# Supplementary material for: Characterization of Spanish Olive Virome by High Throughput Sequencing Opens New Insights and Uncertainties
Source: MDPI journal article supplement (doi:10.3390/v13112233), 2021-11-06
Supplement: s1 [file s1]

$+$ 

+

+

+

+

+

+

[illegible]

@A00721:190:HGJW7DSXY:4:2612:5168:33207 2:N:0:TCTGCAAG+GCTGCACT  
AATAAATATAAATTTTGAATTTCAAATTGACCGTCGATTCTACTGCGTCACTATAGAATTCATTTTT  
TAGATGGTTATGATCGTGACGCGTGGTCTAATGACAAATCGACACGTAAGCGTACGGAGGTGTCCCCG  
GCGCGGGCAAGCCAG

@A00721:190:HGJW7DSXY:4:1402:4146:21793 2:N:0:TCTGCAAG+GCTGCACT  
AATAAATATAAATTTTGAATTTCAAATTGACCGTCGATTCTACTGCGTCACTATAGAATTCATTTTT  
TAGATGGTTATGATCGTGACGCGTGGTCTAATGACAAATCGACACGTAAGCGTACGGAGGTGTCCCCG  
GCGCGGGCAAGCCCCG

@A00721:190:HGJW7DSXY:4:1215:27733:12352 2:N:0:TCTGCAAG+GCTGCACT  
ACACAATAAATATAAATTTTGAATTTCAAAATTGACCGTCGATTCTACTGCGTCACTATAGAATTCAT  
TTTTTAGATGGTTATGATCGTGACGCGTGGTCTAATGACAAATCGACACGTAAGCGTACGGAGGTGTC  
CCCGGCGCGGGCAAG

@A00721:190:HGJW7DSXY:4:1331:21504:6731 2:N:0:TCTGCAAG+GCTGCACT  
ACACAATAAATATAAATTTTGAATTTCAAAATTGACCGTCGATTCTACTGCGTCACTATAGAATTCAT  
TTTTTAGATGGTTATGATCGTGACGCGTGGTCTAATGACAAATCGACACGTAAGAGTACGGAGGTGTC  
CCCGGCGCGGGCAAG

@A00721:190:HGJW7DSXY:4:1512:4869:5541 2:N:0:TCTGCAAG+GCTGCACT  
ACACAATAAATATAAATTTTGAATTTCAAAATTGACCGTCGATTCTACTGCGTCACTATAGAATTCAT  
TTTTTAGATGGTTATGATCGTGACGCGTGGTCTAATGACAAATCGACACGTAAGCGTACGGAGGTGTC  
CCCGGCGCGGGCAAG

@A00721:190:HGJW7DSXY:4:1650:3866:34616 2:N:0:TCTGCAAG+GCTGCACT  
ACACAATAAATATAAATTTTGAATTTCAAAATTGACCGTCGATTCTACTGCGTCACTATAGAATTCAT  
TTTTTAGATGTTATGATCGTGACGCGTGGTCTAATGACAAATCGACACGTAAGCGTACGGAGGTGTC  
CCCGGCGCGGGCAAG

@A00721:190:HGJW7DSXY:4:2205:8612:13839 2:N:0:TCTGCAAG+GCTGCACT  
ACACAATAAATATAAATTTGAATTTCAAAATTGACCGTCGATTCTACTGCGTCACTATAGAATTCAT  
TTTTTAGATGGTTATGATCGTGACGCGTGGTCTAATGACAAATCGACACGTAAGCGTACGGAGGTGTC  
CCCGGCGCGGGCAAG

```
+
FFFFFFFFFFFFFFFFFFFFFFFFFFFFFFFFFFFFFFFFFFFFFFFFFFFFFFFFFFFFFFFF
FFFFFFFFFFFFFFFFFFFFFFFFFFFFFFFFFFFFFFFFFFFFFFFFFFFFFFFFFFFFFFFF
FFFFFFFFFFFFFFF,F
@A00721:190:HGJW7DSXY:4:2450:20003:1376 2:N:0:TCTGCAAG+GCTGCACT
ACACAATAAATATAAATTTTGAATTTCAAAATTGACCGTCGATTCTACTGCGTCACTATAGAATTCAT
TTTTTAGATGGTTATGATCGTGACGCGTGGTCTAATGACAAATCGACACGTAAGCGTACGGAGGTGTC
CCCGGCGCGGGCAAG
```

```
+  
FFFFFFFFFFFFFFFFFFFFFFFFFFFFFFFFFFFFFFFFFFFFF:FFFFFFF:FFFF:FFF:F,:FFFFFFFFFFFF  
FFFFFFFFFFFFFFFFFFFFFFFFFFFFFFFFFFFFFFFFFFFFF:FFFFFFF:FFFFFFF:FFFFF,FFFFF,FFFF:F:  
FFFFFFFF::FF:FF  
@A00721:190:HGW7DSXY:4:2319:23854:34569 2:N:0:TCTGCAAG+GCTGCACT  
CAACACAATAAATATAAAATTTGAATTTCAAATTGACCGTCGATTCTACTGCGTCACTATAGAATTC  
ATTTTTTAGATGGTTATGATCGTGACGCGTGGTCTAATGACAAATCGACACGTAAGCGTACGGAGGTG  
TCCCCGGCGCGGGCA
```

```

+
FFFFFFFFFFFFFF,FFFFFFFFFFFFFFFFFFFFFFFFFFFFFFFFFFFFFFFFFFFFFFFF:FF:FFFFFFFFFFFFFF:FFF
FFFFFFFFFFFFFFFFFFFFFFFFFFFFFFFFFFFFFFFFFFFFFFFFFFFFFFFFFFFFFFFF:FFFFFFFF:F:FFFFFFFF
FFFFFFFFFFFFFF:F
@A00721:190:HGJW7DSXY:4:1163:25925:9533 2:N:0:TCTGCAAG+GCTGCACT
TTTAAACAGTCTATTGTTATCAAAAAGACGATGATATAACATATCATCTGCCGTCGATTTTACTGCG
TCACTATAGAATTCATTTTTTAGATGGTCATGATCGTGACGCGTGGTCTAATGACAAATCGACACGTA
AGCGTACGGAGGTGT

```



@A00721:190:HGJW7DSXY:4:1262:31575:33661 2:N:0:TCTGCAAG+GCTGCACT  
CTTTTAACAGTCTATTGGTTATCAAAAAGACGATGATATAACATATCATCTGCCGTCGATTTTACTGC  
GTCACTATAGAATTCATTTTTTAGATGGTCATGATCGTGACGCGTGGTCTAATGACAAATCGACACGT  
AAGCGTACGGAGGTG

+

FFFFFFFFFFFFFF:FFFFFFFFFFFFFFFFFFFFFFFFFFFFFFFFFFFFFFFFFFFFFFFFFFFFFFFFFFFFFFFF  
FFFFFFFFFFFFFFFFFFFFFFFFFFFFFFFFFFFFFFFFFFFFFFFFFFFFFFFFFFFFFFFFFFFFFFFFFFFFFFFF  
FFFFF:FFFFFFFFF

@A00721:190:HGJW7DSXY:4:1339:12255:29951 2:N:0:TCTGCAAG+GCTGCACT  
TGCTAAAGCAGTCATCAACACAATAAATATAAATTTGAATTTCAAATTGACCGTCGATTCTACTGC  
GTCACTATAGAATTCATTTTTTAGATGGTTATGATCGTGACGCGTGGTCTAATGACAAATCGACACGT  
AAGCGTACGGAGGTG

+

FFF:FFFFFFFFFFFFFFFFFFFFFFFFFFFFFFFFFFFFFFFFFFFFFFFFFFFFFFFFFFFFFFFFFFFFFFFF  
FFFFFFFFF:FFFFFFFFF::FFFF:FFFF:FFFFFFFFFFFFFF,FFFFFFFF,FFFFFFFFFFFFFFFF  
F:FFFFFFFFFFFF::

@A00721:190:HGJW7DSXY:4:1522:2410:36793 2:N:0:TCTGCAAG+GCTGCACT  
CTTTTAACAGTCTATTGGTTATCAAAAAGACGATGATATAACATATCATCTGCCGTCGATTTTACTGC  
GTCACTATAGAATTCATTTTTTAGATGGTCATGATCGTGACGCGTGGTCTAATGACAAATCGACACGT  
AAGCGTACGGAGGTG

+

FFFFFFFFFFFFFFFFFFFFFFFFFFFFFFFFFFFFFFFFFFFFFFFFFFFFFFFFFFFFFFFFFFFFFFFFFFFF  
FFFFFFFFFFFFFFFFFFFFFFFFFFFFFFFFFFFFFFFFFFFFFFFFFFFFFFFFFFFFFFFFFFFFFFFFFFFF  
F:FFFFFFFFFFFFFFF

@A00721:190:HGJW7DSXY:4:1544:8648:17347 2:N:0:TCTGCAAG+GCTGCACT  
CTTTTAACAGTCTATTGGTTATCAAAAAGACGATGATATAACATATCATCTGCCGTCGATTTTACTGC  
GTCACTATAGAATTCATTTTTTAGATGGTCATGATCGTGACGCGTGGTCTAATGACAAATCGACACGT  
AAGCGTACGGAGGTG

+

FFFFFFFFFFFFFFFFFFFFFFFFFFFFFFFFFFFFFFFFFFFFFFFFFFFFFFFFFFFFFFFFFFFFFFFFFFFF  
FFFFFFFFF:FFFFFFFFF:FFFFFFFFF:FFFFFFFFFFFFFFFFFFFFFFFFFFFFFFFFFFFFFFFFFFFF  
F,,FFFFFFFFFFFF

@A00721:190:HGJW7DSXY:4:1602:7129:24893 2:N:0:TCTGCAAG+GCTGCACT  
CTTTTAACAGTCTATTGGTTATCAAAAAGACGATGATATAACATATCATCTGCCGTCGATTTTACTGC  
GTCACTATAGAATTCATTTTTTAGATGGTCATGATCGTGACGCGTGGTCTAATGACAAATCGACACGT  
AAGCGTACGGAGGTG

+

FFFFFFFFFFFFFFFFFFFFFFFFFFFFFFFFFFFFFFFFFFFFFFFFFFFFFFFFFFFFFFFFFFFFFFFFFFFF  
FFFFFFFFFFFFFFFF,FFFFFFFFFFFFFFFFF:F:FFFFF:FFFFFFFFFFFFFFFFFFFFFFFFFFFFFFFF  
FFFFFFFFFFFFF:FF

@A00721:190:HGJW7DSXY:4:1645:5873:25347 2:N:0:TCTGCAAG+GCTGCACT  
TGCTAAAGCAGTCATCAACACAATAAATATAAATTTGAATTTCAAATTGACCGTCGATTCTACTGC  
GTCACTATAGAATTCATTTTTTAGATGGTTATGATCGTGACGCGTGGTCTAATGACAAATCGACACGT  
AAGCGTACGGAGGTG

+

FFFFFFFFFFFFFFFFFFFFFFFFFFFFFFFFFFFFFFFFFFFFFFFFFFFFFFFFFFFFFFFFFFFFFFFFFFFF  
FFFFFFFFF:FFFFFFF:FFFFFFF:FFFFFFFFFFFFF:F:FFFFFFFFFFFF:FFFFFFFFFFFFFFFF  
FFFFFFFFFFFF:FFFF

@A00721:190:HGJW7DSXY:4:1667:12301:20948 2:N:0:TCTGCAAG+GCTGCACT  
CTTTTAACAGTCTATTGGTTATCAAAAAGACGATGATATAACATATCATCTGCCGTCGATTTTACTGC  
GTCACTATAGAATTCATTTTTTAGATGGTCATGATCGTGACGCGTGGTCTAATGACAAATCGACACGT  
AAGCGTACGGAGGTG

+

:F:FFFFFFFFFFFF:FFFFFFFFFFFFFFFFFFFF:FFFFFFFFFFFFF::F:FFFF:F,,:FF::FFFFF

,FFFFFFF:F::FFFF,:FFFF,F:::FFF::FFFF,FFFFFF,F:,FFFFFF,FFFFFFFFF,FFFF  
FF:FF:FFFFF:,F:

@A00721:190:HGJW7DSXY:4:2123:21151:29168 2:N:0:TCTGCAAG+GCTGCACT  
CTTTTAACAGTCTATTGGTTATCAAAAAGACGATGATATAACATATCATCTGCCGTCGATTTTACTGC  
GTCACTATAGAATTCATTTTTTTAGATGGTCATGATCGTGACGCGTGGTCTAATGACAAATCGACACGT  
AAGCGTACGGAGGTG

+

:FFFFFFFFFFFFFFFFFFFFFFFFFFFFFFFFFFFFFFFFFFFFFFFFFFFFFFFFFFFFFFFFFFFFFFFFF:FFFFFFFFFFFFFFFFF  
FFFFFFFFFFFFFF:FFFFFFFFFF:FFFFFFF,FFFFFFFFFFFFFFFFFFFFFFFFFFFFFFFFFFFFFFFFF,FF:FF:F  
:F:FFFFFF,FF::F:

@A00721:190:HGJW7DSXY:4:2175:12057:9502 2:N:0:TCTGCAAG+GCTGCACT  
TGCTAAAGCAGTCATCAACACAATAAATATAAATTTGAATTTCAAATTGACCGTCGATTCTACTGC  
GTCACTATAGAATTCATTTTTTTAGATGGTTATGATCGTGACGCGTGGTCTAATGACAAATCGACACGT  
AAGCGTACGGAGGTG

+

FFFFFFFFFFFFFFFFFFFFFFFFFFFFFFFFFFFFFFFFFFFFFFFFFFFFFFFFFFFFFFFFFFFFFFFFF  
FFFFFFFFFFFFFFFFFFFFFFFFFFFFFFFFFFFFFFFFFFFFFFFFFFFFFFFFFFFFFFFFFFFFFFFFF,FFFFFF:FFFFFFFFFFFFFFFFFFFFFFFFFFFFFFFFF:FFFFFFF  
FFFFFFFFF:FFFFFFF

@A00721:190:HGJW7DSXY:4:2340:16504:6840 2:N:0:TCTGCAAG+GCTGCACT  
CTTTTAACAGTCTATTGGTTATCAAAAAGACGATGATATAACATATCATCTGCCGTCGATTTTACTGC  
GTCACTATAGAATTCATTTTTTTAGATGGTCATGATCGTGACGCGTGGTCTAATGACAAATCGACACGT  
AAGCGTACGGAGGTG

+

FFFFFFFFFFFFFFFFFFFFFFFFFFFFFFFFFFFFFFFFFFFFFFFFFFFFFFFFFFFFFFFFFFFFFFFFF  
FFFFFFFFFFFFFFFFFFFFFFFFFFFFFFFFFFFFFFFFFFFFFFFFFFFFFFFFFFFFFFFFFFFFFFFFF:FFFFFFFFFF:FFFFFFFFFFFFF  
FF,F:FFFFFFFFF

@A00721:190:HGJW7DSXY:4:2462:10303:26287 2:N:0:TCTGCAAG+GCTGCACT  
CTTTTAACAGTCTATTGGTTATCAAAAAGACGATGATATAACATATCATCTGCCGTCGATTTTACTGC  
GTCACTATAGAATTCATTTTTTTAGATGGTCATGATCGTGACGCGTGGTCTAATGACAAATCGACACGT  
AAGCGTACGGAGGTG

+

FFFFFFFFFFFFFFFFFFFFFFFFFFFFFFFFFFFFFFFFFFFFFFFFFFFFFFFFFFFFFFFFFFFFFFFFF  
FFFFFFFFFF:FFFFFFFFFFFFFFFFFFFFFFFFFFFFFFFFFFFFFFFFF:FFFFFFFFFFFFFFFFF:FFFFFFF:FFFFFFF  
FFFFFFFFFFFFFFFFF

@A00721:190:HGJW7DSXY:4:2553:13602:11929 2:N:0:TCTGCAAG+GCTGCACT  
CTTTTAACAGTCTATTGGTTATCAAAAAGACGATGATATAACATATCATCTGCCGTCGATTTTACTGC  
GTCACTATAGAATTCATTTTTTTAGATGGTCATGATCGTGACGCGTGGTCTAATGACAAATCGACACGT  
AAGCGTACGGAGGTG

+

FFFFFFFFFFFFFFFFF,FFFFFFFFFFFFFFFFFFFFFFFFFFFFFFFFFFFFFFFFFFFFFFFFFFFFFFFFF:FFFFFFF  
FFFFFFFFFFFFFFFFFFFFFFFFFFFFFFFFFFFFFFFFFFFFFFFFFFFFFFFFFFFFFFFFF:FFFFFFFFFF:FFFFFFFFF:FFFFFFF  
FFFFFFFFFFFFFFFFF:

@A00721:190:HGJW7DSXY:4:2608:5484:6887 2:N:0:TCTGCAAG+GCTGCACT  
CTTTTAACAGTCTATTGGTTATCAAAAAGACGATGATATAACATATCATCTGCCGTCGATTTTACTGC  
GTCACTATAGAATTCATTTTTTTAGATGGTCATGATCGTGACGCGTGGTCTAATGACAAATCGACACGT  
AAGCGTACGGAGGTG

+

FFFFFFFFFFFF:FFF:FFFFFFFFFFFFFFFFF:FFFFFF:FFFFFFFFFFFFFFFFF:FFFFFFFFFFFFFFFFF:  
FF:FFF,FFFFFFFFFFFFFFFFFFFFFFFFF:FFF,FF:FFFF,:FFFFFFFFFFFFFFFFFFFFFFFFF:,FFFFFFF  
FFFF:FFF,FF,FFF

@A00721:190:HGJW7DSXY:4:1427:1642:12853 2:N:0:TCTGCAAG+GCTGCACT  
AATCAACTGCTAAAGCAGTCATCAACACAATAAATATAAATTTGAATTTCAAATTGACCGTCGATT  
CTACTGCGTCACTATAGAATTCATTTTTTTAGATGGTTATGATCGTGACGCGTGGTCTAATGACAAATC  
GACACGTAAGCGTAC

+  
FFFFFFFFFFFFFFFFFFFFFFFFFFFFFFFFFFFFFFFFFFFFFFFFFFFFFFFFFFFFFFFFFFFFFFFF  
FFFFFFFFFFFFFFFFFFFFFFFFFFFFFFFFFFFFFFFFFFFFFFFFFFFFFFFFFFFFFFFFFFFFFFFF  
FFF:FFF,FFFFF  
@A00721:190:HGJW7DSXY:4:1512:16477:34381 2:N:0:TCTGCAAG+GCTGCACT  
AATCAACTGCTAAAGCAGTCATCAACACAATAAATATAAAATTTTGAATTTCAAATTGACCGTCGATT  
CTACTGCGTCACTATAGAATTCATTTTTTTAGATGGTTATGATCGTGACGCGTGGTCTAATGACAAATC  
GACACGTAAGCGTAC  
+  
FFFFFFFFFFFFFFFFFFFFFFFFFFFFFFFFFFFFFFFFFFFFFFFFFFFFFFFFFFFFFFFFFFFFFFFF  
FFFFFFFFFFFFFFFFFFFFFFFFFFFFFFFFFFFFFFFFFFFFFFFFFFFFFFFFFFFFFFFFFFFFFFFF  
FFFFFFFFFFFFFFFF:F:FFFFFFFF:FFF:FFFFFF:FFFFFF:FFFFFFFF,FFFFFFF  
FFFFFFFFFFFFFFFF  
@A00721:190:HGJW7DSXY:4:1512:18584:35117 2:N:0:TCTGCAAG+GCTGCACT  
AATCAACTGCTAAAGCAGTCATCAACACAATAAATATAAAATTTTGAATTTCAAATTGACCGTCGATT  
CTACTGCGTCACTATAGAATTCATTTTTTTAGATGGTTATGATCGTGACGCGTGGTCTAATGACAAATC  
GACACGTAAGCGTAC  
+  
FFFFFFFFFFFFFFFFFFFFFFFFFFFFFFFFFFFFFFFFFFFFFFFFFFFFFFFFFFFFFFFFFFFFFFFF  
FFFFFFFFFFFFFFFFFFFFFFFFFFFFFFFFFFFFFFFFFFFFFFFFFFFFFFFFFFFFFFFFFFFFFFFF  
FFFFF:FFFFFFFF  
@A00721:190:HGJW7DSXY:4:2445:12762:23688 2:N:0:TCTGCAAG+GCTGCACT  
AATCAACTGCTAAAGCAGTCATCAACACAATAAATATAAAATTTTGAATTTCAAATTGACCGTCGATT  
CTACTGCGTCACTATAGAATTCATTTTTTTAGATGGTTATGATCGTGACGCGTGGTCTAATGACAAATC  
GACACGTAAGCGTAC  
+  
FFFFFFFFFFFFFFFFFFFFFFFFFFFFFFFFFFFFFFFFFFFFFFFFFFFFFFFFFFFFFFFFFFFFFFFF  
FFFFFFFFFFFFFFFFFFFFFFFFFFFFFFFFFFFFFFFFFFFFFFFFFFFFFFFFFFFFFFFFFFFFFFFF  
FFFFFFFFFFFFFFFF  
@A00721:190:HGJW7DSXY:4:2468:5367:7623 2:N:0:TCTGCAAG+GCTGCACT  
AATCAACTGCTAAAGCAGTCATCAACACAATAAATATAAAATTTTGAATTTCAAATTGACCGTCGATT  
CTACTGCGTCACTATAGAATTCATTTTTTTAGATGGTTATGATCGTGACGCGTGGTCTAATGACAAATC  
GACACGTAAGCGTAC  
+  
FFFFFFFFFFFFFFFFFFFFFFFFFFFFFFFFFFFFFFFFFFFFFFFFFFFFFFFFFFFFFFFFFFFFFFFF  
FFFFFFFFFFFFFFFFFFFFFFFFFFFFFFFFFFFFFFFFFFFFFFFFFFFFFFFFFFFFFFFFFFFFFFFF  
:FFFFFFFF  
@A00721:190:HGJW7DSXY:4:2545:15881:17096 2:N:0:TCTGCAAG+GCTGCACT  
AATCAACTGCTAAAGCAGTCATCAACACAATAAATATAAAATTTTGAATTTCAAATTGACCGTCGATT  
CTACTGCGTCACTATAGAATTCATTTTTTTAGATGGTTATGATCGTGACGCGTGGTCTAATGACAAATC  
GACACGTAAGCGTAC  
+  
FFFFFFFFFFFFFFFFFFFFFFFFFFFFFFFFFFFFFFFFFFFFFFFFFFFFFFFFFFFFFFFFFFFFFFFF,F  
FFFFFFFFFFFFFFFF:F:FFFFFFFF,FFFFFFFFFFFFFFFFFFFFFFFF:FFFF:F  
FFFFFFFF  
@A00721:190:HGJW7DSXY:4:1240:24876:2769 2:N:0:TCTGCAAG+GCTGCACT  
ATTAGGTCTAGCCGTGCAGCCTCTTTGCTACCCACAATATTTATAAAATTTTGAATTTCAAATTGACC  
GTGATTCTACTGCGTCACTATAGAATTCATTTTTTTAGATGGTTATGATCGTGACGCGTGGTCTAATG  
ACAAATCGACACGTA  
+  
FFFFFFFFFFFFFFFFFFFFFFFF,FFFFFFFF:F:FFFFFFFFFFFFFFFFFFFFFFFF:FF  
FFFFFFFFFFFFFFFF:F:FFFFFFFFFFFFFFFFFFFFFFFFFFFFFFFF,FFFF:,  
FFFFFFFF:F  
@A00721:190:HGJW7DSXY:4:1341:18484:7294 2:N:0:TCTGCAAG+GCTGCACT  
ATTAGGTCTAGCCGTGCAGCCTCTTTGCTACCCACAATATTTATAAAATTTTGAATTTCAAATTGACC

GTCGATTCTACTGCGTCACTATAGAATTCATTTTTTAGATGGTTATGATCGTGACGCGTGGTCTAATG  
ACAAATCGACACGTA

```
:FFFFFFFFFFFFFFFFFFFFFFFFFFFFFFFFFFFFFFFFFFFFFFFFFFFFFFFFFFFFFFF  
FFFFFFFFFFFFFFFFFFFFFFFFFFFFFFFFFFFF,:FFFFFFFFFFFFFFFFFFFFFFFFFF:  
FFFFFFFFFFFFFFFF
```

 $+$ 

```
F:FFFFFFFFFFFFFFFFFFFFFFFFFFFFFFFF:FFFFFFFFFFFFFF:FFFFFFFFFFFFFFFF
FFFFFFFFFFFFFFFFFFFFFFFF:FFFFFFFFFFFFFFFF:FFFFFFFFFFFFFF:FFFFFFFFFFFFF
FFFFFFFFFFFFFFFF
```

$$+$$

```
FFF:FFFFFF:FFFFFFFFF:FFFFFFFFFFFFFFF:FFFFFFFFFFFFFFF:FFFFFFFFFFFFFFF
FFF:FFFFFFFFFFFFFFFFF:FFFFFFFFFFFFFFFFFFFFFFF:FFFFFFFFFFFFFFF
::FFFFFFFFFFFFFFF
```

+

```

FFFFFFFFFFFFFFFFFFFFFFFFFFFFFFFF:FFFFFF:,F:FFFFFFFFFFFFFFFFFFFFFFFF:FF,FFFFFF:
FFFFFFFFFFFFFFFFFFFFFFFFFFFFFFFF:FF:F,F,:FF:F:FFFFFFFF:FFFF,FF:FFF,F,:FFFFFFFF,F:
,FFF:FF,FFFFFF

```

+

[illegible]

+

```

FFFFFFFFFFFFFFFFFFFFFFFFFFFFFFFF:FFFF,FFFFFFFFFFFFFFFFFFFFFFFF:FF
FFFF:FFFFFFFFFF:FF:FFFFF::FF:FFF:FFF:FFFF,FFFFFFFFFF:FFFFFFF:FF,FF,
FFFFFFFFF:FFFFFF

```

+

```

FFFFFFFFFFFFFFFFFFFFFFFFFFFFFFFFFFFFFFFFFFFFFFFFFFFFFFFFFFFF:FFFFFFFFFF
FFFFFFFFFFFFFFFFFFFFFFFFFFFF,F::FFFFF:FFFF,F:FFFFFFFFFFFFFFFF:FFFFFFFFFFFF
FFFF:FFFFFFFFFFFF:

```





FFFFFFFFFFFFFFFFFFFFFFFFFFFFFFFF:F,:FFFFFFFFFFFFFFFF:FFFFFFFFFFFFFFFF:  
FFFF,FFFFFF,F:F

@A00721:190:HGJW7DSXY:4:1223:10917:35900 2:N:0:TCTGCAAG+GCTGCACT  
CTTCTTTGTAATGTATTAGGTCTAGCCGTGCAGCCTCTTTGCTACCCACAATATTTATAAATTTTGAA  
TTTCAAATTGACCGTCGATTCTACTGCGTCACTATAGAATTCATTTTTTAGATGGTTATGATCGTGA  
CGCGTGGTCTAATGA

+

FFFFFFFFFFFFFFFFFFFFFFFFFFFFFFFF,FFFFFFFF:FFFFFFFF:F:FFFFFFFFFFFFFFFFFFFFFFF  
FFFF:FFFFFFFFFFFFFFFFFFFFFFFF:FFFF,:FFFF:,F,FFFFFF,:F:FFFFFFFF:FFF,F  
FFFFFFFFFFFFFFFF

@A00721:190:HGJW7DSXY:4:1234:28827:29277 2:N:0:TCTGCAAG+GCTGCACT  
CTTCTTTGTAATGTATTAGGTCTAGCCGTGCAGCCTCTTTGCTACCCACAATATTTATAAATTTTGAA  
TTTCAAATTGACCGTCGATTCTACTGCGTCACTATAGAATTCATTTTTTAGATGGTTATGATCGTGA  
CGCGTGGTCTAATGA

+

FFFF:FFFFFFFFFFFFFFFFFFFFFFFF:FFFFFFFF:FFFFFFFFFFFFFFFFFFFFFFFF:F  
FF:FFF,,FFFFFFFF:FFFFFFFFFFFF,FFFFFFFF:F:FFFFFFFFFFFFFFFFFFFFFFF  
F,FFFFFFFF

@A00721:190:HGJW7DSXY:4:1240:2790:33505 2:N:0:TCTGCAAG+GCTGCACT  
CTTCTTTGTAATGTATTAGGTCTAGCCGTGCAGCCTCTTTGCTACCCACAATATTTATAAATTTTGAA  
TTTCAAATTGACCGTCGATTCTACTGCGTCACTATAGAATTCATTTTTTAGATGGTTATGATCGTGA  
CGCGTGGTCTAATGA

+

FFFFFFFF:FFFFFFFF:FFFF:FFFF:FFF:FFFFFFFF:FFFFFFFF:FFFFFFFF  
FFFFFFFF:FFFFFFFF:FFFF:FFFF:FFFF:FFFF:FFFF:FFFF:F,  
::FF::FFFFFFFF

@A00721:190:HGJW7DSXY:4:1246:3739:17049 2:N:0:TCTGCAAG+GCTGCACT  
CTTCTTTGTAATGTATTAGGTCTAGCCGTGCAGCCTCTTTGCTACCCACAATATTTATAAATTTTGAA  
TTTCAAATTGACCGTCGATTCTACTGCGTCACTATAGAATTCATTTTTTAGATGGTTATGATCGTGA  
CGCGTGGTCTAATGA

+

FFFF:FFFFFFFFFFFFFFFF:FFFFFFFFFFFFFFFF:FFFFFFFF:FFFFF  
FFFFFFFFFFFFFFFF:FFFFFFFF:FFF:FFFFFFFF:FFFFFFFFFFFFFFFF:FFFFF  
FFFFFFFF

@A00721:190:HGJW7DSXY:4:1530:25048:7670 2:N:0:TCTGCAAG+GCTGCACT  
CTTCTTTGTAATGTATTAGGTCTAGCCGTGCAGCCTCTTTGCTACCCACAATATTTATAAATTTTGAA  
TTTCAAATTGACCGTCGATTCTACTGCGTCACTATAGAATTCATTTTTTAGATGGTTATGATCGTGA  
CGCGTGGTCTAATGA

+

FFFFFFFF:FFFFFFFFFFFFFFFFFFFFFFFFFFFFFFFFFFFFFFFF:FFFFF  
FFFFFFFFFFFFFFFF:F,FF:F:,FFFF,FF:,FFFFFFFF,FFFFFFFF:FFFFF  
FFFFFFFF:F

@A00721:190:HGJW7DSXY:4:1634:13801:1783 2:N:0:TCTGCAAG+GCTGCACT  
CTTCTTTGTAATGTATTAGGTCTAGCCGTGCAGCCTCTTTGCTACCCACAATATTTATAAATTTTGAA  
TTTCAAATTGACCGTCGATTCTACTGCGTCACTATAGAATTCATTTTTTAGATGGTTATGATCGTGA  
CGCGTGGTCTAATGA

+

FFFFFFFFFFFFFFFFFFFFFFFFFFFFFFFFFFFFFFFFFFFFFFFF:FFFFF  
FFFFFFFFFFFF,FF:FFFFFFFFFFFF,F:FFFF:FFFFFFFF:FFFF,FFFFF  
:FFFFFFFF

@A00721:190:HGJW7DSXY:4:1674:17924:7200 2:N:0:TCTGCAAG+GCTGCACT  
CTTCTTTGTAATGTATTAGGTCTAGCCGTGCAGCCTCTTTGCTACCCACAATATTTATAAATTTTGAA  
TTTCAAATTGACCGTCGATTCTACTGCGTCACTATAGAATTCATTTTTTAGATGGTTATGATCGTGA  
CGCGTGGTCTAATGA

+  
FFFFFFFF:FFFFFFFFFFFFFFFFFFFFFFFFFFFFFFFFFFFFFFFFFFFFFFFFFFFFFFFF  
FFFFFFFFFFFFFFFFFFFFFFFFFFFFFFFFFFFFFFFFFFFFFFFFFFFFFFFFFFFFFFFF  
FFFFFFFFFFFFFFFF  
@A00721:190:HGJW7DSXY:4:2124:28809:9298 2:N:0:TCTGCAAG+GCTGCACT  
CTTCTTTGTAATGTATTAGGTCTAGCCGTGCAGCCTCTTTGCTACCCACAATATTTATAAATTTTGAA  
TTTCAAAATTGACCGTCGATTCTACTGCGTCACTATAGAATTCATTTTTTTAGATGGTTATGATCGTGA  
CGCGTGGTCTAATGA

+  
FFFFFFFFFFFFFFFFFFFFFFFFFFFFFFFFFFFFFFFFFFFFFFFFFFFFFFFFFFFFFFFF  
FFFFFFFFFFFFFFFF:FFFFF:FFFFFFFFFFFF:FFFFFFFFFFFF,F:FFFFFFFF,FF,FFFFFFFF:FFF:  
FFFFFFFF:FFFFF:F  
@A00721:190:HGJW7DSXY:4:2210:6081:26584 2:N:0:TCTGCAAG+GCTGCACT  
CTTCTTTGTAATGTATTAGGTCTAGCCGTGCAGCCTCTTTGCTACCCACAATATTTATAAATTTTGAA  
TTTCAAAATTGACCGTCGATTCTACTGCGTCACTATAGAATTCATTTTTTTAGATGGTTATGATCGTGA  
CGCGTGGTCTAATGA

+  
FFFFFFFFFFFF::F,FFFFFFFF:FFFFFFFFFFFFFFFFFFFFFFFFFFFFFFFFFFFFFFFF:FFFFFFFFFFFFFFFF  
FFFFFFFFFFFFFFFFFFFFFFFFFFFFFFFFFFFFFFFF,FFFFFF::FFFFF:,FFFFFFFFFFFFFFFFFFFF,F:FFFFF  
:,FF,FFFFFFFF:F  
@A00721:190:HGJW7DSXY:4:2238:20311:11616 2:N:0:TCTGCAAG+GCTGCACT  
CTTCTTTGTAATGTATTAGGTCTAGCCGTGCAGCCTCTTTGCTACCCACAATATTTATAAATTTTGAA  
TTTCAAAATTGACCGTCGATTCTACTGCGTCACTATAGAATTCATTTTTTTAGATGGTTATGATCGTGA  
CGCGTGGTCTAATGA

+  
FFFFFFFFFFFFFFFFFFFFFFFFFFFFFFFFFFFFFFFFFFFFFFFFFFFFFFFFFFFFFFFF  
FFFFFFFFFFFFFFFFFFFFFFFFFFFFFFFFFFFFFFFF:F:FFFFFFFF::FFFFFFFFFFFFFFFFFFFFFFFF  
:FFFFFFFFFFFF:FFF  
@A00721:190:HGJW7DSXY:4:2257:4589:26005 2:N:0:TCTGCAAG+GCTGCACT  
CTTCTTTGTAATGTATTAGGTCTAGCCGTGCAGCCTCTTTGCTACCCACAATATTTATAAATTTTGAA  
TTTCAAAATTGACCGTCGATTCTACTGCGTCACTATAGAATTCATTTTTTTAGATGGTTATGATCGTGA  
CGCGTGGTCTAATGA

+  
FFFFFFFFFFFF:FFFFFFFFFFFF:FF:FFFFFFFFFFFFFFFFFFFFFFFFFFFFFFFFFFFFFFFFFFFFFFFF  
FFFFFFFFFFFFFFFF:FFFFFFFFFFFF:FFFFFFFFFFFF:FFFFFF:FFFFFFFFFFFF,F:FFFFFFFF:,FFFF  
FFFFFFFFFFFFFFFF  
@A00721:190:HGJW7DSXY:4:2257:4833:27179 2:N:0:TCTGCAAG+GCTGCACT  
CTTCTTTGTAATGTATTAGGTCTAGCCGTGCAGCCTCTTTGCTACCCACAATATTTATAAATTTTGAA  
TTTCAAAATTGACCGTCGATTCTACTGCGTCACTATAGAATTCATTTTTTTAGATGGTTATGATCGTGA  
CGCGTGGTCTAATGA

+  
FFFFFFFFFFFFFFFFFFFFFFFFFFFFFFFFFFFFFFFFFFFFFFFFFFFFFFFFFFFFFFFF  
FFFFFFFFFFFFFFFFFFFFFFFFFFFFFFFFFFFFFFFFFFFFFFFFFFFFFFFFFFFFFFFF:FFFFFFF  
FFFFFFF,FFFFFFFF  
@A00721:190:HGJW7DSXY:4:2348:22073:16235 2:N:0:TCTGCAAG+GCTGCACT  
CTTCTTTGTAATGTATTAGGTCTAGCCGTGCAGCCTCTTTGCTACCCACAATATTTATAAATTTTGAA  
TTTCAAAATTGACCGTCGATTCTACTGCGTCACTATAGAATTCATTTTTTTAGATGGTTATGATCGTGA  
CGCGTGGTCTAATGA

+  
FF:FFFFFFFFFFFFFFFFFFFFFFFFFFFFFFFFFFFFFFFFFFFFFFFFFFFFFFFF:FFFFFFFFFFFF  
FFFFFFFFFFFFFFFFFFFFFFFFFFFFFFFFFFFFFFFFFFFFFFFFFFFFFFFFFFFFFFFF:FFFFFFFFFFFF  
FF:FFFFFFFFFFFF  
@A00721:190:HGJW7DSXY:4:2630:6560:23657 2:N:0:TCTGCAAG+GCTGCACT  
CTTCTTTGTAATGTATTAGGTCTAGCCGTGCAGCCTCTTTGCTACCCACAATATTTATAAATTTTGAA

TTTCAAAATTGACCGTCGATTCTACTGCGTCACTATAGAATTCATTTTTTAGATGGTTATGATCGTGA  
CGCGTGGTCTAATGA

+

FFFFFFFFFFFF,FFFFFFFFFFFFFFFF:FFFFFFFFFFFFFFFFFFFFFFFFFFFFFFFFFFFFFFFF  
FFFFFFFFFFFFFFFFFFFFFFFFFFFFFFFFFFFFFFFF:F,FFFFFF:FFFFFFFFFFFFFFFFFFFFFF  
FFFFFFFFFFFFFFFF

@A00721:190:HGJW7DSXY:4:1304:11912:1297 2:N:0:TCTGCAAG+GCTGCACT  
GACCGCCTGACCACTTCCTCTTCTTGAAGACGAATCCATCAATCAACTGCTAAAGCAGTCATCAACA  
CAATAAATATAAATTTTGAATTTCAAATGACCGTCGATTCTACTGCGTCACTATAGAATTCATTTT  
TTAGATGGTTATGAT

+

F:FFFFFFFFFFFFFFFF:FFFFFFFFFFFFFFFF:FFFFFFFF:FFFFFFFF:FFF  
FFFFFF:FFFFFFFF:FFFFFFFFFFFFFFFF:FFFFFF:FFF:FFF,FFFF  
FFFF,FFFFFFFF

@A00721:190:HGJW7DSXY:4:1622:31665:13056 2:N:0:TCTGCAAG+GCTGCACT  
GACCGCCTGACCACTTCCTCTTCTTGAAGACGAATCCATCAATCAACTGCTAAAGCAGTCATCAACA  
CAATAAATATAAATTTTGAATTTCAAATGACCGTCGATTCTACTGCGTCACTATAGAATTCATTTT  
TTAGATGGTTATGAT

+

FFFFFFFFFFFFFFFFFFFFFFFFFFFFFFFFFFFFFFFFFFFFFFFFFFFFFFFFFFFFFFFFFFFF  
FFFFFFFFFFFFFFFFFFFFFFFFFFFFFFFF:FFFFFFFFFFFF, :FFFFFFFFF:  
FF:F:FFFFFFFF

@A00721:190:HGJW7DSXY:4:2168:15510:14512 2:N:0:TCTGCAAG+GCTGCACT  
GACCGCCTGACCACTTCCTCTTCTTGAAGACGAATCCATCAATCAACTGCTAAAGCAGTCATCAACA  
CAATAAATATAAATTTTGAATTTCAAATGACCGTCGATTCTACTGCGTCACTATAGAATTCATTTT  
TTAGATGGTTATGAT

+

FFFFFFFFFFFFFFFFFFFFFFFF:FFFFFFFFFFFFFFFF:FFFFFFFFFFFFFFFF  
FFFFF::FFFFFFFFFFFFFFFF:FFFF:FF:FFFFFFFF:FF,F::FFFFFFF  
FF,FFFF:FFFFFF

@A00721:190:HGJW7DSXY:4:2611:14977:25520 2:N:0:TCTGCAAG+GCTGCACT  
GACCGCCTGACCACTTCCTCTTCTTGAAGACGAATCCATCAATCAACTGCTAAAGCAGTCATCAACA  
CAATAAATATAAATTTTGAATTTCAAATGACCGTCGATTCTACTGCGTCACTATAGAATTCATTTT  
TTAGATGGTTATGAT

+

FFFFFFFFFFFFFFFFFFFFFFFFFFFFFFFFFFFFFFFFFFFFFFFFFFFFFFFFFFFFFFFFFFFF  
FFFFFFFFFFFFFFFFFFFFFFFFFFFFFFFF:FFFFFFFFFFFFFFFF:FFF  
FFFFFF:FFFFFF

@A00721:190:HGJW7DSXY:4:1168:13883:7153 2:N:0:TCTGCAAG+GCTGCACT  
GACCGCCTGACCACTTCCTCTTCTTGAAGACGAATCCATCAATCAACTGCTAAAGCAGTCATCAACA  
CAATAAATATAAATTTTGAATTTCAAATGACCGTCGATTCTACTGCGTCACTATAGAATTCATTTT  
TTAGATGGTTATGA

+

:F:F::FFFF:FFFF:F,FFFF,,F,F:FF::FFFFFFFFFFFF:F,F:,FFFF:F::FFFFF  
,FF,FFF,F:FFF:F::FFF,,F,FFFF,FFFF,F:,F,:FFFF,,F,F::F,F,F:FFFF:F:,F,  
,FF:FF:,FFF,:F

@A00721:190:HGJW7DSXY:4:1315:15691:1924 2:N:0:TCTGCAAG+GCTGCACT  
CGATAACCGGCGGTCTAAACGGACCGCTGACCACTTCCTCTTCTTGAAGACGAATCCATCAATCA  
ACTGCTAAAGCAGTCATCAACACAATAAATATAAATTTTGAATTTCAAATGACCGTCGATTCTACT  
GCGTCACTATAGAAT

+

FFFFFFFFFFFFFFFFFFFFFFFF:FFFFFFFFFFFFFFFFFFFFFFFFFFFFFFFFFFFF  
FFFFFFFFFFFF:FFFFFF:FFFFFFFFFFFFFFFF:FFFFFFFFFFFFFFFFFFFF  
FFFFFFF:,FFFF:F



@A00721:190:HGJW7DSXY:4:2102:22697:10363 2:N:0:TCTGCAAG+GCTGCACT  
CTATAGTGACGCAGTAGAATCGACGGTCAATTTTGAAATTCAAAATTTATATTTATTGTGTTGATGAC  
TGCTTTAGCAGTTGATTGATGGATTCTGCTTCCAAGAAGAGGAAGTGGTAAAAGGACCGCCGGTTATC  
GTAAAACACGACGAG

@A00721:190:HGJW7DSXY:4:2154:14832:16376 2:N:0:TCTGCAAG+GCTGCACT  
CTATAGTGACGCAGTAGAATCGACGGTCAATTTTGAAATTCAAAATTTATATTTATTGTGTTGATGAC  
TGCTTTAGCAGTTGATTGATGGATTCTGCTTCCAAGAAGAGGAAGTGGTAAAAGGACCGCCGGTTATC  
GTAAAACACGACGAG

@A00721:190:HGJW7DSXY:4:2231:29089:5682 2:N:0:TCTGCAAG+GCTGCACT  
CTATAGTGACGCAGTAGAATCGACGGTCAATTTTGAAATTCAAAATTTATATTTATTGTGTGATGAC  
TGCTTTAGCAGTTGATTGATGGATTCGTCTTCCAAGAAGAGGAAGTGGTAAAAGGACCGCCGTTATC  
GTAAAACACGACGAG

@A00721:190:HGJW7DSXY:4:2413:25925:4210 2:N:0:TCTGCAAG+GCTGCACT  
CTATAGTGACGCAGTAGAATCGACGGTCAATTTTGAAATTCAAAATTTATATTTATTGTGTGATGAC  
TGCTTTAGCAGTTGATTGATGGATTCGTCTTCCAAGAAGAGGAAGTGGTAAAAGGACCGCCGTTATC  
GTAAAACACGACGAG

@A00721:190:HGJW7DSXY:4:2465:19786:16501 2:N:0:TCTGCAAG+GCTGCACT  
CTATAGTGACGCAGTAGAATCGACGGTCAATTTTGAAATTCAAAATTTATATTTATTGTGTGATGAC  
TGCTTTAGCAGTTGATTGATGGATTCGTCTTCCAAGAAGAGGAAGTGGTAAAAGGACCGCCGGTTATC  
GTAAAACACGACGAG

@A00721:190:HGJW7DSXY:4:2475:30544:13651 2:N:0:TCTGCAAG+GCTGCACT  
CGATAACCGGCGGTCTAAACGGACCGCTGACCACTTCCTCTTCTTGAAGACGAATCCATCAATCA  
ACTGCTAAAGCAGTCATCAACACAATAAATAAATTTGAATTTCAAATTGACCGTCGATTCTACT  
GCGTCACTATAG

@A00721:190:HGJW7DSXY:4:2518:7129:2347 2:N:0:TCTGCAAG+GCTGCACT  
CTATAGTGACGCAGTAGAATCGACGGTCAATTTTGAAATTCAAAATTTATATTTATTGTGTTGATGAC  
TGCTTTAGCAGTTGATTGATGGATTCGTCTTCCAAGAAGAGGAAGTGGTAAAAGGACCGCCGTTATC  
GTAAAACACGACGA



CAATCAACTGCTAAAGCAGTCATCAACACAATAAATATAAATTTTGAATTTCAAATTGACCGTCGAT  
TCTACTGCGTCACTA

+

FFFFFFFFF:FFFFFFFFFFFFFF:FFFFFFFFFFFFFFF:FFFFFFFFFFFFFFF  
FFFFFFFFFFFFFFFFFFFFFFFFF:FFFFFFFFFFFFFF:FFFFFFF:FFFFFFF:F  
FFFFFFFFF::FFF:

@A00721:190:HGJW7DSXY:4:1253:8802:29074 2:N:0:TCTGCAAG+GCTGCACT  
GTTTTACGATAACCGGCGGTCCTAAACGGACCGCCTGACCACTTCCTCTTCTTGGAAGACGAATCCAT  
CAATCAACTGCTAAAGCAGTCATCAACACAATAAATATAAATTTTGAATTTCAAATTGACCGTCGAT  
TCTACTGCGTCACTA

+

FFFFFFFFFFFFFFFFFFFFFFFFFFFFFFFFFFFFFFFFF:FFFFFFFFFFFF,FFFF  
FFFFFFFFFFFFFFFFFFFFFFFFF:FFFFFFF:FFFFFFFFFFFFFFF:FFFFFFF,FF:F  
F:FFFFF,FFFFF:

@A00721:190:HGJW7DSXY:4:1430:27127:3192 2:N:0:TCTGCAAG+GCTGCACT  
GTTTTACGATAACCGGCGGTCCTAAACGGACCGCCTGACCACTTCCTCTTCTTGGAAGACGAATCCAT  
CAATCAACTGCTAAAGCAGTCATCAACACAATAAATATAAATTTTGAATTTCAAATTGACCGTCGAT  
TCTACTGCGTCACTA

+

FFFFFFF:FFFFFFFFFFFFFFFFFFFFFFFFFFFFFFFFF,FFFFFFFFF:F  
FFFFFFFFFFFFFFFFFFFFFFFFF:FFFFFFF:FFFFFFFFFFFFFFF:FFFFFFF,FF:F  
FFFFFFFFFFFFFFF

@A00721:190:HGJW7DSXY:4:1457:4101:3427 2:N:0:TCTGCAAG+GCTGCACT  
GTTTTACGATAACCGGCGGTCCTAAACGGACCGCCTGACCACTTCCTCTTCTTGGAAGACGAATCCAT  
CAATCAACTGCTAAAGCAGTCATCAACACAATAAATATAAATTTTGAATTTCAAATTGACCGTCGAT  
TCTACTGCGTCACTA

+

FFFFFFFFFFFFFFFFFFFFFFFFFFFFFFFFFFFFFFFFF:FFFFFFF:FFFFFFFFFFFF  
FFFFFFFFFFFFFFFFFFFFFFFFF:FFFFFFF,FFFFFFFFFFFFFFF,FFFF,FFFFFFFFFFFF  
FFFFFFFFF,FFF:F

@A00721:190:HGJW7DSXY:4:1619:11785:6151 2:N:0:TCTGCAAG+GCTGCACT  
GTTTTACGATAACCGGCGGTCCTAAACGGACCGCCTGACCACTTCCTCTTCTTGGAAGACGAATCCAT  
CAATCAACTGCTAAAGCAGTCATCAACACAATAAATATAAATTTTGAATTTCAAATTGACCGTCGAT  
TCTACTGCGTCACTA

+

FFFFFFF,FFFFFFFFFFFFFFFFF:FFFFFFFFFFFFFFFFFFFFFFFFFFFFFFFFF  
FFFFFFFFFFFFFFFFFFFFFFFFF:FFFFFFFFFFFFFFFFFFFFFFFFFFFFFFFFF  
FFFFFFFFFFFFFFF

@A00721:190:HGJW7DSXY:4:2132:10755:12164 2:N:0:TCTGCAAG+GCTGCACT  
GTTTTACGATAACCGGCGGTCCTAAACGGACCGCCTGACCACTTCCTCTTCTTGGAAGACGAATCCAT  
CAATCAACTGCTAAAGCAGTCATCAACACAATAAATATAAATTTTGAATTTCAAATTGACCGTCGAT  
TCTACTGCGTCACTA

+

FFFFFFFFFFFFFFFFFFFFFFFFFFFFFFFFF:FFFFFFFFFFFFFFFFFFFFFFFFF  
FFFFFFFFFFFFFFFFFFFFFFFFF:FFFFFFFFFFFFFFFFFFFFFFFFFFFFFFFFF:FFFFF:  
F:FFFFFFFFFFFFF:

@A00721:190:HGJW7DSXY:4:2138:16523:35243 2:N:0:TCTGCAAG+GCTGCACT  
GTTTTACGATAACCGGCGGTCCTAAACGGACCGCCTGACCACTTCCTCTTCTTGGAAGACGAATCCAT  
CAATCAACTGCTAAAGCAGTCATCAACACAATAAATATAAATTTTGAATTTCAAATTGACCGTCGAT  
TCTACTGCGGCACTA

+

FFFFFFF:,FFF:FFFFFF:F:FFFFFFFFFFFFFFFFFFFFFFFFF:F::FF,FFFFFFFF  
FFFF:FFF:FFFFF,FFFF,FFF:FFFFFFFFFFFFFFFFFFFFFFFFFFFFFFFFF:  
FFFFFFFFF,FFFFF





FFFFFFFF:FFFFF:FFFFFFFFFFFF,FFFFFFFF,FFFFFFFFFFFF:FFF::FFFFFFFFFFFFFFFFFFFF  
FFFFFFFFFFFF

@A00721:190:HGJW7DSXY:4:1153:20030:5838 2:N:0:TCTGCAAG+GCTGCACT  
GTTGAATTGCAACACTCGTCGTGTTTTACGATAACCGGCGGTCCTAAACGGACCGCCTGACCACTTCC  
TCTTCTTGGAAGACGAATCCATCAATCAACTGCTAAAGCAGTCATCAACACAATAAATTTTGAATTC  
AAAATTGACCGTCGA

+

F,FFFFFFFFFFFFFFFFFFFFFFFFFFFFFFFFFFFFFFFFFFFFFFFFFFFFFFFFFFFFFFFF,FFFFFFFFFFFFFFFFFFFF  
FFFFFFFFFFFFFFFFFFFFFFFFFFFFFFFFFFFFFFFFFFFFFFFFFFFFFFFFFFFFFFFF:FFFFFFFF  
FFFFF:FF:,FFFFF

@A00721:190:HGJW7DSXY:4:1309:18295:35462 2:N:0:TCTGCAAG+GCTGCACT  
GTTGAATTGCAACACTCGTCGTGTTTTACGATAACCGGCGGTCCTAAACGGACCGCCTGACCACTTCC  
TCTTCTTGGAAGACGAATCCATCAATCAACTGCTAAAGCAGTCATCAACACAATAAATTTTGAATTC  
AAAATTGACCGTCGA

+

FFFFFFFFFFFFFFFFFFFFFFFFFFFFFFFFFFFFFFFFFFFFFFFFFFFFFFFFFFFFFFFFFFFF  
FFFFFFFFFFFFFFFFFFFFFFFFFFFFFFFFFFFFFFFFFFFFFFFFFFFFFFFFFFFFFFFF:FFFFF:FF  
F:FFFFFFFFFFFF:

@A00721:190:HGJW7DSXY:4:1331:21667:36417 2:N:0:TCTGCAAG+GCTGCACT  
GTTGAATTGCAACACTCGTCGTGTTTTACGATAACCGGCGGTCCTAAACGGACCGCCTGACCACTTCC  
TCTTCTTGGAAGACGAATCCATCAATCAACTGCTAAAGCAGTCATCAACACAATAAATTTTGAATTC  
AAAATTGACCGTCGA

+

FFFFFFFFFFFFFFFFFFFFFFFFFFFFFFFFFFFFFFFFFFFFFFFFFFFFFFFFFFFFFFFFFFFF  
FFFFFFFFFFFFFFFFFFFFFFFFFFFFFFFFFFFFFFFFFFFFFFFFFFFFFFFFFFFFFFFF:FF:FFFFFFFF,FFFFFFFFFFFFFFFFFFFF  
FFFFF:FFFFFFFF

@A00721:190:HGJW7DSXY:4:1332:32678:4789 2:N:0:TCTGCAAG+GCTGCACT  
GTTGAATTGCAACACTCGTCGTGTTTTACGATAACCGGCGGTCCTAAACGGACCGCCTGACCACTTCC  
TCTTCTTGGAAGACGAATCCATCAATCAACTGCTAAAGCAGTCATCAACACAATAAATTTTGAATTC  
AAAATTGACCGTCGA

+

FFFFF:FFFFFFFFFFFFFFFF:FFFFF,FFFFFFFFFFFF,FFFFF,FFFFF:FFFFFFFFFFFF  
:FFFF:FFF,FFFFFFFFFFFF:FFFFFFFFFFFFFFFF:FF:,FF:FF:FFFFFFFF:FFF,FFFFF  
FFFFF,::F,FFF:F

@A00721:190:HGJW7DSXY:4:1345:8513:19022 2:N:0:TCTGCAAG+GCTGCACT  
TTGCAACACTCGTCGTGTTTTACGATAACCGGCGGTCCTAAACGGACCGCCTGACCACTTCTCTTCT  
TGGAAGACGAATCCATCAATCAACTGCTAAAGCAGTCATCAACACAATAAATATAAATTTTGAATTC  
AAAATTGACCGTCGA

+

FFFFFFFFFFFFFFFFFFFFFFFFFFFFFFFFFFFFFFFFFFFFFFFFFFFFFFFFFFFFFFFFFFFF  
FFFFFFFFFFFFFFFFFFFFFFFFFFFFFFFFFFFFFFFFFFFFFFFFFFFFFFFFFFFFFFFF:FFFFFFFFFFFF  
FFFFFFFFFFFFFFFF

@A00721:190:HGJW7DSXY:4:1539:18159:22013 2:N:0:TCTGCAAG+GCTGCACT  
TTGCAACACTCGTCGTGTTTTACGATAACCGGCGGTCCTAAACGGACCGCCTGACCACTTCTCTTCT  
TGGAAGACGAATCCATCAATCAACTGCTAAAGCAGTCATCAACACAATAAATATAAATTTTGAATTC  
AAAATTGACCGTCGA

+

FFFFFFFFFFFFFFFFFFFFFFFFFFFFFFFFFFFFFFFFFFFFFFFFFFFFFFFFFFFFFFFFFFFF  
FFFFFFFFFFFF:FFFFFFFFFFFFFFFFFFFFFFFFFFFFFFFFFFFFFFFF:FFFFFFFFFFFFFFFF  
FFF:FF:FFFFFFFF

@A00721:190:HGJW7DSXY:4:2153:11930:29888 2:N:0:TCTGCAAG+GCTGCACT  
TTGCAACACTCGTCGTGTTTTACGATAACCGGCGGTCCTAAACGGACCGCCTGACCACTTCTCTTCT  
TGGAAGACGAATCCATCAATCAACTGCTAAAGCAGTCATCAACACAATAAATATAAATTTTGAATTC  
AAAATTGACCGTCGA

```

FFFFFFFFFFFFFFFFFFFFFFFFFFFFFFFFFFFFFFFF:FFFFFFFFFFFFFFFFFFFFFFFFFFFFFFFF
FFFFFFFFFFFFFFFFFFFFFFFFFFFFFFFFFFFFFFFF:FFFFFFFFFFFFFFFFFFFFFFFF:FFF
FFFFFFFFFFFFFFFF

```

[illegible][illegible]

```

FFFFFFFF:FFFFFFFFFFFFFFFF:FFFFFFFFFFFFFFFFFFFFFFFFFFFFFFFF,FFFFFFFF
FFFFFFFF,FFFF:FFFFFFFFFFFFFFFF:FFFFFFFFFFFFFFFFFFFFFFFF:FFFFFFFFFFFFFFFF
FFFFFFFFEE:FFFFF

```

F:FF,FFFFFFFF:FFFFFFFFFF:FFFFF:FFFFFFFFFFFF:FFF,FFFFFFFFFFFF:FFF,FF,FF  
 FFFFFFFF:FFFF:FFFFFFFFFFFFFFFFFFFFFFFFFFFFF:,FFFFFFFFFF:FF:F,FFF,F:F,FFFF:FF  
 FFFFFFFF:F:FFF,F

[illegible]

```
FF:FFFFFFFFFFFFFFFF:FFF:FFF:FF:FFFFFFFF:FFF:FFFFFFFFFFFFFFFF:,FF:,F
FFFFFFFFFFFF:F:F,FF:FFFFFFFFFFFF:,FFFFFFFF:FFFFFFFFFFFF,FFFFFF,FFFFFFFF
:FFFFFFFFFFFFFFFF
```

@A00721:190:HGJW7DSXY:4:1501:32407:31125 2:N:0:TCTGCAAG+GCTGCACT  
GACGGTCAATTTTGAATTCAAAATTTATATTTATTGTGTTGATGACTGCTTTAGCAGTTGATTGATG

GATTCGTCTTCCAAGAAGAGGAAGTGGTAAAAGGACCGCCGTTATCGTAAAACACGACGAGTGTTC  
AATTCAACAGGACTC

+

FFFFFFFFFFFFFFFFFFFFFFFF:FFFFFF:F:FFFFFFFFFFFFFFFFFFFFFFFFFFFFFFFF:FF  
FFFFFFFFFFFFFFFFFFFFFFFF:FFFFFF:F:FF,FFFFFFFFFFFFFFFF:FFFFFFFFFFFFFFFF  
FFFFFF,FFFFFFFF

@A00721:190:HGJW7DSXY:4:1442:18403:17268 2:N:0:TCTGCAAG+GCTGCACT  
TGTTGAATTGCAACACTCGTCGTGTTTTACGATAACCGGCGGTCCTAAACGGACCGCTGACCACTTC  
CTCTTCTTGGAAGACGAATCCATCAATCAACTGCTAAAGCAGTCATCAACACAATAAATATAAATTTT  
GAATTTCAAAATTGA

+

FFF:,FFFF:FFFFFF,:F:FF,:F::,FFFFFFFF:FFF:FFFFFF:FF:FFF:FFFFFF:F  
FFF::FF,,FFF,FFFFFF,FFFFFFFFFFFFFFFF:FFFF:F:FFFFFFFFFFFFFFFF:FFFFFFF:,  
:FF,FFFFFFFF,:F

@A00721:190:HGJW7DSXY:4:1448:14796:13996 2:N:0:TCTGCAAG+GCTGCACT  
TGTTGAATTGCAACACTCGTCGTGTTTTACGATAACCGGCGGTCCTAAACGGACCGCTGACCACTTC  
CTCTTCTTGGAAGACGAATCCATCAATCAACTGCTAAAGCAGTCATCAACACAATAAATATAAATTTT  
GAATTTCAAAATTGA

+

FFFFFFFFFFFFFFFFFFFFFFFFFFFFFFFF:FF:F:FFFFFFFFFFFFFFFFFFFFFFFFFFFFFFFF  
FFFFFFFFFFFFFFFFFFFFFFFFFFFFFFFF:FFFFFFFFFFFFFFFFFFFFFFFFFFFFFFFF  
:FFFFFFFF

@A00721:190:HGJW7DSXY:4:2159:14588:17895 2:N:0:TCTGCAAG+GCTGCACT  
TGTTGAATTGCAACACTCGTCGTGTTTTACGATAACCGGCGGTCCTAAACGGACCGCTGACCACTTC  
CTCTTCTTGGAAGACGAATCCATCAATCAACTGCTAAAGCAGTCATCAACACAATAAATATAAATTTT  
GAATTTCAAAATTGA

+

FFFF:FFFFFFFF:FFFFFFFFFFFFFFFFFFFFFFFFFFFFFFFFFFFFFFFFFFFFFFFF  
:FFFFFF:FFFFFF:FFFF:FFFF:FFFFFFFFFFFFFFFFFFFFFFFFFFFFFFFF:FFFF  
FFFFFF:FFFFFF

@A00721:190:HGJW7DSXY:4:2618:30897:21590 2:N:0:TCTGCAAG+GCTGCACT  
TGTTGAATTGCAACACTCGTCGTGTTTTACGATAACCGGCGGTCCTAAACGGACCGCTGACCACTTC  
CTCTTCTTGGAAGACGAATCCATCAATCAACTGCTAAAGCAGTCATCAACACAATAAATATAAATTTT  
GAATTTCAAAATTGA

+

FFFFFFFFFFFFFFFFFFFFFFFFFFFFFFFF:FFFFFFFFFFFFFFFF:FFFFFF:FFFFFFFF  
FFFFFFFFFFFFFFFFFFFFFFFFFFFFFFFFFFFFFFFFFFFFFFFFFFFFFFFF:FFFFF,FFFFFFFF  
FFFFFF:FFF:FFFF

@A00721:190:HGJW7DSXY:4:2677:8793:23265 2:N:0:TCTGCAAG+GCTGCACT  
TGTTGAATTGCAACACTCGTCGTGTTTTACGATAACCGGCGGTCCTAAACGGACCGCTGACCACTTC  
CTCTTCTTGGAAGACGAATCCATCAATCAACTGCTAAAGCAGTCATCAACACAATAAATATAAATTTT  
GAATTTCAAAATTGA

+

FFFFFFF:FFFFFFFFFFFFFFFF:FFFFFFFFFFFFFFFF:FFFFFFFFFFFFFFFF  
FFFFFFF:FFFFFFFFFFFFFFFFFFFFFFFF:FFFFFFFFF:FFFFFFF:FF::F  
FFFF:FFFFFF,F

@A00721:190:HGJW7DSXY:4:2677:8730:24158 2:N:0:TCTGCAAG+GCTGCACT  
TGTTGAATTGCAACACTCGTCGTGTTTTACGATAACCGGCGGTCCTAAACGGACCGCTGACCACTTC  
CTCTTCTTGGAAGACGAATCCATCAATCAACTGCTAAAGCAGTCATCAACACAATAAATATAAATTTT  
GAATTTCAAAATTGA

+

FFF:FFFFFFFF:FFFFFFFFFFFFFFFF:FFFFFFFFFFFFFFFF:FFFFFF,FFFFFFFF  
FFFFFFFFFFFFFFFFFFFFFFFF:FFFFFFF:FFFFFF,FFFFFFFFFFFFFFFF:F,FFFF:F  
FFF,FF:FFFFFF

$+$ 

+

+

+

+

+

 $+$ 

```
FF: FF: FFFFFFFF: FFFFFFFF FFFFFFFF FFFFFFFF FFFFFFFF: FFFFFFFF FFFFFFFF FFFFFFFF FFFFFFFF
```

[illegible]

+

@A00721:190:HGJW7DSXY:4:2545:10691:29747 2:N:0:TCTGCAAG+GCTGCACT  
TTTATATTTATTGTGTTGATGACTGCTTTAGCAGTTGATTGATGGATTTCGTCTTCCAAGAAGAGGAAG  
TGGTCAGGCGGTCCGTTTAGGACCGCCGGTTATCGTAAACACGACGAGTGTTGCAATTCAACAGGAC  
TCAGCGGTCACAGCT

[illegible]

+

@A00721:190:HGJW7DSXY:4:2160:16396:12915 2:N:0:TCTGCAAG+GCTGCACT  
TTATATTTATTGTGTTGATGACTGCTTTAGCAGTTGATTGATGGATTCGTCTTCCAAGAAGAGGAAGT  
GGTCAGGCGGTCCGTTTAGGACCGCCGGTTATCGTAAACACGACGAGTGTTGCAATTCAACAGGACT  
CAGCGGTCACAGCT

```

FFFFFFFF:FFFFFFFF:FFFFFFFFFFFFFFFFFFFFFFFFFFFFFFFFFFFFFFFFFFFFFFFF
FFFFFFFF:FFFFFFFF:FFFFF::FFF:FFFFFFFFF::F:FFFFFFFFFFFFFFFFFFFFF:FFF:FF
FFF:FFFFF:FFFF

```

+

@A00721:190:HGJW7DSXY:4:1439:4987:19993 2:N:0:TCTGCAAG+GCTGCACT  
TGAACCGGCAGCTGTGACCGCTGAGTCCTGTTGAATTGCAACACTCGTCGTGTTTTACGATAACCGGC  
GGTCCTAAACGGACCGCCTGACCACTTCCTCTTCTTGGAAGACGAATCCATCAATCAACTGCTAAAGC  
AGTCATCAACACAAT

```

FFFFFFFFFFFFFFFFFFFFFFFFFFFFFFFFFFFFFFFFFFFFFFFFFFFFFFFFFFFF:FFFFFFFFFFFF
FFFFFFFF,FFFFFFFFFFFFFFFFFFFFFFFFFFFFFFFF:FFFFFFFFFFFFFFFF:FFFFFFFFFFFFFFFF
EEEE:EEEEEEEEEE

```

+  
FFFFFFFFFFFF:FFF:FFFFFFFFFFFFFFFF:FFFFFFFFFF,FFFF::FFFFFFFFFFFFFFFF:FFFFFF  
FFFFFFFFFFFFFFFF:FFFFFF:FFFFFFFFFFFFFFFF:FFFFF:FFFFFF::FFFFFF:FFFFFFFF  
FFFFF,FF:FFF:F:

@A00721:190:HGJW7DSXY:4:2356:5873:16986 2:N:0:TCTGCAAG+GCTGCACT  
TGAACCGGCAGCTGTGACCGCTGAGTCCTGTTGAATTGCAACACTCGTCGTGTTTTACGATAACCGGC  
GGTCCTAAACGGACCGCCTGACCACTTCCTCTTCTTGAAGACGAATCCATCAATCAACTGCTAAAGC  
AGTCATCAACACAAT

+  
FFFFFFFFFFFFFFFFFFFFFFFFFFFFFFFFFFFFFFFFFFFFFFFFFFFFFFFFFFFFFFFF:FFFFFFFF  
FFFFFFFFFFFFFFFF:FFFFFFFFFFFFFFFFFFFFFFFFFFFFFFFFFFFFFFFFFFFFFFFFFFFFFFFF  
FFFFFFFFFFFFFFFF:

@A00721:190:HGJW7DSXY:4:2516:22489:9314 2:N:0:TCTGCAAG+GCTGCACT  
TGAACCGGCAGCTGTGACCGCTGAGTCCTGTTGAATTGCAACACTCGTCGTGTTTTACGATAACCGGC  
GGTCCTAAACGGACCGCCTGACCACTTCCTCTTCTTGAAGACGAATCCATCAATCAACTGCTAAAGC  
AGTCATCAACACAAT

+  
FFFFFFFFFFFFFFFFFFFFFFFFFFFFFFFFFFFFFFFFFFFFFFFFFFFFFFFFFFFFFFFF:FFFFFFFF  
FFFFFFFFFFFFFFFFFFFFFFFFFFFFFFFFFFFFFFFFFFFFFFFFFFFFFFFFFFFFFFFF:FFFFFFFF  
FFFFF:FF,FFFFF

@A00721:190:HGJW7DSXY:4:1513:27444:5024 2:N:0:TCTGCAAG+GCTGCACT  
CACTGAACCGGCAGCTGTGACCGCTGAGTCCTGTTGAATTGCAACACTCGTCGTGTTTTACGATAACC  
GGCGGTCCTAAACGGACCGCCTGACCACTTCCTCTTCTTGAAGACGAATCCATCAATCAACTGCTAA  
AGCAGTCATCAACAC

+  
FFFFFFFFFFFFFFFFFFFFFFFFFFFFFFFFFFFFFFFFFFFFFFFFFFFFFFFFFFFFFFFF:FFFF  
FFFFFFFFFFFFFFFFFFFFFFFFFFFFFFFFFFFFFFFFFFFFFFFFFFFFFFFFFFFFFFFF:FFFF  
FFFFFFFFFFFF:FFF

@A00721:190:HGJW7DSXY:4:2207:20193:31391 2:N:0:TCTGCAAG+GCTGCACT  
CACTGAACCGGCAGCTGTGACCGCTGAGTCCTGTTGAATTGCAACACTCGTCGTGTTTTACGATAACC  
GGCGGTCCTAAACGGACCGCCTGACCACTTCCTCTTCTTGAAGACGAATCCATCAATCAACTGCTAA  
AGCAGTCATCAACAC

+  
FFFFFFFFFFFFFFFFFFFFFFFFFFFFFFFFFFFFFFFFFFFFFFFFFFFFFFFFFFFFFFFF:FFFFFFFF  
FFFFFFFFFFFFFFFFFFFFFFFFFFFFFFFFFFFFFFFFFFFFFFFFFFFFFFFFFFFFFFFF:FFFF  
FFFFFFFF:FFF:FFF

@A00721:190:HGJW7DSXY:4:2232:26250:9032 2:N:0:TCTGCAAG+GCTGCACT  
CACTGAACCGGCAGCTGTGACCGCTGAGTCCTGTTGAATTGCAACACTCGTCGTGTTTTACGATAACC  
GGCGGTCCTAAACGGACCGCCTGACCACTTCCTCTTCTTGAAGACGAATCCATCAATCAACTGCTAA  
AGCAGTCATCAACAC

+  
FFFFFFFFFFFFFFFFFFFFFFFFFFFFFFFFFFFFFFFFFFFFFFFFFFFFFFFFFFFFFFFF:FFFFFFFF  
FFFFFFFFFFFF:FFFFFFFFFFFFFFFFFFFFFFFFFFFFFFFFFFFFFFFFFFFFFFFFFFFFFFFF  
FFFFFFFFFFFFFFFF

@A00721:190:HGJW7DSXY:4:2427:24858:14011 2:N:0:TCTGCAAG+GCTGCACT  
CACTGAACCGGCAGCTGTGACCGCTGAGTCCTGTTGAATTGCAACACTCGTCGTGTTTTACGATAACC  
GGCGGTCCTAAACGGACCGCCTGACCACTTCCTCTTCTTGAAGACGAATCCATCAATCAACTGCTAA  
AGCAGTCATCAACAC

+  
FFFFFFFFFFFFFFFFFFFFFFFFFFFFFFFFFFFFFFFFFFFFFFFFFFFFFFFFFFFFFFFF:F  
FFFFFFFFFFFFFFFF:FFFFFFFFFFFFFFFFFFFFFFFFFFFFFFFFFFFFFFFFFFFFFFFFFFFF:F  
FF:FF:FFFFFFFF

@A00721:190:HGJW7DSXY:4:2348:8052:22420 2:N:0:TCTGCAAG+GCTGCACT  
CCACTGAACCGGCAGCTGTGACCGCTGAGTCCTGTTGAATTGCAACACTCGTCGTGTTTTACGATAAC





$+$ 

+

+

+

+

+

+

FFFFFFFF:FFFFFFFF:FFFFFFFFFFFFFFFF:FFFF:FFFFFFFFFFFFFFFF  
FFFFFFFF

@A00721:190:HGJW7DSXY:4:2514:9435:22091 2:N:0:TCTGCAAG+GCTGCACT  
AGCAGTTGATTGATGGATTCTGCTTCCAAGAAGAGGAAGTGGTCAGGCGGTCCGTTTAGGACCGCCGG  
TTATCGTAAAACACGACGAGTGTTGCAATACAACAGGACTCAGCGGTCACAGCTGCCGGTTCAGTGGT  
CGAGGTCT

+

FFFFFFFFFFFFFFFFFFFFFFFFFFFFFFFF:FFFFFFFFFFFFFFFF:FFFFFFFFFFFFFFF  
,FFFFFFFFFFFFFFFFFFFFFFFFFFFFFFFF,FFFFFFFFFFFFFFFFFFFFFFFFFFFFFFFFFFFFF  
FFFFFFFF

@A00721:190:HGJW7DSXY:4:1155:8350:14450 2:N:0:TCTGCAAG+GCTGCACT  
TATCTCAGAGACCTCGACCACTGAACCGGCAGCTGTGACCGCTGAGTCCTGTTGAATTGCAACACTCG  
TCGTGTTTTACGATAACCGGCGGTCTAAACGGACCGCCTGACCACTTCCTCTTCTTGAAGACGAAT  
CCATCAATCAACTGC

+

FFFFFFFFFFFFFFFFFFFFFFFFFFFFFFFFFFFFFFFFFFFFFFFFFFFFFFFFFFFFFFFFFFFFF  
FFFFFFFFFFFFFFFFFFFFFFFFFFFFFFFFFFFFFFFFFFFFFFFFFFFFFFFFFFFFFFFFFFFF:FFF:FFFFF  
FFFFFFFFFFFFFFFF

@A00721:190:HGJW7DSXY:4:2112:6705:13949 2:N:0:TCTGCAAG+GCTGCACT  
CTCAGAGACCTCGACCACTGAACCGGCAGCTGTGACCGCTGAGTCCTGTTGAATTGCAACACTCGTCG  
TGTTTTACGATAACCGGCGGTCTAAACGGACCGCCTGACCACTTCCTCTTCTTGAAGACGAATCCA  
TCAATCAACTGC

+

FFFFFFFFFFFFFFFF:FFFFFF:FFF:FFFFFFFFFFFFFFFF,FFF:FF,FFFFFFFFFFFFFF,FF  
FF,,FFFF:FFF:FFFFFF:FF:FF:FFF:FF::,F::F,F:F:F,F,,F,FFF,:FF:F:FF:::  
,F,:F:F:FFF

@A00721:190:HGJW7DSXY:4:2669:22878:31626 2:N:0:TCTGCAAG+GCTGCACT  
TATCTCAGAGACCTCGACCACTGAACCGGCAGCTGTGACCGCTGAGTCCTGTTGAATTGCAACACTCG  
TCGTGTTTTACGATAACCGGCGGTCTAAACGGACCGCCTGACCACTTCCTCTTCTTGAAGACGAAT  
CCATCAATCAACTGC

+

FFFFFFFFFFFFFFFFFFFF:FFFF:FFFFFFFFFFFFFFFFFFFFFFFFFFFFFFFF:FFFFFFFFFFFF:  
FFFFFFFFFFFFFFFFFFFFFFFFFFFFFFFF,FFFFFFFFFFFF:FFFFFFFFFFFFFFFF:FFFFFFF  
FFF,FFFFFF:FFF

@A00721:190:HGJW7DSXY:4:1418:13819:21167 2:N:0:TCTGCAAG+GCTGCACT  
GTTGATTGATGGATTCTGCTTCCAAGAAGAGGAAGTGGTCAGGCGGTCCGTTTAGGACCGCCGGTTATC  
CGTAAAACACGACGAGTGTTGCAATTCAACAGGACTCAGCGGTCACAGCTGCCGGTTCAGTGGTCGAG  
GTCTCTGAGATATAA

+

FFFFFFFFFFFFFFFFFFFFFFFFFFFF,FFFFFFFFFFFFFFFFFFFFFFFFFFFFFFFFFFFF,F  
FFFFFFFFFFFFFFFFFFFFFFFFFFFFFFFFFFFF:FFFF:FFFFFFFF:FFFFFFFFFFFF:FFFFF  
FFFFFFFFFFFFFFFF

@A00721:190:HGJW7DSXY:4:1617:21920:26804 2:N:0:TCTGCAAG+GCTGCACT  
TTGATTGATGGATTCTGCTTCCAAGAAGAGGAAGTGGTCAGGCGGTCCGTTTAGGACCGCCGGTTATC  
GTAAAACACGACGAGTGTTGCAATTCAACAGGACTCAGCGGTCACAGCTGCCGGTTCAGTGGTCGAGG  
TCTCTGAGATATAA

+

F:FFFFFFFF,FFF:FFFFFFFFFFFFFFFFFFFFFFFFFFFFFFFF:FFFFFFFFFFFFFFFFFFFF:,F  
FFFFFFFFFFFFFFFFFFFFFFFFFFFF:FFFFFFFFFFFFFFFFFFFFFFFFFFFF,::FFF::F:FFFFFFF  
FFFFFFFFFFFF:F

@A00721:190:HGJW7DSXY:4:1271:10809:9878 2:N:0:TCTGCAAG+GCTGCACT  
CTTCGATTATATCTCAGAGACCTCGACCACTGAACCGGCAGCTGTGACCGCTGAGTCCTGTTGAATTG  
CAACACTCGTCGTGTTTTACGATAACCGGCGGTCTAAACGGACCGCCTGACCACTTCCTCTTCTTGG  
AAGACGAATCCATCA

+  
FFFFFFFFFFFFFFFFFFFFFFFFFFFFFFFFFFFFFFFFFFFFFFFFFFFFFFFFFFFFFFFFFFFFFFFF  
FFFFFFFFFFFFFFFFFFFFFFFFFFFFFFFFFFFFFFFFFFFFFFFFFFFFFFFFFFFFFFFFFFFFFFFF  
FFFFFFFFFFFFFFFF

@A00721:190:HGJW7DSXY:4:1540:7835:19758 2:N:0:TCTGCAAG+GCTGCACT  
CTTCGATTATATCTCAGAGACCTCGACCACTGAACCGGCAGCTGTGACCGCTGAGTCCTGTTGAATTG  
CAACACTCGTCGTGTTTTACGATAACCGGCGGTCTAAACGGACCGCCTGACCACTTCATCTTCTTGG  
AAGACGAATCCATCA

+  
F:FFFF:FF:FFFFFF,FFFFFF::F:FF:FF:F:F:, :F, :F, F:FF::F:FFFFFF:FFF:FFF, F:  
:FF, F:F:FFF, FFFFFFF:F:FFFF, :FFF, F, :FFF, FF:F:, , , FFFF, , F, :FF, F:FF, :, FF  
FFFFFF:F:FFFF::F

@A00721:190:HGJW7DSXY:4:1559:12255:16986 2:N:0:TCTGCAAG+GCTGCACT  
CTTCGATTATATCTCAGAGACCTCGACCACTGAACCGGCAGCTGTGACCGCTGAGTCCTGTTGAATTG  
CAACACTCGTCGTGTTTTACGATAACCGGCGGTCTAAACGGACCGCCTGACCACTTCCTCTTCTTGG  
AAGACGAATCCATCA

+  
FFFFFFFFFFFFFFFFFFFFFFFFFFFFFFFFFFFFFFFFFFFFFFFFFFFFFFFFFFFFFFFFFFFFFFFF  
FFFFFFFFFFFFFFFFFFFFFFFFFFFFFFFFFFFFFFFFFFFFFFFFFFFFFFFFFFFFFFFFFFFFFFFF  
FFFFFFFFFFFFFFFF

@A00721:190:HGJW7DSXY:4:1635:28501:35571 2:N:0:TCTGCAAG+GCTGCACT  
CTTCGATTATATCTCAGAGACCTCGACCACTGAACCGGCAGCTGTGACCGCTGAGTCCTGTTGAATTG  
CAACACTCGTCGTGTTTTACGATAACCGGCGGTCTAAACGGACCGCCTGACCACTTCCTCTTCTTGG  
AAGACGAATCCATCA

+  
FFFFFFFFFFFFFFFFFFFFFFFFFFFFFFFFFFFFFFFFFFFFFFFFFFFFFFFFFFFFFFFFFFFFFFFF  
FFFFFFFFFFFFFFFFFFFFFFFFFFFFFFFF:F::FFFFFFFFFFFFFF:FFFFFFFFFFFFFFFFFFFFFFFF  
F:FF:FFFF:FFFF

@A00721:190:HGJW7DSXY:4:2106:25961:33708 2:N:0:TCTGCAAG+GCTGCACT  
CTTCGATTATATCTCAGAGACCTCGACCACTGAACCGGCAGCTGTGACCGCTGAGTCCTGTTGAATTG  
CAACACTCGTCGTGTTTTACGATAACCGGCGGTCTAAACGGACCGCCTGACCACTTCCTCTTCTTGG  
AAGACGAATCCATCA

+  
FFFFFFFFFFFFFFFFFFFFFFFFFFFFFFFFFFFFFFFFFFFFFFFFFFFFFFFFFFFFFFFFFFFFFFFF  
FFFFFFFFFFFFFFFFFFFFFFFFFFFFFFFF:FFFFFFFFFFFFFF:FFFFFFFFFFFFFFFFFFFFFFFF  
FFFFFFFFFFFFFFFF

@A00721:190:HGJW7DSXY:4:2212:9182:6245 2:N:0:TCTGCAAG+GCTGCACT  
CTTCGATTATATCTCAGAGACCTCGACCACTGAACCGGCAGCTGTGACCGCTGAGTCCTGTTGAATTG  
CAACACTCGTCGTGTTTTACGATAACCGGCGGTCTAAACGGACCGCCTGACCACTTCCTCTTCTTGG  
AAGACGAATCCATCA

+  
FFFFFFFFFFFFFFFFFFFFFFFFFFFFFFFFFFFFFFFFFFFFFFFFFFFFFFFFFFFFFFFFFFFFFFFF  
FFFFFFF:FFFFFFFFF:FFFFFFFFFFFFFFFFFFFFFFFFFFFFFFFFFFFFFFFFFFFFFFFF  
F:FFFFF,FFFF:FF

@A00721:190:HGJW7DSXY:4:2261:19343:28886 2:N:0:TCTGCAAG+GCTGCACT  
CTTCGATTATATCTCAGAGACCTCGACCACTGAACCGGCAGCTGTGACCGCTGAGTCCTGTTGAATTG  
CAACACTCGTCGTGTTTTACGATAACCGGCGGTCTAAACGGACCGCCTGACCACTTCCTCTTCTTGG  
AAGACGAATCCATCA

+  
F:FFFFFFFFFFFFFFFFFFFFFFFFFFFFFFFFFFFFFFFFFFFFFFFFFFFFFFFFFFFFFFFF  
FFFFFFFFFFFFFFFFFFFFFFFFFFFFFFFFFFFFFFFFFFFFFFFFFFFFFFFFFFFFFFFF  
F:FFFFFFFFFFFF

@A00721:190:HGJW7DSXY:4:2618:12635:32769 2:N:0:TCTGCAAG+GCTGCACT  
CTTCGATTATATCTCAGAGACCTCGACCACTGAACCGGCAGCTGTGACCGCTGAGTCCTGTTGAATTG

CAACACTCGTCGTGTTTTACGATAACCGGCGGTCCTAAACGGACCGCCTGACCACTTCCTCTTCTTGG  
AAGACGAATCCATCA

+

FFFFFFFFFFFFFFFFFFFFFFFFFFFFFFFFFFFFFFFFFFFFFFFFFFFFFFFFFFFFFFFFFFFFFFFF  
FFFFFFFFFFFFFFFFFFFFFFFFFFFFFFFFFFFFFFFFFFFFFFFFFFFFFFFFFFFFFFFFFFFFFFFF  
FF:FFFFFFFFFFFF

@A00721:190:HGJW7DSXY:4:2618:12626:32784 2:N:0:TCTGCAAG+GCTGCACT  
CTTCGATTATATCTCAGAGACCTCGACCACTGAACCGGCAGCTGTGACCGCTGAGTCCTGTTGAATTG  
CAACACTCGTCGTGTTTTACGATAACCGGCGGTCCTAAACGGACCGCCTGACCACTTCCTCTTCTTGG  
AAGACGAATCCATC

+

F:FFFFFFFFFFFFFFFFFFFFFFFFFFFFFFFFFFFFFFFFFFFFFFFFFFFFFFFFFFFFFFFFFFFF  
FFFFFFF,FFFFFFFFFF,FFFF:FFFFFFFFFFFFFFFFFFFFFFFFFFFFFFFFFFFFFFFFFFFF  
FFFFFFFFFF,FF:F

@A00721:190:HGJW7DSXY:4:1101:21432:30405 2:N:0:TCTGCAAG+GCTGCACT  
CAAGTCTTCGATTATATCTCAGAGACCTCGACCACTGAACCGGCAGCTGTGACCGCTGAGTCCTGTTG  
AATTGCAACACTCGTCGTGTTTTACGATAACCGGCGGTCCTAAACGGACCGCCTGACCACTTCCTCTT  
CTTGAAGACGAATC

+

FFF:FFFFFF:FFFFFFFFFFFFFFFFFFFFFFFFFFFFFFFFFFFFFFFFFFFFFFFFFFFFFFFFFFFF  
FFFFFFFFFFFF:FFFFFFFFFFFF,:F::F,FFFFF:FFFFF,FF,FFFF,,FF:FF,FFFF:FF  
FF,F:FF:FFFFFFF

@A00721:190:HGJW7DSXY:4:2217:25690:7560 2:N:0:TCTGCAAG+GCTGCACT  
CAAGTCTTCGATTATATCTCAGAGACCTCGACCACTGAACCGGCAGCTGTGACCGCTGAGTCCTGTTG  
AATTGCAACACTCGTCGTGTTTTACGATAACCGGCGGTCCTAAACGGACCGCCTGACCACTTCCTCTT  
CTTGAAGACGAATC

+

FFFFFFFFFFFFFFFFFFFFFFFFFFFFFFFFFFFFFFFFFFFFFFFFFFFFFFFFFFFFFFFFFFFFFFFF  
FFFFFFFFFFFFFFFFFFFFFFFFFFFFFFFFFFFFFFFFFFFFFFFFFFFFFFFFFFFFFFFFFFFFFFFF  
FFFFFFFFFFFFFFFFFFFF

@A00721:190:HGJW7DSXY:4:1114:31132:21465 2:N:0:TCTGCAAG+GCTGCACT  
ACCAAGTCTTCGATTATATCTCAGAGACCTCGACCACTGAACCGGCAGCTGTGACCGCTGAGTCCTGT  
TGAATTGCAACACTCGTCGTGTTTTACGATAACCGGCGGTCCTAAACGGACCGCCTGACCACTTCCTC  
TTCTTGAAGACGAA

+

FFFFFFFFFFFFFFFFFFFFFFFFFFFFFFFFFFFFFFFFFFFFFFFFFFFFFFFFFFFFFFFFFFFFFFFF  
FFFFFFFFFFFFFFFFFFFFFFFFFFFFFFFFFFFFFFFFFFFFFFFFFFFFFFFFFFFFFFFFFFFFFFFF  
FFFFFFFFFF:FF,FFFF

@A00721:190:HGJW7DSXY:4:1552:27751:28855 2:N:0:TCTGCAAG+GCTGCACT  
ACCAAGTCTTCGATTATATCTCAGAGACCTCGACCACTGAACCGGCAGCTGTGACCGCTGAGTCCTGT  
TGAATTGCAACACTCGTCGTGTTTTACGATAACCGGCGGTCCTAAACGGACCGCCTGACCACTTCCTC  
TTCTTGAAGACGAA

+

FFFFFFFFFFFFFFFFFFFFFFFFFFFFFFFFFFFFFFFFFFFFFFFFFFFFFFFFFFFFFFFFFFFFFFFF  
FFFFFFFFFFFFFFFFFFFFFFFFFFFFFFFFFFFFFFFFFFFFFFFFFFFFFFFFFFFFFFFFFFFFFFFF  
FFFFFFFFFFFFFFFFFFFF

@A00721:190:HGJW7DSXY:4:2119:19054:35493 2:N:0:TCTGCAAG+GCTGCACT  
CCAAGTCTTCGATTAAATCTCAGAGACCTCGACCACTGAACCGGAAGCTGTTACCGCTGAGTCCTGTA  
GAATTGCAACACTCGTCGTGTTTTACGATAACCGGCGGTCCTAAACGGACCGCATGACCACTTACACT  
TCTTGAAGACGAA

+

FFF,:FF,:::F,:F,FF,F:FFF:FFFFF,FF,FFFFFFFF,FF,F:FF::FFF,F,FFFFFFFF,,  
F,FF:F,FFFF:F,:FF,FF,FF,F::F:F::FFF,F,,FFFFF,:F,:F,FF:F:F:F:,F,F,  
FF,F:F::,FFFF

$+$ 

+

+

+

+

+

+

[illegible]

@A00721:190:HGJW7DSXY:4:1469:26096:13964 2:N:0:TCTGCAAG+GCTGCACT  
ACACCAAGTCTTCGATTATATCTCAGAGACCTCGACCACTGAACCGGCAGCTGTGACCGCTGAGTCCT  
GTTGAATTGCAACACTCGTCGTGTTTTACGATAACCGGCGGTCTCTAAACGGACCGCCTGACCACTTC  
TCTTCTTGGAAGACG

@A00721:190:HGJW7DSXY:4:1531:18204:21465 2:N:0:TCTGCAAG+GCTGCACT  
ACACCAAGTCTTCGATTATATCTCAGAGACCTCGACCACTGAACCGGCAGCTGTGACCGCTGAGTCCT  
GTTGAATTGCAACACTCGTCGTGTTTTACGATAACCGGCGGTCTCTAAACGGACCGCCTGACCACTTCC  
TCTTCTTGGAAGACG

@A00721:190:HGJW7DSXY:4:1536:15989:34663 2:N:0:TCTGCAAG+GCTGCACT  
ACACCAAGTCTTCGATTATATCTCAGAGACCTCGACCACTGAACCGGCAGCTGTGACCGCTGAGTCCT  
GTTGAATTGCAACACTCGTCGTGTTTTACGATAACCGGCGGTCCTAAACTGACCGCCTGACCACTTCC  
TCTTCTTGGAAGACG

@A00721:190:HGJW7DSXY:4:1658:27914:31610 2:N:0:TCTGCAAG+GCTGCACT  
ACACCAAGTCTTCGATTATATCTCAGAGACCTCGACCACTGAACCGGCAGCTGTGACCGCTGAGTCCT  
GTTGAATTGCAACACTCGTCGTGTTTTACGATAACCGGCGGTCTCTAAACGGACCGCCTGACCACTTCC  
TCTTCTTGGAAGACG

@A00721:190:HGJW7DSXY:4:1659:17336:27038 2:N:0:TCTGCAAG+GCTGCACT  
ACACCAAGTCTTCGATTATATCTCAGAGACCTCGACCACTGAACCGGCAGCTGTGACCGCTGAGTCCT  
GTTGAATTGCAACACTCGTCGTGTTTTACGATAACCGGCGGTCCTAAACGGACCGCCTGACCACTTCC  
TCTTCTTGGAAGACG

@A00721:190:HGJW7DSXY:4:2505:16984:13714 2:N:0:TCTGCAAG+GCTGCACT  
ACACCAAGTCTTCGATTATATCTCAGAGACCTCGACCACTGAACCGGCAGCTGTGACCGCTGAGTCCT  
GTTGAATTGCAACACTCGTCGTGTTTTACGATAACCGGCGGTCCTAAACGGACCGCTGACCACTTCC  
TCTTCTTGGAAGACG

@A00721:190:HGJW7DSXY:4:2554:17345:20885 2:N:0:TCTGCAAG+GCTGCACT  
ACACCAAGTCTTCGATTATATCTCAGAGACCTCGACCACTGAACCGGCAGCTGTGACCGCTGAGTCCT  
GTTGAATTGCAACACTCGTCGTGTTTTACGATAACCGGCGGTCCTAAACGGACCGCCTGACCACTTCC  
TCTTCTTGGAAGACG

```

FFFFFFFFFFFFFFFFFFFFFFFF:FFFFFFFFFFFFFFFFFFFFFFFF:FFFFFFFFFFFFFFFF:
FFFFFFFFFFFFFFFFFFFF,FFFF:FFFFF:FFFFFFFFFFFFFFFFFFFFFFFFFFFFFFFF
FFFFFFFFFFFFFFFF

```

[illegible][illegible]

```
F:FFFFFFFFFFFFFFFF:FFFFFFFFFFFFFFFFFFFFFFFFFFFFFFFFFFFFFFFF
FFFFFFFF:;FFFFFFFF:F:FFFFF::FFFFFFFF:FFFFFFFFFFFFFFFF:FFFF:FFFFFFFF:F
:FF,FF:E:FFFFF
```

[illegible]

```
FFF:FFFFFF:,F::,,F:F,FFFF,F,F:FFFF::FF:FFFFFF,,F,FF,,FFFFFFFFFF:FFFF,F
,F,FFFFFF,F:FFFF,:FFF,,,FF,,:FF:::FFF,,F:F:F,FFFF,F:FFF,F,:F,FFFF:FF
FFF,F,FF:FF,FF
```

[illegible]

@A00721:190:HGJW7DSXY:4:2637:30318:36276 2:N:0:TCTGCAAG+GCTGCACT  
CACACCAAGTCTTCGATTATATCTCAGAGACCTCGACCACTGAACCGGCAGCTGTGACCGCTGAGTCC





$+$ 

+

 $+$ 

+

+

+

+

[illegible]

+

@A00721:190:HGJW7DSXY:4:2529:5791:13808 2:N:0:TCTGCAAG+GCTGCACT  
GAACACACCAAGTCTTCGATTATATCTCAGAGACCTCGACCACTGAACCGGCAGCTGTGACCGCTGAG  
TCCTGTTGAATTGCAACACTCGTCGTGTTTTACGATAACCGGCGGTCCTAAACGGACCGCCTGACCAC  
TTCCTCTTCTT

[illegible] $+$ 

@A00721:190:HGJW7DSXY:4:1241:29143:1047 2:N:0:TCTGCAAG+GCTGCACT  
GAGGAAGTGGTCAGGCGGTCCGTTTAGGACCGCCGGTTATCGTAAACACGACGAGTGTGCAATTCA  
ACAGGACTCAGCGGTACAGCTGCCGGTTCAGTGGTCGAGGTCTCTGAGATATAATCGAAGACTTGGT  
GTGTTACAGCCTCCT

F:F:FF:FF:FFFFFFFF:FFFFFF:F:FFFFFFFF:FFFFFFFFFFFFFFF:,F:FF:FFFF,FFFFFFFF  
 FFFFFFFF:FFFFFFFFF,F:F::F:F:FFFF,F:FFFF:FFFFFFF,FFFFFFF:FFFFFFF:F,F:FF  
 FFFFF:F,:F:FFFF

+

@A00721:190:HGJW7DSXY:4:1264:10700:21684 2:N:0:TCTGCAAG+GCTGCACT  
GAGGAAGTGGTCAGGCGGTCCGTTTAGGACCGCCGGTTATCGTAAACACGACGAGTGTGCAATTCA  
ACAGGACTCAGCGGTACAGCTGCCGGTTCAGTGGTCGAGGTCTCTGAGATATAATCGAAGACTTGGT  
GTGTTACAGCCTCCT

[illegible]

+  
FFFF:FF,F:FFFFFFFFF:F:FFFF:,FFFFFFFFFFFF,FFFFFFFFF:FFFFFF:FFF:FFFF  
FFFFFFFFF:,FFFF:FFFF::FFFFFF:FFFFFFFFFFFFFFFFFFFF,,FFF:FFFF:FFFFF  
F:FFFFFFFFFFFF

@A00721:190:HGJW7DSXY:4:1634:3604:11960 2:N:0:TCTGCAAG+GCTGCACT  
GAGGAAGTGGTCAGGCGGTCCGTTTAGGACCGCCGGTTATCGTAAAACACGACGAGTGTTGCAATTCA  
ACAGGACTCAGCGGTACAGCTGCCGGTTCAGTGGTCGAGGTCTCTGAGATATAATCGAAGACTTGGT  
GTGTTACGCCTCCT

+  
FFFFFFFF:FFFFFFFFFFFFFFFF:FFFFFFFFFFFFFFFFFFFFFFFFFFFFFFFFFFFFFFFFFFFFF  
FFFFFFFFFFFFFFFFFFFFFFFFFFFFFFFFFFFFFFFFFFFFFFFFFFFFFFFFFFFFFFFFFFFFFFFFF  
F:FFFFFFFFFFFF

@A00721:190:HGJW7DSXY:4:2329:5728:30890 2:N:0:TCTGCAAG+GCTGCACT  
GAGGAAGTGGTCAGGCGGTCCGTTTAGGACCGCCGGTTATCGTAAAACACGACGAGTGTTGCAATTCA  
ACAGGACTCAGCGGTACAGCTGCCGGTTCAGTGGTCGAGGTCTCTGAGATATAATCGAAGACTGGGT  
GTGTTACGCCTCCT

+  
FFFFFFFFFFFFFFFFFFFFFFFF:FFFFFFFFFFFF:FFFFFFFFFFFF:FFFFFFFFFFFFFFFFFFFFF  
FFF:FFFFFFFFFFFFFFFF,FFFFFFFF:FFFFFFFFFFFFFFFFFFFFFFFF,FFFFFFFF,FF,  
FFFF:F:FFFFFFF

@A00721:190:HGJW7DSXY:4:1175:21278:28855 2:N:0:TCTGCAAG+GCTGCACT  
GGAAGTGGTCAGGCGGTCCGTTTAGGACCGCCGGTTATCGTAAAACACGACGAGTGTTGCAATTCAAC  
AGGACTCAGCGGTACAGCTGCCGGTTCAGTGGTCGAGGTCTCTGAGATATAATCGAAGACTTGGTGT  
GTTACGCCTCCTAT

+  
FFFFFFFFFFFFFFFFFFFFFFFFFFFFFFFFFFFFFFFFFFFF:FFFFFF:FFFFFFFFFFFFFFFFFFFFF  
FFFFFFFFFFFFFFFFFFFFFFFF:FFFFFFFFFFFFFFFFFFFFFFFFFFFFFFFFFFFFFFFFFFFFFFFFF  
FFFFFFFFFFFFFFFFFFFF

@A00721:190:HGJW7DSXY:4:1219:23809:2988 2:N:0:TCTGCAAG+GCTGCACT  
GGAAGTGGTCAGGCGGTCCGTTTAGGACCGCCGGTTATCGTAAAACACGACGAGTGTTGCAATTCAAC  
AGGACTCAGCGGTACAGCTGCCGGTTCAGTGGTCGAGGTCTCTGAGATATAATCGAAGACTTGGTGT  
GTTACGCCTCCTAT

+  
FFFFFFFFFFFFFFFFFFFFFFFF:FFFFFFFFFFFF:FFFFFFFFFFFF:FFFFFFFFFFFFFFFFFFFFF  
FFFFFFFFFFFFFFFFFFFFFFFFFFFFFFFFFFFFFFFFFFFFFFFFFFFFFFFFFFFFFFFFFFFFFFFFF  
FFFFFFFFFFFFFFFFFFFF

@A00721:190:HGJW7DSXY:4:1219:23475:3161 2:N:0:TCTGCAAG+GCTGCACT  
GGAAGTGGTCAGGCGGTCCGTTTAGGACCGCCGGTTATCGTAAAACACGACGAGTGTTGCAATTCAAC  
AGGACTCAGCGGTACAGCTGCCGGTTCAGTGGTCGAGGTCTCTGAGATATAATCGAAGACTTGGTGT  
GTTACGCCTCCTAT

+  
FFF:FFFFFFFFFFFFFFFFFFFFFFFFFFFFFFFFFFFFFFFFFFFFFFFFFFFFFFFFFFFFFFFFFFFFF  
FFFFFFFFFFFFFFFFFFFFFFFFFFFFFFFFFFFFFFFFFFFFFFFFFFFFFFFFFFFFFFFFFFFFFFFFF  
FFFFFFFFFFFFFFFFFFFF

@A00721:190:HGJW7DSXY:4:1337:23791:1799 2:N:0:TCTGCAAG+GCTGCACT  
GGAAGTGGTCAGGCGGTCCGTTTAGGACCGCCGGTTATCGTAAAACACGACGAGTGTTGCAATTCAAC  
AGGACTCAGCGGTACAGCTGCCGGTTCAGTGGTCGAGGTCTCTGAGATATAATCGAAGACTTGGTGT  
GTTACGCCTCCTAT

+  
FFFFFFFFF,FFFFFFFFFFFFFFFFFFFFFFFFFFFFFFFFFFFFFFFFFFFFFFFFFFFFFFFFFFFFF  
FF,FFFF:FF:FFFFFFFFF:FFFFFFFFFFFFFFFFFFFFFFFFFFFFFFFFFFFFFFFF,FFFFF,:FFFFF  
FFFFFFFFFFFF:FFF

@A00721:190:HGJW7DSXY:4:1347:11939:8829 2:N:0:TCTGCAAG+GCTGCACT  
GGAAGTGGTCAGGCGGTCCGTTTAGGACCGCCGGTTATCGTAAAACACGACGAGTGTTGCAATTCAAC

AGGACTCAGCGGTCACAGCTGCCGGTTCAGTGGTCGAGGTCTCTGAGATATAATCGAAGACTTGGTGT  
GTTACAGCCTCCTAT

+

FFFFFFFFFFFFFFFFFFFFF,,FFFF:FFFFFFFFFFFFFFFF:FFFFFFFFFFFFFFFFFFFFF  
FFFFFFFFFFFFFFFFFFFFFFFFFFFFFFFFFFFFFFFF:FFFFFFFFFFFFFFFFFFFFFFFFFFFFF  
FFFFFFFFFFFFFFFF

@A00721:190:HGJW7DSXY:4:2111:12084:16783 2:N:0:TCTGCAAG+GCTGCACT  
GGAAGTGGTCAGGCGGTCCGTTTAGGACCGCCGGTATCGTAAAACACGACGAGTGTTGCAATTCAAC  
AGGACTCAGCGGTCACAGCTGCCGGTTCAGTGGTCGAGGTCTCTGAGATATAATCGAAGACTTGGTGT  
GTTACAGCCTCCTAT

+

FFF:FFFFFFFFFFFFFFFFFFFFFFFFFFFFFFFF:FFFFFFFFFFFFFFFF:FFFFFFF  
FFFFFFFFFFFFFFFFFFFFFFFFFFFFFFFFFFFFFFFF:FFFF:FFFFFFFFFFFFF  
FFFFFFFFFFFFFFFF

@A00721:190:HGJW7DSXY:4:2158:4499:12571 2:N:0:TCTGCAAG+GCTGCACT  
GGAAGTGGTCAGGCGGTCCGTTTAGGACCGCCGGATATCGTAAAACACGACGAGTGTTGCAATTCAAC  
AGGACTCAGCGGTCACAGCTGACGGTTCAGTGGTCGAGTTCTCTGAGATATAATCGAAGACTTGGTGT  
GTTAACGCATCCTAT

+

FF:F::,FFFF:F::,,,,FFFF:F,FF,FF,:FFFF:FFFFF:FFFFF,::FFFF,FFF  
FF:FFF:FF,F,FFF:FF,::,F,FFFFFFFFFFFFF,,,FFFFF,:FFF,FFFFF,FF:F:,F  
FF:,F,,F,FF,,FF

@A00721:190:HGJW7DSXY:4:2222:22806:18380 2:N:0:TCTGCAAG+GCTGCACT  
GGAAGTGGTCAGGCGGTCCGTTTAGGACCGCCGGTATCGTAAAACACGACGAGTGTTGCAATTCAAC  
AGGACTCAGCGGTCACAGCTGCCGGTTCAGTGGTCGAGGTCTCTGAGATATAATCGAAGACTTGGTGT  
GTTACAGCCTCCTAT

+

FFFFFFFFFFFFFFFFFFFFFFFFFFFFFFFF:FFFFFFFFFFFFFFFF:FFFFFFF:FFFFFFF  
FFFFFFFFFFFFFFFFFFFFFFFFFFFFFFFFFFFFF,FFFF:FFFFFFFF:FFFFFFFFFFFFF  
FFFFFFFFFFFFFFFF

@A00721:190:HGJW7DSXY:4:2370:18412:3662 2:N:0:TCTGCAAG+GCTGCACT  
GGAAGTGGTCAGGCGGTCCGTTTAGGACCGCCGGTATCGTAAAACACGACGAGTGTTGCAATTCAAC  
AGGACTCAGCGGTCACAGCTGCCGGTTCAGTGGTCGAGGTCTCTGAGATATAATCGAAGACTTGGTGT  
GTTACAGCCTCCTAT

+

FFFFFFFFFFFFFFFFFFFFFFFFFFFFFFFF:FFFFF,FFFF:FFFFFFFFFFFFFFFFFFFFFFFF  
FFFFFFFFFFFFFFFFFFFFFFFFFFFFFFFFFFFFFFFFFFFFFFFFFFFFFFFF:FFFFFFF:FF:FFFFF  
FFFFFFFF:FFFFFFFF

@A00721:190:HGJW7DSXY:4:1129:17056:6073 2:N:0:TCTGCAAG+GCTGCACT  
GAAGTGGTCAGGCGGTCCGTTTAGGACCGCCGTTATCGTAAAACACGACGAGTGTTGCAATTCAACA  
GTACACAGCGGTCACAGCTGCCGGTTCAGTGGTCGAGGTCTCTGAGATATAATCGAAGACTTGGTGTG  
TTCACCTCCTCAA

+

FFF,FFFF:F,:FF:F:FF::FF,FFFFFFFF,F,FFF:FFFF::FF,FF,FF,::FFF:FF,FFFF:  
:,F,,,FFF,FFFFF,F,F::FFF,,FF,,FF,::,,FF,,FFFF:FFF,,::,F,FF::,,FF  
F,F:F,FF,F:::

@A00721:190:HGJW7DSXY:4:1412:32181:12884 2:N:0:TCTGCAAG+GCTGCACT  
GAAGTGGTCAGGCGGTCCGTTTAGGACCGCCGGTATCGTAAAACACGACGAGTGTTGCAATTCAAAA  
GGAATCAGCGGTCACAGCTGCCTGTTTCAGTGGTCGAGGTCTCTGAGATATAATCTAAGACTGGGTGTG  
TTCACGCCTCCTAT

+

FFFFFFFFFFFFF::FF::FFFFFFFF:F:::F,FFFF:FFFFF,F,FFFF,:F,FFF:F::F:FFFF,:  
F:F,FF::FFFF,FFFF:FFF,::FFFF::FF,:FFFF,FFF:FFF:FFFF:,FFFF:F,::,F:FF  
FFFF:FFFF:F,F

@A00721:190:HGJW7DSXY:4:2231:28483:22795 2:N:0:TCTGCAAG+GCTGCACT  
GCAAAGGAGGTGTGAACACACCAAGTCTTCGATTATATCTCAGAGACCTCGACCACTGAACCGGCAGC  
TGTGACCGCTGAGTCCTGTTGACTTGCAACACTGGGCGTGTTTTACGATAACCGGCGGTCCTAAACGG  
ACCGCCTGACCACTT

```
FFF,FF,F,F,,FFFFFFFFFFFF:FFFFFF:FF,FFF,FFFFFFFFFFFFFFFFFFFFFFFFFFFFFFFF
FFFFFFFFF,,FFFF,FFFFFF,,FFFFFFFFF,F:,FFFFFFFF:FFFF,F:F,,F:,F:FFFFF:,F
FFFFFFFFF,FFFF:
```

+

```

FFFFFFFFFFFFFFFFFFFFFFFFFFFFFFFF:FFFFFFFFFFFFFFFFFFFFFFFFFFFFFFFF
FFFFFFFFFFFFFFFFFFFFFFFF:FF:FFFFFFFF:FFFFFFFFFFFFFFFFFFFFFFFF
FFFFFFFFFFFFFFFF

```

+

```

FFFFFFFFFFFFFFFFFFFFFFFFFFFFFFFFFFFFFFFFFFFFFFFFFFFFFFFFFFFFFFFF:FFFFFF
FFFFFFFFFFFFFFFFFFFFFFFFFFFFFFFFFFFFFFFFFFFFFFFFFFFFFFFFFFFFFF,FF::FFFFFFFFFFFFFFFFFFFFFFFFFFFFFF
FFFFFFFF,FFFFF

```

+

[illegible]

+

[illegible]

+

```
FFFFFFFFFFFFFFFFFFFFFFFFFFFFFFFFFFFFFFFFFFFFFFFFFFFFFFFFFFFF
FFFFFFFFFFFFFFFFFFFFFFFFFFFFFFFFFFFFFFFFFFFFFFFFFFFFFFFFFFFF
FFFFFFFFFFFFFFFFFFFFFFFFFFFFFFFFFFFFFFFFFFFFFFFFFFFFFFFFFFFF
```

+

[illegible]

:FFFFFF,FFFFFF:FFFFFFFFFFFFFF:FFFFFFFFFFFFFF:FFFF:FF,FFFF  
FFFF:FFFF:FFFF

@A00721:190:HGJW7DSXY:4:2402:12644:5415 2:N:0:TCTGCAAG+GCTGCACT  
CTGCATAGGAGGTGTGAACACACCAAGTCTTCGATTATATCTCAGAGACCTCGACCACTGAACCGGCA  
GCTGTGACCGCTGAGTCCTGTTGAATTGCAACACTCGTCGTGTTTTACGATAACCGGCGGTCCTAAAC  
GGACCGCCTGACCAC

+

FFFF:FFFFFF:FFFFFFFFFFFFFF:FFFF:FF:FFFFFFFFFFFFFFFFFFFFFFFF,FF,FFF:FFFF  
FFFFFFFFFFFFFFFFFFFFFF,FFFFFFFFFFFFFFFF:F,FFFF:FF,FFF:F:,FF:FF:FFFF:  
:FF:FF::FFFF:FF

@A00721:190:HGJW7DSXY:4:2574:3667:29293 2:N:0:TCTGCAAG+GCTGCACT  
CTGCATAGGAGGTGTGAACACACCAAGTCTTCGATTATATCTCAGAGACCTCGACCACTGAACCGGCA  
GCTGTGACCGCTGAGTCCTGTTGAATTGCAACACTCGTCGTGTTTTACGATAACCGGCGGTCCTAAAC  
GGACCGCCTGACCAC

+

FFFFFFFFFFFFFFFFFFFFFFFFFFFFFFFFFFFFFFFFFFFFFFFFFFFFFFFFFFFFFFFFFFFF,  
FFFF:FFFFFFFFFFFFFFFFFFFFFFFFFFFFFFFF:FFFFFFFFFFFFFF:FFFFFFFFFFFFFF  
FFFFFFFF,FFFF

@A00721:190:HGJW7DSXY:4:2637:18331:14888 2:N:0:TCTGCAAG+GCTGCACT  
CTGCATAGGAGGTGTGAACACACCAAGTCTTCGATTATATCTCAGAGACCTCGACCACTGAACCGGCA  
GCTGTGACCGCTGAGTCCTGTTGAATTGCAACACTCGTCGTGTTTTACGATAACCGGCGGTCCTAAAC  
GGACCGCCTGACCAC

+

FFFFFFFFFFFFFFFFFFFFFF:FFFFFFFFFFFFFFFFFFFFFFFFFFFFFFFFFFFFFFFFFFFFF  
FFFFFFFFFFFFFFFFFFFFFFFFFFFFFFFFFFFFFFFFFFFFFFFF:F:FFFFFFFFFFFFFF  
FFFFFFFFFFFFFF

@A00721:190:HGJW7DSXY:4:1130:32009:16908 2:N:0:TCTGCAAG+GCTGCACT  
ACTGCATAGGAGGTGTGAACACACCAAGTCTTCGATTATATCTCAGAGACCTCGACCACTGAACCGGC  
AGCTGTGACCGCTGAGTCCTGTTGAATTGCAACACTCGTCGTGTTTTACGATAACCGGCGGTCCTAAA  
CGGACCGCCTGACCA

+

FFFFFFFFFFFFFFFFFFFFFFFFFFFFFFFFFFFFFFFFFFFFFFFFFFFFFFFFFFFFFFFFFFFF  
FFFFFFFFFFFFFFFFFFFFFFFFFFFFFFFFFFFFFFFFFFFFFFFF:FFFFFFFFFFFFFF  
FFFFFFFFFFFF:FFF

@A00721:190:HGJW7DSXY:4:1647:1732:13135 2:N:0:TCTGCAAG+GCTGCACT  
ACTGCATAGGAGGTGTGAACACACCAAGTCTTCGATTATATCACAGAGACCTCGACCACTGAACCGGC  
AGCTGTGACCGCTGAGTCCTGTTGAATTGCAACACTCGTCGTGTTTTACGATAACCGGCGGTCCTAAA  
CGGACCGCCTGACCA

+

FFFF:FFFFFFFFFFFFFFFFFFFFFFFFFFFFFFFF:FFFFFFFFFFFFFFFFFFFFFFFFFFFF  
FFFFFFFFFFFFFFFFFFFFFF,FFFFFFFF:FFFFFFFFFFFFFF:FFFFFFFFFFFFFFFFFFFF  
FFFFFFFFFFFFFF:

@A00721:190:HGJW7DSXY:4:2303:6460:6793 2:N:0:TCTGCAAG+GCTGCACT  
ACTGCATAGGAGGTGTGAACACACCAAGTCTTCGATTATATCTCAGAGACCTCGACCACTGAACCGGC  
AGCTGTGACCGCTGAGTCCTGTTGAATTGCAACACTCGTCGTGTTTTACGATAACCGGCGGTCCTAAA  
CGGACCGCCTGACCA

+

FFFFFFFFFFFFFFFFFFFFFFFFFFFFFFFFFFFFFFFFFFFFFFFFFFFFFFFFFFFFFFFFFFFF  
:FFFFFFFFFFFFFFFFFFFFFF:FFFFFFFFFFFFFFFFFFFFFFFFFFFFFFFFFFFFFFFFFFFF  
FFFFFFFFFFFFFF

@A00721:190:HGJW7DSXY:4:2303:7310:7858 2:N:0:TCTGCAAG+GCTGCACT  
ACTGCATAGGAGGTGTGAACACACCAAGTCTTCGATTATATCTCAGAGACCTCGACCACTGAACCGGC  
AGCTGTGACCGCTGAGTCCTGTTGAATTGCAACACTCGTCGTGTTTTACGATAACCGGCGGTCCTAAA  
CGGACCGCCTGACCA

+  
FF:FFFFFFFFFFFFFFFFFFFFFFFFFFFFFFFFFFFFFFFFFFFFFFFFFFFFFFFFFFFFFFFF  
FFFFFFFF,FFFFFFFFFFFFFFFFFFFFFFFFFFFFFFFFFFFFFFFFFFFFFFFFFFFFFFFF:  
FFFF:FFFFFFFFFFFFFFFF  
FFFF,FFFFFFFF

@A00721:190:HGJW7DSXY:4:2469:30463:23406 2:N:0:TCTGCAAG+GCTGCACT  
ACTGCATAGGAGGTGTGAACACACCAAGTCTTCGATTATATCTCAGAGACCTCGACCACTGAACCGGC  
AGCTGTGACCGCTGAGTCCTGTTGAATTGCAACACTCGTCGTGTTTTACGATAACCGGCGGTCCTAAA  
CGGACCGCCTGACCA

+  
FFFFFFFFFFFFFFFFFFFFFFFFFFFFFFFFFFFFFFFFFFFFFFFFFFFFFFFFFFFFFFFFFFFF  
FFFFFFFFFFFFFFFFFFFFFFFFFFFFFFFFFFFFFFFFFFFFFFFFFFFFFFFFFFFFFFFF:FFFF:  
FFFFFFFFFFFFFFFFFFFFFFFF  
FFFFFFFFFFFFFFFF

@A00721:190:HGJW7DSXY:4:2469:30816:24173 2:N:0:TCTGCAAG+GCTGCACT  
ACTGCATAGGAGGTGTGAACACACCAAGTCTTCGATTATATCTCAGAGACCTCGACCACTGAACCGGC  
AGCTGTGACCGCTGAGTCCTGTTGAATTGCAACACTCGTCGTGTTTTACGATAACCGGCGGTCCTAAA  
CGGACCGCCTGACCA

+  
FFFFFFFFFFFF:FFFFFFFFFFFFFFFFFFFFFFFFFFFFFFFFFFFFFFFFFFFFFFFFFFFFFFFF  
FFFFFFFFFFFFFFFF:FFFFFFFFFFFFFFFFFFFFFFFFFFFFFFFFFFFFFFFFFFFFFFFFFFFF:  
FF:FFFFFFFFFFFFFFFFFFFFFFFF  
FFFFFFFFFFFFFFFF

@A00721:190:HGJW7DSXY:4:2617:24144:15217 2:N:0:TCTGCAAG+GCTGCACT  
ACTGCATAGGAGGTGTGAACACACCAAGTCTTCGATTATATCTCAGAGACCTCGACCACTGAACCGGC  
AGCTGTGACCGCTGAGTCCTGTTGAATTGCAACACTCGTCGTGTTTTACGATAACCGGCGGTCCTAAA  
CGGACCGCCTGACCA

+  
FFFFFFFFFFFFFFFFFFFFFFFFFFFFFFFFFFFFFFFFFFFFFFFFFFFFFFFFFFFFFFFFFFFF  
FFFFFFFFFFFFFFFFFFFFFFFFFFFFFFFFFFFFFFFFFFFFFFFFFFFFFFFFFFFFFFFFFFFF,FF  
FFFFFFFFFFFFFFFF

@A00721:190:HGJW7DSXY:4:1554:13738:4022 2:N:0:TCTGCAAG+GCTGCACT  
CTCTGACAACTCCGTCTTGTACTGCATAGGAGATGTGAACACACCAAGTCTTCGATTATATCTCAGA  
GACCTCGACCACTGAACCGGCAGCTGTGACCGCTGAGTCCTGTTGAATTGCAACACTCGTCGTGTTTT  
ACGATAACCGGCGGT

+  
FFFFFFFFFFFFFFFFFFFFFFFFFFFFFFFFFFFFFFFFFFFFFFFFFFFFFFFFFFFFFFFFFFFF  
FFFFFFFFFFFFFFFF:FFFFFFFFFFFF:FFFFFFFFFFFFFFFFFFFFFFFFFFFFFFFFFFFF  
F:FFFF:,F:FFFF

@A00721:190:HGJW7DSXY:4:2158:26187:28369 2:N:0:TCTGCAAG+GCTGCACT  
CTCTGACAACTCCGTCTTGTACTGCATAGGAGATGTGAACACACCAAGTCTTCGATTATATCTCAGA  
GACCTCGACCACTGAACCGGCAGCTGTGACCGCTGAGTCCTGTTGAATTGCAACACTCGTCGTGTTTT  
ACGATAACCGGCGGT

+  
FFFFFFFFFFFFFFFFFFFFFFFFFFFFFFFFFFFFFFFFFFFFFFFFFFFFFFFFFFFFFFFFFFFF  
FFFFFFFFFFFFFFFFFFFFFFFFFFFFFFFFFFFFFFFFFFFFFFFFFFFFFFFFFFFFFFFFFFFF:  
FFFFFFFFFFFFFFFF  
FFFFFFFFFFFFFFFF

@A00721:190:HGJW7DSXY:4:2229:11749:12070 2:N:0:TCTGCAAG+GCTGCACT  
CTCTGACAACTCCGTCTTGTACTGCATAGGAGATGTGAACACACCAAGTCTTCGATTATATCTCAGA  
GACCTCGACCACTGAACCGGCAGCTGTGACCGCTGAGTCCTGTTGAATTGCAACACTCGTCGTGTTTT  
ACGATAACCGGCGGT

+  
FFFFFFF:FFFFFFFFFFFFFFFFFFFFFFFFFFFFFFFFFFFFFFFFFFFFFFFFFFFFFFFFFFFF  
FFFFFFFFFFFFFFFF,FF:FFFFFFFFFFFFFFFFFFFFFFFFFFFFFFFFFFFF:FFFF:  
FFFFFFFFFFFFFFFFFFFFFFFF  
FFFFFFFFFFFFFFFF

@A00721:190:HGJW7DSXY:4:2475:21206:6057 2:N:0:TCTGCAAG+GCTGCACT  
CTCTGACAACTCCGTCTTGTACTGCATAGGAGATGTGAACACACCAAGTCTTCGATTATATCTCAGA





@A00721:190:HGJW7DSXY:4:2628:4038:10833 2:N:0:TCTGCAAG+GCTGCACT  
GTCTTCCAAGAAGAGGAAGTGGTCAGCCGGTTATCGTAAAACACGACGAGTGTGCAATTCAACAGGA  
CTCAGCGGTCACAGCTGCCGGTTCAGTGGTCGAGGTCTCTGAGATATAATCGAAGACTTGGTGTGTTC  
ACACCTCCTATGCAG

```

FFFFFFFFFFFFFFFFFFFFFFFFFFFFFFFF:FFFFFFFFFFFFFFFFFFFFFFFFFFFFFFFF:FFFFFFFFFF
FFFFFFFFFFFFFFFFFFFFFFFFFFFFFFFFFFFFFFFFFFFFFFFFFFFFFFFFFFFFFFFFFFFF,:FFFFFFFFFFFFFFFFFFFFFFFF:FFFF
:FFFFFFFF:FFFFF:

```

+

[illegible]

+

[illegible]

+

[illegible]

+

[illegible]

+

[illegible]

+

[illegible]

@A00721:190:HGJW7DSXY:4:2420:17571:14606 2:N:0:TCTGCAAG+GCTGCACT  
ATTA ACTCTGACAACTCCGTCTTG TACTGCATAGGAGGTGTGAACACACCAAGTCTTCGATTATATC  
TCAGAGACCTCGACCACTGAACCGGCAGCTGTGACCGCTGAGTCCTGTTGAATTGCAACACTCGTCGT  
GTTTTACGATAACCG

@A00721:190:HGJW7DSXY:4:2476:7591:1579 2:N:0:TCTGCAAG+GCTGCACT  
ATTA ACTCTGACAACTCCGTCTTG TACTGCATAGGAGGTGTGAACACACCAAGTCTTCGATTATATC  
TCAGAGACCTCGACCACTGAACCGGCAGCTGTGACCGCTGAGTCCTGTTGAATTGCAACACTCGTCGT  
GTTTTACGATAACCG

@A00721:190:HGJW7DSXY:4:2523:28863:25864 2:N:0:TCTGCAAG+GCTGCACT  
ATTA ACTCTGACAACTCCGTCTTGTACTGCATAGGAGGTGTGAACACACCAAGTCTTCGATTATATC  
TCAGAGACCTCGACCACTGAACCGGCAGCTGTGACCGCTGAGTCCTGTTGAATTGCAACACTCGTCGT  
GTTTTACGATAACCG

@A00721:190:HGJW7DSXY:4:2535:28628:11804 2:N:0:TCTGCAAG+GCTGCACT  
ATTAACCTCTGACAACTCCGTCTTGTACTGCATAGGAGGTGTGAACACACCAAGTCTTCGATTATATC  
TCAGAGACCTCGACCACTGAACCGGCAGCTGTGACCGCTGAGTCCTGTTGAATTGCAACACTCGTCGT  
GTTTTACGATAACCG

@A00721:190:HGJW7DSXY:4:2536:23411:33802 2:N:0:TCTGCAAG+GCTGCACT  
ATTAACCTCTGACAAACTCCGTCTTGTACTGCATAGGAGGTGTGAACACACCAAGTCTTCGATTATATC  
TCAGAGACCTCGACCACTGAACCGGCAGCTGTGACCGCTGAGTCCTGTTGAATTGCAACACTCGTCGT  
GTTTTACGATAACCG

@A00721:190:HGJW7DSXY:4:2618:30445:3396 2:N:0:TCTGCAAG+GCTGCACT  
ATTAACCTCTGACAAACTCCGTCTTGTACTGCATAGGAGGTGTGAACACCAAGTCTTCGATTATATC  
TCAGAGACCTCGACCCTGAACCGGCAGCTGTGACCGCTGAGTCCTGTTGAATTGCAACACTCGTCGT  
GTTTACGATAACCG

@A00721:190:HGJW7DSXY:4:1105:27326:11960 2:N:0:TCTGCAAG+GCTGCACT  
TATTAAGCTTGACAAACTCCGTCTTGTACTGCATAGGAGGTGTGAACACACCAAGTCTTCGATTATAT  
CTCAGAGACTCTCGACCACTGAACCGGCAGCTGTGACCGCTGAGTCCTGTTGAATTGCAACACTCGTCG  
TGTTTTACGATAACC

+  
FFFFFFFFFFFFFFFFFFFFFFFFFFFFFFFFFFFFFFFFFFFFFFFFFFFFFFFFFFFFFFFFFFFFFFFF  
FFFFFFFFFFFFFFFFFFFFFFFFFFFFFFFFFFFFFFFFFFFFFFFFFFFFFFFFFFFFFFFFFFFFFFFF  
FFFFFFFFFFFFFFFF  
@A00721:190:HGJW7DSXY:4:1169:5448:31939 2:N:0:TCTGCAAG+GCTGCACT  
TATTAAGCTGACAACTCCGTCTTGTACTGCATAGGAGGTGTGAACACACCAAGTCTTCGATTATAT  
CTCAGAGACCTCGACCACTGAACCGGCAGCTGTGACCGCTGAGTCCTGTTGAATTGCAACACTCGTCG  
TGTTTTACGATAACC

+  
FFFFFFFFFFFFFFFFFFFFFFFFFFFFFFFFFFFFFFFFFFFFFFFFFFFFFFFFFFFFFFFFFFFFFFFF  
FFFFF:FFFFFFFFFFFFFFFFFFFFFFFFFFFFFFFFFFFFFFFFFFFFFFFFFFFFFFFFFFFFFFFF  
FFFFFFFFFF:FFFFF  
@A00721:190:HGJW7DSXY:4:1203:17689:8735 2:N:0:TCTGCAAG+GCTGCACT  
TATTAAGCTGACAACTCCGTCTTGTACTGCATAGGAGGTGTGAACACACCAAGTCTTCGATTATAT  
CTCAGAGACCTCGACCACTGAACCGGCAGCTGTGACCGCTGAGTCCTGTTGAATTGCAACACTCGTCG  
TGTTTTACGATAACC

+  
FFFFFFFFFFFFFFFFFFFFFFFFFFFFFFFFFFFFFFFFFFFFFFFFFFFFFFFFFFFFFFFFFFFFF:FFFFFFFFFFFFFFFFFFFFFFFF  
FFFFFFFFFFFFFFFFFFFFFFFFFFFFFFFFFFFFFFFFFFFFFFFFFFFFFFFFFFFFFFFFFFFFF:F,FF:FFFFFFFFFFFFFFFFFFFFFFFF  
FFFFFFFFFFFFFFFF  
@A00721:190:HGJW7DSXY:4:1311:11406:23312 2:N:0:TCTGCAAG+GCTGCACT  
TATTAAGCTGACAACTCCGTCTTGTACTGCATAGGAGGTGTGAACACACCAAGTCTTCGATTATAT  
CTCAGAGACCTCGACCACTGAACCGGCAGCTGTGACCGCTGAGTCCTGTTGAATTGCAACACTCGTCG  
TGTTTTACGATAACC

+  
FFFFFFFFFFFFFFFFFFFFFFFFFFFFFFFFFFFFFFFFFFFFFFFFFFFFFFFFFFFFFFFFFFFFF:FFFFFFFFFFFFF  
FFFFFFFFFFFFFFFFFFFFFFFFFFFFFFFFFFFFFFFFFFFFFFFFFFFFFFFFFFFFFFFFFFFFF,FFFFFFFFF:FFFFFFFFFFFFF  
FFFFFFF:FFFFFFF:F  
@A00721:190:HGJW7DSXY:4:1349:28691:32111 2:N:0:TCTGCAAG+GCTGCACT  
TATTAAGCTGACAACTCCGTCTTGTACTGCATAGGAGGTGTGAACACACCAAGTCTTCGATTATAT  
CTCAGAGACCTCGACCACTGAACCGGCAGCTGTGACCGCTGAGTCCTGTTGAATTGCAACACTCGTCG  
TGTTTTACGATAACC

+  
FFFFFFFFFFFFFFFFF:FFFFFFFFFFFFFFFFFFFFFFFFFFFFFFFFFFFFFFFFFFFFFFFFFFFFFFFFFFFFFFFFFFFFFFFF  
FFFFFFFFFFFFFFFFFFFFFFFFFFFFFFFFFFFFFFFFFFFFFFFFFFFFFFFFFFFFFFFFFFFFFFFFFFFFFFFFFFFFFFFFFFFFFFFF  
FFFFFFFFFFFFFFFFFFFFF  
@A00721:190:HGJW7DSXY:4:1441:8504:20259 2:N:0:TCTGCAAG+GCTGCACT  
TATTAAGCTGACAACTCCGTCTTGTACTGCATAGGAGGTGTGAACACACCAAGTCTTCGATTATAT  
CTCAGAGACCTCGACCACTGAACCGGCAGCTGTGACCGCTGAGTCCTGTTGAATTGCAACACTCGTCG  
TGTTTTACGATAACC

+  
FFFFFFFFFFFFFFFFFFFFFFFFFFFFFFFFFFFFFFFFFFFFFFFFFFFFFFFFFFFFFFFFFFFFFFFF  
FFFFFFFFFFFFFFFFFFFFFFFFFFFFFFFFFFFFFFFFFFFFFFFFFFFFFFFFFFFFFFFFFFFFF:FFFFF:FFFFFFFFFFFFFFFFFFFF  
FFFFFFFFFFFFFFF,FF  
@A00721:190:HGJW7DSXY:4:2214:18954:2597 2:N:0:TCTGCAAG+GCTGCACT  
TATTAAGCTGACAACTCCGTCTTGTACTGCATAGGAGGTGTGAACACACCAAGTCTTCGATTATAT  
CTCAGAGACCTCGACCACTGAACCGGCAGCTGTGACCGCTGAGTCCTGTTGAATTGCAACACTCGTCG  
TGTTTTACGATAACC

+  
FFFFFFFFFFFFFFFFFFFFFFFFFFFFFFFFFFFFFFFFFFFFFFFFFFFFFFFFFFFFFFFFFFFFFFFF  
FFFFFFFFFFFFFFFFFFFFFFFFFFFFFFFFFFFFFFFFFFFFFFFFFFFFFFFFFFFFFFFFFFFFFFFFFFFFFFFFFFFFFFFFFFFFFFFF  
FFFFFFFFFFFFFFFFFFFFF  
@A00721:190:HGJW7DSXY:4:2216:14724:27211 2:N:0:TCTGCAAG+GCTGCACT  
TATTAAGCTGACAACTCCGTCTTGTACTGCATAGGAGGTGTGAACACACCAAGTCTTCGATTATAT

CTCAGAGACCTCGACCACTGAACCGGCAGCTGTGACCGCTGAGTCCTGTTGAATTGCAACACTCGTCG  
TGTTTTACGATAACC

```
:FFFFF,FFFFF,FFFF:::FF,F:FFFFF:FF:F::FFFFFFFFFFFF:FF:FFFFF:F:FF:FFFF
FFFF,F,FFF:FFFFFFFFFFFF:FF,FFF::F:FFFFF,F:,FF:F,:F:F:FF:,,,FFF:F:FF,FF:
F:F,FFFFFF,FF,:

```

 $+$ [illegible]

+

[illegible] $+$ [illegible] $+$ [illegible]

+

[illegible]

+

[illegible]

$+$ 

+

 $+$ 

+

+

+

+

.....

FFFFFFFFFFFFFFFFFFFFFFFFFFFFFFFFFFFFFFFFFFFFFFFFFFFFFFFFFFFFFFFFFFFFFFFFFFFFFFFF  
FFFFFFFFFFFFFFFF

@A00721:190:HGJW7DSXY:4:2532:2456:2519 2:N:0:TCTGCAAG+GCTGCACT  
CGTCCACAATATTATTAAGTCTGACAACTCCGTCTTGTACTGCATAGGAGGTGTGAACACCAAGTCT  
TCGATTATATCTCAGAGACCTCGACCACTGAACCGGCAGCTGTGACCGCTGAGTCCTGTTGAATTGCA  
ACACTCGTCGTGTTT

+

FFFFFFFFFFFFFFFFFFFFFFFFFFFFFFFFFFFFFFFFFFFFFFFFFFFFFFFFFFFFFFFFFFFFFFFFFFFFFFFF  
FFFFFFFFFFFFFFFFFFFFFFFFFFFFFFFFFFFFFFFFFFFFFFFFFFFFFFFFFFFFFFFFFFFFFFFFFFFFFFFF  
FFFFFFFFFFFFFFFFFFFFFFFFFFFFFFFFFFFFFFFFFFFFFFFFFFFFFFFFFFFFFFFFFFFFFFFFFFFFFFFF  
FFFFFFFFFFFFFFFF

@A00721:190:HGJW7DSXY:4:2672:7708:24361 2:N:0:TCTGCAAG+GCTGCACT  
CGTCCACAATATTATTAAGTCTGACAACTCCGTCTTGTACTGCATAGGAGGTGTGAACACCAAGTCT  
TCGATTATATCTCAGAGACCTCGACCACTGAACCGGCAGCTGTGACCGCTGAGTCCTGTTGAATTGCA  
ACACTCGTCGTGTTT

+

FFFFFFFFFFFFFFFFFFFFFFFFFFFFFFFFFFFFFFFFFFFFFFFFFFFFFFFFFFFFFFFFFFFFFFFFFFFFFFFF  
FFFFFFFFFFFFFFFFFFFFFFFFFFFFFFFFFFFFFFFFFFFFFFFFFFFFFFFFFFFFFFFFFFFFFFFFFFFFFFFF  
FFFFFFFFFFFFFFFFFFFFFFFFFFFFFFFFFFFFFFFFFFFFFFFFFFFFFFFFFFFFFFFFFFFFFFFFFFFFFFFF  
FFFFFFF,FFFFFFFF

@A00721:190:HGJW7DSXY:4:1166:14253:23484 2:N:0:TCTGCAAG+GCTGCACT  
CTGCCAACGTCCACAATATTATTAAGTCTGACAACTCCGTCTTGTACTGCATAGGAGGTGTGAACAC  
ACCAAGTCTTCGATTATATCTCAGAGACCTCGACCACTGAACCGGCAGCTGTGACCGCTGAGTCCTGT  
TGAATTGCAACACTC

+

FFFFFFFFFFFFFFFFFFFFFFFFFFFFFFFFFFFFFFFFFFFFFFFFFFFFFFFFFFFFFFFFFFFFFFFFFFFFFFFF  
FFFFFFFFFFFFFFFFFFFFFFFFFFFFFFFFFFFFFFFFFFFFFFFFFFFFFFFFFFFFFFFFFFFFFFFFFFFFFFFF  
FF:FFFFFFFFFFFFFFFF

@A00721:190:HGJW7DSXY:4:1337:14027:27289 2:N:0:TCTGCAAG+GCTGCACT  
CTGCCAACGTCCACAATATTATTAAGTCTGACAACTCCGTCTTGTACTGCATAGGAGGTGTGAACAC  
ACCAAGTCTTCGATTATATCTCAGAGACCTCGACCACTGAACCGGCAGCTGTGACCGCTGAGTCCTGT  
TGAATTGCAACACTC

+

FFFFFFFFFFFFFFFFFFFFFFFFFFFFFFFFFFFFFFFFFFFFFFFFFFFFFFFFFFFFFFFFFFFFFFFFFFFFFFFF  
FFFFFFFFFFFFFFFFFFFFFFFFFFFFFFFFFFFFFFFFFFFFFFFFFFFFFFFFFFFFFFFFFFFFFFFFFFFFFFFF  
FFFFFFFFFFFFFFFF

@A00721:190:HGJW7DSXY:4:1501:25753:13557 2:N:0:TCTGCAAG+GCTGCACT  
CTGCCAACGTCCACAATATTATTAAGTCTGACAACTCCGTCTTGTACTGCATAGGAGGTGTGAACAC  
ACCAAGTCTTCGATTATATCTCAGAGACCTCGACCACTGAACCGGCAGCTGTGACCGCTGAGTCCTGT  
TGAATTGCAACACTC

+

FFFFFFFFFFFFFFFFFFFFFFFFFFFFFFFFFFFFFFFFFFFFFFFFFFFFFFFFFFFFFFFFFFFFFFFFFFFFFFFF  
FFFFFFFFFFFFFFFFFFFFFFFFFFFFFFFFFFFFFFFFFFFFFFFFFFFFFFFFFFFFFFFFFFFFFFFFFFFFFFFF  
FFFFFFFFFFFF:FFFFF

@A00721:190:HGJW7DSXY:4:1611:15745:21903 2:N:0:TCTGCAAG+GCTGCACT  
CTGCCAACGTCCACAATATTATTAAGTCTGACAACTCCGTCTTGTACTGCATAGGAGGTGTGAACAC  
ACCAAGTCTTCGATTATATCTCAGAGACCTCGACCACTGAACCGGCAGCTGTGACCGCTGAGTCCTGT  
TGAATTGCAACACTC

+

FFFFF:FFFFFFFF:FFFFF:FFFFFFFFF,FFFFFFFFFFFFFFFFFFFFFFFFFFFFFFFFFFFFFFFF  
FFFFFFFFFFFFFFFF:FFFFFFFFFFFFFFFFFFFFFFFFFFFFFFFFFFFFFFFFFFFFFFFFFFFFFFFF  
FFFFFFFFFFFF:FFF

@A00721:190:HGJW7DSXY:4:2140:1850:21386 2:N:0:TCTGCAAG+GCTGCACT  
CTGCCAACGTCCACAATATTATTAAGTCTGACAACTCCGTCTTGTACTGCATAGGAGGTGTGAACAC  
ACCAAGTCTTCGATTATATCTCAGAGACCTCGACCACTGAACCGGCAGCTGTGACCGCTGAGTCCTGT  
TGAATTGCAACACTC

+  
FFFFFFFFFFFFFFFFFFFFFFFFFFFFFFFFFFFFFFFFFFFFFFFFFFFFFFFFFFFFFFFF  
FFFFFFFF:FFFFFF:FFFFFF:FFFFFFFF:FFFFFFFFFFFF:FFFFFF:FFFFFFFFFFFFFFFF  
FFFFFFFFFFFFFFFF

@A00721:190:HGJW7DSXY:4:2308:7437:34381 2:N:0:TCTGCAAG+GCTGCACT  
CTGCCAACGTCCACAATATTATTAAGTCTGACAACTCCGTCTTGTACTGCATAGGAGGTGTGAACAC  
ACCAAGTCTTCGATTATATCTCAGAGACCTCGACCACTGAACCGGCAGCTGTGACCGCTGAGTCCTGT  
TGAATTGCAACACTC

+  
FFFFFFFF:FFFFFFFF,FFFFFFFFFFFFFFFF:FFFFFFFFFFFFFFFF:FFFFFFFFFFFFFFFF  
FFFFFFFFFFFFFFFFFFFFFFFFFFFFFFFFFFFFFFFFFFFFFFFFFFFFFFFFFFFFFFFF:FF  
FFFFFFFF:FFFFFF

@A00721:190:HGJW7DSXY:4:2369:1163:23954 2:N:0:TCTGCAAG+GCTGCACT  
CTGCCAACGTCCACAATATTATTAAGTCTGACAAACACCGTCTTGTACTGCATAGGAGGTGTGAACAC  
ACCAAGTCTTCGATTATATCTCAGAGACCTCGACCACTGAACCGGCAGCTGTGACCGCTGAGTCCTGT  
TGAATTGCAACACTC

+  
FFFF:FFFFFFFF:FFFFFFFFFFFF:FF,FFFFFF:,FF:F::,F,FFFFFFFF,FFF:,FFF::FF  
FF:FF:FF::FFF:FF:FFFFFFFFFFFFFFFF:FFFFFFF::F:FFFF:FFFF:FF,FFFF:FFFF:  
FFFFFFFF,:FF:F:F

@A00721:190:HGJW7DSXY:4:1228:20410:7247 2:N:0:TCTGCAAG+GCTGCACT  
CCAACGTCCACAATATTATTAAGTCTGACAACTCCGTCTTGTACTGCATAGGAGATGTGAACACACC  
AAGTCTTCGATTATATCTCAGAGACCTCGACCACTGAACCGGCAGCTGTGACCGCTGAGTCCTGTTGA  
ATTGCAAGATCGGAA

+  
FFFFFFFFFFFFFFFFFFFFFFFFFFFFFFFFFFFFFFFFFFFFFFFFFFFFFFFFFFFFFFFF:FFFFFFF  
FFFFFFFFFFFFFFFFFFFFFFFF:FFFFFFFFFFFFFFFFFFFFFFFFFFFFFFFF:FFFFFFFFFFFFFFFF  
FFFFFFFFFFFFFFFF

@A00721:190:HGJW7DSXY:4:1304:9525:26788 2:N:0:TCTGCAAG+GCTGCACT  
CCAACGTCCACAATATTATTAAGTCTGACAACTCCGTCTTGTACTGCATAGGAGATGTGAACACACC  
AAGTCTTCGATTATATCTCAGAGACCTCGACCACTGAACCGGCAGCTGTGACCGCTGAGTCCTGTTGA  
ATTGCAAGATCGGAA

+  
FFFFFFFFFFFFFFFFFFFFFFFFFFFFFFFFFFFFFFFFFFFFFFFFFFFFFFFFFFFFFFFF  
FFFFFFFFFFFFFFFFFFFFFFFFFFFFFFFFFFFFFFFFFFFFFFFFFFFFFFFFFFFFFFFF:FFFFF  
FFFFFFFFFFFFFFFF

@A00721:190:HGJW7DSXY:4:1375:5195:9236 2:N:0:TCTGCAAG+GCTGCACT  
CCAACGTCCACAATATTATTAAGTCTGACAACTCCGTCTTGTACTGCATAGGAGATGTGAACACACC  
AAGTCTTCGATTATATCTCAGAGACCTCGACCACTGAACCGGCAGCTGTGACCGCTGAGTCCTGTTGA  
ATTGCAAGATCGGAA

+  
FFFFFFFFFFFF:FFFFFFF:FFFFFFFFFFFFFFFFFFFFFFFFFFFFFFFFFFFFFFFFFFFFF  
FFFFFFFFFFFFFFFFFFFFFFFFFFFFFFFFFFFFFFFFFFFFFFFFFFFFFFFFFFFFFFFF,FFFFF  
,FFFFFFFFFFFFFF

@A00721:190:HGJW7DSXY:4:1441:28754:18693 2:N:0:TCTGCAAG+GCTGCACT  
CCAACGTCCACAATATTATTAAGTCTGACAACTCCGTCTTGTACTGCATAGGAGATGTGAACACACC  
AAGTCTTCGATTATATCTCAGAGACCTCGACCACTGAACCGGCAGCTGTGACCGCTGAGTCCTGTTGA  
ATTGCAAGATCGGAA

+  
FFFFFFFFFFFFFFFFFFFFFFFFFFFFFFFFFFFFFFFFFFFFFFFFFFFFFFFFFFFFFFFF  
F:FFFFFFFF:FFFFFFFFFFFFFFFFFFFFFFFFFFFFFFFFFFFFFFFFFFFFFFFFFFFFF  
FFFFFFFFFFFFFFFF:

@A00721:190:HGJW7DSXY:4:1633:14154:7999 2:N:0:TCTGCAAG+GCTGCACT  
CCAACGTCCACAATATTATTAAGTCTGACAACTCCGTCTTGTACTGCATAGGAGATGTGAACACACC







FFFFFFFFFFFFFFFFFFFFFFFFFFFFFFFFFFFFFFFFFFFFFFFFFFFFFFFFFFFFFFFFFFFFFFFF  
FFFFFFFF,FFFFFFFF

@A00721:190:HGJW7DSXY:4:2441:2085:8171 2:N:0:TCTGCAAG+GCTGCACT  
ACAAACGATACTGCCAACGTCCACAATATTATTAAGTCTGACAACTCCGTCTTGTACTGCATAGGAG  
GTGTGAACACACCAAGTCTTCGATTATATCTCAGAGACCTCGACCACTGAACCGGCAGCTGTGACCGC  
TGAGTCCTGTTGAAT

+

FFF:FFFFFFFFFFFFFFFFFFFFFFFFFFFF:,FFFFFFFF:FFF:F:FF:FFFFFFFF:FFF:FF  
FFF,FFFF:FFFFFFFF:FFFFFF:F:FFFFFFFFFFFFFFFF,FFFF:FFFFFFFFFFFFFFFF  
:FFFF,FFFFFFFF:

@A00721:190:HGJW7DSXY:4:2444:19605:23797 2:N:0:TCTGCAAG+GCTGCACT  
ACAAACGATACTGCCAACGTCCACAATATTATTAAGTCTGACAACTCCGTCTTGTACTGCATAGGAG  
GTGTGAACACACCAAGTCTTCGATTATATCTCAGAGACCTCGACCACTGAACCGGCAGCTGTGACCGC  
TGAGTCCTGTTGAAT

+

FFFFFFFFFFFFFFFFFFFFFFFFFFFFFFFFFFFFFFFFFFFFFFFFFFFFFFFFFFFFFFFFFFFFFFFF  
FFFFFFFFFFFFFFFFFFFFFFFFFFFFFFFFFFFFFFFFFFFFFFFFFFFFFFFFFFFFFFFFFFFFFFFF  
FFFFFFFFFFFFF:,F

@A00721:190:HGJW7DSXY:4:2461:1877:7592 2:N:0:TCTGCAAG+GCTGCACT  
ACAAACGATACTGCCAACGTCCACAATATTATTAAGTCTGACAACTCCGTCTTGTACTGCATAGGAG  
GTGTGAACACACCAAGTCTTCGATTATATCTCAGAGACCTCGACCACTGAACCGGCAGCTGTGACCGC  
TGAGTCCTGTTGAAT

+

FFFFFFFFFFFFFFFFFFFFFFFFFFFF:FFFFFFFFFFFFFFFFFFFFFFFFFFFFFFFFFFFFFFFF  
FFFFFFFFFFFFFFFFFFFFFFFFFFFFFFFFFFFFFFFFFFFFFFFFFFFFFFFFFFFFFFFFFFFFFFFF  
FFFFFFFF,F:FFF:

@A00721:190:HGJW7DSXY:4:2669:19569:18630 2:N:0:TCTGCAAG+GCTGCACT  
ACAAACGATACTGCCAACGTCCACAATATTATTAAGTCTGACAACTCCGTCTTGTACTGCATAGGAG  
GTGTGAACACACCAAGTCTTCGATTATATCTCAGAGACCTCGACCACTGAACCGGCAGCTGTGACCGC  
TGAGTCCTGTTGAAT

+

FFFFFFFFFFFFFFFFFFFFFFFFFFFFFFFFFFFFFFFFFFFFFFFFFFFFFFFFFFFFFFFFFFFFFFFF  
FFFFFFFFFFFFFFFFFFFFFFFFFFFFFFFFFFFFFFFFFFFFFFFFFFFFFFFFFFFFFFFFFFFFFFFF  
:FFFFFFFF,FFFF

@A00721:190:HGJW7DSXY:4:2203:25500:14434 2:N:0:TCTGCAAG+GCTGCACT  
ATTTATACAAACGATACTGCCAACGTCCACAATATTATTAAGTCTGACAACTCCGTCTTGTACTGCA  
TAGGAGGTGTGAACACACCAAGTCTTCGATTATATCTCAGAGACCTCGACCACTGAACCGGCAGCTGT  
GACCGCTGAGTCCTG

+

FFFFFFFFFFFFFFFFFFFFFFFFFFFFFFFFFFFFFFFFFFFFFFFFFFFFFFFFFFFFFFFFFFFFFFFF  
FFFFFFFFFFFFFFFFFFFFFFFFFFFFFFFFFFFFFFFFFFFFFFFFFFFFFFFFFFFFFFFFFFFFFFFF  
FFFFFFFFFFFFFFFFF

@A00721:190:HGJW7DSXY:4:2346:4110:31219 2:N:0:TCTGCAAG+GCTGCACT  
ATTTATACAAACGATACTGCCAACGTCCACAATATTATTAAGTCTGACAACTCCGTCTTGTACTGCA  
TAGGAGGTGTGAACACACCAAGTCTTCGATTATATCTCAGAGACCTCGACCACTGAACCGGCAGCTGT  
GACCGCTGAGTCCTG

+

FF,FF:FFFFF,F,F:FFF:FFF:FFFFFFFFFFFFFFFF,FFFF,FFFFF:FF,FF:FFFFF:,FFF  
FFFFF,FFF:FFFFF:,FF,F,FF,FF,:FFF,FFF:FF,F:F:,FFF:FFF:FFFF:FF,FFFF  
FF,F:FFFFFFFFF

@A00721:190:HGJW7DSXY:4:2346:4137:31234 2:N:0:TCTGCAAG+GCTGCACT  
ATTTATACAAACGATACTGCCAACGTCCACAATATTATTAAGTCTGACAACTCCGTCTTGTACTGCA  
TAGGAGGTGTGAACACACCAAGTCTTCGATTATATCTCAGAGACCTCGACCACTGAACCGGCAGCTGT  
GACCGCTGAGTCCTG

+  
FFFFFFFFFFFFFFFFFFFFFFFFFFFFFFFFFFFFFFFFFFFFFFFFFFFFFFFFFFFFFFFFFFFFFFFF:FFFF:  
FFFFFFFFFFFFFFFFFFFFFFFFFFFFFFFFFFFFFFFFFFFFFFFFFFFFFFFFFFFFFFFFFFFFFFFF  
FFFFFFFFFFFFFFFF

@A00721:190:HGJW7DSXY:4:2538:5882:14403 2:N:0:TCTGCAAG+GCTGCACT  
ATTTATACAAACGATACTGCCAACGTCCACAATATTATTAAGTCTGACAACTCCGTCTTGTACTGCA  
TAGGAGGTGTGAACACACCAAGTCTTCGATTATATCTCAGAGACCTCGACCACTGAACCGGCAGCTGT  
GACCGCTGAGTCCTG

+  
FFFFFFFFFFFFFFFFFFFFFFFFFFFFFFFFFFFFFFFFFFFFFFFFFFFFFFFFFFFFFFFFFFFFFFFF:FFFFFFFF:FFFF  
FFFFFFFFFFFFFFFFFFFFFFFFFFFFFFFFFFFFFFFFFFFFFFFFFFFFFFFFFFFFFFFFFFFFFFFF:FFFFFFFFFFFFFFFF  
FFFFFFFF,FFFFF

@A00721:190:HGJW7DSXY:4:1132:11071:4131 2:N:0:TCTGCAAG+GCTGCACT  
ATCATTTATACAAACGATACTGCCAACGTCCACAATATTATTAAGTCTGACAACTCCGTCTTGTACT  
GCATAGGAGGTGTGAACACACCAAGTCTTCGATTATATCTCAGAGACCTCGACCACTGAACCGGCAGC  
TGTGACCGCTGAGTC

+  
FFFFFFFFFFFFFF,FFFFFFFFFFFFFFFFFFFFFFFFFFFFFFFFFFFFFFFFFFFFFFFFFFFFFFFF  
:FFFFFFFFFFFFFFFFFFFFFFFFFFFFFFFFFFFFFFFFFFFFFFFFFFFFFFFFFFFFFFFF:FFFFFFFFFFFFFFFF:FF  
FFFFFFFFFFFFFF

@A00721:190:HGJW7DSXY:4:2155:17038:31250 2:N:0:TCTGCAAG+GCTGCACT  
CAATCATTTATACAAACGATACTGCCAACGTCCACAATATTATTAAGTCTGACAACTCCGTCTTGTGTA  
CTGCATAGGAGGTGTGAACACACCAAGTCTTCGATTATATCTCAGAGACCTCGACCACTGAACCGGCA  
GCTGTGACCGCTGAG

+  
FFFFFFFFFFFFFFFFFFFFFFFFFFFFFFFFFFFFFFFFFFFFFFFFFFFFFFFFFFFFFFFFFFFFFFFF  
FFFFFFFFFFFFFFFFFFFFFFFFFFFFFFFF:FFFFFFFF:FFFFFFFF:FFFFFFFFFFFFFFFF  
FFFFFFFFFFFFFF

@A00721:190:HGJW7DSXY:4:2352:18792:31814 2:N:0:TCTGCAAG+GCTGCACT  
CAATCATTTATACAAACGATACTGCCAACGTCCACAATATTATTAAGTCTGACAACTCCGTCTTGTGTA  
CTGCATAGGAGGTGTGAACACACCAAGTCTTCGATTATATCTCAGAGACCTCGACCACTGAACCGGCA  
GCTGTGACCGCTGAG

+  
FFFFFFFFFFFFFFFF:FFFFFFFFFFFFFFFFFFFFFFFFFFFFFFFFFFFFFFFFFFFFFFFF  
FFFFFFFFFFFFFFFFFFFFFFFFFFFFFFFF:FFFFFFFF:FFFFFFFF:FFFFFFFFFFFFFFFF  
FFFFFFFFFFFFFF

@A00721:190:HGJW7DSXY:4:2433:9824:11146 2:N:0:TCTGCAAG+GCTGCACT  
CAATCATTTATACAAACGATACTGCCAACGTCCACAATATTATTAAGTCTGACAACTCCGTCTTGTGTA  
CTGCATAGGAGGTGTGAACACACCAAGTCTTCGATTATATCTCAGAGACCTCGACCACTGAACCGGCA  
GCTGTGACCGCTGAG

+  
FFFFFFFFFFF,FFFF:FFFFFFFFFFFFFFFFFFFFFFFF:FFFF:FFFFFFFFFFFFFFFF:FF  
FFFF,FFFFFFFFFFFFFFFFFFFFFFFFFFFFFFFFFFFFFFFFFFFFFFFFFFFFFFFF  
FF,FFFF:FFFFF

@A00721:190:HGJW7DSXY:4:2622:9643:14278 2:N:0:TCTGCAAG+GCTGCACT  
CAATCATTTATACAAACGATACTGCCAACGTCCACAATATTATTAAGTCTGACAACTCCGTCTTGTGTA  
CTGCATAGGAGGTGTGAACACACCAAGTCTTCGATTATATCTCAGAGACCTCGACCACTGAACCGGCA  
GCTGTGACCGCTGAG

+  
FFFFFFFFFFFFFFFFFFFFFFFFFFFFFFFFFFFFFFFFFFFFFFFFFFFFFFFFFFFFFFFF  
FFFFFFFFFFFFFFFFFFFFFFFFFFFFFFFF,FFFFFFFFFFFFFFFFFFFFFFFF  
FFFFFFFFFFFFFF

@A00721:190:HGJW7DSXY:4:1272:1805:1986 2:N:0:TCTGCAAG+GCTGCACT  
CGAGGTTCCAGTAGGACAATCATTTATACAAACGATACTGCCAACGTCCACAATATTATTAAGTCTGA

CAAACCTCCGTCTTGTACTGTCATAGGAGGTGTGAACACACCAAGTCTTCGATTATATCTCAGAGACCTC  
GACCACTGAACCGGC

[illegible]

5' CGAGGTTCCAGTAGGACAATCATTTATACAAACGATACTGCCAACGTCCACAATATTATTA AACTCTGA  
 CAAACTCCGTCTTGTACTGCATAGGAGGTGTGAACACACCAAGTCTTCGATTATATCTCAGAGACCTC  
 GACCACTGAACCGGC

[illegible]

CGAGGTTCCAGTAGGACAATCATTTATACAAACGATACTGCCAACGTCCACAATATTATTA ACTCTGA  
CAA ACTCCGCTTG TACTGCATAGGAGGTGTGAACACACCAAGTCTTCGATTATATCTCAGAGACCTC  
GACCACTGAACCGGC

```

FFFFFFFFFF:FF:FFFF:FF:FFF,FFFFFFFFFFFF,FFFFF:FFFFFFFFFFFFFFFFFFFFFF
FFFF,FFFFF:FFFFFFFFF,FFFFFFFF:FFFFFFFFFFFFFFFF:FFFFFFFFFFFFFFFFFFFFFF
FFFFFFFFFFFFFFFF

```

5' CGAGGTTCCAGTAGGACAATCATTTATACAAACGATACTGCCAACGTCCACAATATTATTAACTCTGA  
 CAAACTCCGTCTTGTACTGCATAGGAGGTGTGAACACACCAAGTCTTCGATTATATCTCAGAGACCTC  
 GACCACTGAACCGGC

```

FFFFFFFFFFFFFFFFFFFFFFFFFFFFFFFFFFFFFFFF:FFFFFFFFFFFFFFFFFFFFFFFFFFFFFFFF
FFFFFFFFFFFFFFFFFFFFFFFFFFFFFFFFFFFFFFFF:FFFFFFFFFFFFFFFFFFFFFFFFFFFFFFFF
FFFFFFFF:FFFFFF

```

5' CGAGGTTCCAGTAGGACAATCATTTATACAAACGATACTGCCAACGTCCACAATATTATTAACTCTGA  
 CAAACTCCGTCTTGTACTGCATAGGAGGTGTGAACACACCAAGTCTTCGATTATATCTCAGAGACCTC  
 GACCACTGAACCGGC

[illegible]

5' CGAGGTTCCAGTAGGACAATCATTTATACAAACGATACTGCCAACGTCCACAATATTATTAACTCTGA  
 CAAACTCCGTCTTGTA  
 3' CTGACTGCATAGGAGGTGTGAACACACCAAGTCTTCGATTATATCTCAGAGACCTC  
 GACCACTGAACCGGC

[illegible]

5  
 ĆGAGGTTCCAGTAGGACAATCATTTATACAAACGATACTGCCAACGTCCACAATATTATTA ACTCTGA  
 CAAACTCCGTCTTGTACTGCATAGGAGGTGTGAACACACCAAGTCTTCGATTATATCTCAGAGACCTC  
 GACCACTGAACCGGC

[illegible]

@A00721:190:HGJW7DSXY:4:2172:28899:8140 2:N:0:TCTGCAAG+GCTGCACT  
CGAGGTTCCAGTAGGACAATCATTTATACAAACGATACTGCCAACGTCCACAATATTATTAACCTCTGA  
CAAACCTCCGTCTTGTACTGCATAGGAGGTGTGAACACACCAAGTCTTCGATTATATCTCAGAGACCTC  
GACCACTGAACCGGC

@A00721:190:HGJW7DSXY:4:2172:29152:8328 2:N:0:TCTGCAAG+GCTGCACT  
CGAGGTTCCAGTAGGACAATCATTTATACAAACGATACTGCCAACGTCCACAATATTATTAACCTCTGA  
CAAACCTCCGTCTTGTACTGCATAGGAGGTGTGAACACACCAAGTCTTCGATTATATCTCAGAGACCTC  
GACCACTGAACCGGC

@A00721:190:HGJW7DSXY:4:2246:17110:2785 2:N:0:TCTGCAAG+GCTGCACT  
CGAGGTTCCAGTAGGACAATCATTTATACAAACGATACTGCCAACGTCCACAATATTATTAACCTCTGA  
CAAACCTCCGTCTTGTACTGCATAGGAGGTGTGAACACACCAAGTCTTCGATTATATCTCAGAGACCTC  
GACCACTGAACCGGC

@A00721:190:HGJW7DSXY:4:2246:26838:11428 2:N:0:TCTGCAAG+GCTGCACT  
CGAGGTTCCAGTAGGACAATCATTTATACAAACGATACTGCCAACGTCCACAATATTATTAACCTCTGA  
CAAACCTCCGTCTTGTACTGCATAGGAGGTGTGAACACACCAAGTCTTCGATTATATCTCAGAGACCTC  
GACCACTGAACCGGC

@A00721:190:HGJW7DSXY:4:2251:22535:18818 2:N:0:TCTGCAAG+GCTGCACT  
CGAGGTTCCAGTAGGACAATCATTTATACAAACGATACTGCCAACGTCCACAATATTATTAACCTCTGA  
CAAACCTCCGTCTTGTACTGCATAGGAGGTGTGAACACACCAAGTCTTCGATTATATCTCAGAGACCTC  
GACCACTGAACCGGC

@A00721:190:HGJW7DSXY:4:2307:9136:15781 2:N:0:TCTGCAAG+GCTGCACT  
CGAGGTTCCAGTAGGACAATCATTTATACAAACGATACTGCCAACGTCCACAATATTATTAACCTCTGA  
CAAACCTCCGTCTTGTACTGCATAGGAGGTGTGAACACACCAAGTCTTCGATTATATCTCAGAGACCTC  
GACCACTGAACCGGC

@A00721:190:HGJW7DSXY:4:2447:2049:26459 2:N:0:TCTGCAAG+GCTGCACT  
CGAGGTTCCAGTAGGACAATCATTTATACAAACGATACTGCCAACGTCCACAATATTATTAACCTCTGA  
CAAACCTCCGTCTTGTACTGCATAGGAGGTGTGAACACACCAAGTCTTCGATTATATCTCAGAGACCTC  
GACCACTGAACCGGC



+  
FFFFFFFFFFFFFFFFFFFFFFFFFFFFFFFFFFFFFFFFFFFFFFFFFFFFFFFFFFFFFFFFFFFFFFFF  
FFFFFFFFFFFFFFFFFFFFFFFFFFFFFFFFFFFFFFFFFFFFFFFFFFFFFFFFFFFFFFFFFFFFFFFF  
FFFFFFFFFFFFFFFF

@A00721:190:HGJW7DSXY:4:2639:4851:1407 2:N:0:TCTGCAAG+GCTGCACT  
CCGAGGTTCCAGTAGGACAATCATTTATACAAACGATACTGCCAACGTCCACAATATTATTA  
ACTCTGACAACTCCGTCTTGTACTGCATAGGAGGTGTGAACACACCAAGTCTTCGATTATATCTCAGAGACCT  
CGACCACTGAACCGG

+  
FFFFFFFFFFFFFFFFFFFFFFFFFFFFFFFFFFFFFFFFFFFFFFFFFFFFFFFFFFFFFFFFFFFFFFFF  
FFF:FFFFFFFFFFFFFFFFFFFFFFFFFFFFFFFFFFFFFFFFFFFFFFFFFFFFFFFFFFFFFFFF  
F:FFFFFFFFFFFFFF

@A00721:190:HGJW7DSXY:4:1167:28501:19852 2:N:0:TCTGCAAG+GCTGCACT  
TATCGACCGAGGTTCCAGTAGGACAATCATTTATACAAACGATACTGCCAACGTCCACAATATTATTA  
ACTCTGACAACTCCGTCTTGTACTGCATAGGAGGTGTGAACACACCAAGTCTTCGATTATATCTCAG  
AGACCTCGACCACTG

+  
FFFFFFFFFFFFFFFFFFFFFFFFFFFFFFFFFFFFFFFFFFFFFFFFFFFFFFFFFFFFFFFFFFFFFFFF  
,FFFFFFFFFFFFFFFFFFFFFFFFFFFFFFFFFFFFFFFFFFFFFFFFFFFFFFFFFFFFFFFF  
,FFFFFFFFFFFFFFFFFFFFFFFFFFFFFFFFFFFFFFFFFFFFFFFFFFFFFFFFFFFFFFFF:FFFFFFFF  
FFFFFFFFFFFFFFFF

@A00721:190:HGJW7DSXY:4:1256:1895:6183 2:N:0:TCTGCAAG+GCTGCACT  
TATCGACCGAGGTTCCAGTAGGACAATCATTTATACAAACGATACTGCCAACGTCCACAATATTATTA  
ACTCTGACAACTCCGTCTTGTACTGCATAGGAGGTGTGAACACACCAAGTCTTCGATTATATCTCAG  
AGACCTCGACCACTG

+  
FFFFFFFFFFFFFFFFFFFFFFFFFFFFFFFFFFFFFFFFFFFFFFFFFFFFFFFFFFFFFFFFFFFFFFFF  
FFFFFFFFFFFFFFFFFFFFFFFFFFFFFFFFFFFFFFFFFFFFFFFFFFFFFFFFFFFFFFFF:FFFFFFFF  
FFFFFFFFFFFFFFFF

@A00721:190:HGJW7DSXY:4:1268:4869:5635 2:N:0:TCTGCAAG+GCTGCACT  
TATCGACCGAGGTTCCAGTAGGACAATCATTTATACAAACGATACTGCCAACGTCCACAATATTATTA  
ACTCTGACAACTCCGTCTTGTACTGCATAGGAGGTGTGAACACACCAAGTCTTCGATTATATCTCAG  
AGACCTCGACCACTG

+  
FFFFFFFFFFFFFFFFFFFFFFFFFFFFFFFFFFFFFFFFFFFFFFFFFFFFFFFFFFFFFFFFFFFFFFFF  
FFFFFFFFFFFFFFFFFFFFFFFFFFFFFFFFFFFFFFFFFFFFFFFFFFFFFFFFFFFFFFFF:FFFFFFFF  
FFFFFFFFFFFFFFFF

@A00721:190:HGJW7DSXY:4:1317:10429:32142 2:N:0:TCTGCAAG+GCTGCACT  
TATCGACCGAGGTTCCAGTAGGACAATCATTTATACAAACGATACTGCCAACGTCCACAATATTATTA  
ACTCTGACAACTCCGTCTTGTACTGCATAGGAGGTGTGAACACACCAAGTCTTCGATTATATCTCAG  
AGACCTCGACCACTG

+  
FFFFFFFFFFFFFFFFFFFFFFFFFFFFFFFFFFFFFFFFFFFFFFFFFFFFFFFFFFFFFFFFFFFFFFFF  
FFFFFFFFFFFFFFFFFFFFFFFFFFFFFFFFFFFFFFFFFFFFFFFFFFFFFFFFFFFFFFFF:FFFFF:FF  
FFFFFFFFFFFFFFFFFFFFFFFFFFFFFFFFFFFFFFFFFFFFFFFFFFFFFFFFFFFFFFFF:FFFFFFFF  
FFFFFFFFFFFFFFFF:

@A00721:190:HGJW7DSXY:4:1672:27371:21339 2:N:0:TCTGCAAG+GCTGCACT  
TATCGACCGAGGTTCCAGTAGGACAATCATTTATACAAACGATACTGCCAACGTCCACAATATTATTA  
ACTCTGACAACTCCGTCTTGTACTGCATAGGAGGTGTGAACACACCAAGTCTTCGATTATATCTCAG  
AGACCTCGACCACTG

+  
FFFFFFFFFFFFFFFFFFFFFFFFFFFFFFFFFFFFFFFFFFFFFFFFFFFFFFFFFFFFFFFFFFFFFFFF  
FFFFFFFFFFFFFFFFFFFFFFFFFFFFFFFFFFFFFFFFFFFFFFFFFFFFFFFFFFFFFFFF:FFFFFFFF  
FFFFFFFFFFFFFFFF

@A00721:190:HGJW7DSXY:4:1445:9570:1939 2:N:0:TCTGCAAG+GCTGCACT  
CTCGTATCGACCGAGGTTCCAGTAGGACAATCATTTATACAAACGATACTGCCAACGTCCACAATATT







FFFFFFFFFFFFFFFFFFFFFFFFFFFFFFFFFFFFFFFFFFFFFFFFFFFFFFFFFFFFFFFFFFFFFFFFFFFFFFFF  
FFFFFFFFFFFFFFFF

@A00721:190:HGJW7DSXY:4:2614:8133:35493 2:N:0:TCTGCAAG+GCTGCACT  
GTCTGAGGTCTCTGAGATATAATCGAAGACTTGGTGTGTTACGCCTCCTATGCAGTACAAGACGGAGT  
TTGTCAGAGTTAATAATATTGTGGACGTTGGCAGTATCGTTTGTATAAATGATTGTCTACTGGAACC  
TCGGTCGATACGAGA

+

FFFFFFFFFFFFFFFFFFFFFFFFFFFFFFFFFFFFFFFFFFFFFFFFFFFFFFFFFFFFFFFFFFFFFFFFFFFFFFFF  
FFFF:FFFFFFFFFFFF,FFFFFFFFFFFFFFFFFFFFFFFFFFFFFFFFFFFFFFFFFFFFFFFFFFFFFFFFFFFF  
FF:FFFFFFFF,FFF

@A00721:190:HGJW7DSXY:4:1156:15121:17534 2:N:0:TCTGCAAG+GCTGCACT  
TTCTGGGTATGTCTCGTATCGACCGAGGTTCCAGTAGGACAATCATTTATACAAACGATACTGCCAAC  
GTCCACAATATTATTAACCTGACAAACTCCGTCTTGTACTGCATAGGAGGTGTGAACACACCAAGTC  
TTCGATTATATCTCA

+

FFFFFFFFFFFFFFFFFFFFFFFFFFFFFFFFFFFFFFFFFFFFFFFFFFFFFFFFFFFFFFFFFFFFFFFFFFFFFFFF  
FFF:FFF:,F:FFF:FFF,FFF:FFF::FF,:F,F:FFFFFFFF,FFFFFF  
F:FFFFFFFF,FFF:FFF:,F:FFF:FFF,F:FFFFFFFF:FFFFFFFFFFFFFFFF,FFFFFF:FFFFFF:F  
F:FFFFFFFF

@A00721:190:HGJW7DSXY:4:1164:1163:17973 2:N:0:TCTGCAAG+GCTGCACT  
TTCTGGGTATGTCTCGTATCGACCGAGGTTCCAGTAGGACAATCATTTATACAAACGATACTGCCAAC  
GTCCACAATATTATTAACCTGACAAACTCCGTCTTGTACTGCATAGGAGATGTGAACACACCAAGTC  
TTCGATTATATCTCA

+

FFF:FFFFFFFFFFFFFFFFFFFFFFFFFFFFFFFFFFFFFFFFFFFFFFFFFFFFFFFFFFFFFFFFFFFFFFFFFFFF  
FFFFFFFFFFFFFFFFFFFFFFFFFFFFFFFFFFFFFFFFFFFFFFFFFFFFFFFFFFFFFFFFFFFFFFFFFFFFFFFF  
FFFFFFFFFFFFFFFF

@A00721:190:HGJW7DSXY:4:1619:24985:30358 2:N:0:TCTGCAAG+GCTGCACT  
TTCTGGGTATGTCTCGTATCGACCGAGGTTCCAGTAGGACAATCATTTATACAAACGATACTGCCAAC  
GTCCACAATATTATTAACCTGACAAACTCCGTCTTGTACTGCATAGGAGATGTGAACACACCAAGTC  
TTCGATTATATCTCA

+

FFFFFFFFFFFFFFFFFFFFFFFFFFFFFFFFFFFFFFFFFFFFFFFFFFFFFFFFFFFFFFFFFFFFFFFFFFFFFFFF  
FFFFFFFFFFFFFFFFFFFFFFFFFFFFFFFFFFFFFFFFFFFFFFFFFFFFFFFFFFFFFFFFFFFFFFFFFFFFFFFF  
FFFFFFFFFFFFFFFF

@A00721:190:HGJW7DSXY:4:2134:24379:30530 2:N:0:TCTGCAAG+GCTGCACT  
TTCTGGGTATGTCTCGTATCGACCGAGGTTCCAGTAGGACAATCATTTATACAAACGATACTGCCAAC  
GTCCACAATATTATTAACCTGACAAACTCCGTCTTGTACTGCATAGGAGATGTGAACACACCAAGTC  
TTCGATTATATCTCA

+

FFFFFFFFFFFFFFFFFFFFFFFFFFFFFFFFFFFFFFFFFFFFFFFFFFFFFFFFFFFFFFFFFFFFFFFFFFFFFFFF  
FFFFFFFFFFFFFFFFFFFFFFFFFFFFFFFFFFFFFFFFFFFFFFFFFFFFFFFFFFFFFFFFFFFFFFFFFFFFFFFF  
FFFFFFFFFFFFFFFF

@A00721:190:HGJW7DSXY:4:2431:9534:14246 2:N:0:TCTGCAAG+GCTGCACT  
TTCTGGGTATGTCTCGTATCGACCGAGGTTCCAGTAGGACAATCATTTATACAAACGATACTGCCAAC  
GTCCACAATATTATTAACCTGACAAACTCCGTCTTGTACTGCATAGGAGGTGTGAACACACCAAGTC  
TTCGATTATATCTCA

+

FFFFFFFFFFFFFFFFFFFFFFFFFFFFFFFFFFFFFFFFFFFFFFFFFFFFFFFFFFFFFFFFFFFFFFFFFFFFFFFF  
FFFFFFFFFFFFFFFFFFFFFFFFFFFFFFFFFFFFFFFFFFFFFFFFFFFFFFFFFFFFFFFFFFFFFFFFFFFFFFFF  
FFFFFFFFFFFFFFFF

@A00721:190:HGJW7DSXY:4:2458:22480:2190 2:N:0:TCTGCAAG+GCTGCACT  
TTCTGGGTATGTCTCGTATCGACCGAGGTTCCAGTAGGACAATCATTTATACAAACGATACTGCCAAC  
GTCCACAATATTATTAACCTGACAAACTCCGTCTTGTACTGCATAGGAGATGTGAACACACCAAGTC  
TTCGATTATATCTCA

+  
FFFFFFFFFFFFFFFFFFFFFFFFFFFFFFFFFFFFFFFFFFFFFFFFFFFFFFFFFFFFFFFFFFFFFFFF  
FFFFFFFFFFFFFFFFFFFFFFFFFFFFFFFFFFFFFFFFFFFFFFFFFFFFFFFFFFFFFFFFFFFFFFFF:FFFFFFFFFFFFFFFFFFFF  
FFFFFFFFFFFFFFFFFFFF  
@A00721:190:HGJW7DSXY:4:2551:24596:33348 2:N:0:TCTGCAAG+GCTGCACT  
TTCTGGGTATGTCTCGTATCGACCGAGGTTCCAGTAGGACAATCATTTATACAAACGATACTGCCAAC  
GTCCACAATATTATTAACCTCTGACAACTCCGTCTTGTACTGCATAGGAGGTGTGAACACACCAAGTC  
TTCGATTATATCTCA  
+  
FFFFFFFFFFFFFFFFFFFFFFFFFFFFFFFFFFFFFFFFFFFFFFFFFFFFFFFFFFFFFFFFFFFFFFFF  
FFFFFFFFFFFFFFFFFFFFFFFFFFFFFFFFFFFFFFFFFFFFFFFFFFFFFFFFFFFFFFFFFFFFFFFF  
FFFFFFFFFFFFFFFFFFFF  
@A00721:190:HGJW7DSXY:4:1136:1398:19883 2:N:0:TCTGCAAG+GCTGCACT  
GAGATATAATCGAAGACTTGGTGTGTTACACCTCCTATGCAGTACAAGACGGAGTTTGTGTCAGAGTTA  
ATAATATTGTGGACGTTGGCAGTATCGTTTGTATAAATGATTGTCCTACTGGAACCTCGGTCGATACG  
AGACATACCCAGAAA  
+  
FFF:FFFFFFFFFFFFFFFFFFFFFFFFFFFFFFFFFFFFFFFFFFFFFFFFFFFFFFFFFFFFFFFF,FFFFFFFF::FFF:FFFFF  
F,:FFFFFFFFFFFFFFFF,F::FFFFFFFF:FFFFFFFFFFFF::FFFFFFFFFFF:FFF,FFFFFFFFF,F,  
FFFF:FFFFFFFFFFFF  
@A00721:190:HGJW7DSXY:4:1359:20184:27743 2:N:0:TCTGCAAG+GCTGCACT  
GAGATATAATCGAAGACTTGGTGTGTTACACCTCCTATGCAGTACAAGACGGAGTTTGTGTCAGAGTTA  
ATAATATTGTGGACGTTGGCAGTATCGTTTGTATAAATGATTGTCCTACTGGAACCTCGGTCGATACG  
AGACATACCCAGAAA  
+  
FFFFFFFFFFFFFFFFFFFFFFFFFFFFFFFFFFFFFFFFFFFFFFFFFFFFFFFFFFFFFFFFFFFFFFFF:  
FFFFFFFFFFFFFFFFFFFFFFFFFFFFFFFFFFFFFFFFFFFFFFFFFFFFFFFFFFFFFFFFFFFFFFFF:FFF  
FFFFFFFFFFFFFFFFFFFF  
@A00721:190:HGJW7DSXY:4:1359:19569:28902 2:N:0:TCTGCAAG+GCTGCACT  
GAGATATAATCGAAGACTTGGTGTGTTACACCTCCTATGCAGTACAAGACGGAGTTTGTGTCAGAGTTA  
ATAATATTGTGGACGTTGGCAGTATCGTTTGTATAAATGATTGTCCTACTGGAACCTCGGTCGATACG  
AGACATACCCAGAAA  
+  
FFFFFFFFFFFFFFFFFFFFFFFFFFFFFFFFFFFFFFFFFFFFFFFFFFFFFFFFFFFFFFFFFFFFFFFF  
FFFFFFFFFFFFFFFFFFFFFFFFFFFFFFFFFFFFFFFFFFFFFFFFFFFFFFFFFFFFFFFFFFFFFFFF  
FFFFFFFFFFFFFFFFFFFF  
@A00721:190:HGJW7DSXY:4:1574:15203:9502 2:N:0:TCTGCAAG+GCTGCACT  
GAGATATAATCGAAGACTTGGTGTGTTACACCTCCTATGCAGTACAAGACGGAGTTTGTGTCAGAGTTA  
ATAATATTGTGGACGTTGGCAGTATCGTTTGTATAAATGATTGTCCTACTGGAACCTCGGTCGATACG  
AGACATACCCAGAAA  
+  
FFFFFFFFFFFFFFFFFFFFFFFFFFFFFFFFFFFFFFFFFFFFFFFFFFFFFFFFFFFFFFFFFFFFFFFF  
FFFFFFFFFFFFFFFFFFFFFFFFFFFFFFFFFFFFFFFFFFFFFFFFFFFFFFFFFFFFFFFFFFFFFFFF  
FFFFFFFFFFFFFFFFFFFF  
@A00721:190:HGJW7DSXY:4:1148:18521:18630 2:N:0:TCTGCAAG+GCTGCACT  
AGATATAATCGAAGACTTGGTGTGTTACACCTCCTATGCAGTACAAGACGGAGTTTGTGTCAGAGTTAA  
TAATATTGTGGACGTTGGCAGTATCGTTTGTATAAATGATTGTCATACTGGAACCTCGGTCGATACTA  
GACATACCCAGAAA  
+  
FFF:F,FFF,FFF,FFFFFF:::FFFFFF:,FF,:FFF:F:FFFFFFFF:F,F:FFF:FFFFFFFFF:  
F:FFFFFF:FF,F:,FFF:,FFFFFF:FFFFFFFFFFFF,FFF:FF,,F,:FF,FF,FFFF:FFFF,F  
:F:F,F:,FFFFFFF  
@A00721:190:HGJW7DSXY:4:1315:10583:24017 2:N:0:TCTGCAAG+GCTGCACT  
CACTTTCTGGGTATGTCTCGTATCGACCGAGGTTCCAGTAGGACAATCATTTATACAAACGATACTGC

CAACGTCCACAATATTATTAAGTCTGACAACTCCGTCTTGTACTGCATAGGAGGTGTGAACACACCA  
AGTCTTCGATTATAT

+

FFFFFFFFFFFFFFFFFFFFFFFFFFFFFFFFFFFFFFFFFFFFFFFFFFFFFFFFFFFFFFFFFFFFFFFF  
FFFFFFFFFFFFFFFFFFFF,FFFFFFFFFFFFFF:FFFFFFFFFFFFFFFFFFFFFFFF:FFFFFFFFFFFFFFFF:  
FFFFFFFFFFFFFFFFFFFF

@A00721:190:HGJW7DSXY:4:1460:25654:17362 2:N:0:TCTGCAAG+GCTGCACT  
CACTTTCTGGGTATGTCTCGTATCGACCGAGGTTCCAGTAGGACAATCATTTATACAAACGATACTGC  
CAACGTCCACAATATTATTAAGTCTGACAACTCCGTCTTGTACTGCATAGGAGGTGTGAACACACCA  
AGTCTTCGATTATAT

+

FFFFFFFFFFFFFFFFFFFFFFFFFFFFFFFFFFFFFFFFFFFFFFFFFFFFFFFFFFFFFFFFFFFFFFFF  
FFFFFFFFFFFFFFFFFFFF,FFFFFFFFFFFFFFFFFFFFFFFFFFFFFFFFFFFFFFFFFFFFFFFF:FFFFF  
FFFFFFFFFFFFFFFFFFFF

@A00721:190:HGJW7DSXY:4:1463:4752:12978 2:N:0:TCTGCAAG+GCTGCACT  
CACTTTCTGGGTATGTCTCGTATCGACCGAGGTTCCAGTAGGACAATCATTTATACAAACGATACTGC  
CAACGTCCACAATATTATTAAGTCTGACAACTCCGTCTTGTACTGCATAGGAGGTGTGAACACACCA  
AGTCTTCGATTATAT

+

FFFFFFFFFFFFFFFFFFFFFFFFFFFFFFFFFFFFFFFFFFFFFFFFFFFFFFFFFFFFFFFFFFFFFFFF  
FFFFFFFFFFFFFFFFFFFF,FFFFFFFFFFFFFFFFFFFFFFFFFFFFFFFFFFFFFFFFFFFFFFFF:FFFFF  
FFFFFFFFFFFF:F:F

@A00721:190:HGJW7DSXY:4:2242:17635:29904 2:N:0:TCTGCAAG+GCTGCACT  
CACTTTCTGGGTATGTCTCGTATCGACCGAGGTTCCAGTAGGACAATCATTTATACAAACGATACTGC  
CAACGTCCACAATATTATTAAGTCTGACAACTCCGTCTTGTACTGCATAGGAGGTGTGAACACACCA  
AGTCTTCGATTATAT

+

FFFFFFFFFFFFFFFFFFFFFFFFFFFFFFFFFFFFFFFFFFFFFFFFFFFFFFFFFFFFFFFFFFFFFFFF:  
FF:FFFFFFFFFFFFFFFFFFFFFFFFFFFFFFFFFFFFFFFFFFFFFFFFFFFFFFFFFFFFFFFFFFFF  
FFFFFFFF,FFFFFF

@A00721:190:HGJW7DSXY:4:2247:11505:31939 2:N:0:TCTGCAAG+GCTGCACT  
CACTTTCTGGGTATGTCTCGTATCGACCGAGGTTCCAGTAGGACAATCATTTATACAAACGATACTGC  
CAACGTCCACAATATTATTAAGTCTGACAACTCCGTCTTGTACTGCATAGGAGGTGTGAACACACCA  
AGTCTTCGATTATAT

+

FFFFFFFFFFFF:FFFFFFFFFFFFFFFFFFFFFFFFFFFFFFFFFFFFFFFFFFFFFFFF:FFFFFFFFFFFFFFFF  
FFFFFFFFFFFFFFFFFFFFFFFFFFFFFFFFFFFFFFFFFFFFFFFFFFFFFFFFFFFFFFFF:FFFF,FFFFFFFFFFFF:FFFFFF  
FFFFFFFFFFFF:FFFFF

@A00721:190:HGJW7DSXY:4:2335:19452:18584 2:N:0:TCTGCAAG+GCTGCACT  
CACTTTCTGGGTATGTCTCGTATCGACCGAGGTTCCAGTAGGACAATCATTTATACAAACGATACTGC  
CAACGTCCACAATATTATTAAGTCTGACAACTCCGTCTTGTACTGCATAGGAGGTGTGAACACACCA  
AGTCTTCGATTATAT

+

FFFFFFFFFFFFFFFFFFFFFFFFFFFFFFFFFFFFFFFFFFFFFFFF:FFFFF:FFFFFFFFFFFFFFFFFFFF  
FFFFFFFFFFFFFFFFFFFFFFFFFFFFFFFFFFFFFFFFFFFFFFFFFFFFFFFFFFFFFFFFFFFFFFFF  
FFFFFFFFFFFFFFFFFFFF

@A00721:190:HGJW7DSXY:4:2335:19895:18818 2:N:0:TCTGCAAG+GCTGCACT  
CACTTTCTGGGTATGTCTCGTATCGACCGAGGTTCCAGTAGGACAATCATTTATACAAACGATACTGC  
CAACGTCCACAATATTATTAAGTCTGACAACTCCGTCTTGTACTGCATAGGAGGTGTGAACACACCA  
AGTCTTCGATTATAT

+

FFFFF:FFFFFFFFFFFFFFFFFFFFFFFFFFFFFFFFFFFFFFFFFFFFFFFFFFFFFFFFFFFFFFFF  
FFFFFFFFFFFFFFFFFFFFFFFFFFFFFFFFFFFFFFFF,FFFFF,FFFFFFFFFFFFF,FFFFFFFFFFFFFFFF  
FFFFFFFFFFFFFFFFFFFF

@A00721:190:HGJW7DSXY:4:2413:7726:29089 2:N:0:TCTGCAAG+GCTGCACT  
CACTTTCTGGGTATGTCTCGTATCGACCGAGGTTCCAGTAGGACAATCATTTATACAAACGATACTGC  
CAACGTCCACAATATTATTA ACTCTGACAAACTCCGTCTTGTACTGCATAGGAGGTGTGAACACACCA  
AGTCTTCGATTATAT

```
FF:FF::FFF,FFF,FFFFFFFFFFFFFFFF,FFFFFFFFFF:FFFFFFFF,FFFF,FFF,FFFFFFFF
FFFFFF,FF,FF::FFFFFFFF,,FF:FFFFF::,F,F,FFFFF::F:F,FF,,FFFFFFFFFFFF:FF
FFFFFFFFFFFFFFFF
```

+

[illegible]

+

```
FFFFFFFFFFFFFFFFFFFFFFFFFFFFFFFFFFFFFFFFFFFFFFFFFFFFFFFFFFFFF
FFFFFFFFFFFFFFFFFFFFFF:FFFFFFFFFFFFFFFFFFFFFFFFFFFFFFFFFFFFF
FFFFF:FF:FFFFFF
```

+

[illegible]

+

```
FFF:FFFFFFFFFFFFFFFF:FFF:FFFFFFFFFFFFFFFF:FFFFFFFFFFFFFFFF
FFFFFFFF:FFFFFFFFFFFFFFFF,FFFFFFFF,FFFFFFFF:FFFFFFFFFFFF,FFFF
FFFFFFFFFFFFFFF;
```

+

[illegible]

+

[illegible]



+  
FFFFFFFFFFFFFFFFFFFFFFFFFFFFFFFFFFFFFFFFFFFFFFFFFFFFFFFFFFFFFFFFFFFFFFFF  
FFFFFFFFFFFFFFFFFFFFFFFFFFFFFFFFFFFFFFFFFFFFFFFFFFFFFFFFFFFFFFFFFFFFFFFF  
FFFFFFFFFFFFFFFF

@A00721:190:HGJW7DSXY:4:1621:22381:31078 2:N:0:TCTGCAAG+GCTGCACT  
CACAATTCGATTCCATCTCACTTTCTGGGTATGTCTCGTATCGACCGAGGTTCCAGTAGGACAATCAT  
TTATACAAACGATACTGCCAACGTCCACAATATTATTAACCTCTGACAAACTCCGTCTTGTACTGCATA  
GGAGGTGTGAACACA

+  
FFFFFFFFFFFFFFFF,FFFFFFFFFFFFFFFFFFFFFFFFFFFFFFFFFFFFFFFFFFFFFFFFFFFFFFFF  
FFFFFFFFFFFFFFFFFFFFFFFFFFFFFFFFFFFFFFFFFFFFFFFFFFFFFFFFFFFFFFFFFFFFFFFF:FFF  
FFFFFFFFFFFFFFFF

@A00721:190:HGJW7DSXY:4:1641:27959:20384 2:N:0:TCTGCAAG+GCTGCACT  
CACAATTCGATTCCATCTCACTTTCTGGGTATGTCTCGTATCGACCGAGGTTCCAGTAGGACAATCAT  
TTATACAAACGATACTGCCAACGTCCACAATATTATTAACCTCTGACAAACTCCGTCTTGTACTGCATA  
GGAGGTGTGAACACA

+  
FFFFFFFFFFFFFFFF:FFFFFFFFFFFFFFFFFFFFFFFFFFFFFFFFFFFFFFFFFFFFFFFFFFFFFFFF  
FFFFFFFFFFFFFFFFFFFFFFFF:F,FFFFFFFF,FFFFFFFFFFFFFFFFFFFFFFFFFFFFFFFF:FFFFF  
FF:FFFFFFFF:

@A00721:190:HGJW7DSXY:4:1657:17607:33144 2:N:0:TCTGCAAG+GCTGCACT  
CACAATTCGATTCCATCTCACTTTCTGGGTATGTCTCGTATCGACCGAGGTTCCAGTAGGACAATCAT  
TTATACAAACGATACTGCCAACGTCCACAATATTATTAACCTCTGACAAACTCCGTCTTGTACTGCATA  
GGAGGTGTGAACACA

+  
FFFFFFFFFFFFFFFFFFFFFFFF:FFFFFFFFFFFFFFFFFFFFFFFFFFFFFFFFFFFFFFFFFFFFFFFF  
FFFFFFFFFFFFFFFFFFFFFFFF:FFFFFFFFFFFFFFFFFFFFFFFFFFFFFFFFFFFFFFFF:FFFFFFFF:  
FFFFFFFFFFFFFFFF

@A00721:190:HGJW7DSXY:4:1674:12843:14747 2:N:0:TCTGCAAG+GCTGCACT  
CACAATTCGATTCCATCTCACTTTCTGGGTATGTCTCGTATCGACCGAGGTTCCAGTAGGACAATCAT  
TTATACAAACGATACTGCCAACGTCCACAATATTATTAACCTCTGACAAACTCCGTCTTGTACTGCATA  
GGAGGTGTGAACACA

+  
FFFFFFFFFFFFFFFFFFFFFFFF:FFFFFFFFFFFFFFFFFFFFFFFFFFFFFFFFFFFFFFFF:FFFFF  
FFFFFFFF:FFFFFFFFFFFFFFFFFFFFFFFF:FFFFFFFFFFFFFFFFFFFFFFFF:FFFFFFFF:  
FFFFFFFF: :FF

@A00721:190:HGJW7DSXY:4:2102:22996:10848 2:N:0:TCTGCAAG+GCTGCACT  
CACAATTCGATTCCATCTCACTTTCTGGGTATGTCTCGTATCGACCGAGGTTCCAGTAGGACAATCAT  
TTATACAAACGATACTGCCAACGTCCACAATATTATTAACCTCTGACAAACTCCGTCTTGTACTGCATA  
GGAGGTGTGAACACA

+  
FFFFFFFFFFFFFFFFFFFFFFFFFFFFFFFFFFFFFFFFFFFFFFFFFFFFFFFFFFFFFFFFFFFFFFFF  
FFFFFFFFFFFFFFFFFFFFFFFFFFFFFFFFFFFFFFFFFFFFFFFFFFFFFFFFFFFFFFFFFFFFFFFF  
FFFFFFFFFFFFFFFF

@A00721:190:HGJW7DSXY:4:2139:27227:14606 2:N:0:TCTGCAAG+GCTGCACT  
CACAATTCGATTCCATCTCACTTTCTGGGTATGTCTCGTATCGACCGAGGTTCCAGTAGGACAATCAT  
TTATACAAACGATACTGCCAACGTCCACAATATTATTAACCTCTGACAAACTCCGTCTTGTACTGCATA  
GGAGGTGTGAACACA

+  
FFFFFFFFFFFFFFFFFFFFFFFFFFFFFFFFFFFFFFFFFFFFFFFFFFFFFFFFFFFFFFFFFFFFFFFF  
FFFFFFFFFFFFFFFFFFFFFFFF:FFFFFFFFFFFFFFFFFFFFFFFFFFFFFFFFFFFFFFFF  
FFFFFFFFFFFFFFFF

@A00721:190:HGJW7DSXY:4:2227:15718:5040 2:N:0:TCTGCAAG+GCTGCACT  
CACAATTCGATTCCATCTCACTTTCTGGGTATGTCTCGTATCGACCGAGGTTCCAGTAGGACAATCAT

TTATACAAACGATACTGCCAACGTCCACAATATTATTAAGTCTGACAACTCCGTCTTGTACTGCATA  
GGAGGTGTGAACACA

+

FFFFFFFFFFFFFFFFFFFFFFFFFFFFFFFFFFFFFFFFFFFFFFFFFFFFFFFFFFFFFFFFFFFFFFFF  
FFFFFFFF:FFFFFFFFFFFFFFFFFFFFFFFFFFFFFFFFFFFFFFFFFFFFFFFFFFFFFFFFFFFFFFFF  
,FFFFFFFFFFFFFF

@A00721:190:HGJW7DSXY:4:2503:8088:31939 2:N:0:TCTGCAAG+GCTGCACT  
CACAAATTCGATTCCATCTCACTTTCTGGGTATGTCTCGTATCGACCGAGGTTCCAGTAGGACAATCAT  
TTATACAAACGATACTGCCAACGTCCACAATATTATTAAGTCTGACAACTCCGTCTTGTACTGCATA  
GGAGGTGTGAACACA

+

FFFFFFFFFFFFFFFF:FFFFFFFFFFFFFF:FFFFFFFFFFFFFF:FFFFFF:FFFFFFFFFFFFFFFFFFFF  
FFFFFFFFFFFF:FF:FFFFFFFFFFFFFFFFFFFFFFFFFFFFFFFF:FFFFFFFFFFFF,FFFFFF:FFFFFFF  
FFFFFFFFFF:,FFF

@A00721:190:HGJW7DSXY:4:2572:15483:5822 2:N:0:TCTGCAAG+GCTGCACT  
CACAAATTCGATTCCATCTCACTTTCTGGGTATGTCTCGTATCGACCGAGGTTCCAGTAGGACAATCAT  
TTATACAAACGATACTGCCAACGTCCACAATATTATTAAGTCTGACAACTCCGTCTTGTACTGCATA  
GGAGGTGTGAACACA

+

FFFFF,::FF:FFF,FFFFFFFF:FFFF:FFFFFF,F:FF,FFFFFFFF,FFFF,FFFFFFFFFFFF  
::FFF:FFFF:F,F:FFFFFFFF:FFFFFFFF:FF,FFFF,FF:,FFFF:FF::FFF,FFFF:FFFF  
FFFF,F:FFFF,FFF

@A00721:190:HGJW7DSXY:4:1117:10357:30295 2:N:0:TCTGCAAG+GCTGCACT  
GCACAATTCGATTCCATCTCACTTTCTGGGTATGTCTCGTATCGACCGAGGTTCCAGTAGGACAATCA  
TTTATACAAACGATACTGCCAACGTCCACAATATTATTAAGTCTGACAACTCCGTCTTGTACTGCAT  
AGGAGGTGTGAACAC

+

FFFFFFFFFFFFFFFFFFFFFFFFFFFFFFFFFFFFFFFFFFFFFFFFFFFFFFFFFFFFFFFFFFFFFFFF  
FFFFFF:FFFFFFFFFFFFFFFFFFFFFFFFFFFFFFFFFFFFFFFFFFFFFFFFFFFFFFFFFFFFFFFF,FFFF  
FFFFFFFFFFFFFFFF

@A00721:190:HGJW7DSXY:4:1169:24885:34507 2:N:0:TCTGCAAG+GCTGCACT  
GCACAATTCGATTCCATCTCACTTTCTGGGTATGTCTCGTATCGACCGAGGTTCCAGTAGGACAATCA  
TTTATACAAACGATACTGCCAACGTCCACAATATTATTAAGTCTGACAACTCCGTCTTGTACTGCAT  
AGGAGGTGTGAACAC

+

FFFFFFFFFFFF:FFFFFFFFFFFFFFFFFFFFFFFFFFFFFFFFFFFFFFFFFFFFFFFFFFFFFFFFFFFF:FFF  
FFFFFFFFFFFFFFFFFFFFFFFFFFFFFFFFFFFFFFFFFFFFFFFFFFFFFFFFFFFFFFFF:FFFFFFFFFFFFFFFF  
FFFFFFFFFFFFFFFF

@A00721:190:HGJW7DSXY:4:1442:28980:18239 2:N:0:TCTGCAAG+GCTGCACT  
GCACAATTCGATTCCATCTCACTTTCTGGGTATGTCTCGTATCGACCGAGGTTCCAGTAGGACAATCA  
TTTATACAAACGATACTGCCAACGTCCACAATATTATTAAGTCTGACAACTCCGTCTTGTACTGCAT  
AGGAGGTGTGAACAC

+

FFFFFFFFFFFFFFFFFFFFFFFFFFFFFFFFFFFFFFFFFFFFFFFFFFFFFFFFFFFFFFFFFFFFFFFF  
FFF:FFFFFFFFFFFFFFFFFFFFFFFFFFFFFFFFFFFFFFFFFFFFFFFFFFFFFFFF:FF:FFFFFFFFFFFF:FFFFFFFFFFFFFFFF  
FFFFFFFFFFFFFFFF:F

@A00721:190:HGJW7DSXY:4:1620:26386:6480 2:N:0:TCTGCAAG+GCTGCACT  
GCACAATTCGATTCCATCTCACTTTCTGGGTATGTCTCGTATCGACCGAGGTTCCAGTAGGACAATCA  
TTTATACAAACGATACTGCCAACGTCCACAATATTATTAAGTCTGACAACTCCGTCTTGTACTGCAT  
AGGAGGTGTGAACAC

+

F:FFFFFFFFFFFFFFFF,FFFFFFFFFFFFFFFFFFFFFFFF:FFFFFFFFFFFFFFFFFFFFFFFF  
F:FFFFFFF:FFF,FFFFFFFFFFFFFFFFFFFFFFFF,FFFFFFFFFFFFFFFFFFFF:,FF:F::FF:FFF  
FFFF:FFFFFFFF



$+$ 

+

+

+

+

+

+

FFFFFFFFFFFF:FFFFFFFF:FFFFFFFFFFFFF:F:FFFFF,FFFFFFFFFFFFFFFFFFFFFFFFFFFFF  
FFFFFFFFFFFFFFFFF

@A00721:190:HGJW7DSXY:4:2402:12807:25363 2:N:0:TCTGCAAG+GCTGCACT  
AATCACAATTCGATTCCATCTCACTTTCTGGGTATGTCTCGTATCGACCGAGGTTCCAGTAGGACAAT  
CATTTATACAAACGATACTGCCAACGTCCACAATATTATTA ACTCTGACAACTCCGTCTTGTACTGC  
ATAGGAGGTGTGAAC

+

FF,:F:FFF,:F,FF:FFF,:F:FFFFFFFF,FFF,F,F:,FFF,F:FFF,,F,FFFF,F:,FFFFF  
FF:,F:FF,FFF:FF,F:F,F,FFF:FFFFFFFF:F,FF::FFF:FF:F:FFFFFFFF,:F,FFFFF:FFF  
FFFF:FF:F:FFFF:

@A00721:190:HGJW7DSXY:4:2577:15221:4993 2:N:0:TCTGCAAG+GCTGCACT  
AAGCACAATTCGATTCCATCTCACTTTCTGGGTATGTCTCGTATCGACCGAGGTTCCAGTAGGACAAT  
CATTTATACAAACGATACTGCCAACGTCCACAATATTATTA ACTCTGACAACTCCGTCTTGTACTGC  
ATAGGAGGTGTGAAC

+

F:FFFFFFFFFFFFFFFFFFFFFFFFFFFFFFFFFFFFFFFFFFFFFFFFFFFFFFFFFFFFFFFFFFFFF  
FFFFFFFFFFFFFFFFFFFFFFFFFFFFFFFFFFFFFFFFFFFFFFFFFFFFFFFFFFFFFFFFFFFFFFFFF  
FFFFFFFF:FFFFFFFF

@A00721:190:HGJW7DSXY:4:1328:31358:20791 2:N:0:TCTGCAAG+GCTGCACT  
GTTAAGCACAATTCGATTCCATCTCACTTTCTGGGTATGTCTCGTATCGACCGAGGTTCCAGTAGGAC  
AATCATTTATACAAACGATACTGCCAACGTCCACAATATTATTA ACTCTGACAACTCCGTCTTGTAC  
TGCATAGGAGGTGTG

+

FFFFFFFFFFFFFFFFF:FFFFFFFFFFFFFFFFFFFFFFFFFFFFFFFFFFFFFFFFFFFFFFFFFFFFF  
F:FFFFFFFF,FFFFFFFFFFFFFFFFFFFFFFFFFFFF:F:FFFFFFFFFFFFFFFFFFFFFFFFFFFFF:FFFF  
FFFFFFFFFFFFFFFFF

@A00721:190:HGJW7DSXY:4:1547:4942:23484 2:N:0:TCTGCAAG+GCTGCACT  
GTTAAGCACAATTCGATTCCATCTCACTTTCTGGGTATGTCTCGTATCGACCGAGGTTCCAGTAGGAC  
AATCATTTATACAAACGATACTGCCAACGTCCACAATATTATTA ACTCTGACAACTCCGTCTTGTAC  
TGCATAGGAGGTGTG

+

FFFFFFFFF:F:FFFFFFFFFFFFFFFFF:FFFFFFFFFFFFFFFFFFFFFFFFFFFFFFFFF:FFFFFFF  
FFFFFFFFFFFFFFFFFFFFFFFFFFFFFFFFFFFFFFFFFFFF,FFFF:FFFFFFFFFFFFFFFFFFFFFFFFF  
FFFFFFFFFFFFFFFFF

@A00721:190:HGJW7DSXY:4:1551:20726:2534 2:N:0:TCTGCAAG+GCTGCACT  
CACACCTCCTATGCAGTACAAGACGGAGTTTGTGAGAGTTAATAATATTGTGGACGTTGGCAGTATCG  
TTTGTATAAATGATTGTCCTACTGGAACCTCGGTCGATACGAGACATACCCAGAAAGTGAGATGGAAT  
CGAATTGTGCTTAAC

+

FFFFFFFFFFFFFFFFFFFFFFFFFFFFFFFFFFFFFFFFFFFFFFFFFFFFFFFFFFFFFFFFFFFFF,FFFFFFFFF:FFFFFFFFF  
FFFFFFFFF:F:FFFFFFFFFFFFFFFFFFFFFFFFFFFFFFFFF:FFFFFFFFFFFFFFFFFFFFFFFFFFFFF  
FFFFFFFFFFFFF:FF

@A00721:190:HGJW7DSXY:4:1619:5810:6574 2:N:0:TCTGCAAG+GCTGCACT  
CACACCTCCTATGCAGTACAAGACGGAGTTTGTGAGAGTTAATAATATTGTGGACGTTGGCAGTATCG  
TTTGTATAAATGATTGTCCTACTGGAACCTCGGTCGATACGAGACATACCCAGAAAGTGAGATGGAAT  
CGAATTGTGCTTAAC

+

FFFFFFFFFFFFFFFFFFFFFFFFFFFFFFFFFFFFFFFFFFFFFFFFFFFFFFFFFFFFFFFFFFFFF:FFFFFFFFF:FFFFFFFFF  
FFFFFFFFFFFFFFFFFFFFFFFFFFFFFFFFFFFFFFFFFFFF,FFFFFFFFFFFFFFFFFFFFFFFFFFFFF:FFFFF  
FF,F:FFFFFFFFF

@A00721:190:HGJW7DSXY:4:1643:21269:16157 2:N:0:TCTGCAAG+GCTGCACT  
CACACCTCCTATGCAGTACAAGACGGAGTTTGTGAGAGTTAATAATATTGTGGACGTTGGCAGTATCG  
TTTGTATAAATGATTGTCCTACTGGAACCTCGGTCGATACGAGACATACCCAGAAAGTGAGATGGAAT  
CGAATTGTGCTTAAC

+  
FFFFFFFFFFFFFFFFFFFFFFFFFFFFFFFFFFFFFFFFFFFFFFFFFFFFFFFFFFFFFFFFFFFFFFFF  
FFFFFFFFFFFFFFFFFFFFFFFFFFFFFFFFFFFFFFFFFFFFFFFFFFFFFFFFFFFFFFFFFFFFFFFF:FFFFFFFFFFFF  
FFFFFFFFFFFFFFFF:

@A00721:190:HGJW7DSXY:4:1675:26142:20275 2:N:0:TCTGCAAG+GCTGCACT  
GTTAAGCACAATTTCGATTCCATCTCACTTTCTGGGTATGTCTCGTATCGACCGAGGTTCCAGTAGGAC  
AATCATTTATACAAACGATACTGCCAACGTCCACAATATTATTA ACTCTGACAACTCCGTCTTGTAC  
TGCATAGGAGGTGTG

+  
FFF:FFFFFFFFFFFFFFFFFFFFFFFFFFFFFFFFFFFFFFFFFFFFFFFFFFFFFFFFFFFFFFFFFFFF  
FFFFFFFFFFFFFFFFFFFFFFFFFFFFFFFFFFFFFFFFFFFFFFFFFFFFFFFFFFFFFFFFFFFFFFFF,FFFFFFFF  
FFFFFFFFFFFFFFFF

@A00721:190:HGJW7DSXY:4:2278:7808:13197 2:N:0:TCTGCAAG+GCTGCACT  
GTTAAGCACAATTTCGATTCCATCTCACTTTCTGGGTATGTCTCGTATCGACCGAGGTTCCAGTAGGAC  
AATCATTTATACAAACGATACTGCCAACGTCCACAATATTATTA ACTCTGACAACTCCGTCTTGTAC  
TGCATAGGAGGTGTG

+  
FFFFFFFFFFFFFFFFFFFFFFFFFFFFFFFFFFFFFFFFFFFFFFFFFFFFFFFFFFFFFFFFFFFFFFFF  
FFFFFF:FFFFFFFFFFFFFFFFFFFFFFFFFFFFFFFFFFFFFFFFFFFFFFFFFFFFFFFFFFFFFFFFFFFF  
FFFFFFFFFFFFFFFF

@A00721:190:HGJW7DSXY:4:2451:19931:25676 2:N:0:TCTGCAAG+GCTGCACT  
GTTAAGCACAATTTCGATTCCATCTCACTTTCTGGGTATGTCTCGTATCGACCGAGGTTCCAGTAGGAC  
AATCATTTATACAAACGATACTGCCAACGTCCACAATATTATTA ACTCTGACAACTCCGTCTTGTAC  
TGCATAGGAGGTGTG

+  
FFFFFFFFFFFFFFFFFFFFFFFFFFFFFFFFFFFFFFFFFFFFFFFFFFFFFFFFFFFFFFFFFFFFFFFF  
,F:FFFFFFFFFFFFFFFFFFFFFFFFFFFFFFFFFFFFFFFFFFFFFFFFFFFFFFFFFFFFFFFFFFFF,  
,FF:FFFFFFFF

@A00721:190:HGJW7DSXY:4:2514:4779:32534 2:N:0:TCTGCAAG+GCTGCACT  
GTTAAGCACAATTTCGATTCCATCTCACTTTCTGGGTATGTCTCGTATCGACCGAGGTTCCAGTAGGAC  
AATCATTTATACAAACGATACTGCCAACGTCCACAATATTATTA ACTCTGACAACTCCGTCTTGTAC  
TGCATAGGAGGTGTG

+  
FFFFFFFFFFFFFFFFFFFFFFFFFFFFFFFFFFFFFFFFFFFFFFFFFFFFFFFFFFFFFFFFFFFFFFFF  
FFFFFFFFFFFFFFFFFFFFFFFFFFFFFFFFFFFFFFFFFFFFFFFFFFFFFFFFFFFFFFFFFFFFFFFF  
FFFFFFFFFFFFFFFF

@A00721:190:HGJW7DSXY:4:1122:3830:26913 2:N:0:TCTGCAAG+GCTGCACT  
TACAAGACGGAGTTTGTCTCAGAGTTAATAATATTGTGGACGTTGGCAGTATCGTTTGTATAAATGATTG  
TCCTACTGGACCCTCGGTCGATACGAGACATACCCAGCAAGTGAGATGGAATCGAATTGTGCTTAACG  
GTTCAAGTTAAGTTGA

+  
FFFFF,FFFFFFFFFFFFFFFFFFFFFFFFFFFFFFFFFFFFFFFFFFFFFFFFFFFFFFFFFFFFFFFF  
FFFFFFFFFF:FF,FFFFF:FFFFF,FFFFF:FFF:,FFFFFFFFFFFFFFFF  
FFFFFFFF:FF,FFFFF:FFFFFFFFFF:FF:FFFF,FFFFF,FFFFFFFFFFFFFFFFFFFF:F  
FFFF:F:FFFF,FFF

@A00721:190:HGJW7DSXY:4:1161:3215:19460 2:N:0:TCTGCAAG+GCTGCACT  
TACAAGACGGAGTTTGTCTCAGAGTTAATAATATTGTGGACGTTGGCAGTATCGTTTGTATAAATGATTG  
TCCTACTGGAACCTCGGTCGATACGAGACATACCCAGAAAGTGAGATGGAATCGAATTGTGCTTAACG  
GTTCAAGTTAAGTTGA

+  
FFFFFFFFFFFFFFFFFFFFFFFFFFFFFFFFFFFFFFFFFFFFFFFFFFFFFFFFFFFFFFFFFFFF,FFFFF:FFFFF  
FFFFFFFFFFFFFFFFFFFFFFFFFFFFFFFFFFFFFFFFFFFFFFFFFFFFFFFFFFFFFFFFFFFF,FFFFFFFFFFFFFFFF  
FFFFFFFF:FFFFFFFF

@A00721:190:HGJW7DSXY:4:1223:27905:35853 2:N:0:TCTGCAAG+GCTGCACT  
TACAAGACGGAGTTTGTCTCAGAGTTAATAATATTGTGGACGTTGGCAGTATCGTTTGTATAAATGATTG





FFFFFFFFFFFFFFFFFFFFFFFFFFFFFFFFFFFFFFFFFFFFFFFFFFFFFFFFFFFFFFFF:FFFFFFFFFFFFFFFFFFFF  
FFFFFFFFFFFF

@A00721:190:HGJW7DSXY:4:1126:15474:25160 2:N:0:TCTGCAAG+GCTGCACT  
ACTTAACTGAACCGTTAAGCACAATTCGATTCCATCTCACTTTCTGGGTATGTCTCGTATCGACCGAG  
GTTCCAGTAGGACAATCATTATACAAACGATACTGCCAACGTCCACAATATTATTAAGTCTGACAAA  
CTCCGTCAGAT

+

FFFFFFFFFFFFFFFFFFFFFFFFFFFFFFFFFFFFFFFFFFFFFFFFFFFFFFFFFFFFFFFF  
FFFFFFFFFFFFFFFFFFFFFFFFFFFFFFFFFFFFFFFFFFFFFFFFFFFFFFFFFFFFFFFF  
FFFFFFFFFFFF:

@A00721:190:HGJW7DSXY:4:1355:6352:28056 2:N:0:TCTGCAAG+GCTGCACT  
ACTTAACTGAACCGTTAAGCACAATTCGATTCCATCTCACTTTCTGGGTATGTCTCGTATCGACCGAG  
GTTCCAGTAGGACAATCATTATACAAACGATACTGCCAACGTCCACAATATTATTAAGTCTGACAAA  
CTCCGTCAGAT

+

FFFFFFFFFFFFFFFFFFFFFFFFFFFFFFFFFFFFFFFFFFFFFFFFFFFFFFFFFFFFFFFF  
FFFFFFFFFFFFFFFFFFFFFFFFFFFFFFFFFFFFFFFFFFFFFFFFFFFFFFFFFFFFFFFF  
FFFFFFFFFFFF,F

@A00721:190:HGJW7DSXY:4:1510:12843:36104 2:N:0:TCTGCAAG+GCTGCACT  
ACTTAACTGAACCGTTAAGCACAATTCGATTCCATCTCACTTTCTGGGTATGTCTCGTATCGACCGAG  
GTTCCAGTAGGACAATCATTATACAAACGATACTGCCAACGTCCACAATATTATTAAGTCTGACAAA  
CTCCGTCAGAT

+

FFFFFFFFFFFFFFFFFFFFFFFFFFFFFFFFFFFFFFFFFFFFFFFFFFFFFFFFFFFFFFFF  
FFFFFFFFFFFFFFFFFFFFFFFFFFFFFFFFFFFFFFFFFFFFFFFFFFFFFFFFFFFFFFFF  
FFFFFFFFFFFF

@A00721:190:HGJW7DSXY:4:2142:18159:22420 2:N:0:TCTGCAAG+GCTGCACT  
ACTTAACTGAACCGTTAAGCACAATTCGATTCCATCTCACTTTCTGGGTATGTCTCGTATCGACCGAG  
GTTCCAGTAGGACAATCATTATACAAACGATACTGCCAACGTCCACAATATTATTAAGTCTGACAAA  
CTCCGTCAGAT

+

FFFFFFFFFFFFFFFFFFFFFFFFFFFFFFFFFFFFFFFFFFFFFFFFFFFFFFFFFFFFFFFF  
FFFFFFFFFFFFFFFFFFFFFFFFFFFFFFFFFFFFFFFFFFFFFFFFFFFFFFFFFFFFFFFF  
FFFFFFFFFFFF:FFF

@A00721:190:HGJW7DSXY:4:2253:29713:5415 2:N:0:TCTGCAAG+GCTGCACT  
ACTTAACTGAACCGTTAAGCACAATTCGATTCCATCTCACTTTCTGGGTATGTCTCGTATCGACCGAG  
GTTCCAGTAGGACAATCATTATACAAACGATACTGCCAACGTCCACAATATTATTAAGTCTGACAAA  
CTCCGTCAGAT

+

FFFFFFFFFFFFFFFFFFFFFFFFFFFFFFFFFFFFFFFFFFFFFFFFFFFFFFFFFFFFFFFF  
FFFFFFFFFFFFFFFFFFFFFFFFFFFFFFFFFFFFFFFFFFFFFFFFFFFFFFFFFFFFFFFF  
FFFFFFFFFFFF

@A00721:190:HGJW7DSXY:4:2477:14877:9032 2:N:0:TCTGCAAG+GCTGCACT  
ACTTAACTGAACCGTTAAGCACAATTCGATTCCATCTCACTTTCTGGGTATGTCTCGTATCGACCGAG  
GTTCCAGTAGGACAATCATTATACAAACGATACTGCCAACGTCCACAATATTATTAAGTCTGACAAA  
CTCCGTCAGAT

+

FFFFFFFFFFFFFFFFFFFFFFFFFFFFFFFFFFFFFFFFFFFFFFFFFFFFFFFFFFFFFFFF  
FFFFFFFFFFFFFFFFFFFFFFFFFFFFFFFFFFFFFFFFFFFFFFFFFFFFFFFFFFFFFFFF  
FFFFFFFFFFFF

@A00721:190:HGJW7DSXY:4:2665:7473:31031 2:N:0:TCTGCAAG+GCTGCACT  
ACTTAACTGAACCGTTAAGCACAATTCGATTCCATCTCACTTTCTGGGTATGTCTCGTATCGACCGAG  
GTTCCAGTAGGACAATCATTATACAAACGATACTGCCAACGTCCACAATATTATTAAGTCTGACAAA  
CTCCGTCAGAT

+  
FFFFFFFFFFFFFFFFFFFFFFFFFFFFFFFFFFFFFFFFFFFFFFFFFFFFFFFFFFFFFFFFFFFFFFFF  
FFFFFFFFFFFFFFFFFFFFFFFFFFFFFFFFFFFFFFFFFFFFFFFFFFFFFFFFFFFFFFFFFFFFFFFF  
FFFFFFFFFFFF

@A00721:190:HGJW7DSXY:4:1140:9688:20619 2:N:0:TCTGCAAG+GCTGCACT  
GTTTGTGTCAGAGTTAATAATATTGTGGACGTTGGCAGTATCGTTTGTATAAATGATTGTCCTACTGGAA  
CCTCGGTCGATACGAGACATACCCAGAAAGTGAGATGGAATCGAATTGTGCTTAACGGTTCAGTTAAG  
TTGACTAGCGAAGCC

+  
FFFFFFFFFFFFFFFFFFFFFFFFFFFFFFFFFFFFFFFFFFFFFFFFFFFFFFFFFFFFFFFFFFFFFFFF  
FFFFFFFFFFFFFFFFFFFFFFFFFFFFFFFFFFFFFFFFFFFFFFFFFFFFFFFFFFFFFFFFFFFFFFFF  
FFF:FFF,FF:FFFF

@A00721:190:HGJW7DSXY:4:1357:27299:21402 2:N:0:TCTGCAAG+GCTGCACT  
GTTTGTGTCAGAGTTAATAATATTGTGGACGTTGGCAGTATCGTTTGTATAAATGATTGTCCTACTGGAA  
CCTCGGTCGATACGAGACATACCCAGAAAGTGAGATGGAATCGAATTGTGCTTAACGGTTCAGTTAAG  
TTGACTAGCGAAGCC

+  
FFFFFFFFFFFFFFFFFFFFFFFFFFFFFFFFFFFFFFFFFFFFFFFFFFFFFFFFFFFFFFFFFFFFFFFF  
FFFFFFFFFFFFFFFFFFFFFFFFFFFFFFFFFFFFFFFFFFFFFFFFFFFFFFFFFFFFFFFFFFFFFFFF  
FFFFFFFFFFFFFFFFFFFF

@A00721:190:HGJW7DSXY:4:1460:18050:4789 2:N:0:TCTGCAAG+GCTGCACT  
GTTTGTGTCAGAGTTAATAATATTGTGGACGTTGGCAGTATCGTTTGTATAAATGATTGTCCTACTGGAA  
CCTCGGTCGATACGAGACATACCCAGAAAGTGAGATGGAATCGAATTGTGCTTAACGGTTCAGTTAAG  
TTGACTAGCGAAGCC

+  
FFFFFFFFFFFFFFFFFFFFF:FF:FFFFFFFF:FFFFFFFFFFFFFFFF:FFFFFFFFFFFFFFFFFFFF  
FFFFFFFFFFFFFFFFFFFFF:FFFFFFFF:FFFFFFFFFFFFFFFFFFFFF:FFFFFFFFFFFFFFFFFFFF  
FFFFFFFFFFFF:FFFFF

@A00721:190:HGJW7DSXY:4:2215:18412:33536 2:N:0:TCTGCAAG+GCTGCACT  
GTTTGTGTCAGAGTTAATAATATTGTGGACGTTGGCAGTATCGTTTGTATAAATGATTGTCCTACTGGAA  
CCTCGGTCGATACGAGACATACCCAGAAAGTGAGATGGAATCGAATTGTGCTTAACGGTTCAGTTAAG  
TTGACTAGCGAAGCC

+  
FFFFFFFFFFFFFFFFFFFFFFFFFFFFFFFFFFFFFFFFFFFFFFFFFFFFFFFFFFFFFFFFFFFFFFFF  
FFFFFFFFFFFFFFFFFFFFFFFFFFFFFFFFFFFFFFFFFFFFFFFFFFFFFFFFFFFFFFFFFFFFFFFF  
FFFFFFFFF,F,FFFFF

@A00721:190:HGJW7DSXY:4:2249:15447:11459 2:N:0:TCTGCAAG+GCTGCACT  
GTTTGTGTCAGAGTTAATAATATTGTGGACGTTGGCAGTATCGTTTGTATAAATGATTGTCCTACTGGAA  
CCTCGGTCGATACGAGACATACCCAGAAAGTGAGATGGAATCGAATTGTGCTTAACGGTTCAGTTAAG  
TTGACTAGCGAAGCC

+  
F:FFFFFFFFFFFFFFFF:FFFFFFFFFFFFFFFFFFFFFFFFFFFFFFFFFFFFFFFFFFFFFFFFFFFF  
FFFFFFFFFFFFFFFFFFFFFFFFFFFFFFFFFFFFFFFFFFFFFFFFFFFFFFFFFFFFFFFFFFFFFFFF  
FF:FFFF:FFFF::F

@A00721:190:HGJW7DSXY:4:1137:21775:33348 2:N:0:TCTGCAAG+GCTGCACT  
TCAGAGTTAATAATATTGTGGACGTTGGCAGTATCGTTTGTATAAATGATTGTCCTACTGGAACCTCG  
GTGATACGAGACATACCCAGAAAGTGAGATGGAATCGAATTGTGCTTAACGGTTCAGTTAAGTTGAC  
TAGCGAAGCCAATGT

+  
FFFFFFFFFFFFFFFFFFFFFFFFFFFFFFFFFFFFFFFFFFFFFFFFFFFFFFFFFFFFFFFFFFFFFFFF  
FFFFFFFFFFFFFFFFFFFFFFFFFFFFFFFFFFFFFFFFFFFFFFFFFFFFFFFFFFFFFFFFFFFFFFFF  
FFFFFFFFFFFFFFFFFFFF

@A00721:190:HGJW7DSXY:4:1413:24451:17503 2:N:0:TCTGCAAG+GCTGCACT  
TCAGAGTTAATAATATTGTGGACGTTGGCAGTATCGTTTGTATAAATGATTGTCCTACTGGAACCTCG





@A00721:190:HGJW7DSXY:4:1514:32606:25676 2:N:0:TCTGCAAG+GCTGCACT  
TATGAACATTGGCTTCGCTAGTCAACTTAACTGAACCGTTAAGCACAATTCGATTCCATCTCACTTTC  
TGGGTATGTCTCGTATCGACCGAGGTTCCAGTAGGACAATCATTTATACAAACGATACTGCCAACGTC  
CACAATATTATTAAC

```

FFFFFFFFFFFFFFFFFFFFFFFFFFFFFFFFFFFFFFFFFFFFFFFFFFFFFFFFFFFFFFFFFFFFFFFF
FFFFFFFFFFFFFFFFFFFFFFFFFFFFFFFFFFFFFFFF:FFFFFFFFFFFFFFFFFFFFFFFFFFFFFF,
FFF:F:FFFFFFFF:F

```

@A00721:190:HGJW7DSXY:4:1573:1723:30686 2:N:0:TCTGCAAG+GCTGCACT  
TATGAACATTGGCTTCGCTAGTCAACTTAAGTGAACCGTTAAGCACAATTCGATTCCATCTCACTTTC  
TGGGTATGTCTCGTATCGACCGAGGTTCCAGTAGGACAATCATTTATACAAACGATACTGCCAACGTC  
CACAATATTATTAAC

[illegible]

@A00721:190:HGJW7DSXY:4:2157:4833:12399 2:N:0:TCTGCAAG+GCTGCACT  
TATGAACATTGGCTTCGCTAGTCAACTTAACTGAACCGTTAAGCACAATTCGATTCCATCTCACTTTC  
TGGGTATGTCTCGTATCGACCGAGGTTCCAGTAGGACAATCATTTATACAAACGATACTGCCAACGTC  
CACAATATTATTAAC

[illegible]

@A00721:190:HGJW7DSXY:4:2409:22896:27962 2:N:0:TCTGCAAG+GCTGCACT  
TATGAACATTGGCTTCGCTAGTCAACTTAACTGAACCGTTAAGCACAATTCGATTCCATCTCACTTTC  
TGGGTATGTCTCGTATCGACCGAGGTTCCAGTAGGACAATCATTTATACAAACGATACTGCCAACGTC  
CACAATATTATTAAC

[illegible]

@A00721:190:HGJW7DSXY:4:2430:15185:17801 2:N:0:TCTGCAAG+GCTGCACT  
TATGAACATTGGCTTCGCTAGTCAACTTAACTGAACCGTTAAGCACAATTCGATTCCATCTCACTTTC  
TGGGTATGTCTCGTATCGACCGAGGTTCCAGTAGGACAATCATTTATACAAACGATACTGCCAACGTC  
CACAATATTATTAAC

```

FFFFFFFFFFFFFFFFFFFFFFFFFFFFFFFFFFFFFFFF:FFFFFFFFFFFFFFFFFFFFFFFF
FFFFFFFFFFFFFFFFFFFFFFFFFFFFFFFF:FFFFFFFFFFFFFFFFFFFFFFFFFFFFFFFF:F
FFFF,FFFFFFFF

```

@A00721:190:HGJW7DSXY:4:2430:14850:18693 2:N:0:TCTGCAAG+GCTGCACT  
TATGAACATTGGCTTCGCTAGTCAACTTAACTGAACCGTTAAGCACAATTCGATTCCATCTCACTTTC  
TGGGTATGTCTCGTATCGACCGAGGTTCCAGTAGGACAATCATTTATACAAACGATACTGCCAACGTC  
CACAATATTATTAAC

[illegible]

@A00721:190:HGJW7DSXY:4:1447:6189:34413 2:N:0:TCTGCAAG+GCTGCACT  
CCACAGCCACTGCTTCATATTATGAACATTGGCTTCGCTAGTCAACTTAACTGAACCGTTAAGCACAA  
TTCGATTCCATCTCACTTTCTGGGTATGTCTCGTATCGACCGAGGTTCCAGTAGGACAATCATTTATA  
CAAACGATACTGCCA

```
FFFFFFFFFFFFFFFFFFFFFFFFFFFFF:FFFFFFFFFFFFFFFFFFFFFFFFFFFFFFFFFFFFFFFFFFFFFFFF,F
```

FFFFFFFF:FFFFFFFF:FFFFFFFF::FFFFFFFFFFFFFFFFFFFFFFFFFFFFFFFF:
FFFFFF:FFF:FFFF

@A00721:190:HGJW7DSXY:4:1519:8983:35368 2:N:0:TCTGCAAG+GCTGCACT
CCACAGCCACTGCTTCATATTATGAACATTGGCTTCGCTAGTCAACTTAACTGAACCGTTAAGCACAA
TTCGATTCCATCTCACTTTCTGGGTATGTCTCGTATCGACCGAGGTTCCAGTAGGACAATCATTTATA
CAAACGATACTGCCA

+
FFFFFFFFFFFFFFFFFFFFFFFFFFFFFFFF:FFFFFFFFFFFFFFFFFFFFFFFFFFFFFFFF
FFFFFFFFFFFFFFFFFFFFFFFFFFFFFFFFFFFFFFFFFFFFFFFFFFFFFFFF:FFFFFFFFFFFFFFFF
FF:FFFFFFFFFFFF

@A00721:190:HGJW7DSXY:4:1608:18973:5447 2:N:0:TCTGCAAG+GCTGCACT
CCACAGCCACTGCTTCATATTATGAACATTGGCTTCGCTAGTCAACTTAACTGAACCGTTAAGCACAA
TTCGATTCCATCTCACTTTCTGGGTATGTCTCGTATCGACCGAGGTTCCAGTAGGACAATCATTTATA
CAAACGATACTGCCA

+
FFFFFFFFFFFFFFFFFFFFFFFFFFFFFFFF:FFFFFFFF:FFFFFFFFFFFFFFFFFFFFFFFF
FFFFFFFFFFFFFFFF:FFFFFFFFFFFFFFFFFFFFFFFFFFFFFFFFFFFFFFFF,FFFFFFFF
FFFFFFFFFFFF:F:

@A00721:190:HGJW7DSXY:4:1634:12726:19429 2:N:0:TCTGCAAG+GCTGCACT
CCACAGCCACTGCTTCATATTATGAACATTGGCTTCGCTAGTCAACTTAACTGAACCGTTAAGCACAA
TTCGATTCCATCTCACTTTCTGGGTATGTCTCGTATCGACCGAGGTTCCAGTAGGACAATCATTTATA
CAAACGATACTGCCA

+
FFFFFFFFFFFFFFFFFFFFFFFF:FFFFF,FFFFFFFFFFFFFFFFFFFFFFFFFFFFFFFF:F
FFFF,FFFF:FFFFFFFFFFFFFFFF,FFFFFFFF,FFFFFFFFFFFFFFFFFFFFFFFF
FFFFFFFFFFFFF:

@A00721:190:HGJW7DSXY:4:2152:1172:10911 2:N:0:TCTGCAAG+GCTGCACT
CCACAGCCACTGCTTCATATTATGAACATTGGCTTCGCTAGTCAACTTAACTGAACCGTTAAGCACAA
TTCGATTCCATCTCACTTTCTGGGTATGTCTCGTATCGACCGAGGTTCCAGTAGGACAATCATTTATA
CAAACGATACTGCCA

+
FFFFFFFFFFFFFFFFFFFFFFFFFFFFFFFF:FFFFFFFFFFFFFFFFFFFFFFFF
:FFFFFFFFFFFFFFFFFFFFFFFFFFFFFFFFFFFFFFFF:FFF:FFFFFF:FFFFFFFF
:FF:FFFFFFFF

@A00721:190:HGJW7DSXY:4:2557:4092:21355 2:N:0:TCTGCAAG+GCTGCACT
CCACAGCCACTGCTTCATATTATGAACATTGGCTTCGCTAGTCAACTTAACTGAACCGTTAAGCACAA
TTCGATTCCATCTCACTTTCTGGGTATGTCTCGTATCGACCGAGGTTCCAGTAGGACAATCATTTATA
CAAACGATACTGCCA

+
FFFFFFFFFFFFFFFFFFFFFFFFFFFFFFFF:FFFFFFFF:FFFFFFFFFFFFFFFF
FFFFFFFFFFFFFFFFFFFFFFFFFFFFFFFFFFFFFFFFFFFFFFFF
FFFFFFFFFFFFF

@A00721:190:HGJW7DSXY:4:2562:25211:33912 2:N:0:TCTGCAAG+GCTGCACT
CCACAGCCACTGCTTCATATTATGAACATTGGCTTCGCTAGTCAACTTAACTGAACCGTTAAGCACAA
TACGATTCCATCTCACTGTCTGGGTATGTCTCGTATCGACCGAGGTTCCAGTAGGACAATCATTTATA
CAAACGATACTGCCA

+
FFFFF:,FF:FFF:FFF,F,FF::FFFF,,F,FFFF,FFFF:FFFFFFFF
F,FFF,,FFFFFFFFF,,F,:F:F:F,FF:F::FFFFFFFF,FFFF:FFF,FFF
FF,F,:FFFF,F,F

@A00721:190:HGJW7DSXY:4:2548:26368:10802 2:N:0:TCTGCAAG+GCTGCACT
CCACAGCCACTGCTTCATATTATGAACATTGGCTTCGCTAGTCAACTTAACTGAACCGTTAAGCACAA
TTCGATTCCATCTCACTTTCTGGGTATGTCTCGTATCGACCGAGGTTCCAGTAGGACAATCATTTATA
CAAACGATACTGCC

[illegible][illegible][illegible][illegible]

```
FF,FFFFFFFFFFFFFFFFFFFFFFFFFFFFFFFF,FFFFFFFFFFFFFFFFFFFFFFFF:FFFF
FFFF:FFFF::FFF:FF,FFFFFF:FFFF,FFFFFFFFFFFFFFFFFFFFFFFFFFFFFF:FFF
:FFFFFFFFF,FFFFF
```

```
F.:FFFFFFFFFFFFFFFFFFFFFFFFFFFFFFF,FF:FFFFFFFFFFFFFFFFFFFFFFFFFFFF  
FFFFFFFFFFFFFFFFFFFFFFFFFFFFFFFFFFFFFFFFFFFFFFFFFFFFFFFFFFFFFFFF:  
FFFFFFFFFFFFFFFFFFFFFFFFFFFFFFFFFFFFFFFF
```

[illegible]

@A00721:190:HGJW7DSXY:4:2248:11207:34303 2:N:0:TCTGCAAG+GCTGCACT  
CGAGCCACATCCACAGCCACTGCTTCATATTATGAACATTGGCTTCGCTAGTCAACTTAACTGAACCG



@A00721:190:HGJW7DSXY:4:1337:4616:2754 2:N:0:TCTGCAAG+GCTGCACT  
ATCATACACGAGCCACATCCACAGCCACTGCTTCATATTATGAACATTGGCTTCGCTAGTCAACTTAA  
CTGAACCGTTAAGCACAAATTCGATTCCATCTCACTTTCTGGGTATGTCTCGTATCGACCGAGGTTCCA  
GTAGGACAATCATTT

[illegible]

+

```

FFFFFFFFFFFFFFFFFFFFFFFFFFFFFFFFFFFFFFFFFFFFFFFFFFFFFFFFFFFFFFFFFFFFFFFF:FF
FFFFFFFF:FFFFFFFFFFFFFFFFFFFFFFFFFFFFFFFF:FFFFFFFF:FFFFFFFFFFFFFFFFFFFF:FFFFF
F:FF:FFFFFFFF,F

```

+

```

FFFFFFFFFFFFFFFFFFFFFFFFFFFFFFFFFFFFFFFFFFFFFFFFFFFFFFFFFFFFFFFFFFFFFFFF
FFFFFFFF:FFFFFFFFFFFFFFFFFFFFFFFFFFFFFFFF,FFFFFFFFFFFFFFFFFFFFFFFFFFFFFF:FFFFFF
FFFFFFFFFFFFFFFF

```

+

```
:FFFFFF:FFFFFFF:FFFFFFF:FFFFFFF:FFFFFFF:FFFFFFF:FFFFFFF:FFFFFFF:FFFFFFF:FFFFFFF
,F,FFF:FFFF,FF:FFFF::FFF:FFF:F,FFF,FFFFFF:FFF:,FFFFFF:FF:,FF:,F
:FFF::FFFFFF:FF
```

+

```

FFFFFFFFFFFFFFFFFFFFFFFFFFFFFFFFFFFFFFFFFFFFFFFFFFFFFFFFFFFFFFFFFFFFFFFF
FFFFFFFFFFFFFFFFFFFFFFFF:FFFFFFFFFFFFFFFFFFFF:FFF:FFFF,FFFFFFFF:FFFFFFFFFFFFFFFF
EEEEEEEEEEEEEE.EE

```

+

```
FFFFFFFFFFFFFFFFFFFFFFFFFFFFFFFFFFFFFFFFFFFFFFFFFFFFFFFFFFFFFFF
FFFFFFFFFFFFFFFFFFFFFFFFFFFFFFFFFFFF:FFFFFFFFFFFFFFFFFFFFFFFFFFFF
EEEEEEEEEEEEE.F
```

+

[illegible]

FFFFFFFF:FFFFFFFFFFFFFFFFFFFFFFFFFFFFFFFFFFFFFFFFFFFFFFFFFFFFFFFFFFFFFFFFFFFFFFFF  
FFFFFFFFFFFFFFFF

@A00721:190:HGJW7DSXY:4:2614:12979:1141 2:N:0:TCTGCAAG+GCTGCACT  
ATCATACACGAGCCACATCCACAGCCACTGCTTCATATTATGAACATTGGCTTCGCTAGTCAACTTAA  
CTGAACCGTTAAGCACAATTTCGATTCCATCTCACTTTCTGGGTATGTCTCGTATCGACCGAGGTTCCA  
GTAGGACAATCATTT

+

FFFFFFFFFFFFFFFFFFFFFFFFFFFFFFFFFFFFFFFFFFFFFFFFFFFFFFFFFFFFFFFFFFFFFFFFFFFFFFFF  
FFF:FF:FFFFFFFFFFFFFFFFFFFF,FF::FFFF::FFFFFF:FF:FFFFFFFFFFFFFFFFFFFF:FFFFFFFF  
FFFFFFFF,FFFFFF

@A00721:190:HGJW7DSXY:4:1161:25744:3803 2:N:0:TCTGCAAG+GCTGCACT  
CTATCATACACGAGCCACATCCACAGCCACTGCTTCATATTATGAACATTGGCTTCGCTAGTCAACTT  
AACTGAACCGTTAAGCACAATTTCGATTCCATCTCACTTTCTGGGTATGTCTCGTATCGACCGAGGTTCC  
CAGTAGGACAATCAT

+

F,FFFFFFFFFFFFFFFFFFFF:FFFFFFFFFF:FFFF::FFFFFFFFFFFFFFFFFFFFFFFF:FFFFFFFFFFFF  
FFFFFFFFFFFFFFFFFFFFFFFFFFFF:,FFF:FFFFFFFFFFFFFFFFFFFFFFFF:FF:FFFFFFFFF:F:FF:F::FFF  
:FFFFFFFFFFFF:F

@A00721:190:HGJW7DSXY:4:1166:17833:19445 2:N:0:TCTGCAAG+GCTGCACT  
CTATCATACACGAGCCACATCCACAGCCACTGCTTCATATTATGAACATTGGCTTCGCTAGTCAACTT  
AACTGAACCGTTAAGCACAATTTCGATTCCATCTCACTTTCTGGGTATGTCTCGTATCGACCGAGGTTCC  
CAGTAGGACAATCAT

+

FFFFFFFFFFFFFFFFFFFFFFFFFFFFFFFFFFFFFFFFFFFFFFFFFFFFFFFFFFFFFFFFFFFFFFFFFFFFFFFF  
FFFFFFFFFFFFFFFFFFFFFFFFFFFFFFFFFFFFFFFFFFFFFFFFFFFFFFFFFFFFFFFFFFFFFFFFFFFFFFFF  
FFFFFFFFFFFFFFFFFFFF

@A00721:190:HGJW7DSXY:4:1241:23583:18223 2:N:0:TCTGCAAG+GCTGCACT  
CTATCATACACGAGCCACATCCACAGCCACTGCTTCATATTATGAACATTGGCTTCGCTAGTCAACTT  
AACTGAACCGTTAAGCACAATTTCGATTCCATCTCACTTTCTGGGTATGTCTCGTATCGACCGAGGTTCC  
CAGTAGGACAATCAT

+

FFFFFFFFFFFFFFFFFFFFFFFFFFFFFFFFFFFFFFFFFFFFFFFFFFFFFFFFFFFFFFFFFFFFFFFFFFFFFFFF  
FFFFFFFFFFFFFFFFFFFFFFFFFFFFFFFFFFFFFFFFFFFFFFFFFFFFFFFFFFFFFFFFFFFFFFFFFFFFFFFF  
FFFF:FFFFFFFFFFFF

@A00721:190:HGJW7DSXY:4:1514:4589:7467 2:N:0:TCTGCAAG+GCTGCACT  
CTATCATACACGAGCCACATCCACAGCCACTGCTTCATATTATGAACATTGGCTTCGCTAGTCAACTT  
AACTGAACCGTTAAGCACAATTTCGATTCCATCTCACTTTCTGGGTATGTCTCGTATCGACCGAGGTTCC  
CAGTAGGACAATCAT

+

FFFFFFFFFFFFFFFFFFFFFFFFFFFFFFFFFFFFFFFFFFFFFFFFFFFFFFFFFFFFFFFFFFFFFFFFFFFFFFFF  
FFFFFFFFFFFFFFFFFFFFFFFFFFFFFFFFFFFFFFFFFFFFFFFFFFFFFFFFFFFFFFFFFFFFFFFFFFFFFFFF  
FFFFFFFFFFFFFFFFFFFF

@A00721:190:HGJW7DSXY:4:1578:3314:7357 2:N:0:TCTGCAAG+GCTGCACT  
CTATCATACACGAGCCACATCCACAGCCACTGCTTCATATTATGAACATTGGCTTCGCTAGTCAACTT  
AACTGAACCGTTAAGCACAATTTCGATTCCATCTCACTTTCTGGGTATGTCTCGTATCGACCGAGGTTCC  
CAGTAGGACAATCAT

+

FFFFFFFFFFFFFFFFFFFFFFFFFFFF:F:FFFFFFFF:FFFFFFFFFF:FFFFFFFF:FFFFFFFFFFFFFFFF  
FFFFFFFFFFFFFFFFFFFFFFFFFFFF:FFFFFFFFFFFFFFFFFFFF,FFFFFFFFF:FFFFFFFFFFFFFFFFFFFF  
FFF:FFFFFFFFFFFF

@A00721:190:HGJW7DSXY:4:1653:31675:5807 2:N:0:TCTGCAAG+GCTGCACT  
CTATCATACACGAGCCACATCCACAGCCACTGCTTCATATTATGAACATTGGCTTCGCTAGTCAACTT  
AACTGAACCGTTAAGCACAATTTCGATTCCATCTCACTTTCTGGGTATGTCTCGTATCGACCGAGGTTCC  
CAGTAGGACAATCAT

+  
FFFFFFFFFFFFFFFFFFFFFFFFFFFFFFFFFFFFFFFFFFFFFFFFFFFFFFFFFFFFFFFFFFFFFFFF  
FFFFFFFFFFFFFFFFFFFFFFFFFFFFFFFFFFFFFFFFFFFFFFFFFFFFFFFFFFFFFFFFFFFFFFFF:FFFFFFFFFFFFFFFF  
FFFFFFFFFFFFFFFF  
@A00721:190:HGJW7DSXY:4:1673:29903:23563 2:N:0:TCTGCAAG+GCTGCACT  
CTATCATACACGAGCCACATCCACAGCCACTGCTTCATATTATGAACATTGGCTTCGCTAGTCAACTT  
AACTGAACCGTTAAGCACAATTTCGATTCCATCTCACTTTCTGGGTATGTCTCGTATCGACCGAGGTTC  
CAGTAGGACAATCAT

+  
FFFFFFFFF:FFFFFFFFFFFFFFFFFFFFFFFFFFFFFFFFFFFFFFFFFFFFFFFFFFFFFFFFFFFFFFFF  
FFFFFFFFFFFFFFFFFFFFFFFFFFFFFFFFFFFFFFFFFFFFFFFFFFFFFFFFFFFFFFFFFFFFFFFF:FFFFFFFFFFFFFFFF  
FFFFFFFFFFFFFFFF  
@A00721:190:HGJW7DSXY:4:2204:17824:20369 2:N:0:TCTGCAAG+GCTGCACT  
CTATCATACACGAGCCACATCCACAGCCACTGCTTCATATTATGAACATTGGCTTCGCTAGTCAACTT  
AACTGAACCGTTAAGCACAATTTCGATTCCATCTCACTTTCTGGGTATGTCTCGTATCGACCGAGGTTC  
CAGTAGGACAATCAT

+  
FFFFFFFFFFFFFFFFFFFFFFFFFFFFFFFFFFFFFFFFFFFFFFFFFFFFFFFFFFFFFFFFFFFFFFFF  
FFFFFFFFFFFFFFFFFFFFFFFFFFFFFFFFFFFFFFFFFFFFFFFFFFFFFFFFFFFFFFFFFFFFFFFF:FFFFFFFFFFFF  
F:FF,FFFF:FFFF  
@A00721:190:HGJW7DSXY:4:2368:22553:4914 2:N:0:TCTGCAAG+GCTGCACT  
CTATCATACACGAGCCACATCCACAGCCACTGCTTCATATTATGAACATTGGCTTCGCTAGTCAACTT  
AACTGAACCGTTAAGCACAATTTCGATTCCATCTCACTTTCTGGGTATGTCTCGTATCGACCGAGGTTC  
CAGTAGGACAATCAT

+  
FFFFFFFFF:FFFFFFFFFFFFFFFFFFFFFFFFFFFFFFFFFFFFFFFFFFFFFFFFFFFFFFFFFFFFFFFF  
FFFFFFFFFFFFFFFFFFFFFFFFFFFFFFFFFFFFFFFFFFFFFFFFFFFFFFFFFFFFFFFFFFFFFFFF:FFF:FFFFFFF:FFFFFFFFF:FFFFFFFFFFFFF:  
FFFFF:FF:FFFFF  
@A00721:190:HGJW7DSXY:4:2378:15320:3098 2:N:0:TCTGCAAG+GCTGCACT  
CTATCATACACGAGCCACATCCACAGCCACTGCTTCATATTATGAACATTGGCTTCGCTAGTCAACTT  
AACTGAACCGTTAAGCACAATTTCGATTCCATCTCACTTTCTGGGTATGTCTCGTATCGACCGAGGTTC  
CAGTAGGACAATCAT

+  
FFFFFFFFFFFFFFFFFFFFFFFFFFFFFFFFFFFFFFFFFFFFFFFFFFFFFFFFFFFFFFFFFFFFFFFF  
FFFFFFFFFFFFFFFFFFFFFFFFFFFFFFFFFFFFFFFFFFFFFFFFFFFFFFFFFFFFFFFFFFFFFFFF  
FFFFFFFFFFFFFFFFFFFF  
@A00721:190:HGJW7DSXY:4:2407:31955:35196 2:N:0:TCTGCAAG+GCTGCACT  
CTATCATACACGAGCCACATCCACAGCCACTGCTTCATATTATGAACATTGGCTTCGCTAGTCAACTT  
AACTGAACCGTTAAGCACAATTTCGATTCCATCTCACTTTCTGGGTATGTCTCGTATCGACCGAGGTTC  
CAGTAGGACAATCAT

+  
FFFFFFFFFFFFFFFFFFFFF:FFFF:F:FFFFFFFFFFFFFFFFFFFFFFFFFFFFFFFF:FFFFFFFFFFFFFFFFFFFFFFFFFFFF  
FFFFFFF:FFFFFFFFFFFFF:FFFFFFFFFFFF,FFFFFFFFFFFFFFFFFFFFFFFFFFFFFFFF,FF:FFFFFF,  
FFFFFFFFFFFF:FFFF  
@A00721:190:HGJW7DSXY:4:2509:14371:19053 2:N:0:TCTGCAAG+GCTGCACT  
CTATCATACACGAGCCACATCCACAGCCACTGCTTCATATTATGAACATTGGCTTCGCTAGTCAACTT  
AACTGAACCGTTAAGCACAATTTCGATTCCATCTCACTTTCTGGGTATGTCTCGTATCGACCGAGGTTC  
CAGTAGGACAATCAT

+  
FFFFFFFFFFFFFFFFFFFFFFFFFFFFFFFFFFFFFFFFFFFFFFFFFFFFFFFFFFFFFFFFFFFFFFFF  
FFFFFFFFFFFFFFFFFFFFFFFFFFFFFFFFFFFFFFFFFFFFFFFFFFFFFFFFFFFFFFFFFFFFFFFF  
FFFFF:FFFF:FFFF  
@A00721:190:HGJW7DSXY:4:2569:17996:35227 2:N:0:TCTGCAAG+GCTGCACT  
CTATCATACACGAGCCACATCCACAGCCACTGCTTCATATTATGAACATTGGCTTCGCTAGTCAACTT





$+$ 

+

 $+$ 

+

+

+

+

[illegible]



+  
FFFFFFFFFFFFFFFFFFFFFFFFFFFFFFFFFFFFFFFFFFFFFFFFFFFFFFFFFFFFFFFFFFFFFFFF  
FFFFFFFFFFFFFFFFFFFFFFFFFFFFFFFFFFFFFFFFFFFFFFFFFFFFFFFFFFFFFFFFFFFFFFFF  
FFFFFFFFFFFFFFFF  
@A00721:190:HGJW7DSXY:4:2102:12888:7467 2:N:0:TCTGCAAG+GCTGCACT  
ACCGGGACGTCTATCATACACGAGCCACATCCACAGCCACTGCTTCATATTATGAACATTGGCTTCGC  
TAGTCAACTTAACTGAACCGTTAAGCACAATTCGATTCCATCTCACTTTCTGGGTATGTCTCGTATCG  
ACCGAGGTTCCAGTA

+  
FFFFFFFFFFFFFFFFFFFFFFFFFFFFFFFFFFFFFFFFFFFFFFFFFFFFFFFFFFFFFFFFFFFFFFFF  
F:FFFFFFFFFFFFFFFFFFFFFFFFFFFFFFFFFFFFFFFFFFFFFFFFFFFFFFFFFFFFFFFFFFFFFFFF  
FFFFFFFFFFFFFFFF  
@A00721:190:HGJW7DSXY:4:2108:10565:9674 2:N:0:TCTGCAAG+GCTGCACT  
ACCGGGACGTCTATCATACACGAGCCACATCCACAGCCACTGCTTCATATTATGAACATTGGCTTCGC  
TAGTCAACTTAACTGAACCGTTAAGCACAATTCGATTCCATCTCACTTTCTGGGTATGTCTCGTATCG  
ACCGAGGTTCCAGTA

+  
FFFFFFFFFFFFFFFFFFFFFFFFFFFFFFFFFFFFFFFFFFFFFFFFFFFFFFFFFFFFFFFFFFFFFFFF  
FFFFFFFFFFFFFFFFFFFFFFFFFFFFFFFFFFFFFFFFFFFFFFFFFFFFFFFFFFFFFFFFFFFFFFFF  
FFFFFFFFFFFFFFFF  
@A00721:190:HGJW7DSXY:4:2531:19768:35102 2:N:0:TCTGCAAG+GCTGCACT  
ACCGGGACGTCTATCATACACGAGCCACATCCACAGCCACTGCTTCATATTATGAACATTGGCTTCGC  
TAGTCAACTTAACTGAACCGTTAAGCACAATTCGATTCCATCTCACTTTCTGGGTATGTCTCGTATCG  
ACCGAGGTTCCAGTA

+  
FFFFFFFFFFFFFFFFFFFFFFFFFFFFFFFFFFFFFFFFFFFFFFFFFFFFFFFFFFFFFFFFFFFFFFFF  
FFFFFFFFFFFFFFFFFFFFFFFFFFFFFFFFFFFFFFFFFFFFFFFFFFFFFFFFFFFFFFFFFFFFFFFF  
FFFFFFFFFFFFFFFF  
@A00721:190:HGJW7DSXY:4:2625:6090:26506 2:N:0:TCTGCAAG+GCTGCACT  
ACCGGGACGTCTATCATACACGAGCCACATCCACAGCCACTGCTTCATATTATGAACATTGGCTTCGC  
TAGTCAACTTAACTGAACCGTTAAGCACAATTCGATTCCATCTCACTTTCTGGGTATGTCTCGTATCG  
ACCGAGGTTCCAGTA

+  
FFFFFFFFFFFFFFFFFFFFFFFFFFFFFFFFFFFFFFFFFFFFFFFFFFFFFFFFFFFFFFFFFFFFFFFF  
FFFFFFFFFFFFFFFFFFFFFFFFFFFFFFFFFFFFFFFFFFFFFFFFFFFFFFFFFFFFFFFFFFFFFFFF  
FFFFFFFFFFFFFFFF  
@A00721:190:HGJW7DSXY:4:1273:6361:29356 2:N:0:TCTGCAAG+GCTGCACT  
TACCGGGACGTCTATCATACACGAGCCACATCCACAGCCACTGCTTCATATTATGAACATTGGCTTCG  
CTAGTCAACTTAACTGAACCGTTAAGCACAATTCGATTCCATCTCACTTTCTGGGTATGTCTCGTATC  
GACCGAGGTTCCAGT

+  
FFFFFFFFFFFFFFFFFFFFFFFFFFFFFFFFFFFFFFFFFFFFFFFFFFFFFFFFFFFFFFFFFFFFFFFF  
FFFFFFFFFFFFFFFFFFFFFFFFFFFFFFFFFFFFFFFFFFFFFFFFFFFFFFFFFFFFFFFFFFFFFFFF  
FFFFFFFFFFFFFFFF  
@A00721:190:HGJW7DSXY:4:1303:7491:30843 2:N:0:TCTGCAAG+GCTGCACT  
AATTACCGGGACGTCTATCATACACGAGCCACATCCACAGCCACTGCTTCATATTATGAACATTGGCT  
TCGCTAGTCAACTTAACTGAACCGTTAAGCACAATTCGATTCCATCTCACTTTCTGGGTATGTCTCGT  
ATCGACCGAGGTTCC

+  
FFFFFFFFFFFFFFFFFFFFFFFFFFFFFFFFFFFFFFFFFFFFFFFFFFFFFFFFFFFFFFFFFFFFFFFF  
FFFFFFFFFFFFFFFFFFFFFFFFFFFFFFFFFFFFFFFFFFFFFFFFFFFFFFFFFFFFFFFFFFFFFFFF  
:FFFFFFFFFFFFFFFF  
@A00721:190:HGJW7DSXY:4:1346:23628:3521 2:N:0:TCTGCAAG+GCTGCACT  
AATTACCGGGACGTCTATCATACACGAGCCACATCCACAGCCACTGCTTCATATTATGAACATTGGCT



$+$ 

+

+

+

+

+

+

[illegible]

@A00721:190:HGJW7DSXY:4:1350:24659:17644 2:N:0:TCTGCAAG+GCTGCACT  
ATTAGAATTACCGGGACGTCTATCATACACGAGCCACATCCACAGCCACTGCTTCATATTATGAACAT  
TGGCTTCGCTAGTCAACTTAACTGAACCGTTAAGCACAATTCGATTCCATCTCACTTTCTGGGTATGT  
CTCGTATCGACCGAG

@A00721:190:HGJW7DSXY:4:1578:15546:17425 2:N:0:TCTGCAAG+GCTGCACT  
ATTAGAATTACCGGGACGTCTATCATACACGAGCCACATCCACAGCCACTGCTTCATATTATGAACAT  
TGGCTTCGCTAGTCAACTTAACTGAACCGTTAAGCACAATTCGATTCCATCTCACTTTCTGGGTATGT  
CTCGTATCGACCGAG

@A00721:190:HGJW7DSXY:4:2169:4761:3693 2:N:0:TCTGCAAG+GCTGCACT  
ATTAGAATTACCGGGACGTCTATCATACACGAGCCACATCCACAGCCACTGCTTCATATTATGAACAT  
TGGCTTCGCTAGTCAACTTAACTGAACCGTTAAGCACAATTCGATTCCATCTCACTTTCTGGGTATGT  
CTCGTATCGACCGAG

@A00721:190:HGJW7DSXY:4:2237:5394:16877 2:N:0:TCTGCAAG+GCTGCACT  
ATTAGAATTACCGGGACGTCTATCATACAGCCACATCCACAGCCACTGCTTCATATTATGAACAT  
TGGCTTCGCTAGTCAACTTAACTGAACCGTTAAGCACAATTCGATTCCATCTCACTTTCTGGGTATGT  
CTCGTATCGACCGAG

@A00721:190:HGJW7DSXY:4:2259:13268:3834 2:N:0:TCTGCAAG+GCTGCACT  
ATTAGAATTACGGGACGTCTATCATACAGACCACATCCACAGCCACTGCTTCATATTATGAACAT  
TGGCTTCGCTAGTCAACTTAACTGAACCGTTAAGCACAATTCGATTCCATCTCACTTTCTGGGTATGT  
CTCGTATCGACCGAG

@A00721:190:HGJW7DSXY:4:2450:31467:20290 2:N:0:TCTGCAAG+GCTGCACT  
ATTAGAATTACGGGACGTCTATCATACACGAGCCACATCCACAGCCACTGCTTCATATTATGAACAT  
TGGCTTCGCTAGTCAACTTAACTGAACCGTTAAGCACAATTGATTCCATCTCACTTTCTGGGTATGT  
CTCGTATCGACCGAG

@A00721:190:HGJW7DSXY:4:2508:4643:6151 2:N:0:TCTGCAAG+GCTGCACT  
ATTAGAATTACGGGACGTCTATCATACACGAGCCACATCCACAGCCACTGCTTCATATTATGAACAT  
TGGCTTCGCTAGTCAACTTAACTGAACCGTTAAGCACAAATTCGATTCCATCTCACTTTCTGGGTATGT  
CTCGTATCGACCGAG

```
FFFFFFFFFFFFFFFFFFFFFFFFFFFFFFFFF:FFFFFFFFFFFFFFFFFFFFFFFFFFF,
FFFFFFFFFFFFFFFFFFFFFFFFFFFFFFFFF:FFFFFFFFFFFFFFFFFFFFFFFFFFF
FFFFFFFFFFFFFFFFFF
```

[illegible]

```

FFFFFFFFFFFFFF:FFFFFFFFFFFFFFFFFFFFFFFFFFFFFFFFFFFFFFFF
FFFFFFFFFFFFFF:FFFFFFFF:FFFFFFF,FFFFFFFFFFFFFFFFFFFFF:FFF
FFFFFFFFFFFFFF

```

```

FFFFFFFFFFFFFFFFFFFFFFFFFFFFFFFFFFFFFFFFFFFFFFFFFFFFFFFFFFFFFFFFFFFFFFFF
:FFFFFFFFFFFFFFFF:FFFFFFFF:FFFFFFFFFFFF:FFFFFFFFFFFFFFFFFFFFFFFFFFFFFFF
FFFFFFFFFFFFFFFF:F

```

[illegible]

```
FFFFFFFFFFFFFFFFFFFFFFFFFFFFFFFFFFFFFFFFFFFFFFFFFFFFFFFFFFFFFFF
FFFFFFFFFFFFFFFFFFFFFFFFFFFFFFFFFFFF;FFFFFFFFFFFFFFFFFFFFFFFFFFF
FFFFFFFFFFFFFFFF
```

```

FFFFFFFFFFFFFFFF:FFF,FFFFFFFF::F::FFF:FFFF,FFFFFFFFF:,FFFFFFFFF::FF:FFFF
FFF,:FFFFFFFFF:F,FF:FFF,FFFF:FFF:FF,FFFF:F,F:F,:F:,FFFFFFFFFFFFFFFF:FF
:FFFFFF:E:FFFFFF

```

@A00721:190:HGJW7DSXY:4:1569:20754:19398 2:N:0:TCTGCAAG+GCTGCACT  
ACGAGACATACCCAGAAAGTGAGATGGAATCGAATTGTGCTTAACGGTTCAGTTAAGTTGACTAGCGA





@A00721:190:HGJW7DSXY:4:1543:8133:35399 2:N:0:TCTGCAAG+GCTGCACT  
CTCATTCACTCTGGGATTAGAATTACCGGGACGTCTATCATACACGAGCCACATCCACAGCCACTGCT  
TCATATTATGAACATTGGCTTCGCTAGTCAACTTAACTGAACCGTTAAGCACAAATTCGATTCCATCTC  
ACTTTCTGGGTATGT

```

FFFFFFFFFFFFFFFFFFFFFFFFFFFFFFFFFFFFFFFFFFFFFFFFFFFFFFFFFFFFFFFFFFFFFFFF
FFFFFFFFFFFFFFFFFFFFFFFFFFFFFFFF:FFFFFFFF:FFFFFFFF:FFF:FFFFFFFFFFFFFFFF
FFFFFFFFFFFFFFFF

```

+

[illegible]

+

```

FFFFFFFFFFFFFFFFFFFFFFFFFFFFFFFF:FFFFFFFFFFFFFFFFFFFFFFFFFFFFFFFF
FFFFFFFFFFFFFFFFFFFFFFFF:FF:FFFF,FFFFFFFFFFFFFFFFFFFFFFFFFFFFFFFF
FFFF:FFFFFFFFFFFF

```

+

[illegible]

+

[illegible]

+

```

FFFFFFFFFFFFFFFF:FFFFFFFFFFFFFFFF:FFFFFFFFFFFFFFFFFFFFFFFFFFFFFFFF
FFFFFFFFFFFFFFFFFFFFFFFFFFFFFFFFFFFFFFFF:FFFFFFFFFFFF:FFFFFFFFFF,FFFFFFFFFFFF
FFFFFFFFFFFF:FFFFF

```

 $+$ [illegible]



+  
FFFFFFFFFFFFFFFFFFFFFFFFFFFFFFFFFFFF::FFFFFFFFFFFFFFFFFFFFFFFFFFFFFFFF  
FFFFFFFFFFFFFFFFFFFFFFFFFFFFFFFFFFFFFFFFF:FFF:FFFFFFFFFFFFFFFF,F:F  
FFFFFF:FFFFFF

@A00721:190:HGJW7DSXY:4:2101:31656:29293 2:N:0:TCTGCAAG+GCTGCACT  
CATACCCAGAAAGTGAGATGGAATCGAATTGTGCTTAACGGTTCAGTTAAGTTGACTAGCGAAGCCAA  
TGTTCATAATATGAAGCAGTGGCTGTGGATGTGGCTCGTGTATGATAGACGTCCCGGTAATTCTAATC  
CCAGAGTGAATGAGA

+  
FFF:FFFFFF,FFFF:FFFFFFFFFFFFFFFFFFFFFFFFFFFFFFFF:FFFFFFFFFF:FFF:FFFFFFFF  
FFFFFFFFF:FFF,:FFFFFFFFFFFFFFFF:F:FFFF:FFFFFF,FFFFFFFFFFFFFFFF,FFF  
FFFFFFFFFFFFFF:

@A00721:190:HGJW7DSXY:4:2167:6831:17581 2:N:0:TCTGCAAG+GCTGCACT  
CATACCCAGAAAGTGAGATGGAATCGAATTGTGCTTAACGGTTCAGTTAAGTTGACTAGCGAAGCCAA  
TGTTCATAATATGAAGCAGTGGCTGTGGATGTGGCTCGTGTATGATAGACGTCCCGGTAATTCTAATC  
CCAGAGTGAATGAGA

+  
FFFFFFFFFFFFFFFFFFFFFFFFFFFFFFFFFFFFFFFFFFFFFFFFFFFFFFFFFFFFFFFFFFFFFFFF  
FFFFFFFFFFFFFFFFFFFFFFFFFFFFFFFFFFFFFFFFFFFFFFFFFFFFFFFFFFFFFFFFFFFFFFFF  
FFFFFFFFFFFFFFFF

@A00721:190:HGJW7DSXY:4:1274:16315:24706 2:N:0:TCTGCAAG+GCTGCACT  
CATTCCTCTGGGATTAGAATTACCGGGACGTCTATCATACACGAGCCACATCCACAGCCACTGCTTC  
ATATTATGAACATTGGCTTCGCTAGTCAACTTAACTGAACCGTTAAGCACAAATTCGATTCCATCTCAC  
TTTCTGGGTAT

+  
FF,FFF,FFF:FFF,FFFF,:F:FF::F,FFFFFFFFF:FFFFFFFFFF,,FFFF:FFFF,:FF:  
F,FFFFFFFF:FFF:F:FF:FFFF,FFFFFF:FFFFFFFFFF,FF:FFFF,F:FF:FFFFFF:FFF  
FF,FF:,FFFF

@A00721:190:HGJW7DSXY:4:1330:30454:11083 2:N:0:TCTGCAAG+GCTGCACT  
CATTCCTCTGGGATTAGAATTACCGGGACGTCTATCATACACGAGCCACATCCACAGCCACTGCTTC  
ATATTATGAACATTGGCTTCGCTAGTCAACTTAACTGAACCGTTAAGCACAAATTCGATTCCATCTCAC  
TTTCTGGGTAT

+  
FFFFFFFFFFFFFFFFFFFFFFFFFFFFFFFFFFFFFFFFFFFFFFFFFFFFFFFFFFFFFFFFFFFFFFFF  
F:FFFF:FFFFFF,FFFF::FFFFFFFFFFFFFFFFFFFFFFFF:F:FFFFFFFF:F,FFFFFFFFFFFF  
:FF,F:F,FFF

@A00721:190:HGJW7DSXY:4:1337:13711:8171 2:N:0:TCTGCAAG+GCTGCACT  
CATTCCTCTGGGATTAGAATTACCGGGACGTCTATCATACACGAGCCACATCCACAGCCACTGCTTC  
ATATTATGAACATTGGCTTCGCTAGTCAACTTAACTGAACCGTTAAGCACAAATTCGATTCCATCTCAC  
TTTCTGGGTAT

+  
FFFFFFFFFFFFFFFFFFFFFFFFFFFFFFFFFFFFFFFFFFFFFFFFFFFFFFFFFFFFFFFFFFFFFFFF  
FFFFFFFFF:FFFFFFFFFFFFFFFFFFFF,FFFFFFFFFFFFFFFFFFFFFFFFFFFFFFFFFFFFFFFF  
FFFFFFFFFFFF

@A00721:190:HGJW7DSXY:4:1376:17056:1626 2:N:0:TCTGCAAG+GCTGCACT  
CATTCCTCTGGGATTAGAATTACCGGGACGTCTATCATACACGAGCCACATCCACAGCCACTGCTTC  
ATATTATGAACATTGGCTTCGCTAGTCAACTTAACTGAACCGTTAAGCACAAATTCGATTCCATCTCAC  
TTTCTGGGTAT

+  
FFFFFFFFFFFFFFFFFFFFFFFFFFFFFFFFFFFFFFFFFFFFFFFFFFFFFFFFFFFFFFFFFFFFFFFF  
FFFFFFFFFFFFFFFFF:FFFFFFFFFFFFFFFFFFFFFFFFFFFFFFFFFFFFFFFFFFFFFFFFFFFFFFFF  
FFFFFFFFFFFF

@A00721:190:HGJW7DSXY:4:1376:16288:2080 2:N:0:TCTGCAAG+GCTGCACT  
CATTCCTCTGGGATTAGAATTACCGGGACGTCTATCATACACGAGCCACATCCACAGCCACTGCTTC

ATATTATGAACATTGGCTTCGCTAGTCAACTTAACTGAACCGTTAAGCACAATTCGATTCCATCTCAC  
TTTCTGGGTAT

+

FFFFFFFFFFFFFFFFFFFFFFFFFFFFFFFFFFFFFFFFFFFFFFFFFFFFFFFFFFFFFFFFFFFFFFFF  
FFFFFFFF:FFFFFFFFFFFFFFFFFFFFFFFFFFFFFFFFFFFFFFFFFFFFFFFFFFFFFFFFFFFFFFFF  
:FFFF:FFFF

@A00721:190:HGJW7DSXY:4:1502:11026:4554 2:N:0:TCTGCAAG+GCTGCACT  
CATTTACTCTGGGATTAGAATTACCGGGACGTCTATCATACACGAGCCACATCCACAGCCACTGCTTC  
ATATTATGAACATTGGCTTCGCTAGTCAACTTAACTGAACCGTTAAGCACAATTCGATTCCATCTCAC  
TTTCTGGGTAT

+

FFFFFFFFFFFFFFFFFFFFFFFFFFFFFFFFFFFFFFFFFFFFFFFFFFFFFFFFFFFFFFFFFFFFFFFF  
FFFFFFFFFF:FFFFFFFFFFFFFFFFFFFFFFFFFFFFFFFFFFFFFFFFFFFFFFFFFFFFFFFFFFFF  
FFFFFFFFFF:FFFFFFFFFFFFFFFFFFFFFFFFFFFFFFFFFFFFFFFFFFFFFFFFFFFFFFFFFFFF  
FFFFFFFFFFFF

@A00721:190:HGJW7DSXY:4:1663:19352:11397 2:N:0:TCTGCAAG+GCTGCACT  
CATTTACTCTGGGATTAGAATTACCGGGACGTCTATCATACACGAGCCACATCCACAGCCACTGCTTC  
ATATTATGAACATTGGCTTCGCTAGTCAACTTAACTGAACCGTTAAGCACAATTCGATTCCATCTCAC  
TTTCTGGGTAT

+

FFFFFFFFFFFFFFFFFFFFFFFFFFFFFFFFFFFFFFFFFFFFFFFFFFFFFFFFFFFFFFFFFFFFFFFF  
FFFFFFFFFFFFFFFFFFFFFFFFFFFFFFFFFFFFFFFFFFFFFFFFFFFFFFFFFFFFFFFFFFFFFFFF  
FFFFFFFFFFFF

@A00721:190:HGJW7DSXY:4:2328:3043:7294 2:N:0:TCTGCAAG+GCTGCACT  
CATTTACTCTGGGATTAGAATTACCGGGACGTCTATCATACACGAGCCACATCCACAGCCACTGCTTC  
ATATTATGAACATAGGCTTCGCTAGTCAACTTAACTGAACCGTTAAGCACAATTCGATTCCATCTCAC  
ATTCTGGGTAT

+

:::FFFFFF:FF:FFFFFF:F:FF:FFFF,FF:FFFFFFFF:FFF:FFF:FFF,FFF:FF:F  
FFFFFFFFFFFF,,FFF:FFFFFFFFFF,FF:,,:FFFFFFFF,FFFF,:F:,F,F,:FFF:FFF  
,,,F:FF,FFF

@A00721:190:HGJW7DSXY:4:2507:21558:13589 2:N:0:TCTGCAAG+GCTGCACT  
CATTTACTCTGGGATTAGAATTACCGGGACGTCTATCATACACGAGCCACATCCACAGCCACTGCTTC  
ATATTATGAACATTGGCTTCGCTAGTCAACTTAACTGAACCGTTAAGCACAATTCGATTCCATCTCAC  
TTTCTGGGTAT

+

FFFFFFFFFFFFFFFFFFFFFFFFFFFFFFFFFFFFFFFFFFFFFFFFFFFFFFFFFFFFFFFFFFFFFFFF  
FFFFFFFFFFFFFFFFFFFFFFFFFFFFFFFFFFFFFFFFFFFFFFFFFFFFFFFFFFFFFFFFFFFFFFFF  
FFF,FFFFFF

@A00721:190:HGJW7DSXY:4:2507:31186:15953 2:N:0:TCTGCAAG+GCTGCACT  
CATTTACTCTGGGATTAGAATTACCGGGACGTCTATCATACACGAGCCACATCCACAGCCACTGCTTC  
ATATTATGAACATTGGCTTCGCTAGTCAACTTAACTGAACCGTTAAGCACAATTCGATTCCATCTCAC  
TTTCTGGGTAT

+

FFFFFFFFFFFFFFFFFFFFFFFFFFFFFFFFFFFFFFFFFFFFFFFFFFFFFFFFFFFFFFFFFFFFFFFF  
FFFFFFFFFFFFFFFFFFFFFFFFFFFFFFFFFFFFFFFFFFFFFFFFFFFFFFFFFFFFFFFFFFFFFFFF  
FFFFFFFFFFFF

@A00721:190:HGJW7DSXY:4:2615:2166:23156 2:N:0:TCTGCAAG+GCTGCACT  
CATTTACTCTGGGATTAGAATTACCGGGACGTCTATCATACACGAGCCACATCCACAGCCACTGCTTC  
ATATTATGAACATTGGCTTCGCTAGTCAACTTAACTGAACCGTTAAGCACAATTCGATTCCATCTCAC  
TTTCTGGGTAT

+

FFFFFFFFFFFFFFFFFFFF:FFFFFFFFFFFFFFFFFFFF:FFF:FFFFFFFF:FF:FFFFFFFFFFFF  
FFFFFFFFFFFF:FFFFFFFFFFFFFFFFFFFF:FFFFFFFFFFFF:FFFFFFFF:FFF:FF:FFFFFFFFFFFF,FF  
F:FFFFFFFF:F

@A00721:190:HGJW7DSXY:4:2626:9091:31704 2:N:0:TCTGCAAG+GCTGCACT  
CATTCACTCTGGGATTAGAATTACCGGGACGTCTATCATACACGAGCCACATCCACAGCCACTGCTTC  
ATATTATGAACATTGGCTTCGCTAGTCAACTTAACTGAACCGTTAGGCACAATTCGATTCCATCTCAC  
TTTCTGGGTAT

+

FFFFFFFFFFFFFFFFFFFFFFFFFFFFFFFFFFFFFFFFFFFFFFFFFFFFFFFFFFFFFFFFFFFFFFFF  
FFFFFFFFFFFFFFFFFFFFFFFFFFFFFFFFFFFFFFFFFFFFFFFFFFFFFFFFFFFFFFFFFFFFFFFF  
F:FFFFFFFF

@A00721:190:HGJW7DSXY:4:2635:30626:8719 2:N:0:TCTGCAAG+GCTGCACT  
CATTCACTCTGGGATTAGAATTACCGGGACGTCTATCATACACGAGCCACATCCACAGCCACTGCTTC  
ATATTATGAACATTGGCTTCGCTAGTCAACTTAACTGAACCGTTAAGCACAATTCGATTCCATCTCAC  
TTTCTGGGTAT

+

FFFFFF:FFFFFFFF:FFFFFFFFFFFFFFFFFFFFFFFFFFFFFFFFFFFFFFFFFFFFFFFFFFFFFF  
FFFFFFFFFFFFFFFFFFFFFFFFFFFFFFFFFFFFFFFFFFFFFFFFFFFFFFFFFFFFFFFFFFFFFF:FFFF  
FFF:FFFFFF

@A00721:190:HGJW7DSXY:4:1530:18837:32487 2:N:0:TCTGCAAG+GCTGCACT  
TATCTCATTCACTCTGGGATTAGAATTACCGGGACGTCTATCATACACGAGCCACATCCACAGCCACT  
GCTTCATATTATGAACATTGGCTTCGCTAGTCAACTTAACTGAACCGTTAAGCACAATTCGATTCCAT  
CTCACTTTCTGGGTA

+

:FFFFFFFF,FFFFFFFF:FFFFFFFFFFFFFFFFFFFFFFFFFFFFFFFFFFFFFFFFFFFFFFFFFFFF  
FFFFFFFFFFFFFFFFFFFFFFFFFFFFFFFFFFFFFFFFFFFFFFFFFFFFFFFFFFFFFFFFFFFFFF:F:FFFFF,FFFF::FFFF  
FFFF:F:FFFFFF

@A00721:190:HGJW7DSXY:4:2242:22815:21402 2:N:0:TCTGCAAG+GCTGCACT  
TATCTCATTCACTCTGGGATTAGAATTACCGGGACGTCTATCATACACGAGCCACATCCACAGCCACT  
GCTTCATATTATGAACATTGGCTTCGCTAGTCAACTTAACTGAACCGTTAAGCACAATTCGATTCCAT  
CTCACTTTCTGGGTA

+

FFFFFFFFFFFFFFFFFFFFFFFFFFFFFFFFFFFFFFFFFFFFFFFFFFFFFFFFFFFFFFFFFFFFFFFF  
FFFFFFFFFFFFFFFFFFFFFFFFFFFFFFFFFFFFFFFFFFFFFFFFFFFFFFFFFFFFFFFFFFFFFF:FFFFFFFFFFFFFFFF  
:FFFF:FFFFFF

@A00721:190:HGJW7DSXY:4:2457:12138:23422 2:N:0:TCTGCAAG+GCTGCACT  
TATCTCATTCACTCTGGGATTAGAATTACCGGGACGTCTATCATACACGAGCCACATCCACAGCCACT  
GCTTCATATTATGAACATTGGCTTCGCTAGTCAACTTAACTGAACCGTTAAGCACAATTCGATTCCAT  
CTCACTTTCTGGGTA

+

FFFFFFFFFF:FF::,F,FF:FFFFFFFFFFFFFFFFFFFFFFFFFFFFFFFFFFFFFFFFFFFFFFFFFFFF  
FFFFFFFFFFFFFFFFFFFFFFFFFFFFFFFFFFFFFFFFFFFFFFFFFFFFFFFFFFFFFFFFFFFFFF:FFFFFFFFFFFFFFFF  
FFFFFFFFFFFFFFFF:FF

@A00721:190:HGJW7DSXY:4:2635:32705:9095 2:N:0:TCTGCAAG+GCTGCACT  
CATTCACTCTGGGATTAGAATTACCGGGACGTCTATCATACACGAGCCACATCCACAGCCACTGCTTC  
ATATTATGAACATTGGCTTCGCTAGTCAACTTAACTGAACCGTTAAGCACAATTCGATTCCATCTCAC  
TTTCTGGG

+

FFFFF,FFFFFFFFFFFFFFFFFFFFFFFFFFFFFFFFFFFFFFFFFFFFFFFFFFFFFFFFFFFFFFFF  
FFFFFFFFFFFFFFFFFFFFFFFFFFFFFFFFFFFFFFFFFFFFFFFFFFFFFFFFFFFFFFFFFFFFFF:FFFFFFFFFFFFFFFF  
::F,,FFF

@A00721:190:HGJW7DSXY:4:2278:1705:20572 2:N:0:TCTGCAAG+GCTGCACT  
CTCATTCACTCTGGGATTAGAATTACCGGGACGTCTATCATACACGAGCCACATCCACAGCCACTGCT  
TCATATTATGAACATTGGCTTCGCTAGTCAACTTAACTGAACCGTTAAGCACAATTCGATTCCATCTC  
ACTATCTGAGATCG

+

:FFFF:F:F:F,,FFF:FFFF::FFFF,FF:FFFFFFFFFFFF,F,:FFFF,FFFFFFFFFFFF,FFF

,FFFFFF:FFFFFF:, :FFF:F:FFFF:FFFF,FFFFFFFF,:::FFF:FFFF,:F,FFFFFFFFFFF  
FFF,F::FFFFFF:

@A00721:190:HGJW7DSXY:4:2539:27145:19758 2:N:0:TCTGCAAG+GCTGCACT  
TCTCATTCACTCTGGGATTAGAATTACCGGGACGTCTATCATACACGAGCCACATCCACAGCCACTGC  
TTCATATTATGAACATTGGCTTCGCTAGTCAACTTAACTGAACCGTTAAGCACAATTCGATTCCATCT  
CACTTTCTGAGATCG

+

FFFFFFFFFFFF,FFFFFFFFFFFFFFFFFFFFFFFFFFFFFFFFFFFFFFFFFFFFFFFFFFFFFFFFFFFF  
FFFFFFFFFFFFFFFFFFFFFFFFFFFFFFFFFFFFFFFFFFFFFFFFFFFFFFFFFFFFFFFF:F:FFFFFFFFFFFF:FFFFFFFFFFFFF  
FFFFFFFFFFFFFFFFFFFF

@A00721:190:HGJW7DSXY:4:2633:6705:24283 2:N:0:TCTGCAAG+GCTGCACT  
TCTCATTCACTCTGGGATTAGAATTACCGGGACGTCTATCATACACGAGCCACATCCACAGCCACTGC  
TTCATATTATGAACATTGGCTTCGCTAGTCAACTTAACTGAACCGTTAAGCACAATTCGATTCCATCT  
CACTTTCTGAGATCG

+

FFFFFFFFFFFFFFFFFFFFFFFFFFFFFFFFFFFFFFFFFFFFFFFFFFFFFFFFFFFFFFFFFFFFFFFF  
FFFFFFFFFFFFFFFFFFFFFFFFFFFFFFFFFFFFFFFFFFFFFFFFFFFFFFFFFFFFFFFF:F:FFFFFFFFFFFF:FFFFFFFFFFFFF  
FFFF,FFFFFFFFFFFF

@A00721:190:HGJW7DSXY:4:1271:29080:7733 2:N:0:TCTGCAAG+GCTGCACT  
TGAATATCTCATTCACTCTGGGATTAGAATTACCGGGACGTCTATCATACACGAGCCACATCCACAGC  
CACTGCTTCATATTATGAACATTGGCTTCGCTAGTCAACTTAACTGAACCGTTAAGCACAATTCGATT  
CCATCTCACTTTCTG

+

FFFFFFFFFFFFFFFFFFFF,FFFFF:FFFFFFFFFFFFFFFFFFFFFFFFFFFFFFFFFFFFFFFFFFFFF:FFFF  
FFFFFFFFFFFFFFFFFFFFFFFFFFFFFFFFFFFFFFFFFFFFFFFFFFFFFFFFFFFFFFFF:F:FFFFFFFFFFFF:FFFFFFFFFFFFF  
FFFFFFFFFFFFFFFFFFFF

@A00721:190:HGJW7DSXY:4:1372:25355:14967 2:N:0:TCTGCAAG+GCTGCACT  
TGAATATCTCATTCACTCTGGGATTAGAATTACCGGGACGTCTATCATACACGAGCCACATCCACAGC  
CACTGCTTCATATTATGAACATTGGCTTCGCTAGTCAACTTAACTGAACCGTTAAGCACAATTCGATT  
CCATCTCACTTTCTG

+

FFFF,FFFFFFFFFFFFFFFFFFFFFFFFFFFFFFFFFFFFFFFFFFFFFFFFFFFFFFFFFFFFFFFFFFFF  
FFFFFFFFFFFFFFFFFFFFFFFFFFFFFFFFFFFFFFFFFFFFFFFFFFFFFFFFFFFFFFFFFFFFFFFFFFFF  
FFFFFFFFFFFFFFFFFFFF

@A00721:190:HGJW7DSXY:4:2402:16559:5181 2:N:0:TCTGCAAG+GCTGCACT  
TGAATATCTCATTCACTCTGGGATTAGAATTACCGGGACGTCTATCATACACGAGCCACATCCACAGC  
CACTGCTTCATATTATGAACATTGGCTTCGCTAGTCAACTTAACTGAACCGTTAAGCACAATTCGATT  
CCATCTCACTTTCTG

+

FFFFFFFFFFFFFFFFFFFFFFFFFFFFFFFFFFFFFFFFFFFFFFFFFFFFFFFFFFFFFFFFFFFFFFFF  
FFFFFFFFFFFFFFFFFFFFFFFFFFFFFFFFFFFFFFFFFFFFFFFFFFFFFFFFFFFFFFFFFFFFFFFFFFFF  
FFFFFFFFFFFFFFFFFFFF

@A00721:190:HGJW7DSXY:4:1308:7030:20087 2:N:0:TCTGCAAG+GCTGCACT  
GATGAATATCTCATTCACTCTGGGATTAGAATTACCGGGACGTCTATCATACACGAGCCACATCCACA  
GCCACTGCTTCATATTATGAACATTGGCTTCGCTAGTCAACTTAACTGAACCGTTAAGCACAATTCGA  
TTCCATCTCACTTTC

+

FFFFFFFFFFFFFFFFFFFFFFFFFFFFFFFFFFFFFFFFFFFFFFFFFFFFFFFFFFFFFFFFFFFF,FF:FFFFFFFFFFFFF  
FFFFFFFFFFFFFFFFFFFFFFFFFFFFFFFFFFFFFFFFFFFFFFFFFFFFFFFFFFFFFFFF:F:FFFFFFFFFFFF:F:FFFF:FFFF:FFFFFFFFFFFF,F  
FFF:FFFFFFFFFFFF

@A00721:190:HGJW7DSXY:4:1308:8106:20854 2:N:0:TCTGCAAG+GCTGCACT  
GATGAATATCTCATTCACTCTGGGATTAGAATTACCGGGACGTCTATCATACACGAGCCACATCCACA  
GCCACTGCTTCATATTATGAACATTGGCTTCGCTAGTCAACTTAACTGAACCGTTAAGCACAATTCGA  
TTCCATCTCACTTTC

+  
FFFFFFFFFFFFFFFFFFFFFFFFFFFFFFFFFFFFFFFFFFFFFFFFFFFFFFFFFFFFFFFFFFFFFFFF  
FFFFFFFFFFFFFFFFFFFFFFFFFFFFFFFFFFFFFFFFFFFFFFFFFFFFFFFFFFFFFFFFFFFFFFFF  
FFFFFFFFFFFFFFFF

@A00721:190:HGJW7DSXY:4:1356:24478:34773 2:N:0:TCTGCAAG+GCTGCACT  
GATGAATATCTCATTCACTCTGGGATTAGAATTACCGGGACGTCTATCATACACGAGCCACATCCACA  
GCCACTGCTTCATATTATGAACATTGGCTTCGCTAGTCAACTTAACTGAACCGTTAAGCACAATTCTGA  
TTCCATCTCACTTTC

+  
FFFFFFFFFFFF,FF,FFFFFFFFFFFFFFFF:FFFF::FFF:FFFFFFFFFFFFFFFFFFFF, :FFFFFFFFFFFF,F  
:,FFF:FF:,FF:FFFFFFFFFFFF, :FFFF:FFFFFF,F:FFF:FFFF::,FF:FFFFFF:F,F  
FFFFFFFFFFFF,FFF

@A00721:190:HGJW7DSXY:4:1516:6876:35227 2:N:0:TCTGCAAG+GCTGCACT  
GATGAATATCTCATTCACTCTGGGATTAGAATTACCGGGACGTCTATCATACACGAGCCACATCCACA  
GCCACTGCTTCATATTATGAACATTGGCTTCGCTAGTCAACTTAACTGAACCGTTAAGCACAATTCTGA  
TTCCATCTCACTTTC

+  
FFFFF,FFFFFFFFFFFFFFFF:FFFF:FFFFFFFFFFFFFFFFFFFFFFFFFFFFFFFFFFFFFFFFFFFF  
FFFFFFFFFFFFFFFFFFFFFFFFFFFFFFFFFFFF:,FFFFFFFFFFFFFFFF:FFFFFFFFFFFFFFFFFFFF  
FFFFF:FFFFFFFF:

@A00721:190:HGJW7DSXY:4:2420:10945:9173 2:N:0:TCTGCAAG+GCTGCACT  
GATGAATATCTCATTCACTCTGGGATTAGAATTACCGGGACGTCTATCATACACGAGCCACATCCACA  
GCCACTGCTTCATATTATGAACATTGGCTTCGCTAGTCAACTTAACTGAACCGTTAAGCACAATTCTGA  
TTCCATCTCACTTTC

+  
FFFFFFFFFFFFFFFFFFFFFFFFFFFFFFFFFFFFFFFF:FFFFFFFFFFFFFFFFFFFFFFFFFFFFFFFFFFFF  
FFFFFFFFFFFFFFFFFFFFFFFFFFFFFFFF:FFFFFFFFFFFFFFFF:FFFFFFFFFFFFFFFFFFFFFFFFFFFF  
FFFFFFFFFFFFFFFF

@A00721:190:HGJW7DSXY:4:2465:1145:26303 2:N:0:TCTGCAAG+GCTGCACT  
GATGAATATCTCATTCACTCTGGGATTAGAATTACCGGGACGTCTATCATACACGAGCCACATCCACA  
GCCACTGCTTCATATTATGAACATTGGCTTCGCTAGTCAACTTAACTGAACCGTTAAGCACAATTCTGA  
TTCCATCTCACTTTC

+  
FFFFFFFFFFFFFFFFFFFFFFFFFFFFFFFFFFFFFFFF:FFF:FFFFFFFFFFFFFFFFFFFFFFFFFFFF  
FFFFFF:FFFFFFFFFFFFFFFFFFFFFFFFFFFF:FF:FFFFFFFFFFFFFFFF:FF:FFFFFFFFFFFF  
FFFFFFFFFFFF

@A00721:190:HGJW7DSXY:4:1143:28501:9361 2:N:0:TCTGCAAG+GCTGCACT  
CGATGAATATCTCATTCACTCTGGGATTAGAATTACCGGGACGTCTATCATACACGAGCCACATCCAC  
AGCCACTGCTTCATATTATGAACATTGGCTTCGCTAGTCAACTTAACTGAACCGTTAAGCACAATTCTG  
ATTCCATCTCACTTT

+  
FFFFFFFFFFFFFFFFFFFFFFFFFFFFFFFFFFFFFFFFFFFFFFFFFFFFFFFFFFFFFFFFFFFFFFFF  
FFFFFFFFFFFFFFFFFFFFFFFFFFFFFFFFFFFFFFFFFFFFFFFFFFFFFFFFFFFFFFFFFFFFFFFF  
FFFFFFFFFFFF

@A00721:190:HGJW7DSXY:4:1408:13865:27727 2:N:0:TCTGCAAG+GCTGCACT  
CGATGAATATCTCATTCACTCTGGGATTAGAATTACCGGGACGTCTATCATACACGAGCCACATCCAC  
AGCCACTGCTTCATATTATGAACATTGGCTTCGCTAGTCAACTTAACTGAACCGTTAAGCACAATTCTG  
ATTCCATCTCACTTT

+  
FFFFFFFFFFFFFFFFFFFFFFFFFFFFFFFFFFFFFFFFFFFFFFFFFFFFFFFFFFFFFFFFFFFFFFFF  
FFFFFFFFFFFFFFFFFFFFFFFFFFFFFFFFFFFFFFFFFFFFFFFFFFFFFFFFFFFFFFFFFFFFFFFF:FFF:F  
FFFFFFFFFFFF

@A00721:190:HGJW7DSXY:4:2177:16215:21496 2:N:0:TCTGCAAG+GCTGCACT  
CGATGAATATCTCATTCACTCTGGGATTAGAATTACCGGGACGTCTATCATACACGAGCCACATCCAC

AGCCACTGCTTCATATTATGAACATTGGCTTCGCTAGTCAACTTAACTGAACCGTTAAGCACAATTTCG  
ATTCCATCTCACTTT

+

FFFFFFFFFFFFFFFFFFFFFFFFFFFFFFFFFFFFFFFFFFFFFFFFFFFFFFFFFFFFFFFFFFFFFFFF  
FFFFFFFFFFFFFFFFFFFFFFFFFFFFFFFFFFFFFFFFFFFFFFFFFFFFFFFFFFFFFFFFFFFFFFFF  
FFFFFFFFFFFFFFFF

@A00721:190:HGJW7DSXY:4:2238:16541:31704 2:N:0:TCTGCAAG+GCTGCACT  
CGATGAATATCTCATTCACTCTGGGATTAGAATTACCGGGACGTCTATCATACACGAGCCACATCCAC  
AGCCACTGCTTCATATTATGAACATTGGCTTCGCTAGTCAACTTAACTGAACCGTTAAGCACAATTTCG  
ATTCCATCTCACTTT

+

FFFFFFFFFFFFFFFFFFFFFFFFFFFFFFFFFFFFFFFFFFFFFFFFFFFFFFFFFFFFFFFFFFFFFFFF  
FFFFFFFFFFFFFFFFFFFFFFFF:FFFFFFFFFFFFFFFF:FFFFFFFFFFFFFFFF:FFFF:FFFFFFFF  
FFFFFFFF:FFFFFF

@A00721:190:HGJW7DSXY:4:2307:6623:9424 2:N:0:TCTGCAAG+GCTGCACT  
CGATGAATATCTCATTCACTCTGGGATTAGAATTACCGGGACGTCTATCATACACGAGCCACATCCAC  
AGCCACTGCTTCATATTATGAACATTGGCTTCGCTAGTCAACTTAACTGAACCGTTAAGCACAATTTCG  
ATTCCATCTCACTTT

+

FFFFF,FFFFFFFFFFFFFFFFFFFFFFFFFFFFFFFFFFFFFFFFFFFFFFFFFFFFFFFFFFFFFFFF  
FFFFFFFFFFFFFFFFFFFFFFFF:FFFFFFFFF,FFFFFFFFFFFFFFFFFFFFFFFF:FFFFFFFFF  
FFFFFF:FFFFF:F

@A00721:190:HGJW7DSXY:4:2677:3549:36104 2:N:0:TCTGCAAG+GCTGCACT  
CGATGAATATCTCATTCACTCTGGGATTAGAATTACCGGGACGTCTATCATACACGAGCCACATCCAC  
AGCCACTGCTTCATATTATGAACATTGGCTTCGCTAGTCAACTTAACTGAACCGTTAAGCACAATTTCG  
ATTCCATCTCACTTT

+

FFFFFFFFFFFFFFFFFFFFFFFFFFFFFFFFFFFFFFFFFFFFFFFFFFFFFFFFFFFFFFFFFFFFFFFF  
FFFFFFFFFFFFFFFFFFFFFFFF:FFFFFFFFFFFF,FFFFFFFFFFFFFFFFFFFFFFFF:FFFFFFFFF  
FFFFFFFFFFFF,F

@A00721:190:HGJW7DSXY:4:1102:8847:6261 2:N:0:TCTGCAAG+GCTGCACT  
CCGATGAATATCTCATTCACTCTGGGATTAGAATTACCGGGACGTCTATCATACACGAGCCACATCCA  
CAGCCACTGCTTCATATTATGAACATTGGCTTCGCTAGTCAACTTAACTGAACCGTTAAGCACAATTC  
GATTCCATCTCACTT

+

FFFFFFFF,FFFFFFFFFF,FF,:FFF:FFFFFFFFFFFFFFFFFFFFFFFFFFFFFFFF:FF:FF:FFFFF  
FFFFFFFFF:FFFFFF:FFFF:FFFFFFFFFFFFFFFFFFFFFFFFFFFFFFFF:FFFFFFFFF  
FFFFF:FFFFFFFFF:

@A00721:190:HGJW7DSXY:4:1206:28248:5478 2:N:0:TCTGCAAG+GCTGCACT  
CCGATGAATATCTCATTCACTCTGGGATTAGAATTACCGGGACGTCTATCATACACGAGCCACATCCA  
CAGCCACTGCTTCATATTATGAACATTGGCTTCGCTAGTCAACTTAACTGAACCGTTAAGCACAATTC  
GATTCCATCTCACTT

+

FFFFFFFFFFFFFFFFFFFFFFFFFFFFFFFFFFFFFFFFFFFFFFFFFFFFFFFFFFFFFFFFFFFFFFFF  
FFFFFFFFFFFFFFFFFFFFFFFF:FFFFFFFFFFFFFFFF:FFFFFFFFFFFFFFFF:FFFFF  
FFFFFFFFFFFFFFFF

@A00721:190:HGJW7DSXY:4:1239:16532:3035 2:N:0:TCTGCAAG+GCTGCACT  
CGATGAATATCTCATTCACTCTGGGATTAGAATTACCGGGACGTCTATCATACACGAGCCACATCCAC  
AGCCACTGCTTCATATTATGAACATTGGCTTCGCTAGTCAACTTAACTGAACCGTTAAGCACAATTTCG  
ATTCCATCTCACTT

+

FFF:FFF:FFFF:FFFFFFFFF,FFFF:FFFF:FFFFFFFF:F,FFFFFFFFFFFFFFFF  
FF:FFFF:FFFF:FFFFFFFF:FFFF,FFFF:FFFFFFFFFFFFFFFF:FFFF:FFF:,FF  
,,FFFFFFFFF:F



@A00721:190:HGJW7DSXY:4:1267:18493:6402 2:N:0:TCTGCAAG+GCTGCACT  
CCGATGAATATCTCATTCACTCTGGGATTAGAATTACCGGGACGTCTATCATACACGAGCCACATCCA  
CAGCCACTGCTTCATATTATGAACATTGGCTTCGCTAGTCAACTTAACTGAACCGTTAAGCACAAATTC  
GATTCCATCTCACTT

+

FFFFFFFFFFFFFFFFFFFFFFFFFFFFFFFFFFFFFFFFFFFFFFFFFFFFFFFFFFFFFFFFFFFFFFFF  
FFFFFFFFFFFFFFFFFFFFFFFFFFFFFFFFFFFFFFFFFFFFFFFFFFFFFFFFFFFFFFFFFFFFFFFF  
FFFFFFFFFFFFFFFF

@A00721:190:HGJW7DSXY:4:2219:24099:10535 2:N:0:TCTGCAAG+GCTGCACT  
CCGATGAATATCTCATTCACTCTGGGATTAGAATTACCGGGACGTCTATCATACACGAGCCACATCCA  
CAGCCACTGCTTCATATTATGAACATTGGCTTCGCTAGTCAACTTAACTGAACCGTTAAGCACAAATTC  
GATTCCATCTCACTT

+

FFFFFFFFFFFFFFFFFFFF,FFFFFFFFFFFFFFFFFFFFFFFFFFFFFFFFFFFFFFFFFFFFFFFFFFFF  
FFFFFFFFFFFFFFFFFFFFFFFFFFFFFFFFFFFFFFFFFFFFFFFFFFFFFFFFFFFFFFFFFFFFFFFF  
FFFFFFFFFFFFFFFF

@A00721:190:HGJW7DSXY:4:2239:21215:34350 2:N:0:TCTGCAAG+GCTGCACT  
CCGATGAATATCTCATTCACTCTGGGATTAGAATTACCGGGACGTCTATCATACACGAGCCACATCCA  
CAGCCACTGCTTCATATTATGAACATTGGCTTCGCTAGTCAACTTAACTGAACCGTTAAGCACAAATTC  
GATTCCATCTCACTT

+

FFFFFFF:FFFFFFFFFFFFFFFFFFFFFFFFFFFFFFFFFFFFFFFFFFFFFFFFFFFFFFFFFFFF,FFFF  
FFFFFFFFFFFFFFFFFFFFFFFFFFFFFFFFFFFFFFFFFFFFFFFFFFFFFFFFFFFFFFFFFFFFFFFF  
:FFFF,FFFFFFFF

@A00721:190:HGJW7DSXY:4:2170:2618:18176 2:N:0:TCTGCAAG+GCTGCACT  
CCCCGATGAATATCTCATTCACTCTGGGATTAGAATTACCGGGACGTCTATCATACACGAGCCACATC  
CACAGCCACTGCTTCATATTATGAACATTGGCTTCGCTAGTCAACTTAACTGAACCGTTAAGCACAAAT  
TCGATTCCATCTCAC

+

FFFFFF:FFFFFFFFFFFFFFFFFFFFFFFFFFFFFFFFFFFFFFFFFFFFFFFFFFFFFFFFFFFFFFFF  
FFFFFFFFFFFFFFFFFFFFFFFFFFFFFFFF:FF:FFFFFFFF:FFFFFFFFFFFFFFFFFFFFFFFF  
FFFFFFFFFFFFFFFF

@A00721:190:HGJW7DSXY:4:2411:17888:10833 2:N:0:TCTGCAAG+GCTGCACT  
CCCCGATGAATATCTCATTCACTCTGGGATTAGAATTACCGGGACGTCTATCATACACGAGCCACATC  
CACAGCCACTGCTTCATATTATGAACATTGGCTTCGCTAGTCAACTTAACTGAACCGTTAAGCACAAAT  
TCGATTCCATCTCAC

+

FFFFFFFFFFFF,FFFFFFFFFFFF,:F,FFFFFFFF:FFFFFFFFFFFFFFFFFFFFFFFFFFFFFFFF  
FFFFFFFFFFFFFFFFFFFFFFFFFFFFFFFF:FFFFFF:F,FFFFFFFFFFFFFFFFFFFFFFFFFFFF:FFFF:FFF:F  
FFFFFFFF:FF:FFFF:

@A00721:190:HGJW7DSXY:4:2525:30653:31876 2:N:0:TCTGCAAG+GCTGCACT  
CCCCGATGAATATCTCATTCACTCTGGGATTAGAATTACCGGGACGTCTATCATACACGAGCCACATC  
CACAGCCACTGCTTCATATTATGAACATTGGCTTCGCTAGTCAACTTAACTGAACCGTTAAGCACAAAT  
TCGATTCCATCTCAC

+

FFFFFFFFFFFFFFFFFFFFFFFFFFFFFFFFFFFFFFFFFFFFFFFFFFFFFFFFFFFFFFFFFFFFFFFF  
FFFFFFFFFFFFFFFFFFFFFFFFFFFFFFFF:FFFFFFFFFFFFFFFFFFFFFFFFFFFFFFFF:FFFFFFFFFFFF:  
FFFFFFFFFFFFFFFF

@A00721:190:HGJW7DSXY:4:1140:31186:26162 2:N:0:TCTGCAAG+GCTGCACT  
CTTTCCCCGATGAATATCTCATTCACTCTGGGATTAGAATTACCGGGACGTCTATCATACACGAGCCA  
CATCCACAGCCACTGCTTCATATTATGAACATTGGCTTCGCTAGTCAACTTAACTGAACCGTTAAGCA  
CAATTCGATTCCATC

+

FFFFFFFFFFFFFF:FFFFFFFFF:FFFFFFFFFFFF:FFFFFFFFFFFFFFFFFFFFFFFFFFFF:FFFFFFF



+  
FFFFFFFFFFFFFF,FF,FFFFFF:FFFF:FFFFFFFF:FFFFFFFFFFFFFFFFFFFFFFFF  
FFFFFFFFFFFFFFFFFFFFFFFFFFFFFFFF:FFFFFFFFFFFF:FFFFFFFF:FFFF:FFFFFFFF  
FFFFFFFFFFFFFFFF

@A00721:190:HGJW7DSXY:4:1315:22525:20870 2:N:0:TCTGCAAG+GCTGCACT  
CTTTCCCCGATGAATATCTCATTCACCTCTGGGATTAGAATTACCGGGACGTCTATCATACACGAGCCA  
CATCCACAGCCACTGCTTCATATTATGAACATTGGCTTCGCTAGTCAACTTAACTGAACCGTTAAGCA  
CAATTCGATTCCATC

+  
FFFFFFFFFFFFFFFFFFFFFFFFFFFFFFFFFFFFFFFFFFFFFFFFFFFFFFFFFFFFFFFF  
FFFFFFFFFFFFFFFFFFFFFFFFFFFFFFFFFFFFFFFFFFFFFFFFFFFFFFFFFFFFFFFF  
FFFFFFFFFFFFFFFF

@A00721:190:HGJW7DSXY:4:1444:30029:25410 2:N:0:TCTGCAAG+GCTGCACT  
CTTTCCCCGATGAATATCTCATTCACCTCTGGGATTAGAATTACCGGGACGTCTATCATACACGAGCCA  
CATCCACAGCCACTGCTTCATATTATGAACATTGGCTTCGCTAGTCAACTTAACTGAACCGTTAAGCA  
CAATTCGATTCCATC

+  
FFFFFFFFFFFFFFFFFFFFFFFFFFFFFFFFFFFFFFFFFFFFFFFFFFFFFFFF,FFFFFFFFFFFFFFFF:FFF  
F:FFFFFFFFFFFFFFFF:FFFFFFFFFFFFFFFF:FFFFFFF:FFFFFFFFFFFFFFFF:FFFFFFFF  
FFF,FFFFFF:FFF

@A00721:190:HGJW7DSXY:4:2148:8757:34976 2:N:0:TCTGCAAG+GCTGCACT  
CTTTCCCCGATGAATATCTCATTCACCTCTGGGATTAGAATTACCGGGACGTCTATCATACACGAGCCA  
CATCCACAGCCACTGCTTCATATTATGAACATTGGCTTCGCTAGTCAACTTAACTGAACCGTTAAGCA  
CAATTCGATTCCATC

+  
FFFFFFFFFFFFFFFFFFFFFFFFFFFFFFFFFFFFFFFF:FFFFFFFFFFFFFFFFFFFFFFFF  
FFFFFFFFFFFFFFFFFFFFFFFFFFFFFFFFFFFFFFFFFFFFFFFFFFFFFFFFFFFFFFFF  
FFFFFFFFFFFFFFFF

@A00721:190:HGJW7DSXY:4:2148:11704:35728 2:N:0:TCTGCAAG+GCTGCACT  
CTTTCCCCGATGAATATCTCATTCACCTCTGGGATTAGAATTACCGGGACGTCTATCATACACGAGCCA  
CATCCACAGCCACTGCTTCATATTATGAACATTGGCTTCGCTAGTCAACTTAACTGAACCGTTAAGCA  
CAATTCGATTCCATC

+  
FFFFFFFFFFFFFFFFFFFFFFFFFFFFFFFFFFFFFFFFFFFFFFFFFFFFFFFFFFFFFFFF  
FFFFFFFFFFFFFFFFFFFFFFFFFFFFFFFFFFFFFFFFFFFFFFFFFFFFFFFFFFFFFFFF  
FFFFFFFFFFFFFFFF

@A00721:190:HGJW7DSXY:4:2204:30165:35258 2:N:0:TCTGCAAG+GCTGCACT  
CTTTCCCCGATGAATATCTCATTCACCTCTGGGATTAGAATTACCGGGACGTCTATCATACACGAGCCA  
CATCCACAGCCACTGCTTCATATTATGAACATTGGCTTCGCTAGTCAACTTAACTGAACCGTTAAGCA  
CAATTCGATTCCATC

+  
FFFFFFFFFFFFFF:FFFFFFFFFFFFFFFFFFFFFFFFFFFFFFFFFFFFFFFFFFFFFFFF  
FFFFFFFFFFFFFFFFFFFFFFFFFFFFFFFFFFFFFFFFFFFFFFFFFFFFFFFFFFFFFFFF  
FFFFFFFFFFFF:FFF

@A00721:190:HGJW7DSXY:4:2206:1434:31751 2:N:0:TCTGCAAG+GCTGCACT  
CTTTCCCCGATGAATATCTCATTCACCTCTGGGATTAGAATTACCGGGACGTCTATCATACACGAGCCA  
CATCCACAGCCACTGCTTCATATTATGAACATTGGCTTCGCTAGTCAACTTAACTGAACCGTTAAGCA  
CAATTCGATTCCATC

+  
FFFFFFFFFFFFFFFFFFFFFFFFFFFFFFFFFFFFFFFFFFFFFFFFFFFFFFFFFFFFFFFF  
FFFFFFFFFFFFFFFFFFFFFFFFFFFFFFFFFFFFFFFFFFFFFFFFFFFFFFFFFFFFFFFF  
FFFFFFFFFFFFFFFF

@A00721:190:HGJW7DSXY:4:2260:15257:31454 2:N:0:TCTGCAAG+GCTGCACT  
CTTTCCCCGATGAATATCTCATTCACCTCTGGGATTAGAATTACCGGGACGTCTATCATACACGAGCCA

CATCCACAGCCACTGCTTCATATTATGAACATTGGCTTCGCTAGTCAACTTAACTGAACCGTTAAGCA  
CAATTCGATTCCATC

```

FFFFFFFFFFFFFFFF:FFFFFFFF,FFFFFFFFFFFFFFFFFFFFFFFFFFFFFFFFFFFFFFFF
FFFFFFFFFFFFFFFFFFFFFFFFFFFFFFFF:FFFFFFFFFFFFFFFFFFFFFFFFFFFFFFFF
FFFFFFFFFFFFFFFF

```

 $+$ 

@A00721:190:HGJW7DSXY:4:2349:12572:11052 2:N:0:TCTGCAAG+GCTGCACT  
CTTTCCCCGATGAATATCTCATTCACTCTGGGATTAGAATTACCGGGACGTCTATCATACACGAGCCA  
CATCCACAGCCACTGCTTCATATTATGAACATTGGCTTCGCTAGTCAACTTAACTGAACCGTTAAGCA  
CAATTCGATTCCATC

```
F::FFFFFFFFF:FFFFFF,,FF::FFFFFF,FFF:FFFFFFFFFFFF,FF:FF:FFFFFF:FFFF
FFFFFFFF:FFFFFFFFF:,FFFFFF:FF:FFFFFF:FFFF,FFFFFF,FFFFFFFFFFFFFFFFFFFF:FFFFFF
FFFFFFFF,FFFFFF
```

 $+$ 

@A00721:190:HGJW7DSXY:4:2601:17318:4617 2:N:0:TCTGCAAG+GCTGCACT  
CTTTCCCCGATGAATATCTCATTCACTCTGGGATTAGAATTACCGGGACGTCTATCATACACGAGCCA  
CATCCACAGCCACTGCTTCATATTATGAACATTGGCTTCGCTAGTCAACTTAACTGAACCGTTAAGCA  
CAATTCGATTCCATC

[illegible]

+

@A00721:190:HGJW7DSXY:4:2664:18014:21010 2:N:0:TCTGCAAG+GCTGCACT  
CTTTCCCCGATGAATATCTCATTCACTCTGGGATTAGAATTACCGGGACGTCTATCATACACGAGCCA  
CATCCACAGCCACTGCTTCATATTATGAACATTGGCTTCGCTAGTCAACTTAACTGAACCGTTAAGCA  
CAATTCGATTCCATC

[illegible]

@A00721:190:HGJW7DSXY:4:1316:28646:10645 2:N:0:TCTGCAAG+GCTGCACT  
CGACTTTCCCGATGAATATCTCATTCACTCTGGGATTAGAATTACCGGGACGTCTATCATACACGAG  
CCACATCCACAGCCACTGCTTCATATTATGAACATTGGCTTCGCTAGTCAACTTAACTGAACCGTTAA  
GCACAATTCGATTCC

+

FFFFFFFF::FFFFFFFF:FFFFF,FFFFFFFFF:F:FFF:FFFF,FFFFFFFFFFFF:FFF,FF:F,  
FFFFFFFFFFFF:FFFF:FF,F:FFFFFFFF:FFFFF:F:FFFF,,: ,FFFFFFFF:FFFFFFFF,FFF:FF  
FFFFFFFFFFFF:FF

@A00721:190:HGJW7DSXY:4:1454:26729:33098 2:N:0:TCTGCAAG+GCTGCACT  
CGACTTTCCCGATGAATATCTCATTCACTCTGGGATTAGAATTACCGGGACGTCTATCATACACGAG  
CCACATCCACAGCCACTGCTTCATATTATGAACATTGGCTTCGCTAGTCAACTTAACTGAACCGTTAA  
GCACAATTCGATTCC

+

FFFFFFFFFFFFFFFFFFFF,FFFFFFFFFFFFFFFFFFFFFFFFFFFFFFFFFFFFFFFFFFFFFFFFFFFF  
FFFFFFFFFFFFFFFFFFFFFFFFFFFFFFFFFFFFFFFFFFFFFFFFFFFFFFFFFFFFFFFFFFFFFFFFFFFF  
FFFFFFFFFFFFFFFFFFFF

@A00721:190:HGJW7DSXY:4:1512:1678:22060 2:N:0:TCTGCAAG+GCTGCACT  
CGACTTTCCCGATGAATATCTCATTCACTCTGGGATTAGAATTACCGGGACGTCTATCATACACGAG  
CCACATCCACAGCCACTGCTTCATATTATGAACATTGGCTTCGCTAGTCAACTTAACTGAACCGTTAA  
GCACAATTCGATTCC

+

FFFFFFFFFFFFFFFFFFFFFFFFFFFFFFFFFFFFFFFFFFFFFFFFFFFFFFFFFFFFFFFFFFFFFFFFFFFF  
FFFFFFFFFFFFFFFFFFFFFFFFFFFFFFFFFFFFFFFFFFFFFFFFFFFFFFFFFFFFFFFFFFFFFFFFFFFF  
FFFFFFFFFFFFFFFFFFFF

@A00721:190:HGJW7DSXY:4:1571:16794:29262 2:N:0:TCTGCAAG+GCTGCACT  
CGACTTTCCCGATGAATATCTCATTCACTCTGGGATTAGAATTACCGGGACGTCTATCATACACGAG  
CCACATCCACAGCCACTGCTTCATATTATGAACATTGGCTTCGCTAGTCAACTTAACTGAACCGTTAA  
GCACAATTCGATTCC

+

FFFFFFFFFFFFFFFFFFFF:FFFFFFFFFFFFFFFFFFFFFFFFFFFFFFFFFFFFFFFFFFFFFFFFFFFF  
FFFFFFFFFFFFFFFFFFFFFFFFFFFFFFFFFFFFFFFFFFFFFFFFFFFFFFFFFFFFFFFFFFFFFFFFFFFF  
FFFFFFFFFFFFFFFFFFFF

@A00721:190:HGJW7DSXY:4:2624:12355:24799 2:N:0:TCTGCAAG+GCTGCACT  
CGACTTTCCCGATGAATATCTCATTCACTCTGGGATTAGAATTACCGGGACGTCTATCATACACGAG  
CCACATCCACAGCCACTGCTTCATATTATGAACATTGGCTTCGCTAGTCAACTTAACTGAACCGTTAA  
GCACAATTCGATTCC

+

FFFFFFFFFFFFFFFFFFFFFFFFFFFFFFFFFFFFFFFFFFFFFFFFFFFFFFFFFFFFFFFFFFFFFFFFFFFF  
FFFFFFFFFFFFFFFFFFFFFFFFFFFF:FFFF:FFFFFFFFFFFFFFFFFFFFFFFFFFFFFFFFFFFFFFFFFFFF  
FFFFFFFFF:FFFFF

@A00721:190:HGJW7DSXY:4:2638:16812:15358 2:N:0:TCTGCAAG+GCTGCACT  
CGACTTTCCCGATGAATATCTCATTCACTCTGGGATTAGAATTACCGGGACGTCTATCATACACGAG  
CCACATCCACAGCCACTGCTTCATATTATGAACATTGGCTTCGCTAGTCAACTTAACTGAACCGTTAA  
GCACAATTCGATTCC

+

FFFFFFFFFFFFFFFFFFFFFFFFFFFFFFFFFFFFFFFFFFFFFFFFFFFFFFFFFFFFFFFFFFFFFFFFFFFF  
F:FFFFFFFFFFFFFFFFFFFFFFFFFFFFFFFFFFFF, :FFFF:FF:FF:FFFF:FFF:FFFFFFFFFFFFFFFFFFFF  
FFFFFF:FFFFFF:F

@A00721:190:HGJW7DSXY:4:2660:22327:25379 2:N:0:TCTGCAAG+GCTGCACT  
CGACTTTCCCGATGAATATCTCATTCACTCTGGGATTAGAATTACCGGGACGTCTATCATACACGAG  
CCACATCCACAGCCACTGCTTCATATTATGAACATTGGCTTCGCTAGTCAACTTAACTGAACCGTTAA  
GCACAATTCGATTCC

+

F:F:FFF:F,FFF::FFFFFFFFFFFF:FFF,FFFFFFFF,FF:FF:::F:FFFFFFFF,FFFFFF:F,

,:FFFF:FFFFFFFF,,FFFFFF:F:,FF:F::F,FFFF,,FFFFFFFF:FFFFFFFF:, :F,FF  
,,FFFFFF:FFFF

@A00721:190:HGJW7DSXY:4:1145:2157:8891 2:N:0:TCTGCAAG+GCTGCACT  
CCCGACTTTCCCGATGAATATCTCATTCACTCTGGGATTAGAATTACCGGGACGTCTATCATACACG  
AGCCACATCCACAGCCACTGCTTCATATTATGAACATTGGCTTCGCTAGTCAACTTAACTGAACCGTT  
AAGCACAATTCGATT

+

:FFFFFFFFFFFFFFFFFFFF,FFFFFF:FFF:FFFFFFFF:FFFFFFFFFFFF:FFFFFFFFFFFF:FFFFF  
FFFFFFFFFFFFFFFFFFFF:FFFFFFFFFFFFFFFFFFFF:FFFFFFFFFFFFFFFFFFFF:FFFFFFFF  
FFFFFFFF,FFFFFF

@A00721:190:HGJW7DSXY:4:1159:14271:29716 2:N:0:TCTGCAAG+GCTGCACT  
CCCGACTTTCCCGATGAATATCTCATTCACTCTGGGATTAGAATTACCGGGACGTCTATCATACACG  
AGCCACATCCACAGCCACTGCTTCATATTATGAACATTGGCTTCGCTAGTCAACTTAACTGAACCGTT  
AAGCACAATTCGATT

+

FFFFFFFFFFFFFFFFFFFFFFFFFFFFFFFFFFFF:FFFF:FFFFFFFFFFFFFFFFFFFFFFFFFFFF  
FFFFFFFFFFFFFFFFFFFFFFFFFFFFFFFFFFFFFFFFFFFFFFFFFFFFFFFFFFFFFFFFFFFF  
FFFFFFFFFFFFFFFF

@A00721:190:HGJW7DSXY:4:1313:12066:26271 2:N:0:TCTGCAAG+GCTGCACT  
CCCGACTTTCCCGATGAATATCTCATTCACTCTGGGATTAGAATTACCGGGACGTCTATCATACACG  
AGCCACATCCACAGCCACTGCTTCATATTATGAACATTGGCTTCGCTAGTCAACTTAACTGAACCGTT  
AAGCACAATTCGATT

+

FFFFFFFFFFFFFFFFFFFFFFFFFFFFFFFFFFFF:FFFFFFFFFFFFFFFFFFFFFFFFFFFFFFFFFFFF  
FFFFFFFFFFFFFFFFFFFFFFFFFFFFFFFFFFFFFFFFFFFFFFFFFFFFFFFFFFFFFFFFFFFF  
FFFFFFF:FFFFFF

@A00721:190:HGJW7DSXY:4:1635:4083:16329 2:N:0:TCTGCAAG+GCTGCACT  
CCCGACTTTCCCGATGAATATCTCATTCACTCTGGGATTAGAATTACCGGGACGTCTATCATACACG  
AGCCACATCCACAGCCACTGCTTCATATTATGAACATTGGCTTCGCTAGTCAACTTAACTGAACCGTT  
AAGCACAATTCGATT

+

FFFFFFFFFFFFFFFFFFFFFFFFFFFFFFFFFFFF:FFFFFFFFFFFFFFFFFFFFFFFFFFFFFFFFFFFF  
FFFFFFFFFFFFFFFFFFFFFFFFFFFFFFFFFFFFFFFFFFFFFFFFFFFFFFFFFFFFFFFFFFFF  
FFFFFFFFFFFFFFFF

@A00721:190:HGJW7DSXY:4:1664:16776:26256 2:N:0:TCTGCAAG+GCTGCACT  
CCCGACTTTCCCGATGAATATCTCATTCACTCTGGGATTAGAATTACCGGGACGTCTATCATACACG  
AGCCACATCCACAGCCACTGCTTCATATTATGAACATTGGCTTCGCTAGTCAACTTAACTGAACCGTT  
AAGCACAATTCGATT

+

FFFFFFFFFFFFFFFFFFFFFFFFFFFFFFFFFFFF:FFFFFFFFFFFFFFFFFFFFFFFFFFFFFFFFFFFF  
FFFFFFFFFFFFFFFFFFFFFFFFFFFFFFFFFFFFFFFFFFFFFFFFFFFFFFFFFFFFFFFFFFFF  
FFFFFFF,FFFFFF

@A00721:190:HGJW7DSXY:4:1676:14724:13745 2:N:0:TCTGCAAG+GCTGCACT  
CCCGACTTTCCCGATGAATATCTCATTCACTCTGGGATTAGAATTACCGGGACGTCTATCATACACG  
AGCCACATCCACAGCCACTGCTTCATATTATGAACATTGGCTTCGCTAGTCAACTTAACTGAACCGTT  
AAGCACAATTCGATT

+

FFFFFFFFFFFFFFFFFFFFFFFFFFFFFFFFFFFF:FFFFFFFFFFFFFFFFFFFFFFFFFFFFFFFFFFFF  
FFFFFFFFFFFFFFFFFFFFFFFFFFFFFFFFFFFFFFFFFFFFFFFFFFFFFFFFFFFFFFFFFFFF:FFFFF:FFFFF  
FFFFFFFFFFFFFFFF

@A00721:190:HGJW7DSXY:4:2117:16812:19930 2:N:0:TCTGCAAG+GCTGCACT  
CCCGACTTTCCCGATGAATATCTCATTCACTCTGGGATTAGAATTACCGGGACGTCTATCATACACG  
AGCCACATCCACAGCCACTGCTTCATATTATGAACATTGGCTTCGCTAGTCAACTTAACTGAACCGTT  
AAGCACAATTCGATT

+  
FFFFFFFFF:F:FFFFFFFF:FFFFFFFF:FFFFFF:FFF:FFF:FFFFFFFF:FFFFFFFFFFFFF  
FFFFFFFFFFFFFFFFFFFFFFFF:FFFF:FFFFF:F:FF:FFFFFFFF:FFFFFFFFFFFFFFFF::  
FFFFFFFF:FFF,FF  
@A00721:190:HGJW7DSXY:4:2137:18765:1110 2:N:0:TCTGCAAG+GCTGCACT  
CCCGACTTTCCCGATGAATATCTCATTCACTCTGGGATTAGAATTACCGGGACGTCTATCATACACG  
AGCCACATCCACAGCCACTGCTTCATATTATGAACATTGGCTTCGCTAGTCAACTTAACTGAACCGTT  
AAGCACAATTCGATT  
+  
FFFFFFFFFFFFFFFFFFFFFFFFFFFFFFFFFFFFFFFFFFFFFFFFFFFFFFFFFFFFFFFFFFFFF  
:FFFFFFFFFFFFFFFFFFFFFFFFFFFFFFFFFFFFFFFFFFFFFFFFFFFFFFFFFFFFFFFFFFFFF:  
FFFFFFFF:FFFFF  
@A00721:190:HGJW7DSXY:4:2352:2248:17347 2:N:0:TCTGCAAG+GCTGCACT  
CCCGACTTTCCCGATGAATATCTCATTCACTCTGGGATTAGAATTACCGGGACGTCTATCATACACG  
AGCCACATCCACAGCCACTGCTTCATATTATGAACATTGGCTTCGCTAGTCAACTTAACTGAACCGTT  
AAGCACAATTCGATT  
+  
FFFFFFFFFFFFFFFF:FFFFFFFFFFFFF:F:FFF:F:F:FFFFF,FFFFFFFF:FFF:FFFFFFFFF  
FFFFFFFFFFFFFFFFFFFFFFFF:FFFFFFFFFFFF:FF:F,FFFF:FFFFFFFF:FFFFFFFFFF,F  
FF:FFF:FFFFFFFFF  
@A00721:190:HGJW7DSXY:4:2440:21802:29794 2:N:0:TCTGCAAG+GCTGCACT  
CCCGACTTTCCCGATGAATATCTCATTCACTCTGGGATTAGAATTACCGGGACGTCTATCATACACG  
AGCCACATCCACAGCCACTGCTTCATATTATGAACATTGGCTTCGCTAGTCAACTTAACTGAACCGTT  
AAGCACAATTCGATT  
+  
FFFFFFFFFFFFFFFFFFFFFFFFFFFFFFFFFFFFFFFFFFFFFFFFFFFFFFFFFFFFFFFFFFFFF  
F,F:FFFFFFFFFFFFFFFFFFFFFFFFFFFFFFFFFFFF:FFF:FFF:FFFFFFFFFFFFFFFFFFFF  
:F:FFFF,FF:FFFF  
@A00721:190:HGJW7DSXY:4:2652:26576:7435 2:N:0:TCTGCAAG+GCTGCACT  
CCCGACTTTCCCGATGAATATCTCATTCACTCTGGGATTAGAATTACCGGGACGTCTATCATACACG  
AGCCACATCCACAGCCACTGCTTCATATTATGAACATTGGCTTCGCTAGTCAACTTAACTGAACCGTT  
AAGCACAATTCGATT  
+  
FFFFFFFFFFFFFFFFFFFFFFFFFFFFFFFFFFFFFFFFFFFFFFFFFFFFFFFFFFFFFFFFFFFFF  
FFFFFFFFFFFFFFFFFFFFFFFFFFFFFFFFFFFFFFFFFFFF:FFFFFFFFFFFFFFFFFFFFFFFF:F  
,FFFFFFFFFFFFF  
@A00721:190:HGJW7DSXY:4:2656:23773:24158 2:N:0:TCTGCAAG+GCTGCACT  
CCCGACTTTCCCGATGAATATCTCATTCACTCTGGGATTAGAATTACCGGGACGTCTATCATACACG  
AGCCACATCCACAGCCACTGCTTCATATTATGAACATTGGCTTCGCTAGTCAACTTAACTGAACCGTT  
AAGCACAATTCGATT  
+  
FFFFFFFFFFFFFFFFFFFFFFFFFFFFFFFFFFFFFFFFFFFFFFFFFFFFFFFFFFFFFFFFFFFFF  
FFFFFFFFFFFFFFFFFFFFFFFFFFFFFFFFFFFFFFFFFFFFFFFFFFFFFFFFFFFFFFFFFFFFF  
FFFFFFFFFFFFFFFFF:  
@A00721:190:HGJW7DSXY:4:2656:23909:24236 2:N:0:TCTGCAAG+GCTGCACT  
CCCGACTTTCCCGATGAATATCTCATTCACTCTGGGATTAGAATTACCGGGACGTCTATCATACACG  
AGCCACATCCACAGCCACTGCTTCATATTATGAACATTGGCTTCGCTAGTCAACTTAACTGAACCGTT  
AAGCACAATTCGATT  
+  
FFFFFFFFFFFFFFFFFFFFFFFFFFFFFFFFFFFF:FFFFFFFFFFFFFFFFFFFFFFFFFFFFFFFFF  
FFFFFFFFFFFFFFFFFFFFFFFFFFFFFFFFFFFFFFFFFFFFFFFFFFFFFFFFFFFFFFFFFFFFF:F  
FFFFFFFFFFFFFFFFF  
@A00721:190:HGJW7DSXY:4:1311:23710:28244 2:N:0:TCTGCAAG+GCTGCACT  
AAGTATCTGGATCCCGACTTTCCCGATGAATATCTCATTCACTCTGGGATTAGAATTACCGGGACGT





@A00721:190:HGJW7DSXY:4:1377:20943:29027 2:N:0:TCTGCAAG+GCTGCACT  
CAAGTATCTGGATCCCGACTTTCCCCGATGAATATCTCATTCACTCTGGGATTAGAATTACCGGGACG  
TCTATCATACACGAGCCACATCCACAGCCACTGCTTCATATTATGAACATTGGCTTCGCTAGTCAACT  
TAACTGAACCGTTAA

[illegible]

+

```

FFFFFFFFFFFFFFFFFFFFFFFF:FFF,FFF,FFFFFFFF:,F,FFF:FFFFFFFF:FFFFFFF
F,FFF:FFFFFFFFFFFFFFFF:FFFF:FFFF:FF,FFF:FFFFFF,FFFFFFFFFFFFFFFF:FFFF:F
FFFFFFF:FFF:FFF

```

+

```

FFFFFFFFFFFFFFFFFFFFFFFFFFFFFFFFFFFFFFFFFFFFFFFFFFFFFFFFFFFFFFFF:FFFFFFFFFFFFFFFFFFFFFFFFFFFFFFFFFFFFFFFFFFFFFFFFFFFFFFFFFFFFFFFF:FFFFFFFFFFFFFFFF:FFFF
FFF:FFFFFFFFFFFFFFFFFFFFFFFFFFFFFFFFFFFFFFFFFFFFFFFFFFFFFFFFFFFFFFFF:FFFFFFFFFFFFFFFFFFFFFFFFFFFFFFFFFFFFFFFFFFFFFFFFFFFFFFFFFFFFFFFF:FF::F,FFFFFFFFFFFFFFFF
FFFFFFFFFFFFFFFFFFFFFFFF

```

+

```
:F:FFFFFF,FF:FFF:FFFFFFFFF:FF:FFFFFFFFFFFFFFFF:FFFFFF:FFFFFFFFF,FF,F,F:
:F:FFFFFFFFF,FFFFFF:FFFFF:FFFF,,,:F,FFFF,FFF:FFF::,:FFFFFFFFFFFF,FF
FF:F,FE:,:FFFFF
```

+

[illegible]

+

[illegible]

+

[illegible]

FFFFFFFFFFFFFFFFFFFFFFFFFFFFFFFFFFFFFFFFFFFFFFFFFFFFFFFFFFFFFFFFFFFFFFFFFFFFFFFF  
FFFFFFFFFFFFFFFF

@A00721:190:HGJW7DSXY:4:1411:32280:29183 2:N:0:TCTGCAAG+GCTGCACT  
CCAAGTATCTGGATCCCGACTTTCCCGATGAATATCTCATTCACTCTGGGATTAGAATTACCGGGAC  
GTCTATCATACACGAGCCACATCCACAGCCACTGCTTCATATTATGAACATTGGCTTCGCTAGTCAAC  
TTAACTGAACCGTTA

+

FFFFFFFFFFFFFFFFFFFFFFFFFFFFFFFFFFFFFFFFFFFFFFFFFFFFFFFFFFFFFFFFFFFFFFFFFFFFFFFF  
FFFFFFFFFFFFFFFFFFFFFFFFFFFFFFFFFFFFFFFFFFFFFFFFFFFFFFFFFFFFFFFFFFFFFFFFFFFFFFFF  
FFFFFFFFFFFFFFFF

@A00721:190:HGJW7DSXY:4:1441:20048:8437 2:N:0:TCTGCAAG+GCTGCACT  
CCAAGTATCTGGATCCCGACTTTCCCGATGAATATCTCATTCACTCTGGGATTAGAATTACCGGGAC  
GTCTATCATACACGAGCCACATCCACAGCCACTGCTTCATATTATGAACATTGGCTTCGCTAGTCAAC  
TTAACTGAACCGTTA

+

FFFFFFFFFFFFFFFFFFFFFFFFFFFFFFFFFFFFFFFFFFFFFFFFFFFFFFFFFFFFFFFFFFFFFFFFFFFFFFFF  
FFFFFFFFFFFFFFFFFFFFFFFFFFFFFFFFFFFFFFFFFFFFFFFFFFFFFFFFFFFFFFFFFFFFFFFFFFFFFFFF  
FFFFFFFF:FFFFFFF

@A00721:190:HGJW7DSXY:4:1474:11867:36229 2:N:0:TCTGCAAG+GCTGCACT  
CCAAGTATCTGGATCCCGACTTTCCCGATGAATATCTCATTCACTCTGGGATTAGAATTACCGGGAC  
GTCTATCATACACGAGCCACATCCACAGCCACTGCTTCATATTATGAACATTGGCTTCGCTAGTCAAC  
TTAACTGAACCGTTA

+

FFFFFFFFFFFFFFFFFFFFFFFFFFFFFFFFFFFFFFFFFFFFFFFFFFFFFFFFFFFFFFFFFFFFFFFFFFFFFFFF  
FFFFFFFFFFFFF:FFFFFFFFFFFFF  
FFFFFFFFFFFFF:FFFFFFFFFFFFFFFFFFFFFFFFFFFFFFFFFFFFFFFFFFFFFFFFFFFFFFFFFFFFFFFF  
FFFFFFFFFFFFFFFF

@A00721:190:HGJW7DSXY:4:1543:19886:23750 2:N:0:TCTGCAAG+GCTGCACT  
CCAAGTATCTGGATCCCGACTTTCCCGATGAATATCTCATTCACTCTGGGATTAGAATTACCGGGAC  
GTCTATCATACACGAGCCACATCCACAGCCACTGCTTCATATTATGAACATTGGCTTCGCTAGTCAAC  
TTAACTGAACCGTTA

+

FFFFFFF:FFFFFFFFFFFFF:FFFFFFFFFFFFF:FFFFFFFFFFFFF:F,FFFFFFFFFFFFFFFFFFFFF  
FFFFFFF:FFFFFFFFFFFFFFFFFFFFFFFFFFFFF,FFFFFFFFF:FFFFFFFFFFFFFFFFFFFFFFFFFFFF  
FFFFFFFFFFFFF:F

@A00721:190:HGJW7DSXY:4:2265:18349:30170 2:N:0:TCTGCAAG+GCTGCACT  
CCAAGTATCTGGATCCCGACTTTCCCGATGAATATCTCATTCACTCTGGGATTAGAATTACCGGGAC  
GTCTATCATACACGAGCCACATCCACAGCCACTGCTTCATATTATGAACATTGGCTTCGCTAGTCAAC  
TTAACTGAACCGTTA

+

FFFFFFFFFFFFFFFFFFFFFFFFFFFFFFFFFFFFFFFFFFFFFFFFFFFFFFFFFFFFFFFFFFFFFFFFFFFFFFFF  
FFFFFFFFFFFFFFFFFFFFFFFFFFFFFFFFFFFFFFFFFFFFFFFFFFFFFFFFFFFFFFFFFFFFFFFFFFFFFFFF  
FFFFFFFFFFFFF:F::

@A00721:190:HGJW7DSXY:4:2507:11966:28823 2:N:0:TCTGCAAG+GCTGCACT  
CCAAGTATCTGGATCCCGACTTTCCCGATGAATATCTCATTCACTCTGGGATTAGAATTACCGGGAC  
GTCTATCATACACGAGCCACATCCACAGCCACTGCTTCATATTATGAACATTGGCTTCGCTAGTCAAC  
TTAACTGAACCGTTA

+

FFFFFFFFFFFFFFFFFFFFFFFFFFFFFFFFFFFFFFFFFFFFFFFFFFFFFFFFFFFFFFFFFFFFFFFFFFFFFFFF  
FFFFFFFFFFFFFFFFFFFFFFFFFFFFFFFFFFFFFFFFFFFFFFFFFFFFFFFFFFFFFFFFFFFFFFFFFFFFFFFF  
FFFFFFFFFFFFFFFF

@A00721:190:HGJW7DSXY:4:2658:18258:26318 2:N:0:TCTGCAAG+GCTGCACT  
CCAAGTATCTGGATCCCGACTTTCCCGATGAATATCTCATTCACTCTGGGATTAGAATTACCGGGAC  
GTCTATCATACACGAGCCACATCCACAGCCACTGCTTCATATTATGAACATTGGCTTCGCTAGTCAAC  
TTAACTGAACCGTTA

+  
FFFFFFFFFFFFFFFFFFFFFFFFFFFFFFFFFFFFFFFFFFFFFFFFFFFFFFFFFFFFFFFFFFFFFFFF  
FFFFFFFFFFFFFFFFFFFFFFFFFFFFFFFFFFFFFFFFFFFFFFFFFFFFFFFFFFFFFFFFFFFFFFFF:FFFF  
FFFFFFFFFFFFFFFF  
@A00721:190:HGJW7DSXY:4:1578:18530:7341 2:N:0:TCTGCAAG+GCTGCACT  
CATCCAAGTATCTGGATCCCGACTTTCCCGATGAATATCTCATTCACTCTGGGATTAGAATTACCGG  
GACGTCTATCATACACGAGCCACATCCACAGCCACTGCTTCATATTATGAACATTGGCTTCGCTAGTC  
AACTTAACTGAACCG  
+  
FFFFFFFFFFFFFFFFFFFFFFFFFFFFFFFFFFFFFFFFFFFFFFFFFFFFFFFFFFFFFFFFFFFFFFFF  
FFFFFFFFFFFFFFFFFFFFFFFFFFFFFFFFFFFFFFFFFFFFFFFFFFFFFFFFFFFFFFFFFFFFFFFF  
FFFFFFFFFFFFFFFF  
@A00721:190:HGJW7DSXY:4:1610:19768:23140 2:N:0:TCTGCAAG+GCTGCACT  
CATCCAAGTATCTGGATCCCGACTTTCCCGATGAATATCTCATTCACTCTGGGATTAGAATTACCGG  
GACGTCTATCATACACGAGCCACATCCACAGCCACTGCTTCATATTATGAACATTGGCTTCGCTAGTC  
AACTTAACTGAACCG  
+  
FFFFFFFFFFFFFFFFFFFFFFFFFFFFFFFFFFFFFFFFFFFFFFFFFFFFFFFFFFFFFFFFFFFFFFFF  
FFFFFFFFFFFFFFFFFFFFFFFFFFFFFFFFFFFFFFFFFFFFFFFFFFFFFFFFFFFFFFFFFFFFFFFF  
FFFFFFFFFFFFFFFF  
@A00721:190:HGJW7DSXY:4:2660:11605:2300 2:N:0:TCTGCAAG+GCTGCACT  
CATCCAAGTATCTGGATCCCGACTTTCCCGATGAATATCTCATTCACTCTGGGATTAGAATTACCGG  
GACGTCTATCATACACGAGCCACATCCACAGCCACTGCTTCATATTATGAACATTGGCTTCGCTAGTC  
AACTTAACTGAACCG  
+  
FFFFFFF:FF:FFFFFFFFFFFFFFFFFFFFFFFFFFFFFFFFFFFFFFFFFFFFFFFFFFFFFFFFFFFF:F  
FFFFFFF:FFFFFFFFFFFFFFFFFFFFFFFFFFFFFFFFFFFFFFFFFFFFFFFFFFFFFFFFFFFFFFFF:FFF  
FFFFFFFFFFFFFFFF  
@A00721:190:HGJW7DSXY:4:1244:15130:31735 2:N:0:TCTGCAAG+GCTGCACT  
GTTTCAGTTAAGTTGACTAGCGAAGCCAATGTTTCATAATATGAAGCAGTGGCTGTGGATGTGGCTCGTG  
TATGATAGACGTCCCGGTAATTCTAATCCAGAGTGAATGAGATATTCATCGGGGAAAGTCGGGATCC  
AGATACTTGGATGAT  
+  
FFFFFFFFF:FFFFFFFFFFFFFFFFFFFFFFFFFFFFFFFFFFFFFFFFFFFFFFFFFFFFFFFFFFFFFFF  
FFFFFFFFFFFFFFFFFFFFFFFFFFFFFFFFFFFFFFFFFFFFFFFFFFFFFFFFFFFFFFFFFFFFFFFF,FFFFF:FFFFFFFFFFFFFFFFFFFFFFFFFFFFFFFF  
FFFFFFFFFFFFFFFF  
@A00721:190:HGJW7DSXY:4:1312:29568:13088 2:N:0:TCTGCAAG+GCTGCACT  
GTTTCAGTTAAGTTGACTAGCGAAGCCAATGTTTCATAATATGAAGCAGTGGCTGTGGATGTGGCTCGTG  
TATGATAGACGTCCCGGTAATTCTAATCCAGAGTGAATGAGATATTCATCGGGGAAAGTCGGGATCC  
AGATACTTGGATGAT  
+  
FFFFFFFFFFFFFFFFFFFFFFFFFFFFFFFFFFFFFFFFFFFFFFFFFFFFFFFFFFFFFFFFFFFFFFFF  
FFFFFFFFFFFFFFFFFFFFFFFFFFFFFFFFFFFFFFFFFFFFFFFFFFFFFFFFFFFFFFFFFFFFFFFF,FFFFFFF:FFFFFFF  
FFF::,FFFFFFF:F  
@A00721:190:HGJW7DSXY:4:1444:13503:16454 2:N:0:TCTGCAAG+GCTGCACT  
GTTTCAGTTAAGTTGACTAGCGAAGCCAATGTTTCATAATATGAAGCAGTGGCTGTGGATGTGGCTCGTG  
TATGATAGACGTCCCGGTAATTCTAATCCAGAGTGAATGAGATATTCATCGGGGAAAGTCGGGATCC  
AGATACTTGGATGAT  
+  
:FFFFFFFFFFFFFFFFFFFFFFFFFFFFFFFFFFFFFFFFFFFFFFFFFFFFFFFFFFFFFFFFFFFFFFF  
FFFFFFF:FFFFFFFFFFFFFFFFFFFFFFFFFFFFFFFFFFFFFFFFFFFFFFFFFFFFFFFFFFFFFFFF:FFFFFFF:FFFFFFF:FF  
FFFFFFFFFFFFFFF:FF  
@A00721:190:HGJW7DSXY:4:2104:18466:29684 2:N:0:TCTGCAAG+GCTGCACT  
GTTTCAGTTAAGTTGACTAGCGAAGCCAATGTTTCATAATATGAAGCAGTGTCTGTGGATGTGGCTCGTG

TATGATAGACGTCCCGGTAATTCTAATCCCAGAGTGAATGAGATATTCATCGGGGAAAAGTCGGGATCC  
AGATACTTGGATGAT

@A00721:190:HGJW7DSXY:4:2228:5321:17660 2:N:0:TCTGCAAG+GCTGCACT  
GTTTCAGTTAAGTTGACTAGCGAAGCCAATGTTTCATAATATGAAGCAGTGGCTGTGGATGTGGCTCGTG  
TATGATAGACGTCCCGGTAATTCTAATCCAGAGTGAATGAGATATTCATCGGGGAAAGTCGGGATCC  
AGATACTTGGATGAT

@A00721:190:HGJW7DSXY:4:2265:15293:30358 2:N:0:TCTGCAAG+GCTGCACT  
GTTTCAGTTAAGTTGACTAGCGAAGCCAATGTTTCATAATATGAAGCAGTGGCTGTGGATGTGGCTCGTG  
TATGATAGACGTCCCGGTAATTCTAATCCAGAGTGAATGAGATATTCATCGGGGAAAGTCGGGATCC  
AGATACTTGGATGAT

@A00721:190:HGJW7DSXY:4:2571:14687:18756 2:N:0:TCTGCAAG+GCTGCACT  
GTTTCAGTTAAGTTGACTAGCGAAGCCAATGTTTCATAATATGAAGCAGTGGCTGTGGATGTGGCTCGTG  
TATGATAGACGTCCCGGTAATTCTAATCCAGAGTGAATGAGATATTCATCGGGGAAAGTCGGGATCC  
AGATACTTGGATGAT

@A00721:190:HGJW7DSXY:4:1306:13612:22561 2:N:0:TCTGCAAG+GCTGCACT  
TGATCATCCAAGTATCTGGATCCCGACTTTCCCCGATGAATATCTCATTCACTCTGGGATTAGAATTA  
CCGGGACGTCTATCATACACGAGCCACATCCACAGCCACTGCTTCATATTATGAACATTGGCTTCGCT  
AGTCAACTTAACTGA

@A00721:190:HGJW7DSXY:4:2119:11559:25708 2:N:0:TCTGCAAG+GCTGCACT  
TGATCATCCAAGTATCTGGATCCCGACTTTCCCCGATGAATATCTCATTCACTCTGGGATTAGAATTA  
CCGGGACGTCTATCATACACGAGCCACATCCACAGCCACTGCTTCATATTATGAACATTGGCTTCGCT  
AGTCAACTTAACTGA

@A00721:190:HGJW7DSXY:4:2333:17363:25207 2:N:0:TCTGCAAG+GCTGCACT  
TGATCATCCAAGTATCTGGATCCCGACTTTCCCCGATGAATATCTCATTATTCTGGGATTAGAATTA  
CCGGGACGTCTATCATACACGAGCCACATCCACAGCCACTGCTTCATATTATGAACATTGGCTTCGCT  
AGTCAACTTAACTGA

@A00721:190:HGJW7DSXY:4:2464:5764:26256 2:N:0:TCTGCAAG+GCTGCACT  
TGATCATCCAAGTATCTGGATCCCGACTTTCCCCGATGAATATCTCATTCACTCTGGGATTAGAATTA  
CCGGGACGTCTATCATACACGAGCCACATCCACAGCCACTGCTTCATATTATGAACATTGGCTTCGCT  
AGACAACTTAACTGA

```

FFFFFFFF:F,FF:FFF:F:F:F,:FFF:FF,,FF,F:,FFFF:FFFF:F:F,FFF:FFFFFF,FFFF
F:FFFFFF,,,FFFFFFFF,FF,F:FFFF,,F:FFF:,FFFFFF,FFFFFFFFFFFF:F:F,:,,F,F,
F:,FFF:FF:F,FF:

```

TGTGATCATCCAAGTATCTGGATCCCGACTTTCCCGATGAATATCTCATTCACTCTGGGATTAGAA  
 TTACCGGGACGTCTATCATACACGAGCCACATCCACAGCCACTGCTTCATATTATGAACATTGGCTTC  
 GCTAGTCAACTTAAC

[illegible]

TGTTGATCATCCAAGTATCTGGATCCCGACTTTCCCGATGAATATCTCATTCACTCTGGGATTAGAA  
TTACCGGGACGTCTATCATACACGAGCCACATCCACAGCCACTGCTTCATATTATGAACATTGGCTTC  
GCTAGTCAACTTAAC

[illegible]

TCCATGTTGATCATCCAAGTATCTGGATCCCGACTTTCCCGGATGAATATCTCATTCACTCTGGGATT  
AGAATTACCGGGACGTCTATCATACACGAGCCACATCCACAGCCACTGCTTCATATTATGAACATTGG  
CTTCGCTAGTCAACT

```

FFFFFFFF,FFFFFFFFFFFFFFFFFFFFFFFF:FFF:F,FFFFFFFF:FFFFFFFFFFFFFFFFFFFFFFFF
FFFFFFFFFFFF:FFFFFFFFFFFFFFFFFFFF,FFFFFFFFFF,FF:FFFFFFFFFFFFFFFF:FFFFF:FFFFFFF
FFFFFFFFFFFFFFFF

```

TCCATGTTGATCATCCAAGTATCTGGATCCCGACTTTCCCGGATGAATATCTCATTCACTCTGGGATT  
AGAATTACCGGGACGTCTATCATACACGAGCCACATCCACAGCCACTGCTTCATATTATGAACATTGG  
CTTCGCTAGTCAACT

[illegible]

TCCATGTTGATCATCCAAGTATCTGGATCCCGACTTTCCCGATGAATATCTCATTCACTCTGGGATT  
AGAATTACCGGGACGTCTATCATACACGAGCCACATCCACAGCCACTGCTTCATATTATGAACATTGG  
CTTCGCTAGTCAACT

[illegible]

TCCATGTTGATCATCCAAGTATCTGGATCCCGACTTTCCCGGATGAATATCTCATTCACTCTGGGATT  
AGAATTACCGGGACGTCTATCATACACGAGCCACATCCACAGCCACTGCTTCATATTATGAACATTGG  
CTTCGCTAGTCAACT

[illegible]

@A00721:190:HGJW7DSXY:4:1530:3884:18270 2:N:0:TCTGCAAG+GCTGCACT  
TCCATGTTGATCATCCAAGTATCTGGATCCCGACTTTCCCGGATGAATATCTCATTCACTCTGGGATT  
AGAATTACCGGGACGTCTATCATACACGAGCCACATCCACAGCCACTGCTTCATATTATGAACATTGG  
CTTCGCTAGTCAACT

@A00721:190:HGJW7DSXY:4:1530:5746:20087 2:N:0:TCTGCAAG+GCTGCACT  
TCCATGTTGATCATCCAAGTATCTGGATCCCGACTTTCCCGATGAATATCTCATTCACTCTGGGATT  
AGAATTACCGGGACGTCTATCATACACGAGCCACATCCACAGCCACTGCTTCATATTATGAACATTGG  
CTTCGCTAGTCAACT

@A00721:190:HGJW7DSXY:4:1577:10285:24158 2:N:0:TCTGCAAG+GCTGCACT  
TCCATGTTGATCATCCAAGTATCTGGATCCCGACTTTCCCCGATGAATATCTCATTCACTCTGGGATT  
AGAATTACCGGGACGTCTATCATACACGAGCCACATCCACAGCCACTGCTTCATATTATGAACATTGG  
CTTCGCTAGTCAACT

@A00721:190:HGJW7DSXY:4:1627:26051:6496 2:N:0:TCTGCAAG+GCTGCACT  
TCCATGTTGATCATCCAAGTATCTGGATCCCGACTTTCCCGATGAATATCTCATTCACTCTGGGATT  
AGAATTACCGGGACGTCTATCATACACGAGCCACATCCACAGCCACTGCTTCATATTATGAACATTGG  
CTTCGCTAGTCAACT

@A00721:190:HGJW7DSXY:4:1627:25319:7545 2:N:0:TCTGCAAG+GCTGCACT  
TCCATGTTGATCATCCAAGTATCTGGATCCCGACTTTCCCGATGAATATCTCATTCACTCTGGGATT  
AGAATTACCGGGACGTCTATCATACACGAGCCACATCCACAGCCACTGCTTCATATTATGAACATTGG  
CTTCGCTAGTCAACT

@A00721:190:HGJW7DSXY:4:2207:5457:11412 2:N:0:TCTGCAAG+GCTGCACT  
TCCATGTTGATCATCCAAGTATCTGGATCCCGACTTTCCCGATGAATATCTCATTCACTCTGGGATT  
AGAATTACCGGGACGTCTATCATACACGAGCCACATCCACAGCCACTGCTTCATATTATGAACATTGG  
CTTCGCTAGTCAACT

@A00721:190:HGJW7DSXY:4:2216:7102:1548 2:N:0:TCTGCAAG+GCTGCACT  
TCCATGTTGATCATCCAAGTATCTGGATCCCGACTTTCCCGATGAATATCTCATTCAACCCTGGGATT  
AGAATTACCGGGACGTCTATCATACACGAGCCACATCCACAGCCACTGCTTCATATTATGAACATTGG  
CTTCGCTAGTCAACT

+  
FFFFFFF::FFFF:F:FF,FF:FF:FF,FFF,FFFFFFFFFFFF,FFFFFFFFFFFF:F,,:F,,FF,:  
F,FF::FFFF::FFF,FFFF:F:F,FFFF:FFFF:F:FFFF::FFFF,::FFFF,F,:FFFF,::,  
FFFF:FFF,FFFFFF  
@A00721:190:HGJW7DSXY:4:2274:31394:14434 2:N:0:TCTGCAAG+GCTGCACT  
TCCATGTTGATCATCCAAGTATCTGGATCCCGACTTTCCCGATGAATATCTCATTTCACTCTGGGATT  
AGAATTACCGGGACGTCTATCATACACGAGCCACATCCACAGCCACTGCTTCATATTATGAACATTGG  
CTTCGCTAGTCAACT

+  
FFFFFFFFFFFFFFFF:FFFFFFFFFFFFFFFF:FFFFFFFF,FFFFFFFFFFFFFFFF:FFFFF,F  
FFFFFFFFFFFFFFFF:FFFFFFFFFFFFFFFF:FFFFFFFFFFFFFFFF:FFFFFFFF:FFF:FFFF:FF:FFF  
F,F,FFFFFF,FFFF  
@A00721:190:HGJW7DSXY:4:2325:9091:12289 2:N:0:TCTGCAAG+GCTGCACT  
TCCATGTTGATCATCCAAGTATCTGGATCCCGACTTTCCCGATGAATATCTCATTTCACTCTGGGATT  
AGAATTACCGGGACGTCTATCATACACGAGCCACATCCACAGCCACTGCTTCATATTATGAACATTGG  
CTTCGCTAGTCAACT

+  
FFFFFFFFFFFFFFFFFFFFFFFFFFFFFFFFFFFFFFFFFFFFFFFFFFFFFFFFFFFFFFFFFFFFFFFF  
FFFFFFFFF:FFFFFFFFFFFFFFFFFFFFFFFFFFFFFFFFFFFFFFFFFFFFFFFFFFFFFFFFFFFFF:  
FFFFFFFFF:FFFFF  
@A00721:190:HGJW7DSXY:4:2372:5095:24377 2:N:0:TCTGCAAG+GCTGCACT  
TCCATGTTGATCATCCAAGTATCTGGATCCCGACTTTCCCGATGAATATCTCATTTCACTCTGGGATT  
AGAATTACCGGGACGTCTATCATACACGAGCCACATCCACAGCCACTGCTTCATATTATGAACATTGG  
CTTCGCTAGTCAACT

+  
FFFFFFFFFFFFFFFFFFFFFFFFFFFFFFFFFFFFFFFFFFFFFFFFFFFFFFFFFFFFFFFFFFFFFFFF  
FFFFFFFFFFFFFFFFFFFFFFFFFFFFFFFFFFFFFFFFFFFFFFFFFFFFFFFFFFFFFFFFFFFFFFFF:  
FFFF,FF:FFFFFFF  
@A00721:190:HGJW7DSXY:4:2466:17635:23985 2:N:0:TCTGCAAG+GCTGCACT  
TCCATGTTGATCATCCAAGTATCTGGATCCCGACTTTCCCGATGAATATCTCATTTCACTCTGGGATT  
AGAATTACCGGGACGTCTATCATACACGAGCCACATCCACAGCCACTGCTTCATATTATGAACATTGG  
CTTCGCTAGTCAACT

+  
FFFFFFFFFFFFFFFFFFFFFFFFFFFFFFFFFFFFFFFFFFFFFFFFFFFFFFFFFFFFFFFFFFFFFFFF  
FFFFFFFFFFFFFFFFFFFFFFFFFFFFFFFFFFFFFFFFFFFFFFFFFFFFFFFFFFFFFFFFFFFFFFFF:  
FFFFFFFFFFFFFFFFF  
@A00721:190:HGJW7DSXY:4:2503:5764:24283 2:N:0:TCTGCAAG+GCTGCACT  
TCCATGTTGATCATCCAAGTATCTGGATCCCGACTTTCCCGATGAATATCTCATTTCACTCTGGGATT  
AGAATTACCGGGACGTCTATCATACACGAGCCACATCCACAGCCACTGCTTCATATTATGAACATTGG  
CTTCGCTAGTCAACT

+  
FFFFFF:FFFFFFFFFFFFFFFFFFFFFFFFFFFFFFFFFFFFFFFFFFFFFFFFFFFFFFFFFFFFFFFF:  
FFFFFFFFFFFFFFFFFFFFFFFFFFFFFFFFFFFFFFFFFFFFFFFFFFFFFFFFFFFFFFFFFFFFFFFF:F:F  
FFFFFF:FFFFFFF  
@A00721:190:HGJW7DSXY:4:2576:7482:32080 2:N:0:TCTGCAAG+GCTGCACT  
TCCATGTTGATCATCCAAGTATCTGGATCCCGACTTTCCCGATGAATATCTCATTTCACTCTGGGATT  
AGAATTACCGGGACGTCTATCATACACGAGCCACATCCACAGCCACTGCTTCATATTATGAACATTGG  
CTTCGCTAGTCAACT

+  
FFFFFFFFFFFFFFFFFFFFFFFFFFFFFFFFFFFFFFFFFFFFFFFFFFFFFFFFFFFFFFFF:FFFFFFF:F  
FFFFFFFFFFFFFFFFFFFFFFFFFFFFFFFFFFFFFFFFFFFFFFFFFFFFFFFFFFFFFFFF:F:F  
FFFFFFF:FFFFFFF  
@A00721:190:HGJW7DSXY:4:2634:1859:26631 2:N:0:TCTGCAAG+GCTGCACT  
TCCATGTTGATCATCCAAGTATCTGGATCCCGACTTTCCCGATGAATATCTCATTTCACTCTGGGATT

AGAATTACCGGGACGTCTATCATACACGAGCCACATCCACAGCCACTGCTTCATATTATGAACATTGG  
CTTCGCTAGTCAACT

+

FFFFFFFFFFFFFF:FFFFFFFFFFFFFF:FFFFFFFFFFFFFF:F,FFFFFFFFFF,FFFFFFFFF:FFFFF  
FFFFFFFFFFFFFFFFFFFFFF:F,FFFFFFFFFFFF:FFFFFFFFFFFFFFFFFFFFFF:FFFFFF:FFFFF:  
FFFFFFFFFFFFFFFF

@A00721:190:HGJW7DSXY:4:1148:10366:3317 2:N:0:TCTGCAAG+GCTGCACT  
CATTATCCATGTTGATCATCCAAGTATCTGGATCCCGACTTTCCCGATGAATATCTCATTCACTCTG  
GGATTAGAATTACCGGGACGTCTATCATACACGAGCCACATCCACAGCCACTGCTTCATATTATGAAC  
ATTGGCTTCGCTAGT

+

FFFFFFFFFFFFFFFFFFFFFFFFFFFFFF:FFFFFFFFFFFFFFFFFFFFFFFFFFFFFF:FFFFFFFFFFFFF  
FFFFFFFFFFFFFFFFFFFFFFFFFFFFFF:FFFFFFFFFFFFFFFFFFFFFFFFFFFFFF:FFFFFFFFFFFFF  
FFFFFFFFFFFF:F:

@A00721:190:HGJW7DSXY:4:1444:25536:23923 2:N:0:TCTGCAAG+GCTGCACT  
CATTATCCATGTTGATCATCCAAGTATCTGGATCCCGACTTTCCCGATGAATATCTCATTCACTCTG  
GGATTAGAATTACCGGGACGTCTATCATACACGAGCCACATCCACAGCCACTGCTTCATATTATGAAC  
ATTGGCTTCGCTAGT

+

FFFFFFFFFFFFFFFFFFFFFF:FFFFFFFFFFFFFFFFFFFFFFFFFFFFFFFFFFFFFFFFFFFFFF:FFFFFFFFFFFF::F  
FFFF,FFFFFF,F,FFFFFFFFFFFFFFFFFFFFFFFFFFFFFFFFFFFFFFFFFFFFFFFFFFFFFF:FFFFFFF:  
FFFFFFFFF:FFF:FF

@A00721:190:HGJW7DSXY:4:1472:29161:27821 2:N:0:TCTGCAAG+GCTGCACT  
CATTATCCATGTTGATCATCCAAGTATCTGGATCCCGACTTTCCCGATGAATATCTCATTCACTCTG  
GGATTAGAATTACCGGGACGTCTATCATACACGAGCCACATCCACAGCCACTGCTTCATATTATGAAC  
ATTGGCTTCGCTAGT

+

FFFFFFFFFFFFFFFFFFFFFFFFFFFFFFFFFFFFFFFFFFFFFFFFFFFFFFFFFFFFFFFFFFFFFFFFFFFF  
FFFFFFFFFFFFFFFFFFFFFFFFFFFFFFFFFFFFFFFFFFFFFFFFFFFFFFFFFFFFFFFFFFFFFFFFFFFF  
FFFFFFFFFFFF:FFF

@A00721:190:HGJW7DSXY:4:1512:17906:22889 2:N:0:TCTGCAAG+GCTGCACT  
CATTATCCATGTTGATCATCCAAGTATCTGGATCCCGACTTTCCCGATGAATATCTCATTCACTCTG  
GGATTAGAATTACCGGGACGTCTATCATACACGAGCCACATCCACAGCCACTGCTTCATATTATGAAC  
ATTGGCTTCGCTAGT

+

FFFFF:FFFFFFFFFFFFFFFFFFFFFFFFFFFFFFFFFFFFFFFFFFFFFFFFFFFFFFFFFFFFFFFFFFFFF  
FFFF,FFFFFFFFFFFFFFFFFFFFFFFFFFFFFFFFFFFFFFFFFFFFFFFFFFFFFFFFFFFFFFFFFFFFF  
FFF::FFFFF:FFFF

@A00721:190:HGJW7DSXY:4:1516:28610:20635 2:N:0:TCTGCAAG+GCTGCACT  
CATTATCCATGTTGATCATCCAAGTATCTGGATCCCGACTTTCCCGATGAATATCTCATTCACTCTG  
GGATTAGAATTACCGGGACGTCTATCATACACGAGCCACATCCACAGCCACTGCTTCATATTATGAAC  
ATTGGCTTCGCTAGT

+

FFFFFFFFFFFFFFFFFFFFFFFFFFFFFFFFFFFFFFFFFFFFFFFFFFFFFFFFFFFFFFFFFFFFFFFFFFFF  
FFFFFFFFFFFFFFFFFFFFFFFFFFFFFFFFFFFFFFFFFFFFFFFFFFFFFFFFFFFFFFFFFFFFFFFFFFFF:FF  
FFFF,FFFF:FFFF

@A00721:190:HGJW7DSXY:4:1601:27814:36323 2:N:0:TCTGCAAG+GCTGCACT  
CATTATCCATGTTGATCATCCAAGTATCTGGATCCCGACTTTCCCGATGAATATCTCATTCACTCTG  
GGATTAGAATTACCGGGACGTCTATCATACACGAGCCACATCCACAGCCACTGCTTCATATTATGAAC  
ATTGGCTTCGCTAGT

+

FFFFF:FFFFFFFFFFFFFFFFFFFF:FFFFFFFFFFFFFFFFFFFFFFFFFFFFFFFFFFFFFFFFFFFF:FFFF  
FFF:FFFFFFFFFFFFFFFFFFFFFFFFFFFFFFFFFFFFFFFFFFFF:FFFFFFFFFFFFFFFFFFFFFFFFFFFF  
FFF:FFFFF::FF:F



@A00721:190:HGJW7DSXY:4:2131:14705:33505 2:N:0:TCTGCAAG+GCTGCACT  
CATTATCCATGTTGATCATCCAAGTATCTGGATCCCGACTTTCCCGATGAATATCTCATTCACTCTG  
GGATTAGAATTACCGGGACGTCTATCATACACGAGCCACATCCACAGCCACTGCTTCATATTATGAAC  
ATTGGCTTCGCTAGT

+

FFFFFFFFFFFFFFFFFFFFFFFFFFFFFFFFFFFFFFFFFFFFFFFFFFFFFFFFFFFFFFFFFFFFFFFF:  
FFFFFFFFFFFFFFFFFFFFFFFFFFFFFFFFFFFFFFFFFFFFFFFFFFFFFFFFFFFFFFFFFFFFFFFF  
FFFFFFFFFF,FFF:F

@A00721:190:HGJW7DSXY:4:2225:12102:27461 2:N:0:TCTGCAAG+GCTGCACT  
CATTATCCATGTTGATCATCCAAGTATCTGGATCCCGACTTTCCCGATGAATATCTCATTCACTCTG  
GGATTAGAATTACCGGGACGTCTATCATACACGAGCCACATCCACAGCCACTGCTTCATATTATGAAC  
ATTGGCTTCGCTAGT

+

FFFFFF:FFFFFFFFFFFFFFFFFFFFFFFFFFFFFFFFFFFFFFFFFFFFFFFFFFFFFFFFFFFFFFFF:  
:FFF:FFFFFF:FFF,FFFFFFFFFFFFFFFFFFFFFFFFFFFFFFFFFFFFFFFFFFFFFFFFFFFF:  
F:F,FFFF,FFFF:

@A00721:190:HGJW7DSXY:4:2244:13901:9095 2:N:0:TCTGCAAG+GCTGCACT  
CATTATCCATGTTGATCATCCAAGTATCTGGATCCCGACTTTCCCGATGAATATCTCATTCACTCTG  
GGATTAGAATTACCGGGACGTCTATCATACACGAGCCACATCCACAGCCACTGCTTCATATTATGAAC  
ATTGGCTTCGCTAGT

+

FFFF:FFFF:FFFFFFFFFFFFFFFFFFFFFFFFFFFFFFFFFFFFFFFFFFFFFFFFFFFFFFFFFFFF:  
FFFFFFFFFFFFFFFF:F:F:F:FFFFFFFFFFFFFFFF,FF:FFF:FFFFFFFFFFFF,FFFFFFFFFFFF  
FFFF:FFFFFFFF:FF

@A00721:190:HGJW7DSXY:4:2265:6108:36119 2:N:0:TCTGCAAG+GCTGCACT  
CATTATCCATGTTGATCATCCAAGTATCTGGATCCCGACTTTCCCGATGAATATCTCATTCACTCTG  
GGATTAGAATTACCGGGACGTCTATCATACACGAGCCACATCCACAGCCACTGCTTCATATTATGAAC  
ATTGGCTTCGCTAGT

+

FFFFFFFFFFFFFFFFFFFFFFFFFFFFFFFFFFFFFFFFFFFFFFFFFFFFFFFFFFFFFFFFFFFFFFFF  
FFFFFFFFFFFFFFFFFFFFFFFFFFFFFFFFFFFFFFFFFFFFFFFFFFFFFFFFFFFFFFFFFFFFFFFF  
:FFFFFFFFFFFFFFF

@A00721:190:HGJW7DSXY:4:2265:6551:36323 2:N:0:TCTGCAAG+GCTGCACT  
CATTATCCATGTTGATCATCCAAGTATCTGGATCCCGACTTTCCCGATGAATATCTCATTCACTCTG  
GGATTAGAATTACCGGGACGTCTATCATACACGAGCCACATCCACAGCCACTGCTTCATATTATGAAC  
ATTGGCTTCGCTAGT

+

FFFFFFFFFFFFFFFFFFFFFFFFFFFFFFFFFFFFFFFFFFFFFFFFFFFFFFFFFFFFFFFFFFFFFFFF  
FFFFFFFFFFFFFFFFFFFFFFFFFFFFFFFFFFFFFFFFFFFFFFFFFFFFFFFFFFFFFFFFFFFFFFFF  
F,FFFFFFFFFFFFF

@A00721:190:HGJW7DSXY:4:2431:9498:35289 2:N:0:TCTGCAAG+GCTGCACT  
CATTATCCATGTTGATCATCCAAGTATCTGGATCCCGACTTTCCCGATGAATATCTCATTCACTCTG  
GGATTAGAATTACCGGGACGTCTATCATACACGAGCCACATCCACAGCCACTGCTTCATATTATGAAC  
ATTGGCTTCGCTAGT

+

FFFFFFFFFFFFFFFFFFFFFFFFFFFFFFFFFFFFFFFFFFFFFFFFFFFFFFFFFFFFFFFFFFFFFFFF  
FFFFFFFFFFFFFFFFFFFFFFFFFFFFFFFFFFFFFFFFFFFFFFFFFFFFFFFFFFFFFFFFFFFFFFFF  
FFFFFFF:FFFFFFF

@A00721:190:HGJW7DSXY:4:2467:1434:20603 2:N:0:TCTGCAAG+GCTGCACT  
CATTATCCATGTTGATCATCCAAGTATCTGGATCCCGACTTTCCCGATGAATATCTCATTCACTCTG  
GGATTAGAATTACCTGGACGTCTATCATACACGAGCCACATCCACAGCCACTGCTTCATATTATGAAC  
ATTGGCTTCGCTAGT

+

F:,F:,F,FF::FFFFF,F:FFFFFFFFFFFF::FFFF:FFF:::FF:FFFFFFFF:FFF:FF,F

FFFFFFFFFFFFFF,,:FFF:FFFF,FFFFFFFF:F,FFFFFFFFFF,:FF:FFFFFF::FF:FFFF  
FFFFF:F::FF:,F:

@A00721:190:HGJW7DSXY:4:2649:10402:35634 2:N:0:TCTGCAAG+GCTGCACT  
CATTATCCATGTTGATCATCCAAGTATCTGGATCCCGACTTTCCCCGATGAATATCTCATTCACTCTG  
GGATTAGAATTACCGGGACGTCTATCATACACGAGCCACATCCACAGCCACTGCTTCATATTATGAAC  
ATTGGCTTCGCTAGT

+

FFFFFFFFFFFFFFFFFFFFFFFFFFFFFFFFFFFFFFFFFFFFFFFFFFFFFFFFFFFFFFFFFFFFFFFF  
FFFFFFFFFFFFFFFFFFFFFFFFFFFFFFFFFFFFFFFFFFFFFFFFFFFFFFFFFFFFFFFFFFFFFFFF  
FFFFFFFFFFFFFFFF

@A00721:190:HGJW7DSXY:4:1153:28836:3239 2:N:0:TCTGCAAG+GCTGCACT  
CAACATTATCCATGTTGATCATCCAAGTATCTGGATCCCGACTTTCCCCGATGAATATCTCATTCACT  
CTGGGATTAGAATTACCGGGACGTCTATCATACACGAGCCACATCCACAGCCACTGCTTCATATTATG  
AACATTGGCTTCGCT

+

FFFFFFFFFFFFFFFFFFFFFFFFFFFFFFFFFFFFFFFFFFFFFFFFFFFFFFFFFFFFFFFFFFFFFFFF  
FFFFFFFFFFFFFFFFFFFFFFFFFFFFFFFFFFFFFFFFFFFFFFFFFFFFFFFFFFFFFFFFFFFFFFFF  
FFFFFFFFFFFFFFFF

@A00721:190:HGJW7DSXY:4:1222:18566:6684 2:N:0:TCTGCAAG+GCTGCACT  
CAACATTATCCATGTTGATCATCCAAGTATCTGGATCCCGACTTTCCCCGATGAATATCTCATTCACT  
CTGGGATTAGAATTACCGGGACGTCTATCATACACGAGCCACATCCACAGCCACTGCTTCATATTATG  
AACATTGGCTTCGCT

+

FFFFFFFFFFFFFFFF:FFFFFFFFFFFFFFFFFFFFFFFFFFFFFFFFFFFFFFFFFFFFFFFFFFFFF  
:FF:FFFFFFFFFFFF:FFFFFFFFFFFFFFFFFFFFFFFFFFFFFFFFFFFFFFFFFFFFFFFFFFFF:  
FFFFFFFFFFFFFFFF

@A00721:190:HGJW7DSXY:4:1266:2193:33536 2:N:0:TCTGCAAG+GCTGCACT  
CAACATTATCCATGTTGATCATCCAAGTATCTGGATCCCGACTTTCCCCGATGAATATCTCATTCACT  
CTGGGATTAGAATTACCGGGACGTCTATCATACACGAGCCACATCCACAGCCACTGCTTCATATTATG  
AACATTGGCTTCGCT

+

FFFFFFFFFFFFFFFFFFFFFFFFFFFFF:FFFFFFFFFFFFFFFFFFFFFFFFFFFFFFFFFFFFF:FF  
FFFFFFFFFFFFFFFFFFFFFFFFFFFFFFFFFFFFFFFFFFFFFFFFFFFFFFFFFFFFFFFFFFFFF  
FFFFFFFFFFFF:FFFF

@A00721:190:HGJW7DSXY:4:1421:18349:36151 2:N:0:TCTGCAAG+GCTGCACT  
CAACATTATCCATGTTGATCATCCAAGTATCTGGATCCCGACTTTCCCCGATGAATATCTCATTCACT  
CTGGGATTAGAATTACCGGGACGTCTATCATACACGAGCCACATCCACAGCCACTGCTTCATATTATG  
AACATTGGCTTCGCT

+

FFFFFFFFFFFFFFFFFFFFFFFFFFFFFFFFFFFFFFFFFFFFFFFFFFFFFFFFFFFFFFFFFFFFF:FF  
F:FFFF:FFFFFFFFFFFFFFFFFFFFFFFFFFFFF:FFFFFFFFFFFFFFFFFFFFFFFFFFFFF  
FFFFFFFFFF:FFFF

@A00721:190:HGJW7DSXY:4:1426:16993:28761 2:N:0:TCTGCAAG+GCTGCACT  
CAACATTATCCATGTTGATCATCCAAGTATCTGGATCCCGACTTTCCCCGATGAATATCTCATTCACT  
CTGGGATTAGAATTACCGGGACGTCTATCATACACGAGCCACATCCACAGCCACTGCTTCATATTATG  
AACATTGGCTTCGCT

+

FFF,F,FF,F:FFFF,:F,FFFF,FF,FF:FFF:FF,FFFFFFFF,FF:FFFFFFFF:FFFF:F  
FFFFFF,FFFF:FFF,F:FFFF,FFFF,FFF,F,FF::F:FFFFFFFF:FFFF:FFFF:FFFFF  
FFFFFFFF:FFF:F:F

@A00721:190:HGJW7DSXY:4:1429:30427:26725 2:N:0:TCTGCAAG+GCTGCACT  
CAACATTATCCATGTTGATCATCCAAGTATCTGGATCCCGACTTTCCCCGATGAATATCTCATTCACT  
CTGGGATTAGAATTACCGGGACGTCTATCATACACGAGCCACATCCACAGCCACTGCTTCATATTATG  
AACATTGGCTTCGCT

+  
FFFFFFFFFFFFFFFFFFFFFFFFFFFFFFFFFFFFFFFFFFFFFFFFFFFFFFFFFFFFFFFFFFFFFFFF  
FFFFFFFFFFFFFFFFFFFFFFFFFFFFFFFFFFFFFFFFFFFFFFFFFFFFFFFFFFFFFFFFFFFFFFFF:FFFFFFFFFFFFFFFF  
FFFFFFFFFFFFFFFF

@A00721:190:HGJW7DSXY:4:1515:23882:12070 2:N:0:TCTGCAAG+GCTGCACT  
CAACATTATCCATGTTGATCATCCAAGTATCTGGATCCCGACTTTCCCCGATGAATATCTCATTCACT  
CTGGGATTAGAATTACCGGGACGTCTATCATACACGAGCCACATCCACAGCCACTGCTTCATATTATG  
AACATTGGCTTCGCT

+  
FF:FF,:FFFFFFFFFFFFFFFFFFFFFFFFFFFFFFFFFFFFFFFFFFFFFFFFFFFFFFFFFFFFFFFF  
FFFFFFFFFFFFFFFF:FFFFF:,FFFFF:FFFFFFFF:FFFFFFFF:FFFFFFFF:FFFF:FFFFFF,  
FF,FFF:FFFFFFF

@A00721:190:HGJW7DSXY:4:1653:21983:30639 2:N:0:TCTGCAAG+GCTGCACT  
CAACATTATCCATGTTGATCATCCAAGTATCTGGATCCCGACTTTCCCCGATGAATATCTCATTCACT  
CTGGGATTAGAATTACCGGGACGTCTATCATACACGAGCCACATCCACAGCCACTGCTTCATATTATG  
AACATTGGCTTCGCT

+  
FFFFFFFFFFFFFFFFFFFFFFFFFFFFFFFFFFFFFFFFFFFFFFFFFFFFFFFFFFFFFFFFFFFFFFFF  
FFFFFFFFFFFFFFFFFFFFFFFFFFFFFFFFFFFFFFFFFFFFFFFFFFFFFFFFFFFFFFFFFFFFFFFF:FFFFFFFFFFFFFFFF  
F:FFFFFFFFFFFFFFF

@A00721:190:HGJW7DSXY:4:2253:2085:21887 2:N:0:TCTGCAAG+GCTGCACT  
CAACATTATCCATGTTGATCATCCAAGTATCTGGATCCCGACTTTCCCCGATGAATATCTCATTCACT  
CTGGGATTAGAATTACCGGGACGTCTATCATACACGAGCCACATCCACAGCCACTGCTTCATATTATG  
AACATTGGCTTCGCT

+  
FFFFFFFFFFFFFFFFFFFFFFFFFFFFFFFFFFFFFFFF:FFFFFFFFFFFFFFFFFFFFFFFF:FFFFF:FFFFFFFFFFFF:  
FFFFFFFFFFFFFFFFFFFFFFFFFFFFFFFFFFFFFFFFFFFFFFFFFFFFFFFFFFFFFFFFFFFFFFFF,FFFF:FFFF  
FFFFFFFFFFFFFFFF

@A00721:190:HGJW7DSXY:4:2317:12400:11099 2:N:0:TCTGCAAG+GCTGCACT  
CAACATTATCCATGTTGATCATCCAAGTATCTGGATCCCGACTTTCCCCGATGAATATCTCATTCACT  
CTGGGATTAGAATTACCGGGACGTCTATCATACACGAGCCACATCCACAGCCACTGCTTCATATTATG  
AACATTGGCTTCGCT

+  
FFFFFFFFFFFFFFFFFFFFFFFFFFFFFFFFFFFFFFFFFFFFFFFFFFFFFFFFFFFFFFFFFFFFFFFF:FFFFFFFFFFFFFFFF  
FFFFFFFFFFFFFFFFFFFFFFFFFFFFFFFFFFFFFFFFFFFFFFFFFFFFFFFFFFFFFFFFFFFFFFFF:FFFFF:FFF  
FFFFF,FFFFFFFFF

@A00721:190:HGJW7DSXY:4:2336:9706:8312 2:N:0:TCTGCAAG+GCTGCACT  
CAACATTATCCATGTTGATCATCCAAGTATCTGGATCCCGACTTTCCCCGATGAATATCTCATTCACT  
CTGGGATTAGAATTACCGGGACGTCTATCATACACGAGCCACATCCACAGCCACTGCTTCATATTATG  
AACATTGGCTTCGCT

+  
FFFFFFFFFFFFFFFFFFFFFFFFFFFFFFFFFFFFFFFFFFFFFFFFFFFFFFFFFFFFFFFFFFFFFFFF  
FFFFFFFFFFFFFFFFFFFFFFFFFFFFFFFFFFFFFFFFFFFFFFFFFFFFFFFFFFFFFFFFFFFFFFFF:FFFFFFFFFFFFFFFF  
FFFFFFFFFFFFFFFF

@A00721:190:HGJW7DSXY:4:2338:12816:2926 2:N:0:TCTGCAAG+GCTGCACT  
CAACATTATCCATGTTGATCATCCAAGTATCTGGATCCCGACTTTCCCCGATGAATATCTCATTCACT  
CTGGGATTAGAATTACCGGGACGTCTATCATACACGAGCCACATCCACAGCCACTGCTTCATATTATG  
AACATTGGCTTCGCT

+  
FFFFFFFFFFFFFFFFFFFFFFFFFFFFFFFFFFFFFFFFFFFFFFFFFFFFFFFFFFFFFFFFFFFFFFFF  
FFFFFFFFFFFFFFF:FFF:FFFFFFFFFFFFFFFFFFFFFFFFFFFFFFFFFFFFFFFFFFFFFFFFFFFF  
FFFFFFFFFFFFFFF,FF

@A00721:190:HGJW7DSXY:4:2338:12807:2942 2:N:0:TCTGCAAG+GCTGCACT  
CAACATTATCCATGTTGATCATCCAAGTATCTGGATCCCGACTTTCCCCGATGAATATCTCATTCACT



@A00721:190:HGJW7DSXY:4:2352:1226:9408 2:N:0:TCTGCAAG+GCTGCACT  
CTATCAACATTATCCATGTTGATCATCCAAGTATCTGGATCCCGACTTTCCCGATGAATATCTCATT  
CACTCTGGGATTAGAATTACCGGGACGTCTATCATACACGAGCCACATCCACAGCCACTGCTTCATAT  
TATGAACATTGGCTT

+

FFFFFFFFFFFFFFFFFFFFFFFFFFFFFFFFFFFFFFFFFFFFFFFFFFFFFFFFFFFFFFFFFFFFFFFF  
FFFFFFFFFFFFFFFFFFFFFFFFFFFFFFFFFFFFFFFFFFFFFFFFFFFFFFFFFFFFFFFFFFFFFFFF  
FFFFFFFFFFFFFFFF

@A00721:190:HGJW7DSXY:4:2628:14642:36307 2:N:0:TCTGCAAG+GCTGCACT  
CTATCAACATTATCCATGTTGATCATCCAAGTATCTGGATCCCGACTTTCCCGATGAATATCTCATT  
CACTCTGGGATTAGAATTACCGGGACGTCTATCATACACGAGCCACATCCACAGCCACTGCTTCATAT  
TATGAACATTGGCTT

+

FFFFFFFFFFFFFFFFFFFFFFFFFFFFFFFFFFFFFFFFFFFFFFFFFFFFFFFFFFFFFFFFFFFFFFFF  
FFFFFFFFFFFFFFFFFFFFFFFFFFFFFFFFFFFFFFFFFFFFFFFFFFFFFFFFFFFFFFFFFFFFFFFF  
FFFF:F:FFFFFFFF

@A00721:190:HGJW7DSXY:4:1144:5963:1673 2:N:0:TCTGCAAG+GCTGCACT  
CCTATCAACATTATCCATGTTGATCATCCAAGTATCTGGATCCCGACTTTCCCGATGAATATCTCAT  
TCACTCTGGGATTAGAATTACCGGGACGTCTATCATACACGAGCCACATCCACAGCCACTGCTTCATA  
TTATGAACATTGGCT

+

FFFFFFFFFFFF:FFFFFF:FFFFFFFFFFFFFFFFFFFFFFFFFFFFFFFFFFFFFFFFFFFFFFFFFFFF  
FFFFFFFFFFFFFFFFFFFFFFFFFFFFFFFFFFFFFFFFFFFFFFFFFFFFFFFFFFFFFFFFFFFFFFFF  
FFFFFFF:FFF:FFF

@A00721:190:HGJW7DSXY:4:1152:4679:15984 2:N:0:TCTGCAAG+GCTGCACT  
CCTATCAACATTATCCATGTTGATCATCCAAGTATCTGGATCCCGACTTTCCCGATGAATATCTCAT  
TCACTCTGGGATTAGAATTACCGGGACGTCTATCATACACGAGCCACATCCACAGCCACTGCTTCATA  
TTATGAACATTGGCT

+

FFFFFFFFFFFFFFFFFFFFFFFFFFFFFFFFFFFF,FFFFFFFFFFFFFFFFFFFFFFFFFFFFFFFF:FFFFFF  
FFFFFFFFFFFFFFFFFFFFFFFFFFFFFFFFFFFFFFFFFFFFFFFFFFFFFFFFFFFFFFFFFFFFFFFF:FFFFFFFFF:F  
FFFFFFFFFFFFFFFF

@A00721:190:HGJW7DSXY:4:1447:22354:9204 2:N:0:TCTGCAAG+GCTGCACT  
CCTATCAACATTATCCATGTTGATCATCCAAGTATCTGGATCCCGACTTTCCCGATGAATATCTCAT  
TCACTCTGGGATTAGAATTACCGGGACGTCTATCATACACGAGCCACATCCACAGCCACTGCTTCATA  
TTATGAACATTGGCT

+

FFF:FFFFFFFFFFFFFFFFFFFFFFFFFFFFFFFFFFFFFFFFFFFFFFFFFFFFFFFFFFFFFFFFFFFF  
FFFFFFFFFFFFFFFFFFFFFFFFFFFFFFFFFFFFFFFFFFFFFFFFFFFFFFFFFFFFFFFFFFFFFFFF  
FFFFFFFFFFFFFFFF

@A00721:190:HGJW7DSXY:4:1652:17155:1548 2:N:0:TCTGCAAG+GCTGCACT  
CCTATCAACATTATCCATGTTGATCATCCAAGTATCTGGATCCCGACTTTCCCGATGAATATCTCAT  
TCACTCTGGGATTAGAATTACCGGGACGTCTATCATACACGAGCCACATCCACAGCCACTGCTTCATA  
TTATGAACATTGGCT

+

FFFFFFFFFFFFFFFFFFFFFFFFFFFFFFFFFFFF:FFFFFFFFFFFFFFFFFFFFFFFFFFFF:FFFFFFFFFFFFF  
FFFFFFFFFFFFFFFFFFFFFFFFFFFFFFFFFFFFFFFFFFFFFFFFFFFFFFFFFFFFFFFFFFFFFFFF,F  
FFFFFFFFF:FFFF

@A00721:190:HGJW7DSXY:4:1652:17381:2002 2:N:0:TCTGCAAG+GCTGCACT  
CCTATCAACATTATCCATGTTGATCATCCAAGTATCTGGATCCCGACTTTCCCGATGAATATCTCAT  
TCACTCTGGGATTAGAATTACCGGGACGTCTATCATACACGAGCCACATCCACAGCCACTGCTTCATA  
TTATGAACATTGGCT

+

FFFFFFFFFFFFFFFFFFFFFFFFFFFFFFFFFFFF:FFFFFFFFFFFFFFFFFFFFFFFFFFFFFFFFFFFFFFFF

FFFFFFFFFFFFFFFFFFFFFFFFFFFFFFFFFFFFFFFFFFFFFFFFFFFFFFFFFFFFFFFFFFFFFFFF  
FFFFFFFFFFFFFFFF

@A00721:190:HGJW7DSXY:4:2172:8205:26475 2:N:0:TCTGCAAG+GCTGCACT  
CCTATCAACATTATCCATGTTGATCATCCAAGTATCTGGATCCCGACTTTCCCCGATGAATATCTCAT  
TCACTCTGGGATTAGAATTACCGGGACGTCTATCATACACGAGCCACATCCACAGCCACTGCTTCATA  
TTATGAACATTGGCT

+

FFFFFFFFFFFFFFFFFFFFFFFFFFFFFFFFFFFFFFFFFFFFFFFFFFFFFFFFFFFFFFFFFFFFFFFF  
FFFFFFFFFFFFFFFFFFFFFFFFFFFFFFFFFFFFFFFFFFFFFFFFFFFFFFFFFFFFFFFFFFFFFFFF:F  
FFFFFFFFFFFF:FFFF

@A00721:190:HGJW7DSXY:4:2301:18177:13463 2:N:0:TCTGCAAG+GCTGCACT  
CTATCAACATTATCCATGTTGATCATCCAAGTATCTGGATCCCGACTTTCCCCGATGAATATCTCATT  
CACTCTGGGATTAGAATTACCGGGACGTCTATCATACACGAGCCACATCCACAGCCACTGCTTCATAT  
TATGAACATTGGCT

+

FFFFFFFFFFFFFF:FF:FFFFFFFFFFFFFF,F:F,F,F:FF::FFF:FF:F:FF:FFFFFF:FFFF,  
:FF,F,,FF:FF::FFFFFF:FFFF,,FF::FFFFFFFFFF,FFFF::FFF:FFFF:::,FFF::  
:FF,FFFF,,,:F

@A00721:190:HGJW7DSXY:4:2303:31593:23422 2:N:0:TCTGCAAG+GCTGCACT  
CCTATCAACATTATCCATGTTGATCATCCAAGTATCTGGATCCCGACTTTCCCCGATGAATATCTCAT  
TCACTCTGGGATTAGAATTACCGGGACGTCTATCATACACGAGCCACATCCACAGCCACTGCTTCATA  
TTATGAACATTGGCT

+

FFFFFFFFFFFFFFFFFFFFFFFFFFFFFFFFFFFFFFFFFFFFFFFFFFFFFFFFFFFFFFFFFFFFFFFF  
FFFFFFFFFFFFFFFFFFFFFFFFFFFFFFFFFFFFFFFFFFFFFFFFFFFFFFFFFFFFFFFFFFFFFFFF  
FFFFFFFFFFFFFFFF

@A00721:190:HGJW7DSXY:4:2314:6686:26224 2:N:0:TCTGCAAG+GCTGCACT  
CCTATCAACATTATCCATGTTGATCATCCAAGTATCTGGATCCCGACTTTCCCCGATGAATATCTCAT  
TCACTCTGGGATTAGAATTACCGGGACGTCTATCATACACGAGCCACATCCACAGCCACTGCTTCATA  
TTATGAACATTGGCT

+

FFFFFFFFFFFFFFFFFFFFFFFFFFFFFFFFFFFFFFFFFFFFFFFFFFFFFFFFFFFFFFFFFFFFFFFF  
FFFFFFFFFFFFFFFFFFFFFFFFFFFFFFFFFFFFFFFFFFFFFFFFFFFFFFFFFFFFFFFFFFFFFFFF  
FFFFFFFFFFFFFFFF

@A00721:190:HGJW7DSXY:4:2340:22733:34851 2:N:0:TCTGCAAG+GCTGCACT  
CCTATCAACATTATCCATGTTGATCATCCAAGTATCTGGATCCCGACTTTCCCCGATGAATATCTCAT  
TCACTCTGGGATTAGAATTACCGGGACGTCTATCATACACGAGCCACATCCACAGCCACTGCTTCATA  
TTATGAACATTGGCT

+

FFFFFFFFFFFFFFFFFFFFFFFFFFFFFFFFFFFFFFFFFFFFFFFFFFFFFFFFFFFFFFFFFFFFFFFF  
FFFFFFFFFFFFFFFFFFFFFFFFFFFFFFFFFFFFFFFFFFFFFFFFFFFFFFFFFFFFFFFFFFFFFFFF  
FFFFF:FFFFFFFF

@A00721:190:HGJW7DSXY:4:2372:29080:36104 2:N:0:TCTGCAAG+GCTGCACT  
CCTATCAACATTATCCATGTTGATCATCCAAGTATCTGGATCCCGACTTTCCCCGATGAATATCTCAT  
TCACTCTGGGATTAGAATTACCGGGACGTCTATCATACACGAGCCACATCCACAGCCACTGCTTCATA  
TTATGAACATTGGCT

+

FFFFFFFFFFFFFFFFFFFFFFFFFFFFFFFFFFFFFFFFFFFFFFFFFFFFFFFFFFFFFFFFFFFFFFFF  
FFFFFFFFFFFFFFFFFFFFFFFFFFFFFFFFFFFFFFFFFFFFFFFFFFFFFFFFFFFFFFFFFFFFFFFF:  
FFFFFFFFFFFFFFFF

@A00721:190:HGJW7DSXY:4:2374:24361:26428 2:N:0:TCTGCAAG+GCTGCACT  
CCTATCAACATTATCCATGTTGATCATCCAAGTATCTGGATCCCGACTTTCCCCGATGAATATCTCAT  
TCACTCTGGGATTAGAATTACCGGGACGTCTATCATACACGAGCCACATCCACAGCCACTGCTTCATA  
TTATGAACATTGGCT

[illegible]

```

FFFFFFFFFFFFFFFFFFFFFFFF:FFFFFFFFFFFFFFFFFFFFFFFFFFFFFFFF:FFFFFFF:FFFFFFF
FFFFFFFFFFFFFFFFFFFFFFFF:FFFFF::FFFFFFFFFFFFF,FFFFFFFFFFFF:FFF:FF,F:FF,, :FFFFFFFFFFFF
FFFF,FF:FFFF

```

[illegible]

```

FFFFFFFFFFFF:FFFFFFFFFFFF:FFFFFFFFFFFF,FFFFFFFFFFFFFFFFFFFFFFFFFFFFFFFF
FFFFFFFF,FFFFFFFFFFFF,FFFFFFFF:FFFFFFFFFFFFFFFFFFFFFFFFFFFFFFFFFFFFFFFF
FFFFF:FFFFFFF:F

```

```

FFFFFFFFFFFFFFFF,FFFFFFFFFFFFFFFFF:F::FF:FFF:,FF:FFFFFFFFFFF:FFFFF
FFF:FFFFFFFFF:FFFFF:FFFFFFFFFFFFFFFFF:FFFFFF:FFFFFFFFFFFFFFFFFFFFFFFF
FFFFFFF:FFFFFFFFF

```

[illegible]

```
FFFFFFFFFFFFFFFFFFFFFFFFFFFFF:FFFFF:FFFFFFFFFFFFFFFFFFFFFFFFFFFFFFFFFFFFF
FFFFF:FFFFFFFFFFFFFFFFFFFFFFFFFFFFFFFFFFFFFFFFFFFFFFFFFFFFF:FFFFFFFFFFFFFFFFFFFFF:F:
FFFFFFFFFFFFFFFFFFFF;
```

@A00721:190:HGJW7DSXY:4:2348:27805:17926 2:N:0:TCTGCAAG+GCTGCACT  
TAAACCTATCAACATTATCCATGTTGATCATCCAAGTATCTGGATCCCGACTTTCCCCGATGAATATC





@A00721:190:HGJW7DSXY:4:1646:9498:23672 2:N:0:TCTGCAAG+GCTGCACT  
CTAAACCTATCAACATTATCCATGTTGATCATCCAAGTATCTGGATCCCGACTTTCCCCGATGAATAT  
CTCATTCACTCTGGGATTAGAATTACCGGGACGTCTATCATACACGAGCCACATCCACAGCCACTGCT  
TCATATTATGAACAT

[illegible]

+

```

FFFFFFFFFFFFFFFFFFFFFFFFFFFFFFFF:FFFFFF:FFF:FFFFFFFFFFFFFFFFFFFFFFFF
FFFFFFFFFFFFFFFFFFFFFFFF,FFFFFFFFFFFFFFFFFFFFFFFFFFFFFFFFFFFFFFFF
FFFFF:FFFFF:FFF

```

+

[illegible]

+

```
FFFFFFFFFFFFFFFFFFFFFFFFFFFFFFFFFFFFFFFFFFFFFFFFFFFFFFFFFFFFFFF
FFFFFFFFFFFFFFFFFFFFFFFFFFFF:FFFFFFFFFFFFFFFFFFFFFFFFFFFFFFFFFFF:F
FFFFFFFFFFFFFFFF
```

+

```

FFFFFFFFFFFFFFFFFFFFFFFFFFFFFFFFFFFFFFFFFFFFFFFFFFFFFFFFFFFFFFFF:FFF
FFFFFFFFFFFFFFFFFFFFFFFFFFFFFFFF:FFFFFFFFFFFFFFFFFFFFFFFFFFFFFFFF
FFFFFFFFF:FFFFFF

```

+

```

FFFFFFFFFFFFFFFF:FFFFFFFFFFFFFFFFFFFFFFFFFFFFFFFFFFFFFFFF
FFFFFFFFFFFFFFF,FFFFFFFFFFFFFFFFFFFFFFFFFFFFFFFFFFFFFFFF
FFFFFFFFFFFFFFFF

```

+

[illegible]

FFFFFFFFFFFFFFFF,FFFFFFFFFFFFFFFFFFFFFFFFFFFFFFFFFFFFFFFFFFFFFFFFFFFFFFFF  
FFFFFFFFFFFFFFFF

@A00721:190:HGJW7DSXY:4:1638:17381:4382 2:N:0:TCTGCAAG+GCTGCACT  
CACTAAACCTATCAACATTATCCATGTTGATCATCCAAGTATCTGGATCCCGACTTTCCCGATGAAT  
ATCTCATTCACCTCTGGGATTAGAATTACCGGGACGTCTATCATACACGAGCCACATCCACAGCCACTG  
CTTCATATTATGAAC

+

FFFFFFFFF:FF:FFFFFFFFFFFFFFFFFFFFFFFFFFFFFFFFFFFFFFFFFFFFFFFFFFFFFFFF  
F,,FFFF,,F,FFFFFFFF:FFFFFFFFFFFFFFFFFFFFFFFFFFFFFFFFFFFFFFFFFFFFFFFF  
FF:FFFFFFFFFFFFFFFF

@A00721:190:HGJW7DSXY:4:2169:14362:6324 2:N:0:TCTGCAAG+GCTGCACT  
CACTAAACCTATCAACATTATCCATGTTGATCATCCAAGTATCTGGATCCCGACTTTCCCGATGAAT  
ATCTCATTCACCTCTGGGATTAGAATTACCGGGACGTCTATCATACACGAGCCACATCCACAGCCACTG  
CTTCATATTATGAAC

+

FFFFFFFFFFFFFFFFFFFFFFFFFFFFFFFFFFFFFFFFFFFFFFFFFFFFFFFFFFFFFFFFFFFFFFFF  
FFFFFFFFFFFFFFFFFFFFFFFFFFFFFFFFFFFFFFFFFFFFFFFFFFFFFFFFFFFFFFFFFFFFFFFF  
FFFFFFFFFFFFFFFF:FF

@A00721:190:HGJW7DSXY:4:2358:22083:34851 2:N:0:TCTGCAAG+GCTGCACT  
CACTAAACCTATCAACATTATCCATGTTGATCATCCAAGTATCTGGATCCCGACTTTCCCGATGAAT  
ATCTCATTCACCTCTGGGATTAGAATTACCGGGACGTCTATCATACACGAGCCACATCCACAGCCACTG  
CTTCATATTATGAAC

+

FFFF:FFFFFFFFFFFFFFFFFFFFFFFFFFFFFFFFFFFFFFFFFFFFFFFFFFFFFFFFFFFFFFFF  
:FFFF:FFFFFFFFFFFFFFFFFFFFFFFFFFFFFFFFFFFFFFFFFFFFFFFFFFFFFFFFFFFFFFFF  
FFFF:FFFFFFFF

@A00721:190:HGJW7DSXY:4:2543:5448:7451 2:N:0:TCTGCAAG+GCTGCACT  
CACTAAACCTATCAACATTATCCATGTTGATCATCCAAGTATCTGGATCCCGACTTTCCCGATGAAT  
ATCTCATTCACCTCTGGGATTAGAATTACCGGGACGTCTATCATACACGAGCCACATCCACAGCCACTG  
CTTCATATTATGAAC

+

FFFFFFFFFFFFFFFFFFFFFFFFFFFFFFFFFFFFFFFFFFFFFFFFFFFFFFFFFFFFFFFFFFFFFFFF  
FFFFFFFFFFFFFFFFFFFFFFFFFFFFFFFFFFFFFFFFFFFFFFFFFFFFFFFFFFFFFFFFFFFFFFFF  
FF:FFFFFFFF

@A00721:190:HGJW7DSXY:4:2628:18747:17080 2:N:0:TCTGCAAG+GCTGCACT  
CACTAAACCTATCAACATTATCCATGTTGATCATCCAAGTATCTGGATCCCGACTTTCCCGATGAAT  
ATCTCATTCACCTCTGGGATTAGAATTACCGGGACGTCTATCATACACGAGCCACATCCACAGCCACTG  
CTTCATATTATGAAC

+

FFFFFFFFFFFFFFFFFFFFFFFF,FFFFFF:FFFFFFFFFFFFFFFFFFFFFFFFFFFFFFFFFFFFFFFF  
FFFFFFFFF:FFFFFFFFFFFF:FFFFF:,FFFFFFFFFFFFFFFFFFFFFFFFFFFFFFFF:FFFFFFFFF:  
FFFFFFFFFFFFFFFF

@A00721:190:HGJW7DSXY:4:1375:24930:18646 2:N:0:TCTGCAAG+GCTGCACT  
CACTAAACCTATCAACATTATCCATGTTGATCATCCAAGTATCTGGATCCCGACTTTCCCGATGAAT  
ATCTCATTCACCTCTGGGATTAGAATTACCGGGACGTCTATCATACACGAGCCACATCCACAGCCACTG  
CTTCATATTATGAA

+

FFFFFFFFFFFFFFFFF:FFFFFFFFFFFFFFFFFFFFFFFFFFFFFFFFFFFFFFFFFFFFFFFFFFFF  
FFFFFFFFF:FFFFFFFFF,FFFFF:FFFF,FFFFFFFFFFFFFFFFFFFFFFFFFFFFFFFF,FFFFF,  
:F,,FFF:FFFF:

@A00721:190:HGJW7DSXY:4:1368:8892:28635 2:N:0:TCTGCAAG+GCTGCACT  
CGACACTAAACCTATCAACATTATCCATGTTGATCATCCAAGTATCTGGATCCCGACTTTCCCGATG  
AATATCTCATTCACCTCTGGGATTAGAATTACCGGGACGTCTATCATACACGAGCCACATCCACAGCCA  
CTGCTTCAGATCGGA

```
F,FFFFFF:FFFFFFFFFFFFFFFFFFFFFFFFFFFFFFFFFFFFFFFFFFFFFFFFFFFFFFFF:FFF
FFFFFFFFFFFF,FF:FF:F:FFFFFFFFFFFFFFFF:FFFFFF:FFFFFFF:F:FFFF,FFFFFFFFFFFFFFFF,
FFFFFFFFFFFFFFFF
```

[illegible][illegible][illegible]

```

FFFFFFFFFFFFFFFF:FFFFFFFFFFFFFFFFFFFFFFFFFFFFFFFFFFFFFFFF
FFFFFFFFFFFFFFFF:FFFFFFFFFFFFFFFFFFFFFFFFFFFFFFFFFFFFFFFF
FFFFFFFFFFFFFFFF

```

[illegible]

```
FFFFFFFFFFFFFFFFFFFFFFFFFFFFFFFFFFFFFFFFFFFFFFFFFFFFFFFFFFFFF
FFFFFFFFFFFFFFFFFFFFFFFFFFFFFFFFFFFF;FFFFFFFFFFFFFFFFFFFFFF;FFFFFFFFFF
FFFFFFFFFFFFFFFF
```

@A00721:190:HGJW7DSXY:4:1472:5864:21449 2:N:0:TCTGCAAG+GCTGCACT  
GTTTTTCACAAACGACACTAAACCTATCAACATTATCCATGTTGATCATCCAAGTATCTGGATCCCGA



$+$ 

@A00721:190:HGJW7DSXY:4:1234:23981:32471 2:N:0:TCTGCAAG+GCTGCACT  
TCGTTTTTACAAACGACACTAAACCTATCAACATTATCCATGTTGATCATCCAAGTATCTGGATCCC  
GACTTTCCCCGATGAATATCTCATTCACTCTGGGATTAGAATTACCGGGACGTCTATCATACACGAGC  
CACATCCACAGCCAC

+

@A00721:190:HGJW7DSXY:4:1501:29722:19711 2:N:0:TCTGCAAG+GCTGCACT  
TCGTTTTTTCACAAACGACACTAAACCTATCAACATTATCCATGTTGATCATCCAAGTATCTGGATCCC  
GACTTTCCCCGATGAATATCTCATTCACTCTGGGATTAGAATTACCGGGACGTCTATCATACACGAGC  
CACATCCACAGCCAC

+

@A00721:190:HGJW7DSXY:4:1626:5981:6590 2:N:0:TCTGCAAG+GCTGCACT  
TCGTTTTTACAAACGACACTAAACCTATCAACATTATCCATGTTGATCATCCAAGTATCTGGATCCC  
GACTTTCCCCGATGAATATCTCATTCACTCTGGGATTAGAATTACCGGGACGTCTATCATACACGAGC  
CACATCCACAGCCAC

+

@A00721:190:HGJW7DSXY:4:2128:24876:15358 2:N:0:TCTGCAAG+GCTGCACT  
TCGTTTTTACAAACGACACTAAACCTATCAACATTATCCATGTTGATCATCCAAGTATCTGGATCCC  
GACTTTCCCCGATGAATATCTCATTGACTCTGGGATTAGAATTAACGGGACGTCTATAATACACGAGC  
CACATCCACAGCCAC

+

@A00721:190:HGJW7DSXY:4:2213:7708:26334 2:N:0:TCTGCAAG+GCTGCACT  
TCGTTTTTACAAACGACACTAAACCTATCAACATTATCCATGTTGATCATCCAAGTATCTGGATCCC  
GACTTTCCCCGATGAATATCTCATTCACTCTGGGATTAGAATTACCGGGACGTCTATCATACACGAGC  
CACATCCACAGCCAC

+

@A00721:190:HGJW7DSXY:4:2227:12608:4852 2:N:0:TCTGCAAG+GCTGCACT  
TCGTTTTTACAAACGACACTAAACCTATCAACATTATCCATGTTGATCATCCAAGTATCTGGATCCC  
GACTTTCCCCGATGAATATCTCATTCACTCTGGGATTAGAATTACCGGGACGTCTATCATACACGAGC  
CACATCCACAGCCAC

+

FFFFFFFFFFFFFFFFFFFFFFFFFFFFFFFFFFFFFFFFFFFFFFFFFFFFFFFFFFFFFFFFFFFFFFFF  
FFFFFFFFFFFFFFFF

@A00721:190:HGJW7DSXY:4:2543:12753:33254 2:N:0:TCTGCAAG+GCTGCACT  
TCGTTTTTTCACAAACGACACTAAACCTATCAACATTATCCATGTTGATCATCCAAGTATCTGGATCCC  
GACTTTCCCCGATGAATATCTCATTCACTCTGGGATTAGAATTACCGGGACGTCTATCATACACGAGC  
CACATCCACAGCCAC

+

FFFFFFFFFFFFFFFFFFFFFFFFFFFFFFFFFFFFFFFFFFFFFFFFFFFFFFFFFFFFFFFFFFFFFFFF  
FFFFFFFFFFFFFFFFFFFFFFFFFFFFFFFFFFFFFFFFFFFFFFFFFFFFFFFFFFFFFFFFFFFFFFFF  
FFFFFFFFFFFFFFFF

@A00721:190:HGJW7DSXY:4:1204:22435:29011 2:N:0:TCTGCAAG+GCTGCACT  
ATCGTTTTTTCACAAACGACACTAAACCTATCAACATTATCCATGTTGATCATCCAAGTATCTGGATCC  
CGACTATCCCCGATGAATATCTCATTCACTCTGGGATTAGAATTACCGGGACGTCTATCATACACGAG  
CCACATCCACAGCCA

+

FFFFFFFFFFFFFFFFFFFFFFFFFFFFFFFFFFFFFFFFFFFFFFFFFFFFFFFFFFFFFFFFFFFFFFFF  
FFFFF,FFFFFFFFFFFF:FFFFFFFFFFFFFFFF:FFFFFFFFFFFFFFFFFFFFFFFFFFFFFFFF  
FFFFFFFFFFFFFFFF

@A00721:190:HGJW7DSXY:4:1556:31801:17738 2:N:0:TCTGCAAG+GCTGCACT  
ATCGTTTTTTCACAAACGACACTAAACCTATCAACATTATCCATGTTGATCATCCAAGTATCTGGATCC  
CGACTTTCCCCGATGAATATCTCATTCACTCTGGGATTAGAATTACCGGGACGTCTATCATACACGAG  
CCACATCCACAGCCA

+

FFFFFFFFFFFFFFFFFFFFFFFFFFFF:,F:FFFFFFFFFFFFFFFFFFFFFFFF:FFFFFFFFFFFFFFFF  
FFFFFFFFFFFFFFFFFFFFFFFFFFFFFFFF:FFFFFFFFFFFFFFFFFFFFFFFFFFFFFFFFFFFFFFFF  
FFFFFFFFFFFFFFFF

@A00721:190:HGJW7DSXY:4:2160:11153:7059 2:N:0:TCTGCAAG+GCTGCACT  
ATCGTTTTTTCACAAACGACACTAAACCTATCAACATTATCCATGTTGATCATCCAAGTATCTGGATCC  
CGACTTTCCCCGATGAATATCTCATTCACTCTGGGATTAGAATTACCGGGACGTCTATCATACACGAG  
CCACATCCACAGCCA

+

FF::FFF:F,FFFF:, :FFFFFFFF,FFFF,FFFFFFFF:FF,FF:F:FFFF,FF:FFF:F,FFFF:  
,FFFF:F,:FFFF:FFFF,FFFFFFFFFFFF:F:,FFFF:FFFF:, , ,FFF:F,FFFFFFFF,FFF,  
,FFFFFF:FFF:,FF

@A00721:190:HGJW7DSXY:4:2308:19126:24439 2:N:0:TCTGCAAG+GCTGCACT  
ATCGTTTTTTCACAAACGACACTAAACCTATCAACATTATCCATGTTGATCATCCAAGTATCTGGATCC  
CGACTTTCCCCGATGAATATCTCATTCACTCTGGGATTAGAATTACCGGGACGTCTATCATACACGAG  
CCACATCCACAGCCA

+

:FFFFFFFFFFFFFFFFFFFFFFFFFFFFFFFFFFFFFFFFFFFFFFFFFFFFFFFFFFFFFFFFFFFF  
FFFFFFFFFFFFFFFFFFFFFFFFFFFFFFFFFFFFFFFFFFFFFFFFFFFFFFFFFFFFFFFFFFFFFFFF  
FFFFFFFFFFFFFFFF

@A00721:190:HGJW7DSXY:4:2368:31458:13072 2:N:0:TCTGCAAG+GCTGCACT  
ATCGTTTTTTCACAAACGACACTAAACCTATCAACATTATCCATGTTGATCATCCAAGTATCTGGATCC  
CGACTTTCCCCGATGAATATCTCATTCACTCTGGGATTAGAATTACCGGGACGTCTATCATACACGAG  
CCACATCCACAGCCA

+

:FFFFFFFFFFFFFFFFFFFFFFFFFFFFFFFFFFFFFFFFFFFFFFFFFFFFFFFFFFFFFFFFFFFF  
FFFFFFFFF:F:FFFFFFFFFFFFFFFF:F:F::FFFFFFFFF::FFFFFFFFFFFFFFFF:FF  
:FF:FFF:FFF:::

@A00721:190:HGJW7DSXY:4:2527:4553:5149 2:N:0:TCTGCAAG+GCTGCACT  
TCGTTTTTTCACAAACGACACTAAACCTATCAACATTATCCATGTTGATCATCCAAGTATCTGGATCCC  
GACTTTCCCCGATGAATATCTCATTCACTCTGGGATTAGAATTACCGGGACGTCTATCATACACGAG  
CCACATCCACAGCCA

```
FFFFFFFFFFFFFFFFFFFFFFFFFFFFFFFFFFFFFFFFFFFFFFFFFFFFFFFFFFFF:FFFFFFFFFFFF
FFFFFFFFFFFFFFFFFFFFFFFFFFFFFFFFFFFFFFFFFFFFFFFFFFFF:FFFFFFFFFFFFFFFFFFFF:FFFFFFF
FFFFFFFF,FFFFFFFF
```

[illegible][illegible]

```

FFFFFFFFFFFFFFFFFFFFFFFFFFFFFFFFFFFFFFFFFFFFFFFFFFFFFFFFFFFFFFFFFFFFFFFF
FFFFFFFFFFFF:FFFFFFFFFFFF:FFFFFFFFFFFFFFFFFFFF:FFFFFFFFFFFFFFFFFFFF:FFFFFFF
FFFFFFFFFFFFFFFFFFFF

```

[illegible]

```
FFFFFFFFFFFFFFFFFFFFFFFFFFFFFFFFFFFFFFFFFFFFFFFFFFFFFFFFFFFFFFFFFFFFF  
FFFFFFFFFFFFFFFFFFFFFFFFFFFFFF:FFFFFFFFFFFFFFFFFFFFFFFFFFFFFFFFFFFF,F  
FFFFFFFFFFFFFF:F
```

```
FFF,FFF:FFFF:FFFFFFFFFFFFFFFFFFFFFFFF:FFFFFFFF,FFF:FFFFFFF
,FFFFFFFFFFFFFFFFFFFFFFFF,FFFFFFFFFFFF:FF:F,F:FFFFFFFFFFFF:FFFFF:
FFFFFFF:F,FFFF:
```

@A00721:190:HGJW7DSXY:4:2509:11306:9173 2:N:0:TCTGCAAG+GCTGCACT  
GACCTTCTAGAACGTATCGTTTTTCACAAACGACACTAAACCTATCAACATTATCCATGTTGATCATC

CAAGTATCTGGATCCCGACTTTCCCGATGAATATCTCATTCACTCTGGGATTAGAATTACCGGGACG  
TCTATCATAACACGAG

+

FFFFFFFFFFFFFFFFFFFFFFFFFFFFFFFFFFFFFFFFFFFFFFFFFFFFFFFFFFFFFFFFFFFFFFFF  
FFFFF:FFFFFFFFFFFFFFFFFFFFFFFFFFFFFFFFFFFFFFFFFFFFFFFFFFFFFFFFFFFFFFFFF:  
FFFFFFFFFFFF,FF

@A00721:190:HGJW7DSXY:4:2528:15420:18333 2:N:0:TCTGCAAG+GCTGCACT  
GACCTTCTAGAACGTATCGTTTTTCACAAACGACACTAAACCTATCAACATTATCCATGTTGATCATC  
CAAGTATCTGGATCCCGACTTTCCCGATGAATATCTCATTCACTCTGGGATTAGAATTACCGGGACG  
TCTATCATAACACGAG

+

FFFFFFFFF:FFFFFFFFFFFFFFFFFFFFFFFFFFFFFFFFFFFFFFFFFFFFFFFFFFFFFFFFFFFFF  
FFFFFFFFFFFFFFFFFFFFFFFFFFFFFFFFFFFFFFFFFFFFFFFFFFFFFFFFFFFFFFFFFFFFF:FFFFF  
FFFFFFFFFFFFFFFF

@A00721:190:HGJW7DSXY:4:2610:15971:16376 2:N:0:TCTGCAAG+GCTGCACT  
GACCTTCTAGAACGTATCGTTTTTCACAAACGACACTAAACCTATCAACATTATCCATGTTGATCATC  
CAAGTATCTGGATCCCGACTTTCCCGATGAATATCTCATTCACTCTGGGATTAGAATTACCGGGACG  
TCTATCATAACACGAG

+

FFFFFFFFFFFFFFFFF:FFFFFFFFF:FFFFFFFFFFFFFFFFFFFFFFFFFFFFFFFFFFFFFFFFFFFF  
FFFF:FFFFFFFFFFFFFFFFFFFFFFFFFFFFFFFFFFFFFFFFFFFFFFFFFFFFFFFFFFFFF:F:FFFFFFFFFFFFF  
FFFFFFFFFFFFFFFF

@A00721:190:HGJW7DSXY:4:1150:22589:32315 2:N:0:TCTGCAAG+GCTGCACT  
CGACCTTCTAGAACGTATCGTTTTTCACAAACGACACTAAACCTATCAACATTATCCATGTTGATCAT  
CCAAGTATCTGGATCCCGACTTTCCCGATGAATATCTCATTCACTCTGGGATTAGAATTACCGGGAC  
GTCTATCATAACACGA

+

FFFFFFFFFFFFFFFFFFFFFFFFFFFFFFFFFFFFFFFFFFFFFFFFFFFFFFFFFFFFFFFFFFFFF:FFFFFFFFFFFFF  
FFF:FF:FFFFFFFFFFFFFFFFFFFFFFFFFFFFFFFFFFFFFFFFFFFFFFFFFFFFFFFFFFFFF:FFFFFFFFFFFFF  
F:FFFFFFFFFFFFF

@A00721:190:HGJW7DSXY:4:1263:21802:34115 2:N:0:TCTGCAAG+GCTGCACT  
CGACCTTCTAGAACGTATCGTTTTTCACAAACGACACTAAACCTATCAACATTATCCATGTTGATCAT  
CCAAGTATCTGGATCCCGACTTTCCCGATGAATATCTCATTCACTCTGGGATTAGAATTACCGGGAC  
GTCTATCATAACACGA

+

FFFFFFFFFFFFFFFFFFFFFFFFFFFFFFFFFFFFFFFFFFFFFFFFFFFFFFFFFFFFFFFFFFFFF  
FFFFFFFFFFFFFFFFFFFFFFFFFFFFFFFFFFFFFFFFFFFFFFFFFFFFFFFFFFFFFFFFFFFFF,FFFFFFFFFFFFF  
FFFFFFFFFFFFFFFF

@A00721:190:HGJW7DSXY:4:1329:14669:33348 2:N:0:TCTGCAAG+GCTGCACT  
CGACCTTCTAGAACGTATCGTTTTTCACAAACGACACTAAACCTATCAACATTATCCATGTTGATCAT  
CCAAGTATCTGGATCCCGACTTTCCCGATGAATATCTCATTCACTCTGGGATTAGAATTACCGGGAC  
GTCTATCATAACACGA

+

FFF:FFFF:FFFFFFFFFFFFFFFFFFFFFFFFFFFFFFFFFFFFFFFFFFFFFFFFFFFFFFFFFFFFF  
FFFF:FFFF,F:FF:F:FFFFFF:FF:FFFF:.:FFFFFF:FFFFFF:FFF:F:FFFFFF:FFFF  
FFFFFFFF:FFFFF

@A00721:190:HGJW7DSXY:4:1540:14904:7921 2:N:0:TCTGCAAG+GCTGCACT  
CGACCTTCTAGAACGTATCGTTTTTCACAAACGACACTAAACCTATCAACATTATCCATGTTGATCAT  
CCAAGTATCTGGATCCCGACTTTCCCGATGAATATCTCATTCACTCTGGGATTAGAATTACCGGGAC  
GTCTATCATAACACGA

+

FFFFFFFFFFFFFFFFFFFFFFFFFFFFFFFFFFFFFFFFFFFF:FF:FFFFFFFFFFFFFFFFF:FFFFFFFFF  
FFFF:FFFFFFFFFFFFFFFFFFFFF:FFFFFFF:FFFFFFF:FFFFFFFFFFFFFFFFFFFFF,:FFFF  
FFFFFFFFFFFFFFFF



@A00721:190:HGJW7DSXY:4:1609:24587:30921 2:N:0:TCTGCAAG+GCTGCACT  
CGACCTTCTAGAACGTATCGTTTTTCAAAACGACACTAAACCTATCAACATTATCCATGTTGATCAT  
CCAAGTATCTGGATCCCGACTTTCCCCGATGAATATCTCATTCACTCTGGGATTAGAATTACCGGGAC  
GTCTATCATAACGA

[illegible]

+

```

FFFFF:,FFFFFFFFFFFFFFFFFFFFFFFFFFFFFFFFFFFFFFFFFFFFFFFFFFFFFFFF:FFFFFFFF:FF:
FFFFFFFFFFFF:FFFFFF:FFFFFF,FF::FFFFF,FFFFF,FFFFFFFFF,FFFFFFFFF:FFFF:FFFF
:FFFFFFFFFFFF:E:F

```

+

[illegible]

+

[illegible]

+

[illegible] $+$ [illegible]

+

[illegible]

FFFFFFFF:FFFF,FFFFFFFF,FFFFFFFFFFFFFFFFFFFFFFFF:FF::FFFFFFFFFFFFFFFF::  
:FFFFFFFFFFFFFF

@A00721:190:HGJW7DSXY:4:2278:15429:25238 2:N:0:TCTGCAAG+GCTGCACT  
ACGACCTTCTAGAACGTATCGTTTTTCACAAACGACACTAAACCTATCAACATTATCCATGTTGATCA  
TCCAAGTATCTGGATCCCGACTTTCCCGATGAATATCTCATTCACTCTGGGATTAGAATTACCGGA  
CGTCTATCATACACG

+

FFFFFFFFFFFFFFFFFFFFFFFFFFFFFFFFFFFFFFFFFFFFFFFFFFFFFFFFFFFFFFFFFFFFFFFF  
FFFFFFFFFFFFFFFFFFFFFFFFFFFFFFFFFFFFFFFFFFFFFFFFFFFFFFFFFFFFFFFFFFFFFFFF  
FFFFFFFFFFFFFFFF

@A00721:190:HGJW7DSXY:4:1222:9390:22263 2:N:0:TCTGCAAG+GCTGCACT  
CCACGACCTTCTAGAACGTATCGTTTTTCACAAACGACACTAAACCTATCAACATTATCCATGTTGAT  
CATCCAAGTATCTGGATCCCGACTTTCCCGATGAATATCTCATTCACTCTGGGATTAGAATTACCG  
GACGTCTATCATACA

+

FFFFFFFF:FFFF:FFFFFFFF:FFFFFFFFFFFFFFFFFFFFFFFFFFFFFFFF:FFFFF,FFFFFFFFFFFF  
FF:FF,FFF:FFFFFFFFFFFFFF,FFFFFFFFFF:FFFFFFFFFFFF:FFFFFFFFFFFFFFFFFFFF  
FFFFFFFFFFFF:FFF

@A00721:190:HGJW7DSXY:4:1250:30563:5415 2:N:0:TCTGCAAG+GCTGCACT  
CCACGACCTTCTAGAACGTATCGTTTTTCACAAACGACACTAAACCTATCAACATTATCCATGTTGAT  
CATCCAAGTATCTGGATCCCGACTTTCCCGATGAATATCTCATTCACTCTGGGATTAGAATTACCG  
GACGTCTATCATACA

+

FFFFFFFFFFFFFFFFFFFFFFFFFFFFFFFFFFFFFFFFFFFFFFFFFFFFFFFFFFFFFFFFFFFFFFFF  
FFFFFFFFFFFFFFFFFFFFFFFFFFFFFFFFFFFFFFFF:FFFF:FFFFFFFFFFFFFFFFFFFFFFFFFFFF:FFFFF  
FFFFFFFFFFFF:FFF

@A00721:190:HGJW7DSXY:4:1268:11162:20666 2:N:0:TCTGCAAG+GCTGCACT  
CCACGACCTTCTAGAACGTATCGTTTTTCACAAACGACACTAAACCTATCAACATTATCCATGTTGAT  
CATCCAAGTATCTGGATCCCGACTTTCCCGATGAATATCTCATTCACTCTGGGATTAGAATTACCG  
GACGTCTATCATACA

+

FFFFFFFFFFFFFFFFFFFF:FFFFFFFFFFFFFFFFFFFFFFFFFFFFFFFFFFFFFFFF:FFFFFFFFFFFFFFFFFFFFFFFF  
FFFFFFFFFFFFFFFFFFFFFFFFFFFFFFFFFFFFFFFFFFFFFFFFFFFFFFFFFFFFFFFFFFFFFFFF  
FFFFFFFFFFFFFFFF:

@A00721:190:HGJW7DSXY:4:1345:2157:5071 2:N:0:TCTGCAAG+GCTGCACT  
CCACGACCTTCTAGAACGTATCGTTTTTCACAAACGACACTAAACCTATCAACATTATCCATGTTGAT  
CATCCAAGTATCTGGATCCCGACTTTCCCGATGAATATCTCATTCACTCTGGGATTAGAATTACCG  
GACGTCTATCATACA

+

FFFFFFFFFFFFFFFFFFFF:FFFFFFFFFFFF:FFFFFFFF:FFFFFFFFFFFFFFFFFFFFFFFFFFFF  
FFFFFFFFFFFFFFFFFFFFFFFFFFFFFFFFFFFFFFFF:FFFF,FFFFFFFFFFFFFFFFFFFFFFFFFFFF  
FFFFFFFFFFFFFFFF

@A00721:190:HGJW7DSXY:4:1363:16984:21480 2:N:0:TCTGCAAG+GCTGCACT  
CCACGACCTTCTAGAACGTATCGTTTTTCACAAACGACACTAAACCTATCAACATTATCCATGTTGAT  
CATCCAAGTATCTGGATCCCGACTTTCCCGATGAATATCTCATTCACTCTGGGATTAGAATTACCG  
GACGTCTATCATACA

+

F,FF:F::FFF,F,F:F::F,F:FFFFFFFF:FFFFFFFFFFFFFFFF,,FF,FFFF,:F:F:F:,FFF  
:FFF:FFF,F,FF:FF,F,F:FF:F,FFF:,FFFFFFFFFFFF:FFFF,FFF:FFFF,FFFFF,,F  
FFFFFF:FFFFFF

@A00721:190:HGJW7DSXY:4:1621:12057:13730 2:N:0:TCTGCAAG+GCTGCACT  
CCACGACCTTCTAGAACGTATCGTTTTTCACAAACGACACTAAACCTATCAACATTATCCATGTTGAT  
CATCCAAGTATCTGGATCCCGACTTTCCCGATGAATATCTCATTCACTCTGGGATTAGAATTACCG  
GACGTCTATCATACA

+  
FFFFFFFFFFFFFFFFFFFFFFFFFFFFFFFFFFFFFFFFFFFFFFFFFFFFFFFFFFFFFFFFFFFFFFFF  
FFFFFFFFFFFFFFFFFFFFFFFFFFFFFFFFFFFFFFFFFFFFFFFFFFFFFFFFFFFFFFFFFFFFFFFF  
FFFFFFFFFFFFFFFF

@A00721:190:HGJW7DSXY:4:1668:19253:9721 2:N:0:TCTGCAAG+GCTGCACT  
CCACGACCTTCTAGAACGTATCGTTTTTCACAAACGACACTAAACCTATCAACATTATCCATGTTGAT  
CATCCAAGTATCTGGATCCCGACTTTCCCGATGAATATCTCATTCACCTCTGGGATTAGAATTACCGG  
GACGTCTATCATACA

+  
FFFFFFFFFFFFFFFFFFFFFFFFFFFFFFFFFFFFFFFFFFFFFFFFFFFFFFFFFFFFFFFFFFFFFFFF  
FFFFFFFFFFFFFFFFFFFFFFFFFFFFFFFFFFFFFFFFFFFFFFFFFFFFFFFFFFFFFFFFFFFFFFFF  
FFFFFFFFFFFFFFFF

@A00721:190:HGJW7DSXY:4:1668:18900:9799 2:N:0:TCTGCAAG+GCTGCACT  
CCACGACCTTCTAGAACGTATCGTTTTTCACAAACGACACTAAACCTATCAACATTATCCATGTTGAT  
CATCCAAGTATCTGGATCCCGACTTTCCCGATGAATATCTCATTCACCTCTGGGATTAGAATTACCGG  
GACGTCTATCATACA

+  
FFFFFFFFFFFFFFFFFFFFFFFFFFFFFFFFFFFFFFFFFFFFFFFFFFFFFFFFFFFFFFFFFFFFFFFF  
FFFFFFFFFFFFFFFFFFFFFFFFFFFFFFFFFFFFFFFFFFFFFFFFFFFFFFFFFFFFFFFFFFFFFFFF  
FFF::FFFF,FFFF

@A00721:190:HGJW7DSXY:4:2220:22914:10708 2:N:0:TCTGCAAG+GCTGCACT  
CCACGACCTTCTAGAACGTATCGTTTTTCACAAACGACACTAAACCTATCAACATTATCCATGTTGAT  
CATCCAAGTATCTGGATCCCGACTTTCCCGATGAATATCTCATTCACCTCTGGGATTAGAATTACCGG  
GACGTCTATCATACA

+  
FFFFFFFF:FFFFFF:FFFFFFFFFFFFFFFFFFFF,F:FFFFFFFFFFFFFFFFFFFF,F,FFF,FFFFFFFF:F,  
:FFFF,FF::FFFF,F,FFFFFF,FFFF:F,F:::FFFFFFFF,FFFFFF:FFFFFF:F,,  
:FFFFFFFF,FFF

@A00721:190:HGJW7DSXY:4:2249:31286:3599 2:N:0:TCTGCAAG+GCTGCACT  
CCACGACCTTCTAGAACGTATCGTTTTTCACAAACGACACTAAACCTATCAACATTATCCATGTTGAT  
CATCCAAGTATCTGGATCCCGACTTTCCCGATGAATATCTCATTCACCTCTGGGATTAGAATTACCGG  
GACGTCTATCATACA

+  
FFFFFFFFFFFFFFFFFFFFFFFFFFFFFFFFFFFFFFFFFFFFFFFFFFFFFFFFFFFFFFFFFFFFFFFF  
FFFFFFFFFFFFFFFFFFFFFFFFFFFFFFFFFFFFFFFFFFFFFFFFFFFFFFFFFFFFFFFFFFFFFFFF  
FFFFFFFFFFFFFFFF

@A00721:190:HGJW7DSXY:4:2301:5873:25911 2:N:0:TCTGCAAG+GCTGCACT  
CCACGACCTTCTAGAACGTATCGTTTTTCACAAACGACACTAAACCTATCAACATTATCCATGTTGAT  
CATCCAAGTATCTGGATCCCGACTTTCCCGATGAATATCTCATTCACCTCTGGGATTAGAATTACCGG  
GACGTCTATCATACA

+  
FFFFFFFFFFFFFFFFFFFFFFFFFFFFFFFFFFFFFFFFFFFFFFFFFFFFFFFFFFFFFFFFFFFFFFFF  
FFFFF:FFFFFFFFFFFF,FFFF:FFF:FFFFFFFFFFFFFFFFFFFF,FFFFFFFFFFFF,FFFFFF  
FFFFFFFFFFFFFFFF:

@A00721:190:HGJW7DSXY:4:2348:9010:35446 2:N:0:TCTGCAAG+GCTGCACT  
CCACGACCTTCTAGAACGTATCGTTTTTCACAAACGACACTAAACCTATCAACATTATCCATGTTGAT  
CATCCAAGTATCTGGATCCCGACTTTCCCGATGAATATCTCATTCACCTCTGGGATTAGAATTACCGG  
GACGTCTATCATACA

+  
FFFFFFFF:FFFFFFFFFFFFFFFFFFFFFFFFFFFFFFFFFFFFFFFFFFFFFFFFFFFFFFFFFFFFFFFF  
FFFFFFFFFFFFFFFFFFFFFFFFFFFFFFFFFFFFFFFFFFFFFFFFFFFFFFFFFFFFFFFFFFFFFFFF  
FFFFFFFFFFFFFFFF

@A00721:190:HGJW7DSXY:4:2375:12120:6480 2:N:0:TCTGCAAG+GCTGCACT  
CCACGACCTTCTAGAACGTATCGTTTTTCACAAACGACACTAAACCTATCAACATTATCCATGTTGAT

CATCCAAGTATCTGGATCCCGACTTTCCCGGATGAATATCTCATTCACTCTGGGATTAGAATTACCGG  
GACGTCTATCATACA

```

FFFFFFFFFFFFFFFFFFFFFFFFFFFFFFFFFFFFFFFFFFFFFFFFFFFFFFFFFFFFFFFFFFFFFFFF
FFFFFFFFFFFFFFFFFFFFFFFFFFFFFFFF:FFF:FFFFFFFFFFFFFFFFFFFFFFFFFFFFFFFFFFFF
FFFFFFFFFFFFFFFFFFFF

```

 $+$ 

@A00721:190:HGJW7DSXY:4:2533:1154:28040 2:N:0:TCTGCAAG+GCTGCACT  
CCACGACCTTCTAGAACGTATCGTTTTTACAAACGACACTAAACCTATCAACATTATCCATGTTGAT  
CATCCAAGTATCTGGATCCCGACTTTCCCGATGAATATCTCATTCACTCTGGGATTAGAATTACCGG  
GACGTCTATCATACA

```
FFFF,F:FFFFFFFFFFFF,F:, :FFFFFFFFFFFF:FFFFFF:FFFFFFFF:FFFFFFFF,FFFFFFFFF::F
FFFF:F,FFFFFF:FFFFFF:FFFFFFF:F::F:FFFF,:FFFFFFFFF:FFFF,FFFFFFFFF:FF,F,
FFF,,F::FF:FFFF
```

+

@A00721:190:HGJW7DSXY:4:2655:25482:12399 2:N:0:TCTGCAAG+GCTGCACT  
CCACGACCTTCTAGAACGTATCGTTTTTCACAAACGACACTAAACCTATCAACATTATCCATGTTGAT  
CATCCAAGTATCTGGATCCCGACTTTCCCGATGAATATCTCATTCACTCTGGGATTAGAATTACCGG  
GACGTCTATCATACA

[illegible]

+

@A00721:190:HGJW7DSXY:4:1273:13584:29590 2:N:0:TCTGCAAG+GCTGCACT  
CAACGTAACCACGACCTTCTAGAACGTATCGTTTTTCACAAACGACACTAAACCTATCAACATTATCC  
ATGTTGATCATCCAAGTATCTGGATCCCGACTTTCCTCGATGAATATCTCATTCACTCTGGGATTAGA  
ATTACCGGGACGTCT

[illegible]

@A00721:190:HGJW7DSXY:4:1326:3640:18443 2:N:0:TCTGCAAG+GCTGCACT  
CAACGTAACCACGACCTTCTAGAACGTATCGTTTTTCAAAACGACACTAAACCTATCAACATTATCC  
ATGTTGATCATCCAAGTATCTGGATCCCGACTTTCCCCGATGAATATCTCATTCACTCTGGGATTAGA  
ATTACCGGGACGTCT

[illegible]

@A00721:190:HGJW7DSXY:4:2271:25364:26537 2:N:0:TCTGCAAG+GCTGCACT  
CAACGTAACCACGACCTTCTAGAACGTATCGTTTTTCAAAACGACACTAAACCTATCAACATTATCC  
ATGTTGATCATCCAAGTATCTGGATCCCGACTTTCCCCGATGAATATCTCATTCACTCTGGGATTAGA  
ATTACCGGGACGTCT

```

FFFFFFFFFFFFFFFF:FFFFFFFFFFFFFFFFFFFFFFFFFFFFFFFFFFFFFFFF
FFFFFFFFFFFFFFFFFFFFFFFFFFFFFFFFFFFFFFFF:FFFFFFFFF:FFFFFFFFFFFFFFFFFFFFFFFFFFFFFFFF
FFFFFFFFFFFFFFFF

```

@A00721:190:HGJW7DSXY:4:2315:13630:8249 2:N:0:TCTGCAAG+GCTGCACT  
CAACGTAACCACGACCTTCTAGAACGTATCGTTTTTCAAAACGACACTAAACCTATCAACATTATCC  
ATGTTGATCATCCAAGTATCTGGATCCCGACTTTCCCCGATGAATATCTCATTCACTCTGGGATTAGA  
ATTACCGGGACGTCT

[illegible]

@A00721:190:HGJW7DSXY:4:2433:22019:6840 2:N:0:TCTGCAAG+GCTGCACT  
CAACGTAACCACGACCTTCTAGAACGTATCGTTTTTCAAAACGACACTAAACCTATCAACATTATCC  
ATGTTGATCATCCAAGTATCTGGATCCCGACTTTCCCCGATGAATATCTCATTCACTCTGGGATTAGA  
ATTACCGGGACGTCT

[illegible]

@A00721:190:HGJW7DSXY:4:2449:10050:10128 2:N:0:TCTGCAAG+GCTGCACT  
CAACGTAACCACGACCTTCTAGAACGTATCGTTTTTCACAAACGACACTAAACCTATCAACATTATCC  
ATGTTGATCATCCAAGTATCTGGATCCCGACTTTCCCCGATGAATATCTCATTCACTCTGGGATTAGA  
ATTACCGGGACGTCT

```
FFFFFFFFFFFFFFFFFFFFFFFFFFFFFFFFFFFFFFFFFFFFFFFFFFFFFFFFFFFFFFFFFFF  
FFFFFFFFFFFFFFFFFFFFFFFFFFFFFFFFFFFFFFFF:F:FFF:FF:FFFFFFFFFFFFFFFFFFFFF  
:FFFFFFFFFFFFFFFF
```

@A00721:190:HGJW7DSXY:4:2462:14235:6981 2:N:0:TCTGCAAG+GCTGCACT  
CAACGTAACCACGACCTTCTAGAACGTATCGTTTTTCACAAACGACACTAAACCTATCAACATTATCC  
ATGTTGATCATCCAAGTATCTGGATCCCGACTTTCCTCGATGAATATCTCATTCACTCTGGGATTAGA  
ATTACCGGGACGTCT

[illegible]

@A00721:190:HGJW7DSXY:4:2513:30201:15186 2:N:0:TCTGCAAG+GCTGCACT  
CAACGTAACCACGACCTTCTAGAACGTATCGTTTTTACAAACGACACTAAACCTATCAACATTATCC  
ATGTTGATCATCCAAGTATCTGGATCCCGACTTTCCTCCGATGAATATCTCATTCACTCTGGGATTAGA  
ATTACCGGGACGTCT

[illegible]

FFFFFFFFFFFFFFFF:FFFFFFFFFFFFFFFFFFFFFFFFFFFFFFFFFFFFFFFFFFFFFFFFFFFFFFFFFFFFFFFF:FFFF  
FFFFF:FF:FFFFFF

@A00721:190:HGJW7DSXY:4:2549:11903:30029 2:N:0:TCTGCAAG+GCTGCACT  
CAACGTAACCACGACCTTCTAGAACGTATCGTTTTTCACAAACGACACTAAACCTATCAACATTATCC  
ATGTTGATCATCCAAGTATCTGGATCCCGACTTTCCCGATGAATATCTCATTCACTCTGGGATTAGA  
ATTACCGGGACGTCT

+

FFFFFFFFFFFFFFFFFFFFFFFFFFFFFFFFFFFFFFFFFFFFFFFFFFFFFFFFFFFFFFFFFFFFFFFFFFFFFFFF:FFFFFFFFFFFFFFFFFFFFF  
FFFFFFFFFFFFFFFFFFFFFFFFFFFFFFFFFFFFFFFFFFFFFFFFFFFFFFFFFFFFFFFFFFFFFFFFFFFFFFFF:FFFFFFFFFFFFFFFFFFFFFFFFFFFFFFFF  
FFFFFFFFFFFFFFFFFFFF

@A00721:190:HGJW7DSXY:4:2636:4960:20979 2:N:0:TCTGCAAG+GCTGCACT  
CAACGTAACCACGACCTTCTAGAACGTATCGTTTTTCACAAACGACACTAAACCTATCAACATTATCC  
ATGTTGATCATCCAAGTATCTGGATCCCGACTTTCCCGATGAATATCTCATTCACTCTGGGATTAGA  
ATTACCGGGACGTCT

+

FFFFFFFFFFFFFFFFFFFFFFFFFFFFFFFFFFFFFFFFFFFFFFFFFFFFFFFFFFFFFFFFFFFFFFFFFFFFFFFF:FFFFF  
FFFFFFFFFFFFFFFFFFFFFFFFFFFFFFFFFFFFFFFFFFFFFFFFFFFFFFFFFFFFFFFFFFFFFFFFFFFFFFFF:FFFF,FFFF  
FFFFFFFFFFFF:,FFF

@A00721:190:HGJW7DSXY:4:1163:29903:11318 2:N:0:TCTGCAAG+GCTGCACT  
GATGAATCAACGTAACCACGACCTTCTAGAACGTATCGTTTTTCACAAACGACACTAAACCTATCAAC  
ATTATCCATGTTGATCATCCAAGTATCTGGATCCCGACTTTCCCGATGAATATCTCATTCACTCTGG  
GATTAGAATTACCGG

+

FFFFFFFFFFFFFFFFFFFFFFFFFFFFFFFFFFFFFFFFFFFFFFFFFFFFFFFFFFFFFFFFFFFFFFFFFFFFFFFF:FFFFF  
FFFFFFFFFFFFFFFFFFFFFFFFFFFFFFFFFFFFFFFFFFFFFFFFFFFFFFFFFFFFFFFFFFFFFFFFFFFFFFFF:FFFFF,FFFFF  
FFFFFFFFFFFFFFFFFFFF

@A00721:190:HGJW7DSXY:4:1353:18005:7780 2:N:0:TCTGCAAG+GCTGCACT  
GATGAATCAACGTAACCACGACCTTCTAGAACGTATCGTTTTTCACAAACGACACTAAACCTATCAAC  
ATTATCCATGTTGATCATCCAAGTATCTGGATCCCGACTTTCCCGATGAATATCTCATTCACTCTGG  
GATTAGAATTACCGG

+

FFFFF:FFFFFFFFFFFFFFFFFFFFFFFFFFFFFFFFFFFFFFFFFFFFFFFFFFFFFFFFFFFFFFFFFFFFFFFFFFFFFFFF  
FFFFFFFFFFFFFFFFFFFFFFFFFFFFFFFFFFFFFFFFFFFFFFFFFFFFFFFFFFFFFFFFFFFFFFFFFFFFFFFF:FFFFF  
FFFFFFFF:FFFFFFF

@A00721:190:HGJW7DSXY:4:2446:10872:32597 2:N:0:TCTGCAAG+GCTGCACT  
GATGAATCAACGTAACCACGACCTTCTAGAACGTATCGTTTTTCACAAACGACACTAAACCTATCAAC  
ATTATCCATGTTGATCATCCAAGTATCTGGATCCCGACTTTCCCGATGAATATCTCATTCACTCTGG  
GATTAGAATTACCGG

+

FFFFFFFFFFFFFFFFFFFFFFFFFFFFFFFFFFFFFFFFFFFFFFFFFFFFFFFFFFFFFFFFFFFFFFFFFFFFFFFF:FFFFF:FFFFFFFFFFFFFFFFFFFFF  
F:FFFFFFFFFFFFFFFFFFFFFFFFFFFFFFFFFFFFFFFFFFFFFFFFFFFFFFFFFFFFFFFFFFFFFFFFFFFFFFFF:FFFFFFFFFFFFFFFFFFFFF  
FFFFFFFF:FFFFFFF

@A00721:190:HGJW7DSXY:4:2643:32334:27899 2:N:0:TCTGCAAG+GCTGCACT  
GATGAATCAACGTAACCACGACCTTCTAGAACGTATCGTTTTTCACAAACGACACTAAACCTATCAAC  
ATTATCCATGTTGATCATCCAAGTATCTGGATCCCGACTTTCCCGATGAATATCTCATTCACTCTGG  
GATTAGAATTACCGG

+

FFFFFFFFFFFFFF:FFFFFFFFFFFFFFFFFFFFFFFFFFFFFFFFFFFFFFFFFFFFFFFFFFFFFFFFFFFFFFFF,F:FFFFFFFF,FFFFFFFFF  
F:FFFFF,FFFFFFFFFFFFFFFFFFFFFFFFFFFFFFFFFFFFFFFFFFFFFFFFFFFFFFFFFFFFFFFF:FFFFFFFFFFFFFFFFFFFF,FF  
F:FFFFFFFFFFFF,F

@A00721:190:HGJW7DSXY:4:1121:9100:22232 2:N:0:TCTGCAAG+GCTGCACT  
GGATGAATCAACGTAACCACGACCTTCTAGAACGTATCGTTTTTCACAAACGACACTAAACCTATCAA  
CATTATCCATGTTGATCATCCAAGTATCTGGATCCCGACTTTCCCGATGAATATCTCATTCACTCTG  
GGATTAGAATTACCG

+  
FFF,FFFFFFFF:F:FFFFFF:FFFFFFFF,FFFFFFFFFFFFFFFF,FFFFFFFFFFFFFFFF:FFFF  
FFFFFFFFFFFFFFFF:FFFF:FFFF:FFFFFFFFFFFFFFFF:FFFFFFFFFFFF,FFFFFFFFFFFFFFFF  
:F:,FF:F:FFFF:

@A00721:190:HGJW7DSXY:4:1361:31801:3865 2:N:0:TCTGCAAG+GCTGCACT  
GGATGAATCAACGTAACCACGACCTTCTAGAACGTATCGTTTTTCACAAACGACACTAAACCTATCAA  
CATTATCCATGTTGATCATCCAAGTATCTGGATCCCGACTTTCCCGATGAATATCTCATTCACTCTG  
GGATTAGAATTACCG

+  
FFFFFFFFFFFFFFFF:FF:FFFFFFFFFFFFFFFFFFFFFFFFFFFFFFFFFFFFFFFF:FFFFFFFFF  
FFFFFFFFFFFFFFFFFFFFFFFFFFFFFFFF:FFFF:FFFFF,FFFFFFFFFFFFFFFFFFFFFFFF,F:FF  
FFFFFFFFFFFFFFFF

@A00721:190:HGJW7DSXY:4:1361:4381:5791 2:N:0:TCTGCAAG+GCTGCACT  
GGATGAATCAACGTAACCACGACCTTCTAGAACGTATCGTTTTTCACAAACGACACTAAACCTATCAA  
CATTATCCATGTTGATCATCCAAGTATCTGGATCCCGACTTTCCCGATGAATATCTCATTCACTCTG  
GGATTAGAATTACCG

+  
FFFFFFFFFFFFFFFFFFFFFFFF:FFFFFFFFFFFF,FFFF:FFFFFFFFFFFFFFFFFFFFFFFFFFFFFFF  
FFFFFFFFFFFFFFFFFFFFFFFF:FFFFFFFFFFFFFFFFFFFFFFFFFFFFFFFFFFFFFFFFFFFFFFFFF  
FFFFFFFFFFFF,FF

@A00721:190:HGJW7DSXY:4:1466:28592:12587 2:N:0:TCTGCAAG+GCTGCACT  
GGATGAATCAACGTAACCACGACCTTCTAGAACGTATCGTTTTTCACAAACGACACTAAACCTATCAA  
CATTATCCATGTTGATCATCCAAGTATCTGGATCCCGACTTTCCCGATGAATATCTCATTCACTCTG  
GGATTAGAATTACCG

+  
FF:FFFFFFFFFFFFFFFFFFFFFFFFFFFFFFFFFFFFFFFFFFFFFFFFFFFFFFFFFFFFFFFFFFFFF  
FFFFFFFFFFFFFFFFFFFFFFFFFFFFFFFFFFFFFFFFFFFFFFFFFFFFFFFFFFFFFFFFFFFFFFFFF  
FFFFFFFFFFFFFFFF

@A00721:190:HGJW7DSXY:4:2116:19199:21527 2:N:0:TCTGCAAG+GCTGCACT  
GGATGAATCAACGTAACCACGACCTTCTAGAACGTATCGTTTTTCACAAACGACACTAAACCTATCAA  
CATTATCCATGTTGATCATCCAAGTATCTGGATCCCGACTTTCCCGATGAATATCTCATTCACTCTG  
GGATTAGAATTACCG

+  
FFFFFFFFFFFFFFFFFFFFFFFFFFFFFFFFFFFFFFFFFFFFFFFFFFFFFFFFFFFFFFFFFFFFFFFFF  
FFFFFFFFFFFFFFFFFFFFFFFF:FFFFFFFFFFFFFFFFFFFFFFFFFFFFFFFFFFFFFFFFFFFFFFFFF  
FFFFFFFFFFFFFFFF

@A00721:190:HGJW7DSXY:4:2116:19298:22451 2:N:0:TCTGCAAG+GCTGCACT  
GGATGAATCAACGTAACCACGACCTTCTAGAACGTATCGTTTTTCACAAACGACACTAAACCTATCAA  
CATTATCCATGTTGATCATCCAAGTATCTGGATCCCGACTTTCCCGATGAATATCTCATTCACTCTG  
GGATTAGAATTACCG

+  
FFFFFFFFFFFFFFFFFFFFFFFFFFFFFFFFFFFFFFFFFFFFFFFFFFFFFFFFFFFFFFFF:FFFFFFFFFFFFFFFFF  
FF:FFFFFFFFFFFFFFFFFFFFFFFFFFFFFFFFFFFFFFFFFFFFFFFFFFFFFFFFFFFFFFFF:FFFF  
FFFFFFFFFFFF:FFF

@A00721:190:HGJW7DSXY:4:2233:25201:17863 2:N:0:TCTGCAAG+GCTGCACT  
GGATGAATCAACGTAACCACGACCTTCTAGAACGTATCGTTTTTCACAAACGACACTAAACCTATCAA  
CATTATCCATGTTGATCATCCAAGTATCTGGATCCCGACTTTCCCGATGAATATCTCATTCACTCTG  
GGATTAGAATTACCG

+  
FFFFFFFFFFFFFFFFFFFFFFFFFFFFFFFFFFFFFFFFFFFFFFFFFFFFFFFFFFFFFFFFFFFFFFFFF  
FFFFFFFFFFFFFFFFFFFFFFFF:FFFFFFFFFFFFFFFFFFFFFFFFFFFFFFFF:FFF,FFFFFFFFFFFFFFFF:F:FFFF  
FFFFFFFF:FFFF:,F

@A00721:190:HGJW7DSXY:4:2234:5376:19727 2:N:0:TCTGCAAG+GCTGCACT  
GGATGAATCAACGTAACCACGACCTTCTAGAACGTATCGTTTTTCACAAACGACACTAAACCTATCAA

CATTATCCATGTTGATCATCCAAGTATCTGGATCCCGACTTTCCCGATGAATATCTCATTCACTCTG  
GGATTAGAATTACCG

+

FFFFFFFFFFFFFFFFFFFFFFFFFFFFFFFFFFFFFFFFFFFFFFFFFFFFFFFFFFFFFFFFFFFFFFFFFFFF:FFFFFFFFFFFF  
FFFF:FFFF:FFFFFFFFFFFF,:FFF::F:FFFFFF:::FFFFFF::FF:F,FF:FFFF,::::F  
FFF::,FF:F::F::

@A00721:190:HGJW7DSXY:4:2238:10303:29199 2:N:0:TCTGCAAG+GCTGCACT  
GGATGAATCAACGTAACACGACCTTCTAGAACGTATCGTTTTTCACAAACGACACTAAACCTATCAA  
CATTATCCATGTTGATCATCCAAGTATCTGGATCCCGACTTTCCCGATGAATATCTCATTCACTCTG  
GGATTAGAATTACCG

+

FFFFFFFFFFFFFFFFFFFFFFFFFFFFFFFFFFFFFFFFFFFFFFFFFFFFFFFFFFFFFFFFFFFFFFFFFFFF  
FFFFFFFFFFFFFFFFFFFFFFFFFFFFFFFFFFFFFFFFFFFFFFFFFFFFFFFFFFFFFFFFFFFFFFFFFFFF  
FF:FFFFFFFFFFFF:F

@A00721:190:HGJW7DSXY:4:2271:14082:19836 2:N:0:TCTGCAAG+GCTGCACT  
GGATGAATCAACGTAACACGACCTTCTAGAACGTATCGTTTTTCACAAACGACACTAAACCTATCAA  
CATTATCCATGTTGATCATCCAAGTATCTGGATCCCGACTTTCCCGATGAATATCTCATTCACTCTG  
GGATTAGAATTACCG

+

FFFFFFFFFFFFFFFF:FFFFFFFF:FFFFF:FFFFFFFFFFFF:, :FFFFFFFFFFFFFFFF,FFFFFFFFFFFF  
FF,FFFFFFFF,FF:FFFFFFFFFFFFFFFF:FFFFFFFFFFFF:FFFF:F:FFFFFFFFFFFF,:FFFFFFF  
FFFFFFFFF:FFFFFFF

@A00721:190:HGJW7DSXY:4:2574:10764:24799 2:N:0:TCTGCAAG+GCTGCACT  
GGATGAATCAACGTAACACGACCTTCTAGAACGTATCGTTTTTCACAAACGACACTAAACCTATCAA  
CATTATCCATGTTGATCATCCAAGTATCTGGATCCCGACTTTCCCGATGAATATCTCATTCACTCTG  
GGATTAGAATTACCG

+

FFFFFFFFFFFFFFFFFFFFFFFFFFFFFFFFFFFFFFFFFFFFFFFFFFFFFFFFFFFFFFFFFFFFFFFFFFFF  
FFFFFFFFFFFFFFFFFFFF:FFFFFFF:FFFFFFFFFFFFFFFFFFFFFFFFFFFFFFFFFFFFFFFFFFFFF  
FFFFFFFFFFFFFFFFFFFF

@A00721:190:HGJW7DSXY:4:1120:15899:32252 2:N:0:TCTGCAAG+GCTGCACT  
CATGGATGAATCAACGTAACACGACCTTCTAGAACGTATCGTTTTTCACAAACGACACTAAACCTAT  
CAACATTATCCATGTTGATCATCCAAGTATCTGGATCCCGACTTTCCCGATGAATATCTCATTCACT  
CTGGGATTAGAATTA

+

FF,FFFFFFFFFFFFFFFFFFFFFFFFFFFFFFFF:FFFFFFFFFFFFFFFF:FFFFFFFFFFFFFFFFFFFFF  
FFFFFFFFFFFFFFFFFFFFFFFFFFFFFFFF:FFFFFFFFFFFFFFFFFFFFFFFF:FFFFFFFFFFFFFFFFFFFF  
FFFFFFFFFFFFFFFF:F

@A00721:190:HGJW7DSXY:4:1145:23710:2347 2:N:0:TCTGCAAG+GCTGCACT  
CATGGATGAATCAACGTAACACGACCTTCTAGAACGTATCGTTTTTCACAAACGACACTAAACCTAT  
CAACATTATCCATGTTGATCATCCAAGTATCTGGATCCCGACTTTCCCGATGAATATCTCATTCACT  
CTGGGATTAGAATTA

+

FFFFFFFFFFFFFFFFFFFFFFFFFFFFFFFFFFFFFFFFFFFFFFFFFFFFFFFFFFFFFFFFFFFFFFFFFFFF,F  
FFFFFFFFFFFFFFFFFFFFFFFFFFFFFFFFFFFFFFFFFFFFFFFFFFFFFFFFFFFFFFFFFFFFFFFFFFFF:FFFF  
FFFFFFFFFFFFFFFFFFFF

@A00721:190:HGJW7DSXY:4:1250:30065:23688 2:N:0:TCTGCAAG+GCTGCACT  
CATGGATGAATCAACGTAACACGACCTTCTAGAACGTATCGTTTTTCACAAACGACACTAAACCTAT  
CAACATTATCCATGTTGATCATCCAAGTATCTGGATCCCGACTTTCCCGATGAATATCTCATTCACT  
CTGGGATTAGAATTA

+

FFFFF::FFF:FFFFFFFFFFFF:FFFFFFFFFFFF:FFFFFFFFFFFF:FFFF:FFFFFFFFFFFFFFFF:FF:FFFFF  
FFFFF,F:FF,FF::FFFFFFFFFFFF:F:FFFF,FF:FFFFFFFFFFFFFFFFFFFF,FFFFFFFFFFFFFFFF,F  
F:FF:FFFFFFFFFFFF





```

FFFFFFFF:FFFFFFFFFFFFFFFFFFFFFFFFFFFFFFFF:FFFFFFFFFFFFFFF:FFFF:FFFFFFFFFFFFFFFFFFFF:
FFFFFFFFFFFFFFFFFFFF

```

+

@A00721:190:HGJW7DSXY:4:2341:28800:2988 2:N:0:TCTGCAAG+GCTGCACT  
TCTTAACGTCGTCGTCGCCATCCATGGATGAATCAACGTAACCACGACCTTCTAGAACGTATCGTTTT  
TCACAAACGACACTAAACCTATCAACATTATCCATGTTGATCATCCAAGTATCTGGATCCCGACTTTC  
CCCGATGAATATCTC

```
FFFFFFFFFFFFFFFFFFFFFFFFFFFFFFFFFFFFFFFFFFFFFFFFFFFFFFFFFFFFFFF
FF:FFFFFFFFFFFFFF,FFFFFFFF:FFFFFFFFFFFFFFFFFFFFFFFFFFFFFFFFFFFF
EEEEEEEEE:EEEEEE
```

+

@A00721:190:HGJW7DSXY:4:2366:29930:32409 2:N:0:TCTGCAAG+GCTGCACT  
TCTTAACGTCGTCGTCGCCATCCATGGATGAATCAACGTAACCACGACCTTCTAGAACGTATCGTTTT  
TCACAAACGACACTAAACCTATCAACATTATCCATGTTGATCATCCAAGTATCTGGATCCCGACTTTC  
CCCGATGAATATCTC

[illegible]

+

@A00721:190:HGJW7DSXY:4:1102:30544:36072 2:N:0:TCTGCAAG+GCTGCACT  
AAGCGTTCTTAACGTCGTCGTCCGCATCCATGGATGAATCAACGTAACCACGACCTTCTAGAACGTAT  
CGTTTTTTCACAAACGACACTAAACCTATCAACATTATCCATGTTGATCATCCAAGTATCTGGATCCCG  
ACTTTCCTCCGATGAA

[illegible]

+  
FFFFFFFFFFFFFFFFFFFFFFFFFFFFFFFFFFFFFFFFFFFFFFFFFFFFFFFFFFFFFFFFFFFFFFFF  
FFFFFFFFFFFFFFFFFFFFFFFFFFFFFFFFFFFFFFFFFFFFFFFFFFFFFFFFFFFFFFFFFFFFFFFF:FFFFFFFFFFFFFFF  
FFFFFFFFFFFFFFFF

@A00721:190:HGJW7DSXY:4:2556:8070:2065 2:N:0:TCTGCAAG+GCTGCACT  
AAGCGTTCTTAACGTCGTCTCGCATCCATGGATGAATCAACGTAACCACGACCTTCTAGAACGTAT  
CGTTTTTTCACAAACGACACTAAACCTATCAACATTATCCATGTTGATCATCCAAGTATCTGGATCCCG  
ACTTTCCCGATGAA

+  
FFFFFFFFFFFFFFFFFFFFFFFFFFFFFFFFFFFFFFFFFFFFFFFFFFFFFFFFFFFFFFFFFFFFFFFF  
FFFFFFFFFFFFFFFFFFFFFFFFFFFFFFFFFFFFFFFFFFFFFFFFFFFFFFFFFFFFFFFFFFFFFFFF  
FFFFFFFFFFFFFFFF:

@A00721:190:HGJW7DSXY:4:2607:32877:10113 2:N:0:TCTGCAAG+GCTGCACT  
AAGCGTTCTTAACGTCGTCTCGCATCCATGGATGAATCAACGTAACCACGACCTTCTAGAACGTAT  
CGTTTTTTCACAAACGACACTAAACCTATCAACATTATCCATGTTGATCATCCAAGTATCTGGATCCCG  
ACTTTCCCGATGA

+  
FFFFFFF:FFFFFFFFFFFFFFFFFFFFFFFFFFFFFFFFFFFFFFFFFFFFFFFFFFFFFFFFFFFFFFFF  
FFFFFFFFF:FFF,,FFFFFF:FFFFFFFFFFFFFFFFFFFF,FFFF,FF,FF:FFF:FF:FFF,F:  
FFFF: :FFFFFFFF

@A00721:190:HGJW7DSXY:4:1224:16360:5901 2:N:0:TCTGCAAG+GCTGCACT  
CTCATATAACAGAAGTAAGCGTTCTTAACGTCGTCTCGCATCCATGGATGAATCAACGTAACCACG  
ACCTTCTAGAACGTATCGTTTTTTCACAAACGACACTAAACCTATCAACATTATCCATGTTGATCATCC  
AAGTATCTGGATCCC

+  
FFFFFFFFFFFFFFFFFFFFFFFFFFFFFFFFFFFFFFFFFFFFFFFFFFFFFFFFFFFFFFFFFFFFFFFF  
FFFFFFFFFFFFFFFFFFFFFFFFFFFFFFFFFFFFFFFFFFFFFFFFFFFFFFFFFFFFFFFFFFFFFFFF  
FFFFFFFFFFFFFFFF

@A00721:190:HGJW7DSXY:4:1245:5430:36104 2:N:0:TCTGCAAG+GCTGCACT  
CTCATATAACAGAAGTAAGCGTTCTTAACGTCGTCTCGCATCCATGGATGAATCAACGTAACCACG  
ACCTTCTAGAACGTATCGTTTTTTCACAAACGACACTAAACCTATCAACATTATCCATGTTGATCATCC  
AAGTATCTGGATCCC

+  
FFFFFFFFF:FFFFFFFFFFFFFFFFFFFFFFFFFFFFFFFFFFFFFFFFFFFFFFFFFFFFFFFFFFFFFFFF  
FFFFFFFFFFFFFFFFFFFFFFFFFFFFFFFFFFFFFFFFFFFFFFFFFFFFFFFFFFFFFFFFFFFFFFFF:FFFFFFFFFFFFFF  
FFFFF:FFFFFFFF

@A00721:190:HGJW7DSXY:4:1301:6876:6104 2:N:0:TCTGCAAG+GCTGCACT  
CTCATATAACAGAAGTAAGCGTTCTTAACGTCGTCTCGCATCCATGGATGAATCAACGTAACCACG  
ACCTTCTAGAACGTATCGTTTTTTCACAAACGACACTAAACCTATCAACATTATCCATGTTGATCATCC  
AAGTATCTGGATCCC

+  
FFFFFFFFFFFFFFFFFFFFFFFFFFFFFFFFFFFFFFFFFFFFFFFFFFFFFFFFFFFFFFFFFFFFFFFF  
FFFF:FFFFFFFFFFFFFFFFFFFFFFFFFFFFFFFFFFFFFFFFFFFFFFFFFFFFFFFFFFFFFFFF:FFFFFFFFF,FFFFFFFFF  
FFFFF:FFFFFFFF

@A00721:190:HGJW7DSXY:4:1301:6180:6277 2:N:0:TCTGCAAG+GCTGCACT  
CTCATATAACAGAAGTAAGCGTTCTTAACGTCGTCTCGCATCCATGGATGAATCAACGTAACCACG  
ACCTTCTAGAACGTATCGTTTTTTCACAAACGACACTAAACCTATCAACATTATCCATGTTGATCATCC  
AAGTATCTGGATCCC

+  
:FFFFFFFFFFFFFFFFFFFFFFFFFFFFFFFFFFFFFFFFFFFFFFFFFFFFFFFFFFFFFFFFFFFFFFFF  
FFFFFFFFFFFFFFFFFFFFFFFFFFFFFFFFFFFFFFFFFFFFFFFFFFFFFFFFFFFFFFFFFFFFFFFF  
FFFFFFFFFFFFFFFF

@A00721:190:HGJW7DSXY:4:1334:9679:21668 2:N:0:TCTGCAAG+GCTGCACT  
CTCATATAACAGAAGTAAGCGTTCTTAACGTCGTCTCGCATCCATGGATGAATCAACGTAACCACG

ACCTTCTAGAACGTATCGTTTTTACAAACGACACTAAACCTATCAACATTATCCATGTTGATCATCC  
AAGTATCTGGATCCC

```

FFFFFFFFFFFFFFFFFFFFFFFF:FFFFFFFFFFFFFFFFFFFFFFFFFFFFFFFF
FFF,FFFFFFFFFFFFFFFF:FFFFFFFF:FFF:FFF:FFFF,FFFFFFFF
FFFFF:FFF:FFFF

```

 $+$ [illegible] $+$ [illegible]

+

```

FFFFFFFFFFFFFFFFFFFFFFFFFFFFFFFF:FFFFFFFFFFFFFFFFFFFFFFFF:FFFFFFF
FFFFFFFFFFFFFFFFFFFFFFFF:FFFFFFFFFFFFFFFFFFFFFFFFFFFFFFFFFFFFFFFF
FFFFFFFFF:FFFFFF

```

+

```

FFFFFFFFFFFFFFFFFFFF:FF:FFFFFFFFFFFFFFFFFFFFFFFFFFFFFFFFFFFFFFFFFFFF
FFF:FFFFFFFFFFFFFFFFFFFF:FFFFF:FFFFFFFFF:FFFFFFFFFFFFFFFFFFFFFFFFFFFF:FFFF
FFFFFFFFFFFFFFFFFFFF

```

+

[illegible]

+

[illegible]

@A00721:190:HGJW7DSXY:4:2119:16251:8531 2:N:0:TCTGCAAG+GCTGCACT  
CTCATATAACAGAAGTAAGCGTTCTTAACGTCGTCGTCGCCATCCATGGATGAATCAACGTAACCACG  
ACCTTCTAGAACGTATCGTTTTTCAAAACGACACTAAACCTATCAACATTATCCATGTTGATCATCC  
AAGTATCTGGATCCC

@A00721:190:HGJW7DSXY:4:2136:31882:11490 2:N:0:TCTGCAAG+GCTGCACT  
CTCATATAACAGAAGTAAGCGTTCCTTAACGTCGTCGTCGCCATCCATGGATGAATCAACGTAACCACG  
ACCTTCTAGAACGTATCGTTTTTACAAACGACACTAAACCTATCAACATTATCAATGTTGATCATCC  
AAGTATCTGGATCCC

@A00721:190:HGJW7DSXY:4:2222:16758:7592 2:N:0:TCTGCAAG+GCTGCACT  
CTCATATAACAGAAGTAAGCGTTCTTAACGTCGTCGTCGCCATCCATGGATGAATCAACGTAACCACG  
ACCTTCTAGAACGTATCGTTTTTCAAAACGACACTAAACCTATCAACATTATCCATGTTGATCATCC  
AAGTATCTGGATCCC

@A00721:190:HGJW7DSXY:4:2608:29053:25848 2:N:0:TCTGCAAG+GCTGCACT  
CTCATATAACAGAAGTAAGCGTTCTTAACGTCGTCGTCGCCATCCATGGATGAATCAACGTAACCACG  
ACCTTCTAGAACGTATCGTTTTTCAAAACGACACTAAACCTATCAACATTATCCATGTTGATCATCC  
AAGTATCTGGATCCC

@A00721:190:HGJW7DSXY:4:2654:30228:30326 2:N:0:TCTGCAAG+GCTGCACT  
CTCATATAACAGAAGTAAGCGTTCTTAACGTCGTCGTCGCAACCATGGATGAATCAACGTAACCACG  
ACCTTCTAGAACGTATCGTTTTTCACAAACGACACTAAACCTATCAACATTATCAAAGATTATCATCC  
AAGTATCTGGATCC

@A00721:190:HGJW7DSXY:4:1104:4200:29058 2:N:0:TCTGCAAG+GCTGCACT  
TCTAGACCTCATATAACAGAAGTAAGCGTTCTTAACGTCGTCGTCGTCATCCATGGATGAATCAACGT  
AACCACGACCTTCTAGAACGTATCGTTTTTCACAAACGACACTAAACCTATCAACATTATCCATGTTG  
ATCATCCAAGTATCT

@A00721:190:HGJW7DSXY:4:1104:4255:29371 2:N:0:TCTGCAAG+GCTGCACT  
TCTAGACCTCATATAACAGAAGTAAGCGTTCTTAACGTCGTCGTCGTCATCCATGGATGAATCAACGT  
AACCACGACCTTCTAGAACGTATCGTTTTTCACAAACGACACTAAACCTATCAACATTATCCATGTTG  
ATCATCCAAGTATCT

FFFFFFFFFFFFFFFFFFFFFFFFFFFFFFFFFFFFFFFFFFFFFFFFFFFFFFFFFFFFFFFFFFFFFFFF  
FFFFFFFFFFFFFFFF

@A00721:190:HGJW7DSXY:4:1134:23854:20384 2:N:0:TCTGCAAG+GCTGCACT  
TCTAGACCTCATATAACAGAAGTAAGCGTTCTTAACGTCGTCGTCGCATCCATGGATGAATCAACGT  
AACCACGACCTTCTAGAACGTATCGTTTTTCACAAACGACACTAAACCTATCAACATTATCCATGTTG  
ATCATCCAAGTATCT

+

FFFFFFFFFFFFFFFFFFFFFFFFFFFFFFFFFFFFFFFFFFFFFFFFFFFFFFFFFFFFFFFFFFFFFFFF:FFFFFFF  
FFFFFFFFFFFFFFFFFFFFFFFFFFFFFFFFFFFFFFFFFFFFFFFFFFFFFFFFFFFFFFFFFFFFFFFF:FFFFFFFFFFFFFFFFFFFFFFFF  
FFFFFFFFFFFFFFFF

@A00721:190:HGJW7DSXY:4:1157:24948:14199 2:N:0:TCTGCAAG+GCTGCACT  
AGATACTTGGATGATCAACATGGATAATGTTGATAGGTTTAGTGTCGTTTGTGAAAAACGATACGTTT  
TAGAAGGTCGTGGTTACGTTGATTATCCATGGATGCGGACGACGACGTTAAGAACGCTTACTTCTGT  
TATATGAGGTCTAGA

+

F:FFF:FF:FFF:FFFFFFFFFFFFFFFFFFFFFFFFFFFFFFFFFFFFFFFF:FFF,FFFFFFFFFFFF:::FF:,FF:  
FF,FF,:::,F:FFFF:F:FFFFF:FF:FFFFFFF,FFFF:,F,:FF:FFFF:FF,:FFFFFFFF:F  
FFFF::FFFFFF::F

@A00721:190:HGJW7DSXY:4:1421:6253:5619 2:N:0:TCTGCAAG+GCTGCACT  
AGATACTTGGATGATCAACATGGATAATGTTGATAGGTTTAGTGTCGTTTGTGAAAAACGATACGTTT  
TAGAAGGTCGTGGTTACGTTGATTATCCATTGATGCGGACGACGACCTTAAGAACGCATACAGCTGT  
TATATGAGGTCTAGA

+

F:FFFFFFF,F,FF,:FFFF,F:FFFFF:F:FFFFFFF:FF,FF,FFF,FF,FFFF:::F:,F,  
:F,FF,:F:,FFF:F,:F::F:F,F,FFFF:,F,,FF::F:FF,,F,:F:,FF,,F,,FF,,,:FF  
FF,FFFF,FF::F::

@A00721:190:HGJW7DSXY:4:1421:29188:6981 2:N:0:TCTGCAAG+GCTGCACT  
TCTAGACCTCATATAACAGAAGTAAGCGTTCTTAACGTCGTCGTCGCATCCATGGATGAATCAACGT  
AACCACGACCTTCTAGAACGTATCGTTTTTCACAAACGACACTAAACCTATCAACATTATCCATGTTG  
ATCATCCAAGTATCT

+

FFFFFFFFFFFFFFFFFFFFFFFFFFFFFFFFFFFFFFFFFFFFFFFFFFFFFFFFFFFFFFFFFFFFFFFF  
FFFFFFFFFFFFFFFFFFFFFFFFFFFFFFFFFFFFFFFFFFFFFFFFFFFFFFFFFFFFFFFFFFFFFFFF  
FFFFFFFFFFFFFFFF

@A00721:190:HGJW7DSXY:4:1629:26847:4460 2:N:0:TCTGCAAG+GCTGCACT  
TCTAGACCTCATATAACAGAAGTAAGCGTTCTTAACGTCGTCGTCGCATCCATGGATGAATCAACGT  
AACCACGACCTTCTAGAACGTATCGTTTTTCACAAACGACACTAAACCTATCAACATTATCCATGTTG  
ATCATCCAAGTATCT

+

FFFFFFFFFFFFFFFFFFFFFFFFFFFFFFFFFFFFFFFFFFFFFFFFFFFFFFFFFFFFFFFFFFFFFFFF  
FFFFFFFFFFFFFFFFFFFFFFFFFFFFFFFFFFFFFFFFFFFFFFFFFFFFFFFFFFFFFFFFFFFFFFFF  
FFFFFFFFFFFFFFFF

@A00721:190:HGJW7DSXY:4:1642:30852:17503 2:N:0:TCTGCAAG+GCTGCACT  
TCTAGACCTCATATAACAGAAGTAAGCGTTCTTAACGTCGTCGTCGCATCCATGGATGAATCAACGT  
AACCACGACCTTCTAGAACGTATCGTTTTTCACAAACGACACTAAACCTATCAACATTATCCATGTTG  
ATCATCCAAGTATCT

+

FFFFFFFFFFFFFFFFFFFF:FFFF:FFFFFFFFFFFFFFFFFFFFFFFFFFFFFFFFFFFFFFFFFFFFFFFF  
FFFFFFFFFFFFFFFFFFFFFFFFFFFFFFFFFFFFFFFFFFFFFFFFFFFFFFFFFFFFFFFFFFFFFFFF:FFFFFFFFFFFFFFFFFFFFFFFF  
FFFFFFFFFFFFFFFF

@A00721:190:HGJW7DSXY:4:2473:4643:29168 2:N:0:TCTGCAAG+GCTGCACT  
TCTAGACCTCATATAACAGAAGTAAGCGTTCTTAACGTCGTCGTCGCATCCATGGATGAATCAACGT  
AACCACGACCTTCTAGAACGTATCGTTTTTCACAAACGACACTAAACCTATCAACATTATCCATGTTG  
ATCATCCAAGTATCT

+  
FFFFFFFFFFFFFFFFFFFFFFFFFFFFFFFFFFFFFFFFFFFFFFFFFFFFFFFFFFFFFFFFFFFFFFFF  
FFFFFFFFFFFFFFFFFFFFFFFFFFFFFFFFFFFFFFFFFFFFFFFFFFFFFFFFFFFFFFFFFFFFFFFF  
FFFFFFFFFFFFFFFF:

@A00721:190:HGJW7DSXY:4:2554:24551:16861 2:N:0:TCTGCAAG+GCTGCACT  
TCTAGACCTCATATAACAGAAGTAAGCGTTCTTAACGTCGTCGTCGTCATCCATGGATGAATCAACGT  
AACCACGACCTTCTAGAACGTATCGTTTTTCACAAACGACACTAAACCTATCAACATTATCCATGTTG  
ATCATCCAAGTATCT

+  
FFFFFFFFFFFFFFFFFFFFFFFFFFFFFFFFFFFFFFFFFFFFFFFFFFFFFFFFFFFFFFFFFFFFFFFF  
FFFFFFFFFFFFFFFFFFFFFFFFFFFFFFFFFFFFFFFFFFFFFFFFFFFFFFFFFFFFFFFFFFFFFFFF  
FFFFFFFFFFFFFFFF

@A00721:190:HGJW7DSXY:4:2658:27995:36323 2:N:0:TCTGCAAG+GCTGCACT  
TCTAGACCTCATATAACAGAAGTAAGCGTTCTTAACGTCGTCGTCGTCATCCATGGATGAATCAACGT  
AACCACGACCTTCTAGAACGTATCGTTTTTCACAAACGACACTAAACCTATCAACATTATCCATGTTG  
ATCATCCAAGTATCT

+  
FFFFFFFFFFFFFFFFFFFFFFFFFFFFFFFFFFFFFFFFFFFFFFFFFFFFFFFFFFFFFFFFFFFFFFFF  
FFFFFFFFFFFFFFFFFFFFFFFFFFFFFFFFFFFFFFFFFFFFFFFFFFFFFFFFFFFFFFFFFFFFFFFF  
FFFFFFFFFFFFFFFF

@A00721:190:HGJW7DSXY:4:1262:4065:5462 2:N:0:TCTGCAAG+GCTGCACT  
GATGATCAACATGGATAATGTTGATAGGTTTAGTGTCGTTTGTGAAAAACGATACGTTCTAGAAGGTC  
GTGGTTACGTTGATTCATCCATGGATGCGGACGACGACGTTAAGAACGCTTACTTCTGTTATATGAGG  
TCTAGACCGAT

+  
FFFFFFFFFFFFFFFFFFFFFFFFFFFFFFFFFFFFFFFFFFFFFFFFFFFFFFFFFFFFFFFFFFFF::F,FF,:FF  
FF:F,FFFF:F:FFFFFFFFFFFFFFFFFFFFFFFF:FFFF:FFFFFFFFFFFF:F:F:FFFFFFFF  
F:FF:F:F:FF

@A00721:190:HGJW7DSXY:4:1605:5584:12477 2:N:0:TCTGCAAG+GCTGCACT  
GATGATCAACATGGATAATGTTGATAGGTTTAGTGTCGTTTGTGAAAAACGATACGTTCTATAAGGTC  
GTGGTTACGTTGATTCATCCATGGATGCGGACGACGACGTTAAGAACGCTTACTTCTGTTATATGAGG  
TCTAGACCGAT

+  
FFFFFFFFFFFFFFFFFFFFFFFFFFFFFFFFFFFFFFFFFFFFFFFFFFFF::FFFFFF:FFFF:FFFF,:F,FF,  
F:FF:FFF::F,F:F,FFFFFF:F:FF:FFFFFFFF:FFFFFF:FF,::FFF:F:, ,FFFFFF,FFF  
F::F:F,FFFF

@A00721:190:HGJW7DSXY:4:2228:23213:12226 2:N:0:TCTGCAAG+GCTGCACT  
GATGATCAACATGGATAATGTTGATAGGTTTAGTGTCGTTTGTGAAAAAGATACGTTCTAGAAGGTC  
GTGGTTACGTTGATTCATCCATGGATGCGGACGACGACGTTAAGAACGCTTACTTCTGTTATATGAGG  
TCTAGACCGAT

+  
FFFFFFFFFFFFFFFF:FFFFFFFFFFFFFFFFFFFFFFFFFFFF:FFFF:FFFF,FFF:FF,FF,F:FF,FF:  
FFFF:FFFF,FF,FFFF:F,:F:F:FF:FFFFFF::FF,FFF,,F:FF,FFF,F,FF,FFF,F,: ,F  
,F:F:F:FFFF

@A00721:190:HGJW7DSXY:4:2250:5466:6386 2:N:0:TCTGCAAG+GCTGCACT  
GATGATCAACATGGATAATGTTGATAGGTTTAGTGTCGTTTGTGAAAAACGATACGTTCTAGAAGGTC  
GTGGTTACGTTGATTCATCCATGGATGCGGACGACGACGTTAAGAACGCTTACTTCTGTTATATGAGG  
TCTAGACCGAT

+  
FFFFFFFFFFFFFFFFFFFFFFFFFFFF:FFFFFFFFFFFFFFFFFFFF:FFFFFF:FFFFFFFFFFFFFFFF  
FF:FFFFFFFFFFFFFFFF,F:FFFFFFFFFFFF:FFFFFFFF,FF,FFFF,,FF,:FFFFFF:F,:  
F:FFFF:FFFF

@A00721:190:HGJW7DSXY:4:2425:1904:2347 2:N:0:TCTGCAAG+GCTGCACT  
GATGATCAACATGGATAATGTTGATAGGTTTAGTGTCGTTTGTGAAAAACGATACGTTCTAGAAGGTC







FFFFFFFFFFFFFFFFFFFFFFFFFFFFFFFFFFFFFFFFFFFFFFFFFFFFFFFFFFFFFFFFFFFFFFFFFFFFFFFF:FFFFFFFF:F:  
FFF:FFFFFFFFFFFF

@A00721:190:HGJW7DSXY:4:1537:30129:9204 2:N:0:TCTGCAAG+GCTGCACT  
GTTTCTTCCTCACAGAAATCGGTCTAGACCTCATATAACAGAAGTAAGCGTTCTTAACGTCGTCGTCC  
GCATCCATGGATGAATCAACGTAACCACGACCTTCTAGAACGTATCGTTTTTCACAAACGACACTAAA  
CCTATCAACATTATC

+  
FFFFFFFFFFFFFFFFFFFFFFFFFFFFFFFFFFFFFFFFFFFFFFFFFFFFFFFFFFFFFFFFFFFFFFFFFFFFFFFF,FFFFFFFFFFFFFFFFFFFFFFFF  
FF,FFFFFFFFFFFFFFFFFFFFFFFFFFFFFFFFFFFFFFFFFFFFFFFFFFFFFFFFFFFFFFFFFFFFFFFFFFFFFFFF  
FFFFFFFFFFFF:FFFFF

@A00721:190:HGJW7DSXY:4:1567:3432:1110 2:N:0:TCTGCAAG+GCTGCACT  
GTTTCTTCCTCACAGAAATCGGTCTAGACCTCATATAACAGAAGTAAGCGTTCTTAACGTCGTCGTCC  
GCATCCATGGATGAATCAACGTAACCACGACCTTCTAGAACGTATCGTTTTTCACAAACGACACTAAA  
CCTATCAACATTATC

+  
FFFFFFFFFFFFFFFFFFFFFFFFFFFFFFFFFFFFFFFFFFFFFFFFFFFFFFFFFFFFFFFFFFFFFFFFFFFFFFFF:FFFFFFFFFFFFFFFFFFFFFFFF  
FFFFFFFFFFFFFFFFFFFFFFFFFFFFFFFFFFFFFFFFFFFFFFFFFFFFFFFFFFFFFFFFFFFFFFFFFFFFFFFF,FFF,FFFFFFFFFFFF:FFFFFF:FFFF,FFFF  
F:FFFFFFFFFFFFFFFF

@A00721:190:HGJW7DSXY:4:1601:30942:19695 2:N:0:TCTGCAAG+GCTGCACT  
GTTTCTTCCTCACAGAAATCGGTCTAGACCTCATATAACAGAAGTAAGCGTTCTTAACGTCGTCGTCC  
GCATCCATGGATGAATCAACGTAACCACGACCTTCTAGAACGTATCGTTTTTCACAAACGACACTAAA  
CCTATCAACATTATC

+  
FFFFFFFFFFFFFFFFFFFFFFFFFFFFFFFFFFFFFFFFFFFFFFFFFFFFFFFFFFFFFFFFFFFFFFFFFFFFFFFF,FFFFFFFFFFFFFFFFFFFFFFFF  
FFFFFFFFFFFFFFFFFFFFFFFFFFFFFFFFFFFFFFFFFFFFFFFFFFFFFFFFFFFFFFFFFFFFFFFFFFFFFFFF:FFFFFFFF:  
FFFFFFFFFFFFFFFFFFFF

@A00721:190:HGJW7DSXY:4:2154:20546:18255 2:N:0:TCTGCAAG+GCTGCACT  
GTTTCTTCCTCACAGAAATCGGTCTAGACCTCATATAACAGAAGTAAGCGTTCTTAACGTCGTCGTCC  
GCATCCATGGATGAATCAACGTAACCACGACCTTCTAGAACGTATCGTTTTTCACAAACGACACTAAA  
CCTATCAACATTATC

+  
F:FFFFFFFFFFFFFFFFFFFFFFFFFFFFFFFFFFFFFFFFFFFFFFFFFFFFFFFFFFFFFFFFFFFFFFFFFFFFFFFF,FFFFFFFFFFFFFFFFFFFFFFFF  
FFFFFFFFFFFFFFFFFFFFFFFFFFFFFFFFFFFFFFFFFFFFFFFFFFFFFFFFFFFFFFFFFFFFFFFFFFFFFFFF:FFFF:FFFFFFFFFFFFFFFFFFFF:FFFF  
FF:,FFFFFFFFFFFF

@A00721:190:HGJW7DSXY:4:2531:13566:22326 2:N:0:TCTGCAAG+GCTGCACT  
GTTTCTTCCTCACAGAAATCGGTCTAGACCTCATATAACAGAAGTAAGCGTTCTTAACGTCGTCGTCC  
GCATCCATGGATGAATCAACGTAACCACGACCTTCTAGAACGTATCGTTTTTCACAAACGACACTAAA  
CCTATCAACATTATC

+  
FFFFFFFFFFFFFFFFFFFFFFFFFFFFFFFFFFFFFFFFFFFFFFFFFFFFFFFFFFFFFFFFFFFFFFFFFFFFFFFFFFFFFFFFFFFFFFFFFFFFFFFF  
FFFFFFFFFFFFFFFFFFFFFFFFFFFFFFFFFFFFFFFFFFFFFFFFFFFFFFFFFFFFFFFFFFFFFFFFFFFFFFFFFFFFFFFFFFFFFFFFFFFFFFFF:FF  
FFFFFFFFFFFFFFFFFFFF

@A00721:190:HGJW7DSXY:4:2676:9326:17581 2:N:0:TCTGCAAG+GCTGCACT  
GTTTCTTCCTCACAGAAATCGGTCTAGACCTCATATAACAGAAGTAAGCGTTCTTAACGTCGTCGTCC  
GCATCCATGGATGAATCAACGTAACCACGACCTTCTAGAACGTATCGTTTTTCACAAACGACACTAAA  
CCTATCAACATTATC

+  
FFFFFFFFFFFFFFFFFFFFFFFFFFFFFFFFFFFFFFFFFFFFFFFFFFFFFFFFFFFFFFFFFFFFFFFFFFFFFFFFFFFFFFFFFFFFFFFFFFFFFFFF  
FFFFFFFFFFFFFFFFFFFFFFFFFFFFFFFFFFFFFFFFFFFFFFFFFFFFFFFFFFFFFFFFFFFFFFFFFFFFFFFFFFFFFFFFFFFFFFFFFFFFFFFF:FF:  
FFFFFFFFFFFFFFFFFFFF

@A00721:190:HGJW7DSXY:4:1168:12183:18427 2:N:0:TCTGCAAG+GCTGCACT  
AAGTTTCTTCCTCACAGAAATCGGTCTAGACCTCATATAACAGAAGTAAGCGTTCTTAACGTCGTCGT  
CCGCATCCATGGATGAATCAACGTAACCACGACCTTCTAGAACGTATCGTTTTTCACAAACGACACTA  
AACCTATCAACATTA

+  
FFFFFFFFFFFFFFFFFFFFFFFFFFFFFFFFFFFFFFFFFFFFFFFFFFFFFFFFFFFFFFFFFFFFFFFF  
FFFFFFFFFFFFFF:FFFFFFFFFFFFFFFFFFFFFFFFFFFFFFFFFFFFFFFFFFFFFFFFFFFFFFFF  
FFFFFFFFFFFFFFFF

@A00721:190:HGJW7DSXY:4:1403:5819:18584 2:N:0:TCTGCAAG+GCTGCACT  
AAGTTTCTTCCTCACAGAAATCGGTCTAGACCTCATATAACAGAAGTAAGCGTTCTTAACGTCGTCGT  
CCGCATCCATGGATGAATCAACGTAACCACGACCTTCTAGAACGTATCGTTTTTCACAAACGACACTA  
AACCTATCAACATTA

+  
FFFFFFFFFFFFFFFFFFFFFFFFFFFFFFFFFFFFFFFFFFFFFFFFFFFFFFFFFFFFFFFFFFFFFFFF  
FFFFFFFFFFFFFFFFFFFFFFFFFFFFFFFFFFFFFFFFFFFFFFFFFFFFFFFFFFFFFFFFFFFFFFFF  
FFFFFFFFFFFFFFFF

@A00721:190:HGJW7DSXY:4:2257:19443:32064 2:N:0:TCTGCAAG+GCTGCACT  
AAGTTTCTTCCTCACAGAAATCGGTCTAGACCTCATATAACAGAAGTAAGCGTTCTTAACGTCGTCGT  
CCGCATCCATGGATGAATCAACGTAACCACGACCTTCTAGAACGTATCGTTTTTCACAAACGACACTA  
AACCTATCAACATTA

+  
FFFFFFFFFFFFFFFFFFFFFFFFFFFFFFFFFFFFFFFFFFFFFFFFFFFFFFFFFFFFFFFFFFFFFFFF  
FFFFFFFFFFFFFFFFFFFFFFFFFFFFFFFFFFFFFFFFFFFFFFFFFFFFFFFFFFFFFFFFFFFFFFFF  
FFFFFFFFFFFFFFFF

@A00721:190:HGJW7DSXY:4:2505:8757:19789 2:N:0:TCTGCAAG+GCTGCACT  
AAGTTTCTTCCTCACAGAAATCGGTCTAGACCTCATATAACAGAAGTAAGCGTTCTTAACGTCGTCGT  
CCGCATCCATGGATGAATCAACGTAACCACGACCTTCTAGAACGTATCGTTTTTCACAAACGACACTA  
AACCTATCAACATTA

+  
FFFFFFFFFFFFFFFFFFFFFFFFFFFFFFFFFFFFFFFFFFFFFFFFFFFFFFFFFFFFFFFFFFFFFF,FFF  
FFFFFFFFFFFFFFFFFFFFFFFFFFFFFFFFFFFFFFFFFFFFFFFFFFFFFFFFFFFFFFFFFFFFFF:FFFFFF,  
FFFFF:FFFFFF:FF

@A00721:190:HGJW7DSXY:4:1201:25563:27070 2:N:0:TCTGCAAG+GCTGCACT  
CTAAGTTTCTTCCTCACAGAAATCGGTCTAGACCTCATATAACAGAAGTAAGCGTTCTTAACGTCGTC  
GTCCGCATCCATGGATGAATCAACGTAACCACGACCTTCTAGAACGTATCGTTTTTCACAAACGACAC  
TAAACCTATCAACAT

+  
FFFFFFFFFFFFFFFFFFFFFFFFFFFFFFFFFFFFFFFFFFFFFFFFFFFFFFFFFFFFFFFFFFFFFF  
FFFFFFFFFFFFFFFFFFFFFFFFFFFFFFFFFFFFFFFFFFFFFFFFFFFFFFFFFFFFFFFFFFFFFF  
FFFFF:FFFFFFFF

@A00721:190:HGJW7DSXY:4:1534:11650:28808 2:N:0:TCTGCAAG+GCTGCACT  
CTAAGTTTCTTCCTCACAGAAATCGGTCTAGACCTCATATAACAGAAGTAAGCGTTCTTAACGTCGTC  
GTCCGCATCCATGGATGAATCAACGTAACCACGACCTTCTAGAACGTATCGTTTTTCACAAACGACAC  
TAAACCTATCAACAT

+  
FFFFFFFFFFFFFFFFFFFFFFFFFFFFFFFFFFFFFFFFFFFFFFFFFFFFFFFFFFFFFFFFFFFFFF  
FFFFFFFFFFFFFF:FFFFFFFFFFFFFFFFFFFFFFFFFFFFFFFFFFFFFFFFFFFFFFFFFFFFFFFF  
FFFFF,:FFFFFFFF

@A00721:190:HGJW7DSXY:4:1633:8739:26835 2:N:0:TCTGCAAG+GCTGCACT  
CTAAGTTTCTTCCTCACAGAAATCGGTCTAGACCTCATATAACAGAAGTAAGCGTTCTTAACGTCGTC  
GTCCGCATCCATGGATGAATCAACGTAACCACGACCTTCTAGAACGTATCGTTTTTCACAAACGACAC  
TAAACCTATCAACAT

+  
FFFFFFFFFFFFFFFFFFFFFFFFFFFFFFFFFFFFFFFFFFFFFFFFFFFFFFFFFFFFFFFFFFFFFF  
FFFFFFF:FFFFFFFFFFFFFFFFFFFFFFFFFFFFFFFFFFFFFFFFFFFFFFFFFFFFFFFFFFFFFF  
FFFFFFFFFFFFFFFF

@A00721:190:HGJW7DSXY:4:2166:32913:14465 2:N:0:TCTGCAAG+GCTGCACT  
CTAAGTTTCTTCCTCACAGAAATCGGTCTAGACCTCATATAACAGAAGTAAGCGTTCTTAACGTCGTC

GTCCGCATCCATGGATGAATCAACGTAACCACGACCTTCTAGAACGTATCGTTTTTCACAAACGACAC  
TAAACCTATCAACAT

+

FFFFFFFFFFFFFFFFFFFFFFFFFFFFFFFFFFFFFFFFFFFFFFFFFFFFFFFFFFFFFFFFFFFFFFFF  
FFFFFFFFFFFFFFFFFFFFFFFFFFFFFFFFFFFFFFFFFFFFFFFFFFFFFFFFFFFFFFFFFFFFFFFF  
FFFFFFFFFFFFFFFFFFFFFFFF

@A00721:190:HGJW7DSXY:4:2312:15492:6997 2:N:0:TCTGCAAG+GCTGCACT  
CTAAGTTTCTTCCTCACAGAAATCGGTCTAGACCTCATATAACAGAAGTAAGCGTTCTTAACGTCGTC  
GTCCGCATCCATGGATGAATCAACGTAACCACGACCTTCTAGAACGTATCGTTTTTCACAAACGACAC  
TAAACCTATCAACAT

+

FFFFFFFFFFFFFFFFFFFFFFFFFFFFFFFFFFFFFFFFFFFFFFFFFFFFFFFFFFFFFFFFFFFFFFFF  
FFFFFFFFFFFFFFFFFFFFFFFF,FFFFFFFFFFFFFFFFFFFFFFFFFFFFFFFFFFFFFFFFFFFFFFFF  
FFFFFFFFFFFFFFFFFFFFFFFF

@A00721:190:HGJW7DSXY:4:2322:18548:21245 2:N:0:TCTGCAAG+GCTGCACT  
CTAAGTTTCTTCCTCACAGAAATCGGTCTAGACCTCATATAACAGAAGTAAGCGTTCTTAACGTCGTC  
GTCCGCATCCATGGATGAATCAACGTAACCACGACCTTCTAGAACGTATCGTTTTTCACAAACGACAC  
TAAACCTATCAACAT

+

FFFFFFFFFFFFFFFFFFFFFFFFFFFFFFFFFFFFFFFFFFFFFFFFFFFFFFFFFFFFFFFFFFFFFFFF  
FFFFFFFFFFFFFFFFFFFFFFFFFFFFFFFFFFFFFFFFFFFFFFFFFFFFFFFFFFFFFFFFFFFFFFFF  
FFF:F:FFFFFFFF

@A00721:190:HGJW7DSXY:4:2441:28854:26162 2:N:0:TCTGCAAG+GCTGCACT  
CTAAGTTTCTTCCTCACAGAAATCGGTCTAGACCTCATATAACAGAAGTAAGCGTTCTTAACGTCGTC  
GTCCGCATCCATGGATGAATCAACGTAACCACGACCTTCTAGAACGTATCGTTTTTCACAAACGACAC  
TAAACCTATCAACAT

+

FFFFFFFFFFFFFFFFFFFFFFFFFFFFFFFFFFFFFFFFFFFFFFFFFFFFFFFFFFFFFFFFFFFFFFFF  
FFFFFFFFFFFFFFFFFFFFFFFFFFFFFFFFFFFFFFFFFFFFFFFFFFFFFFFFFFFFFFFFFFFFFFFF  
FFFFFFFFFFFFFFFFFFFFFFFF

@A00721:190:HGJW7DSXY:4:1511:11324:20509 2:N:0:TCTGCAAG+GCTGCACT  
TGTTGATAGGTTTAGTGTCGTTTGTGAAAAACGATACGTTCTAGAAGGTCGTGGTTACGTTGATTCAT  
CCATGGATGCGGACGACGACGTTAAGAACGCTTACTTATGTTATATTAGGTCTAGACCGATTTCTGTG  
AGGAAGAACTTAGT

+

FFFFFFF:FFFFFFF:FFFF::F:FFFFFFFFFFFF, :FF:FF:FF, FF:F:F:FFF::, FF,, F, F,  
:::F, FFF, FFFF,, FF, FFF:FFF::F,, :, FFF:F,, FF:FFF:, F:FF:, F, F:FFFFFF, F:FF  
F:FFF::FF, :FF:F

@A00721:190:HGJW7DSXY:4:1533:28393:13495 2:N:0:TCTGCAAG+GCTGCACT  
TGTTGATAGGTTTAGTGTCGTTTGTGAAAAACGATACGTTCTAGAAGGTCGTGGTTACGTTGATTCAT  
CCATGGATGCGGACGACGACGTTAAGAACGCTTACTTCTGTTATATGAGGTCTAGACCGATTTCTGTG  
AGGAAGAACTTAGT

+

FFFFFFFFFFFFFFFFFFFFFFFFFFFFFFFFFFFFFFFFFFFFFFFFFFFFFFFFFFFFFFFFFFFFFFFF  
FFF,FFFFFFFFFFFFFFFFFFFFFFFFFFFFFFFF:FF,F:FF:,FFFFFF:FFFFFF,FFFF::F:FF:FFF,F:FF  
FFFFFF::FF:,FFFF

@A00721:190:HGJW7DSXY:4:1637:21495:26475 2:N:0:TCTGCAAG+GCTGCACT  
TGTTGATAGGTTTAGTGTCGTTTGTGAAAAACGATACGTTCTAGAAGGTCGTGGTTACGTTGATTCAT  
CCATGGATGCGGACGACGACGTTAAGAACGCTTACTTCTGTTATATGAGGTCTAGACCGATTTCTGTG  
AGGAAGAACTTAGT

+

FFFFFFFFFFFFFFFFFFFFFFFF:FF,F:FFFFFFFF,FF:FFFFFFFFFFFF::FFFFFFFFFFFFFF,FF:F  
FFFFFFFF:FFFFFFFF:F::FF,FFFFFFFFFFFF:, :FFFFFF,FF,FF:FF,F,FFFFFF:FFFF  
FFFFFFFF,FFFF

$+$ 

@

+

@

+

@

+

@

+

@

+

@

+

1

FFFFFFFFFFFFFFFFFFFFFFFFFFFFFFFFFFFFFFFFFFFFFFFFFFFFFFFFFFFFFFFF:FFFFFFFFFFFFFFFF  
FFFFFFFFFFFFFFFF

@A00721:190:HGJW7DSXY:4:2151:2446:4883 2:N:0:TCTGCAAG+GCTGCACT  
TCCACTAAGTTTCTTCCTCACAGAAATCGGTCTAGACCTCATATAACAGAAGTAAGCGTTCTTAACGT  
CGTCGTCCGCATCCATGGATGAATCAACGTAACCACGACCTTCTAGAACGTATCGTTTTTCACAAACG  
ACACTAAACCTATCA

+

FFFFFFFFFFFFFFFFFFFFFFFFFFFFFFFFFFFFFFFFFFFFFFFFFFFFFFFFFFFFFFFF:FFFFFFFF,FFFFFFFFFFFFFFFF  
FFFFFFFFFFFFFFFFFFFFFFFF:FFF:FFFFFFFF:FFFFFFFFFFFFFFFF:FFFF:F:FFFFFFFFFFFFFFFF  
FFFF:FFFFFFFF:F

@A00721:190:HGJW7DSXY:4:2269:8919:31469 2:N:0:TCTGCAAG+GCTGCACT  
TCCACTAAGTTTCTTCCTCACAGAAATCGGTCTAGACCTCATATAACAGAAGTAAGCGTTCTTAACGT  
CGTCGTCCGCATCCATGGATGAATCAACGTAACCACGACCTTCTAGAACGTATCGTTTTTCACAAACG  
ACACTAAACCTATCA

+

FFFFFFFFFFFFFFFFFFFFFFFFFFFFFFFFFFFFFFFFFFFFFFFFFFFFFFFFFFFFFFFFFFFFFFFFFFFFFFFF  
FFFFFFFFFFFFFFFFFFFFFFFFFFFFFFFFFFFFFFFFFFFFFFFFFFFFFFFFFFFFFFFFFFFFFFFFFFFFFFFF  
FFFF:FFFFFFFF

@A00721:190:HGJW7DSXY:4:2627:4887:13902 2:N:0:TCTGCAAG+GCTGCACT  
TCCACTAAGTTTCTTCCTCACAGAAATCGGTCTAGACCTCATATAACAGAAGTAAGCGTTCTTAACGT  
CGTCGTCCGCATCCATGGATGAATCAACGTAACCACGACCTTCTAGAACGTATCGTTTTTCACAAACG  
ACACTAAACCTATCA

+

FFFFFFFFFFFFFFFFFFFFFFFFFFFFFFFFFFFFFFFFFFFFFFFFFFFFFFFFFFFFFFFFFFFFFFFFFFFFFFFF  
FFFFFFFFFFFF:FFFFFFFFFFFFFFFFFFFFFFFFFFFFFFFFFFFFFFFFFFFFFFFFFFFFFFFFFFFFFFFF  
FFFFF:FFFFFFFF

@A00721:190:HGJW7DSXY:4:1239:4209:8625 2:N:0:TCTGCAAG+GCTGCACT  
GATAGGTTTAGTGTCGTTTGTGAAAAACGATACGTTCTAGAAGGTCGTGGTTACGTTGATTCATCCAT  
GGATGCGGACGACGACGTTAAGAACGCTTACTTCTGTTATATGAGGTCTAGACCGATTTCTGTGAGGA  
AGAAACTTAGTGAC

+

FFFFFFFFFFFFFFFFFFFFFFFFFFFFFFFF:FFFFF,F,FFFFFFFF:FFFFF,FFFFFFFFFF:FFFFF,  
FFFFFFFFFFFF:F,FFFFFFFF:FF:F::FFFF::,F:FFFF::FFFFFFFFFF:FF:FFFFF::,FF  
FFFFF:FFFFFFFF

@A00721:190:HGJW7DSXY:4:1254:21784:36902 2:N:0:TCTGCAAG+GCTGCACT  
GATAGGTTTAGTGTCGTTTGTGAAAAACGATACGTTCTAGAAGGTCGTGGTTACGTTGATTCATCCAT  
GGATGCGGACGACGACGTTAAGAACGCTTACTTCTGTTATATGAGGTCTAGACCGATTTCTGTGAGGA  
AGAAACTTAGTGAC

+

FFFFFFFFFFFFFFFFFFFFFFFFFFFFFFFF:FF:FF:FFF,FFFFF:FF:FFFFFFFFFFFFFFFF:FFFFF  
FFFFFFFFFFFFFFFF:FFFFF:FF:FFF:F,FFFFFFFFFF,FFFFF:FFFFFFFFFFFFFFFF:FFF  
FFFFFFFFF::FFFF

@A00721:190:HGJW7DSXY:4:1340:18511:14606 2:N:0:TCTGCAAG+GCTGCACT  
GATAGGTTTAGTGTCGTTTGTGAAAAACGATACGTTCTAGAAGGTCGTGGTTACGTTGATTCATCCAT  
GGATGCGGACGACGACGTTAAGAAAGCTTACTTCTGTTATATGAGGTCTAGACCGATTTCTGTGAGGA  
AGAAACTTAGTGAC

+

FFFFFFFFFFFFFFFFFFFFFFFF,FFFFFFFFFFFFFFFF,FF,:F,FF:F::FFFF,FFF,FFFFFFFF  
:FFFFFFFFFFFF:F:FFFFF:,F,FFFFF,FF,F,FFFFFF:FF:F,FF:F,FFFFFFFF:FFFFF  
FF::F,,FFFFFFFF

@A00721:190:HGJW7DSXY:4:1417:31132:3803 2:N:0:TCTGCAAG+GCTGCACT  
GATAGGTTTAGTGTCGTTTGTGAAAAACGATACGTTCTAGAAGGTCGTGGTTACGTTGATTCATCCAT  
GGATGCGGACGACGACGTTAAGAACGCTTACTTCTGTTATATGAGGTCTAGACCGATTTCTGTGAGGA  
AGAAACTTAGTGAC

+  
FFFFFFFFFFFFFFFF,F:FFFFFFFF:F:FF,,FF:FFFFFFFF:F::FFFF,FFFF,FFFFFFFF:,  
FFF:FF:FFFF,FFF:FFFF,:FF::,F,F,F,,,:FFFF:F,FFFF:FFF:FFFFFFFF,,:::FFFF  
F::FFF:FF::FF,F

@A00721:190:HGJW7DSXY:4:1440:4074:6104 2:N:0:TCTGCAAG+GCTGCACT  
GATAGGTTTAGTGTCGTTTTGTGAAAAACGATACGTTCTAGAAGGTAGTGTTACGTTGTTTCAACCAT  
GTATGCGGACGAAGACGTTAAGAACGCTTAACCTTCTGTTATATGATGTCTAGAACGATTTCTGTGAGGA  
AGAAACTTAGTGTA

+  
FFFFFF,FFFF::FF,,,F,,,FFFFFF,FFFFFF,,FF,F:F,,,::,FFFFFF::F,,FFFF,,,,:  
F,F,,,::,F:,F,,F:,,,F:,,FF,,,F,FF:FF,F:,F,FF,F,F:,F,F,,,::,::F,F:,F:F  
F,FFF:F,FFF,FF

@A00721:190:HGJW7DSXY:4:1524:15374:16188 2:N:0:TCTGCAAG+GCTGCACT  
GATAGGTTTAGTGTCGTTTGTGAAAAACGATACGTTCTAGAAGGTCGTGGTTACGTTGATTCATCCAT  
GGATGCGGACGACGACGTTAAGAACGCTTACTTCTGTTATATGAGGTCTAGACCGATTTCTGTGAGGA  
AGAAACTTAGTGAC

+  
FFFFFFFFFFFFFFFFFFFF,FFFFFFFFFFFF,FFF::FF:F:FF,:F:F,:FFFFFF,FFFFFFFF::F::  
:FFFFFFFFFFFF:FFF:FFFFFFFF:FF:FF:FFF,F:,F:FFFF:,FFFFFFFF,F::FFFFFF:F:FFF,FF  
F:FFF::FF,F:FFF

@A00721:190:HGJW7DSXY:4:1632:29143:7059 2:N:0:TCTGCAAG+GCTGCACT  
GATAGGTTTAGTGTCGTTTGTGAAAAACGATACGTTCTAGAAGGTCGTGGTTACGTTGATTCATCCAT  
GGATGCGGACGACGACGTTAAGAACGCTTACTTCTGTTATATGAGGTCTAGACCGATTTCTGTGAGGA  
AGAAACTTAGTGAC

+  
FFFFFFFFFFFFFFFFFFFF:FFFFFFFFFFFF:FFFF,FFF:FFFF:F:,F:FFFFFFFFFFFFFFFF,FF:F:F  
FFFFFFFFFFFFFFFFFFFF:FFF,F,FFFFFFFF:F::F,:FFFFFF,FFFFFFFFFFFF:FF,FFFFFFFF  
FFFFFF,FF,FF,FF

@A00721:190:HGJW7DSXY:4:2231:20763:32346 2:N:0:TCTGCAAG+GCTGCACT  
GATAGGTTTAGTGTCGTTTGTGAAAAACGATACGTTCTAGAAGGTCGTGGTTACGTTGATTCATCCAT  
GGATGCGGACGACGACGTTAAGAACGCTTACTTCTGTTATATGAGGTCTAGACCGATTTCTGTGAGGA  
AGAAACTTAGTGGA

+  
::F:FFFFFFFFFFFFFFFF:FFFFFFFF:FFFF:FFFF:FF,FFFFFFFFFFFFFFFF:FFFFFF,FF,  
FFF:FFFFFFFFFFFFFFFF:FFFF,FF:FF:FFF:FF:FFFFFFFF:F:FFFF:F,F:F:FF:,FFF::FF  
FFFF,::FF:FFFF

@A00721:190:HGJW7DSXY:4:2270:27832:31344 2:N:0:TCTGCAAG+GCTGCACT  
GATAGGTTTAGTGTCGTTTGTGAAAAACGATACGTTCTAGAAGGTCGTGGTTACGTTGATTCATCCAT  
GGATGCGGACGACGACGTTAAGAACGCTTACTTCTGTTATATGAGGTCTAGACCGATTTCTGTGAGGA  
AGAAACTTAGTGAC

+  
FFFFFFFFFFFFFFFFFFFFFFFFFFFFFFFFFFFFFFFF::F:FFFF,FFFFFFFFFFFF:FFFFFF:FFFFFFFF  
FF,FFFFFFFFFFFF:FFFFFFFFFFFF:FFF::FF:F,FFFFFFFFFFFF,F:FF:FFFFFFFF:FFF  
:FFFFFFFFFFFF:

@A00721:190:HGJW7DSXY:4:2321:1163:1282 2:N:0:TCTGCAAG+GCTGCACT  
GATAGGTTTAGTGTCGTTTGTGAAAAACGATACGTTCTATAAGGTCGTGGTTACGTTGATTAATCCAT  
GGATGCGGACGACGACGTTAATAACGCTTACTTCTGTTATATGAGGTCTAGACCGATCTCTGTGAGGA  
AGAAACTTATTGGA

+  
FF:FFFFFFFFFFFF:FF,F,FF:FF:F,FF:,F:FF,FF,FFFF,,:FFFF,::F:FFF,F:F:FF  
,FF:FFFF,,F:F,,::FFF,FF,FFFF,,::,FFF:FF:,F:,::,FFF::,::FFFFFFFF:F,F,  
FFFF::FF,F:::

@A00721:190:HGJW7DSXY:4:2324:23547:30342 2:N:0:TCTGCAAG+GCTGCACT  
GATAGGTTTAGTGTCGTTTGTGAAAAACGATACGTTCTAGAAGGTCGTGGTTACGTTGATTCATCCAT





@A00721:190:HGJW7DSXY:4:1266:29939:23500 2:N:0:TCTGCAAG+GCTGCACT  
CTTAAAACTGTGAGTCCACTAAGTTTCTTCCTCACAGAAATCGGTCTAGACCTCATATAACAGAAGT  
AAGCGTTCTTAACGTCGTCGTCGCATCCATGGATGAATCAACGTAACCACGACCTTCTAGAACGTAT  
CGTTTTTCACAAACG

+

FFFFFFFFFFFFFFFFFFFFFFFFFFFFFFFFFFFFFFFFFFFFFFFFFFFFFFFFFFFFFFFFFFFFFFFF  
FFFFFFFFFFFFFFFFFFFFFFFFFFFFFFFFFFFFFFFFFFFFFFFFFFFFFFFFFFFFFFFFFFFFFFFF  
FFFFFFFFFFFFFF, :F

@A00721:190:HGJW7DSXY:4:1271:25681:32503 2:N:0:TCTGCAAG+GCTGCACT  
CGTTTGTGAAAAACGATACGTTCTAGAAGGTCGTGGTTACGTTGATTCATCCATGGATGCGGACGACG  
ACGTTAAGAACGCTTACTTCTGTTATATGAGGTCTAGACCGATTTCTGTGAGGAAGAACTTAGTGGA  
CTCACAGTTTTTAAG

+

FF:FFFFFFFFFFFFFFFFFFFFFFFFFFFFFFFFFFFFFFFFFFFFFFFFFFFFFFFFFFFFFFFF:FF:FFFF:FF  
FFFFFFFFFFFF:FFFFFFFFFFFFFFFFFFFFFFFFFFFFFFFFFFFFFFFFFFFFFFFFFFFFFFFF:FFFFFFFFFFFF:FFFFFFFFFFFF  
:FF:FFFFFFFF:F

@A00721:190:HGJW7DSXY:4:1349:32280:10207 2:N:0:TCTGCAAG+GCTGCACT  
CGTTTGTGAAAAACGATACGTTCTAGAAGGTCGTGGTTACGTTGATTCATCCATGGATGCGGACGACG  
ACGTTAAGAACGCTTACTTCTGTTATATGAGGTCTAGACCGATTTCTGTGAGGAAGAACTTAGTGGA  
CTCACAGTTTTTAAG

+

FFFFFFFFFFFFFFFFFFFFFFFFFFFFFFFFFFFFFFFFFFFFFFFFFFFFFFFFFFFFFFFF:FFFF:F::FFFFFFFFFFFFFFFFFFFFFFFF:FFFF, FFF  
FFFFFFFF:FFFFFFFF:FFFFFFFF:FFFFFFFFFFFFFFFF:FFFFFFFFFFFFFFFF, FFFFFFFFF:F  
:FF:F:FFFFFFFF

@A00721:190:HGJW7DSXY:4:1364:26395:20588 2:N:0:TCTGCAAG+GCTGCACT  
CGTTTGTGAAAAACGATACGTTCTAGAAGGTCGTGGTTACGTTGATTCATCCATGGATGCGGACGACG  
ACGTTAAGAACGCTTACTTCTGTTATATGAGGTCTAGACCGATTTCTGTGAGGAAGAACTTAGTGGA  
CTCACAGTTTTTAAG

+

FFFFFFFFFFFFFFFFFFFFFFFFFFFFFFFFFFFFFFFFFFFFFFFFFFFFFFFFFFFFFFFF:FFFFFF:FFFFFFFFFFFFFFFFFFFFFFFF  
FFFFFFFF:FFFFFFFFFFFFFFFF:F:FFFFFFFFFFFFFFFFFFFFFFFFFFFFFFFFFFFFFFFF:FFFFFFFFFFFFFFFF  
FFFFF:FFFFFF:

@A00721:190:HGJW7DSXY:4:1371:30454:33567 2:N:0:TCTGCAAG+GCTGCACT  
CTTAAAACTGTGAGTCCACTAAGTTTCTTCCTCACAGAAATCGGTCTAGACCTCATATAACAGAAGT  
AAGCGTTCTTAACGTCGTCGTCGCATCCATGGATGAATCAACGTAACCACGACCTTCTAGAACGTAT  
CGTTTTTCACAAACG

+

FFFFFFFFFFFFFFFFFFFFFFFF, FFFFFFFFFFFFFFFFFFFFFFFFFFFFFFFFFFFFFFFFFFFFFFFFF  
FFFFFFFFFFFFFFFFFFFFFFFF:FFFFFFFFFFFFFFFFFFFFFFFFFFFFFFFFFFFFFFFF:FFFFFFFFFFFFFFFF  
FFFFFFFFFFFFFFFF

@A00721:190:HGJW7DSXY:4:1517:1696:16767 2:N:0:TCTGCAAG+GCTGCACT  
CTTAAAACTGTGAGTCCACTAAGTTTCTTCCTCACAGAAATCGGTCTAGACCTCATATAACAGAAGT  
AAGCGTTCTTAACGTCGTCGTCGCATCCATGGATGAATCAACGTAACCACGACCTTCTAGAACGTAT  
CGTTTTTCACAAACG

+

FFFFFFFFFFFFFFFFFFFFFFFFFFFFFFFFFFFFFFFFFFFFFFFFFFFFFFFFFFFFFFFF:FFFFFFFFFFFFFFFFFFFFFFFFFFFFFFFF  
FFFFFFFFFFFFFFFFFFFFFFFFFFFFFFFFFFFFFFFFFFFFFFFFFFFFFFFF:FFFFFFFFFFFFFFFFFFFFFFFF, FFFFFFFFF  
FFFFFFF:FFFFFF

@A00721:190:HGJW7DSXY:4:1603:7139:33990 2:N:0:TCTGCAAG+GCTGCACT  
CTTAAAACTGTGAGTCCACTAAGTTTCTTCCTCACAGAAATCGGTCTAGACCTCATATAACAGAAGT  
AAGCGTTCTTAACGTCGTCGTCGCATCCATGGATGAATCAACGTAACCACGACCTTCTAGAACGTAT  
CGTTTTTCACAAACG

+

FF:FFFFFFFFFFFFFFFF:FFFFFFFFFFFFFFFFFFFFFFFFFFFFFFFFFFFFFFFFFFFFFFFF:FF

@A00721:190:HGJW7DSXY:4:1652:29695:2722 2:N:0:TCTGCAAG+GCTGCACT  
CTTAAAACTGTGAGTCCACTAAGTTTCTTCCTCACAGAAATCGGTCTAGACCTCATATAACAGAAGT  
AAGCGTTCCTTAACGTCGTCGTCGCATCCATGGATGAATCAACGTAACCACGACCTTCTAGAACGTAT  
CGTTTTTCACAAACG

@A00721:190:HGJW7DSXY:4:1662:11017:13213 2:N:0:TCTGCAAG+GCTGCACT  
CTTAAAAACTGTGAGTCCACTAAGTTTCTTCCTCACAGAAATCGGTCTAGACCTCATATAACAGAAGT  
AAGCGTTCCTTAACGTCGTCGTCGCCATCCATGGATGAATCAACGTAACCACGACCTTCTAGAACGTAT  
CGTTTTTCACAAACG

@A00721:190:HGJW7DSXY:4:2137:1976:31814 2:N:0:TCTGCAAG+GCTGCACT  
CGTTTGTGAAAAACGATACGTTCTAGAAGTCTGTGGTTACGTTGATTCATCCATGGATGCGGACGACG  
ACGTTAAGAACGCTTACTTCTGTTATATGAGGTCTAGACCGATTTCTGTGAGGAAGAACTTAGTGGA  
CTCACAGTTTTTAAG

@A00721:190:HGJW7DSXY:4:2243:20103:2769 2:N:0:TCTGCAAG+GCTGCACT  
CTTAAAACTGTGAGTCCACTAAGTTTCTTCCTCACAGAAATCGGTCTAGACCTCATATAACAGAAGT  
AAGCGTTCCTTAACGTCGTCGTCGCCATCCATGGATGAATCAACGTAACCACGACCTTCTAGAACGTAT  
CGTTTTTCACAAACG

@A00721:190:HGJW7DSXY:4:2250:5367:17926 2:N:0:TCTGCAAG+GCTGCACT  
CGTTTGTGAAAAACGATACGTTCTAGAAGTCGTGGTTACGTTGATTCATCCATGGATGCGGACGACG  
ACGTTAAGAACGCTTACTTCTGTTATATGAGGTCTAGACCGATTTCTGTGAGGAAGAACTTAGTGGA  
CTCACAGTTTTTAAG

@A00721:190:HGJW7DSXY:4:2350:22498:29309 2:N:0:TCTGCAAG+GCTGCACT  
CTTAAAACTGTGAGTCCACTAAGTTTCTTCCTCACAGAAATCGGTCTAGACCTCATATAACAGAAGT  
AAGCGTTCCTTAACGTCGTCGTCGTCATCCATGGATGAATCAACGTAACCACGACCTTCTAGAACGTAT  
CGTTTTTCACAAACG

@A00721:190:HGJW7DSXY:4:2374:8874:26193 2:N:0:TCTGCAAG+GCTGCACT  
CTTAAAACTGTGAGTCCACTAAGTTTCTTCCTCACAGAAATCGGTCTAGACCTCATATAACAGAAGT  
AAGCGTTCCTTAACGTCGTCGTCCGCATCCATGGATGAATCAACGTAACCACGACCTTCTAGAACGTAT  
CGTTTTTCACAAACG

[illegible][illegible][illegible][illegible]

```
FFF:F:FFFFFFFF:FFFFFFFFFFFFFFFF:F:,F,F:FFF::FFFFFF:FFF::FF:FFFFFF:FFFFFF:
FFFFFFFF::F:F:FFF:F,,FFFFFF:FFFFFF:FFFF,F,F:FFFFFFFFFFFF:,F:F:FFFFFF,FFFF
FFF:FFFFFFFFF,:
```

[illegible][illegible]

@A00721:190:HGJW7DSXY:4:2561:5394:27774 2:N:0:TCTGCAAG+GCTGCACT  
CTTAAAAACTGTGAGTCCACTAAGTTTCTTCCTCACAGAAATCGGTCTAGACCTCATATAACAGAAGT

AAGCGTTCCTTAACGTCGTCGTCCGCATCCATGGATGAATCAACGTAACCACGACCTTCTAGAACGTAT  
CGTTTTTTCACAAAC

[illegible] $+$ 

```
FFFFFFFF:FFFF:FFFFFFFFFFFFFFFFFFFFFF:FFFFFFFFFFF:FFFFFFFFFFFFFFFFFFFFFF:FFFFFFFFF
:FFF:FFFFFFFFFFFFFFFFFFFFFFFFFFFFFF,FFFFF:FFFFFFFFFFFFFFFFFFFFFFFFFFFFFF:FFFFFFF
F:FFFFFF,FFF:FF
```

+

```

: ,FF:FFFF:FFFFF,F,:FF:FFFFFF,FF,: ,FFF::FFFFFFF::FFF::FFFF,:::FF:FFFFF
FFF,F,,:FF:F,,,FFF,:FF:FFF,F,FFFFFF,F::, :F:FF,F::FF,FFFFFF,FF,: ,FF,:F
FF::FFFFFFFF

```

+

```

::F:FF,,,FFF,F,:FFF:FFFF,,F::,FFF,:FFFF,F,,:FF::FF,F:FF:FF:FF,:FF:
F:FF,,,,F:F,:,,,F::F,,:F:F:FF,F::,F,F:::FF:::FF,F::,F,F,FF,F::FF,F,
F,,F:FF

```

+

[illegible]

+

```
FFFFFFFFFFFFFFFFFFFFFFFFFFFFFFFFFFFFFFFFFFFFFFFFFFFFFFFFFFFFFFFFFFFFF
FFFFFFFFFFFFFFFFFFFFFFFFFFFFFFFFFFFFFF,FFFFFFFFFFFFFFFFFFFFFFFFFFFFFF,FFFFF
FFFFFFFFFFFFFFFF
```

+

[illegible]



FFFFFFFFF,FFFFFFFFFFFFFFFF:FFFFFFFFFFFFFFFFFFFFFFFFFFFFFFFFFFFFFFFF  
FFFFFFFFFFFFFFFF

@A00721:190:HGJW7DSXY:4:2112:25771:6261 2:N:0:TCTGCAAG+GCTGCACT  
CCTCTACACTGCCACCAGTGGTGTCTTAAAACTGTGAGTCCACTAAGTTTCTTCCTCACAGAAATC  
GGTCTAGACCTCATATAACAGAAGTAAGCGTTCTTAACGTCGTCGTCGCGCATCCATGGATGAATCAAC  
GTAACCACGACCTTC

+

FFFFFFFFFFFFFFFFFFFFFFFFFFFFFFFFFFFFFFFFFFFFFFFFFFFFFFFFFFFFFFFFFFFFFFFF  
FFFFFFFFFFFFFFFFFFFFFFFFFFFFFFFFFFFFFFFFFFFFFFFFFFFFFFFFFFFFFFFFFFFFFFFF  
FFFFFFFFFFFFFFFF

@A00721:190:HGJW7DSXY:4:2452:20500:18302 2:N:0:TCTGCAAG+GCTGCACT  
CCTCTACACTGCCACCAGTGGTGTCTTAAAACTGTGAGTCCACTAAGTTTCTTCCTCACAGAAATC  
GGTCTAGACCTCATATAACAGAAGTAAGCGTTCTTAACGTCGTCGTCGCGCATCCATGGATGAATCAAC  
GTAACCACGACCTTC

+

FFFFFFFFFFFFFFFFFFFFFFFFFFFFFFFFFFFFFFFFFFFFFFFFFFFFFFFFFFFFFFFFFFFFFFFF  
FFFFFFF:FFFFFFFFFFFFFFFFFFFFFFFFFFFFFFFFFFFFFFFFFFFFFFFFFFFFFFFFFFFFFFFF  
FFFFFFFFFFFFFFFF

@A00721:190:HGJW7DSXY:4:2572:30942:8422 2:N:0:TCTGCAAG+GCTGCACT  
CCTCTACACTGCCACCAGTGGTGTCTTAAAACTGTGAGTCCACTAAGTTTCTTCCTCACAGAAATC  
GGTCTAGACCTCATATAACAGAAGTAAGCGTTCTTAACGTCGTCGTCGCGCATCCATGGATGAATCAAC  
GTAACCACGACCTTC

+

FFFFFFFFFFFFFFFFFFFFFFFFFFFFFFFFFFFFFFFFFFFFFFFFFFFFFFFFFFFFFFFFFFFFFFFF  
FFFFFFFFFFFFFFFFFFFFFFFFFFFFFFFFFFFFFFFFFFFFFFFFFFFFFFFFFFFFFFFFFFFFFFFF:  
FFFFFFFFFFFFFFFF

@A00721:190:HGJW7DSXY:4:2606:11957:15718 2:N:0:TCTGCAAG+GCTGCACT  
CCTCTACACTGCCACCAGTGGTGTCTTAAAACTGTGAGTCCACTAAGTTTCTTCCTCACAGAAATC  
GGTCTAGACCTCATATAACAGAAGTAAGCGTTCTTAACGTCGTCGTCGCGCATCCATGGATGAATCAAC  
GTAACCACGACCTTC

+

FFFFFFFFFFFFFFFFFFFFFFFFFFFFFFFFFFFFFFFFFFFFFFFFFFFFFFFFFFFFFFFFFFFFFFFF  
FFFFFFFFFFFFFFFFFFFFFFFFFFFFFFFFFFFFFFFFFFFFFFFFFFFFFFFFFFFFFFFFFFFFFFFF  
FFFFFFFFFFFFFFFF

@A00721:190:HGJW7DSXY:4:2632:7654:8829 2:N:0:TCTGCAAG+GCTGCACT  
CCTCTACACTGCCACCAGTGGTGTCTTAAAACTGTGAGTCCACTAAGTTTCTTCCTCACAGAAATC  
GGTCTAGACCTCATATAACAGAAGTAAGCGTTCTTAACGTCGTCGTCGCGCATCCATGGATGAATCAAC  
GTAACCACGACCTTC

+

FFFFFFFFFFFFFFFFFFFFFFFFFFFFFFFFFFFFFFFFFFFFFFFFFFFFFFFFFFFFFFFFFFFFFFFF  
FFFFFFFFFFFFFFFFFFFFFFFFFFFFFFFFFFFFFFFFFFFFFFFFFFFFFFFFFFFFFFFFFFFFFFFF  
FFFFF:FFFFFFFF

@A00721:190:HGJW7DSXY:4:1417:31647:32440 2:N:0:TCTGCAAG+GCTGCACT  
GTCCTCTACACTGCCACCAGTGGTGTCTTAAAACTGTGAGTCCACTAAGTTTCTTCCTCACAGAAA  
TCGGTCTAGACCTCATATAACAGAAGTAAGCGTTCTTAACGTCGTCGTCGCGCATCCATGGATGAATCA  
ACGTAACCACGACCT

+

FFFFFFFFFFFFFFFFFFFFFFFFFFFFFFFFFFFFFFFFFFFFFFFFFFFFFFFFFFFFFFFFFFFFFFFF  
FFFFFFFFFFFFFFFFFFFFFFFFFFFFFFFFFFFFFFFFFFFFFFFFFFFFFFFFFFFFFFFFFFFFFFFF:  
FFFFFFFFFFFFF:FFF

@A00721:190:HGJW7DSXY:4:1475:32045:31876 2:N:0:TCTGCAAG+GCTGCACT  
GTCCTCTACACTGCCACCAGTGGTGTCTTAAAACTGTGAGTCCACTAAGTTTCTTCCTCACAGAAA  
TCGGTCTAGACCTCATATAACAGAAGTAAGCGTTCTTAACGTCGTCGTCGCGCATCCATGGATGAATCA  
ACGTAACCACGACCT

+  
FFFFFFFFFFFFFFFFFFFFFFFFFFFFFFFFFFFFFFFFFFFFFFFFFFFFFFFFFFFFFFFFFFFFFFFF  
FFFFFFFFFFFFFFFFFFFFFFFFFFFFFFFFFFFFFFFFFFFFFFFFFFFFFFFFFFFFFFFFFFFFFFFF:FFF  
FFFFFFFF,FFFFF  
@A00721:190:HGJW7DSXY:4:1571:22345:3709 2:N:0:TCTGCAAG+GCTGCACT  
GTCCTCTACACTGCCACCAGTGGTGTCTTAAAACTGTGAGTCCACTAAGTTTCTTCCTCACAGAAA  
TCGGTCTAGACCTCATATAACAGAAGTAAGCGTTCTTAACGTCGTCGTCCGCATCCATGGATGAATCA  
ACGTAACCACGACCT  
+  
FFFFFFFFFFFFFFFFFFFFFFFFFFFFFFFFFFFFFFFFFFFFFFFFFFFFFFFFFFFFFFFFFFFFFFFF  
FFFFFFFFFFFFFFFFFFFFFFFFFFFFFFFFFFFFFFFFFFFFFFFFFFFFFFFFFFFFFFFFFFFFFFFF:FFFFFF:FFF  
FFFFFFFFFFFFFFFF  
@A00721:190:HGJW7DSXY:4:2301:11207:5682 2:N:0:TCTGCAAG+GCTGCACT  
GTCCTCTACACTGCCACCAGTGGTGTCTTAAAACTGTGAGTCCACTAAGTTTCTTCCTCACAGAAA  
TCGGTCTAGACCTCATATAACAGAAGTAAGCGTTCTTAACGTCGTCGTCCGCATCCATGGATGAATCA  
ACGTAACCACGACCT  
+  
FFFFFFFFFFFFFFFFFFFFFFFFFFFFFFFFFFFFFFFFFFFFFFFFFFFFFFFFFFFFFFFFFFFFFFFF:FFFFFFFFFFFFFFFFFFFFFFFF  
FFFFFFFFFFFFFFFFFFFFFFFFFFFFFFFFFFFFFFFFFFFFFFFFFFFFFFFFFFFFFFFFFFFFFFFFFFFFFFFFFFFFFFFFFFFFFFFF  
FFFFFFFFFFFFFFFF  
@A00721:190:HGJW7DSXY:4:2443:28275:34867 2:N:0:TCTGCAAG+GCTGCACT  
GTCCTCTACACTGCCACCAGTGGTGTCTTAAAACTGTGAGTCCACTAAGTTTCTTCCTCACAGAAA  
TCGGTCTAGACCTCATATAACAGAAGTAAGCGTTCTTAACGTCGTCGTCCGCATCCATGGATGAATCA  
ACGTAACCACGACCT  
+  
FFFFFFFFFFFFFFFFFFFFFFFFFFFFFFFFFFFFFFFFFFFFFFFFFFFFFFFFFFFFFFFFFFFFFFFF  
FFFFFFFFFFFFFFFFFFFFFFFFFFFFFFFFFFFFFFFFFFFFFFFFFFFFFFFFFFFFFFFFFFFFFFFFFFFFFFFFFFFFFFFFFFFFFFFF  
FF:FFFFFFFFFFFFFFFF  
@A00721:190:HGJW7DSXY:4:2448:29785:1814 2:N:0:TCTGCAAG+GCTGCACT  
GTCCTCTACACTGCCACCAGTGGTGTCTTAAAACTGTGAGTCCACTAAGTTTCTTCCTCACAGAAA  
TCGGTCTAGACCTCATATAACAGAAGTAAGCGTTCTTAACGTCGTCGTCCGCATCCATGGATGAATCA  
ACGTAACCACGACCT  
+  
:FFFFFFFFFFFFFFFFFFFFFFFFFFFFFFFFFFFFFFFFFFFFFFFFFFFFFFFFFFFFFFFFFFFFFFFF  
FFFFFFFFFFFFFFFFFFFFFFFFFFFFFFFFFFFFFFFFFFFFFFFFFFFFFFFFFFFFFFFFFFFFFFFF:FFFFFFFFFFFFFFFFFFFFFFFF  
FFFFFFFFFFFFFFFF  
@A00721:190:HGJW7DSXY:4:2578:6099:8046 2:N:0:TCTGCAAG+GCTGCACT  
GTCCTCTACACTGCCACCAGTGGTGTCTTAAAACTGTGAGTCCACTAAGTTTCTTCCTCACAGAAA  
TCGGTCTAGACCTCATATAACAGAAGTAAGCGTTCTTAACGTCGTCGTCCGCATCCATGGATGAATCA  
ACGTAACCACGACCT  
+  
FFFFFFFFFFFFFFFFFFFFFFFFFFFFFFFFFFFFFFFFFFFFFFFFFFFFFFFFFFFFFFFFFFFFFFFF:FFFFFFFF,FFFFFFFF:FFFFFFF  
FFFFFF,FFFFFFFFFFFFFFFF:FF:FF:FFFFFFFF,FFFFFFFFFFFFFFFFFFFFFFFFFFFFFFFF  
FFFFFFFFFFFFFFFF  
@A00721:190:HGJW7DSXY:4:2641:18249:16125 2:N:0:TCTGCAAG+GCTGCACT  
GTCCTCTACACTGCCACCAGTGGTGTCTTAAAACTGTGAGTCCACTAAGTTTCTTCCTCACAGAAA  
TCGGTCTAGACCTCATATAACAGAAGTAAGCGTTCTTAACGTCGTCGTCCGCATCCATGGATGAATCA  
ACGTAACCACGACCT  
+  
FFFFFFFFFFFFFFFFFFFFFFFFFFFFFFFFFFFFFFFF,FFFFFFFFFFFFFFFFFFFFFFFFFFFFFFFFFFFFFFFFFFFFFFFF  
FFFFFFFFFFFFFFFF:FFFFFFFFFFFFFFFF:FFFFFFFFFFFFFFFFFFFFFFFFFFFFFFFFFFFFFFFF:FF,FFF  
FFFFFFFFFFFFFFFF  
@A00721:190:HGJW7DSXY:4:2675:19018:32080 2:N:0:TCTGCAAG+GCTGCACT  
GTCCTCTACACTGCCACCAGTGGTGTCTTAAAACTGTGAGTCCACTAAGTTTCTTCCTCACAGAAA

TCGGTCTAGACCTCATATAACAGAAGTAAGCGTTCTTAACGTCGTCGTCGCATCCATGGATGAATCA  
ACGTAACCACGACCT

[illegible] $+$ 

@A00721:190:HGJW7DSXY:4:1276:11478:23563 2:N:0:TCTGCAAG+GCTGCACT  
TACGTTGATTCATCCATGGATGCGGACGACGACGTTAAGAACGCTTACTTCTGTTATATGAGGTCTAG  
ACCGATTTCTGTGAGGAAGAACTTAGTGGACTCACAGTTTTTAAGGACACCACTGGTGGCAGTGTAG  
AGGACATGATGAAAG

[illegible]

+

@A00721:190:HGJW7DSXY:4:1462:18195:26553 2:N:0:TCTGCAAG+GCTGCACT  
TACGTTGATTCATCCATGGATGCGGACGACGACGTTAAGAACGCTTACTTCTGTTATATGAGGTCTAG  
ACCGATTTCTGTGAGGAAGAACTTAGTGGACTCACAGTTTTTAAGGACACCACTGGTGGCAGTGTAG  
AGGACATGATGAAAG

```

FFFF:FFFFFFFFFFFFFFFFFFFFFFFFFFFFFFFF:FFFFFFFFFFFF,FF:FFFFFFFFFFFFFF
FFFFFFFFFFFFFFFFFFFFFFFFFFFFFFFF,FFFFFFFF,,:,FFFFFFFFFFFFFFFFFFFFF:F,:F
FFFFFFFFFFFFFFFF

```

+

@A00721:190:HGJW7DSXY:4:1624:7654:33599 2:N:0:TCTGCAAG+GCTGCACT  
TACGTTGATTCATCCATGGATGCGGACGACGACGTTAAGAACGCTTACTTCTGTTATATGAGGTCTAG  
ACCGATTTCTGTGAGGAAGAACTTAGTGGACTCACAGTTTTTAAGGACACCACTGGTGGCAGTGTAG  
AGGACATGATGAAAG

```

FFFFFFFFFFFFFFFF:FFFFFFFFFFFFFFFFFFFFFFFFFFFFFFFF:FFFFFFFFFFFFFFFFFFFFFFFFFFFFFFFF
FFFFF:FFFFFFFFFFFFFFFFFFFFFFFFFFFFFFFFFFFFFFFF:FFFFFFFFFFFFFFFFFFFFFFFFFFFFFFFF
FFFFFFFFFFFFFFFF

```





```
FFFFFFFFFFFFFFFFFFFFFFFFFFFFFFFFFFFFFFFFFFFFFFFFFFF:FFFFFFFFFFFFFFFFFFFFFFFFFFFFFFFFFFFFF:,
FFFFFFFFFFFFFF:F:F
```

+

@A00721:190:HGJW7DSXY:4:2326:19045:34601 2:N:0:TCTGCAAG+GCTGCACT  
CCATGGATGCGGACGACGACGTTAAGAACGCTTACTTCTGTTATATGAGGTCTAGACCGATTTCTGTG  
AGGAAGAACTTAGTGGA CTACAGTTTTTAAGGACACCACTGGTGCGAGTGTAGAGGACATGATGAA  
AGGAGCTTATTATTT

[illegible]

+

@A00721:190:HGJW7DSXY:4:1611:27254:11334 2:N:0:TCTGCAAG+GCTGCACT  
CAAAAACTAAATAATAAGCTCCTTTTCATCATGTCCTCTACACTGCCACCAGTGGTGTCTTAAAAACT  
GTGAGTCCACTAAGTTTCTTCCTCACAGAAATCGGTCTAGACCTCATATAACAGAAGTAAGCGTTCTT  
AACGTCGTCGTCCGC

[illegible]

+

@A00721:190:HGJW7DSXY:4:2202:18918:5697 2:N:0:TCTGCAAG+GCTGCACT  
CAAAAACTAAATAATAAGCTCCTTTTCATCATGTCCTCTACACTGCCACCAGTGGTGTCTTAAAAACT  
GTGAGTCCACTAAGTTTCTTCCTCACAGAAATCGGTCTAGACCTCATATAACAGAAGTAAGCGTTCTT  
AACGTCGTCGTCCGC

```

FFFFFFFFFFFFFFFFFFFFFFFFFFFFFFFFFFFFFFFFFFFFFFFFFFFFFFFFFFFFFFFF
FFFFFFFFFFFFF:FFFFFFFFFFFFFFFFFFFFF,FFFFFFFFFFFFFFFFFFFFFFFFFFFFF:FFFF
E:FFFFFFFFFFFFFFF

```

+  
FFFF:FFFFFFFFFFFFFFFF:FFFFFFFFFFFFFFFF:F:FFFFFFFF:FFFFFFFFFFFFF  
:F:FFFF:FFFFFF,FFFF:,FFFFFF:FFFFFFFF,FF,F,FFFFFFFFFFFF,FFFF:F,FFFFFF  
FFF:FFFFFFFFF:

@A00721:190:HGJW7DSXY:4:2249:6515:18944 2:N:0:TCTGCAAG+GCTGCACT  
CAAAAACTAAATAATAAGCTCCTTTTCATCATGTCCTCTACACTGCCACCAGTGGTGTCTTAAAACT  
GTGAGTCCACTAAGTTTCTTCCTCACAGAAATCGGTCTAGACCTCATATAACAGAAGTAAGCGTTCTT  
AACGTCGTCGTCCGC

+  
FFFFFFFFFFFFFFFFFFFFFFFFFFFFFFFFFFFFFFFFFFFFFFFFFFFFFFFFFFFFFFFFFFFFF  
FFFFFFFFFFFFFFFFFFFFFFFFFFFFFFFFFFFFFFFFFFFFFFFFFFFFFFFFFFFFFFFFFFFFF:FFFFFFFF  
FFFFFFFFFFFFFFFFF

@A00721:190:HGJW7DSXY:4:2301:14633:11898 2:N:0:TCTGCAAG+GCTGCACT  
CAAAAACTAAATAATAAGCTCCTTTTCATCATGTCCTCTACACTGCCACCAGTGGTGTCTTAAAACT  
GTGAGTCCACTAAGTTTCTTCCTCACAGAAATCGGTCTAGACCTCATATAACAGAAGTAAGCGTTCTT  
AACGTCGTCGTCCGC

+  
FFFFFFFFFFFFFFFFFFFFFFFFFFFFFFFFFFFFFFFFFFFFFFFFFFFF:FFFFF,FFFFFFFFFFFFFFFF  
FFF:FFFFF:FFFFFFFFFFFFFFFFFFFFFFFF:FFFFFFFFFF:FF:FFFF:FFFF:FFFFFFFF  
FFFFFFFFFFFFFFFFF

@A00721:190:HGJW7DSXY:4:2520:4743:1752 2:N:0:TCTGCAAG+GCTGCACT  
CAAAAACTAAATAATAAGCTCCTTTTCATCATGTCCTCTACACTGCCACCAGTGGTGTCCATAAAAACT  
GTGAGTCCACTAAGTTTCTACCTCACAGAAATCGGTCTAGACCTCATCTAACAGAAGTAAGCGTTCTT  
AACGTCGTCGTCCGC

+  
FFF,FFF,F:FFF,FFFF:F,FFFF:FFF:FF:FF,FF:::FF:F:F,FF,F,FFF,,FF:FFF:  
,:,F,FFFF:F,FFF:F:F,F::FFFFFF,FFFFFF:FFFFFF:F,,:FF,:FFF,FF,FF:FFF,  
,FFFFFF,F:F:FFF

@A00721:190:HGJW7DSXY:4:1653:32524:11506 2:N:0:TCTGCAAG+GCTGCACT  
GTGCAAAAACTAAATAATAAGCTCCTTTTCATCATGTCCTCTACACTGCCACCAGTGGTGTCTTAAA  
AACTGTGAGTCCACTAAGTTTCTTCCTCACAGAAATCGGTCTAGACCTCATATAACAGAAGTAAGCGT  
TCTTAACGTCGTCGT

+  
FFFFFFFFFFFFFFFFFFFFFFFFFFFFFFFFFFFFFFFFFFFFFFFFFFFFFFFFFFFFFFFFFFFFF  
F:FFFFFFFFF:FFFFFFFFFFFFFFFFFFFFFFFFFFFFFFFFFFFFFFFFFFFFFFFFFFFF:FF:FFFFFF  
FFFFF:FFFFFFFFF

@A00721:190:HGJW7DSXY:4:1661:16278:30436 2:N:0:TCTGCAAG+GCTGCACT  
GTGCAAAAACTAAATAATAAGCTCCTTTTCATCATGTCCTCTACACTGCCACCAGTGGTGTCTTAAA  
AACTGTGAGTCCACTAAGTTTCTTCCTCACAGAAATCGGTCTAGACCTCATATAACAGAAGTAAGCGT  
TCTTAACGTCGTCGT

+  
FFFFFFFFFFFFFFFFFFFFFFFFFFFF:FFFFFFFFFFFFFFFFFFFFFFFFFFFFFFFFFFFF:FFF  
F:FFFFFFFFFFFFFFFFFFFFFFFFFFFFFFFFFFFFFFFFFFFFFFFFFFFFFFFFFFFFFFFFFFFFF  
FFFFFFFFFFFFFFFFF

@A00721:190:HGJW7DSXY:4:2312:19271:21527 2:N:0:TCTGCAAG+GCTGCACT  
GTGCAAAAACTAAATAATAAGCTCCTTTTCATCATGTCCTCTACACTGCCACCAGTGGTGTCTTAAA  
AACTGTGAGTCCACTAAGTTTCTTCCTCACAGAAATCGGTCTAGACCTCATATAACAGAAGTAAGCGT  
TCTTAACGTCGTCGT

+  
FFFFFFFFFFFFFFFFFFFFFFFFFFFFFFFFFFFFFFFFFFFFFFFFFFFF:FFFFFFFFFFFFFFFFFFFF  
FFFFFFFFFFFFFFFFFFFFFFFFFFFFFFFFFFFFFFFFFFFFFFFFFFFFFFFFFFFFFFFFFFFFF:FF  
FFFFFFFFFFF:FFFF

@A00721:190:HGJW7DSXY:4:1533:26205:15468 2:N:0:TCTGCAAG+GCTGCACT  
CGTTAAGAACGCTTACTTCTGTTATATGAGGTCTAGACCGATTTCTGTGAGGAAGAACTTAGTGGAC



@A00721:190:HGJW7DSXY:4:1475:18756:36041 2:N:0:TCTGCAAG+GCTGCACT  
GATGAAATGTCGCAAAAACTAAATAATAAGCTCCTTTCATCATGTCCTCTACACTGCCACCAGTGGTG  
TCCTTAAAACTGTGAGTCCACTAAGTTTCTTCCTCACAGAAATCGGTCTAGACCTCATATAACAGAA  
GTAAGCGTTCTTAAC

+

FFFFFFFFFFFFFFFFFFFFFFFFFFFFFFFFFFFFFFFFFFFFFFFFFFFFFFFFFFFFFFFFFFFFFFFF  
FFFFFFFFFFFFFFFFFFFFFFFFFFFFFFFFFFFFFFFFFFFFFFFFFFFFFFFFFFFFFFFFFFFFFFFF  
FFFFFFFF:FFFFFFFF

@A00721:190:HGJW7DSXY:4:1558:16288:18865 2:N:0:TCTGCAAG+GCTGCACT  
GATGAAATGTCGCAAAAACTAAATAATAAGCTCCTTTCATCATGTCCTCTACACTGCCACCAGTGGTG  
TCCTTAAAACTGTGAGTCCACTAAGTTTCTTCCTCACAGAAATCGGTCTAGACCTCATATAACAGAA  
GTAAGCGTTCTTAAC

+

FFFFFFFFFFFFFFFFFFFFFFFFFFFFFFFFFFFFFFFFFFFFFFFFFFFFFFFFFFFFFFFFFFFFFFFF  
FF::FFFFFFFF,FFFFF,FFFF:FFFFF:,FFFFFFFFFF,F::FF:FF:FFFF:F:FFFF  
:FFFFFFFFFFFFFFFF

@A00721:190:HGJW7DSXY:4:2104:22263:13620 2:N:0:TCTGCAAG+GCTGCACT  
GATGAAATGTCGCAAAAACTAAATAATAAGCTCCTTTCATCATGTCCTCTACACTGCCACCAGTGGTG  
TCCTTAAAACTGTGAGTCCACTAAGTTTCTTCCTCACAGAAATCGGTCTAGACCTCATATAACAGAA  
GTAAGCGTTCTTAAC

+

FFFFFFFFFFFFFFFFFFFFFFFFFFFFFFFFFFFFFFFFFFFFFFFFFFFFFFFFFFFFFFFFFFFFFFFF  
FFFFF:FFFFFFFFFFFFFFFFFFFFFFFFFFFFFFFFFFFFFFFFFFFFFFFFFFFFFFFFFFFFFFFF  
FFFF,FFFFFFFFF:

@A00721:190:HGJW7DSXY:4:2157:18041:25598 2:N:0:TCTGCAAG+GCTGCACT  
GATGAAATGTCGCAAAAACTAAATAATAAGCTCCTTTCATCATGTCCTCTACACTGCCACCAGTGGTG  
TCCTTAAAACTGTGAGTCCACTAAGTTTCTTCCTCACAGAAATCGGTCTAGACCTCATATAACAGAA  
GTAAGCGTTCTTAAC

+

FFFFFFFFFFFFFFFF:FFFFFFFFFFFFFFFFFFFFFFFFFFFFFFFFFFFFFFFFFFFFFFFFFFFF  
FFFFFFFFFFFFFFFFFFFFF:FFFFFFFFFFFFFFFFFFFFF:FFFF:F:FFFFFFFFFFFFFFFFFFFF  
FFFF:F:FFFFFFFF

@A00721:190:HGJW7DSXY:4:2268:28411:14372 2:N:0:TCTGCAAG+GCTGCACT  
GATGAAATGTCGCAAAAACTAAATAATAAGCTCCTTTCATCATGTCCTCTACACTGCCACCAGTGGTG  
TCCTTAAAACTGTGAGTCCACTAAGTTTCTTCCTCACAGAAATCGGTCTAGACCTCATATAACAGAA  
GTAAGCGTTCTTAAC

+

FFFFFFFFFFFFFFFFFFFFFFFFFFFFFFFFFFFFFFFFFFFFFFFFFFFFFFFFFFFFFFFFFFFFFFFF  
FFFFFFFFFFFFFFFFFFFFFFFFFFFFFFFFFFFFFFFFFFFFFFFFFFFFFFFFFFFFFFFFFFFFFFFF  
FFF:FFFFFFFF

@A00721:190:HGJW7DSXY:4:2420:19651:33771 2:N:0:TCTGCAAG+GCTGCACT  
GATGAAATGTCGCAAAAACTAAATAATAAGCTCCTTTCATCATGTCCTCTACACTGCCACCAGTGGTG  
TCCTTAAAACTGTGAGTCCACTAAGTTTCTTCCTCACAGAAATCGGTCTAGACCTCATATAACAGAA  
GTAAGCGTTCTTAAC

+

FFFFFFFFFFFFFFFFFFFFFFFFFFFFFFFFFFFFFFFFFFFFFFFFFFFFFFFFFFFFFFFFFFFFFFFF  
FFFFFFFFFFFFFFFFFFFFFFFFFFFFFFFFFFFFFFFFFFFFFFFFFFFFFFFFFFFFFFFFFFFFFFFF  
FFFFFFFFFFFFFFFF:

@A00721:190:HGJW7DSXY:4:2575:30183:36385 2:N:0:TCTGCAAG+GCTGCACT  
GATGAAATGTCGCAAAAACTAAATAATAAGCTCCTTTCATCATGTCCTCTACACTGCCACCAGTGGTG  
TCCTTAAAACTGTGAGTCCACTAAGTTTCTTCCTCACAGAAATCGGTCTAGACCTCATATAACAGAA  
GTAAGCGTTCTTAAC

+

:FFFFFFFFFFFFFFFF:FFFFFFFFFFFFFFFFFFFFFFFFFFFFFFFFFFFFFFFFFFFFFFFFFFFF

FFFFFFFF:FFFFFFFFFFFFFFFFFFFFFFFFFFFFFFFFFFFFFFFFFFFFFFFFFFFFFFFFFFFFFFFF  
FFFF:FFFFFFFF,F

@A00721:190:HGJW7DSXY:4:2656:27724:5760 2:N:0:TCTGCAAG+GCTGCACT  
GATGAAATGTCGCAAAAACTAAATAATAAGCTCCTTTCATCATGTCCTCTACACTGCCACCAGTGGTG  
TCCTTAAAACTGTGAGTCCACTAAGTTTCTTCCTCACAGAAATCGGTCTAGACCTCATATAACAGAA  
GTAAGCGTTCTTAAC

+

FFFFFFFFFFFFFFFFFFFFFFFFFFFFFFFFFFFFFFFFFFFFFFFFFFFFFFFFFFFFFFFFFFFFFFFF:FFFFFFF  
FFFFFFFFFFFFFFFFFFFFFFFFFFFFFFFFFFFFFFFFFFFFFFFFFFFFFFFFFFFFFFFFFFFFFFFFFFFFF  
FFFFFFFFFFFFFFFFFFFF

@A00721:190:HGJW7DSXY:4:2565:6280:15311 2:N:0:TCTGCAAG+GCTGCACT  
ATGAAATGTCGCAAAAACTAAATAATAAGCTCCTTTCATCATGTCCTCTACACTGCCACCAGTGGTGT  
CCTTAAAACTGTGAGTCCACTAAGTTTCTTCCTCACAGAAATCGGTCTAGACCTCATATAACAGAAG  
TAAGCGTTCTTAA

+

:::FFFFFFFFFFFFFFFFFFFFFFFFFFFFFFFFFFFFFFFFFFFFFFFFFFFFFFFFFFFFFFFF:F:FFF:FFFFFFFFFFFFFFFF:F:FF:FFFFFFFFF  
FFFFFFFFF:FFFFFF:F:FFFF:FFFFFFF:FFFFFFFFF:F,FFFF:FFFFFFFFFFFF:FFFF,  
FFFFFFFFFFFFFFF

@A00721:190:HGJW7DSXY:4:1270:29432:33708 2:N:0:TCTGCAAG+GCTGCACT  
CGCATATTGATGAAATGTCGCAAAAACTAAATAATAAGCTCCTTTCATCATGTCCTCTACACTGCCAC  
CAGTGGTGTCTTAAAACTGTGAGTCCACTAAGTTTCTTCCTCACAGAAATCGGTCTAGACCTCATA  
TAACAGAAGTAAGCG

+

FFFFFFFFFFFFFFFFFFFFFFFFFFFFFFFFFFFFFFFFFFFFFFFFFFFFFFFFFFFFFFFFFFFFFFFFFFFF  
FFFFFFFFFFFFFFFFFFFFFFFFFFFFFFFFFFFFFFFFFFFFFFFFFFFFFFFFFFFFFFFFFFFF,FFFFFFFFFFFFFFFFFFFFFFFFFFFF:FF  
FFFFFFFFF:F,FFF

@A00721:190:HGJW7DSXY:4:1450:20808:8437 2:N:0:TCTGCAAG+GCTGCACT  
CGCATATTGATGAAATGTCGCAAAAACTAAATAATAAGCTCCTTTCATCATGTCCTCTACACTGCCAC  
CAGTGGTGTCTTAAAACTGTGAGTCCACTAAGTTTCTTCCTCACAGAAATCGGTCTAGACCTCATA  
TAACAGAAGTAAGCG

+

FFFFFFFFFFFFFFFFFFFFFFFFFFFFFFFFFFFFFFFFFFFFFFFFFFFFFFFFFFFFFFFFFFFFFFFFFFFF  
FFFFFFFFFFFFFFFFFFFFFFFFFFFFFFFFFFFFFFFFFFFFFFFFFFFFFFFFFFFFFFFFFFFFFFFFFFFF:FFFFFFF  
FFFFFFFFFFFFFFFFF:

@A00721:190:HGJW7DSXY:4:1675:31304:34914 2:N:0:TCTGCAAG+GCTGCACT  
CGCATATTGATGAAATGTCGCAAAAACTAAATAATAAGCTCCTTTCATCATGTCCTCTACACTGCCAC  
CAGTGGTGTCTTAAAACTGTGAGTCCACTAAGTTTCTTCCTCACAGAAATCGGTCTAGACCTCATA  
TAACAGAAGTAAGCG

+

FFFFFFFFFFFFFFFFFFFFFFFFFFFFFFFFFFFFFFFFFFFFFFFFFFFFFFFFFFFFFFFFFFFFFFFFFFFF:FFF,FFFFFFFF:FFFFF  
FFFF:FFFF,FFFFF,FFFFF,FFF:FFFFFFFFFFFF,FFFFF,FFF:F,FF::FFFF,FFFFF  
FFFFFFFF:FFFF:FF

@A00721:190:HGJW7DSXY:4:2138:30553:24815 2:N:0:TCTGCAAG+GCTGCACT  
CGCATATTGATGAAATGTCGCAAAAACTAAATAATAAGCTCCTTTCATCATGTCCTCTACACTGCCAC  
CAGTGGTGTCTTAAAACTGTGAGTCCACTAAGTTTCTTCCTCACAGAAATCGGTCTAGACCTCATA  
TAACAGAAGTAAGCG

+

FFFFF:FFFF:FFFFFFFFF:F:FFFFFFFFFFFFFFFFFFFFFFFFFFFFFFFFFFFFFFFF:FFFF:FFF,FFFFF  
FF:FFFFFFFFFFFFFFFFFFFFFFFFFFFFFFFFFFFFFFFFFFFFFFFFFFFFFFFFFFFFF:FFFFFFFFF:FFFF:F:FFFFFFFFFFFFFFFFFFFFF  
FFFFFFFFFFFFFFF,FF

@A00721:190:HGJW7DSXY:4:2314:20003:20572 2:N:0:TCTGCAAG+GCTGCACT  
CGCATATTGATGAAATGTCGCAAAAACTAAATAATAAGCTCCTTTCATCATGTCCTCTACACTGCCAC  
CAGTGGTGTCTTAAAACTGTGAGTCCACTAAGTTTCTTCCTCACAGAAATCGGTCTAGACCTCATA  
TAACAGAAGTAAGCG



TGTCCTCTACACTGCCACCAGTGGTGTCTTAAAACTGTGAGTCCACTAAGTTTCTTCCTCACAGAA  
ATCGGTCTAGACCTC

+

FFFFFFFFFFFFFFFFFFFFFFFFFFFFFFFFFFFFFFFFFFFFFFFFFFFFFFFFFFFFFFFFFFFFFFFF  
FFFFFFFFFFFFFFFFFFFFFFFFFFFFFFFFFFFFFFFFFFFFFFFFFFFFFFFFFFFFFFFFFFFFFFFF  
FFFFFFFFFFFF, :FF

@A00721:190:HGJW7DSXY:4:2408:11008:15953 2:N:0:TCTGCAAG+GCTGCACT  
ATTTAATGCAACTTCCATCGCATATTGATGAAATGTCGCAAAAACTAAATAATAAGCTCCTTTCATCA  
TGTCCTCTACACTGCCACCAGTGGTGTCTTAAAACTGTGAGTCCACTAAGTTTCTTCCTCACAGAA  
ATCGGTCTAGACCTC

+

FFFFFFFFFFFFFFFFFFFFFFFFFFFFFFFFFFFFFFFFFFFFFFFFFFFFFFFFFFFFFFFFFFFFFFFF  
FFFFFFFFFFFFFFFFFFFFFFFFFFFFFFFFFFFFFFFFFFFFFFFFFFFFFFFFFFFFFFFFFFFFFFFF  
FFFFFFFFFFFFFFFF

@A00721:190:HGJW7DSXY:4:2574:1479:26976 2:N:0:TCTGCAAG+GCTGCACT  
ATTTAATGCAACTTCCATCGCATATTGATGAAATGTCGCAAAAACTAAATAATAAGCTCCTTTCATCA  
TGTCCTCTACACTGCCACCAGTGGTGTCTTAAAACTGTGAGTCCACTAAGTTTCTTCCTCACAGAA  
ATCGGTCTAGACCTC

+

FFFFFFFFFFFFFFFFFFFFFFFFFFFFFFFFFFFFFFFFFFFFFFFFFFFFFFFFFFFFFFFFFFFFFFFF  
FFFFFFFFFFFFFFFFFFFFFFFFFFFFFFFFFFFFFFFFFFFFFFFFFFFFFFFFFFFFFFFFFFFFFFFF  
FFFFFFFFFFFFFFFF

@A00721:190:HGJW7DSXY:4:1220:1714:9439 2:N:0:TCTGCAAG+GCTGCACT  
TACATTTAATGCAACTTCCATCGCATATTGATGAAATGTCGCAAAAACTAAATAATAAGCTCCTTTC  
TCATGTCCTCTACACTGCCACCAGTGGTGTCTTAAAACTGTGAGTCCACTAAGTTTCTTCCTCACA  
GAAATCGGTCTAGAC

+

FFFFFFFFFFFFFFFFFFFFFFFFFFFFFFFFFFFFFFFFFFFFFFFFFFFFFFFFFFFFFFFFFFFFFFFF  
FFFFFFFFFFFF, FFFFFFFFFFFFFFFFFFFFFFFFFFFFFFFFFFFFFFFFFFFFFFFFFFFFFFFFFF  
F:FFFFFFFFFFFFFFFF

@A00721:190:HGJW7DSXY:4:1220:1452:9455 2:N:0:TCTGCAAG+GCTGCACT  
TACATTTAATGCAACTTCCATCGCATATTGATGAAATGTCGCAAAAACTAAATAATAAGCTCCTTTC  
TCATGTCCTCTACACTGCCACCAGTGGTGTCTTAAAACTGTGAGTCCACTAAGTTTCTTACTCACA  
GAAATCGGTCTAGAC

+

FFFFF:, FFFF:FFFFFFFFF:FFFFF:FFF:FFFFFFFF:FFF, FFFFFFFF, FFFF:FF, :FFFF:  
FFFFFFFFFFFFFFFFF:FFFFF, FFFFFFFF, FFFFFFFFFF:FFFFFFFFFFFFFFFFF::, :FF, FF  
, FF:FFFF, FF, FFF

@A00721:190:HGJW7DSXY:4:1412:4227:16767 2:N:0:TCTGCAAG+GCTGCACT  
TACATTTAATGCAACTTCCATCGCATATTGATGAAATGTCGCAAAAACTAAATAATAAGCTCCTTTC  
TCATGTCCTCTACACTGCCACCAGTGGTGTCTTAAAACTGTGAGTCCACTAAGTTTCTTCCTCACA  
GAAATCGGTCTAGAC

+

FFFFFFFFFFFFFFFFFFFFFFFFFFFFFFFFFFFFFFFFFFFFFFFFFFFFFFFFFFFFFFFFFFFFFFFF  
FFFFFFFFFFFFFFFFFFFFFFFFFFFFFFFFFFFFFFFFFFFFFFFFFFFFFFFFFFFFFFFFFFFFFFFF  
FF:FFFFFFFFFFFF

@A00721:190:HGJW7DSXY:4:1412:28293:17394 2:N:0:TCTGCAAG+GCTGCACT  
TACATTTAATGCAACTTCCATCGCATATTGATGAAATGTCGCAAAAACTAAATAATAAGCTCCTTTC  
TCATGTCCTCTACACTGCCACCAGTGGTGTCTTAAAACTGTGAGTCCACTAAGTTTCTTCCTCACA  
GAAATCGGTCTAGAC

+

FFFFFFFFFFFFFFFFFFFFFFFFFFFFFFFFFFFFFFFFFFFFFFFFFFFFFFFFFFFFFFFFFFFFFFFF  
FFFFFFFFFFFFFFFFFFFFFFFFFFFFFFFFFFFFFFFFFFFFFFFFFFFFFFFFFFFFFFFFFFFFFFFF  
:FFFFFFFFFFFFFFFF  
:FFFFFFFFFFFFFFFF



@A00721:190:HGJW7DSXY:4:1477:10755:16579 2:N:0:TCTGCAAG+GCTGCACT  
TACATTTAATGCAACTTCCATCGCATATTGATGAAATGTCGAAAACTAAATAATAAGCTCCTTTCA  
TCATGTCCTCTACACTGCCACCAGTGGTGTCTTAAAACTGTGAGTCCACTAAGTTTCTTCCTCACA  
GAAATCGGTCTAGAC

+

FFFFFFFFFFFFFF:FFFFFFFFFFFFFF:FFFFFFFFFFFFFF:FFFFFFFFFFFFFF  
FFFFF:FFFFFFFFFFFFFF,F:FFFFFFFFFFFFFF:FFF:FFFFF  
FFFFFFFFFFFF,FF

@A00721:190:HGJW7DSXY:4:1542:9652:7686 2:N:0:TCTGCAAG+GCTGCACT  
TACATTTAATGCAACTTCCATCGCATATTGATGAAATGTCGAAAACTAAATAATAAGCTCCTTTCA  
TCATGTCCTCTACACTGCCACCAGTGGTGTCTTAAAACTGTGAGTCCACTAAGTTTCTTCCTCACA  
GAAATCGGTCTAGAC

+

FFFFFFFFFFFFFF:FFFFFFFFFFFFFF:FFFFFFFFFFFFFF:FFFFFFFFFFFFFF  
FFFFFFFFFFFFFF:FFFFFFFFFFFFFF,FFFFF  
FFFFFFFFFFFF

@A00721:190:HGJW7DSXY:4:2504:24216:34507 2:N:0:TCTGCAAG+GCTGCACT  
TACATTTAATGCAACTTCCATCGCATATTGATGAAATGTCGAAAACTAAATAATAAGCTCCTTTCA  
TCATGTCCTCTACACTGCCACCAGTGGTGTCTTAAAACTGTGAGTCCACTAAGTTTCTTCCTCACA  
GAAATCGGTCTAGAC

+

:FFFFFFFFFFFF:FFFFFF:FFFFFFFFFFFFFF,FFFFFFFFFFFFFF  
FFFFFFFF,FFFFFF:FFF:FFFFFFFF:FFFFFFF,:FFFFFFFFFFFFFF  
FFFFFFFFFFFF

@A00721:190:HGJW7DSXY:4:2613:4887:16094 2:N:0:TCTGCAAG+GCTGCACT  
TACATTTAATGCAACTTCCATCGCATATTGATGAAATGTCGAAAACTAAATAATAAGCTCCTTTCA  
TCATGTCCTCTACACTGCCACCAGTGGTGTCTTAAAACTGTGAGTCCACTAAGTTTCTTCCTCACA  
GAAATCGGTCTAGAC

+

FFFFFFFFFFFFFF:FFFFFFFFFFFFFF:FFFFFFFFFFFFFF:FFFFFFFFFFFFFF  
FFFFFFFFFFFFFF:FFFFFFFFFFFFFF:FFFFFFFFFFFFFF  
FFFFFFFFFFFF

@A00721:190:HGJW7DSXY:4:1235:2293:14763 2:N:0:TCTGCAAG+GCTGCACT  
GTACATTTAATGCAACTTCCATCGCATATTGATGAAATGTCGAAAACTAAATAATAAGCTCCTTTC  
ATCATGTCCTCTACACTGCCACCAGTGGTGTCTTAAAACTGTGAGTCCACTAAGTTTCTTCCTCAC  
AGAAATCGGTCTAGA

+

FFFFF:FFFFFFFFFFFF:F:FFFFFFFFFFFF:F,FFFF:FFF,FFFFFFFF,FFF  
FF:FFFFFFFFFFFF:FFFFFFFFF:FFFFFFFFFFFF:FF:FF:,FFFFFFFFF,FFF  
FFFF:FFFFFFFF

@A00721:190:HGJW7DSXY:4:1577:28763:31767 2:N:0:TCTGCAAG+GCTGCACT  
GTACATTTAATGCAACTTCCATCGCATATTGATGAAATGTCGAAAACTAAATAATAAGCTCCTTTC  
ATCATGTCCTCTACACTGCCACCAGTGGTGTCTTAAAACTGTGAGTCCACTAAGTTTCTTCCTCAC  
AGAAATCGGTCTAGA

+

FFFFFFFFFFFFFF:FFFFFFFFFFFFFF:FFFF:FFFFFFFFFFFFFF  
FFFFFFFFFFFFFF:FFFFFFFFFFFFFF:FFFFFFFFFFFFFF:FF  
FF,FFFFFFFF

@A00721:190:HGJW7DSXY:4:1609:7500:32142 2:N:0:TCTGCAAG+GCTGCACT  
GTACATTTAATGCAACTTCCATCGCATATTGATGAAATGTCGAAAACTAAATAATAAGCTCCTTTC  
ATCATGTCCTCTACACTGCCACCAGTGGTGTCTTAAAACTGTGAGTCCACTAAGTTTCTTCCTCAC  
AGAAATCGGTCTAGA

+

:FFFFFFFFFFFFFF:FFFFFFFFFFFFFF:FFFFF:FFF:FFFFFFFF

@A00721:190:HGJW7DSXY:4:2121:7374:13260 2:N:0:TCTGCAAG+GCTGCACT  
GTACATTTAATGCAACTTCCATCGCATATTGATGAAATGTCGCAAAACTAAATAATAAGCTCCTTTC  
ATCATGTCTCTACACTGCCACCAAGTGGTGTCTTAAAACTGTGAGTCCACTAAGTTTCTTCCTCAC  
AGAAATCGGTCTAGA

@A00721:190:HGJW7DSXY:4:2248:1127:23046 2:N:0:TCTGCAAG+GCTGCACT  
GTACATTTAATGCAACTTCCATCGCATATTGATGAAATGTCGCAAAACTAAATAATAAGCTCCTTTC  
ATCATGTCTCTACACTGCCACCAAGTGGTGTCTTAAAACTGTGAGTCCACTAAGTTTCTTCCTCAC  
AGAAATCGGTCTAGA

@A00721:190:HGJW7DSXY:4:2248:1307:23077 2:N:0:TCTGCAAG+GCTGCACT  
GTACATTTAATGCAACTTCCATCGCATATTGATGAAATGTCGCAAACTAAATAATAAGCTCCTTTC  
ATCATGTCCTCTACACTGCCACAGTGGTGTCTTAAAACTGTGAGTCCACTAAGTTTCTTCCTCAC  
AGAAATCGGTCTAGA

@A00721:190:HGJW7DSXY:4:2365:12093:17206 2:N:0:TCTGCAAG+GCTGCACT  
GTACATTTAATGCAACTTCCATCGCATATTGATGAAATGTCGCAAACTAAATAATAAGCTCCTTTC  
ATCATGTCCTCTACACTGCCACAGTGGTGTCTTAAAACTGTGAGTCCACTAAGTTTCTTCCTCAC  
AGAAATCGGTCTAGA

@A00721:190:HGJW7DSXY:4:2454:32940:21840 2:N:0:TCTGCAAG+GCTGCACT  
GTACATTTAATGCAACTTCCATCGCATATTGATGAAATGTCGCAAACTAAATAATAAGCTCCTTTC  
ATCATGTCCTCTACACTGCCACCAAGTGGTGTCTTAAAACTGTGAGTCCACTAAGTTTCTTCCTCAC  
AGAAATCGGTCTAGA

@A00721:190:HGJW7DSXY:4:2514:10411:7842 2:N:0:TCTGCAAG+GCTGCACT  
GTACATTTAATGCAACTTCCATCGCATATTGATGAAATGTCGCAAACTAAATAATAAGCTCCTTTC  
ATCATGTCCTCTACACTGCCACCAGTGGTGTCTTAAAACTGTGAGTCCACTAAGTTTCTTCCTCAC  
AGAAATCGGTCTAGA

@A00721:190:HGJW7DSXY:4:2542:9941:26537 2:N:0:TCTGCAAG+GCTGCACT  
GTACATTTAATGCAACTTCCATCGCATATTGATGAAATGTCGCAAAACTAAATAATAAGCTCCTTTC  
ATCATGTCCTCTACACTGCCACCAAGTGGTGTCTTAAAACTGTGAGTCCACTAAGTTTCTTCCTCAC  
AGAAATCGGTCTAGA

[illegible][illegible]

```
FFFFFFFFFFFFFFFFFFFFFFFFFFFFFFFFFFFFFFFFFFFFFFFFFFFFFFFFFFFFFFF
FFFFFFFFFFFFFFFFFFFF:F:FFFFFF:F:FFF:F:FFFFFFFF:F:F:FFFFFF:F
FFFFFFFFFFFF:F
```

[illegible]

```

FFFFFFFFFFFFFFFFFFFFFFFFFFFFFFFFFFFFFFFF:FFFFFFFF:FFFFFFFFFFFFFFFF
FFFFFFFFFFFFFFFFFFFFFFFFFFFFFFFFFFFFFFFF:FFFFFFFFFFFFFFFFFFFFFFFFFFFF
FFFFFFFFFFFFFFFF

```

```

FFFFFFFFFFFFFFFF:FFFFFFFFFFFFFFFFFFFFFFFFFFFFFFFF:FFF:FFFFFFFFFFFFFFFFFFFFFFFF
FFFFF:FFFFFFFFFFFFFFFFFFFFFFFFFFFFFFFF:FFFFFFFFFFFFFFFFFFFFFFFFFFFFFFFFFFFFF,
FFFFF,FFFFFFFFF

```

```

FFFFFFFFFFFFFFFFFFFFFFFF:FFFFFFFFFFFFFFFFFFFFFFFF:FFFFFFFFFFFFFFFFFFFF
F:FFFFFFFFFFFFFFFFFFFFFFFF:FFFFF:FFFFFFFFFFFFFFFFFFFF:FFFFFFFFFFFFF
FFFFFFFFFFFFFFFFFFFF

```

@A00721:190:HGJW7DSXY:4:2133:24153:5525 2:N:0:TCTGCAAG+GCTGCACT  
CGTACATTTAATGCAACTTCCATCGCATATTGATGAAATGTCGCAAAAACTAAATAATAAGCTCCTTT





:::FFFFFFF, :FF, F:FF, FFFFFFFF, FFFFFFFF:FFFF::F, FFF, FFF:FF:F  
F, F:F:FF, FFF:F

@A00721:190:HGJW7DSXY:4:2165:7419:29496 2:N:0:TCTGCAAG+GCTGCACT  
CACATTTCGTACATTTAATGCAACTTCCATCGCATATTGATGAAATGTCGCAAAAATAAATAAGC  
TCCTTTCATCATGTCCTCTACACTGCCACCAGTGGTGTCTTAAAACTGTGAGTCCACTAAGTTTCT  
TCCTCACAGAAATCG

+

FFFFFFFFFFFFFFFFFFFFFFFFFFFFFFFFFFFFFFFFFFFFFFFFFFFFFFFFFFFFFFFFFFFFFFFF:FFFFFFFFFFFFFFF  
FFFFFFFFFFFFFFFFFFFFFFFFFFFFFFFFFFFFFFFFFFFFFFFFFFFFFFFFFFFFFFFFFFFFFFFF:FFFFFFFFFFFFFFFFF  
FFFFFFFFFFFF, FFFF

@A00721:190:HGJW7DSXY:4:2471:9824:28651 2:N:0:TCTGCAAG+GCTGCACT  
CACATTTCGTACATTTAATGCAACTTCCATCGCATATTGATGAAATGTCGCAAAAATAAATAAGC  
TCCTTTCATCATGTCCTCTACACTGCCACCAGTGGTGTCTTAAAACTGTGAGTCCACTAAGTTTCT  
TCCTCACAGAAATCG

+

FFFFFFFFFFFFFFFFFFFFFFFFFFFFFFFFFFFFFFFFFFFFFFFFFFFFFFFFFFFFFFFFFFFFFFFF:FFFFFFFFFFFFFFF  
FFFF:FFFFFFFFFFFFFFFFFFFFFFFFFFFFFFFFFFFFFFFFFFFFFFFFFFFFFFFFFFFFFFFFFFFF, FFFFFFFFFFFFFFFFFFFFFF  
FFFFFFFFFF, FFF, FF

@A00721:190:HGJW7DSXY:4:2535:23981:15781 2:N:0:TCTGCAAG+GCTGCACT  
CACATTTCGTACATTTAATGCAACTTCCATCGCATATTGATGAAATGTCGCAAAAATAAATAAGC  
TCCTTTCATCATGTCCTCTACACTGCCACCAGTGGTGTCTTAAAACTGTGAGTCCACTAAGTTTCT  
TCCTCACAGAAATCG

+

FFFFFFFFFFFFFFFFFFFFFFFFFFFFFFFFFFFFFFFFFFFFFFFFFFFFFFFFFFFFFFFFFFFFFFFF:FFFFFFFFFFFFFFF  
FFFFFFFFFFFFFF:FFFFFFFFFFFFFFFFFFFFFFFFFFFFFFFFFFFFFFFFFFFFFFFFFFFFFFFFFFFFF, FFF:FFF  
FF, FFFFFFFFFF

@A00721:190:HGJW7DSXY:4:1102:12545:14418 2:N:0:TCTGCAAG+GCTGCACT  
CCACATTCGTACATTTAATGCAACTTCCATCGCATATTGATGAAATGTCGCAAAAATAAATAAGC  
CTCCTTTCATCATGTCCTCTACACTGCCACCAGTGGTGTCTTAAAACTGTGAGTCCACTAAGTTTC  
TTCCTCACAGAAATC

+

FFFFFFFFFFFFFFFFFFFFFFFFFFFFFFFFFFFFFFFFFFFFFFFFFFFFFFFFFFFFFFFFFFFFFFFF:FFFFFFFFFFFFFFF  
FFFFFFFFFFFFFFFFFFFFFFFFFFFFFFFFFFFFFFFFFFFFFFFFFFFFFFFFFFFFFFFFFFFFFFFFFFFFFFFFFFFFFFFFFFFFF  
FFFFFFFFFFFFFF, FF

@A00721:190:HGJW7DSXY:4:1104:10601:22639 2:N:0:TCTGCAAG+GCTGCACT  
CCACATTCGTACATTTAATGCAACTTCCATCGCATATTGATGAAATGTCGCAAAAATAAATAAGC  
CTCCTTTCATCATGTCCTCTACACTGCCACCAGTGGTGTCTTAAAACTGTGAGTCCACTAAGTTTC  
TTCCTCACAGAAATC

+

FFFFFFFFFFFFFFFFFFFFFFFFFFFFFFFFFFFFFFFFFFFFFFFFFFFFFFFFFFFFFFFFFFFFFFFFFFFFFFFFFFFFFFFFFFFFF  
FFFFFFFFFFFFFFFFFFFFFFFFFFFFFFFFFFFFFFFFFFFFFFFFFFFFFFFFFFFFFFFFFFFFFFFFFFFFFFFFFFFFFFFFFFFFF  
FFFFFFFFFFFFFFF

@A00721:190:HGJW7DSXY:4:1127:14543:20791 2:N:0:TCTGCAAG+GCTGCACT  
CCACATTCGTACATTTAATGCAACTTCCATCGCATATTGATGAAATGTCGCAAAAATAAATAAGC  
CTCCTTTCATCATGTCCTCTACACTGCCACCAGTGGTGTCTTAAAACTGTGAGTCCACTAAGTTTC  
TTCCTCACAGAAATC

+

FFFFFFFFFFFFFFFFFFFFFFFFFFFFFFFFFFFFFFFFFFFFFFFFFFFFFFFFFFFFFFFFFFFFFFFFFFFFFFFFFFFFFFFFFFFFF  
FFF:FFFFFFFFFFFFFFFFFFFFFFFFFFFFFFFFFFFFFFFFFFFFFFFFFFFFFFFFFFFFFFFFFFFFFFFFFFFFFFFFFFFFFFFFF  
FFF:FFFFFFFF:FF

@A00721:190:HGJW7DSXY:4:1150:2239:13730 2:N:0:TCTGCAAG+GCTGCACT  
GCACATTCGTACATTTAATGCAACTTCCATCGCATATTGATGAAATGTCGCAAAAATAAATAAGC  
CTCCTTTCATCATGTCCTCTACACTGCCACCAGTGGTGTCTTAAAACTGTGAGTCCACTAAGTTTC  
TTCCTCACAGAAATC

+  
FFFFFFFFFFFFFFFFFFFFFFFFFFFFFFFFFFFFFFFFFFFFFFFFFFFFFFFFFFFFFFFFFFFFFFFF  
FFFFFFFFFFFFFFFF:FFFFFFFFFFFFFFFFFFFFFFFFFFFFFFFFFFFFFFFFFFFFFFFFFFFFFFFF  
FF:FFFFFFFFFFFF

@A00721:190:HGJW7DSXY:4:1169:21829:25770 2:N:0:TCTGCAAG+GCTGCACT  
CCACATTCGTACATTTAATGCAACTTCCATCGCATATTGATGAAATGTCGCAAAACTAAATAATAAG  
CTCCTTTCATCATGTCCTCTACACTGCCACCAGTGGTGTCTTAAAAACTGTGAGTCCACTAAGTTTC  
TTCCTCACAGAAATC

+  
FFFFFFFFFFFFFFFFFFFFFFFFFFFFFFFFFFFFFFFFFFFFFFFFFFFFFFFFFFFFFFFFFFFFFFFF  
FFFFFFFFFFFFFFFFFFFFFFFFFFFFFFFFFFFFFFFFFFFFFFFFFFFFFFFFFFFFFFFFFFFFFFFF  
FFFFFFFFFFFF:FFFF

@A00721:190:HGJW7DSXY:4:1232:3721:19774 2:N:0:TCTGCAAG+GCTGCACT  
CCACATTCGTACATTTAATGCAACTTCCATCGCATATTGATGAAATGTCGCAAAACTAAATAATAAG  
CTCCTTTCATCATGTCCTCTACACTGCCACCAGTGGTGTCTTAAAAACTGTGAGTCCACTAAGTTTC  
TTCCTCACAGAAATC

+  
FFFF:FFFFFFFFFFFFFFFFFFFFFFFFFFFFFFFFFFFFFFFFFFFFFFFFFFFFFFFFFFFFFFFF  
FFFFFFFFFFFFFFFFFFFFFFFFFFFFFFFFFFFFFFFFFFFFFFFFFFFFFFFFFFFFFFFFFFFFFFFF  
FFFFFFFFFFFF

@A00721:190:HGJW7DSXY:4:1237:5321:24267 2:N:0:TCTGCAAG+GCTGCACT  
CCACATTCGTACATTTAATGCAACTTCCATCGCATATTGATGAAATGTCGCAAAACTAAATAATAAG  
CTCCTTTCATCATGTCCTCTACACTGCCACCAGTGGTGTCTTAAAAACTGTGAGTCCACTAAGTTTC  
TTCCTCACAGAAATC

+  
FFFFFFFFFFFFFFFFFFFFFFFFFFFFFFFFFFFFFFFFFFFFFFFFFFFFFFFFFFFFFFFFFFFFFFFF  
FFF:FFFFFFFFFFFFFFFFFFFFFFFFFFFFFFFFFFFFFFFFFFFFFFFFFFFFFFFFFFFFFFFF  
FFFFFFFFFFFF

@A00721:190:HGJW7DSXY:4:1243:21486:16814 2:N:0:TCTGCAAG+GCTGCACT  
CCACATTCGTACATTTAATGCAACTTCCATCGCATATTGATGAAATGTCGCAAAACTAAATAATAAG  
CTCCTTTCATCATGTCCTCTACACTGCCACCAGTGGTGTCTTAAAAACTGTGAGTCCACTAAGTTTC  
TTCCTCACAGAAATC

+  
FFFFFFFFFFFFFFFFFFFFFFFFFFFFFFFFFFFFFFFFFFFFFFFFFFFFFFFFFFFFFFFFFFFFFFFF  
FFFFFFFFFFFFFFFFFFFFFFFFFFFFFFFFFFFFFFFFFFFFFFFFFFFFFFFFFFFFFFFFFFFFFFFF  
FFFFFFFFFFFF

@A00721:190:HGJW7DSXY:4:1266:4264:23657 2:N:0:TCTGCAAG+GCTGCACT  
GCACATTCGTACATTTAATGCAACTTCCATCGCATATTGATGAAATGTCGCAAAACTAAATAATAAG  
CTCCTTTCATCATGTCCTCTACACTGCCACCAGTGGTGTCTTAAAAACTGTGAGTCCACTAAGTTTC  
TTCCTCACAGAAATC

+  
FFFF:FFFFFFFFFFFFFFFFFFFFFFFFFFFFFFFFFFFFFFFFFFFFFFFFFFFFFFFFFFFFFFFF  
FFFF,FFFFFFFFFFFFFFFFFFFFFFFFFFFFFFFFFFFFFFFFFFFFFFFFFFFFFFFFFFFFFFFF  
FFFFFFFFFFFF

@A00721:190:HGJW7DSXY:4:1269:24234:31845 2:N:0:TCTGCAAG+GCTGCACT  
CCACATTCGTACATTTAATGCAACTTCCATCGCATATTGATGAAATGTCGCAAAACTAAATAATAAG  
CTCCTTTCATCATGTCCTCTACACTGCCACCAGTGGTGTCTTAAAAACTGTGAGTCCACTAAGTTTC  
TTCCTCACAGAAATC

+  
F:FFFFFFFFFFFFFFFFFFFFFFFFFFFFFFFFFFFFFFFFFFFFFFFFFFFFFFFFFFFFFFFF  
FFFFFFFFFFFFFFFFFFFFFFFFFFFFFFFFFFFFFFFFFFFFFFFFFFFFFFFFFFFFFFFFFFFFFFFF  
FFFFFFFFFFFF

@A00721:190:HGJW7DSXY:4:1275:10013:33238 2:N:0:TCTGCAAG+GCTGCACT  
CCACATTCGTACATTTAATGCAACTTCCATCGCATATTGATGAAATGTCGCAAAACTAAATAATAAG





@A00721:190:HGJW7DSXY:4:1411:29568:29465 2:N:0:TCTGCAAG+GCTGCACT  
CCACATTCGTACATTTAATGCAACTTCCATCGCATATTGATGAAATGTCGAAAACTAAATAATAAG  
CTCCTTTTCATCATGTCCTCTACACTGCCACCAGTGGTGTCTTAAAACTGTGAGTCCACTAAGTTTC  
TTCCTCACAGAAATC

F,FFFFFFFFFFFFFFFFFFFFFFFFFFFFFFFF:FFFFFFFFFFFFFFFFFFFFFFFF,F::F,FFFFFFFFFFFF:  
:FFFFFF:FFFFFF::FFFFFF:FFFFFFFF:FFFFFF,F,FFFFFFFFF,,:FFFF,F,:F:FFF,  
FF:FFFF,FFFFFF:

@A00721:190:HGJW7DSXY:4:1414:28917:10614 2:N:0:TCTGCAAG+GCTGCACT  
CCACATTCGTACATTTAATGCAACTTCCATCGCATATTGATGAAATGTCGAAAACTAAATAATAAG  
CTCCTTTTCATCATGTCCTCTACACTGCCACCAGTGGTGTCTTAAAAACTGTGAGTCCACTAAGTTTC  
TTCCTCACAGAAATC

```
:FFFF::F:FFFFFF,FFFF:FF:FF:FFFFF,FFFFFFFFFFFFFF,FF,FFFFF,F:FF:F:FFFFF
,FFFFFFFFFFFFFFFFFFFFFFFF:FFFFFFF:F::FFFFFFFF:F::FF,FFF,F:F,,FFFF,:FF,F
FFFFFFFFEE::F:FF
```

@A00721:190:HGJW7DSXY:4:1472:13919:20400 2:N:0:TCTGCAAG+GCTGCACT  
GCACATTCGTACATTTAATGCAACTTCCATCGCATATTGATGAAATGTCGAAAACTAAATAATAAG  
CTCCTTTTCATCATGTCTCTACACTGCCACCAGTGGTGTCTTAAAACTGTGAGTCCACTAAGTTTC  
TTCCTCACAGAAATC

```

FFFFFFFFFFFFFF,FFFFFFFFFFFFFFFFFFFFFFFFFFFFFFFF:FFFFFFFFFFFFFFFFFFFFFF::FFFFF
FFFFFFF:FF:FFFFFF:FFFFF,:FFF:FFFFFFFFF:FFFFF:FFFFFFFFFFFFFFFFF:,FF,FF:FFFF
FFF,FFFFFFFFFFFF

```

@A00721:190:HGJW7DSXY:4:1501:12780:15358 2:N:0:TCTGCAAG+GCTGCACT  
GCACATTCGTACATTTAATGCAACTTCCATCGCATATTGATGAAATGTCGAAAACTAAATAATAAG  
CTCCTTTTCATCATGTCCTCTACACTGCCACCAGTGGTGTCTTAAAACTGTGAGTCCACTAAGTTTC  
TTCCTCACAGAAATC

[illegible]

@A00721:190:HGJW7DSXY:4:1508:12066:23891 2:N:0:TCTGCAAG+GCTGCACT  
CCACATTCGTACATTTAATGCAACTTCCATCGCATATTGATGAAATGTCGAAAACTAAATAATAAG  
CTCCTTTCATCATGTCTCTACACTGCCACCAGTGGTGTCTTAAAACTGTGAGTCCACTAAGTTTC  
TTCCTCACAGAAATC

[illegible]

@A00721:190:HGJW7DSXY:4:1509:29668:7874 2:N:0:TCTGCAAG+GCTGCACT  
CCACATTCGTACATTTAATGCAACTTCCATCGCATATTGATGAAATGTCGAAAACTAAATAATAAG  
CTCCTTTTCATCATGTCTCTACACTGCCACCAGTGGTGTCTTAAAACTGTGAGTCCACTAAGTTTC  
TTCCTCACAGAAATC

[illegible]

@A00721:190:HGJW7DSXY:4:1522:23873:4319 2:N:0:TCTGCAAG+GCTGCACT  
CCACATTCGTACATTTAATGCAACTTCCATCGCATATTGATGAAATGTCGAAAACTAAATAATAAG  
CTCCTTTCATCATGTCCTCTACACTGCCACCAGTGGTGTCTTAAAACTGTGAGTCCACTAAGTTTC  
TTCCTCACAGAAATC

[illegible]

FFFFFFFFFFFFFFFFFFFFFFFFFFFFFFFFFFFFFFFFFFFFFFFFFFFFFFFFFFFFFFFFFFFFFFFF  
FFFFFFFFFFFFFFFF

@A00721:190:HGJW7DSXY:4:1565:25880:21543 2:N:0:TCTGCAAG+GCTGCACT  
CCACATTCGTACATTTAATGCAACTTCCATCGCATATTGATGAAATGTCGCAAAACTAAATAATAAG  
CTCCTTTCATCATGTCCTCTACACTGCCACCAGTGGTGTCTTAAAAACTGTGAGTCCACTAAGTTTC  
TTCCTCACAGAAATC

+

FFFFFFFFFFFFFFFFFFFFFFFFFFFFFFFFFFFFFFFFFFFFFFFFFFFFFFFFFFFFFFFFFFFFFFFF  
FFFF:FFFFFFFFFFFFFFFFFFFFFFFFFFFFFFFFFFFFFFFFFFFFFFFFFFFFFFFFFFFFFFFF  
FFFFFFFFFFFFFFFF

@A00721:190:HGJW7DSXY:4:1565:24948:21840 2:N:0:TCTGCAAG+GCTGCACT  
CCACATTCGTACATTTAATGCAACTTCCATCGCATATTGATGAAATGTCGCAAAACTAAATAATAAG  
CTCCTTTCATCATGTCCTCTACACTGCCACCAGTGGTGTCTTAAAAACTGTGAGTCCACTAAGTTTC  
TTCCTCACAGAAATC

+

FFFFFFFFFFFFFFFFFFFF:FFFFFFFFFFFFFFFFFFFFFFFFFFFFFFFFFFFFFFFF:FFFF:FFF:FFFFFFF  
FFF,FFFFFFFFFFFF:FFFFFFFFFFFFFFFFFFFFFFFFFFFFFFFF,FFFFFFFF:FFFFFFFF:FFFFFFF:F:  
FFFFFFFFFFFFFFFF

@A00721:190:HGJW7DSXY:4:1610:23502:25723 2:N:0:TCTGCAAG+GCTGCACT  
CCACATTCGTACATTTAATGCAACTTCCATCGCATATTGATGAAATGTCGCAAAACTAAATAATAAG  
CTCCTTTCATCATGTCCTCTACACTGCCACCAGTGGTGTCTTAAAAACTGTGAGTCCACTAAGTTTC  
TTCCTCACAGAAATC

+

FFFFFFFFFFFFFFFFFFFF:FF:FFFFFFFFFFFFFFFFFFFFFFFFFFFFFFFFFFFFFFFFFFFFFFFF  
FFFF:FFFF:FFFFFFF:FFF:FFFFFFFF:FFFFFF:FFFFFFFFFFFFFFFFFFFFFFFF:FFFF  
FFFFFFFFFFFFFFFF

@A00721:190:HGJW7DSXY:4:1654:25211:35759 2:N:0:TCTGCAAG+GCTGCACT  
CCACATTCGTACATTTAATGCAACTTCCATCGCATATTGATGAAATGTCGCAAAACTAAATAATAAG  
CTCCTTTCATCATGTCCTCTACACTGCCACCAGTGGTGTCTTAAAAACTGTGAGTCCACTAAGTTTC  
TTCCTCACAGAAATC

+

FFFFFFFFFFFFFFFFFFFFFFFFFFFFFFFFFFFFFFFFFFFFFFFFFFFFFFFFFFFFFFFFFFFFFFFF  
FFFFFFFFFFFFFFFFFFFFFFFFFFFFFFFFFFFFFFFFFFFFFFFFFFFFFFFFFFFFFFFFFFFFFFFF  
FFF:FFFFFFFFFFFF

@A00721:190:HGJW7DSXY:4:2105:25663:23547 2:N:0:TCTGCAAG+GCTGCACT  
CCACATTCGTACATTTAATGCAACTTCCATCGCATATTGATGAAATGTCGCAAAACTAAATAATAAG  
CTCCTTTCATCATGTCCTCTACACTGCCACCAGTGGTGTCTTAAAAACTGTGAGTCCACTAAGTTTC  
TTCCTCACAGAAATC

+

FFFFFFFFFFFFFFFFFFFFFFFFFFFFFFFFFFFFFFFFFFFFFFFFFFFFFFFFFFFFFFFFFFFFFFFF  
FFFFFFFFFFFFFFFFFFFFFFFFFFFFFFFFFFFFFFFFFFFFFFFFFFFFFFFFFFFFFFFFFFFFFFFF  
FFFFFFFFFFFFFFFF

@A00721:190:HGJW7DSXY:4:2126:3676:32409 2:N:0:TCTGCAAG+GCTGCACT  
CCACATTCGTACATTTAATGCAACTTCCATCGCATATTGATGAAATGTCGCAAAACTAAATAATAAG  
CTCCTTTCATCATGTCCTCTACACTGCCACCAGTGGTGTCTTAAAAACTGTGAGTCCACTAAGTTTC  
TTCCTCACAGAAATC

+

FFFFFFFFFFFFFFFFFFFFFFFFFFFFFFFFFFFFFFFFFFFFFFFFFFFFFFFFFFFFFFFFFFFFFFFF  
FFFFFFFFFFFFFFFFFFFFFFFFFFFFFFFFFFFFFFFF:FFFFFFFFFF,FFFFFFFFFFFFFFFFFFFFF  
FFFFFFFFFFFFFFFF

@A00721:190:HGJW7DSXY:4:2212:16143:34334 2:N:0:TCTGCAAG+GCTGCACT  
CCACATTCGTACATTTAATGCAACTTCCATCGCATATTGATGAAATGTCGCAAAACTAAATAATAAG  
CTCCTTTCATCATGTCCTCTACACTGCCACCAGTGGTGTCTTAAAAACTGTGAGTCCACTAAGTTTC  
TTCCTCACAGAAATC

+  
FFFFFFFFFFFFFFFFFFFFFFFFFFFFFFFFFFFFFFFFFFFFFFFFFFFFFFFFFFFFFFFFFFFFFFFF  
FFFFFFFFFFFFFFFFFFFFFFFFFFFFFFFFFFFFFFFFFFFFFFFFFFFFFFFFFFFFFFFFFFFFFFFF  
FFFFFFFFFFFFFFFF

@A00721:190:HGJW7DSXY:4:2266:5728:1204 2:N:0:TCTGCAAG+GCTGCACT  
CCACATTCGTACATTTAATGCAACTTCCATCGCATATTGATGAAATGTCGCAAAACTAAATAATAAG  
CTCCTTTCATCATGTCCTCTACACTGCCACCAGTGGTGTCTTAAAAACTGTGAGTCCACTAAGTTTC  
TTCCTCACAGAAATC

+  
FFFFFFFFFFFFFFFFFFFFFFFFFFFFFFFFFFFFFFFFFFFFFFFFFFFFFFFFFFFFFFFFFFFFFFFF  
FFFFFFFFFFFFFFFFFFFFFFFFFFFFFFFFFFFFFFFFFFFFFFFFFFFFFFFFFFFFFFFFFFFFFFFF  
FFFFFFFFFFFFFFFF

@A00721:190:HGJW7DSXY:4:2302:2781:25254 2:N:0:TCTGCAAG+GCTGCACT  
CCACATTCGTACATTTAATGCAACTTCCATCGCATATTGATGAAATGTCGCAAAACTAAATAATAAG  
CTCCTTTCATCATGTCCTCTACACTGCCACCAGTGGTGTCTTAAAAACTGTGAGTCCACTAAGTTTC  
TTCCTCACAGAAATC

+  
FFFF:FFFFFFFFFFFFFFFFFFFFFFFFFFFFFFFFFFFFFFFFFFFFFFFFFFFFFFFFFFFFFFFF  
FFFFFFFFFFFFFFFFFFFFFFFFFFFFFFFFFFFFFFFFFFFFFFFFFFFFFFFFFFFFFFFFFFFFFFFF  
FFFFFFFFFFFFFFFF

@A00721:190:HGJW7DSXY:4:2334:26648:20369 2:N:0:TCTGCAAG+GCTGCACT  
CCACATTCGTACATTTAATGCAACTTCCATCGCATATTGATGAAATGTCGCAAAACTAAATAATAAG  
CTCCTTTCATCATGTCCTCTACACTGCCACCAGTGGTGTCTTAAAAACTGTGAGTCCACTAAGTTTC  
TTCCTCACAGAAATC

+  
FFFF:FFFFFFFFFFFFFFFFFFFF,FFFFFFFFFFFFFFFFFFFFFFFFFFFFFFFFFFFFFFFFFFFF:F  
FFFFFFFFFFFFFFFFFFFFFFFFFFFFFFFFFFFFFFFFFFFFFFFFFFFFFFFFFFFFFFFFFFFFFFFF:FFFFFFF:FFFFF  
FFFFFFFFFFFF,FF

@A00721:190:HGJW7DSXY:4:2355:28004:4398 2:N:0:TCTGCAAG+GCTGCACT  
CCACATTCGTACATTTAATGCAACTTCCATCGCATATTGATGAAATGTCGCAACAATAATAATAAG  
CTCCTTTCATCATGTCCTCTACACTGCCACCAGTGGTGTCTTAAAAACTGTGAGTCCACTAAGTTTC  
TTCCTCACAGAAATC

+  
FFFFFFFFFFFFFFFFFFFFFFFFFFFF,FFFFFFFFFFFFFFFFFFFFFFFFFFFFFFFFFFFFFFFFFFFF,F,FFFFF:FFFFF  
FFFFFFFFF:FF:FFFFFFFFFFFFFFFFFFFFFFFFFFFFFFFFFFFFFFFFFFFFFFFFFFFF:FFFFFFF,FFFFFF:FF,:FFFFF  
FFFFFFFFFFFF,F::F

@A00721:190:HGJW7DSXY:4:2362:28854:30295 2:N:0:TCTGCAAG+GCTGCACT  
CCACATTCGTACATTTAATGCAACTTCCATCGCATATTGATGAAATGTCGCAAAACTAAATAATAAG  
CTCCTTTCATCATGTCCTCTACACTGCCACCAGTGGTGTCTTAAAAACTGTGAGTCCACTAAGTCTC  
TTCCTCACAGAAATC

+  
FFFFFFFFFFFFFFFFFFFFFFFFFFFFFFFFFFFFFFFFFFFFFFFFFFFFFFFFFFFFFFFFFFFFFFFF  
FFFFFFFFFFFFFFFFFFFFFFFFFFFFFFFFFFFFFFFFFFFFFFFFFFFFFFFFFFFFFFFFFFFFFFFF  
FFFFFFFFFFFFFFFF

@A00721:190:HGJW7DSXY:4:2434:12952:3756 2:N:0:TCTGCAAG+GCTGCACT  
CCACATTCGTACATTTAATGCAACTTCCATCGCATATTGATGAAATGTCGCAAAACTAAATAATAAG  
CTCCTTTCATCATGTCCTCTACACTGCCACCAGTGGTGTCTTAAAAACTGTGAGTCCACTAATTTTC  
TTCCTCACAGAAATC

+  
:FFFFF:,FFFFFFFFFFFFFFFFFFFFFFFFFFFF,,FFF:, :FFFFF:,FF::FFFFFFFFF:FFFFF  
FFFF:FFFFF:FF,FFF:FFFFF:,FFFFFFFF::F::FFFFFFFFFFFFFFFF,FF:F:FF,F,F:FF  
FFFFF, :,F,FFFFF

@A00721:190:HGJW7DSXY:4:2442:29695:26991 2:N:0:TCTGCAAG+GCTGCACT  
GCACATTCGTACATTTAATGCAACTTCCATCGCATATTGATGAAATGTCGCAAAACTAAATAATAAG



@A00721:190:HGJW7DSXY:4:2601:5882:29089 2:N:0:TCTGCAAG+GCTGCACT  
CCACATTCGTACATTTAATGCAACTTCCATCGCATATTGATGAAATGTCGAAAACTAAATAATAAG  
CTCCTTTTCATCATGTCCTCTACACTGCCACCAGTGGTGTCTTAAAACTGTGAGTCCACTAAGTTTC  
TTCCTCACAGAAATC

[illegible]

+

[illegible]

+

[illegible]

+

[illegible]

+

[illegible]

+

[illegible]

+

[illegible]

FFFFFFFFFFFFFFFFFFFFFFFFFFFFFFFFFFFFFFFFFFFFFFFFFFFFFFFFFFFFFFFFFFFFFFFF  
FFFFFFFFFFFFFFFF

@A00721:190:HGJW7DSXY:4:2352:32832:11631 2:N:0:TCTGCAAG+GCTGCACT  
GCACATTCGTACATTTAATGCAACTTCCATCGCATATTGATGAAATGTCGCAAAACTAAATAATAAG  
CTCCTTTTCATCATGTCCTCTACACTGCCACCAGTGGTGTCTTAAAACTGTGAGTCCACTAAGTTTC  
TTCCTCACAGAAAT

+

F,FFFFFF:FFFFFFFF:FFFFFFFFFFFFFFFFFFFFFFFF:FFFFFF:F:FFFFFF:FFFFFFFFFFFF  
FFFFFFFFFFFF:FFFFFFFFFFFFFFFF:FFFF,FFFFFF,FFF:FFF,FFFFFF:FF,FFFFFF  
FF::F,F:FFF:FF

@A00721:190:HGJW7DSXY:4:1339:31051:2284 2:N:0:TCTGCAAG+GCTGCACT  
CTGTGAGGAAGAACTTAGTGGACTCACAGTTTTTAAGGACACCACTGGTGGCAGTGTAGAGGACATG  
ATGAAAGGAGCTTATTATTTAGTTTTTGCACATTTTCATCAATATGCGATGGAAGTTGCATTAAATGT  
ACGAATGT

+

FFFFFFFFFFFFFFFFFFFFFFFFFFFFFFFFFFFFFFFFFFFFFFFFFFFFFFFFFFFFFFFFFFFFFFFF  
FFFFF:FFFFF::FFFFFFFFFFFFFFFFFFFFFFFFFFFFFFFFFFFFFFFFFFFFFFFFFFFFFFFF  
FFFF:FFF

@A00721:190:HGJW7DSXY:4:1511:2401:25848 2:N:0:TCTGCAAG+GCTGCACT  
CTGTGAGGAAGAACTTAGTGGACTCACAGTTTTTAAGGACACCACTGGTGGCAGTGTAGAGGACATG  
ATGAAAGGAGCTTATTATTTAGTTTTTGCACATTTTCATCAATATGCGATGGAAGTTGCATTAAATGT  
ACGAATGT

+

FFFFFFFFFFFFFFFFFFFFFFFFFFFFFFFFFFFFFFFFFFFFFFFFFFFFFFFFFFFFFFFFFFFFFFFF  
FFFFFFFFFFFF:FF:FF:FFFFFFFFFFFFFFFFFFFFFFFFFFFFFFFFFFFFFFFFFFFFFFFFFFFF  
FFFFFFFF

@A00721:190:HGJW7DSXY:4:2309:24460:29763 2:N:0:TCTGCAAG+GCTGCACT  
CTGTGAGGAAGAACTTAGTGGACTCACAGTTTTTAAGGACACCACTGGTGGCAGTGTAGAGGACATG  
ATGAAAGGAGCTTATTATTTAGTTTTTGCACATTTTCATCAATATGCGATGGAAGTTGCATTAAATGT  
ACGAATGT

+

FFFFFFF:FFF,FFFFFFFFFFFF:FFFFFFFFF::FFFFFFFFFFFFFFFFFFFFFFFFFFFF,F::FFF:FF  
FFFFFFFFFFFFFFFFFFFFFFFFFFFFFFFFFFFFFFFF:FFFFFFFFFFFF:FF,,FFFFFF:FFFFFFFF:FFFF  
FFFFFF,F

@A00721:190:HGJW7DSXY:4:1454:24460:14105 2:N:0:TCTGCAAG+GCTGCACT  
TACATTTAATGCAACTTCCATCGCATATTGATGAAATGTCGCAAAACTAAATAATAAGCTCCTTTCA  
TCATGTCCTCTACACTGCCACCAGTGGTGTCTTAAAACTGTGAGTCCACTAAGTTTCTTCCT

+

FFFFFFFFFFFFFFFFFFFFFFFFFFFFFFFFFFFFFFFFFFFFFFFF:FFFFFF:FFFFFFFFFFFFFFFFFFFF  
FFFFFFFFFFFFFFFFFFFFFFFFFFFFFFFFFFFFFFFFFFFFFFFFFFFFFFFFFFFFFFFFFFFFFFFF

@A00721:190:HGJW7DSXY:4:2308:19407:11365 2:N:0:TCTGCAAG+GCTGCACT  
TACATTTAATGCAACTTCCATCGCATATTGATGAAATGTCGCAAAACTAAATAATAAGCTCCTTTCA  
TCATGTCCTCTACACTGCCACCAGTGGTGTCTTAAAACTGTGAGTCCACTAAGTTTCTTCCT

+

FFFFFFFFFFFFFFFFFFFFFFFFFFFFFFFFFFFFFFFFFFFFFFFF:FF,FFFFFF:FFFFFFFFFFFFF  
FFFFFFFFF:FFFFFFFFFFFF:FFFF:FFFFFFFFF:F,FFFFFFF,FFFFFFFFFFFF

@A00721:190:HGJW7DSXY:4:2528:28592:36667 2:N:0:TCTGCAAG+GCTGCACT  
TACATTTAATGCAACTTCCATCGCATATTGATGAAATGTCGCAAAACTAAATAATAAGCTCCTTTCA  
TCATGTCCTCTACACTGCCACCAGTGGTGTCTTAAAACTGTGAGTCCACTAAGTTTCTTCCT

+

FFFFFFFFFFFFFFFFFFFFFFFFFFFFFFFFFFFFFFFFFFFFFFFFFFFFFFFFFFFFFFFFFFFFFFFF  
FFFFFFFFFFFFFFFFFFFFFFFFFFFFFFFFFFFFFFFF:FFFFFFFFFFFFFFFFFFFFFFFFFFFFFFFF

@A00721:190:HGJW7DSXY:4:2532:29993:22780 2:N:0:TCTGCAAG+GCTGCACT  
TACATTTAATGCAACTTCCATCGCATATTGATGAAATGTCGCAAAACTAAATAATAAGCTCCTTTCA

[illegible]

FFF:FFFFFFFFFFFFFFFFFFFFFFFF,FFFFFFFFFFFFFFFFFFFFFFFFFFFFFFFFFFFFFFFF  
FFFFFFFFFFFFFFFF

@A00721:190:HGJW7DSXY:4:2405:29740:24471 2:N:0:TCTGCAAG+GCTGCACT  
TATATATCATTTTATTAAACACTTCTGAACCACATTTCGTACATTTAATACAACCTCCATCGCATATTG  
ATGAAATGTCGCAAAAACTAAATAATAAGCTCCTTTCATCATGTCCTCTACACTGCCACCAGTGGTGT  
CCTTAAAAACTGTGA

+

F:FFFFFFFFFFFFFFFFFFFFFFFFFFFFFFFFFFFFFFFFFFFFFFFFFFFFFFFFFFFFFFFF  
FFFF:FFFFFFFF:FFFFFFFFFFFFFFFFFFFFFFFFFFFFFFFFFFFFFFFFFFFFFFFFFFFF  
FFFFFFFFFFFFFFFF

@A00721:190:HGJW7DSXY:4:2456:6153:2597 2:N:0:TCTGCAAG+GCTGCACT  
TATATATCATTTTATTAAACACTTCTGAACCACATTTCGTACATTTAATACAACCTCCATCGCATATTG  
ATGAAATGTCGCAAAAACTAAATAATAAGCTCCTTTCATCATGTCCTCTACACTGCCACCAGTGGTGT  
CCTTAAAAACTGTGA

+

FFFFFFFFFFFFFFFFFFFF:FFFFFFFFFFFFFFFF:FFFFFF:F:FFFFFF,F,FFFFFFFF:FFFF  
FFFFFFFFFFFFFFFF,FFFFFFFFFFFFFFFF,FFFFFFFFFFFFFFFF:FFFFFF:FFFFFFFF  
F,F,FFFFFFFF

@A00721:190:HGJW7DSXY:4:2641:22634:5744 2:N:0:TCTGCAAG+GCTGCACT  
TATATATCATTTTATTAAACACTTCTGAACCACATTTCGTACATTTAATACAACCTCCATCGCATATTG  
ATGAAATGTCGCAAAAACTAAATAATAAGCTCCTTTCATCATGTCCTCTACACTGCCACCAGTGGTGT  
CCTTAAAAACTGTGA

+

FFFFFFFFFFFFFFFFFFFFFFFFFFFFFFFFFFFF:FFFFFFFFFFFFFFFFFFFFFFFF:FFFFFFF  
FFFFFFFFFFFFFFFFFFFF:FFFFFFFFF,:F:FFFF,F:FFF:FFFF:FFFFFFFF:FFFFF:F:,F  
FFFFFFFFFFFFFFFF

@A00721:190:HGJW7DSXY:4:2678:14823:4335 2:N:0:TCTGCAAG+GCTGCACT  
TATATATCATTTTATTAAACACTTCTGAACCACATTTCGTACATTTAATACAACCTCCATCGCATATTG  
ATGAAATGTCGCAAAAACTAAATAATAAGCTCCTTTCATCATGTCCTCTACACTGCCACCAGTGGTGT  
CCTGAAAAACTGTGA

+

FFFFFFFFFFFFFFFFFFFFFFFFFFFFFFFFFFFF:FFFF:FFFFFFFFFFFFFFFF:FFFFFFF,:FFFFFF:  
FFFFFFFFFFFFFFFFFFFFFFFFFFFFFFFFFFFF:FFFFFFF:FFFFFFF:FFFFFFFFFFFFFFFFFFFF:FF  
FFF,FFFFFF:FFFF

@A00721:190:HGJW7DSXY:4:2134:11514:3302 2:N:0:TCTGCAAG+GCTGCACT  
TATATATCATTTTATTAAACACTTCTGAACCACATTTCGTACATTTAATACAACCTCCATCGCATATTG  
ATGAAATGTCGCAAAAACTAAATAATAAGCTCCTTTCATCATGTCCTCTACACTGCCACCAGTGGTGT  
CCTTAAAAACTGTGG

+

FFFFFFFFFFFFFFFFFFFFFFFFFFFFFFFFFFFF:FFFFFFFFFFFFFFFFFFFFFFFFFFFFFFFFFFFF  
FFFFFFFFFFFFFFFFFFFF:FFFFFFFFF,FFFFFFFFFFFFFFFFFFFF:FFFFFFFFFFFFFFFFFFFF  
FFFFFFFFFFFFFFFF:

@A00721:190:HGJW7DSXY:4:1554:32280:29747 2:N:0:TCTGCAAG+GCTGCACT  
TGGAAAATGAATATATATCATTTTATTAAACACTTCTGAACCACATTTCGTACATTTAATACAACCTCC  
ATCGCATATTGATGAAATGTCGCAAAAACTAAATAATAAGCTCCTTTCATCATGTCCTCTACACTGCC  
ACCAGTGGTGTCTT

+

FFFFFFFFFFFFFFFFFFFFFFFFFFFFFFFFFFFF:FFFFFFFFFFFFFFFFFFFFFFFFFFFFFFFFFFFF  
FFFFFFFFFFFFFFFFFFFF:FFFFFFFFFFFF:FFFFFFFFFFFFFFFFFFFFFFFFFFFFFFFFFFFF  
FFFFFFFFFFFF::FF

@A00721:190:HGJW7DSXY:4:2223:18059:28166 2:N:0:TCTGCAAG+GCTGCACT  
TGGAAAATGAATATATATCATTTTATTAAACACTTCTGAACCACATTTCGTACATTTAATACAACCTCC  
ATCGCATATTGATGAAATGTCGCAAAAACTAAATAATAAGCTCCTTTCATCATGTCCTCTACACTGCC  
ACCAGTGGTGTCTT



```

FFFFFFFF,FFFF,FF:FFFFFFFFFFFFFFFFFFFFFFFFFFFFFFFF:FFFFFFFFFFFFFFFFFFFFFFFFFFFFFFFF
FFFFFFFFFFFFFFFF:FFFFFF:FFF:FF:FFFFFF:FF,FFFFFFFF,FFFFFFFF:FFFFFFFFFFFF
FFFFFFFFFFFFFFFF

```

[illegible][illegible][illegible][illegible][illegible][illegible]

@A00721:190:HGJW7DSXY:4:2468:23574:32550 2:N:0:TCTGCAAG+GCTGCACT  
ATTATCGAATGGAAATGAATATATATCATTTTATTA AACACTTCTGAACCACATTCGTACATTTAAT

GCAACTTCCATCGCATATTGATGAAATGTCGCAAAAACTAAATAATAAGCTCCTTTCATCATGTCCTC  
TACTACTGCCACCAGT

+

FFFFFFFFFFFFFFFFFFFFFFFF:FFFFF,FFFFFFFFFFFFF,:FFFF:FFFFFFFFFFFFFFFFFFFFFFFF  
FFFFFFFFFFFFFFFFFFFFFFFFFFFFFFFFFFFFFFFFFFFFFFFFFFFFFFFFFFFFFFFFFFFFFFFF:FF  
FFFFFFFFFFFFFFFFFFFF

@A00721:190:HGJW7DSXY:4:2561:14235:10207 2:N:0:TCTGCAAG+GCTGCACT  
ATTATCGAATGGAAAATGAATATATATCATTTTTATTAAACACTTCTGAACCACATTCGTACATTTAAT  
GCAACTTCCATCGCATATTGATGAAATGTCGCAAAAACTAAATAATAAGCTCCTTTCATCATGTCCTC  
TACTACTGCCACCAGT

+

FFFFFFFFFFFFFFFFFFFFFFFFFFFFFFFFFFFFFFFFFFFFFFFFFFFFFFFFFFFFFFFFFFFFFFFF  
FFFFFFFFFFFFFFFFFFFFFFFFFFFFFFFFFFFFFFFFFFFFFFFFFFFFFFFFFFFFFFFFFFFFFFFF  
FFFFFFFFFFFFFFFFFFFF

@A00721:190:HGJW7DSXY:4:2544:23601:21167 2:N:0:TCTGCAAG+GCTGCACT  
ATTATCGAATGGAAAATGAATATATATCATTTTTATTAAACACTTCTGAACCACATTCGTACATTTAAT  
GCAACTTCCATCGCATATTGATGAAATGTCGCAAAAACTAAATAATAAGCTCCTTTCATCATGTCCTC  
TACTACTGCCACCAG

+

FFFFFFFFF::FFFFF,FFF:FF:FFFFFF,,FFFFFFFFFFFFFFFFFFFFFFFF,FF:FFFFF,:FF:  
:FFFFFFFF,FF,F:F:FFF,FFFFFFFF,F,,FFFFFF:FF:FFFFFF::,F,FFFFFFFF,F::F,F  
F:FF:F,,FFFFF:

@A00721:190:HGJW7DSXY:4:1315:9399:22936 2:N:0:TCTGCAAG+GCTGCACT  
AGATTATCGAATGGAAAATGAATATATATCATTTTTATTAAACACTTCTGAACCACATTCGTACATTTA  
ATGCAACTTCCATCGCATATTGATGAAATGTCGCAAAAACTAAATAATAAGCTCCTTTCATCATGTCC  
TCTACTACTGCCACCA

+

FFF,FFFF:FFFFFFFFFFFFFFFFFFFFFFFFFFFFFFFFFFFFFFFFFFFFFFFFFFFFFFFFFFFF  
FFFFFFFFFFFFFFFF:FFFFFFFFFFFFFFFFFFFFFFFFFFFFFFFFFFFFFFFFFFFFFFFFFFFFFFFF  
FFFFFFFFFFFFFFFFFFFF

@A00721:190:HGJW7DSXY:4:1510:17743:36292 2:N:0:TCTGCAAG+GCTGCACT  
AGATTATCGAATGGAAAATGAATATATATCATTTTTATTAAACACTTCTGAACCACATTCGTACATTTA  
ATGCAACTTCCATCGCATATTGATGAAATGTCGCAAAAACTAAATAATAAGCTCCTTTCATCATGTCC  
TCTACTACTGCCACCA

+

FFFFFFFFFFFFFFFFFFFFFFFFFFFFFFFF:FFFFFFFFFFFFFFFFFFFFFFFFFFFFFFFFFFFFFFFF  
FFFFF:FFFFFFFFFFFFFFFFFFFFFFFFFFFFFFFFFFFFFFFFFFFFFFFFFFFFFFFFFFFFFFFF  
FFFFFFFFFFFFFFFFFFFF

@A00721:190:HGJW7DSXY:4:2333:17942:29872 2:N:0:TCTGCAAG+GCTGCACT  
AGATTATCGAATGGAAAATGAATATATATCATTTTTATTAAACACTTCTGAACCACATTCGTACATTTA  
ATGCAACTTCCATCGCATATTGATGAAATGTCGCAAAAACTAAATAATAAGCTCCTTTCATCATGTCC  
TCTACTACTGCCACCA

+

FFFFFFFFFFFFFFFFFFFFFFFFFFFFFFFFFFFFFFFFFFFFFFFFFFFFFFFFFFFFFFFFFFFFFFFF  
FFFFFFFFFFFFFFFFFFFFFFFFFFFFFFFFFFFFFFFF:FFFFFFFFFFFFFFFFFFFFFFFF:FFFFFFFFFFFF  
FFFFFFFFFFFFFFFFFFFF

@A00721:190:HGJW7DSXY:4:1328:7554:7028 2:N:0:TCTGCAAG+GCTGCACT  
CAAAGATTATCGAATGGAAAATGAATATATATCATTTTTATTAAACACTTCTGAACCACATTCGTACAT  
TTAATGCAACTTCCATCGCATATTGATGAAATGTCGCAAAAACTAAATAATAAGCTCCTTTCATCATG  
TCCTCTACTACTGCCA

+

FFFFF:FFFFFFFFFFFFFFFFFFFFFFFFFFFFFFFFFFFFFFFFFFFFFFFFFFFFFFFFFFFFFFFF  
FFFFFFFFFFFFFFFFFFFFFFFF:FFFFFFFFFFFFFFFFFFFFFFFF,FFF:FFFFFFFFFFFFFFFFFFFF  
FF:FFFFFFFFFFFF:FF



FFFFFFFFFFFFFFFFFFFFFFFFFFFFFFFFFFFFFFFFFFFFFFFFFFFFFFFFFFFFFFFF:FFF:FFFFFFF  
FFFFFFFFFFFFFFFF

@A00721:190:HGJW7DSXY:4:2347:15845:17284 2:N:0:TCTGCAAG+GCTGCACT  
TGTAATCAAAGATTATCGAATGGAAAATGAATATATATCATTTTATTAAACACTTCTGAACCACATTC  
GTACATTTAATACAACCTCCATCGCATATTGATGAAATGTCGCAAAAACCTAAATAATAAGCTCCTTTC  
ATCATGTCCTCTACA

+

FFFFFFFFFFFFFFFFFFFFFFFFFFFFFFFFFFFFFFFFFFFFFFFFFFFFFFFFFFFFFFFF:FFFFFFFFFFFFFFFFFFFFFFFFFFFFFFFF:FF  
FFFFFFFFFFFF:FFFFFFFFFFFFFFFF:FFFFFFFFFFFFFFFFFFFFFFFF:F:FFF:FFFFFFFFFFFFFFFFFFFF  
:FFFFF:FFFFFFFF

@A00721:190:HGJW7DSXY:4:2517:13196:17550 2:N:0:TCTGCAAG+GCTGCACT  
TGTAATCAAAGATTATCGAATGGAAAATGAATATATATCATTTTATTAAACACTTCTGAACCACATTC  
GTACATTTAATACAACCTCCATCGCATATTGATGAAATGTCGCAAAAACCTAAATAATAAGCTCCTTTC  
ATCATGTCCTCTACA

+

FFFF,FFFFFFFFFFFFFFFFFFFFFFFFFFFFFFFFFFFFFFFFFFFFFFFFFFFFFFFFFFFFFFFF,FFFFFFFFFFFFFFFFFFFFFFFFFFFFFFFF  
FFFFFFFFFFFFFFFFFFFFFFFFFFFFFFFFFFFFFFFFFFFFFFFFFFFFFFFFFFFFFFFF:FFFFFFFFFFFFFFFFFFFFFFFFFFFFFFFF  
FFFFFFFF:FFFFFFFF

@A00721:190:HGJW7DSXY:4:2663:23999:32346 2:N:0:TCTGCAAG+GCTGCACT  
TGTAATCAAAGATTATCGAATGGAAAATGAATATATATCATTTTATTAAACACTTCTGAACCACATTC  
GTACATTTAATACAACCTCCATCGCATATTGATGAAATGTCGCAAAAACCTAAATAATAAGCTCCTTTC  
ATCATGTCCTCTACA

+

FFFFFFFFFFFFFFFFFFFFFFFFFFFFFFFFFFFFFFFFFFFFFFFFFFFFFFFFFFFFFFFFFFFFFFFFFFFFFFFFFFFFFFFFFFFFFFFF  
FFFFFFFFFFFFFFFFFFFFFFFFFFFFFFFFFFFFFFFFFFFFFFFFFFFFFFFFFFFFFFFF,FFFFFFFFFFFFFFFFFFFFFFFFFFFFFFFF  
FFFFFFFFFFFFFFFF

@A00721:190:HGJW7DSXY:4:1375:23204:33442 2:N:0:TCTGCAAG+GCTGCACT  
AAGCAATGGAAAATCTAGATCATGTAATCAAAGATTATCGAATGGAAAATGAATATATATCATTTTAT  
TAAACACTTCTGAACCACATTCGTACATTTAATGCAACTTCCATCGCATATTGATGAAATGTCGCAAA  
AACTAAATAATAAGC

+

FFFFFFFFFFFFFFFFFFFF,FFFFF:F:FFFFFFFFFFFFFFFFFFFFFFFFFFFFFFFFFFFFFFFFFFFFFFFFFFFFFFFFFFFFFFFF  
FFFFFFFFFFFFFFFFFFFFFFFFFFFFFFFFFFFFFFFFFFFFFFFFFFFFFFFFFFFFFFFF:FFFFFFFFFFFFFFFFFFFFFFFFFFFF,FF  
FFFFFFFFFFFFFFFF:

@A00721:190:HGJW7DSXY:4:2566:29577:33113 2:N:0:TCTGCAAG+GCTGCACT  
AAGCAATGGAAAATCTAGATCTTGTAAATCAAAGATTATCGAATGGAAAATGAATATATATCATTTTAT  
TAAACACTTCTGAACCACATTCGTACATTTAATGCAACTTCCATCGCATATTGATGAAATGTCGCAAA  
AACTAAATAATAAGC

+

FFFFFFFFFFFFFFFFFFFF:FF,FFFFFFFFFFFFFFFFFFFFFFFFFFFFFFFFFFFFFFFFFFFFFFFFFFFFFFFFFFFFFFFF  
FFFFFFFFFFFFFFFFFFFFFFFFFFFFFFFFFFFFFFFFFFFFFFFFFFFFFFFFFFFFFFFF:FFFFFFFFFFFFFFFFFFFFFFFFFFFF  
FFFFFFFFFFFFFFFF:

@A00721:190:HGJW7DSXY:4:2660:20329:24956 2:N:0:TCTGCAAG+GCTGCACT  
AAGCAATGGAAAATCTAGATCATGTAATCAAAGATTATCGAATGGAAAATGAATATATATCATTTTAT  
TAAACACTTCTGAACCACATTCGTACATTTAATGCAACTTCCATCGCATATTGATGAAATGTCGCAAA  
AACTAAATAATAAGC

+

FFFFFFFFFFFFFFFFFFFF:FFFFFFFFFFFF,FF,FFFFFFFFFFFFFFFFFFFFFFFFFFFFFFFFFFFFFFFFFFFFFFFFFFFFFFFF  
FFFFF:FFFFFFFFFFFF:FF:FFFFFFFFFFFFFFFFFFFFFFFFFFFFFFFFFFFFFFFF:FFFFFFFFFFFFFFFFFFFF:  
F,FFFFF:FFFFFF

@A00721:190:HGJW7DSXY:4:1104:7934:30545 2:N:0:TCTGCAAG+GCTGCACT  
AAGCAATGGAAAATCTAGATCATGTAATCAAAGATTATCGAATGGAAAATGAATATATATCATTTTAT  
TAAACACTTCTGAACCACATTCGTACATTTAATGCAACTTCCATCGCATATTGATGAAATGTCGCAAA  
AACTAAATAATAAGC

[illegible]

```
FF,,FFFF,F:FF,FFFF,FFF::FFFFFFFFFFFFFFFF::,FFFF:FFFF:FFFFF:F,F,FFFFFFFF
:FFF,F,,FFF:FFF,FFF:FFFFFFFF:FFFF,,FFFFF,,FF,,, :FF,F,FF,FFF:,FF:FFFF
F,:,F:F:FF,:FF
```

```
FFFFFFFFFFFFFFFFFFFFFFFFFFFFFFFFFFFFFFFFFFFFFFFFFFFFFFFFFFFFFFFFFFFFF
:FFFFF:FFFFFFFFFFFFFFFF:FFFFFFFFFFFFFFFFFFFFFFFFFFFFFFFFFFFFFFFFFFFFF
FFFF,FFFFFFFF
```

```

FFFFFFFFFFFFFFFFFFFFFFFFFFFFFFFFFFFFFFFF:FFFFFFFFFFFFFFFFFFFFFFFF:F
:FFFFFFFFFFFFFFFFFFFFFFFF,FFFFFF:FFFFFFF:FFFFFFFFFFFF,FFFFFFF:FFF,:F
FFF:FFFFFFFF

```

[illegible]

```

FFFFFFFF:FFF:FFFFFFFFFFFFFFFFFFFFFFFFFFFFFFFFFFFFFFFF:FFFFFFFFFFFFFFFF
:FFFFFFFFFFFFFF,,FFFFF:FFFFFFFFF:FFFF,FFFFF:F:FF:FFFFFF:FFFFFFFFFFFF:
FFFFFFFFFFFF:FFF

```

```

FFFFFFFFFFFFFF,FFFFFFFF:FFFFFFFFFFFFFFFF:FFFFFFFFFFFFFFFFFFFFFFFFFFFFFFFF
FFFFFFFFFFFFFFFFFFFFFFFF:FFFFFFFFFFFFFFFF,FFFFF:FFFFFFFFFFFF,FFFFFFFFFFFFFFFF
FFFFFFFFFFFF::F:F

```

@A00721:190:HGJW7DSXY:4:1219:2781:13698 2:N:0:TCTGCAAG+GCTGCACT  
AAAATCTTTGTAATTTAGGGGTAATTTCAATTTATAATTTTTGTTATGCGTGGCATAAAGCAATGGAA





FFFFFFFF:,F:FFF:FF:FFFFFFFFFFFFFFFFFFFFFFFF, :FFFFFFFF:FFFFFFFF:FFFF:F  
FFFF:FF,FFFFFF

@A00721:190:HGJW7DSXY:4:1626:1750:28792 2:N:0:TCTGCAAG+GCTGCACT  
GGAAGACGATGATTTCTGGGACTTTATCCCGACGGCTTTATTTTTATATCCATAAAAATCTTTGTAAG  
TTAGGGGTAATTTCAATTTATAATTTTTGTTATGCGTGGCATAAAGCAATGGAAAATCTAGATCATGT  
AATCAAAGATTATC

+

FFF,FFFFFFFFFFFFFFFFFFFFFFFFFFFFFFFFFFFFFFFF:F,FFFFFFFFFFFFFF:F:FFFF,  
FFFF:FFFFFFFFFFFFFFFFFFFFFFFF,FFFFFFFF:F:FFFF,FFFFFFFFFFFFFFFF,FFFF,F  
FFFF,F,FFFFFF

@A00721:190:HGJW7DSXY:4:1650:20383:8547 2:N:0:TCTGCAAG+GCTGCACT  
GGAAGACGATGATTTCTGGGACTTTATCCCGACGGCTTTATTTTTATATCCATAAAAATCTTTGTAAT  
TTAGGGGTAATTTCAATTTATAATTTTTGTTATGCGTGGCATAAAGCAATGGAAAATCTAGATCATGT  
AATCAAAGATTATC

+

FFFFFFFFFFFFFFFFFFFFFFFFFFFFFFFFFFFFFFFFFFFFFFFFFFFFFFFFFFFFFFFFFFFF  
FFFFFFFF:F,FFFF:FFFFFFFF:FFFFFFFFFFFFFF:,FFFF,FFFF,FFFFFFFF:FFFF  
FFFFFFFFFFFFFF

@A00721:190:HGJW7DSXY:4:1306:6677:12587 2:N:0:TCTGCAAG+GCTGCACT  
ATTACATGATCTAGATTTTCCATTGCTTTATGCCACGCATAACAAAATTATAAATTGAAATTACCCC  
TAAATTACAAAGATTTTTATGGATATAAAAATAAAGCCGTCGGGATAAAGTCCCAGAAATCATCGTCT  
TCCATGACGGGTTCT

+

FFFFFFFFFFFFFFFFFFFFFFFFFFFFFFFFFFFFFFFFFFFFFFFFFFFFFFFFFFFFFFFFFFFF  
FFFFFFFFFFFFFFFFFFFFFFFFFFFFFFFF:F:FFFFFFFFFFFFFF:FFFFFFFFFFFF:FF  
FFFFFFFFFFFFFF

@A00721:190:HGJW7DSXY:4:1513:28076:15608 2:N:0:TCTGCAAG+GCTGCACT  
ATTACATGATCTAGATTTTCCATTGCTTTATGCCACGCATAACAAAATTATAAATTGAAATTACCCC  
TAAATTACAAAGATTTTTATGGATATAAAAATAAAGCCGTCGGGATAAAGTCCCAGAAATCATCGTCT  
TCCATGACGGGTTCT

+

FFFFFFFFFFFFFFFFFFFFFFFFFFFFFFFFFFFFFFFFFFFFFFFFFFFFFFFFFFFFFFFFFFFF  
FFFFFFFFFFFFFFFFFFFFFFFFFFFFFFFF:F:FFFFFFFFFFFFFF:FFFFFFFFFFFF  
FFFFFFFFFFFFFF

@A00721:190:HGJW7DSXY:4:1523:21124:26647 2:N:0:TCTGCAAG+GCTGCACT  
ATTACATGATCTAGATTTTCCATTGCTTTATGCCACGCATAACAAAATTATAAATTGAAATTACCCC  
TAAATTACAAAGATTTTTATGGATATAAAAATAAAGCCGTCGGGATAAAGTCCCAGAAATCATCGTCT  
TCCATGACGGGTTCT

+

FFF:FFFFFFFFFFFFFFFFFFFFFFFFFFFFFFFF:F:FFFFFFFFFFFFFF:FFFFFFFFFFFF  
F:FF:FFFFFFFFFFFFFFFFFFFFFFFFFFFFFFFF:F:FFFFFFFF:FFFFFFFFFFFFFFFF  
FFFF,FFF:FFFFF

@A00721:190:HGJW7DSXY:4:2104:16007:14340 2:N:0:TCTGCAAG+GCTGCACT  
ATTACATGATCTAGATTTTCCATTGCTTTATGCCACGCATAACAAAATTATAAATTGAAATTACCCC  
TAAATTACAAAGATTTTTATGGATATAAAAATAAAGCCGTCGGGATAAAGTCCCAGAAATCATCGTCT  
TCCATGACGGGTTCT

+

FF,FF:FFFFFF:FFFFFF,FFFFFFFF,FFFFFFFFFFFFFFFFFFFFFFFF:FFFFF:  
FFFFFFFFFF,FFFFFFFFFFFFFFFFFFFFFFFF,FFFF:::FFFFFF:FFFF:FFFFFFFF  
FFFFFF,F,F:FFFF

@A00721:190:HGJW7DSXY:4:1265:21866:7670 2:N:0:TCTGCAAG+GCTGCACT  
TGCAGAACCCGTCATGGAAGACGATGATTTCTGGGACTTTATCCCGACGGCTTTATTTTTATATCCAT  
AAAAATCTTTGTAATTTAGGGGTAATTTCAATTTATAATTTTTGTTATGCGTGGCATAAAGCAATGGA  
AAATCTAGATCATGT



+  
FFFFFFFF:FFFFFFFFFFFFFFFFFFFFFFFFFFFFFFFFFFFFFFFFFFFFFFFFFFFFFFFF  
FFFFFFFFFFFFFFFF:FFFFFFFFFFFFFFFF:FFFFFFFFFFFFFFFFFFFFFFFFFFFFFFFF  
FFFFFFFF:FFFFF  
@A00721:190:HGJW7DSXY:4:1311:24939:11678 2:N:0:TCTGCAAG+GCTGCACT  
ACATGATCTAGATTTTCCATTGCTTTATTCAACGCATAACAAAAATTATAAATAGAAAATACCCCTAA  
ATAACAAAGATTTTATGGATATAAAAAATAAATCAGTCGGGATAAAGTCCCAGAAATCATCGTCTTCC  
ATGACGGGTTCT

+  
FFF:,, :F,FFFF:FF,FF:FFF,FFF,F,F,,F,,::,FFFF,,FFFF:F,,FFFF,FF,FF,FF:  
F,:FFFF,FF:,FFFF,FFFFFF,FFFFFFF,F,:F,,,F,FFF:, ,FFF:FFF,FFFFFF,,:,,  
FF,FF,F,:FFF

@A00721:190:HGJW7DSXY:4:1320:16740:26349 2:N:0:TCTGCAAG+GCTGCACT  
TGCAGAACCCGTCATGGAAGACGATGATTTCTGGGACTTTATCCCGACGGCTTTATTTTATATCCAT  
AAAAATCTTTGTAATTTAGGGTAATTTCAATTTATAATTTTGTATGCGTGGCATAAAGCAATGGA  
AAATCTAGATCATGT

+  
FFFFFFFFFFFFFFFFFFFFFFFFFFFFFFFFFFFFFFFFFFFFFFFFFFFFFFFFFFFFFFFF  
FFFFFFFFFFFFFFFF: :F,FFFFFFFFFFFFFFFFFFFFFFFFFFFFFFFFFFFFFFFFFFFF  
FF:FFFF:FFFFF

@A00721:190:HGJW7DSXY:4:1667:8124:13839 2:N:0:TCTGCAAG+GCTGCACT  
TGCAGAACCCGTCATGGAAGACGATGATTTCTGGGACTTTATCCCGACGGCTTTATTTTATATCCAT  
AAAAATCTTTGTAATTTAGGGTAATTTCAATTTATAATTTTGTATGCGTGGCATAAAGCAATGGA  
AAATCTAGATCATGT

+  
FFFFF,FFFFFFFFFFFFFFFFFFFFFFFFFFFFFFFFFFFFFFFFFFFFFFFFFFFFFFFF  
FFFFFFFFFFFFFFFFFFFFFFFFFFFFFFFFFFFFFFFF,FFFFFFFFFFFFFFFFFFFF:FFFFFFFFFFFFFFFF  
FF,FFFF:,FFFFF

@A00721:190:HGJW7DSXY:4:2167:31937:19758 2:N:0:TCTGCAAG+GCTGCACT  
TGCAGAACCCGTCATGGAAGACGATGATTTCTGGGACTTTATCCCGACGGCTTTATTTTATATCCAT  
AAAAATCTTTGTAATTTAGGGTAATTTCAATTTATAATTTTGTATGCGTGGCATAAAGCAATGGA  
AAATCTAGATCATGT

+  
FFFFFFFFFFFFFF:FFFFFFFFFFFFFFFFFFFFFFFFFFFFFFFFFFFFFFFFFFFFFFFF  
FF:FFFFFFFFFFFF: :F:FFFFFFFFFFFF:F,FFFFFFFFFFFFFFFFFFFF:FF,F:, :FF:FFF::  
FF,F:FFF:FFFFF:

@A00721:190:HGJW7DSXY:4:2259:9760:25786 2:N:0:TCTGCAAG+GCTGCACT  
TGCAGAACCCGTCATGGAAGACGATGATTTCTGGGACTTTATCCCGACGGCTTTATTTTATATCCAT  
AAAAATCTTTGTAATTTAGGGTAATTTCAATTTATAATTTTGTATGCGTGGCATAAAGCAATGGA  
AAATCTAGATCATGT

+  
F::FFFFFFFFFFFFFFFFFFFF:FFFFFFFFF,,::FFFFF:FFF,FFF:FF:FFFFFFFFFFFFFFFF  
FFFFFFF,FFF:FFFFFFFFFFFF:FFF,FF,,FFFFFFFF,:FFF:,FFF:FFF,FFFFFFFFFFFF  
FFFF:FF:FFFFF:

@A00721:190:HGJW7DSXY:4:2427:19678:22388 2:N:0:TCTGCAAG+GCTGCACT  
TGCAGAACCCGTCATGGAAGACGATGATTTCTGGGACTTTATCCCGACGGCTTTATTTTATATCCAT  
AAAAATCTTTGTAATTTAGGGTAATTTCAATTTATAATTTTGTATGCGTGGCATAAAGCAATGGA  
AAATCTAGATCATGT

+  
FFFFFFFFFFFFFF:FFFFFFFFF,FFFFFFFFFFFFFFFFFFFFFFFFFFFFFFFFFFFF  
FFFF:FFFFFFFFFFFF: :F,FFFFF,FFFFFFF:F:FFFFFFFFFFFFFFFFFFFF:FFFF:FF,FFFFFFF  
FFFFFFFFFFFFFFFF

@A00721:190:HGJW7DSXY:4:2559:15085:3662 2:N:0:TCTGCAAG+GCTGCACT  
TGCAGAACCCGTCATGGAAGACGATGATTTCTGGGACTTTATCCCGACGGCTTTATTTTATATCCAT

AAAAATCTTTGTAATTTAGGGGTAATTTCAATTTATAATTTTTGTTATGCGTGGCATAAAGCAATGGA  
AAATCTAGATCATGT

[illegible] $+$ 

```

FFFFFFFFFFFFFFFFFFFFFFFFFFFFFFFFFFFFFFFFFFFFFFFFFFFFFFFFFFFFFFFFFFFFFFFF
FFFFFFFFFFFFFFFFFFFFFFFF:FFFF:FFFFFFFF:FFFF:FFFFFFFFFFFFFFFF:FFFFFFFF:FFFF:FFFF
FFFFFFFFFFFFFFFF:FF

```

 $+$ [illegible]

+

[illegible]

+

[illegible] $+$ [illegible]

+

[illegible]



```
FFFFFFFFFFFFFFFFFFFFFFFFFFFFF:FFFFFF:FFFFFFFFFFFFFFFFFFFFFFFFFFFFFFFFFFFFF:FFFFF
FFFFFFFFFF:FFFF:
```

+

@A00721:190:HGJW7DSXY:4:1521:5204:8750 2:N:0:TCTGCAAG+GCTGCACT  
GAATTACTGCAGAACCCGTCATGGAAGACGATGATTTCTGGGACTTTATCCCACGGCTTTATTTTAA  
TATCCATAAAAAATCTTTGTAATTTAGGGGTAATTTCAATTTATAATTTTTGTTATGCGTGGCATAAAG  
CAATGGAAAATCTAG

```

FFFFFFFFFFFFFFFFFFFFFFFF:FFFFFFFFFFFFFFFFFFFFFFFFFFFFFFFF
FFFFFFFFFFFFFFFFFFFF,FFF:FFFF:FFFF,FFFF:FFFFFFFFFFFFFFFF
FF,FFFFFFFFFFFFFF

```

 $+$ 

@A00721:190:HGJW7DSXY:4:2533:29568:33849 2:N:0:TCTGCAAG+GCTGCACT  
GAATTACTGCAGAACCCGTCATGGAAGACGATGATTTCTGGGACTTTATCCCACGCGCTTTATTTTAA  
TATCCATAAAAAATCTTTGTAATTTAGGGGTAATTTCAATTTATAATTTTTGTTATGCGTGGCATAAAG  
CAATGGAAAATCTAG

```
FFFFFFFFFFFFFFFFFFFFFFFFFFFFFFFFFFFFFFFFFFFFFFFFFFFFFFFFFFFFFFFFFFFFF
FFFFFFFFFFFFFFFFFFFFFFFFFFFFFF,FFF:FFF:FFFFFFFFFFFFFFFFFFFFFFFFFFFFF
F:FFFFF:FFFFFFFF
```

+

@A00721:190:HGJW7DSXY:4:2178:24433:18599 2:N:0:TCTGCAAG+GCTGCACT  
GAATTACTGCAGAACCCGTCATGGAAGACGATGATTTCTGGGACTTTATCCCACGGCTTTATTTTAA  
TATCCATAAAAAATCTTTGTAATTTAGGGGTAATTTCAATTTATAATTTTTGTTATGCGTGGCATAAAG  
CAATGGAAAAATCTA

[illegible]

+  
FFFFFFFFFFFFFFFFFFFFFFFFFFFFFFFFFFFFFFFFFFFFFFFFFFFFFFFFFFFFFFFFFFFFFFFF  
FFFFFFFFFFFFFFFFFFFFFFFFFFFFFFFFFFFFFFFFFFFFFFFFFFFFFFFFFFFFFFFFFFFFFFFF  
FFFF:FFFF:FFFF  
@A00721:190:HGJW7DSXY:4:1246:21811:10614 2:N:0:TCTGCAAG+GCTGCACT  
ATTACAACCAGTCCCAGAATTACTGCAGAACCCGTCATGGAAGACGATGATTTCTGGGACTTTATCCC  
GACGGCTTTATTTTTATATCCATAAAAAATCTTTGTAATTTAGGGGTAATTTCAATTTATAATTTTGT  
TATGCGTGGCATAAA

+  
FFFFFFFFFFFFFFFFFFFFFFFFFFFFFFFFFFFFFFFFFFFFFFFFFFFFFFFFFFFFFFFFFFFF:FFFFFFFF  
FFFFFFFFFFFFFFFFFFFFFFFFFFFFFFFFFFFFFFFFFFFFFFFFFFFFFFFFFFFFFFFFFFFF,FFFFFFFFFFFFFFFF:FFFFFFFF  
FFF,FFFFFFFF:  
@A00721:190:HGJW7DSXY:4:2248:23936:33583 2:N:0:TCTGCAAG+GCTGCACT  
ATTACAACCAGTCCCAGAATTACTGCAGAACCCGTCATGGAAGACGATGATTTCTGGGACTTTATCCC  
GACGGCTTTATTTTTATATCCATAAAAAATCTTTGTAATTTAGGGGTAATTTCAATTTATAATTTTGT  
TATGCGTGGCATAAA

+  
FFFFFFFFFFFFFFFFFFFFFFFFFFFFFFFFFFFF:FFFFFFFFFFFF:FFFFFFFFFF,FFFFFFFFFFFFFFFF  
FFFFFFFFFFFFFFFFFFFFFFFFFFFFFFFFFFFFFFFFFFFFFFFFFFFFFFFFFFFFFFFFFFFF:FFFFFFFFFFFF  
FFFF:FFFFF:FFF  
@A00721:190:HGJW7DSXY:4:2264:21893:30984 2:N:0:TCTGCAAG+GCTGCACT  
ATTACAACCAGTCCCAGAATTACTGCAGAACCCGTCATGGAAGACGATGATTTCTGGGACTTTATCCC  
GACGGCTTTATTTTTATATCCATAAAAAATCTTTGTAATTTAGGGGTAATTTCAATTTATAATTTTGT  
TATGCGTGGCATAAA

+  
FFFFFFFFFFFFFFFFFFFF:FFFFFFFFFFFFFFFFFFFFFFFFFFFFFFFFFFFF:FFFFFFFFFFFFFFFFFFFF  
FFFFFFFFFFFFFFFFFFFFFFFFFFFF:FFFFFFFFFFFFFFFFFFFFFFFFFFFF,FFFFFFFFFFFFFFFF:FFFFFFFFFFFF  
FFF:F:FF:FFFF:F  
@A00721:190:HGJW7DSXY:4:2270:9625:22263 2:N:0:TCTGCAAG+GCTGCACT  
ATTACAACCAGTCCCAGAATTACTGCAGAACCCGTCATGGAAGACGATGATTTCTGGGACTTTATCCC  
GACGGCTTTATTTTTATATCCATAAAAAATCTTTGTAATTTAGGGGTAATTTCAATTTATAATTTTGT  
TATGCGTGGCATAAA

+  
FFFFFFFFFFFFFFFFFFFFFFFFFFFFFFFFFFFFFFFFFFFFFFFFFFFFFFFFFFFFFFFFFFFFFFFF  
FFFFFFFFFFFFFFFFFFFFFFFFFFFF:FFFFFFFFFFFFFFFFFFFFFFFFFFFF,FFFFFFFFFFFFFFFFFFFFFFFF  
FFF:FFFFFFFFFFFF  
@A00721:190:HGJW7DSXY:4:1505:24198:24017 2:N:0:TCTGCAAG+GCTGCACT  
ATTACAACCAGTCCCAGAATTACTGCAGAACCCGTCATGGAAGACGATGATTTCTGGGACTTTATCCC  
GACGGCTTTATTTTTATATCCATAAAAAATCTTTGTAATTTAGGGGTAATTTCAATTTATAATTTTGT  
TATGCGTGGCATAA

+  
FFFFFFFFFFFFFFFFFFFFFFFFFFFFFFFFFFFFFFFFFFFFFFFFFFFFFFFFFFFFFFFFFFFFFFFF  
FFFFFFFFFFFFFFFFFFFFFFFFFFFFFFFFFFFFFFFFFFFFFFFFFFFF,FFFFFFFFFFFFFFFF:FFFFFFFFFFFF  
FFFFFFFFFFFFFFFFFFFF  
@A00721:190:HGJW7DSXY:4:1162:24903:32784 2:N:0:TCTGCAAG+GCTGCACT  
GGACGACATTACAACCAGTCCCAGAATTACTGCAGAACCCGTCATGGAAGACGATGATTTCTGGGACT  
TTATCCCGACGGCTTTATTTTTATATCCATAAAAAATCTTTGTAATTTAGGGGTAATTTCAATTTATAA  
TTTTTTTTATGCGTG

+  
FFFFFFFFFFFFFFFFFFFFFFFFFFFF:FFFFFFFFFFFFFFFFFFFFFFFFFFFF:FFFFFFFFFFFFFFFFFFFF,FFFF:FFFF  
FFFFFFFF:FF,F:FFFFFFFFFFFFFFFFFFFFFFFFFFFF,FFFFFF:FFFFFF:FFFFFF,FFFFFFFF  
FFFF:,FFFFFFFF:  
@A00721:190:HGJW7DSXY:4:1234:29640:34162 2:N:0:TCTGCAAG+GCTGCACT  
GGACGACATTACAACCAGTCCCAGAATTACTGCAGAACCCGTCATGGAAGACGATGATTTCTGGGACT



$+$ 

+

+

+

+

+

+

[illegible]

FFFFFFFFFFFFFFFFFFFFFFFFFFFFFFFFFFFFFFFFFFFFFFFFFFFFFFFFFFFFFFFFFFFFFFFFFFFFFFFF:FFFF,FFFFFF  
FFFFFFFFFFFFFFFF

@A00721:190:HGJW7DSXY:4:2576:14262:7122 2:N:0:TCTGCAAG+GCTGCACT  
GGACGACATTACAACCAGTCCCAGAATTACTGCAGAACCCGTCATGGAAGACGATGATTTCTGGGACT  
TTATCCCGACGGCTTTATTTTTATATCCATAAAAATCTTTGTAATTTAGGGGTAATTTCAATTTATAA  
TTTTTGTTATGCGTG

+

FFFFFFFFFFFFFFFFFFFFFFFFFFFFFFFFFFFFFFFFFFFFFFFFFFFFFFFFFFFFFFFFFFFFFFFFFFFFFFFF  
FFFFFFFFFFFFFFFFFFFFFFFFFFFFFFFFFFFFFFFFFFFFFFFFFFFFFFFFFFFFFFFFFFFFFFFFFFFFFFFF:FFFFFFFFFFFFFFFF  
FFFFFFFFFFFFFFFF

@A00721:190:HGJW7DSXY:4:2647:12997:10066 2:N:0:TCTGCAAG+GCTGCACT  
GGACGACATTACAACCAGTCCCAGAATTACTGCAGAACCCGTCATGGAAGACGATGATTTCTGGGACT  
TTATCCCGACGGCTTTATTTTTATATCCATAAAAATCTTTGTAATTTAGGGGTAATTTCAATTTATAA  
TTTTTGTTATGCGTG

+

FFFFFFFFFFFFFFFFFFFFFFFFFFFFFFFFFFFFFFFFFFFFFFFFFFFFFFFFFFFFFFFFFFFFFFFFFFFFFFFF  
FFFFFFFFFFFFFFFFFFFFFFFFFFFFFFFFFFFFFFFFFFFFFFFFFFFFFFFFFFFFFFFFFFFFFFFFFFFFFFFF:FFFFFFFFFFFFFFFF  
FFFFFF,FFFFFF:FF

@A00721:190:HGJW7DSXY:4:2662:23936:7435 2:N:0:TCTGCAAG+GCTGCACT  
GGACGACATTACAACCAGTCCCAGAATTACTGCAGAACCCGTCATGGAAGACGATGATTTCTGGGACT  
TTATCCCGACGGCTTTATTTTTATATCCATAAAAATCTTTGTAATTTAGGGGTAATTTCAATTTATAA  
TTTTTGTTATGCGTG

+

FFFFFFF:FFFFFFFFFFFFFFFFFFFFFFFFFFFFFFFFFFFFFFFFFFFFFFFFFFFFFFFFFFFFFFFFFFFFFFFF  
FFFFFFFFFFFFFFFFFFFFFFFFFFFFFFFFFFFFFFFFFFFFFFFFFFFFFFFFFFFFFFFFFFFFFFFFFFFFFFFF:FFFFFFFFFFFFFFFF  
:FFFFFFFFFFFF,FFF

@A00721:190:HGJW7DSXY:4:2678:27127:7889 2:N:0:TCTGCAAG+GCTGCACT  
GGACGACATTACAACCAGTCCCAGAATTACTGCAGAACCCGTCATGGAAGACGATGATTTCTGGGACT  
TTATCCCGACGGCTTTATTTTTATATCCATAAAAATCTTTGTAATTTAGGGGTAATTTCAATTTATAA  
TTTTTGTTATGCGTG

+

FFFFFFF:FFFFFFFFFFFFFFFFFFFFFFFFFFFFFFFFFFFFFFFFFFFFFFFFFFFFFFFFFFFFFFFFFFFFFFFF  
FFFFFFFFFFFFFFFFFFFFFFFFFFFFFFFFFFFFFFFFFFFFFFFFFFFFFFFFFFFFFFFFFFFFFFFFFFFFFFFF:FFFFFFFFFFFFFFFF  
FFFFFFFFFFFFFF:FF

@A00721:190:HGJW7DSXY:4:1344:3143:9721 2:N:0:TCTGCAAG+GCTGCACT  
GGACGACATTACAACCAGTCCCAGAATTACTGCAGAACCCGTCATGGAAGACGATGATTTCTGGGACT  
TTATCCCGACGGCTTTATTTTTATATCCATAAAAATCTTTGTAATTTAGGGGTAATTTCAATTTATAA  
TTTTTG

+

FFFFFFFFFFFFFFFFFFFFFFFFFFFFFFFFFFFFFFFFFFFFFFFFFFFFFFFFFFFFFFFFFFFFFFFFFFFFFFFF  
FFFFFFFFFFFFFFFFFFFFFFFFFFFFFFFFFFFFFFFFFFFFFFFFFFFFFFFFFFFFFFFFFFFFFFFFFFFFFFFF:FFFFFFFFFFFF,F:FFFFFF,FFFF:FFFFFFFF  
FFFFFFF

@A00721:190:HGJW7DSXY:4:1567:22761:12696 2:N:0:TCTGCAAG+GCTGCACT  
GGACGACATTACAACCAGTCCCAGAATTACTGCAGAACCCGTCATGGAAGACGATGATTTCTGGGACT  
TTATCCCGACGGCTTTATTTTTATATCCATAAAAATCTTTGTAATTTAGGGGTAATTTCAATTTATAA  
TTTTTG

+

FFFFFFFFFFFFFFFFFFFFFFFFFFFFFFFFFFFFFFFFFFFFFFFFFFFFFFFFFFFFFFFFFFFFFFFFFFFFFFFF  
FFFFFFFFFFFFFFFFFFFFFFFFFFFFFFFFFFFFFFFFFFFFFFFFFFFFFFFFFFFFFFFFFFFFFFFFFFFFFFFF:FFFFFFFFFFFFFFFF  
FFFFFFF

@A00721:190:HGJW7DSXY:4:2342:27308:7106 2:N:0:TCTGCAAG+GCTGCACT  
GGACGACATTACAACCAGTCCCAGAATTACTGCAGAACCCGTCATGGAAGACGATGATTTCTGGGACT  
TTATCCCGACGGCTTTATTTTTATATCCATAAAAATCTTTGTAAGTTAGGGGTAATTTCAATTTATAA  
TTTTTG



+  
FFFFFFFF:FFFFFFFFFFFFFFFF:FFFFFFFFFFFFFFFF,FFF,FFFFFFFFFFFFFFFF  
:FFFFFFFFFFFFFFFFFFFFFFFF:FFFFFF:F:FFFFFFFF,,F,FF:FFF:F:FFFFFFFF  
F::FFF

@A00721:190:HGJW7DSXY:4:2357:31611:22357 2:N:0:TCTGCAAG+GCTGCACT  
GGACGACATTACAACCAGTCCCAGAATTACTGCAGAACCCGTCATGGAAGACGATGATTTCTGGGACT  
TTATCCCGACGGCTTTATTTTATATCCATAAAAATCTTTGTAATTTAGGGGTAATTTCAATTTATAA  
TTTTTG

+  
FFFFFFFFFFFFFFFFFFFFFFFFFFFFFFFF:FFFFFFFFFFFFFFFFFFFFFFFFFFFFFFFF  
FFFFFFFFFFFFFFFFFFFFFFFFFFFFFFFF:FFFFFFFFFF,FFFFFF  
FF:FF:

@A00721:190:HGJW7DSXY:4:2648:21594:16658 2:N:0:TCTGCAAG+GCTGCACT  
GGACGACATTACAACCAGTCCCAGAATTACTGCAGAACCCGTCATGGAAGACGATGATTTCTGGGACT  
TTATCCCGACGGCTTTATTTTATATCCATAAAAATCTTTGTAATTTAGGGGTAATTTCAATTTATAA  
TTTTTG

+  
FFFFFFFF:FFFFFFFFFFFFFFFFFFFFFFFFFFFFFFFFFFFFFFFFFFFFFFFFFFFFFFFF  
FFFFFFFFFFFFFFFF:FFFFFFFFFFFFFFFF:FFFFFFFFF:FFFF:F:FFFFFF  
FFFF:

@A00721:190:HGJW7DSXY:4:1118:31548:6934 2:N:0:TCTGCAAG+GCTGCACT  
GGACGACATTACAACCAGTCCCAGAATTACTGCAGAACCCGTCATGGAAGACGATGATTTCTGGGACT  
TTATCCCGACGGCTTTATTTTATATCCATAAAAATCTTTGTAATTTAGGGGTAATTTCAATTTATAA  
TTTT

+  
F:FFFFFF,FFFFFFFFFFFFFFFF:FFFFFFFFFFF,F:FFFFFFFF:FF::,FFF:FF:F,,  
FFFFF::FFFF:F::FF:,FFFFFFFF:FFFFFFF,FFF:FFFFFF:FFFFFFFFFFFF:FFF  
:F:F

@A00721:190:HGJW7DSXY:4:1213:20546:10551 2:N:0:TCTGCAAG+GCTGCACT  
GGACGACATTACAACCAGTCCCAGAATTACTGCAGAACCCGTCATGGAAGACGATGATTTCTGGGACT  
TTATCCCGACGGCTTTATTTTATATCCATAAAAATCTTTGTAATTTAGGGGTAATTTCAATTTATAA  
TTT

+  
FFFFFFFFFFFFFFFFFFFFFFFFFFFFFFFFFFFFFFFFFFFFFFFFFFFFFFFFFFFFFFFF  
FFFFFFFFFFFFFFFFFFFFFFFFFFFFFFFF:FFFF,FFFFFFFFFFFFFFFF:  
:FF

@A00721:190:HGJW7DSXY:4:1236:26060:1094 2:N:0:TCTGCAAG+GCTGCACT  
GGACGACATTACAACCAGTCCCAGAATTACTGCAGAACCCGTCATGGAAGACGATGATTTCTGGGACT  
TTATCCCGACGGCTTTATTTTATATCCATAAAAATCTTTGTAATTTAGGGGTAATTTCAATTTATAA  
TTT

+  
FFFFFFFFFFFFFFFFFFFFFFFFFFFFFFFFFFFFFFFFFFFFFFFFFFFFFFFFFFFFFFFF:F,  
FF:FFFFFFFFFFFFFFFFFFFFFFFF:FFFFFFFFFF,F,FFFFFFF,:FFFF,FFFF  
FFF

@A00721:190:HGJW7DSXY:4:1434:10230:33332 2:N:0:TCTGCAAG+GCTGCACT  
GGACGACATTACAACCAGTCCCAGAATTACTGCAGAACCCGTCATGGAAGACGATGATTTCTGGGACT  
TTATCCCGACGGCTTTATTTTATATCCATAAAAATCTTTGTAATTTAGGGGTAATTTCAATTTATAA  
TTT

+  
FFFFFFFFFFFFFFFFFFFFFFFFFFFFFFFFFFFFFFFFFFFFFFFFFFFFFFFFFFFFFFFF  
FFFFFFFFFFFFFFFFFFFFFFFFFFFFFFFF,FFFFFFFFFFFFFFFFFFFFFFFF  
FFF

@A00721:190:HGJW7DSXY:4:1437:3938:20932 2:N:0:TCTGCAAG+GCTGCACT  
GGACGACATTACAACCAGTCCCAGAATTACTGCAGAACCCGTCATGGAAGACGATGATTTCTGGGACT

TTATCCCGACGGCTTTATTTTTATATCCATAAAAATCTTTGTAATGTAGGGGTAATTTCAATTTATAA  
TTT

+

FFFFFFFFFFFFFFFFFFFFFFFFFFFFFFFFFFFFFFFFFFFFFFFFFFFFFFFFFFFFFFFFFFFFFFFFF,  
FFFFFFFFFFFFFF:FFFFFFFFFFFFFFFFFFFFFFFFFFFFFFFFFFFFFFFFFFFFFFFF,FFF,FFFFFFFFFFFFFFFF  
FFF

@A00721:190:HGJW7DSXY:4:1617:4047:11882 2:N:0:TCTGCAAG+GCTGCACT  
GGACGACATTACAACCAGTCCCAGAATTACTGCAGAACCCGTCATGGAAGACGATGATTTCTGGGACT  
TTATCCCGACGGCTTTATTTTTATATCCATAAAAATCTTTGTAATTTAGGGGTAATTTCAATTTATAA  
TTT

+

FFFFFFFFFFFFFFFFFFFFFFFFFFFFFFFFFFFFFFFFFFFFFFFFFFFFFFFFFFFFFFFFFFFFFFFFF  
FFFFF:FFFFFFFFFFFFFFFFFFFFFFFFFFFFFFFFFFFFFFFF:FF:FF:FF:FFFFFFFFFFFF,FF:FFF  
FFF

@A00721:190:HGJW7DSXY:4:2132:11514:10629 2:N:0:TCTGCAAG+GCTGCACT  
GGACGACATTACAACCAGTCCCAGAATTACTGCAGAACCCGTCATGGAAGACGATGATTTCTGGGACT  
TTATCCCGACGGCTTTATTTTTATATCCATAAAAATCTTTGTAATTTAGGGGTAATTTCAATTTATAA  
TTT

+

FFFFFFFFFFFFFFFFFFFFFFFFFFFFFFFFFFFFFFFFFFFFFFFFFFFFFFFFFFFFFFFFFFFFFFFFF  
FFFFFFFFFFFFFFFFFFFFFFFFFFFFFFFFFFFFFFFFFFFFFFFF:FFFFFFFFFFFFF,FFFF:FFFFFF,FFFFF  
FFF

@A00721:190:HGJW7DSXY:4:2642:23213:18552 2:N:0:TCTGCAAG+GCTGCACT  
GGACGACATTACAACCAGTCCCAGAATTACTGCAGAACCCGTCATGGAAGACGATGATTTCTGGGACT  
TTATCCCGACGGCTTTATTTTTATATCCATAAAAATCTTTGTAATTTAGGGGTAATTTCAATTTATAA  
TTT

+

FFFFFFFFFFFFFFFFFFFFFFFFFFFFFFFFFFFFFFFFFFFFFFFFFFFFFFFFFFFFFFFFFFFFFFFFF  
FFFFFFFFFFFFFFFFFFFFFFFFFFFFFFFFFFFFFFFFFFFFFFFF:FFFFFFFFFFFFFFFFFFFFFFFFFFFFF  
FFF

@A00721:190:HGJW7DSXY:4:1441:19144:22404 2:N:0:TCTGCAAG+GCTGCACT  
GGACTATCCGCATCTGGACGACATTACAACCAGTCCCAGAATTACTGCAGAACCCGTCATGGAAGACG  
ATGATTTCTGGGACTTTATCCCGACGGCTTTATTTTTATATCCATAAAAATCTTTGTAATTTAGGGGT  
AATTTCAATTTATAA

+

FFFFFFFFFFFFFFFFFFFFFFFFFFFFFFFFFFFFFFFFFFFFFFFFFFFFFFFFFFFFFFFFFFFFFFFFF  
FFFFFFFFFFFFFFFFFFFFFFFFFFFFFFFFFFFFFFFFFFFFFFFF:FF:FFFFFFFFFFFFFFFFFFFFFFFF  
,FFFFFFFFFFFFF

@A00721:190:HGJW7DSXY:4:1623:32271:15139 2:N:0:TCTGCAAG+GCTGCACT  
GGACTATCCGCATCTGGACGACATTACAACCAGTCCCAGAATTACTGCAGAACCCGTCATGGAAGACG  
ATGATTTCTGGGACTTTATCCCGACGGCTTTATTTTTATATCCATAAAAATCTTTGTAATTTAGGGGT  
AATTTCAATTTATAA

+

FFFFFFFFFFFFFFFFFFFFFFFFFFFFFFFFFFFFFFFFFFFFFFFFFFFFFFFFFFFFFFFFFFFFFFFFF  
FFF:FFFFFF,F:FF:FFFFF::FFF:FFFFFFFFFFFFFFFFFFFFFFFFFFFFFFFFFFFF,,FFFFFFF  
FFF:FFFF:F:FF:F

@A00721:190:HGJW7DSXY:4:1642:15582:24189 2:N:0:TCTGCAAG+GCTGCACT  
GGACTATCCGCATCTGGACGACATTACAACCAGTCCCAGAATTACTGCAGAACCCGTCATGGAAGACG  
ATGATTTCTGGGACTTTATCCCGACGGCTTTATTTTTATATCCATAAAAATCTTTGTAATTTAGGGGT  
AATTTCAATTTATAA

+

FFFFFFFFFFFFFFFFFFFFFFFFFFFFFFFFFFFFFFFFFFFFFFFFFFFFFFFFFFFFFFFFFFFFFFFFF  
FFFFFFFFF:FFFFFFFFFFFFFFFFFFFFFFFFFFFFFFFFFFFFFFFF:FFFFFFFFFFFF:FFFFFFFFF  
FFF:FFFFFFFFF



FFFFFFFFFFFFFFFFFFFFFFFFFFFFFFFFFFFFFFFFFFFFFFFFFFFFFFFFFFFFFFFF:FFFF:FF:FFFFFFFFFFFFFFFFFFFF  
:FFFFFFFFFFFFFFFF

@A00721:190:HGJW7DSXY:4:2311:3730:24298 2:N:0:TCTGCAAG+GCTGCACT  
TGAAATTACCCCTAAATTACAAAGATTTTTATGGATATAAAAATAAAGCCGTCGGGATAAAGTCCCAG  
AAATCATCGTCTTCCATGACGGGTTCTGCAGTAATTCTGGGACTGGTTGTAATGTCGTCCAGATGCGG  
ATAGTCCACCATGCT

+

FFFFFFFFFFFFFFFFFFFFFFFFFFFFFFFFFFFFFFFFFFFFFFFFFFFFFFFFFFFFFFFF:F:FFF:FFFFFFFF:FFFFF  
FFFFFFFFF:FFFFFFFFFFFFFFFFFFFFFFFFFFFFFFFFFFFFFFFFFFFFFFFF:FFF:F:FFFFFFFFF:FF,FFFFFFFF  
FFFFFF:FFFFFFFF

@A00721:190:HGJW7DSXY:4:2640:2456:31266 2:N:0:TCTGCAAG+GCTGCACT  
TGAAATTACCCCTAAATTACAAAGATTTTTATGGATATAAAAATAAAGCCGTCGGGATAAAGTCCCAG  
AAATCATCGTCTTCCATGACGGGTTCTGCAGTAATTCTGGGACTGGTTGTAATGTCGTCCAGATGCGG  
ATAGTCCACCATGCT

+

FFFFFFFFFFFFFFFFFFFFFFFFFFFFFFFFFFFFFFFFFFFFFFFFFFFFFFFFFFFFFFFF:FFFF:FFFFFFFFFFFFFFFFFFFFFFFFFFFFFFFFFFFFFFFF  
FFFFFFFFFFFFFFFFFFFFFFFFFFFFFFFFFFFFFFFFFFFFFFFFFFFFFFFFFFFFFFFF:FFFFFFFFFFFFFFFFFFFFFFFFFFFFFFFF  
FFFFFFFFFFFF:FFF

@A00721:190:HGJW7DSXY:4:1264:26539:7780 2:N:0:TCTGCAAG+GCTGCACT  
CGAGCATGGTGGACTATCCGCATCTGGACGACATTACAACCAGTCCCAGAATTACTGCAGAACCCGTC  
ATGGAAGACGATGATTTCTGGGACTTTATCCCGACGGCTTTATTTTTATATCCATAAAAATCTTTGTA  
ATTTAGGGGTAATTT

+

FFFFFFFFFFFFFFFFFFFFFFFFFFFFFFFFFFFFFFFFFFFFFFFFFFFFFFFFFFFFFFFFFFFFFFFFFFFFFFFFFFFFFFFFFFFFFFFF  
FFFFFFFFFFFFFFFFFFFFFFFFFFFFFFFFFFFFFFFFFFFFFFFFFFFFFFFFFFFFFFFF:FFFFFFF:FFFFFFFF  
FFFFFFFFFFFFFFFF

@A00721:190:HGJW7DSXY:4:1264:26250:7968 2:N:0:TCTGCAAG+GCTGCACT  
CGAGCATGGTGGACTATCCGCATCTGGACGACATTACAACCAGTCCCAGAATTACTGCAGAACCCGTC  
ATGGAAGACGATGATTTCTGGGACTTTATCCCGACGGCTTTATTTTTATATCCATAAAAATCTTTGTA  
ATTTAGGGGTAATTT

+

FFFFFFFFFFFFFFFFFFFFFFFFFFFFFFFFFFFFFFFFFFFFFFFFFFFFFFFFFFFFFFFF:FFFFFFFFFFFFFFFFFFFFFFFF:FFFFFFFF  
FFFFFFFFF:FFFFFFFFFFFFFFFFFFFFFFFFFFFFFFFFFFFFFFFFFFFFFFFFFFFFFFFFFFFFFFFFFFFFFFFFFFFFFFFF  
FFFFFFFFFFFF:FF

@A00721:190:HGJW7DSXY:4:1329:32633:6903 2:N:0:TCTGCAAG+GCTGCACT  
CGAGCATGGTGGACTATCCGCATCTGGACGACATTACAACCAGTCCCAGAATTACTGCAGAACCCGTC  
ATGGAAGACGATGATTTCTGGGACTTTATCCCGACGGCTTTATTTTTATATCCATAAAAATCTTTGTA  
ATTTAGGGGTAATTT

+

FFFFFFFFFFFFFFFFFFFFFFFFFFFFFFFFFFFFFFFFFFFFFFFFFFFFFFFFFFFFFFFFFFFFFFFFFFFFFFFFFFFFFFFF  
FFFFFFF:FFFFFFFFFFFFFFFFFFFFFFFFFFFFFFFFFFFFFFFFFFFFFFFFFFFFFFFFFFFFFFFFFFFFFFFFFFFFFFFF  
FFFFFFFFFFFF,FFFF  
FFFFFFFFFFFF,FFFF

@A00721:190:HGJW7DSXY:4:1466:16740:24220 2:N:0:TCTGCAAG+GCTGCACT  
CGAGCATGGTGGACTATCCGCATCTGGACGACATTACAACCAGTCCCAGAATTACTGCAGAACCCGTC  
ATGGAAGACGATGATTTCTGGGACTTTATCCCGACGGCTTTATTTTTATATCCATAAAAATCTTTGTA  
ATTTAGGGGTAATTT

+

FFFFFFFFFFFFFFFFFFFFFFFFFFFFFFFFFFFFFFFFFFFFFFFFFFFFFFFFFFFFFFFFFFFFFFFFFFFFFFFFFFFFFFFF:FF  
FFFFFFFFFFFFFFFFFFFFFFFFFFFFFFFFFFFFFFFFFFFFFFFFFFFFFFFFFFFFFFFFFFFFFFFFFFFFFFFFFFFF,FFFFFFFF  
FFFFFF:FFFFFFF:

@A00721:190:HGJW7DSXY:4:2508:13286:33959 2:N:0:TCTGCAAG+GCTGCACT  
CGAGCATGGTGGACTATCCGCATCTGGACGACATTACAACCAGTCCCAGAATTACTGCAGAACCCGTC  
ATGGAAGACGATGATTTCTGGGACTTTATCCCGACGGCTTTATTTTTATATCCATAAAAATCTTTGTA  
ATTTAGGGGTAATTT

+  
FFFFFFFFFFFFFFFFFFFFFFFFFFFFFFFFFFFFFFFFFFFFFFFFFFFFFFFFFFFFFFFFFFFFFFFF  
FFFFFFFFFFFFFFFFFFFFFFFFFFFFFFFFFFFFFFFFFFFFFFFFFFFFFFFFFFFFFFFFFFFFFFFF  
FFFFFFFFF:FFFFFFF

@A00721:190:HGJW7DSXY:4:1343:30436:36260 2:N:0:TCTGCAAG+GCTGCACT  
AATTACCCCTAAATTACAAAGATTTTTATGGATATAAAAAATAAGCCGTCGGGATAAAGTCCCAGAAA  
TCATCGTCTTCCATGACGGGTTCTGCAGTAATTCTGGGACTGGTTGTAATGTCGTCCAGATGCGGATA  
GTCCACCATGCTCGC

+  
FFFFFFFFFFFFFFFFFFFFFFFFFFFFFFFFFFFFFFFFFFFFFFFFFFFFFFFFFFFFFFFFFFFFFFFF  
FFFFFFFFFFFFFFFFF:F:FFFFFFF,FFFFFFFFFFFFFFFFFFFFFFFFFFFFFFFFFFFFFFFFF:FFFFFFF,  
FFFF:F,::FFFFFFF

@A00721:190:HGJW7DSXY:4:1344:27633:1094 2:N:0:TCTGCAAG+GCTGCACT  
AATTACCCCTAAATTACAAAGATTTTTATGGATATAAAAAATAAGCCGTCGGGATAAAGTCCCAGAAA  
TCATCGTCTTCCATGACGGGTTCTGCAGTAATTCTGGGACTGGTTGTAATGTCGTCCAGATGCGGATA  
GTCCACCATGCTCGC

+  
F,FFFFFFFFFFFFFFFFF:FF:FFFFFFFFF:FF:FFFFFFFFFFFFFFFFFFFFFFFFFFFFFFFFF  
FFFFFFFFFFFFFFFFF:FFFFFFFFFFFFFFFFF,FFFFFFFFF,FFFFFFF:FFFF:FFFFFFFFFFFFFFFFF:  
FFFFFFFFFFFFFFFFF

@A00721:190:HGJW7DSXY:4:1656:3332:8954 2:N:0:TCTGCAAG+GCTGCACT  
AATTACCCCTAAATTACAAAGATTTTTATGGATATAAAAAATAAGCCGTCGGGATAAAGTCCCAGAAA  
TCATCGTCTTCCATGACGGGTTCTGCAGTAATTCTGGGACTGGTTGTAATGTCGTCCAGATGCGGATA  
GTCCACCATGCTCGC

+  
FFFFFFFFFFFFFFFFFFFFFFFFF:FFFFFFFFFFFFFFFFF:FFFFFFFFFFFFFFFFFFFFFFFFF:FFFFFFFFF:FFFF  
,FFFFFFFFFFFFFFFFFFFFFFFFF:FF:FFFFFFFFF:FFF,FFFFFFFFFFFFFFFFFFFFFFFFF,F  
FFFFFFFFFFFFFFFFF

@A00721:190:HGJW7DSXY:4:2305:21341:8547 2:N:0:TCTGCAAG+GCTGCACT  
AATTACCCCTAAATTACAAAGATTTTTATGGATATAAAAAATAAGCCGTCGGGATAAAGTCCCAGAAA  
TCATCGTCTTCCATGACGGGTTCTGCAGTAATTCTGGGACTGGTTGTAATGTCGTCCAGATGCGGATA  
GTCCACCATGCTCGC

+  
F:FFFFFFFFFFFFFFFFF:FFFFF:FFFFFFFFF:FFFFFFFFFFFFFFFFFFFFFFFFFFFFFFFFF,FFFFF  
FFFFFFFFFFFFF:FFFFFFFFFFFFFFFFFFFFFFFFF,FFFFFFFFF:FFFF,FFFFFFFFFFFFFFFFFFFFF  
F:F:FFFFFFFFF

@A00721:190:HGJW7DSXY:4:2448:2031:11083 2:N:0:TCTGCAAG+GCTGCACT  
AATTACCCCTAAATTACAAAGATTTTTATGGATATAAAAAATAAGCCGTCGGGATAAAGTCCCAGAAA  
TCATCGTCTTCCATGACGGGTTCTGCAGTAATTCTGGGACTGGTTGTAATGTCGTCCAGATGCGGATA  
GTCCACCATGCTCGC

+  
FFFFFFFFFFFFFFFFFFFFFFFFFFFFFFFFFFFFFFFFFFFFFFFFF:FFFFF,F:FFFFFFFFFFFFFFFFFFFFF  
FFFFFFFFFFFFFFFFFFFFFFFFFFFFFFFFFFFFFFFFFFFFFFFFFFFFFFFFFFFFFFFFFFFFFFFF  
FFFFFFFFF:FFFFFFF

@A00721:190:HGJW7DSXY:4:1511:4264:21057 2:N:0:TCTGCAAG+GCTGCACT  
TTTAAAGATTTGGACAGACTATCCGCATCTGGTCGACATTACAACCAGTCCCAGAATTACTGCAGAAC  
CCGTCATGGAAGACGAGGATTTCTGGGACTTTATCCCGACGGCTTTATTTTATATCCATAAAAATCT  
TTGTAATTTAGGGT

+  
FFFFFFFFFFFFFFFFFFFFFFFFFFFFFFFFFFFFFFFFF,FFFFFFFFFFFFFFFFFFFFFFFFFFFFFFFFF  
FFFFFFFFFFFFF:FFFF,FFFFFFFFFFFFFFFFFFFFFFFFFFFFFFFFFFFFFFFFF:FFFFFFFFF,FFFFF  
FFFFFFF,FFFFFFF

@A00721:190:HGJW7DSXY:4:1217:29550:5854 2:N:0:TCTGCAAG+GCTGCACT  
GCGGATAAAGCGAGCATGGTGGACTATCCGCATCTGGACGACATTACAACCAGTCCCAGAATTACTGC



@A00721:190:HGJW7DSXY:4:1438:9923:9846 2:N:0:TCTGCAAG+GCTGCACT  
TGCGGATAAAGCGAGCATGGTGGACTATCCGCATCTGGACGACATTACAACCAGTCCCAGAATTACTG  
CAGAACCCGTCATGGAAGACGATGATTTCTGGGACTTTATCCCGACGGCTTTATTTTTATATCCATAA  
AAATCTTTGTAATTT

+

FFFFFFFFFFFFFFFFFFFFFFFFFFFFFFFFFFFFFFFFFFFFFFFFFFFFFFFFFFFFFFFFFFFFFFFF  
FFFFFFFFFFFFFFFFFFFFFFFFFFFFFFFFFFFFFFFFFFFFFFFFFFFFFFFFFFFFFFFFFFFFFFFF  
FFFFFFFFFFFFFF:FF

@A00721:190:HGJW7DSXY:4:2225:3685:22748 2:N:0:TCTGCAAG+GCTGCACT  
TGCGGATAAAGCGAGCATGGTGGACTATCCGCATCTGGACGACATTACAACCAGTCCCAGAATTACTG  
CAGAACCCGTCATGGAAGACGATGATTTCTGGGACTTTATCCCGACGGCTTTATTTTTATATCCATAA  
AAATCTTTGTAATTT

+

FFFFFFFFFFFFFFFFFFFFFFFFFFFFFFFFFFFFFFFFFFFFFFFFFFFFFFFFFFFFFFFFFFFFFFFF  
FFFFFFF:FFFFFFFFFFFFFFFFFFFFFFFFFFFFFFFFFFFFFFFFFFFFFFFFFFFFFFFFFFFFFFF:FFFFFFFFFFFF:F:FF  
FFFFFFFFFFFF:FFF:F

@A00721:190:HGJW7DSXY:4:2243:7943:28526 2:N:0:TCTGCAAG+GCTGCACT  
TGCGGATAAAGCGAGCATGGTGGACTATCCGCATCTGGACGACATTACAACCAGTCCCAGAATTACTG  
CAGAACCCGTCATGGAAGACGATGATTTCTGGGACTTTATCCCGACGGCTTTATTTTTATATCCATAA  
AAATCTTTGTAATTT

+

FFFFFFFFFFFFFFFFFFFFFFFFFFFFFFFFFFFFFFFFFFFFFFFFFFFFFFFFFFFFFFFFFFFFFFFF  
FFFFFFF:FFFFFFFFFFFFFFFFFFFFFFF:FFFFFFFFFFFFFFFFFFFFFFFFFFFFF:FFFFFFFFFFFFFFFFFFFFFFFF  
FFFFFFFFFFFFFFFFFFFF

@A00721:190:HGJW7DSXY:4:2342:9570:19977 2:N:0:TCTGCAAG+GCTGCACT  
TGCGGATAAAGCGAGCATGGTGGACTATCCGCATCTGGACGACATTACAACCAGTCCCAGAATTACTG  
CAGAACCCGTCATGGAAGACGATGATTTCTGGGACTTTATCCCGACGGCTTTATTTTTATATCCATAA  
AAATCTTTGTAATTT

+

FFFFFFFFFFFFFFFFFFFFFFFFFFFFFFFFFFFFFFFFFFFFFFFFFFFFFFFFFFFFFFFFFFFFFFFF  
FFFFFFFFFFFFFFF:FFFFFFFFFFFF:FFFFFFFFFFFFFFFFFFFFFFFFFFFFFFFFFFFFFFFFFFFFF:FFFFFFFFFFFF  
FFFFFFFFFFFFFFFFFFFF

@A00721:190:HGJW7DSXY:4:2358:19524:33708 2:N:0:TCTGCAAG+GCTGCACT  
TGCGGATAAAGCGAGCATGGTGGACTATCCGCATCTGGACGACATTACAACCAGTCCCAGAATTACTG  
CAGAACCCGTCATGGAAGACGATGATTTCTGGGACTTTATCCCGACGGCTTTATTTTTATATCCATAA  
AAATCTTTGTAATTT

+

FFFFFFFFFFFFFFFFFFFFFFFFFFFFFFFFFFFFFFFFFFFFFFFFFFFFFFFFFFFFFFFFFFFFFFFF  
FFFFFFFFFFFFFFFFFFFFF:FFFFFFFFFFFFFFFFFFFFFFFFFFFFFFFFFFFFFFFFFFFFFFFFFFFFF:FFFFFFFFFFFF  
FFFFFFFFFFFFFFFFFFFF

@A00721:190:HGJW7DSXY:4:2416:12834:32800 2:N:0:TCTGCAAG+GCTGCACT  
TGCGGATAAAGCGAGCATGGTGGACTATCCGCATCTGGACGACATTACAACCAGTCCCAGAATTACTG  
CAGAACCCGTCATGGAAGACGATGATTTCTGGGACTTTATCCCGACGGCTTTATTTTTATATCCATAA  
AAATCTTTGTAATTT

+

FFFFFFFFFFFFFFFFFFFFF:FFFFFFFFFFFFFFFFFFFFFFFFFFFFFFFFFFFFFFFFFFFFFFFFFFFFF,FFFFFFF  
FFFFFFFFFFFFFFFFFFFFFFFFFFFFFFFFFFFFFFFFFFFFFFFFFFFFFFFFFFFFFFFFFFFFF:FFFFFFFFFFFFFFFFFFFFFFFFFFFFF  
FFFFFFFFFFFFFFFFFFFF

@A00721:190:HGJW7DSXY:4:2471:7148:18192 2:N:0:TCTGCAAG+GCTGCACT  
TGCGGATAAAGCGAGCATGGTGGACTATCCGCATCTGGACGACATTACAACCAGTCCCAGAATTACTG  
CAGAACCCGTCATGGAAGACGATGATTTCTGGGACTTTATCCCGACGGCTTTATTTTTATATCCATAA  
AAATCTTTGTAATTT

+

F:FFFFFFFFF:,FF::FFFFFFFFF:FFFF,FF::F:FFFFF:FFFFFFFFFFFFFFFFFFFFF:FFFFFFFFF:

:FFFFFFFFFFFFFFFF,F:FFFFF:FFFFF::FFF:FFF:F::F::FF:FFFFFFFFFFFFFFFF:FF  
FFFFFFFF:FFFFF:F:

@A00721:190:HGJW7DSXY:4:2554:14362:7858 2:N:0:TCTGCAAG+GCTGCACT  
TGCGGATAAAGCGAGCATGGTGGACTATCCGCATCTGGACGACATTACAACCAGTCCCAGAATTACTG  
CAGAACCCGTCATGGAAGACGATGATTTCTGGGACTTTATCCCGACGGCTTTATTTTTATATCCATAA  
AAATCTTTGTAATTT

+

FFFFFFFFFFFFFFFFFFFFFFFFFFFFFFFFFFFFFFFFFFFFFFFFFFFFFFFFFFFFFFFFFFFFFFFF  
FFFFFFFFFFFFFFFFFFFFFFFFFFFFFFFFFFFFFFFFFFFFFFFFFFFFFFFFFFFFFFFF:FFFFFFFF:FFFFFFFFFFFFFFFF  
FFFFFFFFFF:FF,FF

@A00721:190:HGJW7DSXY:4:2570:19859:12399 2:N:0:TCTGCAAG+GCTGCACT  
TGCGGATAAAGCGAGCATGGTGGACTATCCGCATCTGGACGACATTACAACCAGTCCCAGAATTACTG  
CAGAACCCGTCATGGAAGACGATGATTTCTGGGACTTTATCCCGACGGCTTTATTTTTATATCCATAA  
AAATCTTTGTAATTT

+

FFFFFFFFFFFFFFFFFFFFFFFFFFFFFFFFFFFFFFFFFFFFFFFFFFFFFFFFFFFFFFFFFFFFFFFF  
FFFFFFFFFFFFFFFF:FFFFFFFFFFFFFF,FFFFFFFFFFFFFFFFFFFFFFFFFFFFFFFF,FFFFFFF  
FFFFFFFFFF:FFFFF

@A00721:190:HGJW7DSXY:4:2570:20717:12602 2:N:0:TCTGCAAG+GCTGCACT  
TGCGGATAAAGCGAGCATGGTGGACTATCCGCATCTGGACGACATTACAACCAGTCCCAGAATTACTG  
CAGAACCCGTCATGGAAGACGATGATTTCTGGGACTTTATCCCGACGGCTTTATTTTTATATCCATAA  
AAATCTTTGTAATTT

+

FFFFFFFFFFFFFFFFFFFFFFFFFFFFFFFFFFFFFFFFFFFFFFFFFFFFFFFFFFFFFFFFFFFFFFFF  
FFFFFFFFFFFFFFFFFFFFFFFFFFFFFFFFFFFFFFFFFFFFFFFFFFFFFFFFFFFFFFFFFFFFFFFF  
FFFFFFFFFFFFFFFFFF

@A00721:190:HGJW7DSXY:4:2665:8232:9486 2:N:0:TCTGCAAG+GCTGCACT  
TGCGGATAAAGCGAGCATGGTGGACTATCCGCATCTGGACGACATTACAACCAGTCCCAGAATTACTG  
CAGAACCCGTCATGGAAGACGATGATTTCTGGGACTTTATCCCGACGGCTTTATTTTTATATCCATAA  
AAATCTTTGTAATTT

+

FFFFFFFFFFFFFFFFFFFFFFFFFFFFFFFFFFFFFFFFFFFFFFFFFFFFFFFFFFFFFFFFFFFFFFFF  
FFFFFFFFFFFFFFFFFFFFFFFFFFFFFFFFFFFFFFFFFFFFFFFFFFFFFFFFFFFFFFFFFFFFFFFF  
:FFFFFFFFFFFF:FFF

@A00721:190:HGJW7DSXY:4:1176:8612:33004 2:N:0:TCTGCAAG+GCTGCACT  
GTTGCGGATAAAGCGAGCATGGTGGACTATCCGCATCTGGACGACATTACAACCAGTCCCAGAATTAC  
TGCAGAACCCGTCATGGAAGACGATGATTTCTGGGACTTTATCCCGACGGCTTTATTTTTATATCCAT  
AAAAATCTTTGTAAT

+

FFFFFFFFFFFFFFFFFFFFFFFFFFFFFFFFFFFFFFFFFFFFFFFFFFFFFFFFFFFFFFFFFFFFFFFF  
FFFFFFFFFFFFFFFFFFFFFFFFFFFFFFFFFFFFFFFFFFFFFFFFFFFFFFFFFFFFFFFF:FFFFFFFFFFFFFFFFFFFFFFFF  
FFFFFFFFFFFFFFFFFF

@A00721:190:HGJW7DSXY:4:1177:23204:10426 2:N:0:TCTGCAAG+GCTGCACT  
GTTGCGGATAAAGCGAGCATGGTGGACTATCCGCATCTGGACGACATTACAACCAGTCCCAGAATTAC  
TGCAGAACCCGTCATGGAAGACGATGATTTCTGGGACTTTATCCCGACGGCTTTATTTTTATATCCAT  
AAAAATCTTTGTAAT

+

FFFFFFFFFFFFFFFFFFFFFFFFFFFFFFFFFFFFFFFFFFFFFFFFFFFFFFFFFFFFFFFFFFFFFFFF  
FFFFFFFFFFFFFFFFFFFFFFFFFFFFFFFFFFFFFFFFFFFFFFFFFFFFFFFFFFFFFFFF:FFFFFFFFFFFFFFFFFFFFFFFF  
FFFFFFFFFFFFFFFFFF

@A00721:190:HGJW7DSXY:4:1223:29785:8797 2:N:0:TCTGCAAG+GCTGCACT  
GTTGCGGATAAAGCGAGCATGGTGGACTATCCGCATCTGGACGACATTACAACCAGTCCCAGAATTAC  
TGCAGAACCCGTCATGGAAGACGATGATTTCTGGGACTTTATCTCGACGGCTTTATTTTTATATCCAT  
AAAAATCTTTGTAAT



+  
FFFFFFFFFFFFFFFFFFFFFFFFFFFFFFFFFFFFFFFFFFFFFFFFFFFFFFFFFFFFFFFFFFFFFFFF  
FFFFFFFFF:FFFFFFFFFFFFFFFFFFFFFFFFFFFFFFFFFFFFFFFFFFFFFFFFFFFFFFFFFFFFF:FFFFFF:  
FFFFFFFFF:FFFF  
@A00721:190:HGJW7DSXY:4:1269:10068:35368 2:N:0:TCTGCAAG+GCTGCACT  
GTTGCGGATAAAGCGAGCATGGTGGACTATCCGCATCTGGACGACATTACAACCAGTCCCAGAATTAC  
TGCAGAACCCGTCATGGAAGACGATGATTTCTGGGACTTTATCCCGACGGCTTTATTTTTATATCCAT  
AAAAATCTTTGTAAT

+  
FFFFFFFFFFFFFFFFFFFFFFFFFFFFFFFFFFFFFFFFFFFFFFFFFFFFFFFFFFFFFFFFFFFFFFFF  
FFFFFFFFFFFFFFFFF,FFFFFFFFFFFFFFFFFFFFFFFFFFFFFFFFFFFFFFFFFFFFFFFFFFFFFFFF  
FFFFFFFFF:FFFFFF  
@A00721:190:HGJW7DSXY:4:1308:24795:23453 2:N:0:TCTGCAAG+GCTGCACT  
AATTCATCTTTAAAGATTTGGACAGACTATCCGCATCTGGACGACATTACAACCAGTCCCAGAATTAC  
TGCAGAACCCGTCATGGAAGACGATGATTTCTGGGACTTTATCCCGACGGCTTTATTTTTATATCCAT  
AAAAATCTTTGTAAT

+  
FFFFFFFFFFFFFFFFFFFFFFFFFFFFFFFFFFFFFFFFFFFFFFFFFFFFFFFFFFFFFFFFFFFFFFFF  
FFFFFFFFFFFFFFFFFFFFFFFFFFFFFFFFFFFFFFFFFFFFFFFFFFFFFFFFFFFFFFFFFFFFFFFF  
FFFF:FFFFFFFFF  
@A00721:190:HGJW7DSXY:4:1367:11153:1924 2:N:0:TCTGCAAG+GCTGCACT  
GTTGCGGATAAAGCGAGCATGGTGGACTATCCGCATCTGGACGACATTACAACCAGTCCCAGAATTAC  
TGCAGAACCCGTCATGGAAGACGATGATTTCTGGGACTTTATCTACGGCTTTATTTTTATATCAAT  
AAAAATCTTTGTAAT

+  
:,FFF:,FF:F,FF,F:FFFFFFFF,FFFFFF:F,FFF:,FF,FFFF,FFFF,FFFFFFFF,:F:,F:  
F,FF:FFFF:,FFF,FFFFFFFF,,:FFFFFFFF,FFFF:F,FF,FFF,F:FFFFFFFFFFFFFF,F,  
:FFF:,FF,FFF:,F  
@A00721:190:HGJW7DSXY:4:1367:10682:2237 2:N:0:TCTGCAAG+GCTGCACT  
GTTGCGGATAAAGCGAGCATGGTGGACTATCCGCATCTGGACGACATTACAACCAGTCCCAGAATTAC  
TGCAGAACCCGTCATGGAAGACGATGATTTCTGGGACTTTATCTCGACGGCTTTATTTTTATATCCAT  
AAAAATCTTTGTAAT

+  
FFFFFFFFFFFFFFFFFFFFFFFFFFFFFFFFFFFFFFFFFFFFFFFFFFFFFFFFFFFFFFFFFFFFFFFF  
FFFFFFFFF:FFFFFFFFFFFFFFFFFFFFFFFFFFFFFFFFFFFFFFFFFFFFFFFFFFFFFFFFFFFFF  
FFFFFFFFFFFFFFFFF  
@A00721:190:HGJW7DSXY:4:1375:24831:32377 2:N:0:TCTGCAAG+GCTGCACT  
GTTGCGGATAAAGCGAGCATGGTGGACTATCCGCATCTGGACGACATTACAACCAGTCCCAGAATTAC  
TGCAGAACCCGTCATGGAAGACGATGATTTCTGGGACTTTATCTCGACGGCTTTATTTTTATATCCAT  
AAAAATCTTTGTAAT

+  
FFFFFF:FFFFFFFFFFFFFFFFFFFFFFFFFFFFFFFFFFFFFFFFFFFFFFFFFFFFFFFFFFFFFFFF  
F:FF:FFFFFFFFFFFFFFFFFFFFFFFFFFFFFFFFFFFFFFFFFFFFFFFFFFFFFFFFFFFFFFFF  
FF:FFF,FFFFFFFFF  
@A00721:190:HGJW7DSXY:4:1557:5023:16454 2:N:0:TCTGCAAG+GCTGCACT  
GTTGCGGATAAAGCGAGCATGGTGGACTATCCGCATCTGGACGACATTACAACCAGTCCCAGAATTAC  
TGCAGAACCCGTCATGGAAGACGATGATTTCTGGGACTTTATCCCGACGGCTTTATTTTTATATCCAT  
AAAAATCTTTGTAAT

+  
FFFFFFFFFFFFFFFFFFFFFFFFFFFFFFFFFFFFFFFFFFFFFFFFFFFFFFFFFFFFFFFFFFFFFFFF  
FFFFFFFFFFF:FFFFFFF,FFFFFFFFFFFFFFFFFFFFFFFFFFFFFFFFFFFFFFFFFFFFFFFFFFFF  
FFFFFFFFFFFFFFFFF  
@A00721:190:HGJW7DSXY:4:1618:3296:12774 2:N:0:TCTGCAAG+GCTGCACT  
GTTGCGGATAAAGCGAGCATGGTGGACTATCCGCATCTGGACGACATTACAACCAGTCCCAGAATTAC

TGCAGAACCCGTCATGGAAGACGATGATTTCTGGGACTTTATCCCGACGGCTTTATTTTTATATCCAT  
AAAAATCTTTGTAAT

+

FFFFFFFFFFFFFFFFFFFFFFFFFFFFFFFFFFFFFFFFFFFFFFFFFFFFFFFFFFFFFFFFFFFFFFFF  
FFFFFFFFFFFFFFFFFFFFFFFFFFFFFFFFFFFFFFFFFFFFFFFFFFFFFFFFFFFFFFFFFFFFFFFF  
FFFFFFFFFFFFFFFF

@A00721:190:HGJW7DSXY:4:1671:5999:35274 2:N:0:TCTGCAAG+GCTGCACT  
GTTGCGGATAAAGCGAGCATGGTGGACTATCCGCATCTGGACGACATTACAACCAGTCCCAGAATTAC  
TGCAGAACCCGTCATGGAAGACGATGATTTCTGGGACTTTATCTCGACGGCTTTATTTTTATATCCAT  
AAAAATCTTTGTAAT

+

FF,FFFF:FFFF,FFFFFF,FFFFF,,F:FFFFFFFF:FFFFFFFF:FFF,FFFFFF:F:FF  
FF,F,:FF,FF:FFFF:FF:FF,FF:FF:,,FF::F,F,FFF:FFFFFFFFFFFFFFFF:F:FFFF,F,  
FF:FFFFFFFF::FFF

@A00721:190:HGJW7DSXY:4:2108:3070:18333 2:N:0:TCTGCAAG+GCTGCACT  
AATTCATCTTTAAAGATTTGGACAGACTATCCGCATCTGGACGACATTACAACCAGTCCCAGAATTAC  
TGCAGAACCCGTCATGGAAGACGATGATTTCTGGGACTTTATCCCGACGGCTTTATTTTTATATCCAT  
AAAAATCTTTGTAAT

+

F,FFFFFFFFFFFFFFFFFFFFFFFFFFFFFFFFFFFFFFFFFFFFFFFFFFFFFFFFFFFFFFFF:FFFFFFFF  
FFFFFFFF:FFFFFFFFFFFFFFFFFFFFFFFFFFFFFFFFFFFFFFFFFFFFFFFFFFFFFFFF:FF,FFFF,FFF  
FFFF:FFF:F,FF,F

@A00721:190:HGJW7DSXY:4:2165:5665:32503 2:N:0:TCTGCAAG+GCTGCACT  
GTTGCGGATAAAGCGAGCATGGTGGACTATCCGCATCTGGACGACATTACAACCAGTCCCAGAATTAC  
TGCAGAACCCGTCATGGAAGACGATGATTTCTGGGACTTTATCCCGACGGCTTTATTTTTATATCCAT  
AAAAATCTTTGTAAT

+

F:FFFFFFFFFFFFFFFFFFFFFFFFFFFFFFFFFFFFFFFFFFFFFFFFFFFFFFFFFFFFFFFFFFFF  
FFFFFFFFFFFFFFFFFFFFFFFFFFFFFFFFFFFFFFFFFFFFFFFFFFFFFFFFFFFFFFFFFFFFFFFF  
FFFFFFFFFFFFFFFF

@A00721:190:HGJW7DSXY:4:2177:24053:12837 2:N:0:TCTGCAAG+GCTGCACT  
GTTGCGGATAAAGCGAGCATGGTGGACTATCCGCATCTGGACGACATTACAACCAGTCCCAGAATTAC  
TGCAGAACCCGTCATGGAAGACGATGATTTCTGGGACTTTATCCCGACGGCTTTATTTTTATATCCAT  
AAAAATCTTTGTAAT

+

FF:FFFF:FFFFFFFFFFFF:FFFFFFFFFFFFFFFFFFFFFFFFFFFFFFFFFFFFFFFFFFFF,FFFFFFFFFFFF:  
FFFF:FF:FFFFFF:FFF:FFFFFFFFFFFFFFFFFFFFFFFF,FFFFFF:FFFFFF,FFFFFFFFFFFF:FFF,  
FFFF:FF,F:FFFF

@A00721:190:HGJW7DSXY:4:2209:22209:14497 2:N:0:TCTGCAAG+GCTGCACT  
GTTGCGGATAAAGCGAGCATGGTGGACTATCCGCATCTGGACGACATTACAACCAGTCCCAGAATTAC  
TGCAGAACCCGTCATGGAAGACGATGATTTCTGGGACTTTATCCCGACGGCTTTATTTTTATATCCAT  
AAAAATCTTTGTAAT

+

FFFF:FFFFFFFFFFFF:FFFFFFFFFFFFFFFFFFFF:FFFFFF,FFFFFFFFFFFFFFFFFFFFFFFFFFFF  
FFFFFFFFFFFFFFFFFFFF,FFFFFFFFFFFFFFFFFFFFFFFFFFFF:F:FFF:FFFFFFFFFFFFFFFFFFFF  
FF:FFF:FFFF:F

@A00721:190:HGJW7DSXY:4:2222:6605:6637 2:N:0:TCTGCAAG+GCTGCACT  
GTTGCGGATAAAGCGAGCATGGTGGACTATCCGCATCTGGACGACATTACAACCAGTCCCAGAATTAC  
TGCAGAACCCGTCATGGAAGACGATGATTTCTGGGACTTTATCCCGACGGCTTTATTTTTATATCCAT  
AAAAATCTTTGTAAT

+

FFF:FF:FFF,FFFFFFFFFFFFFFFFFFFFFFFFFFFFFFFFFFFF:FF:FFFFFFFFFFFFFFFFFFFF::FFFF  
FFFFFFFFFFFF:FFFFFFFFFFFFFFFF::FF:FFFFFFFFFFFF:FFFFFF:FFFFFFFFFFFF,FFFF:FFFF  
FFFFFFFFFFFF::FF:F

@A00721:190:HGJW7DSXY:4:2226:2555:20071 2:N:0:TCTGCAAG+GCTGCACT  
GTTGCGGATAAAGCGAGCATGGTGGACTATCCGCATCTGGACGACATTACAACCAGTCCCAGAATTAC  
TGCAGAACCCGTCATGGAAGACGATGATTTCTGGGACTTTATCCCGACGGCTTTATTTTATATCCAT  
AAAAATCTTTGTAAT

+

FFFFFFFFFFFFFFFFFFFFFFFFFFFFFFFFFFFFFFFFFFFFFFFFFFFFFFFFFFFFFFFFFFFFFFFF  
FFFFFFFFF:FFFFFFFFFFFFF:FFFFFFFFFFFFFFFFFFFFFFFFF:F:FFFFFFFF:FFFFFFFFFFFF:FF  
FFFFFFFFFFFFFFFFF

@A00721:190:HGJW7DSXY:4:2252:27127:17315 2:N:0:TCTGCAAG+GCTGCACT  
GTTGCGGATAAAGCGAGCATGGTGGACTATCCGCATCTGGACGACATTACAACCAGTCCCAGAATTAC  
TGCAGAACCCGTCATGGAAGACGATGATTTCTGGGACTTTATCCCGACGGCTTTATTTTATATCCAT  
AAAAATCTTTGTAAT

+

FFFFFFFFFFFFFFFFFFFFFFFFFFFFFFFFFFFFFFFFFFFFFFFFFFFFFFFFFFFFFFFFFFFFFFFF  
FFFFFFFFFFFFFFFFFFFFF:FFFFFFFFF:FFFFFFFFFFFFFFFFFFFFFFFFFFFFFFFFFFFFFFFFFFFF  
FFFFFFFFFFFFFFFFF

@A00721:190:HGJW7DSXY:4:2327:24605:9377 2:N:0:TCTGCAAG+GCTGCACT  
GTTGCGGATAAAGCGAGCATGGTGGACTATCCGCATCTGGACGACATTACAACCAGTCCCAGAATTAC  
TGCAGAACCCGTCATGGAAGACGATGATTTCTGGGACTTTATCTCGACGGCTTTATTTTATATCCAT  
AAAAATCTTTGTAAT

+

FFFFFFFFFFFF,FFFFFFFFF:FFFFFFFFFFFFFFFFFFFFFFFFFFFFFFFFFFFFFFFFFFFFFFFF  
FFFFFFFFF:FFFFFFFFFFFFFFFFFFFFFFFFF:FFFFFFFFF:FFFFFFFFF:FFFFFFFFFFFFFFFFFFFF  
FFFFFFFFF:FFFFF

@A00721:190:HGJW7DSXY:4:2408:8458:6997 2:N:0:TCTGCAAG+GCTGCACT  
GTTGCGGATAAAGCGAGCATGGTGGACTATCCGCATCTGGACGACATTACAACCAGTCCCAGAATTAC  
TGCAGAACCCGTCATGGAAGACGATGATTTCTGGGACTTTATCTCGACGGCTTTATTTTATATCCAT  
AAAAATCTTTGTAAT

+

FFFFFFFFFFFFFFFFFFFFFFFFFFFFFFFFFFFFFFFFFFFFFFFFFFFFFFFFFFFFFFFFFFFFFFFF  
FFFFFFFFFFFFFFFFFFFFFFFFFFFFFFFFFFFFFFFFFFFFFFFFFFFFFFFFFFFFFFFFF:FFFFFFFFFFFFFFFFFFFFFFFF  
FFFFFFFFFFFFFFFFF

@A00721:190:HGJW7DSXY:4:2603:4227:10441 2:N:0:TCTGCAAG+GCTGCACT  
GTTGCGGATAAAGCGAGCATGGTGGACTATCCGCATCTGGACGACATTACAACCAGTCCCAGAATTAC  
TGCAGAACCCGTCATGGAAGACGATGATTTCTGGGACTTTATCTCGACGGCTTTATTTTATATCCAT  
AAAAATCTTTGTAAT

+

F,FFFFFFFFF:FFFFFF::FFFFFFF::FFFFFF:FFFFFFFFFFFFFFFFFFFFFFFFFFFFFFFFF:F  
FFFFFFFFFFFFFFFFF:FFFFFFFFFFFFF:FFFFFFFFFFFFFFFFFFFFFFFFFFFFFFFFFFFFFFFFF,F  
:FFFFFFFFFFFFFFFFF

@A00721:190:HGJW7DSXY:4:2611:6262:9580 2:N:0:TCTGCAAG+GCTGCACT  
GTTGCGGATAAAGCGAGCATGGTGGACTATCCGCATCTGGACGACATTACAACCAGTCCCAGAATTAC  
TGCAGAACCCGTCATGGAAGACGATGATTTCTGGGACTTTATCTCGACGGCTTTATTTTATATCCAT  
AAAAATCTTTGTAAT

+

FFFFFFFFFFFFFFFFFFFFFFFFFFFFFFFFFFFFFFFFFFFFFFFFFFFFFFFFFFFFFFFFF,FFFFFF:FF  
FFFFFFFFFFFF:FFFFFFFFFFFFFFFFF:FFFFFFFFFFFFFFFFFFFFFFFFFFFFFFFFFFFFFFFFF,  
FFFFFFFFF,FFFFF

@A00721:190:HGJW7DSXY:4:2616:29143:2832 2:N:0:TCTGCAAG+GCTGCACT  
AATTCATCTTTAAAGATTTGGACAGACTATCCGCATCTGGACGACATTACAACCAGTCCCAGAATTAC  
TGCAGAACCCGTCATGGAAGACGATGATTTCTGGGACTTTATCCCGACGGCTTTATTTTATATCCAT  
AAAAATCTTTGTAAT

+

FFFFFFFFFFFFFFFFF:FFFFFFFFFFFFFFFFFFFFFFFFFFFFFFFFFFFFFFFFFFFFFFFFFFFFF

@A00721:190:HGJW7DSXY:4:2632:22824:17347 2:N:0:TCTGCAAG+GCTGCACT  
AATTCATCTTTAAAGATTTGGACAGACTATCCGCATCTGGACGACATTACAACCAGTCCCAGAATTAC  
TGCAGAACCCGTCATGGAAGACGATGATTTCTGGGACTTTATCCCACGGCTTTATTTTTATATCCAT  
AAAAATCTTTGTAAT

@A00721:190:HGJW7DSXY:4:1659:27823:3396 2:N:0:TCTGCAAG+GCTGCACT  
AATTCATCTTTAAAGATTTGGACAGACTATCCGCATCTGGACGACATTACAACCAGTCCCAGAATTAC  
TGCAGAACCCGTCATGGAAGACGATGATTTCTGGGACTTTATCCCGACGGCTTTATTTTTATATCCAT  
AAAAATCTTTGTAA

@A00721:190:HGJW7DSXY:4:2308:25012:30217 2:N:0:TCTGCAAG+GCTGCACT  
AATTCATCTTTAAAGATTTGGACAGACTATCAGCATCTGGACGACATTACAACCAGTCCCAGAATTAC  
TGCAGAACCCGTC AAGGAAGACGATGATTTCTGGTACATTATCCCGACGGCTTTATTTTTATATCCAT  
AAAAATCTTAGTAA

@A00721:190:HGJW7DSXY:4:1132:29894:14904 2:N:0:TCTGCAAG+GCTGCACT  
AAAGATTTTTATGGATATAAAAATAAATCCGTCGGGATAAAGTCCCAGAAATCATCGTCTTCCATTAC  
GTGTTCTGCAGTAATTCTGTGACTGGTTGTAATGTCGTCCAGATGCGGATAGTCCACAATGCTCGCTT  
TATCCGCAACTGCAT

@A00721:190:HGJW7DSXY:4:1152:5538:6511 2:N:0:TCTGCAAG+GCTGCACT  
AAAGATTTTTATGGATATAAAAATAAAGCCGTCGGGATAAAGTCCCAGAAATCATCGTCTTCCATGAC  
GGGTTCTGCAGTAATTCTGGGACTGGTTGTAATGTCGTCCAGATGCGGATAGTCCACCATGCTCGCTT  
TATCCGCAACTGCAT

@A00721:190:HGJW7DSXY:4:1276:4137:9752 2:N:0:TCTGCAAG+GCTGCACT  
AAAGATTTTTATGGATATAAAAATAAAGCCGTCGGGATAAAGTCCCAGAAATCATCGTCTTCCATGAC  
GGGTTCTGCAGTAATTCTGGGACTGGTTGTAATGTCGTCCAGATGCGGATAGTCCACCATGCTCGCTT  
TATCCGCAACTGCAT

@A00721:190:HGJW7DSXY:4:1302:5312:5400 2:N:0:TCTGCAAG+GCTGCACT  
AAAGATTTTTATGGATATAAAAATAAAGCCGTCGGGATAAAGTCCCAGAAATCATCGTCTTCCATGAC  
GGGTTCTGCAGTAATTCTGGGACTGGTTGTAATGTCGTCCAGATGCGGATAGTCCACCATGCTCGCTT  
TATCCGCAACTGCAT

+  
FFFFFFFFFFFF:FFFFF,FFFFF,FFFFFFFFFFFFFFFFFFFFFFFFFFFFFFFF,FFFFFFFFF:FFFFFFFFF  
FFFFFFFFFFFFF:,FFFFF,FFF,FF,FFFF:FFFFFFFFFFFFFFFFFFFFFFFF,FFFFFFFFFFFFFFFFF,,  
FFFFFFFFFFFF:FFFF

@A00721:190:HGJW7DSXY:4:1462:25437:7467 2:N:0:TCTGCAAG+GCTGCACT  
ATGCCAATTCATCTTTAAAGATTTGGACAGACTATCCGCATCTGGACGACATTACAACCAGTCCCAGA  
ATTACTGCAGAACCCGTCATGGAAGACGATGATTTCTGGGACTTTATCCCGACGGCTTTATTTTTTATA  
TCCATAAAAATCTTT

+  
FFFFFFFF:FFFFFFFFFFFFFFFFFFFFFFFFFFFFFFFFFFFFFFFFFFFFFFFFFFFFFFFFFFFFFFFF  
FFFFFFFFFFFFFFFFFFFFFFFFFFFFFFFFFFFFFFFFFFFFFFFFFFFFFFFFFFFFFFFFFFFFFFFF  
FFF:FFFFFFFFF,F

@A00721:190:HGJW7DSXY:4:2104:15600:5932 2:N:0:TCTGCAAG+GCTGCACT  
ATGCCAATTCATCTTTAAAGATTTGGACAGACTATCCGCATCTGGACGACATTACAACCAGTCCCAGA  
ATTACTGCAGAACCCGTCATGGAAGACGATGATTTCTGGGACTTTATCCCGACGGCTTTATTTTTTACA  
TCCATAAAAATCTTT

+  
FFFFFFFFFFFFFFFFFFFFFFFFFFFFFFFFFFFFFFFFFFFFFFFFFFFFFFFFFFFFFFFFFFFFFFFF:FF  
FFFFFFFFFFFFFFFFFFFFFFFFFFFFFFFFFFFFFFFFFFFFFFFFFFFFFFFFFFFFFFFFFFFFFFFF:F,F  
FFFFFFFFFFFFFFFFF

@A00721:190:HGJW7DSXY:4:2114:16658:22545 2:N:0:TCTGCAAG+GCTGCACT  
ATGCCAATTCATCTTTAAAGATTTGGACAGACTATCCGCATCTGGACGACATTACAACCAGTCCCAGA  
ATTACTGCAGAACCCGTCATGGAAGACGATGATTTCTGGGACTTTATCCCGACGGCTTTATTTTTTATA  
TCCATAAAAATCTTT

+  
FFFFFFFFFFFFFFFFFFFFFFFFFFFFFFFFFFFFFFFFFFFFFFFFFFFFFFFFFFFFFFFFFFFFFFFF  
FFFFFFFFFFFFFFFFFFFFFFFFFFFFFFFFFFFFFFFFFFFFFFFFFFFFFFFFFFFFFFFFFFFFFFFF:F  
F:FFFFFFFF:FFFFF

@A00721:190:HGJW7DSXY:4:2119:4842:24314 2:N:0:TCTGCAAG+GCTGCACT  
AAAGATTTTTATGGATATAAAAATAAAGCCGTCGGGATAAAGTCCCAGAAATCATCGTCTTCCATGAC  
GGGTTCTGCAGTAATTCTGGGACTGGTTGTAATGTCTGCCAGATGCGGATAGTCCACCATGCTCGCTT  
TATCCGCAACTGCAT

+  
FFFFFFFFFFFFFFFFFFFFFFFFFFFFFFFFFFFFFFFFFFFFFFFFFFFFFFFFFFFFFFFFFFFFFFFF  
FFFFFFFFFFFFFFFFFFFFFFFFFFFFFFFFFFFFFFFFFFFFFFFFFFFFFFFFFFFFFFFFFFFFFFFF  
FFFFFFFFF:FFFFF

@A00721:190:HGJW7DSXY:4:2503:12174:30217 2:N:0:TCTGCAAG+GCTGCACT  
ATGCCAATTCATCTTTAAAGATTTGGACAGACTATCCGCATCTGGACGACATTACAACCAGTCCCAGA  
ATTACTGCAGAACCCGTCATGGAAGACGATGATTTCTGGGACTTTATCCCGACGGCTTTATTTTTTATA  
TCCATAAAAATCTTT

+  
FFFFFFF,FFFFFFFFFFFFFFFFFFFFFFFFFFFFFFFFFFFFFFFFFFFFFFFFFFFFFFFFFFFFFFFF  
FFFFFFFFFFFFFFFFFFFFFFFFFFFFFFFFFFFFFFFFFFFFFFFFFFFFFFFFFFFFFFFFFFFFFFFF:FFF  
FF,FFFFFFFFFFFF

@A00721:190:HGJW7DSXY:4:2623:20564:31250 2:N:0:TCTGCAAG+GCTGCACT  
ATGCCAATTCATCTTTAAAGATTTGGACAGACTATCCGCATCTGGACGACATTACAACCAGTCCCAGA  
ATTACTGCAGAACCCGTCATGGAAGACGATGATTTCTGGGACTTTATCCCGACGGCTTTATTTTTTATA  
TCCATAAAAATCTTT

+  
FFFFFFF:FFFFFFFFF,FFFFFFFFFFFFFFFFFFFFFFFFFFFFFFFFFFFFFFFFFFFFFFFFFFFFFFFF  
FFFFFFFFFFFFFFFFF:FFFFFFFFFFFFFFFFFFFFFFFFFFFFFFFFFFFFFFFFFFFFFFFFFFFFFFFF  
FFFFFFFFFFFFFFFFF

@A00721:190:HGJW7DSXY:4:1173:6433:2644 2:N:0:TCTGCAAG+GCTGCACT  
AAGATTTTTATGGATATAAAAATAAAGCCGTCGGGATAAAGTCCCAGAAATCATCGTCTTCCATGACG



@A00721:190:HGJW7DSXY:4:2445:32606:23202 2:N:0:TCTGCAAG+GCTGCACT  
AATGCAGTTGCGGATAAAGCGAGCATGGTGGACTATCCGCATCTGGACGACATTACAACCACTCCCAG  
AATTACTGCAGAACCCGTCATGGAAGACGATGATTTCTGGGACTTTATCCCGACGGCTTTATTTTAT  
ATCCATAAAAATCTT

+

FFFFFFFFFFFFFFFFFFFFFFFFFFFFFFFFFFFFFFFFFFFFFFFFFFFFFFFFFFFFFFFFFFFFFFFF  
FFFFFFFFFFFFFFFFFFFFFFFFFFFFFFFFFFFFFFFFFFFFFFFFFFFFFFFFFFFFFFFFFFFFFFFF  
FFFFFFFF,FFFFF

@A00721:190:HGJW7DSXY:4:2467:8160:5259 2:N:0:TCTGCAAG+GCTGCACT  
AAGATTTTTATGGATATAAAAATAAAGCCGTCGGGATAAAGTCCCAGAAATCATCGTCTTCCATGACG  
GGTTCTGCAGTAATTCTGGGACTGGTTGTAATGTCGTCCAGATGCGGATAGTCCACCATGCTCGCTTT  
ATCCGCAACTGCATT

+

FFFFFFFFFFFFFFFFFFFFFFFFFFFFFFFFFFFFFFFFFFFFFFFFFFFFFFFFFFFFFFFFFFFFFFFF  
FFFFFFFFFFFFFFFFFFFFFFFFFFFFFFFFFFFFFFFFFFFFFFFFFFFFFFFFFFFFFFFFFFFFFFFF  
FFFFFFFFFFFFFFFF

@A00721:190:HGJW7DSXY:4:2537:18728:15640 2:N:0:TCTGCAAG+GCTGCACT  
AAGATTTTTATGGATATAAAAATAAAGCCGTCGGGATAAAGTCCCAGAAATCATCGTCTTCCATGACG  
GGTTCTGCAGTAATTCTGGGACTGGTTGTAATGTCGTCCAGATGCGGATAGTCCACCATGCTCGCTTT  
ATCCGCAACTGCATT

+

FFFFFFFFF:FFFFFFFFFFFFFFFFFFFFFFFFFFFFFFFFFFFFFFFFFFFFFFFFFFFFFFFFFFFFF  
FFFFFFFFF:FFFFFFFFFFFFFFFFF,FFFFFFFFFFFFFFFFFFFFFFFFFFFFFFFFFFFFFFFFFFFF  
FFFFFFF,FFFFFFF

@A00721:190:HGJW7DSXY:4:2562:15103:7858 2:N:0:TCTGCAAG+GCTGCACT  
AAGATTTTTATGGATATAAAAATAAAGCCGTCGGGATAAAGTCCCAGAAATCATCGTCTTCCATGACG  
GGTTCTGCAGTAATTCTGGGACTGGTTGTAATGTCGTCCAGATGCGGATAGTCCACCATGCTCGCTTT  
ATCCGCAACTGCATT

+

FFFFFFFFFFFFFFFFFFFFFFFFF:FFFFFFFFFFFFFFFFFFFFFFFFFFFFFFFFFFFFFFFFFFFFF  
FFFFFFFFFFFFFFFFFFFFFFFFFFFFFFFFFFFFFFFFFFFFFFFFFFFFFFFFFFFFFFFFFFFFFFFF  
FFFFFFFFFFFFFFFF

@A00721:190:HGJW7DSXY:4:2669:6316:20791 2:N:0:TCTGCAAG+GCTGCACT  
AAGATTTTTATGGATATAAAAATAAAGCCGTCGGGATAAAGTCCCAGAAATCATCGTCTTCCATGACG  
GGTTCTGCAGTAATTCTGGGACTGGTTGTAATGTCGTCCAGATGCGGATAGTCCACCATGCTCGCTTT  
ATCCGCAACTGCATT

+

FFFFFFFFFFFFFFFFFFFFFFFFFFFFFFFFFFFFFFFFFFFFFFFFFFFFFFFFFFFFFFFFFFFFFFFF  
FFFFFFFFFFFFFFFFFFFFFFFFFFFFFFFFFFFFFFFFFFFFFFFFFFFFFFFFFFFFFFFFFFFFFFFF  
FFFFFFFFFFFFFFFF

@A00721:190:HGJW7DSXY:4:1108:17255:23672 2:N:0:TCTGCAAG+GCTGCACT  
AGATTTTTATGGATATAAAAATAAAGCCGTCGGGATAAAGTCCCAGAAATCATCGTCTTCCATGACG  
GTTCTGCAGTAATTCTGGGACTGGTTGTAATGTCGTCCAGATGCGGATAGTCCACCATGCTCGCTTTA  
TCCGCAACTGCATTC

+

FFFFFFF::FF:F,FFFFFFFFF:F::FFFF:FFFFFFFFFFFFFFFFFFFFFFFFFFFFFFFFFFFF  
F:FFFFFFFFFFFFFFFFFFFFFFFFFFFFFFFFFFFFFFFFFFFFFFFFFFFF:FFFFFF:FFFFFFFFFFFF  
FF,FFFFFFFF

@A00721:190:HGJW7DSXY:4:1552:3070:20776 2:N:0:TCTGCAAG+GCTGCACT  
AGATTTTTATGGATATAAAAATAAAGCCGTCGGGATAAAGTCCCAGAAATCATCGTCTTCCATGACG  
GTTCTGCAGTAATTCTGGGACTGGTTGTAATGTCGTCCAGATGCGGATAGTCCACCATGCTCGCTTTA  
TCCGCAACTGCATTC

+

FFFFFFFFFFFFF:FFFFFFFFFFFFF:FFFFFFFFFFFFFFFFFFFFFFFFFFFFFFFFFFFF:FFFFFFFF

FFFFFFFF:FFFFFFFF,FFFFFFFFFFFFFFFF,FFFFFFFFFFFFFFFFFFFFFFFFFFFFFFFF  
FFFFFFFFFFFFFFFF

@A00721:190:HGJW7DSXY:4:1622:15483:34820 2:N:0:TCTGCAAG+GCTGCACT  
AGATTTTATGGATATAAAAATAAAGCCGTCGGGATAAAGTCCCAGAAATCATCGTCTTCCATGACGG  
GTTCTGCAGTAATTCTGGGACTGGTTGTAATGTCGTCCAGATGCGGATAGTCCACCATGCTCGCTTTA  
TCCGCACCTGCATTC

+

FFFFFFFF:FFFFFFFFFFFFFFFFFFFFFFFFFFFFFFFFFFFFFFFFFFFFFFFFFFFFFFFF  
FFFFFFFFFFFFFFFFFFFFFFFFFFFFFFFFFFFFFFFFFFFFFFFFFFFFFFFFFFFFFFFF  
,FFFF,FFFF,:

@A00721:190:HGJW7DSXY:4:1667:4237:20384 2:N:0:TCTGCAAG+GCTGCACT  
AGATTTTATGGATATAAAAATAAAGCCGTCGGGATAAAGTCCCAGAAATCATCGTCTTCCATGACGG  
GTTCTGCAGTAATTCTGGGACTGGTTGTAATGTCGTCCAGATGCGGATAGTCCACCATGCTCGCTTTA  
TCCGCAACTGCATTC

+

FFFFFFFF,FFFFFFFFFFFFFFFFFFFFFFFFFFFFFFFFFFFFFFFFFFFFFFFFFFFFFFFF  
FFF:FFFF:FFFFFFFFFFFF:FFF:FFFFFFFFFFFFFFFFFFFFFFFFFFFFFFFFFFFF  
FFFFFF,FFFFFF

@A00721:190:HGJW7DSXY:4:2104:2040:10661 2:N:0:TCTGCAAG+GCTGCACT  
AGATTTTATGGATATAAAAATAAAGCCGTCGGGATAAAGTCCCAGAAATCATCGTCTTCCATGACGG  
GTTCTGCAGTAATTCTGGGACTGGTTGTAATGTCGTCCAGATGCGGATAGTCCACCATGCTCGCTTTA  
TCCGCAACTGCATTC

+

FFFFFFFFFFFFFFFFFFFFFFFFFFFFFFFFFFFFFFFFFFFFFFFFFFFFFFFFFFFFFFFF  
FFFFFFFFFFFFFFFFFFFF::FFFFFFFF:FFFFFFFFFFFFFFFFFFFFFFFFFFFFFFFF:  
FFFFF:FFFF:FF

@A00721:190:HGJW7DSXY:4:2364:30472:15781 2:N:0:TCTGCAAG+GCTGCACT  
AGATTTTATGGATATAAAAATAAAGCCGTCGGGATAAAGTCCCAGAAATCATCGTCTTCCATGACGG  
GTTCTGCAGTAATTCTGGGACTGGTTGTAATGTCGTCCAGATGCGGATAGTCCACCATGCTCGCTTTA  
TCCGCAACTGCATT

+

FFFFFFFF,FFF,F:,FFFFFFFF,F,:FFFF:FFFFFF:FFFFFF:FFFFFFFFFFFF:F,F:  
,FF:FF,FFFFFFFFFFFF,FFF,FFFFFFFF,:F::F,:FF::FFFFFFFF:FFFFFF:,FF  
FF,:FFFFFFFF

@A00721:190:HGJW7DSXY:4:2368:19551:24017 2:N:0:TCTGCAAG+GCTGCACT  
AGATTTTATGGATATAAAAATAAAGCCGTCGGGATAAAGTCCCAGAAATCATCGTCTTCCATGACGG  
GTTCTGCAGTAATTCTGGGACTGGTTGTAATGTCGTCCAGATGCGGATAGTCCACCATGCTCGCTTTA  
TCCGCAACTGCATTC

+

FFFFFFFFFFFFFFFFFFFF,F,FFFFFFFFFFFFFFFFFFFFFFFFFFFFFFFFFFFF  
FFFFFFFFFFFFFFFFFFFF::FFFFFFFFFFFFFFFF:FFFFFFFFFFFFFFFFFFFF  
FFFFFFFFFFFFFF

@A00721:190:HGJW7DSXY:4:2506:7355:34147 2:N:0:TCTGCAAG+GCTGCACT  
AGATTTTATGGATATAAAAATAAAGCCGTCGGGATAAAGTCCCAGAAATCATCGTCTTCCATGACGG  
GTTCTGCAGTAATTCTGGGACTGGTTGTAATGTCGTCCAGATGCGGATAGTCCACCATGCTCGCTTTA  
TCCGCAACTGCATTC

+

FFFF::FFFFFFFF:FFF:FFFF:FFFFFFFF,FFFFFFFFFFFFFFFFFFFFFFFF:FFFF:FF  
:FFFFFFFFFFFFFFFFFFFF:FF:FFFFFFFFFFFFFFFFFFFFFFFF:FFFFFFFFFFFFFFFF  
FFFFFFFF,F:FF

@A00721:190:HGJW7DSXY:4:1230:1362:22263 2:N:0:TCTGCAAG+GCTGCACT  
CCTGGACAAGGATGCCAATTCATCTTTAAAGATTTGGACAGACTATCCGCATCTGGACGACATTACAA  
CCAGTCCCAGAATTACTGCAGAACCCGTCATGGAAGACGATGATTTCTGGGACTTTATCCCGACGGCT  
TTATTTTATATCCA



```
FFFFFFFFFFFFFFFFFFFF,FFFFFFFFFF:FFFFFFFFFFFFFFFFFFFFFFFFFFFFFFFFFFFFFFFFFFFF,FF
FF:FFFFFFFFFFFFFFFFFFFFFFFFFFFFFFFFFFFFFFFFFFFFFFFFFFFFFFFFFFFFFFFF:FFFFFFF,FFFFFFFFFFFFFFFFFFFF
FFFFFFFFFFFFFFFFFFFF
```

[illegible]

```

FFFFFFFFFFFFFFFFFFFFFFFFFFFFFFFF:F:FFFFFFFFFFFFFFFFFFFFFFFFFFFFFFFF
FFFFFFFFFFFFFFFFFFFFFFFFFFFFFFFF:F:FFFFFF:FFFFFFFFFFFFFFFF:F:FFFFFF
FFFFF:FFFFFFFFF

```

[illegible]

```
FFFFFFFFFFFFFFFFFFFFFFFFFFFFFFFFFFFFFFFFFFFFFFFFFFFFFFFFFFFFFFF
FFFFFFFFFFFFFFFFFFFF:FFFFFFFFFFFFFFFFFFFFFFFFFF::FFFFFFFFFFFFFFF
FFFFFFFFFFFFFFFF
```

[illegible]

```
FFFFFFFFFFFFFFFFFFFFFFFFFFFF:FFFFFFFFFFFFFFFFFFFFFFFFFFFFFFFF
FFFFFFFFFFFFFFFFFFFFFFFFFFFF:FFFF,FFFFFFFFFFFFFFF,FFFFFFFFFFFFFFF
FFFFFFFFFFFFFFF
```

@A00721:190:HGJW7DSXY:4:2570:16188:24643 2:N:0:TCTGCAAG+GCTGCACT  
CTACAATCTCAGAATGCAGTTGCGGATAAAGCGAGCATGGTGGACTATCCGCATCTGGACGACATTAC



$+$ 

+

+

+

+

+

+

.....



+  
FFFFFFFFFFFFFFFFFFFFFFFFFFFFFFFFFFFFFFFFFFFFFFFFFFFFFFFFFFFFFFFFFFFFFFFF  
FFFFFFFFFFFFFFFFFFFFFFFFFFFFFFFFFFFFFFFFFFFFFFFFFFFFFFFFFFFFFFFFFFFFFFFF  
FFFFFFFFFFFFFFFF  
@A00721:190:HGJW7DSXY:4:2567:2483:16501 2:N:0:TCTGCAAG+GCTGCACT  
GATTCAACTACAATCTCAGAATGCAGTTGCGGATAAAGCGAGCATGGTGGACTATCCGCATCTGGACG  
ACATTACAACCAGTCCCAGAATTACTGCAGAACCCGTCATGGAAGACGATGATTTCTGGGACTTTATC  
CCGACGGCTTTATTT

+  
FFFFFFFFFFFFFFFFFFFFFFFFFFFFFFFFFFFFFFFFFFFFFFFFFFFFFFFFFFFFFFFFFFFFFFFF:FF  
FFFFFFFFFFFFFFFFFFFFFFFFFFFFFFFFFFFFFFFFFFFFFFFFFFFFFFFFFFFFFFFFFFFFFFFF:FFFFFFFFFFFFFFFF  
FFFFFFFFFFFFFFFF  
@A00721:190:HGJW7DSXY:4:2607:25843:31469 2:N:0:TCTGCAAG+GCTGCACT  
GATTCAACTACAATCTCAGAATGCAGTTGCGGATAAAGCGAGCATGGTGGACTATCCGCATCTGGACG  
ACATTACAACCAGTCCCAGAATTACTGCAGAACCCGTCATGGAAGACGATGATTTCTGGGACTTTATC  
CCGACGGCTTTATTT

+  
FFFFFFFFFF:FFFFFFFFFFFFFFFFFFFFFFFFFFFFFFFFFFFFFFFFFFFFFFFFFFFFFFFFFFFFFFFF  
FFFFFFFFFFFFFFFFFFFFFFFFFFFFFFFFFFFFFFFFFFFFFFFFFFFFFFFFFFFFFFFFFFFFFFFF  
FFFFFFFFFFFFFFFF  
@A00721:190:HGJW7DSXY:4:2404:21314:35524 2:N:0:TCTGCAAG+GCTGCACT  
ATTCAACTACAATCTCAGAATGCAGTTGCGGATAAAGCGAGCATGGTGTACTATCCGCATCAGGACGA  
CATTACAACCAGTCCCAGAATTACTGCAGAACCCGTCATGGAAGACTATGATTTCTGGGACTTTATCC  
CGACGGCTTTATTAT

+  
:FF,FFF,FFFFF:FFFFFFFF:,FF,:FF::FFFFFFFF:FF:FF::,,,FF:FFF,F::FF,:,F,FF  
F:FFFFFFFF:,,FF:F,FFF:F,,,FFFF,,:,:,FF,,,FFF:,,FF,FFF,F,,,FFF::FF,,  
:FFF:FFF,FFF:,:  
@A00721:190:HGJW7DSXY:4:1130:29550:12994 2:N:0:TCTGCAAG+GCTGCACT  
AAGATTCAACTACAATCTCAGAATGCAGTTGCGGATAAAGCGAGCATGGTGGACTATCCGCATCTGGA  
CGACATTACAACCAGTCCCAGAATTACTGCAGAACCCGTCATGGAAGACGATGATTTCTGGGACTTTA  
TCCCGACGGCTTTAT

+  
F:FFFFFFFFFFFFFFFFFFFFFFFFFFFFFFFFFFFFFFFFFFFFFFFFFFFFFFFFFFFFFFFFFFFFFFFF  
FFFFFFFFFFFFFFFFFFFFFFFFFFFFFFFFFFFFFFFFFFFFFFFFFFFFFFFFFFFFFFFFFFFFFFFF:FF:FFFFFFFFFFFFFFFF  
FFFFFFFFFFFFFFFF  
@A00721:190:HGJW7DSXY:4:1465:10438:31125 2:N:0:TCTGCAAG+GCTGCACT  
AAGATTCAACTACAATCTCAGAATGCAGTTGCGGATAAAGCGAGCATGGTGGACTATCCGCATCTGGA  
CGACATTACAACCAGTCCCAGAATTACTGCAGAACCCGTCATGGAAGACGATGATTTCTGGGACTTTA  
TCCCGACGGCTTTAT

+  
FFFFFFFFFFFFFFFFFFFFFFFFFFFFFFFFFFFFFFFFFFFFFFFFFFFFFFFFFFFFFFFFFFFFFFFF  
FFFFFFFFFFFFFFFFFFFFFFFFFFFFFFFFFFFFFFFFFFFFFFFFFFFFFFFFFFFFFFFFFFFFFFFF:FF:FFFFFFFFFFFFFFFF  
FFFFFFFFFFFFFFFF  
@A00721:190:HGJW7DSXY:4:1530:27091:26741 2:N:0:TCTGCAAG+GCTGCACT  
AAGATTCAACTACAATCTCAGAATGCAGTTGCGGATAAAGCGAGCATGGTGGACTATCCGCATCTGGA  
CGACATTACAACCAGTCCCAGAATTACTGCAGAACCCGTCATGGAAGACGATGATTTCTGGGACTTTA  
TCCCGACGGCTTTAT

+  
FFFFFFFFFFFFFFFFFFFFFFFFFFFFFFFFFFFFFFFFFFFFFFFFFFFFFFFFFFFFFFFFFFFFFFFF  
FFFFFFFFFFFFFFFFFFFFFFFFFFFFFFFFFFFFFFFFFFFFFFFFFFFFFFFFFFFFFFFFFFFFFFFF:FF,FFFFFFFFFFFFFFFF  
FFFFFFFFFFFFFFFF  
@A00721:190:HGJW7DSXY:4:1544:20961:31093 2:N:0:TCTGCAAG+GCTGCACT  
AAGATTCAACTACAATCTCAGAATGCAGTTGCGGATAAAGCGAGCATGGTGGACTATCCGCATCTGGA

CGACATTACAACCAGTCCCAGAATTACTGCAGAACCCGTCATGGAAGACGATGATTTCTGGGACTTTA  
TCCCGACGGCTTTAT

+

FFFFFFFFFFFFFFFFFFFFFFFFFFFFFFFFFFFFFFFFFFFFFFFFFFFFFFFFFFFFFFFFFFFFFFFF  
FFFFFFFF:FFFFFFFFFFFFFFFFFFFFFFFFFFFFFFFFFFFFFFFFFFFFFFFFFFFFFFFFFFFFFFFF  
FF:FFFFFFFFFFFF

@A00721:190:HGJW7DSXY:4:1578:28845:29590 2:N:0:TCTGCAAG+GCTGCACT  
AAGATTCAACTACAATCTCAGAATGCAGTTGCGGATAAAGCGAGCATGGTGGACTATCCGCATCTGGA  
CGACATTACAACCAGTCCCAGAATTACTGCAGAACCCGTCATGGAAGACGATGATTTCTGGGACTTTA  
TCCCGACGGCTTTAT

+

FFFFFF:FFFFFFFFFFFFFFFFFFFFFFFFFFFFFFFFFFFFFFFFFFFFFFFFFFFFFFFFFFFFFFFF  
FFFFFFFFFFFF,F:FFFFF:FFFFF:F:FFFFF:FF,FFFFFFFFFFFFFFFFFFFFFFFFFFFF,FFFFFF  
FFF:FFFFFFFFFFFF

@A00721:190:HGJW7DSXY:4:1660:4634:6731 2:N:0:TCTGCAAG+GCTGCACT  
AAGATTCAACTACAATCTCAGAATGCAGTTGCGGATAAAGCGAGCATGGTGGACTATCCGCATCTGGA  
CGACATTACAACCAGTCCCAGAATTACTGCAGAACCCGTCATGGAAGACGATGATTTCTGGGACTTTA  
TCCCGACGGCTTTAT

+

FFFFF,,FFFFF:F:FF,,FFFFF,::,FF,::,,FFFFF:FFFF:FF,F::,FFFFFF:,F:F:FF,F  
:FFFFFFFF,FFFFFFFF:FF:,FF:F:,F:FF:FFFF::FFFF,FFFFF,FFFFFF,F::F,:FFF,,F  
F,F:FF:,::,F:F:

@A00721:190:HGJW7DSXY:4:1676:6903:6746 2:N:0:TCTGCAAG+GCTGCACT  
AAGATTCAACTACAATCTCAGAATGCAGTTGCGGATAAAGCGAGCATGGTGGACTATCCGCATCTGGA  
CGACATTACAACCAGTCCCAGAATTACTGCAGAACCCGTCATGGAAGACGATGATTTCTGGGACTTTA  
TCCCGACGGCTTTAT

+

FFFFFFFF,FFFFFFFFFFFFFFFFFFFFFFFFFFFFFFFFFFFFFFFFFFFFFFFFFFFFFFFFFFFFFFFF  
FFFFFFFFFFFFFFFF:FFFFF,FFFFFFFFFFFFFFFFFFFFFFFFFFFFFFFFFFFFFFFFFFFFFFFFFFFF  
FFFFFFFFFFFFFFFFFFFF

@A00721:190:HGJW7DSXY:4:2120:9959:18771 2:N:0:TCTGCAAG+GCTGCACT  
AAGATTCAACTACAATCTCAGAATGCAGTTGCGGATAAAGCGAGCATGGTGGACTATCCGCATCTGGA  
CGACATTACAACCAGTCCCAGAATTACTGCAGAACCCGTCATGGAAGACGATGATTTCTGGGACTTTA  
TCCCGACGGCTTTAT

+

FFFFFFFFFFFFFFFFFFFFFFFFFFFFFFFFFFFFFFFFFFFFFFFFFFFFFFFFFFFFFFFFFFFFFFFF  
FFFFFFFFFFFFFFFFFFFFFFFF:FFFFFFFFFFFFFFFFFFFFFFFFFFFFFFFFFFFFFFFFFFFFFFFFFFFF  
FFFFFFFFFFFFFFFFFFFF

@A00721:190:HGJW7DSXY:4:2356:26558:16579 2:N:0:TCTGCAAG+GCTGCACT  
AAGATTCAACTACAATCTCAGAATGCAGTTGCGGATAAAGCGAGCATGGTGGACTATCCGCATCTGGA  
CGACATTACAACCAGTCCCAGAATTACTGCAGAACCCGTCATGGAAGACGATGATTTCTGGGACTTTA  
TCCCGACGGCTTTAT

+

FFFFFFFFFFFFFFFFFFFFFFFFFFFFFFFFFFFFFFFFFFFFFFFFFFFFFFFFFFFFFFFFFFFFFFFF  
FFFFFFFFFFFFFFFFFFFFFFFFFFFFFFFFFFFFFFFFFFFFFFFFFFFFFFFFFFFFFFFFFFFFFFFF  
FFFFFFFFFFFFFFFFFFFF

@A00721:190:HGJW7DSXY:4:2357:17788:31829 2:N:0:TCTGCAAG+GCTGCACT  
AAGATTCAACTACAATCTCAGAATGCAGTTGCGGATAAAGCGAGCATGGTGGACTATCCGCATCTGGA  
CGACATTACAACCAGTCCCAGAATTACTGCAGAACCCGTCATGGAAGACGATGATTTCTGGGACTTTA  
TCCCGACGGCTTTAT

+

F:FFFFFFFFFFFFFFFFFFFFFFFFFFFFFFFFFFFFFFFFFFFFFFFFFFFFFFFFFFFFFFFFFFFF  
FFFFFFFFFFFFFFFFFFFFFFFFFFFFFFFFFFFFFFFFFFFFFFFFFFFFFFFFFFFFFFFFFFFF:FFFFFFF:FFFFF:FFFFFFF  
FFFFFFFFFFFFFFFFFFFF



FFFFFFFF:FFFFFFFFFFFFFFFFFFFFFFFFFFFFFFFFFFFFFFFFFFFFFFFFFFFFFFFFFFFFFFFF:FFFFFFFF:FFFFFFFF  
FFFFF:FFFFFFFF:

@A00721:190:HGJW7DSXY:4:1257:21784:6715 2:N:0:TCTGCAAG+GCTGCACT  
CTAAGATTCAACTACAATCTCAGAATGCAGTTGCGGATAAAGCGAGCATGGTGGACTATCCGCATCTG  
GACGACATTACAACCAAGTCCCAGAATTACTGCAGAACCCGTCATGGAAGACGATGATTTCTGGGACTT  
TATCCCGACGGCTTT

+

FFFFFFFFFFFFFFFFFFFFFFFFFFFFFFFFFFFFFFFFFFFFFFFFFFFFFFFFFFFFFFFF,FFF:FFFFFFFFFFFFFFFF  
FFFFFFFFFFFFFFFF:FFF,FFFF,FF,FFF::FFFFF:FFFFFFFF,FFF,:F,FF:FF,,:FFFFFF,,F,  
F:FFFFF:,FF,FFF

@A00721:190:HGJW7DSXY:4:1335:23583:2503 2:N:0:TCTGCAAG+GCTGCACT  
CTAAGATTCAACTACAATCTCAGAATGCAGTTGCGGATAAAGCGAGCATGGTGGACTATCCGCATCTG  
GACGACATTACAACCAAGTCCCAGAATTACTGCAGAACCCGTCATGGAAGACGATGATTTCTGGGACTT  
TATCCCGACGGCTTT

+

FFFFFFFFFFFFFFFFFFFFFFFFFFFFFFFFFFFFFFFFFFFFFFFFFFFFFFFFFFFFFFFF:FFFFFFFFFFFFFFFF  
FFFFFFFFFFFFFFFFFFFFFFFFFFFFFFFFFFFFFFFFFFFFFFFFFFFFFFFFFFFFFFFF,FFFFFFFFFFFFFFFF  
FF:FFFFFFFFFFFFFF

@A00721:190:HGJW7DSXY:4:1340:20799:33755 2:N:0:TCTGCAAG+GCTGCACT  
CTAAGATTCAACTACAATCTCATAATGCAGTTGCGGATAAAGCGAGCATGGTGGACTATCCGCATCTG  
GACGACATTACAACCAAGTCCCAGAATTACTGCAGAACCCGTCATGGAAGACGATGATTTCTGGGACTT  
TATCCCGACGGCTTT

+

FFFFFFFFFFFFFFFFFFFFFFFF:FFF:FFFFFFFF:FFFFFFFFFFFFFFFF:F:FFFFFFFFFFFFFFFF  
FFFFFFFFFFFFFFFFFFFFFFFF:FFFFFFFFFFFFFFFFFFFFFFFFFFFFFFFF:FF:FFFFFFFF  
FF:FFFFFFFF

@A00721:190:HGJW7DSXY:4:1340:21061:33927 2:N:0:TCTGCAAG+GCTGCACT  
CTAAGATTCAACTACAATCTCATAATGCAGTTGCGGATAAAGCGAGCATGGTGGACTATCCGCATCTG  
GACGACATTACAACCAAGTCCCAGAATTACTGCAGAACCCGTCATGGAAGACGATGATTTCTGGGACTT  
TATCCCGACGGCTTT

+

FFFFFFFFFFFFFFFFFFFFFFFFFFFFFFFFFFFFFFFFFFFFFFFFFFFFFFFFFFFFFFFFFFFFFFFF  
FFFFFFFFFFFFFFFFFFFFFFFFFFFFFFFFFFFFFFFFFFFFFFFFFFFFFFFFFFFFFFFFFFFFFFFF  
FFFFF:FFF:FFFF

@A00721:190:HGJW7DSXY:4:1347:11071:15624 2:N:0:TCTGCAAG+GCTGCACT  
CTAAGATTCAACTACAATCTCATAATGCAGTTGCGGATAAAGCGAGCATGGTGGACTATCCGCATCTG  
GACGACATTACAACCAAGTCCCAGAATTACTGCAGAACCCGTCATGGAAGACGATGATTTCTGGGACTT  
TATCCCGACGGCTTT

+

FFFFFFFFFFFFFFFFFFFFFFFFFFFFFFFFFFFFFFFFFFFFFFFFFFFFFFFFFFFFFFFFFFFFFFFF  
FFFFFFFFFFFFFFFFFFFFFFFFFFFFFFFFFFFFFFFFFFFFFFFFFFFFFFFFFFFFFFFFFFFFFFFF  
FFFFFFFFFFFFFFFF

@A00721:190:HGJW7DSXY:4:1431:5141:7607 2:N:0:TCTGCAAG+GCTGCACT  
CTAAGATTCAACTACAATCTCAGAATGCAGTTGCGGATAAAGCGAGCATGGTGGACTATCCGCATCTG  
GACGACAGTACAACCAAGTCCCAGAATTACTGCAGAACCCGTCATGGAAGACGATGATTTCTGGGACTT  
TATCCCGACGGCTTT

+

FFFFFFFFFFFFFFFF,FFFFFFFFFFFFFFFFFFFFFFFFFFFFFFFF:FFF:FFFF,,FFF  
F:FFFF,FFFFFFFF:FFFFFFFFFFFFFFFFFFFFFFFFFFFFFFFF:FFFF:FF::FFFFFFFF:F  
FFFFFFFFFFFFFFFF

@A00721:190:HGJW7DSXY:4:1465:19316:22169 2:N:0:TCTGCAAG+GCTGCACT  
CTAAGATTCAACTACAATCTCAGAATGCAGTTGCGGATAAAGCGAGCATGGTGGACTATCCGCATCTG  
GACGACATTACAACCAAGTCCCAGAATTACTGCAGAACCCGTCATGGAAGACGATGATTTCTGGGACTT  
TATCTCGACGGCTTT



+  
FFFFFFFFFFFFFFFFFFFFFFFFFFFFFFFFFFFFFFFFFFFFFFFFFFFFFFFFFFFFFFFFFFFFFFFF  
FFFFFFFFFFFFFFFFFFFFFFFFFFFFFFFFFFFFFFFFFFFFFFFFFFFFFFFFFFFFFFFFFFFFFFFF  
FFFFFFFFFFFFFFFF:F

@A00721:190:HGJW7DSXY:4:1508:16288:34992 2:N:0:TCTGCAAG+GCTGCACT  
CTAAGATTCAACTACAATCTCAGAATGCAGTTGCGGATAAAGCGAGCATGGTGGACTATCCGCATCTG  
GACGACATTACAACCAAGTCCCAGAATTACTGCAGAACCCGTCATGGAAGACGATGATTTCTGGGACTT  
TATCCCGACGGCTTT

+  
FFFFFFFFFFFFFFFFFFFFFFFFFFFFFFFFFFFFFFFFFFFFFFFFFFFFFFFFFFFFFFFFFFFFFFFF  
FFFFFFFFFFFFFFFFFFFFFFFFFFFFFFFFFFFFFFFFFFFFFFFFFFFFFFFFFFFFFFFFFFFFFFFF  
FFFFFFFFFFFFFFFF:F

@A00721:190:HGJW7DSXY:4:1552:8712:15984 2:N:0:TCTGCAAG+GCTGCACT  
CTAAGATTCAACTACAATCTCAGAATGCAGTTGCGGATAAAGCGAGCATGGTGGACTATCCGCATCTG  
GACGACATTACAACCAAGTCCCAGAATTACTGCAGAACCCGTCATGGAAGACGATGATTTCTGGGACTT  
TATCCCGACGGCTTT

+  
FFFFFFFFFFFFFFFFFFFFFFFFFFFFFFFFFFFFFFFFFFFFFFFFFFFFFFFFFFFFFFFFFFFFFFFF  
FFFFFFFFFFFFFFFFFFFFFFFFFFFFFFFFFFFFFFFFFFFFFFFFFFFFFFFFFFFFFFFFFFFFFFFF  
FFFFFFFFFFFFFFFF:F

@A00721:190:HGJW7DSXY:4:1568:27055:21355 2:N:0:TCTGCAAG+GCTGCACT  
CTAAGATTCAACTACAATCTCAGAATGCAGTTGCGGATAAAGCGAGCATGGTGGACTATCCGCATCTG  
GACGACATTACAACCAAGTCCCAGAATTACTGCAGAACCCGTCATGGAAGACGATGATTTCTGGGACTT  
TATCCCGACGGCTTT

+  
FFFFFFFFFFFFFFFFFFFFFFFFFFFFFFFFFFFFFFFFFFFFFFFFFFFFFFFFFFFFFFFFFFFFFFFF  
FFFFFFFFFFFFFFFFFFFFFFFFFFFFFFFFFFFFFFFFFFFFFFFFFFFFFFFFFFFFFFFFFFFFFFFF  
FFFF:FFFFFFFF

@A00721:190:HGJW7DSXY:4:1602:10511:19507 2:N:0:TCTGCAAG+GCTGCACT  
CTAAGATTCAACTACAATCTCAGAATGCAGTTGCGGATAAAGCGAGCATGGTGGACTATCCGCATCTG  
GACGACATTACAACCAAGTCCCAGAATTACTGCAGAACCCGTCATGGAAGACGATGATTTCTGGGACTT  
TATCCCGACGGCTTT

+  
FFFFFFFFFFFFFFFFFFFFFFFFFFFFFFFFFFFFFFFFFFFFFFFFFFFFFFFFFFFFFFFFFFFFFFFF  
FFFFFFFFFFFFFFFFFFFFFFFFFFFFFFFFFFFFFFFFFFFFFFFFFFFFFFFFFFFFFFFFFFFFFFFF  
FFFFFFFFFFFFFFFF:F

@A00721:190:HGJW7DSXY:4:1602:10438:19852 2:N:0:TCTGCAAG+GCTGCACT  
CTAAGATTCAACTACAATCTCAGAATGCAGTTGCGGATAAAGCGAGCATGGTGGACTATCCGCATCTG  
GACGACATTACAACCAAGTCCCAGAATTACTGCAGAACCCGTCATGGAAGACGATGATTTCTGGGACTT  
TATCCCGACGGCTTT

+  
FFFFF:,FFFFFFFFFFFFFFFFFFFFFFFFFFFFFFFFFFFFFFFFFFFFFFFFFFFFFFFFFFFFFFFF  
FFFFFFFFFFFFFFFFFFFFFFFFFFFFFFFFFFFFFFFFFFFFFFFFFFFFFFFFFFFFFFFFFFFFFFFF  
FFFFFFFFFFFFFFFF:F

@A00721:190:HGJW7DSXY:4:1602:12834:21308 2:N:0:TCTGCAAG+GCTGCACT  
CTAAGATTCAACTACAATCTCAGAATGCAGTTGCGGATAAAGCGAGCATGGTGGACTATCCGCATCTG  
GACGACATTACAACCAAGTCCCAGAATTACTGCAGAACCCGTCATGGAAGACGATGATTTCTGGGACTT  
TATCCCGACGGCTTT

+  
FFFFFFFFF:FFFFFFFFFFFFFFFFFFFFFFFFFFFFFFFFFFFFFFFFFFFFFFFFFFFFFFFFFFFF  
FFFFFFFFFFFFFFFFFFFFFFFFFFFFFFFFFFFFFFFFFFFFFFFFFFFFFFFFFFFFFFFFFFFFFFFF  
FFFFFFFFFFFFFFFF

@A00721:190:HGJW7DSXY:4:1620:17824:21966 2:N:0:TCTGCAAG+GCTGCACT  
CTAAGATTCAACTACAATCTCAGAATGCAGTTGCGGATAAAGCGAGCATGGTGGACTATCCGCATCTG



@A00721:190:HGJW7DSXY:4:1664:2284:35383 2:N:0:TCTGCAAG+GCTGCACT  
CTAAGATTCAACTACAATCTCATAATGCAGTTGCGGATAAAGCGAGCATGGTGGACTATCCGCATCTG  
GACGACATTACAACCGAGTCCCAGAATTACTGCAGAACCCGTCATGGAAGACGATGATTTCTGGGACTT  
TATCCCGACGGCTTT

@A00721:190:HGJW7DSXY:4:1670:8332:12915 2:N:0:TCTGCAAG+GCTGCACT  
CTAAGATTCAACTACAATCTCAGAATGCAGTTGCGGATAAAGCGAGCATGGTGGACTATCCGCATCTG  
GACGACATTACAACCAGTCCCAGAATTACTGCAGAACCCGTCATGGAAGACGATGATTTCTGGGACTT  
TATCCCGACGGCTTT

@A00721:190:HGJW7DSXY:4:2122:19831:4304 2:N:0:TCTGCAAG+GCTGCACT  
CTAAGATTCAACTACAATCTCAGAATGCAGTTGCGGATAAAGCGAGCATGGTGGACTATCCGCATCTG  
GACGACATTACAACCGAGTCCCAGAATTACTGCAGAACCCGTCATGGAAGACGATGATTTCTGGGACTT  
TATCCCGACGGCTTT

@A00721:190:HGJW7DSXY:4:2157:4056:11021 2:N:0:TCTGCAAG+GCTGCACT  
CTAAGATTCAACTACAATCTCATAATGCAGTTGCGGATAAAGCGAGCATGGTGGACTATCCGCATCTG  
GACGACATTACAACCGAGTCCCAGAATTACTGCAGAACCCGTCATGGAAGACGATGATTTCTGGGACTT  
TATCCCGACGGCTTT

@A00721:190:HGJW7DSXY:4:2167:26521:21715 2:N:0:TCTGCAAG+GCTGCACT  
CTAAGATTCAACTACAATCTCAGAATGCAGTTGCGGATAAAGCGAGCATGGTGGACTATCCGCATCTG  
GACGACATTACAACCAGTCCCAGAATTACTGCAGAACCCGTCATGGAAGACGATGATTTCTGGGACTT  
TATCCCGACGGCTTT

@A00721:190:HGJW7DSXY:4:2207:25319:4601 2:N:0:TCTGCAAG+GCTGCACT  
CTAAGATTCAACTACAATCTCAGAATGCAGTTGCGGATAAAGCGAGCATGGTGGACTATCCGCATCTG  
GACGACATTACAACCAGTCCCAGAATTACTGCAGAACCCGTCATGGAAGACGATGATTTCTGGGACTT  
TATCTCGACGGCTTT

@A00721:190:HGJW7DSXY:4:2217:3305:18145 2:N:0:TCTGCAAG+GCTGCACT  
CTAAGATTCAACTACAATCTCATAATGCAGTTGCGGATAAAGCGAGCATGGTGGACTATCCGCATCTG  
GACGACATTACAACCAGTCCCAGAATTACTGCAGAACCCGTCATGGAAGACGATGATTCTGGGACTT  
TATCCCGACGGCTTT

@A00721:190:HGJW7DSXY:4:2251:1814:36699 2:N:0:TCTGCAAG+GCTGCACT  
CTAAGATTCAACTACAATCTCAGAATGCAGTTGCGGATAAAGCGAGCATGGTGGACTATCCGCATCTG  
GACGACATTACAACCGAGTCCCAGAATTACTGCAGAACCCGTCATGGAAGACGATGATTTCTGGGACTT  
TATCTCGACGGCTTT

@A00721:190:HGJW7DSXY:4:2310:31213:17378 2:N:0:TCTGCAAG+GCTGCACT  
CTAAGATTCAACTACAATCTCATAATGCAGTTGCGGATAAAGCGAGCATGGTGGACTATCCGCATCTG  
GACGACATTACAACCGAGTCCCAGAATTACTGCAGAACCCGTCATGGAAGACGATGATTTCTGGGACTT  
TATCCCGACGGCTTT

@A00721:190:HGJW7DSXY:4:2317:29884:17738 2:N:0:TCTGCAAG+GCTGCACT  
CTAAGATTCAACTACAATCTCAGAATGCAGTTGCGGATAAAGCGAGCATGGTGGACTATCCGCATCTG  
GACGACATTACAACCAGTCCCAGAATTACTGCAGAACCCGTCATGGAAGACGATGATTTCTGGGACTT  
TATCCCGACGGCTTT

@A00721:190:HGJW7DSXY:4:2320:28492:21684 2:N:0:TCTGCAAG+GCTGCACT  
CTAAGATTCAACTACAATCTCAGAATGCAGTTGCGGATAAAGCGAGCATGGTGGACTATCCGCATCTG  
GACGACATTACAACCAGTCCCAGAATTACTGCAGAACCCGTCATGGAAGACGATGATTTCTGGGACTT  
TATCCCGACGGCTTT

@A00721:190:HGJW7DSXY:4:2326:9833:31986 2:N:0:TCTGCAAG+GCTGCACT  
CTAAGATTCAACTACAATCTCATAATGCAGTTGCGGATAAAGCGAGCATGGTGGACTATCCGCATCTG  
GACGACATTACAACCAGTCCCAGAATTACTGCAGAACCCGTCATGGAAGACGATGATTTCTGGGACTT  
TATCCCGACGGCTTT

@A00721:190:HGJW7DSXY:4:2359:18837:19492 2:N:0:TCTGCAAG+GCTGCACT  
CTAAGATTCAACTACAATCTCAGAATGCAGTTGCGGATAAAGCGAGCATGGTGGACTATCCGCATCTG  
GACGACATTACAACCAGTCCCAGAATTACTGCAGAACCCGTCATGGAAGACGATGATTTCTGGGACTT  
TATCCCGACGGCTTT

@A00721:190:HGJW7DSXY:4:2362:5348:26068 2:N:0:TCTGCAAG+GCTGCACT  
CTAAGATTCAACTACAATCTCAGAATGCAGTTGCGGATAAAGCGAGCATGGTGGACTATCCGCATCTG  
GACGACATTACAACCAGTCCCAGAATTACTGCAGAACCCGTCATGGAAGACGATGATTTCTGGGACTT  
TATCCCGACGGCTTT

[illegible][illegible][illegible][illegible][illegible]

```

FFFFF:FFFFFFFFFFFFFFFFFFFFFFFFFFFFFFFFFFFFFFFFFFFFFFFFFFFFFFFFFFFFFFFF
FFFFFFFFFFFFFFFFFFFF:FFFFFFFFFFFF:FFFFFFFF:FFFFFFFFFFFFFFFFFFFFFFFFFFFF
FFFFF:FFFFFFFFF:

```

[illegible]

@A00721:190:HGJW7DSXY:4:2601:9227:1783 2:N:0:TCTGCAAG+GCTGCACT  
CTAAGATTCAACTACAATCTCAGAATGCAGTTGCGGATAAAGCGAGCATGGTGGACTATCCGCATCTG

GACGACATTACAACCAGTCCCAGAATTACTGCAGAACCCGTCATGGAAGACGATGATTTCTGGGACTT  
TATCCCGACGGCTTT

[illegible]

+

@A00721:190:HGJW7DSXY:4:2623:7337:19241 2:N:0:TCTGCAAG+GCTGCACT  
CTAAGATTCAACTACAATCTCAGAATGCAGTTGCGGATAAAGCGAGCATGGTGGACTATCCGCATCTG  
GACGACATTACAACCAGTCCCAGAATTACTGCAGAACCCGTCATGGAAGACGATGATTTCTGGGACTT  
TATCTCGACGGCTTT

[illegible]

+

@A00721:190:HGJW7DSXY:4:2635:15835:28855 2:N:0:TCTGCAAG+GCTGCACT  
CTAAGATTCAACTACAATCTCATAATGCAGTTGCGGATAAAGCGAGCATGGTGGACTATCCGCATCTG  
GACGACATTACAACCAGTCCCAGAATTACTGCAGAACCCGTCATGGAAGACGATGATTTCTGGGACTT  
TATCCCGACGGCTTT

```

FFFFFFFFFFFFFFFFFFFFFFFFFFFFFFFF:FFFFFFFFFFFFFFFFFFFFFFFFFFFFFFFFFFFFFFFF
FFFFFFFFFFFFFFFFFFFFFFFFFFFFFFFF:FFFFFFFFFFFF:FFFFFFFFFFFFFFFFFFFFFFFF:FFFFFFF:
FFFF:FFFFFFFFFFFF

```

+

@A00721:190:HGJW7DSXY:4:2678:31503:30655 2:N:0:TCTGCAAG+GCTGCACT  
CTAAGATTCAACTACAATCTCATAATGCAGTTGCGGATAAAGCGAGCATGGTGGACTATCCGCATCTG  
GACGACATTACAACCAGTCCCAGAATTACTGCAGAACCCGTCATGGAAGACGATGATTTCTGGGACTT  
TATCCCGACGGCTTT

```

FFFFF,FFFFFFFFFFFFFFFFFFFFFFFFFFFFFFFFFFFFFFFF:FFFFFFFFFFFFFFFF
FFFFFFFFFFFFFFFFFFFFFFFFFFFFFFFF:FFFFFFFFFFFFFFFF:FFFFFFFFFFFFFFFF
FFFFFFFFFFFFFFFF

```

@A00721:190:HGJW7DSXY:4:1413:6180:6778 2:N:0:TCTGCAAG+GCTGCACT  
ATTCTTATAAGACGTTCTGGACAAGGATGCCAATTCATCTTTAAAGATTTGGACAGACTATCCGCAT  
CTGGACGACATTACAACCAGTCCCAGAATTACTGCAGAACCCGTCATGGAAGACGATGATTTCTGGGA  
CTTTATCCCGACGGC

@A00721:190:HGJW7DSXY:4:2515:20853:5822 2:N:0:TCTGCAAG+GCTGCACT  
ATTCTTATAAGACGTTCTGGACAAGGATGCCAATTCATCTTTAAAGATTTGGACAGACTATCCGCAT  
CTGGACGACATTACAACCAGTCCCAGAATTACTGCAGAACCCGTCATGGAAGACGATGATTTCTGGGA  
CTTTATCCCGACGGC

@A00721:190:HGJW7DSXY:4:2648:18059:31078 2:N:0:TCTGCAAG+GCTGCACT  
ATTCTTATAAGACGTTCTGGACAAGGATGCCAATTCATCTTTAAAGATTTGGACAGACTATCCGCAT  
CTGGACGACATTACAACCAGTCCCAGAATTACTGCAGAACCCGTCATGGAAGACGATGATTTCTGGGA  
CTTTATCCCCGACGGC

@A00721:190:HGJW7DSXY:4:1261:27308:18035 2:N:0:TCTGCAAG+GCTGCACT  
GAAGAATATTCTTATAAGACGTTCTGGACAAGGATGCCAATTCATCTTTAAAGATTTGGACAGACTA  
TCCGCATCTGGACGACATTACAACCAAGTCCCAGAATTACTGCAGAACCCGTCATGGAAGACGATGATT  
TCTGGGACTTTATCC

@A00721:190:HGJW7DSXY:4:1306:22833:14544 2:N:0:TCTGCAAG+GCTGCACT  
GAAGAATATTCTTATAAGACGTTCTGACAAGGATGCCAATTCATCTTTAAAGATTTGGACAGACTA  
TCCGCATCTGGACGACATTACAACCAGTCCCAGAATTACTGCAGAACCCGTCATGGAAGACGATGATT  
TCTGGGACTTTATCC

@A00721:190:HGJW7DSXY:4:2262:2049:20290 2:N:0:TCTGCAAG+GCTGCACT  
GAAGAATATTCTTATAAGACGTTCTCGGACAAGGATGCCAATTCATCTTTAAAGATTTGGACAGACTA  
TCCGCATCTGGACGACATTACAACCAGTCCCAGAATTACTGCAGAACCCGTCATGGAAGACGATGATT  
TCTGGGACTTTATCC

@A00721:190:HGJW7DSXY:4:2454:5882:5228 2:N:0:TCTGCAAG+GCTGCACT  
GAAGAATATTCTTATAAGACGTTCTGGACAAGGATGCCAATTCATCTTTAAAGATTTGGACAGACTA  
TCCGCATCTGGACGACATTACAACCAGTCCCAGAATTACTGCAGAACCCGTCATGGAAGACGATGATT  
TCTGGGACTTTATCC





+  
FFFFFFFFFFFFFFFFFFFFFFFFFFFFFFFFFFFFFFFFFFFFFFFFFFFFFFFFFFFFFFFFFFFFFFFF  
FFFFFFFFFFFFFFFFFFFFFFFFFFFFFFFFFFFFFFFFFFFFFFFFFFFFFFFFFFFFFFFFFFFFFFFF  
FFFFFFFFFFFFFFFF  
@A00721:190:HGJW7DSXY:4:2678:9317:31187 2:N:0:TCTGCAAG+GCTGCACT  
CACCGTTCCATCACATCTTCACGGTGGAACTAAGATTCAACTACAATCTCAGAATGCAGTTGCGGATA  
AAGCGAGCATGGTGGACTATCCGCATCTGGACGACATTACAACCAGTCCCAGAATTACTGCAGAACCC  
GTCATGGAAGACGAT

+  
FFFFFFFFFFFFFFFFFFFFFFFFFFFFFFFFFFFFFFFFFFFFFFFFFFFFFFFFFFFFFFFFFFFFFFFF  
FFFFFFFFFFFFFFFFFFFFFFFFFFFFFFFFFFFFFFFFFFFFFFFFFFFFFFFFFFFFFFFFFFFFFFFF  
FFFFFFFFFFFFFFFF  
@A00721:190:HGJW7DSXY:4:1139:11523:1188 2:N:0:TCTGCAAG+GCTGCACT  
CACCGTTCCATCACATCTTCACGGTGGAACTAAGATTCAACTACAATCTCAGAATGCAGTTGCGGATA  
AAGCGAGCATGGTGGACTATCCGCATCTGGACGACATTACAACCAGTCCCAGAATTACTGCAGAACCC  
GTCATGGAAGACGA

+  
FFF,:,,FFFFFFFF,FF,F:FF::F:FF:FFF:FFFFFFFFFFFFFFFF:FFFFFFFF:FFFFFFFFFFF,F  
FF:FFFF:,F:FFFFFFFFFFFFFFFFFFFFFFFF:FFFFF,FFF,FFFF,FFFFF:,FFF,FFFF:FFF  
,FF:FF,FFFF:F  
@A00721:190:HGJW7DSXY:4:1207:3332:13777 2:N:0:TCTGCAAG+GCTGCACT  
GACGAGTCCACCGTTCCATCACATCTTCACGGTGGAACTAAGATTCAACTACAATCTCAGAATGCAGT  
TGCGGATAAAGCGAGCATGGTGGACTATCCGCATCTGGACGACATTACAACCAGTCCCAGAATTACTG  
CAGAACCCGTCATGG

+  
FFFFFFFFFFFFFFFFFFFFFFFFFFFFFFFFFFFFFFFFFFFFFFFFFFFFFFFFFFFFFFFFFFFFFFFF  
FFFFFFFFFFFFFFFFFFFFFFFFFFFFFFFFFFFFFFFFFFFFFFFFFFFFFFFFFFFFFFFFFFFFFFFF  
FF:FFFFFFFFFFFFF  
@A00721:190:HGJW7DSXY:4:2531:17020:31876 2:N:0:TCTGCAAG+GCTGCACT  
GACGAGTCCACCGTTCCATCACATCTTCACGGTGGAACTAAGATTCAACTACAATCTCAGAATGCAGT  
TGCGGATAAAGCGAGCATGGTGGACTATCCGCATCTGGACGACATTACAACCAGTCCCAGAATTACTG  
CAGAACCCGTCATGG

+  
FFFFFFFFFFFFFFFFFFFFFFFFFFFFFFFFFFFFFFFFFFFFFFFFFFFFFFFFFFFFFFFFFFFFFFFF  
FFFFFFFFFFFFFFFFFFFFFFFFFFFFFFFFFFFFFFFFFFFFFFFFFFFFFFFFFFFFFFFFFFFFFFFF  
FFFFFFFFFFFFFFFFFFFF  
@A00721:190:HGJW7DSXY:4:2617:5439:21684 2:N:0:TCTGCAAG+GCTGCACT  
GACGAGTCCACCGTTCCATCACATCTTCACGGTGGAACTAAGATTCAACTACAATCTCAGAATGCAGT  
TGCGGATAAAGCGAGCATGGTGGACTATCCGCATCTGGACGACATTACAACCAGTCCCAGAATTACTG  
CAGAACCCGTCATGG

+  
FFFFFFFFFFFFFFFF:FFFFFFFFFFFFFFFFFFFFFFFFFFFFFFFF:FFFFFFFFFFFFFFFFFFFF:FFFFFFFFFFFFF  
FFFFFFFFFFFFFFFFFFFFFFFFFFFFFFFFFFFFFFFFFFFFFFFFFFFFFFFFFFFFFFFFFFFFFFFF  
FFFFFFFFFFFFFFFFFFFF  
@A00721:190:HGJW7DSXY:4:1102:21902:22013 2:N:0:TCTGCAAG+GCTGCACT  
CGACGAGTCCACCGTTCCATCACATCTTCACGGTGGAACTAAGATTCAACTACAATCTCAGAATGCAG  
TTGCGGATAAAGCGAGCATGGTGGACTATCCGCATCTGGACGACATTACAACCAGTCCCAGAATTACT  
GCAGAACCCGTCATG

+  
FFFFFFFFFFFFFFFFFFFFFFFFFFFFFFFFFFFFFFFFFFFFFFFFFFFFFFFFFFFFFFFFFFFFFFFF  
FFFFFFFFFFFFFFFFFFFFFFFFFFFFFFFFFFFFFFFFFFFFFFFFFFFFFFFFFFFFFFFFFFFFFFFF  
FFFFFFFFFFFFFFFFFFFF  
@A00721:190:HGJW7DSXY:4:1107:2953:22921 2:N:0:TCTGCAAG+GCTGCACT  
CGACGAGTCCACCGTTCCATCACATCTTCACGGTGGAACTAAGATTCAACTACAATCTCAGAATGCAG

TTGCGGATAAAGCGAGCATGGTGGAATATCCGCATCTGGACGACATTACAACCAGTCCCAGAATTACT  
GCAGAACCCGTCATG

[illegible]

+

[illegible] $+$ [illegible] $+$ [illegible] $+$ 

```
FFFFFFFFFFFFFFFFFFFFFFFFFFFFFFFFFFFFFFFFFFFFFFFFFFFFFFFFFFFFFFF
FFFFFFFFFFFFFFFF:FFFFFFFFFFFFFFFFFFFF,FFFFFFFFF:FFFFFFFFFFFFFFFFFF:FFFFF
FFFFFFFFFFFFFFFF
```

+

[illegible] $+$ [illegible]



FFFF,FFFFFFFFFFFFFFFFFFFFFFFFFFFFFFFFFFFFFFFFFFFFFFFFFFFFFFFFFFFFFFFF  
FFFFFFFF:FFFF:

@A00721:190:HGJW7DSXY:4:1671:28284:12273 2:N:0:TCTGCAAG+GCTGCACT  
CAGACGACGAGTCCACCGTTCCATCACATCTTCACGGTGGAAGATTCAACTACAATCTCAGAAT  
GCAGTTGCGGATAAAGCGAGCATGGTGGACTATCCGCATCTGGACGACATTACAACCAGTCCCAGAAT  
TACTGCAGAACCCGT

+

FF:FFFFFFFFFFFFFFFFFFFFFFFFFFFFFFFFFFFFFFFFFFFFFFFFFFFFFFFFFFFFFFFF  
FFFFFFFF:FFFFFFFFFFFFFFFFFFFFFFFFFFFFFFFFFFFFFFFFFFFFFFFFFFFFFFFFFFFF,FFFF  
FFFFFFFF:FF:FF

@A00721:190:HGJW7DSXY:4:2165:10502:15796 2:N:0:TCTGCAAG+GCTGCACT  
CAGACGACGAGTCCACCGTTCCATCACATCTTCACGGTGGAAGATTCAACTACAATCTCAGAAT  
GCAGTTGCGGATAAAGCGAGCATGGTGGACTATCCGCATCTGGACGACATTACAACCAGTCCCAGAAT  
TACTGCAGAACCCGT

+

FFFFFFFFFFFFFFFFFFFFFFFFFFFFFFFFFFFFFFFFFFFFFFFFFFFFFFFFFFFFFFFF,FFFFFFFFFFFFFFFFFFFFFFFF:FFFFFFFF  
FFFFFFFFFFFFFFFFFFFFFFFFFFFFFFFFFFFFFFFFFFFFFFFFFFFFFFFFFFFFFFFF:FFFFFFFFFFFFFFFFFFFFFFFF  
FFFFFFFFFFFFFFFF

@A00721:190:HGJW7DSXY:4:2228:15121:33536 2:N:0:TCTGCAAG+GCTGCACT  
CAGACGACGAGTCCACCGTTCCATCACATCTTCACGGTGGAAGATTCAACTACAATCTCAGAAT  
GCAGTTGCGGATAAAGCGAGCATGGTGGACTATCCGCATCTGGACGACATTACAACCAGTCCCAGAAT  
TACTGCAGAACCCGT

+

FFFFFFFFFFFFFFFFFFFFFFFFFFFFFFFFFFFFFFFFFFFFFFFFFFFFFFFFFFFFFFFF:FFFFFFFFFFFFFFFFFFFFFFFF:F:FF  
FFFFFFFFFFFFFFFF:FFFFFF:FFFFFFFFFFFFFFFFFFFFFFFFFFFFFFFFFFFFFFFF,FFFFFFFFFFFFFFFFFFFFFFFF  
FFFFFFFFFFFFFFFF

@A00721:190:HGJW7DSXY:4:2473:30038:7420 2:N:0:TCTGCAAG+GCTGCACT  
CAGACGACGAGTCCACCGTTCCATCACATCTTCACGGTGGAAGATTCAACTACAATCTCAGAAT  
GCAGTTGCGGATAAAGCGAGCATGGTGGACTATCCGCATCTGGACGACATTACAACCAGTCCCAGAAT  
TACTGCAGAACCCGT

+

FFFFFFFFFFFFFFFFFFFFFFFFFFFFFFFFFFFFFFFFFFFFFFFFFFFFFFFFFFFFFFFF:FFFFFFFF  
FFFFFFFFFFFFFFFFFFFFFFFF:FFFFFFFFFFFFFFFF:FFFFFFFFFFFFFFFFFFFFFFFFFFFFFFFF,FFFF  
FFFFF:FFFFFFFF

@A00721:190:HGJW7DSXY:4:2503:14778:1689 2:N:0:TCTGCAAG+GCTGCACT  
CAGACGACGAGTCCACCGTTCCATCACATCTTCACGGTGGAAGATTCAACTACAATCTCAGAAT  
GCAGTTGCGGATAAAGCGAGCATGGTGGACTATCCGCATCTGGACGACATTACAACCAGTCCCAGAAT  
TACTGCAGAACCCGT

+

FFFFF,FFFFFFFFFFFFFFFFFFFFFFFFFFFFFFFFFFFFFFFFFFFFFFFFFFFFFFFFFFFFFFFF  
FFFFFFFF:FFFFFFFFFFFFFFFFFFFFFFFFFFFFFFFFFFFFFFFFFFFFFFFFFFFFFFFF,FFFFFFFF:FFFF  
FFFFFFFFFFFFFFFF

@A00721:190:HGJW7DSXY:4:2503:17734:14231 2:N:0:TCTGCAAG+GCTGCACT  
CAGACGACGAGTCCACCGTTCCATCACATCTTCACGGTGGAAGATTCAACTACAATCTCAGAAT  
GCAGTTGCGGATAAAGCGAGCATGGTGGACTATCCGCATCTGGACGACATTACAACCAGTCCCAGAAT  
TACTGCAGAACCCGT

+

FFFFFFFFFFFFFFFFFFFFFFFFFFFFFFFFFFFFFFFFFFFFFFFFFFFFFFFFFFFFFFFF  
FFFFF:FFFFFFFFFFFFFFFFFFFFFFFFFFFFFFFFFFFFFFFFFFFFFFFFFFFFFFFFFFFFFFFF  
F:FFFFFFFF

@A00721:190:HGJW7DSXY:4:2575:20518:21840 2:N:0:TCTGCAAG+GCTGCACT  
CAGACGACGAGTCCACCGTTCCATCACATCTTCACGGTGGAAGATTCAACTACAATCTCAGAAT  
GCAGTTGCGGATAAAGCGAGCATGGTGGACTATCCGCATCTGGACGACATTACAACCAGTCCCAGAAT  
TACTGCAGAACCCGT

+  
FF:FFFFFFFFFFFFFFFFFFFFFFFFFFFFFFFFFFFFFFFFFFFFFFFFFFFFFFFFFFFFFFFF:FFF  
FFFFFFFF:FFFFFFFFFFFFFFFFFFFFFFFFFFFFFFFFFFFFFFFFFFFFFFFFFFFFFFFF:FFFFFF:FFFFFFF:F  
FFFFFFFFFFFFFF:F:

@A00721:190:HGJW7DSXY:4:1254:15826:28776 2:N:0:TCTGCAAG+GCTGCACT  
TGGACAGACGACGAGTCCACCGTTCCATCACATCTTCACGGTGGAATAAGATTCAACTACAATCTCA  
GAATGCAGTTGCGGATAAAGCGAGCATGGTGGACTATCCGCATCTGGACGACATTACAACCAGTCCCA  
GAATTACTGCAGAAC

+  
FFFFFFFFFFFFFFFFFFFFFFFFFFFFFFFFFFFFFFFFFFFFFFFFFFFFFFFFFFFFFFFF:FFFFFFFF,F,FFFF  
FFFFFFFFFFFFFFFFFFFFFFFFFFFFFFFFFFFFFFFFFFFFFFFFFFFFFFFFFFFFFFFFFFFFFFFF  
FFFFFFFFFFFFFFFF

@A00721:190:HGJW7DSXY:4:1254:15148:29074 2:N:0:TCTGCAAG+GCTGCACT  
TGGACAGACGACGAGTCCACCGTTCCATCACATCTTCACGGTGGAATAAGATTCAACTACAATCTCA  
GAATGCAGTTGCGGATAAAGCGAGCATGGTGGACTATCCGCATCTGGACGACATTACAACCAGTCCCA  
GAATTACTGCAGAAC

+  
FFFFFFFFFFF:FFFFFFFFFFFFFFFFFFFFFFFFFFFFFFFFFFFFFFFFFFFFFFFF:FF:FF:FFFFFFFFFFFF:FF:  
FFFFF:FFFFFF:FFFFFFFFFFFFFFFFFFFFFFFFFFFFFFFFFFFFFFFFFFFFFFFFFFFFFFFFFFFFFFFF  
FF,FFFFFFFFFFFF

@A00721:190:HGJW7DSXY:4:1304:30978:2816 2:N:0:TCTGCAAG+GCTGCACT  
TGGACAGACGACGAGTCCACCGTTCCATCACATCTTCACGGTGGAATAAGATTCAACTACAATCTCA  
GAATGCAGTTGCGGATAAAGCGAGCATGGTGGACTATCCGCATCTGGACGACATTACAACCAGTCCCA  
GAATTACTGCAGAAC

+  
FFFFFFFFFFFFFFFFFFFFFFFFFFFFFFFFFFFFFFFFFFFFFFFFFFFFFFFF,F:FFFFFFFFFFFFFFFFFFFFF  
FFFFFFFFFFF:FFFFFFFFFFFFFFFFFFFFFFFFFFFFFFFFFFFFFFFFFFFFFFFFFFFFFFFFFFFFFFFF  
FFFFFFFFFFFFFFFF

@A00721:190:HGJW7DSXY:4:1304:29776:3020 2:N:0:TCTGCAAG+GCTGCACT  
TGGACAGACGACGAGTCCACCGTTCCATCACATCTTCACGGTGGAATAAGATTCAACTACAATCTCA  
GAATGCAGTTGCGGATAAAGCGAGCATGGTGGACTATCCGCATCTGGACGACATTACAACCAGTCCCA  
GAATTACTGCAGAAC

+  
FFFFFFFFFFFFFFFFFFFFFFFFFFFFFFFFFFFFFFFFFFFFFFFFFFFFFFFFFFFFFFFFFFFFFFFF  
FFFFFFFFFFFFFFFFFFFFFFFFFFFFFFFFFFFFFFFFFFFFFFFFFFFFFFFFFFFFFFFFFFFFFFFF  
FFFFFFFFFFFFFFFF

@A00721:190:HGJW7DSXY:4:1313:9019:2237 2:N:0:TCTGCAAG+GCTGCACT  
TGGACAGACGACGAGTCCACCGTTCCATCACATCTTCACGGTGGAATAAGATTCAACTACAATCTCA  
GAATGCAGTTGCGGATAAAGCGAGCATGGTGGACTATCCGCATCTGGACGACATTACAACCAGTCCCA  
GAATTACTGCAGAAC

+  
FFFFFFFFFFFFFFFFFFFFFFFFFFFFFFFFFFFFFFFFFFFFFFFFFFFFFFFFFFFFFFFFFFFFFFFF  
FFFFFFFFFFFFFFFFFFFFFFFFFFFFFFFFFFFFFFFFFFFFFFFFFFFFFFFFFFFFFFFFFFFFFFFF  
FFFFFFFFFFFF:FFFF

@A00721:190:HGJW7DSXY:4:1345:27868:5228 2:N:0:TCTGCAAG+GCTGCACT  
TGGACAGACGACGAGTCCACCGTTCCATCACATCTTCACGGTGGAATAAGATTCAACTACAATCTCA  
GAATGCAGTTGCGGATAAAGCGAGCATGGTGGACTATCCGCATCTGGACGACATTACAACCAGTCCCA  
GAATTACTGCAGAAC

+  
FFFFFFFFFFFFFFFFFFFFFFFFFFFFFFFFFFFFFFFFFFFFFFFFFFFFFFFFFFFFFFFF:FFFFFFFFFFFF  
FFFFFFFFFFFFFFFFFFFFFFFFFFFFFFFFFFFFFFFFFFFFFFFFFFFFFFFFFFFFFFFF:FF:FFFFFF  
FFFFFFFFFFFFFFFF

@A00721:190:HGJW7DSXY:4:1345:27579:5854 2:N:0:TCTGCAAG+GCTGCACT  
TGGACAGACGACGAGTCCACCGTTCCATCACATCTTCACGGTGGAATAAGATTCAACTACAATCTCA

GAATGCAGTTGCGGATAAAGCGAGCATGGTGGACTATCCGCATCTGGACGACATTACAACCAGTCCCA  
GAATTACTGCAGAAC

```
FFFFFFFFFFFFFFFFFFFFFFFFFFFFFFFFFFFFFFFFFFFFFFFFFFFF,FFFFFFFFFFFFFFFFFFFFFFFFFFFFF
FFF:FFFFFFFFFF::FFF:FFFFFFFFFFFFFFFFFFFFFFFFFFFF:FFFFFFFFFFFF,FFFFFFFF:FFFFFFF
FF,FF:FFFFFFFF
```

+

[illegible] $+$ [illegible]

+

[illegible]

+

[illegible]

+

```
FFFFFFFFF:FFFFFFFFFFFFFFFFFFFFFFFFFFFFFFFFFFFFFFFFFFFFFFFFFFFFFFFFFF
FFFFFFFFFFFFFFFFFFFFFFFFFFFFFFFFFFFFFFFF:FFFFFFFFFFFFFFFFFFFFFFFFFFFFFF
FFFFFFFFFFFFFFFF
```

+

[illegible]

@A00721:190:HGJW7DSXY:4:2532:4435:10332 2:N:0:TCTGCAAG+GCTGCACT  
TGGACAGACGACGAGTCCACCGTTCCATCACATCTTCACGGTGGAACTAAGATTCAACTACAATCTCA  
GAATGCAGTTGCGGATAAAGCGAGCATGGTGGACTATCCGCATCTGGACGACATTACAACCAGTCCCA  
GAATTACTGCAGAAC

[illegible]

+

[illegible]

+

```
FFFFFFFFFFFFFFFFFFFFFFFFFFFFF,FFFFFFFFFFFFFFFFFFFFFFFFFFF:FFF:
FFF:FF:FFFFFF:FFFFFFFF:FFFFFFFFFFFFFFFFFFFFFFFFF::FFF::FFFFFFF:FFFF
,:FFFFFFFF
```

+

[illegible]

+

[illegible] $+$ [illegible] $+$ [illegible]

FFFFFFFFFFFFFFFFFFFFFFFFFFFFFFFFFFFFFFFFFFFFFFFFFFFFFFFFFFFFFFFFFFFFFFFF  
FFFFF,FFFFFFFFF

@A00721:190:HGJW7DSXY:4:2471:27507:19539 2:N:0:TCTGCAAG+GCTGCACT  
CTCTGGACAGACGACGAGTCCACCGTTCCATCACATCTTCACGGTGGAATAAGATTCAACTACAATC  
TCAGAATGCAGTTGCGGATAAAGCGAGCATGGTGGACTATCCGCATCTGGACGACATTACAACCAGTC  
CCAGAATTACTGCAG

+

FFFFFFFFFFFFFFFFFFFFFFFFFFFFFFFFFFFFFFFFFFFFFFFFFFFFFFFFFFFFFFFFFFFFFFFF,F:FFFFFFFFFFFF:FFFFFFF  
FFFFFFFFFFFFFFFFFFFFFFFFFFFFFFFFFFFFFFFFFFFFFFFFFFFFFFFFFFFFFFFFFFFFFFFF:F:FFFFFFFFFFFF  
FFFFFFFFFFFFFFFFFFFF

@A00721:190:HGJW7DSXY:4:2471:27706:19758 2:N:0:TCTGCAAG+GCTGCACT  
CTCTGGACAGACGACGAGTCCACCGTTCCATCACATCTTCACGGTGGAATAAGATTCAACTACAATC  
TCAGAATGCAGTTGCGGATAAAGCGAGCATGGTGGACTATCCGCATCTGGACGACATTACAACCAGTC  
CCAGAATTACTGCAG

+

FFFFFFFFFFFFFFFFFFFFFFFFFFFFFFFFFFFFFFFFFFFFFFFFFFFFFFFFFFFFFFFFFFFFFFFF  
FFFFFFFFFFFFFFFFFFFFFFFFFFFFFFFFFFFFFFFFFFFFFFFFFFFFFFFFFFFFFFFFFFFFFFFF  
FFFFFFFFFFFFFFFFFFFF:

@A00721:190:HGJW7DSXY:4:1173:16803:32409 2:N:0:TCTGCAAG+GCTGCACT  
CCAACACTCTGGACAGACGACGAGTCCACCGTTCCATCACATCTTCACGGTGGAATAAGATTCAACT  
ACAATCTCAGAATGCAGTTGCGGATAAAGCGAGCATGGTGGACTATCCGCATCTGGACGACATTACAA  
CCAGTCCCAGAATTA

+

FFFFFFFFFFFFFFFFFFFFFFFFFFFFFFFFFFFFFFFFFFFFFFFFFFFFFFFFFFFFFFFFFFFFFFFF  
FFFFFFFFFFFFFFFFFFFFFFFFFFFFFFFFFFFFFFFFFFFFFFFFFFFFFFFFFFFFFFFFFFFFFFFF  
FF:FFFFFFFFFFFFF

@A00721:190:HGJW7DSXY:4:1319:6777:4460 2:N:0:TCTGCAAG+GCTGCACT  
CCAACACTCTGGACAGACGACGAGTCCACCGTTCCATCACATCTTCACGGTGGAATAAGATTCAACT  
ACAATCTCAGAATGCAGTTGCGGATAAAGCGAGCATGGTGGACTATCCGCATCTGGACGACATTACAA  
CCAGTCCCAGAATTA

+

FFFFFFFFFFFFFFFFFFFFFFFFFFFFFFFFFFFFFFFFFFFFFFFFFFFFFFFFFFFFFFFFFFFFFFFF,F:FFFFFFFFFFFF  
FFFFFFFFFFFFFFFFFFFFFFFFFFFFFFFFFFFFFFFFFFFFFFFFFFFFFFFFFFFFFFFFFFFFFFFF  
FFFFFFFFFFFFFFFFFFFF:

@A00721:190:HGJW7DSXY:4:2131:23773:27915 2:N:0:TCTGCAAG+GCTGCACT  
CCAACACTCTGGACAGACGACGAGTCCACCGTTCCATCACATCTTCACGGTGGAATAAGATTCAACT  
ACAATCTCAGAATGCAGTTGCGGATAAAGCGAGCATGGTGGACTATCCGCATCTGGACGACATTACAA  
CCAGTCCCAGAATTA

+

FFFFFFFFFFFFFFFFFFFFFFFFFFFFFFFFFFFFFFFFFFFFFFFFFFFFFFFFFFFFFFFFFFFFFFFF:F:FFFFFFFFFFFF  
FFFFFFFFFFFFFFFFFFFFFFFFFFFFFFFFFFFFFFFFFFFFFFFFFFFFFFFFFFFFFFFFFFFFFFFF  
FFFFFFFFFFFFFFFFFFFF

@A00721:190:HGJW7DSXY:4:2221:25798:27633 2:N:0:TCTGCAAG+GCTGCACT  
CCAACACTCTGGACAGACGACGAGTCCACCGTTCCATCACATCTTCACGGTGGAATAAGATTCAACT  
ACAATCTCAGAATGCAGTTGCGGATAAAGCGAGCATGGTGGACTATCCGCATCTGGACGACATTACAA  
CCAGTCCCAGAATTA

+

FFFFFFFFFFFFFFFFFFFFFFFFFFFFFFFFFFFFFFFFFFFFFFFFFFFFFFFFFFFFFFFFFFFFFFFF:F:FFFFFFF  
FFFFFFFFFFFFFFFFFFFFFFFFFFFFFFFFFFFFFFFFFFFFFFFFFFFFFFFFFFFFFFFFFFFFFFFF  
FFFFFFFFFFFFFFFFFFFF

@A00721:190:HGJW7DSXY:4:2529:22896:9267 2:N:0:TCTGCAAG+GCTGCACT  
CCAACACTCTGGACAGACGACGAGTCCACCGTTCCATCACATCTTCACGGTGGAATAAGATTCAACT  
ACAATCTCAGAATGCAGTTGCGGATAAAGCGAGCATGGTGGACTATCCGCATCTGGACGACATTACAA  
CCAGTCCCAGAATTA



```
FFF:FFFFFFFFFFFFFFFFFFFFFFFF:FFFFFFFFFFFFFF:FFFFFFFFFFFFFFFFFFFFFFFF:FFF
FFFFFFFFFFFFFFFFFFFFFFFFFFFFFFFFFFFFFFFF:FFFFFFFFFFFFFFFFFFFFFFFFFFFFFFFF:FFF:F
FFFFFFFFFFFFFFF,:
```

[illegible][illegible][illegible][illegible]

```

FFFFFFFFFFFF:FFFFFFFFFFFFFFFFFFFFFFFFFFFFFFFFFFFFFFFFFFFF,FF,:FF
FFFFFFFFFFFFFFFFFFFFFFFFFFFFFFFFFFFFFFFFFFFF:FFFFFFFFFFFFFFFFFFFFFFFF
FFFFFFFFFFFF:FFFFF

```

```
FFFFFFFFFFFFFFFFFFFFFFFFFFFFFFFFFFFFFFFFFFFFFFFFFFFFFFFFFFFFFFF
FFFFFFFFFFFFFFFFFFFFF:FFFFFFFFFFFFFFFFFFFFFFFFFFFFFFFFFFFFFFFFF
FFFFFFFFFF,FFFFF
```

@A00721:190:HGJW7DSXY:4:1415:31901:33160 2:N:0:TCTGCAAG+GCTGCACT  
TACGAGTCCAACACTCTGGACAGACGACGAGTCCACCGTTCCATCACATCTTCACGGTGGAACTAAGA

TTCAACTACAATCTCAGAATGCAGTTGCGGATAAAGCGAGCATGGTGGACTATCCGCATCTGGACGAC  
ATTACAACCAGTCCC

+

FFFFFFFFFFFFFFFFFFFFFFFFFFFFFFFFFFFFFFFFFFFFFFFFFFFFFFFFFFFFFFFFFFFFFFFF  
FFFFFFFFFFFFFFFFFFFFFFFFFFFFFFFFFFFFFFFFFFFFFFFFFFFFFFFFFFFFFFFFFFFFFFFF  
F:FFFFFFFFFFFFFFF

@A00721:190:HGJW7DSXY:4:1415:30770:33739 2:N:0:TCTGCAAG+GCTGCACT  
TACGAGTCCAACACTCTGGACAGACGACGAGTCCACCGTTCCATCACATCTTCACGGTGGAACTAAGA  
TTCAACTACAATCTCAGAATGCAGTTGCGGATAAAGCGAGCATGGTGGACTATCCGCATCTGGACGAC  
ATTACAACCAGTCCC

+

FFF:FFFFFF:FFFFFFFFFFFFFFFFFFFFFFFFFFFFFFFFFFFFFFFFFFFFFFFFFFFFFFFFFFFF  
FFFFFFFFF,FFF,FFFFFFFFFFFFFFF,FFFFF::F:FFFFFFFFFFFFFFFFFFFFFFFFFFFFFFF,FF  
:FFFFFF:FF::F,F

@A00721:190:HGJW7DSXY:4:1547:4770:15295 2:N:0:TCTGCAAG+GCTGCACT  
TACGAGTCCAACACTCTGGACAGACGACGAGTCCACCGTTCCATCACATCTTCACGGTGGAACTAAGA  
TTCAACTACAATCTCAGAATGCAGTTGCGGATAAAGCGAGCATGGTGGACTATCCGCATCTGGACGAC  
ATTACAACCAGTCCC

+

FFFFF:FFFF:FFFFFFFFFFFFFFFFFFFFFFFFFFFFFFFFFFFFFFFFFFFFFFFFFFFFFFFFFFFF  
FFFFFFFFFFFFFFFFFFFFFFFFFFFFFFFFFFFFFFFFFFFFFFFFFFFFFFFFFFFFFFFFFFFFFFFF  
F:F,:FFFFFFFFF

@A00721:190:HGJW7DSXY:4:2129:3314:13401 2:N:0:TCTGCAAG+GCTGCACT  
TACGAGTCCAACACTCTGGACAGACGACGAGTCCACCGTTCCATCACATCTTCACGGTGGAACTAAGA  
TTCAACTACAATCTCAGAATGCAGTTGCGGATAAAGCGAGCATGGTGGACTATCCGCATCTGGACGAC  
ATTACAACCAGTCCC

+

FFFFFFFFFFFFFFFFFFFFFFFFFFFFFFFFFFFFFFFFFFFFFFFFFFFFFFFFFFFFFFFFFFFFFFFF  
FFFFFFFFFFFFFFFFFFFFFFFFFFFFFFFFFFFFFFFFFFFFFFFFFFFFFFFFFFFFFFFFFFFFFFFF  
FFFFFFFFF:FFFFF,F

@A00721:190:HGJW7DSXY:4:2139:29225:35446 2:N:0:TCTGCAAG+GCTGCACT  
TACGAGTCCAACACTCTGGACAGACGACGAGTCCACCGTTCCATCACATCTTCACGGTGGAACTAAGA  
TTCAACTACAATCTCAGAATGCAGTTGCGGATAAAGCGAGCATGGTGGACTATCCGCATCTGGACGAC  
ATTACAACCAGTCCC

+

FFFFFFFFFFFFFFFFFFFFFFFFFFFFFFFFFFFFFFFFFFFFFFFFFFFFFFFFFFFFFFFFFFFFFFFF  
FFFFFFFFFFFFFFFFFFFFFFFFFFFFFFFFFFFFFFFFFFFFFFFFFFFFFFFFFFFFFFFFFFFFFFFF  
FFFFFFFFFFFFFFFFF

@A00721:190:HGJW7DSXY:4:2326:4779:25645 2:N:0:TCTGCAAG+GCTGCACT  
TACGAGTCCAACACTCTGGACAGACGACGAGTCCACCGTTCCATCACATCTTCACGGTGGAACTAAGA  
TTCAACTACAATCTCAGAATGCAGTTGCGGATAAAGCGAGCATGGTGGACTATCCGCATCTGGACGAC  
ATTACAACCAGTCCC

+

F:FFFFFFFFFFFFFFFFFFFFFFFFFFFFFFFFFFFFFFFFFFFFFFFFFFFFFFFFFFFFFFFFFFFFF,FFFFFF  
FFFFFFFFFFFFFFFFFFFFFFFFFFFFFFFFFFFFFFFFFFFFFFFFFFFFFFFFFFFFFFFFFFFFFFFF  
FFFFFFFFF:FFFFF

@A00721:190:HGJW7DSXY:4:2333:6234:26537 2:N:0:TCTGCAAG+GCTGCACT  
TACGAGTCCAACACTCTGGACAGACGACGAGTCCACCGTTCCATCACATCTTCACGGTGGAACTAAGA  
TTCAACTACAATCTCAGAATGCAGTTGCGGATAAAGCGAGCATGGTGGACTATCCGCATCTGGACGAC  
ATTACAACCAGTCCC

+

FFFFFFFFFFFFFFFFF:FFFFFFFF:FFFFFFFFFFFFFFFFFFFFFFFFFFFFFFFFFFFFFFFFFFFFF:FFFFFFFF:FF  
FFFFFFFF:FFFFFFFFFFFFFFFFFFFFFFFFFFFFFFFFFFFFFFFFFFFFFFFFFFFFFFFFFFFFF,FFFFFFFF:FFFFFFFFFFFFFFFF  
FFFFFFFFFFFFFFFFF,F

@A00721:190:HGJW7DSXY:4:2372:19524:9690 2:N:0:TCTGCAAG+GCTGCACT  
TACGAGTCCAACACTCTGGACAGACGACGAGTCCACCGTTCCATCACATCTTCACGGTGGAACTAAGA  
TTCAACTACAATCTCAGAATGCAGTTGCGGATAAAGCGAGCATGGTGGACTATCCGCATCTGGACGAC  
ATTACAACCAGTCCC

```
FFFFFFFFFFFFFFFFFFFFFFFFFFFFFFFFFFFFFFFFFFFFFFFFFFFFFFFFFFFFFFF
FFFFFFFFFFFFFFFFFFFFFFFFFFFF:FFFFFFFFFFFFFFFFFFFFFFFFFFFFFFFFFFF
FFFFFFFFFFFFFFFF
```

+

[illegible]

+

[illegible]

+

```

FFFFFFFFFFFFFFFFFFFFFFFFFFFFFFFFFFFFFFFFFFFFFFFFFFFFFFFFFFFFFFFF
FFFFFFFFFFFFFFFFFFFFFFFF:FFFFFFFFFFFFFFFFFFFFFFFFFFFFFFFFFFFFFFFF
FFFFFFFFFFFFFFFF

```

+

```
FFFFFFFFFFFFFFFFFFFFF:FFFFFFFFFFFFFFFFFFFFFFFFFFFFFFFF  
FFFFFFFFFFFFFFFFFFFFF:FFFFFFFFFFFFFFFFFFFFFFFFFFFFFF,  
FFFFFFFF:
```

+

[illegible] $+$ 

FFFFFFFFFFFFFFFFFFFFFFFF:F,FFFFFFFFFFFFFFFF:FFFFFFFFFFFFFFFFFFFFFFFF,FFF

F:FFFFFFFF:FFFFFF:FFFF:FFFFFFFFFFFFFFFFFFFF,FFFFFFFF:FFFFF,FFF  
FFFFFFFFFFFFFFFF

@A00721:190:HGJW7DSXY:4:2312:1253:25958 2:N:0:TCTGCAAG+GCTGCACT  
AAACAATCCAATATGGATACGAGTCCAACACTCTGGACAGACGACGAGTCCACCGTTCCATCACATCTT  
CACGGTGGAATAAGATTCAACTACAATCTCAGAATGCAGTTGCGGATAAAGCGAGCATGGTGGACTA  
TCCGCATCTGGACGA

+

FFFFFFFFFFFFFFFFFFFFFFFFFFFFFFFFFFFFFFFFFFFFFFFFFFFFFFFFFFFFFFFFFFFF  
FFFFFFFFFFFFFFFFFFFFFFFFFFFFFFFFFFFFFFFFFFFFFFFFFFFFFFFFFFFFFFFFFFFF:FFFFFFFF  
FFFFFFFFFFFFFFFF

@A00721:190:HGJW7DSXY:4:2448:31232:32095 2:N:0:TCTGCAAG+GCTGCACT  
AAACAATCCAATATGGATACGAGTCCAACACTCTGGACAGACGACGAGTCCACCGTTCCATCACATCTT  
CACGGTGGAATAAGATTCAACTACAATCTCAGAATGCAGTTGCGGATAAAGCGAGCATGGTGGACTA  
TCCGCATCTGGACGA

+

FFFFFFFFFFFFFFFFFFFFFFFFFFFFFFFFFFFFFFFFFFFFFFFFFFFFFFFFFFFFFFFFFFFF  
FFFFFFFF:FFF:FFFFFF:FFFFFFFFFFFFFFFFFFFFFFFFFFFFFFFFFFFFFFFFFFFFFFFFFFFF  
FFFFFF:FFFFFFFF

@A00721:190:HGJW7DSXY:4:1350:25825:7921 2:N:0:TCTGCAAG+GCTGCACT  
AAACAATCCAATATGGATACGAGTCCAACACTCTGGACAGACGACGAGTCCACCGTTCCATCACATCT  
TCACGGTGGAATAAGATTCAACTACAATCTCAGAATGCAGTTGCGGATAAAGCGAGCATGGTGGACT  
ATCCGCATCTGGACG

+

FFFFFFFFFFFFFFFFFFFFFFFFFFFFFFFFFFFFFFFFFFFFFFFFFFFFFFFFFFFFFFFFFFFF  
FFFFFFFFFFFFFFFFFFFFFFFFFFFFFFFFFFFFFFFFFFFFFFFFFFFFFFFFFFFFFFFFFFFF  
FFFFFFFFFFFFFFFF

@A00721:190:HGJW7DSXY:4:1415:17499:15953 2:N:0:TCTGCAAG+GCTGCACT  
AAACAATCCAATATGGATACGAGTCCAACACTCTGGACAGACGACGAGTCCACCGTTCCATCACATCT  
TCACGGTGGAATAAGATTCAACTACAATCTCAGAATGCAGTTGCGGATAAAGCGAGCATGGTGGACT  
ATCCGCATCTGGACG

+

FFFFFFFFFFFFFFFFFFFFFFFFFFFFFFFFFFFFFFFFFFFFFFFFFFFFFFFFFFFFFFFFFFFF  
FFFFFF:FFF:FFFFFFFFFFFFFFFFFFFFFFFFFFFF: :FFFF:FFFFFFFFFFFFFFFF:FFFFFFF  
FFFFFFFFFFFFFFFF

@A00721:190:HGJW7DSXY:4:2232:4869:13369 2:N:0:TCTGCAAG+GCTGCACT  
AAACAATCCAATATGGATACGAGTCCAACACTCTGGACAGACGACGAGTCCACCGTTCCATCACATCT  
TCACGGTGGAATAAGATTCAACTACAATCTCAGAATGCAGTTGCGGATAAAGCGAGCATGGTGGACT  
ATCCGCATCTGGACG

+

FFFFFFFFFFFFFFFFFFFFFFFFFFFFFFFFFFFFFFFFFFFFFFFFFFFFFFFFFFFFFFFFFFFF  
FFFFFFFFFFFFFFFFFFFF:FFFFFFFFFFFFFFFFFFFFFFFFFFFFFFFFFFFFFFFFFFFFFFFFFFFF  
FFFFFFFFFFFFFFFF:

@A00721:190:HGJW7DSXY:4:2246:28565:20337 2:N:0:TCTGCAAG+GCTGCACT  
AAACAATCCAATATGGATACGAGTCCAACACTCTGGACAGACGACGAGTCCACCGTTCCATCACATCT  
TCACGGTGGAATAAGATTCAACTACAATCTCAGAATGCAGTTGCGGATAAAGCGAGCATGGTGGACT  
ATCCGCATCTGGACG

+

FFFFFFFFFFFFFFFFFFFFFFFFFFFFFFFFFFFFFFFFFFFFFFFFFFFFFFFFFFFFFFFFFFFF  
FFFFFFFFFFFFFFFFFFFFFFFFFFFFFFFFFFFFFFFFFFFFFFFFFFFFFFFFFFFFFFFFFFFF:FFFFFFFFFFFFFFFFFFFFFFFFFFFF  
FFFFFFFFFFFFFFFF

@A00721:190:HGJW7DSXY:4:2678:2645:10363 2:N:0:TCTGCAAG+GCTGCACT  
AAACAATCCAATATGGATACGAGTCCAACACTCTGGACAGACGACGAGTCCACCGTTCCATCACATCT  
TCACGGTGGAATAAGATTCAACTACAATCTCAGAATGCAGTTGCGGATAAAGCGAGCATGGTGGACT  
ATCCGCATCTGGACG

+  
FFFFFFFFFFFFFFFFFFFFFFFFFFFFFFFFFFFFFFFFFFFFFFFFFFFFFFFFFFFFFFFFFFFFFFFF  
FFFFFFFFFFFFFFFFFFFFFFFFFFFFFFFFFFFFFFFFFFFFFFFFFFFFFFFFFFFFFFFFFFFFFFFF  
FFFFFFFFFFFFFFFF

@A00721:190:HGJW7DSXY:4:1309:14633:10457 2:N:0:TCTGCAAG+GCTGCACT  
AAACAATCCAATATGGATACGAGTCCAACACTCTGGACAGACGACGAGTCCACCGTTCCATCACATCT  
TCACGGTGGAACTAAGATTCAACTACAATCTCAGAATGCAGTTGCGGATAAAGCGAGCATGGTGGACT  
ATCCGCATCTGGACA

+  
FFFFFFFFFFFFFFFFFFFFFFFFFFFFFFFFFFFFFFFFFFFFFFFFFFFFFFFFFFFFFFFFFFFFFFFF  
FFFFFFFFFFFFFFFFFFFFFFFFFFFFFFFFFFFFFFFFFFFFFFFFFFFFFFFFFFFFFFFFFFFFFFFF  
FFFFFFFFFFFFFFFF

@A00721:190:HGJW7DSXY:4:1309:14678:10504 2:N:0:TCTGCAAG+GCTGCACT  
AAACAATCCAATATGGATACGAGTCCAACACTCTGGACAGACGACGAGTCCACCGTTCCATCACATCT  
TCACGGTGGAACTAAGATTCAACTACAATCTCAGAATGCAGTTGCGGATAAAGCGAGCATGGTGGACT  
ATCCGCATCTGGACA

+  
FFFFFFFFFFFFFFFFFFFFFFFFFFFFFFFFFFFFFFFFFFFFFFFFFFFFFFFFFFFFFFFFFFFFFFFF  
FFFFFFFFFFFFFFFFFFFFFFFFFFFFFFFFFFFFFFFFFFFFFFFFFFFFFFFFFFFFFFFFFFFFFFFF  
FFFFFFFF,FFFFFF

@A00721:190:HGJW7DSXY:4:2643:29423:15812 2:N:0:TCTGCAAG+GCTGCACT  
AAACAATCCAATATGGATACGAGTCCAACACTCTGGACAGACGACGAGTCCACCGTTCCATCACATCT  
TCACGGTGGAACTAAGATTCAACTACAATCTCAGAATGCAGTTGCGGATAAAGCGAGCATGGTGGACT  
ATCCGCATCTGGACA

+  
FFFFFFFFFFFFFFFFFFFFFFFFFFFFFFFFFFFFFFFFFFFFFFFFFFFFFFFFFFFFFFFFFFFFFFFF  
FFFFFFFFFFFFFFFFFFFFFFFFFFFFFFFFFFFFFFFFFFFFFFFFFFFFFFFFFFFFFFFFFFFFFFFF  
FFFFFFF:FFFFFF

@A00721:190:HGJW7DSXY:4:1617:17788:21089 2:N:0:TCTGCAAG+GCTGCACT  
AAACAATCCAATATGGATACGAGTCCAACACTCTGGACAGACGACGAGTCCACCGTTCCATCACATCT  
TCACGGTGGAACTAAGATTCAACTACAATCTCAGAATGCAGTTGCGGATAAAGCGAGCATGGTGGACT  
ATCCGCATCTGGAC

+  
FFFFFFFFFFFFFF:FFFF:FFFFFFFFFFFFFFFFFFFFFFFFFFFFFFFFFFFFFFFFFFFFFFFF  
FFFFFFFFFFFFFF:FFFFFFFFFF:FF:F,FFFF:FFFFFF:FFFFFFFFFFFFFFFFFFFF,FFF:,FFF  
FFFFFFFFFFFFFF

@A00721:190:HGJW7DSXY:4:1235:27010:19523 2:N:0:TCTGCAAG+GCTGCACT  
AAACAATCCAATATGGATACGAGTCCAACACTCTGGACAGACGACGAGTCCACCGTTCCATCACATCT  
TCACGGTGGAACTAAGATTCAACTACAATCTCAGAATGCAGTTGCGGATAAAGCGAGCATGGTGGACT  
ATCCGCATCCGGAGA

+  
FFFFFFFFFFFFFFFFFFFFFFFFFFFFFFFFFFFFFFFFFFFFFFFFFFFFFFFFFFFFFFFFFFFFFFFF  
FF,FFFFFFFFFFFFFFFFFFFFFFFFFFFFFFFFFFFFFFFFFFFFFFFFFFFFFFFFFFFFFFFFFFFF  
FFFFFFF,FFFFFFF

@A00721:190:HGJW7DSXY:4:1269:2139:6637 2:N:0:TCTGCAAG+GCTGCACT  
AAACAATCCAATATGGATACGAGTCCAACACTCTGGACAGACGACGAGTCCACCGTTCCATCACATCT  
TCACGGTGGAACTAAGATTCAACTACAATCTCAGAATGCAGTTGCGGATAAAGCGAGCATGGTGGACT  
ATCCGCATCCGGAGA

+  
FFFFFFFFFFFFFFFFFFFFFFFFFFFFFFFFFFFFFFFFFFFFFFFFFFFFFFFFFFFFFFFFFFFFFFFF  
FFFFFFFFFFFF,F:FFFFFFFFFFFFFFFFFFFFFFFFFFFFFFFFFFFFFFFFFFFFFFFFFFFFFFFF  
FFFFFFFFFFFFFFFF

@A00721:190:HGJW7DSXY:4:1302:28402:3490 2:N:0:TCTGCAAG+GCTGCACT  
AAACAATCCAATATGGATACGAGTCCAACACTCTGGACAGACGACGAGTCCACCGTTCCATCACATCT





FFFFFFFFFFFFFFFFFFFFFFFFFFFFFFFFFFFFFFFFFFFFFFFFFFFFFFFFFFFFFFFFFFFFFFFFFFFFFFFF  
FFFFFFFFFFFFFFFF

@A00721:190:HGJW7DSXY:4:1640:4860:13041 2:N:0:TCTGCAAG+GCTGCACT  
CTGGAACCTAAACAATCCAATATGGATACGAGTCCAACACTCTGGACAGACGACGAGTCCACCGTTCC  
ATCACATCTTCACGGTGGAACTAAGATTCAACTACAATCTCAGAATGCAGTTGCGGATAAAGCGAGCA  
TGGTGGACTATCCGC

+

FFFFFFFFFFFFFFFFFFFFFFFFFFFFFFFFFFFFFFFFFFFFFFFFFFFFFFFFFFFFFFFFFFFFFFFFFFFFFFFF  
FFFFFFFFFFFFFFFFFFFFFFFFFFFFFFFFFFFFFFFFFFFFFFFFFFFFFFFFFFFFFFFFFFFFFFFFFFFFFFFF  
,FFFFFFFFFFFFFFFF

@A00721:190:HGJW7DSXY:4:2355:4435:23328 2:N:0:TCTGCAAG+GCTGCACT  
CTGGAACCTAAACAATCCAATATGGATACGAGTCCAACACTCTGGACAGACGACGAGTCCACCGTTCC  
ATCACATCTTCACGGTGGAACTAAGATTCAACTACAATCTCAGAATGCAGTTGCGGATAAAGCGAGCA  
TGGTGGACTATCCGC

+

FFFFFFFFFFFFFFFFFFFFFFFFFFFFFFFFFFFFFFFFFFFFFFFFFFFFFFFFFFFFFFFFFFFFFFFFFFFFFFFF  
FFFFFFFFFFFFFFFFFFFFFFFFFFFFFFFFFFFFFFFFFFFFFFFFFFFFFFFFFFFFFFFFFFFFFFFFFFFFFFFF  
FFFFFFFFFFFFFFFFFFFFFFFFFFFFFFFFFFFFFFFFFFFFFFFFFFFFFFFFFFFFFFFFFFFFFFFFFFFFFFFF

@A00721:190:HGJW7DSXY:4:2607:15347:23657 2:N:0:TCTGCAAG+GCTGCACT  
CTGGAACCTAAACAATCCAATATGGATACGAGTCCAACACTCTGGACAGACGACGAGTCCACCGTTCC  
ATCACATCTTCACGGTGGAACTAAGATTCAACTACAATCTCAGAATGCAGTTGCGGATAAAGCGAGCA  
TGGTGGACTATCCGC

+

FFFFF::FF:F,FFFFFFFF:FFFFFFFFFFFFFFFFFFFFFFFFFFFFFFFFFFFFFFFFFFFFFFFFFFFFFFFF  
FFFFFFFFFFFFFFFFFFFFFFFFFFFFFFFFFFFFFFFFFFFFFFFFFFFFFFFFFFFFFFFFFFFFFFFFFFFFFFFF  
FFFFFFFFFFFFFFFFFFFFFFFFFFFFFFFFFFFFFFFFFFFFFFFFFFFFFFFFFFFFFFFFFFFFFFFFFFFFFFFF

@A00721:190:HGJW7DSXY:4:1127:19596:2675 2:N:0:TCTGCAAG+GCTGCACT  
CTGGAACCTAAACAATCCAATATGGATACGAGTCCAACACTCTGGACAGAAGACGAGTCCACCGTTCC  
ATCACAGCTTCACGGTGGAACTAAGATTCAACTACAATCTCAGAATGCAGTTGCGGATAAAGCGAGCA  
TGGTGGACTATCCG

+

FFFFF:FF::FFFFF:FFFFF:FFFFF:FF:F:FF:FFFFFFFFFFFFFFFF,FFFFF:FF,FFFFFFFF  
FFFFF,,FFFFFFFFFFFF:FFFFF:FFF:FFFF,FFFFFF:FF:FFFFFFFFFFFFFFFF:FFF,FFFF,,  
,:FFFFFF:FFFF

@A00721:190:HGJW7DSXY:4:1501:31611:23578 2:N:0:TCTGCAAG+GCTGCACT  
ACTGGAACCTAAACAATCCAATATGGATACGAGTCCAACACTCTGGACAGACGACGAGTCCACCGTTCC  
CATCACATCTTCACGGTGGAACTAAGATTCAACTACAATCTCAGAATGCAGTTGCGGATAAAGCGAGC  
ATGGTGGACTATCCG

+

FFFFFFFFFFFFFFFFFFFFFFFFFFFFFFFFFFFFFFFFFFFFFFFFFFFFFFFFFFFFFFFFFFFFFFFFFFFFFFFF  
FFFFFFFFFFFFFFFFFFFFFFFFFFFFFFFFFFFFFFFFFFFFFFFFFFFFFFFFFFFFFFFFFFFFFFFFFFFFFFFF  
FFFFFFFFFFFFFFFFFFFFFFFF

@A00721:190:HGJW7DSXY:4:1502:24831:24142 2:N:0:TCTGCAAG+GCTGCACT  
ACTGGAACCTAAACAATCCAATATGGATACGAGTCCAACACTCTGGACAGACGACGAGTCCACCGTTCC  
CATCACATCTTCACGGTGGAACTAAGATTCAACTACAATCTCAGAATGCAGTTGCGGATAAAGCGAGC  
ATGGTGGACTATCCG

+

FFFFFFFFF:FFFFFFFFFFFFFFFFFFFFFFFFFFFFFFFFFFFFFFFFFFFFFFFFFFFFFFFFFFFFFFFFFFFF  
FFFFFFFFFFFFFFFFFFFFFFFFFFFFFFFFFFFFFFFFFFFFFFFFFFFFFFFFFFFFFFFFFFFFFFFFFFFFFFFF  
F,FFFFFFFFFFFFFFFF

@A00721:190:HGJW7DSXY:4:1523:19506:28917 2:N:0:TCTGCAAG+GCTGCACT  
ACTGGAACCTAAACAATCCAATATGGATACGAGTCCAACACTCTGGACAGACGACGAGTCCACCGTTCC  
CATCACATCTTCACGGTGGAACTAAGATTCAACTACAATCTCAGAATGCAGTTGCGGATAAAGCGAGC  
ATGGTGGACTATCCG



[illegible]

```
:FFFFFF:FFFFFF:FFFFFFFFFFFFFFFFFFFFFFFFFFFFFFFFFFFFFFFFFFFFFFFFFFFF:FF  
FFFFFFFF,FFFFFFFFFFFFFF:FFFFFFFFFFFFFFFFFFFFFFFFFFFF:FFFFFFF:FFFFFFFFFFF,FFF  
,FFFFFFFFF:FFFFF
```

[illegible]

```

FFFFFFFFFFFFFFFFFFFFFFFFFFFFFFFFFFFFFFFFFFFFFFFFFFFFFFFFFFFFFFFFFFFFFFFF
FFFFFFFFFFFFFFFFFFFFFFFFFFFFFFFF:FFFFFFFFFFFF:FFFF:FFFFFFFFFFFFFFFFFFFF
:FFFFFFFFFFFFFFFF

```

[illegible][illegible][illegible]

@A00721:190:HGJW7DSXY:4:2148:5475:26130 2:N:0:TCTGCAAG+GCTGCACT  
ACTGGAACCTAAACAATCCAATATGGATACGAGTCCAACACTCTGGACAGACGACGAGTCCACCGTTC



$+$ 

+

+

+

+

+

+

---



+  
FFFFFFFF:FFFFFFFFFFFFFFFFFFFFFFFFFFFFFFFFFFFFFFFFFFFFFFFFFFFFFFFFFFFFFFFF  
FF:FFFFFFFF,FFFFFFFFFFFFFFFFFFFFFFFFFFFFFFFFFFFFFFFFFFFFFFFFFFFFFFFF:F:FFFFFF,FFFFF  
FFFFFFFFFFFFFFFF

@A00721:190:HGJW7DSXY:4:1619:25464:8108 2:N:0:TCTGCAAG+GCTGCACT  
GTCCACCATGCTCGCTTTATCCGCAACTGCATTCTGAGATTGTAGTTGAATCTTAGTTCCACCGTGAA  
GATGTGATGGAACGGTGGACTCGTCGTCTGTCCAGAGTGTTGGACTCGTATCCATATTGGATTGTTTA  
GGTTCCAGTAGTACT

+  
FFF:FFFFFFFF:F,FFFFFFFF:FFFF::FFFF:FFFFFFFF:F,:::FFFFFFFF:FFFF:F:FFFF  
FFFFFFFF:FFFFF:FF:FF,FF:FF:FFFF,F,F::F::FFF,,FFFF,,FFFF,FFFF:FFF  
::FFF,FFFF,FFF

@A00721:190:HGJW7DSXY:4:2120:11234:29590 2:N:0:TCTGCAAG+GCTGCACT  
GTCCACCATGCTCGCTTTATCCGCAACTGCATTCTGAGATTGTAGTTGAATCTTAGTTCCACCGTGAA  
GATGTGATGGAACGGTGGACTCGTCGTCTGTCCAGAGTGTTGGACTCGTATCCATATTGGATTGTTTA  
GGTTCCAGTAGTACT

+  
FFFFFFFFFFFFFFFFFFFFFFFFFFFFFFFFFFFFFFFFFFFFFFFFFFFFFFFFFFFFFFFFFFFFFFFF:  
FFFFFFFFFFFFFFFFFFFFFFFFFFFFFFFFFFFFFFFFFFFFFFFFFFFFFFFFFFFFFFFFFFFFFFFF:FFFF,FFFFF  
FFFFFFFFFFFFFFFF

@A00721:190:HGJW7DSXY:4:1133:23339:3114 2:N:0:TCTGCAAG+GCTGCACT  
GGGAGTACTACTGGAACCTAAACAATCCAATATGGATACGAGTCCAACACTCTGGACAGACGACGAGT  
CCACCGTTCCATCACATCTTCACGGTGGAATAAGATTCAACTACAATCTCAGAATGCAGTTGCGGAT  
AAAGCGAGCATGGTG

+  
FFFFFFFFFFFFFFFFFFFFFFFFFFFFFFFFFFFFFFFFFFFFFFFFFFFFFFFFFFFFFFFFFFFFFFFF:  
FFFFFFFFFFFFFFFFFFFFFFFFFFFFFFFFFFFFFFFFFFFFFFFFFFFFFFFFFFFFFFFFFFFFFFFF:FFF  
FFFFFFFFFFFF,FF

@A00721:190:HGJW7DSXY:4:1136:22498:3568 2:N:0:TCTGCAAG+GCTGCACT  
GGGAGTACTACTGGAACCTAAACAATCCAATATGGATACGAGTCCAACACTCTGGACAGACGACGAGT  
CCACCGTTCCATCACATCTTCACGGTGGAATAAGATTCAACTACAATCTCAGAATGCAGTTGCGGAT  
AAAGCGAGCATGGTG

+  
FFFFFFFFFFFFFFFFFFFFFFFFFFFFFFFFFFFFFFFFFFFFFFFFFFFFFFFFFFFFFFFFFFFFFFFF  
FFFFFFFFFFFFFFFFFFFFFFFFFFFFFFFFFFFFFFFFFFFFFFFFFFFFFFFFFFFFFFFFFFFFFFFF:  
FFFFF:FFFFFFFF

@A00721:190:HGJW7DSXY:4:1534:26594:2957 2:N:0:TCTGCAAG+GCTGCACT  
GGGAGTACTACTGGAACCTAAACAATCCAATATGGATACGAGTCCAACACTCTGGACAGACGACGAGT  
CCACCGTTCCATCACATCTTCACGGTGGAATAAGATTCAACTACAATCTCAGAATGCAGTTGCGGAT  
AAAGCGAGCATGGTG

+  
FFFFFFFFFFFFFFFFFFFFFFFFFFFFFFFFFFFFFFFFFFFFFFFFFFFFFFFFFFFFFFFFFFFFFFFF  
FFFFFFFFFFFFFFFFFFFFFFFFFFFFFFFFFFFFFFFFFFFFFFFFFFFFFFFFFFFFFFFFFFFFFFFF  
FFFFFFFFFFFFFFFF

@A00721:190:HGJW7DSXY:4:1535:30101:1548 2:N:0:TCTGCAAG+GCTGCACT  
GGGAGTACTACTGGAACCTAAACAATCCAATATGGATACGAGTCCAACACTCTGGACAGACGACGAGT  
CCACCGTTCCATCACATCTTCACGGTGGAATAAGATTCAACTACAATCTCAGAATGCAGTTGCGGAT  
AAAGCGAGCATGGTG

+  
FFFFFFFFFFFFFFFF,FFFFFFFFFFFFFFFFFFFFFFFFFFFFFFFFFFFFFFFFFFFFFFFFFFFFFFFF  
FFFFFFFFFFFFFFFFFFFFFFFFFFFFFFFFFFFFFFFFFFFFFFFFFFFFFFFFFFFFFFFFFFFFFFFF  
FFFFFFFFFF:FFFFF

@A00721:190:HGJW7DSXY:4:1542:7374:21903 2:N:0:TCTGCAAG+GCTGCACT  
GGGAGTACTACTGGAACCTAAACAATCCAATATGGATACGAGTCCAACACTCTGGACAGACGACGAGT



$+$ 

+

+

+

+

+

+

[illegible]





```

FFFFFFFFFFFF:FFFFFFFFFFFFFFFFFFFFFFFFFFFF:FFFFFFFFFFFFFFFFFFFFFFFFFFFF:FFFFFFFFFFFF
FFFFFFFFFFFFFFFFFFFFFFFFFFFF:FFFFFFFFFFFFFFFFFFFFFFFFFFFF:FFFFFFFFFFFFFFFFFFFFFFFFFFFF
FFFFFFFFFFFFFFFFFFFF

```

```

FFFFFFFFFFFFFFFFFFFFFFFFFFFFFFFF,FF:FFFFFFFFFFFFFFFFFFFFFFFFFFFFFFFF
FFFFFFFFFFFFFFFFFFFFFFFFFFFFFFFF:FFFFFFFFFFFFFFFF,F:FFFFFFFFFFFFFFFF
F:FFFFFFFFFFFFFF

```

```
FFFFFFFFFFFFFFFFFFFFF:F:FF:FFFFFFFFFFFF:FFFFFFFFFFFFFF:F:FFFFFFFF:F  
::FFFFFF:FF:FFFFFF:F,FFFFFFFFFFFFFFFFFFFF::FF:FFFF:FFFF,FF,FFF,:FFF  
FF:,FFF:FF,::F
```

[illegible]

```

FFFFFFFFFFFFFFFFFFFFFFFFFFFFFFFFFFFFFFFFFFFFFFFFFFFFFFFFFFFFFFFF,FFFFFFFFFFFFFFFF
FFFFFFFFFFFFFFFF:FFFFFFFFFFFF,FFFFFFFFFFFF:FFFFFFFF:FF:FFFFFFFFFFFFFFFFFFFFFF:F
FFFFFFFFFFFFFFFFFFFF

```

```
F,FFF:FFFFFFFFFFFFFFFF,FFFFFFFF:FF:FFFFFFFF,F:FF::FFF,FFFFFFFF,FFFFF
F:FFFFFFFFFFFFFFFFFFFFFFFFFFFFFFFFFFFFFFFF:FFFFFFFF:FFFFFFFF:FFFFFF:FFFF
,:FFFFF:F,FFFFF
```

```
FFFFFFFFFFFFFFFFFFFFFFFFFFFFFFFFFFFFFFFFFFFFFFFFFFFFFFFFFFFFFFFFFFFFFFFF
FFFFFFFFFFFFFFFFFFFFFFFFFFFFFFFFFFFF:FFFFFFFFFFFFFFFFFFFFFFFFFFFFFF:F
FFFFFFFFFFFFFFFFF
```

@A00721:190:HGJW7DSXY:4:1348:16532:7983 2:N:0:TCTGCAAG+GCTGCACT  
CTCACATGGCAGCAACTACAAGTAGGGGAGTACTACTGGAACCTAAACAATCCAATATGGATACGAGT





@A00721:190:HGJW7DSXY:4:2350:8422:23938 2:N:0:TCTGCAAG+GCTGCACT  
GCATTCTGAGATTGTAGTTGAATCTTAGTTCCACCGTGAAGATGTGATGGAACGGTGGACTCGTCGTC  
TGTCCAGAGTGTTGGACTCGTATCCATATTGGATTGTTTAGTTCCAGTAGTACTCCCCTACTTGTAG  
TTGCTGCCATGTGAG

@A00721:190:HGJW7DSXY:4:2356:20889:14027 2:N:0:TCTGCAAG+GCTGCACT  
GCATTCTGAGATTGTAGTTGAATCTTAGTTCCACCGTGAAGATGTGATGGAACGGTGGACTCGTCGTC  
TGTCCAGAGTGTTGGACTCGTATCCATATTGGATTGTTAGTTCCAGTAGTACTCCCCTACTTGTAG  
TTGCTGCCATGTGAG

@A00721:190:HGJW7DSXY:4:2356:21278:14137 2:N:0:TCTGCAAG+GCTGCACT  
GCATTCTGAGATTGTAGTTGAATCTTAGTTCCACCGTGAAGATGTGATGGAACGGTGGACTCGTCGTC  
TGTCCAGAGTGTTGGACTCGTATCCATATTGGATTGTTAGTTCCAGTAGTACTCCCCTACTTGTAG  
TTGCTGCCATGTGAG

@A00721:190:HGJW7DSXY:4:2371:7997:30499 2:N:0:TCTGCAAG+GCTGCACT  
GCATTCTGAGATTGTAGTTGAATCTTAGTTCCACCGTGAAGATGTGATGGAACGGTGGACTCGTCGTC  
TGTCCAGAGTGTTGGACTCGTATCCATATTGGATTGTTAGTTCCAGTAGTACTCCCCTACTTGTAG  
TTGCTGCCATGTGAG

@A00721:190:HGJW7DSXY:4:2373:1316:31078 2:N:0:TCTGCAAG+GCTGCACT  
CTCACATGGCAGCAACTACAAGTAGGGGAGTACTACTGGAACCTAAACAATCCAATATGGATACGAGT  
CCAACACTCTGGACAGACGACGAGTCCACCGTTCCATCACATCTTCACGGTGGAAGTCAAGATTCAACT  
ACAATCTCAGAATGC

@A00721:190:HGJW7DSXY:4:2414:17038:2942 2:N:0:TCTGCAAG+GCTGCACT  
CTCACATGGCAGCAACTACAAGTAGGGGAGTACTACTGGAACCTAAACAATCCAATATGGATACGAGT  
CCAACACTCTGGACAGACGACGAGTCCACCGTTCCATCACATCTTCACGGTGGAACTAAGATTCAACT  
ACAATCTCAGAATGC

@A00721:190:HGJW7DSXY:4:2418:27082:36714 2:N:0:TCTGCAAG+GCTGCACT  
GCATTCTGAGATTGTAGTTGAATCTTAGTTCCACCGTGAAGATGTGATGGAACGGTGGACTCGTCGTC  
TGTCCAGAGTGTTGGACTCGTATCCATATTGGATTGTTAGTTCCAGTAGTACTCCCCTACTTGTAG  
TTGCTGCCATGTGA

```

FFFFFFFFFFFFFFFFFFFFFFFFFFFFFFFF:FFFFFFFFFFFFFFFFFFFFFFFFFFFFFFFF
FF:FFFFFFFFFFFFFFFF:FFFFFFFFFFFFFFFF:FFFFF:FFFFFFFF:FF:FF:FFFFFF:FF,FFFF
FFFFFFFFFFFFFFFF

```

```
FF:FFFFFFFFFFFFFFFFFFFFFFFFFFFFFFFFFFFFFFFFFFFFFFFFFFFFFFFFFFFFFFF
FF:FFFFFFFFFFFFFFFFFFFFFFFFFFFF:F:FFFFFFFFFFFFFFFFFFFFFFFFFFFFFF:F:FFFFFF
FFFF:F:FFF:F:
```

```

FFFFFFFFFFFFFFFFFFFFFFFFFFFFFFFFFFFFFFFFFFFFFFFFFFFFFFFFFFFFFFFF:FFFFF
FFFFFFFFFFFFFFFFFFFFFFFFFFFFFFFFFFFFFFFF:FFFFFFFFFFFFFFFFFFFF,FFFFFFFFFFFF
FF,FFFFFFFF:FFF

```

[illegible]

```

FFFFFFFFFFFFFFFFFFFFFFFFFFFFFFFFFFFFFFFFFFFFFFFFFFFFFFFFFFFFFFFFFFFFFFFF
FF:FFFFFFFFFFFFFFFFFFFFFFFFFFFFFFFFFFFFFFFF:FFFFFF:FFFFFFFFFFFFFFFF:FFFF:FFFFF
FFFFFFFFFFFFFFFF

```

[illegible]

```

FFFFFFFFFFFFFFFFFFFFFFFF:FFFFFFFFFFFFFFFFFFFFFFFF:FFFFFFF,FFFFFF:FFFFF
FFFFFFFFFFFFF:FFFFFF:FFFFFFFFFFFFFFFFFFFFFFFFFFFFFFFF:FFFFFFFFFFFF,FFFFFFFFFFFFFF
FFFFFFFFFFFFFFFFFFFF

```

@A00721:190:HGJW7DSXY:4:2304:28592:34726 2:N:0:TCTGCAAG+GCTGCACT  
CTCACATGGCAGCAACTACAAGTAGGGGAGTACTACTGGAACCTAAACAATCCAATATGGATACGAGT

CCAACACTCTGGACAGACGACGAGTCCACCGTTCCATCACATCTTCACGGTGGAAC TAAGATTCAACT  
ACAATCTCAGAATG

```
FFFFFFFF:FFFFFFFFFFFF:FFFFFFFFFFFFFFFF:FFFFFFFFFFFFFFFFFFFFFFFFFFFFFFF  
FFFFFFFFFFFF:FFFFFFFFF:FFFFFFFFFFFFFFFFFFFFFFFFFFFFF:FFFFFFFFFFFFFFFFFFFFF:FFFF:  
F:FFFF:FFFFFF
```

 $+$ [illegible] $+$ [illegible]

+

[illegible]

+

[illegible]

+

[illegible]

+

[illegible]







+  
FFFFFFFFFFFFFFFFFFFFFFFFFFFFFFFFFFFFFFFFFFFFFFFFFFFFFFFFFFFFFFFFFFFFFFFF  
FFFFFFFFFFFFFFFFFFFFFFFFFFFFFFFFFFFFFFFFFFFFFFFFFFFFFFFFFFFFFFFFFFFFFFFF  
FFFFFFFFFFFFFFFF  
@A00721:190:HGJW7DSXY:4:2345:4598:4820 2:N:0:TCTGCAAG+GCTGCACT  
GGATTCGTCCACAAGGGTGCCACTCACATGGCAGCAACTACAAGTAGGGGAGTACTACTGGAACCTAA  
ACAATCCAATATGGATACGAGTCCAACACTCTGGACAGACGACGAGTCCACCGTTCCATCACATCTTC  
ACGGTGGAACCTAAGA

+  
FFFFFFFFFFFFFFFFFFFFFFFFFFFFFFFFFFFFFFFFFFFFFFFFFFFFFFFFFFFFFFFFFFFFFFFF:FFFFFFFFFFFFFFFFFFFF  
FFFFFFFFFFFFFFFFFFFFFFFFFFFFFFFFFFFFFFFFFFFFFFFFFFFFFFFFFFFFFFFFFFFFFFFFFFFF  
FFFFFFFFFF:FF,FF:  
@A00721:190:HGJW7DSXY:4:2556:20148:33755 2:N:0:TCTGCAAG+GCTGCACT  
GGATTCGTCCACAAGGGTGCCACTCACATGGCAGCAACTACAAGTAGGGGAGTACTACTGGAACCTAA  
ACAATCCAATATGGATACGAGTCCAACACTCTGGACAGACGACGAGTCCACCGTTCCATCACATCTTC  
ACGGTGGAACCTAAGA

+  
FF:FFFFFFFFFFFFFFFFFFFFFFFFFFFFFFFFFFFFFFFFFFFFFFFFFFFFFFFFFFFFFFFFFFFFFFFF  
FFFFFFFFFFFFFFFFFFFFFFFFFFFFFFFFFFFFFFFFFFFFFFFFFFFFFFFFFFFFFFFFFFFFFFFFFFFF  
FFFFFFFFFFFFFFFFFFFF  
@A00721:190:HGJW7DSXY:4:2573:29830:29543 2:N:0:TCTGCAAG+GCTGCACT  
TCTTAGTTCACCGTGAAGATGTGATGGAACGGTGGACTCGTCGTCTGTCCAGAGTGTTGGACTCGTA  
TCCATATTGGATTGTTTAGGTTCCAGTAGTACTCCCCTACTTGTAGTTGCTGCCATGTGAGTGGCACC  
CTTGCGGACAGATCG

+  
FFFFFFFFFFFFFFFFFFFFFFFFFFFFFFFFFFFFFFFFFFFFFFFFFFFFFFFFFFFFFFFFFFFFFFFF:FFFFFFFFFFFFF:FFFFFFFFFFFFFFFFFFFFFFFFFFFFFFFFFFFF  
FFFFFFFFFFFFFFFFFFFFFFFFFFFFFFFFFFFFFFFFFFFFFFFFFFFFFFFFFFFFFFFFFFFFFFFFFFFF  
F:FFFFFFFFFFFFFFFF  
@A00721:190:HGJW7DSXY:4:2626:3839:25739 2:N:0:TCTGCAAG+GCTGCACT  
GGATTCGTCCACAAGGGTGCCACTCACATGGCAGCAACTACAAGTAGGGGAGTACTACTGGAACCTAA  
ACAATCCAATATGGATACGAGTCCAACACTCTGGACAGACGACGAGTCCACCGTTCCATCACATCTTC  
ACGGTGGAACCTAAGA

+  
FFFFFFFFFFFFFFFFFFFFFFFFFFFFFFFFFFFFFFFFFFFFFFFFFFFFFFFFFFFFFFFFFFFFFFFF  
FFFFFFFFFFFFFFFFFFFFFFFFFFFFFFFFFFFFFFFFFFFFFFFFFFFFFFFFFFFFFFFFFFFFFFFFFFFF  
FFFFFFF:F:FF,FFF  
@A00721:190:HGJW7DSXY:4:2667:25816:35900 2:N:0:TCTGCAAG+GCTGCACT  
GGATTCGTCCACAAGGGTGCCACTCACATGGCAGCAACTACAAGTAGGGGAGTACTACTGGAACCTAA  
ACAATCCAATATGGATACGAGTCCAACACTCTGGACAGACGACGAGTCCACCGTTCCATCACATCTTC  
ACGGTGGAACCTAAGA

+  
FFFFFFFFFFFFFFFFFFFFFFFFFFFFFFFFFFFFFFFFFFFFFFFFFFFFFFFFFFFFFFFFFFFFFFFF  
FFFFFFFFFFFFFFFFFFFFFFFFFFFFFFFFFFFFFFFFFFFFFFFFFFFFFFFFFFFFFFFFFFFFFFFF:FFFFFFFFFFFFFFFFFFFF  
FFFFFFFFFFFFFFFFFFFF  
@A00721:190:HGJW7DSXY:4:2668:27877:16016 2:N:0:TCTGCAAG+GCTGCACT  
GGATTCGTCCACAAGGGTGCCACTCACATGGCAGCAACTACAAGTAGGGGAGTACTACTGGAACCTAA  
ACAATCCAATATGGATACGAGTCCAACACTCTGGACAGACGACGAGTCCACCGTTCCATCACATCTTC  
ACGGTGGAACCTAAGA

+  
FFFFFFFFFFFFFFFFFFFFFFFFFFFFFFFFFFFFFFFFFFFFFFFFFFFFFFFFFFFFFFFFFFFFFFFF  
:FFFFFFFFFFFFFFFFFFFFFFFFFFFFFFFFFFFFFFFFFFFFFFFFFFFFFFFFFFFFFFFFFFFFFFFF  
FFFFFFF:F:FFFFF  
@A00721:190:HGJW7DSXY:4:1107:5629:29778 2:N:0:TCTGCAAG+GCTGCACT  
AATGGATTCGTCCACAAGGGTGCCACTCACATGGCAGCAACTACAAGTAGGGGAGTACTACTGGAACC



$+$ 

+

 $+$ 

+

+

 $+$  $+$

@A00721:190:HGJW7DSXY:4:1655:31412:17127 2:N:0:TCTGCAAG+GCTGCACT  
TGCAGAAACAATGGATTCGTCCACAAGGGTGCCACTCATATGGCAGCAACTACAAGTAGGGGAGTACT  
ACTGGAACCTAAACAATCCAATATGGATACGAGTCCAACACTCTGGACAGACGACGAGTCCACCGTTC  
CATCATCTTTCAG

@A00721:190:HGJW7DSXY:4:2150:29098:31501 2:N:0:TCTGCAAG+GCTGCACT  
TGCAGAAACAATGGATTCGTCCACAAGGGTGCCACTCATATGGCAGCAACTACAAGTAGGGGAGTACT  
ACTGGAACCTAAACAATCCAATATGGATACGAGTCCAACACTCTGGACAGACGACGAGTCCACCGTTC  
CATCATCTTCACG

@A00721:190:HGJW7DSXY:4:2233:9127:28416 2:N:0:TCTGCAAG+GCTGCACT  
TGCAGAAACAATGGATTCGTCCACAAGGGTGCCACTCATATGGCAGCAACTACAAGTAGGGGAGTACT  
ACTGGAACCTAAACAATCCAATATGGATACGAGTCCAACACTCTGGACAGACGACGAGTCCACCGTTC  
CATCATCTTTCAG

@A00721:190:HGJW7DSXY:4:2262:12156:3098 2:N:0:TCTGCAAG+GCTGCACT  
TGCAGAAACAATGGATTCGTCCACAAGGGTGCCACTCATATGGCAGCAACTACAAGTAGGGGAGTACT  
ACTGGAACCTAAACAATCCAATATGGATACGAGTCCAACACTCTGGACAGACGACGAGTCCACCGTTC  
CATCACATCTTCAG

@A00721:190:HGJW7DSXY:4:2407:17879:9784 2:N:0:TCTGCAAG+GCTGCACT  
TGCAGAAACAATGGATTCGTCCACAAGGGTGCCACTCATATGGCAGCAACTACAAGTAGGGGAGTACT  
ACTGGAACCTAAACAATCCAATATGGATACGAGTCCAACACTCTGGACAGACGACGAGTCCACCGTTC  
CATCACATCTTCAGG

@A00721:190:HGJW7DSXY:4:2407:18448:9799 2:N:0:TCTGCAAG+GCTGCACT  
TGCAGAAACAATGGATTCGTCCACAAGGGTGCCACTCATATGGCAGCAACTACAAGTAGGGGAGTACT  
ACTGGAACCTAAACAATCCAATATGGATACGAGTCCAACACTCTGGACAGACGACGAGTCCACCGTTC  
CATCATCTTCAG

@A00721:190:HGJW7DSXY:4:2434:12364:4241 2:N:0:TCTGCAAG+GCTGCACT  
TGCAGAAACAATGGATTCGTCCACAAGGGTGCCACTCACATGGCAGCAACTACAAGTAGGGGAGTACT  
ACTGGAACCTAAACAATCCAATATGGATACGAGTCCAACACTCTGGACAGACGACGAGTCCACCGTTC  
CATCACATCTTCAGG

+  
FFFFFFFFFFFFFFFFFFFFFFFFFFFFFFFFFFFFFFFFFFFFFFFFFFFFFFFFFFFFFFFFFFFFFFFF  
FFFFFFFFFFFFFFFFFFFFFFFFFFFFFFFFFFFFFFFFFFFFFFFFFFFFFFFFFFFFFFFFFFFFFFFF  
FFFFFFFFFFFFFFFF  
@A00721:190:HGJW7DSXY:4:2444:2609:7420 2:N:0:TCTGCAAG+GCTGCACT  
TGCAGAAACAATGGATTTCGTCCACAAGGGTGCCACTCACATGGCAGCAACTACAAGTAGGGGAGTACT  
ACTGGAACCTAAACAATCCAATATGGATACGAGTCCAACACTCTGGACAGACGACGAGTCCACCGTTC  
CATCACATCTTCACG  
+  
FFFFFFFFFFFFFFFFFFFFFFFFFFFFFFFFFFFFFFFFFFFFFFFFFFFFFFFFFFFFFFFFFFFFFFFF:FFFFFFFFFFFFFFFFFFFFFFFFFFFFFFFFFFFFFFFFFFFFFFFFFFFFFFFF  
FFFFFFFFFFFFFFFFFFFFFFFFFFFFFFFFFFFFFFFFFFFFFFFFFFFFFFFFFFFFFFFFFFFFFFFF:FFFFF  
FFFFFFFFFFFFFFFF  
@A00721:190:HGJW7DSXY:4:2450:22625:28244 2:N:0:TCTGCAAG+GCTGCACT  
TGCAGAAACAATGGATTTCGTCCACAAGGGTGCCACTCACATGGCAGCAACTACAAGTAGGGGAGTACT  
ACTGGAACCTAAACAATCCAATATGGATACGAGTCCAACACTCTGGACAGACGACGAGTCCACCGTTC  
CATCACATCTTCACG  
+  
FFFFFFFFFFFFFFFFFFFFFFFFFFFFFFFFFFFFFFFFFFFFFFFFFFFFFFFFFFFFFFFFFFFFFFFF:FFFFFFFFFFFFFFFF  
FFFFFFFFFFFFFFFFFFFFFFFFFFFFFFFFFFFFFFFFFFFFFFFFFFFFFFFFFFFFFFFFFFFFFFFF:FF  
FFFFFFFFFFFFFFFF  
@A00721:190:HGJW7DSXY:4:2562:25563:25911 2:N:0:TCTGCAAG+GCTGCACT  
TGCAGAAACAATGGATTTCGTCCACAAGGGTGCCACTCACATGGCAGCAACTACAAGTAGGGGAGTACT  
ACTGGAACCTAAACAATCCAATATGGATACGAGTCCAACACTCTGGACAGACGACGAGTCCACCGTTC  
CATCACAACCTTCACG  
+  
:FFFFFFFF,FFFFFFFFFFFFFFFF,FFFFFFFFFFFFFFFFFFFFFFFFFFFFFFFFFFFFFFFF,FFFFF:FF:FFFFFFFF:  
FFF:FF,FFFFFFFFFFFFFFFFFFFFFFFF,FFFFFFFF:FFF:FFF,FFF,FFFFFFFFFFFFFFFFFFFF, :FFF  
FFFFFFFF,FFFFF,F  
@A00721:190:HGJW7DSXY:4:2131:7157:34867 2:N:0:TCTGCAAG+GCTGCACT  
AGACTATAGATTGCAGAAACAATGGATTTCGTCCACAAGGGTGCCACTCACATGGCAGCAACTACAAGT  
AGGGGAGTACTACTGGAACCTAAACAATCCAATATGGATACGAGTCCAACACTCTGGACAGACGACGA  
GTCCACCGTTCCATC  
+  
FFFFFFFFFFFFFFFFFFFFFFFFFFFFFFFFFFFFFFFFFFFFFFFFFFFFFFFFFFFFFFFFFFFFFFFF  
:FFFFFFFFFFFFFFFFFFFFFFFFFFFFFFFFFFFFFFFFFFFFFFFFFFFFFFFFFFFFFFFFFFFFFFFF  
FFFFFFFFFFFFFFFF  
@A00721:190:HGJW7DSXY:4:2433:27208:8437 2:N:0:TCTGCAAG+GCTGCACT  
AGACTATAGATTGCAGAAACAATGGATTTCGTCCACAAGGGTGCCACTCACATGGCAGCAACTACAAGT  
AGGGGAGTACTACTGGAACCTAAACAATCCAATATGGATACGAGTCCAACACTCTGGACAGACGACGA  
GTCCACCGTTCCATC  
+  
FFFFFFFFFFFFFFFFFFFFFFFFFFFFFFFFFFFFFFFFFFFFFFFFFFFFFFFFFFFFFFFFFFFFFFFF:FFFFFFFFFFFFFFFFFFFFFFFF,FFFFFFFFFFFF:FF  
FFFFFFFFFFFFFFFFFFFFFFFFFFFFFFFFFFFFFFFF,FFFFFFFFFFFFFFFFFFFFFFFF,FFFFFFFFFFFFFFFF  
FFFFFFFFFFFFFFFF  
@A00721:190:HGJW7DSXY:4:2433:27290:9580 2:N:0:TCTGCAAG+GCTGCACT  
AGACTATAGATTGCAGAAACAATGGATTTCGTCCACAAGGGTGCCACTCACATGGCAGCAACTACAAGT  
AGGGGAGTACTACTGGAACCTAAACAATCCAATATGGATACGAGTCCAACACTCTGGACAGACGACGA  
GTCCACCGTTCCATC  
+  
FFFFFFFFFFFFFFFFFFFFFFFFFFFFFFFFFFFFFFFFFFFFFFFFFFFFFFFFFFFFFFFFFFFFFFFF,FFFFFFFFFFFFFFFFFFFFFFFFFFFFFFFF  
FFFFFFFFFFFFFFFFFFFFFFFFFFFFFFFF:FFFFFFFFFFFFFFFFFFFFFFFFFFFFFFFFFFFFFFFFFFFFFFFF  
FFFFFFFFFFFFFFFF  
@A00721:190:HGJW7DSXY:4:2464:26630:29825 2:N:0:TCTGCAAG+GCTGCACT  
AGACTATAGATTGCAGAAACAATGGATTTCGTCCACAAGGGTGCCACTCACATGGCAGCAACTACAAGT

AGGGGAGTACTACTGGAACCTAAACAATCCAATATGGATACGAGTCCAACACTCTGGACAGACGACGA  
GTCCACCGTTCCATC

+

FFFFFFFFFFFFFFFFFFFFFFFFFFFFFFFFFFFFFFFFFFFFFFFFFFFFFFFFFFFFFFFFFFFFFFFFF,  
:FFFFFFFFFFFFFFFFFFFFFFFFFFFFFFFFFFFFFFFFFFFFFFFFFFFFFFFFFFFFFFFFFFFFFFFFF  
FFFFFFFFFFFFFFFF

@A00721:190:HGJW7DSXY:4:1166:18439:35180 2:N:0:TCTGCAAG+GCTGCACT  
GACTATAGATTGCAGAAACAATGGATTCGTCCACAAGGGTGCCACTCACATGGCAGCAACTACAAGTA  
GGGGAGTACTACTGGAACCTAAACAATCCAATATGGATACGAGTCCAACACTCTGGACAGACGACGAG  
TCCACCGTTCCAGAT

+

FFFFFFFFFFFFFFFFFFFFFFFFFFFFFFFFFFFFFFFFFFFFFFFFFFFFFFFFFFFFFFFFFFFFFFFFF,FFFFFF  
FFFFFFFFFFFFFFFFFFFFFFFFFFFFFFFFFFFFFFFFFFFFFFFFFFFFFFFFFFFFFFFFFFFFFFFFF:FFFF:FFFF  
FFF,FFFFFFFF:F

@A00721:190:HGJW7DSXY:4:1308:22815:29450 2:N:0:TCTGCAAG+GCTGCACT  
GACTATAGATTGCAGAAACAATGGATTCGTCCACAAGGGTGCCACTCACATGGCAGCAACTACAAGTA  
GGGGAGTACTACTGGAACCTAAACAATCCAATATGGATACGAGTCCAACACTCTGGACAGACGACGAG  
TCCACCGTTCCAGAT

+

FFFFFFF:FFFFFFFFFFFFFFFFFFFFFFFFFFFFFFFFFFFFFFFFFFFFFFFFFFFFFFFFFFFFFFFFF:FFFFFFFFFFF:FFFFFFFFFFF:FFF  
FFFFFFFFFFFFFFFFFFFFFFFFFFFFFFFFFFFFFFFFFFFFFFFFFFFFFFFFFFFFFFFFFFFFFFFFF:FFFFFFFFFFF:FFFFFFFFFFF:FFFFFFFFFFF:FFFF  
FF,FFFFFFFF:FFFF

@A00721:190:HGJW7DSXY:4:1321:30273:30874 2:N:0:TCTGCAAG+GCTGCACT  
GACTATAGATTGCAGAAACAATGGATTCGTCCACAAGGGTGCCACTCACATGGCAGCAACTACAAGTA  
GGGGAGTACTACTGGAACCTAAACAATCCAATATGGATACGAGTCCAACACTCTGGACAGACGACGAG  
TCCACCGTTCCAGAT

+

FFFFFFFFFFFFFFFFFFFFFFFFFFFFFFFFFFFFFFFFFFFFFFFFFFFFFFFFFFFFFFFFFFFFFFFFF:FFFFFFFFF  
FFFFFFFFFFFFFFFFFFFFFFFFFFFFFFFFFFFFFFFFFFFFFFFFFFFFFFFFFFFFFFFFFFFFFFFFF  
FFFFFFFFFFFFFFFF

@A00721:190:HGJW7DSXY:4:1333:31177:3881 2:N:0:TCTGCAAG+GCTGCACT  
GACTATAGATTGCAGAAACAATGGATTCGTCCACAAGGGTGCCACTCACATGGCAGCAACTACAAGTA  
GGGGAGTACTACTGGAACCTAAACAATCCAATATGGATACGAGTCCAACACTCTGGACAGACGACGAG  
TCCACCGTTCCAGAT

+

F:FFFFFFFFFFFFFFFFFFFFFFFFFFFFFFFFFFFFFFFFFFFFFFFFFFFFFFFFFFFFFFFFFFFFFFFFF  
FFFFFFFFFFFFFFFFFFFFFFFFFFFFFFFFFFFFFFFFFFFFFFFFFFFFFFFFFFFFFFFFFFFFFFFFF  
FFFFFFFFFFFFFFFF

@A00721:190:HGJW7DSXY:4:1416:16975:23437 2:N:0:TCTGCAAG+GCTGCACT  
GACTATAGATTGCAGAAACAATGGATTCGTCCACAAGGGTGCCACTCACATGGCAGCAACTACAAGTA  
GGGGAGTACTACTGGAACCTAAACAATCCAATATGGATACGAGTCCAACACTCTGGACAGACGACGAG  
TCCACCGTTCCAGAT

+

FFFFFFFFFFFFFFFFFFFFFFFFFFFFFFFFFFFFFFFFFFFFFFFFFFFFFFFFFFFFFFFFFFFFFFFFF:FFFFFFFFF,FFFFFFF:F  
FFFF:FFFFFFFFFFFFFFFFFFFFFFFFFFFFFFFFFFFFFFFFFFFFFFFFFFFFFFFFFFFFFFFFFFFFFFFFF  
FFFFFFFFFFFFFFFF

@A00721:190:HGJW7DSXY:4:1423:5168:10191 2:N:0:TCTGCAAG+GCTGCACT  
GACTATAGATTGCAGAAACAATGGATTCGTCCACAAGGGTGCCACTCACATGGCAGCAACTACAAGTA  
GGGGAGTACTACTGGAACCTAAACAATCCAATATGGATACGAGTCCAACACTCTGGACAGACGACGAG  
TCCACCGTTCCAGAT

+

FFFFFFFFFFFFF:F:FFFFFFFFF:FFFFFFFFFFFFFFFFFFFFFFFFF:FFFF::FFFFFFFFFFFFFFFFF  
FFFFFFFFFFFF:FFF:FFF,FFFFFFFFFFFFF::FFFFFFF,FFFFFFFFFFFF,FFF:F:F:FF,:FFFF  
FFFFFFFF,,FFFFF:

$+$ 

@A00721:190:HGJW7DSXY:4:2104:28293:29136 2:N:0:TCTGCAAG+GCTGCACT  
GACTATAGATTGCAGAAACAATGGATTCGTCCACAAGGGTGCCACTCACATGGCAGCAACTACAAGTA  
GGGGAGTACTACTGGAACCTAAACAATCCAATATGGATACGAGTCCAACACTCTGGACAGACGACGAG  
TCCACCGTTCCAGAT

+

@A00721:190:HGJW7DSXY:4:2378:18530:33364 2:N:0:TCTGCAAG+GCTGCACT  
GACTATAGATTGCAGAAACAATGGATTCGTCCACAAGGGTGCCACTCACATGGCAGCAACTACAAGTA  
GGGGAGTACTACTGGAACCTAAACAATCCAATATGGATACGAGTCCAACACTCTGGACAGACGACGAG  
TCCACCGTTCCAGAT

+

@A00721:190:HGJW7DSXY:4:2378:19642:34757 2:N:0:TCTGCAAG+GCTGCACT  
GACTATAGATTGCAGAAACAATGGATTCGTCCACAAGGGTGCCACTCACATGGCAGCAACTACAAGTA  
GGGGAGTACTACTGGAACCTAAACAATCCAATATGGATACGAGTCCAACACTCTGGACAGACGACGAG  
TCCACCGTTCCAGAT

+

@A00721:190:HGJW7DSXY:4:1559:29821:4445 2:N:0:TCTGCAAG+GCTGCACT  
GCATCATTATCAGACTATAGATTGCAGAAACAATGGATTCTGCCACAAGGTGCCACTCACATGGCA  
GCAACTACAAGTAGGGGAGTACTACTGGAACCTAAACAATCCAATATGGATACGAGTCCAACACTCTG  
GACAGACGACGAGTC

 $+$ 

@A00721:190:HGJW7DSXY:4:2230:20528:2347 2:N:0:TCTGCAAG+GCTGCACT  
GCATCATTATCAGACTATAGATTGCAGAAACAATGGATTCTGCCACAAGGTGCCACTCACATGGCA  
GCAACTACAAGTAGGGGAGTACTACTGGAACCTAAACAATCCAATATGGATACGAGTCCAACACTCTG  
GACAGACGACGAGTC

+

@A00721:190:HGJW7DSXY:4:1104:31024:17206 2:N:0:TCTGCAAG+GCTGCACT  
CTGCATCATTTATCAGACTATAGATTGCAGAAACAATGGATTCTGCCACAAGGTGCCACTCACATGG  
CAGCAACTACAAGTAGGGGAGTACTACTGGAACCTAAACAATCCAATATGGATACGAGTCCAACACTC  
TGGACAGACGACGAG

+

@A00721:190:HGJW7DSXY:4:1113:14642:11068 2:N:0:TCTGCAAG+GCTGCACT  
CTGCATCATTATCAGACTATAGATTGCAGAAACAATGGATTCTGCCACAAGGGTGCCACTCACATGG  
CAGCAACTACAAGTAGGGGAGTACTACTGGAACCTAAACAATCCAATATGGATACGAGTCCAACACTC  
TGGACAGACGACGAG

@A00721:190:HGJW7DSXY:4:1202:2745:26506 2:N:0:TCTGCAAG+GCTGCACT  
CTGCATCATTTATCAGACTATAGATTGCAGAAACAATGGATTCTGCCACAAGGGTGCCACTCACATGG  
CAGCAACTACAAGTAGGGGAGTACTACTGGAACCTAAACAATCCAATATGGATACGAGTCCAACACTC  
TGGACAGACGACGAG

@A00721:190:HGJW7DSXY:4:1367:22073:6089 2:N:0:TCTGCAAG+GCTGCACT  
CTGCATCATTTATCAGACTATAGATTGCAGAAACAATGGATTCTGCCACAAGGGTGCCACTCACATGG  
CAGCAACTACAAGTAGGGGAGTACTACTGGAACCTAAACAATCCAATATGGATACGAGTCCAACACTC  
TGGACAGACGACGAG

@A00721:190:HGJW7DSXY:4:1368:8938:20509 2:N:0:TCTGCAAG+GCTGCACT  
CTGCATCATTTATCAGACTATAGATTGCAGAAACAATGGATTCTGCCACAAGGGTGCCACTCACATGG  
CAGCAACTACAAGTAGGGGAGTACTACTGGAACCTAAACAATCCAATATGGATACGAGTCCAACACTC  
TGGACAGACGACGAG

@A00721:190:HGJW7DSXY:4:1436:12653:14888 2:N:0:TCTGCAAG+GCTGCACT  
CTGCATCATTTATCAGACTATAGATTGCAGAAACAATGGATTTCGTCCACAAGGGTGCCACTCACATGG  
CAGCAACTACAAGTAGGGGAGTACTACTGGAACCTAAACAATCCAATATGGATACGAGTCCAACACTC  
TGGACAGACGACGAG

@A00721:190:HGJW7DSXY:4:2118:25852:3302 2:N:0:TCTGCAAG+GCTGCACT  
CTGCATCATTTATCAGACTATAGATTGCAGAAACAATGGATTCTGCCACAAGGGTGCCACTCACATGG  
CAGCAACTACAAGTAGGGGAGTACTACTGGAACCTAAACAATCCAATATGGATACGAGTCCAACACTC  
TGGACAGACGACGAG

@A00721:190:HGJW7DSXY:4:2430:12915:9455 2:N:0:TCTGCAAG+GCTGCACT  
CTGCATCATTTATCAGACTATAGATTGCAGAAACAATGGATTCTGCCACAAGGGTGCCACTCACATGG  
CAGCAACTACAAGTAGGGGAGTACTACTGGAACCTAAACAATCCAATATGGATACGAGTCCAACACTC  
TGGACAGACGACGAG



+  
FFFFFFFFFFFFFFFFFFFFFFFFFFFFFFFFFFFFFFFFFFFFFFFFFFFFFFFFFFFFFFFFFFFFFFFF  
F:FFFFFFFFFFFFFFFFFFFFFFFFFFFFFFFFFFFFFFFFFFFFFFFFFFFFFFFFFFFFFFFFFFFFFFFF  
FFFFFFFFFFFFFFFF

@A00721:190:HGJW7DSXY:4:2536:28103:10520 2:N:0:TCTGCAAG+GCTGCACT  
CTGCATCATTTATCAGACTATAGATTGCAGAAACAATGGATTTCGTCCACAAGGGTGCCACTCACATGG  
CAGCAACTACAAGTAGGGGAGTACTACTGGAACCTAAACAATCCAATATGGATACGAGTCCAACACTC  
TGGACAGACGACGAG

+  
FFFFFFFF,FFFFFFFFFFFFFFFFFFFFFFFFFFFFFFFFFFFFFFFFFFFFFFFFFFFFFFFFFFFFFFFF  
FFFFFFFFFFFFFFFFFFFFFFFFFFFFFFFFFFFFFFFFFFFFFFFFFFFFFFFFFFFFFFFFFFFFFFFF  
FFFFFFFFFFFFFFFF

@A00721:190:HGJW7DSXY:4:2611:10276:11209 2:N:0:TCTGCAAG+GCTGCACT  
CTGCATCATTTATCAGACTATAGATTGCAGAAACAATGGATTTCGTCCACAAGGGTGCCACTCACATGG  
CAGCAACTACAAGTAGGGGAGTACTACTGGAACCTAAACAATCCAATATGGATACGAGTCCAACACTC  
TGGACAGACGACGAG

+  
FFFFFFFFFFFFFFFFFFFFFFFFFFFFFFFFFFFFFFFFFFFFFFFFFFFFFFFFFFFFFFFFFFFFFFFF  
FFFFFFFFFFFFFFFFFFFFFFFFFFFFFFFFFFFFFFFFFFFFFFFFFFFFFFFFFFFFFFFFFFFFFFFF  
FFFFFFFFFFFFFFFF

@A00721:190:HGJW7DSXY:4:2111:30129:10582 2:N:0:TCTGCAAG+GCTGCACT  
CTGCATCATTTATCAGACTATAGATTGCAGAAACAATGGATTTCGTCCACAAGGGTGCCACTCACATGG  
CAGCAACTACAAGTAGGGGAGTACTACTGGAACCTAAACAATCCAATATGGATACGAGTCCAACACTC  
TGGACAGACGACTA

+  
FFF,FFFFFFFFF:FFFFF:FFFFFFFFFFFFFFFFFFFFFFFFFFFFFFFFFFFFFFFFFFFFFFFF  
FFFFFFFFFFFFFFFFF:FFF:FFFFFFFFFFFF,FFFFFF:FF,FFFFFFFFFFFFF:FFFFFF:FFFFF  
F:FFFF:FF,FF,F

@A00721:190:HGJW7DSXY:4:1156:28239:9032 2:N:0:TCTGCAAG+GCTGCACT  
CTTACACTACCGTGCGGCTGCATCATTTATCAGACTATAGATTGCAGAAACAATGGATTTCGTCCACAA  
GGGTGCCACTCACATGGCAGCAACTACAAGTAGGGGAGTACTACTGGAACCTAAACAATCCAATATGG  
ATACGAGTCCAACAC

+  
FFFFFFFFFFFFFFFFFFFFFFFFFFFFFFFFFFFFFFFFFFFFFFFFFFFFFFFFFFFFFFFFFFFFFFFF  
FFFFFFFFFFFFFFFFFFFFFFFFFFFFFFFFFFFFFFFFFFFFFFFFFFFFFFFFFFFFFFFFFFFFFFFF  
FFFFFFFFFFFFFFFF

@A00721:190:HGJW7DSXY:4:2149:2582:26506 2:N:0:TCTGCAAG+GCTGCACT  
CTTACACTACCGTGCGGCTGCATCATTTATCAGACTATAGATTGCAGAAACAATGGATTTCGTCCACAA  
GGGTGCCACTCACATGGCAGCAACTACAAGTAGGGGAGTACTACTGGAACCTAAACAATCCAATATGG  
ATACGAGTCCAACAC

+  
:FFFFFFFFFFFFFFFFFFFFFFFFFFFFFFFFFFFFFFFFFFFFFFFFFFFFFFFFFFFFFFFFFFFFFFFF  
FFFFFFFFFFFFFFFFFFFFFFFFFFFFFFFFFFFFFFFFFFFFFFFFFFFFFFFFFFFFFFFFFFFFFFFF  
FFFFFFFFFFFFFFFF

@A00721:190:HGJW7DSXY:4:2643:13259:20134 2:N:0:TCTGCAAG+GCTGCACT  
CTTACACTACCGTGCGGCTGCATCATTTATCAGACTATAGATTGCAGAAACAATGGATTTCGTCCACAA  
GGGTGCCACTCACATGGCAGCAACTACAAGTAGGGGAGTACTACTGGAACCTAAACAATCCAATATGG  
ATACGAGTCCAACAC

+  
FFF:FFFFFFFFFFFFFFFFFFFFFFFFFFFFFFFFFFFFFFFFFFFFFFFFFFFFFFFFFFFFFFFF  
FFFFFFFFFFFFFFFFFFFFFFFFFFFFFFFFFFFFFFFFFFFFFFFFFFFFFFFFFFFFFFFFFFFFFFFF  
FFFFF:FFFFFFFF

@A00721:190:HGJW7DSXY:4:1526:10890:12273 2:N:0:TCTGCAAG+GCTGCACT  
GTCTTACACTACCGTGCGGCTGCATCATTTATCAGACTATAGATTGCAGAAACAATGGATTTCGTCCAC

AAGGGTGCCACTCACATGGCAGCAACTACAAGTAGGGGAGTACTACTGGAACCTAAACAATCCAATAT  
GGATACGAGTCCAAC

[illegible] $+$ [illegible]

+

```

FFFFFFFFFFFFFFFFFFFFFFFFFFFFFFFFFFFFFFFF:FFFFFFFFFFFFFFFFFFFFFFFFFFFFFFFF
FFFFFFFFFFFFFFFFFFFFFFFFFFFFFFFF,FFFFFFFFFFFFFFFFFFFFFFFFFFFFFFFFFFFFFFFF
FFFFFFFFFFFFFF:FF

```

+

```

FFFFFFFFFFFFFFFFFFFFFFFF:FFFFFFFFFFFFFFFF,FFFF:FF:FFFFFF:FFF::FFFFFF
FFFFFFFFFFFFFFFFFFFFFFFF,FFFFFFFF,,FFFFFFFFFFFF:F:FFFFFFFFFFFF,FF,FFFFFFFFFF:F
F:FFFFFFFFFFFFFFFF

```

+

[illegible]

+

[illegible]

+

[illegible]

$+$ 

+

+

+

+

+

+

[illegible]

@A00721:190:HGJW7DSXY:4:2418:12798:12038 2:N:0:TCTGCAAG+GCTGCACT  
CTCGTATCCATATTGGATTGTTTAGGTTCCAGTAGTACTCCCCTACTTGTAGTTGCTGCCATGTGAGT  
GGCACCCCTGTGGACGAATCCATTGTTTCTGCAATCTATAGTCTGATAAATGATGCAGCCGCACGGTA  
GTGTAAGACGTCTAG

@A00721:190:HGJW7DSXY:4:2543:2528:2268 2:N:0:TCTGCAAG+GCTGCACT  
CTCGTATCCATATTGGATTGTTTAGGTTCCAGTAGTACTCCCCTACTTGTAGTTGCTGCCATGTGAGT  
GGCACCCCTTGTGGACGAATCCATTGTTTCTGCAATCTATAGTCTGATAAATGATGCAGCCGCACGGTA  
GTGTAAGACGTCTAG

@A00721:190:HGJW7DSXY:4:2569:11044:3082 2:N:0:TCTGCAAG+GCTGCACT  
CTCGTATCCATATTGGATTGTTTAGGTTCCAGTAGTACTCCCCTACTTGTAGTTGCTGCCATGTGAGT  
GGCACCCCTTGTGGACGAATCCATTGTTTCTGCAATCTATAGTCTGATAAATGATGCAGCCGCACGGTA  
GTGTAAGACGTCTAG

@A00721:190:HGJW7DSXY:4:2621:32488:5431 2:N:0:TCTGCAAG+GCTGCACT  
CTCGTATCCATATTGGATTGTTTAGGTTCCAGTAGTACTCCCCTACTTGTAGTTGCTGCCATGTGAGT  
GGCACCCCTTGTGGACGAATCCATTGTTTCTGCAATCTATAGTCTGATAAATGATGCAGCCGCACGGTA  
GTGTAAGACGTCTAG

@A00721:190:HGJW7DSXY:4:1225:2202:1266 2:N:0:TCTGCAAG+GCTGCACT  
CAAGCCTAGACGTCTTACACTACCGTGCGGCTGCATCATTTATCAGACTATAGATTGCAGAAACAATG  
GATTTCGTCCACAAGGGTGCCACTCACATGGCAGCAACTACAAGTAGGGGAGTACTACTGGAACCTAAA  
CAATCCAATATGGAT

@A00721:190:HGJW7DSXY:4:1240:20347:24549 2:N:0:TCTGCAAG+GCTGCACT  
CAAGCCTAGACGTCTTACACTACCGTGCGGCTGCATCATTTATCAGACTATAGATTGCAGAAACAATG  
GATTCGTCCACAAGGGTGCCACTCACATGGCAGCAACTACAAGTAGGGGAGTACTACTGGAACCTAAA  
CAATCCAATATGGAT

@A00721:190:HGJW7DSXY:4:1246:24071:16313 2:N:0:TCTGCAAG+GCTGCACT  
CAAGCCTAGACGTCTTACACTACCGTGCGGCTGCATCATTTATCAGACTATAGATTGCAGAAACAATG  
GATTCGTCCACAAGGGTGCCACTCACATGGCAGCAACTACAAGTAGGGGAGTACTACTGGAACCTAAA  
CAATCCAATATGGAT

+  
FFFFFFFF:FFFFFFFFFFFFFFFFFFFFFFFFFFFFFFFFFFFFFFFFFFFFFFFFFFFFFFFFFFFFFFFF  
FFFFFFFFFFFFFFFF:FFFFFFFFFFFFFFFFFFFFFFFFFFFFFFFFFFFFFFFFFFFFFFFFFFFFFFFF:FFFF  
FFFFFFFFFFFFFFFF  
@A00721:190:HGJW7DSXY:4:1313:8341:6167 2:N:0:TCTGCAAG+GCTGCACT  
CAAGCCTAGACGTCTTACACTACCGTGCGGCTGCATCATTTATCAGACTATAGATTGCAGAAACAATG  
GATTCGTCCACAAGGGTGCCACTCACATGGCAGCAACTACAAGTAGGGGAGTACTACTGGAACCTAAA  
CAATCCAATATGGAT

+  
FFFFFFFF:FFFFFFFFFFFFFFFFFFFFFFFFFFFFFFFFFFFFFFFFFFFFFFFFFFFFFFFFFFFFFFFF:FFFF  
FFFFF:FFFFFF:FFFFFFFFFFFFFFFFFFFFFFFFFFFFFFFFFFFFFFFFFFFFFFFFFFFFFFFFFFFF:F  
FFFFFFFFFFFFFFFF  
@A00721:190:HGJW7DSXY:4:1557:17707:21919 2:N:0:TCTGCAAG+GCTGCACT  
CAAGCCTAGACGTCTTACACTACCGTGCGGCTGCATCATTTATCAGACTATAGATTGCAGAAACAATG  
GATTCGTCCACAAGGGTGCCACTCACATGGCAGCAACTACAAGTAGGGGAGTACTACTGGAACCTAAA  
CAATCCAATATGGAT

+  
FFFFFFFFFFFFFFFFFFFFFFFFFFFFFFFFFFFFFFFFFFFFFFFFFFFFFFFFFFFFFFFFFFFFFFFFFFFF  
FFFFFFFFFFFFFFFFFFFFFFFFFFFFFFFFFFFFFFFFFFFFFFFFFFFFFFFFFFFFFFFFFFFFFFFFFFFF:FFFFF:FFFFFFFFFFFFFFFFFFFFFFFFFFFFFFFF  
FFFFFFFFFFFFFFFF  
@A00721:190:HGJW7DSXY:4:1623:3794:33646 2:N:0:TCTGCAAG+GCTGCACT  
CAAGCCTAGACGTCTTACACTACCGTGCGGCTGCATCATTTATCAGACTATAGATTGCAGAAACAATG  
GATTCGTCCACAAGGGTGCCACTCACATGGCAGCAACTACAAGTAGGGGAGTACTACTGGAACCTAAA  
CAATCCAATATGGAT

+  
FFFFFFFFFFFFFFFFFFFFFFFFFFFFFFFFFFFFFFFFFFFFFFFFFFFFFFFFFFFFFFFFFFFFFFFFFFFF:FFFFFFFFFFFF  
FFFFFFFFFFFFFFFFFFFFFFFFFFFFFFFFFFFFFFFFFFFFFFFFFFFFFFFFFFFFFFFFFFFFFFFFFFFF  
FFFFFFFFFFFFFFFF  
@A00721:190:HGJW7DSXY:4:2272:8721:32628 2:N:0:TCTGCAAG+GCTGCACT  
CAAGCCTAGACGTCTTACACTACCGTGCGGCTGCATCATTTATCAGACTATAGATTGCAGAAACAATG  
GATTCGTCCACAAGGGTGCCACTCACATGGCAGCAACTACAAGTAGGGGAGTACTACTGGAACCTAAA  
CAATCCAATATGGAT

+  
FFFFFFFFFFFFFFFFFFFFFFFFFFFFFFFFFFFFFFFFFFFFFFFFFFFFFFFFFFFFFFFFFFFFFFFFFFFF:FFFFFFFFFFFF  
FFFFFFFFFFFFFFFFFFFFFFFFFFFFFFFFFFFFFFFFFFFFFFFFFFFFFFFFFFFFFFFFFFFFFFFFFFFF:FFFF  
FFFFFFFFFFFF,FFFF  
@A00721:190:HGJW7DSXY:4:2358:32886:19867 2:N:0:TCTGCAAG+GCTGCACT  
CAAGCCTAGACGTCTTACACTACCGTGCGGCTGCATCATTTATCAGACTATAGATTGCAGAAACAATG  
GATTCGTCCACAAGGGTGCCACTCACATGGCAGCAACTACAAGTAGGGGAGTACTACTGGAACCTAAA  
CAATCCAATATGGAT

+  
FFFFFFFFFFFFFFFFFFFFFFFFFFFFFFFFFFFFFFFFFFFFFFFFFFFFFFFFFFFFFFFFFFFFFFFFFFFF:FFFF  
FFFFFFFFFFFFFFFFFFFFFFFFFFFFFFFFFFFFFFFFFFFFFFFFFFFFFFFFFFFFFFFFFFFFFFFFFFFF:FF  
FFFFFFFFFFFFFFFF  
@A00721:190:HGJW7DSXY:4:2665:11704:9893 2:N:0:TCTGCAAG+GCTGCACT  
CAAGCCTAGACGTCTTACACTACCGTGCGGCTGCATCATTTATCAGACTATAGATTGCAGAAACAATG  
GATTCGTCCACAAGGGTGCCACTCACATGGCAGCAACTACAAGTAGGGGAGTACTACTGGAACCTAAA  
CAATCCAATATGGAT

+  
FFFFFFFFFFFFFFFFFFFFFFFFFFFFFFFFFFFFFFFFFFFFFFFFFFFFFFFFFFFFFFFFFFFFFFFFFFFF:FFFF  
FFFFFFFFFFFFFFFFFFFFFFFFFFFFFFFFFFFFFFFFFFFFFFFFFFFFFFFFFFFFFFFFFFFFFFFFFFFF,FF  
FFFFFFFFFFFFFFFF  
@A00721:190:HGJW7DSXY:4:1407:17933:24314 2:N:0:TCTGCAAG+GCTGCACT  
CGTCTAGCGATCAAGCCTAGACGTCTTACACTACCGTGCGGCTGCATCATTTATCAGACTATAGATTG

CAGAAACAATGGATTTCGTCCACAAGGGTGCCACTCACATGGCAGCAACTACAAGTAGGGGAGTACTAC  
TGGAACCTAAACAAT

+

FFFFFFFFFFFFFFFFFFFFFFFFFFFFFFFFFFFFFFFFFFFFFFFFFFFFFFFFFFFFFFFFFFFFFFFF  
FFFFFFFFFFFFFFFFFFFFFFFFFFFFFFFFFFFFFFFFFFFFFFFFFFFFFFFFFFFFFFFFFFFFFFFF  
FFFFFFFFFFFFFFFF

@A00721:190:HGJW7DSXY:4:1515:19777:24408 2:N:0:TCTGCAAG+GCTGCACT  
CGTCTAGCGATCAAGCCTAGACGTCTTACACTACCGTGCGGCTGCATCATTTATCAGACTATAGATTG  
CAGAAACAATGGATTTCGTCCACAAGGGTGCCACTCACATGGCAGCAACTACAAGTAGGGGAGTACTAC  
TGGAACCTAAACAAT

+

FFFFFFFFFFFFFFFFFFFFFFFFFFFFFFFFFFFFFFFFFFFFFFFFFFFFFFFFFFFFFFFFFFFFFFF:FFFFFFFFFFFFFFFF  
FFFFFFFFFFFFFFFFFFFFFFFFFFFFFFFFFFFFFFFFFFFFFFFFFFFFFFFFFFFFFFFFFFFFFFF:FFFF:FFFFFFFFFFFFFFFF  
FFFFFFFFFFFF:FFFF

@A00721:190:HGJW7DSXY:4:1554:30924:33285 2:N:0:TCTGCAAG+GCTGCACT  
CGTCTAGCGATCAAGCCTAGACGTCTTACACTACCGTGCGGCTGCATCATTTATCAGACTATAGATTG  
CAGAAACAATGGATTTCGTCCACAAGGGTGCCACTCACATGGCAGCAACTACAAGTAGGGGAGTACTAC  
TGGAACCTAAACAAT

+

FFFFFFFFFFFFFFFFFFFFFFFFFFFFFFFFFFFFFFFFFFFFFFFFFFFFFFFFFFFFFFFFFFFFFFFF  
FFFFFFFFFFFFFFFFFFFFFFFFFFFFFFFFFFFFFFFFFFFFFFFFFFFFFFFFFFFFFFFFFFFFFFFF:FFFFFFFF  
FFFFFFFFFFFF:FFFF

@A00721:190:HGJW7DSXY:4:2103:1334:23062 2:N:0:TCTGCAAG+GCTGCACT  
CGTCTAGCGATCAAGCCTAGACGTCTTACACTACCGTGCGGCTGCATCATTTATCAGACTATAGATTG  
CAGAAACAATGGATTTCGTCCACAAGGGTGTCACACTCACATGGCAGCAACTACAAGTAGGGGAGTACTAC  
TGGAACCTAAACAAT

+

FFFFFFFFFFFFFFFFFFFFFFFFFFFFFFFFFFFFFFFFFFFFFFFFFFFFFFFFFFFFFFFFFFFFFFFF  
FFFFFFFFFFFFFFFFFFFFFFFFFFFFFFFFFFFFFFFFFFFFFFFFFFFFFFFFFFFFFFFFFFFFFFFF  
FFFFFFFFFFFFFFFF

@A00721:190:HGJW7DSXY:4:2268:31774:11052 2:N:0:TCTGCAAG+GCTGCACT  
CGTCTAGCGATCAAGCCTAGACGTCTTACACTACCGTGCGGCTGCATCATTTATCAGACTATAGATTG  
CAGAAACAATGGATTTCGTCCACAAGGGTGTCACACTCACATGGCAGCAACTACAAGTAGGGGAGTACTAC  
TGGAACCTAAACAAT

+

FFFFFFFFFFFFFFFFFFFFFFFFF:FFFFFFFFFFFFFFFFFFFFFFFFFFFFFFFFFFFFFFFFFFFFFFF:FFFF  
FFFFFFFFFFFFFFFFFFFFFFFFFFFF,FFFFFFFFFFFFFFFFFFFFFFFFF:FFFFFF:FFFFFFFFFFFFFFFF  
FFFFF:FFF:FFFF

@A00721:190:HGJW7DSXY:4:2371:17725:4914 2:N:0:TCTGCAAG+GCTGCACT  
CGTCTAGCGATCAAGCCTAGACGTCTTACACTACCGTGCGGCTGCATCATTTATCAGACTATAGATTG  
CAGAAACAATGGATTTCGTCCACAAGGCTGTCACTCACATGGCAGCAACTACAAGTAGGGGAGTACTAC  
TGGAACCTAAACAAT

+

FF:FFFFFFFFFFFFFFFFFFFFF:FFFFFFFFFFFFFFFFFFFFFFFFFFFFFFFFFFFFFFFFFFFFFFF:FFFFFFFFFFFF  
FFFFFFFFFFFF:FFFFFFFFFFFFFFFFFFFF,FFFFFFFFFFFFF::FFFFFFFFFFFFFFFFFFFFFFFFFFFFFFFF  
FFFFFFFFFFFF:FFFF

@A00721:190:HGJW7DSXY:4:2469:18882:1814 2:N:0:TCTGCAAG+GCTGCACT  
CGTCTAGCGATCAAGCCTAGACGTCTTACACTACCGTGCGGCTGCATCATTTATCAGACTATAGATTG  
CAGAAACAATGGATTTCGTCCACAAGGGTGCCACTCACATGGCAGCAACTACAAGTAGGGGAGTACTAC  
TGGAACCTAAACAAT

+

FFFFFFFFFFFFFFFFFFFFFFFFFFFFFFFFFFFFFFFFF:FFFFFFFFFFFFFFFFFFFFFFFFF:FFFFFFFFFFFFFFFF  
:FFFFFFFFFFFF:FFFFFF:FFFFF,FFFFFFFFFFFFFFFFF:FFFFFFF,FFFFFFFFFFFFFFFFFFFFFFFF  
FFFFF:FFFFFFF:F



@A00721:190:HGJW7DSXY:4:2357:27868:33724 2:N:0:TCTGCAAG+GCTGCACT  
TTTAGGTTCCAGTAGTACTCCCCTACTTGTAGTTGCTGCCATGTGAGTGTCACACTTGTGGACGAATC  
CATTGTTTCTGCAATCTATAGTCTGATAAATGATTACGCCGCACGGTAGTGTAAGACTTATA

@A00721:190:HGJW7DSXY:4:1241:22770:9298 2:N:0:TCTGCAAG+GCTGCACT  
GAAGAGACGTCTAGCGATCAAGCCTAGACGTCTTACACTACCGTGCGGCTGCATCATTTATCAGACTA  
TAGATTGCAGAAACAATGGATTTCGTCCACAAGGTGCCACTCACATGGCAGCAACTACAAGTAGGGGA  
GTACTACTGGAACCT

@A00721:190:HGJW7DSXY:4:1242:26512:9925 2:N:0:TCTGCAAG+GCTGCACT  
GAAGAGACGTCTAGCGATCAAGCCTAGACGTCTTACACTACCGTGCGGCTGCATCATTTATCAGACTA  
TAGATTGCAGAAACAATGGATTTCGTCCACAAGGGTGCCACTCACATGGCAGCAACTACAAGTAGGGGA  
GTACTACTGGAACCT

@A00721:190:HGJW7DSXY:4:1602:24903:34381 2:N:0:TCTGCAAG+GCTGCACT  
GAAGAGACGTCTAGCGATCAAGCCTAGACGTCTTACACTACCGTGCGGCTGCATCATTTATCAGACTA  
TAGATTGCAGAAACAATGGATTTCGTCCACAAGGGTGCCACTCACATGGCAGCAACTACAAGTAGGGGA  
GTACTACTGGAACCT

@A00721:190:HGJW7DSXY:4:2163:24370:6684 2:N:0:TCTGCAAG+GCTGCACT  
GAAGAGACGTCTAGCGATCAAGCCTAGACGTCTTACACTACCGTGCGGCTGCATCATTTATCAGACTA  
TAGATTGCAGAAACAATGGATTTCGTCCACAAGGGTGCCACTCACATGGCAGCAACTACAAGTAGGGGA  
GTACTACTGGAACCT

@A00721:190:HGJW7DSXY:4:2303:25509:23907 2:N:0:TCTGCAAG+GCTGCACT  
GAAGAGACGTCTAGCGATCAAGCCTAGACGTCTTACACTACCGTGCGGCTGCATCATTTATCAGACTA  
TAGATTGCAGAAACAATGGATTTCGTCCACAAGGGTGCCACTCACATGGCAGCAACTACAAGTAGGGGA  
GTACTACTGGAACCT

@A00721:190:HGJW7DSXY:4:2339:16089:36902 2:N:0:TCTGCAAG+GCTGCACT  
GAAGAGACGTCTAGCGATCAAGCCTAGACGTCTTACACTACCGTGCGGCTGCATCATTTATCAGACTA  
TAGATTGCAGAAACAATGGATTTCGTCCACAAGGGTGCCACTCACATGGCAGCAACTACAAGTAGGGGA  
GTACTACTGGAACCT

[illegible]





+  
FFFFFFFFFFFFFFFFFFFFFFFFFFFFFFFFFFFFFFFFFFFFFFFFFFFFFFFFFFFFFFFFFFFFFFFF  
FFFFFFFFFFFFFFFFFFFFFFFFFFFFFFFFFFFFFFFFFFFFFFFFFFFFFFFFFFFFFFFFFFFFFFFF  
FFFFFFFFFFFFFFFF

@A00721:190:HGJW7DSXY:4:1510:13304:21465 2:N:0:TCTGCAAG+GCTGCACT  
TAGTACTCCCCTACTTGTAGTTGCTGCCATGTGAGTGGCACCCTTGTGGACGAATCCATTGTTTCTGC  
AATCTATGTCTGATAAATGATGCAGCCGCACGGTAGTGTAAAGACGTCTAGGCTTGATCGCTAGACGTC  
TCTTCCGTTTCGCATT

+  
FFFFFFFFFFFFFFFF:FFFFFFFFFFFFFFFFFFFFFFFFFFFFFFFFFFFFFFFFFFFFFFFF:FFFFFFFF  
FFFFF:FFFFFFFFFFFFFFFFFFFFFFFFFFFFFFFFFFFFFFFFFFFFFFFFFFFFFFFFFFFFFFFF  
FFFFFFFFFFFFFF,F

@A00721:190:HGJW7DSXY:4:1605:11939:9674 2:N:0:TCTGCAAG+GCTGCACT  
TAGTACTCCCCTACTTGTAGTTGCTGCCATGTGAGTGGCACCCTTGTGGACGAATCCATTGTTTCTGC  
AATCTATGTCTGATAAATGATGCAGCCGCACGGTAGTGTAAAGACGTCTAGGCTTGATCGCTAGACGTC  
TCTTCCGTTTCGCATT

+  
FFFFFFFFFFFFFFFFFFFFFFFFFFFFFFFFFFFFFFFFFFFFFFFFFFFFFFFFFFFFFFFFFFFFFFFF  
FFFFFFFFFFFFFFFFFFFFFFFF:FFFFFFFFFFFFFFFFFFFFFFFFFFFFFFFFFFFFFFFFFFFFFFFF  
FFFFFFFFFFFFFF

@A00721:190:HGJW7DSXY:4:2313:21974:22952 2:N:0:TCTGCAAG+GCTGCACT  
TAGTACTCCCCTACTTGTAGTTGCTGCCATGTGAGTGGCACCCTTGTGGACGAATCCATTGTTTCTGC  
AATCTATGTCTGATAAATGATGCAGCCGCACGGTAGTGTAAAGACGTCTAGGCTTGATCGCTAGACGTC  
TCTTCCGTTTCGCATT

+  
FFFFFFFFFFFFFFFFFFFFFFFFFFFFFFFFFFFFFFFFFFFFFFFFFFFFFFFFFFFFFFFFFFFFFFFF  
FFFFFFFFFFFFFFFFFFFFFFFFFFFFFFFFFFFFFFFFFFFFFFFFFFFFFFFFFFFFFFFFFFFFFFFF  
FFFFFFFFFFFFFF

@A00721:190:HGJW7DSXY:4:2508:17119:2644 2:N:0:TCTGCAAG+GCTGCACT  
TAGTACTCCCCTACTTGTAGTTGCTGCCATGTGAGTGGCACCCTTGTGGACGAATCCATTGTTTCTGC  
AATCTATGTCTGATAAATGATGCAGCCGCACGGTAGTGTAAAGACGTCTAGGCTTGATCGCTAGACGTC  
TCTTCCGTTTCGCATT

+  
FFFFFFFFFFFFFFFFFFFFFFFFFFFFFFFFFFFFFFFFFFFFFFFFFFFFFFFFFFFFFFFFFFFFFFFF  
FFFFF,FFFFFFFFFFFFFFFFFFFFFFFFFFFFFFFFFFFFFFFFFFFFFFFFFFFFFFFFFFFFFFFF:F:FFFF  
FFFFFFFFFFFFFF

@A00721:190:HGJW7DSXY:4:2517:16025:20478 2:N:0:TCTGCAAG+GCTGCACT  
TAGTACTCCCCTACTTGTAGTTGCTGCCATGTGAGTGGCACCCTTGTGGACGAATCCATTGTTTCTGC  
AATCTATGTCTGATAAATGATGCAGCCGCACGGTAGTGTAAAGACGTCTAGGCTTGATCGCTAGACGTC  
TCTTCCGTTTCGCATT

+  
FFFFFFFFFFFFFFFF:FF:FFFFFFFFFFFFFFFFFFFFFFFFFFFFFFFF:FFF:FFFFFFFFFFFFFFFF  
FFFFFFFFFFFFFFFFFFFFFFFFFFFFFFFFFFFFFFFFFFFFFFFFFFFFFFFF:FFFF:FFFFFFFFFFFF:FFFF  
FFFFFFFFFFFFFF

@A00721:190:HGJW7DSXY:4:2623:20672:23234 2:N:0:TCTGCAAG+GCTGCACT  
TAGTACTCCCCTACTTGTAGTTGCTGCCATGTGAGTGGCACCCTTGTGGACGAATCCATTGTTTCTGC  
AATCTATGTCTGATAAATGATGCAGCCGCACGGTAGTGTAAAGACGTCTAGGCTTGATCGCTAGACGTC  
TCTTCCGTTTCGCATT

+  
FFFFFFFFFFFFFFFFFFFFFFFFFFFFFFFF:FFFFFFFFFFFFFFFFFFFFFFFFFFFFFFFFFFFFFFFF  
FFFFFFFFFFFFFFFFFFFFFFFFFFFFFFFF:FFFFFFFFFFFFFFFFFFFFFFFFFFFFFFFFFFFFFFFF  
FFFFFFFFFFFFFF

@A00721:190:HGJW7DSXY:4:2637:9733:33786 2:N:0:TCTGCAAG+GCTGCACT  
TAGTACTCCCCTACTTGTAGTTGCTGCCATGTGAGTGGCACCCTTGTGGACGAATCCATTGTTTCTGC

AATCTATGTCTGATAAATGATGCAGCCGCACGGTAGTGTAAGACGTCTAGGCTTGATCGCTAGACGTC  
TCTTCGTTTCGATT

+

FFFFFFFFFFFFFFFF:FFFFFFFFFFFFFFFFFFFFFFFFFFFFFFFFFFFFFFFFFFFFFFFF  
FFFFFFFFFFFFFFFFFFFFFFFFFFFFFFFFFFFFFFFFFFFFFFFFFFFFFFFFFFFFFFFF:FFFFFFFFFFFFFFFFFFFFFFFFFFFFFFFF  
FFFFFFFFFFFFFFFF

@A00721:190:HGJW7DSXY:4:1108:16242:20760 2:N:0:TCTGCAAG+GCTGCACT  
GTACTCCCCTACTTGTAGTTGCTGCCATGTGAGTGGCACCCCTTGTGGACGAATCCATTGTTTCTGCAA  
TCTATAGTCTGATAAATGATGCAGCCGCACGGTAGTGTAAGACGTCTAGGCTTGATCGCTAGACGTCT  
CTTCCGTTTCGATTG

+

FFFFFFFFFFFFFFFFFFFFFFFFFFFFFFFFFFFFFFFFFFFFFFFFFFFFFFFFFFFFFFFF:FFFFFFFF  
FFFFFFFFFFFFFFFFFFFFFFFFFFFFFFFFFFFFFFFFFFFFFFFFFFFFFFFFFFFFFFFF:FFFFFFFFFFFFFFFFFFFFFFFFFFFFFFFF  
FFFFFFFFFFFFFFFF

@A00721:190:HGJW7DSXY:4:1350:26847:32925 2:N:0:TCTGCAAG+GCTGCACT  
GTACTCCCCTACTTGTAGTTGCTGCCATGTGAGTGGCACCCCTTGTGGACGAATCCATTGTTTCTGCAA  
TCTATAGTCTGATAAATGATGCAGCCGCACGGTAGTGTAAGACGTCTAGGCTTGATCGCTAGACGTCT  
CTTCCGTTTCGATTG

+

:FFFFFFFFFFFFFFFFFFFFFFFFFFFFFFFFFFFFFFFFFFFFFFFFFFFFFFFFFFFFFFFF:FF  
F:FFFFFFFFFFFFFFFFFFFFFFFFFFFFFFFFFFFFFFFFFFFFFFFFFFFFFFFFFFFFFFFF:FFFF  
FFFFFFFFFFFFFFFF

@A00721:190:HGJW7DSXY:4:1476:15411:25207 2:N:0:TCTGCAAG+GCTGCACT  
GTACTCCCCTACTTGTAGTTGCTGCCATGTGAGTGGCACCCCTTGTGGACGAATCCATTGTTTCTGCAA  
TCTATAGTCTGATAAATGATGCAGCCGCACGGTAGTGTAAGACGTCTAGGCTTGATCGCTAGACGTCT  
CTTCCGTTTCGATTG

+

FFFFFFFFFF,FFFFFFFFFFFFFFFFFFFFFFFFFFFFFFFFFFFFFFFFFFFFFFFFFFFFFFFF  
FFFFFFF,FFFFFFF:FFFFFFFFFFFFFFFFFFFFFFFFFFFFFFFFFFFFFFFFFFFFFFFFFFFF  
FFFFFFFFFFFFFFFF

@A00721:190:HGJW7DSXY:4:2177:10610:17519 2:N:0:TCTGCAAG+GCTGCACT  
GTACTCCCCTACTTGTAGTTGCTGCCATGTGAGTGGCACCCCTTGTGGACGAATCCATTGTTTCTGCAA  
TCTATAGTCTGATAAATGATGCAGCCGCACGGTAGTGTAAGACGTCTAGGCTTGATCGCTAGACGTCT  
CTTCCGTTTCGATTG

+

FFFFFFFFFFFFFFFFFFFFFFFFFFFFFFFFFFFFFFFFFFFFFFFFFFFFFFFFFFFFFFFF:FFFFFFFF  
FFFFFFFFFFFFFFFFFFFFFFFFFFFFFFFFFFFFFFFFFFFFFFFFFFFFFFFFFFFFFFFF:FFFFFFFF  
FFFFFFFFFFFFFFFF

@A00721:190:HGJW7DSXY:4:2535:26720:16924 2:N:0:TCTGCAAG+GCTGCACT  
GTACTCCCCTACTTGTAGTTGCTGCCATGTGAGTGGCACCCCTTGTGGACGAATCCATTGTTTCTGCAA  
TCTATAGTCTGATAAATGATGCAGCCGCACGGTAGTGTAAGACGTCTAGGCTTGATCGCTAGACGTCT  
CTTCCGTTTCGATTG

+

FFFFFFFFFFFFFFFFFFFFFFFFFFFFFFFFFFFFFFFFFFFFFFFFFFFFFFFFFFFFFFFF:FFFFFFFF  
FFFFFFFFFFFFFFFFFFFFFFFFFFFFFFFFFFFFFFFFFFFFFFFFFFFFFFFFFFFFFFFF:FFFFFFFF  
FFFFFFFFFFFFFFFF

@A00721:190:HGJW7DSXY:4:2538:12798:9377 2:N:0:TCTGCAAG+GCTGCACT  
GTACTCCCCTACTTGTAGTTGCTGCCATGTGAGTGGCACCCCTTGTGGACGAATCCATTGTTTCTGCAA  
TCTATAGTCTGATAAATGATGCAGCCGCACGGTAGTGTAAGACGTCTAGGCTTGATCGCTAGACGTCT  
CTTCCGTTTCGATTG

+

FFFFFFFFFFFFFF:FFFFFFFFFFFFFFFFFFFFFFFFFFFFFFFFFFFFFFFFFFFFFFFF: :FFFFFFFF  
FFFFFFFFFFFFFFFFFFFFFFFFFFFFFFFFFFFFFFFFFFFFFFFFFFFFFFFF:FFF:FFFFFFFF:FFFFFF:FFFF  
FFFFFFFF:FFFF:F

@A00721:190:HGJW7DSXY:4:2569:28691:5838 2:N:0:TCTGCAAG+GCTGCACT  
GTACTCCCCTACTTGTAGTTGCTGCCATGTGAGTGGCACCCCTTGTGGACGAATCCATTGTTTCTGCAA  
TCTATAGTCTGATAAATGATGCAGCCGCACGGTAGTGTAAAGACGTCTAGGCTTGATCGCTAGACGTCT  
CTTCCGTTCGCATTG

+

FFFFFFFFFFFFFFFF:FFFFFFFFFFFFFFFFFFFFFFFFFFFFFFFFFFFFFFFFFFFFFFFFFFFFFFFF  
FFFFFFFFFFFFFFFFFFFFFFFFFFFFFFFFFFFFFFFFFFFFFFFFFFFFFFFFFFFFFFFFFFFFFFFF  
FFFFFFFFFF:FFF:F

@A00721:190:HGJW7DSXY:4:2641:14488:4382 2:N:0:TCTGCAAG+GCTGCACT  
GTACTCCCCTACTTGTAGTTGCTGCCATGTGAGTGGCACCCCTTGTGGACGAATCCATTGTTTCTGCAA  
TCTATAGTCTGATAAATGATGCAGCCGCACGGTAGTGTAAAGACGTCTAGGCTTGATCGCTAGACGTCT  
CTTCCGTTCGCATTG

+

FFFFFFFFFFFFFFFFFFFFFFFFFFFFFFFFFFFFFFFFFFFFFFFFFFFFFFFFFFFFFFFFFFFFFFFF  
FFF:FFFFFFFFFFFFFFFFFFFFFFFFFFFFFFFFFFFFFFFFFFFFFFFFFFFFFFFFFFFFFFFF  
FF::FFFFFFFF:FF:F

@A00721:190:HGJW7DSXY:4:1144:26422:24205 2:N:0:TCTGCAAG+GCTGCACT  
ATGCAACGGAAGAGACGTCTAGCGATCAAGCCTAGACGTCTTACACTACCGTGCGGCTGCATCATTT  
ATCAGACTATAGATTGCAGAAACAATGGATTTCGTCCACAAGGGTGCCACTCACATGGCAGCAACTACA  
AGTAGGGGAGTAGAT

+

FFFFFFFFFFFFFFFFFFFFFFFFFFFFFFFFFFFFFFFFFFFFFFFFFFFFFFFFFFFFFFFFFFFFFFFF  
FFFFFFF::FFFFFFFFFFFFFFFF:FFF:FFFFFFFFFFFFFFFF:FFFFFFFFFFFFFFFF:FFFFFFFF  
FFFFFFF:FFFFFFF

@A00721:190:HGJW7DSXY:4:1419:14253:6856 2:N:0:TCTGCAAG+GCTGCACT  
ATGCAACGGAAGAGACGTCTAGCGATCAAGCCTAGACGTCTTACACTACCGTGCGGCTGCATCATTT  
ATCAGACTATAGATTGCAGAAACAATGGATTTCGTCCACAAGGGTGCCACTCACATGGCAGCAACTACA  
AGTAGGGGAGTAGAT

+

FFFFFFFFFFFFFFFFFFFFFFFFFFFFFFFFFFFFFFFFFFFFFFFFFFFFFFFFFFFFFFFFFFFFFFFF  
FFFFFFFFFFFF,FFFFFFFFFFFFFFFFFFFFFFFFFFFFFFFFFFFFFFFFFFFFFFFF:FFFFFF,F  
FFFFFFFFFFFF,FFFFFFFFFFFFFFFFFFFFFFFF:FFFFFF:F,F,FF:FFFF:FFFFFFFFFFFF,FFFFFF:FF  
F::,F:FFFFFF,F:

@A00721:190:HGJW7DSXY:4:1435:10664:24659 2:N:0:TCTGCAAG+GCTGCACT  
ATGCAACGGAAGAGACGTCTAGCGATCAAGCCTAGACGTCTTACACTACCGTGCGGCTGCATCATTT  
ATCAGACTATAGATTGCAGAAACAATGGATTTCGTCCACAAGGGTGCCACTCACATGGCAGCAACTACA  
AGTAGGGGAGTAGAT

+

FFFFFF:FFFFFFFFFFFFFFFFFFFFFFFFFFFFFFFFFFFFFFFFFFFFFFFFFFFFFFFFFFFFFFFF  
FFFFF,F:FFFFFFFFFFFFFFFFFFFFFFFFFFFFFFFFFFFFFFFFFFFFFFFFFFFFFFFFFFFFFFFF  
FFFFFFFFFFFFFFFF

@A00721:190:HGJW7DSXY:4:1460:19578:26224 2:N:0:TCTGCAAG+GCTGCACT  
ATGCAACGGAAGAGACGTCTAGCGATCAAGCCTAGACGTCTTACACTACCGTGCGGCTGCATCATTT  
ATCAGACTATAGATTGCAGAAACAATGGATTTCGTCCACAAGGGTGCCACTCACATGGCAGCAACTACA  
AGTAGGGGAGTAGAT

+

FFFFFFFFFFFFFFFFFFFFFFFFFFFFFFFFFFFFFFFFFFFFFFFFFFFFFFFFFFFFFFFFFFFFFFFF  
FFFFFFFFFFFFFFFFFFFFFFFF:FFFFFFFFFFFFFFFF:FFFFFFFFFFFFFFFFFFFFFFFF  
FFFFFFFFFFFFFFFF

@A00721:190:HGJW7DSXY:4:1468:30472:27586 2:N:0:TCTGCAAG+GCTGCACT  
ATGCAACGGAAGAGACGTCTAGCGATCAAGCCTAGACGTCTTACACTACCGTGCGGCTGCATCATTT  
ATCAGACTATAGATTGCAGAAACAATGGATTTCGTCCACAAGGGTGCCACTCACATGGCAGCAACTACA  
AGTAGGGGAGTAGAT

+

FFFFFFFFFFFF:FFFFFFFFFFFFFFFFFFFFFFFFFFFFFFFFFFFFFFFFFFFFFFFFFFFFFFFF

FFFFFFFF:FFFFFFFFFFFFFFFFFFFFFFFFFFFFFFFFFFFFFFFFFFFFFFFFFFFFFFFF:FFF::  
FF:FFFFFFFF:FFF  
@A00721:190:HGJW7DSXY:4:2210:6189:6073 2:N:0:TCTGCAAG+GCTGCACT  
ATGCAACGGAAGAGACGTCTAGCGATCAAGCCTAGACGTCTTACACTACCGTGCGGCTGCATCATTT  
ATCAGACTATAGATTGCAGAAACAATGGATTTCGTCCACAAGGGTGCCACTCACATGGCAGCAACTACA  
AGTAGGGGAGTAGAT  
+  
FFFFFFFFFFFFFFFF:FFFFFFFFFFFFFFFFFFFFFFFFFFFFFFFFFFFFFFFFFFFFFFFFFFFFFFFF  
:FFFFFFFFFFFFFFFFFFFFFFFFFFFFFFFFFFFFFFFFFFFFFFFFFFFFFFFF:FFFFFFFFFFFFFFFF  
FF:FFFFFFFF  
@A00721:190:HGJW7DSXY:4:2266:10059:25113 2:N:0:TCTGCAAG+GCTGCACT  
ATGCAACGGAAGAGACGTCTAGCGATCAAGCCTAGACGTCTTACACTACCGTGCGGCTGCATCATTT  
ATCAGACTATAGATTGCAGAAACAATGGATTTCGTCCACAAGGGTGCCACTCACATGGCAGCAACTACA  
AGTAGGGGAGTAGAT  
+  
FFFFFFFFFFFFFFFFFFFFFFFFFFFFFFFFFFFFFFFFFFFFFFFFFFFFFFFFFFFFFFFFFFFFFFFF  
FFFFFFFF:FFFFFFFFFFFFFFFFFFFFFFFFFFFFFFFFFFFFFFFFFFFFFFFFFFFFFFFF:FFFFFFFF  
FF:,FFFFFFFF  
@A00721:190:HGJW7DSXY:4:2476:23845:11318 2:N:0:TCTGCAAG+GCTGCACT  
ATGCAACGGAAGAGACGTCTAGCGATCAAGCCTAGACGTCTTACACTACCGTGCGGCTGCATCATTT  
ATCAGACTATAGATTGCAGAAACAATGGATTTCGTCCACAAGGGTGCCACTCACATGGCAGCAACTACA  
AGTAGGGGAGTAGAT  
+  
FFFFFFF:FFFFFFFFFFFFFFFFFFFFFFFFFFFFFFFFFFFFFFFFFFFFFFFFFFFFFFFFFFFFFFFF  
FFFFFFFFFFFFFFFFFFFFFFFFFFFFFFFFFFFFFFFFFFFFFFFFFFFFFFFFFFFFFFFFFFFFFFFF  
FFFF:FFFFFFFF  
@A00721:190:HGJW7DSXY:4:2615:15049:25175 2:N:0:TCTGCAAG+GCTGCACT  
ATGCAACGGAAGAGACGTCTAGCGATCAAGCCTAGACGTCTTACACTACCGTGCGGCTGCATCATTT  
ATCAGACTATAGATTGCAGAAACAATGGATTTCGTCCACAAGGGTGCCACTCACATGGCAGCAACTACA  
AGTAGGGGAGTAGAT  
+  
FFFFFFFFFFFFFFFFFFFFFFFFFFFFFFFFFFFFFFFFFFFFFFFFFFFFFFFFFFFFFFFFFFFFFFFF  
FFFFFFFFF:FFFFFFFFFFFFFFFFFFFFFFFFFFFFFFFFFFFFFFFFFFFFFFFFFFFFFFFF:FFFFF  
FFFFFFFFFFFFFFFF  
@A00721:190:HGJW7DSXY:4:2668:11351:28886 2:N:0:TCTGCAAG+GCTGCACT  
ATGCAACGGAAGAGACGTCTAGCGATCAAGCCTAGACGTCTTACACTACCGTGCGGCTGCATCATTT  
ATCAGACTATAGATTGCAGAAACAATGGATTTCGTCCACAAGGGTGCCACTCACATGGCAGCAACTACA  
AGTAGGGGAGTAGAT  
+  
FFFFFFFFFFFFFFFFFFFFFFFFFFFFFFFFFFFFFFFFFFFFFFFFFFFFFFFFFFFFFFFFFFFFFFFF  
FFFFFFFFFFFFFFFFFFFFFFFFFFFFFFFFFFFFFFFF:FFFFF:FFFFFFFFF:FFFFFFFFFFFF:FFFFFFFFF:FF  
FFFF:FFFFFFFF  
@A00721:190:HGJW7DSXY:4:1160:20283:4460 2:N:0:TCTGCAAG+GCTGCACT  
CTCCCCTACTTGTAGTTGCTGCCATGTGAGTGGCACCCTTGTGGACGAATCCATTGTTTCTGCAATCT  
ATAGTCTGATAAATGATGCAGCCGCACGGTAGTGTAAAGACGTCTAGGCTTGATCGCTAGACGTCTCTT  
CCGTTTCGATTGCTG  
+  
FFFFFFFFFFFFFFFFFFFFFFFFFFFFFFFFFFFFFFFFFFFFFFFFFFFFFFFF:FFFFF:FFFFFFFFFFFFFFFF  
FFFFFFFFFFFFFFFFFFFFFFFFFFFFFFFFFFFFFFFF:,F:FFFFFFFFFFFFFFFFFFFFFFFFFFFFFFFF:FF  
FFFFFFFFFFFF:FFF  
@A00721:190:HGJW7DSXY:4:1229:2682:27430 2:N:0:TCTGCAAG+GCTGCACT  
CTCCCCTCCTTGTAGTTGCTGCCATGTGAGTGGCACCCTTGTGGACGAATCCATGGTTTCTGCAATCT  
ATAGTCTGATAAATGATGCAGCCGCACGGTAGTGTAAAGACGTCTAGGCTTGATCGCTAGACGTCTCTT  
CCGTTTCGATTGCTG





@A00721:190:HGJW7DSXY:4:2116:13621:9330 2:N:0:TCTGCAAG+GCTGCACT  
AGCGAAGCATCAGCAATGCAAACGGAAGAGACGTCTAGCGATCAAGCCTAGACGTCTTACACTACCGT  
GCGGCTGCATCATTTATCAGACTATAGATTGCAGAAACAATGGATTCTGCCACAAGGGTGCCACTCAC  
ATGGCAGCAACTACA

[illegible]

+

[illegible]

+

```

FFFFFFFFFFFFFFFFFFFFFFFF:FFFFFFFFFFFFFFFF:FFFFFFFFFF:FFFFFFFFFFFFFFFF
FFFFFFFF:FFF:FFFFFF:F:FFFF:FFFFFFFFFFFFFFFFFFFFFFFFFFFFFFFFFFFFFFFF
FFFFFFFFFFFFFFFF

```

+

[illegible]

+

[illegible]

+

[illegible]

+

[illegible]



FFFFFFFFFFFFFFFF:FFFFFFFFFFFFFFFFFFFFFFFFFFFFFFFFFFFFFFFF:FFFFFFFFFFFFFFFF  
FFFFFFFFFFFFFFFF

@A00721:190:HGJW7DSXY:4:2652:29894:2253 2:N:0:TCTGCAAG+GCTGCACT  
AGCGAAGCATCAGCAATGCAAACGGAAGAGACGTCTAGCGATCAAGCCTAGACGTCTTACACTACCGT  
GCGGCTGCATCATTTATCAGACTATAGATTGCAGAAACAATGGATTTCGTCCACAAGGGTGCCACTCAC  
ATGGCAGCAACTACA

+

F:FFFFFFFFFFFFFFFFFFFFFFFFFFFFFFFFFFFFFFFF:FF,FFFFFFFFFFFFFFFF:FFFFFFFFFFFFFFFF  
FFFFFFFFFFFFFFFFFFFFFFFFFFFFFFFF:FFFFFFFFFFFFFFFFFFFFFFFFFFFFFFFFFFFFFFFF:FFFFF  
FFFFFFFFF:FFFFF

@A00721:190:HGJW7DSXY:4:2658:24668:27085 2:N:0:TCTGCAAG+GCTGCACT  
AGCGAAGCATCAGCAATGCAAACGGAAGAGACGTCTAGCGATCAAGCCTAGACGTCTTACACTACCGT  
GCGGCTGCATCATTTATCAGACTATAGATTGCAGAAACAATGGATTTCGTCCACAAGGGTGCCACTCAC  
ATGGCAGCAACTACA

+

FFFFFFFFFFFFFFFFFFFFFFFFFFFFFFFFFFFFFFFFFFFFFFFFFFFFFFFFFFFFFFFFFFFFFFFF  
FFFFFFFFFFFFFFFFFFFFFFFFFFFFFFFF:FF:FFFF:FFFFFFFFFFFFFFFFFFFFFFFFFFFFFFFF  
FFFFFFFFFFFFFFFF

@A00721:190:HGJW7DSXY:4:1134:3170:1063 2:N:0:TCTGCAAG+GCTGCACT  
GCCTTCTATAGAAGCGAAGCATCAGCAATGCAAACGGAAGAGACGTCTAGCGATCAAGCCTAGACGTC  
TTACACTACCGTGCGGCTGCATCATTTATCAGACTATAGATTGCAGAAACAATGGATTTCGTCCACAAG  
GGTGCCACTCACATG

+

FFFFFFFFFFFFFFFFFFFFFFFFFFFFFFFFFFFFFFFFFFFFFFFFFFFFFFFFFFFFFFFFFFFFFFFF  
FFFFFFFFFFFFFFFFFFFFFFFFFFFFFFFF:FFFFFFFFF:FFFF:FFFFFFFFFFFF:FFFF  
FFFFFFFFFFFFFFFF

@A00721:190:HGJW7DSXY:4:1633:23746:15123 2:N:0:TCTGCAAG+GCTGCACT  
GCCTTCTATAGAAGCGAAGCATCAGCAATGCAAACGGAAGAGACGTCTAGCGATCAAGCCTAGACGTC  
TTACACTACCGTGCGGCTGCATCATTTATCAGACTATAGATTGCAGAAACAATGGATTTCGTCCACAAG  
GGTGCCACTCACATG

+

FFFFFFFFFFFFFFFFFFFFFFFFFFFFFFFFFFFFFFFFFFFFFFFFFFFFFFFFFFFFFFFFFFFFFFFF  
FFFFFFFFFFFFFFFFFFFFFFFFFFFFFFFF:FFFFFFFFFFFFFFFF:FFF:FFFFFFFFFFFF  
FFFF:FFFFFFFFFFFF

@A00721:190:HGJW7DSXY:4:2207:11315:28667 2:N:0:TCTGCAAG+GCTGCACT  
GCCTTCTATAGAAGCGAAGCATCAGCAATGCAAACGGAAGAGACGTCTAGCGATCAAGCCTAGACGTC  
TTACACTACCGTGCGGCTGCATCATTTATCAGACTATAGATTGCAGAAACAATGGATTTCGTCCACAAG  
GGTGCCACTCACATG

+

FFFFFFFFFFFFFFFFFFFFFFFFFFFFFFFFFFFFFFFFFFFFFFFFFFFFFFFFFFFFFFFFFFFFFFFF  
FFFFFFFFFFFFFFFFFFFFFFFFFFFFFFFF:FFFFFFFFF:FF:FFFFFFFFFFFFFFFFFFFFFFFF  
FFFFFFFFFFFFFFFF

@A00721:190:HGJW7DSXY:4:2562:20338:3615 2:N:0:TCTGCAAG+GCTGCACT  
GCCTTCTATAGAAGCGAAGCATCAGCAATGCAAACGGAAGAGACGTCTAGCGATCAAGCCTAGACGTC  
TTACACTACCGTGCGGCTGCATCATTTATCAGACTATAGATTGCAGAAACAATGGATTTCGTCCACAAG  
GGTGCCACTCACATG

+

F::,FFFFFFFFF::FFFFFFF,:F,F:F,:FF:FFF,FFFF:FFF:F,F:F:FFFF,F,FFFFFFFF  
F:FFFF,FF,,FFFFFF:FFF:F,,,FFF:FF::FFF,FF::FFFFFFFFFFFFFFFF:FFFFFFF  
FFFFFFFFFFFF:FF,F

@A00721:190:HGJW7DSXY:4:2562:20283:3771 2:N:0:TCTGCAAG+GCTGCACT  
GCCTTCTATAGAAGCGAAGCATCAGCAATGCAAACGGAAGAGACGTCTAGCGATCAAGCCTAGACGTC  
TTACACTACCGTGCGGCTGCATCATTTATCAGACTATAGATTGCAGAAACAATGGATTTCGTCCACAAG  
GGTGCCACTCACATG

```

FFFFFFFFFFFFFFFFFFFFFFFFFFFFFFFFFFFFFFFFFFFFFFFFFFFFFFFFFFFFFFFF:FFFFFFFFFFFFFFFFFFFFFFFF
FFFFFFFFFFFFFFFFFFFFFFFFFFFFFFFFFFFFFFFFFFFFFFFFFFFFFFFFFFFFFFFF:FFFFFFFFFFFFFFFFFFFFFFFF
FFFFFFFFFFFFFFFFFFFFFFFF

```

```

FFFFFFFFFFFFFFFFFFFFFFFFFFFFFFFF:FFFFFFFFFFFFFFFFFFFFFFFFFFFFFFFFFFFFFFFF
FFFFFFFFFFFFFFFFFFFFFFFFFFFFFFFF:FFFFFFFFFFFF,FFFFFFFFFFFFFFFFFFFFFFFFFFFF:F
FFFFFFFFFFFFFFFFFFFF

```

```
FFFFFFFFFFFFFFFFFFFFFFFFFFFFFFFFFFFFFFFFFFFFFFFFFFFFFFFFFFFFFFF
FFFFFFFFFFFFFFFFFFFFFFFFFFFFFFFFFFFF:FFFFFFFFFFFFFFFFFFFFFFFFFFFF
FFFFFFFFFFFFFFFF
```

```
FFFFFFFFFFFFFFFFFFFFFFFFFFFFFFFFFFFFFFFFFFFFFFFFFFFFFFFFFFFFFFFFFFFFF
FFFFFFFFFFFFFFFFFFFFFFFFFFFFFFFFFFFFFF,FFFFFFFFFFFFFFFFFFFFFFFFFFFFFFFF
FFFFFFFFFFFFFFFE
```

[illegible]

```

FFFFFFFFFFFFFFFFFFFFFFFFFFFFFFFFFFFFFFFFFFFFFFFFFFFFFFFFFFFFFFFFFFFF:FFFFF
FFFFF:FFFFFF:FFF:FFFFFFFFF:FFFFFFFFF:FFFFFFFFFFFFFFFFFFFFFFFFFFFFFFFF
FFFFFFFFFFFFFFFFFFFF

```

[illegible]

@A00721:190:HGJW7DSXY:4:1274:17445:23594 2:N:0:TCTGCAAG+GCTGCACT  
CGCCTTCTATAGAAGCGAAGCATCAGCAATGCAAACGGAAGAGACGTCTAGCGATCAAGCCTAGACGT

CTTACACTACCGTGCGGCTGCATCATTTATCAGACTATAGATTGCAGAAACAATGGATTTCGTCCACAC  
GGGTGCCACTCACAT

+

FFFFFFFFFFFFFFFFFFFFFFFFFFFFFFFFFFFFFFFFFFFFFFFFFFFFFFFFFFFFFFFFFFFFFFFF:FFF,  
FFFFFFFFFFFFFFFFFFFFFFFFFFFFFFFFFFFFFFFFFFFFFFFFFFFFFFFFFFFFFFFFFFFFFFFF,FF,  
FFFFFFF,FFFFFFF

@A00721:190:HGJW7DSXY:4:1471:13187:8046 2:N:0:TCTGCAAG+GCTGCACT  
CGCCTTCTATAGAAGCGAAGCATCAGCAATGCAAACGGAAGAGACGTCTAGCGATCAAGCCTAGACGT  
CTTACACTACCGTGCGGCTGCATCATTTATCAGACTATAGATTGCAGAAACAATGGATTTCGTCCACAA  
GGGTGCCACTCACAT

+

FFFFFFFFFFFFFFFFFFFFFFFFFFFFFFFFFFFFFFFFFFFFFFFFFFFFFFFFFFFFFFFFFFFFFFFF:FFFFFF:FFFFFFFFFFFFFFFFFFFFFFFF  
FFFFFFFFFFFFFFFFFFFFFFFFFFFFFFFFFFFFFFFFFFFFFFFFFFFFFFFFFFFFFFFFFFFFFFFF:FFFFFF:FFFF:FFFFFFFFFFFFFFFFFFFFFFFF  
FFFFFFFFFFFFFFFFFFFF

@A00721:190:HGJW7DSXY:4:1123:1723:2409 2:N:0:TCTGCAAG+GCTGCACT  
CCGCTTCTATAGAAGCGAAGCATCAGCAATGCAAACGGAAGAGACGTCTAGCGATCAAGCCTAGACG  
TCTTACACTACCGTGCGGCTGCATCATTTATCAGACTATAGATTGCAGAAACAATGGATTTCGTCCACA  
AGGGTGCCACTCACA

+

FFFFFFFFFFFFFFFFFFFFFFFFFFFFFFFFFFFFFFFFFFFFFFFFFFFFFFFFFFFFFFFFFFFFFFFF:FFFFFF:FFFFFFFFFFFFFFFFFFFFFFFF  
FFFFFFFFFFFFFFFFFFFFFFFFFFFFFFFFFFFFFFFFFFFFFFFFFFFFFFFFFFFFFFFFFFFFFFFF:FFFFFFF:,FFFFFFFFFFFFFFFFFFFFFFFF  
FFFFFFFFF:FFFFFFF

@A00721:190:HGJW7DSXY:4:1160:24668:15562 2:N:0:TCTGCAAG+GCTGCACT  
CCGCTTCTATAGAAGCGAAGCATCAGCAATGCAAACGGAAGAGACGTCTAGCGATCAAGCCTAGACG  
TCTTACACTACCGTGCGGCTGCATCATTTATCAGACTATAGATTGCAGAAACAATGGATTTCGTCCACA  
AGGGTGCCACTCACA

+

FFFFFFFFFFFFFFFFFFFFFFFFFFFFFFFFFFFFFFFFFFFFFFFFFFFFFFFFFFFFFFFFFFFFFFFF  
FFFFFFFFF,:FFFFFFFFFFFFFFFFFFFFFFFFFFFFFFFFFFFFFFFFFFFFFFFFFFFFFFFFFFFFFFFF:FFFFFFF  
FFFFFFFFFFFFFFFFFFFF

@A00721:190:HGJW7DSXY:4:1571:1732:15358 2:N:0:TCTGCAAG+GCTGCACT  
CCGCTTCTATAGAAGCGAAGCATCAGCAATGCAAACGGAAGAGACGTCTAGCGATCAAGCCTAGACG  
TCTTACACTACCGTGCGGCTGCATCATTTATCAGACTATAGATTGCAGAAACAATGGATTTCGTCCACA  
AGGGTGCCACTCACA

+

FFFFFFFFFFFFFFFFFFFFFFFFFFFFFFFFFFFFFFFFFFFFFFFFFFFFFFFFFFFFFFFFFFFFFFFF  
FFFFFFFFF:FFFFFFFFFFFFFFFFFFFFFFFFFFFFFFFFFFFFFFFFFFFFFFFFFFFFFFFFFFFFFFFF:FF:FFFFFFFFFFFFFFFF  
FFFFFFFFFFFFFFFFFFFF

@A00721:190:HGJW7DSXY:4:1676:1931:26944 2:N:0:TCTGCAAG+GCTGCACT  
CCGCTTCTATAGAAGCGAAGCATCAGCAATGCAAACGGAAGAGACGTCTAGCGATCAAGCCTAGACG  
TCTTACACTACCGTGCGGCTGCATCATTTATCAGACTATAGATTGCAGAAACAATGGATTTCGTCCACA  
AGGGTGCCACTCACA

+

FFFFFFFFFFFFFFFFFFFFFFFFFFFFFFFFFFFFFFFFFFFFFFFFFFFFFFFFFFFFFFFFFFFFFFFF:FFFFFFFFFFFFFFFFFFFFFFFF  
FFFFFFFFFFFFFFFFFFFFFFFFFFFFFFFFFFFFFFFFFFFFFFFFFFFFFFFFFFFFFFFFFFFFFFFF:FFFFFF:FFFFFFFFFFFFFFFFFFFFFFFF  
FFFFFFFFFFFFFFFFFFFF

@A00721:190:HGJW7DSXY:4:2537:30101:3396 2:N:0:TCTGCAAG+GCTGCACT  
CCGCTTCTATAGAAGCGAAGCATCAGCAATGCAAACGGAAGAGACGTCTAGCGATCAAGCCTAGACG  
TCTTACACTACCGTGCGGCTGCATCATTTATCAGACTATAGATTGCAGAAACAATGGATTTCGTCCACA  
AGGGTGCCACTCACA

+

FFFFFFFFFFFFFFFFFFFFFFFFFFFFFFFFFFFFFFFFFFFFFFFFFFFFFFFFFFFFFFFFFFFFFFFF  
FFFFFFFFFFFFFFFFFFFFFFFFFFFFFFFFFFFFFFFFFFFFFFFFFFFFFFFFFFFFFFFFFFFFFFFF:FFFFFF:FFF:FFFFFFFFFFFFFFFF  
FFFFFFFFFFFFFFFFFFFF

@A00721:190:HGJW7DSXY:4:1136:23809:9815 2:N:0:TCTGCAAG+GCTGCACT  
CGCCGAATCCGCCTTCTATAGAAGCGAAGCATCAGCAATGCAAACGGAAGAGACGTCTAGCGATCAAG  
CCTAGACGTCTTACACTACCGTGCGGCTGCATCATTTATCAGACTATAGATTGCAGAAACAATGGATT  
CGTCCACAAGGGTGC

@A00721:190:HGJW7DSXY:4:1226:15872:18740 2:N:0:TCTGCAAG+GCTGCACT  
CGCCGAATCCGCCTTCTATAGAAGCGAAGCATCAGCAATGCAAACGGAAGAGACGTCTAGCGATCAAG  
CCTAGACGTCTTACACTACCGTGC GGCTGCATCATTTATCAGACTATAGATTGCAGAAACAATGGATT  
CGTCCACAAGGGTGC

@A00721:190:HGJW7DSXY:4:1262:28447:22576 2:N:0:TCTGCAAG+GCTGCACT  
CGCCGAATCCGCCTTCTATAGAAGCGAAGCATCAGCAATGCAAACGGAAGAGACGTCTAGCGATCAAG  
CCTAGACGTCTTACACTACCGTGCGGCTGCATCATTTATCAGACTATAGATTGCAGAAACAATGGATT  
CGTCCACAAGGGTGC

@A00721:190:HGJW7DSXY:4:2460:23737:22216 2:N:0:TCTGCAAG+GCTGCACT  
CGCCGAATCCGCCTTCTATAGAAGCGAAGCATCAGCAATGCAAACGGAAGAGACGTCTAGCGATCAAG  
CCTAGACGTCTTACACTACCGTGCGGCTGCATCATTTATCAGACTATAGATTGCAGAAACAATGGATT  
CGTCCACAAGGGTGC

@A00721:190:HGJW7DSXY:4:2649:12608:13025 2:N:0:TCTGCAAG+GCTGCACT  
CGCCGAATCCGCCTTCTATAGAAGCGAAGCATCAGCAATGCAAACGGAAGAGACGTCTAGCGATCAAG  
CCTAGACGTCTTACACTACCGTGC GGCTGCATCATTTATCAGACTATAGATTGCAGAAACAATGGATT  
CGTCCACAAGGGTGC

@A00721:190:HGJW7DSXY:4:1227:4553:19586 2:N:0:TCTGCAAG+GCTGCACT  
GCAGAATTCTTCTTCGCCGAATCCGCCTTCTATAGAAGCGAAGCATCAGCAATGCAAACGGAAGAGAC  
GTCTAGCGATCAAGCCTAGACGTCTTACACTACCGTGCGGCTGCATCATTTATCAGACTATAGATTGC  
AGAAACAATGGATTC

@A00721:190:HGJW7DSXY:4:1468:23927:32252 2:N:0:TCTGCAAG+GCTGCACT  
GCAGAATTCTTCTTCGCCGAATCCGCCTTCTATAGAAGCGAAGCATCAGCAATGCAAACGGAAGAGAC  
GTCTAGCGATCAAGCCTAGACGTCTTACACTACCGTGCGGCTGCATCATTTATCAGACTATAGATTGC  
AGAAACAATGGATTC

FFFF: :FFFFFFFFFFFFFFFFFFFFFFFFFFFFFFFFFFFFFFFFFFFFFFFFFFFFFFFFFFFFFFFF,FF,FF:FFF:FFFFFFFFF  
FFFFFFFFFFFFFFFF

@A00721:190:HGJW7DSXY:4:1508:19768:10645 2:N:0:TCTGCAAG+GCTGCACT  
GCAGAATTCTTCTTCGCCGAATCCGCCTTCTATAGAAGCGAAGCATCAGCAATGCAAACGGAAGAGAC  
GTCTAGCGATCAAGCCTAGACGTCTTACACTACCGTGCGGCTGCATCATTTATCAGACTATAGATTGC  
AGAAACAATGGATTC

+

:FFFFFFFFFFFFFFFFFFFFFFFFFFFFFFFFFFFFFFFFFFFFFFFFFFFFFFFFFFFFFFFFFFFFFFFF  
FFFFF:FFFFFFFFFFFFFF:FFFFFFFFFFFFFFFFFFFFFFFFFFFFFFFFFFFFFFFFFFFFFFFF:FFFFFFFFFF,FF,FFFFF  
FFFFFFFFFFFFFFFF

@A00721:190:HGJW7DSXY:4:1508:19425:12305 2:N:0:TCTGCAAG+GCTGCACT  
GCAGAATTCTTCTTCGCCGAATCCGCCTTCTATAGAAGCGAAGCATCAGCAATGCAAACGGAAGAGAC  
GTCTAGCGATCAAGCCTAGACGTCTTACACTACCGTGCGGCTGCATCATTTATCAGACTATAGATTGC  
AGAAACAATGGATTC

+

FFFFFFFFFFFFFFFFFFFFFFFFFFFFFFFFFFFFFFFFFFFFFFFFFFFFFFFFFFFFFFFFFFFFFFFF  
FFFFFFFFFFFFFFFFFFFFFFFFFFFFFFFFFFFFFFFFFFFFFFFFFFFFFFFFFFFFFFFFFFFFFFFF:FFFFFFFFFF  
FFFFFFFFFFFFFFFF:F

@A00721:190:HGJW7DSXY:4:2137:22706:29512 2:N:0:TCTGCAAG+GCTGCACT  
GCAGAATTCTTCTTCGCCGAATCCGCCTTCTATAGAAGCGAAGCATCAGCAATGCAAACGGAAGAGAC  
GTCTAGCGATCAAGCCTAGACGTCTTACACTACCGTGCGGCTGCATCATTTATCAGACTATAGATTGC  
AGAAACAATGGATTC

+

FFFFFFFFFFFFFFFFFFFFFFFFFFFFFFFFFFFFFFFFFFFFFFFFFFFFFFFFFFFFFFFFFFFFFFFF  
FFFFFFFFFFFFFFFFFFFFFFFFFFFFFFFFFFFFFFFFFFFFFFFFFFFFFFFFFFFFFFFFFFFFFFFF:FFFFFFFFFF  
FFFFFFFFFFFFFFFF:F

@A00721:190:HGJW7DSXY:4:2653:17454:8171 2:N:0:TCTGCAAG+GCTGCACT  
GCAGAATTCTTCTTCGCCGAATCCGCCTTCTATAGAAGCGAAGCATCAGCAATGCAAACGGAAGAGAC  
GTCTAGCGATCAAGCCTAGACGTCTTACACTACCGTGCGGCTGCATCATTTATCAGACTATAGATTGC  
AGAAACAATGGATTC

+

FFFFFFFFFFFFFFFFFFFFFFFFFFFFFFFFFFFFFFFFFFFFFFFFFFFFFFFFFFFFFFFFFFFFFFFF  
FFFFFFFFFFFFFFFFFFFFFFFFFFFFFFFFFFFFFFFFFFFFFFFFFFFFFFFFFFFFFFFFFFFFFFFF:FFF:,FFFFFFFF  
FFFFFFFFFFFFFFFF

@A00721:190:HGJW7DSXY:4:2359:22625:7545 2:N:0:TCTGCAAG+GCTGCACT  
TGCAGAATTCTTCTTCGCCGAATCCGCCTTCTATAGAAGCGAAGCATCAGCAATGCAAACGGAAGAGA  
CGTCTAGCGATCAAGCCTAGACGTCTTACACTACCGTGCGGCTGCATCATTTATCAGACTATAGATTG  
CAGAAACAATGGATT

+

FFFFFFFFFFFFFFFFFFFFFFFFFFFFFFFFFFFFFFFFFFFFFFFFFFFFFFFFFFFFFFFFFFFFFFFF  
FFFFFFFFFFFFFFFFFFFFFFFFFFFFFFFFFFFFFFFFFFFFFFFFFFFFFFFFFFFFFFFFFFFFFFFF:FFFFFFF  
FFFFFFFFFFFFFFFF

@A00721:190:HGJW7DSXY:4:2601:26304:29982 2:N:0:TCTGCAAG+GCTGCACT  
TGCAGAATTCTTCTTCGCCGAATCCGCCTTCTATAGAAGCGAAGCATCAGCAATGCAAACGGAAGAGA  
CGTCTAGCGATCAAGCCTAGACGTCTTACACTACCGTGCGGCTGCATCATTTATCAGACTATAGATTG  
CAGAAACAATGGATT

+

FFFFFFFFFFFFFFFFFFFFFFFFFFFFFFFFFFFFFFFFFFFFFFFFFFFFFFFFFFFFFFFFFFFFFFFF  
FFFFFFFFFFFFFFFFFFFFFFFFFFFFFFFFFFFFFFFFFFFFFFFFFFFFFFFFFFFFFFFFFFFFFFFF:FFFFFFF  
FFFFFFFFFFFFFFFF

@A00721:190:HGJW7DSXY:4:2638:16360:33990 2:N:0:TCTGCAAG+GCTGCACT  
TGCAGAATTCTTCTTCGCCGAATCCGCCTTCTATAGAAGCGAAGCATCAGCAATGCAAACGGAAGAGA  
CGTCTAGCGATCAAGCCTAGACGTCTTACACTACCGTGCGGCTGCATCATTTATCAGACTATAGATTG  
CAGAAACAATGGATT

+  
FFFFFFFFFFFFFFFFFFFFFFFFFFFFFFFFFFFFFFFFFFFFFFFFFFFFFFFFFFFFFFFFFFFFFFFF  
FFFFFFFFFFFFFFFFFFFFFFFFFFFFFFFFFFFFFFFFFFFFFFFFFFFFFFFFFFFFFFFFFFFFFFFF  
FFFFFFFFFFFFFFFF:

@A00721:190:HGJW7DSXY:4:1129:26521:16986 2:N:0:TCTGCAAG+GCTGCACT  
CAGAGACAAATGCAGAATTCTTCTTCGCCGAATCCGCCTTCTATAGAAGCGAAGCATCAGCAATGCAA  
ACGGAAGAGACGTCTAGCGATCAAGCCTAGACGTCTTACACTACCGTGCGGCTGCATCATTTATCAGA  
CTATAGATTGCAGAA

+  
FFFFFFFFFFFFFFFF:FFFFFFFFFFFFFFFFFFFFFFFFFFFFFFFFFFFFFFFFFFFFFFFFFFFFFFFF  
FFFFFFFFFFFFFFFFFFFFFFFFFFFFFFFFFFFFFFFFFFFFFFFFFFFFFFFFFFFFFFFFFFFFFFFF  
FFFFFFFFFFFFFFFF

@A00721:190:HGJW7DSXY:4:1161:21956:32033 2:N:0:TCTGCAAG+GCTGCACT  
CAGAGACAAATGCAGAATTCTTCTTCGCCGAATCCGCCTTCTATAGAAGCGAAGCATCAGCAATGCAA  
ACGGAAGAGACGTCTAGCGATCAAGCCTAGACGTCTTACACTACCGTGCGGCTGCATCATTTATCAGA  
CTATAGATTGCAGAA

+  
FFFFFFFFFFFFFFFFFFFFFFFFFFFFFFFFFFFFFFFFFFFFFFFFFFFFFFFFFFFFFFFFFFFFFFFF:FFFFFFFFFFFFFFFF  
FFFFFFFFFFFFFFFFFFFFFFFFFFFFFFFFFFFFFFFFFFFFFFFFFFFFFFFFFFFFFFFFFFFFFFFF  
FFFFFFFFFFFFFFFF

@A00721:190:HGJW7DSXY:4:1206:2889:29512 2:N:0:TCTGCAAG+GCTGCACT  
CAGAGACAAATGCAGAATTCTTCTTCGCCGAATCCGCCTTCTATAGAAGCGAAGCATCAGCAATGCAA  
ACGGAAGAGACGTCTAGCGATCAAGCCTAGACGTCTTACACTACCGTGCGGCTGCATCATTTATCAGA  
CTATAGATTGCAGAA

+  
FFFFFFFFFFFFFFFFFFFFFFFF:FFFFFFFFFFFFFFFFFFFFFFFF:FFFFFFFF,FFFFFFFFFFFFFFFF  
FFFFFFFFFFFFFFFFFFFFFFFFFFFFFFFFFFFFFFFFFFFFFFFFFFFFFFFFFFFFFFFFFFFFFFFF  
FFFFFFFFFFFFFFFF

@A00721:190:HGJW7DSXY:4:1427:20971:31234 2:N:0:TCTGCAAG+GCTGCACT  
CAGAGACAAATGCAGAATTCTTCTTCGCCGAATCCGCCTTCTATAGAAGCGAAGCATCAGCAATGCAA  
ACGGAAGAGACGTCTAGCGATCAAGCCTAGACGTCTTACACTACCGTGCGGCTGCATCATTTATCAGA  
CTATAGATTGCAGAA

+  
FFFFFFFF:FFFFFFFFFFFFFFFFFFFFFFFFFFFFFFFFFFFFFFFFFFFFFFFFFFFFFFFFFFFFFFFF  
FFFFFFFFFFFFFFFFFFFFFFFFFFFFFFFFFFFFFFFF:F,FFFFFFFFFFFFFFFFFFFFFFFF:FFFFFFFF  
FFFFFFFF,FFFF

@A00721:190:HGJW7DSXY:4:1509:8612:10895 2:N:0:TCTGCAAG+GCTGCACT  
CAGAGACAAATGCAGAATTCTTCTTCGCCGAATCCGCCTTCTATAGAAGCGAAGCATCAGCAATGCAA  
ACGGAAGAGACGTCTAGCGATCAAGCCTAGACGTCTTACACTACCGTGCGGCTGCATCATTTATCAGA  
CTATAGATTGCAGAA

+  
FFFFFFFFFFFFFFFFFFFFFFFFFFFFFFFFFFFFFFFFFFFFFFFFFFFFFFFFFFFFFFFFFFFFFFFF:FFFFFFFFFFFFFFFF  
FFFFFFFFFFFFFFFFFFFFFFFFFFFFFFFFFFFFFFFFFFFFFFFFFFFFFFFFFFFFFFFFFFFFFFFF  
FFFFFFFFFFFFFFFF

@A00721:190:HGJW7DSXY:4:1568:3712:31657 2:N:0:TCTGCAAG+GCTGCACT  
CAGAGACAAATGCAGAATTCTTCTTCGCCGAATCCGCCTTCTATAGAAGCGAAGCATCAGCAATGCAA  
ACGGAAGAGACGTCTAGCGATCAAGCCTAGACGTCTTACACTACCGTGCGGCTGCATCATTTATCAGA  
CTATAGATTGCAGAA

+  
FFFFFFFFFFFFFFFF:FFFFFFFFFFFFFFFFFFFFFFFFFFFFFFFFFFFFFFFFFFFFFFFFFFFFFFFF:FFFFFFFFFFFFFFFF  
FFFFFFFFFFFFFFFFFFFFFFFFFFFFFFFFFFFFFFFFFFFFFFFFFFFFFFFFFFFFFFFFFFFFFFFF  
FFFFFFFFFFFFFFFF:F

@A00721:190:HGJW7DSXY:4:2260:6696:4570 2:N:0:TCTGCAAG+GCTGCACT  
CAGAGACAAATGCAGAATTCTTCTTCGCCGAATCCGCCTTCTATAGAAGCGAAGCATCAGCAATGCAA



@A00721:190:HGJW7DSXY:4:2628:24325:8609 2:N:0:TCTGCAAG+GCTGCACT  
ATTTGGACAGAGACAAATGCAGAATTCTTCTTCGCCGAATCCGCCTTCTATAGAAGCGAAGCATCAGC  
AATGCAAACGGAAGAGACGTCTAGCGATCAAGCCTAGACGTCTTACACTACCGTGCGGCTGCATCATT  
TATCAGACTATAGAT

[illegible]

+

```
F:FF:FFFFFFFFFFFFFFFF,F,FFFFFFFFFFFFFFFFFFFFFFFFFFFFFFFF:FFFFFF:FFFF
FFFFFFFFFFFFFFFF:FFFF:FFFFFFFFFFFF,F,FFF:FF,FF,FFFFFFFFFF,FFFFFFFFFFFFFFFF
:EEEEEEE:EEEEEE
```

+

```

FFFFFFFFFFFFFFFFFFFF:FFFFFFFFFFFFFFFF:FFFFFFFFFFFFFFFF:FFFFFFFFFFFFFFFF
FFFFFFFF:FFFFFFFFFFFF,FFFFFFFFFFFFFFFFFFFFFFFFFFFF:FFFFFFFFFFFF,F,FFFFFFFFFFFFFFFF
FFF:FFFFFFFFFFFF

```

+

```

FFFFFFFFFFFFFFFFFFFFFFFFFFFFFFFFFFFFFFFFFFFFFFFFFFFFFFFFFFFFFFFFFFFFFFFF
FFFFFFFF:FFFFFFFFFFFFFFFFFFFFFFFF:FFFFFFFFFFFFFFFFFFFFFFFFFFFFFFFF:FFFFFFFF
FFF:FFFFFFFF

```

+

```
FFFFFFFFFFFFFFFFFFFFFFFFFFFFF:FFFFFF:FFFFFFFFFFFFFFFFFFFFFFFFFFFFF,FFF
FFFFFFFFFFFFFFFFFFFFFFFFFFFFF:FFFFFFFFFFFFFFFFFFFFFFFFFFFFF
E:EEEEEEEEEEEEEE
```

+

```

FFFFFFFF:FFFFFFFFFFFFFFFFFFFFFFFFFFFFFFFFFFFFFFFFFFFFFFFFFFFFFFFFFFFFFFFF:FFFFFF
FFFFFFFFFFFFFFFFFFFFFFFFFFFFFFFFFFFFFFFF:FFFFFFFFFFFFFFFFFFFFFFFFFFFFFFFFFFFF
FFFFFFFFFFFFFFFFFFFF

```

+

[illegible]



FFFFFFFFFFFFFFFFFFFFFFFFFFFFFFFFFFFFFFFFFFFFFFFFFFFFFFFFFFFFFFFFFFFFFFFF  
FFFFFFFFFFFFFF:FF

@A00721:190:HGJW7DSXY:4:1471:28284:24612 2:N:0:TCTGCAAG+GCTGCACT  
AAAGATTTGGACAGAGACAAATGCAGAATTCTTCTTCGCCGAATCCGCCTTCTATAGAAGCGAAGCAT  
CAGCAATGCAAACGGAAGAGACGTCTAGCGATCAAGCCTAGACGTCTTACACTACCGTGCGGCTGCAT  
CATTTATCAGACTAT

+

F:FFFFFFFFFFFFFFFFFFFFFFFFFFFFFFFFFFFFFFFFFFFFFFFFFFFFFFFFFFFFFFFFFFFF:FFFFFFFFFFFFFFFF  
FFFFFFFFFFFFFFFFFFFFFFFFFFFFFFFFFFFFFFFFFFFFFFFFFFFFFFFFFFFFFFFFFFFFFFFF  
FFFFFFFFFFFFFFFF

@A00721:190:HGJW7DSXY:4:1471:28275:24659 2:N:0:TCTGCAAG+GCTGCACT  
AAAGATTTGGACAGAGACAAATGCAGAATTCTTCTTCGCCGAATCCGCCTTCTATAGAAGCGAAGCAT  
CAGCAATGCAAACGGAAGAGACGTCTAGCGATCAAGCCTAGACGTCTTACACTACCGTGCGGCTGCAT  
CATTTATCAGACTAT

+

FFFFFFFFFFFFFFFFFFFFFFFFFFFFFFFFFFFFFFFFFFFFFFFFFFFFFFFFFFFFFFFFFFFF:FFFFFFFFFFFFFFFF:FFFFFFFF  
FFFFFFFFFFFFFFFFFFFFFFFFFFFFFFFFFFFFFFFFFFFFFFFFFFFFFFFFFFFFFFFFFFFFFFFF  
FFFFFFFFFFFFFFFF

@A00721:190:HGJW7DSXY:4:1667:22426:28213 2:N:0:TCTGCAAG+GCTGCACT  
AAAGATTTGGACAGAGACAAATGCAGAATTCTTCTTCGCCGAATCCGCCTTCTATAGAAGCGAAGCAT  
CAGCAATGCAAACGGAAGAGACGTCTAGCGATCAAGCCTAGACGTCTTACACTACCGTGCGGCTGCAT  
CATTTATCAGACTAT

+

FFFFFFFFFFFFFFFFFFFFFFFFFFFFFFFFFFFFFFFFFFFFFFFFFFFFFFFFFFFFFFFFFFFF:FFFFFFFFFFFFFFFF:FFFFFFFF  
FFFFFFFFFFFFFFFFFFFFFFFFFFFFFFFFFFFFFFFFFFFFFFFFFFFFFFFFFFFFFFFFFFFFFFFF  
FFFFFFFFFFFFFFFF

@A00721:190:HGJW7DSXY:4:2361:16532:18035 2:N:0:TCTGCAAG+GCTGCACT  
AAAGATTTGGACAGAGACAAATGCAGAATTCTTCTTCGCCGAATCCGCCTTCTATAGAAGCGAAGCAT  
CAGCAATGCAAACGGAAGAGACGTCTAGCGATCAAGCCTAGACGTCTTACACTACCGTGCGGCTGCAT  
CATTTATCAGACTAT

+

FFFFFFFFFFFFFF,FFFFFFFF:FFFFFFFFFFFFFFFFFFFFFFFFFFFFFFFFFFFFFFFF:FFFFFFFFFFFFFFFF  
FFFFF:FFFFF:FFFFFFFFFFFFFFFFFFFFFFFFFFFFFFFFFFFFFFFFFFFFFFFFFFFFFFFF  
FFFFFFFFFFFFFF:,F

@A00721:190:HGJW7DSXY:4:2515:7048:16892 2:N:0:TCTGCAAG+GCTGCACT  
AAAGATTTGGACAGAGACAAATGCAGAATTCTTCTTCGCCGAATCCGCCTTCTATAGAAGCGAAGCAT  
CAGCAATGCAAACGGAAGAGACGTCTAGCGATCAAGCCTAGACGTCTTACACTACCGTGCGGCTGCAT  
CATTTATCAGACTAT

+

FFFFFFFFFFFFFFFFFFFFFFFFFFFF:FFF:FFFFFFFFFFFFFFFFFFFFFFFF,FFFFFFFFFFFFFFFF  
FFFFFFFFFFFFFFFFFFFFFFFFFFFFFFFFFFFFFFFFFFFFFFFFFFFFFFFFFFFFFFFF:FFFFFFFFFFFFFFFF  
FFFFFFFFFFFFFFFF

@A00721:190:HGJW7DSXY:4:2524:17002:4006 2:N:0:TCTGCAAG+GCTGCACT  
AAAGATTTGGACAGAGACAAATGCAGAATTCTTCTTCGCCGAATCCGCCTTCTATAGAAGCGAAGCAT  
CAGCAATGCAAACGGAAGAGACGTCTAGCGATCAAGCCTAGACGTCTTACACTACCGTGCGGCTGCAT  
CATTTATCAGACTAT

+

FFFFFFFFFFFF:FFFFFFFFFFFFFFFFFFFFFFFFFFFFFFFFFFFFFFFF:FFFFFFFFFFFF:FFFFFFFFFFFF  
FFFFFFFFFFFF:FFFF,FFFFFFFF,FFF:FFFFFFFFFFFFFFFFFFFFFFFF:FFFFFFFFFFFFFFFF  
FF,FFFFFFFF

@A00721:190:HGJW7DSXY:4:2553:23249:7185 2:N:0:TCTGCAAG+GCTGCACT  
AAAGATTTGGACAGAGACAAATGCAGAATTCTTCTTCGCCGAATCCGCCTTCTATAGAAGCGAAGCAT  
CAGCAATGCAAACGGAAGAGACGTCTAGCGATCAAGCCTAGACGTCTTACACTACCGTGCGGCTGCAT  
CATTTATCAGACTAT

+  
FFFFFFFFFFFFFFFFFFFFFFFFFFFFFFFFFFFFFFFFFFFFFFFFFFFFFFFFFFFFFFFFFFFFFFFF  
FFFFFFFFFFFFFFFFFFFFFFFFFFFFFFFFFFFFFFFFFFFFFFFFFFFFFFFFFFFFFFFFFFFFFFFF  
FFFFFFFFFFFFFFFF

@A00721:190:HGJW7DSXY:4:2604:18855:28197 2:N:0:TCTGCAAG+GCTGCACT  
AAAGATTTGGACAGAGACAAATGCAGAATTCTTCTTCGCCGAATCCGCCTTCTATAGAAGCGAAGCAT  
CAGCAATGCAAACGGAAGAGACGTCTAGCGATCAAGCCTAGACGTCTTACACTACCGTGCGGCTGCAT  
CATTTATCAGACTAT

+  
FFFFF:FFFFFFFFFFFFFFFFFFFFFF,FFF:FFFFFFFFFFFFFFFFFFFFFFFFFFFFFFFFFFFFF  
FFFFFFFFFFFFFFFFFFFFFFFFFFFFFFFFFFFFFFFFFFFFFFFFFFFFFFFFFFFFFFFFFFFFFFFF  
FF:FFF:FFFFFF:F

@A00721:190:HGJW7DSXY:4:2618:31910:27602 2:N:0:TCTGCAAG+GCTGCACT  
AAAGATTTGGACAGAGACAAATGCAGAATTCTTCTTCGCCGAATCCGCCTTCTATAGAAGCGAAGCAT  
CAGCAATGCAAACGGAAGAGACGTCTAGCGATCAAGCCTAGACGTCTTACACTACCGTGCGGCTGCAT  
CATTTATCAGACTAT

+  
FFFFFFFFFFFFFF:FFFFFFFFFFFFFF:FFFFFFFFFFFFFFFFFFFFFFFFFFFFFFFFFFFFFFFF  
FFFF,FFFFFF:FFFFFFFFFFFFFF:FFFFFFFFFFFFFFFFFFFFFFFFFFFFFFFFFFFFFFFF  
FF:FFFFFFFF,F

@A00721:190:HGJW7DSXY:4:2645:29866:1329 2:N:0:TCTGCAAG+GCTGCACT  
AAAGATTTGGACAGAGACAAATGCAGAATTCTTCTTCGCCGAATCCGCCTTCTATAGAAGCGAAGCAT  
CAGCAATGCAAACGGAAGAGACGTCTAGCGATCAAGCCTAGACGTCTTACACTACCGTGCGGCTGCAT  
CATTTATCAGACTAT

+  
FFFFFFFFFFFFFFFFFFFFFFFFFFFFFFFFFFFFFFFFFFFFFFFFFFFFFFFFFFFFFFFFFFFFFF:FFFFFFFF  
FFFFFFFFFFFFFF:FFFFFFFFFFFFFFFFFFFFFFFFFFFFFFFFFFFFFFFFFFFFFFFFFFFFFFFF  
FFFFFFFF:FFFFFF:

@A00721:190:HGJW7DSXY:4:1206:18728:14669 2:N:0:TCTGCAAG+GCTGCACT  
TAAAGATTTGGACAGAGACAAATGCAGAATTCTTCTTCGCCGAATCCGCCTTCTATAGAAGCGAAGCA  
TCAGCAATGCAAACGGAAGAGACGTCTAGCGATCAAGCCTAGACGTCTTACACTACCGTGCGGCTGCA  
TCATTTATCAGACTA

+  
FFFFFF:FFFFFFFFFFFFFFFFFFFFFFFFFFFFFFFFFFFFFFFFFFFFFFFFFFFFFFFFFFFFFF:FFFFFF  
FFFFFFFF,FFFFFFFFFFFFFFFFFFFFFFFFFFFFFFFFFFFFFFFFFFFFFFFFFFFFFFFFFFFFFF:FFFFFF  
FFFFFFFFFFFFFF:F

@A00721:190:HGJW7DSXY:4:2371:10863:35712 2:N:0:TCTGCAAG+GCTGCACT  
TAAAGATTTGGACAGAGACAAATGCAGAATTCTTCTTCGCCGAATCCGCCTTCTATAGAAGCGAAGCA  
TCAGCAATGCAAACGGAAGAGACGTCTAGCGATCAAGCCTAGACGTCTTACACTACCGTGCGGCTGCA  
TCATTTATCAGACTA

+  
FFFFFFFFFFFFFFFFFFFFFFFFFFFFFFFFFFFFFFFFFFFFFFFFFFFFFFFFFFFFFFFFFFFFFF:FFFFFFFF  
FFFFFFFFFFFFFFFFFFFFFFFFFFFFFFFFFFFFFFFFFFFFFFFFFFFFFFFFFFFFFFFFFFFFFF:FFFFFF  
FFFFFFFFFFFFFF:F

@A00721:190:HGJW7DSXY:4:2133:5593:12587 2:N:0:TCTGCAAG+GCTGCACT  
TTCATCTTTAAAGATTTGGACAGAGACAAATGCAGAATTCTTCTTCGCCGAATCCGCCTTCTATAGAA  
GCGAAGCATCAGCAATGCAAACGGAAGAGACGTCTAGCGATCAAGCCTAGACGTCTTACACTACCGTG  
CGGCTGCATCATTTA

+  
FFFFFFFFFFFFFFFFFFFFFFFFFFFFFFFFFFFFFFFFFFFFFFFFFFFFFFFFFFFFFFFFFFFFFF:FFFFF  
FFFFFFFFFFFFFFFFFFFFFFFFFFFFFFFFFFFFFFFFFFFFFFFFFFFFFFFFFFFFFFFFFFFFFF:FFFFF  
FFFFFFFFFFFFFF

@A00721:190:HGJW7DSXY:4:2141:25211:23265 2:N:0:TCTGCAAG+GCTGCACT  
TTCATCTTTAAAGATTTGGACAGAGACAAATGCAGAATTCTTCTTCGCCGAATCCGCCTTCTATAGAA

CGGAAGCATCAGCAATGCAAACGGAAGAGACGTCTAGCGATCAAGCCTAGACGTCTTACACTACCGTG  
CGGCTGCATCATTTA

```

FFFFFFFFFFFFFFFFFFFFFFFF:FFFFFFFFFFFF:FFFFF:FFFF:FFF:FF:FFF,:FFFFFFFFFFFF
,FFFFF,FFFFFFFFFFFFFFFF,FFFFFFFFFFFF:FF,,FFF,FFFFFFFFFFFFFFFFFFFFFFFF:FFFFFFF
FF:FFFFFFFFFFFFFFFF

```

 $+$ 

@A00721:190:HGJW7DSXY:4:2255:6262:28056 2:N:0:TCTGCAAG+GCTGCACT  
TTCATCTTTAAAGATTTGGACAGAGACAAATGCAGAATTCTTCTTCGCCGAATCCGCCTTCTATAGAA  
GCGAAGCATCAGCAATGCAAACGGAAGAGACGTCTAGCGATCAAGCCTAGACGTCTTACACTACCGTG  
CGGCTGCATCATTTA

[illegible]

+

@A00721:190:HGJW7DSXY:4:2334:19678:2284 2:N:0:TCTGCAAG+GCTGCACT  
TTCATCTTTAAAGATTTGGACAGAGACAAATGCAGAATTCTTCTTCGCCGAATCCGCCTTCTATAGAA  
GCGAAGCATCAGCAATGCAAACGGAAGAGACGTCTAGCGATCAAGCCTAGACGTCTTACACTACCGTG  
CGGCTGCATCATTTA

[illegible]

+

@A00721:190:HGJW7DSXY:4:2551:27444:25034 2:N:0:TCTGCAAG+GCTGCACT  
TTCATCTTTAAAGATTTGGACAGAGACAAATGCAGAATTCTTCTTCGCCGAATCCGCCTTCTATAGAA  
GCGAAGCATCAGCAATGCAAACGGAAGAGACGTCTAGCGATCAAGCCTAGACGTCTTACACTACCGTG  
CGGCTGCATCATTTA

```

FFFFFFFFFFFFFFFFFFFFFFFFFFFFFFFF:FFFFFFFF,FFFFFFFFFFFFFFFFFFFFFFFFFFFFFFFF:FFFF:
FFFF:FFFFFFFFFFFFFFFFFFFFFFFFFFFFFFFFFFFFFFFFFFFFFFFFFFFFFFFF,FFFFFFFFFFFFFF:FFFFFFFFFFFFFFFF
FFFFFFFFFFFFFFFF

```

@A00721:190:HGJW7DSXY:4:1224:27308:25520 2:N:0:TCTGCAAG+GCTGCACT  
AATTCATCTTTAAAGATTTGGACAGAGACAAATGCAGAATTCTTCTTCGCCGAATCCGCCTTCTATAG  
AAGCGAAGCATCAGCAATGCAAACGGAAGAGACGTCTAGCGATCAAGCCTAGACGTCTTACACTACCG  
TGCGGCTGCATCATT

+

FFFFFFFFFFFFFFFFFFFFFFFFFFFFFFFFFFFFFFFFFFFFFFFFFFFFFFFFFFFFFFFFFFFFFFFF  
FFFFFF:FFFFFFFFFFFFFFFFFFFFFFFFFFFFFFFFFFFFFFFFFFFFFFFFFFFFFFFFFFFFFFFF  
FF,FFFFFFFFFFFF

@A00721:190:HGJW7DSXY:4:2236:7003:2253 2:N:0:TCTGCAAG+GCTGCACT  
AATTCATCTTTAAAGATTTGGACAGAGACAAATGCAGAATTCTTCTTCGCCGAATCCGCCTTCTATAG  
AAGCGAAGCATCAGCAATGCAAACGGAAGAGACGTCTAGCGATCAAGCCTAGACGTCTTACACTACCG  
TGCGGCTGCATCATT

+

FFFFFFFFFFFFFFFFFFFFFFFFFFFFFFFFFFFFFFFFFFFFFFFFFFFFFFFFFFFFFFFFFFFFFFFF  
FF:FFFFFFFFFFFFFFFFFFFFFFFFFFFFFFFFFFFFFFFFFFFFFFFFFFFFFFFFFFFFFFFFFFFF  
FFFFFFFFFFFFFFFFFFFF

@A00721:190:HGJW7DSXY:4:2411:29586:15749 2:N:0:TCTGCAAG+GCTGCACT  
AATTCATCTTTAAAGATTTGGACAGAGACAAATGCAGAATTCTTCTTCGCCGAATCCGCCTTCTATAG  
AAGCGAAGCATCAGCAATGCAAACGGAAGAGACGTCTAGCGATCAAGCCTAGACGTCTTACACTACCG  
TGCGGCTGCATCATT

+

FFFFFFFFFFFFFFFFFFFFFFFFFFFFFFFFFFFFFFFFFFFFFFFFFFFFFFFFFFFFFFFFFFFFFFFF  
FFFFFFFFFFFFFFFFFFFFFFFFFFFFFFFFFFFFFFFFFFFFFFFFFFFFFFFFFFFFFFFFFFFFFFFF  
FFFFFFFFFFFFFFFFFFFF:

@A00721:190:HGJW7DSXY:4:1176:4887:28964 2:N:0:TCTGCAAG+GCTGCACT  
CAATTCATCTTTAAAGATTTGGACAGAGACAAATGCAGAATTCTTCTTCGCCGAATCCGCCTTCTATA  
GAAGCGAAGCATCAGCAATGCAAACGGAAGAGACGTCTAGCGATCAAGCCTAGACGTCTTACACTACC  
GTGCGGCTGCATCAA

+

FFFFFFFFFFFFFFFFFFFFFFFFFFFFFFFFFFFFFFFFFFFFFFFFFFFFFFFFFFFFFFFFFFFFFFFF  
FFFFFFFFFFFFFFFFFFFFFFFFFFFFFFFFFFFFFFFFFFFFFFFFFFFFFFFFFFFFFFFFFFFFFFFF  
FFFFFFFFFFFFFFFFFFFF:

@A00721:190:HGJW7DSXY:4:1475:14136:3208 2:N:0:TCTGCAAG+GCTGCACT  
CAATTCATCTTTAAAGATTTGGACAGAGACAAATGCAGAATTCTTCTTCGCCGAATCCGCCTTCTATA  
GAAGCGAAGCATCAGCAATGCAAACGGAAGAGACGTCTAGCGATCAAGCCTAGACGTCTTACACTACC  
GTGCGGCTGCATCAA

+

FFF:FFFFFFFFFFFFFFFFFFFFFFFFFFFFFFFFFFFFFFFFFFFFFFFFFFFFFFFFFFFFFFFFFFFF  
FFFFFFFFFFFFFFFFFFFFFFFFFFFFFFFFFFFFFFFFFFFFFFFFFFFFFFFFFFFFFFFFFFFFFFFF  
FFFFFFFFFFFFFFFFFFFF:

@A00721:190:HGJW7DSXY:4:1508:8088:2096 2:N:0:TCTGCAAG+GCTGCACT  
CAATTCATCTTTAAAGATTTGGACAGAGACAAATGCAGAATTCTTCTTCGCCGAATCCGCCTTCTATA  
GAAGCGAAGCATCAGCAATGCAAACGGAAGAGACGTCTAGCGATCAAGCCTAGACGTCTTACACTACC  
GTGCGGCTGCATCAA

+

FFFFFFFFFFFFFFFFFFFFFFFFFFFFFFFFFFFFFFFFFFFFFFFFFFFFFFFFFFFFFFFFFFFFFFFF  
FFFFFFFFFFFFFFFFFFFFFFFFFFFFFFFFFFFFFFFFFFFFFFFFFFFFFFFFFFFFFFFFFFFFFFFF  
FFFFFFFFFFFFFFFFFFFF:FFF:FFFFFFFFFFFFFFFFFFFFFFFFFFFFFFFFFFFFFFFFFFFF:FFF  
FFFFFFFFFFFFFFFFFFFF

@A00721:190:HGJW7DSXY:4:2308:4716:22623 2:N:0:TCTGCAAG+GCTGCACT  
CAATTCATCTTTAAAGATTTGGACAGAGACAAATGCAGAATTCTTCTTCGCCGAATCCGCCTTCTATA  
GAAGCGAAGCATCAGCAATGCAAACGGAAGAGACGTCTAGCGATCAAGCCTAGACGTCTTACACTACC  
GTGCGGCTGCATCAA

+

:FFFFFFFFFFFFFF:FFFF,FFFFFFFFFFFF:FFFFFFFFFFFFFFFFFFFFFFFFFFFFFFFFFFFF:FFF,:F,,FF

FF::FFFF:FFFFFFFF,FFFF,FFFF,FFFFFFFFFFFFFFFFFFFFFFFF:FFFFFFFFFFFF  
FFFFFFFFFFFFFFFF

@A00721:190:HGJW7DSXY:4:2477:23267:36808 2:N:0:TCTGCAAG+GCTGCACT  
CAATTCATCTTTAAAGATTTGGACAGAGACAAATGCAGAATTCTTCTTCGCCGAATCCGCCTTCTATA  
GAAGCGAAGCATCAGCAATGCAAACGGAAGAGACGTCTAGCGATCAATCCTAGACGTCTTACACAACC  
GTGCGGCTGCATCAA

+

FFFFFFFF:FFFFFF,FFFFFFFFFFFFFFFFFFFFFFFF,FFFFFFFF:FF::FF:FF,FFFFFFFF  
,FF,FFF:,FFFFFFFF::FFFFFF:FFFF:FFFF,FFFFFFFF,FFFFF,,FFFF:FF,FFF  
F,FFFFFF:FFFFFF

@A00721:190:HGJW7DSXY:4:1127:29206:13683 2:N:0:TCTGCAAG+GCTGCACT  
AGGATGCCAATTCATCTTTAAAGATTTGGACAGAGACAAATGCAGAATTCTTCTTCGCCGAATCCGCC  
TTCTATAGAAGCGAAGCATCAGCAATGCAAACGGAAGAGACGTCTAGCGATCAAGCCTAGACGTCTTA  
CACTACCGTGCGGCT

+

FFFFFFFFFFFFFFFFFFFFFFFFFFFFFFFFFFFFFFFFFFFFFFFFFFFFFFFFFFFFFFFFFFFF  
FFFFFFFFFFFFFFFFFFFFFFFFFFFFFFFFFFFFFFFF:FFFFFFFFFFFFFFFFFFFFFFFF:FFFFF:FFFFFFF  
FFFFFFFFFFFFFFFF

@A00721:190:HGJW7DSXY:4:1127:29261:13777 2:N:0:TCTGCAAG+GCTGCACT  
AGGATGCCAATTCATCTTTAAAGATTTGGACAGAGACAAATGCAGAATTCTTCTTCGCCGAATCCGCC  
TTCTATAGAAGCGAAGCATCAGCAATGCAAACGGAAGAGACGTCTAGCGATCAAGCCTAGACGTCTTA  
CACTACCGTGCGGCT

+

FFFFFFFFFFFFFFFF:FFFFF:FFFFFFFFFFFFFFFFFFFFFFFF:FFFFFFF,FFFFFFFFFFFFFFFFFFFF  
FFFFFFFFFFFFFFFFFFFFFFFFFFFFFFFFFFFFFFFF:FFFFFFFF:FFF:F,FFFFFFFFFFFF:F:FFFF:FF  
FFFFFFFFFFFFFFFF

@A00721:190:HGJW7DSXY:4:1417:19343:31579 2:N:0:TCTGCAAG+GCTGCACT  
AGGATGCCAATTCATCTTTAAAGATTTGGACAGAGACAAATGCAGAATTCTTCTTCGCCGAATCCGCC  
TTCTATAGAAGCGAAGCATCAGCAATGCAAACGGAAGAGACGTCTAGCGATCAAGCCTAGACGTCTTA  
AACTACCGTGCGGCT

+

FFFFFFFFFFFF:F:FFFFFFFFFFFFFFFFFFFFFFFFFFFFFFFF:FFFF,FFFFFFFF:F:FFFFFFF,F  
FFFFF:FFFF,FFFFFFFFFFFFFFFF:FFFF,FFFFFFFF:FFF:F:FFFFFFFF:FFFFFFFFFFFF  
,FFFF:FF,FFFF

@A00721:190:HGJW7DSXY:4:1563:18394:19445 2:N:0:TCTGCAAG+GCTGCACT  
AGGATGCCAATTCATCTTTAAAGATTTGGACAGAGACAAATGCAGAATTCTTCTTCGCCGAATCCGCC  
TTCTATAGAAGCGAAGCATCAGCAATGCAAACGGAAGAGACGTCTAGCGATCAAGCCTAGACGTCTTA  
CACTACCGTGCGGCT

+

FFFFFFFFFFFFFFFFFFFFFFFFFFFFFFFFFFFFFFFFFFFFFFFFFFFFFFFFFFFFFFFFFFFF  
FFFFFFFFFFFFFFFFFFFFFFFF:FFFFFFFFFFFFFFFFFFFFFFFFFFFFFFFFFFFFFFFFFFFFFFFF  
FFFFFFFFFFFFFFFF

@A00721:190:HGJW7DSXY:4:1563:18566:19492 2:N:0:TCTGCAAG+GCTGCACT  
AGGATGCCAATTCATCTTTAAAGATTTGGACAGAGACAAATGCAGAATTCTTCTTCGCCGAATCCGCC  
TTCTATAGAAGCGAAGCATCAGCAATGCAAACGGAAGAGACGTCTAGCGATCAAGCCTAGACGTCTTA  
CACTACCGTGCGGCT

+

FFFFFFFFFFFFFFFFFFFFFFFFFFFFFFFFFFFFFFFFFFFFFFFFFFFFFFFFFFFFFFFFFFFF  
FFFFFFFFFFFFFFFFFFFFFFFFFFFFFFFFFFFFFFFF:FFFFFFFF:FFFFFFFFFFFFFFFFFFFFFFFF  
FFFFFFF,FFFFF

@A00721:190:HGJW7DSXY:4:1563:18204:19617 2:N:0:TCTGCAAG+GCTGCACT  
AGGATGCCAATTCATCTTTAAAGATTTGGACAGAGACAAATGCAGAATTCTTCTTCGCCGAATCCGCC  
TTCTATAGAAGCGAAGCATCAGCAATGCAAACGGAAGAGACGTCTAGCGATCAAGCCTAGACGTCTTA  
CACTACCGTGCGGCT

+  
FFFFFFFFFFFFFFFFFFFFFFFFFFFFFFFFFFFFFFFFFFFFFFFFFFFFFFFFFFFFFFFFFFFFFFFF  
F:FFFFFF:FFFFFFFFFFFFFFFFFFFFFFFFFFFFFFFFFFFFFFFFFFFFFFFFFFFFFFFFFFFFFFFF  
FFFFFFFFFFFFFFFF  
@A00721:190:HGJW7DSXY:4:2118:1136:30702 2:N:0:TCTGCAAG+GCTGCACT  
AGGATGCCAATTCATCTTTAAAGATTTGGACAGAGACAAATGCAGAATTCTTCTTCGCCGAATCCGCC  
TTCTATAGAAGCGAAGCATCAGCAATGCAAACGGAAGAGACGTCTAGCGATCAAGCCTAGACGTCTTA  
CACTACCGTGCGGCT  
+  
FFFFFF:FFFFFFFFFFFFFFFFFFFFFFFFFFFFFFFFFFFFFFFFFFFFFFFFFFFFFFFFFFFFFFFF  
F,FFFFFFFF:FFFFFFFFFFFFFFFFFFFFFFFFFFFFFFFFFFFFFFFFFFFFFFFFFFFFFFFFFFFF  
FFFFFF,FFFFFF  
@A00721:190:HGJW7DSXY:4:2128:1768:27727 2:N:0:TCTGCAAG+GCTGCACT  
AGGATGCCAATTCATCTTTAAAGATTTGGACAGAGACAAATGCAGAATTCTTCTTCGCCGAATCCGCC  
TTCTATAGAAGCGAAGCATCAGCAATGCAAACGGAAGAGACGTCTAGCGATCAAGCCTAGACGTCTTA  
CACTACCGTGCGGCT  
+  
FFFF:FFFFFFFFFFFFFFFF,FFFFFFFFFFFF:FFFFFF:F,FFFFFFFFFFFFFFFFFFFFFFFF  
FFFFFF:FFF::FFFF:FFFF,FFFFFFFFF:FFF:FF,FFFFFFFFFFFFFFFF,FFFFFFFFFFFF  
FFFFFFFF,F,FFF:  
@A00721:190:HGJW7DSXY:4:2128:1877:28510 2:N:0:TCTGCAAG+GCTGCACT  
AGGATGCCAATTCATCTTTAAAGATTTGGACAGAGACAAATGCAGAATTCTTCTTCGCCGAATCCGCC  
TTCTATAGAAGCGAAGCATCAGCAATGCAAACGGAAGAGACGTCTAGCGATCAAGCCTAGACGTCTTA  
CACTACCGTGCGGCT  
+  
FFFFFFFFFFFFFFFFFFFFFFFFFFFFFFFFFFFFFFFFFFFFFFFFFFFFFFFFFFFFFFFFFFFFFFFF  
FFFFFFFFFFFFFFFFFFFFFFFFFFFFFFFFFFFFFFFFFFFFFFFFFFFFFFFFFFFFFFFFFFFFFFFF  
FFFF::FFFFFFFF  
@A00721:190:HGJW7DSXY:4:2142:19226:2691 2:N:0:TCTGCAAG+GCTGCACT  
AGGATGCCAATTCATCTTTAAAGATTTGGACAGAGACAAATGCAGAATTCTTCTTCGCCGAATCCGCC  
TTCTATAGAAGCGAAGCATCAGCAATGCAAACGGAAGAGACGTCTAGCGATCAAGCCTAGACGTCTTA  
CACTACCGTGCGGCT  
+  
FFFFFFFFFFFFFFFFFFFFFFFFFFFFFFFFFFFFFFFFFFFFFFFFFFFFFFFFFFFFFFFFFFFFFFFF  
FFFFFFFFFFFFFFFFFFFFFFFFFFFFFFFFFFFFFFFFFFFFFFFFFFFFFFFFFFFFFFFFFFFFFFFF  
FFF:FFFFF,FFFF  
@A00721:190:HGJW7DSXY:4:2221:14371:34961 2:N:0:TCTGCAAG+GCTGCACT  
AGGATGCCAATTCATCTTTAAAGATTTGGACAGAGACAAATGCAGAATTCTTCTTCGCCGAATCCGCC  
TTCTATAGAAGCGAAGCATCAGCAATGCAAACGGAAGAGACGTCTAGCGATCAAGCCTAGACGTCTTA  
CACTACCGTGCGGCT  
+  
FFFFFFFFFFFFFFFFFFFFFFFFFFFFFFFFFFFFFFFFFFFFFFFFFFFFFFFFFFFFFFFFFFFFFFFF  
FFFFFFFFFFFFFFFFFFFFFFFFFFFFFFFFFFFFFFFFFFFFFFFFFFFFFFFFFFFFFFFFFFFFFFFF  
FFFFFFFFF:FFFFF  
@A00721:190:HGJW7DSXY:4:2267:22544:4961 2:N:0:TCTGCAAG+GCTGCACT  
AGGATGCCAATTCATCTTTAAAGATTTGGACAGAGACAAATGCAGAATTCTTCTTCGCCGAATCCGCC  
TTCTATAGAAGCGAAGCATCAGCAATGCAAACGGAAGAGACGTCTAGCGATCAAGCCTAGACGTCTTA  
CACTACCGTGCGGCT  
+  
FFFFFFFFFFFFFFFFFFFFFFFFFFFFFFFFFFFFFFFFFFFFFFFFFFFFFFFFFFFFFFFFFFFFFFFF  
FFFFFFFFFFFF,FFFFFFFFFFFFFFFFFFFFFFFFFFFFFFFFFFFFFFFFFFFFFFFFFFFFFFFF  
FFFFFFFFFFFFFFFF  
@A00721:190:HGJW7DSXY:4:2512:31629:6355 2:N:0:TCTGCAAG+GCTGCACT  
AGGATGCCAATTCATCTTTAAAGATTTGGACAGAGACAAATGCAGAATTCTTCTTCGCCGAATCCGCC

TTCTATAGAAGCGAAGCATCAGCAATGCAAACGGAAGAGACGTCTAGCGATCAAGCCTAGACGTCTTA  
CACTACCGTGCGCT

+

FFFFFF:FFFFFFFFFFFFFFFFFFFFFFFF:FFFFFF:FFFFFFFFFFFFFFFFFFFFFFFFFFFF  
F:FFFFFF:FFFFFFFFFFFFFFFFFFFFFFFF:FFFFFFFFFFFFFFFFFFFFFFFFFFFFFFFFFFFF  
FFFF:FF,FFFF

@A00721:190:HGJW7DSXY:4:1623:22978:9408 2:N:0:TCTGCAAG+GCTGCACT  
ACAAGGATGCCAATTCATCTTTAAAGATTTGGACAGAGACAAATGCAGAATTCTTCTTCGCCGAATCC  
GCCTTCTATAGAAGCGAAGCATCAGCAATGCAAACGGAAGAGACGTCTAGCGATCAAGCCTAGACGTC  
TTACACTACCGTGCG

+

FFFFFFFFFFFFFFFFFFFFFFFFFFFFFFFFFFFFFFFF:FFFFFFFFFFFFFFFFFFFFFFFFFFFF  
FFFF:FFFFFFFFFFFFFFFFFFFFFFFFFFFFFFFFFFFFFFFF:FFFFFFFFFFFFFFFF:FFFF  
FFFFFFFFFFFFFFFF

@A00721:190:HGJW7DSXY:4:2116:20491:14810 2:N:0:TCTGCAAG+GCTGCACT  
ACAAGGATGCCAATTCATCTTTAAAGATTTGGACAGAGACAAATGCAGAATTCTTCTTCGCCGAATCC  
GCCTTCTATAGAAGCGAAGCATCAGCAATGCAAACGGAAGAGACGTCTAGCGATCAAGCCTAGACGTC  
TTACACTACCGTGCG

+

FFFFFFFFFFFFFFFFFFFFFFFFFFFFFFFFFFFFFFFF:FFFFFFFF:FFFFFFFFFFFFFFFFFFFFFFFFFFFFFFFFFFFF  
FFFFFFFFFFFFFFFFFFFFFFFFFFFFFFFF:FFFF:FFFFFFFFFFFFFFFFFFFFFFFFFFFFFFFFFFFF  
FFFFFFFFFFFFFFFF

@A00721:190:HGJW7DSXY:4:2145:11758:23484 2:N:0:TCTGCAAG+GCTGCACT  
ACAAGGATGCCAATTCATCTTTAAAGATTTGGACAGAGACAAATGCAGAATTCTTCTTCGCCGAATCC  
GCCTTCTATAGAAGCGAAGCATCAGCAATGCAAACGGAAGAGACGTCTAGCGATCAAGCCTAGACGTC  
TTACACTACCGTGCG

+

FFFFFFFFFFFFFFFFFFFFFFFFFFFFFFFFFFFFFFFFFFFFFFFFFFFFFFFFFFFFFFFFFFFFFFFFFFFF  
FFFFFFFFFFFFFFFFFFFFFFFFFFFFFFFF:FFFFFFFFFFFFFFFFFFFFFFFFFFFFFFFFFFFFFFFFFFFF  
FFFFFFFFFFFFFFFF

@A00721:190:HGJW7DSXY:4:2145:12048:23860 2:N:0:TCTGCAAG+GCTGCACT  
ACAAGGATGCCAATTCATCTTTAAAGATTTGGACAGAGACAAATGCAGAATTCTTCTTCGCCGAATCC  
GCCTTCTATAGAAGCGAAGCATCAGCAATGCAAACGGAAGAGACGTCTAGCGATCAAGCCTAGACGTC  
TTACACTACCGTGCG

+

FFFFFFFFFFFF:FFFFFFFFFFFF:FFFFFFFFFFFF:FFFFFFFFFFFFFFFFFFFFFFFFFFFFFFFF:FFFFFFF  
FFFFFFF:FFFFFF:FFFFFFFFFFFFFFFF:FFFFFFFFFFFFFFFFFFFFFFFFFFFFFFFFFFFF  
FFFFFFFFFF,FF:F,F

@A00721:190:HGJW7DSXY:4:2562:29351:14935 2:N:0:TCTGCAAG+GCTGCACT  
ACAAGGATGCCAATTCATCTTTAAAGATTTGGACAGAGACAAATGCAGAATTCTTCTTCGCCGAATCC  
GCCTTCTATAGAAGCGAAGCATCAGCAATGCAAACGGAAGAGACGTCTAGCGATCAAGCCTAGACGTC  
TTACACTACCGTGCG

+

FFFFFFFFFFFFFFFFFFFFFFFFFFFFFFFFFFFFFFFFFFFFFFFFFFFFFFFFFFFFFFFFFFFFFFFFFFFF  
FFFFFFFFFFFFFFFFFFFFFFFF:FFFFFFFFFFFFFFFFFFFFFFFFFFFFFFFFFFFFFFFFFFFFFFFFFFFF  
FFFFFFFFFFFFFFFF

@A00721:190:HGJW7DSXY:4:2576:30020:30592 2:N:0:TCTGCAAG+GCTGCACT  
ACAAGGATGCCAATTCATCTTTAAAGATTTGGACAGAGACAAATGCAGAATTCTTCTTCGCCGAATCC  
GCCTTCTATAGACGCGAAGCATCAGCAATGCAAACGGAAGAGACGTCTAGCGATCAAGCCTAGACGTC  
TTACACTACCGTGCG

+

FFFFF:FFFFFFFFFFFFFFFF:FFFFFFFFFFFFFF,FFFF:FFFFFF:FF:FFFFFF:FFFFF  
FFFF,FF,FFFF,FF:FFFFFFFFFFFF,FFFFFFFFFFFFFFFF:FFF:FFFF:FFFF:FFFFF  
FFFFFFFFFFFF,FF:

@A00721:190:HGJW7DSXY:4:1177:17427:15483 2:N:0:TCTGCAAG+GCTGCACT  
GGACAAGGATGCCAATTCATCTTTAAAGATTTGGACAGAGACAAATGCAGAATTCTTCTTCGCCGAAT  
CCGCCTTCTATAGAAGCGAAGCATCAGCAATGCAAACGGAAGAGACGTCTAGCGATCAAGCCTAGACG  
TCTTACACTACCGTG

+

FFFFFFFFFFFFFFFF:FFFFFFFFFFFFFFFF:FFFFFFFFFFFFFFFF:FFFF:FFFFFFFFFFFFFFFF  
FFFFFFFFFFFFFFFFFFFFFFFFFFFFFFFFFFFFFFFFFFFFFFFFFFFFFFFFFFFFFFFFFFFFFFFF  
FFFFFFFFFFFFFFFF

@A00721:190:HGJW7DSXY:4:1333:6795:9627 2:N:0:TCTGCAAG+GCTGCACT  
GGACAAGGATGCCAATTCATCTTTAAAGATTTGGACAGAGACAAATGCAGAATTCTTCTTCGCCGAAT  
CCGCCTTCTATAGAAGCGAAGCATCAGCAATGCAAACGGAAGAGACGTCTAGCGATCAAGCCTAGACG  
TCTTACACTACCGTG

+

FFFFFFF:FFFFF:FFFFFFFFFFFFFFFFFFFFFFFFFFFFFFFFFFFFFFFFFFFFFFFFFFFFFFFF:FFFF  
FFFFFFFFFFFFFFFFFFFFFFFFFFFFFFFF:FFFF:FFFFF,FFFFFFFFFFFF:FFFFFFFFFFFF,FFFFFFFF,  
FFFFFFFFFF:FFFFF

@A00721:190:HGJW7DSXY:4:2333:5565:24784 2:N:0:TCTGCAAG+GCTGCACT  
GGACAAGGATGCCAATTCATCTTTAAAGATTTGGACAGAGACAAATGCAGAATTCTTCTTCGCCGAAT  
CCGCCTTCTATAGAAGCGAAGCATCAGCAATGCAAACGGAAGAGACGTCTAGCGATCAAGCCTAGACG  
TCTTACACTACCGTG

+

FFFFFFFFFFFFFFFFFFFFFFFFFFFFFFFFFFFFFFFFFFFFFFFFFFFFFFFFFFFFFFFFFFFFFFFF  
FFFFFFFFFFFFFFFFFFFFFFFFFFFFFFFF:FFFFFFFFFFFFFFFFFFFFFFFFFFFFFFFFFFFFFFFF:FFFF  
FFFFFFFFFFFFFFFF

@A00721:190:HGJW7DSXY:4:2445:26395:15107 2:N:0:TCTGCAAG+GCTGCACT  
GGACAAGGATGCCAATTCATCTTTAAAGATTTGGACAGAGACAAATGCAGAATTCTTCTTCGCCGAAT  
CCGCCTTCTATAGAAGCGAAGCATCAGCAATGCAAACGGAAGAGACGTCTAGCGATCAAGCCTAGACG  
TCTTACACTACCGTG

+

:FFF,F:FFFFFF:FFFF::FFFFFFFFFFFFFFFFFFFFFFFFFFFFFFFFFFFFFFFFFFFFFFFF  
FFFFFFFFFFFFFF:FFFFFFF,FFF:FFFFF,F,FFFFF:FFFFFFFFFF,:FFF,F:FFFFFFFFFF:F  
FFFFFFFFFFFFFFFF

@A00721:190:HGJW7DSXY:4:2526:31448:29340 2:N:0:TCTGCAAG+GCTGCACT  
GGACAAGGATGCCAATTCATCTTTAAAGATTTGGACAGAGACAAATGCAGAATTCTTCTTCGCCGAAT  
CCGCCTTCTATAGAAGCGAAGCATCAGCAATGCAAACGGAAGAGACGTCTAGCGATCAAGCCTAGACG  
TCTTACACTACCGTG

+

FFFF:FFFFFFFFFFFFFFFFFFFFFFFFFFFFFFFFFFFFFFFFFFFFFFFFFFFFFFFFFFFFFFFF  
FFFFFFFFFFFFFFFFFFFFFFFFFFFFFFFFFFFFFFFFFFFFFFFFFFFFFFFFFFFFFFFF:FFFFFFFF  
:FFFFFFFFFFFFFF:

@A00721:190:HGJW7DSXY:4:1105:9932:12806 2:N:0:TCTGCAAG+GCTGCACT  
ATAAGACGTTCTGGACAAGGATGCCAATTCATCTTTAAAGATTTGGACAGAGACAAATGCAGAATTC  
TTCTTCGCCGAATCCGCCTTCTATAGAAGCGAAGCATCAGCAATGCAAACGGAAGAGACGTCTAGCGA  
TCAAGCCTAGACGTC

+

FFFFFFFFFFFFFFFFFFFFFFFF:FFFF,FF::FFFFFF:FFFFFFFFFFFFFFFFFFFFFFFFFFFFFFFF:FF  
FFFFFFFFFFFFFFFFFFFFFFFF:FFFFFF:FF,FF:FFFFFFFFFFFFFFFFFFFFFFFFFFFFFFFF:FFFFFF  
FFFFFFFFFF:FFFFF

@A00721:190:HGJW7DSXY:4:1130:32606:30718 2:N:0:TCTGCAAG+GCTGCACT  
ATAAGACGTTCTGGACAAGGATGCCAATTCATCTTTAAAGATTTGGACAGAGACAAATGCAGAATTC  
TTCTTCGCCGAATCCGCCTTCTATAGAAGCGAAGCATCAGCAATGCAAACGGAAGAGACGTCTAGCGA  
TCAAGCCTAGACGTC

+

FF:FFFFFFFFFFFFFF:FFFFFFFFFFFFFFFFFFFFFFFF:F,FFFFFFFFFFFFFFFFFF:,FF:FFFFF



FFFFFFFFFFFFFFFFFFFFF,,: ,FFFFFFFFFFFFFFFFFFFF:FFFFFFFFFFFF,FFFFFFFF:F,,F:F  
FFFF:FFFFFFFFFFFF

@A00721:190:HGJW7DSXY:4:1173:4978:27555 2:N:0:TCTGCAAG+GCTGCACT  
ATAAGACGTTCTGGACAAGGATGCCAATTCATCTTTAAAGATTTGGACAGAGACAAATGCAGAATTC  
TTCTTCGCCGAATCCGCCTTCTATAGAAGCGAAGCATCAGCAATGCAAACGGAAGAGACGTCTAGCGA  
TCAAGCCTAGACGTC

+

FFFFFFFFFFFFFFFFFFFFF:FFFFFFFFFFFFFFFFFFFFFFFFFFFFFFFFFFFFFFFFFFFFFFFFFFFFF  
FFFFFFFFFFFFFFFFFFFFF:FFFFF:FFFFFFFFFFFFFFFFFFFFFFFFFFFFFFFFFFFFFFFFFFFFF:  
FFFFFFFFFFFFFFFFFFFF

@A00721:190:HGJW7DSXY:4:1240:11243:33238 2:N:0:TCTGCAAG+GCTGCACT  
ATAAGACGTTCTGGACAAGGATGCCAATTCATCTTTAAAGATTTGGACAGAGACAAATGCAGAATTC  
TTCTTCGCCGAATCCGCCTTCTATAGAAGCGAAGCATCAGCAATGCAAACGGAAGAGACGTCTAGCGA  
TCAAGCCTAGACGTC

+

FFFFFFFFFFFFFFFFFFFFFFFFFFFFFFFFFFFFFFFFFFFFF::FFFFFFFFFFFFFFFFFFFFFFFF,F,FFFFFFFFFFFF  
FFFFFFFFFFFFFFFFFFFFFFFFFFFFFFFFFFFFFFFFFFFFFFFFFFFFFFFFFFFFFFFFFFFFFFFFFFFFF:F  
FFF:FFFFF:FFFFF

@A00721:190:HGJW7DSXY:4:1539:24560:12806 2:N:0:TCTGCAAG+GCTGCACT  
ATAAGACGTTCTGGACAAGGATGCCAATTCATCTTTAAAGATTTGGACAGAGACAAATGCAGAATTC  
TTCTTCGCCGAATCCGCCTTCTATAGAAGCGAAGCATCAGCAATGCAAACGGAAGAGACGTCTAGCGA  
TCAAGCCTAGACGTC

+

FFFFFFFFFFFFFFFFFFFFFFFFFFFFFFFFFFFFFFFFFFFFF  
FFFFFFFFFFFFFFFFFFFFFFFFFFFFFFFFFFFFFFFFFFFFFFFFFFFFFFFFFFFFFFFFFFFFFFFFFFFFF  
FFFFFFFFFFFFFFFFFFFF

@A00721:190:HGJW7DSXY:4:1547:9118:18630 2:N:0:TCTGCAAG+GCTGCACT  
ATAAGACGTTCTGGACAAGGATGCCAATTCATCTTTAAAGATTTGGACAGAGACAAATGCAGAATTC  
TTCTTCGCCGAATCCGCCTTCTATAGAAGCGAAGCATCAGCAATGCAAACGGAAGAGACGTCTAGCGA  
TCAAGCCTAGACGTC

+

FFFFFFFFFFFFFFFFFFFFFFFFFFFFFFFFFFFFF:FFFFFFFFFFFFFFFFFFFFFFFFFFFFFFFFFFFFF  
FFFFFFFFFFFFFFFFFFFFFFFFFFFFFFFFFFFFFFFFFFFFFFFFFFFFFFFFFFFFFFFFFFFFFFFFFFFFF:FF:F  
FFFF:FFFFFFFFFFFF

@A00721:190:HGJW7DSXY:4:1637:3622:23547 2:N:0:TCTGCAAG+GCTGCACT  
ATAAGACGTTCTGGACAAGGATGCCAATTCATCTTTAAAGATTTGGACAGAGACAAATGCAGAATTC  
TTCTTCGCCGAATCCGCCTTCTATAGAAGCGAAGCATCAGCAATGCAAACGGAAGAGACGTCTAGCGA  
TCAAGCCTAGACGTC

+

FFFFFFFFFFFFFFFFFFFFF:FFFFFFFFF:FFFFFFFFFFFFFFFFFFFFFFFFFFFFFFFFFFFFFFFFFFFFF  
,FFFFFFFFFFFFFFFFFFFFFFFFFFFFFFFFFFFFFFFFFFFFFFFFFFFFFFFFFFFFFFFFFFFFF:FFF  
FFFFFFFFFFFFFFFFFFFF

@A00721:190:HGJW7DSXY:4:2149:16604:2190 2:N:0:TCTGCAAG+GCTGCACT  
ATAAGACGTTCTGGACAAGGATGCCAATTCATCTTTAAAGATTTGGACAGAGACAAATGCAGAATTC  
TTCTTCGCCGAATCCGCCTTCTATAGAAGCGAAGCATCAGCAATGCAAACGGAAGAGACGTCTAGCGA  
TCAAGCCTAGACGTC

+

FFFFFFFFFFFFFFFFFFFFFFFFFFFFF,FFFFFFFFFFFFFFFFF:FFFFFFFFFFFFFFFFFFFFFFFFFFFFF  
FFFFFFFFFFFFFFFFFFFFFFFFFFFFFFFFFFFFFFFFFFFFFFFFFFFFFFFFFFFFFFFFFFFFFFFFFFFFF  
FFFFFFFFFFFFFFFFFFFF

@A00721:190:HGJW7DSXY:4:2158:16369:30968 2:N:0:TCTGCAAG+GCTGCACT  
ATAAGACGTTCTGGACAAGGATGCCAATTCATCTTTAAAGATTTGGACAGAGACAAATGCAGAATTC  
TTCTTCGCCGAATCCGCCTTCTATAGAAGCGAAGCATCAGCAATGCAAACGGAAGAGACGTCTAGCGA  
TCAAGCCTAGACGTC

[illegible]

```

FFFFFFFFFFFFFFFF:FFFFFFFFF:,FFFFFFFFFFFFFFFF:FFFFFFFFFFFFFFFFFFFFFFFF
FFFFFFF:FFFFFFFFFFFFFFFFF:FFFFFFFFFFFFFFFFFFFFFFFFFFFFFFFFFFFFFFFF
FFF:FFFFFFFFF

```

```
FFFFFFFFFFFFFFFFFFFFFFFFFFFFFFFFFFFFFFFFFFFFFFFFFFFFFFFFFFFFFFF
FFFFFFFFFFFFFFFFFFFF,FF:FFFFFFFFFFFFFFFFFFFFFFFFFFFFFFFFFFFFFFF
FFFFFFFFFFFFFFFF
```

```

FFFFFFFFFFFFFFFFFFFFF:FFFFFFFFFFFFFFFFFFFFFFFFF:FFFFFFFFFFFFFFFFF,FFFFFF::FF
FFFFFFFFFFFFFFFFFFFFF:FFFFFFFFFFFFFFFFFFFFFFFFF:FFF::FFFFFFFFFFFFFFFFFFFFFFFF
FFFF:FFFFFFFFFFFF

```

```

FFFFFFFFFFFFFFFF:F:FFFFFFFF:FF:FFFFFFFFFFFFFFFFFFFFFFFFFFFFFFFF
FFFFFFFFFFFFFFFFFFFFFFFFFFFFFFFF,FFFFFFFFFFFFFFFFFFFFFFFFFFFFFF
FFFFFFFFFFFFFFFF

```

```
FFFFFFFF:FFFFFFFFFFFFFFFFFFFFFFFFFFFFFFFFFFFFFFFFFFFFFFFFFFFFF
FFFFFFFFFFFFFFFFFFFFFFFF:FFFFFFFFFFFFFFFFFFFFFFFF:FFFFFFFFFFFFFFF
FFFFFFFFFFFFFFFF
```

[illegible]

@A00721:190:HGJW7DSXY:4:2527:4227:17550 2:N:0:TCTGCAAG+GCTGCACT  
ATAAGACGTTCTGGACAAGGATGCCAATTCATCTTTAAAGATTTGGACAGAGACAAATGCAGAATTC

TTCTTCGCCGAATCCGCTTCTATAGAAGCGAAGCATCAGCAATGCAAACGGAAGAGACGTCTAGCGA  
TCAAGCCTAGACGTC

```
FFFFFFFFFFFFFFFFFFFFFFFFFFFFFFFFFFFFFFFFFFFFFFFFFFFFFFFFFFFFFFF
FFFFFFFFFFFFFFFFFFFF:FFFFFFFFFFFFFFFFFFFFFFFFFFFFFFFFFFFFFFFFF
FFFFFFFFFFFFFFFF
```

CTTATAAGACGTTCTGACAAGGATGCCAATTCATCTTTAAAGATTTGGACAGAGACAAATGCAGAA  
TTCTTCTTCGCCGAATCCGCCTTCTATAGAAGCGAAGCATCAGCAATGCAAACGGAAGAGACGTCTAG  
CGATCAAGCCTAGAC

```

FFFFFFFFFFFFFFFFFFFFFFFFFFFFFFFFFFFFFFFFFFFFFFFFFFFFFFFFFFFFFFFF:FFFFFFFF
FFFFFFFFFFFFFFFFFFFFFFFFFFFFFFFF:FFFFFFFFFFFFFFFFFFFFFFFFFFFFFFFFFFFFFFFF:
FFFFFFFF:FFFFFF:

```

CTTATAAGACGTTCTGACAAGGATGCCAATTCATCTTTAAAGATTTGGACAGAGACAAATGCAGAA  
TTCTTCTTCGCCGAATCCGCCTTCTATAGAAGCGAAGCATCAGCAATGCAAACGGAAGAGACGTCTAG  
CGATCAAGCCTAGAC

[illegible]

CTTATAAGACGTTCTTGACAAGGATGCCAATTCATCTTTAAAGATTTGGACAGAGACAAATGCAGAA  
TTCTTCTTCGCCGAATCCGCCTTCTATAGAAGCGAAGCATCAGCAATGCAAACGGAAGAGACGTCTAG  
CGATCAAGCCTAGAC

[illegible]

CTTATAAGACGTTCTGACAAAGGATGCCAATTCATCTTTAAAGATTTGGACAGAGACAAATGCAGAA  
TTCTTCTTCGCCGAATCCGCCTTCTATAGAAGCGAAGCATCAGCAATGCAAACGGAAGAGACGTCTAG  
CGATCAAGCCTAGAC

```
FFFFFFFFFFFFFFFFFFFFFFFFFFFFFFFFFFFFFFFFFFFFFFFFFFFFFFFFFFFFFFF
FFFFFFFFFFFFFFFFFFFFFFFFFFFF,FFFFFFFFFFFFFFFFFFFFFFFFFFFFFFFFFFF
EEEEEEE:EEEEEE
```

CTTATAAGACGTTCTTGACAAGGATGCCAATTCATCTTTAAAGATTTGGACAGAGACAAATGCAGAA  
TTCTTCTTCGCCGAATCCGCCTTCTATAGAAGCGAAGCATCAGCAATGCAAACGGAAGAGACGTCTAG  
CGATCAAGCCTAGAC

```

FFFFFFFFFFFFFFFFFFFFFFFFFFFFFFFFFFFFFFFFFFFFFFFFFFFFFFFFFFFFFFFF
FFFFFFFFFFFFFFFFFFFFFFFFFFFFFFFFFFFFFFFF:FFF:FFFFFFFFFFFFFFFF,FFFFFFFF
FFFFFFFFFFFFFFFF

```

CTTATAAGACGTTCTTGACAAGGATGCCAATTCATCTTTAAAGATTTGGACAGAGACAAATGCAGAA  
TTCTTCTTCGCCGAATCCGCCTTCTATAGAAGCGAAGCATCAGCAATGCAAACGGAAGAGACGTCTAG  
CGATCAAGCCTAGAC

```

FFFFFFFFFFFFFFFFFFFFFFFFFFFFFFFF:FFF:FF:FFFFFFFFFFFFFFFFFFFF:FF
FFFFFFFFFFFFFFFFFFFFFFFFFFFFFFFF:FFFFFFFFFFFFFFFF:FFFFFFFFFFFFFFFF
FFFFFFFFFFFFFFFF

```



@A00721:190:HGJW7DSXY:4:1456:12048:25770 2:N:0:TCTGCAAG+GCTGCACT  
GAATATTCTTATAAGACGTTCTGGACAAGGATGCCAATTCATCTTTAAAGATTTGGACAGAGACAAA  
TGCAGAATTCTTCTTCGCCGAATCCGCCTTCTATAGAAGCGAAGCATCAGCAATGCAAACGGAAGAGA  
CGTCTAGCGATCAAG

@A00721:190:HGJW7DSXY:4:1458:21187:1799 2:N:0:TCTGCAAG+GCTGCACT  
GAATATTCTTATAAGACGTTCTTGGACAAGGATGCCAATTCATCTTTAAAGATTTGGACAGAGACAAA  
TGCAGAATTCTTCTTCGCCGAATCCGCCTTCTATAGAAGCGAAGCATCAGCAATGCAAACGGAAGAGA  
CGTCTAGCGATCAAG

@A00721:190:HGJW7DSXY:4:1601:16450:29105 2:N:0:TCTGCAAG+GCTGCACT  
GAATATTCTTATAAGACGTTCTTGACAAGGATGCCAATTCATCTTTAAAGATTTGGACAGAGACAAA  
TGCAGAATTCTTCTTCGCCGAATCCGCCTTCTATAGAAGCGAAGCATCAGCAATGCAAACGGAAGAGA  
CGTCTAGCGATCAAG

@A00721:190:HGJW7DSXY:4:1613:22941:17957 2:N:0:TCTGCAAG+GCTGCACT  
GAATATTCTTATAAGACGTTCTGGACAAGGATGCCAATTCATCTTTAAAGATTTGGACAGAGACAAA  
TGCAGAAGTCTTCTTCGCCGAATCCGCCTTCTATAGAAGCGAAGCATCAGCAATGCAAACGGAAGAGA  
CGTCTAGCGATCAAG

@A00721:190:HGJW7DSXY:4:2142:14552:10034 2:N:0:TCTGCAAG+GCTGCACT  
GAATATTCTTATAAGACGTTCTGGACAAGGATGCCAATTCATCTTTAAAGATTTGGACAGAGACAAA  
TGCAGAATTCTTCTTCGCCGAATCCGCCTTCTATAGAAGCGAAGCATCAGCAATGCAAACGGAAGAGA  
CGTCTAGCGATCAAG

@A00721:190:HGJW7DSXY:4:2336:18783:5087 2:N:0:TCTGCAAG+GCTGCACT  
GAATATTCTTATAAGACGTTCTTGGACAAGGATGCCAATTCATCTTTAAAGATTTGGACAGAGACAAA  
TGCAGAATTCTTCTTCGCCGAATCCGCCTTCTATAGAAGCGAAGCATCAGCAATGCAAACGGAAGAGA  
CGTCTAGCGATCAAG

@A00721:190:HGJW7DSXY:4:2402:30210:21684 2:N:0:TCTGCAAG+GCTGCACT  
GAATATTCTTATAAGACGTTCTGGACAAGGATGCCAATTCATCTTTAAAGATTTGGACAGAGACAAA  
TGCAGAATTCTTCTTCGCCGAATCCGCCTTCTATAGAAGCGAAGCATCAGCAATGCAAACGGAAGAGA  
CGTCTAGCGATCAAG



AATGCAGAATTCTTCTTCGCCGAATCCGCCTTCTATAGAAGCGAAGCATCAGCAATGCAAACGGAAGA  
GACGTCTAGCGATCA

+

FFFFFF:FFFFFFFFFFFFFFFFFFFFFFFFFFFFFFFFFFFFFFFFFFFFFFFFFFFFFFFFFFFFFFFFFFFFFFFF  
FFFFFFFFFFFFFFFFFFFFFFFFFFFFFFFFFFFFFFFFFFFFFFFFFFFFFFFFFFFFFFFFFFFFFFFFFFFFFFFF  
FFFFFFFFFFFFFFFFFFFFFFFF

@A00721:190:HGJW7DSXY:4:2301:9896:31720 2:N:0:TCTGCAAG+GCTGCACT  
AAGAATATTCTTATAAGACGTTCTTGACAAGGATGCCAATTCATCTTTAAAGATTTGGACAGAGACA  
AATGCAGAATTCTTCTTCGCCGAATCCGCCTTCTATAGAAGCGAAGCATCAGCAATGCAAACGGAAGA  
GACGTCTAGCGATCA

+

F:FFFFFFFFFFFFFFFFFFFFFFFFFFFFFFFFFFFFFFFFFFFFFFFFFFFFFFFFFFFFFFFFFFFFFFFFFFFF  
FFFFFFFFFFFFFFFFFFFFFFFFFFFFFFFFFFFFFFFFFFFFFFFFFFFFFFFFFFFFFFFFFFFFFFFFFFFFFFFF  
FFFFFFFFFFFFFFFFFFFFFFFF

@A00721:190:HGJW7DSXY:4:1123:21441:22811 2:N:0:TCTGCAAG+GCTGCACT  
GAAGAATATTCTTATAAGACGTTCTTGACAAGGATGCCAATTCATCTTTAAAGATTTGGACAGAGAC  
AAATGCAGAATTCTTCTTCGCCGAATCCGCCTTCTATAGAAGCGAAGCATCAGCAATGCAAACGGAAG  
AGACGTCTAGCGATC

+

FF:F:FFFFFFFFFFFFFFFFFFFFFFFFFFFFFFFFFFFFFFFFFFFFFFFFFFFFFFFFFFFFFFFFFFFFFFFF  
FFFFFFFFFFFFFFFFFFFFFFFFFFFFFFFFFFFFFFFFFFFFFFFFFFFFFFFFFFFFFFFFFFFFFFFFFFFFFFFF  
FFFFFFFFFFFFFFFFFFFFFFFF

@A00721:190:HGJW7DSXY:4:1273:25373:22326 2:N:0:TCTGCAAG+GCTGCACT  
GAAGAATATTCTTATAAGACGTTCTTGACAAGGATGCCAATTCATCTTTAAAGATTTGGACAGAGAC  
AAATGCAGAATTCTTCTTCGCCGAATCCGCCTTCTATAGAAGCGAAGCATCAGCAATGCAAACGGAAG  
AGACGTCTAGCGATC

+

FFFFFFFFFFFFFFFFFFFFFFFFFFFFFFFFFFFFFFFFFFFFFFFFFFFFFFFFFFFFFFFFFFFFFFFFFFFF  
FFFFFFFFFFFFFFFFFFFFFFFFFFFFFFFFFFFFFFFFFFFFFFFFFFFFFFFFFFFFFFFFFFFFFFFFFFFFFFFF  
FFFFFFFFFFFFFFFFFFFFFFFF

@A00721:190:HGJW7DSXY:4:1526:12165:19742 2:N:0:TCTGCAAG+GCTGCACT  
GAAGAATATTCTTATAAGACGTTCTTGACAAGGATGCCAATTCATCTTTAAAGATTTGGACAGAGAC  
AAATGCAGAATTCTTCTTCGCCGAATCCGCCTTCTATAGAAGCGAAGCATCAGCAATGCAAACGGAAG  
AGACGTCTAGCGATC

+

FFFFFFFFFFFFFFFFFFFFFFFFFFFFFFFFFFFFFFFFFFFFFFFFFFFFFFFFFFFFFFFFFFFFFFFFFFFF  
FFFFFFFFFFFFFFFFFFFFFFFFFFFFFFFFFFFFFFFFFFFFFFFFFFFFFFFFFFFFFFFFFFFFFFFFFFFFFFFF  
FFFFFFFFFFFFFFFFFFFFFFFF

@A00721:190:HGJW7DSXY:4:1615:8639:9095 2:N:0:TCTGCAAG+GCTGCACT  
GAAGAATATTCTTATAAGACGTTCTTGACAAGGATGCCAATTCATCTTTAAAGATTTGGACAGAGAC  
AAATGCAGAATTCTTCTTCGCCGAATCCGCCTTCTATAGAAGCGAAGCATCAGCAATGCAAACGGAAG  
AGACGTCTAGCGATC

+

FFFFFFFFFFFFFFFFFFFFFFFFFFFFFFFFFFFFFFFFFFFFFFFFFFFFFFFFFFFFFFFFFFFFFFFFFFFF  
FF,FFFFFFFFFFFFFFFFFFFFFFFFFFFFFFFFFFFFFFFFFFFFFFFFFFFFFFFFFFFFFFFFFFFFFFFFFFFF  
FFFFFFFFFFFFFFFFFFFFFFFF

@A00721:190:HGJW7DSXY:4:2123:21459:35211 2:N:0:TCTGCAAG+GCTGCACT  
GAAGAATATTCTTATAAGACGTTCTTGACAAGGATGCCAATTCATCTTTAAAGATTTGGACAGAGAC  
AAATGCAGAATTCTTCTTCGCCGAATCCGCCTTCTATAGAAGCGAAGCATCAGCAATGCAAACGGAAG  
AGACGTCTAGCGATC

+

:FF:FFFFFFFFFFFFFFFF:FF:FFFFFFFFFFFFFFFF:FFFFFF:FFFFFFFFFFFFFFFFFFFFFFFF,FFFFFFF  
FFFF:FFFFFFFFFFFFFFFF,FFFFF,FFF:F:FFFFF,FF:,FFF:FFF:FFFFFF,FFFF,,:FFF  
FFFF:FFFF,FFF:F

@A00721:190:HGJW7DSXY:4:2272:6207:23453 2:N:0:TCTGCAAG+GCTGCACT  
GAAGAATATTCTTATAAGACGTTCTGGACAAGGATGCCAATTCATCTTTAAAGATTTGGACAGAGAC  
AAATGCAGAATTCTTCTTCGCCGAATCCGCCTTCTATAGAAGCGAAGCATCAGCAATGCAAACGGAAG  
AGACGTCTAGCGATC

```

FFFFFFFFFFFFFFFFFFFFFFFFFFFFFFFFFFFFFFFFFFFFFFFFFFFFFFFFFFFFFFFF:FFFFFFFFFFFFFFFF
FFFFFFFFFFFFFFFFFFFFFFFFFFFFFFFFFFFFFFFFFFFFFFFFFFFFFFFFFFFFFFFF:FFFFFFFFFFFF,FFFFFFFFFFFFFFFFFFFFFFFFFFFFFFFF
FFFFFFFFFFFFFFFFFFFFFFFF

```

@A00721:190:HGJW7DSXY:4:2615:21965:36652 2:N:0:TCTGCAAG+GCTGCACT  
GAAGAATATTCTTATAAGACGTTCTGGACAAGGATGCCAATTCATCTTTAAAGATTTGGACAGAGAC  
AAATGCAGAATTCTTCTTCGCCGAATCCGCCTTCTATAGAAGCGAAGCATCAGCAATGCAAACGGAAG  
AGACGTCTAGCGATC

[illegible]

@A00721:190:HGJW7DSXY:4:2619:16712:10989 2:N:0:TCTGCAAG+GCTGCACT  
GAAGAATATTCTTATAAGACGTTCTGACAAGGATGCCAATTCATCTTTAAAGATTTGGACAGAGAC  
AAATGCAGAATTCTTCTTCGCCGAATCCGCCTTCTATAGAAGCGAAGCATCAGCAATGCAAACGGAAG  
AGACGTCTAGCGATC

[illegible]

@A00721:190:HGJW7DSXY:4:1121:3748:25144 2:N:0:TCTGCAAG+GCTGCACT  
CTCAGAAGAATATTCTTATAAGACGTTCTGGACAAGGATGCCAATTCATCTTTAAAGATTTGGACAG  
AGACAAATGCAGAATTCTTCTTCGCCGAATCCGCCTTCTATAGAAGCGAAGCATCAGCAATGCAAACG  
GAAGAGACGTCTAGC

[illegible]

@A00721:190:HGJW7DSXY:4:1134:20030:30295 2:N:0:TCTGCAAG+GCTGCACT  
CTCAGAAGAATATTCTTATAAGACGTTCTGGACAAGGATGCCAATTCATCTTTAAAGATTTGGACAG  
AGACAAATGCAGAATTCTTCTTCGCCGAATCCGCCTTCTATAGAAGCGAAGCATCAGCAATGCAAACG  
GAAGAGACGTCTAGC

```
FFFFF:FFFFFFFFFFFFFF:FFFFFFFFFFFFFFFFFFFF:F:FFFFFFFFFFFFFFFFFFFFFFFF  
FFFFFFFF:FFFFFFFFFFFFFFFFFFFFFFFFFFFFFFFFFF:FF,FFF:FFFFFFFFFFFFFFFFFFFF  
FFFFFFFFFFFFFFFF
```

@A00721:190:HGJW7DSXY:4:1163:23692:20478 2:N:0:TCTGCAAG+GCTGCACT  
CTCAGAAGAATATTCTTATAAGACGTTCTGGACAAGGATGCCAATTCATCTTTAAAGATTTGGACAG  
AGACAAATGCAGAATTCTTCTTCGCCGAATCCGCCTTCTATAGAAGCGAAGCATCAGCAATGCAAACG  
GAAGAGACGTCTAGC

```
F,FFFFFFFFFFFFFFFFFFFFFFFFFFFFFFFFFFFFFFFFFFFFFFFFFFFFFFFFFFFFFFFFFFFFF
:FFFFF:FFFFFF,FFFFFFFFFFFFFFFFFFFFFFFFFFFFFFFFFF:FFFFFFF:FFFFFFFFFF:FFFFFFF
FFFFFFFFFFFFFFFF;F
```

@A00721:190:HGJW7DSXY:4:1308:22815:28260 2:N:0:TCTGCAAG+GCTGCACT  
CTCAGAAGAATATTCTTATAAGACGTTCTGGACAAGGATGCCAATTCATCTTTAAAGATTTGGACAG  
AGACAAATGCAGAATTCTTCTTCGCCGAATCCGCCTTCTATAGAAGCGAAGCATCAGCAATGCAAACG  
GAAGAGACGTCTAGC

```
FFFFFFFFFFFFFFFF:FFFFFFFF:FF:FFFFFFFFFFFFFFFF:FFFF::FFF:FFFFFF,FFFFFF,FFFF
```



FFFFFFFFFFFFFFFF:FFFFFFFFFFFFFFFF:FFF:F,F:FFFFFFFFFFF,:FFFFFF:FFFFFFFFFFFFF  
FF:FFFF:FFFF:

@A00721:190:HGJW7DSXY:4:1338:20491:16564 2:N:0:TCTGCAAG+GCTGCACT  
CTCAGAAGAATATTCTTATAAGACGTTCTGGACAAGGATGCCAATTCATCTTTAAAGATTTGGACAG  
AGACAAATGCAGAATTCTTCTCGCCGAATCCGCCTTCTATAGAAGCGAAGCATCAGCAATGCAAACG  
GAAGAGACGTCTAGC

+

FFFFFFFFFFFFFFFFFFFFFFFFFFFFFFFFFFFFFFFFFFFFFFFFFFFFFFFFFFFFFFFFFFFFFFFF:FFFFFFFFFFFF  
FFFFFFFFFFFFFFFF:FFFFFFFFFFFFFFFFFFFFFFFFFFFFFFFFFFFFFFFFFFFFFFFFFFFFFFFFFFFFFFFF  
FFFFF:FFFFF::F

@A00721:190:HGJW7DSXY:4:1365:13910:5635 2:N:0:TCTGCAAG+GCTGCACT  
CTCAGAAGAATATTCTTATAAGACGTTCTGGACAAGGATGCCAATTCATCTTTAAAGATTTGGACAG  
AGACAAATGCAGAATTCTTCTCGCCGAATCCGCCTTCTATAGAAGCGAAGCATCAGCAATGCAAACG  
GAAGAGACGTCTAGC

+

FFFFFFFFFFFFFFFFFFFFFFFFFFFFFFFFFFFFFFFFFFFFFFFFFFFFFFFFFFFFFFFFFFFFFFFFFFFF  
FFFFFFFFFFFFFFFFFFFFFFFFFFFFFFFFFFFFFFFFFFFFFFFFFFFFFFFFFFFFFFFFFFFFFFFF:FFFFFFFFFFFFFFFF  
FFFFFFFFFFFFFFFF::F

@A00721:190:HGJW7DSXY:4:1524:3414:15358 2:N:0:TCTGCAAG+GCTGCACT  
CTCAGAAGAATATTCTTATAAGACGTTCTGGACAAGGATGCCAATTCATCTTTAAAGATTTGGACAG  
GGACAAATGCAGAATTCTTCTCGCCGAATCCGCCTTCTATAGAAGCGAAGCATCAGCAATGCAAACG  
GAAGAGACGTCTAGC

+

FFFFFF,FFFFFFFFFFFFFFFFFFFFFFFFFFFFFFFFFFFFFFFFFFFFFFFFFFFFFFFFFFFFFFFFFFFF  
FFFFFFFFFFFFFFFFFFFFFFFFFFFFFFFFFFFFFFFFFFFFFFFFFFFFFFFFFFFFFFFFFFFFFFFF:FFFFFFFFFFFFFFFF  
FFFFFFFFFFFFFFFF

@A00721:190:HGJW7DSXY:4:1641:3016:10755 2:N:0:TCTGCAAG+GCTGCACT  
CTCAGAAGAATATTCTTATAAGACGTTCTGGACAAGGATGCCAATTCATCTTTAAAGATTTGGACAG  
AGACAAATGCAGAATTCTTCTCGCCGAATCCGCCTTCTATAGAAGCGAAGCATCAGCAATGCAAACG  
GAAGAGACGTCTAGC

+

FFFFFFFFFFFFF:FFFFFFFFFFFFFFFFFFFFFFFFFFFFFFFFFFFFFFFFFFFFFFFFFFFFFFFFFFFFFFFF,FFFF  
FFFFFFFFFFFFFFFFFFFFFFFFFFFFFFFFFFFFFFFFFFFFFFFFFFFFFFFFFFFFFFFFFFFFFFFFFFFFFFFF,FFF  
FFFFFFFFFFFFFFFF

@A00721:190:HGJW7DSXY:4:2112:32136:7670 2:N:0:TCTGCAAG+GCTGCACT  
CTCAGAAGAATATTCTTATAAGACGTTCTGGACAAGGATGCCAATTCATCTTTAAAGATTTGGACAG  
AGACAAATGCAGAATTCTTCTCGCCGAATCCGCCTTCTATAGAAGCGAAGCATCAGCAATGCAAACG  
GAAGAGACGTCTAGC

+

FFFFFFFFFFFFFFFFFFFFFFFFFFFFFFFFFFFFFFFFFFFFFFFFFFFFFFFFFFFFFFFFFFFFFFFF:FFFFFFFFFFFF  
FFFFFFFFFFFFFFFFFFFFFFFFFFFFFFFFFFFFFFFFFFFFFFFFFFFFFFFFFFFFFFFFFFFFFFFFFFFFFFFF  
FFFF:FFFFFFFF

@A00721:190:HGJW7DSXY:4:2114:29487:28040 2:N:0:TCTGCAAG+GCTGCACT  
CTCAGAAGAATATTCTTATAAGACGTTCTGGACAAGGATGCCAATTCATCTTTAAAGATTTGGACAG  
AGACAAATGCAGAATTCTTCTCGCCGAATCCGCCTTCTATAGAAGCGAAGCATCAGCAATGCAAACG  
GAAGAGACGTCTAGC

+

FFFFFFFFFFFFFFFFFFFFFFFFFFFFFFFFFFFFFFFFFFFFFFFFFFFFFFFFFFFFFFFFFFFFFFFFFFFF  
FFFFFFFFFFFFFFFFFFFFFFFFFFFFFFFFFFFFFFFFFFFFFFFFFFFFFFFFFFFFFFFFFFFFFFFFFFFFFFFF  
FFFFFFFFFFFFFFFF

@A00721:190:HGJW7DSXY:4:2148:9679:27993 2:N:0:TCTGCAAG+GCTGCACT  
CTCAGAAGAATATTCTTATAAGACGTTCTGGACAAGGATGCCAATTCATCTTTAAAGATTTGGACAG  
AGACAAATGCAGAATTCTTCTCGCCGAATCCGCCTTCTATAGAAGCGAAGCATCAGCAATGCAAACG  
GAAGAGACGTCTAGC

```

FFFFFFFFFFFFFFFFFFFFFF:FFFFFFFFFFFFFFFFFFFFFFFFFFFFFFFFFFFFFFFF:FFFFFFFFFFFF
FFFFFFFFFFFF:FFFFFFFFFFFF,FFFF:FFFFFFFFFFFF,FFFFFFFFFFFFFFFFFFFFFFFFFFFFFFFF:FFFFF
FFFFFFFFFFFFFFFF:F

```

[illegible][illegible]

```
FFFFFFFFFFFFFFFFFFFFF::FF:FFFFFFFFFFFFFFFFFFFFFFFFFFFFFFF:FFF  
FFFFFFFFFFFFFFFFFFFFF:FFFFFFFFFFFFFFFFFFFFF:FFF:FFFFFFFFFFFF:FFFFFFF  
FFFFFFFFFFFFFFFF
```

```

FFFFFFFFFFFFFFFFFFFFFFFF:FFFFFFFFFFFFFFFFFFFFFFFFFFFFFFFF: ,FFFFFFFFFFFF
FFFFFFFFFFFFFFFFFFFFFFFFFFFFFFFFFFFFFFFF:FFFFFFFFFFFFFFFF:FFFFFFFFFFFFFFFF
FFFFFFFFFFFFFFFF

```

```

FFFFFFFFFFFFFFFFFFFFFFFFFFFFFFFFFFFFFFFF:FFFFFFFFFFFFFFFF:FFFFFFFF
FFFFFFFFFFFFFFFFFFFFFFFFFFFFFFFFFFFFFFFF:FFFFFF:FFFFFFFFFFFFFFFFFFFF:FFFF
FFFFFFFFFFFFFFFF

```

[illegible]

@A00721:190:HGJW7DSXY:4:2521:20989:11068 2:N:0:TCTGCAAG+GCTGCACT  
CTCAGAAGAATATTCTTATAAGACGTTCTGGACAAGGATGCCAATTCATCTTTAAAGATTTGGACAG



@A00721:190:HGJW7DSXY:4:1154:26332:22608 2:N:0:TCTGCAAG+GCTGCACT  
CCGTCAATCGTGCTTTGCAATCCAGGCTCAGAAGAATATTCTTATAAGACGTTCTGGACAAGGATGC  
CAATTCATCTTTAAAGATTTGGACAGAGACAAATGCAGAATTCTTCTTCGCCGAATCCGCCTTCTATA  
GAAGCGAAGCATCAG

+

FFFFFFFFFFFFFFFFFFFFFFFFFFFFFFFFFFFFFFFFFFFFFFFFFFFFFFFFFFFFFFFFFFFFFFFF:FFFFFFFFFFFF  
FFFFFFFFFFFFFFFFFFFFFFFFFFFFFFFFFFFFFFFFFFFFFFFFFFFFFFFFFFFFFFFFFFFFFFFF:FFFFFFFFFFFF  
FFF,FFF,FF:FFFF

@A00721:190:HGJW7DSXY:4:1655:20980:12305 2:N:0:TCTGCAAG+GCTGCACT  
CCGTCAATCGTGCTTTGCAATCCAGGCTCAGAAGAATATTCTTATAAGACGTTCTGGACAAGGATGC  
CAATTCATCTTTAAAGATTTGGACAGAGACAAATGCAGAATTCTTCTTCGCCGAATCCGCCTTCTATA  
GAAGCGAAGCATCAG

+

FFFFFFFFFFFFFFFFFFFFFFFFFFFFFFFFFFFFFFFFFFFFFFFFFFFFFFFFFFFFFFFFFFFFFFFF  
FFFFFFFFFFFFFFFFFFFFFFFFFFFFFFFFFFFFFFFFFFFFFFFFFFFFFFFFFFFFFFFFFFFFFFFF  
FFFFFFFFFFFFFFFFFFFF

@A00721:190:HGJW7DSXY:4:2104:3097:25300 2:N:0:TCTGCAAG+GCTGCACT  
CGTCAATCGTGCTTTGCAATCCAGGCTCAGAAGAATATTCTTATAAGACGTTCTGGACAAGGATGCC  
AATTCATCTTTAAAGATTTGGACAGAGACAAATGCAGAATTCTTCTTCGCCGAATCCGCCTTCTATAG  
AAGCGAAGCATCAG

+

F:FFFFFFFFFFFFFFFFFFFFFFFFFFFFFFFF:F:FFFFF,FFFFFFFFFFFFFFFFFFFFFFFF:FF:FFFFFFFF:F  
FFFFFFFFF:,F,FFFF:,FFFFF,FFFFFFFF:FFFFFFFF:FFFFFFFFFFFFFFFF,FFFFF:FF,FFFF  
FFFFFFFFF:F:FFF

@A00721:190:HGJW7DSXY:4:2347:6171:30561 2:N:0:TCTGCAAG+GCTGCACT  
CCGTCAATCGTGCTTTGCAATCCAGGCTCAGAAGAATATTCTTATAAGACGTTCTGGACAAGGATGC  
CAATTCATCTTTAAAGATTTGGACAGAGACAAATGCAGAATTCTTCTTCGCCGAATCCGCCTTCTATA  
GAAGCGAAGCATCAG

+

FFFFFFFFFFFFFFFFFFFFFFFFFFFFFFFFFFFFFFFFFFFFFFFFFFFFFFFFFFFFFFFFFFFFFFFF  
FFFFFFFFFFFFFFFFFFFFFFFFFFFFFFFFFFFFFFFFFFFFFFFFFFFFFFFFFFFFFFFFFFFFFFFF  
:FFFFFFFFFFFFFFFF

@A00721:190:HGJW7DSXY:4:1272:13358:33990 2:N:0:TCTGCAAG+GCTGCACT  
ATCGTGCTTTGCAATCCAGGCTCAGAAGAATATTCTTATAAGACGTTCTGGACAAGGATGCCAATTC  
ATCTTTAAAGATTTGGACAGAGACAAATGCAGAATTCTTCTTCGCCGAATCCGCCTTCTATAGAAGCG  
AAGCATC

+

FFFFFFFFFFFFFFFFFFFFFFFFFFFFFFFFFFFFFFFFFFFFFFFFFFFFFFFFFFFFFFFFFFFFFFFF  
FFFFFFFFF:F:FFFFFFFFFFFFFFFFFFFFFFFF:FFFFFFFFFFFFFFFFFFFFFFFFFFFFFFFF,FF:FF  
FFFFFFFF

@A00721:190:HGJW7DSXY:4:1331:15139:28557 2:N:0:TCTGCAAG+GCTGCACT  
ATCGTGCTTTGCAATCCAGGCTCAGAAGAATATTCTTATAAGACGTTCTGGACAAGGATGCCAATTC  
ATCTTTAAAGATTTGGACAGAGACAAATGCAGAATTCTTCTTCGCCGAATCCGCCTTCTATAGAAGCG  
AAGCATC

+

FFFFFFFFF:FFFFFFFFFFFFFFFFFFFFFFFFFFFFFFFFFFFFFFFFFFFFFFFFFFFFFFFF:FFFFFF:FFFFF  
FFFFFFFFF:,F:FFFFFFFFFFFFFFFFFFFFFFFF:FFFFFFFFFFFFFFFFFFFFFFFFFFFFFFFF:FF:FF  
F,:FFFF

@A00721:190:HGJW7DSXY:4:1509:27606:30702 2:N:0:TCTGCAAG+GCTGCACT  
ATCGTGCTTTGCAATCCAGGCTCAGAAGAATATTCTTATAAGACGTTCTGGACAAGGATGCCAATTC  
ATCTTTAAAGATTTGGACAGAGACAAATGCAGAATTCTTCTTCGCCGAATCCGCCTTCTATAGACGCG  
AAGCATC

+

FFFFFFFFFFFFFFFFFFFFFFFFFFFFFFFF,FFFFF:FFFFFFFFFFFFFFFFFFFFFFFFFFFFFFFFFFFFF:,FF

FFFFFFFFFFFF::FFFFF,FFFFFFFFFFFFFFFF:FFFFFF:FFFFFF,FFFFFFFF,FF,FF:F,FFF  
FF:FFFF

@A00721:190:HGJW7DSXY:4:1607:3323:21183 2:N:0:TCTGCAAG+GCTGCACT  
ATCGTGCTTTGCAATCCAGGCTCAGAAGAATATTCTTATAAGACGTTCTTGACAAGGATGCCAATTC  
ATCTTTAAAGATTTGGACAGAGACAAATGCAGAATTCTTCTTCGCCGAATCCGCCTTCTATAGAAGCG  
AAGCATC

+

FFFFFFFFFFFFFFFFFFFFFFFFFFFFFFFFFFFFFFFFFFFFFFFFFFFFFFFFFFFFFFFFFFFFFFFF  
FFFFFFFFFFFFFFFFFFFFFFFFFFFFFFFFFFFFFFFFFFFFFFFFFFFFFFFFFFFFFFFFFFFFFFFF  
F,FFFFF

@A00721:190:HGJW7DSXY:4:2272:8404:27164 2:N:0:TCTGCAAG+GCTGCACT  
ATCGTGCTTTGCAATCCAGGCTCAGAAGAATATTCTTATAAGACGTTCTTGACAAGGATGCCAATTC  
ATCTTTAAAGATTTGGACAGAGACAAATGCAGAATTCTTCTTCGCCGAATCCGCCTTCTATAGAAGCG  
AAGCATC

+

FFFFFFFFFFFFFFFFFFFFFFFFFFFFFFFFFFFFFFFFFFFFFFFFFFFFFFFFFFFFFFFFFFFFFFFF  
FFFFFFFFFFFFFFFFFFFFFFFFFFFFFFFFFFFFFFFFFFFFFFFFFFFFFFFFFFFFFFFFFFFFFFFF  
FFFFFFF

@A00721:190:HGJW7DSXY:4:2276:26549:14465 2:N:0:TCTGCAAG+GCTGCACT  
ATCGTGCTTTGCAATCCAGGCTCAGAAGAATATTCTTATAAGACGTTCTTGACAAGGATGCCAATTC  
ATCTTTAAAGATTTGGACAGAGACAAATGCAGAATTCTTCTTCGCCGAATCCGCCTTCTATAGAAGCG  
AAGCATC

+

FFFFFFFFFFFFFFFFFFFFFFFFFFFFFFFFFFFFFFFFFFFFFFFFFFFFFFFFFFFFFFFFFFFFFFFF  
FFFFFFFFFFFFFFFFFFFFFFFFFFFFFFFFFFFFFFFFFFFFFFFFFFFFFFFFFFFFFFFFFFFFFFFF::F:  
FFFFFFF

@A00721:190:HGJW7DSXY:4:2347:4318:12727 2:N:0:TCTGCAAG+GCTGCACT  
ATCGTGCTTTGCAATCCAGGCTCAGAAGAATATTCTTATAAGACGTTCTTGACAAGGATGCCAATTC  
ATCTTTAAAGATTTGGACAGAGACAAATGCAGAATTCTTCTTCGCCGAATCCGCCTTCTATAGAAGCG  
AAGCATC

+

FFFFFFFFFFFFFFFFFFFFFFFFFFFFFFFFFFFFFFFFFFFFFFFFFFFFFFFFFFFFFFFFFFFFFFFF  
FFFFFFFFFFFFFFFFFFFFFFFFFFFFFFFFFFFFFFFFFFFFFFFFFFFFFFFFFFFFFFFFFFFFFFFF:F:F:FFFFFF  
FFFFFFF

@A00721:190:HGJW7DSXY:4:2563:12364:2049 2:N:0:TCTGCAAG+GCTGCACT  
ATCGTGCTTTGCAATCCAGGCTCAGAAGAATATTCTTATAAGACGTTCTTGACAAGGATGCCAATTC  
ATCTTTAAAGATTTGGACAGAGACAAATGCAGAATTCTTCTTCGCCGAATCCGCCTTCTATAGAAGCG  
AAGCATC

+

FFFFFFFFFFFFFFFFFFFFFFFFFFFFFFFFFFFFFFFFFFFFFFFFFFFFFFFFFFFFFFFFFFFFFFFF  
FFFFFFF,FFFFFFFFFFFFFFFFFFFFFFFFFFFFFFFFFFFFFFFFFFFFFFFFFFFFFFFFFFFFFFFF  
FFFF:FF

@A00721:190:HGJW7DSXY:4:1107:27272:3255 2:N:0:TCTGCAAG+GCTGCACT  
AACCAATTCAAATTAAGGTGGTATCCCGTCAATCGTGCTTTGCAATCCAGGCTCAGAAGAATATTCT  
TATAAGACGTTCTTGACAAGGATGCCAATTCATCTTTAAAGATTTGGACAGAGACAAATGCAGAATT  
CTTCTTCGCCGAATC

+

FFFFFFFFFFFFFFFFFFFFFFFFFFFFFFFFFFFFFFFFFFFFFFFFFFFFFFFFFFFFFFFFFFFFFFFF  
FFFFFFFFFFFFFFFFFFFFFFFFFFFFFFFFFFFFFFFFFFFFFFFFFFFFFFFFFFFFFFFF:FF:FFFFFFFF  
FFFFFFFFFFFFF

@A00721:190:HGJW7DSXY:4:1133:10158:32424 2:N:0:TCTGCAAG+GCTGCACT  
AACCAATTCAAATTAAGGTGGTATCCCGTCAATCGTGCTTTGCAATCCAGGCTCAGAAGAATATTCT  
TATAAGACGTTCTTGACAAGGATGCCAATTCATCTTTAAAGATTTGGACAGAGACAAATGCAGAATT  
CTTCTTCGCCGAATC

+  
FFFFFFFFFFFFFFFFFFFFFFFFFFFFFFFFFFFFFFFFFFFFFFFFFFFFFFFFFFFFFFFFFFFFFFFF  
FFFFFFFFFFFFFFFF:FFFFFFFFFFFFFFFFFFFFFFFFFFFFFFFFFFFFFFFFFFFFFFFF:F,FFFF  
FFFFFFFFFFFFFFFF

@A00721:190:HGJW7DSXY:4:1165:11704:2660 2:N:0:TCTGCAAG+GCTGCACT  
AACCAATTCAAATTAAGGTGGTATCCCGTCAATCGTGCTTTGCAATCCAGGCTCAGAAGAATATTCT  
TATAAGACGTTCTTGACAAGGATGCCAATTCATCTTTAAAGATTTGGACAGAGACAAATGCAGAATT  
CTTCTTCGCCGAATC

+  
FFFFFFFFFFFFFFFFFFFFFFFFFFFFFFFFFFFFFFFFFFFFFFFFFFFFFFFFFFFFFFFFFFFFFFFF  
FFFFFFFFFFFFFFFFFFFFFFFFFFFFFFFFFFFFFFFFFFFFFFFFFFFFFFFFFFFFFFFF:FFF:FFFFFFFFFFFFFFFF  
FFFFFFFFFFFFFFFF

@A00721:190:HGJW7DSXY:4:1350:1163:34976 2:N:0:TCTGCAAG+GCTGCACT  
AACCAATTCAAATTAAGGTGGTATCCCGTCAATCGTGCTTTGCAATCCAGGCTCAGAAGAATATTCT  
TATAAGACGTTCTTGACAAGGATGCCAATTCATCTTTAAAGATTTGGACAGAGACAAATGCAGAATT  
CTTCTTCGCCGAATC

+  
FFFFFFFFFFFFFFFFFFFFFFFFFFFFFFFFFFFFFFFFFFFFFFFFFFFFFFFFFFFFFFFFFFFFFFFF  
FFFFFFFFFFFFFFFFFFFFFFFFFFFFFFFFFFFFFFFFFFFFFFFFFFFFFFFFFFFFFFFF:FFFFFFFFFFFFFFFFFFFFFFFF  
FFFFFFFFFFFFFFFF

@A00721:190:HGJW7DSXY:4:1448:5222:28197 2:N:0:TCTGCAAG+GCTGCACT  
AACCAATTCAAATTAAGGTGGTATCCCGTCAATCGTGCTTTGCAATCCAGGCTCAGAAGAATATTCT  
TATAAGACGTTCTTGACAAGGATGCCAATTCATCTTTAAAGATTTGGACAGAGACAAATGCAGAATT  
CTTCTTCGCCGAATC

+  
FFFFFFFFFFFFFFFF:FFFF:FFFFFFFFFFFFFFFFFFFFFFFFFFFFFFFF:FFFFFFFFFFFF:FFFF:FFF  
FFFFFFFF:FFFFFFFFFFFFFFFFFFFFFFFFFFFFFFFFFFFFFFFFFFFFFFFFFFFFFFFF:F:FFFFF  
FFF:FFF,FF,F,FF

@A00721:190:HGJW7DSXY:4:1521:18991:27461 2:N:0:TCTGCAAG+GCTGCACT  
AACCAATTCAAATTAAGGTGGTATCCCGTCAATCGTGCTTTGCAATCCAGGCTCAGAAGAATATTCT  
TATAAGACGTTCTTGACAAGGATGCCAATTCATCTTTAAAGATTTGGACAGAGACAAATGCAGAATT  
CTTCTTCGCCGAATC

+  
F:FFFFFFFFFFFFFFFFFFFFFFFFFFFFFFFFFFFFFFFFFFFFFFFFFFFFFFFFFFFFFFFF  
:FFFFFFFFFFFFFFFFFFFFFFFFFFFFFFFFFFFFFFFFFFFFFFFF:FFFFFFFFFFFFFFFFFFFFFFFF  
FFFFFFFFFFFFFFFF

@A00721:190:HGJW7DSXY:4:1618:3161:30953 2:N:0:TCTGCAAG+GCTGCACT  
AACCAATTCAAATTAAGGTGGTATCCCGTCAATCGTGCTTTGCAATCCAGGCTCAGAAGAATATTCT  
TATAAGACGTTCTTGACAAGGATGCCAATTCATCTTTAAAGATTTGGACAGAGACAAATGCAGAATT  
CTTCTTCGCCGAATC

+  
FFFFFFFFFFFFFFFFFFFFFFFFFFFFFFFFFFFFFFFF:FFFFFFFF:FFFFFFFFFFFFFFFFFFFFFFFF  
FFFFFFFFFFFFFFFFFFFF,FFFFFFFFFFFFFFFF:FFFFFFFFFFFFFFFF:FFFFF,FFFF  
FFFFFF:F:FFF:F

@A00721:190:HGJW7DSXY:4:1619:27290:25645 2:N:0:TCTGCAAG+GCTGCACT  
AACCAATTCAAATTAAGGTGGTATCCCGTCAATCGTGCTTTGCAATCCAGGCTCAGAAGAATATTCT  
TATAAGACGTTCTTGACAAGGATGCCAATTCATCTTTAAAGATTTGGACAGAGACAAATGCAGAATT  
CTTCTTCGCCGAATC

+  
FFFFFFFFFFFF:FFFFFFFFFFFFFFFFFFFF:FFFFFFFF:FFFFFFFFFFFFFFFF:FFFFFFFFFFFFF:  
FFF:FFFF:FFFFFFFFFFFFFFFFFFFF:F:FFFFFF:FFFFFFFFFFFFFFFFFFFFFFFF,FFF,  
F:FFFF:FFFFFF

@A00721:190:HGJW7DSXY:4:2218:2184:5588 2:N:0:TCTGCAAG+GCTGCACT  
AACCAATTCAAATTAAGGTGGTATCCCGTCAATCGTGCTTTGCAATCCAGGCTCAGAAGAATATTCT



$+$ 

@

+

@

+

@

+

@

+

@

+

@

+



FFFFFFFFFFFFFFFFFFFFFFFFFFFFFFFFFFFFFFFFFFFFFFFFFFFFFFFFFFFFFFFFFFFFFFFF  
FFFFFFFFFFFFFFFF

@A00721:190:HGJW7DSXY:4:1528:9453:6715 2:N:0:TCTGCAAG+GCTGCACT  
GTACGGCAAACCAATTCAAATTAAGGTGGTATCCCGTCAATCGTGCTTTGCAATCCAGGCTCAGAAG  
AATATTCTTATAAGACGTTCTGACAAGGATGCCAATTCATCTTTAAAGATTGGACAGAGACAAAT  
GCAGAATTCTTCTTC

+

FFFFFFFFFFFFFFFFFFFFFFFFFFFFFFFFFFFFFFFFFFFFFFFFFFFFFFFFFFFFFFFFFFFFFFFF  
FFFFFFFFFFFFFFFFFFFFFFFFFFFFFFFFFFFFFFFFFFFFFFFFFFFFFFFFFFFFFFFFFFFFFFFF  
FFFFFFFFFFFFFFFF

@A00721:190:HGJW7DSXY:4:1564:17183:7357 2:N:0:TCTGCAAG+GCTGCACT  
GTACGGCAAACCAATTCAAATTAAGGTGGTATCCCGTCAATCGTGCTTTGCAATCCAGGCTCAGAAG  
AATATTCTTATAAGACGTTCTGACAAGGATGCCAATTCATCTTTAAAGATTGGACAGAGACAAAT  
GCAGAATTCTTCTTC

+

FFFFFFFFFFFFFFFFFFFFFFFFFFFFFFFFFFFFFFFFFFFFFFFFFFFFFFFFFFFFFFFFFFFFFFFF  
FFFFFFFFFFFFFFFFFFFFFFFFFFFFFFFFFFFFFFFFFFFFFFFFFFFFFFFFFFFFFFFFFFFFFFFF  
FFFFFFFFFFFFFFFF

@A00721:190:HGJW7DSXY:4:1676:15157:23484 2:N:0:TCTGCAAG+GCTGCACT  
GTACGGCAAACCAATTCAAATTAAGGTGGTATCCCGTCAATCGTGCTTTGCAATCCAGGCTCAGAAG  
AATATTCTTATAAGACGTTCTGACAAGGATGCCAATTCATCTTTAAAGATTGGACAGAGACAAAT  
GCAGAATTCTTCTTC

+

F:FFFFFFFFFFFFFFFFFFFFFFFFFFFFFFFFFFFFFFFFFFFFFFFFFFFFFFFFFFFFFFFF  
FFFFFFFF:FFFFFFFFFFFFFFFFFFFFFFFFFFFFFFFFFFFFFFFFFFFFFFFFFFFFFFFF  
FFFFFFFFFFFFFFFF

@A00721:190:HGJW7DSXY:4:1213:27597:5447 2:N:0:TCTGCAAG+GCTGCACT  
AGAAGAATTCTGCATTTGTCTCTGTCCAAATCTTTAAAGATGAATTGGCATCCTTGTCCAGGAACGTC  
TTATAAGAATATTCTTCTGAGCCTGGATTGCAAAGCACGATTGACGGGATACCACCTTAATTTGAAT  
TGGTTTGCCGTACTT

+

FFFFFFFFFFFFFFFFFFFFFFFFFFFFFFFFFFFFFFFFFFFFFFFFFFFFFFFFFFFFFFFFFFFFFFFF  
FFFF,FFFFFFFFFFFFFFFFFFFFFFFFFFFFFFFFFFFFFFFFFFFFFFFFFFFFFFFFFFFFFFFF  
FFFFFFFFFFFFFFFF

@A00721:190:HGJW7DSXY:4:1228:19813:22561 2:N:0:TCTGCAAG+GCTGCACT  
AGAAGAATTCTGCATTTGTCTCTGTCCAAATCTTTAAAGATGAATTGGCATCCTTGTCCAGGAACGTC  
TTATAAGAATATTCTTCTGAGCCTGGATTGCAAAGCACGATTGACGGGATACCACCTTTAATTTGAAT  
TGGTTTGCCGTACTT

+

FFFFFF:FFFFFFFFFFFFFFFFFFFFFFFFFFFFFFFFFFFFFFFFFFFFFFFFFFFFFFFFFFFFFFFF  
FFFFFF:FFFFFFFFFFFFFFFFFFFFFFFFFFFFFFFFFFFFFFFFFFFFFFFFFFFFFFFFFFFFFFFF  
FFFFFFFFFFFFFFFF

@A00721:190:HGJW7DSXY:4:2134:28203:13542 2:N:0:TCTGCAAG+GCTGCACT  
AGAAGAATTCTGCATTTGTCTCTGTCCAAATCTTTAAAGATGAATTGGCATCCTTGTCCAGGAACGTC  
TTATAAGAATATTCTTCTGAGCCTGGATTGCAAAGCACGATTGACGGGATACCACCTTTAATTTGAAT  
TGGTTTGCCGTACTT

+

FFFFFF:FFFF:FFF,FFFFFFFFFFFFFFFFFFFFFFFFFFFFFFFFFFFFFFFFFFFFFFFF  
FFFFFF:FFFFFFFFFFFFFFFFFFFFFFFFFFFFFFFFFFFFFFFFFFFFFFFFFFFFFFFFFFFFFFFF  
FFFFFF,FFF,FFFFFFF:

@A00721:190:HGJW7DSXY:4:2272:32579:21840 2:N:0:TCTGCAAG+GCTGCACT  
AGAAGAATTCTGCATTTGTCTCTGTCCAAATCTTTAAAGATGAATTGGCATCCTTGTCCAGGAACGTC  
TTATAAGAATATTCTTCTGAGCCTGGATTGCAAAGCACGATTGACGGGATACCACCTTTAATTTGAAT  
TGGTTTGCCGTACTT

```

FFFFFFFFFFFFFFFFFFFFFFFFFFFFFFFFFFFFFFFF:FFFFFFFFFFFFFFFFFFFFFFFFFFFFFFFF
FFFFFFFF,F:FFFFFFFF:FF:FFFFF:FFFFF:FFFFFFFFFFFFFFFFFFFFFFFF:FFFFF:FFFFFFF
F:FFFFFFFFFFFFFFFF:

```

```
FFFFFFFFFFFFFFFFFFFFFFFFFFFFFFFFFFFFFFFFFFFFFFFFFFFFFFFFFFFFF
FFFFFFFFFFFFFFFFFFFFFFFF:FFFFFFFFFFFFFFFFFFFFFFFFFFFFFFFFFFFF
FFF:FFFFFFFF
```

```

FFFFFFFF,FFFFFFFFFFFFFFFF:FFFFFFFFFFFFFFFF:FFFFFFFFFFFFFFFFFFFFFFFF
:FFFFFFFFFFFFFFFFFFFFFFFFFFFFFFFF,FFFFFFFFFFFFFFFF:FFF:FFFFFFFF:FFF
FFFFFFFFFFFFFFFF

```

```

FFFFFFFFFFFFFFFFFFFFFFFFFFFFFFFF:FFFFFF:,FFF:FF:FFFFFFFFFFFFFFFFFFFFFFFF
:FFFFFFFFFFFFFFFFFFFFFFFFFFFFFFFF:FFFFFFFFFFFFFFFFFFFFFFFF:FFFFFFFFFFFFFFFF
FFFFFFFFFFFFFFFF

```

[illegible][illegible][illegible]

@A00721:190:HGJW7DSXY:4:1536:28971:25676 2:N:0:TCTGCAAG+GCTGCACT  
ATCCCGTCAATCGTGCTTTGCAATCCAGGCTCAGAAGAATATTCTTATAAGACGTTCTGGACAAGGA

TGCCAATTCATCTTTAAAGATTTGGACAGACTATCCGCATCTGGACGACATTACAACCAGTCCCAGAA  
TTACTGCAGAACCCG

```

FFFFFFFFFFFFFFFFFFFFFFFFFFFFFFFF:FFFFFFFFFFFFFFFFFFFFFFFFFFFFFFFFFFFFFFFF
FFFFFFFFFFFFFFFFFFFF:F:FFFFFF:FFFFFFFFFFFFFFFFFFFF,FFFFFFFF,FFFFFFFFFFFFFF
F:FFFFFF:FFFFF

```

 $+$ 

@A00721:190:HGJW7DSXY:4:2343:7527:22451 2:N:0:TCTGCAAG+GCTGCACT  
ATCCCGTCAATCGTGCTTTGCAATCCAGGCTCAGAAGAATATTCTTATAAGACGTTCTGGACAAGGA  
TGCCAATTCACTTTAAAGATTTGGACAGACTATCCGCATCTGGACGACATTACAACCAGTCCCAGAA  
TTACTGCAGAACCCG

[illegible]

+

@A00721:190:HGJW7DSXY:4:1421:7961:20415 2:N:0:TCTGCAAG+GCTGCACT  
CGGCAAACCAATTCAAATTAAGGTGGTATCCCGTCAATCGTGCTTTGCAATCCAGGCTCAGAAGAAT  
ATTCTTATAAGACGTTCTGGACAAGGATGCCAATTCATCTTTAAAGATTTGGACAGACTATCCGCAT  
CTGGACGACATTACA

[illegible]

+

@A00721:190:HGJW7DSXY:4:1560:2193:26678 2:N:0:TCTGCAAG+GCTGCACT  
CGGCAACCAATTCAAATTAAGGTGGTATCCCGTCAATCGTGCTTTGCAATCCAGGCTCAGAAGAAT  
ATTCTTATAAGACGTTCTGGACAAGGATGCCAATTCATCTTTAAGATTTGGACAGACTATCCGCAT  
CTGGACGACATTACA

[illegible]

@A00721:190:HGJW7DSXY:4:2612:27380:33724 2:N:0:TCTGCAAG+GCTGCACT  
CGGCAAACCAATTCAAATTAAAGGTGGTATCCCGTCAATCGTGCTTTGCAATCCAGGCTCAGAAGAAT  
ATTCTTATAAGACGTTCTGGACAAGGATGCCAATTCATCTTTAAAGATTTGGACAGACTATCCGCAT  
CTGGACGACATTACA

[illegible]

+

```
FFFFF:FFFFFFFFFFFFFF:FFFFFF:FFFFFFFFFFFFFFFFFFFFFFFF:FFFFFFFFFFFFFFFFFFFF  
FFFFFFFF,FFFFFFFFFFFF:FFFF:FFFFFFFFFFFFFFFFFFFFFFFF:F:FFFFFFFFF,  
FFFFFFE:EEEEEEEEE
```

+

[illegible]

+

[illegible]

+

[illegible]

+

[illegible] $+$ [illegible]



+  
FFFFFFFFFFFFFFFFFFFFFFFFFFFFFFFFFFFFFFFFFFFFFFFFFFFFFFFFFFFFFFFFFFFFFFFF  
FFFFFFFFFFFFFFFFFFFFFFFFFFFFFFFFFFFFFFFFFFFFFFFFFFFFFFFFFFFFFFFFFFFFFFFF  
FFFFFFFFFFFFFFFF

@A00721:190:HGJW7DSXY:4:2541:2935:16094 2:N:0:TCTGCAAG+GCTGCACT  
GCACAATTGGGTATCCAATGTGAAGTACGGCAAACCAATTCAAATTAAAGGTGGTATCCCGTCAATCG  
TGCTTTGCAATCCAGGCTCAGAAGAATATTCTTATAAGACGTTCTGACAAGGATGCCAATTCATCT  
TTAAAGATTTGGACA

+  
F:FFFFFFFFFFFFFFFFFFFFFFFFFFFFFFFFFFFFFFFFFFFFFFFFFFFFFFFFFFFFFFFFFFFFFFFF  
FFFFFFFFF:FFFFFFFFFFFFFFFFFFFFFFFFFFFFFFFFFFFFFFFFFFFFFFFFFFFFFFFFFFFFFFFF  
FFFFFFFFFFFFFFFF

@A00721:190:HGJW7DSXY:4:2603:12319:34851 2:N:0:TCTGCAAG+GCTGCACT  
GCACAATTGGGTATCCAATGTGAAGTACGGCAAACCAATTCAAATTAAAGGTGGTATCCCGTCAATCG  
TGCTTTGCAATCCAGGCTCAGAAGAATATTCTTATAAGACGTTCTGACAAGGATGCCAATTCATCT  
TTAAAGATTTGGACA

+  
FFFFFFFFFFFFFFFFFFFFFFFFFFFFFFFFFFFFFFFFFFFFFFFFFFFFFFFFFFFFFFFFFFFFFFFF  
FFFFFFFFFFFFFFFFFFFFFFFFFFFFFFFFFFFFFFFFFFFFFFFFFFFFFFFFFFFFFFFFFFFFFFFF  
FFFFFFFFFFFFFFFF  
:FF:FFFFFFFFFFFFFFFFFFFFFFFFFFFFFFFFFFFFFFFFFFFFFFFFFFFFFFFFFFFFFFFF  
:FF:FFFFFFFFFFFFFFFFFFFFFFFFFFFFFFFFFFFFFFFFFFFFFFFFFFFFFFFFFFFFFFFF  
:FF:FFFFFFFFFFFFFFFF

@A00721:190:HGJW7DSXY:4:2659:29215:1892 2:N:0:TCTGCAAG+GCTGCACT  
GCACAATTGGGTATCCAATGTGAAGTACGGCAAACCAATTCAAATTAAAGGTGGTATCCCGTCAATCG  
TGCTTTGCAATCCAGGCTCAGAAGAATATTCTTATAAGACGTTCTGACAAGGATGCCAATTCATCT  
TTAAAGATTTGGACA

+  
FFFFFFFFFFFFFFFFFFFFFFFFFFFFFFFFFFFFFFFFFFFFFFFFFFFFFFFFFFFFFFFFFFFFFFFF  
FFFFFFFFFFFFFFFFFFFFFFFFFFFFFFFFFFFFFFFFFFFFFFFFFFFFFFFFFFFFFFFFFFFFFFFF  
FFF::FFFF:FFFF

@A00721:190:HGJW7DSXY:4:1418:32244:35196 2:N:0:TCTGCAAG+GCTGCACT  
GCACAATTGGGTATCCAATGTGAAGTACGGCAAACCAATTCAAATTAAAGGTGGTATCCCGTCAATCG  
TGCTTTGCAATCCAGGCTCAGAAGAATATTCTTATAAGACGTTCTGACAAGGATGCCAATTCATCT  
TTAAAGATTTGGAC

+  
FFFFFFFFFFFFFFFFFFFFFFFFFFFFFFFFFFFFFFFFFFFFFFFFFFFFFFFFFFFFFFFFFFFFFFFF  
FFFF:FFFFFFFFFFFFFFFFFFFFFFFFFFFFFFFFFFFFFFFFFFFFFFFFFFFFFFFFFFFFFFFF  
FFFFFFFFFFFFFFFF:FFFF

@A00721:190:HGJW7DSXY:4:1132:3676:14434 2:N:0:TCTGCAAG+GCTGCACT  
ACAATTGGGAATCCAATGTGAAGTACGGCAAACCAATTCAAATTAAAGGTGGTATCCCGTCAATCGTG  
CTTTGCAATCCAGGCTCAGAATAATAATCTTATAAAACGTTCTGACAAGTATGCCAATACATAATT  
AAATATTTCTACA

+  
:,::FFF,,,::::F,,::F::FF:::,:F:::,:::,:::,:::,:::,:::,:::,:::,::,  
:F:F,,,::::,,,::::,:::,:::,:::,:::,:::,:::,:::,:::,:::,:::,:::,F,  
:::,::,FF,::,:

@A00721:190:HGJW7DSXY:4:1146:22164:7560 2:N:0:TCTGCAAG+GCTGCACT  
ATTGGGGTCCAGCACAATTGGGTATCCAATGTGAAGTACGGCAAACCAATTCAAATTAAAGGTGGTAT  
CCCGTCAATCGTGCTTTGCAATCCAGGCTCAGAAGAATATTCTTATAAGACGTTCTGACAAGGATG  
CCAATTCATCTTTAA

+  
FFFFFFFFFFFFFFFFFFFFFFFFFFFFFFFFFFFFFFFFFFFFFFFFFFFFFFFFFFFFFFFFFFFFFFFF  
FFFFFFFFFFFFFFFFFFFFFFFFFFFFFFFFFFFFFFFFFFFFFFFFFFFFFFFFFFFFFFFFFFFFFFFF  
FFFFFFFFFFFFFFFF:

@A00721:190:HGJW7DSXY:4:1272:22435:2895 2:N:0:TCTGCAAG+GCTGCACT  
ATTGGGGTCCAGCACAATTGGGTATCCAATGTGAAGTACGGCAAACCAATTCAAATTAAAGGTGGTAT



@A00721:190:HGJW7DSXY:4:1525:15148:2362 2:N:0:TCTGCAAG+GCTGCACT  
CTTATTGGGGTCCAGCACAATTGGGTATCCAATGTGAAGTACGGCAAACCAATTCAAATTAAAGGTGG  
TATCCCGTCAATCGTGCTTTGCAATCCAGGCTCAGAAGAATATTCTTATAAGACGTTCTCTGGACAAGG  
ATGCCAATTCATCTT

+

FFFFFFFFFFFFFFFFFFFFFFFFFFFFFFFFFFFFFFFFFFFFFFFFFFFFFFFFFFFFFFFFFFFFFFFF  
FFFFFFFFFFFFFFFFFFFFFFFFFFFFFFFFFFFFFFFFFFFFFFFFFFFFFFFFFFFFFFFFFFFFFFFF  
FFFFFFFFFFFFFFFF

@A00721:190:HGJW7DSXY:4:2378:21459:13949 2:N:0:TCTGCAAG+GCTGCACT  
CTTATTGGGGTCCAGCACAATTGGGTATCCAATGTGAAGTACGGCAAACCAATTCAAATTAAAGGTGG  
TATCCCGTCAATCGTGCTTTGCAATCCAGGCTCAGAAGAATATTCTTATAAGACGTTCTCTGGACAAGG  
ATGCCAATTCATCTT

+

:FFFFFFFFFFFFFFFFFFFFFFFFFFFFFFFFFFFFFFFFFFFFFFFFFFFFFFFFFFFFFFFFFFFF:FFFFFFFFFFFF:FF  
FFFFFFFFFFFFFFFFFFFFFFFFFFFFFFFFFFFFFFFFFFFFFFFFFFFFFFFFFFFFFFFFFFFF:FFFFFFFFFFFF:FFFF:,FF  
FFF:FFF:FFFFFFFF

@A00721:190:HGJW7DSXY:4:1164:12210:18630 2:N:0:TCTGCAAG+GCTGCACT  
AGCTTATTGGGGTCCAGCACAATTGGGTATCCAATGTGAAGTACGGCAAACCAATTCAAATTAAAGGT  
GGTATCCCGTCAATCGTGCTTTGCAATCCAGGCTCAGAAGAATATTCTTATAAGACGTTCTCTGGACAA  
GGATGCCAATTCATC

+

FFF:FF:FFFFFFFF:FFFFFFFFFFFFFFFFFFFFFFFFFFFFFFFFFFFFFFFFFFFFFFFFFFFFFFFF  
FFFFFFFF:FFFF:FFFFFFFFFFFFFFFFFFFFFFFFFFFFFFFFFFFFFFFFFFFFFFFFFFFF:FFF:FFFF:F  
FFFFFFFFFFFFFFFF

@A00721:190:HGJW7DSXY:4:1472:13729:8390 2:N:0:TCTGCAAG+GCTGCACT  
AGCTTATTGGGGTCCAGCACAATTGGGTATCCAATGTGAAGTACGGCAAACCAATTCAAATTAAAGGT  
GGTATCCCGTCAATCGTGCTTTGCAATCCAGGCTCAGAAGAATATTCTTATAAGACGTTCTCTGGACAA  
GGATGCCAATTCATC

+

FFFFFFFFFFFFFFFFFFFFFFFFFFFFFFFFFFFFFFFFFFFFFFFFFFFFFFFFFFFFFFFFFFFFFFFF  
FFFFFFFFFFFFFFFFFFFFFFFFFFFFFFFFFFFFFFFFFFFFFFFFFFFFFFFFFFFFFFFFFFFF:FFFFFFFFFFFF  
FFFFFFFFFFFFFFFF

@A00721:190:HGJW7DSXY:4:2442:18801:7216 2:N:0:TCTGCAAG+GCTGCACT  
AGCTTATTGGGGTCCAGCACAATTGGGTATCCAATGTGAAGTACGGCAAACCAATTCAAATTAAAGGT  
GGTATCCCGTCAATCGTGCTTTGCAATCCAGGCTCAGAAGAATATTCTTATAAGACGTTCTCTGGACAA  
GGATGCCAATTCATC

+

FFFFFFFFFFFFFFFFFFFFFFFFFFFFFFFFFFFFFFFFFFFFFFFFFFFFFFFFFFFFFFFFFFFF:FFFFFFFF:F:FFFF:FF:FFFF  
FFFFFFFFFFFFFFFFFFFFFFFFFFFFFFFFFFFFFFFFFFFFFFFFFFFFFFFFFFFFFFFFFFFF:FFFFFFFFFFFF:FFFFFFFFFFFF  
FFFFFFFFFFFFFFFF

@A00721:190:HGJW7DSXY:4:2578:7708:11992 2:N:0:TCTGCAAG+GCTGCACT  
AGCTTATTGGGGTCCAGCACAATTGGGTATCCAATGTGAAGTACGGCAAACCAATTCAAATTAAAGGT  
GGTATCCCGTCAATCGTGCTTTGCAATCCAGGCTCAGAAGAATATTCTTATAAGACGTTCTCTGGACAA  
GGATGCCAATTCATC

+

FFFFFFFFFFFFFFFFFFFFFFFFFFFFFFFFFFFFFFFFFFFFFFFFFFFFFFFFFFFFFFFFFFFFFFFF  
FFFFFFFFFFFFFFFFFFFFFFFFFFFFFFFFFFFFFFFFFFFFFFFFFFFFFFFFFFFFFFFFFFFF:FFFFFFFFFFFF  
FFFFFFFFFFFFFFFF

@A00721:190:HGJW7DSXY:4:2641:19623:16438 2:N:0:TCTGCAAG+GCTGCACT  
AGCTTATTGGGGTCCAGCACAATTGGGTATCCAATGTGAAGTACGGCAAACCAATTCAAATTAAAGGT  
GGTATCCCGTCAATCGTGCTTTGCAATCCAGGCTCAGAAGAATATTCTTATAAGACGTTCTCTGGACAA  
GGATGCCAATTCATC

+

FF,FF:,F:FFF::F,FFFFFFFF,FFFF,FF,FF,:F::FFFFFFFF:,FFFF:FFFF:FFF,F:



,,FFFF:, :FFFFFF:F:,FF:, :FF,FFFF::F:FFFFFFFFF:FF:FFFF,FFFF,FFF,FFFF  
,FFF,F:F:,F,FF:

@A00721:190:HGJW7DSXY:4:1336:19434:7467 2:N:0:TCTGCAAG+GCTGCACT  
GGAGCTTATTGGGGTCCAGCACAATTGGGTATCCAATGTGAAGTACGGCAAACCAATTCAAATTAAG  
GTGGTATCCCGTCAATCGTGCTTTGCAATCCAGGCTCAGAAGAATATTCTTATAAGACGTTCTTGAC  
AAGGATGCCAATTCA

+

FFFFFFF:F:FFFFFFFFFFFFFFF:FFFFFFF:FFFFFFFFFFFFFFF:FFFFFFFFF:FFFFF  
FFFFFFFFF:FFFFFFFFFFFFFFF:FFFFFFFFFFFFFFF:FFFFFFFFFFFFFFF:FFFFFFFFF  
FFFFFFFFFFFFFFF

@A00721:190:HGJW7DSXY:4:1434:20971:14951 2:N:0:TCTGCAAG+GCTGCACT  
GGAGCTTATTGGGGTCCAGCACAATTGGGTATCCAATGTGAAGTACGGCAAACCAATTCAAATTAAG  
GTGGTATCCCGTCAATCGTGCTTTGCAATCCAGGCTCAGAAGAATATTCTTATAAGACGTTCTTGAC  
AAGGATGCCAATTCA

+

FFFFF:FFFFFFFFFFFFFFF:FFFFFFFFFFFFFFF:FFFFFFFFFFFFFFF:FFFFFFFFF  
FFFFFFFFFFFFFFF:FFFFFFFFFFFFFFF:FFFFFFFFFFFFFFF:FFFFFFFFFFFFFFF:FFFFF  
FFFFFFFFFFFFFFF

@A00721:190:HGJW7DSXY:4:1453:4553:21214 2:N:0:TCTGCAAG+GCTGCACT  
GGAGCTTATTGGGGTCCAGCACAATTGGGTATCCAATGTGAAGTACGGCAAACCAATTCAAATTAAG  
GTGGTATCCCGTCAATCGTGCTTTGCAATCCAGGCTCAGAAGAATATTCTTATAAGACGTTCTTGAC  
AAGGATGCCAATTCA

+

FFFFFFFFFFFFFFFFFFFFFFFFFFFFFFFFFFFFFFFFFFFFFFFFFFFFFFFFFFFFFFFFF:FFF  
FFFFFFFFFFFFFFFFFFFFFFF,FFFFFFFFFFFFFFFFF,FFFFFFFFFFFFFFFFF  
FFFFFFFFFFFFFFF:

@A00721:190:HGJW7DSXY:4:2310:25545:26506 2:N:0:TCTGCAAG+GCTGCACT  
GGAGCTTATTGGGGTCCAGCACAATTGGGTATCCAATGTGAAGTACGGCAAACCAATTCAAATTAAG  
GTGGTATCCCGTCAATCGTGCTTTGCAATCCAGGCTCAGAAGAATATTCTTATAAGACGTTCTTGAC  
AAGGATGCCAATTCA

+

:FFFFFFFFFFFFFFFFFFFFFFF,FFFFFFFFF,FFFFFFFFFFFFFFF,FF:F::FFFFFFFFFFFFF  
FFFFFFFFFFFFFFFFFFFFFFF:FFFFFFFFFFFFFFFFF:FFFFFFFFFFFFFFFFF  
F:FFFFFFFF,FF,FF

@A00721:190:HGJW7DSXY:4:2602:18620:3302 2:N:0:TCTGCAAG+GCTGCACT  
GGAGCTTATTGGGGTCCAGCACAATTGGGTATCCAATGTGAAGTACGGCAAACCAATTCAAATTAAG  
GTGGTATCCCGTCAATCGTGCTTTGCAATCCAGGCTCAGAAGAATATTCTTATAAGACGTTCTTGAC  
AAGGATGCCAATTCA

+

FFFFFFFFFFFFFFFFFFFFFFFFFFFFFFFFFFFFFFFFFFFFFFFFFFFFFFFFFFFFFFFFF  
FFFFFFFFFFFFFFFFFFFFFFFFFFFFFFFFFFFFFFFFFFFFFFFFFFFFFFFFFFFFFFFFF  
FFFFFFFFFFFFFFF

@A00721:190:HGJW7DSXY:4:1163:19470:18208 2:N:0:TCTGCAAG+GCTGCACT  
GGAGCTTATTGGGGTCCAGCACAATTGGGTATCCAATGTGAAGTACGGCAAACCAATTCAAATTAAG  
GTGGTATCCCGTCAATCGTGCTTTGCAATCCAGGCTCAGAAGAATATTCTTATAAGACGTTCTTGAC  
AAGGATGCCAATTCA

+

FFFFFFFFFFFFFFFFFFFFFFFFFFFFFFFFFFFFFFFFFFFFFFFFFFFFFFFFFFFFFFFFF  
FFFFFFFFFFFFFFFFFFFFFFFFFFFFFFFFFFFFFFFFFFFFFFFFFFFFFFFFFFFFFFFFF  
FFFFFFFFFFFF, :F

@A00721:190:HGJW7DSXY:4:1150:10936:20807 2:N:0:TCTGCAAG+GCTGCACT  
AAGGAGCTTATTGGGGTCCAGCACAATTGGGTATCCAATGTGAAGTACGGCAAACCAATTCAAATTAAG  
AGGTGGTATCCCGTCAATCGTGCTTTGCAATCCAGGCTCAGAAGAATATTCTTATAAGACGTTCTTGAC  
ACAAGGATGCCAATT

```
F:FFFFFFFFFFFFFFFFFFFFFFFFFFFFFFFFFFFFFFFFFFFFFFFFFFFFFFFFFFFFFFF  
FFFFFFFFFFFFFFFFFFFFFFFFFFFFFFFFFFFFFFFFFFFFFFFFFFFF,FFFFFFFFFFFFFFFFFFFFFFFFFF  
FFFFFFFFFFFFFFFF
```

[illegible]

FF,F:F:, :FFFFFFF:F:F,FFFFFFFFF:,F:,FFF,,FFFF:FFF:,FFF:,FFFFFFFF,F:FF  
FF,F,,FFFFFFF,FFFFFFF,F,:FFF,FFFFFFF:F:,F:F:FF:F:FFFFFF:FFFFFFF,FFFFFFF, :  
FFFF,FFF:, ,F:FF

[illegible][illegible]

```

FFFFFFFF,FFFFFFFFFFFFFFFFFFFFFFFF:FF:FFFFFFFFFFFF:FFFFFFFFFFFFFFFFFFFFFFFFFFFF
FFFFFFFFFFFFFFFFFFFFFFFFFFFFFFFF:FFFFFFFFFFFFFFFF:FFFFFF:FFFFFFFF,FFFFFFF
FFFFFFFFFFFFFFFF:FF

```

[illegible]

@A00721:190:HGJW7DSXY:4:1569:19108:14951 2:N:0:TCTGCAAG+GCTGCACT  
AAGGAGCTTATTGGGGTCCAGCACAATTGGGTATCCAATGTGAAGTACGGCAAACCAATTCAAATTA

AGGTGGTATCCCGTCAATCGTGCTTTGCAATCCAGGCTCAGAAGAATATTCTTATAAGACGTTCTCGG  
ACAAGGATGCCAATT

[illegible]

+

[illegible] $+$ [illegible]

+

```
FFFFFFFF:F:FFFFFFFFFFFFFFFFFFFFFFFFFFFFFFFFFFFFFFFFFFFFFFFFFFFFF
FFFFFFFFFFFFFFFFFFFFFFFFFFFFFFFFFFFFFFFFFFFFFFFFFFFFFFFFFFFFFFF:FFFFFFFFFFFFFFFFFFFFFFFFFFFFFFFFFFFFF
FFFFFFFFFFFFFFFFFFFF
```

+

[illegible]

+

```

FFFFFFFFFFFFFFFFFFFFFFFFFFFFFFFFFFFFFFFF:FFFFFFFFFFFFFFFFFFFFFFFFFFFFFFFF
FFFFFFFF:FFFFFFFFFFFFFFFFFFFFFFFFFFFFFFFFFFFFFFFF:FF,FFFFFFFFFFFFFFFFFFFFFFFF
FFFFFFFFFFFF.FF:

```

+

[illegible]

$+$ 

+

+

+

+

+

+

F:FF:FFFFFFFF:FFFFFFFFFFFFFFFFFFFFFFFFFFFFFFFF:FF:FFFFFFFFFFFFFFFFFFFFFFFF  
FFFFFFFF:FFFF

@A00721:190:HGJW7DSXY:4:2277:28872:36777 2:N:0:TCTGCAAG+GCTGCACT  
GAAGGAGCTTATTGGGGTCCAGCACAAATTGGGTATCCAATGTGAAGTACGGCAAACCAATTCAAATTA  
AAGGTGGTATCCCGTCAATCGTGCTTTGCAATCCAGGCTCAGAAGAATATTCTTATAAGACGTTCTG  
GACAAGGATGCCAAT

+

FFFFFFFFFFFF,FFFFFFFFFFFFFFFF:FFFFFFFFFFFFFFFFFFFFFFFF,FFFFFFFFFFFFFFFF  
F,FFFFFFFF:FFFF:FFFFFFFFFFFFFFFFFFFFFFFFFFFFFFFF:FFFFFFFF:FFFF  
FFFF:FFFFFFFF

@A00721:190:HGJW7DSXY:4:2320:29161:19241 2:N:0:TCTGCAAG+GCTGCACT  
GAAGGAGCTTATTGGGGTCCAGCACAAATTGGGTATCCAATGTGAAGTACGGCAAACCAATTCAAATTA  
AAGGTGGTATCCCGTCAATCGTGCTTTGCAATCCAGGCTCAGAAGAATATTCTTATAAGACGTTCTG  
GACAAGGATGCCAAT

+

FFFFFFFFFFFFFFFFFFFFFFFFFFFFFFFFFFFFFFFFFFFFFFFFFFFFFFFFFFFFFFFF:FF  
FFFFFFFF:FFFFFFFFFFFFFFFF:FFFFFFFFFFFFFFFFFFFFFFFFFFFFFFFFFFFFFFFF  
FFFFFFFFFFFFFFFF

@A00721:190:HGJW7DSXY:4:2320:29423:19445 2:N:0:TCTGCAAG+GCTGCACT  
GAAGGAGCTTATTGGGGTCCAGCACAAATTGGGTATCCAATGTGAAGTACGGCAAACCAATTCAAATTA  
AAGGTGGTATCCCGTCAATCGTGCTTTGCAATCCAGGCTCAGAAGAATATTCTTATAATACGTTCTG  
GACAAGGATGCCAAT

+

:F:FFF::FF:F,,FFFFFFFF:FFFFFFFF:FF:FF:FF::FFFFFFFF:FFFFFFFF  
FF,FFFF:FFFFFFFF:FF:FFFFFF:FFF:FFF,FFFFFFFFFFFFFFFF,F,:F::F:  
FFFF,F,F:FFF

@A00721:190:HGJW7DSXY:4:2641:11695:30796 2:N:0:TCTGCAAG+GCTGCACT  
GAAGGAGCTTATTGGGGTCCAGCACAAATTGGGTATCCAATGTGAAGTACGGCAAACCAATTCAAATTA  
AAGGTGGTATCCCGTCAATCGTGCTTTGCAATCCAGGCTCAGAAGAATATTCTTATAAGACGTTCTG  
GACAAGGATGCCAAT

+

FFFFFFFFF::FFFFFFFF:FFFFFFFF,FFFFFFFFFFFFFFFF, :FFF:FFF  
FFFFFFFFFFFFFFFFFFFFFFFFFFFFFFFF:FF,FFFFFFFFFFFFFFFF,FF  
FFFFFFFF:FF

@A00721:190:HGJW7DSXY:4:1121:14561:14340 2:N:0:TCTGCAAG+GCTGCACT  
ATTGGAAGGAGCTTATTGGGGTCCAGCACAAATTGGGTATCCAATGTGAAGTACGGCAAACCAATTCAA  
ATTAAAGGTGGTATCCCGTCAATCGTGCTTTGCAATCCAGGCTCAGAAGAATATTCTTATAAGACGTT  
CCTGGACAAGGATGC

+

F:FFFFFFFFFFFFFFFFFFFFFFFFFFFFFFFFFFFFFFFFFFFFFFFFFFFFFFFF  
FFFFFFFFFFFFFFFFFFFFFFFF:FFFFFFFF:FFFFFFFFFFFFFFFF,FFFF  
FF:FFFFFFFF

@A00721:190:HGJW7DSXY:4:1204:10773:32925 2:N:0:TCTGCAAG+GCTGCACT  
ATTGGAAGGAGCTTATTGGGGTCCAGCACAAATTGGGTATCCAATGTGAAGTACGGCAAACCAAGTCAA  
ATTAAAGGTGGTATCCCGTCAATCGTGCTTTGCAATCCAGGCTCAGAAGAATATTCTTATAAGACGTT  
CCTGGACAAGGATGC

+

FFF:FFFFFFFF:FFFFFFFFFFFFFFFF:FFFFFFFFFFFFFFFF,FFFFFFFF,F,FFF  
FF:FFFFFFFF:FFFFFFFF:FFFFF:FF,FFFFFFFF:,FFFFFFFF  
FF,FFFFFFFF:FF

@A00721:190:HGJW7DSXY:4:1403:10854:16125 2:N:0:TCTGCAAG+GCTGCACT  
ATTGGAAGGAGCTTATTGGGGTCCAGCACAAATTGGGTATCCAATGTGAAGTACGGCAAACCAATTCAA  
ATTAAAGGTGGTATCCCGTCAATCGTGCTTTGCAATCCAGGCTCAGAAGAATATTCTTATAAGACGTT  
CCTGGACAAGGATGC

+  
FFFFFFFFFFFFFFFFFFFFFFFFFFFFFFFFFFFFFFFFFFFFFFFFFFFFFFFFFFFFFFFFFFFFFFFF  
FFFFFFFFFFFFFFFFFFFFFFFFFFFFFFFFFFFFFFFFFFFFFFFFFFFFFFFFFFFFFFFFFFFFFFFF  
FFFFFFFFFFFFFFFF

@A00721:190:HGJW7DSXY:4:1403:11659:17268 2:N:0:TCTGCAAG+GCTGCACT  
ATTGGAAGGAGCTTATTGGGGTCCAGCACAAATTGGGTATCCAATGTGAAGTACGGCAAACCAATTCAA  
ATTAAAGGTGGTATCCCGTCAATCGTGCTTTGCAATCCAGGCTCAGAAGAATATTCTTATAAGACGTT  
CCTGGACAAGGATGC

+  
F:FFFFFFFFFFFFFFFFFFFFFFFFFFFFFFFFFFFFFFFFFFFFFFFFFFFFFFFFFFFFFFFFFFFFFFFF  
FFFFFFFFFFFFFFFFFFFFFFFFFFFFFFFFFFFFFFFFFFFFFFFFFFFFFFFFFFFFFFFFFFFFFFFF:FF  
FFFFFFFFFFFFFFFF

@A00721:190:HGJW7DSXY:4:1669:3450:36714 2:N:0:TCTGCAAG+GCTGCACT  
ATTGGAAGGAGCTTATTGGGGTCCAGCACAAATTGGGTATCCAATGTGAAGTACGGCAAACCAATTCAA  
ATTAAAGGTGGTATCCCGTCAATCGTGCTTTGCAATCCAGGCTCAGAAGAATATTCTTATAAGACGTT  
CCTGGACAAGGATGC

+  
FFFFFFFFFFF:FFFFFF:FFFFF,FFFFFFFFFFFFFFFFF,FFFFF:FFFFFFFFF:,FFFFFFFFFFF  
FFF:FFF,FFFFFFFFFFFFFFFFF:F,FFFF:FFF:FFFFFF:FFFFFFFFFFFFFFFFFFFFFFFFF:F  
FF:FFFFFFFFFFFF

@A00721:190:HGJW7DSXY:4:2143:28772:21261 2:N:0:TCTGCAAG+GCTGCACT  
TTGGAAGGAGCTTATTGGGGTCCAGCACAAATTGGGTATCCAATGTGAAGTACGGCAAACCAATTCAA  
TTAAAGGTGGTATCCCGTCAATCGTGCTTTGCAATCCAGGCTCAGAAGAATATTCTTATAAGACGTTC  
CTGGACAAGGATGC

+  
FF:FFFFFFFFFFFFFFFFFFFFFFFFFFFFFFFFFFFFFFFFFFFFFFFFFFFFFFFFFFFFFFFFFFFFFFFF  
FFFFFFFFFFFFFF:FFFFFFFFFFFFFFFFFFFFFFFFFFFFFFFFFFFFFFFFFFFFFFFFFFFFFFFFFFFF  
FFFFFFFFFFFFFFFF

@A00721:190:HGJW7DSXY:4:2157:16523:11788 2:N:0:TCTGCAAG+GCTGCACT  
ATTGGAAGGAGCTTATTGGGGTCCAGCACAAATTGGGTATCCAATGTGAAGTACGGCAAACCAATTCAA  
ATTAAAGGTGGTATCCCGTCAATCGTGCTTTGCAATCCAGGCTCAGAAGAATATTCTTATAAGACGTT  
CCTGGACAAGGATGC

+  
FFFFFFF::FF::FFF:FFFF:FFFFFFFFF:F::F:F:FF:FFFF:FFFFFF:F:FF:FFFFFF::FFF  
FFFFFFFFFFFFFF:FF,,FFFF:F:F,:FF:,F:FF:F:FFF:FFFFFF,FFFF:FFFFFFFFF:FFF  
:F:FFFF:FFFFFF

@A00721:190:HGJW7DSXY:4:1625:9914:18537 2:N:0:TCTGCAAG+GCTGCACT  
CATCCTTGTCAGGAACGTCTTATAAGAATATTCTTCTGAGCCTGGATTGCAAAGCACGATTGACGGG  
ATACCACCTTTAATTTGAATTGGTTTGCCGTACTTCACATTGGATACCCAATTGTGCTGGACCCAAT  
AAGCTCCTTCCAATG

+  
FFFFFF:FFFFFFFFFFFFFFFFFFFFFFFFFFFFFFFFFFFFFFFFFFFFFFFFFFFFFFFFFFFFFFFF  
FFFFFFFFFFFFFFFFFFFFFFFFFFFFFFFFFFFFFFFFFFFFFFFFFFFFFFFFFFFFFFFFFFFFFFFF  
FFFFFF:FFFFF,F

@A00721:190:HGJW7DSXY:4:2633:30029:2237 2:N:0:TCTGCAAG+GCTGCACT  
CATCCTTGTCAGGAACGTCTTATAAGAATATTCTTCTGAGCCTGGATTGCAAAGCACGATTGACGGG  
ATACCACCTTTAATTTGAATTGGTTTGCCGTACTTCACATTGGATACCCAATTGTGCTGGACCCAAT  
AAGCTCCTTCCAA

+  
FFFFFFFFFFFFFFFFFFFF:FFFFFFFFFFFF:FFF,:FFF:FFFFFFFFFFFFFFFFFFFFFFFFFFFF,FF  
FFFFFFFFFFFFFFFFFFFFFFFFFFFF,FFFFFF:FFFFFFFFFFFF:,FFFFFFFFF:F,F:,FF:FFFF:FFF  
FF:,F:FFF,FFF

@A00721:190:HGJW7DSXY:4:2635:21124:30530 2:N:0:TCTGCAAG+GCTGCACT  
CATCCTTGTCAGGAACGTCTTATAAGAATATTCTTCTGAGCCTGGATTGCAAAGCACGATTGACGGG

ATACCACCTTTAATTTGAATTGGTTTGCCGTACTTCACATTGGATACCCAATTGTGCTGGACCCCAAT  
AAGCTCCTTCCAATG

+

FFFFFFFFFFFFFFFFFFFFFFFFFFFFFFFFFFFFFFFFFFFFFFFFFFFFFFFFFFFFFFFFFFFFFFFF  
FFFFFFFFFFFFFFFFFFFFFFFFFFFFFFFFFFFFFFFFFFFFFFFFFFFFFFFFFFFFFFFFFFFFFFFF  
FFFFFF:FFFFFFFF

@A00721:190:HGJW7DSXY:4:2652:19533:11804 2:N:0:TCTGCAAG+GCTGCACT  
GGAGCTTATTGGGGTCCAGCACAATTGGGTATCCAATGTGAAGTACGGCAAACCAATTCAAATTAAG  
GTGGTATCCCGTCAATCGTGCTTTGCAATCCAGGCTCAGAAGAATATTCTTATAAGACGTTCTTGAC  
AAGGATG

+

FFFF:FFFFFFFFFFFFFFFFFFFFFFFFFFFFFFFFFFFFFFFFFFFFFFFFFFFFFFFFFFFFFFFF,FF  
FFFFFFFFFFFFFF:FFFFFFFFFFFFFFFFFFFFFFFFFFFFFFFFF:F,FF:FFFF:F:FF:FFFFFFFF:  
,,FF:,F

@A00721:190:HGJW7DSXY:4:1314:27190:1172 2:N:0:TCTGCAAG+GCTGCACT  
AAACATTGGAAGGAGCTTATTGGGGTCCAGCACAATTGGGTATCCAATGTGAAGTACGGCAAACCAAT  
TCAAATTAAGGTGGTATCCCGTCAATCGTGCTTTGCAATCCAGGCTCAGAAGAATATTCTTATAAGA  
CGTTCCTGGACAAGG

+

FFFFFFFFFFFFFFFFFFFFFFFFFFFFFFFFFFFFFFFFFFFFFFFFFFFFFFFFFFFFFFFFFFFFFFFF  
FFFFFFFFFFFFFFFFFFFFFFFFFFFFFFFFFFFFFFFFFFFFFFFFFFFFFFFFFFFFFFFF,F:FFFFFFFF  
FFFFFFFFFFFFFF

@A00721:190:HGJW7DSXY:4:1268:29044:27993 2:N:0:TCTGCAAG+GCTGCACT  
CTTCAAAAGAAACATTGGAAGGAGCTTATTGGGGTCCAGCACAATTGGGTATCCAATGTGAAGTACGG  
CAAACCAATTCAAATTAAGGTGGTATCCCGTCAATCGTGCTTTGCAATCCAGGCTCAGAAGAATATT  
CTTATAAGACGTTCC

+

FFFFFFFFFFFFFF:FFFFFFFFFFFFFFFFFFFFFFFFFFFFFFFFFFFFFFFFFFFFFFFFFFFFFFFF  
FFFFFFFFFFFFFFFFFFFFFFFFFFFFFFFFFFFFFFFFFFFFFFFFFFFFFFFFFFFFFFFFFFFFFFFF  
FFFFFFFFFFFFFF

@A00721:190:HGJW7DSXY:4:1276:19054:16016 2:N:0:TCTGCAAG+GCTGCACT  
CTTCAAAAGAAACATTGGAAGGAGCTTATTGGGGTCCAGCACAATTGGGTATCCAATGTGAAGTACGG  
CAAACCAATTCAAATTAAGGTGGTATCCCGTCAATCGTGCTTTGCAATCCAGGCTCAGAAGAATATT  
CTTATAAGACGTTCC

+

FFFFFFFFFFFFFFFFFFFFFFFFFFFFFFFFFFFFFFFFFFFFFFFFFFFFFFFFFFFFFFFFFFFFFFFF  
FFFFFFFFFFFFFFFFFFFFFFFFFFFFFFFF,FFFFFFFFFFFFFFFF:FFFFFFFFFFFFFFFFFFFF::FFFFF  
FFFFFFFF:FFFFF

@A00721:190:HGJW7DSXY:4:1503:23836:17409 2:N:0:TCTGCAAG+GCTGCACT  
CTTCAAAAGAAACATTGGAAGGAGCTTATTGGGGTCCAGCACAATTGGGTATCCAATGTGAAGTACGG  
CAAACCAATTCAAATTAAGGTGGTATCCCGTCAATCGTGCTTTGCAATCCAGGCTCAGAAGAATATT  
CTTATAAGACGTTCC

+

F,FFFFFFFFFFFFFFFFFFFFFFFFFFFFFFFFFFFFFFFFFFFFFFFFFFFFFFFFFFFFFFFF:  
F:FFF:FFF:FFFF:F:FF:FF:FFFFFFFFFFFF:F,:FFF,:FFFFFFFFFFFFFFFFFFFF,F  
FFFFFFFFF::FFF

@A00721:190:HGJW7DSXY:4:1550:26096:34569 2:N:0:TCTGCAAG+GCTGCACT  
TTCAAAAGAAACATTGGAAGGAGCTTATTGGGGTCCAGCACAATTGGGTATCCAATGTGAAGTACGGC  
AAACCAATTCAAATTAAGGTGGTATCCCGTCAATCGTGCTTTGCAATCCAGGCTCAGAAGAATATTC  
TTATAAGACGTTCC

+

FFFFFF,FF:FFFFFFFFFFFFFFFFFFFFFFFFFFFFFFFFFFFFFFFF,FFFF:F,FFFFFF:FFFFFF,:FF  
FF:F,FFFFFFFFF:FFF:FFFFFF,FFFFFF:FFFFFF,FFFFFF:F,FFFFFFFFFFFFFF  
F:FFFF:,F:FF:F

@A00721:190:HGJW7DSXY:4:1636:8757:16344 2:N:0:TCTGCAAG+GCTGCACT  
CTTCAAAAGAAACATTGGAAGGAGCTTATTGGGGTCCAGCACAATTGGGTATCCAATGTGAAGTACGG  
CAAACCAATTCAAATTAAGGTGGTATCCCGTCAATCGTGCTTTGCAATCCAGGCTCAGAAGAATATT  
CTTATAAGACGTTCC

+

FFFFFFFF:FFFFFF:FFFFFFFFFFFFFFFFFFFFFFFFFFFFFFFFFFFFFFFFFFFFFFFFFFFFFFFF  
FFFFFFFFFFFFFFFFFFFFFFFFFFFFFFFFFFFFFFFFFFFFFFFFFFFFFFFFFFFFFFFFFFFFFFFF  
FFFFFFFFFFFFFFFF

@A00721:190:HGJW7DSXY:4:2451:7744:17378 2:N:0:TCTGCAAG+GCTGCACT  
CTTCAAAAGAAACATTGGAAGGAGCTTATTGGGGTCCAGCACAATTGGGTATCCAATGTGAAGTACGG  
CAAACCAATTCAAATTAAGGTGGTATCCCGTCAATCGTGCTTTGCAATCCAGGCTCAGAAGAATATT  
CTTATAAGACGTTCC

+

FFFFFFFFFFFFFFFF:FFFFFFFFFFFFFFFF:FFFFFFFFFFFFFFFFFFFFFFFFFFFFFFFF,FFFFFFFF  
FFFFFFFFFFFFFFFFFFFFFFFFFFFFFFFFFFFFFFFFFFFFFFFFFFFFFFFFFFFFFFFFFFFFFFFF  
FFFFFFFFFFFFFFFF

@A00721:190:HGJW7DSXY:4:2609:6343:12164 2:N:0:TCTGCAAG+GCTGCACT  
CTTCAAAAGAAACATTGGAAGGAGCTTATTGGGGTCCAGCACAATTGGGTATCCAATGTGAAGTACGG  
CAAACCAATTCAAATTAAGGTGGTATCCCGTCAATCGTGCTTTGCAATCCAGGCTCAGAAGAATATT  
CTTATAAGACGTTCC

+

FFFFFFFFFFFFFFFFFFFFFFFFFFFFFFFFFFFFFFFFFFFFFFFFFFFFFFFFFFFFFFFFFFFFFFFF  
FFFFFFFFFFFFFFFFFFFFFFFFFFFFFFFFFFFFFFFFFFFFFFFFFFFFFFFFFFFFFFFFFFFFFFFF  
FFFFFFFFFFFFFFFF

@A00721:190:HGJW7DSXY:4:1532:19542:14920 2:N:0:TCTGCAAG+GCTGCACT  
GAACGTCTTATAAGAATATTCTTCTGAGCCTGGATTGCAAAGCACGATTGACGGGATACCACCTTTAA  
TTTGAATTGGTTTGCCGTACTTCACATTGGATACCCAATTGTGCTGGACCCAATAAGCTCCTTCCAA  
TGTTTCTTTTGAAGA

+

FFFFFFFFFFFFFFFFFFFFFFFFFFFFFFFFFFFFFFFFFFFFFFFFFFFFFFFFFFFFFFFFFFFFFFFF  
FFFFFFFFFFFFFFFFFFFFFFFFFFFFFFFFFFFFFFFFFFFFFFFFFFFFFFFFFFFFFFFFFFFFFFFF:FF  
:FFFFFFFF:FFF

@A00721:190:HGJW7DSXY:4:1544:7184:36605 2:N:0:TCTGCAAG+GCTGCACT  
GAACGTCTTATAAGAATATTCTTCTGAGCCTGGATTGCAAAGCACGATTGACGGGATACCACCTTTAA  
TTTGAATTGGTTTGCCGTACTTCACATTGGATACCCAATTGTGCTGGACCCAATAAGCTCCTTCCAA  
TGTTTCTTTTGAAGA

+

FFFFF:FFFFFFFFFFFFFFFFFFFFFFFFFFFFFFFFFFFFFFFFFFFFFFFFFFFFFFFFFFFFFFFF  
FFFFF:FFFFFF:FFFFFFFFFFFF:FFFFFFFFFFFFFFFFFFFFFFFFFFFFFFFFFFFFFFFFFFFF  
FFFFFFFFFFFFFFFF

@A00721:190:HGJW7DSXY:4:1566:3016:32643 2:N:0:TCTGCAAG+GCTGCACT  
GAACGTCTTATAAGAATATTCTTCTGAGCCTGGATTGCAAAGCACGATTGACGGGATACCACCTTTAA  
TTTGAATTGGTTTGCCGTACTTCACATTGGATACCCAATTGTGCTGGACCCAATAAGCTCCTTCCAA  
TGTTTCTTTTGAAGA

+

FFFFFFFFFFFFFFFFFFFF:FFFFFFFFFFFFFFFFFFFFFFFFFFFFFFFFFFFFFFFFFFFFFFFF:FFFFFF  
FFFFFFFFFFFFFFFFFFFFFFFFFFFFFFFFFFFFFFFFFFFFFFFFFFFFFFFFFFFFFFFFFFFFFFFF:FFFF  
:FFFFFFFF,FFF

@A00721:190:HGJW7DSXY:4:2357:5023:20337 2:N:0:TCTGCAAG+GCTGCACT  
GAACGTCTTATAAGAATATTCTTCTGAGCCTGGATTGCAAAGCACTATTGACGGGATACCACCTTTAA  
TTTGAATTGGTTTGCCGTACTTCACATTGGATACCCAATTGTGCTGGACCCAATAAGCTCCTTCCAA  
TGTTTCTTTTGAAGA

+

FFFFFFFFFF:FFFFFF:FFF,FFFFFFFFFFFF:FFFF:FFF,,FF,FFFFFFFF:FF:FFFF



F::FFFFF:::FFFFFFFFF:FFFF,FFFFF,FFF,FFFF:FFFFF:F:FF:FFFFFFFFF,FF  
FFFFFFFF::F:FFF:

@A00721:190:HGJW7DSXY:4:2471:17327:34162 2:N:0:TCTGCAAG+GCTGCACT  
GAACGTCTTATAAGAATATTCTTCTGAGCCTGGATTGCAAAGCACGATTGACGGGATACCACCTTTAA  
TTTGAATTGGTTTGCCGTACTTCACATTGGATACCCAATTGTGCTGGACCCAATAAGCTCCTTCCAA  
TGTTTCTTTTGAAGA

+

:FFFFFFFFFFFFFFFFFFFFFFFFFFFFFFFFFFFFFFFFFFFFFFFFFFFFFFFFFFFFFFFFF:FFFFFFFFFFFFFFFFF  
F:FFFFFFFFFFFFFFFFFFFFFFFFFFFFFFFFFFFFFFFFFFFFFFFFFFFFFFFFFFFFFFFF:FF:FFFFFFFFFFFFFFFFF  
FFFFFFFFFFFFFFFFF

@A00721:190:HGJW7DSXY:4:2145:8332:22842 2:N:0:TCTGCAAG+GCTGCACT  
AGAATATTCTTCTGAGCCTGGATTGCAAAGCACGATTGACGGGATACCACCTTTAATTTGAATTGGTT  
TGCCGTACTTCACATTGGATACCCAATTGTGCTGGACCCAATAAGCTCCTTCCAATGTTTCTTTTGA  
AGATATGAAGGGCTT

+

:FFFFFFFFFFFFFFFFFFFFFFFFFFFFFFFFFFFFFFFFFFFFFFFFFFFFFFFFFFFFFFFFF  
FFFFFFFFFFFFFFFFFFFFFFFFFFFFFFFFFFFFFFFFFFFFFFFFFFFFFFFFFFFFFFFF:FFFFFFFFFFFFFFFFF  
FFFFFFFFFFFF:F

@A00721:190:HGJW7DSXY:4:1265:21251:27492 2:N:0:TCTGCAAG+GCTGCACT  
GTAAGCCCTTCATATCTTCAAAGAAACATTGGAAGGAGCTTATTGGGGTCCAGCACAATTGGGTATC  
CAATGTGAAGTACGGCAAACCAATTCAAATTAAGGTGGTATCCCGTCAATCGTGCTTTGCAATCCAG  
GCTCAGAAGAATATT

+

FFFFFFFFFFFFFFFFFFFFFFFFFFFFFFFFFFFFFFFFFFFFFFFFFFFFFFFFFFFFFFFFF  
FFFFFFFFFFFFFFFFFFFFFFFFFFFFFFFFFFFFFFFFFFFFFFFFFFFFFFFFFFFFFFFF,FFF:FFFFFFFFFFFFFFFFF  
FFFF:F

@A00721:190:HGJW7DSXY:4:1550:32181:29857 2:N:0:TCTGCAAG+GCTGCACT  
GTAAGCCCTTCATATCTTCAAAGAAACATTGGAAGGAGCTTATTGGGGTCCAGCACAATTGGGTATC  
CAATGTGAAGTACGGCAAACCAATTCAAATTAAGGTGGTATCCCGTCAATCGTGCTTTGCAATCCAG  
GCTCAGAAGAATATT

+

FFFFFFFFFFFFFFFFFFFFFFFFFFFFFFFFFFFFFFFFFFFFFFFFFFFFFFFFFFFFFFFFF  
FFFFFFF:FFFFFFFFFFFFFFFFFFFFFFFFFFFFFFFFFFFFFFFFFFFFFFFFFFFFFFFFF  
FFFFFFFFFFFF:F

@A00721:190:HGJW7DSXY:4:2326:6424:8516 2:N:0:TCTGCAAG+GCTGCACT  
GTAAGCCCTTCATATCTTCAAAGAAACATTGGAAGGAGCTTATTGGGGTCCAGCACAATTGGGTATC  
CAATGTGAAGTACGGCAAACCAATTCAAATTAAGGTGGTATCCCGTCAATCGTGCTTTGCAATCCAG  
GCTCAGAAGAATATT

+

FFFFFFFFFFFFFFFFFFFFFFFFFFFFFFFFFFFFFFFFFFFFFFFFFFFFFFFFFFFFFFFFF  
FFFFFFFFFFFFFFFFFFFFFFFFFFFFFFFFFFFFFFFFFFFFFFFFFFFFFFFFFFFFFFFF,FFFFFFFFFFFFFFFFF  
FFFFFFFFFFFF:F

@A00721:190:HGJW7DSXY:4:2403:22661:17315 2:N:0:TCTGCAAG+GCTGCACT  
GTAAGCCCTTCATATCTTCAAAGAAACATTGGAAGGAGCTTATTGGGGTCCAGCACAATTGGGTATC  
CAATGTGAAGTACGGCAAACCAATTCAAATTAAGGTGGTATCCCGTCAATCGTGCTTTGCAATCCAG  
GCTCAGAAGAATATT

+

FFFFFFFFFFFFFFFFFFFFFFFFFFFFFFFFFFFFFFFFFFFFFFFFFFFFFFFFFFFFFFFFF  
FFFFFFFFFFFFFFFFFFFFFFFFFFFFFFFFFFFFFFFFFFFFFFFFFFFFFFFFFFFFFFFF:FFFFF  
,FFFFFFFFFFFFF

@A00721:190:HGJW7DSXY:4:2514:25753:33912 2:N:0:TCTGCAAG+GCTGCACT  
GTAAGCCCTTCATATCTTCAAAGAAACATTGGAAGGAGCTTATTGGGGTCCAGCACAATTGGGTATC  
CAATGTGAAGTACGGCAAACCAATTCAAATTAAGGTGGTATCCCGTCAATCGTGCTTTGCAATCCAG  
GCTCAGAAGAATATT

```

FFFFFFFFFFFFFFFFFFFFFFFF:FFFFFFFFFFFFFFFF:FF:FFFFFFFFFFFFFFFFFFFFFFFF
FFFFFFFFFFFFFFFFFFFFFFFF:FFFF:FFFFFFFFFFFFFFFF:FFFFFFFFFFFFFFFF:F
FFFFFFFFF:FFFF

```

[illegible]

```
FFF:FFFFFF:FFFFFFFFFFFFFFFFFFFF:FFFFFFFFFF:FFFFFFFFFFFFFFFFFFFFFFFFFFFF
FFFFFFFFFFFFFFFFFFFFFFFFFFFFFFFF,F:FFFFFFFF,FFFFFFFFFFFFFFFFFF:FFFFFFFFFF
FFFFFFFF,FFF:FF
```

[illegible][illegible]

```
FFFFFFFFFFFFFFFFFFFFFFFFFFFFFFFFFFFFFFFFFFFFF,FFFFFFFFFFFFFFFFFFFFFFFFFFFFFFF
FFFFFFFFFFFFFFFFFFFFFFFFFFFF:FFFFFFFFFFFFFFFFFFFFFFFFFFFF:FfF:FFFFFFFFFFFFFFFFFFFFF
FFFFFFFFFFFFFFFFFFFF
```

[illegible]

@A00721:190:HGJW7DSXY:4:2326:5981:8531 2:N:0:TCTGCAAG+GCTGCACT  
GTAAGCCCTTCATATCTTCAAAAGAAACATTGGAAGGAGCTTATTGGGGTCCAGCACAATTGGGTATC

CAATGTGAAGTACGGCAAACCAATTCAAATTAAGGTGGTATCCCGTCAATAGTGCTTTGCAATCCAG  
GCTCAGAAGAATAT

+

:FFF:F::,,:F,FFF,FFFFFF:FFF:F::,,FFF::,FFF:FF,,F,FF,F,FFFF::FFF,:F,  
FF:,FFFFFFFF:F,F:FFF:FFF:F:FF,FFFF,FF:FFFFFFFF,F,F,,FFFF,,:FFFF:FF  
FFFF,FFFFFF:

@A00721:190:HGJW7DSXY:4:1371:12301:1971 2:N:0:TCTGCAAG+GCTGCACT  
CGTAAGCCCTTCATATCTTCAAAAGAAACATTGGAAGGAGCTTATTGGGGTCCAGCACAATTGGGTAT  
CCAATGTGAAGTACGGCAAACCAATTCAAATTAAGGTGGTATCCCGTCAATCGTGCTTTGCAATCCA  
GGCTCAGAAGAATA

+

FFFFFFFFFFFFFFFFFFFFFFFF:FFFFFFFFFFFFFFFFFFFFFFFFFFFFFFFFFFFFFFFFFFFF  
FFFF:FFFFFFFFFFFFFFFFFFFFFFFFFFFF,FFFFFFFFFFFFFFFFFFFFFFFF:FFFFFFFFFFFF:FFFF  
FFFFFFFFFFFFFFFF

@A00721:190:HGJW7DSXY:4:1101:12952:34757 2:N:0:TCTGCAAG+GCTGCACT  
ATGACGTAAGCCCTTCATATCTTCAAAAGAAACATTGGAAGGAGCTTATTGGGGTCCAGCACAATTGG  
GTATCCAATGTGAAGTACGGCAAACCAATTCAAATTAAGGTGGTATCCCGTCAATCGTGCTTTGCAA  
TCCAGGCTCAGAAGA

+

FFFFFFFFFFFFFFFFFFFFFFFFFFFFFFFF:FFFFFFFFFFFFFFFFFFFFFFFFFFFFFFFFFFFF  
FFFFFFFFFFFFFFFFFFFFFFFFFFFFFFFF:FFFF:FFFF::FFFFFFFFFFFFFFFFFFFF:FFFFFFFFFFFF:FF  
FFFFFFFFFFFFFFFF

@A00721:190:HGJW7DSXY:4:1141:4661:15264 2:N:0:TCTGCAAG+GCTGCACT  
ATGACGTAAGCCCTTCATATCTTCAAAAGAAACATTGGAAGGAGCTTATTGGGGTCCAGCACAATTGG  
GTATCCAATGTGAAGTACGGCAAACCAATTCAAATTAAGGTGGTATCCCGTCAATCGTGCTTTGCAA  
TCCAGGCTCAGAAGA

+

FFFFFFFFFFFFFFFFFFFFFFFFFFFFFFFFFFFFFFFF:FFFFFFFFFFFFFFFFFFFFFFFFFFFFFFFF  
FFFF:FFFFFFFFFFFFFFFFFFFFFFFFFFFFFFFFFFFF:FFF:FFFFFFFFFFFFFFFFFFFFFFFFFFFFF:  
FFFFFFFFFFFFFFFF

@A00721:190:HGJW7DSXY:4:1328:6795:32424 2:N:0:TCTGCAAG+GCTGCACT  
ATGACGTAAGCCCTTCATATCTTCAAAAGAAACATTGGAAGGAGCTTATTGGGGTCCAGCACAATTGG  
GTATCCAATGTGAAGTACGGCAAACCAATTCAAATTAAGGTGGTATCCCGTCAATCGTGCTTTGCAA  
TCCAGGCTCAGAAGA

+

FFFFFFFFFFFFFFFFFFFFFFFFFFFFFFFFFFFFFFFFFFFFFFFFFFFFFFFFFFFFFFFFFFFF  
FFFFFFFF:FFFFFFFFFFFFFFFFFFFFFFFF,F:FFFFFF:FFFFFFFFFFFFFFFFFFFFFFFFFFFF  
FFFFFFFFFFFFFFFF

@A00721:190:HGJW7DSXY:4:1417:4797:7169 2:N:0:TCTGCAAG+GCTGCACT  
ATGACGTAAGCCCTTCATATCTTCAAAAGAAACATTGGAAGGAGCTTATTGGGGTCCAGCACAATTGG  
GTATCCAATGTGAAGTACGGCAAACCAATTCAAATTAAGGTGGTATCCCGTCAATCGTGCTTTGCAA  
TCCAGGCTCAGAAGA

+

FFFFFFFFFFFFFFFFFFFFFFFFFFFFFFFFFFFFFFFF:FFFFFFFFFFFFFFFFFFFFFFFFFFFFFFFF  
FFFFFFFFFFFFFFFFFFFFFFFFFFFFFFFFFFFFFFFFFFFFFFFFFFFFFFFFFFFFFFFFFFFF:FFFFF  
FFFFFFFFFFFFFFFF

@A00721:190:HGJW7DSXY:4:1504:11189:23531 2:N:0:TCTGCAAG+GCTGCACT  
ATGACGTAAGCCCTTCATATCTTCAAAAGAAACATTGGAAGGAGCTTATTGGGGTCCAGCACAATTGG  
GTATCCAATGTGAAGTACGGCAAACCAATTCAAATTAAGGTGGTATCCCGTCAATCGTGCTTTGCAA  
TCCAGGCTCAGAAGA

+

FFFFFFFFFFFFFFFFFFFFFFFFFFFFFFFFFFFF,FFFFFFFFFFFFFFFFFFFFFFFFFFFFFFFFFFFF  
F:FFFFFF:FFFFFFFFFFFFFFFFFFFF:FFFFFFFFFF,FFFFFFFFFFFFFFFFFFFFFFFFFFFFFFFF  
FFFFFFFFFFFFFFFF:F

$+$ 

+

+

+

+

+

+

[illegible]

@A00721:190:HGJW7DSXY:4:1221:25762:22811 2:N:0:TCTGCAAG+GCTGCACT  
AGATGACGTAAGCCCTTCATATCTTCAAAAGAAACATTGGAAGGAGCTTATTGGGGTCCAGCACAATT  
GGGTATCCAATGTGAAGTACGGCAAACCAATTCAAATTAAAGGTGGTATCCCGTCAATCGTGCTTTGC  
AATCCAGGCTCAGAA

@A00721:190:HGJW7DSXY:4:1271:11279:24158 2:N:0:TCTGCAAG+GCTGCACT  
AGATGACGTAAGCCCTTCATATCTTCAAAAGAAACATTGGAAGGAGCTTATTGGGGTCCAGCACAATT  
GGGTATCCAATGTGAAGTACGGCAAACCAATTCAAATTAAAGGTGGTATCCCGTCAATCGTGCTTTGC  
AATCCAGGCTCAGAA

@A00721:190:HGJW7DSXY:4:1306:25952:8453 2:N:0:TCTGCAAG+GCTGCACT  
AGATGACGTAAGCCCTTCATATCTTCAAAAGAAACATTGGAAGGAGCTTATTGGGGTCCAGCACAATT  
GGGTATCCAATGTGAAGTACGGCAAACCAATTCAAATTAAAGGTGGTATCCCGTCAATCGTGCTTTGC  
AATCCAGGCTCAGAA

@A00721:190:HGJW7DSXY:4:1475:21459:15295 2:N:0:TCTGCAAG+GCTGCACT  
AGATGACGTAAGCCCTTCATATCTTCAAAAGAAACATTGGAAGGAGCTTATTGGGGTCCAGCACAATT  
GGGTATCCAATGTGAAGTACGGCAAACCAATTCAAATTAAGGTGGTATCCCGTCAATCGTGCTTTGC  
AATCCAGGCTCAGAA

@A00721:190:HGJW7DSXY:4:2142:7075:19789 2:N:0:TCTGCAAG+GCTGCACT  
AGATGACGTAAGCCCTTCATATCTTCAAAAGAAACATTGGAAGGAGCTTATTGGGGTCCAGCACAATT  
GGGTATCCAATGTGAAGTACGGCAAACCAATTCAAATTAAGGTGGTATCCCGTCAATCGTGCTTTGC  
AATCCAGGCTCAGAA

@A00721:190:HGJW7DSXY:4:2509:9498:17190 2:N:0:TCTGCAAG+GCTGCACT  
AGATGACGTAAGCCCTTCATATCTTCAAAAGAAACATTGGAAGGAGCTTATTGGGGTCCAGCACAATT  
GGGTATCCAATGTGAAGTACGGCAAACCAATTCAAATTAAAGGTGGTATCCCGTCAATCGTGCTTTGC  
AATCCAGGCTCAGAA

@A00721:190:HGJW7DSXY:4:1125:25807:12806 2:N:0:TCTGCAAG+GCTGCACT  
CTGAGCCTGGATTGCAAAGCACGATTGACGGGATACCACCTTTAATTTGAATTGGTTTGCCGTACTTC  
ACATTGGATACCAACATTGTGCTGGACCCCAATAAGCTCCTTCCAATGTTTCTTTGAAGATATGAAGG  
GCTTGGCTCATCTAT

+  
FFFFFFFFFFFFFFFFFFFFFFFFFFFFFFFFFFFFFFFFFFFFFFFFFFFFFFFFFFFFFFFFFFFFFFFF  
FFF,FFFFF:FFFFFFFFFFFFFFFFFFFFFFFFFFFFFFFFFFFFFFFFFFFFFFFFFFFFFFFFFFFFF:,FFFFFFFFFFFFFFF  
FFFFFFFFFFFF:FFF:

@A00721:190:HGJW7DSXY:4:2205:17409:21621 2:N:0:TCTGCAAG+GCTGCACT  
CTGAGCCTGGATTGCAAAGCACGATTGACGGGATACCACCTTTAATTTGAATTGGTTTGCCGTACTTC  
ACATTGGATACCCAATTGTGCTGGACCCCAATAAGCTCCTTCCAATGTTTCTTTTGAAGATATGAAGG  
GCTTGCGTCATCTAT

+  
FFFFFFFFFFFFFFFFFFFFFFFFFFFFFFFFFFFFFFFFFFFFFFFFFFFFFFFFFFFFFFFFFFFFFFFF  
FFFFFFFFFFFFFFFFFFFFFFFFFFFFFFFFFFFFFFFFFFFFFFFFFFFFFFFFFFFFFFFFFFFFFFFF:FFFFFFFFF  
FFFFFFFFFFFFFFFF

@A00721:190:HGJW7DSXY:4:2511:25093:26193 2:N:0:TCTGCAAG+GCTGCACT  
CTGAGCCTGGATTGCAAAGCACGATTGACGGGATACCACCTTTAATTTGAATTGGTTTGCCGTACTTC  
ACATTGGATACCCAATTGTGCTGGACCCCAATAAGCTCCTTCCAATGTTTCTTTTGAAGATATGAAGG  
GCTTGCGTCATCTAT

+  
FFFFFFFFFFFFFFFFFFFFFFFFFFFFFFFFFFFFFFFFFFFFFFFFFFFFFFFFFFFFFFFFFFFFFFFF  
FFFFFFFFFFFFFFFFFFFFF,FFFFFFFFFFFFFFFFFFFFFFFFFFFFFFFFFFFFFFFFFFFFFFFFFFFFF:FFFFFFFFF  
FFFFFFFFFFFFFFFF

@A00721:190:HGJW7DSXY:4:1242:19524:9095 2:N:0:TCTGCAAG+GCTGCACT  
ATCATAGATGACGTAAGCCCTTCATATCTTCAAAGAAACATTGGAAGGAGCTTATTGGGGTCCAGCA  
CAATTGGGTATCCAATGTGAAGTACGGCAAACCAATTCAAATTAAGGTGGTATCCCGTCAATCGTGC  
TTTGAATCCAGGCT

+  
FFFFFFFFFFFFFFFFFFFFFFFFFFFFFFFFFFFFFFFFFFFFFFFFFFFFFFFFFFFFFFFFFFFFFFFF  
FFFFFFFFFFFFFFFFFFFFFFFFFFFFFFFFFFFFFFFFFFFFFFFFFFFFFFFFFFFFFFFFFFFFF:FFFFFFFFFFFFFFF  
FFFFFFFFFFFFFFFF

@A00721:190:HGJW7DSXY:4:1258:4291:1689 2:N:0:TCTGCAAG+GCTGCACT  
ATCATAGATGACGTAAGCCCTTCATATCTTCAAAGAAACATTGGAAGGAGCTTATTGGGGTCCAGCA  
CAATTGGGTATCCAATGTGAAGTACGGCAAACCAATTCAAATTAAGGTGGTATCCCGTCAATCGTGC  
TTTGAATCCAGGCT

+  
:FFFFFFFFFFFFFFFFFFFFFFFFFFFFFFFFFFFFFFFFFFFFFFFFFFFFFFFFFFFFFFFFFFFFFFFF  
FFFFFFFFFFFFFFFFF:FFFFFFFFFFFFFFFFFFFFFFFFFFFFFFFFFFFFFFFFFFFFFFFFFFFFF:FFFFFFFFFFFFFFF  
FFFFFFF:FFFFFFF

@A00721:190:HGJW7DSXY:4:1362:7952:27101 2:N:0:TCTGCAAG+GCTGCACT  
ATCATAGATGACGTAAGCCCTTCATATCTTCAAAGAAACATTGGAAGGAGCTTATTGGGGTCCAGCA  
CAATTGGGTATCCAATGTGAAGTACGGCAAACCAATTCAAATTAAGGTGGTATCCCGTCAATCGTGC  
TTTGAATCCAGGCT

+  
FFFFFFFFFFFFFFFFFFFFFFFFFFFFFFFFFFFFFFFFFFFFFFFFFFFFFFFFFFFFFFFFFFFFF,FFFFFFFFFFFFFFFFFFFFFFFFFFFFFFFFFFFFF  
FFFFFFFFF,FFFFFFFFFFFFFFFFFFFFFFFFFFFFFFFFFFFFFFFFFFFFFFFFFFFFFFFFFFFFFFFFF  
FFFFFFF:FFFFFFF:

@A00721:190:HGJW7DSXY:4:1374:21902:28902 2:N:0:TCTGCAAG+GCTGCACT  
ATCATAGATGACGTAAGCCCTTCATATCTTCAAAGAAACATTGGAAGGAGCTTATTGGGGTCCAGCA  
CAATTGGGTATCCAATGTGAAGTACGGCAAACCAATTCAAATTAAGGTGGTATCCCGTCAATCGTGC  
TTTGAATCCAGGCT

+  
FFFFFFFFFFFFFFFFFFFFFFFFFFFFFFFFFFFFFFFFFFFFFFFFFFFFFFFFFFFFFFFFFFFFFFFF  
FFFFFFFFFFFFFFFFFFFFFFFFFFFFFFFFFFFFFFFFFFFFFFFFFFFFFFFFFFFFFFFFFFFFFFFF  
FFFFFFFFFFFFFFFF

@A00721:190:HGJW7DSXY:4:1430:31358:22670 2:N:0:TCTGCAAG+GCTGCACT  
ATCATAGATGACGTAAGCCCTTCATATCTTCAAAGAAACATTGGAAGGAGCTTATTGGGGTCCAGCA

CAATTGGGTATCCAATGTGAAGTACGGCAAACCAATTCAAATTAAGGTGGTATCCCGTCAATCGTGC  
TTTGCAATCCAGGCT

+

FFFFFFFFFFFFFFFFFFFFFFFFFFFFFFFFFFFFFFFFFFFFFFFFFFFFFFFFFFFFFFFFFFFFFFFF  
FFFFFFFFFFFFFFFFFFFFFFFFFFFFFFFFFFFFFFFFFFFFFFFFFFFFFFFFFFFFFFFFFFFFFFFF,  
FFFF,:FF:FFFF:FFFFFF:F,,FFF  
FFFF:FFFFFFFF

@A00721:190:HGJW7DSXY:4:1472:8043:36996 2:N:0:TCTGCAAG+GCTGCACT  
ATCATAGATGACGTAAGCCCTTCATATCTTCAAAGAAACATTGGAAGGAGCTTATTGGGGTCCAGCA  
CAATTGGGTATCCAATGTGAAGTACGGCAAACCAATTCAAATTAAGGTGGTATCCCGTCAATCGTGC  
TTTGCAATCCAGGCT

+

FFFFFFFFFF:FFFF,FFFF:FFFFFFFFFFFFFFFFFFFFFFFFFFFFFFFFFFFFFFFFFFFFFFFF  
FFF:FFFFFFFF:FFFFFFFFFFFF::FFFFFFFFFFFFFFFFFFFFFFFFFFFFFFFFFFFFFFFF:  
FFFFFFFFFFFFFFFF

@A00721:190:HGJW7DSXY:4:1638:11523:36104 2:N:0:TCTGCAAG+GCTGCACT  
ATCATAGATGACGTAAGCCCTTCATATCTTCAAAGAAACATTGGAAGGAGCTTATTGGGGTCCAGCA  
CAATTGGGTATCCAATGTGAAGTACGGCAAACCAATTCAAATTAAGGTGGTATCCCGTCAATCGTGC  
TTTGCAATCCAGGCT

+

FFFFFFFFFFFFFFFFFFFFFFFFFFFFFFFFFFFFFFFFFFFFFFFFFFFFFFFFFFFFFFFFFFFFFFFF,  
FFFFFFFFFF:FFFFFFFFFFFFFFFFFFFFFFFFFFFFFFFFFFFFFFFF:FFFF:FFFFFFFFFFFFFFFF  
FFFFFFFFFFFFFFFFFFFFFFFFFFFFFFFFFFFFFFFFFFFFFFFFFFFFFFFFFFFFFFFF,FFFFFF  
FFFFFFFFFFFFFFFF

@A00721:190:HGJW7DSXY:4:2122:1850:9267 2:N:0:TCTGCAAG+GCTGCACT  
ATCATAGATGACGTAAGCCCTTCATATCTTCAAAGAAACATTGGAAGGAGCTTATTGGGGTCCAGCA  
CAATTGGGTATCCAATGTGAAGTACGGCAAACCAATTCAAATTAAGGTGGTATCCCGTCAATCGTGC  
TTTGCAATCCAGGCT

+

FFFF:F:FFFFFFFFFFFFFFFF:FFFFFF:FFFFFFFFFFFFFFFFFFFFFFFFFFFFFFFF:FFFFFFFF  
FFF,FFFFFFFFFFFFFFFF:FFFFFFFFFFFFFFFF:FFF:F:FFFFFFFFFFFFFFFFFFFFFFFF  
FFFFFFFFFFFFFFFF

@A00721:190:HGJW7DSXY:4:2219:32145:34272 2:N:0:TCTGCAAG+GCTGCACT  
ATCATAGATGACGTAAGCCCTTCATATCTTCAAAGAAACATTGGAAGGAGCTTATTGGGGTCCAGCA  
CAATTGGGTATCCAATGTGAAGTACGGCAAACCAATTCAAATTAAGGTGGTATCCCGTCAATCGTGC  
TTTGCAATCCAGGCT

+

FFFFFFFFFF:FFFFFFFFFFFFFFFFFFFFFFFF:FFF:FFFFFFFF:F:FFF:FFFFFFFFFFFFFFFF  
FFFFFFFFFFFFFFFFFFFFFFFFFFFFFFFF:FFF:FFFFFFFFFFFF:, :FFF:FFF,FFFFFFFF::FFF  
FFFF,FFFF:F:FFF

@A00721:190:HGJW7DSXY:4:1150:5403:24940 2:N:0:TCTGCAAG+GCTGCACT  
TATAACATCATAGATGACGTAAGCCCTTCATATCTTCAAAGAAACATTGGAAGGAGCTTATTGGGGT  
CCAGCACAATTGGGTATCCAATGTGAAGTACGGCAAACCAATTCAAATTAAGGTGGTATCCCGTCAA  
TCGTGCTTTGCAATC

+

FFFFFFFFFFFFFFFFFFFFFFFFFFFFFFFFFFFFFFFFFFFFFFFFFFFFFFFFFFFFFFFFFFFFFFFF  
FFFFFFFFFFFFFFFF:FFFFFFFFFFFFFFFFFFFFFFFFFFFFFFFF:FFFFFFFFFFFFFFFF,F  
FFFFFFFFFFFF,FF

@A00721:190:HGJW7DSXY:4:1204:4164:20729 2:N:0:TCTGCAAG+GCTGCACT  
TATAACATCATAGATGACGTAAGCCCTTCATATCTTCAAAGAAACATTGGAAGGAGCTTATTGGGGT  
CCAGCACAATTGGGTATCCAATGTGAAGTACGGCAAACCAATTCAAATTAAGGTGGTATCCCGTCAA  
TCGTGCTTTGCAATC

+

::FFFFFFFFFFFFFFFFFFFFFFFF,FFFFFFFFFFFF::FF:FFFFFF:F,FFFFFFFF:FFFF  
FFFFFFFFFFFFFFFF:FFFFFF:FFFFFFFFFFFFFFFF:FFF,,FFF,FFF,FF:FF,FFF,FFFFFF  
FFFFF,:,FF:FFFF

@A00721:190:HGJW7DSXY:4:1356:4227:5932 2:N:0:TCTGCAAG+GCTGCACT  
TATAACATCATAGATGACGTAAGCCCTTCATATCTTCAAAAGAAACATTGGAAGGAGCTTATTGGGGT  
CCAGCACAAATTGGGTATCCAATGTGAAGTACGGCAAACCAATTCAAATTAAAGGTGGTATCCCGTCAA  
TCGTGCTTTGCAATC

```

FFFFFFFFFFFFFFFFFFFFFFFFFFFFFFFF:FFFFFFFFFFFFFFFFFFFFFFFFFFFF,FFFFFFFF
FFFFFFFFFFFFFFFFFFFFFFFFFFFFFFFFF::FFF:F:FFFFFFFF:F:FFFFFFFFFFFFFFFF
FFFFFFFFFFFFFF,FF

```

@A00721:190:HGJW7DSXY:4:1462:14543:32158 2:N:0:TCTGCAAG+GCTGCACT  
TATAACATCATAGATGACGTAAGCCCTTCATATCTTCAAAAGAAACATTGGAAGGAGCTTATTGGGGT  
CCAGCACAAATTGGGTATCCAATGTGAAGTACGGCAAACCAATTCAAATTAAAGGTGGTATCCCGTCAA  
TCGTGCTTTGCAATC

```
FFFFFFFFFFFFFFFFFFFF:FFFFFFFFFFFFFFFFFFFFFFFFF:,FF::F:F:FF:FFFFFFFF
FFF:FFFFFFFFFFFFFFFFF:FFFFFFFFFFFFFFF,FFFFFFFFFF:FF:F,F:FFFFF:FFFFF
FFFFFFFFFFFFFFFF
```

@A00721:190:HGJW7DSXY:4:1514:5113:8688 2:N:0:TCTGCAAG+GCTGCACT  
TATAACATCATAGATGACGTAAGCCCTTCATATCTTCAAAAGAAACATTGGAAGGAGCTTATTGGGGT  
CCAGCACAAATTGGGTATCCAATGTGAAGTACGGCAAACCAATTCAAATTAAAGGTGGTATCCCGTCAA  
TCGTGCTTTGCAATC

```
FFFFFFFFFFFFFFFFFFFFFFFFFFFFFFFFFFFFFFFFFFFFFFFFFFFFFFFFFFFFFFFFFFFFF
FFFFFFFFFFFFFFFFFFFFFFFFFFFFFFFFFFFFFFFFFFFFFFFFFFFFFFFFFFFFFFFFFFFFF:
FFFFFFFFFFFFFFFFFFFFFFFFFFFFFFFFFFFFF
FFFFFFFFFFFFFFFFFFFF
```

@A00721:190:HGJW7DSXY:4:1612:7916:28855 2:N:0:TCTGCAAG+GCTGCACT  
ATAACATCATAGATGACGTAAGCCCTTCATATCTTCAAAAAGAAACATTGGAAGGAGCTTATTGGGGTC  
CAGCACAATTGGGTATCCAATGTGAAGTACGGCAAACCAATTCAAATTAAGGTGGTATCCCGTCAAT  
CGTGCTTTGCAATC

```
:FFFFFFFFFFFFFFFFFFFFFFFFFFFFFFFFFFFFFFFF:F,FFFFFFFFFFFFFFFFFFFFFFFF
FFFFFFFFFFFFFFFFFFFFFFFFFFFFFFFFFFFFFFFF,FFFFFFFFFFFFFFFFFFFFFFFFFFFF
FFFFFFFFFFFFFFFF
```

@A00721:190:HGJW7DSXY:4:1612:8775:29371 2:N:0:TCTGCAAG+GCTGCACT  
TATAACATCATAGATGACGTAAGCCCTTCATATCTTCAAAAGAAACATTGGAAGGAGCTTATTGGGGT  
CCAGCACAAATTGGGTATCCAATGTGAAGTACGGCAAACCAATTCAAATTAAAGGTGGTATCCCGTCAA  
TCGTGCTTTGCAATC

[illegible]

@A00721:190:HGJW7DSXY:4:1619:4209:9283 2:N:0:TCTGCAAG+GCTGCACT  
TATAACATCATAGATGACGTAAGCCCTTCATATCTTCAAAAGAAACATTGGAAGGAGCTTATTGGGGT  
CCAGCACAAATTGGGTATCCAATGTGAAGTACGGCAAACCAATTCAAATTAAAGGTGGTATCCCGTCAA  
TCGTGCTTTGCAATC

```
F:FFFFFFFFFFFFFFFFFFFFFFFFFFFFFFFFFFFFFFFFFFFFF,FFFFFFFFFFFFFFFFFFFFFFFF
FFFFFFFFFFFFFFFFFFFFFFFF:F:FFFFFFFFFFFFFFFF:F:FFFFFFFFFFFFFFFFFFFFFFFF
FFFFFFFFFFFFFFFF
```

@A00721:190:HGJW7DSXY:4:1631:25635:11694 2:N:0:TCTGCAAG+GCTGCACT  
TATAACATCATAGATGACGTAAGCCCTTCATATCTTCAAAAGAAACATTGGAAGGAGCTTATTGGGGT  
CCAGCACAAATTGGGTATCCAATGTGAAGTACGGCAAACCAATTCAAATTAAAGGTGGTATCCCGTCAA  
TCGTGCTTTGCAATC

[illegible]





+  
FFFFFFFFFFFFFFFFFFFFFFFFFFFFFFFFFFFFFFFFFFFFFFFFFFFFFFFFFFFFFFFFFFFFFFFF  
FFFFFFFFFFFFFFFFFFFFFFFFFFFFFFFFFFFFFFFFFFFFFFFFFFFFFFFFFFFFFFFFFFFFFFFF  
FFFFFFFFFFFFFFFFFFFFFFFF

@A00721:190:HGJW7DSXY:4:1526:10068:33739 2:N:0:TCTGCAAG+GCTGCACT  
GGATAACATCATAGATGACTTAAGCCCTTCATATCTTCAAAAGAAACATTGGAAGGAGCTTATTGGGG  
TCCAGCACAATAGGGTATCCAATGTGAAGTACGGCAAACCAATTCAAATTAAGGTGGTATCACGTCA  
ATCGTGCTTTGCAAT

+  
:,:FFFFFF,FF,FFFFFF,,,:FFFFFF:,FFFFFF,FFFF:FFFFFF:,:FFF,F:F,FFFF,:F  
F,,F,:FFFF,,,:FF,FFFF,,:F,,FFF,:FFF:FFFFFFFF:FFF:F,:FFFFFF:,,F:F  
F,:,:FFFF:F,F:F

@A00721:190:HGJW7DSXY:4:2465:16459:13495 2:N:0:TCTGCAAG+GCTGCACT  
GTATAACATCATAGATGACGTAAGCCCTTCATATCTTCAAAAGAAACATTGGAAGGAGCTTATTGGGG  
TCCAGCACAATTGGGTATCCAATGTGAAGTACGGCAAACCAATTCAAATTAAGGTGGTATCCCGTCA  
ATCGTGCTTTGCAAT

+  
FFF:FFFFFFFFFFFFFFFFFFFFFFFFFFFFFFFFFFFFFFFFFFFFFFFFFFFFFFFFFFFFFFFF  
FFFFFFFFFFFFFFFFFFFFFFFFFFFFFFFFFFFFFFFFFFFFFFFFFFFFFFFFFFFFFFFFFFFFF  
FFFFFFFFFFFFFFFFFFFFFFFF

@A00721:190:HGJW7DSXY:4:1155:8124:14184 2:N:0:TCTGCAAG+GCTGCACT  
CGCATGGTATAACATCATAGATGACGTAAGCCCTTCATATCTTCAAAAGAAACATTGGAAGGAGCTTA  
TTGGGGTCCAGCACAATTGGGTATCCAATGTGAAGTACGGCAAACCAATTCAAATTAAGGTGGTATC  
CCGTCAATCGTGCTT

+  
FFFFFFFFFF:FFFFFFFFFF:FFFFFFFFFFFFFFFFFFFFFFFFFFFFFFFFFFFFFFFFFFFFF:FFFF:FFF  
FF,FFFFFFFFFFFFFFFFFF:FFFFFFFF:F:FF,FFFFFFFF:FFFFFFFF,FFFF:FFF:,FFF,FFFF  
:FF,FFFFFFFF,FF

@A00721:190:HGJW7DSXY:4:1155:7464:16047 2:N:0:TCTGCAAG+GCTGCACT  
CGCATGGTATAACATCATAGATGACGTAAGCCCTTCATATCTTCAAAAGAAACATTGGAAGGAGCTTA  
TTGGGGTCCAGCACAATTGGGTATCCAATGTGAAGTACGGCAAACCAATTCAAATTAAGGTGGTATC  
CCGTCAATCGTGCTT

+  
:FFFFFFFFFFFFFFFFFFFFFFFFFFFFFFFFFFFFFFFFFFFFFFFFFFFFFFFFFFFFFFFFFFFF  
FFFFFFFFFFFFFFFFFFFFFFFFFFFFFFFFFFFFFFFFFFFFFFFFFFFFFFFFFFFFFFFFFFFFF  
FFFFFFFFFFFFFFFFFFFF

@A00721:190:HGJW7DSXY:4:1207:17155:1611 2:N:0:TCTGCAAG+GCTGCACT  
CGCATGGTATAACATCATAGATGACGTAAGCCCTTCATATCTTCAAAAGAAACATTGGAAGGAGCTTA  
TTGGGGTCCAGCACAATTGGGTATCCAATGTGAAGTACGGCAAACCAATTCAAATTAAGGTGGTATC  
CCGTCAATCGTGCTT

+  
FFFFFFFFFFFFFFFFFFFFFFFFFFFFFFFFFFFFFFFFFFFFFFFFFFFFFFFFFFFFFFFFFFFF,FF  
FFFFFFFFFFFFFFFFFFFFFFFFFFFFFFFFFFFFFFFFFFFFFFFFFFFFFFFFFFFFFFFFFFFF,FFFFFFFFFFFFFFFF:FFFFFF:FF  
FFFFFFFFFFFFFFFFFFFF

@A00721:190:HGJW7DSXY:4:1310:28926:29700 2:N:0:TCTGCAAG+GCTGCACT  
CGCATGGTATAACATCATAGATGACGTAAGCCCTTCATATCTTCAAAAGAAACATTGGAAGGAGCTTA  
TTGGGGTCCAGCACAATTGGGTATCCAATGTGAAGTACGGCAAACCAATTCAAATTAAGGTGGTATC  
CCGTCAATCGTGCTT

+  
FFFFFFFFFFFFFFFFFFFFFFFFFFFFFFFFFFFFFFFFFFFFFFFFFFFFFFFFFFFFFFFFFFFF:FFFFFF:FFFFFFFFFFFFFFFF  
FFFFFFFFFFFFFFFFFFFFFFFFFFFFFFFFFFFFFFFFFFFFFFFFFFFFFFFFFFFFFFFFFFFF:FFFFFF  
FFFFFFFFFFFFFFFFFFFF

@A00721:190:HGJW7DSXY:4:1410:10438:33912 2:N:0:TCTGCAAG+GCTGCACT  
CGCATGGTATAACATCATAGATGACGTAAGCCCTTCATATCTTCAAAAGAAACATTGGAAGGAGCTTA



$+$  $+$ 

+

+

+

+

+

[illegible]

FFFFFFFFFFFFFFFFFFFFFFFFFFFFFFFFFFFFFFFFFFFFFFFFFFFFFFFFFFFFFFFFFFFFFFFF  
FFFFFFFFFFFFFFFF:

@A00721:190:HGJW7DSXY:4:1643:14154:11569 2:N:0:TCTGCAAG+GCTGCACT  
CGAAACTATATTCGAATAACGCATGGTATAACATCATAGATGACGTAAGCCCTTCATATCTTCAAAAG  
AAACATTGGAAGGAGCTTATTGGGGTCCAGCACAATTGGGTATCCAATGTGAAGTACGGCAAACCAAT  
TCAAATTAAAGGTGG

+

FFF:FFF,FFFFFFFFFFFFFFFFFFFFFFFFFFFFFFFFFFFFFFFFFFFFFFFFFFFFFFFFFFFFFFFF  
:FFFFFFFFFFFFFFFFFFFFFFFFFFFFFFFFFFFFFFFFFFFFFFFFFFFFFFFFFFFFFFFFFFFFFFFF  
FFFFFFFFFFF:F:FFF

@A00721:190:HGJW7DSXY:4:2369:32750:32753 2:N:0:TCTGCAAG+GCTGCACT  
CGAAACTATATTCGAATAACGCATGGTATAACATCATAGATGACGTAAGCCCTTCATATCTTCAAAAG  
AAACATTGGAAGGAGCTTATTGGGGTCCAGCACAATTGGGTATCCAATGTGAAGTACGGCAAACCAAT  
TCAAATTAAAGGTGG

+

FFFFFFFFFFFFFFFFFFFFFFFFFFFFFFFFFFFFFFFFFFFFFFFFFFFFFFFFFFFFFFFFFFFFFFFF  
FFFFFFFFFFFFFFFFFFFFFFFFFFFFFFFFFFFFFFFFFFFFFFFFFFFFFFFFFFFFFFFFFFFFFFFF  
FFFFFFFFFFF:FF:FFF

@A00721:190:HGJW7DSXY:4:1113:16866:23281 2:N:0:TCTGCAAG+GCTGCACT  
CACCTTTAATTTGAATTGGTTTGCCGTACTTCACATTGGATACCCAATTGTGCTGGACCCCAATAAGC  
TCCTTCCAATGTTTCTTTTGAAGATATGAAGGGCTTGCGTCATCTATGATGTTATACCATGCGTTATT  
CGAATATAGTTTCGA

+

FFFF:FFFFFFFFFFF:FFFFFFFFFFFFFFFFFFFFFFFFFFFFFFFFFFFFFFFFFFFFFFFFFFFFFFFF  
FFFFFFFFFFFFFFFFFFFFFFFFFFFFFFFFFFFFFFFFFFFFFFFFFFFFFFFFFFFFFFFFFFFFFFFF  
F,FFFFFFFFFFFFFFFF

@A00721:190:HGJW7DSXY:4:1402:22064:33317 2:N:0:TCTGCAAG+GCTGCACT  
CACCTTTAATTTGAATTGGTTTGCCGTACTTCACATTGGATACCCAATTGTGCTGGACCCCAATAAGC  
TCCTTCCAATGTTTCTTTTGAAGATATGAAGGGCTTGCGTCATCTATGATGTTATACCATGCGTTATT  
CGAATATAGTTTCGA

+

FFFFFFFFFFFFFFFFFFFFFFFFFFFFFFFFFFFFFFFFFFFFFFFFFFFFFFFFFFFFFFFFFFFFFFFF  
FFFFFFFFFFFFFFFFFFFFFFFFFFFFFFFFFFFFFFFFFFFFFFFFFFFFFFFFFFFFFFFFFFFFFFFF  
FFFFFFFFFFFFFFFF

@A00721:190:HGJW7DSXY:4:1450:5746:23062 2:N:0:TCTGCAAG+GCTGCACT  
CACCTTTAATTTGAATTGGTTTGCCGTACTTCACATTGGATACCCAATTGTGCTGGACCCCAATAAGC  
TCCTTCCAATGTTTCTTTTGAAGATATGAAGGGCTTGCGTCATCTATGATGTTATACCATGCGTTATT  
CGAATATAGTTTCGA

+

FFFFFFFFFFFFFFFFFFFFFFFFFFFFFFFFFFFFFFFFFFFFFFFFFFFFFFFFFFFFFFFFFFFFFFFF  
FFFFFFFFFFFFFFFFFFFFFFFFFFFFFFFFFFFFFFFFFFFFFFFFFFFFFFFFFFFFFFFFFFFFFFFF  
FFFFFFFFFFFFFFFF

@A00721:190:HGJW7DSXY:4:1468:24957:24361 2:N:0:TCTGCAAG+GCTGCACT  
CACCTTTAATTTGAATTGGTTTGCCGTACTTCACATTGGATACCCAATTGTGCTGGACCCCAATAAGC  
TCCTTCCAATGTTTCTTTTGAAGATATGAAGGGCTTGCGTCATCTATGATGTTATACCATGCGTTATT  
CGAATATAGTTTCGA

+

FFFFFFFFFFFFFFFFFFFFFFFFFFFFFFFFFFFFFFFFFFFFFFFFFFFFFFFFFFFFFFFFFFFFFFFF  
FFFFFFFFFFFFFFFFFFFFFFFFFFFFFFFFFFFFFFFFFFFFFFFFFFFFFFFFFFFFFFFFFFFFFFFF  
FFFFFFFFFFFFFFFF

@A00721:190:HGJW7DSXY:4:1509:14217:14716 2:N:0:TCTGCAAG+GCTGCACT  
CACCTTTAATTTGAATTGGTTTGCCGTACTTCACATTGGATACCCAATTGTGCTGGACCCCAATAAGC  
TCCTTCCAATGTTTCTTTTGAAGATATGAAGGGCTTGCGTCATCTATGATGTTATACCATGCGTTATT  
CGAATATAGTTTCGA

+  
FFFFFFFFFFFFFFFFFFFFFFFFFFFFFFFFFFFFFFFFFFFFFFFFFFFFFFFFFFFFFFFFFFFFFFFF  
FFFFFFF:FFFFFFFFFFFFFFFFFFFFFFFFFFFFFFFFFFFFFFFFFFFFFFFFFFFFFFFFFFFFFFFF  
FFFFFFFFFFFFFFF:F

@A00721:190:HGJW7DSXY:4:2139:8386:21840 2:N:0:TCTGCAAG+GCTGCACT  
CGAAACTATATTCTGAATAACGCATGGTATAACATCATAGATGACGTAAGCCCTTCATATCTTCAAAAG  
AAACATTGGAAGGAGCTTATTGGGGTCCAGCACAATTGGGTATCCAATGTGAAGTACGGCAAACCAAT  
TCAAATTAAAGGTG

+  
FFFFFFFFF:FFFFFFFFFFFFFFFFFFFFFFFFFFFFFFFFFFFFFFFFFFFFFFFFFFFFFFFFFFFFFF  
FFFFFFFFFFFFFFFFF:FFFFFFFFFFFFFFFFFFFFFFFFFFFFFFFFFFFFFFFFFFFFFFFFFFFFFF  
FFFFFFFFFFFFFFF

@A00721:190:HGJW7DSXY:4:1171:26512:20979 2:N:0:TCTGCAAG+GCTGCACT  
CTTTAATTCGAAACTATATTCTGAATAACGCATGGTATAACATCATAGATGACGTAAGCCCTTCATATC  
TTCAAAAGAAACATTGGAAGGAGCTTATTGGGGTCCAGCACAATTGGGTATCCAATGTGAAGTACGGC  
AAACCAATTCAAATT

+  
FFFFFFFFFFFFFFFFF:FFFFFFFFFFFFFFFFFFFFFFFFFFFFFFFFFFFFFFFFFFFFFFFFFFFFFF,FFFFFFFFFFFF  
FFFF:FFFFFFFFFFFFFFFFFFFF,FFFFFFFFFFFFFFFFFFFFFFFFFFFFFFFFFFFFFFFFFFFFFFF  
FFFFFFFFFFFFFFF:

@A00721:190:HGJW7DSXY:4:1201:6741:32299 2:N:0:TCTGCAAG+GCTGCACT  
CTTTAATTCGAAACTATATTCTGAATAACGCATGGTATAACATCATAGATGACGTAAGCCCTTCATATC  
TTCAAAAGAAACATTGGAAGGAGCTTATTGGGGTCCAGCACAATTGGGTATCCAATGTGAAGTACGGC  
AAACCAATTCAAATT

+  
FFFFFFFFFFFFFFFFF:FFFFFFFFFFFFFFFFFFFFFFFFFFFFFFFFFFFFFFFFFFFFFFFFFFFFFF  
FFFFFFFFFFFFFFFFFFFFFFFFFFFFFFFFFFFFFFFFFFFFFFFFFFFFFFFFFFFFFFFFFFFFFFFF  
FFFFFFFFFFFFFFF:F

@A00721:190:HGJW7DSXY:4:1209:4065:11412 2:N:0:TCTGCAAG+GCTGCACT  
CTTTAATTCGAAACTATATTCTGAATAACGCATGGTATAACATCATAGATGACGTAAGCCCTTCATATC  
TTCAAAAGAAACATTGGAAGGAGCTTATTGGGGTCCAGCACAATTGGGTATCCAATGTGAAGTACGGC  
AAACCAATTCAAATT

+  
FFFFFFFFFFFFFFFFF,FFFFFFFFFFFFFFFFFFFFFFFFFFFFFFFFFFFFFFFFFFFFFFFFFFFFFF:FFFFFFFFFFFFFFFFFFFF  
FFFFFFFFFFFFFFFFFFFFFFFFFFFFFFFFFFFFFFFFFFFFFFFFFFFFFFFFFFFFFFFFFFFFFFFF,FF  
FFFFFFFFFFFFFFF

@A00721:190:HGJW7DSXY:4:1527:21838:23375 2:N:0:TCTGCAAG+GCTGCACT  
CTTTAATTCGAAACTATATTCTGAATAACGCATGGTATAACATCATAGATGACGTAAGCCCTTCATATC  
TTCAAAAGAAACATTGGAAGGAGCTTATTGGGGTCCAGCACAATTGGGTATCCAATGTGAAGTACGGC  
AAACCAATTCAAATT

+  
FFFFFFFFFFFFFFFFF:FFFFFFFFFFFFFFFFFFFFFFFFFFFFFFFFFFFFFFFFFFFFFFFFFFFFFF  
FFFFFFFFFFFFFFFFFFFFFFFFFFFFFFFFFFFFFFFFFFFFFFFFFFFFFFFFFFFFFFFFFFFFFFFF  
F:FFFFFFFFFFFFFFF

@A00721:190:HGJW7DSXY:4:1625:17363:14121 2:N:0:TCTGCAAG+GCTGCACT  
CTTTAATTCGAAACTATATTCTGAATAACGCATGGTATAACATCATAGATGACGTAAGCCCTTCATATC  
TTCAAAAGAAACATTGGAAGGAGCTTATTGGGGTCCAGCACAATTGGGTATCCAATGTGAAGTACGGC  
AAACCAATTCAAATT

+  
FFFFFFFFFFFFFFFFFFFFFFFFFFFFFFFFFFFFFFFFFFFFFFFFFFFFFFFFFFFFFFFFFFFFFFFF  
FFFFF:FFFFFFFFFFFFFFFFFFFFFFFFFFFFFFFFFFFFFFFFFFFFFFFFFFFFFFFFFFFFFFFFF  
FFFFFFFFF:FFFFFFFFF

@A00721:190:HGJW7DSXY:4:2242:13304:28855 2:N:0:TCTGCAAG+GCTGCACT  
CTTTAATTCGAAACTATATTCTGAATAACGCATGGTATAACATCATAGATGACGTAAGCCCTTCATATC







FFFFFFFF:FFFFFFFF:FFFFFFFFFFFFFFFFFFFFFFFFFFFFFFFFFFFFFFFF:FFFF:FFFFFF  
FFFFFFFFFFFFFFFF

@A00721:190:HGJW7DSXY:4:2675:15510:15890 2:N:0:TCTGCAAG+GCTGCACT  
CTAGACTTTAATTGAAACTATATTCGAATAACGCATGGTATAACATCATAGATGACGTAAGCCCTTC  
ATATCTTCAAAGAAACATTGGAAGGAGCTTATTGGGGTCCAGCACAATTGGGTATCCAATGTGAAGT  
ACGGCAAACCAATTC

+

FFFFFFFFFFFFFFFFFFFFFFFFFFFFFFFFFFFFFFFFFFFFFFFFFFFFFFFFFFFFFFFF  
FFFFFFFFFFFFFFFFFFFFFFFFFFFFFFFFFFFFFFFFFFFFFFFFFFFFFFFF:FFFFFFFFFFFFFFFF  
FFFFF,FFFFFFFF

@A00721:190:HGJW7DSXY:4:2263:12274:1986 2:N:0:TCTGCAAG+GCTGCACT  
CTAGACTTTAATTGAAACTATATTCGAATAACGCATGGTATAACATCATAGATGACGTAAGCCCTTC  
ATATCTTCAAAGAAACATTGGAAGGAGCTTATTGGGGTCCAGCACAATTGGGTATCCAATGTGAAGT  
ACGGCAAACCAATT

+

:FFFFFFFFFFFFFFFFFFFFFFFF:FFFFFFFF:FFFFFF:FFFFFFFF::F:FFFFFF:FFFFFF  
FFFF:FFFFFFFFFFFFFFFF,FFFFFFFFFFFFFFFFFFFFFFFFFFFFFFFF:F:FFFF:FFFFFF  
FFFFFFFFFFFF,FF

@A00721:190:HGJW7DSXY:4:1326:3125:21527 2:N:0:TCTGCAAG+GCTGCACT  
AGACTTTAATTGAAACTATATTCGAATAACGCATGGTATAACATCATAGATGACGTAAGCCCTTCAT  
ATCTTCAAAGAAACATTGGAAGGAGCTTATTGGGGTCCAGCACAATTGGGTATCCAATGTGAAGTAC  
GGCAAACCAAT

+

FFFFFFFFFFFFFFFFFFFFFFFF:FFFFFFFFFFFFFFFF:FFFFFFFFFFFFFFFFFFFFFFFF  
FFFFFFFFFFFFFFFFFFFFFFFFFFFFFFFFFFFFFFFFFFFFFFFFFFFFFFFFFFFFFFFF  
FFFFFFFFFFFF

@A00721:190:HGJW7DSXY:4:1336:16324:17487 2:N:0:TCTGCAAG+GCTGCACT  
AGACTTTAATTGAAACTATATTCGAATAACGCATGGTATAACATCATAGATGACGTAAGCCCTTCAT  
ATCTTCAAAGAAACATTGGAAGGAGCTTATTGGGGTCCAGCACAATTGGGTATCCAATGTGAAGTAC  
GGCAAACCAAT

+

FFFFFFFFFFFFFFFFFFFFFFFFFFFFFFFF:FFFFFFFFFFFFFFFFFFFFFFFFFFFFFFFF  
FFFFFFFFFFFFFFFFFFFFFFFFFFFFFFFFFFFFFFFFFFFFFFFFFFFFFFFFFFFFFFFF:FFFFFFFF  
FFFFFFFF:F

@A00721:190:HGJW7DSXY:4:2124:16080:8829 2:N:0:TCTGCAAG+GCTGCACT  
AGACTTTAATTGAAACTATATTCGAATAACGCATGGTATAACATCATAGATGACGTAAGCCCTTCAT  
ATCTTCAAAGAAACATTGGAAGGAGCTTATTGGGGTCCAGCACAATTGGGTATCCAATGTGAAGTAC  
GGCAAACCAAT

+

FFFFFFFFFFFFFFFFFFFF, :FFFFFFFFFFFFFFFFFFFFFFFFFFFFFFFFFFFFFFFF  
FFFFFFFF: ,F,FFFFFFFF:FFFFFFFF:FFFFFFFFFFFFFFFF:FFFFFFFFFFFFFFFF  
FFFFFFFFFFFF

@A00721:190:HGJW7DSXY:4:2247:2573:29215 2:N:0:TCTGCAAG+GCTGCACT  
AGACTTTAATTGAAACTATATTCGAATAACGCATGGTATAACATCATAGATGACGTAAGCCCTTCAT  
ATCTTCAAAGAAACATTGGAAGGAGCTTATTGGGGTCCAGCACAATTGGGTATCCAATGTGAAGTAC  
GGCAAACCAAT

+

FFFFFFFFFFFFFFFFFFFF:FFFFFFFFFFFFFFFFFFFFFFFFFFFFFFFFFFFFFFFF  
FFF:FFFFFFFFFFFFFFFFFFFFFFFFFFFFFFFFFFFFFFFFFFFFFFFFFFFFFFFF,FFFFFFFF  
FFFFFFFF:F

@A00721:190:HGJW7DSXY:4:2264:19732:7138 2:N:0:TCTGCAAG+GCTGCACT  
AGACTTTAATTGAAACTATATTCGAATAACGCATGGTATAACATCATAGATGACGTAAGCCCTTCAT  
ATCTTCAAAGAAACATTGGAAGGAGCTTATTGGGGTCCAGCACAATTGGGTATCCAATGTGAAGTAC  
GGCAAACCAAT

+  
FFFFFFFFFFFFFFFFFFFFFFFFFFFFFFFFFFFFFFFFFFFFFFFFFFFFFFFFFFFFFFFF  
FFFFFFFFFFFFFFFFFFFFFFFFFFFFFFFFFFFFFFFFFFFFFFFFFFFFFFFFFFFFFFFF  
FFFF: :FFFF  
@A00721:190:HGJW7DSXY:4:2314:28999:5713 2:N:0:TCTGCAAG+GCTGCACT  
AGACTTTAATTGAAACTATATTCGAATAACGCATGGTATAACATCATAGATGACGTAAGCCCTTCAT  
ATCTTCAAAGAAACATTGGAAGGAGCTTATTGGGGTCCAGCACAATTGGGTATCCAATGTGAAGTAC  
GGCAAACCAAT

+  
FFFFFFFFFFFFFFFF,FF:FFFFFFFFFFFFFFFFFFFFFFFFFFFFFFFFFFFFFFFF  
FFFFFFFFFFFFFFFF,FFFFFFFF:FF:FFFFFFFFFFFFFFFFFFFFFFFFFFFFFFFF:FFF  
FFFF:FFFFF  
@A00721:190:HGJW7DSXY:4:2350:25174:34914 2:N:0:TCTGCAAG+GCTGCACT  
AGACTTTAATTGAAACTATATTCGAATAACGCATGGTATAACATCATAGATGACGTAAGCCCTTCAT  
ATCTTCAAAGAAACATTGGAAGGAGCTTATTGGGGTCCAGCACAATTGGGTATCCAATGTGAAGTAC  
GGCAAACCAAT

+  
FFFFFFFFFFFFFFFF:FFFF:FFFFFFFFFFFFFFFF,FFF:FFFFFFFFFFFFFFFF, :,FFFFF  
FFFFFFFFFFFFFFFF:FFFFF:FFFF:FF,FFFFFFFFFFFFFFFF:FFFF: :FFFFFFFFFFFF  
FFFFF:FFFFF  
@A00721:190:HGJW7DSXY:4:2457:16514:9424 2:N:0:TCTGCAAG+GCTGCACT  
AGACTTTAATTGAAACTATATTCGAATAACGCATGGTATAACATCATAGATGTCGTAAGCCCTTCAT  
ATCTTCAAAGAAACATTGGAAGGAGCTTATTGGGGTCCAGCACAATTGGGTATCCAATGTGAAGTAC  
GGCAAACCACT

+  
FFFFF:FFFFFFFFFFFFFFFF:FF:FFF:FFFFFF, ,FF, :FFFF,FFFFFF: , ,FF,FFFFFFFF  
FF:FF:FFFF,FFF:FF,F:FFFFFF, , ,FFFFFFFF:FFFFFFFF:FFFFFF,FFFFFFFF  
FFFF:F,FF,F  
@A00721:190:HGJW7DSXY:4:1132:11650:32597 2:N:0:TCTGCAAG+GCTGCACT  
ATATATAGACTTTAATTGAAACTATATTCGAATAACGCATGGTATAACATCATAGATGACGTAAGCC  
AATCATATCTACAAAGAAACATTTGAAGGAGCTTATTGGTTTCCAGCACAATTGGGTATCCAATGTG  
AAGTACGGCAAACCA

+  
FFF, ,F:FFF, :FF:FF,FFF,F:FF,F, ,F, ,F: , ,FF:F:FF:F:FFFFFF,FFFFFF:FFF:FFF  
 , ,FFFF:FF,FF: , :FFFF:F,FFF, :F,F:FFF,FF,F, : ,FF,FFF,FFF,F,FFFFFFFF,F  
 :FFF, : ,FFF:FFFF  
@A00721:190:HGJW7DSXY:4:1434:31078:8782 2:N:0:TCTGCAAG+GCTGCACT  
ATATCTAGACTTTAATTGAAACTATATTCGAATAACGCATGGTATAACATCATAGATGACGTAAGCC  
CTTCATATCTTCAAAGAAACATTGGAAGGAGCTTATTGGGGTCCAGCACAATTGGGTATCCAATGTG  
AAGTACGGCAAACCA

+  
FFFFFF:FFFFFFFFFFFFFFFFFFFFFFFFFFFFFFFFFFFFFFFFFFFFFFFFFFFFFFFF  
FFFFFF:FFFFFFFF,FFFFFFFF:FFFFFFFFFFFFFFFF,FFFFFFFFFFFFFFFF  
FFFFFFFFFFFF: ,FFF  
@A00721:190:HGJW7DSXY:4:1519:21911:25191 2:N:0:TCTGCAAG+GCTGCACT  
ATATCTAGACTTTAATTGAAACTATATTCGAATAACGCATGGTATAACATCATAGATGACGTAAGCC  
CTTCATATCTTCAAAGAAACATTGGAAGGAGCTTATTGGGGTCCAGCACAATTGGGTATCCAATGTG  
AAGTACGGCAAACCA

+  
FFFFFF:FFFFFFFFFFFFFFFFFFFFFFFFFFFFFFFFFFFFFFFFFFFFFFFFFFFFFFFF  
FFFFFFFFFFFFFFFF:FFFFFFFFFFFFFFFFFFFFFFFFFFFFFFFF:FFFFFFFFFFFFFFFF  
FFFFFFFFFFFFFFFF  
@A00721:190:HGJW7DSXY:4:1545:7437:18912 2:N:0:TCTGCAAG+GCTGCACT  
ATATCTAGACTTTAATTGAAACTATATTCGAATAACGCATGGTATAACATCATAGATGACGTAAGCC

CTTCATATCTTCAAAGAAACATTGGAAGGAGCTTATTGGGGTCCAGCACAAATTGGGTATCCAATGTG  
AAGTACGGCAAACCA

[illegible] $+$ [illegible] $+$ [illegible]

+

```
FFFFFFFFFFFFFFFFFFFFFFFFFFFFFFFFFFFFFFFFFFFFFFFFFFFFFFFFFFFFFFF
FFFFFFFFFFFFFFFFFFFF,FFFFFFFFFFFFFFFFFFFFFFFFFFFFFFFFFFFFFFFFFFF
FFFFFFFFFFFFFFFF
```

+

[illegible]

+

[illegible]

+

[illegible]



```

FFFFFFFFFFFFFFFFFFFFFFFFFFFFFFFF:FFFFFFFFFFFFFFFF:FFFFFFF:FFFF:FFFFFFFFF
FFFFFFF:FFFFFFF

```

+

@A00721:190:HGJW7DSXY:4:1232:1506:28808 2:N:0:TCTGCAAG+GCTGCACT  
ATTACATGTTTCGGATATCTAGACTTTAATTCGAACTATATTCGAATAACGCATGGTATAACATCATA  
GATGACGTAAGCCCTTCATATCTTCAAAAAGAAACATTGGAAGGAGCTTATTGGGGTCCAGCACAAATTG  
GGTATCCAATGTGAA

```

FFFFFFFFFFFFFFFFFFFFFFFFFFFFFFFF:FFFFFFFF:FFFFFFFF:FFFFFFFFFFFFFFFF
FFFFFFFFFFFFFFFFFFFFFFFFFFFFFFFFFFFFFFFFFFFFFFFFFFFFFFFFFFFFFFFF,
FFFFFFFFFFFFFFFFFFFFFFFF:
FFFFFFFFFFFFFFFF:

```

+

@A00721:190:HGJW7DSXY:4:1562:14498:10848 2:N:0:TCTGCAAG+GCTGCACT  
ATTACATGTTTCGGATATCTAGACTTTAATTCGAACTATATTCGAATAACGCATGGTATAACATCATA  
GATGACGTAAGCCCTTCATATCTTCAAAAAGAAACATTGGAAGGAGCTTATTGGGGTCCAGCACAATTG  
GGTATCCAATGTGAA

```

FFFFFFFFFFFFFFFFFFFFFFFFFFFFFFFFFFFFFFFFFFFFFFFFFFFFFFFFFFFFFFFF:FFFFFFFFFFFFFFFF
FFFFFFFFFFFFFFFFFFFFFFFFFFFFFFFFFFFFFFFFFFFFFFFFFFFFFFFFFFFFFFFF:FF:FFFFFFFFFFFFFFFF:FFFFFF
FFFFFFFFFFFFFFFF

```

+

@A00721:190:HGJW7DSXY:4:2111:18891:20243 2:N:0:TCTGCAAG+GCTGCACT  
ATTACATGTTTCGGATATCTAGACTTTAATTCGAAACTATATTCGAATAACGCATGGTATAACATCATA  
GATGACGTAAGCCCTTCATATCTTCAAAAGAAACATTGGAAGGAGCTTATTGGGGTCCAGCACAAATTG  
GGTATCCAATGTGAA

```

FFFFFFFF:FF,FF,FFF:FFFF:FF:F:FF:FFFF,FFFFFFFF:FFFFFFFF,FFFFFF:FFFFFF
FFF:FFF:FFFFFFFF,:F:FFF,FFFFFFFFFFFFFFFF:FFF,:F,F,F,F,FFF:FFFF:FFF,FFF
.F:FF:FFF:F:FFF

```

[illegible]

```
FFFFFFFFFFFFFFFFFFFFFFFFFFFFFFFFFFFFFFFFFFFFFFFFFFFFFFFFFFFFFFF
FF:FFFFFFFFFFFFFFFFFFFF:FFFFFFFFFFFFFFFFFFFFFFFFFFFFFFFFFFFF:FFF
FFFFFFFFFFFFFFFF
```

```

FFFFFFFFFFFFFFFFFFFFFFFFFFFFFFFFFFFFFFFF:FFFFFFFFFFFFFFFFFFFFFFFFFFFFFFFF
FFFFFFFFFFFFFFFFFFFFFFFFFFFFFFFFFFFFFFFF:FFFFFFFFFFFFFFFFFFFFFFFFFFFFFFFF
FFFFFFFFFFFFFFFF

```

```
FFF:FFFFFFFFFFFFFFFFFFFFFFFFFFFFFFFF:FFF:FF:FFFFFFFFFFFFFFFFFFFFFFFF
FFFFFFFFFFFFFFFFFFFFFFFFFFFFFFFF:FFFFFFFFFFFFFFFFFFFFFFFF:FF:FFFFFFFF
F:FFFFFFFF
```

[illegible][illegible][illegible]

@A00721:190:HGJW7DSXY:4:2616:16224:7357 2:N:0:TCTGCAAG+GCTGCACT  
ATTACATGTTCCGATATCTAGACTTTAATTCGAAACTATATTCGAATAACGCATGGTATAACATCATA



$+$ 

+

+

+

+

 $+$  $+$ 

.....



@A00721:190:HGJW7DSXY:4:2528:6225:27211 2:N:0:TCTGCAAG+GCTGCACT  
CATAATTACATGTTTCGGATATCTAGACTTTAATTCGAAACTATATTCGAATAACGCATGGTATAACAT  
CATAGATGACGTAAGCCCTTCATATCTTCAAAGAAACATTGGAAGGAGCTTATTGGGGTCCAGCACA  
ATTGGGTATCCAATG

@A00721:190:HGJW7DSXY:4:2557:7202:17065 2:N:0:TCTGCAAG+GCTGCACT  
CATAATTACATGTTTCGGATATCTAGACTTTAATTCGAAACTATATTCGAATAACGCATGGTATAACAT  
CATAGATGACGTAAGCCCTTCATATCTTCAAAGAAACATTGGAAGGAGCTTATTGGGGTCCAGCACA  
ATTGGGTATCCAATG

@A00721:190:HGJW7DSXY:4:2559:8449:25175 2:N:0:TCTGCAAG+GCTGCACT  
CATAATTACATGTTCTGGATATCTAGACTTTAATTCGAAACTATATTCGAATAACGCATGGTATAACAT  
CATAGATGACGTAAGCCCTTCATATCTTCAAAGAAACATTGGAAGGAGCTTATTGGGGTCCAGCACA  
ATTGGGTATCCAATG

@A00721:190:HGJW7DSXY:4:2647:15673:16861 2:N:0:TCTGCAAG+GCTGCACT  
CATAATTACATGTTCTGGATATCTAGACTTTAATTCGAAACTATATTCGAATAACGCATGGTATAACAT  
CATAGATGACGTAAGCCCTTCATATCTTCAAAGAAACATTGGAAGGAGCTTATTGGGGTCCAGCACA  
ATTGGGTATCCAATG

@A00721:190:HGJW7DSXY:4:1130:13422:1157 2:N:0:TCTGCAAG+GCTGCACT  
CATAATTACATGTTCTGGATATCTAGACTTTAATTCGAAACTATATTCGAATAACGCATGGTATAACAT  
CATAGATGACGTAAGCCCTTCATATCTTCAAAGAAACATTGGAAGGAGCTTATTGGGGTCCAGCACA  
ATTGGGTATCCAAT

@A00721:190:HGJW7DSXY:4:1507:25491:17456 2:N:0:TCTGCAAG+GCTGCACT  
ACATAATTACATGTTTCGGATATCTAGACTTTAATTGAACTATATTCGAATAACGCATGGTATAACA  
TCATAGATGACGTAAGCCCTTCATATCTTCAAAGAAACATTGGAAGGAGCTTATTGGGGTCCAGCAC  
AATTGGGTATCCAAT

@A00721:190:HGJW7DSXY:4:2419:18240:30138 2:N:0:TCTGCAAG+GCTGCACT  
ACATAATTACATGTTTCGGATATCTAGACTTTAATTCGAACTATATTCGAATAACGCATGGTATAACA  
TCATAGATGACGTAAGCCCTTCATATCTTCAAAGAAACATTGGAAGGAGCTTATTGGGGTCCAGCAC  
AATTGGGTATCCAAT

+  
FFFFFFFFFFFFFFFFFFFFFFFFFFFFFFFFFFFFFFFFFFFFFFFFFFFFFFFFFFFFFFFFFFFFFFFF  
FFFFFFFFFFFFFF:FFF:FFFFFFFFFFFFFFFFFFFFFFFFFFFFFFFFFFFFFFFFFFFFFFFF  
FFFFFFFFF,FFFFFF  
@A00721:190:HGJW7DSXY:4:1626:22001:30358 2:N:0:TCTGCAAG+GCTGCACT  
CCCAATTGTGCTGGACCCCAATAAGCTCCTTCCAATGTTTCTTTTGAAGATATGAAGGGCTTGCGTCA  
TCTATGATGTTATACCATGCGTTATTGAATATAGTTTGAATTAAAGTCTAGATATCCGAACATGTA  
ATTATGTGGGCCTAG

+  
FFFFFFFFFFFFFFFFFFFFFFFFFFFFFFFFFFFFFFFFFFFFFFFFFFFFFFFFFFFFFFFFFFFFFFFF  
FFFF: :FFFFFFFFFFFFFF:FFFFFFFFFFFFFFFFFFFFFFFFFFFFFFFFFFFFFFFFFFFFFFFF:FFF:F  
FFFFFFFFFFFF:FFFF  
@A00721:190:HGJW7DSXY:4:1656:20754:15734 2:N:0:TCTGCAAG+GCTGCACT  
CTAGGCCACATAATTACATGTTGATATCTAGACTTTAATTCGAACTATATTGAATAACGCATG  
GTATAACATCATAGATGACGTAAGCCCTTCATATCTTCAAAAGAAACATTGGAAGGAGCTTATTGGGG  
TCCAGCACAATTGGG

+  
FFFFFFFFFFFFFFFFFFFFFFFFFFFFFFFFFFFFFFFFFFFFFFFFFFFFFFFFFFFFFFFFFFFFFFFF  
FFFFFFFFFFFFFFFFFFFFFFFFFFFFFFFFFFFFFFFFFFFFFFFFFFFFFFFFFFFFFFFFFFFFFFFF  
FFFFFFFFFFFFFFFFFFFF  
@A00721:190:HGJW7DSXY:4:1659:2474:30013 2:N:0:TCTGCAAG+GCTGCACT  
CCCAATTGTGCTGGACCCCAATAAGCTCCTTCCAATGTTTCTTTTGAAGATATGAAGGGCTTGCGTCA  
TCTATGATGTTATACCATGCGTTATTGAATATAGTTTGAATTAAAGTCTAGATATCCGAACATGTA  
ATTATGTGGGCCTAG

+  
FFFFFFFFFFFFFFFFFFFFFFFFFFFFFFFFFFFFFFFFFFFFFFFFFFFFFFFFFFFFFFFFFFFFFFFF  
FFFFFFFFFFFFFFFFFFFFFFFFFFFFFFFFFFFFFFFFFFFFFFFFFFFFFFFFFFFFFFFFFFFFFFFF  
FFFFFFFFFFFFFFFFFFFF  
@A00721:190:HGJW7DSXY:4:1666:13593:25755 2:N:0:TCTGCAAG+GCTGCACT  
CTAGGCCACATAATTACATGTTGATATCTAGACTTTAATTCGAACTATATTGAATAACGCATG  
GTATAACATCATAGATGACGTAAGCCCTTCATATCTTCAAAAGAAACATTGGAAGGAGCTTATTGGGG  
TCCAGCACAATTGGG

+  
FFFFFFFFFFFFFFFFFFFFFFFFFFFFFFFFFFFFFFFFFFFFFFFFFFFFFFFFFFFFFFFFFFFFFFFF  
FFFFFFFFFFFFFFFFFFFFFFFFFFFFFFFFFFFFFFFFFFFFFFFFFFFFFFFFFFFFFFFFFFFFFFFF  
FFFFFFFFFFFFFFFFFFFF  
@A00721:190:HGJW7DSXY:4:2327:15465:14591 2:N:0:TCTGCAAG+GCTGCACT  
CTAGGCCACATAATTACATGTTGATATCTAGACTTTAATTCGAACTATATTGAATAACGCATG  
GTATAACATCATAGATGACGTAAGCCCTTCATATCTTCAAAAGAAACATTGGAAGGAGCTTATTGGGG  
TCCAGCACAATTGGG

+  
FFFFFFFFFFFFFFFFFFFFFFFFFFFFFFFFFFFFFFFFFFFFFFFFFFFFFFFFFFFFFFFFFFFFFFFF  
FFFFFF:FFFFFFFFFFFFFFFFFFFFFFFFFFFFFFFFFFFFFFFFFFFFFFFFFFFFFFFFFFFFFFFF  
FFFFFFFFFFFFFFFFFFFF  
@A00721:190:HGJW7DSXY:4:2347:11189:8719 2:N:0:TCTGCAAG+GCTGCACT  
CTAGGCCACATAATTACATGTTGATATCTAGACTTTAATTCGAACTATATTGAATAACGCATG  
GTATAACATCATAGATGACGTAAGCCCTTCATATCTTCAAAAGAAACATTGGAAGGAGCTTATTGGGG  
TCCAGCACAATTGGG

+  
FFFFFFFFFFFFFFFFFFFFFFFFFFFFFFFFFFFFFFFFFFFFFFFFFFFFFFFFFFFFFFFFFFFFFFFF  
FFFFFFFFFFFFFFFFFFFFFFFFFFFFFFFFFFFFFFFFFFFFFFFFFFFFFFFFFFFFFFFFFFFFFFFF  
FFFFFFFFFFFFFFFFFFFF  
@A00721:190:HGJW7DSXY:4:2503:21260:26694 2:N:0:TCTGCAAG+GCTGCACT  
CCCAATTGTGCTGGACCCCAATAAGCTCCTTCCAATGTTTCTTTTGAAGATATGAAGGGCTTGCGTCA



@A00721:190:HGJW7DSXY:4:2222:26313:9017 2:N:0:TCTGCAAG+GCTGCACT  
CTCTAGGCCACATAATTACATGTTCTGGATATCTAGACTTTAATTCGAACTATATTCGAATAACGCA  
TGGTATAACATCATAGATGACGTAAGCCCTTCATATCTTCAAAGAAACATTGGAAGGAGCTTATTGG  
GGTCCAGCACAAATTG

[illegible]

+

[illegible]

+

[illegible]

+

```

FFFFFFFFFFFFFF:FFFFFFFFFFFFFFFFFFFFFFFFFFFFFFFF:FFF,:FFFFFFFFFFFFFFFF
FFFFF,FFFFFF:FFFFFFFFFFFFFFFF,FFFF:FFFFFFFFFFFFFFFFFFFFFFFFFFFFFFFF,FFFFF
FFFFFFFFFFFF:FFF

```

+

[illegible]

+

```
FF:FFFFFFFFFFFFFFFF:FFFFFFF::FFFFFFFFFF:FFFFFFFF:FFFFFFFFFF:FFFFFFFFFF:FFFF
FFFFFFFFFF:FFFFFFFFF:FFF:FFF::FFFFFFFFFFFF,FFFFFF::FFF:,FFFFFFFFFFFFFFFFFFFFF
:FFF::F:FF
```

+

[illegible]



+  
FFFFFFFFFFFFFFFFFFFFFFFFFFFFFFFFFFFFFFFFFFFFFFFFFFFFFFFFFFF:FFFFFFFFFFFFFFFF  
F:FFFFFFFFFFFFFFFFFFFFFFFFFFFFFFFFFFFFFFFFFFFFFFFFFFFFFFFFFF,FFFFFFFFF:FFF:FFFFFF:FFFF:FFFF  
:FFF,F:  
@A00721:190:HGW7DSXY:4:2341:29921:16579 2:N:0:TCTGCAAG+GCTGCACT  
CTAGGCCACATAATTACATGTTCGGATATCTAGACTTTTAATTCGAACTATATTCGAATAACGCATG  
GTATAACATCATAGATGACGTAAGCCCTTCATATCTTCAAAGA AACATTGGAAGGAGCTTATTGGGG  
TCCAGCACAA  
+  
FFFFFFFFFFFFFFFFFFFFFFFFFFFFFFFFFFFFFFFFFFFFFFFFFFFFFFFFFFFFFFFFFFF  
FFFFFFFFFFFFFFFFFFFFFFFFFFFFFFFFFFFFFFFFFFFFFFFFFFFFFFFFFFFF:F:FFFFFFF  
FFFFFFFFF  
@A00721:190:HGW7DSXY:4:2453:9842:25363 2:N:0:TCTGCAAG+GCTGCACT  
CTAGGCCACATAATTACATGTTCGGATATCTAGACTTTTAATTCGAACTATATTCGAATAACGCATG  
GTATAACATCATAGATGACGTAAGCCCTTCATATCTTCAAAGA AACATTGGAAGGAGCTTATTGGGG  
TCCAGCACAA  
+  
FFFFFFFFFFFFFFFFFFFFFFFFFFFFFFFFFFFFFFFFFFFFFFFFFFFFFFFFFFFFFFFFFFF,FFFFFFFFFFFFFFFF  
FFFFFFFFFFFFFFFFFFFFFFFFFFFFFFFFFFFFFFFFFFFFFFFFFFFFFFFFFFFF:F:FFFFFF  
FFFFFFFFF  
@A00721:190:HGW7DSXY:4:2453:10276:25520 2:N:0:TCTGCAAG+GCTGCACT  
CTAGGCCACATAATTACATGTTCGGATATCTAGACTTTTAATTCGAACTATATTCGAATAACGCATG  
GTATAACATCATAGATGACGTAAGCCCTTCATATCTTCAAAGA AACATTGGAAGGAGCTTATTGGGG  
TCCAGCACAA  
+  
FFF:FFFFFFFFFFFFFFFFFFFFFFFFFFFFFFFFFFFFFFFFFFFFFFFFFFFFFFFFFFF  
FFFFFFFFFFFFFFFFFFFFFFFFFFFFFFFFFFFFFFFFFFFFFFFFFFFF:FF:FFFFFFFFFFFFFFFFFFFFFFFF  
FFF,F,F,FFFF  
@A00721:190:HGW7DSXY:4:2465:28863:12461 2:N:0:TCTGCAAG+GCTGCACT  
CTAGGCCACATAATTACATGTTCGGATATCTAGACTTTTAATTCGAACTATATTCGAATAACGCATG  
GTATAACATCATAGATGACGTAAGCCCTTCATATCTTCAAAGA AACATTGGAAGGAGCTTATTGGGG  
TCCAGCACAA  
+  
FFF:FFFFFFFFFFFFFFFFFFFFFFFFFFFFFFFFFFFFFFFFFFFFFFFFFFFFFFFFFFF  
FFFFFFFFFFFFFFFFFFFFFFFFFFFFFFFFFFFFFFFFFFFF:FF:FFFFFFFFFFFFFFFFFFFFFFFF  
FFFFFFFFF  
@A00721:190:HGW7DSXY:4:1153:18150:13322 2:N:0:TCTGCAAG+GCTGCACT  
CTAGGCCACATAATTACATGTTCGGATATCTAGACTTTTAATTCGAACTATATTCGAATAACGCATG  
GTATAACATCATAGATGACGTAAGCCCTTCATATCTTCAAAGA AACATTGGAAGGAGCTTATTGGGG  
TCCAGCACA  
+  
FFFFFFFFFFFFFFFFFFFFFFFFFFFFFFFFFFFFFFFFFFFFFFFFFFFFFFFFFFF:FFFFFFFFFFFFFFFF  
FFFFFFFFF:FFFFFFFFFFFF:,FFFFFFFFFFFFFFFF::FFFFFF,:FFFFFFFF:FFFFF  
FFFFFFFFF  
@A00721:190:HGW7DSXY:4:2530:27615:14340 2:N:0:TCTGCAAG+GCTGCACT  
CTAGGCCACATAATTACATGTTCGGATATCTAGACTTTTAATTCGAACTATATTCGAATAACGCATG  
GTATAACATCATAGATGACGTAAGCCCTTCATATCTTCAAAGA AACATTGGAAGGAGCTTATTGGGG  
TCCAGCACA  
+  
FFFFFFFFFFFFFFFFFFFFFFFFFFFFFFFFFFFFFFFFFFFFFFFFFFFFFFFFFFF:FFFFFFFFFFFF:F  
FFFFFFFFFFFFFFFFFFFFFFFF:FFFFFFFFFFFFFFFFFFFFFFFFFFFFFFFFFFFFFFFFFFFF  
FFFFFFFFF  
@A00721:190:HGW7DSXY:4:1173:28999:30044 2:N:0:TCTGCAAG+GCTGCACT  
CTAGATCTTAGGCCACATAATTACATGTTCGGATATCTAGACTTTTAATTCGAACTATATTCGAAT

AACGCATGGTATAACATCATAGATGACGTAAGCCCTTCATATCTTCAAAGAAACATTGGAAGGAGCT  
TATTGGGGTCCAGCA

[illegible] $+$ 

@A00721:190:HGJW7DSXY:4:1510:9218:1141 2:N:0:TCTGCAAG+GCTGCACT  
CTAGATCTCTAGGCCACATAATTACATGTTCCGATATCTAGACTTTAATTCGAACTATATTCGAAT  
AACGCATGGTATAACATCATAGATGACGTAAGCCCTTCATATCTTCAAAGAAACATTGGAAGGAGCT  
TATTGGGGTCCAGCA

```

FFFFFFFFFFFFFFFFFFFFFFFFF:,FFFFFFFFFFFFFFFF:FFFF:FFFFFFFFFFFF:FFFFFFFFF
FF:FFFFFFFFFFFFFFFFFFFFFFFF:FFF:FFFFFFFFFFFFFFFFFFFFFFFF:, ,FFFFFF:FFFFFFF:F
FFFFFF:FFFFFFF

```

+

@A00721:190:HGJW7DSXY:4:1654:4589:27445 2:N:0:TCTGCAAG+GCTGCACT  
CTAGATCTCTAGGCCACATAATTACATGTTCCGATATCTAGACTTTAATTCGAACTATATTCGAAT  
AACGCATGGTATAACATCATAGATGACGTAAGCCCTTCATATCTTCAAAGAAACATTGGAAGGAGCT  
TATTGGGGTCCAGCA

[illegible]

+

@A00721:190:HGJW7DSXY:4:2164:2157:36166 2:N:0:TCTGCAAG+GCTGCACT  
CTAGATCTCTAGGCCACATAATTACATGTTTCGATATCTAGACTTTAATTGAAACTATATTCGAAT  
AACGCATGGTATAACATCATAGATGACGTAAGCCCTTCATATCTTCAAAGAAACATTGGAAGGAGCT  
GATTGGGGTCCAGCA

[illegible]

@A00721:190:HGJW7DSXY:4:2240:19741:30264 2:N:0:TCTGCAAG+GCTGCACT  
CTAGATCTCTAGGCCACATAATTACATGTTCCGATATCTAGACTTTAATTCGAACTATATTCGAAT  
AACGCATGGTATAACATCATAGATGACGTAAGCCCTTCATATCTTCAAAGAAACATTGGAAGGAGCT  
TATTGGGGTCCAGCA

[illegible]

@A00721:190:HGJW7DSXY:4:2428:16152:16282 2:N:0:TCTGCAAG+GCTGCACT  
CTAGATCTCTAGGCCACATAATTACATGTTCCGATATCTAGACTTTAATTCGAACTATATTCGAAT  
AACGCATGGTATAACATCATAGATGACGTAAGCCCTTCATATCTTCAAAGAAACATTGGAAGGAGCT  
TATTGGGGTCCAGCA

[illegible]

@A00721:190:HGJW7DSXY:4:2578:28203:26850 2:N:0:TCTGCAAG+GCTGCACT  
CTAGATCTCTAGGCCACATAATTACATGTTCCGATATCTAGACTTTAATTCGAACTATATTCTGAAT  
AACGCATGGTATAACATCATAGATGACGTAAGCCCTTCATATCTTCAAAGAAACATTGGAAGGAGCT  
TATTGGGGTCCAGCA

```

FFFFFFFFFFFFFFFFFFFFFFFFFFFFFFFFFFFFFFFFFFFFFFFFFFFFFFFFFFFF,FFFFFFFFF
FFFFFF:FFF:FFFFFFFFFFF:FFFFF:FFFFFFFFFFFFFFFFFFFFFFFFFFFF:FFFFFFFFFFF
:FFFFFFFFFFFFFFFF

```

@A00721:190:HGJW7DSXY:4:2613:27769:10723 2:N:0:TCTGCAAG+GCTGCACT  
CTAGATCTCTAGGCCACATAATTACATGTTCCGATATCTAGACTTTAATTCGAACTATATTCGAAT  
AACGCATGGTATAACATCATAGATGACGTAAGCCCTTCATATCTTCAAAGAAACATTGGAAGGAGCT  
TATTGGGGTCCAGCA

[illegible]

@A00721:190:HGJW7DSXY:4:2613:5394:21073 2:N:0:TCTGCAAG+GCTGCACT  
CTAGATCTCTAGGCCACATAATTACATGTTTCGATATCTAGACTTTAATTCGAACTATATTCGAAT  
AACGCATGGTATAACATCATAGATGACGTAAGCCCTTCATATCTTCAAAGAAACATTGGAAGGAGCT  
TATTGGGGTCCAGCA

```
FF:FFFFFFFF:FFFFFFFFFFFFFFFFFFFFFFFFFFFFFFFFFFFFFFFFFFFFFFFF
FFFFFFFF,FFFF:FFFFFFFF:FFFFFFFF:FFFFFFFFFFFF:FFFFFFFFFFFF:FFFFFFFFFFFF,FFF:F
FFFF:FFFFFFFF
```

@A00721:190:HGJW7DSXY:4:1339:13774:5243 2:N:0:TCTGCAAG+GCTGCACT  
GGAAAAACTCTGTGGGCTAGATCTCTAGGCCACATAATTACATGTTCCGATATCTAGACTTTAATTC  
GAAACTATATTCTGAATAACGCATGGTATAACATCATAGATGACGTAAGCCCTTCATATCTTCAAAGA  
AACATTGGAAGGAGC

```

FFFFFFFFFFFFFFFFFFFF,FFFFFFFFFFFFFF:FFFF:FFFFFFFFFFFF::FFFFFFFFFFFFFF:F
FFFFFFFFF,:FFFFFFFFFFFFFFFFFFFF:FFFFFFFFF:FFFFFFFFFFFFFFFFFFFFFFFFFFFFFFF
FFFFFFFFFFFFFFFFFFFF

```

@A00721:190:HGJW7DSXY:4:1340:19605:20071 2:N:0:TCTGCAAG+GCTGCACT  
GGAAAAACTCTGTGGGCTAGATCTCTAGGCCACATAATTACATGTTCCGATATCTAGACTTTAATTC  
GAAACTATATTCTGAATAACGCATGGTATAACATCATAGATGACGTAAGCCCTTCATATCTTCAAAGA  
AACATTGGAAGGAGC

[illegible]



FFFFFF,FFFFFFFF:FFFFFF, :FFFFFF:FF:FFFFFFFFFFFFFFFFFFFFFFFF, F,  
FFFFFFFF, FFFF

@A00721:190:HGJW7DSXY:4:1355:7238:7075 2:N:0:TCTGCAAG+GCTGCACT  
GGAAAACTCTGTGGGCTAGATCTCTAGGCCACATAATTACATGTTGCGATATCTAGACTTTAATTC  
GAAACTATATTGAATAACGCATGGTATAACATCATAGATGACGTAAGCCCTTCATATCTTCAAAGA  
AACATTGGAAGGAGC

+

FFFFFFFFFFFFFFFFFFFFFFFFFFFFFFFF:FFFFFFFF:FFFFFFFFFFFFFFFFFFFFFFFF  
FFFF,FFFFFFFFFFFFFFFFFFFFFFFFFFFFFFFFFFFFFFFFFFFFFFFFFFFFFFFF:FF  
FFFFFFFFFFFFFFFF

@A00721:190:HGJW7DSXY:4:2121:19732:16188 2:N:0:TCTGCAAG+GCTGCACT  
GGAAAACTCTGTGGGCTAGATCTCTAGGCCACATAATTACATGTTGCGATATCTAGACTTTAATTC  
GAAACTATATTGAATAACGCATGGTATAACATCATAGATGACGTAAGCCCTTCATATCTTCAAAGA  
AACATTGGAAGGAGC

+

FFFFF:FFFFFFFF,FFFFFFFF,FFFFFFFFFFFFFFFF:FFFFFFFF  
FFFFFFFF,FFFFFFFF:FF,FFFFFFFFFFFFFFFFFFFFFFFFFFFFFFFFFFFFFFFF  
FFFF:FF:F:FFFF

@A00721:190:HGJW7DSXY:4:2121:19804:16313 2:N:0:TCTGCAAG+GCTGCACT  
GGAAAACTCTGTGGGCTAGATCTCTAGGCCACATAATTACATGTTGCGATATCTAGACTTTAATTC  
GAAACTATATTGAATAACGCATGGTATAACATCATAGATGACGTAAGCCCTTCATATCTTCAAAGA  
AACATTGGAAGGAGC

+

FFFFFFFFFFFFFFFFFFFFFFFFFFFFFFFFFFFFFFFFFFFFFFFFFFFFFFFFFFFFFFFF  
FFFF,FFFFFFFF:FFFFFFFFFFFFFFFFFFFFFFFFFFFFFFFF:FFFFFFFF:FFFF  
FFFFFFFF:FFF:

@A00721:190:HGJW7DSXY:4:2312:4273:14246 2:N:0:TCTGCAAG+GCTGCACT  
GGAAAACTCTGTGGGCTAGATCTCTAGGCCACATAATTACATGTTGCGATATCTAGACTTTAATTC  
GAAACTATATTGAATAACGCATGGTATAACATCATAGATGACGTAAGCCCTTCATATCTTCAAAGA  
AACATTGGAAGGAGC

+

FFFFFFFFFFFFFFFFFFFFFFFFFFFFFFFFFFFFFFFFFFFFFFFFFFFFFFFFFFFFFFFF  
FFF:FFF:FFFFFFFFFFFFFFFF:FFFFFFFF:FF,FFFFFFFFFFFFFFFFFFFFFFFF  
FFFF,FFFFFFFF

@A00721:190:HGJW7DSXY:4:2435:2157:5415 2:N:0:TCTGCAAG+GCTGCACT  
GGAAAACTCTGTGGGCTAGATCTCTAGGCCACATAATTACATGTTGCGATATCTAGACTTTAATTC  
GAAACTATATTGAATAACGCATGGTATAACATCATAGATGACGTAAGCCCTTCATATCTTCAAAGA  
AACATTGGAAGGAGC

+

FFFFFFFFFFFFFFFFFFFFFFFFFFFFFFFFFFFFFFFFFFFFFFFFFFFFFFFFFFFFFFFF  
FFFFFFFFFFFFFFFF:FFFFFFFF:FFFFFFFF:FFFFFFFF:FFFF,FFFFFFFF  
FFFF,FFFFFFFF

@A00721:190:HGJW7DSXY:4:2476:23122:3709 2:N:0:TCTGCAAG+GCTGCACT  
GGAAAACTCTGTGGGCTAGATCTCTAGGCCACATAATTACATGTTGCGATATCTAGACTTTAATTC  
GAAACTATATTGAATAACGCATGGTATAACATCATAGATGACGTAAGCCCTTCATATCTTCAAAGA  
AACATTGGAAGGAGC

+

FFFF:FFFFFFFFFFFFFFFFFFFFFFFFFFFFFFFFFFFFFFFFFFFFFFFFFFFFFFFF  
FFFFFFFFFFFFFFFFFFFFFFFFFFFFFFFF,FFF,FFFFFFFF:FFFFFF,FFFF  
FFFFFFFFFFFFFFFF

@A00721:190:HGJW7DSXY:4:2573:32000:35837 2:N:0:TCTGCAAG+GCTGCACT  
GGAAAACTCTGTGGGCTAGATCTCTAGGCCACATAATTACATGTTGCGATATCTAGACTTTAATTC  
GAAACTATATTGAATAACGCATGGTATAACATCATAGATGACGTAAGCCCTTCATATCTTCAAAGA  
AACATTGGAAGGAGC

+  
FFFFF:,FFFFFFFFFFFFFFFFFFFFFFFFFFFFFFFFFFFFFFFFFFFFFFFFFFFFFFFFFFFFFFFF:FFF  
FFFFFFFFF::FFFFFFFF:FFFF,FFFFFFFF,FFFF,FFFF::FFFFFFFF,FF,F:FFFF:FF,:FF  
FFFFF:FFFFFFFFF

@A00721:190:HGJW7DSXY:4:1304:20690:13025 2:N:0:TCTGCAAG+GCTGCACT  
TGGA AAAA ACTCTGTGGGCTAGATCTCTAGGCCACATAATTACATGTTTCGGATATCTAGACTTTAATT  
CGAAACTATATTCTGAATAACGCATGGTATAACATCATAGATGACGTAAGCCCTTCATATCTTCAAAG  
AAACATTGGAAGGAG

+  
FFFFFFFFFFFFFFFFFFFFFFFFFFFFFFFFFFFFFFFFFFFFFFFFFFFFFFFFFFFFFFFFFFFFFFFF  
FFFFFFFFFFFFFFFFFFFFFFFFFFFFFFFFFFFFFFFFFFFFFFFFFFFFFFFFFFFFFFFFFFFFFFFF  
FFFFFFFFFFFFFFFFF

@A00721:190:HGJW7DSXY:4:1676:25934:9956 2:N:0:TCTGCAAG+GCTGCACT  
TGGA AAAA ACTCTGTGGGCTAGATCTCTAGGCCACATAATTACATGTTTCGGATATCTAGACTTTAATT  
CGAAACTATATTCTGAATAACGCATGGTATAACATCATAGATGACGTAAGCCCTTCATATCTTCAAAG  
AAACATTGGAAGGAG

+  
FFFFFF:FFFFFFFFFFFFFFFFFFFFFFFFFFFFFFFFFFFFFFFFFFFFFFFFFFFFFFFFFFFFFFFF  
FFFFFFFFFFFFFFFFFFFFFFFFFFFFFFFFFFFFFFFFFFFFFFFFFFFFFFFFFFFFFFFFFFFFFFFF  
:FFFFFFFFFFFFFFFFF

@A00721:190:HGJW7DSXY:4:2363:9625:13025 2:N:0:TCTGCAAG+GCTGCACT  
TGGA AAAA ACTCTGTGGGCTAGATCTCTAGGCCACATAATTACATGTTTCGGATATCTAGACTTTAATT  
CGAAACTATATTCTGAATAACGCATGGTATAACATCATAGATGACGTAAGCCCTTCATATCTTCAAAG  
AAACATTGGAAGGAG

+  
FFFFFFF:FFFFFFFFFFFFFFFFFFFFFFFFFFFFFFFFFFFFFFFFFFFFFFFFFFFFFFFFFFFFFFFF  
FFFFFFFFFFFFFFF,FFFFFFFFFFFFFFFFFFFFFFFFFFFFFFFFFFFFFFFFFFFFFFFFFFFFFFFF  
FFFFFFFFFFFFFFFFF

@A00721:190:HGJW7DSXY:4:1204:5367:19586 2:N:0:TCTGCAAG+GCTGCACT  
TAGAAGTGGA AAAA ACTCTGTGGGCTAGATCTCTAGGCCACATAATTACATGTTTCGGATATCTAGACT  
TTAATTCTGA AACTATATTCTGAATAACGCATGGTATAACATCATAGATGACGTAAGCCCTTCATATCTT  
CAAAGAAACATTGG

+  
FFFFFFFFFFFFFFFFFFFFFFFFFFFFFFFFFFFFFFFFFFFFFFFFFFFFFFFFFFFFFFFFFFFFFFFF  
FFFFFFFFFFFFFFF:FFFFFFFFFFFFFFFFFFFF,FFFFFFFFFFFFFFFFFFFFFFFFFFFFFFFFFFFF  
FFFFFFFFFFFFFFFFF

@A00721:190:HGJW7DSXY:4:1227:18738:30091 2:N:0:TCTGCAAG+GCTGCACT  
TAGAAGTGGA AAAA ACTCTGTGGGCTAGATCTCTAGGCCACATAATTACATGTTTCGGATATCTAGACT  
TTAATTCTGA AACTATATTCTGAATAACGCATGGTATAACATCATAGATGACGTAAGCCCTTCATATCTT  
CAAAGAAACATTGG

+  
FFFFFFFFFFFFFFFFFFFFFFFFFFFFFFFFFFFFFFFFFFFFFFFFFFFFFFFFFFFFFFFFFFFFFFFF  
FFFFFFFFFFFFFFFFFFFFFFFFFFFFFFFFFFFFFFFFFFFFFFFFFFFFFFFFFFFFFFFFFFFFFFFF  
FFFFFFFFFFFFFFF:F:

@A00721:190:HGJW7DSXY:4:1375:27914:35055 2:N:0:TCTGCAAG+GCTGCACT  
TAGAAGTGGA AAAA ACTCTGTGGGCTAGATCTCTAGGCCACATAATTACATGTTTCGGATATCTAGACT  
TTAATTCTGA AACTATATTCTGAATAACGCATGGTATAACATCATAGATGACGTAAGCCCTTCATATCTT  
CAAAGAAACATTGG

+  
F:FFFF:FFF:FFFFFFFFFFFFFFFFFFFFFFFFFFFFFFFFFFFFFFFFFFFFFFFFFFFFFFFFFFFF  
FFFFFFFFFFFFFFFFFFFF:FFFFFFFFFFFFFFFFFFFF::FFFFFFFFFFFFFFFFFFFFFFFFFFFFF,FFF:  
FFFFFFFFFFFFFFFFF

@A00721:190:HGJW7DSXY:4:1541:25635:34992 2:N:0:TCTGCAAG+GCTGCACT  
TAGAAGTGGA AAAA ACTCTGTGGGCTAGATCTCTAGGCCACATAATTACATGTTTCGGATATCTAGACT



@A00721:190:HGJW7DSXY:4:1122:10755:29700 2:N:0:TCTGCAAG+GCTGCACT  
GTCTGATACTCGAAGGTCCATCTAGAAGTGAAAACTCTGTGGGCTAGATCTCTAGGCCACATAAT  
TACATGTTTCGGATATCTAGACTTTAATTCGAACTATATTCGAATAACGCATGGTATAACATCATAGA  
TGACGTAAGCCCTTC

+

FFFFFFFFFFFFFFFFFFFFFFFFFFFFFFFFFFFFFFFFFFFFFFFFFFFFFFFFFFFFFFFFFFFFFFFF  
FFFFFFFFFFFFFFFFFFFFFFFFFFFFFFFFFFFFFFFFFFFFFFFFFFFFFFFFFFFFFFFFFFFFFFFF  
FFFFFFFFFFFFFFFFFFFFFFFF

@A00721:190:HGJW7DSXY:4:1304:13196:22780 2:N:0:TCTGCAAG+GCTGCACT  
GTCTGATACTCGAAGGTCCATCTAGAAGTGAAAACTCTGTGGGCTAGATCTCTAGGCCACATAAT  
TACATGTTTCGGATATCTAGACTTTAATTCGAACTATATTCGAATAACGCATGGTATAACATCATAGA  
TGACGTAAGCCCTTC

+

FFFFFFFFFFFFFFFFFFFFFFFFFFFFFFFFFFFFFFFFFFFFFFFFFFFFFFFFFFFFFFFFFFFFFFFF  
FFFFFFFFFFFFFFFFFFFFFFFFFFFFFFFFFFFFFFFFFFFFFFFFFFFFFFFFFFFFFFFFFFFFFFFF  
FFFFFFFFFFFFFFFFFFFFFFFF

@A00721:190:HGJW7DSXY:4:1431:29857:13307 2:N:0:TCTGCAAG+GCTGCACT  
GTCTGATACTCGAAGGTCCATCTAGAAGTGAAAACTCTGTGGGCTAGATCTCTAGGCCACATAAT  
TACATGTTTCGGATATCTAGACTTTAATTCGAACTATATTCGAATAACGCATGGTATAACATCATAGA  
TGACGTAAGCCCTTC

+

FFFFFFFFFFFFFFFFFFFFFFFFFFFFFFFFFFFFFFFFFFFFFFFFFFFFFFFFFFFFFFFFFFFFFFFF  
FFFFFFFFFFFFFFFFFFFFFFFFFFFFFFFFFFFFFFFFFFFFFFFFFFFFFFFFFFFFFFFFFFFFFFFF  
FFFFFFFFFFFFFFFFFFFFFFFF

@A00721:190:HGJW7DSXY:4:2367:15203:6746 2:N:0:TCTGCAAG+GCTGCACT  
GTCTGATACTCGAAGGTCCATCTAGAAGTGAAAACTCTGTGGGCTAGATCTCTAGGCCACATAAT  
TACATGTTTCGGATATCTAGACTTTAATTCGAACTATATTCGAATAACGCATGGTATAACATCATAGA  
TGACGTAAGCCCTTC

+

FFFFFFF:FFFFFFFFFFFFFFFFFFFFFFFFFFFFFFFFFFFFFFFFFFFFFFFFFFFFFFFFFFFFFFFF  
FFFFFFFFFFFFFFFFFFFFFFFFFFFFFFFFFFFFFFFFFFFFFFFFFFFFFFFFFFFFFFFFFFFFFFFF  
FFFFFFFFFFFFFFFFFFFFFFFF

@A00721:190:HGJW7DSXY:4:2432:9344:13009 2:N:0:TCTGCAAG+GCTGCACT  
GTCTGATACTCGAAGGTCCATCTAGAAGTGAAAACTCTGTGGGCTAGATCTCTAGGCCACATAAT  
TACATGTTTCGGATATCTAGACTTTAATTCGAACTATATTCGAATAACGCATGGTATAACATCATAGA  
TGACGTAAGCCCTTC

+

FFFFFFF:FFFFFFFFFFFFFFFFFFFFFFFFFFFFFFFFFFFFFFFFFFFFFFFFFFFFFFFFFFFFFFFF  
FFFFFFFFFFFFFFFFFFFFFFFFFFFFFFFFFFFFFFFFFFFFFFFFFFFFFFFFFFFFFFFFFFFFFFFF  
FFFFFFFFFFFFFFFFFFFFFFFF

@A00721:190:HGJW7DSXY:4:2531:8657:36025 2:N:0:TCTGCAAG+GCTGCACT  
GTCTGATACTCGAAGGTCCATCTAGAAGTGAAAACTCTGTGGGCTAGATCTCTAGGCCACATAAT  
TACATGTTTCGGATATCTAGACTTTAATTCGAACTATATTCGAATAACGCATGGTATAACATCATAGA  
TGACGTAAGCCCTTC

+

F:FFFFFFFFFFFFFFFFFFFFFFFFFFFFFFFFFFFFFFFFFFFFFFFFFFFFFFFFFFFFFFFFFFFF  
FFFFFFFFFFFFFFFFFFFFFFFFFFFFFFFFFFFFFFFFFFFFFFFFFFFFFFFFFFFFFFFFFFFFFFFF  
FFFFFFFFFFFFFFFFFFFFFFFF

@A00721:190:HGJW7DSXY:4:2177:27814:6417 2:N:0:TCTGCAAG+GCTGCACT  
GTCTGATACTCGAAGGTCCATCTAGAAGTGAAAACTCTGTGGGCTAGATCTCTAGGCCACATAAT  
TACATGTTTCGGATATCTAGACTTTAATTCGAACTATATTCGAATAACGCATGGTATAACATCATAGA  
TGACGTAAGCCCTT

+

FFFFFFF::FF:F,:FFFFFFF:::F:FFFFFFF,FFFFFFF:FFF:F,F:FFFFFFF:F:FFFFFFF

FFFFFFFFFFFFFFFF::F,FFFFFF:F:,FFFF:FFFF:F:FFFFFF,F,FFFFFF:FFFFFF:FFFF  
F,FFFFFF,FF,:F

@A00721:190:HGJW7DSXY:4:2346:32922:13479 2:N:0:TCTGCAAG+GCTGCACT  
CTGATACTCGAAGGTCCATCTAGAAGTGGA AAAACTCTGTGGGCTAGATCTCTAGGCCACATAATTA  
CATGTTTCGGATATCTAGACTTTAATTGAACTATATTGCAATAACGCATGGTATAACATCATAGATG  
ACGTAAGCCCTT

+

: ,FFFFFFFF:FFFFFFFFFFFFFF:FFFFFF,F:F:FFF:FFFF:FFFFFFFFFFFFFFFF:FFF,F  
FFFFFF:F:FFFFFF,FFF:FFFFFF,FFFFFFFFFFFF,FFFF:,FFFF::FFFFFFFFFFFFFF,,  
F,,:FF:F,FFF

@A00721:190:HGJW7DSXY:4:2611:30346:30342 2:N:0:TCTGCAAG+GCTGCACT  
GTCTGATACTCGAAGGTCCATCTAGAAGTGGA AAAACTCTGTGGGCTAGATCTCTAGGCCACATAAT  
TACATGTTTCGGATATCTAGACTTTAATTGAACTATATTGCAATAACGCATGGTATAACATCATAGA  
TGACGTAAGCCCT

+

FFFFFFF:FFF:FFF:FFFFFFF, :FFFFFFFFFFFFFFFFFFFFFFFFFFFFFFFFFFFFFFFFFFFFFFFF  
FF:FFFFFFF:FFFFFFF:F:F,FFFFFFFF:FFF:FFF,FFFF::F,F:F,FFFFFF,FFFFFF:,  
FFFF,FFFF::F

@A00721:190:HGJW7DSXY:4:1118:30770:19742 2:N:0:TCTGCAAG+GCTGCACT  
CCAAGAGTCTGATACTCGAAGGTCCATCTAGAAGTGGA AAAACTCTGTGGGCTAGATCTCTAGGCCCA  
CATAATTACATGTTTCGGATATCTAGACTTTAATTGAACTATATTGCAATAACGCATGGTATAACAT  
CATAGATGACGTAAG

+

FFFFFFFFFFFFFFFFFFFFFFFFFFFFFFFFFFFFFFFFFFFFFFFFFFFFFFFFFFFFFFFFFFFFFFFF  
FFFFFFFFFFFF:FFFFFFFFFFFFFFFFFFFFFFFFFFFFFFFFFFFFFFFFFFFFFFFFFFFFFFFFFFFF  
FFFF:FFFFFFFFFFFF

@A00721:190:HGJW7DSXY:4:1425:12671:23688 2:N:0:TCTGCAAG+GCTGCACT  
CCAAGAGTCTGATACTCGAAGGTCCATCTAGAAGTGGA AAAACTCTGTGGGCTAGATCTCTAGGCCCA  
CATAATTACATGTTTCGGATATCTAGACTTTAATTGAACTATATTGCAATAACGCATGGTATAACAT  
CATAGATGACGTAAG

+

FFFFFFFFFFFFFFFFFFFF:FFFFFFFFFFFFFFFFFFFFFFFFFFFFFFFFFFFFFFFFFFFFFFFFFFFF  
FFFFFFFFFFFFFFFFFFFFF:,FFFFFFFF:FFFF:FFFFFFFFFFFFFFFFFFFFFFFFFFFFFFFFFFFF  
FFFFFFFFF:FFFF:

@A00721:190:HGJW7DSXY:4:1442:6280:19100 2:N:0:TCTGCAAG+GCTGCACT  
CCAAGAGTCTGATACTCGAAGGTCCATCTAGAAGTGGA AAAACTCTGTGGGCTAGATCTCTAGGCCCA  
CATAATTACATGTTTCGGATATCTAGACTTTAATTGAACTATATTGCAATAACGCATGGTATAACAT  
CATAGATGACGTAAG

+

FFFFFFFFFFFFFFFFFFFFFFFFFFFFFFFFFFFFFFFFFFFFFFFFFFFFFFFFFFFFFFFFFFFFFFFF  
FFFFFFFFF:FFFFFFFFF:FFFFFFFFFFFFFFFFFFFFFFFFFFFF,F,FFFFFFFFFFFFFFFFFFFFFFFF  
FFFFFFFFFFFFFFFFFFFF

@A00721:190:HGJW7DSXY:4:1443:12707:8688 2:N:0:TCTGCAAG+GCTGCACT  
CTTACGTCATCTATGATGTTATACCATGCGTTATTGCAATATAGTTTCGAATTAAAGTCTAGATATCC  
GAACATGTAATTATGTGGGCCTAGAGATCTAGCCACAGAGTTTTTCCACTTCTAGATGGACCTTCGA  
GTATCAGACTCTTGG

+

FFFFFFFFF:FFFFFFFF,FF:FFFFFFFFFF:FF:FFFFFFFF:FFFFFFFFFFFFFFFFFFFFFFFF  
FFFFF,F:FFFFFFFFFFFFFFFFFFFFFFFFFFFFFFFFFFFF:FF::FFFFFFFF:FFFF,FFFF:F  
,FFFF:FFFF:FFF

@A00721:190:HGJW7DSXY:4:1508:15085:5760 2:N:0:TCTGCAAG+GCTGCACT  
CTTACGTCATCTATGATGTTATACCATGCGTTATTGCAATATAGTTTCGAATTAAAGTCTAGATATCC  
GAACATGTAATTATGTGGGCCTAGAGATCTAGCCACAGAGTTTTTCCACTTCTAGATGGACCTTCGA  
GTATCAGACTCTTGG

+  
FFFFFFFFFFFFFFFFFFFFFFFFFFFFFFFFFFFFFFFFFFFFFFFFFFFFFFFFFFFFFFFFFFFFFFFF  
FFFFFFFFFFFFFFFFFFFFFFFFFFFFFFFFFFFFFFFFFFFFFFFFFFFFFFFFFFFFFFFFFFFFFFFF  
FFFFF:FFFFF:  
@A00721:190:HGJW7DSXY:4:1611:21468:1595 2:N:0:TCTGCAAG+GCTGCACT  
CTTACGTCATCTATGATGTTATACCATGCGTTATTCGAATATAGTTTCGAATTAAAGTCTAGATATCC  
GAACATGTAATTATGTGGGCCTAGAGATCTAGCCACAGAGTTTTTCCACTTCTAGATGGACCTTCGA  
GTATCAGACTCTTGG  
+  
FFFFFFFFFFFFFFFFFFFFFFFFFFFFFFFFFFFFFFFFFFFFFFFFFFFFFFFFFFFFFFFFFFFFFFFF  
FFFFFFFFFFFFFFFFFFFFFFFFFFFFFFFFFFFFFFFFFFFFFFFFFFFFFFFFFFFFFFFFFFFFFFFF  
FFFFFFFFFFFFFFFFFFFFFFFFFFFFFFFFFFFFFFFFFFFFFFFFFFFFFFFFFFFFFFFFFFFFFFFF  
@A00721:190:HGJW7DSXY:4:1621:31412:10332 2:N:0:TCTGCAAG+GCTGCACT  
CCAAGAGTCTGATACTCGAAGGTCCATCTAGAAGTGGA AAAACTCTGTGGGCTAGATCTCTAGGCCCA  
CATAATTACATGTTTCGGATATCTAGACTTTAATTCGAAACTATATTCAATAACGCATGGTATAACAT  
CATAGATGACGTAAG  
+  
FFFF:FFFFFFFFFFFFFFFFFFFFFFFFFFFFFFFFFFFFFFFFFFFFFFFFFFFFFFFFFFFFFFFF  
FFFFFFFFFFFFFFFFFFFFFFFFFFFFFFFFFFFFFFFFFFFFFFFFFFFFFFFFFFFFFFFFFFFFFFFF  
F,FFFFFFFFFFFFFFFF  
@A00721:190:HGJW7DSXY:4:2111:5086:36730 2:N:0:TCTGCAAG+GCTGCACT  
CCAAGAGTCTGATACTCGAAGGTCCATCTAGAAGTGGA AAAACTCTGTGGGCTAGATCTCTAGGCCCA  
CATAATTACATGTTTCGGATATCTAGACTTTAATTCGAAACTATATTCAATAACGCATGGTCTAACAT  
CATAGATGACGTAAG  
+  
FFFFFFFFFFFFFFFFFFFFFFFFFFFFFFFFFFFFFFFFFFFFFFFFFFFFFFFFFFFFFFFFFFFFFFFF  
FFFFFFFFFFFFFFFFFFFFFFFFFFFFFFFFFFFFFFFFFFFFFFFFFFFFFFFFFFFFFFFFFFFFFFFF  
F:FFFFFFFFFFFFFFFF  
@A00721:190:HGJW7DSXY:4:2172:27055:5979 2:N:0:TCTGCAAG+GCTGCACT  
CCAAGAGTCTGATACTCGAAGGTCCATCTAGAAGTGGA AAAACTCTGTGGGCTAGATCTCTAGGCCCA  
CATAATTACATGTTTCGGATATCTAGACTTTAATTCGAAACTATATTCAATAACGCATGGTATAACAT  
CATAGATGACGTAAG  
+  
FFFFFFFFFFFFFFFFFFFFFFFFFFFFFFFFFFFFFFFFFFFFFFFFFFFFFFFFFFFFFFFFFFFFFFFF  
FFFFFFFFFFFFFFFFFFFFFFFFFFFFFFFFFFFFFFFFFFFFFFFFFFFFFFFFFFFFFFFFFFFFFFFF  
FFFFF:FFFFF:  
@A00721:190:HGJW7DSXY:4:2458:8874:36088 2:N:0:TCTGCAAG+GCTGCACT  
CTTACGTCATCTATGATGTTATACCATGCGTTATTCGAATATAGTTTCGAATTAAAGTCTAGATATCC  
GAACATGTAATTATGTGGGCCTAGAGATCTAGCCACAGAGTTTTTCCACTTCTAGATGGACCTTCGA  
GTATCAGACTCTTGG  
+  
FFFFFFFFFFFFFFFFFFFFFFFFFFFFFFFFFFFFFFFFFFFFFFFFFFFFFFFFFFFFFFFFFFFFFFFF  
FFFFFFFFFFFFFFFFFFFFFFFFFFFFFFFFFFFFFFFFFFFFFFFFFFFFFFFFFFFFFFFFFFFFFFFF  
FFFFFFFFFFFFFFFFFFFFFFFF  
@A00721:190:HGJW7DSXY:4:2473:15854:17456 2:N:0:TCTGCAAG+GCTGCACT  
CTTACGTCATCTATGATGTTATACCATGCGTTATTCGAATATAGTTTCGAATTAAAGTCTAGATATCC  
GAACATGTAATTATGTGGGCCTAGAGATCTAGCCACAGAGTTTTTCCACTTCTAGATGGACCTTCGA  
GTATCAGACTCTTGG  
+  
FFFFFFFFFFFFFFFFFFFFFFFFFFFFFFFFFFFFFFFFFFFFFFFFFFFFFFFFFFFFFFFFFFFFFFFF  
FFFFFFF:FFFFFFFFFFFFFFFFFFFFFFFFFFFFFFFFFFFFFFFFFFFFFFFFFFFFFFFFFFFFFFFF  
FFFFFFFFFFFFFFFFFFFFFFFF  
@A00721:190:HGJW7DSXY:4:2474:6379:6464 2:N:0:TCTGCAAG+GCTGCACT  
CCAAGAGTCTGATACTCGAAGGTCCATCTAGAAGTGGA AAAACTCTGTGGGCTAGATCTCTAGGCCCA



@A00721:190:HGJW7DSXY:4:1251:32235:1705 2:N:0:TCTGCAAG+GCTGCACT  
CATCTATGATGTTATACCATGCGTTATTCGAATATAGTTTTCGAATTAAAGTCTAGATATCCGAACATG  
TAATTATGTGGGCCTAGAGATCTAGCCACAGAGTTTTTCCACTTCTAGATGGACCTTCGAGTATCAG  
ACTCTTGGTCCTGTA

[illegible]

+

[illegible]

+

[illegible]

+

[illegible] $+$ 

```
FFF:FFFFFFFFFFFFFF:FFFFFFFFFFFFFFFFFFFFFFFFFFFFFFFFFFFFFF:FFFFFFFFFFFF
,FFFFFFFFFFFFFFFFFFFFFFFFFFFFFFFFFFFFFF:FFFFFFFFFFFFFF:FF:FFFF:FFFFFFFFFFFF:FFFFFFFF
FFFFFFFFFFFF:FFFFF
```

+

```

FFFFFFFFFFFFFF,FFFFFFFFFFFFFFFFFFFFFFFFFFFFFFFFFFFFFFFFFFFFFFFFFFFFFFFF:FF
F:FFFFFFFF:FFFFFFFFFFFFFFFFFFFFFF,FFFFFFFFFFFF:FFFF,FFFFF,FFFFFFFFFFFF:FF,F
FFFFFFFFFFFFFF:FF:

```

+

[illegible]



FFFFFFFFFFFFFFFFFFFFFFFFFFFFFFFFFFFFFFFFFFFFFFFFFFFFFFFFFFFFFFFF:F,FF:FFFFFFFFFFFF  
FFFFFFFFFFFFFFFF

@A00721:190:HGJW7DSXY:4:1464:6949:28087 2:N:0:TCTGCAAG+GCTGCACT  
CTTACAGGACCAAGAGTCTGATACCCGAAGTCCATCTAGAAGTGAAAACTCTGTGGGCTAGATCT  
CTAGGCCACATAATTACATGTTTCGGATATCTAGACTTTAATTCGAACTATATTGAATAACGCATG  
GTATAACATCATAGA

+

FFFFFFFFFFFFFFFFFFFFFFFFFFFFFFFFFFFFFFFFFFFFFFFFFFFFFFFFFFFFFFFFFFFFF  
FFFFFFFFFFFFFFFFFFFFFFFFFFFFFFFFFFFFFFFFFFFFFFFFFFFFFFFFFFFFFFFFFFFFF:FFFF  
FFFFFFFFFFFF:F

@A00721:190:HGJW7DSXY:4:1469:10628:10567 2:N:0:TCTGCAAG+GCTGCACT  
CTTACAGGACCAAGAGTCTGATACTCGAAGTCCATCTAGAAGTGAAAACTCTGTGGGCTAGATCT  
CTAGGCCACATAATTACATGTTTCGGATATCTAGACTTTAATTCGAACTATATTGAATAACGCATG  
GTATAACATCATAGA

+

FFFFF:,FFFF:F,,F::F,FFFFFFFF:F,:FFFF,FFF:::FFFFFFFFF,,:F,:F,:FFFF  
FFFFF:FFFFFFFFFFFFF,,FFF:FFFFFFFFF::FFFFF:,FFF:F,FFF,F,FFFFF:F:F:F  
FFF,FFFFFFFFF:F

@A00721:190:HGJW7DSXY:4:1557:1072:34538 2:N:0:TCTGCAAG+GCTGCACT  
CTTACAGGACCAAGAGTCTGATACTCGAAGTCCATCTAGAAGTGAAAACTCTGTGGGCTAGATCT  
CTAGGCCACATAATTACATGTTTCGGATATCTAGACTTTAATTCGAACTATATTGAATAACGCATG  
GTATAACATCATAGA

+

FFFFFFFFFFFFFFFFFFFFFFFFFFFFFFFFFFFFFFFFFFFFFFFFFFFFFFFFFFFFFFFFFFFFF  
FFFFFFFFFFFFFFFFFFFFFFFFFFFFFFFFFFFFFFFFFFFFFFFFFFFFFFFFFFFFFFFFFFFFF:FFF:FFFFFF:FFF,F  
FFFFFFFFFFFFFFFFF:

@A00721:190:HGJW7DSXY:4:2130:19081:32064 2:N:0:TCTGCAAG+GCTGCACT  
CTTACAGGACCAAGAGTCTGATACTCGAAGTCCATCTAGAAGTGAAAACTCTGTGGGCTAGATCT  
CTAGGCCACATAATTACATGTTTCGGATATCTAGACTTTAATTCGAACTATATTGAATAACGCATG  
GTATAACATCATAGA

+

FFFFFFFFFFFFFFFFFFFFFFFFFFFFFFFFFFFFFFFFFFFFFFFFFFFFFFFFFFFFFFFFFFFFF  
FFFFFFFFFFFFFFFFFFFFFFFFFFFFFFFFFFFFFFFFFFFFFFFFFFFFFFFFFFFFFFFFFFFFF:FFFFFFFFFFFFFFFFFFFFF  
FFFFFFFFFFFFFFFFF:

@A00721:190:HGJW7DSXY:4:2403:10429:30483 2:N:0:TCTGCAAG+GCTGCACT  
CTTACAGGACCAAGAGTCTGATACTCGAAGTCCATCTAGAAGTGAAAACTCTGTGGGCTAGATCT  
CTAGGCCACATAATTACATGTTTCGGATATCTAGACTTTAATTCGAACTCTATTGAATAACGCATG  
GTATAACATCATAGA

+

FFFFFFFFFFFFFFFFFFFFFFFFFFFFFFFFFFFFFFFFFFFFFFFFFFFFFFFFFFFFFFFFFFFFF:FFFFFFFFFFFF  
FFFFFFFFFFFFFFFFFFFFFFFFFFFFFFFFFFFF,FFFF:FFFFFFFFFFFFFFFFF:,F:FFFFFFFFFFFFF,F  
FF:FFFFFFFFFFFFF:

@A00721:190:HGJW7DSXY:4:1154:30309:34225 2:N:0:TCTGCAAG+GCTGCACT  
AGACCTTACAGGACCAAGAGTCTGATACTCGAAGTCCATCTAGAAGTGAAAACTCTGTGGGCTAG  
ATCTCTAGGCCACATAATTACATGTTTCGGATATCTAGACTTTAATTCGAACTATATTGAATAACG  
CATGCTATAACATCA

+

FFFFFFFFFFFFFFFFFFFFFFFFFFFFFFFFFFFFFFFFFFFFFFFFFFFFFFFFFFFFFFFFFFFFF:FFF:FFFFFF:FFFFFFFFFFFFF  
FFFFFFFFFFFFFFFFFFFFFFFFFFFFFFFFFFFFFFFFFFFFFFFFFFFFFFFFFFFFFFFFFFFFF:FFFFFFFFFFFFFFFFFFFFF  
FFFFFFFFFFFFFFFFF

@A00721:190:HGJW7DSXY:4:1154:30770:36495 2:N:0:TCTGCAAG+GCTGCACT  
AGACCTTACAGGACCAAGAGTCTGATACTCGAAGTCCATCTAGAAGTGAAAACTCTGTGGGCTAG  
ATCTCTAGGCCACATAATTACATGTTTCGGATATCTAGACTTTAATTCGAACTATATTGAATAACG  
CATGCTATAACATCA

+  
FFFFFFFFFFFFFFFFFFFFFFFFFFFFFFFFFFFFFFFFFFFFFFFFFFFFFFFFFFFFFFFFFFFFFFFF  
FFFFFFFFFFFFFFFFFFFFFFFFFFFFFFFFFFFFFFFFFFFFFFFFFFFFFFFFFFFFFFFFFFFFFFFF:FFFFFFFF:FFF  
FFFFFFFF:FFFFF

@A00721:190:HGJW7DSXY:4:1174:10963:24893 2:N:0:TCTGCAAG+GCTGCACT  
AGACCTTACAGGACCAAGAGTCTGATACTCGAAGGTCCATCTAGAAGTGAAAAACTCTGTGGGCTAG  
ATCTCTAGGCCACATAATTACATGTTCGGATATCTAGACTTTAATTCGAACTATATTGAATAACG  
CATGCTATAACATCA

+  
FFFFFFFFFFFFFFFFFFFFFFFFFFFFFFFFFFFFFFFFFFFFFFFFFFFFFFFFFFFFFFFFFFFFFFFF  
FFFFFFFFFFFFFFFFFFFFFFFFFFFFFFFFFFFFFFFFFFFFFFFFFFFFFFFFFFFFFFFFFFFFFFFF:FFFFFFFFFFFFFFFFFFFFFFFFFFFFFFFF  
FFFFF,FFFFF:F

@A00721:190:HGJW7DSXY:4:1204:27127:34131 2:N:0:TCTGCAAG+GCTGCACT  
AGACCTTACAGGACCAAGAGTCTGATACTCGAAGGTCCATCTAGAAGTGAAAAACTCTGTGGGCTAG  
ATCTCTAGGCCACATAATTACATGTTCGGATATCTAGACATTAATTCGAACTATATTGAATAACG  
CATGGTATAACATCA

+  
FFFFFFFFFFFFFFFFFFFFFFFFFFFFFFFFFFFFFFFFFFFFFFFFFFFFFFFFFFFFFFFFFFFFFFFF  
FFFFFFFFFFFFFFFFFFFFFFFFFFFFFFFFFFFFFFFFFFFFFFFFFFFFFFFFFFFFFFFFFFFFFFFF,FFFFFFFFFFFFFFFF:FFFFF:FFFFFFFF  
FFFFFFFFFFFFFFFF

@A00721:190:HGJW7DSXY:4:1434:7310:27586 2:N:0:TCTGCAAG+GCTGCACT  
AGACCTTACAGGACCAAGAGTCTGATACTCGAAGGTCCATCTAGAAGTGAAAAACTCTGTGGGCTAG  
ATCTCTAGGCCACATAATTACATGTTCGGATATCTAGACTTTAATTCGAACTATATTGAATAACG  
CATGGTATAACATCA

+  
F:FFFFFFFFFFFFFFFFFFFFFFFFFFFFFFFFFFFFFFFFFFFFFFFFFFFFFFFFFFFFFFFFFFFFFFFF  
FFFFFFFFFFFFFFFFFFFFFFFFFFFFFFFFFFFFFFFFFFFFFFFFFFFFFFFFFFFFFFFFFFFFFFFF:FFFFFFFFFFFFFFFF:FFFFF:FFFFFF  
FFFFFFFFFFFFFFFF

@A00721:190:HGJW7DSXY:4:2143:4065:24283 2:N:0:TCTGCAAG+GCTGCACT  
AGACCTTACAGGACCAAGAGTCTGATACTCGAAGGTCCATCTAGAAGTGAAAAACTCTGTGGGCTAG  
ATCTCTAGGCCACATAATTACATGTTCGGATATCTAGACTTTAATTCGAACTATATTGAATAACG  
CATGCTATAACATCA

+  
FFFFFFFFFFFFFFFFFFFFFFFFFFFFFFFFFFFFFFFFFFFFFFFFFFFFFFFFFFFFFFFFFFFFFFFF  
FFFFFFFFFFFFFFFFFFFFFFFFFFFFFFFFFFFFFFFFFFFFFFFFFFFFFFFFFFFFFFFFFFFFFFFF  
FFFFFFFFFFFFFFFF

@A00721:190:HGJW7DSXY:4:2163:8006:30170 2:N:0:TCTGCAAG+GCTGCACT  
AGACCTTACAGGACCAAGAGTCTGATACTCGAAGGTCCATCTAGAAGTGAAAAACTCTGTGGGCTAG  
ATCTCTAGGCCACATAATTACATGTTCGGATATCTAGACTTTAATTCGAACTATATTGAATAACG  
CATGCTATAACATCA

+  
FFFFFFFFFFFFFFFFFFFFFFFFFFFFFFFFFFFFFFFFFFFFFFFFFFFFFFFFFFFFFFFFFFFFFFFF  
FFFFFFFFFFFFFFFFFFFFFFFFFFFFFFFFFFFFFFFFFFFFFFFFFFFFFFFFFFFFFFFFFFFFFFFF:F:FF:FFFFFFFFF:  
FFFFF:FFFFFFF

@A00721:190:HGJW7DSXY:4:2228:28908:11945 2:N:0:TCTGCAAG+GCTGCACT  
AGACCTTACAGGACCAAGAGTCTGATACTCGAAGGTCCATCTAGAAGTGAAAAACTCTGTGGGCTAG  
ATCTCTAGGCCACATAATTACATGTTCGGATATCTAGACTTTAATTCGAACTATATTGAATAACG  
CATGCTATAACATCA

+  
FFFFFFFFFFFFFFFFFFFFFFFFFFFFFFFFFFFFFFFFFFFFFFFFFFFFFFFFFFFFFFFFFFFFFFFF  
FFFFFFFFFFFFFFFFFFFFFFFFFFFFFFFFFFFFFFFFFFFFFFFFFFFFFFFFFFFFFFFFFFFFFFFF:,FFFFFFFFFFFF  
FFFFFFFF:FFFFF

@A00721:190:HGJW7DSXY:4:2403:17933:8469 2:N:0:TCTGCAAG+GCTGCACT  
AGACCTTACAGGACCAAGAGTCTGATACTCGAAGGTCCATCTAGAAGTGAAAAACTCTGTGGGCTAG

ATCTCTAGGCCACATAATTACATGTTCTGGATATCTAGACTTTAATTCGAACTATATTCGAATAACG  
CATGCTATAACATCA

```

FFFFFFFF:FFFFFF:FFFFFFFFFFFFFFFFFFFFFFFFFFFFFFFFFFFFFFFFFFFFFFFF
FFFFFFFFFFFFFFFFFFFFFFFFFFFFFFFFFFFFFFFF,FFFFFFFFFFFFFFFF:FFF,
FFFFFFFF:FFF
FFFFF::FFFFFFFF

```

 $+$ 

```

FFFFFFFFFFFFFFFFFFFFFFFFFFFFFFFFFFFFFFFFFFFFFFFFFFFFFFFFFFFFFFFFFFFFFFFF
F:FFFFFFFFFFFFFFFF,FF:FFFF:F:FF,FFFFFFFF:F:FFF:FFFFFFFF:F:FFFFFFFF
FF,FFFFFFFF:FF:F

```

 $+$ 

```

FFFFFFFF:FFFFFFFFFFFFFFFFFFFFFFFFFFFFFFFF:FFFFFFFFFFFFFFFFFFFFFFFFFFFFFFFF
,FFFFFFFFFFFFFFFFFFFFFFFFFFFFFFFFFFFFFFFF,FFFFFFFFFFFFFFFF,FF,FFFFFFFFFFFFFF
FFFFFFFF:FFFFFFF

```

+

[illegible]

+

[illegible]

+

```

FFFFFFFFFFFFFFFFFFFFFFFFFFFFFFFFFFFFFFFF,FFFFFFFFFFFFFFFFFFFF,FFFFFFFFFFFF:,,:FFFF
FFFFFFFFFFFFFFFFFFFF:FFFFFFFFFFFFFFFFFFFFFFFFFFFFFFFFFFFF:FFFFFF,FFF:FFFFFFFFFFFFFFFFFFFF:F
FF:FFFFFFFFFFFFFFFF

```

+

[illegible]

$+$ 

+

+

+

+

+

 $+$



+  
FFFFFFFF:FFFFFFFFFFFFFFFFFFFFFFFFFFFFFFFFFFFFFFFFFFFFFFFFFFFFFFFF  
F:FFFFFFFFFFFFFFFF:FFFFFFFF:FFFF,F:FFFFFFFF:FFFF,FFFFFFFF,FFFFFFFF  
F::FF:FFFF:FF  
@A00721:190:HGJW7DSXY:4:2504:10999:36761 2:N:0:TCTGCAAG+GCTGCACT  
AATATATTCTCACCTGAGTCCAGACCTTACAGGACCAAGAGTCTGATACTCGAAGGTCCATCTAGAAG  
TGGAAAAACTCTGTGGGCTAGATCTCTAGGCCACACATAATTACATGTTTCGGATATCTAGACTTTAATT  
CGAAACTATATTCGA

+  
FFFFFFFFFFFFFFFF:FFFFFFFFFFFFFFFFFFFFFFFFFFFFFFFFFFFFFFFFFFFFFFFFFFFFFFFF  
FFFFFFFFFFFFFFFFFFFFFFFF:FFFFFFFFFFFFFFFFFFFFFFFF:FFFFFFFFFFFFFFFF,FF:FF:FFFF  
FFFFFFFF,FFFFF  
@A00721:190:HGJW7DSXY:4:2275:14027:27853 2:N:0:TCTGCAAG+GCTGCACT  
ATAATATATTCTCACCTGAGTCCAGACCTTACAGGACCAAGAGTCTGATACTCGAAGGTCCATCTAGA  
AGTGGAAAAACTCTGTGGGCTAGATCTCTAGGCCACACATAATTACATGTTTCGGATATCTAGACTTTAA  
TTCGAAACTATATTC

+  
FFFFFFFFFFFFFFFFFFFFFFFFFFFFFFFFFFFFFFFFFFFFFFFFFFFFFFFFFFFFFFFF:FFFFFFFFFFFFFFFF  
FFFFFFFFFFFFFFFFFFFFFFFFFFFFFFFFFFFFFFFFFFFFFFFF:FFFFFFFF,FFFFFFFFFFFFFFFF  
FFFFFFFF:FFFFF  
@A00721:190:HGJW7DSXY:4:1113:27570:4304 2:N:0:TCTGCAAG+GCTGCACT  
CCATAATATATTCTCACCTGAGTCCAGACCTTACAGGACCAAGAGTCTGATACTCGAAGGTCCATCTA  
GAAGTGGAAAAACTCTGTGGGCTAGATCTCTAGGCCACACATAATTACATGTTTCGGATATCTAGACTTT  
AATTCGAAACTATAT

+  
FF,:FFFFFFFFFFFFFFFFFFFFFFFFFFFFFFFFFFFFFFFF:FFFFFFFFFFFFFFFFFFFFFFFF:FF  
FFFFFFFF:FFFFF:FFFFFFFF:FFFFFFFFFFFFFFFF:FFFFFFFFFFFFFFFFFFFFFFFF  
FFFFFFFF,FFFF,F  
@A00721:190:HGJW7DSXY:4:1134:4164:35383 2:N:0:TCTGCAAG+GCTGCACT  
CCATAATATATTCTCACCTGAGTCCAGACCTTACAGGACCAAGAGTCTGATACTCGAAGGTCCATCTA  
GAAGTGGAAAAACTCTGTGGGCTAGATCTCTAGGCCACACATAATTACATGTTTCGGATATCTAGACTTT  
AATTCGAAACTATAT

+  
FFFFFFFFF:FFFFFFFFFFFFFFFFFFFFFFFFFFFFFFFFFFFFFFFFFFFFFFFFFFFFFFFF:FFFF  
FFFFFFFFFFFFFFFF:FFFFFFFFFFFFFFFFFFFFFFFFFFFFFFFFFFFFFFFF:F::FFFF,FFFFFFFF:F  
FFFFFFFFF:FFFF  
@A00721:190:HGJW7DSXY:4:1178:31756:17534 2:N:0:TCTGCAAG+GCTGCACT  
CCATAATATATTCTCACCTGAGTCCAGACCTTACAGGACCAAGAGTCTGATACTCGAAGGTCCATCTA  
GAAGTGGAAATACTCTGTGGGCTAGATCTCTAGGCCACACATAATTACATGTTTCGGATATCTAGACTTT  
AATTCGAAACTATAT

+  
FFFFFFFFFFFFFFFF:FFFFFFFFFFFFFFFFFFFFFFFFFFFFFFFFFFFFFFFFFFFFFFFFFFFFFFFF  
FFFFFFFF:F,FFFFFFFFFFFFFFFFFFFFFFFFFFFFFFFFFFFFFFFFFFFFFFFFFFFFFFFF:FFFF  
FFFFFFFF:FFFFF  
@A00721:190:HGJW7DSXY:4:1348:28809:34882 2:N:0:TCTGCAAG+GCTGCACT  
CCATAATATATTCTCACCTGAGTCCAGACCTTACAGGACCAAGAGTCTGATACTCGAAGGTCCATCTA  
GAAGTGGAAAAACTCTGTGGGCTAGATCTCTAGGCCACACATAATTACATGTTTCGGATATCTAGACTTT  
AATTCGAAACTATAT

+  
FFFFFFFFFFFFFFFFFFFFFFFFFFFFFFFFFFFFFFFFFFFFFFFFFFFFFFFFFFFFFFFF:FFFFFFFFFFFFFFFF  
FFFFFFFFF:FFFFFFFFFFFFFFFFFFFFFFFFFFFFFFFFFFFFFFFFFFFFFFFFFFFFFFFFFFFFFFFF  
FFFFFFFFF:FFF  
@A00721:190:HGJW7DSXY:4:2121:28619:3333 2:N:0:TCTGCAAG+GCTGCACT  
CCATAATATATTCTCACCTGAGTCCAGACCTTACAGGACCAAGAGTCTGATACTCGAAGGTCCATCTA



@A00721:190:HGJW7DSXY:4:1647:28745:34491 2:N:0:TCTGCAAG+GCTGCACT  
GGGTGACCCATAATATATTCTCACCTGAGTCCAGACCTTACAGGACCAAGAGTCTGATACTCGAAGCT  
CCATCTAGAAGTGGA AAAACTCTGTGGGCTAGATCTCTAGGCCACATAATTACATGTTCCGATATCT  
AGACTTTAATT CGAA

+

FFFFFFFFFFFFFFFFFFFFFFFFFFFFFFFFFFFFFFFFFFFFFFFFFFFFFFFFFFFFFFFFFFFFFFFF, F  
FFFFFFFFFFFFFFFFFFFFFFFFFFFFFFFFFFFFFFFFFFFFFFFFFFFFFFFFFFFFFFFF: FFFFFFFFFFFFFFFFFF  
FFFFFFFFFFFFFF, F:

@A00721:190:HGJW7DSXY:4:2152:6045:1313 2:N:0:TCTGCAAG+GCTGCACT  
GGGTGACCCATAATATATTCTCACCTGAGTCCAGACCTTACAGGACCAAGAGTCTGATACTCGAAGGT  
CCATCTAGAAGTGGA AAAACTCTGTGGGCTAGATCTCTAGGCCACATAATTACATGTTCCGATATCT  
AGACTTTAATT CGAA

+

FFFFFF, FFFF: FFFFFFFFFFFFFFFFFFFFFFFFFFFFFFFFFFFFFFFFFFFFFFFFFFFFFFFFF: FFFF  
F: FFF: FFFFFFFFFFFFFFFFFFFFFFFFF: FFFFFFFFFFFFFFFFF: FFFFFFFFFFFFFFFFF  
F: FFFF: FFFFFFFF

@A00721:190:HGJW7DSXY:4:2152:5177:2660 2:N:0:TCTGCAAG+GCTGCACT  
GGGTGACCCATAATATATTCTCACCTGAGTCCAGACCTTACAGGACCAAGAGTCTGATACTCGAAGGT  
CCATCTAGAAGTGGA AAAACTCTGTGGGCTAGATCTCTAGGCCACATAATTACATGTTCCGATATCT  
AGACTTTAATT CGAA

+

FFFFFF, FFFFFFF: F: FFFFFFFFFFFFFFFFFFFFFFFFFFFFFFFFFFFFFFFFFFFFFFFFF: FFFF  
FFFF: FFFFFFFFFFFFFFFFFFFFFFFFF: FFFFFFFFFFFFFFFFF: FFFFFFF, : FFFFFFFFFFFFFFFFF  
F, F: F: FFFFFFFF

@A00721:190:HGJW7DSXY:4:1140:14651:30655 2:N:0:TCTGCAAG+GCTGCACT  
TGGGTGACCCATAATATATTCTCACCTGAGTCCAGACCTTACAGGACCAAGAGTCTGATACTCGAAGG  
TCCATCTAGAAGTGGA AAAACTCTGTGGGCTAGATCTCTAGGCCACATAATTACATGTTCCGATATC  
TAGACTTTAATT CGA

+

FFFFFFFF: FFFFFFF: FFFFFFFFFFFFFFFFFFFFFFFFF: FFFFFFFFFFFFF, FFFFFFFFF: FFFFFF  
FFF: FFFFF, FFFFFFF: FFFFFFFFFFFFFFFFF: FFFFFFFFFFFFFFFFFFFFFFFFFFFFFFFFF  
FFFFFFFFFFFF: FFF

@A00721:190:HGJW7DSXY:4:1241:9688:28510 2:N:0:TCTGCAAG+GCTGCACT  
TGGGTGACCCATAATATATTCTCACCTGAGTCCAGACCTTACAGGACCAAGAGTCTGATACTCGAAGG  
TCCATCTAGAAGTGGA AAAACTCTGTGGGCTAGATCTCTAGGCCACATAATTACATGTTCCGATATC  
TAGACTTTAATT CGA

+

FFFFFFFF: FFFFFFFFFFFFFFFFFFFFFFFFFFFFFFFFFFFFFFFFFFFFFFFFFFFFFFFFF: FFFF  
FFFFFFFF, FFFFFFFFFFFFFFFFFFFFFFFFFFFFFFFFFFFFFFFFFFFFFFFFF: FFFFFFFF:  
FFFFFFFFFFFFFFFF

@A00721:190:HGJW7DSXY:4:1249:27841:27759 2:N:0:TCTGCAAG+GCTGCACT  
TGGGTGACCCATAATATATTCTCACCTGAGTCCAGACCTTACAGGACCAAGAGTCTGATACTCGAAGG  
TCCATCTAGAAGTGGA AAAACTCTGTGGGCTAGATCTCTAGGCCACATAATTACATGTTCCGATATC  
TAGACTTTAATT CGA

+

FFFFFFFF: FFFFFFFFFFFFFFFFFFFFFFFFFFFFFFFFFFFFFFFFFFFFFFFFFFFFFFFFF: FFFF  
FFFFFFFF: FFFFFFFFFFFFFFFFFFFFFFFFFFFFFFFFF: FFFFFF, FFFFFFF, FFFFFFFFF  
FFFFFFFFFFFFFFFF

@A00721:190:HGJW7DSXY:4:1271:27796:31375 2:N:0:TCTGCAAG+GCTGCACT  
TGGGTGACCCATAATATATTCTCACCTGAGTCCAGACCTTACAGGACCAAGAGTCTGATACTCGAAGG  
TCCATCTAGAAGTGGA AAAACTCTGTGGGCTAGATCTCTAGGCCACATAATTACATGTTCCGATATC  
TAGACTTTAATT CGA

+

FFFFFFFF: FF: F: FFFFFFFFF: FFFFFFFFFFFFFFFFFFFFFFFFFFFFFFFFFFFFFFFFF



FFFFFF:FFFFFFFFFFFFFFFFFFFFFFFFFFFFFFFFFFFFFFFFFFFFFFFFFFFFFFFFFFFFFFFF:FFFFF:FFFFFFFFFFFF  
FF:FFFFF:FFFFF

@A00721:190:HGJW7DSXY:4:1341:26341:17237 2:N:0:TCTGCAAG+GCTGCACT  
TGGGTGACCCATAATATATTCTCACCTGAGTCCAGACCTTACAGGACCAAGAGTCTGATACTCGAAGG  
TCCATCTAGAAGTGGAAAAACTCTGTGGGCTAGATCTCTAGGCCACATAATTACATGTTCGGATATC  
TAGACTTTAATTCGA

+

FFFFFF:FFFFFFFFF:F:FFFFFF:FFFFFFFFF:FFFFFFFFFFFFFFFFF:FFFFFFFFFFFFFFFFFFFF  
FFFFFF:FFFFF,FFFFFF:FFFFFFFFF:FFFFFFFFFFFFFFFFF:FFFF,FFFFFFFFFFFF,:FF:F:FF,  
FFFFFF:FFFFFFFF

@A00721:190:HGJW7DSXY:4:2209:7889:33567 2:N:0:TCTGCAAG+GCTGCACT  
TGGGTGACCCATAATATATTCTCACCTGAGTCCAGACCTTACAGGACCAAGAGTCTGATACTCGAAGG  
TCCATCTAGAAGTGGAAAAACTCTGTGGGCTAGATCTCTAGGCCACATAATTACATGTTCGGATATC  
TAGACTTTAATTCGA

+

FFFFFFFF:FFFFFFFF,FFFFFFFFFFFFFFFFFFFFFFFFFFFFFFFFFFFFFFFFFFFFFFFFF:FFFFFFFFFFFF:FFFFFFF  
FFFFFFFFFFFFFFFFFFFFFFFFFFFFFFFFFFFFFFFFF:FFFFFFFFFFFFFFFFFFFFFFFFF:FFFFFFFFFFFF,FFFFFFFFF  
FFF:FFFFFFFF:F

@A00721:190:HGJW7DSXY:4:2418:23791:28166 2:N:0:TCTGCAAG+GCTGCACT  
TGGGTGACCCATAATATATTCTCACCTGAGTCCAGACCTTACAGGACCAAGAGTCTGATACTCGAAGG  
TCCATCTAGAAGTGGAAAAACTCTGTGGGCTAGATCTCTAGGCCACATAATTACATGTTCGGATATC  
TAGACTTTAATTCGA

+

FFFFFFFFFFFFFFFFFFFFF,FFFFFFFFFFFFFFFFFFFFFFFFFFFFFFFFFFFFFFFFFFFFFFFFFFFFFFFFF  
FFFFFFFFFFFFFFFFFFFFFFFFFFFFFFFFFFFFFFFFF:FFFFFFFFFFFFFFFFFFFFFFFFFFFFFFFFFFFFFFFFF:FF  
FF:FFF:FFFFFF:F

@A00721:190:HGJW7DSXY:4:2552:7862:5337 2:N:0:TCTGCAAG+GCTGCACT  
TGGGTGACCCATAATATATTCTCACCTGAGTCCAGACCTTACAGGACCAAGAGTCTGATACTCGAAGG  
TCCATCTAGAAGTGGAAAAACTCTGTGGGCTAGATCTCTAGGCCACATAATTACATGTTCGGATATC  
TAGACTTTAATTCGA

+

FFFFFFFF:FFFFFF:F:FFFFFFFFFFFFFFFFFFFFFFFFFFFFFFFFFFFFFFFFFFFFFFFFFFFFFFFFF  
FFFFFFFFFFFFFFFFFFFFFFFFFFFFFFFFFFFFFFFFF:FFFFFFFFFFFFFFFFFFFFFFFFFFFFFFFFFFFFFFFFF  
FFFFFFFFFFFFFFFF:F

@A00721:190:HGJW7DSXY:4:2633:28131:14512 2:N:0:TCTGCAAG+GCTGCACT  
TGGGTGACCCATAATATATTCTCACCTGAGTCCAGACCTTACAGGACCAAGAGTCTGATACTCGAAGG  
TCCATCTAGAAGTGGAAAAACTCTGTGGGCTAGATCTCTAGGCCACATAATTACATGTTCGGATATC  
TAGACTTTAATTCGA

+

:FFFFFFFF:FFFFFFFFFFFFFFFFFFFFFFFFFFFFFFFFFFFFFFFFFFFFFFFFFFFFFFFFF:FF  
FFFFFFFFFFFFFFFFFFFFFFFFFFFFFFFFFFFFFFFFF:FFFFFFFFFFFFFFFFFFFFFFFFFFFFFFFFF  
:,FFFFFFFFFFFF

@A00721:190:HGJW7DSXY:4:1226:28266:19069 2:N:0:TCTGCAAG+GCTGCACT  
ATTGGGTGACCCATAATATATTCTCACCTGAGTCCAGACCTTACAGGACCAAGAGTCTGATACTCGAA  
GGTCCATCTAGAAGTGGAAAAACTCTGTGGGCTAGATCTCTAGGCCACATAATTACATGTTCGGATA  
TCTAGACTTTAATTC

+

FFFFF:FF:F:FFFFFFFFFFFFFFFFF:F:FFFFFFFFFFFFFFFFFFFFFFFFF:FFF,FFFFFFFFFFFF  
FFFFFF,FFFFFFFFFFFFFFFFF:FFFFFFFFFFFFFFFFF:FFFFFFFFF,F,,FFF:F::FFF:F  
FFFFFFFFFFFFFFFFF

@A00721:190:HGJW7DSXY:4:1323:25527:33270 2:N:0:TCTGCAAG+GCTGCACT  
ATTGGGTGACCCATAATATATTCTCACCTGAGTCCAGACCTTACAGGACCAAGAGTCTGATACTCGAA  
GGTCCATCTAGAAGTGGAAAAACTCTGTGGGCTAGATCTCTAGGCCACATAATTACATGTTCGGATA  
TCTAGACTTTAATTC

```

FFFFFFFFFFFFFFFFFFFF:FFFFFFFFFFFFFFFFFFFF:FFFFFFFFFFFFFFFFFFFF
FFFFFFFF:FFFFFFFFFFFFFFFFFFFFFFFFFFFFFFFF:FFFFFFFFF,FFFFFFFFF:FFFF:FF
FFFFFFFFFFFFFFFFFFFF

```

[illegible]

```
FFFFFFFFFFFFFFFFFFFFFFFFFFFFFFFFFFFFFFFFFFFFFFFFFFFFFFFFFFFFFFF
FFFFFFFFF:FFFFFFFFFFFFFFFFFFFFF:FFFFFFFFFFFFFFFFFFFF,F:FFFFFFF
FFFFFFF:FFFFFFF
```

[illegible]

```

FFFFFFFF:FFFFFFFF:FFFFFFFFFFFFFFFFFFFFFFFFFFFFFFFF:FFFFFFFFFFFFFFFFFFFFFFFFFFFFFFFF
FFFFFFFFFFFFFFFFFFFFFFFFFFFFFFFF, :FFFFFFFFFFFFFFFFFFFFFFFF:FFFFFFFFFFFFFFFFFFFFFFFF, F:FFFF
FFFFFFFFFFFFFFFF

```

```

FFFFFFFFFFFFFFFFFFFFFFFFFFFFFFFFFFFFFFFFFFFFFFFFFFFFFFFFFFFFFFF:FFFF:
FFFFFFFFFFFFFF:FFFFFFFFFFFFFFFFFF:FFFFFFFFFFFFFFFFFFFFFFFFFFFF,FFFFFFFFFF
FFFFF:FFFFFFFFF

```

```
FFFFFFFFFFFFFF:FFFFFFFFFFFFFFFFFFFFFFFFFFFFFFFFFFFFFFFFFFFFF
FFFFFFFFFF.:FFFFFFFFFFFFFFFFFFFFFFFFFFFFFFFFFFFFFFFF:F
FE:E:EE:EEEEEE:
```

@A00721:190:HGJW7DSXY:4:2453:12753:9173 2:N:0:TCTGCAAG+GCTGCACT  
TGGGTGACCCATAATATATTCTCACCTGAGTCCAGACCTTACAGGACCAAGAGTCTGATACTCGAAGG



@A00721:190:HGJW7DSXY:4:1625:18213:31939 2:N:0:TCTGCAAG+GCTGCACT  
GAGTTACAGTATTGGGTGACCCATAATATATTCTCACCTGAGTCCAGACCTTACAGGACCAAGAGTCT  
GATACTCGAAGGTCCATCTAGAAGTGGAAAACTCTGTGGGCTAGATCTCTAGGCCACACATAATTACA  
TGTTTCGGATATCTAG

+

FFFFFFFFFFFFFFFFFFFF,FFFFFFFFFFFFFFFF:FFFFFFFFFFFFFFFFFFFFFFFFFFFFFFFFFFFF  
FFFFFFFFFFFFFFFFFFFFFFFFFFFFFFFFFFFFFFFF,FFFFFFFFFFFFFFFFFFFFFFFFFFFFFFFFFFFF  
FFFFFFFFFFFF,FFFFF

@A00721:190:HGJW7DSXY:4:1673:8214:8703 2:N:0:TCTGCAAG+GCTGCACT  
GAGTTACAGTATTGGGTGACCCATAATATATTCTCACCTGAGTCCAGACCTTACAGGACCAAGAGTCT  
GATACTCGAAGGTCCATCTAGAAGTGGAAAACTCTGTGGGCTAGATCTCTAGGCCACACATAATTACA  
TGTTTCGGATATCTAG

+

FFF,FFF:FFFFFFFFFFFF:FFFFFFFFFFFFFFFFFFFFFFFFFFFFFFFFFFFFFFFFFFFFFFFFFFFF  
FFFFFFFFFFFFFFFFFFFFFFFFFFFFFFFFFFFFFFFFFFFFFFFFFFFFFFFFFFFFFFFFFFFFFFFFFFFF  
FFFFFFFFFFFFFFFFFFFF

@A00721:190:HGJW7DSXY:4:2139:32470:1517 2:N:0:TCTGCAAG+GCTGCACT  
GAGTTACAGTATTGGGTGACCCATAATATATTCTCACCTGAGTCCAGACCTTACAGGACCAAGAGTCT  
GATACTCGAAGGTCCATCTAGAAGTGGAAAACTCTGTGGGCTAGATCTCTAGGCCACACATAATTACA  
TGTTTCGGATATCTAG

+

FFFFFFFFFFFFFFFFFFFFF:FFFFFFFFFFFFFFFFFFFFFFFFFFFFFFFFFFFFFFFFFFFFFFFFFFFF  
FFFFFFFFFFFF,FFFFFFFFFFFFFFFFFFFFFFFFFFFF,FFFFFFFFFFFFFFFFFFFFFFFFFFFF,FFFFF:FFFFF  
FFFFFFFFFFFFFFFFFFFF

@A00721:190:HGJW7DSXY:4:2410:14389:4492 2:N:0:TCTGCAAG+GCTGCACT  
GAGTTACAGTATTGGGTGACCCATAATATATTCTCACCTGAGTCCAGACCTTACAGGACCAAGAGTCT  
GATACTCGAAGGTCCATCTAGAAGTGGAAAACTCTGTGGGCTAGATCTCTAGGCCACACATAATTACA  
TGTTTCGGATATCTAG

+

:FFFF:FFFFFFFFFFFFFFFF,FFFFFF:FFFF:FF:FFFFFFFFFFFFFFFF,FFFFFFFFFFFFFFFFFFFF  
FFFFFFFFFFFFFFFFFFFFFFFFFFFFFFFFFFFFFFFF,FFFFFFFFFFFFFFFFFFFFFFFFFFFF:FFF,FFFFFFFFFFFF,  
FFFFFFFFFFFF:FFFFF

@A00721:190:HGJW7DSXY:4:2450:15673:3646 2:N:0:TCTGCAAG+GCTGCACT  
GAGTTACAGTATTGGGTGACCCATAATATATTCTCACCTGAGTCCAGACCTTACAGGACCAAGAGTCT  
GATACTCGAAGGTCCATCTAGAAGTGGAAAACTCTGTGGGCTAGATCTCTAGGCCACACATAATTACA  
TGTTTCGGATATCTAG

+

FFFFFFFFFFFFFFFFFFFFFFFFFFFFFFFFFFFFFFFFFFFFFFFFFFFFFFFFFFFFFFFFFFFFFFFFFFFF  
FFFFFFFFFFFFFFFFFFFFFFFFFFFFF:FFFFFFFF:FFFFFFFFFFFFFFFFFFFFFFFFFFFFFFFFFFFF  
FFFFFFFFFFFFFFFFFFFF

@A00721:190:HGJW7DSXY:4:2450:16396:3740 2:N:0:TCTGCAAG+GCTGCACT  
GAGTTACAGTATTGGGTGACCCATAATATATTCTCACCTGAGTCCAGACCTTACAGGACCAAGAGTCT  
GATACTCGAAGGTCCATCTAGAAGTGGAAAACTCTGTGGGCTAGATCTCTAGGCCACACATAATTACA  
TGTTTCGGATATCTAG

+

FFFFFFFFFFFFFFFFFFFFF:FFFFFFFFFFFFFFFFFFFFFFFFFFFFFFFFFFFFFFFFFFFFFFFFFFFF  
FFFFFFFFFFFFFFFFFFFFFFFFFFFFFFFFFFFFFFFFFFFFFFFFFFFFFFFFFFFFFFFFFFFF:FFFFFFFFFFFFFFFFFFFF  
FFFFFFFFFFFFFFFFFFFF

@A00721:190:HGJW7DSXY:4:2450:25111:21872 2:N:0:TCTGCAAG+GCTGCACT  
GAGTTACAGTATTGGGTGACCCATAATATATTCTCACCTGAGTCCAGACCTTACAGGACCAAGAGTCT  
GATACTCGAAGGTCCATCTAGAAGTGGAAAACTCTGTGGGCTAGATCTCTAGGCCACACATAATTACA  
TGTTTCGGATATCTAG

+

FFFFFFFFFFFFF:FFFFFFFF,FFFFFFFFFFFFFFFF:FFFFFFFFFFFFFFFFFFFFFFFFFFFFFFFFFFFF

FFFFFFFFFFFFFFFFFFFFFFFFFFFFFFFFFFFFFFFFFFFFFFFFFFFFFFFFFFFFFFFFFFFFFFFF:FF:FFFFFFFFFFFF  
FFFFFFFFFF,FFFFF

@A00721:190:HGJW7DSXY:4:2649:12952:8954 2:N:0:TCTGCAAG+GCTGCACT  
GAGTTACAGTATTGGGTGACCCATAATATATTCTCACCTGAGTCCAGACCTTACAGGACCAAGAGTCT  
GATACTCGAAGGTCCATCTAGAAGTGGAAAACTCTGTGGGCTAGATCTCTAGGCCACATAATTACA  
TGTTCCGATATCTAG

+

F:FFFFFFFFFFFFFFFFFFFFFFFFFFFFFFFFFFFFFFFFFFFFFFFFFFFFFFFFFFFFFFFFFFFFF  
FFFFFFFFFFFFFFFFFFFFFFFFFFFFFFFFFFFFFFFFFFFFFFFFFFFFFFFFFFFFFFFFFFFFFFFF  
F,FFFFFFFFFFFFFFFF

@A00721:190:HGJW7DSXY:4:1577:2031:24737 2:N:0:TCTGCAAG+GCTGCACT  
GAGTTACAGTATTGGGTGACCCATAATATATTCTCACCTGAGTCCAGACCTTACAGGACCAAGAGTCT  
GATACTCGAAGGTCCATCTAGAAGTGGAAAACTCTGTGGGCTAGATCTCTAGGCCACATAATTACA  
TGTTCCGATATCTA

+

FFFFFFFFFFFFFFFFFFFFFFFFFFFFFFFFFFFFFFFFFFFFFFFFFFFFFFFFFFFFFFFFFFFFFFFF  
FFFFFFFFFFFFFFFFFFFFFFFFFFFFFFFFFFFFFFFFFFFFFFFFFFFFFFFFFFFFFFFFFFFFFFFF  
FFFFFFFFFFFFFFFFFFFF

@A00721:190:HGJW7DSXY:4:1368:3387:19445 2:N:0:TCTGCAAG+GCTGCACT  
TTACAGTATTGGGTGACCCATAATATATTCTCACCTGAGTCCAGACCTTACAGGACCAAGAGTCTGAT  
ACTCGAAGGTCCATCTAGAAGTGGAAAACTCTGTGGGCTAGATCTCTAGGCCACATAATTACATGT  
TCGGATAGATCGGAA

+

FFFFFFFFFFFFFFFFFFFFFFFFFFFFFFFFFFFFFFFFFFFFFFFFFFFFFFFFFFFFFFFFFFFFFFFF  
FFFFFFFFFFFFFFFFFFFFFFFFFFFFFFFFFFFFFFFFFFFFFFFFFFFFFFFFFFFFFFFFFFFFFFFF  
FFFFFFFFFFFFFFFFFFFF

@A00721:190:HGJW7DSXY:4:1374:28601:23093 2:N:0:TCTGCAAG+GCTGCACT  
TTACAGTATTGGGTGACCCATAATATATTCTCACCTGAGTCCAGACCTTACAGGACCAAGAGTCTGAT  
ACTCGAAGGTCCATCTAGAAGTGGAAAACTCTGTGGGCTAGATCTCTAGGCCACATAATTACATGT  
TCGGATAGATCGGAA

+

FFFFFFFFFFFFFFFFFFFFFFFFFFFFFFFFFFFFFFFFFFFFFFFFFFFFFFFFFFFFFFFFFFFFFFFF:FF  
FFFFFFFFFFFFFFFFFFFFFFFFFFFFFFFFFFFFFFFFFFFFFFFFFFFFFFFFFFFFFFFFFFFFFFFF  
FF,FFFFFFFFFFFFFFFF

@A00721:190:HGJW7DSXY:4:1167:8639:9721 2:N:0:TCTGCAAG+GCTGCACT  
CACAAGAGTTACAGTATTGGGTGACCCATAATATATTCTCACCTGAGTCCAGACCTTACAGGACCAAG  
AGTCTGATACTCGAAGGTCCATCTAGAAGTGGAAAACTCTGTGGGCTAGATCTCTAGGCCACATAA  
TTACATGTTCCGATA

+

FFFFFFFFFFFFFFFFFFFFFFFFFFFFFFFFFFFFFFFFFFFFFFFFFFFFFFFFFFFFFFFFFFFFFFFF  
FFFFFFFFFFFFFFFFFFFFFFFFFFFFFFFFFFFFFFFFFFFFFFFFFFFFFFFFFFFFFFFFFFFFFFFF:FFFFFFFFFFFFFFFFFFFFF  
FFFFFFFFFFFFFFFFFFFF

@A00721:190:HGJW7DSXY:4:1405:28718:22576 2:N:0:TCTGCAAG+GCTGCACT  
CACAAGAGTTACAGTATTGGGTGACCCATAATATATTCTCACCTGAGTCCAGACCTTACAGGACCAAG  
AGTCTGATACTCGAAGGTCCATCTAGAAGTGGAAAACTCTGTGGGCTAGATCTCTAGGCCACATAA  
TTACATGTTCCGATA

+

FFFFFFFFFFFFFFFFFFFFFFFFFFFFFFFFFFFFFFFFFFFFFFFFFFFFFFFFFFFFFFFFFFFFFFFF  
FFFFFFFFFFFFFFFFFFFFFFFFFFFFFFFFFFFFFFFFFFFFFFFFFFFFFFFFFFFFFFFFFFFFFFFF:FFFFFFFFFFFFFFFFFFFFF  
FFFFFFFFFFFFFFFFFFFF

@A00721:190:HGJW7DSXY:4:1536:23647:13354 2:N:0:TCTGCAAG+GCTGCACT  
CACAAGAGTTACAGTATTGGGTGACCCATAATATATTCTCACCTGAGTCCAGACCTTACAGGACCAAG  
AGTCTGATACTCGAAGGTCCATCTAGAAGTGGAAAACTCTGTGGGCTAGATCTCTAGGCCACATAA  
TTACATGTTCCGATA

+  
FFFFFFFFFFFFFFFFFFFFFFFFFFFFFFFFFFFFFFFFFFFFFFFFFFFFFFFFFFFFFFFFFFFFFFFF  
FFFFFFFFFFFFFFFFFFFFFFFFFFFFFFFFFFFFFFFFFFFFFFFFFFFFFFFFFFFFFFFFFFFFFFFF  
FFFFFFFFFFFFFFFF

@A00721:190:HGJW7DSXY:4:1108:2184:30295 2:N:0:TCTGCAAG+GCTGCACT  
GTTGTTCCACAAGAGTTACAGTATTGGGTGACCCATAATATATTCTCACCTGAGTCCAGACCTTACAG  
GACCAAGAGTCTGATACTCGAAGGTCCATCTAGAAGTGAAAAACTCTGTGGGCTAGATCTCTAGGCC  
CACATAATTACATGT

+  
FFFFFFFFFFFFFFFFFFFFFFFFFFFFFFFFFFFFFFFFFFFFFFFFFFFFFFFFFFFFFFFFFFFFFFFF  
FFFFFFFFFFFFFFFFFFFFFFFFFFFFFFFFFFFFFFFFFFFFFFFFFFFFFFFFFFFFFFFFFFFFFFFF  
FFFFFFFFFFFFFFFF

@A00721:190:HGJW7DSXY:4:1155:4942:28087 2:N:0:TCTGCAAG+GCTGCACT  
GTTGTTCCACAAGAGTTACAGTATTGGGTGACCCATAATATATTCTCACCTGAGTCCAGACCTTACAG  
GACCAAGAGTCTGATACTCGAAGGTCCATCTAGAAGTGAAAAACTCTGTGGGCTAGATCTCTAGGCC  
CACATAATTACATGT

+  
FFFFFFFFFFFFFFFFFFFFFFFFFFFFFFFFFFFFFFFFFFFFFFFFFFFFFFFFFFFFFFFFFFFFFFFF  
FFFFFFFFFFFFFFFFFFFFFFFFFFFFFFFFFFFFFFFFFFFFFFFFFFFFFFFFFFFFFFFFFFFFFFFF  
FFFFFFFFFFFFFFFF,FFF

@A00721:190:HGJW7DSXY:4:1155:5367:28385 2:N:0:TCTGCAAG+GCTGCACT  
GTTGTTCCACAAGAGTTACAGTATTGGGTGACCCATAATATATTCTCACCTGAGTCCAGACCTTACAG  
GACCAAGAGTCTGATACTCGAAGGTCCATCTAGAAGTGAAAAACTCTGTGGGCTAGATCTCTAGGCC  
CACATAATTACATGT

+  
FFFFFFFFFFFFFFFFFFFFFFFFFFFFFFFFFFFFFFFFFFFFFFFFFFFFFFFFFFFFFFFFFFFFFFFF  
FFFFFFFFFFFFFFFFFFFFFFFFFFFFFFFFFFFFFFFFFFFFFFFFFFFFFFFFFFFFFFFFFFFFFFFF  
FFFFFFFFFFFFFFFF

@A00721:190:HGJW7DSXY:4:1165:23167:34851 2:N:0:TCTGCAAG+GCTGCACT  
GTTGTTCCACAAGAGTTACAGTATTGGGTGACCCATAATATATTCTCACCTGAGTCCAGACCTTACAG  
GACCAAGAGTCTGATACTCGAAGGTCCATCTAGAAGTGAAAAACTCTGTGGGCTAGATCTCTAGGCC  
CACATAATTACATGT

+  
FFFFFFFFFFFFFFFFFFFFFFFFFFFFFFFFFFFFFFFFFFFFFFFFFFFFFFFFFFFFFFFFFFFFFFFF  
FFFFFFFFFFFFFFFFFFFFFFFFFFFFFFFFFFFFFFFFFFFFFFFFFFFFFFFFFFFFFFFFFFFFFFFF  
FFFF,F:FFFF:FF

@A00721:190:HGJW7DSXY:4:1242:11867:7889 2:N:0:TCTGCAAG+GCTGCACT  
GTTGTTCCACAAGAGTTACAGTATTGGGTGACCCATAATATATTCTCACCTGAGTCCAGACCTTACAG  
GACCAAGAGTCTGATACTCGAAGGTCCATCTAGAAGTGAAAAACTCTGTGGGCTAGATCTCTAGGCC  
CACATAATTACATGT

+  
FFF:FFFFFFFFFFFFFFFFFFFFFFFFFFFFFFFFFFFFFFFFFFFFFFFFFFFFFFFFFFFFFFFF  
FFFFFFFFFFFFFFFFFFFFFFFFFFFFFFFFFFFFFFFFFFFFFFFFFFFFFFFFFFFFFFFFFFFFFFFF  
FFFFFFFFFFFFFFFF

@A00721:190:HGJW7DSXY:4:1307:27407:35336 2:N:0:TCTGCAAG+GCTGCACT  
GTTGTTCCACAAGAGTTACAGTATTGGGTGACCCATAATATATTCTCACCTGAGTCCAGACCTTACAG  
GACCAAGAGTCTGATACTCGAAGGTCCATCTAGAAGTGAAAAACTCTGTGGGCTAGATCTCTAGGCC  
CACATAATTACATGT

+  
F:FFFFFFFFFFFFFFFFFFFFFFFFFFFFFFFFFFFFFFFFFFFFFFFFFFFFFFFFFFFFFFFF  
FFFFFFFFFFFFFFFFFFFFFFFFFFFFFFFFFFFFFFFFFFFFFFFFFFFFFFFFFFFFFFFFFFFFFFFF  
FFFFFFFFFFFFFFFF

@A00721:190:HGJW7DSXY:4:1328:30337:31015 2:N:0:TCTGCAAG+GCTGCACT  
GTTGTTCCACAAGAGTTACAGTATTGGGTGACCCATAATATATTCTCACCTGAGTCCAGACCTTACAG

GACCAAGAGTCTGATACTCGAAGGTCCATCTAGAAGTGGA AAAACTCTGTGGGCTAGATCTCTAGGCC  
CACATAATTACATGT

```
FFFFFFFFFFFFFFFFFFFFFFFFFFFFFFFFFFFFFFFFFFFFFFFFFFFFFFFFFFFF:FFFFFFFFFFFFFFFFFFFFFFF
F:FFFFFFFFFFFFFFFFFFFFFFFFFFFFFFFFFFFFFFFFFFFFFFFFFFFFFFFFFFFF:FFFFFFFFFFFFFFFFFFFFFFF
FFFFFFFFFFFFFFFFFFFF
```

+

@A00721:190:HGJW7DSXY:4:2302:8856:22341 2:N:0:TCTGCAAG+GCTGCACT  
GTTGTTCCACAAGAGTTACAGTATTGGGTGACCCATAATATATTCTCACCTGAGTCCAGACCTTACAG  
GACCAAGAGTCTGATACTCGAAGGTCCATCTAGAAGTGGA AAAACTCTGTGGGCTAGATCTCTAGGCC  
CACATAATTACATGT

[illegible]

+

@A00721:190:HGJW7DSXY:4:2624:23439:31093 2:N:0:TCTGCAAG+GCTGCACT  
GTTGTTCCACAAGAGTTACAGTATTGGGTGACCCATAATATATTCTCACCTGAGTCCAGACCTTACAG  
GACCAAGAGTCTGATACTCGAAGGTCCATCTAGAAGTGAAAAACTCTGTGGGCTAGATCTCTAGGCC  
CACATAATTACATGT

```
FFFFFFFFFFFFFFFF:FFFFFFFFFFFFFFFF:FFFFFFFFF:FFFFFFFFFFFFFFFFFFFF
FFFFFFFFFFFFFFFFFFFFFFFFFFFFFFFF:FFFFFFF,FFFFFFFFFFFFFFFFFFFFFFFF
FFFFFFFFFFFFFFFF
```

 $+$ 

@A00721:190:HGJW7DSXY:4:1213:14877:14450 2:N:0:TCTGCAAG+GCTGCACT  
ATTCGTTGTTCCACAAGAGTTACAGTATTGGGTGACCCATAATATATTCTCACCTGAGTCCAGACCTT  
ACAGGACCAAGAGTCTGATACTCGAAGGTCCATCTAGAAGTGGAAAACTCTGTGGGCTAGATCTCTA  
GGCCACATAATTAC

```

FFFFFFFFFFFFFFFFFFFFFFFFFFFFFFFF:FFFFFFFFFFFFFFFFFFFFFFFFFFFFFFFF
FFFFFFFFFFFFFFFFFFFFFFFFFFFFFFFF:FFFFFFFFFFFFFFFFFFFFFFFFFFFFFFFF
FFFFFFFFFFFFFF,FF

```

@A00721:190:HGJW7DSXY:4:1439:1316:19680 2:N:0:TCTGCAAG+GCTGCACT  
GTAATTATGTGGGCCTAGAGATCTAGCCACAGAGTTTTTCCACTTCTAGATGGACCTTCGAGTATCA  
GACTCTTGGTCTGTAAAGTCTGGACTCAGGTGAGAATATATTATGGGTCACCCAATACTGTAACCTCT  
TGTGGAACAACGAAT

+

F,FFFFFFFF:FFFFFFFF:FFFFFFFF:FFFFFF:FFFF:FFFFFFFFFFFFFFFF:FF:FFFFFF  
,FFF:FFFF,F,F:FF:FFFFFF,F,FFFF:FFFF:FFFFFFFF,FFFFFFFF:FF,,FFFFFFFF  
FFFF:FFFFFFFF:F

@A00721:190:HGJW7DSXY:4:1459:30888:16689 2:N:0:TCTGCAAG+GCTGCACT  
ATTCGTTGTTCCACAAGAGTTACAGTATTGGGTGACCCATAATATATTCTCACCTGAGTCCAGACCTT  
ACAGGACCAAGAGTCTGATACTCGAAGGTCCATCTAGAAGTGAAAAACTCTGTGGGCTAGATCTCTA  
GGCCACATAATTAC

+

FFFFFFFFFFFFFFFFFFFFFFFFFFFFFFFFFFFFFFFFFFFFFFFFFFFFFFFFFFFFFFFFFFFFFFFF:FFFF  
FFFF:FFFF:FFFFFFFFFFFFFFFFFFFFFFFFFFFFFFFFFFFFFFFFFFFFFFFFFFFFFFFF:FFF:,FFFFFFFF  
FFFF:FFFFFFFF

@A00721:190:HGJW7DSXY:4:1518:3983:8672 2:N:0:TCTGCAAG+GCTGCACT  
GTAATTATGTGGGCCTAGAGATCTAGCCACAGAGTTTTTCCACTTCTAGATGGACCTTCGAGTATCA  
GACTCTTGGTCTGTAAAGTCTGGACTCAGGTGAGAATATATTATGGGTCACCCAATACTGTAACCTCT  
TGTGGAACAACGAAT

+

FFFFFFFFFFFFFFFFFFFFFFFFFFFFFFFFFFFFFFFFFFFFFFFFFFFFFFFFFFFFFFFFFFFFFFFF:FFFF  
FFFFFFFFFFFFFFFFFFFFFFFFFFFFFFFFFFFFFFFFFFFFFFFFFFFFFFFFFFFFFFFFFFFFFFFF:FFFF  
FFFFFFFFFFFFFFFF:F

@A00721:190:HGJW7DSXY:4:1542:27172:27884 2:N:0:TCTGCAAG+GCTGCACT  
ATTCGTTGTTCCACAAGAGTTACAGTATTGGGTGACCCATAATATATTCTCACCTGAGTCCAGACCTT  
ACAGGACCAAGAGTCTGATACTCGAAGGTCCATCTAGAAGTGAAAAACTCTGTGGGCTAGATCTCTA  
GGCCACATAATTAC

+

FFFFFFFFFFFFFFFFFFFFFFFFFFFFFFFFFFFFFFFFFFFFFFFFFFFFFFFFFFFFFFFFFFFFFFFF:FFFF  
FFFFFFFFFFFFFFFFFFFFFFFFFFFFFFFFFFFFFFFFFFFFFFFFFFFFFFFFFFFFFFFFFFFFFFFF:FFFF  
FF:FFFF:F:FFF

@A00721:190:HGJW7DSXY:4:1611:2844:36041 2:N:0:TCTGCAAG+GCTGCACT  
ATTCGTTGTTCCACAAGAGTTACAGTATTGGGTGACCCATAATATATTCTCACCTGAGTCCAGACCTT  
ACAGGACCAAGAGTCTGATACTCGAAGGTCCATCTAGAAGTGAAAAACTCTGTGGGCTAGATCTCTA  
GGCCACATAATTAC

+

FFFFFFFFFFFFFFFFFFFFFFFFFFFFFFFFFFFFFFFFFFFFFFFFFFFFFFFFFFFFFFFFFFFFFFFF:FFFF  
FFFF:FFFFFFFFFFFFFFFFFFFFFFFFFFFFFFFFFFFFFFFFFFFFFFFFFFFFFFFFFFFFFFFFFFFFFFFF:FFFF  
FFFFFFFFFFFFFFFF

@A00721:190:HGJW7DSXY:4:2205:6723:17581 2:N:0:TCTGCAAG+GCTGCACT  
ATTCGTTGTTCCACAAGAGTTACAGTATTGGGTGACCCATAATATATTCTCACCTGAGTCCAGACCTT  
ACAGGACCAAGAGTCTGATACTCGAAGGTCCATCTAGAAGTGAAAAACTCTGTGGGCTAGATCTCTA  
GGCCACATAATTAC

+

FFFFFFFFFFFFFFFFFFFFFFFFFFFFFFFFFFFFFFFFFFFFFFFFFFFFFFFFFFFFFFFFFFFFFFFF:FFFF  
FFFFFFFFFFFFFFFFFFFFFFFFFFFFFFFFFFFFFFFFFFFFFFFFFFFFFFFFFFFFFFFFFFFFFFFF:FFFF  
FFFFFFFFFFFFFFFF:

@A00721:190:HGJW7DSXY:4:2219:7536:19429 2:N:0:TCTGCAAG+GCTGCACT  
ATTCGTTGTTCCACAAGAGTTACAGTATTGGGTGACCCATAATATATTCTCACCTGAGTCCAGACCTT  
ACAGGACCAAGAGTCTGATACTCGAAGGTCCATCTAGAAGTGAAAAACTCTGTGGGCTAGATCTCTA  
GGCCACATAATTAC

+

F:FFFFFFFFFFFFFFFF:FFFF:FFFF:FFFFFFFF:FFFFFFFFFFFFFFFFFFFFFFFFFFFFFFFF



@A00721:190:HGJW7DSXY:4:2219:7383:19539 2:N:0:TCTGCAAG+GCTGCACT  
ATTCGTTGTTCCACAAGAGTTACAGTATTGGGTGACCCATAATATATTCTCACCTGAGTCCAGACCTT  
ACAGGACCAAGAGTCTGATACTCGAAGGTCCATCTAGAAGTGGAAAACTCTGTGGGCTAGATCTCTA  
GGCCACATAATTAC

@A00721:190:HGJW7DSXY:4:2309:10583:34225 2:N:0:TCTGCAAG+GCTGCACT  
GTAATTATGTGGGCCTAGAGATCTAGCCACAGAGTTTTTCCACTTCTAGATGGACCTTCGAGTATCA  
GACTCTTGGTCCTGTAAGGTCTGGACTCAGGTGAGAATATATTATGGGTCACCCAATACTGTAECTCT  
TGTGGAACAACGAAT

@A00721:190:HGJW7DSXY:4:2471:5502:26991 2:N:0:TCTGCAAG+GCTGCACT  
ATTCGTTGTTCCACAAGAGTTACAGTATTGGGTGACCCATAATATATTCTCACCTGAGTCCAGACCTT  
ACAGGACCAAGAGTCTGATACTCGAAGGTCCATCTAGAAGTGGA AAAACTCTGTGGGCTAGATCTCTA  
GGCCACATAATTAC

@A00721:190:HGJW7DSXY:4:2544:16550:15781 2:N:0:TCTGCAAG+GCTGCACT  
ATTCGTTGTTCCACAAGAGTTACAGTATTGGGTGACCCATAATATATTCTCACCTGAGTCCAGACCTT  
ACAGGACCAAGAGTCTGATACTCGAAGGTCCATCTAGAAGTGGA AAAACTCTGTGGGCTAGATCTCTA  
GGCCACATAATTAC

@A00721:190:HGJW7DSXY:4:1420:21558:36542 2:N:0:TCTGCAAG+GCTGCACT  
ATTCGTTGTTCCACAAGAGTTACAGTATTGGGTGACCCATAATATATTCTCACCTGAGTCCAGACCTT  
ACAGGACCAAGAGTCTGATACTCGAAGGTCCATCTAGAAGTGGAAAACTCTGTGGGCTAGATCTCTA  
GGCCACATAA

@A00721:190:HGJW7DSXY:4:1104:18891:31266 2:N:0:TCTGCAAG+GCTGCACT  
CACAATCATTCGTTGTTCCACAAGAGTTACAGTATTGGGTGACCCATAATATATTCTCACCTGAGTCC  
AGACCTTACAGGACCAAGAGTCTGATACTCGAAGGTCCATCTAGAAGTGAAAAACTCTGTGGGCTAG  
ATCTCTAGGCCCCACA

@A00721:190:HGJW7DSXY:4:1108:3432:23093 2:N:0:TCTGCAAG+GCTGCACT  
CACAATCATTCGTTGTTCCACAAGAGTTACAGTATTGGGTGACCCATAATATATTCTCACCTGAGTCC  
AGACCTTACAGGACCAAGAGTCTGATACTCGAAGGTCCATCTAGAAGTGAAAAACTCTGTGGGCTAG  
ATCTCTAGGCCCA

+  
FFFFFF,FFFFFFFFFFFFFFFFFFFFFFFF:FFFFFFFFFFFFFF,FFFFFFFFFFFFFFFFFFFFFFFF  
FFFFFFFFFFFFFFFFFFFFFFFFFFFFFFFFFFFFFFFFFFFFFFFFFFFFFFFFFFFFFFFF:FFFFFFF  
FFFFFFFFFFFFFFFF

@A00721:190:HGJW7DSXY:4:1109:4264:19241 2:N:0:TCTGCAAG+GCTGCACT  
CACAATCATTCGTTGTTCCACAAGAGTTACAGTATTGGGTGACCCATAATATATTCTCACCTGAGTCC  
AGACCTTACAGGACCAAGAGTCTGATACTCGAAGGTCCATCTAGAAGTGAAAAACTCTGTGGGCTAG  
ATCTCTAGGCCACA

+  
FFFFFF,F:FFFFFF:FFFFFFFFFFFF:FFFFFFFFFFFFFFFF,FFFFFFFFFFFFFFFFFFFFFFFF  
FFFFFFFFFFFFFFFFFFFFFFFFFFFFFFFFFFFFFFFFFFFFFFFFFFFFFFFFFFFFFFFF  
F:FFFFFFFFFFFFFF

@A00721:190:HGJW7DSXY:4:1350:14742:36260 2:N:0:TCTGCAAG+GCTGCACT  
CACAATCATTCGTTGTTCCACAAGAGTTACAGTATTGGGTGACCCATAATATATTCTCACCTGAGTCC  
AGACCTTACAGGACCAAGAGTCTGATACTCGAAGGTCCATCTAGAAGTGAAAAACTCTGTGGGCTAG  
ATCTCTAGGCCACA

+  
FFFFF:,FFFF:FFFFFF:FF:FFFFFFFFFFFFFFFFFFFF:FFFF:FFFFFFFFFFFF:FF:FFF  
FFFFFFFFFFFFFFFFFFFF:FFFFFFFFFFFFFFFFFFFFFFFFFFFFFFFFFFFFFFFF  
FFFFFFFFFFFFFF,FF

@A00721:190:HGJW7DSXY:4:1443:7048:34240 2:N:0:TCTGCAAG+GCTGCACT  
CACAATCATTCGTTGTTCCACAAGAGTTACAGTATTGGGTGACCCATAATATATTCTCACCTGAGTCC  
AGACCTTACAGGACCAAGAGTCTGATACTCGAAGGTCCATCTAGAAGTGAAAAACTCTGTGGGCTAG  
ATCTCTAGGCCACA

+  
FFFFFF:F:FFFFFFFFFFFFFFFFFFFF:FFFFFFFFFFFFFFFFFFFF,FFFFFFFFFFFFFFFFFFFF  
FFFFFFFFFFFFFFFFFFFFFFFFFFFFFFFFFFFFFFFFFFFF:FFFFFFFFFFFFFFFFFFFF  
FFFFFF:FFFFFF

@A00721:190:HGJW7DSXY:4:1505:26883:13510 2:N:0:TCTGCAAG+GCTGCACT  
CACAATCATTCGTTGTTCCACAAGAGTTACAGTATTGGGTGACCCATAATATATTCTCACCTGAGTCC  
AGACCTTACAGGACCAAGAGTCTGATACTCGAAGGTCCATCTAGAAGTGAAAAACTCTGTGGGCTAG  
ATCTCTAGGCCACA

+  
FFFFFF,F,:,FFF:FFF:F,FF:FF:FFFF:FFF:F,FFFF::F:FFFFFFFFFFFF::FFFF  
F:F:F::FFFF:FF:F::FFFF:FFFFF:FFFF,FFFF:FFFF,FFFFF::FF:FFFFFFF  
FF,FFFFFFF:FF:F

@A00721:190:HGJW7DSXY:4:1628:25039:30765 2:N:0:TCTGCAAG+GCTGCACT  
CACAATCATTCGTTGTTCCACAAGAGTTACAGTATTGGGTGACCCATAATATATTCTCACCTGAGTCC  
AGACCTTACAGGACCAAGAGTCTGATACTCGAAGGTCCATCTAGAAGTGAAAAACTCTGTGGGCTAG  
ATCTCTAGGCCACA

+  
FFFFFF,FF:::FFFFFF:FFF,FFF,:FFFF:F:FFFFFFFFFFFF:FFFF:,FFFFFF,FFFF:FFF  
F,FFFF,FFFF,FFFFFFFFFFFFFFFFFFFFFFFF:FFFFFFFF:::FFFF:FFFFFFFF::FFF:  
F:FFFFFF:FFFFFF

@A00721:190:HGJW7DSXY:4:1673:28257:10473 2:N:0:TCTGCAAG+GCTGCACT  
CACAATCATTCGTTGTTCCACAAGAGTTACAGTATTGGGTGACCCATAATATATTCTCACCTGAGTCC  
AGACCTTACAGGACCAAGAGTCTGATACTCGAAGGTCCATCTAGAAGTGAAAAACTCTGTGGGCTAG  
ATCTCTAGGCCACA

+  
FFFFFF,FFFFFFFFFFFFFFFFFFFF:FFFF:FFFF:FF:FFFFFFFFFFFFFFFFFFFF:FFFF  
FFFF,FFFFFFFFFFFFFFFFFFFF,FFF:FFFFFFFFFFFFFFFFFFFFFFFFFFFF:FFFF  
FFFFFFFFFFFFFF

@A00721:190:HGJW7DSXY:4:2169:3622:4288 2:N:0:TCTGCAAG+GCTGCACT  
CACAATCATTCGTTGTTCCACAAGAGTTACAGTATTGGGTGACCCATAATATATTCTCACCTGAGTCC

AGACCTTACAGGACCAAGAGTCTGATACTCGAAGGTCCATCTAGAAGTGAAAACTCTGTGGGCTAG  
ATCTCTAGGCCCA

+

FFFFFF:FFFFFFFFFFFFFFFFFFFFFFFFFFFFFFFFFFFFFFFFFFFFFFFFFFFFFFFFFFFFFFFF  
FFFFFFFFFFFFFFFFFFFFFFFFFFFFFFFFFFFFFFFFFFFFFFFFFFFFFFFFFFFFFFFFFFFFFFFF:FFFFFFFFFFFF,F  
FFFFFF:FFFFFFF

@A00721:190:HGJW7DSXY:4:2172:6659:36292 2:N:0:TCTGCAAG+GCTGCACT  
CACAATCATTCGTTGTTCCACAAGAGTTACAGTATTGGGTGACCCATAATATATTCTCACCTGAGTCC  
AGACCTTACAGGACCAAGAGTCTGATACTCGAAGGTCCATCTAGAAGTGAAAACTCTGTGGGCTAG  
ATCTCTAGGCCCA

+

FFFFFF,F:FFFFFFFFFFFFFFFFFFFFFFFFFFFFFFFFFFFFFFFFFFFFFFFFFFFFFFFFFFFFFFFF  
FFFFFFFFFFFFFFFFFFFFFFFFFFFFFFFFFFFFFFFFFFFFFFFFFFFFFFFFFFFFFFFFFFFFFFFF:FFFFFFFFFFFF,FFFFFFFFFFFFFFFF  
FFFFFFFFFFFFFFFFFFFF

@A00721:190:HGJW7DSXY:4:2335:6650:32487 2:N:0:TCTGCAAG+GCTGCACT  
CACAATCATTCGTTGTTCCACAAGAGTTACAGTATTGGGTGACCCATAATATATTCTCACCTGAGTCC  
AGACCTTACAGGACCAAGAGTCTGATACTCGAAGGTCCATCTAGAAGTGAAAACTCTGTGGGCTAG  
ATCTCTAGGCCCA

+

FFFFFFFFFFFFFFFFFFFFFFFFFFFFFFFFFFFFFFFFFFFFFFFFFFFFFFFFFFFFFFFFFFFFFFFF  
FFFFFFFFFFFFFFFFFFFFFFFFFFFFFFFFFFFFFFFFFFFFFFFFFFFFFFFFFFFFFFFFFFFFFFFF:FFFFFFFFFFFF,FFFFFFFFFFFFFFFF  
FF:FFFFFFFFFFFFF

@A00721:190:HGJW7DSXY:4:2337:30563:13526 2:N:0:TCTGCAAG+GCTGCACT  
CACAATCATTCGTTGTTCCACAAGAGTTACAGTATTGGGTGACCCATAATATATTCTCACCTGAGTCC  
AGACCTTACAGGACCAAGAGTCTGATACTCGAAGGTCCATCTAGAAGTGAAAACTCTGTGGGCTAG  
ATCTCTAGGCCCA

+

FFFFFFFFFFFFFFFFFFFFFFFFFFFFFFFFFFFFFFFFFFFFFFFFFFFFFFFFFFFFFFFFFFFFFFFF  
FFFFFFFFFFFFFFFFFFFFFFFFFFFFFFFFFFFFFFFFFFFFFFFFFFFFFFFFFFFFFFFFFFFFFFFF:FFF  
FFFFFFFFFFFF:FFFF

@A00721:190:HGJW7DSXY:4:2407:14109:23234 2:N:0:TCTGCAAG+GCTGCACT  
CACAATCATTCGTTGTTCCACAAGAGTTACAGTATTGGGTGACCCATAATATATTCTCACCTGAGTCC  
AGACCTTACAGGACCAAGAGTCTGATACTCGAAGGTCCATCTAGAAGTGAAAACTCTGTGGGCTAG  
ATCTCTAGGCCCA

+

FFFFFF,F:FFFFFFFFFFFFFFFFFFFFFFFFFFFFFFFFFFFFFFFFFFFFFFFFFFFFFFFFFFFFFFFF  
FFFFFFFFFFFFFFFFFFFFFFFFFFFFFFFFFFFFFFFFFFFFFFFFFFFFFFFFFFFFFFFFFFFFFFFF:FFF  
FFFFFFFFFFFF:FFFF

@A00721:190:HGJW7DSXY:4:2416:25220:5619 2:N:0:TCTGCAAG+GCTGCACT  
CACAATCATTCGTTGTTCCACAAGAGTTACAGTATTGGGTGACCCATAATATATTCTCACCTGAGTCC  
AGACCTTACAGGACCAAGAGTCTGATACTCGAAGGTCCATCTAGAAGTGAAAACTCTGTGGGCTAG  
ATCTCTAGGCCCA

+

FFFFFF,F:FFFFFFFFFFFF:FFFFFF:FFFFFFFFFFFFFFFFFFFFFFFFFFFFFFFFFFFFFFFF  
FFFF:FFFFFF:F,FFFFFFFFFFFFFFFFFFFFFFFFFFFFFFFFFFFFFFFFFFFFFFFFFFFFFFFF:FFFFFFF:FFFFFFF  
FFFFFFFFFFFFFFFFFFFF

@A00721:190:HGJW7DSXY:4:2420:6189:1564 2:N:0:TCTGCAAG+GCTGCACT  
CACAATCATTCGTTGTTCCACAAGAGTTACAGTATTGGGTGACCCATAATATATTCTCACCTGAGTCC  
AGACCTTACAGGACCAAGAGTCTGATACTCGAAGGTCCATCTAGAAGTGAAAACTCTGTGGGCTAG  
ATCTCTAGGCCCA

+

FFFFFF,,FFFFFFFFFFFFFFFF:FFFFFF:FFFFFFFFFFFFFFFFFFFFFFFFFFFFFFFF:FFFFFF:FFFFFFFFFFFFFFFF  
FFFFFFFFFFFFFFFFFFFFFFFFFFFFFFFFFFFFFFFFFFFFFFFFFFFFFFFFFFFFFFFF:FFFFFFF:FFF:FFFFFFF  
:FFFFFFFFFFFFFFFF

@A00721:190:HGJW7DSXY:4:2432:25798:20400 2:N:0:TCTGCAAG+GCTGCACT  
CACAATCATTCGTTGTTCCACAAGAGTTACAGTATTGGGTGACCCATAATATATTCTCACCTGAGTCC  
AGACCTTACAGGACCAAGAGTCTGATACTCGAAGGTCCATCTAGAAGTGAAAAACTCTGTGGGCTAG  
ATCTCTAGGCCCA

[illegible]

+

```

FFFF:F,,FFFF,FFF:FF,F:FFFFFFFFFFFFFFFFFFFFFFFFFFFFFFFF,FFFFFFFFFFFFFFFF:FFFF
F::FF:FFFFFFFFFFFFFFFF,FFFFFFF:FFF:FFFFFFF:FF,,FFF,FFFFFFFFF,FFFF:FFFFFFF
,FFFF:,FFFF:FFF

```

+

```

FFFFFFFF,F,FFFFFFFFFFFFFFFFFFFFFFFFFFFFFFFF:FF:FFF,FFFFFFFFFFFFFFFF
FFFF:FFFFFFFFFFFFFFFFFFFFFFFF:FFF,FFFFFFFFFFFFFFFFFFFFFFFF:FFFFFFFF
FFFFFFFFFFFFFFFF

```

+

[illegible]

+

```
FFFF:F,:F,FFFFFFFFFFFFFFFF:FFFFFF:FFFFFFF:FFFFF,F:FFFFFFFFFFFFFFFFFFFFF
,F,:F:FFFFFFF:FFFFFFFFFFFFFFFFFFFFFFFFFFFFF:FF,F,FFFFFFFFFFFFFFFFFFFFFFFF
.FFFFF:FFFFFF;
```

+

```

FFFFFFFF,FFFFFFFFFFFFFFFFFFFFFFFFFFFFFFFF:FFFFFFFFFFFFFFFFFFFFFFFFFFFFFFFF
FFFFFFFFFFFFFFFFFFFFFFFFFFFFFFFFFFFFFFFF:FFFFFFFFFFFF:FFFFFFFFFFFFFFFF
FFFFFFFFFFFFFFFF

```

+

```

FFFFFFFF.:FFFFFFFFFFFFFFFFFFFFFFFFFFFFFFFFFFFFF:FFFFFFFFFFFF:FFFFFFFFFFFFFFFFFFFF:FFFFFFFFFFFF

```

[illegible]

+

@A00721:190:HGJW7DSXY:4:1401:15637:31422 2:N:0:TCTGCAAG+GCTGCACT  
CCACAATCATTCGTTGTTCCACAAGAGTTACAGTATTGGGTGACCCATAATATATTCTCACCTGAGTC  
CAGACCTTACAGGACCAAGAGTCTGATACTCGAAGGTCCATCTAGAAGTGAAAACTCTGTGGGCTA  
GATCTCTAGGCCAC

```
F:FFFFF,FF::F:FF:FFFFFFFF:FFFFFFFF,F:FF:FFFFFFFFFFFFFFFF:FFFF:FFFFF,F
FFFFF, :FFF:F:FFF:FFFF:FFFFFFFF:FFFFFFFF:FFFF:FFF:FF:FF:FFFFF:F, :F:FFF
FFFFFFFFFFFFFFFF
```

+

@A00721:190:HGJW7DSXY:4:1470:30192:14137 2:N:0:TCTGCAAG+GCTGCACT  
CCACAATCATTCGTTGTTCCACAAGAGTTACAGTATTGGGTGACCCATAATATATTCTCACCTGAGTC  
CAGACCTTACAGGACCAAGAGTCTGATACTCGAAGGTCCATCTAGAAGTGGA AAAACTCTGTGGGCTA  
GATCTCTAGGCCAC

```
FFFFFFFF:FFFFFFFFFFFFFFFFFFFFF,FFFFFFFFFFFFFFFFFFFFFFFFF:FFFFFFFFFFFFFFFFFFFF
FFFFFFFFFFFFFFFFFFFFFFFFFFFFFFFFFFFFFFFFFFFFFFFFFFFFF:FF:FFFFFFFFF,FFFFFFFFFFFFF
FFFFFFFFFFFFFFFFFFFF
```

+

@A00721:190:HGJW7DSXY:4:2347:1705:21136 2:N:0:TCTGCAAG+GCTGCACT  
CACAATCATTCGTTGTTCCACAAGAGTTACAGTATTGGGTGACCCATAATATATTCTCACCTGAGTCC  
AGACCTTACAGGACCAAGAGTCTGATACTCGAAGGTCCATCTAGAAGTGAAAAACTCTGTGGGCTAG  
ATCTCTAGGCCCCAC

```

FFFFF,FFFFFFFFFFFFFFFF:FFFFFFFF,FFFFFFFFFFFFFFFFFFFFFFFFFFFFFFFF
FFFFFFFFFFFFFFFFFFFFFFFF:F:FF:FFFFFFFF,FF,FF:FFFF,:FFFFFFFFFFFFF
FF:FF:FFFFFFFF

```

```
F,FFFFFF,F:FFFFFFFFFFFFFFFFFFFFFFFFFFFFFFFFFFFFFFFF:FFFFFFFFFFFFFFF:F:FFFFFFF
FFFF:FFFFFFFFFFFFFFFFFFFFFFFFFFFFFFFFFFFFFFFFFFFFFFFF:FFFFFFFFFFFFFFFFFFFFFFF:FFF,
:FFFFFFFFF:FF:FF
```

```
:FFFFFF:FFFFFF:FFF:FFFFFF:FFFFFF,FFFFFFFFFFFFFF:F,FFFFFFFFFFFFFF
:FFFFF:FF:FF,FFFFFF,F:FFFFFF:FFF:F:FFFFFF:FF::F:FFFF:FFFF:FFFFFF
:F:FFF:,,:FFFF:
```

```

FFFFFFFF,FFFFFFFFFFFFFFFF:FFFFFFFFFFFFFFFFFFFFFFFF:F:FFFFFFFFFFFFFFFFFFFFFFFF
FFFFFFFFFFFFFFFF:F:FFFFFFFFFFFFFFFFFFFFFFFFFFFFFFFF:F:FFFFFFFFFFFFFFFFFFFFFFFF:
FFFFFFFFFFFFFFFF,F

```

```

FFFFFFFF,F:FFFFFFFFFFFFFFFFFFFFFFFFFFFFFFFFFFFFFFFFFFFFFFFFFFFFFFFF
FFFFFFFFFFFFFFFFFFFFFFFFFFFFFFFFFFFFFFFFFFFFFFFFFFFFFFFFFFFFFFFF:FFFFFFF,FFFFFFFFFFFFFF
FFFFFFFFFFFFFFFFFFFF

```

```

FFFFFFFF,F:FFF:FFFFFFFFFFFFFFFF:FF:FFFFFFFFFFFFFFFF:F:FFFFFFFF:FFFF:FFFFFF
F:FFFFFFFFFFFFFFFFFFFFFFFFFFFFFFFFFFFFFFFF,FFF,FF:F,FFFFFFFFFFFFFFFF:FF:
FFFFFFFFFFFFFFFF

```

[illegible][illegible]

@A00721:190:HGJW7DSXY:4:1244:3043:29403 2:N:0:TCTGCAAG+GCTGCACT  
ATCCACAATCATTCTGTTGTTCCACAAGAGTTACAGTATTGGGTGACCCATAATATATTCTCACCTGAG

TCCAGACCTTACAGGACCAAGAGTCTGATACTCGAAGGTCCATCTAGAAGTGGAAAACTCTGTGGGC  
TAGATCTCTAGGCC

```
FFFFFFFF:FFFFFFFFFFFFFFFFFFFFFFFFFFFFFFFFFFFFFFFFFFFFFFFFFFFFF
FFFFFFFFFFFFFFFFFFFFFFFFFFFFFFFFFFFFFFFFFFFFFFFFFFFFFFFFFFFFFFF:FFFFFFFFFFFFFFF:FFFFFFFFFFFF
FFFFFFFFFFFFFFFFFFFF
```

 $+$ 

@A00721:190:HGJW7DSXY:4:2567:25816:3396 2:N:0:TCTGCAAG+GCTGCACT  
ATCCACAATCATTCGTTGTTCCACAAGAGTTACAGTATTGGGTGACCCATAATATATTCTCACCTGAG  
TCCAGACCTTACAGGACCAAGAGTCTGATACTCGAAGGTCCATCTAGAAGTGAAAAACTCTGTGGGC  
TAGATCTCTAGGCC

```

FFFFFFFF,FFFFFFFFFFFFFFFF:FFFFFFFFFFFFFFFFFFFFFFFF:F:FFFFFFFFFFFFFFFFFFFF
FFFFFFFFFFFFFFFFFFFFFFFFFFFFFFFFFFFFFFFF:FFFFFFF:FFFFF,FFFFFFFF:FFFFFFFF
FFFFFFFFFFFFFFFF

```

+

@A00721:190:HGJW7DSXY:4:1332:27525:20384 2:N:0:TCTGCAAG+GCTGCACT  
GTTTCGATCCACAATCATTCGTTGTTCCACAAGAGTTACAGTATTGGGTGACCCATAATATATTCTCAC  
CTGAGTCCAGACCTTACAGGACCAAGAGTCTGATACTCGAAGGTCCATCTAGAAGTGAAAACTCTG  
TGGGCTAGATCTCTA

```
FFFFFFFFFFFFFFFF,FFFFF:FFFFFFFFFFFFFFFF:FFFFFFFFFFFFFFFFFFFFFF,FFF:FFFFFFFFFF
FFFFFFFFFFFFFFFFFFFFFFFFFFFFFFFF,FFFFFFFFFFFFFFFFFFFFFFFF:F:FFFFFFFFFF
FFFFFFF:FFFFFFF
```

+

@A00721:190:HGJW7DSXY:4:2123:14714:27445 2:N:0:TCTGCAAG+GCTGCACT  
TATCGCCGTTGATCCACAATCATTCGTTGTTCCACAAGAGTTACAGTATTGGGTGACCCATAATATA  
TTCTCACCTGAGTCCAGACCTTACAGGACCAAGAGTCTGATACTCGAAGGTCCATCTAGAAGTGGA  
AACTCTGTGGGCTAG

[illegible]

$+$ 

+

+

+

+

+

+



@A00721:190:HGJW7DSXY:4:1209:7726:9956 2:N:0:TCTGCAAG+GCTGCACT  
AGTTTTTCCACTTCTAGATGGACCTTCGAGTATCAGACTCTTGGTCCTGTAAGGTCTGGACTCAGGTG  
AGAATATATTATGGGTCACCCAATACTGTAACTCGTGTGGAACAACGAATGATTGTGGATCGAACGGC  
GATAGATATTCTTGT

@A00721:190:HGJW7DSXY:4:1638:18945:13354 2:N:0:TCTGCAAG+GCTGCACT  
AGTTTTTCCACTTCTAGATGGACCTTCGAGTATCAGACTCTTGGTCCTGTAAGGTCTGGACTCAGGTG  
AGAATATATTATGGGTCACCCAATACTGTAACCTCGTGTGGAACAACGAATGATTGTGGATCGAACGGC  
GATAGATATTCTTGT

@A00721:190:HGJW7DSXY:4:1648:27218:21418 2:N:0:TCTGCAAG+GCTGCACT  
AGTTTTTCCACTTCTAGATGGACCTTCGAGTATCAGACTCTTGGTCCTGTAAGGTCTGGACTCAGGTG  
AGAATATATTATGGGTCACCCAATACTGTAACCTCGTGTGGAACAACGAATGATTGTGGATCGAACGGC  
GATAGATATTCTTGT

@A00721:190:HGJW7DSXY:4:1649:12500:13745 2:N:0:TCTGCAAG+GCTGCACT  
AGTTTTTCCACTTCTAGATGGACCTTCGAGTATCAGACTCTTGGTCCTGTAAGGTCTGGACTCAGGTG  
AGAATATATTATGGGTCACCCAATACTGTAACCTCGTGTGGAACAACGAATGATTGTGGATCGAACGGC  
GATAGATATTCTTGT

@A00721:190:HGJW7DSXY:4:2202:31313:36746 2:N:0:TCTGCAAG+GCTGCACT  
AGTTTTTCCACTTCTAGATGGACCTTCGAGTATCAGACTCTTGGTCCTGTAAGGTCTGGACTCAGGTG  
AGAATATATTATGGGTCACCCAATACTGTAACCTCGTGTGGAACAACGAATGATTGTGGATCGAACGGC  
GATAGATATTCTTGT

@A00721:190:HGJW7DSXY:4:2207:22652:11600 2:N:0:TCTGCAAG+GCTGCACT  
AGTTTTTCCACTTCTAGATGGACCTTCGAGTATCAGACTCTTGGTCCTGTAAGGTCTGGACTCAGGTG  
AGAATATATTATGGGTCACCCAATACTGTAACCTCGTGTGGAACAACGAATGATTGTGGATCGAACGGC  
GATAGATATTCTTGT

@A00721:190:HGJW7DSXY:4:2355:4634:17534 2:N:0:TCTGCAAG+GCTGCACT  
AGTTTTTCCACTTCTAGATGGACCTTCGAGTATCAGACTCTTGGTCCTGTAAGGTCTGGACTCAGGTG  
AGAATATATTATGGGTCACCAATACTGTAACCTCGTGTGGAACAACGAATGATTGTGGATCGAACGGC  
GATAGATATTCTTGT

+  
FFFFFFFFFFFFFFFF:FFFFFFFF:FF:FFFFFFFFFFFFFFFFFFFFFFFFFFFFFFFF:FF  
FFFFFFFFFFFFFFFF:F:FFFFFFFF:FF:FFFFFF:FFFFFFFFFFFF:FFFF:F:FFFFFFFFFFFFFFFF  
FFFFFFFFFFFFFFFF

@A00721:190:HGJW7DSXY:4:2526:1226:15922 2:N:0:TCTGCAAG+GCTGCACT  
AGTTTTTCCACTTCTAGATGGACCTTCGAGTATCAGACTCTTGGTCCTGTAAGGTCTGGACTCAGGTG  
AGAATATATTATGGGTCACCCAATACTGTAACCTCGTGTGGAACAACGAATGATTGTGGATCGAACGGC  
GATAGATATTCTTGT

+  
FFFFFFFFFFFF:FFFFFFFFFFFFFFFFFFFFFFFFFFFFFFFF:FF:FFFFFFFFFFFFFFFFFFFFFFFFFFFFFFFF  
FFF:FFFFFFFFFFFFFFFFFFFF,FFFFFFFFFFFF:FFFFFFFFFFFFFFFFFFFFFFFFFFFFFFFF:FFFFFFF  
FFFFFFFFFFFF:FF:F

@A00721:190:HGJW7DSXY:4:2648:28094:19961 2:N:0:TCTGCAAG+GCTGCACT  
AGTTTTTCCACTTCTAGATGGACCTTCGAGTATCAGACTCTTGGTCCTGTAAGGTCTGGACTCAGGTG  
AGAATATATTATGGGTCACCCAATACTGTAACCTCGTGTGGAACAACGAATGAGTGTGGATCGAACGGC  
GATAGATATTCTTGT

+  
FFFFFFFFFFFFFFFFFFFFFFFFFFFFFFFFFFFFFFFFFFFFFFFFFFFFFFFFFFFF,FFFFFFFFFFFF:FFFFFFFFFFFF  
FFFFFFFFFFFFFFFFFFFFFFFFFFFFFFFFFFFFFFFFFFFFFFFFFFFFFFFFFFFFFFFFFFFF,FFFFFFFFFFFFFFFF  
FFFFFFF:FFFFFFFF

@A00721:190:HGJW7DSXY:4:2655:7455:24455 2:N:0:TCTGCAAG+GCTGCACT  
AGTTTTTCCACTTCTAGATGGACCTTCGAGTATCAGACTCTTGGTCCTGTAAGGTCTGGACTCAGGTG  
AGAATATATTATGGGTCACCCAATACTGTAACCTCGTGTGGAACAACGAATGATTGTGGATCGAACGGC  
GATAGATATTCTTGT

+  
FFFFFFFFFFFFFFFFFFFFFFFFFFFFFFFFFFFFFFFFFFFFFFFFFFFFFFFFFFFF:FFFFFFFFFFFFFFFF:FFFFFFFFFFFF  
FFF:FFFFFFFFFFFFFFFFFFFFFFFFFFFFFFFFFFFFFFFFFFFFFFFFFFFFFFFFFFFFFFFFFFFF:FFFFFFFFFFFFFFFF  
FFFFFFFFFFFF:FFFFFF

@A00721:190:HGJW7DSXY:4:1128:29559:20744 2:N:0:TCTGCAAG+GCTGCACT  
TACAAGAATATCTATCGCCGTTTCGATCCACAATCATTCTGTTGTTCCACAAGAGTTACAGTATTGGGTG  
ACCCATAATATATTCTCACCTGAGTCCAGACCTTACAGGACCAAGAGTCTGATACTCGAAGGTCCATC  
TAGAAGTGGAAAAAC

+  
FFFFFFFFFFFFFFFFFFFFFFFFFFFFFFFFFFFFFFFFFFFFFFFFFFFF:FFFFFFFFFFFFFFFF:FFFFFFF:FFFFFFFFFFFFFFFF  
FFFFFFF:FFFFFFFFFFFFFFFFFFFFFFFFFFFFFFFFFFFFFFFFFFFFFFFFFFFFFFFFFFFFFFFFFFFF  
FFFFFFFFFFFF:FFFF

@A00721:190:HGJW7DSXY:4:1170:25753:19413 2:N:0:TCTGCAAG+GCTGCACT  
TACAAGAATATCTATCGCCGTTTCGATCCACAATCATTCTGTTGTTCCACAAGAGTTACAGTATTGGGTG  
ACCCATAATATATTCTCACCTGAGTCCAGACCTTACAGGACCAAGAGTCTGATACTCGAAGGTCCATC  
TAGAAGTGGAAAAAC

+  
FFFFFFFFFFFFFFFFFFFFFFFFFFFFFFFFFFFFFFFFFFFFFFFFFFFF:FFFFFFFFFFFFFFFFFFFFFFFFFFFFFFFFFFFFFFFF  
FFFFFFFFFFFFFFFFFFFFFFFFFFFFFFFFFFFFFFFFFFFFFFFFFFFF:FFFFFFFFFFFFFFFFFFFFFFFF:FF  
FFFFFFFFFFFF:F

@A00721:190:HGJW7DSXY:4:1258:29387:23891 2:N:0:TCTGCAAG+GCTGCACT  
TACAAGAATATCTATCGCCGTTTCGATCCACAATCATTCTGTTGTTCCACAAGAGTTACAGTATTGGGTG  
ACCCATAATATATTCTCACCTGAGTCCAGACCTTACAGGACCAAGAGTCTGATACTCGAAGGTCCATC  
TAGAAGTGGAAAAAC

+  
F,FFFFFFFFFFFFFFFFFFFFFFFFFFFFFFFFFFFFFFFFFFFF:FFFFFFFFFFFFFFFFFFFFFFFFFFFFFFFFFFFFFFFF  
FFFFFFFFFFFFFFFFFFFFFFFF:FFFFFFFFFFFFFFFFFFFFFFFFFFFFFFFFFFFFFFFFFFFFFFFFFFFFFFFF  
FFFFFFFFFFFFFFFF

@A00721:190:HGJW7DSXY:4:1575:17309:28025 2:N:0:TCTGCAAG+GCTGCACT  
TACAAGAATATCTATCGCCGTTTCGATCCACAATCATTCTGTTGTTCCACAAGAGTTACAGTATTGGGTG

ACCCATAATATATTCTCACCTGAGTCCAGACCTTACAGGACCAAGAGTCTGATACTCGAAGGTCCATC  
TAGAAGTGGAAAAAC

[illegible]

+

```

FFFFFFFFFFFFFFFFFFFFFFFFFFFFFFFF:F,FFFFFFFFFFFFFFFFFFFFFFFFFFFFFFFF:FFFFFFFF
FFFFFFFFFFFFFFFFFFFFFFFF:FFFFFFF:FFFFFFFFFFFF:FFFFFFFFFFFFFFFF:FFFFFFFFFFFFFFFF
FFFFFFFFFFFFFFFFFFFF:

```

 $+$ [illegible]

+

```

FFFFFFFFFFFFFFFFFFFFFFFFFFFFFFFFFFFFFFFF::FFFFFFFFF,F:FFF:F:FFFFF:FF:
F:FFFFFFFFFFFFFF:F:F:F::F,::,FF:F::,FF:F,:F::FF,F,:::,FFF:,::FF,,,:F::
,F,FF,:::FFFFFFF

```

+

FF,,,:F,FF:F,:FFF,:F,,F::F,:F:FF,:F,:,:,:FF,,FF,,F,:FFF:FF,,,,  
FFF,,F:F,FF,,,:FFFF,FF,F,,FF:F,:,,,,,:F:,,FF,FFF:,:,,FF:,FFF:,F  
,F,FFF,,,::

+

[illegible]

+

```

FFFFFFFFFFFFFFFFFFFFFFFFFFFFFFFFFFFFFFFF:FFFFFFFFFFFFFFFFFFFFFFFFFFFFFFFF
FFFFFFFFFFFFFFFFFFFFFFFFFFFFFFFFFFFFFFFF:FFFFFFFFFFFFFFFFFFFFFFFFFFFFFFFF
FFFFFFFFFFFFFFFF

```

$+$ 

+

+

+

+

+

+

@A00721:190:HGJW7DSXY:4:2151:21649:28526 2:N:0:TCTGCAAG+GCTGCACT  
CCAGAACCAATACAAGAATATCTATCGCCGTTTCGATCCACAATCATTCGTTGTTCCACAAGAGTTACA  
GTATTGGGTGACCCATAATATATTCTCACCTGAGTCCAGACCTTACAGGACCAAGAGTCTGATACTCG  
AAGGTCCATCTAGAA

@A00721:190:HGJW7DSXY:4:2215:22634:7623 2:N:0:TCTGCAAG+GCTGCACT  
CCAGAACCAATACAAGAATATCTATCGCCGTTTCGATCCACAATCATTCGTTGTTCCACAAGAGTTACA  
GTATTGGGTGACCCATAATATATTCTCACCTGAGTCCAGACCTTACAGGACCAAGAGTCTGATACTCG  
AAGGTCCATCTAGAA

@A00721:190:HGJW7DSXY:4:2221:11668:5196 2:N:0:TCTGCAAG+GCTGCACT  
CCAGAACCAATACAAGAATATCTATCGCCGTTGATCCACAATCATTCGTTGTTCCACAAGAGTTACA  
GTATTGGGTGACCCATAATATATTCTCACCTGAGTCCAGACCTTACAGGACCAAGAGTCTGATACTCG  
AAGGTCCATCTAGAA

@A00721:190:HGJW7DSXY:4:2405:6885:21966 2:N:0:TCTGCAAG+GCTGCACT  
CCAGAACCAATACAAGAATATCTATCGCCGTTGATCCACAATCAATCGTTGTTCCACAAGAGTTACA  
GTATTGGGTGACCCATAATATATTCTCACCTGAGTCCAGACCTTACAGGACCAAGAGTCTGATACTCG  
AAGGTCCATCTAGAA

@A00721:190:HGJW7DSXY:4:2428:23475:33505 2:N:0:TCTGCAAG+GCTGCACT  
CCAGAACCAATACAAGAATATCTATCGCCGTTGATCCACAATCATTCGTTGTTCCACAAGAGTTACA  
GTATTGGGTGACCCATAATATATTCTCACCTGAGTCCAGACCTTACAGGACCAAGAGTCTGATACTCG  
AAGGTCCATCTAGAA

@A00721:190:HGJW7DSXY:4:2442:11035:8140 2:N:0:TCTGCAAG+GCTGCACT  
CCAGAACCAATACAAGAATATCTATCGCCGTTGATCCACAATCATTCGTTGTTCCACAAGAGTTACA  
GTATTGGGTGACCCATAATATATTCTCACCTGAGTCCAGACCTTACAGGACCAAGAGTCTGATACTCG  
AAGGTCCATCTAGAA

@A00721:190:HGJW7DSXY:4:2578:7979:13056 2:N:0:TCTGCAAG+GCTGCACT  
CCAGAACCAATACAAGAATATCTATCGCCGTTTCGATCCACAATCATTCGTTGTTCCACAAGAGTTACA  
GTATTGGGTGACCCATAATATATTCTCACCTGAGTCCAGACCTTACAGGACCAAGAGTCTGATACTCG  
AAGGTCCATCTAGAA

+  
FFFFFFFFFFFFFFFF:FFFFFFFFFFFFFFFFFFFFFFFFFFFFFFFFFFFFFFFF,FFFFFFFFFFFFFFFF:FFF:FFFF  
FFFFFF:FFFFFFFFFFFFFFFFFFFFFFFFFFFFFFFFFFFFFFFF:FFFFFFFFFFFFFFFFFFFFFFFFFFFFFFFF:FFFFF  
FFFFFFFFFFFF,FF  
@A00721:190:HGJW7DSXY:4:2622:31665:36229 2:N:0:TCTGCAAG+GCTGCACT  
CCAGAACCAATACAAGAATATCTATCGCCGTTGATCCACAATCATTGTTGTTCCACAAGAGTTACA  
GTATTGGGTGACCCATAATATATTCTCACCTGAGTCCAGACCTTACAGGACCAAGAGTCTGATACTCG  
AAGGTCCATCTAGAA

+  
FFFFFFFFFFFFFFFFFFFFFFFFFFFFFFFFFFFFFFFFFFFFFFFFFFFFFFFFFFFFFFFF:FFFFFFFFFFFFFFFFFFFFFFFFFFFFFFFF  
FFFFFFFFFFFFFFFFFFFFFFFFFFFFFFFFFFFFFFFFFFFFFFFFFFFFFFFFFFFFFFFFFFFFFFFFFFFFFFFF:FFF  
FF:FFFFFFFFFFFF  
@A00721:190:HGJW7DSXY:4:2658:23665:21339 2:N:0:TCTGCAAG+GCTGCACT  
CCAGAACCAATACAAGAATATCTATCGCCGTTGATCCACAATCATTGTTGTTCCACAAGAGTTACA  
GTATTGGGTGACCCATAATATATTCTCACCTGAGTCCAGACCTTACAGGACCAAGAGTCTGATACTCG  
AAGGTCCATCTAGAA

+  
FFFFFFFFFFFFFFFFFFFFFFFFFFFFFFFFFFFFFFFFFFFFFFFFFFFFFFFFFFFFFFFF,FFFFFFFFFFFFFFFFFFFFFFFFFFFFFFFF  
FFFFFFFFFFFFFFFFFFFFFFFFFFFFFFFFFFFFFFFFFFFFFFFFFFFFFFFFFFFFFFFFFFFFFFFFFFFFFFFFFFFFFFFF  
FFFFFFFFFFFFFFFFFFFF  
@A00721:190:HGJW7DSXY:4:2663:3287:13354 2:N:0:TCTGCAAG+GCTGCACT  
CCAGAACCAATACAAGAATATCTATCGCCGTTGATCCACAATCATTGTTGTTCCACAAGAGTTACA  
GTATTGGGTGACCCATAATATATTCTCACCTGAGTCCAGACCTTACAGGACCAAGAGTCTGATACTCG  
AAGGTCCATCTAGAA

+  
FFFFFFFFFFFFFFFFFFFFFFFFFFFFFFFFFFFFFFFFFFFFFFFFFFFFFFFFFFFFFFFF,FFFFFFFFFFFFFFFFFFFFFFFFFFFFFFFF  
FFFFFFFFFFFFFFFFFFFFFFFFFFFFFFFFFFFFFFFFFFFFFFFFFFFFFFFFFFFFFFFFFFFFFFFFFFFFFFFFFFFFFFFF  
FFFFFFFFFFFFFFFFFFFF  
@A00721:190:HGJW7DSXY:4:2668:3007:5196 2:N:0:TCTGCAAG+GCTGCACT  
CCAGAACCAATACAAGAATATCTATCGCCGTTGATCCACAATCATTGTTGTTCCACAAGAGTTACA  
GTATTGGGTGACCCATAATATATTCTCACCTGAGTCCAGACCTTACAGGACCAAGAGTCTGATACTCG  
AAGGTCCATCTAGAA

+  
FFFFFFFFFFFFFFFFFFFFFFFFFFFFFFFFFFFFFFFFFFFFFFFFFFFFFFFFFFFFFFFF,FFFFF:FFFFFFFFFFFF,FFF:FFFF  
FF:FFFFFFFFFFFFFFFFFFFFFFFFFFFFFFFFFFFFFFFFFFFFFFFFFFFFFFFFFFFFFFFFFFFFFFFFFFFFFFFF  
FFFFFFFFFFFFFFFFFFFF  
@A00721:190:HGJW7DSXY:4:1107:15185:28385 2:N:0:TCTGCAAG+GCTGCACT  
TCCAGAACCAATACAAGAATATCTATCGCCGTTGATCCACAATCATTGTTGTTCCACAAGAGTTAC  
AGTATTGGGTGACCCATAATATATTCTCACCTGAGTCCAGACCTTACAGGACCAAGAGTCTGATACTC  
GAAGGTCCATCTAGA

+  
FFFFFFFFFFFFFFFFFFFFFFFFFFFFFFFFFFFFFFFFFFFFFFFFFFFFFFFFFFFFFFFF:FFFF:FFFFFFFFFFFFFFFFFFFFFFFF  
FFFFFFFFFFFFFFFF:FFFFFFFFFFFFFFFFFFFFFFFFFFFFFFFFFFFFFFFFFFFFFFFFFFFFFFFF:FF:FFFFFF:FFFFF:FF  
FFFFFFFFFFFFFFFF:F  
@A00721:190:HGJW7DSXY:4:2128:12644:16313 2:N:0:TCTGCAAG+GCTGCACT  
TCCAGAACCAATACAAGAATATCTATCGCCGTTGATCCACAATCATTGTTGTTCCACAAGAGTTAC  
AGTATTGGGTGACCCATAATATATTCTCACCTGAGTCCAGACCTTACAGGACCAAGAGTCTGATACTC  
GAAGGTCCATCTAGA

+  
FFFFFFFFFFFFFFFFFFFFFFFFFFFFFFFFFFFFFFFFFFFFFFFFFFFFFFFF,FFFFFFF,FF,,F,FFFFFFFFFFFF:FFFFFF  
FFFFFFFF:FFF:F:FFFFFFFF:FFFFFFFFFFFFFFFFFFFFFFFFFFFFFFFFFFFFFFFFFFFFFFFF:FFFFFF  
FFFFFFFFFF:FF:FF  
@A00721:190:HGJW7DSXY:4:2204:29071:3458 2:N:0:TCTGCAAG+GCTGCACT  
TCCAGAACCAATACAAGAATATCTATCGCCGTTGATCCACAATCATTGTTGTTCCACAAGAGTTAC

AGTATTGGGTGACCCATAATATATTCTCACCTGAGTCCAGACCTTACAGGACCAAGAGTCTGATACTC  
GAAGGTCCATCTAGA

+

FFFFF,FFFFFFFFFFFF:FF:FFFFFFFFFFFF::FFFFFFFFFFFF,FFFFF:FFFFFFFF:FFFFFFFF  
FFFFFFFFFFFF:FFFFFFFF:FFFFFF:FFFFFFFFFFFF,F,FFFFFFFFFFFFFFFFFFFF  
FFFFFFFF:FFFFF

@A00721:190:HGJW7DSXY:4:2357:23827:6057 2:N:0:TCTGCAAG+GCTGCACT  
TCCAGAACCAATACAAGAATATCTATCGCCGTTTCGATCCACAATCATTCGTTGTTCCACAAGAGTTAC  
AGTATTGGGTGACCCATAATATATTCTCACCTGAGTCCAGACCTTACAGGACCAAGAGTCTGATACTC  
GAAGGTCCATCTAGA

+

FFFFFFFFFFFFFFFF:FFFFFFFFFFFFFFFFFFFFFFFFFFFFFFFF:FFFFFFFFFFFFFFFFFFFFFFFF  
FFF:FFFFFFFF,FFFF:FFFFFFFF::FFFFFFFFFFFFFFFFFFFFFFFFFFFFFFFF:FF:FFF  
FFF:FFF:F:FFFFF

@A00721:190:HGJW7DSXY:4:1123:6705:9032 2:N:0:TCTGCAAG+GCTGCACT  
ATTTCCAGAACCAATACAAGAATATCTATCGCCGTTTCGATCCACAATCATTCGTTGTTCCACAAGAGT  
TACAGTATTGGGTGACCCATAATATATTCTCACCTGAGTCCAGACCTTACAGGACCAAGAGTCTGATA  
CTCGAAGGTCCATCT

+

FFFFFFFFFFFFFFFFFFFF,FFFFFFFFFFFFFFFFFFFFFFFFFFFF,FFFFFFFFFFFFFFFFFFFFFFFF  
FFFFFFFFFFFFFFFFFFFFFFFFFFFFFFFFFFFFFFFF:FFFFFFFFFFFFF:FFFFFFFFFFFFFFFFFFFF  
FFFFFFFFFFFFFFFF

@A00721:190:HGJW7DSXY:4:1231:1081:31704 2:N:0:TCTGCAAG+GCTGCACT  
ATTTCCAGAACCAATACAAGAATATTTATCGCCGTTTCGATCCACAATCATTCGTTGTTCCACAAGAGT  
TACAGTATTGGGTGACCCATAATATATTCTCACCTGAGTCCAGACCTTACAGGACCAAGAGTCTGATA  
CTCGAAGGTCCATCT

+

FFFFFFFF:FF,FFFF:FFFFFFFF,FFF:FFFFFFFFFFFFFFFF,FFFFFFFFFFFFFFFFFFFFFFFF  
FFFFFFFFFFFF,:FFF:FFFFFFFFFFFF:FFFFFFFF,FFFFFFFF,FFFFFFFFFFFFFFFF  
FFFFFFFFFF:FF::

@A00721:190:HGJW7DSXY:4:1306:8766:13542 2:N:0:TCTGCAAG+GCTGCACT  
ATTTCCAGAACCAATACAAGAATATCTATCGCCGTTTCGATCCACAATCATTCGTTGTTCCACAAGAGT  
TACAGTATTGGGTGACCCATAATATATTCTCACCTGAGTCCAGACCTTACAGGACCAAGAGTCTGATA  
CTCGAAGGTCCATCT

+

FFFFFFFFFFFFFFFFFFFFFFFFFFFFFFFFFFFFFFFFFFFFFFFFFFFF,FFFFFFFFFFFFFFFFFFFFFFFF  
FFFFFFFFFFFFFFFF:FFFFFFFFFFFFFFFFFFFF:FFFFFFFFFFFFFFFFFFFFFFFFFFFFFFFFFFFF  
:FFFFFFFFFFFF:F

@A00721:190:HGJW7DSXY:4:1312:15799:34867 2:N:0:TCTGCAAG+GCTGCACT  
ATTTCCAGAACCAATACAAGAATATCTATCGCCGTTTCGATCCACAATCATTCGTTGTTCCACAAGAGT  
TACAGTATTGGGTGACCCATAATATATTCTCACCTGAGTCCAGACCTTACAGGACCAAGAGTCTGATA  
CTCGAAGGTCCATCT

+

FFFFFFFFFFFFFFFFFFFFFFFF:F:FFFFFFFFFFFFFFFFFFFFFFFF,F:FFFFFFFF:FFFFFF:  
FFFFFFFFFFFFFFFFFFFF:F:FFFFFFFFFFFFFFFFFFFFFFFFFFFFFFFFFFFFFFFFFFFFFFFF  
FFFFFFFFFFFFFFFF

@A00721:190:HGJW7DSXY:4:1466:18087:34475 2:N:0:TCTGCAAG+GCTGCACT  
ATTTCCAGAACCAATACAAGAATATCTATCGCCGTTTCGATCCACAATCATTCGTTGTTCCACAAGAGT  
TACAGTATTGGGTGACCCATAATATATTCTCACCTGAGTCCAGACCTTACAGGACCAAGAGTCTGTA  
CTCGAAGGTCCATCT

+

FFFFFFFFFFFFFFFFFFFFFFFFFFFFFFFF:FFFFFFFFFFFFFFFFFFFFFFFF:FFFFFFFFFFFFFFFF  
F:FFFFFFFFFFFFFFFFFFFF,FF:FFFFFFFFFFFFFFFFFFFFFFFF:FFFFFFFFFFFFFFFF,FF  
FFFFFFFFFFFFFFFF

$+$ 

+

+

+

+

+

+



@A00721:190:HGJW7DSXY:4:2222:6135:27054 2:N:0:TCTGCAAG+GCTGCACT  
ATTTCCAGAACCAATACAAGAATATCTATCGCCGTTGATCCACAATCATTCGTTGTTCCACAAGAGT  
TACAGTATTGGGTGACCCATAATATATTCTCACCTGAGTCCAGACCTTACAGGACCAAGAGTCTGATA  
CTCGAAGGTCCATCT

@A00721:190:HGJW7DSXY:4:2263:24171:32675 2:N:0:TCTGCAAG+GCTGCACT  
ATTTCCAGAACCAATACAAGAATATCTATCGCCGTTGATCCACAATCATTCGTTGTTCCACAAGAGT  
TACAGTATTGGGTGACCCATAATATATTCTCACCTGAGTCCAGACCTTACAGGACCAAGAGTCTGATA  
CTCGAAGGTCCATCT

@A00721:190:HGJW7DSXY:4:2314:26268:6997 2:N:0:TCTGCAAG+GCTGCACT  
ATTTCCAGAACCAATACAAGAATATCTATCGCCGTTGATCCACAATCATTCGTTGTTCCACAAGAGT  
TACAGTATTGGGTGACCCATAATATATTCTCACCTGAGTCCAGACCTTACAGGACCAAGAGTCTGATA  
CTCGAAGGTCCATCT

@A00721:190:HGJW7DSXY:4:2545:23909:20697 2:N:0:TCTGCAAG+GCTGCACT  
ATTTCCAGAACCAATACAAGAATATCTATCGCCGTTGATCCACAATCATTGTTGTTCCACAAGAGT  
TACAGTATTGGGTGACCCATAATATATTCTCACCTGAGTCCAGACCTTACAGGACCAAGAGTCTGATA  
CTCGAAGGTCCATCT

@A00721:190:HGJW7DSXY:4:2556:26268:29262 2:N:0:TCTGCAAG+GCTGCACT  
ATTTCCAGAACCAATACAAGAATATCTATCGCCGTTTCGATCCACAATCATTCGTTGTTCCACAAGAGT  
TACAGTATTGGGTGACCCATAATATATTCTCACCTGAGTCCAGACCTTACAGGACCAAGAGTCTGATA  
CTCGAAGGTCCATCT

@A00721:190:HGJW7DSXY:4:2616:12590:18975 2:N:0:TCTGCAAG+GCTGCACT  
ATTTCCAGAACCAATACAAGAATATCTATCGCCGTTTCGATCCACAATCATTCGTTGTTCCACAAGAGT  
TACAGTATTGGGTGACCCATAATATATTCTCACCTGAGTCCAGACCTTACAGGACCAAGAGTCTGATA  
CTCGAAGGTCATCT

@A00721:190:HGJW7DSXY:4:1128:11903:2159 2:N:0:TCTGCAAG+GCTGCACT  
TTATTTCCAGAACCAATACAAGAATATCTATCGCCGTTTCGATCCACAATCATTCGTTGTTCCACAAGA  
GTTACAGATTGGGTGACCCATAATATATTCTCACCTGAGTCCAGACCTTACAGGACCAAGAGTCTGA  
TACTCGAAGGTCCAT

+  
FFFFFFFFFFFFFFFFFFFFFFFFFFFFFFFFFFFFFFFFFFFFFFFFFFFFFFFFFFFFFFFFFFFFFFFF  
FFF:FFFFFFFFFFFFFFFFFFFFFFFFFFFFFFFFFFFFFFFFFFFFFFFFFFFFFFFFFFFFFFFF:  
FFFFFFFFFFFFFFFF:

@A00721:190:HGJW7DSXY:4:1144:23619:2033 2:N:0:TCTGCAAG+GCTGCACT  
TTATTTCCAGAACCAATACAAGAATATCTATCGCCGTTTCGATCCACAATCATTCGTTGTTCCACAAGA  
GTTACAGTATTGGGTGACCCATAATATATTCTCACCTGAGTCCAGACCTTACAGGACCAAGAGTCTGA  
TACTCGAAGGTCCAT

+  
FFFFFFFFFFFFFFFFFFFFFFFFFFFFFFFFFFFFFFFFFFFFFFFFFFFFFFFFFFFFFFFFFFFFFFFF  
FFFFFFFFFFFFFFFFFFFFFFFF,FFFFFFFFFFFFFFFF:FFFFFFFFFFFFFFFFFFFFFFFFFFFFF  
FFFFFFFFFFFFFFFF

@A00721:190:HGJW7DSXY:4:1425:26838:3599 2:N:0:TCTGCAAG+GCTGCACT  
TTATTTCCAGAACCAATACAAGAATATCTATCGCCGTTTCGATCCACAATCATTCGTTGTTCCACAAGA  
GTTACAGTATTGGGTGACCCATAATATATTCTCACCTGAGTCCAGACCTTACAGGACCAAGAGTCTGA  
TACTCGAAGGTCCAT

+  
FFFFFFFFFFFFFFFF:FFFFFFFFFFFFFFFFFFFFFFFFFFFFFFFF:FFFFFFFFFFFFFFFF:FFFFFFFF:F  
FFFFF,FFFFF:FFFFF:FFFFFFFFFFFFFFFFFFFFFFFF:FFFFF,FFFF,FFFFFFFFFFFFFFFFFFFF:F  
FFFFFFFFFFFFFFFF

@A00721:190:HGJW7DSXY:4:1641:12798:18490 2:N:0:TCTGCAAG+GCTGCACT  
TTATTTCCAGAACCAATACAAGAATATCTATCGCCGTTTCGATCCACAATCATTCGTTGTTCCACAAGA  
GTTACAGTATTGGGTGACCCATAATATATTCTCACCTGAGTCCAGACCTTACAGGACCAAGAGTCTGA  
TACTCGAAGGTCCAT

+  
FFFFFFFFFFFFFFFFFFFFFFFFFFFFFFFFFFFFFFFFFFFFFFFFFFFFFFFFFFFFFFFFFFFFFFFF  
FFFFFFFFFFFFFFFFFFFFFFFFFFFFFFFFFFFFFFFFFFFFFFFFFFFFFFFFFFFFFFFFFFFFFFFF  
FFFFF:FFFFF:F

@A00721:190:HGJW7DSXY:4:2149:29414:34303 2:N:0:TCTGCAAG+GCTGCACT  
TTATTTCCAGAACCAATACAAGAATATCTATCGCCGTTTCGATCCACAATCATTCGTTGTTCCACAAGA  
GTTACAGTATTGGGTGACCCATAATATATTCTCACCTGAGTCCAGACCTTACAGGACCAAGAGTCTGA  
TACTCGAAGGTCCAT

+  
FFFFFFFFFFFFFFFFFFFFFFFFFFFFFFFFFFFFFFFFFFFFFFFFFFFFFFFFFFFFFFFFFFFFFFFF  
FFFFFFFFFFFFFFFFFFFFFFFFFFFFFFFFFFFFFFFFFFFFFFFFFFFFFFFFFFFFFFFFFFFFFFFF  
FFFFFFFFFFFFFFFF

@A00721:190:HGJW7DSXY:4:2154:21902:9799 2:N:0:TCTGCAAG+GCTGCACT  
TTATTTCCAGAACCAATACAAGAATATCTATCGCCGTTTCGATCCACAATCATTCGTTGTTCCACAAGA  
GTTACAGTATTGGGTGACCCATAATATATTCTCACCTGAGTCCAGACCTTACAGGACCAAGAGTCTGA  
TACTCGAAGGTCCAT

+  
FFFF:FFFFFFFFFFFFFFFF,FFFFFFFFFFFFFFFFFFFFFFFFFFFFFFFFFFFFFFFF, :FFFFFFFF:FF  
FFFFFFFFFFFFFFFFFFFFFFFFFFFFFFFFFFFFFFFFFFFFFFFFFFFFFFFFFFFFFFFF:FFFFFFF,FFFFFFF  
FFFF:FFFF:FFFFF

@A00721:190:HGJW7DSXY:4:2308:8477:10410 2:N:0:TCTGCAAG+GCTGCACT  
TTATTTCCAGAACCAATACAAGAATATCTATCGCCGTTTCGATCCACAATCATTCGTTGTTCCACAAGA  
GTTACAGTATTGGGTGACCCATAATATATTCTCACCTGAGTCCAGACCTTACAGGACCAAGAGTCTGA  
TACTCGAAGGTCCAT

+  
FFFFFFFFFFFFFFFFFFFFFFFFFFFFFFFFFFFFFFFFFFFFFFFFFFFFFFFFFFFFFFFFFFFFFFFF  
FFFFFFFFFFFFFFFFFFFFFFFFFFFFFFFFFFFFFFFFFFFFFFFFFFFFFFFFFFFFFFFFFFFFFFFF  
FFFFFFFFFFFFFFFF:

@A00721:190:HGJW7DSXY:4:2510:26142:18865 2:N:0:TCTGCAAG+GCTGCACT  
TTATTTCCAGAACCAATACAAGAATATCTATCGCCGTTTCGATCCACAATCATTCGTTGTTCCACAAGA



@A00721:190:HGJW7DSXY:4:2135:16758:26819 2:N:0:TCTGCAAG+GCTGCACT  
TGCAGATAGATTATTTCCAGAACCAATACAAGAATATCTATCGCCGTTTCGATCCACAATCATTCGTTG  
TTCCACAAGAGTTACAGTATTGGGTGACCCATAATATATTCTCACCTGAGTCCAGACCTTACAGGACC  
AAGAGTCTGATACTC

```

FFFFFFFFF:FFFFFFFFFFFFFFFFFFFFFFFFFFFFFFFFFFFFFFFFFFFFFFFFFFFFFFFFF:FFFF:FFF
FFFFFFFFFFFFFFFFFFFFFFFFFFFFFFFFF:FF:FFFFFFFFFFFFFFFFFFFFFFFFFFFFFFFFF
FFFFFFFFFFFFFFFFF

```

+

```
F:FFFFFFFF:FFF,FFFF:FFFF,FFFFF:FFFF::FFF:FFFFFFFF:FFFF,:FFF:,,,FFFF,
FFF:FFFFFFFFFFFF,,F:FF:FFFFFFFFFFFF:FFF:,,,FFFFFFFFFFFF:FFFFF:FFFFF:FFF
FF,F:FFFFFF:
```

+

```
FFFFFFFFFFFFFFFFFFFFFFFFFFFFFFFFFFFFFFFFFFFFFFFFFFFFFFFFFFFF
FFFFFFFFFFFFFFFFFFFFFFFFFFFFFFFFFFFFFFFFFFFFFFFFFFFFFFFFFFFF
FFFFFFFFFFFFFFFFFFFFFFFFFFFFFFFFFFFFFFFFFFFFFFFFFFFFFFFFFFFF
```

+

```
FFFFFFFFFFFFFFFF:FFFFFFFFFFFFFFFFFFFFFFFFFFFFFFFFFFFFFFFFFFFFFFFF:FF
FFFFFFFFFFFFFFFFFFFFFFFFFFFFF:FFFFFFFFFFFFFFFFFFFFFFFFFFFFFFFFFFFF
FFFFFFFFFFFFFFFFFFFF
```

+

```
F:FFFFFFFFFFFFFFFFFFFFFFFFFFFFFFFFFFFFFFFFFFFFFFFFFFFFFFFFFFFFFFFFFFFFFFFF
FFFF:FFFFFFFFFFFFFFFFFFFFFFFFFFFFFFFFF:F:FFFFFFFFFFFFFFFFFFFFFFFFFFFFFFFF
FE:FFFFFFFFFE
```

+

```

FFFFFFFFFFFFFFFFFFFFFFFFFFFFFFFFFFFFFFFFFFFFFFFFFFFFFFFFFFFFFFFF
FFFFFFFFFFFFFFFFFFFFFFFFFFFFFFFF:FFFFFFFFFFFFFFFFFFFFFFFFFFFFFFFF
FFFFFFFFFFFFFFFF

```

+

[illegible]

FFFFFFFFFFFFFFFF:F:F:FFFFFFFFFFFFFFFFFFFFFFFFFFFF,:FFFFFFFF,F::FFFFFFFF  
FFFFFFFFFFFFFFFF

@A00721:190:HGJW7DSXY:4:1460:18349:14481 2:N:0:TCTGCAAG+GCTGCACT  
CTTCAGCATCACAAATATCTGCAAATGCAGATAGATTATTTCCAGAACCAATACAAGAATATCTATC  
GCCGTTCGATCCACAATCATTCGTTGTTCCACAAGAGTTACAGTATTGGGTGACCCATAATATATTCT  
CACCTGAGTCCAGAC

+

FFFFFFFFFFFFFFFFFFFFFFFFFFFFFFFFFFFFFFFFFFFFFFFFFFFFFFFFFFFFFFFFFFFFFFFF:F:FFFFFFFF  
FFFFFF:FFFFFFFFFFFFFF,FFFFFFFF:FFFFFFFFFFFFFFFFFFFFFFFFFFFFFFFFFFFFFFFF:FFFFFFFF  
FFFFFFFFFFFFFFFF

@A00721:190:HGJW7DSXY:4:2308:30192:9627 2:N:0:TCTGCAAG+GCTGCACT  
CTTCAGCATCACAAATATCTGCAAATGCAGATAGATTATTTCCAGAACCAATACAAGAATATCTATC  
GCCGTTCGATCCACAATCATTCGTTGTTCCACAAGAGTTACAGTATTGGGTGACCCATAATATATTCT  
CACCTGAGTCCAGAC

+

FFFFFFFFFFFFFFFFFFFFFFFFFFFFFFFFFFFFFFFFFFFFFFFFFFFFFFFFFFFFFFFFFFFFFFFF:F:FFFFFFFF  
FFFFFFFFFFFFFFFFFFFFFF,FFFFFFFFFFFFFFFF:F:FFFF:FFFFFFFFFFFFFFFFFFFFFF,FFFFFFFF  
F,FFFFFFFFFFFFFFFF

@A00721:190:HGJW7DSXY:4:2544:10411:1141 2:N:0:TCTGCAAG+GCTGCACT  
CTTCAGCATCACAAATATCTGCAAATGCAGATAGATTATTTCCAGAACCAATACAAGAATATCTATC  
GCCGTTCGATCCACAATCATTCGTTGTTCCACAAGAGTTACAGTATTGGGTGACCCATAATATATTCT  
CACCTGAGTCCAGAC

+

FFFFFFFFFFFFFFFFFFFFFFFFFFFFFFFFFFFFFFFFFFFFFFFFFFFFFFFFFFFFFFFFFFFFFFFF:F:FFFFFFFF  
:FFF:FFFFFFFFFFFFFF,FFFFFFFFFFFFFFFFFFFFFFFFFFFFFFFFFFFFFFFF:FFFFFFFFFFFFFFFF  
FFFFFFFF:F:FFFF

@A00721:190:HGJW7DSXY:4:2634:10646:15828 2:N:0:TCTGCAAG+GCTGCACT  
CTTCAGCATCACAAATATCTGCAAATGCAGATAGATTATTTCCAGAACCAATACAAGAATATCTATC  
GCCGTTCGATCCACAATCATTCGTTGTTCCACAAGAGTTACAGTATTGGGTGACCCATAATATATTCT  
CACCTGAGTCCAGAC

+

FFFFFFFFFFFFFFFFFFFFFFFFFFFFFFFFFFFFFFFFFFFFFFFFFFFFFFFFFFFFFFFFFFFFFFFF:F:FFFFFFFF  
FFFFFFFFFFFFFFFFFFFFFF,FFFFFFFFFFFFFFFF:F:FFFFFFFFFFFFFFFFFFFFFFFFFFFFFFFF  
FFF:FFFFFFFFFFFFFF

@A00721:190:HGJW7DSXY:4:1127:12436:2456 2:N:0:TCTGCAAG+GCTGCACT  
TCTGGACTCAGGTGAGAATATATTATGGGTCACCCAATACTGTAACCTCGTGTGGAACAACGAATGATT  
GTGGATCGAACGCGGATAGATATTCTTGATTGGTTCTGGAAATAATCTATCTGCATTTGCAGATATG  
TTGTGATGCTGAAGG

+

FFF:FFFFFFFFFFFFFFFFFFFFFFFFFFFFFFFFFFFFFFFFFFFFFFFFFFFFFFFFFFFFFFFF,FFFFFFFF  
FFFFFFFFFFFFFFFFFFFFFF:FFFF:FFFFF:FFFFFFFFFFFFFFFFFFFFFF,FFFFF:FFFFFFFF  
FFFFFFFFFFFFFF

@A00721:190:HGJW7DSXY:4:1231:13223:8422 2:N:0:TCTGCAAG+GCTGCACT  
TCTGGACTCAGGTGAGAATATATTATGGGTCACCCAATACTGTAACCTCGTGTGGAACAACGAATGATT  
GTGGATCGAACGCGGATAGATATTCTTGATTGGTTCTGGAAATAATCTATCTGCATTTGCAGATATG  
TTGTGATGCTGAAGG

+

FFFFFFFFFFFFFFFFFFFFFFFF:F:FFFF:FFFFFFFFFFFFFFFFFFFFFFFFFFFFFFFFFFFFFFFF:F:FFFFFF  
FFFFFFFFFFFFFFFFFFFFFFFFFFFFFFFFFFFFFFFFFFFFFFFFFFFFFFFFFFFFFFFF:FFFFFFFFFFFFFFFF  
FFFFFFFFFFFFFF

@A00721:190:HGJW7DSXY:4:1426:15148:18239 2:N:0:TCTGCAAG+GCTGCACT  
TCTGGACTCAGGTGAGAATATATTATGGGTCACCCAATACTGTAACCTCGTGTGGAACAACGAATGATT  
GTGGATCGAACGCGGATAGATATTCTTGATTGGTTCTGGAAATAATCTATCTGCATTTGCAGATATG  
TTGTGATGCTGAAGG

[illegible][illegible][illegible]

```
FFFFFFFFFFFFFFFFFFFFFFFFFFFFFFFFFFFFFFFFFFFFFFFFFFFFFFFFFFFF:FFFFFFFFFFF::F
FF:FFFFFFFF,FFFFFFFFFF:FFFFFFFFFFFFFFFFFFFFFFFFFFFFFFFFFFFFFFFF
FFFFF::FFF::E:F
```

```

FFFFFFFFFFFFFFFFFFFFFFFF:FFFFFFFFFFFFFFFFFFFFFFFF:FFFFFFFFFFFF
FFFFFFFFFFFFFFFFFFFFFFFF:F:FFFFFFFFFFFFFFFF,FFFFFFFF:FFFFF:FFFFFFF:FFFFFF
FFFFF:FFFFFF,F

```

[illegible]

```

FFFFFFFFFFFFFFFF,FFFFFFFFFFFFFFFFFFFFFFFFFFFFFFFF,FF:FFFFFFFF
FFFFFFFFFFFFFFFFFFFFFFFFF:,FFFFFFFFFFFFFFFFFFFFFFFFFFFFFFFFFFFF
:E:FFFFFFFFFFFFFF

```

@A00721:190:HGJW7DSXY:4:2541:18502:35008 2:N:0:TCTGCAAG+GCTGCACT  
TCTGGACTCAGGTGAGAATATATTATGGGTCACCCAATACTGTAACCTCTTGTGGAACAACGAATGATT



@A00721:190:HGJW7DSXY:4:1145:29948:14685 2:N:0:TCTGCAAG+GCTGCACT  
GGAAGAACGATCCAAGAACGTTCTACCTTCAGCATCACAAATATCAGCAAATGCAGATAGATTATTT  
CCAGAACCAATACAAGAATATCTATCGCCGTTGATCCACAATCATTGTTGTTCCACAAGAGTTACA  
GTATTGGGTGACCCA

```
FF:FFFFFFFFFFFFFFFFFFFFFFFF:FFFFFFFFFFFFFFFFFFFFFFFF,FFFFFFFFFFFFFFFFFFFFFFFF
FFFFFFFFFFFFFFFFFFFFFFFFFFFFFFFF:FFFFFFFFFFFF:FFFFFFFFFFFF,FFFFFFFFFFFFFFFF:FF:F
FFFFFFFFFFFFFFFFFFFF
```

+

```

FFFFFFFFFFFFFFFFFFFFFFFFFFFFFFFFFFFFFFFFFFFFFFFFFFFFFFFFFFFF:FFFFFFFFF
FFFFFFF:FF:FFFFFFFFFFFFFFFFFFFFFFFFFFFF:FFFFFFFFFFFFFFFFFFFFFFFFFFFF,FFFFF
FFFFFFF::FFFF:FF

```

+

[illegible]

+

```

FFFFFFFFFFFFFFFFFFFFFFFFFFFFFFFFFFFFFFFFFFFFFFFFFFFFFFFFFFFFFFFFFFFFFFFF:F
FFFFF,FFF:FFFFFFFFFFFFFFFF:FFFFFF:F:FFFFFFFFFFFFFFFFFFFFFFFFFFFFFFFF:FFF
FFFF:FFFFFFFFFFFF

```

+

[illegible]

+

```

FFFFFFFF:FFFFFFFFFFFFFFFFFFFFFF,FFFFFFFF:FFFFFFFF:FFFFFFFF:F
FFFFFFFFFFFFFFFFFFFFFFFFFFFFFFFFFFFFFFFF:FFFFFFFFFFFFFFFF:F,FFFFFFFF
EEEEEE.EEEEEEE.

```

 $+$ [illegible]



FFFFFFFFFFFFFFFFFFFFFFFFFFFFFFFFFFFFFFFFFFFFFFFFFFFFFFFFFFFFFFFFFFFFFFFFFFFFFFFF:FFFFFFFFFFFF  
FFFFFFFFFFFFFFFF

@A00721:190:HGJW7DSXY:4:2145:27100:31892 2:N:0:TCTGCAAG+GCTGCACT  
CTAGAAATAATCCGGAAGAACGATCCAAGAACGTTCTACCTTCAGCATCACAAACATATCTGCAAATGC  
AGATAGATTATTTCCAGAACCAATACAAGAATATCTATCGCCGTTTCGATCCACAATCATTCGTTGTTC  
CACAA

+

FFFFFFFFFFFFFFFFFFFFFFFFFFFFFFFFFFFFFFFFFFFFFFFFFFFFFFFFFFFFFFFFFFFFFFFFFFFFFFFF:FFFFFFFFFFFF  
FFFFFFFFFFFFFFFFFFFFFFFFFFFFFFFFFFFFFFFFFFFFFFFFFFFFFFFFFFFFFFFFFFFFFFFFFFFFFFFF:FFF::FFFFF  
FFFFF

@A00721:190:HGJW7DSXY:4:2248:19533:9142 2:N:0:TCTGCAAG+GCTGCACT  
CTAGAAATAATCCGGAAGAACGATCCAAGAACGTTCTACCTTCAGCATCACAAACATATCTGCAAATGC  
AGATAGATTATTTCCAGAACCAATACAAGAATATCTATCGCCGTTTCGATCCACAATCATTCGTTGTTC  
CACAA

+

FFFFFFFFFF:FFFFFFFFF:FFFFFFFFF:F:FFFFFFFFFFFFFFFFFFFFFFFFFFFFFFFFFFFFFFFFFFFFFFFFFFFF  
FFFFFFFFFFFFFFFFFFFFFFFFFFFFFFFFFFFFFFFFFFFFFFFFFFFFFFFFFFFFFFFFFFFFFFFFFFFFFFFF,FFFF:FFFFFFFFF:FFFFFFFFFFFFFFFFFFFFFFFF,FFFF:FFFFFFFF  
FFFF:

@A00721:190:HGJW7DSXY:4:1338:19759:4867 2:N:0:TCTGCAAG+GCTGCACT  
GCTTTATCAGCTAGGTCAAAGACAGAGTCTCTAGAAATAATCCGGAAGAACGATCCAAGAACGTTCTA  
CCTTCAGCATCACAAACATATCTGCAAATGCAGATAGATTATTTCCAGAACCAATACAAGAATATCTAT  
CGCCGTTTCGATCCAC

+

FFFFFFFFFFFFFFFFFFFFFFFFFFFFFFFFFFFFFFFFFFFFFFFFFFFFFFFFFFFFFFFFFFFFFFFFFFFFFFFFFFFF  
FFFFFFFFFFFFFFFFFFFFFFFFFFFFFFFFFFFFFFFFFFFFFFFFFFFFFFFFFFFFFFFFFFFFFFFFFFFFFFFF:FFFFFFFFFFFF  
FFFFF,FFFFFFFFF

@A00721:190:HGJW7DSXY:4:1419:5475:25755 2:N:0:TCTGCAAG+GCTGCACT  
GCTTTATCAGCTAGGTCAAAGACAGAGTCTCTAGAAATAATCCGGAAGAACGATCCAAGAACGTTCTA  
CCTTCAGCATCACAAACATATCTGCAAATGCAGATAGATTATTTCCAGAACCAATACAAGAATATCTAT  
CGCCGTTTCGATCCAC

+

FFFFFFFFFFFFFFFFFFFFFFFFFFFFFFFFFFFFFFFFFFFFFFFFFFFFFFFFFFFFFFFFFFFFFFFFFFFFFFFFFFFF  
FFFFFFFFFFFFFFFFFFFFFFFFFFFFFFFFFFFFFFFFFFFFFFFFFFFFFFFFFFFFFFFFFFFFFFFFFFFFFFFFFFFF  
:FFFFFFFFFFFFFFFF

@A00721:190:HGJW7DSXY:4:1423:31403:14638 2:N:0:TCTGCAAG+GCTGCACT  
GCTTTATCAGCTAGGTCAAAGACAGAGTCTCTAGAAATAATCCGGAAGAACGATCCAAGAACGTTCTA  
CCTTCAGCATCACAAACATATCTGCAAATGCAGATAGATTATTTCCAGAACCAATACAAGAATATCTAT  
CGCCGTTTCGATCCAC

+

FFFFFFFFFFFFFFFFFFFFFFFFFFFFFFFFFFFFFFFFFFFFFFFFFFFFFFFFFFFFFFFFFFFFFFFFFFFFFFFFFFFF  
FFFFFFF:FFFFFFFFFFFFF:FFFFFFFFF:FFFFFFFFFFFFFFFFFFFFFFFFFFFFFFFFFFFFFFFFFFFFFFFFFFFF  
F:FFFFFFFFFFFFFFFF

@A00721:190:HGJW7DSXY:4:1526:6479:31093 2:N:0:TCTGCAAG+GCTGCACT  
GCTTTATCAGCTAGGTCAAAGACAGAGTCTCTAGAAATAATCCGGAAGAACGATCCAAGAACGTTCTA  
CCTTCAGCATCACAAACATATCTGCAAATGCAGATAGATTATTTCCAGAACCAATACAAGAATATCTAT  
CGCCGTTTCGATCCAC

+

FFFFFFFFFFFFFFFFFFFFFFFFFFFFFFFFFFFFFFFFFFFFFFFFFFFFFFFFFFFFFFFFFFFFFFFFFFFFFFFFFFFF  
FF:FFFFFFFFFFFFFFFFFFFFFFFFFFFFFFFFFFFFFFFFFFFFFFFFFFFFFFFFFFFFFFFFFFFFFFFFFFFFFFFF  
FFFFFFFFFFFFFFFF

@A00721:190:HGJW7DSXY:4:1576:16595:25567 2:N:0:TCTGCAAG+GCTGCACT  
GCTTTATCAGCTAGGTCAAAGACAGAGTCTCTAGAAATAATCCGGAAGAACGATCCAAGAACGTTCTA  
CCTTCAGCATCACAAACATATCTGCAAATGCAGATAGATTATTTCCAGAACCAATACAAGAATATCTAT  
CGCCGTTTCGATCCAC

+  
FFF,FFFFFFFF:FFFFFFFFFFFFFF,FFFFFFFFFFFFFFFFFFFFFFFFFFFFFFFFFFFFFFFF:FFFF  
FFFFFFFFFFFFFFFF:FFFFFFFFFFFFFFFFFFFFFFFFFFFFFFFFFFFFFFFFFFFFFFFFFFFFFFFF  
FFFFFFFFFFFFFFFF  
@A00721:190:HGJW7DSXY:4:2278:20790:10848 2:N:0:TCTGCAAG+GCTGCACT  
GCTTTATCAGCTAGGTCAAAGACAGAGTCTCTAGAAATAATCCGGAAGAACGATCCAAGAACGTTCTA  
CCTTCAGCATCACAACATATCTGCAAATGCAGATAGATTATTTCCAGAACCAATACAAGAATATCTAT  
CGCCGTTTCGATCCAC  
+  
FFFFFFFFFFFFFFFFFFFFFFFFFFFFFFFFFFFFFFFFFFFFFFFFFFFFFFFFFFFFFFFFFFFFFFFF  
FFFFF:FFFFFFFFFFFFFFFFFFFFFFFFFFFFFFFFFFFFFFFFFFFFFFFFFFFFFFFF:FFFFF:FFFFF  
FFFFF:FFFFFFFFF  
@A00721:190:HGJW7DSXY:4:2516:18430:28776 2:N:0:TCTGCAAG+GCTGCACT  
GCTTTATCAGCTAGGTCAAAGACAGAGTCTCTAGAAATAATCCGGAAGAACGATCCAAGAACGTTCTA  
CCTTCAGCATCACAACATATCTGCAAATGCAGATAGATTATTTCCAGAACCAATACAAGAATATCTAT  
CGCCGTTTCGATCCAC  
+  
FFFFFFFFFFFFFFFFFFFFFFFFFFFFFFFFFFFFFFFFFFFFFFFFFFFFFFFFFFFFFFFFFFFFFFFF  
FFFFFFFF:FFFFFFFFFFFFFFFF:FFFFF:FFFFFFFFFFFFFFFF,FFFFFFFFF:FFFFFFFFFFFF  
:,FFF:FF,FF:,FF  
@A00721:190:HGJW7DSXY:4:2622:1551:12947 2:N:0:TCTGCAAG+GCTGCACT  
GCTTTATCAGCTAGGTCAAAGACAGAGTCTCTAGAAATAATCCGGAAGAACGATCCAAGAACGTTCTA  
CCTTCAGCATCACAACATATCTGCAAATGCAGATAGATTATTTCCAGAACCAATACAAGAATATCTAT  
CGCCGTTTCGATCCAC  
+  
FFFFFFFFFFFFFFFFFFFFFFFFFFFFFFFFFFFFFFFFFFFFFFFFFFFFFFFFFFFFFFFFFFFFFFFF  
FFFFFFFFFFFFFFFFFFFFFFFFFFFFFFFFFFFFFFFFFFFFFFFFFFFFFFFFFFFFFFFFFFFFFFFF  
:FFFFFFFFFFFFFFFF  
@A00721:190:HGJW7DSXY:4:1362:25057:18270 2:N:0:TCTGCAAG+GCTGCACT  
AAAGCTTTATCAGCTAGGTCAAAGACAGAGTCTCTAGAAATAATCCGGAAGAACGATCCAAGAACGTT  
CTACCTTCAGCATCACAACATATCTGCAAATGCAGATAGATTATTTCCAGAACCAATACAAGAATATC  
TATCGCCGTTTCGATC  
+  
FFFFFFFFFFFFFFFFFFFFFFFFFFFFFFFFFFFFFFFFFFFFFFFFFFFFFFFFFFFFFFFFFFFFFFFF  
FFFFFFFFF:FFFFFFFFFFFFFFFF:FFF:FFFFFFFFFFFFFFFFFFFFFFFFFFFFFFFF,FFFFF  
:FFFFFFFFFFFFFFFF  
@A00721:190:HGJW7DSXY:4:1444:10357:9878 2:N:0:TCTGCAAG+GCTGCACT  
AAAGCTTTATCAGCTAGGTCAAAGACAGAGTCTCTAGAAATAATCCGGAAGAACGATCCAAGAACGTT  
CTACCTTCAGCATCACAACATATCTGCAAATGCAGATAGATTATTTCCAGAACCAATACAAGAATATC  
TATCGCCGTTTCGATC  
+  
FFFFFFFFFFFFFFFFFFFFFFFFFFFFFFFFFFFFFFFFFFFFFFFFFFFFFFFFFFFFFFFFFFFFFFFF  
FFFFFFFFF::FFFFFFFFFFFFFFFFFFFFFFFFFFFFFFFFFFFFFFFF:FFFFFFFFFFFFFFFFFFFF  
FFFFFFFFFFFFFFFF  
@A00721:190:HGJW7DSXY:4:1610:20428:5149 2:N:0:TCTGCAAG+GCTGCACT  
AAAGCTTTATCAGCTAGGTCAAAGACAGAGTCTCTAGAAATAATCCGGAAGAACGATCCAAGAACGTT  
CTACCTTCAGCATCACAACATATCTGCAAATGCAGATAGATTATTTCAAGAACCAATACAAGAATATC  
TATCGCCGTTTCGATC  
+  
FFFF:F:F:FFFF,FFF:FFFF,FFFFFFFFFFFFFFFFFFFFFFFFFFFFFFFF:FFFFF:FF:FFF,FFFFF  
:FFF:FFFF:FFF::FFFFF,FFF:F,FF,FFFFFFFFFFFF:FFFFF,FFFFFFFFFFFFFFFFFFFFF,  
FFFF,F::FF:,FFF  
@A00721:190:HGJW7DSXY:4:2211:16731:23390 2:N:0:TCTGCAAG+GCTGCACT  
AAAGCTTTATCAGCTAGGTCAAAGACAGAGTCTCTAGAAATAATCCTGAAGAACGATCCAAGAACGTT

+

@A00721:190:HGJW7DSXY:4:1104:1127:19132 2:N:0:TCTGCAAG+GCTGCACT

+

@A00721:190:HGJW7DSXY:4:1258:8278:6872 2:N:0:TCTGCAAG+GCTGCACT

+

@A00721:190:HGJW7DSXY:4:1339:21278:2362 2:N:0:TCTGCAAG+GCTGCACT

+

@A00721:190:HGJW7DSXY:4:1402:1877:15327 2:N:0:TCTGCAAG+GCTGCACT

 $+$ 

@A00721:190:HGJW7DSXY:4:2152:10022:6073 2:N:0:TCTGCAAG+GCTGCACT

+

@A00721:190:HGJW7DSXY:4:2175:6714:3662 2:N:0:TCTGCAAG+GCTGCACT

+

```

:FFFFFFFFFFFFFFFFFFFFFFFFFFFFFFFF:FFFFF:FFFFFFFFFFFFFFFFFFFFFFFFFFFFFFFF
FFFFFFFFFFFFFFFFFFFFFFFF:FF:FFFFF,F,F:FFFFFFFFFFFF:FFFFFF:FFF:F:F:FF:FFFFFFF
F,FFFFFFFFFFFFFF::F

```



@A00721:190:HGJW7DSXY:4:2228:6397:18959 2:N:0:TCTGCAAG+GCTGCACT  
GATCGTATCGAACTAGACGTTGTTTATAATAAAGCTTTATCAGCTAGGTCAAAGACAGAGTCTCTAGA  
AATAATCCGGAAGAACGATCCAAGAACGTTCTACCTTCAGCATCACAACATATCTGCAATGCAGATA  
GATTATTTCCA

+  
FFFFFFFFFFFFFFFFFFFFFFFFFFFFFFFFFFFFFFFFFFFFFFFFFFFFFFFFFFFFFFFF  
FFFFFFF:F:FFFFFFFFFFFFFFFFFFFFFFFFFFFFFFFFFFFFFFFFFFFFFFFFFFFF:FF:  
FFFFFFFFFFFF

@A00721:190:HGJW7DSXY:4:2257:24279:33144 2:N:0:TCTGCAAG+GCTGCACT  
GATCGTATCGAACTAGACGTTGTTTATAATAAAGCTTTATCAGCTAGGTCAAAGACAGAGTCTCTAGA  
AATAATCCGGAAGAACGATCCAAGAACGTTCTACCTTCAGCATCACAACATATCTGCAAATGCAGATA  
GATTATTTCCA

+  
FFFFFFFFFFFFFFFFFFFFFFFF:F:F:F,FF,FFFFFFFF:FFFF::FFFFFFFFFFFFFFFFFFFFFFFF:FF  
FFFFFFF,F:FFFFFFFF:FFFFFFFF::FFFFFF,F,FF,FFFFFFFF,FFFFFFFFF,FFF  
,F::FFF:,FF

@A00721:190:HGJW7DSXY:4:2328:1452:31908 2:N:0:TCTGCAAG+GCTGCACT  
GATCGTATCGAACTAGACGTTGTTTATAATAAAGCTTTATCAGCTAGGTCAAAGACAGAGTCTCTAGA  
AATAATCCGGAAGAACGATCCAAGAACGTTCTACCTTCAGCATCACAACATATCTGCAAATGCAGATA  
GATTATTTCCA

+  
FFFFFFFFFFFFFFFFFFFFFFFFFFFFFFFFFFFFFFFFFFFFFFFFFFFFFFFFFFFFFFFF  
FFFFFFFFFFFFFFFFFFFFFFFFFFFFFFFFFFFFFFFFFFFFFFFFFFFFFFFFFFFFFFFF:FFFFFFFFFFFF  
FFFFFFFFFFFF

@A00721:190:HGJW7DSXY:4:2438:12418:18521 2:N:0:TCTGCAAG+GCTGCACT  
GATCGTATCGAACTAGACGTTGTTTATAATGAAGCTTTATCAGCTAGGTCAAAGACAGAGTCTCTAGA  
AATAATCCGGAAGAACGATCCAAGAACGTTCTACCTTCAGCATCACAACATATCTGCAAATGCAGATA  
GATTATTTCCA

+  
FFFFFFFFFFFFFFFFFFFFFFFFFFFFFFFFFFFFFFFFFFFFFFFFFFFFFFFFFFFFFFFF  
FFFFFFF:FFFFFFFF:FF:FFFFFFFFFFFFFFFF,FFFFFFFFFFFFFFFFFFFFFFFF,FFFF,F  
:FFFFFFFF:FF

@A00721:190:HGJW7DSXY:4:2464:29134:10833 2:N:0:TCTGCAAG+GCTGCACT  
GATCGTATCGAACTAGACGTTGTTTATAATAAAGCTTTATCAGCTAGGTCAAAGACAGAGTCTCTAGA  
AATAATCCGGAAGAACGATCCAAGAACGTTCTACCTTCAGCATCACAACATATCTGCAAATGCAGATA  
GATTATTTCCA

+  
FFFFFFFFFFFFFFFFFFFFFFFFFFFFFFFFFFFFFFFFFFFFFFFFFFFFFFFFFFFFFFFF  
FFFFFFFFFFFFFFFFFFFFFFFFFFFFFFFFFFFFFFFFFFFFFFFFFFFFFFFFFFFFFFFF:FFFFFFFFFFFF  
FFFFFFFFFFFF

@A00721:190:HGJW7DSXY:4:2520:28456:1861 2:N:0:TCTGCAAG+GCTGCACT  
GATCGTATCGAACTAGACGTTGTTTATAATAAAGCTTTATCAGCTAGGTCAAAGACAGAGTCTCTAGA  
AATAATCCGGAAGAACGATCCAAGAACGTTCTACCTTCAGCATCACAACATATCTGCAAATGCAGATA  
GATTATTTCCA

+  
FFFFFFFFFFFFFFFFFFFFFFFFFFFFFFFFFFFFFFFFFFFFFFFFFFFFFFFFFFFFFFFF  
FFFFFFFFFFFFFFFFFFFFFFFFFFFFFFFFFFFFFFFFFFFFFFFFFFFFFFFFFFFFFFFF:FFFFFFFFFFFF  
FFFFFFFFFFFF

@A00721:190:HGJW7DSXY:4:2539:26377:20619 2:N:0:TCTGCAAG+GCTGCACT  
GATCGTATCGAACTAGACGTTGTTTATAATAAAGCTTTATCAGCTAGGTCAAAGACAGAGTCTCTAGA  
AATAATCCGGAAGAACGATCCAAGAACGTTCTACCTTCAGCATCACAACATATCTGCAAATGCAGATA  
GATTATTTCCA

+  
FFF:FFFFFFFFFFFFFFFFFFFFFFFFFFFFFFFFFFFFFFFFFFFFFFFFFFFFFFFFFFFF  
FFFFFFF:F::FFFFFF:FFFFFFFFFFFFFFFFFFFFFFFF:F:F:FFFFFFFF:FFFFFFFF:F:F,FFF  
F:FFFFFF,F

@A00721:190:HGJW7DSXY:4:2542:29767:13244 2:N:0:TCTGCAAG+GCTGCACT  
GATCGTATCGAACTAGACGTTGTTTATAATAAAGCTTTATCAGCTAGGTCAAAGACAGAGTCTCTAGA



$+$ 

@

+

6

+

9

+

94

 $+$ 

9

+

6

+

•



FFFFFFFFFFFFFFFF:FFFFFFFFFFFFFFFFFFFFFFFFFFFFFFFF:FFF,FF:FFFFFFFFFFFFFFFFFFFFFFFF  
FFFFFFFFFFFFFFFF

@A00721:190:HGJW7DSXY:4:1373:4887:7670 2:N:0:TCTGCAAG+GCTGCACT  
GCCGAAAAGAAAGTGTGATCGTATCGAACTAGACGTTGTTTATAATAAAGCTTTATCAGCTAGGTCA  
AAGACAGAGTCTCTAGAAATAATCCGGAAGAACGATCCAAGAACGTTCTACCTTCAGCATCACAAACAT  
ATCTGCAAATGCAGA

+

FFFFFFFFFFFFFFFFFFFFFFFFFFFFFFFFFFFFFFFFFFFFFFFF:FFFFFFFFFFFFFFFFFFFFFFFFFFFFFFFF  
FFFFFFFFFFFFFFFFFFFFFFFFFFFFFFFFFFFFFFFFFFFFFFFFFFFFFFFFFFFFFFFFFFFFFFFF,FFFFFFFF  
FFFFFFFFFFFFFFFF

@A00721:190:HGJW7DSXY:4:1420:24957:15405 2:N:0:TCTGCAAG+GCTGCACT  
GCCGAAAAGAAAGTGTGATCGTATCGAACTAGACGTTGTTTATAATAAAGCTTTATCAGCTAGGTCA  
AAGACAGAGTCTCTAGAAATAATCCGGAAGAACGATCCAAGAACGTTCTACCTTCAGCATCACAAACAT  
ATCTGCAAATGCAGA

+

FFFF:FFFFFFFFFFFFFFFFFFFFFFFFFFFFFFFFFFFFFFFFFFFFFFFFFFFFFFFFFFFFFFFF:FFFF:FF  
FFFFFFFFFFFFFFFFFFFFFFFFFFFFFFFFFFFFFFFFFFFFFFFFFFFFFFFFFFFFFFFFFFFFFFFF  
FFFFFFFFFFFF:FFFF

@A00721:190:HGJW7DSXY:4:1502:17381:29684 2:N:0:TCTGCAAG+GCTGCACT  
GCCGAAAAGAAAGTGTGATCGTATCGAACTAGACGTTGTTTATAATAAAGCTTTATCAGCTAGGTCA  
AAGACAGAGTCTCTAGAAATAATCCGGAAGAACGATCCAAGAACGTTCTACCTTCAGCATCACAAACAT  
ATCTGCAAATGCAGA

+

FFFFFFFFFFFFFFFFFFFFFFFFFFFFFFFFFFFFFFFFFFFFFFFFFFFFFFFFFFFFFFFF,FFFFFFFFFFFFFFFF:FFF  
FFFFFFFFFFFFFFFFFFFFFFFFFFFFFFFFFFFFFFFFFFFFFFFFFFFFFFFFFFFFFFFFFFFFFFFF  
FFFFFFFFFFFF:FFFF

@A00721:190:HGJW7DSXY:4:1529:15383:4398 2:N:0:TCTGCAAG+GCTGCACT  
GCCGAAAAGAAAGTGTGATCGTATCGAACTAGACGTTGTTTATAATAAAGCTTTATCAGCTAGGTCA  
AAGACAGAGTCTCTAGAAATAATCCGGAAGAACGATCCAAGAACGTTCTACCTTCAGCATCACAAACAT  
ATCTGCAAATGCAGA

+

FFFFF,FFFFFFFFFFFFFFFFFFFFFFFFFFFFFFFFFFFFFFFF:FFFFFFFFFFFFFFFFFFFFFFFFFFFFFFFF  
FFFFFFFFFFFFFFFFFFFFFFFFFFFFFFFFFFFFFFFFFFFFFFFFFFFFFFFFFFFFFFFF,FFFFFFFFFFFFFFFF  
:FFFFFFFF:FFFF

@A00721:190:HGJW7DSXY:4:2102:10936:34522 2:N:0:TCTGCAAG+GCTGCACT  
GCCGAAAAGAAAGTGTGATCGTATCGAACTAGACGTTGTTTATAATAAAGCTTTATCAGCTAGGTCA  
AAGACAGAGTCTCTAGAAATAATCCGGAAGAACGATCCAAGAACGTTCTACCTTCAGCATCACAAACAT  
ATCTGCAAATGCAGA

+

FFFFFFFFFFFFFFFFFFFFFFFFFFFFFFFFFFFFFFFFFFFFFFFFFFFFFFFFFFFFFFFFFFFFFFFF  
FFFFFFFFFFFFFFFFFFFFFFFFFFFFFFFFFFFFFFFFFFFFFFFFFFFFFFFFFFFFFFFFFFFFFFFF:F  
FFFFFFFFFFFF:FFFF

@A00721:190:HGJW7DSXY:4:2109:30517:7592 2:N:0:TCTGCAAG+GCTGCACT  
GCCGAAAAGAAAGTGTGATCGTATCGAACTAGACGTTGTTTATAATAAAGCTTTATCAGCTAGGTCA  
AAGACAGAGTCTCTAGAAATAATCCGGAAGAACGATCCAAGAACGTTCTACCTTCAGCATCACAAACAT  
ATCTGCAAATGCAGA

+

FFFF:FFFFFFFFFFFFFFFFFFFFFFFFFFFFFFFF:FFFF:FFFFFFFFFFFF,FFFFFFFFFFFFFFFF:FF  
F,F:FFFF,FFFFF:FFFFFFFFF:,FFF:FFFFFFFFFFFF:FFF,FFF:FFFF:F:FFFFF  
FFFF:FF:FF,FFFF

@A00721:190:HGJW7DSXY:4:2109:30463:7780 2:N:0:TCTGCAAG+GCTGCACT  
GCCGAAAAGAAAGTGTGATCGTATCGAACTAGACGTTGTTTATAATAAAGCTTTATCAGCTAGGTCA  
AAGACAGAGTCTCTAGAAATAATCCGGAAGAACGATCCAAGAACGTTCTACCTTCAGCATCACAAACAT  
ATCTGCAAATGCAGA

+  
FFFFFFFFFFFFFFFFFFFFFFFFFFFFFFFFFFFFFFFFFFFFFFFFFFFFFFFFFFFFFFFFFFFFFFFF  
FFF:FFFFFFFFFFFFFFFFFFFFFFFFFFFFFFFFFFFFFFFFFFFFFFFFFFFFFFFFFFFFFFFF  
FFFFFFFFFFFFFFFF

@A00721:190:HGJW7DSXY:4:2343:17372:35462 2:N:0:TCTGCAAG+GCTGCACT  
GCCGAAAAGAAAGTGTGATCGTATCGAACTAGACGTTGTTTATAATAAAGCTTTATCAGCTAGGTCA  
AAGACAGAGTCTCTAGAAATAATCCGGAAGAACGATCCAAGAACGTTCTACCTTCAGCATCACAACAT  
ATCTGCAAATGCAGA

+  
FFFFFFFF:FFFF:FFFFFFFFFFFFFFFFFFFFFFFFFFFFFFFFFFFFFFFFFFFFFFFFFFFFFFFF  
FFFFFFFF:FFFFFFFFFFFFFFFFFFFFFFFFFFFFFFFFFFFFFFFFFFFFFFFFFFFFFFFFFFFF  
FFFF:FFFFFFFF

@A00721:190:HGJW7DSXY:4:2349:20998:8985 2:N:0:TCTGCAAG+GCTGCACT  
GCCGAAAAGAAAGTGTGATCGTATCGAACTAGACGTTGTTTATAATAAAGCTTTATCAGCTAGGTCA  
AAGACAGAGTCTCTAGAAATAATCCGGAAGAACGATCCAAGAACGTTCTACCTTCAGCATCACAACAT  
ATCTGCAAATGCAGA

+  
FFFFFFFFFFFFFFFFFFFFFFFFFFFFFFFFFFFFFFFFFFFFFFFFFFFFFFFFFFFFFFFFFFFFFFFF  
FFFFFFFFFFFFFFFFFFFFFFFFFFFFFFFFFFFFFFFFFFFFFFFFFFFFFFFFFFFFFFFFFFFFFFFF  
FFFFFFFFFFFF:FFF

@A00721:190:HGJW7DSXY:4:2349:21007:9001 2:N:0:TCTGCAAG+GCTGCACT  
GCCGAAAAGAAAGTGTGATCGTATCGAACTAGACGTTGTTTATAATAAAGCTTTATCAGCTAGGTCA  
AAGACAGAGTCTCTAGAAATAATCCGGAAGAACGATCCAAGAACGTTCTACCTTCAGCATCACAACAT  
ATCTGCAAATGCAGA

+  
FFFFF:FFFFFFFFFFFFFFFFFFFFFFFFFFFFFFFFFFFFFFFFFFFFFFFFFFFFFFFFFFFFFFFF  
FFFFFFFFFFFFFFFFFFFFFFFFFFFFFFFFFFFFFFFFFFFFFFFFFFFFFFFFFFFFFFFFFFFFFFFF  
FFF:F:FFF:F:FFF

@A00721:190:HGJW7DSXY:4:2452:28637:25347 2:N:0:TCTGCAAG+GCTGCACT  
GCCGAAAAGAAAGTGTGATCGTATCGAACTAGACGTTGTTTATAATAAAGCTTTATCAGCTAGGTCA  
AAGACAGAGTCTCTAGAAATAATCCGGAAGAACGATCCAAGAACGTTCTACCTTCAGCATCACAACAT  
ATCTGCAAATGCAGA

+  
F:FFFFFFFFFFFFFFFFFFFFFFFFFFFFFFFFFFFFFFFFFFFFFFFFFFFFFFFFFFFFFFFFFFFF  
F:F:FFFFFFFFFFFFFFFFFFFFFFFFFFFFFFFFFFFFFFFFFFFFFFFFFFFFFFFFFFFFFFFF  
FFF,F,FFF:FFFF:

@A00721:190:HGJW7DSXY:4:2533:18430:11459 2:N:0:TCTGCAAG+GCTGCACT  
GCCGAAAAGAAAGTGTGATCGTATCGAACTAGACGTTGTTTATAATAAAGCTTTATCAGCTAGGTCA  
AAGACAGAGTCTCTAGAAATAATCCGGAAGAACGATCCAAGAACGTTCTACCTTCAGCATCACAACAT  
ATCTGCAAATGCAGA

+  
FFFFFFFFFFFFFFFFFFFFFFFFFFFFFFFFFFFFFFFFFFFFFFFFFFFFFFFFFFFFFFFFFFFFFFFF  
F:FFFFFFFFFFFFFFFFFFFFFFFFFFFFFFFFFFFFFFFFFFFFFFFFFFFFFFFFFFFFFFFFFFFF  
FFFFFFFFFF:::FFF

@A00721:190:HGJW7DSXY:4:2539:2311:5431 2:N:0:TCTGCAAG+GCTGCACT  
GCCGAAAAGAAAGTGTGATCGTATCGAACTAGACGTTGTTTATAATAAAGCTTTATCAGCTAGGTCA  
AAGACAGAGTCTCTAGAAATAATCCGGAAGAACGATCCAAGAACGTTCTACCTTCAGCATCACAACAT  
ATCTGCAAATGCAGA

+  
FFFFFFFFFFFFFFFFFFFFFFFFFFFFFFFFFFFFFFFFFFFFFFFFFFFFFFFFFFFFFFFFFFFFFFFF  
FFFFFFFFFFFFFFFFFFFFFFFFFFFFFFFFFFFFFFFFFFFFFFFFFFFFFFFFFFFFFFFFFFFF  
:FFFFFFFFFFFFFFFF

@A00721:190:HGJW7DSXY:4:2619:24659:13135 2:N:0:TCTGCAAG+GCTGCACT  
GCCGAAAAGAAAGTGTGATCGTATCGAACTAGACGTTGTTTATAATAAAGCTTTATCAGCTAGGTCA



$+$ 

@A00721:190:HGJW7DSXY:4:2154:6732:6950 2:N:0:TCTGCAAG+GCTGCACT  
ATATTGATCACGGTCAATTTCAAGAAGACGGCCGAAAAGAAAGTGTGATCGTATCGAACTAGACGTT  
GTTTATAATAAAGCTTTATCAGCTAGGTCAAAGACAGAGTCTCTAGAAATAATCCGGAAGAACGATCC  
AAGAACGTTCTACCT

+

@A00721:190:HGJW7DSXY:4:2221:10140:27352 2:N:0:TCTGCAAG+GCTGCACT  
ATATTGATCACGGTCAATTTCAAGAAGACGGCCGAAAAAGAAAGTGTGATCGTATCGAACTAGACGTT  
GTTTATAATAAAGCTTTATCAGCTAGGTCAAAGACAGAGTCTCTAGAAATAATCCGGAAGAACGATCC  
AAGAACGTTCTACCT

+

@A00721:190:HGJW7DSXY:4:2446:16477:7420 2:N:0:TCTGCAAG+GCTGCACT  
ATATTGATCACGGTCAATTTCAAGAAGACGGCCGAAAAAGAAAGTGTGATCGTATCGAACTAGACGTT  
GTTTATAATAAAGCTTTATCAGCTAGGTCAAAGACAGAGTCTCTAGAAATAATCCGGAAGAACGATCC  
AAGAACGTTCTACCT

+

@A00721:190:HGJW7DSXY:4:2560:27877:29888 2:N:0:TCTGCAAG+GCTGCACT  
ATATTGATCACGGTCAATTTCAAGAAGACGGCCGAAAAAGAAAGTGTGATCGTATCGAACTAGACGTT  
GTTTATAATAAAGCTTTATCAGCTAGGTCAAAGACAGAGTCTCTAGAAATAATCCGGAAGAACGATCC  
AAGAACGTTCTACCT

+

@A00721:190:HGJW7DSXY:4:2628:25807:6198 2:N:0:TCTGCAAG+GCTGCACT  
ATATTGATCACGGTCAATTTCAAGAAGACGGCCGAAAAAGAAAGTGTGATCGTATCGAACTAGACGTT  
GTTTATAATAAAGCTTTATCAGCTAGGTCAAAGACAGAGTCTCTAGAAATAATCCGGAAGAACGATCC  
AAGAACGTTCTACCT

+

@A00721:190:HGJW7DSXY:4:2655:7093:32972 2:N:0:TCTGCAAG+GCTGCACT  
ATATTGATCACGGTCAATTTCAAGAAGACGGCCGAAAAGAAAGTGTGATCGTATCGAACTAGACGTT  
GTTTATAATAAAGCTTTATCAGCTAGGTCAAAGACAGAGTCTCTAGAAATAATCCGGAAGAACGATCC  
AAGAACGTTCTACCT

+

@A00721:190:HGJW7DSXY:4:2656:1488:12618 2:N:0:TCTGCAAG+GCTGCACT  
ATATTGATCACGGTCAATTTCAAGAAGACGGCCGAAAAAGAAAGTGTGATCGTATCGAACTAGACGTT  
GTTTATAATAAAGCTTTATCAGCTAGGTCAAAGACAGAGTCTCTAGAAATAATCCGGAAGAACGATCC  
AAGAACGTTCTACCT

@A00721:190:HGJW7DSXY:4:1128:27525:25019 2:N:0:TCTGCAAG+GCTGCACT  
CTTATATTGATCACGGTCAATTTCAAGAAGACGGCCGAAAGAAAGTGTGATCGTATCGAACTAGAC  
GTTGTTTATAATAAAGCTTTATCAGCTAGGTCAAAGACAGAGTCTCTAGAAATAATCCGGAAGAACGA  
TCCAAGAACGTTCTA

@A00721:190:HGJW7DSXY:4:1136:19705:25504 2:N:0:TCTGCAAG+GCTGCACT  
CTTATATTGATCACGGTCAATTTCAAGAAGACGGCCGAAAAGAAAGTGTGATCGTATCGAACTAGAC  
GTTGTTTATAATAAAGCTTTATCAGCTAGGTCAAAGACAGAGTCTCTAGAAATAATCCGGAAGAACGA  
TCCAAGAACGTTCTA

@A00721:190:HGJW7DSXY:4:1136:20256:26052 2:N:0:TCTGCAAG+GCTGCACT  
CTTATATTGATCACGGTCAATTTCAAGAAGACGGCCGAAAAGAAAGTGTGATCGTATCGAACTAGAC  
GTTGTTTATAATAAAGCTTTATCAGCTAGGTCAAAGACAGAGTCTCTAGAAATAATCCGGAAGAACGA  
TCCAAGAACGTTCTA

@A00721:190:HGJW7DSXY:4:1263:26096:11960 2:N:0:TCTGCAAG+GCTGCACT  
CTTATATTGATCACGGTCAATTTCAAGAAGACGGCCGAAAGAAAGTGTGATCGTATCGAACTAGAC  
GTTGTTTATAATAAAGCTTTATCAGCTAGGTCAAAGACAGAGTCTCTAGAAATAATCCGGAAGAACGA  
TCCAAGAACGTTCTA

@A00721:190:HGJW7DSXY:4:1308:2383:35274 2:N:0:TCTGCAAG+GCTGCACT  
CTTATATTGATCACGGTCAATTTCAAGAAGACGGCCGAAAAGAAAGTGTGATCGTATCGAACTAGAC  
GTTGTTTATAATAAAGCTTTATCAGCTAGGTCAAAGACAGAGTCTCTAGAAATAATCCGGAAGAACGA  
TCCAAGAAGCTTCTA

@A00721:190:HGJW7DSXY:4:1310:14778:25175 2:N:0:TCTGCAAG+GCTGCACT  
CTTATATTGATCACGGTCAATTTCAAGAAGACGGCCGAAAAGAAAGTGTGATCGTATCGAACTAGAC  
GTTGTTTATAATAAAGCTTTATCAGCTAGGTCAAAGACAGAGTCTCTAGAAATAATCCGGAAGAACGA  
TCCAAGAAGCTTCTA

[illegible]

GTTGTTTATAATAAAGCTTTATCAGCTAGGTCAAAGACAGAGTCTCTAGAAATAATCCGGAAGAACGA  
TCCAAGAACGTTCTA

+

FFFFFFFFFFFFFFFFFFFFFFFFFFFFFFFFFFFFFFFFFFFFFFFFFFFFFFFFFFFFFFFFFFFFFFFF  
FFFFFFFFFFFFFFFFFFFFFFFFFFFFFFFFFFFFFFFFFFFFFFFFFFFFFFFFFFFFFFFFFFFFFFFF:F  
FFFFFFFFFFFFFFFF

@A00721:190:HGJW7DSXY:4:2611:10375:1673 2:N:0:TCTGCAAG+GCTGCACT  
CTTATATTGATCACGGTCAATTTCAAGAAGACGGCCGGAAGAAAGTGTGATCGTATCGAACTAGAC  
GTTGTTTATAATAAAGCTTTATCAGCTAGGTCAAAGACAGAGTCTCTAGAAATAATCCGGAAGAACGA  
TCCAAGAACGTTCTA

+

FFFFFFFFFFFFFFFFFFFFFFFFFFFFFFFFFFFFFFFFFFFFFFFFFFFFFFFFFFFFFFFFFFFFFFFF:F  
FFFF:,F,:FFFFFFFFFFFFFFFFFFFFFFFFFFFFFFFFFFFFFFFFFFFFFFFFFFFFFFFFFFFFFFFF:F  
FFFFFFFFFFFFFFFF

@A00721:190:HGJW7DSXY:4:1262:31430:35571 2:N:0:TCTGCAAG+GCTGCACT  
CTTATATTGATCACGGTCAATTTCAAGAAGACGGCCGGAAGAAAGTGTGATCGTATCGAACTAGAC  
GTTGTTTATAATAAAGCTTTATCAGCTAGGTCAAAGACAGAGTCTCTAGAAATAATCCGGAAGAACGA  
TCCAAGAACGTTCT

+

FFFFFFFFFFFFFFFFFFFFFFFFFFFFFFFF,F  
FFFF,F,F:FFFFFFFFFFFFFFFFFFFFFFFFFFFFFFFFFFFFFFFFFFFFFFFFFFFFFFFFFFFFFFFF:F  
FFFFFFFF,F

@A00721:190:HGJW7DSXY:4:1554:27968:19617 2:N:0:TCTGCAAG+GCTGCACT  
CTTATATTGATCACGGTCAATTTCAAGAAGACGGCCGGAAGAAAGTGTGATCGTATCGAACTAGAC  
GTTGTTTATAATAAAGCTTTATCAGCTAGGTCAAAGACAGAGTCTCTAGAAATAATCCGGAAGAACGA  
TCCAAGAACGTTCT

+

FFFFFFFFFFFFFFFFFFFFFFFFFFFFFFFF:F  
FF:FFFF:F:FF:FFFFFFFFFFFFFFFFFFFFFFFFFFFFFFFFFFFFFFFF:F:FFFFFFFFFFFFFFFF  
FFFFFFFF:FFFFF

@A00721:190:HGJW7DSXY:4:1436:22941:3176 2:N:0:TCTGCAAG+GCTGCACT  
AAAAGGAGGATCTTATATTGATCACGGTCAATTTCAAGAAGACGGCCGGAAGAAAGTGTGATCGTA  
TCGAACTAGACGTTGTTTATAATAAAGCTTTATCAGCTAGGTCAAAGACAGAGTCTCTAGAAATAATC  
CGGAAGAACGATCCA

+

FF,:FFFFFFFFFFFFFFFFFFFFFFFFFFFFFFFFFFFFFFFFFFFFFFFFFFFFFFFFFFFFFFFF  
FFFFFFFFFFFFFFFFFFFFFFFF:F  
F:FFFFFFFF

@A00721:190:HGJW7DSXY:4:1625:5990:25958 2:N:0:TCTGCAAG+GCTGCACT  
AAAAGGAGGATCTTATATTGATCACGGTCAATTTCAAGAAGACGGCCGGAAGAAAGTGTGATCGTA  
TCGAACTAGACGTTGTTTATAATAAAGCTTTATCAGCTAGGTCAAAGACAGAGTCTCTAGAAATAATC  
CGGAAGAACGATCCA

+

FF:FFFFFFFFFFFFFFFFFFFFFFFFFFFFFFFF,F  
FFFFFFFF:F:FF:FFFFFFFFFFFFFFFFFFFFFFFFFFFFFFFFFFFFFFFFFFFFFFFFFFFFFFFF  
FFFFF:FFFFF

@A00721:190:HGJW7DSXY:4:2325:16640:13150 2:N:0:TCTGCAAG+GCTGCACT  
AAAAGGAGGATCTTATATTGATCACGGTCAATTTCAAGAAGACGGCCGGAAGAAAGTGTGATCGTA  
TCGAACTAGACGTTGTTTATAATAAAGCTTTATCAGCTAGGTCAAAGACAGAGTCTCTAGAAATAATC  
CGGAAGAACGATCCA

+

FFFFFFFFFFFFFFFFFFFFFFFF:F  
FFFFFFFF,F,FFFF,FF:FF,FFFFFFFFFFFFFFFFFFFFFFFF:F  
FFFFFFFF

@A00721:190:HGJW7DSXY:4:2325:16532:13338 2:N:0:TCTGCAAG+GCTGCACT  
AAAAGGAGGATCTTATATTGATCACGGTCAATTTCAAGAAGACGGCCGAAAGAAAGTGTGATCGTA  
TCGAAGTACGCTTGTGTTATAATAAAGCTTTATCAGCTAGGTCAAAGACAGAGTCTCTAGAAATAATC  
CGGAAGAACGATCCA

@A00721:190:HGJW7DSXY:4:2417:24288:6856 2:N:0:TCTGCAAG+GCTGCACT  
AAAAGGAGGATCTTATATTGATCACGGTCAATTTCAAGAAGACGGCCGGAAAAGAAAGTGTGATCGTA  
TCGAAGTACGCTTGTGTTTATAATAAAGCTTTATCAGCTAGGTCAAAGACAGAGTCTCTAGAAATAATC  
CGGAAGAACGATCCA

@A00721:190:HGJW7DSXY:4:2608:17951:2644 2:N:0:TCTGCAAG+GCTGCACT  
AAAAGGAGGATCTTATATTGATCACGGTCAATTTCAAGAAGACGGCCGGAAAAGAAAGTGTGATCGTA  
TCGAAGTACGCTTGTGTTATAATAAAGCTTTATCAGCTAGGTCAAAGACAGAGTCTCTAGAAATAATC  
CGGAAGAACGATCCA

@A00721:190:HGJW7DSXY:4:2677:24044:35055 2:N:0:TCTGCAAG+GCTGCACT  
AAAAGGAGGATCTTATATTGATCACGGTCAATTTCAAGAAGACGGCCGAAAGAAAGTGTGATCGTA  
TCGAACTAGACGTTGTTTATAATAAAGCTTTATCAGCTAGGTCAAAGACAGAGTCTCTAGAAATAATC  
CGGAAGAACGATCCA

@A00721:190:HGJW7DSXY:4:1131:23258:20603 2:N:0:TCTGCAAG+GCTGCACT  
CACAAAAGGAGGATCTTATATTGATCACGGTCAATTTCAAGAAGACGGCCGAAAAGAAAGTGTGATC  
GTATCGAACTAGACGTTGTTTATAATAAAGCTTTATCAGCTAGGTCAAAGACAGAGTCTCTAGAAATA  
ATCCGGAAGAACGAT

@A00721:190:HGJW7DSXY:4:1248:5547:35994 2:N:0:TCTGCAAG+GCTGCACT  
CACAAAAGGAGGATCTTATATTGATCACGGTCAATTTCAAGAAGACGGCCGAAAAGAAAGTGTGATC  
GTATCGAACTAGACGTTGTTTATAATAAAGCTTTATCAGCTAGGTCAAAGACAGAGTCTCTAGAAATA  
ATCCGGAAGAACGAT

@A00721:190:HGJW7DSXY:4:1347:12590:3286 2:N:0:TCTGCAAG+GCTGCACT  
CACAAAAGGAGGATCTTATATTGATCACGGTCAATTTCAAGAAGACGGCCGAAAAGAAAGTGTGATC  
GTATCGAACTAGACGTTGTTTATAATAAAGCTTTATCAGCTAGGTCAAAGACAGAGTCTCTAGAAATA  
ATCCGGAAGAACGAT



FFFFFFFFFFFFFFFF:FFFFFF:FFFFFFFF:FFFFFFFFFFFFFFFFFFFFFFFFFFFFFFFF  
FFFFFFFFFFFFFFFF

@A00721:190:HGJW7DSXY:4:1348:26684:22623 2:N:0:TCTGCAAG+GCTGCACT  
CACAAAAGGAGGATCTTATATTGATCACGGTCAATTTCAAGAAGACGGCCGAAAAGAAAGTGTGATC  
GTATCGAACTAGACGTTGTTTATAATAAAGCTTTATCAGCTAGGTCAAAGACAGAGTCTCTAGAAATA  
ATCCGGAAGAACGAT

+

FFFFFFFFFFFFFFFFFFFFFFFFFFFFFFFFFFFFFFFFFFFFFFFFFFFFFFFFFFFFFFFF,FFFFFFFFFFFFFFFFFFFFFFFF  
FFFFFFFFFFFFFFFFFFFFFFFFFFFFFFFFFFFFFFFF:FFFFFFFF:FFFFFFFF:FFFFFFFFFFFFFFFF  
FFFF:FFFFFFFF

@A00721:190:HGJW7DSXY:4:1358:18050:24925 2:N:0:TCTGCAAG+GCTGCACT  
CACAAAAGGAGGATCTTATATTGATCACGGTCAATTTCAAGAAGACGGCCGAAAAGAAAGTGTGATC  
GTATCGAACTAGACGTTGTTTATAATAAAGCTTTATCAGCTAGGTCAAAGACAGAGTCTCTAGAAATA  
ATCCGGAAGAACGAT

+

FFFFFFFFFFFFFFFFFFFFFFFFFFFFFFFFFFFFFFFFFFFFFFFFFFFFFFFFFFFFFFFF:FFFFFFFF:FFFFFFFF  
FFFFFFFFFFFFFFFFFFFFFFFFFFFFFFFF:FFFFFFFFFFFFFFFFFFFFFFFFFFFFFFFFFFFFFFFF  
FFFFFFFFFFFFFFFF:F

@A00721:190:HGJW7DSXY:4:1411:6180:3082 2:N:0:TCTGCAAG+GCTGCACT  
CACAAAAGGAGGATCTTATATTGATCACGGTCAATTTCAAGAAGACGGCCGAAAAGAAAGTGTGATC  
GTATCGAACTAGACGTTGTTTATAATAAAGCTTTATCAGCTAGGTCAAAGACAGAGTCTCTAGAAATA  
ATCCGGAAGAACGAT

+

FFFFFFFFFFFFFFFFFFFFFFFFFFFFFFFFFFFFFFFFFFFFFFFFFFFFFFFFFFFFFFFF:FFFFFFFF  
FFFFFFFFFFFFFFFF:FFFFFFFFFFFFFFFFFFFFFFFFFFFFFFFFFFFFFFFFFFFFFFFF  
FFFFFFFFFFFFFFFF

@A00721:190:HGJW7DSXY:4:1421:7997:10363 2:N:0:TCTGCAAG+GCTGCACT  
CACAAAAGGAGGATCTTATATTGATCACGGTCAATTTCAAGAAGACGGCCGAAAAGAAAGTGTGATC  
GTATCGAACTAGACGTTGTTTATAATAAAGCTTTATCAGCTAGGTCAAAGACAGAGTCTCTAGAAATA  
ATCCGGAAGAACGAT

+

FFFFFFFFFFFFFFFFFFFFFFFFFFFFFFFFFFFFFFFFFFFFFFFFFFFFFFFFFFFFFFFF  
FFFFFFFFFFFFFFFFFFFFFFFFFFFFFFFF:FFFFFFFF,FFFFFFFFFFFFFFFFFFFFFFFF  
FFFFFF:FFFFFF

@A00721:190:HGJW7DSXY:4:1443:19271:12320 2:N:0:TCTGCAAG+GCTGCACT  
CACAAAAGGAGGATCTTATATTGATCACGGTCAATTTCAAGAAGACGGCCGAAAAGAAAGTGTGATC  
GTATCGAACTAGACGTTGTTTATAATAAAGCTTTATCAGCTAGGTCAAAGACAGAGTCTCTAGAAATA  
ATCCGGAAGAACGAT

+

:FFFFFFFF, :FFFFFF, :FFF:FF:FFFFFFFFFFFFFFFF:FFFF:F:FF::, FFF:FFFFFF  
FFFF, FFFFFFFFFF: ,FF:F::FF:FFF, FF, FFFF, F:F:FFF:FF:FFFFFFFFFFFFFFFF  
FF,, :FFF:FF:F:

@A00721:190:HGJW7DSXY:4:1563:9182:33332 2:N:0:TCTGCAAG+GCTGCACT  
CACAAAAGGAGGATCTTATATTGATCACGGTCAATTTCAAGAAGACGGCCGAAAAGAAAGTGTGATC  
GTATCGAACTAGACGTTGTTTATAATAAAGCTTTATCAGCTAGGTCAAAGACAGAGTCTCTAGAAATA  
ATCCGGAAGAACGAT

+

FFFFFFFFFFFFFFFFFFFFFFFFFFFFFFFFFFFFFFFFFFFFFFFFFFFFFFFFFFFFFFFF  
FFFFFFFFFFFFFFFF, FFFFFFFFFF:FFFFFFFFFFFFFFFFFFFFFFFFFFFFFFFF  
FFF, FFF:FFFFFF

@A00721:190:HGJW7DSXY:4:2103:9462:18035 2:N:0:TCTGCAAG+GCTGCACT  
CACAAAAGGAGGATCTTATATTGATCACGGTCAATTTCAAGAAGACGGCCGAAAAGAAAGTGTGATC  
GTATCGAACTAGACGTTGTTTATAATAAAGCTTTATCAGCTAGGTCAAAGACAGAGTCTCTAGAAATA  
ATCCGGAAGAACGAT

+  
:FFFF:FFFFFFFFFFFFFFFF:FFFFFFFFFFFFFFFFFFFFFFFF:FFFFFFFF:FFFFFFFFFFFFFFFF  
FFFFFFFFFFFFFFFF:FFFFF:FFFFFFFFFFFFFFFFFFFFFFFFFFFFFFFFFFFFFFFFFFFFFFFF  
FFFFFFFF:FFFF:FF  
@A00721:190:HGJW7DSXY:4:2130:28745:1767 2:N:0:TCTGCAAG+GCTGCACT  
CACAAAAGGAGGATCTTATATTGATCACGGTCAATTTCAAGAAGACGGCCGGAAGAAAGTGTGATC  
GTATCGAACTAGACGTTGTTTATAATAAAGCTTTATCAGCTAGGTCAAAGACAGAGTCTCTAGAAATA  
ATCCGGAAGAACGAT  
+  
FFFFFF,FFFFFFFFFFFFFFFFFFFFFFFFFFFFFFFFFFFFFFFFFFFFFFFF:FFFFFFFF  
FFFFFFFFFFFFFFFF:FF:FFFFFFFFFFFF,FFFFFFFFFFFFFFFFFFFFFFFFFFFFFFFF  
FFFFFFFFFFFFFFFF  
@A00721:190:HGJW7DSXY:4:2139:13639:14904 2:N:0:TCTGCAAG+GCTGCACT  
CACAAAAGGAGGATCTTATATTGATCACGGTCAATTTCAAGAAGACGGCCGGAAGAAAGTGTGATC  
GTATCGAACTAGACGTTGTTTATAATAAAGCTTTATCAGCTAGGTCAAAGACAGAGTCTCTAGAAATA  
ATCCGGAAGAACGAT  
+  
F:FFFFFFFFFFFFFFFFFFFFFFFFFFFFFFFFFFFFFFFFFFFFFFFFFFFFFFFFFFFFFFFF  
FFFFFFFFFFFF:FFFF:FFFFFFFFFFFFFFFFFFFFFFFFFFFFFFFFFFFFFFFF:FFFFFFFFFFFFFFFF  
FFFF:FFFFFFFF  
@A00721:190:HGJW7DSXY:4:2143:15293:15608 2:N:0:TCTGCAAG+GCTGCACT  
CACAAAAGGAGGATCTTATATTGATCACGGTCAATTTCAAGAAGACGGCCGGAAGAAAGTGTGATC  
GTATCGAACTAGACGTTGTTTATAATAAAGCTTTATCAGCTAGGTCAAAGACAGAGTCTCTAGAAATA  
ATCCGGAAGAACGAT  
+  
FFFFFFFFFFFF:FFFFFFFFFFFFFFFFFFFFFFFFFFFFFFFFFFFF,,FFFFFFFFFFFFFFFF  
F:FFFFFF:FFFFFF,FF:FFFFFFFFFFFFFFFFFFFFFFFFFFFFFFFFFFFFFFFF:F:F  
FFFFFFFFFFFFFFFF  
@A00721:190:HGJW7DSXY:4:2153:18502:24236 2:N:0:TCTGCAAG+GCTGCACT  
CACAAAAGGAGGATCTTATATTGATCACGGTCAATTTCAAGAAGACGGCCGGAAGAAAGTGTGATC  
GTATCGAACTAGACGTTGTTTATAATAAAGCTTTATCAGCTAGGTCAAAGACAGAGTCTCTAGAAATA  
ATCCGGAAGAACGAT  
+  
FFFFFFFFFFFFFFFFFFFFFFFFFFFFFFFFFFFFFFFFFFFF,FFFFFFFFFFFFFFFF  
FFFFFFFFFFFFFFFFFFFF:FF:FFFFFFF,F:FFFFFFFFFFFF:FFFFFFFFFFFF:FFF  
FFF:FFFFFF:FF  
@A00721:190:HGJW7DSXY:4:2161:8305:27774 2:N:0:TCTGCAAG+GCTGCACT  
CACAAAAGGAGGATCTTATATTGATCACGGTCAATTTCAAGAAGACGGCCGGAAGAAAGTGTGATC  
GTATCGAACTAGACGTTGTTTATAATAAAGCTTTATCAGCTAGGTCAAAGACAGAGTCTCTAGAAATA  
ATCCGGAAGAACGAT  
+  
FFFF,FFFFFFFFFFFFFFFFFFFFFFFFFFFFFFFFFFFFFFFFFFFFFFFFFFFFFFFF  
FFFFFFFFFFFFFFFF:FFFFFFFFFFFFFFFFFFFFFFFFFFFFFFFF:FFFFFFFFFFFFFFFF  
FFFF:FFFFFFFF  
@A00721:190:HGJW7DSXY:4:2228:9625:22482 2:N:0:TCTGCAAG+GCTGCACT  
CACAAAAGGAGGATCTTATATTGATCACGGTCAATTTCAAGAAGACGGCCGGAAGAAAGTGTGATC  
GTATCGAACTAGACGTTGTTTATAATAAAGCTTTATCAGCTAGGTCAAAGACAGAGTCTCTAGAAATA  
ATCCGGAAGAACGAT  
+  
FFFFFFFFFFFFFFFFFFFFFFFFFFFFFFFFFFFFFFFFFFFFFFFFFFFFFFFFFFFFFFFF  
FFFFFFFFFFFFFFFFFFFFFFFFFFFFFFFFFFFFFFFFFFFFFFFFFFFFFFFFFFFFFFFF  
FFFFFFFFFFFFFFFF:F  
@A00721:190:HGJW7DSXY:4:2240:11008:16266 2:N:0:TCTGCAAG+GCTGCACT  
CACAAAAGGAGGATCTTATATTGATCACGGTCAATTTCAAGAAGACGGCCGGAAGAAAGTGTGATC

GTATCGAACTAGACGTTGTTTATAATAAAGCTTTATCAGCTAGGTCAAAGACAGAGTCTCTAGAAATA  
ATCCGGAAGAACGAT

[illegible]

+

[illegible]

+

```

FFFFFFFFFFFFFFFFFFFFFFFFFFFFFFFFFFFFFFFFFFFFFFFFFFFF:FF:FFFFFFFFFFFFFFFF
FFFFFFFFFFFFFFFFFFFFFFFFFFFFFFFFFFFFFFFFFFFFFFFFFFFF,FFFFFFFFFFFFFFFFFFFFF:FFFFFFFF:FFFFFFFFFFFF,FFFFF
FFFFFFFFFFFFFFFFFFFF

```

+

```
FFFFFF:FFFFFFFFFFFFFFFFFFFFFFFFFFFFFFFFFFFFFFFFFFFFFFFFFFFFF
F:FFFFFFFFFFFFFFFFFFFFFFFFFFFFFFFF,FFFFFFFFFFFFFFFFFFFFFFFFFF:FFF
FE:EEEEEEEEEEEEE
```

+

[illegible]

+

[illegible]

+

[illegible]

$+$ 

@A00721:190:HGJW7DSXY:4:2622:9579:19335 2:N:0:TCTGCAAG+GCTGCACT  
CACAAAAGGAGGATCTTATATTGATCACGGTCAATTTCAAGAAGACGGCCGAAAAGAAAGTGTGATC  
GTATCGAACTAGACGTTGTTTATAATAAAGCTTTATCAGCTAGGTCAAAGACAGAGTCTCTAGAAATA  
ATCCGGAAGAACGAT

+

@A00721:190:HGJW7DSXY:4:1230:11812:4914 2:N:0:TCTGCAAG+GCTGCACT  
CTTCCGGATTATTTCTAGAGACTCTGTCTTTGACCTAGCTGATAAAGCTTTATTATAAAACAACGTCTA  
GTTTCGATACGATCACACTTTCTTTTCCGGCCGTCTTCTTGAAATTGACCGTGATCAATATAAGATCCT  
CCTTTTGTGATATA

+

@A00721:190:HGJW7DSXY:4:1248:8305:3787 2:N:0:TCTGCAAG+GCTGCACT  
CTTCCGGATTATTTCTAGAGACTCTGTCTTTGACCTAGCTGATAAAGCTTTATTATAAAACAACGTCTA  
GTTGATACGATCACACTTTCTTTTCCGGCCGTCTTCTTGAAATTGACCGTGATCAATATAAGATCCT  
CCTTTTGTGATATAA

+

@A00721:190:HGJW7DSXY:4:1402:18213:22983 2:N:0:TCTGCAAG+GCTGCACT  
CTTCCGGATTATTTCTAGAGACTCTGTCTTTGACCTAGCTGATAAAGCTTTATTATAAAACAACGTCTA  
GTTGATACGATCACACTTTCTTTTCCGGCCGTCTTCTTGAAATTGACCGTGATCAATATAAGATCCT  
CCTTTTGTGATATAA

+

@A00721:190:HGJW7DSXY:4:1406:15456:34272 2:N:0:TCTGCAAG+GCTGCACT  
CTTCCGGATTATTTCTAGAGACTCTGTCTTTGACCTAGCTGATAAAGCTTTATTATAAAACACGTCTA  
GTTGATACGATCACACTTTCTTTTCCGGCCGTCTTCTTGAAATTGACCGTGATCAATATAAGATCCT  
CCTTTTGTGATATAA

+

@A00721:190:HGJW7DSXY:4:1512:1325:27023 2:N:0:TCTGCAAG+GCTGCACT  
CTTCCGGATTATTTCTAGAGACTCTGTCTTTGACCTAGCTGATAAAGCTTTATTATAAAACAACGTCTA  
GTTGATACGATCACACTTTCTTTTCCGGCCGTCTTCTTGAAATTGACCGTGATCAATATAAGATCCT  
CCTTTTGTGATATAA

+

@A00721:190:HGJW7DSXY:4:2233:18548:4711 2:N:0:TCTGCAAG+GCTGCACT  
CTTCCGGATTATTTCTAGAGACTCTGTCTTTGACCTAGCTGATAAAGCTTTATTATAAACACGTCTA  
GTTGATACGATCACACTTTCTTTTCCGGCCGTCTTCTTGAAATTGACCGTGATCAATATAAGATCCT  
CCTTTTGTGATATAA

@A00721:190:HGJW7DSXY:4:2574:30490:32377 2:N:0:TCTGCAAG+GCTGCACT  
CTTCCGGATTATTTCTAGAGACTCTGTCTTTGACCTAGCTGATAAAGCTTTATTATAAACACGTCTA  
GTTGATACGATCACACTTTCTTTTCCGGCCGTCTTCTTGAAATTGACCGTGATCAATATAAGATCCT  
CCTTTTGTGATATAA

@A00721:190:HGJW7DSXY:4:2613:1398:18693 2:N:0:TCTGCAAG+GCTGCACT  
CTTCCGGATTATTTCTAGAGACTCTGTCTTTGACCTAGCTGATAAAGCTTTATTATAAACACGTCTA  
GTTGATACGATCACACTTTCTTTTCCGGCCGTCTTCTTGAAATTGACCGTGATCAATATAAGATCCT  
CCTTTTGTGATATAA

@A00721:190:HGJW7DSXY:4:1110:16477:29559 2:N:0:TCTGCAAG+GCTGCACT  
CACAAAAGGAGGATCTTATATTGATCACGGTCAATTTCAAGAAGACGGCCGAAAAGAAAGTGTGATC  
GTATCGAACTAGACGTTGTTTATAATAAAGCTTTATCAGCTAGGTCAAAGACAGAGTCTCTAGAAATA  
ATCCGGAGATCGGAA

@A00721:190:HGJW7DSXY:4:1322:16016:5368 2:N:0:TCTGCAAG+GCTGCACT  
CACAAAAGGAGGATCTTATATTGATCACGGTCAATTTCAAGAAGACGGCCGAAAAGAAAGTGTGATC  
GTATCGAACTAGACGTTGTTTATAATAAAGCTTTATCAGCTAGGTCAAAGACAGAGTCTCTAGAAATA  
ATCCGGAGATCGGAA

@A00721:190:HGJW7DSXY:4:1549:8540:10676 2:N:0:TCTGCAAG+GCTGCACT  
CACAAAAGGAGGATCTTATATTGATCACGGTCAATTTCAAGAAGACGGCCGAAAAGAAAGTGTGATC  
GTATCGAACTAGACGTTGTTTATAATAAAGCTTTATCAGCTAGGTCAAAGACAGAGTCTCTAGAAATA  
ATCCGGAGATCGGAA

@A00721:190:HGJW7DSXY:4:2522:6976:21433 2:N:0:TCTGCAAG+GCTGCACT  
CACAAAAGGAGGATCTTATATTGATCACGGTCAATTTCAAGAAGACGGCCGAAAAGAAAGTGTGATC  
GTATCGAACTAGACGTTGTTTATAATAAAGCTTTATCAGCTAGGTCAAAGACAGAGTCTCTAGAAATA  
ATCCGGAGATCGGAA

```

FFFFFFFFFFFFFFFFFFFFFFFFFFFFFFFFFFFFFFFFFFFFFFFFFFFFFFFFFFFFFFFF:FFFFFFFFF:F
FFFFFFFFFFFFFFFF:FFFFFFFF:FFFFFF:FFFFFFFFFFFFFFFF:FFFFF,FFFFFFFFFFFFFFFFFFFF
FFFFFFFFFFFF:FFF

```

```

FFFFFFFF:FFFFFFFF:FFFFFFFFFFFFFFFFFFFFFFFFFFFFFFFFFFFFFFFF:FFFFFFFFFF,
FFFFFFFFFFFFFFFFFFFFFFFFF:F,FFFF:F,FF,FF,FF,FF,FF,FF,FF,FF,FF,FF,FF,FF
FF:FFFFFFFFFF,FF

```

[illegible][illegible]

```
F:FFFFFFFFFFFFFFFFFFFFFFFFFFFFFFFFFFFFFFFFFFFFFFFFFFFFFFFFFFFFFFFF:FFFFFFFFFF
FFFFFFFFFFFFFFFFFFFFFFFFFFFFFFFFFFFFFFFF:FFFFFFFFFFFFFFFF:FFFFFFFFFFFFFFFF
F:FFFFFFF:FFFFFFF
```

```

FFFFFFFFFFFFFFFFFFFFFFFFFFFFFFFFFFFFFFFFFFFFFFFFFFFFFFFFFFFFFFFFFFFFFFFF
FFFFFFFFFFFFFFFFFFFFFFFFFFFFFFFFFFFFFFFF,FF:FFFFFFFFFFFFFFFFFFFFFFFFFFFF
FFFFFFFFFFFFFFFF

```

```
FFFFFFFFFFFFFFFFFFFFFFFFFFFFFFFFFFFFFFFFFFFFFFFFFFFFFFFFFFFF,FFFFFFFFF
FFFFFFFFFFFFFFFFFFFFFFFFFFFFFFFFFFFFFFFFFF:FF:FF:FFFFFFF,FFFFFFFFFFFFF
FFFFFFFFFFFFFFFF
```

@A00721:190:HGJW7DSXY:4:2326:2899:3349 2:N:0:TCTGCAAG+GCTGCACT  
GTCGCCGATTATATCACAAAAGGAGGATCTTATATTGATCACGGTCAATTTCAAGAAGACGGCCGGAA

AAGAAAGTGTGATCGTATCGAACTAGACGTTGTTTATAATAAAGCTTTATCAGCTAGGTCAAAGACAG  
AGTCTCTAGAAATAA

```

FFFFFFFFFFFFFFFFFFFFFFFFFFFFFFFFFFFFFFFFFFFFFFFFFFFFFFFFFFFFFFFFFFFFFFFF
FFFF:FFFFFFFF:FFFFFFFFFFFFFFFFFFFFFFFF:FFFFFFFFFFFFFFFFFFFFFFFFFFFFFFFF:F
FFFFFFF:FFFFFFF

```

 $+$ 

```

FFFFFFFFFFFFFFFFFFFFFFFFFFFFFFFFFFFFFFFFFFFFFFFFFFFFFFFFFFFFFFFFFFFFF
FFFFFFFFFFFFFFFFFFFFFFFFFFFFFFF:FFFFFFFFFFFFFFFFFFFFFFFFFFFFFFFFFFFFF
FFFFFFFFFFFFFFFFFFF
```

 $+$ 

```

FFFFFFFFFFFFFFFFFFFFFFFFFFFFFFFFFFFFFFFFFFFFFFFFFFFFFFFFFFFF:FFFFFFFF
FFFFFFFFFFFFFFFFFFFFFFFFFFFFFFFFFFFFFFFFFFFFFFFFFFFFFFFFFFFF:FFFFFFFFFFFFFFFFFFFFFFFFFFFFFFFF
FFFFFFFFFFFFFFFF

```

+

```

FFFFFFFF,FFFFFFFFFFFFFFFFFFFFFFFFFFFFFFFFFFFFFFFFFFFFFFFFFFFFFFFF:FFFFFFFF
FFFF:FF:FFFF:FFFFFFFF:FFFFFFF:,FFF:F:FFFFFFFF,F:FFF:FFFFFFFFFFFFFFF
FF:FFFFFFFFFFFFFF

```

+

```
:F:FFFFFFFFFFFFFFFFFFFFFFFFFFFFFFFF:FFFFF,FFFFFFFFFFFFFFFFFFFF:F:FFFFFFFFFFFF
FFFFFFFF,FFF:FFFFF:FFFFFFFF::FFF,FFF::FF:FFFFFFFF::FFFFFF:FFFF:FFFFF,FFFF
FFFFFFFFFFFF:EEEE
```

 $+$ 

```

FFFFFFFFFFFF:FF:FFFF:FFFFFFFFFFFFFFFF:FFFFFFFFFFFFFF,FFFFFF:FF,FFF:FFFFFF
FF,FF:FFFFFFF,FFFF,:FFFFFFFF,F,:F,FF:FFFFFFFFFFFFFFFF,F:FFFF:FFF:F:FFF,
F:EEEE:EEEE:..F

```

+

[illegible]

$+$ 

+

 $+$ 

+

+

+

+

---



@A00721:190:HGJW7DSXY:4:2530:4083:13354 2:N:0:TCTGCAAG+GCTGCACT  
GACGTCGCCGATTATATCACAAAAGGAGGATCTTATATTGATCACGGTCAATTTCAAGAAGACGGCCG  
GAAAAGAAAGTGTGATCGTATCGAACTAGACGTTGTTTATAATAAAGCTTTATCAGCTAGGTCAAAGA  
CAGAGTCTCTAGAAA

@A00721:190:HGJW7DSXY:4:2622:22697:7639 2:N:0:TCTGCAAG+GCTGCACT  
GACGTCGCCGATTATATCACAAAAGGAGGATCTTATATTGATCACGGTCAATTTCAAGAAGACGGCCG  
GAAAAGAAAGTGTGATCGTATCGAACTAGACGTTGTTTATAATAAAGCTTTATCAGCTAGGTCAAAGA  
CAGAGTCTCTAGAAA

@A00721:190:HGJW7DSXY:4:2666:9715:11052 2:N:0:TCTGCAAG+GCTGCACT  
GACGTCGCCGATTATATCACAAAAGGAGGATCTTATATTGATCACGGTCAATTTCAAGAAGACGGCCG  
GAAAAGAAAGTGTGATCGTATCGAACTAGACGTTGTTTATAATAAAGCTTTATCAGCTAGGTCAAAGA  
CAGAGTCTCTAGAAA

@A00721:190:HGJW7DSXY:4:1131:14163:25144 2:N:0:TCTGCAAG+GCTGCACT  
AATGACGTCGCCGATTATATCACAAAAGGAGGATCTTATATTGATCACGGTCAATTTCAAGAAGACGG  
CCGAAAAAGAAAGTGTGATCGTATCGAACTAGACGTTGTTTATAATAAAGCTTTATCAGCTAGGTCAA  
AGACAGAGTCTCTAG

@A00721:190:HGJW7DSXY:4:1427:16504:18834 2:N:0:TCTGCAAG+GCTGCACT  
AATGACGTCGCCGATTATATCACAAAAGGAGGATCTTATATTGATCACGGTCAATTTCAAGAAGACGG  
CCGAAAAGAAAGTGTGATCGTATCGAACTAGACGTTGTTTATAATAAAGCTTTATCAGCTAGGTCAA  
AGACAGAGTCTCTAG

@A00721:190:HGJW7DSXY:4:1563:19081:9549 2:N:0:TCTGCAAG+GCTGCACT  
AATGACGTCGCCGATTATATCACAAAAGGAGGATCTTATATTGATCACGGTCAATTTCAAGAAGACGG  
CCGAAAAAGAAAGTGTGATCGTATCGAACTAGACGTTGTTTATAATAAAGCTTTATCAGCTAGGTCAA  
AGACAGAGTCTCTAG

@A00721:190:HGJW7DSXY:4:1651:25057:12070 2:N:0:TCTGCAAG+GCTGCACT  
AATGACGTCGCCGATTATATCACAAAAGGAGGATCTTATATTGATCACGGTCAATTTCAAGAAGACGG  
CCGAAAAAGAAAGTGTGATCGTATCGAACTAGACGTTGTTTATAATAAAGCTTTATCAGCTAGGTCAA  
AGACAGAGTCTCTAG

+  
FF:FFF:FFFFFFFF:FF:FFFFFFFFFFFFFF:FFFFFF:FFFFFFFFFFFFFFFFFFFFFFFFFFFFFFFF:FFFF  
FFFFFFFFFFFFFFFFFFFFFF,FFFFFFFFFFFFFFFF:FFFFFFFFFFFFFFFFFFFFFFFFFFFFFFFFFFFFFF  
FF:FFFFFFFF:F:

@A00721:190:HGJW7DSXY:4:2335:20292:28902 2:N:0:TCTGCAAG+GCTGCACT  
ACTGACGTCGCCGATTATATCACAAAAGGAGGATCTTATATTGATCACGGTCAATTTCAAGAAGACGG  
CCGAAAAGAAAGTGTGATCGTATCGAACTAGACGTTGTTTATAATAAAGCTTTATCAGCTAGGTCAA  
AGACAGAGTCTCTAG

+  
F,FFF:FFFFFFFFFFFFFF:F:FF,FFFFFFFFFFFFFFFF:FFFFFFFFFFFFFFFFFFFFFFFF:FFF  
FFFF,FFFFFFFFFFFFFF:F:FFFF:FFF,FFFF:FFFFFFFFFFFFFFFF:FFFFFFFFFFFFFF  
FFFFFFFFFFFFFF:

@A00721:190:HGJW7DSXY:4:2340:19922:22529 2:N:0:TCTGCAAG+GCTGCACT  
AATGACGTCGCCGATTATATCACAAAAGGAGGATCTTATATTGATCACGGTCAATTTCAAGAAGACGG  
CCGAAAAGAAAGTGTGATCGTATCGAACTAGACGTTGTTTATAATAAAGCTTTATCAGCTAGGTCAA  
AGACAGAGTCTCTAG

+  
FFFFFFFFFFFFFFFFFFFFFFFFFFFFFF:FFFFFFFFFFFFFFFFFFFFFFFFFFFFFFFFFFFFFFFF:FFF  
FFFFFFFF:FFFFFFFFFFFFFFFFFFFFFFFFFFFFFFFFFFFFFFFFFFFFFFFFFFFFFFFFFFFFFFFF  
FFFFFFFFFFFFFF

@A00721:190:HGJW7DSXY:4:2604:7699:24283 2:N:0:TCTGCAAG+GCTGCACT  
AATGACGTCGCCGATTATATCACAAAAGGAGGATCTTATATTGATCACGGTCAATTTCAAGAAGACGG  
CCGAAAAGAAAGTGTGATCGTATCGAACTAGACGTTGTTTATAATAAAGCTTTATCAGCTAGGTCAA  
AGACAGAGTCTCTAG

+  
FFFFFFFFFFFFFFFFFFFFFFFFFFFFFF:FFFFFFFFFFFFFFFFFFFFFFFFFFFFFFFFFFFFFFFF:FFF  
FFFFFFFFFFFFFFFFFFFFFFFFFFFFFFFF:FFFFFFFFFFFFFFFFFFFFFFFFFFFFFFFFFFFFFFFF  
FFFFFFFFFFFFFF

@A00721:190:HGJW7DSXY:4:2627:1561:25394 2:N:0:TCTGCAAG+GCTGCACT  
AATGACGTCGCCGATTATATCACAAAAGGAGGATCTTATATTGATCACGGTCAATTTCAAGAAGACGG  
CCGAAAAGAAAGTGTGATCGTATCGAACTAGACGTTGTTTATAATAAAGCTTTATCAGCTAGGTCAA  
AGACAGAGTCTCTAG

+  
FFFFFFFFFFFFFFFFFFFFFF:FFFFFFFFFFFFFFFFFFFFFFFFFFFFFFFFFFFFFFFF:FFFFFFF:F:F  
FFFFFFFFFFFFFFFFFFFFFF:FFFFFFFFFFFFFFFF,FF:F:FFFFFFFFFFFFFFFF:FF:FFFF  
:FFFFFFFFFFFFFF

@A00721:190:HGJW7DSXY:4:1119:2311:13166 2:N:0:TCTGCAAG+GCTGCACT  
GAATGACGTCGCCGATTATATCACAAAAGGAGGATCTTATATTGATCACGGTCAATTTCAAGAAGACG  
GCCGAAAAGAAAGTGTGATCGTATCGAACTCGACGTTGTTTATAATAAAGCTTTATCAGCTAGGTCA  
AAGACAGAGTCTCTA

+  
FFFFFF:FFFFFFF: :FFFFFFFFFFFFFFFFFFFFFFFFFFFFFFFFFFFFFFFFFFFFFFFFFFFFFFF  
FFFFFF:FFFFFFFFFFFFFFFF, :FFFF,FFFFFFFF:F,FFFFFFFFFFFFFFFF:FFFF:  
FFFFFF:FFFFFF

@A00721:190:HGJW7DSXY:4:1248:22001:1548 2:N:0:TCTGCAAG+GCTGCACT  
GAATGACGTCGCCGATTATATCACAAAAGGAGGATCTTATATTGATCACGGTCAATTTCAAGAAGACG  
GCCGAAAAGAAAGTGTGATCGTATCGAACTAGACGTTGTTTATAATAAAGCTTTATCAGCTAGGTCA  
AAGACAGAGTCTCTA

+  
FFFFFFFFFFFFFFFFFFFFFFFF: :FFFFFFFFFFFFFFFFFFFFFFFFFFFFFFFFFFFFFFFFFFFFFFF  
FFFFFFFFFFFFFF:FFFFFFFFFFFFFFFFFFFFFFFFFFFFFFFFFFFFFFFFFFFFFFFFFFFFFFFF  
FF,FFFFFFFF

@A00721:190:HGJW7DSXY:4:1514:32389:3850 2:N:0:TCTGCAAG+GCTGCACT  
GAATGACGTCGCCGATTATATCACAAAAGGAGGATCTTATATTGATCACGGTCAATTTCAAGAAGACG

GCCGAAAAGAAAGTGTGATCGTATCGAACTAGACGTTGTTTATAATAAAGCTTTATCAGCTAGGTCA  
AAGACAGAGTCTCTA

+

FFFFFFFFFFFFFFFFFFFFFFFFFFFFFFFFFFFFFFFFFFFFFFFFFFFFFFFFFFFFFFFFFFFFFFFF  
FFFFFFFFF:FFFFFFFFFFFF,FFFF:FFFFFFFFFFFF:FFFFFFFFFFFF:FFFFFF:FFFFFF  
FFFFFFFFFFFFFFFF

@A00721:190:HGJW7DSXY:4:1639:2058:31955 2:N:0:TCTGCAAG+GCTGCACT  
GAATGACGTCGCCGATTATATCACAAAAGGAGGATCTTATATTGATCACGGTCAATTTCAAGAAGACG  
GCCGAAAAGAAAGTGTGATCGTATCGAACTAGACGTTGTTTATAATAAAGCTTTATCAGCTAGGTCA  
AAGACAGAGTCTCTA

+

FFFFFFFFFFFFFFFFFFFF:FFFFFF,FFFFFFFFFFFFFFFFFFFFFFFFFFFFFFFFFFFFFFFFFFFF  
FFFFFF:FFFFFFFFFFFFFFFFFFFFFFFFFFFFFFFFFFFFFFFFFFFF:FFF:FF:FFFFFFFFFFFFFFFFFFFF  
FFFFFFFFFFFFFFFF

@A00721:190:HGJW7DSXY:4:2119:3197:16642 2:N:0:TCTGCAAG+GCTGCACT  
GAATGACGTCGCCGATTATATCACAAAAGGAGGATCTTATATTGATCACGGTCAATTTCAAGAAGACG  
GCCGAAAAGAAAGTGTGATCGTATCGAACTAGACGTTGTTTATAATAAAGCTTTATCAGCTAGGTCA  
AAGACAGAGTCTCTA

+

F:FFFFFFFFFFFFFFFFFFFFFFFFFFFFFFFFFFFFFFFFFFFFFFFFFFFFFFFFFFFFFFFFFFFF  
FFFFFFFFFFFFFFFFFFFFFFFFFFFFFFFFFFFFFFFFFFFFFFFFFFFFFFFFFFFFFFFFFFFFFFFF  
FFFFFFFFFFFFFFFF

@A00721:190:HGJW7DSXY:4:2253:25581:11036 2:N:0:TCTGCAAG+GCTGCACT  
GAATGACGTCGCCGATTATATCACAAAAGGAGGATCTTATATTGATCACGGTCAATTTCAAGAAGACG  
GCCGAAAAGAAAGTGTGATCGTATCGAACTAGACGTTGTTTATAATAAAGCTTTATCAGCTAGGTCA  
AAGACAGAGTCTCTA

+

F:FFFFFFFFFFFFFFFFFFFFFFFFFFFFFFFFFFFFFFFFFFFFFFFFFFFFFFFFFFFFFFFFFFFF  
FFFFFFFFFFFFFFFFFFFFFFFFFFFFFFFFFFFFFFFFFFFFFFFFFFFFFFFFFFFFFFFFFFFFFFFF  
FFFFFFFFFFFFFFFF

@A00721:190:HGJW7DSXY:4:2457:24668:25739 2:N:0:TCTGCAAG+GCTGCACT  
GAATGACGTCGCCGATTATATCACAAAAGGAGGATCTTATATTGATCACGGTCAATTTCAAGAAGACG  
GCCGAAAAGAAAGTGTGATCGTATCGAACTAGACGTTGTTTATAATAAAGCTTTATCAGCTAGGTCA  
AAGACAGAGTCTCTA

+

FFFFFFFFFFFFFFFFFFFFFFFFFFFFFFFFFFFFFFFFFFFFFFFFFFFFFFFFFFFFFFFFFFFF  
FFFFFFFFFFFFFFFFFFFFFFFFFFFF:FFFFFFFFFFFFFFFF: :FFFFFF:FFFFFFFFFFFFFFFFFFFF  
FFFFFFFFFFFFFF:F

@A00721:190:HGJW7DSXY:4:2457:28339:25989 2:N:0:TCTGCAAG+GCTGCACT  
GAATGACGTCGCCGATTATATCACAAAAGGAGGATCTTATATTGATCACGGTCAATTTCAAGAAGACG  
GCCGAAAAGAAAGTGTGATCGTATCGAACTAGACGTTGTTTATAATAAAGCTTTATCAGCTAGGTCA  
AAGACAGAGTCTCTA

+

F:FFFFFFFFFFFFFFFFFFFFFFFFFFFFFFFFFFFFFFFFFFFFFFFFFFFFFFFFFFFFFFFFFFFF  
FFFFFFFFFFFFFFFFFFFFFFFFFFFFFFFFFFFFFFFFFFFFFFFFFFFFFFFFFFFFFFFFFFFFFFFF  
FFFFFFFFFFFFFFFF

@A00721:190:HGJW7DSXY:4:2627:1434:25300 2:N:0:TCTGCAAG+GCTGCACT  
AATGACGTCGCCGATTATATCACAAAAGGAGGATCTTATATTGATCACGGTCAATTTCAAGAAGACG  
CCGAAAAGAAAGTGTGATCGTATCGAACTAGACGTTGTTTATAATAAAGCTTTATCAGCTAGGTCAA  
AGACAGAGTCTCTA

+

FFFFFFFFFFFFFFFFFFFFFFFFFFFFFFFFFFFFFFFFFFFF:FFFFFF:FFFFFFFFFFFFFF:FFF  
FFFFF,FFFFFFFFFFFFFFFFFFFFFFFFFFFFFFFFFFFF,FFF,:FFFFFFFFFFFF: :FFFFFFFFFFFF  
FFFFFFFFFFFFFFFF

$+$ 

+

+

+

 $+$ 

+

+

FFFFFFFF:FFFFFFFFFFFFFFFFFFFFFFFFFFFFFFFF,FF,:F:,FFFFFFFF:FFFFFFF  
F:F,FFF,F::F:FF

@A00721:190:HGJW7DSXY:4:1370:32931:22075 2:N:0:TCTGCAAG+GCTGCACT  
CTTTTCACCCAAATATTCAAAGTGCAGATCGGCGAATGACGTCGCCGATTATATCACAAAAGGAGGA  
TCTTATATTGATCACGGTCAATTTCAAGAAGACGGCCGAAAAGAAAGTGTGATCGTATCGAACTAGA  
CGTTGTTTATAATAA

+

FFFFFFFFFFFFFFFFFFFFFFFFFFFFFFFFFFFFFFFF:FFFFFFFFFFFFFF,F:FFFFFFFF:FFFFFF  
FFFFFFFF:FFFF:FFFFFFFFFFFFFF,F:FFFFFFFF,FFFF:FF:FFFFFF,FFFFFFFF:FF  
FFFF,FF:FFFF

@A00721:190:HGJW7DSXY:4:2143:24451:29997 2:N:0:TCTGCAAG+GCTGCACT  
CTTTTCACCCAAATATTCAAAGTGCAGATCGGCGAATGACGTCGCCGATTATATCACAAAAGGAGGA  
TCTTATATTGATCACGGTCAATTTCAAGAAGACGGCCGAAAAGAAAGTGTGATCGTATCGAACTAGA  
CGTTGTTTATAATAA

+

FFFFFFF:FFFFFFFFFFFF:FFFF:FFFFFFFFFFFFFFFFFFFFFFFFFFFFFFFFFFFFFFFF:FFF  
FFFFFFFFFFFFFFFFFFFFFFFFFFFF:FFFFFFFFFFFFFFFFFFFFFFFFFFFF,FFFFFFFFFFFFFFFF:FFF  
:FF:FFFF,FFF:FF

@A00721:190:HGJW7DSXY:4:2234:24297:26162 2:N:0:TCTGCAAG+GCTGCACT  
CTTTTCACCCAAATATTCAAAGTGCAGATCGGCGAATGACGTCGCCGATTATATCACAAAAGGAGGA  
TCTTATATTGATCACGGTCAATTTCAAGAAGACGGCCGAAAAGAAAGTGTGATCGTATCGAACTAGA  
CGTTGTTTATAATAA

+

FFFFFFFFFFFFFFFFFFFFFFFFFFFFFFFFFFFF:,FFFFFFFFFFFF:F:FFFFFFFFFFFFFFFF:FFF:F  
FFFFFFFF:FFFFFFFFFFFFFFFF:FFFFFF:FFF:FF:FFFF:FFF:F,,FFFFFFFF,:FF,FF,F  
F:,FF:FFFFFFFF

@A00721:190:HGJW7DSXY:4:1517:29658:19507 2:N:0:TCTGCAAG+GCTGCACT  
AATCTTTTCACCCAAATATTCAAAGTGCAGATCGGCGAATGACGTCGCCGATTATATCACAAAAGGA  
GGATCTTATATTGATCACGGTCAATTTCAAGAAGACGGCCGAAAAGAAAGTGTGATCGTATCGAACT  
AGACGTTGTTTATAA

+

FFFFFFFFFFFFFFFFFFFFFFFFFFFFFFFFFFFFFFFFFFFFFFFFFFFFFFFFFFFFFFFFFFFFF::FFF  
FFFFFF:FFFFFFFF:FFFFFFFFFFFFFFFFFFFF:FFFFFFFFFFFF,F,FFFFFFFF,FFFFFF  
FF:FFF:FFF:F:FF

@A00721:190:HGJW7DSXY:4:1547:13865:20494 2:N:0:TCTGCAAG+GCTGCACT  
AATCTTTTCACCCAAATATTCAAAGTGCAGATCGGCGAATGACGTCGCCGATTATATCACAAAAGGA  
GGATCTTATATTGATCACGGTCAATTTCAAGAAGACGGCCGAAAAGAAAGTGTGATCGTATCGAACT  
AGACGTTGTTTATAA

+

FFFFFFFFFFFFFFFFFFFFFFFFFFFFFFFFFFFFFFFFFFFFFFFFFFFFFFFFFFFFFFFFFFFFF  
FFFFFFFFFFFFFFFFFFFFFFFFFFFFFFFFFFFF:FF::FFFFFFFF:FFFFFFFFFFFFFFFFFFFF  
FFFFFFFFFFFFFFFF

@A00721:190:HGJW7DSXY:4:2255:23529:22952 2:N:0:TCTGCAAG+GCTGCACT  
AATCTTTTCACCCAAATATTCAAAGTGCAGATCGGCGAATGACGTCGCCGATTATATCACAAAAGGA  
GGATCTTATATTGATCACGGTCAATTTCAAGAAGACGGCCGAAAAGAAAGTGTGATCGTATCGAACT  
AGACGTTGTTTATAA

+

FFFFF:FFFFFFFFFFFFFFFFFFFF:FFFFFFFFFFFFFF:FFFFFFFFFFFF:FFFFFF:FFFF  
FFFFFFFFFFFFFFFFFFFFFFFFFFFFFFFFFFFF:FFFFFFFFFFFF,FFFFFFFFFFFFFFFFFFFF  
FFFFFFFFFFFFFFFF

@A00721:190:HGJW7DSXY:4:2434:14253:33880 2:N:0:TCTGCAAG+GCTGCACT  
AATCTTTTCACCCAAATATTCAAAGTGCAGATCGGCGAATGACGTCGCCGATTATATCACAAAAGGA  
GGATCTTATATTGATCACGGTCAATTTCAAGAAGACGGCCGAAAAGAAAGTGTGATCGTATCGAACT  
AGACGTTGTTTATAA

+  
FFFFFFFFFFFFFFFFFFFFFFFFFFFFFFFFFFFFFFFFFFFFFFFFFFFFFFFFFFFFFFFFFFFFFFFF  
FFFFFFFFFFFFFFFFFFFFFFFFFFFFFFFFFFFFFFFFFFFFFFFFFFFFFFFFFFFFFFFFFFFFFFFF  
FFF:FFFF:FFFF  
@A00721:190:HGJW7DSXY:4:2478:1289:15875 2:N:0:TCTGCAAG+GCTGCACT  
AATCTTTTCACCCAAATATTCAAAGTGCAGATCGGCGAATGACGTCGCCGATTATATCACAAAAGGA  
GGATCTTATATTGATCACGGTCAATTTCAAGAAGACGGCCGAAAAGAAAGTGTGATCGTATCGAACT  
AGACGTTGTTTATAA

+  
FFFFFFFFFFFFFFFFFFFFFFFFFFFFFFFFFFFFFFFFFFFFFFFFFFFFFFFFFFFFFFFFFFFFFFFF  
FFFFFFFFFFFFFFFFFFFFFFFFFFFFFFFFFFFFFFFFFFFFFFFFFFFFFFFFFFFFFFFFFFFFFFFF  
FFFFFFFFFFFFFFFFFFFFFFFF  
@A00721:190:HGJW7DSXY:4:2522:24017:3881 2:N:0:TCTGCAAG+GCTGCACT  
AATCTTTTCACCCAAATATTCAAAGTGCAGATCGGCGAATGACGTCGCCGATTATATCACAAAAGGA  
GGATCTTATATTGATCACGGTCAATTTCAAGAAGACGGCCGAAAAGAAAGTGTGATCGTATCGAACT  
AGAAGTTGTTTATAA

+  
FFFFF:F::FF,FF,F::FFFF:F,:F:F,FFF:F:FFF:FFFF:FFF:FFFFFFFF,FFF:, :FF  
:FFFFFFFFF::FF::,:FF,FFFF:FFF,FF:FF:F:FFFF,FFFFFF,FFF:,F:FF:,FF,F  
FFF,,FF,FFFF:  
@A00721:190:HGJW7DSXY:4:1129:10746:14841 2:N:0:TCTGCAAG+GCTGCACT  
CGAATCTTTTCACCCAAATATTCAAAGTGCAGATCGGCGAATGACGTCGCCGATTATATCACAAAAG  
GAGGATCTTATATTGATCACGGTCAATTTCAAGAAGACGGCCGAAAAGAAAGTGTGATCGTATCGAA  
CTAGACGTTGTTTAT

+  
:FFFFFFFFFFFFFFFFFFFFFFFFFFFFFFFFFFFFFFFFFFFFFFFFFFFFFFFFFFFFFFFFFFFFFFFF  
FFFFFFFFFFFFFFFFFFFFFFFFFFFFFFFFFFFFFFFFFFFFFFFFFFFFFFFFFFFFFFFFFFFFFFFF  
FFFFFFFFFFFFFFFFFFFFFFFF  
@A00721:190:HGJW7DSXY:4:1322:7084:23218 2:N:0:TCTGCAAG+GCTGCACT  
CGAATCTTTTCACCCAAATATTCAAAGTGCAGATCGGCGAATGACGTCGCCGATTATATCACAAAAG  
GAGGATCTTATATTGATCACGGTCAATTTCAAGAAGACGGCCGAAAAGAAAGTGTGATCGTATCGAA  
CTAGACGTTGTTTAT

+  
FFFFFFFFFFFFFFFFFFFFFFFFFFFFFFFFFFFFFFFFFFFFFFFFFFFFFFFFFFFFFFFFFFFFFFFF,FF  
:F::FF,FFFF:FFFF,F:FFFFFFFFF:FF:F:F,FF:FFFFFFFFF:FFFF::FFFFFFFF  
FFFFF:FFFFFFFFF  
@A00721:190:HGJW7DSXY:4:2204:15637:28385 2:N:0:TCTGCAAG+GCTGCACT  
CGAATCTTTTCACCCAAATATTCAAAGTGCAGATCGGCGAATGACGTCGACGATTATATCACAAAAG  
GAGGATCTTATATTGATCACCGTCAATTTCAAGAAGACTGCCGAAAAGAAAGTGTGATCTTATCGAA  
CTAGACGTTGATTAT

+  
FF:FFF,,,,,F,FFFF::F,:FF::,FF,F,F::,F,FF:F:FF,FF,,FFF:FF::FFF,FFFF:  
,,FFFF,:F:FF,,F,:FF::,F::,FFFFFF,FF,F,,:F,:FFFF:F,,FFF,:FF:FF:  
FFFF,F::F,,FF:F  
@A00721:190:HGJW7DSXY:4:2474:12337:31031 2:N:0:TCTGCAAG+GCTGCACT  
CGAATCTTTTCACCCAAATATTCAAAGTGCAGATCGGCGAATGACGTCGCCGATTATATCACAAAAG  
GAGGATCTTATATTGATCACGGTCAATTTCAAGAAGACGGCCGAAAAGAAAGTGTGATCGTATCGAA  
CTAGACGTTGTTTAT

+  
FFFFFFFFFFFFFFFFFFFFFFFFFFFFFFFFFFFFFFFFFFFFFFFFFFFFFFFFFFFFFFFFFFFFFFFF  
FFFFFFFFFFFFFFFFFFFFFFFFFFFFFFFFFFFFFFFFFFFFFFFFFFFFFFFFFFFFFFFFFFFFFFFF  
FFFFFFFFFFFFFFFFFFFFFFFF  
@A00721:190:HGJW7DSXY:4:1101:21133:3145 2:N:0:TCTGCAAG+GCTGCACT  
CGACGAATCTTTTCACCCAAATATTCAAAGTGCAGATCGGCGAATGACGTCGCCGATTATATCACAA

AAGGAGGATCTTATATTGATCACGGTCAATTTCAAGAAGACGGCCGGAAAAGAAAGTGTGATCGTATC  
GAACTAGACGTTGTT

```
FFFFFFFFFFFFFFFFFFFFFFFFFFFFFFFFFFFFFFFFFFFFFFFFFFFFFFFFFFFFFFFFFFFFFFFFFFFFF
:FFFFFFFFFFFFFFFFFFFFFFFFFFFFFFFFFFFFFFFFFFFFFFFFFFFFFFFFFFFFFFFFFFFFFFFFFFFFF
FFFFFFFFFFFFFF,FFFFF:FFFFFFFFFFFFFFFFF
FFFFFFFFFFFF:F
```

+

@A00721:190:HGJW7DSXY:4:1138:18909:22153 2:N:0:TCTGCAAG+GCTGCACT  
CGACGAATCTTTTACCCAAATATTCAAAGTGCAGATCGGCGAATGACGTCGCCGATTATATCACAA  
AAGGAGGATCTTATATTGATCACGGTCAATTTCAAGAAGACGGCCGGAAAAGAAAGTGTGATCGTATC  
GAACTAGACGTTGTT

[illegible]

+

@A00721:190:HGJW7DSXY:4:1603:11333:28886 2:N:0:TCTGCAAG+GCTGCACT  
CGACGAATCTTTTACCCAAATATTCAAAGTGCAGATCGGCGAATGACGTCGCCGATTATATCACAA  
AAGGAGGATCTTATATTGATCACGGTCAATTTCAAGAAGACGGCCGAAAAGAAAGTGTGATCGTATC  
GAACTAGACGTTGTT

```
FFF,FFF:FFFFFFFFF:F:FFFF,FFFFFF:FFFFFFF::FFFFFFFFFFFFFFFFF:F,FFFF:FF
:FFFF:FFFFFFFFFFFFFFFF:FFF,F:FFFFFF:FF,FF,FFF,,FF,FFF,FFF:,FFFFFFF,FFFFF
,FFFFFF,:FFF,:FF
```

+

@A00721:190:HGJW7DSXY:4:2127:28311:35837 2:N:0:TCTGCAAG+GCTGCACT  
CGACGAATCTTTTACCCAAATATTCAAAGTGCGAGATCGGCGAATGACGTGCGCGATTATATCACAA  
AAGGAGGATCTTATATTGATCACGGTCAATTTCAAGAAGACGGCCGAAAAGAAAGTGTGATCGTATC  
GAACTAGACGTTGTT

[illegible]

@A00721:190:HGJW7DSXY:4:2221:23321:12258 2:N:0:TCTGCAAG+GCTGCACT  
CGACGAATCTTTTACCCAAATATTCAAAGTGCAGATCGGCGAATGACGTCGCCGATTATATCACAA  
AAGGAGGATCTTATATTGATCACGGTCAATTTCAAGAAGACGGCCGAAAGAAAGTGTGATCGTATC  
GAACTAGACGTTGTT

@A00721:190:HGJW7DSXY:4:2521:31304:18067 2:N:0:TCTGCAAG+GCTGCACT  
CGACGAATCTTTTACCCAAATATTCAAAGTGCAGATCGGCGAATGACGTCGCCGATTATATCACAA  
AAGGAGGATCTTATATTGATCACGGTCAATTTCAAGAAGACGGCCGAAAGAAAGTGTGATCGTATC  
GAACTAGACGTTGTT

@A00721:190:HGJW7DSXY:4:2562:28971:7357 2:N:0:TCTGCAAG+GCTGCACT  
CGACGAATCTTTTACCCAAATATTCAAAGTGCAGATCGGCGAATGACGTCGCCGATTATATCACAA  
AAGGAGGATCTTATATTGATCACGGTCAATTTCAAGAAGACGGCCGAAAGAAAGTGTGATCGTATC  
GAACTAGACGTTGTT

@A00721:190:HGJW7DSXY:4:2634:17535:19304 2:N:0:TCTGCAAG+GCTGCACT  
CGACGAATCTTTTACCCAAATATTCAAAGTGCAGATCGGCGAATGACGTCGCCGATTATATCACAA  
AAGGAGGATCTTATATTGATCACGGTCAATTTCAAGAAGACGGCCGAAAGAAAGTGTGATCGTATC  
GAACTAGACGTTGTT

@A00721:190:HGJW7DSXY:4:1112:26106:14951 2:N:0:TCTGCAAG+GCTGCACT  
CGACGAATCTTTTACCCAAATATTCAAAGTGCGAGATCGGCGAATGACGTGCGCGATTATATCACAA  
AAGGAGGATCTTATATTGATCACGGTCAATTTCAAGAAGACGGCCGAAAGAAAGTGTGATCGTATC  
GAACTAGACGTTGT

@A00721:190:HGJW7DSXY:4:1551:8901:1658 2:N:0:TCTGCAAG+GCTGCACT  
CGACGAATCTTTTACCCCAAATATTCAAAGTGCGAGATCGGCGAATGACGTCGCCGATTATATCACAA  
AAGGAGGATCTTATATTGATCACGGTCAATTTCAAGAAGACGGCCGAAAGAAAGTGTGATCGTATC  
GAACTAGACGTTGT

@A00721:190:HGJW7DSXY:4:2404:28058:11068 2:N:0:TCTGCAAG+GCTGCACT  
CGACGAATCTTTTACCCCAAATATTTCAAAGTGCAGATCGGCGAATGACGTCGCCGATTATATCACAA  
AAGGAGGATCTTATATTGATCACGGTCAATTTCAAGAAGACGGCCGAAAGAAAGTGTGATCGTATC  
GAACTAGACGTTGT



F,FFFFFFFF,FFFFFFFFF:FFFFFFFFFFFFFFFF:FFFFFF,FFFFFFFFFFFFFFFFFFFF  
FFFFFFFF:FF:F

@A00721:190:HGJW7DSXY:4:1463:14570:32581 2:N:0:TCTGCAAG+GCTGCACT  
TCCGACGAATCTTTTACCCAAATATTCAAAGTGCAGATCGGCGAATGACGTGCGCGATTATATCAC  
AAAAGGAGGATCTTATATTGATCACGGTCAATTTCAAGAAGACGGCCGAAAAGAAAGTGTGATCGTA  
TCGAAGTAGACGTTG

+

:F:FFFFFFFF::FFFFF:FFFFFF:FFFFFFFF:FFFFFFFF,FFF:FFFFF:FFFFFFFFFFFFFFFF  
FFFFFFFFFFFFFFFF:FFFFFFFFFFFF,FFF:FFFFFFFF:FFFFF,,FFFFFFFF:FF,FFFF,FF  
F:FFFFF,FF:,FF

@A00721:190:HGJW7DSXY:4:1560:15510:16141 2:N:0:TCTGCAAG+GCTGCACT  
TCCGACGAATCTTTTACCCAAATATTCAAAGTGCAGATCGGCGAATGACGTGCGCGATTATATCAC  
AAAAGGAGGATCTTATATTGATCACGGTCAATTTCAAGAAGACGGCCGAAAAGAAAGTGTGATCGTA  
TCGAAGTAGACGTTG

+

FFFFFFFFFFFFFFFFFFFFFFFFFFFFFFFFFFFFFFFFFFFFFFFFFFFFFFFFFFFFFFFFFFFF  
FFFFFFFFFFFFFFFFFFFFFFFFFFFFFFFFFFFFFFFFFFFFFFFF:F:FFFFFFFFFFFFFFFFFFFFFFFF  
FFFFFFFFFFFFFFFF

@A00721:190:HGJW7DSXY:4:2173:22471:2487 2:N:0:TCTGCAAG+GCTGCACT  
TCCGACGAATCTTTTACCCAAATATTCAAAGTGCAGATCGGCGAATGACGTGCGCGATTATATCAC  
AAAAGGAGGATCTTATATTGATCACGGTCAATTTCAAGAAGACGGCCGAAAAGAAAGTGTGATCGTA  
TCGAAGTAGACGTTG

+

FFFFFFFFFFFFFFFFFFFFFFFFFFFFFFFFFFFFFFFFFFFFFFFFFFFFFFFFFFFFFFFFFFFF  
FFFFFFFFFFFFFFFFFFFFFFFFFFFFFFFFFFFFFFFFFFFFFFFFFFFFFFFFFFFFFFFF,FFF,FFFFFFFFFFFF  
FFFFFFFFFFFFFF,:

@A00721:190:HGJW7DSXY:4:1209:12572:6699 2:N:0:TCTGCAAG+GCTGCACT  
GACGAATCTTTTACCCAAATATTCAAAGTGCAGATCGGCGAATGACGTGCGCGATTATATCACAAA  
AGGAGGATCTTATATTGATCACGGTCAATTTCAAGAAGACGGCCGAAAAGAAAGTGTGATCGTATCG  
AACTAGACAGATCGG

+

FFFFFFFFFFFFFFFFFFFFFFFFFFFFFFFFFFFFFFFFFFFFFFFFFFFFFFFFFFFFFFFFFFFF  
FFFFFFFFFFFFFFFFFFFFFFFFFFFFFFFFFFFFFFFFFFFFFFFFFFFFFFFFFFFFFFFFFFFF:FFFFFFFFFFFF  
FFFFFFFF

@A00721:190:HGJW7DSXY:4:1244:2862:29121 2:N:0:TCTGCAAG+GCTGCACT  
GACGAATCTTTTACCCAAATATTCAAAGTGCAGATCGGCGAATGACGTGCGCGATTATATCACAAA  
AGGAGGATCTTATATTGATCACGGTCAATTTCAAGAAGACGGCCGAAAAGAAAGTGTGATCGTATCG  
AACTAGACAGATCGG

+

FFFFFFFFFFFFFFFFFFFFFFFFFFFFFFFFFFFFFFFFFFFFFFFFFFFFFFFFFFFFFFFFFFFF:FFFFFFFFFFFF  
FFFFFFFFFFFFFFFFFFFFFFFFFFFFFFFFFFFFFFFFFFFFFFFFFFFFFFFFFFFFFFFFFFFF:FFFFFFFFFFFF  
FFFFFFFF

@A00721:190:HGJW7DSXY:4:1318:5782:13041 2:N:0:TCTGCAAG+GCTGCACT  
GACGAATCTTTTACCCAAATATTCAAAGTGCAGATCGGCGAATGACGTGCGCGATTATATCACAAA  
AGGAGGATCTTATATTGATCACGGTCAATTTCAAGAAGACGGCCGAAAAGAAAGTGTGATCGTATCG  
AACTAGACAGATCGG

+

FFFFFFFFFFFFFFFFFFFFFFFFFFFFFFFFFFFFFFFFFFFFFFFFFFFFFFFFFFFFFFFFFFFF:FFFFFFFFFFFF  
FFFFFFFFFFFFFFFFFFFFFFFFFFFFFFFFFFFFFFFFFFFFFFFFFFFFFFFFFFFFFFFFFFFF:FFFFFFFFFFFF,FFFFFFFFFFFFFFFFFFFF  
FFFFFFFF

@A00721:190:HGJW7DSXY:4:1520:20383:12743 2:N:0:TCTGCAAG+GCTGCACT  
GACGAATCTTTTACCCAAATATTCAAAGTGCAGATCGGCGAATGACGTGCGCGATTATATCACAAA  
AGGAGGATCTTATATTGATCACGGTCAATTTCAAGAAGACGGCCGAAAAGAAAGTGTGATCGTATCG  
AACTAGACAGATCGG

[illegible]

```

FFFFFFFFFFFFFFFF:FFFFFFFFFFFFFFFFFFFFFFFFFFFFFFFFFFFFFFFFFFFFFFFF
:FFFFFFFFFFFFFFFFFFFFFFFF:FFFFFFF:FFFFFFFFFFFFFFFFFFFFFFFF:FFFFFFFFFFFFFFFF
FFFFFFFFFFFFFFFF

```

```

FFFFFFFFFFFFFFFFFFFFFFFFFFFFFFFFFFFFFFFFFFFFFFFFFFFFFFFFFFFFFFFF:FFFFFFFF
FFF:FFFFFFFFFFFFFFFFFFFFFFFFFFFFFFFF:FFFFFFFF:FFFFFFFFFFFFFFFFFFFFFFFF
FFFFFFFFFFFFFFFF

```

[illegible]

```

FFFFFFFF:FFFFFFFF:FFFFFF:FFFFFFFFF,:FFFFFFFFF::FFFFFFFFFFFFFF:FFFFFFFFFFFFFFF
FFFF:FFFF:FF:F:FFFFFFFFFFFFFFFFF:FFFF:F,FFFFFFFFF:F,FFFFFFFFFFFFFFFFFFFFFF
FFFFFFFFF:FFF,F

```

[illegible]

```

FFFF:F,FF:FF,,FF:, ,FFFFFFFFF,,F:FFFF:FFF,F:,::FF:FFFF,FFFFFF:FF,FF,
FF:FFFFFF:FFFFFF:,FFFFFF,FFF:FFFFFFFF:FFF:F,F,FF,F,FFF,FFF:, ,FFF,F,,FFFF
FFFFFFFFF:,FFF:

```

@A00721:190:HGJW7DSXY:4:2667:14082:2675 2:N:0:TCTGCAAG+GCTGCACT  
GACGAATCTTTTCACCCAAATATTCAAAGTGCGAGATCGGCGAATGACGTCGCCGATTATATCACAAA

AGGAGGATCTTATATTGATCACGGTCAATTTCAAGAAGACGGCCGAAAAGAAAGTGTGATCGTATCG  
AACTAGACAGATCGG

+

FFFFFFFFFFFFFFFFFFFFFFFFFFFFFFFFFFFFFFFFFFFFFFFFFFFFFFFFFFFFFFFFFFFFFFFF  
FFFFFFFFFFFFFFFFFFFFFFFFFFFFFFFFFFFFFFFFFFFFFFFFFFFFFFFFFFFFFFFFFFFFFFFF  
FFFFFFFFFFFFFFFF

@A00721:190:HGJW7DSXY:4:1278:29387:36886 2:N:0:TCTGCAAG+GCTGCACT  
AGATTCCGACTAATCTTTTCACCCAAATATTCAAAGTGCAGATCGGCGAATGACGTCGCCGATTATA  
TCACAAAAGGAGGATCTTATATTGATCACGGTCAATTTCAAGAAGACGGCCGAAAAGAAAGTGTGAT  
CGTATCGAACTAGAC

+

F:F:FFF::FFFFFFFFFFFFFF:FFFFFFFFFFFFFFFFFFFFFFFFFFFFFFFF:FFFFFFFF:FFFFF  
FFFFFF:FFFFFFFFFFFFFF::FFF,FFFFFFFFFFFFFF:F::F:FFFFFFFFFFFFFF:FFFFF  
FFFFFF,FFFFFF

@A00721:190:HGJW7DSXY:4:2236:14868:1752 2:N:0:TCTGCAAG+GCTGCACT  
AGATTCCGACTAATCTTTTCACCCAAATATTCAAAGTGCAGATCGGCGAATGACGTCGCCGATTATA  
TCACAAAAGGAGGATCTTATATTGATCACGGTCAATTTCAAGAAGACGGCCGAAAAGAAAGTGTGAT  
CGTATCGAACTAGAC

+

FFFFFFFFFFFFFFFFFFFFFFFFFFFFFF, :FFFFFF:FFFFFFFFFFFFFFFFFFFFFF::FFFFFF:FFFF  
FFFFFF:,FFFFFFFFFFFFFFFFFFFFFF:FFFF:FFFFFFFF:FFFFFFFF::FF:FFFFFF:  
FFFFFFFF:F::FF:

@A00721:190:HGJW7DSXY:4:2303:16947:1783 2:N:0:TCTGCAAG+GCTGCACT  
AGATTCCGACTAATCTTTTCACCCAAATATTCAAAGTGCAGATCGGCGAATGACGTCGCCGATTATA  
TCACAAAAGGAGGATCTTATATTGATCACGGTCAATTTCAAGAAGACGGCCGAAAAGAAAGTGTGAT  
CGTATCGAACTAGAC

+

FFFFFFFF::F,FFFF:FFFFFF:FFFF,FFFF:FF:FF,FF:F:FFFF:FF:FFFF:FF,FFF  
FFF,F:FF,FFFF, :,FF:FFFFFFFF:FFFFFFFFFFFFFF,FFFFFFFF:F,FFFF::F,FF:  
,FFF:FFF::F:FFF

@A00721:190:HGJW7DSXY:4:2453:16785:6605 2:N:0:TCTGCAAG+GCTGCACT  
AGATTCCGACTAATCTTTTCACCCAAATATTCAAAGTGCAGATCGGCGAATGACGTCGCCGATTATA  
TCACAAAAGGAGGATCTTATATTGATCACGGTCAATTTCAAGAAGACGGCCGAAAAGAAAGTGTGAT  
CGTATCGAACTAGAC

+

FFFFFFFFFFFFFFFFFFFFFFFFFFFFFFFFFFFFFFFFFFFFFFFFFFFFFFFFFFFFFFFFFFFFFFFF  
FFFFFF:FFFFFF:FFFFFFFFFFFFFFFFFFFFFFFFFFFFFFFF:FFFF:F:FF,FFFFFFFF  
F:FFFFFFFF

@A00721:190:HGJW7DSXY:4:2453:17065:6684 2:N:0:TCTGCAAG+GCTGCACT  
AGATTCCGACTAATCTTTTCACCCAAATATTCAAAGTGCAGATCGGCGAATGACGTCGCCGATTATA  
TCACAAAAGGAGGATCTTATATTGATCACGGTCAATTTCAAGAAGACGGCCGAAAAGAAAGTGTGAT  
CGTATCGAACTAGAC

+

FFFFFFFFFFFFFFFFFFFFFFFFFFFFFFFFFFFFFFFFFFFFFFFFFFFFFFFFFFFFFFFFFFFFFF:FFFF  
F:FFFFFFFFFFFFFFFFFFFFFFFFFFFFFFFFFFFFFFFF,FFFFFFFF:FFFF:FFFFFF  
FFFFFFFF

@A00721:190:HGJW7DSXY:4:2569:26539:14356 2:N:0:TCTGCAAG+GCTGCACT  
AGATTCCGACTAATCTTTTCACCCAAATATTCAAAGTGCAGATCGGCGAATGACGTCGCCGATTATA  
TCACAAAAGGAGGATCTTATATTGATCACGGTCAATTTCAAGAAGACGGCCGAAAAGAAAGTGTGAT  
CGTATCGAACTAGAC

+

FFFFFFFFFFFFFFFFFFFFFFFF,FF:FFFFFFFFFFFFFFFFFFFFFFFFFFFFFFFFFFFFFFFF  
FFFF,FFFFFFFFFFFFFFFF,FFFFFFFFFFFFFFFFFFFFFFFF, :,FFFFFFFF  
FFFFFFFF

@A00721:190:HGJW7DSXY:4:1206:6488:28635 2:N:0:TCTGCAAG+GCTGCACT  
CAGATTCCGACGAATCTTTTACCCCAAATATTCAAAGTGCGAGATCGGCGACTGACGTCGCCGATTAT  
ATCACAAAAGGAGGATCTTATATTGATCACGGTCAATTTCAAGAAGACGGCCGAAAAGAAAGTGTGA  
TCGTATCGAACTAGA

```
FFFFFFFFFFFFFFFFFFFFFFFFFFFFFFFFFFFFFFFFFFFFFFFFFFFFFFFFFFFFFFFFFFFFF
FFFFFF:FFFFFFFFFFFFFFFFFFFF:FFFFFFFFFFFFFFFFFFFFFFFFFFFFFFFFFFFF:FFFFF
FFFFF:FFFFFFFFFF
```

+

```

FFFFFFFFFFFFFFFFFFFFFFFFFFFFFFFFFFFFFFFFFFFFFFFFFFFFFFFFFFFFFFFFFFFFFFFF
:F,FFFF,FFFFFFFFFFFFFFFFFFFFFFFF:FFFFF:FFFFFFFFFFFF:FFFFF:FFF:FFFF,F::FFFF:
::FFFFFFFFFFFFFFF:

```

+

```

FFFFFFFFFFFFFFFFFFFFFFFFFFFFFFFFFFFFFFFFFFFFFFFFFFFFFFFFFFFFFFFF:FFFFFFFFFFFF:FFFF:FFF
FF:FFFFFFFFFFFF,FFFFFFFFFFFFFFFFFFFFFFFFFFFFFFFFFFFFFFFF:FFFFFFFF:FF:FFF,F:,FF:FF,FFFFFF:FF:FF
F::FFF:FFFFFF:F

```

+

[illegible] $+$ [illegible]

+

[illegible]

+

[illegible]

FFFF:FFFFFF:FFFFFFFFFFFFFFFF:FFF::FFFFFFFFFFFFFF,FFFFFFFF:FFFF:F:FFFFFFFF  
FFFFFFFFFFFFFF:FF

@A00721:190:HGJW7DSXY:4:1476:15456:25191 2:N:0:TCTGCAAG+GCTGCACT  
CAGATTCCGACGAATCTTTTCACCCAAATATTCAAAGTGCGAGATCGGCGACTGACGTGCGCCGATTAT  
ATCACAAAAGGAGGATCTTATATTGATCACGGTCAATTTCAAGAAGACGGCCGGAAAAGAAAGTGTGA  
TCGTATCGAACTAGA

+

FFFFFFFFFFFFFFFFFFFFFFFF: ,FFFFFF:FFFFFFFFFFFFFF:FFFFFFFFFFFFFF: ,FFFFFF:FFFF  
FF,FFFF:FF:FFFFFF:FFFFFF,FF,:FFFFFFFF::FF,FF:, :F::F:FF:::FFFFFF:FFFF  
FFF::F,FF::FF,F

@A00721:190:HGJW7DSXY:4:1510:17002:24236 2:N:0:TCTGCAAG+GCTGCACT  
CAGATTCCGACGAATCTTTTCACCCAAATATTCAAAGTGCGAGATCGGCGAATGACGTGCGCCGATTAT  
ATCACAAAAGGAGGATCTTATATTGATCACGGTCAATTTCAAGAAGACGGCCGGAAAAGAAAGTGTGA  
TCGTATCGAACTAGA

+

FFFFFFFFFFFFFFFFFFFFFFFFFFFFFFFFFFFFFFFFFFFFFFFFFFFFFFFFFFFFFFFF:FFF  
FFFFFFFF:FFFFFFFFFFFFFFFFFFFFFFFFFFFFFFFFFFFFFFFFFFFFFFFFFFFFFFFF:FFFFFFFFFFFFFFFF:FFFFF  
FFFFFFFFFFFFFFFF

@A00721:190:HGJW7DSXY:4:2510:1271:14935 2:N:0:TCTGCAAG+GCTGCACT  
CAGATTCCGACGAATCTTTTCACCCAAATATTCAAAGTGCGAGATCGGCGACTGACGTGCGCCGATTAT  
ATCACAAAAGGAGGATCTTATATTGATCACGGTCAATTTCAAGAAGACGGCCGGAAAAGAAAGTGTGA  
TCGTATCGAACTAGA

+

FFFFFFFFFFFFFFFFFFFFFFFFFFFFFFFFFFFFFFFFFFFFFFFFFFFFFFFFFFFFFFFF:FFFFFFFFFFFFFFF  
FFFFFFFFFFFFFFFFFFFFFFFFFFFFFFFFFFFFFFFFFFFFFFFFFFFFFFFFFFFFFFFFFFFFFFFFFFFFFFFF  
F:FFFFFFFFFFFFFF

@A00721:190:HGJW7DSXY:4:2538:12509:32142 2:N:0:TCTGCAAG+GCTGCACT  
CAGATTCCGACGAATCTTTTCACCCAAATATTCAAAGTGCGAGATCGGCGAATGACGTGCGCCGATTAT  
ATCACAAAAGGAGGATCTTATATTGATCACGGTCAATTTCAAGAAGACGGCCGGAAAAGAAAGTGTGA  
TCGTATCGAACTAGA

+

FFFFFFFFFFFFFFFFFFFFFFFFFFFFFFFFFFFFFFFFFFFFFFFFFFFFFFFFFFFFFFFFFFFFFFFF  
FFFFFFFFFFFFFFFFFFFFFFFFFFFFFFFFFFFFFFFFFFFFFFFFFFFFFFFFFFFFFFFFFFFFFFFF  
FFFFFFFFFFFFFFFF

@A00721:190:HGJW7DSXY:4:2518:2935:14967 2:N:0:TCTGCAAG+GCTGCACT  
CATAATCAACCCAGATTCCGACGAATCTTTTCACCCAAATATTCAAAGTGCGAGATCGGCGAATGACG  
TCGCCGATTATATCACAAAAGGAGGATCTTATATTGATCACGGTCAATTTCAAGAAGACGGCCGGAAA  
AGAAAGTGTGATCGT

+

FFFFFFFFFFFFFFFFFFFFFFFFFFFFFFFFFFFFFFFFFFFFFFFFFFFFFFFFFFFFFFFF:FFFFFFFFFFFFF  
FFFFFFFFFFFFFFFFFFFFFFFFFFFFFFFFFFFFFFFFFFFFFFFFFFFFFFFFFFFFFFFFFFFFFFFFFFFF,  
FFF:FFFFFFFF

@A00721:190:HGJW7DSXY:4:1123:27425:9846 2:N:0:TCTGCAAG+GCTGCACT  
ACATAATCAACCCAGATTCCGACGAATCTTTTCACCCAAATATTCAAAGTGCGAGATCGGCGAATGAC  
GTCGCCGATTATATCACAAAAGGAGGATCTTATATTGATCACGGTCAATTTCAAGAAGACGGCCGGAA  
AAGAAAGTGTGATCG

+

FFFFFFFFFFFFFFFFFFFFFFFFFFFFFFFFFFFFFFFFFFFFFFFFFFFFFFFFFFFFFFFF:FFFFFFFFFFFFF  
FFFFFFFFFFFFFFFFFFFFFFFFFFFFFFFFFFFFFFFFFFFFFFFFFFFFFFFFFFFFFFFFFFFFFFFFFFFF  
FFFFFFF:FFFFFF:

@A00721:190:HGJW7DSXY:4:1149:9941:26850 2:N:0:TCTGCAAG+GCTGCACT  
ACATAATCAACCCAGATTCCGACGAATCTTTTCACCCAAATATTCAAAGTGCGAGATCGGCGAATGAC  
GTCGCCGATTATATCACAAAAGGAGGATCTTATATTGATCACGGTCAATTTCAAGAAGACGGCCGGAA  
AAGAAAGTGTGATCG

+  
FFFFFFFFFFFFFFFFFFFFFFFFFFFFFFFFFFFFFFFFFFFFFFFFFFFFFFFFFFFFFFFFFFFFFFFF  
FFFFFFFFFFFFFFFFFFFFFFFFFFFFFFFFFFFFFFFFFFFFFFFFFFFFFFFFFFFFFFFFFFFFFFFF:  
FFFFFFFFFFFFFFFF

@A00721:190:HGJW7DSXY:4:1447:6072:19961 2:N:0:TCTGCAAG+GCTGCACT  
CGATCACACTTTCTTTTCCGGCCGTCTTCTTGAAATTGACCGTGATCAATATAAGATCCTCCTTTTGT  
GATATAATCGGCGACGTCATTGCGCGATCTCGCACTTTGAATATTTGGGTGAAAAGATTGTCGGAAT  
CTGGGTTGATTATGT

+  
FFFFFFFFFFFFFFFFFFFFFFFFFFFFFFFFFFFFFFFFFFFFFFFFFFFFFFFFFFFFFFFFFFFFFFFF:  
FFFFFFFFFFFFFFFFFFFFFFFFFFFFFFFFFFFFFFFFFFFFFFFFFFFFFFFFFFFFFFFFFFFFFFFF:  
FFFFFFFF,FFF  
FFFFFFFFFFFFFFFFFFFFFFFFFFFFFFFFFFFFFFFFFFFFFFFFFFFFFFFFFFFFFFFFFFFFFFFF:  
FFFFFFFF,FFF  
FFFFF,FFFFFFFF

@A00721:190:HGJW7DSXY:4:1548:8856:8061 2:N:0:TCTGCAAG+GCTGCACT  
CGATCACACTTTCTTTTCCGGCCGTCTTCTTGAAATTGACCGTGATCAATATAAGATCCTCCTTTTGT  
GATATAATCGGCGACGTCATTGCGCGATCTCGCACTTTGAATATTTGGGTGAAAAGATTGTCGGAAT  
CTGGGTTGATTATGT

+  
FFFFFFFFFFFFFFFFFFFFFFFFFFFFFFFFFFFFFFFFFFFFFFFFFFFFFFFFFFFFFFFFFFFFFFFF:  
FFFFFFFFFFFFFFFFFFFFFFFFFFFFFFFFFFFFFFFFFFFFFFFFFFFFFFFFFFFFFFFFFFFFFFFF:  
FFFFFFFFFFFFFFFF

@A00721:190:HGJW7DSXY:4:1621:10655:36417 2:N:0:TCTGCAAG+GCTGCACT  
ACATAATCAACCCAGATTCCGACGAATCTTTTCACCCAAATATTCAAAGTGCGAGATCGGCGAATGAC  
GTCGCCGATTATATCACAAAAGGAGGATCTTATATTGATCACGGTCAATTTCAAGAAGACGGCCGAA  
AAGAAAGTGTGATCG

+  
FF:FFFFFFFFFFFFFFFFFFFFFFFFFFFFFFFFFFFFFFFFFFFFFFFFFFFFFFFFFFFFFFFFFFFFFFFF:  
FFFFFFFFFF:FFFFFFFFFFFFFFFFFFFFFFFFFFFFFFFFFFFFFFFFFFFFFFFFFFFFFFFFFFFFFFFF:  
FFFFFFFFFFFFFFFF

@A00721:190:HGJW7DSXY:4:2319:29225:18317 2:N:0:TCTGCAAG+GCTGCACT  
ACATAATCAACCCAGATTCCGACGAATCTTTTCACCCAAATATTCAAAGTGCGAGATCGGCGAATGAC  
GTCGCCGATTATATCACAAAAGGAGGATCTTATATTGATCACGGTCAATTTCAAGAAGACGGCCGAA  
AAGACAGTGTGATCG

+  
FFFFFFFFFFFFFFFFFFFFFFFFFFFFFFFFFFFFFFFFFFFFFFFFFFFFFFFFFFFFFFFFFFFFFFFF:  
FFFFFFFFFFFFFFFFFFFFFFFFFFFFFFFFFFFFFFFFFFFFFFFFFFFFFFFFFFFFFFFFFFFFFFFF:  
FFFF,FFFFFFFF

@A00721:190:HGJW7DSXY:4:2332:12870:13886 2:N:0:TCTGCAAG+GCTGCACT  
CGATCACACTTTCTTTTCCGGCCGTCTTCTTGAAATTGACCGTGATCAATATAAGATCCTCCTTTTGT  
GATATAATCGGCGACGTCATTGCGCGATCTCGCACTTTGAATATTTGGGTGAAAAGATTGTCGGAAT  
CTGGGTTGATTATGT

+  
FFFFFFFFFFFFFFFFFFFFFFFFFFFFFFFFFFFFFFFFFFFFFFFFFFFFFFFFFFFFFFFFFFFFFFFF:  
FFFFFFFFFFFFFFFFFFFFFFFFFFFFFFFFFFFFFFFFFFFFFFFFFFFFFFFFFFFFFFFFFFFFFFFF:  
FFFFFFFF,FFF,FFFFFFFFFFFFFFFF  
FFFFFFFFFFFFFFFFFFFFFFFFFFFFFFFFFFFFFFFFFFFFFFFFFFFFFFFFFFFFFFFFFFFFFFFF:  
FFFFFFFFFF:FFFF:FFFFFFFF

@A00721:190:HGJW7DSXY:4:2361:16477:16219 2:N:0:TCTGCAAG+GCTGCACT  
CGATCACACTTTCTTTTCCGGCCGTCTTCTTGAAATTGACCGTGATCAATATAAGATCCTCCTTTTGT  
GATATAATCGGCGACGTCATTGCGCGATCTCGCACTTTGAATATTTGGGTGAAAAGATTGTCGGAAT  
CTGGGTTGATTATGT

+  
FFFFFFFFFFFFFFFFFFFFFFFFFFFFFFFFFFFFFFFFFFFFFFFFFFFFFFFFFFFFFFFFFFFFFFFF:  
FFFFFFFFFFFFFFFFFFFFFFFFFFFFFFFFFFFFFFFFFFFFFFFFFFFFFFFFFFFFFFFFFFFFFFFF:  
FFFFFFFF,FFFFFFFF  
FFFFFFFFFFFFFFFFFFFFFFFFFFFFFFFFFFFFFFFFFFFFFFFFFFFFFFFFFFFFFFFFFFFFFFFF:  
FFFFFFFF,FFFFFFFF  
FFFFFFFF:FFFFFFFF

@A00721:190:HGJW7DSXY:4:1107:1452:18850 2:N:0:TCTGCAAG+GCTGCACT  
ACATAATCAACCCAGATTCCGACGAATCTTTTCACCCAAATATTCAAAGTGCGAGATCGGCGAATGAC

GTCGCCGATTATATCACAAAAGGAGGATCTTATATTGATCACGGTCAATTTCAAGAAGACGGCCGGAA  
AAGAAAGTGTGATC

```

FFFFFFFF:FF:FFFFFFFFFFFFFFFFFFFFFFFF:FFFFFFFFFFFFFFFF,FFFFFF:FFF:FFFFFFFF
FFF:FFFFFFFF:FFFFFF::F:,FFFFFFFF,FF:F,::FFFF:FFFF,FF,FF:F:F:FFF
FF:FFF,::F:FF:

```

 $+$ 

```
FFFFFFFFFFFFFFFFFFFFFFFFFFFFFFFFFFFFFFFFFFFFFFFFFFFFFFFFFFFFFFF
FFFFFFFFFFFFFFFFFFFFFFFFFFFFFFFF:FFFFFFFFFFFFFFFFFFFFFFFFFFFFFFFF
FFFFFFFFFFFFFF
```

+

[illegible]

+

[illegible]

+

```

FFFFFFFFFFFFFFFFFFFFFFFFFFFFFFFFFFFFFFFFFFFFFFFFFFFFFFFFFFFFFFFF
FFFFFFFFFFFFFFFFFFFFFFFF:~F:FFFFFFFFFFFFFFFFFFFFFFFFFFFFFFFFFFFF
F,F:FFFFFFFFFFFF

```

+

[illegible]

+

[illegible]

$+$ 

+

+

+

+

+

+

[illegible]



FFFFFFFFFFFFFFFFFFFFFFFFFFFFFFFFFFFFFFFFFFFFFFFFFFFFFFFFFFFFFFFFFFFFFFFF  
FFF:FFFF:FFFF

@A00721:190:HGJW7DSXY:4:2148:8820:32863 2:N:0:TCTGCAAG+GCTGCACT  
CTTCGACATAATCAACCCAGATTCCGACGAATCTTTTCACCCAAATATTCAAAGTGCAGATCGGCGA  
ATGACGTCGCCGATTATATCACAAAAGGAGGATCTTATATTGATCACGGTCAATTTCAAGAAGACGGC  
CGGAAAAGAAAGTGT

+

FFFFFFFFFFFFFFFFFFFFFFFFFFFFFFFFFFFFFFFFFFFFFFFFFFFFFFFFFFFFFFFFFFFFFFFF  
FFFFFFFFFFFFFFFF:FFFFFFFFFFFFFFFFFFFFFFFFFFFFFFFFFFFFFFFFFFFFFFFFFFFFFFFF  
FFFF:FFFF,FFFF

@A00721:190:HGJW7DSXY:4:2654:6596:27539 2:N:0:TCTGCAAG+GCTGCACT  
CTTCGACATAATCAACCCAGATTCCGACGAATCTTTTCACCCAAATATTCAAAGTGCAGATCGGCGA  
ATGACGTCGCCGATTATATCACAAAAGGAGGATCTTATATTGATCACGGTCAATTTCAAGAAGACGGC  
CGGAAAAGAAAGTGT

+

FFFFFFFFFFFFFFFFFFFFFFFFFFFFFFFFFFFFFFFFFFFFFFFFFFFFFFFFFFFFFFFFFFFFFFFF  
FFFFFFFFFFFFFFFF:FFFF,FFFFFFFFFFFFFFFFFFFFFFFFFFFFFFFFFFFFFFFFFFFFFFFF  
FFFFFFFFFFFFFFFF

@A00721:190:HGJW7DSXY:4:1151:23430:32111 2:N:0:TCTGCAAG+GCTGCACT  
GGTTCTTCGACATAATCAACCCAGATTCCGACGAATCTTTTCACCCAAATATTCAAAGTGCAGATCG  
GCGAATGACGTCGCCGATTATATCACAAAAGGAGGATCTTATATTGATCACGGTCAATTTCAAGAAGA  
CGGCCGAAAAGAAA

+

FFFFFFFFFFFFFFFFFFFFFFFFFFFFFFFFFFFFFFFFFFFFFFFFFFFFFFFFFFFFFFFFFFFFFFFF  
FFFFFFFFFFFFFFFF:FFFFFFFFFFFFFFFFFFFFFFFFFFFFFFFFFFFFFFFFFFFFFFFF:FFFFF::  
F:F:FFFFFFFF

@A00721:190:HGJW7DSXY:4:1173:9634:3333 2:N:0:TCTGCAAG+GCTGCACT  
GGTTCTTCGACATAATCAACCCAGATTCCGACGAATCTTTTCACCCAAATATTCAAAGTGCAGATCG  
GCGAATGACGTCGCCGATTATATCACAAAAGGAGGATCTTATATTGATCACGGTCAATTTCAAGAAGA  
CGGCCGAAAAGAAA

+

: :FFFFFFFFFFFFFFFFFFFFFFFFFFFFFFFFFFFFFFFFFFFFFFFFFFFFFFFFFFFFFFFF  
FFFFFFFFFFFFFFFFFFFFFFFFFFFFFFFFFFFFFFFFFFFFFFFFFFFFFFFFFFFFFFFFFFFFFFFF  
FF:FFFFFFFF

@A00721:190:HGJW7DSXY:4:1564:26006:33912 2:N:0:TCTGCAAG+GCTGCACT  
GGTTCTTCGACATAATCAACCCAGATTCCGACGAATCTTTTCACCCAAATATTCAAAGTGCAGATCG  
GCGAATGACGTCGCCGATTATATCACAAAAGGAGGATCTTATATTGATCACGGTCAATTTCAAGAAGA  
CGGCCGAAAAGAAA

+

FFFFFFFFFFFFFFFFFFFFFFFFFFFFFFFFFFFFFFFFFFFFFFFFFFFFFFFFFFFFFFFFFFFFFFFF  
FFFFFFFFFFFFFFFFFFFFFFFFFFFFFFFFFFFFFFFFFFFFFFFFFFFFFFFFFFFFFFFFFFFFFFFF  
FFFFFFFFFFFFFFFF

@A00721:190:HGJW7DSXY:4:1643:29993:13354 2:N:0:TCTGCAAG+GCTGCACT  
GGTTCTTCGACATAATCAACCCAGATTCCGACGAATCTTTTCACCCAAATATTCAAAGTGCAGATCG  
GCGAATGACGTCGCCGATTATATCACAAAAGGAGGATCTTATATTGATCACGGTCAATTTCAAGAAGA  
CGGCCGAAAAGAAA

+

FFFFFFFFFFFF,FFFFFFFFFFFFFFFFFFFFFFFFFFFFFFFFFFFFFFFFFFFFFFFF:FFFFFFFFFFFF,F:  
FFFFFFFFFFFFFFFFFFFF,FFFFFFFFFFFFFFFFFFFFFFFFFFFFFFFFFFFFFFFF:FFFFFFFFFF:FFFFFFFFF,:  
FFF:FFFF,FFFFF

@A00721:190:HGJW7DSXY:4:2130:13160:36057 2:N:0:TCTGCAAG+GCTGCACT  
GGTTCTTCGACATAATCAACCCAGATTCCGACGAATCTTTTCACCCAAATATTCAAAGTGCAGATCG  
GCGAATGACGTCGCCGATTATATCACAAAAGGAGGATCTTATATTGATCACGGTCAATTTCAAGAAGA  
CGGCCGAAAAGAAA

+  
FFFFFFFFFFFFFFFFFFFFFFFFFFFFFFFFFFFFFFFFFFFFFFFFFFFFFFFFFFFFF,FFFFFFFFFFFFFFFFFFFFFF  
FFFFFFFFFFFFFFFFFFFFFF:FFF:FFFFF:FFFFFFFFF:FFFFFFFFFF:FFFFFFFFFFFFFFFFFFFFFF,  
FFFFFFFFF,FFFFFFF  
@A00721:190:HGWJ7DSXY:4:2554:31602:7623 2:N:0:TCTGCAAG+GCTGCACT  
GGTTCTTCGACATAATCAACCCAGATTCCGACGAATCTTTTCACCCAAATATTCAAAGTGCGAGATCG  
GCGAATGACGTGCGCCGATTATATCACAAAAGGAGGATCTTATATTGATCACGGTCAATTTCAAGAAGA  
CGGCCGAAAAAGAAA  
+  
FF,FFFFFFFFFFFFFFFFFFFFFFFFFFFFFFFFFFFFFFFFFFFFFFFFFFFFFFFFFFFFF:FF  
FFFFFFFFFFFFFFFFFFFFFF::FFFFFFFFF,FFFFFFFFFFFFFFFFFFFFFFFFFFFFF:FF,FFFFFFFFF:FF,:FF  
:FF,:FFFFFFFFF:  
@A00721:190:HGWJ7DSXY:4:2614:24632:4319 2:N:0:TCTGCAAG+GCTGCACT  
GGTTCTTCGACATAATCAACCCAGATTCCGACGAATCTTTTCACCCAAATATTCAAAGTGCGAGATCG  
GCGAATGACGTGCGCCGATTATATCACAAAAGGAGGATCTTATATTGATCACGGTCAATTTCAAGAAGA  
CGGCCGAAAAAGAAA  
+  
:FFFFFFFF:FFFFF:FFF,FFFFFFFFFFFFFFFFFFFFFFFFFFFFFFFFFFFF:FFFFFFFFFFFFFFFFFFFFFFFFFFFFF  
FFFFFFFFFFFFFFFFFFFFFF::FFFFFFFFFFFF,FFFFFFFFFFFFFFFFFFFFFFFFFFFFF,FFFFFFFFFFFFF  
FFFFFFFFF,FFFFF:  
@A00721:190:HGWJ7DSXY:4:2618:25735:3223 2:N:0:TCTGCAAG+GCTGCACT  
GGTTCTTCGACATAATCAACCCAGATTCCGACGAATCTTTTCACCCAAATATTCAAAGTGCGAGATCG  
GCGAATGACGTGCGCCGATTATATCACAAAAGGAGGATCTTATATTGATCACGGTCAATTTCAAGAAGA  
CGGCCGAAAAAGAAA  
+  
FFFFFFFFFFFFFFFFFFFFFFFFFFFFFFFFFFFFFFFFFFFFFFFFFFFFFFFFFFFFF:FF:FFFFFFFFFFFF:FFF  
FFFFFFFFFFFF,FFFFFFFFFFFFFFFFF:FFFFFFFFF,FFFFFFFFFFFFFFFFFFFFFFFFF:FFFFFFFFFFFF:FFFF  
F:FFFFFFFFFFFFF  
@A00721:190:HGWJ7DSXY:4:1120:28113:10473 2:N:0:TCTGCAAG+GCTGCACT  
CGGAATCCAAGGTTCTTCGACATAATCAACCCAGATTCCGACGAATCTTTTCACCCAAATATTCAAAG  
TGCGAGATCGGCGAATGACGTGCGCCGATTATATCACAAAAGGAGGATCTTATATTGATCACGGTCAAT  
TTCAAGAAGACGGCC  
+  
FFFFFFFFFFFFFFFFFFFFFFFFFFFFFFFFFFFFFFFFFFFFFFFFFFFFFFFFFFFFF:FFFFFFFFFFFFF  
FFFFFFFFFFFFFFFFFFFFFFFFFFFFFFFFFFFFFFFFFFFFFFFFFFFFFFFFFFFFF:FFFFFFFFFFFFF  
FFFFF:FFFFFFFF:F  
@A00721:190:HGWJ7DSXY:4:1330:20971:21809 2:N:0:TCTGCAAG+GCTGCACT  
CGGAATCCAAGGTTCTTCGACATAATCAACCCAGATTCCGACGAATCTTTTCACCCAAATATTCAAAG  
TGCGAGATCGGCGAATGACGTGCGCCGATTATATCACAAAAGGAGGATCTTATATTGATCACGGTCAAT  
TTCAAGAAGACGGCC  
+  
FFFFFFFFF:FFFFFFFFFFFFFFFFFFFFFFFFFFFFFFFFFFFFFFFFFFFFFFFFFFFFF:FFFFFFFFF  
FFFFFFFFFFFFFFFFFFFFFFFFFFFFFFFFFFFFFFFFFFFFFFFFFFFFFFFFFFFFF,FFF,FF:FFFFFFFFFFFF  
FFF:FFFFFFFF:FF  
@A00721:190:HGWJ7DSXY:4:1513:13991:31391 2:N:0:TCTGCAAG+GCTGCACT  
CGGAATCCAAGGTTCTTCGACATAATCAACCCAGATTCCGACGAATCTTTTCACCCAAATATTCAAAG  
TGCGAGATCGGCGAATGACGTGCGCCGATTATATCACAAAAGGAGGATCTTATATTGATCACGGTCAAT  
TTCAAGAAGACGGCC  
+  
FFFF:FFFFFFFFFFFFFFFFFFFFFFFFFFFFFFFFFFFFFFFFFFFFFFFFFFFFF:FFF::FF  
FFFFFFFFFFFFFFFFFFFFFFFFFFFFFFFFFFFFFFFFFFFFFFFFFFFFFFFFFFFFF:FFF:FF  
FFFFFFFFFFFFF:FFF  
@A00721:190:HGWJ7DSXY:4:1517:30273:11177 2:N:0:TCTGCAAG+GCTGCACT  
CGGAATCCAAGGTTCTTCGACATAATCAACCCAGATTCCGACGAATCTTTTCACCCAAATATTCAAAG



$+$ 

+

+

+

+

+

+

[illegible]

@A00721:190:HGJW7DSXY:4:2369:5764:15922 2:N:0:TCTGCAAG+GCTGCACT  
TCGGAATCCAAGTTCTTCGACATAATCAACCCAGATTCCGACGAATCTTTTCACCCAAATATTCAA  
GTGCGAGATCGGCGAATGACGTCGCCGATTATATCACAAAAGGAGGATCTTATATTGATCACGGTCAA  
TTTCAAGAAGACGGC

@A00721:190:HGJW7DSXY:4:1121:4915:9627 2:N:0:TCTGCAAG+GCTGCACT  
GTCGGAATCCAAGGTTCTTCGACATAATCAACCCAGATTCCGACGAATCTTTTACCCAAATATTCAA  
AGTGCGAGATCGGCGAATGACGTCGCCGATTATATCACAAAAGGAGGATCTTATATTGATCACGGTCA  
ATTTCAAGAAGACGG

@A00721:190:HGJW7DSXY:4:1252:16694:35352 2:N:0:TCTGCAAG+GCTGCACT  
GTCGGAATCCAAGGTTCTTCGACATAATCAACCCAGATTCCGACGAATCTTTTACCCAAATATTCAA  
AGTGCGAGATCGGCGAATGACGTCGCCGATTATATCACAAAAGGAGGATCTTATATTGATCACGGTCA  
ATTTCAAGAAGACGG

@A00721:190:HGJW7DSXY:4:1676:22435:18114 2:N:0:TCTGCAAG+GCTGCACT  
GTCGGAATCCAAGGTTCTTCGACATAATCAACCCAGATTCCGACGAATCTTTTACCCAAATATTCAA  
AGTGCGAGATCGGCGAATGACGTCGCCGATTATATCACAAAAGGAGGATCTTATATTGATCACGGTCA  
ATTTCAAGAAGACGG

@A00721:190:HGJW7DSXY:4:2176:28067:20541 2:N:0:TCTGCAAG+GCTGCACT  
GTCGGAATCCAAGGTTCTTCGACATAATCAACCCAGATTCCGACGAATCTTTTACCCAAATATTCAA  
AGTGCGAGATCGGCGAATGACGTCGCCGATTATATCACAAAAGGAGGATCTTATATTGATCACGGTCA  
ATTTCAAGAAGACGG

@A00721:190:HGJW7DSXY:4:2357:29704:15828 2:N:0:TCTGCAAG+GCTGCACT  
GTCGGAATCCAAGGTTCTTCGACATAATCAACCCAGATTCCGACGAATCTTTTACCCAAATATTCAA  
AGTGCGAGATCGGCGAATGACGTCGCCGATTATATCACAAAAGGAGGATCTTATATTGATCACGGTCA  
ATTTCAAGAAGACGG

@A00721:190:HGJW7DSXY:4:2357:29722:16016 2:N:0:TCTGCAAG+GCTGCACT  
GTCGGAATCCAAGGTTCTTCGACATAATCAACCCAGATTCCGACGAATCTTTTACCCAAATATTCAA  
AGTGCGAGATCGGCGAATGACGTCGCCGATTATATCACAAAAGGAGGATCTTATATTGATCACGGTCA  
ATTTCAAGAAGACGG

+  
FFFFFFFFF:FFFFFFFFFFFFFFFFFFFFFFFFFFFFFFFFFFFFFFFFFFFFFFFFFFFFFFFF  
FFFFFFFFFFFFFFFFFFFFFFFFFFFFFFFFFFFFFFFFFFFFFFFFFFFFFFFF,FFFFF::FFFFFFFFFFFFFFFF  
FFFFF:,FFFFFFF  
@A00721:190:HGJW7DSXY:4:2415:6533:26459 2:N:0:TCTGCAAG+GCTGCACT  
GTCGGAATCCAAGTTCTTCGACATAATCAACCCAGATTCCGACGAATCTTTTCACCCAAATATTCAA  
AGTGCGAGATCGGCGAATGACGTCGCCGATTATATCACAAAAGGAGGATCTTATATTGATCACGGTCA  
ATTTCAAGAAGACGG

+  
FFFFFFF:FF:,FF,FFFFFFFFFFFFFF:FFFF:,FFFFFFFF:FFFFFFF:,F:F:FFF:FF:FFFFFF  
FF,F:,FFFFF:F:FFFF:FF:FFFFFFFFFFFF:FFFFFFF:F:,F,FF::FF,FFF,F:,F,FFFF  
F:F,FF:F,FFFFFFF  
@A00721:190:HGJW7DSXY:4:1377:31394:36542 2:N:0:TCTGCAAG+GCTGCACT  
GTCTTCTTGAAATTGACCGTGATCAATATAAGATCCTCCTTTTGTGATATAATCGGCGACGTCATTCTG  
CCGATCTCGCACTTTGAATATTTGGGTGAAAAGATTCTGTCGGAATCTGGGTTGATTATGTCGAAGAAC  
CTTGGATTCCGACAT

+  
FFFFFFFFFFFFFFFFFFFFFFFFFFFFFFFFFFFFFFFFFFFFFFFFFFFFFFFFFFFFFFFF  
FFFFFFFFFFFFFFFFFFFFFFFFFFFFFFFFFFFFFFFFFFFFFFFFFFFFFFFF:F:FFFFFFFFFFFFFFFFFFFF::FF  
F:FFFFFFFFF:FFF  
@A00721:190:HGJW7DSXY:4:2167:15094:15139 2:N:0:TCTGCAAG+GCTGCACT  
GTCTTCTTGAAATTGACCGTGATCAATATAAGATCCTCCTTTTGTGATATAATCGGCGACGTCATTCTG  
CCGATCTCGCACTTTGAATATTTGGGTGAAAAGATTCTGTCGGAATCTGGGTTGATTATGTCGAAGAAC  
CTTGGATTCCGACAT

+  
FFFFFFFFFFFFFFFFFFFFFFFFFFFFFFFFFFFFFFFFFFFFFFFFFFFFFFFFFFFFF:,FFFFFFFFF  
FFFFFFFFFFFFFFFFFFFFFFFFFFFFFFFFFFFFFFFFFFFFFFFFFFFFFFFFFFFFFFFF:FFFFFFF  
FFF:FF:FFFFFFFFF  
@A00721:190:HGJW7DSXY:4:2167:13693:16595 2:N:0:TCTGCAAG+GCTGCACT  
GTCTTCTTGAAATTGACCGTGATCAATATAAGATCCTCCTTTTGTGATATAATCGGCGACGTCATTCTG  
CCGATCTCGCACTTTGAATATTTGGGTGAAAAGATTCTGTCGGAATCTGGGTTGATTATGTCGAAGAAC  
CTTGGATTCCGACAT

+  
F:FFFFFFFFFFFFFFFFFFFFFFFFFFFFFFFFFFFFFFFFFFFFFFFFFFFFFFFFFFFFFFFF  
FFFFFFFFFFFFFFFFFFFFFFFFFFFFFFFFFFFFFFFFFFFFFFFFFFFFFFFFFFFFFFFF:FFFFFFFFF  
FFFFFFFFFFFFFFFFF  
@A00721:190:HGJW7DSXY:4:2218:12084:15937 2:N:0:TCTGCAAG+GCTGCACT  
GTCTTCTTGAAATTGACCGTGATCAATATAAGATCCTCCTTTTGTGATATAATCGGCGACGTCATTCTG  
CCGATCTCGCACTTTGAATATTTGGGTGAAAAGATTCTGTCGGAATCTGGGTTGATTATGTCGAAGAAC  
CTTGGATTCCGACAT

+  
FFFFFFFFFFFFFFFFFFFFFFFFFFFFFFFFFFFFFFFFFFFFFFFFFFFFFFFFFFFFF:FFFFFFFFF:FFFFFFFFF  
FFFFFFFFFFFFFFFFFFFFFFFFFFFFFFFFFFFFFFFFFFFFFFFFFFFFFFFFFFFFFFFF,FFFFFFF,FFFFFFFFF  
FFFFFFF:FFFFFFFFF  
@A00721:190:HGJW7DSXY:4:2457:16360:3583 2:N:0:TCTGCAAG+GCTGCACT  
GTCTTCTTGAAATTGACCGTGATCAATATAAGATCCTCCTTTTGTGATATAATCGGCGACGTCATTCTG  
CCGATCTCGCACTTTGAATATTTGGGTGAAAAGATTCTGTCGGAATCTGGGTTGATTATGTCGAAGAAC  
CTTGGATTCCGACAT

+  
FFFFFFFFFFFFFFFFFFFFFFFFFFFFFFFFFFFFFFFFFFFFFFFFFFFFFFFFFFFFF:FFFFFFFFF:FFFFFFFFF  
:FF:FFFFFFFFFFFFFFFFF:FFF,FFFFF:F:FFFFFFFFFFFFF,FFFFFF:FFFFFFFFFFFFFFFFF:F:  
:,FF::FFFFFFFFF  
@A00721:190:HGJW7DSXY:4:2415:6280:27336 2:N:0:TCTGCAAG+GCTGCACT  
GTTCTTCGACATAATCAACCCAGATTCCGACGAAAATTTTCACAAAATATACAAAGTGCGAGATCGT

CGAATCACGTCGCCTATTAAATCAAAAAAGGAGGATCATATATTGTTAAAGGTCAATTTAAAGAACA  
+  
FFF:,,:FF:,FF,FF:F,FF,F,:F,F:FFF,,,,:,,,,,,F,,,FF,:FF,,:::FF,FF,  
F,FF:,,:F,F,:F,F,FFFF,FF,,F,F:,F,,,F:FFFF,,,,,,,FF:FF:,FF,FF,F  
@A00721:190:HGJW7DSXY:4:1129:5330:10661 2:N:0:TCTGCAAG+GCTGCACT  
TAAATGTCGGAATCCAAGGTTCTTCGACATAATCAACCCAGATTCCGACGAATCTTTTCACCCAAATA  
TTCAAAGTGCAGATCGGCGAATGACGTCGCCGATTATATCACAAAAGGAGGATCTTATATTGATCAC  
GGTCAATTTCAAGA

+  
:FFFFFFFFFFFFFFFFFFFFFFFFFFFFFFFFFFFFFFFFFFFFFFFFFFFFFFFFFFFFFFFFFFFFFFFF  
:FFFFFFFFF:FFF,F:FFFFFFFFFFFFFFFFFFFFFFFFFFFFFFFFFFFFFFFFFFFFFFFFFFFFFFFF  
,FFFFFFFF:FFFF  
@A00721:190:HGJW7DSXY:4:1129:5692:11130 2:N:0:TCTGCAAG+GCTGCACT  
GTAAATGTCGGAATCCAAGGTTCTTCGACATAATCAACCCAGATTCCGACGAATCTTTTCACCCAAAT  
ATTCAAAGTGCAGATCGGCGAATGACGTCGCCGATTATATCACAAAAGGAGGATCTTATATTGATCA  
CGGTCAATTTCAAGA

+  
FFFFFFFFFFFFFFFFFFFFFFFFFFFFFFFFFFFFFFFFFFFFFFFFFFFFFFFFFFFFFFFFFFFFFFFF  
FFFFFFFFFFFFFFFFFFFFFFFFFFFFFFFFFFFFFFFFFFFFFFFFFFFFFFFFFFFFFFFFFFFFFFFF  
FFFFFFFFFFFFFFFFFFFF  
@A00721:190:HGJW7DSXY:4:1220:30689:20885 2:N:0:TCTGCAAG+GCTGCACT  
GTAAATGTCGGAATCCAAGGTTCTTCGACATAATCAACCCAGATTCCGACGAATCTTTTCACCCAAAT  
ATTCAAAGTGCAGATCGGCGAATGACGTCGCCGATTATATCACAAAAGGAGGATCTTATATTGATCA  
CGGTCAATTTCAAGA

+  
FFFFFFFFFFFFFFFFFFFFFFFFFFFFFFFFFFFFFFFFFFFFFFFFFFFFFFFFFFFFFFFFFFFFFFFF  
FFFFFFFFFFFFFFFFFFFFFFFFFFFFFFFFFFFFFFFFFFFFFFFFFFFFFFFFFFFFFFFFFFFFFFFF  
FFFFF:FFFFFFFF  
@A00721:190:HGJW7DSXY:4:1355:18457:1391 2:N:0:TCTGCAAG+GCTGCACT  
GTAAATGTCGGAATCCAAGGTTCTTCGACATAATCAACCCAGATTCCGACGAATCTTTTCACCCAAAT  
ATTCAAAGTGCAGATCGGCGAATGACGTCGCCGATTATATCACAAAAGGAGGATCTTATATTGATCA  
CGGTCAATTTCAAGA

+  
FFFF:FFFFFFFFFFFFFFFFFFFFFFFFFFFFFFFFFFFFFFFFFFFFFFFFFFFFFFFFFFFFFFFF  
FFFFFFFFFFFFFFFFFFFFFFFFFFFFFFFFFFFFFFFFFFFFFFFFFFFFFFFFFFFFFFFFFFFFFFFF  
FFFFFFFFFFFFFFFFFFFF  
@A00721:190:HGJW7DSXY:4:1377:31602:36338 2:N:0:TCTGCAAG+GCTGCACT  
TCTTGAAATTGACCGTGATCAATATAAGATCCTCCTTTGTGATATAATCGGCGACGTCAATCGCCGA  
TCTCGCACTTTGAATATTTGGGTGAAAAGATTCTGTCGGAATCTGGGTTGATTATGTCGAAGAACCTTG  
GATTCGACAT

+  
FFFF,F:F,,FF:FFFF,F:FF::FF:FF,FFF:,FF,:FFFFFF,FF:F:FFFFFFFFF:,FFF:F  
,FFFF::FFFF:,FF,FFFFFFFFF,:FFFFFF:F:FF,,FFFF,:FF,:FFFFFF:FFFFFF  
FF:FF,F::FF  
@A00721:190:HGJW7DSXY:4:1461:22227:18630 2:N:0:TCTGCAAG+GCTGCACT  
GTAAATGTCGGAATCCAAGGTTCTTCGACATAATCAACCCAGATTCCGACGAATCTTTTCACCCAAAT  
ATTCAAAGTGCAGATCGGCGAATGACGTCGCCGATTATATCACAAAAGGAGGATCTTATATTGATCA  
CGGTCAATTTCAAGA

+  
FFFFFFFFFFFFFFFFFFFFFFFFFFFFFFFFFFFFFFFFFFFFFFFFFFFFFFFFFFFFFFFFFFFFFFFF  
FFFFFFFFFFFFFFFFFFFFFFFFFFFFFFFFFFFFFFFFFFFFFFFFFFFFFFFFFFFFFFFFFFFFFFFF  
FFFFFFFFFFFFFFFFFFFF  
@A00721:190:HGJW7DSXY:4:1526:29179:14325 2:N:0:TCTGCAAG+GCTGCACT  
GTAAATGTCGGAATCCAAGGTTCTTCGACATAATCAACCCAGATTCCGACGAATCTTTTCACCCAAAT

ATTCAAAGTGCGAGATCGGCGAATGACGTCGCCGATTATATCACAAAAGGAGGATCTTATATTGATCA  
CGGTCAATTTCAAGA

+

FFFFFFFFFFFFFFFFFFFFFFFFFFFFFFFFFFFFFFFFFFFFFFFFFFFFFFFFFFFFFFFFFFFFFFFF:FFFFFFFF  
FFFFFFFFFFFFFFFFFFFFFFFFFFFFFFFFFFFFFFFFFFFFFFFFFFFFFFFFFFFFFFFFFFFFFFFF  
FFFFFFFFFFFFFFFF

@A00721:190:HGJW7DSXY:4:1534:22110:35149 2:N:0:TCTGCAAG+GCTGCACT  
GTAAATGTCGGAATCCAAGGTTCTTCGACATAATCAACCCAGATTCCGACGAATCTTTTCACCCAAAT  
ATTCAAAGTGCGAGATCGGCGAATGACGTCGCCGATTATATCACAAAAGGAGGATCTTATATTGATCA  
CGGTCAATTTCAAGA

+

FFFFF,FFFFFFFFFFFF:F,FFFFFFFF:FFFF::F,FFFFFFFF::,FFFFFFFFF,F,FF::F:FFF  
FFFFF,FFFFFFFFF,FF:FFFFFFFFF:F:FFFF,FFFFFFFF:FFFF:F,F:FFFF:FFFF,,FF,:  
::,FFF,F:FF:FF

@A00721:190:HGJW7DSXY:4:1669:18141:28401 2:N:0:TCTGCAAG+GCTGCACT  
GTAAATGTCGGAATCCAAGGTTCTTCGACATAATCAACCCAGATTCCGACGAATCTTTTCACCCAAAT  
ATTCAAAGTGCGAGATCGGCGAATGACGTCGCCGATTATATCACAAAAGGAGGATCTTATATTGATCA  
CGGTCAATTTCAAGA

+

FFFFFFFFFFFFFF:FFFFFFFFFFFFFFFFFFFFFFFFFFFFFFFFFFFFFFFFFFFFFFFFFFFFFFFF  
FFFFFFFFFFFFFFFFFFFFFFFFFFFFFFFFFFFFFFFFFFFFFFFFFFFFFFFFFFFFFFFFFFFFFFFF  
F,FFFFFFFFFFFF,F

@A00721:190:HGJW7DSXY:4:2332:1624:25003 2:N:0:TCTGCAAG+GCTGCACT  
GTAAATGTCGGAATCCAAGGTTCTTCGACATAATCAACCCAGATTCCGACGAATCTTTTCACCCAAAT  
ATTCAAAGTGCGAGATCGGCGAATGACGTCGCCGATTATATCACAAAAGGAGGATCTTATATTGATCA  
CGGTCAATTTCAAGA

+

FFFFFFFFFFFFFFFFFFFFFFFFFFFFFFFFFFFFFFFFFFFFFFFFFFFFFFFFFFFFFFFFFFFFFFFF,FFFFFF:FFFFFF,  
FFFFFF,FFFFFFFFF:FFFFFFFFFFFFFFFFFFFFFFFFFFFFFFFFFFFFFFFFFFFFFFFFFFFF:FF:FFFF  
F::FFFFFFFF:FFF

@A00721:190:HGJW7DSXY:4:2645:3956:1517 2:N:0:TCTGCAAG+GCTGCACT  
GTAAATGTCGGAATCCAAGGTTCTTCGACATAATCAACCCAGATTCCGACGAATCTTTTCACCCAAAT  
ATTCAAAGTGCGAGATCGGCGAATGACGTCGCCGATTATATCACAAAAGGAGGATCTTATATTGATCA  
CGGTCAATTTCAAGA

+

FFFFFFFFFFFFFFFFFFFFFFFFFFFFFFFFFFFFFFFFFFFFFFFFFFFFFFFFFFFFFFFFFFFFFFFF  
F:FFFFFFFFFFFFFFFFFFFFFFFFFFFFFFFFFFFFFFFFFFFFFFFFFFFFFFFFFFFFFFFFFFFF  
FFFFFFFFFFFFFFFF

@A00721:190:HGJW7DSXY:4:1109:2293:29512 2:N:0:TCTGCAAG+GCTGCACT  
TATAAATGTCGGAATCCAAGGTTCTTCGACATAATCAACCCAGATTCCGACGAATCTTTTCACCCAAA  
GATTCAAAGTGCAGATCGGCGAATGACGTCGTCGATTATATCACAAAAGGAGGATCTTATATTGATC  
ACGGTCAATTTCAAG

+

:FFFF:FFFFFFFFFFFF:FFFFFFFFFFFFFFFF:FFFFFFFFFFFFFFFFFFFFFFFFFFFFFFFFFFFF,FF  
,FFFFFFFFFFFFFFFFFFFFFFFFFFFFFFFFFFFFFFFFFFFF,FFFFFFFF,:F:FF,FFFFFF:FF:FF:FFF  
,:FFFFFFFFFFFF

@A00721:190:HGJW7DSXY:4:2310:7175:23688 2:N:0:TCTGCAAG+GCTGCACT  
TATAAATGTCGGAATCCAAGGTTCTTCGACATAATCAACCCAGATTCCGACGAATCTTTTCACCCAAA  
TATTCAAAGTGCAGATCGGCGAATGACGTCGTCGATTATATCACAAAAGGAGGATCTTATATTGATC  
ACGGTCAATTTCAAG

+

FFFFFFFFFFFFFFFFFFFFFFFFFFFFFFFFFFFFFFFFFFFFFFFFFFFFFFFFFFFFFFFFFFFF,FFFFFFFF:  
FFFFFFFFFFFFFFFFFFFFFFFFFFFFFFFFFFFFFFFFFFFF,FFFFFFFFF,FFFFFFFFFFFFFFFFFFFF  
FFFFFFFFFFFFFFFF





FFFFFFFFFFFFFFFFFFFFF:F:F:FFFFFF:FFFFFFFFFFFF,F:FFFF,,F:FFFFFFFFF::,FF  
,F,F:F:FFF:F:FF

@A00721:190:HGJW7DSXY:4:2441:16052:8124 2:N:0:TCTGCAAG+GCTGCACT  
ATAAATGTCGGAATCCAAGTTCTTCGACATAATCAACCCAGATTCCGACGAATCTTTTCACCCAAAT  
ATTCAAAGTGCAGATCGGCGACTGACGTCGCCGATTATATCACAAAAGGAGGATCTTATATTGATCA  
CGGTCAATTTCAA

+

F:FFFFFF:F:FF:FFFFFFFFFFFFFFFFFFFFFFFFFFFFFFFFFFFFFFFFFFFFFFFFFFFFFFFFFFFFF:FFFF:  
F:FFFFFFFFFFFFFFFFFFFFFFFFFFFF:FFFF:FFFFFFFFFFFFF:F:F:FFF:FFFFFFFFF::FF,,F  
F:FFFFFF::FFF

@A00721:190:HGJW7DSXY:4:2678:23918:37027 2:N:0:TCTGCAAG+GCTGCACT  
TATAAATGTCGGAATCCAAGTTCTTCGACATAATCAACCCAGATTCCGACGAATCTTTTCACCCAAA  
TATTCAAAGTGCAGATCGGCGAATGACGTCGTCGATTATATCACAAAAGGAGGATCTTATATTGATC  
ACGGTCAATTTCAA

+

FF:FFFFFFFFF:FFFFFFFFFFFFFFFFFFFFFFFFFFFFFFFFFFFFFFFFFFFFFFFFFFFFFFFFFFFFF  
FFFFFFFFFFFFFFFFFFFF::FFF,FFFFFFFFFFFFF:FFFFFFFFFFFFFFFFFFFFFFFFFFFFFFFFFFFFF:FFF  
FFFFFFFFFFFFFFFFF

@A00721:190:HGJW7DSXY:4:1235:3486:21997 2:N:0:TCTGCAAG+GCTGCACT  
GCAAGTATAAATGTCGGAATCCAAGTTCTTCGACATAATCAACCCAGATTCCGACGAATCTTTTCAC  
CCAAATATTCAAAGTGCAGATCGGCGAATGACGTCGCCGATTATATCACAAAAGGAGGATCTTATAT  
TGATCACGGTCAATT

+

FFFFFFFFFFFFFFFFFFFFFFFFFFFFFFFFFFFFFFFFFFFFFFFFFFFFFFFFFFFFFFFFFFFFFFFFFFFFF  
FFFFFFFFFFFFFFFFFFFFFFFFFFFFFFFFFFFFFFFFFFFFFFFFFFFFFFFFFFFFFFFFFFFFFFFFFFFFF  
FFFFFFFFFFFFFFFFF

@A00721:190:HGJW7DSXY:4:1244:25437:23437 2:N:0:TCTGCAAG+GCTGCACT  
GCAAGTATAAATGTCGGAATCCAAGTTCTTCGACATAATCAACCCAGATTCCGACGAATCTTTTCAC  
CCAAATATTCAAAGTGCAGATCGGCGAATGACGTCGCCGATTATATCACAAAAGGAGGATCTTATAT  
TGATCACGGTCAATT

+

FFFFFFFFFFFFFFFFFFFFFFFFFFFFFFFFFFFFFFFFFFFFFFFFFFFFFFFFFFFFFFFFFFFFFFFFFFFFF:FFFFF  
FFFFFFFFFFFFFFFFFFFFFFFFFFFFFFFFFFFFFFFFFFFFFFFFFFFFFFFFFFFFFFFFFFFFFFFFFFFFF  
FFFFFFFFFFFFFFFFF

@A00721:190:HGJW7DSXY:4:1262:12011:17785 2:N:0:TCTGCAAG+GCTGCACT  
GCAAGTATAAATGTCGGAATCCAAGTTCTTCGACATAATCAACCCAGATTCCGACGAATCTTTTCAC  
CCAAATATTCAAAGTGCAGATCGGCGAATGACGTCGCCGATTATATCACAAAAGGAGGATCTTATAT  
TGATCACGGTCAATT

+

FFFFFFFFFFF,FFFFFFFFFFFF:FFFFFFFFFFFFFFFFFFFFFFFFFFFFFFFFFFFFFFFFFFFFFFFFFFFFF  
FFFFFFFFFFFFFFFFFFFFFFFFFFFFF:FFFFFFFFFFFFFFFFFFFFFFFFFFFFFFFFFFFFF,FFFFFFFFFFF,FFF  
FFFFFFFFFFFFFFFFF

@A00721:190:HGJW7DSXY:4:2229:5638:6965 2:N:0:TCTGCAAG+GCTGCACT  
CAAGAATAAATGTCGGAATCCAAGTTCTTCGACATAATCAACCCAGATTCCGACGAATCTTTTCACC  
CAAATATTCAAAGTGCAGATCGGCGAATGACGACGCCGATAATATAACAAAAGGAGGATCTTATATT  
GATCACGGTCAATT

+

:FFF,FFFFF:FF,FFFFF,,FF,FF,FF:,FF,F:FFFFFFFFFFF,FFFF:FF:FFFFFFFF:F,F,F  
:FFFFF,,FFFF:FF,FFFF,,FF,FFFFFFFF,,F,F,:F,:F,F,,:FF:FF,FF,FFFF,FFFFF  
,F,:FFF:FFFFF

@A00721:190:HGJW7DSXY:4:2611:8124:32033 2:N:0:TCTGCAAG+GCTGCACT  
GCAAGTATAAATGTCGGAATCCAAGTTCTTCGACATAATCAACCCAGATTCCGACGAATCTTTTCAC  
CCAAATATTCAAAGTGCAGATCGGCGAATGACGTCGCCGATTATATCACAAAAGGAGGATCTTATAT  
TGATCACGGTCAATT

```
FFFF:F:FFF,FFFFFFFF:FFFFFFFFFFFFFFFFFFFFFFFF:FFFFFFFFFFFFFFFFFFFFFFFF:F
:FFFF:FFFFFFFFFFFFFFFFFFFFFFFFFFFFFFFF:FFFFFFFFFFFFFF:F:FFFFFFFFFFFFF
FFFFFFFFFFFFFFFF
```

[illegible]

```

FFFFFFFFFFFF:FFFFFFFFFFFFFFFFFFFFFFFFFFFFFFFFFFFFFFFFFFFFFFFFFFFFFFFFFFFF
FFF:FFFFFFFFFFFFFFFFFFFFFFFFFFFFFFFFFFFFFFFFFFFFFFFFFFFFFFFFFFFFFFFF:FFFFFFFFFFFFFFFFFFFFFFFFFFFFFFFF
FFF:FFFFFFFFFFFF

```

```

: ,FFF:FFFF:FF::,FFFF,FF::,FF,FFF,F:F:FFFFFFFFFFFFFFFF:F:F:FFFFFFFF:FF
F,FFFFFFFF,FFFFFF:F:F,F:, :F:,FFF,FFF:F,F,:FFFFFFFF,FFF:F:FF:FF,:FFFF
F:FF,FF,FFFFFF

```

[illegible]

```
FFFFFFFFFFFFFFFFFFFFFFFFFFFFFFFF:FFFFFFFFFFFFFFFFFFFFFFFFFFFFFFF
FFFFFFFFFFFFFFFFFFFFFFFFFFFFFFFF:FFFFFFFF:FFFFFFFFFFFFFFFFFFFF
FFF:FFFFFFFFFFFFFF
```

[illegible]

@A00721:190:HGJW7DSXY:4:2154:23222:33379 2:N:0:TCTGCAAG+GCTGCACT  
GCAAGTATAAATGTCGGAATCCAAGGTTCTTCGACATAATCAACCCAGATTCCGACGAATCTTTTCAC

CCAAATATTCAAAGTGCGAGATCGGCGAATGACGTCGCCGATTATATCACAAAGGAGGATCTTATAT  
TGATCACGGTCAAT

```
FF:FFFFFF:FFF:FFFFFFFFFFFFFFFFFFFFFFFF,FFFFFFFFFFFFFFFF:FFFFFFFFFFFFFFFF
FFFFF:FFFFFFFF:FFFFFFFFFFFFFFFF:FFFFFFFFFFFF::FF,FFFFF:FFFFFFFFFFFFFFFF:F
:F:,FF:F:FFFFF
```

 $+$ 

```

FFFFFFFFFFFFFFFFFFFFFFFFFFFFFFFF:FFFFFFFFFFFFFFFFFFFFFFFFFFFFFFFF
FFFFF:FFFFFFFFFFFFFFFF:FFFFFFFFFFFFFF:FFFFFFFFFFFFFFFF,FF:FF:FFFFFF:F
FFFFF.:FFFFFFF

```

 $+$ 

```

FFFFFFFFFFFF:FFFFFFFFFFFFFFFFFFFFFFFFFFFFFFFFFFFFFFFFFFFFFFFF
FFFFFFFFFFFFFFFFFFFFFFFFFFFFFFFFFFFFFFFFFFFFFFFFFFFFFFFFFFFF:FFFFFFFFFFFFFFFFFFFFFFFF
FFFFFFFFFFFFFFFFFFFF

```

+

```

FFFFFFFFFFFFFFFFFFFFFFFF::FFFFFFFFFFFFFFFFFFFFFFFFFFFFFFFF:FF:F:
FFFFFF:FFF:FFFFFFFFFFFFFFFFFFFFFFFF:FFF:FFFFFFFFFFFFFFFFFFFF,FFFFFFFFF:FFFF
FF,FFFFF,FFFFF:

```

+

```

FFFFFFFFFFFF,FFFFFFFF,FFFFFFFFFFFFFFFFFFFFFFFFFFFFFFFFFFFFFFFFFFFFFFFF
:FFF::FFFFFFFFFFFFFFFF:FFFF::FFFF,FFFFFFFFFFFFFFFFFFFFFFFF:FFFFFFFFFFFFFFFF
FFFFFFFFFFFFFFFF

```

+

[illegible]

+

[illegible]

$+$ 

@

+

@

+

@

+

©

+

9

+

©

 $+$ 

11

FFFFFFFFFFFFFFFFFFFFFFFFFFFFFFFFFFFFFFFFFFFFFFFFFFFFFFFFFFFFFFFFFFFFFFFF  
,FFFFFFFFFFFFFFFF

@A00721:190:HGJW7DSXY:4:2314:24080:7968 2:N:0:TCTGCAAG+GCTGCACT  
CCTTCACTGTCTTCTCCAATTTTCCGGCAAGTATAAATGTCGGAATCCAAGGTTCTTCGACATAATCA  
ACCCAGATTCCGACGAATCTTTTCACCCAAATATTCAAAGTGCGAGATCGGCGACTGACGTCGCCGAT  
TATATCACAAAAGGA

+

FFFFFFFFFFFFFFFFFFFFFFFFFFFFFFFFFFFFFFFFFFFFFFFFFFFFFFFFFFFFFFFFFFFFFFFF  
FFFFFFFFFFFFFFFFFFFFFFFFFFFFFFFFFFFFFFFFFFFFFFFFFFFFFFFFFFFFFFFFFFFFFFFF  
:FFFFFFFFFFFFFFFF

@A00721:190:HGJW7DSXY:4:2338:19298:25989 2:N:0:TCTGCAAG+GCTGCACT  
CCTTCACTGTCTTCTCCAATTTTCCGGCAAGTATAAATGTCGGAATCCAAGGTTCTTCGACATAATCA  
ACCCAGATTCCGACGAATCTTTTCACCCAAATATTCAAAGTGCGAGATCGGCGACTGACGTCGCCGAT  
TATATCACAAAAGGA

+

FFFFFFFFFFFFFFFFFFFFFFFFFFFFFFFFFFFFFFFFFFFFFFFFFFFFFFFFFFFFFFFFFFFFFFFF  
FFFFFFFFFFFFFFFFFFFFFFFFFFFFFFFFFFFFFFFFFFFFFFFFFFFFFFFFFFFFFFFFFFFFFFFF  
FFFFFFFFFFFFFFFF:F

@A00721:190:HGJW7DSXY:4:2338:19913:26428 2:N:0:TCTGCAAG+GCTGCACT  
CCTTCACTGTCTTCTCCAATTTTCCGGCAAGTATAAATGTCGGAATCCAAGGTTCTTCGACATAATCA  
ACCCAGATTCCGACGAATCTTTTCACCCAAATATTCAAAGTGCGAGATCGGCGACTGACGTCGCCGAT  
TATATCACAAAAGGA

+

FFFFFFFFFFFFFFFFFFFFFFFFFFFFFFFFFFFFFFFFFFFFFFFFFFFFFFFFFFFFFFFFFFFFFFFF  
FFFFFFFFFFFFFFFFFFFFFFFFFFFFFFFFFFFFFFFFFFFFFFFFFFFFFFFFFFFFFFFFFFFFFFFF:  
FFFFFFFFFFFFFFFF

@A00721:190:HGJW7DSXY:4:2602:14036:17848 2:N:0:TCTGCAAG+GCTGCACT  
CCTTCACTGTCTTCTCCAATTTTCCGGCAAGTATAAATGTCGGAATCCAAGGTTCTTCGACATAATCA  
ACCCAGATTCCGACGAATCTTTTCACCCAAATATTCAAAGTGCGAGATCGGCGACTGACGTCGCCGAT  
TATATCACAAAAGGA

+

FFFFFFFFFFFFFFFFFFFFFFFFFFFFFFFFFFFFFFFFFFFFFFFFFFFFFFFFFFFFFFFF:FF,FFFF,FFFFFFFF  
FFFFFF:FFFFFFFFFFFFFFFFFFFFFFFFFFFFFFFFFFFFFFFFFFFFFFFFFFFFFFFF:FFFF,FF:FF:F,,F::FF,  
FFFF,F:FFFF:FF

@A00721:190:HGJW7DSXY:4:2330:14371:1391 2:N:0:TCTGCAAG+GCTGCACT  
CCTTCACTGTCTTCTCCAATTTTCCGGCAAGTATAAATGTCGGAATCCAAGGTTCTTCGACATAATCA  
ACCCAGATTCCGACGAATCTTTTCACCCAAATATTCAAAGTGCGAGATCGGCGACTGACGTCGCCGAT  
TATATCACAAAAGG

+

FFFFFFFFFFFFFFFFFFFFFFFFFFFFFFFFFFFFFFFFFFFFFFFFFFFFFFFFFFFFFFFF:FFFFFFFF  
F,FFF:FFFFFFFFFFFFFFFF:FFFFFFFF,FFFFFFFFFFFFFFFFF:FFFFFFFF:FFFFFFFF:F  
FFFFFF:FFFFFF

@A00721:190:HGJW7DSXY:4:1153:25491:20588 2:N:0:TCTGCAAG+GCTGCACT  
CACCTTCACTGTCTTCTCCAATTTTCCGGCAAGTATAAATGTCGGAATCCAAGGTTCTTCGACATAAT  
CAACCCAGATTCCGACGAATCTTTTCACCCAAATATTCAAAGTGCGAGATCGGCGAATGACGTCGCCG  
ATTATATCACAAAAG

+

FFFFFFFFFFFFFFFFFFFFFFFFFFFFFFFFFFFFFFFFFFFFFFFFFFFFFFFFFFFFFFFF:FFFFFFFF  
FFFFFFFFFFFFFFFFFFFFFFFFFFFFFFFF:FFFFFFFFFFFFFFFFFFFFFFFFFFFFFFFF  
:FFFF::FFFFFF

@A00721:190:HGJW7DSXY:4:1552:24144:27211 2:N:0:TCTGCAAG+GCTGCACT  
CACCTTCACTGTCTTCTCCAATTTTCCGGCAAGTATAAATGTCGGAATCCAAGGTTCTTCGACATAAT  
CAACCCAGATTCCGACGAATCTTTTCACCCAAATATTCAAAGTGCGAGATCGGCGAATGACGTCGCCG  
ATTATATCACAAAAG

+  
FFFFF:FFF:FFFFFFFFFFFFFFFFFFFFFFFF,FFFF:,FFFFFFFFFFFFFFFF,FFF:FFFFFFFF  
F:FF:FFFFFFFFFFFFFFFFFFFF:FFFFFFFF:FFFF:FFF:FFFF:FFFFFFFFFFFFFFFFFFFF  
FF:FFFFFFFFFFFF

@A00721:190:HGJW7DSXY:4:2105:3920:3991 2:N:0:TCTGCAAG+GCTGCACT  
CACCTTCACTGTCTTCTCCAATTTTCCGGCAAGTATAAATGTCGGAATCCAAGGTTCTTCGACATAAT  
CAACCCAGATTCCGACGAATCTTTTCACCCAAATATTCAAAGTGCGAGATCGGCGAATGACGTCGCCG  
ATTATATCACAAAAG

+  
FFFFFFFFFFFFFFFFFFFFFFFFFFFFFFFFFFFFFFFF:FFFFFFFFFFFFFFFFFFFFFFFFFFFFFFFF  
FFFFFFFFFFFFFFFFFFFFFFFFFFFFFFFFFFFFFFFF:FFFFFFFFFFFFFFFFFFFFFFFFFFFFFFFF  
F:FF:FFFFF:FFF

@A00721:190:HGJW7DSXY:4:2231:23312:5478 2:N:0:TCTGCAAG+GCTGCACT  
CACCTTCACTGTCTTCTCCAATTTTCCGGCAAGTATAAATGTCGGAATCCAAGGTTCTTCGACATAAT  
CAACCCAGATTCCGACGAATCTTTTCACCCAAATATTCAAAGTGCGAGATCGGCGAATGACGTCGCCG  
ATTATATCACAAAAG

+  
FFFFFFFFFFFFFFFFFFFFFFFFFFFFFFFFFFFFFFFFFFFFFFFFFFFFFFFFFFFFFFFFFFFFFFFF  
FFFFFFFFFFFFFFFFFFFFFFFFFFFFFFFFFFFFFFFFFFFFFFFFFFFFFFFFFFFFFFFFFFFFFFFF  
:FFFFFFFFFFFF,F

@A00721:190:HGJW7DSXY:4:2643:29351:25739 2:N:0:TCTGCAAG+GCTGCACT  
CACCTTCACTGTCTTCTCCAATTTTCCGGCAAGTATAAATGTCGGAATCCAAGGTTCTTCGACATAAT  
CAACCCAGATTCCGACGAATCTTTTCACCCAAATATTCAAAGTGCGAGATCGGCGAATGACGTCGCCG  
ATTATATCACAAAAG

+  
FFFFFFFFFFFFFFFFFFFFFFFFFFFFFFFFFFFFFFFFFFFFFFFFFFFFFFFFFFFFFFFFFFFFFFFF  
FFFFFFFFFFFFFFFFFFFFFFFFFFFFFFFFFFFFFFFF,F:F:FFFFFFFFFFFFFFFFFFFFFFFFFFFF  
FF:FFFFFFFFFFFF

@A00721:190:HGJW7DSXY:4:1350:11749:19711 2:N:0:TCTGCAAG+GCTGCACT  
AATCACCTTCACTGTCTTCTCCAATTTTCCGGCAAGTATAAATGTCGGAATCCAAGGTTCTTCGACAT  
AATCAACCCAGATTCCGACGAATCTTTTCACCCAAATATTCAAAGTGCGAGATCGGCGAATGACGTCG  
CCGATTATATCACAA

+  
FFFF:FFFFFFFFFFFFFFFFFFFFFFFFFFFFFFFF:FFFFFFFFFFFFFFFFFFFFFFFFFFFFFFFF:FFFFFFF  
FFFFFFFFFFFFFFFFFFFFFFFFFFFFFFFFFFFFFFFFFFFFFFFFFFFFFFFFFFFFFFFF:FF:FFFFF:FFFFFFFFF:FFF  
FFFFFFFFFFFFFFFF

@A00721:190:HGJW7DSXY:4:1366:28944:14356 2:N:0:TCTGCAAG+GCTGCACT  
AATCACCTTCACTGTCTTCTCCAATTTTCCGGCAAGTATAAATGTCGGAATCCAAGGTTCTTCGACAT  
AATCAACCCAGATTCCGACGAATCTTTTCACCCAAATATTCAAAGTGCGAGATCGGCGAATGACGTCG  
CCGATTATATCACAA

+  
FFFFFFFFFFFFFFFFFFFFFFFFFFFFFFFFFFFFFFFF:FFFFFFFFFFFFFFFFFFFFFFFFFFFFFFFF  
FFFF:FFFFFFFFFFFFFFFFFFFFFFFF:FFFFFF:FFFFFFFFFFFFFFFFFFFFFFFF:FFFFFF:FFFFFFF  
FFF,:FFFFFFFF

@A00721:190:HGJW7DSXY:4:1501:1344:22138 2:N:0:TCTGCAAG+GCTGCACT  
AATCACCTTCACTGTCTTCTCCAATTTTCCGGCAAGTATAAATGTCGGAATCCAAGGTTCTTCGACAT  
AATCAACCCAGATTCCGACGAATCTTTTCACCCAAATATTCAAAGTGCGAGATCGGCGAATGACGTCG  
CCGATTATATCACAA

+  
FFFF:FFFFFFFFFFFF:FFFFF:FFFFF:F,FFFFFFFFF:F,FF:FFFFFFFFF:F,FFFFFFFF,F  
FFFF:FFFFFFFFFFFFFFFFFFFF:F,:FFFFFFFFFFFFFFFFFFFFFFFF:FF:FFFFF:F,:,,FFF:FFFF  
F,FFFFFFFFF:FFF

@A00721:190:HGJW7DSXY:4:1513:14579:2942 2:N:0:TCTGCAAG+GCTGCACT  
AATCACCTTCACTGTCTTCTCCAATTTTCCGGCAAGTATAAATGTCGGAATCCAAGGTTCTTCGACAT





@A00721:190:HGJW7DSXY:4:2549:23674:26490 2:N:0:TCTGCAAG+GCTGCACT  
AATCACCTTCACTGTCTTCTCCAATTTTCCGGCAAGTATAAATGTCGGAATCCAAGTTCTTCGACAT  
AATCAACCCAGATTCCACGAATCTTTTACCCAAATATTCAAAGTGCAGATCGGCGAATGACGTCG  
CCGATTATATCACAA

```

FFFFFFFFFFFFFFFFFFFFFFFFFFFFFFFFFFFFFFFFFFFFFFFFFFFFFFFFFFFFFFFFFFFFFFFF
FFFFFFF::FFFFFFF,,FFF:FFFFFF::FFFFFFFFFFFF:FFFFF,FFF:FFF,FF:FFFF::FF:,FF
FF,:FFFFFF,FF:FF

```

@A00721:190:HGJW7DSXY:4:1120:14136:29105 2:N:0:TCTGCAAG+GCTGCACT  
TTCAGACGGTGATAATCACCTTCACTGTCTTCTCCAATTTTCCGGCAAGTATAAATGTCGGAATCCAA  
GGTTCTTCGACATAATCAACCCAGATTCCGACGAATCTTTTCACCCAAATATTCAAAGTGCGAGATCG  
GCGAATGACGTCGCC

[illegible]

@A00721:190:HGJW7DSXY:4:1523:19217:19022 2:N:0:TCTGCAAG+GCTGCACT  
TTCAGACGGTGATAATCACCTTCACTGTCTTCTCCAATTTTCCGGCAAGTATAAATGTCGGAATCCAA  
GGTTCTTCGACATAATCAACCCAGATTCCGACGAATCTTTTCACCCAAATATTCAAAGTGCGAGATCG  
GCGAATGACGTCGCC

[illegible]

@A00721:190:HGJW7DSXY:4:1632:6605:28213 2:N:0:TCTGCAAG+GCTGCACT  
TTCAGACGGTGATAATCACCTTCACTGTCTTCTCCAATTTTCCGGCAAGTATAAATGTCGGAATCCAA  
GGTTCTTCGACATAATCAACCCAGATTCCGACGAATCTTTTCACCCAAATATTCAAAGTGCGAGATCG  
GCGAATGACGTCGCC

[illegible]

@A00721:190:HGJW7DSXY:4:2306:32380:30953 2:N:0:TCTGCAAG+GCTGCACT  
TTCAGACGGTGATAATCACCTTCACTGTCTTCTCCAATTTTCCGGCAAGTATAAATGTCGGAATCCAA  
GGTTCTTCGACATAATCAACCCAGATTCCGACGAATCTTTTCACCCAAATATTCAAAGTGCGAGATCG  
GCGAATGACGTCGCC

[illegible]

@A00721:190:HGJW7DSXY:4:2310:29631:9878 2:N:0:TCTGCAAG+GCTGCACT  
TTCAGACGGTGATAATCACCTTCACTGTCTTCTCCAATTTTCCGGCAAGTATAAATGTCGGAATCCAA  
GGTTCTTCGACATAATCAACCCAGATTCCGACGAATCTTTTCACCCAAATATTCAAAGTGCGAGATCG  
GCGAATGACGTCGCC

[illegible]

@A00721:190:HGJW7DSXY:4:2642:4562:31626 2:N:0:TCTGCAAG+GCTGCACT  
TTCAGACGGTGATAATCACCTTCACTGTCTTCTCCAATTTTCCGGCAAGTATAAATGTCGGAATCCAA  
GGTTCTTCGACATAATCAACCCAGATTCCGACGAATCTTTTCACCCAAATATTCAAAGTGCGAGATCG  
GCGAATGACGTCGCC

[illegible]

@A00721:190:HGJW7DSXY:4:1119:26196:23813 2:N:0:TCTGCAAG+GCTGCACT  
ATTCAGACGGTGATAATCACCTTCACTGTCTTCTCCAATTTTCCGGCAAGTATAAATGTCGGAATCCA  
AGGTTCTTCGACATAATCAACCCAGATTCCGACGAATCTTTTCACCCAAATATTCAAAGTGCGAGATC  
GGCGAATGACGTCGC

@A00721:190:HGJW7DSXY:4:1426:7518:20369 2:N:0:TCTGCAAG+GCTGCACT  
ATTCAGACGGTGATAATCACCTTCACTGTCTTCTCCAATTTTCCGGCAAGTATAAATGTCGGAATCCA  
AGGTTCTTCGACATAATCAACCCAGATTCCGACGAATCTTTTACCCAAATATTCAAAGTGCGAGATC  
GGCGAATGACGTCGC

@A00721:190:HGJW7DSXY:4:1426:23068:32111 2:N:0:TCTGCAAG+GCTGCACT  
ATTCAGACGGTGATAATCACCTTCACTGTCTTCTCCAATTTTCCGGCAAGTATAAATGTCGGAATCCA  
AGGTTCTTCGACATAATCAACCCAGATTCCGACGAATCTTTTACCCAAATATTCAAAGTGCGAGATC  
GGCGAATGACGTCGC

@A00721:190:HGJW7DSXY:4:1572:27688:1658 2:N:0:TCTGCAAG+GCTGCACT  
ATTCAGACGGTGATAATCACCTTCACTGTCTTCTCCAATTTTCCGGCAAGTATAAATGTCGGAATCCA  
AGGTTCTTCGACATAATCAACCCAGATTCCGACGAATCTTTTACCCAAATATTCAAAGTGCGAGATC  
GGCGAATGACGTCGC

@A00721:190:HGJW7DSXY:4:1624:24053:8578 2:N:0:TCTGCAAG+GCTGCACT  
ATTCAGACGGTGATAATCACCTTCACTGTCTTCTCCAATTTTCCGGCAAGTATAAATGTCGGAATCCA  
AGGTTCTTCGACATAATCAACCCAGATTCCGACGAATCTTTTACCCAAATATTCAAAGTGCGAGATC  
GGCGAATGACGTCGC

@A00721:190:HGJW7DSXY:4:2111:25834:9157 2:N:0:TCTGCAAG+GCTGCACT  
ATTCAGACGGTGATAATCACCTTCACTGTCTTCTCCAATTTTCCGGCAAGTATAAATGTCGGAATCCA  
AGGTTCTTCGACATAATCAACCCAGATTCCGACGAATCTTTTACCCAAATATTCAAAGTGCGAGATC  
GGCGAATGACGTCGC

@A00721:190:HGJW7DSXY:4:2139:12915:1971 2:N:0:TCTGCAAG+GCTGCACT  
ATTCAGACGGTGATAATCACCTTCACTGTCTTCTCCAATTTTCCGGCAAGTATAAATGTCGGAATCCA  
AGGTTCTTCGACATAATCAACCCAGATTCCGACGAATCTTTTACCCAAATATTCAAAGTGCGAGATC  
GGCGAATGACGTCGC

```
FFFFFFFFFFFFFFFFFFFFFFFFFFFFF:FFFFFFFFFFFFFFFFFFFFFFFFFFFFF:FFFFFFFFFFFFFFFFFFFFFFFFFFFFF
FFFFFFFFFFFFFFFFFFFFFFFFFFFFFFFFF:FFFFFFFFFFFFFFFFFFFFFFFFFFFFFFFFF:FFFFFFFFFFFFFFFFFFFFFFFFFFFFF
FFFFFFFFFFFFFFFFFFFFFFFF
```

[illegible]

```

FFFF:FFFFFFFFFFFFFFFFFFFFFFFFFFFFFFFFFFFFFFFFFFFFFFFFFFFFFFFFFFFF
FFFFFFFFFFFFFFFFFFFFFFFFFFFFFFFF:FFFFFFF,FFFFFFFFF:FFFFFFFFFFFFFFF
,FFFFFFFFF::FFF

```

[illegible]

```

FFFFFFFF:FFFFFFFF:F:F,FFFFFF:F:FFFFFFFFFFFFFFFFFFFFFFFF,FFFFFFFFFFFFFFFFFFFFFFFF
FFFFFF,FFFFFFFF,FFF:FFFFFFFF:FFFFFF:FF:FFFFF::,FFFFFFFF:FFFFFF:FFFF,FFF:F
,FFFFFFFFFFFFFF:FFF

```

[illegible]

```

:FFFFFFFFFFFFFFFF:FFFFFFFFFFFFFFFF:FFFFFFF:FFFFF:FFFFFFFFFFFFFF,FFFFFF:FFFFFFFFFF
FFFFFFFF:FFFFFFFFFFFFFFFFFFFF:FFF:FFFFFFFFFFFFFFFF:FFFFFFFFFFFFFFFFFFFFFFFFFFFFFF:FF
FFFFFFFFFFFFFFFFFFFF

```

@A00721:190:HGJW7DSXY:4:1603:7835:15468 2:N:0:TCTGCAAG+GCTGCACT  
CAACATTCAGACGGTGATAATCACCTTCACTGTCTTCTCCAATTTTCCGGCAAGTATAAATGTCGGAA



@A00721:190:HGJW7DSXY:4:1217:4797:17033 2:N:0:TCTGCAAG+GCTGCACT  
GAACAACATTCAGACGGTGATAATCACCTTCACTGTCTTCTCCAATTTTCCGGCAAGTATAAATGTCTG  
GAATCCAAGGTTCTTCGACATAATCAACCCAGATTCCGACGAATCTTTTCACCCAAATATTCAAAGTG  
CGAGATCGGCGAATG

[illegible]

+

[illegible]

+

[illegible]

+

[illegible]

+

[illegible]

+

[illegible]

+

[illegible]

FF,FFFFFFFFFFFFFFFFFFFFFFFFFFFFFFFFFFFFFFFFFFFFFFFFFFFFFFFFFFFFFFFF:FFF  
FFFFFFFFFFFFFFFF

@A00721:190:HGJW7DSXY:4:1401:29559:26913 2:N:0:TCTGCAAG+GCTGCACT  
GAACAACATTTCAGACGGTGATAATCACCTTCACTGTCTTCTCCAATTTTCCGGCAAGTATAAATGTCTG  
GAATCCAAGGTTCTTCGACATAATCAACCCAGATTCCGACGAATCTTTTCACCCAAATATTCAAAGTG  
CGAGATCGGCGAATG

+  
FFFFFFFFFFFFFFFFFFFFFFFFFFFFFFFFFFFFFFFFFFFFFFFFFFFFFFFFFFFFFFFF:FFFFFF:FFFFF  
FFFFFFFFF:FFFFFFFFFFFFFFFFFFFFFFFFFFFFFFFFFFFFFFFFFFFFFFFF:FFFF:FFFFFFFFFFFFFFFF  
FFFFFFFFFFFF:FF:

@A00721:190:HGJW7DSXY:4:1410:27272:35947 2:N:0:TCTGCAAG+GCTGCACT  
GAACAACATTTCAGACGGTGATAATCACCTTCACTGTCTTCTCCAATTTTCCGGCAAGTATAAATGTCTG  
GAATCCAAGGTTCTTCGACATAATCAACCCAGATTCCGACGAATCTTTTCACCCAAATATTCAAAGTG  
CGAGATCGGCGAATG

+  
FFFFFFFFFFFFFFFFFFFFFFFFFFFFFFFFFFFFFFFFFFFFFFFFFFFFFFFFFFFFFFFF  
FFFFFFFFFFFFFFFFFFFFFFFFFFFFFFFFFFFFFFFFFFFFFFFFFFFFFFFFFFFFFFFF  
FFFFFFFFFFFFFFFF

@A00721:190:HGJW7DSXY:4:1430:11595:28870 2:N:0:TCTGCAAG+GCTGCACT  
GAACAACATTTCAGACGGTGATAATCACCTTCACTGTCTTCTCCAATTTTCCGGCAAGTATAAATGTCTG  
GAATCCAAGGTTCTTCGACATAATCAACCCAGATTCCGACGAATCTTTTCACCCAAATATTCAAAGTG  
CGAGATCGGCGAATG

+  
FFFFFFFFFFFFFFFFFFFFFFFFFFFFFFFFFFFFFFFFFFFFFFFFFFFFFFFFFFFFFFFF:FFFFFF  
FFFFFFFFFFFFFFFFFFFFFFFFFFFFFFFFFFFFFFFFFFFFFFFFFFFFFFFFFFFFFFFF  
FFFFFFFFFFFFFFFF

@A00721:190:HGJW7DSXY:4:1541:2908:25003 2:N:0:TCTGCAAG+GCTGCACT  
GAACAACATTTCAGACGGTGATAATCACCTTCACTGTCTTCTCCAATTTTCCGGCAAGTATAAATGTCTG  
GAATCCAAGGTTCTTCGACATAATCAACCCAGATTCCGACGAATCTTTTCACCCAAATATTCAAAGTG  
CGAGATCGGCGAATG

+  
FFFFFFFFFFFFFFFFFFFFFFFFFFFFFFFFFFFFFFFFFFFFFFFFFFFFFFFFFFFFFFFF:FFFFFF  
FF:FFFFFFFFFFFFFFFFFFFFFFFFFFFFFFFFFFFFFFFFFFFFFFFF:FFFFFFFFFFFFFFFF  
FF:FFFFFFFF,FF

@A00721:190:HGJW7DSXY:4:1573:28239:28072 2:N:0:TCTGCAAG+GCTGCACT  
GAACAACATTTCAGACGGTGATAATCACCTTCACTGTCTTCTCCAATTTTCCGGCAAGTATAAATGTCTG  
GAATCCAAGGTTCTTCGACATAATCAACCCAGATTCCGACGAATCTTTTCACCCAAATATTCAAAGTG  
CGAGATCGGCGAATG

+  
FFFFFFFFFFFFFFFFFFFFFFFFFFFFFFFFFFFFFFFFFFFFFFFFFFFFFFFFFFFFFFFF  
FFFFFFFFFFFFFFFFFFFFFFFFFFFFFFFFFFFFFFFFFFFFFFFFFFFFFFFFFFFFFFFF:FFFFFF  
FFFFFFFFFFFFFFFF

@A00721:190:HGJW7DSXY:4:1637:6831:5494 2:N:0:TCTGCAAG+GCTGCACT  
GAACAACATTTCAGACGGTGATAATCACCTTCACTGTCTTCTCCAATTTTCCGGCAAGTATAAATGTCTG  
GAATCCAAGGTTCTTCGACATAATCAACCCAGATTCCGACGAATCTTTTCACCCAAATATTCAAAGTG  
CGAGATCGGCGAATG

+  
::FFFFFFFFFFFFFFFFFFFFFFFFFFFFFFFFFFFFFFFFFFFFFFFFFFFFFFFFFFFFFFFF  
FFFFFFFFFFFFFFFFFFFFFFFFFFFFFFFFFFFFFFFFFFFFFFFFFFFFFFFFFFFFFFFF:F  
FFFFFFFFFFFFFFFF

@A00721:190:HGJW7DSXY:4:1672:32750:17221 2:N:0:TCTGCAAG+GCTGCACT  
GAACAACATTTCAGACGGTGATAATCACCTTCACTGTCTTCTCCAATTTTCCGGCAAGTATAAATGTCTG  
GAATCCAAGGTTCTTCGACATAATCAACCCAGATTCCGACGAATCTTTTCACCCAAATATTCAAAGTG  
CGAGATCGGCGAATG

+  
FFFFFFFFFFFFFFFFFFFFFFFFFFFFFFFFFFFFFFFFFFFFFFFFFFFFFFFFFFFFFFFFFFFFFFFF:FFFFF  
FFFFFFFFFFFFFFFFFFFFFFFFFFFFFFFFFFFFFFFFFFFFFFFFFFFFFFFFFFFFFFFFFFFFFFFF,F  
FFFFFFFFFFFFFFFF

@A00721:190:HGJW7DSXY:4:2116:31792:21887 2:N:0:TCTGCAAG+GCTGCACT  
GAACAACATTGACGCGGTGATAATCACCTTCACTGTCTTCTCCAATTTTCCGGCAAGTATAAATGTCTG  
GAATCCAAGGTTCTTTCGACATAATCAACCCAGATTCCGACGAATCTTTTCACCCAAATATTCAAAGTG  
CGAGATCGGCGAATG

+  
FFFFFFFFFFFFFFFFFFFFFFFFFFFFFFFFFFFFFFFFFFFFFFFFFFFFFFFFFFFFFFFFFFFFFFFF  
FFFFFFFFFFFFFFFFFFFFFFFFFFFFFFFFFFFFFFFFFFFFFFFFFFFFFFFFFFFFFFFFFFFFFFFF:FFFFFFF:FFFFFFF:FF  
FFFFFFFFFFFFFFFF

@A00721:190:HGJW7DSXY:4:2208:29234:33051 2:N:0:TCTGCAAG+GCTGCACT  
GAACAACATTGACGCGGTGATAATCACCTTCACTGTCTTCTCCAATTTTCCGGCAAGTATAAATGTCTG  
GAATCCAAGGTTCTTTCGACATAATCAACCCAGATTCCGACGAATCTTTTCACCCAAATATTCAAAGTG  
CGAGATCGGCGAATG

+  
FFFFFFFFFFFFFFFFFFFFFFFFFFFFFFFFFFFFFFFFFFFFFFFFFFFFFFFFFFFFFFFFFFFFFFFF,F:FFFFFFF:F:  
FFFFFFFFFFFF,FFFFFFFFFFFFFFFFFFFFFFFFFFFFFFFFFFFFFFFFFFFFFFFFFFFFFFFFFFFFFFFF:FFFFFFF:FFFFFFF:FF  
FFFFFFFFFFFFFFFF

@A00721:190:HGJW7DSXY:4:2241:30590:31516 2:N:0:TCTGCAAG+GCTGCACT  
GAACAACATTGACGCGGTGATAATCACCTTCACTGTCTTCTCCAATTTTCCGGCAAGTATAAATGTCTG  
GAATCCAAGGTTCTTTCGACATAATCAACCCAGATTCCGACGAATCTTTTCACCCAAATATTCAAAGTG  
CGAGATCGGCGAATG

+  
FFFFFFFFFFFFFFFFFFFFFFFFFFFFFFFFFFFFFFFFFFFFFFFFFFFFFFFFFFFFFFFFFFFFFFFF  
FFFFFFFFFFFFFFFFFFFFFFFFFFFFFFFFFFFFFFFFFFFFFFFFFFFFFFFFFFFFFFFFFFFFFFFF:FF  
FFFFFFFFFFFFFFFF

@A00721:190:HGJW7DSXY:4:2303:15040:3928 2:N:0:TCTGCAAG+GCTGCACT  
GAACAACATTGACGCGGTGATAATCACCTTCACTGTCTTCTCCAATTTTCCGGCAAGTATAAATGTCTG  
GAATCCAAGGTTCTTTCGACATAATCAACCCAGATTCCGACGAATCTTTTCACCCAAATATTCAAAGTG  
CGAGATCGGCGAATG

+  
FFFFFFFFF:FFFFFFFFFFFFFFFFFFFFFFFFFFFFFFFFFFFFFFFFFFFFFFFFFFFFFFFFFFFFFFFF:FFFFFFF  
FFFFFFFFFFFFFFFFFFFFFFFFFFFFFFFFFFFFFFFFFFFFFFFFFFFFFFFFFFFFFFFFFFFFFFFF:FFF:FFFFFFFF  
FFFFFFFFFFFFFFFF

@A00721:190:HGJW7DSXY:4:2343:29324:26882 2:N:0:TCTGCAAG+GCTGCACT  
GAACAACATTGACGCGGTGATAATCACCTTCACTGTCTTCTCCAATTTTCCGGCAAGTATAAATGTCTG  
GAATCCAAGGTTCTTTCGACATAATCAACCCAGATTCCGACGAATCTTTTCACCCAAATATTCAAAGTG  
CGAGATCGGCGAATG

+  
FFFFFFFFFFFFFFFFFFFFFFFFFFFFFFFFFFFFFFFFFFFFFFFFFFFFFFFFFFFFFFFFFFFFFFFF,FFFFFFFFFFFFF  
FFFFFFFFFFFFFFFFFFFFFFFFFFFFFFFFFFFFFFFFFFFFFFFFFFFFFFFFFFFFFFFFFFFFFFFF:FFF:FFFFFFFF  
FFF:FFFFFFFF

@A00721:190:HGJW7DSXY:4:2428:30752:13197 2:N:0:TCTGCAAG+GCTGCACT  
GAACAACATTGACGCGGTGATAATCACCTTCACTGTCTTCTCCAATTTTCCGGCAAGTATAAATGTCTG  
GAATCCAAGGTTCTTTCGACATAATCAACCCAGATTCCGACGAATCTTTTCACCCAAATATTCAAAGTG  
CGAGATCGGCGAATG

+  
FFFFFFFFFFFFFFFFFFFFFFFFFFFFFFFFFFFFFFFFFFFFFFFFFFFFFFFFFFFFFFFFFFFFFFFF:FFFFFFFFF:FFFFFFFFFFFFFFFF  
FFFFFFFFFFFFFFFFFFFFFFFFFFFFFFFFFFFFFFFFFFFFFFFFFFFFFFFFFFFFFFFFFFFFFFFF,:FFFFFFFFF:F,FFF  
FFFFFFFFFFFFFFFF,FF

@A00721:190:HGJW7DSXY:4:2433:20971:13510 2:N:0:TCTGCAAG+GCTGCACT  
GAACAACATTGACGCGGTGATAATCACCTTCACTGTCTTCTCCAATTTTCCGGCAAGTATAAATGTCTG





$+$ 

@

+

6

 $+$ 

9

+

94

+

@

+

©

+

FFFFFFFFFFFFFFFFFFFFFFFFFFFFFFFFFFFFFFFFFFFFFFFFFFFFFFFFFFFFFFFFFFFFFFFF  
F::FFFFFFFF

@A00721:190:HGJW7DSXY:4:2504:14570:5368 2:N:0:TCTGCAAG+GCTGCACT  
GGAACAACATTCAGACGGTGATAATCACCTTCACTGTCTTCTCCAATTTTCCGGCAAGTATAAATGTC  
GGAATCCAAGTTCTTCGACATAATCAACCCAGATTCCGACGAATCTTTTCACCCAAATATTCAAAGT  
GCGAGATCGGC

+

FFFFFFFFFFFFFFFFFFFFFFFFFFFFFFFFFFFFFFFFFFFFFFFFFFFFFFFFFFFFFFFFFFFFFFFF,FF:FF:F:FFFFFFFFFFFFFF  
FFFFFFFFFFFFFFFF:FF:FFF,FFFFFF:FFFFFF:FFFFFFFFFFFFFF:F:FFFFFFFFFFFFFF:FFFF  
FF:FFFFFFFF

@A00721:190:HGJW7DSXY:4:2510:31078:33270 2:N:0:TCTGCAAG+GCTGCACT  
GGAACAACATTCAGACGGTGATAATCACCTTCACTGTCTTCTCCAATTTTCCGGCAAGTATAAATGTC  
GGAATCCAAGTTCTTCGACATAATCAACCCAGATTCCGACGAATCTTTTCACCCAAATATTCAAAGT  
GCGAGATCGGC

+

FFFFFFFFFFFFFFFFFFFFFFFFFFFFFFFFFFFFFFFFFFFFFFFFFFFFFFFFFFFFFFFFFFFFFFFF  
FFF:FFFFFFFFFFFFFFFFFFFFFFFFFFFFFFFFFFFFFFFF:FFFFFFFFFFFFFF:FFFFFFFFFFFF:FF  
FFFFFFFFFFFF

@A00721:190:HGJW7DSXY:4:2560:23737:16611 2:N:0:TCTGCAAG+GCTGCACT  
GGAACAACATTCAGACGGTGATAATCACCTTCACTGTCTTCTCCAATTTTCCGGCAAGTATAAATGTC  
GGAATCCAAGTTCTTCGACATAATCAACCCAGATTCCGACGAATCTTTTCACCCAAATATTCAAAGT  
GCGAGATCGGC

+

FFFFFFFFFFFFFFFFFFFFFFFFFFFFFFFFFFFFFFFFFFFFFFFFFFFFFFFFFFFFFFFFFFFFFFFF  
FFFFFFFFFFFFFFFFFFFFFFFFFFFFFFFFFFFFFFFFFFFFFFFF:FFFFFFFFFFFFFF:FFFFFFFFFFFF:FF  
FFFFFFFFFFFF

@A00721:190:HGJW7DSXY:4:1377:32108:31516 2:N:0:TCTGCAAG+GCTGCACT  
GTCAGGAACAACATTCAGACGGTGATAATCACCTTCACTGTCTTCTCCAATTTTCCGGCAAGTATAAA  
TGTCGGAATCCAAGTTCTTCGACATAATCAACCCAGATTCCGACGAATCTTTTCACCCAAATATTCA  
AAGTGCGA

+

FFFFFFFFFFFFFFFFFFFFFFFFFFFFFFFFFFFFFFFFFFFFFFFFFFFFFFFFFFFFFFFFFFFFFFFF,  
FFFFFFFFFFFFFFFFFFFFFFFFFFFFFFFFFFFFFFFFFFFFFFFFFFFFFFFFFFFFFFFFFFFFFFFF  
FFFF:FFF

@A00721:190:HGJW7DSXY:4:1478:11803:31548 2:N:0:TCTGCAAG+GCTGCACT  
GTCAGGAACAACATTCAGACGGTGATAATCACCTTCACTGTCTTCTCCAATTTTCCGGCAAGTATAAA  
TGTCGGAATCCAAGTTCTTCGACATAATCAACCCAGATTCCGACGAATCTTTTCACCCAAATATTCA  
AAGTGCGA

+

FFFFFFFFFFFFFFFFFFFFFFFFFFFFFFFFFFFFFFFFFFFFFFFFFFFFFFFFFFFFFFFFFFFFFFFF:  
FFFFFFFFFFFFFFFFFFFFFFFFFFFFFFFFFFFFFFFFFFFFFFFFFFFFFFFFFFFFFFFFFFFFFFFF  
FFFFFFFF

@A00721:190:HGJW7DSXY:4:1670:11794:34851 2:N:0:TCTGCAAG+GCTGCACT  
GTCAGGAACAACATTCAGACGGTGATAATCACCTTCACTGTCTTCTCCAATTTTCCGGCAAGTATAAA  
TGTCGGAATCCAAGTTCTTCGACATAATCAACCCAGATTCCGACGAATCTTTTCACCCAAATATTCA  
AAGTGCGA

+

FFFFFFFFFFFFFFFFFFFFFFFFFFFFFFFFFFFFFFFFFFFFFFFFFFFFFFFFFFFFFFFFFFFFFFFF:FF,  
FFFFFFFFFFFFFFFFFFFFFFFFFFFFFFFFFFFFFFFFFFFFFFFFFFFFFFFFFFFFFFFFFFFFFFFF,  
FFFFFFFF

@A00721:190:HGJW7DSXY:4:2117:22146:32988 2:N:0:TCTGCAAG+GCTGCACT  
GTCAGGAACAACATTCAGACGGTGATAATCACCTTCACTGTCTTCTCCAATTTTCCGGCAAGTATAAA  
TGTCGGAATCCAAGTTCTTCGACATAATCAACCCAGATTCCGACGAATCTTTTCACCCAAATATTCA  
AAGTGCGA

+  
FFFFFFFFFFFFFFFFFFFFFFFFFFFFFFFFFFFFFFFFFFFFFFFFFFFFFFFFFFFFFFFF:FFFFFFF  
FFFF:FFFFFFFFFFFFFFFFFFFFFFFFFFFFFFFFFFFFFFFFFFFFFFFFFFFFFFFF:F:F:FFFFFF  
FFFFFFFF  
@A00721:190:HGJW7DSXY:4:2120:1136:16705 2:N:0:TCTGCAAG+GCTGCACT  
GTCAGGAACAACATTCAGACGGTGATAATCACCTTCACTGTCTTCTCCAATTTTCCGGCAAGTATAAA  
TGTCGGAATCCAAGGTTCTTCGACATAATCAACCCAGATTCCGACGAATCTTTTCACCCAAATATTCA  
AAGTGCGA  
+  
FFFFFFFFFFFFFFFFFFFFFFFFFFFFFFFFFFFFFFFFFFFFFFFFFFFFFFFFFFFFFFFF:FFFFFFFFFFFF:FFFFFFFFFFFF  
FFFFF:FFF:FFF,FFFFFFFF:FFFFFFFFFFFFFFFFFFFFFFFFFFFFFFFFFFFF,FF:FFFF:FFFF:,F  
FF,FF::F  
@A00721:190:HGJW7DSXY:4:2161:13765:28745 2:N:0:TCTGCAAG+GCTGCACT  
GTCAGGAACAACATTCAGACGGTGATAATCACCTTCACTGTCTTCTCCAATTTTCCGGCAAGTATAAA  
TGTCGGAATCCAAGGTTCTTCGACATAATCAACCCAGATTCCGACGAATCTTTTCACCCAAATATTCA  
AAGTGCGA  
+  
FFFFFFFFFFFFFFFFFFFFFFFFFFFFFFFFFFFFFFFFFFFFFFFFFFFFFFFFFFFFFFFF:FFFFFFFFFFFF  
F:FFFFFFFFFFFFFFFFFFFFFFFFFFFFFFFFFFFFFFFFFFFFFFFFFFFFFFFF:FFFF:FFFFFFFFFFFFFFFFFFFFFFFFFFFFFFFF:FFFFF:F  
FFFFFFFF  
@A00721:190:HGJW7DSXY:4:2238:20121:21872 2:N:0:TCTGCAAG+GCTGCACT  
GTCAGGAACAACATTCAGACGGTGATAATCACCTTCACTGTCTTCTCCAATTTTCCGGCAAGTATAAA  
TGTCGGAATCCAAGGTTCTTCGACATAATCAACCCAGATTCCGACGAATCTTTTCACCCAAATATTCA  
AAGTGCGA  
+  
FFF:FFFFFFFF:FFFFFFFF:, :FFFFFFFF:F,FF:FF,,F:FF::FF:FF:FFF:FFFFFFFFFFFF  
FFF,FFFFFFFFF::FF,,F,,FFFFFFFF:FF:F,F,FF,::FFFFFFFFFFFF:, ,FFFFFFFFFFFF  
FF:F:FFF  
@A00721:190:HGJW7DSXY:4:2318:1371:35023 2:N:0:TCTGCAAG+GCTGCACT  
GTCAGGAACAACATTCAGACGGTGATAATCACCTTCACTGTCTTCTCCAATTTTCCGGCAAGTATAAA  
TGTCGGAATCCAAGGTTCTTCGACATAATCAACCCAGATTCCGACGAATCTTTTCACCCAAATATTCA  
AAGTGCGA  
+  
F:FFFFFFFFF:FFFFF:FFFFF:FFFFFFFFFFFFFFFFFFFFFFFFFFFFFFFFFFFFFFFFFFFFFFFF  
FFFFFFFFFFFF:FFFFFFFFFFFFFFFFFFFFFFFFFFFFFFFFFFFFFFFFFFFFFFFFFFFFFFFFFFFFFFFF  
FFFFFFFFFFFF  
@A00721:190:HGJW7DSXY:4:2357:5963:1172 2:N:0:TCTGCAAG+GCTGCACT  
GTCAGGAACAACATTCAGACGGTGATAATCACCTTCACTGTCTTCTCCAATTTTCCGGCAAGTATAAA  
TGTCGGAATCCAAGGTTCTTCGACATAATCAACCCAGATTCCGACGAATCTTTTCACCCAAATATTCA  
AAGTGCGA  
+  
FFFFFFFFFFFFFFFFFFFFFFFFFFFFFFFFFFFFFFFFFFFFFFFFFFFFFFFFFFFFFFFFFFFFFFFFFFFF  
FFFFFFFFFFFFFFFFFFFFFFFFFFFFFFFFFFFFFFFFFFFFFFFFFFFFFFFFFFFFFFFFFFFFFFFFFFFF  
FFFFFFFFFFFF  
@A00721:190:HGJW7DSXY:4:2407:28402:3333 2:N:0:TCTGCAAG+GCTGCACT  
GTCAGGAACAACATTCAGACGGTGATAATCACCTTCACTGTCTTCTCCAATTTTCCGGCAAGTATAAA  
TGTCGGAATCCAAGGTTCTTCGACATAATCAACCCAGATTCCGACGAATCTTTTCACCCAAATATTCA  
AAGTGCGA  
+  
FFFFFFFFFFFFFFFFFFFFFFFFFFFFFFFFFFFFFFFFFFFFFFFFFFFFFFFFFFFFFFFFFFFFFFFFFFFF  
FFFFFFFFFFFFFFFFFFFFFFFFFFFFFFFFFFFFFFFFFFFFFFFFFFFFFFFFFFFFFFFFFFFFFFFFFFFF  
:FFFFFFFF  
@A00721:190:HGJW7DSXY:4:2562:22019:8813 2:N:0:TCTGCAAG+GCTGCACT  
GTCAGGAACAACATTCAGACGGTGATAATCACCTTCACTGTCTTCTCCAATTTTCCGGCAAGTATAAA

TGTCGGAATCCAAGGTTCTTCGACATAATCAACCCAGATTCCGACGAATCTTTTCACCCAAATATTCA  
AAGTGCGA

[illegible] $+$ 

@A00721:190:HGJW7DSXY:4:1168:7798:35070 2:N:0:TCTGCAAG+GCTGCACT  
CAGAGTATGTCAGGAACAACATTCAGACGGTGATAATCACCTTCACTGTCTTCTCCAATTTTCCGGCA  
AGTATAAATGTCGGAATCCAAGGTTCTTCGACATAATCAACCCAGATTCCGACGAATCTTTTACCCA  
AATATTCAAAGTGCG

```

FFFFFFFFFFFFFFFFFFFFFFFFFFFFFFFFFFFFFFFFFFFFFFFFFFFFFFFFFFFF:FFFFFFFFFF
FFFFFFFF,FFFFFFFFFFFFFFFFFFFFFFFFFFFFFFFF:FFFFFFFFFFFFFFFFFFFFFFFFFFFF
FFFFFFFFFFFFFFFFFFFF

```

+

@A00721:190:HGJW7DSXY:4:1249:4707:23422 2:N:0:TCTGCAAG+GCTGCACT  
CAGAGTATGTCAGGAACAACATTCAGACGGTGATAATCACCTTCACTGTCTTCTCCAATTTTCCGGCA  
AGTATAAATGTCGGAATCCAAGGTTCTTCGACATAATCAACCCAGATTCCGACGAATCTTTTACCCA  
AATATTCAAAGTGCG

[illegible]

+

@A00721:190:HGJW7DSXY:4:1263:8567:28667 2:N:0:TCTGCAAG+GCTGCACT  
CGCACTTTGAATATTTGGGTGAAAAGATTCTGTCGGAATCTGGGTTGATTATGTCGAAGAACCTTGAT  
TCCGACATTTATACTTGCCGGAAAATTGGAGAAGACAGTGAAGGTGATTATCACCGTCTGAATGTTGT  
TCCTGACATACTCTG

```

FFFFFFFFFFFFFFFFFFFFFFFFFFFFFFFFFFFFFFFFFFFFFFFFFFFFFFFFFFFF,FFFFFFFFF
FFFF:FFFF:FFFFFFFFFFFF:F:FFFF:FFFFFFFFFFFFFFFFFFFFFFFFFFFFFFFFFFFF
FFFFFFFFFFFF:FFF

```

$+$ 

+

+

+

+

+

+

[illegible]

FFFFFFFF:F:FFFFFFFF:FFFFFFFFFFFFFF:FFFFFFFFFFFFFFF:FFFFFFFFFFFFFF:FFFFF  
FFFFFFFF:FFFF:FFF

@A00721:190:HGJW7DSXY:4:1648:28763:29356 2:N:0:TCTGCAAG+GCTGCACT  
CGCACTTTGAATATTTGGGTGAAAAGATTCGTGGAATCTGGGTTGATTATGTGCAAGAACCTTGAT  
TCCGACATTTATACTTGCCGAAAATTGGAGAAGACAGTGAAGGTGATTATCACCGTCTGAATGTTGT  
TCCTGACATACTCTG

+

FFFFFFFFFFFFFFFFFFFFFFFFFFFFFFFFFFFFFFFFFFFFFFFFFFFFFFFFFFFFFFFFFFFFFFFF:FFFFF  
FFFFFFFFFFFFFFFFFFFFFFFFFFFFFFFFFFFFFFFFFFFFFFFFFFFFFFFFFFFFFFFFFFFFFFFF  
FFFFFFFFFFFFFFFFFFFF

@A00721:190:HGJW7DSXY:4:1659:7075:28432 2:N:0:TCTGCAAG+GCTGCACT  
CAGAGTATGTCAGGAACAACATTCAGACGGTGATAATCACCTTCACTGTCTTCTCCAATTTTCCGGCA  
AGGATAAATGTCGGAATCCAAGGTTCTTCGACATAATCAACCCAGATTCCGACGAATCTTTTCACCCA  
AATATTCAAAGTGCG

+

FFFFFFFFFFFFFFFFFFFFFFFFFFFFFFFFFFFFFFFFFFFFFFFFFFFFFFFFFFFFFFFFFFFFFFFF  
FF,FFFF:FFFFFFFFFFFFFFFFFFFFFFFFFFFFFFFFFFFFFFFFFFFFFFFFFFFFFFFFFFFFFFFF  
FFFFFFFFFFFFFFFFFFFF

@A00721:190:HGJW7DSXY:4:2219:3884:3302 2:N:0:TCTGCAAG+GCTGCACT  
CAGAGTATGTCAGGAACAACATTCAGACGGTGATAATCACCTTCACTGTCTTCTCCAATTTTCCGGCA  
AGTATAAATGTCGGAATCCAAGGTTCTTCGACATAATCAACCCAGATTCCGACGAATCTTTTCACCCA  
AATATTCAAAGTGCG

+

:F,FFF::F,FFFFF,:FFFFFFFFFFFF,FFFFFFFFFFFF:F,FFFFFFFFFFFFFF:FFFFFFFF,FF:  
FFFFFFFFFFFF,F:,FFFFFFFFFFFFFF:FFFFFF:F,FFFFFFFFFFFFFF::F:F:FFFF:F,FF  
F,,FFFFFF:F:F:

@A00721:190:HGJW7DSXY:4:2226:18231:35039 2:N:0:TCTGCAAG+GCTGCACT  
CGCACTTTGAATATTTGGGTGAAAAGATTCGTGGAATCTGGGTTGATTATGTGCAAGAACCTTGAT  
TCCGACATTTATACTTGCCGAAAATTGGAGAAGACAGTGAAGGTGATTATCACCGTCTGAATGTTGT  
TCCTGACATACTCTG

+

FFFFFFFFF:FFFFFFFFFFFFFFFFFFFFFFFFFFFFF::FFFFFFFFFFFFFFFFFFFFFFFFFFFFFFF  
FFFF:FFFFFFFFFFFFFF:FFFFFFFFFFFFFFFFFFFFFF:FFFFFFF::FFFFFFFFFFFFFFFFFFFFF  
FFFFFFFF:FFFFFFF

@A00721:190:HGJW7DSXY:4:2268:30698:4836 2:N:0:TCTGCAAG+GCTGCACT  
CAGAGTATGTCAGGAACAACATTCAGACGGTGATAATCACCTTCACTGTCTTCTCCAATTTTCCGGCA  
AGTATAAATGTCGGAATCCAAGGTTCTTCGACATAATCAACCCAGATTCCGACGAATCTTTTCACCCA  
AATATTCAAAGTGCG

+

FFF:FFFFFFFFFFFFFFFFFFFFFFFFFFFFF:FFFFFFFFFFFFFFFFFFFFFFFFFFFFFFFFFFFFF  
FFFFFFFFFFFFFFFFFFFFFFFFFFFFFFFFFFFFFFFFFFFFFFFFFFFFFFFFFFFFFFFFFFFFFF:FFF:FFFFFFF  
FFFFFFFFFFFFFFFFFFFF

@A00721:190:HGJW7DSXY:4:2322:27272:19852 2:N:0:TCTGCAAG+GCTGCACT  
CAGAGTATGTCAGGAACAACATTCAGACGGTGATAATCACCTTCACTGTCTTCTCCAATTTTCCGGCA  
AGTATAAATGTCGGAATCCAAGGTTCTTCGACATAATCAACCCAGATTCCGACGAATCTTTTCACCCA  
AATATTCAAAGTGCG

+

FFFFFFFFFFFFFFFFFFFFFFFFFFFFFFFFFFFFF:FFFFFFFFFFFFFFFFFFFFFFFFFFFFFFFFFFFFF  
FFFFFFFFFFFFFFFFFFFFFFFFFFFFF:FF:FFFFFFFFFFFFFFFFFFFFFFFFFFFFFFFFFFFFF  
FFFF:FFFFFFFFFFFF

@A00721:190:HGJW7DSXY:4:2451:14733:32737 2:N:0:TCTGCAAG+GCTGCACT  
CGCACTTTGAATATTTGGGTGAAAAGATTCGTGGAATCTGGGTTGATTATGTGCAAGAACCTTGAT  
TCCGACATTTATACTTGCCGAAAATTGGAGAAGACAGTGAAGGTGATTATCACCGTCTGAATGTTGT  
TCCTGACATACTCTG

```

FFFFFFFFFFFF:F:FFFFFFFFFFFFFFFFFFFFFFFFFFFFFFFFFFFFFFFFFFFFFFFF:FFFFFFFF
FFFFFFFFFFFFFFFFFFFFFFFFFFFFFFFFFFFFFFFFFFFFFFFF:FFFFFFF::FFFFFFFFFFFFFFFFFFFFFFFFFFFFFFFF
FFFFFFFFFFFFFFFFF:

```

[illegible]

```
FFFFFFFFFFFFFFFFFFFFFFFFFFFFFFFF:FFFFFFFFFFFFFFFFFFFFFFFF:FFFF  
FFFFFFF:FFF:FFFFFFFFFFFFFFFFFFFFFFFF:FFFFFFFFFFFFFFFFFFFFFF  
FFFFFFFFFFFFFFFF:
```

[illegible][illegible][illegible]

```

FFFFFFFFFFFFFFFF:FFFFFFFFFFFFFF,FFFFFFFFFFFFFFFFFFFFFFFFFFFFFFFFFFFFFFFF
FFFFFFFFFFFFFFFF:FFF:FF:FFFFFFFFFFFFFFFFFFFFFFFF:FFFFFFFFFFFFFFFF
FFF:FFFFFFFF

```

@A00721:190:HGJW7DSXY:4:1410:25464:5854 2:N:0:TCTGCAAG+GCTGCACT  
GTTAATTTGGCGTTCATCAGAGTATGTCAGGAACAACATTTCAGACGGTGATAATCACCTTCACTGTCT





@A00721:190:HGJW7DSXY:4:2369:2953:12117 2:N:0:TCTGCAAG+GCTGCACT  
GTTAATTTGGCGTTCATCAGAGTATGTCAGGAACAACATTCAGACGGTGATAATCACCTTCACTGTCT  
TCTCCAATTTTCCGGAAGTATAAATGTCGGAATCCAAGTTCTTCGACATAATCAACCCAGATTCCG  
ACGAATCTTTTCACC

```
FFF:FFF:FFFFFFFF:FFFFF:FFFFFFFFFFFFFFFFFFFFFFFFFFFFFFFFFFFF
FFFFFFFFFFFFFFFFFFFF::FFFFF:F:FFFFFF,:FFFFFFFF:FF,FFFFFF,FFFFFFFF
FFFFFFFF,FFFFFF
```

+

```
FF:FFFFFF::FF,FFFFFFFF:FFFFFF:FF::FFFFFFFFFFFF:FF:F,FF:FF:FF:FFFFFFFF
FFFFFFFF::FFFF:FFFFFFFFFFFFFFFF::FFF:FFF:F,FFFFFF:F:FFFFFF:FFFF,F:FFFF:
FF,FFF,F,:FFF,:

```

+

```

FFFFFFFFFFFFFFFFFFFFFFFFFFFFFFFFFFFFFFFFFFFFFFFFFFFFFFFFFFFFFFFFFFFFFFFF
FFFFFFFFFFFFFFFFFFFFFFFF,FFFFFFFFFFFFFFFF:FFFFFFFFFFFFFFFFFFFFFFFF:FFFFF:FFFFFFFF
FFFFFFFFFFFFFFFF

```

+

[illegible]

+

```
FFFFFFFF:FFFFFFFFFFFFFFFFFFFFFFFFFFFFFFFFFFFFFFFFFFFFFFFF:F  
FFFFFFFFFFFFFFFFFFFFFFFFFFFFF:FFFFFF:FFFFFFFFFFFFFFFFFFFFF,F:F  
EEEEEEEEE.EEFFF
```

 $+$ [illegible] $\perp$ [illegible]

FFFFFFFFFFFFFFFFFFFFFFFF:FFFFFFFF:FFFFFFFF:FFFF:FFFFFFFFFFFFFFFFFFFF  
FFFFFFFFFFFFFFFF

@A00721:190:HGJW7DSXY:4:1374:23619:14403 2:N:0:TCTGCAAG+GCTGCACT  
AAAATTTTAGTTTTCCAGTTAATTTGGCGTTCATCAGAGTATGTCAGGAACAACATTCAGACGGTGAT  
AATCACCTTCACTGTCTTCTCCAATTTTCCGGCAAGTATAAATGTCGGAATCCAAGGTTCTTCGACAT  
AATCAACCCAGATTC

+  
:FF:FFFFFFFFFFFFFFFFFFFFFFFFFFFFFFFFFFFFFFFFFFFFFFFFFFFFFFFFFFFFFFFF  
FFFFFFFFFFFFFFFFFFFFFFFFFFFFFFFFFFFFFFFFFFFFFFFFFFFFFFFFFFFFFFFF, , FFFFF:FFFFFFFFFFFFFFFFFFFF:F  
F:FFFFFFFFFFFF:FF

@A00721:190:HGJW7DSXY:4:1420:32723:23688 2:N:0:TCTGCAAG+GCTGCACT  
AAAATTTTAGTTTTCCAGTTAATTTGGCGTTCATCAGAGTATGTCAGGAACAACATTCAGACGGTGAT  
AATCACCTTCACTGTCTTCTCCAATTTTCCGGCAAGTATAAATGTCGGAATCCAAGGTTCTTCGACAT  
AATCAACCCAGATTC

+  
:F:FFF:FFFFFFFFFFFFFFFFFFFFFFFFFFFFFFFFFFFFFFFFFFFFFFFFFFFFFFFFFFFF  
FFFFFFFFFFFFFFFFFFFFFFFFFFFFFFFFFFFFFFFFFFFFFFFFFFFFFFFFFFFFFFFF, FFFFFFFFFFFFFFFFFFFFF:FFFF:FFFFF:,  
FFFFFFFFF::FFFFF

@A00721:190:HGJW7DSXY:4:1509:15076:26819 2:N:0:TCTGCAAG+GCTGCACT  
AAAATTTTAGTTTTCCAGTTAATTTGGCGTTCATCAGAGTATGTCAGGAACAACATTCAGACGGTGAT  
AATCACCTTCACTGTCTTCTCCAATTTTCCGGCAAGTATAAATGTCGGAATCCAAGGTTCTTCGACAT  
AATCAACCCAGATTC

+  
FFFFFFFFFFFFFFFFFFFFFFFFFFFFFFFFFFFFFFFFFFFFFFFFFFFFFFFFFFFFFFFFFFFF  
FFFFFFFFFFFFFFFFFFFFFFFFFFFFFFFFFFFFFFFFFFFFFFFFFFFFFFFFFFFFFFFF:FFFFFFFFFFFFFFFFFFFFFFFFFFFF  
FFFFFFFFFFFFFFFFFFFF

@A00721:190:HGJW7DSXY:4:2149:14018:34319 2:N:0:TCTGCAAG+GCTGCACT  
AAAATTTTAGTTTTCCAGTTAATTTGGCGTTCATCAGAGTATGTCAGGAACAACATTCAGACGGTGAT  
AATCACCTTCACTGTCTTCTCCAATTTTCCGGCAAGTATAAATGTCGGAATCCAAGGTTCTTCGACAT  
AATCAACCCAGATTC

+  
FFFFFFF:,FFFF:,FFFFFFFFFFFF,FFFFFFFFFFFFF,F,FFFFFFFF,FFFFFFFF:F:FFFF,FFF  
FFF,F:::FFFF,,FFFFF:FFFF,,F:FFFFFFFF,FFFFFFF,F,,:F:FFFFFF:FFFFFFFFFFFF  
:FF,FFF:,FFFFFFF

@A00721:190:HGJW7DSXY:4:2222:11279:7842 2:N:0:TCTGCAAG+GCTGCACT  
AAAATTTTAGTTTTCCAGTTAATTTGGCGTTCATCAGAGTATGTCAGGAACAACATTCAGACGGTGAT  
AATCACCTTCACTGTCTTCTCCAATTTTCCGGCAAGTATAAATGTCGGAATCCAAGGTTCTTCGACAT  
AATCAACCCAGATTC

+  
FFFFFFFFFFFFFFFFFFFFFFFFFFFFFFFFFFFFFFFFFFFFFFFFFFFFFFFFFFFFFFFFFFFF:FFFFFFFFFFFF  
:FFFFFFFFFFFFFFFFFFFF:FFFFFFFFFFFF::FFF,:FFFFF:FFFFFFFFFFFF:FFFFFFFFFFFF:FFFFF  
FFFFF:F:FFFFFFFFF

@A00721:190:HGJW7DSXY:4:1154:7184:16376 2:N:0:TCTGCAAG+GCTGCACT  
AAAAATTTTAGTTTTCCAGTTAATTTGGCGTTCATCAGAGTATGTCAGGAACAACATTCAGACGGTGA  
TAATCACCTTCACTGTCTTCTCCAATTTTCCGGCAAGTATAAATGTCGGAATCCAAGGTTCTTCGACA  
TAATCAACCCAGATT

+  
:FFFFFFFFFFFFFFFFFFFFFFFFFFFFFFFFFFFFFFFFFFFFFFFFFFFFFFFFFFFFFFFFFFFF:FFFFFFFFFFFFFFFFFFFF  
FFFFFFFFFFFFFFFFFFFFFFFFFFFFFFFFFFFFFFFFFFFFFFFFFFFFFFFFFFFFFFFF:FFFFFFFFFFFFFFFFFFFFFFFFFFFF  
FF:FFFFFFFFFFFFF:

@A00721:190:HGJW7DSXY:4:1170:29288:15515 2:N:0:TCTGCAAG+GCTGCACT  
AAAAATTTTAGTTTTCCAGTTAATTTGGCGTTCATCAGAGTATGTCAGGAACAACATTCAGACGGTGA  
TAATCACCTTCACTGTCTTCTCCAATTTTCCGGCAAGTATAAATGTCGGAATCCAAGGTTCTTCGACA  
TAATCAACCCAGATT

[illegible][illegible]

```
FFFFFFFFFFFFFFFFFFFFF:FFFFFFFFFFFFFFFFFFFFFFFFFFFFFFFFF:FFFFFFF
FFFFFFFFFFFFFFFFFFFFFFFFFFFFF:FFFFFFF:FFFFFFFFFFFFFFFFFFFFFFFFFFFFF,FFF
FFFFFFFFF:FFFFFF
```

```

FFFFFFFFFFFFFF:FFFFFFFFFFFFFFFFFFFFFFFFFFFFFFFF:FFFFFFFFFFFFFFFFFFFFFF
FFFFFFFFFFFFFFFFFFFFFFFFFFFFFFFFFFFFFFFF:FFFFFFFFFFFFFFFFFFFFFFFFFFFFFF
FFFF:FFFFFFFFFFFF

```

```

FFFFFFFFFFFFFFFFFFFFFFFFFFFFFFFFFFFFFFFFFFFFFFFFFFFFFFFFFFFFFFFFFFFFFFFF:FFFFFF
FFFFFFFFFFFFFFFFFFFFFFFFFFFFFFFFFFFFFFFFFFFFFFFFFFFFFFFFFFFFFFFFFFFFFF,:FFFFFFFF:FFFFFFFFFFFFFFFF
FFFFFFFFFFFFFFFF

```

```

FFFFFFFFFFFFFF:FFFF:FFFFFFFFFFFFFFFFFFFFFFFF:FFFFFFFF:FFFFFFFFFFFFFFFFFFFFFFFF:
F:FFF:FFFF:FFFFFFFFFFFFFFFFFFFF,FFFFFFF:FFFFFFFFFFFFFFFFFFFF::FFFF:F,FFFFF
,FFFFFFFFFFFFFFFF

```

```

FFFFFFFFFFFFFFFFFFFFFFFF:FFFFFFFFFFFFFFFF:FFFFFFFFFFFFFFFFFFFFFFFF:FFFFFFFFFFFFFFFF
FFFFFFFFFFFFFFFFFFFFFFFFFFFFFFFFFFFFFFFFFFFFFFFFFFFFFFFFFFFFFFFF:FFFFFFFFFFFFFFFFFFFFFFFF
FFFFFFFFFFFFFFFFFFFF

```

@A00721:190:HGJW7DSXY:4:1253:23312:35008 2:N:0:TCTGCAAG+GCTGCACT  
CTCGACCAAATTAATAATTTTGTGTTTCCAGTTAATTTGGCGTTCATCAGAGTATGTCAGGAACAACA



@A00721:190:HGJW7DSXY:4:2370:2917:28401 2:N:0:TCTGCAAG+GCTGCACT  
CTCGACCAAATTA AAAATTTTAGTTTTCCAGTTAATTTGGCGTTCATCAGAGTATGTCAGGAACAACA  
TTCAGACGGTGATAATCACCTTCACTGTCTTCTCCAATTTCCGGCAAGTATAAATGTCGGAATCCAA  
GGTTCTTCGACATAA

[illegible]

+

[illegible]

+

[illegible]

+

```

FFFFFFFFFFFFFFFFFFFFFFFFFFFFFFFFFFFFFFFFFFFFFFFFFFFFFFFFFFFFFFFF:FFFFFFFF
F:FFFFFFFFFFFFFFFFFFFFFFFF:FFFFFFFFFFFFFFFF:FFF:FFFFFFFFFFFFFFFFFFFFFFFF
FFFFFFFFFFFFFFFF: F

```

+

```

FFFFFFFFFFFF:FFFFFFFFFFFFFFFFFFFFFFFFFFFFFFFFFFFFFFFF,FFFFFFFFFFFFFFFFFFFF
FFFFFFFFFFFF:FFF:FFFFFF,FFFFFFFFFFFF:FFFFFFFFFFFFFFFFFFFFFFFF,FFFFFFFFFFFFFFFF
FFFFF:,.FFFFFFF:

```

+

[illegible]

+

[illegible]

@A00721:190:HGJW7DSXY:4:2241:18114:23249 2:N:0:TCTGCAAG+GCTGCACT  
ATTGTTCTCGACCAAATTAATAATTTTAGTTTTCCAGTTAATTTGGCGTTCATCAGAGTATGTCAGGA  
ACAACATTACAGACGGTGATAATCACCTTCACTGTCTTCTCCAATTTTCCGGCAAGTATAAATGTCGGA  
ATCCAAGGTTCTTCG

+

[illegible]

@A00721:190:HGJW7DSXY:4:2241:17815:23359 2:N:0:TCTGCAAG+GCTGCACT  
ATTGTTCTCGACCAAATTAATAATTTTAGTTTTCCAGTTAATTTGTCGTTTCATCAGAGTATGTCAGGA  
ACAACATTTCAGACGGTGATAATCACCTTCACTGTCTTCTCCAATTTTCAGGCAAGTATAAATGTCGGA  
ATCCAAGGTTCTTCG

+

```

FFFFFFFF:FFFFFFFF:, :FFFF:FFFFFFFF::FFFF,FFFFFFFF:F,FF,FFFF:FFFF:FFFFFFFF:FF
FFFFFFFFFFFFFFFFFFFFFFFFFFFFFFFFFFFFFFFF:FFFFFFFFFFFFFFFF:.,FFFFFFFF:FF:FFFF: :F
FFFFFFFF:FFFFFFFF

```

@A00721:190:HGJW7DSXY:4:1403:11867:7921 2:N:0:TCTGCAAG+GCTGCACT  
CCAATTTCCAAAGAAATTGTTCTCGACCAAATTAATAATTTAGTTTTCCAGTTAATTTGGCGTTCAT  
CAGAGTATGTCAGGAACAACATTCAGACGGTGATAATCACCTTCACTGTCTTCTCCAATTTCCGGCA  
AGTATAAATGTCGGA

+

[illegible]

@A00721:190:HGJW7DSXY:4:1457:4345:28463 2:N:0:TCTGCAAG+GCTGCACT  
CCAATTTCCAAAGAAATTGTTCTCGACCAAATTAATAATTTTAGTTTTCCAGTTAATTTGGCGTTCAT  
CAGAGTATGTCAGGAACAACATTCAGACGGTGATAATCACCTTCACTGTCTTCTCCAATTTTCCGGCA  
AGTATAAATGTCGGA

+

```

FFFFFFFF,FFFF:FFFFFFFFFFFFFF,FFFFFFFF:FFFF:FFFFFFFFFFFFFFFFFFFF:FFFF
FFFF:FFFFFFFFFFFFFFFFFFFFFFFFFFFFFFFFFFFF:FFFFFFFFFFFFFFFFFFFF:FFFFFFFFFFFF
FFFFFFFFFFFF:FF

```

@A00721:190:HGJW7DSXY:4:1561:4354:34209 2:N:0:TCTGCAAG+GCTGCACT  
CCAATTTCCAAAGAAATTGTTCTCGACCAAATTAATAATTTAGTTTTCCAGTTAATTTGGCGTTCAT  
CAGAGTATGTCAGGAACAACATTCAGACGGTGATAATCACCTTCACTGTCTTCTCCAATTTCCGGCA  
AGTATAAATGTCGGA

+

```

FFFFFFFFF:FFFFF::FFFFFFFFF::,F,:F,F:F,FFFFFFFF,:F:FFFFF::FFFFF:FFFFF
F:FFFFFFFFFFFFFFFF,F,FF,,F:F:F,:::FFFF,FF:F,FFFFFFFFF:FF,:F:FFFFF,:F::
F,FFFFFFFFFFFF:,F

```

@A00721:190:HGJW7DSXY:4:2130:2374:17378 2:N:0:TCTGCAAG+GCTGCACT  
CCAATTTCCAAAGAAATTGTTCTCGACCAAATTAATAATTTAGTTTTCCAGTTAATTTGGCGTTCAT  
CAGAGTATGTCAGGAACAACATTCAGACGGTGATAATCACCTTCACTGTCTTCTCCAATTTCCGGCA  
AGTATAAATGTCGGA

+

```

FFFFFFFFFFFFFFFFFFFFFFFFFFFFFFFF:FFFFFFFFFFFFFFFFFFFFFFFF:FF
FFFFFFFFFFFFFFFFFFFFFFFFFFFFFFFF:FFFFFFFFFFFFFFFFFFFFFFFF:FFFF
FFFF:FFFFFFFF

```

@A00721:190:HGJW7DSXY:4:2251:11740:33599 2:N:0:TCTGCAAG+GCTGCACT  
CCAATTTCCAAAGAAATTGTTCTCGACCAAATTCAAAATTTTAGTTTTCCAGTTAATTTGGCGTTCAT  
CAGAGTATGTCAGGAACAACATTCAGACGGTGATAATCACCTTCACTGTCTTCTCCAATTTTCCGGCA  
AGTATAAATGTCGGA

+  
FFFFFFFFFFFF,FFFFFFFF:FFFFFFFFFFFF:FF,:F:FFFFFF:FFF,FFF:FF::FFFFFFFFFFFF  
FFFFFFFF,FFFFFFFFFFFFFFFFFFFF,FFFFFFFF,FFFFFFFFFFFFFFFFFFFFFFFFFFFFFFFF:FFFFFFFF  
FFFFFFFFFFFFFFFFFFFF

@A00721:190:HGJW7DSXY:4:2370:12545:25723 2:N:0:TCTGCAAG+GCTGCACT  
CCAATTTCCAAAGAAATTGTTCTCGACCAAATTAATAATTTTAGTTTTCCAGTTAATTTGGCGTTCAT  
CAGAGTATGTCAGGAACAACATTCAGACGGTGATAATCACCTTCACTGTCTTCTCCAATTTTCCGGCA  
AGTATAATTGTCGGA

+  
FFFFFFFFFFFFFFFFFFFFFFFFFFFFFFFFFFFFFFFF:FFFFFFFFFFFFFFFFFFFFFFFF:FFFFFFFFFFFF  
FFFFFFFFFFFF:FFFFFFFFFFFFFFFFFFFFFFFFFFFFFFFFFFFFFFFFFFFFFFFFFFFFFFFF:FFFFFFFF:  
FFFFFFFF,FFFFFF

@A00721:190:HGJW7DSXY:4:2404:24017:1219 2:N:0:TCTGCAAG+GCTGCACT  
CCAATTTCCAAAGAAATTGTTCTCGACCAAATTAATAATTTTAGTTTTCCAGTTAATTTGGCGTTCAT  
CAGAGTATGTCAGGAACAACATTCAGACGGTGATAATCACCTTCACTGTCTTCTCCAATTTTCCGGCA  
AGAATAAATGTCGGA

+  
FFFFFFFFF:FFFFF:,FFF:FFFFFFFFFFFFFFFFFFFF:FFFFFFFFFFFFFFFFFFFF:FFFF:F:FFFF  
FFFFFFFFFFFFFFFFFFFF,FFFFFFFFFFFFFFFF:FFFFF:FFFFFFFFFFFFFFFF:FFFFFFFF:FFF:FFF,  
FF,FFFFFFFFFFFF

@A00721:190:HGJW7DSXY:4:2457:5556:24079 2:N:0:TCTGCAAG+GCTGCACT  
CCAATTTCCAAAGAAATTGTTCTCGACCAAATTAATAATTTTAGTTTTCCAGTTAATTTGGCGTTCAT  
CAGAGTATGTCAGGAACAACATTCAGACGGTGATAATCACCTTCACTGTCTTCTCCAATTTTCCGGCA  
AGTATAAATGTCGGA

+  
FFFFFFFFFFFFFFFFFFFF:FFFFFFFFFFFFFFFF:FFFFFFFFF:FFFF:F:FFFFFFFFFFFF:FFFFFFFF  
FFFFFFFFFFFF:FFFFF:FFFF:,F:FFFF:FFF:FFFFFFFFFFFF,FFFFFFFFFFFFFFFFFFFF:FFFF  
FFFF,FFF,FFFFFF

@A00721:190:HGJW7DSXY:4:2516:3631:12633 2:N:0:TCTGCAAG+GCTGCACT  
CCAATTTCCAAAGAAATTGTTCTCGACCAAATTAATAATTTTAGTTTTCCAGTTAATTTGGCGTTCAT  
CAGAGTATGTCAGGAACAACATTCAGACGGTGATAATCACCTTCACTGTCTTCTCCAATTTTCCGGCA  
AGTATAAATGTCGGA

+  
FFFFFFFFFFFFFFFFFFFFFFFFFFFFFFFFFFFFFFFF:FFFFFFFFF:FFFF:FFFFFFFFFFFFFFFFFFFF  
FFFFFFFFFFFFFFFFFFFFFFFFFFFFFFFFFFFF:FFFFFFFFFFFFFFFFFFFFFFFFFFFFFFFFFFFF:FF  
FFFFFFFFFFFFFFFFFFFF

@A00721:190:HGJW7DSXY:4:2543:16785:14559 2:N:0:TCTGCAAG+GCTGCACT  
CCAATTTCCAAAGAAATTGTTCTCGACCAAATTAATAATTTTAGTTTTCCAGTTAATTTGGCGTTCAT  
CAGAGTATGTCAGGAACAACATTCAGACGGTGATAATCACCTTCACTGTCTTCTCCAATTTTCCGGCA  
AGTATAAATGTCGGA

+  
FFFFFFFFFFFFFFFFFFFFFFFFFFFFFFFFFFFFFFFF:FFFFFFFFFFFFFFFFFFFF:FFFFFFFFFFFF  
FFFF,FFFFFFFF:FFFFFFFFFFFFFFFFFFFFFFFFFFFF:FFFFFFFFFFFFFFFFFFFFFFFFFFFFFFFF  
,FF:FFFFFFFFFFFF

@A00721:190:HGJW7DSXY:4:1537:1199:19601 2:N:0:TCTGCAAG+GCTGCACT  
TCAAGATGTCCAATTTCCAAAGAAATTGTTCTCGACCAAATTAATAATTTTAGTTTTCCAGTTAATTT  
GGCGTTCATCAGAGTATGTCAGGAACAACATTCAGACGGTGATAATCACCTTCACTGTCTTCTCCAAT  
TTTCCGGCAAGTATA

+  
FFFFFFFFFFFFFFFFFFFFFFFFFFFFFFFFFFFFFFFFFFFFFFFFFFFFFFFFFFFFFFFFFFFFFFFFFFFF  
FFFFFFFFFFFFFFFFFFFFFFFFFFFFFFFFFFFFFFFFFFFFFFFFFFFFFFFFFFFFFFFFFFFFFFFF:FFFF  
FFFF:FFFFFFFFFFFF

@A00721:190:HGJW7DSXY:4:2344:4038:12273 2:N:0:TCTGCAAG+GCTGCACT  
TCAAGATGTCCAATTTCCAAAGAAATTGTTCTCGACCAAATTAATAATTTTAGTTTTCCAGTTAATTT

GGCGTTCATCAGAGTATGTCAGGAACAACATTTCAGACGGTGATAATCACCTTCACTGTCTTCTCCAAT  
TTTCCGGCAAGTATA

[illegible] $+$ 

```
FFFFFFFFFFFFFFFFFFFFFFFFFFFFFFFFFFFFFFFFFFFFFFFFF,FFFFFFFFFFFFFFFFFFFFFFFFFFFFFFFFF
FFFFFFFFFFFFFFFFFFFFFFFFFFFFFFFFFFFFFFFFFFFFFFFFF,FFF:FFFFFFFFFFFFFFFFFFFFFFFFFFFFFFF
FFFFFFFFFFFFFFFFFFFF
```

+

```

FFFFFFFFFFFFFFFFFFFFFFFF,FFFF:FFFFFFFFFFFFFFFFFFFFFFFFFFFFFFFFFFFFFFFF
FFFFFFFFFFFFFFFFFFFFFFFFFFFFFFFFFFFFFFFF:FFFFFFFFFFFFFFFFFFFFFFFFFFFFFF
FFFF:FFFFFFFFFFFF

```

+

[illegible]

+

```
FFFFFFFFFFFFFFFFFFFFFFFFFFFFFFFFFFFFFFFFFFFFFFFFFFFFFFFFFFFFFFF  
FFFFFFFFFFFFFFFFFFFFFFFFFFFFFFFFFFFF;FFFFFFFFFFFFFFFFFFFFFFFFFFFF  
FFFFFFFFFFFFFFFF
```

+

```
FFFFF,FFFFFF:FFFFFFFFFFFFFFFFFFFFFFFFFFFFFFFFFFFFFFFF:FFFFFFFFFF:FF  
FFFF:FFFFFFFFFFFFFFFFFFFFFFFFFFFFFFFFFFFFFFFF,F:F,FFF:FFFF,:F:FFFFFFFF  
FFFFFFE,,FFFFFF
```

+

```

FFFFFFFF,FFFFFFFFFFFFFFFFFFFFFFFFFFFFFFFFFFFFFFFFFFFFFFFFFFFFFFFFFFFFFFFF:F
FFFFFFFFFFFFFFFFFFFFFFFFFFFFFFFFFFFFFFFF:F
FFFFFFFFFFFFFFFFFFFFFFFFFFFFFFFF:F
FFFFFFFFFFFFFFFF

```



@A00721:190:HGJW7DSXY:4:2101:24017:5071 2:N:0:TCTGCAAG+GCTGCACT  
CTTAACCTTATTCAAGATGTCCAATTTCCAAAGAAATTGTTCTCGACCAAATTAATAATTTTAGTTTTTC  
CAGTTAATTTGGCGTTCATCAGAGTATGTCAGGAACAACATTCAGACGGTGATAATCACCTTCACTGT  
CTTCTCCAATTTTCC

[illegible]

+

```

FFFFF:FFFFFFFFFFFFFFFFFFFFFFFFFFFFFFFFFFFFFFFFFFFFFFFFFFFFFFFFFFFFF:
FFFFFFFF:FFFFFFFFFFFFFFFF:FFFFFFFFFFFFFFFFFFFFF:FFF:FFFFF,FFFFFFF
FFFFFFFFFFFFFFFF

```

+

```

FFFFFFFFFFFFFFFFFFFFFFFFFFFFFFFF:FFF:FFFFFFFFFFFFFFFF:FFF:FFFFFFFF
FFFFFFFFFFFFFFFFFFFFFFFFFFFFFFFF:FFFFFFFFFFFFFFFFFFFFFFFFFFFFFF
FFFFFFFFFFFFFFFF

```

+

[illegible]

+

```

FFFFFFFFFFFFFFFFFFFFFFFF,FFFFFFFFFFFFFFFFFFFFFFFFFFFFFFFFFFFFFFFF
FFFFFFFFFFFFFF:FFFFFFFFFFFFFF:FFFFFFFFFFFF:FFFFFFFFFF,FFFFFFFFFFFF
:FFFFFFFFFFFFFF:F

```

+

```
FFFFFFFFFFFFFFFFFFFFFFFFFFFFFFFFFFFFF:FFF:F  
FFFFFFFFFFFFFFFFFFFFFFFFFFFFFFFFFFFFF  
FFFFFFFFFFFFFFFF
```

+

[illegible]

FFFFF:FFF:FFFF,F:FFFFFFF,FFFFFFFFF:FFFFFFFFFFFFFFFFF:FF,FFFFFFFFFFFFF,  
FFFFFFFFFFFF:FFF

@A00721:190:HGJW7DSXY:4:1316:20166:3599 2:N:0:TCTGCAAG+GCTGCACT  
TATTTCTTAACCTATTCAAGATGTCCAATTTCCAAAGAAATTGTTCTCGACCAAATTAATAATTTTAG  
TTTTCCAGTTAATTTGGCGTTCATCAGAGTATGTCAGGAACAACATTAGACGGTGATAATCACCTTC  
ACTGTCTTCTCCAAT

+

FFFFFFFFFFFF:FFF:FFFFFFFFFFFFFFFFFFFFFFFFFFFFFFFFFFFFFFFFFFFFFFFFFFFFFFFFF:FFF:FFF:FFFFFFFFFFFFF:  
FFFFFFFFFFFFFFFFFFFF:FFFFFFFFFFFFFFFFFFFF:FFFF,FF,FFFFFF:FFFFFFFFFFFFFFFFFFFF:FFFF  
FFF,FFFFFFFF,FF

@A00721:190:HGJW7DSXY:4:1316:20365:4288 2:N:0:TCTGCAAG+GCTGCACT  
TATTTCTTAACCTATTCAAGATGTCCAATTTCCAAAGAAATTGTTCTCGACCAAATTAATAATTTTAG  
TTTTCCAGTTAATTTGGCGTTCATCAGAGTATGTCAGGAACAACATTAGACGGTGATAATCACCTTC  
ACTGTCTTCTCCAAT

+

FFFFFFFFFFFFFFFFFFFFFFFFFFFFFFFFFFFFFFFFFFFFFFFFFFFFFFFFFFFFFFFFFFFFFFFFFFFF  
FFFFFFFFFFFFFFFFFFFFFFFFFFFFFFFFFFFFFFFFFFFFFFFFFFFFFFFFFFFFFFFFFFFFFFFFFFFF  
FFFFFFFFFFFFFFFFFFFF

@A00721:190:HGJW7DSXY:4:1324:3215:20055 2:N:0:TCTGCAAG+GCTGCACT  
TATTTCTTAACCTATTCAAGATGTCCAATTTCCAAAGAAATTGTTCTCGACCAAATTAATAATTTTAG  
TTTTCCAGTTAATTTGGCGTTCATCAGAGTATGTCAGGAACAACATTAGACGGTGATAATCACCTTC  
ACTGTCTTCTCCAAT

+

FFFFFFFFFFFFFFFFFFFFFFFFFFFFFFFFFFFFFFFFFFFFFFFFFFFFFFFFFFFFFFFFFFFFFFFFFFFF:FFF  
FF:FFFFFFFFFFFFFFFFFFFFFFFFFFFFFFFFFFFFFFFFFFFFFFFFFFFFFFFFFFFFFFFFFFFF:FFFFF:FFFFFFFFFFFFFFFFFFFFFFFFFFFF  
FFFFFFFFFFFFFFFFFFFF

@A00721:190:HGJW7DSXY:4:1330:11270:20322 2:N:0:TCTGCAAG+GCTGCACT  
TATTTCTTAACCTATTCAAGATGTCCAATTTCCAAAGAAATTGTTCTCGACCAAATTAATAATTTTAG  
TTTTCCAGTTAATTTGGCGTTCATCAGAGTATGTCAGGAACAACATTAGACGGTGATAATCACCTTC  
ACTGTCTTCTCCAAT

+

FFFFFFFFFFFFFFFFFFFFFFFFFFFFFFFFFFFFFFFFFFFFFFFFFFFFFFFFFFFFFFFFFFFFFFFFFFFF  
FFFFFFFFFFFFFFFFFFFF:FFFFF:FFFFFFFFFFFFFFFFFFFFFFFFFFFFFFFFFFFFFFFFFFFFFFFFFFFF  
FFFFFFFFFFFFFFFFFFFF

@A00721:190:HGJW7DSXY:4:1438:4571:14857 2:N:0:TCTGCAAG+GCTGCACT  
TATTTCTTAACCTATTCAAGATGTCCAATTTCCAAAGAAATTGTTCTCGACCAAATTAATAATTTTAG  
TTTTCCAGTTAATTTGGCGTTCATCAGAGTATGTCAGGAACAACATTAGACGGTGATAATCACCTTC  
ACTGTCTTCTCCAAT

+

FFFFFFFFFF,FFFF:FFFFFFFFFFFFFFFFFFFFFFFFF:F,FF:FF:FFFFFFFF:FFFFF:FFFFFFFFFFFF  
FFFFFFFFFFFFFFFFFFFFFFFFFFFFFFFFFFFFFFFFFFFFFFFFFFFFFFFFFFFFFFFFFFFF:FFFFF:FFFFFFFFFFFF:FFFFFFFFF  
FFFFFFFFFFFFFFFF:F

@A00721:190:HGJW7DSXY:4:1452:8865:18818 2:N:0:TCTGCAAG+GCTGCACT  
TATTTCTTAACCTATTCAAGATGTCCAATTTCCAAAGAAATTGTTCTCGACCAAATTAATAATTTTAG  
TTTTCCAGTTAATTTGGCGTTCATCAGAGTATGTCAGGAACAACATTAGACGGTGATAATCACCTTC  
ACTGTCTTCTCCAAT

+

FFFFFFFFFFFFFFFFFFFFF:FFFFFFFFFFFFFFFFFFFFFFFFFFFFFFFFFFFFFFFFFFFFFFFFFFFFF:FFF  
FFFFFFFFFFFFFFFFFFFFFFFFFFFFFFFFFFFFFFFFFFFFFFFFFFFFFFFFFFFFFFFFFFFF:,FFF:FFFFFFFFF:FFF  
FFFFFFFFFFFFFFFFFFFF

@A00721:190:HGJW7DSXY:4:1549:29930:13964 2:N:0:TCTGCAAG+GCTGCACT  
TATTTCTTAACCTATTCAAGATGTCCAATTTCCAAAGAAATTGTTCTCGACCAAATTAATAATTTTAG  
TTTTCCAGTTAATTTGGCGTTCATCAGAGTATGTCAGGAACAACATTAGACGGTGATAATCACCTTC  
ACTGTCTTCTCCAAT

+  
FFFFFFFFFFFFFFFFFFFFFFFFFFFFFFFFFFFFFFFFFFFFFFFFFFFFFFFFFFFFFFFFFFFFFFFF  
FFFFFFFFFFFFFFFFFFFFFFFFFFFFFFFFFFFFFFFFFFFFFFFFFFFFFFFFFFFFFFFFFFFFFFFF,FFFFFFFF:F:FFFFFFFFFFFFFFFF  
FFFFFFFFFFFFFFFF  
@A00721:190:HGJW7DSXY:4:1665:27181:27649 2:N:0:TCTGCAAG+GCTGCACT  
TATTTCTTAACCTATTCAAGATGTCCAATTTCCAAAGAAATTGTTCTCGACCAAATTAATAATTTTAG  
TTTTCCAGTTAATTTGGCGTTCATCAGAGTATGTCAGGAACAACATTCAGACGGTGATAATCACCTTC  
ACTGTCTTCTCCAAT  
+  
FFFFFFFFFFFFFFFFFFFFFFFFFFFFFFFFFFFFFFFFFFFFFFFFFFFFFFFFFFFFFFFFFFFFFFFF:FFFFFFFFFFFFFFFFFFFFFFFFFFFFFFFF:FFFFF:FFFF  
FFFFFFFF:FFFFFFFFFFFFFFFFFFFFFFFFFFFFFFFFFFFFFFFFFFFFFFFFFFFFFFFFFFFFFFFF:FFFFFFFFFFFFFFFFFFFFFFFF  
FFFFFFFFFFFF,FFF  
@A00721:190:HGJW7DSXY:4:2538:18493:19241 2:N:0:TCTGCAAG+GCTGCACT  
TATTTCTTAACCTATTCAAGATGTCCAATTTCCAAAGAAATTGTTCTCGACCAAATTAATAATTTTAG  
TTTTCCAGTTAATTTGGCGTTCATCAGAGTATGTCAGGAACAACATTCAGACGGTGATAATCACCTTC  
ACTGTCTTCTCCAAT  
+  
FFFFFFFFFFFFFFFFFFFFFFFFFFFFFFFFFFFFFFFFFFFFFFFFFFFFFFFFFFFFFFFFFFFFFFFF:FFFFFFFFFFFFFFFFFFFFFFFFFFFFFFFF:FFFFFFFFFFFFFFFFFFFFFFFF  
FFFFFFFFFFFFFFFFFFFFFFFF,FFFFFFFFFFFFFFFFFFFFFFFFFFFFFFFFFFFFFFFFFFFFFFFFFFFFFFFFFFFFFFFFFFFFFFFF  
FFFFFFFFFFFFFFFF  
@A00721:190:HGJW7DSXY:4:2568:21450:11459 2:N:0:TCTGCAAG+GCTGCACT  
TATTTCTTAACCTATTCAAGATGTCCAATTTCCAAAGAAATTGTTCTCGACCAAATTAATAATTTTAG  
TTTTCCAGTTAATTTGGCGTTCATCAGAGTATGTCAGGAACAACATTCAGACGGTGATAATCACCTTC  
ACTGTCTTCTCCAAT  
+  
FFFFFFFFFFFFFFFFFFFFFFFFFFFFFFFFFFFFFFFFFFFFFFFFFFFFFFFFFFFFFFFFFFFFFFFF:FFFFFFFFFFFFFFFFFFFFFFFFFFFFFFFF,FFFF,FFFF  
FFFFFFFFFFFFFFFFFFFFFFFFFFFFFFFFFFFFFFFFFFFFFFFFFFFFFFFFFFFFFFFFFFFFFFFF:FFFFFFFFFFFFFFFFFFFFFFFFFFFFFFFF  
FFFFFFFFFFFFFFFF:FF  
@A00721:190:HGJW7DSXY:4:2669:10945:23923 2:N:0:TCTGCAAG+GCTGCACT  
TATTTCTTAACCTATTCAAGATGTCCAATTTCCAAAGAAATTGTTCTCGACCAAATTAATAATTTTAG  
TTTTCCAGTTAATTTGGCGTTCATCAGAGTATGTCAGGAACAACATTCAGACGGTGATAATCACCTTC  
ACTGTCTTCTCCAAT  
+  
FFFFFFFFFFFFFFFFFFFFFFFFFFFFFFFFFFFFFFFFFFFFFFFFFFFFFFFFFFFFFFFFFFFFFFFF:FFFFFFFFFFFFFFFFFFFFFFFFFFFFFFFF:FF  
FFFFFFFFFFFFFFFFFFFFFFFFFFFFFFFFFFFFFFFFFFFFFFFFFFFFFFFFFFFFFFFFFFFFFFFFFFFFFFFFFFFFFFFFFFFFFFFF  
FFF,FFFFFFFF  
@A00721:190:HGJW7DSXY:4:1575:32443:12994 2:N:0:TCTGCAAG+GCTGCACT  
GAATTATTTCTTAACCTATTCAAGATGTCCAATTTCCAAAGAAATTGTTCTCGACCAAATTAATAATTTAG  
TTAGTTTTCCAGTTAATTTGGCGTTCATCAGAGTATGTCAGGAACAACATTCAGACGGTGATAATCAC  
CTTCACTGTCTTCTC  
+  
F:FFFFFFFFFFFFFFFFFFFFFFFFFFFFFFFFFFFFFFFFFFFFFFFFFFFFFFFFFFFFFFFFFFFFFFFF,FFFFFFFFFFFFFFFFFFFFFFFFFFFFFFFF  
FFFFFFFFF:FFF:FFFFF,FF:FFFFFFFFFFFFFFFFFFFFFFFFFFFFFFFFFFFFFFFF:F:FFFFFFFFFFFFFFFF:F:  
FFFFF:FFF:FFFF  
@A00721:190:HGJW7DSXY:4:2166:24460:29418 2:N:0:TCTGCAAG+GCTGCACT  
GAATTATTTCTTAACCTATTCAAGATGTCCAATTTCCAAAGAAATTGTTCTCGACCAAATTAATAATTTAG  
TTAGTTTTCCAGTTAATTTGGCGTTCATCAGAGTATGTCAGGAACAACATTCAGACGGTGATAATCAC  
CTTCACTGTCTTCTC  
+  
FFFFFFFFFFFFFFFFFFFFFFFFFFFFFFFFFFFFFFFFFFFFFFFFFFFFFFFFFFFFFFFFFFFFFFFF:FF  
FFFFFFFFFFFFFFFFFFFFFFFFFFFFFFFFFFFFFFFFFFFFFFFFFFFFFFFFFFFFFFFFFFFFFFFF  
FFFFFFFFFFFFFFFF  
@A00721:190:HGJW7DSXY:4:2226:32461:1908 2:N:0:TCTGCAAG+GCTGCACT  
GAATTATTTCTTAACCTATTCAAGATGTCCAATTTCCAAAGAAATTGTTCTCGACCAAATTAATAATTTAG

TTAGTTTTCCAGTTAATTTGGAGTTCATCAGAGTATGTCAGGAACAAAATTCAGACGGTGATAATCAC  
CTTCACTGTCTTCTC

+

FF:FFFFFFFF:FFFFFFFF,FF,FFFFFFFFFFFF:,FFFF:FFFF,FF,F:FF,:FF:FFFFFFFF  
FFFFFFFF::F,F:FF:FFFF,FFF,,F:FF,FFFF:F:FFFF,F,FFFF:F:FFFFFFFF:F:F:  
:,FF:::F,FF:F:

@A00721:190:HGJW7DSXY:4:2375:11460:36151 2:N:0:TCTGCAAG+GCTGCACT  
GAATTATTTCTTAAGTATTCAAGATGTCCAATTTCAAAGAAATTGTTCTCGACCAAATTAATAATT  
TTAGTTTTCCAGTTAATTTGGCGTTCATCAGAGTATGTCAGGAACAACATTCAGACGGTGATAATCAC  
CTTCACTGTCTTCTC

+

FFFFFFFFFFFFFFFFFFFFFFFFFFFFFFFFFFFFFFFFFFFFFFFFFFFFFFFFFFFFFFFFFFFF  
FFFFFFFFFFFFFFFFFFFFFFFFFFFFFFFFFFFFFFFFFFFFFFFFFFFFFFFFFFFFFFFFFFFF  
FFFFFFFFFFFFFFFF

@A00721:190:HGJW7DSXY:4:2406:21748:11976 2:N:0:TCTGCAAG+GCTGCACT  
GAATTATTTCTTAAGTATTCAAGATGTCCAATTTCAAAGAAATTGTTCTCGACCAAATTAATAATT  
TTAGTTTTCCAGTTAATTTGGCGTTCATCAGAGTATGTCAGGAACAACATTCAGACGGTGATAATCAC  
CTTCACTGTCTTCTC

+

FFFFFFFFFFFFFFFFFFFFFFFFFFFFFFFFFFFFFFFFFFFFFFFFFFFFFFFFFFFFFFFFFFFF  
FFFFFFFFFFFFFFFFFFFFFFFFFFFFFFFFFFFFFFFFFFFFFFFFFFFFFFFFFFFFFFFFFFFF  
FFFFFFFFFFFFFFFF

@A00721:190:HGJW7DSXY:4:2417:9932:27211 2:N:0:TCTGCAAG+GCTGCACT  
GAATTATTTCTTAAGTATTCAAGATGTCCAATTTCAAAGAAATTGTTCTCGACCAAATTAATAATT  
TTAGTTTTCCAGTTAATTTGGCGTTCATCAGAGTATGTCAGGAACAACATTCAGACGGTGATAATCAC  
CTTCACTGTCTTCTC

+

FFFFFFFFFFFFFFFFFFFFFFFFFFFFFFFFFFFFFFFFFFFFFFFFFFFFFFFFFFFFFFFFFFFF:FFFFFFFFFFFFFFFF  
FFFFFFFF:FFFFFFFFFFFFFFFFFFFFFFFFFFFFFFFFFFFFFFFFFFFFFFFFFFFFFFFFFFFF:FFFFFFFFFFFFFFFF  
FFFFFFFFFFFFFFFF

@A00721:190:HGJW7DSXY:4:2572:29622:1094 2:N:0:TCTGCAAG+GCTGCACT  
GAATTATTTCTTAAGTATTCAAGATGTCCAATTTCAAAGAAATTGTTCTCGACCAAATTAATAATT  
TTAGTTTTCCAGTTAATTTGGCGTTCATCAGAGTATGTCAGGAACAACATTCAGACGGAGATAATCAC  
CTTCACTGTCTTCTC

+

:F::FF:FFF:FF:FFFFFFFFFFFFFFFFFFFFFFFFFFFFFFFFFFFF,FFFFFFFF:FFFFFFFFFFFFFFFF:F  
FFFFFFFFFFFF:F:FFF::F,FF:FFFFFFFF:FFFFFFFFFFFFFFFF,FFFFFFFF,FFFFFFFF  
FFFFFF::FFFFFF

@A00721:190:HGJW7DSXY:4:2669:26051:1861 2:N:0:TCTGCAAG+GCTGCACT  
GAATTATTTCTTAAGTATTCAAGATGTCCAATTTCAAAGAAATTGTTCTCGACCAAATTAATAATT  
TTAGTTTTCCAGTTAATTTGGCGTTCATCAGAGTATGTCAGGAACAACATTCAGACGGTGATAATCAC  
CTTCACTGTCTTCTC

+

F:FFFFFFFFFFFFFFFFFFFFFFFFFFFFFFFFFFFFFFFFFFFFFFFFFFFFFFFFFFFFFFFFFFFF  
FFFFFFFFFFFFFFFFFFFFFFFFFFFFFFFFFFFFFFFFFFFFFFFFFFFFFFFFFFFFFFFFFFFF:FFFFFFFFFFFF  
FFFFFFFFFFFFFFFF

@A00721:190:HGJW7DSXY:4:1372:13241:25676 2:N:0:TCTGCAAG+GCTGCACT  
GCGAAGAATTATTTCTTAAGTATTCAAGATGTCCAATTTCAAAGAAATTGTTCTCGACCAAATTAATA  
AATTTTAGTTTTCCAGTTAATTTGGCGTTCATCAGAGTATGTCAGGAACAACATTCAGACGGTGATA  
ATCACCTTCACTGTC

+

FFFFFFFFFFFFFFFFFFFFFFFFFFFFFFFFFFFFFFFFFFFFFFFFFFFFFFFFFFFFFFFFFFFF  
F:FFFFFFFFFFFFFFFFFFFFFFFFFFFF:FFFF:FFFFFF:FFFFFFFFFFFFFFFFFFFFFFFFFFFF  
FFFFFFFFFFFFFFFF

@A00721:190:HGJW7DSXY:4:2224:27760:5760 2:N:0:TCTGCAAG+GCTGCACT  
GCGAAGAATTATTTCTTAAC TTATTCAAGATGTCCAATTTCAAAGAAATTGTTCTCGACCAAATTA  
AAATTTTAGTTTTCCAGTTAATTTGGCGTTCATCAGAGTATGTCAGGAACAACATTAGACGGTGATA  
ATCACCTTCACTGTC

```
FFF,FF:FFFFFFFFFFFFFFFFFFFFFFFF:FFFFFFFF:FFFFFFFFFFFFFFFFFFFFFFFF:FFFFFF:F
FFFF:FFFFFFFFFFFFFFFFFFFFFFFF:~F:FFFFFFFFFFFFFFFF:FFFFF:FFFFFFFFFFFFFFFF:FF
FFFF:FFFFFFFF
```

+

```

FFFFFFFFFFFFFFFF:FFFFFF:FFFFFFFFFFFFFFFF:FFFFFFFFFFFFFFFF
FF::FFFFFFFF:FFFFFFFFFFFFFFFFFFFFFFFFFFFFFFFF:FFFFFFFF:
FFF:FFFFFFFF

```

+

```

FFFF::F::FF,:F,F:F,:FF,F::,:FF:FFFFFFFF,FFFF:,FF:,FFFFFF,FFF,,FFFF
,:FFFFFF,FF:F:F::,,FF:FF:FFF:F,FF,:F,,FF,F,,FFFF,,F,,F:FFF,FF,F,FFFFF
:F,F:FFF::F:F

```

+

[illegible]

+

[illegible]

+

```

FFFFFFFF:FFFFFFFF:FFFF:FFFF:FFFFFFFFFFFFFFFF,FFFFFFFFFFFFFFFF:FFF
FFF:FFFFFFFFFFFFFFFFFFFFFFFF:FFFFFFFFFFFFFFFF,FFFFFFFFFFFFFF,FF,FFF
FFFFFFFFFFFFFFFF

```

 $+$ 

```
FFFFFFFF:FFFF:FFFFFFFFFFFFFFFFFFFFFFFFFFFFFFFF:FFFFFFFF:FFF:FF:,F
```

F,FFF:F::FFFFFFFFFFFFFFFFFFFFFFFFFFFFFFFF, :FF,FFFFFFFFFFFFFFFFFFFF, F,FF:::FFF  
FFFFFFFFF:FFFFFF

@A00721:190:HGJW7DSXY:4:2536:8784:4022 2:N:0:TCTGCAAG+GCTGCACT  
AACTGGAAACTAAAATTTTAAATTTGGTCGAGAACAATTTCTTTGGAAATTGGACATCTTGAATAAG  
TTAAGAAATAATTCTTCGCGTTAATGCAGAAACGCGATGAAGAAGATGAAGGAGTCCCCATTACTGTT  
AAATCAGGGACATTC

+

FFFFFFFFFFFFFFFFFFFFFFFFFFFFFFFFFFFFFFFFFFFFFFFFFFFFFFFFFFFFFFFFFFFFFFFF  
FFFFFFFFFFFFFFFFFFFFFFFFFFFFFFFFFFFFFFFFFFFFFFFFFFFFFFFFFFFFFFFFFFFFFFFF  
FFFFFFFFFFFFFFFFF:

@A00721:190:HGJW7DSXY:4:1133:12066:21574 2:N:0:TCTGCAAG+GCTGCACT  
GGAAAACTAAAATTTTAAATTTGGTCGAGAACAATTTCTTTGGAAATTGGACATCTTGAATAAGTTAA  
GAAATAATTCTTCGCGTTAATGCAGAAACGCGATGAAGAAGATGAAGGAGTCCCCATTACTGTAAAT  
CAGGGACATTCGCAT

+

FFF:FFFFFFFFFFFFFFFFFFFFFFFFFFFFFFFFFFFFFFFF:FFFF:FF:FFFFFFFFFFFFFFFFFFFF  
FFFFFFFFFFFFFFFFFFFFFFFFFFFFFFFF:FFF:FFFFFFFFFFFFFFFF:FFFFFFFFFFFF:FFFFFFFFFFFF  
FFFFFFFFFFFFFFFFF

@A00721:190:HGJW7DSXY:4:1277:23122:32800 2:N:0:TCTGCAAG+GCTGCACT  
GGAAAACTAAAATTTTAAATTTGGTCGAGAACAATTTCTTTGGAAATTGGACATCTTGAATAAGTTAA  
GAAATAATTCTTCGCGTTAATGCAGAAACGCGATGAAGAAGATGAAGGAGTCCCCATTACTGTAAAT  
CAGGGACATTCGCAT

+

FFFFFFFFFFFFFFFFFFFFFFFFFFFFFFFFFFFFFFFFFFFF,FFFFFFFFFFFF:FFFFFFFFFFFF  
FFFFFFFFFFFFFFFFFFFFFFFFFFFFFFFFFFFFFFFF:FFFFFFFFFFFFFFFFFFFFFFFFFFFFFFFFFFFF  
FFFFFFFFFFFFFFFFF:

@A00721:190:HGJW7DSXY:4:1347:23421:11397 2:N:0:TCTGCAAG+GCTGCACT  
GGAAAACTAAAATTTTAAATTTGGTCGAGAACAATTTCTTTGGAAATTGGACATCTTGAATAAGTTAA  
GAAATAATTCTTCGCGTTAATGCAGAAACGCGATGAAGAAGATGAAGGAGTCCCCATTACTGTAAAT  
CAGGGACATTCGCAT

+

FFFFF,FFFFFFFFFFFFFFFFFFFFFFFFFFFFFFFFFFFFFFFFFFFFFFFFFFFFFFFFFFFFFFFF  
FFFFFFFFFFFFFFFFFFFFFFFFFFFFFFFFFFFFFFFFFFFFFFFFFFFFFFFFFFFFFFFFFFFFFFFF  
FFFFFFFFFFFFFFFFF

@A00721:190:HGJW7DSXY:4:1374:15908:28447 2:N:0:TCTGCAAG+GCTGCACT  
GGAAAACTAAAATTTTAAATTTGGTCGAGAACAATTTCTTTGGAAATTGGACATCTTGAATAAGTTAA  
GAAATAATTCTTCGCGTTAATGCAGAAACGCGATGAAGAAGATGAAGGAGTCCCCATTACTGTAAAT  
CAGGGACATTCGCAT

+

FFFFFFFFFFFFFFFFFFFFFFFFFFFFFFFFFFFFFFFF,FFFF,FFFFFFFFFFFFFFFFFFFFFFFF  
FFFFFFFFFFFFFFFFFFFFFFFFFFFFFFFFFFFFFFFF:FFFFFFFFFFFFFFFFFFFFFFFFFFFFFFFFFFFF  
FFFFFFFFFFFFFFFFF

@A00721:190:HGJW7DSXY:4:1435:19199:32643 2:N:0:TCTGCAAG+GCTGCACT  
GGAAAACTAAAATTTTAAATTTGGTCGAGAACAATTTCTTTGGAAATTGGACATCTTGAATAAGTTAA  
GAAATAATTCTTCGCGTTAATGCAGAAACGCGATGAAGAAGATGAAGGAGTCCCCATTACTGTAAAT  
CAGGGACATTCGCAT

+

FFFFFFFFFFFFFFFFFFFFFFFFFFFFFFFFFFFFFFFFFFFFFFFFFFFFFFFFFFFFFFFF:FFFFFFF  
FFFFFFFFFFFFFFFFFFFFFFFFFFFFFFFFFFFFFFFFFFFFFFFFFFFFFFFFFFFFFFFFFFFFFFFF:F  
FFFFFFFFFFFFFFFFF

@A00721:190:HGJW7DSXY:4:1539:19488:29074 2:N:0:TCTGCAAG+GCTGCACT  
GGAAAACTAAAATTTTAAATTTGGTCGAGAACAATTTCTTTGGAAATTGGACATCTTGAATAAGTTAA  
GAAATAATTCTTCGCGTTAATGCAGAAACGCGATGAAGAAGATGAAGGAGTCCCCATTACTGTAAAT  
CAGGGACATTCGCAT

[illegible]

```
FF:FFFFFFFFFFFFFFFFFFFFFFFFFFFFFFFFFFFFFFFFFFFFFFFFFFFFFFFFFFFFF  
F:FFFFFFFFFFFFFFFFFFFFFFFFFFFFFFFFFFFFFFFF:F:FFFFFFFFFFFFFFFFFFFFFFF  
FFFFFFFFFFFFFFFF
```

[illegible]

```
FFFFFFFFFFFFFFFFFFFFFFFFFFFFF:FFF:FFFFFFFFFFFFFFFFFFFFFFFFFFFFF
FFFFFFFFFFFFFFFFFFFFFFFFFFFFF
FFFFFF::FFFFFF
```

[illegible][illegible]

```

FFFFFFFFFFFFFFFFFFFFFFFFFFFFFFFFFFFFFFFFFFFFFFFFFFFFFFFFFFFFFFFF
FFFFFFFFFFFFFFFFFFFFFFFF,FFFFFFFFFFFFFFFFFFFFFFFFFFFFFFFF:FFFFFFFF
FFFFFFFFFFFFFFFF

```

@A00721:190:HGJW7DSXY:4:1554:14877:33238 2:N:0:TCTGCAAG+GCTGCACT  
ATAATGCTTAATATGCGAATGTCCCTGATTTAACAGTAATGGGGACTCCTTCACCTTCTTCATCGCGT





@A00721:190:HGJW7DSXY:4:1535:19470:26694 2:N:0:TCTGCAAG+GCTGCACT  
CCCCAATATAATGCTTAATATGCGAATGTCCCTGATTTAACAGTAATGGGGACTCCTTCATCTTCTTC  
ATCGCGTTTCTGCATCAACGCGAAGAATTATTTCTTAACTTATTCAAGATGTCCAATTTCCAAAGAAA  
TTGTTCTCGACCAA

[illegible]

@A00721:190:HGJW7DSXY:4:2650:28031:10050 2:N:0:TCTGCAAG+GCTGCACT  
CCCCAATATAATGCTTAATATGCGAATGTCCCTGATTTAACAGTAATGGGGACTCCTTCATCTTCTTC  
ATCGCGTTTCTGCATTAACGCGAAGAATTATTTCTTAAGTATTCAAGATGTCCAATTTCCAAAGAAA  
TTGTTCTCGACCAA

```

FFFFFFFFFFFFFFFFFFFFFFFFFFFFFFFFFFFFFFFFFFFFFFFFFFFFFFFFFFFFFFFFFFFFFFFF
FFFFFFFFFFFFFFFFFFFFFFFFFFFFFFFFFFFFFFFFFFFFFFFFFFFFFFFFFFFFFFFFFFFFFFFF:
FFFFFFFFFFFFFFFFFFFFFFFFFFFFFFFF
FFFFFFFF,FFFFFF

```

@A00721:190:HGJW7DSXY:4:1136:24505:32659 2:N:0:TCTGCAAG+GCTGCACT  
TTTCTTTGGAAATTGGACATCTTGAATAAGTTAAGAAATAATTCTTCGCGTTAATGCAGAAACGCGAT  
GAAGAAGATGAAGGAGTCCCCATTACTGTAAATCAGGGACATTTCGCATATTAAGCATTATATTGGGG  
ACTGGGGACCTATAT

```

FFFFFFFFFFFFFFFFFFFFFFFFFFFFFFFF:FFFFFFFFFFFFFFFFFFFFFFFF:FF,FFF:FFFFFF:FF
FFFFFFFFFFFFFFFFFFFFFFFF:FFFFFFF,:FFFFFFFF:FF:FFFFFFFF:FFF:FFF,FFF:FFF::,F
:,FFF:FFFFFFFF

```

@A00721:190:HGJW7DSXY:4:1213:15076:32612 2:N:0:TCTGCAAG+GCTGCACT  
TTTCTTTGGAAATTGGACATCTTGAATAAGTTAAGAAATAATTCTTCGCGTTAATGCAGAAACGCGAT  
GAAGAAGATGAAGGAGTCCCCATTACTGTAAATCAGGGACATTTCGCATATTAAGCATTATATTGGGG  
ACTGGGGACCTATAT

```
FF:FF:FFFF:FFFFFFFFFFFFFFFFFFFFFFFFFFFFFFFF:FFFFFFFFFFFF:FFFFFF:FFFF:
FFFF:FFFFFFFFFFFFFFFF:FFFFFFFFFFFFFFFF:FFFFFFFF:F:FFFFFF,FFFF,FFFFFFFF
F:FFFFFFFF,FFF
```

@A00721:190:HGJW7DSXY:4:1264:29234:26475 2:N:0:TCTGCAAG+GCTGCACT  
TTTCTTTGGAAATTGGACATCTTGAATAAGTTAAGAAATAATTCTTCGCGTTAATGCAGAAACGCGAT  
GAAGAAGATGAAGGAGTCCCCATTACTGTAAATCAGGGACATTTCGCATATTAAGCATTATATTGGGG  
ACTGGGGACCTATAT

```
FFFFFFFFFFFFFFFFFFFFFFFFFFFFFFFFFFFFFFFFFFFFFFFFFFFFFFFFFFFFFFFF
FFFFFFFFFFFF:FFFFFFFFFFFFFFFFFFFFFFFFFFFFFFF,FFFFFFFFFFFF:FFFFFFFFFFFFFFFF
FFFFFFFFFFFFFFFF
```

@A00721:190:HGJW7DSXY:4:1342:13557:26944 2:N:0:TCTGCAAG+GCTGCACT  
TTTCTTTGGAAATTGGACATCTTGAATAAGTTAAGAAATAATTCTTCGCGTTAATGCAGAAACGCGAT  
GAAGAAGATGAAGGAGTCCCCATTACTGTAAATCAGGGACATTTCGCATATTAAGCATTATATTGGGG  
ACTGGGGACCTATAT

[illegible]

@A00721:190:HGJW7DSXY:4:1545:10601:21543 2:N:0:TCTGCAAG+GCTGCACT  
TTTCTTTGGAAATTGGACATCTTGAATAAGTTAAGAAATAATTCTTCGCGTTAATGCAGAAACGCGAT  
GAAGAAGATGAAGGAGTCCCCATTACTGTTAAATCAGGGACATTTCGCATATTAAGCATTATATTGGGG  
ACTGGGGACCTATAT

[illegible]

[illegible]

+

@A00721:190:HGJW7DSXY:4:1510:26395:35117 2:N:0:TCTGCAAG+GCTGCACT  
GGAAATTGGACATCTTGAATAAGTTAAGAAATAATTCTTCGCGTTAATGCAGAAACGCGATGAAGAAG  
ATGAAGGAGTCCCCATTACTGTTAAATCAGGGACATTGCGATATTAAGCATTATATTGGGGACTGGGG  
ACCTATATATATGTA

[illegible]

+

@A00721:190:HGJW7DSXY:4:2660:9715:10050 2:N:0:TCTGCAAG+GCTGCACT  
GGAAATTGGACATCTTGAATAAGTTAAGAAATAATTCTTCGCGTTAATGCAGAAACGCGATGAAGAAG  
ATGAAGGAGTCCCCATTACTGTAAATCAGGGACATTTCGCATATTAAGCATTATATTGGGGACTGGGG  
ACCTATATATATGTA

[illegible]

+

@A00721:190:HGJW7DSXY:4:1607:25265:16438 2:N:0:TCTGCAAG+GCTGCACT  
ATTCCTCCGGATTACTCTATACATATATATAGGTCCCCAGTCCCCAATATAATGCTTAATATGCGAAT  
GTCCCTGATTAAACAGTAATGGGGACTCCTTCATCTTCTTCATCGGTTTCTGCATTAACGCGAAGAA  
TTATTTCTTAACTTA

```
FFF::FFFFFFFFFFFF:FFFFFFFFF:FFFFFF:FFFFFFFFF:FFFFFFFFF,F:FFFFFFFF:F:FFF
FFF::FFFFFFFFFFFFFFFFFFFF:FFF::F,F:FFF:FFFFFFFFFFFF:F,:F::FFF:FFFFF:FFF,FF
FFF:FF.FFFFFF:FF
```

+  
F:FFFFFFFFFFFFFFFFFFFFFFFFFFFFFFFFFFFFFFFFFFFFFFFFFFFFFFFFFFFFFFFF  
FFFFFFFF:FFFFFFFFFFFFFFFFFFFFFFFFFFFFFFFFFFFFFFFFFFFFFFFF:FFFFFFF,FF:FFFFFFF  
FFFFFF:FFFFFFF  
@A00721:190:HGJW7DSXY:4:2549:18295:28635 2:N:0:TCTGCAAG+GCTGCACT  
ATTCTCCGGATTACTCTATACATATATATAGGTCCCCAGTCCCCAATATAATGCTTAATATGCGAAT  
GTCCCTGATTAAACAGTAATGGGGACTCCTTCATCTTCTTCATCGCGTTTCTGCATTAACGCGAAGAA  
TTATTTCTTAACTTA

+  
FFFFFFFFFFFF:FFFFFFFFFFFFFFFFFFFFFFFFFFFFFFFFFFFFFFFFFFFFFFFFFFFFFFF  
FFFFFFFFFFFFFFFFFFFFFFFFFFFFFFFFFFFFFFFF:F:FFFFFFFFFFFFFFFF:FFFFFFFFFFFFFFFF  
FFFFFFFFFFFF:FFFF  
@A00721:190:HGJW7DSXY:4:1129:23610:36714 2:N:0:TCTGCAAG+GCTGCACT  
GATTCCTCCGGATTACTCTATACATATATATAGGTCCCCAGTCCCCAATATAATGCTTAATATGCGAA  
TGTCCCTGATTAAACAGTAATGGGGACTCCTTCATCTTCTTCATCGCGTTTCTGCATTAACGCGAAGA  
ATTATTTCTTAACTT

+  
FFFFFFFFFFFFFFFFFFFFFFFFFFFFFFFFFFFFFFFFFFFFFFFFFFFFFFFFFFFFFFFFFFFFF  
FFFFFFFFFFFFFFFFFFFFFFFFFFFFFFFFFFFFFFFFFFFFFFFFFFFFFFFFFFFFFFFFFFFF:FFFFF  
FFFFFFFFFFFFF  
@A00721:190:HGJW7DSXY:4:1202:25880:25739 2:N:0:TCTGCAAG+GCTGCACT  
GATTCCTCCGGATTACTCTATACATATATATAGGTCCCCAGTCCCCAATATAATGCTTAATATGCGAA  
TGTCCCTGATTAAACAGTAATGGGGACTCCTTCATCTTCTTCATCGCATTTCTGCATTAACGCGAAGA  
ATTATTTCTTAACTT

+  
FFFFFFFFFFFFFFFFFFFFFFFFFFFFFFFFFFFFFFFFFFFFFFFFFFFFFFFFFFFFFFFFFFFFF  
FFFFFFFFF:FFFFFFFFF,:FFFFFFFFFFFFFFFFFFFFFFFFFFFFFFFFFFFFFFFFFFFFF:FFFFFFF  
F:FFFFFFFFFFFFF  
@A00721:190:HGJW7DSXY:4:2527:21703:13777 2:N:0:TCTGCAAG+GCTGCACT  
ATTCTCCGGATTACTCTATACATATATATAGGTCCCCAGTCCCCAATATAATGCTTAATATGCGAAT  
GTCCCTGATTGAACAGTAATGGGGACTCCTTCATCTTCTTCATCGCGTTTCTGCATTAACGCGAAGAA  
TTATTTCTTAACTT

+  
F:FF,,,:FFF:FF,F,F,FFF::F:,FFF:F,:::FFFFFF,FFFF,FF:F:F:FF:FF:FF::F  
:FF,:FFF,,F,:F,,F,:::FFF:,FFFFFF::F,:FFF,FFF,,F,:FFFFFF,,FFF,F:F  
F,F::F:,FF:::  
@A00721:190:HGJW7DSXY:4:2606:11333:23437 2:N:0:TCTGCAAG+GCTGCACT  
GATTCCTCCGGATTACTCTATACATATATATAGGTCCCCAGTCCCCAATATAATGCTTAATATGCGAA  
TGTCCCTGATTAAACAGTAATGGGGACTCCTTCATCTTCTTCATCGCATTTCTGCATTAACGCGAAGA  
ATTATTTCTTAACTT

+  
FFFFFFFFFFFF,FFFFFFFFF:FF:FFFF:FF:FFFFFFFFFFFFFFFFFFFFFFFFFFFFF:FFF,F:FF  
FFFF:FFFFF:FFFFFFFFFFFFFFFFFFFFFFFFFFFF,FF,,FFFF:FFFF:,FFFF::F:FF:FF  
FFFFFFFFFFFFF:  
@A00721:190:HGJW7DSXY:4:1212:28212:23140 2:N:0:TCTGCAAG+GCTGCACT  
AAATAATTCTTCGCTTAATGCAGAAACGCGATGAAGAAGATGAAGGAGTCCCCATTACTGTAAATC  
AGGGACATTTCGCATATTAAGCATTATATTGGGGACTGGGGACCTATATATATGTATAGAGTAATCCGG  
AGGAATCTATCCCCA

+  
FFFFFFFFFFFFF:FFFFFFFFFFFFFFFFFFFF:,FF::FFFF,FFFFFFFFF:FFF:FFF,FFFFFFFF  
FFFFFFFFFFFFFFFFFFFFFFFFFFFF:FFFFFF:FFFFFFFFF:,F,FFFFFFFF:FFFFFFFFFFFFF  
FFFF,FFFFFFFFF  
@A00721:190:HGJW7DSXY:4:1240:8983:33301 2:N:0:TCTGCAAG+GCTGCACT  
AAATAATTCTTCGCTTAATGCAGAAACGCGATGAAGAAGATGAAGGAGTCCCCATTACTGTAAATC

AGGGACATTCGCATATTAAGCATTATATTGGGGACTGGGGACCTATATATATGTATAGAGTAATCCGG  
AGGAATCTATCCCCA

```
FFFFFFFFFFFFFFFFFFFFFFFFFFFFFFFFFFFFFFFFFFFFFFFFFFFFFFFFFFFFFFFFFFFFF
FFFFFFFFFFFFFFFFFFFFFF;FFFFFFFFFFFFFFFFFFFFFFFFFFFFFFFFFFFFFFFF;FFFFFFFFFFFFFFFFFFFFFFFFFFFFFFFF
FFFFFFFFFFFFFFFFFFFF
```

 $+$ 

@A00721:190:HGJW7DSXY:4:1415:14543:33160 2:N:0:TCTGCAAG+GCTGCACT  
AAATAATTCTTCGCGTTAATGCAGAAACGCGATGAAGAAGATGAAGGAGTCCCCATTACTGTTAAATC  
AGGGACATTCGCATATTAAGCATTATATTGGGGACTGGGGACCTATATATATGTATAGAGTAATCCGG  
AGGAATCTATCCCCA

[illegible]

+

@A00721:190:HGJW7DSXY:4:2443:14009:31735 2:N:0:TCTGCAAG+GCTGCACT  
AAATAATTCTTCGCGTTAATGCAGAAACGCGATGAAGAAGATGAAGGAGTCCCCATTACTGTTAAATC  
AGGGACATTCGCATATTAAGCATTATATTGGGGACTGGGGACCTATATATATGTATAGAGTAATCCGG  
AGGAATCTATCCCCA

[illegible]

+

@A00721:190:HGJW7DSXY:4:2671:9905:21183 2:N:0:TCTGCAAG+GCTGCACT  
AAATAATTCTTCGCGTTAATGCAGAAACGCGATGAAGAAGATGAAGGAGTCCCCATTACTGTTAAATC  
AGGGACATTCGCATATTAAGCATTATATTGGGGACTGGGGACCTATATATATGTATAGAGTAATCCGG  
AGGAATCTATCCCCA

[illegible]



FFF::FFFFFFF:F:FFFF:FFFFFF:FFFFFFFFFFFFFFFFFFFFFFFFFFFFFFFFFFFF  
FFFFFF:FFFFFFF

@A00721:190:HGJW7DSXY:4:2549:2094:11443 2:N:0:TCTGCAAG+GCTGCACT  
CAATATAATGCTTAATATGCGGATGTCCCTGATTTAACAGTAATGGGGACTCCTTCATCTTCTTCATC  
GCGTTTCTCCATTAACGCTAACATCATATTCAGAAATTTACTTTTCATCTCTTCCCGATGAAATCAAAC  
ATATCATCAAGGATA

+

FFFFFFFFFFFFFFFFFFFFFFFFFFFFFFFFFFFFFFFFFFFFFFFFFFFFFFFFFFFFFFFFFFFF  
FFFFFFFFFFFFFFFFFFFFFFFFFFFFFFFFFFFFFFFFFFFFFFFFFFFFFFFFFFFFFFFFFFFF  
FFFFFFFFFFFFFFFFFFFF

@A00721:190:HGJW7DSXY:4:1153:20509:6668 2:N:0:TCTGCAAG+GCTGCACT  
CCAATATAATGCTTAATATGCGGATGTCCCTGATTTAACAGTAATGGGGACTCCTTCATCTTCTTCAT  
CGCGTTTCTCCATTAACGCTAACATCATATTCAGAAATTTACTTTTCATCTCTTCCCGATGAAATCAAA  
CATATCATCAAGGAT

+

FFFFFFFFFFFFFFFFFFFFFFFFFFFFFFFFFFFFFFFFFFFFFFFFFFFFFFFFFFFFFFFFFFFF  
FFFFFFFFFFFFFFFFFFFFFFFFFFFFFFFFFFFFFFFFFFFFFFFFFFFFFFFFFFFFFFFFFFFF,  
FFFFFFFFFFFFFFFFFFFF

@A00721:190:HGJW7DSXY:4:1266:23032:30608 2:N:0:TCTGCAAG+GCTGCACT  
CCAATATAATGCTTAATATGCGGATGTCCCTGATTTAACAGTAATGGGGACTCCTTCATCTTCTTCAT  
CGCGTTTCTCCATTAACGCTAACATCATATTCAGAAATTTACTTTTCATCTCTTCCCGATGAAATCAAA  
CATATCATCAAGGAT

+

FFFFFFFFFFFFFFFFFFFFFFFFFFFFFFFFFFFFFFFFFFFFFFFFFFFFFFFFFFFFFFFFFFFF  
FFFFFFFFFFFFFFFFFFFFFFFFFFFFFFFFFFFFFFFFFFFFFFFFFFFFFFFFFFFFFFFFFFFF:  
FFFFFFFFFFFFFFFFFFFF

@A00721:190:HGJW7DSXY:4:1409:26811:9095 2:N:0:TCTGCAAG+GCTGCACT  
CCAATATAATGCTTAATATGCGGATGTCCCTGATTTAACAGTAATGGGGACTCCTTCATCTTCTTCAT  
CGCGTTTCTCCATTAACGCTAACATCATATTCAGAAATTTACTTTTCATCTCTTCCCGATGAAATCAAA  
CATATCATCAAGGAT

+

FFFFFFFFFFFFFFFFFFFFFFFFFFFFFFFFFFFFFFFFFFFFFFFFFFFFFFFFFFFFFFFFFFFF  
FFFF:FFFFFFFF:FFFF:FFFFFFFFFFFFFFFFFFFFFFFFFFFFFFFFFFFF  
FFFFFFFFFFFFFFFFFFFF

@A00721:190:HGJW7DSXY:4:1418:25970:21167 2:N:0:TCTGCAAG+GCTGCACT  
CCAATATAATGCTTAATATGCGGATGTCCCTGATTTAACAGTAATGGGGACTCCTTCATCTTCTTCAT  
CGCGTTTCTCCATTAACGCTAACATCATATTCAGAAATTTACTTTTCATCTCTTCCCGATGAAATCAAA  
CATATCATCAAGGAT

+

FFFFFFFFFFFFFFFFFFFFFFFFFFFFFFFFFFFFFFFFFFFFFFFFFFFFFFFFFFFFFFFFFFFF  
FFFFFFFFFFFFFFFFFFFF:FFFF,FFFFFFFF,FFFF:FFFFFFFFFFFFFFFFFFFFFFFFFFFF  
FFF,FFFFFFFFFFFF

@A00721:190:HGJW7DSXY:4:1445:17246:34585 2:N:0:TCTGCAAG+GCTGCACT  
CCAATATAATGCTTAATATGCGGATGTCCCTGATTTAACAGTAATGGGGACTCCTTCATCTTCTTCAT  
CGCGTTTCTCCATTAACGCTAACATCATATTCAGAAATTTACTTTTCATCTCTTCCCGATGAAATCAAA  
CATATCATCAAGGAT

+

FFFFFFF:FFFFFFFFFFFFFFFFFFFFFFFFFFFFFFFFFFFFFFFFFFFFFFFFFFFFFFFFFFFF  
FFFFFFFFFFFFFFFFFFFFFFFFFFFFFFFFFFFFFFFFFFFFFFFFFFFFFFFFFFFFFFFFFFFF:  
FFFFFFFFFFFF,FFFF:

@A00721:190:HGJW7DSXY:4:2310:9525:27946 2:N:0:TCTGCAAG+GCTGCACT  
CCAATATAATGCTTAATATGCGGATGTCCCTGATTTAACAGTAATGGGGACTCCTTCATCTTCTTCAT  
CGCGTTTCTCCATTAACGCTAACATCATATTCAGAAATTTACTTTTCATCTCTTCCCGATGAAATCAAA  
CATATCATCAAGGAT

```

FFFFFFFFFFFFFFFFFFFFFFFFFFFFFFFFFFFFFFFF:FFFFFFFFFFFFFFFFFFFFFFFFFFFFFFFF
FFFFFFFFFFFFFFFFFFFFFFFFFFFFFFFF:FFFF:FF:FFFFFFFFFFFFFFFF:FFFFFFFFFFFFFFFF
FFFF:FFFFFFFF

```

[illegible][illegible]

```

FFFFFFFF:FFFFFFFFFFFFFFFFFFFFFFFFFFFFFFFFFFFFFFFFFFFFFFFFFFFFFFFF
FFFFFFFFFFFFFFFF:FFFFFFFFFFFFFF:FFFFFFFFFFFFFFFF:FFF,FFFFFF:FF:FFFFF
FFFF:FFFFFFFF

```

```

FFFFFFFF,F:FFFF,F:F,FFFFFFFF:F:FFFFFFFF:FFFF::FFF,F:F,F:FFFF,F::FF
FFFF:FF,FFFF,FF:, ,FFFF:FF,F:FFF,F,FFF,FFF,: ,F,FF,FFFF::F:FF:FFFF:FFF
FFFF:F:FFF,FFF

```

```
FFF:FFFFFFFFFFFFFFFFFFFFFFFFFFFFFFFF,FFFFFFFFFFFFFF,FFFFFFFFFFFF
FFFFFFFF:FFFFFFFFFFFFFFFFFFFFFFFF:FFFFFFFFFFFFFFFF:FFFFFFFFFFFF::F
FFF:FFFFFFFFFFFF
```

[illegible]

@A00721:190:HGJW7DSXY:4:1326:30165:25958 2:N:0:TCTGCAAG+GCTGCACT  
TGAAAGTAAATTTCTGAATATGATGTTAGCGTTAATGGAGAAACGCGATGAAGAAGATGAAGGAGTCC





@A00721:190:HGJW7DSXY:4:2365:24017:26115 2:N:0:TCTGCAAG+GCTGCACT  
TGAAAGTAAATTTCTGAATATGATGTTAGCGTTAATGGAGAAACGCGATGAAGAAGATGAAGGAGTCC  
CCATTACTGTTAAATCAGGGACATCCGCATATTAAGCATTATATTGGGGACTGGGGACCTATATATAT  
GTATAGAGTAATCCG

+

FFF:FFFFFFFFFFFFFFFFFFFFFFFFFFFFFFFFFFFFFFFFFFFFFFFFFFFFFFFFFFFFFFFFFFFF  
FFFFFFFFFFFFFFFFFFFFFFFFFFFFFFFFFFFFFFFFFFFFFFFFFFFFFFFFFFFFFFFFFFFFF,FFFFFFFFFFFF,FFFFFFFFFFFFFFFFFFFFFFFFFFFF  
FFFFFFFFFFFFFFFFFFFF

@A00721:190:HGJW7DSXY:4:2528:16098:19351 2:N:0:TCTGCAAG+GCTGCACT  
TGAAAGTAAATTTCTGAATATGATGTTAGCGTTAATGGAGAAACGCGATGAAGAAGATGAAGGAGTCC  
CCATTACTGTTAAATCAGGGACATCCGCATATTAAGCATTATATTGGGGACTGGGGACCTATATATAT  
GTATAGAGTAATCCG

+

FFFFFFFFFFFFFFFFFFFFFFFFFFFFFFFFFFFFFFFFFFFFFFFFFFFFFFFFFFFFFFFFFFFFFFFF  
FFFFFFFFFFFFFFFFFFFFFFFFFFFFFFFFFFFFFFFFFFFFFFFFFFFFFFFFFFFFFFFFFFFFFFFF  
:FFFFFFFFFFFFFFFFFFFF

@A00721:190:HGJW7DSXY:4:2565:21838:17237 2:N:0:TCTGCAAG+GCTGCACT  
TGAAAGTAAATTTCTGAATATGATGTTAGCGTTAATGGAGAAACGCGATGAAGAAGATGAAGGAGTCC  
CCATTACTGTTAAATCAGGGACATCCGCATATTAAGCATTATATTGGGGACTGGGGACCTATATATAT  
GTATAGAGTAATCCG

+

FFFFFFFFFFFFFFFFFFFFFFFFFFFFFFFFFFFFFFFFFFFFFFFFFFFFFFFFFFFFFFFFFFFFFFFF  
FFFFFFFFFFFFFFFFFFFFFFFFFFFFFFFFFFFFFFFFFFFFFFFFFFFFFFFFFFFFFFFFFFFFFFFF  
:FFFFFFFFFFFFFFFFFFFF

@A00721:190:HGJW7DSXY:4:2575:21495:25160 2:N:0:TCTGCAAG+GCTGCACT  
TGAAAGTAAATTTCTGAATATGATGTTAGCGTTAATGGAGAAACGCGATGAAGAAGATGAAGGAGTCC  
CCATTACTGTTAAATCAGGGACATCCGCATATTAAGCATTATATTGGGGACTGGGGACCTATATATAT  
GTATAGAGTAATCCG

+

FF:FFFFFFFFFFFFFFFFFFFFFFFFFFFFFFFFFFFFFFFFFFFFFFFFFFFFFFFFFFFFFFFFFFFF  
FFFFFFFFFFFFFFFFFFFFFFFFFFFFFFFFFFFFFFFFFFFFFFFFFFFFFFFFFFFFFFFFFFFFFFFF  
FFFFFFFFFFFF:FFFFFF:FFFF:FFFF:FFFFFFFFFFFF

@A00721:190:HGJW7DSXY:4:2674:21169:16799 2:N:0:TCTGCAAG+GCTGCACT  
TGAAAGTAAATTTCTGAATATGATGTTAGCGTTAATGGAGAAACGCGATGAAGAAGATGAAGGAGTCC  
CCATTACTGTTAAATCAGGGACATCCGCATATTAAGCATTATATTGGGGACTGGGGACCTATATATAT  
GTATAGAGTAATCCG

+

FFFFFFFFFFFFFFFFFFFFFFFFFFFFFFFFFFFFFFFFFFFFFFFFFFFFFFFFFFFFFFFFFFFFFFFF  
FFFFFFFFFFFFFFFF:FFFFFFFFFFFFFFFFFFFFFFFFFFFFFFFFFFFFFFFFFFFFFFFFFFFFF:FFFF:FFFFFFFFFFFFFFFFFFFF:FFFFFFF  
FFFFFFFFFFFFFFFFFFFF

@A00721:190:HGJW7DSXY:4:1341:2266:1626 2:N:0:TCTGCAAG+GCTGCACT  
AAATTTCTGAATATGATGTTAGCGTTAATGGAGAAACGCGATGAAGAAGATGAAGGAGTCCCCATTAC  
TGTTAAATCAGGGACATCCGCATATTAAGCATTATATTGGGGACTGGGGACCTATATATATGTATAGA  
GTAATCCGGAGATCG

+

FFFFFFFFFFFFFFFFFFFFFFFFFFFFFFFFFFFFFFFFFFFFFFFFFFFFFFFFFFFFFFFFFFFFFFFF  
FFFFFFFFFFFFFFFFFFFFFFFFFFFFFFFFFFFFFFFFFFFFFFFFFFFFFFFFFFFFFFFFFFFFFFFF  
FF:FFFFFFFFFFFF:F

@A00721:190:HGJW7DSXY:4:2417:14163:36542 2:N:0:TCTGCAAG+GCTGCACT  
AAATTTCTGAATATGATGTTAGCGTTAATGGAGAAACGCGATGAAGAAGATGAAGGAGTCCCCATTAC  
TGTTAAATCAGGGACATCCGCATATTAAGCATTATATTGGGGACTGGGGACCTATATATATGTACAGA  
GTAATCCGGAGATCG

+

FFFFF:FFFFFFFFFFFFFFFFFFFFFFFFFFFFFFFFFFFFFFFFFFFFFFFFFFFFFFFFFFFFFFFF  
::FFFFFFFFFFFFFFFFFFFF:FFFFFF:FF:FFF

:FFFFFFFFFFFF,FFFFFF:FFFF:FFFFFF:FF,FF:F:FF:FFFFFFFFFFFFFFFF,FFFF:FFFF  
FFFFFFFFFFFFFFFF

@A00721:190:HGJW7DSXY:4:2443:9381:3834 2:N:0:TCTGCAAG+GCTGCACT  
AAATTTCTGAATATGATGTTAGCGTTAATGGAGAAACGCGATGAAGAAGATGAAGGAGTCCCCATTAC  
TGTTAAATCAGGGACATCCGCATATTAAGCATTATATTGGGGACTGGGGACCTATATATATGTATAGA  
GTAATCCGGAGATCG

+

FFFFFFFFFFFFFFFFFFFFFFFFFFFFFFFFFFFFFFFFFFFFFFFFFFFFFFFFFFFFFFFFFFFFFFFF  
FFFFFFFFFFFFFFFFFFFFFFFFFFFFFFFFFFFFFFFFFFFFFFFFFFFFFFFFFFFFFFFFFFFFFFFF  
FFFFFFFFFFFFFFFF

@A00721:190:HGJW7DSXY:4:2445:11505:5415 2:N:0:TCTGCAAG+GCTGCACT  
AAATTTCTGAATATGATGTTAGCGTTAATGGAGAAACGCGATGAAGAAGATGAAGGAGTCCCCATTAC  
TGTTAAATCAGGGACATCCGCATATTAAGCATTATATTGGGGACTGGGGACCTATATATATGTATAGA  
GTAATCCGGAGATCG

+

F:FFFFFFFFFFFF:FFFFFFFFFFFFFFFFFFFFFFFFFFFFFFFFFFFFFFFFFFFFFFFFFFFFFFFF  
FFFFFFFFFFFFFFFFFFFFFFFFFFFFFFFFFFFFFFFFFFFFFFFFFFFFFFFFFFFFFFFFFFFFFFFF  
FFFFFFFFFFFFFFFF,FFFFFFFFFFFF:FFFFFF,FFFFFFFFFFFF:F  
FFFFF:FFFFFFFF

@A00721:190:HGJW7DSXY:4:2466:11098:25003 2:N:0:TCTGCAAG+GCTGCACT  
AAATTTCTGAATATGATGTTAGCGTTAATGGAGAAACGCGATGAAGAAGATGAAGGAGTCCCCATTAC  
TGTTAAATCAGGGACATCCGCATATTAAGCATTATATTGGGGACTGGGGACCTATATATATGTATAGA  
GTAATCCGGAGATCG

+

FFFFFFFFFFFFFFFFFFFFFFFFFFFFFFFFFFFFFFFFFFFFFFFFFFFFFFFFFFFFFFFFFFFFFFFF  
FFFFFFFFFFFFFFFFFFFFFFFFFFFFFFFFFFFFFFFFFFFFFFFFFFFFFFFFFFFFFFFFFFFFFFFF  
FFFFFFFFFFFFFFFF

@A00721:190:HGJW7DSXY:4:2368:5358:34006 2:N:0:TCTGCAAG+GCTGCACT  
TGGGGATAGATTCTCCGGATTACTCTATACATATATATAGGTCCCCAGTCCCCAATATAATGCTTAA  
TATGCGGATGTCCCTGATTAAACAGTAATGGGGACTCCTTCATCTTCTTCATCGCGTTTCTCCATTAA  
CGCTAACATCAGAGA

+

FFFFFFFFFFFFFFFFFFFFFFFFFFFFFFFFFFFFFFFFFFFFFFFFFFFFFFFFFFFFFFFFFFFFFFFF:  
FFFFFFFFFFFFFFFFFFFFFFFFFFFFFFFFFFFFFFFFFFFFFFFFFFFFFFFFFFFFFFFFFFFFFFFF:  
FFFFFFFFFFFFFFFF

@A00721:190:HGJW7DSXY:4:2370:17770:30358 2:N:0:TCTGCAAG+GCTGCACT  
TGGGGATAGATTCTCCGGATTACTCTATACATATATATAGGTCCCCAGTCCCCAATATAATGCTTAA  
TATGCGGATGTCCCTGATTAAACAGTAATGGGGACTCCTTCATCTTCTTCATCGCGTTTCTCCATTAA  
CGCTAACATCAGAGA

+

FFFFFFFFFFFFFFFFFFFFFFFFFFFFFFFFFFFFFFFFFFFFFFFFFFFFFFFFFFFFFFFFFFFFFFFF  
FFFFFFFFFFFFFFFFFFFFFFFFFFFFFFFFFFFFFFFFFFFFFFFFFFFFFFFFFFFFFFFFFFFFFFFF  
FFFFFFFFFFFFFFFF

@A00721:190:HGJW7DSXY:4:2475:24804:8844 2:N:0:TCTGCAAG+GCTGCACT  
TGGGGATAGATTCTCCGGATTACTCTATACATATATATAGGTCCCCAGTCCCCAATATAATGCTTAA  
TATGCGGATGTCCCTGATTAAACAGTAATGGGGACTCCTTCATCTTCTTCATCGCGTTTCTCCATTAA  
CGCTAACATCAGAGA

+

FFFFFFFFFFFFFFFFFFFFFFFFFFFFFFFFFFFFFFFFFFFFFFFFFFFFFFFFFFFFFFFFFFFFFFFF  
FFFFFFFFFFFFFFFFFFFFFFFFFFFFFFFFFFFFFFFFFFFFFFFFFFFFFFFFFFFFFFFFFFFFFFFF:  
FFFFFFFFFFFFFFFF

@A00721:190:HGJW7DSXY:4:2535:9715:22608 2:N:0:TCTGCAAG+GCTGCACT  
TGGGGATAGATTCTCCGGATTACTCTATACATATATATAGGTCCCCAGTCCCCAATATAATGCTTAA  
TATGCGGATGTCCCTGATTAAACAGTAATGGGGACTCCTTCATCTTCTTCATCGCGTTTCTCCATTAA  
CGCTAACATCAGAGA

+  
FFFFFFFFFFFFFFFFFFFFFFFFFFFFFFFFFFFFFFFFFFFFFFFFFFFFFFFFFFFFFFFFFFFFFFFF  
FFFFFFFFFFFFFFFFFFFFFFFFFFFFFFFFFFFFFFFFFFFFFFFFFFFFFFFFFFFFFFFFFFFFFFFF:FFFFFFFFFFFFFFF  
F:FFFFFFFFFFFFFFF  
@A00721:190:HGJW7DSXY:4:2613:1461:23469 2:N:0:TCTGCAAG+GCTGCACT  
TGGGGATAGATTCTCCGATTACTCTATACATATATATAGGTCCCCAGTCCCCAATATAATGCTTAA  
TATGCGGATGTCCCTGATTAAACAGTAATGGGGACTCCTTCATCTTCTTCATCGCGTTTCTCCATTAA  
CGCTAACATCAGAGA

+  
FFFFFFFFFFFFFFFFFFFFFFFFFFFFFFFFFFFFFFFFFFFFFFFFFFFFFFFFFFFFFFFFFFFFFFFF  
FFFFFFFFFFFFFFFFFFFFFFFFFFFFFFFFFFFFFFFFFFFFFFFFFFFFFFFFFFFFFFFFFFFFFFFF  
FFFFFFFFFFFFFFFFFFFFFFF  
@A00721:190:HGJW7DSXY:4:2654:5891:16172 2:N:0:TCTGCAAG+GCTGCACT  
TGGGGATAGATTCTCCGATTACTCTATACATATATATAGGTCCCCAGTCCCCAATATAATGCTTAA  
TATGCGGATGTCCCTGATTAAACAGTAATGGGGACTCCTTCATCTTCTTCATCGCGTTTCTCCATTAA  
CGCTAACATCAGAGA

+  
FFFFFFFFFFFFFFFFFFFFFFFFFFFFFFFFFFFF,FFFFFFFFFFFFFFFFFFFFFF:FFF:FFFFFFFFFFFFFFFF  
FFFFFFFFFFFFFF:F:FFFFFFFFFFFFFFFFFFFFFFFFFFFFFF:FFFFFFFFFFFFFF:F:FFF:FFFFF,FFFFF  
:FFFFFFFF:FFFFFFF  
@A00721:190:HGJW7DSXY:4:1214:22996:14606 2:N:0:TCTGCAAG+GCTGCACT  
CGCGATGAAGAAGATGAAGGAGTCCCCATTACTGTAAATCAGGGACATCCGCATATTAAGCATTATA  
TTGGGGACTGGGGACCTATATATATGTATAGAGTAATCCGGAGGAATCTATCCCCAATTGGAATAGTA  
ATGATTTCAAATTC

+  
FFFFFFFFFFFFFFF,:FFFFFFFFFFFFFFFFFFFFFFFFFFFFFFFFFFFFFFFFFFFFFFFFFFFFFFFF  
FFFFFFFFFFFFFFFFFFFFFFFFFFFFFFFFFFFF,FFFFFFFFFFFFFFFFFFFFFFFFFFFFFFFFFFFFFF:FF  
FFFFFFFFFFFFFFFFFFFFF  
@A00721:190:HGJW7DSXY:4:1244:17463:10347 2:N:0:TCTGCAAG+GCTGCACT  
CGCGATGAAGAAGATGAAGGAGTCCCCATTACTGTAAATCAGGGACATCCGCATATTAAGCATTATA  
TTGGGGACTGGGGACCTATATATATGTATAGAGTAATCCGGAGGAATCTATCCCCAATTGGAATAGTA  
ATGATTTCAAATTC

+  
FFFFFFFFFFFFFFFFFFFFFFFFFFFFFFFFFFFFFFFFFFFFFFFFFFFFFFFFFFFFFFFFFFFFFFFF  
FFFFFFFFFFFFFFFFFFFFFFFFFFFFFFFFFFFFFFFFFFFFFFFFFFFFFFFFFFFFFFFFFFFFFFFF:FFFFFFF  
FFFFF:FFFF:FFFF  
@A00721:190:HGJW7DSXY:4:1674:29116:17472 2:N:0:TCTGCAAG+GCTGCACT  
CGCGATGAAGAAGATGAAGGAGTCCCCATTACTGTAAATCAGGGACATCCGCATATTAAGCATTATA  
TTGGGGACTGGGGACCTATATATATGTATAGAGTAATCCGGAGGAATCTATCCCCAATTGGAATAGTA  
ATGATTTCAAATTC

+  
FFFFFFFFFFFF:FFFFFFFFFFFFFFFFFFFFFFFFFFFFFFFFFFFFFFFFFFFFFFFFFFFFFFFF  
:FFFFFFFFFFFFFFFFFFFF:FFFFFFFFFFFFFFFFFFFFFFFFFFFFFFFFFFFF,FFFFFFFFFFFFFFFF  
FFFFFFFFFFFFFFFFFFFFF  
@A00721:190:HGJW7DSXY:4:2536:3794:34898 2:N:0:TCTGCAAG+GCTGCACT  
CGCGATGAAGAAGATGAAGGAGTCCCCATTACTGTAAATCAGGGACATCCGCATATTAAGCATTATA  
TTGGGGACTGGGGACCTATATATATGTATAGAGTAATCCGGAGGAATCTATCCCCAATTGGAATAGTA  
ATGATTTCAAATTC

+  
FFFFFFFFFFFFFFFFFFFFFFFFFFFFFFFFFFFFFFFFFFFFFFFFFFFFFFFFFFFFFFFFFFFFFFFF:  
FFFFFFFFFFFFFFFFFFFFFFFFFFFFFFFFFFFFFFFFFFFFFFFFFFFFFFFFFFFFFFFFFFFFFFFF:FFFFFFFFFFFFFFFF  
FFFFFFFFFFFF:FFFF  
@A00721:190:HGJW7DSXY:4:1656:14814:8672 2:N:0:TCTGCAAG+GCTGCACT  
CGGGATATTTCAAATTTGAAATTTGAAATCATTACTATTCCAATTGGGGATAGATTCTCCGATTA

CTCTATACATATATATAGGTCCCCAGTCCCCAATATAATGCTTAATATGCGGATGTCCCTGATTAAAC  
AGTAATGGGGACTCC

[illegible] $+$ [illegible]

+

[illegible]

+

```

FFFFFFFFFFFFFFFFFFFFFFFF:FFFFFFFFFFFFFFFF,F:FF:F:F,FFFF:FF:FFFF:F:FF
FFFFFFFF:FFFFFFFFFFFFFFFF,FFFF:FFFF,FFFFFFFFFFFF:FFFFFF,FFFF,FFFF
FF:FFFF:FF,FF

```

+

```

FFFFFFFFFFFFFFFF,FFF:FFFFFFFFFFFFFFFF,FFFFF:FFFFFFFFFFFFFFFFFFFFFFFFFFFF
F:FF,FFFFFFFFFFFFFFFFFFFFFFFF:FFFFFFFF,FFFFFFFFFFFF:FFFFF:FFFFFFFFFFFF
FFFFFFFFFFFFFFFF

```

+

```
F:FFFFFFFFFFFFFFFFFFFFFFFFFFFFFFFFFFFFFFFFFFFFFFFFFFFFFFFFFFFFFFFFFFFFFFFFF
FFFFFFFFFFFFFFFFFFFFFFFFFFFFFFFFFFFFFFFFFFFF::FFFFFFFFFFFFFFFFFFFFFFFFFFFFF
FFFFFFFFEE:E.FFF
```

+

[illegible]

@A00721:190:HGJW7DSXY:4:1455:17372:5306 2:N:0:TCTGCAAG+GCTGCACT  
TTTGAATTGGTATACTGTAGGGCGGGATATTTTCAAATTTGAAATTTGAAATCATTACTATTCCAATT  
GGGGATAGATTCCCTCCGATTACTCTATACATATATATAGGTCCCCAGTCCCCAATATAATGCTTAAT  
ATGCGGATGTCCTG

```
FFFFFFFF:FFFFFFFF:FFFFFFFFFFFFFFFFFFFFFFFFFFFFFFFFFFFFFFFFFFFFFFFFFFFFFFFF,FFFFFFF
FFFFFFFF,FFFFFFFFFFFFFFFFFFFFFFFFFFFFFFFFFFFFFFFF:FFFFFFFF:FFFFFFFFFFFFFFFFFFFFFFFF
FFFFFFFFFFFFFFFFFFFF,F
```

+

[illegible]

+

```

FFFFFFFFFFFFFFFFFFFFFFFF:FFFFFFFFFFFFFFFFFFFFFFFFFFFFFFFFFFFFFFFF
FFFFFFFFFFFFFFFFFFFFFFFF:FFFFFFFFFFFFFFFFFFFFFFFF,FFFFFFFF,FFFFFFFFFFFFFFFFFFFFFFFF
FFFFFFFFFFFFFFFFFFFF:

```

+

[illegible]

+

[illegible]

+

[illegible]

+

[illegible]



[illegible][illegible]

```

FFFFFFFFFFFFFFFFFFFFFFFFFFFFFFFFFFFFFFFF:FFFFFFFFFFFFFFFFFFFFFFFF
FFFFFFFFFFFFFFFFFFFFFFFFFFFFFFFFFFFFFFFF:FFFF:FFFFFFFFFFFFFFFFFFFFFFFF
FFFFFFFFFFFFFFFFFFFF

```

[illegible]

```

FFFFFFFFFFFFFFFFFFFFFFFF:F,FFFFFFFF:FFFF::FFFFFFFFFFFFFFFF,FFFFFFF
FFFFFFFFFFFFFFFF:FFFFFF:FFFFFFFFFFFFFFFF:FFFFFFFF:F:FF:FF:FFFFFFFF
,FFFF,FFFF:,FF

```

```
FFFFFFFFFFFFFFFFFFFFFFFFFFFFFFFFFFFFF:FFFFFFFFFFFFFFF:FFFFFF
FFFFFFFFFFFFFFFFFFFFFFFFFFFFFFFFFFFFF:FF,
FF:FFFFFF:FFFF
```

[illegible]

@A00721:190:HGJW7DSXY:4:1413:26621:28463 2:N:0:TCTGCAAG+GCTGCACT  
CTGGGGACCTATATATATGTATAGAGTAATCCGGAGGAATCTATCCCCAATTGGAATAGTAATGATTT





@A00721:190:HGJW7DSXY:4:2441:26666:24251 2:N:0:TCTGCAAG+GCTGCACT  
GGGACCTATATATATGTATAGAGTAATCCGGAGGAATCTATCCCCAATTGGAATAGTAATGATTTCAA  
ATTTCAAATTTGAAATATCCCGCCCTACAGTATACCAATTCAAATTCAAATAGAATTCCAT  
AGGCCCCGCAGGGGC

+

FFFFFFFFFFFFFFFFFFFFFFFFFFFFFFFFFFFFFFFFFFFFFFFFFFFFFFFFFFFFFFFFFFFFFFFF:FF:FFFFFFFFFFFFFFFFFFFF  
F:FFFFFFFFFFFFFF:FFFFFFFFFFFFFFFFFFFFFFFFFFFFFFFFFFFFFFFFFFFFFFFFFFFFFFFFFFFFFFFFFFFFFFFF,FFFFFFFFFFFFFF:,FFF:F:FFFF,FFF  
FF:FFFFFFFF:FFF

@A00721:190:HGJW7DSXY:4:1222:2492:22811 2:N:0:TCTGCAAG+GCTGCACT  
GATGCCCTGCGGGGCCTATGGAATTCTATTTGAATTTGAATTTGAATTGGTATACTGTAGGGCGGGA  
TATTTTCAAATTTGAAATTTGAAATCATTACTATTCCAATTGGGGATAGATTCCTCCGGATTACTCTA  
TACATATATATAGGT

+

FFFFFFFFFFFFFFFFFFFFFFFFFFFFFFFFFFFFFFFFFFFFFFFFFFFFFFFFFFFFFFFFFFFFFFFF:FFFFFF:F:FFFF:FFFFFFFFFFFFFFFFFFFFFFFFFFFFFFFFFFFFFFFF:FFFFFFFFFFFF  
F:FFFFFFFFFFFFFF:FFFFFFFFFFFFFFFFFFFFFFFFFFFFFFFFFFFFFFFFFFFFFFFFFFFFFFFFFFFFFFFFFFFFFFFF,FFFFFF,FFFFFFFFFFFFFFFFFFFFFFFFFFFFFFFFFFFFFFFF  
FFFFFFFFFFFF:FFFFF

@A00721:190:HGJW7DSXY:4:2216:32280:35477 2:N:0:TCTGCAAG+GCTGCACT  
GATGCCCTGCGGGGCCTATGGAATTCTATTTGAATTTGAATTTGAATTGGTATACTGTAGGGCGGGA  
TATTTTCAAATTTGAAATTTGAAATCATTACTATTCCAATTGGGGATAGATTCCTCCGGATTACTCTA  
TACATATATATAGGT

+

F:FFFFFFFFFFFFFFFFFFFFFFFFFFFFFFFFFFFFFFFFFFFFFFFFFFFFFFFFFFFFFFFFFFFFFFFFFFFFFFFFFFFFFFFFFFFFFFFFFFFFFFFFFFFFFFFFFFFFFFFF  
FFFFFFFFFFFFFFFFFFFFFFFFFFFFFFFFFFFFFFFFFFFFFFFFFFFFFFFFFFFFFFFFFFFFFFFF:FFFFFFFFFFFF:FFFFFFFFFFFFFFFFFFFFFFFFFFFFFFFFFFFFFFFF  
FFFFFFFFFFFFFFFF,F

@A00721:190:HGJW7DSXY:4:1436:6017:29481 2:N:0:TCTGCAAG+GCTGCACT  
GTAAGATGCCCTGCGGGGCCTATGGAATTCTATTTGAATTTGAATTTGAATTGGTATACTGTAGGGC  
GGGATATTTTCAAATTTGAAATTTGAAATCATTACTATTCCAATTGGGGATAGATTCCTCCGGATTAC  
TCTATACATATATAT

+

FFFFFFFFFFFFFFFFFFFFFFFFFFFFFFFFFFFFFFFFFFFFFFFFFFFFFFFFFFFFFFFFFFFFFFFFFFFFFFFFFFFFFFFFFFFFFFFFFFFFFFFFFFFFFFFFFFFFFFFF  
FFFFFFFFFFFFFFFFFFFFFFFFFFFFFFFFFFFFFFFFFFFFFFFFFFFFFFFFFFFFFFFFFFFFFFFF,FFF,FFFFFFFFFFFFFFFFFFFFFFFFFFFFFFFFFFFFFFFF:FFFFFFFFFFFF  
FFF,FFFFFFFFFFFF

@A00721:190:HGJW7DSXY:4:1606:21043:24408 2:N:0:TCTGCAAG+GCTGCACT  
GTAAGATGCCCTGCGGGGCCTATGGAATTCTATTTGAATTTGAATTTGAATTGGTATACTGTAGGGC  
GGGATATTTTCAAATTTGAAATTTGAAATCATTACTATTCCAATTGGGGATAGATTCCTCCGGATTAC  
TCTATACATATATAT

+

FFFFFFFFFFFFFFFFFFFFFFFFFFFFFFFFFFFFFFFFFFFFFFFFFFFFFFFFFFFFFFFFFFFFFFFFFFFFFFFFFFFFFFFFFFFFFFFFFFFFFFFFFFFFFFFFFFFFFFFF  
FFFFFFFFFFFFFFFFFFFFFFFFFFFFFFFFFFFFFFFFFFFFFFFFFFFFFFFFFFFFFFFFFFFFFFFF:FFFFFFFFFFFFFFFFFFFFFFFFFFFFFFFFFFFFFFFFFFFFFFFF  
FFF,F,FFFF:FFFF

@A00721:190:HGJW7DSXY:4:1651:23927:18004 2:N:0:TCTGCAAG+GCTGCACT  
GTAAGATGCCCTGCGGGGCCTATGGAATTCTATTTGAATTTGAATTTGAATTGGTATACTGTAGGGC  
GGGATATTTTCAAATTTGAAATTTGAAATCATTACTATTCCAATTGGGGATAGATTCCTCCGGATTAC  
TCTATACATATATAT

+

FFFFFFFFFFFFFFFFFFFFFFFFFFFFFFFFFFFFFFFFFFFFFFFFFFFFFFFFFFFFFFFFFFFFFFFFFFFFFFFFFFFFFFFFFFFFFFFFFFFFFFFFFFFFFFFFFFFFFFFF  
FFFFFFFFFFFFFFFFFFFFFFFFFFFFFFFFFFFFFFFFFFFFFFFFFFFFFFFFFFFFFFFFFFFFFFFF:FFFFFFFFFFFFFFFFFFFFFFFFFFFFFFFFFFFFFFFFFFFFFFFF  
FFFFFFFFFFFFFFFFFFFF

@A00721:190:HGJW7DSXY:4:2525:7708:18192 2:N:0:TCTGCAAG+GCTGCACT  
GTAAGATGCCCTGCGGGGCCTATGGAATTCTATTTGAATTTGAATTTGAATTGGTATACTGTAGGGC  
GGGATATTTTCAAATTTGAAATTTGAAATCATTACTATTCCAATTGGGGATAGATTCCTCCGGATTAC  
TCTATACATATATAT

+

FFFFFFFFFFFFFFFFFFFFFFFFFFFFFFFFFFFFFFFFFFFFFFFFFFFFFFFFFFFFFFFFFFFFFFFF:FFFFFFFFFFFF:F:FFFFFFFFFFFFFFFFFFFFFFFF:FFFFFFFFFFFFFFFFFFFF

@A00721:190:HGJW7DSXY:4:1357:30698:19617 2:N:0:TCTGCAAG+GCTGCACT  
CACGGTCTGCGGTAAGATGCCCTGCGGGCCTATGGAATTCTATTTGAATTTGAATTTGAATTGGTA  
TACTGTAGGGCGGGATATTTTCAAATTTGAAATTTGAAATCATTACTATTCCAATTGGGGATAGATTC  
CTCCGGATTACTCTA

@A00721:190:HGJW7DSXY:4:1471:23294:3411 2:N:0:TCTGCAAG+GCTGCACT  
CACGGTCTGCGGTAAGATGCCCTGCGGGCCTATGGAATTCTATTTGAATTTGAATTTGAATTGGTA  
TACTGTAGGGCGGGATATTTTCAAATTTGAAATTTGAAATCATTACTATTCCAATTGGGGATAGATTC  
CTCCGGATTACTCTA

@A00721:190:HGJW7DSXY:4:2177:32045:21136 2:N:0:TCTGCAAG+GCTGCACT  
CACGGTCTGCGGTAAGATGCCCTGCGGGCCTATGGAATTCTATTTGAATTTGAATTTGAATTGGTA  
TACTGTAGGGCGGGATATTTTCAAATTTGAAATTTGAAATCATTACTATTCCAATTGGGGATAGATTC  
CTCCGGATTACTCTA

@A00721:190:HGJW7DSXY:4:2201:10809:17143 2:N:0:TCTGCAAG+GCTGCACT  
CACGGTCTGCGGTAAGATGCCCTGCGGGCCTATGGAATTCTATTTGAATTTGAATTTGAATTGGTA  
TACTGTAGGGCGGGATATTTTCAAATTTGAAATTTGAAATCATTACTATTCCAATTGGGGATAGATTC  
CTCCGGATTACTCTA

@A00721:190:HGJW7DSXY:4:1418:10004:3568 2:N:0:TCTGCAAG+GCTGCACT  
CCACGGTCTGCGGTAAGATGCCCTGCGGGCCTATGGAATTCTATTTGAATTTGAATTTGAATTGGT  
ATACTGTAGGGCGGGATATTTCAAATTTGAAATTTGAAATCATTACTATTCCAATTGGGGATAGATT  
CCTCCGGATTACTCT

@A00721:190:HGJW7DSXY:4:1525:7880:20525 2:N:0:TCTGCAAG+GCTGCACT  
CCACGGTCTGCGGTAAGATGCCCTGCGGGCCTATGGAATTCTATTTGAATTTGAATTTGAATTGGT  
ATACTGTAGGGCGGGATATTTCAAATTTGAAATTTGAAATCATTACTATTCCAATTGGGGATAGATT  
CCTCCGGATTACTCT

@A00721:190:HGJW7DSXY:4:1526:9317:11960 2:N:0:TCTGCAAG+GCTGCACT  
CCACGGTCTGCGGTAAGATGCCCTGCGGGCCTATGGAATTCTATTTGAATTTGAATTTGAATTGGT  
ATACTGTAGGGCGGGATATTTCAAATTTGAAATTTGAAATCATTACTATTCCAATTGGGGATAGATT  
CCTCCGGATTACTCT

+  
FFFFFFFFFFFFFFFFFFFFFFFFFFFFFFFFFFFFFFFFFFFFFFFFFFFFFFFFFFFFFFFFFFFFFFFF  
FFFFFFFFFFFFFFFFFFFFFFFFFFFFFFFFFFFFFFFFFFFFFFFFFFFFFFFFFFFFFFFFFFFFFFFF:FFFFFFFFFFFFFFFFFFFFFFFF  
FFFFFFFFFFFFFFFFFFFFFFFF  
@A00721:190:HGJW7DSXY:4:1529:9091:8594 2:N:0:TCTGCAAG+GCTGCACT  
CCACGGTCTGCGGTAAGATGCCCCTGCGGGGCCTATGGAATTCTATTTGAATTTGAATTTGAATTGGT  
ATACTGTAGGGCGGGATATTTTCAAATTTGAAATTTGAAATCATTACTATTCCAATTGGGGATAGATT  
CCTCCGGATTACTCT

+  
FFFFFFFFFFFFFFFFFFFFFFFFFFFFFFFFFFFFFFFFFFFFFFFFFFFFFFFFFFFFFFFFFFFFFFFF  
FFFFFFFFFFFFFFFFFFFFFFFFFFFFFFFFFFFFFFFFFFFFFFFFFFFFFFFFFFFFFFFFFFFFFFFF:FFFFFFF:FFFFFFFFFFFFFFFFFFFFFFFF  
FFFFFFFFFFFFFFFFFFFFFFFF  
@A00721:190:HGJW7DSXY:4:1547:18900:14309 2:N:0:TCTGCAAG+GCTGCACT  
CCACGGTCTGCGGTAAGATGCCCCTGCGGGGCCTATGGAATTCTATTTGAATTTGAATTTGAATTGGT  
ATACTGTAGGGCGGGATATTTTCAAATTTGAAATTTGAAATCATTACTATTCCAATTGGGGATAGATT  
CCTCCGGATTACTCT

+  
FFFFFFFFFFFFFFFFFFFFFFFFFFFFFFFFFFFFFFFFFFFFFFFFFFFFFFFFFFFFFFFFFFFFFFFF:FFFFFF:FFFFFFFFFFFFFFFFFFFFFFFF  
FFFFFFFF:FFFFFFFFFFFFFFFF,FFFFFFFF,FFFFFFFFFFFFFFFFFFFFFFFFFFFFFFFF:F:FFFFFF:FFFFFFFF  
F:FFFFFFFF:FFF  
@A00721:190:HGJW7DSXY:4:1565:11686:23109 2:N:0:TCTGCAAG+GCTGCACT  
CCACGGTCTGCGGTAAGATGCCCCTGCGGGGCCTATGGAATTCTATTTGAATTTGAATTTGAATTGGT  
ATACTGTAGGGCGGGATATTTTCAAATTTGAAATTTGAAATCATTACTATTCCAATTGGGGATAGATT  
CCTCCGGATTACTCT

+  
FFFFFFFFFFFFFFFFFFFFFFFFFFFFFFFFFFFFFFFFFFFFFFFFFFFFFFFFFFFFFFFFFFFFFFFF:FFFFFF:FFFFFFFFFFFFFFFF  
FFFFFFFFFFFFFFFFFFFFFFFFFFFFFFFFFFFFFFFFFFFFFFFFFFFFFFFFFFFFFFFFFFFFFFFF:FFFFFFFF  
FFFFFFFFFFFFFFFF  
@A00721:190:HGJW7DSXY:4:1162:21649:31970 2:N:0:TCTGCAAG+GCTGCACT  
GTAATCCGGAGGAATCTATCCCAATTGGAATAGTAATGATTTCAAATTTCAAATTTGAAAATATCCC  
GCCCTACAGTATACCAATTCAAATTCAAATTCAAATAGAAATTCATAGGCCCGCAGGGGCATCTTAC  
CGCAGACCGTGGGGC

+  
FFFFFFFFFFFFFFFFFFFFFFFFFFFFFFFFFFFFFFFFFFFFFFFFFFFFFFFFFFFFFFFFFFFFFFFF:FFFFFFFFFFFFFFFFFFFFFFFF:FFFFFF  
FFFFF:FFFFFFFFFFFFFFFF,FFFFFFFF:FFFFFFFFFFFFFFFF:FFF:FFFFFFFFFFFFFFFF  
FFFFFFFF:FFFFFF  
@A00721:190:HGJW7DSXY:4:1223:7346:19038 2:N:0:TCTGCAAG+GCTGCACT  
GTAATCCGGAGGAATCTATCCCAATTGGAATAGTAATGATTTCAAATTTCAAATTTGAAAATATCCC  
GCCCTACAGTATACCAATTCAAATTCAAATTCAAATAGAAATTCATAGGCCCGCAGGGGCATCTTAC  
CGCAGACCGTGGGGC

+  
FFFFFFFFFFFFFFFFFFFFFFFFFFFFFFFFFFFFFFFFFFFFFFFFFFFFFFFFFFFFFFFFFFFFFFFF  
FFFFFFFFFFFFFFFFFFFFFFFFFFFFFFFFFFFFFFFFFFFFFFFFFFFFFFFFFFFFFFFFFFFFFFFF:FFFFFFFFFFFFFFFFFFFFFFFF  
FFFFFFFFFFFFFFFF  
@A00721:190:HGJW7DSXY:4:1257:2745:13761 2:N:0:TCTGCAAG+GCTGCACT  
GTAATCCGGAGGAATCTATCCCAATTGGAATAGTAATGATTTCAAATTTCAAATTTGAAAATATCCC  
GCCCTACAGTATACCAATTCAAATTCAAATTCAAATAGAAATTCATAGGCCCGCAGGGGCATCTTAC  
CGCAGACCGTGGGGC

+  
FFFFFFFFFFFFFFFFFFFFFFFFFFFFFFFF,FFFF,,FFFFFFFFFFFFFFFFFFFFFFFF:FFF:FFFFFFFF  
FFFFFFFFFFFFFFFFFFFFFFFF:FFFF:FFFFFFFFFFFFFFFFFFFFFFFFFFFFFFFF:FFFFFFFF  
FFFFFFFF  
@A00721:190:HGJW7DSXY:4:1348:27850:2597 2:N:0:TCTGCAAG+GCTGCACT  
GTAATCCGGAGGAATCTATCCCAATTGGAATAGTAATGATTTCAAATTTCAAATTTGAAAATATCCC

GCCCTACAGTATACCAATTCAAATTCAAATTCAAATAGAATTCCATAGGCCCCGCAGGGGCATCTTAC  
CGCAGACCGTGGGGC

+

FF,FFFFFFFFFFFFFFFFFFFFFFFFFFFFFFFFFFFFFFFFFFFFFFFFFFFFFFFFFFFFFFFF  
FFFFFFFFFFFFFFFF:FFFFFFFFFFFFFFFFFFFFFFFFFFFFFFFFFFFFFFFFFFFFFFFF  
FFFFFFFFFFFFFFFF

@A00721:190:HGJW7DSXY:4:1451:3414:23312 2:N:0:TCTGCAAG+GCTGCACT  
GTAATCCGGAGGAATCTATCCCAATTGGAATAGTAATGATTTCAAATTTCAAATTTGAAAATATCCC  
GCCCTACAGTATACCAATTCAAATTCAAATTCAAATAGAATTCCATAGGCCCCGCAGGGGCATCTTAC  
CGCAGACCGTGGGGC

+

FFF:FFFFFFFFFFFFFFFFFFFFFFFFFFFFFFFFFFFFFFFFFFFFFFFFFFFFFFFFFFFFFFFF  
FFFFFFFF:FFFFFFFFFFFFFFFFFFFFFFFFFFFFFFFFFFFFFFFFFFFFFFFFFFFFFFFF:FFFFF  
FFFFFFFFFFFFFFFF

@A00721:190:HGJW7DSXY:4:2142:13304:34240 2:N:0:TCTGCAAG+GCTGCACT  
GTAATCCGGAGGAATCTATCCCAATTGGAATAGTAATGATTTCAAATTTCAAATTTGAAAATATCCC  
GCCCTACAGTATACCAATTCAAATTCAAATTCAAATAGAATTCCATAGGCCCCGCAGGGGCATCTTAC  
CGCAGACCGTGGGGC

+

FFFFFFFFFFFFFF,FFF,FFFFFFFFFFFFFFFFFFFFFFFFFFFFFFFFFFFFFFFF,FFFF,FFFF:FF:FFFF  
FFFFFFFF,FF:F,FFF:FFFFFF:FFFF,:FFF,:FFF,FFFF,:FFFFFFFF,FFFF,FFFF:  
FFFFFFFFF,FFFF

@A00721:190:HGJW7DSXY:4:2571:32931:26772 2:N:0:TCTGCAAG+GCTGCACT  
GTAATCCGGAGGAATCTATCCCAATTGGAATAGTAATGATTTCAAATTTCAAATTTGAAAATATCCC  
GCCCTACAGTATACCAATTCAAATTCAAATTCAAATAGAATTCCATAGGCCCCGCAGGGGCATCTTAC  
CGCAGACCGTGGGGC

+

FFFFFFFFFFFFFFFFFFFFFFFFFFFFFFFFFFFFFFFF:FFFFFFFFFFFFFFFF:FFFFFFFFFFFF:FFFFFFFF  
FFFFFFFF:FFFFFFFFFFFFFFFF,FFFFFFFFFFFF:FFFFFFFFFFFFFFFF:FFFFFFFFFFFFFFFF:  
FFFFFFFFF:FFFFF

@A00721:190:HGJW7DSXY:4:1503:30056:17253 2:N:0:TCTGCAAG+GCTGCACT  
GAGGAATCTATCCCAATTGGAATAGTAATGATTTCAAATTTCAAATTTGAAAATATCCCGCCCTACA  
GTATACCAATTCAAATTCAAATTCAAATAGAATTCCATAGGCCCCGCAGGGGCATCTTACCGCAGACC  
GTGGGGCAAGCCAAT

+

FFFFFFFFFFFFFFFFFFFFFFFFFFFFFFFFFFFFFFFF:FFFFFFFFFFFFFFFFFFFFFFFFFFFFFFFFFFFF  
FFFFFFFFFFFFFFFFFFFFFFFFFFFFFFFFFFFFFFFFFFFFFFFFFFFFFFFFFFFFFFFFFFFFFFFFFFFF  
F:FFFFF,FFFFFF

@A00721:190:HGJW7DSXY:4:2225:18376:12273 2:N:0:TCTGCAAG+GCTGCACT  
GAGGAATCTATCCCAATTGGAATAGTAATGATTTCAAATTTCAAATTTGAAAATATCCCGCCCTACA  
GTATACCAATTCAAATTCAAATTCAAATAGAATTCCATAGGCCCCGCAGGGGCATCTTACCGCAGACC  
GTGGGGCAAGCCAAT

+

FFFFF,FFFFFFFFFFFFFFFFFFFFFFFFFFFFFFFFFFFFFFFFFFFFFFFFFFFFFFFFFFFFFFFF  
FFFFFFFFFFFFFFFFFFFFFFFFFFFFFFFFFFFFFFFFFFFFFFFFFFFFFFFFFFFFFFFFFFFFFFFF  
FFFFFFFFFFFFFFFF

@A00721:190:HGJW7DSXY:4:2264:32832:25974 2:N:0:TCTGCAAG+GCTGCACT  
GAGGAATCTATCCCAATTGGAATAGTAATGATTTCAAATTTCAAATTTGAAAATATCCCGCCCTACA  
GTATACCAATTCAAATTCAAATTCAAATAGAATTCCATAGGCCCCGCAGGGGCATCTTACCGCAGACC  
GTGGGGCAAGCCAAT

+

FFFFFFFFFFFFFFFFFFFFFFFFFFFFFFFFFFFFFFFF:FFFFF,FFFFFF:FFFFFFFFFFFFFFFF  
FFFFFFFFFFFFFFFF:FFFFF,FFFF,FFFFFFFFFFFF:FFFFF:FFFFFFFFFFFFFFFFFFFF:FFF  
F:FFFF:F:FFFFF

$+$ 

@

+

@

+

@

+

@

+

@

+

@

+

FFFFFFFFFFFF:FFFFFFFFFFFFFFFFFFFFFFFFFFFFF,F::FFFFFF:FFFFFFFF:FFFFFFFFF  
FFFFFFFFFFFFFFFF

@A00721:190:HGJW7DSXY:4:2110:4779:14058 2:N:0:TCTGCAAG+GCTGCACT  
ATTATATTGGCTTGCCCCACGGTCTGCGGTAAGATGCCCTGCGGGGCCTATGGAATTCTATTTGAAT  
TTGAATTTGAATTGGTATACTGTAGGGCGGGATATTTTCAAATTTGAAATTTGAAATCATTACTATTC  
CAATTGGGGATAGAT

+

FFFFFFFFFFFFFFFFFFFFFFFFFFFFFFFFFFFFFFFF:FFFFFFFFFFFFFFFFFFFFFFFFFFFFFFFF:FFFF,FFFF:  
FFFFFFFFFFFFFFFFFFFFFFFFFFFFFFFFFFFFFFFF:FFFFFFFFFFFFFFFFFFFFFFFFFFFFFFFFFFFFFFFF  
FFF:FFFFFFFFFFFF

@A00721:190:HGJW7DSXY:4:2110:2700:16157 2:N:0:TCTGCAAG+GCTGCACT  
ATTATATTGGCTTGCCCCACGGTCTGCGGTAAGATGCCCTGCGGGGCCTATGGAATTCTATTTGAAT  
TTGAATTTGAATTGGTATACTGTAGGGCGGGATATTTTCAAATTTGAAATTTGAAATCATTACTATTC  
CAATTGGGGATAGAT

+

FFFFFFFFFFFF:FFF:FFFFFFFFFFFFFFFFFFFFFFFFFFFFFFFFFFFFFFFFFFFFFFFF:FFF:F,:FFFFF  
FFFFFFFFFFFF:FFFFFFFFFFFFFFFFFFFFFFFF:FFFFFFFFFFFFFFFFFFFFFFFFFFFFFFFF:FFFFFFFFFFFFF  
FFFFFFFFFFFFFFFF

@A00721:190:HGJW7DSXY:4:2241:10773:23531 2:N:0:TCTGCAAG+GCTGCACT  
ATTATATTGGCTTGCCCCACGGTCTGCGGTAAGATGCCCTGCGGGGCCTATGGAATTCTATTTGAAT  
TTGAATTTGAATTGGTATACTGTAGGGCGGGATATTTTCAAATTTGAAATTTGAAATCATTACTATTC  
CAATTGGGGATAGAT

+

F,FFFFFFFFFFFFFFFFFFFFFFFF:FFFFFFFFFFFFFFFFFFFFFFFFFFFFFFFF:FFFFFFFFFFFF:FFFF:  
FFFFF:FF:FFFFFFFFFFFFFFFFFFFFFFFFFFFFFFFFFFFFFFFFFFFFFFFFFFFFFFFFFFFFFFFF,FFF  
F:F::FFFFFFFF

@A00721:190:HGJW7DSXY:4:2406:28076:8155 2:N:0:TCTGCAAG+GCTGCACT  
ATTATATTGGCTTGCCCCACGGTCTGCGGTAAGATGCCCTGCGGGGCCTATGGAATTCTATTTGAAT  
TTGAATTTGAATTGGTATACTGTAGGGCGGGATATTTTCAAATTTGAAATTTGAAATCATTACTATTC  
CAATTGGGGATAGAT

+

F:FFFFFF:FF,FF:FFFFFF:FFFFFFFFFFFFFFFFFFFFFFFF:FFFFFFFFFFFFFFFF:FF::FFFFF  
FFFFFFFFFFFF:FFFF:FFF:FFF:F:FFFFFF:F:FFFFFF::FF,FFFF:F:,,:F,:F:FFFF,F  
,:,FFF,FF,:FFFF

@A00721:190:HGJW7DSXY:4:2418:31159:20791 2:N:0:TCTGCAAG+GCTGCACT  
ATTATATTGGCTTGCCCCACGGTCTGCGGTAAGATGCCCTGCGGGGCCTATGGAATTCTATTTGAAT  
TTGAATTTGAATTGGTATACTGTAGGGCGGGATATTTTCAAATTTGAAATTTGAAATCATTACTATTC  
CAATTGGGGATAGAT

+

FFFFFFFFFFFFFFFFFFFFFFFFFFFFFFFFFFFFFFFFFFFFFFFFFFFFFFFFFFFFFFFFFFFFFFFFFFFFF  
FFFFFFFFFFFFFFFFFFFFFFFFFFFFFFFFFFFFFFFFFFFFFFFFFFFFFFFFFFFFFFFF,FFFFFF:FFFF:FFFFFFFFF  
FFFFFFFF::FFF,FF

@A00721:190:HGJW7DSXY:4:2437:23448:23813 2:N:0:TCTGCAAG+GCTGCACT  
ATTATATTGGCTTGCCCCACGGTCTGCGGTAAGATGCCCTGCGGGGCCTATGGAATTCTATTTGAAT  
TTGAATTTGAATTGGTATACTGTAGGGCGGGATATTTTCAAATTTGAAATTTGAAATCATTACTATTC  
CAATTGGGGATAGAT

+

FFFFFFFFFFFFFFFFFFFFFFFFFFFFFFFFFFFFFFFFFFFFFFFFFFFFFFFFFFFFFFFF:FFFFFFFFFFFFFFFF:  
FFFFFFFFFFFFFFFFFFFFFFFFFFFFFFFFFFFFFFFFFFFFFFFFFFFFFFFFFFFFFFFF,FFFFFFFFFFFFFFFF:  
FFFFFFFFFFFFFFFF

@A00721:190:HGJW7DSXY:4:2441:19379:23657 2:N:0:TCTGCAAG+GCTGCACT  
ATTATATTGGCTTGCCCCACGGTCTGCGGTAAGATGCCCTGCGGGGCCTATGGAATTCTATTTGAAT  
TTGAATTTGAATTGGTATACTGTAGGGCGGGATATTTTCAAATTTGAAATTTGAAATCATTACTATTC  
CAATTGGGGATAGAT



TTGAATTTGAATTTGAATTGGTATACTGTAGGGCGGGATATTTTCAAATTTGAAATTTGAAATCATT  
CTATTCCAATTGGGG

+

FFFFFFFFFFFFFFFFFFFFFFFFFFFFFFFFFFFFFFFFFFFFFFFFFFFFFFFFFFFFFFFFFFFFFFFF:FFF  
FFFFFFFFFFFFFFFFFFFFFFFFFFFFFFFFFFFFFFFFFFFFFFFFFFFFFFFFFFFFFFFFFFFFFFFF:FFFFFFF:FFFFF  
FFFFF:FFF,FFFF

@A00721:190:HGJW7DSXY:4:1424:7093:20196 2:N:0:TCTGCAAG+GCTGCACT  
AGTAATATTATATTGGCTTGCCCCACGGTCTGCGGTAAGATGCCCTGCGGGGCCTATGGAATTCTAT  
TTGAATTTGAATTTGAATTGGTATACTGTAGGGCGGGATATTTTCAAATTTGAAATTTGAAATCATT  
CTATTCCAATTGGGG

+

FFFFFFFF:FFFFFFFFFFFFFFFFFFFFFFFFFFFFFFFFFFFFFFFFFFFFFFFFFFFFFFFFFFFFFFFF:F  
FFFFFFFFFFFFFFFFFFFFFFFFFFFFFFFFFFFFFFFFFFFFFFFFFFFFFFFFFFFFFFFFFFFFFFFF:FFFFF  
FFFFFFFFFFFFFFFF

@A00721:190:HGJW7DSXY:4:1574:10619:4413 2:N:0:TCTGCAAG+GCTGCACT  
AGTAATATTATATTGGCTTGCCCCACGGTCTGCGGTAAGATGCCCTGCGGGGCCTATGGAATTCTAT  
TTGAATTTGAATTTGAATTGGTATACTGTAGGGCGGGATATTTTCAAATTTGAAATTTGAAATCATT  
CTATTCCAATTGGGG

+

FFFFFFFFFFFFFFFFFFFFFFFFFFFFFFFFFFFFFFFFFFFFFFFFFFFFFFFFFFFFFFFFFFFFFFFF:FFFFFFFFFFFFFFFF  
FFFFFFFFFFFFFFFFFFFFFFFFFFFFFFFFFFFFFFFFFFFFFFFFFFFFFFFFFFFFFFFFFFFFFFFF:FFFFFFF  
FFF:FFFFFFFF

@A00721:190:HGJW7DSXY:4:1574:10619:4633 2:N:0:TCTGCAAG+GCTGCACT  
AGTAATATTATATTGGCTTGCCCCACGGTCTGCGGTAAGATGCCCTGCGGGGCCTATGGAATTCTAT  
TTGAATTTGAATTTGAATTGGTATACTGTAGGGCGGGATATTTTCAAATTTGAAATTTGAAATCATT  
CTATTCCAATTGGGG

+

FFFFFFFFFFFFFFFF:FFFFFFFFFFFFFFFFFFFFFFFFFFFFFFFFFFFFFFFFFFFFFFFFFFFFFFFF:FFFFFFF  
FFFFF:FFFFFFFFFFFFFFFFFFFFFFFFFFFFFFFFFFFFFFFFFFFFFFFFFFFFFFFFFFFFFFFFFFFFFFFF,FFFFF  
FFFFFFFFFFFFFFFF

@A00721:190:HGJW7DSXY:4:1668:32307:27007 2:N:0:TCTGCAAG+GCTGCACT  
AGTAATATTATATTGGCTTGCCCCACGGTCTGCGGTAAGATGCCCTGCGGGGCCTATGGAATTCTAT  
TTGAATTTGAATTTGAATTGGTATACTGTAGGGCGGGATATTTTCAAATTTGAAATTTGAAATCATT  
CTATTCCAATTGGGG

+

FFFFFFFFFFFFFFFFFFFFFFFFFFFFFFFFFFFFFFFFFFFFFFFFFFFFFFFFFFFFFFFFFFFFFFFFFFFFFFFF  
FFFFFFFFFFFFFFFFFFFFFFFFFFFFFFFF:FFFFF:FFFFFFFFFFFFFFFFFFFFFFFFFFFFFFFF:FFFFF  
FFFFFFFF:FFFFF

@A00721:190:HGJW7DSXY:4:2209:1081:11475 2:N:0:TCTGCAAG+GCTGCACT  
AGTAATATTATATTGGCTTGCCCCACGGTCTGCGGTAAGATGCCCTGCGGGGCCTATGGAATTCTAT  
TTGAATTTGAATTTGAATTGGTATACTGTAGGGCGGGATATTTTCAAATTTGAAATTTGAAATCATT  
CTATTCCAATTGGGG

+

FFFFFFFFFFFFFFFFFFFFFFFFFFFFFFFFFFFFFFFFFFFFFFFFFFFFFFFFFFFFFFFFFFFFFFFFFFFFFFFF  
FFFFFFFFFFFFFFFFFFFFFFFFFFFFFFFFFFFFFFFFFFFFFFFFFFFFFFFFFFFFFFFFFFFFFFFFFFFFFFFF  
FFFFF:FFFFFFFF

@A00721:190:HGJW7DSXY:4:2223:9001:1705 2:N:0:TCTGCAAG+GCTGCACT  
AGTAATATTATATTGGCTTGCCCCACGGTCTGCGGTAAGATGCCCTGCGGGGCCTATGGAATTCTAT  
TTGAATTTGAATTTGAATTGGTATACTGTAGGGCGGGATATTTTCAAATTTGAAATTTGAAATCATT  
CTATTCCAATTGGGG

+

FFFF:FFFF:FFFFFF:FFFFFFFFFFFFFFFFFFFFFFFF:FFFFFF,FFFFFF:FFFFFFFF,F:F  
FFFFFFFF:FFFF:FFFF:FFFFFFFFFFFFFFFF:FFFFFFFF:FFFFFFFFFFFF:FFFF:FFFF  
:FFFFFFFFFFFF,FF



$+$ 

+

 $+$ 

+

+

+

+



+  
FFFFFFFFFFFFFFFFFFFFFFFFFFFFFFFFFFFFFFFFFFFFFFFFFFFFFFFFFFFFF,FF  
FFF:F,FFF,FFFF,F:FFFFFFFFFFFFFFFFFFFFFF:FFF,FFFFFF:FFFFFFFFFFFFFFFFFFFF  
FFFFFFFFFFFFFF:FF  
@A00721:190:HGJW7DSXY:4:2465:22146:8938 2:N:0:TCTGCAAG+GCTGCACT  
CGGGCAAGCCAGTAATATTATATTGGCTTGCCCCACGGTCTGCGGTAAAGATGCCCTGCGGGGCCTAT  
GGAATTCTATTTGAATTTGAATTTGAATTGGTATACTGTAGGGC GGGATATTTTTCAAATTTGAAATTT  
GAAATCAT TACTATT  
+  
FFFFFF:FFFFFFFF:FFFFFFFFFFFFFF:FFFFFFFF:FFFFFFFFFFFFFFFFFFFFFFFF  
FFFFFFFFFFFFFFFFFFFFFFFFFFFFFFFF:FFFFFFFFFFFFFFFFFFFFFFFFFFFFFFFF  
FFFFFFFFFF:FFFFF  
@A00721:190:HGJW7DSXY:4:1140:6280:1783 2:N:0:TCTGCAAG+GCTGCACT  
AGCGTACGGAGGTGTCCCCGGCGCGGGCAAGCCAGTAATATTATATTGGCTTGCCCCACGGTCTGCGG  
TAAGATGCCCTGCGGGGCCTATGGAATTCTATTTGAATTTGAATTTGAATTGGTATACTGTAGGGCG  
GGATATTTTTCAAATT  
+  
FFFFFF:FFFFFFFFFFFFFFFFFFFFFFFFFFFFFFFFFFFFFFFFFFFF,FFFF:FFF:FFFFFFFF:FFFFFF:FF  
FFFFFFFFFFFFFFFFFFFFFFFF::FFFFFFFF,:FF:FF:FFFF:FFFF,FFFFFFFFFFFFFFFFFFFF  
FFFFFFFFFFFFFFFFFFFF  
@A00721:190:HGJW7DSXY:4:1239:2926:9815 2:N:0:TCTGCAAG+GCTGCACT  
AGCGTACGGAGGTGTCCCCGGCGCGGGCAAGCCAGTAATATTATATTGGCTTGCCCCACGGTCTGCGG  
TAAGATGCCCTGCGGGGCCTATGGAATTCTATTTGAATTTGAATTTGAATTGGTATACTGTAGGGCG  
GGATATTTTTCAAATT  
+  
FFFFFFFFFFFFFFFFFFFFFFFFFFFFFFFFFFFFFFFFFFFFFFFFFFFFFFFFFFFFF,F,FFFF  
FFFF:FFFFFFFFFFFFFFFF:FFFFFFFFFFFF:FFFFFFFFFFFF:FFFFFFFFFFFF:FFFFFFFFFFFF  
FFF::FFFF:FF,F  
@A00721:190:HGJW7DSXY:4:1301:1389:25441 2:N:0:TCTGCAAG+GCTGCACT  
AGCGTACGGAGGTGTCCCCGGCGCGGGCAAGCCAGTAATATTATATTGGCTTGCCCCACGGTCTGCGG  
TAAGATGCCCTGCGGGGCCTATGGAATTCTATTTGTATTTGAATTTGAATTGGTATACTGTAGGGCG  
GGATATTTTTCAAATT  
+  
FFFFFFFFFFFFFFFFFFFFFFFFFFFFFFFFFFFFFFFFFFFFFFFFFFFFFFFFFFFFF,F,FFFF  
FFFF:FFFFFFFFFFFFFFFF:FFFFFFFFFFFF:FFFFFFFFFFFF:FFFFFFFFFFFF:FFFFFFFFFFFF  
FFF::FFFF:FF,F  
@A00721:190:HGJW7DSXY:4:1301:16278:35790 2:N:0:TCTGCAAG+GCTGCACT  
AGCGTACGGAGGTGTCCCCGGCGCGGGCAAGCCAGTAATATTATATTGGCTTGCCCCACGGTCTGCGG  
TAAGATGCCCTGCGGGGCCTATGGAATTCTATTTGAATTTGAATTTGAATTGGTATACTGTAGGGCG  
GGATATTTTTCAAATT  
+  
FFFFFFFFFFFFFFFFFFFFFFFFFFFFFFFFFFFFFFFFFFFFFFFFFFFFFFFFFFFFF:F,FFFF::FFF,FFF:FFFFFFFF,FFF:, :FFFF  
FFFF:FFFFFF:FFFFFF,FF,FFFFFFFF,F,F:FF,F,FFF,:FFF:FFFFFF,F,FFFF:FF:F  
F:FF:FFFF:F,F,F  
@A00721:190:HGJW7DSXY:4:1310:21206:18270 2:N:0:TCTGCAAG+GCTGCACT  
AGCGTACGGAGGTGTCCCCGGCGCGGGCAAGCCAGTAATATTATATTGGCTTGCCCCACGGTCTGCGG  
TAAGATGCCCTGCGGGGCCTATGGAATTCTATTTGAATTTGAATTTGAATTGGTATACTGTAGGGCG  
GGATATTTTTCAAATT  
+  
FFFFFFFFFFFFFFFFFFFFFFFFFFFFFFFFFFFFFFFFFFFFFFFFFFFFFFFFFFFFF,FFFFFFFFFFFFFFFFFFFFFFFFFFFFFFFF  
:FFFF:FFFFFFFFFFFFFFFFFFFFFFFFFFFFFFFFFFFFFFFFFFFFFFFFFFFFFFFF:FFFFFFFFFFFFFFFF  
FFFFFFFFFFFF:FFFFF

@A00721:190:HGJW7DSXY:4:1612:22869:5963 2:N:0:TCTGCAAG+GCTGCACT  
AGCGTACGGAGGTGTCCCCGGCGCGGGCAAGCCAGTAATATTATATTGGCTTGCCCCACGGTCTGCGG

TAAGATGCCCCTGCGGGGCCTATGGAATTCTATTTGAATTTGAATTTGAATTGGTATACTGTAGGGCG  
GGATATTTTCAAATT

+

FFFFFFFFFFFFFFFFFFFFFFFFFFFFFFFFFFFFFFFF:FFFFFF,FFFFFFFFFFFFFFFFFFFFFFFF:FFF  
FFFFFF:FFFFFFFFFFFF,FFFFFFFF:FFF,F:FFFFFFFFFFFFFFFFFFFFFFFFFFFFFFFF  
FFF:FFFFFFFF

@A00721:190:HGJW7DSXY:4:2145:16947:17065 2:N:0:TCTGCAAG+GCTGCACT  
AGCGTACGAGGTGTCCCCGGCGCGGGCAAGCCAGTAATATTATATTGGCTTGCCCCACGGTCTGCGG  
TAAGATGCCCCTGCGGGGCCTATGGAATTCTATTTGAATTTGAATTTGAATTGGTATACTGTAGGGCG  
GGATATTTTCAAATT

+

FFFFFFFFFFFFFFFFFFFFFFFFFFFFFFFFFFFFFFFF:FFFFFFFF:FFFFFFFFFFFFFFFFFFFFFFFF  
:FFFFFFFFFFFFFFFFFFFF,FFFF,FFFFFFFFFFFFFFFF:FFFFFFFFFFFFFFFFFFFFFFFF  
FFFFFFFFFFFF:F

@A00721:190:HGJW7DSXY:4:2169:19307:31955 2:N:0:TCTGCAAG+GCTGCACT  
AGCGTACGAGGTGTCCCCGGCGCGGGCAAGCCAGTAATATTATATTGGCTTGCCCCACGGTCTGCGG  
TAAGATGCCCCTGCGGGGCCTATGGAATTCTATTTGAATTTGAATTTGAATTGGTATACTGTAGGGCG  
GGATATTTTCAAATT

+

FFFFFFFFFFFFFFFFFFFFFFFFFFFFFFFFFFFFFFFF,F:FF:FFFFFFFF:FFFFFFFFFFFFFFFF  
:FFFFFF:FFFFFFFFFFFFFFFFFFFFFFFFFFFFFFFF:FFFFFFFFFFFFFFFFFFFFFFFF  
FFF:FFFF:F:F

@A00721:190:HGJW7DSXY:4:2336:22968:27023 2:N:0:TCTGCAAG+GCTGCACT  
AGCGTACGAGGTGTCCCCGGCGCGGGCAAGCCAGTAATATTATATTGGCTTGCCCCACGGTCTGCGG  
TAAGATGCCCCTGCGGGGCCTATGGAATTCTATTTGAATTTGAATTTGAATTGGTATACTGTAGGGCG  
GGATATTTTCAAATT

+

FFFFFFFFFFFFFFFFFFFFFFFFFFFFFFFFFFFFFFFF:FFFF:FFFFFFFFFFFFFFFFFFFFFFFF,FFF  
FFFFFFFFFFFFFFFFFFFFFFFFFFFFFFFF:FFFF::FFFFFFFFFFFF,F,F:FFFF:F:FF,:F,  
FF,FFFFFFFF::F

@A00721:190:HGJW7DSXY:4:2544:24153:5494 2:N:0:TCTGCAAG+GCTGCACT  
AGCGTACGAGGTGTCCCCGGCGCGGGCAAGCCAGTAATATTATATTGGCTTGCCCCACGGTCTGCGG  
TAAGATGCCCCTGCGGGGCCTATGGAATTCTATTTGAATTTGAATTTGAATTGGTATACTGTAGGGCG  
GGATATTTTCAAATT

+

FFFFFFFFFFFFFFFFFFFFFFFFFFFFFFFFFFFFFFFFFFFFFFFFFFFFFFFFFFFFFFFF:FFFFFFFF  
FFFF:FFFFFF,FFFFFFFFFFFFFFFF,F:F:FFF:FFFFFFFFFFFFFFFF,FFF:FFFFFF  
FFF,FFFFFFFF

@A00721:190:HGJW7DSXY:4:2544:27697:5682 2:N:0:TCTGCAAG+GCTGCACT  
AGCGTACGAGGTGTCCCCGGCGCGGGCAAGCCAGTAATATTATATTGGCTTGCCCCACGGTCTGCGG  
TAAGATGCCCCTGCGGGGCCTATGGAATTCTATTTGAATTTGAATTTGAATTGGTATACTGTAGGGCG  
GGATATTTTCAAATT

+

FFFFFFFFFFFFFFFFFFFFFFFFFFFFFFFFFFFFFFFF:FFFFFFFFFFFFFFFFFFFFFFFFFFFFFFFF  
FFFFFFFFFFFFFFFFFFFFFFFFFFFFFFFFFFFFFFFFFFFFFFFFFFFFFFFFFFFFFFFF  
FFFFFFFFFFFFFFFF

@A00721:190:HGJW7DSXY:4:1110:21540:10332 2:N:0:TCTGCAAG+GCTGCACT  
CGTAAGCGTACGAGGTGTCCCCGGCGCGGGCAAGCCAGTAATATTATATTGGCTTGCCCCACGGTCT  
GCGGTAAGATGCCCCTGCGGGGCCTATGGAATTCTATTTGAATTTGAATTTGAATTGGTATACTGTAG  
GGCGGGATATTTCA

+

FFFFFFFFFFFFFFFFFFFFFFFFFFFFFFFFFFFFFFFF:FFF,FFFFFFFFFFFF:FFFF,FFFFFFFF:  
FFFFFFFF:FFFFFFFFFFFF,FFFFFFFFFFFF:FFFF,FFFFFFFFFFFFFFFF,FFFF  
F:FFFFFFFF

$+$ 

+

 $+$ 

+

+

+

+

F,FFFFF,FFFFFFFFF:FFFF,FFFFF,FFFFFFFFFFFFF:F:FFF:F:,FFFF,FF:F::FFFFF,  
FFFF:FF:,FFFF,F

@A00721:190:HGJW7DSXY:4:1228:23647:17989 2:N:0:TCTGCAAG+GCTGCACT  
TGACAAATCGACACGTAAGCGTACGGAGGTGTCCCCGGCGCGGGCAAGCCAGTAATAATATATTGCT  
TGCCCCACGGTCTGCGGGAAGATGCACCTGCGGGGCCTATGGAATTCTATTTGAATTTGAATTTAAT  
TGGTATACTGTAGGG

+

FFFFFFFFF:FF,FFFFFFFF::FF,F:FFFFF:F:F,F:FFFFF,FFF,F:F,FFF:F,FF,FFF,FFF  
F:::FF:FF,::F,,F:,FF:FFF:,FF:FFFF::FF,:::FFF:FFFF:FF,FFFFFFFF,FF,FF,  
F,:FF,:F:FFF,:F

@A00721:190:HGJW7DSXY:4:1305:31286:30655 2:N:0:TCTGCAAG+GCTGCACT  
TGACAAATCGACACGTAAGCGTACGGAGGTGTCCCCGGCGCGGGCAAGCCAGTAATATTATATTGGCT  
TGCCCCACGGTCTGCGGTAAGATGCCCCCTGCGGGGCCTATGGAATTCTATTTGAATTTGAATTTGAAT  
TGGTATACTTTAGGG

+

FF:FFFFFFFF:F,:FFFFFFFFFFFF,FFFFFFFFF:,FFFF:FFF:F:FFFFF,FFFFFFFF,FF,:FF  
F:,FFFFFF:FFF:::F,,FF:F::FFF,FFF:FF::,F,FFFF:F,FFFFFFFF:F,:::F:FFF:FF,  
F:FF,FF,,,FFF,F

@A00721:190:HGJW7DSXY:4:1430:28971:2816 2:N:0:TCTGCAAG+GCTGCACT  
TGACAAATCGACACGTAAGCGTACGGAGGTGTCCCCGGCGCGGGCAAGCCAGTAATATTATATTGGCT  
TGCCCCACGGTCTGCGGTAAGATGCCCCCTGCGGGGCCTATGGAATTCTATTTGAATTTGAATTTGAAT  
TGGTATACTGTAGGG

+

FFFFFFFFFFFF:FFFFFFFFFFFFF,FFFFFFFFFFFF:FFFFFFFFFFFFFFFFFFFFFFFFFFFFFFFFFFFF  
F:FFFFFFFFF:,FFFFFFFFFFFFFFFFFFFFFFFFFFFFFFFFFFFF:FFFFFFFFFFFF:FFFFFFFF  
FFF:FFF:FFFFFFFF

@A00721:190:HGJW7DSXY:4:1472:9751:28401 2:N:0:TCTGCAAG+GCTGCACT  
TGACAAATCGACACGTAAGCGTACGGAGGTGTCCCCGGCGCGGGCAAGCCAGTAATATTATATTGGCT  
TGCCCCACGGTCTGCGGTAAGATGCCCCCTGCGGGGCCTATGGAATTCTATTTGAATTTGAATTTGAAT  
TGGTATACTGTAGGG

+

FFFFFFFFFFFFFFFFFFFFFFFFFFFFFFFFFFFFFFFFFFFFFFFFFFFFFFFFFFFFFFFFFFFF,FFFFF  
FFFFFFFFFFFFFFFFFFFF:FFF:FFFFF,:FFFFFF:,FFFFFFFFFFFF:FFFFFFFFFFFFFFFF  
FFFFFF:FFFFFFFF

@A00721:190:HGJW7DSXY:4:1475:29469:6684 2:N:0:TCTGCAAG+GCTGCACT  
TGACAAATCGACACGTAAGCGTACGGAGGTGTCCCCGGCGCGGGCAAGCCAGTAATATTATATTGGCT  
TGCCCCACGGTCTGCGGTAAGATGCCCCCTGCGGGGCCTATGGAATTCTATTTGAATTTGAATTTGAAT  
TGGTATACTGTAGGG

+

FFFFFFFFFFFF:FFFFFFFFFFFFFFFFFFFFFFFFFFFFFFFFFFFF::F,FFFFFF:FFFFFFFFFF  
FFFFFFFFFFFFFFFFFFFF:FFFFFFFFFFFFFFFFFFFFF,FFFFFFFFFFFFFFFFFFFF:FFFFFFFF  
F:FFFFFF:FFFFFF

@A00721:190:HGJW7DSXY:4:1577:21169:5431 2:N:0:TCTGCAAG+GCTGCACT  
TGACAAATCGACACGTAAGCGTACGGAGGTGTCCCCGGCGCGGGCAAGCCAGTAATATTATATTGGCT  
TGCCCCACGGTCTGCGGTAAGATGCCCCCTGCGGGGCCTATGGAATTCTATTTGAATTTGAATTTGAAT  
TGGTATACTGTAGGG

+

:FFFFFFFFFFFFFFFFFFFF:FFFFFF:FFFFFF:FFFFFFFFFFFF:FFFFFFFFFFFFFFFFFFFF  
F:FFFFFFFFFFFFFFFFFFFF:FFFFFF:FFFFFFFFFFFF:FFFFFF:FFFFF,F:FFFFFFFFFFFFFFFF  
FFFFFFFF:FFFFF,:

@A00721:190:HGJW7DSXY:4:1635:8205:22874 2:N:0:TCTGCAAG+GCTGCACT  
TGACAAATCGACACGTAAGCGTACGGAGGTGTCCCCGGCGCGGGCAAGCCCGTAATATTATATTGGCT  
TGCCCCACGGTCTGCGGTAAGATGCCCCCTGCGGGGCCTATGGAATTCTATTTGAATTTGAATTTGAAT  
TGGTATACTGTAGGG

@A00721:190:HGJW7DSXY:4:2108:14425:34554 2:N:0:TCTGCAAG+GCTGCACT  
TGACAAATCGACACGTAAGCGTACGGAGGTGTCCCCGGCGCGGGCAAGCCAGTAATATTATATTGGCT  
TGCCCCACGGTCTGCGGTAAGATGCCCCCTGCGGGGCCTATGGAATTCTATTTGAATTTGAATTTGAAT  
TGGTATACTGTAGGG

@A00721:190:HGJW7DSXY:4:2211:19777:13135 2:N:0:TCTGCAAG+GCTGCACT  
TGACAAATCGACACGTAAGCGTACGGAGGTGTCCCCGGCGGGGCAAGCCAGTAATATTATATTGGCT  
TGCCCCACGGTCTGCGGTAAGATGCCCCCTGCGGGGCCTATGGAATTCTATTTGAATTTGAATTTGAAT  
TGGTATACTGTAGGG

@A00721:190:HGJW7DSXY:4:2222:9281:5760 2:N:0:TCTGCAAG+GCTGCACT  
TGACAAATCGACACGTAAGCGTACGGAGGTGTCCCCGGCGGGGCAAGCCAGTAATATTATATTGGCT  
TGCCCCACGGTCTGCGGTAAGATGCCCCCTGCGGGGCCTATGGAATTCTATTTGAATTTGAATTTGAAT  
TGGTATACTGTAGGG

@A00721:190:HGJW7DSXY:4:2226:21025:23030 2:N:0:TCTGCAAG+GCTGCACT  
TGACAAATCGACACGTAAGCGTACGGAGGTGTCCCCGGCGGGGCAAGCCAGTAATATTATATTGGCT  
TGCCCCACGGTCTGCGGTAAGATGCCCCCTGCGGGGCTATGGAATTCTATTTGAATTTGAATATGAAT  
TGGTATACTGTAGGG

@A00721:190:HGJW7DSXY:4:2236:6207:29277 2:N:0:TCTGCAAG+GCTGCACT  
TGACAAATCGACACGTAAGCGTACGGAGGTGTCCCCGGCGGGGCAAGCCAGTAATATTATATTGGCT  
TGCCCCACGGTCTGCGGTAAGATGCCCCCTGCGGGGCCTATGGAATTCTATTTGAATTTGAATTTGAAT  
TGGTATAATGTAGGG

@A00721:190:HGJW7DSXY:4:2655:29053:6339 2:N:0:TCTGCAAG+GCTGCACT  
TGACAAATCGACACGTAAGCGTACGGAGGTGTCCCCGGCGGGGCAAGCCAGTAATATTATATTGGCT  
TGCCCCACGGTCTGCGGTAAGATGCCCCCTGCGGGGCCTATGGAATTCTATTTGAATGTGAATTTGAAT  
TGGTATACTGTAGGG

@A00721:190:HGJW7DSXY:4:1336:25464:1720 2:N:0:TCTGCAAG+GCTGCACT  
GACAAATCGACACGTAAGCGTACGGAGGTGTCCCCGGCGCGGGCAAGCCAGTAATATTATATTGGCTT

GCCCCACGGTCTGCGGTAAGATGCCCCTGCGGGGCCTATGGAATTCTATTTGAATTTGAATTTGAATT  
GGTATACTGTAGGAG

+

FFFFFFFFFFFFFFFFFFFFFFFFFFFFFFFFFFFFFFFFFFFFFFFFFFFFFFFFFFFFFFFFFFFFFFFF  
FFFFFFFFFFFFFF:FFFFFF:FFFFFFFFFFFFFFFFFFFFFFFF:FFFFFF:FFFFFFFF:FFFFFFFFFFFF  
FFFFFF,FFFFFFFF

@A00721:190:HGJW7DSXY:4:1371:16676:26678 2:N:0:TCTGCAAG+GCTGCACT  
GACAAATCGACACGTAAGCGTACGGAGGTGTCCCCGGCGCGGGCAAGCCAGTAATATTATATTGGCTT  
GCCCCACGGTCTGCGGTAAGATGCCCCTGCGGGGCCTATGGAATTCTATTTGAATTTGAATTTGAATT  
GGTATACTGTAGGAG

+

FFFFFFFFFFFFFFFFFFFFFFFFFFFFFFFFFFFFFFFFFFFFFFFFFFFFFFFFFFFFFFFFFFFFFF:FFFFFFFFFFFF  
FFFFFFFFFFFFFFFFFFFFFFFFFFFFFFFFFFFFFFFFFFFFFFFF:FFFFFFFFFFFFFFFFFFFFFFFFFFFFFFF  
FFFFFFFFFFFFFFFF

@A00721:190:HGJW7DSXY:4:1430:18927:10567 2:N:0:TCTGCAAG+GCTGCACT  
GACAAATCGACACGTAAGCGTACGGAGGTGTCCCCGGCGCGGGCAAGCCAGTAATATTATATTGGCTT  
GCCCCACGGTCTGCGGTAAGATGCCCCTGCGGGGCCTATGGAATTCTATTTGAATTTGAATTTGAATT  
GGTATACTGTAGGAG

+

FFFFFFFFFFFFFFFFFFFFFFFFFFFFFFFFFFFFFFFFFFFFFFFFFFFFFFFFFFFFFFFFFFFFFF:FFFFFFFFFFFF  
FFFFFFFFFFFF:FFFFFFFFFFFFFFFFFFFFFFFFFFFFFFFFFFFFFFFFFFFFFFFF,F:FFFFFFFFFFFF,FFFFFFFF  
:FF:FF,FFFFFFFF

@A00721:190:HGJW7DSXY:4:1530:3938:2487 2:N:0:TCTGCAAG+GCTGCACT  
GACAAATCGACACGTAAGCGTACGGAGGTGTCCCCGGCGCGGGCAAGCCAGTAATATTATATTGGCTT  
GCCCCACGGTCTGCGGTAAGATGCCCCTGCGGGGCCTATGGAATTCTATTTGAATTTGAATTTGAATT  
GGTATACTGTAGGAG

+

FFFFFFFFFFFFFFFFFFFFFFFFFFFFFFFFFFFFFFFFFFFFFFFFFFFFFFFFFFFFFFFFFFFFFF  
FFFFFFFFFFFFFFFFFFFF:FFFFFFFFFFFFFFFFFFFFFFFF::FFFFFFFFFFFFFF::FFFF:FFFFFFFFFFFF  
FFFFFFFFFFFFFFFF

@A00721:190:HGJW7DSXY:4:1677:20799:11522 2:N:0:TCTGCAAG+GCTGCACT  
GACAAATCGACACGTAAGCGTACGGAGGTGTCCCCGGCGCGGGCAAGCCAGTAATATTATATTGGCTT  
GCCCCACGGTCTGCGGTAAGATGCCCCTGCGGGGCCTATGGAATTCTATTTGAATTTGAATTTGAATT  
GGTATACTGTAGGAG

+

FFFFFFFFFFFFFFFFFFFFFFFFFFFFFFFFFFFFFFFFFFFFFFFFFFFFFFFFFFFFFFFFFFFFFF  
FFFFFFFFFFFF,FFFFF:FFFFFFFFFFFFFFFFFFFF,FFFFF::FFFFF::FFFFFFFFFFFFFFFFFFFF  
FFFFFFFFFFFFFFFF

@A00721:190:HGJW7DSXY:4:2458:3224:24142 2:N:0:TCTGCAAG+GCTGCACT  
GACAAATCGACACGTAAGCGTACGGAGGTGTCCCCGGCGCGGGCAAGCCAGTAATATTATATTGGCTT  
GCCCCACGGTCTGCGGTAAGATGCCCCTGCGGGGCCTATGGAATTCTATTTGAAGTTGAATTTGAATT  
GGTATACTGTAGGAG

+

FFFFFF:FFFFFFFFFFFFFFFFFFFF:FFFFFFF:FF:FFFFFFFF:FFF:F::F:F:,F:,F:FFFF  
,,FFF:FFF:F,FFFF:F::F:F,FFFFFFFFFFFFFFFF,FFF,,FFF:F,FF::,FFFF:,FFF::F  
FFF,F:FFFFFFFF

@A00721:190:HGJW7DSXY:4:1237:4661:7310 2:N:0:TCTGCAAG+GCTGCACT  
GACAAATCGACACGTAAGCGTACGGAGGTGTCCCCGGCGCGGGCAAGCCAGTAATATTATATTGGCTT  
GCCCCACGGTATGCGGTAAGATGCCCCTGCGGGGCCTATGGAATTCTATTTGAATTTGAATTTGAATT  
GGTATACTGTAGGA

+

FFFFFFFFFFFFFFFFFFFF:FFF:FFFFFFFFFFFFFFFFFFFFFFFFFFFF:FF,FF:FFFF,FFFFFF,  
,FF:FFFF,FFFFFF:FF::FFFFFFFFFFFFFFFF:F:FFFFF::FF,FFF:F,F:FFF,FFFF:F  
FFF:,::,F,:FFF



@A00721:190:HGJW7DSXY:4:1325:24822:5431 2:N:0:TCTGCAAG+GCTGCACT  
AATGACAAATCGACACGTAAGCGTACGGAGGTGTCCCCGGCGCGGGCAAGCCAGTAATATTATATTGG  
CTTGCCCCACGGTCTGCGGTAAGATGCCCCTGCGGGGCCTATGGAATTCTATTTGAATTTGAATTTGA  
ATTGGTATACTGTAG

+

FFFFFFFFFFFFFFFFFFFFFFFFFFFFFFFFFFFFFFFFFFFFFFFFFFFFFFFFFFFFFFFFFFFFFFFF  
FFFFFFFFFFFFFFFF:FFFFFFFFFFFFFFFFFFFFFFFFFFFFFFFFFFFFFFFFFFFFFFFFFFFFFFFF  
F,FFFFFFFFFFFFFFFF

@A00721:190:HGJW7DSXY:4:2369:7148:3223 2:N:0:TCTGCAAG+GCTGCACT  
AATGACAAATCGACACGTAAGCGTACGGAGGTGTCCCCGGCGCGGGCAAGCCAGTAATATTATATTGG  
CTTGCCCCACGGTCTGCGGTAAGATGCCCCTGCGGGGCCTATGGAATTCTATTTGAATTTGAATTTGA  
ATTGGTATACTGTAG

+

FFFFFFFFFFFFFFFFFFFFFFFFFFFFFFFFFFFFFFFFFFFFFFFFFFFFFFFFFFFFFFFFFFFFFFFF  
FFFFFFFFFFFFFFFF:FFFFFFFFFFFFFFFFFFFFFFFFFFFFFFFFFFFFFFFFFFFFFFFFFFFFFFFF  
FFFF:FFFFFFFFFFFF

@A00721:190:HGJW7DSXY:4:1504:2862:4946 2:N:0:TCTGCAAG+GCTGCACT  
CTAATGACAAATCGACACGTAAGCGTACGGAGGTGTCCCCGGCGCGGGCAAGCCAGTAATATTATATT  
GGCTTGCCCCACGGTCTGCGGTAAGATGCCCCTGCGGGGCCTATGGAATTCTATTTGAATTCGAATTT  
GAATTGGTATACTGT

+

FFFFFFFFFFFFFFFFFFFFFFFFFFFFFFFFFFFFFFFFFFFFFFFFFFFFFFFFFFFFFFFFFFFFFFFF  
FFFFFFFFFFFFFFFF:FFFFFFFFFFFFFFFFFFFFFFFFFFFFFFFFFFFFFFFFFFFFFFFFFFFFFFFF  
FFFF:FFFFFFFFFFFF,FF,FFFFFFFFFFFF,FFFFFFFFFFFF:FFFFFFFFFFFF,F,:FFFFFFFF:FFFF  
FFFF:FFFFFFFF:FF

@A00721:190:HGJW7DSXY:4:2120:31611:18693 2:N:0:TCTGCAAG+GCTGCACT  
CTAATGACAAATCGACACGTAAGCGTACGGAGGTGTCCCCGGCGCGGGCAAGCCAGTAATATTATAGT  
GGCTTGCCCCACGGTCTGCGGTAAGATGCCCCTGCGGGGCCTATGGAATTCTATTTGAATTCGAATTT  
GAATTGGTATACTGT

+

FFFFFFFFFFFF:FFFFFFFFFFFFFFFFFFFFFFFFFFFFFFFFFFFFFFFFFFFFFFFFFFFFFFFF:F::F:FF,F  
FFFFFFFFFFFFFFFF:F:FFFFFFFF:F,F::FFFFFFFF:FFF:FFFFFFFF:F:,FF:FFFF:FFF:,FFF  
FFFFFFFFFFFFFFFF

@A00721:190:HGJW7DSXY:4:2242:18105:7482 2:N:0:TCTGCAAG+GCTGCACT  
CTAATGACCAATCGACACGTAAGCGTACGGAGGTGTCCCCGGCGCGGGCAAGCCAGTAATATTATATT  
GGCTTGCCCCACGGTCTGCGGTAAGATGCCCCTGCGGGGCCTATGGAATTCTATTTGACTTCGAATTT  
GAATTGGTATACTGT

+

FFFFFFFFF,:FFFFFFFFFFFFFFFFFFFFFFFFFFFFFFFFFFFFFFFFFFFFFFFF,FFFFFFF,FFF,F:F:F,:F,FF:F  
F:FFFFFFFFFFFFFFFF:F,F,FFF:FFFFFFFFFFFFFFFFFFFFFFFF:FFFFFFF,:FF,FF,F:F,:FFF,FFF  
FFF,,,FF:FFFFF

@A00721:190:HGJW7DSXY:4:2316:30120:26694 2:N:0:TCTGCAAG+GCTGCACT  
CTAATGACAAATCGACACGTAAGCGTACGGAGGTGTCCCCGGCGCGGGCAAGCCAGTAATATTATATT  
GGCTTGCCCCACGGTCTGCGGTAAGATGCCCCTGCGGGGCCTATGGAATTCTATTTGAATTCGAATTT  
GAATTGGTATACTGT

+

FFFFFFFFFFFFFFFFFFFFFFFFFFFFFFFFFFFFFFFFFFFFFFFFFFFFFFFFFFFFFFFFFFFFFFFF  
FFFFFFFFFFFFFFFF:FFFFFFFFFFFFFFFFFFFFFFFFFFFFFFFFFFFFFFFFFFFFFFFFFFFFFFFF  
FFFFFFFFFFFFFFFF

@A00721:190:HGJW7DSXY:4:2641:6515:33818 2:N:0:TCTGCAAG+GCTGCACT  
CTAATGACAAATCGACACGTAAGCGTACGGAGGTGTCCCCGGCGCGGGCAAGCCAGTAATATTATATT  
GGCTTGCCCCACGGTCTGCGGTAAGATGCCCCTGCGGGGCCTATGGAATTCTATTTGAATTCGAATTT  
GAATTGGTATACTGT

+

FFFFFFFFFFFFFFFFFFFFFFFFFFFFFFFFFFFFFFFFFFFFFFFFFFFFFFFFFFFFFFFFFFFFFFFF  
FFFFFFFFFFFFFFFF:FFFFFFFFFFFFFFFFFFFFFFFFFFFFFFFFFFFFFFFFFFFFFFFF:FF



+  
FFFFFFFFFFFFFFFFFFFFFFFFFFFFFFFFFFFFFFFFFFFFFFFFFFFFFFFFFFFFFFFFFFFFFFFF  
FFFF:F:FFFFFFFF:FFFFFFFF:FFFF:FFFFFFFF,F:FFFFFFFF:FFFFFFFFFFFF  
F,:FFF,FFFFFFFF  
@A00721:190:HGJW7DSXY:4:1344:4562:35133 2:N:0:TCTGCAAG+GCTGCACT  
GTCTAATGACAAATCGACACGTAAGCGTACGGAGGTGTCCCCGGCGCGGGCAAGCCAGTAATATTATA  
TTGGCTTGCCCCACGGTCTGCGGTAAGATGCCCCTGCGGGCCTATGGAATTCTATTTGAATTTGAAT  
TTGAATTGGTAAGAT

+  
FFFFFFFFFFFFFFFFFFFFFFFFFFFFFFFFFFFFFFFFFFFFFFFFFFFFFFFFFFFFFFFFFFFF,FFFFFFFFFFFF:FFF  
FFFFFFFFFFFFFFFFFFFFFFFFFFFFFFFFFFFFFFFFFFFFFFFFFFFFFFFFFFFF:,FFFFFFFF:F,F,FFFF,F:FF:F  
FFFF,FFFFFF:FF  
@A00721:190:HGJW7DSXY:4:1648:5692:33144 2:N:0:TCTGCAAG+GCTGCACT  
GTCTAATGACAAATCGACACGTAAGCGTACGGAGGTGTCCCCGGCGCGGGCAAGCCAGTAATATTATA  
TTGGCTTGCCCCACGGTCTGCGGTAAGATGCCCCTGCGGGCCTATGGAATTCTATTTGAATTTGAAT  
TTGAATTGGTAAGAT

+  
FFFFFFFFFFFFFFFFFFFFFFFFFFFFFFFFFFFFFFFFFFFFFFFFFFFFFFFFFFFFFFFFFFFF  
,FFFFFFFFFFFFFFFFFFFFFFFFFFFFFFFFFFFFFFFFFFFFFFFFFFFFFFFFFFFF:FF,FFFFFFFFFFFFFFFF:FFFF,FFFF:FFF:FF,FFF,F  
FFFF:FFFFFFFF  
@A00721:190:HGJW7DSXY:4:2648:7780:27336 2:N:0:TCTGCAAG+GCTGCACT  
GTCTAATGACAAATCGACACGTAAGCGTACGGAGGTGTCCCCGGCGCGGGCAAGCCAGTAATATTATA  
TTGGCTTGCCCCACGGTCTGCGGTAAGATGCCCCTGCGGGCCTATGGAATTCTATTTGAATTTGAAT  
TTGAATTGGTAAGAT

+  
FFFFFFFFFFFFFFFFFFFFFFFFFFFFFFFFFFFFFFFFFFFFFFFFFFFFFFFFFFFFFFFFFFFF,FFFFFFF  
FFFFFFFFFFFFFFFFFFFFFFFFFFFFFFFFFFFFFFFFFFFFFFFFFFFFFFFFFFFF,FFFFFFFFFFFFFFFF:FFFFFFF  
FFFFFFFFFFFFFFFFFFFF  
@A00721:190:HGJW7DSXY:4:2239:9869:26976 2:N:0:TCTGCAAG+GCTGCACT  
CGCGTGGTCTAATGACAAATCGACACGTAAGCGTACGGAGGTGTCCCCGGCGCGGGCAAGCCAGTAAT  
ATTATATTGGCTTGCCCCACGGTCTGCGGTAAGATGCCCCTGCGGGCCTATGGAATTCTATTTGAAT  
TTGAATTTGAATTGG

+  
FFFFFFFFFFFFFFFFFFFFFFFFFFFFFFFFFFFFFFFFFFFFFFFFFFFFFFFFFFFFFFFFFFFF:FFFFFFFFFFFFFFFFFFFFFFFFFFFFFFFF  
FFFFFFFFFFFFFFFFFFFFFFFFFFFFFFFFFFFFFFFFFFFFFFFFFFFFFFFFFFFF,FFFFFFFFFFFFFFF  
F:FF:FFF:FFFFFF  
@A00721:190:HGJW7DSXY:4:2639:6433:6214 2:N:0:TCTGCAAG+GCTGCACT  
CGCGTGGTCTAATGACAAATCGACACGTAAGCGTACGGAGGTGTCCCCGGCGCGGGCAAGCCAGTAAT  
ATTATATTGGCTTGCCCCACGGTCTGCGGTAAGATGCCCCTGCGGGCCTATGGAATTCTATTTGAAT  
TTGAATTTGAATTGG

+  
FFFF:FFFFFFFFFFFFFFFFFFFFFFFFFFFFFFFFFFFFFFFFFFFFFFFFFFFFFFFFFFFF,FFFFFFFF:F  
FFFF:FFFFFFFFFFFFFFFFFFFFFFFFFFFFFFFFFFFFFFFFFFFFFFFFFFFFFFFFFFFF,F,FFFF:FFFF:,FFF,F  
FFFFFF:FFFFFFF  
@A00721:190:HGJW7DSXY:4:1128:6958:6026 2:N:0:TCTGCAAG+GCTGCACT  
GTGACGCGTGGTCTAATGACAAATCGACACGTAAGCGTACGGAGGTGTCCCCGGCGCGGGCAAGCCAG  
TAATATTATATTGGCTTGCCCCACGGTCTGCGGTAAGATGCCCCTGCGGGCCTATGGAATTCTATTT  
GAATTTGAATTTGAA

+  
FFFFFFFFFFFFFFFFFFFFFFFFFFFFFFFFFFFFFFFFFFFFFFFFFFFFFFFFFFFFFFFFFFFF:FFFFFFF  
FFFFFFFFFFFFFF,FFFFFFFFFFFFFFFF:FFFF:FFFFFFFFFFFFFFFFFFFF,F,FFF:FFFF:FFF  
FFFFFFFFFFFFFFFFFFFF  
@A00721:190:HGJW7DSXY:4:1435:2220:11475 2:N:0:TCTGCAAG+GCTGCACT  
GTGACGCGTGGTCTAATGACAAATCGACACGTAAGCGTACGGAGGTGTCCCCGGCGCGGGCAAGCCAG

TAATATTATATTGGCTTGCCCCACGGTCTGCGGTAAGATGCCCTGCGGGGCCTATGGAATTCTATTT  
GAATTTGAATTTGAA

+

FFFFFFFFFFFFFFFFFFFFFFFFFFFFFFFFFFFFFFFFFFFFFFFFFFFFFFFFFFFFFFFFFFFFFFFF:F  
FFFFFF:FFFFFFFFFFFFFFFFFFFFFFFF,FFFFFFFFFFFFFFFFFFFFFFFFFFFFFFFFFFFFFFFF:FF  
FFFFFFFFF,FFFFF

@A00721:190:HGJW7DSXY:4:1471:23493:29684 2:N:0:TCTGCAAG+GCTGCACT  
GTGACGCGTGGTCTAATGACAAATCGACACGTAAGCGTACGGAGGTGTCCCCGGCGCGGGCAAGCCAG  
TAATATTATATTGGCTTGCCCCACGGTCTGCGGTAAGATGCCCTGCGGGGCCTATGGAATTCTATTT  
GAATTTGAATTTGAA

+

FFFFFFFFFFFFFFFFFFFFFFFFFFFFFFFFFFFFFFFFFFFFFFFFFFFFFFFFFFFFFFFFFFFFFFFF  
FFFFFF,F:FFFFFFFFFFFFFFFFFFFFFFFF,FFFFFFFFF:FFFFFFFFFFFFFFFFFFFFFFFF,FFFFFFF  
:F:FFFFFFFFFFFFF

@A00721:190:HGJW7DSXY:4:1641:5231:35790 2:N:0:TCTGCAAG+GCTGCACT  
GTGACGCGTGGTCTAATGACAAATCGACACGTAAGCGTACGGAGGTGTCCCCGGCGCGGGCAAGCCAG  
TAATATTATATTGGCTTGCCCCACGGTCTGCGGTAAGATGCCCTGCGGGGCCTATGGAATTCTATTT  
GAATTTGAATTTGAA

+

FFF:FFFFFFFFFFFFFFFFFFFFFFFFFFFFFFFFFFFFFFFFFFFFFFFFFFFFFFFFFFFFFFFFFFFF  
FFF:FF,FFFFFFFFFFFFFFFFFFFFFFFFFFFFFFFFFFFFFFFFFFFFFFFFFFFFFFFFFFFFFFFF:FFF:,F,F:FF:  
FF:FFFFFFFFFFFFF

@A00721:190:HGJW7DSXY:4:2133:1542:32409 2:N:0:TCTGCAAG+GCTGCACT  
GTGACGCGTGGTCTAATGACAAATCGACACGTAAGCGTACGGAGGTGTCCCCGGCGCGGGCAAGCCAG  
TAATATTATATTGGCTTGCCCCACGGTCTGCGGTAAGATGCCCTGCGGGGCCTATGGAATTCTATTT  
GAATTTGAATTTGAA

+

FFFFFFFFFFFFFFFFFFFFFFFFFFFFFFFFFFFFFFFFFFFFFFFFFFFFFFFFFFFFFFFFFFFFFFFF  
FFFFFFFFFFFFFFFFFFFFFFFFFFFFFFFFFFFFFFFFFFFFFFFFFFFFFFFFFFFFFFFFFFFFFFFF  
FFFFFFFFFFFFFFFFFFFFF

@A00721:190:HGJW7DSXY:4:2455:26775:12477 2:N:0:TCTGCAAG+GCTGCACT  
GTGACGCGTGGTCTAATGACAAATCGACACGTAAGCGTACGGAGGTGTCCCCGGCGCGGGCAAGCCAG  
TAATATTATATTGGCTTGCCCCACGGTCTGCGGTAAGATGCCCTGCGGGGCCTATGGAATTCTATTT  
GAATTTGAATTTGAA

+

FFFFFFFFFFFFFFFFFFFFFFFFFFFFFFFFFFFFFFFFFFFFFFFFFFFFFFFFFFFFFFFFFFFFFFFF  
,FFFF:FFFFFFFFF,FFFFFFFFFFFFFFFFFFFFFFFF:FFFFFF:FFFFFFFFFFFF,,:FFF,F:FFF:FF  
F::FFF:FFF,FFF

@A00721:190:HGJW7DSXY:4:2242:28782:13698 2:N:0:TCTGCAAG+GCTGCACT  
TACCAATCAAATTCAAAAAGAAATCCATAGGCACCGCAGGGGCATATTACCGCAGACCGTGGGGCAA  
GCCAATATAAAATAACAGGCTAGCCCGCGCCGGGGACACCTCCGTACGCTTACGTGTGATTTGTCAT  
TAGACCACGCGTCA

+

FFF:FF,,FFFFFFFFF:,F:FF,,FFFFFFFFF:FFFF:FFF:F,,FFFFFFFFF,F:,FFFF:,F  
FFFF,,:FFF,FF:FF,:FFF,F,F:F,FF:F:FFFFFFFFFFFF,FFFF:F:FFFFFFF::FFF,FF  
,FFFFFFFFFFFF:

@A00721:190:HGJW7DSXY:4:2123:10601:31000 2:N:0:TCTGCAAG+GCTGCACT  
TACCAATTCAAATTCAAATAGAAATCCATAGGCCCGCAGGGGCATCTTACCGCAGACCGTGGGGCAA  
GCCAATATAATATTACTGGCTTGCCCGCGCCGGGGACACCTCCGTACGCTTACGTGTGATTTGTCAT  
TAGACCACGCGTCA

+

FFFFFFFFFFFFFFFFFFFFFFFFFFFFFFFFFFFF,F:FFFFFFFFFFFF:FFFFFFFFFFFF:FFFFFFFFFFFF  
FFF:FFFF:FFFFFFF,FFF:FFFFFFFFFFFFFFFFFFFFFFFF:F:FF,F:FFFFFFFFF:FFFFFFF  
FFFFFFFFFFFF:FF:



@A00721:190:HGJW7DSXY:4:1432:15374:8359 2:N:0:TCTGCAAG+GCTGCACT  
GATCGTGACGCGTGGTCTAATGACAAATCGACACGTAAGCGTACGGAGGTGTCCCCGGCGCGGGCAAG  
CCAGTAATATTATATTTGCTTGCCCCACGGTCTGCGGTAAGATGCCCTGCGGGGCCTATGGAATTCT  
ATTTGAATTTGAATT

@A00721:190:HGJW7DSXY:4:1668:7374:34240 2:N:0:TCTGCAAG+GCTGCACT  
GATCGTGACGCGTGGTCTAATGACAAATCGACACGTAAGCGTACGGAGGTGTCCCCGGCGCGGGCAAG  
CCAGTAATATTATATTGGCTTGCCCCACGGTCTGCGGTAAGATGCCCCCTGCGGGGCTATGGAATTCT  
ATGTGAATTTGAATT

@A00721:190:HGJW7DSXY:4:1677:32208:4758 2:N:0:TCTGCAAG+GCTGCACT  
GATCGTGACGCGTGGTCTAATGACAAATCGACACGTAAGCGTACGGAGGTGTCCCCGGCGCGGGCAAG  
CCAGTAATATTATATTGGCTTGCCCCACGGTCTGCGGTAAGATGCCCCTGCGGGGCTATGGAATTCT  
ATTTGAATTTGAATT

@A00721:190:HGJW7DSXY:4:2174:5267:34601 2:N:0:TCTGCAAG+GCTGCACT  
GATCGTGACGCGTGGTCTAATGACAAATCGACACGTAAGCGTACGGAGGTGTCCCCGGCGCGGGCAAG  
CCAGTAATATTATATTGGCTTGCCCCACGGTCTGCGGTAAGATGCCCTGCGGGCCTATGGAATTCT  
ATTTGAATTTGAATT

@A00721:190:HGJW7DSXY:4:2267:5575:17534 2:N:0:TCTGCAAG+GCTGCACT  
GATCGTGACGCGTGGTCTAATGACAAATCGACACGTAAGCGTACGGAGGTGTCCCCGGCGCGGGCAAG  
CCAGTAATATTATATTGGCTTGCCCCACGGTCTGCGGTAAGATGCCCTGCGGGGCTATGGAATTCT  
ATTTGAATTTGAATT

@A00721:190:HGJW7DSXY:4:2327:10077:6324 2:N:0:TCTGCAAG+GCTGCACT  
GATCGTGACGCGTGGTCTAATGACAAATCGACACGTAAAGCGTACGGAGGTGTCCCCGGCGCGGGAAG  
CCAGTAATATTATATTGGCTTGCCCCACGGTCGGCGGTAAGATGCCCTGCGGGGCCTATGGAATTCT  
ATTTGAATTIGAATT

@A00721:190:HGJW7DSXY:4:2533:6506:11600 2:N:0:TCTGCAAG+GCTGCACT  
GATCGTGACGCGTGGTCTAATGACAAATCGACACGTAAGCGTACGGAGGTGTCCCCGGCGGGGCAAG  
CATAGTAATATTATATTGGCTTGCCCCACGGTCTGCGGTAAGATGCCCTGCGGGGCCTATGGAATTCT  
ATTTGAATTGGAATT

+  
FFFFFFFFFFFFFFFFFFFFFFFFFFFFFFFFFFFFFFFFFFFFFFFFFFFFFFFFFFFFFFFFFFFFFFFF:F  
FFFFFFFFF:FFFFFFFFF:FFFFFFFFFFFFFFFFFFFFFFFF:FF:FFFFFFFFFFFF,FFFFF:FFFF  
F,FFFFFFFFF::FF

@A00721:190:HGJW7DSXY:4:2670:10131:26647 2:N:0:TCTGCAAG+GCTGCACT  
GATCGTGACGCGTGGTCTAATGACAAATCGACACGTAAGCGTACGGAGGTGTCCCCGGCGCGGGCAAG  
CCAGTAATATTATATTGGCTTGCCCCACGGTCTGCGGTAAGATGCCCTGCGGGGCCTATGGAATTCT  
ATTTGAATTTGAATT

+  
FFFFFFFFFFFFFFFFFFFFFFFFFFFFFFFFFFFFFFFFFFFFFFFFFFFFFFFFFFFFFFFFFFFFFFFF:FF  
FFFFFF:FFFFFFF:FFFFFFFFFFFFFFFFFFFFFFFFFFFFFFFFFFFFFFFFFFFFFFFFFFFFF,FFFFF,FFFF  
F,F:FFF,FFFFFFF

@A00721:190:HGJW7DSXY:4:1611:23149:18004 2:N:0:TCTGCAAG+GCTGCACT  
ATGATCGTGACGCGTGGTCTAATGACAAATCGACACGTAAGCGTACGGAGGTGTCCCCGGCGCGGGCA  
AGCCAGTAATATTATATTGGCTTGCCCCACGGTCTGCGGTAAGATGCCCTGCGGGGCCTATGGAATT  
CTATTTGAATTTGAA

+  
FFFFFFFFFFFFFFFFFFFFFFFFFFFFFFFFFFFFFFFFFFFFFFFFFFFFFFFFFFFFFFFFFFFFFFFF  
FFFFFFFFFFFFFFFFFFFFFFFFFFFFFFFFFFFFFFFFFFFFFFFFFFFFFFFFFFFFFFFFFFFFFFFF,FFFFF,  
,F,FFFF:FFFFFFF

@A00721:190:HGJW7DSXY:4:2216:14642:25629 2:N:0:TCTGCAAG+GCTGCACT  
ATGATCGTGACGCGTGGTCTAATGACAAATCGACACGTAAGCGTACGGAGGTGTCCCCGGCGCGGGCA  
AGCCAGTAATATTATATTGGCTTGCCCCACGGTCTGCGGTAAGATGCCCTGCGGGGCCTATGGAATT  
CTATTTGAATTTGAA

+  
FFFFFFFFFFFFFFFFFFFFFFFFFFFFFFFFFFFFFFFFFFFFFFFFFFFFFFFFFFFFFFFFFFFFFFFF  
FFFFFFFFFFFFFFFFFFFFFFFFFFFFFFFFFFFFFFFFFFFFFFFFFFFFFFFFFFFFFFFFFFFFFFFF:FFFFF  
FFFFFFFFFFFF:FFFF

@A00721:190:HGJW7DSXY:4:1128:5855:25598 2:N:0:TCTGCAAG+GCTGCACT  
ATTTTTTAGATGGTCATGATCGTGACGCGTGGTCTAATGACAAATCGACACGTAAGCGTACGGAGGTG  
TCCCCGGCGCGGGCAAGCCAGTAATATTATATTGGCTTGCCCCACGGTCTGCGGTAAGATGCCCTGC  
GGGGCCTATGGAATT

+  
FFFFFFFFFFFF:FFFFFFFFFFFFFFFFFFFFFFFFFFFFFFFFFFFFFFFFFFFFFFFFFFFFFFFF:FFFFF:  
FF:FFFFFFFFFFFFF,:FFF:FFFFFFFFFFFFFFFF:FFF,,FFFFFFFFFFFFFFFFFFFFFFFFFFFFF:  
FFFFFFFFFFFFFFFF

@A00721:190:HGJW7DSXY:4:1128:3540:35931 2:N:0:TCTGCAAG+GCTGCACT  
ATTTTTTAGATGGTCATGATCGTGACGCGTGGTCTAATGACAAATCGACACGTAAGCGTACGGAGGTG  
TCCCCGGCGCGGGCAAGCCAGTAATATTATATTGGCTTGCCCCACGGTCTGCGGTAAGATGCCCTGC  
GGGGCCTATGGAATT

+  
FFF:FFFF:FFFFFFFFFFFFFFFFFFFFFFFFFFFFFFFFFFFFFFFFFFFFFFFFFFFFFFFFFFFFF  
FF,FFFFFFFFFFFFFFFFFFFFFFFF:FFFFFFFFFFFFFFFFFFFFFFFFFFFFFFFFFFFFFFFF:FFFFFFFFFFF  
FFFFFFFFFFFFFFFF

@A00721:190:HGJW7DSXY:4:1172:20961:16344 2:N:0:TCTGCAAG+GCTGCACT  
ATTTTTTAGATGGTCATGATCGTGACGCGTGGTCTAATGACAAATCGACACGTAAGCGTACGGAGGTG  
TCCCCGGCGCGGGCAAGCCAGTAATATTATATTGGCTTGCCCCACGGTCTGCGGTAAGATGCCCTGC  
GGGGCCTATGGAATT

+  
FFFFFFFFFFFFFFFFFFFFFFFFFFFFFFFFFFFFFFFFFFFFFFFFFFFFFFFFFFFFFFFFFFFFFFFF:F  
FFFFFFFFFFFFFFFFFFFFFFFF,FFF:FF,FFFFFFFFFFFFFFFFFFFFFFFFFFFFFFFF:FFFFFFFFFFFFFFF:F  
FFFFFFFFFFFFFFFF

@A00721:190:HGJW7DSXY:4:1253:25129:27007 2:N:0:TCTGCAAG+GCTGCACT  
ATTTTTTAGATGGTCATGATCGTGACGCGTGGTCTAATGACAAATCGACACGTAAGCGTACGGAGGTG

TCCCCGGCGCGGGCAAGCCAGTAATATTATATTGGCTTGCCCCACGGTCTGCGGTAAGATGCCCCTGC  
GGGGCCTATGGAATT

+

FFFFFFFFFFFFFFFFFFFFFFFFFFFFFFFFFFFFFFFFFFFFFFFFFFFFFFFFFFFFFFFFFFFFFFFF  
FFFFFFFFFFFFFFFFFFFFFFFFFFFFFFFFFFFFFFFFFFFFFFFFFFFFFFFFFFFFFFFFFFFFFFFF  
FFFFFFFFFFFFFF,FF

@A00721:190:HGJW7DSXY:4:1255:23628:12633 2:N:0:TCTGCAAG+GCTGCACT  
ATTTTTTAGATGGTCATGATCGTGACGCGTGGTCTAATGACAAATCGACACGTAAGCGTACGGAGGTG  
TCCCCGGCGCGGGCAAGCCAGTAATATTATATTGGCTTGCCCCACGGTCTGCGGTAAGATGCCCCTGC  
GGGGCCTATGGAATT

+

FFFFFF:FFF:FFFFFFFFFFFFFFFFFFFFFFFFFFFFFFFFFFFFFFFFFFFFFFFFFFFFFFFFFFFF  
FFFFFFFFFFFFFFFFFFFFFFFFFFFFFFFFFFFFFFFFFFFFFFFFFFFFFFFFFFFFFFFFFFFFFFFF  
FFFFFFFFFFFFFF:FF

@A00721:190:HGJW7DSXY:4:1263:30581:8766 2:N:0:TCTGCAAG+GCTGCACT  
ATTTTTTAGATGGTCATGATCGTGACGCGTGGTCTAATGACAAATCGACACGTAAGCGTACGGAGGTG  
TCCCCGGCGCGGGCAAGCCAGTAATATTATATTGGCTTGCCCCACGGTCTGCGGTAAGATGCCCCTGC  
GGGGCCTATGGAATT

+

FFF:FFFFFFFFFFFFFFFFFFFFFFFFFFFFFFFFFFFFFFFFFFFFFFFFFFFFFFFFFFFFFFFFFFFF  
FFFFFFFFFFFFFFFFFFFFFFFFFFFFFFFFFFFFFFFFFFFFFFFFFFFFFFFFFFFFFFFFFFFFFFFF  
FFFFFFFFFFFFFF:FF

@A00721:190:HGJW7DSXY:4:1317:17535:17738 2:N:0:TCTGCAAG+GCTGCACT  
ATTTTTTAGATGGTCATGATCGTGACGCGTGGTCTAATGACAAATCGACACGTAAGCGTACGGAGGTG  
TCCCCGGCGCGGGCAAGCCAGTAATATTATATTGGCTTGCCCCACGGTCTGCGGTAAGATGCCCCTGC  
GGGGCCTATGGAATT

+

FFFF,FFFFFFFFFFFFFFFFFFFFFFFFFFFFFFFFFFFFFFFFFFFFFFFFFFFFFFFFFFFFFFFFFFFF  
FFFFFFFFFFFFFFFFFFFFFFFFFFFFFFFFFFFFFFFFFFFFFFFFFFFFFFFFFFFFFFFFFFFFFFFF  
FFFFFF:FFFFFF

@A00721:190:HGJW7DSXY:4:1460:12391:12680 2:N:0:TCTGCAAG+GCTGCACT  
ATTTTTTAGATGGTCATGATCGTGACGCGTGGTCTAATGACAAATCGACACGTAAGCGTACGGAGGTG  
TCCCCGGCGCGGGCAAGCCAGTAATATTATATTGGCTTGCCCCACGGTCTGCGGTAAGATGCCCCTGC  
GGGGCCTATGGAATT

+

FFFF:F:FFFFFFFFFFFFFFFFFFFFFFFFFFFFFFFFFFFFFFFFFFFFFFFFFFFFFFFFFFFFFFFFFFFF  
FFFFFFFFFFFFFFFFFFFFFFFFFFFFFFFFFFFFFFFFFFFFFFFFFFFFFFFFFFFFFFFFFFFFFFFF  
FFFFFF:FFFFFF

@A00721:190:HGJW7DSXY:4:2655:7229:20838 2:N:0:TCTGCAAG+GCTGCACT  
ATTTTTTAGATGGTCATGATCGTGACGCGTGGTCTAATGACAAATCGACACGTAAGCGTACGGAGGTG  
TCCCCGGCGCGGGCAAGCCAGTAATATTATATTGGCTTGCCCCACGGTCTGCGGTAAGATGCCCCTGC  
GGGGCCTATGGAATT

+

FFFFFFFFFFFFFFFFFFFFFFFFFFFFFFFFFFFFFFFFFFFFFFFFFFFFFFFFFFFFFFFFFFFFFFFF  
FFFFFFFFFFFFFF:FFFFFF:FFF:FFFFFF,FFFFFFFFFFFFFFFFFFFFFFFFFFFFFFFFFFFF  
FF:FFFFFFFF

@A00721:190:HGJW7DSXY:4:2673:31810:15374 2:N:0:TCTGCAAG+GCTGCACT  
ATTTTTTAGATGGTCATGATCGTGACGCGTGGTCTAATGACAAATCGACACGTAAGCGTACGGAGGTG  
TCCCCGGCGCGGGCAAGCCAGTAATATTATATTGGCTTGCCCCACGGTCTGCGGTAAGATGCCCCTGC  
GGGGCCTATGGAATT

+

FFFFFFFFFFFFFFFFFFFFFFFFFFFFFFFFFFFFFFFFFFFFFFFFFFFFFFFFFFFFFFFFFFFFFFFF  
FFFFFFFFFFFFFFFFFFFFFFFFFFFFFFFFFFFFFFFFFFFFFFFFFFFFFFFFFFFFFFFFFFFFFFFF  
FFFFFFFF:FFFF,FFFFFFFFFFFFFFFFFFFFFFFFFFFFFFFFFFFFFFFFFFFFFFFFFFFFFFFF



@A00721:190:HGJW7DSXY:4:1268:16324:5431 2:N:0:TCTGCAAG+GCTGCACT  
TTCATTTTTTTAGATGGTTATGATCGTGACGCGTGGTCTAATGACAAATCGACACGTAAGCGTACGGAG  
GTGTCCCCGGCGCGGGCAAGCCAGTAATATTATATTGGCTTGCCCCACGGTCTGCGGTAAGATGCCCC  
TGCGGGGCCTATGGA

+

FFFFFFFFFFFFFFFF:FFFFFFFFFFFFFFFF:FFFFFFFFFFFFFFFF:FFFFFFFF  
FFFFFFFFFFFFFFFF:FFFFFFFFFFFFFFFF:FFFFFFFFFFFFFFFF:FFFFFFFF  
FFFFFFFF:FFFF

@A00721:190:HGJW7DSXY:4:1433:1036:3380 2:N:0:TCTGCAAG+GCTGCACT  
TTCATTTTTTTAGATGGTTATGATCGTGACGCGTGGTCTAATGACAAATCGACACGTAAGCGTACGGAG  
GTGTCCCCGGCGCGGGCAAGCCAGTAATATTATATTGGCTTGCCCCACGGTCTGCGGTAAGATGCCCC  
TGCGGGGCCTATGGA

+

FFFFFFFFFFFFFFFFFFFFFFFFFFFFFFFFFFFFFFFFFFFFFFFFFFFFFFFF  
FFFFFFFFFFFFFFFF:FFFFFFFFFFFFFFFF:FFFFFFFFFFFFFFFF,FFFFF  
FFFFFFFF::FF:FFF

@A00721:190:HGJW7DSXY:4:1457:6470:2832 2:N:0:TCTGCAAG+GCTGCACT  
TTCATTTTTTTAGATGGTTATGATCGTGACGCGTGGTCTAATGACAAATCGACACGTAAGCGTACGGAG  
GTGTCCCCGGCGCGGGCAAGCCAGTAATATTATATTGGCTTGCCCCACGGTCTGCGGTAAGATGCCCC  
TGCGGGGCCTATGGA

+

FFFFFFFFFFFF,FFFFFFFFFFFFFFFFFFFFFFFFFFFFFFFFFFFFFFFF  
FFFFFFFFFFFFFFFF:FFFFFFFFFFFF:FF:FFFFFFFFFFFF  
FFFFFFFFFFFF

@A00721:190:HGJW7DSXY:4:1464:1280:7498 2:N:0:TCTGCAAG+GCTGCACT  
TTCATTTTTTTAGATGGTTATGATCGTGACGCGTGGTCTAATGACAAATCGACACGTAAGCGTACGGAG  
GTGTCCCCGGCGCGGGCAAGCCAGTAATATTATATTGGCTTGCCCCACGGTCTGCGGTAAGATGCCCC  
TGCGGGGCCTATGGA

+

FFFFFFF,FFFFFFFFFFFFFFFF:FFFFFFFFFFFF:FFFFFFFFFFFFFFFF  
FFFFFFFFFFFFFFFF:FFFFFFFFFFFF:FFFFFFFFFFFF::FFFFFFFFFFFF  
FFFFFF:FFFFFF

@A00721:190:HGJW7DSXY:4:1535:17942:12868 2:N:0:TCTGCAAG+GCTGCACT  
TTCATTTTTTTAGATGGTTATGATCGTGACGCGTGGTCTAATGACAAATCGACACGTAAGCGTACGGAG  
GTGTCCCCGGCGCGGGCAAGCCAGTAATATTATATTGGCTTGCCCCACGGTCTGCGGTAAGATGCCCC  
TGCGGGGCCTATGGA

+

FFFFFFFF:FFFFFFFFFFFFFFFF:FF:FFFFFFFF:FF:FFFFFFFF:FFFF:FF  
FFFFFFFFFFFFFFFF:FFFFFFFFFFFF:FF:FFFF:FF:FFFF:FF:FF:FF  
FF:FFFFFFFF

@A00721:190:HGJW7DSXY:4:2202:15863:18975 2:N:0:TCTGCAAG+GCTGCACT  
TTCATTTTTTTAGATGGTTATGATCGTGACGCGTGGTCTAATGACAAATCGACACGTAAGCGTACGGAG  
GTGTCCCCGGCGCGGGCAAGCCAGTAATATTATATTGGCTTGCCCCACGGTCTGCGGTAAGATGCCCC  
TGCGGGGCCTATGGA

+

FFFFF:FFFFFFFFFFFFFFFFFFFFFFFFFFFFFFFFFFFFFFFF  
FFFFFFFFFFFFFFFF:FFF:FFF:FFFFFF:F,:FFF,FFFFFFFF:F:FFF:FFF,FFF  
,FFFF:FF,FFFF

@A00721:190:HGJW7DSXY:4:2230:26250:3176 2:N:0:TCTGCAAG+GCTGCACT  
TTCATTTTTTTAGATGGTTATGATCGTGACGCGTGGTCTAATGACAAATCGACACGTAAGCGTACGGAG  
GTGTCCCCGGCGCGGGCAAGCCAGTAATATTATATTGGCTTGCCCCACGGTCTGCGGTAAGATGCCCC  
TGCGGGGCCTATGGA

+

FFFFFFFFFFFFFFFF:FFFFFFFFFFFFFFFF:FFFFFFFFFFFF:FFFFFFFF

```

FFFFFFFFF:FFFFFFFFFFFFFFFFFFFFFFFFFFFFFFFF:FFFFFFFFFFFFFFFFFFFFFFFFFFFFFFFF
FFFFFFF:FFFFFFF

```

+

@A00721:190:HGJW7DSXY:4:1176:29514:28432 2:N:0:TCTGCAAG+GCTGCACT  
ATTCATTTTTTAGATGGTTATGATCGTGACGCGTGGTCTAATGACAAATCGACACGTAAGCGTACGGA  
GGTGTCCCCGGCGCGGGCAAGCCAGTAATATTATATTGGCTTGCCCCACGGTCTGCGGTAAGATGCC  
CTGCAGGGCCAGATC

```

FFFFFFFFFFFFFFFFFFFFFFFFFFFFFFFFFFFFFFFFFFFFFFFFFFFFFFFF:FF:FFF::F:F:FFFFFFFF
FFFFFFFFFFFFFFFFFFFFFFFFFFFFFFFFFFFFFFFFFFFFFFFF,FFFFFFFFFFFF,FFF:FFFFFF,FFFFF:FFFF,FFF
FFFFFFFFFFFFFFFF,F

```

+

@A00721:190:HGJW7DSXY:4:1551:13467:17143 2:N:0:TCTGCAAG+GCTGCACT  
ATTCATTTTTTAGATGGTTATGATCGTGACGCGTGGTCTAATGACAAATCGACACGTAAGCGTACGGA  
GGTGTCCCCGGCGCGGGCAAGCCAGTAATATTATATTGGCTTGCCCCACGGTCTGCGGTAAGATGCC  
CTGCAGGGCCAGATC

[illegible]

+

@A00721:190:HGJW7DSXY:4:2123:15637:25535 2:N:0:TCTGCAAG+GCTGCACT  
ATTCATTTTTTAGATGGTTATGATCGTGACGCGTGGTCTAATGACAAATCGACACGTAAGCGTACGGA  
GGTGTCCCCGGCGCGGGCAAGCCAGTAATATTATATTGGCTTGCCCCACGGTCTGCGGTAAGATGCC  
CTGCAGGGCCAGATC

[illegible]

[illegible]

ACGGAGGTGTCCCCGGCGCGGGCAAGCCAGTAATATTATATTGGCTTGCCCCACGGTCTGCGGTAAGA  
TGCCCCTGCGGGGCC

+

FFFF:FFFFFFFFFFFFFFFFFFFFFFFFFFFFFFFFFFFFFFFFFFFFFFFFFFFFFFFFFFFFFFFF:F  
FF:FFFFFFFF,FFFFFF:FFF:F,FFF:FF:FFFF,F:F,:FFF:FFFF:FFFF:,FFFF,FFFF  
F:FFFFFFFFF,F:

@A00721:190:HGJW7DSXY:4:1460:9109:2300 2:N:0:TCTGCAAG+GCTGCACT  
ATAGAATTCATTTTTTAGATGGTCATGATCGTGACGCGTGGTCTAATGACAAATCGACACGTAAGCGT  
ACGGAGGTGTCCCCGGCGCGGGCAAGCCAGTAATATTATATTGGCTTGCCCCACGGTCTGCGGTAAGA  
TGCCCCTGCGGGGCC

+

FFFFF:FFFFFFFFF:FFFFFFFFFFFFFFFFFFFFFFFFFFFFFFFFFFFFFFFFFFFFFFFFFFFFFFF  
FFFFFFFFFFFFFFFFFFFFFFFFFFFFFFFFFFFFFFFFFFFFFFFFFFFFFFFFFFFFFFFFFFFFFF:FFFF  
FFFFFFFFFFFFFFFFF

@A00721:190:HGJW7DSXY:4:2158:27769:23124 2:N:0:TCTGCAAG+GCTGCACT  
ATAGAATTCATTTTTTAGATGGTCATGATCGTGACGCGTGGTCTAATGACAAATCGACACGTAAGCGT  
ACGGAGGTGTCCCCGGCGCGGGCAAGCCAGTAATATTATATTGGCTTGCCCCACGGTCTGCGGTAAGA  
TGCCCCTGCGGGGCC

+

FFFFFFFFFFFFFFFFFFFFFFFFFFFFFFFFFFFFFFFFFFFFFFFFFFFFFFFFFFFFFFFFFFFFFF:FFFFF  
FFFFFF:FFFFFFFFFFFFFFFFFFFFFFFFFFFFFFFFFFFFFFFFFFFFFFFFFFFFFFFFFFFFFFFFF  
FFFFFFFFFFFFFFFFF

@A00721:190:HGJW7DSXY:4:2326:7093:34976 2:N:0:TCTGCAAG+GCTGCACT  
ATAGAATTCATTTTTTAGATGGTCATGATCGTGACGCGTGGTCTAATGACAAATCGACACGTAAGCGT  
ACGGAGGTGTCCCCGGCGCGGGCAAGCCAGTAATATTATATTGGCTTGCCCCACGGTCTGCGGTAAGA  
TGCCCCTGCGGGGCC

+

FF,FFFFFFFFFFFFFFFFF:FFFFFFFFFFFFFFFFFFFFFFFFFFFFFFFFFFFFFFFFFFFFFFFFF  
FFFFFFFFFFFFFFFFFFFFFFFFFFFFFFFFFFFFFFFFF:F:FFFF,FFFFFFFF:FFFFFFFFFFFFFFFFF,FFF  
FFFFFFFFFFFFFFFFF

@A00721:190:HGJW7DSXY:4:2349:24713:12446 2:N:0:TCTGCAAG+GCTGCACT  
ATAGAATTCATTTTTTAGATGGTTATGATCGTGACGCGTGGTCTAATGACAAATCGACACGTAAGCGT  
ACGGAGGTGTCCCCGGCGCGGGCAAGCCAGTAATATTATATTGGCTTGCCCCACGGTCTGCGGTAAGA  
TGCCCCTGCGGGGCC

+

F:FFFFFFFFFFFF:FFFF:FFFFFFFFFFFFFFFFFFFFFFFFFFFFFFFFF:FFFFFF:FFFFFF:FFFFFFF  
FFFFFFF:FFFFFFFFFFFFFFFFF:FFFFFFFFFFFFFFFFF:FFFFF,FFFFFFFFFFFFFFFFF  
F:FFFFF:FFFFFFF

@A00721:190:HGJW7DSXY:4:2358:25238:16141 2:N:0:TCTGCAAG+GCTGCACT  
ATAGAATTCATTTTTTAGATGGTCATGATCGTGACGCGTGGTCTAATGACAAATCGACACGTAAGCGT  
ACGGAGGTGTCCCCGGCGCGGGCAAGCCAGTAATATTATATTGGCTTGCCCCACGGTCTGCGGTAAGA  
TGCCCCTGCGGGGCC

+

FFFFFFFFFFFFFFFFF,FFFFFFFFFFFFFFFFF:FFFF:FFFFFF:FFFFFF:FFFFFFF::FF  
::FFFFFFFFFFFFFFFFFFFFFFFFFFFFFFFFF:FFFFFF:FFFFFFFFFFFFFFFFF,FFFF  
FFF,FFFFFFFFF

@A00721:190:HGJW7DSXY:4:2555:13810:25285 2:N:0:TCTGCAAG+GCTGCACT  
ATAGAATTCATTTTTTAGATGGTCATGATCGTGACGCGTGGTCTAATGACAAATCGACACGTAAGCGT  
ACGGAGGTGTCCCCGGCGCGGGCAAGCCAGTAATATTATATTGGCTTGCCCCACGGTCTGCGGTAAGA  
TGCCCCTGCGGGGCC

+

FFFFFFFFFFFFFFFFF:FFFFFFFFFFFFFFFFFFFFFFFFFFFFFFFFF:FFFFFFFFF:FFFF  
FFFFFFFFFFFFFFFFFFFFFFFFF::FF:FFFFFFFFF,FFFFFF:FFFFFFFFFFFFFFFFF  
FFFFFFFFFFFFFFFFF

$+$ 

@

+

©

 $+$ 

6

+

©

+

@

+

©

+

1

FFFFFFFFFFFFFFFFFFFFFFFFFFFFFFFFFFFFFFFFFFFFFFFFFFFFFFFFFFFFFFFFFFFFFFFFFFFFFFFF  
FFFFFFFFFFFF

@A00721:190:HGJW7DSXY:4:2240:14769:29074 2:N:0:TCTGCAAG+GCTGCACT  
CTATAGAATTCATTTTTTTAGATGGTCATGATCGTGACGCGTGGTCTAATGACAAATCGACACGTAAGC  
GTACGGAGGTGTCCCCGGCGCGGGCAAGCCAGTAATATTATATTGGCTTGCCCCACGGTCTGCGGTAA  
GATGCCCCTGC

+

FFFFFFFFFFFFFFFFFFFFFFFFFFFFFFFFFFFFFFFFFFFFFFFFFFFFFFFFFFFFFFFFFFFFFFFFFFFFFFFF  
FFFFFFFFFFFFFFFFFFFFFFFFFFFFFFFFFFFFFFFFFFFFFFFFFFFFFFFFFFFFFFFFFFFFFFFFFFFFFFFF  
FFFFFFFFFFFF

@A00721:190:HGJW7DSXY:4:2307:20925:27492 2:N:0:TCTGCAAG+GCTGCACT  
CTATAGAATTCATTTTTTTAGATGGTCATGATCGTGACGCGTGGTCTAATGACAAATCGACACGTAAGC  
GTACGGAGGTGTCCCCGGCGCGGGCAAGCCAGTAATATTATATTGGCTTGCCCCACGGTCTGCGGTAA  
GATGCCCCTGC

+

FFFFFFFFFFFFFFFFFFFFFFFFFFFFFFFFFFFFFFFFFFFFFFFFFFFFFFFFFFFFFFFFFFFFFFFFFFFFFFFF  
FFFFFFFFFFFFFFFFFFFFFFFFFFFFFFFFFFFFFFFFFFFFFFFFFFFFFFFFFFFFFFFFFFFFFFFFFFFFFFFF  
FFF:FFFF:FF

@A00721:190:HGJW7DSXY:4:2446:10321:9220 2:N:0:TCTGCAAG+GCTGCACT  
CTATAGAATTCATTTTTTTAGATGGTCATGATCGTGACGCGTGGTCTAATGACAAATCGACACGTAAGC  
GTACGGAGGTGTCCCCGGCGCGGGCAAGCCAGTAATAGTATATTGGCTTGCCCCACGGTCTGCGGTAA  
GATGCCCCTGC

+

FFFFFFFFF:FFFFFFFFFFFFFFFFFFFFFFFFFFFFFFFFFFFFFFFFFFFFFFFFFFFFFFFFFFFFFFFFFFFFF  
FFFFFFFFFFFFFFFFFFFFFFFFFFFFFFFFFFFFFFFFFFFFFFFFFFFFFFFFFFFFFFFFFFFFFFFFFFFFFFFF  
FFFFFFFFFFFF

@A00721:190:HGJW7DSXY:4:2519:28230:22044 2:N:0:TCTGCAAG+GCTGCACT  
CTATAGAATTCATTTTTTTAGATGGTCATGATCGTGACGCGTGGTCTAATGACAAATCGACACGTAAGC  
GTACGGAGGTGTCCCCGGCGCGGGCAAGCCAGTAATATTATATTGGCTTGCCCCACGGTCTGCGGTAA  
GATGCCCCTGC

+

FFFF:F:FFFFFFFFFFFFFFFFFFFFFFFFFFFFFFFFFFFFFFFFFFFFFFFFFFFFFFFFFFFFFFFFFFFFF  
FFFFFFFFFFFFFFFFFFFFFFFFFFFFFFFFFFFFFFFFFFFFFFFFFFFFFFFFFFFFFFFFFFFFFFFFFFFFFFFF  
FFFFF,FFFFF

@A00721:190:HGJW7DSXY:4:2653:17544:34194 2:N:0:TCTGCAAG+GCTGCACT  
CTATAGAATTCATTTTTTTAGATGGTCATGATCGTGACGCGTGGTCTAATGACAAATCGACACGTAAGC  
GTACGGAGGTGTCCCCGGCGCGGGCAAGCCAGTAATATTATATTGGCTTGCCCCACGGTCTGCGGTAA  
GATGCCCCTGC

+

FFFFFFF,FFFFFFFFFFFFFFFFFFFFFFFFFFFFFFFFFFFFFFFFFFFFFFFFFFFFFFFFFFFFFFFFFFFFF  
FFFFFFFFFFFFFFFFFFFFFFFFFFFFFFFFFFFFFFFFFFFFFFFFFFFFFFFFFFFFFFFFFFFFFFFFFFFFFFFF  
FFFFFFF:F

@A00721:190:HGJW7DSXY:4:2653:17852:34225 2:N:0:TCTGCAAG+GCTGCACT  
CTATAGAATTCATTTTTTTAGATGGTCATGATCGTGACGCGTGGTCTAATGACAAATCGACACGTAAGC  
GTACGGAGGTGTCCCCGGCGCGGGCAAGCCAGTAATATTATATTGGCTTGCCCCACGGTCTGCGGTAA  
GATGCCCCTGC

+

FFFFFFFFFFFFFFFFFFFFFFFFFFFFFFFFFFFFFFFFFFFFFFFFFFFFFFFFFFFFFFFFFFFFFFFFFFFFF  
FFFFFFFFFFFFFFFFFFFFFFFFFFFFFFFFFFFFFFFFFFFFFFFFFFFFFFFFFFFFFFFFFFFFFFFFFFFFFFFF  
FFFFFFFFFFFF

@A00721:190:HGJW7DSXY:4:1119:8558:22200 2:N:0:TCTGCAAG+GCTGCACT  
TGCGTCACTATAGAATTCATTTTTTTAGATGGTTATGATCGTGACGCGTGGTCTAATGACAAATCGACA  
CGTAAGCGTACGGAGGTGTCCCCGGCGCGGGCAAGCCAGTAATATTATATTGGCTTGCCCCACGGTCT  
GCGGTAAGATGCCCC

+  
 FFFFFFFFFFFFFFFFFFFFFFFFFF,FFF:FFFFFFFFFFFFFFFFFFFFFFFFFFFFFFFF:FFFFFF  
 FFFFFFFFFFFFFFFFFFFFFFFFFF, :FFFFFF: :FFFFFFFFFFFFFFFFFFFFFF  
 F:FFFFFFFFFFFFFF  
 @A00721:190:HGJW7DSXY:4:1647:11939:23703 2:N:0:TCTGCAAG+GCTGCACT  
 TCGTCACTATAGAATTCATTTTTTAGATGGTTATGATCGTGACGCGTGGTCTAATGACAAATCGACA  
 CGTAAGCGTACGGAGGTGTCCCCGGCGCGGGCAAGCCAGTAATATTATATTGTCTTGCCCCACGGTCT  
 GCGGTAAGATGCCCC  
 +  
 FFFF,FFFF,FFFFFFFFFFFF::FFFF,FF:FFFF:FFF:FFFF:F:FFF,FFFFFFFFFFFFFF  
 FFFFFFFFFF:F,FF:,FFFFFFFFFFFF:FF:,FFFF,FFFFFFFFFFFF:,FFF,F:FFFF::FFF  
 FFF:,F::FF:FFF:  
 @A00721:190:HGJW7DSXY:4:2664:18177:3317 2:N:0:TCTGCAAG+GCTGCACT  
 TCGTCACTATAGAATTCATTTTTTAGATGGTTATGATCGTGACGCGTGGTCTAATGACAAATCGACA  
 CGTAAGCGTACGGAGGTGTCCCCGGCGCGGGCAAGCCAGTAATATTATATTGGCTTGCCCCACGGTCT  
 GCGGTAAGATGCCCC  
 +  
 FFFFFFFFFFFFFFFFFFFFFFFFFF,FFFFFFFFFFFFFFFFFFFFFFFF,FFFFFFFFFFFFFFFF:FFFF  
 FFFFFFFFFFFFFFFFFFFFFFFFFF:FFFFFFFFFFFF:FFFFFFFFFFFF,FFFFFFFFFFFF  
 FFFFFFFFFFFFFFFF  
 @A00721:190:HGJW7DSXY:4:1214:3179:35180 2:N:0:TCTGCAAG+GCTGCACT  
 ATTCTACTGCGTCACTATAGAATTCATTTTTTAGATGGTTATGATCGTGACGCGTGGTCTAATGACAA  
 ATCGACACGTAAGCGTACGGAGGTGTCCCCGGCGCGGGCAAGCCAGTAATATTATATTGGCTTGCCCC  
 ACGGTCTGCGGTAAG  
 +  
 F:FFFFFFFFFFFFFFFFFFFFFFFFFFFF:FF:FF,FFFFFFFFFFFFFFFFFFFFFFFFFFFFFFFF:  
 FFFFFFFFFF:FFFFFFFFFFFFFFFFFFFFFFFFFFFFFFFFFFFFFFFF,FFFFFFFFFFFFFFFF  
 FFFFFF:FFFFFFFFF  
 @A00721:190:HGJW7DSXY:4:1417:10936:12884 2:N:0:TCTGCAAG+GCTGCACT  
 ATTCTACTGCGTCACTATAGAATTCATTTTTTAGATGGTTATGATCGTGACGCGTGGTCTAATGACAA  
 ATCGACACGTAAGCGTACGGAGGTGTCCCCGGCGCGGGCAAGCCAGTAATATTATATTGGCTTGCCCC  
 ACGGTCTGCGGTAAG  
 +  
 FFFFFFFFFFFFFFFFFFFFFFFFFFFFFF:FFF::FFFFFFFFFFFFFFFFFFFFFFFFFFFFFFFF:  
 FFFFFFFFFF:FFFFFFFFFFFFFFFFFFFFFFFFFFFFFFFFFFFFFFFF,FFFFFFFFFFFFFFFF  
 FFFFFF,FFFF:F:F  
 @A00721:190:HGJW7DSXY:4:1621:25852:28729 2:N:0:TCTGCAAG+GCTGCACT  
 ATTCTACTGCGTCACTATAGAATTCATTTTTTAGATGGTTATGATCGTGACGCGTGGTCTAATGACAA  
 ATCGACACGTAAGCGTACGGAGGTGTCCCCGGCGCGGGCAAGCCAGTAATATTATATTGGCTTGCCCC  
 ACGGTCTGCGGTAAG  
 +  
 FFFFFFFFFFFFFFFFFFFFFFFFFFFFFFFFFFFFFFFFFFFFFFFFFFFFFFFFFFFFFFFFFF  
 FFFFFFFFFFFFFFFFFFFFFFFFFFFFFFFFFFFFFFFFFFFFFFFFFFFFFFFFFFFFFFFFFF  
 FFFFFFFFFFFFFF:  
 @A00721:190:HGJW7DSXY:4:1656:13892:10770 2:N:0:TCTGCAAG+GCTGCACT  
 ATTCTACTGCGTCACTATAGAATTCATTTTTTAGATGGTTATGATCGTGACGCGTGGTCTAATGACAA  
 ATCGACACGTAAGCGTACGGAGGTGTCCCCGGCGCGGGCAAGCCAGTAATATTATATTGGCTTGCCCC  
 ACGGTCTGCGGTAAG  
 +  
 FFFFFFFFFFFFFFFFFFFFFFFFFFFFFFFFFFFFFFFFFFFFFFFFFFFFFFFFFFFFFFFFFF:  
 FFFFFFFFFFFFFFFFFF:FFFFFFFFFFFFFFFFFFFFFFFFFFFFFFFFFFFFFFFFFFFFFFFFF  
 FFFFFFFFFFFFFFFF  
 @A00721:190:HGJW7DSXY:4:2253:9100:6104 2:N:0:TCTGCAAG+GCTGCACT  
 ATTCTACTGCGTCACTATAGAATTCATTTTTTAGATGGTTATGATCGTGACGCGTGGTCTAATGACAA

ATCGACACGTAAGCGTACGGAGGTGTCCCCGGCGCGGGCAAGCCAGTAATATTATATTGGCTTGCCCC  
ACGGTCTGCGGTAAG

+

FFFFFFFFFFFFFFFFFFFFFFFFFFFFFFFFFFFFFFFFFFFFFFFFFFFFFFFFFFFFFFFFFFFFFFFFFFFFFFFF  
FFF,FFFFFFFFF:FFFFFFFFFFFFFFFFFFFFFFFFFFFFFFFFFFFFFFFFFFFFFFFFFFFFFFFFFFFFFFFF  
:F:F,FFFFFFFFF

@A00721:190:HGJW7DSXY:4:1128:23402:8923 2:N:0:TCTGCAAG+GCTGCACT  
CGATTTTACTGCGTCACTATAGAATTCATTTTTTAGATGGTCATGATCGTGACGCGTGGTCTAATGAC  
AAATCGACACGTAAGCGTACGGAGGTGTCCCCGGCGCGGGCAAGCCAGTAATATTATATTGGCTTGCC  
CCACGGTCTGCGGTA

+

FFFF,FFFFF:FFFFFFFFFFFFFFFFFFFFFFFFFFFFFFFFFFFFFFFFFFFFFFFFFFFFFFFFFFFFFFFF  
FFFFFFFFF,FFFF:F,FFFFF:FFF:,FFFFFFFFF::F::FFFF:FFFFFFFF:FFFFFFFFF,FFFFFF  
F::,F,FFFF::F

@A00721:190:HGJW7DSXY:4:1231:6415:31391 2:N:0:TCTGCAAG+GCTGCACT  
CGATTTTACTGCGTCACTATAGAATTCATTTTTTAGATGGTCATGATCGTGACGCGTGGTCTAATGAC  
AAATCGACACGTAAGCGTACGGAGGTGTCCCCGGCGCGGGCAAGCCAGTAATATTATATTGGCTTGCC  
CCACGGTCTGCGGTA

+

FFFFFFFFFFFFFFFFFFFFFFFFFFFFFFFFFFFFFFFFFFFFFFFFFFFFFFFFFFFFFFFFFFFFFFFFFFFFFFFF  
FFFFFFFFFFFFFFFFFFFFFFFFFFFFFFFFFFFFFFFFFFFFFFFFFFFFFFFFFFFFFFFFFFFFFFFFFFFFFFFF  
FF:FFFFFFFFFFFFF

@A00721:190:HGJW7DSXY:4:1644:11451:13088 2:N:0:TCTGCAAG+GCTGCACT  
CGATTTTACTGCGTCACTATAGAATTCATTTTTTAGATGGTCATGATCGTGACGCGTGGTCTAATGAC  
AAATCGACACGTAAGCGTACGGAGGTGTCCCCGGCGCGGGCAAGCCAGTAATATTATATTGGCTTGCC  
CCACGGTCTGCGGTA

+

FFF,:FFFFFFFFFFFFFFFFF,FF,FFFFFFFFFFFFFFFFF:FFFFFFFFFFFFFFFFFFFFFFFFFFFFFFF  
F,FFFFFFFFFFFFFFFFFFFFFFFFFFFFFFFFFFFFFFFFFFFFFFFFFFFFFFFFFFFFFFFFFFFFFFFFFFFF  
FF:FFFFFFFFFFFFF

@A00721:190:HGJW7DSXY:4:1338:16685:19899 2:N:0:TCTGCAAG+GCTGCACT  
ATTTTACTGCGTCACTATAGAATTCATTTTTTAGATGGTCATGATCGTGACGCGTGGTCTAATGACAA  
ATCGACACGTAAGCGTACGGAGGTGTCCCCGGCGCGGGCAAGCCAGTAATATTATATTGGCTTGCCCC  
ACGGTCTGCGGAGAT

+

FFFFFFFFFFFFFFF:FFFFF:FFFFFFFFFFFF:FFFFFFFFFFFFFFFFFFFFFFFFFFFFFFFFFFFFFFF  
FFFFFFFFFFFFFFFFFFFFFFFFFFFFFFFFFFFFFFFFFFFFFFFFFFFFFFFFFFFFFFFFFFFFFFFFFFFF  
FFFFFFFFF::FFFFFFF

@A00721:190:HGJW7DSXY:4:2424:28022:34679 2:N:0:TCTGCAAG+GCTGCACT  
ATTTTACTGCGTCACTATAGAATTCATTTTTTAGATGGTCATGATCGTGACGCGTGGTCTAATGACAA  
ATCGACACGTAAGCGTACGGAGGTGTCCCCGGCGCGGGCAAGCCAGTAATATTATATTGGCTTGCCCC  
ACGGTCTGCGGAGAT

+

F:FFFFFFFFFFFFFFFFFFFFFFFFFFFFFFFFFFFFFFFFFFFFFFFFFFFFFFFFFFFFFFFFFFFFFFFFFFFF  
FFFFFFFFFFFFFFFFFFFFFFFFFFFFFFFFFFFFFFFFFFFFFFFFFFFFFFFFFFFFFFFFFFFFFFFFFFFF:F,FF:FFFFFFFFFFFFFFFF  
FFFFFFFFFFFFFFFFF

@A00721:190:HGJW7DSXY:4:2504:9290:10128 2:N:0:TCTGCAAG+GCTGCACT  
ATTTTACTGCGTCACTATAGAATTCATTTTTTAGATGGTCATGATCGTGACGCGTGGTCTAATGACAA  
ATCGACACGTAAGCGTACGGAGGTGTCCCCGGCGCGGGCAAGCCAGTAATATTATATTGGCTTGCCCC  
ACGGTCTGCGGAGAT

+

FFFFFFFFFFFFF:F:FF,FFFFFFFFFFFFFFFFFFFFFFFFFFFFFFFFFFFFFFFFFFFFFFFFFFFFFFFF  
FFFFFFFFFFFFFFFFFFFFFFFFFFFFFFFFFFFFFFFFFFFFFFFFFFFFFFFFFFFFFFFFFFFFFFFF:F:FFFF,F,F,FFFF,FFFFFFFF  
:FFFFF:FFFFFFFFF



@A00721:190:HGJW7DSXY:4:2522:31864:13088 2:N:0:TCTGCAAG+GCTGCACT  
ATTTTACTGCGTCACTATAGAATTCATTTTTTTAGATGGTCATGATCGTGACGCGTGGTCTAATGACAA  
ATCGACACGTAAGCGTACGGAGGTGTCCCCGGCGCGGGCAAGCCAGTAATATTATATTGGCTTGCCCC  
ACGGTCTGCGGAGAT

+

FFFFFF:FFFFFFF,FFFFFFFFFFFFFFFFFFFFFFFFFFFFFFFFFFFFFFFF:FFFFFFF:FFF  
FFFF:FFFFFFFFFFFFFFFFFFFFFFFFFFFFFFFFFFFFFFFF:FFFFF,FFFFFFFFF,FFFFFFFFF  
FFFFFFFFFFFF:FF

@A00721:190:HGJW7DSXY:4:1110:23321:23406 2:N:0:TCTGCAAG+GCTGCACT  
GTGATTCTACTGCGTCACTATAGAATTCATTTTTTTAGATGGTTATGATCGTGACGCGTGGTCTAATG  
ACAAATCGACACGTAAGCGTACGGAGGTGTCCCCGGCGCGGGCAAGCCAGTAATATTATATTGGCTTG  
CCCCACGGTCTGCGG

+

FFFFFFFFFFFFFFFFFFFF,FFFFFF:FFFFFFFFFFFFFFFF,FFFFFFFFFFFFFFFFFFFFFFFFFFFF  
FFFFFFFFFFFFFFFFFFFFFFFFFFFFFFFFFFFFFFFF:FFFFFFFFFFFF:,FFFFFF:FF:FFFFFF:FF:FF  
FFFF,FFFFFFFFF

@A00721:190:HGJW7DSXY:4:2320:20745:14027 2:N:0:TCTGCAAG+GCTGCACT  
GTGATTCTACTGCGTCACTATAGAATTCATTTTTTTAGATGGTTATGATCGTGACGCGTGGTCTAATG  
ACAAATCGACACGTAAGCGTACGGAGGTGTCCCCGGCGCGGGCAAGCCAGTAATATTATATTGGCTTG  
CCCCACGGTCTGCGG

+

FFFFFFFFFFFFFFFFFFFFF,F,FFFFFFFFFFFF:FFFFFFFFFFFFFFFFFFFFFFFFFFFFFFFF:FFFFFFF  
FFFFFFF:FFFFFFFFFFFFFFFFFFFFFFFFFFFFFFFF:FFFFFFFFFFFFFFFFFFFFFFFFFFFFFFFFFFFFF  
FFFFFFFFFFFFFFFFF

@A00721:190:HGJW7DSXY:4:2331:11668:20447 2:N:0:TCTGCAAG+GCTGCACT  
GTGATTCTACTGCGTCACTATAGAATTCATTTTTTTAGATGGTTATGATCGTGACGCGTGGTCTAATG  
ACAAATCGACACGTAAGCGTACGGAGGTGTCCCCGGCGCGGGCAAGCCAGTAATATTATATTGGCTTG  
CCCCACGGTCTGCGG

+

FFFFFFFFFFFFFFFFFFFFFFFFF:,FFFFFFFFFFFFFFFFFFFFFFFFFFFFFFFFFFFFFFFF:FFFFF:FFF  
FFFFFFFFFFFFFFFFFFFF:FFFFFFF:FFFFFFFFFFFFFFFFFFFFFFFF:FFFFFFFFFFFFFFFFFFFFF,FFFF  
:FFFFFFFFFFFFFFFFF

@A00721:190:HGJW7DSXY:4:2472:18331:9377 2:N:0:TCTGCAAG+GCTGCACT  
GTGATTCTACTGCGTCACTATAGAATTCATTTTTTTAGATGGTTATGATCGTGACGCGTGGTCTAATG  
ACAAATCGACACGTAAGCGTACGGAGGTGTCCCCGGCGCGGGCAAGCCAGTAATATTATATTGGCTTG  
CCCCACGGTCTGCGG

+

FF:FFFFFFFFFFFFFFFFFFFFFFFFF,:FFFFFFFFFFFFFFFFFFFFFFFF:FFFFFF:FFFFFFFFFFFFF  
FFFFFFFFFFFFFFFFFFFF:FF:F:FFFFFFFFF:FFFFFFFFFFFF,FFFFFFFFFFFFFFFF:FFFF:F  
FFFFFFFFFFFFFFFFF

@A00721:190:HGJW7DSXY:4:2472:18285:9424 2:N:0:TCTGCAAG+GCTGCACT  
GTGATTCTACTGCGTCACTATAGAATTCATTTTTTTAGATGGTTATGATCGTGACGCGTGGTCTAATG  
ACAAATCGACACGTAAGCGTACGGAGGTGTCCCCGGCGCGGGCAAGCCAGTAATATTATATTGGCTTG  
CCCCACGGTCTGCGG

+

FFFFFFFFFFFFFFFFFFFFFFFFFFFFFFFFFFFFFFFFFFFFFFFFFFFFFFFFFFFFFFFFFFFFFFFFFFFF  
FFFFFFFFFFFFFFFFFFFFFFFFFFFFFFFFFFFFFFFFFFFFFFFFFFFFFFFFFFFFFFFF:FFFFF:FFFF:FFFFFFFFFFFFF  
FFFFFFFFFFFFFFFFF

@A00721:190:HGJW7DSXY:4:1528:12816:22467 2:N:0:TCTGCAAG+GCTGCACT  
CGTCGATTCTACTGCGTCACTATAGAATTCATTTTTTTAGATGGTTATGATCGTGACGCGTGGTCTAAT  
GACAAATCGACACGTAAGCGTACGGAGGTGTCCCCGGCGCGGGCAAGCCAGTAATATTATATTGGCTTG  
GCCCCACGGTCTGCGG

+

FFFFFFFFFFFFFFFFFFFFFFFFF:,FFFFFFFFFFFFFFFFFFFFFFFFFFFFFFFFFFFFFFFFFFFFFFFF:FFFFF

FFFFFFFFFFFFFFFFFFFFFFFFFFFFFFFFFFFFFFFFFFFFFFFFFFFFFFFFFFFFFFFFFFFFFFFF  
:FFFFFFFFFFFFFFFF

@A00721:190:HGJW7DSXY:4:2123:22923:15327 2:N:0:TCTGCAAG+GCTGCACT  
CGTCGATTCTACTGCGTCACTATAGAATTCATTTTTTAGATGGTTATGATCGTGACGCGTGGTCTAAT  
GACAAATCGACACGTAAGCGTACGGAGGTGTCCCCGGCGCGGGCAAGCCAGTAATATTATATTGGCTT  
GCCCCACGGTCTGCG

+

FF:FFFFFFFFFFFFFF:FFFF:FFFF,FFFFFFFFFFFFFF:FFFFFFFFFFFFFFFFFFFFFFFFFFFF  
FFFFFFFFFFFFFFFFFFFFFFFFFFFFFFFFFFFFFFFFFFFFFFFFFFFFFFFFFFFFFFFFFFFFFFFF:FFF  
FFF:FFFFFFFFFFFF

@A00721:190:HGJW7DSXY:4:2167:3106:31579 2:N:0:TCTGCAAG+GCTGCACT  
CGTCGATTCTACTGCGTCACTATAGAATTCATTTTTTAGATGGTTATGATCGTGACGCGTGGTCTAAT  
GACAAATCGACACGTAAGCGTACGGAGGTGTCCCCGGCGCGGGCAAGCCAGTAATATTATATTGGCTT  
GCCCCACGGTCTGCG

+

FFFFFFFFFFFFFFFFFFFFFFFFFFFFFFFFFFFFFFFFFFFFFFFFFFFFFFFFFFFFFFFFFFFFFFFF  
FFFFFFFFFFFFFFFFFFFFFFFFFFFFFFFFFFFFFFFFFFFFFFFFFFFFFFFFFFFFFFFFFFFFFFFF:FFF  
FFFFFFFFFFFF:FFF

@A00721:190:HGJW7DSXY:4:2167:4200:32847 2:N:0:TCTGCAAG+GCTGCACT  
CGTCGATTCTACTGCGTCACTATATAATTCAAATATTATATGGTTATGATCGTGACGCGTGGTCTAAT  
GACAAATCGACACGAAAGCGAACGGAGGTCTACCGGCGCGGGCAAGCCAGAAAAATTATAAAGGCTT  
GCCCCACGGACTGC

+

FFFF,FFFFFF:FFF,F::F,FF:,F:,FFF,,,,,,,,,F,,,FF:,FFFF,::,FFFFFF,F:FF:F:  
FFF:FFF:FF:,::,,,F,,FF,,F:F:,,F,FF,:F,FF,,F,:FFF,::,,FF,:F,,,FF,  
,:,,,F,::,FFF:

@A00721:190:HGJW7DSXY:4:1311:4851:26396 2:N:0:TCTGCAAG+GCTGCACT  
ATTGACCGTCGATTCTACTGCGTCACTATAGAATTCATTTTTTAGATGGTTATGATCGTGACGCGTGG  
TCTAATGACAAATCGACACGTAAGCGTACGGAGGTGTCCCCGGCGCGGGCAAGCCAGTAATATTATAT  
TGGCTTGCCCCACGG

+

FFFFFFFFFFFFFF,FFFF:F:FFF:FFFF,:FFFFFFFFFFFFFFFF:FFFFFFFF:FFFFFFFF,FF  
FFFFFFFFFFFFFFFFFFFFFFFFFFFFFFFFFFFFFFFFFFFFFFFFFFFFFFFFFFFFFFFF:FFFF:  
FFFFFFFFFFFFFFFF

@A00721:190:HGJW7DSXY:4:1616:6894:26710 2:N:0:TCTGCAAG+GCTGCACT  
ATTGACCGTCGATTCTACTGCGTCACTATAGAATTCATTTTTTAGATGGTTATGATCGTGACGCGTGG  
TCTAATGACAAATCGACACGTAAGCGTACGGAGGTGTCCCCGGCGCGGGCACGCCAGTAATATTATAT  
TGGCTTGCCCCACGG

+

FFFFFFFFFFFFFFFFFFFFFFFFFFFF,FFF:FFFFFFFFFF:FF,FFFFFFFFFFFFFFFF:FFFFFFF  
,FFFFFFFFFFFFFFFF:FF:FFFFFFFFFFFFFFFFFFFFFFFFFFFFFFFFFFFFFFFF,FF:FFF,FFFF,FFFF  
F,FFFF,FFFFFFFF

@A00721:190:HGJW7DSXY:4:2206:16794:32675 2:N:0:TCTGCAAG+GCTGCACT  
ATTGACCGTCGATTCTACTGCGTCACTATAGAATTCATTTTTTAGATGGTTATGATCGTGACGCGTGG  
TCTAATGACAAATCGACACGTAAGCGTACGGAGGTGTCCCCGGCGCGGGCAAGCCAGTAATATTATAT  
TGGCGTGCCCCACGG

+

FFFFFFFFFFFFFF:FFFFFFFFFF,FF,FFFFFF,FFFFFF:FF::FFFFFF:FFFFFF:FFFFFFF  
FFFFF:FFFFFFFFFFFF:F:FFFFF:,FFFFFFFFFFFFFFFF:FFFFF,:FFF,,:F::FFFF  
FFFF:FFFFFFFF

@A00721:190:HGJW7DSXY:4:2304:12084:33254 2:N:0:TCTGCAAG+GCTGCACT  
ATTGACCGTCGATTCTACTGCGTCACTATAGAATTCATTTTTTAGATGGTTATGATCGTGACGCGTGG  
TCTAATGACAAATCGACACGTAAGCGTACGGAGGTGTCCCCGGCGCGGGCAAGCCAGTAATATTATAT  
TGGCTTGCCCCACGG

+  
FFFFFFFFFFFFFFFFFFFFFFFFFFFFFFFF:FFFF:FFFFFFFFFFFFFFFF:FFFFFFF:FFFFFF:FFFFFF  
FFFFFFFFFFFFFFFFFFFFFFFFFFFFFFFFFFFFFFFFFFFFFFFFFFFFFFFFFFFFFFFF:FFFF:FF:FFFFFF:  
FFFFFFFFFFFFFFFF:F

@A00721:190:HGJW7DSXY:4:2509:10384:30686 2:N:0:TCTGCAAG+GCTGCACT  
ATTGACCGTCGATTCTACTGCGTCACTATAGAATTCATTTTTTTAGATGGTTATGATCGTGACGCGTGG  
TCTAATGACAAATCGACACGTAAGCGTACGGAGGTGTCCCCGGCGCGGGCAAGCCAGTAATATTATAT  
TGGCTTGCCCCACGG

+  
FFFFFFFFFFFFFFF:FFFFFF:FFFFFFF:,F:FFFFFFFFF,FFF:FFFFFFFF:FFFFFFFFFFFFFFF  
:FFFFFFFF:FFFFFFFFFFFFFFFFFFFFFFFFFFFFFFFFFFFFFFFFFFFFFFFFFFFFFFFFFFFFFFFF  
FF,FFFFFFFFFFFFFF

@A00721:190:HGJW7DSXY:4:1103:9064:11866 2:N:0:TCTGCAAG+GCTGCACT  
TGAATTTCAAATTGACCGTCGATTCTACTGCGTCACTATAGAATTCATTTTTTTAGATGGTTATGATC  
GTGACGCGTGGTCTAATGACAAATCGACACGTAAGCGTACGGAGGTGTCCCCGGCGCGGGCAAGCCAG  
TAATATTATATTGGC

+  
FFFFFFFFFFFFFFFFFFFFFFF:FFFFFFFFFFFFFFFFFFFFFFFFFFFFFFFF:FFFFFFFFFFFFFFFFFFFFFFF,FF  
FFF:FFFFFFFFFFFFFFFF:FFFFFFFFFFFFFFFF:FFFFFFFFF,FFFFFFFFFFFFFFFFFFFFFFF,:FFFFF  
,FFF:FFFF:FFF,F

@A00721:190:HGJW7DSXY:4:1166:12554:2284 2:N:0:TCTGCAAG+GCTGCACT  
TGAATTTCAAATTGACCGTCGATTCTACTGCGTCACTATAGAATTCATTTTTTTAGATGGTTATGATC  
GTGACGCGTGGTCTAATGACAAATCGACACGTAAGCGTACGGAGGTGTCCCCGGCGCGGGCAAGCCAG  
TAATATTATATTGGC

+  
FFFFFFFFFFFFFFFFF:FFFFFFFFFFFFFFFFFFFFFFFFFFFFFFFFFFFFFFFF:FFFFFFFFFFFFFFFFFFFF  
FFFFFFFFF:FFFFFFFFFFFFFFFFFFFFFFFFFFFFFFFFFFFFFFFFFFFFFFFF:FFFFF:FFFFFFFFFFFF:F  
F:FFFFFFFFFFFF,:F

@A00721:190:HGJW7DSXY:4:1331:22110:18020 2:N:0:TCTGCAAG+GCTGCACT  
TGAATTTCAAATTGACCGTCGATTCTACTGCGTCACTATAGAATTCATTTTTTTAGATGGTTATGATC  
GTGACGCGTGGTCTAATGACAAATCGACACGTAAGCGTACGGAGGTGTCCCCGGCGCGGGCAAGCCAG  
TAATATTATATTGGC

+  
FF:FFFFFFFFFFFFFFF:FFFFFFFFFFFFFFFFFFFFFFFFFFFFFFFFFFFFFFFFFFFFFFFFFFFFFFFFFFFF  
FFFFFFFFFFFFFFFFFFFFFFFFFFFFFFFFFFFFFFFFFFFFFFFFFFFFFFFFFFFFFFFF:FFFFFFFFFFFFFFF  
F:FFFFFFFFFFFFFF:

@A00721:190:HGJW7DSXY:4:1622:28718:24893 2:N:0:TCTGCAAG+GCTGCACT  
TGAATTTCAAATTGACCGTCGATTCTACTGCGTCACTATAGAATTCATTTTTTTAGATGGTTATGATC  
GTGACGCGTGGTCTAATGACAAATCGACACGTAAGCGTACGGAGGTGTCCCCGGCGCGGGCAAGCCAG  
TAATATTATATTGGC

+  
FFFFFFFFFFFFFFFFFFFFFFFFFFFFFFFFFFFFFFFFFFFFFFFF:FFF:,FFFFFFFFFFFFFFFFFFFFFFFF  
FFFFFFFFF:FFFFFFF:FFFFFFF:FFFFFFFFFFFFF,F:F:FFFFFFFFFFFFFFFFFFFFFFF:FFFFF  
FFFFFFFFFFFFF,:F

@A00721:190:HGJW7DSXY:4:2456:4625:10191 2:N:0:TCTGCAAG+GCTGCACT  
TGAATTTCAAATTGACCGTCGATTCTACTGCGTCACTATAGAATTCATTTTTTTAGATGGTTATGATC  
GTGACGCGTGGTCTAATGACAAATCGACACGTAAGCGTACGGAGGTGTCCCCGGCGCGGGCAAGCCAG  
TAATATTATATTGGC

+  
FFFFFFFFFFFFFFFFFFFFFFFFFFFFFFFFFFFFFFFFFFFFFFFF:FFFFFFFFFFFFFFFFFFFF:FFFFFFFFFF  
FFFFFFFFF,FFFFFFFFFF:FFFFFFFFFFFFFFFFFFFFFFFFFFFFFFFFFFFFFFFFFFFFFFFF,F:F,F  
,FFFFFFF::FFFF,F

@A00721:190:HGJW7DSXY:4:2510:11116:9001 2:N:0:TCTGCAAG+GCTGCACT  
TGAATTTCAAATTGACCGTCGATTCTACTGCGTCACTATAGAATTCATTTTTTTAGATGGTTATGATC



@A00721:190:HGJW7DSXY:4:2521:8865:25488 2:N:0:TCTGCAAG+GCTGCACT  
TTTGAATTTCAAATTGACCGTCGATTCTACTGCGTCACTATAGAATTCATTTTTTAGATGGTTATGA  
TCGTGACGCGTGGTCTAATGACAAATCGACACGTAAGCGTACGGAGGTGTCCCCGGCGCGGGCAAGCC  
AGTAATATTATATTG

```

FFFFFFFF:FFFFFFFFFFFFFFFF:FF:FFFFFFFFFFFF:,FFF:FFFFFFFFFFFF:FFFFFFFF
FFFFFFFFFFFFFFFF:FFFFFFF:FFFFFFFFFFFF:FFFFFFFFFFFFFFFFFFFFFFFFFFFF:FFF
FFFF:FFF,FF::FF

```

+

```
FFFFFFFF:FFFFFF:FFFFFFFFFFFFFFFFFFFFFFFFFFFFFFFFFFFFF,FF:FFFFFFFF,F0FFFFFFFFFFFF  
FFFFFFFFFFFFFFFFFFFFFFFFFFFFFFFFFFFFFFFFFFFFFFFFFFFFFFFFFFFFF:FFFFFFFFFFFF:F0  
FFFFFFFF,FFFF:FF
```

+

```

FFFFFFFF:FFFFFFFFFFFFFFFFFFFFFFFF:FFFFFFFFFFFFFFFFFFFFFFFFFFFFFFFFFFFFFFFF
FFFFFFFFFFFFFFFFFFFFFFFFFFFFFFFF:FFF:FFF:FFF,FFFFFFFFFFFFFFFFFFFFFFFFFFFFF
FFFFFFFFFFFFFFFF

```

+

```

FFFFFFFFFFFFFFFFFFFFFFFFFFFFFFFF:FFFFFFFFFFFFFFFF:FFFFFFFFFFFFFFFF:FFF
FFFFFFFFFFFFFFFFFFFFFFFFFFFFFFFF:FFF:FFFFFFFFFFFFFFFFFFFFFFFFFFFFFFFF:FFFFFFFF
FFFFFF:FF:E:FFF

```

+

```

FFFFFFFFFFFFFF:FFFFFFFFFFFFFFFFFFFFFFFFFFFFFFFF,,:FFFFFF:FFFF:FF,FFFFFF::F
FFFFFF:FF:, ,FFFFFF:FFFFFFFF::FFFFFF:FFF:FFFFFFFFFFFFFFFFFFFFFFFFFFFFFFFF
FF:FFFFFFFF:FF:F

```

+

```
FFFFFFFFFFFFFF:FFFFFFFFFFFFFFFFFFFFFFFFFFFF:FF,FFFFFF:FF:FFFF:FFFFFFFFF
FF:FFFFFFFFF:FFFF,FFFFFFFFFFFFFFFFFFFFFFFF,FFFFFFFFFFFFFFFFFFFFFFFFFFFFFF
FE,EEEEEEEEEE,E
```

+

FFFFFFFFFFFFFFFFFFFFFFFFFFFFFFFFFFFFFFFF:FFFFFFFFFFFFFFFFFFFFFFFFFFFFFFFF:FFFFFFFFFFFFFFFF:F:F



[illegible][illegible]

```

FFFFFFFFFFFFFFFFFFFFFFFFFFFFFFFF:FFFFFFFFF:FFFFFFFFFFFFFFFFFFFFFFFF
FFF:FFFFFFFFFFFFFF:FFFFFFF,FFF:FFFFFFFFFFFFFFFFFFFFFFFFFFFFFFFFF:F:
F:FFFFFFFFFFFFFF

```

[illegible][illegible]

```

FFFFFFFFFFFFFFFFFFFFFFFFFFFFFFFFFFFFFFFFFFFFFFFFFFFFFFFFFFFFFFFFFFFFFFFF
FFFFFFFFFFFFFFFFFFFFFFFFFFFFFFFF:FFF:FFF:FFFFFFFFFFFFFFFFFFFFFFFFFFFFFFFF
FFFFFFFFFFFFFFFF:FF

```

```

FFFFFFFFFFFFFFFFFFFFFFFFFFFFFFFFFFFFFFFFFFFFFFFFFFFFFFFFFFFFFFFF:FFFFFFFFFFFFFFFF
FFFFFFFFFFFFFFFF:F:FFFFFF:FFF:F:,FFFFFFFFFFFFFFFFFFFFFFFFFFFFFFFFFFFFFFFF
FFFF,FFFFFFFF

```

@A00721:190:HGJW7DSXY:4:2475:21206:6057 1:N:0:TCTGCAAG+GCTGCACT  
ACTGGCTTGCCCGCGCCGGGGACACCTCCGTACGCTTACGTGTCGATTTGTCATTAGACCACGCGTCA

CGATCATAACCATCTAAAAAATGAATTCTATAGTGACGCAGTAGAATCGACGGTCAATTTTGAAATTC  
AAAATTTATATTTAT

+

FFFFFFFFFFFFFFFFFFFFFFFFFFFFFFFFFFFFFFFFFFFFFFFFFFFFFFFFFFFFFFFFFFFFFFFF  
FFFFFFFFFFFFFFFFFFFFFFFFFFFFFFFFFFFFFFFFFFFFFFFFFFFFFFFFFFFFFFFFFFFFFFFF,  
F:FFF,FFFF:,FFF

@A00721:190:HGJW7DSXY:4:2553:13602:11929 1:N:0:TCTGCAAG+GCTGCACT  
ACTGGCTTGCCCGCGCCGGGACACCTCCGTACGCTTACGTGTCGATTTGTCATTAGACCACGCGTCA  
CGATCATGACCATCTAAAAAATGAATTCTATAGTGACGCAGTAAAATCGACGGCAGATGATATGTTAT  
ATCATCGTCTTTTGTG

+

FFFFFFFFFFFFFFFFFFFFFFFFFFFFFFFFFFFFFFFFFFFFFFFFFFFFFFFFFFFFFFFFFFFFFFFF  
FFFFFFFFFFFFFFFFFFFFFFFFFFFFFFFFFFFFFFFFFFFFFFFFFFFFFFFFFFFFFFFFFFFFFFFF:FFF  
FFF:FFFFFFFF

@A00721:190:HGJW7DSXY:4:1138:13376:9345 1:N:0:TCTGCAAG+GCTGCACT  
GCTGGCTTGCCCGCGCCGGGACACCTCCGTACGCTTACGTGTCGATTTGTCATTAGACCACGCGTCA  
CGATCATAACCATCTAAAAAATGAATTCTATAGTGACGCAGTAGAATCGACGGTCAATTTTGAAATTC  
AAAATTTATAGTTAT

+

FFFFFFFFFFFFFFFFFFFFFFFFFFFFFFFFFFFFFFFFFFFFFFFFFFFFFFFFFFFFFFFFFFFFFFFF  
FFFFFFFFFFFFFFFFFFFFFFFFFFFFFFFFFFFFFFFFFFFFFFFFFFFFFFFFFFFFFFFFFFFFFFFF:FFF  
FFF:FFFF,F,F:FF

@A00721:190:HGJW7DSXY:4:1160:23439:19883 1:N:0:TCTGCAAG+GCTGCACT  
GCTGGCTTGCCCGCGCCGGGACACCTCCGTACGCTTACGTGTCGATTTGTCATTAGACCACGCGTCA  
CGATCATAACCATCTAAAAAATGAATTCTATAGTGACGCAGTAGAATCGACGGTCAATTTTGAAATTC  
AAAATTTATATTTAT

+

FFFFFFFFFFFFFFFFFFFFFFFFFFFFFFFFFFFFFFFFFFFFFFFFFFFFFFFFFFFFFFFFFFFFFFFF  
FFFFFFF:FFFFFFFFFFFF:FFFFFFFFFFFFFFFFFFFFFFFFFFFFFFFFFFFFFFFFFFFFFFFF  
FFFFFFFFFFFF:FFF

@A00721:190:HGJW7DSXY:4:2162:13928:7983 1:N:0:TCTGCAAG+GCTGCACT  
GCTGGCTTGCCCGCGCCGGGACACCTCCGTACGCTTACGTGTCGATTTGTCATTAGACCACGCGTCA  
CGATCATAACCATCTAAAAAATGAATTCTATAGTGACGCAGTAGAATCGACGGTCAATTTTGAAATTC  
AAAATTTATATTTAT

+

FFFFFFFFFFFFFFFFFFFFFFFFFFFFFFFFFFFFFFFFFFFFFFFFFFFFFFFFFFFFFFFFFFFFFFFF  
FFFFFFFFFFFFFFFFFFFF:FFFFFFFFFFFFFFFFFFFFFFFFFFFFFFFFFFFFFFFFFFFFFFFF  
FFF:FFFFFF:FFF

@A00721:190:HGJW7DSXY:4:2162:13865:8750 1:N:0:TCTGCAAG+GCTGCACT  
GCTGGCTTGCCCGCGCCGGGACACCTCCGTACGCTTACGTGTCGATTTGTCATTAGACCACGCGTCA  
CGATCATAACCATCTAAAAAATGAATTCTATAGTGACGCAGTAGAATCGACGGTCAATTTTGAAATTC  
AAAATTTATATTTA

+

FFFFFFFFFFFFFFFFFFFFFFFFFFFFFFFFFFFFFFFFFFFFFFFFFFFFFFFFFFFFFFFFFFFFFFFF  
FFFFFFFFFFFFFFFFFFFFFFFFFFFFFFFFFFFFFFFFFFFFFFFFFFFFFFFFFFFFFFFFFFFFFFFF  
FFFFFFFFFFFF,FFF

@A00721:190:HGJW7DSXY:4:2354:6153:9737 1:N:0:TCTGCAAG+GCTGCACT  
GCTGGCTTGCCCGCGCCGGGACACCTCCGTACGCTTACGTGTCGATTTGTCATTAGACCACGCGTCA  
CGATCATAACCATCTAAAAAATGAATTCTAGAGTGACGCAGTAGAATCGACGGTCAATTTTGAAATTC  
AAAATTTAGATTTAT

+

FFFFFFFFFFFFFFFFFFFFFFFFFFFFFFFFFFFFFFFFFFFFFFFFFFFFFFFFFFFFFFFFFFFFFFFF  
FFFFFFFFFFFFFFFFFFFF,FFFF,FFFFFF, :F,FFFFFFFFFFFFFFFFFFFFFFFFFFFFFFFF  
:F:F,FFF,:F::FF





FFFFFFFF:FFFFFFFF:,FFFFF,FFFFFFFFFFFFFFFF:FFFFFFFFFFFF,FF,FFFFFF,FFFFF  
F:,FFF:F:FFFFFF

@A00721:190:HGJW7DSXY:4:1203:23836:35352 1:N:0:TCTGCAAG+GCTGCACT  
CGCCCGCGCCGGGGACACCTCCGTACGCTTACGTGTCGATTTGTCATTAGACCACGCGTCACGATCAT  
AACCATCTAAAAAATGAATTCTATAGTGACGCAGTAGAATCGACGGTCAATTTTGAAATTCAAATTT  
ATAAATATTGTGGGT

+

FFFFFFFFFFFFFFFFFFFFFFFFFFFFFFFF:F:FFFF:FFFFFFFF:F:FFFF:FFFFFFFFFFFFFFFF  
FFFFFFFF,FFFFFFFF:, ,FFFFFFFFFFFFFFFFFFFFFFFF:FFFF,FF::FFFFFFFFFFFFFFFF  
FF:FF:FFF:F:,FF

@A00721:190:HGJW7DSXY:4:1351:24297:1329 1:N:0:TCTGCAAG+GCTGCACT  
CGCCCGCGCCGGGGACACCTCCGTACGCTTACGTGTCGATTTGTCATTAGACCACGCGTCACGATCAT  
AACCATCTAAAAAATGAATTCTATAGTGACGCAGTAGAATCGACGGTCAATTTTGAAATTCAAATTT  
ATAAATATTGTGGGT

+

FFFFFFFFFFFFFFFFFFFFFFFFFFFFFFFFFFFFFFFFFFFFFFFFFFFFFFFFFFFFFFFFFFFFFFFF  
FFFFFFFFFFFFFFFFFFFFFFFF,F:F:FFFFFFFFFFFF,FFFFFFFFFFFFFFFF:FFFFFFFFFFFF:FF,F  
FFF:FFFFFF:FFFF

@A00721:190:HGJW7DSXY:4:1571:31024:20243 1:N:0:TCTGCAAG+GCTGCACT  
CGCCCGCGCCGGGGACACCTCCGTACGCTTACGTGTCGATTTGTCATTAGACCACGCGTCACGATCAT  
AACCATCTAAAAAATGAATTCTATAGTGACGCAGTAGAATCGACGGTCAATTTTGAAATTCAAATTT  
ATAAATATTGTGGGT

+

F:FFFFFFFFFFFF:FFFFFFFFFFFF:F:FFFFFFFFFFFFFFFF:FFFFFFFFFFFFFFFFFFFFFFFF  
FFFFFFFFFFFFFFFF:FFFFFFFF:FFFF:FFFFFFFFFFFFFFFF:FFFFFFFF,FF:FFF:FFFFFFFF  
FFFFFFFF:FFFFF

@A00721:190:HGJW7DSXY:4:1643:9805:8797 1:N:0:TCTGCAAG+GCTGCACT  
CGCCCGCGCCGGGGACACCTCCGTACGCTTACGTGTCGATTTGTCATTAGACCACGCGTCACGATCAT  
AACCATCTAAAAAATGAATTCTATAGTGACGCAGTAGAATCGACGGTCAATTTTGAAATTCAAATTT  
ATAAATATTGTGGGT

+

FFFFFFFFFFFFFFFFFFFFFFFFFFFFFFFFFFFFFFFFFFFFFFFFFFFFFFFFFFFFFFFFFFFFFFFF  
FFFFFFFFFFFFFFFFFFFFFFFF,FFFFFFFFFFFFFFFFFFFFFFFFFFFFFFFFFFFFFFFFFFFFFFFF  
FFFFFFFFFFFFFFFF

@A00721:190:HGJW7DSXY:4:1657:2338:7858 1:N:0:TCTGCAAG+GCTGCACT  
CGCCCGCGCCGGGGACACCTCCGTACGCTTACGTGTCGATTTGTCATTAGACCACGCGTCACGATCAT  
AACCATCTAAAAAATGAATTCTATAGTGACGCAGTAGAATCGACGGTCAATTTTGAAATTCAAATTT  
ATAAATATTGTGGGT

+

FFFFFFFFFFFFFFFFFFFFFFFFFFFFFFFFFFFFFFFFFFFFFFFFFFFFFFFFFFFFFFFFFFFFFFFF  
FFFFFFFFFFFFFFFFFFFFFFFF:FF,F,FFFFFFFFFFFFFFFFFFFFFFFFFFFFFFFF:FFFFFFFFFFFF  
FFFFF::FFFFFFFF

@A00721:190:HGJW7DSXY:4:2238:21070:33098 1:N:0:TCTGCAAG+GCTGCACT  
CGCCCGCGCCGGGGACACCTCCGTACGCTTACGTGTCGATTTGTCATTAGACCACGCGTCACGATCAT  
AACCATCTAAAAAATGAATTCTATAGTGACGCAGTAGAATCGACGGTCAATTTTGAAATTCAAATTT  
ATAAATATTGTGGGT

+

FFFFFFFFFFFFFFFFFFFFFFFFFFFFFFFFFFFFFFFFFFFFFFFFFFFFFFFFFFFFFFFFFFFFFFFF  
FFFFFFFFFFFFFFFFFFFFFFFF:FFF,FFFFFF:FFFFFFFF:F:FFFFFF:FFFFFF:FFFFF  
F:FFFFFFFFFFFF

@A00721:190:HGJW7DSXY:4:2238:21730:33270 1:N:0:TCTGCAAG+GCTGCACT  
CGCCCGCGCCGGGGACACCTCCGTACGCTTACGTGTCGATTTGTCATTAGACCACGCGTCACGATCAT  
AACCATCTAAAAAATGAATTCTATAGTGACGCAGTAGAATCGACGGTCAATTTTGAAATTCAAATTT  
ATAAATATTGTGGGT



ACCATCTAAAAAAGAATTCTATAGTGACGCAGTAGAATCGACGGTCAATTTTGAAATTCAAAATTTA  
TATTTATTGTGTTG

+

FFFFFFFFFFFFFFFFFFFFFFFFFFFFFFFFFFFFFFFFFFFFFFFFFFFFFFFFFFFFFFFFFFFFFFFF  
FFFFFFFFFFFFFFFFFFFFFFFFFFFFFFFFFFFFFFFFFFFFFFFFFFFFFFFFFFFFFFFFFFFFFFFF:FFFF  
FF:FFFFFFFF:F

@A00721:190:HGJW7DSXY:4:2505:15067:21167 1:N:0:TCTGCAAG+GCTGCACT  
GCCCCGCGCCGGGGACACCTCCGTACGCTTACGTGTCGATTTGTCATTAGACCACGCGTCACGATCATA  
ACCATCTAAAAAAGAATTCTATAGTGACGCAGTAGAATCGACGGTCAATTTTGAAATTCAAAATTTA  
TATTTATTGTGTTGA

+

FFFFFFFFFFFFFFFFFFFFFFFFFFFFFFFFFFFFFFFFFFFFFFFFFFFFFFFFFFFFFFFFFFFFFFFF  
FFF:FFFFFF:FFFF,FFF:F:FFFFFFFFFFFFFFFFFFFFFFFFFFFFFFFFFFFFFFFF:FFFFFF:FF:F,F  
FFFFFFFFFFFFFFFF:

@A00721:190:HGJW7DSXY:4:1104:5593:22357 1:N:0:TCTGCAAG+GCTGCACT  
CCCCGCGCCGGGGACACCTCCGTACGCTTACGTGTCGATTTGTCATTAGACCACGCGTCACGATCATAA  
CCATCTAAAAAATGAATTCTATAGTGACGCAGTAGAATCGACGGTCAATTTTGAAATTCAAAATTTAT  
ATTTATT

+

FFFFFFFFFFFFFFFFFFFFFFFFFFFFFFFFFFFFFFFFFFFFFFFFFFFFFFFFFFFFFFFFFFFFFFFF  
FFFFFFFFFFFFFFFF:FFFFFFFFFFFFFFFFFFFFFFFFFFFFFFFFFFFFFFFF:FFFFFFFFFFFFFFF  
FFFFFFF

@A00721:190:HGJW7DSXY:4:1122:6153:21386 1:N:0:TCTGCAAG+GCTGCACT  
CCCCGCGCCGGGGACACCTCCGTACGCTTACGTGTCGATTTGTCATTAGACCACGCGTCACGATCATGA  
CCATCTAAAAAATGAATTCTATAGTGACGCAGTAAATCGACGGCAGATGATATGTTATATCATCGTC  
TTTTTGA

+

FFFFFFFFFFFFFFFFFFFFFFFFFFFFFFFFFFFFFFFFFFFFFFFFFFFFFFFFFFFFFFFFFFFFFFFF  
FFFFFFFFFFFFFFFF:FFFFFFFFFFFFFFFFFFFFFFFFFFFFFFFFFFFFFFFF:FFFFFFFFFFFFFFF  
FFFFFFF

@A00721:190:HGJW7DSXY:4:1159:3676:24142 1:N:0:TCTGCAAG+GCTGCACT  
CCCCGCGCCGGGGACACCTCCGTACGCTTACGTGTCGATTTGTCATTAGACCACGCGTCACGATCATGA  
CCATCTAAAAAATGAATTCTATAGTGACGCAGTAAATCGACGGCAGATGATATGTTATATCATCGTC  
TTTTTGA

+

FFFFFFFFFFFFFFFFFFFFFFFFFFFF,FFFFFFFFFFFFFFFFFFFFFFFFFFFFFFFFFFFFFFFF  
FFFFFFFFFFFFFFFF:FFFFFFFFFFFFFFFFFFFFFFFFFFFFFFFFFFFFFFFF,FFF:FFFFFFFF  
FFFFFFF

@A00721:190:HGJW7DSXY:4:1163:25925:9533 1:N:0:TCTGCAAG+GCTGCACT  
CCCCGCGCCGGGGACACCTCCGTACGCTTACGTGTCGATTTGTCATTAGACCACGCGTCACGATCATGA  
CCATCTAAAAAATGAATTCTATAGTGACGCAGTAAATCGACGGCAGATGATATGTTATATCATCGTC  
TTTTTGA

+

FFFFFFFFFFFFFF:FFFFFFFFFFFFFF:FFFFFFFF:F:FFFFFFFFFFFFFFFFFFFFFFFF  
FFFFFFFFFFFF::FF,,FF::,FFFFFFFFFFFFFFFFFFFFFFFFFFFFFFFF:FFFFFFFFFFFFFFF  
FFFFFFF

@A00721:190:HGJW7DSXY:4:1215:27733:12352 1:N:0:TCTGCAAG+GCTGCACT  
CCCCGCGCCGGGGACACCTCCGTACGCTTACGTGTCGATTTGTCATTAGACCACGCGTCACGATCATAA  
CCATCTAAAAAATGAATTCTATAGTGACGCAGTAGAATCGACGGTCAATTTTGAAATTCAAAATTTAT  
ATTTATTGTG

+

FFFFFFFFFFFFFFFFFFFFFFFFFFFFFFFFFFFFFFFFFFFFFFFFFFFFFFFFFFFFFFFF:FFF  
FFFF:FFFFFFFF:F:FFF:FFFFFFFFFFFFFFFFFFFFFFFFFFFFFFFFFFFFFFFF  
FFFFFFFFF

@A00721:190:HGJW7DSXY:4:1224:13937:19774 1:N:0:TCTGCAAG+GCTGCACT  
CCCGCGCCGGGGACACCTCCGTACGCTTACGTGTCGATTTGTCATTAGACCACGCGTCACGATCATGA  
CCATCTAAAAAATGAATTCTATAGTGACGCAGTAAAATCGACGGCAGATGATATGTTATATCATCGTC  
TTTTTGA

+

FFFFFFFFFFFFFFFFFFFFFFFFFFFFFFFFFFFFFFFFFFFFFFFFFFFFFFFFFFFFFFFFFFFFFFFF  
FFFFFFFFFFFFFFFFFFFFFFFFFFFFFFFFFFFFFFFFFFFFFFFFFFFFFFFFFFFFFFFFFFFFFFFF  
FFFF:FF

@A00721:190:HGJW7DSXY:4:1246:20329:22858 1:N:0:TCTGCAAG+GCTGCACT  
CCCGCGCCGGGGACACCTCCGTACGCTTACGTGTCGATTTGTCATTAGACCACGCGTCACGATCATGA  
CCATCTAAAAAATGAATTCTATAGTGACGCAGTAAAATCGACGGCAGATGATATGTTATATCATCGTC  
TTTTTGA

+

FFFFFFFFFFFFFFFFFFFFFFFFFFFFFFFFFFFFFFFFFFFFFFFFFFFFFFFFFFFFFFFFFFFFFFFF  
FFFFFFFFFFFFFFFFFFFFFFFFFFFFFFFFFFFFFFFFFFFFFFFFFFFFFFFFFFFFFFFFFFFFFFFF  
FFFF:FF

@A00721:190:HGJW7DSXY:4:1316:24686:18474 1:N:0:TCTGCAAG+GCTGCACT  
CCCGCGCCGGGGACACCTCCGTACGCTTACGTGTCGATTTGTCATTAGACCACGCGTCACGATCATGA  
CCATCTAAAAAATGAATTCTATAGTGACGCAGTAAAATCGACGGCAGATGATATGTTATATCATCGTC  
TTTTTGA

+

FFFFFFFFFFFFFFFFFFFFFFFFFFFFFFFFFFFFFFFFFFFFFFFFFFFFFFFFFFFFFFFFFFFFFFFF  
FFFFFFFFFFFFFFFFFFFFFFFFFFFFFFFFFFFFFFFFFFFFFFFFFFFFFFFFFFFFFFFFFFFFFFFF  
FFFF:FF

@A00721:190:HGJW7DSXY:4:1325:14606:11725 1:N:0:TCTGCAAG+GCTGCACT  
CCCGCGCCGGGGACACCTCCGTACGCTTACGTGTCGATTTGTCATTAGACCACGCGTCACGATCATGA  
CCATCTAAAAAATGAATTCTATAGTGACGCAGTAAAATCGACGGCAGATGATATGTTATATCATCGTC  
TTTTTGA

+

FFFFFFFFFFFFFFFFFFFFFFFFFFFFFFFFFFFFFFFFFFFFFFFFFFFFFFFFFFFFFFFFFFFFFFFF  
FFFFFFFFFFFFFFFFFFFFFFFFFFFFFFFFFFFFFFFFFFFFFFFFFFFFFFFFFFFFFFFFFFFFFFFF  
FFFF:FF

@A00721:190:HGJW7DSXY:4:1331:21504:6731 1:N:0:TCTGCAAG+GCTGCACT  
CCCGCGCCGGGGACACCTCCGTACGCTTACGTGTCGATTTGTCATTAGACCACGCGTCACGATCATAA  
CCATCTAAAAAATGAATTCTATAGTGACGCAGTAGAATCGACGGTCAATTTTGAAATTCAAAATTTAT  
ATTTATTGTG

+

FF:::F:FF:F::FFFFFFFFFFFFFFFFFFFFFFFFFFFFFFFFFFFFFFFFFFFFFFFFFFFFFFFF  
FFFFFFFFFFFFFFFFFFFFFFFFFFFFFFFFFFFFFFFFFFFFFFFFFFFFFFFFFFFFFFFFFFFFFFFF  
FF,FFFF::

@A00721:190:HGJW7DSXY:4:1339:12255:29951 1:N:0:TCTGCAAG+GCTGCACT  
CCCGCGCCGGGGACACCTCCGTACGCTTACGTGTCGATTTGTCATTAGACCACGCGTCACGATCATAA  
CCATCTAAAAAATGAATTCTATAGTGACGCAGTAGAATCGACGGTCAATTTTGAAATTCAAAATTTAT  
ATTTATT

+

FFFFFFFFFFFFFFFFFFFFFFFFFFFFFFFFFFFFFFFFFFFFFFFFFFFFFFFFFFFFFFFFFFFFFFFF  
FFFFFFFFFFFFFFFFFFFFFFFFFFFFFFFFFFFFFFFFFFFFFFFFFFFFFFFFFFFFFFFFFFFFFFFF  
FFFF:FF

@A00721:190:HGJW7DSXY:4:1363:18954:8641 1:N:0:TCTGCAAG+GCTGCACT  
CCCGCGCCGGGGACACCTCCGTACGCTTACGTGTCGATTTGTCATTAGACCACGCGTCACGATCATGA  
CCATCTAAAAAAGGAATTCTATAGTGACGCAGTAAAATCGACGGCAGATGATATGTTATATCATCGTC  
TTTTTGA

+

:FFFF,FFF:FFFFFFFFFFFFFFFFFFFFFFFFFFFFFFFFFFFFFFFFFFFFFFFFFFFFFFFF

FFFFFFFF:FFF,,FF:,F:,FF,FFFFFFFF:FFFFFFFF:FFFFFFFF,FFF,FF:FFFFFFFF  
F,F,FFF

@A00721:190:HGJW7DSXY:4:1414:13449:4961 1:N:0:TCTGCAAG+GCTGCACT  
CCCGCGCCGGGACACCTCCGTACGCTTACGTGTCGATTTGTCATTAGACCACGCGTCACGATCATGA  
CCATCTAAAAAATGAATTCTATAGTGACGCAGTAAATCGACGGCAGATGATATGTTATATCATCGTC  
TTTTTGA

+

FFFFFFFFFFFFFFFFFFFFFFFFFFFFFFFFFFFFFFFFFFFFFFFFFFFFFFFFFFFFFFFF  
FFFFFFFFFFFFFFFFFFFFFFFFFFFFFFFFFFFFFFFFFFFFFFFFFFFFFFFFFFFFFFFF  
FFFFFFF

@A00721:190:HGJW7DSXY:4:1427:1642:12853 1:N:0:TCTGCAAG+GCTGCACT  
CCCGCGCCGGGACACCTCCGTACGCTTACGTGTCGATTTGTCATTAGACCACGCGTCACGATCATAA  
CCATCTAAAAAATGAATTCTATAGTGACGCAGTAGAATCGACGGTCAATTTTGAAATTCAAAATTTAT  
ATTTATTGTG

+

FFFFFFFFFFFFFFFFFFFFFFFFFFFFFFFFFFFFFFFFFFFFFFFFFFFFFFFFFFFFFFFF  
FFFFFFFFFFFFFFFFFFFFFFFF:FFFFFFFFFFFFFFFFFFFFFFFFFFFFFFFF:FFFFFF:  
F:F::FFFF

@A00721:190:HGJW7DSXY:4:1442:18403:17268 1:N:0:TCTGCAAG+GCTGCACT  
CCCGCGCCGGGACACCTCCGTACGCTTACGTGTCGATTTGTCATTAGACCACGCGTCACGATCATAA  
CCATCTAAAAAATGAATTCTATAGTGACGCAGTAGAATCGACGGTCAATTTTGAAATTCAAAATTTAT  
ATTTATTGTG

+

FFFFFFF:F:FFFF:FF:F:FFFF,FFFF:FFFF:FFF,FFF,,FFF:FF,FFFFFF,FFFFFF,  
FFFFFFFFFFFF,:FF:FF:F:F:,F,FFFFFFFFFFFFFFFFFFFFFFFFFFFFFFFF,FF::  
:FFFF:F::FF

@A00721:190:HGJW7DSXY:4:1447:22878:28588 1:N:0:TCTGCAAG+GCTGCACT  
CCCGCGCCGGGACACCTCCGTACGCTTACGTGTCGATTTGTCATTAGACCACGCGTCACGATCATGA  
CCATCTAAAAAATGAATTCTATAGTGACGCAGTAAATCGACGGCAGATGATATGTTATATCATCGTC  
TTTTTGA

+

FFFFFFFFFFFFFFFFFFFFFFFF,FFFFFFFFFFFFFFFF:FFFFFFFFFFFFFFFF:FFFF:FFFF  
FFFFFFFFFFFFFFFF:,FF:F,FFFFFFFFFFFFFFFFFFFFFFFFFFFFFFFF:FFFF,FFFFFFFF  
FFFFFFF

@A00721:190:HGJW7DSXY:4:1448:14796:13996 1:N:0:TCTGCAAG+GCTGCACT  
CCCGCGCCGGGACACCTCCGTACGCTTACGTGTCGATTTGTCATTAGACCACGCGTCACGATCATAA  
CCATCTAAAAAATGAATTCTATAGTGACGCAGTAGAATCGACGGTCAATTTTGAAATTCAAAATTTAT  
ATTTATTGTG

+

FFFFFFFFFFFFFFFFFFFFFFFFFFFFFFFFFFFFFFFF:FFFFFFFFFFFFFFFF:FFFF  
FFFFFFFFFFFFFFFF:FFFF:FFFFFFFFFFFFFFFFFFFFFFFFFFFFFFFF:FFFFF  
FFFFFFFFF

@A00721:190:HGJW7DSXY:4:1512:4869:5541 1:N:0:TCTGCAAG+GCTGCACT  
CCCGCGCCGGGACACCTCCGTACGCTTACGTGTCGATTTGTCATTAGACCACGCGTCACGATCATAA  
CCATCTAAAAAATGAATTCTATAGTGACGCAGTAGAATCGACGGTCAATTTTGAAATTCAAAATTTAT  
ATTTATTGT

+

FFF:FFFFFFFFFFFFFFFFFFFFFFFFFFFFFFFF,F,FFFFFF:FFFFFFFFFFFFFFFF:FF  
FFFFFFFFFF,FF:FFFFFFFFFFFF,FFFF,FF:FFFFFFFFFFFFFFFF:FFFFFFFFFFFF  
FFFFFFFFF

@A00721:190:HGJW7DSXY:4:1512:16477:34381 1:N:0:TCTGCAAG+GCTGCACT  
CCCGCGCCGGGACACCTCCGTACGCTTACGTGTCGATTTGTCATTAGACCACGCGTCACGATCATAA  
CCATCTAAAAAATGAATTCTATAGTGACGCAGTAGAATCGACGGTCAATTTTGAAATTCAAAATTTAT  
ATTTATTGTG

+  
FFFFFFFFFFFFFFFFFFFFFFFFFFFFFFFFFFFFFFFFFFFFFFFFFFFFFFFFFFFFFFFFFFFFFFFF  
FFFFFFFFFFFFFFFFFFFFFFFFFFFFFFFFFFFFFFFFFFFFFFFFFFFFFFFFFFFFFFFFFFFFFFFF  
F:FFFFFF:F

@A00721:190:HGJW7DSXY:4:1512:18584:35117 1:N:0:TCTGCAAG+GCTGCACT  
CCCGCGCCGGGGACACCTCCGTACGCTTACGTGTCGATTTGTCATTAGACCACGCGTCACGATCATAA  
CCATCTAAAAAATGAATTCTATAGTGACGCAGTAGAATCGACGGTCAATTTTGAAATTCAAAATTTAT  
ATTTATTGTG

+  
FFFFFFFFFFFFFFFFFFFFFFFFFFFFFFFFFFFFFFFFFFFFFFFFFFFFFFFFFFFFFFFFFFFFFFFF  
FFFFFFFFFFFFFFFFFFFFFFFFFFFFFFFFFFFFFFFFFFFFFFFFFFFFFFFFFFFFFFFFFFFFFFFF  
FFF,FFFFF

@A00721:190:HGJW7DSXY:4:1523:32036:18584 1:N:0:TCTGCAAG+GCTGCACT  
CCCGCGCCGGGGACACCTCCGTACGCTTACGTGTCGATTTGTCATTAGACCACGCGTCACGATCATGA  
CCATCTAAAAAATGAATTCTATAGTGACGCAGTAAAATCGACGGCAGATGATATGTTATATCATCGTC  
TTTTTGA

+  
FFFFFFF::F:FFFFFFFFFFFFFFFFFFFFFFFFFFFFFFFFFFFFFFFFFFFFFFFFFFFFFFFFFFFF  
FFFFFFFFFFFFFFFFFFFFFFFFFFFFFFFFFFFFFFFFFFFFFFFFFFFFFFFFFFFFFFFFFFFFFFFF  
FFF,FFFFF

@A00721:190:HGJW7DSXY:4:1530:2510:35650 1:N:0:TCTGCAAG+GCTGCACT  
CCCGCGCCGGGGACACCTCCGTACGCTTACGTGTCGATTTGTCATTAGACCACGCGTCACGATCATGA  
CCATCTAAAAAATGAATTCTATAGTGACGCAGTAAAATCGACGGCAGATGATATGTTATATCATCGTC  
TTTTTGA

+  
FFFFFFFFFFFFFFFFFFFFFFFFFFFFFFFFFFFFFFFFFFFFFFFFFFFFFFFFFFFFFFFFFFFFFFFF  
FFFFFF:FFFF::,FFFFFF:F:FFFFFFFFFFFFFFFFFFFFFFFFFFFFFFFFFFFFFFFFFFFFFFF  
FFF,FFF

@A00721:190:HGJW7DSXY:4:1569:31024:3615 1:N:0:TCTGCAAG+GCTGCACT  
CCCGCGCCGGGGACACCTCCGTACGCTTACGTGTCGATTTGTCATTAGACCACGCGTCACGATCATGA  
CCATCTAAAAAATGAATTCTATAGTGACGCAGTAAAATCGACGGCAGATGATATGTTATATCATCGTC  
TTTTTGA

+  
FFFFFFFFFFFFFFFFFFFFFFFFFFFFFFFFFFFFFFFFFFFFFFFFFFFFFFFFFFFFFFFFFFFFFFFF  
FFFFFFFFFFFFFFFFFFFFFFFFFFFFFFFFFFFFFFFFFFFFFFFFFFFFFFFFFFFFFFFFFFFFFFFF  
FFFFFFF

@A00721:190:HGJW7DSXY:4:1645:5873:25347 1:N:0:TCTGCAAG+GCTGCACT  
CCCGCGCCGGGGACACCTCCGTACGCTTACGTGTCGATTTGTCATTAGACCACGCGTCACGATCATAA  
CCATCTAAAAAATGAATTCTATAGTGACGCAGTAGAATCGACGGTCAATTTTGAAATTCAAAATTTAT  
ATTTATT

+  
FFFFFFFFFFFFFFFFFFFFFFFFFFFFFFFFFFFFFFFFFFFFFFFFFFFFFFFFFFFFFFFFFFFFFFFF  
FFFFFFFFFFFFFFFFFFFFFFFFFFFFFFFFFFFFFFFFFFFFFFFFFFFFFFFFFFFFFFFFFFFFFFFF  
FFFFFFF

@A00721:190:HGJW7DSXY:4:1650:3866:34616 1:N:0:TCTGCAAG+GCTGCACT  
CCCGCGCCGGGGACACCTCCGTACGCTTACGTGTCGATTTGTCATTAGACCACGCGTCACGATCATAA  
CCATCTAAAAAATGAATTCTATAGTGACGCAGTAGAATCGACGGTCAATTTTGAAATTCAAAATTTAT  
ATTTATTGTG

+  
FFFFFFFFFFFFFFFFFFFFFFFFFFFFFFFFFFFFFFFFFFFFFFFFFFFFFFFFFFFFFFFFFFFFFFFF  
FFFFFFFFFFFFFFFFFFFFFFFFFFFFFFFFFFFFFFFFFFFFFFFFFFFFFFFFFFFFFFFFFFFFFFFF  
FFFFFFF

@A00721:190:HGJW7DSXY:4:1663:9842:32534 1:N:0:TCTGCAAG+GCTGCACT  
CCCGCGCCGGGGACACCTCCGTACGCTTACGTGTCGATTTGTCATTAGACCACGCGTCACGATCATGA

CCATCTAAAAAATGAATTCTATAGTGACGCAGTAAAATCGACGGCAGATGATATGTTATATCATCGTC  
TTTTTGA

+

FFFFFFFFFFFFFFFFFFFFFFFFFFFFFFFFFFFFFFFFFFFFFFFFFFFFFFFFFFFFFFFFFFFFFFFF  
FFFFFFFFFFFFFF:FFFFFFFFFFFFFFFFFFFFFFFFFFFFFFFFFFFFFFFFFFFFFFFFFFFFFFFF  
FFFFFFF

@A00721:190:HGJW7DSXY:4:2138:10447:24565 1:N:0:TCTGCAAG+GCTGCACT  
CCCGCGCCGGGGACACCTCCGTACGCTTACGTGTCGATTTGTCATTAGACCACGCGTCACGATCATGA  
CCATCTAAAAAATGAATTCTATAGTGACGCAGTAAAATCGACGGCAGATGATATGTTATATCATCGTC  
TTTTTGA

+

FFFFFF:FFFFFFFFFFFFFFFF:FFFFFFFFFFFFFFFF:F:FFFFFFFFFFFFFFFF:F  
FFFFFFFFFFFFFF:FFFFFFFFFFFF:FFFFFFFFFFFFFFFFFFFFF,F:FFFFFFF,F  
F:FFFFF

@A00721:190:HGJW7DSXY:4:2159:14588:17895 1:N:0:TCTGCAAG+GCTGCACT  
CCCGCGCCGGGGACACCTCCGTACGCTTACGTGTCGATTTGTCATTAGACCACGCGTCACGATCATAA  
CCATCTAAAAAATGAATTCTATAGTGACGCAGTAGAATCGACGGTCAATTTTGAAATTCAAAATTTAT  
ATTTATTGTGT

+

FFFFFFFFFFFFFFFFFFFFFFFFFFFFFFFFFFFFFFFFFFFFFFFFFFFFFFFFFFFFFFFFFFFFFFFF  
FFFFFFFFFFFFFFFFFFFFFFFFFFFF:FFFFFFFFFFFFFFFFFFFF:FFFFFFFFFFFFFFFFFFFF  
FFFFFFFFFFFF

@A00721:190:HGJW7DSXY:4:2175:12057:9502 1:N:0:TCTGCAAG+GCTGCACT  
CCCGCGCCGGGGACACCTCCGTACGCTTACGTGTCGATTTGTCATTAGACCACGCGTCACGATCATAA  
CCATCTAAAAAATGAATTCTATAGTGACGCAGTAGAATCGACGGTCAATTTTGAAATTCAAAATTTAT  
ATTTATT

+

FFFFFFFFFFFFFFFFFFFFFFFFFFFFFFFFFFFFFFFFFFFFFFFFFFFFFFFFFFFFFFFFFFFFFFFF  
FFFFFFFFFFFFFFFFFFFFFFFFFFFFFFFFFFFF:FFFFFFFFFFFFFFFFFFFF:FFFFFFFFFFFFF  
FFFFFFF

@A00721:190:HGJW7DSXY:4:2205:8612:13839 1:N:0:TCTGCAAG+GCTGCACT  
CCCGCGCCGGGGACACCTCCGTACGCTTACGTGTCGATTTGTCATTAGACCACGCGTCACGATCATAA  
CCATCTAAAAAATGAATTCTATAGTGACGCAGTAGAATCGACGGTCAATTTTGAAATTCAAAATTTAT  
ATTTATTGTG

+

FFFFFFFFFFFFFFFFFFFFFFFFFFFFFFFFFFFFFFFFFFFFFFFFFFFFFFFFFFFFFFFFFFFFFFFF  
FFFFFFFFFFFFFFFFFFFF:FF,FFFFFFFFFFFFFFFFFFFF:FFFFFFF:FFFFFFFFFFFF:FFFFF  
FFFFF:FFFF

@A00721:190:HGJW7DSXY:4:2249:4824:21840 1:N:0:TCTGCAAG+GCTGCACT  
CCCGCGCCGGGGACACCTCCGTACGCTTACGTGTCGATTTGTCATTAGACCACGCGTCACGATCATGA  
CCATCTAAAAAATGAATTCTATAGTGACGCAGTAAAATCGACGGCAGATGATATGTTATATCATCGTC  
TTTTTGA

+

FFFFFFFFFFFFFFFFFFFFFFFFFFFFFFFFFFFFFFFFFFFFFFFFFFFFFFFFFFFFFFFFFFFFFFFF  
FFFFFFFFFFFFFFFFFFFFFFFFFFFFFFFFFFFF:FFFFFFFFFFFFFFFFFFFF:FFFFFFFFFFFF:FF  
FFFFFFF

@A00721:190:HGJW7DSXY:4:2258:9932:28025 1:N:0:TCTGCAAG+GCTGCACT  
CCCGCGCCGGGGACACCTCCGTACGCTTACGTGTCGATTTGTCATTAGACCACGCGTCACGATCATGA  
CCATCTAAAAAATGAATTCTATAGTGACGCAGTAAAATCGACGGCAGATGATATGTTATATCATCGTC  
TTTTTG

+

FFFFFFFFFFFFFFFFFFFFFFFFFFFFFFFFFFFFFFFFFFFFFFFFFFFFFFFFFFFFFFFFFFFFFFFF  
FFFFFFFFFFFFFFFFFFFF,FFFFFFFFFFFFFFFFFFFF:FFFFFFFFFFFFFFFFFFFF  
FFFFFFF





@A00721:190:HGJW7DSXY:4:2502:26829:2738 1:N:0:TCTGCAAG+GCTGCACT  
CCCGCGCCGGGGACACCTCCGTACGCTTACGTGTCGATTTGTCATTAGACCACGCGTCACGATCATAA  
CCATCTAAAAAATGAATTCTATAGTGACGCAGTAGAATCGACGGTCAATTTTGAAATTCAAAATTTAT  
ATTTATTGT

@A00721:190:HGJW7DSXY:4:2517:6894:16908 1:N:0:TCTGCAAG+GCTGCACT  
CCCGCGCCGGGGACACCTCCGTACGCTTACGTGTCGATTTGTCATTAGACCACGCGTCACGATCATGA  
CCATCTAAAAAATGAATTCTATAGTGACGCGAGTAAATCGACGGCAGATGATATGTTATATCATCGTC  
TTTTTGA

@A00721:190:HGJW7DSXY:4:2530:30779:5353 1:N:0:TCTGCAAG+GCTGCACT  
CCCCGCCGGGGACACCTCCGTACGCTTACGTGTCGATTTGTCATTAGACCACGCGTCACGATCATGA  
CCATCTAAAAAATGAATTCTATAGTGACGCGAGTAAATCGACGGCAGATGATATGTTATATCATCGTC  
TTTTTGA

@A00721:190:HGJW7DSXY:4:2533:5801:32017 1:N:0:TCTGCAAG+GCTGCACT  
CCCCGCCGGGGACACCTCCGTACGCTTACGTGTCGATTTGTCATTAGACCACGCGTCACGATCATGA  
CCATCTAAAAAATGAATTCTATAGTGACGCAGTAAAATCGACGGCAGATGATATGTTATATCATCGTC  
TTTTTGA

@A00721:190:HGJW7DSXY:4:2543:12491:31735 1:N:0:TCTGCAAG+GCTGCACT  
CCCCGCGCCGGGACACCTCCGTACGCTTACGTGTCGATTTGTCATTAGACCACGCGTCACGATCATGA  
CCATCTAAAAAATGAATTCTATAGTGACGCGAGTAAAATCGACGGCAGATGATATGTTATATCATCGTC  
TTTTGA

@A00721:190:HGJW7DSXY:4:2544:4227:36495 1:N:0:TCTGCAAG+GCTGCACT  
CCCCGCGCCGGGACACCTCCGTACGCTTACGTGTCGATTTGTCATTAGACCACGCGTCACGATCATGA  
CCATCTAAAAAATGAATTCTATAGTGACGCGAGTAAAATCGACGGCAGATGATATGTTATATCATCGTC  
TTTTTGA

@A00721:190:HGJW7DSXY:4:2545:15881:17096 1:N:0:TCTGCAAG+GCTGCACT  
CCCGCGCCGGGACACCTCCGTACGCTTACGTGTCGATTTGTCATTAGACCACGCGTCACGATCATAA  
CCATCTAAAAAATGAATTCTATAGTGACGCAGTAGAATCGACGGTCAATTTTGAAATTCAAAATTTAT  
ATTTATTGTG

+  
 FFFFFFFFFFFFFFFFFFFFFFFFFFFFFFFFFF:FFFFFFFFFFFFFFFFFFFFFFFFFFFFFFFFF  
 FFFFFFFFFFFFFFFFFFFFFFFFFFFFFFFFFF:FFFFFFF:FFFFF  
 F,::,FFFF:F  
 @A00721:190:HGJW7DSXY:4:2614:5330:18584 1:N:0:TCTGCAAG+GCTGCACT  
 CCCGCGCCGGGGACACCTCCGTACGCTTACGTGTCGATTTGTCATTAGACCACGCGTCACGATCATGA  
 CCATCTAAAAAATGAATTCTATAGTGACGCAGTAAAATCGACGGCAGATGATATGTTATATCATCGTC  
 TTTTGA  
 +  
 FFFFFFFFFFFFFFFFFFFFFFFFFFFFFFFFFF:FFFFFFFFFFFFFFFFFFFFFFFFFFFFFFFFF  
 FFFFFFFFFFFFFFFFFFFFFFFFFFFFFFFFFF:FFFFFFFFFFFFFFFFFFFFFFFFFFFFFFFFF  
 FFFFFFFF  
 @A00721:190:HGJW7DSXY:4:2618:30897:21590 1:N:0:TCTGCAAG+GCTGCACT  
 CCCGCGCCGGGGACACCTCCGTACGCTTACGTGTCGATTTGTCATTAGACCACGCGTCACGATCATAA  
 CCATCTAAAAAATGAATTCTATAGTGACGCAGTAGAATCGACGGTCAATTTTGAATTCAAATTTAT  
 ATTTATTGTGT  
 +  
 FFFFFFFFFFFFFFFFFFFFFFFFFFFFFFFFFF:FFFFFFFFFFFFFFFFFFFFFFFFFFFFFFFFF  
 FFFFFFFFFFFFFFFFFFFFFFFFFFFFFFFFFF:FFFFFFFFFFFFFFFFFFFFFFFFFFFFFFFFF,FF:  
 FFFFFFFFFF  
 @A00721:190:HGJW7DSXY:4:2631:25626:1846 1:N:0:TCTGCAAG+GCTGCACT  
 CCCGCGCCGGGGACACCTCCGTACGCTTACGTGTCGATTTGTCATTAGACCACGCGTCACGATCATGA  
 CCATCTAAAAAATGAATTCTATAGTGACGCAGTAAAATCGACGGCAGATGATATGTTATATCATCGTC  
 TTTTGA  
 +  
 FFFFFFFFFFFFFFFFFFFFFFFFFFFFFFFFFF:FFFFFFFFFFFFFFFFFFFFFFFFFFFFFFFFF  
 FFFFFFFFFFFFFFFFFFFFFFFFFFFFFFFFFF:FFFFFFFFFFFFFFFFFFFFFFFFFFFFFFFFF,FFFFFFFFF  
 FFFFFF:  
 @A00721:190:HGJW7DSXY:4:2677:8793:23265 1:N:0:TCTGCAAG+GCTGCACT  
 CCCGCGCCGGGGACACCTCCGTACGCTTACGTGTCGATTTGTCATTAGACCACGCGTCACGATCATAA  
 CCATCTAAAAAATGAATTCTATAGTGACGCAGTAGAATCGACGGTCAATTTTGAATTCAAATTTAT  
 ATTTATTGTGT  
 +  
 FFFFFFFFFFFFFFFFFFFFFFFFFFFFFFFFFF:FFFFFFFFFFFFFFFFFFFFFFFFFFFFFFFFF  
 FFFFFFFFFFFFFFFFFFFFFFFFFFFFFFFFFF:FFFFFFFFFFFFFFFFFFFFFFFFFFFFFFFFF,FFFFFFFFF  
 FFFFF:FFFF:  
 @A00721:190:HGJW7DSXY:4:2677:8730:24158 1:N:0:TCTGCAAG+GCTGCACT  
 CCCGCGCCGGGGACACCTCCGTACGCTTACGTGTCGATTTGTCATTAGACCACGCGTCACGATCATAA  
 CCATCTAAAAAATGAATTCTATAGTGACGCAGTAGAATCGACGGTCAATTTTGAATTCAAATTTAT  
 ATTTATTGTGT  
 +  
 FFFFFFFFFF:FFFFFFFFFFFFFFFFFFFFFFFF:FFFFFFFFFFFFFFFFFFFFFFFFFFFFFFFFF  
 FFFF:FFFFFFFFFFFFFFFF:FFFFF:,FFFFFFFFFFFFFFFFFFFFFFFFFFFFFFFFF,FFFFFFFFF  
 F:FFFFFFFFF  
 @A00721:190:HGJW7DSXY:4:1168:13883:7153 1:N:0:TCTGCAAG+GCTGCACT  
 ACCTCCGTACGCTTACGTGTCGATTTGTCATTAGACCACGCGTCACGATCATAACCATCTAAAAAATG  
 AAATCTATAGTGACGCAGTAGAATCGACGGTCAATTTTGAATTCAAATTTATATTTATTGTGTTGA  
 TGA CTGCTTAGCAG  
 +  
 F,FFFF,FFFFFF,FFFF,FF:FFF:F,,F:FF,F::F,,:FFFF:FFFF,FFFF,F:FFFFFFFF:  
 FF,,FFFF:,FF::FF:FFFF:FFF:,FFF,FF,,FFFF::FFFFF,F:F,:FF,F,,FFFF  
 ,,FFFF,,FFF,,FF  
 @A00721:190:HGJW7DSXY:4:1304:11912:1297 1:N:0:TCTGCAAG+GCTGCACT  
 ACCTCCGTACGCTTACGTGTCGATTTGTCATTAGACCACGCGTCACGATCATAACCATCTAAAAAATG

AATTCTATAGTGACGCAGTAGAATCGACGGTCAATTTTGAAATTCAAAATTTATATTTATTGTGTTGA  
TGACTGCTTTAGCAG

[illegible] $+$ 

@A00721:190:HGJW7DSXY:4:2168:15510:14512 1:N:0:TCTGCAAG+GCTGCACT  
ACCTCCGTACGCTTACGTGTCGATTTGTCATTAGACCACGCGTCACGATCATAACCATCTAAAAAATG  
AATTCTATAGTGACGCAGTAGAATCGACGGTCAATTTTGAAATTCAAATTTATATTTATTGTGTTGA  
TGACTGCTTTAGCAG

```

FFFFFFFFFFFFFFFF:FFFFFF::FFFFFFFF:FFFFFFFFFFFFFFFFFFFFFFFF,FFFF
FFFFFFFF:FFF:FFFFFFFFFFFF:FFFFFFFFFFFF:FFFFFFFFFFFFFFFFFFFF:FFFF:FFF:FFF
FFF:FFFFFFFF:F,F

```

+

@A00721:190:HGJW7DSXY:4:2340:11767:31172 1:N:0:TCTGCAAG+GCTGCACT  
CCTCTGTACGCTTACGTGTCGATTTGTCATTAGACCACGCGTCACGATCATGACCATCTAAAAAATGA  
ATTCTATAGTGACGCAGTAAAATCGACGGCAGATGATATGTTATATCATCGTCTTTTTGATAACCAAT  
AGACTGTTAAAAGGT

```

FFFFFFFFFFFFFFFFFFFFFFFFFFFFFFFFFFFFFFFFFFFFFFFFFFFFFFFFFFFFFFFFFFFFFFFF:FFFF
FFFF:F:FFFF:FFFFFFFFFFFFFFFFFFFF,FFFFFFFF:FFFFFFFFFFFFFFFF:FFFFFFFFFFFF:FFFFF
F,FFFFFFFFFFFFFFFF

```

+

@A00721:190:HGJW7DSXY:4:1436:24496:15890 1:N:0:TCTGCAAG+GCTGCACT  
CTCCGTACGCTTACGTGTCGATTTGTCATTAGACCACGCGTCACGATCATGACCATCTAAAAAATGAA  
TTCTATAGTGACGCAGTAAAATCGACGGCAGATGATATGTTATATCATCGTCTTTTTGATAACCAATA  
GACTGTTAAAAGGTC

[illegible]

$+$ 

+

+

+

+

+

+

@A00721:190:HGJW7DSXY:4:1309:18295:35462 1:N:0:TCTGCAAG+GCTGCACT  
ACGCTTACGTGTCGATTTGTCATTAGACCACGCGTCACGATCATAACCATCTAAAAATGAATTCTAT  
AGTGACGCAGTAGAATCGACGGTCAATTTTGAAATTCAAAATTTATTGTGTTGATGACTGCTTTAGCA  
GTTGATTGATGGATT

@A00721:190:HGJW7DSXY:4:1331:21667:36417 1:N:0:TCTGCAAG+GCTGCACT  
ACGCTTACGTGTCGATTTGTCATTAGACCACGCGTCACGATCATAACCATCTAAAAATGAATTCTAT  
AGTGACGCAGTAGAATCGACGGTCAATTTTGAAATTCAAAATTTATTGTGTTGATGACTGCTTTAGCA  
GTTGATTGATGGATT

@A00721:190:HGJW7DSXY:4:1332:32678:4789 1:N:0:TCTGCAAG+GCTGCACT  
ACGCTTACGTGTCGATTTGTCATTAGACCACGCGTCACGATCATAACCATCTAAAAATGAATTCTAT  
AGTGACGCAGTAGAATCGACGGTCAATTTTGAAATTCAAAATTTATTGTGTTGATGACTGCTTTAGCA  
GTTGATTGATGGATT

@A00721:190:HGJW7DSXY:4:2271:13015:4210 1:N:0:TCTGCAAG+GCTGCACT  
ACGCTTACGTGTCGATTTGTCATTAGACCACGCGTCACGATCATAACCATCTAAAAATGAATTCTAT  
AGTGACGCAGTAGAATCGACGGTCAATTTTGAAATTCAAAATTTATTGTGTTGATGACTGCTTTAGCA  
GTTGATTGATGGATT

@A00721:190:HGJW7DSXY:4:2642:29559:11475 1:N:0:TCTGCAAG+GCTGCACT  
ACGCTTACGTGTCGATTTGTCATTAGACCACGCGTCACGATCATAACCATCTAAAAATGAATTCTAT  
AGTGACGCAGTAGAATCGACGGTCAATTTTGAAATTCAAAATTTATTGTGTTGATGACTGCTTTAGCA  
GTTGATTGATGGATT

@A00721:190:HGJW7DSXY:4:1249:23041:12587 1:N:0:TCTGCAAG+GCTGCACT  
GCTTACGTGTCGATTTGTCATTAGACCACGCGTCACGATCATAACCATCTAAAAAATGAATTCTATAG  
TGACGCAGTAGAATCGACGGTCAATTTTGAAATTCAAAATTTATATTTATTGTGTTGATGACTGCTTT  
AGCAGTTGATTGATG

@A00721:190:HGJW7DSXY:4:1253:8983:29042 1:N:0:TCTGCAAG+GCTGCACT  
GCTTACGTGTCGATTTGTCATTAGACCACGCGTCACGATCATAACCATCTAAAAAATGAATTCTATAG  
TGACGCAGTAGAATCGACGGTCAATTTTGAAATTCAAAATTTATATTTATTGTGTTGATGACTGCTTT  
AGCAGTTGATTGATG

+  
FFFFFFFFFFFFFFFFFFFFFFFFFFFFFFFFFFFFFFFFFFFFFFFFFFFFFFFFFFFFFFFFFFFFFFFF  
FF:FFFFFFFFFFFFFF:FFFFFFFFFFFFFFFFFFFFFFFFFFFFFFFFFFFFFFFF:FFFFFFFFFFFFFF:FF:FFFFFF  
FFFFF:FFFFFFFFF

@A00721:190:HGJW7DSXY:4:1253:8802:29074 1:N:0:TCTGCAAG+GCTGCACT  
GCTTACGTGTCGATTTGTCATTAGACCACGCGTCACGATCATAACCATCTAAAAAATGAATTCTATAG  
TGACGCAGTAGAATCGACGGTCAATTTTGAAATTCAAATTTATATTTATTGTGTTGATGACTGCTTT  
AGCAGTTGATTGATG

+  
FFFFFFFFFFFFFFFFFFFFFFFFFFFFFFFFFFFFFFFFFFFFFFFFFFFFFFFFFFFFFFFFFFFFFFFF:FFFFFFFF  
FFFF:FFFFFFFFFFFFFFFFFFFFFFFFFFFFFFFFFFFFFFFFFFFFFFFF:F:FFFFF:FFFFFFFFFFFFFFFF  
FFFFFFFFFFFFFFFFF

@A00721:190:HGJW7DSXY:4:1430:27127:3192 1:N:0:TCTGCAAG+GCTGCACT  
GCTTACGTGTCGATTTGTCATTAGACCACGCGTCACGATCATAACCATCTAAAAAATGAATTCTATAG  
TGACGCAGTAGAATCGACGGTCAATTTTGAAATTCAAATTTATATTTATTGTGTTGATGACTGCTTT  
AGCAGTTGATTGATG

+  
FFFFFFFFFFFFFFFFFFFFFFFFFFFFFFFFFFFFFFFFFFFFFFFFFFFFFFFFFFFFFFFFFFFFFFFF: :FFFFFF  
FFFFFFFFFFFFFFFFFFFFFFFFFFFFFFFFFFFFFFFFFFFFFFFFFFFFFFFFFFFFFFFF,F:FFFF:FFFFFFFF  
FFFFFF:FF:FFFFF

@A00721:190:HGJW7DSXY:4:1457:4101:3427 1:N:0:TCTGCAAG+GCTGCACT  
GCTTACGTGTCGATTTGTCATTAGACCACGCGTCACGATCATAACCATCTAAAAAATGAATTCTATAG  
TGACGCAGTAGAATCGACGGTCAATTTTGAAATTCAAATTTATATTTATTGTGTTGATGACTGCTTT  
AGCAGTTGATTGATG

+  
FFFFFFFFFFFFFFFFFFFFFFFFFFFFFFFFFFFFFFFFFFFFFFFFFFFFFFFFFFFFFFFFFFFFFFFF:FFFFFF  
FFFFFFFFFFFFFFFFFFFFFFFFFFFFFFFFFFFFFFFFFFFFFFFFFFFFFFFFFFFFFFFF,F,F:F:FFFFFFFF  
FFFFFFFFFFFFFFFFF

@A00721:190:HGJW7DSXY:4:1619:11785:6151 1:N:0:TCTGCAAG+GCTGCACT  
GCTTACGTGTCGATTTGTCATTAGACCACGCGTCACGATCATAACCATCTAAAAAATGAATTCTATAG  
TGACGCAGTAGAATCGACGGTCAATTTTGAAATTCAAATTTATATTTATTGTGTTGATGACTGCTTT  
AGCAGTTGATTGATG

+  
FFFFFFFFFFFFFFFFFFFFFFFFFFFFFFFFFFFFFFFFFFFFFFFFFFFFFFFFFFFFFFFFFFFFFFFF:FFFFFF  
FFFFFFFFFFFFFFFFFFFFFFFFFFFFFFFFFFFFFFFFFFFFFFFFFFFFFFFFFFFFFFFF,FFFF:FFFFFFFF  
FF:FFFFFFFFFFFFF

@A00721:190:HGJW7DSXY:4:2108:15917:19946 1:N:0:TCTGCAAG+GCTGCACT  
GCTTACGTGTCGATTTGTCATTAGACCACGCGTCACGATCATAACCATCTAAAAAATGAATTCTATAG  
TGACGCAGTAGAATCGACGGTCAATTTTGAAATTCAAATTTATATTTATTGTGTTGATGACTGCTTT  
AGCAGTTGATTGATG

+  
FFFFFFFFFFFFFFFFFFFFFFFFFFFFFFFFFFFFFFFFFFFFFFFFFFFFFFFFFFFFFFFFFFFFFFFF:FFFFFF  
FFFFFFFFFFFFFFFFFFFFFFFFFFFFFFFFFFFFFFFFFFFFFFFFFFFFFFFFFFFFFFFF,FFFF,FFFFFFFF,FF,FFFFFFFF:FFFF  
FFF:FF,F:FFF:FF

@A00721:190:HGJW7DSXY:4:2132:10755:12164 1:N:0:TCTGCAAG+GCTGCACT  
GCTTACGTGTCGATTTGTCATTAGACCACGCGTCACGATCATAACCATCTAAAAAATGAATTCTATAG  
TGACGCAGTAGAATCGACGGTCAATTTTGAAATTCAAATTTATATTTATTGTGTTGATGACTGCTTT  
AGCAGTTGATTGATG

+  
FFFFFFFFFFFFFFFFFFFFFFFFFFFFFFFFFFFFFFFFFFFFFFFFFFFFFFFFFFFFFFFFFFFFFFFF  
FFFFFFFFFFFFFFFFFFFFFFFFFFFFFFFFFFFFFFFFFFFFFFFFFFFFFFFFFFFFFFFF:FFFF:FFFFFFFF  
FF:FFFFFFFFFFFFF

@A00721:190:HGJW7DSXY:4:2138:16523:35243 1:N:0:TCTGCAAG+GCTGCACT  
GCTTACGTGTCGATTTGTCATTAGACCACGCGTCACGATCATAACCATCTAAAAAATGAATTCTATAG

TGACGCAGTAGAATCGACGGTCAATTTTGAAATTCAAATTTATATTTATTGTGTTGATGACTGCTTT  
AGCAGTTGATTGATG

+

FFF,FFFF::FFF:FF:FFFF:FFFF:FFFFFFFFFFFF:FFFFFFFFFFFF:FF:FF,FFF:F:F  
FFFFFFFFFFFFFFFFFFFF,FFFFFFFFFFFFFFFFFFFF:FFFF,FFFFFFFF:FFFFFF,F,FFFF  
FF:FFF,::,FFFF

@A00721:190:HGJW7DSXY:4:1315:15691:1924 1:N:0:TCTGCAAG+GCTGCACT  
CTTACGTGTCGATTTGTCATTAGACCACGCGTCACGATCATAACCATCTAAAAAATGAATTCTATAGT  
GACGCAGTAGAATCGACGGTCAATTTTGAAATTCAAATTTATATTTATTGTGTTGATGACTGCTTTA  
GCAGTTGATTGATGG

+

FFFFFFFFFFFFFFFFFFFFFFFFFFFFFFFFFFFFFFFFFFFFFFFFFFFFFFFFFFFFFFFFFFFF:FF:FFFFFFF  
F:F:FFFFFFFFFFFFFFFF:FFFFFFFFFFFFFFFFFFFFFFFFFFFFFFFFFFFFFFFFFFFFFFFF  
FF:FFFFFFFFFFFF

@A00721:190:HGJW7DSXY:4:1350:24749:14544 1:N:0:TCTGCAAG+GCTGCACT  
CTTACGTGTCGATTTGTCATTAGACCACGCGTCACGATCATAACCATCTAAAAAATGAATTCTATAGT  
GACGCAGTAGAATCGACGGTCAATTTTGAAATTCAAATTTATATTTATTGTGTTGATGACTGCTTTA  
GCAGTTGATTGATGG

+

FFFFFFFFFFFFFFFFFFFFFFFFFFFFFFFFFFFFFFFFFFFFFFFFFFFFFFFFFFFFFFFFFFFF  
FFFFFFFFFFFFFFFFFFFFFFFFFFFFFFFFFFFFFFFFFFFFFFFFFFFFFFFFFFFFFFFFFFFF  
FFFFFFFFFFFFFFFFFFFF

@A00721:190:HGJW7DSXY:4:1370:28058:17801 1:N:0:TCTGCAAG+GCTGCACT  
CTTACGTGTCGATTTGTCATTAGACCACGCGTCACGATCATAACCATCTAAAAAATGAATTCTATAGT  
GACGCAGTAGAATCGACGGTCAATTTTGAAATTCAAATTTATATTTATTGTGTTGATGACTGCTTTA  
GCAGTTGATTGATGG

+

FFFFFFFFFFFFFFFFFFFFFFFFFFFFFFFFFFFFFFFFFFFFFFFFFFFFFFFFFFFFFFFFFFFF:FFFF:FFFFFFF:FFFFFFF:FF  
FFFFFFFF:FFFFFFFFFFFFFFFFFFFFFFFF:FFFFFFFF:FF:FF:,FFFFFFFFFFFFFFFFFFFF  
FFFFFFFFFFFF:FFF

@A00721:190:HGJW7DSXY:4:1531:6090:35931 1:N:0:TCTGCAAG+GCTGCACT  
CTTACGTGTCGATTTGTCATTAGACCACGCGTCACGATCATAACCATCTAAAAAATGAATTCTATAGT  
GACGCAGTAGAATCGACGGTCAATTTTGAAATTCAAATTTATATTTATTGTGTTGATGACTGCTTTA  
GCAGTTGATTGATGG

+

FFFFFFFFFFFFFFFFFFFFFFFFFFFFFFFFFFFFFFFFFFFFFFFFFFFFFFFFFFFFFFFFFFFF:FFFF  
FFF:FFFFFFFFFFFFFFFFFFFFFFFFFFFFFFFFFFFFFFFFFFFFFFFF:FFFFFF:F:FFFFFFFFFFFF  
FFFFFFFFFFFFFFFFFFFF

@A00721:190:HGJW7DSXY:4:2322:10881:19366 1:N:0:TCTGCAAG+GCTGCACT  
CTTACGTGTCGATTTGTCATTAGACCACGCGTCACGATCATAACCATCTAAAAAATGAATTCTATAGT  
GACGCAGTAGAATCGACGGTCAATTTTGAAATTCAAATTTATATTTATTGTGTTGATGACTGCTTTA  
GCAGTTGATTGATGG

+

FFFFFFFFFFFFFFFFFFFFFFFFFFFFFFFFFFFFFFFFFFFFFFFFFFFFFFFFFFFFFFFFFFFF  
F:FFFFFFFFFFFFFFFFFFFFFFFFFFFFFFFFFFFFFFFFFFFFFFFFFFFFFFFFFFFFFFFFFFFF:FFFFFFFFFFFFFFFFFFFF  
F:FFFFFF:FFFFFF

@A00721:190:HGJW7DSXY:4:2475:30544:13651 1:N:0:TCTGCAAG+GCTGCACT  
CTTACGTGTCGATTTGTCATTAGACCACGCGTCACGATCATAACCATCTAAAAAATGAATTCTATAGT  
GACGCAGTAGAATCGACGGTCAATTTTGAAATTCAAATTTATATTTATTGTGTTGATGACTGCTTTA  
GCAGTTGATTGATGG

+

FFFFFFFFFFFFFFFFFFFFFFFFFFFFFFFFFFFFFFFFFFFFFFFFFFFFFFFFFFFFFFFFFFFF  
FFFFFFFFFFFFFFFFFFFF:FFFFFFFFFFFF:FFFFFFFFFFFFFFFF,FFFFFFFFFFFFFFFF:FFFFFFF  
FFFFFFFFFFFFFFFFFFFF





@A00721:190:HGJW7DSXY:4:1552:27751:28855 1:N:0:TCTGCAAG+GCTGCACT  
GGCGCAGTAGAATCGACGGTCAATTTTGAAATTCAAAATGTATATTTATTGTGTTGATGACTGCTTTA  
GCAGTTGATTGATGGATTCGTCTTCCAAGAAGAGGAAGTGGTCAGGCGGTCCGTTTAGGACCGCCGGT  
TATCGTAAAACACGA

@A00721:190:HGJW7DSXY:4:2119:19054:35493 1:N:0:TCTGCAAG+GCTGCACT  
GGCGCAGTAGAAACGACGGTCAATTTTGTAAATTCAAAATTTATATTTATTGTGTTGAATACTGCTTTA  
TCAGTTGATTGATGGATTCTTCTTCAAATAAGAGGAAGTGGACATGCGGTCCGTTTATGACCGACTGT  
TATCGTAAAAAACGA

@A00721:190:HGJW7DSXY:4:2234:19135:2190 1:N:0:TCTGCAAG+GCTGCACT  
GGCGCAGTAGAATCGACGGTCAATTTTGAATTCAAATTTATATTTATTGTGTTGATGACTGCTTTA  
GCAGTTGATTGATGGATTCTGCTTCCAAGAAGAGGAAGTGGTCAGGCGGTCCGTTTAGGACCGCCGGT  
TATCGTAAACACGA

@A00721:190:HGJW7DSXY:4:2402:11451:15969 1:N:0:TCTGCAAG+GCTGCACT  
GGCGCAGTAGAATCGACGGTCAATTTTGAAATTCAAAATTTATATTTATTGTGTTGATGACTGCTTTA  
GCAGTTGATTGATGGATTCGTCTTCCAAGAAGAGGAAGTGGTCAGGCGGTCCGTTTAGGACCGCCGGT  
TATCGTAAAAACACGA

@A00721:190:HGJW7DSXY:4:1539:31765:17487 1:N:0:TCTGCAAG+GCTGCACT  
CGCAGTAGAATCGACGGTCAATTTTGAAATTCAAAATTTATATTTATTGTGTGATGACTGCTTTAGC  
AGTTGATTGATGGATTCGTCTTCCAAGAAGAGGAAGTGGTCAGGCGGTCCGTTTAGGACCGCCGGTTA  
TCGTAAAACACGACG

@A00721:190:HGJW7DSXY:4:1271:10809:9878 1:N:0:TCTGCAAG+GCTGCACT  
GTAGAATCGACGGTCAATTTTGAATTCAAAATTTATATTTATTGTGTTGATGACTGCTTTAGCAGTT  
GATTGATGGATTCTGCTTCCAAGAAGAGGAAGTGGTCAGGCGGTCCGTTTAGGACCGCCGGTTATCGT  
AAAACACGACGAGTG

@A00721:190:HGJW7DSXY:4:1559:12255:16986 1:N:0:TCTGCAAG+GCTGCACT  
GTAGAATCGACGGTCAATTTTGAATTCAAAATTTATATTTATTGTGTTGATGACTGCTTTAGCAGTT  
GATTGATGGATTCTGCTTCCAAGAAGAGGAAGTGGTCAGGCGGTCCGTTTAGGACCGCCGGTTATCGT  
AAAACACGACGAGTG

+  
FFFFFFFFFFFFFFFFFFFFFFFFFFFFFFFFFFFFFFFF:FFFFFF:FF:FFFF:FFFFFFFFFFFFFFFFFFFFFFFF  
FFFFFFFFFFFFFFFFFFFFFFFFFFFFFFFFFFFFFFFF:FFFFFF:FFFFFFFFFFFFFFFFFFFFFFFF:FFFFFFFFFFFFFFFF:FFFFFF  
FFFFFFFFFFFFFFFF

@A00721:190:HGJW7DSXY:4:1635:28501:35571 1:N:0:TCTGCAAG+GCTGCACT  
GTAGAATCGACGGTCAATTTTGAAATTCAAATTTATATTTATTGTGTTGATGACTGCTTTAGCAGTT  
GATTGATGGATTCTGCTTCCAAGAAGAGGAAGTGGTCAGGCGGTCCGTTTAGGACCGCCGGTTATCGT  
AAAACACGACGAGTG

+  
FFFFFFFFFFFFFFFFFFFFFFFFFFFFFFFFFFFFFFFF:FFFFFF:FFFFFFFFFFFFFFFFFFFFFFFFFFFFFFFF  
FFFFFFFFFFFFFFFFFFFFFFFFFFFFFFFFFFFFFFFFFFFFFFFFFFFFFFFFFFFFFFFFFFFFFFFFFFFFFFFF  
FFFFFFFF:FFFF

@A00721:190:HGJW7DSXY:4:2106:25961:33708 1:N:0:TCTGCAAG+GCTGCACT  
GTAGAATCGACGGTCAATTTTGAAATTCAAATTTATATTTATTGTGTTGATGACTGCTTTAGCAGTT  
GATTGATGGATTCTGCTTCCAAGAAGAGGAAGTGGTCAGGCGGTCCGTTTAGGACCGCCGGTTATCGT  
AAAACACGACGAGTG

+  
FFFFFFFFFFFFFFFFFFFFFFFFFFFFFFFFFFFFFFFF:FFFFFFFFFFFFFFFFFFFFFFFFFFFFFFFFFFFFFFFF  
FF:FFFFFFFFFFFFFFFFFFFFFFFFFFFFFFFF:FFFFFFFFFFFFFFFF:FFFFFF:FFFFFF:FFF:F:FF  
:F:FFFFFFFF:FFFF

@A00721:190:HGJW7DSXY:4:2212:9182:6245 1:N:0:TCTGCAAG+GCTGCACT  
GTAGAATCGACGGTCAATTTTGAAATTCAAATTTATATTTATTGTGTTGATGACTGCTTTAGCAGTT  
GATTGATGGATTCTGCTTCCAAGAAGAGGAAGTGGTCAGGCGGTCCGTTTAGGACCGCCGGTTATCGT  
AAAACACGACGAGTG

+  
FFFFFFFFFFFFFFFFFFFFFFFFFFFFFFFFFFFFFFFF:FFFFFFFFFFF:FFFFFFFFFFFFFFFFFFFFFFFFFFFF  
FF:FFFFFFFFFFFFFFFFFFFFFFFFFFFFFFFF:FFFFFFFFFFFFFFFF:.:FFF:.:FFF:FFFFFFFF  
FFFFFFFF:FFFF

@A00721:190:HGJW7DSXY:4:2261:19343:28886 1:N:0:TCTGCAAG+GCTGCACT  
GTAGAATCGACGGTCAATTTTGAAATTCAAATTTATATTTATTGTGTTGATGACTGCCTTAGCAGTT  
GATTGATGGATTCTGCTTCCAAGAAGAGGAAGTGGTCAGGCGGTCCGTTTAGGACCGCCGGTTATCGT  
AAAACACGACGAGTG

+  
FFFFFFFFFFFFFFFFFFFFFFFFFFFFFFFFFFFFFFFF:F,FFFFFFFFFFFFFFFFFFFFFFFFFFFFFFFF:FFFFFFFF  
FFFFFFFFFFFFFFFFFFFFFFFFFFFFFFFFFFFFFFFF,FFFFFFFFFFFFFFFF:FFFFFFFFFFFFFFFFFFFFFFFF  
FFFFFFFFFFFFFFFF

@A00721:190:HGJW7DSXY:4:2618:12635:32769 1:N:0:TCTGCAAG+GCTGCACT  
GTAGAATCGACGGTCAATTTTGAAATTCAAATTTATATTTATTGTGTTGATGACTGCTTTAGCAGTT  
GATTGATGGATTCTGCTTCCAAGAAGAGGAAGTGGTCAGGCGGTCCGTTTAGGACCGCCGGTTATCGT  
AAAACACGACGAGTG

+  
FFFFFFFFFFFFFFFFFFFFFFFFFFFFFFFFFFFFFFFF:F:FFFFFFFFFFFFFFFFFFFFFFFFFFFFFFFFFFFF  
FFFFFFFFFFFFFFFFFFFFFFFFFFFFFFFFFFFFFFFFFFFFFFFFFFFFFFFFFFFFFFFF:FFFFFFFFFFFFFFFF:FFFF,  
FFFFFF:.:F:FFFF

@A00721:190:HGJW7DSXY:4:2618:12626:32784 1:N:0:TCTGCAAG+GCTGCACT  
GTAGAATCGACGGTCAATTTTGAAATTCAAATTTATATTTATTGTGTTGATGACTGCTTTAGCAGTT  
GATTGATGGATTCTGCTTCCAAGAAGAGGAAGTGGTCAGGCGGTCCGTTTAGGACCGCCGGTTATCGT  
AAAACACGACGAGTG

+  
FFFFFFFFFFFFFFFFFFFFFFFFFFFFFFFF,FFFFF,FFFFFF:FFFF:FFFFFFFFFFFFFFFFFFFFFFFF:.:F  
FFFF:FFFFFFFFFFFFFFFF:FFFFF:FFFFFFFFFFFF,FFFF,F,FFF,FFFFFF:F:FFFF:F  
:FFF,FFFF,:::F

@A00721:190:HGJW7DSXY:4:1540:7835:19758 1:N:0:TCTGCAAG+GCTGCACT  
TAGAATCGACGGTCAATTTTGAAATTCAAATTAATATTAATTGTGTTGATGACTGCTTTAGCAGTTG

ATTGATGGATTTCGTCTTCCAAGAAGAGGAAGTGGTCAGGCGGTCCGTTTAGGACCGCCGGTTAAAGTA  
AAACACGACGAGTG

+

FF:FFFF:FF,F,,FFF,:,:FF:,FFFF:F,:,:F:FFF,FFFF,FFFFFFFFFFFF,F:,F:,,F,,F  
,:F:F,:,:FFF,FFFFF:FF::FFFFF:FFFFF::FF:,F,,F:,F,,,FFF,FF,:,,FF,,:,F  
F:F,F:,FF,F,FF

@A00721:190:HGJW7DSXY:4:1155:8350:14450 1:N:0:TCTGCAAG+GCTGCACT  
CCGACGGTCAATTTTGAAATTCAAATTTATATTTATTGTGTTGATGACTGCTTTAGCAGTTGATTGA  
TGGATTTCGTCTTCCAAGAAGAGGAAGTGGTCAGGCGGTCCGTTTAGGACCGCCGGTTATCGTAAAACA  
CGACGAGTGTTGCAA

+

FFFFFFFFFFFFFFFFFFFFFFFFFFFFFFFFFFFFFFFFFFFFFFFFFFFFFFFFFFFFFFFFFFFFFFFF:FFFFFFF  
FFFFFFFFFFFFFFFFFFFFFFFFFFFFFFFFFFFFFFFFFFFFFFFFFFFFFFFFFFFFFFFFFFFFFFFFFFFF  
:FFFFFFFFFFFFFFFF

@A00721:190:HGJW7DSXY:4:2669:22878:31626 1:N:0:TCTGCAAG+GCTGCACT  
CCGACGGTCAATTTTGAAATTCAAATTTATATTTATTGTGTTGATGACTGCTTTAGCAGTTGATTGA  
TGGATTTCGTCTTCCAAGAAGAGGAAGTGGTCAGGCGGTCCGTTTAGGACCGCCGGTTATCGTAAAACA  
CGACGAGTGTTGCAA

+

FFFFFFFFFFFFFFF:FFFF:F,FFFFFF::,F:F:F,FFFFFF:FFFF::FFF,FFFFFFFF,F:FFFFF  
FFFFFFFFFFFF,FF:F:FFFF::FFFF:FFFF:F:FFF::FFFF:F:,FFFFF:,FF:F:FFFFF  
FFFF:F,FFFFFFFF

@A00721:190:HGJW7DSXY:4:1345:8513:19022 1:N:0:TCTGCAAG+GCTGCACT  
CGACGGTCAATTTTGAAATTCAAATTTATATTTATTGTGTTGATGACTGCTTTAGCAGTTGATTGAT  
GGATTTCGTCTTCCAAGAAGAGGAAGTGGTCAGGCGGTCCGTTTAGGACCGCCGGTTATCGTAAAACAC  
GACGAGTGTTGCAAA

+

FFFFFFFFFFFFFFFFFFFFFFFFFFFF,FFFFFFFFF:FFF:FFFF:FFFFFFFFFFFFFFFFFFFFFFFFFFFF  
FFFFFFFFFFFFFFFFFFFFFFFFFFFFFFFFFFFFFFFFFFFFFFFFFFFFFFFFFFFFFFFFFFFF,FFFFFFFFFF,F:FFFFFFFF  
FFFFFFFFFFFFFFFF

@A00721:190:HGJW7DSXY:4:1351:28221:11663 1:N:0:TCTGCAAG+GCTGCACT  
CGACGGTCAATTTTGACATTCAAATTTATATTTATTGTGTTGATGACTGCTTTAGCAGTTGATTGAT  
GGATTTCGTCTTCCAAGAAGAGGAAGTGGTCAGGCGGTCCGTTTAGGACCGCCGGTTATCGTAAAACAC  
GACGAGTGTTGCAAT

+

FFFFFFFFFFFFFFF:FFF,,FFF::FFFFF:FF:FFFFFFFFFFFFFFFFFFFFFFFFFFFFFFFFFFFF  
FFFFFFFFFFFFFFFFFFFFFFFFFFFFFFFFFFFFFFFFFFFFFFFFFFFFFFFFFFFFFFFFFFFF,FFFFFFFFF,FFFF  
FFFFFFFF:FFF:FFFF

@A00721:190:HGJW7DSXY:4:1448:29161:6590 1:N:0:TCTGCAAG+GCTGCACT  
CGACGGTCAATTTTGAACTTCAAATTTATATTTATTGTGTTGATGACTGCTTTAGCAGTTGATTGAT  
GGATTTCGTCTTCCAAGAAGAGGAAGTGGTCAGGCGGTCCGTTTAGGACCGCCGGTTATCGTAAAACAC  
GACGAGTGTTGCAAT

+

FFFFFFFFFFFFFFFFFFFF:,FFFF:FFFFFFFFFFFF:FFF,FFFFFFFFFFFFFFFFFFFFFFFFFFFF:FFFFFFFFF  
FFFFFFFFFFFFFFFFFFFF:F,FFFFFFFFFFFFFFFFFFFFFFFFFFFF:FFFFFFFFF:FFFFFFFFFFFF,FFF:FFF  
FFF,FFFFFFFF:FF:

@A00721:190:HGJW7DSXY:4:1539:18159:22013 1:N:0:TCTGCAAG+GCTGCACT  
CGACGGTCAATTTTGAAATTCAAATTTATATTTATTGTGTTGATGACTGCTTTAGCAGTTGATTGAT  
GGATTTCGTCTTCCAAGAAGAGGAAGTGGTCAGGCGGTCCGTTTAGGACCGCCGGTTATCGTAAAACAC  
GACGAGTGTTGCAAA

+

FFFFFFFFFFFFFFFFFFFFFFFFFFFF:F,FFF:FFFFFFFFFFFFFFFFFFFFFFFFFFFFFFFFFFFF  
FFFFFFFFFFFFFFFFFFFFFFFFFFFFFFFFFFFFFFFFFFFFFFFFFFFF,FFFFFF:FFFFFF:FFFFFFFFFFFF:FF  
FFF:FFFFFFFFFFFF

@A00721:190:HGJW7DSXY:4:2153:11930:29888 1:N:0:TCTGCAAG+GCTGCACT  
CGACGGTCAATTTTGAAATTCAAAATTTATATTTATTGTGTTGATGACTGCTTTAGCAGTTGATTGAT  
GGATTCTGCTTCCAAGAAGAGGAAGTGGTCAGGCGGTCCGTTTAGGACCGCCGGTTATCGTAAACAC  
GACGAGTGTTGCAA

```

FFFFFFFFFFFFFFFFFFFFFFFFFFFFFFFF:FFFFFFFFFFFFFFFFFFFFFFFFFFFFFFFF
FFFFFFFFFFFFFFFFFFFFFFFF:FFFFFFFFFFFFFFFFFFFFFFFFFFFFFFFF:FFFFFFFFFFFFFFFFFFFFFFFFFFFFFFFF
FFFFFFFFFFFF,FFFF

```

+

```

FFFFFFFFFFFFFFFFFFFFFFFFFFFFFFFF:FFFFFFFFFFFFFFFFFFFFFFFFFFFFFFFFFFFFFFFF
FFFFFFFFFFFFFFFFFFFFFFFFFFFFFFFFFFFFFFFFFFFFFFFF:FF,FFFFFFFFFFFFFFFFFFFFFFFF
FF:FFFFFFFFFFFFFFFF

```

+

```

FFFFFFFFF::FFF,FFFFFFFFF,FFF,F,FFFF,,,:FFFFFFFFF:FFF:FF,FFFFF:F:
:FFFFF:FFF::FFFFFFF,F,F,,FFFFFFFF:FFFFF:F,,,,:F,:F,:FFF,FF,F::,FFF,FF
,F:F,,,,FF::

```

+

```

FFFFFFFFFFFFFFFFFFFFFFFF:FFFFFFFF:FF:FFFFFFFFFFFFFFFFFFFFFFFFFFFFFFFF
FFFFFFFFFFFFFFFFFFFFFFFF:FFFFFFFFFFFFFFFF::F,FFF:FFFFFFFFF,FFFFFFFFF:FF
,F:,F:,FFF:FFFF

```

+

```

FFFFFFFF:FFFFFFFFFFFFFFFFFFFFFFFF:FFFFFF,F:FFFFFFFFFFFFFFFFFFFFFFFF:FFFFFFFFFF
FFFFFFFFFFFFFFFFFFFFFFFF:FFF:FFFFFFFFFFFFFFFFFFFF,FFFFFFFFFFFF:FFFFFFFFFFFFF
FFFFFFFFFFFFFFFF.F

```

+

```

:FFFFFFFFFFFFFFFF,,FFFF:FFF:FF:FFF:FFF:FFFF:FFF,FFF:FFF:F:FFF,:FFFFFFFF
FFFFFFFF,:FFF,:FFFFFF,,FFFFFF:FFFF,:F:F:F:FFFFFFFF,:::FF,FF,,:FFFFFF,F,
,F,,F:F:,FF:FF

```

+

F:F:FFFFFFFFFFFFFFFF:FFFFFFFFF:F,FFF:FFFF:FFFF:FFFFF:FFFFF:FFFFF:FFFFF:FF

:FFFFFFFFF:FFF:FF:F:FFFFFFFFFFFFFFFF:FF:, ,FFFF,F,F,FF:, :FF, , , ,FFFF:F,  
:FF:F, : , ,F, ,FFF

@A00721:190:HGJW7DSXY:4:2348:8052:22420 1:N:0:TCTGCAAG+GCTGCACT  
GCACGGTCAATTTTGAAATTCAAATTTATATTTATTGTGTTGATGACTGCTTTAGCAGTTGATTGAT  
GGATTCGTCTTCCAAGAAGAGGAAGTGGTCAGGCGGTCCGTTTAGGACCGCCGTTATCGTAAAACAC  
GACGAGTGTGCAAT

+

FF:FFFFFFFFFFFFFFFF,FFFFF::FFFFFFFF,FFF:FFF:,FFFFFFFFFFFFFFFFFFFFFFFF,FFF,FFF  
FFFFFFFFFFFFFFFF:F:FFFFF,FFFFFFFFFFFFFFFFFFFFFFFF:FFFFFFFFFFFFFFFF,FFFFFFFFFFFFFFF  
FFFFFFFFFFFFFFFF,F

@A00721:190:HGJW7DSXY:4:1260:24894:29794 1:N:0:TCTGCAAG+GCTGCACT  
GGTCAATTTTGAAATTCAAATTTATATTTATTGTGTTGATGACTGCTTTAGCAGTTGATTGATGGAT  
TCGTCTTCCAAGAAGAGGAAGTGGTCAGGCGGTCCGTTTAGGACCGCCGTTATCGTAAAACACGACG  
AGTGTGCAATTCAA

+

FFFFFFFFFFFFFFF::FFF:FFFFFFFFFFFFFFFFFFFFFFFFFFFFFFFFFFFFFFFFFFFFFFFFFFFFFFFF  
FFFFFFFFFFFFFFFFFFFFFFFFFFFFFFFFFFFFFFFFFFFFFFFFFFFFFFFFFFFFFFFFFFFFFFFF:FFFFFFFFF  
FF:FFFFFFFFFFFF

@A00721:190:HGJW7DSXY:4:1260:23845:29951 1:N:0:TCTGCAAG+GCTGCACT  
GGTCAATTTTGACATTCAAATTTATATTTATTGTGTTGATGACTGCTTTAGCAGTTGATTGATGGAT  
TCGTCTTCCAAGAAGAGGAAGTGGTCAGGCGGTCCGTTTAGGACCGCCGTTATCGTAAAACACGACG  
AGTGTGCAATTCAA

+

FFFFFFFFFFFF:, ,FF:, :F:FFFF:F:FF,FFFF:FFFFFFFFFFFFFFFFFFFFFFFFFFFFFFFFFFFF  
F:FFFFF:FFFF:FF,FFFF:FFFFFFFFFFFFFFFFFFFFFFFF:FFFFFFFFFFFFFFFF:FFFFF  
FFF,:FFFFFFFF

@A00721:190:HGJW7DSXY:4:1305:29704:20588 1:N:0:TCTGCAAG+GCTGCACT  
GGTCAATTTTGAAATTCAAATTTATATTTATTGTGTTGATGACTGCTTTAGCAGTTGATTGATGGAT  
TCGTCTTCCAAGAAGAGGAAGTGGTCAGGCGGTCCGTTTAGGACCGCCGTTATCGTAAAACACGACG  
AGTGTGCAATTCAA

+

FFFFFFFFFFFF:FFFFFFFF:FFFFFFFFFFFFFFFFFFFFFFFFFFFFFFFFFFFFFFFF:FFFFFF:FFFFF  
FFFFFFFFFFFFFFFFFFFFFFFF:FFFFFFFFFFFFFFFF:FF:FFFFFFFF:FFFFFFFFF, :,FFF:  
FF:FFFFFFFF:FFFF

@A00721:190:HGJW7DSXY:4:2120:12373:15781 1:N:0:TCTGCAAG+GCTGCACT  
GGTCAATTTTGAAATTCAAATTTATATTTATTGTGTTGATGACTGCTTTAGCAGTTGATTGATGGAT  
TCGTCTTCCAAGAAGAGGAAGTGGTCAGGCGGTCCGTTTAGGACCGCCGTTATCGTAAAACACGACG  
AGTGTGCAATTCAA

+

FFFFFFFFFFFFF,FFFF::FF:FFFFFFFFFFFFFFFFFFFFFFFF:FFFFFFFFFFFFFFFFFFFFFFFF:FFFF  
FFFFFFFFFFFF,FFFFF,FFFFFFFFFFFF:FFFFFFFFF,FFFFFFFFFFFFFFF::FFF:FFF:FFF:  
FFFFFF,FFFF,FF

@A00721:190:HGJW7DSXY:4:2120:11867:17347 1:N:0:TCTGCAAG+GCTGCACT  
GGTCAATTTTGAAATTCAAATTTATATTTATTGTGTTGATGACTGCTTTAGCAGTTGATTGATGGAT  
TCGTCTTCCAAGAAGAGGAAGTGGTCAGGCGGTCCGTTTAGGACCGCCGTTATCGTAAAACACGACG  
AGTGTGCAATTCAA

+

FFFFFFFFFFFF, , ,:FF, ,FFFFFFFFFFFFFFFFFFFFFFFFFFFFFFFFFFFFFFFF:FFFFFFFFFFFFFFFF  
F:FFFFF:FFFFFFFFFFFFFFFFFFFFFFFFFFFFFFFFFFFFFFFF,FFFF:FFFFFFFF:FFFFFF:F:,FFF  
FFFFFF::FFFFFF

@A00721:190:HGJW7DSXY:4:2219:4716:16673 1:N:0:TCTGCAAG+GCTGCACT  
GGTCAATTTTGAAATTCAAATTTATATTTATTGTGTTGATGACTGCTTTAGCAGTTGATTGATGGAT  
TCGTCTTCCAAGAAGAGGAAGTGGTCAGGCGGTCCGTTTAGGACCGCCGTTATCGTAAAACACGACG  
AGTGTGCAATTCAA

+  
FFFFFFFFFFFF:F,FFFFF::FFFFFFFFFFFFFFFFFFFFFFFFFFFFFFFFFFFFFFFF  
FFFFFFFFFFFF:FFFFFFFFFFFFFFFFFFFFFFFFFFFFFFFFFFFFFFFFFFFFFFFF:FFF  
FFFFFFFFFFFF,FF  
@A00721:190:HGJW7DSXY:4:2529:5791:13808 1:N:0:TCTGCAAG+GCTGCACT  
GGTCAATTTTGAATTCAAAATTTATATTTATTGTGTTGATGACTGCTTTAGCAGTTGATTGATGGAT  
TCGTCTTCCAAGAAGAGGAAGTGGTCAGGCGGTCCGTTTAGGACCGCCGGTTATCGTAAAACACGACG  
AGTGTTGAAATTCAA

+  
:FFFFFFFFFFFF::FFF::FFFFFFFFFFFF:FFFFFFFFFFFF:FF:FFFFFFFFFFFF:FFFFF:FFFFF  
FF,FFFFF:FF:FFFFFFFFFFFFFFFFFFFF:F:FFFFFF,FFF,FF,,FF,,FFF::FFF:FFFF,:FF,  
F:FFF,,,FF,:,:F  
@A00721:190:HGJW7DSXY:4:2629:13847:8625 1:N:0:TCTGCAAG+GCTGCACT  
GGTCAATTTTGAATTCAAAATTTATATTTATTGTGTTGATGACTGCTTTAGCAGTTGATTGATGGAT  
TCGTCTTCCAAGAAGAGGAAGTGGTCAGGCGGTCCGTTTAGGACCGCCGGTTATCGTAAAACACGACG  
AGTGTTGCAATTCAA

+  
FFFFFFFFFFFFFFFF:FFF,:FFFFFFFFFFFF:FFFFFFFFFFFFFFFFFFFFFFFFFFFFFFFFFFFFFFFF  
FFFFFFFFFFFFFFFFFFFFFFFFFFFF,FFFFFFFFFFFFFFFFFFFFFFFFFFFF:FFFFFFFFFFFFFFFFFFFFFFFF  
FF:FFFFFFFF:FFFF  
@A00721:190:HGJW7DSXY:4:1223:13847:2957 1:N:0:TCTGCAAG+GCTGCACT  
CTGCTGAGTCCTGTTGAATTGCAACACTCGTCGTGTTTTACGATAACCGGCGGTCCTTTTACCACTTC  
CTCTTCTTGAAGACGAATCCATCAATCAACTGCTAAAGCAGTCATCAACACAATAAATATAAATTTT  
GAATTTCAAAATTGA

+  
FFFFFFFFFFFFFFFFFFFFFFFFFFFFFFFFFFFFFFFFFFFFFFFFFFFFFFFFFFFFFFFFFFFFFFFFFFFF  
FFFFFFFFFFFFFFFFFFFFFFFFFFFFFFFFFFFFFFFFFFFFFFFFFFFFFFFFFFFFFFFFFFFFFFFFFFFF  
,:FFFFFFFFFFFF:F  
@A00721:190:HGJW7DSXY:4:1647:24288:27085 1:N:0:TCTGCAAG+GCTGCACT  
CTGCTGAGTCCTGTTGAATTGCAACACTCGTCGTGTTTTACGATAACCGGCGGTCCTTTTACCACTTC  
CTCTTCTTGAAGACGAATCCATCAATCAACTGCTAAAGCAGTCATCAACACAATAAATATAAATTTT  
GAATTTCAAAATTGA

+  
FFFFFFFFFFFFFFFFFFFFFFFFFFFFFFFFFFFFFFFFFFFFFFFFFFFFFFFFFFFFFFFFFFFFFFFFFFFF  
FFFFFFFFFFFFFFFFFFFFFFFFFFFFFFFFFFFFFFFFFFFFFFFFFFFFFFFFFFFFFFFFFFFFFFFFFFFF  
FFFFFFFFFFFFFFFFFFFF  
@A00721:190:HGJW7DSXY:4:2102:22697:10363 1:N:0:TCTGCAAG+GCTGCACT  
CTGCTGAGTCCTGTTGAATTGCAACACTCGTCGTGTTTTACGATAACCGGCGGTCCTTTTACCACTTC  
CTCTTCTTGAAGACGAATCCATCAATCAACTGCTAAAGCAGTCATCAACACAATAAATATAAATTTT  
GAATTTCAAAATTGA

+  
FFFFFFFFFFFFFFFFFFFFFFFFFFFFFFFFFFFFFFFFFFFFFFFFFFFFFFFFFFFFFFFFFFFFFFFFFFFF  
FFFFFFFFFFFFFFFFFFFFFFFFFFFFFFFFFFFFFFFFFFFFFFFFFFFFFFFFFFFFFFFFFFFFFFFFFFFF,  
FFFFFFFFFFFFFFFFFFFF  
@A00721:190:HGJW7DSXY:4:2231:29089:5682 1:N:0:TCTGCAAG+GCTGCACT  
CTGCTGAGTCCTGTTGAATTGCAACACTCGTCGTGTTTTACGATAACCGGCGGTCCTTTTACCACTTC  
CTCTTCTTGAAGACGAATCCATCAATCAACTGCTAAAGCAGTCATCAACACAATAAATATAAATTTT  
GAATTTCAAAATTGA

+  
FFFFFFFFFFFF:FFFFFFFFFFFFFFFFFFFFFFFFFFFFFFFFFFFFFFFFFFFFFFFFFFFFFFFFFFFFFFFF  
FFFFFFFFFFFF:FFFFFFFFFFFFFFFFFFFFFFFFFFFFFFFFFFFFFFFFFFFFFFFF:FFFFFF:FFFFFFFFFFFF  
,:FFFFFFFFFFFF::F  
@A00721:190:HGJW7DSXY:4:2413:25925:4210 1:N:0:TCTGCAAG+GCTGCACT  
CTGCTGAGTCCTGTTGAATTGCAACACTCGTCGTGTTTTACGATAACCGGCGGTCCTTTTACCACTTC

CTCTTCTTGGAAGACGAATCCATCAATCAACTGCTAAAGCAGTCATCAACACAATAAATATAAAATTTT  
GAATTTCAAAATTGA

+

FFFF,FFFFFFFFFFFFFFFFFFFFFFFFFFFFFFFFFFFFFFFFFFFFFFFFFFFFFFFFFFFFFFFF  
FFFFFFFFFFFFFFFFFFFFFFFFFFFFFFFFFFFFFFFFFFFFFFFFFFFFFFFFFFFFFFFF,FFFFFF:FFFFFFFFFFFFFFFF:FFF  
,FFFFFF,FFFFFF,F

@A00721:190:HGJW7DSXY:4:2465:19786:16501 1:N:0:TCTGCAAG+GCTGCACT  
CTGCTGAGTCCTGTTGAATTGCAACACTCGTCGTGTTTTACGATAACCGGCGGTCCTTTTACCACTTC  
CTCTTCTTGGAAGACGAATCCATCAATCAACTGCTAAAGCAGTCATCAACACAATAAATATAAAATTTT  
GAATTTCAAAATTGA

+

FFFFFFFFFFFFFFFFFFFFFFFFFFFFFFFFFFFFFFFFFFFFFFFFFFFFFFFFFFFFFFFF,FF:FFFFFF:FFFFFFF:FFFFFFF:FF  
FFFFFFFF:FFFFFFFFFFFFFFFF:FFFFFFFFF:FFFF:FFFFFFFFFFFFFFFF,FFFFFFFF:FFFF  
:FFFFFFFFFFFFFFFF

@A00721:190:HGJW7DSXY:4:2518:7129:2347 1:N:0:TCTGCAAG+GCTGCACT  
CTGAGTCCTGTTGAATTGCAACACTCGTCGTGTTTTACGATAACCGGCGGTCCTTTTAACTTCTC  
TTCTTGGAAGACGAATCCATCAATCAACTTCAAAGCAGTCATCAACACAATAAATATAAAATTTTGA  
TTTCAAAAATGA

+

FFFF:,FF:,F::FFFF:,F:,FF,,F,F,,F:,FF,,F,FF,,,F,:FFF,F,,F,,FF,,:FFF  
:F:FF:,FF:F:F:FFF,FFFF:,FF,F,F,FFF:,FFF,F,:FFFF,F:FF:FFF,FF::,FF,FF  
F,F,,FFF,F,F

@A00721:190:HGJW7DSXY:4:2154:14832:16376 1:N:0:TCTGCAAG+GCTGCACT  
CTGCTGAGTCCTGTTGAATTGCAACACTCGTCGTGTTTTACGATAACCGGCGGTCCTTTTACCACTTC  
CTCTTCTTGGAAGACGAATCCATCAATCAACTGCTAAAGCAGTCATCAACACAATAAATATAAAATTTT  
GAATTTCAAAATTG

+

FFFFFFFFFFFFFFFFFFFFFFFFFFFFFFFFFFFFFFFFFFFFFFFFFFFFFFFFFFFFFFFFFFFFFFFF  
FFFFFFFFFFFFFFFFFFFFFFFFFFFFFFFFFFFFFFFFFFFFFFFFFFFFFFFFFFFFFFFFFFFFFFFF:FFF  
:FF:FFFFFFFF

@A00721:190:HGJW7DSXY:4:1374:32145:4679 1:N:0:TCTGCAAG+GCTGCACT  
CCACTGAACCGGCAGCTGTGACCGCTGAGTCCTGTTGAATTGCAACACTCGTCGTGTTTTACGATAAC  
CGGCGGTCCTTTTACCACTTCCTCTTCTTGGAAGACGAATCCATCAATCAACTGCTAAAGCAGTCATC  
AACACAATAAATATA

+

FFFFFFFFFFFFFFFFFFFFFFFFFFFFFFFFFFFFFFFFFFFFFFFFFFFFFFFFFFFFFFFFFFFFFFFF  
FFFFFFFFFFFFFFFFFFFFFFFFFFFFFFFFFFFFFFFFFFFFFFFFFFFFFFFFFFFFFFFFFFFFFFFF:FFFFFFF  
F::FFFFFFFF

@A00721:190:HGJW7DSXY:4:1501:32407:31125 1:N:0:TCTGCAAG+GCTGCACT  
CCACTGAACCGGCAGCTGTGACCGCTGAGTCCTGTTGAATTGCAACACTCGTCGTGTTTTACGATAAC  
CGGCGGTCCTTTTACCACTTCCTCTTCTTGGAAGACGAATCCATCAATCAACTGCTAAAGCAGTCATC  
AACACAATAAATATA

+

FFFFFFFFFFFFFFFFFFFFFFFFFFFFFFFFFFFFFFFFFFFFFFFFFFFFFFFFFFFFFFFFFFFFFFFF  
FFFFFFFFFFFFFFFF:FFFFFFFFFFFFFFFFFFFFFFFF:FFFFFFFFF:FFFFFF:FFF:FFFF  
FFFFFFFFFFFFFFFF

@A00721:190:HGJW7DSXY:4:1130:32009:16908 1:N:0:TCTGCAAG+GCTGCACT  
TGTTGATGACTGCTTTAGCAGTTGATTGATGGATTCTGCTTCCAAGAAGAGGAAGTGGTCAGGCGGTC  
CGTTTAGGACCGCCGGTTATCGTAAACACGACGAGTGTTGCAATTCAACAGGACTCAGCGGTCACAG  
CTGCCGTTTCACTGG

+

F:FFFFFFFFFFFFFFFFFFFFFFFFFFFFFFFFFFFFFFFFFFFFFFFFFFFFFFFFFFFFFFFF:FF  
FF:FFFFFFFFFFFFFFFFFFFFFFFFFFFFFFFF:FFFFFFFFF:FFFFFF:FFF:FFFF  
FF:FFFFF:FFFF





FFFFFFFFFFFFFFFFFFFFFFFFFFFFFFFFFFFFFFFFFFFFFFFFFFFFFFFFFFFFFFFFFFFFFFFF  
FFFFFFFFFFFFFFFF

@A00721:190:HGJW7DSXY:4:2617:24144:15217 1:N:0:TCTGCAAG+GCTGCACT  
TGTGATGACTGCTTTAGCAGTTGATTGATGGATTCTGTCTTCCAAGAAGAGGAAGTGGTCAGGCGGTCC  
CGTTTAGGACCGCCGGTTATCGTAAACACGACGAGTGTTGCAATTCAACAGGACTCAGCGGTCACAG  
CTGCCGGTTCAGTGG

+  
FFFFFFFFFFFFFFFFFFFFFFFFFFFFFFFFFFFFFFFFFFFFFFFFFFFFFFFFFFFFFFFFFFFFFFFF:FFFFFFFFFFFFFFFF  
FFFFFFFFFFFFFFFFFFFFFFFFFFFFFFFFFFFFFFFFFFFFFFFFFFFFFFFFFFFFFFFFFFFFFFFF:FFFFFFFFFFFFFFFF:FFFFFFFFFFFFFFFFFFFFFFFFFFFFFFFF  
FFFFFFFFFFFFFFFF:

@A00721:190:HGJW7DSXY:4:1132:11071:4131 1:N:0:TCTGCAAG+GCTGCACT  
GTTGATGACTGCTTTAGCAGTTGATTGATGGATTCTGTCTTCCAAGAAGAGGAAGTGGTCAGGCGGTCC  
GTTTAGGACCGCCGGTTATCGTAAACACGACGAGTGTTGCAATTCAACAGGACTCAGCGGTCACAGC  
TGCCGGTTCAGTGGT

+  
FFFFFFFFFFFFFFFFFFFFFFFFFFFFFFFFFFFFFFFFFFFFFFFFFFFFFFFFFFFFFFFFFFFFFFFF  
FFFFFFFFFFFFFFFFFFFFFFFFFFFFFFFFFFFFFFFFFFFFFFFFFFFFFFFFFFFFFFFFFFFFFFFF:FFFFFFFFFFFFFFFFFFFFFFFFFFFFFFFFFFFFFFFF  
FFFFFFFFFFFFFFFF

@A00721:190:HGJW7DSXY:4:1135:17282:30514 1:N:0:TCTGCAAG+GCTGCACT  
GTTGATGACTGCTTTAGCAGTTGATTGATGGATTCTGTCTTCCAAGAAGAGGAAGTGGTCAGGCGGTCC  
GTTTAGGACCGCCGGTTATCGTAAACACGACGAGTGTTGCAATTCAACAGGACTCAGCGGTCACAGC  
TGCCGGTTCAGTGGT

+  
FFFFFFFFFFFFFFFFFFFFFFFFFFFFFFFFFFFFFFFFFFFFFFFFFFFFFFFFFFFFFFFFFFFFFFFF  
FF:FFFFF:FFFFFFFFFFFFFFFFFFFFFFFFFFFFFFFFFFFFFFFFFFFFFFFFFFFFFFFFFFFFFFFF:FF,FFFF  
:FFFFFFFFFFFFFFFF

@A00721:190:HGJW7DSXY:4:1156:15998:24878 1:N:0:TCTGCAAG+GCTGCACT  
GTTGATGACTGCTTTAGCAGTTGATTGATGGATTCTGTCTTCCAAGAAGAGGAAGTGGTCAGGCGGTCC  
GTTTAGGACCGCCGGTTATCGTAAACACGACGAGTGTTGCAATTCAACAGGACTCAGCGGTCACAGC  
TGCCGGTTCAGTGGT

+  
FFFFFFFFFFFFFFFFFFFFFFFFFFFFFFFFFFFFFFFFFFFFFFFFFFFFFFFFFFFFFFFFFFFFFFFF  
FFFFFFFFFFFFFFFFFFFFFFFFFFFFFFFFFFFFFFFFFFFFFFFFFFFFFFFFFFFFFFFFFFFFFFFF:FF:FFFFFFFFFFFFFFFFFFFFFFFFFFFFFFFF  
FFFFFFFFFFFFFFFF

@A00721:190:HGJW7DSXY:4:1447:6189:34413 1:N:0:TCTGCAAG+GCTGCACT  
GTTGATGACTGCTTTAGCAGTTGATTGATGGATTCTGTCTTCCAAGAAGAGGAAGTGGTCAGGCGGTCC  
GTTTAGGACCGCCGGTTATCGTAAACACGACGAGTGTTGCAATTCAACAGGACTCAGCGGTCACAGC  
TGCCGGTTCAGTGGT

+  
FFFFFFFFFFFFFFFFFFFFFFFFFFFFFFFFFFFFFFFFFFFFFFFFFFFFFFFFFFFFFFFFFFFFFFFF:FFFFFFFFFFFFFFFF  
FFFFFFFFFFFFFFFFFFFFFFFFFFFFFFFFFFFFFFFFFFFFFFFFFFFFFFFFFFFFFFFFFFFFFFFF,FF  
FFFFFFFFFFFFFFFF:F

@A00721:190:HGJW7DSXY:4:1519:8983:35368 1:N:0:TCTGCAAG+GCTGCACT  
GTTGATGACTGCTTTAGCAGTTGATTGATGGATTCTGTCTTCCAAGAAGAGGAAGTGGTCAGGCGGTCC  
GTTTAGGACCGCCGGTTATCGTAAACACGACGAGTGTTGCAATTCAACAGGACTCAGCGGTCACAGC  
TGCCGGTTCAGTGGT

+  
FFFFFFFFFFFFFFFFFFFFFFFFFFFFFFFFFFFFFFFFFFFFFFFFFFFFFFFFFFFFFFFFFFFFFFFF  
FFFFFFFFFFFFFFFFFFFFFFFFFFFFFFFFFFFFFFFFFFFFFFFFFFFFFFFFFFFFFFFFFFFFFFFF  
FF:FFF:FFFFFFFF

@A00721:190:HGJW7DSXY:4:1608:18973:5447 1:N:0:TCTGCAAG+GCTGCACT  
GTTGATGACTGCTTTAGCAGTTGATTGATGGATTCTGTCTTCCAAGAAGAGGAAGTGGTCAGGCGGTCC  
GTTTAGGACCGCCGGTTATCGTAAACACGACGAGTGTTGCAATTCAACAGGACTCAGCGGTCACAGC  
TGCCGGTTCAGTGGT

+  
FFFFFFFFFFFFFFFFFFFFFFFFFFFFFFFFFFFFFFFFFFFFFFFFFFFFFFFFFFFFFFFFFFFFFFFF:F  
F:FFFFFFFFFFFFFFFF:FFF,FFFFFFFF:FFFF,FFFFFFFFFFFFFFFF,FF,FFFFFFFF:FFFF  
FF:FFFFFFFFFFFF

@A00721:190:HGJW7DSXY:4:1634:12726:19429 1:N:0:TCTGCAAG+GCTGCACT  
GTTGATGACTGCTTTAGCAGTTGATTGATGGATTCTGCTTCCAAGAAGAGGAAGTGGTCAGGCGGTCC  
GTTTAGGACCGCCGGTTATCGTAAAACACGACGAGTGTTGCAATTCAACAGGACTCAGCGGTCACAGC  
TGCCGGTTCAGTGGT

+  
FFFFFFFFFFFFFFFFFFFFFFFFFFFFFFFFFFFFFFFFFFFFFFFFFFFFFFFFFFFFFFFFFFFFFFFF  
FFFFFFFFFFFFFFFFFFFFFFFFFFFFFFFFFFFFFFFFFFFFFFFFFFFFFFFFFFFFFFFFFFFFFFFF  
FFFFFFFFFFFF:FFFFF

@A00721:190:HGJW7DSXY:4:1644:17427:28354 1:N:0:TCTGCAAG+GCTGCACT  
GTTGATGACTGCTTTAGCAGTTGATTGATGGATTCTGCTTCCAAGAAGAGGAAGTGGTCAGGCGGTCC  
GTTTAGGACCGCCGGTTATCGTAAAACACGACGAGTGTTGCAATTCAACAGGACTCAGCGGTCACAGC  
TGCCGGTTCAGTGGT

+  
FFFFFFFFFFFFFFFFFFFFFFFFFFFFFFFFFFFFFFFFFFFFFFFFFFFFFFFFFFFFFFFFFFFFFFFF  
FFFFFFFFFFFFFFFFFFFFFFFFFFFFFFFFFFFFFFFFFFFFFFFFFFFFFFFFFFFFFFFFFFFFFFFF  
FFFFFFFFFFFF:FFF:FFFFFFFFFFFFFFFFFFFFFFFFFFFFFFFFFFFFFFFF:FF:FFFFFF:FF  
FFFFFFFFFFFF:FFF

@A00721:190:HGJW7DSXY:4:2152:1172:10911 1:N:0:TCTGCAAG+GCTGCACT  
GTTGATGACTGCTTTAGCAGTTGATTGATGGATTCTGCTTCCAAGAAGAGGAAGTGGTCAGGCGGTCC  
GTTTAGGACCGCCGGTTATCGTAAAACACGACGAGTGTTGCAATTCAACAGGACTCAGCGGTCACAGC  
TGCCGGTTCAGTGGT

+  
FFFFFFFFFFFFFFFFFFFFFFFFFFFFFFFFFFFFFFFFFFFFFFFFFFFFFFFFFFFFFFFFFFFFFFFF  
FFFFFFFFFFFFFFFFFFFFFFFFFFFFFFFFFFFFFFFFFFFFFFFFFFFFFFFFFFFFFFFFFFFFFFFF  
FFFFFFFFFFFF:FFF:FFFFFFFFFFFFFFFFFFFFFFFFFFFFFFFFFFFFFFFF:FFFFFFFFFF

@A00721:190:HGJW7DSXY:4:2418:14380:33692 1:N:0:TCTGCAAG+GCTGCACT  
GTTGATGACTGCTTTAGCAGTTGATTGATGGATTCTGCTTCCAAGAAGAGGAAGTGGTCAGGCGGTCC  
GTTTAGGACCGCCGGTTATCGTAAAACACGACGAGTGTTGCAATTCAACAGGACTCAGCGGTCACAGC  
TGCCGGTTCAGTGGT

+  
FFFFFFFFFFFFFFFFFFFFFFFFFFFFFFFFFFFFFFFFFFFFFFFFFFFFFFFFFFFFFFFFFFFFFFFF  
FF,FF:FFFFFFFFFFFFFFFF:FFFFFFFFFFFF,FFF,FF:FFFF:FF:F,FFF:,F:FFFF:FFFF  
FFFFFFFFFFFF:FFFF

@A00721:190:HGJW7DSXY:4:2548:26368:10802 1:N:0:TCTGCAAG+GCTGCACT  
GTTGATGACTGCTTTAGCAGTTGATTGATGGATTCTGCTTCCAAGAAGAGGAAGTGGTCAGGCGGTCC  
GTTTAGGACCGCCGGTTATCGTAAAACACGACGAGTGTTGCAATTCAACAGGACTCAGCGGTCACAGC  
TGCCGGTTCAGTGGT

+  
FFFFFFFFFFFFFFFFFFFFFFFFFFFFFFFFFFFFFFFFFFFFFFFFFFFFFFFFFFFFFFFFFFFFFFFF  
FF:FFFFFFFFFFFFFFFFFFFFFFFFFFFFFFFFFFFFFFFFFFFFFFFFFFFFFFFFFFFFFFFFFFFF  
FFFFFFFFFFFF

@A00721:190:HGJW7DSXY:4:2557:4092:21355 1:N:0:TCTGCAAG+GCTGCACT  
GTTGATGACTGCTTTAGCAGTTGATTGATGGATTCTGCTTCCAAGAAGAGGAAGTGGTCAGGCGGTCC  
GTTTAGGACCGCCGGTTATCGTAAAACACGACGAGTGTTGCAATTCAACAGGACTCAGCGGTCACAGC  
TGCCGGTTCAGTGGT

+  
FFFFFFFFFFFFFFFFFFFFFFFFFFFFFFFFFFFFFFFFFFFFFFFFFFFFFFFFFFFFFFFFFFFFFFFF  
FFFFFFFFFFFFFFFFFFFFFFFFFFFFFFFFFFFFFFFFFFFFFFFFFFFFFFFFFFFFFFFFFFFFFFFF  
FFFFFFFFFFFF

@A00721:190:HGJW7DSXY:4:2562:25211:33912 1:N:0:TCTGCAAG+GCTGCACT  
TTGATGACTGCTTTAGCAGTTGATTGATGGATTCTGCTTCCAAGAAGAGGAAGTGGTCAGGCGGTCCG

TTTAGGACCGCCGGTTATCGTAAACACGACGAGTGTTGCAATTCAACAGGACTCAGCGGTCACAGCT  
GCCGGTTCAGTGGT

+

F,FFFFFF,FFF:FF:FFFFFFF,FFFFFFFFFFFFFFFFFFFFFFFFF::F,F:FFF,FFFF,:F:  
FF:FF::FFFFFF,F:F:FFFFFFFFFFFFFFFFFFFFFFFFF::FFFFFFFFFFF,:F:FF:FFFFF  
:,FFF,FFF,,::F

@A00721:190:HGJW7DSXY:4:1136:31991:13463 1:N:0:TCTGCAAG+GCTGCACT  
TGATGACTGCTTTAGCAGTTGATTGATGGATTTCGTCTTCCAAGAAGAGGAAGTGGTCAGGCGGTCCGT  
TTAGGACCGCCGGTTATCGTAAACACGACGAGTGTTGCAATTCAACAGGACTCAGCGGTCACAGCTG  
CCGGTTCAGTG

+

FFFFFFFFFFFFFFFFFFFFFFFFFFFFFFFFFFFFFFFFFFFFFFFFFFFFFFFFFFFFFFFFFFFFFFFFF:FFFFFFFFFFFFFFFFFFFFFFFFFFFFFFFFF  
FFFFFFFFFFFFFFFFFFFFFFFFFFFFFFFFFFFFFFFFFFFFFFFFFFFFFFFFFFFFFFFFFFFFFFFFF  
FFFFFF:FFFF

@A00721:190:HGJW7DSXY:4:1166:14253:23484 1:N:0:TCTGCAAG+GCTGCACT  
TGATGACTGCTTTAGCAGTTGATTGATGGATTTCGTCTTCCAAGAAGAGGAAGTGGTCAGGCGGTCCGT  
TTAGGACCGCCGGTTATCGTAAACACGACGAGTGTTGCAATTCAACAGGACTCAGCGGTCACAGCTG  
CCGGTTCAGTG

+

FFFFFFFFFFFFFFFFFFFFFFFFFFFFFFFFFFFFFFFFFFFFFFFFFFFFFFFFFFFFFFFFFFFFFFFFF:FFFFFFFFFFFFFFFFFFFFFFFFFFFFFFFFF  
FFFFFFFFFFFFFFFFFFFFFFFFFFFFFFFFFFFFFFFFFFFFFFFFFFFFFFFFFFFFFFFFFFFFFFFFF  
FFFFFF:FFF

@A00721:190:HGJW7DSXY:4:1228:30761:31876 1:N:0:TCTGCAAG+GCTGCACT  
TGATGACTGCTTTAGCAGTTGATTGATGGATTTCGTCTTCCAAGAAGAGGAAGTGGTCAGGCGGTCCGT  
TTAGGACCGCCGGTTATCGTAAACACGACGAGTGTTGCAATTCAACAGGACTCAGCGGTCACAGCTG  
CCGGTTCAGTG

+

FFFFFFFFFFFFFFFFFFFFFFFFFFFFFFFFFFFFFFFFFFFFFFFFFFFFFFFFFFFFFFFFFFFFFFFFF:FFFFFFFFFFFFFFFFFFFFFFFFFFFFFFFFF  
FFFFFF,F:FF,FFFFFFFFFFFF,F:,FF,F:FFFFFFFF,FFFF,F,FFFFFFFF:::F:,,:FFF  
FF:,FF:FFF:

@A00721:190:HGJW7DSXY:4:1243:8793:26209 1:N:0:TCTGCAAG+GCTGCACT  
TGATGACTGCTTTAGCAGTTGATTGATGGATTTCGTCTTCCAAGAAGAGGAAGTGGTCAGGCGGTCCGT  
TTAGGACCGCCGGTTATCGTAAACACGACGAGTGTTGCAATTCAACAGGACTCAGCGGTCACAGCTG  
CCGGTTCAGTG

+

FFFFFFFFFFFFFFFFFFFFFFFFFFFFFFFFFFFFFFFFFFFFFFFFFFFFFFFFFFFFFFFFFFFFFFFFF,  
FFFFFFFFFFFFFFFFFFFFFFFFFFFFFFFFFFFFFFFFFFFFFFFFFFFFFFFFFFFFFFFFFFFFFFFFF,FFFF:F  
FFFFFFFFFFFF

@A00721:190:HGJW7DSXY:4:1272:1805:1986 1:N:0:TCTGCAAG+GCTGCACT  
TGATGACTGCTTTAGCAGTTGATTGATGGATTTCGTCTTCCAAGAAGAGGAAGAAAGGACCGCGGTTA  
TCGTAAACACGACGAGTGTTGCAATTCAACAGGACTCAGCGGTCACAGCTGCCGGTTCAGTGGTCGA  
GGTCTCTGAGA

+

FFFFFFFFFFFFFFFFFFFFFFFFFFFFFFFFFFFFFFFFFFFFFFFFFFFFFFFFFFFFFFFFFFFFFFFFF  
FFFFFFFFFFFFFFFFFFFFFFFFFFFFFFFFFFFFFFFFFFFFFFFFFFFFFFFFFFFFFFFFFFFFFFFFF  
FFFFFFFFFFFF

@A00721:190:HGJW7DSXY:4:1315:10583:24017 1:N:0:TCTGCAAG+GCTGCACT  
TGATGACTGCTTTAGCAGTTGATTGATGGATTTCGTCTTCCAAGAAGAGGAAGTGGTCAGGCGGTCCGT  
TTAGGACCGCCGGTTATCGTAAACACGACGAGTGTTGCAATTCAACAGGACTCAGCGGTCACAGCTG  
CCGGTTCAGTG

+

FFFFFFFFFFFFFFFFFFFFFFFFFFFFFFFFFFFFFFFFFFFFFFFFFFFFFFFFFFFFFFFFFFFFFFFFF  
F:FFFFFFFFFFFFFFFFFFFFFFFFFFFFFFFFFFFFFFFFFFFFFFFFFFFFFFFFFFFFFFFFF:FFFFFFFFF:FFFFFFFFFFFFFFFFF  
FFFFFFFFFFFF



FFFFFFFFFFFFFFFFFFFFFFFFFFFFFFFFFFFFFFFFFFFFFFFFFFFFFFFFFFFFFFFFFFFFFFFFFFFFFFFF  
FFFFFFFFFFFF

@A00721:190:HGJW7DSXY:4:1463:4752:12978 1:N:0:TCTGCAAG+GCTGCACT  
TGATGACTGCTTTAGCAGTTGATTGATGGATTTCGTCTTCCAAGAAGAGGAAGTGGTCAGGCGGTCCGT  
TTAGGACCGCCGTTATCGTAAAACACGACGAGTGTTGCAATTCAACAGGACTCAGCGGTCACAGCTG  
CCGGTTCAGTG

+

FFFFFFFFFFFFFFFFFFFFFFFFFFFFFFFFFFFFFFFFFFFFFFFFFFFFFFFFFFFFFFFFFFFFFFFFFFFFFFFF  
FFFFFFFFFFFFFFFFFFFFFFFFFFFFFFFFFFFFFFFFFFFFFFFFFFFFFFFFFFFFFFFFFFFFFFFFFFFFFFFF:  
FFFFFFFFFFFF

@A00721:190:HGJW7DSXY:4:1465:32588:13777 1:N:0:TCTGCAAG+GCTGCACT  
TGATGACTGCTTTAGCAGTTGATTGATGGATTTCGTCTTCCAAGAAGAGGAAGTGGTCAGGCGGTCCGT  
TTAGGACCGCCGTTATCGTAAAACACGACGAGTGTTGCAATTCAACAGGACTCAGCGGTCACAGCTG  
CCGGTTCAGTG

+

FFFFFFFFFFFFFFFFFFFFFFFFFFFFFFFFFFFFFFFFFFFFFFFFFFFFFFFFFFFFFFFFFFFFFFFFFFFFFFFF:  
FFFFFFFFFFFFFFFFFFFFFFFFFFFFFFFFFFFFFFFFFFFFFFFFFFFFFFFFFFFFFFFFFFFFFFFFFFFFFFFF:  
FFFFFFFFFFFF, FFFF:FFFFFFFFFFFFFFFFFFFF

@A00721:190:HGJW7DSXY:4:1465:32570:13902 1:N:0:TCTGCAAG+GCTGCACT  
TGATGACTGCTTTAGCAGTTGATTGATGGATTTCGTCTTCCAAGAAGAGGAAGTGGTCAGGCGGTCCGT  
TTAGGACCGCCGTTATCGTAAAACACGACGAGTGTTGCAATTCAACAGGACTCAGCGGTCACAGCTG  
CCGGTTCAGTG

+

FFFFFFFFFFFFFFFFFFFFFFFFFFFFFFFFFFFFFFFFFFFFFFFFFFFFFFFFFFFFFFFFFFFFFFFFFFFFFFFF:  
FFFFFFFFFFFFFFFFFFFFFFFFFFFFFFFFFFFFFFFFFFFFFFFFFFFFFFFFFFFFFFFFFFFFFFFFFFFFFFFF:  
FFFFFFFFFFFF

@A00721:190:HGJW7DSXY:4:1469:26096:13964 1:N:0:TCTGCAAG+GCTGCACT  
TGATGACTGCTTTAGCAGTTGATTGATGGATTTCGTCTTCCAAGAAGAGGAAGTGGTCAGGCGGTCCGT  
TTAGGACCGCCGTTATCGTAAAACACGACGAGTGTTGCAATTCAACAGGACTCAGCGGTCACAGCTG  
CCGGTTCAGTG

+

FFFFFFFFFFFFFFFFFFFFFFFFFFFFFFFFFFFFFFFFFFFFFFFFFFFFFFFFFFFFFFFFFFFFFFFFFFFFFFFF:  
FFFFFFFFFFFFFFFFFFFFFFFFFFFFFFFFFFFFFFFFFFFFFFFFFFFFFFFFFFFFFFFFFFFFFFFFFFFFFFFF:  
FFFFFFFFFFFF

@A00721:190:HGJW7DSXY:4:1513:27444:5024 1:N:0:TCTGCAAG+GCTGCACT  
TGATGACTGCTTTAGCAGTTGATTGATGGATTTCGTCTTCCAAGAAGAGGAAGTGGTCAGGCGGTCCGT  
TTAGGACCGCCGTTATCGTAAAACACGACGAGTGTTGCAATTCAACAGGACTCAGCGGTCACAGCTG  
CCGGTTCAGTG

+

FFFFFFFFFFFFFFFFFFFFFFFFFFFFFFFFFFFFFFFFFFFFFFFFFFFFFFFFFFFFFFFFFFFFFFFFFFFFFFFF:  
: FFFFFFFFFF: F, FFFFFFFFFF: FFFFFFFFFF: FFFFFFFFFF: FFFFFFFFFF: FFFFFFFFFF:  
FFFF: FFFF, F

@A00721:190:HGJW7DSXY:4:1531:18204:21465 1:N:0:TCTGCAAG+GCTGCACT  
TGATGACTGCTTTAGCAGTTGATTGATGGATTTCGTCTTCCAAGAAGAGGAAGTGGTCAGGCGGTCCGT  
TTAGGACCGCCGTTATCGTAAAACACGACGAGTGTTGCAATTCAACAGGACTCAGCGGTCACAGCTG  
CCGGTTCAGTG

+

FFFFFFFFFFFFFFFFFFFFFFFFFFFFFFFFFFFFFFFFFFFFFFFFFFFFFFFFFFFFFFFFFFFFFFFFFFFFFFFF  
FFFFFFFFFFFFFFFF: FFFFFFFFFF: FFFFFFFFFF: FFFFFFFFFF: FFFFFFFFFF: FFFFFFFFFF:  
FFFFFFFF: FF

@A00721:190:HGJW7DSXY:4:1536:15989:34663 1:N:0:TCTGCAAG+GCTGCACT  
TGATGACTGCTTTAGCAGTTGATTGATGGATTTCGTCTTCCAAGAAGAGGAAGTGGTCAGGCGGTCCGT  
TTAGGACCGCCGTTATCGTAAAACACGACGAGTGGTGCAATTCAACAGGACTCAGCGGTCACAGCTG  
CCGGTTCAGTG

+  
F:F,FF:FF::FFFF:FFFFFFFF:FF::FFFF,FF:F:FFF,FF:FFFFFFFF:FFF:FFF:FF:F,  
FFF,,FFFF,F:,FFF,FF:F:FFFF,,FF,FFF:,::F:FF,FFFF,FFFFFFFF:FFFFFFFF:,F  
,FFF:FFFF,F

@A00721:190:HGJW7DSXY:4:1561:10059:18255 1:N:0:TCTGCAAG+GCTGCACT  
TGATGACTGCTTTAGCAGTTGATTGATGGATTTCGTCTTCCAAGAAGAGGAAGTGGTCAGGCGGTCCGT  
TTAGGACCGCCGGTTATCGTAAAACACGACGAGTGTTGCAATTCAACAGGACTCAGCGGTCACAGCTG  
CCGGTTCAGTG

+  
FFFFFFFFFFFFFFFFFFFFFFFFFFFFFFFFFFFFFFFFFFFFFFFFFFFFFFFFFFFFFFFFFFFFFFFF  
FFFFF:FFFFFFFF:FFFFFFFFFFFFFFFFFFFFFFFFFFFFFFFFFFFFFFFFFFFFFFFF:FFFFFFF  
FFFFFFFFFFFF

@A00721:190:HGJW7DSXY:4:1611:9082:35790 1:N:0:TCTGCAAG+GCTGCACT  
TGATGACTGCTTTAGCAGTTGATTGATGGATTTCGTCTTCCAAGAAGAGGAAGTGGTCAGGCGGTCCGT  
TTAGGACCGCCGGTTATCGTAAAACACGACGAGTGTTGCAATTCAACAGGACTCAGCGGTCACAGCTG  
CCGGTTCAGTG

+  
FFFFFFFFFFFFFFFFFFFF:FFFFFFFFF:FFFFFFFFFFFFF::FFFFFFFFFFFFFFFFFFFFF::FFF  
FF:,FFFF:FFFFFFFF:FFFFFFF:F::FFFF:F,FFFFFFFF:FFFF:FFF:FF:FFFF,FFFFFFF  
FFFF,F,FFF:

@A00721:190:HGJW7DSXY:4:1616:17327:9361 1:N:0:TCTGCAAG+GCTGCACT  
TGATGACTGCTTTAGCAGTTGATTGATGGATTTCGTCTTCCAAGAAGAGGAAGAAAGGACCGCCGGTTA  
TCGTAAAACACGACGAGTGTTGCAATTCAACAGGACTCAGCGGTCACAGCTGCCGGTTCAGTGGTCGA  
GGTCTCTGAGA

+  
FFFFFFFFF:FFFFFFFF:FFFFFFFF,FFFFFFFF:FFFFFFFFFFFF:FFFFFFFF:FFF:FF:FFFF  
FFFFFFFFFFFFF:FF,:F::FFFF,FFFFFF:FFFFFFFFF,FFFF,F::FF,FF,FFFFFFFF:FF  
FFF:F::FFF:

@A00721:190:HGJW7DSXY:4:1618:15989:26991 1:N:0:TCTGCAAG+GCTGCACT  
TGATGACTGCTTTAGCAGTTGATTGATGGATTTCGTCTTCCAAGAAGAGGAAGTGGTCAGGCGGTCCGT  
TTAGGACCGCCGGTTATCGTAAAACACGACGAGTGTTGCAATTCAACAGGACTCAGCGGTCACAGCTG  
CCGGTTCAGTG

+  
F:FFFFFFFFFFFFFFFFFFFFFFFFFFFFFFFFFFFFFFFFFFFFFFFFFFFFFFFFFFFFFFFFFFFF  
FF:,FFFFFFFFFFFFFFFFFFFFF:F:FFFF,FFFFFFFFF::FF:F:FFFFFFFFFFFF:FFFFFFF  
FFFFFFFF,FF

@A00721:190:HGJW7DSXY:4:1618:17933:28604 1:N:0:TCTGCAAG+GCTGCACT  
TGATGACTGCTTTAGCAGTTGATTGATGGATTTCGTCTTCCAAGAAGAGGAAGTGGTCAGGCGGTCCGT  
TTAGGACCGCCGGTTATCGTAAAACACGACGAGTGTTGCAATTCAACAGGACTCAGCGGTCACAGCTG  
CCGGTTCAGTG

+  
FFFFFFFFFFFFFFFFFFFFFFFFFFFFFFFFFFFFFFFFFFFFFFFFFFFFFFFFFFFFFFFFFFFF  
FFFFFFFFFFFFFFFFFFFFFFFFFFFFFFFFFFFFFFFFFFFFFFFF:FFFFFF:FFFFFFFFFFFFFFFFF,F  
FFFFFFFF:FF

@A00721:190:HGJW7DSXY:4:1618:17951:28667 1:N:0:TCTGCAAG+GCTGCACT  
TGATGACTGCTTTAGCAGTTGATTGATGGATTTCGTCTTCCAAGAAGAGGAAGTGGTCAGGCGGTCCGT  
TTAGGACCGCCGGTTATCGTAAAACACGACGAGTGTTGCAATTCAACAGGACTCAGCGGTCACAGCTG  
CCGGTTCAGTG

+  
FFFFFF:FFFFFFFFFFFF,FFFFFFFFFFFFFFFFFFFFFFFFFFFFFFFFFFFFFFFF,FFFFFFFFFFFFFFFFF,  
FFF:FFF:FFF:FFF,FFFFFF,FFFFFFFFF,FFFFFF::FFFFFFFFF,FFF::FFFFFFFFF  
FFFF:FFFFF

@A00721:190:HGJW7DSXY:4:1618:31259:33865 1:N:0:TCTGCAAG+GCTGCACT  
TGATGACTGCTTTAGCAGTTGATTGATGGATTTCGTCTTCCAAGAAGAGGAAGTGGTCAGGCGGTCCGT

TTAGGACCGCCGTTATCGTAAAACACGACGAGTGTTGCAATTC AACAGGACTCAGCGGTCACAGCTG  
CCGTTTCAGTG

```

FFFFFFFFFFFFFFFFFFFFFFFFFFFFFFFFFFFFFFFFFFFFFFFFFFFFFFFFFFFF:FF,FFFFFFFFF,,F:F
FFFFFFFFFFFFFFFFFFFFFFFFFFFFFFFFFFFFFFFFFFFFFFFFFFFFFFFFFFFF,FFFFFFFFFFFFFFFFFFFF,FFF:FFFFFFFFFFFFFFFFFFFF
F,FFFFFFFFF

```

 $+$ [illegible]

+

[illegible]

+

```

FFFFFFFF:FFFFFFFFFFFFFFFFFFFFFFFFFFFFFFFFFFFFFFFF:FFFFFFFFFFFFFFFFFFFFFFFF
FFFFFFFFFFFFFFFF,FFFFFF:FFFF,FFFFFFFFFF:FFFF,FFFF,FFFFFFFF:FFFF,FFFF:FF
,FFF,FF:F,F

```

+

```
F:F:FFFFFFFF:F:FFFFFFFFFFFFFFFFFFFFFFFF:FFFFFFFFFFFFFFFFFFFFFFFFFFFFFFF
FFF,FFF,F,FFFFFFFFFFFFFFFF:FF,FF::F,FFFF,FFFF::FF,FF,FFF:F:,F:FFFF:,F
FFF:E,,EEEE
```

 $+$ [illegible] $+$ [illegible]





FFFF:FFFFFFFFFFFFFFFFFFFFFFFFFFFFFFFFFFFFFFFFFFFFFFFFFFFFFFFFFFFFFFFF  
FFFFFFFFFFFF

@A00721:190:HGJW7DSXY:4:2265:21197:29121 1:N:0:TCTGCAAG+GCTGCACT  
TGATGACTGCTTTAGCAGTTGATTGATGGATTTCGTCTTCCAAGAAGAGGAAGTGGTCAGGCGGTCCGT  
TTAGGACCGCCGTTATCGTAAAACACGACGAGTGTTGCAATTCAACAGGACTCAGCGGTCACAGCTG  
CCGGTTCAGTG

+

FFFFFFFFFFFFFFFFFFFFFFFFFFFFFFFFFFFFFFFFFFFFFFFFFFFFFFFFFFFFFFFF:FFFFFFFFFFFFFFFFFFFF  
:FFFFFFFFFFFFFFFFFFFFFFFFFFFFFFFFFFFFFFFFFFFFFFFFFFFFFFFFFFFFFFFF,FFFFFFF  
FFFFFFFFFFFF

@A00721:190:HGJW7DSXY:4:2275:20916:20776 1:N:0:TCTGCAAG+GCTGCACT  
TGATGACTGCTTTAGCAGTTGATTGATGGATTTCGTCTTCCAAGAAGAGGAAGTGGTCAGGCGGTCCGT  
TTAGGACCGCCGTTATCGTAAAACACGACGAGTGTTGCAAAACAACAGGACTCAGCGGTCACAGCTG  
CCGGTTCAGTG

+

,:F,FFFFFF,FF:FF,,F,FF,FFFF:FFF,FFFF:FFF:, ,FF:F:F:FFF,FFF,:FFFF:FF  
,::FFFF,FFFFFF,FF,F,FFF,FF,,:FFF,:FFF,FFF,,F:FFF:FF,,FFFF:FFF,FF:, ,F  
FF,, ,FFF::F

@A00721:190:HGJW7DSXY:4:2308:7437:34381 1:N:0:TCTGCAAG+GCTGCACT  
TGATGACTGCTTTAGCAGTTGATTGATGGATTTCGTCTTCCAAGAAGAGGAAGTGGTCAGGCGGTCCGT  
TTAGGACCGCCGTTATCGTAAAACACGACGAGTGTTGCAATTCAACAGGACTCAGCGGTCACAGCTG  
CCGGTTCAGTG

+

FFFFFFFFFFFFFFFFFFFFFFFFFFFFFFFFFFFFFFFFFFFFFFFFFFFFFFFFFFFFFFFF:FFFFF:  
FF::FFFFFFFF:FF:, :FFFFFFFF:FF,:FFFFFFFFF,F:FF:F:FFF,:FFFFFFFFF:FFF  
FFFFFFFFFFFF

@A00721:190:HGJW7DSXY:4:2335:19452:18584 1:N:0:TCTGCAAG+GCTGCACT  
TGATGACTGCTTTAGCAGTTGATTGATGGATTTCGTCTTCCAAGAAGAGGAAGTGGTCAGGCGGTCCGT  
TTAGGACCGCCGTTATCGTAAAACACGACGAGTGTTGCAATTCAACAGGACTCAGCGGTCACAGCTG  
CCGGTTCAGTG

+

FFFFFFFFFFFFFFFFFFFFFFFFFFFFFFFFFFFFFFFFFFFFFFFFFFFFFFFFFFFFFFFF:FFFFF:  
FFFFFFFFFFFFFFFFFFFFFFFFFFFFFFFFFFFFFFFFFFFFFFFFFFFFFFFFFFFFFFFFFFFFF  
FFFFFFFFFFFF

@A00721:190:HGJW7DSXY:4:2335:19895:18818 1:N:0:TCTGCAAG+GCTGCACT  
TGATGACTGCTTTAGCAGTTGATTGATGGATTTCGTCTTCCAAGAAGAGGAAGTGGTCAGGCGGTCCGT  
TTAGGACCGCCGTTATCGTAAAACACGACGAGTGTTGCAATTCAACAGGACTCAGCGGTCACAGCTG  
CCGGTTCAGTG

+

FFFFFFFFFFFFFFFFFFFFFFFFFFFFFFFFFFFFFFFFFFFFFFFFFFFFFFFFFFFFFFFF:FFFFF:  
:FFFFFFFFFFFFFFFFFFFFFFFFFFFFFFFFFFFFFFFFFFFFFFFFFFFFFFFFFFFFFFFFFFFFF  
FFFFFFFFFFFF

@A00721:190:HGJW7DSXY:4:2362:3314:34037 1:N:0:TCTGCAAG+GCTGCACT  
TGATGACTGCTTTAGCAGTTGATTGATGGATTTCGTCTTCCAAGAAGAGGAAGTGGTCAGGCGGTCCGT  
TTAGGACCGCCGTTATCGTAAAACACGACGAGTGTTGCAATTCAACAGGACTCAGAGGTCACAGCTG  
CCGGTTCAGTG

+

FFFFFFFFFFFFFFFFFFFFFFFFFFFFFFFFFFFFFFFFFFFFFFFFFFFFFFFFFFFFFFFF:FFFFF:  
F:FFFFF:FFFFFFFFFFFFFFFF:F:FF,FF:FF:, ,FFFFFFFF:F:FFFFF, ,F:FFFF,FFF  
FF,FFFF:,F

@A00721:190:HGJW7DSXY:4:2369:1163:23954 1:N:0:TCTGCAAG+GCTGCACT  
TGATGACTGCTTTAGCAGTTGATTGATGGATTTCGTCTTCCAAGAAGAGGAAGTGGTCAGGCGGTCCGT  
TTAGGACCGCCGTTATCGTAAAACACGACGAGTGTTGCAATTCAACAGGACTCAGCGGTCACAGCTG  
CCGGTTCAGTG



TTAGGACCGCCGGTTATCGTAAAACACGACGAGTGTTGCAATTCAACAGGACTCAGCGGTCACAGCTG  
CCGGTTCAGTG

+

FFFFFFFFFFFFFFFFFFFFFFFFFFFFFFFFFFFFFFFFFFFFFFFFFFFFFFFFFFFFFFFFFFFFFFFF  
FFFFFFFFFFFFFFFFFFFFFFFFFFFFFFFFFFFFFFFFFFFFFFFFFFFFFFFFFFFFFFFFFFFFFFFF  
FFFFFFFFFFFFFFFFFFFFFFFFFFFFFFFFFFFFFFFFFFFFFFFFFFFFFFFFFFFFFFFFFFFFFFFF  
FFFFFFFFFFFFFFFFFFFFFFFFFFFFFFFFFFFFFFFFFFFFFFFFFFFFFFFFFFFFFFFFFFFFFFFF  
FFFFFFFFFFFFFFFF

@A00721:190:HGJW7DSXY:4:2554:17345:20885 1:N:0:TCTGCAAG+GCTGCACT  
TGATGACTGCTTTAGCAGTTGATTGATGGATTTCGTCTTCCAAGAAGAGGAAGTGGTCAGGCGGTCCGT  
TTAGGACCGCCGGTTATCGTAAAACACGACGAGTGTTGCAATTCAACAGGACTCAGCGGTCACAGCTG  
CCGGTTCAGTG

+

FFFFFFFFFFFFFFFFFFFFFFFFFFFFFFFFFFFFFFFFFFFFFFFFFFFFFFFFFFFFFFFFFFFFFFFF  
FFFFFFFFFFFFFFFFFFFFFFFFFFFFFFFFFFFFFFFFFFFFFFFFFFFFFFFFFFFFFFFFFFFFFFFF  
FFFFFFFFFFFFFFFFFFFFFFFFFFFFFFFFFFFFFFFFFFFFFFFFFFFFFFFFFFFFFFFFFFFFFFFF  
FFFFFFFFFFFFFFFF

@A00721:190:HGJW7DSXY:4:2601:29686:21527 1:N:0:TCTGCAAG+GCTGCACT  
TGATGACTGCTTTAGCAGTTGATTGATGGATTTCGTCTTCCAAGAAGAGGAAGAAAGGACCGCCGGTTA  
TCGTAAAACACGACGAGTGTTGCAATTCAACAGGACTCAGCGGTCACAGCTGCCGGTTCAGTGGTCGA  
GGTCTCTGAGA

+

FFFFFFFFFFFFFFFFFFFFFFFFFFFFFFFFFFFFFFFFFFFFFFFFFFFFFFFFFFFFFFFFFFFFFFFF  
FFFFFFFFFFFFFFFFFFFFFFFFFFFFFFFFFFFFFFFFFFFFFFFFFFFFFFFFFFFFFFFFFFFFFFFF  
FFFFFFFFFFFFFFFFFFFFFFFFFFFFFFFFFFFFFFFFFFFFFFFFFFFFFFFFFFFFFFFFFFFFFFFF  
FFFFFFFFFFFFFFFF

@A00721:190:HGJW7DSXY:4:2627:24749:30890 1:N:0:TCTGCAAG+GCTGCACT  
TGATGACTGCTTTAGCAGTTGATTGATGGATTTCGTCTTCCAAGAAGAGGAAGAAAGGACCGCCGGTTA  
TCGTAAAACACGACGAGTGTTGCAATTCAACAGGACTCAGCGGTCACAGCTGCCGGTTCAGTGGTCGA  
GGTCTCTGAGA

+

FFFFFFFFFFFFFFFFFFFFFFFFFFFFFFFFFFFFFFFFFFFFFFFFFFFFFFFFFFFFFFFFFFFFFFFF  
FFFFFFFFFFFFFFFFFFFFFFFFFFFFFFFFFFFFFFFFFFFFFFFFFFFFFFFFFFFFFFFFFFFFFFFF  
FFFFFFFFFFFFFFFFFFFFFFFFFFFFFFFFFFFFFFFFFFFFFFFFFFFFFFFFFFFFFFFFFFFFFFFF  
FFFFFFFFFFFFFFFF

@A00721:190:HGJW7DSXY:4:2637:30318:36276 1:N:0:TCTGCAAG+GCTGCACT  
TGATGACTGCTTTAGCAGTTGATTGATGGATTTCGTCTTCCAAGAAGAGGAAGTGGTCAGGCGGTCCGT  
TTAGGACCGCCGGTTATCGTAAAACACGACGAGTGTTGCAATTCAACAGGACTCAGCGGTCACAGCTG  
CCGGTTCAGTG

+

FFFFFFFFFFFFFFFFFFFFFFFFFFFFFFFFFFFFFFFFFFFFFFFFFFFFFFFFFFFFFFFFFFFFFFFF  
FFFFFFFFFFFFFFFFFFFFFFFFFFFFFFFFFFFFFFFFFFFFFFFFFFFFFFFFFFFFFFFFFFFFFFFF  
FFFFFFFFFFFFFFFFFFFFFFFFFFFFFFFFFFFFFFFFFFFFFFFFFFFFFFFFFFFFFFFFFFFFFFFF  
FFFFFFFFFFFFFFFF

@A00721:190:HGJW7DSXY:4:2665:32606:32315 1:N:0:TCTGCAAG+GCTGCACT  
TGATGACTGCTTTAGCAGTTGATTGATGGATTTCGTCTTCCAAGAAGAGGAAGTGGTCAGGCGGTCCGT  
TTAGGACCGCCGGTTATCGTAAAACACGACGAGTGTTGCAATTCAACAGGACTCAGCGGTCACAGCGG  
CCGGTTCAGTG

+

FFFFFFFFFFFFFFFFFFFFFFFFFFFFFFFFFFFFFFFFFFFFFFFFFFFFFFFFFFFFFFFFFFFFFFFF  
FFFFFFFFFFFFFFFFFFFFFFFFFFFFFFFFFFFFFFFFFFFFFFFFFFFFFFFFFFFFFFFFFFFFFFFF  
FFFFFFFFFFFFFFFFFFFFFFFFFFFFFFFFFFFFFFFFFFFFFFFFFFFFFFFFFFFFFFFFFFFFFFFF  
FFFFFFFFFFFFFFFF

@A00721:190:HGJW7DSXY:4:1243:19678:25144 1:N:0:TCTGCAAG+GCTGCACT  
AGCAGTTGATTGATGGATTTCGTCTTCCAAGAAGAGGAAGTGGTCAGGCGGTCCGTTTAGGACCGCCGG  
TTATCGTAAAACACGACGAGTGTTGCAATTCAACAGGACTCAGCGGTCACAGCTGCCGGTTCAGTGGT  
CGAGGTCTCTGAGAT

+

FFFFF, :FFFFFFFFF, FFFF: FFFF: FFFFFFFFFF: FFFFF: : FFFF, , FF, : F: : FFFF  
FFFF, FFFFFFFFF: : F, : FFFF: F, FFF: FFFFFFFFF: FF: : F, FF: FFFF: F, FFFFFFFFF: FF  
: , F, : FFFFFFFFF

@A00721:190:HGJW7DSXY:4:2303:12924:20807 1:N:0:TCTGCAAG+GCTGCACT  
AGCAGTTGATTGATGGATTCTGCTTCCAAGAAGAGGAAGTGGTCAGGCGGTCCGTTTAGGACCGCCGG  
TTATCGTAAACACGACGAGTGTTGCAATTCAACAGGACTCAGCGGTCACAGCTGCCGGTTCAGTGGT  
CGAGGTCTCTGAGAT

```

FFFFFFFFFFFFFFFFFFFFFFFFFFFFFFFFFFFFFFFF:FFFFFFFFFFFFFFFF:FFFFFFFFFFFF:F
FFFFFFFFFFFF,FF:FFF:FF:FF:FFF:F,FF:FFFFFF:F:FFFFFF:F::FFFFFFFFF:FFFFFF
FF,FFF,F::FFFFF

```

+

[illegible]

+

```

FFFFFFFFFFFFFFFF:FFFFFFFFFFFFFFFF::FFFFFFFFFFFFFFFFFFFFFFFFFFFFFFFF,FFFFFFFFFFFFFFFF
FF:FFFFFFFFFFFF:FFFFFFFFFFFFFFFFFFFF:FFFFFFFFF:FFFFFFFFF:FFFFF:F:FFFFF:FFFFFFFF
FFFFFFFF,FFFFFFFF

```

+

[illegible]

+

```

FFFFFFFFFFFFFFFFFFFFFFFFFFFFFFFF:FFFFFFFFFFFFFFFFFFFFFFFF
FFFFFFFFFFFFFFFFFFFFFFFFFFFFFFFF,FFFFFFFFFFFF,FFFFFFFFF:FFFF
FFFFFFFFEE:E:EEF

```

+

[illegible]

+

[illegible]

FF:FFFFFFFF:FFFFFFFF,FFFFFFFF:FFF:FFFFFFFFFFFF:FFFF:FFFFFFFF  
FFFFFFFFFFFFFFFF

@A00721:190:HGJW7DSXY:4:1657:7744:21167 1:N:0:TCTGCAAG+GCTGCACT  
GCAGTTGATTGATGGATTCGTCTTCCAAGAAGAGGAAGTGGTCAGGCGGTCCGTTTAGGACCGCCGGT  
TATCGTAAAACACGACGAGTGTTGCAATTCAACAGGACTCAGCGGTACAGCTGCCGGTTCAGTGGTC  
GAGGTCTCTGAGATA

+

FFFFFFFFFFFFFFFFFFFFFFFFFFFFFFFF,FFFFFFFFFFFFFFFFFFFFFFFFFFFFFFFF  
FFFFFFFFFFFFFFFFFFFFFFFF:FFFFFFFFFFFFFFFFFFFFFFFF:FFFFFFFFFFFFFFFF  
FFFFFFFF:FFFFF

@A00721:190:HGJW7DSXY:4:1670:19045:18599 1:N:0:TCTGCAAG+GCTGCACT  
GCAGTTGATTGATGGATTCGTCTTCCAAGAAGAGGAAGTGGTCAGGCGGTCCGTTTAGGACCGCCGGT  
TATCGTAAAACACGACGAGTGTTGCAATTCAACAGGACTCAGCGGTACAGCTGCCGGTTCAGTGGTC  
GAGGTCTCTGAGATA

+

FFFF:FFFFFFFFFFFFFFFFFFFFFFFFFFFFFFFFFFFFFFFFFFFFFFFFFFFFFFFF  
FFFFFFFFFFFFFFFFFFFFFFFFFFFFFFFFFFFFFFFFFFFFFFFFFFFFFFFFFFFFFFFF  
F:FFFFFFFFFFFF

@A00721:190:HGJW7DSXY:4:2203:25500:14434 1:N:0:TCTGCAAG+GCTGCACT  
GCAGTTGATTGATGGATTCGTCTTCCAAGAAGAGGAAGTGGTCAGGCGGTCCGTTTAGGACCGCCGGT  
TATCGTAAAACACGACGAGTGTTGCAATTCAACAGGACTCAGCGGTACAGCTGCCGGTTCAGTGGTC  
GAGGTCTCTGAGATA

+

FFFFFFFFFFFFFFFFFFFFFFFFFFFFFFFF:FFFFFFFFFFFF,FFFFFF:FFFF,FF:F:  
FFF,FFFFFF:F,,FF:F,FFFF:FFF,F,FFFF:FFF:FF,FFFFFF:,F,F:F,F:FF,:FFFF  
F,,F:,::,F:F::F

@A00721:190:HGJW7DSXY:4:2246:26838:11428 1:N:0:TCTGCAAG+GCTGCACT  
GCAGTTGATTGATGGATTCGTCTTCCAAGAAGAGGAAGTGGTCAGGCGGTCCGTTTAGGACCGCCGGT  
TATCGTAAAACACGACGAGTGTTGCAATTCAACAGGACTCAGCGGTACAGCTGCCGGTTCAGTGGTC  
GAGGTCTCTGAGATA

+

FFFFFFFFFFFFFFFFFFFFFFFFFFFFFFFFFFFFFFFFFFFFFFFFFFFFFFFF: F:FF:FFFFFFFF  
FFFFFFFFFFFF,FFFF:FFFFF,FFFFFFFF:FFFFF:FFFFFFFFF:FFFFFFFFF:FFFF  
F:FFFFFFFFFFFF

@A00721:190:HGJW7DSXY:4:2251:22535:18818 1:N:0:TCTGCAAG+GCTGCACT  
GCAGTTGATTGATGGATTCGTCTTCCAAGAAGAGGAAGTGGTCAGGCGGTCCGTTTAGGACCGCCGGT  
TATCGTAAAACACGACGAGTGTTGCAATTCAACAGGACTCAGCGGTACAGCTGCCGGTTCAGTGGTC  
GAGGTCTCTGAGATA

+

FFFFFFFFFFFFFFFFFFFFFFFFFFFFFFFFFFFFFFFFFFFFFFFFFFFFFFFF:FFFFFFFFFFFFFFFF  
FFFFFFFFFFFFFFFF:FFFFFFFFFFFF:FFFF:FFFFFFFFFFFFFFFFFFFFFFFFFFFFFFFF  
FFFFFFFFFFFFFFFF

@A00721:190:HGJW7DSXY:4:2307:9136:15781 1:N:0:TCTGCAAG+GCTGCACT  
GCAGTTGATTGATGGATTCGTCTTCCAAGAAGAGGAAGTGGTCAGGCGGTCCGTTTAGGACCGCCGGT  
TATCGTAAAACACGACGAGTGTTGCAATTAAACAGGACTCAGCGGTACAGCTGCCGGTTCAGTGGTC  
GAGGTCTCTGAGATA

+

FFFFFFFFFFFFFFFFFFFFFFFFFFFFFFFFFFFFFFFFFFFFFFFFFFFFFFFF:FFFFF:,FFFF,FFFF  
FFF,:FFFF:F,,F::FFFFF,F:F:F,FF,F,FFF:F:FF:::F,FF,FFFFF,FFFFF:  
:,,:FFFFFFFF

@A00721:190:HGJW7DSXY:4:2339:8820:10347 1:N:0:TCTGCAAG+GCTGCACT  
GCAGTTGATTGATGGATTCGTCTTCCAAGAAGAGGAAGTGGTCAGGCGGTCCGTTTAGGACCGCCGGT  
TATCGTAAAACACGACGAGTGTTGCAATTCAACAGGACTCAGCGGTACAGCTGCCGGTTCAGTGGTC  
GAGGTCTCTGAGATA

+  
FFFFFFFFFFFFFFFFFFFFFFFFFFFFFFFFFFFFFFFFFFFFFFFFFFFFFFFFFFFFFFFF:FFFFFFFFFFFF  
FFF:FFFF:FF:FFF:F:FFFF:FFFFFFFFFFFFFFFFFFFFFFFFFFFFFFFF:FFFFFFFFFFFFFF:FFF  
FFFF:FFFF:FFFF

@A00721:190:HGJW7DSXY:4:2346:4110:31219 1:N:0:TCTGCAAG+GCTGCACT  
GCAGTTGATTGATGGATTCGTCTTCCAAGAAGAGGAAGTGGTCAGGCGGTCCGTTTAGGACCGCCGGT  
TATCGTAAAACACGACGAGTGTTTCAATTCAACAGGACTCAGCGGTACAGCTGCCGGTTCAGTGGTC  
GAGGTCTCTGAGATA

+  
FFFF,FFF:FFFF,F:FFFF:,FF:F:FF:F,:F,F::,FFF,:,FF,FF:,FF,:F,:,F,,:  
FFF,:FFFF,FF,F::F,:,F,FFF,F,FF,F,F:,FF:,F,FFFFFFFF,,,:FF:F,FF:FF  
F,F,:F,:,FF,FFF

@A00721:190:HGJW7DSXY:4:2346:4137:31234 1:N:0:TCTGCAAG+GCTGCACT  
GCAGTTGATTGATGGATTCGTCTTCCAAGAAGAGGAAGTGGTCAGGCGGTCCGTTTAGGACCGCCGGT  
TATCGTAAAACACGACGAGTGTTGCAATTCAACAGGACTCAGCGGTACAGCTGCCGGTTCAGTGGTC  
GAGGTCTCTGAGATA

+  
FFFF,FFFFFFFFFFFFFFFFFFFFFFFFFFFFFFFFFFFFFFFFFFFFFFFFFFFFFFFF:FFFFFFFFFFFFFF  
FFFFFFFFFFFF,FFFFFFFFFFFFFFFFFFFFFFFFFFFFFFFFFFFFFFFF:FFFFFFFFFFFF:FFFFFFFFFFFFFF  
FFFFFFFFFFFFFFFF

@A00721:190:HGJW7DSXY:4:2420:17571:14606 1:N:0:TCTGCAAG+GCTGCACT  
GCAGTTGATTGATGGATTCGTCTTCCAAGAAGAGGAAGTGGTCAGGCGGTCCGTTTAGGACCGCCGGT  
TATCGTAAAACACGACGAGTGTTGCAATTCAACAGGACTCAGCGGTACAGCTGCCGGTTCAGTGGTC  
GAGGTCTCTGATATA

+  
FFFFFFFFFFFFFF:FFFFFFFF:FFFFF:FFFFFFFFFFFFFFFFFFFF:FFFFFF::,FFF:FFFF,FFFF  
FFF,FFFFFF,F,,:F,:,,:FFF:FFFFFFFF:FFFF,,FF:F,FF:FFF:F,FFF,FFFFFFFF,  
FF:F:F:F:FF,FFF

@A00721:190:HGJW7DSXY:4:2476:7591:1579 1:N:0:TCTGCAAG+GCTGCACT  
GCAGTTGATTGATGGATTCGTCTTCCAAGAAGAGGAAGTGGTCAGGCGGTCCGTTTAGGACCGCCGGT  
TATCGTAAAACACGACGAGTGTTGCAATTCAACAGGACTCAGCGGTACAGCTGCCGGTTCAGTGGTC  
GAGGTCTCTGAGATA

+  
FFFFFFFFFFFFFFFFFFFFFFFFFFFFFFFFFFFFFFFFFFFFFFFFFFFFFFFFFFFFFFFF:FFFFFFFFFFFFFF  
FFFFFFFFFFFFFFFFFFFFFFFFFFFFFFFFFFFFFFFFFFFFFFFF:FFFFFFFFFFFFFFFFFFFFFFFFFFFFFFFF  
FFFFFFFFFFFFFFFF

@A00721:190:HGJW7DSXY:4:2523:28863:25864 1:N:0:TCTGCAAG+GCTGCACT  
GCAGTTGATTGATGGATTCGTCTTCCAAGAAGAGGAAGTGGTCAGGCGGTCCGTTTAGGACCGCCGGT  
TATCGTAAAACACGACGAGTGTTGCAATTCAACAGGACTCAGCGGTACAGCTGCCGGTTCAGTGGTC  
GAGGTCTCTGAGATA

+  
FFFFFFFFFFFFFFFFFFFFFFFFFFFFFFFFFFFFFFFFFFFFFFFF:FFFFFFFFFFFFFF:FFFFF:FFFFFFFFFFFF  
FFFF:FFFFFFFFFFFFFF:FFFFFFFFF,FFFFFF:FFFFFFFFFFFFFFFFFFFF,F:FFFFFFFF:FF:F  
FFFFFFFF:FFFFF

@A00721:190:HGJW7DSXY:4:2535:28628:11804 1:N:0:TCTGCAAG+GCTGCACT  
GCAGTTGATTGATGGATTCGTCTTCCAAGAAGAGGAAGTGGTCAGGCGGTCCGTTTAGGACCGCCGGT  
TATCGTAAAACACGACGAGTGTTGCAATTCAACAGGACTCAGCGGTACAGCTGCCGGTTCAGTGGTC  
GAGGTCTCTGAGATA

+  
FFFFFFFFFFFFFFFFFFFFFFFFFFFFFFFFFFFFFFFFFFFFFFFFFFFFFFFFFFFFFFFF:FFFFFFFFFFFFFF  
FFFFFFFFFFFFFFFFFFFFFFFFFFFFFFFFFFFFFFFFFFFFFFFFFFFFFFFFFFFFFFFF,FFFFFFFFFFFFFF  
FFFFFFFFFFFFFFFF

@A00721:190:HGJW7DSXY:4:2536:23411:33802 1:N:0:TCTGCAAG+GCTGCACT  
GCAGTTGATTGATGGATTCGTCTTCCAAGAAGAGGAAGTGGTCAGGCGGTCCGTTTAGGACCGCCGGT

TATCGTAAAACACGACGAGTGTTGCAATTCAACAGGACTCAGCGGTACACAGCTGCCGGTTCAGTGGTC  
GAGGTCTCTGAGATA

+

FFFFFFFFFFFFFFFFFFFFFFFFFFFFFFFFFFFFFFFFFFFFFFFFFFFFFFFFFFFFFFFFFFFFFFFF:FFFFFFFF  
FFFFFFFFFFFFFFFF:FFFFFFFFFFFFFFFF,FFFFFFFF:FFFFFFFF:FFFFFFFF:FFFFFFFFFFFFFFFF  
FFFFFFFFFFFFFFFF

@A00721:190:HGJW7DSXY:4:2538:5882:14403 1:N:0:TCTGCAAG+GCTGCACT  
GCAGTTGATTGATGGATTCTTCCAAGAAGAGGAAGTGGTCAGGCGGTCCGTTTAGGACCGCCGGT  
TATCGTAAAACACGACGAGTGTTGCAATTCAACAGGACTCAGCGGTACACAGCTGCCGGTTCAGTGGTC  
GAGGTCTCTGAGATA

+

FFFFFFFFFFFFFFFFFFFFFFFFFFFFFFFFFFFFFFFFFFFFFFFFFFFFFFFFFFFFFFFFFFFFFFFF:FFFFFFFF  
FFFFFFFFFFFFFFFF:FFFFFFFFFFFFFFFFFFFFFFFFFFFFFFFFFFFFFFFFFFFFFFFF,FFFFFFFF:FFFF  
FFFFFFFFFFFFFFFF

@A00721:190:HGJW7DSXY:4:2618:30445:3396 1:N:0:TCTGCAAG+GCTGCACT  
GCAGTTGATTGATGGATTCTTCCAAGAAGAGGAAGTGGTCAGGCGGTCCGTTTAGGACCGCCGGT  
TATCGTAAAACACGACGAGTGTTGCAATTCAACAGGACTCAGCGGTACACAGCTGCCGGTTCAGTGGTC  
GAGGTCTCTGAGATA

+

FFFFFFFFFFFFFFFFFFFFFFFFFFFFFFFFFFFFFFFFFFFFFFFFFFFFFFFFFFFFFFFFFFFFFFFF  
FFFF:FFFFFF,FFF:FFF,FFFFFFFFFFFFFFFF:FFFF,:FFFFFFFFFFFFFFFFFFFFFFFF:FFFF  
:,FFFFFFFF,FFFF

@A00721:190:HGJW7DSXY:4:1162:5041:17738 1:N:0:TCTGCAAG+GCTGCACT  
GTTGATTGATGGATTCTTCCAAGAAGAGGAAGTGGTCAGGCGGTCCGTTTAGGACCGCCGGTTAT  
CGTAAAACACGACGAGTGTTGCAATTCAACAGGACTCAGCGGTACACAGCTGCCGGTTCAGTGGTCGAG  
GTCTCTGAGATATAA

+

FFFFFFFFFFFFFFFFFFFFFFFFFFFFFFFFFFFFFFFFFFFFFFFFFFFFFFFFFFFFFFFFFFFFFFFF:FFF  
FFFFFFFFFFFFFFFFFFFFFFFFFFFFFFFFFFFFFFFFFFFFFFFF:FFFFFFFF:FFFFFFFFFFFFFFFF  
FFFFFFFFFFFFFFFF:FF

@A00721:190:HGJW7DSXY:4:1162:25681:35196 1:N:0:TCTGCAAG+GCTGCACT  
GTTGATTGATGGATTCTTCCAAGAAGAGGAAGTGGTCAGGCGGTCCGTTTAGGACCGCCGGTTAT  
CGTAAAACACGACGAGTGTTGCAATTCAACAGGACTCAGCGGTACACAGCTGCCGGTTCAGTGGTCGAG  
GTCTCTGAGATATAA

+

F:FFFFFFFFFFFFFFFFFFFFFFFFFFFFFFFFFFFFFFFFFFFFFFFFFFFFFFFFFFFFFFFF:FFFFFFFF  
FFFFFFFFFFFFFFFFFFFFFFFFFFFFFFFFFFFFFFFFFFFFFFFFFFFFFFFF,FFFFFFFFFFFFFFFF:  
FFFFFFFFFFFFFFFF:FF

@A00721:190:HGJW7DSXY:4:2224:11930:35055 1:N:0:TCTGCAAG+GCTGCACT  
GTTGATTGATGGATTCTTCCAAGAAGAGGAAGTGGTCAGGCGGTCCGTTTAGGACCGCCGGTTAT  
CGTAAAACACGACGAGTGTTGCAATTCAACAGGACTCAGCGGTACACAGCTGCCGGTTCAGTGGTCGAG  
GTCTCTGAGATATAA

+

FFFFFFFFFFFFFFFFFFFFFFFFFFFFFFFFFFFFFFFFFFFFFFFFFFFFFFFFFFFFFFFFFFFFFFFF  
FF:FFFF:F:FFFFFFFFFFFFFFFF:FFFFFFFFFFFFFFFFFFFFFFFFFFFFFFFFFFFFFFFF  
FFFFFFFFFFFFFFFF

@A00721:190:HGJW7DSXY:4:2240:5620:31266 1:N:0:TCTGCAAG+GCTGCACT  
GTTGATTGATGGATTCTTCCAAGAAGAGGAAGTGGTCAGGCGGTCCGTTTAGGACCGCCGGTTAT  
CGTAAAACACGACGAGTGTTGCAATTCAACAGGACTCAGCGGTACACAGCTGCCGGTTCAGTGGTCGAG  
GTCTCTGAGATATAA

+

FFFFFFFFFFFFFFFFFFFFFFFFFFFFFFFFFFFFFFFFFFFFFFFFFFFFFFFFFFFFFFFFFFFFFFFF  
FFFFFFFFFFFFFFFFFFFFFFFFFFFFFFFFFFFFFFFF:FFFFFFFFFFFFFFFF:FFFFFFFFFFFFFFFF  
FFFFFFFFFFFFFFFF



@A00721:190:HGJW7DSXY:4:2248:9444:7889 1:N:0:TCTGCAAG+GCTGCACT  
GTTGATTGATGGATTTCGTCTTCCAAGAAGAGGAAGTGGTCAGGCGGTCCGTTTAGGACCGCCGGTTAT  
CGTAAACACGACGAGTGTTGCAATTCAACAGGACTCAGCGGTCACAGCTGCCGGTTCAGTGGTCGAG  
GTCTCTGAGATATAA

[illegible]

+

[illegible] $+$ [illegible]

+

```

FFFFFFFFFFFFFFFFFFFFFFFFFFFFFFFFFFFFFFFFFFFFFFFFFFFFFFFFFFFFFFFFFFFFFFFF
FFFFFFFF,F:FFFFFFFFFFFFFFFFFFFFFFFF:FFFFFFFFFFFF:F:FFFFFFFFFFFFFFFFFFFF
F:FFFFFFFFFFFFFF

```

+

[illegible]

+

FF,,:F:FFF,F:F,FFF:FFF::,FFFF:F,F:,FF,F,:F:F,,F,,:,::,F:,,,FF:,FFFFF  
 ,F:,F,:F,F,:F:,FFF,::F:,,,,F,,:,F:,,,,F,F,:F::F,,,,,:F,,FF,,,,:,F  
 F.F...FFF:,FF.F

+

[illegible]

FFFFFFFFFFFFFFFFFFFFFFFF:FFFFFF:FFFFFFFFF::,F,F:FFF:FFFFFFFF:FFF,FFFF  
:F:FFFFFF:FFF,F

@A00721:190:HGJW7DSXY:4:1169:5448:31939 1:N:0:TCTGCAAG+GCTGCACT  
GATGGATTCTGCTTCCAAGAAGAGGAAGTGGTCAGGCGGTCCGTTTAGGACCGCCGGTTATCGTAAAA  
CACGACGAGTGTTGCAATTCAACAGGACTCAGCGGTCACAGCTGCCGGTTCAGTGGTCGAGGTCTCTG  
AGATATAATCGAAGA

+

FFFFFFFFFFFFFFFFFFFFFFFFFFFFFFFFFFFFFFFFFFFFFFFFFFFFFFFFFFFFFFFF  
FFFFFFFFFFFFFFFFFFFFFFFFFFFFFFFFFFFFFFFFFFFFFFFFFFFFFFFF:FFFFFFFFFFFFFFFF  
FFFFFFFFFFFFFFFF

@A00721:190:HGJW7DSXY:4:1203:17689:8735 1:N:0:TCTGCAAG+GCTGCACT  
GATGGATTCTGCTTCCAAGAAGAGGAAGTGGTCAGGCGGTCCGTTTAGGACCGCCGGTTATCGTAAAA  
CACGACGAGTGTTGCAATTCAACAGGACTCAGCGGTCACAGCTGCCGGTTCAGTGGTCGAGGTCTCTG  
AGATATAATCGAAGA

+

FFFFFFFFFFFFFFFFFFFFFFFFFFFFFFFFFFFFFFFFFFFFFFFF:FFFF:FF:FFFFFF:FFFF:FFFF  
,F:FFFFFFFF:FFFFFFFF,F:FFFF:FF:FFFFFFFF,FFF:FFFF,FFF:FFFF,FF,:F  
FFFFFFFF:,FFF,F

@A00721:190:HGJW7DSXY:4:1256:31367:15045 1:N:0:TCTGCAAG+GCTGCACT  
GATGGATTCTGCTTCCAAGAAGAGGAAGTGGTCAGGCGGTCCGTTTAGGACCGCCGGTTATCGTAAAA  
CACGACGAGTGTTGCAATTCAACAGGACTCAGCGGTCACAGCTGCCGGTTCAGTGGTCGAGGTCTCTG  
AGATATAATCGAAGA

+

FFFFFFFFFFFFFFFFFFFFFFFFFFFFFFFFFFFFFFFFFFFFFFFFFFFFFFFFFFFFFFFF  
FFFFFFFFFFFFFFFF:FFFF:FFFFFFFFFFFFFFFF,FFFFFFFF:FFFFFFFF:FFFF:FF  
FFFFFFFF:FFFF

@A00721:190:HGJW7DSXY:4:1311:11406:23312 1:N:0:TCTGCAAG+GCTGCACT  
GATGGATTCTGCTTCCAAGAAGAGGAAGTGGTCAGGCGGTCCGTTTAGGACCGCCGGTTATCGTAAAA  
CACGACGAGTGTTGCAATTCAACAGGACTCAGCGGTCACAGCTGCCGGTTCAGTGGTCGAGGTCTCTG  
AGATATAATCGAAGA

+

FFFFFFFFFFFFFFFFFFFFFFFFFFFFFFFFFFFFFFFF:FFFFFFFFFFFFFFFFFFFFFFFF  
,F::FFFFFFFF,FFFF:FFFFFFFFFFFFFFFF:F,FFFFFFFF:FF:FFFF:FFFF:F  
FFFFFFFF

@A00721:190:HGJW7DSXY:4:1349:28691:32111 1:N:0:TCTGCAAG+GCTGCACT  
GATGGATTCTGCTTCCAAGAAGAGGAAGTGGTCAGGCGGTCCGTTTAGGACCGCCGGTTATCGTAAAA  
CACGACGAGTGTTGCAATTCAACAGGACTCAGCGGTCACAGCTGCCGGTTCAGTGGTCGAGGTCTCTG  
AGATATAATCGAAGA

+

FFFFFFFFFFFFFFFFFFFFFFFFFFFFFFFFFFFFFFFFFFFFFFFFFFFFFFFFFFFFFFFF  
FFFFFFFFFFFFFFFFFFFFFFFFFFFFFFFF:FFFFFFFF,FFFFFFFF  
FFFFFFFF

@A00721:190:HGJW7DSXY:4:1441:8504:20259 1:N:0:TCTGCAAG+GCTGCACT  
GATGGATTCTGCTTCCAAGAAGAGGAAGTGGTCAGGCGGTCCGTTTAGGACCGCCGGTTATCGTAAAA  
CACGACGAGTGTTGCAATTCAACAGGACTCAGCGGTCACAGCTGCCGGTTCAGTGGTCGAGGTCTCTG  
AGATATAATCGAAGA

+

FFFFFFFFFFFFFFFFFFFFFFFFFFFFFFFFFFFFFFFFFFFFFFFFFFFFFFFFFFFFFFFF  
FFFFFFFFFFFFFFFF:FFFFFFFFFFFFFFFF,FFFFFFFF:FFFF:FFF  
FFFFFFFF

@A00721:190:HGJW7DSXY:4:1452:20681:19116 1:N:0:TCTGCAAG+GCTGCACT  
GATGGATTCTGCTTCCAAGAAGAGGAAGTGGTCAGGCGGTCCGTTTAGGACCGCCGGTTATCGTAAAA  
CACGACGAGTGTTGCAATTCAACAGGACTCAGCGGTCACAGCTGCCGGTTCAGTGGTCGAGGTCTCTG  
AGATATAATCGAAGA

+  
FFFFFFFFFFFFFFFFFFFFFFFFFFFFFFFFFFFFFFFFFFFFFFFFFFFFFFFFFFFFFFFFFFFFFFFF  
FFFFFFFFFFFFFFFFFFFFFFFFFFFFFFFFFFFFFFFFFFFFFFFFFFFFFFFFFFFFFFFFFFFFFFFF  
FFFFFFFFFFFFFFFFFFFFFFFF

@A00721:190:HGJW7DSXY:4:1601:22896:32064 1:N:0:TCTGCAAG+GCTGCACT  
GATGGATTCTGCTTCCAAGAAGAGGAAGTGGTCAGGCGGTCCGTTTAGGACCGCCGTTATCGTAAAA  
CACGACGAGTGTTGCAATTCAACAGGACTCAGCGGTCACAGCTGCCGGTTCAGTGGTCGAGGTCTCTG  
AGATATAATCGAAGA

+  
FFFFFFFFFFFFFFFFFFFFFFFFFFFFFFFFFFFFFFFFFFFFFFFFFFFFFFFFFFFFFFFFFFFFFFFF,FF,FF:,F:FF:FFFFFFFF,,FFFFFF  
:F::FF:F:FFFFFFFF,F,FFFF,FFF,:F,FFFF:,FFFF:FFFFFFFF:F:FFFF,F,FF::F:FF  
,F:FFFFFFFF:F:F:F

@A00721:190:HGJW7DSXY:4:1672:28275:3396 1:N:0:TCTGCAAG+GCTGCACT  
GATGGATTCTGCTTCCAAGAAGAGGAAGTGGTCAGGCGGTCCGTTTAGGACCGCCGTTATCGTAAAA  
CACGACGAGTGTTGCAATTCAACAGGACTCAGCGGTCACAGCTGCCGGTTCAGTGGTCGAGGTCTCTG  
AGATATAATCGAAGA

+  
FFFFFFFFFFFFFFFFFFFFFFFFFFFFFFFFFFFFFFFFFFFFFFFFFFFFFFFFFFFFFFFFFFFFFFFF:FFFFFFFF  
FFFFFFFFFFFFFFFFFFFFFFFFFFFFFFFFFFFFFFFFFFFFFFFFFFFFFFFFFFFFFFFFFFFFFFFF,FFFF:FFFFFFFFFFFFFFFFFFFFFFFFFFFF:F  
FFFFFFFFFFFFFFFFFFFFFFFF

@A00721:190:HGJW7DSXY:4:2214:18954:2597 1:N:0:TCTGCAAG+GCTGCACT  
GATGGATTCTGCTTCCAAGAAGAGGAAGTGGTCAGGCGGTCCGTTTAGGACCGCCGTTATCGTAAAA  
CACGACGAGTGTTGCAATTCAACAGGACTCAGCGGTCACAGCTGCCGGTTCAGTGGTCGAGGTCTCTG  
AGATATAATCGAAGA

+  
FFFFFFFFFFFFFFFFFFFFFFFFFFFFFFFFFFFFFFFFFFFFFFFFFFFFFFFFFFFFFFFFFFFFFFFF:FFFFFFFF  
,FFFF:FFFF:FFFF:F:FF,FFFF:F:FFFFFFFFFFFFFFFFFFFFFFFFFFFFFFFF:FFFFFFFF  
FFFFFFFFFFFFFFFF,F

@A00721:190:HGJW7DSXY:4:2216:14724:27211 1:N:0:TCTGCAAG+GCTGCACT  
GATGGATTCTGCTTCCAAGAAGAGGAAGTGGTCAGGCGGTCCGTTTAGGACCGCCGTTATCGTAAAA  
CACGACGAGTGTTGCAATTCAACAGGACTCAGCGGTCACAGCTGCCGGTTCAGTGGTCGAGGTCTCTG  
AGATATAATCGAAGA

+  
:FFFF:FFFFFFFF,FFFFFFFF:FFFF:FFFF,FFFF,F:FF,FFFF:FFF,F,FF:FFFFFFFF  
FFFFFFFF:F,FFFF,FF,:FFFF:FFFFFFFFFFFF,,F,FF::,,,FFFF,,FFFFFFFF:F:F:,F  
FF:FF,FFFF:F,:F

@A00721:190:HGJW7DSXY:4:2217:25690:7560 1:N:0:TCTGCAAG+GCTGCACT  
GATGGATTCTGCTTCCAAGAAGAGGAAGTGGTCAGGCGGTCCGTTTAGGACCGCCGTTATCGTAAAA  
CACGACGAGTGTTGCAATTCAACAGGACTCAGCGGTCACAGCTGCCGGTTCAGTGGTCGAGGTCTCTG  
AGATATAATCGAATA

+  
FFFFFFFFFFFFFFFFFFFFFFFFFFFFFFFFFFFFFFFFFFFFFFFFFFFFFFFFFFFFFFFFFFFFFFFF:FFF,FFFFFFFFFFFFFFFF:FFFFF  
,F:FF:FFFFFFFF:FFF,F,:F:F,F,F::F,:FF:F,FFFF::FFFFFFFF,FFFF,F:FFF:FFFF  
FFFFFFFF:FFF,F

@A00721:190:HGJW7DSXY:4:2240:1136:12352 1:N:0:TCTGCAAG+GCTGCACT  
GATGGATTCTGCTTCCAAGAAGAGGAAGTGGTCAGGCGGTCCGTTTAGGACCGCCGTTATCGTAAAA  
CACGACGAGTGTTGCAATTCAACAGGACTCAGCGGTCACAGCTGCCGGTTCAGTGGTCGAGGTCTCTG  
AGATATAATCGAAGA

+  
FFFFFFFFFFFFFFFFFFFFFFFFFFFFFFFFFFFFFFFFFFFFFFFFFFFFFFFFFFFFFFFFFFFFFFFF  
:F:FFFFFFFFFFFFFFFFFFFFFFFFFFFFFFFFFFFFFFFFFFFFFFFFFFFFFFFFFFFFFFFF,FFFFFFFF  
FFFFFFFFFFFFFFFF

@A00721:190:HGJW7DSXY:4:2308:22498:35571 1:N:0:TCTGCAAG+GCTGCACT  
GATGGATTCTGCTTCCAAGAAGAGGAAGTGGTCAGGCGGTCCGTTTAGGACCGCCGTTATCGTAAAA

CACGACGAGTGTTGCAATTCAACAGGACTCAGCGGTCACAGCTGCCGGTTCAGTGGTCGAGGTCTCTG  
AGATATAATCGAAGA

+

FFFFFFFFFFFF:FFFFFFFFFFFFFFFFFFFFFFFFFFFFFFFFFFFFFFFF:FF:F:FFFF,FFFF,FF,,F,FFFF  
,F,,FF,:,FF:F,FFF:F:FFFFFFFF,FFFF:FF:,FF:::FFFFFFFF,FF,:FFFF:FFFFFFFF:  
FFFFFFFFF:::FF,F

@A00721:190:HGJW7DSXY:4:2353:19054:22404 1:N:0:TCTGCAAG+GCTGCACT  
GATGGATTCTGCTTCCAAGAAGAGGAAGTGGTCAGGCGGTCCGTTTAGGACCGCCGGTTATCGTAAAA  
CACGACGAGTGTTGCAATTCAACAGGACTCAGCGGTCACAGCTGCCGGTTCAGTGGTCGAGGTCTCTG  
AGATATAATCGAAGA

+

FFFFFFFFFFFFFFFFFFFFFFFFFFFFFFFFFFFFFFFFFFFFFFFFFFFFFFFFFFFFFFFFFFFFFFFF  
FFFFFFFFFFFFFFFFFFFFFFFFFFFFFFFFFFFFFFFFFFFFFFFFFFFFFFFFFFFFFFFFFFFFFFFF  
F:FFFFFFFFFFFFFFF

@A00721:190:HGJW7DSXY:4:2402:12644:5415 1:N:0:TCTGCAAG+GCTGCACT  
GATGGATTCTGCTTCCAAGAAGAGGAAGTGGTCAGGCGGTACGTTTATGACCGCCGGTTATAGTAAAA  
CAGGAAGAGTGTTGCAATTAAACAGGAAACAGCCGTCACAGCTGCCGGTTCAGTGTTCGAGGTCTCTG  
AGAAATAATAGAAGA

+

:FF::F,:FF,FFFFFFFFFFFFFFFF:FFFF:FFFFFFFF,,F:,F,F,,F,,,F:::FF:, :FFFF  
,F,,F,: :FF:F,,FF,F,FFFF,:F:,F,: :FF,,F,F,F,F,,FF,F,: :F,,,:FFFF,,  
: :F,F,FF,F,FF,F

@A00721:190:HGJW7DSXY:4:2574:3667:29293 1:N:0:TCTGCAAG+GCTGCACT  
GATGGATTCTGCTTCCAAGAAGAGGAAGTGGTCAGGCGGTCCGTTTAGGACCGCCGGTTATCGTAAAA  
CACGACGAGTGTTGCAATTCAACAGGACTCAGCGGTCACAGCGGCCGGTTCAGTGGTCGAGGTCTCTG  
AGATATAATCGAAGA

+

FF:FFFFFF:FFFFFFF:FFFFFF:FFFFFFFFFFFFFFFFFFFFFFFF:FFFFFFFFFFFFFFFFFFFF  
FFFFFF:FFFFFFFFFFFFFFFFFFFFFFFFFFFFFFFFFFFFFFFF,FFFFFF:FFFFFFFFFFFF:FFFF:F  
FFFFFFFFFFFFFFF,F

@A00721:190:HGJW7DSXY:4:2637:18331:14888 1:N:0:TCTGCAAG+GCTGCACT  
GATGGATTCTGCTTCCAAGAAGAGGAAGTGGTCAGGCGGTCCGTTTAGGACCGCCGGTTATCGTAAAA  
CACGACGAGTGTTGCAATTCAACAGGACTCAGCGGTCACAGCTGCCGGTTCAGTGGTCGAGGTCTCTG  
AGATATAATCGAAGA

+

FFFFFFFFFFFFFFFFFFFFFFFFFFFFFFFFFFFFFFFFFFFFFFFF:FFFFFFFFFFFFFFFFFFFFFFFF  
FF:FFFFFFFFF:FFFFFFFFFFFFFFFFFFFFFFFFF:,FFFF,FFFFFFFFFFFFFFFF:FFFFFF:F  
FFFFFFFFFFFFFFF

@A00721:190:HGJW7DSXY:4:2231:29351:22075 1:N:0:TCTGCAAG+GCTGCACT  
ATGGATTCTGCTTCCAAGAAGAGGAAGTGGTCAGGCGGTCCGTTTAGGACCGCCGGTTATCGTAAAC  
ACGACGAGTGTTGCAATTCAACAGGACTCAGCGGTCACAGCTGCCGGTTCAGTGGTCGAGGTCTCTGA  
GATATAATCGAAGAC

+

FFFFFFFFFFFFFFFFFFFFFFFFFFFFFFFFFFFFFFFFFFFFFFFF:FFFFFFFFFFFFFF:FFFFFFFFF:  
FFFFFFFFFFFFFFFFFFFFFFFFF:FFFFFFFFFFFFFFFFFFFFFFFFFFFFFFFF:FFF:FF:FF  
F:FFFFFFFFFFFFFFF

@A00721:190:HGJW7DSXY:4:2231:28483:22795 1:N:0:TCTGCAAG+GCTGCACT  
ATGGATTCTGCTTCCAAGAAGAGGAAGTGGTCAGGCGGTCCGTTTTGGACCCAGGTATAGTAAAC  
ACGACCAGTGAAGCAATACAAATGACACAACGGTCACAGCAGCCGATCAGTGTCTAGGACTCGGA  
GATATAATCTAACAC

+

F,:,,:F:,FFFF,F:FFFF,:F:F:::FF:FF:F,,FF::,FF,,,FFF,F,,,FFF,,:::FFFF  
FF,F,FF:,,,,,:FFF,,FF:,,,,,,F,F,,FFFF,,,,,:F,F,,F,,F,,F,,F:,F:,F:  
,F,FFFF,,FF,FF

@A00721:190:HGJW7DSXY:4:2660:21504:32409 1:N:0:TCTGCAAG+GCTGCACT  
ATGGATTCTGCTTCCAAGAAGAGGAAGTGGTCAGGCGGTCCGTTTAGGACCGCCGGTTATCGTAAAC  
ACGACGAGTGTGCAATTCAACAGGACTCAGCGGTACAGCTGCCGGTTCAGTGGTCGAGGTCTCTGA  
GATATAATCGAAGAC

@A00721:190:HGJW7DSXY:4:1353:19153:9862 1:N:0:TCTGCAAG+GCTGCACT  
TGGATTCTGTTTCCAAGAAGAGGAAGTGGTCAGGCGGTCCGTTTAGGACCGCCGTTATCGTAAAACA  
CGACGAGTGTTGCAATTCAACAGGACTCAGCGGTCACAGCTGCCGGTTCAGTGGTCGAGGTCTCTGAG  
ATATAATCGAAGACT

@A00721:190:HGJW7DSXY:4:1513:15718:28494 1:N:0:TCTGCAAG+GCTGCACT  
TGGATTCTGCTTCCAAGAAGAGGAAGTGGTCAGGCGGTCCGTTTAGGACCGCCGTTATCGTAAAACA  
CGACGAGTGTTGCAATTCAACAGGACTCAGCGGTCACAGCTGCCGGTTCAGTGGTCGAGGTCTCTGAG  
ATATAATCGAAGACT

@A00721:190:HGJW7DSXY:4:2407:8223:32988 1:N:0:TCTGCAAG+GCTGCACT  
TGGATTCTGTTTCCAAGAAGAGGAAGTGGTCAGGCGGTCCGTTTAGGACCGCCGTTATCGTAAAACA  
CGACGAGTGTTGCAATTCAACAGGACTCAGCGGTCACAGCTGCCGGTTCAGTGGTCGAGGTCTCTGAG  
ATATAATCGAAGA

@A00721:190:HGJW7DSXY:4:2518:31340:24236 1:N:0:TCTGCAAG+GCTGCACT  
TGGATTCTGCTTCCAAGAAGAGGAAGTGGTCAGGCGGTCCGTTTAGGACCGCCGGTTATCGTAAAACA  
CGACGAGTGTTGCAATTCAACAGGACTCAGCGGTCACAGCTGCCGGTTCAGTGGTCGAGGTCTCTGAG  
ATATAATCGAAGACT

@A00721:190:HGJW7DSXY:4:2576:15167:19805 1:N:0:TCTGCAAG+GCTGCACT  
TGGATTTCGTCTTCCAAGAAGAGGAAGTGGTCAGGCGGTCCGTTTAGGACCGCCGGTTATCGTAAAACA  
CGACGAGTGTTGCAATTCAACAGGACTCAGCGGTCACAGCTGCCGGTTCAGTGGTCGAGGTCTCTGAG  
ATATAATCGAAGACT

@A00721:190:HGJW7DSXY:4:1418:13819:21167 1:N:0:TCTGCAAG+GCTGCACT  
GGCGTGAACACACCAAGTCTTCGATTATATCTCAGAGACCTCGACCACTGAACCGGCAGCTGTGACCG  
CTGAGTCCTGTTGAATTGCAACACTCGTCGTGTTTTACGATAACCGGCGGTCTAAACGGACCGCCTG  
ACCACTTCCTCTTCT



[illegible][illegible][illegible]

```
FFF:FFFFFFFF:FFFFFFFFFFFFFFFF,FFF,FF:FFFF,,FF::FFFFFFFF:F:FFFF
FFFFFFFFFFFFFFFF:F,FFFFFFFF:FFFFFFFF:F:FFFF,FFFFFFFFFFFF,FFFFFFFF:F:FFFF
F:FFFFFFFFFFFFFFF;
```

[illegible][illegible]

```
FFFFFFFFFFFFFFFFFFFFFFFFFFFFFFFFFFFFFFFFFFFFFFFFFFFFF:FFFFFFFFFFFFFFFFFFFFFFF
FFFFFFFFFFFFFFFFFFFFFFFFFFFFFFFFFFFFFFFFFFFFFFFFFFFFF,FFFFFFFFFFFFFFFFFFFFFFFFFFFFF:
FFFF:FFFF:FFFF
```

@A00721:190:HGJW7DSXY:4:1241:29857:2597 1:N:0:TCTGCAAG+GCTGCACT  
CTGACAAACTCCGTCTTGTACTGCATAGGAGGCGTGAACACACCAAGTCTTCGATTATATCTCAGAGA

+

@

+

@

+

@

+

@

+

@

+

@

+

[illegible]



$+$ 

+

+

+

 $+$  $+$ 

+

---

FFFFFFFFFFFFFFFFFFFFFFFFFFFFFFFFFFFFFFFFFFFFFFFFFFFFFFFFFFFFFFFFFFFFFFFF  
FFF::FFFFFFFF

@A00721:190:HGJW7DSXY:4:2370:18412:3662 1:N:0:TCTGCAAG+GCTGCACT  
CCACAATATTATTAAGTCTGACAACTCCGTCTTGTACTGCATAGGAGGCGTGAACACACCAAGTCTT  
CGATTATATCTCAGAGACCTCGACCACTGAACCGGCAGCTGTGACCGCTGAGTCCTGTTGAATTGCA  
CACTCGTCGTGTTTT

+

FFFFFFFFFFFFFFFFFFFFFFFFFFFFFFFFFFFFFFFFFFFFFFFFFFFFFFFFFFFFFFFFFFFFFFFF  
FFFFFFFFFFFFFFFFFFFFFFFFFFFFFFFFFFFFFFFFFFFFFFFFFFFFFFFFFFFFFFFFFFFFFFFF  
FFFFFFFFFFFFFFFF

@A00721:190:HGJW7DSXY:4:1102:5909:18771 1:N:0:TCTGCAAG+GCTGCACT  
GCCACAATATTATTAAGTCTGACAACTCCGTCTTGTACTGCATAGGAGGTGTGAACACACCAAGTCT  
TCGATTATATCTCAGAGACCTCGACCACTGAACCGGCAGCTGTGACCGCTGAGTCCTGTTGAATTGCA  
ACACTCGTCGTGTTTT

+

FFFFFFFFFFFFFFFFFFFFFFFFFFFFFFFFFFFFFFFFFFFFFFFFFFFFFFFFFFFFFFFFFFFFFFFF  
FFFFFFFFFFFFFFFFFFFFFFFFFFFFFFFFFFFFFFFFFFFFFFFFFFFFFFFFFFFFFFFFFFFFFFFF  
FFFFFFFFFFFFFFFF:F

@A00721:190:HGJW7DSXY:4:1151:12255:8061 1:N:0:TCTGCAAG+GCTGCACT  
GCCACAATATTATTAAGTCTGACAACTCCGTCTTGTACTGCATAGGAGGTGTGAACACACCAAGTCT  
TCGATTATATCTCAGAGACCTCGACCACTGAACCGGCAGCTGTGACCGCTGAGTCCTGTTGAATTGCA  
ACACTCGTCGTGTTTT

+

FFFFFFFFFFFFFFFFFFFFFFFFFFFFFFFFFFFFFFFFFFFFFFFFFFFFFFFFFFFFFFFFFFFFFFFF  
FFFFFFFFFFFFFFFFFFFFFFFFFFFFFFFFFFFFFFFFFFFFFFFFFFFFFFFFFFFFFFFFFFFFFFFF  
FFFFFFFFFFFFFFFF

@A00721:190:HGJW7DSXY:4:1232:16306:25347 1:N:0:TCTGCAAG+GCTGCACT  
GCCACAATATTATTAAGTCTGACAACTCCGTCTTGTACTGCATAGGAGGTGTGAACACACCAAGTCT  
TCGATTATATCTCAGAGACCTCGACCACTGAACCGGCAGCTGTGACCGCTGAGTCCTGTTGAATTGCA  
ACACTCGTCGTGTTTT

+

FFFFFFFFFFFFFFFFFFFFFFFFFFFFFFFFFFFFFFFFFFFFFFFFFFFFFFFFFFFFFFFFFFFFFFFF  
FFFFFFFFFFFFFFFFFFFFFFFFFFFFFFFFFFFFFFFFFFFFFFFFFFFFFFFFFFFFFFFFFFFFFFFF  
FFFFFFFFFFFFFFFF

@A00721:190:HGJW7DSXY:4:2158:4499:12571 1:N:0:TCTGCAAG+GCTGCACT  
CCACAAAATTATTAAGTCTGACAACTCAGTCTTGTACTGCATAGGAGGCGTGAACACACCAAGTCTT  
CTATTATATCTCAGAGACCTCGACCACTGAACCGGCAGCTGTGACCGCTGAGTCCTGTAGAATTGCA  
CACTCGTCGTGTTTT

+

FFF,FF,F,,FFFFFFFFFFFFFFFF,F,,:F:F::FFFF::FFF,:F,:FF,FFF,F:FF:FF,,:FF  
,,FFFFFFFFFFF:F,FFF::,F:,F,,:FFF:, ,FF:F:,FFFF:FF,FFF::FF:F,FFF,:F,FF  
FF:FF,,::,,::F

@A00721:190:HGJW7DSXY:4:2223:3911:5071 1:N:0:TCTGCAAG+GCTGCACT  
GCCACAATATTATTAAGTCTGACAACTCCGTCTTGTACTGCATAGGAGGTGTGAACACACCAAGTCT  
TCGATTATATCTCAGAGACCTCGACCACTGAACCGGCAGCTGTGACCGCTGAGTCCTGTTGAATTGCA  
ACACTCGTCGTGTTTT

+

FFFFFFFFF:FFFFFFFFFFFFFFFFFFFFFFFFFFFFFFFFFFFFFFFFFFFFFFFFFFFFFFFFFFFFF  
FFFFFFFFF:FFFFFFFFFFF:FFFFFFFFFFFFFFFFFFFFFFFFFFFFFFFFFFFFFFFFFFFFFFFFF  
:FFFF::FFF:F:FF

@A00721:190:HGJW7DSXY:4:2359:16984:29653 1:N:0:TCTGCAAG+GCTGCACT  
GCCACAATATTATTAAGTCTGACAACTCCGTCTTGTACTGCATAGGAGGTGTGAACACACCAAGTCT  
TCGATTATATCTCAGAGACCTCGACCACTGAACCGGCAGCTGTGACCGCTGAGTCCTGTTGAATTGCA  
ACACTCGTCGTGTTTT

[illegible]

```

FFFFFFFF:FFFFFFFFFFFFFFFF:FFFFFFFFFFFFFFFFFFFFFFFFFFFFFFFFFFFFFFFF
FFFF:FFFFFFFFFFFFFFFFFFFFFFFFFFFFFFFF:FFFFFFFFFFFFFFFFFFFFFFFFFFFF,FF:FFFF
FFFFFFFF:FFFFFFFF

```

F:FFFFFFFF:FF,FFFFFFFF:F:FF::,F:FF:FFFF::FFFF,F:,:,FFFF:FFFFFFFF:FFF  
F,F:FFFF:F:FFFFFFFF::FFFF:FFFF,F:FFF:,FFFFFFFF,FFF::FF:F,FFFFFF:FF  
FFFF::FFF,FF

[illegible][illegible][illegible]

```

FFFFFFFFFFFFFF:FFFFFFFFFFFFFFFFFFFFFFFFFFFFFFFFFFFFFFFF:FFFFFFFFFFFFFFF:
FFFF:FFFFFFFFFFFFFFFFFFFFFFFFFFFFFFFF:FFFFFFFFFFFFFFFFFFFFFFFFFFFFFFFFFFFFFFFF
FFF:FFFFFFFFFFFF

```

@A00721:190:HGJW7DSXY:4:1167:28501:19852 1:N:0:TCTGCAAG+GCTGCACT  
CGACGAGTGTTCGAATTC AACAGGACTCAGCGGTACAGCTGCCGGTTCAGTGGTCGAGGTCTCTGAG

ATATAATCGAAGACTTGGTGTGTTCCACACCTCCTATGCAGTACAAGACGGAGTTTGTCTAGAGTTAATA  
ATATTGTGGACGTTG

```

FFFFFFFFFFFFFFFFFFFFFFFFFFFFFFFFFFFFFFFF:FFFFFFFFFFFFFFFFFFFFFFFFFFFFFFFF
FFFFFFFFFFFFFF:FFFFFFFFFFFFFFFFFFFFFFFFFFFFFFFF:FFFFFFFFFFFFFFFFFFFFFFFFFFFFF:F
FFFFFFFFFFFFFFFF

```

5' CGACGAGTGTGCAATTCACAGGACTCAGCGGTCACAGCTGCCGGTTCAGTGGTCGAGGTCTCTGAG  
 ATATAATCGAAGACTTGGTGTGTTACACCTCCTATGCAGTACAAGACGGAGTTTGTGAGAGTTAATA  
 ATATTGTGGACGTTG

[illegible]

CGACGAGTGTTGCAATTC AACAGGACTCAGCGGTCACAGCTGCCGGTTCAGTGGTCGAGGTCTCTGAG  
 ATATAATCGAAGACTTGGTGTGTTACACCTCCTATGCAGTACAAGACGGAGTTTGTGAGAGTTAATA  
 ATATTGTGGACGTTG

[illegible]

ĆGACGAGTGTTCGAATTC AACAGGACTCAGCGGTACAGCTGCCGGTTCAGTGGTCGAGGTCTCTGAG  
 ATATAATCGAAGACTTGGTGTGTTACACCTCCTATGCAGTACAAGACGGAGTTTGT CAGAGTTAATA  
 ATATTGTGGACGTTG

```
FFFFFFFFFFFFFFFFFFFFFFFFFFFFFFFFFFFFFFFFFFFFFFFFFFFFFFFFFFFFF::FFF
FFFFFFFFFFFFFF:FFFFFFFFFF,FFFFFFFFFFFFFFFFFFFFFFFFFFFFFFFFFFFF:F
F,F:FFFFFFFFFFFF
```

ĆGACGAGTGTTCGAATTC AACAGGACTCAGCGGTACAGCTGCCGGTTCAGTGGTCGAGGTCTCTGAG  
 ATATAATCGAAGACTTGGTGTGTTACACCTCCTATGCAGTACAAGACGGAGTTTGTCTAGAGTTAATA  
 ATATTGTGGACGTTG

[illegible]

GCGAGTGTTCGAATTCACAGGACTCAGCGGTCACAGCTGCCGGTTCAGTGGTCGAGGTCTCTGAGAT  
 ATAATCGAAGACTTGGTGTGTTACACCTCCTATGCAGTACAAGACGGAGTTTGTGAGAGTTAATAAT  
 ATTGTGGACGTTGGC

[illegible]

GCGAGTGTTCGAATTCACAGGACTCAGCGGTCACAGCTGCCGGTTCAGTGGTCGAGGTCTCTGAGAT  
 ATAATCGAAGACTTGGTGTGTTACACCTCCTATGCAGTACAAGACGGAGTTTGTCTGAGAGTTAATAAT  
 ATTGTGGACGTTGGC

[illegible]

@A00721:190:HGJW7DSXY:4:1442:28980:18239 1:N:0:TCTGCAAG+GCTGCACT  
GCGAGTGTTGCAATTCAACAGGACTCAGCGGTACAGCTGCCGTTTCAGTGGTCGAGGTCTCTGAGAT  
ATAATCGAAGACTTGGTGTGTTACACCTCCTATGCAGTACAAGACGGAGTTTGTCTAGAGTTAATAAT  
ATTGTGGACGTTGGC

@A00721:190:HGJW7DSXY:4:1620:26386:6480 1:N:0:TCTGCAAG+GCTGCACT  
GCGAGTGTTCGAATTCACAGGACTCAGCGGTACAGCTGCCGTTTCAGTGGTCGAGGTCTCTGAGAT  
ATAATCGAAGACTTGGTGTGTTACACCTCCTATGCAGTACAAGACGGAGTTTGTTCAGAGTTAATAAT  
ATTGTGGACGTTGGC

@A00721:190:HGJW7DSXY:4:2642:5484:14278 1:N:0:TCTGCAAG+GCTGCACT  
GCGAGTGTTCGAATTCACAGGACTCAGCGGTACAGCTGCCGTTTCAGTGGTCGAGGTCTCTGAGAT  
ATAATCGAAGACTTGGTGTGTTACACCTCCTATGCAGTACAAGACGGAGTTTGTTCAGAGTTAATAAT  
ATTGTGGACGTTGGC

@A00721:190:HGJW7DSXY:4:2677:3992:36589 1:N:0:TCTGCAAG+GCTGCACT  
GCGAGTGTTGCAATTCAACAGGACTCAGCGGTACAGCTGCCGGTTCAGTGGTCGAGGTCTCTGAGAT  
ATAATCGAAGACTTGGTGTGTTACACCTCCTATGCAGTACAAGACGGAGTTTGTCTAGAGTTAATAAT  
ATTGTGGACGTTGGC

@A00721:190:HGJW7DSXY:4:1344:22679:12524 1:N:0:TCTGCAAG+GCTGCACT  
GGCCAACGTCCACAATATTATTAAGTCTGACAACTCCGTCTTGTACTGCATAGGAGGCGTGAACACA  
CCAAGTCTTCGATTATATCTCAGAGACCTCGACCACTGAACCGGCAGCTGTGACCGCTGAGTCCTGTT  
GAATTGCAACACTCG

@A00721:190:HGJW7DSXY:4:1411:18602:30201 1:N:0:TCTGCAAG+GCTGCACT  
GGCCAACGTCCACAATATTATTAAGTCTGACAACTCCGTCTTGTACTGCATAGGAGGCGTGAACACA  
CCAAGTCTTCGATTATATCTCAGAGACCTCGACCACTGAACCGGCAGCTGTGACCGCTGAGTCCTGTT  
GAATTGCAACACTCG

@A00721:190:HGJW7DSXY:4:2514:9435:22091 1:N:0:TCTGCAAG+GCTGCACT  
GGCCAACGTCCACAATATTATTAAGTCTGACAACTCCGTCTTGTACTGCATAGGAGGCGTGAACACA  
CCAAGTCTTCGATTATATCTCAGAGACCTCGACCACTGAACCGGCAGCTGTGACCGCTGAGTCCTGTT  
GAATTGCAACACTCG

FFFFFFFFFFFFFFFFFFFFFFFFFFFFFFFFFFFFFFFFFFFFFFFFFFFFFFFFFFFFFFFFFFFFFFFF  
F:FFFFFFFFFFFFFF:

@A00721:190:HGJW7DSXY:4:1126:32235:25347 1:N:0:TCTGCAAG+GCTGCACT  
TGCAATTCAACAGGACTCAGCGGTCACAGCTGCCGGTTCAGTGGTCGAGGTCTCTGAGATATAATCGA  
AGACTTGGTGTGTTACACCTCCTATGCAGTACAAGACGGAGTTTGTCTAGAGTTAATAATATTGTGGA  
CGTTGGCAG

+

FFFFFFFFFFFFFFFFFFFFFFFFFFFFFFFFFFFFFFFFFFFFFFFFFFFFFFFFFFFFFFFFFFFFFFFF  
FFFFFFFFFFFFFFFFFFFFFFFFFFFFFFFFFFFFFFFFFFFFFFFFFFFFFFFFFFFFFFFFFFFFFFFF  
FFFFFFFFFFFFFFFFFFFFFFFFFFFFFFFFFFFFFFFFFFFFFFFFFFFFFFFFFFFFFFFFFFFFFFFF  
FFFFFFFFFFFFFFFF

@A00721:190:HGJW7DSXY:4:1211:32642:23860 1:N:0:TCTGCAAG+GCTGCACT  
TGCAATTCAACAGGACTCAGCGGTCACAGCTGCCGGTTCAGTGGTCGAGGTCTCTGAGATATAATCGA  
AGACTTGGTGTGTTACACCTCCTATGCAGTACAAGACGGAGTTTGTCTAGAGTTAATAATATTGTGGA  
CGTTGGCAG

+

FFFFFFFFFFFFFFFFFFFFFFFFFFFFFFFFFFFFFFFFFFFFFFFFFFFFFFFFFFFFFFFFFFFFFFFF  
FFFFFFFFFFFFFFFFFFFFFFFFFFFFFFFFFFFFFFFFFFFFFFFFFFFFFFFFFFFFFFFFFFFFFFFF  
FFFFFFFFFFFFFFFF

@A00721:190:HGJW7DSXY:4:1228:20066:7122 1:N:0:TCTGCAAG+GCTGCACT  
TGCAATTCAACAGGACTCAGCGGTCACAGCTGCCGGTTCAGTGGTCGAGGTCTCTGAGATATAATCGA  
AGACTTGGTGTGTTACATCTCCTATGCAGTACAAGACGGAGTTTGTCTAGAGTTAATAATATTGTGGA  
CGTTGGAGATCGGAA

+

FFFFFFFFFFFFFFFFFFFFFFFFFFFFFFFFFFFFFFFFFFFFFFFFFFFFFFFFFFFFFFFFFFFFFFFF  
FFFFFFFFFFFFFFFFFFFFFFFFFFFFFFFFFFFFFFFFFFFFFFFFFFFFFFFFFFFFFFFFFFFFFFFF  
FFF,FFFFFFFFFFFF

@A00721:190:HGJW7DSXY:4:1228:20410:7247 1:N:0:TCTGCAAG+GCTGCACT  
TGCAATTCAACAGGACTCAGCGGTCACAGCTGCCGGTTCAGTGGTCGAGGTCTCTGAGATATAATCGA  
AGACTTGGTGTGTTACATCTCCTATGCAGTACAAGACGGAGTTTGTCTAGAGTTAATAATATTGTGGA  
CGGTGGAGATCGGAA

+

FFFFFFFFFFFFFFFFFFFFFFFFFFFFFFFFFFFFFFFFFFFFFFFFFFFFFFFFFFFFFFFFFFFFFFFF  
FFFFFFFFFFFFFFFFFFFFFFFFFFFFFFFFFFFFFFFFFFFFFFFFFFFFFFFFFFFFFFFFFFFFFFFF  
FF,FFFFFFFFFFFF

@A00721:190:HGJW7DSXY:4:1304:9525:26788 1:N:0:TCTGCAAG+GCTGCACT  
TGCAATTCAACAGGACTCAGCGGTCACAGCTGCCGGTTCAGTGGTCGAGGTCTCTGAGATATAATCGA  
AGACTTGGTGTGTTACATCTCCTATGCAGTACAAGACGGAGTTTGTCTAGAGTTAATAATATTGTGGA  
CGTTGGAGATCGGAA

+

FFFFFFFFFFFFFFFFFFFFFFFFFFFFFFFFFFFFFFFFFFFFFFFFFFFFFFFFFFFFFFFFFFFFFFFF  
FFFFFFFFFFFFFFFFFFFFFFFFFFFFFFFFFFFFFFFFFFFFFFFFFFFFFFFFFFFFFFFFFFFFFFFF  
FFF,FFFFFFFFFFFF:

@A00721:190:HGJW7DSXY:4:1339:6488:2174 1:N:0:TCTGCAAG+GCTGCACT  
TGCAATTCAACAGGACTCAGCGGTCACAGCTGCCGGTTCAGTGGTCGAGGTCTCTGAGATATAATCGA  
AGACTTGGTGTGTTACACCTCCTATGCAGTACAAGACGGAGTTTGTCTAGAGTTAATAATATTGTGGA  
CGTTGGCAG

+

FFFFFFFFFFFFFFFFFFFFFFFFFFFFFFFFFFFFFFFFFFFFFFFFFFFFFFFFFFFFFFFFFFFFFFFF  
FF:FFFFFFFFFFFFFFFFFFFFFFFFFFFFFFFFFFFFFFFFFFFFFFFFFFFFFFFFFFFFFFFFFFFF  
FFFFFFFFFFFF

@A00721:190:HGJW7DSXY:4:1375:5195:9236 1:N:0:TCTGCAAG+GCTGCACT  
TGCAATTCAACAGGACTCAGCGGTCACAGCTGCCGGTTCAGTGGTCGAGGTCTCTGAGATATAATCGA  
AGACTTGGTGTGTTACATCTCCTATGCAGTACAAGACGGAGTTTGTCTAGAGTTAATAATATTGTGGA  
CGTTGGAGATCGGAA

+  
FFFFFFFFFFFFFFFFFFFFFFFFFFFFFFFFFFFFFFFFFFFFFFFFFFFFFFFFFFFFFFFFFFFFFFFF  
FFFFFFFFFFFFFFFFFFFFFFFFFFFFFFFFFFFFFFFFFFFFFFFFFFFFFFFFFFFFFFFFFFFFFFFF  
FF::FFFFFFFFFFFF  
@A00721:190:HGJW7DSXY:4:1441:28754:18693 1:N:0:TCTGCAAG+GCTGCACT  
TGCAATTCAACAGGACTCAGCGGTCACAGCTGCCGGTTCAGTGGTCGAGGTCTCTGAGATATAATCGA  
AGACTTGGTGTGTTACATCTCCTATGCAGTACAAGACGGAGTTTGTCTAGAGTTAATAATATTGTGGA  
CGTTGGAGATCGGAA

+  
FFFFFFFFFFFFFFFFFFFFFFFFFFFFFFFFFFFFFFFFFFFFFFFFFFFFFFFFFFFFFFFFFFFFFFFF  
FFFFFFFFFFFFFFFFFFFFFFFFFFFFFFFFFFFFFFFFFFFFFFFFFFFFFFFFFFFFFFFFFFFFFFFF  
FF:FFFFFFFFFFFF  
@A00721:190:HGJW7DSXY:4:1464:18014:19914 1:N:0:TCTGCAAG+GCTGCACT  
TGCAATTCAACAGGACTCAGCGGTCACAGCTGCCGGTTCAGTGGTCGAGGTCTCTGAGATATAATCGA  
AGACTTGGTGTGTTACACCTCCTATGCAGTACAAGACGGAGTTTGTCTAGAGTTAATAATATTGTGGA  
CGTTGGCAG

+  
FFFFFFFFFFFFFFFFFFFFFFFFFFFFFFFFFFFFFFFFFFFFFFFFFFFFFFFFFFFFFFFFFFFFFFFF  
FFFFFFFFFFFFFFFFFFFFFFFFFFFFFFFFFFFFFFFFFFFFFFFFFFFFFFFFFFFFFFFFFFFFFFFF  
FFFFFFFFFFFF  
@A00721:190:HGJW7DSXY:4:1633:14154:7999 1:N:0:TCTGCAAG+GCTGCACT  
TGCAATTCAACAGGACTCAGCGGTCACAGCTGCCGGTTCAGTGGTCGAGGTCTCTGAGATATAATCGA  
AGACTTGGTGTGTTACATCTCCTATGCAGTACAAGACGGAGTTTGTCTAGAGTTAATAATATTGTGGA  
CGTTGGAGATCGGAA

+  
FFFFFFFFFFFFFFFFFFFFFFFFFFFFFFFFFFFFFFFFFFFFFFFFFFFFFFFFFFFFFFFFFFFFFFFF  
FFFFFFFFFFFF:F:FFFFFF:FFFFFFFFFFFFFFFFFFFFFFFFFFFFFFFFFFFFFFFFFFFFFFFF  
FFF:FFF:FFF,FFF  
@A00721:190:HGJW7DSXY:4:2202:14615:10207 1:N:0:TCTGCAAG+GCTGCACT  
TGCAATTCAACAGGACTCAGCGGTCACAGCTGCCGGTTCAGTGGTCGAGGTCTCTGAGATATAATCGA  
AGACTTGGTGTGTTACACCTCCTATGCAGTACAAGACGGAGTTTGTCTAGAGTTAATAATATTGTGGA  
CGTTGGCAG

+  
FF,FF:FFFFFF:F:FFFFFFFF,F,FFF,F:FFFFFF,FF:FF:FFF,FF,:FFFFFFFFFFFF:  
FFFFFF:FF,FF:FFF,F:,FFF:FF:,FFFFFFFFFFFF:FFFFFFFF:FFFFFFFFFFFFFFFF:,FFFF  
F,:F,FFFF  
@A00721:190:HGJW7DSXY:4:2268:19063:26960 1:N:0:TCTGCAAG+GCTGCACT  
TGCAATTCAACAGGACTCAGCGGTCACAGCTGCCGGTTCAGTGGTCGAGGTCTCTGAGATATAATCGA  
AGACTTGGTGTGTTACACCTCCTATGCAGTACAAGACGGAGTTTGTCTAGAGTTAATAATATTGTGGA  
CGTTGGCAG

+  
FFFFFFFFFFFFFFFFFFFFFFFFFFFFFFFFFFFFFFFFFFFFFFFFFFFFFFFFFFFFFFFFFFFFFFFF  
FFFFFFFFFFFFFFFFFFFFFFFFFFFFFFFFFFFFFFFFFFFFFFFFFFFFFFFFFFFFFFFFFFFFFFFF  
FFFFFFFFFFFF  
@A00721:190:HGJW7DSXY:4:2345:30436:26303 1:N:0:TCTGCAAG+GCTGCACT  
TGCAATTCAACAGGACTCAGCGGTCACAGCTGCCGGTTCAGTGGTCGAGGTCTCTGAGATATAATCGA  
AGACTTGGTGTGTTACATCTCCTATGCAGTACAAGACGGAGTTTGTCTAGAGTTAATAATATTGTGGA  
CGTTGGAGATCGGAA

+  
FFFFFFFFFFFFFFFFFFFFFFFFFFFFFFFFFFFFFFFFFFFFFFFFFFFFFFFFFFFFFFFFFFFFFFFF  
FFFFFFFFFFFFFFFFFFFFFFFFFFFFFFFFFFFFFFFFFFFFFFFFFFFFFFFFFFFFFFFFFFFFFFFF  
FFF:FFFFFFFFFFFF  
@A00721:190:HGJW7DSXY:4:2508:1416:9987 1:N:0:TCTGCAAG+GCTGCACT  
TGCAATTCAACAGGACTCAGCGGTCACAGCTGCCGGTTCAGTGGTCGAGGTCTCTGAGATATAATCGA





@A00721:190:HGJW7DSXY:4:2669:19569:18630 1:N:0:TCTGCAAG+GCTGCACT  
GCAATTC AACAGGACTCAGCGGTCACAGCTGCCGGTTCAGTGGTCGAGGTCTCTGAGATATAATCGAA  
GACTTGGTGTGTTACACCTCCTATGCAGTACAAGACGGAGTTTGTGAGAGTTAATAATATTGTGGAC  
GTTGGCAGTATCGTT

+

FFFFFFFFFFFFFFFFFFFFFFFFFFFFFFFFFFFFFFFFFFFFFFFFFFFFFFFFFFFFFFFFFFFFFFFF  
FFFFFFFFFFFFFFFFFFFFFFFFFFFFFFFFFFFFFFFFFFFFFFFFFFFFFFFFFFFFFFFFFFFFFFFF:FFFFFFFFFFFFFFFF  
FFFFFFFFFFFFFFFF

@A00721:190:HGJW7DSXY:4:2441:2085:8171 1:N:0:TCTGCAAG+GCTGCACT  
CAATTC AACAGGACTCAGCGGTCACAGCTGCCGGTTCAGTGGTCGAGGTCTCTGAGATATAATCGAAG  
ACTTGGTGTGTTACACCTCCTATGCAGTACAAGACGGAGTTTGTGAGAGTTAATAATATTGTGGACG  
TTGGCAGTATCGTT

+

FFFFFFFF:FFFFFFFF,F:FFF:F:FF::FFFFFFFF:F:FFFFFFFFFFFFFFFFFFFFFFFF:FF:  
FFFF:FFFFFFFF:FFFFFFFFFFFFFFFFFFFFFFFF:FFFFFFFFFFFFFFFF:FFFFFFFF,F,:FFF:  
FFFFFFFFFFFF:

@A00721:190:HGJW7DSXY:4:1375:31403:12132 1:N:0:TCTGCAAG+GCTGCACT  
ATTCAACAGGACTCAGCGGTCACAGCTGCCGGTTCAGTGGTCGAGGTCTCTGAGATATAATCGAAGAC  
TTGGTGTGTTACATCTCCTATGCAGTACAAGACGGAGTTTGTGAGAGTTAATAATATTGTGGACGTT  
GGCAGTATCGTTTGT

+

FFFFFFFFFFFFFFFFFFFF:FFFFFFFFFFFFFFFFFFFFFFFFFFFFFFFFFFFFFFFFFFFFFFFF  
FFFFFFFFFFFFFFFFFFFFFFFFFFFFFFFFFFFFFFFF:FFFFFFFFFFFFFFFFFFFFFFFF:FFFFFFFFFFFF  
FFFFFF:FFFF,FFF

@A00721:190:HGJW7DSXY:4:1557:25464:7106 1:N:0:TCTGCAAG+GCTGCACT  
ATTCAACAGGACTCAGCGGTCACAGCTGCCGGTTCAGTGGTCGAGGTCTCTGAGATATAATCGAAGAC  
TTGGTGTGTTACATCTCCTATGCAGTACAAGACGGAGTTTGTGAGAGTTAATAATATTGTGGACGTT  
GGCAGTATCGTTTGT

+

FFFFFFFFFFFFFFFFFFFFFFFFFFFFFFFFFFFFFFFFFFFFFFFFFFFFFFFFFFFFFFFFFFFF:F  
FFFFFFFFFFFFFFFFFFFFFFFFFFFFFFFFFFFFFFFFFFFFFFFFFFFFFFFFFFFFFFFF:FF:FFFFFFFFFFFFFFFF  
FFFFFFFFFFFF:FFF

@A00721:190:HGJW7DSXY:4:1308:7030:20087 1:N:0:TCTGCAAG+GCTGCACT  
TGGACTCAGCGGTCACAGCTGCCGGTTCAGTGGTCGAGGTCTCTGAGATATAATCGAAGACTTGGTGT  
GTTACACCTCCTATGCAGTACAAGACGGAGTTTGTGAGAGTTAATAATATTGTGGACGTTGGCAGTA  
TCGTTTGTATAAATG

+

FFFFFFFFFFFFFFFFFFFFFFFFFFFFFFFFFFFFFFFFFFFFFFFFFFFFFFFFFFFFFFFFFFFF  
FFFFFFFFFFFFFFFFFFFFFFFFFFFFFFFFFFFFFFFFFFFFFFFFFFFFFFFFFFFFFFFFFFFF  
FFFF:FFFFFFFFFFFF

@A00721:190:HGJW7DSXY:4:1308:8106:20854 1:N:0:TCTGCAAG+GCTGCACT  
TGGACTCAGCGGTCACAGCTGCCGGTTCAGTGGTCGAGGTCTCTGAGATATAATCGAAGACTTGGTGT  
GTTACACCTCCTATGCAGTACAAGACGGAGTTTGTGAGAGTTAATAATATTGTGGACGTTGGCAGTA  
TCGTTTGTATAAATG

+

FFFFFFFFFFFFFFFFFFFFFFFFFFFFFFFFFFFFFFFFFFFFFFFFFFFFFFFFFFFFFFFFFFFF  
FFFFFFFFFFFFFFFFFFFFFFFFFFFFFFFFFFFFFFFFFFFFFFFFFFFFFFFFFFFFFFFF:FFFF:FFFFFFFFFFFFFFFF  
FFFFFFFFFFFFFFFF

@A00721:190:HGJW7DSXY:4:1356:24478:34773 1:N:0:TCTGCAAG+GCTGCACT  
TGGACTCAGCGGTCACAGCTGCCGGTTCAGTGGTCGAGGTCTCTGAGATATAATCGAAGACTTGGTGT  
GTTACACCTCCTATGCAGTACAAGACGGAGTTTGTGAGAGTTAATAATATTGTGGACGTTGGCAGTA  
TCGTTTGTATAAAT

+

FFFFF,,:FFF:FF,FFFF:FFFF:FFF,:FFFF:F:FFFFFFFF,FFFFFFFF,F::FFFF

FFFFFFFFFFFF:FFFFFFFFFFFF:F:FFFF,,FFFFFFFFFFFFFFFF:FFFF:FFFFFFFFFFFF,F  
FFFF:FFF:FFFF

@A00721:190:HGJW7DSXY:4:1516:6876:35227 1:N:0:TCTGCAAG+GCTGCACT  
TGGACTCAGCGGTCACAGCTGCCGGTTCAGTGGTCGAGGTCTCTGAGATATAATCGAAGACTTGGTGT  
GTTACACCTCCTATGCAGTACAAGACGGAGTTTGTGAGAGTTAATAATATTGCGGACGTTGGCAGTA  
TCGTTTGTATAAATG

+

FFFFFFFFFFFFFFFFFFFFFFFFFFFFFFFFFFFFFFFFFFFFFFFFFFFFFFFFFFFFFFFFFFFFFFFF  
FFFFFFFFFFFFFFFFFFFFFFFFFFFFFFFFFFFFFFFFFFFFFFFFFFFFFFFFFFFFFFFFFFFFFFFF  
FFFF,FFFFFFFF

@A00721:190:HGJW7DSXY:4:2420:10945:9173 1:N:0:TCTGCAAG+GCTGCACT  
TGGACTCAGCGGTCACAGCTGCCGGTTCAGTGGTCGAGGTCTCTGAGATATAATCGAAGACTTGGTGT  
GTTACACCTCCTATGCAGTACAAGACGGAGTTTGTGAGAGTTAATAATATTGTGGACGTTGGCAGTA  
TCGTTTGTATAAATG

+

FFFFFFFFFFFFFFFFFFFFFFFFFFFFFFFFFFFFFFFFFFFFFFFFFFFFFFFFFFFFFFFFFFFFFFFF  
FFFFFFFFFFFFFFFFFFFFFFFFFFFFFFFFFFFFFFFFFFFFFFFFFFFFFFFFFFFFFFFFFFFFFFFF  
FFFFFFFFFF:FF:FF

@A00721:190:HGJW7DSXY:4:2465:1145:26303 1:N:0:TCTGCAAG+GCTGCACT  
TGGACTCAGCGGTCACAGCTGCCGGTTCAGTGGTCGAGGTCTCTGAGATATAATCGAAGACTTGGTGT  
GTTACACCTCCTATGCAGTACAAGACGGAGTTTGTGAGAGTTAATAATATTGTGGACGTTGGCAGTA  
TCGTTTGTATAAATG

+

FFFFFFFFFFFFFFFFFFFFFFFFFFFFFFFFFFFFFFFFFFFFFFFFFFFFFFFFFFFFFFFFFFFFFFFF  
FFFFFFFFFFFFFFFFFFFFFFFFFFFFFFFFFFFFFFFFFFFFFFFFFFFFFFFFFFFFFFFFFFFFFFFF  
FFFFFFFFFFFFFFFF

@A00721:190:HGJW7DSXY:4:1445:9570:1939 1:N:0:TCTGCAAG+GCTGCACT  
CAGCTGCCGGTTCAGTGGTCGAGGTCTCTGAGATATAATCGAAGACTTGGTGTGTTACACCTCCTAT  
GCAGTACAAGACGGAGTTTGTGAGAGTTAATAATATTGTGGACGTTGGCAGTATCGTTTGTATAAATG  
ATTGTCCTACTGGA

+

FFFFFFFFFFFFFFFFFFFFFFFFFFFFFFFFFFFFFFFFFFFFFFFFFFFFFFFFFFFFFFFFFFFFFFFF  
FFFFFFFFFFFFFFFFFFFFFFFFFFFFFFFFFFFFFFFFFFFFFFFFFFFFFFFFFFFFFFFFFFFF:FFFFFFFFFFFFFFFF  
FFFFFFFFFFFFFFFF

@A00721:190:HGJW7DSXY:4:2240:2672:35963 1:N:0:TCTGCAAG+GCTGCACT  
CAGCTGCCGGTTCAGTGGTCGAGGTCTCTGAGATATAATCGAAGACTTGGTGTGTTACACCTCCTAT  
GCAGTACAAGACGGAGTTTGTGAGAGTTAATAATATTGTGGACGTTGGCAGTATCGTTTGTATAAATG  
ATTGTCCTACTGGAA

+

FFFFFFFFFFFFFFFFFFFFFFFFFFFFFFFFFFFFFFFFFFFFFFFFFFFFFFFFFFFFFFFFFFFFFFFF  
FFFFFFFFFFFFFFFFFFFFFFFFFFFFFFFFFFFFFFFFFFFFFFFFFFFFFFFFFFFFFFFFFFFFFFFF  
FFFFFFFFFFFFFFFF:

@A00721:190:HGJW7DSXY:4:2464:10746:6605 1:N:0:TCTGCAAG+GCTGCACT  
CAGCTGCCGGTTCAGTGGTCGAGGTCTCTGAGATATAATCGAAGACTTGGTGTGTTACACCTCCTAT  
GCAGTACAAGACGGAGTTTGTGAGAGTTAATAATATTGTGGACGTTGGCAGTATCGTTTGTATAAATG  
ATTGTCCTACTGGAA

+

FFFFFFFFFFFFFFFFFFFFFFFFFFFFFFFFFFFFFFFFFFFFFFFFFFFFFFFFFFFFFFFFFFFFFFFF  
FFFFFFFFFFFFFFFFFFFFFFFFFFFFFFFFFFFFFFFFFFFFFFFFFFFFFFFFFFFFFFFFFFFF:FFFFFFFFFFFFFFFF  
FFFFFFFFFFFF:FFF

@A00721:190:HGJW7DSXY:4:2464:6171:37012 1:N:0:TCTGCAAG+GCTGCACT  
CAGCTGCCGGTTCAGTGGTCGAGGTCTCTGAGATATAATCGAAGACTTGGTGTGTTACACCTCCTAT  
GCAGTACAAGACGGAGTTTGTGAGAGTTAATAATATTGTGGACGTTGGCAGTATCGTTTGTATAAATG  
ATTGTCCTACTGGAA

+  
FFFFFFFFFFFFFFFFFFFFFFFFFFFFFFFFFFFFFFFFFFFFFFFFFFFFFFFFFFFFFFFFFFFFFFFF  
FFFFFFFFFFFFFFFFFFFFFFFFFFFFFFFFFFFFFFFFFFFFFFFFFFFFFFFFFFFFFFFFFFFFFFFF  
FFFFFFFFFFFFFFFF:

@A00721:190:HGJW7DSXY:4:2623:19388:29340 1:N:0:TCTGCAAG+GCTGCACT  
CAGCTGCCGGTTCAGTGGTCGAGGTCTCTGAGATATAATCGAAGACTTGGTGTGTTCACACCTCCTAT  
GCAGTACAAGACGGAGTTTGTCTGAGAGTTAATAATATTGTGGACGTTGGCAGTATCGTTTGTATAAATG  
ATTGTCCTACTGGAA

+  
FFFFFFFFFFFFFFFFFFFFFFFFFFFFFFFFFFFFFFFFFFFFFFFFFFFFFFFFFFFFFFFFFFFFFFFF  
FFFFFFFFFFFFFFFFFFFFFFFFFFFFFFFFFFFFFFFFFFFFFFFFFFFFFFFFFFFFFFFFFFFFFFFF  
FFFFFFFFFFFFFFFF:FFFFFFFFFFFFFFFFFFFFFFFFFFFFFFFF:FF::FFFFFFFFFFFF  
FFFFFFFFFFFFFFFF

@A00721:190:HGJW7DSXY:4:2645:15736:20040 1:N:0:TCTGCAAG+GCTGCACT  
CAGCTGCCGGTTCAGTGGTCGAGGTCTCTGGGATATAATCGAAGACTTGGTGTGTTCACACCTCCTAT  
GCAGTACAAGACGGAGTTTGTCTGAGAGTTAATAATATTGTGGACGTTGGCAGTATCGTTTGTATAAATG  
ATTGTCCTACTGGAA

+  
FFFFFFFFFFFFFFFFFFFFFFFFFFFFFFFFFFFFFFFFFFFFFFFFFFFFFFFFFFFFFFFFFFFFFFFF  
FFFFFFFFFFFFFFFFFFFFFFFFFFFFFFFFFFFFFFFFFFFFFFFFFFFFFFFFFFFFFFFFFFFFFFFF  
FFFFFFFFFFFFFFFF,FFFFFFFFFFFF  
FFFFFFFFFFFFFFFF

@A00721:190:HGJW7DSXY:4:2650:13602:7012 1:N:0:TCTGCAAG+GCTGCACT  
CAGCTGCCGGTTCAGTGGTCGAGGTCTCTGAGATATAATCGAAGACTTGGTGTGTTCACACCTCCTAT  
GCAGTACAAGACGGAGTTTGTCTGAGAGTTAATAATATTGTGGACGTTGGCAGTATCGTTTGTATAAATG  
ATTGTCCTACTGGAA

+  
FFFFFFFFFFFFFFFFFFFFFFFFFFFFFFFFFFFFFFFFFFFFFFFFFFFFFFFFFFFFFFFFFFFFFFFF  
FFFFFFFFFFFFFFFFFFFFFFFFFFFFFFFFFFFFFFFFFFFFFFFFFFFFFFFFFFFFFFFFFFFFFFFF  
FFFFFFFFFFFFFFFF:FFFFFFFF:FFFFFFFFFFFFFFFF:FFFFFFFFFFFFFFFFFFFF  
FFFFFFFFFFFFFFFFFFFF:FFFFFFFFFFFFFFFFFFFFFFFF:FFFFFFFF:F:FFFFFFFFFFFFFFFFFFFF  
FFFFFFFF:FFF:FFFF

@A00721:190:HGJW7DSXY:4:1420:12933:17315 1:N:0:TCTGCAAG+GCTGCACT  
GGCCGGTTCAGTGGTCGAGGTCTCTGAGATATAATCGAAGACTTGGTGTGTTCACACCTCCTATGCAG  
TACAAGACGGAGTTTGTCTGAGAGTTAATAATATTGTGGACGTTGGCAGTATCGTTTGTATAAATGATTG  
TCCTACTGGAACCTC

+  
FFFFFFFFFFFFFFFFFFFFFFFFFFFFFFFFFFFFFFFFFFFFFFFFFFFFFFFFFFFFFFFFFFFFFFFF  
FFFFFFFFFFFFFFFFFFFFFFFF:FFF:FFF:FFFFFFFFFFFFFFFFFFFFFFFFFFFFFFFFFFFF  
FFFFFFFFFFFFFFFFFFFF  
FFFFFFFFFFFFFFFFFFFF

@A00721:190:HGJW7DSXY:4:1456:32868:28134 1:N:0:TCTGCAAG+GCTGCACT  
GGCCGGTTCAGTGGTCGAGGTCTCTGAGATATAATCGAAGACTTGGTGTGTTCACACCTCCTATGCAG  
TACAAGACGGAGTTTGTCTGAGAGTTAATAATATTGTGGACGTTGGCAGTATCGTTTGTATAAATGATTG  
TCCTACTGGAACCTC

+  
FFFFFFFFFFFFFFFFFFFFFFFFFFFFFFFFFFFFFFFFFFFFFFFFFFFFFFFFFFFFFFFFFFFFFFFF  
FFFFFFFFFFFFFFFFFFFFFFFF,FFFFFFFFFFFFFFFFFFFFFFFFFFFFFFFFFFFFFFFF:FFFFF:FFFFFFFFFFFF  
FFFFFFFF:FFFFFFFF

@A00721:190:HGJW7DSXY:4:2458:5936:5290 1:N:0:TCTGCAAG+GCTGCACT  
GGCCGGTTCAGTGGTCGAGGTCTCTGAGATATAATCGAAGACTTGGTGTGTTCACACCTCCTATGCAG  
TACAAGACGGAGTTTGTCTGAGAGTTAATAATATTGTGGACGTTGGCAGTATCGTTTGTATAAATGATTG  
TCCTACTGGAACCTC

+  
FFFFFFFFFFFFFFFFFFFFFFFFFFFFFFFFFFFFFFFFFFFFFFFFFFFFFFFFFFFFFFFFFFFFFFFF  
FFFFFFFFFFFFFFFFFFFFFFFFFFFFFFFFFFFFFFFFFFFFFFFFFFFFFFFFFFFFFFFFFFFFFFFF  
FFFFFFFFFFFFFFFFFFFF

@A00721:190:HGJW7DSXY:4:2609:5285:5228 1:N:0:TCTGCAAG+GCTGCACT  
GGCCGGTTCAGTGGTCGAGGTCTCTGAGATATAATCGAAGACTTGGTGTGTTCACACCTCCTATGCAG



@A00721:190:HGJW7DSXY:4:2514:4779:32534 1:N:0:TCTGCAAG+GCTGCACT  
GCCGGTTCAGTGGTCGAGGTCTCTGAGATATAATCGAAGACTTGGTGTGTTACACCTCCTATGCAGT  
ACAAGACGGAGTTTGTCTCAGAGTTAATAATATTGTGGACGTTGGCAGTATCGTTTGTATAAATGATTGT  
CCTACTGGAACCTCG

[illegible][illegible][illegible][illegible]

```

FFFFFFFFFFFFFFFFFFFFFFFFFFFFFFFFFFFFFFFFFFFFFFFFFFFFFFFFFFFF:FFFFFFFFFFFF
FFFFFFFFFFFFFFFFFFFFFFFFFFFFFFFFFFFFFFFFFFFFFFFFFFFFFFFFFFFF:FFFFFFFFFFFFFFFFFFFFFFFFFFFFFFFFFFFFFFFF
FFFFF:FFFFFFFFFFFF

```

[illegible][illegible]

[illegible]

+

@A00721:190:HGJW7DSXY:4:1106:12897:18223 1:N:0:TCTGCAAG+GCTGCACT  
CTGTGGTCGAGGTCTCTGAGATATAATCGAAGACTTGGTGTGTTACATCTCCTATGCAGTACAAGAC  
GGAGTTTGTCTAGAGTTAATAATATTGTGGACGTTGGCAGTATCGTTTGTATAAATGATTGTCCTACTG  
GAACCTCGGTCGATA

```

FFFFFFFFFFFFFFFFFFFFFFFF,FFFFFFFF:FFFFFFFFFFFFFFFFFFFFFFFFFFFFFFFF
FFFFFFFFFFFFFFFFFFFFFFFFFFFFFFFF:FFFFFFFFFFFFFFFFFFFFFFFFFFFFFFFF
FFFFFFFFFFFFFFFF

```

+

@A00721:190:HGJW7DSXY:4:2217:30572:10128 1:N:0:TCTGCAAG+GCTGCACT  
CTGTGGTCGAGGTCTCTGAGATATAATCGAAGACTTGGTGTGTTACATCTCCTATGCAGTACAAGAC  
GGAGTTTGTCTAGAGTTAATAATATTGTGGACGTTGGCAGTATCGTTTGTATAAATGATTGTCCTACTG  
GAACCTCGGTCGATA

[illegible]

+

@A00721:190:HGJW7DSXY:4:2325:27299:6308 1:N:0:TCTGCAAG+GCTGCACT  
CTGTGGTCGAGGTCTCTGAGATATAATCGAAGACTTGGTGTGTTACATCTCCTATGCAGTACAAGAC  
GGAGTTTGTGTCAGAGTTAATAATATTGTGGACGTTGGCAGTATCGTTTGTATAAATGATTGTCCTACTG  
GAACCTCGGTCGATA

[illegible]

+  
FFFFFFFFFFFFFFFFFFFFFFFFFFFFFFFFFFFFFFFFFFFFFFFFFFFFFFFFFFFFFFFFFFFFFFFF  
FFFFFFFFFFFFFFFFFFFFFFFFFFFFFFFFFFFFFFFFFFFFFFFFFFFFFFFFFFFFFFFFFFFFFFFF  
FFFFFFF:FFFFFFF  
@A00721:190:HGJW7DSXY:4:2258:22697:31939 1:N:0:TCTGCAAG+GCTGCACT  
CTCGTATCGACCGAGGTTCCAGTAGGACAATCATTTATACAAACGATACTGCCAACGTCCACAATATT  
ATTAACCTCTGACAACTCCGTCTTGTACTGCATAGGAGGCGTGAACACACCAAGTCTTCGATTATATC  
TCAGAGACCTCGACA

+  
FFFFFFFFFFFFFFFFFFFFFFFFFFFFFFFFFFFFFFFFFFFFFFFFFFFFFFFFFFFFFFFFFFFFFFFF  
FFFFFFFFFFFFFFFFFFFFFFFFFFFFFFFFFFFFFFFFFFFFFFFFFFFFFFFFFFFFFFFFFFFFFFFF  
FF:FFFFFFFFFFFF  
@A00721:190:HGJW7DSXY:4:2614:8133:35493 1:N:0:TCTGCAAG+GCTGCACT  
CTCGTATCGACCGAGGTTCCAGTAGGACAATCATTTATACAAACGATACTGCCAACGTCCACAATATT  
ATTAACCTCTGACAACTCCGTCTTGTACTGCATAGGAGGCGTGAACACACCAAGTCTTCGATTATATC  
TCAGAGACCTCGACA

+  
FFFFFFFFFFFF:FFFFFFFF:FFFFFFFFFFFFFFFFFFFFFFFF:FFF:FFFFFFFFFFFF::FFFFFFFF:FF  
FF:FFFF:FFF:FFFFFFFF:FFF:FFF:FFFFFFFFFFFFFFFFFFFF:FF:FFFFFFFFFFFF,FFFF:F  
FF:FFFFFFFFFFFF  
@A00721:190:HGJW7DSXY:4:1156:15121:17534 1:N:0:TCTGCAAG+GCTGCACT  
GTGAGGTCTCTGAGATATAATCGAAGACTTGGTGTGTTACACCTCCTATGCAGTACAAGACGGAGT  
TTGTCAGAGTTAATAATATTGTGGACGTTGGCAGTATCGTTTGTATAAATGATTGTCCTACTGGAACC  
TCGGTCGATACGAGA

+  
FFFFFFFFFFFFFFFFFFFFFFFFFFFF:FFFFFFFF:FFFFFFFFFFFF:FFF:FFFF:FF:FFFF::FFF:FF  
FFFFFFFF::FFFFFF:FFF,FFFF,:FF:FFFFFFFFFFFFFFFF:FFFFFFFFFFFFFFFFFFFF:F,FF  
FFFF:FFFFFFFF  
@A00721:190:HGJW7DSXY:4:2431:9534:14246 1:N:0:TCTGCAAG+GCTGCACT  
GTGAGGTCTCTGAGATATAATCGAAGACTTGGTGTGTTACACCTCCTATGCAGTACAAGACGGAGT  
TTGTCAGAGTTAATAATATTGTGGACGTTGGCAGTATCGTTTGTATAAATGATTGTCCTACTGGAACC  
TCGGTCGATACGAGA

+  
FFFFFFFFFFFFFFFFFFFFFFFFFFFFFFFFFFFFFFFFFFFFFFFFFFFFFFFFFFFFFFFFFFFFFFFF  
FFFFFFFFFFFFFFFFFFFFFFFFFFFFFFFFFFFFFFFFFFFFFFFFFFFFFFFFFFFFFFFFFFFF:FF:FFFFFF:FF  
FFFFFFFFFFFFFFFF  
@A00721:190:HGJW7DSXY:4:2551:24596:33348 1:N:0:TCTGCAAG+GCTGCACT  
GTGAGGTCTCTGAGATATAATCGAAGACTTGGTGTGTTACACCTCCTATGCAGTACAAGACGGAGT  
TTGTCAGAGTTAATAATATTGTGGACGTTGGCAGTATCGTTTGTATAAATGATTGTCCTACTGGAACC  
TCGGTCGATACGAGA

+  
FFFFFFFFFFFFFFFFFFFFFFFFFFFFFFFFFFFFFFFFFFFFFFFFFFFFFFFFFFFFFFFFFFFFFFFF  
FFFFFFFFFFFFFFFFFFFFFFFFFFFFFFFFFFFFFFFFFFFFFFFFFFFFFFFFFFFF:FFF:FFFFFFFFFFFF  
FFFFFFFFFFFFFFFF  
@A00721:190:HGJW7DSXY:4:1160:19443:33974 1:N:0:TCTGCAAG+GCTGCACT  
GTCTCTGAGATATAATCGAAGACTTGGTGTGTTACACCTCCTATGCAGTACAAGACGGAGTTTGTCA  
GAGTTAATAATATTGTGGACGTTGGCAGTATCGTTTGTATAAATGATTGTCCTACTGGAACCTCGGTC  
GATACGAGACATACC

+  
FFFFFFFFFFFFFFFFFFFFFFFFFFFFFFFFFFFFFFFFFFFFFFFFFFFFFFFFFFFFFFFFFFFFFFFF  
FFFFFFFFFFFFFFFFFFFFFFFFFFFFFFFFFFFFFFFFFFFFFFFFFFFFFFFFFFFFFFFFFFFFFFFF  
FFFFFFFFFFFFFFFFFFFF  
@A00721:190:HGJW7DSXY:4:1417:10574:21746 1:N:0:TCTGCAAG+GCTGCACT  
GTCTCTGAGATATAATCGAAGACTTGGTGTGTTACACCTCCTATGCAGTACAAGACGGAGTTTGTCA

GAGTTAATAATATTGTGGACGTTGGCAGTATCGTTTGTATAAATGATTGTCCTACTGGAACCTCGGTC  
GATACGAGACATACC

+

FFFFFFFFFFFFFFFFFFFFFFFFFFFFFFFFFFFFFFFFFFFFFFFFFFFFFFFFFFFFFFFFFFFFFFFF  
FFFFFFFFFFFFFFFFFFFFFFFFFFFFFFFFFFFFFFFFFFFFFFFFFFFFFFFFFFFFFFFFFFFFFFFF:FFF  
FFFF,FFFFFFFF:F

@A00721:190:HGJW7DSXY:4:1467:15329:25034 1:N:0:TCTGCAAG+GCTGCACT  
GTCTCTGAGATATAATCGAAGACTTGGTGTGTTACACCTCCTATGCAGTACAAGACGGAGTTTGTCA  
GAGTTAATAATATTGTGGACGTTGGCAGTATCGTTTGTATAAATGATTGTCCTACTGGAACCTCGGTC  
GATACGAGACATACC

+

FFFFFFFFFFFFFFFFFFFFFFFFFFFFFFFFFFFFFFFFFFFFFFFFFFFFFFFFFFFFFFFFFFFFFFFF  
FFFFFFFFFFFFFFFFFFFFFFFFFFFFFFFFFFFFFFFFFFFFFFFFFFFFFFFFFFFFFFFFFFFFFFFF  
FFFFFFFFFFFFFFFF

@A00721:190:HGJW7DSXY:4:1621:22381:31078 1:N:0:TCTGCAAG+GCTGCACT  
GTCTCTGAGATATAATCGAAGACTTGGTGTGTTACACCTCCTATGCAGTACAAGACGGAGTTTGTCA  
GAGTTAATAATATTGTGGACGTTGGCAGTATCGTTTGTATAAATGATTGTCCTACTGGAACCTCGGTC  
GATACGAGACATACC

+

FFFFFFFFFFFFFFFFFFFFFFFFFFFFFFFFFFFFFFFFFFFFFFFFFFFFFFFFFFFFFFFFFFFFFFFF  
FFFFFFFF:FFFFFFFFFFFFFFFFFFFFFFFF:FFF:FFFFFFFFFFFFFFFFFFFFFFFF,FFFFFFFF  
FFFFFFFF:FFFFFFF

@A00721:190:HGJW7DSXY:4:1657:17607:33144 1:N:0:TCTGCAAG+GCTGCACT  
GTCTCTGAGATATAATCGAAGACTTGGTGTGTTACACCTCCTATGCAGTACAAGACGGAGTTTGTCA  
GAGTTAATAATATTGTGGACGTTGGCAGTATCGTTTGTATAAATGATTGTCCTACTGGAACCTCGGTC  
GATACGAGACATACC

+

FFFFFFFFFFFFFFFFFFFFFFFFFFFFFFFFFFFFFFFFFFFFFFFFFFFFFFFFFFFFFFFFFFFFFFFF  
FFFFFFFF:FFFFFFFFFFFFFFFFFFFFFFFFFFFFFFFFFFFFFFFFFFFFFFFFFFFFFFFFFFFFFFFF  
FFFFFFFFFFFFFFFF

@A00721:190:HGJW7DSXY:4:2227:15718:5040 1:N:0:TCTGCAAG+GCTGCACT  
GTCTCTGAGATATAATCGAAGACTTGGTGTGTTACACCTCCTATGCAGTACAAGACGGAGTTTGTCA  
GAGTTAATAATATTGTGGACGTTGGCAGTATCGTTTGTATAAATGATTGTCCTACTGGAACCTCGGTC  
GATACGAGACATACC

+

FFFFFFFFFFFFFFFFFFFFFFFFFFFFFFFFFFFFFFFFFFFFFFFFFFFFFFFFFFFFFFFFFFFFFFFF  
FFFFFFFFFFFFFFFFFFFFFFFFFFFFFFFFFFFFFFFFFFFFFFFFFFFFFFFFFFFFFFFFFFFFFFFF  
FFFFFFFFFFFFFFFF

@A00721:190:HGJW7DSXY:4:2503:8088:31939 1:N:0:TCTGCAAG+GCTGCACT  
GTCTCTGAGATATAATCGAAGACTTGGTGTGTTACACCTCCTATGCAGTACAAGACGGAGTTTGTCA  
GAGTTAATAATATTGTGGACGTTGGCAGTATCGTTTGTATAAATGATTGTCCTACTGGAACCTCGGTC  
GATACGAGACATAC

+

FFFFFF:FFFFFFFFFFFFFFFFFFFFFFFFFFFFFFFFFFFFFFFFFFFFFFFFFFFFFFFFFFFFFFFF  
FFFFFFFFFFFFFFFFFFFFFFFFFFFFFFFFFFFFFFFFFFFFFFFFFFFFFFFFFFFFFFFFFFFFFFFF  
FFFFFF,F:FFF:FF

@A00721:190:HGJW7DSXY:4:2572:15483:5822 1:N:0:TCTGCAAG+GCTGCACT  
GTCTCTGAGATATAATCGAAGACTTGGTGTGTTACACCTCCTATGCAGTACAATACGGAGTTTGTCA  
GAGTTAATAATATTGTGGACGTTGGCAGTATCGTTTGTATAAATGATTGTCCTACTGGAACCTCGGTC  
GATACGAGACATAC

+

FFFFF,FFFFFF,FFFFFFFFFFFFFFFFF:,FFFF:FF,F:FFFF:FFF,FFF:F,FFFFFF,FF,,F  
FFFFFFFFFFFF::FFFFFFFFF:FFFFFF:FFFFFFFFF:FFFF:FFFFFFFF:FFF:F,F  
FF,FF,FFFF:FF



$+$ 

+

+

+

+

+

+

[illegible]

FFFFFFFFFFFFFFFFFFFFFFFFFFFFFFFFFFFFFFFFFFFFFFFFFFFFFFFFFFFFFFFFFFFFFFFFFFFF  
FFF:FFFFFFFFFFFF

@A00721:190:HGJW7DSXY:4:1244:12825:8234 1:N:0:TCTGCAAG+GCTGCACT  
CTGAGATATAATCGAAGACTTGGTGTGTTACACCTCCTATGCAGTACAAGACGGAGTTTGTGAGAGT  
TAATAATATTGTGGACGTTGGCAGTATCGTTTGTATAAATGATTGTCCTACTGGAACCTCGGTCGATA  
CGAGACATACCCAGA

+

FFFFFFFFFFFFFFFFFFFFFFFFFFFFFFFFFFFFFFFFFFFFFFFFFFFFFFFFFFFFFFFFFFFFFFFFFFFF  
FFFFFFFFFFFFFFFFFFFFFFFFFFFFFFFFFFFFFFFFFFFFFFFFFFFFFFFFFFFFFFFFFFFFFFFFFFFF  
FFFFFFFFFFFFFFFFFFFF

@A00721:190:HGJW7DSXY:4:1641:27959:20384 1:N:0:TCTGCAAG+GCTGCACT  
CTGAGATATAATCGAAGACTTGGTGTGTTACACCTCCTATGCAGTACAAGACGGAGTTTGTGAGAGT  
TAATAATATTGTGGACGTTGGCAGTATCGTTTGTATAAATGATTGTCCTACTGGAACCTCGGTCGATA  
CGAGACATACCCAGA

+

FFFFFFFFFFFFFFFFFFFFFFFFFFFFFFFFFFFFFFFFFFFFFFFFFFFFFFFFFFFFFFFFFFFFFFFFFFFF,  
FFFFFFFFFFFFFFFFFFFFFFFFFFFFFFFFFFFFFFFFFFFFFFFFFFFFFFFFFFFFFFFFFFFFFFFFFFFF,  
FFFFFFFFFFFFFFFFFFFF,FFFFFFFFFFFF:FF,FFFFFFFFFFFFFFFFFFFFFFFFFFFF

@A00721:190:HGJW7DSXY:4:1674:12843:14747 1:N:0:TCTGCAAG+GCTGCACT  
CTGAGATATAATCGAAGACTTGGTGTGTTACACCTCCTATGCAGTACAAGACGGAGTTTGTGAGAGT  
TAATAATATTGTGGACGTTGGCAGTATCGTTTGTATAAATGATTGTCCTACTGGAACCTCGGTCGATA  
CGAGACATACCCAGA

+

FFFFFFFFFFFFFFFFFFFFFFFFFFFFFFFFFFFFFFFFFFFFFFFFFFFFFFFFFFFFFFFFFFFFFFFFFFFF  
FFFFFFFFFFFFFFFFFFFFFFFFFFFFFFFFFFFFFFFFFFFFFFFFFFFFFFFFFFFFFFFFFFFFFFFFFFFF  
FFFFFFFFFFFFFFFFFFFF

@A00721:190:HGJW7DSXY:4:2102:22996:10848 1:N:0:TCTGCAAG+GCTGCACT  
CTGAGATATAATCGAAGACTTGGTGTGTTACACCTCCTATGCAGTACAAGACGGAGTTTGTGAGAGT  
TAATAATATTGTGGACGTTGGCAGTATCGTTTGTATAAATGATTGTCCTACTGGAACCTCGGTCGATA  
CGAGACATACCCAGA

+

FFFFFFFFFFFFFFFFFFFFFFFFFFFFFFFFFFFFFFFFFFFFFFFFFFFFFFFFFFFFFFFFFFFFFFFFFFFF  
FFFFFFFFFFFFFFFFFFFFFFFFFFFFFFFFFFFFFFFFFFFFFFFFFFFFFFFFFFFFFFFFFFFFFFFFFFFF,  
FFFFFFFFFFFFFFFFFFFFFFFFFFFFFFFFFFFFFFFFFFFFFFFFFFFFFFFFFFFFFFFFFFFFFFFFFFFF

@A00721:190:HGJW7DSXY:4:2139:27227:14606 1:N:0:TCTGCAAG+GCTGCACT  
CTGAGATATAATCGAAGACTTGGTGTGTTACACCTCCTATGCAGTACAAGACGGAGTTTGTGAGAGT  
TAATAATATTGTGGACGTTGGCAGTATCGTTTGTATAAATGATTGTCCTACTGGAACCTCGGTCGATA  
CGAGACATACCCAGA

+

FFFFFFFFFFFFFFFFFFFFFFFFFFFFFFFFFFFFFFFFFFFFFFFFFFFFFFFFFFFFFFFFFFFFFFFFFFFF:FFF  
FFFFFFFFFFFFFFFFFFFFFFFFFFFFFFFFFFFFFFFFFFFFFFFFFFFFFFFFFFFFFFFFFFFFFFFFFFFF:FFFFFFFFFFFFFFFFFFFFFFFFFFFF  
FFFFFFFFFFFFFFFFFFFF

@A00721:190:HGJW7DSXY:4:1349:1136:6402 1:N:0:TCTGCAAG+GCTGCACT  
AGATATAATCGAAGACTTGGTGTGTTACACCTCCTATGCAGTACAAGACGGAGTTTGTGAGAGTTAA  
TAATATTGTGGACGTTGGCAGTATCGTTTGTATAAATGATTGTCCTACTGGAACCTCGGTCGATACGA  
GACATACCCAGA

+

F:F,F:FFFF,FFFFFFFFFFFF:FFFFFFFFFFFFFFFFFFFFFFFFFFFFFFFFFFFF:F:FFFFFFFFFFFFFFFF:FFFF  
FFFFFFFF:FFFFFFFFFFFF,FFFFFFFFFFFF:FFFFFFFF,FF:FFF:FF,FFFFFFFFFFFF:FFFFFFF,FF  
FF:FFFF:FFF

@A00721:190:HGJW7DSXY:4:1578:17219:19351 1:N:0:TCTGCAAG+GCTGCACT  
AGATATAATCGAAGACTTGGTGTGTTACACCTCCTATGCAGTACAAGACGGAGTTTGTGAGAGTTAA  
TAATATTGTGGACGTTGGCAGTATCGTTTGTATAAATGATTGTCCTACTGGAACCTCGGTCGATACGA  
GAGATCTGAAGAG

+  
F,F,F:FF:F:F:FF:FF:FF:FF,FFF:FF,FFFFFF,FFFFFFFF,FFF,FFF:FF,FFFFFFFF  
FFFFFFFF:F:FFFFFFFFF,:FFF:FFFFFFFFFFFF,FFFF:F,FF::F,FFFFFF,FFFFFFFF  
:::FFF,FFF:F

@A00721:190:HGJW7DSXY:4:1126:21296:12101 1:N:0:TCTGCAAG+GCTGCACT  
CTCACTTTCTGGGTATGTCTCGTATCGACCGAGGTTCCAGTAGGACAATCATTTATACAAACGATACT  
GCCAACGTCCACAATATTATTAAGTCTGACAACTCCGCTTGTACTGCATAGGAGGTGTGAACACAC  
CAAGTCTTCGATTAT

+  
FFFFFFFFFFFFFFFFFFFFFFFFFFFFFFFFFFFFFFFFFFFFFFFFFFFFFFFFFFFFFFFF  
FFFFFFFFFFFFFFFFFFFFFFFFFFFFFFFFFFFFFFFFFFFFFFFFFFFFFFFFFFFFFFFF  
FFFFFFFFFFFFFFFF

@A00721:190:HGJW7DSXY:4:1509:9824:33004 1:N:0:TCTGCAAG+GCTGCACT  
CTCACTTTCTGGGTATGTCTCGTATCGACCGAGGTTCCAGTAGGACAATCATTTATACAAACGATACT  
GCCAACGTCCACAATATTATTAAGTCTGACAACTCCGCTTGTACTGCATAGGAGGTGTGAACACAC  
CAAGTCTTCGATTAT

+  
FFFFFFFFFFFFFFFFFFFFFFFFFFFFFFFFFFFFFFFFFFFFFFFFFFFFFFFFFFFFFFFF  
FFFFFFFFFFFFFFFFFFFFFFFFFFFFFFFFFFFFFFFFFFFFFFFFFFFFFFFFFFFFFFFF  
FFFFFFFFFFFFFFFF

@A00721:190:HGJW7DSXY:4:2455:3947:28244 1:N:0:TCTGCAAG+GCTGCACT  
CTCACTTTCTGGGTATGTCTCGTATCGACCGAGGTTCCAGTAGGACAATCATTTATACAAACGATACT  
GCCAACGTCCACAATATTATTAAGTCTGACAACTCCGCTTGTACTGCATAGGAGGTGTGAACACAC  
CAAGTCTTCGATTAT

+  
FFFFFFFFFFFFFFFFFFFFFFFFFFFFFFFFFFFFFFFFFFFFFFFFFFFFFFFFFFFFFFFF  
FFFFFFFFFFFFFF:FFFFFF,FFFFFFFFFFFFFFFFFFFFFFFFFFFFFFFFFFFFFFFF  
FFFFFFFFFFFF:FFF

@A00721:190:HGJW7DSXY:4:2527:16685:21245 1:N:0:TCTGCAAG+GCTGCACT  
CTCACTTTCTGGGTATGTCTCGTATCGACCGAGGTTCCAGTAGGACAATCATTTATACAAACGATACT  
GCCAACGTCCACAATATTATTAAGTCTGACAACTCCGCTTGTACTGCATAGGAGGTGTGAACACAC  
CAAGTCTTCGATTAT

+  
FFFFFFFFFFFFFFFFFFFFFFFFFFFFFFFFFFFFFFFFFFFFFFFFFFFFFFFFFFFFFFFF  
FFFFFFFFFFFFFFFFFFFFFFFFFFFFFFFFFFFFFFFFFFFFFFFFFFFFFFFFFFFFFFFF  
FFFFFFFFFFFFFFFF

@A00721:190:HGJW7DSXY:4:2550:31548:1924 1:N:0:TCTGCAAG+GCTGCACT  
CTCACTTTCTGGGTATGTCTCGTATCGACCGAGGTTCCAGTAGGACAATCATTTATACAAACGATACT  
GCCAACGTCCACAATATTATTAAGTCTGACAACTCCGCTTGTACTGCATAGGAGGTGTGAACACAC  
CAAGTCTTCGATTAT

+  
FFFFFFFFFFFFFFFFFFFFFFFFFFFFFFFFFFFFFFFFFFFFFFFFFFFFFFFFFFFFFFFF  
FFFFFFFFFFFFFFFFFFFFFFFFFFFFFFFFFFFFFFFFFFFFFFFFFFFFFFFFFFFFFFFF  
FFFFFFFFFFFFFFFF

@A00721:190:HGJW7DSXY:4:2601:4526:31501 1:N:0:TCTGCAAG+GCTGCACT  
CTCACTTTCTGGGTATGTCTCGTATCGACCGAGGTTCCAGTAGGACAATCATTTATACAAACGATACT  
GCCAACGTCCACAATATTATTAAGTCTGACAACTCCGCTTGTACTGCATAGGAGGTGTGAACACAC  
CAAGTCTTCGATTAT

+  
FFFFFFFFFFFFFFFFFFFFFFFFFFFFFFFFFFFFFFFFFFFFFFFFFFFFFFFFFFFFFFFF  
FFFF:FFFFFFFFFFFFFF:FFFFFFFFFFFF:FFFFFFFFFFFFFFFF:FFFFFFFFFFFFFFFF  
FFFFFFFFFFFF:FFF

@A00721:190:HGJW7DSXY:4:1102:8847:6261 1:N:0:TCTGCAAG+GCTGCACT  
CGAAGACTTGGTGTGTTCCACATCTCCTATGCAGTACAAGACGGAGTTTGTGAGAGTTAATAATATTGT



@A00721:190:HGJW7DSXY:4:1549:12536:22733 1:N:0:TCTGCAAG+GCTGCACT  
GTTACACCTCCTATGCAGTACAAGACGGAGTTTGTGAGAGTTAATAATATTGTGGACGTTGGCAGTA  
TCGTTTGTATAAATGATTGTCCTACTGGAACCTCGGTCGATACGAGACATACCCAGAAAGTGAGATGG  
AATCGAATTGT

[illegible]

+

[illegible]

+

[illegible]

+

```

FFFFFFFFFFFFFFFFFFFFFFFFFFFFFFFF:FFFFFFFFFFFFFFFFFFFFFFFFFFFFFFFF
FFFFFFFFFFFFFFFFFFFFFFFFFFFFFFFF,FFFFFFFFFFFFFFFF,FFFFFFFFFFFFFFFF
FFFFFFFFFFFFFFFF

```

+

[illegible]

+

[illegible]

+

```
FFFFFFFFFFFFFFFFFFFFFFFFFFFF;FFF:FFFFFFFFFFFFFFFFFFFFFFFFFFFFFFFFFFFFFF,FFF
```

FFFFF:FFFFFFFFFFFFFFFFFFFFFFFFFFFFFFFFFFFFFFFFFFFFFFFFFFFFFFFFFFFFFFFF,FFFFF  
FFFFFFFFFFFFFFFF:

@A00721:190:HGJW7DSXY:4:1303:7491:30843 1:N:0:TCTGCAAG+GCTGCACT  
ATGCAGTACAAGACGGAGTTTGTCTAGAGTTAATAATATTGTGGACGTTGGCAGTATCGTTTGTATAAA  
TGATTGTCCTACTGGAACCTCGGTCGATACGAGACATACCCAGAAAGTGAGATGGAATCGAATTGTGC  
TTAACGGTTCAGTTA

+

FFFFFFFFFFFFFFFFFFFFFFFFFFFFFFFFFFFFFFFFFFFFFFFFFFFFFFFFFFFFFFFF,FFFFFFFFF  
FFFFFFFFFFFFFFFFFFFFFFFFFFFFFFFFFFFFFFFFFFFFFFFFFFFFFFFF:FFFFF,FFFFFFFFFFFFFF:FFFFFFF:FFF  
FFFFFFFFFFFFFF:FF

@A00721:190:HGJW7DSXY:4:1346:23628:3521 1:N:0:TCTGCAAG+GCTGCACT  
ATGCAGTACAAGACGGAGTTTGTCTAGAGTTAATAATATTGTGGACGTTGGCAGTATCGTTTGTATAAA  
TGATTGTCCTACTGGAACCTCGGTCGATACGAGACATACCCAGAAAGTGAGATGGAATCGAATTGTGC  
TTAACGGTTCAGTTA

+

FFFFFFFFFFFFFFFFFFFFFFFFFFFFFFFFFFFFFFFFFFFFFFFFFFFFFFFFFFFFFFFF,FFFFFFFFFFF  
FFFFFFFFFFFFFFFFFFFFFFFFFFFFFFFFFFFFFFFFFFFFFFFFFFFFFFFFFFFFFFFF:FFFFFFFFFFFFFFF  
FFFFFFFFFFFFFFF

@A00721:190:HGJW7DSXY:4:1554:19425:13526 1:N:0:TCTGCAAG+GCTGCACT  
ATGCAGTACAAGACGGAGTTTGTCTAGAGTTAATAATATTGTGGACGTTGGCAGTATCGTTTGTAGAAA  
TGATTGTCCTACTGGAACCTCGGTCGATACGAGACATACCCAGAAAGTGAGATGGAATCGAATTGTGC  
TTAACGGTTCAGTTA

+

FFFFFFFFFFFFFFFFFFFFFFFFFFFFFFFFFFFFFFFFFFFFFFFFFFFFFFFFFFFFFFFF,FFF  
FFFFFFFFFFFFFFFFFFFFFFFFFFFFFFFFFFFFFFFFFFFFFFFFFFFFFFFFFFFFFFFF:FFFFFFFFFFFFF  
FFFFFFFFFFFFFFF

@A00721:190:HGJW7DSXY:4:2337:14253:29121 1:N:0:TCTGCAAG+GCTGCACT  
ATGCAGTACAAGACGGAGTTTGTCTAGAGTTAATAATATTGTGGACGTTGGCAGTATCGTTTGTATAAA  
TGATTGTCCTACTGGAACCTCGGTCGATACGAGACATACCCAGAAAGTGAGATGGAATCGAATTGTGC  
TTAACGGTTCAGTTA

+

FFFFFFFFFFFFFFFFFFFFFFFFFFFFFFFFFFFFFFFFFFFFFFFFFFFFFFFFFFFFFFFF,FFFFFFFFFFF  
FFFFFFFFFFFFFFFFFFFFFFFFFFFFFFFFFFFFFFFFFFFFFFFFFFFFFFFFFFFFFFFF:FFFFF:F:FFFFFFFFFF  
FFFFF:F:FFFFFFFFFF

@A00721:190:HGJW7DSXY:4:2459:5204:17174 1:N:0:TCTGCAAG+GCTGCACT  
ATGCAGTACAAGACGGAGTTTGTCTAGAGTTAATAATATTGTGGACGTTGGCAGTATCGTTTGTATAAA  
TGATTGTCCTACTGGAACCTCGGTCGATACGAGACATACCCAGAAAGTGAGATGGAATCGAATTGTGC  
TTAACGGTTCAGTTA

+

FFFFFFFFFFFFFFFFFFFFFFFFFFFFFFFFFFFFFFFFFFFFFFFFFFFFFFFF:FFF,F:FFFFFFFFF:FFF:FFFFFFFFF  
FFFFFFFFFFFFFFFFFFFFFFFFFFFFFFFFFFFFFFFFFFFFFFFFFFFFFFFF:FFFF,FFFFFFFF:FFFFFFF  
FFFFFFF:FF:FFFFF

@A00721:190:HGJW7DSXY:4:1268:19840:21668 1:N:0:TCTGCAAG+GCTGCACT  
ACAAGACGGAGTTTGTCTAGAGTTAATAATATTGTGGACGTTGGCAGTATCGTTTGTATAAATGATTGT  
CCTACTGGAACCTCGGTCGATACGAGACATACCCAGAAAGTGAGATGGAATCGAATTGTGCTTAACGG  
TTCAGTTAAGTTGAC

+

FFFFF,FFFFF,FFFFFFF:FF:FFFFFFFFF:FFFFFF:FFFFFFFFFFFFFF,FFFFFFFFF  
FFFFFFFF:FF:FFF:FFFFFFFFFFFFFFFFFFFFFFFF:FFFFFFFFF:F:FFFFFFFFF:FFFFFFF,  
:FFFF:FFFFFFFFF

@A00721:190:HGJW7DSXY:4:1336:19678:31782 1:N:0:TCTGCAAG+GCTGCACT  
ACAAGACGGAGTTTGTCTAGAGTTAATAATATTGTGGACGTTGGCAGTATCGTTTGTATAAATGATTGT  
CCTACTGGAACCTCGGTCGATACGAGACATACCCAGAAAGTGAGATGGAATCGAATTGTGCTTAACGG  
TTCAGTTAAGTTGAC

+  
FFFFFFFFFFFFFFFFFFFFFFFFFFFFFFFFFFFFFFFFFFFFFFFFFFFFFFFFFFFFFFFFFFFFFFFF  
FFFFFFFF,FFFFFFFFFFFFFFFFFFFFFFFFFFFFFFFFFFFFFFFFFFFFFFFFFFFFFFFFFFFFFFFF  
FFFFFFFFFFFFFFFF:FF  
@A00721:190:HGJW7DSXY:4:1577:10285:24158 1:N:0:TCTGCAAG+GCTGCACT  
ACAAGACGGAGTTTGTCTAGAGTTAATAATATTGTGGACGTTGGCAGTATCGTTTGTATAAATGATTGT  
CCTACTGGAACCTCGGTCGATACGAGACATACCCAGAAAGTGAGATGGAATCGAATTGTGCTTAACGG  
TTCAGTTAAGTTGAC  
+  
FFFFFFFFFFFFFFFFFFFFFFFFFFFFFFFFFFFFFFFFFFFFFFFFFFFFFFFFFFFFFFFFFFFFFFFF  
FFFFFFFF,FFFFFFFFFFFFFFFF:FFFFFFFFFFFFFFFFFFFFFFFFFFFFFFFFFFFFFFFFFFFFFFFF  
FFF:FFFFFFFF  
@A00721:190:HGJW7DSXY:4:1627:26051:6496 1:N:0:TCTGCAAG+GCTGCACT  
ACAAGACGGAGTTTGTCTAGAGTTAATAATATTGTGGACGTTGGCAGTATCGTTTGTATAAATGATTGT  
CCTACTGGAACCTCGGTCGATACGAGACATACCCAGAAAGTGAGATGGAATCGAATTGTGCTTAACGG  
TTCAGTTAAGTTGAC  
+  
FFFF:FFFFFFFFFFFFFFFF,FFFFFFFFFFFFFFFFFFFFFFFFFFFFFFFF:FF:FFF:FFF:F:FF::F:,FF  
FF,FFFF:,FFF:FFFFFFFF:FFFF:FFFFFFFFFFFFFFFF:FF,FFFF:FFFFFFFF  
:FFFF:FFFF,FF  
@A00721:190:HGJW7DSXY:4:1627:25319:7545 1:N:0:TCTGCAAG+GCTGCACT  
ACAAGACGGAGTTTGTCTAGAGTTAATAATATTGTGGACGTTGGCAGTATCGTTTGTATAAATGATTGT  
CCTACTGGAACCTCGGTCGATACGAGACATACCCAGAAAGTGAGATGGAATCGAATTGTGCTTAACGG  
TTCAGTTAAGTTGAC  
+  
FFFFFFFFFFFFFFFFFFFFFFFFFFFFFFFFFFFFFFFFFFFFFFFFFFFFFFFFFFFFFFFFFFFFFFFF  
FFFFFFFFFFFFFFFFFFFFFFFF:FFFFFFFFFFFFFFFFFFFFFFFF:FFFF,FFFFFFFF  
:FFFFFFFF  
@A00721:190:HGJW7DSXY:4:2207:5457:11412 1:N:0:TCTGCAAG+GCTGCACT  
ACAAGACGGAGTTTGTCTAGAGTTAATAATATTGTGGACGTTGGCAGTATCGTTTGTATAAATGATTGT  
CCTACTGGAACCTCGGTCGATACGAGACATACCCAGAAAGTGAGATGGAATCGAATTGTGCTTAACGG  
TTCAGTTAAGTTGAC  
+  
F:FFFF:FFFF:F:FFFF:FFFFFFFFFFFFFFFF:FF:F,:F:FFFFFFFFFFFFFFFF  
::FFFFFFFF,FFFFFFFF:F:FFFFFFFF,FFFF:FFFFFFFF,FF,FF,FFFF  
FF:F,FFFF::F,F:  
@A00721:190:HGJW7DSXY:4:2216:7102:1548 1:N:0:TCTGCAAG+GCTGCACT  
ACAAGACGGAGTTTGTCTAGAGTTAATAATATTGTGGACGTTGGCAGTATCGTTTGTATAAATGATTGT  
CCTACTGGAACCTCGGTCGATACGAGACATACCCAGAAAGTGAGATGGAATCGAATTGTGCTTAACGG  
TTCAGTTAAGTTGAC  
+  
FFFFFFFFFFFFFFFFFFFFFFFF:FFFFFFFFFFFFFFFF:FFFFFFFF:FFFFFFFF:FF  
FFFFFFFF:FFF,FFFFFF:F:FFFFFFFF::FF:FFFF:FFFFFFFF:FFFFFF  
F,:FFFFFFFF  
@A00721:190:HGJW7DSXY:4:2274:31394:14434 1:N:0:TCTGCAAG+GCTGCACT  
ACAAGACGGAGTTTGTCTAGAGTTAATAATATTGTGGACGTTGGCAGTATCGTTTGTATAAATGATTGT  
CCTACTGGAACCTCGGTCGATACGAGACATACCCAGAAAGTGAGATGGAATCGAATTGTGCTTAACGG  
TTCAGTTAAGTTGAC  
+  
FFFFFFFFFFFFFFFFFFFFFFFF:FFFFFFFFFFFFFFFF:FFFFFFFFFFFFFFFFFFFFFFFF  
:FFFFFFFFFFFFFFFFFFFFFFFFFFFFFFFFFFFFFFFFFFFFFFFF,FFFFFFFF  
::,FFFFFFFF:  
@A00721:190:HGJW7DSXY:4:2325:9091:12289 1:N:0:TCTGCAAG+GCTGCACT  
ACAAGACGGAGTTTGTCTAGAGTTAATAATATTGTGGACGTTGGCAGTATCGTTTGTATAAATGATTGT





$+$ 

@

+

@

+

@

+

@

+

@

+

©

+

1

@A00721:190:HGJW7DSXY:4:1510:12843:36104 1:N:0:TCTGCAAG+GCTGCACT  
GACGGAGTTTGTCTAGAGTTAATAATATTGTGGACGTTGGCAGTATCGTTTGTATAAATGATTGTCCTA  
CTGGAACCTCGGTCGATACGAGACATACCCAGAAAGTGAGATGGAATCGAATTGTGCTTAACGGTTCA  
GTTAAGTTGACAGAT

@A00721:190:HGJW7DSXY:4:1574:15203:9502 1:N:0:TCTGCAAG+GCTGCACT  
GCTAGTCAACTTAACTGAACCGTTAAGCACAAATTCGATTCCATCTCACTTTCTGGGTATGTCTCGTAT  
CGACCGAGGTTCCAGTAGGACAATCATTTATACAAACGATACTGCCAACGTCCACAATATTATTA  
CTGACAAACTCCGTC

@A00721:190:HGJW7DSXY:4:2142:18159:22420 1:N:0:TCTGCAAG+GCTGCACT  
GACGGAGTTTGTCTAGAGTTAATAATATTGTGGACGTTGGCAGTATCGTTTGTATAAATGATTGTCCTA  
CTGGAACCTCGGTCGATACGAGACATAACCAGAAAGTGAGATGGAATCGAATTGTGCTTAACGGTTCA  
GTTAAGTTGACAGAT

@A00721:190:HGJW7DSXY:4:2253:29713:5415 1:N:0:TCTGCAAG+GCTGCACT  
GACGGAGTTTGTGACAGTTAATAATATTGTGGACGTTGGCAGTATCGTTTGTATAAATGATTGTCCTA  
CTGGAACCTCGGTCGATACGAGACATAACCCAGAAAGTGAGATGGAATCGAATTGTGCTTAACGGTTCA  
GTTAAGTTGACAGAT

@A00721:190:HGJW7DSXY:4:2477:14877:9032 1:N:0:TCTGCAAG+GCTGCACT  
GACGGAGTTTGTGACAGTTAATAATATTGTGGACGTTGGCAGTATCGTTTGTATAAATGATTGTCCTA  
CTGGAACCTCGGTCGATACGAGACATAACCCAGAAAGTGAGATGGAATCGAATTGTGCTTAACGGTTCA  
GTTAAGTTGACAGAT

@A00721:190:HGJW7DSXY:4:2665:7473:31031 1:N:0:TCTGCAAG+GCTGCACT  
GACGGAGTTTGTGACAGTTAATAATATTGTGGACGTTGGCAGTATCGTTTGTATAAATGATTGTCCTA  
CTGGAACCTCGGTCGATACGAGACATACCCAGAAAGTGAGATGGAATCGAATTGTGCTTAACGGTTCA  
GTTAAGTTGACAGAT

@A00721:190:HGJW7DSXY:4:2372:18304:36542 1:N:0:TCTGCAAG+GCTGCACT  
CACGGAGTTTGTGACAGTTAATAATATTGTGGACGTTGGCAGTATCGTTTGTATAAATGATTGTCCTA  
CTGGAACCTCGGTGATACGAGACATACCCAGAAAGTGAGATGGAATCGAATTGTGCTTAACGGTTCA  
GTTAAGTTGACTAGC

```

FFFFFFFFFFFFFFFFFFFFFFFF:FFFFFFFFFFFF:FFFFFFFFFFFFFFFFFFFFFFFF:FFFFFFFFFFFFFFFFFFFF:
FFFFFFFFFFFFFFFFFFFFFFFF:FFFFFFFFFFFFFFFFFFFFFFFF:FFFFF:FFFFFFFFFFFFFFFFFFFFFFFF
:FFFFFFFF:FFFF,F

```

[illegible][illegible][illegible]

```

FFFFFFFFFFFFFFFFFFFFFFFFFFFFFFFFFFFFFFFF:FFFFFFFFFFFFFFFFFFFFFFFFFFFF
FFFFFFFFFFFFFFFFFFFFFFFF:FFFFFFFFFFFF:FFFFFFFFFFFF:F:FFFFFFFFFFFFFFFFFFFF
FFFFF,FFFFFFF

```

[illegible][illegible]

@A00721:190:HGJW7DSXY:4:1548:21920:27899 1:N:0:TCTGCAAG+GCTGCACT  
CAGAGTTAATAATATTGTGGACGTTGGCAGTATCGTTTGTATAAATGATTGTCCTACTGGAACCTCGG



@A00721:190:HGJW7DSXY:4:2377:14091:20917 1:N:0:TCTGCAAG+GCTGCACT  
CAGAGTTAATAATATTGTGGACGTTGGCAGTATCGTTTGTATAAATGATTGTCCTACTGGAACCTCGG  
TCGATACGAGACATACCCAGAAAGTGAGATGGAATCGAATTGTGCTTAACGGTTCAGTTAAGTTGACT  
AGCGAAGCCAATGTT

+

FFFFFFFFFFFFFFFFFFFFFFFFFFFFFFFFFFFFFFFFFFFFFFFFFFFFFFFFFFFFFFFFFFFFFFFF  
FFFFFFFFFFFFFFFFFFFFFFFFFFFFFFFFFFFFFFFFFFFFFFFFFFFFFFFFFFFFFFFFFFFFFFFF  
FFFF:F:FFFFFFFF

@A00721:190:HGJW7DSXY:4:2438:27380:6511 1:N:0:TCTGCAAG+GCTGCACT  
CAGAGTTAATAATATTGTGGACGTTGGCAGTATCGTTTGTATAAATGATTGTCCTACTGGAACCTCGG  
TCGATACGAGACATACCCAGAAAGTGAGATGGAATCGAATTGTGCTTAACGGTTCAGTTAAGTTGACT  
AGCGAAGCCAATGTT

+

FFFFFFFFFFFFFFFFFFFFFFFFFFFFFFFFFFFFFFFFFFFFFFFFFFFFFFFFFFFFFFFFFFFFFFF:FFFFFFFFFFFFFFFF  
FFFFFFFFFFFFFFFFFFFFFFFFFFFFFFFFFFFFFFFFFFFFFFFFFFFFFFFFFFFFFFFFFFFFFFFFF:FFFFFFFFFFFFFFFF  
FF:FFFFFFFF:FFFF

@A00721:190:HGJW7DSXY:4:2508:4643:6151 1:N:0:TCTGCAAG+GCTGCACT  
CAGAGTTAATAATATTGTGGACGTTGGCAGTATCGTTTGTATAAATGATTGTCCTACTGGAACCTCGG  
TCGATACGAGACATACCCAGAAAGTGAGATGGAATCGAATTGTGCTTAACGGTTCAGTTAAGTTGACT  
AGCGAAGCCAATGTT

+

FFFFFFFFFFFFFFFFFFFFFFFFFFFFFFFFFFFFFFFFFFFFFFFFFFFFFFFFFFFFFFFFFFFFFFF:FFFFFFF  
FFFFFFFFF,FFFFFFFFFFFFFFFFFFFFFFFFFFFFFFFFFFFFFFFFFFFFFFFFFFFFFFFFFFFFFFF  
F:FFFFFFFF:F:FFF

@A00721:190:HGJW7DSXY:4:2543:21007:23437 1:N:0:TCTGCAAG+GCTGCACT  
CAGAGTTAATAATATTGTGGACGTTGGCAGTATCGTTTGTATAAATGATTGTCCTACTGGAACCTCGG  
TCGATACGAGACATACCCAGAAAGTGAGATGGAATCGAATTGTGCTTAACGGTTCAGTTAAGTTGACT  
AGCGAAGCCAATGTT

+

FFFFFFFFFFFFFFFFFFFFFFFFFFFFFFFFFFFFFFFFFFFFFFFFFFFFFFFFFFFFFFFFFFFFFFF  
FFFFFFFFFFFFFFF:FFFFFFFFFFFFFFFFFFFFFFFFFFFFFFFFFFFFFFFFFFFFFFFFFFFFFFFF  
FFFFFFFFFFFFFFFFF

@A00721:190:HGJW7DSXY:4:2614:12979:1141 1:N:0:TCTGCAAG+GCTGCACT  
CAGAGTTAATAATATTGTGGACGTTGGCAGTATCGTTTGTATAAATGATTGTCCTACTGGAACCTCGG  
TCGATACGAGACATACCCAGAAAGTGAGATGGAATCGAATTGTGCTTAACGGTTCAGTTAAGTTGACT  
AGCGAAGCCAATGTT

+

FFFFFFFFFFFFFFFFFFFFFFFFFFFFFFF:FFF:FFFFFF:FFFFFFFFFF:FF:FFFFFFFF:FFF:FFFF  
FF,FFFF,F,F,:FF:FF:FFFFFFFFFFFFFFFFFFFF,FFFFFFFFFFFFFF,FFFFFFF:,FFF  
F,FFFF:FF:FF:FF

@A00721:190:HGJW7DSXY:4:1456:16929:20102 1:N:0:TCTGCAAG+GCTGCACT  
AGAGTTAATAATATTGTGGACGTTGGCAGTATCGTTTGTATAAATGATTGTCCTACTGGAACCTCGGT  
CGATACGAGACATACCCAGAAAGTGAGATGGAATCGAATTGTGCTTAAGGTTAAGTTAAGTTGACTA  
GCGAAGCCAATGTT

+

FFFF,FFFFFFFF,FF,FF::FFF::F:FFF:FFFF:FFFFFFFF:F:F:F,FFFFFF:FF:F:F::  
FFFF,FFFF,FFFFFFFFFFFF,FFF,:,FF:F:F,FFFF,FFFF,F::F,F,FFFF:FFFFFF  
,FFFF,FFFF,FF

@A00721:190:HGJW7DSXY:4:1578:18530:7341 1:N:0:TCTGCAAG+GCTGCACT  
AGAGTTAATAATATTGTGGACGTTGGCAGTATCGTTTGTATAAATGATTGTCCTACTGGAACCTCGGT  
CGATACGAGACATACCCAGAAAGTGAGATGGAATCGAATTGTGCTTAACGGTTCAGTTAAGTTGACTA  
GCGAAGCCAATGTT

+

FFFFFFFFFFFFFFFFFFFFFFFFFFFFFFF:FFFFFFFFFFFFFF:FFFFFFFFFFFFFFFFFFFFFFF:F

@A00721:190:HGJW7DSXY:4:1610:19768:23140 1:N:0:TCTGCAAG+GCTGCACT  
AGAGTTAATAATATTGTGGACGTTGGCAGTATCGTTTGTATAAATGATTGTCCTACTGGAACCTCGGT  
CGATACGAGACATACCCAGAAAGTGAGATGGAATCGAATTGTGCTTAACGGTTCAGTTAAGTTGACTA  
GCGAAGCCAATGTTC

@A00721:190:HGJW7DSXY:4:2660:11605:2300 1:N:0:TCTGCAAG+GCTGCACT  
AGAGTTAATAATATTGTGGACGTTGGCAGTATCGTTTGTATAAATGATTGTCCTACTGGAACCTCGGT  
CGATACGAGACATACCCAGAAAGTGAGATGGAATCGAATTGTGCTTAACGGTTCAGTTAAGTTGACTA  
GCGAAGCCAATGTTC

@A00721:190:HGJW7DSXY:4:1107:21459:4867 1:N:0:TCTGCAAG+GCTGCACT  
GAGTTAATAATATTGTGGACGTTGGCAGTATCGTTTGTATAAATGATTGTCCTACTGGAACCTCGGTC  
GATACGAGACATACCCAGAAAGTGAGATGGAATCGAATTGTGCTTAACGGTTCAGTTAAGTTGACTAG  
CGAAGCCAATG

@A00721:190:HGJW7DSXY:4:1328:32199:18364 1:N:0:TCTGCAAG+GCTGCACT  
GAGTTAATAATATTGTGGACGTTGGCAGTATCGTTTGTATAAATGATTGTCCTACTGGAACCTCGGTC  
GATACGAGACATACCCAGAAAGTGAGATGGAATCGAATTGTGCTTAACGGTTCAGTTAAGTTGACTAG  
CGAAGCCAATG

@A00721:190:HGJW7DSXY:4:1418:32145:21809 1:N:0:TCTGCAAG+GCTGCACT  
GAGTTAATAATATTGTGGACGTTGGCAGTATCGTTTGTATAAATGATTGTCCTACTGGAACCTCGGTC  
GATACGAGACATACCCAGAAAGTGAGATGGAATCGAATTGTGCTTAACGGTTCAGTTAAGTTGACTAG  
CGAAGCCAAT

@A00721:190:HGJW7DSXY:4:1505:18014:1877 1:N:0:TCTGCAAG+GCTGCACT  
GAGTTAATAATATTGTGGACGTTGGCAGTATCGTTTGTATAAATGATTGTCCTACTGGAACCTCGGTC  
GATACGAGACATACCCAGAAAGTGAGATGGAATCGAATTGTGCTTAACGGTTCAGTTAAGTTGACTAG  
CGAAGCCAATG

@A00721:190:HGJW7DSXY:4:1556:31801:17738 1:N:0:TCTGCAAG+GCTGCACT  
GAGTTAATAATATTGTGGACGTTGGCAGTATCGTTTGTATAAATGATTGTCCTACTGGAACCTCGGTC  
GATACGAGACATACCCAGAAAGTGAGATGGAATCGAATTGTGCTTAACGGTTCAGTTAAGTTGACTAG  
CGAAGCCAATG

+  
FFFFFFFFFFFFFFFFFFFFFFFFFFFFFFFFFFFFFFFFFFFFFFFFFFFFFFFFFFFFFFFFFFFFFFFF  
FFFFFFFFFFFFFFFFFFFFFFFFFFFFFFFFFFFFFFFFFFFFFFFFFFFFFFFFFFFFFFFFFFFFFFFF  
FFFFFFFFFFFF:

@A00721:190:HGJW7DSXY:4:1571:2184:9345 1:N:0:TCTGCAAG+GCTGCACT  
GAGTTAATAATATTGTGGACGTTGGCAGTATCGTTTGTATAAATGATTGTCCTACTGGAACCTCGGTC  
GATACGAGACATACCCAGAAAGTGAGATGGAATCGAATTGTGCTTAACGGTTCAGTTAAGTTGACTAG  
CGAAGCCAATG

+  
FFFFFFFFFFFFFFFFFFFFFFFFFFFFFFFFFFFFFFFFFFFFFFFFFFFFFFFFFFFFFFFFFFFFFFFF  
FFFF:FFFFFFFFFFFFFFFFFFFFFFFFFFFFFFFFFFFFFFFFFFFFFFFFFFFFFFFFFFFFFFFF  
FFFF:F:FFFF

@A00721:190:HGJW7DSXY:4:1601:14407:7122 1:N:0:TCTGCAAG+GCTGCACT  
GAGTTAATAATATTGTGGACGTTGGCAGTATCGTTTGTATAAATGATTGTCCTACTGGAACCTCGGTC  
GATACGAGACATACCCAGAAAGTGAGATGGAATCGAATTGTGCTTAACGGTTCAGTTAAGTTGACTAG  
CGAAGCCAATG

+  
FFFFFFF:FFFFFFFFFFFFFFFFFFFFFFFFFFFFFFFFFFFFFFFFFFFFFFFFFFFFFFFFFFFFFFF  
FFFFFFFFFFFFFFFFFFFFFFFFFFFFFFFFFFFFFFFFFFFFFFFFFFFFFFFFFFFFFFFFFFFFFFF  
FFFFFFFFF,FF

@A00721:190:HGJW7DSXY:4:1614:27317:18208 1:N:0:TCTGCAAG+GCTGCACT  
GAGTTAATAATATTGTGGACGTTGGCAGTATCGTTTGTATAAATGATTGTCCTACTGGAACCTCGGTC  
GATACGAGACATACCCAGAAAGTGAGATGGAATCGAATTGTGCTTAACGGTTCAGTTAAGTTGACTAG  
CGAAGCCAATG

+  
FFFFFFFFFFFFFFFFFFFFFFFFFFFFFFFFFFFFFFFFFFFFFFFFFFFFFFFFFFFFFFFFFFFFFFF  
FFFFFFFFFFFFFFFFFFFFFFFFFFFFFFFFFFFFFFFFFFFFFFFFFFFFFFFFFFFFFFFFFFFFFFF  
FFFF:FFFFF

@A00721:190:HGJW7DSXY:4:2152:5231:36949 1:N:0:TCTGCAAG+GCTGCACT  
GAGTTAATAATATTGTGGACGTTGGCAGTATCGTTTGTATAAATGATTGTCCTACTGGAACCTCGGTC  
GATACGAGACATACCCAGAAAGTGAGATGGAATCGAATTGTGCTTAACGGTTCAGTTAAGTTGACTAG  
CGAAGCCAATG

+  
FFFFFFFFFFFFFFFFFFFFFFFFFFFFFFFFFFFFFFFFFFFFFFFFFFFFFFFFFFFFFFFFFFFFFFF  
FFFFFFFFFFFFFFFFFFFFFFFFFFFFFFFFFFFFFFFFFFFFFFFFFFFFFFFFFFFFFFFFFFFFFFF  
FFFFFFFFFFFF

@A00721:190:HGJW7DSXY:4:2160:11153:7059 1:N:0:TCTGCAAG+GCTGCACT  
GAGTTAATAATATTGTGGACGTTGGCAGTATCGTTTGTATAAATGATTGTCCTACTGGAACCTCGGTC  
GATACGAGACATACCCAGAAAGTGAGATGGAATCGAATTGTGCTTAACGTTTTCAGTTAAGTTGACTAG  
CGAAGCCAATG

+  
FFFFFFFFFFFFFFFFFFFF:FFFF:FFFFFFFFFFFF,,:::FFFF,:FF,FFF,FFF:FFFFFF:FFFF  
FFFFFFFFF::FFF::FFFFFFFFFFFF,:FFFF:FFFFFFFFFFFF:FFFF:FF,,FFFFFFFFFFFF,,FFFF  
:FFFF,FFF:

@A00721:190:HGJW7DSXY:4:2368:30725:12524 1:N:0:TCTGCAAG+GCTGCACT  
GAGTTAATAATATTGTGGACGTTGGCAGTATCGTTTTTATAAATGATTGTCCTACTGGAACTCGGTC  
GATAAGAGACATACCCAGAAAGTGAGATGGAATCGAATTGTGCTTAACGGTTCAGTTAAGTTGACTAT  
CGAAGACAATG

+  
F,F:FFF:F::FFFF:FFFF,F,:F,,FF,:::,,FFFFFF:FF,F:F,,FF,F,,F,,:F,F,FF  
:FFF,FF,F:F:FF,,F,FFF:F:FFFF,F,FFF,FF,,,:F,FFF,F:F,F,F:F:FFFF,:F,  
:FFF:,FFF:F

@A00721:190:HGJW7DSXY:4:2368:31458:13072 1:N:0:TCTGCAAG+GCTGCACT  
GAGTTAATAATATTGTGGACGTTGGCAGTATCGTTTGTATAAATGATTGTCCTACTGGAACCTCGGTC





@A00721:190:HGJW7DSXY:4:1355:12798:10661 1:N:0:TCTGCAAG+GCTGCACT  
GGGTTAATAATATTGTGGACGTTGGCAGTATCGTTTGTATAAATGATTGTCCTACTGGAACCTCGGTC  
GATACGAGACATACCCAGAAAGTGAGATGGAATCGAATTGTGCTTAACGGTTCAGTTAAGTTGACTAG  
CGAAGCCAATG

+

FFF:FFFFFFFFFFFFFFFF:FFFFFF:FF::FFFFFFFF:FFFFFFFFFFFFFFFFFFFFFFFF:FFFF:F  
FFFFFFFFFFFFFFFFFFFFFFFF:FFFFFFFFFFFFFFFF:FFFFFFFFFFFF,FFFFFFFFFFFF:FFFFFFF  
F:FFF:FFFF

@A00721:190:HGJW7DSXY:4:1514:32606:25676 1:N:0:TCTGCAAG+GCTGCACT  
GGGTTAATAATATTGTGGACGTTGGCAGTATCGTTTGTATAAATGATTGTCCTACTGGAACCTCGGTC  
GATACGAGACATACCCAGAAAGTGAGATGGAATCGAATTGTGCTTAACGGTTCAGTTAAGTTGACTAG  
CGAAGCCAATG

+

FFFFFFFFFFFFFFFFFFFFFFFFFFFFFFFFFFFFFFFFFFFFFFFFFFFFFFFFFFFFFFFFFFFFFFFF  
FFFFFFFFFFFFFFFFFFFFFFFFFFFFFFFFFFFFFFFF:FFFFFFFFFFFFFFFF:FFFF:FFFFFF:FFFF:FF:  
FF:FFFFFFFF

@A00721:190:HGJW7DSXY:4:1573:1723:30686 1:N:0:TCTGCAAG+GCTGCACT  
GGGTTAATAATATTGTGGACGTTGGCAGTATCGTTTGTATAAATGATTGTCCTACTGGAACCTCGGTC  
GATACGAGACATACCCAGAAAGTGAGATGGAATCGAATTGTGCTTAACGGTTCAGTTAAGTTGACTAG  
CGAAGCCAATG

+

FFFFFFFFFFFFFFFFFFFFFFFFFFFFFFFFFFFFFFFFFFFFFFFFFFFFFFFFFFFFFFFFFFFFFFFF  
FFFFFFFFFFFFFFFFFFFFFFFFFFFFFFFFFFFFFFFF,FFFFFFFFFFFFFFFFFFFFFFFFFFFFFFFF:FF  
FFF:FFFFFF

@A00721:190:HGJW7DSXY:4:2157:4833:12399 1:N:0:TCTGCAAG+GCTGCACT  
GGGTTAATAATATTGTGGACGTTGGCAGTATCGTTTGTATAAATGATTGTCCTACTGGAACCTCGGTC  
GATACGAGACATACCCAGAAAGTGAGATGGAATCGAATTGTGCTTAACGGTTCAGTTAAGTTGACTAG  
CGAAGCCAATG

+

FFFFFFFFFFFFFFFFFFFFFFFFFFFFFFFFFFFFFFFFFFFFFFFFFFFFFFFFFFFFFFFFFFFFFFFF  
FFFFFFFFFFFF:FFFFFFFFFFFFFFFFFFFFFFFFFFFFFFFFFFFFFFFFFFFFFFFFFFFFFFFFFFFF  
FFFFFFFFFFFF

@A00721:190:HGJW7DSXY:4:2409:22896:27962 1:N:0:TCTGCAAG+GCTGCACT  
GGGTTAATAATATTGTGGACGTTGGCAGTATCGTTTGTATAAATGATTGTCCTACTGGAACCTCGGTC  
GATACGAGACATACCCAGAAAGTGAGATGGAATCGAATTGTGCTTAACGGTTCAGTTAAGTTGACTAG  
CGAAGCCA

+

FFFFFFFFFFFFFFFFFFFFFFFFFFFFFFFFFFFFFFFFFFFFFFFFFFFFFFFFFFFFFFFFFFFFFFFF  
FFFFFFFFFFFF:FFFFFFFFFFFFFFFFFFFFFFFFFFFFFFFFFFFFFFFFFFFFFFFFFFFFFFFFFFFF  
FFFFFFFFFFFF  
:F:F:FFFFFFFF:FFFFFF:FFFF,FFF,FFFF,F:F:FFFF:F,FF,F,FFFF,F,FFFFFF  
,FFF:FFF

@A00721:190:HGJW7DSXY:4:2430:15185:17801 1:N:0:TCTGCAAG+GCTGCACT  
GGGTTAATAATATTGTGGACGTTGGCAGTATCGTTTGTATAAATGATTGTCCTACTGGAACCTCGGTC  
GATACGAGACATACCCAGAAAGTGAGATGGAATCGAATTGTGCTTAACGGTTCAGTTAAGTTGACTAG  
CGAAGCCAATG

+

FFFFFFFFFFFFFFFFFFFFFFFFFFFFFFFFFFFFFFFFFFFFFFFFFFFFFFFFFFFFFFFFFFFFFFFF  
FFFFFFFFFFFFFFFFFFFFFFFFFFFFFFFFFFFFFFFF:FFFFFFFFFFFFFFFFFFFFFFFFFFFFFFFF  
:FFFFFFFF

@A00721:190:HGJW7DSXY:4:2430:14850:18693 1:N:0:TCTGCAAG+GCTGCACT  
GGGTTAATAATATTGTGGACGTTGGCAGTATCGTTTGTATAAATGATTGTCCTACTGGAACCTCGGTC  
GATACGAGACATACCCAGAAAGTGAGATGGAATCGAATTGTGCTTAACGGTTCAGTTAAGTTGACTAG  
CGAAGCCAATG

+

,FFFFFFFF,FFFF::FFFFFFFF:FFFF:::FFFFFFFFFFFFFFFFFFFFFFFF:FFFF,FF::FFFFFF

FFF::FF:F,:FFFFFFFFFFFFFFFFFFFF::F:FF,:FF,FFFFFF:FF:,F,FFFFFF:FFFFFF  
:FFFFFFFFF:

@A00721:190:HGJW7DSXY:4:1311:23710:28244 1:N:0:TCTGCAAG+GCTGCACT  
AGTGGACGTTGGCAGTATCGTTTGTATAAATGATTGTCCTACTGGAACCTCGGTCGATACGAGACATA  
CCCAGAAAGTGAGATGGAATCGAATTGTGCTTAACGGTTCAGTTAAGTTGACTAGCGAAGCCAATGTT  
CATAATATGAAGCAG

+

FFFFFFFFFFFFFFFFFFFFFFFFFFFFFFFFFFFFFFFFFFFFFFFFFFFFFFFFFFFFFFFFFFFFFFFF  
FFF,FFFFFFFFFFFFFFFFFFFFFFFFFFFFFFFFFFFFFFFFFFFFFFFFFFFFFFFFFFFFFFFFFFFF  
FFFF:FFFFFFFFF

@A00721:190:HGJW7DSXY:4:1643:29948:13369 1:N:0:TCTGCAAG+GCTGCACT  
AGTGGACGTTGGCAGTATCGTTTGTATAAATGATTGTCCTACTGGAACCTCGGTCGATACGAGACATA  
CCCAGAAAGTGAGATGGAATCGAATTGTGCTTAACGGTTCAGTTAAGTTGACTAGCGAAGCCAATGTT  
CATAATATGAAGCAG

+

FFFFFFFFFFFFFFFFFFFFFFFFFFFFFFFFFFFFFFFFFFFFFFFFFFFFFFFFFFFFFFFFFFFFFFFF  
FFFFFFFFFFFFFFFFFFFFFFFF,FFFF,FFFFFFFFFFFFFFFFFFFFFFFFFFFFFFFFFFFFFFFF  
FF:FFFFFFFFF:FF

@A00721:190:HGJW7DSXY:4:2212:17833:27868 1:N:0:TCTGCAAG+GCTGCACT  
AGTGGACGTTGGCAGTATCGTTTGTATAAATGATTGTCCTACTGGAACCTCGGTCGATACGAGACATA  
CCCATAAAGTGAGATGGAATCGAATTGTGCTTAACGGTTCAGTTAAGTTGACTAGCGAAGCCAATGTT  
CATAATATGAAGCAG

+

FFFFFFFFF:FFFF:FF:FFFF:FFFFFF,,FFFF::FFFF:FFFFFFFFF:FFFFFF,FFFF  
:,F,FFF:F:F,FF::FF,FFFFFF,F,FFFFFF,F:FF:, ,FFFFFF,F,FF,F,FF,,FFFFFF:  
:FFFFFF,FFF:F:

@A00721:190:HGJW7DSXY:4:2215:27633:11021 1:N:0:TCTGCAAG+GCTGCACT  
AGTGGACGTTGGCAGTATCGTTTGTATAAATGATTGTCCTACTGGAACCTCGGTCGATACGAGACATA  
CCCAGAAAGTGAGATGGAATCGAATTGTGCTTAACGGTTCAGTTAAGTTGACTAGCGAAGCCAATGTT  
CATAATATGAAGCA

+

FFFFFFFFFFF:FFFFFF:,FF:FFFFFF:FFFFFFFFF:FFFF:FFFFFF:FFFFFFF,FFFF  
::FFFFFF:F:FFFF:FFF,,FFFFFFFFF:FFF,FFF:FFFFFFFFF,FFFFFF::,FF:FF  
:FFFFFFFFFFF,F

@A00721:190:HGJW7DSXY:4:2413:28311:7968 1:N:0:TCTGCAAG+GCTGCACT  
AGTGGACGTTGGCAGTATCGTTTGTATAAATGATTGTCCTACTGGAACCTCGGTCGATACGAGACATA  
CCCAGAAAGTGAGATGGAATCGAATTGTGCTTAACGGTTCAGTTAAGTTGACTAGCGAAGCCAATGTT  
CATAATATGAAGCAG

+

FFFFFFFFFFFFFFFFFFFFFFFFFFFFFFFFFFFFFFFFFFFFFFFFFFFFFFFFFFFFFFFFFFFFFFFF  
FFFFFFFFFFFFFFFFFFFFFFFFFFFFFFFFFFFFFFFFFFFFFFFFFFFFFFFFFFFFFFFFFFFFFFFF  
FFFFFFFFFF:FFFFF

@A00721:190:HGJW7DSXY:4:2426:9444:30311 1:N:0:TCTGCAAG+GCTGCACT  
AGTGGACGTTGGCAGTATCGTTTGTATAAATGATTGTCCTACTGGAACCTCGGTCGATACGAGACATA  
CCCAGAAAGTGAGATGGAATCGAATTGTGCTTAACGGTTCAGTTAAGTTGACTAGCGAAGCCAATGTT  
CATAATATGAAGCAG

+

FFFFFFFFFFFFFFFFFFFFFFFFFFFFFFFFFFFFFFFFFFFFFFFFFFFFFFFFFFFFFFFFFFFFFFFF  
FFFFFFFFFFFFFFFFFFFFFFFFFFFFFFFFFFFFFFFFFFFFFFFFFFFFFFFFFFFFFFFFFFFFFFFF  
FFFFFFFFFFF:FFF

@A00721:190:HGJW7DSXY:4:2426:9362:30859 1:N:0:TCTGCAAG+GCTGCACT  
AGTGGACGTTGGCAGTATCGTTTGTATAAATGATTGTCCTACTGGAACCTCGGTCGATACGAGACATA  
CCCAGAAAGTGAGATGGAATCGAATTGTGCTTAACGGTTCAGTTAAGTTGACTAGCGAAGCCAATGTT  
CATAATATGAAGCAG

[illegible]

```

FFFFFFFFFFFFFFFFFFFFFFFFFFFFFFFFFFFFFFFFFFFFFFFFFFFFFFFFFFFFFFFFFFFFFFFF
FFFFFFFFFFFFFFFFFFFFFFFF:FFF:FFFFFFFFFFFF:FFFFFFFFFFFF:FFF:FFFFFFFFFF:FF:FFFF
FFFFFFFFFFFF:FFF

```

[illegible]

```

FFFFFFFFFFFFFFFFFFFFFFFFFFFFFFFFFFFFFFFFFFFFF::FFF:FFFFFFFF:FFFFFFFFFF
FFF:FFFFFFFF:FFFFFF:FFFFF:FFFFFFF,FFFFFFFFFFFF,FFFFFFFF:FFFF:FFFFFFFF
FFFF:FFFFF,:FFF

```

```

FFFFFFFFFFFF:FFFFFFFFFFFFFFFFFFFFFFFFFFFFFFFF:FFFFFF:FFFFFFFFFFFFFFFF,FFFFF
FF:FFFF,FFFF:FF:FFFFFFFFFF,FFFFFFFFFFFFFFFF:FFF:FF,FFFFFFFFFFFFFF:F,FFFF
FFFFFFFF:FFF:F,:

```

[illegible]

```

FFFFFFFFFFFFFFFFFFFFFFFF:FFFFFFFFFFFF,F:FF:FFFFFFFFFFFFFFFF:F:FFFFFFFFFFFF:F
F,FFFFFFFFFFFF:FFFFFFFFFFFFFFFF:FFFFF,:FFFFFFFFFFFF:FFFFFFFFFFFF:F:FFFF:F,FF
FFFFFF,FFFFFF

```

@A00721:190:HGJW7DSXY:4:1166:17833:19445 1:N:0:TCTGCAAG+GCTGCACT  
TGGACGTTGGCAGTATCGTTTGTATAAATGATTGTCCTACTGGAACCTCGGTCGATACGAGACATACC

CAGAAAGTGAGATGGAATCGAATTGTGCTTAACGGTTCAGTTAAGTTGACTAGCGAAGCCAATGTTCA  
TAATATGAAGCAGTG

```

FFFFFFFFFFFFFFFFFFFF:FFFFFFFFFFFFFFFFFFFFFFFFFFFFFFFFFFFFFFFF
FFFFFFFFFFFFFFFFFFFFFFFFFFFFFFFFFFFFFFFFFFFFFFFF:FFFFFFF:FFFFFFFFFFFFFFFF
FFFFFFFFFFFFFFFFFFFF

```

 $+$ [illegible]
$$+$$
[illegible]

+

[illegible]

+

FFFF,,FF:FFFF,F:,FF,FFF:F,FF:FFFFFF,FF,,FFF,F,F:,FF:FF:,FFFF:,F,FFF  
F:FFFFFFFF::FFFF:FFFF,FFF::FFF,,:,F,F,:FFFFFFFF:F:F,F::FF,FFF,F:FFFF,F  
:F:::F:F:::F

+

[illegible]

+

[illegible]

@A00721:190:HGJW7DSXY:4:1673:29903:23563 1:N:0:TCTGCAAG+GCTGCACT  
TGGACGTTGGCAGTATCGTTTGTATAAATGATTGTCCTACTGGAACCTCGGTCGATACGAGACATACC  
CAGAAAGTGAGATGGAATCGAATTGTGCTTAACGGTTCAGTTAAGTTGACTAGCGAAGCCAATGTTCA  
TAATATGAAGCAGTG

[illegible]

@A00721:190:HGJW7DSXY:4:2204:17824:20369 1:N:0:TCTGCAAG+GCTGCACT  
TGGACGTTGGCAGTATCGTTTGTATAAATGATTGTCCTACTGGAACCTCGGTCGATACGAGACATACC  
CAGAAAGTGAGATGGAATCGAATTGTGCTTAACGGTTCAGTTAAGTTGACTAGCGAAGCCAATGTTCA  
TAATATGAAGCAGTG

[illegible]

@A00721:190:HGJW7DSXY:4:2243:32334:31845 1:N:0:TCTGCAAG+GCTGCACT  
TGGACGTTGGCAGTATCGTTTGTATAAATGATTGTCCTACTGGAACCTCGGTCGATACGAGACATACC  
CAGAAAGTGAGATGGAATCGAATTGTGCTTAACGGTTCAGTTAAGTTGAATAGCGAAGCCAATGTTCA  
TAATATGAAGCA

```
FF:FFFFFFFFFFFFFFFF:FF:FFFFFF,FFFF:FFFFFFFFFFFFFFFF:FFFFFFFFFF,FF:
FFFFFFFF:FFF,:FFFFFFFF:FFFFFF,FFFF,FFFF:FFF:FF,:FF:,FF,,FFFF,FFF::FFFF
FFFFFFFFFFFFFF
```

@A00721:190:HGJW7DSXY:4:2340:32859:18724 1:N:0:TCTGCAAG+GCTGCACT  
CACTGCTTCATATTATGAACATTGGCTTCGCTAGTCAACTTAACTGAACCGTTAAGCACAAATTCGATT  
CCATCTCACTTTCTGGGTATGTCTCGTATCGACCGAGGTTCCAGTAGGACAATCATTTATACAAACGA  
TACTGCCAACGTCCA

FFF,F,,FFFFFFFF:FFFFFFFF::FF:F,FF:FFFFFFFF:FFFF:FF:,FF:FFFFFFFF:FF:FF:  
 FFFFFFFFF,FFF,:FFFFFFFF,FFFFFFFF,:F:FFFFFFFFF,FFF:FF:FFFFFFFFFFFF:FFFF:F  
 FFF,F:,E:F,EE,F

@A00721:190:HGJW7DSXY:4:2368:22553:4914 1:N:0:TCTGCAAG+GCTGCACT  
TGGACGTTGGCAGTATCGTTTGTATAAATGATTGTCCTACTGGAACCTCGGTCGATACGAGACATACC  
CAGAAAGTGAGATGGAATCGAATTGTGCTTAACGGTTCAGTTAAGTTGACTAGCGAAGCCAATGTTCA  
TAATATGAAGCAGTG

```
F:FFFFFFFFFFFFFFFFFFFFFFFFFFFFFFFFFFFFFFFFFFFFFFFFFFFFFFFFFFFFFFFFFFFFFFFF
FFFFFFFFFFFFFFFFFFFFFFFFFFFFFFFF:FFFFFFFFF,FFFFFFFFFFFFFFFFFFFFFFFFFFFFF,FFF:FFFFF
FFFFF:FFF::FFFF
```

@A00721:190:HGJW7DSXY:4:2378:15320:3098 1:N:0:TCTGCAAG+GCTGCACT  
TGGACGTTGGCAGTATCGTTTGTATAAATGATTGTCCTACTGGAACCTCGGTCGATACGAGACATACC  
CAGAAAGTGAGATGGAATCGAATTGTGCTTAACGGTTCAGTTAAGTTGACTAGCGAAGCCAATGTTCA  
TAATATGAAGCAGTG

[illegible]

@A00721:190:HGJW7DSXY:4:2407:31955:35196 1:N:0:TCTGCAAG+GCTGCACT  
TGGACGTTGGCAGTATCGTTTGTATAAATGATTGTCCTACTGGAACCTCGGTCGATACGAGACATACC  
CAGAAAGTGAGATGGAATCGAATTGTGCTTAAAGGTTTCAGTTAAGTTGACTATCGAAGCCAATGTTCA  
TAATATGAAGCAGTG

[illegible]

:FFFFF:FFFFFFFFFFFF,FFFF::FFFFFFFF,FFFFF::FFFF:FFFFFFFF,FFFF,F,FFFFFFFF,F  
FFFFFFFF::F,FF::F

@A00721:190:HGJW7DSXY:4:2509:14371:19053 1:N:0:TCTGCAAG+GCTGCACT  
TGGACGTTGGCAGTATCGTTTGTATAAATGATTGTCCTACTGGAACCTCGGTTCGATACGAGACATACC  
CAGAAAGTGAGATGGAATCGAATTGTGCTTAACGGTTCAGTTAAGTTGACTAGCGAAGCCAATGTTCA  
TAATATGAAGCAGTG

+

FFFFFFFFFFFFFFFFFFFFFFFFFFFFFFFFFFFFFFFFFFFFFFFFFFFFFFFFFFFFFFFFFFFFFFFF:FFF:FFF  
FFFFFFFFFFFFFFFFFFFFFFFFFFFFFFFFFFFFFFFFFFFFFFFFFFFFFFFFFFFFFFFFFFFFFFFF:FFFFFFFFFF  
FFFFFFFFFFFF,FF:F

@A00721:190:HGJW7DSXY:4:2569:17996:35227 1:N:0:TCTGCAAG+GCTGCACT  
TGGACGTTGGCAGTATCGTTTGTATAAATGATTGTCCTACTGGAACCTCGGTTCGATACGAGACATACC  
CAGAAAGTGAGATGGAATCGAATTGTGCTTAACGGTTCAGTTAAGTTGACTAGCGAAGCCAATGTTCA  
TAATATGAAGCAGTG

+

FFFFFFFF:FFFFFFFFFFFFFFFFFFFFFFFFFFFFFFFFFFFFFFFFFFFFFFFFFFFFFFFFFFFFFFFF  
FFFFFFFFFFFFFFFFFFFFFFFFFFFFFFFFFFFFFFFFFFFFFFFFFFFFFFFFFFFFFFFFFFFFFFFF  
FFFFFFFFFFFF:FFFF

@A00721:190:HGJW7DSXY:4:1148:10366:3317 1:N:0:TCTGCAAG+GCTGCACT  
CGGACGTTGGCAGTATCGTTTGTATAAATGATTGTCCTACTGGAACCTCGGTTCGATACGAGACATACC  
CAGAAAGTGAGATGGAATCGAATTGTGCTTAACGGTTCAGTTAAGTTGACTAGCGAAGCCAATGTTCA  
TAATATGAAGCAGTG

+

FFFFFFFFFFFFFFFFFFFFF:FFFFF:FFFFFFFFFFFFFFFFFFFFFFFFFFFFFFFFFFFFFFFFFFFF  
FFFFFFFFFFFF:F:FFFFFFFFFFFFFFFFFFFFFFFFFFFFFFFFFFFFFFFFFFFFFFFF:FFFFFFFFFFFFFFFF  
FFFFFFFFFFFF:FFFF

@A00721:190:HGJW7DSXY:4:1444:25536:23923 1:N:0:TCTGCAAG+GCTGCACT  
CGGACGTTGGCAGTATCGTTTGTATAAATGATTGTCCTACTGGAACCTCGGTTCGATACGAGACATACC  
CAGAAAGTGAGATGGAATCGAATTGTGCTTAACGGTTCAGTTAAGTTGACTAGCGAAGCCAATGTTCA  
TAATATGAAGCAGTG

+

FFFFFFFFFFFFFFFFFFFFFFFFFFFFFFFFFFFFFFFFFFFFFFFFFFFFFFFFFFFFFFFFFFFFFFFF  
FFFFFFFFF::FFFFFFFFFFFFFFFFFFFF,FFFFFFFF,FFFFFF:FFFFFF:FFFF:FFFFFF::F:FFFF  
FF:FFFFFFFF:FFFF

@A00721:190:HGJW7DSXY:4:1512:17906:22889 1:N:0:TCTGCAAG+GCTGCACT  
CGGACGTTGGCAGTATCGTTTGTATAAATGATTGTCCTACTGGAACCTCGGTTCGATACGAGACATACC  
CAGAAAGTGAGATGGAATCGAATTGTGCTTAACGGTTCAGTTAAGTTGACTAGCGAAGCCAATGTTCA  
TAATATGAAGCAGTG

+

FFFFFFFFFFFFFFFFFFFFFFFFFFFFFFFFFFFFFFFFFFFFFFFFFFFFFFFFFFFFFFFFFFFFFFFF:F  
FFFFFFFFFFFFFFFFFFFFFFFFFFFFFFFFFFFFFFFFFFFFFFFF:FFFFFFFFFFFFFFFFFFFFFFFF  
FFFFFFF:FF,FFFF

@A00721:190:HGJW7DSXY:4:2131:14705:33505 1:N:0:TCTGCAAG+GCTGCACT  
CGGACGTTGGCAGTATCGTTTGTATAAATGATTGTCCTACTGGAACCTCGGTTCGATACGAGACATACC  
CAGAAAGTGAGATGGAATCGAATTGTGCTTAACGGTTCAGTTAAGTTGACTAGCGAAGCCAATGTTCA  
TAATATGAAGCAGTG

+

FFFFFFFFFFFF:FFFFFFFFF:FFFFFFFFFFFFFFFFFFFFFFFF:FFFF,FFFFFFFFFFFF:FFFFFFFF  
F:FFFFFFFFFFFFFFFFFFFFFFFFFFFFFFFFFFFFFFFF:FFFF:FFFFFFFFF,FFFF:FFFF:FFFFFFFF  
FFFFF:FF:F,FFF:

@A00721:190:HGJW7DSXY:4:2225:12102:27461 1:N:0:TCTGCAAG+GCTGCACT  
CGGACGTTGGCAGTATCGTTTGTATAAATGATTGTCCTACTGGAACCTCGGTTCGATACGAGACATACC  
CAGAAAGTGAGATGGAATCGAATTGTGCTTAACGGTTCAGTTAAGTTGACTAGCGAAGCCAATGTTCA  
TAATATTAAGCAGTG

+  
FFFFFFFFFFFFFFFFFFFFFFFFFFFFFFFFFFFFFFFFFFFFFFFFFFFFFFFFFFFFFFFFFFFFFFFFF,  
FFFFFFFFFFFFFFFFFFFFFFFFFFFFFFFFFFFFFFFFFFFFFFFFFFFFFFFFFFFFFFFFFFFFFFFFF,  
FFFFFFFF,FF,FF:FF  
@A00721:190:HGJW7DSXY:4:2244:13901:9095 1:N:0:TCTGCAAG+GCTGCACT  
CGGACGTTGGCAGTATCGTTTGTATAAATGATTGTCCTACTGGAACCTCGGTTCGATACGAGACATACC  
CAGAAAGTGAGATGGAATCGAATTGTGCTTAACGGTTCAGTTAAGTTGACTAGCGAAGCCAATGTTCA  
TAATATGAAGCAGTG

+  
F:FFFFFFFF:FFF:FFFF,F:FFFFFFFF:FFF:FFFFFFFFFFFFFFFF:F:FFF:F,F::FFFFFFFF  
,FFFF,F:F,FF:FF,F::,FFF,F,F:FFFFFF,F,:FFFFFF:F,F:FF,F,F:,FFFF,FF:,F  
FFFFFFFF:FFF,:,:F  
@A00721:190:HGJW7DSXY:4:2265:6108:36119 1:N:0:TCTGCAAG+GCTGCACT  
CGGACGTTGGCAGTATCGTTTGTATAAATGATTGTCCTACTGGAACCTCGGTTCGATACGAGACATACC  
CAGAAAGTGAGATGGAATCGAATTGTGCTTAACGGTTCAGTTAAGTTGACTAGCGAAGCCAATGTTCA  
TAATATGAAGCAGTG

+  
FFFFFFFFFFFFFFFFFFFFFFFFFFFFFFFFFFFFFFFFFFFFFFFFFFFFFFFFFFFFFFFFFFFFFFFFF  
FFFFFFFFFFFFFFFFFFFFFFFFFFFFFFFFFFFFFFFFFFFFFFFFFFFFFFFFFFFFFFFFFFFFFFFFF:  
FFFFFFFFFFFF,FFFF  
@A00721:190:HGJW7DSXY:4:2265:6551:36323 1:N:0:TCTGCAAG+GCTGCACT  
CGGACGTTGGCAGTATCGTTTGTATAAATGATTGTCCTACTGGAACCTCGGTTCGATACGAGACATACC  
CAGAAAGTGAGATGGAATCGAATTGTGCTTAACGGTTCAGTTAAGTTGACTAGCGAAGCCAATGTTCA  
TAATATGAAGCAGTG

+  
FFFFFF:FFFFFFFF:FFFFFFFFFFFFFFFFFFFFFFFFFFFFFFFF:FFFFFFFFFFFFFFFFFFFFFFFFF  
FFFFFFFFFFFFFFFFFFFFFFFFFFFFFFFFFFFFFFFFFFFFFFFFFFFFFFFFFFFFFFFFFFFFFFFFF:FFFF  
FFFFFFFFFFFF:FFFF  
@A00721:190:HGJW7DSXY:4:2431:9498:35289 1:N:0:TCTGCAAG+GCTGCACT  
CGGACGTTGGCAGTATCGTTTGTATAAATGATTGTCCTACTGGAACCTCGGTTCGATACGAGACATACC  
CAGAAAGTGAGATGGAATCGAATTGTGCTTAACGGTTCAGTTAAGTTGACTAGCGAAGCCAATGTTCA  
TAATATGAAGCAGTG

+  
FFFFFFFFFFFFFFFFFFFFFFFFFFFFFFFFFFFFFFFFFFFFFFFFFFFFFFFFFFFFFFFFFFFFFFFFF  
FFFFFFFFFFFFFFFFFFFFFFFFFFFFFFFFFFFFFFFFFFFFFFFFFFFFFFFFFFFFFFFFFFFFFFFFF:FFFFFFFF:FFFF  
FFFFFFFFFFFF:FFFF  
@A00721:190:HGJW7DSXY:4:2467:1434:20603 1:N:0:TCTGCAAG+GCTGCACT  
CGGACGTTGGCAGTATCGTTTGTATAAATGAATGACCTACTGGAACCTCGTACGATACGAGACATACC  
CAGAAAGTGAGATGGAATCGAATTGTGCTTAACGGTTCAGTTAAGTTGACTAGCGAAGCCAATGTTCA  
TAATATGAAGCAG

+  
F,FFFF:,,:FFFF:,FF:FFFFFFFF:FFF,,F,,FFF,,FFFF,,,,,FFFFFF:FFFF,F,F  
,,:FFFFFFFF,FFFF,FFFF:,FFF,FFFF,:FF:F,FFF,FF,FF:FFFF:,FFFF,,:F:F  
FFF,FFFF::F:  
@A00721:190:HGJW7DSXY:4:2649:10402:35634 1:N:0:TCTGCAAG+GCTGCACT  
CGGACGTTGGCAGTATCGTTTGTATAAATGATTGTCCTACTGGAACCTCGGTTCGATACGAGACATACC  
CAGAAAGTGAGATGGAATCGAATTGTGCTTAACGGTTCAGTTAAGTTGACTAGCGAAGCCAATGTTCA  
TAATATGAAGCAGTG

+  
FFFFFFFFFFFFFFFFFFFF,FFFFFFFFFFFFFFFFFFFFFFFFFFFFFFFFFFFFFFFFFFFFFFFFFFFFF  
FFFFFFFFFFFFFFFFFFFFFFFFFFFFFFFFFFFFFFFFFFFFFFFFFFFFFFFFFFFFFFFFFFFFFFFFF  
FFFFFFFFFFFFFFFFFFFF  
@A00721:190:HGJW7DSXY:4:1159:14271:29716 1:N:0:TCTGCAAG+GCTGCACT  
TGGCAGTATCGTTTGTATAAATGATTGTCCTACTGGAACCTCGGTTCGATACGAGACATACCCAGAAAG





$+$ 

+

+

+

+

+

+

FFFFFFFFFFFFFFFFFFFFFFFFFFFFFFFFFFFFFFFFFFFFFFFFFFFFFFFFFFFFFFFFFFFFFFFFFFFFFFFF  
FFFFFFFFFFFFFFFF

@A00721:190:HGJW7DSXY:4:1209:17861:14606 1:N:0:TCTGCAAG+GCTGCACT  
GGCAGTATCGTTTGTATAAATGATTGTCCTACTGGAACCTCGGTTCGATACGAGACATACCCAGAAAGT  
GAGATGGAATCGAATTGTGCTTAACGGTTCAGTTAAGTTGACTAGCGAAGCCAATGTTTCATAATATGA  
AGCAGTGGCTGTGGA

+  
FFFFF:FFF,:,:,FFFFFFFF::FFFFFF:F:F,FFFF:,FFF:F,F:F:FFFF,F:F,F,F:FFFFFF:F  
FF,FFF:FFFFFFFFFFF,FFF:,F:F,FFFFFF:FFFF,FFF,FF,FFF,F:F,FFFF,FF,FF,F:,F  
FF:FF,:FFFF,:,::

@A00721:190:HGJW7DSXY:4:1261:19054:26005 1:N:0:TCTGCAAG+GCTGCACT  
GGCAGTATCGTTTGTATAAATGATTGTCCTACTGGAACCTCGGTTCGATACGAGACATACCCAGAAAGT  
GAGATGGAATCGAATTGTGCTTAACGGTTCAGTTAAGTTGACTAGCGAAGCCAATGTTTCATAATATGA  
AGCAGTGGCTGTGGA

+  
FFFFFFFFFFFFFFFFFFFFFFFFFFFFFFFFFFFFFFFFFFFFFFFFFFFFFFFFFFFFFFFFFFFFFFFFFFFF:  
FF:FFFF::FFFFFFFFFFFFFFFFFFFFFFFFFFFFFFFFFFFFFFFFFFFFFFFFFFFFFFFFFFFFFFFF  
FFFFFFFFFFFFFFFF

@A00721:190:HGJW7DSXY:4:1313:28872:5901 1:N:0:TCTGCAAG+GCTGCACT  
GGCAGTATCGTTTGTATAAATGATTGTCCTACTGGAACCTCGGTTCGATACGAGACATACCCAGAAAGT  
GAGATGGAATCGAATTGTGCTTAACGGTTCAGTTAAGTTGACTAGCGAAGCCAATGTTTCATAATATGA  
AGCAGTGGCTGTGGA

+  
FFFFFFFFFFFFFFFFFFFFFFFFFFFFFFFFFFFFFFFFFFFFFFFFFFFFFFFFFFFFFFFFFFFFFFFFFFFF  
FFFFFFFFFFFFFFFFFFFFFFFFFFFFFFFFFFFFFFFFFFFFFFFFFFFFFFFFFFFFFFFFFFFFFFFFFFFF:  
FF:FFFFFFFFFFFF

@A00721:190:HGJW7DSXY:4:1365:18864:34507 1:N:0:TCTGCAAG+GCTGCACT  
GGCAGTATCGTTTGTATAAATGATTGTCCTACTGGAACCTCGGTTCGATACGAGACATACCCAGAAAGT  
GAGATGGAATCGAATTGTGCTTAACGGTTCAGTTAAGTTGACTAGCGAAGCCAATGTTTCATAATATGA  
AGCAGTGGCTGTGGA

+  
FFFFFFFFFFFF:FFFFFFFFFFFFFFFFFFFFFFFFFFFFFFFFFFFFFFFFFFFFFFFFFFFFFFFFFFFFFFF  
FFF:FFFFFFFFFFFFFFFFFFFFFFFFFFFFFFFFFFFFFFFFFFFFFFFFFFFFFFFFFFFFFFFFFFFF:  
FFFFFFFFFFFF:FFF

@A00721:190:HGJW7DSXY:4:1444:30029:25410 1:N:0:TCTGCAAG+GCTGCACT  
GGCAGTATCGTTTGTATAAATGATTGTCCTACTGGAACCTCGGTTCGATACGAGACATACCCAGAAAGT  
GAGATGGAATCGAATTGTGCTTAACGGTTCAGTTAAGTTGACTAGCGAAGCCAATGTTTCATAATATGA  
AGCAGTGGCTGTGGA

+  
FFFFFFFFFFFFFFFFFFFFFFFFFFFF:FFFF:FFFFFFFFFFFFFFFFFFFFFFFFFFFFFFFFFFFFFFFFFFFF  
FFFFFFFFFFFFFFFFFFFF:FFFFFFFFFFFFFFFFFFFFFFFFFFFFFFFFFFFF:FFFF:FFFFFFFFFFFF:  
FF:FFF,FFFFFFFF

@A00721:190:HGJW7DSXY:4:1638:28546:20181 1:N:0:TCTGCAAG+GCTGCACT  
GGCAGTATCGTTTGTATAAATGATTGTCCTACTGGAACCTCGGTTCGATACGAGACATACCCAGAAAGT  
GAGATGGAATCGAATTGTGCTTAACGGTTCAGTTAAGTTGACTAGCGAAGCCAATGTTTCATAATATGA  
AGCAGTGGCTGTGGA

+  
FFFFFFFFFFFFFFFFFFFFFFFFFFFFFFFFFFFFFFFFFFFF:FFFFFFFFFFFFFFFFFFFFFFFFFFFFFFFFFFFF  
FFFFFFFFFFFFFFFFFFFF:FFFFFFFFFFFF:FFFFFFFFFFFFFFFFFFFFFFFFFFFF:FFFFFFFFFFFFFFFFFFFF:  
FFFFFFFFFFFFFFFF

@A00721:190:HGJW7DSXY:4:1646:9498:23672 1:N:0:TCTGCAAG+GCTGCACT  
GGCAGTATCGTTTGTATAAATGATTGTCCTACTGGAACCTCGGTTCGATACGAGACATACCCAGAAAGT  
GAGATGGAATCGAATTGTGCTTAACGGTTCAGTTAAGTTGACTAGCGAAGCCAATGTTTCATAATATGA  
AGCAGTGGCTGTGGA

+  
FFFFFFFFFFFFFFFFFFFFFFFFFFFFFFFFFFFFFFFFFFFFFFFFFFFFFFFFFFFFFFFFFFFFFFFF  
FFFFFFFFFFFFFFFFFFFFFFFFFFFFFFFFFFFFFFFFFFFFFFFFFFFFFFFFFFFFFFFFFFFFFFFF  
F,:FFFFFFFFFFFF  
@A00721:190:HGJW7DSXY:4:2139:4544:6762 1:N:0:TCTGCAAG+GCTGCACT  
GGCAGTATCGTTTGTATAAATGATTGTCCTACTGGAACCTCGGTTCGATACGAGACATACCCAGAAAGT  
GAGATGGAATCGAATTGTGCTTAACGGTTCAGTTAAGTTGACTAGCGAAGCCAATGTTTCATAATATGA  
AGCAGTGGCTGTGGA  
+  
FFFFFFFFFFFF,:FFFFFFFFFFFFFFFFFFFFFFFFFFFFFFFFFFFFFFFFFFFFFFFFFFFFFFFFFFFF  
FFFFFFFFFFFFFFFFFFFFFFFFFFFFFFFFFFFFFFFFFFFFFFFFFFFFFFFFFFFFFFFFFFFFFFFF  
F,:FFFFFF:FFFFFFF  
@A00721:190:HGJW7DSXY:4:2204:30165:35258 1:N:0:TCTGCAAG+GCTGCACT  
GGCAGTATCGTTTGTATAAATGATTGTCCTACTGGAACCTCGGTTCGATACGAGACATACCCAGAAAGT  
GAGATGGAATCGAATTGTGCTTAACGGTTCAGTTAAGTTGACTAGCGAAGCCAATGTTTCATAATATGA  
AGCAGTGGCTGTGGA  
+  
FFFFFFFFFFFFFFFFFFFFFFFFFFFFFFFFFFFFFFFFFFFFFFFFFFFFFFFFFFFFFFFFFFFFFFFF  
FF:FFFFFFFFFFFF,F:FF,,FFF,:FFFFF,FFFF:FFFFFFFFF:FFF:FF,F,FFFFFFFF,FF,F  
F:,F:F:FFFFFFFFF  
@A00721:190:HGJW7DSXY:4:2206:1434:31751 1:N:0:TCTGCAAG+GCTGCACT  
GGCAGTATCGTTTGTATAAATGATTGTCCTACTGGAACCTCGGTTCGATACGAGACATACCCAGAAAGT  
GAGATGGAATCGAATTGTGCTTAACGGTTCAGTTAAGTTGACTAGCGAAGCCAATGTTTCATAATATGA  
AGCAGTGGCTGTGGA  
+  
FFFFFFFFFFFFFFFFFFFFFFFFFFFFFFFFFFFFFFFFFFFFFFFFFFFFFFFFFFFFFFFFFFFFFFFF  
FFFFFFFFFFFFFFFFFFFFFFFFFFFFFFFFFFFFFFFFFFFFFFFFFFFFFFFFFFFFFFFFFFFFFFFF  
FF:FFFFFFFFFFFFF  
@A00721:190:HGJW7DSXY:4:2260:15257:31454 1:N:0:TCTGCAAG+GCTGCACT  
GGCAGTATCGTTTGTATAAATGATTGTCCTACTGGAACCTCGGTTCGATACGAGACATACCCAGAAAGT  
GAGATGGAATCGAATTGTGCTTAACGGTTCAGTTAAGTTGACTAGCGAAGCCAATGTTTCATAATATGA  
AGCAGTGGCTGTGGA  
+  
FFFFFFFFFFFFFFFFFFFFFFFFFFFFFFFFFFFFFFFFFFFFFFFFFFFFFFFFFFFFFFFFFFFFFFFF  
FFFFFFFFFFFFFFFFFFFFFFFFFFFFFFFFFFFFFFFFFFFFFFFFFFFFFFFFFFFFFFFFFFFFFFFF  
FF:FFFFFFFFFFFFF  
@A00721:190:HGJW7DSXY:4:2349:12572:11052 1:N:0:TCTGCAAG+GCTGCACT  
GGCAGTATCGTTTGTATAAATGATTGTCCTACTGGAACCTCGGTTCGATACGAGACATACCCAGAAAGT  
GAGATGGAATCGAATTGTGCTTAACGGTTCAGTTAAGTTGACTAGCGAAGCCAATGTTTCATAATATGA  
AGCAGTGGCTGTGGA  
+  
FFFFFFFFFFFF:FFFFFFF:FFFFFFFFFFFFFFFFFFFFFFFFFFFFFFFFFFFFFFFFFFFFFFFFFFFF  
FFFFFFFFFFFFFFFFFFFFFFFFFFFFFFFFFFFFFFFFFFFFFFFFFFFFFFFFFFFFFFFFFFFFFFFF  
FF:FFFFFFFFFFFFF  
@A00721:190:HGJW7DSXY:4:2621:16215:3646 1:N:0:TCTGCAAG+GCTGCACT  
GGCAGTATCGTTTGTATAAATGATTGTCCTACTGGAACCTCGGTTCGATACGAGACATACCCAGAAAGT  
GAGATGGAATCGAATTGTGCTTAACGGTTCAGTTAAGTTGACTAGCGAAGCCAATGTTTCATAATATGA  
AGCAGTGGCTGTGGA  
+  
FFFFFFFFFFFFFFFFF,FFFFFFFFFFFFFFFFFFFFFFFFFFFFFFFFFFFFFFFFFFFFFFFFFFFFFFFF  
FF:FFFFFFFFFFFFFFFFFFFFFFFFFFFFFFFFFFFFFFFFFFFFFFFFFFFFFFFFFFFFFFFFFFFFFFFF  
F,FFFFFFFFFFFFFFFFF  
@A00721:190:HGJW7DSXY:4:2645:14561:12211 1:N:0:TCTGCAAG+GCTGCACT  
GGCAGTATCGTTTGTATAAATGATTGTCCTACTGGAACCTCGGTTCGATACGAGACATACCCAGAAAGT

GAGATGGAATCGAATTGTGCTTAACGGTTCAGTTAAGTTGACTAGCGAAGCCAATGTTCATAATATGA  
AGCAGTGGCTGTGGA

+

FFFFFFFFFFFFFFFFFFFFFFFFFFFFFFFFFFFFFFFFFFFFFFFFFFFFFFFFFFFFFFFFFFFFFFFF  
FFFFFFFFFFFFFFFFFFFFFFFFFFFFFFFFFFFFFFFFFFFFFFFFFFFFFFFFFFFFFFFFFFFFFFFF  
FF:FFFFFFFFFFFF

@A00721:190:HGJW7DSXY:4:2645:14235:12461 1:N:0:TCTGCAAG+GCTGCACT  
GGCAGTATCGTTTGTATAAATGATTGTCCTACTGGAACCTCGGTCGATACGAGACATACCCAGAAAGT  
GAGATGGAATCGAATTGTGCTTAACGGTTCAGTTAAGTTGACTAGCGAAGCCAATGTTCATAATATGA  
AGCAGTGGCTGTGGA

+

FFFFFFF:FFFFFFFFFFFFFFFFFFFFFFFFFFFFFFFFFFFFFFFFFFFFFFFFFFFFFFFFFFFFFFF  
FFFFFFFFFFFFFFFFFFFFFFFFFFFFFFFFFFFFFFFFFFFFFFFFFFFFFFFFFFFFFFFFFFFFFFFF  
F,:FFFFFFFFFFFF

@A00721:190:HGJW7DSXY:4:1530:18837:32487 1:N:0:TCTGCAAG+GCTGCACT  
ATCGTTTGTATAAATGATTGTCCTACTGGAACCTCGGTCGATACGAGACATACCCAGAAAGTGAGATG  
GAATCGAATTGTGCTTAACGGTTCAGTTAAGTTGACTAGCGAAGCCAATGTTCATAATATGAAGCAGT  
GGCTGTGGATGTGGC

+

FFFFFFFFFFFFFFFFFFFFFFFFFFFFFFFFFFFFFFFFFFFFFFFFFFFFFFFFFFFFFFFFFFFFFFF  
FFF,FFFFF::FF:FFFFF:F,FF,FFF:FFFFFFFFF:FFFFFFFFF:FFF:FFFFFFFFFFFFF  
FFFFF,FFFFFFFFFFFF

@A00721:190:HGJW7DSXY:4:2242:22815:21402 1:N:0:TCTGCAAG+GCTGCACT  
ATCGTTTGTATAAATGATTGTCCTACTGGAACCTCGGTCGATACGAGACATACCCAGAAAGTGAGATG  
GAATCGAATTGTGCTTAACGGTTCAGTTAAGTTGACTAGCGAAGCCAATGTTCATAATATGAAGCAGT  
GGCTGTGGATGTGGC

+

FFFFFFF:FFFFFFFFFFFFFFFFFFFFFFFFFFFFFFFFFFFFFFFFFFFFFFFFFFFFFFFFFFFFFFF  
FFFFFFFFFFFFFFFFFFFFFFFFFFFFFFFFFFFFFFFFFFFFFFFFFFFFFFFFFFFFFFFFFFFFFFF:FFF  
FFFFFFFFFFFFFFFFFFFF

@A00721:190:HGJW7DSXY:4:2457:12138:23422 1:N:0:TCTGCAAG+GCTGCACT  
ATCGTTAGTATAAATGATTGTCCTACTGGAACCTCGGTCGATACGAGACATACCCAGAAAGTGAGATG  
GAATCGAATTGTGCTTAACGGTTCAGTTAAGTTGACTAGCGAAGCCAATGTTCATAATATGAAGCAGT  
GGCTGTGGATGTGGC

+

FFFFFFF,,:FFFFF:FFFFF,F:FF::F:F:FFFFFFFFF,::FF:F:FFFFF,FFF:FFFF,FF:FFF  
FFFF,FFFFF:FFFFFFFFF,FFF:FF:FFF::FFFFFFFFF:FF::FF,FFFF:FF,,,F::FFFF  
F,:FFFFFFFFF:F:,F

@A00721:190:HGJW7DSXY:4:1165:21233:6981 1:N:0:TCTGCAAG+GCTGCACT  
CGTTTGTATAAATGATTGTCCTACTGGAACCTCGGTCGATACGAGACATACCCAGAAAGTGAGATGGA  
ATCGAATTGTGCTTAACGGTTCAGTTAAGTTGACTAGCGAAGCCAATGTTCATAATATGAAGCAGTGG  
CTGTGGATGTGGCTC

+

FFFFFFFFFFFFFFFFFFFFFFFFFFFFFFFFFFFFFFFFFFFFFFFFFFFFFFFFFFFFFFFFFFFFFFF  
FFFFFFFFFFFFFFFFFFFFFFFFFFFFFFFFFFFFFFFFFFFFFFFFFFFFFFFFFFFFFFFFFFFFFFF:F,FF:FFFFFFFFF  
FFFFFFFFFFFFFFFFFFFF

@A00721:190:HGJW7DSXY:4:1375:24930:18646 1:N:0:TCTGCAAG+GCTGCACT  
CGTTTGTATAAATGATTGTCCTACTGGAACCTCGGTCGATACGAGACATACCCAGAAAGTGAGATGGA  
ATCGAATTGTGCTTAACGGTTCAGTTAAGTTGACTAGCGAAGCCAATGTTCATAATATGAAGCAGTGG  
CTGTGGATGTGGCT

+

F:FFFFFFFFFFFFFFFFF::FFFFF::FFFFFFFFFFFFFFFFFFFFFFFFFFFFFFFFF:F:FF:,FFF:FFFFF  
FFFFFFFFF,,FF::FFF:FFFFF:FFFFFFFFFFFFFFFFFFFFFFFFF:FFFFFFFFFFFFFFFFF,,FFFFF  
:FF,,:FFFFFFFFF

$+$ 

+

+

+

+

+

+

F:FFFFF:FFFFFFFFFFFF:FFF,FFFFFFFF:FFFFFFFF,FFFFFFFF:FF,FFFFF::FFFFF  
FFFFFFFF:FFFFF:

@A00721:190:HGJW7DSXY:4:1222:18566:6684 1:N:0:TCTGCAAG+GCTGCACT  
GTTTGTATAAATGATTGTCCTACTGGAACCTCGGTCGATACGAGACATACCCAGAAAGTGAGATGGAA  
TCGAATTGTGCTTAACGGTTCAGTTAAGTTGACTAGCGAAGCCAATGTTTCATAATATGAAGCAGTGGC  
TGTGGATGTGGCTCG

+

FFFFFFFFFFFFFFFFFFFFFFFFFFFFFFFFFFFFFFFFFFFFFFFFFFFFFFFFFFFFFFFFFFFFFFFF:  
FFFFFFFFF:FFFFFFFFFFFFFFFFFFFFFFFFFFFFFFFFFFFFFFFF,FFFFFFFFFFFFFF,FFFFF:FFFFFFFFF  
FFFFFFFFFFFFFFFFF:

@A00721:190:HGJW7DSXY:4:1313:12066:26271 1:N:0:TCTGCAAG+GCTGCACT  
GTTTGTATAAATGATTGTCCTACTGGAACCTCGGTCGATACGAGACATACCCAGAAAGTGAGATGGAA  
TCGAATTGTGCTTAACGGTTCAGTTAAGTTGACTAGCGAAGCCAATGTTTCATAATATGAAGCAGTGGC  
TGTGGATGTGGCTCG

+

FFFFFFFFFFFFFFFFFFFFFFFFFFFFFFFFFFFFFFFFFFFFFFFFFFFFFFFFFFFFFFFFFFFFFFFF:  
FFFFFFFFFFFFFFFFFFFFFFFFFFFFFFFFFFFFFFFFFFFFFFFFFFFFFFFFFFFFFFFFFFFFFFFF:  
FFFFFFFFFFFFFFFFF

@A00721:190:HGJW7DSXY:4:1330:30002:24236 1:N:0:TCTGCAAG+GCTGCACT  
GTTTGTATAAATGATTGTCCTACTGGAACCTCGGTCGATACGAGACATACCCAGAAAGTGAGATGGAA  
TCGAATTGTGCTTAACGGTTCAGTTAAGTTGACTAGCGAAGCCAATGTTTCATAATATGAAGCAGTGGC  
TGTGGATGTGGCTCG

+

FFFFFFFFFFFFFFFFFFFFFFFFFFFFFFFFFFFFFFFFFFFFFFFFFFFFFFFFFFFFFFFFFFFFFFFF:  
FFFFFFFFFFFFFFFFFFFFFFFFFFFFFFFFFFFFFFFFFFFFFFFFFFFFFFFFFFFFFFFFFFFFFFFF:  
FFFFFFFFFFFFFFFFF

@A00721:190:HGJW7DSXY:4:1426:16993:28761 1:N:0:TCTGCAAG+GCTGCACT  
GTTTGTATAAATGATTGTCCTACTGGAACCTCGGTCGATACGAGACATACCCAGAAAGTGAGATGGAA  
TCGAATTGTGCTTAACGGTTCAGTTAAGTTGACTAGCGAAGCCAATGTTTCATAATATGAATCAGTGGC  
TGTGGATGTGGCTCG

+

FFF,FFFFFFFF:FFF::F,FF:F,:FFFF:::FFFFFF:FF:FFFFFF:F,,FFF:F:FFFFFFFF  
,:FFF,FFF:,F,F:FFFF,FFFF:FFF:,F:FFFF,FFF,,FF,:F:FFF,F:F,:FF,:FFFF,,  
FFFF:FFFF,,:F:F

@A00721:190:HGJW7DSXY:4:1515:23882:12070 1:N:0:TCTGCAAG+GCTGCACT  
GTTTGTATAAATGATTGTCCTACTGGAACCTCGGTCGATACGAGACATACCCAGAAAGTGAGATGGAA  
TCGAATTGTGCTTAACGGTTCAGTTAAGTTGACTAGCGAAGCCAATGTTTCAGAATATGAAGCAGTGGC  
TGTGGATGTGGCTCG

+

FF,F,FFFFFF,FFF:FFFFFFFF:FFF::FFFFFFFFFFFFFFFF,FF:FFFFFFFF:F,FFFFFF  
F,,FFFF,F:, :FFFF,,F:,FFFFFFFF:FF:FFFF,,FFFFFFFFF,FFF,FF,FFFF,,FF,:FF  
F,, :FFFFFFFFF

@A00721:190:HGJW7DSXY:4:1543:8133:35399 1:N:0:TCTGCAAG+GCTGCACT  
GTTTGTATAAATGATTGTCCTACTGGAACCTCGGTCGATACGAGACATACCCAGAAAGTGAGATGGAA  
TCGAATTGTGCTTAACGGTTCAGTTAAGTTGACTAGCGAAGCCAATGTTTCATAATATGAAGCAGTGGC  
TGTGGATGTGGCTCG

+

FFFFFFFFFFFFFFFFFFFFFFFFFFFFFFFFFFFFFFFFFFFFFFFFFFFFFFFFFFFFFFFFFFFFFFFF:  
FFFFFFFFFFFFFFFFFFFFFFFFFFFFFFFFFFFFFFFFFFFFFFFFFFFFFFFFFFFFFFFFFFFFFFFF,  
FFFFFFFFFFFFFFFFF

@A00721:190:HGJW7DSXY:4:1664:16776:26256 1:N:0:TCTGCAAG+GCTGCACT  
GTTTGTATAAATGATTGTCCTACTGGAACCTCGGTCGATACGAGACATACCCAGAAAGTGAGATGGAA  
TCGAATTGTGCTTAACGGTTCAGTTAAGTTGACTAGCGAAGCCAATGTTTCATAATATGAAGCAGTGGC  
TGTGGATGTGGCTCG

+  
FFFFFFFFFFFFFFFFFFFFFFFFFFFFFFFFFFFFFFFFFFFFFFFFFFFFFFFFFFFFFFFF  
FFFFFFFF:FFFFFFFFFFFFFFFFFFFFFFFFFFFFFFFFFFFFFFFFFFFFFFFFFFFFFFFF  
FFFFFFFFFFFFFFFF

@A00721:190:HGJW7DSXY:4:1676:14724:13745 1:N:0:TCTGCAAG+GCTGCACT  
GTTTGTATAAATGATTGTCCTACTGGAACCTCGGTCGATACGAGACATACCCAGAAAGTGAGATGGAA  
TCGAATTGTGCTTAACGGTTCAGTTAAGTTGACTAGCGAAGCCAATGTTTCATAATATGAAGCAGTGGC  
TGTGGATGTGGCTCG

+  
FFFFF:FFF:FFFFFFFFFFFFFFFFFFFFFFFFFFFFFFFFFFFFFFFFFFFFFFFFFFFFFF  
FFFFFFFFFFFFFFFFFFFFFFFFFFFFFFFFFFFFFFFFFFFFFFFFFFFFFFFFFFFFFFFF  
FFFFFFFFFFFFFFFF

@A00721:190:HGJW7DSXY:4:2117:16812:19930 1:N:0:TCTGCAAG+GCTGCACT  
GTTTGTATAAATGATTGTCCTACTGGAACCTCGGTCGATACGAGACATACCCAGAAAGTGAGATGGAA  
TCGAATTGTGCTTAACGGTTCAGTTAAGTTGACTAGCGAAGCCAATGTTTCATAATATGAAGCAGTGGC  
TGTGGATGTGGCTCG

+  
FF:,FFFFFFFFF:FFFFFFFFFFFF,FFFFFFFFFFFFFFFFFFFFFFFFFFFFFFFFFFFFF:  
FFFFF:FFFFFFFFFFFFFFFFFFFFFFFFFFFFFFFFFFFFFFFFFFFFFFFFFFFFFFFF:FF:FFFFFFFFF:FFFFF  
FFFFFFFFFFFFFFFF

@A00721:190:HGJW7DSXY:4:2169:5258:33614 1:N:0:TCTGCAAG+GCTGCACT  
GTTTGTATAAATGATTGTCCTACTGGAACCTCGGTCGATACGAGACATACCCAGAAAGTGAGATGGAA  
TCGAATTGTGCTTAACGGTTCAGTTAAGTTGACTAGCGAAGCCAATGTTTCATAATATGAAGCAGTGGC  
TGTGGATGTGGCTCG

+  
FF:FFFFFFFFFFFFFFFFFFFFFFFFFFFFFFFFFFFFFFFFFFFFFFFFFFFFFFFFFFFFF:FFFFFFFFF  
FFFFFFFFFFFFFFFFFFFFFFFFFFFFFFFFFFFFFFFFFFFFFFFFFFFFFFFFFFFFFFFFFFFF  
FFFFFFFFFFFFFFFF

@A00721:190:HGJW7DSXY:4:2264:31250:35383 1:N:0:TCTGCAAG+GCTGCACT  
GTTTGTATAAATGATTGTCCTACTGGAACCTCGGTCGATACGAGACATACCCAGAAAGTGAGATGGAA  
TCGAATTGTGCTTAACGGTTCAGTTAAGTTGACTAGCGAAGCCAATGTTTCATAATATGAAGCAGTGGC  
TGTGGATGTGGCTCG

+  
FFFFFFFFFFFFFFFFFFFFFFFFFFFFFFFFFFFFFFFFFFFFFFFFFFFFFFFFFFFFF:FFFFFFFFF:  
FFFFFFFFFFFFFFFFFFFFFFFFFFFFFFFFFFFFFFFFFFFFFFFFFFFFFFFFFFFFFFFFFFFF  
FFFFFFFFFF:FFFFF

@A00721:190:HGJW7DSXY:4:2264:31376:35916 1:N:0:TCTGCAAG+GCTGCACT  
GTTTGTATAAATGATTGTCCTACTGGAACCTCGGTCGATACGAGACATACCCAGAAAGTGAGATGGAA  
TCGAATTGTGCTTAACGGTTCAGTTAAGTTGACTAGCGAAGCCAATGTTTCATAATATGAAGCAGTGGC  
TGTGGATGTGGCTCG

+  
FFFFFFFFF:F:FFFFFFFFFFFFFFFFFFFFF:FFFFFFFFFFFFFFFFFFFFFFFFFFFFFFFFFFFF  
FFFFFFFFFFFFFFFFFFFF:FFFFFFFFFFFFFFFFFFFFFFFFFFFFFFFFFFFF:FFFFFFFFFFFFFFFFFFFFF:  
F:FFFFFFFFF,FFFF

@A00721:190:HGJW7DSXY:4:2267:8422:12320 1:N:0:TCTGCAAG+GCTGCACT  
GTTAGTATAAATGATTGTCCTACTGGAACCTCGGTCGATACGAGACATACCCAGAAAGTGAGATGGAA  
TCGAATTGTGCTTAACGGTTCAGTTAAGTTGACTAGCGAAGCCAATGTTTCATAATATGAAGCAGTGGC  
TGTGGATGTGGCTCG

+  
FFF,FFFFFFFFFFFFFFFFFFFFF:FFFFFFFFFFFFFFFFFFFFFFFFFFFFFFFFFFFF,FFFFFFFFF  
FFFFFFFFFFFFFFFFFFFFFFFFFFFFFFFFFFFFFFFFFFFFFFFFFFFFFFFFFFFFFFFFFFFF:FFFFF:  
FFFFFFFFFFFFFFFF

@A00721:190:HGJW7DSXY:4:2317:12400:11099 1:N:0:TCTGCAAG+GCTGCACT  
GTTTGTATAAATGATTGTCCTACTGGAACCTCGGTCGATACGAGACATACCCAGAAAGTGAGATGGAA





@A00721:190:HGJW7DSXY:4:1337:13711:8171 1:N:0:TCTGCAAG+GCTGCACT  
TTTGTATAAATGATTGTCCTACTGGAACCTCGGTCGATACGAGACATACCCAGAAAGTGAGATGGAAT  
CGAATTGTGCTTAACGGTTCAGTTAAGTTGACTAGCGAAGCCAATGTTTCATAATATGAAGCAGTGGCT  
GTGGATGTGGCTCGT

[illegible]

+

```
FFFFFFFFFFFFFFFFFFFFFFFFFFFFFFFFFFFFFFFFFFFFFFFFFFFFFFFFFFFF:FFFFFFFFFF
FFFFFFFFFFFFFFFFFFFFFFFFFFFFFFFFFFFFFFFFFFFFFFFFFFFFFFFFFFFF,FFFFFFFFFF,FFFFFFFFFFFFFFFF
FFFFFFFFFFFFFF:FFF
```

+

```
FFFFFFFFFFFFFFFFFFFFFFFFFFFFFFFFFFFFFFFFFFFFFFFFFFFFFFFFFF:FFFFFFFFFF  
FFF,FFFFFFFFFFFFFFFFFFFFFFFFFFFFFFFFFF:FFFFFFFFFFFFFFFFFFFF:FFFFFFF:  
FFFFFFFFFFFFFFFF
```

+

[illegible]

+

[illegible] $+$ 

```
FF:FFFFFFFFFFFFFFFFFFFFFFFF:FFFFFFFFFFFFFFFFFFFFFFFF:FF:FF:FFFFFFFFFFFF
F:FFFFFFFFFFFFFFFFFFFFFFFF:FFFF:FFFFFFFFFFFFFFFFFFFFFFFF:FFFFF:FFFFF:FFFFF:FFF:FFFFFFFF
E•FFFFFFFFFFFFFF
```

 $+$ 

```
FFFFFFFFFFFFFFFFFFFFFFFFFFFFFFFF: FFFFFFFFFFFFFFFFFFFFFFFFFFFFFFFFFF: FFFFFFFFFFFFFFFF
```

```
F::FFFFFFFFFFFFFFFFFFFFFFFFFFFFFFFFF:FFFFFFFFFFFFFFFFFFFFFF:FFFFFFF  
FFFFF,FFFFFF,: 
```

+

@A00721:190:HGJW7DSXY:4:2615:2166:23156 1:N:0:TCTGCAAG+GCTGCACT  
TTTGTATAAATGATTGTCCTACTGGAACCTCGGTCGATACGAGACATACCCAGAAAGTGAGATGGAAT  
CGAATTGTGCTTAACGGTTCAGTTAAGTTGACTAGCGAAGCCAATGTTTCATAATATGAAGCAGTGGCT  
GTGGATGTGGCTCG

[illegible]

+

@A00721:190:HGJW7DSXY:4:2635:30626:8719 1:N:0:TCTGCAAG+GCTGCACT  
TTTGTATAAATGATTGTCCTACTGGAACCTCGGTCGATACGAGACATACCCAGAAAGTGAGATGGAAT  
CGAATTGTGCTTAACGGTTCAGTTAAGTTGACTAGCGAAGCCAATGTTTCATAATATGAAGCAGTGGCT  
GTGGATGTGGCTCGT

[illegible]

+

@A00721:190:HGJW7DSXY:4:1336:5575:34287 1:N:0:TCTGCAAG+GCTGCACT  
GTATAATGATTGTCCTACTGGAACCTCGGTGATACGAGACATACCCAGAAAGTGAGATGGAATCGA  
ATTGTGCTTAACGGTTCAGTTAAGTTGACTAGCGAAGCCAATGTTCATAATATGAAGCAGTGGCTGTG  
GATGTGGCTCGTGTA

[illegible]

[illegible][illegible][illegible]

```
FFFFFFFFFFFFFFFFFFFFF::FFFFFFFFFFFFFFFFFFFFF:FFFFFFFFFFFFFFFFFFFFF  
FFFFFFFFFFFFFFFFFFFFF:FFFFFFFFFFFFFFFFFFF:FFF:FFFFFFFF:FFFFFF:F:F  
:FFFFFFFF:F:FFFF
```

[illegible]

```

FFFFFFFFF:,FFFFFFFFFFFFFFFF:FFFFFFFFF:FFFFFFFFFFFFFFFF:FFFFFFFFF
FFFFFFFFFFFFFFFFFFFFFFFFFFFFFFFF:FFFFFFFFFFFFFFFF:FFFFFFFFFFFF:F
FFFFFFFFF,FF:FFF

```

[illegible]

@A00721:190:HGJW7DSXY:4:1342:13485:29481 1:N:0:TCTGCAAG+GCTGCACT  
GTCCTACTGGAACCTCGGTCGATACGAGACATACCCAGAAAGTGAGATGGAATCGAATTGTGCTTAAC

GGTTCAGTTAAGTTGACTAGCGAAGCCAATGTTTCATAATATGAAGCAGTGGCTGTGGATGTGGCTCGT  
GTATGATAAGATCGG

[illegible]

+

@A00721:190:HGJW7DSXY:4:1372:25355:14967 1:N:0:TCTGCAAG+GCTGCACT  
GTCCTACTGGAACCTCGGTCGATACGAGACATACCCAGAAAGTGAGATGGAATCGAATTGTGCTTAAC  
GGTTCAGTTAAGTTGACTAGCGAAGCCAATGTTTCATAATGAAGCAGTGGCTGTGGATGTGGCTCGT  
GTATGATAGACGTCC

```
FFFFFFFFFFFFFFFFFFFFFFFFFFFFFFFFFFFF:FFFFFFFFFFFFFFFFFFFFFFFFFFFFFFF
FFFFFFFFFFFFFFFFFFFFFFFFFFFFFFFFFFFFF
FFFFFFFFFFFFFFFF
```

+

@A00721:190:HGJW7DSXY:4:1455:10691:34914 1:N:0:TCTGCAAG+GCTGCACT  
GTCCTACTGGAACCTCGGTCGATACGAGACATACCCAGAAAGTGAGATGGAATCGAATTGTGCTTAAC  
GGTTTCAGTTAAGTTGACTAGCGAAGCCAATGTTTCATAATATGAAGCAGTGGCTGTGGATGTGGCTCGT  
GTATGATAAGATCGG

[illegible]

+

@A00721:190:HGJW7DSXY:4:2402:16559:5181 1:N:0:TCTGCAAG+GCTGCACT  
GTCCTACTGGAACCTCGGTCGATACGAGACATACCCAGAAAGTGAGATGGAATCGAATTGTGCTTAAC  
GGTTCAGTTAAGTTGACTAGCGAAGCCAATGTTTCATAATGAAGCAGTGGCTGTGGATGTGGCTCGT  
GTATGATAGACGTCC

```

FFFFFFFFFFFF:FFFFFFFFFFFFFFFFFFFFFFFFFFFFFFFF:FFFFFFFFFFFFFFFFFFFFFFFFFFFFFFFF
FFFFFFFFFFFFFFFFFFFFFFFFFFFFFFFFFFFFFFFF:FFFFFFFF:FFFFFFFFFFFFFFFFFFFFFFFF
FFFFFFFFFFFFFFFF

```

@A00721:190:HGJW7DSXY:4:2557:2184:7811 1:N:0:TCTGCAAG+GCTGCACT  
GTCCTACTGGAACCTCGGTCGATACGAGACATACCCAGAAAGTGAGATGGAATCGAATTGTGCTTAAC  
GGTTTCAGTTAAGTTGACTAGCGAAGCCAATGTTTCATAATGAAGCAGTGGCTGTGGATGTGGCTCGT  
GTATGATAAGATCGG

```

FFFFFFFFFFFF:FFFFFFFFFFFFFFFFFFFFFFFFFFFFFFFFFFFFFFFFFFFFFFFF
FFFFFFFFFFFFFFFFFFFFFFFFFFFFFFFF:FFFFFFFFFFFFFFFFFFFFFFFFFFFFF:
FFFFFFFFFFFFFFFF

```

+

```

FFFFFFFFFFFFFFFFFFFFFFFFFFFFFFFFFFFFFFFF,FFFFFFFFFFFFFFFFFFFFFFFFFFFFFFFF
FFFFFFFFFFFFFFFFFFFFFFFFFFFFFFFF:FFFFF,FFFFFFFFFFFFFFFF:FFFFFFFFFFFF:FFFF
FFFFFFFFFFFFFFFF

```

+

```

FFFFFFFFFFFFFFFFFFFFFFFFFFFFFFFFFFFFFFFFFFFFFFFFFFFFFFFFFFFF:F:FFFFFFFF,F
FFFFFFFFFFFFFFFFFFFFFFFFFFFFFFFFFFFFFFFFFFFFFFFFFFFFFFFFFFFF:F,FFFFFFFF,F
FFFFFFFF,F:FFFFFFFF:F:FFFFFFFF
FFFFFFFF:FFFFFFF

```

+

[illegible]

+

```

FFFFF:FFF::FFFF::FFFFFF:FFFFFFFFFFFF:FFFFFFFFFFFF:FF::FFFFF:,FFFFFF
:,,:,FFFFFF,FFFFFFFFFFFFFFFFFFFF:F:FFFFFF:F,,FFF:F:FFF:F,:,,FFFF,FF
FF,FFFF,F:F,F

```

+

[illegible]

+

[illegible]

@A00721:190:HGJW7DSXY:4:1564:3522:1454 1:N:0:TCTGCAAG+GCTGCACT  
CTGGAACCTCGGTCGATACGAGACATACCCAGAAAGTGAGATGGAATCGAATTGTGCTTAACGGTTCA  
GTTAAGTTGACTAGCGAAGCCAATGTTCATAATATGAAGCAGTGGCTGTGGATGTGGCTCGTGTATGA  
TAGACGTCCCGGTAA

@A00721:190:HGJW7DSXY:4:2231:21187:30232 1:N:0:TCTGCAAG+GCTGCACT  
CTGGAACCTCGGTCGATACGAGACATACCCAGAAAGTGAGATGGAATCGAATTGTGCTTAACGGTTCA  
GTTAAGTTGACTAGCGAAGCCAATGTTCATAATATGAAGCAGTGGCTGTGGATGTGGCTCGTGTATGA  
TAGACGTCCCGGTAA

@A00721:190:HGJW7DSXY:4:2621:31295:22122 1:N:0:TCTGCAAG+GCTGCACT  
CTGGAACCTCGGTCGATACGAGACATACCCAGAAAGTGAGATGGAATCGAATTGTGCTTAACGGTTCA  
GTTAAGTTGACTAGCGAAGCCAATGTTCATAATATGAAGCAGTGGCTGTGGATGTGGCTCGTGTATGA  
TAGACGTCCCGGTAA

@A00721:190:HGJW7DSXY:4:2666:30011:8061 1:N:0:TCTGCAAG+GCTGCACT  
CTGGAACCTCGGTGCGATACGAGACATACCCAGAAAGTGAGATGGAATCGAATTGTGCTTAACGGTTCA  
GTTAAGTTGACTAGCGAAGCCAATGTTTCATAATATGAAGCAGTGGCTGTGGATGTGGCTCGTGTATGA  
TAGACGTCCCGGTAA

@A00721:190:HGJW7DSXY:4:2219:24099:10535 1:N:0:TCTGCAAG+GCTGCACT  
CTCGGTGCGATACGAGACATACCCAGAAAGTGAGATGGAATCGAATTGTGCTTAACGGTTCAGTTAAGT  
TGACTAGCGAAGCCAATGTTCATAATATGAAGCAGTGGCTGTGGATGTGGCTCGTGTATGATAGACGT  
CCCGGTAATTCTAAT

@A00721:190:HGJW7DSXY:4:2239:21215:34350 1:N:0:TCTGCAAG+GCTGCACT  
CTCGGTGCGATACGAGACATACCCAGAAAGTGAGATGGAATCGAATTGTGCTTAACGGTTCAGTTAAGT  
TGACTAGCGAAGCCAATGTTCATAATATGAAGCAGTGGCTGTGGATGTGGCTCGTGTATGATAGACGT  
CCCGGTAATTCTAAT

@A00721:190:HGJW7DSXY:4:1306:13612:22561 1:N:0:TCTGCAAG+GCTGCACT  
TCGGTCGATACGAGACATACCCAGAAAGTGAGATGGAATCGAATTGTGCTTAACGGTTCAGTTAAGTT  
GACTAGCGAAGCCAATGTTTCATAATATGAAGCAGTGGCTGTGGATGTGGCTCGTGTATGATAGACGTC  
CCGGTAATTCTAATC

+  
FFFFFFFFFFFFFFFFFFFFFFFFFFFFFFFFFFFFFFFFFFFFFFFFFFFFFFFFFFFFFFFFFFFFFFFF  
FFFFFFFFFFFFFFFFFFFFFFFFFFFFFFFFFFFFFFFFFFFFFFFFFFFFFFFFFFFFFFFFFFFFFFFF  
FFFFFFFFFFFFFFFF

@A00721:190:HGJW7DSXY:4:2119:11559:25708 1:N:0:TCTGCAAG+GCTGCACT  
TCGGTCGATACGAGACATACCCAGAAAGTGAGATGGAATCGAATTGTGCTTAACGGTTCAGTTAAGTT  
GACTAGCGAAGCCAATGTTTCATAATATGAAGCAGTGGCTGTGGATGTGGCTCGTGTATGATAGACGTC  
CCGGTAATTCTAATC

+  
FFFFFFFFFFFFFFFFFFFFFFFFFFFFFFFFFFFFFFFFFFFFFFFFFFFFFFFFFFFFFFFFFFFFFFFF  
FFFFFFFFFFFFFFFFFFFFFFFFFFFFFFFFFFFFFFFFFFFFFFFFFFFFFFFFFFFFFFFFFFFFFFFF  
FFFFFFFF, F:FFF, FFFFFFFFFFFFFFFFFFFFFFFFFFFFFFFFFFFFFFFFFFFFFFFFFF: F:FFFF: FFFFFFFFFF  
FFFFF, ::FFFF

@A00721:190:HGJW7DSXY:4:2333:17363:25207 1:N:0:TCTGCAAG+GCTGCACT  
TCGGTCGATACGAGACATACCCAGAAAGTGAGATGGAATCGAATTGTGCTTAACGGTTCAGTTAAGTT  
GACTAGCGAAGCCAATGTTTCATAATATGAAGCAGTGGCTGTGGATGTGGCTCGTGTATGATAGACGTC  
CCGGTAATTCTAATC

+  
FFFFFFFFFFFFFFFFFFFFFFFFFFFFFFFFFFFFFFFFFFFFFFFFFFFFFFFFFFFFFFFFFFFFFFFF  
FFFFFFFFFFFFFFFFFFFFFFFFFFFFFFFFFFFFFFFFFFFFFFFFFFFFFFFFFFFFFFFFFFFFFFFF  
FFFFFFFFFFFFFFFFFFFFFFFFFFFFFFFFFFFFFFFFFFFFFFFFFFFFFFFFFFFFFFFFFFFFFFFF, FFFFFFFFFF  
FFFFFFFFFFFFFFFF

@A00721:190:HGJW7DSXY:4:2464:5764:26256 1:N:0:TCTGCAAG+GCTGCACT  
TCGGACGATACGAGACATACCCAGAAAGTGAGATGGAATCGAATTGTGCTTAACGGTTCAGTTAAGTT  
GACTAGCGAAGCCAATGTTTCATAATATGAAGCAGTGGCTGTGGATGTGGCTCGTGTATGATATACGTC  
ACGGTAATTCTAATC

+  
FF, F, FFFFF: ::FFF, :FF, FF:FF, F:FFFF, ::FFF:FF:FFF, F:FFF:F:F:FFFFFFFF:FF  
, F, F, :FFFFFFFFF:FFFF, F:, FFF:FF:FFF, :FF, FFFFF:, F, F::, FF:FFF, , FF, :F  
, , , , FFFF:FFF, F

@A00721:190:HGJW7DSXY:4:1316:28646:10645 1:N:0:TCTGCAAG+GCTGCACT  
GTGATACGAGACATACCCAGAAAGTGAGATGGAATCGAATTGTGCTTAACGGTTCAGTTAAGTTGAC  
TAGCGAAGCCAATGTTTCATAATATGAAGCAGTGGCTGTGGATGTGGCTCGTGTATGATAGACGTCCCG  
GTAATTCTAATCCCA

+  
:FFF:FFFF:F:F:FF:FFFF:FFFFFFFF, :F:FFFFFFFF, , F:FF:, F, FFFF, :FF:, F, FF  
:F, F:FFF:FFFFFFFFF, FFF:, FF, , F, , F, FF:, FFFF:FFFFFFFFF:FFF:F:FFFFF, F  
:FFFFFFFF, FF:FF

@A00721:190:HGJW7DSXY:4:1454:26729:33098 1:N:0:TCTGCAAG+GCTGCACT  
GTGATACGAGACATACCCAGAAAGTGAGATGGAATCGAATTGTGCTTAACGGTTCAGTTAAGTTGAC  
TAGCGAAGCCAATGTTTCATAATATGAAGCAGTGGCTGTGGATGTGGCTCGTGTATGATAGACGTCCCG  
GTAATTCTAATCCCA

+  
FFFFFFFFFFFFFFFFFFFFFFFFFFFFFFFFFFFFFFFFFFFFFFFFFFFFFFFFFFFFFFFFFFFFFFFF  
FFFFFFFFFFFFFFFFFFFFFFFFFFFFFFFFFFFFFFFFFFFFFFFFFFFFFFFFFFFFFFFFFFFFFFFF  
FFFFFFFFFFFFFFFF

@A00721:190:HGJW7DSXY:4:1512:1678:22060 1:N:0:TCTGCAAG+GCTGCACT  
GTGATACGAGACATACCCAGAAAGTGAGATGGAATCGAATTGTGCTTAACGGTTCAGTTAAGTTGAC  
TAGCGAAGCCAATGTTTCATAATATGAAGCAGTGGCTGTGGATGTGGCTCGTGTATGATAGACGTCCCG  
GTAATTCTAATCCCA

+  
FFFFFFFFFFFFFFFFFFFFFFFFFFFFFFFFFFFFFFFFFFFFFFFFFFFFFFFFFFFFFFFFFFFFFFFF  
FFFFFFFFFFFFFFFFFFFFFFFFFFFFFFFFFFFFFFFFFFFFFFFFFFFFFFFFFFFFFFFFFFFFFFFF  
FF:FFFFFFFF

@A00721:190:HGJW7DSXY:4:1571:16794:29262 1:N:0:TCTGCAAG+GCTGCACT  
GTGATACGAGACATACCCAGAAAGTGAGATGGAATCGAATTGTGCTTAACGGTTCAGTTAAGTTGAC







FFFFFFFFFFFFFFFFFFFFFFFFFFFFFFFFFFFFFFFFFFFFFFFFFFFFFFFFFFFFFFFFFFFFFFFF  
FFFFFFFFFFFFFFFF

@A00721:190:HGJW7DSXY:4:1421:10520:32831 1:N:0:TCTGCAAG+GCTGCACT  
CTGGGATTAGAATTACCGGGACGTCTATCATACACGAGCCACATCCACAGCCACTGCTTCATATTATG  
AACATTGGCTTCGCTAGTCAACTTAACTGAACCGTTAAGCACAATTCGATTCCATCTCACTTTATGGG  
TATGTCTAGTAGATC

+

FFFF,FFFF,FF:FF,FFFFFF:FFFF:FF,FFF:FFFF:F,FF,,FFFF:FFFF,FF::FF:F,FFF  
FFFFFF:,FFF:FFFFFF:FFFFFFFF,FF:,F,,FF,:F,FF,F:,FFFFFF::FFF,:F,F,FF  
F,FF::,:FF:F:F

@A00721:190:HGJW7DSXY:4:1569:20754:19398 1:N:0:TCTGCAAG+GCTGCACT  
CTGGGATTAGAATTACCGGGACGTCTATCATACACGAGCCACATCCACAGCCACTGCTTCATATTATG  
AACATTGGCTTCGCTAGTCAACTTAACTGAACCGTTAAGCACAATTCGATTCCATCTCACTTTCTGGG  
TATGTCTCGTAGATC

+

FFFFFFFFFFFFFFFFFFFFFFFFFFFFFFFFFFFFFFFFFFFFFFFFFFFFFFFFFFFFFFFFFFFFFFFF  
FFFFFFFFFFFFFFFFFFFFFFFFFFFFFFFFFFFFFFFFFFFFFFFFFFFFFFFFFFFFFFFFFFFFFFFF  
FFFFFFFFFFFFFFFF

@A00721:190:HGJW7DSXY:4:1668:31647:4413 1:N:0:TCTGCAAG+GCTGCACT  
CTGGGATTAGAATTACCGGGACGTCTATCATACACGAGCCACATCCACAGCCACTGCTTCATATTATG  
AACATTGGCTTCGCTAGTCAACTTAACTGAACCGTTAAGCACAATTCGATTCCATCTCACTTTCTGGG  
TATGTCTCGTAGATC

+

FFFFFFFFFFFFFFFFFFFFFFFFFFFFFFFFFFFFFFFFFFFFFFFFFFFFFFFFFFFFFFFFFFFFFFFF  
FFFFFFFFFFFFFFFFFFFFFFFFFFFFFFFFFFFFFFFFFFFFFFFFFFFFFFFFFFFFFFFFFFFFFFFF  
F:FFFFFFFFFFFFFFFF

@A00721:190:HGJW7DSXY:4:2516:6931:5822 1:N:0:TCTGCAAG+GCTGCACT  
CTGGGATTAGAATTACCGGGACGTCTATCATACACGAGCCACATCCACAGCCACTGCTTCATATTATG  
AACATTGGCTTCGCTAGTCAACTTAACTGAACCGTTAAGCACAATTCGATTCCATCTCACTTTCTGGG  
TATGTCTCGTAGATC

+

FFFFFFFFFFFFFFFFFFFFFFFFFFFFFFFFFFFFFFFFFFFFFFFFFFFFFFFFFFFFFFFFFFFFFFFF  
FFFFFFFFFFFFFFFFFFFFFFFFFFFFFFFFFFFFFFFFFFFFFFFFFFFFFFFFFFFFFFFFFFFFFFFF  
FFFFFFFF:FF,FFF

@A00721:190:HGJW7DSXY:4:1140:31186:26162 1:N:0:TCTGCAAG+GCTGCACT  
CACCCAGAAAGTGAGATGGAATCGAATTGTGCTTAACGGTTCAGTTAAGTTGACTAGCGAAGCCAATG  
TTCATAATATGAAGCAGTGGCTGTGGATGTGGCTCGTGTATGATAGACGTCCCGTAATTCTAATCCC  
AGAGTGAATGAGATA

+

FFFFFFFFFFFFFFFFFFFFFFFFFFFFFFFFFFFFFFFFFFFFFFFFFFFFFFFFFFFFFFFFFFFFFFFF  
FFFFFFFFFFFFFFFF:FFFFFFFFFFFFFFFFFFFFFFFFFFFFFFFFFFFFFFFFFFFFFFFFFFFFFFFF  
FFFFFFFFFFFFFFFF

@A00721:190:HGJW7DSXY:4:1143:28501:9361 1:N:0:TCTGCAAG+GCTGCACT  
CACCCAGAAAGTGAGATGGAATCGAATTGTGCTTAACGGTTCAGTTAAGTTGACTAGCGAAGCCAATG  
TTCATAATATGAAGCAGTGGCTGTGGATGTGGCTCGTGTATGATAGACGTCCCGTAATTCTAATCCC  
AGAGTGAATGAGATA

+

FFFFFFFFFFFFFFFFFFFFFFFFFFFFFFFFFFFFFFFFFFFFFFFFFFFFFFFFFFFFFFFFFFFFFFFF  
FFFF,FFFFFFFFFFFFFFFFFFFFFFFFFFFFFFFFFFFFFFFFFFFFFFFFFFFFFFFFFFFFFFFF  
FFFFFFFFFFFFFFFF

@A00721:190:HGJW7DSXY:4:1177:19569:18630 1:N:0:TCTGCAAG+GCTGCACT  
CACCCAGAAAGTGAGATGGAATCGAATTGTGCTTAACGGTTCAGTTAAGTTGACTAGCGAAGCCAATG  
TTCATAATATGAAGCAGTGGCTGTGGATGTGGCTCGTGTATGATAGACGTCCCGTAATTCTAATCCC  
AGAGTGAATGAGATA

+  
FFFFFFFFFFFFFFFFFFFFFFFFFFFFFFFFFFFFFFFFFFFFFFFFFFFFFFFFFFFFFFFFFFFFFFFF  
FFFFFFFFFFFFFFFFFFFFFFFFFFFFFFFFFFFFFFFFFFFFFFFFFFFFFFFFFFFFFFFFFFFFFFFF  
FFFFFFFF:FFFFFFFF  
@A00721:190:HGJW7DSXY:4:1221:30337:31109 1:N:0:TCTGCAAG+GCTGCACT  
CACCCAGAAAGTGAGATGGAATCGAATTGTGCTTAACGGTTCAGTTAAGTTGACTAGCGAAGCCAATG  
TTCATAATATGAAGCAGTGGCTGTGGATGTGGCTCGTGTATGATAGACGTCCCGTAATTCTAATCCC  
AGAGTGAATGAGATA

+  
FFFFFFFFFFFFFFFFFFFFFFFFFFFFFFFFFFFFFFFFFFFFFFFFFFFFFFFFFFFFFFFFFFFFFFFF  
FFFFFFFFFFFFFFFFFFFFFFFFFFFFFFFFFFFFFFFFFFFFFFFFFFFFFFFFFFFFFFFFFFFFFFFF  
FFFFFFFFFFFFFFFF  
@A00721:190:HGJW7DSXY:4:1239:16532:3035 1:N:0:TCTGCAAG+GCTGCACT  
CACCCAGAAAGTGAGATGGAATCGAATTGTGCTTAACGGTTCAGTTAAGTTGACTAGCGAAGCCAATG  
TTCATAATATGAAGCAGTGGCTGTGGATGTGGCTCGTGTATGAAATACTACCCGCTCATTCAAATCCC  
AGAGTGAATGAGATA

+  
FFFFFF:FFF:,,,:FF,F:,,F,F::,FF,F:,F:FFFF,,F,,FF:F,,,:F,FFF:FFF,FFF:,  
F:,F,FFFFFFFF,FFF,F,FFF,,FFF,F,,F,F,,FFFFFF,F,F,,FFF,,F,:FF,F,FFFF  
F,FFFF,F,F,,FF  
@A00721:190:HGJW7DSXY:4:1273:17192:7529 1:N:0:TCTGCAAG+GCTGCACT  
CACCCAGAAAGTGAGATGGAATCGAATTGTGCTTAACGGTTCAGTTAAGTTGACTAGCGAAGCCAATG  
TTCATAATATGAAGCAGTGGCTGTGGATGTGGCTCGTGTATGATAGACGTCCCGTAATTCTAATCCC  
AGAGTGAATGAGATA

+  
FFFFFFFFFFFFFFFFFFFFFFFFFFFFFFFFFFFFFFFFFFFFFFFFFFFFFFFFFFFFFFFFFFFFFFFF  
FFFFFFFFFFFFFFFFFFFFFFFFFFFFFFFFFFFFFFFFFFFFFFFFFFFFFFFFFFFFFFFFFFFFFFFF  
FFFFFFFFFFFFFFFF  
@A00721:190:HGJW7DSXY:4:1314:31295:7435 1:N:0:TCTGCAAG+GCTGCACT  
CACCCAGAAAGTGAGATGGAATCGAATTGTGCTTAACGGTTCAGTTAAGTTGACTAGCGAAGCCAATG  
TTCATAATATGAAGCAGTGGCTGTGGATGTGGCTCGTGTATGATAGACGTCCCGTAATTCTAATCCC  
AGAGTGAATGAGATA

+  
FFFFFFFFFFFFFFFFFFFFFFFFFFFFFFFFFFFFFFFFFFFFFFFFFFFFFFFFFFFFFFFFFFFFFFFF  
FFFFFFFFFFFFFFFFFFFFFFFFFFFFFFFFFFFFFFFFFFFFFFFFFFFFFFFFFFFFFFFFFFFFFFFF  
FFFFFFFFFFFFFFFF  
@A00721:190:HGJW7DSXY:4:1315:22525:20870 1:N:0:TCTGCAAG+GCTGCACT  
CACCCAGAAAGTGAGATGGAATCGAATTGTGCTTAACGGTTCAGTTAAGTTGACTAGCGAAGCCAATG  
TTCATAATATGAAGCAGTGGCTGTGGATGTGGCTCGTGTATGATAGACGTCCCGTAATTCTAATCCC  
AGAGTGAATGAGATA

+  
FFFFFFFFFFFFFFFFFFFFFFFFFFFFFFFFFFFFFFFFFFFFFFFFFFFFFFFFFFFFFFFFFFFFFFFF  
FFFFFFFFFFFFFFFFFFFFFFFFFFFFFFFFFFFFFFFFFFFFFFFFFFFFFFFFFFFFFFFFFFFFFFFF  
FFFFFFFFFFFFFFFF  
@A00721:190:HGJW7DSXY:4:1408:13865:27727 1:N:0:TCTGCAAG+GCTGCACT  
CACCCAGAAAGTGAGATGGAATCGAATTGTGCTTAACGGTTCAGTTAAGTTGACTAGCGAAGCCAATG  
TTCATAATATGAAGCAGTGGCTGTGGATGTGGCTCGTGTATGATAGACGTCCCGTAATTCTAATCCC  
AGAGTGAATGAGATA

+  
FFFFFFFFFFFFFFFFFFFFFFFFFFFFFFFFFFFFFFFFFFFFFFFFFFFFFFFFFFFFFFFFFFFFFFFF  
:FFF:FFFFFFFF:FFFFFFFFFFFFFFFFFFFFFFFFFFFFFFFFFFFFFFFFFFFFFFFF,FFFF:F:FFF  
FFFFFFFFFFFFFFFF  
@A00721:190:HGJW7DSXY:4:2148:8757:34976 1:N:0:TCTGCAAG+GCTGCACT  
CACCCAGAAAGTGAGATGGAATCGAATTGTGCTTAACGGTTCAGTTAAGTTGACTAGCGAAGCCAATG

TTCATAATATGAAGCAGTGGCTGTGGATGTGGCTCGTGTATGATAGACGTCCCGGTAATTCTAATCCC  
AGAGTGAATGAGATA

[illegible]

+

@A00721:190:HGJW7DSXY:4:2177:16215:21496 1:N:0:TCTGCAAG+GCTGCACT  
CACCCAGAAAGTGAGATGGAATCGAATTGTGCTTAACGGTTCAGTTAAGTTGACTAGCGAAGCCAATG  
TTCATAATATGAAGCAGTGGCTGTGGATGTGGCTCGTGTATGATAGACGTCGCGTAATTCTAATCCC  
AGAGTGAATGAGATA

[illegible]

+

@A00721:190:HGJW7DSXY:4:2307:6623:9424 1:N:0:TCTGCAAG+GCTGCACT  
CACCCAGAAAGTGAGATGGAATCGAATTGTGCTTAACGGTTCAGTTAAGTTGACTAGCGAAGCCAATG  
TTCATAATATGAAGCAGTGGCTGTGGATGTGGCTCGTGTATGATAGACGTCCCGGTAATTCTAATCCC  
AGAGTGAATGAGATA

```

FFFFFFFFFFFFFFFFFFFFFFFFFFFFFFFFFFFFFFFFFFFFFFFFFFFFFFFFFFFFFFFFFFFFFFFF
FFFF:FFFFFFFF:FFFFFFFFFFFFFFFFFFFF:FFFFFFFFFFFFFFFFFFFFFFFF:FFFFFFFFFFFF
FFFFFFFFFFFFFFFF

```

+

@A00721:190:HGJW7DSXY:4:2357:24641:5149 1:N:0:TCTGCAAG+GCTGCACT  
CACCCAGAAAGTGAGATGGAATCGAATTGTGCTTAACGGTTCAGTTAAGTTGACTAGCGAAGCCAATG  
TTCATAATATGAAGCAGTGGCTGTGGATGTGGCTCGTGTATGATAGACGTCCCGGTAATTCTAATCCC  
AGAGTGAATGAGATA

[illegible]

$+$ 

+

 $+$ 

+

+

+

+

[illegible]

@A00721:190:HGJW7DSXY:4:1522:3830:24627 1:N:0:TCTGCAAG+GCTGCACT  
ACCCAGAAAGTGAGATGGAATCGAATTGTGCTTAACGGTTCAGTTAAGTTGACTAGCGAAGCCAATGT  
TCATAATATGAAGCAGTGGCTGTGGATGTGGCTCGTGTATGATAGACGTCCCGGTAATTCTAATCCCA  
GAGTGAATGAGATAT

@A00721:190:HGJW7DSXY:4:1530:3884:18270 1:N:0:TCTGCAAG+GCTGCACT  
ACCCAGAAAGTGAGATGGAATCGAATTGTGCTTAACGGTTCAGTTAAGTTGACTAGCGAAGCCAATGT  
TCATAATATGAAGCAGTGGCTGTGGATGTGGCTCGTGTATGATAGACGTCCCGGTAATTCTAATCCCA  
GAGTGAATGAGATAT

@A00721:190:HGJW7DSXY:4:1530:5746:20087 1:N:0:TCTGCAAG+GCTGCACT  
ACCCAGAAAGTGAGATGGAATCGAATTGTGCTTAACGGTTCAGTTAAGTTGACTAGCGAAGCCAATGT  
TCATAATATGAAGCAGTGGCTGTGGATGTGGCTCGTGTATGATAGACGTCCCGGTAATTCTAATCCCA  
GAGTGAATGAGATAT

@A00721:190:HGJW7DSXY:4:1540:14904:7921 1:N:0:TCTGCAAG+GCTGCACT  
ACCCAGAAAGTGGGATGGAATCGAATTGTGCTTAACGGTTCAGTTAAGTTGACTAGCGAAGCCAATGT  
TCATAATATGAAGCAGTGGCTGTGGATGTGGCTCGTGTATGATAGACGTCCCGGTAATTCTAATCCCA  
GAGTGAATGAGATAT

@A00721:190:HGJW7DSXY:4:2372:5095:24377 1:N:0:TCTGCAAG+GCTGCACT  
ACCCAGAAAGTGAGATGGAATCGAATTGTGCTTAACGGTTCAGTTAAGTTGACTAGCGAAGCCAATGT  
TCATAATATGAAGCAGTGGCTGTGGATGTGGCTCGTGTATGATAGACGTCCCGGTAATTCTAATCCCA  
GAGTGAATGAGATAT

@A00721:190:HGJW7DSXY:4:2420:28926:18646 1:N:0:TCTGCAAG+GCTGCACT  
ACCCAGAAAGTGAGATGGAATCGAATTGTGCTTAACGGTTCAGTTAAGTTGACTAGCGAAGCCAATGT  
TCATAATATGAAGCAGTGGCTGTGGATGTGGCTCGTGTATGATAGACGTCCCGGTAATTCTAATCCCA  
GAGTGAATGAGATAT

@A00721:190:HGJW7DSXY:4:2503:5764:24283 1:N:0:TCTGCAAG+GCTGCACT  
ACCCAGAAAGTGAGATGGAATCGAATTGTGCTTAACGGTTCAGTTAAGTTGACTAGCGAAGCCAATGT  
TCATAATATGAAGCAGTGGCTGTGGATGTGGCTCGTGTATGATAGACGTCCCGGTAATTCTAATCCCA  
GAGTGAATGAGATAT

[illegible]

```
FFFFFFFFFFFFFFFFFFFFFFFFFFFFFFFFFFFFFFFFFFFFFFFFFFFFFFFFFFFFF
FFFFFFFFFFFFFFFFFFFFFF:FFFFFFFFFFFFFFFFFFFFFFFFFFFFFFFFFFFFF
FFFFFF,FFFFFFF
```

```
:FFFF,FFFFFFFFFFFFFFFFFFFFFFFF,FFFFFFFFFFFFFFFF,FFFFFFFFFFFF:FFFFFFF
FFFFFFFFFFFFF::FFFFFFFF:FFFFFFFF:FFFFFFFFFFFFFFFF:FFFFFFFF:FFFFFFFFFFFF:FFFF
FFF:FFFFFFFFFFFF
```

```
FFFFFFFFFFFFFFFFFFFF:FFFFFFFFFFFFFFFFFFFFFFFFFFFFFFFFFFFFFFFFFFFFFFF  
FFF:FFFFFFFF:FFFFFFFFFFFFFFFFFFFFFFFFFFFFFFFFFFFFFFFFFFFFF:FFFFFFFFFFFFFFFFFFFFFFFFFFFFFFFF  
FFFFFFFFFFFFFFFFFFFF
```

[illegible]

```

FFFFFFFFFFFFFF:FFF:FFFFFFFFFFFFFFFFFFFFFFFFFFFFFFFFFFFFFFFF:FFFFFFFF
FFFFFFFFFFFFFFFFFFFFFFFF:FFFFFFFFFFF,FFFFFFFF:FFFFFFFFFFFFFFFFFFFF
FFFFFFFFFFFFFF:FF

```

[illegible]

@A00721:190:HGJW7DSXY:4:1411:32280:29183 1:N:0:TCTGCAAG+GCTGCACT  
CCAGAAAGTGAGATGGAATCGAATTGTGCTTAACGGTTCAGTTAAGTTGACTAGCGAAGCCAATGTTCT







FFFFFFFFFFFF:FFFFFFFFFFFFFFFFFFFFFFFFFFFFFFFFFFFFFFFFFFFFFFFFFFFFFFFFFFFFFFFF  
FFFFFFFFFFFFFFFF

@A00721:190:HGJW7DSXY:4:1126:7744:7075 1:N:0:TCTGCAAG+GCTGCACT  
CAGAAAGTGAGATTGAATCGAATTGTGCTTAACGGTTCAGTTAAGTTGACTAGCGAAGCCAATGTTCA  
TAATATGAATCAGAGGCTGTGGATGTGGCTCGTTTATGATAGACGTCCCGGTAATTCTAATCCCAGAG  
TGAATGAGATATT

+

:F:FFFFF:FFFF,FFF:F,FFFFFF,:FFFF::FF,F,,FFF,:F,:F,FFFFFF:F:FFF,,FFF  
FFFF:FFFF,FF,,,,,:,:,FF,F,,F:,,F,FF,:F:F,F:FFF,F,,:F:FF::FFFF,,FFF:  
,FFFFFFF:F:F:

@A00721:190:HGJW7DSXY:4:1163:29903:11318 1:N:0:TCTGCAAG+GCTGCACT  
CAGAAAGTGAGATGGAATCGAATTGTGCTTAACGGTTCAGTTAAGTTGACTAGCGAAGCCAATGTTCA  
TAATATGAAGCAGTGGCTGTGGATGTGGCTCGTGTATGATAGACGTCCCGGTAATTCTAATCCCAGAG  
TGAATGAGATATTCA

+

FF:FFFFFFFFFFFFFF:FFFFFFFFFFFFFFFFFFFFFFFFFFFFFFFFFFFFFFFFFFFFFFFFFFFFFFFF  
FFFFFFFFFFFFFFFFFFFFFFFFFFFF,FFFFFFFFFFFFFFFFFFFFFFFF:F:FFF:FFFFFFFFFFFFFFFF  
FFFFFFFFFFFFFFFF

@A00721:190:HGJW7DSXY:4:1202:14660:18615 1:N:0:TCTGCAAG+GCTGCACT  
CAGAAAGTGAGATGGAATCGAATTGTGCTTAACGGTTCAGTTAAGTTGACTAGCGAAGCCAATGTTCA  
TAATATGAAGCAGTGGCTGTGGATGTGGCTCGTGTATGATAGACGTCCCGGTAATTCTAATCCCAGAG  
TGAATGAGATATTCA

+

FFFFFFFFFFFFFFFFFFFFFFFFFFFFFFFFFFFFFFFFFFFFFFFFFFFFFFFFFFFFFFFFFFFFFFFFF:  
FFFFFFFFFFFFFFFFFFFFFFFFFFFFFFFFFFFFFFFFFFFFFFFFFFFFFFFFFFFFFFFF:FFFFF:FFFFFFF  
FFFFFFFFFFFFFFFF

@A00721:190:HGJW7DSXY:4:1353:18005:7780 1:N:0:TCTGCAAG+GCTGCACT  
CAGAAAGTGAGATGGAATCGAATTGTGCTTAACGGTTCAGTTAAGTTGACTAGCGAAGCCAATGTTCA  
TAATATGAAGCAGTGGCTGTGGATGTGGCTCGTGTATGATAGACGTCCCGGTAATTCTAATCCCAGAG  
TGAATGAGATATTCA

+

FFFFFFFFFFFFFFFFFFFFFFFFFFFFFFFFFFFFFFFFFFFFFFFFFFFFFFFFFFFFFFFFFFFFFFFFF:  
FFFFFFFFFFFFFFFFFFFFFFFFFFFFFFFFFFFFFFFFFFFFFFFFFFFFFFFFFFFFFFFFFFFFFFFFF:  
FFFFFFFFFFFFFFFF

@A00721:190:HGJW7DSXY:4:1634:8757:23422 1:N:0:TCTGCAAG+GCTGCACT  
CAGAAAGTGAGATGGAATCGAATTGTGCTTAACGGTTCAGTTAAGTTGACTAGCGAAGCCAATGTTCA  
TAATATGAAGCAGTGGCTGTGGATGTGGCTCGTGTATGATAGACGTCCCGGTAATTCTAATCCCAGAG  
TGAATGAGATATTCA

+

FFFFFFF:FFFF:F:FFF:FFFFFFFFFFFFFFFF:FF:FFFF,FFF:FF:FFFF,FFF:,FFFF  
:FFFF:FFFFFFFFFFFF:F:F,FFFF::F:FFFFFFFF:FF,FF,FF:FFFF,FFFF,FFFFF,  
:FFFFFFFFFFFF::F

@A00721:190:HGJW7DSXY:4:2134:4372:26443 1:N:0:TCTGCAAG+GCTGCACT  
CAGAAAGTGAGATGGAATCGAATTGTGCTTAACGGTTCAGTTAAGTTGACTAGCGAAGCCAATGTTCA  
TAATATGAAGCAGTGGCTGTGGATGTGGCTCGTGTAAAGATAGACGTCCCGGTAATTCTAATCCCAGAG  
TGAATGAGATATTCA

+

FFFFFFFFFFFFFFFFFFFFFFFFFFFFFFFFFFFFFFFFFFFFFFFFFFFFFFFFFFFFFFFFFFFFFFFFF:  
FFFFFFFFFFFF:FFFFFFFFFFFFFFFFFFFFFFFFFFFF,FFFFFFFFFFFFFFFFFFFFFFFF:FFFFF  
FFFFFFFFFFFFFFFF

@A00721:190:HGJW7DSXY:4:2134:1452:27461 1:N:0:TCTGCAAG+GCTGCACT  
CAGAAAGTGAGATGGAATCGAATTGTGCTTAACGGTTCAGTTAAGTTGACTAGCGAAGCCAATGTTCA  
TAATATGAAGCAGTGGCTGTGGATGTGGCTCGTGTATGATAGACGTCCCGGTAATTCTAATCCCAGAG  
TGAATGAGATATTCA

+  
FFFFFFFFFFFFFFFFFFFFFFFFFFFFFFFFFFFFFFFFFFFFFFFFFFFFFFFFFFFFFFFFFFFFFFFF  
FFFFFFFFFFFF:FFFFFFFFFFFFFFFFFFFFFFFFFFFFFFFFFFFFFFFFFFFFFFFFFFFFFFFF  
FFFFFFFFFFFFFFFFFFFF

@A00721:190:HGJW7DSXY:4:2278:1705:20572 1:N:0:TCTGCAAG+GCTGCACT  
CAGAAAGTGAGATGGAATCGAATTGTGCTTAACGGTTCAGTTAAGTTGACTAGCGAAGCCAATGTTCA  
TAATATGAAGCAGTGGCTGTGGATGTGGCTCGTGTATGATAGACGTCCCGGTAATTCTAATCCCAGAG  
TGAATGAGAAGATC

+  
FF:FFFF,FFFFF:FFFF:FFF,FF,F,FFFFFFFFFFFF::FFF,FFFFF,FFFFFFFFFFFF:FFFFF  
FFFFFFFFFFFF:FF,F:FFFFF:FFFF:F,FF:FFFFFFFFFFFF,FFFF::FF:F:F:FFFFFFFF,FFFF  
F,FF,FFFF:FFF

@A00721:190:HGJW7DSXY:4:2348:27805:17926 1:N:0:TCTGCAAG+GCTGCACT  
CAGAAAGTGAGATGGAATCGAATTGTGCTTAACGGTTCAGTTAAGTTGACTAGCGAAGCCAATGTTCA  
TAATATGAAGCAGTGGCTGTGGATGTGGCTCGTGTATGATAGACGTCCCGGTAATTCTAATCCCAGAG  
TGAATGAGATATTCA

+  
:FFFFFFFFFFFFFFFFFFFFFFFFFFFFFFFFFFFFFFFFFFFF:FF:FFFFF:FF:FFFF:F:FFFFFFF:,FF:F  
:FFFFFFFFFFFFFFFFFFFF,FFFFFFFFFFFF,FFFFFFFFFFFFFFFFFFFFFFFFFFFFFFFF:FFFFF:FFFFFFF:  
FFFFFFFFF:FFFFFFF

@A00721:190:HGJW7DSXY:4:2416:10294:25582 1:N:0:TCTGCAAG+GCTGCACT  
CAGAAAGTGAGATGGAATCGAATTGTGCTTAACGGTTCAGTTAAGTTGACTAGCGAAGCCAATGTTCA  
TAATATGAAGCAGTGGCTGTGGATGTGGCTCGTGTATGATAGACGTCCCGGTAATTCTAATCCCAGAG  
TGAATGAGATATTCA

+  
FFFFFFFFFFFFFFFFFFFFFFFFFFFFF:FFFFFFFFFFFFFFFFFFFFFFFFFFFFFFFFFFFFFFFFFFFFF  
FFFFFFFFFFFFFFFFFFFFFFFFFFFFFFFFFFFFFFFFFFFFFFFFFFFFFFFFFFFFFFFFFFFFFFFFFFFF  
FFFFFFFFFFFFFFFFFFFF

@A00721:190:HGJW7DSXY:4:2446:10872:32597 1:N:0:TCTGCAAG+GCTGCACT  
CAGAAAGTGAGATGGAATCGAATTGTGCTTAACGGTTCAGTTAAGTTGACTAGCGAAGCCAATGTTCA  
TAATATGAAGCAGTGGCTGTGGATGTGGCTCGTGTATGATAGACGTCCCGGTAATTCTAATCCCAGAG  
TGAATGAGATATTCA

+  
FFFFFFFFFFFFFFFFFFFFF:FFFFFFFFFFFFFFFFFFFFFFFFFFFFFFFFFFFFFFFFFFFFFFFFFFFFF  
FFFFFFFFFFFFFFFFFFFFFFFFFFFFFFFFFFFFFFFFFFFF:FFFFFFFFFFFFFFFFFFFFFFFFFFFFFFFFFFFFF  
FFFFFFFFFFFFFFFFFFFF

@A00721:190:HGJW7DSXY:4:2539:27145:19758 1:N:0:TCTGCAAG+GCTGCACT  
CAGAAAGTGAGATGGAATCGAATTGTGCTTAACGGTTCAGTTAAGTTGACTAGCGAAGCCAATGTTCA  
TAATATGAAGCAGTGGCTGTGGATGTGGCTCGTGTATGATAGACGTCCCGGTAATTCTAATCCCAGAG  
TGAATGAGAAGATCG

+  
FFFFFFFFFFFFFFFFFFFFFFFFFFFFFFFFFFFFFFFFFFFFFFFFFFFFFFFFFFFFFFFFFFFFFFFFFFFF  
FFFF:FFFFF:FFFFFFFFFFFFFFFFFFFFFFFFFFFFFFFFFFFFFFFFFFFFFFFFFFFFFFFFFFFFF  
FFFFFFFFFFFFFFFFFFFF

@A00721:190:HGJW7DSXY:4:2633:6705:24283 1:N:0:TCTGCAAG+GCTGCACT  
CAGAAAGTGAGATGGAATCGAATTGTGCTTAACGGTTCAGTTAAGTTGACTAGCGAAGCCAATGTTCA  
TAATATGAAGCAGTGGCTGTGGATGTGGCTCGTGTATGATAGACGTCCCGGTAATTCTAATCCCAGAG  
TGAATGAGAAGATCG

+  
FFFFFFFFFFFFFFFFFFFFFFFFFFFFFFFFFFFFFFFFFFFF:FFFFFFFFFFFFF:FFFFFFFFFFFFFFFFF  
FFFFFFFFFFFFFFFFFFFFFFFFFFFFFFFFFFFFFFFFFFFFFFFFFFFFFFFFFFFFFFFFFFFFF:FFFFFFFFFFFFF  
FFFFFFFFFFFFFFFFFFFF,F

@A00721:190:HGJW7DSXY:4:2643:32334:27899 1:N:0:TCTGCAAG+GCTGCACT  
CAGAAAGTGAGATGGAATCGAATTGTGCTTAACGGTTCAGTTAAGTTGACTAGCGAAGCCAATGTTCA



@A00721:190:HGJW7DSXY:4:1204:3414:8970 1:N:0:TCTGCAAG+GCTGCACT  
CCCCGATGAATATCTCATTCACTCTGGGATTAGAATTACCGGGACGTCTATCATACACGAGCCACATC  
CACAGCCACTGCTTCATATTATGAACATTGGCTTCGCTAGTCAACTTAACTGAACCGTTAAGCACAAAT  
TCGATTCCATCTCAC

```

FFFFFFFFFFFFFFFF:FFFFFF:FFFFFFFFFFFFFFFFFFFFFFFFFFFFFFFF:FFFFFFFFFFFFFFFF
FFFFFFFFFFFFFFFF:FFFFFFFFFFFFFFFF:FFFFFFFFFFFFFFFF:FFFFFFFFFFFFFFFF:
:FFFFFF:FFF::FFF

```

@A00721:190:HGJW7DSXY:4:1223:27905:35853 1:N:0:TCTGCAAG+GCTGCACT  
CCCCGATGAATATCTCATTCACTCTGGGATTAGAATTACCGGGACGTCTATCATACACGAGCCACATC  
CACAGCCACTGCTTCATATTATGAACATTGGCTTCGCTAGTCAACTTAACTGAACCGTTAAGCACAAAT  
TCGATTCCATCTCAC

```

FFFFFFFFFFFFFFFFFFFFFFFFFFFFFFFFFFFFFFFFFFFFFFFFFFFFFFFFFFFFFFFFFFFFFFFF
FFFFFFFFFFFFFFFFFFFFFFFF:FFFFFFFFFFFFFFFF:FFFFFFFFFFFFFFFFFFFFFFFF:FFFFFFFF
FFFFFFFFFFFF:FFF

```

@A00721:190:HGJW7DSXY:4:1662:13449:28197 1:N:0:TCTGCAAG+GCTGCACT  
CCCCGATGAATATCTCATTCACTCTGGGATTAGAATTACCGGGACGTCTATCATACACGAGCCACATC  
CACAGCCACTGCTTCATATTATGAACATTGGCTTCGCTAGTCAACTTAACTGAACCGTTAAGCACAAT  
TCGATTCCATCTCAC

[illegible]

@A00721:190:HGJW7DSXY:4:1665:29152:14747 1:N:0:TCTGCAAG+GCTGCACT  
CCCCGATGAATATCTCATTCACTCTGGGATTAGAATTACCGGGACGTCTATCATACACGAGCCACATC  
CACAGCCACTGCTTCATATTATGAACATTGGCTTCGCTAGTCAACTTAACTGAACCGTTAAGCACAAT  
TCGATTCCATCTCAC

[illegible]

@A00721:190:HGJW7DSXY:4:2178:17635:23328 1:N:0:TCTGCAAG+GCTGCACT  
GTGAGATGGAATCGAATTGTGCTTAACGGTTCAGTTAAGTTGACTAGCGAAGCCAATGTTCATAATAT  
GAAGCAGTGGCTGTGGATGTGGCTCGTGTATGATAGACGTCCCGTAATTCTAATCCCAGAGTGAATG  
AGATATTCATCGGGG

[illegible]

@A00721:190:HGJW7DSXY:4:2434:1316:4147 1:N:0:TCTGCAAG+GCTGCACT  
GTGAGATGGAATCGAATTGTGCTTAACGGTTCAGTTAAGTTGACTAGCGAAGCCAATGTTTCATAATAT  
GAAGCAGTGGCTGTGGATGTGGCTCGTGTATGATAGACGTCCCGGTAATTCTAATCCCAGAGTGAATG  
AGATATTCATCGGGG

```
F:FFFFFFFFFFFFFFFFFFFFFFFF:FFFFF:FFFFFFFFF:F:FFFFFFFFFFFF,FFFFFFFFFFFFFFFF:
:FFFFFFFFFFFFFFFFFFFFFFFFFFFFFFFFFFFFFFFF:FFFFF:FFF,FFFF,:FFFFFFFFFFFFFFFF,FFFFF
FFFFFFFF:FFFFF:F
```

@A00721:190:HGJW7DSXY:4:2509:11306:9173 1:N:0:TCTGCAAG+GCTGCACT  
GTGAGATGGAATCGAATTGTGCTTAACGGTTCAGTTAAGTTGACTAGCGAAGCCAATGTTCATAATAT  
GAAGCAGTGGCTGTGGATGTGGCTCGTGTATGATAGACGTCCCGGTAATTCTAATCCCAGAGTGAATG  
AGATATTCATCGGGG

[illegible]



+  
FFFFFFFFFFFFFFFFFFFFFFFFFFFFFFFFFFFFFFFFFFFFFFFFFFFFFFFFFFFFFFFFFFFFFFFF  
FFFFFFFFFFFFFFFFFFFFFFFFFFFFFFFFFFFFFFFFFFFFFFFFFFFFFFFFFFFFFFFFFFFFFFFF  
FFFFFFFFFFFFFFFF

@A00721:190:HGJW7DSXY:4:1566:12635:7874 1:N:0:TCTGCAAG+GCTGCACT  
GAGGTGGAATCGAATTGTGCTTAACGGTTCAGTTAAGTTGACTAGCGAAGCCAATGTTCATAATATGA  
AGCAGTGGCTGTGGATGTGGCTCGTGTATGATAGACGTCCCGGTAATTCTAATCCCAGAGTGAATGAG  
ATATTCATCGGGGAA

+  
FFFFFFFFFFFFFFFFFFFFFFFFFFFFFFFFFFFFFFFFFFFFFFFFFFFFFFFFFFFFFFFFFFFFFFFF  
FFFFFFFFFFFFFFFFFFFFFFFFFFFFFFFFFFFFFFFFFFFFFFFFFFFFFFFFFFFFFFFFFFFFFFFF  
FFF:FFFFFFFFFFFF:

@A00721:190:HGJW7DSXY:4:1675:31304:34914 1:N:0:TCTGCAAG+GCTGCACT  
GAGGTGGAATCGAATTGTGCTTAACGGTTCAGTTAAGTTGACTAGCGAAGCCAATGTTCATAATATGA  
AGCAGTGGCTGTGGATGTGGCTCGTGTATGATAGACGTCCCGGTAATTCTAATCCCAGAGTGAATGAG  
ATATTCATCGGGGAA

+  
F:FFFFFFFFFFFFFFFFFFFFFFFFFFFFFFFFFFFFFFFFFFFFFFFFFFFFFFFFFFFFFFFFFFFFFFFF  
F,FFFFFFFFFFFFFFFFFFFFFFFFFFFFFFFFFFFFFFFFFFFFFFFFFFFFFFFFFFFFFFFFFFFFFFFF  
FFFFFFFFFFFFFFFF

@A00721:190:HGJW7DSXY:4:2138:30553:24815 1:N:0:TCTGCAAG+GCTGCACT  
GAGGTGGAATCGAATTGTGCTTAACGGTTCAGTTAAGTTGACTAGCGAAGCCAATGTTCATAATATGA  
AGCAGTGGCTGTGGATGTGGCTCGTGTATGATAGACGTCCCGGTAATTCTAATCCCAGAGTGAATGAG  
ATATTCATCGGGGAA

+  
FFFF:FFFFFFFFFFFFFFFFFFFFFFFFFFFFFFFFFFFFFFFFFFFFFFFFFFFFFFFFFFFFFFFFFFFF  
FF:FFFFFFFFFFFFFFFFFFFFFFFFFFFFFFFFFFFFFFFFFFFFFFFFFFFFFFFFFFFFFFFFFFFFFFFF  
FFFFFFFFFFFF,FFFF:

@A00721:190:HGJW7DSXY:4:2314:20003:20572 1:N:0:TCTGCAAG+GCTGCACT  
GAGGTGGAATCGAATTGTGCTTAACGGTTCAGTTAAGTTGACTAGCGAAGCCAATGTTCATAATATGA  
AGCAGTGGCTGTGGATGTGGCTCGTGTATGATAGACGTCCCGGTAATTCTAATCCCAGAGTGAATGAG  
ATATTCATCGGGGAA

+  
FFFFFFFFFFFFFFFFFFFF:FFFFFFFFFFFFFFFFFFFFFFFFFFFFFFFFFFFFFFFFFFFFFFFFFFFF  
FFFFFFFFFFFFFFFFFFFFFFFFFFFFFFFFFFFFFFFFFFFFFFFFFFFFFFFFFFFFFFFFFFFFFFFF  
FFFFFFFFFFFFFFFF

@A00721:190:HGJW7DSXY:4:2666:12626:35258 1:N:0:TCTGCAAG+GCTGCACT  
GAGGTGGAATCGAATTGTGCTTAACGGTTCAGTTAAGTTGACTAGCGAAGCCAATGTTCATAATATGA  
AGCAGTGGCTGTGGATGTGGCTCGTGTATGATAGACGTCCCGGTAATTCTAATCCCAGAGTGAATGAG  
ATATTCATCGGGGAA

+  
FFFFFFFFFFFF:FFFFFFFFFFFFFFFFFFFFFFFFFFFFFFFFFFFFFFFFFFFFFFFFFFFFFFFFFFFF  
FFFFFFFFFFFFFFFFFFFFFFFFFFFFFFFFFFFFFFFFFFFFFFFFFFFFFFFFFFFFFFFFFFFFFFFF  
FFFFFFFFFFFF:FFFFFFF

@A00721:190:HGJW7DSXY:4:1174:8422:16517 1:N:0:TCTGCAAG+GCTGCACT  
ATGGAATCGAATTGTGCTTAACGGTTCAGTTAAGTTGACTAGCGAAGCCAATGTTCATAATATGAAGC  
AGTGGCTGTGGATGTGGCTCGTGTATGATAGACGTCCCGGTAATTCTAATCCCAGAGTGAATGAGATA  
TTCATCGGGGAAAGT

+  
FFFFFFFFFFFFFFFFFFFFFFFFFFFFFFFFFFFFFFFFFFFFFFFFFFFFFFFFFFFFFFFFFFFFFFFF  
FFFFFFFFFFFFFFFFFFFFFFFFFFFFFFFFFFFFFFFFFFFFFFFFFFFFFFFFFFFFFFFFFFFFFFFF  
FFFFFFFFFFFFFFFF

@A00721:190:HGJW7DSXY:4:1220:18927:34585 1:N:0:TCTGCAAG+GCTGCACT  
ATGGAATCGAATTGTGCTTAACGGTTCAGTTAAGTTGACTAGCGAAGCCAATGTTCATAATATGAAGC

AGTGGCTGTGGATGTGGATCGTGTATGATAGACGTCCAGGTAATTCTAATACCAGAGTGAATGAGATA  
TTCATCGGGGAAAGT

+

FF,:FFF,FFF:,:FFFFFFFF::FFFFFFFF::F,FFFFFF:FF,F:FFF,F:FFFFFFFFFFFF,,  
FF:,,FFF:,FFFF:,F,F:,FFFFF,:FFFFFFFF:,,:FFF,FFFFFF,,FF,FF:FFFFFFFFFFFF  
FFFFF:FFFFFFFFFFFF

@A00721:190:HGJW7DSXY:4:1222:9390:22263 1:N:0:TCTGCAAG+GCTGCACT  
ATGGAATCGAATTGTGCTTAACGGTTCAGTTAAGTTGACTAGCGAAGCCAATGTTTCATAATATGAAGC  
AGTGGCTGTGGATGTGGCTCGTGTATGATAGACGTCCCGGTAATTCTAATCCCAGAGTGAATGAGATA  
TTCATCGGGGAAAGT

+

F:F,FFFFFFFF:FFFFFFFF:FFFFFFFFFFFFFFFFFFFFFFFFFFFFFFFFFFFFFFFFFFFFFFFFFFFFF:  
FFFFFFFFFFFFFFFFFFFFFFFFFFFFFFFFFFFFFFFFFFFFFFFFFFFFFFFFFFFFFFFFFFFFFFFFFFFFF:  
FFFFF:FFF:FFFFF

@A00721:190:HGJW7DSXY:4:1225:19786:20572 1:N:0:TCTGCAAG+GCTGCACT  
ATGGAATCGAATTGTGCTTAACGGTTCAGTTAAGTTGACTAGCGAAGCCAATGTTTCATAATATGAAGC  
AGTGGCTGTGGATGTGGCTCGTGTATGATAGACGTCCCGGTAATTCTAATCCCAGAGTGAATGAGATA  
TTCATCGGGGAAAG

+

FFFFFFFFFFFFFFFFFFFFF,F:FFF:FFFFFFFFFFFFFFFFFFFFFFFFFFFFFFFFFFFFFFFFFFFFFFFFFFFFF:  
FFFFFFFFFFFFFFFFFFFFFFFFFFFFFFFFFFFFFFFFFFFFFFFFFFFFFFFFFFFFFFFFFFFFFFFFFFFFF:  
FFFFFFFFFFFFFFFFFFFF

@A00721:190:HGJW7DSXY:4:1234:23981:32471 1:N:0:TCTGCAAG+GCTGCACT  
ATGGAATCGAATTGTGCTTAACGGTTCAGTTAAGTTGACTAGCGAAGCCAATGTTTCATAATATGAAGC  
AGTGGCTGTGGATGTGGCTCGTGTATGATAGACGTCCCGGTAATTCTAATCCCAGAGTGAATGAGATA  
TTCATCGGGGAAAGT

+

FFFFF:FFFFFFFFFFFFFFFFFFFFFFFFFFFFFFFFFFFFFFFFFFFFFFFFFFFFFFFFFFFFFFFFFFFFFFFFFFFFF:  
FFFFFFFFF:FFFFFFFFFFFFFFFFFFFFFFFFFFFFFFFFFFFFFFFFFFFFFFFFFFFFFFFFFFFFFFFFFFFFFFFFFFFFF:  
FFFFFFFFFFFFFFFFFFFF

@A00721:190:HGJW7DSXY:4:1268:11162:20666 1:N:0:TCTGCAAG+GCTGCACT  
ATGGAATCGAATTGTGCTTAACGGTTCAGTTAAGTTGACTAGCGAAGCCAATGTTTCATAATATGAAGC  
AGTGGCTGTGGATGTGGCTCGTGTATGATAGACGTCCCGGTAATTCTAATCCCAGAGTGAATGAGATA  
TTCATCGGGGAAAGT

+

FFFFF:FFFFFFFFFFFFFFFFFFFFFFFFFFFFFFFFFFFFFFFFFFFFFFFFFFFFFFFFFFFFFFFFFFFFFFFFFFFFF,  
FFFFFFFFFFFFFFFFFFFFFFFFFFFFFFFFFFFFFFFFFFFFFFFFFFFFFFFFFFFFFFFFFFFFFFFFFFFFF:  
FFFFFFFFFFFFFFFFFFFF

@A00721:190:HGJW7DSXY:4:1345:2157:5071 1:N:0:TCTGCAAG+GCTGCACT  
ATGGAATCGAATTGTGCTTAACGGTTCAGTTAAGTTGACTAGCGAAGCCAATGTTTCATAATATGAAGC  
AGTGGCTGTGGATGTGGCTCGTGTATGATAGACGTCCCGGTAATTCTAATCCCAGAGTGAATGAGATA  
TTCATCGGGGAAAGT

+

FFFFF:FFFFFFFFFFFFFFFFFFFFFFFFFFFFFFFFFFFFFFFFFFFFFFFFFFFFFFFFFFFFFFFFFFFFFFFFFFFFF,  
FFFFFFFFFFFFFFFFFFFFFFFFFFFFFFFFFFFFFFFFFFFFFFFFFFFFFFFFFFFFFFFFFFFFFFFFFFFFF:  
FFFFFFFFFFFF::FFF

@A00721:190:HGJW7DSXY:4:1363:16984:21480 1:N:0:TCTGCAAG+GCTGCACT  
ATGGAATCGAATTGTGCTTAACGGTTCAGTTAAGTTGACTAGCGAAGCCAATGAACATAATATGAAGC  
AGTGGCTGTGGATGTGGCTCGTGTATTATAGACGTCACGGTAATTCTAATCCCAGAGTGAATGAGATA  
TTCATCTGGGAAAGT

+

FF::F,,,FFFFFF,FF:FFFF,F,:FF,FFFF:FF:F:FF,,,FF,FFFFFF,,,FFFFFF,:FF:F  
FFF,F::,,F,FFF:FFF,,F,F:FF,F,FFF,F,F,,FFFF,,FFF,F:FFFF,,:FF,FFFFFF  
:,F,F,:::FFF:F



$+$ 

+

 $+$ 

+

 $+$ 

+

+

@A00721:190:HGJW7DSXY:4:2227:12608:4852 1:N:0:TCTGCAAG+GCTGCACT  
ATGGAATCGAATTGTGCTTAACGTTTCAGTTAAGTTGACTAGCGAAGCCAATGTTTCATAATATGAAGC  
AGTGGCTGTGGATGTGGCTCGTGTATGATAGACGTCCCGTAATTCTAATCCCAGAGTGAATGAGATA  
TTCATCGGGGAAAGT

@A00721:190:HGJW7DSXY:4:2271:4182:29465 1:N:0:TCTGCAAG+GCTGCACT  
ATGGAATCGAATTGTGCTTAACGTTTCAGTTAAGTTGACTAGCGAAGCCAATGTTTCATAATATGAAGC  
AGTGGCTGTGGATGTGGCTCGTGTATGATAGACGTCCCGGTAATTCTAATCCCAGAGTGAATGAGATA  
TTCATCGGGGAAAGT

@A00721:190:HGJW7DSXY:4:2301:5873:25911 1:N:0:TCTGCAAG+GCTGCACT  
ATGGAATCGAATTGTGCTTAACGTTTCAGTTAAGTTGACTAGCGAAGCCAATGTTTCATAATATGAAGC  
AGTGGCTGTGGATGTGGCTCGTGTATGATAGACGTCCCGTAATTCTAATCCCAGAGTGAATGAGATA  
TTCATCGGGGAAAGT

@A00721:190:HGJW7DSXY:4:2348:9010:35446 1:N:0:TCTGCAAG+GCTGCACT  
ATGGAATCGAATTGTGCTTAACGTTTCAGTTAAGTTGACTAGCGAAGCCAATGTTTCATAATATGAAGC  
AGTGGCTGTGGATGTGGCTCGTGTATGATAGACGTCCCGTAATTCTAATCCCAGAGTGAATGAGATA  
TTCATCGGGGAAAGT

@A00721:190:HGJW7DSXY:4:2527:4553:5149 1:N:0:TCTGCAAG+GCTGCACT  
ATGGAATCGAATTGTGCTTAACGTTTCAGTTAAGTTGACTAGCGAAGCCAATGTTTCATAATATGAAGC  
AGTGGCTGTGGATGTGGCTCGTGTATGATAGACGTCCCGTAATTCTAATCCCAGAGTGAATGAGATA  
TTCATCGGGGGAAAG

@A00721:190:HGJW7DSXY:4:2533:1154:28040 1:N:0:TCTGCAAG+GCTGCACT  
ATGGAATCGAATTGTGCTTAACGTTTCAGTTAAGTTGACTAGCGAAGCCAATGTTTCATAATATGAAGC  
AGTGGCTGTGGATGTGGCTCGTGTATGATAGACGTCCCGTAATTCTAATCCCAGAGTGAATGAGATA  
TTCATCGGGGAAAGT

@A00721:190:HGJW7DSXY:4:2543:12753:33254 1:N:0:TCTGCAAG+GCTGCACT  
ATGGAATCGAATTGTGCTTAACGTTTCAGTTAAGTTGACTAGCGAAGCCAATGTTTCATAATATGAAGC  
AGTGGCTGTGGATGTGGCTCGTGTATGATAGACGTCCCGTAATTCTAATCCCAGAGTGAATGAGATA  
TTCATCGGGGAAAGT

+  
FFFFF:FFFFFFFFFFFFFFFFFFFFFFFFFFFFFFFFFFFFFFFFFFFFFFFFFFFFFFFFFFFFFFFF  
FFFFFFFFFFFFFFFFFFFFFFFFFFFFFFFFFFFFFFFFFFFFFFFFFFFFFFFFFFFFFFFF:FFFFFFFFFFFFFFFFFFFFFFFF:FFFFFFFFFFFFFFFF:FFFFF  
FFFFFFFFFFFFFFFF

@A00721:190:HGJW7DSXY:4:2655:25482:12399 1:N:0:TCTGCAAG+GCTGCACT  
ATGGAATCGAATTGTGCTTAACGGTTCAGTTAAGTTGACTAGCGAAGCCAATGTTTCATAATATGAAGC  
AGTGGCTGTGGATGTGGCTCGTGTATGATAGACGTCCCGTAATTCTAATCCCAGAGTGAATGAGATA  
TTCATCGGGGAAAGT

+  
FFFFF:FFFFFFFFFFFFFFFFFFFFFFFFFFFFFFFFFFFFFFFFFFFFFFFFFFFFFFFFFFFFFFFF:FFFFFFFF:F  
FFFFFFFFFFFFFFFFFFFFFFFFFFFFFFFFFFFFFFFFFFFFFFFFFFFFFFFFFFFFFFFFFFFFFFFF:FFFFFFFF  
FFFFFFFFFFFF:FFF

@A00721:190:HGJW7DSXY:4:1150:22589:32315 1:N:0:TCTGCAAG+GCTGCACT  
CAATCGAATTGTGCTTAACGGTTCAGTTAAGTTGACTAGCGAAGCCAATGTTTCATAATATGAAGCAGT  
GGCTGTGGATGTGGCTCGTGTATGATAGACGTCCCGTAATTCTAATCCCAGAGTGAATGAGATATTC  
ATCGGGGAAAGTCGG

+  
FFFFFFFFFFFFFFFFFFFFFFFFFFFFFFFFFFFFFFFFFFFFFFFFFFFFFFFFFFFFFFFFFFFFFFFF:FFFFFFF  
F:FFFFFFFFFFFFFFFFFFFFFFFFFFFFFFFFFFFFFFFFFFFFFFFFFFFFFFFFFFFFFFFFFFFFFFFF:FFFFFFF  
FFFFFFFFFFFF:FFFFF

@A00721:190:HGJW7DSXY:4:1609:24587:30921 1:N:0:TCTGCAAG+GCTGCACT  
CAATCGAATTGTGCTTAACGGTTCAGTTAAGTTGACTAGCGAAGCCAATGTTTCATAATATGAAGCAGT  
GGCTGTGGATGTGGCTCGTGTATGATAGACGTCCCGTAATTCTAATCCCAGAGTGAATGAGATATTC  
ATCGGGGAAAGTCGG

+  
FFFFFFFFFFFFFFFFFFFFFFFFFFFFFFFFFFFFFFFFFFFFFFFFFFFFFFFFFFFFFFFFFFFF,F:FFFFFFFFFFFF  
FFFFFFFFFFFFFFFFFFFFFFFFFFFFFFFFFFFFFFFFFFFFFFFFFFFFFFFFFFFFFFFFFFFFFFFF:FFFFFFF  
FFFFFFFFFFFFFFFFFFFF

@A00721:190:HGJW7DSXY:4:2102:28772:18129 1:N:0:TCTGCAAG+GCTGCACT  
CAATCGAATTGTGCTTAACGGTTCAGTTAAGTTGACTAGCGAAGCCAATGTTTCATAATATGAAGCAGT  
GGCTGTGGATGTGGCTCGTGTATGATAGACGTCCCGTAATTCTAATCCCAGAGTGAATGAGATATTC  
ATCGGGGAAAGTCGG

+  
FFFFFFFFFFFFFFFFFFFFFFFFFFFFFFFFFFFFFFFFFFFFFFFFFFFFFFFFFFFFFFFF:FFFFF:FFFFFFF:FFFFFFFFFFFF  
FFFFFFFFFFFFFFFFFFFFFFFFFFFFFFFFFFFFFFFFFFFFFFFFFFFFFFFFFFFFFFFF:FFFFF:FFFFFFF:FFFFFFFFFFFF  
:FF,FFFFF,FFFFF

@A00721:190:HGJW7DSXY:4:2115:25093:25817 1:N:0:TCTGCAAG+GCTGCACT  
CAATCGAATTGTGCTTAACGGTTCAGTTAAGTTGACTAGCGAAGCCAATGTTTCATAATATGAAGCAGT  
GGCTGTGGATGTGGCTCGTGTATGATAGACGTCCCGTAATTCTAATCCCAGAGTGAATGAGATATTC  
ATCGGGGAAAGTCGG

+  
FFFFFFFFFFFFFFFFFFFFFFFFFFFFFFFFFFFFFFFFFFFFFFFFFFFFFFFFFFFFFFFF:FFFFFFFFFFFF  
FFF:FFFFFFFFFFFFFFFFFFFFFFFFFFFFFFFFFFFFFFFFFFFFFFFFFFFFFFFFFFFFFFFF,FFFFFFFF  
FFFFFFFFFFFFFFFF

@A00721:190:HGJW7DSXY:4:2133:23240:18035 1:N:0:TCTGCAAG+GCTGCACT  
CAATCGAATTGTGCTTAACGGTTCAGTTAAGTTGACTAGCGAAGCCAATGTTTCATAATATGAAGCAGT  
GGCTGTGGATGTGGCTCGTGTATGATAGACGTCCCGTAATTCTAATCCCAGAGTGAATGAGATATTC  
ATCGGGGAAAGTCGG

+  
FFFFFFFFFFFFFFFFFFFFFFFFFFFFFFFFFFFFFFFFFFFFFFFFFFFFFFFFFFFFFFFF:F,FFFFFF:FFF  
FFFFFFFFFFFFFFFFFFFFFFFFFFFFFFFFFFFFFFFFFFFFFFFFFFFFFFFFFFFFFFFF,FFFFFFFF  
FFFFFFFFFFFFFFFF

@A00721:190:HGJW7DSXY:4:2512:30572:36839 1:N:0:TCTGCAAG+GCTGCACT  
CAATCGAATTGTGCTTAACGGTTCAGTTAAGTTGACTAGCGAAGCCAATGTTTCATAATATGAAGCAGT



@A00721:190:HGJW7DSXY:4:2453:28944:14199 1:N:0:TCTGCAAG+GCTGCACT  
GGTGCTTAACGGTTCAGTTAAGTTGACTAGCGAAGCCAATGTTCATAATATGAAGCAGTGGCTGTGGA  
TGTGGCTCGTGTATGATAGACGTCCCGGTAATTCTAATCCAGAGTGAATGAGATATTCATCGGGGAA  
AGTCGGGATCCAGAT

[illegible]

+

```
:FFFFFF:FFFFFFFFFFFFFFFF:FFFFFFFFFFFF:FFFFFFFFFFFF:FFFFFFFFFFFF::F:F::FFFF:FF
FFFFFFFFFFFFFFFF:FFFF:FFFFFF::FFFFFFFFFFFFFFFFFFFFFFFF:FFFFFFFFFFFFFFFFFFFFFFFF:,FFFF
FFFFFFFFFFFFFFFFFFFF
```

+

[illegible]

+

[illegible]

+

```

FFFFFFFFFFFFFFFFFFFFFFFFFFFFFFFFFFFFFFFF:FFFFFFFF:FFFFFFFFFFFFFFFF
FFFFFFFFFFFFFFFFFFFFFFFFFFFFFFFF:FFFFFFFFFFFFFFFFFFFFFFFFFFFFFFFF:FFFF:FFFF
FFFFFFFFFFFFFFFF

```

+

[illegible]

+

[illegible]

FFFFFFFFFFFFFFFFFFFFFFFFFFFFFFFFFFFFFFFFFFFFFFFFFFFFFFFFFFFFFFFFFFFFFFFF  
FFFFFFFFF:FFFFF

@A00721:190:HGJW7DSXY:4:1472:4797:20760 1:N:0:TCTGCAAG+GCTGCACT  
CGGTTCAAGTTGACTAGCGAAGCCAATGTTTATAATATGAAGCAGTGGCTGTGGATGTGGCTCG  
TGTATGATAGACGTCCCGGTAATTCTAATCCCAGAGTGAATGAGATATTCATCGGGGAAAGTCGGGAT  
CCAGATACTTGGATG

+

FFF:FFFFFFFFFFFFFFFFFFFFFFFFFFFFFFFFFFFFFFFFFFFFFFFFFFFFFFFFFFFFFFFF  
FFFFFFFFFFFFFFFFFFFFFFFFFFFFFFFFFFFFFFFFFFFFFFFFFFFFFFFFFFFFFFFFFFFF  
FFFFFFFFFFFFFFFFF

@A00721:190:HGJW7DSXY:4:1472:5864:21449 1:N:0:TCTGCAAG+GCTGCACT  
CGGTTCAAGTTGACTAGCGAAGCCAATGTTTATAATATGAAGCAGTGGCTGTGGATGTGGCTCG  
TGTATGATAGACGTCCCGGTAATTCTAATCCCAGAGTGAATGAGATATTCATCGGGGAAAGTCGGGAT  
CCAGATACTTGGATG

+

FFFFFFFFFFFFFFFFFFFFFFFFFFFFFFFFFFFFFFFFFFFFFFFFFFFFFFFFFFFFFFFFFFFF  
FFFFFFFFFFFFFFFFFFFFFFFFFFFFFFFFFFFFFFFFFFFFFFFFFFFFFFFFFFFFFFFFFFFF  
FFFFFFFFFFFFFFFFF

@A00721:190:HGJW7DSXY:4:1618:17409:21183 1:N:0:TCTGCAAG+GCTGCACT  
CGGTTCAAGTTGACTAGCGAAGCCAATGTTTATAATATGAAGCAGTGGCTGTGGATGTGGCTCG  
TGTATGATAGACGTCCCGGTAATTCTAATCCCAGAGTGAATGAGATATTCATCGGGGAAAGTCGGGAT  
CCAGATACTTGGATG

+

FFFFFFFFFFFFFFFFFFFFFFFFFFFFFFFFFFFFFFFFFFFFFFFFFFFFFFFFFFFFFFFFFFFF  
FFFFFFFFFFFFFFFFFFFFFFFFFFFFFFFFFFFFFFFFFFFFFFFFFFFFFFFFFFFFFFFFFFFF  
FFFFFFFFFFFFFFFFF

@A00721:190:HGJW7DSXY:4:2341:2745:19648 1:N:0:TCTGCAAG+GCTGCACT  
CGGTTCAAGTTGACTAGCGAAGCCAATGTTTATAATATGAAGCAGTGGCTGTGGATGTGGCTCG  
TGTATGATAGACGTCCCGGTAATTCTAATCCCAGAGTGAATGAGATATTCATCGGGGAAAGTCGGGAT  
CCAGATACTTGGATG

+

FFFFFFFFFFFFFFFFFFFFFFFFFFFFFFFFFFFFFFFFFFFFFFFFFFFFFFFFFFFFFFFFFFFF  
FFFFFFFFFFFFFFFFFFFFFFFFFFFFFFFFFFFFFFFFFFFFFFFFFFFFFFFFFFFFFFFFFFFF  
FFFFF:FFFFFFFFF

@A00721:190:HGJW7DSXY:4:1152:4679:15984 1:N:0:TCTGCAAG+GCTGCACT  
GGTTCAAGTTGACTAGCGAAGCCAATGTTTATAATATGAAGCAGTGGCTGTGGATGTGGCTCGT  
GTATGATAGACGTCCCGGTAATTCTAATCCCAGAGTGAATGAGATATTCATCGGGGAAAGTCGGGATC  
CAGATACTTGGATGA

+

FFFFFFFFF:FFFFFFFFFFFFFFFFFFFFFFFFFFFFFFFFFFFFFFFFFFFFFFFFFFFFFFFFFFFF  
FFFFFFFFFFFFFFFFFFFFFFFFFFFFFFFFFFFFFFFFFFFFFFFFFFFFFFFFFFFFFFFFFFFF  
FFFFFFFFFFFFFFFFF

@A00721:190:HGJW7DSXY:4:2303:31593:23422 1:N:0:TCTGCAAG+GCTGCACT  
GGTTCAAGTTGACTAGCGAAGCCAATGTTTATAATATGAAGCAGTGGCTGTGGATGTGGCTCGT  
GTATGATAGACGTCCCGGTAATTCTAATCCCAGAGTGAATGAGATATTCATCGGGGAAAGTCGGGATC  
CAGATACTTGGATGA

+

FFFFFFFFFFFFFFFFFFFFFFFFFFFFFFFFFFFFFFFFFFFFFFFFFFFFFFFFFFFFFFFFFFFF  
FFFFFFFFFFFFFFFFFFFFFFFFFFFFFFFFFFFFFFFFFFFFFFFFFFFFFFFFFFFFFFFFFFFF  
FFFFF:FFFFF:

@A00721:190:HGJW7DSXY:4:2314:6686:26224 1:N:0:TCTGCAAG+GCTGCACT  
GGTTCAAGTTGACTAGCGAAGCCAATGTTTATAATATGAAGCAGTGGCTGTGGATGTGGCTCGT  
GTATGATAGACGTCCCGGTAATTCTAATCCCAGAGTGAATGAGATATTCATCGGGGAAAGTCGGGATC  
CAGATACTTGGATGA

+  
FFFFFFFFFFFFFFFFFFFFFFFFFFFFFFFFFFFFFFFFFFFFFFFFFFFFFFFFFFFFFFFFFFFFFFFF  
FFFFFFFFFFFFFFFFFFFFFFFFFFFFFFFFFFFFFFFFFFFFFFFFFFFFFFFFFFFFFFFFFFFFFFFF  
FFFFFFFFFFFFFFFFFFFFFFFF  
@A00721:190:HGJW7DSXY:4:2372:29080:36104 1:N:0:TCTGCAAG+GCTGCACT  
GGTTCAGTTAAGTTGACTAGCGAAGCCAATGTTTCATAATATGAAGCAGTGGCTGTGGATGTGGCTCGT  
GTATGATAGACGTCCCGTAATTCTAATCCCAGAGTGAATGAGATATTCATCGGGGAAAGTCGGGATC  
CAGATACTTGGATGA

+  
FFFFFFFFFFFFFFFFFFFFFFFFFFFFFFFFFFFFFFFFFFFFFFFFFFFFFFFFFFFFFFFFFFFFFFFF  
FFFFFFFFFFFFFFFFFFFFFFFFFFFFFFFFFFFFFFFFFFFFFFFFFFFFFFFFFFFFFFFFFFFFFFFF  
FFFFFFFFFFFFFFFFFFFFFFFF  
@A00721:190:HGJW7DSXY:4:1472:29161:27821 1:N:0:TCTGCAAG+GCTGCACT  
GTTTCAGTTAAGTTGACTAGCGAAGCCAATGTTTCATAATATGAAGCAGTGGCTGTGGATGTGGCTCGTG  
TATGATAGACGTCCCGTAATTCTAATCCCAGAGTGAATGAGATATTCATCGGGGAAAGTCGGGATCC  
AGATACTTGGATGAT

+  
FFFFFFFFFFFFFFFFFFFFFFFFFFFFFFFFFFFFFFFFFFFFFFFFFFFFFFFFFFFFFFFFFFFFFFFF  
FFFFFFFFFFFFFFFFFFFFFFFFFFFFFFFFFFFFFFFFFFFFFFFFFFFFFFFFFFFFFFFFFFFFFFFF  
FFF:FFFFFFFFFFFFFFFF  
@A00721:190:HGJW7DSXY:4:1516:28610:20635 1:N:0:TCTGCAAG+GCTGCACT  
GTTTCAGTTAAGTTGACTAGCGAAGCCAATGTTTCATAATATGAAGCAGTGGCTGTGGATGTGGCTCGTG  
TATGATAGACGTCCCGTAATTCTAATCCCAGAGTGAATGAGATATTCATCGGGGAAAGTCGGGATCC  
AGATACTTGGATGAT

+  
FFFFFFFFFFFFFFFFFFFFFFFFFFFFFFFFFFFFFFFFFFFFFFFFFFFFFFFFFFFFFFFFFFFFFFFF  
FFFFFFFFFFFFFFFFFFFFFFFFFFFFFFFFFFFFFFFFFFFFFFFFFFFFFFFFFFFFFFFFFFFFFFFF  
FFFFFFFFFFFFFFFFFFFFFFFF  
@A00721:190:HGJW7DSXY:4:1103:32660:8578 1:N:0:TCTGCAAG+GCTGCACT  
GATCATCCAAGTATCTGGATCCCGACTTTCCCGATGAATATCTCATTCACTCTGGGATTAGAATTAC  
CGGGACGTCTATCATACACGAGCCACATCCACAGCCACTGCTTCATATTATGAACATTGGCTTCGCTA  
GTCAACTTAAGTAA

+  
FFFFFFFFFFFFFFFFFFFFFFFFFFFFFFFFFFFFFFFFFFFFFFFFFFFFFFFFFFFFFFFFFFFFFFFF  
FFFFFFFFFFFFFFFFFFFFFFFFFFFFFFFFFFFFFFFFFFFFFFFFFFFFFFFFFFFFFFFFFFFFFFFF  
FFFFFFFFFFFFFFFF  
@A00721:190:HGJW7DSXY:4:1204:22435:29011 1:N:0:TCTGCAAG+GCTGCACT  
TTCAGTTAAGTTGACTAGCGAAGCCAATGTTTCATAATATGAAGCAGTGGCTGTGGATGTGGCTCGTGT  
ATGATAGACGTCCCGTAATTCTAATCCCAGAGTGAATGAGATATTCATCGGGGAGAGTCGGGATCCA  
GATACTTGGATGATC

+  
FFFFFFFFFFFFFFFFFFFFFFFFFFFFFFFFFFFFFFFFFFFFFFFFFFFFFFFFFFFFFFFFFFFFFFFF  
FFFFFFFFFFFFFFFFFFFFFFFFFFFFFFFFFFFFFFFFFFFFFFFFFFFFFFFFFFFFFFFFFFFFFFFF  
FFFFFFFFFFFFFFFF  
@A00721:190:HGJW7DSXY:4:1273:13584:29590 1:N:0:TCTGCAAG+GCTGCACT  
TTCAGTTAAGTTGACTAGCGAAGCCAATGTTTCATAATATGAAGCAGTGGCTGTGGATGTGGCTCGTGT  
ATGATAGACGTCCCGTAATTCTAATCCCAGAGTGAATGAGATATTCATCGGGGAAAGTCGGGATCCA  
GATACTTGGATGATC

+  
FFFFFFFFFFFFFFFFFFFFFFFFFFFFFFFFFFFFFFFFFFFFFFFFFFFFFFFFFFFFFFFFFFFFFFFF  
FFFFFFFFFFFFFFFFFFFFFFFFFFFFFFFFFFFFFFFFFFFFFFFFFFFFFFFFFFFFFFFFFFFFFFFF  
FFFFFFFFFFFFFFFF  
@A00721:190:HGJW7DSXY:4:1355:14778:30499 1:N:0:TCTGCAAG+GCTGCACT  
GATCATCCAAGTATCTGGATCCCGACTTTCCCGATGAATATCTCATTCACTCTGGGATTAGAATTAC





@A00721:190:HGJW7DSXY:4:1176:1072:8234 1:N:0:TCTGCAAG+GCTGCACT  
TTAAGTTGACTAGCGAANCCAATGTTTCATAATATGAAGCAGTGGCTGTGGATGTGGCTCGTGTATGAT  
AGACGTCCCGTAATTCTAATCCCAGAGTGAATGAGATATTCA

+

FFFFFFFF:FFFFFFFF#FF:FFFFFFFFFFFFFFFF:FFFFFFFF:FFFFFFFFFFFFFFFFFFFFFFFF  
FFFFFFFFFFFFFFFFFFFFFFFFFFFFFFFFFFFFFFFFFFFFFFFFFFFFFFFFFFFFFFFF

@A00721:190:HGJW7DSXY:4:1142:23818:9518 1:N:0:TCTGCAAG+GCTGCACT  
GTTGACTAGCGAAGCCAATGTTTCATAATATGAAGCAGTGGCTGTGGATGTGGCTCGTGTATGATAGAC  
GTCCCGTAATTCTAATCCCAGAGTGAATGAGATATTTCATCGGGGAAAGTCGGGATCCAGATACTTGG  
ATGATCAACATGGAT

+

FFFFF:FFFFFFFFFFFFFFFFFFFFFFFFFFFFFFFF:FFFFFFFF:FFFFFFFFFFFFFFFFFFFFFFFF  
FFFFFFFFFFFFFFFFFFFFFFFFFFFFFFFFFFFFFFFFFFFFFFFFFFFFFFFFFFFFFFFF  
FFFFF:FFFFFFFF

@A00721:190:HGJW7DSXY:4:1349:18475:10504 1:N:0:TCTGCAAG+GCTGCACT  
GTTGACTAGCGAAGCCAATGTTTCATAATATGAAGCAGTGGCTGTGGATGTGGCTCGTGTATGATAGAC  
GTCCCGTAATTCTAATCCCAGAGTGAATGAGATATTTCATCGGGGAAAGTCGGGATCCAGATACTTGG  
ATGATCAACATGGAT

+

FFFFFFFFFFFFFFFFFFFFFFFFFFFFFFFF:FFFFFFFFFFFFFFFFFFFFFFFFFFFFFFFFFFFFFFFF  
FFFFFFFFFFFFFFFFFFFFFFFFFFFFFFFFFFFFFFFFFFFFFFFFFFFFFFFFFFFFFFFF  
FFFFFFFFFFFFFFFF

@A00721:190:HGJW7DSXY:4:1566:7319:21778 1:N:0:TCTGCAAG+GCTGCACT  
GTTGACTAGCGAAGCCAATGTTTCATAATATGAAGCAGTGGCTGTGGATGTGGCTCGTGTATGATAGAC  
GTCCCGTAATTCTAATCCCAGAGTGAATGAGATATTTCATCGGGGAAAGTCGGGATCCAGATACTTGG  
ATGATCAACATGGAT

+

FFFFFFFFFFFFFFFFFFFFFFFFFFFFFFFFFFFFFFFFFFFFFFFFFFFFFFFFFFFFFFFF  
FFFFFFFFFFFFFFFFFFFFFFFFFFFFFFFFFFFFFFFFFFFFFFFFFFFFFFFFFFFFFFFF  
FFFFFFFFFFFFFFFF

@A00721:190:HGJW7DSXY:4:1604:6460:19633 1:N:0:TCTGCAAG+GCTGCACT  
GTTGACTAGCGAAGCCAATGTTTCATAATATGAAGCAGTGGCTGTGGATGTGGCTCGTGTATGATAGAC  
GTCCCGTAATTCTAATCCCAGAGTGAATGAGATATTTCATCGGGGAAAGTCGGGATCCAGATACTTGG  
ATGATCAACATGGAT

+

F,FFFFFFFFF:FFFFFFFFFFFF:FF:FFF:FFF,F,F:FFF::FFF:,F,FFF:FFFFFF,  
FF:FFFFFF:F,FFFF:FFF,FFFFFF:FFFFFFFFFFFF,F,FFF,FFFFFFFFF::F,,FF:  
FF,FFF::F:F,FFF

@A00721:190:HGJW7DSXY:4:2137:27471:24298 1:N:0:TCTGCAAG+GCTGCACT  
GTTGACTAGCGAAGCCAATGTTTCATAATATGAAGCAGTGGCTGTGGATGTGGCTCGTGTATGATAGAC  
GTCCCGTAATTCTAATCCCAGAGTGAATGAGATATTTCATCGGGGAAAGTCGGGATCCAGATACTTGG  
ATGATCAACATGGAT

+

F:FFFFFFFFFFFFFFFFFFFFFFFF:FFFFFFFF:FFFFF:FFFFFFFFFFFFFFFFFFFFFFFF  
FFFFFFFF:FFFFFFF:FFFFFFFFF,FFFFFFFFFFFFFFFF,FFFFFFFFFFFF,FF,FF  
FFFFFFFFFFFFFFFF

@A00721:190:HGJW7DSXY:4:2142:15564:10347 1:N:0:TCTGCAAG+GCTGCACT  
GTTGACTAGCGAAGCCAATGTTTCATAATATGAAGCAGTGGCTGTGGATGTGGCTCGTGTATGATAGAC  
GTCCCGTAATTCTAATCCCAGAGTGAATGAGATATTTCATCGGGGAAAGTCGGGATCCAGATACTTGG  
ATGATCAACATGGAT

+

FFFFFFFFFFFFFFFFFFFFFFFF:F,FFFFFFFFFFFFFFFF:FFFFFFFFFFFFFFFFFFFFFFFF  
FFFFFFFFF:FFFF:FFFFFFFFFFFF:FFFFFFFFFFFFFFFFFFFFFFFFFFFFFFFF  
FFFFFFFFFFFF:FFFF

$+$ 

+

 $+$ 

+

+

+

 $+$



+  
FFFFFFFFFFFFFFFFFFFFFFFFFFFFFFFFFFFFFFFFFFFFFFFFFFFFFFFFFFFFFFFFFFFFFFFFFFFFFFFF  
FFFFFFFFFFFFFFFFFFFFFFFFFFFFFFFFFFFFFFFFFFFFFFFFFFFFFFFFFFFFFFFFFFFFFFFFFFFFFFFF  
FFFFFFFFFFFFFFFF  
@A00721:190:HGJW7DSXY:4:2234:5376:19727 1:N:0:TCTGCAAG+GCTGCACT  
AGCGAAGCCAATGTTTCATAATATGAAGCAGTGGCTGTGGATGTGGCTCGTGTATGATAGACGTCCCGG  
TAATTCTAATCCAGAGTGAATGAGATATTCATCGGGGAAAGTCGGGATCCAGATACTTGGATGATCA  
ACATGGATAATGTTG  
+  
FFFFFFFFFFFF:FFFFFF:FFFFFFFF:FFFFFFFFFFFFFFFFFFFFFFFFFFFFFFFFFFFFFFFFFFFFFFFF  
FFFFFFFFFFFFFFFFFFFFFFFFFFFFFFFFFFFFFFFFFFFFFFFFFFFFFFFFFFFFFFFFFFFFFFFFFFFFFFFF  
FFFFFFFF:F::FFFF  
@A00721:190:HGJW7DSXY:4:2238:10303:29199 1:N:0:TCTGCAAG+GCTGCACT  
AGCGAAGCCAATGTTTCATAATATGAAGCAGTGGCTGTGGATGTGGCTCGTGTATGATAGACGTCCCGG  
TAATTCTAATCCAGAGTGAATGAGATATTCATCGGGGAAAGTCGGGATCCAGATACTTGGATGATCA  
ACATGGATAATGTTG  
+  
FFFFFFFFFFFFFFFFFFFF:FF:FFFFFFFFFFFFFFFFFFFFFFFFFFFFFFFFFFFFFFFFFFFFFFFFFFFF  
FFFFFFFFFFFFFFFFFFFFFFFFFFFFFFFFFFFFFFFFFFFFFFFFFFFFFFFFFFFFFFFFFFFFFFFFFFFF  
FFF:FFF:FFFFFFF  
@A00721:190:HGJW7DSXY:4:2271:14082:19836 1:N:0:TCTGCAAG+GCTGCACT  
AGCGAAGCCAATGTTTCATAATATGAAGCAGAGGCTGTGGATGTGGCTCGTGTATGATAGACGTCCCGG  
TAATTCTAATCCAGAGTGAATGAGATATTCATCGGGGAAAGTCGGGATCCAGATACTTGGATGATCA  
ACATGGATAATGTT  
+  
F:FFFF:FFFF,FFFF:FFF:F:FFF,FF,,F,F::FF,F::,,F,FF,:FFFFFFFF,FF:FFFF,  
FFFF,,,FF,FFFFFF,,FFF::FFFFFFFFFF,,:,FFFF:,FF,:,FFFFFFF,:FFF,FF:FFFF  
,F::,,:FFFF,::,F  
@A00721:190:HGJW7DSXY:4:2340:22733:34851 1:N:0:TCTGCAAG+GCTGCACT  
AGCGAAGCCAATGTTTCATAATATGAAGCAGTGGCTGTGGATGTGGCTCGTGTATGATAGACGTCCCGG  
TAATTCTAATCCAGAGTGAATGAGATATTCATCGGGGAAAGTCGGGATCCAGATACTTGGATGATCA  
ACATGGATAATGTTG  
+  
FFFFFFFFFFFFFFFFFFFF:FFFFFFFFFFFFFFFFFFFFFFFFFFFFFFFFFFFFFFFFFFFFFFFFFFFF  
FFFFFFFFFFFFFFFFFFFFFFFFFFFFFFFFFFFFFFFFFFFFFFFFFFFFFFFFFFFFFFFFFFFFFFFFFFFF  
FFFFFFFF:FFFFFFF  
@A00721:190:HGJW7DSXY:4:2574:10764:24799 1:N:0:TCTGCAAG+GCTGCACT  
AGCGAAGCCAATGTTTCATAATATGAAGCAGTGGCTGTGGATGTGGCTCGTGTATGATAGACGTCCCGG  
TAATTCTAATCCAGAGTGAATGAGATATTCATCGGGGAAAGTCGGGATCCAGATACTTGGATGATCA  
ACATGGATAATGTTG  
+  
FFFFFFFFFF:FFFFFFFF:FFFFFFFFFFFFFFFFFFFFFFFFFFFFFFFFFFFFFFFFFFFFFFFFFFFF  
FFFFFFFFFFFFFFFFFFFFFFFFFFFF:FFFFFFFFFFFFFFFFFFFFFFFFFFFFFFFFFFFFFFFFFFFF  
FFFFFFFF:FFFF:FF  
@A00721:190:HGJW7DSXY:4:1244:15130:31735 1:N:0:TCTGCAAG+GCTGCACT  
AAACCTATCAACATTATCCATGTTGATCATCCAAGTATCTGGATCCCGACTTTCCCCGATGAATATCT  
CATTCACTCTGGGATTAGAATTACCGGGACGTCTATCATACACGAGCCACATCCACAGCCACTGCTTC  
ATATTATGAACATTG  
+  
FFFFFFFFFFFFFFFFFFFFFFFFFFFFFFFFFFFFFFFFFFFFFFFFFFFFFFFFFFFFFFFFFFFFFFFFFFFF  
FFFFFFFFFFFFFFFFFFFFFFFFFFFFFFFFFFFFFFFFFFFFFFFFFFFFFFFFFFFFFFFFFFFFFFFFFFFF  
FFFFFFFFFFFFFFFFFFFF  
@A00721:190:HGJW7DSXY:4:1312:29568:13088 1:N:0:TCTGCAAG+GCTGCACT  
AAACCTATCAACATTATCCATGTTGATCATCCAAGTATCTGGATCCCGACTTTCCCCGATGAATATCT

CATTCACTCTGGGATTAGAATTACCGGGACGTCTATCATACACGAGCCACATCCACAGCCACTGCTTC  
ATATTATGAACATTG

+

FFFFFFFFFFFFFFFFFFFFFFFFFFFFFFFFFFFFFFFFFFFFFFFFFFFFFFFFFFFFFFFFFFFFFFFF  
FFFFFFFFFFFFFFFF:FFFFFFFFFFFFFFFFFFFFFFFFFFFFFFFFFFFFFFFFFFFFFFFFFFFFFFFF  
FFFFFFFFFFFFFFFF

@A00721:190:HGJW7DSXY:4:1444:13503:16454 1:N:0:TCTGCAAG+GCTGCACT  
AAACCTATCAACATTATCCATGTTGATCATCCAAGTATCTGGATCCCGACTTTCCCGATGAATATCT  
CATTCACTCTGGGATTAGAATTACCGGGACGTCTATCATACACGAGCCACATCCACAGCCACTGCTTC  
ATATTATGAACATTG

+

FFFFFFFFFFFFFFFF:FFFFFFFFFFFFFFFFFFFFFFFFFFFFFFFFFFFFFFFFFFFFFFFFFFFFFFFF  
FFFFFFFFFFFFFFFFFFFFFFFFFFFFFFFFFFFFFFFFFFFFFFFFFFFFFFFFFFFFFFFFFFFFFFFF  
F:FFFFFFFFFFFFFF

@A00721:190:HGJW7DSXY:4:2104:18466:29684 1:N:0:TCTGCAAG+GCTGCACT  
AAACCTATCAACATTATCCATGTTGATCATCCAAGTATCTGGATCCCGACTATCCCGATGAATATCT  
CATTCACTCTGGGATTAGAATTACCGGGACGTCTATCATACACGAGCCACATCCACAGCCACTGCTTC  
ATATAATGAACATTG

+

FFFFFFFF,FFFFFFFF::,FF:FFFFFF,FF:FF,,F:,FFFFFF,F,:FFF:FFFFFF,FFFF  
FFF,FFF,,:,,,FFFFFFFF:FF:F:FF:FFFF::FFFFFFFFFFFF:FFFFFF:F:FFFFFF,F:F  
FF::F,:FFFF,FF

@A00721:190:HGJW7DSXY:4:2228:5321:17660 1:N:0:TCTGCAAG+GCTGCACT  
AAACCTATCAACATTATCCATGTTGATCATCCAAGTATCTGGATCCCGACTTTCCCGATGAATATCT  
CATTCACTCTGGGATTAGAATTACCGGGACGTCTATCATACACGAGCCACATCCACAGCCACTGCTTC  
ATATTATGAACATTG

+

FFFFFFFFFFFFFF:F:FFFFFFFFFFFFFFFFFFFFFFFFFFFFFFFFFFFFFFFFFFFFFFFFFFFFFF  
FF:FFFFFFFFFFFFFFFFFFFFFFFFFFFFFFFFFFFFFFFFFFFFFFFFFFFFFFFFFFFFFFFFFFFF  
F:FFFFFFFFFFFF:F

@A00721:190:HGJW7DSXY:4:2265:15293:30358 1:N:0:TCTGCAAG+GCTGCACT  
AAACCTATCAACATTATCCATGTTGATCATCCAAGTATCTGGATCCCGACTTTCCCGATGAATATCT  
CATTCACTCTGGGATTAGAATTACCGGGACGTCTATCATACACGAGCCACATCCACAGCCACTGCTTC  
ATATTATGAACATTG

+

FFFFFFFFFFFFFFFFFFFFFFFFFFFFFFFFFFFFFFFFFFFFFFFFFFFFFFFFFFFFFFFFFFFFFF  
FFFFFFFFFFFFFFFFFFFFFFFFFFFFFFFFFFFFFFFFFFFFFFFFFFFFFFFFFFFFFFFFFFFFFF  
FFFFFFFFFFFFFFFF

@A00721:190:HGJW7DSXY:4:2571:14687:18756 1:N:0:TCTGCAAG+GCTGCACT  
AAACCTATCAACATTATCCATGTTGATCATCCAAGTATCTGGATCCCGACTTTCCCGATGAATATCT  
CATTCACTCTGGGATTAGAATTACCGGGACGTCTATCATACACGAGCCACATCCACAGCCACTGCTTC  
ATATTATGAACATTG

+

FFFFFFFFFFFFFFFFFFFFFFFFFFFFFFFFFFFFFFFFFFFFFFFFFFFFFFFFFFFFFFFFFFFFFF  
FFFFFFFFFFFFFFFF:FFFFFFFFFFFFFFFFFFFFFFFFFFFFFFFFFFFFFFFFFFFFFFFFFFFFFF  
FFFFFFFFFFFFFFFF

@A00721:190:HGJW7DSXY:4:1368:8892:28635 1:N:0:TCTGCAAG+GCTGCACT  
GAAGCAGTGGCTGTGGATGTGGCTCGTGTATGATAGACGTCCCGGTAATTCTAATCCCAGAGTGAATG  
AGATATTCATCGGGAAAGTCGGGATCCAGATACTTGGATGATCAACATGGATAATGTTGATAGTTT  
AGTGTGCGAGATCGGA

+

FFF:FF:,F:F:F:F,F:F:,F,FF:FFFFFFFFFFFFFFFFFFFF,FFFFFFFFFFFFFFFF:F,F,FFFF  
FFFFF::FFFF:,FFFFF:,FFFFF:,::FF::FFFF:FFF::FFFF:,FFF,F:,F:::  
FF,:FFFFFFFF:,F

@A00721:190:HGJW7DSXY:4:2402:18719:26835 1:N:0:TCTGCAAG+GCTGCACT  
GAAGCAGTGGCTGTGGATGTGGCTCGTGTATGATAGACGTCCCGGTAATTCTAATCCCAGAGTGAATG  
AGATATTCATCGGGGAAAGTCGGGATCCAGATACTTGGATGATCAACATGGATAATGTTGATAGGTTT  
AGTGTGCGAGATCGGA

[illegible]

+

```

FFFFFFFFFFFF:FFFFFFFFFFFFFFFFFFFFFFFFFFFFFFFFFFFFFFFFFFFFFFFF
FFFFFFFFFFFFFFFFFFFFFFFF:FFFFFFFFFFFFFFFFFFFFFFFF,FFFFFFFFFFFF
FFFFFFFFFFFFFFFF

```

+

```

FFFFFFFFFFFFFFFFFFFFFFFFFFFFFFFFFFFFFFFFFFFFFFFFFFFFFFFFFFFFFFFFFFFFFFFF:FF
FFFFFFFFFFFFFFFFFFFFFFFFFFFFFFFFFFFFFFFFFFFFFFFFFFFFFFFFFFFFFFFFFFFFFFFF,FFFFFFFFFFFFFFFF:FFFFFF:FFFFFFFFFFFFFF
F:FFFFFFFFFFFFFFFF

```

+

[illegible] $+$ 

```
:FFF:FFFFFFFFFFFFFFFFFFFFFFFFFFFFFFFFFFFFFFFF:FFFFFFFFFFFFFFFFFFFFFFF
FFFFFFFFF:FFFFFFFFFFFFFFFF,FFFFFFFF:FFFFFFFFFFFFFFF,:FFFFFFF,FFFFFFFFFFFFFF
F,F,F:FFF,FF:F
```

+

```
FFFFFFFFFFFFFFFFFFFFFFFFFFFFFFFFFFFFFFFFFFFFFFFFFFFFFFFFFFFFFFFFFFFFFFFFF
FFFFFFFFFFFFFFFFFFFFFFFFFFFFFF,FFFFFFFFFFFFFFFFFFFFFFFFFFFFFFFFFFFFF:F
F,FFF:FFFF,,FF
```

 $+$ [illegible]

FFFFFFFFFFFFFFFFFFFFFFFFFFFFFFFFFFFFFFFFFFFFFFFFFFFFFFFFFFFFFFFFFFFFFFFF  
F:FFF,:FFFF:F:  
@A00721:190:HGJW7DSXY:4:1467:23990:21026 1:N:0:TCTGCAAG+GCTGCACT  
TGGCTGTGGATGTGGCTCGTGTATGATAGACGTCCCGGTAATTCTAATCCCAGAGTGAATGAGATATT  
CATCGGGGAAAGTCGGGATCCAGATACTTGGATGATCAACATGGATAATGTTGATAGGTTTAGTGTCG  
TTTGTGAAAAACGA  
+  
FFFFFFFFFFFFFFFFFFFFFFFFFFFFFFFFFFFFFFFFFFFFFFFFFFFFFFFFFFFFFFFFFFFFFFFF  
FFFFFFFFFFFFFFFFFFFFFFFFFFFFFFFFFFFFFFFFFFFFFFFFFFFFFFFFFFFFFFFFFFFFFFFF  
FFF:FFFFFFFF:FF  
@A00721:190:HGJW7DSXY:4:1537:6081:21668 1:N:0:TCTGCAAG+GCTGCACT  
TGGCTGTGGATGTGGCTCGTGTATGATAGACGTCCCGGTAATTCTAATCCCAGAGTGAATGAGATATT  
CATCGGGGAAAGTCGGGATCCAGATACTTGGATGATCAACATGGATAATGTTGATAGGTTTAGTGTCG  
TTTGTGAAAAACGA  
+  
FFFFFFFFFFFFFFFFFFFFFFFFFFFFFFFFFFFFFFFFFFFFFFFFFFFFFFFFFFFFFFFFFFFFFFFF  
FFFFFFFFFFFF:FFFFFFFFFFFFFFFFFFFFFFFFFFFFFFFFFFFFFFFFFFFFFFFFFFFFFFFF  
FFFFFFFFFFFF:FFFFFFFFFFFF:FFFFFFFFFFFFFFFF:FFF:FFFFFFFFFFFF:FFFFFFFFFFFF  
FFFFFFFFFFFF,FF  
@A00721:190:HGJW7DSXY:4:2136:31882:11490 1:N:0:TCTGCAAG+GCTGCACT  
TGGCTGTGGATGTGGCTCGTGTATGATAGACGTCCCGGTAATTCTAATCCCAGAGTGAATGAGATATT  
CATCGGGGAAAGTCGGGATCCAGATACTTGGATGATCAACATGGATAATTTTGATAGGTTTAGTGTCG  
TTTGTGAAAA  
+  
FFFFFFFFFFFFFFFFFFFFFFFFFFFF,F:FFFF:FFFFFFFFFFFFFFFF:FFFFFF:FFFFFFFFFFFF  
:FFFFFF:FFFFF:FFFFF:,FFFFFFFF:FFFFFFFFFFFF:FFFFFFFF,FF:FFFF,FFFFFF,FF,  
FFF,F,,FFF  
@A00721:190:HGJW7DSXY:4:2608:29053:25848 1:N:0:TCTGCAAG+GCTGCACT  
TGGCTGTGGATGTGGCTCGTGTATGATAGACGTCCCGGTAATTCTAATCCCAGAGTGAATGAGATATT  
CATCGGGGAAAGTCGGGATCCAGATACTTGGATGATCAACATGGATAATGTTGATAGGTTTAGTGTCG  
TTTGTGAAAAACAT  
+  
FFFFFFFFFFFFFFFFFFFFFFFFFFFFFFFFFFFFFFFFFFFFFFFFFFFFFFFFFFFFFFFFFFFFFFFF  
FFFFFFFFFFFFFFFFFFFFFFFFFFFFFFFFFFFFFFFFFFFFFFFFFFFFFFFFFFFFFFFFFFFFFFFF  
F:F,F,:FFFF,,F:  
@A00721:190:HGJW7DSXY:4:1366:3775:8249 1:N:0:TCTGCAAG+GCTGCACT  
CTGTGGATGTGGCTCGTGTATGATAGACGTCCCGGTAATTCTAATCCCAGAGTGAATGAGATATTCAT  
CGGGGAAAGTCGGGATCCAGATACTTGGATGATCAACATGGATAATGTTGATAGGTTTAGTGTCGTT  
GTGAAAAACGATACG  
+  
FFFFFFFFFFFFFFFFFFFFFFFFFFFFFFFFFFFFFFFFFFFFFFFFFFFFFFFFFFFFFFFFFFFFF:FFFFFFFF  
FFFFFFFFFFFFFFFFFFFFFFFFFFFFFFFFFFFFFFFFFFFFFFFFFFFFFFFFFFFFFFFFFFFF:FFF  
,FFFFFFFF:FFFFF  
@A00721:190:HGJW7DSXY:4:1537:30129:9204 1:N:0:TCTGCAAG+GCTGCACT  
CTGTGGATGTGGCTCGTGTATGATAGACGTCCCGGTAATTCTAATCCCAGAGTGAATGAGATATTCAT  
CGGGGAAAGTCGGGATCCAGATACTTGGATGATCAACATGGATAATGTTGATAGGTTTAGTGTCGTT  
GTGAAAAACGATACG  
+  
FFFFFFF:FFFFFFFFFFFFFFFFFFFFFFFFFFFFFFFFFFFFFFFFFFFFFFFFFFFFFFFFFFFFF:FFFFFFFF  
FFFFFFFFFFFFFFFFFFFFFFFFFFFFFFFFFFFFFFFFFFFFFFFFFFFFFFFFFFFFF:FFFFFF  
,FFFFFFFFFFFFF  
@A00721:190:HGJW7DSXY:4:1567:3432:1110 1:N:0:TCTGCAAG+GCTGCACT  
CTGTGGATGTGGCTCGTGTATGATAGACGTCCCGGTAATTCTAATCCCAGAGTGAATGAGATATTCAT  
CGGGGAAAGTCGGGATCCAGATACTTGGATGATCAACATGGATAATGTTGATAGGTTTAGTGTCGTT  
GTGAAAAACGATACG

+  
FFFFFFFFFFFFFFFFFFFFFFFFFFFFFFFFFFFFFFFFFFFFFFFFFFFFFFFFFFFFF:FFFFFFFFFFF:FFFFFFFFFFFFFF  
F::FFFFFFFFFFFFFFFFFF:FFF:FFFFFFFFFFFFFFFFFFFFFF,FFFFFFFFFFFFFFFFFF:F:FFFFFFFF  
,FFFFFFF,:FFFF:  
@A00721:190:HGW7DSXY:4:1601:30942:19695 1:N:0:TCTGCAAG+GCTGCACT  
CTGTGGATGTGGCTCGTGTATGATAGACGTCCCGGTAATTCTAATCCCAGAGTGAATGAGATATTCAT  
CGGGGAAAGTCGGGATCCAGATACTTGATGATCAACATGGATAATGTTGATAGGTTTAGTGTCGTTT  
GTGAAAAAAGATACG  
+  
FFFFFFFFFFFFFFFFFFFFFFFFFFFFFFFFFFFFFFFFFFFFFFFFFFFFFFFFFFFFFFF  
FFFFFFFFFFFFFFFFFFFFFFFFFFFFFFFFFFFFFFFFFFFFFFFFFFFFFFFFFFFFF:FFFFFFFFFFFFFFFFFFFFFFF,  
FFF:FFF::F,,F  
@A00721:190:HGW7DSXY:4:2154:20546:18255 1:N:0:TCTGCAAG+GCTGCACT  
CTGTGGATGTGGCTCGTGTATGATAGACGTCCCGGTAATTCTAATCCCAGAGTGAATGAGATATTCAT  
CGGGGAAAGTCGGGATCCAGATACTTGATGATCAACATGGATAATGTTGATAGGTTTAGTGTCGTTT  
GTGAAAAACGATACG  
+  
F:FFFFFFFF:FFFFFFFFFFFFFFFFFFFFFFFFFFFFFFFFFFFFFFFFFFFFFFFFFFFFF,FFFFFFFFFF:FFFFFFFFFFFFFF  
FFFFFFFFFFFFFFFFFFFFFFFFFFFFFFFFFFFFFFFFFFFFFFFFFFFFFFFFFFFFF:FFFFFFFFFFFFFFFFFFFFFFF  
FFFFFFFFF::F,F,  
@A00721:190:HGW7DSXY:4:2531:13566:22326 1:N:0:TCTGCAAG+GCTGCACT  
CTGTGGATGTGGCTCGTGTATGATAGACGTCCCGGTAATTCTAATCCCAGAGTGAATGAGATATTCAT  
CGGGGAAAGTCGGGATCCAGATACTTGATGATCAACATGGATAATGTTGATAGGTTTAGTGTCGTTT  
GTGAAAAACGATAC  
+  
FFFFFFFFFFFFFFFFFFFFFFFFFFFFFFFFFFFFFFFFFFFFFFFFFFFFFFFFFFFFFFF  
FFFFFFFFFFFFFFFFFFFFFFFFFFFFFFFFFFFFFFFFFFFFFFFFFFFFFFFFFFFFF:FFFFFFFFF,FF:FF:FF:FFFFFFFFFFFFFFFF  
FFFFFFFFF::F,F,  
@A00721:190:HGW7DSXY:4:2544:6479:34131 1:N:0:TCTGCAAG+GCTGCACT  
CTGTGGATGTGGCTCGTGTATGATAGACGTCCCGGTAATTCTAATCCCAGAGTGAATGAGATATTCAT  
CGGGGAAAGTCGGGATCCAGATACTTGATGATCAACATGGATAATGTTGATAGGTTTAGTGTCGTTT  
GTGAAAAAGATAGGA  
+  
FFFFFFFFFFFFFFFFFFFFFFFFFFFFFFFFFFFFFFFFFFFFFFFFFFFFFFFFFFFFFFF  
FFFFFFFFFFFFFFFFFFFFFFFFFFFFFFFFFFFFFFFFFFFFFFFFFFFFFFFFFFFFF:FFF  
:F:FFFF,FF,FFF  
@A00721:190:HGW7DSXY:4:2556:31675:4805 1:N:0:TCTGCAAG+GCTGCACT  
CTGTGGATGTGGCTCGTGTATGATAGACGTCCCGGTAATTCTAATCCCAGAGTGAATGAGATATTCAT  
CGGGGAAAGTCGGGATCCAGATACTTGATGATCAACATGGATAATGTTGATAGGTTTAGTGTCGTTT  
GTGAAAAAGATCGGA  
+  
FFFFFFFFFFFFFFFFFFFFFFFFFFFFFFFFFFFFFFFFFFFFFFFFFFFFFFFFFFFFFFF  
FFFFFFFFFFFFFFFFFFFFFFFFFFFFFFFFFFFFFFFFFFFFFFFFFFFFFFFFFFFFF:FFFFFFFFFFFFFFFFFFFFFFFFFFFFFFF  
FFFFFFFFF,FF,FFF  
@A00721:190:HGW7DSXY:4:2656:7536:20932 1:N:0:TCTGCAAG+GCTGCACT  
CTGTGGATGTGGCTCGTGTATGATAGACGTCCCGGTAATTCTAATCCCAGAGTGAATGAGATATTCAT  
CGGGGAAAGTCGGGATCCAGATACTTGATGATCAACATGGATAATGTTGATAGGTTTAGTGTCGTTT  
GTGAAAAAGATCGGA  
+  
FFFFFFF:FFFFFFFFFFFFFFFFFFFFFFFFFFFFFFFFFFFFFFFFFFFFFFFFFFFFF:FFFFFFFFF:FFFFFFFFFFFFFFFFFFFFFFF  
FFFFFFF::FFFFFFFFF:FFFFFFFFFFFFFFFFFFFFFFFFFFFFFFFFFFFFFFFFFFFFF:FFFFFFFFFFFFFFF,  
FF,FFFFF,FF:,FF  
@A00721:190:HGW7DSXY:4:2676:9326:17581 1:N:0:TCTGCAAG+GCTGCACT  
CTGTGGATGTGGCTCGTGTATGATAGACGTCCCGGTAATTCTAATCCCAGAGTGAATGAGATATTCAT







```

FFFFFFFFFFFFFFFFFFFFFFFFFFFFFFFFFFFFFFFFFFFFFFFFFFFFFFFFFFFFFFFFFFFFFFFFFFFF,FFFF,FFFF::
:FF,FFF:FF,FF:F
@A00721:190:HGJW7DSXY:4:1630:24668:33692 1:N:0:TCTGCAAG+GCTGCACT
GGCTCGTGTATGATAGACGTCCCGGTAATTCTAATCCCAGAGTGAATGAGATATTCATCGGGGAAAGT
CGGGATCCAGATACTTGATGATCAACATGGATAATGTTGATAGGTTTAGTGTCGTTTGTGAAAAACG
ATACGTTCTAGAAGG
+
FFFFFFFFFFFFFFFFFFFFFFFFFFFFFFFFFFFFFFFFFFFFFFFFFFFFFFFFFFFFFFFFFFFFFFFFFFFF
FFFFFFFFFFFFFFFFFFFFFFFFFFFFFFFFFFFFFFFFFFFFFFFFFFFFFFFFFFFFFFFFFFFFFFFFFFFF:FF,:,F
FFF:F,F,FF:FF,:
@A00721:190:HGJW7DSXY:4:2222:16758:7592 1:N:0:TCTGCAAG+GCTGCACT
GGCTCGTGTATGATAGACGTCCCGGTAATTCTAATCCCAGAGTGAATGAGATATTCATCGGGGAAAGT
CGGGATCCAGATACTTGATGATCAACATGGATAATGTTGATAGGTTTAGTGTCGTTTGTGAAAAACG
ATAAGTTCTAGAAGG
+
FFFFFFFFFFFFFFFFFFFFFFFFFFFFFFFFFFFFFFFFFFFFFFFFFFFFFFFFFFFFFFFFFFFFFFFFFFFF
FFFFFFFFFFFFFFF:FFFFFFFFFFFFFFFFFFFFFFFFFFFFFFFFFFFFFFFFFFFFFFFFFFFFFFFFFFFF,FFF,FFFF,:
F:F,,FF,:F,:F,F
@A00721:190:HGJW7DSXY:4:2271:25364:26537 1:N:0:TCTGCAAG+GCTGCACT
GGCTCGTGTATGATAGACGTCCCGGTAATTCTAATCCCAGAGTGAATGAGATATTCATCGGGGAAAGT
CGGGATCCAGATACTTGATGATCAACATGGATAATGTTGATAGGTTTAGTGTCGTTTGTGAAAAACG
ATACGTTCTAGAAGG
+
FFFFFFFFFFFFFFFFFFFFFFFFFFFFFFFFFFFFFFFFFFFFFFFFFFFFFFFFFFFFFFFFFFFFFFFFFFFF:FFF
FFFFFFFFFFFFFFFFFFFFFFFFFFFFFFFFFFFFFFFFFFFFFFFFFFFFFFFFFFFFFFFFFFFFFFFFFFFF:FFFFFFFFF
FFFF:F,:FFFF,F
@A00721:190:HGJW7DSXY:4:2315:13630:8249 1:N:0:TCTGCAAG+GCTGCACT
GGCTCGTGTATGATAGACGTCCCGGTAATTCTAATCCCAGAGTGAATGAGATATTCATCGGGGAAAGT
CGGGATCCAGATACTTGATGATCAACATGGATAATGTTGATAGGTTTAGTGTCGTTTGTGAAAAAG
ATAAGTTCTAGAAGG
+
FFFFFFFFFFFFFFFFFFFFFFFFFFFFFFFFFFFFFFFFFFFFFFFFFFFFFFFFFFFFFFFFFFFFFFFFFFFF
FFFFFFFFFFFFFFFFFFFFFFFFFFFFFFFFFFFFFFFFFFFFFFFFFFFFFFFFFFFFFFFFFFFFFFFFFFFF:FFF:FFFF,:
FFF,,:F,FF,,F,F
@A00721:190:HGJW7DSXY:4:2433:22019:6840 1:N:0:TCTGCAAG+GCTGCACT
GGCTCGTGTATGATAGACGTCCCGGTAATTCTAATCCCAGAGTGAATGAGATATTCATCGGGGAAAGT
CGGGATCCAGATACTTGATGATCAACATGGATAATGTTGATAGGTTTAGTGTCGTTTGTGAAAAACG
ATACGTTCTAGAAGG
+
FFFFFFFFFFFFFFFFFFFFFFFFFFFFFFFFFFFFFFFFFFFFFFFFFFFFFFFFFFFFFFFFFFFFFFFFFFFF:FFFF:F
FFFFFFFFFFFFFFFFFFFF:FFFFFFFFFFFFFFFFFFFFFFFFFFFFFFFFFFFFFFFFFFFFFFFFFFFF:FFF:FFFF,,
:FFF,FF,FF,FF,:
@A00721:190:HGJW7DSXY:4:2449:10050:10128 1:N:0:TCTGCAAG+GCTGCACT
GGCTCGTGTATGATAGACGTCCCGGTAATTCTAATCCCAGAGTGAATGAGATATTCATCGGGGAAAGT
CGGGATCCAGATACTTGATGATCAACATGGATAATGTTGATAGGTTTAGTGTCGTTTGTGAAAAACG
ATACGTTCTAGAAGG
+
FFFFFFFFFFFFFFFFFFFFFFFFFFFFFFFFFFFFFFFFFFFFFFFFFFFFFFFFFFFFFFFFFFFFFFFFFFFF
FFFFFFFFFFFFFFFFFFFF:FFFFFFFFFFFFFFFFFFFFFFFFFFFFFFFFFFFFFFFFFFFFFFFFFFFF,FFFFFFFFF,F
FFF:FFF:FFFF,F
@A00721:190:HGJW7DSXY:4:2462:14235:6981 1:N:0:TCTGCAAG+GCTGCACT
GGCTCGTGTATGATAGACGTCCCGGTAATTCTAATCCCAGAGTGAATGAGATATTCATCGGGGAAAGT
CGGGATCCAGATACTTGATGATCAACATGGATAATGTTGATAGGTTTAGTGTCGTTTGTGAAAAACG
ATACGTTCTAGAAGG

```

+  
FFFFFFFFFFFFFFFFFFFFFFFFFFFFFFFFFFFFFFFFFFFFFFFFFFFFFFFFFFFFFFFFFFFFFFFF  
FFFFFFFFFFFFFFFFFFFFFFFFFFFFFFFFFFFFFFFFFFFFFFFFFFFFFFFFFFFFFFFFFFFFFFFF:FFFFFFFF::  
FFF,FFFF,FF:F  
@A00721:190:HGJW7DSXY:4:2513:30201:15186 1:N:0:TCTGCAAG+GCTGCACT  
GGCTCGTGTATGATAGACGTCCCGGTAATTCTAATCCCAGAGTGAATGAGATATTCATCGGGGAAAGT  
CGGGATCCAGATACTTGGATGATCAACATGGATAATGTTGATAGGTTTAGTGTCGTTTGTGAAAAACG  
ATAAGTTCTATAA  
+  
FFFFFFFFFFFFFFFFFFFFFFFFFFFFFFFFFFFFFFFFFFFFFFFFFFFFFFFFFFFFFFFFFFFFFFFF  
FFFFFFFFFFFFFFFFFFFFFFFFFFFFFFFFFFFFFFFFFFFFFFFFFFFFFFFFFFFFFFFFFFFFFFFF,F,FF,FFFF,,  
FFF,FF:,FF,F:  
@A00721:190:HGJW7DSXY:4:2549:11903:30029 1:N:0:TCTGCAAG+GCTGCACT  
GGCTCGTGTATGATAGACGTCCCGGTAATTCTAATCCCAGAGTGAATGAGATATTCATCGGGGAAAGT  
CGGGATCCAGATACTTGGATGATCAACATGGATAATGTTGATAGGTTTAGTGTCGTTTGTGAAAAACG  
ATACGTTCTAGAAGG  
+  
FFFFFFFFFFFFFFFFFFFFFFFFFFFFFFFFFFFFFFFFFFFFFFFFFFFFFFFFFFFFFFFFFFFFFFFF  
FFFFFFFFFFFFFFFFFFFFFFFFFFFFFFFFFFFFFFFFFFFFFFFFFFFFFFFFFFFFFFFFFFFFFFFF,FFFFFFFFFFFF  
FF::FFFFFFFFFFFF  
@A00721:190:HGJW7DSXY:4:2636:4960:20979 1:N:0:TCTGCAAG+GCTGCACT  
GGCTCGTGTATGATAGACGTCCCGGTAATTCTAATCCCAGAGTGAATGAGATATTCATCGGGGAAAGT  
CGGGATCCAGATACTTGGATGATCAACATGGATAATGTTGATAGGTTTAGTGTCGTTTGTGAAAAACG  
ATACGTTCTAGAAGG  
+  
FFFFFFFFFFFFFFFFFFFFFFFFFFFFFFFFFFFFFFFFFFFFFFFFFFFFFFFFFFFFFFFFFFFFFFFF  
FFFFFFFFFFFFFFFFFFFFFFFFFFFFFFFFFFFFFFFFFFFFFFFFFFFFFFFFFFFFFFFFFFFFFFFF:F,F::FFFFF:  
FFFF:FF:FF,FF:F  
@A00721:190:HGJW7DSXY:4:1266:29939:23500 1:N:0:TCTGCAAG+GCTGCACT  
AGCTCGTGTATGATAGACGTCCCGGTAATTCTAATCCCAGAGTGAATGAGATATTCATCGGGGAAAGT  
CGGGATCCAGATACTTGGATGATCAACATGGATAATGTTGATAGGTTTAGTGTCGTTTGTGAAAAACG  
ATACGTTCTAGAAGG  
+  
FFFFFFFFFFFFFFFFFFFFFFFFFFFFFFFFFFFFFFFFFFFFFFFFFFFFFFFFFFFFFFFFFFFFFFFF  
FFFFFFFFFFFFFFFFFFFFFFFFFFFFFFFFFFFFFFFFFFFFFFFFFFFFFFFFFFFFFFFFFFFFFFFF:FFFFFFFFF:FFFFFFFFFF,F  
FFF:FFFFFF:FF:F  
@A00721:190:HGJW7DSXY:4:1371:30454:33567 1:N:0:TCTGCAAG+GCTGCACT  
AGCTCGTGTATGATAGACGTCCCGGTAATTCTAATCCCAGAGTGAATGAGATATTCATCGGGGAAAGT  
CGGGATCCAGATACTTGGATGATCAACATGGATAATGTTGATAGGTTTAGTGTCGTTTGTGAAAAACG  
ATACGTTCTAGAAGG  
+  
FFFFFFFFFFFFFFFFFFFFFFFFFFFFFFFFFFFFFFFFFFFFFFFFFFFFFFFFFFFFFFFFFFFFFFFF:FF:  
FFFFFFFFFFFFFFFF::FFF:FFFFFFFFFFFFFFFF:FFFFFFFFFFFFFFFF:FFFFF:FFFF,F  
:F:FFFF:FFFFFFF  
@A00721:190:HGJW7DSXY:4:1662:11017:13213 1:N:0:TCTGCAAG+GCTGCACT  
AGCTCGTGTATGATAGACGTCCCGGTAATTCTAATCCCAGAGTGAATGAGATATTCATCGGGGAAAGT  
CGGGATCCAGATACTTGGATGATCAACATGGATAATGTTGATAGGTTTAGTGTCGTTTGTGAAAAACG  
ATACGTTCTAGAAGG  
+  
FFFFFFFFFFFFFFFFFFFFFFFFFFFFFFFFFFFFFFFFFFFFFFFFFFFFFFFFFFFFFFFFFFFFFFFF  
FFFFFFFFFFFFFF:FFFFFFFFFFFFFFFFFFFFFFFFFFFFFFFF:FFFFFFFFFFFFFFFFFFFFFFFF,FFFFFF:F  
FFFFFFFFFFFFFFFFFFFF  
@A00721:190:HGJW7DSXY:4:2243:20103:2769 1:N:0:TCTGCAAG+GCTGCACT  
AGCTCGTGTATGATAGACGTCCCGGTAATTCTAATCCCAGAGTGAATGAGATATTCATCGGGGAAAGT

CGGGATCCAGATACTTGGATGATCAACATGGATAATGTTGATAGGTTTAGTGTCGTGTGTGAAAAACG  
ATACGTTCTAGAAGG

+

FFFFFFFFFFFFFFFFFFFFFFFFFFFFFFFFFFFFFFFFFFFFFFFFFFFFFFFFFFFFFFFFFFFFFFFF  
FFFFFFFFFFFF:FFFFFFFFFFFFFFFFFFFFFFFFFFFFFFFFFFFFFFFFFFFFFFFFFFFFFFFFFFFF,FF,F:FFFF,F  
FFF:,FF:FF:FFF:

@A00721:190:HGJW7DSXY:4:2374:8874:26193 1:N:0:TCTGCAAG+GCTGCACT  
AGCTCGTGTATGATAGACGTCCCGGTAATTCTAATCCCAGAGTGAATGAGATATTCATCGGGGAAAGT  
CGGGATCCAGATACTTGGATGATCAACATGGATAATGTTGATAGGTTTAGTGTCGTTTGTGAAAAACG  
ATACGTTCTAGAAG

+

FF::,FFFF:,FFF:F,FFFFF::FFFFFFFFFFFFFFFF:FF::F,:FFFFFFFFFFFFFF::FFF:::,  
FFF,FF,,FFF,FFFF:FF:FFFF:,,:FFF,:F::,F,FF:FFF,FFF,,FFF,,, :F:FFFF:,  
F,:F::,FF:,FF:

@A00721:190:HGJW7DSXY:4:2433:13865:33458 1:N:0:TCTGCAAG+GCTGCACT  
AGCTCGTGTATGATAGACGTCCCGGTAATTCTAATCCCAGAGTGAATGAGATATTCATCGGGGAAAGT  
CGGGATCCAGATACTTGGATGATCAACATGGATAATGTTGATAGGTTTAGTGTCGTTTGTGAAAAACG  
ATACGTTCTAGAAGG

+

FFFFFFFFFFFFFFFFFFFFFFFFFFFFFFFFFFFFFFFFFFFFFFFFFFFFFFFFFFFFFFFFFFFFFFFF  
FFFFFFFFFFFFFFFFFFFFFFFFFFFFFFFFFFFFFFFFFFFFFFFFFFFFFFFFFFFFFFFF::,FFFF,:  
::FF:,F:FF,FFFF

@A00721:190:HGJW7DSXY:4:1120:15899:32252 1:N:0:TCTGCAAG+GCTGCACT  
CTCGTGTATGATAGACGTCCCGGTAATTCTAATCCCAGAGTGAATGAGATATTCATCGGGGAAAGTCG  
GGATCCAGATACTTGGATGATCAACATGGATAATGTTGATAGGTTTAGTGTCGTTTGTGTAAAACGAT  
ACGTTCTAGAAGGTC

+

FFFFFFFFFFFFFFFFFFFFFFFFFFFFFFFFFFFFFFFFFFFFFFFFFFFFFFFFFFFFFFFFFFFFFFFF  
FFFFFFFFFFFF:FFFFFFFFFFFFFFFFFFFFFFFFFFFFFFFFFFFFFFFFFFFFFFFFFFFFFFFFFFFF,FFFF,FFFF,:F  
FF:,F:FF::F:F::

@A00721:190:HGJW7DSXY:4:1145:23710:2347 1:N:0:TCTGCAAG+GCTGCACT  
CTCGTGTATGATAGACGTCCCGGTAATTCTAATCCCAGAGTGAATGAGATATTCATCGGGGAAAGTCG  
GGATCCAGATACTTGGATGATCAACATGGATAATGTTGATAGGTTTAGTGTCGTTTGTGAAAAACGAT  
ACGTTCTAGAAGGTC

+

FFFFFFFFFFFFFFF:FFFFFFFFFFFFFFFFFFFFFFFFFFFFFFFFFFFFFFFFFFFFFFFFFFFFFFFF  
FFFFFFFFFFFFFFFFFFFFFFFFFFFFFFFFFFFFFFFFFFFFFFFFFFFFFFFFFFFFFFFFFFF:FFF:FFFFFFFFFFFFFF:F:FFFFFFFF:FF  
F::FFFF,FFFF:

@A00721:190:HGJW7DSXY:4:1157:30535:35493 1:N:0:TCTGCAAG+GCTGCACT  
CTCGTGTATGATAGACGTCCCGGTAATTCTAATCCCAGAGTGAATGAGATATTCATCGGGGAAAGTCG  
GGATCCAGATACTTGGATGATCAACATGGATAATGTTGATAGGTTTAGTGTCGTTTGTGAAAAACGAT  
ACGTTCTAGAAGGTC

+

FFFFFFFFFFFFFFFFFFFFFFFFFFFFFFFFFFFFFFFFFFFFFFFFFFFFFFFFFFFFFFFFFFFFFF:FFFF  
FFFFFFFFFFFFFFFFFFFFFFFFFFFFFFFFFFFFFFFFFFFFFFFFFFFFFFFFFFFFFFFFFFFF,FFFF:FFFFFFF:  
FFFF:FFFF,FF:

@A00721:190:HGJW7DSXY:4:1250:30065:23688 1:N:0:TCTGCAAG+GCTGCACT  
CTCGTGTATGATAGACGTCCCGGTAATTCTAATCCCAGAGTGAATGAGATATTCATCGGGGAAAGTCG  
GGATCCAGATACTTGGATGATCAACATGGATAATGTTGATAGGTTTAGAGTCGTTTTTGAAAAACGAT  
A

+

FFF:FFFF:FFFFFFFF,F,::,F,FF:FFFF,FFFFF,FFFFFFFFFFF:FFF:F,FFFF:FFF  
F,F:,FFF,F:,FFFF:, :FFF:FFFFFFFF::FFFF:FF::FFF,FFF,FFF:F,F,FFFF:FF:,FF  
F

@A00721:190:HGJW7DSXY:4:1259:25907:1517 1:N:0:TCTGCAAG+GCTGCACT  
CTCGTGTATGATAGACGTCCCGGTAATTCTAATCCCAGAGTGAATGAGATATTCATCGGGGAAAAGTCG  
GGATCCAGATACTTGGATGATCAACATGGATAATGTTGATAGGTTTAGTGTCGTTTGTGAAAAACGAT  
ACGTTCTAGAAGGTC

+

FFFFFFFFFFFFFF:FFFFFFFFFFFFFF:FFFFFFFFFFFFFF:FFFFFFFFFFFFFF:FFFFF  
FFFFFFFFFFFFFF:FFFFFFFFFFFFFF:FFFFFFFFFFFFFF:FFFFFFFFFFFFFF:FFFFF:FF  
FFFFF::F:FFFFFF

@A00721:190:HGJW7DSXY:4:1369:8395:4977 1:N:0:TCTGCAAG+GCTGCACT  
CTCGTGTATGATAGACGTCCCGGTAATTCTAATCCCAGAGTGAATGAGATATTCATCGGGGAAAAGTCG  
GGATCCAGATACTTGGATGATCAACATGGATAATGTTGATAGGTTTAGTGTCGTTTGTGAAAAACGAT  
ACGTTCTAGAAGGTC

+

FFFFFFFFFFFFFF:FFFFFFFFFFFFFF:FFFFFFFFFFFFFF:FFFFFFFFFFFFFF:FFFFFFFFF  
FFFFFF:FFFFFFFFFFFFFF:FFFFFFFFFFFFFF:FFFFFFFFFFFFFF:FFF:FFFFFFFFF  
FFFFF:FF:FFFFFF

@A00721:190:HGJW7DSXY:4:1375:19560:9784 1:N:0:TCTGCAAG+GCTGCACT  
CTCGTGTATGATAGACGTCCCGGTAATTCTAATCCCAGAGTGAATGAGATATTCATCGGGGAAAAGTCG  
GGATCCAGATACTTGGATGATCAACATGGATAATGTTGATAGGTTTAGTGTCGTTTGTGAAAAACGAT  
ACGTTCTAGAAGGTC

+

FFFFFFFFFFFFFF:FFFFFFFFFFFFFF:FFFFFFFFFFFFFF:FFFFFFFFFFFFFF:FFFFFFFFF  
FFFFFFFFFFFFFF:FFFFFFFFFFFFFF:FFFFFFFFFFFFFF:FFFFFFFFFFFFFF:FFFFFFF:  
FF:,F::F:FF:FFF

@A00721:190:HGJW7DSXY:4:1446:16098:29152 1:N:0:TCTGCAAG+GCTGCACT  
CTCGTGTATGATAGACGTCCCGGTAATTCTAATCCCAGAGTGAATGAGATATTCATCGGGGAAAAGTCG  
GGATCCAGATACTTGGATGATCAACATGGATAATGTTGATAGGTTTAGTGTCGTTTGTGAAAAACGAT  
ACGTTCTAGAAGGTC

+

FFFFFFFFFFFFFF:FFFFFFFFFFFFFF:FFFFFFFFFFFFFF:FFFFFFFFFFFFFF:FFFFFFFFF  
FFFFFFFFFFFFFF:FFFFFFFFFFFFFF:FFFFFFFFFFFFFF:FFFFFFFFFFFFFF:FFFF:FFFFFFF  
FFF,FFFFFF,FFF

@A00721:190:HGJW7DSXY:4:1560:6967:29528 1:N:0:TCTGCAAG+GCTGCACT  
CTCGTGTATGATAGACGTCCCGGTAATTCTAATCCCAGAGTGAATGAGATATTCATCGGGGAAAAGTCG  
GGATCCAGATACTTGGATGATCAACATGGATAATGTTGATAGGTTTAGTGTCGTTTGTGAAAAACGAT  
ACGTTCTAGAAGGTC

+

FFFFFFFFFFFFFF:FFFFFFFFFFFFFF:FFFFFFFFFFFFFF:FFFFFFFFFFFFFF:FFFFFFFFF  
FFFFFFFFFFFFFF:FFFFFFFFFFFFFF:FFFFFFFFFFFFFF,F:F:FFFF:FFF  
FF:,F:FFFFFFFF

@A00721:190:HGJW7DSXY:4:2326:19325:32142 1:N:0:TCTGCAAG+GCTGCACT  
CTCGTGTATGATAGACGTCCCGGTAATTCTAATCCCAGAGTGAATGAGATATTCATCGGGGAAAAGTCG  
GGATCCAGATACTTGGATGATCAACATGGATAATGTTGATAGGTTTAGTGTCGTTTGTGAAAAACGAT  
ACGTTCTAGAAGGTC

+

FFFFFFFFFFFFFF:FFFFFFFFFFFFFF:FFFFFFFFFFFFFF:FFFFFFFFFFFFFF:FFFFFFFFF  
FFFFFFFFFFFFFF:FFFFFFFFFFFFFF:FFFFFFFFFFFFFF:F:FFFF:FFF:::F  
FF,FF,FF:FF,:F:

@A00721:190:HGJW7DSXY:4:2339:2871:6590 1:N:0:TCTGCAAG+GCTGCACT  
CTCGTGTATGATAGACGTCCCGGTAATTCTAATCCCAGAGTGAATGAGATATTCATCGGGGAAAAGTCG  
GGATCCAGATACTTGGATGATCAACATGGATAATGTTGATAGGTTTAGTGTCGTTTGTGAAAAACGAT  
ACGTTCTAGAAGGTC

+

FFFFFFFFFFFFFF:FFFFFFFFFFFFFF:FFFFFFFFFFFFFF:FFFFFFFFFFFFFF:FFFFFFFFF

```
FF:FFFFFFFFFFFFFFFFFFFFFFFFFFFFFFFF:FFFFFFFFFFFFFFFFFFFFFFFF,F,F,FFFFF::F
F:,FF,FF,FF,:F:
```

+

@A00721:190:HGJW7DSXY:4:2351:30409:30671 1:N:0:TCTGCAAG+GCTGCACT  
CTCGTGTATGATAGACGTCCCGGTAATTCTAATCCCAGAGTGAATGAGATATTCATCGGGGAAAGTCG  
GGATCCAGATACTTGGATGATCAACATGGATAATGTTGATAGGTTTAGTGTCGTTTGTGAAAAACGAT  
ACGTTCTAGAAGGTC

@A00721:190:HGJW7DSXY:4:2366:29930:32409 1:N:0:TCTGCAAG+GCTGCACT  
CTCGTGTATGATAGACGTCCCGGTAATTCTAATCCCAGAGTGAATGAGATATTCATCGGGGAAAGTCG  
GGATCCAGATACTTGGATGATCAACATGGATAATGTTGATAGGTTTAGTGTCGTTTGTGAAAAACGAT  
ACGTTCTAGAAGGT

@A00721:190:HGJW7DSXY:4:2414:31521:16877 1:N:0:TCTGCAAG+GCTGCACT  
CTCGTGTATGATAGACGTCCCGGTAATTCTAATCCCAGAGTGAATGAGATATTCATCGGGGAAAGTCG  
GGATCCAGATACTTGGATGATCAACATGGATAATGTTGATAGGTTTAGTGTCGTTTGTTAAAAAAGAT  
ACGTTATAGAAGGT

@A00721:190:HGJW7DSXY:4:2416:14886:8609 1:N:0:TCTGCAAG+GCTGCACT  
CTCGTGTATGATAGACGTCCCGGTAATTCTAATCCCAGAGTGAATGAGATATTCATCGGGGAAAGTCG  
GGATCCAGATACTTGGATGATCAACATGGATAATGTTGATAGGTTTAGTGTCGTTTGTGAAAACGAT  
ACGTTATAGAAGGT

@A00721:190:HGJW7DSXY:4:2436:6271:25974 1:N:0:TCTGCAAG+GCTGCACT  
CTCGTGTATGATAGACGTCCCGGTAATTCTAATCCCAGAGTGAATGAGATATTCATCGGGGAAAGTCG  
GGATCCAGATACTTGGATGATCAACATGGATAATGTTGATAGGTTTAGTGTCGTTTGTGAAAAACGAT  
ACGTTCTAGAAGGTC

@A00721:190:HGJW7DSXY:4:2449:31620:17456 1:N:0:TCTGCAAG+GCTGCACT  
CTCGTGTATGATAGACGTCCCGGTAATTCTAATCCCAGAGTGAATGAGATATTCATCGGGGAAAGTCG  
GGATCCAGATACTTGGATGATCAACATGGATAATGTTGATAGGTTTAGTGTCGTTTGTGAAAAACGAT  
ACGTTCTAGAAGGT

+  
FFFFFFFFFFFFFFFFFFFFFFFFFFFFFFFFFFFFFFFFFFFFFFFFFFFFFFFFFFFFFFFFFFFFFFFFFFFFFFFF  
FFFFFFFFFFFFFFFFFFFFFFFFFFFFFFFFFFFFFFFFFFFFFFFFFFFFFFFFFFFFFFFFFFFFFFFFFFFFFFFF  
FFFFF,FF,,FFFF  
@A00721:190:HGJW7DSXY:4:2522:27190:32988 1:N:0:TCTGCAAG+GCTGCACT  
CTCGTGTATGATAGACGTCCCGGTAATTCTAATCCCAGAGTGAATGAGATATTCATCGGGGAAAGTCG  
GGATCCAGATACTTGGATGATCAACATGGATAATGTTGATAGGTTTAGTGTCGTTTGTGAAAAACGAT  
ACGTTCTAGAAGGTC  
+  
FFFFFFFFFFFFFFFFFFFFFFFFFFFFFFFFFFFFFFFFFFFFFFFFFFFFFFFFFFFFFFFFFFFFFFFFFFFFFFFF  
FF,FFFFFFFFFFFFFFFFFFFFFFFFFFFFFFFFFFFFFFFFFFFFFFFFFFFFFFFFFFFFFFFFFFFFFFFFFFFF  
FF:FF,FF,FF,F::  
@A00721:190:HGJW7DSXY:4:2534:32868:2206 1:N:0:TCTGCAAG+GCTGCACT  
CTCGTGTATGATAGACGTCCCGGTAATTCTAATCCCAGAGTGAATGAGATATTCATCGGGGAAAGTCG  
GGATCCAGATACTTGGATGATCAACATGGATAATGTTGATAGGTTTAGTGTCGTTTGTGAAAAACGAT  
ACGTTCTAGAAGGTC  
+  
FFFFFFFFFFFFFFFFFFFFFFFFFFFFFFFFFFFFFFFFFFFFFFFFFFFFFFFFFFFFFFFFFFFFFFFFFFFFFFFF  
FFFFFFFFFFFFFFFFFFFFFFFFFFFFFFFFFFFFFFFFFFFFFFFFFFFFFFFFFFFFFFFFFFFFFFFFFFFFFFFF  
F,FFF,:,,,F,FF:  
@A00721:190:HGJW7DSXY:4:2644:22679:2221 1:N:0:TCTGCAAG+GCTGCACT  
CTCGTGTATGATAGACGTCCCGGTAATTCTAATCCCAGAGTGAATGAGATATTCATCGGGGAAAGTCG  
GGATCCAGATACTTGGATGATCAACATGGATAATGTTGATAGGTTTAGTGTCGTTTGTGAAAAACGAT  
ACGTTCTAGAAGGTC  
+  
FFFFFFFFFFFFFFFFFFFFFFFFFFFFFFFFFFFFFFFFFFFFFFFFFFFFFFFFFFFFFFFFFFFFFFFFFFFFFFFF  
FFFFFFFFFFFFFFFFFFFFFFFFFFFFFFFFFFFFFFFFFFFFFFFFFFFFFFFFFFFFFFFFFFFFFFFFFFFFFFFF  
FFF:F:FF,FF:FF:  
@A00721:190:HGJW7DSXY:4:2647:4101:28855 1:N:0:TCTGCAAG+GCTGCACT  
CTCGTGTATGATAGACGTCCCGGTAATTCTAATCCCAGAGTGAATGAGATATTCATCGGGGAAAGTCG  
GGATCCAGATACTTGGATGATCAACATGGATAATGTTGATAGGTTTAGTGTCGTTTGTGAAAAACGAT  
ACGTTCTAGAAGGTC  
+  
FFFFFFFFFFFFFFFFFFFFFFFFFFFFFFFFFFFFFFFFFFFFFFFFFFFFFFFFFFFFFFFFFFFFFFFFFFFFFFFF  
FFFFFFFFFFFFFFFFFFFFFFFFFFFFFFFFFFFFFFFFFFFFFFFFFFFFFFFFFFFFFFFFFFFFFFFFFFFFFFFF  
F::FF::F::F:FFF  
@A00721:190:HGJW7DSXY:4:2662:5204:21997 1:N:0:TCTGCAAG+GCTGCACT  
CTCGTGTATGATAGACGTCCCGGTAATTCTAATCCCAGAGTGAATGAGATATTCATCGGGGAAAGTCG  
GGATCCAGATACTTGGATGATCAACATGGATAATGTTGATAGGTTTAGTGTCGTTTGTGAAAAACGAT  
ACGTTCTAGAAGGTC  
+  
FFFFFFFFFFFFFFFFFFFFFFFFFFFFFFFFFFFFFFFFFFFFFFFFFFFFFFFFFFFFFFFFFFFFFFFFFFFFFFFF  
FFFFFFFFFFFFFFFFFFFFFFFFFFFFFFFFFFFFFFFFFFFFFFFFFFFFFFFFFFFFFFFFFFFFFFFFFFFFFFFF  
F:FFFFFF,FF:FFF  
@A00721:190:HGJW7DSXY:4:1576:25084:30029 1:N:0:TCTGCAAG+GCTGCACT  
CCGGTAATTCTAATCCCAGAGTGAATGAGATATTCATCGGGGAAAGTCGGGATCCAGATACTTGGATG  
ATCAACATGGATAATGTTGATAGGTTTAGTGTCGTTTGTGAAAAACGATACGTTCTAGAAGGTCGTTG  
TTACGTTGATTCATC  
+  
FFFFFFFFFFFFFFFFFFFFFFFFFFFFFFFFFFFFFFFFFFFFFFFFFFFFFFFFFFFFFFFFFFFFFFFFFFFFFFFF  
FFFFFFFFFFFFFFFF, F:FFFFFFFF:FFF  
:FFFF,FFFFFF:FF  
@A00721:190:HGJW7DSXY:4:2117:14769:10285 1:N:0:TCTGCAAG+GCTGCACT  
CCGGTAATTCTAATCCCAGAGTGAATGAGATATTCATCGGGGAAAGTCGGGATCCAGATACTTGGATG



ATCAACATGGAGAATGTTGATAGGTTTGTAGTGTCTGTTTGTGAAAAAAGATAAGTTATATAAGGTAGTGG  
TTAAGTTTATTAA

+

F:F,:FFF,FF:FFFFFFFFF,FFFFF:F:FFFFF,F:FFFF,FFFFFFFF,FF:FFFFF:F:F,F,F  
FF,FFFF,:FF,FFFFFF,FF:,,FFFFFF:FFFFFFFF,F,:FFFF,F,:F,,::,FF,,F,F,,::,F  
,F:,,F,,,,F::

@A00721:190:HGJW7DSXY:4:2165:7419:29496 1:N:0:TCTGCAAG+GCTGCACT  
CCGGTAATTCTAATCCCAGAGTGAATGAGATATTCATCGGGGAAAGTCGGGATCCAGATACTTGGATG  
ATCAACATGGATAATGTTGATAGGTTTGTAGTGTCTGTTTGTGAAAAACGATACGTTCTAGAAGGTCGTGG  
TTACGTTGATTCATC

+

FFFFFFFFFFFFFFFFFFFFFFFFFFFFFFFFFFFFFFFFFFFFFFFFFFFFFFFFFFFFFFFFFFFFFFFF  
FFFFFFFFFFFFFFFFFFFFFFFFFFFFFFFFFFFFFFFFFFFFFFFFFFFFFFFFFFFFFFFF,FFF:F:F,F:F:FFFFFFFF  
,FF:F,::,FF::,F

@A00721:190:HGJW7DSXY:4:2471:9824:28651 1:N:0:TCTGCAAG+GCTGCACT  
CCGGTAATTCTAATCCCAGAGTGAATGAGATATTCATCGGGGAAAGTCGGGATCCAGATACTTGGATG  
ATCAACATGGATAATGTTGATAGGTTTGTAGTGTCTGTTTGTGAAAAACGATACGTTCTAGAAGGTCGTGG  
TTACGGTGATTCATC

+

FFFFFFFFFFFFFFFF:FFFFFFFFFFFFFFFFFFFFFFFFFFFFFFFFFFFFFFFFFFFFFFFFFFFFFFFF  
FFFFFFFFFFFFFFFFFFFFFFFFFFFFFFFFFFFFFFFFFFFFFFFFFFFFFFFFFFFFFFFF,FFF:FFF:FFF:FFF:FFF:FFF  
FFF:F,F:FFFFFF:

@A00721:190:HGJW7DSXY:4:2535:23981:15781 1:N:0:TCTGCAAG+GCTGCACT  
CCGGTAATTCTAATCCCAGAGTGAATGAGATATTCATCGGGGAAAGTCGGGATCCAGATACTTGGATG  
ATCAACATGGATAATGTTGATAGGTTTGTAGTGTCTGTTTGTGAAAAACGATACGTTCTAGAAGGTCGTGG  
TTACGTTGATTCAT

+

FFFFFFFFFFFFFFFFFFFFFFFFFFFFFFFFFFFFFFFFFFFFFFFFFFFFFFFFFFFFFFFFFFFFFF:  
FFFFFFFFFFFF,F:FFFFFFFFFFFFFFFFFFFFFFFF:FFF:,FFFFFFFF,FFF:FFFF,FF:F:,F  
FFF:FFF::FFFF

@A00721:190:HGJW7DSXY:4:2630:20980:24987 1:N:0:TCTGCAAG+GCTGCACT  
CCGGTAATTCTAATCCCAGAGTGAATGAGATATTCATCGGGGAAAGTCGGGATCCAGATACTTGGATG  
ATCAACATGGATAATGTTGATAGGTTTGTAGTGTCTGTTTGTGAAAAAAGATACGTTCTAGAAGGTCGTGG  
TTACGTTGATTCATC

+

FFFFFFFFFFFFFFFFFFFFFFFFFFFFFFFFFFFFFFFFFFFFFFFFFFFFFFFFFFFFFFFFFFFFFF  
FFFFFFFFFFFF,FFFFFFFF,FFFF:FFFFFFFF,FFFF,FFFF,,F:,::F,FF:,F,FF:F,:F  
FF:,FFFF:FF,::

@A00721:190:HGJW7DSXY:4:1457:28619:13542 1:N:0:TCTGCAAG+GCTGCACT  
GGTAATTCTAATCCCAGAGTGAATGAGATATTCATCGGGGAAAGTCGGGATCCAGATACTTGGATGAT  
CAACATGGATAATGTTGATAGGTTTGTAGTGTCTGTTTGTGAAAAACGTTACGTTCTAGAAGGTCGTGGTT  
ACGGTGATTCATC

+

F:FFFF:FFFFFFFFFFFFFFFFFFFFFFFF:F:F,FFFFFFFFFFFFFFFFFFFFFFFF:FFFFFF:FF  
:FFFF::FFF:F:FFFF,FFFFFFFFFFFFFFFF,FFFFFFFF:F,::,F:,,,FFFF,FF:FF,:FFFF  
F,::,F:FFFFFF

@A00721:190:HGJW7DSXY:4:1168:12183:18427 1:N:0:TCTGCAAG+GCTGCACT  
CGGGGAAAGTCGGGATCCAGATACTTGGATGATCAACATGGATAATGTTGATAGGTTTGTAGTGTCTGTT  
GTGAAAAACGATACGTTCTAGAAGGTCGTGGTTACGTTGATTCATCCATGGATGCGGACGACGACGTT  
AAGAACGCTTACTT

+

FFFFFFFFFFFFFFFFFFFFFFFFFFFFFFFFFFFFFFFFFFFFFFFFFFFFFFFFFFFFFFFFFFFFFF:  
FFFFFFFF:FFFF:FFFF,FFFFFFFF:FFFF:F,FF::FFFF,F:FFFF:FFFFFFFF:FFFF  
FF,FFFF::FF:,F

@A00721:190:HGJW7DSXY:4:1403:5819:18584 1:N:0:TCTGCAAG+GCTGCACT  
CGGGGAAAGTCGGGATCCAGATACTTGGATGATCAACATGGATAATGTTGATAGTTTGTGTCGTGT  
GTGAAAAACGATACGTTCTAGAAGGTCGTGGTTACGTTGATTCATCCATGGATGCGGACGACGACGTT  
AAGAAAGCTTA

+

FFFFFF:FFFFFFF,FFFFFFF,  
:,F:FFFF,,F:F:F,F,FF,F::F:F,FF,FF:,F,,FF:,F:,F:F,:FF::,FFFF:,F  
FF:,F,FF:,F

@A00721:190:HGJW7DSXY:4:1653:32524:11506 1:N:0:TCTGCAAG+GCTGCACT  
CGGGGAAAGTCGGGATCCAGATACTTGGATGATCAACATGGATAATGTTGATAGTTTGTGTCGTTT  
GTGAAAAACGATACGTTCTAGAAGGTCGGGTTACGTTGATTCATCCATGGATGCGGACGACGACGTT  
AAGAACGCTT

+

FFFFFFFFFFFFFFFF:FFFFFFFFF,FFFFFFFFF,  
:F::FFFFFFFF:FFFFF:F,F,FFFF,FF,FFFF,FFFFFFFF:,F,F:F,F,FFFFFFFF:FFF::F  
FF:FFFF:,F

@A00721:190:HGJW7DSXY:4:1661:16278:30436 1:N:0:TCTGCAAG+GCTGCACT  
CGGGGAAAGTCGGGATCCAGATACTTGGATGATCAACATGGATAATGTTGATAGTTTGTGTCGTTT  
GTGAAAAACGATACGTTCTAGAAGGTCGTGGTTACGTTGATTCATCCATGGATGCGGACGACGACGTT  
AAGAACGCTTACTTC

+

FFFFFF:FFFFFFFFF,FFFFFFF,FFFFFF:FFFFFFFFF  
:FFFFFFFF:FF,FF:FFFFF:FFFF:FF,FFFFFFFFF:FFF:FFF:FFF:FFFFFFFF::F  
FF:FF:FF:F:F,F:

@A00721:190:HGJW7DSXY:4:2257:19443:32064 1:N:0:TCTGCAAG+GCTGCACT  
CGGGGAAAGTCGGGATCCAGATACTTGGATGATCAACATGGATAATGTTGATAGTTTGTGTCGTTT  
GTGAAAAACGATACGTTCTAGAAGGTCGTGGTTACGTTGATTCATCCATGGATGCGGACGACGACGTT  
AAGAACGCTTACTT

+

FFFFFFFFFFFFFFFFFFFFFFFFFFFFFFFFFFFFFFFFFFFFFFFFFFFFFFFFF,F  
,,,:FFFFFF::F:F,FFFF:FFFF:F:,F:FFFF,F:FFFF:FF,,FF:F,FFFF:FF:FF,FF  
FF,:FF:FFF:F:F

@A00721:190:HGJW7DSXY:4:2312:19271:21527 1:N:0:TCTGCAAG+GCTGCACT  
CGGGGAAAGTCGGGATCCAGATACTTGGATGATCAACATGGATAATGTTGATAGTTTGTGTCGTGT  
GTGAAAAACGATACGTTCTAGAAGGTCGTGGTTACGTTGATTCATCCATGGATGCGGACGACGACGTT  
AAGAACGCTTACTT

+

FFFFFFFFFFFFFFFFFFFFFFFFFFFFFFFFFFFFFFFFFFFFFFFFFFFFFFFFF,F  
,FF,FFFF::,F,,F,:F,:FFF:F,FF:F:F,,F:,F,FFF,,::FF:FF::,FF:  
F:,FF:,F,:F:,F

@A00721:190:HGJW7DSXY:4:2505:8757:19789 1:N:0:TCTGCAAG+GCTGCACT  
CGGGGAAAGTCGGGATCCAGATACTTGGATGATCAACATGGATAATGTTGATAGTTTGTGTCGTGT  
GTGAAAAAGATAAGTTCTAGAATGTCGTGGGTAAGTTGTTAATCCATGGATGCGG

+

FFFFFFFFFFFFFFFFFFFFFFFFFFFFFFFFFFFFFFFFFFFFFFFFFFFFFFFFF,F  
,,,,FFFF,,F,,,,F::,FF::,F:F,F,,F,,FF,,F::,,F:,FF

@A00721:190:HGJW7DSXY:4:2634:19994:33364 1:N:0:TCTGCAAG+GCTGCACT  
CGGGGAAAGTCGGGATCCAGATACTTGGATGATCAACATGGATAATGTTGATAGTTTGTGTCGTTT  
GTGAAAAAGAAACGTTCTAGAACGTCATGGTTAAGTTGAATAATACATGGATGCGGACGA

+

FF,::FF:F:FFFFFF,FFFFFFFF:FFF,F:FFFFFF:F:,FFFFFFFF:FFFFFF,F::FF:F  
,FF,FFF:F,,F,FFFF,F:FF,,,,F:,FF,,F,F,:FF,,F,FFF,,,FFFF

@A00721:190:HGJW7DSXY:4:1119:25174:21919 1:N:0:TCTGCAAG+GCTGCACT  
GGGGAAAGTCGGGATCCAGATACTTGGATGATCAACATGGATAATGTTGATAGTTTGTGTCGTTTG



@A00721:190:HGJW7DSXY:4:2302:24297:16329 1:N:0:TCTGCAAG+GCTGCACT  
GGGGAAAAGTCGGGATCCAGATACTTGGATGATCAACATGGATAATGTTGATAGGTTTAGTGTCGTTTG  
TGAAAAACGATACGTTCTAGAAGGTCGTGGGTACGTTGATTAATCCATGGATGCGGACGACGACGTTA  
ATAA

+

FFFFFFFFFFFFFFFFFFFFFFFFFFFFFFFFFFFFFFFFFFFFFFFFFFFFFFFFFFFFFFFFFFFFFFFF,F,  
F,,FFFF:,FFF,,FF,FF,FF,FF,F,FF,F:,,:F:,FF,F::F:, :F,F:FFFF::FF:FF:,F,  
F,FF

@A00721:190:HGJW7DSXY:4:2324:15609:2127 1:N:0:TCTGCAAG+GCTGCACT  
GGGGAAAAGTCGGGATCCAGATACTTGGATGATCAACATGGATAATGTTGATAGGTTTAGTGTCGTTTG  
TGAAAAACGATACGTTCTAGAAGGTCGTGGTTACGTTGTTTCATCCATGGCTGCGGACGACGACGTTA  
AGAACGCTTACT

+

FFFFFFFFFFFFFFFFFFFFFFFFFFFFFFFFFFFFFFFFFFFFFFFFFFFFFFFFFFFFFFFFFFFFFFFF,FF  
F,:FFFF,F:FF,:FF:,F,,F::,,,:FF,F,:F:F:,FFFF,,F::FF,:F::FF:FF:,F:,FFF  
F,FFF:F:FF:F

@A00721:190:HGJW7DSXY:4:2452:20500:18302 1:N:0:TCTGCAAG+GCTGCACT  
GGGGAAAAGTCGGGATCCAGATACTTGGATGATCAACATGGATAATGTTGATAGGTTTAGTGTCGTTTG  
TGAAAAACGATACGTTCTAGAAGGTCGTGGTTACGTTGATTCATCCATGGATGCGGACGACGACGTTA  
AGAACGCTTACT

+

FFFFFFFFFFFFFFFFFFFFFFFFFFFFFFFFFFFFFFFFFFFFFFFFFFFFFFFFFFFFFFFFFFFFFFFF,FF  
F,FFFFFF,FFF:FFF:FF::F:FF:FFFF:F::FFF,,FF,,F:F:,FFFF:FFFFFFFFFFFFFFFF  
F,FFF:F,,F:F

@A00721:190:HGJW7DSXY:4:2468:14769:5243 1:N:0:TCTGCAAG+GCTGCACT  
GGGGAAAAGTCGGGATCCAGATACTTGGATGATCAACATGGATAATGTTGATAGGTTTAGTGTCGTTTG  
TGAAAAACGATACGTTCTAGAAGGTCGTGGTTACGTTGATTCATCCATGGATGCGGACGACGACGTTA  
AGAACGCTTACTTCT

+

FFFFFFFFFFFFFFFFFFFFFFFFFFFFFFFFFFFFFFFFFFFFFFFFFFFFFFFFFFFFFFFFFFFFFFFF,FFFF,FFFFFFFFFFFFFFFF::  
F,,FFFF,FFFFFFFF::FF:FFFFFFFF:F::FFF:,FFFF,FF:FF:F,FFFF,FFFF:FF,FF  
FF,FFFF:FFF:F:F

@A00721:190:HGJW7DSXY:4:2572:30942:8422 1:N:0:TCTGCAAG+GCTGCACT  
GGGGAAAAGTCGGGATCCTGATACTTGGATGATCAACATGGATAATGTTGATAGGTTTAGTGTCGTTTG  
TGAAAAACGATACGTTCTAGAAGGTCGTGGTTACGTTGATTCATCCATGGATGCGGACGACGACGTTA  
AGAACGCTTACTTCT

+

FFFFFFFFFFFFFFFFFFFFFFFFFFFFFFFFFFFFFFFFFFFFFFFFFFFFFFFFFFFFFFFFFFFFFFFF  
FFFFFFF:FFFFFFFFFFFF,FFFF::F:,FFFFFF:FFFFFFFFFFFF,FFFFFFFFFF:FFFFFFFF  
FFFF,FF,FF:FFFF

@A00721:190:HGJW7DSXY:4:2606:11957:15718 1:N:0:TCTGCAAG+GCTGCACT  
GGGGAAAAGTCGGGATCCAGATACTTGGATGATCAACATGGATAATGTTGATAGGTTTAGTGTCGTTTG  
TGTAACGATAAGTTATAGAAGGTCGTGGTTACGGTGTTAATCCAGGGATGCGGACGACGACGTTA  
ATAACGC

+

FFFFFFFFFFFFFFFFFFFF:FFFFFFFFFFFF:FFFFFFFFFFFFFFFF:FFFFFFFFFFFFFFFF,F,  
FF,,FFFF,F,,:F,:FF:F,FFFF,FF,,FF,,FF,FF,F,,F,,,F:,F:FF:,FFF,,::,F,  
F,,F,:F

@A00721:190:HGJW7DSXY:4:2632:7654:8829 1:N:0:TCTGCAAG+GCTGCACT  
GGGGAAAAGTCGGGATCCAGATACTTGGATGATCAACATGGATAATGTTGATAGGTTTAGTGTCGTTTG  
TGAAAAACGATACGTTCTAGAAGGTCGTGGTTACGTTGATTCATCCATGGATTGCGGACGACGACGTTA  
AGAACGCTTACTT

+

FFFFFFFFFFFFFFFFFFFFFFFFFFFF:FFFFFFFFFFFFFFFFFFFFFFFFFFFF:FFFFFFFFFFFFFFFF,FF

FF:FFFF,,:FF,,:F::F,F:,FF,:,,F:FF,:F:F,F::,,F:,,:FF,,F:FFF:FF,F:F,FF  
F,,F,F:,F:F,F

@A00721:190:HGJW7DSXY:4:2666:24686:5635 1:N:0:TCTGCAAG+GCTGCACT  
GGGAAAGTCGGGATCCAGATACTTGGATGATCAACATGGATAATGTTGATAGGTTTAGTGTCGTGTG  
TGAAAAACGATACGTTCTAGAAGGTCGGGGTTACGTTGATTCATCCATGGATGCGGACGACGACGTTA  
AGAACGCTTACTT

+

:FFFF:FFFFFFFFFFFFFFFFFFFFFFFFFFFFFFFFFFFFFFFFFFFFFFFFFFFFFFFFFFFFFFFFFFFFFFFF,F:  
FF:FFFF::FFFFFFFF:FFFFFFFFFFFF,FFFFFFFFFFFFFFFF,FFFFFFF,FFFFFFFFFFFFFFFF,FFFFF  
F:FF,,F,:F:FF

@A00721:190:HGJW7DSXY:4:1201:25563:27070 1:N:0:TCTGCAAG+GCTGCACT  
GGGAAAGTCGGGATCCAGATACTTGGATGATCAACATGGATAATGTTGATAGGTTTAGTGTCGTTTGT  
GAAAAAAGATACGTTCTAGAAGGTCGTGGTTACGGTGTTCATCCAAGGATGCGGACGACGACGTAA  
GAACGCGTAATTCTG

+

FFFFFFFFFFFFFFFFFFFFFFFFFFFFFFFFFFFFFFFFFFFFFFFFFFFFFFFFFFFFFFFFFFFFFFFF,F,F  
,FFFFFF,,FF,,F,:F,,F,:F,F,F:,FF,,,:F,FF:F,FFF,:F,:,:FF:,FF,:FF,,FFF  
,:F,:,:,:,,F,:F

@A00721:190:HGJW7DSXY:4:1534:11650:28808 1:N:0:TCTGCAAG+GCTGCACT  
GGGAAAGTCGGGATCCAGATACTTGGATGATCAACATGGATAATGTTGATAGGTTTAGTGTCGTTTGT  
GAAAAACGATACGTTCTAGAAGGTCGTGGTTACGTTGATTCATCCATGGATGCGGACGACGACGTAA  
GAACGCTTACTTCTG

+

FFFFFFFFFFFFFFFFFFFFFFFFFFFFFFFFFFFFFFFFFFFFFFFFFFFFFFFFFFFFFFFFFFFFFFFF,FF,  
FFFFFFFF:F:FFFFFF:FF,:F:F:,F::F,FF:FFF:,FF:,F:FFF,FFFF:FFFF:FFFF:FFFF  
,FFF:F,F:F:,F:

@A00721:190:HGJW7DSXY:4:1633:8739:26835 1:N:0:TCTGCAAG+GCTGCACT  
GGGAAAGTCGGGATCCAGATACTTGGATGATCAACATGGATAATGTTGATAGGTTTAGTGTCGTTTGT  
GAAAAACGATACGTTCTAGAAGGTCGTGGTTACGTTGATTCATCCATGGATGCGGACGACGACGTAA  
GAACGCTTACTTCTG

+

FFFFFFFFFFFFFFFFFFFFFFFFFFFFFFFFFFFFFFFFFFFFFFFFFFFFFFFFFFFFFFFFFFFFFFFF,FF  
F:FFFFFF:FFF,F,F::F,FF:FF:FFFFFF,,FFF:FFF:FF::,,:FF,FFFFFFFF,:F:FFFF  
:FFF:F:F:,,:,::

@A00721:190:HGJW7DSXY:4:2166:32913:14465 1:N:0:TCTGCAAG+GCTGCACT  
GGGAAAGTCGGGATCCAGATACTTGGATGATCAACATGGATAATGTTGATAGGTTTAGTGTCGTTTGT  
GAAAAACGATACGTTCTAGAAGGTCGTGGTTACGTTGATTCATCCATGGATGCGGACGACGACGTAA  
GAAAGCTTACTT

+

FFFFFFFFFFFFFFFFFFFFFFFFFFFFFFFFFFFFFFFFFFFFFFFFFFFFFFFFFFFFFFFFFFFFFFFF,FF  
FFFFFFFFFFF:F:FFFFFF,F,FF:FFFF,F:FF,FFF,F,F,FFF:F::,F::FFFFFF::,FF,F::  
,,F,F:,F:F,F

@A00721:190:HGJW7DSXY:4:2312:15492:6997 1:N:0:TCTGCAAG+GCTGCACT  
GGGAAAGTCGGGATCCAGATACTTGGATGATCAACATGGATAATGTTGATAGGTTTAGTGTCGTTTGT  
GAAAAACGATAAGTTCTAGAATGTCGTGGGTACGTTGACTCATCCATGGATTTCGGACGACGACGTAA  
TAACGCTTAATTC

+

FFFFFFFFFFFFFFFFFFFFFFFFFFFFFFFFFFFFFFFFFFFFFFFFFFFFFFFFFFFFFFFFFFFFFFFF,FF  
F,FFFF,,:F,:F,FF:,F,FF,:F,F,::,:F::,F,F:,FF,,F,,F:FF::,,:::FFF  
,FF::,F:,F:

@A00721:190:HGJW7DSXY:4:2322:18548:21245 1:N:0:TCTGCAAG+GCTGCACT  
GGGAAAGTCGGGATCCAGATACTTGGATGATCAACATGGATAATGTTGATAGGTTTAGTGTCGTTTGT  
GAAAAACGATACGTTCTAGAATGTCGTGGTTTCGGTGTTCATCCAAGGATGCGGACGACGACGTAA  
GAACGCGTACTT

```

+
FFFF:FFFFFFFFFFFFFFFF:FFFFFFFFFFFFFFFFFFFFFFFF::FFFFFFFFFFFFFFFF,FFFFFF,F:F
:,FFFFFF,,,:F,F,,,F,,F,F,:,:FFF:F,:,:,F,:F,:F,F,,,F,:F,FF:F,FFFF:,FFF
:,F:F,:,:,F:F

```

```
+
FFFF:FFFFFFFFFFFFFFFF:FFFFFFFFFFFFFFFFFFFFFFFFFFFFFFFFFFFFFFFF,F,F
:,FFFF::FF,:FF::F:FF:FF:F::FFFFF:,FFFFF,F::F:, ,FFF,F:FF::F:FFFFFFFFF
,:F,FF:F:, ,F:FF
```

```
+
FFFFFFFFFFFFFFFFFFFFFFFFFFFFFFFFFFFFFFFFFFFFFFFFFFFFFFFFFFFFF,,,::,FFFF
,,F,:,:,F,FF,FF,FF,::FFFF::,,F:FFF,::,F,::FF,,, :FF,:F::,,,FFF,:F,,F
,FF,,F,,,,F::FF
```

```
+
FFFFFFFFFFFFFFFFFFFFFFFFFFFFFFFFFFFFF:FFFFFFFFFFFFFFFFFFFFFFFFFFFFFF,F,F,:FFF
,,F::,,FF,:F,:F,:,::,FFF,:,:,F,FF,F,:::,,F:F,:FFF::F:::,::FFF,:F,,F
,F::,,::FF:F:FFF
```

```
+
FFFFFFFFFFFFFFFFFFFFFFFFFFFFFFFFFFFFFFFFFFFFFFFFFFFFFFFFFFFFF,FFFF,FFFF
,FF,F,FFF,FF,FF,FFFFFFFFFFFFFF:F,FF:F,,FF,,FFF,FFFF::F:FF,FFFF,FF,:F
.FF..FFFFFFFF::F
```

```
+
FFFFFFFFFFFF:FFFFFFFFFFFFFFFFFFFFFFFFFFFFFFFF:FFFFFFFFFFFFFFFFFFFFFFFFFFFFFFFF:FFF,FFFFFF
,:FFF,,FF::F,FF::F:F:FF::F:F:,FF,F,FF:FF,FF:F,FFFFFFFFF,FFF,FFF,FF::F
:FFF,:FFFFFFFFF
```

```

+
FFFFFFFFFFFFFFFFFFFFFFFFFFFFFFFFFFFFFFFFFFFFFFFFFFFFFFFFFFFFFFFF:FFFFFFFFFFFFFFFFFFFF,,FFFF
F,:FFF,,F,FF,FF,FFF:::F::F,F,F::FFFF,,::,FFF,,:FFFF:F,F:F:FF:F,FF::F
,FFF,F::,FFF:FFF

```

CGATACGTTCTAGAAGGTCGTGGTTACGTTGATTCATCCAAGGATGCGGACGACGACGTTAAGAACGC  
TTACTTCTGTTATAT

+

F:FFFFFFFFFFFFFFFFFFFFFFFFFFFFFFFFFFFFFFFFFFFFFFFFFFFFFFFFFFFFFFFF:F:FFFFFFF  
,FFFF:,F,FFFF,F,,FF:FFFF::FFF:FF:F,,F:,F:F:FFFF:FF,,::FFFF:FFF,:  
:F:,F,,,FFFFFF

@A00721:190:HGJW7DSXY:4:1417:31647:32440 1:N:0:TCTGCAAG+GCTGCACT  
GTCGGGATCCAGATACTTGGATGATCAACATGGATAATGTTGATAGGTTTAGTGTCGTTTGTGAAAAA  
CGATACGTTCTAGAAGGTCGTGGTTACGTTGATTAATCCATTGATGCGGACGACGACGTTAAGAACGC  
TTACGTCTGTTATAT

+

FFFFFFFFFFFFFFFFFFFFFFFFFFFFFFFFFFFFFFFFFFFFFFFFFFFFFFFFFFFFFFFF:F:FFFFFFF  
,:F:FF:FF,FF,FF,FF,::FFF:,::FFFF,:FF:F,,F:F,:FFFF:FFFF,:FF:F,FF,:  
,F:,,:F:FFFF:

@A00721:190:HGJW7DSXY:4:1421:29188:6981 1:N:0:TCTGCAAG+GCTGCACT  
GTCGGGATCCAGATACTTGGATGATCAACATGGATAATGTTGATAGGTTTAGTGTCGTTTGTGAAAAA  
CGATACGTTCTAGAAGGTCGTGGTTACGTTGATTCATCCATGGATGCGGACGACGACGTTAAGAACGC  
TTACTTCTGTTATAT

+

FFFFFFFFFFFFFFFFFFFFFFFFFFFFFFFFFFFFFFFFFFFFFFFFFFFFFFFFFFFFFFFF:F:,FFFF  
F::FFFFF,:FFFF,FFFF,F,F::,FF:FFFF:F,FFFF,:FFFFF:F,F,FFFF:FF,:F  
:FF,,F:F,FFFFF

@A00721:190:HGJW7DSXY:4:1477:10755:16579 1:N:0:TCTGCAAG+GCTGCACT  
GTCGGGATCCAGATACTTGGATGATCAACATGGATAATGTTGATAGGTTTAGTGTCGTTTGTGAAAAA  
CGATACGTTCTAGAAGGTCGTGGTTACGTTGATTCATCCATGGATGCGGACGACGACGTTAAGAACGC  
TTACTTCTGTTATAT

+

FFFFFFFFF:FFFFFFFFFFFFFFFFFFFFFFFFFFFFFFFFFFFFFFFFFFFFFFFFFFFFFFFF:F:FFFF  
:FF:FF:FF,FF:FFFFF,:FFF,FFF:,FFF:FFFF:F:F:F:FFF:FFFFFFFFF:FFF::F:F:  
::FF:F:,,,FFFFF

@A00721:190:HGJW7DSXY:4:1542:9652:7686 1:N:0:TCTGCAAG+GCTGCACT  
GTCGGGATCCAGATACTTGGATGATCAACATGGATAATGTTGATAGGTTTAGTGTCGTTTGTGAAAAA  
CGATACGTTCTAGAAGGTCGTGGTTACGTTGATTCATCCATGGATGCGGACGACGACGTTAAGAACGC  
TTACTTCTGTTATAT

+

FFFFFFFFFFFFFFFFFFFFFFFFFFFFFFFFFFFFFFFFFFFFFFFFFFFFFFFFFFFFFFFF:F:FFFF  
,FFFFF::F,FF,FF,FFFFFFFF,FF,:F,FFF:FF:FF,FF::FFFFF,FF:FF:FFFF:FF,,F  
,F:,F:::FFFFF

@A00721:190:HGJW7DSXY:4:1611:27254:11334 1:N:0:TCTGCAAG+GCTGCACT  
GTCGGGATCCAGATACTTGGATGATCAACATGGATAATGTTGATAGGTTTAGTGTCGTTTGTGAAAAA  
CGATACGTTATAGAAGGTCGTGGTTACGTTGATTCATCCAAGGATGCGGACGACGACGTTAAGAACGC  
TTACTTCTGTTATAT

+

FFFFFFFFFFFFFFF:FFFFFFFFFFFFFFFFFFFFFFFFFFFFFFFFFFFFFFFFFFFFFFFF::,F,FFFF  
:,FF,,F,F:,FF,F:FF:,F,F,,F:F,,FFFFFFFF,FF:F:FFFFFFFFF::FFF:FF,:  
:F,,,F,,:F:F,F

@A00721:190:HGJW7DSXY:4:1629:26847:4460 1:N:0:TCTGCAAG+GCTGCACT  
GTCGGGATCCAGATACTTGGATGATCAACATGGATAATGTTGATAGGTTTAGTGTCGTTTGTGAAAAA  
CGATACGTTCTAGAAGGTCGTGGTTACGTTGATTCATCCATGGATGCGGACGACGACGTTAAGAACGC  
TTACTTCTGTTATAT

+

FFFFFFFFFFFFFFFFFFFFFFFFFFFFFFFFFFFFFFFFFFFFFFFFFFFFFFFFFFFFFFFF:F:FFFFFFF  
FFFFFFF:,F::,FFFF,,F,FFFF:FFFFFFFFFFFFFFF,FFF:F,FFFFFFFFF,FFFF:FFF:F  
:FF,FF:FF,F:FFF

@A00721:190:HGJW7DSXY:4:1642:30852:17503 1:N:0:TCTGCAAG+GCTGCACT  
GTCGGGATCCAGATACTTGGATGATCAACATGGATAATGTTGATAGGTTTAGTGTCGTTTGTGAAAAA  
CGATACGTTCTAGAAGGTCGTGGTTACGTTGATTCATCCATGGATTTCGGACGACGACGTTAATAACGC  
TTACTTCTGTTATAT

+

FFFFFFFF:FFFFFF:FFFFFFFFFFFFFFFFFFFFFFFFFFFFFFFFFFFFFFFF:FFFF,F,FFFF  
,,F:F,:,F:,F:FF,:F:FF:F:FF,,F::FFF,:,:FF,,FF:,FFFF,FF,,,::FFFF,FF,:F  
F:F:FF,F::FFFF

@A00721:190:HGJW7DSXY:4:2230:22905:29324 1:N:0:TCTGCAAG+GCTGCACT  
GTCGGGATCCAGATACTTGGATGATCAACATGGATAATGTTGATAGGTTTAGTGTCGTTTGTGAAAAA  
CGATAACTTATAGAAGTTAGCGGTTACGGTGAATAAAACATTGATTTCGGACGAAGAAATTA AAAACCC  
ATA

+

F::F:FFFFFFFF:FF:,FFFF:F:,FFF:F,F:FFFFFF,,F:F,F:FFFF::FF:FF,F,FFFF  
:,F,F,,FF,FF,FF,,,,F,FF,,F,,,FF:F:F,,F:F,:,F,,F::,,::,,:FFF,FF,:F  
,F:

@A00721:190:HGJW7DSXY:4:2301:11207:5682 1:N:0:TCTGCAAG+GCTGCACT  
GTCGGGATCCAGATACTTGGATGATCAACATGGATAATGTTGATAGGTTTAGTGTCGTTTGTGAAAAA  
AGATAAGTTCTATAATGTCGTGGTTACGTTGTTTAAATCCATGGATGCGGACGACGACGTTAATAACCC  
TTAAATATGTTATAT

+

FFFFFF:FFFFFFFFFFFFFFFFFFFFFFFFFFFFFFFFFFFFFFFFFFFFFFFFFFFFFFFF,F,,,FFFF  
,,:F,,:F,FF,FF,FF,:FFF:F,,,F,,FF:F,F:F,,:,F::,F:::FF,:,,FF:F,,FF,:  
,FF,,F:,FF,FF:

@A00721:190:HGJW7DSXY:4:2301:14633:11898 1:N:0:TCTGCAAG+GCTGCACT  
GTCGGGATCCAGATACTTGGATGATCAACATGGATAATGTTGATAGGTTTAGTGTCGTTTGTGAAAAA  
ACATACCTTCTAGAAGGTCGGGGTTACGTTTATTCATACAAGGATTTCGGACGACGACGTTAAGAAAGC  
GTACTTGTGTTATAT

+

FFFFFFFFFFFFFFFFFFFFFFFFFFFFFFFFFFFFFFFFFFFFFFFFFFFFFFFF:F,,:,FFFF  
,,:,,::,FF::F,F,,,FF:F,,,::,F::,,F,,,F::,,FF,F,,::,,F,F,,F:::  
,,:F,,,FF:,F:F

@A00721:190:HGJW7DSXY:4:2473:4643:29168 1:N:0:TCTGCAAG+GCTGCACT  
GTCGGGATCCAGATACTTGGATGATCAACATGGATAATGTTGATAGGTTTAGTGTCGTTTGTGAAAAA  
CGATACGTTCTAGAAGGTCGTGGTTACGTTGATTCATCCATGGATGCGGACGACGACGTTAAGAACGC  
TTACTTCTGGTATAT

+

FFFFFFFFFFFFFFFFFFFFFFFFFFFFFFFFFFFFFFFFFFFFFFFFFFFFFFFF::FFFFFFFFF  
,:FFFF,FF,,FFFF:FF:::FF:FFFFFF,FF:F:FFF:,FFF,FFFFFFFFFFFFFFFF,FF:FF  
:FFF,FFF:,FFFF

@A00721:190:HGJW7DSXY:4:2504:24216:34507 1:N:0:TCTGCAAG+GCTGCACT  
GTCGGGATCCAGATACTTGGATGATCAACATGGATAATGTTGATAGGTTTAGTGTCGTTTGTGAAAAA  
AGATAAGGTCTATAAGGTCGTGGTTAAGTTGATTCATCCAAGGATGCGGACGACGACGTTAAGAACGC  
GTAATTCGTTATA

+

FFFFFFFFFFFFFFFFFFFFFFFFFFFFFFFFFFFFFFFFFFFFFFFFFFFFFFFF,F:,FFFF  
,,:F,,,F,,F,,F,F::,FFFF,,F:::,F::,F,FFF:,FF,,::,,F,F,:FF,F  
,F::,F,,F,F,:F

@A00721:190:HGJW7DSXY:4:2520:4743:1752 1:N:0:TCTGCAAG+GCTGCACT  
GTCGGGATCCAGATACTTGGATGATCAACATGGATAATGTTGATAGGTTTAGTGTCGTTTGTGAAAAA  
AGATACGTTGAAGAATTCGTGGTTAACGTGATTCATCCATGGAGTCCGACGAAGACGTTTAGAACGC  
GTAAATATGTTATAT

+

F:FFFFFF,F:FFFF,:FFFFFFFFF:,FFFF:FFFFFF:FF,F,F:,F,FFF,F,F,,FFFF



@A00721:190:HGJW7DSXY:4:2554:24551:16861 1:N:0:TCTGCAAG+GCTGCACT  
GTCGGGATCCAGATACTTGGATGATCAACATGGATAATGTTGATAGGTTTAGTGTCGTTTGTGAAAAA  
CGATACGTTCTAGAAGGTCGTGGTTAAGTTGATTTCATCCATGGATGCGGACGACGACGTTAAGAACGC  
TTACTTCTGTTATAT

@A00721:190:HGJW7DSXY:4:2613:4887:16094 1:N:0:TCTGCAAG+GCTGCACT  
GTCGGGATCCAGATACTTGGATGATCAACATGGATAATGTTGATAGTTTTAGTGTCGTTTGTGAAAAA  
CGATACGTTCTAGAAGGTCGTGGTTACGTTGATTCATCCATGGATGCGGACGACGACGTTAAGAACGC  
TTACTTCTGTTATAT

@A00721:190:HGJW7DSXY:4:2641:18249:16125 1:N:0:TCTGCAAG+GCTGCACT  
GTCGGGATCCAGATACTTGGATGATCAACATGGATAATGTTGATAGGTTTAGTGTCGTTTGTGAAAAA  
CGATACGTTCTATAAGGTCGTGGTTACGTTGATTCATCCATGGATGCGGACGACGACGTTAAGAACGC  
TTACTTCTGTTATAT

@A00721:190:HGJW7DSXY:4:2658:27995:36323 1:N:0:TCTGCAAG+GCTGCACT  
GTCGGGATCCAGATACTTGGATGATCAACATGGATAATGTTGATAGGTTTAGTGTCGTTTGTGAAAAA  
CGATACGTTCTAGAAGGTCGTGGTTAAGTTGATTCATCCATGGATGCGGACGACGACGTTAAGAACGC  
TTACTTCTGTTATAT

@A00721:190:HGJW7DSXY:4:2675:19018:32080 1:N:0:TCTGCAAG+GCTGCACT  
GTCGGGATCCAGATACTTGGATGATCAACATGGATAATGTTGATAGGTTTAGTGTCGTTTGTGAAAAA  
CGATACGTTCTAGAAGGTCGTGGTTAAGTTGATTCATCCATGGATTCGGACGACGACGTTAAGAACGC  
TTACTTCTGTTATAT

@A00721:190:HGJW7DSXY:4:1114:29586:34068 1:N:0:TCTGCAAG+GCTGCACT  
TCGGGATCCAGATACTTGGATGATCAACATGGATAATGTTGATAGGTTTGTGTCGTTTTTGA  
GATACGTTCTATAAGGTAGTGGGTACGTTGATTAATCCATGGATGCGGACGACGCTTAAGA  
ACGCGTACTTATGTTATAT

@A00721:190:HGJW7DSXY:4:1114:29577:34366 1:N:0:TCTGCAAG+GCTGCACT  
TCGGGATCCAGATACTTGGATGATCAACATGGATAATGTTGATAGTTTGTGAAAAAC  
GATACGTTCTAGAAGGTCGTGGTTACGGTGATTCATCCATGGATGCGGACGACGACGTTAATAACGCG  
TACTTCTGTTATATG



GATACGTTCTAGAAGGTCGTGGTTACGTTGATTCATCCATGGATGCGGACGACGACGTTAAGAACGCT  
TACTTCTGTTATATG

+

FFFFFFFFFFFFFFFFFFFFFFFFFFFFFFFFFFFFFFFFFFFFFFFFFFFFFFFFFFFFFFFFFFFFFFFF:FFFF  
F,FF,:FF,FF,FFFFFFFF::F,FFFF,F:,FFFF,FFF:FFFF:FFFF:FF:FFF:FFF,FF,FF:  
FFF:FF:F::FFFF

@A00721:190:HGJW7DSXY:4:1220:1452:9455 1:N:0:TCTGCAAG+GCTGCACT  
CGGGATCCAGATACTTGGATGATCAACATGGATAATGTTGATAGGTTTAGTGTCGTGTGTTAAAAACG  
ATAAGTTCAATAAGGTCGTGGTGACGTTGATTCATACATGGAAGCGGAAGACGACGTTAAGAACGCTT  
ACTTCTGTTATAT

+

F,FF:,F,F:FFFFFF::FFFFFFFFFFFFFFFF,FFF::FF,F,FFFFFFFFFFFFFF,F:F,FFF:F,:  
,:F,,,::,F,FF,,,F,,FF,,,,,:F:FF,F:,F,:F,:FF:F,F:,,,F,F,F,,FF::,F  
,,,,::FF:,FFF

@A00721:190:HGJW7DSXY:4:2561:5394:27774 1:N:0:TCTGCAAG+GCTGCACT  
CGGGATCCAGATACTTGGATGATCAACATGGATAATGTTGATAGGTTTAGTGTCGTTTGTGAAAAACG  
ATACGTTCTAGAAGGTCGTGGTTACGTTGATTCATCCATGGATGCGGACGACGACGTTAATAACGCTT  
ACTTCTGTTATAT

+

FFFFFFFFFFFFFFFFFFFFFFFFFFFFFFFFFFFFFFFFFFFFFFFFFFFFFFFFFFFFFFFFFFFFFFFF:FFFF::  
FFF,FFF,:F:FF:FFFF,FFFFFFFF:FFFF,FF::F::FFF:FFFF,FFFF::F:FFF,FF,:FFF  
FFFF,:FFFFFFFF

@A00721:190:HGJW7DSXY:4:1375:25807:1438 1:N:0:TCTGCAAG+GCTGCACT  
CAGATACTTGGATGATCAACATGGATAATGTTGATAGGTTTAGTGTCGTTTGTGAAAAACGATACGTT  
CTAGAAGGTCGTGGTTACGTTGATTCATCCATGGATGCGGACGACGACGTTAAGAACGCTTACTTCTG  
TTATATGAGGTCTA

+

FFFFFFFFFFFFFFFFFFFFFFFFFFFFFFFFFFFFFFFFFFFFFFFFFFFFFFFFFFFFFFFFFFFFFFFF:F  
FFF:FFFFFFFF,FFFFFFFFFFFFFFFFFFFFFFFF,FFFF,FFFFFFFFFFFF:F  
FFF:FFFFFFFF,FFFFFFFFFFFFFFFFFFFFFFFF:FF,,FFFFFFFFFFFFFFFF::FFFFFF:FFFF:FFFF::F  
,FFFFFF:F,FFFF

@A00721:190:HGJW7DSXY:4:1504:17824:21652 1:N:0:TCTGCAAG+GCTGCACT  
CAGATACTTGGATGATCAACATGGATAATGTTGATAGGTTTAGTGTCGTTTGTGAAAAAGATACGTT  
CTAGAAGGTCGTGGTTACGTTGATTCATCCATGGATGCGGACGACGACGTTAAGAACGCGTACTTCTG  
TTATATGAGGTCTA

+

FFFFFFFFFFFFFFFFFFFFFFFFFFFFFFFFFFFFFFFFFFFFFFFFFFFFFFFFFFFFFFFFFFFFFFFF:F,F::FFFF,:F,FFF:F  
F:F,FF,FF,,,FF,FF:F,FF,FF,F,FFF,:F,F:FFFFFFFF,,:F::FFF:FF,FF,FF,,::,F  
F,FF,F,F,FF,FF

@A00721:190:HGJW7DSXY:4:2128:11767:13228 1:N:0:TCTGCAAG+GCTGCACT  
CAGATACTTGGATGATCAACATGGATAATGTTGATAGGTTTAGTGTCGTTTGTGAAAAAGATACGTT  
CTAGAAGGTCGTGGTTACGTTTATTCATCCATGGATTTCGACGACGACGTTAAGAAAGCTTACTTCTG  
TTATATTAGGTCTA

+

FFFFFFFFFFFFFFFFFFFFFFFFFFFFFFFFFFFFFFFFFFFFFFFFFFFFFFFFFFFFFFFFFFFFFFFF,F:F,,FFFF,,F::,,:F  
,:F,FF,,F::,F:,FF,,,F,FFF:F,,FF,,FFF,F,F::,F,,F:::FF,FF,,F:,F,,F,,:  
FFFFFF,FF:,FFF

@A00721:190:HGJW7DSXY:4:2132:32723:8406 1:N:0:TCTGCAAG+GCTGCACT  
CAGATACTTGGATGATCAACATGGATAATGTTGATAGGTTTAGTGTCGTTTGTGAAAAACGATACGTT  
CTAGAAGGTCGGGTTACGTTGATTCATCCATGGATTTCGACGACGACGTTAAGAAAGCTTACTTCTG  
TTATATGATGTCTA

+

FFFFFFFFFFFFFFFFFFFFFFFFFFFFFFFFFFFFFFFFFFFFFFFFFFFFFFFFFFFFFFFFFFFFFFFF:F::,FFFF,:,:FF,FF  
::F:FF,:F::,FFF,:FF:::F,,,FF,:F:F,FFFF,FF,:FFFFFF:FF,,F,F,,,F::F  
FFFFFF,:FF:F:

+

@A

+

@

+

@

+

@

+

@

+

@

+

@A00721:190:HGJW7DSXY:4:2443:28275:34867 1:N:0:TCTGCAAG+GCTGCACT  
GATGATCAACATGGATAATGTTGATAGGTTTAGTGTCGTTTGTGAAAAACGATACGTTCTAGAAGGTC  
GTGGTTACGTTGATTCATCCATGGATGCGGACGACGACGTTAAGAACGCTTACTTCTGTTATATGAGG  
TCTAGAACGAT

@A00721:190:HGJW7DSXY:4:2448:29785:1814 1:N:0:TCTGCAAG+GCTGCACT  
GATGATCAACATGGATAATGTTGATAGGTTTAGTGTCGTTTGTGAAAAACGATAAGTTCTAGAAGGTC  
GTGGTTACGTTGATTCATCCATGGATGCGGACGACGACGTTAAGAACGCTTACGTCTGTTATATGAGG  
TCTAGACCGAT

@A00721:190:HGJW7DSXY:4:2578:6099:8046 1:N:0:TCTGCAAG+GCTGCACT  
GATGATCAACATGGATAATGTTGATAGGTTTAGTGTCGTTTGTGAAAAACGATACGTTCTAGAAGGTC  
GTGGTTACGGTGATTTCATCCATGGATGCGGACGACGACGTTAAGAACGCTTACTTCTGTTATATGAGG  
TCTAGACCGAT

@A00721:190:HGJW7DSXY:4:1269:24234:31845 1:N:0:TCTGCAAG+GCTGCACT  
ATAGGTTTAGTGTCGTTTGTGAAAAACGATACGTTCTAGAAGGTCGTGGTTACGTTGATTCATCCATG  
GATGCGGACGACGACGTTAAGAACGCTTACTTCTGTTATATGAGGTCTAGACCGATTTCTGTGAGGAA  
GAAACTTAGTGGACT

@A00721:190:HGJW7DSXY:4:1312:30273:32252 1:N:0:TCTGCAAG+GCTGCACT  
ATAGGTTTAGTGTCGTTTGTGAAAAAGATACGTTATAGAAGGTCGTGGTTACGTTGATTCATCCATG  
GATGCGGACGACGACGTTAAGAACGCTTACTTCTGTTATATTAGGTCTATACCGATTTATTTGAGGAA  
GAAAAATATTGGAC

@A00721:190:HGJW7DSXY:4:1509:29668:7874 1:N:0:TCTGCAAG+GCTGCACT  
ATAGGTTTAGTGTCGTTTGTGAAAAACGATACGTTCTAGAAGGTCGTGGTTACGTTGATTAATCCATG  
GATGCGGACGACGAAGTTAAGAACGCTTACTTCTGTTATATTAGGTCTAGACCGATTTATGTGAGGAA  
GAACTTAGTTGAC

@A00721:190:HGJW7DSXY:4:1522:23873:4319 1:N:0:TCTGCAAG+GCTGCACT  
ATAGGTTTAGTGTCGTTTTTGAAGAAAGATACGTTATAGAAGGTCGTGGTTACGTTGATTCAACCCAG  
GATTCGGACGACGACGTTAATAACGCTTACTTCTGTTATATGAGGCTAGACCGATTTATGTGAGGAA  
TAAAAATAGTTGAC

+  
FFFFFFFFFFFFFFFFF:,F,F:FFFFF,,F:F,:FF,:F,FFFFF,F,:F,FF::,FFF:F:,,:F,:,  
F,F,F,FF,,,F,FF:,FFF,FF:::,FF,,F:,FFFFFFF,,F,,F,,F,F:,,,FFFF,F,FFF:FFF  
,FFF,::F,,,F:

@A00721:190:HGJW7DSXY:4:1654:25211:35759 1:N:0:TCTGCAAG+GCTGCACT  
ATAGGTTTAGTGTGCTTTGTGAAAAACGATACGTTCTAGAAGGTCGTGGTTACGTTGATTCATCCATG  
GATGCGGACGACGACGTTAAGAACGCTTACTTCTGTTATATGAGGTCTAGACCGATTTCTGTGAGGAA  
GAAACTTAGTGGACT

+  
FFFFFFFFFFFFFFFFF:FFFFFFFFFFFFF:FF:,F:FF:FFFF:FFFFFFFF,FF,FFFFF:FF,F  
F:F,FFFF:,FFF:FFFFFFFF,FF::F,FF::F:FFFF::FF,F,FF,FF,FFFF,FF:FFFF,FFF  
,FFF:,FF,FFFFFF

@A00721:190:HGJW7DSXY:4:2266:5728:1204 1:N:0:TCTGCAAG+GCTGCACT  
ATAGGTTTAGTGTGCTTTGTGAAAAACGATACGTTCTAGAAGGTCGTGGTTAAGTTGATTCATCCATG  
GATGCGGACGACGACGTTAAGAACGCTTACTTCTGTTATATTAGGTCTAGACCGATTTCTGTGAGGAA  
GAAACTTATTGGACT

+  
F:FFFFFFFFFFFFFFFFF:::FFFFFF:FF:FF:FFF:F,FF,FF,::FFFFFF,FFF,FFFFF:::F:F  
FFFF:FFFF,FF,FF:FFFF,FF:::,FF,,F,,FFFF:FF,FFFF:FFFF,F:F:FFFFFFFFF:FFF  
FFFF:FFF,FFF,:F

@A00721:190:HGJW7DSXY:4:2456:5963:35274 1:N:0:TCTGCAAG+GCTGCACT  
ATAGGTTTAGTGTGCTTTGTGAAAAACGATACGTTCTAGAAGGTCGTGGTTACGTTGATTCATCCATG  
GATGCGGACGACGACGTTAAGAACGCTTACTTCTGTTATATGAGGTCTAGACCGATTTCTGTGAGGAA  
GAAACTTAGTGGACT

+  
FFFFFFFFFFFFFFFFF:,F,FFFFFFFFF:FFF,,FFFFFF:FFFF:,FF:FF,FFFFFFFFF,,FF:,  
F:FFFFFFFF:F::FF,FFFF,FFF,F:F,F:FFFFFFFF,F:F:,FF:FF,FFF,:FFFF:FFFF:FFF  
FFFF,FFFF,FF::

@A00721:190:HGJW7DSXY:4:2546:21920:21042 1:N:0:TCTGCAAG+GCTGCACT  
ATAGGTTTAGTGTGCTTTGTGAAAAACGATACGTTCTAGAAGGTCGTGGTTACGTTGATTCATCCATG  
GATGCGGACGACGACGTTAAGAACGCTTACTTCTGTTATATGAGGTCTAGACCGATTTCTGTGAGGAA  
GAAACTTAGTTGA

+  
FFFFFFFFFFFFFFFFF:F,FFFFFFFFF::FFF,FF,FF,:FFFF,FF:F,FFFFFFFF:FF:FF:::F,  
FF,,FFFF:F,F:FF:FFFF,FF:FF:FFF:,F,F:FFF:F,FFFF,,FF:,FF:FFF,:FF:,FFF  
,FFF,FFF,F,:F

@A00721:190:HGJW7DSXY:4:2639:14742:4100 1:N:0:TCTGCAAG+GCTGCACT  
ATAGGTTTAGTGTGCTTTGTGAAAAACGATACGTTCTAGAATGTCGTGGTTACGTTGATTAATCCATG  
GATTCGGACGACGACGTTAAGAAAGCTTACTTCTGTTATATGAGGTCTAGACCGATTTCTGTGAGGAA  
GAAACTTAGTGGAC

+  
FFFFFFFFFFFFFFFFF,FFFFFFFFF,:F:FF,FF:FF,FF,FF:F:FF:FF,F:FF:FF,::,FF:F  
FF:,::,FFF,F:,FF,,F:F,FF,,:F:,F,,:FFFF::F::F:FF::FF,FF,F,,,:FF:FFF  
,FFF,,FF,F,FF:

@A00721:190:HGJW7DSXY:4:1265:11623:36495 1:N:0:TCTGCAAG+GCTGCACT  
CTAGGTTTAGTGTGCTTTGTGAAAAACGATACGTTCTAGAAGGTCGTGGTTACGTTGATTCATCCATG  
GATGCGGACGACGACGTTAAGAACGCTTACATCTGTTATATGAGGTCTAGACCGATTTCTGTTAGGAA  
GAAACTTAGTGGAC

+  
FFFFFFFFFFFFFFFFF:FFF,FFF,FFFF,,FFF,:FFFFFFFF:,FF,F:,FFF,,,,:F,,:FF::,  
F::,F,F:F:FF,FF:,FFF,FFF,F:FF,,,::,FFFFFF:,FFFF,:F,F::FF:F:F:,F,F:FFF  
:FFFF:,F:F,:FF

@A00721:190:HGJW7DSXY:4:1448:25961:10473 1:N:0:TCTGCAAG+GCTGCACT  
CTAGGTTTAGTGTGCTTTGTGAAAAACGATACGTTCTAGAAGGTCGTGGTTACGTTGATTCATCCATG

GATGCGGACGACGACGGTAAGTACGCGTACGTCGGTTATATGAGGTCTAGACCGATTTCTGTGAGGAA  
GAAACTTAGTGGACT

+

FFFFFFFFFFFFFFFF:F,FFFFFFFF::,FFFFFFFFFFFF,FFF::FFFFFF:,FF,:F:FF:F:,F  
:,::FFFFFFFF:,FF,FFF:,FF:,FF,,F:,FFFFFF:FF:F:FFF:F:FF:F:F,FF:FFFF,F  
FFFF:FF,:FF:FF

@A00721:190:HGJW7DSXY:4:2104:22263:13620 1:N:0:TCTGCAAG+GCTGCACT  
CTAGGTTTAGTGTCTGTTTGTGAAAAAAGATACGTTCTATAAGGTCGTGGTTACGTTTATTCAACCAAG  
GATGCGGACGACGACGTTAAGAACGCTTACATATGTTATATTAGGTATAGACCGATTTATGTGAGGAA  
AAAACATATTGGA

+

FFFFFFFFFFFFFFFF:F,F:,FFFF,,F,F,,:F,:F,FF,:F,:::FFFF,,FF,:F,F,,:F,,  
F,:,,:FF,,F,,F,,:F,F,FF,,:FF:,F,,,,FFFF,,,,,:F,F,:F,:F:,F,,F:F:  
,FFF,,:F,:F:

@A00721:190:HGJW7DSXY:4:2157:18041:25598 1:N:0:TCTGCAAG+GCTGCACT  
CTAGGTTTAGTGTCTGTTTGTGAAAAACGATACGTTCTAGAAGGTCGTGGTTACGTTGATTCATCCATG  
GATGCGGACGACGACGTTAAGAACGCTTACTTCTGTTATATGAGGTCTAGACCGATTTATGTGAGGAA  
GAAACTTAGTGGACT

+

FFFFFFFFFFFFFFFF:F,:F:FFFF,FFF::FF,,F,,F,FF,F,FF:F:,FFF:F:F,F::F:,,  
FFF,F:FF:FF,FFFF,FFFF:F,,:FFFFFF,FFFFFFFF,FF,F,:F,FF:F,F:FFF:FFF  
:FFF:,FF,F,FFF:

@A00721:190:HGJW7DSXY:4:2575:30183:36385 1:N:0:TCTGCAAG+GCTGCACT  
CTAGGTTTAGTGTCTGTTTGTGAAAAACGATACGTTCTATAAGGTCGTGGTTACGTTGATTCATCCATG  
GATTCGACGAAGACGTTAATAACGCTTACTTCTGTTAAATGAGGTCTAGACCGATTTATGTGAGGAA  
GAAAAATAGTGA

+

F:FFFFFFFFFFFFFFFF:F,F,FFFFFFFF:FF::F,,F,:F,:FF:FFFFFF,,FF,:FFF:,FF,,  
:,,,FFFF:,F,,F,:FFF:,F,,F,,:,,,FFF:F,FF,F,:FF,F:F,F,F:,,,FF,,FF:FF  
,FFF,,FF,FFFF

@A00721:190:HGJW7DSXY:4:2656:27724:5760 1:N:0:TCTGCAAG+GCTGCACT  
CTAGGTTTAGTGTCTGTTTGTGAAAAACGATACGTTCTAGAAGGTCGTGGTTACGTTGATTCATCCATG  
GATGCGGACGACCACGTTAAGAACGCTTACTTCTGTTATATGAGGTCTAGACCGATTTCTGTGAGGAA  
GAAAATTAGTGGACT

+

FFFFFFFFFFFFFFFF,FFF:FFFF,,FFFF,:F,FF:FF,FFFFFFFFFFFF:,FFFFFF,F:,FF,,  
FF:,F:FF::F:,F::FFF,FFFFFF:F,F,F,:::FFFFFF:FFFF:FF,:F:FFFF,F:F:FFFF  
,FFF,,FF,F,,F::

@A00721:190:HGJW7DSXY:4:1144:14859:6308 1:N:0:TCTGCAAG+GCTGCACT  
GGGTTTAGTGTCTGTTTGTGAAAAACGAACTTTCTAGAAGTTCGTGGTTACGTTTAAATAAACCAATGA  
TTCGGAAGACGACCTTAAGAACGCTTAATTCTTGATAATAGTTAAAGACCGAATTATTTGAGGAACA  
AACAAACAGGAC

+

::FFFFFFFF,F,:F,FFFF,,:F,,FF:FF,:F,,,F,,F,,,FF,,,,:,,,FFF:,FF  
,,F,FF,FF:,F,:FFF,FF:FF,FF,,FF,,,,FFF,,,,:,,,FFF:F,FF:F,F:F,,FF,F  
FFF:,F,,,FF:

@A00721:190:HGJW7DSXY:4:1144:15790:6355 1:N:0:TCTGCAAG+GCTGCACT  
GGGTTTAGTGTCTGTTTGTGAAAAACGATACGTTCTAGAAGTTCGGGTTACGTTGATTCATCCAAGGA  
TGCGGACGACGACGTTAAGAACGCTTACTTCTGTTATATGAGGTCTAGACCGATTTCTGTGAGGAAGA  
AACTTAGTGGAC

+

FFFFFF:FFFFFFFF,F:F:FFFF,,,:F:,F,,F,:F,FFFF,:F,FFF:,F,,,F:,F:F,,::,  
:F:FF,FFF:F,,:FFF,FF,,,FF,:F,F,,FFF:F,F,:F,:F:FFFFFF:::,,,FFF,F  
FF,,FF,F,FFF





FFFFFFFFFFFFFFFFFFFFFFFF:F:FFFFFFFFFFFFFFFFFFFFFFFFFFFFFFFFFFFFFFFF  
FFFFFFFFFFFFFFFF

@A00721:190:HGJW7DSXY:4:1510:17743:36292 1:N:0:TCTGCAAG+GCTGCACT  
GTCGTTTGTGAAAAACGATACGTTCTAGAAGGTCGTGGTTACGTTGATTCATCCATGGATGCGGACGA  
CGACGTTAAGAACGCTTACTTCTGTTATATGAGGTCTAGACCGATTTCTGTGAGGAAGAACTTAGTG  
GACTCACAGTTTTTA

+

FFFFFFFFFFFFFFFFFFFFFFFFFFFFFFFFFFFFFFFF:FFFFFFFF:FFFFFF:FFFFFFFFFFFFFFFF  
FFFFFFFFFFFFFFFFFFFFFFFF:FFF:FFFFFFFFFFFFFFFF:FFFFFFFFFFFFFFFF  
FFFFFFFFFFFF:FFF

@A00721:190:HGJW7DSXY:4:1577:28763:31767 1:N:0:TCTGCAAG+GCTGCACT  
GTCGTTTGTGAAAAACGATACGTTCTAGAAGGTCGTGGTTACGTTGATTCATCCATGGATGCGGACGA  
CGACGTTAAGAACGCTTACTTCTGTTATATGAGGTCTAGACCGATTTCTGTGAGGAAGAACTTAGTG  
GACTCACAGTTTTTA

+

FFFFFFFFFFFFFFFFFFFFFFFFFFFFFFFFFFFFFFFFFFFFFFFFFFFFFFFFFFFFFFFF:FFFFFFFFFFFF  
FFFFF:FFFFFFFFFFFF:FFFFFF,FFFFFFFFFFFFFFFF:FFFFFFFFFFFFFFFF:FFFFFFFF  
FFFFFFFFFFFFFFFF

@A00721:190:HGJW7DSXY:4:1609:7500:32142 1:N:0:TCTGCAAG+GCTGCACT  
GTCGTTTGTGAAAAACGATACGTTCTAGAAGGTCGTGGTTACGTTGATTCATCCATGGATGCGGACGA  
CGACGTTAAGAACGCTTACTTCTGTTATATGAGGTCTAGACCGATTTCTGTGAGGAAGAACTTAGTG  
GACTCACAGTTTTTA

+

FFFFFFFF:FFFFFFFF:FF,FFFFFFFFFFFFFFFFFFFFFFFFFFFFFFFF:FFFFFFFF:FFFFF  
FFFFFFFF:FF:F,FFFF:FFFFFFFF:FFFFFF:FFFFFFFFFFFF:FF:FFFFFFFFFFFF  
FFFFFFFFFFFFFFFF

@A00721:190:HGJW7DSXY:4:2121:7374:13260 1:N:0:TCTGCAAG+GCTGCACT  
GTCGTTTGTGAAAAACGATACGTTCTAGAAGGTCGTGGTTACGTTGATTCATCCATGGATGCGGACGA  
CGACGTTAAGAACGCTTACTTCTGTTATATGAGGTCTAGACCGATTTCTGTGAGGAAGAACTTAGTG  
GACTCACAGTTTTTA

+

FF,FFFF::FFFF:FFFF:FFF,,FFFF::FF:FFFFFF:F:,::FFFF:FFF,FF:FFF:F,:F  
F:FFFFFFFF:FFF:FFFF:FFF,FFFFFF:F,F::F:FFFFFFFF:F::FFFF:FFF,:F,FF  
:FFF:FFF:,F:FFF

@A00721:190:HGJW7DSXY:4:2248:1127:23046 1:N:0:TCTGCAAG+GCTGCACT  
GTCGTTTGTGAAAAACGATACGTTCTAGAAGGTCGTGGTTACGTTGATTCATCCATGGATGCGGACGA  
CGACGTTAAGAACGCTTACTTCTGTTATATGAGGTCTAGACCGATTTCTGTGAGGAAGAACTTAGTG  
GACTCACAGTTTTTA

+

FFFF:F:FFFFFFFFFFFFFFFF:FFFFFFFFFFFFFFFFFFFFFFFFFFFFFFFF:FFFFFFFFFFFFFFFF  
FFFFFFFFFFFFFFFFFFFFFFFFFFFFFFFFFFFFFFFFFFFFFFFFFFFFFFFFFFFFFFFFFFFFFFFF  
FFFFFFFFFFFFFFFF

@A00721:190:HGJW7DSXY:4:2248:1307:23077 1:N:0:TCTGCAAG+GCTGCACT  
GTCGTTTGTGAAAAACGATACGTTCTAGAAGGTCGTGGTTACGTTGATTCATCCATGGATGCGGACGA  
CGACGTTAAGAACGCTTACTTCTGTTATATGAGGTCTAGACCGATTTCTGTGAGGAAGAACTTAGTG  
GACTCACAGTTTTTA

+

FFFFFFFFFFFFFFFFFFFFFFFFFFFFFFFFFFFFFFFF:FFFFFFFFFFFFFFFFFFFFFFFFFFFFFFFF  
FFFFFFFFFFFFFFFFFFFF:FFF:FFFF:FFFFFFFFFFFFFFFFFFFFFFFFFFFFFFFFFFFFFFFF  
FFFFFFFFFFFFFFFF

@A00721:190:HGJW7DSXY:4:2333:17942:29872 1:N:0:TCTGCAAG+GCTGCACT  
GTCGTTTGTGAAAAACGATACGTTCTAGAAGGTCGTGGTTACGTTGATTCATCCATGGATGCGGACGA  
CGACGTTAAGAACGCTTACTTCTGTTATATGAGGTCTAGACCGATTTCTGTGAGGAAGAACTTAGTG  
GACTCACAGTTTTTA

```

FFFFFFFFFFFFFFFFFFFFFFFFFFFFFFFFFFFFFFFFFFFFFFFFFFFFFFFFFFFFFFFF:FFFFFFFFFFFFFFFF
FFFFFF:FFFFFFFFFFFFFFFFFFFFFFFFFFFFFFFFFFFFFFFF:FFFFFF:FFFFFFFF,FFFF:FFFFFFFF
FFFFFFFF:FFF:FF

```

```

FFFFFFFFFFFFFFFFFFFFFFFFFFFFFFFFFFFFFFFFFFFFFFFFFFFFFFFFFFFFFFFFFFFFFFFF
FFFFFFFFFFFFFFFFFFFFFFFF:FFF:F:FF:FFFFFFFFFFFFFFFFFFFFFFFFFFFFFFFF:FFFFFFFF
FFFFFFFFFFFFFFFF

```

```
FFFFFFFFFFFFFFFFFFFFFFFFFFFFFFFF:FFFFFFFFFFFFFFFFFFFFFFFF:FFFFFFFFFFFFFFFF
FFFFFFFFFFFF:F:F:FFFFFF:F:FFFFFFFFFFFFFFFFFFFFFFFFFFFFFFFF:FFFFFFFFF:
FFFFFFFFFFFFFFFF
```

[illegible][illegible]

```
FFFFFFFFFFFFFFFF:FFFFFFFFFFFFFFFF,FFFFFFFFFFFFFFFFFFFFFFFF:FFFFFFFFFFFFFFFF
FFFFFFFFFFFFFFFFFFFFFFFF:FfF:fFFF:fFFFFFFFFFFFFFFFFFFFFFFFFFFFFF:f:FFFFFFF
FFFFFFFFFFFFFFFF
```

```
FFF:FFFF:FFFFFF:FFFFFFFF:FFFF,FFFFFFFFFFFFFFFF::FFFF,FF::FFFF:FFFFFFF:
FF:FFFFFFFF:FF::FF,F,,F,FFFFFF:FFFF:FF:FFF:F:FF,FFFFFFFFFFFFFFFFFFFF:FF:F
FF:FFF:FFFF
```

@A00721:190:HGJW7DSXY:4:1127:14543:20791 1:N:0:TCTGCAAG+GCTGCACT  
CGTTTGTGAAAAACGATACGTTCTAGAAGTTCGTGGTTACGTTGATTCATCCATGGATGCGGACGACG

ACGTTAAGAACGCTTACTTCTGTTATATGAGGTCTAGACCGATTTCTGTGAGGAAGAACTTAGTGGA  
CTCACAGTTTT

+

FFFFFFFF:FFFFFFFFFFFFFFFFFFFFFFFFFFFFFFFFFFFFFFFFFFFFFFFFFFFFFFFFFFFFFFFFFFFFFFFF  
FFFFFFFF,FFFFFF:FFF:FFFFFFFFFF,F,FFFF,F:FFFFFFFFFFFFFFFFFFFFFFFFFFFFFFFF:F,FFFF  
FFFFFFFFFFFF

@A00721:190:HGJW7DSXY:4:1169:21829:25770 1:N:0:TCTGCAAG+GCTGCACT  
CGTTTGTGAAAAACGATACGTTCTAGAAGGTCGTGGTTACGTTGATTCATCCATGGATGCGGACGACG  
ACGTTAAGAACGCTTACTTCTGTTATATGAGGTCTAGACCGATTTCTGTGAGGAAGAACTTAGTGGA  
CTCACAGTTTT

+

FFFFFFFFFFFFFFFFFFFFFFFFFFFFFFFFFFFFFFFFFFFFFFFFFFFFFFFFFFFFFFFFFFFFFFFFFFFFFFFF  
FFFFFFFFFFFFFFFFFFFFFFFF:FFF:FFFFFFFFFFFFFFFFFFFFFFFFFFFFFFFFFFFFFFFFFFFFFFFFFFFF  
FFFFFFFFFFFF

@A00721:190:HGJW7DSXY:4:1237:5321:24267 1:N:0:TCTGCAAG+GCTGCACT  
CGTTTGTGAAAAACGATACGTTCTAGAAGGTCGTGGTTACGTTGATTCATCCATGGATGCGGACGACG  
ACGTTAAGAACGCTTACTTCTGTTATATGAGGTCTAGACCGATTTCTGTGAGGAAGAACTTAGTGGA  
CTCACAGTTTT

+

FFFFFFFFFFFFFF:FFFFFF:FFFFFFFFFFFFFFFFFFFFFFFF:FFFF:FFFFFFFF:F::FFFF,FFFFFFFF  
FFFFFFFF:FF:FF:FFF:FF,FFFFFF:FF:FFF:FFFFFFFFFFFFFFFFFFFFFFFFFFFFFFFFFFFFFFFF  
FFFFFFFFFFFF

@A00721:190:HGJW7DSXY:4:1243:21486:16814 1:N:0:TCTGCAAG+GCTGCACT  
CGTTTGTGAAAAACGATACGTTCTAGAAGGTCGTGGTTACGTTGATTCATCCATGGATGCGGACGACG  
ACGTTAAGAACGCTTACTTCTGTTATATGAGGTCTAGACCGATTTCTGTGAGGAAGAACTTAGTGGA  
CTCACAGTTTT

+

FFF:FFFFFFFF:FFFFFFFFFFFFFFFFFFFFFFFF:FFFF,FFFFFFFF,FFFFFFFFFFFFFFFFFFFF  
FFFFFFFF:FFFFFFFFFFFF,FF:FFFFFFFFFFFF:FFFFFFFFFFFF:FFFFFFFFFFFFFFFF:FFFF  
FFFFFFFFFFFF

@A00721:190:HGJW7DSXY:4:1323:1741:29778 1:N:0:TCTGCAAG+GCTGCACT  
CGTTTGTGAAAAACGATACGTTCTAGAAGGTCGTGGTTACGTTGATTCATCCAAGGATGCGGACGACG  
ACGTTAAGAACGCTTACTTCTGTTATATGAGGTCTAGACCGATTTCTGTGAGGAAGAACTTAGTGGA  
CTCACAGTTTT

+

FFFFFFF:FFFFFFFFFFFFF:F,FFFF:FFFFFF:FFFFFF::FF:FF,:FF,:FF::F,FFFFFF:,  
F,F:FFF,FF:FFFF,,::,FFFF:FF:FF,,FFFFFFFF::FFFF:,FFFFFFFFF,,FFF:FFF  
F,FFF:,FFFF

@A00721:190:HGJW7DSXY:4:1610:23502:25723 1:N:0:TCTGCAAG+GCTGCACT  
CGTTTGTGAAAAACGATACGTTCTAGAAGGTCGTGGTTACGTTGATTCATCCATGGATGCGGACGACG  
ACGTTAAGAACGCTTACTTCTGTTATATGAGGTCTAGACCGATTTCTGTGAGGAAGAACTTAGTGGA  
CTCACAGTTTT

+

FF,:FFFFFFFF:F:FFFF:,F,FF:FFFFFF::FFFF,,:F,FF:FFF:F,FFF:,FFFFFF,:F:  
F,:FFF:FF:,F,FF::F,,F,,F:FFFFFF:,F,F,F,F,FFF:F:,FF:FFFFFFFF:F:FFFF  
FFFFFF,F:F:

@A00721:190:HGJW7DSXY:4:2302:2781:25254 1:N:0:TCTGCAAG+GCTGCACT  
CGTTTGTGAAAAACGATACGTTCTAGAAGGTCGTGGTTACGTTGATTCATCCATGGATGCGGACGACG  
ACGTTAAGAACGCTTACTTCTGTTATATGAGGTCTAGACCGATTTCTGTGAGGAAGAACTTATTGGA  
CTCACAGTTTT

+

FFF,F,F:FFFFF,:F:F::FF::F,FF,:,:F,FF,FFF:,F:FFF,F:,:::,FFF,FFFFF:F,F  
FF:FFFF,FF,FF:FF::F:,F:FFFFFFFF:FFF:F,FFF:FFFF,FF:FF,F,FFFFF,,FF,:FF  
F,FF:F,FF:F

$+$ 

+

+

+

+

+

+

.....

FFFFFFFFFFFFFFFFFFFFFFFFFFFFFFFFFFFFFFFFFFFFFFFFFFFFFFFFFFFFFFFFFFFFFFFFFFFFFFFF  
FFFFFFFFFFFFFFFF

@A00721:190:HGJW7DSXY:4:2231:20763:32346 1:N:0:TCTGCAAG+GCTGCACT  
CTCTACACTGCCACCAGTGGTGTCTTAAAACTGTGAGTCCACTAAGTTTCTTCCTCACAGAAATCG  
GTCTAGACCTCATATAACAGAAGTAAGCGTTCTTAACGTCGTCGTCCGCATCCATGGATGAATCAACG  
TAACCACGACCTTCT

+

FFFFFFFFFFFFFFFFFFFFFFFFFFFFFFFFFFFFFFFFFFFFFFFFFFFFFFFFFFFFFFFFFFFFFFFFFFFFFFFF  
FFFFFFFFFFFFFFFFFFFFFFFFFFFFFFFFFFFFFFFFFFFFFFFFFFFFFFFFFFFFFFFFFFFFFFFFFFFFFFFF  
:FFFFFFFFFFFFFFFF:FF

@A00721:190:HGJW7DSXY:4:2270:27832:31344 1:N:0:TCTGCAAG+GCTGCACT  
CTCTACACTGCCACCAGTGGTGTCTTAAAACTGTGAGTCCACTAAGTTTCTTCCTCACAGAAATCG  
GTCTAGACCTCATATAACAGAAGTAAGCGTTCTTAACGTCGTCGTCCGCATCCATGGATGAATCAACG  
TAACCACGACCTTCT

+

FFFFFFFFFFFFFFFFFFFFFFFFFFFFFFFFFFFFFFFFFFFFFFFFFFFFFFFFFFFFFFFFFFFFFFFFFFFFFFFF  
FFFFFFFFFFFFFFFFFFFFFFFFFFFFFFFFFFFFFFFFFFFFFFFFFFFFFFFFFFFFFFFFFFFFFFFFFFFFFFFF  
FFFFFFFFFFFFFFFF:

@A00721:190:HGJW7DSXY:4:2321:1163:1282 1:N:0:TCTGCAAG+GCTGCACT  
CTCTACACTGCCACCAGTGGTGTCTTAAAACTGTGAGTCCACTAAGTTTCTTCCTCACAGAGATCG  
GTCTAGACCTCATATAACAGAAGTAAGCGTTCTTAACGTCGTCGTCCGCATCCATGGATGAATCAACG  
TAACAACGACCTTCT

+

FFFFFFFFFFFFFFFFFFFFFFFFFFFFFFFFFFFFFFFFFFFFFFFFFFFFFFFFFFFFFFFFFFFFFFFFFFFFFFFF  
FF:FF,F,FF,FFFFFFFF,F,FFFFFFFFFFFFFFFFFFFFFFFFFFFFFFFFFFFFFFFFFFFFFFFFFFFFFFFF  
FFF:,F,FFFFFFFF

@A00721:190:HGJW7DSXY:4:2324:23547:30342 1:N:0:TCTGCAAG+GCTGCACT  
CTCTACACTGCCACCAGTGGTGTCTTAAAACTGTGAGTCCACTAAGTTTCTTCCTCACAGAAATCG  
GTCTAGACCTCATATAACAGAAGTAAGCGTTCTTAACGTCGTCGTCCGCATCCATGGATGAATCAACG  
TAACCACGACCTTCT

+

FFFFFFFFFFFFFFFFFFFFFFFFFFFFFFFFFFFFFFFFFFFFFFFFFFFFFFFFFFFFFFFFFFFFFFFFFFFFFFFF  
FFFF:FFFFFFFFFFFFFFFFFFFFFFFFFFFFFFFFFFFFFFFFFFFFFFFFFFFFFFFFFFFFFFFFFFFFFFFF  
FFFFF:FFFFFFFF

@A00721:190:HGJW7DSXY:4:2350:25229:35039 1:N:0:TCTGCAAG+GCTGCACT  
CTCTACACTGCCACCAGTGGTGTCTTAAAACTGTGAGTCCACTAAGTTTCTTCCTCACAGAAATCG  
GTCTAGACCTCATATAACAGAAGTAAGCGTTCTTAACGTCGTCGTCCGCATCCATGGATGAATCAACG  
TAACCACGACCTTCT

+

FFFFFFFFFFFFFFFFFFFFFFFFFFFFFFFFFFFFFFFFFFFFFFFFFFFFFFFFFFFFFFFFFFFFFFFFFFFFFFFF  
FFFFFFFFFFFFFFFFFFFFFFFFFFFFFFFFFFFFFFFFFFFFFFFFFFFFFFFFFFFFFFFFFFFFFFFFFFFFFFFF  
FFFF:FFFFFFFF

@A00721:190:HGJW7DSXY:4:2502:6903:26256 1:N:0:TCTGCAAG+GCTGCACT  
CTCTACACTGCCACCAGTGGTGTCTTAAAACTGTGAGTCCACTAAGTTTCTTCCTCACAGAAATCG  
GTCTAGACCTCATATAACAGAAGTAAGCGTTCTTAACGTCGTCGTCCGCATCCATGGATGAATCAACG  
TAACCACGACCTTCT

+

FFFFFFFFFFFFFFFFFFFFFFFFFFFFFFFFFFFFFFFFFFFFFFFFFFFFFFFFFFFFFFFFFFFFFFFFFFFFFFFF  
FFFFFFFFFFFFFFFFFFFFFFFFFFFFFFFFFFFFFFFFFFFFFFFFFFFFFFFFFFFFFFFFFFFFFFFFFFFFFFFF  
FFF:FFF:FFF:FFF

@A00721:190:HGJW7DSXY:4:2550:32768:9392 1:N:0:TCTGCAAG+GCTGCACT  
CTCTACACTGCCACCAGTGGTGTCTTAAAACTGTGAGTCCACTAAGTTTCTTCCTCACAGAAATCG  
GTCTAGACCTCATATAACAGAAGTAAGCGTTCTTAACGTCGTCGTCCGCATCCATGGATGAATCAACG  
TAACCACGACCTTCT

+  
FFFFFFFFFFFFFFFFFFFFFFFFFFFFFFFFFFFFFFFFFFFFFFFFFFFFFFFFFFFFFFFFFFFFFFFF  
FFFFFFFFFFFFFFFFFFFFFFFFFFFFFFFFFFFFFFFFFFFFFFFFFFFFFFFFFFFFFFFFFFFFFFFF:F  
FFFFFFFFFFFFFFFF

@A00721:190:HGJW7DSXY:4:2557:10140:4398 1:N:0:TCTGCAAG+GCTGCACT  
CTCTACACTGCCACCAGTGGTGTCTTAAAACTGTGAGTCCACTAAGTTTCTTCCTCACAGAAATCG  
GTCTAGACCTCATATAACAGAAGTAAGCGTTCTTAACGTCGTCGTCCGCATCCATGGATGAATCAACG  
TAACCACGACCTTCT

+  
FFFFFFFFFFFFFFFFFFFFFFFFFFFFFFFFFFFFFFFFFFFFFFFFFFFFFFFFFFFFFFFFFFFFFFFF  
FFFFF::FFFFFFFFFFFFFFFFFFFFFFFFFFFFFFFFFFFFFFFFFFFFFFFFFFFFFFFFFFFFFFFF  
FFFF:FFFFFFFF

@A00721:190:HGJW7DSXY:4:1262:4065:5462 1:N:0:TCTGCAAG+GCTGCACT  
CCTCTACACTGCCACCAGTGGTGTCTTAAAACTGTGAGTCCACTAAGTTTCTTCCTCACAGAAATC  
GGTCTAGACCTCATATAACAGAAGTAAGCGTTCTTAACGTCGTCGTCCGCATCCATGGATGAATCAAC  
GTAACCACGACCTTC

+  
FFFFFFFFFFFFFFFFFFFFFFFFFFFFFFFFFFFFFFFFFFFFFFFFFFFFFFFFFFFFFFFFFFFFFFFF  
FFFFFFFFFFFFFFFFFFFFFFFFFFFFFFFFFFFFFFFFFFFFFFFFFFFFFFFFFFFFFFFFFFFFFFFF  
FFFFFFFFFFFFFFFF

@A00721:190:HGJW7DSXY:4:1605:5584:12477 1:N:0:TCTGCAAG+GCTGCACT  
CCTCTACACTGCCACCAGTGGTGTCTTAAAACTGTGAGTCCACTAAGTTTCTTCCTCACAGAAATC  
GGTCTAGACCTCATATAACAGAAGTAAGCGTTCTTAACGTCGTCGTCCGCATCCATGGATGAATCAAC  
GTAACCACGACCTTC

+  
FFFFFFFFFFFFFFFFFFFFFFFFFFFFFFFFFFFFFFFFFFFFFFFFFFFFFFFFFFFFFFFFFFFFFFFF  
FF:F,FFFFFFFF:FFFFFFFF,FFFFFFFFFFFFFFFFFFFFFFFFFFFFFFFFFFFFFFFF:FFFFF  
FFFFFFFFFFFF,FF

@A00721:190:HGJW7DSXY:4:2228:23213:12226 1:N:0:TCTGCAAG+GCTGCACT  
CCTCTACACTGCCACCAGTGGTGTCTTAAAACTGTGAGTCCACTAAGTTTCTTCCTCACAGAAATC  
GGTCTAGACCTCATATAACAGAAGTAAGCGTTCTTAACGTCGTCGTCCGCATCCATGGATGAATCAAC  
GTAACCACGACCTTC

+  
FF:FFFFFFFFFFFFFFFFFFFFFFFFFFFFFFFFFFFFFFFFFFFFFFFFFFFFFFFFFFFFFFFFFFFF  
FFFFFFFFFFFFFFFFFFFFFFFFFFFFFFFFFFFFFFFFFFFFFFFFFFFFFFFFFFFFFFFFFFFFFFFF,FFFFFF:FFFFF  
FFFFFFFFFF:FFFFF

@A00721:190:HGJW7DSXY:4:2250:5466:6386 1:N:0:TCTGCAAG+GCTGCACT  
CCTCTACACTGCCACCAGTGGTGTCTTAAAACTGTGAGTCCACTAAGTTTCTTCCTCACAGAAATC  
GGTCTAGACCTCATATAACAGAAGTAAGCGTTCTTAACGTCGTCGTCCGCATCCATGGATGAATCAAC  
GTAACCACGACCTTC

+  
FFFFFFFFFFFFFFFFFFFFFFFFFFFFFFFFFFFFFFFFFFFFFFFFFFFFFFFFFFFFFFFFFFFFFFFF  
FFFFFFFFFFFFFFFFFFFFFFFFFFFFFFFFFFFFFFFFFFFFFFFFFFFFFFFFFFFFFFFFFFFFFFFF  
FFFFFFFFFFFFFFFF

@A00721:190:HGJW7DSXY:4:2425:1904:2347 1:N:0:TCTGCAAG+GCTGCACT  
CCTCTACACTGCCACCAGTGGTGTCTTAAAACTGTGAGTCCACTAAGTTTCTTCCTCACAGAAATC  
GGTCTAGACCTCATATAACAGAAGTAAGCGTTCTTAACGTCGTCGTCCGCATCCATGGATGAATCAAC  
GTAACCACGACCTTC

+  
FFFFFFFFFFFFFFFFFFFFFFFFFFFFFFFFFFFFFFFFFFFFFFFFFFFFFFFFFFFFFFFFFFFFFFFF  
FFFFFFFFFF:FFFFFFFFFFFFFFFFFFFFFFFFFFFFFFFFFFFFFFFFFFFFFFFFFFFFFFFFFFFF  
:FFF:FFF:FFFFF

@A00721:190:HGJW7DSXY:4:2569:22055:29199 1:N:0:TCTGCAAG+GCTGCACT  
CCTCTACACTGCCACCAGTGGTGTCTTAAAACTGTGAGTCCACTAAGTTTCTTCCTCACAGAAATC

GGTCTAGACCTCATATAACAGAAGTAAGCGTTCTTAACGTCGTCGTCGCATCCATGGATGAATCAAC  
GTAACCACGACCTTC

[illegible]

+

@A00721:190:HGJW7DSXY:4:1315:8404:27258 1:N:0:TCTGCAAG+GCTGCACT  
CGTGGTTACGTTGATTCATCCATGGATGCGGACGACGACGTTAAGAACGCTTACTTCTGTTATATGAG  
GTCTAGACCGATTTCTGTGAGGAAGAACTTAGTGGA CTACAGTTTTTAAGGACACCACTGGTGGCA  
GTGTAGAGGACATGA

[illegible]

+

@A00721:190:HGJW7DSXY:4:1612:29333:7200 1:N:0:TCTGCAAG+GCTGCACT  
CGTGGTTACGTTGATTCATCCATGGATGCGGACGACGACGTTAAGAACGCTTACTTCTGTTATATGAG  
GTCTAGACCGATTTCTGTGAGGAAGAACTTAGTGGACTCACAGTTTTTAAGGACACCACTGGTGGCA  
GTGTAGAGGACATGA

[illegible]

+

@A00721:190:HGJW7DSXY:4:2143:27787:31548 1:N:0:TCTGCAAG+GCTGCACT  
CGTGGTTACGTTGATTCATCCATGGATGCGGACGACGACGTTAAGAACGCTTACTTCTGTTATATGAG  
GTCTAGACCGATTTCTGTGAGGAAGAACTTAGTGGAAGTACAGTTTTTAAGGACACCACTGGTGGCA  
GTGTAGAGGACATGA

[illegible]

$+$ 

+

 $+$ 

+

+

 $+$  $+$



FFFFFFFFFFFFFF:FFFF:FFFFFFFFFFFF,FF:FFFFFFFFFFFFFFFF:FFFFFFFF:FFFF:F  
FFF:FFF:FF:F,:F

@A00721:190:HGJW7DSXY:4:1511:11324:20509 1:N:0:TCTGCAAG+GCTGCACT  
GCTCCTTTCATCATGTCTCTACACTGCCACCAGTGGTGTCTTAAAACTGTGAGTCCACTAAGTTT  
CTTCCTCACAGAAATCGGTCTAGACCTCATATAACAGAAGTAAGCGTTCTTAACGTCGTCGTCCGCAT  
CCATGGATGAATCAA

+

FFFFFFFFFFFFFFFFFFFFFFFFFFFFFFFFFFFFFFFFFFFFFFFFFFFFFFFFFFFFFFFFFFFFFFFF  
FFFFFFFFFFFFFFFFFFFFFFFFFFFFFFFFFFFFFFFFFFFFFFFFFFFFFFFFFFFFFFFFFFFFFFFF:F  
FFFFFFFFFFFFFFFFFFFFFFFF

@A00721:190:HGJW7DSXY:4:1533:28393:13495 1:N:0:TCTGCAAG+GCTGCACT  
GCTCCTTTCATCATGTCTCTACACTGCCACCAGTGGTGTCTTAAAACTGTGAGTCCACTAAGTTT  
CTTCCTCACAGAAATCGGTCTAGACCTCATATAACAGAAGTAAGCGTTCTTAACGTCGTCGTCCGCAT  
CCATGGATGAATCAA

+

FFFFFFFFFFFFFFFFFFFFFFFFFFFFFFFFFFFFFFFFFFFFFFFFFFFFFFFFFFFFFFFFFFFFFFFF  
FFFFFFFFFFFFFFFFFFFFFFFFFFFFFFFFFFFFFFFFFFFFFFFFFFFFFFFFFFFFFFFFFFFFFFFF:F  
FFFFFFFFFFFFFFFFFFFFFFFF

@A00721:190:HGJW7DSXY:4:1637:21495:26475 1:N:0:TCTGCAAG+GCTGCACT  
GCTCCTTTCATCATGTCTCTACACTGCCACCAGTGGTGTCTTAAAACTGTGAGTCCACTAAGTTT  
CTTCCTCACAGAAATCGGTCTAGACCTCATATAACAGAAGTAAGCGTTCTTAACGTCGTCGTCCGCAT  
CCATGGATGAATCAA

+

FFFFFFFFFFFFFFFFFFFFFFFFFFFFFFFFFFFFFFFFFFFFFFFFFFFFFFFFFFFFFFFFFFFFFFFF  
FFFFFFFFFFFF:F:FFFF:FFFFFFFFFFFFFFFFFFFFFFFF:F:FFFFFFFFFFFFFFFF,FFFFFFFFFFFF  
FFFF:FFFFFFFFFFFF

@A00721:190:HGJW7DSXY:4:2227:27507:34976 1:N:0:TCTGCAAG+GCTGCACT  
GCTCCTTTCATCATGTCTCTACACTGCCACCAGTGGTGTCTTAAAACTGTGAGTCCACTAAGTTT  
CTTCCTCACAGAAATCGGTCTAGACCTCATATAACAGAAGTAAGCGTTCTTAACGTCGTCGTCCGCAT  
CCATGGATGAATCAA

+

FFFFFFFFFFFFFFFFFFFFFFFFFFFFFFFFFFFFFFFFFFFFFFFFFFFFFFFFFFFFFFFFFFFFFFFF  
FFFFFFFFFFFFFFFFFFFFFFFFFFFFFFFFFFFFFFFFFFFFFFFFFFFFFFFFFFFFFFFFFFFFFFFF:F  
FFF,FF:FFF:FFFF

@A00721:190:HGJW7DSXY:4:2474:29053:26944 1:N:0:TCTGCAAG+GCTGCACT  
GCTCCTTTCATCATGTCTCTACACTGCCACCAGTGGTGTCTTAAAACTGTGAGTCCACTAAGTTT  
CTTCCTCACAGAAATCGGTCTAGACCTCATATAACAGAAGTAAGCGTTCTTAACGTCGTCGTCCGCAT  
CCATGGATGAATCAA

+

FFFFFFFFFFFFFFFFFFFFFFFFFFFFFFFFFFFFFFFFFFFFFFFFFFFFFFFFFFFFFFFFFFFFFFFF  
FFFFFFFFFFFF:F:FFFFFFFFFFFFFFFFFFFFFFFFFFFFFFFFFFFFFFFFFFFFFFFFFFFFFFFF  
FFFFFFFFFFFFFFFFFFFF

@A00721:190:HGJW7DSXY:4:1328:7554:7028 1:N:0:TCTGCAAG+GCTGCACT  
TCCATGGATGCGGACGACGACGTTAAGAACGCTTACTTCTGTTATATGAGGTCTAGACCGATTTCTGT  
GAGGAAGAACTTAGTGACTCACAGTTTTTAAGGACACCACTGGTGGCAGTGTAGAGGACATGATGA  
AAGGAGCTTATTATT

+

F:FFFFFFFFFFFFFFFFFFFFFFFFFFFFFFFFFFFFFFFFFFFFFFFFFFFFFFFFFFFFFFFFFFFFF  
FFFFFFFFFFFFFFFFFFFFFFFFFFFFFFFFFFFFFFFFFFFFFFFFFFFFFFFFFFFFFFFFFFFF,F  
FFFFFFFFFFFFFFFFFFFF

@A00721:190:HGJW7DSXY:4:1653:4029:25473 1:N:0:TCTGCAAG+GCTGCACT  
TCCATGGATGCGGACGACGACGTTAAGAACGCTTACTTCTGTTATATGAGGTCTAGACCGATTTCTGT  
GAGGAAGAACTTAGTGACTCACAGTTTTTAAGGACACCACTGGTGGCAGTGTAGAGGACATGATGA  
AAGGAGCTTATTATT

+  
FFFFFFFFFFFFFFFFFFFFFFFFFFFFFFFFFFFFFFFF:FFF::FFFFFFFFFFFFFFFFFFFFFFFF:FFFFF  
FFFFFFFFFFFFFFFFFFFFFFFFFFFFFFFFFFFFFFFFFFFFFFFFFFFFFFFFFFFFFFFFFFFFFFFFFFFFF  
FFFFFFFFFFFFFFFF

@A00721:190:HGJW7DSXY:4:2216:26838:20666 1:N:0:TCTGCAAG+GCTGCACT  
TCCATGGATGCGGACGACGACGTTAAGAACGCTTACTTCTGTTATATGAGGTCTAGACCGATTTCTGT  
GAGGAAGAACTTAGTGACTCACAGTTTTTAAGGACACCACTGGTGGCAGTGTAGAGGACATGATGA  
AAGGAGCTTATTATT

+  
FFFFFFFFFFFFFFFFFFFFFFFFFFFFFFFFFFFFFFFF:FFFFFF,::FFFF:FFFFFFFFFFFFFFFFFFFFFFFF  
FFFFFFFFFFFFFFFFFFFFFFFFFFFFFFFFFFFFFFFF:FFFFFFFFFFFFFFFFFFFFFFFFFFFFFFFFFFFFF  
FFFFFFFF:FFFFFF

@A00721:190:HGJW7DSXY:4:1235:2293:14763 1:N:0:TCTGCAAG+GCTGCACT  
GACGACGACGTTAAGAACGCTTACTTCTGTTATATGAGGTCTAGACCGATTTCTGTGAGGAAGAACT  
TAGTGGACTIONCACAGTTTTTAAGGACACCACTGGTGGCAGTGTAGAGGACATGATGAAAGGAGCTTATT  
ATTTAGTTTTTGC

+  
FFFFFFFFF,FFFFFFFFFFFFFFFFF,FF,F:,FFFF,FFFFFFFF:FFFFFF,FFFFFFFFFFFF:F  
,FF,F:FFFF:FF:,:,F,F::FFFFFFFFF:,FFFFFFFFFFFFFFFFFFFFFFFF,F,FFFF,:FF  
F,FFF:F,FFFF:F

@A00721:190:HGJW7DSXY:4:1414:28917:10614 1:N:0:TCTGCAAG+GCTGCACT  
GACGACGACGTTAAGAACGCTTACTTCTGTTATATGAGGTCTAGACCGATTTCTGTGAGGAAGAACT  
TAGTGGACTIONCACAGTTTTTAAGGACACCACTGGTGGCAGTGTAGAGGACATGATGAAAGGAGCTTATT  
ATTTAGTTTTTGC

+  
F:,FF:FFF:,F:FF,F:FFFF:,F:FFFF:FFF:FFFF,FFFF,:FFFFFF:F::F,FFF:FFF:  
FFFF,FF:::F,F,FFFFFFFF:FFFF,FF:FF:FFFF:FF:,FF:FF:FF,FF:FFFFFF,FFFF  
,FF:FFF:FF,::FF

@A00721:190:HGJW7DSXY:4:1565:25880:21543 1:N:0:TCTGCAAG+GCTGCACT  
GACGACGACGTTAAGAACGCTTACTTCTGTTATATGAGGTCTAGACCGATTTCTGTGAGGAAGAACT  
TAGTGGACTIONCACAGTTTTTAAGGACACCACTGGTGGCAGTGTAGAGGACATGATGAAAGGAGCTTATT  
ATTTAGTTTTTGC

+  
F:FFFFFFFFFFFFFFFFFFFFFFFFFFFFFFFF,FF:FFFFFFFFFFFFFFFF:FFFFFFFFFFFFFFFFFFFF  
FFFFFFFFFFFFFFFFFFFFFFFFFFFFFFFFFFFFFFFFFFFFFFFFFFFFFFFFFFFFFFFFFFFFFFFFFFFFF  
F,:FFFFFFFF

@A00721:190:HGJW7DSXY:4:1565:24948:21840 1:N:0:TCTGCAAG+GCTGCACT  
GACGACGACGTTAAGAACGCTTACTTCTGTTATATGAGGTCTAGACCGATTTCTGTGAGGAAGAACT  
TAGTGGACTIONCACAGTTTTTAAGGACACCACTGGTGGCAGTGTAGAGGACATGATGAAAGGAGCTTATT  
ATTTAGTTTTTGC

+  
FFFFFFFFFFFFFFFFFFFFFFFF,FFFFFF:FFFF,,FFF,,FFF:FFFFFFFF:FFFFFFFFFFFFF  
FFFFFFFFFFFFFFFF,FFFFFFFFFFFFFFFF,FFFFFFFFFFFF,:FF:F:FF:FFFF:FF:FFFF  
FFFF::FFF:F:FF

@A00721:190:HGJW7DSXY:4:2434:12952:3756 1:N:0:TCTGCAAG+GCTGCACT  
GACGACGACGATAAGAACGCTTACTTCTGGTATATGAGGTCTAGACCGATTTCTGTGAGGAAGAACT  
TAGTGGACTIONCACAGTTTTTAAGGACACCAAGGTGGCAGTGTAGAGGACATGATGAAAGGAGATTATT  
ATATAGTTTTTGC

+  
FFF:F,FF:F,:FF:FFFF,,FFF,F:F,:F:FFFF,,FFF,FF,,F,FF,FFFFFFFFFFFFFFFF  
FF:F,:F,FFFFFF,F:FFFFFFFF:FFFF,F,,FF:F:F,F,F,FFFF,FFF,FFF:,FF,,FFF  
FF:FFFFFFFF

@A00721:190:HGJW7DSXY:4:2514:10411:7842 1:N:0:TCTGCAAG+GCTGCACT  
GACGACGACGTTAAGAACGCTTACTTCTGTTATATGAGGTCTAGACCGATTTCTGTGAGGAAGAACT



$+$ 

+

+

+

+

+

+

---

FFFFFFFFFFFFFFFFFFFFFFFFFFFFFFFFFFFFFFFFFFFFFFFFFFFFFFFFFFFFFFFFFFFFFFFF  
FFFFF:FFFFFFFFF

@A00721:190:HGJW7DSXY:4:2223:18059:28166 1:N:0:TCTGCAAG+GCTGCACT  
CGACGACGTTAAGAACGCTTACTTCTGTTATATGAGGTCTAGACCGATTTCTGTGAGGAAGAACTTA  
GTGGACTCACAGTTTTTAAGGACACCACTGGTGGCAGTGTAGAGGACATGATGAAAGGAGCTTATTAT  
TTAGTTTTTTCGACA

+

F:FFFFFFFFFFFFFFFFFFFFFFFFF,F:F,FFFFFFFFFFFFFFFFFFFFFFFFFFFFFFFFFFFFFFFFF:F  
FFFFFFFFFFFFFFFFFFFFFFFFFFFFFFFFFFFFFFFFFFFFFFFFFFFFFFFFFFFFFFFFFFFFFFFFF:FFFFF:  
F,FFFFFFFFFFFFFFFFF

@A00721:190:HGJW7DSXY:4:2223:16794:29199 1:N:0:TCTGCAAG+GCTGCACT  
CGACGACGTTAAGAACGCTTACTTCTGTTATATGAGGTCTAGACCGATTTCTGTGAGGAAGAACTTA  
GTGGACTCACAGTTTTTAAGGACACCACTGGTGGCAGTGTAGAGGACATGATGAAAGGAGCTTATTAT  
TTAGTTTTTTCGACA

+

FFFFFFFFFFFFFFFFFFFFFFFFF:FFFFF:FFFFFFFFFFFFFFFFFFFFFFFFFFFFFFFFFFFFFFFFF  
FFFFFFFFFFFFFFFFFFFFFFFFFFFFFFFFFFFFFFFFFFFFFFFFFFFFFFFFFFFFFFFFFFFFFFFFF,FFFFF  
,FFFF,FFF:FFFFF

@A00721:190:HGJW7DSXY:4:2346:1479:24158 1:N:0:TCTGCAAG+GCTGCACT  
CGACGACGTTAAGAACGCTTACTTCTGTTATATGAGGTCTAGACCGATTTCTGTGAGGAAGAACTTA  
GTGGACTCACAGTTTTTAAGGACACCACTGGTGGCAGTGTAGAGGACATGATGAAAGGAGCTTATTAT  
TTAGTTTTTTCGACA

+

FFFFFFFFFFFFFFFFFFFFFFFFFFFFFFFFFFFFFFFFFFFFFFFFFFFFFFFFFFFFFFFFFFFFFFFFF  
FFFFFFFFFFFFFFFFFFFFFFFFFFFFFFFFFFFFFFFFFFFFFFFFFFFFFFFFFFFFFFFFFFFFFFFFF  
FFFFFFFFFFFFFFFFF

@A00721:190:HGJW7DSXY:4:2354:23882:36996 1:N:0:TCTGCAAG+GCTGCACT  
CGACGACGTTAAGAACGCTTACTTCTGTTATATGAGGTCTAGACCGATTTCTGTGAGGAAGAACTTA  
GTGGACTCACAGTTTTTAAGGACACCACTGGTGGCAGTGTAGAGGACATGATGAAAGGAGCTTATTAT  
TTAGTTTTTTCGACA

+

FFFFFFFFFFFFFFFFFFFFF:FFFFFFFFFFFFFFFFFFFFFFFFFFFFFFFFFFFFFFFFFFFFFFFFF  
FFFFFFFFFFFFFFFFFFFFFFFFFFFFFFFFFFFFFFFFFFFFFFFFFFFFFFFFFFFFFFFFFFFFFFFFF  
FFFFFFFFFFFFF:FFFF

@A00721:190:HGJW7DSXY:4:2472:12970:26897 1:N:0:TCTGCAAG+GCTGCACT  
CGACGACGTTAAGAACGCTTACTTCTGTTATATGAGGTCTAGACCGATTTCTGTGAGGAAGAACTTA  
GTGGACTCACAGTTTTTAAGGACACCACTGGTGGCAGTGTAGAGGACATGATGAAAGGAGCTTATTAT  
TTAGTTTTTTCGACA

+

FFFFFFFFFFFFFFFFFFFFFFFFF:FFFFFFFFFFFFFFFFFFFFFFFFFFFFFFFFFFFFFFFFFFFFF  
FFFFFFFFFFFFFFFFFFFFFFFFFFFFFFFFFFFFFFFFFFFFFFFFFFFFFFFFFFFFFFFFFFFFFFFFF  
FFFFFFFFFFFFFFFFF

@A00721:190:HGJW7DSXY:4:1533:26205:15468 1:N:0:TCTGCAAG+GCTGCACT  
CGCAAAACTAAATAATAAGCTCCTTTTCATCATGTCCTCTACACTGCCACCACTGGTGTCTTAAAAA  
CTGTGAGTCCACTAAGTTTCTTCCTCACAGAAATCGGTCTAGACCTCATATAACAGAAGTAAGCGTTC  
TTAACGAGATCGGAA

+

FFFFFFFFFFFFFFFFFFFFFFFFFFFFFFFFFFFFFFFFFFFFFFFFFFFFFFFFFFFFFFFFFFFFFFFFF  
FFFFFFFFFFFFFFFFFFFFFFFFFFFFFFFFFFFFFFFFFFFFFFFFFFFFFFFFFFFFFFFFFFFFFFFFF  
FFFFFFFFFFFFFFFFF

@A00721:190:HGJW7DSXY:4:1553:11803:5932 1:N:0:TCTGCAAG+GCTGCACT  
CGCAAAACTAAATAATAAGCTCCTTTTCATCATGTCCTCTACACTGCCACCACTGGTGTCTTAAAAA  
CTGTGAGTCCACTAAGTTTCTTCCTCACAGAAATCGGTCTAGACCTCATATAACAGAAGTAAGCGTTC  
TTAACGAGATCGGAA

+  
FFFFFFFFFFFFFFFFFFFFFFFFFFFFFFFFFFFFFFFFFFFFFFFFFFFFFFFFFFFFFFFFFFFFFFFF  
FFFFFFFFFFFFFFFFFFFFFFFFFFFFFFFFFFFFFFFFFFFFFFFFFFFFFFFFFFFFFFFFFFFFFFFF  
FFFFFFFFFFFFFFFF

@A00721:190:HGJW7DSXY:4:2555:25699:14246 1:N:0:TCTGCAAG+GCTGCACT  
CGCAAAACTAAATAATAAGCTCCTTTTCATCATGTCCTCTACACTGCCACCAGTGGTGTCTTAAAAA  
CTGTGAGTCCACTAAGTTTCTTCCTCACAGAAATCGGTCTAGACCTCATATAACAGAAGTAAGCGTTC  
TTAACGAGATCGGAA

+  
FFFFFFFFFFFFFFFFFFFFFFFFFFFFFFFFFFFFFFFFFFFFFFFFFFFFFFFFFFFFFFFFFFFFFFFF  
FFFFFFFFFFFFFFFFFFFFFFFFFFFFFFFFFFFFFFFFFFFFFFFFFFFFFFFFFFFFFFFFFFFFFFFF  
FFFFFFFFFFFFFFFF

@A00721:190:HGJW7DSXY:4:2424:21242:9721 1:N:0:TCTGCAAG+GCTGCACT  
CGCAAAACTAAATAATAAGCTCCTTTTCATCATGTCCTCTACACTGCCACCAGTGGTGTCTTAAAAA  
CTGTGAGTCCACTAAGTTTCTTCCTCACATAAATCGGTCTAGACCTAATATAACAGAAGTAAGCGTTC  
TTAACGAGATC

+  
F:FF,:F:,FFFF:,FF::F,,,::,F,,FFF,FF,FFFFFFFF,F,:F:FFF,FF:, ,FFFFF  
F:FFFF::FFFF,: , ,F,,FFF,F:FF,,FF::FFFF,:FF,:FF,:FF:, ,FFF,FFFFFFFF:F  
F,FF:FFFF,:

@A00721:190:HGJW7DSXY:4:1461:10827:9189 1:N:0:TCTGCAAG+GCTGCACT  
GTTAAGAACGCTTACTTCTGTTATATGAGGTCTAGACCGATTTCTGTGAGGAAGAACTTAGTGGACT  
CACAGTTTTTAAGGACACCACTGGTGGCAGTGTAGAGGACATGATGAAAGGAGCTTATTATTTAGTTT  
TTGCGACATTTTCATC

+  
FFFFFFFFFFFFFFFFFFFFFFFFFFFFFFFFFFFFFFFFFFFFFFFFFFFFFFFFFFFFFFFFFFFFFFFF  
FFF:FFFFFFFF:FFFFFFFFFFFFFFFFFFFFFFFFFFFFFFFFFFFFFFFFFFFFFFFFFFFFFFFF  
FFFFFFFFFFFFFFFF

@A00721:190:HGJW7DSXY:4:1475:18756:36041 1:N:0:TCTGCAAG+GCTGCACT  
GTTAAGAACGCTTACTTCTGTTATATGAGGTCTAGACCGATTTCTGTGAGGAAGAACTTAGTGGACT  
CACAGTTTTTAAGGACACCACTGGTGGCAGTGTAGAGGACATGATGAAAGGAGCTTATTATTTAGTTT  
TTGCGACATTTTCATC

+  
FFFFFFFFFFFFFFFFFFFFFFFFFFFFFFFFFFFFFFFFFFFFFFFFFFFFFFFFFFFFFFFFFFFFFFF:FFFFFFFFFFFFFFFF  
FFFFFFFFFFFFFFFFFFFFFFFFFFFFFFFFFFFFFFFFFFFFFFFFFFFFFFFFFFFFFFFFFFFFFFFFF:FFFFFFFFFFFFFFFF  
FFFFFFFFFFFFFFFF

@A00721:190:HGJW7DSXY:4:1558:16288:18865 1:N:0:TCTGCAAG+GCTGCACT  
GTTAAGAACGCTTACTTCTGTTATATGAGGTCTAGACCGATTTCTGTGAGGAAGAACTTAGTGGACT  
CACAGTTTTTAAGGACACCACTGGTGGCAGTGTAGAGGACATGATGAAAGGAGCTTATTATTTAGTTT  
TTGCGACATTTTCATC

+  
FFFFFFFFFFFF:FFFFFFFFFFFF:FFFFF:FFFFFFFFF::F:FFF:F:FFFFFFFFFFFF:FF,FFFF  
FFFFFFFF:FFFFFFFFFFFFFFFF,FFFFFFF:FFFFF,F:FFFFFFFFFFFF,FFFFFFFFFFFF:FF  
FF,FFFFFF,FFFF:

@A00721:190:HGJW7DSXY:4:2268:28411:14372 1:N:0:TCTGCAAG+GCTGCACT  
GTTAAGAACGCTTACTTCTGTTATATGAGGTCTAGACCGATTTCTGTGAGGAAGAACTTAGTGGACT  
CACAGTTTTTAAGGACACCACTGGTGGCAGTGTAGAGGACATGATGAAAGGAGCTTATTATTTAGTTT  
TTGCGACATTTTCATC

+  
FFFFFFFFFFFFFFFFFFFFFFFFFFFFFFFFFFFFFFFFFFFFFFFFFFFFFFFFFFFFFFFFFFFFFFFF  
FFFFFFFFFFFFFFFFFFFFFFFFFFFFFFFFFFFFFFFFFFFFFFFFFFFFFFFFFFFFFFFFFFFFFFF:FFFFFFFFFFFFF:FFF  
FFF:FFFFFFFFFFFF

@A00721:190:HGJW7DSXY:4:2420:19651:33771 1:N:0:TCTGCAAG+GCTGCACT  
GTTAAGAACGCTTACTTCTGTTATATGAGGTCTAGACCGATTTCTGTGAGGAAGAACTTAGTGGACT

CACAGTTTTTTAAGGACACCACTGGTGGCAGTGTAGAGGACATGATGAAAGGAGCTTATTATTTAGTTT  
TTGCGACATTTTCATC

```
FFFFFFFFFFFFFFFFFFFFFFFFFFFFFFFFFFFFFFFFFFFFFFFFFFFFFFFFFFFFFFF
FFFFFFFFFFFFFFFF:FFFFFFFFFFFFFFFFFFFFFFFFFFFFFFFFFFFFFFFFFFFFF
FFF:FFFFFFFFFF
```

```
FF:FF,FFFF::FFFF,::FFFF,FFF,FFFFFFFFFFFF:F:F:FFFF:FFFF,FF:F:FFF
FFFF:FFFFFFFF:FFFF:FFFF,:FFFFFFFF:F:FF:F,FFFFFF:,FF,FFFFFF:FFFFFF
FFFFFF:F:FF:FF:
```

```

FFFFFFFFFFFFFFFF:FFFFFFFFFFFFFFFFFFFFFFFFFFFFFFFF:FFFFFFFFFFFFFFFFFFFFFFFF:FFFF
FFFF:FFFFFFFFFFFFFFFFFFFFFFFFFFFFFFFF:FFFFFFFFFFFFFFFF:FFFFFFFFFFFFFFFF:F:FFFFFFF
FFFFFFFFFFFF:FFFF

```

[illegible]

```

FFFFFFFFFFFFFFFFFFFFFFFFFFFFFFFF:FFFFFFFFFFFFFFFFFFFFFFFFFFFFFFFF
FFFFFFFFFFFFFFFFFFFFFFFFFFFFFFFF:FFFFFFFFFFFFFFFFFFFFFFFFFFFFFFFF
FFFFFFFFFFFF:FFF

```

[illegible][illegible]





FFFFFFFFFFFFFFFFFFFFFFFFFFFFFFFFFFFFFFFFFFFFFFFFFFFFFFFFFFFFFFFFFFFFFFFF  
FFFFFFFFFFFFFFFF

@A00721:190:HGJW7DSXY:4:1526:15709:9659 1:N:0:TCTGCAAG+GCTGCACT  
GTTATATGAGGTCTAGACCGATTTCTGTGAGGAAGAACTTAGTGGAACACAGTTTTTAAGGACACC  
ACTGGTGGCAGTGTAGAGGACATGATGAAAGGAGCTTATTATTTAGTTTTTTCGACATTTTCATCAATA  
TGCGATGGAAGTTGT

+

FFFFFFFFFFFFFFFFFFFFFFFFFFFFFFFFFFFFFFFFFFFFFFFFFFFFFFFFFFFFFFFFFFFFFFFF  
FFFFFFFFFFFFFFFFFFFFFFFFFFFFFFFFFFFFFFFFFFFFFFFFFFFFFFFFFFFFFFFFFFFFFFFF:FFFFFFFFFFFFFFFF  
FFFFFFFFFF:FFFFF

@A00721:190:HGJW7DSXY:4:2347:15845:17284 1:N:0:TCTGCAAG+GCTGCACT  
GTTATATGAGGTCTAGACCGATTTCTGTGAGGAAGAACTTAGTGGAACACAGTTTTTAAGGACACC  
ACTGGTGGCAGTGTAGAGGACATGATGAAAGGAGCTTATTATTTAGTTTTTTCGACATTTTCATCAATA  
TGCGATGGAAGTTGT

+

FF:FFFFFFFFFFFFFFFFFFFFFFFFFFFFFFFFFFFFFFFFFFFFFFFFFFFFFFFFFFFFFFFFFFFF  
FFFFFFFFFFFFFFFFFFFFFFFFFFFFFFFFFFFFFFFFFFFFFFFFFFFFFFFFFFFFFFFFFFFFFFFF  
FF:FFFFFFFFFFFFF

@A00721:190:HGJW7DSXY:4:2517:13196:17550 1:N:0:TCTGCAAG+GCTGCACT  
GTTATATGAGGTCTAGACCGATTTCTGTGAGGAAGAACTTAGTGGAACACAGTTTTTAAGGACACC  
ACTGGTGGCAGTGTAGAGGACATGATGAAAGGAGCTTATTATTTAGTTTTTTCGACATTTTCATCAATA  
TGCGATGGAAGTTGT

+

FFFFFFFFFFFFFFFFFFFFFFFFFFFFFFFFFFFFFFFFFFFFFFFFFFFFFFFFFFFFFFFFFFFFFFFF  
FFFFFFFFFFFFFFFFFFFFFFFFFFFFFFFFFFFFFFFFFFFFFFFFFFFFFFFFFFFFFFFFFFFFFFFF:FFFFFFFFFFFFFFFF  
FFFFFFFFFFFFFFFFFFFF

@A00721:190:HGJW7DSXY:4:2663:23999:32346 1:N:0:TCTGCAAG+GCTGCACT  
GTTATATGAGGTCTAGACCGATTTCTGTGAGGAAGAACTTAGTGGAACACAGTTTTTAAGGACACC  
ACTGGTGGCAGTGTAGAGGACATGATGAAAGGAGCTTATTATTTAGTTTTTTCGACATTTTCATCAATA  
TGCGATGGAAGTTGT

+

FFFFFFFFFFFFFFFFFFFFFFFFFFFFFFFFFFFFFFFFFFFFFFFFFFFFFFFFFFFFFFFFFFFFFFFF  
FFFFFFFFFFFFFFFFFFFFFFFFFFFFFFFFFFFFFFFFFFFFFFFFFFFFFFFFFFFFFFFFFFFFFFFF  
FF:FFFFFFFFFFFFF

@A00721:190:HGJW7DSXY:4:1150:2239:13730 1:N:0:TCTGCAAG+GCTGCACT  
ATGAGGTCTAGACCGATTTCTGTGAGGAAGAACTTAGTGGAACACAGTTTTTAAGGACACCACTGG  
TGGCAGTGTAGAGGACATGATGAAAGGAGCTTATTATTTAGTTTTTTCGACATTTTCATCAATATGCGA  
TGGAAGTTGCATTAA

+

FFFFFFFFFFFFFFFFFFFFFFFFFFFFFFFFFFFFFFFFFFFFFFFFFFFFFFFFFFFFFFFFFFFFFFFF  
FFFFFFFFFFFFFFFFFFFFFFFFFFFFFFFFFFFFFFFFFFFFFFFFFFFFFFFFFFFFFFFFFFFFFFFF:FFF:FFFFFFFFFF:FF  
FFFF:FFFFFFFFFFFF

@A00721:190:HGJW7DSXY:4:1266:4264:23657 1:N:0:TCTGCAAG+GCTGCACT  
ATGAGGTCTAGACCGATTTCTGTGAGGAAGAACTTAGTGGAACACAGTTTTTAAGGACACCACTGG  
TGGCAGTGTAGAGGACATGATGAAAGGAGCTTATTATTTAGTTTTTTCGACATTTTCATCAATATGCGA  
TGGAAGTTGCATTAA

+

FFFFFFFFFFFFFFFFFFFFFFFFFFFFFFFFFFFFFFFFFFFFFFFFFFFFFFFFFFFFFFFFFFFFFFFF  
FFFFFFFFFFFFFFFFFFFFFFFFFFFFFFFFFFFFFFFFFFFFFFFFFFFFFFFFFFFFFFFFFFFFFFFF:FFFFFF:FFFFFFFFFFFF  
FFFFFFFFFFFFFFFFFFFF

@A00721:190:HGJW7DSXY:4:1472:13919:20400 1:N:0:TCTGCAAG+GCTGCACT  
ATGAGGTCTAGACCGATTTCTGTGAGGAAGAACTTAGTGGAACACAGTTTTTAAGGACACCACTGG  
TGGCAGTGTAGAGGACATGATGAAAGGAGCTTATTATTTAGTTTTTTCGACATTTTCATCAATATGCGA  
TGGAAGTTGCATTAA

+  
F,FFFFFFFF,FFFFFFFFFFFF,FFFFFFF:,FF,FFFFFFFFFFFFFFFF:FFFFFFFFFFFFFFFF:,  
F:FFFF::FFFF:FFFF:F:F:FFFFFFF:::F,F,FFF:,FF:FFFFFFFFFFFFFFFFFFFFFFFF  
FFFFFFFF:FF,FFFF

@A00721:190:HGJW7DSXY:4:1501:12780:15358 1:N:0:TCTGCAAG+GCTGCACT  
ATGAGGTCTAGACCGATTTCTGTGAGGAAGAACTTAGTGGACTIONCACAGTTTTTAAGGACACCACTGG  
TGGCAGTGTAGAGGACATGATGAAAGGAGCTTATTATTTAGTTTTTTCGACATTTTCATCAATATGCGA  
TGAAGTTGCATTAA

+  
FFFFFFFF:FF:FF:FFFFFFFFFFFFFFFFFFFFFFFFFFFFFFFFFFFFFFFF:FFFFFFFFFFFFFFFF  
FFFFFFFFFFFFFFFFFFFFFFFFFFFFFFFFFFFFFFFFFFFFFFFFFFFFFFFFFFFFFFFFFFFFFFFF:F  
FFFFFFFFFFFFFFFF

@A00721:190:HGJW7DSXY:4:2352:32832:11631 1:N:0:TCTGCAAG+GCTGCACT  
ATGAGGTCTAGACCGATTTCTGTGAGGAAGAACTTAGTGGACTIONCACAGTTTTTAAGGACACCACTGG  
TGGCAGTGTAGAGGACATGATGAAAGGAGCTTATTATTTAGTTTTTTCGACATTTTCATCAATATGCGA  
TGAAGTTGCATTAA

+  
FFFFFFFFFFFFFFFFFFFFFFFFFFFFFFFFFFFFFFFFFFFFFFFFFFFFFFFFFFFFFFFF:FFFFFFFFFFFFFFFF:FFFFFFFF  
FFFFFFFFFFFFFFFFFFFFFFFFFFFFFFFFFFFFFFFFFFFFFFFFFFFFFFFFFFFFFFFFFFFFFFFF:FFFF:FFFF:F  
FF:FF:FFFFFFFF:

@A00721:190:HGJW7DSXY:4:2442:29695:26991 1:N:0:TCTGCAAG+GCTGCACT  
ATGAGGTCTAGACCGATTTCTGTGAGGAAGAACTTAGTGGACTIONCACAGTTTTTAAGGACACCACTGG  
TGGCAGTGTAGAGGACATGATGAAAGGAGCTTATTATTTAGTTTTTTCGACATTTTCATCAATATGCGA  
TGAAGTTGCATTAA

+  
FFFFFFFFFFFFFFFFFFFFFFFFFFFFFFFFFFFFFFFFFFFFFFFFFFFFFFFFFFFFFFFFFFFFFFFF  
FFFFFFFFFFFFFFFFFFFFFFFFFFFFFFFFFFFFFFFFFFFFFFFFFFFFFFFFFFFFFFFFFFFFFFFF:F  
FFFFFFFFFFFFFFFF:

@A00721:190:HGJW7DSXY:4:2443:23601:4695 1:N:0:TCTGCAAG+GCTGCACT  
ATGAGGTCTAGACCGATTTCTGTGAGGAAGAACTTAGTGGACTIONCACAGTTTTTAAGGACACCACTGG  
TGGCAGTGTAGAGGACATGATGAAAGGAGCTTATTATTTAGTTTTTTCGACATTTTCATCAATATGCGA  
TGAAGTTGCATTAA

+  
FFFFFFFFFFFFFFFFFFFFFFFFFFFFFFFFFFFFFFFFFFFFFFFFFFFFFFFFFFFFFFFFFFFFFFFF  
FFFFFFFFFFFFFFFFFFFFFFFFFFFFFFFFFFFFFFFFFFFFFFFFFFFFFFFFFFFFFFFFFFFFFFFF:FFFF  
FFFFFFFF:FFFFFFFF

@A00721:190:HGJW7DSXY:4:1115:26341:8844 1:N:0:TCTGCAAG+GCTGCACT  
GTCTGGACCGATTTCTGTGAGGAAGAACTTAGTGGACTIONCACAGTTTTTAAGGACACCACTGGTGGCA  
GTGTAGAGGACATGATGAAAGGAGCTTATTATTTAGTTTTTTCGACATTTTCATCAATATGCGATGGAA  
GTTGCATTAAATGTA

+  
FFFFFFFFFFFFFFFFFFFFFFFFFFFFFFFFFFFFFFFFFFFFFFFFFFFFFFFFFFFFFFFFFFFFFFFF  
FFFFFFFFFFFFFFFFFFFFFFFFFFFFFFFFFFFFFFFFFFFFFFFFFFFFFFFFFFFFFFFFFFFFFFFF  
FFFFF:FFFFFFFF

@A00721:190:HGJW7DSXY:4:1157:27887:31438 1:N:0:TCTGCAAG+GCTGCACT  
GTCTAGACCGATTTCTGTGAGGAAGAACTTAGTGGACTIONCACAGTTTTTAAGGACACCACTGGTGGCA  
GTGTAGAGGACATGATGAAAGGAGCTTATTATTTAGTTTTTTCGACATTTTCATCAATATGCGATGGAA  
GTTGCATTAAATGTA

+  
FFFFFFFFFFFFFFFFFFFFFFFFFFFFFFFFFFFFFFFFFFFFFFFFFFFFFFFFFFFFFFFFFFFFFFFF  
FFFFFFFFFFFFFFFFFFFFFFFFFFFFFFFFFFFFFFFFFFFFFFFFFFFFFFFFFFFFFFFFFFFFFFFF:  
FFFFFFFFFFFFFFFF:

@A00721:190:HGJW7DSXY:4:1219:2781:13698 1:N:0:TCTGCAAG+GCTGCACT  
GTCTAGACCGATTTCTGTGAGGAAGAACTTAGTGGACTIONCACAGTTTTTAAGGACACCACTGGTGGCA

GTGTAGAGGACATGATGAAAGGAGCTTATTATTTAGTTTTTGCACATTTTCATCAATATGCGATGGAA  
GTTGCATTAATGTA

[illegible] $+$ [illegible] $+$ 

F,FFF,FFF,FFFFFF:F:,FF::F:FFFFFFFF:FF,F,FFFFFF,FFF,,:,F:FFFFFFFF,,,:FF  
 ,,F:,FF,F:,FF:F,,FF,FF:FF,FFFF,,F:,FFF,,F,FFFFFF:,FFFFFF,F,:F,F:FF,  
 ,F:FFF,,:F:FFFF

+

```

FFFFFFFFFFFFFFFF:FFFFFFFFFFFFFFFFFFFFFFFFFFFFFFFFFFFFFFFF
FFFFFFFFFFFFFFFFFFFFFFFF:F:FFFFFFFFFFFFFFFFFFFFFFFFFFFFFF:
FFFFFFFFFFFFFFFF:

```

+

```
FFFFFFFFFFFFFFFFFFFFFFFFFFFFFFFFFFFF:FFFFFFFFFFFFFFFFFFFFFFFFFFFFFFF
FFFFFFFFFFFFFFFFFFFFFFFFFFFFFFFFFFFF:FFFFFFFFFFFFFFFFFFFFFFFFFFFFFFF
EEEEEEEEEEEEEE
```

+

[illegible]

+

[illegible]



FFFFFFFFFFFFFFFFFFFFFFFFFFFFFFFFFFFFFFFFFFFFFFFFFFFFFFFFFFFFFFFFFFFFFFFF  
FF:FFFFFFFFFFFFFF

@A00721:190:HGJW7DSXY:4:1347:16640:19288 1:N:0:TCTGCAAG+GCTGCACT  
CGTACATTTAATGCAACTTCCATCGCATATTGATGAAATGTCGCAAAACTAAATAATAAGCTCCTTT  
CATCATGTCCTCTACACTGCCACCAGTGGTGTCTTAAAACTGTGAGTCCACTAAGTTTCTTCCTCA  
CAGAAATCGGTCTAG

+

FFFFFFFFFFFFFFFFFFFFFFFFFFFFFFFFFFFFFFFFFFFFFFFFFFFFFFFFFFFFFFFFFFFFFFFF  
FFFFFFFFFFFFFFFFFFFFFFFFFFFFFFFFFFFFFFFFFFFFFFFFFFFFFFFFFFFFFFFFFFFFFFFF  
FFFFFFFFFFFFFFFFFFFFFF

@A00721:190:HGJW7DSXY:4:2307:19958:8343 1:N:0:TCTGCAAG+GCTGCACT  
CGTACATTTAATGCAACTTCCATCGCATATTGATGAAATGTCGCAAAACTAAATAATAAGCTCCTTT  
CATCATGTCCTCTACACTGCCACCAGTGGTGTCTTAAAACTGTGAGTCCACTAAGTTTCTTCCTCA  
CAGAAATCGGTCTAG

+

FF:FFFFFFFFFFFFFF:FFFFFFFFFF:FF:FFF:FFFFFFFFFFFFFFFFFFFFFFFFFFFFFFFFFFFF  
FFFFFFFFFFFFFFFFFFFFFFFFFFFFFFFFFFFFFFFFFFFFFFFFFFFFFFFFFFFFFFFFFFFFFFFF  
FF,FFFFFFFFFFFF:

@A00721:190:HGJW7DSXY:4:2326:19045:34601 1:N:0:TCTGCAAG+GCTGCACT  
CGTACATTTAATGCAACTTCCATCGCATATTGATGAAATGTCGCAAAACTAAATAATAAGCTCCTTT  
CATCATGTCCTCTACACTGCCACCAGTGGTGTCTTAAAACTGTGAGTCCACTAAGTTTCTTCCTCA  
CAGAAATCGGTCTAG

+

FFFFFFFFFFFFFFFFFFFFFFFFFFFFFFFFFFFFFFFFFFFFFFFFFFFFFFFFFFFFFFFFFFFFFFFF  
FFFFFFFFFFFFFFFFFFFFFFFFFFFFFFFFFFFFFFFFFFFFFFFFFFFFFFFFFFFFFFFFFFFFFFFF  
FF:FFFFFFFFFFFFFF

@A00721:190:HGJW7DSXY:4:2361:22968:14967 1:N:0:TCTGCAAG+GCTGCACT  
CGTACATTTAATGCAACTTCCATCGCATATTGATGAAATGTCGCAAAACTAAATAATAAGCTCCTTT  
CATCATGTCCTCTACACTGCCACCAGTGGTGTCTTAAAACTGTGAGTCCACTAAGTTTCTTCCTCA  
CAGAAATCGGTCTAG

+

FFFFFFFFFFFFFFFFFFFFFFFFFFFFFFFFFFFFFFFFFFFFFFFFFFFFFFFFFFFFFFFFFFFFFFFF  
FFFFFFFFFFFFFFFFFFFFFFFFFFFFFFFFFFFFFFFFFFFFFFFFFFFFFFFFFFFFFFFFFFFFFFFF  
FFFFFFFFFFFFFFFFFFFF

@A00721:190:HGJW7DSXY:4:1102:12545:14418 1:N:0:TCTGCAAG+GCTGCACT  
GACCGATTTCTGTGAGGAAGAACTTAGTGGACTCACAGTTTTTAAGGACACCACTGGTGGCAGTGTA  
GAGGACATGATGAAAGGAGCTTATTATTAGTTTTTGCACATTTTCATCAATATGCGATGGAAGTTGC  
ATTAAATGTACGAAT

+

FFFFFFFFFFFFFFFFFFFFFFFFFFFFFFFFFFFFFFFFFFFFFFFFFFFFFFFFFFFFFFFFFFFFFFFF  
FFFFFFFFFFFFFFFFFFFFFFFFFFFFFFFFFFFFFFFFFFFFFFFFFFFFFFFFFFFFFFFFFFFFFFFF  
FFFFFFFFFFFFFFFFFFFF

@A00721:190:HGJW7DSXY:4:1232:3721:19774 1:N:0:TCTGCAAG+GCTGCACT  
GACCGATTTCTGTGAGGAAGAACTTAGTGGACTCACAGTTTTTAAGGACACCACTGGTGGCAGTGTA  
GAGGACATGATGAAAGGAGCTTATTATTAGTTTTTGCACATTTTCATCAATATGCGATGGAAGTTGC  
ATTAAATGTACGAAT

+

FFFFFFFFFFFFFFFFFFFFFFFFFFFFFFFFFFFFFFFFFFFFFFFFFFFFFFFFFFFFFFFFFFFFFFFF  
FFFFFFFFFFFFFFFFFFFFFFFFFFFFFFFFFFFFFFFFFFFFFFFFFFFFFFFFFFFFFFFFFFFFFFFF  
FF:FFFFFFFFFFFF:

@A00721:190:HGJW7DSXY:4:1275:10013:33238 1:N:0:TCTGCAAG+GCTGCACT  
GACCGATTTCTGTGAGGAAGAACTTAGTGGACTCACAGTTTTTAAGGACACCACTGGTGGCAGTGTA  
GAGGACATGATGAAAGGAGCTTATTATTAGTTTTTGCACATTTTCATCAATATGCGATGGAAGTTGC  
ATTAAATGTACGAAT

+  
FFFFFFFFFFFFFFFFFFFFFFFFFFFFFFFFFFFFFFFFFFFFFFFFFFFFFFFFFFFFFFFFFFFFFFFF  
FFFFFFFFFFFFFFFFFFFFFFFFFFFFFFFFFFFFFFFFFFFFFFFFFFFFFFFFFFFFFFFFFFFFFFFF  
FFFFFFFFFFFFFFFF

@A00721:190:HGJW7DSXY:4:1307:20220:15280 1:N:0:TCTGCAAG+GCTGCACT  
GACCGATTTCTGTGAGGAAGAACTTAGTGACTCACAGTTTTTAAGGACACCACTGGTGGCAGTGTA  
GAGGACATGATGAAAGGAGCTTATTATTTAGTTTTTGCACATTTTCATCAATATGCGATGGAAGTTGC  
ATTAAATGTACGAAT

+  
FFF,FFFFFFFF:FF:FFFFFFFF:FFFFFFFF:FFFF:FFFFFFFF:FFFFFF:F:F  
FFFFFFFF:FFF:,FF,F,FFFF:F,FF,,FFFF,FFFFFFFF:FF:FFFF:FFFFFFFF:F  
FFFFFFFF:FF,FFF

@A00721:190:HGJW7DSXY:4:1307:19596:15389 1:N:0:TCTGCAAG+GCTGCACT  
GACCGATTTCTGTGAGGAAGAACTTAGTGACTCACAGTTTTTAAGGACACCACTGGTGGCAGTGTA  
GAGGACATGATGAAAGGAGCTTATTATTTAGTTTTTGCACATTTTCATCAATATGCGATGGAAGTTGC  
ATTAAATGTACGAAT

+  
FFFFFFFFFFFFFFFFFFFFFFFFFFFFFFFFFFFFFFFF:FFFFFFFFFFFFFFFFFFFFFFFF  
FFFFFFFFFFFFFFFFFFFFFFFFFFFFFFFFFFFFFFFFFFFFFFFFFFFFFFFFFFFFFFFF:FFF  
FFFFFFFF

@A00721:190:HGJW7DSXY:4:1320:9353:15499 1:N:0:TCTGCAAG+GCTGCACT  
GACCGATTTCTGTGAGGAAGAACTTAGTGACTCACAGTTTTTAAGGACACCACTGGTGGCAGTGTA  
GAGGACATGATGAAAGGAGCTTATTATTTAGTTTTTGCACATTTTCATCAATATGCGATGGAAGTTGC  
ATTAAATGTACGAAT

+  
FFFFFFFFFFFFFFFFFFFFFFFFFFFFFFFFFFFFFFFFFFFFFFFFFFFFFFFFFFFFFFFF  
FFFFFFFFFFFFFFFFFFFFFFFFFFFFFFFF:FFFFFFFFFFFFFFFFFFFFFFFF  
FFFFFF:FFFFFF

@A00721:190:HGJW7DSXY:4:1324:13015:34021 1:N:0:TCTGCAAG+GCTGCACT  
GACCGATTTCTGTGAGGAAGAACTTAGTGACTCACAGTTTTTAAGGACACCACTGGTGGCAGTGTA  
GAGGACATGATGAAAGGAGCTTATTATTTAGTTTTTGCACATTTTCATCAATATGCGATGGAAGTTGC  
ATTAAATGTACGAA

+  
FFFFFFFFFFFFFFFF:FFFFFFFFFFFFFFFFFFFFFFFFFFFFFFFFFFFFFFFF  
FFFFFFFF:FFFFFFFF,FFF,FFFFFFFFFFFFFFFFFFFFFFFFFFFFFFFF  
FFFFFFFF

@A00721:190:HGJW7DSXY:4:1360:15989:10081 1:N:0:TCTGCAAG+GCTGCACT  
GACCGATTTCTGTGAGGAAGAACTTAGTGACTCACAGTTTTTAAGGACACCACTGGTGGCAGTGTA  
GAGGACATGATGAAAGGAGCTTATTATTTAGTTTTTGCACATTTTCATCAATATGCGATGGAAGTTGC  
ATTAAATGTACGAAT

+  
FFFFFFFFFFFF,FFFFFFFFFFFFFFFFFFFFFFFFFFFFFFFFFFFFFFFF  
FFFFFFFFFFFFFFFF:FFFFFFFFFFFFFFFFFFFFFFFFFFFFFFFF:FFFF  
FFFFFFFF

@A00721:190:HGJW7DSXY:4:1406:13358:35336 1:N:0:TCTGCAAG+GCTGCACT  
GACCGATTTCTGTGAGGAAGAACTTAGTGACTCACAGTTTTTAAGGACACCACTGGTGGCAGTGTA  
GAGGACATGATGAAAGGAGCTTATTATTTAGTTTTTGCACATTTTCATCAATATGCGATGGAAGTTGC  
ATTAAATGTACGAAT

+  
FFFFFFFFFFFFFFFFFFFFFFFFFFFFFFFFFFFFFFFFFFFFFFFFFFFFFFFF  
FFFFFFFFFFFFFFFFFFFFFFFFFFFFFFFFFFFFFFFFFFFFFFFFFFFFFFFF  
FFFFFF:FFFFFF

@A00721:190:HGJW7DSXY:4:1411:29568:29465 1:N:0:TCTGCAAG+GCTGCACT  
GACCGATTTCTGTGAGGAAGAACTTAGTGACTCACAGTTTTTAAGGACACCACTGGTGGCAGTGTA

GAGGACATGATGAAAGGAGCTTATTATTTAGTTTTTGCGACATTTCAATATGCGATGGAAGTTGC  
ATTAAATGTACGAAT

```

FFFFFFFF:FFFFFFFF,FFF:FFFF:FF,:,FFFF:FFF:,FFFFFF,FFFFFFFF:F,F,F,F:,F:F
,FF,F,FF:FF,FFF:FF,FFFF:FFFFFFFF:FFF:FF::FFF,FFFFFF::FFF:,FFFFF,FF,:F:F
FFFFFFFF:FFFFFFFF

```

 $+$ 

```

FFFFFFFFFFFFFFFFFFFFFFFFFFFFFFFFFFFFFFFF:FFFFFFFFFFFFFFFFFFFFFFFFFFFFFFFF
FFFFFFFFFFFFFFFFFFFFFFFFFFFFFFFF:FFFFFFFFFFFFFFFFFFFFFFFFFFFFFFFFFFFFFFFF
F,FFFFFFFFFFFFFF

```

 $+$ [illegible] $+$ [illegible] $+$ [illegible]

+

[illegible]

+

[illegible]

@A00721:190:HGJW7DSXY:4:2354:20555:12477 1:N:0:TCTGCAAG+GCTGCACT  
GACCGATTTCTGTGAGGAAGAACTTAGTGGACTCACAGTTTTTAAGGACACCACTGGTGGCAGTGTA  
GAGGACATGATGAAAGGAGCTTATTATTTAGTTTTTGCACATTTTCATCAATATGCGATGGAAGTTGC  
ATTAAATGTACGAAT

+

FFFFFFFFFFFFFFFFFFFFFFFFFFFFFFFFFFFFFFFFFFFFFFFFFFFFFFFFFFFFFFFFFFFFFFFF  
FFFFFFFFFFFFFFFFFFFFFFFFFFFFFFFFFFFFFFFFFFFFFFFFFFFFFFFFFFFFFFFFFFFFFFFF  
FFFFFFFFFFFFFFFFFFFFFFFF

@A00721:190:HGJW7DSXY:4:2355:28004:4398 1:N:0:TCTGCAAG+GCTGCACT  
GACCGATTTCTGTGAGGAAGAACTTAGTGGACTCACAGTTTTTAAGGACACCACTGGTGGCAGTGTA  
GAGGACATGATGAAAGGAGCTTATTATTTAGTTTTTGCACATTTTCATCAATATGCGATGGAAGTTGC  
ATTAAATGTACGAAT

+

FFFFFFFFFFFFFF:FFFFFFFFFFFFFFFFFFFFFFFFFFFFFFFFFFFFFFFFFFFFFFFFFFFFFFFF  
FFFFFFFFFFFFFFFFFFFFFFFFFFFFFFFFFFFFFFFFFFFFFFFFFFFFFFFFFFFFFFFFFFFFFFFF  
FFFFFFFFFFFFFF:F:FF

@A00721:190:HGJW7DSXY:4:2362:28854:30295 1:N:0:TCTGCAAG+GCTGCACT  
GACCGATTTCTGTGAGGAAGAGACTTAGTGGACTCACAGTTTTTAAGGACACCACTGGTGGCAGTGTA  
GAGGACATGATGAAAGGAGCTTATTATTTAGTTTTTGCACATTTTCATCAATATGCGATGGAAGTTGC  
ATTAAATGTACGAAT

+

FFFFFFFFFFFFFFFFFFFFFFFFFFFFFFFFFFFFFFFFFFFFFFFFFFFFFFFFFFFFFFFFFFFFFFFF  
FFFFFFFFFFFFFFFFFFFFFFFFFFFFFFFFFFFFFFFFFFFFFFFFFFFFFFFFFFFFFFFFFFFFFFFF  
FFFFFFFFFFFFFF:FFF

@A00721:190:HGJW7DSXY:4:2468:23574:32550 1:N:0:TCTGCAAG+GCTGCACT  
GACCGATTTCTGTGAGGAAGAACTTAGTGGACTCACAGTTTTTAAGGACACCACTGGTGGCAGTGTA  
GAGGACATGATGAAAGGAGCTTATTATTTAGTTTTTGCACATTTTCATCAATATGCGATGGAAGTTGC  
ATTAAATGTACGAAT

+

FFFFFFFFFFFFFFFFFFFFFFFFFFFFFFFFFFFFFFFFFFFFFFFFFFFFFFFFFFFFFFFFFFFFFFFF  
FFFFFFFFFFFFFFFFFFFFFFFFFFFFFFFFFFFFFFFFFFFFFFFFFFFFFFFFFFFFFFFFFFFFFFFF  
FFFFFFFFFFFFFFFF

@A00721:190:HGJW7DSXY:4:2478:18041:35712 1:N:0:TCTGCAAG+GCTGCACT  
GACCGATTTCTGTGAGGAAGAACTTAGTGGACTCACAGTTTTTAAGGACACCACTGGTGGCAGTGTA  
GAGGACATGATGAAAGGAGCTTATTATTTAGTTTTTGCACATTTTCATCAATATGCGATGGAAGTTGC  
ATTAAATGTACGAAT

+

FFFFFFFFFFFFFFFFFFFFFFFFFFFFFFFFFFFFFFFFFFFFFFFFFFFFFFFFFFFFFFFFFFFFFFFF  
FFFFFFFFFFFF:FFFFFFFFFFFFFFFFFFFFFFFFFFFFFFFFFFFFFFFFFFFFFFFFFFFFFFFF  
FFFF:FFFFFFFF

@A00721:190:HGJW7DSXY:4:2478:16731:36041 1:N:0:TCTGCAAG+GCTGCACT  
GACCGATTTCTGTGAGGAAGAACTTAGTGGACTCACAGTTTTTAAGGACACCACTGGTGGCAGTGTA  
GAGGACATGATGAAAGGAGCTTATTATTTAGTTTTTGCACATTTTCATCAATATGCGATGGAAGTTGC  
ATTAAATGTACGAAT

+

FFFFFFFFFFFF:FFFFFFFFFFFFFFFFFFFFFFFFFFFFFFFFFFFFFFFFFFFFFFFFFFFFFFFF  
FFFFFFFFFFFFFFFFFFFFFFFFFFFFFFFFFFFFFFFFFFFFFFFFFFFFFFFFFFFFFFFFFFFFFFFF  
FFFFFFFFFFFFFFFF

@A00721:190:HGJW7DSXY:4:2523:11116:16673 1:N:0:TCTGCAAG+GCTGCACT  
GACCGATTTCTGTGAGGAAGAACTTAGTGGACTCACAGTTTTTAAGGACACCACTGGTGGCAGTGTA  
GAGGACATGATGAAAGGAGCTTATTATTTAGTTTTTGCACATTTTCATCAATATGCGATGGAAGTTGC  
ATTAAATGTACGAAT

+

FFFFF,F::FFFFF,FFFFFFFFF,,FFF:FFF:,FFFFFFF,::,FFF:FFFF,FF,FFFFFFF



@A00721:190:HGJW7DSXY:4:2561:14235:10207 1:N:0:TCTGCAAG+GCTGCACT  
GACCGATTTCTGTGAGGAAGAACTTAGTGACTCACAGTTTTTAAAGGACACCACTGGTGGCAGTGTA  
GAGGACATGATGAAAGGAGCTTATTATTTAGTTTTTGCACATTTTCATCAATATGCGATGGAAGTTGC  
ATTAAATGTACGAAT

@A00721:190:HGJW7DSXY:4:2601:5882:29089 1:N:0:TCTGCAAG+GCTGCACT  
GACCGATTTCTGTGAGGAAGAACTTAGTGACTCACAGTTTTTAAAGGACACCACTGGTGGCAGTGTA  
GAGGACATGATGAAAGGAGCTTATTATTTAGTTTTTGCACATTTTATCAATATGCGATGGAAGTTGC  
ATTAAATGTACGAAT

@A00721:190:HGJW7DSXY:4:2603:13232:15076 1:N:0:TCTGCAAG+GCTGCACT  
GACCGATTTCTGTGAGGAAGAACTTAGTGACTCACAGTTTTTAAAGGACACCACTGGTGGCAGTGTA  
GAGGACATGATGAAAGGAGCTTATTATTTAGTTTTTGCACATTTCAATATGCGATGGAAGTTGC  
ATTAAATGTACGAAT

@A00721:190:HGJW7DSXY:4:2634:22616:27477 1:N:0:TCTGCAAG+GCTGCACT  
GACCGATTTCTGTGAGGAAGAACTTAGTGACTCACAGTTTTTAAAGGACACCACTGGTGGCAGTGTA  
GAGGACATGATGAAAGGAGCTTATTATTTAGTTTTTGCACATTTCAATATGCGATGGAAGTTGC  
ATTAAATGTACGAAT

@A00721:190:HGJW7DSXY:4:2544:23601:21167 1:N:0:TCTGCAAG+GCTGCACT  
ACCGATTTCTGTGAGGAAGAACTTAGTGGACTCACAGTTTTTAAGGACACCACTGGTGGCAGTGTAG  
AGGACATGATGAAAGGAGCTGATTATTTAGTTTTTGAGACATTTTCATCAATATGCTATTGAAGTTTCA  
TTAAATGTACGAAT

@A00721:190:HGJW7DSXY:4:1139:9561:35837 1:N:0:TCTGCAAG+GCTGCACT  
CCACATTCGTACATTTAATGCAACTTCCATCGCATATTGATGAAATGTCGAAAACTAAATAATAAG  
CTCCTTTCATCATGTCCTCTACACTGCCACCAGTGGTGTCTTAAAACTGTGAGTCCACTAAGTTTC  
TTCCTCACAGAAATC

@A00721:190:HGJW7DSXY:4:1276:11478:23563 1:N:0:TCTGCAAG+GCTGCACT  
CCACATTCGTACATTTAATGCAACTTCCATCGCATATTGATGAAATGTCGAAAACTAAATAATAAG  
CTCCTTTCATCATGTCCTCTACACTGCCACCAGTGGTGTCCTTAAAACTGTGAGTCCACTAAGTTTC  
TTCCTCACAGAAATC

```
FFFFFFFFFFFFFFFFFFFFFFFFFFFFF:FFFFFFFFFFFFFFFFFFFFFFFFFFFFF:FFFFFFFFF
FFFFFFFFFFFFFFFFFFFFFFFFFFFFFFFFFFFFFFFFFFFFFFFFFFFFFFFFFFFFFFFFFFFFF,FFFFFFFFFFFFFFFFFFFFFFFFFFFFFFFFFFFFF
FFFFFFFFFFFFFFFFFFFF
```

[illegible][illegible][illegible]

```

FFFFFF,FFFFFF,,FFFFFF:,FFFF:FFF:FF:FFFFFFFFFFFFFFFFFFFFFF,FFF:FFFFFF:F
FFF,F,FFFFFFFFFFFFFFFFFFFF:FFFFFFFF:FFFFFFFFFFFF:FFFFFF:FF:FF:FFFFFFFF:F
FF:F:FFFF:FFFF

```

[illegible][illegible]

@A00721:190:HGJW7DSXY:4:1408:15212:35446 1:N:0:TCTGCAAG+GCTGCACT  
CTGTGAGGAAGAACTTAGTGGACTCACAGTTTTTAAAGGACACCACTGGTGGCAGTG TAGAGGACATG

ATGAAAGGAGATTATTATTTAGTTTTTGCGACATTTATCAATATGCGATGGAAGTTGCATTAAATGT  
ACGAA

```

FFFFFFFF:FFFFFFFF,,FFFF,FFF,FFF:,F,FFFF,F:FFFF:F:FFF,:FFFF:FF:F,FF,F,F
F,FFFFFF:FF,F,F,FF::FFFFFFFF,,F:F:FFFFFF:FFFFFFFF,FFF:FF,FFF:FF:FFFF:F
FF:FF

```

+

[illegible]

+

```
FFFFFFFFFFFFFFFFFFFFFFFFFFFFFFFFFFFFFFFFFFFFFFFFFFFFFFFFFFFFFFF
FFFFFFFFFFFF:F,FF:FFFFFFFFFFFFFFFFFFFFFFFFFFFFFFFFFFFFFFFFFFFF:FFFFFFF
FFFFFFF
```

+

```
FFFFFFFFFFFFFFFFFFFFFFFFFFFFFFFFFFFFFFFFFFFFFFFFFFFFFFFFFFFFFFFFFFFFFFFFFFFFF
FFF:F:FFF:F:FFFFFFFFFFFFFFFFFFFFFFF:FFFFFFFFFFFFFFFFFFFFF:FFFFFFFFF:FFF
FFFFFFFF
```

+

```
FFFFFFFFFFFFFFFFFFFFFFFFFFFFFFFFFFFFFFFFFFFFFFFFFFFFFFFFFFFFFFFF
FFFFFFFFFFFFFFFF:FFFFFFFFFFFFFFFFFFFFFFFFFFFFFFFFFFFFFFFFFFFFFFF
EEEEEEEEE
```

 $+$ [illegible] $+$ [illegible]

@A00721:190:HGJW7DSXY:4:1511:2401:25848 1:N:0:TCTGCAAG+GCTGCACT  
TCTGAACCACATTCGTACATTTAATGCAACTTCCATCGCATATTGATGAAATGTCGCAAAAACATAAT  
AATAAGCTCCTTTCATCATGTCCTCTACACTGCCACCAGTGGTGTCTTAAAACTGTGAGTCCACTA  
AGTTTCTTCCTCACA

[illegible]

+

[illegible]

+

[illegible]

+

[illegible]

+

```
FFFFFFFFFFFFFFFFFFFFFFFFFFFFFFFFFFFFFFFFFFFFFFFFFFFFFFFFFFFFFFF  
FFFFFFFFFFFFFFFFFFFFFFFFFFFF:FFFFFFFFFFFFFFFFFFFFF:FFFFFFFFFFFFFFFF  
EEEEEEEEE:EEEE
```

+

```
FFFFFFFFFFFFFFFF:FF:F,FFF:FFFFFFFFFFFFFFFFFFFFFFFFFFFFFFFF:FF
FF:FFFFFFFFFFFFFFFF:FFFFFFFFFFFFFFFFFFFFFFFF:FFFFFFF::FFFFFFFFF
FFFFFFF:FFFFFFF
```

+

[illegible]

FFFFFFFFFFFFFFFFFFFFFFFFFFFFFFFFFFFFFFFFFFFFFFFFFFFFFFFFFFFFFFFFFFFFFFFFFFFFFFFF  
FFFFFFFFFFFFFFFF

@A00721:190:HGJW7DSXY:4:1674:25265:1376 1:N:0:TCTGCAAG+GCTGCACT  
CTCACAGTTTTTAAGGACACCACTGGTGGCAGTGTAGAGGACATGATGAAAGGAGCTTATTATTAGTT  
TTTGCACATTTTCATCAATATGCGATGGAAGTTGCATTAAATGTACGAATGTGGTTCAGAAGTGTTTA  
ATAAAATGATATATA

+

FFFFFFFFFFFFFFFFFFFFFFFFFFFFFFFFFFFFFFFFFFFFFFFFFFFFFFFFFFFFFFFFFFFFFFFFFFFFFFFF  
FFFFFFFFFFFFFFFFFFFFFFFFFFFFFFFFFFFFFFFFFFFFFFFFFFFFFFFFFFFFFFFFFFFFFFFFFFFFFFFF  
FFFFFFFFFFFFFFFF

@A00721:190:HGJW7DSXY:4:2220:1741:36605 1:N:0:TCTGCAAG+GCTGCACT  
CTCACAGTTTTTAAGGACACCACTGGTGGCAGTGTAGAGGACATGATGAAAGGAGCTTATTATTAGTT  
TTTGCACATTTTCATCAATATGCGATGGAAGTTGCATTAAATGTACGAATGTGGTTCAGAAGTGTTTA  
ATAAAATGATATATA

+

FFFFFFFFFFFFFFFFFFFFFFFFFFFFFFFFFFFFFFFFFFFFFFFFFFFFFFFFFFFFFFFFFFFFFFFFFFFFFFFF  
FFFFFFFFFFFFFFFFFFFFFFFFFFFFFFFFFFFFFFFFFFFFFFFFFFFFFFFFFFFFFFFFFFFFFFFFFFFFFFFF  
FFFFFFFFFFFFFFFF

@A00721:190:HGJW7DSXY:4:2231:29776:35556 1:N:0:TCTGCAAG+GCTGCACT  
CTCACAGTTTTTAAGGACACCACTGGTGGCAGTGTAGAGGACATGATGAAAGGAGCTTATTATTAGTT  
TTTGCACATTTTCATCAATATGCGATGGAAGTTGCATTAAATGTACTAATGTGGTTCAGAAGTGTTTA  
ATAAAATGATATATA

+

F:FFFFFFFFFFFFFFFFFFFFFFFFFFFFFFFFFFFFFFFFFFFFFFFFFFFFFFFFFFFFFFFFFFFFFFFFFFFF  
FF:FFFF,FF:FFFFFFFFFFFFFFFFFFFFFFFFFFFFFFFFFFFFFFFFFFFFFFFFFFFFFFFFFFFFFFFF  
:FFFF:F,:FFFF

@A00721:190:HGJW7DSXY:4:1162:24903:32784 1:N:0:TCTGCAAG+GCTGCACT  
GGACACCACTGGTGGCAGTGTAGAGGACATGATGAAAGGAGCTTATTATTTAGTTTTTGCACATTTTC  
ATCAATATGCGATGGAAGTTGTATTAAATGTACGAATGTGGTTCAGAAGTGTTTAATAAAATGATATA  
TATTCATTTTCCATT

+

FFFFFFFFFFFFFFFFFFFFFFFFFFFFFFFFFFFFFFFFFFFFFFFFFFFFFFFFFFFFFFFFFFFFFFFFFFFFFFFF  
FFFFFFFFFFFFFFFFFFFFFFFFFFFFFFFFFFFFFFFFFFFFFFFFFFFFFFFFFFFFFFFFFFFFFFFFFFFFFFFF  
FFFF:FFFFFFFFFFFF

@A00721:190:HGJW7DSXY:4:1234:29640:34162 1:N:0:TCTGCAAG+GCTGCACT  
GGACACCACTGGTGGCAGTGTAGAGGACATGATGAAAGGAGCTTATTATTTAGTTTTTGCACATTTTC  
ATCAATATGCGATGGAAGTTGTATTAAATGTACGAATGTGGTTCAGAAGTGTTTAATAAAATGATATA  
TATTCATTTTCCATT

+

FFFFFFFFFFFFFFFFFFFFFFFFFFFFFFFFFFFFFFFFFFFFFFFFFFFFFFFFFFFFFFFFFFFFFFFFFFFFFFFF  
FFFFFFFFFFFFFFFFFFFFFFFFFFFFFFFFFFFFFFFFFFFFFFFFFFFFFFFFFFFFFFFFFFFFFFFFFFFFFFFF  
FFFFFFFFFFFFFFFF

@A00721:190:HGJW7DSXY:4:1252:24768:14951 1:N:0:TCTGCAAG+GCTGCACT  
GGACACCACTGGTGGCAGTGTAGAGGACATGATGAAAGGAGCTTATTATTTAGTTTTTGCACATTTTC  
ATCAATATGCGATGGAAGTTGTATTAAATGTACGAATGTGGTTCAGAAGTGTTTAATAAAATGATATA  
TATTCATTTTCCATT

+

FFFFFFFFFFFFFFFFFFFFFFFFFFFFFFFFFFFFFFFFFFFFFFFFFFFFFFFFFFFFFFFFFFFFFFFFFFFFFFFF  
FFFFFFFFFFFFFFFFFFFFFFFFFFFFFFFFFFFFFFFFFFFFFFFFFFFFFFFFFFFFFFFFFFFFFFFFFFFFFFFF  
FFFFFFFFFFFFFFFF

@A00721:190:HGJW7DSXY:4:1252:24686:14967 1:N:0:TCTGCAAG+GCTGCACT  
GGACACCACTGGTGGCAGTGTAGAGGACATGATGAAAGGAGCTTATTATTTAGTTTTTGCACATTTTC  
ATCAATATGCGATGGAAGTTGTATTAAATGTACTAATGTGGTTCAGAAGTGTTTAATAAAATGATATA  
TATTCATTTTCCA

+  
F,FFF,:FF,:FF,FF::FFFFF,,FFFFF:F,,FFFFF::FFF,FF,:F:FFFFF,F,F:F,FFF  
F:,FFF,:FF:FFF,,FFFFFFF:FFF:F,FFF,:FFFFF,FFFF:FFFFF:F::FFFFFFF,FFFF  
FF,:,:FF:FFFF

@A00721:190:HGJW7DSXY:4:1254:24017:32659 1:N:0:TCTGCAAG+GCTGCACT  
GGACACCACTGGTGGCAGTGTAGAGGACATGATGAAAGGAGCTTATTATTTAGTTTTTGCACATTTTC  
ATCAATATGCGATGGAAGTTGTAGTAAATGTACGAATGTGGTTCAGAAGTGTTTAATAAAATGATATA  
TATTCATTTTCCATT

+  
FFFFFFFF:FFFFFFFFFFFFFF,FFFFFF,FFFFFF:FFF:FFFFFFFFFFFFFF,F:FFFFFFFFFFFF  
:FFFFFFFF:,FFFFFFFFFFFF:FF,F:FFFFFFFFFFFFFF,F::F,F:FFF:FF:FFFFFFFFFFFFFF  
FFFFFFFFFFFF::FFF

@A00721:190:HGJW7DSXY:4:1303:30626:30201 1:N:0:TCTGCAAG+GCTGCACT  
GGACACCACTGGTGGCAGTGTAGAGGACATGATGAAAGGAGCTTATTATTTAGTTTTTGCACATTTTC  
ATCAATATGCGATGGAAGTTGTATTAATGTACGAATGTGGTTCAGAAGTGTTTAATAAAATGATATA  
TATTCATTTTCCATT

+  
FFFFFFFFFFFFFFFFFFFFFFFF:FFFFFFFFFFFFFFFFFFFFFFFFFFFFFFFFFFFFFFFFFFFF  
FFFFFFFFFFFF:FFFF:FFF,FFF,FFFFFFFFFFFFFFFFFFFFFFFFFFFFFFFFFFFFFFFFFFFF  
FFFFFFFFFFFFFFFFFFFF

@A00721:190:HGJW7DSXY:4:1529:32163:4586 1:N:0:TCTGCAAG+GCTGCACT  
GGACACCACTGGTGGCAGTGTAGAGGACATGATGAAAGGAGCTTATTATTTAGTTTTTGCACATTTTC  
ATCAATATGCGATGGAAGTTGTATTAATGTACGAATGTGGTTCAGAAGTGTTTAATAAAATGATATA  
TATTCATTTTCCATT

+  
FFFFFFFFF,FFFFFFFFFFFFFFFFFFFFFFFFFFFFFFFFFFFFFFFFFFFFFFFFFFFFFFFFFFFF  
FFFFFFFFFFFF::FFF:FFFFF:F:F:FFFFFFFFFFFFFFFFFFFFFFFFFFFFFFFFFFFF:FFF:FFFFFFF,  
FFFFFFFFFFFFFFF,F

@A00721:190:HGJW7DSXY:4:1550:18105:29465 1:N:0:TCTGCAAG+GCTGCACT  
GGACACCACTGGTGGCAGTGTAGAGGACATGATGAAAGGAGCTTATTATTTAGTTTTTGCACATTTTC  
ATCAATATGCGATGGAAGTTGTATTAATGTACGAATGTGGTTCAGAAGTGTTTAATAAAATGATATA  
TATTCATTTTCCATT

+  
FFFFFFFFFFFFFFFFFFFFFFFFFFFFFFFFFFFFFFFF:FFFFFFFF:FFFFFFFFFFFFFFFFFFFF:FF  
FFFFFF:FFFFFFFFFFFFFFFFFFFF:FFFFFFFFFF,FFFFFFFFFFFFFFFFFFFFFFFFFFFF:FFF  
:FFFFFFFFFFFFFFF

@A00721:190:HGJW7DSXY:4:1551:29333:14779 1:N:0:TCTGCAAG+GCTGCACT  
GGACACCACTGGTGGCAGTGTAGAGGACATGATGAAAGGAGCTTATTATTTAGTTTTTGCACATTTTC  
ATCAATATGCGATGGAAGTTGTATTAATGTACGAATGTGGTTCAGAAGTGTTTAATAAAATGATATA  
TATTCATTTTCCATT

+  
FFFFFFFFF,:F:FFFFFFFFFFFFFFFFFFFF:FFF:FFFFFFFFFFFFFFFFFFFFFF,FFFFFF:FFFFFF  
FFFFFFFF:FFFFFFFFFF:FFF:FFFF:FFFFFFFFFFFFFF:FFFF:FF:F,FFF:FFFFFF:FF:F  
FFF,FF:FFF:FFFF

@A00721:190:HGJW7DSXY:4:1578:23104:1736 1:N:0:TCTGCAAG+GCTGCACT  
GGACACCACTGGTGGCAGTGTAGAGGACATGATGAAAGGAGCTTATTATTTAGTTTTTGCACATTTTC  
ATCAATATGCGATGGAAGTTGTATTAATGTACGAATGTGGTTCAGAAGTGTTTAATAAAATGATATA  
TATTCATTTTCCATT

+  
FF:FFFFFFFFFFFFFFFFFFFF:FFFFFFFFFFFFFF,FFFFFFFFFFFFFFFFFFFFFFFFFFFFFFFF  
FFFFFFFFFFFFFFFFFFFF:FF,:FFF:FFFFFFFFFFFFFFFFFFFFFFFFFFFFFFFFFFFF:FFFFFFF:FFF  
FFFFFFFFFFFFFFFFFFFF

@A00721:190:HGJW7DSXY:4:2647:12997:10066 1:N:0:TCTGCAAG+GCTGCACT  
GGACACCACTGGTGGCAGTGTAGAGGACATGATGAAAGGAGCTTATTATTTAGTTTTTGCACATTTTC

ATCAATATGCGATGGAAGTTGTATTAAATGTACGAATGTGGTTCAGAAGTGTTTAATAAAATGATATA  
TATTCATTTTCCATT

```

FFFFFFFFFFFFFFFFFFFFFFFFFFFFFFFFFFFFFFFF:FFFFFFFFFFFFFFFFFFFFFFFFFFFFFFFF:FFFFFFFFFFFF
FFFFFFFFFFFFFFFFFFFFFFFFFFFFFFFFFFFFFFFFFFFFFFFFFFFFFFFFFFFFFFFFFFFFFFFF:FFFFFFFFFFFFFFFFFFFFFFFFFFFFFFFF
FFFFFFFFFFFFFFFFFFFF

```

 $+$ [illegible]

+

```
FFFFFFFFFFFFFFFFFFFFFFFFFFFFFFFFFFFFFFFFFFFFFFFFFFFFFFFFFFFFFFFFFFF
FFFFFFFFFFFFFFFFFFFFFFFFFFFFFFFF:FFFFFFFFFFFFFFFFFFFFFFFFFFFFFFFFFFFF
FFFFFFFFFFFFFFFF:
```

+

[illegible]

+

[illegible]

+

```

FFFFFFFFFFFFFFFFFFFFFFFFFFFFFFFFFFFFFFFFFFFFFFFFFFFFFFFFFFFFFFFFFFFFFFFF
FFFFFFFFFFFFFFFFFFFFFFFFFFFFFFFFFFFFFFFFFFFFFFFFFFFFFFFFFFFFFFFFFFFFFFFF:FFFFFFFFFFFFFFFFFFFFFFFFFFFFFFFF
FFFFFFFFFFFFFFFFFFFFFFFF:

```

+

[illegible]

@A00721:190:HGJW7DSXY:4:1349:32280:10207 1:N:0:TCTGCAAG+GCTGCACT  
AGGGGTAATTTCAATTTATAATTTTTGTTATGCGTGGCATAAAGCAATGGAAAATCTAGATCATGTAA  
TCAAAGATTATCGAATGGAAAATGAATATATATCATTTTATTAAACACTTCTGAACCACATTCGTACA  
TTTAATGCAACTTCC

+

FFFFFFFFFFFFFFFFFFFFFFFFFFFFFFFFFFFFFFFFFFFFFFFFFFFFFFFFFFFFFFFF:FFFFFF:FFFFFFFF  
FFFF:FFFFFFFFFFFFFFFFFFFFFFFFFFFFFFFFFFFFFFFFFFFFFFFFFFFFFFFF:FFFFFFFFFFFFFFFFFFFFF  
FFFFFFFFFFFFFFFF

@A00721:190:HGJW7DSXY:4:1364:26395:20588 1:N:0:TCTGCAAG+GCTGCACT  
AGGGGTAATTTCAATTTATAATTTTTGTTATGCGTGGCATAAAGCAATGGAAAATCTAGATCATGTAA  
TCAAAGATTATCGAATGGAAAATGAATATATATCATTTTATTAAACACTTCTGAACCACATTCGTACA  
TTTAATGCAACTTCC

+

FFFFFFFFF:FFFFFFFFFFFFFFFFFFFFFFFFFFFFFFFFFFFFFFFFFFFFFFFFFFFFFFFF,FFFFFFFFFFFFFF:FF  
FFFF:FFFFFFFFFFFFFFFFFFFFFFFFFFFFFFFFFFFFFFFFFFFFFFFFFFFFFFFF:FFFFFFFFFFFFFFFFFFFFF  
FFFFFFFFFFFFFFFF:

@A00721:190:HGJW7DSXY:4:1367:32452:31015 1:N:0:TCTGCAAG+GCTGCACT  
AGGGGTAATTTCAATTTATAATTTTTGTTATGCGTGGCATAAAGCAATGGAAAATCTAGATCATGTAA  
TCAAAGATTATCGAATGGAAAATGAATATATATCATTTTATTAAACACTTCTGAACCACATTCGTACA  
TTTAATGCAACTTCC

+

FFFFFFFFFFFFFFFFFFFFFFFFFFFFFFFFFFFFFFFFFFFFFFFFFFFFFFFFFFFFFFFF:F,FFFF:FF  
FFFFF,FFFFFFFFFFFFFF:FFFFFFFFFFFFFFFFFFFFF:,FFFFFFFFFFFFFF:FF:FF:F  
F:FFFFFFFFFFFF:F

@A00721:190:HGJW7DSXY:4:2137:1976:31814 1:N:0:TCTGCAAG+GCTGCACT  
AGGGGTAATTTCAATTTATAATTTTTGTTATGCGTGGCATAAAGCAATGGAAAATCTAGATCATGTAA  
TCAAAGATTATCGAATGGAAAATGAATATATATCATTTTATTAAACACTTCTGAACCACATTCGTACA  
TTTAATGCAACTTCC

+

FFFFFFFFFFFFFFFFFFFFFFFFFFFFFFFFFFFFFFFFFFFFFFFFFFFFFFFFFFFFFFFF  
FFFFFFFFFFFFFFFFFFFFFFFFFFFFFFFFFFFFFFFFFFFFFFFFFFFFFFFF:FFFFFF:FFFF:FFFFFFFF  
FFFFF,FFFFFFFF

@A00721:190:HGJW7DSXY:4:2250:5367:17926 1:N:0:TCTGCAAG+GCTGCACT  
AGGGGTAATTTCAATTTATAATTTTTGTTATGCGTGGCATAAAGCAATGGAAAATCTAGATCATGTAA  
TCAAAGATTATCGAATGGAAAATGAATATATATCATTTTATTAAACACTTCTGAACCACATTCGTACA  
TTTAATGCAACTTCC

+

FFFFFFFFFFFFFFF:FFFFFFFFFFFFFFFFFFFFFFFFFFFFFFFFFFFFFFFFFFFFFFFFFFFFFFFF:FFFFFFF  
FFFFFFFFFFFFFFFFFFFF:FFFFFFFFFF:FFFFFFFFFFFFFFFFFF:FF:FFFFFFFFFFFFFFFFFFFFF  
:FFFF:FFF:FFFF

@A00721:190:HGJW7DSXY:4:2328:4182:5979 1:N:0:TCTGCAAG+GCTGCACT  
AGGGGTAATTTCAATTTATAATTTTTGTTATGCGTGGCATAAAGCAATGGAAAATCTAGATCATGTAA  
TCAAAGATTATCGAATGGAAAATGAATATATATCATTTTATTAAACACTTCTGAACCACATTCGTACA  
TTTAATGCAACTTCC

+

FFFF,FFFFFFFF,FFF,:FFFFFFFF:FF:FFFFFFFFFFFFFFFFFFFFFFFFFFFFF,F:FFFFFFFF  
FFF,F:FFFFFFFFFFFF:FFFFFFFFFFFFFFFFFFFF:FF,FFFF,:FFFF,FF,,F,FFFFFFFFFFFF  
FFFF,:FFFFFFFF

@A00721:190:HGJW7DSXY:4:2328:3721:6339 1:N:0:TCTGCAAG+GCTGCACT  
AGGGGTAATTTCAATTTATAATTTTTGTTATGCGTGGCATAAAGCAATGGAAAATCTATATCATGAAA  
TCAAAGATTATCGAATGGAAAATGAATATATATCATTTTATTAAAAACTTCTGAAACACATTCTTACA  
ATTAATGCAACTTC

+

FF,:F:F:F:FFFFFFFFFFFF:FF,FFFF:,FF,FF,FFFF,:FFF,FFFF:FFF,,:FF,F,FF



FFFF::,F,FFFFFFF,:FFF,F:,FFFFFFF:F:F:FF:FF,F,FFF:F,FF:F,,FF,FFFF,FFFF  
,FFFF,,FFFFFFF

@A00721:190:HGJW7DSXY:4:2615:23104:3709 1:N:0:TCTGCAAG+GCTGCACT  
AGGGGTAATTTCAATTTATAATTTTGTATGCGTGGCATAAAGCAATGGAAAATCTAGATCATGTAA  
TCAAAGATTATCGAATGGAAAATGAATATATATCATTTTATTAAACACTTCTGAACCACATTCGTACA  
TTTAATGCAACTTC

+

FF:FFFFF:,FF,FFF:FFFFFFF:FFF,F:FF,FFFFFFFFF,FFF:FFFFFFFFF,,FFFF::FF  
FFF,FF:F,FF,FFFF,FF:FF:FFFFFFFFF,FFFFFFFFF:FFFF:FF:,FFFF:FFFF,F  
F,,FFFF,FF:FFF

@A00721:190:HGJW7DSXY:4:1441:19144:22404 1:N:0:TCTGCAAG+GCTGCACT  
GTACGAATGTGGTTCAGAAGTGTTTAATAAAATGATATATATTCATTTTCCATTCGATAATCTTTGAT  
TACATGATCTAGATTTTCCATTGCTTTATGCCACGCATAACAAAAATTATAAATTGAAATTACCCCTA  
AATTACAAAGATTTT

+

FFFFFFFFFFFFFFFFFFFFFFFFFFFFFFFFFFFFFFFFFFFFFFFFFFFFFFFFFFFFFFFFFFFFFFFFFFFFFFFF  
FFFFFFFFFFFFFFFFFFFFFFFFFFFFFFFFFFFFFFFFFFFFFFFFFFFFFFFFFFFFFFFFFFFFFFFFFFFFFFFF  
FFFFFFFFFFFFFFFFFFFFFFFF

@A00721:190:HGJW7DSXY:4:1623:32271:15139 1:N:0:TCTGCAAG+GCTGCACT  
GTACGAATGTGGTTCAGAAGTGTTTAATAAAATGATATATATTCATTTTCCATTCGATAATCTTTGAT  
TACATGATCTAGATTTTCCATTGCTTTATGCCACGCATAACAAAAATTATAAATTGAAATTACCCCTA  
AATTACAAAGATTTT

+

FFFFFFFFFFFFFFFFFFFFFFFFFFFFFFFFFFFFFFFFFFFFFFFFFFFFFFFFFFFFFFFFFFFFFFFFFFFFFFFF  
F:FFFFFFFFFFFFFFFFFFFFFFFFFFFFFFFFFFFFFFFFFFFFFFFFFFFFFFFFFFFFFFFFFFFFFFFF:FFFF  
FFFFFFFFFFFFFFFF

@A00721:190:HGJW7DSXY:4:1642:15582:24189 1:N:0:TCTGCAAG+GCTGCACT  
GTACGAATGTGGTTCAGAAGTGTTTAATAAAATGATATATATTCATTTTCCATTCGATAATCTTTGAT  
TACATGATCTAGATTTTCCATTGCTTTATGCCACGCATAACAAAAATTATAAATTGAAATTACCCCTA  
AATTACAAAGATTTT

+

FFFFFFFFFFFFFFFFFFFFFFFFFFFFFFFFFFFFFFFFFFFFFFFFFFFFFFFFFFFFFFFFFFFFFFFFFFFFFFFF  
FFFFFFFFFFFFFFFFFFFFFFFFFFFFFFFFFFFFFFFFFFFFFFFFFFFFFFFFFFFFFFFFFFFFFFFF:FFFFF  
FFFFFFFFFFFFFFFF

@A00721:190:HGJW7DSXY:4:1645:5611:23703 1:N:0:TCTGCAAG+GCTGCACT  
GTACGAATGTGGTTCAGAAGTGTTTAATAAAATGATATATATTCATTTTCCATTCGATAATCTTTGAT  
TACATGATCTAGATTTTCCATTGCTTTATGCCACGCATAACAAAAATTATAAATTGAAATTACCCCTA  
AATTACAAAGATTTT

+

FFFFFFFFFFFFFFFFFFFFFFFFFFFFFFFFFFFFFFFFFFFFFFFFFFFFFFFFFFFFFFFFFFFFFFFFFFFFFFFF  
F:FFFFFFFFFFFFFFFFFFFFFFFFFFFFFFFFFFFFFFFFFFFFFFFFFFFFFFFFFFFFFFFFFFFFFFFF:FFFFFFFFFF,  
FFFFFFFFFFFF:FF

@A00721:190:HGJW7DSXY:4:2343:3974:9032 1:N:0:TCTGCAAG+GCTGCACT  
GTACGAATGTGGTTCAGAAGTGTTTAATAAAATGATATATATTCATTTTCCATTCGATAATCTTTGAT  
TACATGATCTAGATTTTCCATTGCTTTATGCCACGCATAACAAAAATTATAAATTGAAATTACCCCTA  
AATTACAAAGATTTT

+

FFFFFFFFFFFFFFFFFFFFFFFFFFFFFFFFFFFFFFFFFFFFFFFFFFFFFFFFFFFFFFFFFFFFFFFFFFFFFFFF  
FFFFFFFFFFFFFFFFFFFFFFFFFFFFFFFFFFFFFFFFFFFFFFFFFFFFFFFFFFFFFFFFFFFFFFFFFFFFFFFF  
FFFFFFFFFF:FFFFF

@A00721:190:HGJW7DSXY:4:2358:21748:2049 1:N:0:TCTGCAAG+GCTGCACT  
GTACGAATGTGGTTCAGAAGTGTTTAATAAAATGATATATATTCATTTTCCATTCGATAATCTTTGAT  
TACATGATCTAGATTTTCCATTGCTTTATGCCACGCATAACAAAAATTATAAATTGAAATTACCCCTA  
AATTACAAAGATTTT

+  
FFFFFFFFFFFFFFFFFFFFFFFFFFFFFFFFFFFFFFFFFFFFFFFFFFFFFFFFFFFFFFFFFFFFFFFF  
FFFFFFFFFFFFFFFFFFFFFFFFFFFFFFFFFFFFFFFFFFFFFFFFFFFFFFFFFFFFFFFFFFFFFFFF  
FFFFFFFFFF:FFFFF  
@A00721:190:HGJW7DSXY:4:2554:18891:28385 1:N:0:TCTGCAAG+GCTGCACT  
GTACGAATGTGGTTCAGAAGTGTTTAATAAAATGATATATATTCATTTTCCATTCGATAATCTTTGAT  
TACATGATCTAGATTTTCCATTGCTTTATGCCACGCATAACAAAAATTATAAATTGAAATTACCCCTA  
AATTACAAAGATTTT

+  
FFFFFFFFFFFFFFFFFFFFFFFFFFFFFFFFFFFFFFFFFFFFFFFFFFFFFFFFFFFFFFFFFFFFFFFF  
FFFFFFFFFFFFFFFFFFFFFFFFFFFFFFFFFFFFFFFFFFFFFFFFFFFFFFFFFFFFFFFFFFFFFFFF:  
FFFFFFFFFFFFFFFFF  
@A00721:190:HGJW7DSXY:4:1264:26539:7780 1:N:0:TCTGCAAG+GCTGCACT  
TGTGGTTCAGAAGTGTTTAATAAAATGATATATATTCATTTTCCATTCGATAATCTTTGATTACATGA  
TCTAGATTTTCCATTGCTTTATGCCACGCATAACAAAAATTATAAATTGAAATTACCCCTAAATTACA  
AAGATTTTATGGAT

+  
FFFFFFFFFFFFFFFFFFFFFFFFFFFFFFFFFFFFFFFFFFFFFFFFFFFFFFFFFFFFFFFFFFFFFFFF  
FFFFFFFFFFFFFFFFFFFFFFFFFFFFFFFFFFFFFFFFFFFFFFFFFFFFFFFFFFFFFFFFFFFFFFFF:  
F:FFFFFFFFFFFFFFFFF  
@A00721:190:HGJW7DSXY:4:1264:26250:7968 1:N:0:TCTGCAAG+GCTGCACT  
TGTGGTTCAGAAGTGTTTAATAAAATGATATATATTCATTTTCCATTCGATAATCTTTGATTACATGA  
TCTAGATTTTCCATTGCTTTATGCCACGCATAACAAAAATTATAAATTGAAATTACCCCTAAATTACA  
AAGATTTTATGGAT

+  
FFFFFFFFFFFF:FFFFFFFFF:FFFFFFFFFFFFFFFFFFFFFFFFFFFFFFFFFFFFFFFFFFFFFFFF:  
FFFFFFFFFFFFFFFFFFFFFFFFFFFFFFFFFFFFFFFFFFFFFFFFFFFFFFFFFFFFFFFFFFFFFFFF,  
:FFFF:F:FF:FF,F  
@A00721:190:HGJW7DSXY:4:1329:32633:6903 1:N:0:TCTGCAAG+GCTGCACT  
TGTGGTTCAGAAGTGTTTAATAAAATGATATATATTCATTTTCCATTCGATAATCTTTGATTACATGA  
TCTAGATTTTCCATTGCTTTATGCCACGCATAACAAAAATTATAAATTGAAATTACCCCTAAATTACA  
AAGATTTTATGGAT

+  
FFFFFFFFFFFFFFFFFFFFFFFFFFFFFFFFFFFFFFFFFFFFFFFFFFFFFFFFFFFFFFFFFFFFFFFF:  
FFFFFFFFFFFFFFFFFFFFFFFFFFFFFFFFFFFFFFFFFFFFFFFFFFFFFFFFFFFFFFFFFFFFFFFF,  
FF:FFFFFFFFFFFFF  
@A00721:190:HGJW7DSXY:4:1466:16740:24220 1:N:0:TCTGCAAG+GCTGCACT  
TGTGGTTCAGAAGTGTTTAATAAAATGATATATATTCATTTTCCATTCGATAATCTTTGATTACATGA  
TCTAGATTTTCCATTGCTTTATGCCACGCATAACAAAAATTATAAATTGAAATTACCCCTAAATTACA  
AAGATTTTATGGAT

+  
FFFFFFFFFFFFFFFFFFFFFFFFFFFFFFFFFFFFFFFFFFFFFFFFFFFFFFFFFFFFFFFFFFFFFFFF  
FFFFFFFFFFFFFFFFFFFFFFFFFFFFFFFFFFFFFFFFFFFFFFFFFFFFFFFFFFFFFFFFFFFFFFFF:  
FFFFFFFFFFFFFFFFF  
@A00721:190:HGJW7DSXY:4:2508:13286:33959 1:N:0:TCTGCAAG+GCTGCACT  
TGTGGTTCAGAAGTGTTTAATAAAATGATATATATTCATTTTCCATTCGATAATCTTTGATTACATGA  
TCTAGATTTTCCATTGCTTTATGCCACGCATAACAAAAATTATAAATTGAAATTACCCCTAAATTACA  
AAGATTTTATGGAT

+  
FFFFFFFFFFFFFFFFFFFFFFFFFFFFFFFFFFFFFFFFFFFFFFFFFFFFFFFFFFFFFFFFFFFFFFFF  
FFFFFFF:FFFFFFFFFFFFFFFFFFFFFFFFFFFFFFFFFFFFFFFFFFFFFFFFFFFFFFFFFFFFFF:  
FF:FFF::FFFF,FF  
@A00721:190:HGJW7DSXY:4:1265:21866:7670 1:N:0:TCTGCAAG+GCTGCACT  
GTGGTTCAGAAGTGTTTAATAAAATGATATATATTCATTTTCCATTCGATAATCTTTGATTACATGAT



$+$ 

+

+

+

+

+

+

[illegible]

FFFFFFFFFFFFFFFFFFFFFFFFFFFFFFFFFFFFFFFFFFFFFFFFFFFFFFFFFFFFFFFFFFFFFFFF, F  
FFFFFFFFFFFF:FFFF

@A00721:190:HGJW7DSXY:4:1504:4345:31187 1:N:0:TCTGCAAG+GCTGCACT  
GTTTCAGAAGTGTTTAATAAAATGATATATATTCATTTTCCATTTCGATAATCTTTGATTACATGATCTA  
GATTTTCCATTGCTTTATGCCACGCATAACAAAAATTATAAATTGAAATTACCCCTAAATTACAAAGA  
TTTTTATGGATATAA

+

:F:FFFFFFFFFFFFFFFFFFFFFFFFFFFFFFFFFFFFFFFFFFFFFFFFFFFFFFFFFFFFFFFF  
FFFFFFFFFFFFFFFFFFFFFFFFFFFFFFFFFFFFFFFFFFFFFFFFFFFFFFFFFFFFFFFF:FFF:FFFFF, FFFFFFFFFFFFFFFFFF:FF  
FFFFFFFFFFFFFFFF

@A00721:190:HGJW7DSXY:4:1617:4047:11882 1:N:0:TCTGCAAG+GCTGCACT  
GTTTCAGAAGTGTTTAATAAAATGATATATATTCATTTTCCATTTCGATAATCTTTGATTACATGATCTA  
GATTTTCCATTGCTTTATGCCACGCATAACAAAAATTATAAATTGAAATTACCCCTAAATTACAAAGA  
TTTTTATGGATATAA

+

FFFFFFFFFFFFFFFFFFFFFFFFFFFFFFFFFFFFFFFFFFFFFFFFFFFFFFFFFFFFFFFFFFFFFFFF  
FFFFFFFFFFFFFFFFFFFFFFFFFFFFFFFFFFFFFFFFFFFFFFFFFFFFFFFFFFFFFFFF:FFFFFFFFFFFFFFFF  
FFFFFFFF::FFFF:F

@A00721:190:HGJW7DSXY:4:2132:11514:10629 1:N:0:TCTGCAAG+GCTGCACT  
GTTTCAGAAGTGTTTAATAAAATGATATATATTCATTTTCCATTTCGATAATCTTTGATTACATGATCTA  
GATTTTCCATTGCTTTATGCCACGCATAACAAAAATTATAAATTGAAATTACCCCTAAATTACAAAGA  
TTTTTATGGATATAA

+

FFFFFFFFFFFFFFFFFFFFFFFFFFFFFFFFFFFFFFFFFFFFFFFFFFFFFFFFFFFFFFFFFFFFFFFF  
FFFFFFFFFFFFFFFFFFFFFFFFFFFFFFFFFFFFFFFFFFFFFFFFFFFFFFFFFFFFFFFF:FFFFFFFFFFFFFFFF  
FFFFFFFF, FFFFFF

@A00721:190:HGJW7DSXY:4:2440:28763:33990 1:N:0:TCTGCAAG+GCTGCACT  
GTTTCAGAAGTGTTTAATAAAATGATATATATTCATTTTCCATTTCGATAATCTTTGATTACATGATCTA  
GATTTTCCATTGCTTTATGCCACGCATAACAAAAATTATAAATTGAAATTACCCCTAAATTACAAAGA  
TTTTTATGGATATAA

+

FFFFFFFFFFFFFFFFFFFFFFFFFFFFFFFFFFFFFFFFFFFFFFFFFFFFFFFFFFFFFFFFFFFFFFFF  
FFFFFFFFFFFFFFFFFFFFFFFFFFFFFFFFFFFFFFFFFFFFFFFFFFFFFFFFFFFFFFFF:FFFFFFFFFFFFFFFF  
FFFFFFFF:FFFFF

@A00721:190:HGJW7DSXY:4:2642:23213:18552 1:N:0:TCTGCAAG+GCTGCACT  
GTTTCAGAAGTGTTTAATAAAATGATATATATTCATTTTCCATTTCGATAATCTTTGATTACATGATCTA  
GATTTTCCATTGCTTTATGCCACGCATAACAAAAATTATAAATTGAAATTACCCCTAAATTACAAAGA  
TTTTTATGGATATAA

+

FFFFFFFFFFFFFFFFFFFFFFFFFFFFFFFFFFFFFFFFFFFFFFFFFFFFFFFFFFFFFFFFFFFFFFFF  
FFFFFFFFFFFFFFFFFFFFFFFFFFFFFFFFFFFFFFFFFFFFFFFFFFFFFFFFFFFFFFFF:FFFFFFFFFFFFFFFF  
FFFFFFF::FFFFF

@A00721:190:HGJW7DSXY:4:1106:20057:33943 1:N:0:TCTGCAAG+GCTGCACT  
TTCAGAAGTGTTTAATAAAATGATATATATTCATTTTCCATTTCGATAATCTTTGATTACATGATCTAG  
ATTTTCCATTGCTTTATGCCACGCATAACAAAAATTATAAATTGAAATTACCCCTAAATTACAAAGAT  
TTTTATGGATATAA

+

FFFFFFFFFFFF:FFFFFFFFFFFFFFFFFFFFFFFFFFFFFFFFFFFFFFFFFFFFFFFFFFFFFFFF  
FFFFFFFFFFFFFFFFFFFFFFFFFFFFFFFFFFFFFFFFFFFFFFFFFFFFFFFFFFFFFFFF:FFFFFF:FFFFFFFFFFFFFFFF:FFFFFFFFFFFF  
FFFFFFF, FFFFFF

@A00721:190:HGJW7DSXY:4:1302:11433:34037 1:N:0:TCTGCAAG+GCTGCACT  
TTCAGAAGTGTTTAATAAAATGATATATATTCATTTTCCATTTCGATAATCTTTGATTACATGATCTAG  
ATTTTCCATTGCTTTATGCCACGCATAACAAAAATTATAAATTGAAATTACCCCTAAATTACAAAGAT  
TTTTATGGATATAA

```
FFFFFFFFFFFFFFFFFFFFFFFFFFFFFFFF:FFFFFFFFFFFFFFFFFFFFFFFF:FFFFFFFFFFFF:FFFF  
FFFFFFFFFF:F:FFFFFF:FFFF:FF,FFFFFFFFFFFFFFFFFFFFFFFF:FFFFFFF:FF:FFFFFFF,FFF,FF  
FF:FFFF,FFFFFFFF
```

[illegible]

```

FFFFFFFFF:,FFFFFFFFFFFFFFFFF:FFFFF:FFFFFFFFFFFFFFFFF:FFFFFFFFFFFFFFFFF
F:FFFFFFF,FFFF:FF,FFF:FFFFFF:FFF:FF,FFFFFFFFFFFFFFFFF:,FFF:FFFF,FFF:FF,
:FFFFFFFFF:F,FFF

```

[illegible][illegible][illegible][illegible]

@A00721:190:HGJW7DSXY:4:2538:12075:23750 1:N:0:TCTGCAAG+GCTGCACT  
TTCAGAAGTGTTTAATAAAATGATATATATTCATTTTCCATTCGATAATCTTTGATTACATGATCTAG







@A00721:190:HGJW7DSXY:4:2607:25843:31469 1:N:0:TCTGCAAG+GCTGCACT  
CCATTCGATAATCTTTGATTACATGATCTAGATTTTCCATTGCTTTATGCCACGCATAACAAAAATTA  
TAAATTGAAATTACCCCTAAATTACAAAGATTTTTATGGATATAAAAAATAAAGCCGTCGGGATAAAGT  
CCCAGAAATCATCGT

@A00721:190:HGJW7DSXY:4:1416:12635:29293 1:N:0:TCTGCAAG+GCTGCACT  
ATTCGATAATCTTTGATTACATGATCTAGATTTTCCATTGCTTTATGCCACGCATAACAAAAATTATA  
AATTGAAATTACCCCTAAATTACAAAGATTTTTATGGATATAAAAATAAAGCCGTCGGGATAAAGTCC  
CAGAAATCATCGTCT

@A00721:190:HGJW7DSXY:4:1465:1316:13385 1:N:0:TCTGCAAG+GCTGCACT  
ATTCGATAATCTTTGATTACATGATCTAGATTTTCCATTGCTTTATGCCACGCATAACAAAAATTATA  
AATTGAAATTACCCCTAAATTACAAAGATTTTTATGGATATAAAAATAAAGCCGTCGGGATAAAGTCC  
CAGAAATCATCGTCT

@A00721:190:HGJW7DSXY:4:2450:4417:23766 1:N:0:TCTGCAAG+GCTGCACT  
ATTCGATAATCTTTGATTACATGATCTAGATTTTCCATTGCTTTATGCCACGCATAACAAAAATTATA  
AATTGAAATTACCCCTAAATTACAAAGATTTTTATGGATATAAAAATAAAGCCGTCGGGATAAAGTCC  
CAGAAATCATCGTCT

@A00721:190:HGJW7DSXY:4:2576:14262:7122 1:N:0:TCTGCAAG+GCTGCACT  
ATTCGATAATCTTTGATTACATGATCTAGATTTTCCATTGCTTTATGCCACGCATAACAAAAATTATA  
AATTGAAATTACCCCTAAATTACAAAGATTTTTATGGATATAAAAATAAAGCCGTCGGGATAAAGTCC  
CAGAAATCATCGTCT

@A00721:190:HGJW7DSXY:4:2662:23936:7435 1:N:0:TCTGCAAG+GCTGCACT  
ATTCGATAATCTTTGATTACATGATCTAGATTTTCCATTGCTTTATGCCACGCATAACAAAAATTATA  
AATTGAAATTACCCCTAAATTACAAAGATTTTTATGGATATAAAAATAAAGCCGTCGGGATAAAGTCC  
CAGAAATCATCGTCT

@A00721:190:HGJW7DSXY:4:2678:27127:7889 1:N:0:TCTGCAAG+GCTGCACT  
ATTCGATAATCTTTGATTACATGATCTAGATTTTCCATTGCTTTATGCCACGCATAACAAAAATTATA  
AATTGAAATTACCCCTAAATTACAAAGATTTTTATGGATATAAAAATAAAGCCGTCGGGATAAAGTCC  
CAGAAATCATCGTCT

+  
FFFFFFFFFFFFFFFFFFFFFFFFFFFFFFFFFFFFFFFFFFFFFFFFFFFFFFFFFFFFFFFFFFFFFFFF  
FFFFFFFFFFFFFFFFFFFFFFFFFFFFFFFFFFFFFFFFFFFFFFFFFFFFFFFFFFFFFFFFFFFFFFFF:FFFFFFFF:FFFFFFF  
FFFFFFFFFFFFFFFF

@A00721:190:HGJW7DSXY:4:1246:23421:1846 1:N:0:TCTGCAAG+GCTGCACT  
CTAGATTTTCCATTGCTTTATGCCACGCATAACAAAAATTATAAATTGAAATTACCCCTAAATTACAA  
AGATTTTATGGATATAAAAAATAAGCCGTCGAGATAAAGTCCCAGAAATCATCGTCTTCCATGACGG  
GTTCTGCAGATCGGA

+  
FFFFFFFFFFFFFFFFFFFFFFFFFFFFFFFFFFFFFFFFFFFFFFFFFFFFFFFFFFFFFFFFFFFFFFFF:FFFFFFFF  
FFFFFFFFFFFFFFFFFFFFFFFFFFFFFFFFFFFFFFFFFFFFFFFFFFFFFFFFFFFFFFFFFFFFFFFF:FFFFFFFF  
FFFFFFFF:FFFFFFFF

@A00721:190:HGJW7DSXY:4:1246:7084:3176 1:N:0:TCTGCAAG+GCTGCACT  
CTAGATTTTCCATTGCTTTATGCCACGCATAACAAAAATTATAAATTGAAATTACCCCTAAATTACAA  
AGATTTTATGGATATAAAAAATAAGCCGTCGAGATAAAGTCCCAGAAATCATCGTCTTCCATGACGG  
GTTCTGCAGATCGGA

+  
FFFFFFFFFFFFFFFFFFFFFFFFFFFFFFFFFFFFFFFFFFFFFFFFFFFFFFFFFFFFFFFFFFFFFFFF  
FFFFFFFFFFFFFFFFFFFFFFFFFFFFFFFFFFFFFFFFFFFFFFFFFFFFFFFFFFFFFFFFFFFFFFFF:FFFF  
FFFFFFFFFFFF,FFFFFFFFFFFFFFFFFFFFFFFFFFFFFFFFFFFFFFFFFFFFFFFF:FFFFFFFFFFFF:FFFF  
FFFFFFFFFFFF,FF

@A00721:190:HGJW7DSXY:4:1459:16676:22983 1:N:0:TCTGCAAG+GCTGCACT  
CTAGATTTTCCATTGCTTTATGCCACGCATAACAAAAATTATAAATTGAAATTACCCCTAAATTACAA  
AGATTTTATGGATATAAAAAATAAGCCGTCGAGATAAAGTCCCAGAAATCATCGTCTTCCATGACGG  
GTTCTGCAGATCGGA

+  
FFFFFFFFFFFFFFFFFFFFFFFFFFFFFFFFFFFFFFFFFFFFFFFFFFFFFFFFFFFFFFFFFFFFFFFF  
FFFFFFFFFFFFFFFFFFFFFFFFFFFFFFFFFFFFFFFFFFFFFFFFFFFFFFFFFFFFFFFFFFFFFFFF  
FFFFFFFFFFFFFFFF

@A00721:190:HGJW7DSXY:4:1459:17445:23531 1:N:0:TCTGCAAG+GCTGCACT  
CTAGATTTTCCATTGCTTTATGCCACGCATAACAAAAATTATAAATTGAAATTACCCCTAAATTACAA  
AGATTTTATGGATATAAAAAATAAGCCGTCGAGATAAAGTCCCAGAAATCATCGTCTTCCATGACGG  
GTTCTGCAGATCGGA

+  
FFFFFFF:FF::FFFFFFFF:F:FFF,FFF:FFF:FF:FFFFFFFF:F::F:,F::,F:F:FF,FF:F  
F:FFF::F:FF,F,FF:F,FFF:FF,:,:F,FF,FF:F:,,:FF,:F:,F:,FFF,F:F,F:F,F  
F,,,:F,F:FF::FF

@A00721:190:HGJW7DSXY:4:1513:8214:31219 1:N:0:TCTGCAAG+GCTGCACT  
CTAGATTTTCCATTGCTTTATGCCACGCATAACAAAAATTATAAATTGAAATTACCCCTAAATTACAA  
AGATTTTATGGATATAAAAAATAAGCCGTCGAGATAAAGTCCCAGAAATCATCGTCTTCCATGACGG  
GTTCTGCAGATCGGA

+  
FFFFFFFFFFFFFFFFFFFFFFFFFFFFFFFFFFFFFFFFFFFFFFFFFFFFFFFFFFFFFFFFFFFFFFFF  
FFFFFFFFFFFFFFFFFFFFFFFFFFFFFFFFFFFFFFFFFFFFFFFFFFFFFFFFFFFFFFFFFFFFFFFF  
FFFFFFF:FFFFFFFF

@A00721:190:HGJW7DSXY:4:2167:9634:30827 1:N:0:TCTGCAAG+GCTGCACT  
CTAGATTTTCCATTGCTTTATGCCACGCATAACAAAAATTATAAATTGAAATTACCCCTAAATTACAA  
AGATTTTATGGATATAAAAAATAAGCCGTCGAGATAAAGTCCCAGAAATCATCGTCTTCCATGACGG  
GTTCTGCAGATCGGA

+  
FFFFFFFFFFFFFFFFFFFFFFFFFFFFFFFFFFFFFFFFFFFFFFFFFFFFFFFFFFFFFFFFFFFFFFFF  
FFFFFFFFF:FFFF:FFFFFFFFFFFFFFFFFFFFFFFFFFFFFFFFFFFFFFFF:FFFFFFF:FFFFFFFFFFFF  
FFFFFFFFFFFFFFFF

@A00721:190:HGJW7DSXY:4:2216:16884:8375 1:N:0:TCTGCAAG+GCTGCACT  
CTAGATTTTCCATTGCTTTATGCCACGCATAACAAAAATTATAAATTGAAATTACCCCTAAATTACAA



@A00721:190:HGJW7DSXY:4:2357:31611:22357 1:N:0:TCTGCAAG+GCTGCACT  
AGATTTTCCATTGCTTTATGCCACGCATAACAAAAATTATAAATTGAAATTACCCCTAAATTACAAAG  
ATTTTATGGATATAAAAAATAAAGCCGTCGGGATAAAGTCCCAGAAATCATCGTCTTCCATGACGGGT  
TCTGCAGTA

[illegible]

@A00721:190:HGJW7DSXY:4:2648:21594:16658 1:N:0:TCTGCAAG+GCTGCACT  
AGATTTTCCATTGCTTTATGCCACGCATAACAAAAATTATAAATTGAAATTACCCCTAAATTACAAAG  
ATTTTATGGATATAAAAAATAAAGCCGTCGGGATAAAGTCCCAGAAATCATCGTCTTCCATGACGGGT  
TCTGCAGTA

[illegible]

@A00721:190:HGJW7DSXY:4:1603:18358:5635 1:N:0:TCTGCAAG+GCTGCACT  
TTTCCATTGCTTTATGCCACGCATAACAAAAATTATAAATTGAAATTACCCCTAAATTACAAAGATTT  
TTATGGATATAAAAAATAAAGCCGTCGGGATAAAGTCCCAGAAATCATCGTCTTCCATGACGGGTTCTG  
CAGTAATTCTGGGAC

[illegible]

@A00721:190:HGJW7DSXY:4:2318:23484:29418 1:N:0:TCTGCAAG+GCTGCACT  
TTTCCATTGCTTTATGCCACGCATAACAAAAATTATAAATTGAAATTACCCCTAAATTACAAAGATTT  
TTATGGATATAAAAAATAAAGCCGTCGGGATAAAGTCCCAGAAATCATCGTCTTCCATGACGGGTTCTG  
CAGTAATTCTGGGAC

[illegible]

@A00721:190:HGJW7DSXY:4:2349:5113:3020 1:N:0:TCTGCAAG+GCTGCACT  
TTTCCATTGCTTTATGCCACGCATAACAAAAATTATAAATTGAAATTACCCCTAAATTACAAAGATTT  
TTATGGATATAAAAAATAAAGCCGTCGGGATAAAGTCCCAGAAATCATCGTCTTCCATGACGGGTTCTG  
CAGTAATTCTGGG

[illegible]

@A00721:190:HGJW7DSXY:4:2404:21314:35524 1:N:0:TCTGCAAG+GCTGCACT  
TTTCCATTGCTTTATGCCACGCATAACAAAAATTATAAATTGAAATAACCCCTAAATTACAAAGATTT  
TTATGGATATAAAAAATAAAGCCGTCTGGATAAAGTCCCAGAAATCATCGTCTTCCATGACGGGTTCTG  
CAGTAATACTGGGAC

```
FFFF:FFF::FF:FFFFFFF:F:FFFFFFFFFFFFFF::FF:FFFFFF,FFFFFFFFF:FFFFF:FFFFF
:FFFFFF:FFFFF,:FFF:FF,,F,,:FFFFFFFFF:F,:FFFFFFF:FFF,:F,F:FF,,FFFFFFF
FE::FFF..F..FFF
```

@A00721:190:HGJW7DSXY:4:2469:29957:36245 1:N:0:TCTGCAAG+GCTGCACT  
TTTCCATTGCTTTATGCCACGCATAACAAAAATTATAAATTGAAATTACCCCTAAATTACAAAGATTT  
TTATGGATATAAAAAATAAAGCCGTCGGGATAAAGTCCCAGAAATCATCGTCTTCCATGACGGGTTCTG  
CAGTAATTCTGGGAC

[illegible]

@A00721:190:HGJW7DSXY:4:2678:27597:13589 1:N:0:TCTGCAAG+GCTGCACT  
TTTCCATTGCTTTATGCCACGCATAACAAAAATTATAAATTGAAATTACCCCTAAATTACAAAGATTT  
TTATGGATATAAAAAATAAAGCCGTCGGGATAAAGTCCCAGAAATCATCGTCTTCCATGACGGGTTCTG  
CAGTAATTCTGGGAC

@A00721:190:HGJW7DSXY:4:1230:1362:22263 1:N:0:TCTGCAAG+GCTGCACT  
TTCCATTGCTTTATGCCACGCATAACAAAAATTATAAATTGAAATTACCCCTAAATTACAAAGATTTT  
TATGGATATAAAAAATAAAGCCGTCGGGATAAAGTCCCAGAAATCATCGTCTTCCATGACGGGTTCTGC  
AGTAATTCTGGGAC

@A00721:190:HGJW7DSXY:4:2101:10664:36338 1:N:0:TCTGCAAG+GCTGCACT  
TTCCATTGCTTTATGCCACGCATAACAAAAATTATAAATTGAAATTACCCCTAAATTACAAAGATTTT  
TATGGATATAAAAAATAAAGCCGTCGGGATAAAGTCCCAGAAATCATCGTCTTCCATGACGGGTTCTGC  
AGTAATTCTGGGACT

@A00721:190:HGJW7DSXY:4:2139:31901:32910 1:N:0:TCTGCAAG+GCTGCACT  
TTCCATTGCTTTATGCCACGAATAACAAAAATTATAAATTGAAATTACCCCTAAATTACAAAGATTTT  
TATGGATATAAAAAATAAAGCCGTCGGGATAAAGTCCCAGAAATCATCGTCTTCCATGACGGGTTCTGC  
AGTAATTCTGGGAC

@A00721:190:HGJW7DSXY:4:2151:7654:4726 1:N:0:TCTGCAAG+GCTGCACT  
TTCCATTGCTTTATGCCACGCATAACAAAAATTATAAATTGAAATTACCCCTAAATTACAAAGATTTT  
TATGGATATAAAAAATAAAGCCGTCGGGATAAAGTCCCAGAAATCATCGTCTTCCATGACGGGTTCTGC  
AGTAATTCTGGGACT

@A00721:190:HGJW7DSXY:4:2260:14253:8296 1:N:0:TCTGCAAG+GCTGCACT  
TTCCATTGCTTTATGCCACGAATAACAAAAATTATAAATTGAAATTACCCCTAAATTACAAAGATTTT  
TATGGATATAAAAAATAAAGCCGTCGGGATAAAGTCCCAGAAATCATCGTCTTCCATGACGGGTCTCG  
AGTAATTCTGGGACT

@A00721:190:HGJW7DSXY:4:2310:7654:31407 1:N:0:TCTGCAAG+GCTGCACT  
TTCCATTGCTTTATGCCACGCATAACAAAAATTATAAATTGAAATTACCCCTAAATTACAAAGATTTT  
TATGGATATAAAAAATAAAGCCGTCGGGATAAAGTCCCAGAAATCATCGTCTTCCATGACGGGTTCTGC  
AGTAATTCTGGGACT

+  
FFFFFFFFFFFFFFFFFFFFFFFFFFFFFFFFFFFFFFFFFFFFFFFFFFFFFFFFFFFFFFFFFFFFFFFF  
FFFFFFFFFFFFFFFFFFFFFFFFFFFFFFFFFFFFFFFFFFFFFFFFFFFFFFFFFFFFFFFFFFFFFFFF  
FFFFFFFFFFFFFFFF  
@A00721:190:HGJW7DSXY:4:2328:10474:19820 1:N:0:TCTGCAAG+GCTGCACT  
TTCCATTGCTTTATGCCACGAATAACAAAAATTATAAATTGAAATTACCCCTAAATTACAAAGATTTT  
TATGGATATAAAAATAAAGCCGTCGGGATAAAGTCCCAGAAATCATCGTCTTCCATGACGGGTTCTGC  
AGTAATTCTGGGACT

+  
FFFFFFFFFFFFFFFFFFFFFFFFFFFFFFFFFFFFFFFFFFFFFFFFFFFFFFFFFFFFFFFFFFFFFFFF  
FFFFFFFFFFFFFFFFFFFFFFFFFFFFFFFFFFFFFFFFFFFFFFFFFFFFFFFFFFFFFFFFFFFFFFFF  
FFFFFFFFFFFFFFFF:F  
@A00721:190:HGJW7DSXY:4:2635:18738:30592 1:N:0:TCTGCAAG+GCTGCACT  
TTCCATTGCTTTATGCCACGAATAACAAAAATTATAAATTGAAATTACCCCTAAATTACAAAGATTTT  
TATGGATATAAAAATAAAGCCGTCGGGATAAAGTCCCAGAAATCATCGTCTTCCATGACGGGTTCTGC  
AGTAATTCTGGGACT

+  
FFFFFFFFFFFFFFFFFFFFFFFFFFFFFFFFFFFFFFFFFFFFFFFFFFFFFFFFFFFFFFFFFFFFFFFF  
FFFFFFFFFFFFFFFFFFFFFFFFFFFFFFFFFFFFFFFFFFFFFFFFFFFFFFFFFFFFFFFFFFFFFFFF  
FFFF,FFFFFFFF  
@A00721:190:HGJW7DSXY:4:1108:14850:35070 1:N:0:TCTGCAAG+GCTGCACT  
ATCCATTGCTTTATGCCACGCATAACAAAAATTATAAATTGAAATTACCCCTAAATTACAAAGATTTT  
TATGGATATAAAAATAAAGCCGTCGGGATAAAGTCCCAGAAATCATCGTCTTCCATGACGGGTTCTGC  
AGTAATTCTGGGACT

+  
FFFFFFFFFFFFFFFFFFFFFFFFFFFFFFFFFFFFFFFFFFFFFFFFFFFFFFFFFFFFFFFFFFFFFFFF  
FFFFFFFFFFFFFFFFFFFFFFFFFFFFFFFFFFFFFFFFFFFFFFFFFFFFFFFFFFFFFFFFFFFFFFFF  
FFFFFFFFFFFFFFFF  
@A00721:190:HGJW7DSXY:4:1202:8269:27461 1:N:0:TCTGCAAG+GCTGCACT  
ATCCATTGCTTTATGCCACGCATAACAAAAATTATAAATTGAAATTACCCCTAAATTACAAAGATTTT  
TATGGATATAAAAATAAAGCCGTCGGGATAAAGTCCCAGAAATCATCGTCTTCCATGACGGGTTCTGC  
AGTAATTCTGGGACT

+  
F:FFFFFFFFFFFFFFFFFFFFFFFFFFFFFFFFFFFFFFFFFFFFFFFFFFFFFFFFFFFFFFFFFFFFFFFF  
FFFFFFFFFFFFFFFFFFFFFFFFFFFFFFFFFFFFFFFFFFFFFFFFFFFFFFFFFFFFFFFFFFFFFFFF  
FFFFFFFFFFFFFFFF  
@A00721:190:HGJW7DSXY:4:1335:23583:2503 1:N:0:TCTGCAAG+GCTGCACT  
ATCCATTGCTTTATGCCACGCATAACAAAAATTATAAATTGAAATTACCCCTAAATTACAAAGATTTT  
TATGGATATAAAAATAAAGCCGTCGGGATAAAGTCCCAGAAATCATCGTCTTCCATGACGGGTTCTGC  
AGTAATTCTGGGACT

+  
FFFFFFFFFFFFFFFFFFFFFFFFFFFFFFFFFFFFFFFFFFFFFFFFFFFFFFFFFFFFFFFFFFFFFFFF  
FFFFFFFFFFFFFFFFFFFFFFFFFFFFFFFFFFFFFFFFFFFFFFFFFFFFFFFFFFFFFFFFFFFFFFFF  
FFFFFFFFFFFFFFFF  
@A00721:190:HGJW7DSXY:4:1552:8712:15984 1:N:0:TCTGCAAG+GCTGCACT  
ATCCATTGCTTTATGCCACGCATAACAAAAATTATAAATTGAAATTACCCCTAAATTACAAAGATTTT  
TATGGATATAAAAATAAAGCCGTCGGGATAAAGTCCCAGAAATCATCGTCTTCCATGACGGGTTCTGC  
AGTAATTCTGGGACT

+  
FFFFFFFFFFFFFFFFFFFFFFFFFFFFFFFFFFFFFFFFFFFFFFFFFFFFFFFFFFFFFFFFFFFFFFFF  
FFFFFFFFFFFFFFFFFFFFFFFFFFFF:F:FFFFFFFFFFFFFFFFFFFFFFFFFFFFFFFFFFFFFFFF  
FFFFFFFFFFFFFFFF  
@A00721:190:HGJW7DSXY:4:1659:31530:24815 1:N:0:TCTGCAAG+GCTGCACT  
CTCCATTGCTTTATGCCACGCATAACAAAAATTATAAATTGAAATTACCCCTAAATTACAAAGATTTT







FFFFFFFFFFFFFFFFFFFFFFFFFFFFFFFFFFFFFFFFFFFFFFFFFFFFFFFFFFFFFFFFFFFFFFFF  
FFFFFFFFFFFFFFFF

@A00721:190:HGJW7DSXY:4:1223:29785:8797 1:N:0:TCTGCAAG+GCTGCACT  
CATTGCTTTATGCCACGCATAACAAAAATTATAAATTGAAATTACCCCTAAATTACAAAGATTTTAT  
GGATATAAAAATAAAGCCGTCGAGATAAAGTCCCAGAAATCATCGTCTTCCATGACGGGTTCTGCAGT  
AATTCTGGGACTGGT

+

FFFFFFFFFFFFFFFFFFFFFFFFFFFFFFFFFFFFFFFFFFFFFFFFFFFFFFFFFFFFFFFFFFFFFFFF:FFFFFFFF  
FFFFFFFFFFFFFFFFFFFFFFFFFFFFFFFFFFFFFFFFFFFFFFFFFFFFFFFFFFFFFFFFFFFFFFFF:FFFFFFFF  
F:FFFFFFFF

@A00721:190:HGJW7DSXY:4:1367:11153:1924 1:N:0:TCTGCAAG+GCTGCACT  
CAATGCTTTATGCCACGCATAACAAAAATTATAAATTGAAATACCCCTAAATTACAAAGATTAATAT  
GGATATAAAAATAAAGCCGTCGAGATAAATTCCCAGAAATCATCGTATTCCATGACGGGTTCTGCAGT  
AATTCTGGGACTGGT

+

:F,:F:FFFF::FFF,FF,FFFFFFFF:,FF,FFFF,F,F,FFFF:,F:FFFFFFFF,FF,:FF,  
,F:FF:FFFF,FFF:,:::,FFFF,FFF,FF,,F,F:FF:FFFF,,FF,,F:F:F,:F,F,,:FFFF  
F:F,FF,:FFFF,:F

@A00721:190:HGJW7DSXY:4:1367:10682:2237 1:N:0:TCTGCAAG+GCTGCACT  
CATTGCTTTATGCCACGCATAACAAAAATTATAAATTGAAATTACCCCTAAATTACAAAGATTTTAT  
GGATATAAAAATAAAGCCGTCGAGATAAAGTCCCAGAAATCATCGTCTTCCATGACGGGTTCTGCAGT  
AATTCTGGGACTGGT

+

FFFFFFFFFFFFFFFFFFFFFFFFFFFFFFFFFFFFFFFFFFFFFFFFFFFFFFFFFFFFFFFFFFFFFFFF:FFFFFFFF  
FFFFFFFFFFFFFFFFFFFFFFFFFFFFFFFFFFFFFFFFFFFFFFFFFFFFFFFFFFFFFFFFFFFFFFFF:FFFFFFFF  
F,FFFFFFFF

@A00721:190:HGJW7DSXY:4:1375:24831:32377 1:N:0:TCTGCAAG+GCTGCACT  
CATTGCTTTATGCCACGCATAACAAAAATTATAAATTGAAATTACCCCTAAATTACAAAGATTTTAT  
GGATATAAAAATAAAGCCGTCGAGATAAAGTCCCAGAAATCATCGTCTTCCATGACGGGTTCTGCAGT  
AATTCTGGGACTGGT

+

FFFFFFFFFFFFFFFFFFFFFFFFFFFFFFFFFFFFFFFFFFFFFFFFFFFFFFFFFFFFFFFFFFFFFFFF,FFF:FFFFFFFFFFFFFFFF:FF  
:FFFFFF:FFFFFFFFFFFFFFFFFFFFFFFFFFFFFFFFFFFFFFFFFFFFFFFFFFFFFFFF:FF::FFFFFFFF  
FFFFFFFF

@A00721:190:HGJW7DSXY:4:1465:19316:22169 1:N:0:TCTGCAAG+GCTGCACT  
CATTGCTTTATGCCACGCATAACAAAAATTATAAATTGAAATTACCCCTAAATTACAAAGATTTTAT  
GGATATAAAAATAAAGCCGTCGAGATAAAGTCCCAGAAATCATCGTCTTCCATGACGGGTTCTGCAGT  
AATTCTGGGACTGGT

+

FFFFFFFFFFFFFFFFFFFFFFFFFFFFFFFFFFFFFFFFFFFFFFFFFFFFFFFFFFFFFFFFFFFFFFFF,FFFFFFFFFFFFFFFF:FFFFF  
FFFFFFFFFFFFFFFFFFFFFFFFFFFFFFFFFFFFFFFFFFFFFFFFFFFFFFFFFFFFFFFFFFFFFFFF:FFFFFFFF  
FFFFFFFF

@A00721:190:HGJW7DSXY:4:1508:16288:34992 1:N:0:TCTGCAAG+GCTGCACT  
CATTGCTTTATGCCACGCATAACAAAAATTATAAATTGAAATTACCCCTAAATTACAAAGATTTTAT  
GGATATAAAAATAAAGCCGTCGGGATAAAGTCCCAGAAATCATCGTCTTCCATGACGGGTTCTGCAGT  
AATTCTGGGACTGGT

+

FFFFFFFFFFFFFFFFFFFFFFFFFFFFFFFFFFFFFFFFFFFFFFFFFFFFFFFFFFFFFFFFFFFFFFFF:FFFFFFFF  
FFFFFFFFFFFFFFFFFFFFFFFFFFFFFFFFFFFFFFFFFFFFFFFFFFFFFFFFFFFFFFFFFFFFFFFF:FFFFFFFF  
FFFFFFFF

@A00721:190:HGJW7DSXY:4:1630:28122:21793 1:N:0:TCTGCAAG+GCTGCACT  
CATTGCTTTATGCCACGCATAACAAAAATTATAAATTGAAATTACCCCTAAATTACAAAGATTTTAT  
GGATATAAAAATAAAGCCGTCGGGATAAAGTCCCAGAAATCATCGTCTTCCATGACGGGTTCTGCAGT  
AATTCTGGGACTGGT

+  
FFFFFFFFFFFFFFFFFFFFFFFFFFFFFFFFFFFFFFFFFFFFFFFFFFFFFFFFFFFFFFFFFFFFFFFF  
FFFFFFFFFFFFFFFFFFFFFFFFFFFFFFFFFFFFFFFFFFFFFFFFFFFFFFFFFFFFFFFFFFFFFFFF  
FFFFFFFFFFFF:FFF  
@A00721:190:HGJW7DSXY:4:1634:28474:31548 1:N:0:TCTGCAAG+GCTGCACT  
CATTGCTTTATGCCACGCATAACAAAAATTATAAATTGAAATTACCCCTAAATTACAAAGATTTTAT  
GGATATAAAAATAAAGCCGTCGGGATAAAGTCCCAGAAATCATCGTCTTCCATGACGGGTTCTGCAGT  
AATTCTGGGACTGGT

+  
FFFFFFFFFFFFFFFFFFFFFFFFFFFFFFFFFFFFFFFFFFFFFFFFFFFFFFFFFFFFFFFFFFFFFFFF  
FFFFF:FFF,:FFFFFFFFFFFFFFFFFFFFFFFFFFFFFFFFFFFFFFFFFFFFFFFFFFFFFFFFFFFF  
FFFFFFFFFF:FFFFF  
@A00721:190:HGJW7DSXY:4:1662:21124:13620 1:N:0:TCTGCAAG+GCTGCACT  
CATTGCTTTATGCCACGCATAACAAAAATTATAAATTGAAATTACCCCTAAATTACAAAGATTTTAT  
GGATATAAAAATAAAGCCGTCGAGATAAAGTCCCAGAAATCATCGTCTTCCATGACGGGTTCTGCAGT  
AATTCTGGGACTGGT

+  
FFFFFFF:FFFFFFFFFFFF:FFFFFFFFFFFFFFFFFFFFFFFFFFFFFFFFFFFFFFFFFFFFFFFFFFFF  
FFFFFFFFFFFFFFFFFFFFFFFFFFFFFFFFFFFFFFFFFFFFFFFFFFFFFFFFFFFFFFFFFFFFFFFF  
F:FFFFFFFFFFFFF  
@A00721:190:HGJW7DSXY:4:1671:5999:35274 1:N:0:TCTGCAAG+GCTGCACT  
CATTGCTTTATGCCACGCATAACAAAAATTATAAATTGAAATTACCCCTAAATTACAAAGATTTTAT  
GGATATAAAAATAAAGCCGTCGAGATAAAGTCCCAGAAATCATCGTCTTCCATGACGGGTTCTGCAGT  
AATTCTGTGACTGGT

+  
FFFFFFF,F:FFFFFFF:FFFFFFF:FF:FFFFF:FF:,FF::,,:FFFFFFFF,F:::FFFF,FFF  
FFFFFFFFFFFFF:::F,,FFFFFFFFFF:FF,FFFFF:FFF:FFFF:FFF:FF,,F,FFF:F,F,  
FFFF:FF,FFFF,F:  
@A00721:190:HGJW7DSXY:4:2327:24605:9377 1:N:0:TCTGCAAG+GCTGCACT  
CATTGCTTTATGCCACGCATAACAAAAATTATAAATTGAAATTACCCCTAAATTACAAAGATTTTAT  
GGATATAAAAATAAAGCCGTCGAGATAAAGTCCCAGAAATCATCGTCTTCCATGACGGGTTCTGCAGT  
AATTCTGGGACTGGT

+  
FFFFFFFFFFFFFFFFFFFFFFFFFFFFFFFFFFFFFFFFFFFFFFFFFFFFFFFFFFFFFFFFFFFFFFFF  
FFFFFFFFFFFFFFFFFFFFFFFFFFFFFFFFFFFFFFFFFFFFFFFFFFFFFFFFFFFFFFFFFFFFFFFF  
FFFFFFFFFFFF:FFF:  
@A00721:190:HGJW7DSXY:4:2408:8458:6997 1:N:0:TCTGCAAG+GCTGCACT  
CATTGCTTTATGCCACGCATAACAAAAATTATAAATTGAAATTACCCCTAAATTACAAAGATTTTAT  
GGATATAAAAATAAAGCCGTCGAGATAAAGTCCCAGAAATCATCGTCTTCCATGACGGGTTCTGCAGT  
AATTCTGGGACTGGT

+  
FFFFFFFFFFFFFFFFFFFFFFFFFFFFFFFFFFFFFFFFFFFFFFFFFFFFFFFFFFFFFFFFFFFFFFFF  
FFFFFFFFFFFFFFFFFFFFFFFFFFFFFFFFFFFFFFFFFFFFFFFFFFFFFFFFFFFFFFFFFFFFFFFF  
FFFFFFFFFFFFF  
@A00721:190:HGJW7DSXY:4:2505:14823:21746 1:N:0:TCTGCAAG+GCTGCACT  
CATTGCTTTATGCCACGCATAACAAAAATTATAAATTGAAATTACCCCTAAATTACAAAGATTTTAT  
GGATATAAAAATAAAGCCGTCGAGATAAAGTCCCAGAAATCATCGTCTTCCATGACGGGTTCTGCAGT  
AATTCTGGGACTGG

+  
:FFFFF,FFFFFFFFFFFF,FFFFFFFFF:FFFFF:,FF:F:FFFFFFFFFFFFFFFFFFFFFFFFFFFF  
:FFFF,F,FFFFFFFF:FF:F::F:FFFFFFFFFFFFFFFF::,FFFFFFFFFFFF,FFFF:FFFFF::  
::FFFFFFFFF:F  
@A00721:190:HGJW7DSXY:4:2603:4227:10441 1:N:0:TCTGCAAG+GCTGCACT  
CATTGCTTTATGCCACGCATAACAAAAATTATAAATTGAAATTACCCCTAAATTACAAAGATTTTAT

GGATATAAAAATAAAGCCGTCGAGATAAAGTCCCAGAAATCATCGCTTCCATGACGGGTTCTGCAGT  
AATTCTGGGACTGGT

```
FFFFFFFFFFFFFFFFFFFFFFFFFFFFF:FFFFFFFFFFFFFF,F:FFFFFFFFFFFFFFFFFFFFFFFFFFFF
FFFFFFFFFFFFFFFFFFFFFFFFFFFFFFFFF:FFFFFFFFFFFFFFFFFFFFFFFFFFFF:FFFFFFFFFFFFFF
FFFFFFFFFFFF:F
```

 $+$ 

```

FFFFFFFFF:FFFFFFFFFFFFFFFFFFFFFFFFFFFFFFFFF,FFFFFFFFFFFFFFFFFFFF,FFFFF
:FFFFFFFFFFFFFFFF:FFFFF:FFFFFFF,FFFFFFFFFFFFFFFF:,:FF,FFF:FF:FFFFFFFFFFFF
FFF,FFFFFFFFFFFF

```

+

[illegible]

+

[illegible]

+

[illegible]

+

```

FFFFFFFF:FFFFFFFFFFFFFFFFFFFFFFFF:FFFFFFFF:FFFFFFFFFFFFFFFFFFFFFFFF
FFFFFFFF,FFFF:FFFFFFFFFFFFFFFF:FFFFF:FFFFFFFFFFFFFFFFFFFFFFFFFFFF
FFFFFFFFF:FFFFF

```

+

```
FFFFFFFFFFFFFFFFFFFFFFFFFFFFFFFFFFFFFFFFFFFFFFFFFFFFFFFFFFFFFFF:FFFFF
FF:FFFFFFFFFFFFFFFFFFFFFFFFFFFFFFFFFFFFFFFFFFFFFFFFFFFFFFFFFFFF,FFFFFFFF:FFFFFFFFFFFFFFFFFFFF
FFFFFFFFFFFFE:EEEE
```

@A00721:190:HGJW7DSXY:4:1340:20799:33755 1:N:0:TCTGCAAG+GCTGCACT  
ATTGCTTTATGCCACGCATAACAAAAATTATAAATTGAAATTACCCCTAAATTACAAAGATTTTTATG  
GATATAAAAAATAAAGCCGTCGGGATAAAGTCCCAGAAATCATCGTCTTCCATGACGGGTCTGCAGTA  
ATTCTGGGACTGGTT

[illegible]

+

[illegible]

+

[illegible]

+

[illegible]

+

```
FFFFFFFFFFFFFFFFFFFFFFFFFFFFFFFFFFFFFFFFFFFFFFFFFFFFFFFFFFFFF:FFFFFFFFFF
FFFFFFFFFFFFFFFFFFFFFFFFFFFFFFFFFFFFF:FFFFFFFFFFFFFFFFFFFFFFFFFFFFFFFF:F
FFFFFFFFFFFFFFF.F
```

+

[illegible] $+$ [illegible]

FFF,FFFFFFFFFFFFFFFFFFFFFFFFFFFFFFFFFFFFFFFFFFFFFFFFFFFFFFFFFFFFFFFFFFFFFFFF  
FFFFFFFFF:FFFFF

@A00721:190:HGJW7DSXY:4:2157:4056:11021 1:N:0:TCTGCAAG+GCTGCACT  
ATTGCTTTATGCCACGCATAACAAAAATTATAAATTGAAATTACCCCTAAATTACAAAGATTTTTATG  
GATATAAAAATAAAGCCGTCGGGATAAAGTCCCAGAAATCATCGTCTTCCATGACGGGTTCTGCAGTA  
ATTCTGGGACTGGTT

+

FFFFFFFFFFFFFFFFFFFFFFFFFFFFFFFFFFFFFFFFFFFFFFFFFFFFFFFFFFFFFFFFFFFFFFFF,F  
FF:F:FFFFFFFFFFFFFFFFFFFFFFFFFFFFFFFFFFFFFFFFFFFFFFFFFFFFFFFFFFFFFFFFFFFF  
FFFFFFFFF:FFFFFFF

@A00721:190:HGJW7DSXY:4:2165:5665:32503 1:N:0:TCTGCAAG+GCTGCACT  
ATTGCTTTATGCCACGCATAACAAAAATTATAAATTGAAATTACCCCTAAATTACAAAGATTTTTATG  
GATATAAAAATAAAGCCGTCGGGATAAAGTCCCAGAAATCATCGTCTTCCATGACGGGTTCTGCAGTA  
ATTCTGGGACTGGTT

+

FFFFFFFFFFFFFFFFFFFFFFFFFFFFFFFFFFFFFFFFFFFFFFFFFFFFFFFFFFFFFFFFFFFFFFFF  
FFFFFFFFFFFFFFFFFFFFFFFFFFFFFFFFFFFFFFFFFFFFFFFFFFFFFFFFFFFFFFFFFFFFFFFF:F  
FFFFFFFFF:FFFFF

@A00721:190:HGJW7DSXY:4:2177:24053:12837 1:N:0:TCTGCAAG+GCTGCACT  
ATTGCTTTATGCCACGCATAACAAAAATTATAAATTGAAATTACCCCTAAATTACAAAGATTTTTATG  
GATATAAAAATAAAGCCGTCGGGATAAAGTCCCAGAAATCATCGTCTTCCATGACGGGTTCTGCAGTA  
ATTCTGGGACTGGTT

+

FFF:FFFF:FFFFFFFFFFFFFFFFFFFF::FFF:FF:,FFF,FFFF::FF:FFFFFF::FF:FFFF  
:FFFFFFFFFFFFFF:F:FFFF:FFFFFF:F,FFFF,::FFFF,FFF,F:FF:FFFFFFFFFFFF,F  
FFFFFFFFFFFFFFFF

@A00721:190:HGJW7DSXY:4:2209:22209:14497 1:N:0:TCTGCAAG+GCTGCACT  
ATTGCTTTATGCCACGCATAACAAAAATTATAAATTGAAATTACCCCTAAATTACAAAGATTTTTATG  
GATATAAAAATAAAGCCGTCGGGATAAAGTCCCAGAAATCATCGTCTTCCATGACGGGTTCTGCAGTA  
ATTCTGGGACTGGTT

+

FFFF,FFFFFFFFFFFFFFFFFFFF::FFFFFFFFFFFFFFFFFFFFFFFFFFFFFFFFFFFFFFFF:FFFFF  
FFF:FFF:FFFFFF::F,FFFFFFFFFFFF:FFFFFFFFFFFFFFFFFFFFFFFFFFFFFFFF:FFFFF:FFFF  
FFFFFFFFF:FFFFF

@A00721:190:HGJW7DSXY:4:2217:3305:18145 1:N:0:TCTGCAAG+GCTGCACT  
ATTGCTTTATGCCACGCATAACAAAAATTATAAATTGAAATTACCCCTAAATTACAAAGATTTTTATG  
GATATAAAAATAAAGCCGTCGGGATAAAGTCCCAGAAATCATCGTCTTCCATGACGGGTTCTGCAGTA  
ATTCTGGGACTGGTT

+

F:FFFFFFFF:FFFFFFFFFFFFFFFFFFFFFFFFFFFFFFFFFFFFFFFFFFFFFFFFFFFFFFFF:FFFF  
FFFFFFFFFFFFFFFFFFFFFFFFFFFFFFFFFFFFFFFFFFFFFFFFFFFFFFFFFFFFFFFFFFFFFFFF:FFFF:FFFF:FFFF  
FFFFFFFFFFFFFFFF

@A00721:190:HGJW7DSXY:4:2222:6605:6637 1:N:0:TCTGCAAG+GCTGCACT  
ATTGCTTTATGCCACGCATAACAAAAATTATAAATTGAAATTACCCCTAAATTACAAAGATTTTTATG  
GATATAAAAATAAAGCCGTCGGGATAAAGTCCCAGAAATCATCGTCTTCCATGACGGGTTCTGCAGTA  
ATTCTGGGACTGGTT

+

FFF:FF:,F,:FFFFFFFFFFFFFFFFFFFF:FFFFFFFFFFFFFFFFFFFFFFFFFFFFFFFF,FFFFFF:FFF:F  
FFFFFFFFFFFFFFFF:FFF:,::FF,FFFFFF:F,FFFFFF:F,:FFFF,FFFFFF,,F::F,FFFF  
FFFFFFFF:FFF,F,F

@A00721:190:HGJW7DSXY:4:2226:2555:20071 1:N:0:TCTGCAAG+GCTGCACT  
ATTGCTTTATGCCACGCATAACAAAAATTATAAATTGAAATTACCCCTAAATTACAAAGATTTTTATG  
GATATAAAAATAAAGCCGTCGGGATAAAGTCCCAGAAATCATCGTCTTCCATGACGGGTTCTGCAGTA  
ATTCTGGGACTGGTT

[illegible][illegible]

```

FFFFFFFFFFFFFFFF:FF:FFFFFFFF:FFFFFFFFFFFFFFFFFFFFFFFF:FFFFFFFFFFFFFFFFFFFFFFFF
FFFFFFFF:F:FFFFFF:FFFFFFFFFFFFFFFF:FFFFFFFF:FFF::FFFFFFFFFFFFFFFF:FFFFFFFF
FFFFFFFFFFFFFFFF:F

```

[illegible]

```

FFFFFFFFFFFFFFFFFFFFFFFF:FFFFFFFFFFFFFFFFFFFFFFFFFFFFFFFFFFFFFFFF
FFFFFFFFFFFFFFFFFFFFFFFF:FFFFFFFFFFFF,FFFFFFFFFFFFFFFFFFFFFFFF:FFFF:FFFFFFFFFFFF
FFFFFF,FFF,FFFF

```

```

FFFFFFFFFFFFFFFFFFFFFFFF, :FFFFFFFFFFFFFFFFFFFFFFFF: :FFFFFFFF
FFFFFFFFFFFFFFFF: FFFFFFFFFFFFFFFFFF: FFFFFFFFFFFFFFFFFF, FFFFFFFFF
FFFFFFFF: ..FFFF

```

[illegible]

@A00721:190:HGJW7DSXY:4:1176:25066:7420 1:N:0:TCTGCAAG+GCTGCACT  
TCCACGCATAACAAAAATTATAAATTGAAATTACCCCTAAATTACAAAGATTTTTATGGATATAAAAA



$+$ 

+

+

+

+

+

+

.....



FFFFFFFFFFFFFFFFFFFFFFFFFFFFFFFFFFFFFFFFFFFFFFFFFFFFFFFFFFFFFFFFFFFFFFFF  
FFFFFFFFFFFFFFFF

@A00721:190:HGJW7DSXY:4:2167:26521:21715 1:N:0:TCTGCAAG+GCTGCACT  
CACGCATAACAAAAATTATAAATTGAAATTACCCCTAAATTACAAAGATTTTTATGGATATAAAAATA  
AAGCCGTCGGGATAAAGTCCCAGAAATCATCGTCTTCCATGACGGGTTCTGCAGTAATTCTGGGACTG  
GTTGTAATGTCGTCC

+

FFFFFFFFFFFFFFFFFFFFFFFFFFFFFFFFFFFFFFFFFFFFFFFFFFFFFFFFFFFFFFFFFFFFFFFF  
FFFFFFFFFFFFFFFFFFFFFFFFFFFFFFFFFFFFFFFFFFFFFFFFFFFFFFFFFFFFFFFFFFFFFFFF  
FFFFFFFFFFFFFFFF

@A00721:190:HGJW7DSXY:4:2317:29884:17738 1:N:0:TCTGCAAG+GCTGCACT  
CACGCATAACAAAAATTATAAATTGAAATTACCCCTAAATTACAAAGATTTTTATGGATATAAAAATA  
AAGCCGTCGGGATAAAGTCCCAGAAATCATCGTCTTCCATGACGGGTTCTGCAGTAATTCTGGGACTG  
GTTGTAATGTCGTCC

+

FFFFFFFFFFFFFFFFFFFFFFFFFFFFFFFFFFFFFFFFFFFFFFFFFFFFFFFFFFFFFFFFFFFFFFFF  
FFFFFFFFFFFFFFFFFFFFFFFFFFFFFFFFFFFFFFFFFFFFFFFFFFFFFFFFFFFFFFFFFFFFFFFF  
FFFFFFFFFFFFFFFF

@A00721:190:HGJW7DSXY:4:2362:5348:26068 1:N:0:TCTGCAAG+GCTGCACT  
CACGCATAACAAAAATTATAAATTGAAATTACCCCTAAATTACAAAGATTTTTATGGATATAAAAATA  
AAGCCGTCGGGATAAAGTCCCAGAAATCATCGTCTTCCATGACGGGTTCTGCAGTAATTCTGGGACTG  
GTTGTAATGTCGTCC

+

FFFFFFFFFFFFFFFFFFFFFFFFFFFFFFFFFFFFFFFFFFFFFFFFFFFFFFFFFFFFFFFFFFFFFFF:FFFFFFFFFFFFFFF  
FFFFFFF:FFFFFFFFFFFFFFFFFFFFFFFFFFFFFFFFFFFFFFFFFFFFFFFFFFFFFFFFFFFFFFFFFFFFFFF  
F:FFFFFFFFFFFFFFF

@A00721:190:HGJW7DSXY:4:2540:9408:23516 1:N:0:TCTGCAAG+GCTGCACT  
CACGCATAACAAAAATTATAAATTGAAATTACCCCTAAATTACAAAGATTTTTATGGATATAAAAATA  
AAGCCGTCGGGATAAAGTCCCAGAAATCATCGTCTTCCATGACGGGTTCTGCAGTAATTCTGGGACTG  
GTTGTAATGTCGTCC

+

FFFFFFFFFFFFFFFFFFFFFF:FFFFFFF:FFFFFFFFFFFFFF:FFFF:FFFFFFFFFF,FFFFFFFFFFFFFFFFFFFF  
FFFFFFF:FFFFFFFFFFFFFFFFFFFFFFFFFFFFFFFFFFFFFFFFFFFFFFFFFFFFFFFFFFFFFFFFFFFFFFF  
FFFFFFFFFFFFFFFFFFFF

@A00721:190:HGJW7DSXY:4:2601:9227:1783 1:N:0:TCTGCAAG+GCTGCACT  
CACGCATAACAAAAATTATAAATTGAAATTACCCCTAAATTACAAAGATTTTTATGGATATAAAAATA  
AAGCCGTCGGGATAAAGTCCCAGAAATCATCGTCTTCCATGACGGGTTCTGCAGTAATTCTGGGACTG  
GTTGTAATGTCGTCC

+

FFFFFFFFFFFFFFFFFFFFFFFFFFFFFFFFFFFFFFFFFFFFFFFFFFFFFFFFFFFFFFFFFFFFFFF  
F:FFFFFFFFFFFFFFFFFFFFFFF:FFFFFFFFFFFFFFFFFFFFFFFFFFFFFFFFFFFFFFFFFFFFFFFFFFFFF  
FFFFFFFFFFFFFFFFFFFF

@A00721:190:HGJW7DSXY:4:2624:15609:4069 1:N:0:TCTGCAAG+GCTGCACT  
CACGCATAACAAAAATTATAAATTGAAATTACCCCTAAATTACAAAGATTTTTATGGATATAAAAATA  
AAGCCGTCGGGATAAAGTCCCAGAAATCATCGTCTTCCATGACGGGTTCTGCAGTAATTCTGGGACTG  
GTTGTAATGTCGTCC

+

FFFFFFFFFFFFFFFFFFFFFFFFFFFFFFFFFFFFFFFFFFFFFFFFFFFFFFFFFFFFFFFFFFFFFF:FFF,FFFFFFFFFFFFFFFF  
FFFFFFFFFFFFFFFFFFFFFFFFFFFFFFFFFFFFFFF:F:FFFFFFFFFFFFFFFFFFFFFFF,FFFFFFFFFFFFFFFFFFFF  
FFFFFFF:FFFFFFF:

@A00721:190:HGJW7DSXY:4:1574:7111:20854 1:N:0:TCTGCAAG+GCTGCACT  
TACCCCTAAATTACAAAGATTTTTATGGATATAAAAATAAAGCCGTCGGGATAAAGTCCCAGAAATCA  
TCGTCTTCCATGACGGGTTCTGCAGTAATTCTGGGACTGGTTGTAATGTCGTCCAGATGCGGATAGTC  
CACCATGCTCGCTTT

+  
FFFFFFFFFFFFFFFFFFFFFFFFFFFFFFFFFFFFFFFFFFFFFFFFFFFFFFFFFFFFFFFFFFFFFFFF  
FFFFFFFFFFFFFFFFFFFFFFFFFFFFFFFFFFFFFFFFFFFFFFFFFFFFFFFFFFFFFFFFFFFFFFFF  
FFFF:FFFFFFFF  
@A00721:190:HGJW7DSXY:4:2261:5457:4460 1:N:0:TCTGCAAG+GCTGCACT  
TACCCCTAAATTACAAAGATTTTTATGGATATAAAAATAAAGCCGTCGGGATAAAGTCCCAGAAATCA  
TCGTCTTCCATGACGGGTCTGCAGTAATTCTGGGACTGGTTGTAATGTCGTCCAGATGCGGATAGTC  
CACCATGCTCGCTTT  
+  
FFFFFFFFFFFFFFFFFFFFFFFFFFFFFFFFFFFFFFFFFFFFFFFFFFFFFFFFFFFFFFFFFFFFFFFF  
FFFFFFFFFFFFFFFFFFFFFFFFFFFFFFFFFFFFFFFFFFFFFFFFFFFFFFFFFFFFFFFFFFFFFFFF  
FFFF:FFFFFFFF  
@A00721:190:HGJW7DSXY:4:2465:18141:36104 1:N:0:TCTGCAAG+GCTGCACT  
TACCCCTAAATTACAAAGATTTTTATGGATATAAAAATAAAGCCGTCGGGATAAAGTCCCAGAAATCA  
TCGTCTTCCATGACGGGTCTGCAGTAATTCTGGGACTGGTTGTAATGTCGTCCAGATGCGGATAGTC  
CACCATGCTCGCTTT  
+  
FFFFFFFFFFFFFFFFFFFFFFFFFFFFFFFFFFFFFFFFFFFFFFFFFFFFFFFFFFFFFFFFFFFFFFFF  
FFF:FFFFFFFFFFFFFFFFFFFFFFFFFFFFFFFFFFFFFFFFFFFFFFFFFFFFFFFFFFFFFFFFFFFF  
FFFFFFFFFFFFFFFFFFFFFFFF  
@A00721:190:HGJW7DSXY:4:2549:17716:36276 1:N:0:TCTGCAAG+GCTGCACT  
TACCCCTAAATTACAAAGATTTTTATGGATATAAAAATAAAGCCGTCGGGATAAAGTCCCAGAAATCA  
TCGTCTTCCATGACGGGTCTGCAGTAATTCTGGGACTGGTTGTAATGTCGTCCAGATGCGGATAGTC  
CACCATGCTCGCTTT  
+  
FFFFFFFFFFFFFFFFFFFFFFFFFFFFFFFFFFFFFFFFFFFFFFFFFFFFFFFFFFFFFFFFFFFFFFFF  
FFFFFFFFFFFFFFFFFFFFFFFFFFFFFFFFFFFFFFFFFFFFFFFFFFFFFFFFFFFFFFFFFFFFFFFF  
F,FF:FFFF:FFFF  
@A00721:190:HGJW7DSXY:4:1431:5141:7607 1:N:0:TCTGCAAG+GCTGCACT  
ACCCCTAAATTACAAAGATTTTTATGGATATAAAAATAAAGCCGTCGGGATAAAGTCCCAGAAATCAT  
CGTCTTCCATGACGGGTCTGCAGTAATTCTGGGACTGGTTGTAATGTCGTCCAGATGCGGATAGTCC  
ACCATGCTCGCTTTA  
+  
FFFFFFFFFFFFFFFFFFFFFFFFFFFFFFFFFFFFFFFFFFFFFFFFFFFFFFFFFFFFFFFFFFFFFFFF  
FF:FFFFFFFF,FFFFFFFFFFFFFFFFFFFFFFFFFFFFFFFFFFFFFFFFFFFFFFFFFFFFFFFFFFFF  
FFFFFFFFFFFFFFFFFFFFFFFF  
@A00721:190:HGJW7DSXY:4:1568:27055:21355 1:N:0:TCTGCAAG+GCTGCACT  
ACCCCTAAATTACAAAGATTTTTATGGATATAAAAATAAAGCCGTCGGGATAAAGTCCCAGAAATCAT  
CGTCTTCCATGACGGGTCTGCAGTAATTCTGGGACTGGTTGTAATGTCGTCCAGATGCGGATAGTCC  
ACCATGCTCGCTTTA  
+  
FFFFFFFFFFFFFFFFFFFFFFFFFFFFFFFFFFFFFFFFFFFFFFFFFFFFFFFFFFFFFFFFFFFFFFFF  
FFFFFFFFFFFFFFFFFFFFFFFFFFFFFFFFFFFFFFFFFFFFFFFFFFFFFFFFFFFFFFFFFFFFFFFF  
FFF,FFFFFFFF  
@A00721:190:HGJW7DSXY:4:2320:28492:21684 1:N:0:TCTGCAAG+GCTGCACT  
ACCCCTAAATTACAAAGATTTTTATGGATATAAAAATAAAGCCGTCGGGATAAAGTCCCAGAAATCAT  
CGTCTTCCATGACGGGTCTGCAGTAATTCTGGGACTGGTTGTAATGTCGTCCAGATGCGGATAGTCC  
ACCATGCTCGCTTTA  
+  
FFFFFFFFFFFFFFFFFFFFFFFFFFFFFFFFFFFFFFFFFFFFFFFFFFFFFFFFFFFFFFFFFFFFFFFF  
FFFFFFFFFFFFFFFFFFFFFFFFFFFFFFFFFFFFFFFFFFFFFFFFFFFFFFFFFFFFFFFFFFFFFFFF  
FFF,FFFFFFFF  
@A00721:190:HGJW7DSXY:4:2477:10728:31093 1:N:0:TCTGCAAG+GCTGCACT  
ACCCCTAAATTACAAAGATTTTTATGGATATAAAAATAAAGCCGTCGGGATAAAGTCCCAGAAATCAT



@A00721:190:HGJW7DSXY:4:1139:11523:1188 1:N:0:TCTGCAAG+GCTGCACT  
CCTAAATTACAAAGATTTTTATGGATATAAAAATAAAGCCGTCTGGATAAAGTCCCAGAAATCATCGT  
CTTCCATGACGGGTTCTGCAGTAATTCTGGGACTGGTTGTAATGTCGTCCAGATGCGGATAGTCCACC  
ATGCTCGCTTAATCC

@A00721:190:HGJW7DSXY:4:1207:3332:13777 1:N:0:TCTGCAAG+GCTGCACT  
CCTAAATTACAAAGATTTTTATGGATATAAAAATAAAGCCGTCGGGATAAAGTCCCAGAAATCATCGT  
CTTCCATGACGGGTTCTGCAGTAATTCTGGGACTGGTTGTAATGTCGTCAGATGCGGATAGTCCACC  
ATGCTCGCTTTATCC

@A00721:190:HGJW7DSXY:4:1642:22191:32972 1:N:0:TCTGCAAG+GCTGCACT  
CCTAAATTACAAAGATTTTTATGGATATAAAAATAAAGCCGTCGGGATAAAGTCCCAGAAATCATCGT  
CTTCCATGACGGGTTCTGCAGTAATTCTGGGACTGGTTGTAATGTCGTCCAGATGCGGATAGTCCACC  
ATGCTCGCTTTATCC

@A00721:190:HGJW7DSXY:4:2159:8992:21136 1:N:0:TCTGCAAG+GCTGCACT  
CCTAAATTACAAAGATTTTTATGGATATAAAAATAAAGCCGTCGGGATAAAGTCCCAGAAATCATCGT  
CTTCCATGACGGGTTCTGCAGTAATTCTGGGACTGGTTGTAATGTCGTCCAGATGCGGATAGTCCACC  
ATGCTCGCTTTATCC

@A00721:190:HGJW7DSXY:4:2207:16369:3662 1:N:0:TCTGCAAG+GCTGCACT  
CCTAAATTACAAAGATTTTTATGGATATAAAAATAAAGCCGTCGGGATAAAGTCCCAGAAATCATCGT  
CTTCCATGACGGGTTCTGCAGTAATTCTGGGACTGGTTGTAATGTCGTCAGATGCGGATAGTCCACC  
ATGCTCGCTTTATCC

@A00721:190:HGJW7DSXY:4:2444:1425:23218 1:N:0:TCTGCAAG+GCTGCACT  
CCTAAATTACAAAGATTTTTATGGATATAAAAATAAAGCCGTCGGGATAAAGTCCCAGAAATCATCGT  
CTTCCATGACGGGTTCTGCAGTAATTCTGGGACTGGTTGTAATGTCGTCAGATGCGGATAGTCCACC  
ATGCTCGCTTTATCC

@A00721:190:HGJW7DSXY:4:2528:26386:3881 1:N:0:TCTGCAAG+GCTGCACT  
CCTAAATTACAAAGATTTTTATGGATATAAAAATAAAGCCGTCGGGATAAAGTCCCAGAAATCATCGT  
CTTCCATGACGGGTTCTGCAGTAATTCTGGGACTGGTTGTAATGTCGTCCAGATGCGGATAGTCCACC  
ATGCTCGCTTTATCC

FFFFFFFFFFFFFFFFFFFFFFFFFFFFFFFF:FF:FFFFFFFF:FFFFFFF,FFFFFFFFFFFFFFFF,FF  
,FF,:FFF:FFFF:

@A00721:190:HGJW7DSXY:4:2531:17020:31876 1:N:0:TCTGCAAG+GCTGCACT  
CCTAAATTACAAAGATTTTTATGGATATAAAAATAAAGCCGTCGGGATAAAGTCCCAGAAATCATCGT  
CTTCCATGACGGGTTCTGCAGTAATTCTGGGACTGGTTGTAATGTCGTCCAGATGCGGATAGTCCACC  
ATGCTCGCTTTATCC

+

FFFFFFFFFFFFFFFFFFFFFFFFFFFFFFFF:FFFFFFFFFFFFFFFFFFFFFFFFFFFFFFFF:FFFFFFF  
FFFFFFFFFFFFFFFFFFFFFFFFFFFFFFFFFFFFFFFFFFFFFFFFFFFFFFFFFFFFFFFF,FFFFFFF  
,FFFFFFFFFFFFFFF

@A00721:190:HGJW7DSXY:4:2617:5439:21684 1:N:0:TCTGCAAG+GCTGCACT  
CCTAAATTACAAAGATTTTTATGGATATAAAAATAAAGCCGTCGGGATAAAGTCCCAGAAATCATCGT  
CTTCCATGACGGGTTCTGCAGTAATTCTGGGACTGGTTGTAATGTCGTCCAGATGCGGATAGTCCACC  
ATGCTCGCTTTATCC

+

FFFFFFFFFFFFFFFFFFFFFFFFFFFFFFFFFFFFFFFFFFFFFFFFFFFFFFFFFFFFFFFFFFFFFFF  
FFFFFFFFFFFFFFFFFFFFFFFFFFFFFFFFFFFFFFFF:FFFFFFFFFFFFFFFFFFFFFFFFFFFFFFFF  
:FFFFFFFFFFFFFFF

@A00721:190:HGJW7DSXY:4:2678:9028:28275 1:N:0:TCTGCAAG+GCTGCACT  
CCTAAATTACAAAGATTTTTATGGATATAAAAATAAAGCCGTCGGGATAAAGTCCCAGAAATCATCGT  
CTTCCATGACGGGTTCTGCAGTAATTCTGGGACTGGTTGTAATGTCGTCCAGATGCGGATAGTCCACC  
ATGCTCGCTTTATCC

+

FFFFFFFFFFFFFFFFFFFFFFFFFFFFFFFFFFFFFFFFFFFFFFFFFFFFFFFFFFFFFFFFFFFFFFF  
FFFFFFFFFFFFFFFFFFFFFFFFFFFFFFFFFFFFFFFFFFFFFFFFFFFFFFFFFFFFFFFFFFFFFFF  
:FFFFFFFFFFFFFFF

@A00721:190:HGJW7DSXY:4:2678:9317:31187 1:N:0:TCTGCAAG+GCTGCACT  
CCTAAATTACAAAGATTTTTATGGATATAAAAATAAAGCCGTCGGGATAAAGTCCCAGAAATCATCGT  
CTTCCATGACGGGTTCTGCAGTAATTCTGGGACTGGTTGTAATGTCGTCCAGATGCGGATAGTCCACC  
ATGCTCGCTTTATCC

+

FFFFFFFFFFFFFFFFFFFFFFFFFFFFFFFFFFFFFFFFFFFFFFFFFFFFFFFFFFFFFFFFFFFFFFF  
FFFFFFFFFFFFFFFFFFFFFFFFFFFFFFFFFFFFFFFF:FFFFFFFFFFFFFFFFFFFFFFFFFFFFFFF  
F,FFFFFFFFFFFFFFF

@A00721:190:HGJW7DSXY:4:1102:21902:22013 1:N:0:TCTGCAAG+GCTGCACT  
CTAAATTACAAAGATTTTTATGGATATAAAAATAAAGCCGTCGGGATAAAGTCCCAGAAATCATCGTC  
TTCCATGACGGGTTCTGCAGTAATTCTGGGACTGGTTGTAATGTCGTCCAGATGCGGATAGTCCACCA  
TGCTCGCTTTATCCG

+

FFFFFFFFFFFFFFFFFFFFFFFFFFFFFFFF:FFFFFFFFFFFFFFFFFFFFFFFFFFFFFFFFFFFFFFF  
FFFFFFFFFFFFFFFFFFFFFFFFFFFFFFFFFFFFFFFF, :FFFFFFFFFFFFFFF:FFFFFFFFFFFFFFFFFFFFF,FFF  
FFFFFFFFF,FFFFFFF

@A00721:190:HGJW7DSXY:4:1107:2953:22921 1:N:0:TCTGCAAG+GCTGCACT  
CTAAATTACAAAGATTTTTATGGATATAAAAATAAAGCCGTCGGGATAAAGTCCCAGAAATCATCGTC  
TTCCATGACGGGTTCTGCAGTAATTCTGGGACTGGTTGTAATGTCGTCCAGATGCGGATAGTCCACCA  
TGCTCGCTTTATCCG

+

FFFFFFFFFFFFFFFFFFFFFFFFFFFFFFFFFFFFFFFFFFFFFFFFFFFFFFFFFFFFFFFFFFFFFFF  
FFFFFFFFFFFFFFFFFFFFFFFFFFFFFFFFFFFFFFFF:FFFFFFFFFFFFFFFFFFFFF,FFFFFFFFF  
FFFFFFFFFFFFFFF

@A00721:190:HGJW7DSXY:4:1109:32253:26005 1:N:0:TCTGCAAG+GCTGCACT  
CTAAATTACAAAGATTTTTATGGATATAAAAATAAAGCCGTCGGGATAAAGTCCCAGAAATCATCGTC  
TTCCATGACGGGTTCTGCAGTAATTCTGGGACTGGTTGTAATGTCGTCCAGATGCGGATAGTCCACCA  
TGCTCGCTTTATCCG

+  
FFFFFFFFFFFFFFFFFFFFFFFFFFFFFFFFFFFFFFFFFFFFFFFFFFFFFFFFFFFFFFFF  
FFFFFFF:FFFFFFFFF:FFFFFFFFFFFFFFFFFFFFFFFFFFFFFFFFFFFFFFFF:FFF,FFFF  
FFFFFFFFFFFFFF:F

@A00721:190:HGJW7DSXY:4:1171:24361:36824 1:N:0:TCTGCAAG+GCTGCACT  
CTAAATTACAAAGATTTTTATGGATATAAAAATAAAGCCGTCGGGATAAAGTCCCAGAAATCATCGTC  
TTCCATGACGGGTTCTGCAGTAATTCTGGGACTGGTTGTAATGTCGTCCAGATGCGGATAGTCCACCA  
TGCTCGCTTTATCCG

+  
:FFFFFFFFF:,FFF:FFF:F,FFFF:FFFF:FFFF,,FF::FF:FFF:FFFFFF::F:FFFF,FF  
FF,FF:F:FF,,,:F,FFFFFF:FFFF,F,F,:FF:FFFFFF:F:FFFF,FFFF:,F,:,,FF  
:F:FFF,FFFF,:F

@A00721:190:HGJW7DSXY:4:1219:25861:36072 1:N:0:TCTGCAAG+GCTGCACT  
CTAAATTACAAAGATTTTTATGGATATAAAAATAAAGCCGTCGGGATAAAGTCCCAGAAATCATCGTC  
TTCCATGACGGGTTCTGCAGTAATTCTGGGACTGGTTGTAATGTCGTCCAGATGCGGATAGTCTGTCC  
AAATCTTTAAAGATG

+  
FFFFFFFFFFFFFFFFFFFFFFFFFFFFFFFFFFFFFFFFFFFFFFFFFFFFFFFFFFFFFFFF  
FFFFFFFFFFFFFFFFFFFFFFFFFFFFFFFFFFFFFFFF,FFFFFFFFFFFFFFFFFFFFFFFF:FFFFFFFFFFFFFFF  
FFFFFFFFFFFFFFF

@A00721:190:HGJW7DSXY:4:1267:7111:33098 1:N:0:TCTGCAAG+GCTGCACT  
CTAAATTACAAAGATTTTTATGGATATAAAAATAAAGCCGTCGGGATAAAGTCCCAGAAATCATCGTC  
TTCCATGACGGGTTCTGCAGTAATTCTGGGACTGGTTGTAATGTCGTCCAGATGCGGATAGTCCACCA  
TGCTCGCTTTATCCG

+  
FFFFFFFFFFFFFFFFFFFFFFFFFFFFFFFFFFFFFFFFFFFFFFFFFFFFFFFFFFFFFFFF  
FFFFFFFFFFFFFFFFFFFFFFFFFFFFFFFFFFFFFFFF,FF:FFFFFFFFFFFFFFFFFFFFFFFFFFFFFFFF  
FFFFFFFFFFFFFFF

@A00721:190:HGJW7DSXY:4:1308:24795:23453 1:N:0:TCTGCAAG+GCTGCACT  
CTAAATTACAAAGATTTTTATGGATATAAAAATAAAGCCGTCGGGATAAAGTCCCAGAAATCATCGTC  
TTCCATGACGGGTTCTGCAGTAATTCTGGGACTGGTTGTAATGTCGTCCAGATGCGGATAGTCTGTCC  
AAATCTTTAAAGATG

+  
FFFFFFFFFFFFFFFFFFFFFFFFFFFFFFFFFFFFFFFFFFFFFFFFFFFFFFFFFFFFFFFF  
FFFFFFFFFFFFFFFFFFFFFFFFFFFFFFFFFFFFFFFFFFFFFFFFFFFFFFFFFFFFFFFF:FFFFFFFF  
FFFFFFFFF:FFFF

@A00721:190:HGJW7DSXY:4:1350:3712:18912 1:N:0:TCTGCAAG+GCTGCACT  
CTAAATTACAAAGATTTTTATGGATATAAAAATAAAGCCGTCGGGATAAAGTCCCAGAAATCATCGTC  
TTCCATGACGGGTTCTGCAGTAATTCTGGGACTGGTTGTAATGTCGTCCAGATGCGGATAGTCCACCA  
TGCTCGCTTTATCCG

+  
FFFFFFFFFFFFFFFFFFFFFFFFFFFFFFFFFFFFFFFFFFFFFFFFFFFFFFFFFFFFFFFF  
FFFFFFFFFFFFFFFFFFFFFFFFFFFFFFFFFFFFFFFFFFFFFFFFFFFFFFFFFFFFFFFF:FFFF  
FFFFFFFFFFFFFFF

@A00721:190:HGJW7DSXY:4:1426:17210:22874 1:N:0:TCTGCAAG+GCTGCACT  
CTAAATTACAAAGATTTTTATGGATATAAAAATAAAGCCGTCGGGATAAAGTCCCAGAAATCATCGTC  
TTCCATGACGGGTTCTGCAGTAATTCTGGGACTGGTTGTAATGTCGTCCAGATGCGGATAGTCCACCA  
TGCTCGCTTTATCCG

+  
FFFFFFFFFFFFFFFFFFFFFFFFFFFFFFFFFFFFFFFFFFFFFFFFFFFFFFFFFFFFFFFF  
FFFFFFFFFFFFFFFFFFFFFFFFFFFFFFFFFFFFFFFF:FFFFF:FFFFFFFFFFFFFFFFFFFFFFFFF:  
FFFFFFFFFFFFFFF

@A00721:190:HGJW7DSXY:4:1438:9923:9846 1:N:0:TCTGCAAG+GCTGCACT  
CTAAATTACAAAGATTTTTATGGATATAAAAATAAAGCCGTCGGGATAAAGTCCCAGAAATCATCGTC







@A00721:190:HGJW7DSXY:4:2147:29640:8015 1:N:0:TCTGCAAG+GCTGCACT  
CTAAATTACAAAGATTTTTATGGATATAAAAATAAAGCCGTCGGGATAAAGTCCCAGAAATCATCGTC  
TTCCATGACGGGTTCTGCAGTAATTCTGGGACTGGTTGTAATGTCGTCCAGATGCGGATAGTCCACCA  
TGCTCGCTTTATCCG

@A00721:190:HGJW7DSXY:4:2150:3468:4085 1:N:0:TCTGCAAG+GCTGCACT  
CTAAATTACAAAGATTTTTATGGATATAAAAATAAAGCCGTCGGGATAAAGTCCCAGAAATCATCGTC  
TTCCATGACGGGTTCTGCAGTAATTCTGGGACTGGTTGTAATGTCGTCCAGATGCGGATAGTCCACCA  
TGCTCGCTTTATCCG

@A00721:190:HGJW7DSXY:4:2163:2971:15217 1:N:0:TCTGCAAG+GCTGCACT  
CTAAATTACAAAGATTTTTATGGATATAAAAATAAAGCCGTCGGGATAAAGTCCCAGAAATCATCGTC  
TTCCATGACGGGTTCTGCAGTAATTCTGGGACTGTTGTAATGTCGTCCAGATGCGGATAGTCCACCA  
TGCTCGCTTTATCCG

@A00721:190:HGJW7DSXY:4:2231:26178:29794 1:N:0:TCTGCAAG+GCTGCACT  
CTAAATTACAAAGATTTTTATGGATATAAAAATAAAGCCGTCGGGATAAAGTCCCAGAAATCATCGTC  
TTCCATGACGGGTTCTGCAGTAATTCTGGGACTGTTGTAATGTCGTCCAGATGCGGATAGTCCACCA  
TGCTCGCTTTATCCG

@A00721:190:HGJW7DSXY:4:2259:25066:3944 1:N:0:TCTGCAAG+GCTGCACT  
CTAAATTACAAAGATTTTTATGGATATAAAAATAAAGCCGTCGGGATAAAGTCCCAGAAATCATCGTC  
TTCCATGACGGGTTCTGCAGTAATTCTGGGACTGGTTGTAATGTCGTCCAGATGCGGATAGTCCACCC  
TGCTCGCTTTATCCG

@A00721:190:HGJW7DSXY:4:2343:7527:22451 1:N:0:TCTGCAAG+GCTGCACT  
CTAAATTACAAAGATTTTTATGGATATAAAAAATAAGCCGTCGGGATAAAGTCCCAGAAATCATCGTC  
TTCCATGACGGGTTCTGCAGTAATTCTGGGACTGGTTGTAATGTCGTCCAGATGCGGATAGTCTGTCC  
AAATCTTTAAAGATG

@A00721:190:HGJW7DSXY:4:2416:12834:32800 1:N:0:TCTGCAAG+GCTGCACT  
CTAAATTACAAAGATTTTTATGGATATAAAAATAAAGCCGTCGGGATAAAGTCCCAGAAATCATCGTC  
TTCCATGACGGGTTCTGCAGTAATTCTGGGACTGGTTGTAATGTCGTCCAGATGCGGATAGTCCACCA  
TGCTCGCTTATCCG

[illegible]

```
F:FFF:FFFF::FFFFFFFFFFFF:FFFFFFFFFFFF:FFF,FFFFFFFFFFFFFFFFFFFFFFFFFFFF::F
FF:FFFF:,FF,FFFFFFFFFFFFFFFFFFFF::FFFF:FFFFFFFFFFFF:FFFFFFFFFFFFFFFFFFFF
FFFFF,FF:FFFFF
```

```

FFFFFFFFFFFFFFFFFFFFFFFF:FFF:FFFFFFFFFFFFFFFFFFFFFFFFFFFFFFFFFFFFFFFF
FFFFFFFF:FFFFFFFFFFFFFFFFFFFFFFFFFFFFFFFF:FFFFFFFFFFFFFFFFFFFFFFFFFFFF
FFFFFFFFFFFFFFFFFFFF

```

```
FFFFFFFFFFFFFFFFFFFFFFFFFFFFF:FFFFFFFFFFFFFFFFFFFFFFFFFFFFFFFFF
FFFFFFFFFFFFFFFFFFFFFFFFFFFFF:FFFFFFFFFFFFFFFFFFFFFFFFFFFFFFFFF:FF:
FFFFFFFFFFFFFFFF
```

```

FFFFFFFFFFFFFFFFFFFFFFFF:FFFFFFFFFFFFFFFFFFFFFFFFFFFFFFFF:FFFFFFFFFFFFFFFF
FFFFFFFFFFFFFFFF:FFFFFFFFFFFFFFFFFFFFFFFFFFFFFFFF:FFFFFFFFFFFFFFFFFFFFFFFFFFFFFFFF
,FFFFFFFF:FFFFFF

```

```

FFFFFFFFFFFFFFFFFFFFFFFFFFFFFFFF:FFFFFFFFFF:FFFFFFFFFFFFFFFFFFFFFFFFFFFFFFFF
FFFFFFFFFFFFFFFFFFFFFFFFFFFFFFFFFFFFFFFF:FFFFFFFFFFFFFFFFFFFFFFFFFFFFFFFF
FFFFFFFFFFFFFFFF

```

[illegible]

@A00721:190:HGJW7DSXY:4:2570:20717:12602 1:N:0:TCTGCAAG+GCTGCACT  
CTAAATTACAAAGATTTTTATGGATATAAAAAATAAAGCCGTCGGGATAAAGTCCCAGAAATCATCGTC



@A00721:190:HGJW7DSXY:4:2663:18747:3458 1:N:0:TCTGCAAG+GCTGCACT  
CTAAATTACAAAGATTTTTATGGATATAAAAATAAAGCCGTCGGGATAAAGTCCCAGAAATCATCGTC  
TTCCATGACGGGTTCTGCAGTAATTCTGGGACTGGTTGTAAGGTCGTCCAGATGCGGATAGTCCACCA  
TGCTCGCTTTATCCG

```

FFFFFFFFFFFFFFFFFFFFFF:FFFFFF,F:FFFFFFFFFFFFFFFF,FFFFFFFF:FFFF,FFFFFFFF
FFFFFFFFFFFFFFFF:FFFF:FFFFFFFF,FFFFFFFF:,FFFFFFFFFFFFFFFF::FFF,FFF,
FFFFFFFFFF:FF:F

```

+

[illegible]

+

```
FFFFFFFFFFFFFFFFFFFFF,FFFFFFFFFF:FFFFFFFFFFFFFFFFFFFFFFFFFFFFFFFFFFFFFFFF
FFFFFFFFFFFFFFFFFFFFFFFFFFFFFFFFFFFFFFFFF:FFF:FFFFFFFFFFFFFFFFFFFFFFFFFFFFF:FFFFF
FFFFFFFFFFFFFFFFFFFF
```

+

[illegible]

+

[illegible]

+

```

FFFFFFFF,FFFF:FFFF:FFFF::FFFF,,FFFF:F:FFFF:,FFFFFFFF,FFFFFF:
FFFF:FFFFFF:F::FFFFFFFF:FFF,FFFF::,FFFFFFFFFFFF:,F,FFFFFFFF:FFF:FFF
FFFF:FFFFFF:

```

+

[illegible]

@A00721:190:HGJW7DSXY:4:1530:27091:26741 1:N:0:TCTGCAAG+GCTGCACT  
TAAATTACAAAGATTTTTATGGATATAAAAATAAAGCCGTCGGGATAAAGTCCCAGAAATCATCGTCT  
TCCATGACGGGTTCTGCAGTAATTCTGGGACTGGTTGTAATGTCGTCCAGATGCGGATAGTCCACCAT  
GCTCGCTTTATCCGC

@A00721:190:HGJW7DSXY:4:1544:20961:31093 1:N:0:TCTGCAAG+GCTGCACT  
TAAATTACAAAGATTTTTATGGATATAAAAATAAAGCCGTCGGGATAAAGTCCCAGAAATCATCGTCT  
TCCATGACGGGTTCTGCAGTAATTCTGGGACTGGTTGTAATGTCGTCCAGATGCGGATAGTCCACCAT  
GCTCGCTTTATCCGC

@A00721:190:HGJW7DSXY:4:1578:28845:29590 1:N:0:TCTGCAAG+GCTGCACT  
TAAATTACAAAGATTTTTATGGATATAAAAATAAAGCCGTCGGGATAAAGTCCCAGAAATCATCGTCT  
TCCATGACGGGTTCTGCAGTAATTCTGGGACTGGTTGTAATGTCGTCCAGATGCGGATAGTCCACCAT  
GCTCGCTTTATCCGC

@A00721:190:HGJW7DSXY:4:1660:4634:6731 1:N:0:TCTGCAAG+GCTGCACT  
TAAATTACAAAGATTTTTATGGATATAAAAATAAAGCCGTCGGGATAAAGTCCCAGAAATCATCGTCT  
TCCATGACGGGTTCTGCAGTAATTCTGGGACTGGTTGTAATGTCGTCCAGATGCGGATAGTCCACCAT  
GCTCGCTTTATCCG

@A00721:190:HGJW7DSXY:4:1676:6903:6746 1:N:0:TCTGCAAG+GCTGCACT  
TAAATTACAAAGATTTTTATGGATATAAAAATAAAGCCGTCGGGATAAAGTCCCAGAAATCATCGTCT  
TCCATGACGGGTTCTGCAGTAATTCTGGGACTGGTTGTAATGTCGTCAGATGCGGATAGTCCACCAT  
GCTCGCTTTATCCGC

@A00721:190:HGJW7DSXY:4:2120:9959:18771 1:N:0:TCTGCAAG+GCTGCACT  
TAAATTACAAAGATTTTTATGGATATAAAAATAAAGCCGTCGGGATAAAGTCCCAGAAATCATCGTCT  
TCCATGACGGGTTCTGCAGTAATTCTGGGACTGGTTGTAATGTCGTCCAGATGCGGATAGTCCACCAT  
GCTCGCTTTATCCGC

@A00721:190:HGJW7DSXY:4:2311:3730:24298 1:N:0:TCTGCAAG+GCTGCACT  
GCGGATAAAGCGAGCATGGTGGACTATCCGCATCTGGACGACATTACAACCAGTCCCAGAATTACTGC  
AGAACCCGTCATGGAAGACGATGATTTCTGGGACTTTATCCCGACGGCTTTATTTTTATATCCATAAA  
AATATTTGGAAATTA

+  
FF,FFFFFF::,FF,FF,FFFFFFFFFFFF::FF:FF:F,,FFFFFFFFFFFF:FFFF:FF,FFFFFF  
F,FF:F:FFFF:,FFFF:F:,F,,F:,F,FF:FF:F,FFFF,FF,,FFFFFFFFF:,FF:FFF  
F,,,F,F:,F,FF:

@A00721:190:HGJW7DSXY:4:2356:26558:16579 1:N:0:TCTGCAAG+GCTGCACT  
TAAATTACAAAGATTTTTATGGATATAAAAATAAAGCCGTCGGGATAAAGTCCCAGAAATCATCGTCT  
TCCATGACGGGTTCTGCAGTAATTCTGGGACTGGTTGTAATGTCGTCCAGATGCGGATAGTCCACCAT  
GCTCGCTTTATCCGC

+  
FFFFFFFFFFFFFFFFFFFFFFFFFFFFFFFFFFFFFFFFFFFFFFFFFFFFFFFFFFFFFFFFFFFFFFFF  
FFFFFFFFFFFFFFFFFFFF:FFFFFFFFFFFFF,FFFFFFFFFFFFFFFFFFFFFFFFFFFFFFFFFFFFF  
FFF:F:FFFFFF:F:

@A00721:190:HGJW7DSXY:4:2357:17788:31829 1:N:0:TCTGCAAG+GCTGCACT  
TAAATTACAAAGATTTTTATGGATATAAAAATAAAGCCGTCGGGATAAAGTCCCAGAAATCATCGTCT  
TCCATGACGGGTTCTGCAGTAATTCTGGGACTGGTTGTAATGTCGTCCAGATGCGGATAGTCCACCAT  
GCTCGCTTTATCCGC

+  
FFFFFFFFFFFFFFFFFFFFFFFFFFFFFFFFFFFFFFFFFFFFFFFFFFFFFFFFFFFFFFFFFFFFFFFF  
FFFFFFFFFFFFFFFFFFFFFFFFFFFFFFFFFFFFFFFFFFFFFFFFFFFFFFFFFFFFFFFFFFFFFFFF  
FFFFFFFFFFFFFFFFFFFF

@A00721:190:HGJW7DSXY:4:2447:30807:5337 1:N:0:TCTGCAAG+GCTGCACT  
TAAATTACAAAGATTTTTATGGATATAAAAATAAAGCCGTCGGGATAAAGTCCCAGAAATCATCGTCT  
TCCATGACGGGTTCTGCAGTAATTCTGGGACTGGTTGTAATGTCGTCCAGATGCGGATAGTCCACCAT  
GCTCGCTTTATCCGC

+  
FFFFFFFFFFFF:FFFFFF:FFFFFFFFFFFFFFFFF:FFFFFFFFFFFFFFFFFFFFFFFFFFFFF:FFFFFFFFFFFF  
FFFFFFFF:FFFFFFFFFFFFFFFFFFFFFFFFFFFFF:FFF:FFFFFFFF:FFFFFFFFFFFFFFFFF:FFF,FFF:F  
FFFFFFFFFFFFFFFFFFFF

@A00721:190:HGJW7DSXY:4:2458:24189:7373 1:N:0:TCTGCAAG+GCTGCACT  
TAAATTACAAAGATTTTTATGGATATAAAAATAAAGCCGTCGGGATAAAGTCCCAGAAATCATCGTCT  
TCCATGACGGGTTCTGCAGTAATTCTGGGACTGGTTGTAATGTCGTCCAGATGCGGATAGTCCACCAT  
GCTCGCTTTATCCGC

+  
FFFFFFFFFFFFFFFFFFFFFFFFFFFFF:FFFFFFFFFFFFFFFFFFFFFFFFFFFFFFFFFFFFFFFFFFFF  
FFFFFFFFFFFFFFFFFFFFFFFFFFFFFFFFFFFFF:FFFFFFFFF:FFFFFFFFFFFFFFFFFFFFFFFFFFFF  
FFFFFFFFFFFFFFFFFFFF

@A00721:190:HGJW7DSXY:4:2640:2456:31266 1:N:0:TCTGCAAG+GCTGCACT  
GCGGATAAAGCGAGCATGGTGGACTATCCGCATCTGGACGACATTACAACCAGTCCCAGAATTACTGC  
AGAACCCGTCATGGAAGACGATGATTTCTGGGACTTTATCCCGACGGCTTTATTTTTATATCCATAAA  
AATCTGTGTAATTAA

+  
FFFFFFFFFFFFFFFFFFFFFFFFFFFFFFFFFFFFFFFFFFFFFFFFFFFFFFFFFFFFFFFFFFFFF:FFFFFFFFFFFFF  
FFFFFFFFFFFFFFFFFFFFFFFFFFFFFFFFFFFFF:FFFFFFFFF:FFFFFFFFFFFFFFFFFFFFFFFFFFFF  
FFFFF,FFFF:F::

@A00721:190:HGJW7DSXY:4:2308:25012:30217 1:N:0:TCTGCAAG+GCTGCACT  
AAATTACAAAGATTTTTATGGATATAAAAATAAAGCCGTCGGGATAAAGTCCCAGAAATCATCGTCTT  
CCATGACGGGTTCTGCAGTAATTCTGGGACTGGTTGTAATGTCGTCCAGATGCGGATAGTCTGTCCAA  
ATCTTTAAAGAT

+  
FFFF,:FFFF:FFFF,,F:FF:F:F:,FFFF,,FF,F:,F,:FFFF:F,,F::FF,,FFFFFFFF  
F::FFF:,,,F:::,F:F:FFF:F,:FF,F:,,,F:F:,,:F:FF:FF:F,FF:,F,FF,,:FF:  
FF:,,:F,F,F:

@A00721:190:HGJW7DSXY:4:1254:15826:28776 1:N:0:TCTGCAAG+GCTGCACT  
AATTACAAAGATTTTTATGGATATAAAAATAAAGCCGTCGGGATAAAGTCCCAGAAATCATCGTCTTC

CATGACGGGTTCTGCAGTAATTCTGGGACTGGTTGTAATGTCGTCCAGATGCGGATAGTCCACCATGC  
TCGCTTTATCCGCAA

+

FFFFFFFFFFFFFFFFFFFFFFFF:F:FFFFFFFFFFFFFFFFFFFFFFFFFFFFFFFFFFFFFFFF:FFFFFFFFF  
FFFFFFFFFFFFFFFFFFFFFFFFFFFFFFFFF:,FFF:FFFFFFFFFFFFFFFF:FFFFFFFFFFFFFFFF:FFF  
FFFFFFFF:FFFF:

@A00721:190:HGJW7DSXY:4:1254:15148:29074 1:N:0:TCTGCAAG+GCTGCACT  
AATTACAAAGATTTTTATGGATATAAAAAATAAGCCGTCGGGATAAAGTCCCAGAAATCATCGTCTTC  
CATGACGGGTTCTGCAGTAATTCTGGGACTGGTTGTAATGTCGTCCAGATGCGGATAGTCCACCATGC  
TCGCTTTATCCGCAA

+

FFFFFFFFFFFFFFFF:FF:FFFFFFFFFFFFFFFFFFFFFFFFFFFFFFFFFFFFFFFF:FFFFFFFFFFFFFFFF  
FFFFFFFFFFFFFFFFFFFFFFFFFFFFFFFF:FFFFFFFFFFFFFFFFFFFFFFFFFFFFFFFFFFFFFFFF:FFFF:FF  
FFFFFFFFFFFFFFFF

@A00721:190:HGJW7DSXY:4:1304:30978:2816 1:N:0:TCTGCAAG+GCTGCACT  
AATTACAAAGATTTTTATGGATATAAAAAATAAGCCGTCGGGATAAAGTCCCAGAAATCATCGTCTTC  
CATGACGGGTTCTGCAGTAATTCTGGGACTGGTTGTAATGTCGTCCAGATGCGGATAGTCCACCCTGC  
TCGCTTTATCCGCAA

+

FFFFFFFFFFFFFFFFFFFFFFFFFFFFFFFFFFFFFFFFFFFFFFFFFFFFFFFFFFFFFFFF:FFFFFFFFFFFFFFFF  
FFFF,:FFFFFFFFFFFFFFFFFFFFFFFF:FF,FFFFFFFFFFFFFFFFFFFFFFFFFFFFFFFF:FF,FFF  
FFFFFFFF:FFFF

@A00721:190:HGJW7DSXY:4:1304:29776:3020 1:N:0:TCTGCAAG+GCTGCACT  
AATTACAAAGATTTTTATGGATATAAAAAATAAGCCGTCGGGATAAAGTCCCAGAAATCATCGTCTTC  
CATGACGGGTTCTGCAGTAATTCTGGGACTGGTTGTAATGTCGTCCAGATGCGGATAGTCCACCATGC  
TCGCTTTATCCGCA

+

F:FFFFFFFFFFFFFFFF:FFFFFFFFFFFFFFFFFFFFFFFFFFFFFFFFFFFFFFFFFFFFFFFFFFFFFFFF  
FFFFFFFFFFFFFFFFFFFFFFFFFFFFFFFF:FFFFFFFFFFFFFFFFFFFFFFFFFFFFFFFFFFFFFFFF,FF  
FFFFFFFFFFFFFFFF

@A00721:190:HGJW7DSXY:4:1313:9019:2237 1:N:0:TCTGCAAG+GCTGCACT  
AATTACAAAGATTTTTATGGATATAAAAAATAAGCCGTCGGGATAAAGTCCCAGAAATCATCGTCTTC  
CATGACGGGTTCTGCAGTAATTCTGGGACTGGTTGTAATGTCGTCCAGATGCGGATAGTCCACCATGC  
TCGCTTTATCCGCAA

+

FFFFFFFFFFFFFFFFFFFFFFFFFFFFFFFFFFFFFFFFFFFFFFFFFFFFFFFFFFFFFFFFFFFFFFFF  
FFFFFFFFFFFFFFFFFFFFFFFFFFFFFFFFFFFFFFFFFFFFFFFFFFFFFFFFFFFFFFFFFFFFFFFF:FFF  
FFFFFFFFFFFFFFFF

@A00721:190:HGJW7DSXY:4:1345:27868:5228 1:N:0:TCTGCAAG+GCTGCACT  
AATTACAAAGATTTTTAGGGATATAAAAAATAAGCCGTCGGGATAAAGTCCCAGAAATCATCGTCTTC  
CATGACGGGTTCTGCAGTAATTCTGGGACTGGTTGTAATGTCGTCCAGATGCGGATAGTCCACCCTGC  
TCGCTTTATCCGCAA

+

FFFFFFFFFFFFFFFF,FFFFFFFFFFFFFFFFFFFFFFFFFFFFFFFFFFFFFFFFFFFFFFFFFFFFFFFF  
FFFFFF:FFFFFFFFFFFFFFFFFFFFFFFF,FFFFFFFF:FFFFFFFFFFFFFFFFFFFFFFFFFFFFFFFF,FFF  
FFFFFFFFFFFFFFFF

@A00721:190:HGJW7DSXY:4:1345:27579:5854 1:N:0:TCTGCAAG+GCTGCACT  
AATTACAAAGATTTTTATGGATATAAAAAATAAGCCGTCGGGATAAAGTCCCAGAAATCATCGTCTTC  
CATGACGGGTTCTGCAGTAATTCTGGGACTGGTTGTAATGTCGTCCAGATGCGGATAGTCCACCATGC  
TCGCTTTATCCGCA

+

FFFFFFFFFFFFFFFF,FFFFFFFFFFFFFFFFFFFFFFFFFFFFFFFFFFFFFFFFFFFFFFFF:FFFFFFFFFFFF  
FFFFFFFFFFFFFFFFFFFFFFFF:FFFFFF:FFFF:FFFF:FFFFFFFFFFFFFFFF:F,FFFF,FF:FFF  
,FFFF:F:FFFFFF

@A00721:190:HGJW7DSXY:4:1515:20862:29825 1:N:0:TCTGCAAG+GCTGCACT  
AATTACAAAGATTTTTATGGATATAAAAAATAAGCCGTCGGGATAAAGTCCCAGAAATCATCGTCTTC  
CATGACGGGTCTGCAGTAATTCTGGGACTGGTTGTAATGTCGTCCAGATGCGGATAGTCCACCATGC  
TCGCTTTATCCGCAA

```
FFFFFFFFFFFFFFFFFFFFFFFFFFFFFFFFFFFFFFFFFFFFFFFFFFFFFFFFFFFFF
FFFFFF:FFFFFFFFFFFFFFFFFFFF:FFFFFFFFFFFFFFFFFFFFFFFFFFFFFFFF
FFFFFFFFFFFFFFFF
```

+

```
FFFFFFFFFFFFFFFFFFFFFFFFFFFFFFFFFFFFFFFFFFFFFFFFFFFFFFFFFFFFFFF
FFFFFFFFFFFFFFFFFFFFFFFFFFFF:FFFFFFFFFFFFFFFFFFFFFFFFFFFFFFF,:FF
FFFFFFFFFFFFFFFF
```

+

```
FFFFFFFFFFFFFFFFFFFFFFFFFFFFFFFFFFFFF:FFFFFFFFFFFFFFFFFFFFFFFFF
FFF,FFFFFFFFFFFFFFFFFFFFFFFF,FFF:FFFFFFFFFFFFFFFFFFFFFFFFFFFF:FF,FFF
FFFFFFFFFFFFFFFF
```

+

[illegible]

+

[illegible]

+

```

FFFFFFFFFFFFFFFFFFFFFFFFFFFFFFFFFFFFFFFFFFFFFFFFFFFFFFFFFFFFFFFFFFFFFFFF
FFFF:FFFFFFFFFFFFFFFFFFFFFFFFFFFFFFFF:FFFFFFFFFFFFFFFFFFFFFFFFFFFFFFFF
FFFFFFFFFFFFFFFF:

```

+

FFFFFFFFFFFFFFFFFFFFF:FFFFFFFFFFFFFFFFFFFFFFFFFFFFFFFFFFFFFFFF



FFFFFFFFFFFFFFFFFFFFFFFFFFFFFFFFFFFFFFFFFFFFFFFFFFFFFFFFFFFFFFFFFFFFFFFF  
FFFFFFFFFFFFFFFF

@A00721:190:HGJW7DSXY:4:2671:32389:23234 1:N:0:TCTGCAAG+GCTGCACT  
AATTACAAAGATTTTATGGATATAAAAATAAAGCCGTCGGGATAAAGTCCCAGAAATCATCGTCTTC  
CATGACGGGTCTGCAGTAATTCTGGGACTGGTTGTAATGTCGTCCAGATGCGGATAGTCCACCATGC  
TCGCTTTATCCGCAA

+

FFFFFFFFFFFFFFFFFFFFFFFFFFFFFFFFFFFFFFFFFFFFFFFFFFFFFFFFFFFFFFFFFFFFFFFF  
FFFFFFFFFFFFFFFFFFFFFFFFFFFFFFFFFFFFFFFFFFFFFFFFFFFFFFFFFFFFFFFFFFFFFFFF  
FFFFFFFFFFFFFFFF

@A00721:190:HGJW7DSXY:4:1103:5330:4022 1:N:0:TCTGCAAG+GCTGCACT  
ATGGATATAAAAATAAAGCCGTCGGGATAAAGTCCCAGAAATCATCGTCTTCCATGACGGGTCTGCA  
GTAATTCTGGGACTGGTTGTAATGTCGTCCAGATGCGGATAGTCCACCATGCTCGCTTTATCCGCAAC  
TGCATTCTGAGATTG

+

FFFFFFFFFFFFFFFFFFFFFFFFFFFFFFFFFFFFFFFFFFFFFFFFFFFFFFFFFFFFFFFFFFFFFFFF  
FFFFFFFFFFFFFFFFFFFFFFFFFFFFFFFFFFFFFFFFFFFFFFFFFFFFFFFFFFFFFFFFFFFFFFFF  
FFFFFFFFFFFFFFFF

@A00721:190:HGJW7DSXY:4:1344:23402:27899 1:N:0:TCTGCAAG+GCTGCACT  
ATGGATATAAAAATAAAGCCGTCGGGATAAAGTCCCAGAAATCATCGTCTTCCATGACGGGTCTGCA  
GTAATTCTGGGACTGGTTGTAATGTCGTCCAGATGCGGATAGTCCACCATGCTCGCTTTATCCGCAAC  
TGCATTCTGAGATTG

+

F,FFFFFFFFFFFFFFFFFFFFFFFFFFFFFFFFFFFFFFFFFFFFFFFFFFFFFFFFFFFFFFFFFFFF  
FFFFFFFF:FFFFFFFFFFFFFFFFFFFFFFFFFFFFFFFFFFFFFFFFFFFFFFFFFFFFFFFFFFFF,FF,FFFFFFFFFFFFFFFFFFFF  
FFFFFFFFFFFFFFFF

@A00721:190:HGJW7DSXY:4:1415:31901:33160 1:N:0:TCTGCAAG+GCTGCACT  
ATGGATATAAAAATAAAGCCGTCGGGATAAAGTCCCAGAAATCATCGTCTTCCATGACGGGTCTGCA  
GTAATTCTGGGACTGGTTGTAATGTCGTCCAGATGCGGATAGTCCACCATGCTCGCTTTATCCGCAAC  
TGCATTCTGAGATTG

+

FFFFFFFFFFFFFFFFFFFFFFFFFFFFFFFFFFFFFFFFFFFFFFFFFFFFFFFFFFFFFFFFFFFFFFFF  
FFFFFFFFFFFFFF:,FF:FFFFFFFFFFFFFFFFFFFFFFFFFFFFFFFFFFFFFFFFFFFFFFFFFFFF:FF:FFFFFFFFFFFFFFFFFFFF  
FFFF,FFFFFFFF:FF

@A00721:190:HGJW7DSXY:4:1415:30770:33739 1:N:0:TCTGCAAG+GCTGCACT  
ATGGATATAAAAATAAAGCCGTCGGGATAAAGTCCCAGAAATCATCGTCTTCCATGACGGGTCTGCA  
GTAATTCTGGGACTGGTTGTAATGTCGTCCAGATGCGGATAGTCCACCATGCTCGCTTTATCCGCAAC  
TGCATTCTGAGATT

+

FFFFFFFFFFFFFFFFFFFFFFFFFFFFFFFFFFFFFFFFFFFFFFFFFFFFFFFFFFFFFFFFFFFFFFFF  
FFFFFFFFF:F:FFFF:FFFFFFFFFFFFFFFFFFFFFFFFFFFFFFFFFFFFFFFFFFFFFFFFFFFF,FFFF,FFFFFFFFFFFF,FFFF  
FFFFFFFF:FFFF

@A00721:190:HGJW7DSXY:4:2129:3314:13401 1:N:0:TCTGCAAG+GCTGCACT  
ATGGATATAAAAATAAAGCCGTCGGGATAAAGTCCCAGAAATCATCGTCTTCCATGACGGGTCTGCA  
GTAATTCTGGGACTGGTTGTAATGTCGTCCAGATGCGGATAGTCCACCATGCTCGCTTTATCCGCAAC  
TGCATTCTGAGATTG

+

F:FFFFFFFFFFFFFFFFFFFFFFFFFFFFFFFFFFFFFFFFFFFFFFFFFFFFFFFFFFFFFFFFFFFF  
FFFFFFFFFFFFFFFFFFFFFFFFFFFFFFFFFFFFFFFFFFFFFFFFFFFFFFFFFFFFFFFFFFFFFFFF  
FFFFFFFFFFFFFFFF

@A00721:190:HGJW7DSXY:4:2326:4779:25645 1:N:0:TCTGCAAG+GCTGCACT  
ATGGATATAAAAATAAAGCCGTCGGGATAAAGTCCCAGAAATCATCGTCTTCCATGACGGGTCTGCA  
GTAATTCTGGGACTGGTTGTAATGTCGTCCAGATGCGGATAGTCCACCATGCTCGCTTTATCCGCAAC  
TGCATTCTGAGATTG

+  
FFFFFFFFFFFFFFFFFFFFFFFFFFFFFFFFFFFFFFFFFFFFFFFFFFFFFFFFFFFFFFFF  
FFFFFFFFFFFFFFFFFFFFFFFFFFFFFFFFFFFFFFFFFFFFFFFFFFFFFFFFFFFFFFFF  
FFFFFFFFFFFFFFFF

@A00721:190:HGJW7DSXY:4:2333:6234:26537 1:N:0:TCTGCAAG+GCTGCACT  
ATGGATATAAAAATAAAGCCGTCGGGATAAAGTCCCAGAAATCATCGTCTTCCATGACGGGTTCTGCA  
GTAATTCTGGGACTGGTTGTAATGTCGTCCAGATGCGGATAGTCCACCATGCTCGCTTTATCCGCAAC  
TGCATTCTGAGATTG

+  
FF:FFFFFFFFFFFFFFFFFFFFFFFFFFFFFFFFFFFFFFFFFFFFFFFFFFFFFFFF:FFFFFFF  
:FFFFFFF:FFFFFFFFFFFFFFFFFFFFFFFFFFFFFFFFFFFFFFFFFFFFFFFF:FFFFFFF  
F:FFFFFFFFFFFFFFFFFFFFFFFFFFFFFFFFFFFFFFFFFFFFFFFFFFFFFFFF

@A00721:190:HGJW7DSXY:4:2372:19524:9690 1:N:0:TCTGCAAG+GCTGCACT  
ATGGATATAAAAATAAAGCCGTCGGGATAAAGTCCCAGAAATCATCGTCTTCCATGACGGGTTCTGCA  
GTAATTCTGGGACTGGTTGTAATGTCGTCCAGATGCGGATAGTCCACCATGCTCGCTTTATCCGCAAC  
TGCATTCTGAGATTG

+  
FFFFFFFFFFFFFFFFFFFFFFFFFFFFFFFFFFFFFFFFFFFFFFFFFFFFFFFFFFFFFFFF  
FFFFFFFFFFFFFFF:FFFFFFFFFFFFFFFFFFFFFFFFFFFFFFFFFFFFFFFFFFFFFFFF  
FFFFFFFFFFFFFFF:FFFFFFFFFFFFFFFFFFFFFFFFFFFFFFFFFFFFFFFFFFFFFFFF  
FFFFFFFFFFFFFFF

@A00721:190:HGJW7DSXY:4:2652:25807:20134 1:N:0:TCTGCAAG+GCTGCACT  
ATGGATATAAAAATAAAGCCGTCGGGATAAAGTCCCAGAAATCATCGTCTTCCATGACGGGTTCTGCA  
GTAATTCTGGGACTGGTTGTAATGTCGTCCAGATGCGGATAGTCCACCATGCTCGCTTTATCCGCAAC  
TGCATTCTGAGATTG

+  
FFFFFFFFFFFFFFFFFFFFFFFFFFFFFFFFFFFFFFFFFFFFFFFFFFFFFFFFFFFFFFFF  
FFFFFFFFFFFFFFF:FFFFFFFFFFFFFFFFFFFFFFFFFFFFFFFFFFFFFFFFFFFFFFFF  
FFFFFFFFFFFFFFF

@A00721:190:HGJW7DSXY:4:1619:11858:30326 1:N:0:TCTGCAAG+GCTGCACT  
AGCCGTCGGGATAAAGTCCCAGAAATCATCGTCTTCCATGACGGGTTCTGCAGTAATTCTGGGACTGG  
TTGTAATGTCGTCCAGATGCGGATAGTCCACCATGCTCGCTTTATCCGCAACTGCATTCTGAGATTGT  
AGTTGAATCTTAGTT

+  
FFFFFFFFFFFFFFFFFFFFFFFFFFFFFFFFFFFFFFFFFFFFFFFFFFFFFFFFFFFFFFFF  
FFFFFFFFFFFFFFF:FFF:FFFFFFFFFFFFFFFFFFFFFFFFFFFFFFFFFFFFFFFF  
FFFFFFFFFFFFFFF

@A00721:190:HGJW7DSXY:4:1621:30264:36965 1:N:0:TCTGCAAG+GCTGCACT  
AGCCGTCGGGATAAAGTCCCAGAAATCATCGTCTTCCATGACGGGTTCTGCAGTAATTCTGGGACTGG  
TTGTAATGTCGTCCAGATGCGGATAGTCCACCATGCTCGCTTTATCCGCAACTGCATTCTGAGATTGT  
AGTTGAATCTTAGTT

+  
FFFFFFFFFFFFFFFFFFFFFFFFFFFFFFFFFFFFFFFFFFFFFFFFFFFFFFFFFFFFFFFF  
,FFFFFFFFFFFFFFFFFFFFFFFFFFFFFFFFFFFFFFFFFFFFFFFFFFFFFFFF:FF  
,FFFFFFFFFFFFFFFFFFFFFFFFFFFFFFFFFFFFFFFFFFFFFFFFFFFFFFFF:FF:  
FFFFFFFFFFFFFFFF

@A00721:190:HGJW7DSXY:4:2130:24966:4366 1:N:0:TCTGCAAG+GCTGCACT  
AGCCGTCGAGATAAAGTCCCAGAAATCATCGTCTTCCATGACGGGTTCTGCAGTAATTCTGGGACTGG  
TTGTAATGTCGTCCAGATGCGGATAGTCCACCATGCTCGCTTTATCCGCAACTGCATTCTGAGATTGT  
AGTTGAATCTTAGTT

+  
FFFFFFFFFFFFFFFFFFFFFFFFFFFFFFFFFFFFFFFFFFFFFFFFFFFFFFFFFFFFFFFF  
:FFFFFFFFFFFFFFFFFFFFFFFFFFFFFFFFFFFFFFFFFFFFFFFFFFFFFFFF  
FFFFFFFFFFFFFFF

@A00721:190:HGJW7DSXY:4:2219:25482:9173 1:N:0:TCTGCAAG+GCTGCACT  
AGCCGTCGGGATAAAGTCCCAGAAATCATCGTCTTCCATGACGGGTTCTGCAGTAATTCTGGGACTGG

TTGTAATGTCGTCCAGATGCGGATAGTCCACCATGCTCGCTTTATCCGCAACTGCATTCTGAGATTGT  
AGTTGAATCTTAGTT

+

FFFFFFFFFFFFFFFFFFFFFFFFFFFFFFFFFFFFFFFFFFFFFFFFFFFFFFFFFFFFFFFFFFFFFFFF:FF:FFF  
FFFF:FFFFFFFF:FFFF:FFFFFFFFFFFFFFFFFFFFFFFFFFFFFFFFFFFFFFFFFFFFFFFFFFFF  
:FFFF:FFFFFFFF

@A00721:190:HGJW7DSXY:4:2304:28592:34726 1:N:0:TCTGCAAG+GCTGCACT  
AGCCGTCGGGATAAAGTCCCAGAAATCATCGTCTTCCATGACGGGTTCTGCAGTAATTCTGGGACTGG  
TTGTAATGTCGTCCAGATGCGGATAGTCCACCATGCTCGCTTTATCCGCAACTGCATTCTGAGATTGT  
AGTTGAATCTTAGTT

+

FFFFFFFFFFFF:FFFF:FFFFFFFFFFFFFFFFFFFFFFFF:FFFF:FFFFFFFFFFFFFFFFFFFFFFFF:FF:,FF  
,FF:FF:FFFFFFFFFFFFFFFF:FFFFFFFF:FF,FFFFFFFFFFFFFFFFFFFFFFFF:F,FFFFFFFFFFFF,  
FFFFFFFFFFFF:FF:F

@A00721:190:HGJW7DSXY:4:2530:28646:25457 1:N:0:TCTGCAAG+GCTGCACT  
AGCCGTCGGGATAAAGTCCCAGAAATCATCGTCTTCCATGACGGGTTCTGCAGTAATTCTGGGACTGG  
TTGTAATGTCGTCCAGATGCGGATAGTCCACCATGCTCGCTTTATCCGCAACTGCATTCTGAGATTGT  
AGTTGAATCTTAGTT

+

FFFFFFFFFFFFFFFFFFFFFFFFFFFFFFFFFFFFFFFFFFFFFFFFFFFFFFFFFFFFFFFFFFFFFFFF:FF  
FFFFFFFFFFFFFFFFFFFFFFFFFFFFFFFFFFFFFFFFFFFFFFFFFFFFFFFFFFFFFFFFFFFFFFFF:FF,FFF  
FFF:FFFFFFFFFFFF

@A00721:190:HGJW7DSXY:4:2549:19108:17049 1:N:0:TCTGCAAG+GCTGCACT  
AGCCGTCGAGATAAAGTCCCAGAAATCATCGTCTTCCATGACGGGTTCTGCAGTAATTCTGGGACTGG  
TTGTAATGTCGTCCAGATGCGGATAGTCCACCATGCTCGCTTTATCCGCAACTGCATTCTGAGATTGT  
AGTTGAATCTTAGTT

+

FFFFFFFFFFFFFFFFFFFFFFFFFFFFFFFFFFFFFFFFFFFFFFFFFFFFFFFFFFFFFFFFFFFFFFFF  
FFFFFFFFFFFFFFFFFFFFFFFFFFFFFFFFFFFFFFFFFFFFFFFFFFFFFFFFFFFFFFFFFFFFFFFF,FFF  
FFFFFFFFFFFFFFFF

@A00721:190:HGJW7DSXY:4:1113:18159:17190 1:N:0:TCTGCAAG+GCTGCACT  
GGCCGTCGAGATAAAGTCCCAGAAATCATCGTCTTCCATGACGGGTTCTGCAGTAATTCTGGGACTGG  
TTGTAATGTCGTCCAGATGCGGATAGTCCACCATGCTCGCTTTATCCGCAACTGCATTCTGAGATTGT  
AGTTGAATCTTAGTT

+

FFFFFFFFFFFFFFFFFFFFFFFFFFFFFFFFFFFFFFFFFFFFFFFFFFFFFFFFFFFFFFFFFFFFFFFF:F:  
FFFFFFFFFFFFFFFFFFFFFFFFFFFFFFFF:FFFFFF,FFFFFF:FFFFFFFFFFFF:FFF,FFFFFF:FF  
FFFF:FFFFFFFF:

@A00721:190:HGJW7DSXY:4:1621:17770:35462 1:N:0:TCTGCAAG+GCTGCACT  
GGCCGTCGAGATAAAGTCCCAGAAATCATCGTCTTCCATGACGGGTTCTGCAGTAATTCTGGGACTGG  
TTGTAATGTCGTCCAGATGCGGATAGTCCACCATGCTCGCTTTATCCGCAACTGCATTCTGAGATTGT  
AGTTGAATCTTAGTT

+

FFFFFFFFFFFFFFFFFFFFFFFFFFFFFFFFFFFFFFFFFFFFFFFFFFFFFFFFFFFFFFFFFFFFFFFF  
FFFFFFFFFFFFFFFFFFFFFFFF:FFFFFFFF:FFFFFFFFFFFFFFFFFFFFFFFF:FFFF:FFFFFFFF  
FFFFFFFFFFFFFFFF

@A00721:190:HGJW7DSXY:4:2228:15121:33536 1:N:0:TCTGCAAG+GCTGCACT  
GGCCGTCGAGATAAAGTCCCAGAAATCATCGTCTTCCATGACGGGTTCTGCAGTAATTCTGGGACTGG  
TTGTAATGTCGTCCAGATGCGGATAGTCCACCCTGCTCGCTTTATCCGCAACTGCATTCTGAGATTGT  
AGTTGAATCTTAGTT

+

FFFFFFFFFFFFFFFFFFFFFFFFFFFFFFFFFFFFFFFFFFFFFFFFFFFFFFFFFFFFFFFFFFFFFFFF  
FFFFFFFFFFFFFFFFFFFFFFFF:FF,FFFFFFFFFFFFFFFF:FFFFFFFFFFFFFFFF  
FFFFFFFFFFFFFFFF

$+$ 

+

+

+

+

+

+

FFFFFFFFFFFFFFFFFFFFFFFFFFFFFFFFFFFFFFFFFFFFFFFFFFFFFFFFFFFFFFFF:FFFF  
FFFFFFFFFFFFFFFF

@A00721:190:HGJW7DSXY:4:2471:27507:19539 1:N:0:TCTGCAAG+GCTGCACT  
GCCGTCGAGATAAAGTCCCAGAAATCATCGTCTTCCATGACGGGTTCTGCAGTAATTCTGGGACTGGT  
TGTAATGTCGTCCAGATGCGGATAGTCCACCATGCTCGCTTTATCCGCAACTGCATTCTGAGATTGTA  
GTTGAATCTTAGTTC

+

FFFFFFFFFFFFFFFFFFFFFFFFFFFFFFFFFFFFFFFFFFFFFFFFFFFFFFFFFFFFFFFF,FFF  
FFFFFFFFFFFFFFFFFFFFFFFFFFFFFFFFFFFFFFFFFFFFFFFFFFFFFFFFFFFFFFFF,FFFFFFFF:FFFFFFFFFFFFFFFF:FFFFFFF,FFFF  
FFFFFFFFFFFFFFFF

@A00721:190:HGJW7DSXY:4:2471:27706:19758 1:N:0:TCTGCAAG+GCTGCACT  
GCCGTCGAGATAAAGTCCCAGAAATCATCGTCTTCCATGACGGGTTCTGCAGTAATTCTGGGACTGGT  
TGTAATGTCGTCCAGATGCGGATAGTCCACCATGCTCGCTTTATCCGCAACTGCATTCTGAGATTGTA  
GTTGAATCTTAGTTC

+

FFFFFFFFFFFFFFFFFFFFFFFFFFFFFFFFFFFFFFFFFFFFFFFFFFFFFFFFFFFFFFFF  
FFFFFFFFFFFFFFFFFFFFFFFFFFFFFFFFFFFFFFFFFFFFFFFFFFFFFFFFFFFFFFFF:FFF:FFF:FFFFFFFFFFFFFFFFFFFFFFFFFFFFFFFF  
FFFFFFFFFFFFFFFF:FFF

@A00721:190:HGJW7DSXY:4:2515:20853:5822 1:N:0:TCTGCAAG+GCTGCACT  
GCCGTCGGGATAAAGTCCCAGAAATCATCGTCTTCCATGACGGGTTCTGCAGTAATTCTGGGACTGGT  
TGTAATGTCGTCCAGATGCGGATAGTCTGTCCAAATCTTTAAAGATGAATTGGCATCCTTGTCCAGGA  
ACGTCTTATAAGAAT

+

FFFFFFFFFFFFFFFFFFFFFFFFFFFFFFFFFFFFFFFFFFFFFFFFFFFFFFFFFFFFFFFF  
FFFFFFFFFFFFFFFFFFFFFFFFFFFFFFFFFFFFFFFFFFFFFFFFFFFFFFFFFFFFFFFF  
FFFFFFFFFFFFFFFF

@A00721:190:HGJW7DSXY:4:2648:18059:31078 1:N:0:TCTGCAAG+GCTGCACT  
GCCGTCGGGATAAAGTCCCAGAAATCATCGTCTTCCATGACGGGTTCTGCAGTAATTCTGGGACTGGT  
TGTAATGTCGTCCAGATGCGGATAGTCTGTCCAAATCTTTAAAGATGAATTGGCATCCTTGTCCAGGA  
ACGTCTTATAAGAAT

+

FFFFFFFFFFFFFFFFFFFFFFFFFFFFFFFFFFFFFFFFFFFFFFFFFFFFFFFFFFFFFFFF  
FFFFFFFFFFFFFFFFFFFFFFFFFFFFFFFFFFFFFFFFFFFFFFFFFFFFFFFFFFFFFFFF  
FFFFFFFFFFFFFFFF

@A00721:190:HGJW7DSXY:4:1261:27308:18035 1:N:0:TCTGCAAG+GCTGCACT  
GTCGGGATAAAGTCCCAGAAATCATCGTCTTCCATGACGGGTTCTGCAGTAATTCTGGGACTGGTTGT  
AATGTCGTCCAGATGCGGATAGTCTGTCCAAATCTTTAAAGATGAATTGGCATCCTTGTCCAGGAACG  
TCTTATAAGAATATT

+

FFFFFFFFFFFFFFFFFFFFFFFFFFFFFFFFFFFFFFFFFFFFFFFFFFFFFFFFFFFFFFFF  
FFFFFFFFFFFFFFFFFFFFFFFFFFFFFFFFFFFFFFFFFFFFFFFFFFFFFFFFFFFFFFFF  
FFFFFFFFFFFFFFFF

@A00721:190:HGJW7DSXY:4:1306:22833:14544 1:N:0:TCTGCAAG+GCTGCACT  
GTCGGGATAAAGTCCCAGAAATCATCGTCTTCCATGACGGGTTCTGCAGTAATTCTGGGACTGGTTGT  
AATGTCGTCCAGATGCGGATAGTCTGTCCAAATCTTTAAAGATGAATTGGCATCCTTGTCCAGGAACG  
TCTTATAAGAATATT

+

FFFFFFFFFFFFFFFFFFFFFFFFFFFFFFFFFFFFFFFFFFFFFFFFFFFFFFFFFFFFFFFF:FFFFFFF  
FFFFFFFFFFFFFFFFFFFFFFFFFFFFFFFFFFFFFFFFFFFFFFFFFFFFFFFFFFFFFFFF  
FF,FFF:FFFFFFF

@A00721:190:HGJW7DSXY:4:1408:25590:24361 1:N:0:TCTGCAAG+GCTGCACT  
GTCGGGATAAAGTCCCAGAAATCATCGTCTTCCATGACGGGTTCTGCAGTAATTCTGGGACTGGTTGT  
AATGTCGTCCAGATGCGGATAGTCTGTCCAAATCTTTAAAGATGAATTGGCATCCTTGTCCAGGAACG  
TCTTATAAGAATATT

+  
FFFFFFFFFFFFFFFFFFFFFFFFFFFFFFFFFFFFFFFFFFFFFFFFFFFFFFFFFFFFFFFF:FFFFFF  
FFFFFFFFFFFFFFFFFFFFFFFFFFFFFFFFFFFFFFFFFFFFFFFFFFFFFFFFFFFFFFFF  
FFFF:FFFFFFFF

@A00721:190:HGJW7DSXY:4:1449:32506:19836 1:N:0:TCTGCAAG+GCTGCACT  
GTCGGGATAAAGTCCCAGAAATCATCGTCTTCCATGACGGGTTCTGCAGTAATTCTGGGACTGGTTGT  
AATGTCGTCCAGATGCGGATAGTCTGTCCAAATCTTTAAAGATGAATTGGCATCCTTGTCCAGGAACG  
TCTTATAAGAATATT

+  
FFF,FF,FFFFFFFF:F:FFF:F:FFFFFFFFFFFFFFFF:FFFFFFFF:FFFF:FFF:FF:,FFFFFF  
FFFFFFFFFFFFFFFF:FFFFFF:FFFFF,FFF:FF::FFFFFFFFFFFFFFFF:FFFFFF:FFF:FFF  
F:FF,FFFFFFFF

@A00721:190:HGJW7DSXY:4:1453:25536:6762 1:N:0:TCTGCAAG+GCTGCACT  
GTCGGGATAAAGTCCCAGAAATCATCGTCTTCCATGACGGGTTCTGCAGTAATTCTGGGACTGGTTGT  
AATGTCGTCCAGATGCGGATAGTCTGTCCAAATCTTTAAAGATGAATTGGCATCCTTGTCCAGGAACG  
TCTTATAAGAATATT

+  
FFFFFFFFFFFFFFFFFFFFFFFFFFFFFFFFFFFFFFFFFFFFFFFFFFFFFFFFFFFFFFFF,FFFFFF  
FFFFFFFFFFFFFFFFFFFFFFFFFFFFFFFFFFFFFFFFFFFFFFFFFFFFFFFFFFFFFFFF  
FFFFFFFFFFFFFFFF

@A00721:190:HGJW7DSXY:4:1501:5873:34021 1:N:0:TCTGCAAG+GCTGCACT  
GTGGAACATAAGATTCAACTACAATCTCAGAATGCAGTTGCGGATAAAGCGAGCATGGTGGACTATCCG  
CATCTGGACGACATTACAACCAGTCCCAGAATTACTGCAGAACCCGTCATGGAAGACGATGATTTCTG  
GGACTTTATCCCGAC

+  
FFFFFFFFFFFFFFFFFFFFFFFFFFFFFFFFFFFFFFFFFFFFFFFFFFFFFFFFFFFFFFFF:FFFFFFFFFFFFFFFFFFFFFFFF  
FFFFFFFFFFFFFFFFFFFFFFFFFFFFFFFFFFFFFFFFFFFFFFFFFFFFFFFFFFFFFFFF  
FFFFFFFFFFFFFFFF

@A00721:190:HGJW7DSXY:4:1543:3197:4460 1:N:0:TCTGCAAG+GCTGCACT  
GTCGGGATAAAGTCCCAGAAATCATCGTCTTCCATGACGGGTTCTGCAGTAATTCTGGGACTGGTTGT  
AATGTCGTCCAGATGCGGATAGTCCACCATGCTCGCTTTATCCGCAACTGCATTCTGAGATTGTAGTT  
GAATCTTAGTTCCAC

+  
FFFFFFFFFFFFFFFFFFFFFFFFFFFFFFFFFFFFFFFFFFFFFFFFFFFFFFFFFFFFFFFF  
FFFFFFFFFFFFFFFFFFFFFFFFFFFFFFFFFFFFFFFFFFFFFFFFFFFFFFFFFFFFFFFF  
FFFFFFFFFFFFFFFF

@A00721:190:HGJW7DSXY:4:1605:18982:27884 1:N:0:TCTGCAAG+GCTGCACT  
GTCGGGATAAAGTCCCAGAAATCATCGTCTTCCATGACGGGTTCTGCAGTAATTCTGGGACTGGTTGT  
AATGTCGTCCAGATGCGGATAGTCCACCATGCTCGCTTTATCCGCAACTGCATTCTGAGATTGTAGTT  
GAATCTTAGTTCCAC

+  
FFFFFFFFFFFFFFFFFFFFFFFFFFFFFFFFFFFFFFFFFFFFFFFFFFFFFFFFFFFFFFFF  
FFFFFFFFFFFFFFFFFFFFFFFFFFFFFFFFFFFFFFFFFFFFFFFFFFFFFFFFFFFFFFFF  
FFFFFFFFFFFFFFFF

@A00721:190:HGJW7DSXY:4:2125:6795:17456 1:N:0:TCTGCAAG+GCTGCACT  
GTCGGGATAAAGTCCCAGAAATCATCGTCTTCCATGACGGGTTCTGCAGTAATTCTGGGACTGGTTGT  
AATGTCGTCCAGATGCGGATAGTCCACCATGCTCGCTTTATCCGCAACTGCATTCTGAGATTGTAGTT  
GAATCTTAGTTCCAC

+  
FFFFFFFFFFFFFFFFFFFFFFFFFFFFFFFFFFFFFFFFFFFFFFFFFFFFFFFFFFFFFFFF:FFFFFF  
FFFFFFFFFFFFFFFFFFFFFFFFFFFFFFFFFFFFFFFFFFFFFFFFFFFFFFFFFFFFFFFF  
FFFFFFFFFFFFFFFF:F

@A00721:190:HGJW7DSXY:4:2231:29215:15577 1:N:0:TCTGCAAG+GCTGCACT  
GTCGGGATAAAGTCCCAGAAATCATCGTCTTCCATGACGGGTTCTGCAGTAATTCTGGGACTGGTTGT



@A00721:190:HGJW7DSXY:4:2601:13494:21668 1:N:0:TCTGCAAG+GCTGCACT  
GTCGGGATAAAGTCCCAGAAATCATCGTCTTCCATGACGGGTTCTGCAGTAATTCTGGGACTGGTTGT  
AATGTCGTCCAGATGCGGATAGTCCACCATGCTCGCTTTATCCGCAACTGCATTCTGAGATTGTAGTT  
GAATCTTAGTTCCAC

+

FFFFFFFFFFFFFFFFFFFFFFFFFFFFFFFFFFFFFFFFFFFFFFFFFFFFFFFFFFFFFFFFFFFFFFFF  
FFFFFFFFFFFFFFFFFFFFFFFFFFFFFFFFFFFFFFFFFFFFFFFFFFFFFFFFFFFFFFFFFFFFFFFF  
FFFFFFFFFFFFFFFF

@A00721:190:HGJW7DSXY:4:2657:10285:33144 1:N:0:TCTGCAAG+GCTGCACT  
GTCGGGATAAAGTCCCAGAAATCATCGTCTTCCATGACGGGTTCTGCAGTAATTCTGGGACTGGTTGT  
AATGTCGTCCAGATGCGGATAGTCTGTCCAAATCTTTAAAGATGAATTGGCATCCTTGTCCAGGAACG  
TCTTATAAGAATATT

+

FFFFFFFFFFFFFFFFFFFFFFFFFFFFFFFFFFFFFFFFFFFFFFFFFFFFFFFFFFFFFFFFFFFFFFFF:FF  
FFFFFFFFFFFFFFFFFFFFFFFFFFFFFFFFFFFFFFFFFFFFFFFFFFFFFFFFFFFFFFFFFFFFFFFF:FF  
FFFFFFFFFFFFFFFF

@A00721:190:HGJW7DSXY:4:1306:6677:12587 1:N:0:TCTGCAAG+GCTGCACT  
CACGGTGGAATAAGATTCAACTACAATCTCAGAATGCAGTTGCGGATAAAGCGAGCATGGTGGACTA  
TCCGCATCTGGACGACATTACAACCACTCCAGAATTACTGCAGAACCCGTCATGGAAGACGATGATT  
TCTGGGACTTTATCC

+

FFFFFFFFFFFFFFFFFFFFFFFFFFFFFFFFFFFFFFFFFFFFFFFFFFFFFFFFFFFFFFFFFFFFFFFF:FFFFF:FFFFFFFF  
FFFFFFFFFFFFFFFFFFFFFFFFFFFFFFFFFFFFFFFFFFFFFFFFFFFFFFFFFFFFFFFFFFFFFFFF:FF  
FFFFFFFFFFFFFFFF

@A00721:190:HGJW7DSXY:4:1513:28076:15608 1:N:0:TCTGCAAG+GCTGCACT  
CACGGTGGAATAAGATTCAACTACAATCTCAGAATGCAGTTGCGGATAAAGCGAGCATGGTGGACTA  
TCCGCATCTGGACGACATTACAACCACTCCAGAATTACTGCAGAACCCGTCATGGAAGACGATGATT  
TCTGGGACTTTATCC

+

FFFFFFFFFFFFFFFFFFFFFFFFFFFFFFFFFFFFFFFFFFFFFFFFFFFFFFFFFFFFFFFFFFFFFFFF  
FFFFFFFFFFFFFFFFFFFFFFFFFFFFFFFFFFFFFFFFFFFFFFFFFFFFFFFFFFFFFFFFFFFFFFFF:FFFF  
FFFFFFFFFFFFFFFF

@A00721:190:HGJW7DSXY:4:1523:21124:26647 1:N:0:TCTGCAAG+GCTGCACT  
CACGGTGGAATAAGATTCAACTACAATCTCAGAATGCAGTTGCGGATAAAGCGAGCATGGTGGACTA  
TCCGCATCTGGACGACATTACAACCACTCCAGAATTACTGCAGAACCCGTCATGGAAGACGATGATT  
TCTGGGACTTTATCC

+

FFFFFFFFFFFFFFFFFFFFFFFFFFFFFFFFFFFFFFFFFFFFFFFFFFFFFFFFFFFFFFFFFFFFFFFF:FFFFFFFF  
FFFFFFFFFFFFFFFFFFFFFFFFFFFFFFFFFFFFFFFFFFFFFFFFFFFFFFFFFFFFFFFFFFFFFFFF,FFFFFFFF  
FFFFFFFF:FFFF

@A00721:190:HGJW7DSXY:4:2104:16007:14340 1:N:0:TCTGCAAG+GCTGCACT  
CACGGTGGAATAAGATTCAACTACAATCTCAGAATGCAGTTGCGGATAAAGCGAGCATGGTGGACTA  
TCCGCATCTGGACGACATTACAACCACTCCAGAATTACTGCAGAACCCGTCATGGAAGACGATGATT  
TCTGGGACTTTATCC

+

FFFFFFFFFFFFFFFFFFFFFFFFFFFFFFFFFFFFFFFFFFFFFFFFFFFFFFFFFFFFFFFFFFFFFFFF:FFFFFFFF  
FFFFF:FFFFFFFFFFFFFFFFFFFFFFFFFFFFFFFFFFFFFFFFFFFFFFFFFFFFFFFFFFFFFFFF  
FFFFFFFFFFFFFFFF

@A00721:190:HGJW7DSXY:4:1311:24939:11678 1:N:0:TCTGCAAG+GCTGCACT  
CACGGTGGAATAAGATTCAACTACAATCTCAGAATGCAGTTGCGGATAAAGCGAGCATGGTGGACTA  
TCCGCATCTGGACGACATTACAACCACTCCAGAATTACTGCAGAACCCGTCATGGAAGACGAGGATT  
TCTGTGACTTTATAC

+

FFF,:,:,F:FFF,FFF:FF::FFFF,FFF:FFF,,FFFF::,FFF,FFFFFFFF,:F:,F,,:FFFF



FFF,FF,FF,F:FFFFF:FFFFF,FFFFFFFF, :FF:F:FFFFF: ,FF:FFFF,FFFFFFFF,FFF,  
FFF,,FFFFF,FF, :

@A00721:190:HGJW7DSXY:4:1173:6433:2644 1:N:0:TCTGCAAG+GCTGCACT  
CTTCACGGTGGAACTAAGATTCAACTACAATCTCAGAATGCAGTTGCGGATAAAGCGAGCATGGTGGGA  
CTATCCGCATCTGGACGACATTACAACCAGTCCCAGAATTACTGCAGAACCCGTCATGGAAGACGATG  
ATTTCTGGGACTTTA

+

FFFFFFFFFFFFFFFFFFFFFFFFFFFFFFFFFFFFFFFFFFFFFFFFFFFFFFFFFFFFFFFFFFFFFFFF  
FFFFFFFFFFFFFFFFFFFFFFFFFFFFFFFFFFFFFFFFFFFFFFFFFFFFFFFFFFFFFFFFFFFFFFFF  
FFFFFFFFFFFFFFFF

@A00721:190:HGJW7DSXY:4:1204:8169:33739 1:N:0:TCTGCAAG+GCTGCACT  
CTTCACGGTGGAACTAAGATTCAACTACAATCTCAGAATGCAGTTGCGGATAAAGCGAGCATGGTGGGA  
CTATCCGCATCTGGACGACATTACAACCAGTCCCAGAATTACTGCAGAACCCGTCATGGAAGACGATG  
ATTTCTGGGACTTTA

+

FFFFFFFFFFFFFF:FFFFFFFFFFFFFFFFFFFFFFFFFFFFFFFFFFFFFFFFFFFFFFFFFFFFFFFF  
FFFFFFFFFFFFFFFFFFFFFFFFFFFFFFFFFFFFFFFFFFFFFFFFFFFFFFFFFFFFFFFFFFFFFFFF  
FFFFFFFFFFFFFFFF

@A00721:190:HGJW7DSXY:4:1224:21522:12367 1:N:0:TCTGCAAG+GCTGCACT  
CTTCACGGTGGAACTAAGATTCAACTACAATCTCAGAATGCAGTTGCGGATAAAGCGAGCATGGTGGGA  
CTATCCGCATCTGGACGACATTACAACCAGTCCCAGAATTACTGCAGAACCCGTCATGGAAGACGATG  
ATTTCTGGGACTTTA

+

FFFFFFFFFFFFFFFFFFFFFFFFFFFFFFFFFFFFFFFFFFFFFFFFFFFFFFFFFFFFFFFFFFFFFFF:FFFFFFFFFFFF  
FFFFFFFFFFFFFFFF:FFFFFFFFFFFFFFFFFFFF:FFFFFFFFFFFFFFFFFFFFFFFF:FFFFFFFFFFFF:FFF  
FFFFFFFFFFFFFFFF

@A00721:190:HGJW7DSXY:4:2246:12807:37012 1:N:0:TCTGCAAG+GCTGCACT  
CTTCACGGTGGAACTAAGATTCAACTACAATCTCAGAATGCAGTTGCGGATAAAGCGAGCATGGTGGGA  
CTATCCGCATCTGGACGACATTACAACCAGTCCCAGAATTACTGCAGAACCCGTCATGGAAGACGATG  
ATTTCTGGGACTTTA

+

FFFFFFFFFFFFFFFFFFFFFFFFFFFFFFFFFFFFFFFFFFFFFFFFFFFFFFFFFFFFFFFFFFFFFFFF  
FFFFFFFFFFFFFFFFFFFFFFFFFFFFFFFFFFFFFFFFFFFFFFFFFFFFFFFFFFFFFFFFFFFFFFFF  
F:FFFF:FFFFFFFF

@A00721:190:HGJW7DSXY:4:2467:8160:5259 1:N:0:TCTGCAAG+GCTGCACT  
CTTCACGGTGGAACTAAGATTCAACTACAATCTCAGAATGCAGTTGCGGATAAAGCGAGCATGGTGGGA  
CTATCCGCATCTGGACGACATTACAACCAGTCCCAGAATTACTGCAGAACCCGTCATGGAAGACGATG  
ATTTCTGGGACTTTA

+

FFFFFFFFFFFFFFFFFFFFFFFFFFFFFFFFFFFFFFFFFFFFFFFFFFFFFFFFFFFFFFFFFFFFFFF:FFFFFFF  
FFFFFFFFFFFFFFFFFFFFFFFFFFFFFFFFFFFFFFFFFFFFFFFFFFFFFFFFFFFFFFFFFFFFFFF:FFFFFFF  
F:FFFFFFFF

@A00721:190:HGJW7DSXY:4:2537:18728:15640 1:N:0:TCTGCAAG+GCTGCACT  
CTTCACGGTGGAACTAAGATTCAACTACAATCTCAGAATGCAGTTGCGGATAAAGCGAGCATGGTGGGA  
CTATCCGCATCTGGACGACATTACAACCAGTCCCAGAATTACTGCAGAACCCGTCATGGAAGACGATG  
ATTTCTGGGACTTTA

+

FFFFFFFFFFFFFF:FFFFFFFFFFFFFFFFFFFFFFFFFFFFFFFFFFFFFFFFFFFFFFFFFFFFFFFF  
FFFFFFFFFFFFFFFFFFFFFFFFFFFFFFFFFFFFFFFFFFFFFFFFFFFFFFFFFFFFFFFFFFFFFFFF  
FFFFFFFFFFFFFFFF

@A00721:190:HGJW7DSXY:4:2562:15103:7858 1:N:0:TCTGCAAG+GCTGCACT  
CTTCACGGTGGAACTAAGATTCAACTACAATCTCAGAATGCAGTTGCGGATAAAGCGAGCATGGTGGGA  
CTATCCGCATCTGGACGACATTACAACCAGTCCCAGAATTACTGCAGAACCCGTCATGGAAGACGATG  
ATTTCTGGGACTTTA

+  
FFFFFFFFFFFFFFFFFFFFFFFFFFFFFFFFFFFFFFFFFFFFFFFFFFFFFFFFFFFFFFFFFFFFFFFF  
FFFFFFFFFFFFFFFFFFFFFFFFFFFFFFFFFFFFFFFFFFFFFFFFFFFFFFFFFFFFFFFFFFFFFFFF  
FFFFFFFFFFFFFFFF

@A00721:190:HGJW7DSXY:4:2669:6316:20791 1:N:0:TCTGCAAG+GCTGCACT  
CTTCACGGTGGAACTAAGATTCAACTACAATCTCAGAATGCAGTTGCGGATAAAGCGAGCATGGTGGGA  
CTATCCGCATCTGGACGACATTACAACCAGTCCCAGAATTACTGCAGAACCCGTCATGGAAGACGATG  
ATTTCTGGGACTTTA

+  
FFFFFFFFFFFFFFFFFFFFFFFFFFFFFFFFFFFFFFFFFFFFFFFFFFFFFFFFFFFFFFFFFFFFFFFF  
FFFFFFFFFFFFFFFFFFFFFFFFFFFFFFFFFFFFFFFFFFFFFFFFFFFFFFFFFFFFFFFFFFFFFFFF  
FFFFFFFFFFFFFFFF

@A00721:190:HGJW7DSXY:4:2177:9091:36714 1:N:0:TCTGCAAG+GCTGCACT  
CCCAGAAATCATCGTCTTCCATGACGGGTTCTGCAGTAATTCTGGGACTGGTTGTAATGTCGTCCAGA  
TGCGGATAGTCCACCATGCTCGCTTTATCCGCAACTGCATTCTGAGATTGTAGTTGAATCTTAGTTCC  
ACCGTGAAGATGTGA

+  
FFFFFFFFFFFFFFFFFFFFFFFFFFFFFFFFFFFFFFFFFFFFFFFFFFFFFFFFFFFFFFFFFFFFFFFF  
FFFFFFFFFFFFFFFFFFFFFFFFFFFFFFFFFFFFFFFFFFFFFFFFFFFFFFFFFFFFFFFFFFFFFFFF  
FFFFFFFFFFFFFFFF

@A00721:190:HGJW7DSXY:4:2543:4282:9314 1:N:0:TCTGCAAG+GCTGCACT  
CCCAGAAATCATCGTCTTCCATGACGGGTTCTGCAGTAATTCTGGGACTGGTTGTAATGTCGTCCAGA  
TGCGGATAGTCCACCATGCTCGCTTTATCCGCAACTGCATTCTGAGATTGTAGTTGAATCTTAGTTCC  
ACCGTGAAGATGTGA

+  
FFFFFFFFFFFFFFFFFFFFFFFFFFFFFFFFFFFFFFFFFFFFFFFFFFFFFFFFFFFFFFFFFFFFFFFF  
FFFFFFFFFFFFFFFFFFFFFFFFFFFFFFFFFFFFFFFFFFFFFFFFFFFFFFFFFFFFFFFFFFFFFFFF  
FFFFFFFFFFFFFFFF

@A00721:190:HGJW7DSXY:4:2543:4942:9831 1:N:0:TCTGCAAG+GCTGCACT  
CCCAGAAATCATCGTCTTCCATGACGGGTTCTGCAGTAATTCTGGGACTGGTTGTAATGTCGTCCAGA  
TGCGGATAGTCCACCATGCTCGCTTTATCCGCAACTGCATTCTGAGATTGTAGTTGAATCTTAGTTCC  
ACCGTGAAGATGTGA

+  
FFFFFFFFFFFFFFFFFFFFFFFFFFFFFFFFFFFFFFFFFFFFFFFFFFFFFFFFFFFFFFFFFFFFFFFF  
FFFFFFFFFFFFFFFFFFFFFFFFFFFFFFFFFFFFFFFFFFFFFFFFFFFFFFFFFFFFFFFFFFFFFFFF  
FFFFFFFFFFFFFFFF

@A00721:190:HGJW7DSXY:4:1343:30436:36260 1:N:0:TCTGCAAG+GCTGCACT  
ATCACATCTTCACGGTGGAACTAAGATTCAACTACAATCTCAGAATGCAGTTGCGGATAAAGCGAGCA  
TGGTGGACTATCCGCATCTGGACGACATTACAACCAGTCCCAGAATTACTGCAGAACCCGTCATGGAA  
GACGATGATTTCTGG

+  
FFFFFFFFFFFFFFFFFFFFFFFFFFFFFFFFFFFFFFFFFFFFFFFFFFFFFFFFFFFFFFFFFFFFFFFF  
FFFFFFFFFFFFFFFFFFFFFFFFFFFFFFFFFFFFFFFFFFFFFFFFFFFFFFFFFFFFFFFFFFFFFFFF  
FFFFF:FFFFFFFF

@A00721:190:HGJW7DSXY:4:1344:27633:1094 1:N:0:TCTGCAAG+GCTGCACT  
ATCACATCTTCACGGTGGAACTAAGATTCAACTACAATCTCAGAATGCAGTTGCGGATAAAGCGAGCA  
TGGTGGACTATCCGCATCTGGACGACATTACAACCAGTCCCAGAATTACTGCAGAACCCGTCATGGAA  
GACGATGATTTCTGG

+  
:FFFF:FFFFFFFFFFFFFFFFFFFFFFFFFFFFFFFFFFFFFFFFFFFFFFFFFFFFFFFFFFFFFFFF  
FFFFFFFFFFFFFFFFFFFFFFFFFFFFFFFFFFFFFFFFFFFFFFFFFFFFFFFFFFFFFFFFFFFFFFFF  
FFFFF:FFFFFFFF

@A00721:190:HGJW7DSXY:4:1656:3332:8954 1:N:0:TCTGCAAG+GCTGCACT  
ATCACATCTTCACGGTGGAACTAAGATTCAACTACAATCTCAGAATGCAGTTGCGGATAAAGCGAGCA

TGGTGGACTATCCGCATCTGGACGACATTACAACCAGTCCCAGAATTACTGCAGAACCCGTCATGGAA  
GACGATGATTTCTGG

```
FFFFFFFFFFFFFFFFFFFFFFFFFFFFFFFFFFFFFFFFFFFFFFFFFFFFFFFFFFFFFFFFFFFFF
FFFFFFFFFFFFFFFFFFFFFFFFFFFFFFFFFFFFFFFFFFFFFFFFFFFFFFFFFFFFFFFFFFFFF;
FFFFFFFFFFFFFFFFFFFFFFFFFFFFFFFFFFFFF
FFFFFFFFFFFFFFFFFFFF
```

 $+$ 

@A00721:190:HGJW7DSXY:4:2448:2031:11083 1:N:0:TCTGCAAG+GCTGCACT  
ATCACATCTTCACGGTGGAACTAAGATTCAACTACAATCTCAGAATGCAGTTGCGGATAAAGCGAGCA  
TGGTGGACTATCCGCATCTGGACGACATTACAACCAGTCCCAGAATTACTGCAGAACCCGTCATGGAA  
GACGATGATTTCTGG

```

FFFFFFFFFFFFFFFF:FFFFFFFFFFFFFFFFFFFFFFFFFFFFFFFFFFFFFFFF
FFFFFFFFF:FFF:FFFFFFFFFFFFFFFFFFFFFFFFFFFFFFFFFFFFFFFF
FFFFFFFFFFFFFFFF

```

+

@A00721:190:HGJW7DSXY:4:1152:5538:6511 1:N:0:TCTGCAAG+GCTGCACT  
CACCGTTCCATCACATCTTCACGGTGGAACTAAGATTCAACTACAATCTCAGAATGCAGTTGCGGATA  
AAGCGAGCATGGTGGACTATCCGCATCTGGACGACATTACAACCAGTCCCAGAATTACTGCAGAACCC  
GTCATGGAAGACGAT

[illegible]

+

@A00721:190:HGJW7DSXY:4:1276:4137:9752 1:N:0:TCTGCAAG+GCTGCACT  
CACCGTTCCATCACATCTTCACGGTGGAACTAAGATTCAACTACAATCTCAGAATGCAGTTGCGGATA  
AAGCGAGCATGGTGGACTATCCGCATCTGGACGACATTACAACCAGTCCCAGAATTACTGCAGAACCC  
GTCATGGAAGACGAT

[illegible]





[illegible][illegible][illegible]

```

FFFFFFFFFFFFFFFFFFFFFFFFFFFFFFFFFFFFFFFF:FFFFFFFFFFFFFFFFFFFFFFFFFFFFFFFF
FFFFFFFFFFFFFFFFFFFFFFFFFFFFFFFFFFFFFFFF:FFFFFFFFFFFFFFFFFFFFFFFFFFFFFFFF
FFFFFFFFFFFFFFFFFFFFFFFF

```

[illegible]

```

FFFFFFFF:FFFFFFFF:FFFFFFFFFFFFFFFFFFFFFFFF:FF,FFFFFFFFFFFFFFFFFFFFFFFF
FFFFFFFFFFFFFFFFFFFFFFFFFFFFFFFFFFFFFFFF:FFFFFFFFFFFFFFFFFFFFFFFFFFFFFFFF
FFFFFFFFFFFFFFFF

```

```

FFFFFFFFFFFFFFFFFFFFFFFFFFFFFFFFFFFFFFFFFFFFFFFFFFFFFFFFFFFFFFFF
FFFFFFFFFFFFFFFFFFFFFFFFFFFFFFFFFFFFFFFFFFFFFFFFFFFFFFFFFFFFFFFF:
FFFFFFFFFFFFFFFFFFFFFFFFFFFFFFFF
FFFFFFFFFFFFFFFF

```

@A00721:190:HGJW7DSXY:4:1404:10357:1799 1:N:0:TCTGCAAG+GCTGCACT  
CTGGGACTGGTTGTAATGTCGTCCAGATGCGGATAGTCCACCATGCTCGCTTTATCCGCAACTGCATT







@A00721:190:HGJW7DSXY:4:1542:7374:21903 1:N:0:TCTGCAAG+GCTGCACT  
GGGGCTGGTTGTAATGTCGTCAGATGCGGATAGTCCACCATGCTCGCTTTATCCGCAACTGCATTCT  
GAGATTGTAGTTGAATCTTAGTTCACCGTGAAGATGTGATGGAACGGTGGACTCGTCGTCTGTCCAG  
AGTGTGGACTCGTA

@A00721:190:HGJW7DSXY:4:1547:4770:15295 1:N:0:TCTGCAAG+GCTGCACT  
GGGACTGGTTGTAATGTCGTCAGATGCGGATAGTCCACCATGCTCGCTTTATCCGCAACTGCATTCT  
GAGAGTGTAGTTGAATCTTAGTTCACCGTGAAGATGTGATGGAACGGTGGACTCGTCGTCTGTCCAG  
AGTGTGGACTCGTA

@A00721:190:HGJW7DSXY:4:1573:22815:3552 1:N:0:TCTGCAAG+GCTGCACT  
GGGACTGGTTGTAATGTCGTCCAGATGCGGATAGTCCACCATGCTCGCTTTATCCGCAACTGCATTCT  
GAGATTGTAGTTGAATCTTAGTTCACCGTGAAGATGTGATGGAACGGTGGACTCGTCGTCTGTCCAG  
AGTGTGGACTCGTA

@A00721:190:HGJW7DSXY:4:1638:19750:16313 1:N:0:TCTGCAAG+GCTGCACT  
GGGGCTGGTTGTAATGTCGTCCAGATGCGGATAGTCCACCATGCTCGCTTTATCCGCAACTGCATTCT  
GAGATTGTAGTTGAATCTTAGTTCACCGTGAAGATGTGATGGAACGGTGGACTCGTCGTCTGTCCAG  
AGTGTGGACTCGTA

@A00721:190:HGJW7DSXY:4:1664:18900:20478 1:N:0:TCTGCAAG+GCTGCACT  
GGGGCTGGTTGTAATGTCGTCCAGATGCGGATAGTCCACCATGCTCGCTTTATCCGCAACTGCATTCT  
GAGATTGTAGTTGAATCTTAGTTCACCGTGAAGATGTGATGGAACGGTGGACTCGTCGTCTGTCCAG  
AGTGTGGACTCGTA

@A00721:190:HGJW7DSXY:4:2120:18602:9659 1:N:0:TCTGCAAG+GCTGCACT  
GGGGCTGGTTGTAATGTCGTCCAGATGCGGATAGTCCACCATGCTCGCTTTATCCGCAACTGCATTCT  
GAGATTGTAGTTGAATCTTAGTTCACCGTGAAGATGTGATGGAACGGTGGACTCGTCGTCTGTCCAG  
AGTGTTGGACTCGTA

@A00721:190:HGJW7DSXY:4:2139:29225:35446 1:N:0:TCTGCAAG+GCTGCACT  
GGGACTGGTTGTAATGTCGTCCAGATGCGGATAGTCCACCATGCTCGCTTTATCCGCAACTGCATTCT  
GAGATTGTAGTTGAATCTTAGTTCCACCGTGAAGATGTGATGGAACGGTGGACTCGTCGTCTGTCCAG  
AGTGTGGGACTCGTA

+  
FFFFFFFFFFFFFFFFFFFFFFFFFFFFFFFFFFFFFFFFFFFFFFFFFFFFFFFFFFFFFFFFFFFFFFFF  
FFFFFFFFFFFFFFFFFFFFFFFFFFFFFFFFFFFFFFFFFFFFFFFFFFFFFFFFFFFFFFFFFFFFFFFF:FFFFFFFFFFFFFFFFFFFFFFFF:FFFF  
FFFFFFFFFFFFFFFF

@A00721:190:HGJW7DSXY:4:2148:5430:25958 1:N:0:TCTGCAAG+GCTGCACT  
GGGACTGGTTGTAATGTCGTCCAGATGCGGATAGTCCACCATGCTCGCTTTATCCGCAACTGCATTCT  
GAGATTGTAGTTGAATCTTAGTTCCACCGTGAAGATGTGATGGAACGGTGGACTCGTCGTCTGTCCAG  
AGTGTTGGACTCGTA

+  
FFFFFFFFFFFF:FFFFFFFFFFFFFFFFFFFFFFFFFFFFFFFFFFFFFFFFFFFFFFFFFFFFFFFFFFFF  
FFFFFFFFFFFFFFFFFFFFFFFFFFFFFFFFFFFFFFFFFFFFFFFFFFFFFFFFFFFFFFFFFFFFFFFF:FFF:FF  
FFFFFFFFFFFFFFFF

@A00721:190:HGJW7DSXY:4:2148:5475:26130 1:N:0:TCTGCAAG+GCTGCACT  
GGGACTGGTTGTAATGTCGTCCAGATGCGGATAGTCCACCATGCTCGCTTTATCCGCAACTGCATTCT  
GAGATTGTAGTTGAATCTTAGTTCCACCGTGAAGATGTGATGGAACGGTGGACTCGTCGTCTGTCCAG  
AGTGTTGGACTCGTA

+  
FFFFFFFFFFFFFFFFFFFFFFFFFFFFFFFFFFFFFFFFFFFFFFFFFFFFFFFFFFFFFFFFFFFFFFFF  
FFFFFFFFFFFFFFFFFFFFFFFFFFFFFFFFFFFFFFFFFFFFFFFFFFFFFFFFFFFFFFFFFFFFFFFF  
FFFFFFFFFFFFFFFF

@A00721:190:HGJW7DSXY:4:2446:2736:34882 1:N:0:TCTGCAAG+GCTGCACT  
GGGACTGGTTGTAATGTCGTCCAGATGCGGATAGTCCACCATGCTCGCTTTATCCGCAACTGCATTCT  
GAGATTGTAGTTGAATCTTAGTTCCACCGTGAAGATGTGATGGAACGGTGGACTCGTCGTCTGTCCAG  
AGTGTTGGACTCGTA

+  
FFFFFFFFFF:FFF:FFFFFFFFFFFFFFFFFFFFFFFFFFFFFFFFFFFFFFFFFFFFFFFFFFFFFFFF  
FFFF:FFF,FFFFFFFFFFFFFFFFFFFFFFFFFFFFFFFFFFFFFFFFFFFFFFFFFFFFFFFFFFFF:FFFF:FF:FFFFFFFFFFFFFFFFFFFFFFFF:FFFF  
FFFFFFFFFFFFFFFF

@A00721:190:HGJW7DSXY:4:2460:24361:28307 1:N:0:TCTGCAAG+GCTGCACT  
GGGACTGGTTGTAATGTCGTCCAGATGCGGATAGTCCACCATGCTCGCTTTATCCGCAACTGCATTCT  
GAGATTGTAGTTGAATCTTAGTTCCACCGTGAAGATGTGATGGAACGGTGGACTCGTCGTCTGTCCAG  
AGTGTTGGACTCGTA

+  
FFFFFFFFFFFFFFFFFFFFFFFFFFFFFFFFFFFFFFFFFFFFFFFFFFFFFFFFFFFFFFFFFFFFFFFF  
FFFFFFFFFFFFFFFFFFFFFFFFFFFFFFFFFFFFFFFFFFFFFFFFFFFFFFFFFFFFFFFFFFFFFFFF:FFFFFFFFFFFFFFFFFFFFFFFFFFFFFFFF:FFFF  
FFFFFFFFFFFFFFFF

@A00721:190:HGJW7DSXY:4:2478:2275:10128 1:N:0:TCTGCAAG+GCTGCACT  
GGGACTGGTTGTAATGTCGTCCAGATGCGGATAGTCCACCATGCTCGCTTTATCCGCAACTGCATTCT  
GAGATTGTAGTTGAATCTTAGTTCCACCGTGAAGATGTGATGGAACGGTGGACTCGTCGTCTGTCCAG  
AGTGTTGGACTCGTA

+  
FFFFF,FFFFFFFFFFFFFFFFFFFFFFFFFFFFFFFFFFFFFFFFFFFFFFFFFFFFFFFFFFFFFFFF  
FFFFFFFFF:FFFFFFFFFFFFFFFFFFFFFFFFFFFFFFFFFFFFFFFFFFFFFFFFFFFFFFFFFFFF,FFFFFFFFFFFFFFFFFFFFFFFF:FFF:  
FFFFFFFFFFFFFFFF

@A00721:190:HGJW7DSXY:4:1158:9968:25457 1:N:0:TCTGCAAG+GCTGCACT  
ACTGGTTGTAATGTCGTCCAGATGCGGATAGTCCACCATGCTCGCTTTATCCGCAACTGCATTCTGAG  
ATTGTAGTTGAATCTTAGTTCCACCGTGAAGATGTGATGGAACGGTGGACTCGTCGTCTGTCCAGAGT  
GTTGGACTCGTATCC

+  
FFFFFFFFFFFFFFFFFFFFFFFFFFFFFFFFFFFFFFFFFFFFFFFFFFFFFFFFFFFFFFFFFFFFFFFF  
FFFFFFFFFFFFFFFFFFFFFFFFFFFFFFFFFFFFFFFFFFFFFFFFFFFFFFFFFFFFFFFFFFFFFFFF  
FFFFFFFFFFFFFFFF

@A00721:190:HGJW7DSXY:4:1162:1208:15013 1:N:0:TCTGCAAG+GCTGCACT  
ACTGGTTGTAATGTCGTCCAGATGCGGATAGTCCACCATGCTCGCTTTATCCGCAACTGCATTCTGAG

ATTGTAGTTGAATCTTAGTTCCACCGTGAAGATGTGATGGAACGGTGGACTCGTCGTCTGTCCAGAGT  
GTTGGACTCGTATCC

[illegible] $+$ [illegible]

+

[illegible] $+$ [illegible]
$$+$$
[illegible]

+

```
F,FFF:FF:F:FFFFFFFFFFFF,FF:,FFFF,FFFFFFFFFFFFFFFFFFFF:F:FFFFFF:FFFFFF,FFFF
F:FFFFFFFF:FFF:FFFFFFFFFFFF:FF:FFFFFFFFFFFF:FFFFFFFF:FFF,:FFFF::F,FF::FFFF
F,E,FF:FFFF,:FF
```

+

[illegible]

$+$ 

+

 $+$ 

+

+

 $+$  $+$

FFFFFFFFFFFFFFFFFFFFFFFFFFFFFFFFFFFFFFFFFFFFFFFFFFFFFFFFFFFFFFFFFFFFFFFF  
FFFFFFFFFFFFFFFF

@A00721:190:HGJW7DSXY:4:1640:4860:13041 1:N:0:TCTGCAAG+GCTGCACT  
CGTCCAGATGCGGATAGTCCACCATGCTCGCTTTATCCGCAACTGCATTCTGAGATTGTAGTTGAATC  
TTAGTTCCACCGTGAAGATGTGATGGAACGGTGGACTCGTCGTCTGTCCAGAGTGTTGGACTCGTATC  
CATATTGGATTGTTT

+  
FFFFFFFFFFFFFFFFFFFFFFFFFFFFFFFFFFFFFFFFFFFFFFFFFFFFFFFFFFFFFFFFFFFFFF:FFFF,FFFFFF  
FFFFFFFFFFFFFFFFFFFFFFFFFFFFFFFFFFFFFFFFFFFFFFFFFFFFFFFFFFFFFFFFFFFFFF:FFFFFF  
FFFFFFFFFFFF:F:F

@A00721:190:HGJW7DSXY:4:1655:31286:15937 1:N:0:TCTGCAAG+GCTGCACT  
CGTCCAGATGCGGATAGTCCACCATGCTCGCTTTATCCGCAACTGCATTCTGAGATTGTAGTTGAATC  
TTAGTTCCACCGTGAAGATGTGATGGAACGGTGGACTCGTCGTCTGTCCAGAGTGTTGGACTCGTATC  
CATATTGGATTGTTT

+  
FFFFFFFFFFFFFFFFFFFFFFFFFFFFFF,FFFFFFFFFFFFFFFFFFFFFFFFFFFFFFFFFFFFFF,FFFFFFFFFFFFFF  
FFFFFFFFFFFFFFFFFFFFFFFF,FFFFFFFFFFFFFFFFFFFFFFFFFFFFFFFFFFFFFFFFFFFFFFFFFFFFFF  
FFFFFFFFFFFFFFFF

@A00721:190:HGJW7DSXY:4:1655:31412:17127 1:N:0:TCTGCAAG+GCTGCACT  
CGTCCAGATGCGGATAGTCCACCATGCTCGCTTTATCCGCAACTGCATTCTGAGATTGTAGTTGAATC  
TTAGTTCCACCGTGAAGATGTGATGGAACGGTGGACTCGTCGTCTGTCCAGAGTGTTGGACTCGTATC  
CATATTGGATTGTTT

+  
FFFFFFFFFFFFFFFFFFFFFFFFFFFFFF:FFFFFFFFFFFFFFFFFFFFFFFFFFFFFFFFFFFFFFFFFFFFFF  
FFFFFFFFFFFFFFFFFFFFFFFFFFFFFFFFFFFFFFFFFFFFFFFFFFFFFFFFFFFFFFFFFFFFFFFF  
FFFFFFFFFFFFFFFF

@A00721:190:HGJW7DSXY:4:2150:29098:31501 1:N:0:TCTGCAAG+GCTGCACT  
CGTCCAGATGCGGATAGTCCACCATGCTCGCTTTATCCGCAACTGCATTCTGAGATTGTAGTTGAATC  
TTAGTTCCACCGTGAAGATGTGATGGAACGGTGGACTCGTCGTCTGTCCAGAGTGTTGGACTCGTATC  
CATATTGGATTGTTT

+  
FFFFFFFFFFFFFFFFFFFFFFFFFFFFFF,FFFFFFFFFFFFFFFFFFFFFFFFFFFFFF:FFFFFF:FFFFFFFFFFFF  
FFFFFFFFFFFFFFFFFFFFFFFF:FFFFFF,FFFFFFFFFFFFFFFFFFFFFFFF:FFFFFFF:FFFFFFFF  
F:FFFFFF:FFFF

@A00721:190:HGJW7DSXY:4:2233:9127:28416 1:N:0:TCTGCAAG+GCTGCACT  
CGTCCAGATGCGGATAGTCCACCATGCTCGCTTTATCCGCAACTGCATTCTGAGATTGTAGTTGAATC  
TTAGTTCCACCGTGAAGATGTGATGGAACGGTGGACTCGTCGTCTGTCCAGAGTGTTGGACTCGTATC  
CATATTGGATTGTTT

+  
FFFFFFFFFFFFFFFFFFFFFFFFFFFFFF:FFFFFFFFF:FFF:FFFFFFFF:FF,FFFFFFFFFFFF  
FFFFFFFFFFFFFFFFFFFF,FFFFFFFF:FFF:FFFFFFFFFFFFFFFFFFFFFFFFFFFFFFFFFFFF  
FFFF,FFFFFFFF

@A00721:190:HGJW7DSXY:4:2355:4435:23328 1:N:0:TCTGCAAG+GCTGCACT  
CGTCCAGATGCGGATAGTCCACCATGCTCGCTTTATCCGCAACTGCATTCTGAGATTGTAGTTGAATC  
TTAGTTCCACCGTGAAGATGTGATGGAACGGTGGACTCGTCGTCTGTCCAGAGTGTTGGACTCGTATC  
CATATTGGATTGTTT

+  
FFFFFFFFFFFFFFFF:FFFFFFFF:FFFFFFFFFFFFFFFFFFFFFFFFFFFFFFFF:FFFFFF,FFFF,FFFF  
:FFFFFFFFFFFFFFFFFFFFFFFFFFFFFFFF:FFF:FFFFFFFFFFFFFFFF:FFFF:FFFFFF,FFFF  
FFFFFFFFFFFFFFFF

@A00721:190:HGJW7DSXY:4:2434:12364:4241 1:N:0:TCTGCAAG+GCTGCACT  
CGTCCAGATGCGGATAGTCCACCATGCTCGCTTTATCCGCAACTGCATTCTGAGATTGTAGTTGAATC  
TTAGTTCCACCGTGAAGATGTGATGGAACGGTGGACTCGTCGTCTGTCCAGAGTGTTGGACTCGTATC  
CATATTGGATTGTTT

+  
FFFFFFFFFFFFFFFFFFFFFFFF,FFFFFFFFFFFFFFFFFFFFFFFFFFFFFFFFFFFFFFFF  
FFFFFFFFFFFFFFFF:FFFFFFFFFFFFFFFFFFFFFFFFFFFFFFFFFFFFFFFFFFFFFFFF  
FF:FFFFFFFFFFFF

@A00721:190:HGJW7DSXY:4:2444:2609:7420 1:N:0:TCTGCAAG+GCTGCACT  
CGTCCAGATGCGGATAGTCCACCATGCTCGCTTTATCCGCAACTGCATTCTGAGATTGTAGTTGAATC  
TTAGTTCCACCGTGAAGATGTGATGGAACGGTGGACTCGTCGTCTGTCCAGAGTGTTGGACTCGTATC  
CATATTGGATTGTTT

+  
FFFFFFFFFFFFFFFF:FF:FFFFFF,FFFFFF:FFFF:FFFFFFFF:FF:FFFF:FF:FFFFFFFFFFFF  
FFFFFFFFFFFFFFFFFFFFFFFF:FFFFFF:FFFFFF:FFFFFFFFFFFFFFFF:FFFFFFFF:FFF  
FFFFFF,FFFFFF

@A00721:190:HGJW7DSXY:4:2562:25563:25911 1:N:0:TCTGCAAG+GCTGCACT  
CGTCCAGATGCGGATAGTCCACCATGCTCGCTTTATCCGCAACTGCATTCTGAGATTGTAGTTGAATC  
TTAGTTCCACCGTGAAGATGTGATGGAACGGTGGACTCGTCGTCTGTCCAGAGTGTTGGACTCGTATC  
CATATTGGATTGTTT

+  
FFFFFFFF,FFFFFFFF:FFFF,FF,FFFFFFFF:FFFFFFFFFFFFFFFF,F:F,FFFFFFFFFFFF  
:FFFFFFFFFFFFFFFFFFFFFFFF,FFFF:FFFFFFFFFFFFFFFF,FFFFFFFF:FFFFFF,FF:  
F:FFFFFFFFFFFF::

@A00721:190:HGJW7DSXY:4:2607:15347:23657 1:N:0:TCTGCAAG+GCTGCACT  
CGTCCAGATGCGGATAGTCCACCATGCTCGCTTTATCCGCAACTGCATTCTGAGATTGTAGTTGAATC  
TTAGTTCCACCGTGAAGATGTGATGGAACGGTGGACTCGTCGTCTGTCCAGAGTGTTGGACTCGTATC  
CATATTGGATTGTTT

+  
FFFFFFFFFFFFFFFFFFFFFFFF:FF,FFFFFFFFFFFFFFFFFFFFFFFFFFFFFFFFFFFFFFFFFFFF  
FFFFFFFFFFFFFFFFFFFFFFFFFFFFFFFFFFFFFFFFFFFFFFFFFFFFFFFFFFFFFFFFFFFFFFFF  
FF,FFFFFFFF,FF

@A00721:190:HGJW7DSXY:4:1502:24831:24142 1:N:0:TCTGCAAG+GCTGCACT  
GGTCCAGATGCGGATAGTCCACCATGCTCGCTTTATCCGCAACTGCATTCTGAGATTGTAGTTGAATC  
TTAGTTCCACCGTGAAGATGTGATGGAACGGTGGACTCGTCGTCTGTCCAGAGTGTTGGACTCGTATC  
AATATTGGATTGTTT

+  
FFFF:FFFFFFFFFFFFFFFFFFFFFFFF:FFFFFFFFFFFFFFFFFFFFFFFFFFFFFFFF:FF:FFFFF  
F:FFFFFFFFFFFFFFFFFFFFFFFFFFFFFFFF:FFFFFFFFFFFFFFFFFFFFFFFFFFFFFFFF::FFF  
,F,F,FFFF,FFFF

@A00721:190:HGJW7DSXY:4:1523:19506:28917 1:N:0:TCTGCAAG+GCTGCACT  
GGTCCAGATGCGGATAGTCCACCATGCTCGCTTTATCCGCAACTGCATTCTGAGATTGTAGTTGAATC  
TTAGTTCCACCGTGAAGATGTGATGGAACGGTGGACTCGTCGTCTGTCCAGAGTGTTGGACTCGTATC  
CATATTGGATTGTTT

+  
FFFFFFFFFFFFFFFFFFFFFFFF:FF:FFFFFFFFFFFFFFFFFFFFFFFF:FFFFFF:FFFFFFFFFFFF  
FFFFFFFFFFFFFFFFFFFFFFFFFFFFFFFFFFFFFFFFFFFFFFFFFFFFFFFFFFFFFFFFFFFFFFFF  
FFFFFFFFFFFFFFFF

@A00721:190:HGJW7DSXY:4:1546:1696:19711 1:N:0:TCTGCAAG+GCTGCACT  
GGTCCAGATGCGGATAGTCCACCATGCTCGCTTTATCCGCAACTGCATTCTGAGATTGTAGTTGAATC  
TTAGTTCCACCGTGAAGATGTGATGGAACGGTGGACTCGTCGTCTGTCCAGAGTGTTGGACTCGTATC  
CATATTGGATTGTTT

+  
FFFFFFF:FFFFFFFFFFFFFFFF,FFFFFFFFFFFFFFFFFFFFFFFFFFFFFFFF:FFFFFFFFFFFF  
FFFFFFFFFFFFFFFF:FFFFFFFFF:FFFFFFFFFFFFFFFFFFFFFFFFFFFFFFFFFFFFFFFFFFFF  
FF,FFFF,FF,FF

@A00721:190:HGJW7DSXY:4:1555:11632:34695 1:N:0:TCTGCAAG+GCTGCACT  
GGTCCAGATGCGGATAGTCCACCATGCTCGCTTTATCCGCAACTGCATTCTGAGATTGTAGTTGAATC

TTAGTTCCACCGTGAAGATGTGATGGAACGGTGGACTCGTCGTCTGTCCAGAGTGTTGGACTCGTATC  
CATATTGGATTGTTT

+

FFFFFFFFFFFFFFFFFFFF:FF:FFFFFFFFFFFFFFFFFFFFFFFF:FFFFFFF:FFFFFFFFFFFFF  
FFFFFFFFFFFFFFFFFFFFFFFFFFFFFFFFFFFFFFFFFFFFFFFFFFFFFFFFFFFFFFFFFFFFFFFF  
FFFFFFFFFFFFFFFFFFFF

@A00721:190:HGJW7DSXY:4:1565:22679:25426 1:N:0:TCTGCAAG+GCTGCACT  
GGTCCAGATGCGGATAGTCCACCATGCTCGCTTTATCCGCAACTGCATTCTGAGATTGTAGTTGAATC  
TTAGTTCCACCGTGAAGATGTGATGGAACGGTGGACTCGTCGTCTGTCCAGAGTGTTGGACTCGTATC  
CATATTGGATTGTTT

+

FF,FFFFFFFF:FFFFFFFFFFFFFFFFFFFFFFFFFFFFFFFFFFFFFFFFFFFFFFFFFFFFFFFFFFFF  
FFFFFFFFFFFFFFFFFFFFFFFFFFFFFFFFFFFFFFFFFFFFFFFFFFFFFFFFFFFFFFFFFFFFFFFF  
FFFFFFFFFFFFFFFFFFFF

@A00721:190:HGJW7DSXY:4:1658:13340:22373 1:N:0:TCTGCAAG+GCTGCACT  
GGTCCAGATGCGGATAGTCCACCATGCTCGCTTTATCCGCAACTGCATTCTGAGATTGTAGTTGAATC  
TTAGTTCCACCGTGAAGATGTGATGGAACGGTGGACTCGTCGTCTGTCCAGAGTGTTGGACTCGTATC  
CATATTGGATTGTTT

+

FFFFFFFFFFFFFFFFFFFFFFFF,FFFFFFFFFFFFFFFFFFFFFFFFFFFFFFFFFFFFFFFFFFFFFFFF  
FFFFFFFFFFFFFFFFFFFFFFFFFFFFFFFFFFFFFFFF,FFFFFFFFFFFF:FFFFFFFFFFFFFFFFFFFF  
FFFF,FFFFFFFFFFFF

@A00721:190:HGJW7DSXY:4:2620:5764:12633 1:N:0:TCTGCAAG+GCTGCACT  
GGTCCAGATGCGGATAGTCCACCATGCTCGCTTTATCCGCAACTGCATTCTGAGATTGTAGTTGAATC  
TTAGTTCCACCGTGAAGATGTGATGGAACGGTGGACTCGTCGTCTGTCCAGAGTGTTGGACTCGTATC  
CATATTGGATTGTTT

+

FFFFFFFFFFFFFFFFFFFFFFFF:FFFFFFFFFFFFFFFFFFFFFFFFFFFFFFFFFFFFFFFFFFFFFFFF  
FFFFFFFFFFFFFFFFFFFFFFFFFFFFFFFFFFFFFFFF:FFFFFFFFFFFFFFFFFFFFFFFFFFFFFFFF  
FFFFFFFFFFFF::FFFF

@A00721:190:HGJW7DSXY:4:1309:14633:10457 1:N:0:TCTGCAAG+GCTGCACT  
GTCCAGATGCGGATAGTCCACCATGCTCGCTTTATCCGCAACTGCATTCTGAGATTGTAGTTGAATCT  
TAGTTCCACCGTGAAGATGTGATGGAACGGTGGACTCGTCGTCTGTCCAGAGTGTTGGACTCGTATCC  
ATATTGGATTGTTTA

+

FFFFFFFFFFFFFFFFFFFFFFFFFFFFFFFFFFFFFFFFFFFFFFFFFFFFFFFFFFFFFFFFFFFFFFFF  
FFFFFFFFFFFFFFFFFFFFFFFFFFFFFFFFFFFFFFFF:FFFFFFFFFFFFFFFFFFFFFFFFFFFFFFFF  
F,F:FFFF:FFFFF

@A00721:190:HGJW7DSXY:4:1309:14678:10504 1:N:0:TCTGCAAG+GCTGCACT  
GTCCAGATGCGGATAGTCCACCATGCTCGCTTTATCCGCAACTGCATTCTGAGATTGTAGTTGAATCT  
TAGTTCCACCGTGAAGATGTGATGGAACGGTGGACTCGTCGTCTGTCCAGAGTGTTGGACTCGTATCC  
ATATTGGATTGTTTA

+

FFFFFFFFFFFFFFFFFFFFFFFFFFFFFFFFFFFFFFFFFFFFFFFFFFFFFFFFFFFFFFFFFFFFFFFF  
FFFFFFFFFFFFFFFFFFFFFFFFFFFFFFFFFFFFFFFFFFFFFFFFFFFFFFFFFFFFFFFFFFFFFFFF:F  
FFFFFFFFFFFFFFFF:

@A00721:190:HGJW7DSXY:4:1617:17788:21089 1:N:0:TCTGCAAG+GCTGCACT  
GTCCAGATGCGGATAGTCCACCATGCTCGCTTTATCCGCAACTGCATTCTGAGATTGTAGTTGAATCT  
TAGTTCCACCGTGAAGATGTGATGGAACGGTGGACTCGTCGTCTGTCCAGAGTGTTGGACTCGTATCC  
ATATTGGATTGTGTA

+

F,FFF,F:FFFFFF:FFF:,FF::FF:FFFF,FFFFFFFFFFFFFFFF:FFFF:FFFF:FFF,FFFFF  
FFFFFFFF:FFFFFFFFFFFFFFFF:FFFF:,FFFFFFFFFFFF:,FF:FF:F::FFFFFF:FFFFF  
F,F,FFFFFFFF,:F

@A00721:190:HGJW7DSXY:4:2643:29423:15812 1:N:0:TCTGCAAG+GCTGCACT  
GTCCAGATGCGGATAGTCCACCATGCTCGCTTTATCCGCAACTGCATTCTGAGATTGTAGTTGAATCT  
TAGTTCCACCGTGAAGATGTGATGGAACGGTGGACTCGTCGTCTGTCCAGAGTGTGGACTCGTATCC  
ATATTGGATTGTTTA

+

FFFFFFFFFFFFFFFFFFFFFFFFFFFFFFFFFFFFFFFFFFFFFFFFFFFFFFFFFFFFFFFFFFFFFFFF  
FFFFFFFFFFFFFFFFFFFFFFFFFFFFFFFFFFFFFFFFFFFFFFFFFFFFFFFFFFFFFFFFFFFFFFFF  
FF:FFFF:FFFFF

@A00721:190:HGJW7DSXY:4:1127:19596:2675 1:N:0:TCTGCAAG+GCTGCACT  
CCAGATGCGGATAGTCCACCATGCTCGCTTTATCCGCAACTGCATTCTGAGATTGTAGTTGAATCTTA  
GTTCCACCGTGAAGATGTGATGGAACGGTGGACTCGTCGTCTGTCCAGAGTGTGGACTCGTATACAT  
ATTGGATTTTTT

+

FF:,F,:FFFFFFFFFFFF:FF,:F:FF:FFF,F,:F:FFF:FFFFFFFF,F,:,,FFFF,:FF:F,FFF  
F,F,FFFF,:F:F:FFFF:FFFFF:F,F:FFF:,FF,:FF,F,FF:FF,FFF,FFFF:FFF,,FF:  
FFFFFFFF,F,F

@A00721:190:HGJW7DSXY:4:1235:27010:19523 1:N:0:TCTGCAAG+GCTGCACT  
CCGGATGCGGATAGTCCACCATGCTCGCTTTATCCGCAACTGCATTCTGAGAGTGTAGTTGAATCTTA  
GTTCCACCGTGAAGATGTGATGGAACGGTGGACTCGTCGTCTGTCCAGAGTGTGGACTCGTATCCAT  
ATTGGATTGTGTAG

+

FFFFFFFFFFFFFFFFFFFF,FF:FFFFFFFFFFFFFFFFFFFFFFFFFFFFFFFF:F:FF,FF:FFFFFFFF:FF  
FFFFFFFFFFFF:FFFFFFFF:FFFFFFFFFFFFFFFFFFFFFFFFF::,FFF:F:FFF:FFFFFFFF:F,F  
,:FFF,FF,F,FFF

@A00721:190:HGJW7DSXY:4:1269:2139:6637 1:N:0:TCTGCAAG+GCTGCACT  
CCGGATGCGGATAGTCCACCATGCTCGCTTTATCCGCAACTGCATTCTGAGATTGTAGTTGAATCTTA  
GTTCCACCGTGAAGATGTGATGGAACGGTGGACTCGTCGTCTGTCCAGAGTGTGGACTCGTATCCAT  
ATTGGATTGTTTAGA

+

FFFFFFFFFFFFFFFFFFFF:FF:FFF:FFFFFFFFFFFFFFFFFFFFFFFFFFFFFFFFFFFFFFFFFFFF  
FFFFFFFFFFFFFFFFFFFFFFFFFFFFFFFFFFFFFFFFFFFFFFFFFFFFFFFFFFFFFFFFFFFFFFFF  
,FFFF:FFF:FFFF

@A00721:190:HGJW7DSXY:4:1302:28402:3490 1:N:0:TCTGCAAG+GCTGCACT  
CCGGATGCGGATAGTCCACCATGCTCGCTTTATCCGCAACTGCATTCTGAGATTGTAGTTGAATCTTA  
GTTCCACCGTGAAGATGTGATGGAACGGTGGACTCGTCGTCTGTCCAGAGTGTGGACTCGTATCCAT  
ATTGGATTGTTTAGA

+

FFFFFFFFFFFFFFFFFFFFFFFFFFFFFFFFFFFFFFFFFFFFFFFFFFFFFFFFFFFFFFFFFFFFFFFF  
FFFFFFFFFFFFFFFFFFFFFFFFFFFFFFFFFFFFFFFFFFFFFFFFFFFFFFFFFFFFFFFFFFFFFFFF  
FFFFFFFFFFFFFFFFFFFF

@A00721:190:HGJW7DSXY:4:1513:17056:31156 1:N:0:TCTGCAAG+GCTGCACT  
CCGGATGCGGATAGTCCACCATGCTCGCTTTATCCGCAACTGCATTCTGAGATTGTAGTTGAATCTTA  
GTTCCACCGTGAAGATGTGATGGAACGGTGGACTCGTCGTCTGTCCAGAGTGTGGACTCGTATCCAT  
ATTGGATTGTTTAGA

+

FFFFFFFFFFFFFFFFFFFFFFFF,FFFFFFFFFFFFFFFFFFFFFFFF:FFF:FFF:FFFFFFFFFFFFFFFF  
FFFFFFFFFFFFFFFFFFFFFFFFFFFFFFFFFFFFFFFFFFFFFFFFFFFFFFFFFFFFFFFFFFFFFFFF:FFFFFFFF  
FF:FFF:FFFFF

@A00721:190:HGJW7DSXY:4:1602:13141:1799 1:N:0:TCTGCAAG+GCTGCACT  
CCGGATGCGGATAGTCCACCATGCTCGCTTTATCCGCAACTGCATTCTGAGATTGTAGTTGAATCTTA  
GTTCCACCGTGAAGATGTGATGGAACGGTGGACTCGTCGTCTGTCCAGAGTGTGGACTCGTATCCAT  
ATTGGATTGTTTAGA

+

FFFFFFFFFFFFFFFFFFFF,FF:FFFFFFFFFFFFFFFFFFFFFFFFFFFFFFFFFFFFFFFFFFFFFFFF



@A00721:190:HGJW7DSXY:4:1662:3269:20462 1:N:0:TCTGCAAG+GCTGCACT  
CCGGATGCGGATAGTCCACCATGCTCGCTTTATCCGCAACTGCATTCTGAGATTGTAGTTGAATCTTA  
GTTCCACCGTGAAGATGTGATGGAACGGTGGACTCGTCGTCTGTCCAGAGTGTTGGACTCGTATCCAT  
ATTGGATTGTTTAGA

@A00721:190:HGJW7DSXY:4:1667:16369:6981 1:N:0:TCTGCAAG+GCTGCACT  
CCGGATGCGGATAGTCCACCATGCTCGCTTTATCCGCAACTGCATTCTGAGATTGTAGTTGAATCTTA  
GTTCCACCGTGAAGATGTGATGGAACGGTGGACTCGTCGTCTGTCCAGAGTGTTGGACTCGTATCCAT  
ATTGGATTGTTTAGA

@A00721:190:HGJW7DSXY:4:2210:2627:12273 1:N:0:TCTGCAAG+GCTGCACT  
CCGGATGCGGATAGTCCACCATGCTCGCTTTATCCGCAACTGCATTCTGAGATTGTAGTTGAATCTTA  
GTTCCACCGTGAAGATGTGATGGAACGGTGGACTCGTCGTCTGTCCAGAGTGTTGGACTCGTATCCAT  
ATTGGATTGTTTAGA

@A00721:190:HGJW7DSXY:4:2307:29894:26616 1:N:0:TCTGCAAG+GCTGCACT  
CCGGATGCGGATAGTCCACCATGCTCGCTTTATCCGCAACTGCATTCTGAGATTGTAGTTGAATCTTA  
GTTCCACCGTGAAGATGTGATGGAACGGTGGACTCGTCGTCTGTCCAGAGTGTTGGACTCGTATCCAT  
ATTGGATTGTTTAGA

@A00721:190:HGJW7DSXY:4:2307:29785:26772 1:N:0:TCTGCAAG+GCTGCACT  
CCGGATGCGGATAGTCCACCATGCTCGCTTTATCCGCAACTGCATTCTGAGATTGTAGTTGAATCTTA  
GTTCCACCGTGAAGATGTGATGGAACGGTGGACTCGTCGTCTGTCCAGAGTGTTGGACTCGTATCCAT  
ATTGGATTGTTTAGA

@A00721:190:HGJW7DSXY:4:2421:30101:35493 1:N:0:TCTGCAAG+GCTGCACT  
CCGGATGCGGATAGTCCACCATGCTCGCTTTATCCGCAACTGCATTCTGAGATTGTAGTTGAATCTTA  
GTTCCACCGTGAAGATGTGATGGAACGGTGGACTCGTCGTCTGTCCAGAGTGTTGGACTCGTATCCAT  
ATTGGATTGTTTAGA

@A00721:190:HGJW7DSXY:4:1133:7491:20290 1:N:0:TCTGCAAG+GCTGCACT  
CTGGAACCTAAACAATCCAATATGGATACGAGTCCAACACTCTGGACAGACGACGAGTCCACCGTTCC  
ATCACATCTTCACGGTGGAACTAAGATTCAACTACAATCTCAGAATGCAGTTGCGGATAAAGCGAGCA  
TGGTGGACTATCCGC

+  
FFFFF:FFFFFFFFFFFFFFFFFFFFFFFFFFFFFFFFFFFFFFFFFFFFFFFFFFFFFFFFFFFFFFFF  
FFFFFFFFFFFFFFFFFFFFFFFFFFFFFFFFFFFFFFFFFFFFFFFFFFFFFFFFFFFFFFFFFFFFFFFF  
FFFFFFFFFFFFFFFF  
@A00721:190:HGJW7DSXY:4:1239:23637:17848 1:N:0:TCTGCAAG+GCTGCACT  
CTGGAACCTAAACAATCCAATATGGATACGAGTCCAACACTCTGGACAGACGACGAGTCCACCGTTCC  
ATCACATCTTCACGGTGGAACTAAGATTCAACTACAATCTCAGAATGCAGTTGCGGATAAAGCGAGCA  
TGGTGGACTATCCGC  
+  
FFFFFFFFFFFFFFFFFFFFFFFFFFFFFFFFFFFFFFFFFFFFFFFFFFFFFFFFFFFFFFFFFFFFFFFF  
FFFFFFFFFFFFFFFFFFFFFFFFFFFFFFFFFFFFFFFFFFFFFFFFFFFFFFFFFFFFFFFFFFFFFFFF  
FFFFFFFFFFFFFFFF  
@A00721:190:HGJW7DSXY:4:1523:22752:4038 1:N:0:TCTGCAAG+GCTGCACT  
CTGGAACCTAAACAATCCAATATGGATACGAGTCCAACACTCTGGACAGACGACGAGTCCACCGTTCC  
ATCACATCTTCACGGTGGAACTAAGATTCAACTACAATCTCAGAATGCAGTTGCGGATAAAGCGAGCA  
TGGTGGACTATCCGC  
+  
FFFFFFFFFFFFFFFFFFFFFFFFFFFFFFFFFFFFFFFFFFFFFFFFFFFFFFFFFFFFFFFFFFFFFFFF  
FFFFFFFFFFFFFFFFFFFFFFFFFFFFFFFFFFFFFFFFFFFFFFFFFFFFFFFFFFFFFFFFFFFFFFFF  
FFFFFFFFFFFFFFFF:FFFFFFFF:FFFFFF  
@A00721:190:HGJW7DSXY:4:1532:26467:7373 1:N:0:TCTGCAAG+GCTGCACT  
CTGGAACCTAAACAATCCAATATGGATACGAGTCCAACACTCTGGACAGACGACGAGTCCACCGTTCC  
ATCACATCTTCACGGTGGAACTAAGATTCAACTACAATCTCAGAATGCAGTTGCGGATAAAGCGAGCA  
TGGTGGACTATCCGC  
+  
FFFFFFFFFFFFFFFFFFFFFFFFFFFFFFFFFFFFFFFFFFFFFFFFFFFFFFFFFFFFFFFFFFFFFFFF  
FFFFFFFFFFFFFFFFFFFFFFFFFFFFFFFFFFFFFFFFFFFFFFFFFFFFFFFFFFFFFFFFFFFFFFFF  
FFFFFFFFFFFFFFFF:FFFFFFFFFFFFFFFFFFFFFFFFFFFFFFFFFFFFFFFF,FF:FFFF  
,FFFFFFFF  
@A00721:190:HGJW7DSXY:4:1441:5611:33536 1:N:0:TCTGCAAG+GCTGCACT  
CCACCATGCTCGCTTTATCCGCAACTGCATTCTGAGATTGTAGTTGAATCTTAGTTCCACCGTGAAGA  
TGTGATGGAACGGTGGACTCGTCGTCTGTCCAGAGTGTTGGACTCGTATCCATATTGGATTGTTTAGG  
TTCCAGTAGTACTCC  
+  
FFFFFFFFFFFF:FF:FFFFFFFF:FFFFFFFF:FFFFFFFFFFFFFFFFFFFFFFFFFFFFFFFF:FFFFFF  
F,FFFFFFFF:FFFFFFFFFFFFFFFFFFFFFFFF:FFFFFF,FFFFFFFFFFFF:FFFFFFFF,FFF:F  
FFFF:FFFF:FFF  
@A00721:190:HGJW7DSXY:4:1509:3866:8531 1:N:0:TCTGCAAG+GCTGCACT  
CCACCATGCTCGCTTTATCCGCAACTGCATTCTGAGATTGTAGTTGAATCTTAGTTCCACCGTGAAGA  
TGTGATGGAACGGTGGACTCGTCGTCTGTCCAGAGTGTTGGACTCGTATCCATATTGGATTGTTTAGG  
TTCCAGTAGTACTCC  
+  
FFFFFFFFFFFFFFFFFFFFFFFFFFFFFFFFFFFFFFFFFFFFFFFFFFFFFFFFFFFFFFFFFFFFFFFF  
FFFFFFFF:FFFFFFFFFFFFFFFFFFFFFFFFFFFFFFFFFFFFFFFFFFFFFFFF:FFFFFFFFFFFFFFFF  
FFFFFFFF:FFFFFF  
@A00721:190:HGJW7DSXY:4:1635:16224:24674 1:N:0:TCTGCAAG+GCTGCACT  
CCACCATGCTCGCTTTATCCGCAACTGCATTCTGAGATTGTAGTTGAATCTTAGTTCCACCGTGAAGA  
TGTGATGGAACGGTGGACTCGTCGTCTGTCCAGAGTGTTGGACTCGTATCCATATTGGATTGTTTAGG  
TTCCAGTAGTACTCC  
+  
FFFFFFFFFFFFFFFFFFFFFFFFFFFFFFFFFFFFFFFF,FFFF:FFFFFFFF:FFFFFFFFFFFFFFFF  
FFFFFFFF:FFFFFFFFFFFFFFFFFFFFFFFFFFFFFFFFFFFFFFFF,FFFFFFFFFFFFFFFF  
FFFFFFFFFFFFFFFF  
@A00721:190:HGJW7DSXY:4:2131:7157:34867 1:N:0:TCTGCAAG+GCTGCACT  
CCACCATGCTCGCTTTATCCGCAACTGCATTCTGAGATTGTAGTTGAATCTTAGTTCCACCGTGAAGA



@A00721:190:HGJW7DSXY:4:1278:31702:22764 1:N:0:TCTGCAAG+GCTGCACT  
GGGAGTACTACTGGAACCTAAACAATCCAATATGGATACGAGTCCAACACTCTGGACAGACGACGAGT  
CCACCGTTCCATCACATCTTCACGGTGGAATAAGATTCAACTACAATCTCAGAATGCAGTTGCGGAT  
AAAGCGAGCATGGTG

```
FFFFFFFFFFFFFFFFFFFFFFFFFFFFFFFFFFFFFFFFFFFFFFFFFFFFFFFFFFFFFFF
FFFFFFFFFFFFFFFFFFFFFFFFFFFFFFFFFFFF,FFFFFFFFFFFFFFFFFFFFFFFFFFFF
FFFFFFFFFFFFFFFF
```

+

[illegible]

+

[illegible]

+

```
FF:FFFFFFFFFFFFFFFF:FFF:FFFF:FFFF,FFF:FFFFFFFFFFFFFFFF:FFFFFFFF,F::FF:
FFFFF:,FFFF,F:FF,,FFFFF:F,F,FF:FFFFFFFFFFFFFFFF,FFFF,FFF,FFFFF:F:FFF
FFFFFFFFFFFF::FF
```

 $+$ [illegible] $+$ 

```
FFFFFFFFFFFFFFFFFFFFFFFFFFFFFFFFFFFFFFFFFFFFFFFFFFFFFFFFFFFFF  
FFFFFFFFFFFFFFFFFFFFFFFFFFFFFFF:FFFFFFFFFFFFFFFFFFFFFFFFFFFFF  
:FFFFFFFFFFFFFFFF
```

+

[illegible]

@A00721:190:HGJW7DSXY:4:1416:22354:25739 1:N:0:TCTGCAAG+GCTGCACT  
ACCCATGCTCGCTTTATCCGCAACTGCATTCTGAGATTGTAGTTGAATCTTAGTTCCACCGTGAAGAT  
GTGATGGAACGGTGGACTCGTCGTCTGTCCAGAGTGTTGGACTCGTATCCATATTGGATTGTTTAGGT  
TCCAGTAGTACTCCC

@A00721:190:HGJW7DSXY:4:1416:22797:26569 1:N:0:TCTGCAAG+GCTGCACT  
ACCCATGCTCGCTTTATCCGCAACTGCATTCTGAGATTGTAGTTGAATCTTAGTTCCACCGTGAAGAT  
GTGATGGAACGGTGGACTCGTCGTCTGTCCAGAGTGTTGGACTCGTATCCATATTGGATTGTTTAGGT  
TCCAGTAGTACTCCC

@A00721:190:HGJW7DSXY:4:1208:18484:24017 1:N:0:TCTGCAAG+GCTGCACT  
GCTCGCTTTATCCGCAACTGCATTCTGAGATTGTAGTTGAATCTTAGTTCCACCGTGAAGATGTGATG  
GAACGGTGGACTCGTCGTCTGTCCAGAGTGTTGGACTCGTATCCATATTGGATTGTTTAGGTTCCAGT  
AGTACTCCCCTACTT

@A00721:190:HGJW7DSXY:4:1470:7880:4554 1:N:0:TCTGCAAG+GCTGCACT  
GCTCGCTTTATCCGCAACTGCATTCTGAGATTGTAGTTGAATCTTAGTTCCACCGTGAAGATGTGATG  
GAACGGTGGACTCGTCGTCTGTCCAGAGTGTTGGACTCGTATCCATATTGGATTGTTTAGGTTCCAGT  
AGTACTCCCCTACTT

@A00721:190:HGJW7DSXY:4:1470:7102:6214 1:N:0:TCTGCAAG+GCTGCACT  
GCTCGCTTTATCCGCAACTGCATTCTGAGATTGTAGTTGAATCTTAGTTCCACCGTGAAGATGTGATG  
GAACGGTGGACTCGTCGTCTGTCCAGAGTGTTGGACTCGTATCCATATTGGATTGTTTAGGTTCCAGT  
AGTACTCCCCTACTT

@A00721:190:HGJW7DSXY:4:2329:32660:18881 1:N:0:TCTGCAAG+GCTGCACT  
GCTCGCTTTATCCGCAACTGCATTCTGAGATTGTAGTTGAATCTTAGTTCCACCGTGAAGATGTGATG  
GAACGGTGGACTCTTCGTCTGTCCAGAGTGTTGGACTCGTATCCATATTGGATTGTTTAGGTTCCAGT  
AGTACTCCCCTACTT

@A00721:190:HGJW7DSXY:4:2353:28185:4272 1:N:0:TCTGCAAG+GCTGCACT  
GCTCGCTTTATCCGCAACTGCATTCTGAGATTGTAGTTGAATCTTAGTTCCACCGTGAAGATGTGATG  
GAACGGTGGACTCGTCGTCTGTCCAGAGTGTTGGACTCGTATCCATATTGGATTGTTTAGGTTCCAGT  
AGTACTCCCCTACTT

+  
FFFFFFFFFFFFFFFFFFFFFFFFFFFFFFFFFFFFFFFFFFFFFFFFFFFFFFFFFFFFFFFFFFFFFFFF  
FF,FFFFFFFFFFFFFFFFFFFFFFFFFFFFFFFFFFFFFFFFFFFFFFFFFFFFFFFFFFFFFFFFFFFF  
FFFFFFFFFFFFFFFF  
@A00721:190:HGJW7DSXY:4:2629:30047:6308 1:N:0:TCTGCAAG+GCTGCACT  
GCTCGCTTTATCCGCAACTGCATTCTGAGATTGTAGTTGAATCTTAGTTCCACCGTGAAGATGTGATG  
GAACGGTGGACTCGTCGTCTGTCCAGAGTGTTGGACTCGTATCCATATTGGATTGTTTAGGTTCCAGT  
AGTACTCCCCTACTT  
+  
FFFFFFFFFFFFFFFFFFFFFFFFFFFFFFFFFFFFFFFFFFFFFFFFFFFFFFFFFFFFFFFFFFFFFFFF  
FFFFFFFFFFFFFFFFFFFFFFFFFFFFFFFFFFFFFFFFFFFFFFFFFFFFFFFFFFFFFFFFFFFFFFFF  
FFFFFFFFFFFFFFFF  
@A00721:190:HGJW7DSXY:4:1107:5629:29778 1:N:0:TCTGCAAG+GCTGCACT  
CTCGCTTTATCCGCAACTGCATTCTGAGATTGTAGTTGAATCTTAGTTCCACCGTGAAGATGTGATGG  
AACGGTGGACTCGTCGTCTGTCCAGAGTGTTGGACTCGTATCCATATTGGATTGTTTAGGTTCCAGTA  
GTACTCCCCTACTTG  
+  
FFFFFFFFFFFFFFFFFFFFFFFFFFFFFFFFFFFFFFFFFFFFFFFFFFFFFFFFFFFFFFFFFFFFFFFF  
FFFFFFFFFFFFFFFFFFFFFFFFFFFFFFFFFFFFFFFFFFFFFFFFFFFFFFFFFFFFFFFFFFFFFFFF  
FFFFFFFFFFFFFFFF  
@A00721:190:HGJW7DSXY:4:1126:12183:21903 1:N:0:TCTGCAAG+GCTGCACT  
CTCGCTTTATCCGCAACTGCATTCTGAGATTGTAGTTGAATCTTAGTTCCACCGTGAAGATGTGATGG  
AACGGTGGACTCGTCGTCTGTCCAGAGTGTTGGACTCGTATCCATATTGGATTGTTTAGGTTCCAGTA  
GTACTCCCCTACTTG  
+  
FFFFFFFFFFFFFFFFFFFFFFFFFFFFFFFFFFFFFFFFFFFFFFFFFFFFFFFFFFFFFFFFFFFFFFFF  
FFFFFFFFFFFFFFFFFFFFFFFFFFFFFFFFFFFFFFFFFFFFFFFFFFFFFFFFFFFFFFFFFFFFFFFF  
FFFFFFFFFFFFFFFF  
@A00721:190:HGJW7DSXY:4:1134:14579:28870 1:N:0:TCTGCAAG+GCTGCACT  
CTCGCTTTATCCGCAACTGCATTCTGAGATTGTAGTTGAATCTTAGTTCCACCGTGAAGATGTGATGG  
AACGGTGGACTCGTCGTCTGTCCAGAGTGTTGGACTCGTATCCATATTGGATTGTTTAGGTTCCAGTA  
GTACTCCCCTACTTG  
+  
FFFFFFFFFFFFFFFFFFFFFFFFFFFFFFFFFFFFFFFFFFFFFFFFFFFFFFFFFFFFFFFFFFFFFFFF  
FFFFFFFFFFFFFFFFFFFFFFFFFFFFFFFFFFFFFFFFFFFFFFFFFFFFFFFFFFFFFFFFFFFFFFFF  
FFFFFFFF:FFFF:FF  
@A00721:190:HGJW7DSXY:4:1235:16378:2895 1:N:0:TCTGCAAG+GCTGCACT  
CTCGCTTTATCCGCAACTGCATTCTGAGATTGTAGTTGAATCTTAGTTCCACCGTGAAGATGTGATGG  
AACGGTGGACTCGTCGTCTGTCCAGAGTGTTGGACTCGTATCCATATTGGATTGTTTAGGTTCCAGTA  
GTACTCCCCTACTTG  
+  
FFFFFFFFFFFFFFFFFFFFFFFFFFFFFFFFFFFFFFFFFFFFFFFFFFFFFFFFFFFFFFFFFFFFFFFF  
FFFFFFFFFFFFFFFFFFFFFFFFFFFFFFFFFFFFFFFFFFFFFFFFFFFFFFFFFFFFFFFFFFFFFFFF  
FFFFFFFFFFFFFFFF  
@A00721:190:HGJW7DSXY:4:1446:15673:10942 1:N:0:TCTGCAAG+GCTGCACT  
CTCGCTTTATCCGCAACTGCATTCTGAGATTGTAGTTGAATCTTAGTTCCACCGTGAAGATGTGATGG  
AACGGTGGACTCGTCGTCTGTCCAGAGTGTTGGACTCGTATCCATATTGGATTGTTTAGGTTCCAGTA  
GTACTCCCCTACTTG  
+  
FFFFFFFFFFFFFFFFFFFFFFFFFFFFFFFFFFFFFFFFFFFFFFFFFFFFFFFFFFFFFFFFFFFFFFFF  
F:FFFFFFFFFFFFFFFFFFFFFFFFFFFFFFFFFFFFFFFFFFFFFFFFFFFFFFFFFFFFFFFFFFFF  
FFFFFFFFFFFF:FFFF  
@A00721:190:HGJW7DSXY:4:1457:24334:25848 1:N:0:TCTGCAAG+GCTGCACT  
CTCGCTTTATCCGCAACTGCATTCTGAGATTGTAGTTGAATCTTAGTTCCACCGTGAAGATGTGATGG

AACGGTGGACTCGTCGTCTGTCCAGAGTGTTGGACTCGTATCCATATTGGATTGTTTAGGTTCCAGTA  
GTACTCCCCTACTTG

+

FFFFFFFFFFFFFFFFFFFFFFFFFFFFFFFFFFFFFFFFFFFFFFFFFFFFFFFFFFFFFFFFFFFFFFFF  
F:FFFFFFFFFFFFFFFFFFFFFFFFFFFFFFFFFFFFFFFFFFFFFFFFFFFFFFFFFFFFFFFFFFFFFFFF  
FFFFFFFFFFFFF:FFF

@A00721:190:HGJW7DSXY:4:1649:17589:24878 1:N:0:TCTGCAAG+GCTGCACT  
CTCGCTTTATCCGCAACTGCATTCTGAGATTGTAGTTGAATCTTAGTTCCACCGTGAAGATGTGATGG  
AACGGTGGACTCGTCGTCTGTCCAGAGTGTTGGACTCGTATCCATATTGGATTGTTTAGGTTCCAGTA  
GTACTCCCCTACTTG

+

FFFFFFFFFFFFFFFFFFFFFFFF:FFFFFF:FFFFFFFFFFFFFFFFFFFFFFFFFFFFFFFFFFFFFFFF:FFFFF  
FFFFFFFFFFFFFFFFFFFFFFFFFFFFFFFFFFFFFFFFFFFFFFFFFFFFFFFFFFFFFFFF:F,FF:FFFFFFFFFFFFF  
FFFFFFFFFFFFF:FFF

@A00721:190:HGJW7DSXY:4:2243:22435:31579 1:N:0:TCTGCAAG+GCTGCACT  
CTCGCTTTATCCGCAACTGCATTCTGAGATTGTAGTTGAATCTTAGTTCCACCGTGAAGATGTGATGG  
AACGGTGGACTCGTCGTCTGTCCAGAGTGTTGGACTCGTATCCATATTGGATTGTTTAGGTTCCAGTA  
GTACTCCCCTACTTG

+

FFFFFFFFFFFFFFFFFFFFFFFFFFFFFFFFFFFFFFFFFFFFFFFFFFFFFFFFFFFFFFFFFFFFFFFF  
FFFFFFFFFFFFFFFFFFFFFFFFFFFFFFFFFFFFFFFFFFFFFFFFFFFFFFFFFFFFFFFF:FFFFFFFFFFFFFFFF  
FFFFFFFFFFFFF

@A00721:190:HGJW7DSXY:4:2322:14009:7686 1:N:0:TCTGCAAG+GCTGCACT  
CTCGCTTTATCCGCAACTGCATTCTGAGATTGTAGTTGAATCTTAGTTCCACCGTGAAGATGTGATGG  
AACGGTGGACTCGTCGTCTGTCCAGAGTGTTGGACTCGTATCCATATTGGATTGTTTAGGTTCCAGTA  
GTACTCCCCTACTTG

+

F:FFFFFFFFFFFFFFFFFFFFFFFFFFFFFFFFFFFFFFFFFFFFFFFFFFFFFFFFFFFFFFFFFFFFFFFF  
FFFFFFFFFFFFFFFFFFFFFFFFFFFFFFFFFFFFFFFFFFFFFFFFFFFFFFFFFFFFFFFF:FFFFFFFFFFFFFFFF  
FFFFF,FFFFFFFFF

@A00721:190:HGJW7DSXY:4:2345:4598:4820 1:N:0:TCTGCAAG+GCTGCACT  
CTCGCTTTATCCGCAACTGCATTCTGAGATTGTAGTTGAATCTTAGTTCCACCGTGAAGATGTGATGG  
AACGGTGGACTCGTCGTCTGTCCAGAGTGTTGGACTCGTATCCATATTGGATTGTTTAGGTTCCAGTA  
GTACTCCCCTACTTG

+

FFFFFFFFFFFFFFFFFFFFFFFFFFFFFFFFFFFFFFFFFFFFFFFFFFFFFFFFFFFFFFFFFFFFFFFF  
FFFFFFFFFFFFFFFFFFFFFFFFFFFFFFFFFFFFFFFFFFFFFFFFFFFFFFFFFFFFFFFFFFFFFFFF  
FFFFFFFFFFFFF,F

@A00721:190:HGJW7DSXY:4:2433:5746:13009 1:N:0:TCTGCAAG+GCTGCACT  
CTCGCTTTATCCGCAACTGCATTCTGAGATTGTAGTTGAATCTTAGTTCCACCGTGAAGATGTGATGG  
AACGGTGGACTCGTCGTCTGTCCAGAGTGTTGGACTCGTATCCATATTGGATTGTTTAGGTTCCAGTA  
GTACTCCCCTACTTG

+

FFFFFFFFFFFFFFFFFFFFFFFFFFFFFFFFFFFFFFFF:FFFFFFFFFFFFFFFFFFFFFFFFFFFFFFFF:FFFFFFF  
FFFFFFFFFFFFFFFFFFFFFFFFFFFFFFFFFFFFFFFFFFFFFFFFFFFFFFFFFFFFFFFFFFFFFFFF:FFFF:FFFFFFFFFFFFF  
FFFFF:FFFFFFFFF

@A00721:190:HGJW7DSXY:4:2542:8621:7717 1:N:0:TCTGCAAG+GCTGCACT  
CTCGCTTTATCCGCAACTGCATTCTGAGATTGTAGTTGAATCTTAGTTCCACCGTGAAGATGTGATGG  
AACGGTGGACTCGTCGTCTGTCCAGAGTGTTGGACTCGTATCCATATTGGATTGTTTAGGTTCCAGTA  
GTACTCCCCTACTTG

+

FFFFFFFFFFFFFFFFFFFFFFFF:FFFFFFFFFFFFF:FFFF:FFFFFFFFFFFFFFFFFFFFFFFFFFFFFFFF  
FFFFFFFFFFFFFFFFFFFFFFFFFFFFFFFFFFFFFFFFFFFFFFFFFFFFFFFFFFFFFFFFFFFF,:FF:F:FFFFFFFFFFFFF  
FFFFFFFFFFFFF:FF:F





FFFFFFFFFFFFFFFFFFFFFFFFFFFFFFFFFFFFFFFFFFFFFFFFFFFFFFFFFFFFFFFF:FFFFFFFFFFFFFFFFFFFF  
FFFFFFFFFFFFFFFFFFFF

@A00721:190:HGJW7DSXY:4:1211:16396:25379 1:N:0:TCTGCAAG+GCTGCACT  
AGCAACTGCATTCTGAGATTGTAGTTGAATCTTAGTTCCACCGTGAAGATGTGATGGACCGGTGGACT  
CGTCGTCTGTCCAGAGTGTTGGACTCGTATCCATATTGGATTGTTTAGGTTCCAGTAGTACTCCCCTA  
CTTGTAGTTGCTGCC

+

FFF,FFFFF:FFF:FFFFF:FFFFFFFFFFFFFFFFFFFFFFFFFFFFFFFFFFFFFFFF,FF:FFFFF  
FFFF,FFFFFFFFFFFFFFFFFFFFFFFFFFFFFFFF,FFF:FFFF:F:FFFF:FFFFFFFFFFFFFFFFFFFFF:  
F,FFFFFFFFFFFF:F

@A00721:190:HGJW7DSXY:4:2103:9670:5181 1:N:0:TCTGCAAG+GCTGCACT  
AGCAACTGCATTCTGAGATTGTAGTTGAATCTTAGTTCCACCGTGAAGATGTGATGGAACGGTGGACT  
CGTCGTCTGTCCAGAGTGTTGGACTCGTATCCATATTGGATTGTTTAGGTTCCAGTAGTACTCCCCTA  
CTTGTAGTTGCTGCC

+

FFFFFFFFFFFFFFFFFFFFFFFFFFFFFFFFFFFFFFFFFFFFFFFFFFFFFFFFFFFFFFFFFFFF  
FFFFFFFFFFFFFFFFFFFFFFFFFFFFFFFFFFFFFFFFFFFFFFFFFFFFFFFFFFFFFFFFFFFF  
FFFFFFFFFFFFFFFFFFFF

@A00721:190:HGJW7DSXY:4:2373:1316:31078 1:N:0:TCTGCAAG+GCTGCACT  
AGCAACTGCATTCTGAGATTGTAGTTGAATCTTAGTTCCACCGTGAAGATGTGATGGAACGGTGGACT  
CGTCGTCTGTCCAGAGTGTTGGACTCGTATCCATATTGGATTGTTTAGGTTCCAGTAGTACTCCCCTA  
CTTGTAGTTGCTGCC

+

FFFFFFFFFFFFFFFFFFFFFFFFFFFFFFFFFFFFFFFFFFFFFFFFFFFFFFFFFFFFFFFFFFFF  
FFFFFFFFFFFFFFFFFFFFFFFFFFFFFFFFFFFFFFFFFFFFFFFFFFFFFFFFFFFFFFFFFFFF:F  
FFFFFFFFFFFFFFFFFFFF

@A00721:190:HGJW7DSXY:4:2457:27028:28291 1:N:0:TCTGCAAG+GCTGCACT  
AGCAACTGCATTCTGAGATTGTAGTTGAATCTTAGTTCCACCGTGAAGATGTGATGGAACGGTGGACT  
CGTCGTCTGTCCAGAGTGTTGGACTCGTATCCATATTGGATTGTTTAGGTTCCAGTAGTACTCCCCTA  
CTTGTAGTTGCTGCC

+

FFFFFFFFFFF:FFFFFFFFFFFFFFFFFFFFFFFFFFFFFFFFFFFFFFFFFFFFFFFFFFFFFFFFFFFF:  
FFFFFFFFFFFFFFFFFFFFFFFFFFFFFFFFFFFFFFFFFFFFFFFFFFFFFFFFFFFFFFFFFFFFF:  
FFFFFFFFFFFFFFFFFFFF

@A00721:190:HGJW7DSXY:4:1559:29821:4445 1:N:0:TCTGCAAG+GCTGCACT  
CTGCATTCTGAGATTGTAGTTGAATCTTAGTTCCACCGTGAAGATGTGATGGAACGGTGGACTCGTCG  
TCTGTCCAGAGTGTTGGACTCGTATCCATATTGGATTGTTTAGGTTCCAGTAGTACTCCCCTACTTGT  
AGTTGCTGCCATGTG

+

FFFFFFFFFFFFFFFFFFFFFFFFFFFFFFFFFFFFFFFFFFFFFFFFFFFFFFFFFFFFFFFFFFFF:  
FFFFFFFFFFFFF:FFFFFFFFFFFFF:FFFFFFF:FFFFFFFFFFFFFFFFFFFFFFFFFFFFFFFFFFFF,FFFFF  
FF:FFFFFFFFFFFF:FF

@A00721:190:HGJW7DSXY:4:2230:20528:2347 1:N:0:TCTGCAAG+GCTGCACT  
CTGCATTCTGAGATTGTAGTTGAATCTTAGTTCCACCGTGAAGATGTGATGGAACGGTGGACTCGTCG  
TCTGTCCAGAGTGTTGGACTCGTATCCATATTGGATTGTTTAGGTTCCAGTAGTACTCCCCTACTTGT  
AGTTGCTGCCATGTG

+

FFFFFFFFFFFFFFFFFFFFFFFFFFFFFFFFFFFFFFFFFFFFFFFFFFFFFFFFFFFFFFFFFFFF  
FFFF:FFFFFFFFFFFFFFFFFFFFFFFFFFFFFFFFFFFFFFFFFFFFFFFFFFFFFFFFFFFFFFFFFFFF:FFFF  
FFFFFFFFFFFFFFFFFFFF

@A00721:190:HGJW7DSXY:4:1244:22381:24972 1:N:0:TCTGCAAG+GCTGCACT  
TGCATTCTGAGATTGTAGTTGAATCTTAGTTCCACCGTGAAGATGTGATGGAACGGTGGACTCGTCGT  
CTGTCCAGAGTGTTGGACTCGTATACATATTGGATTGTTTAGGTTCCAGTAGTACTCCCCTACTTGT  
GTTGCGGAGATCGGA

+  
FFFF:FFFFFFFFFFFFFFFFFFFF, :FFF, FFFF:FF:FFFFFF:F, FF:FFFFFFFFFFFF:FFFFF:  
F::FFFF, F,, FF:, , FFF:FFFF, F:FF, FF, FF,, FFFFF, :FFFFFFFF::FFF, F,, :FF:, , FF  
, FFFF,, F:F:FF, F

@A00721:190:HGJW7DSXY:4:1417:5963:16642 1:N:0:TCTGCAAG+GCTGCACT  
TGCATTCTGAGATTGTAGTTGAATCTTAGTTCCACCGTGAAGATGTGATGGAACGGTGGACTCGTCGT  
CTGTCCAGAGTGTGGACTCGTATCCATATTGGATTGTTTAGGTTCCAGTAGTACTCCCCTACTTGTA  
GTTGCTGAGATCGGA

+  
FFFFFFFFFFFFFFFFFFFFFFFFFFFFFFFFFFFFFFFFFFFFFFFFFFFFFFFFFFFFFFFFFFFFFFFFFFFF  
FFFFFFFFFFFFFFFFFFFFFFFFFFFFFFFFFFFFFFFFFFFFFFFFFFFFFFFFFFFFFFFFFFFFFFFFFFFF  
FFFFF:FFFFFFFF:FF

@A00721:190:HGJW7DSXY:4:1263:19985:19038 1:N:0:TCTGCAAG+GCTGCACT  
CTGAGATTGTAGTTGAATCTTAGTTCCACCGTGAAGATGTGATGGAACGGTGGACTCGTCGTCTGTCC  
AGAGTGTGGACTCGTATCCATATTGGATTGTTTAGGTTCCAGTAGTACTCCCCTACTTGAGTTGCT  
GCCATGTGAGTGAGA

+  
FFFFFFFF:FFFFFFFFFFFFFFFFFFFFFFFFFFFFFFFFFFFFFFFFFFFFFFFFFFFFFFFFFFFFFFFFFFFF  
FFFFFFFFFFFFFFFF:FFFFFFFFFFFF:FFFFFFFFFFFFFFFFFFFFFFFFFFFFFFFFFFFFFFFFFFFFF  
FFFFFFFFFFFFFFFFFFFF

@A00721:190:HGJW7DSXY:4:1455:31575:14372 1:N:0:TCTGCAAG+GCTGCACT  
CTGAGATTGTAGTTGAATCTTAGTTCCACCGTGAAGATGTGATGGAACGGTGGACTCGTCGTCTGTCC  
AGAGTGTGGACTCGTATCCATATTGGATTGTTTAGGTTCCAGTAGTACTCCCCTACTTGAGTTGCT  
GCCATGTGAGTGAGA

+  
FFFFFFFFFFFFFFFFFFFFFFFFFFFFFFFFFFFFFFFFFFFFFFFFFFFFFFFFFFFFFFFFFFFFFFFFFFFF  
FFFFFFFFFFFFFFFFFFFFFFFFFFFFFFFFFFFFFFFFFFFFFFFFFFFFFFFFFFFFFFFFFFFFFFFFFFFF  
FFFF:FFFFF:FFFF

@A00721:190:HGJW7DSXY:4:1458:6099:30686 1:N:0:TCTGCAAG+GCTGCACT  
CTGAGATTGTAGTTGAATCTTAGTTCCACCGTGAAGATGTGATGGAACGGTGGACTCGTCGTCTGTCC  
AGAGTGTGGACTCGTATCCATATTGGATTGTTTAGGTTCCAGTAGTACTCCCCTACTTGAGTTGCT  
GCCATGTGAGTGAGA

+  
FFFFFFFFFFFFFFFFFFFFFFFFFFFFFFFFFFFFFFFFFFFFFFFFFFFFFFFFFFFFFFFFFFFFFFFFFFFF  
FFFFFFFFFFFFFFFFFFFFFFFFFFFFFFFFFFFFFFFFFFFFFFFFFFFFFFFFFFFFFFFFFFFFFFFFFFFF  
FFFFFFFFFFFFF:FFFF

@A00721:190:HGJW7DSXY:4:1540:5095:7968 1:N:0:TCTGCAAG+GCTGCACT  
CTGAGATTGTAGTTGAATCTTAGTTCCACCGTGAAGATGTGATGGAACGGTGGACTCGTCGTCTGTCC  
AGAGTGTGGACTCGTATCCATATTGGATTGTTTAGGTTCCAGTAGTACTCCCCTACTTGAGTTGCT  
GCCATGTGAGTGAGA

+  
FFFFFFFFFFFFFFFFFFFFFFFFFFFFFFFFFFFFFFFFFFFFFFFFFFFFFFFFFFFFFFFFFFFFFFFFFFFF  
FFFFFFFFFFFFFFFFFFFFFFFFFFFFFFFFFFFFFFFFFFFFFFFFFFFFFFFFFFFFFFFFFFFFFFFFFFFF  
FFFFFFFFFFFFF:FFFF

@A00721:190:HGJW7DSXY:4:1540:5321:8140 1:N:0:TCTGCAAG+GCTGCACT  
CTGAGATTGTAGTTGAATCTTAGTTCCACCGTGAAGATGTGATGGAACGGTGGACTCGTCGTCTGTCC  
AGAGTGTGGACTCGTATCCATATTGGATTGTTTAGGTTCCAGTAGTACTCCCCTACTTGAGTTGCT  
GCCATGTGAGTGAGA

+  
FFFFFFFF:FFFFFFFFFFFFFFFFFFFFFFFFFFFFFFFFFFFFFFFFFFFFFFFFFFFFFFFFFFFFFFFFFFFF  
FFFFFFFFFFFFFFFFFFFFFFFFFFFFFFFFFFFFFFFFFFFFFFFFFFFFFFFFFFFFFFFFFFFFFFFFFFFF  
FFFFF:FFFFFFFFFFFF

@A00721:190:HGJW7DSXY:4:1621:32407:23891 1:N:0:TCTGCAAG+GCTGCACT  
CTGAGATTGTAGTTGAATCTTAGTTCCACCGTGAAGATGTGATGGAACGGTGGACTCGTCGTCTGTCC



$+$ 

+

+

+

+

+

+

[illegible]

FFFFFFFFFFFFFFFFFFFFFFFFFFFFFFFFFFFFFFFFFFFFFFFFFFFFFFFFFFFFFFFFFFFFFFFFFFFFFFFF  
FFFFFFFFFFFFFFFF

@A00721:190:HGJW7DSXY:4:2356:20889:14027 1:N:0:TCTGCAAG+GCTGCACT  
CACAAGGGTGCCACTCACATGGCAGCAACTACAAGTAGGGGAGTACTACTGGAACCTAAACAATCCAA  
TATGGATACGAGTCCAACACTCTGGACAGACGACGAGTCCACCGTTCCATCACATCTTCACGGTGGAA  
CTAAGATTCAACTAC

+

FFFFFFFFFFFFFFFFFFFFFFFFFFFFFFFFFFFFFFFFFFFFFFFFFFFFFFFFFFFFFFFFFFFFFFFFFFFFFFFF  
FFFFFFFFFFFFFFFFFFFFFFFFFFFFFFFFFFFFFFFFFFFFFFFFFFFFFFFFFFFFFFFFFFFFFFFFFFFFFFFF,  
FFFFFFFFFFFFFFFF

@A00721:190:HGJW7DSXY:4:2356:21278:14137 1:N:0:TCTGCAAG+GCTGCACT  
CACAAGGGTGCCACTCACATGGCAGCAACTACAAGTAGGGGAGTACTACTGGAACCTAAACAATCCAA  
TATGGATACGAGTCCAACACTCTGGACAGACGACGAGTCCACCGTTCCATCACATCTTCACGGTGGAA  
CTAAGATTCAACTAC

+

FFFFFFFFFFFFFFFFFFFFFFFFFFFFFFFFFFFFFFFFFFFFFFFFFFFFFFFFFFFFFFFFFFFFFFFFFFFFFFFF  
FFFFFFFFFF:FFFFF:FFFFFFFFFFFFFFFFFFFFFFFFFFFFFFFFFFFFFFFFFFFFFFFFFFFFFFFFFFFFF:  
FFFF:FFFFFFFFFFFF

@A00721:190:HGJW7DSXY:4:2371:7997:30499 1:N:0:TCTGCAAG+GCTGCACT  
CACAAGGGTGCCACTCACATGGCAGCAACTACAAGTAGGGGAGTACTACTGGAACCTAAACAATCCAA  
TATGGATACGAGTCCAACACTCTGGACAGACGACGAGTCCACCGTTCCATCACATCTTCACGGTGGAA  
CTAAGATTCAACTAC

+

FFFFFFFFFFFFFFFFFFFFFFFFFFFFFFFFFFFFFFFFFFFFFFFFFFFFFFFFFFFFFFFFFFFFFFFFFFFFFFFF  
FFFFFFFFFFFFFFFFFFFFFFFFFFFFFFFFFFFFFFFFFFFFFFFFFFFFFFFFFFFFFFFFFFFFFFFFFFFFFFFF:  
FFFFFFFFFFFFFFFF

@A00721:190:HGJW7DSXY:4:2418:27082:36714 1:N:0:TCTGCAAG+GCTGCACT  
CACAAGGGTGCCACTCACATGGCAGCAACTACAAGTAGGGGAGTACTACTGGAACCTAAACAATCCAA  
TATGGATACGAGTCCAACACTCTGGACAGACGACGAGTCCACCGTTCCATCACATCTTCACGGTGGAA  
CTAAGATTCAACTAC

+

FFFFFFFFFFFFFFFFFFFFFFFFFFFFFFFFFFFFFFFFFFFFFFFFFFFFFFFFFFFFFFFFFFFFFFFFFFFFFFFF  
FFFFFFFFFFFFFFFFFFFFFFFFFFFFFFFFFFFFFFFFFFFFFFFFFFFFFFFFFFFFFFFFFFFFFFFFFFFFFFFF:  
FFFFFFFFFFFFFFFF

@A00721:190:HGJW7DSXY:4:2419:7563:27993 1:N:0:TCTGCAAG+GCTGCACT  
CACAAGGGTGCCACTCACATGGCAGCAACTACAAGTAGGGGAGTACTACTGGAACCTAAACAATCCAA  
TATGGATACGAGTCCAACACTCTGGACAGACGACGAGTCCACCGTTCCATCACATCTTCACGGTGGAA  
CTAAGATTCAACTAC

+

FFFFFFFFFFFFFFFFFFFFFFFFFFFFFFFFFFFFFFFFFFFFFFFFFFFFFFFFFFFFFFFFFFFFFFFFFFFFFFFF  
FFFFFFFFFFFFFFFFFFFFFFFFFFFFFFFFFFFFFFFFFFFFFFFFFFFFFFFFFFFFFFFFFFFFFFFFFFFFFFFF:  
FF:FFFFFFFFFFFF

@A00721:190:HGJW7DSXY:4:2637:8196:11303 1:N:0:TCTGCAAG+GCTGCACT  
CACAAGGGTGCCACTCACATGGCAGCAACTACAAGTAGGGGAGTACTACTGGAACCTAAACAATCCAA  
TATGGATACGAGTCCAACACTCTGGACAGACGACGAGTCCACCGTTCCATCACATCTTCACGGTGGAA  
CTAAGATTCAACTAC

+

FFFFFFFFFFFFFFFFFFFFFFFFFFFFFFFFFFFFFFFFFFFFFFFFFFFFFFFFFFFFFFFFFFFFFFFFFFFFFFFF  
FFFFFFFFFFFFFFFFFFFFFFFFFFFFFFFFFFFFFFFFFFFFFFFFFFFFFFFFFFFFFFFFFFFFFFFFFFFFFFFF  
FFFFFFFFFFFFFFFF

@A00721:190:HGJW7DSXY:4:2675:16486:24659 1:N:0:TCTGCAAG+GCTGCACT  
CACAAGGGTGCCACTCACATGGCAGCAACTACAAGTAGGGGAGTACTACTGGAACCTAAACAATCCAA  
TATGGATACGAGTCCAACACTCTGGACAGACGACGAGTCCACCGTTCCATCACATCTTCACGGTGGAA  
CTAAGATTCAACTAC

[illegible][illegible][illegible][illegible][illegible]

```

FFFFFFFFFFFFFFFFFFFFFFFFFFFFFFFF:FFFFFFFFFFFFFFFFFFFFFFFFFFFFFFFFFFFFFFFF
FFFFFFFFFFFFFFFFFFFFFFFFFFFFFFFFF:FF:FFFFFFFFFFFFFFFFF:,FFFFFFFFFFFFFFFF
FFFFFFFFFFFFFFFF

```

```

FFFFFFFFFFFFFFFFFFFFFFFFFFFFFFFF:FFFFFFFFFFFFFFFFFFFFFFFFFFFFFFFFFFFF,FFFFF
FFFFFFF:FFFFFFFFFFFFF,FFFFFFFFFFFF,FFFFFFFFFFFFFFF:F:FFFFFFFFF:FFF:FF,FFF:FFFFF
FFFFFFFFFFFF:FFFFF

```

@A00721:190:HGJW7DSXY:4:2353:30409:18991 1:N:0:TCTGCAAG+GCTGCACT  
GCTAGTTGAATCTTAGTTCCACCGTGAAGATGTGATGGAACGGTGGACTCGTCTGTCCAGAGTGT



@A00721:190:HGJW7DSXY:4:1310:27525:22326 1:N:0:TCTGCAAG+GCTGCACT  
ACCGTGAAGATGTGATGGAACGGTGGACTCGTCGTCTGTCCAGAGTGTTGGACTCGTATCCATATTGG  
ATTGTTTAGGTTCCAGTAGTACTCCCCTACTTGTAGTTGCTGCCATGTGAGTGGCACCCCTTGTGGACG  
AATCCATTGTTTCTG

@A00721:190:HGJW7DSXY:4:1408:10185:1031 1:N:0:TCTGCAAG+GCTGCACT  
ACCGTGAAGATGTGATGGAACGGTGGACTCGTCGTCTGTCCAGAGTGTTGGACTCGTATCCATATTGG  
ATTGTTTAGGTTCCAGTAGTACTCCCCTACTTGTAGTTGCTGCCATGTGAGTGGCACCTTGTGGACG  
AATCCATTGTTTCTG

@A00721:190:HGJW7DSXY:4:1446:30698:22122 1:N:0:TCTGCAAG+GCTGCACT  
ACCGTGAAGATGTGATGGAACGGTGGACTCGTCGTCTGTCCAGAGTGTTGGACTCGTATCCATATTGG  
ATTGTTTAGGTTCCAGTAGTACTCCCCTACTTGTAGTTGCTGCCATGTGAGTGGCACCCCTTGTGGACG  
AATCCATTGTTTCTG

@A00721:190:HGJW7DSXY:4:1456:12048:25770 1:N:0:TCTGCAAG+GCTGCACT  
ACCGTGAAGATGTGATGGAACGGTGGACTCGTCGTCTGTCCAGAGTGTTGGACTCGTACCCATATTGG  
ATTGTTTAGGTTCCAGTAGTACTCCCCTACTTGTAGTTGCTGCCATGTGAGTGGCACCCCTTGTGGACG  
AATCCATTGTTTCTG

@A00721:190:HGJW7DSXY:4:1458:21187:1799 1:N:0:TCTGCAAG+GCTGCACT  
ACCGTGAAGATGTGATGGAACGGTGGACTCGTCGTCTGTCCAGAGTGTTGGACTCGTATCCATATTGG  
ATTGTTTAGGTTCCAGTAGTACTCCCCTACTTGTAGTTGCTGCCATGTGAGTGGCACCCCTTGTGGACG  
AATCCATTGTTTCTG

@A00721:190:HGJW7DSXY:4:1601:16450:29105 1:N:0:TCTGCAAG+GCTGCACT  
ACCGTGAAGATGTGATGGAACGGTGGACTCGTCGTCTGTCCAGAGTGTTGGACTCGTATCCATATTGG  
ATTGTTTAGGTTCCAGTAGTACTCCCCTACTTGTAGTTGCTGCCATGTGAGTGGCACCCCTTGTGGACG  
AATCCATTGTTTCTG

@A00721:190:HGJW7DSXY:4:1613:22941:17957 1:N:0:TCTGCAAG+GCTGCACT  
ACCGTGAAGATGTGATGGAACGGTGGACTCGTCGTCTGTCCAGAGTGTTGGACTCGTATCCATATTGG  
ATTGTTTAGGTTCCAGTAGTACTCCCCTACTTGTAGTTGCTGCCATGTGAGTGGCACCCCTTGTGGACT  
AATCCATTGTTTCTG



FFF,:FFFFFF,:FF,FFFFFFFF,FF:,FF:FFFF,, ,FFFFFFFF:FF,FFF,FF,: ,F:FF,  
 ,F,:FFFF:F,:FF:

@A00721:190:HGJW7DSXY:4:2142:14552:10034 1:N:0:TCTGCAAG+GCTGCACT  
ACCGTGAAGATGTGATGGAACGGTGGACTCGTCGTCTGTCCAGAGTGTTGGACTCGTATCCATATTGG  
ATTGTTTAGGTTCCAGTAGTACTCCCCTACTTGTAGTTGCTGCCATGTGAGTGGCACCCCTTGTGGACG  
AATCCATTGTTTCTG

+

FFFFFFFFFFFFFFFFFFFFFFFFFFFFFFFFFFFFFFFFFFFFFFFFFFFFFFFFFFFFFFFFFFFFFFFF  
FFFFFFFFFFFFFFFFFFFFFFFFFFFFFFFFFFFFFFFFFFFFFFFFFFFFFFFFFFFFFFFFFFFFFFFF  
FFFFFFFFFFFFFFFF

@A00721:190:HGJW7DSXY:4:2336:18783:5087 1:N:0:TCTGCAAG+GCTGCACT  
ACCGTGAAGATGTGATGGAACGGTGGACTCGTCGTCTGTCCAGAGTGTTGGACTCGTATCCATATTGG  
ATTGTTTAGGTTCCAGTAGTACTCCCCTACTTGTAGTTGCTGCCATGTGAGTGGCACCCCTTGTGGACG  
AATCCATTGTTTCTG

+

FFFF:FFFFFFFFFFFFFFFFFFFFFFFFFFFFFFFFFFFFFFFFFFFFFFFFFFFFFFFFFFFFFFFF  
F:FF:FFFFFFFFFFFFFFFFFFFFFFFFFFFFFFFFFFFFFFFFFFFFFFFFFFFFFFFFFFFFFFFF  
F:FFFF,FFFFFFFF

@A00721:190:HGJW7DSXY:4:2402:30210:21684 1:N:0:TCTGCAAG+GCTGCACT  
ACCGTGAAGATGTGATGGAACGGTGGACTCGTCGTCTGTCCAGAGTGTTGGACTCGTATCCATATTGG  
ATTGTTTAGGTTCCAGTAGTACTCCCCTACTTGTAGTTGCTGCCATGTGAGTGGCACCCCTTGTGGACG  
AATCCATTGTTTCTG

+

FFFFFFFFFFFFFFFFFFFFFF:FFFFFFFFFFFFFFFFFFFFFFFFFFFFFFFFFFFFFFFFFFFFFF  
FFFFFFFFFFFFFFFFFFFFFFFFFFFFFFFFFFFFFFFFFFFFFFFFFFFFFFFFFFFFFFFFFFFFFF  
FFFFFFFFFFFF:FFFF

@A00721:190:HGJW7DSXY:4:2432:9851:14826 1:N:0:TCTGCAAG+GCTGCACT  
ACCGTGAAGATGTGATGGAACGGTGGACTCGTCGTCTGTCCAGAGTGTTGGACTCGTATCCATATTGG  
ATTGTTTAGGTTCCAGTAGTACTCCCCTACTTGTAGTTGCTGCCATGTGAGTGGCACCCCTTGTGGACG  
AATCCATTGTTTCTG

+

FFFFFFFFFFFFFFFFFFFFFFFFFFFFFFFFFFFFFFFFFFFFFFFFFFFFFFFFFFFFFFFFFFFFFF  
FFFFFFFFFFFFFFFFFFFFFFFFFFFFFFFFFFFFFFFFFFFFFFFFFFFFFFFFFFFFFFFFFFFFFF  
:FFFFFFFFFFFFFF

@A00721:190:HGJW7DSXY:4:2438:12807:23171 1:N:0:TCTGCAAG+GCTGCACT  
ACCGTGAAGATGTGATGGAACGGTGGACTCGTCGTCTGTCCAGAGTGTTGGACTCGTATCCATATTGG  
ATTGTTTAGGTTCCAGTAGTACTCCCCTACTTGTAGTTGCTGCCATGTGAGTGGCACCCCTTGTGGACG  
AATCCATTGTTTCTG

+

FFFFFFFFFFFFFFFFFFFFFFFFFFFFFFFFFFFFFF:FFFFFFFFFFFFFFFFFFFFFFFFFFFFFF  
FFFFFFFFFFFFFFFFFFFFFFFFFFFFFFFFFFFFFFFFFFFFFFFFFFFFFFFFFFFFFFFFFFFFFF  
FFFFFFFFFFFF:FFFF

@A00721:190:HGJW7DSXY:4:2519:2275:29951 1:N:0:TCTGCAAG+GCTGCACT  
ACCGTGAAGATGTGATGGAACGGTGGACTCGTCGTCTGTCCAGAGTGTTGGACTCGTATCCATATTGG  
ATTGTTTAGGTTCCAGTAGTACTCCCCTACTTGTAGTTGCTGCCATGTGAGTGGCACCCCTTGTGGACG  
AATCCATTGTTTCTG

+

FFFFFFFFFFFFFFFFFFFFFFFFFFFFFFFFFFFFFFFFFFFFFFFFFFFFFFFFFFFFFFFFFFFFFF  
:,FFFFFFFFFFFFFFFFFFFFFFFFFFFFFF:FFFFFFFFFFFFFFFFFFFFFFFFFFFFFFFF  
FFFFFFFFFFFFFF

@A00721:190:HGJW7DSXY:4:2529:13548:12868 1:N:0:TCTGCAAG+GCTGCACT  
ACCGTGAAGATGTGATGGAACGGTGGACTCGTCGTCTGTCCAGAGTGTTGGACTCGTATCCATATTGG  
ATTGTTTAGGTTCCAGTAGTACTCCCCTACTTGTAGTTGCTGCCATGTGAGTGGCACCCCTTGTGGACG  
AATCCATTGTTTCTG

[illegible][illegible][illegible]

```

FFFFFFFFFFFFFFFF,FFFFFFFF,FFF:FFFF,FFFFFFFF:F:FFFFFFFF:FFFFFF,FFF:F
F:FFFFFFFF:F::FFFFFFFF:FFFF:FFFFFFFFF:F::F,FFFF,FF:FFF::,FFFFFF,FF:
FFFFFFFFFFFFFFFF:

```

[illegible]

```
FFFFFFFFFFFFFFFFFFFFFFFFFFFFFFFFFFFFFFFFFFFFFFFFFFFFFFFFFFFFF:FFFFFF  
FFFFFFFFFFFFFFFFFFFFFFFF:F:FFFFFFFFFFFFFFFFFFFFFFFFFFFFFFFFFFFFF  
FFFFFFFFFFFFFFFF
```

```

FFFFFFFFFFFFFFFFFFFFFFFFFFFFFFFFFFFFFFFF:FFFFFFFFFFFFFFFF:FFFFFF:FFF:F
FFFFFFFFFFFFFFFFFFFFFFFFFFFFFFFFFFFFFFFF,FFFFFFFFFFFFFFFFFFFFFFFFFFFFFFFFFFFFFFFF
FFFFFFFFFFFFFFFF

```

@A00721:190:HGJW7DSXY:4:2317:25030:9799 1:N:0:TCTGCAAG+GCTGCACT  
GGATGTGATGGAACGGTGGACTCGTCGTCTGTCCAGAGTGTTGGACTCGTATCCATATTGGATTGTTT

AGGTTCCAGTAGTACTCCCCTACTTGTAGTTGCTGCCATGTGAGTGGCACCCTTGTGGACGAATCCAT  
TGTTTCTGCAATCTA

```

FFFFFFFFFFFFFFFFFFFFFFFFFFFFFFFF:FFFFFFFFFFFFFFFFFFFFFFFFFFFFFFFF
FFFFFFFFFFFFFFFFFFFFFFFFFFFFFFFF:FFFFFFFFFFFFFFFFFFFFFFFFFFFFFFFF
FFFFFFFFFFFF:FFFF

```

+

@A00721:190:HGJW7DSXY:4:1113:14642:11068 1:N:0:TCTGCAAG+GCTGCACT  
GATGGAACGGTGGACTCGTCGTCTGTCCAGAGTGTTGGACTCGTATCCATATTGGATTGTTTAGGTTT  
CAGTAGTACTCCCCTACTTGTAGTTGCTGCCATGTGAGTGGCACCCCTTGTGGACGAATCCATTGTTTC  
TGCAATCTATAGTCT

```

FFFFFFFFFFFFFFFFFFFFFFFFFFFFFFFF,FFFFFFFFFFFFFFFFFFFFFFFFFFFFFFFF
F:FFFFFFFFFFFFFFFF:FFFFFFFF:FFF:FFFFFFFFFFFFFFFFFFFFFFFF,FFFFFFFF
FFFF,FFFFFFFF

```

+

@A00721:190:HGJW7DSXY:4:1436:12653:14888 1:N:0:TCTGCAAG+GCTGCACT  
GATGGAACGGTGGACTCGTCGTCTGTCCAGAGTGTTGGACTCGTATCCATATTGGATTGTTTAGGTTT  
CAGTAGTACTCCCCTACTTGTAGTTGCTGCCATGTGAGTGGCACCCCTTGTGGACGAATCCATTGTTTC  
TGCAATCTATAGTCT

[illegible]

+

@A00721:190:HGJW7DSXY:4:2611:10276:11209 1:N:0:TCTGCAAG+GCTGCACT  
GATGGAACGGTGGACTCGTCGTCTGTCCAGAGTGTTGGACTCGTATCCATATTGGATTGTTTAGGTTT  
CAGTAGTACTCCCCTACTTGTAGTTGCTGCCATGTGAGTGGCACCCCTTGTGGACGAATCCATTGTTTC  
TGCAATCTATAGTCT

[illegible]



FFFFFFFFFFFFFFFFFFFFFFFFFFFFFFFFFFFFFFFFFFFFFFFFFFFFFFFFFFFFFFFFFFFFFFFF  
FFFFFFFFFFFFFFFF

@A00721:190:HGJW7DSXY:4:2506:7355:34147 1:N:0:TCTGCAAG+GCTGCACT  
TCAGACTATAGATTGCAGAAACAATGGATTTCGTCCACAAGGGTGCCACTCACATGGCAGCAACTACAA  
GTAGGGGAGTACTACTGGAACCTAAACAATCCAATATGGATACGAGTCCAACACTCTGGACAGACGAC  
GAGTCCACCGTTCCA

+

FFFFFFFFFFFFFFFFFFFFFFFFFFFFFFFFFFFFFFFFFFFFFFFFFFFFFFFFFFFFFFFFFFFFFFFF  
FFFFFFFFFFFFFFFFFFFFFFFFFFFFFFFFFFFFFFFFFFFFFFFFFFFFFFFFFFFFFFFFFFFFFFFF  
FFFFFFFFFFFFFFFF

@A00721:190:HGJW7DSXY:4:1166:18439:35180 1:N:0:TCTGCAAG+GCTGCACT  
GGAACGGTGGACTCGTCGTCTGTCCAGAGTGTTGGACTCGTATCCATATTGGATTGTTTAGGTTCCAG  
TAGTACTCCCCTACTTGTAGTTGCTGCCATGTGAGTGGCACCCTTGTGGACGAATCCATTGTTTCTGC  
AATCTATAGTCAGAT

+

F:FFF:FFFFFFFFFFFFFFFF:FFFFFF:FFFFFFFFFFFFFFFF:FFFFFFFFFFFFFFFF  
FFFFFFFFFFFFFFFF:FFFFFFFFFFFFFFFFFFFFFFFFFFFFFFFF:FFFFFFFFFFFFFFFF  
FFFFFFFFFFFFFFFF

@A00721:190:HGJW7DSXY:4:1225:2202:1266 1:N:0:TCTGCAAG+GCTGCACT  
GGAACGGTGGACTCGTCGTCTGTCCAGAGTGTTGGACTCGTATCCATATTGGATTGTTTAGGTTCCAG  
TAGTACTCCCCTACTTGTAGTTGCTGCCATGTGAGTGGCACCCTTGTGGACGAATCCATTGTTTCTGC  
AATCTATAGTCTGAT

+

FFFFFFFFFFFFFFFFFFFFFFFFFFFFFFFFFFFFFFFF:FFFFFFFFFFFF:FFFFFFFFFFFF  
FFFFFFFFFFFFFFFFFFFFFFFF:FFFFFFFFFFFFFFFFFFFFFFFFFFFFFFFFFFFFFFFF:FF  
FFFFFFFFFFFFFFFF

@A00721:190:HGJW7DSXY:4:1240:20347:24549 1:N:0:TCTGCAAG+GCTGCACT  
GGAACGGTGGACTCGTCGTCTGTCCAGAGTGTTGGACTCGTATCCATATTGGATTGTTTAGGTTCCAG  
TAGTACTCCCCTACTTGTAGTTGCTGCCATGTGAGTGGCACCCTTGTGGACGAATCCATTGTTTCTGC  
AATCTATAGTCTGAT

+

FFFFFFFFFFFFFFFFFFFFFFFFFFFFFFFFFFFFFFFFFFFFFFFFFFFFFFFFFFFFFFFFFFFFFFFF  
FFFFFFF:FFFFFFFFFFFFFFFFFFFFFFFFFFFFFFFFFFFFFFFFFFFFFFFFFFFFFFFFFFFFFFF  
FF:FFFF:FF:FFF

@A00721:190:HGJW7DSXY:4:1246:24071:16313 1:N:0:TCTGCAAG+GCTGCACT  
GGAACGGTGGACTCGTCGTCTGTCCAGAGTGTTGGACTCGTATCCATATTGGATTGTTTAGGTTCCAG  
TAGTACTCCCCTACTTGTAGTTGCTGCCATGTGAGTGGCACCCTTGTGGACGAATCCATTGTTTCTGC  
AATCTATAGTCTGAT

+

FFFFFFFFFFFFFFFFFFFFFFFFFFFFFFFF:FFFFFFFFFFFFFFFFFFFFFFFFFFFFFFFFFFFFF  
FFFFFFFFFFFFFFFFFFFFFFFF:FFFFFFF:FFFFFFFFFFFFFFFFFFFFFFFFFFFFFFFF:FF  
FFFFFFF,:FFFFFF

@A00721:190:HGJW7DSXY:4:1308:22815:29450 1:N:0:TCTGCAAG+GCTGCACT  
GGAACGGTGGACTCGTCGTCTGTCCAGAGTGTTGGACTCGTATCCATATTGGATTGTTTAGGTTCCAG  
TAGTACTCCCCTACTTGTAGTTGCTGCCATGTGAGTGGCACCCTTGTGGACGAATCCATTGTTTCTGC  
AATCTATAGTCAGAT

+

FFFFF:FFFFFFFFFFFFFFFFFFFFFFFFFFFFFFFFFFFFFFFF,FFFF,FFFF,FFFFF:  
FF:FFFFFFFFFFFFFFFFFFFF:F:FFFFFFFFFFFF:FFFFF,FFFFF:FFFFF,FFFFF,F  
FFF::FFFF,F,FF

@A00721:190:HGJW7DSXY:4:1313:8341:6167 1:N:0:TCTGCAAG+GCTGCACT  
GGAACGGTGGACTCGTCGTCTGTCCAGAGTGTTGGACTCGTATCCATATTGGATTGTTTAGGTTCCAG  
TAGTACTCCCCTACTTGTAGTTGCTGCCATGTGAGTGGCACCCTTGTGGACGAATCCATTGTTTCTGC  
AATCTATAGTCTGAT

```

FFFFFFFFFFFFFFFFFFFFFFFFFFFFFFFFFFFFFFFFFFFFFFFFFFFFFFFFFFFFFFFF:FFFFFFFF
FFFFFFFFFFFFFFFF:FF,FF:FFFFFFFF:FF:FFFFFFFFFFFFFFFF:FFFFFFFFFFFFFFFF:
FFFFFFFFFFFFFFFF

```

[illegible][illegible][illegible][illegible]

```
FFFFFFFFFFFFFFFFFFFFFFFFFFFFFFFFFFFFFFFFFFFFFFFFFFFFFFFFFFFFFFFFFFFFF
FFFFFFFFFFFFFFFF,FFFFFFFFFFFFFFFFFFFFFFFF:FFFFFFFFFFFFFFFFFFFFFFFFFFFFF
FFFFFFFFFFFFFFFF
```

[illegible]

@A00721:190:HGJW7DSXY:4:2104:28293:29136 1:N:0:TCTGCAAG+GCTGCACT  
GGAACGGTGGACTCGTCGTCTGTCCAGAGTGTTGGACTCGTATCCATATTGGATTGTTTAGGTTCCAG

TAGTACTCCCCTACTTGTAGTTGCTGCCATGTGAGTGGCACCCCTTGTGGACGAATCCATTGTTTCTGC  
AATCTATAGTCAGAT

+

FFFFFFFFFFFFFFFFFFFFFFFFFFFFFFFFFFFFFFFFFFFFFFFFFFFFFFFFFFFFFFFFFFFFFFFF  
FFFFFFFFFFFFFFFFFFFFFFFFFFFFFFFFFFFFFFFFFFFFFFFFFFFFFFFFFFFFFFFFFFFFFFFF  
FF:FFFFFFFFFFFFFF

@A00721:190:HGJW7DSXY:4:2272:8721:32628 1:N:0:TCTGCAAG+GCTGCACT  
GGAACGGTGGACTCGTCGTCTGTCCAGAGTGTTGGACTCGTATCCATATTGGATTGTTTAGGTTCCAG  
TAGTACTCCCCTACTTGTAGTTGCTGCCATGTGAGTGGCACCCCTTGTGGACGAATCCATTGTTTCTGC  
AATCTATAGTCTGAT

+

FFF:FFFFFFFFFFFFFFFFFFFFFFFFFFFFFFFFFFFFFFFFFFFFFFFFFFFFFFFFFFFFFFFFFFFF  
FFFFFFFFFFFFFFFFFFFFFFFFFFFFFFFFFFFFFFFFFFFFFFFFFFFFFFFFFFFFFFFFFFFFFFFF  
FFFFFFFFF,FFFFFF

@A00721:190:HGJW7DSXY:4:2358:32886:19867 1:N:0:TCTGCAAG+GCTGCACT  
GGAACGGTGGACTCGTCGTCTGTCCAGAGTGTTGGACTCGTATCCATATTGGATTGTTTAGGTTCCAG  
TAGTACTCCCCTACTTGTAGTTGCTGCCATGTGAGTGGCACCCCTTGTGGACGAATCCATTGTTTCTGC  
AATCTATAGTCTGAT

+

FFFFFFFFFFFFFFFFFFFFFFFFFFFFFFFFFFFFFFFFFFFFFFFFFFFFFFFFFFFFFFFFFFFFFFFF  
FFFFFFFFFFFFFFFFFFFFFFFFFFFFFFFFFFFFFFFFFFFFFFFFFFFFFFFFFFFFFFFFFFFFFFFF  
FFFFFFFFF:FFFFFF

@A00721:190:HGJW7DSXY:4:2378:18530:33364 1:N:0:TCTGCAAG+GCTGCACT  
GGAACGGTGGACTCGTCGTCTGTCCAGAGTGTTGGACTCGTATCCATATTGGATTGTTTAGGTTCCAG  
TAGTACTCCCCTACTTGTAGTTGCTGCCATGTGAGTGGCACCCCTTGTGGACGAATCCATTGTTTCTGC  
AATCTATAGTCAGAT

+

FFFFFFFFFFFFFFFFFFFFFFFFFFFFFFFFFFFFFFFFFFFFFFFFFFFFFFFFFFFFFFFFFFFFFFFF  
FFFFFFFFFFFFFFFFFFFFFFFFFFFFFFFFFFFFFFFFFFFFFFFFFFFFFFFFFFFFFFFFFFFFFFFF  
F:FFFFFFFFFFFFFF

@A00721:190:HGJW7DSXY:4:2378:19642:34757 1:N:0:TCTGCAAG+GCTGCACT  
GGAACGGTGGACTCGTCGTCTGTCCAGAGTGTTGGACTCGTATCCATATTGGATTGTTTAGGTTCCAG  
TAGTACTCCCCTACTTGTAGTTGCTGCCATGTGAGTGGCACCCCTTGTGGACGAATCCATTGTTTCTGC  
AATCTATAGTCAGAT

+

FFFFFFFFFFFFFFFFFFFFFFFFFFFFFFFFFFFFFFFFFFFFFFFFFFFFFFFFFFFFFFFFFFFFFFFF  
FFFFFFFFFFFFFFFFFFFFFFFFFFFFFFFFFFFFFFFFFFFFFFFFFFFFFFFFFFFFFFFFFFFFFFFF  
FFFFFFFFFFFFFFFFF

@A00721:190:HGJW7DSXY:4:2665:11704:9893 1:N:0:TCTGCAAG+GCTGCACT  
GGAACGGTGGACTCGTCGTCTGTCCAGAGTGTTGGACTCGTATCCATATTGGATTGTTTAGGTTCCAG  
TAGTACTCCCCTACTTGTAGTTGCTGCCATGTGAGTGGCACCCCTTGTGGACGAATCCATTGTTTCTGC  
AATCTATAGTCTGAT

+

FFFFFFFFFFFFFFFFFFFFFFFFFFFFFFFFFFFFFFFFFFFFFFFFFFFFFFFFFFFFFFFFFFFFFFFF  
:FFFFFFFFFFFFFFFFFFFFFFFFFFFFFFFFFFFFFFFFFFFFFFFFFFFFFFFFFFFFFFFFFFFFFFFF  
FFFFFFFFF:FFFFFF

@A00721:190:HGJW7DSXY:4:1423:5168:10191 1:N:0:TCTGCAAG+GCTGCACT  
GAACGGTGGACTCGTCGTCTGTCCAGAGTGTTGGACTCGTATCCATATTGGATTGTTTAGGTTCCAGT  
AGTACTCCCCTACTTGTAGTTGCTGCCATGTGAGTGGCACCCATGTGGACGAATCCATTGTTTCTCA  
ATCTATAGTCAGA

+

:F:FFFFFFFFFFFF,FF:,FF::FFF::FFFF,FFF,::FFFFF,F:F,FFFFF,:FF,F:FFFF:,  
F:FF:F:FFFFF,F,:FFFF,,FF:FFF,:FFFFF:,FFFFF,FF,F:FFFFFFFF,FFF:FFFFF,FF  
F,FFFFF::,F,F

$+$ 

+

+

+

+

+

+



FFFFFFFFFFFFFFFFFFFFFFFFFFFFFFFFFFFFFFFFFFFFFFFFFFFFFFFFFFFFFFFFFFFFFFFF  
FFFFFFFFFFFFFFFF

@A00721:190:HGJW7DSXY:4:1602:24903:34381 1:N:0:TCTGCAAG+GCTGCACT  
CGGTGGACTCGTCGTCTGTCCAGAGTGTGGACTCGTATCCATATTGGATTGTTTAGGTTCCAGTAGT  
ACTCCCCTACTTGTAGTTGCTGCCATGTGAGTGGCACCCCTTGTGGACGAATCCATTGTTTCTGCAATC  
TATAGTCTGATAAAT

+

FFFFFFFFFFFFFFFFFFFFFFFFFFFFFFFFFFFFFFFFFFFFFFFFFFFFFFFFFFFFFFFFFFFFFFFF  
FFFFFFFFFFFFFFFF:FFFFFFFFFFFFFFFFFFFFFFFFFFFFFFFFFFFFFFFFFFFFFFFFFFFFFFFF  
FFFFFFFFFFFFFFFF:FFFFFFFFFFFFFFFFFFFFFFFFFFFFFFFFFFFFFFFFFFFFFFFFFFFFFFFF  
FFFFFFFFFFFFFFFF:FFFFF

@A00721:190:HGJW7DSXY:4:2163:24370:6684 1:N:0:TCTGCAAG+GCTGCACT  
CGGTGGACTCGTCGTCTGTCCAGAGTGTGGACTCGTATCCATATTGGATTGTTTAGGTTCCAGTAGT  
ACTCCCCTACTTGTAGTTGCTGCCATGTGAGTGGCACCCCTTGTGGACGAATCCATTGTTTCTGCAATC  
TATAGTCTGATAAAT

+

FFFFFFFFFFFFFFFFFFFFFFFFFFFFFFFFFFFFFFFFFFFFFFFFFFFFFFFFFFFFFFFFFFFFFFFF  
FFFFFFFFFFFF,F:FF:FFFFFFFFFFFFFFFFFFFFFFFFFFFFFFFFFFFFFFFFFFFFFFFFFFFFF  
FFFFFFFFFFFFFFFF:FFFFFFFFFFFFFFFFFFFFFFFFFFFFFFFFFFFFFFFFFFFFFFFFFFFFFFFF  
FFFFFFFFFFFFFFFF

@A00721:190:HGJW7DSXY:4:2303:25509:23907 1:N:0:TCTGCAAG+GCTGCACT  
CGGTGGACTCGTCGTCTGTCCAGAGTGTGGACTCGTATCCATATTGGATTGTTTAGGTTCCAGTAGT  
ACTCCCCTACTTGTAGTTGCTGCCATGTGAGTGGCACCCCTTGTGGACGAATCCATTGTTTCTGCAATC  
TATAGTCTGATAAAT

+

FFFFFFFFFFFFFFFFFFFFFFFFFFFFFFFFFFFFFFFFFFFFFFFFFFFFFFFFFFFFFFFFFFFFFFFF  
FFFFFFFFFFFFFFFF,FFFFFFFFFFFFFFFFFFFFFFFFFFFFFFFFFFFFFFFFFFFFFFFFFFFFFFFF  
FFFFFFFFFFFFFFFF:FF

@A00721:190:HGJW7DSXY:4:2339:16089:36902 1:N:0:TCTGCAAG+GCTGCACT  
CGGTGGACTCGTCGTCTGTCCAGAGTGTGGACTCGTATCCATATTGGATTGTTTAGGTTCCAGTAGT  
ACTCCCCTACTTGTAGTTGCTGCCATGTGAGTGGCACCCCTTGTGGACGAATCCATTGTTTCTGCAATC  
TATAGTCTGATAAAT

+

FFFFFFFFFFFFFFFFFFFFFFFFFFFFFFFFFFFFFFFFFFFFFFFFFFFFFFFFFFFFFFFFFFFFFFFF  
FFFFFFFFFFFFFFFFFFFFFFFFFFFFFFFFFFFFFFFFFFFFFFFFFFFFFFFFFFFFFFFFFFFFFFFF  
F:FFFFFFFFF:FFFF

@A00721:190:HGJW7DSXY:4:1129:26521:16986 1:N:0:TCTGCAAG+GCTGCACT  
CTCGTCGTCTGTCCAGAGTGTGGACTCGTATCCATATTGGATTGTTTAGGTTCCAGTAGTACTCCCC  
TACTTGTAGTTGCTGCCATGTGAGTGGCACCCCTTGTGGACGAATCCATTGTTTCTGCAATCTATAGTC  
TGATAAATGATGCAG

+

FFFFFFFFFFFFFFFFFFFFFFFFFFFFFFFFFFFFFFFFFFFFFFFFFFFFFFFFFFFFFFFFFFFFFFFF  
FFFF:FFFFFF:FFFFFFFFFFFFFFFFFFFFFFFFFFFFFFFFFFFFFFFFFFFFFFFFFFFFFFFF  
FFFFFFFFFFFFFFFF

@A00721:190:HGJW7DSXY:4:1134:3170:1063 1:N:0:TCTGCAAG+GCTGCACT  
CTCGTCGTCTGTCCAGAGTGTGGACTCGTATCCATATTGGATTGTTTAGGTTCCAGTAGTACTCCCC  
TACTTGTAGTTGCTGCCATGTGAGTGGCACCCCTTGTGGACGAATCCATTGTTTCTGCAATCTATAGTC  
TGATAAATGATGCAG

+

FFFFFFFFFFFFFFFFFFFFFFFFFFFFFFFFFFFFFFFFFFFFFFFFFFFFFFFFFFFFFFFFFFFFFFFF  
FFF,FFFFFFFFFFFFFFFFFFFFFFFFFFFFFFFFFFFFFFFFFFFFFFFFFFFFFFFFFFFFFFFF  
:FFFFFFFFFFFFFFFF

@A00721:190:HGJW7DSXY:4:1161:21956:32033 1:N:0:TCTGCAAG+GCTGCACT  
CTCGTCGTCTGTCCAGAGTGTGGACTCGTATCCATATTGGATTGTTTAGGTTCCAGTAGTACTCCCC  
TACTTGTAGTTGCTGCCATGTGAGTGGCACCCCTTGTGGACGAATCCATTGTTTCTGCAATCTATAGTC  
TGATAAATGATGCAG

+  
FFFFFFFFFFFFFFFFFFFFFFFFFFFFFFFFFFFFFFFFFFFFFFFFFFFFFFFFFFFFFFFFFFFFFFFF  
FFFFFFFFFFFFFFFFFFFFFFFFFFFFFFFFFFFFFFFFFFFFFFFFFFFFFFFFFFFFFFFFFFFFFFFF:FFFF:FFFFFFFFFFFFFFFFFFFFFFFF  
FFFFFFFFFFFFFFFFFFFFFFFF  
@A00721:190:HGJW7DSXY:4:1206:2889:29512 1:N:0:TCTGCAAG+GCTGCACT  
CTCGTCGTCTGTCCAGAGTGTTGGACTCGTATCCATATTGGATTGTTTAGGTTCCAGTAGTACTCCCC  
TACTTGTAGTTGCTGCCATGTGAGTGGCACCCTTGTGGACGAATCCATTGTTTCTGCAATCTATAGTC  
TGATAAATGATGCAG

+  
FFFFFFFFFFFFFFFFFFFFFFFFFFFFFFFFFFFFFFFFFFFFFFFFFFFFFFFFFFFFFFFFFFFFFFFF,FFFFFFFF  
FFFF,FF:FFFFFFFFFFFFFFFFFFFFFFFFFFFFFFFFFFFFFFFFFFFFFFFFFFFFFFFFFFFFFFFF:FFFF,FFFFFFFFFFFFFFFFFFFF,FFFF  
FFFFFFFFFFFFFFFFFFFFFFFF  
@A00721:190:HGJW7DSXY:4:1427:20971:31234 1:N:0:TCTGCAAG+GCTGCACT  
CTCGTCGTCTGTCCAGAGTGTTGGACTCGTATCCATATTGGATTGTTTAGGTTCCAGTAGTACTCCCC  
TACTTGTAGTTGCTGCCATGTGAGTGGCACCCTTGTGGACGAATCCATTGTTTCTGCAATCTATAGTC  
TGATAAATGATGCAG

+  
FF:FFFFFF,FFF:FFFFFFFF:FFFF,F:FFFFFFFFFFFFFFFFFFFF:F,FF,FF,:F,FFF,FF,FF::  
,FFF:,FFFFFF:FF:F:FFF,FFFFFFFF:,F,FFFFFFFFFFFF:FFFF:FFFFFFFF:FF,FFF:,F  
:FFFFFFFFFFFF::FF  
@A00721:190:HGJW7DSXY:4:1509:8612:10895 1:N:0:TCTGCAAG+GCTGCACT  
CTCGTCGTCTGTCCAGAGTGTTGGACTCGTATCCATATTGGATTGTTTAGGTTCCAGTAGTACTCCCC  
TACTTGTAGTTGCTGCCATGTGAGTGGCACCCTTGTGGACGAATCCATTGTTTCTGCAATCTATAGTC  
TGATAAATGATGCAG

+  
FFFFFFFFFFFFFFFFFFFFFFFFFFFFFFFFFFFFFFFFFFFFFFFFFFFFFFFFFFFFFFFFFFFF:,FF:FFFFFFFF:FFFFFFFFFFFFFFFF  
FF:FFF:FFFF:FFFFFFFFFFFFFFFFFFFFFFFFFFFFFFFFFFFFFFFFFFFFFFFFFFFFFFFFFFFF:FFF:FFFFFFFFFFFFFFFF:FFFF:FF  
FFFFFFFFFFFFFFFFFFFFFFFF  
@A00721:190:HGJW7DSXY:4:1568:3712:31657 1:N:0:TCTGCAAG+GCTGCACT  
CTCGTCGTCTGTCCAGAGTGTTGGACTCGTATCCATATTGGATTGTTTAGGTTCCAGTAGTACTCCCC  
TACTTGTAGTTGCTGCCATGTGAGTGGCACCCTTGTGGACGAATCCATTGTTTCTGCAATCTATAGTC  
TGATAAATGATGCAG

+  
FFFFFFFFFFFFFFFFFFFFFFFFFFFFFFFFFFFFFFFFFFFFFFFFFFFFFFFFFFFFFFFFFFFF:FFFFFFFFFFFFFFFFFFFFFFFFFFFF  
FFFFFFFFFFFFFFFFFFFFFFFF:FFFFFFFFFFFFFFFFFFFFFFFFFFFFFFFFFFFFFFFFFFFFFFFFFFFFFFFFFFFFFFFFFFFFFFFFFFFF  
FFFFFFFFFFFFFFFFFFFFFFFF  
@A00721:190:HGJW7DSXY:4:1633:23746:15123 1:N:0:TCTGCAAG+GCTGCACT  
CTCGTCGTCTGTCCAGAGTGTTGGACTCGTATCCATATTGGATTGTTTAGGTTCCAGTAGTACTCCCC  
TACTTGTAGTTGCTGCCATGTGAGTGGCACCCTTGTGGACGAATCCATTGTTTCTGCAATCTATAGTC  
TGATAAATGATGCAG

+  
FFFFFFFFFFFFFFFFFFFFFFFFFFFFFFFFFFFFFFFFFFFFFFFFFFFFFFFFFFFFFFFF:F:FFFFFFFFFFFFFFFFFFFFFFFFFFFF  
F:FFFFFFFFFFFFFFFFFFFFFFFFFFFFFFFFFFFFFFFFFFFFFFFFFFFFFFFF:F:FFFFFFFFFFFFFFFFFFFFFFFFFFFF  
FFFFFF:FFFFFFFF  
@A00721:190:HGJW7DSXY:4:2207:11315:28667 1:N:0:TCTGCAAG+GCTGCACT  
CTCGTCGTCTGTCCAGAGTGTTGGACTCGTATCCATATTGGATTGTTTAGGTTCCAGTAGTACTCCCC  
TACTTGTAGTTGCTGCCATGTGAGTGGCACCCTTGTGGACGAATCCATTGTTTCTGCAATCTATAGTC  
TGATAAATGATGCAG

+  
FFFFFFFFFFFFFFFFFFFFFFFFFFFFFFFFFFFFFFFFFFFFFFFFFFFFFFFFFFFFFFFF:FFFFFFFFFFFF:FFFFFFFFFFFFFFFFFFFFFFFFFFFF:FFF:FFFFFF  
FFFF,FFFFFFFFFFFFFFFFFFFFFFFFFFFFFFFFFFFFFFFFFFFFFFFFFFFFFFFFFFFFFFFF:FFFFFFFFFFFFFFFFFFFFFFFFFFFF  
FF,:FFF:FFFFFFFF  
@A00721:190:HGJW7DSXY:4:2260:6696:4570 1:N:0:TCTGCAAG+GCTGCACT  
CTCGTCGTCTGTCCAGAGTGTTGGACTCGTATCCATATTGGATTGTTTAGGTTCCAGTAGTACTCCCC



@A00721:190:HGJW7DSXY:4:2634:14877:15608 1:N:0:TCTGCAAG+GCTGCACT  
CTCGTCGTCTGTCCAGAGTGTTGGACTCGTATCCATATTGGATTGTTTAGGTTCCAGTAGTACTCCCC  
TACTTGTAGTTGCTGCCATGTGAGTGGCACCCTTGTGGACGAATCCATTGTTTCTGCAATCTATAGTC  
TGATAAATGATGCAG

```

FFFFFFFFFFFFFFFFFFFFFFFFFFFFFFFFFFFFFFFFFFFFFFFFFFFFFFFFFFFFFFFFFFFFFFFF
FFFF:FFFFFFFFFFFFFFFFFFFFFFFFFFFFFFFF:FFFFFFFFF:FFFFFFFFFFFFFFFFFFFF:F:FF:FFFF
FFFFFFFF:F:FFFFF

```

@A00721:190:HGJW7DSXY:4:1156:28239:9032 1:N:0:TCTGCAAG+GCTGCACT  
TCGTCGTCTGTCCAGAGTGTGGACTCGTATCCATATTGGATTGTTTAGGTTCCAGTAGTACTCCCCCT  
ACTTGTAGTTGCTGCCATGTGAGTGGCACCTTGTGGACGAATCCATTGTTTCTGCAATCTATAGTCT  
GATAAATGATGCAGC

```

FFFFFFFFFFFFFFFFFFFFFFFFFFFFFFFF:FFFFFFFF:FF:FFFFFFFFFFFFFFFFFFFFFFFF
,:F:FFFFFFFFFFFFFFFFFFFFFFFFFFFFFFFF,FFFFFFFF:FFFFFFFFFFFFFFFFFFFFFF
F:FFFFFF:FFFFFF

```

@A00721:190:HGJW7DSXY:4:1573:28565:24721 1:N:0:TCTGCAAG+GCTGCACT  
GCTGCATCATTTATCAGACTATAGATTGCAGAAACAATGGATTCTGTCACAAGGGTGCCACTCACATG  
GCAGCAACTACAAGTAGGGGAGTACTACTGGAACCTAAACAATCCAATATGGATACGAGTCCAACACT  
CTGGACAGACGACGA

[illegible]

@A00721:190:HGJW7DSXY:4:2149:2582:26506 1:N:0:TCTGCAAG+GCTGCACT  
TCGTCGTCTGTCCAGAGTGTGGACTCGTATCCATATTGGATTGTTTAGGTTCCAGTAGTACTCCCCCT  
ACTTGTAGTTGCTGCCATGTGAGTGGCACCCTTGTGGACGAATCCATTGTTTCTGCAATCTATAGTCT  
GATAAATGATGCAGC

```

FFFFFFFFFFFFFFFFFFFFFFFFFFFFFFFF:FFF:F:FFFFFFFFFFFFFFFFFFFFFFFF
FF,FFFFFFFFF:FFFFFFFFF:FFFFFFF,FFFFFFF:FFFFFFFFFFFFFFFFFFFF,FFFFFF
FFFFFFFFFFFFFFFF

```

@A00721:190:HGJW7DSXY:4:2204:27823:2957 1:N:0:TCTGCAAG+GCTGCACT  
GCTGCATCATTATCAGACTATAGATTGCAGAAACAATGGATTTCGTCCACAAGGGTGCCACTCACATG  
GCAGCAACTACAAGTAGGGGAGTACTACTGGAACCTAAACAATCCAATATGGATACGAGTCCAACACT  
CTGGACAGACGACGA

[illegible]

@A00721:190:HGJW7DSXY:4:2643:13259:20134 1:N:0:TCTGCAAG+GCTGCACT  
TCGTCTGTGTCCAGAGTGTGGACTCGTATCCATATTGGATTGTTTAGGTTCCAGTAGTACTCCCT  
ACTTGTAGTTGCTGCCATGTGAGTGGCACCCTTGTGGACGAATCCATTGTTTCTGCAATCTATAGTCT  
GATAAATGATGCAGC

[illegible]

@A00721:190:HGJW7DSXY:4:1121:1362:30499 1:N:0:TCTGCAAG+GCTGCACT  
CCGTCGTCTGTCCAGAGTGTGGACTCGTATCCATATTGGATTGTTTAGGTTCCAGTAGTACTCCCCCT  
ACTTGTAGTTGCTGCCATGTGAGTGGCACCCTTGTGGACGAATCCATTGTTTCTGCAATCTATAGTCT  
GATAAATGATGCAGC

[illegible]



+  
FFFFFFFFFFFFFFFFFFFFFFFFFFFFFFFFFFFFFFFFFFFFFFFFFFFFFFFFFFFFFFFF  
FFFFFFFFFFFFFFFF,FFFFFFFFFFFFFFFFFFFFFFFF:FFFF,FFFFFFFFFFFFFFFF:FFFF:F:F  
::FFFFFFFFFFFFFF

@A00721:190:HGJW7DSXY:4:1407:17933:24314 1:N:0:TCTGCAAG+GCTGCACT  
TGTTGGACTCGTATCCATATTGGATTGTTTAGGTTCCAGTAGTACTCCCCTACTTGTAGTTGCTGCCA  
TGTGAGTGGCACCCTTGTGGACGAATCCATTGTTTCTGCAATCTATAGTCTGATAAATGATGCAGCCG  
CACGGTAGTGTAAGA

+  
FFFFFFFFFFFFFFFFFFFFFFFF::FFFFFFFFFFFFFFFFFFFFFFFFFFFFFFFFFFFFFFFF  
FFFFFFFFFFFFFFFF:FFFFFFFFFFFFFFFFFFFFFFFFFFFFFFFFFFFFFFFFFFFFFFFF:FFFFFFFFFFFFFF  
FFFFFFFFFFFFFF

@A00721:190:HGJW7DSXY:4:1515:19777:24408 1:N:0:TCTGCAAG+GCTGCACT  
TGTTGGACTCGTATCCATATTGGATTGTTTAGGTTCCAGTAGTACTCCCCTACTTGTAGTTGCTGCCA  
TGTGAGTGGCACCCTTGTGGACGAATCCATTGTTTCTGCAATCTATAGTCTGATAAATGATGCAGCCG  
CACGGTAGTGTAAGA

+  
FFFFFFFFFFFFFFFFFFFFFFFFFFFFFFFFFFFFFFFFFFFFFFFFFFFFFFFFFFFFFFFF:FFFFFFFFFFFFFFFF  
FFFFFFFFFFFFFFFFFFFFFFFFFFFFFFFFFFFFFFFFFFFFFFFFFFFFFFFFFFFFFFFFFFFFFFFFFFFFFFFF  
FFFF:FFFFFFFF:F

@A00721:190:HGJW7DSXY:4:1554:30924:33285 1:N:0:TCTGCAAG+GCTGCACT  
TGTTGGACTCGTATCCATATTGGATTGTTTAGGTTCCAGTAGTACTCCCCTACTTGTAGTTGCTGCCA  
TGTGAGTGGCACCCTTGTGGACGAATCCATTGTTTCTGCAATCTATAGTCTGATAAATGATGCAGCCG  
CACGGTAGTGTAAGA

+  
FFFFFFFFFFFFFFFFFFFFFFFFFFFFFFFFFFFFFFFFFFFFFFFFFFFFFFFFFFFFFFFFFFFFFFFF  
FFFFFFFFFFFFFFFFFFFFFFFFFFFFFFFFFFFFFFFFFFFFFFFFFFFFFFFFFFFFFFFFFFFFFFFF  
FFFFFFFFFFFFFF

@A00721:190:HGJW7DSXY:4:2103:1334:23062 1:N:0:TCTGCAAG+GCTGCACT  
TGTTGGACTCGTATCCATATTGGATTGTTTAGGTTCCAGTAGTACTCCCCTACTTGTAGTTGCTGCCA  
TGTGAGTGACACCCTTGTGGACGAATCCATTGTTTCTGCAATCTATAGTCTGATAAATGATGCAGCCG  
CACGGTAGTGTAAGA

+  
FFFFFFFFFFFFFFFFFFFFFFFFFFFFFFFFFFFFFFFFFFFFFFFFFFFFFFFFFFFFFFFFFFFFFFFF  
FFFFFFFFFFFFFFFF:FFFFFFFFFFFFFFFFFFFFFFFFFFFFFFFFFFFFFFFFFFFFFFFFFFFFFFFF  
FFFFFFFFFFFFFF

@A00721:190:HGJW7DSXY:4:2268:31774:11052 1:N:0:TCTGCAAG+GCTGCACT  
TGTTGGACTCGTATCCATATTGGATTGTTTAGGTTCCAGTAGTACTCCCCTACTTGTAGTTGCTGCCA  
TGTGAGTGACACCCTTGTGGACGAATCCATTGTTTCTGCAATCTATAGTCTGATAAATGATGCAGCCG  
CACGGTAGTGTAAGA

+  
FF:,FFFFFFFFFFFFFFFFFFFFFFFFFFFFFFFFFFFFFFFFFFFFFFFFFFFFFFFFFFFFFFFF:FFFFFFFF  
FFFFFFFFFFFFFFFFFFFFFFFFFFFFFFFFFFFFFFFFFFFFFFFFFFFFFFFFFFFFFFFFFFFFFFFF  
FFFF,,FFF:F:FFF

@A00721:190:HGJW7DSXY:4:2371:17725:4914 1:N:0:TCTGCAAG+GCTGCACT  
TGTTGGACTCGTATCCATATTGGATTGTTTAGGTTCCAGTAGTACTCCCCTACTTGTAGTTGCTGCCA  
TGTGAGTGACACCCTTGTGGACGAATCCATTGTTTCTGCAATCTATAGTCTGATAAATGATGCAGCCG  
CACGGTAGTGTAAGA

+  
F,:FFFF:FFFF::FFFFFFFFFFFFFFFFFFFFFFFFFFFFFFFFFFFFFFFFFFFFFFFF, :F:FF:FFFF  
,FFFFFFFFFFFFFFFF:FFFFFFFFFFFF,FFFFFFFFFFFFFFFF:F:FFFFFFFFFFFFFFFF  
FFF,FFFFFFFF

@A00721:190:HGJW7DSXY:4:2469:18882:1814 1:N:0:TCTGCAAG+GCTGCACT  
TGTTGGACTCGTATCCATATTGGATTGTTTAGGTTCCAGTAGTACTCCCCTACTTGTAGTTGCTGCCA









+  
FFFFFFFFFFFFFFFFFFFFFFFFFFFFFFFFFFFFFFFFFFFFFFFFFFFFFFFFFFFFFFFFFFFFFFFF  
FFFFFFFFFFFFFFFF:FFFFFFFFFFFFFFFFFFFFFFFFFFFFFFFFFFFFFFFFFFFFFFFFFFFFFFFF  
FFFFFFFFFFFFFFFF  
@A00721:190:HGJW7DSXY:4:1123:1723:2409 1:N:0:TCTGCAAG+GCTGCACT  
CCAGTAGTACTCCCCTACTTGTAGTTGCTGCCATGTGAGTGGCACCCTTGTGGACGAATCCATTGTTT  
CTGCAATCTATAGTCTGATAAATGATGCAGCCGCACGGTAGTGTAAAGACGTCTAGGCTTGATCGCTAG  
ACGTCTCTTCCGTTT  
+  
FFFFFFFFFFFFFFFFFFFFFFFFFFFFFFFFFFFFFFFFFFFFFFFFFFFFFFFFFFFFFFFFFFFFFFFF  
FFFFFFFFFFFFFFFF:FFFFFFFFFFFFFFFFFFFFFFFFFFFFFFFFFFFFFFFFFFFFFFFFFFFFFFFF  
FFFFFFFFFFFFFFFF  
@A00721:190:HGJW7DSXY:4:1160:24668:15562 1:N:0:TCTGCAAG+GCTGCACT  
CCAGTAGTACTCCCCTACTTGTAGTTGCTGCCATGTGAGTGGCACCCTTGTGGACGAATCCATTGTTT  
CTGCAATCTATAGTCTGATAAATGATGCAGCCGCACGGTAGTGTAAAGACGTCTAGGCTTGATCGCTAG  
ACGTCTCTTCCGTTT  
+  
FFFFFFFFFFFFFFFFFFFFFFFFFFFFFFFFFFFFFFFFFFFFFFFFFFFFFFFFFFFFFFFFFFFFFFFF  
FFFFFFF:FF,FFFFFFF:FFF:FFFFFFFFFFFFFFFFFFFFFFFFFFFFFFFFFFFFFFFFFFFF:F  
FFFFFFFFFFFFFFFF  
@A00721:190:HGJW7DSXY:4:1571:1732:15358 1:N:0:TCTGCAAG+GCTGCACT  
CCAGTAGTACTCCCCTACTTGTAGTTGCTGCCATGTGAGTGGCACCCTTGTGGACGAATCCATTGTTT  
CTGCAATCTATAGTCTGATAAATGATGCAGCCGCACGGTAGTGTAAAGACGTCTAGGCTTGATCGCTAG  
ACGTCTCTTCCGTTT  
+  
FFFFFFFFFFFF,FFFFFF:FF:FF:F::FF:,FFF:FF:FF:FFFFFFFF:FFF:FFFFFFFFFFFFFFFF,FF  
,FFFFFFFFF:FFFFFF:FFF,FFFFFFFFFFFFFFFFFFFFFFFFFFFFFFFFFFFFFFFFFFFF:F  
FFFFFFFFFFFFFFFF:FF  
@A00721:190:HGJW7DSXY:4:1676:1931:26944 1:N:0:TCTGCAAG+GCTGCACT  
CCAGTAGTACTCCCCTACTTGTAGTTGCTGCCATGTGAGTGGCACCCTTGTGGACGAATCCATTGTTT  
CTGCAATCTATAGTCTGATAAATGATGCAGCCGCACGGTAGTGTAAAGACGTCTAGGCTTGATCGCTAG  
ACGTCTCTTCCGTTT  
+  
FFFFFFFFFFFFFFFFFFFFFFFFFFFFFFFFFFFFFFFFFFFFFFFFFFFFFFFFFFFFFFFFFFFFFFFF,FFFFFFFFFFFFFFFFFFFF:FF  
FFFFFFFFFFFF:FFFF,FFFFFFFFF:FFFFFFFFFFFFFFFFFFFFFFFFFFFFFFFFFFFFFFFFFFFF  
FFFFFFFFFFFFFFFF  
@A00721:190:HGJW7DSXY:4:2537:30101:3396 1:N:0:TCTGCAAG+GCTGCACT  
CCAGTAGTACTCCCCTACTTGTAGTTGCTGCCATGTGAGTGGCACCCTTGTGGACGAATCCATTGTTT  
CTGCAATCTATAGTCTGATAAATGATGCAGCCGCACGGTAGTGTAAAGACGTCTAGGCTTGATCGCTAG  
ACGTCTCTTCCGTTT  
+  
FFFFFFFFFFFFFFFFFFFFFFFFFFFFFFFFFFFFFFFFFFFFFFFFFFFFFFFFFFFFFFFFFFFFFFFF,FFFFFFFFFFFFFFFFFFFF:FFFF  
FFFFFFFFF:FFFFFF:FFFFFFFFFFFFFFFFFFFFFFFFFFFFFFFFFFFFFFFFFFFFFFFFFFFFFFFF  
FFFFFFFFFFFFFFFF  
@A00721:190:HGJW7DSXY:4:1167:4544:27492 1:N:0:TCTGCAAG+GCTGCACT  
CAGTAGTACTCCCCTACTTGTAGTTGCTGCCATGTGAGTGGCACCCTTGTGGACGAATCCATTGTTTC  
TGCAATCTATAGTCTGATAAATGATGCAGCCGCACGGTAGTGTAAAGACGTCTAGGCTTGATCGCTAGA  
CGTCTCTTCCGTTTG  
+  
FFFFFFFFFFFFFFFFFFFFFFFFFFFFFFFFFFFFFFFFFFFFFFFFFFFFFFFFFFFFFFFFFFFFFFFF,FFFFFFF:FFFFFFFFFFFFFFFFFFFF  
FFFFFFFFFFFFFFFFFFFF:FFFFFFFFFFFFFFFFFFFFFFFFFFFFFFFFFFFFFFFFFFFFFFFFFFFF:FFFFFFFFFFFFFFFFFFFF  
FFFFFFFFFFFFFFFF  
@A00721:190:HGJW7DSXY:4:1304:1814:31062 1:N:0:TCTGCAAG+GCTGCACT  
CAGTAGTACTCCCCTACTTGTAGTTGCTGCCATGTGAGTGGCACCCTTGTGGACGAATCCATTGTTTC

TGCAATCTATAGTCTGATAAATGATGCAGCCGCACGGTAGTGTAAGACGTCTAGGCTTGATCGCTAGA  
 CGTCTCTTCCGTTTG

[illegible] $+$ 

@A00721:190:HGJW7DSXY:4:1362:32479:26083 1:N:0:TCTGCAAG+GCTGCACT  
CAGTAGTACTCCCCTACTTGTAGTTGCTGCCATGTGAGTGGCACCCTTGTGGACGAATCCATTGTTTC  
TGCAATCTATAGTCTGATAAATGATGCAGCCGCACGGTAGTGTAAGACGTCTAGGCTTGATCGCTAGA  
CGTCTCTTCCGTTTG

```

FFFFFFFF:FFFFFFFFFFFFFFFFFFFFFFFFFFFFFFFFFFFFFFFFFFFFFFFFFFFFFFFFFFFFFFFF: ,FF
FFFFFFFF:FFFF:FFFFFFFFFFFFFFFFFFFFFFFFFFFFFFFFFFFFFFFF:FFFFFFFF:FFFFFFF,FFFFFFFFFFFFFFFF:
FFFFFFFF::E:FFFFF

```

 $+$ 

@A00721:190:HGJW7DSXY:4:1471:28284:24612 1:N:0:TCTGCAAG+GCTGCACT  
CAGTAGTACTCCCCTACTTGTAGTTGCTGCCATGTGAGTGGCACCCTTGTGGACGAATCCATTGTTTC  
TGCAATCTATAGTCTGATAAATGATGCAGCCGCACGGTAGTGTAAGACGTCTAGGCTTGATCGCTAGA  
CGTCTCTTCCGTTTG

[illegible]

+

@A00721:190:HGJW7DSXY:4:1667:22426:28213 1:N:0:TCTGCAAG+GCTGCACT  
CAGTAGTACTCCCCTACTTGTAGTTGCTGCCATGTGAGTGGCACCCCTTGTGGACGAATCCATTGTTTC  
TGCAATCTATAGTCTGATAAATGATGCAGCCGCACGGTAGTGTAAGACGTCTAGGCTTGATCGCTAGA  
CGTCTCTTCCGTTTG

[illegible]

$+$ 

+

 $+$ 

+

 $+$  $+$ 

+

[illegible]



+  
FFFFFFFFFFFFFFFFFFFFFFFFFFFFFFFFFFFFFFFFFFFFFFFFFFFFFFFFFFFFFFFFFFFFFFFF  
FFFF:FFFFFFFFFFFFFFFFFFFFFFFFFFFFFFFFFFFFFFFFFFFFFFFFFFFFFFFFFFFFFFFF  
FFFFFFFFFFFFFFFF

@A00721:190:HGJW7DSXY:4:2476:23845:11318 1:N:0:TCTGCAAG+GCTGCACT  
ACTCCCCTACTTGTAGTTGCTGCCATGTGAGTGGCACCCCTTGTGGACGAATCCATTGTTTCTGCAATC  
TATAGTCTGATAAATGATGCAGCCGCACGGTAGTGTAAAGACGTCTAGGCTTGATCGCTAGACGTCTCT  
TCCGTTTGCATAGAT

+  
FFFFFFFFFFFFFFFFFFFFFFFFFFFFFFFFFFFFFFFFFFFFFFFFFFFFFFFFFFFFFFFFFFFFFFFF  
FFFFFFFFFFFFFFFF:FFFFFFFFFFFFFFFFFFFFFFFFFFFFFFFFFFFFFFFFFFFFFFFFFFFFFFFF  
FFFFFFFF:FF:FFFF

@A00721:190:HGJW7DSXY:4:2615:15049:25175 1:N:0:TCTGCAAG+GCTGCACT  
ACTCCCCTACTTGTAGTTGCTGCCATGTGAGTGGCACCCCTTGTGGACGAATCCATTGTTTCTGCAATC  
TATAGTCTGATAAATGATGCAGCCGCACGGTAGTGTAAAGACGTCTAGGCTTGATCGCTAGACGTCTCT  
TCCGTTTGCATAGAT

+  
FFFFFFFFFFFF:FFFFFFFFFFFFFFFFFFFFFFFFFFFFFFFFFFFFFFFFFFFFFFFFFFFFFFFFFFFF  
FFFFFFFFFFFFFFFFFFFF,FFFFFFFFFFFFFFFF:FFFFFFF,FFFFFFFFFFFFFFFFFFFFFFFFFFFF  
FFFFFFFFFFFFFFFF

@A00721:190:HGJW7DSXY:4:2668:11351:28886 1:N:0:TCTGCAAG+GCTGCACT  
ACTCCCCTACTTGTAGTTGCTGCCATGTGAGTGGCACCCCTTGTGGACGAATCCATTGTTTCTGCAATC  
TATAGTCTGATAAATGATGCAGCCGCACGGTAGTGTAAAGACGTCTAGGCTTGATCGCTAGACGTCTCT  
TCCGTTTGCATAGAT

+  
FFFFFFFFFFFF:FFFFFFFFFFFFFFFFFFFFFFFFFFFFFFFFFFFFFFFFFFFFFFFFFFFFFFFFFFFF  
FFFFFFFFFFFFFFFFFFFF:FFFFFFFFFFFFFFFFFFFFFFFFFFFFFFFFFFFFFFFFFFFFFFFFFFFF  
FFFFFFFFFFFFFFFF

@A00721:190:HGJW7DSXY:4:1121:3748:25144 1:N:0:TCTGCAAG+GCTGCACT  
CTCCCCTACTTGTAGTTGCTGCCATGTGAGTGGCACCCCTTGTGGACGAATCCATTGTTTCTGCAATCT  
ATAGTCTGATAAATGATGCAGCCGCACGGTAGTGTAAAGACGTCTAGGCTTGATCGCTAGACGTCTCT  
CCGTTTGCATTGCTG

+  
FFFFFFFFFF::FFFFFFFFFFFFFFFFFFFFFFFFFFFFFFFFFFFFFFFFFFFFFFFFFFFFFFFFFFFF  
FFFFFFFFFF:FFFFFFFFFF:FFFFFFFFFF:FFFFFFFFFFFFFFFFFFFFFFFFFFFFFFFFFFFF  
FFFF:FFFFFFFFFF

@A00721:190:HGJW7DSXY:4:1134:20030:30295 1:N:0:TCTGCAAG+GCTGCACT  
CTCCCCTACTTGTAGTTGCTGCCATGTGAGTGGCACCCCTTGTGGACGAATCCATTGTTTCTGCAATCT  
ATAGTCTGATAAATGATGCAGCCGCACGGTAGTGTAAAGACGTCTAGGCTTGATCGCTAGACGTCTCT  
CCGTTTGCATTGCTG

+  
FFFFFFFFFFFFFFFFFFFFFFFFFFFFFFFFFFFFFFFFFFFFFFFFFFFFFFFFFFFFFFFFFFFFFFFF  
FFFFFFFFFFFFFFFFFFFFFFFFFFFFFFFFFFFFFFFFFFFFFFFFFFFFFFFFFFFFFFFFFFFF:FFFFFFFFFFFFFFFFFFFFFFFFFFFF  
FFFFFFFFFFFFFFFF

@A00721:190:HGJW7DSXY:4:1163:23692:20478 1:N:0:TCTGCAAG+GCTGCACT  
CTCCCCTACTTGTAGTTGCTGCCATGTGAGTGGCACCCCTTGTGGACGAATCCATTGTTTCTGCAATCT  
ATAGTCTGAGAAATGATGCAGCCGCACGGTAGTGTAAAGACGTCTAGGCTTGATCGCTAGACGTCTCT  
CCGTTTGCATTGCTG

+  
FFFFFFFFFFFFFFFFFFFFFFFFFFFFFFFFFFFFFFFFFFFFFFFFFFFFFFFFFFFFFFFFFFFFFFFF  
FFFFFFFFFF,FFFFFFFFFFFFFFFFFFFFFFFFFFFFFFFFFFFFFFFFFFFFFFFFFFFFFFFFFFFF  
FFFFFFFFFFFFFFFF

@A00721:190:HGJW7DSXY:4:1248:15393:15468 1:N:0:TCTGCAAG+GCTGCACT  
CTCCCCTACTTGTAGTTGCTGCCATGTGAGTGGCACCCCTTGTGGACGAATCCATTGTTTCTGCAATCT



@A00721:190:HGJW7DSXY:4:2301:9896:31720 1:N:0:TCTGCAAG+GCTGCACT  
CTCCCCTACTTGTAGTTGCTGCCATGTGAGTGGCACCCCTTGTGGACGAATCCATTGTTTCTGCAATCT  
ATAGTCTGATAAATGATGCAGCCGCACGGTAGTGTAAGACGTCTAGGCTTGATCGCTAGACGTCTCTT  
CCGTTTGCATTGCTG

[illegible]

+

```

FFFFFFFFFFFFFFFFFFFFFFFFFFFFFFFFFFFFFFFF:FFFFFF:F:FFFFFFFFFFFFFFFF
FFFFFFFFFFFFFFFFFFFFFFFF:FFFF:FFFFFFFF:FFFFFFFFFFFFFFFFFFFFFFFF
FFFFFFFFFFFFFFFF

```

+

```

FFFFFFFFFFFFFFFFFFFFFFFFFFFFFFFF:FFFFFF:FFFFFFFFFFFFFFFFFFFFFFFF
F:F:FFFFFFFFF:FFFFF,FFFFFFFF,FFFFFFFFFFFF,FFFFFFFFFFFF:FFFFFFFFFFFF
::FFFF:FFFF,FF

```

+

```

FFFFFFFFFFFFFFFFFFFFFFFFFFFFFFFFFFFFFFFF,FFFFFFFFFFFFFFFFFFFFFFFFFFFFFFFF
FFFFFFFFFFFFFFFFFFFFFFFFFFFFFFFFFFFFFFFF:FFFFFFFF:FFF,FFFFFFFFFFFFFFFF
FFFFFFFFFFFFFFFF

```

+

```
F:FFFFFFFF::FFFFFFFFFFFFFFFFFFFFFFFFFFFFFFFFFFFFFFFFFFFFFFFF:FFFFFF:FFFFFFFF
FFF:,FFFFFFFF:FFFFFF:FFFFFFFF:FFFFFFFFF,F:FFFFFFFF,FFFF:FF:FFFFFFFF
F:FFFFFFFF:FFFF
```

+

[illegible]

+

[illegible]



FFFFFFFFFFFFFFFFFFFFFFFFFFFFFFFFFFFFFFFFFFFFFFFFFFFFFFFFFFFFFFFFFFFFFFFFFFFFFFFF  
FFFFFFFFFFFFFFFF

@A00721:190:HGJW7DSXY:4:2652:29894:2253 1:N:0:TCTGCAAG+GCTGCACT  
CTCCCCTACTTGTAGTTGCTGCCATGTGAGTGGCACCCTTGTGGACGAATCCATTGTTTCTGCAATCT  
ATAGTCTGATAAATGATGCAGCCGCACGGTAGTGTAAGACGTCTAGGCTTGATCGCTAGACGTCTCTT  
CCGTTTGCATTGCTG

+

F:FFFFF,FF,FFFFFFFFFFFFFFFFFFFFFFFFFFFFFFFFFFFFFFFFFFFFFFFFFFFFFFFFFFFFFFFF:  
FFFFFFFFF,FFFFFFFFF,FFFFFFFFFFFF:,FFFFFFFFFFFFFFFF:FFFFFFFFFFFF:FF:F,FFFFF  
FF:FFFFFFFFFFFF

@A00721:190:HGJW7DSXY:4:2658:24668:27085 1:N:0:TCTGCAAG+GCTGCACT  
CTCCCCTACTTGTAGTTGCTGCCATGTGAGTGGCACCCTTGTGGACGAATCCATTGTTTCTGCAATCT  
ATAGTCTGATAAATGATGCAGCCGCACGGTAGTGTAAGACGTCTAGGCTTGATCGCTAGACGTCTCTT  
CCGTTTGCATTGCTG

+

FFFFFFFFFFFFFFFFFFFFFFFFFFFFFFFFFFFFFFFFFFFFFFFFFFFFFFFFFFFFFFFFFFFFFFFFFFFFFFFF  
FFFFFFFFFFFFFFFFFFFFFFFFFFFFFFFFFFFFFFFFFFFFFFFFFFFFFFFFFFFFFFFFFFFFFFFFFFFFFFFF  
FFFFFFFFFFFFFFFF

@A00721:190:HGJW7DSXY:4:1267:8269:21950 1:N:0:TCTGCAAG+GCTGCACT  
CCCTACTTGTAGTTGCTGCCATGTGAGTGGCACCCTTGTGGACGAATCCATTGTTTCTGCAATCTATA  
GTCTGATAAATGATGCAGCCGCACGGTAGTGTAAGACGTCTAGGCTTGATCGCTAGACGTCTCTTCCG  
TTTGCATTGCAGATC

+

FFFFFFFFFFFFFFFFFFFFFFFFFFFFFFFFFFFFFFFFFFFFFFFFFFFFFFFFFFFFFFFFFFFFFFFFFFFFFFFF  
FFFFFFFFFFFFFFFFFFFFFFFFFFFFFFFFFFFFFFFFFFFFFFFFFFFFFFFFFFFFFFFFFFFFFFFFFFFFFFFF  
FFFFFFFFFFFFFFFF

@A00721:190:HGJW7DSXY:4:1673:10447:25128 1:N:0:TCTGCAAG+GCTGCACT  
CCCTACTTGTAGTTGCTGCCATGTGAGTGGCACCCTTGTGGACGAATCCATTGTTTCTGCAATCTATA  
GTCTGATAAATGATGCAGCCGCACGGTAGTGTAAGACGTCTAGGCTTGATCGCTAGACGTCTCTTCCG  
TTTGCATTGCAGATC

+

FFFFFFFFFFFFFFFFFFFFFFFFFFFFFFFFFFFFFFFFFFFFFFFFFFFFFFFFFFFFFFFFFFFFFFFFFFFFFFFF  
FFFFFFFFFFFFFFFFFFFFFFFFFFFFFFFFFFFFFFFFFFFFFFFFFFFFFFFFFFFFFFFFFFFFFFFFFFFFFFFF  
FFFFFFFFFFFFF:FFF

@A00721:190:HGJW7DSXY:4:2166:16071:13949 1:N:0:TCTGCAAG+GCTGCACT  
CCCTACTTGTAGTTGCTGCCATGTGAGTGGCACCCTTGTGGACGAATCCATTGTTTCTGCAATCTATA  
GTCTGATAAATGATGCAGCCGCACGGTAGTGTAAGACGTCTAGGCTTGATCGCTAGACGTCTCTTCCG  
TTTGCATTGCAGATC

+

FFFFFFFFFFFFF,FFFFFFFFFFFFFFFFFFFFFFFFF:F,FFFFFFFFFFFFF:FFFFFFFFFFFFF:FFF  
FFFFFFFFFFFFFFFFFFFF:FFFF:FFFFFFFFFFFFFFFFFFFFFFFFFFFFFFFFFFFFFFFFFFFFF:FFFFFFFFFF  
FFF: :FFFFFFFFFFFF

@A00721:190:HGJW7DSXY:4:2364:1750:9690 1:N:0:TCTGCAAG+GCTGCACT  
CCCTACTTGTAGTTGCTGCCATGTGAGTGGCACCCTTGTGGACGAATCCATTGTTTCTGCAATCTATA  
GTCTGATAAATGATGCAGCCGCACGGTAGTGTAAGACGTCTAGGCTTGATCGCTAGACGTCTCTTCCG  
TTTGCATTGCAGATC

+

FFFFFFFFFFFFFFFFFFFFFFFFFFFFFFFFFFFFFFFFFFFFFFFFFFFFFFFFFFFFFFFFFFFFFFFFFFFFFFFF  
FFFFFFFFFFFFFFFFFFFFFFFFFFFFFFFFFFFFFFFFFFFFFFFFFFFFFFFFFFFFFFFFFFFFFFFFFFFFFFFF  
FFFFFFFFFFFFFFFF

@A00721:190:HGJW7DSXY:4:1121:14561:14340 1:N:0:TCTGCAAG+GCTGCACT  
ACTTGTAGTTGCTGCCATGTGAGTGGCACCCTTGTGGACGAATCCATTGTTTCTGCAATCTATAGTCT  
GATAAATGATGCAGCCGCACGGTAGTGTAAGACGTCTAGGCTTGATCGCTAGACGTCTCTTCCGTTTG  
CATTGCTGATGCTTC

+  
FFFFFFFFFFFFFFFFFFFFFFFFFFFFFFFFFFFFFFFFFFFFFFFFFFFFFFFFFFFFFFFF:FFFFFFFFFFFFFFF  
FFFFFFFFFFFFFFFFFFFFFFFFFFFFFFFFFFFFFFFFFFFFFFFFFFFFFFFFFFFFFFFF:FFFFFFFFF:FFFFFFFFFFFFFFFFFFFFFFFFFFFFFFFF:FFF  
FFFFFFFFFFFFFFF:FF

@A00721:190:HGJW7DSXY:4:1204:10773:32925 1:N:0:TCTGCAAG+GCTGCACT  
ACTTGTAGTTGCTGCCATGTGAGTGGCACCCTTGTGGACGAATCCATTGTTTCTGCAATCTATAGTCT  
GATAAATGATGCAGCCGCACGGTAGTGTAAGACGTCTAGGCTTGATCGCTAGACGTCTCTTCCGTTTG  
CATTGCTGATGCTTC

+  
F:FFFFFFFFFFFFFFFFFFFFFFFFFFFFFFFFFFFFFFFFFFFFFFFFFFFFFFFFFFFFFFFF:FFFFFFFFF:FFFFFFFFFFFFFFFFFFFFFFF  
FFFFFFFFFFFFFFFFFFFFFFFFFFFFFFFFFFFFFFFFFFFFFFFFFFFFFFFFFFFFFFFF:FFFFFFFFF:FFFFF:FFFFFFFFFFFFFFFFFFFFFFF  
FFFFFFFFFFFFFFFFFFFFFFF

@A00721:190:HGJW7DSXY:4:1403:10854:16125 1:N:0:TCTGCAAG+GCTGCACT  
ACTTGTAGTTGCTGCCATGTGAGTGGCACCCTTGTGGACGAATCCATTGTTTCTGCAATCTATAGTCT  
GATAAATGATGCAGCCGCACGGTAGTGTAAGACGTCTAGGCTTGATCGCTAGACGTCTCTTCCGTTTG  
CATTGCTGATGCTTC

+  
FFFFFFFFFFFFFFFFFFFFFFFFFFFFFFFFFFFFFFFFFFFFFFFFFFFFFFFFFFFFFFFFFFFFFFFFFFFFFFFFFFFFFFFFFFFFFFFFFFFFFFFF  
FFFFFFFFF:FFFFFFFFFFFFFFFFFFFFFFFFFFFFFFFFFFFFFFFFFFFFFFFFFFFFFFFFFFFFFFFF:F:FFFFFFFFFFFFFFFFFFFFFFF  
FFFFFFFFFFFFFFFFFFFFFFF

@A00721:190:HGJW7DSXY:4:1403:11659:17268 1:N:0:TCTGCAAG+GCTGCACT  
ACTTGTAGTTGCTGCCATGTGAGTGGCACCCTTGTGGACGAATCCATTGTTTCTGCAATCTATAGTCT  
GATAAATGATGCAGCCGCACGGTAGTGTAAGACGTCTAGGCTTGATCGCTAGACGTCTCTTCCGTTTG  
CATTGCTGATGCTTC

+  
FFFFFFFFFFFFFFFFFFFFFFFFFFFFFFFFFFFFFFFFFFFFFFFFFFFFFFFFFFFFFFFFFFFFFFFFFFFFFFFFFFFFFFFFFFFFFFFFFFFFFFFF  
FFFFFFFFF:FFFFFFFFFFFFFFFFFFFFFFFFFFFFFFFFFFFFFFFFFFFFFFFFFFFFFFFFFFFFFFFF:F:FFFFFFFFFFFFFFFFFFFFFFF  
FFFFFFFFFFFFFFFFFFFFFFF

@A00721:190:HGJW7DSXY:4:1669:3450:36714 1:N:0:TCTGCAAG+GCTGCACT  
ACTTGTAGTTGCTGCCATGTGAGTGGCACCCTTGTGGACGAATCCATTGTTTCTGCAATCTATAGTCT  
GATAAATGATGCAGCCGCACGGTAGTGTAAGACGTCTAGGCTTGATCGCTAGACGTCTCTTCCGTTTG  
CATTGCTGATGCTTC

+  
FF:FFFFF:FFFFFFFFFFFFFFFFF:FFF:FFFFFFFFFFFFFFFFFFFFFFFFFFFFFFFFF,FFFFFFFFFFFFFFFFF  
FFFFFFFFFFFFF:FFFFFFFFFFFFFFFFF:FFFFFFFFFFFFFFFFF:FFF:FFFFFFFFFFFFFFFFF:FF,FFF  
FFFF,FFFFFFFFFFFFF

@A00721:190:HGJW7DSXY:4:2143:28772:21261 1:N:0:TCTGCAAG+GCTGCACT  
ACTTGTAGTTGCTGCCATGTGAGTGGCACCCTTGTGGACGAATCCATTGTTTCTGCAATCTATAGTCT  
GATAAATGATGCAGCCGCACGGTAGTGTAAGACGTCTAGGCTTGATCGCTAGACGTCTCTTCCGTTTG  
CATTGCTGATGCTTC

+  
FFFFFFFFFFFFFFFFFFFFFFFFFFFFFFFFFFFFFFFFFFFFFFFFFFFFFFFFFFFFFFFFFFFFFFFFFFFFFFFFFFFFFFFFFFFFFFFFFFFFFFFF  
FF:FFFFFFFFFFFFFFFFFFFFFFFFF:FFFFFFF:FFFFFFFFFFFFFFFFFFFFFFFFF:FFFFFFFFFFFFFFFFF  
FFFF:FFFFFFFFFFFFF

@A00721:190:HGJW7DSXY:4:2157:16523:11788 1:N:0:TCTGCAAG+GCTGCACT  
ACTTGTAGTTGCTGCCATGTGAGTGGCACCCTTGTGGACGAATCCATTGTTTCTGCAATCTATAGTCT  
GATAAATGATGCAGCCGCACGGTAGTGTAAGACGTCTAGGCTTGATCGCTAGACGTCTCTTCCGTTTG  
CATTGCTGATGCTTC

+  
F:FFFFF:FFF:FFFFFFF:FFFFF:FFFF:FFF:FF:FFFFFFF:FFFFFFF:FFFFFFF:F::FFF:FF,  
FFFFFFFFFFFFFFFFF:FFFFFFF:FFFFFFFFFFFFF:F::FFF,FFFFFFFFF:FFFFFFFFFFFFFFFFF:FFFFF  
FFFF,FFFFFFFFFFFFF

@A00721:190:HGJW7DSXY:4:1646:14724:36636 1:N:0:TCTGCAAG+GCTGCACT  
GCTGCCATGTGAGTGGCACCCTTGTGGACGAATCCATTGTTTCTGCAATCTATAGTCTGATAAATGAT

GCAGCCGCACGGTAGTGTAAGACGTCTAGGCTTGATCGCTAGACGTCTCTTCCGTTTGCATTGCTGAT  
GCTTCGCTTCTATAG

```

FFFFFFFF:FFFFFFFFFFFFFFFF:FFFFFFFFFFFFFFFFFFFFFFFF:FF:FFFFFF,FFFF:FF
FFFFFFFFFFFFFFFFFFFFFFFF:FFFFFF:FFFFFFFFF::FFFFFFFFFFFFFFFFFFFFFFFFF
FFFFFFFFF:FFFFF

```

 $+$ 

@A00721:190:HGJW7DSXY:4:1673:28185:20619 1:N:0:TCTGCAAG+GCTGCACT  
GCTGCCATGTGAGTGGCACCCCTTGTGGACGAATCCATTGTTTCTGCAATCTATAGTCTGATAAATGAT  
GCAGCCGCACGGTAGTGTAAGACGTCTAGGCTTGATCGCTAGACGTCTCTTCCGTTTGCAATTGCTGAT  
GCTTCGCTTCTATAG

[illegible]

+

@A00721:190:HGJW7DSXY:4:1227:4553:19586 1:N:0:TCTGCAAG+GCTGCACT  
GTGGCACCCTTGTGGACGAATCCATTGTTTCTGCAATCTATAGTCTGATAAATGATGCAGCCGCACGG  
TAGTGTAAGACGTCTAGGCTTGATCGCTAGACGTCTCTCCGTTTGCATTGCTGATGCTTCGCTTCTA  
TAGAAGGCGGATTCTG

```
:FFFFFFFF:FFFFFFFFFFFFFFFFFFFFFFFF:FFFFFF:FFFFFFFFFFFFFFFF:FFF:FFFFFFF
FFF:FFF:F:FFFFF,FFFFFFFFFFFFFFFF:FFFFFFFF:FFFFFFFF:FFFFFFFFFF, :FFFFF
FFFFFFE:::EEEE:E
```

+

@A00721:190:HGJW7DSXY:4:1508:19768:10645 1:N:0:TCTGCAAG+GCTGCACT  
GTGGCACCCCTTGTGGACGAATCCATTGTTTCTGCAATCTATAGTCTGATAAATGATGCAGCCGCACGG  
TAGTGTAAGACGTCTAGGCTTGATCGCTAGACGTCTCTTCCGTTTGATTGCTGATGCTTCGCTTCTA  
TAGAAGGCGGATTTCG

```
FFFFFFFFF,FFFFFFFFFFFFFFFFFFFFFFFFFFFFFFFFFFFFFFFFFFFFFFFFFF
FFFFFFFFFFFFFFFFFFFFFFFFFFFFFFFF;FFFFFFFFFFFFFFFFFFFFFFFFFFFFF
FFFFFFFFFFFFFFFF
```

@A00721:190:HGJW7DSXY:4:1508:19425:12305 1:N:0:TCTGCAAG+GCTGCACT  
GTGGCACCCTTGTGGACGAATCCATTGTTTCTGCAATCTATAGTCTGATAAATGATGCAGCCGCACGG  
TAGTGTAAGACGTCTAGGCTTGATCGCTAGACGTCTCTTCCGTTTGCATTGCTGATGCTTCGCTTCTA  
TAGAAGGCGGATTCTG

[illegible]

+

[illegible]

+

[illegible]

+

[illegible]

+

[illegible] $+$ [illegible] $+$ [illegible]

FFFFFFFFFFFFFFFFFFFFFFFFFFFFFFFFFFFFFFFFFFFFFFFFFFFFFFFFFFFFFFFFFFFFFFFF  
FFFFFFFFFFFFFFFF

@A00721:190:HGJW7DSXY:4:2123:21459:35211 1:N:0:TCTGCAAG+GCTGCACT  
CGCACCCCTTGTGGACGAATCCATTGTTTCTGCAATCTATAGTCTGATAAATGATGCAGCCGCACGGTA  
GTGTAAGACGTCTAGGCTTGATCGCTAGACGTCTCTCCGTTTGCATTGCTGATGCTTCGCTTCTATA  
GAAGGCGGATTCTGC

+  
FFFFFFFF,F::FFFFFFFFFFFFFFFF:FFFFFFFFF:,,:F:F:FFFF:FFFFFFFFFFFF:FFFF  
FFFFFFFF:FFFFFFFFF::FFF:FFF:FFF:,F:FFFFFFFF:FFFFFFFFF::F:FFFFFFFF  
,FFF:FFFFFF,FF

@A00721:190:HGJW7DSXY:4:2272:6207:23453 1:N:0:TCTGCAAG+GCTGCACT  
CGCACCCCTTGTGGACGAATCCATTGTTTCTGCAATCTATAGTCTGATAAATGATGCAGCCGCACGGTA  
GTGTAAGACGTCTAGGCTTGATCGCTAGACGTCTCTCCGTTTGCATTGCTGATGCTTCGCTTCTATA  
GAAGGCGGATTCTGCGC

+  
FFFFFFFFFFFFFFFFFFFFFFFFFFFFFFFFFFFFFFFFFFFFFFFFFFFFFFFFFFFFFFFFFFFFFFFF  
FFFFFFFFFFFFFFFFFFFFFFFFFFFFFFFFFFFFFFFFFFFFFFFFFFFFFFFFFFFFFFFFFFFFFFFF  
:FF:FFFFFFFF

@A00721:190:HGJW7DSXY:4:2615:21965:36652 1:N:0:TCTGCAAG+GCTGCACT  
CGCACCCCTTGTGGACGAATCCATTGTTTCTGCAATCTATAGTCTGATAAATGATGCAGCCGCACGGTA  
GTGTAAGACGTCTAGGCTTGATCGCTAGACGTCTCTCCGTTTGCATTGCTGATGCTTCGCTTCTATA  
GAAGGCGGATTCTGCGC

+  
FFFFFFFFFFFFFFFFFFFFFFFFFFFFFFFFFFFFFFFFFFFFFFFFFFFFFFFFFFFFFFFFFFFFFFFF  
FFFFFFFF:FFFFFFFFFFFFFFFFFFFFFFFFFFFFFFFFFFFFFFFFFFFFFFFFFFFFFFFFFFFFFFFF  
FFFFFFFFFFFFFFFF

@A00721:190:HGJW7DSXY:4:2619:16712:10989 1:N:0:TCTGCAAG+GCTGCACT  
CGCACCCCTTGTGGACGAATCCATTGTTTCTGCAATCTATAGTCTGATAAATGATGCAGCCGCACGGTA  
GTGTAAGACGTCTAGGCTTGATCGCTAGACGTCTCTCCGTTTGCATTGCTGATGCTTCGCTTCTATA  
GAAGGCGGATTCTGCGC

+  
FFFFFFF:FFFFFFFFFFFFFFFFFFFFFFFFFFFFFFFFFFFFFFFFFFFFFFFFFFFFFFFFFFFFFFFF  
FFFFFFFFFFFFFFFFFFFFFFFFFFFFFFFFFFFFFFFFFFFFFFFFFFFFFFFFFFFFFFFFFFFFFFFF  
FFFFFFFFFFFFFFFF

@A00721:190:HGJW7DSXY:4:1623:22978:9408 1:N:0:TCTGCAAG+GCTGCACT  
GCACCCTTGTGGACGAATCCATTGTTTCTGCAATCTATAGTCTGATAAATGATGCAGCCGCACGGTAG  
TGTAAGACGTCTAGGCTTGATCGCTAGACGTCTCTCCGTTTGCATTGCTGATGCTTCGCTTCTATAG  
AAGGCGGATTCTGCGC

+  
FFFFFFFFFFFFFFFFFFFFFFFFFFFFFFFFFFFFFFFFFFFFFFFFFFFFFFFFFFFFFFFFFFFFFFFF  
FFFFFFFFFFFFFFFFFFFFFFFFFFFFFFFFFFFFFFFFFFFFFFFFFFFFFFFFFFFFFFFFFFFFFFFF  
FFFFFFFFFFFFFFFF

@A00721:190:HGJW7DSXY:4:2116:20491:14810 1:N:0:TCTGCAAG+GCTGCACT  
GCACCCTTGTGGACGAATCCATTGTTTCTGCAATCTATAGTCTGATAAATGATGCAGCCGCACGGTAG  
TGTAAGACGTCTAGGCTTGATCGCTAGACGTCTCTCCGTTTGCATTGCTGATGCTTCGCTTCTATAG  
AAGGCGGATTCTGCGC

+  
FFFFFF:FFFFFFFFFFFFFFFFFFFFFFFFFFFFFFFFFFFFFFFFFFFFFFFFFFFFFFFFFFFFFFFF  
FFFFFFFFFFFFFFFFFFFFFFFFFFFFFFFFFFFFFFFFFFFFFFFFFFFFFFFFFFFFFFFFFFFFFFFF  
FFFFFFFFFFFF:FFF

@A00721:190:HGJW7DSXY:4:2145:11758:23484 1:N:0:TCTGCAAG+GCTGCACT  
GCACCCTTGTGGACGAATCCATTGTTTCTGCAATCTATAGTCTGATAAATGATGCAGCCGCACGGTAG  
TGTAAGACGTCTAGGCTTGATCGCTAGACGTCTCTCCGTTTGCATTGCTGATGCTTCGCTTCTATAG  
AAGGCGGATTCTGCGC

[illegible][illegible][illegible]

F,,:F::FFFFFF:FFFF:FFFF:FFFFFFFFFFFF,FFF:,FFFFF,FFFFFFFFFFFFFFFF:FFFF,F  
:FFFFFF,FFFFFF:FFFFFFFF:F:F,,:FF::FF,FFF,FFFFF,FF:FFFFFFFFFFFFFFFF,:FFF,F  
FFFFFFFF:FFFFFFF

[illegible][illegible]

```

FFFFFFFFFFFFFFFFFFFFFFFFFFFFFFFFFFFFFFFF:FFF::FFFFFFFFFFFFFFFFFFFFFFFFF
FFFFFF:FFFFFFFFFFFFFFFFFFFFFFFFFFFFFFFFFFFFFFFF:FFFF:FFFF:FFFFFFFFFFFFF
FFFFFFFFFFFFFFFFFFFF

```

@A00721:190:HGJW7DSXY:4:1350:1163:34976 1:N:0:TCTGCAAG+GCTGCACT  
ACACCCTTGTGGACGAATCCATTGTTTCTGCAATCTATAGTCTGATAAATGATGCAGCCGCACGGTAG

TGTAAGACGTCTAGGCTTGATCGCTAGACGTCTCTTCCGTTTGCATTGCTGATGCTTCGCTTCTATAG  
AAGGCGGATTGCGCG

+

FFFFFFFFFFFFFFFFFFFFFFFFFFFFFFFFFFFFFFFFFFFFFFFFFFFFFFFFFFFFFFFFFFFFFFFF:FFF  
FFFFFFFFFFFFFFFFFFFFFFFFFFFFFFFFFFFFFFFFFFFFFFFFFFFFFFFFFFFFFFFFFFFFFFFF  
FFFFFFFFFFFFFFFF

@A00721:190:HGJW7DSXY:4:1448:5222:28197 1:N:0:TCTGCAAG+GCTGCACT  
ACACCCTTGTGGACGAATCCATTGTTTCTGCAATCTATAGTCTGATAAATGATGCAGCCGCACGGTAG  
TGTAAGACGTCTAGGCTTGATCGCTAGACGTCTCTTCCGTTTGCATTGCTGATGCTTCGCTTCTATAG  
AAGGCGGATTGCGCG

+

FFFFF:FFFFFFFFFFFFFFFF:FFFFFFFFFFFF,FF:FFFFFFFFFFFFFFFFFFFFFFFFFFFFFFFF  
FFFFFFFFFFFFFFFFFFFFFFFFFFFFFFFFFFFFFFFFFFFFFFFFFFFFFFFFFFFFFFFFFFFFFFFF,FFFFFFFFFFFF,FFFFFFFFFFFF  
FFFFFFFFFFFF:FFF

@A00721:190:HGJW7DSXY:4:1521:18991:27461 1:N:0:TCTGCAAG+GCTGCACT  
ACACCCTTGTGGACGAATCCATTGTTTCTGCAATCTATAGTCTGATAAATGATGCAGCCGCACGGTAG  
TGTAAGACGTCTAGGCTTGATCGCTAGACGTCTCTTCCGTTTGCATTGCTGATGCTTCGCTTCTATAG  
AAGGCGGATTGCGCG

+

FFFFFFFFFFFFFFFFFFFFFFFFFFFFFFFFFFFFFFFFFFFFFFFFFFFFFFFFFFFFFFFFFFFFFFFF  
FFFFFFFFFFFFFFFFFFFFFFFFFFFFFFFFFFFFFFFFFFFFFFFFFFFFFFFFFFFFFFFFFFFFFFFF  
FFFFFFFFFFFFFFFF

@A00721:190:HGJW7DSXY:4:1618:3161:30953 1:N:0:TCTGCAAG+GCTGCACT  
ACACCCTTGTGGACGAATCCATTGTTTCTGCAATCTATAGTCTGATAAATGATGCAGCCGCACGGTAG  
TGTAAGACGTCTAGGCTTGATCGCTAGACGTCTCTTCCGTTTGCATTGCTGATGCTTCGCTTCTATAG  
AAGGCGGATTGCGCG

+

FFFFFFFFFFFFFFFFFFFF,FFFFFFFF:FFFFFF:FFF:FFFFFFFFFFFFFFFFFFFFFFFF:FFFF:FFFFFFFF  
FFFFFFFFFFFFFFFFFFFFFFFFFFFFFFFFFFFFFFFFFFFFFFFFFFFFFFFFFFFFFFFF:FFFFFFFFFFFFFFFF,FFFFFFFFFFFF  
FFF,FFFFFFFFFFFF

@A00721:190:HGJW7DSXY:4:1619:27290:25645 1:N:0:TCTGCAAG+GCTGCACT  
ACACCCTTGTGGACGAATCCATTGTTTCTGCAATCTATAGTCTGATAAATGATGCAGCCGCACGGTAG  
TGTAAGACGTCTAGGCTTGATCGCTAGACGTCTCTTCCGTTTGCATTGCTGATGCTTCGCTTCTATAG  
AAGGCGGATTGCGCG

+

FFFFFFF:FF:FFFFFFFFFFFFFFFF::FF:FFFFFFFF:FF:FFFFFFFFFFFFFFFF:FFFFFFFF:FF:FF  
FFFFF:FFFFFFFFFFFFFFFF:FFFFFFFFFFFFFFFFFFFFFFFF:F,FFFFFF:FF,FFFF,:FFF,F:F:FFFF  
FFFFFFFFFFFF,FFFF

@A00721:190:HGJW7DSXY:4:2218:2184:5588 1:N:0:TCTGCAAG+GCTGCACT  
ACACCCTTGTGGACGAATCCATTGTTTCTGCAATCTATAGTCTGATAAATGATGCAGCCGCACGGTAG  
TGTAAGACGTCTAGGCTTGATCGCTAGACGTCTCTTCCGTTTGCATTGCTGATGCTTCGCTTCTATAG  
AAGGCGGATTGCGCG

+

FFFFFFFFFFFFFFFFFFFFFFFFFFFFFFFFFFFFFFFFFFFFFFFFFFFFFFFFFFFFFFFFFFFFFFFF  
FFFFFFFFFFFFFFFFFFFFFFFFFFFFFFFFFFFFFFFFFFFFFFFFFFFFFFFFFFFFFFFFFFFFFFFF  
FFFFFFFFFFFFFFFF

@A00721:190:HGJW7DSXY:4:2333:24288:25488 1:N:0:TCTGCAAG+GCTGCACT  
ACACCCTTGTGGACGAATCCATTGTTTCTGCAATCTATAGTCTGATAAATGATGCAGCCGCACGGTAG  
TGTAAGACGTCTAGGCTTGATCGCTAGACGTCTCTTCCGTTTGCATTGCTGATGCTTCGCTTCTATAG  
AAGGCGGATTGCGCG

+

FF:FFFFFFFFFFFFFFFFFFFFFFFFFFFFFFFF:FFFF:F,FFFF:FFFFFFFFFFFFFFFFFFFFFFFF  
FFFFFFFF:FFFF,FFFFFFFFFFFFFFFFFFFFFFFF,FFFF:FFFFFFFFFFFFFFFF:FFF:FFFFF  
FFF:F,FFFFFFFFFFFF

$+$ 

+

+

+

+

+

 $+$ [illegible]



FFFFFFFFFFFFFFFFFFFFFFFFFFFFFFFFFFFFFFFFFFFFFFFFFFFFFFFFFFFFFFFFFFFFFFFFFFFFFFFF  
FFFFFFFFFFFFFFFF

@A00721:190:HGJW7DSXY:4:2253:4878:14982 1:N:0:TCTGCAAG+GCTGCACT  
CACCCCTGTGGACGAATCCATTGTTTCTGCAATCTATAGTCTGATAAATGATGCAGCCGCACGGTAGT  
GTAAGACGTCTAGGCTTGATCGCTAGACGTCTCTCCGTTTGCATTGCTGATGCTTCGCTTCTATAGA  
AGGCGGATTTCGGCGA

+  
FFFFFFFFFFFFFFFFFFFFFFFFFFFFFFFFFFFFFFFFFFFFFFFFFFFFFFFFFFFFFFFFFFFFFFFFFFFFFFFF  
FFFFFFFFFFFFFFFFFFFFFFFFFFFFFFFFFFFFFFFFFFFFFFFFFFFFFFFFFFFFFFFFFFFFFFFFFFFFFFFF  
FFFFFFFFFFFFFFFF,FFFF

@A00721:190:HGJW7DSXY:4:2419:12102:11146 1:N:0:TCTGCAAG+GCTGCACT  
CACCCCTGTGGACGAATCCATTGTTTCTGCAATCTATAGTCTGATAAATGATGCAGCCGCACGGTAGT  
GTAAGACGTCTAGGCTTGATCGCTAGACGTCTCTCCGTTTGCATTGCTGATGCTTCGCTTCTATAGA  
AGGCGGATTTCGGCGA

+  
FFFFFFFFFFFFFFFFFFFFFFFFFFFFFFFFFFFFFFFFFFFFFFFFFFFFFFFFFFFFFFFFFFFFFFFFFFFFFFFF  
FFFFFFFFFFFFFFFFFFFFFFFFFFFFFFFFFFFFFFFFFFFFFFFFFFFFFFFFFFFFFFFFFFFFFFFFFFFFFFFF  
FFFFFFFFFFFFFFFF

@A00721:190:HGJW7DSXY:4:2455:21829:21480 1:N:0:TCTGCAAG+GCTGCACT  
CACCCCTGTGGACGAATCCATTGTTTCTGCAATCTATAGTCTGATAAATGATGCAGCCGCACGGTAGT  
GTAAGACGTCTAGGCTTGATCGCTAGACGTCTCTCCGTTTGCATTGCTGATGCTTCGCTTCTATAGA  
AGGCGGATTTCGGCGA

+  
FFFFFFFFFFFFFFFFFFFFFFFFFFFFFFFFFFFFFFFFFFFFFFFFFFFFFFFFFFFFFFFFFFFFFFFFFFFFFFFF  
FFFFFFFFFFFFFFFFFFFFFFFFFFFFFFFFFFFFFFFFFFFFFFFFFFFFFFFFFFFFFFFFFFFFFFFFFFFFFFFF  
FFFFFFFFFFFFFF:FFFF

@A00721:190:HGJW7DSXY:4:2461:21658:6965 1:N:0:TCTGCAAG+GCTGCACT  
CACCCCTGTGGACGAATCCATTGTTTCTGCAATCTATAGTCTGATAAATGATGCAGCCGCACGGTAGT  
GTAAGACGTCTAGGCTTGATCGCTAGACGTCTCTCCGTTTGCATTGCTGATGCTTCGCTTCTATAGA  
AGGCGGATTTCGGCGA

+  
FFFFFFFFFFFFFFFFFFFFFFFFFFFFFFFFFFFFFFFFFFFFFFFFFFFFFFFFFFFFFFFFFFFFFFFFFFFFFFFF  
FFFFFFFFFFFFFFFFFFFFFFFFFFFFFFFFFFFFFFFFFFFFFFFFFFFFFFFFFFFFFFFFFFFFFFFFFFFFFFFF  
FFFFFFFFFFFFFFFF

@A00721:190:HGJW7DSXY:4:2527:4227:17550 1:N:0:TCTGCAAG+GCTGCACT  
CACCCCTGTGGACGAATCCATTGTTTCTGCAATCTATAGTCTGATAAATGATGCAGCCGCACGGTAGT  
GTAAGACGTCTAGGCTTGATCGCTAGACGTCTCTCCGTTTGCATTGCTGATGCTTCGCTTCTATAGA  
AGGCGGATTTCGGCGA

+  
FFFFFFFFFFFFFFFFFFFFFFFFFFFFFFFFFFFFFFFFFFFFFFFFFFFFFFFFFFFFFFFFFFFFFFFFFFFFFFFF  
FFFFFFFFFFFFFFFFFFFFFFFFFFFFFFFFFFFFFFFFFFFFFFFFFFFFFFFFFFFFFFFFFFFFFFFFFFFFFFFF  
FFFFFFFFFFFFFFFF

@A00721:190:HGJW7DSXY:4:1176:4887:28964 1:N:0:TCTGCAAG+GCTGCACT  
ACCCTTGTGGACGAATCCATTGTTTCTGCAATCTATAGTCTGATAATTGATGCAGCCGCACGGTAGTG  
TAAGACGTCTAGGCTTGATCGCTAGACGTCTCTCCGTTTGCATTGCTGATGCTTCGCTTCTATAGAA  
GGCGGATTTCGGCGAA

+  
FFFFFFFFFFFFFFFFFFFFFFFFFFFFFFFFFFFFFFFFFFFFFFFFFFFFFFFFFFFFFFFFFFFFFFFFFFFFFFFF  
FFFFFFFFFFFFFFFFFFFFFFFFFFFFFFFFFFFFFFFFFFFFFFFFFFFFFFFFFFFFFFFFFFFFFFFFFFFFFFFF  
FFFFFFFFFFFFFFFF

@A00721:190:HGJW7DSXY:4:1475:14136:3208 1:N:0:TCTGCAAG+GCTGCACT  
ACCCTTGTGGACGAATCCATTGTTTCTGCAATCTATAGTCTGATAATTGATGCAGCCGCACGGTAGTG  
TAAGACGTCTAGGCTTGATCGCTAGACGTCTCTCCGTTTGCATTGCTGATGCTTCGCTTCTATAGAA  
GGCGGATTTCGGCGAA

```

FFFFFFFF:FFFFFFFFFFFF:FFFFFFFFFFFFFFFFFFFFFFFFFFFFFFFF:FFFFFFFFFFFFFFFFFFFFFFFFFFFFFFFF
FFFFFFFFFFFFFFFFFFFFFFFFFFFF:FFFFFFFFFFFFFFFFFFFF,FFF:FFFF:FFFFFF::FFFFF:FFFFF,FF
:FFFFFFFF:FFFFFFFF

```

[illegible][illegible]

```
FF:FFF:FF:FFFFFFFF,FF:FFFF:FFFF:FFFFFFFF:F,FFF:FF,,FF:FFFFFFFF:FFFF
FF::F:,FFFF,FF,FFFFFFFF:FFFFFFFF::FFFFFFFFFFFFFF::F,F:,FFFFFFFF,FFFF,FF
F:E,,EEEE,E,FFF
```

```
FFFFFFFFFFFFFFFFFFFFFFFFFFFFFFFFFFFFFFFFFFFFFFFFFFFFFFFFFFFFFFF
FFFFFFFFFFFFFFFFFFFF:FFFFFFFFFFFFFFFFFFFFFFFFFFFFFFFFFFFFFFFFF
FFFFFFFFFFFFFFFF
```

[illegible][illegible]

@A00721:190:HGJW7DSXY:4:1344:6705:19053 1:N:0:TCTGCAAG+GCTGCACT  
CCCTTGTTGGACGAATCCATTGTTTCTGCAATCTATAGTCTGATAAATGATGCAGCCGCACGGTAGTGT

AAGACGTCTAGGCTTGATCGCTAGACGTCTCTCCGTTTGCATTGCTGATGCTTCGCTTCTATAGAAG  
GCGGATTCGGCGAAG

[illegible]

+

@A00721:190:HGJW7DSXY:4:1452:13367:22106 1:N:0:TCTGCAAG+GCTGCACT  
CCCTTGTGGACGAATCCATTGTTTCTGCAATCTATAGTCTGATAAATGATGCAGCCGCACGGTAGTGT  
AAGACGTCTAGGCTTGATCGCTAGACGTCTCTTCCGTTTGATTGCTGATGCTTCGCTTCTATAGAAG  
GCGGATTCGGCGAAG

[illegible]

+

@A00721:190:HGJW7DSXY:4:1563:18566:19492 1:N:0:TCTGCAAG+GCTGCACT  
CCCTTGTGGACGAATCCATTGTTTCTGCAATCTATAGTCTGATAAATGATGCAGCCGCACGGTAGTGT  
AAGACGTCTAGGCTTGATCGCTAGACGTCTCTTCCGTTTGCATTGCTGATGCTTCGCTTCTATAGAAG  
GCGGATTCGGCGAAG

```
FFFFFFFFFFFFFFFF:FFFFFFFFFFFFFFFFFFFFFFFFFFFFFFFFFFFFFFFFFFFFF  
FFFFFFFFFFFFFFFFFFFFFFFFFFFFFFFFFFFFFFFF:F:FFFFFFF:FFFFFFF:FFF:FF  
FFFFFFFFFFFFFFFF
```

 $+$ 

@A00721:190:HGJW7DSXY:4:1655:24722:13808 1:N:0:TCTGCAAG+GCTGCACT  
CCCTTGTTGGACGAATCCATTGTTTCTGCAATCTATAGTCTGATAAATGATGCAGCCGCACGGTAGTGT  
AAGACGTCTAGGCTTGATCGCTAGACGTCTCTCCGTTTGCATTGCTGATGCTTCGCTTCTATAGAAG  
GCGGATTCGGCGAAG

[illegible]

$+$ 

+

+

+

+

+

+

[illegible]

```
:FFFFFFFFFFFFFFFFFFFFFFFFFFFFFFFFFFFFFFFFFFFFFFFFFFFFFFFFFFFFFFFFFFFFFFFFF:
FFFFFFFFFFFFFFFF:F
@A00721:190:HGJW7DSXY:4:2442:16568:14152 1:N:0:TCTGCAAG+GCTGCACT
CCCTTGTGGACGAATCCATTGTTTCTGCAATCTATAGTCTGATAAATGATGCAGCCGCACGGTAGTGT
AAGACGTCTAGGCTTGATCGCTAGACGTCTCTCCGTTTGCATTGCTGATGCTTCGCTTCTATAGAAG
GCGGATTCGGCGAAG
+
FFFFFFFF:FFFF:F:FFFFFFFFFFFFFFFFFFFFFFFFFFFFFFFFFFFFFFFFFFFFFFFFFFFFFFFF:FFFFFFFFFFFFFFFF:FFF
FFFFFFFFFFFFFFFFFFFFFFFFFFFFFFFFFFFFFFFFFFFFFFFFFFFFFFFFFFFFFFFFFFFFFFFFF:FFFFFFFFFFFFFFFF:FFFFFFFFF:
FFFFFFFFF:FFFFF
@A00721:190:HGJW7DSXY:4:2512:31629:6355 1:N:0:TCTGCAAG+GCTGCACT
CCCTTGTGGACGAATCCATTGTTTCTGCAATCTATAGTCTGATAAATGATGCAGCCGCACGGTAGTGT
AAGACGTCTAGGCTTGATCGCTAGACGTCTCTCCGTTTGCATTGCTGATGCTTCGCTTCTATAGAAG
GCGGATTCGGCGAAG
+
FFF,FFFFFFFFFFFFFFFFFFFFFFFFFFFFFFFFFFFFFFFFFFFFFFFFFFFFFFFFFFFFFFFFFFFFF
FFFFFFFFFFFFFFFFFFFFFFFFFFFFFFFFFFFFFFFFFFFFFFFFFFFFFFFFFFFFFFFFFFFFFFFFF:
FFFFFFFFFFFFFFFFF
@A00721:190:HGJW7DSXY:4:2531:29342:1673 1:N:0:TCTGCAAG+GCTGCACT
CCCTTGTGGACGAATCCATTGTTTCTGCAATCTATAGTCTGATAAATGATGCAGCCGCACGGTAGTGT
AAGACGTCTAGGCTTGATCGCTAGACGTCTCTCCGTTTGCATTGCTGATGCTTCGCTTCTATAGAAG
GCGGATTCGGCGAAG
+
FFFFFFFFFFFFFFFFFFFFFFFFFFFFFFFFFFFFFFFFFFFFFFFFFFFFFFFFFFFFFFFFFFFFFFFFF:FFFFFFFFF
FFFFFFFFFFFFFFFFFFFFFFFFFFFFFFFFFFFFFFFFFFFFFFFFFFFFFFFFFFFFFFFFFFFFFFFFF
FFFFFFFFFFFFFFFFF
@A00721:190:HGJW7DSXY:4:2563:9281:22013 1:N:0:TCTGCAAG+GCTGCACT
CCCTTGTGGACGAATCCATTGTTTCTGCAATCTATAGTCTGATAAATGATGCAGCCGCACGGTAGTGT
AAGACGTCTAGGCTTGATCGCTAGACGTCTCTCCGTTTGCATTGCTGATGCTTCGCTTCTATAGAAG
GCGGATTCGGCGAAG
+
FFFFFFFFFFFFFFFFFFFFFFFFFFFFFFFFFFFFFFFFFFFF,FFFFFFFFFFFFFFFFFFFFFFFFFFFFF
FFFFFFFFFFFFFFFFFFFFFFFFFFFFFFFFFFFFFFFFFFFFFFFFFFFFFFFFFFFFFFFFFFFFFFFFF
FF:FFFFFFFFFFFFF
@A00721:190:HGJW7DSXY:4:2648:23737:14951 1:N:0:TCTGCAAG+GCTGCACT
CCCTTGTGGACGAATCCATTGTTTCTGCAATCTATAGTCTGATAAATGATGCAGCCGCACGGTAGTGT
AAGACGTCTAGGCTTGATCGCTAGACGTCTCTCCGTTTGCATTGCTGATGCTTCGCTTCTATAGAAG
GCGGATTCGGCGAAG
+
FFFFFFFFFFFFFFFFFFFFFFFFFFFFFFFFFFFFFFFFFFFFFFFFFFFFFFFFFFFFFFFFFFFFFFFFF:FFFFFFF
FFFFFFFFFFFFFFFFFFFFFFFFFFFFFFFFFFFFFFFFFFFFFFFFFFFFFFFFFFFFFFFFFFFFFFFFF
FFFFFFFFFFFFFFFFF,F
@A00721:190:HGJW7DSXY:4:2663:30391:9251 1:N:0:TCTGCAAG+GCTGCACT
CCCTTGTGGACGAATCCATTGTTTCTGCAATCTATAGTCTGATAAATGATGCAGCCGCACGGTAGTGT
AAGACGTCTAGGCTTGATCGCTAGACGTCTCTCCGTTTGCATTGCTGATGCTTCGCTTCTATAGAAG
GCGGATTCGGCGAAG
+
FFFFFFFFFFFFFFFFFFFFFFFFFFFFFFFFFFFFFFFFFFFFFFFFFFFFFFFFFFFFFFFFFFFFFFFFF
FFFFFFFFFFFFFFFFFFFFFFFFFFFFFFFFFFFFFFFFFFFFFFFFFFFFFFFFFFFFFFFFFFFFFFFFF
FFFFFFFFFFFFFFFFF
@A00721:190:HGJW7DSXY:4:1206:18728:14669 1:N:0:TCTGCAAG+GCTGCACT
TTGTGGACGAATCCATTGTTTCTGCAATCTATAGTCTGATAAATGATGCAGCCGCACGGTAGTGTAAG
ACGTCTAGGCTTGATCGCTAGACGTCTCTCCGTTTGCATTGCTGATGCTTCGCTTCTATAGAAGGCG
GATTCGGCGAAGAAG
```

+  
FFFFFFFF:FFFFFFFF:FFFFFFFF,FFFFFFFFFFFF:FF:FFFFFFFFFFFF:FF:FFFF:FFFF  
FFFFFFFFFFFFFFFFFFFFFFFFFFFF,FFF:F,FF:FFFFFFFF,FF:FFF,FFFFFFFF,F,FFFF  
FFFFF,FFFFFFF::

@A00721:190:HGJW7DSXY:4:2371:10863:35712 1:N:0:TCTGCAAG+GCTGCACT  
TTGTGGACGAATCCATTGTTTCTGCAATCTATAGTCTGATAAATGATGCAGCCGCACGGTAGTGTAAG  
ACGTCTAGGCTTGATCGCTAGACGTCTCTTCCGTTTGCATTGCTGATGCTTCGCTTCTATAGAAGGCG  
GATTCGGCGAAGAAG

+  
FFFFFFFFFFFFFFFFFFFFFFFFFFFFFFFF,FFFFFFFF,FFFFFFFFFFFFFFFFFFFFFFFFFFFF  
FFFFFFFFFFFFFFFFFFFFFFFFFFFFFFFFFFFFFFFFFFFFFFFFFFFFFFFFFFFFFFFFFFFF  
FFFFFFFFF::FFF:

@A00721:190:HGJW7DSXY:4:2359:22625:7545 1:N:0:TCTGCAAG+GCTGCACT  
GTGGACGAATCCATTGTTTCTGCAATCTATAGTCTGATAAATGATGCAGCCGCACGGTAGTGTAAGAC  
GTCTAGGCTTGATCGCTAGACGTCTCTTCCGTTTGCATTGCTGATGCTTCGCTTCTATAGAAGGCGGA  
TTCGGCGAAGAAGAA

+  
FFFFFFFFFFFFFFFFFFFFFFFFFFFFFFFFFFFFFFFFFFFFFFFFFFFFFFFFFFFFFFFFFFFF:F  
FFFFFFFFFFFFFFFFFFFFFFFFFFFFFFFFFFFFFFFFFFFFFFFFFFFFFFFFFFFFFFFFFFFF:FFFFFFF  
FFFFFFFFFFFFFFFFF

@A00721:190:HGJW7DSXY:4:2601:26304:29982 1:N:0:TCTGCAAG+GCTGCACT  
GTGGACGAATCCATTGTTTCTGCAATCTATAGTCTGATAAATGATGCAGCCGCACGGTAGTGTAAGAC  
GTCTAGGCTTGATCGCTAGACGTCTCTTCCGTTTGCATTGCTGATGCTTCGCTTCTATAGAAGGCGGA  
TTCGGCGAAGAAGAA

+  
FFFFFFFFFFFFFFFFFFFFFFFFFFFFFFFFFFFFFFFFFFFFFFFFFFFFFFFFFFFFFFFFFFFF:F  
FFFFFFFFFFFF:FFFFFFFFFFFFFFFFFFFFFFFFFFFFFFFFFFFFFFFFFFFFFFFFFFFFFFFFFFFF  
FFFFFFFFFFFFFFFFF

@A00721:190:HGJW7DSXY:4:2638:16360:33990 1:N:0:TCTGCAAG+GCTGCACT  
GTGGACGAATCCATTGTTTCTGCAATCTATAGTCTGATAAATGATGCAGCCGCACGGTAGTGTAAGAC  
GTCTAGGCTTGATCGCTAGACGTCTCTTCCGTTTGCATTGCTGATGCTTCGCTTCTATAGAAGGCGGA  
TTCGGCGAAGAAGAA

+  
FFFFFFFFFFFFFFFFFFFFFFFFFFFFFFFFFFFFFFFFFFFFFFFFFFFFFFFFFFFFFFFFFFFF:FFFFFFFFFFFFFFFFFFFFFFFFFFFFFFFFFFFF  
FFFFFFFFFFFFFFFFFFFFFFFFFFFFFFFFFFFFFFFFFFFFFFFFFFFFFFFFFFFFFFFFFFFF:FFFFF  
FFFFFFFFFFFFFFFFF

@A00721:190:HGJW7DSXY:4:1108:16242:20760 1:N:0:TCTGCAAG+GCTGCACT  
ACAGAGACAAATGCAGAATTCTTCTTCGCCGAATCCGCCTTCTATAGAAGCGAAGCATCAGCAATGCG  
AACGGAAGAGACGTCTAGCGATCAAGCCTAGACGTCTTACACTACCGTGCGGCTGCATCATTTATCAG  
ACTATAGATTGCAGA

+  
FFFFFFFFFFFFFFFFFFFFFFFFFFFFFFFFFFFFFFFFFFFFFFFFFFFFFFFFFFFFFFFFFFFF,FFFF  
FFFFFFFFFFFFFFFFFFFFFFFFFFFFFFFFFFFFFFFFFFFFFFFFFFFFFFFFFFFFFFFFFFFF:FFF  
FFFFFFFFFFFFFFFFF

@A00721:190:HGJW7DSXY:4:1350:26847:32925 1:N:0:TCTGCAAG+GCTGCACT  
ACAGAGACAAATGCAGAATTCTTCTTCGCCGAATCCGCCTTCTATAGAAGCGAAGCATCAGCAATGCG  
AACGGAAGAGACGTCTAGCGATCAAGCCTAGACGTCTTACACTACCGTGCGGCTGCATCATTTATCAG  
ACTATAGATTGCAGA

+  
FFFFFFFFFFFFFFFFFFFFFFFFFFFFFFFFFFFFFFFFFFFFFFFFFFFFFFFFFFFFFFFFFFFF:FFFFFF:FFFFFFFFFFFF:FFFFFFFFFF  
FFFFFFFFFFFFFFFFFFFF,FFFFFFFFFFFFFFFFFFFF:FFFFFFFF:FFFFFFFFFFFFFFFFFFFF  
FFFFFFFFFFFFFFFFF

@A00721:190:HGJW7DSXY:4:1476:15411:25207 1:N:0:TCTGCAAG+GCTGCACT  
ACAGAGACAAATGCAGAATTCTTCTTCGCCGAATCCGCCTTCTATAGAAGCGAAGCATCAGCAATGCG

AACGGAAGAGACGTCTAGCGATCAAGCCTAGACGTCTTACACTACCGTGCGGCTGCATCATTTATCAG  
ACTATAGATTGCAGA

[illegible] $+$ [illegible] $+$ [illegible] $+$ [illegible] $+$ [illegible] $+$ 

```
FF:FFFFFFFF:FF:FFFFFFFF:FFFFFFFFFFFFFFFF:FFFFFFFFFFFFFFFF
FFFFFFFFFFFFFFFF,F:FFFFFFFFFFFFFFFFFFFFFFFFFFFFFFFFFFFFFFFF
FFFFFFFFFFFFFFFF
```

 $+$ [illegible]





@A00721:190:HGJW7DSXY:4:2517:16025:20478 1:N:0:TCTGCAAG+GCTGCACT  
GGACAGAGACAAATGCAGAAATTCTTCTTCGCCGAATCCGCCTTCTATAGAAGCGAAGCATCAGCAATG  
CGAACGGAAGAGACGTCTAGCGATCAAGCCTAGACGTCTTACACTACCGTGCGGCTGCATCATTTATC  
AGACATAGATTGCAG

@A00721:190:HGJW7DSXY:4:2623:20672:23234 1:N:0:TCTGCAAG+GCTGCACT  
GGACAGAGACAAATGCAGAAATTCTTCTTCGCCGAATCCGCCTTCTATAGAAGCGAAGCATCAGCAATG  
CGAACGGAAGAGACGTCTAGCGATCAAGCCTAGACGTCTTACACTACCGTGCGGCTGCATCATTTATC  
AGACATAGATTGCAG

@A00721:190:HGJW7DSXY:4:2637:9733:33786 1:N:0:TCTGCAAG+GCTGCACT  
GGACAGAGACAAATGCAGATTCTTCTTCGCCGAATCCGCCTTCTATAGAAGCGAAGCATCAGCAATG  
CGAACGGAAGAGACGTCTAGCGATCAAGCCTAGACGTCTTACACTACCGTGCGGCTGCATCATTTATC  
AGACATAGATTGCAG

@A00721:190:HGJW7DSXY:4:1146:25861:4100 1:N:0:TCTGCAAG+GCTGCACT  
GGACAGAGACAAATGCAGATTCTTCTTCGCCGAATCCGCCTTCTATAGAAGCGAAGCATCAGCAATG  
CGAACGGAAGAGACGTCTAGCGATCAAGCCTAGACGTCTTACACTACCGTGCGGCTGCATCATTTATC  
AGACTATAGATTGCA

@A00721:190:HGJW7DSXY:4:1206:2564:31798 1:N:0:TCTGCAAG+GCTGCACT  
GGACAGAGACAAATGCAGATTCTTCTTCGCCGAATCCGCCTTCTATAGAAGCGAAGCATCAGCAATG  
CGAACGGAAGAGACGTCTAGCGATCAAGCCTAGACGTCTTACACTACCGTGCGGCTGCATCATTTATC  
AGACTATAGATTGCA

@A00721:190:HGJW7DSXY:4:1362:22480:25582 1:N:0:TCTGCAAG+GCTGCACT  
GGACAGAGACAAATGCAGAAATCTTCTTCGCCGAATCCGCCTTCTATAGAAGCGAAGCATCAGCAATG  
CGAACGGAAGAGACGTCTAGCGATCAAGCCTAGACGTCTTACACTACCGTGCGGCTGCATCATTATC  
AGACTATAGATTGCA

@A00721:190:HGJW7DSXY:4:1362:23204:27179 1:N:0:TCTGCAAG+GCTGCACT  
GGACAGAGACAAATGCAGAAATCTTCTTCGCCGAATCCGCCTTCTATAGAAGCGAAGCATCAGCAATG  
CGAACGGAAGAGAGCTCTAGCGATCAAGCCTAGACGTCTTACACTACCGTGCGGCTGCATCATTATC  
AGACTAGACATTGCA

+  
FFFFFFFFFFFFFFFFFFFFFFFFFFFFFFFFFFFFFFFFFFFFFFFFFFFFFFFFFFFFFFFFFFFFFFFF  
FFFFFFFFFFFFFFFFFFFFFFFFFFFFFFFFFFFFFFFFFFFFFFFFFFFFFFFFFFFFFFFFFFFFFFFF  
FFFFFFFFFFFFFFFF

@A00721:190:HGJW7DSXY:4:2414:18511:33802 1:N:0:TCTGCAAG+GCTGCACT  
GGACAGAGACAAATGCAGAATTCTTCTTCGCCGAATCCGCCTTCTATAGAAGCGAAGCATCAGCAATG  
CGAACGGAAGAGACGTCTAGCGATCAAGCCTAGACGTCTTACACTACCGTGCGGCTGCATCATTATC  
AGACTATAGATTGCA

+  
FFFFFFFFFFFFFFFFFFFFFFFFFFFFFFFFFFFFFFFFFFFFFFFFFFFFFFFFFFFFFFFFFFFFFFFF  
FFFFFFFFFFFFFFFFFFFFFFFFFFFFFFFFFFFFFFFFFFFFFFFFFFFFFFFFFFFFFFFFFFFFFFFF:FFFF  
FFFFFFFFFFFFFFFF

@A00721:190:HGJW7DSXY:4:1308:22815:28260 1:N:0:TCTGCAAG+GCTGCACT  
TGATGCAGCCGCACGGTAGTGTAAAGACGTCTAGGCTTGATCGCTAGACGTCTCTTCCGTTTGCAATTGC  
TGATGCTTCGCTTCTATAGAAGGCGGATTCGGCGAAGAAGAATTCTGCATTTGTCTCTGTCCAAATCT  
TTAAAGATGAATTGG

+  
FF:FFFFFFFF:FF:FFF:FFFFFFFFFFFFFFFF:FFFFFFFFFFFFFFFFFFFFFFFFFFFFFFFF:FFF:F  
FF:F:FFF:FFF:FFFF:FFF,FFFFFFFFFFFFFFFFFFFFFFFFFFFFFFFF:FFFF:FFFFFFFF:FFF,F  
FFFF, :F, FFFFF

@A00721:190:HGJW7DSXY:4:1338:20491:16564 1:N:0:TCTGCAAG+GCTGCACT  
TGATGCAGCCGCACGGTAGTGTAAAGACGTCTAGGCTTGATCGCTAGACGTCTCTTCCGTTTGCAATTGC  
TGATGCTTCGCTTCTATAGAAGGCGGATTCGGCGAAGAAGAATTCTGCATTTGTCTCTGTCCAAATCT  
TTAAAGATGAATTGG

+  
FFFFFFFFFFFFFFFF:FFFFFFFFFFFFFFFFFFFFFFFFFFFFFFFFFFFFFFFFFFFFFFFF:FFFFFFFF  
FFFFFFFFFFFFFFFFFFFFFFFF:FFFFFFFFFFFFFFFFFFFFFFFFFFFFFFFFFFFFFFFFFFFFFFFF  
FFFFFFFFFFFFFFFF:FFF

@A00721:190:HGJW7DSXY:4:1524:3414:15358 1:N:0:TCTGCAAG+GCTGCACT  
TGATGCAGCCGCACGGTAGTGTAAAGACGTCTAGGCTTGATCGCTAGACGTCTCTTCCGTTTGCAATTGC  
TGATGCTTCGCTTCTATAGAAGGCGGATTCGGCGAAGAAGAATTCTGCATTTGTCCCTGTCCAAATCT  
TTAAAGATGAATTGG

+  
FFFFFFFFFFFFFFFFFFFFFFFFFFFFFFFFFFFFFFFFFFFFFFFFFFFFFFFFFFFFFFFFFFFFFFFF  
FFFFFFFFFFFFFFFFFFFFFFFFFFFFFFFFFFFFFFFFFFFFFFFFFFFFFFFFFFFFFFFFFFFFFFFF  
FFFFFFFFFFFFFFFF

@A00721:190:HGJW7DSXY:4:1641:3016:10755 1:N:0:TCTGCAAG+GCTGCACT  
TGATGCAGCCGCACGGTAGTGTAAAGACGTCTAGGCTTGATCGCTAGACGTCTCTTCCGTTTGCAATTGC  
TGATGCTTCGCTTCTATAGAAGGCGGATTCGGCGAAGAAGAATTCTGCATTTGTCTCTGTCCAAATCT  
TTAAAGATGAATTGG

+  
FFFFFFFFFFFFFFFFFFFFFFFFFFFFFFFFFFFFFFFFFFFFFFFFFFFFFFFFFFFFFFFFFFFFFFFF:  
FFFFFFFFFFFFFFFFFFFFFFFFFFFFFFFFFFFFFFFFFFFFFFFFFFFFFFFFFFFFFFFF:F:FFFFFFFF  
FFFFFFFFFFFFFFFF:F

@A00721:190:HGJW7DSXY:4:2112:32136:7670 1:N:0:TCTGCAAG+GCTGCACT  
TGATGCAGCCGCACGGTAGTGTAAAGACGTCTAGGCTTGATCGCTAGACGTCTCTTCCGTTTGCAATTGC  
TGATGCTTCGCTTCTATAGAAGGCGGATTCGGCGAAGAAGAATTCTGCATTTGTCTCTGTCCAAATCT  
TTAAAGATGAATTGG

+  
FFFFFFFFFFFFFFFFFFFFFFFFFFFFFFFFFFFFFFFFFFFFFFFFFFFFFFFFFFFFFFFFFFFFFFFF  
FFFFFFFFFFFFFFFFFFFFFFFFFFFFFFFFFFFFFFFFFFFFFFFFFFFFFFFFFFFFFFFFFFFFFFFF  
FFF:F:FFFFFFFF

@A00721:190:HGJW7DSXY:4:2114:29487:28040 1:N:0:TCTGCAAG+GCTGCACT  
TGATGCAGCCGCACGGTAGTGTAAAGACGTCTAGGCTTGATCGCTAGACGTCTCTTCCGTTTGCAATTGC



@A00721:190:HGJW7DSXY:4:1335:9155:36417 1:N:0:TCTGCAAG+GCTGCACT  
GCCGCACGGTAGTGTAAGACGTCTAGGCTTGATCGCTAGACGTCTCTTCCGTTTGCATTGCTGATGCT  
TCGCTTCTATAGAAGGCGGATTGCGCGAAGAAGAATTCTGCATTTGTCTCTGTCCAAATCTTTAAAGA  
TGAATTGGCATCCTT

[illegible]

+

[illegible]

+

```
F:FFFFFFFFFFFF,FFFFFF:FFFF,FFFFFFFFFFFF,FFFFFFFFFFFFFFFFFFFF,F,FFFFFF:FFF:FF
FFFFFFFF:FFF:FF,FFF:FF:FFFFFFFFFFFFFFFFFFFF,,FF:,F:FFF:FFFFFFFFFFFF,F,FFFFFFF
FFFFFFFF:E,F:FF:F
```

+

[illegible]

+

[illegible]

+

```

FFFFFFFF:FFFFF:FFFFFFFFFFFFFFFFFFFFFFFFFFFFFFFF:FFFFFFFFFFFFFFFFFFFF
FFF:FFFFFFFFFFFFFFFFFFFFFF,FF:FF:FFFFFFFFFFFFFFFFFFFFFFFFFFFFFFFFFFFF
F:FFFFFFFFF:FFF

```

 $+$ [illegible]



+  
FFFFFFFFFFFFFFFFFFFFFFFFFFFFFFFFFFFFFFFFFFFFFFFFFFFFFFFFFFFFFFFFFFFFFFFF  
FFFFFFFFFFFFFFFFFFFFFFFFFFFFFFFFFFFFFFFFFFFFFFFFFFFFFFFFFFFFFFFFFFFFFFFF  
:FFFFFFFFFFFFFFFF

@A00721:190:HGJW7DSXY:4:2162:25391:24549 1:N:0:TCTGCAAG+GCTGCACT  
CCTGGACAAGGATGCCAATTCATCTTTAAAGATTTGGACAGAGACAAATGCAGAATTCTTCTTCGCCG  
AATCCGCCTTCTATAGAAGCGAAGCATCAGCAATGCGAACGGAAGAGACGTCTAGCGATCAAGCCTAG  
ACGTCTTACACTACC

+  
FFFFFFFFFFFFFFFFFFFFFFFFFFFFFFFFFFFFFFFFFFFFFFFFFFFFFFFFFFFFFFFFFFFFFFFF  
FFFFFFFFFFFFFFFFFFFFFFFFFFFFFFFFFFFFFFFFFFFFFFFFFFFFFFFFFFFFFFFFFFFFFFFF  
:F:FFFFFFFFFFFFFF

@A00721:190:HGJW7DSXY:4:2357:27715:33520 1:N:0:TCTGCAAG+GCTGCACT  
CCTGGACAAGGATGCCAATTCATCTTTAAAGATTTGGACAGAGACAAATGCAGAATTCTTCTTCGCCG  
AATCCGCCTTCTATAGAAGCGAAGCATCAGCAATGCGAACGGAAGAGACGTCTAGCGATCAAGCCTAG  
ACGTCTTACACTACC

+  
FFFFFFFFFFFFFFFFFFFFFFFFFFFFFFFFFFFFFFFFFFFFFFFFFFFFFFFFFFFFFFFFFFFFFFFF  
F:FFFFFFFFFFFFFFFFFFFFFFFFFFFFFFFFFFFFFFFFFFFFFFFFFFFFFFFFFFFFFFFFFFFFFF  
:FFFFFFFFFFFFFFFF

@A00721:190:HGJW7DSXY:4:2357:27868:33724 1:N:0:TCTGCAAG+GCTGCACT  
CCTGGACAAGGATGCCAATTCATCTTTAAAGATTTGGACAGAGACAAATGCAGAATTCTTCTTCGCCG  
AATCCGCCTTCTATAGAAGCGAAGCATCAGCAATGCGAACGGAAGAGACGTCTAGCGATCAAGCCTAG  
ACGTCTTACACTACC

+  
F:,::FFFF:,FF:FFFFFFFF,FF:FF,F:FF,::,FFFFFFFFFFFFFF:FFFFFFFFF:FFFF,F,F  
FFFF,F,FFFFFFFFFFFFFF:F:FFFFFFFFFFFFFFFF::F:F:FF:FFFFFFFFFFFF:,FF:,F:F,  
FF,:F,FFFF,FF:F

@A00721:190:HGJW7DSXY:4:2417:27733:8406 1:N:0:TCTGCAAG+GCTGCACT  
CCTGGACAAGGATGCCAATTCATCTTTAAAGATTTGGACAGAGACAAATGCAGAATTCTTCTTCGCCG  
AATCCGCCTTCTATAGAAGCGAAGCATCAGCAATGCGAACGGAAGAGACGTCTAGCGATCAAGCCTAG  
ACGTCTTACACTACC

+  
FFFFFFFFFFFFFFFFFFFFFFFFFFFFFFFFFFFFFFFFFFFFFFFFFFFFFFFFFFFFFFFFFFFFFFFF  
FFFFFFFFFFFFFFFFFFFFFFFFFFFFFFFFFFFFFFFFFFFFFFFFFFFFFFFFFFFFFFFFFFFFFFFF  
FFFFFFFFFFFFFFFF

@A00721:190:HGJW7DSXY:4:2418:12798:12038 1:N:0:TCTGCAAG+GCTGCACT  
CCTGGACAAGGATGCCAATTCATCTTTAAAGATTTGGACAGAGACAAATGCAGAATTCTTCTTCGCCG  
AATCCGCCTTCTATAGAAGCGAAGCATCAGCAATGCGAACGGAAGAGACGTCTAGCGATCAAGCCTAG  
ACGTCTTACACTACC

+  
FFFFFFFFFFFFFFFFFFFFFF:FFFFFFFFFFFFFFFFFFFFFFFFFFFFFFFFFFFFFFFFFFFFFFFF  
FFFFFFFFFFFFFFFFFFFFFFFFFFFFFFFFFFFFFFFFFFFFFFFFFFFFFFFFFFFFFFFFFFFFFF  
:FFFFFFFFFFFFFFFF

@A00721:190:HGJW7DSXY:4:2543:2528:2268 1:N:0:TCTGCAAG+GCTGCACT  
CCTGGACAAGGATGCCAATTCATCTTTAAAGATTTGGACAGAGACAAATGCAGAATTCTTCTTCGCCG  
AATCCGCCTTCTATAGAAGCGAAGCATCAGCAATGCGAACGGAAGAGACGTCTAGCGATCAAGCCTAG  
ACGTCTTACACTACC

+  
FFFFFFF:FFFFFFFF:FFFFFFFFFFFFFFFFFFFFFFFFFFFFFFFFFFFFFFFFFFFFFFFFFFFF  
FFFFFFFFFFFFFFFFFFFFFF:FFFF:FFFFFFFFFFFFFFFFFFFFFFFFFFFFFFFFFFFFFFFF  
FFFFFFFFFFFFFFFF

@A00721:190:HGJW7DSXY:4:2569:11044:3082 1:N:0:TCTGCAAG+GCTGCACT  
CCTGGACAAGGATGCCAATTCATCTTTAAAGATTTGGACAGAGACAAATGCAGAATTCTTCTTCGCCG



@A00721:190:HGJW7DSXY:4:1435:8214:19727 1:N:0:TCTGCAAG+GCTGCACT  
CCAGGCTCAGAAGAATATTCTTATAAGACGTTCTTGACAAGGATGCCAATTCATCTTTAAAGATTTG  
GACAGAGACAAATGCAGAATTCTTCTTCGCCGAATCCGCCTTCTATAGAAGCGAAGCATCAGCAATGC  
GAACGGAAGAGACGT

[illegible]

+

```

FFFFFFFFFFFF:FFFFFFFFFFFFFFFFFFFFFFFFFFFFFFFFFFFFFFFFFFFFFFFF
FFFFFFFFFFFFFFFFFFFFFFFFFFFFFFFFFFFFFFFF:FFFFFFFFFFFFFFFFFFFF:FFFFFFFF
FFFFFFFFFFFFFFFF

```

+

[illegible]

+

```

FFFFFFFFFFFF:FFFFFFFFFFFFFFFFFFFFFFFFFFFFFFFF:FFFFFFFFFFFFFFFFFFFFFFFFFFFFFFFF
FFFFFFFFFFFFFFFFFFFFFFFFFFFFFFFFFFFFFFFF:FFFFFFFFFFFFFFFFFFFFFFFFFFFFFFFFFFFFFFFF
FFFFFFFFFFFF:FFFFF

```

+

[illegible]

+

```

FFFFFFFFFFFFFFFFFFFFFFFFFFFFFFFFFFFFFFFFFFFFFFFFFFFFFFFFFFFFFFFFFFFFFFFF
FFFFFFFFFFFFFFFFFFFFFFFFFFFFFFFFFFFFFFFFFFFFFFFFFFFFFFFFFFFFFFFFFFFFFFFF:
:FFFFFFFF:FFFFFFFF:FFFFFFFF:FFFFFFFF:
:FFFFFFFF:FFFFFFFF

```

+

[illegible]



FFFFFFFFFFFFFFFFFFFFFFFFFFFFFFFFFFFFFFFFFFFFFFFFFFFFFFFFFFFFFFFFFFFFFFFF  
FFFFFFFFFFFFFFFF

@A00721:190:HGJW7DSXY:4:1462:14543:32158 1:N:0:TCTGCAAG+GCTGCACT  
GTCCGTTTGCATTGCTGATGCTTCGCTTCTATAGAAGGCGGATTTCGGCGAAGAAGAATTCTGCATTG  
TCTCTGTCCAAATCTTTAAAGATGAATTGGCATCCTTGTCAGGAACGTCTTATAAGAATATTCTTCT  
GAGCCTGGATTGCAA

+

F::FFFFFFFF:FFF:FFFFFFFFFFFF:FFFFFF:F:FF:FFFFFFFFFFFFFFFFFFFFFFFF,FFF  
FFFFFF:F,FF:FF:F:FFF:FFFFFFFFFFFFFFFFFFFF:FFFF:::FF,FFFF,FFFF:FF:FF  
FFFF:FFFFFFFF

@A00721:190:HGJW7DSXY:4:1514:5113:8688 1:N:0:TCTGCAAG+GCTGCACT  
GTCCGTTTGCATTGCTGATGCTTCGCTTCTATAGAAGGCGGATTTCGGCGAAGAAGAATTCTGCATTG  
TCTCTGTCCAAATCTTTAAAGATGAATTGGCATCCTTGTCAGGAACGTCTTATAAGAATATTCTTCT  
GAGCCTGGATTGCAA

+

FFFFFFFFFFFFFFFFFFFFFFFFFFFFFFFFFFFFFFFFFFFFFFFFFFFFFFFFFFFFFFFFFFFFFFFF  
FFFFFFFFFFFFFFFFFFFFFFFFFFFFFFFFFFFFFFFFFFFFFFFFFFFFFFFFFFFFFFFFFFFFFFFF  
FFFFFFFFFF:FFFF

@A00721:190:HGJW7DSXY:4:1612:7916:28855 1:N:0:TCTGCAAG+GCTGCACT  
GTCCGTTTGCATTGCTGATGCTTCGCTTCTATAGAAGGCGGATTTCGGCGAAGAAGAATTCTGCATTG  
TCTCTGTCCAAATCTTTAAAGATGAATTGGCATCCTTGTCAGGAACGTCTTATAAGAATATTCTTCT  
GAGCCTGGATTGCAA

+

FFFFFFFFFFFFFFFFFFFFFFFFFFFFFFFFFFFFFFFFFFFFFFFFFFFFFFFFFFFFFFFFFFFFFFFF  
FFFFFFFFFFFFFFFFFFFFFFFFFFFFFFFFFFFFFFFFFFFFFFFFFFFFFFFFFFFFFFFFFFFFFFFF  
FFFFFFFFFF:FFFF

@A00721:190:HGJW7DSXY:4:1612:8775:29371 1:N:0:TCTGCAAG+GCTGCACT  
GTCCGTTTGCATTGCTGATGCTTCGCTTCTATAGAAGGCGGATTTCGGCGAAGAAGAATTCTGCATTG  
TCTCTGTCCAAATCTTTAAAGATGAATTGGCATCCTTGTCAGGAACGTCTTATAAGAATATTCTTCT  
GAGCCTGGATTGCAA

+

FFFFFFFFFFFFFFFFFFFFFFFFFFFFFFFFFFFFFFFFFFFFFFFFFFFFFFFFFFFFFFFFFFFFFFFF  
FFFFFFFFFFFFFFFFFFFFFFFFFFFFFFFFFFFFFFFFFFFFFFFFFFFFFFFFFFFFFFFFFFFFFFFF  
FFF:FFFF:FFFF

@A00721:190:HGJW7DSXY:4:1619:4209:9283 1:N:0:TCTGCAAG+GCTGCACT  
GTCCGTTTGCATTGCTGATGCTTCGCTTCTATAGAAGGCGGATTTCGGCGAAGAAGAATTCTGCATTG  
TCTCTGTCCAAATCTTTAAAGATGAATTGGCATCCTTGTCAGGAACGTCTTATAAGAATATTCTTCT  
GAGCCTGGATTGCAA

+

FFF,FFF:FFF:FFFFFFFFFFFFFFFFFFFF:FFFFFFFFFFFFFFFFFFFFFFFF:FFFFFFFFFFFF  
FFFFFFFFFFFFFFFFFFFF:FFF:FFF:FFFFFFFF:FFFFFFFFFFFFFFFF:FFFF::FFFFFFFF  
F:FFFFFFFF::FF

@A00721:190:HGJW7DSXY:4:1631:25635:11694 1:N:0:TCTGCAAG+GCTGCACT  
GTCCGTTTGCATTGCTGATGCTTCGCTTCTATAGAAGGCGGATTTCGGCGAAGAAGAATTCTGCATTG  
TCTCTGTCCAAATCTTTAAAGATGAATTGGCATCCTTGTCAGGAACGTCTTATAAGAATATTCTTCT  
GAGCCTGGATTGCAA

+

FFFFFFFFFFFFFFFFFFFFFFFFFFFFFFFFFFFFFFFFFFFFFFFFFFFFFFFFFFFFFFFFFFFFFFFF  
FFFFFFFFFFFFFFFFFFFFFFFFFFFFFFFFFFFFFFFFFFFFFFFFFFFFFFFFFFFFFFFFFFFFFFFF  
FFFFFFFFFFFFFFFF

@A00721:190:HGJW7DSXY:4:1642:8558:28964 1:N:0:TCTGCAAG+GCTGCACT  
GTCCGTTTGCATTGCTGATGCTTCGCTTCTATAGAAGGCGGATTTCGGCGAAGAAGAATTCTGCATTG  
TCTCTGTCCAAATCTATAAAGATGAATTGGCATCCTTGTCAGGAACGTCTTATAAGACTATTCTTCT  
GAGCCTGGATTGCAA

+  
::FF,:FFFF,F:FF,F,FFFF,FF,F:FFFF,F,:F:F,,::FF,FFFFFFFFFFFF,FFFF:FFF  
FFFFFFFFFFFFFFFFFFFF,FFFF,::,FFFF,F:F:FF,F,:FF:FFFF:FFFF,FF:FF,F,FFFFFF:  
,,F,F:FFFF,FFF

@A00721:190:HGJW7DSXY:4:2419:1099:16078 1:N:0:TCTGCAAG+GCTGCACT  
GTCCGTTTGCATTGCTGATGCTTCGCTTCTATAGAAGGCGGATTTCGGCGAAGAAGAATTCTGCATTG  
TCTCTGTCCAAATCTTTAAAGATGAATTGGCATCCTTGTCCAGGAACGTCTTATAAGAATATTCTTCT  
GAGCCTGGATTGCAA

+  
FFFFFF:FFFFFFFFFFFFFFFFFFFFFFFFFFFFFFFFFFFFFFFFFFFFFFFFFFFFFFFFFFFFFFFFFFFF  
FFFFFFFFFFFFFFFFFFFFFFFFFFFFFFFFFFFFFFFFFFFFFFFFFFFFFFFFFFFFFFFFFFFF,FFFFFFFFFFFF:FFFFFFFFFFFFFFFFFFFF  
FFF:FFFF:FFFF

@A00721:190:HGJW7DSXY:4:2566:30960:1501 1:N:0:TCTGCAAG+GCTGCACT  
GTCCGTTTGCATTGCTGATGCTTCGCTTCTATAGAAGGCGGATTTCGGCGAAGAAGAATTCTGCATTG  
TCTCTGTCCAAATCTTTAAAGATGAATTGGCATCCTTGTCCAGGAACGTCTTATAAGAATATTCTTCT  
GAGCCTGGATTGCAA

+  
FFFFFFFFFFFFFFFFFFFFFFFFFFFFFFFFFFFFFFFFFFFFFFFFFFFFFFFFFFFFFFFFFFFF  
FFFFFFFFFFFFFFFFFFFFFFFFFFFFFFFFFFFFFFFFFFFFFFFFFFFFFFFFFFFFFFFFFFFF:FFFFFFFFFFFF  
FFFFFFFFFFFFFFFFFFFF

@A00721:190:HGJW7DSXY:4:1242:19524:9095 1:N:0:TCTGCAAG+GCTGCACT  
GCTGATGCTTCGCTTCTATAGAAGGCGGATTTCGGCGAAGAAGAATTCTGCATTGTCTCTGTCCAAAT  
CTTTAAAGATGAATTGGCATCCTTGTCCAGGAACGTCTTATAAGAATATTCTTCTGAGCCTGGATTGC  
AAAGCACGATTGACG

+  
FFFFFFFFFFFFFFFFFFFFFFFFFFFFFFFFFFFFFFFFFFFFFFFFFFFFFFFFFFFFFFFFFFFF  
FFFFFFFFFFFFFFFFFFFFFFFFFFFFFFFFFFFFFFFFFFFFFFFFFFFFFFFFFFFFFFFFFFFF:FFFFFFFFFFFF  
FFFFFFFFFFFFFFFFFFFF

@A00721:190:HGJW7DSXY:4:1258:4291:1689 1:N:0:TCTGCAAG+GCTGCACT  
GCTGATGCTTCGCTTCTATAGAAGGCGGATTTCGGCGAAGAAGAATTCTGCATTGTCTCTGTCCAAAT  
CTTTAAAGATGAATTGGCATCCTTGTCCAGGAACGTCTTATAAGAATATTCTTCTGAGCCTGGATTGC  
AAAGCACGATTGACG

+  
FFFFFFFFFFFFFFFFFFFFFFFFFFFFFFFFFFFFFFFFFFFFFFFFFFFFFFFFFFFFFFFFFFFF  
FFFFFFFFFFFFFFFFFFFFFFFFFFFFFFFFFFFFFFFFFFFFFFFFFFFFFFFFFFFFFFFFFFFF:FFFFFFFFFFFF  
FFFFFFFFFFFFFFFFFFFF

@A00721:190:HGJW7DSXY:4:1362:7952:27101 1:N:0:TCTGCAAG+GCTGCACT  
GCTGATGCTTCGCTTCTATAGAAGGCGGATTTCGGCGAAGAAGAATTCTGCATTGTCTCTGTCCAAAT  
CTTTAAAGATGAATTGGCATCCTTGTCCAGGAACGTCTTATAAGAATATTCTTCTGAGCCTGGATTGC  
AAAGCACGATTGACG

+  
FFFFFFFFFFFFFFFFFFFFFFFFFFFFFFFFFFFFFFFFFFFFFFFFFFFFFFFFFFFFFFFFFFFF  
FFFFFFFFFFFFFFFFFFFFFFFFFFFFFFFFFFFFFFFFFFFFFFFFFFFFFFFFFFFFFFFFFFFF,FFFFFFFFFFFF  
FFFFFFFFFFFFFFFFFFFF

@A00721:190:HGJW7DSXY:4:1374:21902:28902 1:N:0:TCTGCAAG+GCTGCACT  
GCTGATGCTTCGCTTCTATAGAAGGCGGATTTCGGCGAAGAAGAATTCTGCATTGTCTCTGTCCAAAT  
CTTTAAAGATGAATTGGCATCCTTGTCCAGGAACGTCTTATAAGAATATTCTTCTGAGCCTGGATTGC  
AAAGCACGATTGACG

+  
FFFFFFFFFFFFFFFFFFFFFFFFFFFFFFFFFFFFFFFFFFFFFFFFFFFFFFFFFFFFFFFFFFFF  
FFFFFFFFFFFFFFFFFFFFFFFFFFFFFFFFFFFFFFFFFFFFFFFFFFFFFFFFFFFFFFFFFFFF  
FFFFFFFFFFFFFFFFFFFF

@A00721:190:HGJW7DSXY:4:1430:31358:22670 1:N:0:TCTGCAAG+GCTGCACT  
GCTGATGCTTCGCTTCTATAGAAGGCGGATTTCGGCGAAGAAGAATTCTGCATTGTCTCTGTCCAAAT



$+$ 

+

 $+$ 

+

+

+

+

@A00721:190:HGJW7DSXY:4:2240:26377:4085 1:N:0:TCTGCAAG+GCTGCACT  
GGCGGATTCGGCGAAGAAGAATTCTGCATTTGTCTCTGTCCAAATCTTTAAAGATGAATTGGCATCCT  
TGTCCAGGAACGTCTTATAAGAATATTCTTCTGAGCCTGGATTGCAAAGCACGATTGACGGGATACCA  
CCTTTAATTGAATT

@A00721:190:HGJW7DSXY:4:2505:29315:29403 1:N:0:TCTGCAAG+GCTGCACT  
GGCGGATTCGGCGAAGAAGAATTCTGCATTTGTCTCTGTCCAAATCTTTAAAGATGAATTGGCATCCT  
TGTCCAGGAACGTCTTATAAGAATATTCTTCTGAGCCTGGATTGCAAAGCACGATTGACGGGATACCA  
CCTTTAATTTGAATT

@A00721:190:HGJW7DSXY:4:2548:25337:29684 1:N:0:TCTGCAAG+GCTGCACT  
GGCGGATTCGGCGAAGAAGAATTCTGCATTTGTCTCTGTCCAAATCTTTAAAGATGAATTGGCATCCT  
TGTCCAGGAACGTCTTATAAGAATATTCTTCTGAGCCTGGATTGCAAAGCACGATTGACGGGATACCA  
CCTTTAATTTGAATT

@A00721:190:HGJW7DSXY:4:2621:3531:28119 1:N:0:TCTGCAAG+GCTGCACT  
GGCGGATTCGGCGAAGAAGAATTCTGCATTTGTCTCTGTCCAAATCTTTAAAGATGAATTTGCAACCT  
TGTCCAGGAACGTCTTATAAGAATATTCTACTGAGCCTGGATTGCAAAGCACGATTGACGTGATACCA  
CCTTTAATTTGAATT

@A00721:190:HGJW7DSXY:4:1227:25997:28510 1:N:0:TCTGCAAG+GCTGCACT  
CGGCGAAGAAGAATTCTGCATTTGTCTCTGTCCAAATCTTTAAAGATGAATTGGCATCCTTGTCCAGG  
AACGTCTTATAAGAATATTCTTCTGAGCCTGGATTGCAAAGCACGATTGACGGGATACCACCTTTAAT  
TTGAATTGTTTGCC

@A00721:190:HGJW7DSXY:4:1462:32669:12414 1:N:0:TCTGCAAG+GCTGCACT  
CGGCGAAGAAGAATTCTGCATTTGTCTCTGTCCAAATCTTTAAAGATGAATTGGCATCCTTGTCCAGG  
AACGTCTTATAAGAATATTCTTCTGAGCCTGGATTGCAAAGCACGATTGACGGGATACACCTTTAAT  
TTGAATTGGTTTGCC

@A00721:190:HGJW7DSXY:4:1525:15148:2362 1:N:0:TCTGCAAG+GCTGCACT  
CGGCGAAGAAGAATTCTGCATTTGTCTCTGTCCAAATCTTTAAAGATGAATTGGCATCCTTGTCCAGG  
AACGTCTTATAAGAATATTCTTCTGAGCCTGGATTGCAAAGCACGATTGACGGGATACCACTTTAAT  
TTGAATTGGTTTGCC

+  
FFFFFFFFFFFFFFFFFFFFFFFFFFFFFFFFFFFFFFFFFFFFFFFFFFFFFFFFFFFFFFFFFFFFFFFF  
FFFFFFFFFFFFFFFFFFFFFFFFFFFFFFFFFFFFFFFFFFFFFFFFFFFFFFFFFFFFFFFFFFFFFFFF,FFFF  
FFFFFFFFFFFFFFFF

@A00721:190:HGJW7DSXY:4:2317:9362:1892 1:N:0:TCTGCAAG+GCTGCACT  
CGGCGAAGAAGAATTCTGCATTTGTCTCTGTCCAAATCTTTAAAGATGAATTGGCATCCTTGTCCAGG  
AACGTCTTATAAGAATATTCTTCTGAGCCTGGATTGCAAAGCACGATTGACGGGATACCACCTTTAAT  
TTGAATTGGTTTGCC

+  
FFFFFFFFFFFFFFFFFFFFFFFFFFFFFFFFFFFFFFFFFFFFFFFFFFFFFFFFFFFFFFFFFFFFFFFF  
FFFFFFFFFFFFFFFFFFFFFFFFFFFFFFFFFFFFFFFFFFFFFFFFFFFFFFFFFFFFFFFFFFFFFFFF  
FFFFFFFFFFFFFFFF:FF

@A00721:190:HGJW7DSXY:4:2378:21459:13949 1:N:0:TCTGCAAG+GCTGCACT  
CGGCGAAGAAGAATTCTGCATTTGTCTCTGTCCAAATCTTTAAAGATGAATTGGCATCCTTGTCCAGG  
AACGTCTTATAAGAATATTCTTCTGAGCCTGGATTGCAAAGCACGATTGACGGGATACCACCTTTAAT  
TTGAATTGGTTTGCC

+  
FFFFFFFFFFFFFFFFFFFFFFFFFFFFFFFFFFFFFFFFFFFFFFFFFFFFFFFFFFFFFFFFFFFFFFFF  
FFFFFFFFFFFFFFFFFFFFFFFFFFFFFFFFFFFFFFFFFFFFFFFFFFFFFFFFFFFFFFFFFFFFFFFF  
FFFFFFFFFFFFFFFF:FF

@A00721:190:HGJW7DSXY:4:1370:23149:14904 1:N:0:TCTGCAAG+GCTGCACT  
AGCGAAGAAGAATTCTGCATTTGTCTCTGTCCAAATCTTTAAAGATGAATTGGCATCCTTGTCCAGGA  
ACGTCTTATAAGAATATTCTTCTGAGCCTGGATTGCAAAGCACGATTGACGGGATACCACCTTTAAT  
TGAATTGGTTTGCCG

+  
FFFFFFFFFFFFFFFFFFFFFFFFFFFFFFFFFFFFFFFFFFFFFFFFFFFFFFFFFFFFFFFFFFFFFFFF,FFFF:FFF  
FFFFFFFFFFFFFFFFFFFFFFFFFFFFFFFFFFFFFFFFFFFFFFFFFFFFFFFFFFFFFFFFFFFFFFFF:FFFF  
FFF:FFFFFFFF

@A00721:190:HGJW7DSXY:4:1406:1452:16438 1:N:0:TCTGCAAG+GCTGCACT  
AGCGAAGAAGAATTCTGCATTTGTCTCTGTCCAAATCTTTAAAGATGAATTGGCATCCTTGTCCAGGA  
ACGTCTTATAAGAATATTCTTCTGAGCCTGGATTGCAAAGCACGATTGACGGGATACCACCTTTAAT  
TGAATTGGTTTGCCG

+  
FFFFFFFFFFFFFFFFFFFFFFFFFFFFFFFFFFFFFFFFFFFFFFFFFFFFFFFFFFFFFFFFFFFFFFFF:FFFFFFFFFFFFFFFFFFFFFFFF:FFF  
FFFFFFFFFFFFFFFFFFFFFFFFFFFFFFFFFFFFFFFFFFFFFFFFFFFFFFFFFFFFFFFFFFFFFFFF  
FFFFFFFFFFFFFFFF

@A00721:190:HGJW7DSXY:4:1463:6668:7028 1:N:0:TCTGCAAG+GCTGCACT  
AGCGAAGAAGAATTCTGCATTTGTCTCTGTCCAAATCTTTAAAGATGAATTGGCATCCTTGTCCAGGA  
ACGTCTTATAAGAATATTCTTCTGAGCCTGGATTGCAAAGCACGATTGACGGGATACCACCTTTAAT  
TGAATTGGTTTGCC

+  
FFFFF:,FF:FFF:FFFFFFFFF:,,:F::F:FFF:,FFFFF,F:F:FFFFF::F,F,FF:FF:FF:F  
FFF,FFFFF,:FF:FFF:F:,F:F:FFFF,FFFFFFFFF:FF,FFF,FFFF:FFFF,FF:FFFFF  
F,FFFFF,FFFFF

@A00721:190:HGJW7DSXY:4:1514:15121:4163 1:N:0:TCTGCAAG+GCTGCACT  
AGCGAAGAAGAATTCTGCATTTGTCTCTGTCCAAATCTTTAAAGATGAATTGGCATCCTTGTCCAGGA  
ACGTCTTATAAGAATATTCTTCTGAGCCTGGATTGCAAAGCACGATTGACGGGATACCACCTTTAAT  
TGAATTGGTTTGCCG

+  
FFF:FF:F:F:FFFFFFFFF:FFFFFFFFF:FFFFFFFFF:F:FFF,:FF:FF:FF:FF:FFFFF,FF  
FFFF:FFF:FF,FFFFF:FF,FFF:F::,FFFF:FFF:,FFFF:FFFF,,FFF,FF:FFFF:FF  
F:FFFFFFFFF,::

@A00721:190:HGJW7DSXY:4:2176:1407:19366 1:N:0:TCTGCAAG+GCTGCACT  
AGCGAAGAAGAATTCTGCATTTGTCTCTGTCCAAATCTTTAAAGATGAATTGGCATCCTTGTCCAGGA

ACGTCTTATAAGAATATTCTTCTGAGCCTGGATTGCAAAGCACGATTGACGGGATACCACCTTTAATT  
TGAATTGGTTTGCCG

[illegible]

+

@A00721:190:HGJW7DSXY:4:2277:28167:34147 1:N:0:TCTGCAAG+GCTGCACT  
AGCGAAGAAGAATTCTGCATTTGTCTCTGTCCAAATCTTTAAAGATGAATTGGCATCCTTGTCCAGGA  
ACGTCTTATAAGAATATTCTTCTGAGCCTGGATTGCAAAGCACGATTGACGGGATACCACCTTTAATT  
TGAATTGGTTTGCCG

[illegible]

+

@A00721:190:HGJW7DSXY:4:2320:29161:19241 1:N:0:TCTGCAAG+GCTGCACT  
AGCGAAGAAGAATTCTGCATTTGTCTCTGTCCAAATCTTTAAAGATGAATTGGCATCCTTGTCCAGGA  
ACGTCTTATAAGAATATTCTTCTGAGCCTGGATTGCAAAGCACGATTGACGGGATACCACCTTTAATT  
TGAATTGGTTTGCCG

[illegible]

+

@A00721:190:HGJW7DSXY:4:2641:11695:30796 1:N:0:TCTGCAAG+GCTGCACT  
AGCGAAGAAGAATTCTGCATTTGTCTCTGTCCAAATCTTTAAAGATGAATTGGCATCCTTGTCCAGGA  
ACGTCTTATAAGAATATTCTTCTGAGCCTGGATTGCAAAGCACGATTGACGGGATACCACCTTTAATT  
TGAATTGGTTTGCCG

[illegible]





@A00721:190:HGJW7DSXY:4:1221:27019:20290 1:N:0:TCTGCAAG+GCTGCACT  
GAAGAATTCTGCATTTGTCTCTGTCCAAATCTTTAAAGATGAATTGGCATCCTTGTCCAGGAACGTCT  
TATAAGAATATTCTTCTGAGCCTGGATTGCAAAGCACGATTGACGGGATACCACCTTTAATTTGAATT  
GGTTTGCCGTA

@A00721:190:HGJW7DSXY:4:1221:25762:22811 1:N:0:TCTGCAAG+GCTGCACT  
GAAGAATTCTGCATTTGTCTCTGTCCAAATCTTTAAAGATGAATTGGCATCCTTGTCCAGGAACGTCT  
TATAAGAATATTCTTCTGAGCCTGGATTGCAAAGCACGATTGACGGGATACCACCTTTAATTTGAATT  
GGTTTGCCGTA

@A00721:190:HGJW7DSXY:4:1271:11279:24158 1:N:0:TCTGCAAG+GCTGCACT  
GAAGAATTCTGCATTTGTCTCTGTCCAAATCTTTAAAGATGAATTGGCATCCTTGTCCAGGAACGTCT  
TATAAGAATATTCTTCTGAGCCTGGATTGCAAAGCACGATTGACGGGATACCACCTTTAATTTGAATT  
GGTTTGCCGTA

@A00721:190:HGJW7DSXY:4:1306:25952:8453 1:N:0:TCTGCAAG+GCTGCACT  
GAAGAATTCTGCATTTGTCTCTGTCCAAATCTTTAAAGATGAATTGGCATCCTTGTCCAGGAACGTCT  
TATAAGAATATTCTTCTGAGCCTGGATTGCAAAGCACGATTGACGGGATACCACCTTTAATTTGAATT  
GGTTTGCCGTA

@A00721:190:HGJW7DSXY:4:1475:21459:15295 1:N:0:TCTGCAAG+GCTGCACT  
GAAGAATTCTGCATTTGTCTCTGTCCAAATCTTTAAAGATGAATTGGCATCCTTGTCCAGGAACGTCT  
TATAAGAATATTCTTCTGAGCCTGGATTGCAAAGCACGATTGACGGGATACCACCTTTAATTTGAATT  
GGTTTGCCGTACTTC

@A00721:190:HGJW7DSXY:4:2142:7075:19789 1:N:0:TCTGCAAG+GCTGCACT  
GAAGAATTCTGCATTTGTCTCTGTCCAAATCTTTAAAGATGAATTGGCATCCTTGTCCAGGAACGTCT  
TATAAGAATATTCTTCTGAGCCTGGATTGCAAAGCACGATTGACGGGATACCACCTTTAATTTGAATT  
GGTTTGCCGTACTTC

@A00721:190:HGJW7DSXY:4:2509:9498:17190 1:N:0:TCTGCAAG+GCTGCACT  
GAAGAATTCTGCATTTGTCTCTGTCCAAATCTTTAAAGATGAATTGGCATCCTTGTCCAGGAACGTCT  
TATAAGAATATTCTTCTGAGCCTGGATTGCAAAGCACGATTGACGGGATACCACCTTTAATTTGAATT  
GGTTTGCCGTACTTC

+  
FFFFFFFFFFFFFFFFFFFFFFFFFFFFFFFFFFFFFFFFFFFFFFFFFFFFFFFFFFFFFFFFFFFFFFFF  
FFFFFFFFFFFFFFFFFFFFFFFFFFFFFFFFFFFFFFFFFFFFFFFFFFFFFFFFFFFFFFFFFFFFFFFF, FFFFFFFFFF  
FFFFFFFFFFFFFFFF  
@A00721:190:HGJW7DSXY:4:1132:3676:14434 1:N:0:TCTGCAAG+GCTGCACT  
CCTGCATTTGTCTCTGTCCAAATCTTTAAAGATGAATTGGCATCCTTGTCCAGGAACGTCTTATAAGA  
ATATTCTTCTGAGCCTGGATTGCAAAGCACGATTGACGGGATACCACCTTTAATTTGAATTGGTTTGC  
CGTACTTCACATTGG

+  
FFFFFFFFFFFFFFFFFFFFFFFFFFFFFFFF:F, FFFFFFFF:FFF:FFFF:FFFFFFFFFFFF:FFFFF  
FF:FFFFF, :FFFFFFFFFFFFFFFFFFFF, FFF, FF, FFFFFFFF, F, FFFFFFFF, :F::FF:FFF  
FFFFFFFFFFFFFFFF  
@A00721:190:HGJW7DSXY:4:1163:19470:18208 1:N:0:TCTGCAAG+GCTGCACT  
CCTGCATTTGTCTCTGTCCAAATCTTTAAAGATGAATTGGCATCCTTGTCCAGGAACGTCTTATAAGA  
ATATTCTTCTGAGCCTGGATTGCAAAGCACGATTGACGGGATACCACCTTTAATTTGAATTGGTTTGC  
CGTACTTCACATTGG

+  
FFFFFFFFFFFFFFFFFFFFFFFFFFFFFFFF:FFFFFFFFFFFFFFFFFFFFFFFFFFFFFFFFFFFF:FF  
FFFFFFFFFFFFF:FFFFFFFFFFFFFFFFFFFFF:FFFFFF:FFFFFFFFF, FFFFFFFFFFFFFFFFFF  
F:FFFF:FFFFFFFF  
@A00721:190:HGJW7DSXY:4:1276:5141:27211 1:N:0:TCTGCAAG+GCTGCACT  
CCTGCATTTGTCTCTGTCCAAATCTTTAAAGATGAATTGGCATCCTTGTCCAGGAACGTCTTATAAGA  
ATATTCTTCTGAGCCTGGATTGCAAAGCACGATTGACGGGATACCACCTTTAATTTGAATTGGTTTGC  
CGTACTTCACATTGG

+  
FFFFFFFFFFFFFFFFFFFFFFFFFFFFFFFF:FFFFFFFFFFFFFFFFFFFFFFFFFFFFFFFFFFFF  
FFFFFFFFFFFFFFFFFFFFFFFFFFFFFFFFFFFFF:FFFFFFFFF:F, FFFFFFFFFFFFFF  
FFFFFFFFFFFFFFFF  
@A00721:190:HGJW7DSXY:4:1336:19434:7467 1:N:0:TCTGCAAG+GCTGCACT  
CCTGCATTTGTCTCTGTCCAAATCTTTAAAGATGAATTGGCATCCTTGTCCAGGAACGTCTTATAAGA  
ATATTCTTCTGAGCCTGGATTGCAAAGCACGATTGACGGGATACCACCTTTAATTTGAATTGGTTTGC  
CGTACTTCACATTGG

+  
FFFFFFFFFFFFFFFFFFFFFFFFFFFFFFFFFFFFFFFFFFFFFFFFFFFFFFFFFFFFFFFFFFFF:FF  
FFFFFFFFFFFFFFFFFFFFFFFFFFFFFFFFFFFFF:FFFF:FFFFFF:FFFFFFFFFFFFFFFFFFFF:  
FFFFF, FFFFFFFF:  
@A00721:190:HGJW7DSXY:4:1434:20971:14951 1:N:0:TCTGCAAG+GCTGCACT  
CCTGCATTTGTCTCTGTCCAAATCTTTAAAGATGAATTGGCATCCTTGTCCAGGAACGTCTTATAAGA  
ATATTCTTCTGAGCCTGGATTGCAAAGCACGATTGACGGGATACCACCTTTAATTTGAATTGGTTTGC  
CGTACTTCACAGTGG

+  
FFFFFFFFFFFFFFFFFFFFFFFFFFFF:FFFFFFFFFFFFFFFFFFFFFFFFFFFFFFFFFFFF:FFFFFFFFFFFF:FFFF:  
FFFFFFFFFFFFFFFFFFFFFFFFFFFFFFFFFFFFF:FFF::FFFF:FF:FFFFFFFFFFFFFFFF  
FFFFFFFFFFFF, FFF  
@A00721:190:HGJW7DSXY:4:1453:4553:21214 1:N:0:TCTGCAAG+GCTGCACT  
CCTGCATTTGTCTCTGTCCAAATCTTTAAAGATGAATTGGCATCCTTGTCCAGGAACGTCTTATAAGA  
ATATTCTTCTGAGCCTGGATTGCAAAGCACGATTGACGGGATACCACCTTTAATTTGAATTGGTTTGC  
CGTACTTCACATTGG

+  
FFFFFFFFFFFFFFFFFFFFFFFFFFFF:FFFFFFFFFFFFFFFFFFFFFFFFFFFFFFFFFFFF:FFFFF  
FFF:FFFFFFFFFFFFFFFFFFFFFFFFFFFFF:FFFFFFFFFFFFFFFFFFFFFFFFFFFF:FFFFF  
FFFFFFFFFFFFFFFF  
@A00721:190:HGJW7DSXY:4:2308:6262:12461 1:N:0:TCTGCAAG+GCTGCACT  
CCTGCATTTGTCTCTGTCCAAATCTTTAAAGATGAATTGGCATCCTTGTCCAGGAACGTCTTATAAGA



$+$ 

+

+

+

+

 $+$  $+$

FFFFFFFFFFFFFFFFFFFFFFFFFFFFFFFFFFFFFFFFFFFFFFFFFFFFFFFFFFFFFFFFFFFFFFFFFFFFFFFF  
FFFFFFFFFFFFFFFF

@A00721:190:HGJW7DSXY:4:1430:25644:20415 1:N:0:TCTGCAAG+GCTGCACT  
CTGCATTTGTCTCTGTCCAAATCTTTAAAGATGAATTGGCATCCTTGTCCAGGAACGTCTTATAAGAA  
TATTCTTCTGAGCCTGGATTGCAAAGCACGATTGACGGGATACCACCTTTAATTTGAATTGGTTTGCC  
GTACTTCACATTGGA

+

FFFFFFFFFFFFFFFFFFFFFFFFFFFFFFFFFFFFFFFFFFFFFFFFFFFFFFFFFFFFFFFFFFFFFFFFFFFFFFFF  
FFFFFFFFFFFFFFFFFFFFFFFFFFFFFFFFFFFFFFFFFFFFFFFFFFFFFFFFFFFFFFFFFFFFFFFFFFFFFFFF  
FFFFFFFFFFFFFFFF

@A00721:190:HGJW7DSXY:4:1467:30291:31250 1:N:0:TCTGCAAG+GCTGCACT  
CTGCATTTGTCTCTGTCCAAATCTTTAAAGATGAATTGGCATCCTTGTCCAGGAACGTCTTATAAGAA  
TATTCTTCTGAGCCTGGATTGCAAAGCACGATTGACGGGATACCACCTTTAATTTGAATTGGTTTGCC  
GTACTTCACATTGGA

+

FFFFFFFFFFFFFFFFFFFFFFFFFFFFFFFFFFFFFFFFFFFFFFFFFFFFFFFFFFFFFFFFFFFFFFFFFFFFFFFF  
FFFFFFFFFFFFFFFFFFFFFFFFFFFFFFFFFFFFFFFFFFFFFFFFFFFFFFFFFFFFFFFFFFFFFFFFFFFFFFFF  
FFFFFFFFFFFF,FFFF:FF:FFFFFFFFFFFF  
FFFFFFFFFFFF,FFFF

@A00721:190:HGJW7DSXY:4:1544:4562:3912 1:N:0:TCTGCAAG+GCTGCACT  
CTGCATTTGTCTCTGTCCAAATCTTTAAAGATGAATTGGCATCCTTGTCCAGGAACGTCTTATAAGAA  
TATTCTTCTGAGCCTGGATTGCAAAGCACGATTGACGGGATACCACCTTTAATTTGAATTGGTTTGCC  
GTACTTCACATTGGA

+

FFFFFF:FFFFFFFFFFFFFFFFFFFFFFFFFFFFFFFFFFFFFFFFFFFFFFFFFFFFFFFFFFFFFFFFFFFFFFFF  
,FFFF::FFFFFFFFFFFF:FFFFFFFFFFFF:FFF:FFF:FFFFFFFFFFFF:F,FFFFFFFFFFFFFFFF:FF  
:FF:FFFFFFF::F:

@A00721:190:HGJW7DSXY:4:2158:22661:18067 1:N:0:TCTGCAAG+GCTGCACT  
CTGCATTTGTCTCTGTCCAAATCTTTAAAGATGAATTGGCATCCTTGTCCAGGAACGTCTTATAAGAA  
TATTCTTCTGAGCCTGGATTGCAAAGCACGATTGACGGGATACCACCTTTAATTTGAATTGGTTTGCC  
GTACTTCACATTGGA

+

FFFFFFFFFFFFFFFFFFFFFFFFFFFFFFFFFFFFFFFFFFFFFFFFFFFFFFFFFFFFFFFFFFFFFFFFFFFFFFFF  
FFFFFFFFFFFFFFFFFFFFFFFFFFFFFFFFFFFFFFFFFFFFFFFFFFFFFFFFFFFFFFFFFFFFFFFFFFFFFFFF  
FFFFFFFFFFFFFFFF

@A00721:190:HGJW7DSXY:4:2410:8305:2942 1:N:0:TCTGCAAG+GCTGCACT  
CTGCATTTGTCTCTGTCCAAATCTTTAAAGATGAATTGGCATCCTTGTCCAGGAACGTCTTATAAGAA  
TATTCTTCTGAGCCTGGATTGCAAAGCACGATTGACGGGATACCACCTTTAATTTGAATTGGTTTGCC  
GTACTTCACATTGGA

+

FFFFFFFFFFFFFFFFFFFFFFFFFFFFFFFFFFFFFFFFFFFFFFFFFFFFFFFFFFFFFFFFFFFFFFFFFFFFFFFF  
FFFFFFFFFFFFFFFFFFFFFFFFFFFFFFFFFFFFFFFFFFFFFFFFFFFFFFFFFFFFFFFFFFFFFFFFFFFFFFFF  
FFFFFFFFFFFFFFFF

@A00721:190:HGJW7DSXY:4:2659:29215:1892 1:N:0:TCTGCAAG+GCTGCACT  
CTGCATTTGTCTCTGTCCAAATCTTTAAAGATGAATTGGCATCCTTGTCCAGGAACGTCTTATAAGAA  
TATTCTTCTGAGCCTGGATTGCAAAGCACGATTGACGGGATACCACCTTTAATTTGAATTGGTTTGCC  
GTACTTCACATTGGA

+

FFFFFFFFFFFFFFFFFFFFFFFFFFFFFFFFFFFFFFFFFFFFFFFFFFFFFFFFFFFFFFFFFFFFFFFFFFFFFFFF  
FFFFFFFFFFFFFFFFFFFFFFFFFFFFFFFFFFFFFFFFFFFFFFFFFFFFFFFFFFFFFFFFFFFFFFFFFFFFFFFF  
FFFFFFFFFFFFFFFF

@A00721:190:HGJW7DSXY:4:1150:5403:24940 1:N:0:TCTGCAAG+GCTGCACT  
ATTTGTCTCTGTCCAAATCTTTAAAGATGAATTGGCATCCTTGTCCAGGAACGTCTTATAAGAATATT  
CTTCTGAGCCTGGATTGCAAAGCACGATTGACGGGATACCACCTTTAATTTGAATTGGTTTGCCGTAC  
TTCACATTGGATACC

+  
FFFFFFFFFFFFFFFFFFFFFFFFFFFFFFFFFFFFFFFFFFFFFFFFFFFFFFFFFFFFFFFFFFFFFFFF  
FFFFFFFFFFFFFFFFFFFFFFFFFFFFFFFFFFFFFFFFFFFFFFFFFFFFFFFFFFFFFFFFFFFFFFFF  
FFFFFF:FFFFFFF

@A00721:190:HGJW7DSXY:4:1204:4164:20729 1:N:0:TCTGCAAG+GCTGCACT  
ATTTGTCTCTGTCCAAATCTTTAAAGATGAATTGGCATCCTTGTCCAGGAACGTCTTATAAGAATATT  
CTTCTGAGCCTGGATTGCAAAGCACGATTGACGGGATACCACCTTTAATTTGAATTGGTTTGCCGTAC  
TTCACATTGGATACC

+  
FFF:FFFFFFFF:FFFFFFFFFFFF:FFFF:FFFF:FFFF:FF,F:FFFFFFFF,FFFFFFFFFFFF  
:::FFFFFFFFFFFFFFFF:FFFFFFFFFFFFFFFF:FFFFFFFFFFFF,:FFFFFFFFFFFFFFFF:FFFFF  
FF:FFF:FFF:F::

@A00721:190:HGJW7DSXY:4:1356:4227:5932 1:N:0:TCTGCAAG+GCTGCACT  
ATTTGTCTCTGTCCAAATCTTTAAAGATGAATTGGCATCCTTGTCCAGGAACGTCTTATAAGAATATT  
CTTCTGAGCCTGGATTGCAAAGCACGATTGACGGGATACCACCTTTAATTTGAATTGGTTTGCCGTAC  
TTCACATTGGATACC

+  
FFFFFFFFFFFFFFFFFFFFFFFFFFFFFFFFFFFFFFFFFFFFFFFFFFFFFFFFFFFFFFFFFFFFFFFF  
FFFFFFFFFFFF,FFFFFFFFFFFFFFFFFFFFFFFFFFFFFFFFFFFFFFFFFFFFFFFFFFFFFFFFFFFF  
FFFFFFFFFFFF,FFF

@A00721:190:HGJW7DSXY:4:1634:11957:7482 1:N:0:TCTGCAAG+GCTGCACT  
ATTTGTCTCTGTCCAAATCTTTAAAGATGAATTGGCATCCTTGTCCAGGAACGTCTTATAAGAATATT  
CTTCTGAGCCTGGATTGCAAAGCACGATTGACGGGATACCACCTTTAATTTGAATTGGTTTGCCGTAC  
TTCACATTGGATACC

+  
FFFFFFFFFFFFFFFFFFFFFFFFFFFFFFFFFFFFFFFFFFFFFFFFFFFFFFFFFFFFFFFFFFFF:FFFFFFF  
FFFFFFFFFFFFFFFFFFFFFFFFFFFFFFFFFFFFFFFFFFFFFFFFFFFFFFFFFFFFFFFFFFFFFFFF  
FFFFFFFFFFFFFFFFFFFF

@A00721:190:HGJW7DSXY:4:2437:27715:29387 1:N:0:TCTGCAAG+GCTGCACT  
ATTTGTCTCTGTCCAAATCTTTAAAGATGAATTGGCATCCTTGTCCAGGAACGTCTTATAAGAATATT  
CTTCTGAGCCTGGATTGCAAAGCACGATTGACGGGATACCACCTTTAATTTGAATTGGTTTGCCGTAC  
TTCACATTGGATACC

+  
FFFFFFFFFFFFFFFFFFFFFFFFFFFFFFFFFFFFFFFFFFFFFFFFFFFFFFFFFFFFFFFFFFFFFFFF  
FFFFFFFFFFFFFFFFFFFFFFFFFFFF:F:FFFFFFFFFFFF:FFFFFFFFFFFFFFFFFFFFFFFFFFFF  
FFFFFFFF:F::FFF

@A00721:190:HGJW7DSXY:4:2535:1976:23547 1:N:0:TCTGCAAG+GCTGCACT  
ATTTGTCTCTGTCCAAATCTTTAAAGATGAATTGGCATCCTTGTCCAGGAACGTCTTATAAGAATATT  
CTTCTGAGCCTGGATTGCAAAGCACGATTGACGGGATACCACCTTTAATTTGAATTGGTTTGCCGTAC  
TTCACATTGGATACC

+  
FFFFFFFFFFFFFFFFFFFFFFFFFFFFFFFFFFFFFFFFFFFFFFFFFFFFFFFFFFFFFFFFFFFF:FFFFFFF  
FFFFFFFFFFFFFFFFFFFFFFFFFFFFFFFFFFFFFFFFFFFFFFFFFFFFFFFFFFFFFFFFFFFF:FFFFFFF  
FFFFFFF:FFFFFFF

@A00721:190:HGJW7DSXY:4:2608:18041:8406 1:N:0:TCTGCAAG+GCTGCACT  
ATTTGTCTCTGTCCAAATCTTTAAAGATGAATTGGCATCCTTGTCCAGGAACGTCTTATAAGAATATT  
CTTCTGAGCCTGGATTGCAAAGCACGATTGACGGGATACCACCTTTAATTTGAATTGGTTTGCCGTAC  
TTCACATTGGATACC

+  
FFFFFFFFFFFFFFFFFFFFFFFFFFFFFFFFFFFFFFFFFFFFFFFFFFFFFFFFFFFFFFFFFFFFFFFF  
FFFFFFFFFFFFFFFFFFFFFFFFFFFFFFFFFFFFFFFFFFFFFFFFFFFFFFFFFFFFFFFFFFFFFFFF  
FFFFFFFFFFFFFFFFFFFF

@A00721:190:HGJW7DSXY:4:1150:10936:20807 1:N:0:TCTGCAAG+GCTGCACT  
GTCTCTGTCCAAATCTTTAAAGATGAATTGGCATCCTTGTCCAGGAACGTCTTATAAGAATATTCTTC







FFFFFFFFFFFFFFFFFFFFFFFFFFFFFFFFFFFFFFFFFFFFFFFFFFFFFFFFFFFFFFFFFFFFFFFFFFFFFFFF  
FFFFF:FFFFFFFFF

@A00721:190:HGJW7DSXY:4:1560:2193:26678 1:N:0:TCTGCAAG+GCTGCACT  
GCTGCAGTAATTCTGGGACAGTTGTAATGTCGTCCAGATGCGGATAGTCTGTCCAAATCTTTAAAGA  
TGAATTGGCATCCTTGTCAGGAACGTCTTATAAGAATATTCTTCTGAGCCTGGATTGCAAAGCACGA  
TTGACGGGATACCAC

+

FFFFFFFFF:FFFFFFFFFFF::FF:FFFFFFFFFFFFFFFFFFFFFFFFFFFFFFFFFFFFFFFFFFFFFFFF  
FFFFFFFFFFFFFFFFFFFFFFFFFFFFFFFFFFFFFFFFFFFFFFFFFFFFFFFFFFFFFFFFFFFFFFFFFFFF  
FFFFFFFFFFFFFFFFFFFF

@A00721:190:HGJW7DSXY:4:2612:27380:33724 1:N:0:TCTGCAAG+GCTGCACT  
GCTGCAGTAATTCTGGGACTGGTTGTAATGTCGTCCAGATGCGGATAGTCTGTCCAAATCTTTAAAGA  
TGAATTGGCATCCTTGTCAGGAACGTCTTATAAGAATATTCTTCTGAGCCTGGATTGCAAAGCACGA  
TTGACGGGATACCAC

+

FFFFFFFFF:FFFFFFFFFFFFF:FFFF:FFFFFFFFFFFFFFFFFFFFFFFFFFFFFFFFFFFFFFFFFFFF  
FFFFFFFFFFFFFFFFFFFFFFFFFFFFFFFFFFFFFFFFFFFFFFFFFFFFFFFFFFFFFFFFFFFFFFFFFFFF  
FFFFFFFFFFFFFFFFFFFF

@A00721:190:HGJW7DSXY:4:2640:19633:22905 1:N:0:TCTGCAAG+GCTGCACT  
GCTGCAGTAATTCTGGGACTGGTTGTAATGTCGTCCAGATGCGGATAGTCTGTCCAAATCTTTAAAGA  
TGAATTGGCATCCTTGTCAGGAACGTCTTATAAGAATATTCTTCTGAGCCTGGATTGCAAAGCACGA  
TTGACGGGATACCAC

+

FFFFFFFFFFFFFFFFFFFFFFFFFFFFF:FFFFFFFFFFFFFFFFFFFFFFFFFFFFFFFFFFFFFFFFFFFF  
FFFFFFFFFFFFFFFFFFFFFFFFFFFFFFFFFFFFFFFFFFFFFFFFFFFFFFFFFFFFFFFFFFFFFFFFFFFF  
FFFFFFFFFFFFFFFFFFFF

@A00721:190:HGJW7DSXY:4:1314:27190:1172 1:N:0:TCTGCAAG+GCTGCACT  
CAGTAATTCTGGGACTGGTTGTAATGTCGTCCAGATGCGGATAGTCTGTCCAAATCTTTAAAGATGAA  
TTGGCATCCTTGTCAGGAACGTCTTATAAGAATATTCTTCTGAGCCTGGATTGCAAAGCACGATTGA  
CGGGATACCACCTTT

+

FFFFFFFFFFFFFFFFFFFFFFFFFFFFFFFFFFFFFFFFFFFFFFFFFFFFFFFFFFFFFFFFFFFFFFFFFFFF  
FFFFFFFFFFFFFFFFFFFFFFFFFFFFFFFFFFFFFFFFFFFFFFFFFFFFFFFFFFFFFFFFFFFFFFFFFFFF  
FFFFFFFFFFFFFFFFFFFF

@A00721:190:HGJW7DSXY:4:1164:12210:18630 1:N:0:TCTGCAAG+GCTGCACT  
GGGACTGGTTGTAATGTCGTCCAGATGCGGATAGTCTGTCCAAATCTTTAAAGATGAATTGGCATCCT  
TGTCCAGGAACGTCTTATAAGAATATTCTTCTGAGCCTGGATTGCAAAGCACGATTGACGGGATACCA  
CCTTTAATTTGAATT

+

FFFFFFFFF:FFFFFFFFFFFFFFFFFFFFFFFFFFFFFFFFFFFFFFFFFFFFFFFFFFFFFFFFFFFFFFFF  
FFFFFFFFFFFFFFFFFFFFFFFFFFFF,FFFFFFFF:FFFFFFFFFFFFFFFFFFFFFFFFFFFFFFFFFFFF  
FFFF:FF:FFF  
FFFFFFFFFFFFFFFFFFFF

@A00721:190:HGJW7DSXY:4:1472:13729:8390 1:N:0:TCTGCAAG+GCTGCACT  
GGGACTGGTTGTAATGTCGTCCAGATGCGGATAGTCTGTCCAAATCTTTAAAGATGAATTGGCATCCT  
TGTCCAGGAACGTCTTATAAGAATATTCTTCTGAGCCTGGATTGCAAAGCACGATTGACGGGATACCA  
CCTTTAATTTGAATT

+

FFFFFFFFFFFFFFFFFFFFFFFFFFFFFFFFFFFFFFFFFFFFFFFFFFFFFFFFFFFFFFFFFFFFFFFFFFFF  
FFFFFFFFFFFFFFFFFFFFFFFFFFFFFFFFFFFFFFFFFFFFFFFFFFFFFFFFFFFFFFFFFFFFFFFFFFFF  
FFFFFFFFFFFFFFFFFFFF

@A00721:190:HGJW7DSXY:4:2442:18801:7216 1:N:0:TCTGCAAG+GCTGCACT  
GGGACTGGTTGTAATGTCGTCCAGATGCGGATAGTCTGTCCAAATCTTTAAAGATGAATTGGCATCCT  
TGTCCAGGAACGTCTTATAAGAATATTCTTCTGAGCCTGGATTGCAAAGCACGATTGACGGGATACCA  
CCTTTAATTTGAATT

+  
FFFFFFFFFFFFFFFFFFFFFFFFFFFFFFFFFFFFFFFFFFFFFFFFFFFFFFFFFFFFFFFFFFFFFFFF  
FFFFFFFFFFFFFFFFFFFFFFFFFFFFFFFFFFFFFFFFFFFFFFFFFFFFFFFFFFFFFFFFFFFFFFFF  
FFFFFFFFFFFFFFFF

@A00721:190:HGJW7DSXY:4:2578:7708:11992 1:N:0:TCTGCAAG+GCTGCACT  
GGGACTGGTTGTAATGTCGTCCAGATGCGGATAGTCTGTCCAAATCTTTAAAGATGAATTGGCATCCT  
TGTCCAGGAACGTCTTATAAGAATATTCTTCTGAGCCTGGATTGCAAAGCACGATTGACGGGATACCA  
CCTTTAATTTGAATT

+  
FFFFFFFFFFFFFFFFFFFFFFFFFFFFFFFFFFFFFFFFFFFFFFFFFFFFFFFFFFFFFFFFFFFFFFFF  
FFFFFFFFFFFFFFFFFFFFFFFFFFFFFFFFFFFFFFFFFFFFFFFFFFFFFFFFFFFFFFFFFFFFFFFF  
FFFFFFFFFFFFFFFF

@A00721:190:HGJW7DSXY:4:1132:11650:32597 1:N:0:TCTGCAAG+GCTGCACT  
GGACTGGTTGTAATGTCGTCCAGATGCGGATAGTCTGTCCAAATCTGTAAAGATGAATTGGAATCCTT  
GTCCAGGAACGTCTTATAAGAATATTCTTCTGAGCCTGGATTGCAAAGCACGATTGACGGGATACCAC  
CGGTCATTTGAATTG

+  
FFF,FFF:FF:F::F::FFFF,FF,FF:FF:FFFF,::FF:FFFF,FFF:F:FF,:F:FF,FF,FF,  
FF:FFFF:FF:F::FFFFFFFF,FFF,,::FF::FF,FFFF,F,:F,,F,FFFF:,FFF:F,::,FFF  
:,F:,F,,FFF,F

@A00721:190:HGJW7DSXY:4:1434:31078:8782 1:N:0:TCTGCAAG+GCTGCACT  
GGACTGGTTGTAATGTCGTCCAGATGCGGATAGTCTGTCCAAATCTTTAAAGATGAATTGGCATCCTT  
GTCCAGGAACGTCTTATAAGAATATTCTTCTGAGCCTGGATTGCAAAGCACGATTGACGGGATACCAC  
CTTTAATTTGAATTG

+  
FFFFFFFFFFFFFFFFFFFFFFFFFFFFFFFFFFFFFFFFFFFFFFFFFFFFFFFFFFFFFFFFFFFFFFFF  
FFFFFFFFFFFFFFFFFFFFFFFFFFFFFFFFFFFFFFFFFFFFFFFFFFFFFFFFFFFFFFFFFFFFFFFF  
FFFFF:FFFFFFFF

@A00721:190:HGJW7DSXY:4:1519:21911:25191 1:N:0:TCTGCAAG+GCTGCACT  
GGACTGGTTGTAATGTCGTCCAGATGCGGATAGTCTGTCCAAATCTTTAAAGATGAATTGGCATCCTT  
GTCCAGGAACGTCTTATAAGAATATTCTTCTGAGCCTGGATTGCAAAGCACGATTGACGGGATACCAC  
CTTTAATTTGAATTG

+  
FFFFFFFFFFFFFFFFFFFFFFFFFFFFFFFFFFFFFFFFFFFFFFFFFFFFFFFFFFFFFFFFFFFFFFFF  
FFFFFFFFFFFFFFFFFFFFFFFFFFFFFFFFFFFFFFFFFFFFFFFFFFFFFFFFFFFFFFFFFFFFFFFF  
FFFFFFFFFFFFFFFF

@A00721:190:HGJW7DSXY:4:1545:7437:18912 1:N:0:TCTGCAAG+GCTGCACT  
GGACTGGTTGTAATGTCGTCCAGATGCGGATAGTCTGTCCAAATCTTTAAAGATGAATTGGCATCCTT  
GTCCAGGAACGTCTTATAAGAATATTCTTCTGAGCCTGGATTGCAAAGCACGATTGACGGGATACCAC  
CTTTAATTTGAATTG

+  
FFFFFFFFFFFFFFFFFFFFFFFFFFFFFFFFFFFFFFFFFFFFFFFFFFFFFFFFFFFFFFFFFFFFFFFF  
FFFFFFFFFFFFFFFFFFFFFFFFFFFFFFFFFFFFFFFFFFFFFFFFFFFFFFFFFFFFFFFFFFFFFFFF  
FFFFFFFFFFFFFFFF:F

@A00721:190:HGJW7DSXY:4:1545:7491:19257 1:N:0:TCTGCAAG+GCTGCACT  
GGACTGGTTGTAATGTCGTCCAGATGCGGATAGTCTGTCCAAATCTTTAAAGATGAATTGGCATCCTT  
GTCCAGGAACGTCTTATAAGAATATTCTTCTGAGCCTGGATTGCAAAGCACGATTGACGGGATACCAC  
CTTTAATTTGAATTG

+  
FFFFFFFFFFFFFFFFFFFFFFFFFFFFFFFFFFFFFFFFFFFFFFFFFFFFFFFFFFFFFFFFFFFFFFFF  
FFFFFFFFFFFFFFFFFFFFFFFFFFFFFFFFFFFFFFFFFFFFFFFFFFFFFFFFFFFFFFFFFFFFFFFF  
FFFFFFFFFFFFFFFF

@A00721:190:HGJW7DSXY:4:1545:7934:19398 1:N:0:TCTGCAAG+GCTGCACT  
GGACTGGTTGTAATGTCGTCCAGATGCGGATAGTCTGTCCAAATCTTTAAAGATGAATTGGCATCCTT

GTCCAGGAACGTCTTATAAGAATATTCTTCTGAGCCTGGATTGCAAAGCACGATTGACGGGATACCAC  
CTTTAATTTGAATTG

+

FFFFFFFFFFFFFFFFFFFFFFFFFFFFFFFFFFFFFFFFFFFFFFFFFFFFFFFFFFFFFFFFFFFFFFFF  
FFFFFFFFFFFFFFFFFFFFFFFFFFFFFFFFFFFFFFFFFFFFFFFFFFFFFFFFFFFFFFFFFFFFFFFF:FFFF  
FFFFFFFFFFFFFFFF

@A00721:190:HGJW7DSXY:4:2435:12545:12477 1:N:0:TCTGCAAG+GCTGCACT  
GGACTGGTTGTAATGTCGTCCAGATGCGGATAGTCTGTCCAAATCTTTAAAGATGAATTGGCATCCTT  
GTCCAGGAACGTCTTATAAGAATATTCTTCTGAGCCTGGATTGCAAAGCACGATTGACGGGATACCAC  
CTTTAATTTGAATTG

+

FFFFFFFFFFFFFFFFFFFFFFFFFFFFFFFFFFFFFFFFFFFFFFFFFFFFFFFFFFFFFFFFFFFFFFFF  
FFFFFFFFFFFFFFFFFFFFFFFFFFFFFFFFFFFFFFFFFFFFFFFFFFFFFFFFFFFFFFFFFFFFFFFF  
FFFFFFFFFFFFFFFF:

@A00721:190:HGJW7DSXY:4:2470:3251:22780 1:N:0:TCTGCAAG+GCTGCACT  
GGACTGGTTGTAATGTCGTCCAGATGCGGATAGTCTGTCCAAATCTTTAAAGATGAATTGGCATCCTT  
GTCCAGGAACGTCTTATAAGAATATTCTTCTGAGCCTGGATTGCAAAGCACGATTGACGGGATACCAC  
CTTTAATTTGAATTG

+

FFFFFFFFFFFFFFFFFFFFFFFFFFFFFFFFFFFFFFFFFFFFFFFFFFFFFFFFFFFFFFFFFFFFFFFF  
FFFFFFFFFFFFFFFFFFFFFFFFFFFFFFFFFFFFFFFFFFFFFFFFFFFFFFFFFFFFFFFFFFFFFFFF  
FFFFFFFFFFFFFFFF:

@A00721:190:HGJW7DSXY:4:2641:19623:16438 1:N:0:TCTGCAAG+GCTGCACT  
GGACTGGTAGTAATGTCGTCCAGATGCGGATAGTCTGTCCAAATCTTTAAAGATGAATTGGCATCCTT  
GTCCAGGAACGTCTTATAAGAATATACTTCTGAGCCTGGATTGCAAAGCACGATTGACGGGATACCAC  
CTTTAATTTGAATT

+

F,FFF::F,FFFFFFFFFFFFFF,FFF,,FFFF,,FF,FF,FFF,FFF:FFF,FF,FFFF,FFF,FF,  
,F:,FF,:F,:,:F,:FFF,FFFF,,F,FFFF,:,,F:F,FFFF:FF,FF,,F,FFF:,FF,F:  
,F:,FF,F,FFFF:

@A00721:190:HGJW7DSXY:4:2669:5339:7075 1:N:0:TCTGCAAG+GCTGCACT  
GGACTGGTTGTAATGTCGTCCAGATGCGGATAGTCTGTCCAAATCTTTAAAGATGAATTGGCATCCTT  
GTCCAGGAACGTCTTATAAGAATATTCTTCTGAGCCTGGATTGCAAAGCACGATTGACGGGATACCAC  
CTTTAATTTGAATTG

+

FFFFFFFFFFFFFFFFFFFFFFFFFFFFFFFFFFFFFFFFFFFFFFFFFFFFFFFFFFFFFFFFFFFFFFFF  
FFFFFFFFFFFFFFFFFFFFFFFFFFFFFFFFFFFFFFFFFFFFFFFFFFFFFFFFFFFFFFFFFFFFFFFF  
FFFFFFFFFFFFFFFF

@A00721:190:HGJW7DSXY:4:1242:24361:25895 1:N:0:TCTGCAAG+GCTGCACT  
GTCCAGATGCGGATAGTCTGTCCAAATCTTTAAAGATGAATTGGCATCCTTGTCCAGGAACGTCTTAT  
AAGAATATTCTTCTGAGCCTGGATTGCAAAGCACGATTGACGGGATACCACCTTTAATTTGAATTGGT  
TTGCCGTACTTCACA

+

FFFFFFFFFFFFFFFFFFFFFFFFFFFFFFFFFFFFFFFFFFFFFFFFFFFFFFFFFFFFFFFFFFFFFFFF  
FFFFFFFFFFFFFFFFFFFFFFFFFFFFFFFFFFFFFFFFFFFFFFFFFFFFFFFFFFFFFFFFFFFFFFFF  
FFFFFFFFFFFFFFFF

@A00721:190:HGJW7DSXY:4:1265:21251:27492 1:N:0:TCTGCAAG+GCTGCACT  
GTCCAGATGCGGATAGTCTGTCCAAATCTTTAAAGATGAATTGGCATCCTTGTCCAGGAACGTCTTAT  
AAGAATATTCTTCTGAGCCTGGATTGCAAAGCACGATTGACGGGATACCACCTTTAATTTGAATTGGT  
TTGCCGTACTTCACA

+

FFFFFFFFFFFFFFFFFFFFFFFFFFFFFFFFFFFFFFFFFFFFFFFFFFFFFFFFFFFFFFFFFFFFFFFF  
FFFFFFFFFFFFFFFFFFFFFFFFFFFFFFFFFFFFFFFFFFFFFFFFFFFFFFFFFFFFFFFFFFFFFFFF:FFFFFFFFFFFFFFFF,FFFFFFFF  
FFFFFFFFFFFFFFFF

$+$ 

+

+

+

+

+

 $+$ [illegible]

```

FFFFFFFFFFFFFFFFFFFFFFFFFFFFFFFFFFFFFFFF:FFFFFFFFFFFFFFFF:FFFFFFFFF,FFFFFFF
FFFFFFFFFFFFFFFF

```

+

@A00721:190:HGJW7DSXY:4:2403:22661:17315 1:N:0:TCTGCAAG+GCTGCACT  
GTCCAGATGCGGATAGTCTGTCCAAATCTTTAAAGATGAATTGGCATCCTTGTCCAGGAACGTCTTAT  
AAGAATATTCTTCTGAGCCTGGATTGCAAAGCACGATTGACGGGATACCACCTTTAATTTGAATTGGT  
TTGCCGTACTTCACA

[illegible]

+

@A00721:190:HGJW7DSXY:4:2564:10791:24345 1:N:0:TCTGCAAG+GCTGCACT  
GTCCAGATGCGGATAGTCTGTCCAAATCTTTAAAGATGAATTGGCATCCTTGTCAGGAACGTCTTAT  
AAGAATATTCTTCTGAGCCTGGATTGCAAAGCACGATTGACGGGATACCACCTTTAATTTGAATTGGT  
TTGCCGTACTTCACA

[illegible]

+

@A00721:190:HGJW7DSXY:4:1207:32669:25066 1:N:0:TCTGCAAG+GCTGCACT  
CCTGTCCAAATCTTTAAAGATGAATTGGCATCCTTGTCCAGGAACGTCTTATAAGAATATTCTTCTGA  
GCCTGGATTGCAAAGCACGATTGACGGGATACCACCTTTAATTTGAATTGGTTTGCCGTACTTCACAT  
TGGATACCCAATTGT

```

:FFFFFFFF:FFFFFFFFFFFFFFFFFFFFFFFF:FFFFFFFFFFFFFFFF,F:F:FFFFFF
F:FFFFFFFFFFFFFFFFFFFFFFFFFFFFFFFF:FFFF:F:F:FFFFFFFFFFFFFFFF:FFFFFFF:FFFF
FFFFFF:FFFFFF

```

+  
FFFFFFFFFFFFFF:FFFF:FFFFFFFF:FFFF:FFFFFFFFFFFFFFFF:FFF,FFFF::FFFF:  
F::FFFFFFF,FFFFFFFFFFFFFF:FFFFFFFFFFFF,FFFFFFFFFFFFFFFF:FFFF:F::FFF:  
FFFFFFFF:FFFFFF

@A00721:190:HGJW7DSXY:4:1326:12599:2174 1:N:0:TCTGCAAG+GCTGCACT  
CCTGTCCAAATCTTTAAAGATGAATTGGCATCCTTGTCCAGGAACGTCTTATAAGAATATTCTTCTGA  
GCCTGGATTGCAAAGCACGATTGACGGGATACCACCTTTAATTTGAATTGGTTTGCCGTACTTCACAT  
TGGATACCCAATTGT

+  
FFFFFFFFFFFFFFFFFFFFFFFFFFFFFFFF:FFFFFFFFFFFFFFFFFFFFFFFFFFFFFFFFFFFFF  
FFFFFFFFFFFFFFFFFFFFFFFFFFFFFFFFFFFFFFFFFFFFFFFFFFFFFFFFFFFFFFFFFFFFF  
FFFFFFFFFFFFFFFF

@A00721:190:HGJW7DSXY:4:1559:17969:26256 1:N:0:TCTGCAAG+GCTGCACT  
CCTGTCCAAATCTTTAAAGATGAATTGGCATCCTTGTCCAGGAACGTCTTATAAGAATATTCTTCTGA  
GCCTGGATTGCAAAGCACGATTGACGGGATACCACCTTTAATTTGAATTGGTTTGCCGTACTTCACAT  
TGGATACCCAATTGT

+  
FFFFFFFFFFFFFFFFFFFFFFFFFFFFFFFFFFFFFFFFFFFFFFFFFFFFFFFFFFFFFFFFFFFF:FF:FFFFFFFF:FFFFFFFFFFFF  
F:FFFFFFFF:FFFFFF:FF:FFFF,FFFFFFFF,FFF:F:FFFFFFFF:FFFFFF:FFFFFF:  
,,FFFFFFFF

@A00721:190:HGJW7DSXY:4:2273:3757:2174 1:N:0:TCTGCAAG+GCTGCACT  
CCTGTCCAAATCTTTAAAGATGAATTGGCATCCTTGTCCAGGAACGTCTTATAAGAATATTCTTCTGA  
GCCTGGATTGCAAAGCACGATTGACGGGATACCACCTTTAATTTGAATTGGTTTGCCGTACTTCACAT  
TGGATACCCAATTGT

+  
FFFFFFFFFFFFFFFFFFFFFFFFFFFFFFFFFFFFFFFFFFFFFFFFFFFFFFFFFFFFFFFFFFFF  
FFFFFFFFFFFFFFFFFFFFFFFFFFFFFFFFFFFFFFFF,FFFFFFFFFFFFFFFFFFFFFFFFFFFFF  
FFFFFFFFFFFFFFFF

@A00721:190:HGJW7DSXY:4:2577:13738:25128 1:N:0:TCTGCAAG+GCTGCACT  
CCTGTCCAAATCTTTAAAGATGAATTGGCATCCTTGTCCAGGAACGTCTTATAAGAATATTCTTCTGA  
GCCTGGATTGCAAAGCACGATTGACGGGATACCACCTTTAATTTGAATTGGTTTGCCGTACTTCACAT  
TGGATACCCAATTGT

+  
FFFFFFFFFFFFFFFFFFFFFFFFFFFFFFFFFFFFFFFFFFFFFFFFFFFFFFFFFFFFFFFFFFFF:FFFF  
FFFFFFFFFFFFFFFFFFFFFFFFFFFF,FFFFFFFFFFFFFF:FF,FFFFFFFFFFFFFFFFFFFFFFFF  
FFFFFFFFFFFFFFFF

@A00721:190:HGJW7DSXY:4:2675:15510:15890 1:N:0:TCTGCAAG+GCTGCACT  
CCTGTCCAAATCTTTAAAGATGAATTGGCATCCTTGTCCAGGAACGTCTTATAAGAATATTCTTCTGA  
GCCTGGATTGCAAAGCACGATTGACGGGATACCACCTTTAATTTGAATTGGTTTGCCGTACTTCACAT  
TGGATACCCAATTGT

+  
FFFFFFFFFFFFFFFFFFFFFFFFFFFFFFFFFFFFFFFFFFFFFFFFFFFFFFFFFFFFFFFFFFFF  
FFFFFFFFFFFFFFFFFFFFFFFFFFFFFFFFFFFFFFFF:FFFFFFFFFFFFFFFFFFFFFFFFFFFFF  
FFFFFFFFFFFFFFFF

@A00721:190:HGJW7DSXY:4:1171:26512:20979 1:N:0:TCTGCAAG+GCTGCACT  
CCAAATCTTTAAAGATGAATTGGCATCCTTGTCCAGGAACGTCTTATAAGAATATTCTTCTGAGCCTG  
GATTGCAAAGCACGATTGACGGGATACCACCTTTAATTTGAATTGGTTTGCCGTACTTCACATTGGAT  
ACCCAATTGTGCTGG

+  
FFFFFFFFFFFFFFFFFFFFFFFFFFFFFFFFFFFFFFFFFFFFFFFFFFFFFFFFFFFFFFFFFFFF  
FFFFFFFFFFFFFFFFFFFFFFFFFFFFFFFFFFFFFFFFFFFFFFFFFFFFFFFFFFFFFFFFFFFF,FFFFF  
FFFFFFFFFFFFFFFF

@A00721:190:HGJW7DSXY:4:1209:4065:11412 1:N:0:TCTGCAAG+GCTGCACT  
CCAAATCTTTAAAGATGAATTGGCATCCTTGTCCAGGAACGTCTTATAAGAATATTCTTCTGAGCCTG

GATTGCAAAGCACGATTGACGGGATACCACCTTTAATTGAATTGGTTTGCCGTACTTCACATTGGAT  
ACCCAATTGTGCTGG

[illegible]

+

@A00721:190:HGJW7DSXY:4:2668:30382:25238 1:N:0:TCTGCAAG+GCTGCACT  
CCAAATCTTTAAAGATGAATTGGCATCCTTGTCAGGAACGTCTTATAAGAATATTCTTCTGAGCCTG  
GATTGCAAAGCACGATTGACGGGATACCACCTTTAATTGAATTGGTTTGCCGTACTTCACATTGGAT  
ACCCAATTGTGCTGG

[illegible] $+$ 

@A00721:190:HGJW7DSXY:4:1276:19054:16016 1:N:0:TCTGCAAG+GCTGCACT  
CAAATCTTTAAAGATGAATTGGCATCCTTGTCAGGAACGTCTTATAAGAATATTCTTCTGAGCCTGG  
ATTGCAAAGCACGATTGACGGGATACCACCTTTAATTTGAATTGGTTTGCCGTACTTCACATTGGATA  
CCCAATTGTGCTGGA

[illegible]

+

@A00721:190:HGJW7DSXY:4:1636:8757:16344 1:N:0:TCTGCAAG+GCTGCACT  
CAAATCTTTAAAGATGAATTGGCATCCTTGTCAGGAACGTCTTATAAGAATATTCTTCTGAGCCTGG  
ATTGCAAAGCACGATTGACGGGATACCACCTTTAATTTGAATTGGTTGCCGTACTTCACATTGGATA  
CCCAATTGTGCTGGA

[illegible]

$+$ 

+

+

+

+

+

+



FFFFFFFFFFFFFFFFFFFFF:F:FFFFFF:F:FFFFFFFFFFFFFFFFFFFFFFFFFFFFFFFFFFFFF:FFF  
F:FFFFFFFFFFFFFFF

@A00721:190:HGJW7DSXY:4:1675:30490:2065 1:N:0:TCTGCAAG+GCTGCACT  
GGAAGGAGCTTATTGGGGTCCAGCACAATTGGGTATCCAATGTGAAGTACGGCAAACCAATTCAAATT  
AAAGGTGGTATCCCGTCAATCGTGCTTTGCAATCCAGGCTCAGAAGAATATTCTTATAAGACGTTTCCT  
GGACAAGGATGCCAA

+

FFFFFFFFFFFFFFFFFFFFFFFFFFFFFFFFFFFFFFFFFFFFFFFFFFFFFFFFFFFFFFFFFFFFFFFFF  
FFFFFFFFFFFFFFFFFFFFFFFFFFFFFFFFFFFFFFFFFFFFFFFFFFFFFFFFFFFFFFFFFFFFF:FFFFFFFFFFFFFFFFFFFFFFFFF  
FFFFFFFFFFFFFFFFF

@A00721:190:HGJW7DSXY:4:1678:29288:16172 1:N:0:TCTGCAAG+GCTGCACT  
GGAAGGAGCTTATTGGGGTCCAGCACAATTGGGTATCCAATGTGAAGTACGGCAAACCAATTCAAATT  
AAAGGTGGTATCCCGTCAATCGTGCTTTGCAATCCAGGCTCAGAAGAATATTCTTATAAGACGTTTCCT  
GGACAAGGATGCCAA

+

FFFFFFFFFFFFFFFFFFFFFFFFFFFFFFFFFFFFFFFFFFFFFFFFFFFFFFFFFFFFFFFFFFFFFFFFF  
FFFFFFFFFFFFFFFFFFFFFFFFFFFFFFFFFFFFFFFFFFFFFFFFFFFFFFFFFFFFFFFFFFFFF:FFFFFFFFFFFFFFFFFFFFFFFFF  
FFFFFFFFFFFFFFFFF

@A00721:190:HGJW7DSXY:4:2176:24252:20008 1:N:0:TCTGCAAG+GCTGCACT  
GGAAGGAGCTTATTGGGGTCCAGCACAATTGGGTATCCAATGTGAAGTACGGCAAACCAATTCAAATT  
AAAGGTGGTATCCCGTCAATCGTGCTTTGCAATCCAGGCTCAGAAGAATATTCTTATAAGACGTTTCCT  
GGACAAGGATGCCAA

+

FFFFFFFFFFFFFFFFFFFFFFFFFFFFFFFFFFFFFFFFFFFFFFFFFFFFFFFFFFFFFFFFFFFFFFFFF  
FFFFFFFFFFFFFFFFFFFFFFFFFFFFFFFFFFFFFFFFFFFFFFFFFFFFFFFFFFFFFFFFFFFFF:FFFFFFFFFFFFFFFFFFFFFFFFF  
FFFFFFFFFFFFFFFFF

@A00721:190:HGJW7DSXY:4:2247:29857:3693 1:N:0:TCTGCAAG+GCTGCACT  
GGAAGGAGCTTATTGGGGTCCAGCACAATTGGGTATCCAATGTGAAGTACGGCAAACCAATTCAAATT  
AAAGGTGGTATCCCGTCAATCGTGCTTTGCAATCCAGGCTCAGAAGAATATTCTTATAAGACGTTTCCT  
GGACAAGGATGCCAA

+

F,FFFFFFFFF:FFFFFFFFF:FFF:FFFFF,FFFFF:F:FF:FF:FFFFFFFFF:FF::FF:FF,  
FFFF,FFF,:::FFF:FF:FFF,,F::FFFF,,F:F:F:FF:FFFF,F:FFFF:FFF:F,:F:FF  
FFFFF,FFF,,FFF

@A00721:190:HGJW7DSXY:4:2343:7654:27618 1:N:0:TCTGCAAG+GCTGCACT  
GGAAGGAGCTTATTGGGGTCCAGCACAATTGGGTATCCAATGTGAAGTACGGCAAACCAATTCAAATT  
AAAGGTGGTATCCCGTCAATCGTGCTTTGCAATCCAGGCTCAGAAGAATATTCTTATAAGACGTTTCCT  
GGACAAGGATGCCAA

+

FFFFFFFFFFFFFFFFFFFFFFFFFFFFFFFFFFFFFFFFFFFFFFFFFFFFFFFFFFFFFFFFFFFFFFFFF  
FFFFFFFFFFFFFFFFFFFFFFFFFFFFFFFFFFFFFFFFFFFFFFFFFFFFFFFFFFFFFFFFFFFFF,FFFFFFFFFFFFFFFFFFFFFFFFF  
FFFFFFFFFFFFFFFFF

@A00721:190:HGJW7DSXY:4:2414:4860:30733 1:N:0:TCTGCAAG+GCTGCACT  
GGAAGGAGCTTATTGGGGTCCAGCACAATTGGGTATCCAATGTGAAGTACGGCAAACCAATTCAAATT  
AAAGGTGGTATCCCGTCAATCGTGCTTTGCAATCCAGGCTCAGAAGAATATTCTTATAAGACGTTTCCT  
GGACAAGGATGCCAA

+

FFFFFFFFFFFFFFFFFFFFFFFFFFFFFFFFFFFFFFFFFFFFFFFFFFFFFFFFFFFFFFFFFFFFFFFFF  
FFF:FFFFFFFFF:FFFFFFFFF:FFFFFFFFFFFFFFFFFFFFFFFFF,FFFFFFFFFFFFFFFFFFFFFFFFF:FF:F  
FFFFFFFFF,:FFF

@A00721:190:HGJW7DSXY:4:2627:1479:36839 1:N:0:TCTGCAAG+GCTGCACT  
GGAAGGAGCTTATTGGGGTCCAGCACAATTGGGTATCCAATGTGAAGTACGGCAAACCAATTCAAATT  
AAAGGTGGTATCCCGTCAATCGTGCTTTGCAATCCAGGCTCAGAAGAATATTCTTATAAGACGTTTCCT  
GGACAAGGATGCCAA

+  
FFFFFFFFFFFFFFFFFFFFFFFFFFFFFFFFFFFFFFFFFFFFFFFFFFFFFFFFFFFFFFFFFFFFFFFF  
FFFFFFFFFFFFFFFFFFFFFFFFFFFFFFFFFFFFFFFFFFFFFFFFFFFFFFFFFFFFFFFFFFFFFFFF  
FFFFFFFFFFFFFFFF  
@A00721:190:HGJW7DSXY:4:2673:15139:5196 1:N:0:TCTGCAAG+GCTGCACT  
GGAAGGAGCTTATTGGGTCCAGCACAAATTGGGTATCCAATGTGAAGTACGGCAAACCAATTCAAATT  
AAAGGTGGTATCCCGTCAATCGTGCTTTGCAATCCAGGCTCAGAAGAATATTCTTATAAGACGTTCTCT  
GGACAAGGATGCCAA

+  
FFFFFFFFFFFFFFFFFFFFFFFFFFFFFFFFFFFFFFFFFFFFFFFFFFFFFFFFFFFFFFFFFFFFFFFF  
FFFFFFFFFFFFFFFFFFFFFFFFFFFFFFFFFFFFFFFFFFFFFFFFFFFFFFFFFFFFFFFFFFFFFFFF  
FFFFFFFFFFFFFFFF:F  
@A00721:190:HGJW7DSXY:4:1201:8793:14340 1:N:0:TCTGCAAG+GCTGCACT  
GGGCATCCTTGTCCAGGAACGTCTTATAAGAATATTCTTCTGAGCCTGGATTGCAAAGCACGATTGAC  
GGGATACCACCTTTAATTTGAATTGGTTTGCCGTACTTCACATTGGATACCCAATTGTGCTGGACCCC  
AATAAGCTCCTTCCA

+  
FFFFFFFFFFFFFFFFFFFFFFFFFFFFFFFFFFFFFFFFFFFFFFFFFFFFFFFFFFFFFFFFFFFFFFFF  
FFFFFFFFFFFFFFFFFFFFFFFFFFFFFFFFFFFFFFFFFFFFFFFFFFFFFFFFFFFFFFFFFFFFFFFF  
FFFFFFFFFFFFFFFF  
@A00721:190:HGJW7DSXY:4:1363:18385:13698 1:N:0:TCTGCAAG+GCTGCACT  
GGGCATCCTTGTCCAGGAACGTCTTATAAGAATATTCTTCTGAGCCTGGATTGCAAAGCACGATTGAC  
GGGATACCACCTTTAATTTGAATTGGTTTGCCGTACTTCACATTGGATACCCAATTGTGCTGGACCCC  
AATAAGCTCCTTCCA

+  
FFFFFFFFF,FFFFFFFFFFFFFFFFFFFFFFFFFFFFFFFFFFFFFFFFFFFFFFFFFFFFFFFFFFFFFFF  
FFFFFFFFFFFFF:FFFFFFFFFFFFFFFFFFFFFFFFFFFFFFFFFFFFFFFFFFFFFFFFFFFFFFFFFFFF  
FFFFFFFFFFFF:F  
@A00721:190:HGJW7DSXY:4:1371:12301:1971 1:N:0:TCTGCAAG+GCTGCACT  
GGGCATCCTTGTCCAGGAACGTCTTATAAGAATATTCTTCTGAGCCTGGATTGCAAAGCACGATTGAC  
GGGATACCACCTTTAATTTGAATTGGTTTGCCGTACTTCACATTGGATACCCAATTGTGCTGGACCCC  
AATAAGCTCCTTCCA

+  
FFFFFFFFFFFFFFFFFFFFFFFFFFFFFFFFFFFFFFFFFFFFFFFFFFFFFFFFFFFFFFFFFFFFFFFF  
FFFFFFFFFFFFF:FFFFFFFFFFFFFFFFFFFFFFFFFFFFFFFFFFFFFFFFFFFFFFFFFFFFFFFFFFFF  
FFFFFFFFFFFFFFFF  
@A00721:190:HGJW7DSXY:4:2278:17336:14638 1:N:0:TCTGCAAG+GCTGCACT  
GGGCATCCTTGTCCAGGAACGTCTTATAAGAATATTCTTCTGAGCCTGGATTGCAAAGCACGATTGAC  
GGGATACCACCTTTAATTTGAATTGGTTTGCCGTACTTCACATTGGATACCCAATTGTGCTGGACCCC  
AATAAGCTCCTTCCA

+  
FFFFFFFFFFFFFFFFFFFFFFFFFFFFFFFFFFFFFFFFFFFFFFFFFFFFFFFFFFFFFFFFFFFFFFFF  
FFFFFFFFFFFFFFFFFFFFFFFFFFFFFFFFFFFFFFFFFFFFFFFFFFFFFFFFFFFFFFFFFFFFFFFF  
FFFFFFFFFFFFFFFFF:  
@A00721:190:HGJW7DSXY:4:2315:2112:12947 1:N:0:TCTGCAAG+GCTGCACT  
GGGCATCCTTGTCCAGGAACGTCTTATAAGAATATTCTTCTGAGCCTGGATTGCAAAGCACGATTGAC  
GGGATACCACCTTTAATTTGAATTGGTTTGCCGTACTTCACATTGGATACCCAATTGTGCTGGACCCC  
AATAAGCTCCTTCCA

+  
FFFFFFFFFFFFFFFFFFFFFFFFFFFFFFFFFFFFFFFFFFFFFFFFFFFFFFFFFFFFFFFFFFFFFFFF  
FFFFFFFFFFFFFFFFFFFFFFFFFFFFFFFFFFFFFFFFFFFFFFFFFFFFFFFFFFFFFFFFFFFFFFFF  
FF:FFFFFFFF:F  
@A00721:190:HGJW7DSXY:4:2315:2546:13260 1:N:0:TCTGCAAG+GCTGCACT  
GGGCATCCTTGTCCAGGAACGTCTTATAAGAATATTCTTCTGAGCCTGGATTGCAAAGCACGATTGAC



$+$ 

+

+

+

+

+

+

[illegible]

FFFFFFFFFFFFFFFF:FFFFFFFFFFFFFFFFFFFFFFFFFFFFFFFFFFFFFFFF  
FFFFFFFFFFFFFFFF

@A00721:190:HGJW7DSXY:4:1326:3125:21527 1:N:0:TCTGCAAG+GCTGCACT  
TGAGCCTGGATTGCAAAGCACGATTGACGGGATACCACCTTTAATTTGAATTGGTTTGCCGTACTTCA  
CATTGGATACCCAATTGTGCTGGACCCCAATAAGCTCCTTCCAATGTTTCTTTTGAAGATATGAAGGG  
CTTACGTCATCTATG

+

FFFFFF:FFFFFFFFFFFFFFFFFFFFFFFFFFFFFFFFFFFFFFFF:FFFFFFFFFFFFFFFFFFFFFFFFFFFFFFFF  
FF:FFFFFFFFFFFFFFFFFFFFFFFFFFFFFFFFFFFFFFFFFFFFFFFFFFFFFFFFFFFFFFFFFFFFFFFF  
F,FFFFFFFFFFFFFF

@A00721:190:HGJW7DSXY:4:1336:16324:17487 1:N:0:TCTGCAAG+GCTGCACT  
TGAGCCTGGATTGCAAAGCACGATTGACGGGATACCACCTTTAATTTGAATTGGTTTGCCGTACTTCA  
CATTGGATACCCAATTGTGCTGGACCCCAATAAGCTCCTTCCAATGTTTCTTTTGAAGATATGAAGGG  
CTTACGTCATCTATG

+

FFFFFF:FFFFFFFFFFFFFFFFFFFFFFFFFFFFFFFFFFFFFFFF:FFFFFFFFFFFFFFFFFFFFFFFFFFFFFFFF  
FF,FFFFFFFFFFFFFFFFFFFFFFFF:FFFFFFFFFFFFFFFFFFFFFFFFFFFFFFFFFFFFFFFF:FFFF  
FFFFFFFFFFFFFFFF

@A00721:190:HGJW7DSXY:4:2124:16080:8829 1:N:0:TCTGCAAG+GCTGCACT  
TGAGCCTGGATTGCAAAGCACGATTGACGGGATACCACCTTTAATTTGAATTGGTTTGCCGTACTTCA  
CATTGGATACCCAATTGTGCTGGACCCCAATAAGCTCCTTCCAATGTTTCTTTTGAAGATATGAAGGG  
CTTACGTCATCTATG

+

FFFFFFFFFFFFFFFFFFFFFFFFFFFFFFFFFFFFFFFFFFFFFFFFFFFFFFFFFFFFFFFFFFFFFFFF  
FFFFFFFFFFFFFFFFFFFFFFFFFFFFFFFFFFFFFFFF:FFFFFFFFFFFFFFFFFFFFFFFFFFFFFFFF:  
FF:FFFFFFFFFFFF

@A00721:190:HGJW7DSXY:4:2247:2573:29215 1:N:0:TCTGCAAG+GCTGCACT  
TGAGCCTGGATTGCAAAGCACGATTGACGGGATACCACCTTTAATTTGAATTGGTTTGCCGTACTTCA  
CATTGGATACCCAATTGTGCTGGACCCCAATAAGCTCCTTCCAATGTTTCTTTTGAAGATATGAAGGG  
CTTACGTCATCTATG

+

FFFFFFFFFFFFFFFFFFFFFFFFFFFFFFFFFFFFFFFFFFFFFFFFFFFFFFFFFFFFFFFFFFFFFFFF  
FFFFFFFFFFFFFFFFFFFFFFFFFFFFFFFFFFFFFFFFFFFFFFFFFFFFFFFFFFFFFFFFFFFFFFFF  
FFFFFFFFFFFF:FFF

@A00721:190:HGJW7DSXY:4:2264:19732:7138 1:N:0:TCTGCAAG+GCTGCACT  
TGAGCCTGGATTGCAAAGCACGATTGACGGGATACCACCTTTAATTTGAATTGGTTTGCCGTACTTCA  
CATTGGATACCCAATTGTGCTGGACCCCAATAAGCTCCTTCCAATGTTTCTTTTGAAGATATGAAGGG  
CTTACGTCATCTATG

+

FFFFFFFFFFFFFFFFFFFFFFFFFFFFFFFFFFFFFFFFFFFFFFFFFFFFFFFFFFFFFFFFFFFFFFFF  
FFFFFFFFFFFFFFFFFFFFFFFFFFFFFFFFFFFFFFFFFFFFFFFFFFFFFFFFFFFFFFFFFFFFFFFF:  
FFFFFFFFFFFFFFFF

@A00721:190:HGJW7DSXY:4:2314:28999:5713 1:N:0:TCTGCAAG+GCTGCACT  
TGAGCCTGGATTGCAAAGCACGATTGACGGGATACCACCTTTAATTTGAATTGGTTTGCCGTACTTCA  
CATTGGATACCCAATTGTGCTGGACCCCAATAAGCTCCTTCCAATGTTTCTTTTGAAGATATGAAGGG  
CTTACGTCATCTATG

+

FFFFFFFFFFFFFFFFFFFFFFFFFFFFFFFFFFFFFFFFFFFFFFFFFFFFFFFFFFFFFFFFFFFFFFFF  
FFFFFFFFFFFFFF,FFFFFFFFFFFFFFFFFFFFFFFFFFFFFFFFFFFFFFFFFFFFFFFFFFFFFFFF  
FFFFFFFFFFFFFFFF

@A00721:190:HGJW7DSXY:4:2350:25174:34914 1:N:0:TCTGCAAG+GCTGCACT  
TGAGCCTGGATTGCAAAGCACGATTGACGGGATACCACCTTTAATTTGAATTGGTTTGCCGTACTTCA  
CATTGGATACCCAATTGTGCTGGACCCCAATAAGCTCCTTCCAATGTTTCTTTTGAAGATATGAAGGG  
CTTACGTCATCTAT

+  
FFFFFFFF:FFF:FFFF,FFFFFF:FF:FFFFFFFFFFFF:FFFFFFFFFFFFF::FF:F:,FFFFFFFF  
FF:FF:FFFF:FFFFFFFFFFFFFFFFFF:FFFFFFFFFFFF:FFFFFFFFFFFFFFFFFF:FFFFFFFFF:  
FFFFFFFF:FFFFFF

@A00721:190:HGJW7DSXY:4:2457:16514:9424 1:N:0:TCTGCAAG+GCTGCACT  
TGAGCCTGGATTGCAAAGCACGATTGACGGGATACCACCTTTAATTTGAATTGGTTTGCCGTACTTCA  
CATTGGATACCCAATAGTGCTGGACCCCAATAAGCTCCTTCCAATGTTTCTTTTGAAGATATGAAGGG  
CTTACGTCATCTAT

+  
FFFF,FF,,FFF,FFFF:F,F,FF:FFF:FFF:F,FFFF,,F,,F::FFFF,FFFFF,FF::FFF  
FF:FF,FF:FFFF,,,,F,FF:FFF,FFFFFF:FFFFFFFF:FF:F,:FFFFF,F::F:FF:FF:::  
FFFF:FFFF:FF

@A00721:190:HGJW7DSXY:4:1158:6696:3662 1:N:0:TCTGCAAG+GCTGCACT  
GAGCCTGGATTGCAAAGCACGATTGACGGGATACCACCTTTAATTTGAATTGGTTTGCCGTACTTCAC  
ATTGGATACCCAATTGTGCTGGACCCCAATAAGCTCCTTCCAATGTTTCTTTTGAAGATATGAAGGGC  
TTACGTCATCTATGA

+  
FFFFFFFFFFFFFFFFFFFFF:F:FFFF:FFFFFFFFFFFF:FFF,FFFFFFFFFFFFFFFFFFFFF  
FFFF:FFFFFFFFFFFFFFFFFFFFFFFFFFFFF::FF:FFFFF:FFFFFFFFF:FFFFFFFFF:F  
FFFFFFFFFFFFFFFFF:

@A00721:190:HGJW7DSXY:4:1213:3405:31876 1:N:0:TCTGCAAG+GCTGCACT  
GAGCCTGGATTGCAAAGCACGATTGACGGGATACCACCTTTAATTTGAATTGGTTTGCCGTACTTCAC  
ATTGGATACCCAATTGTGCTGGACCCCAATAAGCTCCTTCCAATGTTTCTTTTGAAGATATGAAGGGC  
TTACGTCATCTATGA

+  
FFFFFFFFFFFFFFFFFFFFFFFFFFFFFFFFFFFFFFFFFFFFFFFFFFFFFFFFFFFFFFFFFFFFF  
F:FFFFFFFFFFFFFFFFFFFFFFFFFFFFFFFFFFFFFFFFFFFFFFFFFFFFFFFFFFFFFFFFFFFF:FF  
FFFFFFFFFFFFFFFFF

@A00721:190:HGJW7DSXY:4:1232:1506:28808 1:N:0:TCTGCAAG+GCTGCACT  
GAGCCTGGATTGCAAAGCACGATTGACGGGATACCACCTTTAATTTGAATTGGTTTGCCGTACTTCAC  
ATTGGATACCCAATTGTGCTGGACCCCAATAAGCTCCTTCCAATGTTTCTTTTGAAGATATGAAGGGC  
TTACGTCATCTATGA

+  
FFFFFFFFFFFFFFFFFFFFFFFFFFFFFFFFFFFFFFFFFFFFFFFFFFFFFFFFFFFFFFFFFFFFF  
F:FFFFFFFFFFFFFFFFFFFFFFFFFFFFFFFFFFFFFFFFFFFFFFFFFFFFFFFFFFFFFFFFFFFF:FFFFFFFFFFFFF  
FF:FFFFFFFFFFFFF

@A00721:190:HGJW7DSXY:4:2508:21350:16673 1:N:0:TCTGCAAG+GCTGCACT  
GAGCCTGGATTGCAAAGCACGATTGACGGGATACCACCTTTAATTTGAATTGGTTTGCCGTACTTCAC  
ATTGGATACCCAATTGTGCTGGACCCCAATAAGCTCCTTCCAATGTTTCTTTTGAAGATATGAAGGGC  
TTACGTCATCTATGA

+  
FFFFFFFFFFFFFFFFFFFFFFFFFFFFFFFFFFFFFFFFFFFFFFFFFFFFFFFFFFFFFFFFFFFFF  
FFFFFFFFFFFFFFFFFFFFFFFFFFFFFFFFFFFFFFFFFFFFFFFFFFFFFFFFFFFFFFFFFFFFF  
FFFFFFFFFFFFFFFFF:

@A00721:190:HGJW7DSXY:4:2616:16224:7357 1:N:0:TCTGCAAG+GCTGCACT  
GAGCCTGGATTGCAAAGCACGATTGACGGGATACCACCTTTAATTTGAATTGGTTTGCCGTACTTCAC  
ATTGGATACCCAATTGTGCTGGACCCCAATAAGCTCCTTCCAATGTTTCTTTTGAAGATATGAAGGGC  
TTACGTCATCTATGA

+  
FFFFFFFFFFFFFFFFFFFFFFFFFFFFFFFFFFFFFFFFFFFFFFFFFFFFFFFFFFFFFFFFFFFFF  
FFFFFFFFFFFFFFFFFFFFFFFFFFFFFFFFFFFFFFFFFFFF:FFFFFFFFFFFFFFFFFFFF,FFFFFFFFF  
,FFFFFFFFFFFF,FF

@A00721:190:HGJW7DSXY:4:2111:18891:20243 1:N:0:TCTGCAAG+GCTGCACT  
AGCCTGGATTGCAAAGCACGATTGACGGGATACCACCTTTAATTTGAATTGGTTTGCCGTACTTCACA

TTGGATACCCAATTGTGCTGGACCCCAATAAGCTCCTTCCAATGTTTCTTTGAAGATATGAAGGGCT  
TACGTCATCTATGAT

[illegible] $+$ [illegible]

+

[illegible] $+$ [illegible]
$$+$$
[illegible]

+

[illegible]

+

[illegible]

@A00721:190:HGJW7DSXY:4:1204:27127:34131 1:N:0:TCTGCAAG+GCTGCACT  
GCCTGGATTGCAAAGCACGATTGACGGGATACCACCTTTAATTTGAATTGTTTTGCCGTACTTCACAT  
TGGATACCCAATTGTGCTGGACCCCAATAAGCTCCTTCCAATGTTTCTTTGAAGATATGAAGGGCTT  
ACGTCATCTATGATG

[illegible]

+

[illegible]

+

```
FFF:FFFFFFFFFFFFFFFFFFFFFFFFFFFFFFFFFFFFFFFFFFFFFFFFFFFFFFFFFFFFFFFF
FFFFFFFFFFFFFFFFFFFFFFFFFFFFFFFFFFFFFFFF,FFFFFFFF,FFFFFFFFFFFFFF:FFF,FFFF:FFF
F:FFFF:FF,FFFF
```

+

```

FFFFFFFFFFFFFFFFFFFFFFFFFFFFFFFF:FFFFFFFFFFFFFFFFFFFFFFFFFFFFFFFF
FFFFFFFFFFFFFFFFFFFFFFFFFFFFFFFF:,FFFF:FFFFFFFFFFFF:FFFFFFFFFFFFFFF
FFFFFFFFFFFFFFFF

```

+

```
F,:FFFFFFFFFFFFFFFF,FFF:FFF,FFFFFF:FFF:FFFFFFFFFFFFFFFFFFFFFFFFFFFFFFFF:FFFFFF
F,FFF::FFFFFFFFF:FF,:FFFFFFFF:FFF,FF:FF,FFFFFFFF:F:FFFFFFFFFFFFFFFF:FF,FFFF:
F,FFFFFFFFF:F,F
```

 $+$ 

```
FF:FFFFFFFFFFFFFFFF:FF,FFFFFF:FFFF::FFFFFFFFFFFFFFFF:FFFF::FFFFFFFFFFFFFFFF
FFFFFFFFFFFF:FF,FFFF:F:,FFFFFFFFFFFF:FFF,FFFF:FFF:FFFFFFFFFFFF,F,FFFF:F:
FFFFFFFFFFFF:FFFFF
```

 $+$ [illegible]



@A00721:190:HGJW7DSXY:4:1201:6741:32299 1:N:0:TCTGCAAG+GCTGCACT  
CTGGATTGCAAAGCACGATTGACGGGATACCACCTTTAATTTGAATTGTTTGCCGTACTTCACATTG  
GATACCCAATTGTGCTGGACCCCAATAAGCTCCTTCCAATGTTTCTTTGAAGATATGAAGGGCTTAC  
GTCATCTATGATGTT

@A00721:190:HGJW7DSXY:4:1207:17155:1611 1:N:0:TCTGCAAG+GCTGCACT  
CTGGATTGCAAAGCACGATTGACGGGATACCACCTTTAATTTGAATTGTTTGCCGTACTTCACATTG  
GATACCCAATTGTGCTGGACCCCAATAAGCTCCTTCCAATGTTTCTTTGAAGATATGAAGGGCTTAC  
GTCATCTATGATGTT

@A00721:190:HGJW7DSXY:4:1219:17553:33364 1:N:0:TCTGCAAG+GCTGCACT  
CTGGATTGCAAAGCACGATTGACGGGATACCACCTTTAATTTGAATTGTTTGCCGTACTTCACATTG  
GATACCCAATTGTGCTGGACCCCAATAAGCTCCTTCCAATGTTTCTTTGAAGATATGAAGGGCTTAC  
GTCATCTATGATGTT

@A00721:190:HGJW7DSXY:4:1247:10601:9236 1:N:0:TCTGCAAG+GCTGCACT  
CTGGATTGCAAAGCACGATTGACGGGATACCACCTTTAATTTGAATTGTTTGCCGTACTTCACATTG  
GATACCCAATTGTGCTGGACCCCAATAAGCTCCTTCCAATGTTTCTTTGAAGATATGAAGGGCTTAC  
GTCATCTATGATGTT

@A00721:190:HGJW7DSXY:4:1340:5330:19805 1:N:0:TCTGCAAG+GCTGCACT  
CTGGATTGCAAAGCACGATTGACGGGATACCACCTTTAATTTGAATTGTTTGCCGTACTTCACATTG  
GATACCCAATTGTGCTGGACCCCAATAAGCTCCTTCCAATGTTTCTTTGAAGATATGAAGGGCTTAC  
GTCATCTATGATGTT

@A00721:190:HGJW7DSXY:4:1412:7988:18427 1:N:0:TCTGCAAG+GCTGCACT  
CTGGATTGCAAAGCACGATTGACGGGATACCACCTTTAATTTGAATTGTTTGCCGTACTTCACATTG  
GATACCCAATTGTGCTGGACCCCAATAAGCTCCTTCCAATGTTTCTTTGAAGATATGAAGGGCTTAC  
GTCATCTATGATGTT

@A00721:190:HGJW7DSXY:4:1509:19379:14105 1:N:0:TCTGCAAG+GCTGCACT  
CTGGATTGCAAAGCACGATTGACGGGATACCACCTTTAATTTGAATTGTTTGCCGTACTTCACATTG  
GATACCCAATTGTGCTGGACCCCAATAAGCTCCTTCCAATGTTTCTTTGAAGATATGAAGGGCTTAC  
GTCATCTATGATGTT

+  
FFFFFFFFFFFFFFFFFFFFFFFFFFFFFFFFFFFFFFFFFFFFFFFFFFFFFFFFFFFFFFFFFFFFFFFF  
FFFFFFFFFFFFFFFFFFFFFFFFFFFFFFFFFFFFFFFFFFFFFFFFFFFFFFFFFFFFFFFFFFFFFFFF  
FFF:FFFFFFFFFFFF  
@A00721:190:HGJW7DSXY:4:1527:21838:23375 1:N:0:TCTGCAAG+GCTGCACT  
CTGGATTGCAAAGCACGATTGACGGGATACCACCTTTAATTTGAATTGGTTTGCCGTACTTCACATTG  
GATACCCAATTGTGCTGGACCCCAATAAGCTCCTTCCAATGTTTCTTTTGAAGATATGAAGGGCTTAC  
GTCATCTATGATGTT

+  
FFFFFFFFFFFFFFFFFFFFFFFFFFFFFFFFFFFFFFFFFFFFFFFFFFFFFFFFFFFFFFFFFFFFFFFF  
FFFFFFFFFFFFFFFFFFFFFFFFFFFFFFFFFFFFFFFFFFFFFFFFFFFFFFFFFFFFFFFFFFFFFFFF  
FFFFFFFFFFFFFFFFFFFF  
@A00721:190:HGJW7DSXY:4:1562:14498:10848 1:N:0:TCTGCAAG+GCTGCACT  
CTGGATTGCAAAGCACGATTGACGGGATACCACCTTTAATTTGAATTGGTTTGCCGTACTTCACATTG  
GATACCCAATTGTGCTGGACCCCAATAAGCTCCTTCCAATGTTTCTTTTGAAGATATGAAGGGCTTAC  
GTCATCTATGATGTT

+  
FFFFFFFFFFFFFFFFFFFFFFFFFFFFFFFFFFFFFFFFFFFFFFFFFFFFFFFFFFFFFFFFFFFFFFFF  
FFFFFFFFFFFFFFFFFFFFFFFFFFFFFFFFFFFFFFFFFFFFFFFFFFFFFFFFFFFFFFFFFFFFFFFF  
FFFFFFFFFFFFFFFFFFFF  
@A00721:190:HGJW7DSXY:4:1562:14434:11021 1:N:0:TCTGCAAG+GCTGCACT  
CTGGATTGCAAAGCACGATTGACGGGATACCACCTTTAATTTGAATTGGTTTGCCGTACTTCACATTG  
GATACCCAATTGTGCTGGACCCCAATAAGCTCCTTCCAATGTTTCTTTTGAAGATATGAAGGGCTTAC  
GTCATCTATGATGTT

+  
FFFFFFFFFFFFFFFFFFFFFFFFFFFFFFFFFFFFFFFFFFFFFFFFFFFFFFFFFFFFFFFFFFFFFFFF  
FFFFFFFFFFFFFFFFFFFFFFFFFFFFFFFFFFFFFFFFFFFFFFFFFFFFFFFFFFFFFFFFFFFFFFFF  
FFFFFFFFFFFFFFFFFFFF  
@A00721:190:HGJW7DSXY:4:1625:17363:14121 1:N:0:TCTGCAAG+GCTGCACT  
CTGGATTGCAAAGCACGATTGACGGGATACCACCTTTAATTTGAATTGGTTTGCCGTACTTCACATTG  
GATACCCAATTGTGCTGGACCCCAATAAGCTCCTTCCAATGTTTCTTTTGAAGATATGAAGGGCTTAC  
GTCATCTATGATGTT

+  
FFFFFFFFFFFFFFFFFFFFFFFFFFFFFFFFFFFFFFFFFFFFFFFFFFFFFFFFFFFFFFFFFFFFFFFF  
FFFFFFFFFFFFFFFFFFFFFFFFFFFFFFFFFFFFFFFFFFFFFFFFFFFFFFFFFFFFFFFFFFFFFFFF  
FFFF:FFFFFFFFFFFF  
@A00721:190:HGJW7DSXY:4:2242:13304:28855 1:N:0:TCTGCAAG+GCTGCACT  
CTGGATTGCAAAGCACGATTGACGGGATACCACCTTTAATTTGAATTGGTTTGCCGTACTTCACATTG  
GATACCCAATTGTGCTGGACCCCAATAAGCTCCTTCCAATGTTTCTTTTGAAGATATGAAGGGCTTAC  
GTCATCTATGATGTT

+  
FFFFFFFFFFFFFFFFFFFFFFFFFFFFFFFFFFFFFFFFFFFFFFFFFFFFFFFFFFFFFFFFFFFFFFFF  
FFFFFFFFFFFFFFFFFFFFFFFFFFFFFFFFFFFFFFFFFFFFFFFFFFFFFFFFFFFFFFFFFFFFFFFF  
FFFFFFFFFFFFFFFFFFFF  
@A00721:190:HGJW7DSXY:4:2261:4915:24283 1:N:0:TCTGCAAG+GCTGCACT  
CTGGATTGCAAAGCACGATTGACGGGATACCACCTTTAATTTGAATTGGTTTGCCGTACTTCACATTG  
GATACCCAATTGTGCTGGACCCCAATAAGCTCCTTCCAATGTTTCTTTTGAAGATATGAAGGGCTTAC  
GTCATCTATGATGTT

+  
FFFFFFFFFFFFFFFFFFFFFFFFFFFFFFFFFFFFFFFFFFFFFFFFFFFFFFFFFFFFFFFFFFFFFFFF  
FFFFFFFFFFFFFFFFFFFFFFFFFFFFFFFFFFFFFFFFFFFFFFFFFFFFFFFFFFFFFFFFFFFFFFFF  
FFFFFFFFFFFFFFFFFFFF  
@A00721:190:HGJW7DSXY:4:2346:10710:5102 1:N:0:TCTGCAAG+GCTGCACT  
CTGGATTGCAAAGCACGATTGACGGGATACCACCTTTAATTTGAATTGGTTTGCCGTACTTCACATTG

GATACCAATTGTGCTGGACCCCAATAAGCTCCTTCCAATGTTTCTTTGAAGATATGAAGGGCTTAC  
GTCATCTATGATGTT

[illegible] $+$ 

@A00721:190:HGJW7DSXY:4:2551:7844:4961 1:N:0:TCTGCAAG+GCTGCACT  
CTGGATTGCAAAGCACGATTGACGGGATACCACCTTTAATTTGAATTGTTTGCCGTACTTCACATTG  
GATACCCAATTGTGCTGGACCCCAATAAGCTCCTTCCAATGTTTCTTTGAAGATATGAAGGGCTTAC  
GTCATCTATGATGTT

```
F,FFFFFF:FFF:FFFFFFFFFFFFFFFFFFFFFFFF,FF:FFFFFFFFFFFFFFFF:FFFFFFFFFFFFFF
FFFFFFFFFFFFFFFFFFFFFFFF:FFFFFFFFFFFFFFFF:FFFFFFFFF:FFFFFFFFFFFFFFFF:FF
F:FFFFFFFFFFFFFF
```

+

@A00721:190:HGJW7DSXY:4:2571:12057:17143 1:N:0:TCTGCAAG+GCTGCACT  
CTGGATTGCAAAGCACGATTGACGGGATACCACCTTTAATTTGAATTGTTTGCCGTACTTCACATTG  
GATACCCAATTGTGCTGGACCCCAATAAGCTCCTTCCAATGTTTCTTTGAAGATATGAAGGGCTTAC  
GTCATCTATGATGTT

[illegible]

+

@A00721:190:HGJW7DSXY:4:2659:4589:15327 1:N:0:TCTGCAAG+GCTGCACT  
CTGGATTGCAAAGCACGATTGACGGGATACCACCTTTAATTTGAATTGTTTTGCCGTACTTCACATTG  
GATACCCAATTGTGCTGGACCCCAATAAGCTCCTTCCAATGTTTCTTTTGAAGATATGAAGGGCTTAC  
GTCATCTATGATGTT

[illegible]



FFFFFFFFFFFFFFFFFFFFFFFFFFFFFFFFFFFFFFFFFFFFFFFFFFFFFFFFFFFFFFFFFFFFFFFFFFFFFFFF  
FFFFFFFFFFFFFFFF

@A00721:190:HGJW7DSXY:4:2624:25970:2378 1:N:0:TCTGCAAG+GCTGCACT  
AGCACGATTGACGGGATACCACCTTTAATTTGAATTGGTTTGCCGTACTTCACATTGGATACCCAATTG  
TGCTGGACCCCAATAAGCTCCTTCCAATGTTTCTTTTGAAGATATGAAGGGCTTACGTCATCTATGA  
TGTTATACCATGCGT

+

FFFFFFFFFFFFFFFFFFFFFFFFFFFFFFFFFFFFFFFFFFFFFFFFFFFFFFFFFFFFFFFFFFFFFFFFFFFFFFFF  
FFFFFFFFFFFFFFFFFFFFFFFFFFFFFFFFFFFFFFFFFFFFFFFFFFFFFFFFFFFFFFFFFFFFFFFFFFFFFFFF  
FFFFFFFFFFFFFFFF, :F:FFFFFFFFFFFFFFFFFFFFFFFF  
FFFFFFFFFFFFFF, FF

@A00721:190:HGJW7DSXY:4:1118:30770:19742 1:N:0:TCTGCAAG+GCTGCACT  
GCACGATTGACGGGATACCACCTTTAATTTGAATTGGTTTGCCGTACTTCACATTGGATACCCAATTG  
TGCTGGACCCCAATAAGCTCCTTCCAATGTTTCTTTTGAAGATATGAAGGGCTTACGTCATCTATGAT  
GTTATACCATGCGTT

+

FFFFFFFFFFFFFFFFFFFFFFFFFFFFFFFFFFFFFFFFFFFFFFFFFFFFFFFFFFFFFFFFFFFFFFFFFFFFFFFF  
FFFFFFFFFFFFFFFFFFFFFFFFFFFFFFFFFFFFFFFFFFFFFFFFFFFFFFFFFFFFFFFFFFFFFFFFFFFFFFFF  
FFFFFFF:FFFF:FFF

@A00721:190:HGJW7DSXY:4:1264:31756:14904 1:N:0:TCTGCAAG+GCTGCACT  
GCACGATTGACGGGATACCACCTTTAATTTGAATTGGTTTGCCGTACTTCACATTGGATACCCAATTG  
TGCTGGACCCCAATAAGCTCCTTCCAATGTTTCTTTTGAAGATATGAAGGGCTTACGTCATCTATGAT  
GTTATACCATGCGTT

+

FFFFFFFFFFFFFFFFFFFFFFFFFFFFFFFFFFFFFFFFFFFFFFFFFFFFFFFFFFFFFFFFFFFFFFFFFFFFFFFF  
FFFFFFFFFFFFFFFFFFFFFFFFFFFFFFFFFFFFFFFFFFFFFFFFFFFFFFFFFFFFFFFFFFFFFFFFFFFFFFFF  
FFFFFFFFFFFFFFFF

@A00721:190:HGJW7DSXY:4:1425:12671:23688 1:N:0:TCTGCAAG+GCTGCACT  
GCACGATTGACGGGATACCACCTTTAATTTGAATTGGTTTGCCGTACTTCACATTGGATACCCAATTG  
TGCTGGACCCCAATAAGCTCCTTCCAATGTTTCTTTTGAAGATATGAAGGGCTTACGTCATCTATGAT  
GTTATACCATGCGTT

+

FFFFFFFFFFFFFFFFFFFFFFFFFFFFFFFFFFFFFFFFFFFFFFFFFFFFFFFFFFFFFFFFFFFFFFFFFFFFFFFF  
FFFFFFFFFFFFFFFFFFFFFFFFFFFFFFFFFFFFFFFFFFFFFFFFFFFFFFFFFFFFFFFFFFFFFFFFFFFFFFFF  
FFFFFFFFF, :FFFFFFF

@A00721:190:HGJW7DSXY:4:1442:6280:19100 1:N:0:TCTGCAAG+GCTGCACT  
GCACGATTGACGGGATACCACCTTTAATTTGAATTGGTTTGCCGTACTTCACATTGGATACCCAATTG  
TGCTGGACCCCAATAAGCTCCTTCCAATGTTTCTTTTGAAGATATGAAGGGCTTACGTCATCTATGAT  
GTTATACCATGCGTT

+

FFFFFFFFFFFFFFFFFFFFFFFFFFFFFFFFFFFFFFFFFFFFFFFFFFFFFFFFFFFFFFFFFFFFFFFFFFFFFFFF  
FFFFFFFFFFFFFFFFFFFFFFFFFFFFFFFFFFFFFFFFFFFFFFFFFFFFFFFFFFFFFFFFFFFFFFFFFFFFFFFF  
FFFFFFFFFFFFFFFF

@A00721:190:HGJW7DSXY:4:1470:2645:12148 1:N:0:TCTGCAAG+GCTGCACT  
GCACGATTGACGGGATACCACCTTTAATTTGAATTGGTTTGCCGTACTTCACATTGGATACCCAATTG  
TGCTGGACCCCAATAAGCTCCTTCCAATGTTTCTTTTGAAGATATGAAGGGCTTACGTCATCTATGAT  
GTTATACCATGCGTT

+

FFFFFFFFFFFFFFFFFFFFFFFFFFFFFFFFFFFFFFFFFFFFFFFFFFFFFFFFFFFFFFFFFFFFFFFFFFFFFFFF  
FFFFFFFFFFFFFFFFFFFFFFFFFFFFFFFFFFFFFFFFFFFFFFFFFFFFFFFFFFFFFFFFFFFFFFFFFFFFFFFF  
FFFFFFFFFFFFFFFF

@A00721:190:HGJW7DSXY:4:1621:31412:10332 1:N:0:TCTGCAAG+GCTGCACT  
GCACGATTGACGGGATACCACCTTTAATTTGAATTGGTTTGCCGTACTTCACATTGGATACCCAATTG  
TGCTGGACCCCAATAAGCTCCTTCCAATGTTTCTTTTGAAGATATGAAGGGCTTACGTCATCTATGAT  
GTTATACCATGCGTT

[illegible][illegible]

```

FFFFFFFFFFFFFFFFFFFFFFFFFFFFFFFFFFFFFFFFFFFFFFFFFFFFFFFFFFFFFFFF:FFFFFFFFFFFFFFFF
FFFFFFFFFFFFFFFFFFFFFFFFFFFFFFFFFFFFFFFFFFFFFFFFFFFFFFFFFFFFFFFF:FFFFFFFFF:FFFFFFFFFFFFFFFF:FFFF
FFFFF:FFFFFFFFF

```

[illegible]

```

FFFFFF,FFFFFF:FFFFFF,FFF:,FFFFFF:FFF:FFF,FFFF:FFFFFFF:FFFFFFFFF:F:F:FF
FFFF:FFFFFFF,FFFFFFF,FFFFFFF:FFFFFFFFFFFF:F:FFFF:FFFF,FFF:FFFFFFF
:FFFFE..FF:E::F

```

```

FFFFFFFFFFFFFFFFFFFFFFFF:FFFFFFFFFFFFFFFFFFFFFFFFFFFFFFFFFFFFFFFF
FFFFFFFFFFFFFFFFFFFFFFFF:FFFFFFFFFFFFFFFF:FFFFFFFFFFFFFFFFFFFFFF
FFFFFFFFFFFFFFFF

```

```

FFFFFFFFFFFFFFFFFFFFFFFF:FFFFFFFFFFFFFFFFFFFFFFFFFFFFFFFFFFFFFFFF
FFFFFFFFFFFFFFFFFFFFFFFF:FFFFFFFFFFFFFFFFFFFFFFFF:FFFFFFFFFFFFFFF
FFFFFFF,FFFFFFF

```

@A00721:190:HGJW7DSXY:4:2474:6379:6464 1:N:0:TCTGCAAG+GCTGCACT  
GCACGATTGACGGGATACCACCTTTAATTTGAATTGGTTTGCCGTACTTCACATTGGATACCCAATTG

TGCTGGACCCCAATAAGCTCCTTCCAATGTTTCTTTTGAAGATATGAAGGGCTTACGTCATCTATGAT  
GTTATAACCATGCGTT

+

FFFFFFFFFFFFFFFFFFFFFFFFFFFFFFFFFFFFFFFFFFFFFFFFFFFFFFFFFFFFFFFFFFFFFFFF:FFFFFFFFFFFFFFFF  
FFFFFFFFFFFFFFFFFFFFFFFFFFFFFFFFFFFFFFFFFFFFFFFFFFFFFFFFFFFFFFFFFFFFFFFF:FFFFFFFFFFFFFFFFFFFFFFFFFFFFFFFF  
FFFFFFFFFF::FFFF

@A00721:190:HGJW7DSXY:4:2536:17879:25473 1:N:0:TCTGCAAG+GCTGCACT  
GCACGATTGACGGGATACCACTTTAATTTGAATTGGTTTGCCGTACTTCACATTGGATACCCAATTG  
TGCTGGACCCCAATAAGCTCCTTCCAATGTTTCTTTTGAAGATATGAAGGGCTTACGTCATCTATGAT  
GTTATAACCATGCGTT

+

FFFFFFFFFFFFFFFFFFFFFFFFFFFFFFFFFFFFFFFFFFFFFFFFFFFFFFFFFFFFFFFFFFFFFFFF  
FFFFFFFFFFFFFFFFFFFFFFFFFFFFFFFFFFFFFFFFFFFFFFFFFFFFFFFFFFFFFFFFFFFFFFFF:FFFFFFFFFFFFFFFFFFFFFFFFFFFFFFFF  
FFFFFFFFFFFFFFFFF:F

@A00721:190:HGJW7DSXY:4:2574:15826:12743 1:N:0:TCTGCAAG+GCTGCACT  
GCACGATTGACGGGATACCACTTTAATTTGAATTGGTTTGCCGTACTTCACATTGGATACCCAATTG  
TGCTGGACCCCAATAAGCTCCTTCCAATGTTTCTTTTGAAGATATGAAGGGCTTACGTCATCTATGAT  
GTTATAACCATGCGTT

+

FFFFFFFFFFFFFFFFFFFFFFFFFFFFFFFFFFFFFFFFFFFFFFFFFFFFFFFFFFFFFFFFFFFFFFFF:FFFFFFFF  
FFFFFFFFFFFFFFFFFFFFFFFFFFFFFFFFFFFFFFFFFFFFFFFFFFFFFFFFFFFFFFFFFFFFFFFF:FFFFFFFFFFFFFFFFFFFFFFFFFFFFFFFF  
FFFFFFFFFFFFFFFFF:FF:FFFFFFFFFFFFFFFF:FFFFFFFFFFFFFFFFFFFFFFFF:FFFFFFFF:FF  
FFFFFFFFFFFFFFFFF

@A00721:190:HGJW7DSXY:4:2609:30318:34397 1:N:0:TCTGCAAG+GCTGCACT  
GCACGATTGACGGGATACCACTTTAATTTGAATTGGTTTGCCGTACTTCACATTGGATACCCAATTG  
TGCTGGACCCCAATAAGCTCCTTCCAATGTTTCTTTTGAAGATATGAAGGGCTTACGTCATCTATGAT  
GTTATAACCATGCGTT

+

FFFFFFFFFFFFFFFFFFFFFFFFFFFFFFFFFFFFFFFFFFFFFFFFFFFFFFFFFFFFFFFFFFFFFFFF  
FFFFFFFFFFFFFFFFFFFFFFFFFFFFFFFFFFFFFFFFFFFFFFFFFFFFFFFFFFFFFFFFFFFFFFFF:FFFFFFF:FFFFFF:FFFFFFF  
FFFFFFF:FFFFFFF

@A00721:190:HGJW7DSXY:4:2659:15429:8359 1:N:0:TCTGCAAG+GCTGCACT  
GCACGATTGACGGGATACCACTTTAATTTGAATTGGTTTGCCGTACTTCACATTGGATACCCAATTG  
TGCTGGACCCCAATAAGCTCCTTCCAATGTTTCTTTTGAAGATATGAAGGGCTTACGTCATCTATGAT  
GTTATAACCATGCGTT

+

FFFFFFFFFFFFFFFFFFFFFFFFFFFFFFFFFFFFFFFFFFFFFFFFFFFFFFFFFFFFFFFFFFFFFFFF  
FFFFFFFFFFFFFFFFFFFFFFFFFFFFFFFFFFFFFFFFFFFFFFFFFFFFFFFFFFFFFFFFFFFFFFFF:FFFFFF:FFFFFFFFFFFFFFFFFFFFFFFF  
FFFFFFFFFFFFFFFFF

@A00721:190:HGJW7DSXY:4:2670:6063:15186 1:N:0:TCTGCAAG+GCTGCACT  
GCACGATTGACGGGATACCACTTTAATTTGAATTGGTTTGCCGTACTTCACATTGGATACCCAATTG  
TGCTGGACCCCAATAAGCTCCTTCCAATGTTTCTTTTGAAGATATGAAGGGCTTACGTCATCTATGAT  
GTTATAACCATGCGTT

+

FFFFFFFFFFFFFFFFFFFFFFFFFFFFFFFFFFFFFFFFFFFFFFFFFFFFFFFFFFFFFFFFFFFFFFFF  
FFFFFFFFFFFFFFFFFFFFFFFFFFFFFFFFFFFFFFFFFFFFFFFFFFFFFFFFFFFFFFFFFFFFFFFF:FFFFFFFFFFFFFFFFFFFFFFFF  
F:FFFFFFFFFFFFFFF

@A00721:190:HGJW7DSXY:4:1155:2826:35227 1:N:0:TCTGCAAG+GCTGCACT  
GACGGGATACCACTTTAATTTGAATTGGTTTGCCGTACTTCACATTGGATACCCAATAGTGCTGGAC  
CCCAATAAGCTCCTTCCAATGTTTCTTTTGAAGATATGAAGGGCTTACGTCATCTATGATGTTATACC  
ATGCGTTATTCGAA

+

:F:F:FF:FFFFFF, :F:F,F,FF:FFFF:FFFFFFFFFF,FFFF:, , :FFFF,F: :F,FFFFFF,FF  
,FFFFFF,FFFFFFF,FFFFFF: :FFFFFFFF,FFFFFFFFF:FFFF:FF:FF,FFFF,FFF,FFF  
F:FFFFFF,F,FFF





@A00721:190:HGJW7DSXY:4:2363:9625:13025 1:N:0:TCTGCAAG+GCTGCACT  
ACCACCTTTAATTTGAATTGGTTTGCCGTACTTCACATTGGATACCCAATTGTGCTGGACCCCAATAA  
GCTCCTTCCAATGTTTCTTTGAAGATATGAAGGGCTTACGTCATCTATGATGTTATACCATGCGTTA  
TTCGAATATAGTTTC

@A00721:190:HGJW7DSXY:4:1170:14841:30577 1:N:0:TCTGCAAG+GCTGCACT  
CCACCTTTAATTTGAATTGTTTGCCGTACTTCACATTGGATACCCAATTGTGCTGGACCCCAATAAG  
CTCCTTCCAATGTTTCTTTGAAGATATGAAGGGCTTACGTCATCTATGATGTTATACCATGCGTTAT  
TCGAATATAGTTTCG

@A00721:190:HGJW7DSXY:4:2277:32090:16485 1:N:0:TCTGCAAG+GCTGCACT  
CCACCTTTAATTTGAATTGTTTTGCCGTACTTCACATTGGATACCCAATTGTGCTGGACCCCAATAAG  
CTCCTTCCAATGTTTCTTTTGAAGATATGAAGGGCTTACGTCATCTATGATGTTATACCATGCGTTAT  
TCGAATATAGTTTCG

@A00721:190:HGJW7DSXY:4:2568:20383:16063 1:N:0:TCTGCAAG+GCTGCACT  
CCACCTTTAATTTGAATTGTTTTGCCGTACTTCACATTGGATACCCAATTGTGCTGGACCCCAATAAG  
CTCCTTCCAATGTTTCTTTTGAAGATATGAAGGGCTTACGTCATCTATGATGTTATACCATGCGTTAT  
TCGAATATAGTTTCG

@A00721:190:HGJW7DSXY:4:2635:8305:9518 1:N:0:TCTGCAAG+GCTGCACT  
CCACCTTTAATTTGAATTGTTTGCCGTACTTCACATTGGATACCCAATTGTGCTGGACCCCAATAAG  
CTCCTTCCAATGTTTCTTTTGAAGATATGAAGGGCTTACGTCATCTATGATGTTATACCATGCGTTAT  
TCGAATATAGTTTCG

@A00721:190:HGJW7DSXY:4:1104:18891:31266 1:N:0:TCTGCAAG+GCTGCACT  
CACCTTTAATTTGAATTGGTTTGCCGTACTTCACATTGGATACCCAATTGTGCTGGACCCCAATAAGC  
TCCTTCCAATGTTTCTTTTGAAGATATGAAGGGCTTACGTCTATGATGTTATACCATGCGTTATT  
CGAATATAGTTTCGA

@A00721:190:HGJW7DSXY:4:1109:4264:19241 1:N:0:TCTGCAAG+GCTGCACT  
CACCTTTAATTTGAATTGGTTTGCCGTACTTCACATTGGATACCCAATTGTGCTGGACCCCAATAAGC  
TCCTTCCAATGTTTCTTTTGAAGATATGAAGGGCTTACGTCATCTATGATGTTATACCATGCGTTATT  
CGAATATAGTTTCGA

[illegible][illegible][illegible]

```

FFFFFFFFFFFFFFFFFFFFFFFF:FFFFFFFFFFFFFFFFFFFFFFFFFFFFFFFFFFFFFFFF:FFFF
FFFF:FFFFFFFFFFFFFFFFFFFFFFFFFFFFFFFFFFFFFFFF:FFFFFFFFFFFFFFFFFFFFFFFF,FFFFFFFF
FFFFFFFFFFFFFFFF

```

```
FFFFF:FFFFFFFFFFFFFFFFFFFFFFFFFFFFFFFFFFFFFFFFFFFFFFFFFFFFFFFFFFFFFF  
FFFFFFFFFFFFFFFFFFFFFFFF:FfF:FFFFFFFFFFFFFFFFFFFFFFFFFFFFFFFFFFFFFF  
FFFFFFFFFFFFFFFF
```

[illegible][illegible]

@A00721:190:HGJW7DSXY:4:1549:6949:18317 1:N:0:TCTGCAAG+GCTGCACT  
CACCTTTAATTTGAATTGGTTTGCCGTACTTCACATTGGATACCCAATTGTGCTGGACCCCAATAAGC





FFFFFFFFFFFFFFFFFFFFFFFFFFFFFFFFFFFFFFFFFFFFFFFFFFFFFFFFFFFFFFFFFFFFFFFFFFFFFFFF  
FFFFFFFFFFFFFFFF

@A00721:190:HGJW7DSXY:4:2573:32000:35837 1:N:0:TCTGCAAG+GCTGCACT  
CACCTTTAATTTGAATTGGTTTGCCGTACTTCACATTGGATACCCAATTGTGCTGGACCCCAATAAGC  
TCCTTCCAATGTTTCTTTTGAAGATATGAAGGGCTTACGTCATCTATGATGTTATACCATGCGTTATT  
CGAATATAGTTTCGA

+

FFFFFFFFFFFFFFFFFFFFFFFFFFFFFFFFFFFFFFFFFFFFFFFFFFFFFFFFFFFFFFFFFFFFFFFFFFFFFFFF  
FFFFFFFFFFFFFFFFFFFFFFFFFFFFFFFFFFFFFFFFFFFFFFFFFFFFFFFFFFFFFFFFFFFFFFFFFFFFFFFF  
FF:FFFFFFFFFFFFFFFF

@A00721:190:HGJW7DSXY:4:2673:19660:23985 1:N:0:TCTGCAAG+GCTGCACT  
CACCTTTAATTTGAATTGGTTTGCCGTACTTCACATTGGATACCCAATTGTGCTGGACCCCAATAAGC  
TCCTTCCAATGTTTCTTTTGAAGATATGAAGGGCTTACGTCATCTATGATGTTATACCATGCGTTATT  
CGAATATAGTTTCGA

+

FFFFFFFFFFFFFFFFFFFFFFFFFFFFFFFFFFFFFFFFFFFFFFFFFFFFFFFFFFFFFFFFFFFFFFFFFFFFFFFF  
FF:FFFFFFFFFFFFFFFFFFFFFFFFFFFFFFFFFFFFFFFFFFFFFFFFFFFFFFFFFFFFFFFFFFFFFFFFFFFF  
FFFFFFFFFFFFFFFF:F

@A00721:190:HGJW7DSXY:4:1130:13422:1157 1:N:0:TCTGCAAG+GCTGCACT  
ACCTTTAATTTGAATTGGTTTGCCGTACTTCACATTGGATACCCAATTGTGCTGGACCCCAATAAGCT  
CCTTCCAATGTTTCTTTTGAAGATATGAAGGGCTTACGTCATCTATGATGTTATACCATGCGTTATTC  
GAATATAGTTTCGAA

+

FF,FFFFFF:,FFF:FFFFFFFFFFFFFFFFFFFFFFFFFFFFFFFFFFFFFFFFFFFFFFFFFFFFFFFFFFFF  
FFFF,,FFFFFF::FFFF:FFFFFFFFFFFFFFFFFFFFFFFFFFFFFFFFFFFFFFFFFFFFFFFFFFFFFFFF  
:FFF,:F,FFF:,FF

@A00721:190:HGJW7DSXY:4:1557:5095:11068 1:N:0:TCTGCAAG+GCTGCACT  
ACCTTTAATTTGAATTGGTTTGCCGTACTTCACATTGGATACCCAATTGTGCTGGACCCCAATAAGCT  
CCTTCCAATGTTTCTTTTGAAGATATGAAGGGCTTACGTCATCTATGATGTTATACCATGCGTTATTC  
GAATATAGTTTCGAA

+

FFFFFFFFFFFFFFFFFFFFFFFFFFFFFFFFFFFFFFFFFFFFFFFFFFFFFFFFFFFFFFFFFFFFFFFFFFFF  
FFF:FFFFFFFFFFFFFFFFFFFFFFFFFFFFFFFFFFFFFFFFFFFFFFFFFFFFFFFFFFFFFFFFFFFFFFFF  
FFFFFFFFFFFFFFFF

@A00721:190:HGJW7DSXY:4:1557:3830:11475 1:N:0:TCTGCAAG+GCTGCACT  
ACCTTTAATTTGAATTGGTTTGCCGTACTTCACATTGGATACCCAATTGTGCTGGACCCCAATAAGCT  
CCTTCCAATGTTTCTTTTGAAGATATGAAGGGCTTACGTCATCTATGATGTTATACCATGCGTTATTC  
GAATATAGTTTCGAA

+

FFFFFFFFFFFFFFFFFFFFFFFFFFFFFFFFFFFFFFFFFFFFFFFFFFFFFFFFFFFFFFFFFFFFFFFFFFFF  
FFFFFFFFFFFFFFFFFFFFFFFFFFFFFFFFFFFFFFFFFFFFFFFFFFFFFFFFFFFFFFFFFFFFFFFFFFFF  
FFFFFFFFFFFFFFFF:F

@A00721:190:HGJW7DSXY:4:1672:13630:28886 1:N:0:TCTGCAAG+GCTGCACT  
ACCTTTAATTTGAATTGGTTTGCCGTACTTCACATTGGATACCCAATTGTGCTGGACCCCAATAAGCT  
CCTTCCAATGTTTCTTTTGAAGATATGAAGGGCTTACGTCATCTATGATGTTATACCATGCGTTATTC  
GAATATAGTTTCGAA

+

FFFFFFFFFFFFFFFFFFFFFFFFFFFFFFFFFFFFFFFFFFFFFFFFFFFFFFFFFFFFFFFFFFFFFFFFFFFF  
FFFFFFFFFFFFFFFFFFFFFFFFFFFFFFFFFFFFFFFFFFFFFFFFFFFFFFFFFFFFFFFFFFFFFFFFFFFF  
FFFFFFFFFFFFFFFF

@A00721:190:HGJW7DSXY:4:2138:19633:13730 1:N:0:TCTGCAAG+GCTGCACT  
ACCTTTAATTTGAATTGGTTTGCCGTACTTCACATTGGATACCCAATTGTGCTGGACCCCAATAAGCT  
CCTTCCAATGTTTCTTTTGAAGATATGAAGGGCTTACGTCATCTATGATGTTATACCATGCGTTATTC  
GAATATAGTTTCGAA

+  
FFFFFFFFFFFFFFFFFFFFFFFFFFFFFFFFFFFFFFFFFFFFFFFFFFFFFFFFFFFFFFFFFFFFFFFF  
FFFFFFFFFFFFFFFFFFFFFFFFFFFFFFFFFFFFFFFFFFFFFFFFFFFFFFFFFFFFFFFFFFFFFFFF  
FFFFFFFFFFFFFFFF  
@A00721:190:HGJW7DSXY:4:2377:16776:36182 1:N:0:TCTGCAAG+GCTGCACT  
ACCTTTAATTTGAATTGTTTGCCGTACTTCACATTGGATACCCAATTGTGCTGGACCCCAATAAGCT  
CCTTCCAATGTTTCTTTTGAAGATATGAAGGGCTTACGTCATCTATGATGTTATACCATGCGTTATTC  
GAATATAGTTTCGAA

+  
FFFFFFFFFFFFFFFFFFFFFFFFFFFFFFFFFFFFFFFFFFFFFFFFFFFFFFFFFFFFFFFFFFFFFFFF  
FFFFFFFFFFFFFFFFFFFFFFFFFFFFFFFFFFFFFFFFFFFFFFFFFFFFFFFFFFFFFFFFFFFFFFFF  
FFFFFFFFFFFFFFFF  
@A00721:190:HGJW7DSXY:4:2378:16830:1423 1:N:0:TCTGCAAG+GCTGCACT  
ACCTTTAATTTGAATTGTTTGCCGTACTTCACATTGGATACCCAATTGTGCTGGACCCCAATAAGCT  
CCTTCCAATGTTTCTTTTGAAGATATGAAGGGCTTACGTCATCTATGATGTTATACCATGCGTTATTC  
GAATATAGTTTCGAA

+  
FFFFFFFFFFFFFFFFFFFFFFFFFFFFFFFFFFFFFFFFFFFFFFFFFFFFFFFFFFFFFFFFFFFFFFFF  
FFFFFFFFFFFFFFFFFFFFFFFFFFFFFFFFFFFFFFFFFFFFFFFFFFFFFFFFFFFFFFFFFFFFFFFF  
FFFFFFFFFFFFFFFF  
@A00721:190:HGJW7DSXY:4:2528:6225:27211 1:N:0:TCTGCAAG+GCTGCACT  
ACCTTTAATTTGAATTGTTTGCCGTACTTCACATTGGATACCCAATTGTGCTGGACCCCAATAAGCT  
CCTTCCAATGTTTCTTTTGAAGATATGAAGGGCTTACGTCATCTATGATGTTATACCATGCGTTATTC  
GAATATAGTTTCGAA

+  
FFFFFFFFFFFFFFFFFFFFFFFFFFFFFFFFFFFFFFFFFFFFFFFFFFFFFFFFFFFFFFFFFFFFFFFF  
FFFFFFFFFFFFFFFFFFFFFFFFFFFFFFFFFFFFFFFFFFFFFFFFFFFFFFFFFFFFFFFFFFFFFFFF  
FFFFFFFFFFFFFFFF  
@A00721:190:HGJW7DSXY:4:2557:7202:17065 1:N:0:TCTGCAAG+GCTGCACT  
ACCTTTAATTTGAATTGTTTGCCGTACTTCACATTGGATACCCAATTGTGCTGGACCCCAATAAGCT  
CCTTCCAATGTTTCTTTTGAAGATATGAAGGGCTTACGTCATCTATGATGTTATACCATGCGTTATTC  
GAATATAGTTTCGAA

+  
FFFFFFFFFFFFFFFFFFFFFFFFFFFFFFFFFFFFFFFFFFFFFFFFFFFFFFFFFFFFFFFFFFFFFFFF  
FFFFFFFFFFFFFFFFFFFFFFFFFFFFFFFFFFFFFFFFFFFFFFFFFFFFFFFFFFFFFFFFFFFFFFFF  
FFFFFFFFFFFFFFFF  
@A00721:190:HGJW7DSXY:4:2647:15673:16861 1:N:0:TCTGCAAG+GCTGCACT  
ACCTTTAATTTGAATTGTTTGCCGTACTTCACATTGGATACCCAATTGTGCTGGACCCCAATAAGCT  
CCTTCCAATGTTTCTTTTGAAGATATGAAGGGCTTACGTCATCTATGATGTTATACCATGCGTTATTC  
GAATATAGTTTCGAA

+  
FFFFFFFF,F:FFFFFFFFFFFFFFFFFFFFFFFFFFFFFFFFFFFFFFFFFFFFFFFFFFFFFFFFFFFF  
FFFFFFFFFFFFFFFFFFFFFFFFFFFFFFFFFFFFFFFFFFFFFFFFFFFFFFFFFFFFFFFFFFFFFFFF  
FFFFFFFF:FFFFFFF  
@A00721:190:HGJW7DSXY:4:1113:16866:23281 1:N:0:TCTGCAAG+GCTGCACT  
CTAGACTTTAATTGAACTATATTGAATAACGCATGGTATAACATCATAGATGACGCAAGCCCTTC  
ATATCTTCAAAAGAAACATTGGAAGGAGCTTATTGGGGTCCAGCACAATTGGGTATCCAATGTGAAGT  
ACGGCAAACCAATTC

+  
FF:FFFFFFFF:FFFFFFFF,FFFFFFFFFFFFFFFFFFFFFFFFFFFFFFFF,FFFFFFFFFFFFFFFF  
FFFFFFFFFFFFFFFFFFFFFFFFFFFFFFFFFFFFFFFFFFFFFFFFFFFFFFFFFFFFFFFF:FFFFFFFF  
FF,FFF:FFFFFFF  
@A00721:190:HGJW7DSXY:4:1213:27597:5447 1:N:0:TCTGCAAG+GCTGCACT  
CTAGACTTTAATTGAACTATATTGAATAACGCATGGTATAACATCATAGATGACGTAAGCCCTTC

ATATCTTCAAAAGAAACATTGGAAGGAGCTTATTGGGGTCCAGCACAATTGGGTATCCAATGTGAAGT  
ACGGCAAACCAATTC

+

FFFFFFFFFFFFFFFFFFFFFFFF:FFFFFFFFFFFFFFFFFFFFFFFFFFFFFFFFFFFFFFFFFFFFFFFF  
FFFFFFFFFFFFFFFFFFFFFFFF:FFFFFFFFFFFFFFFF:FFFFFFFFFFFFFFFF:FFFFFFFFFFFFFFFF  
FFFFFFFFFFFF,,FFF

@A00721:190:HGJW7DSXY:4:1228:19813:22561 1:N:0:TCTGCAAG+GCTGCACT  
CTAGACTTTAATTGAAACTATATTCGAATAACGCATGGTATAACATCATAGATGACGTAAGCCCTTC  
ATATCTTCAAAAGAAACATTGGAAGGAGCTTATTGGGGTCCAGCACAATTGGGTATCCAATGTGAAGT  
ACGGCAAACCAATTC

+

FFFFFFFFFFFFFFFFFFFFFFFF:F:FFFFFFFFFFFFFFFFFFFFFFFFFFFFFFFFFFFFFFFFFFFFFFFF:FF  
FFFFFFFFFFFFFFFFFFFFFFFF,FFFFFFFFFFFFFFFF:FFFFFFFFFFFFFFFF:FFFFFFFFFFFFFFFF  
FFFFFFFFFFFFFFFF:F

@A00721:190:HGJW7DSXY:4:1402:22064:33317 1:N:0:TCTGCAAG+GCTGCACT  
CTAGACTTTAATTGAAACTATATTCGAATAACGCATGGTATAACATCATAGATGACGCAAGCCCTTC  
ATATCTTCAAAAGAAACATTGGAAGGAGCTTATTGGGGTCCAGCACAATTGGGTATCCAATGTGAAGT  
ACGGCAAACCAATTC

+

FFFFFFFFFFFFFFFFFFFFFFFFFFFFFFFFFFFFFFFFFFFFFFFFFFFFFFFFFFFFFFFFFFFFFFFF  
FFFFFFFFFFFFFFFFFFFFFFFFFFFFFFFFFFFFFFFFFFFFFFFFFFFFFFFFFFFFFFFFFFFFFFFF:FFFFFFFFFFFFFFFF  
FFFFFFFFFFFFFFFFFFFF

@A00721:190:HGJW7DSXY:4:1450:5746:23062 1:N:0:TCTGCAAG+GCTGCACT  
CTAGACTTTAATTGAAACTATATTCGAATAACGCATGGTATAACATCATAGATGACGCAAGCCCTTC  
ATATCTTCAAAAGAAACATTGGAAGGAGCTTATTGGGGTCCAGCACAATTGGGTATCCAATGTGAAGT  
ACGGCAAACCAATTC

+

FFFFFFFFFFFFFFFFFFFFFFFFFFFFFFFFFFFFFFFFFFFFFFFFFFFFFFFFFFFFFFFFFFFFFFFF  
FFFFFFFFFFFFFFFFFFFFFFFFFFFFFFFFFFFFFFFFFFFFFFFFFFFFFFFFFFFFFFFFFFFFFFFF:FFFFFFFFFFFFFFFF  
FFFFFFFFFFFFFFFFFFFF

@A00721:190:HGJW7DSXY:4:1468:24957:24361 1:N:0:TCTGCAAG+GCTGCACT  
CTAGACTTTAATTGAAACTATATTCGAATAACGCATGGTATAACATCATAGATGACGCAAGCCCTTC  
ATATCTTCAAAAGAAACATTGGAAGGAGCTTATTGGGGTCCAGCACAATTGGGTATCCAATGTGAAGT  
ACGGCAAACCAATTC

+

FFFFFFFFFFFFFFFFFFFFFFFFFFFFFFFFFFFFFFFFFFFFFFFFFFFFFFFFFFFFFFFFFFFFFFFF:FFFFFFFFFFFFFFFF  
FFFFFFFFFFFFFFFFFFFFFFFFFFFFFFFFFFFFFFFFFFFFFFFF:FFFFFFFFFFFFFFFFFFFFFFFFFFFFFFFFFFFFFFFF  
FFFFFFFFFFFFFFFFFFFF

@A00721:190:HGJW7DSXY:4:1509:14217:14716 1:N:0:TCTGCAAG+GCTGCACT  
CTAGACTTTAATTGAAACTCTATTCGAATAACGCATGGTATAACATCATAGATGACGCAAGCCCTTC  
ATATCTTCAAAAGAAACATTGGAAGGAGCTTATTGGGGTCCAGCACAATTGGGTATCCAATGTGAAGT  
ACGGCAAACCAATTC

+

FFFFFFFFFFFFFFFFFFFFFFFF,F:FFFFFFFFFFFFFFFFFFFFFFFFFFFFFFFFFFFFFFFFFFFFFFFF  
FFFFFFFFFFFFFFFFFFFFFFFFFFFFFFFFFFFFFFFF,FFF:FFFFFFFFFFFFFFFFFFFFFFFF:FFFF:FFFFFFF  
FFFFFFFFFFFFFFFFFFFF

@A00721:190:HGJW7DSXY:4:2272:32579:21840 1:N:0:TCTGCAAG+GCTGCACT  
CTAGACTTTAATTGAAACTATATTCGAATAACGCATGGTATAACATCATAGATGACGTAAGCCCTTC  
ATATCTTCAAAAGAAACATTGGAAGGAGCTTATTGGGGTCCAGCACAATTGGGTATCCAATGTGAAGT  
ACGGCAAACCAATTC

+

FFFFFFFFFFF:FFFFFFFFFFFFFFFFFFFFFFFFFFFFFFFFFFFFFFFFFFFFFFFF,F:FFFFFFFFFFF:F,FF  
FFFFFFFFFFF:,FFFFFFFFF:FF:FFFF,FFFF::FFFFFFFFFFFFFFFF:F:FFFF,F:FFFFF,F:F  
F,FFF:FFFFFFFFFFFF

@A00721:190:HGJW7DSXY:4:2616:3025:7012 1:N:0:TCTGCAAG+GCTGCACT  
CTAGACTTTAATTCGAACTATATTCGAATAACGCATGGTATAACATCATAGATGACGTAAGCCCTTC  
ATATCTTCAAAGAAACATTGGAAGGAGCTTATTGGGGTCCAGCACAAATTGGGTATCCAATGTGAAGT  
ACGGCAAACCAATTC

[illegible]

@A00721:190:HGJW7DSXY:4:2134:28203:13542 1:N:0:TCTGCAAG+GCTGCACT  
CTAGACTTTAATTCGAACTATATTCGAATAACGCATGGTATAACATCATAGATGACGTAAGCCCTTC  
ATATCTTCAAAGAAACATAGGAAGGACCGAATTGGGGTCCAGCACAAATGTGTAACCAATGTGAAGT  
ACGGCAAACCAATT

```

FFFFFFFF,FF:F:FF,FFF,:,,,:::FFFFFFFF,: ,FF,FFFFFFFF,FFFF:FFFFFF,FFFF,FFFF
F,FFFF,FFF:F::FFFF:,,FFFF,:,:,FF,,,F:FFFFFFFF,FF,,F,,:F,,,FFF:F,FF,F
FF::FFFFFFFFF,F

```

@A00721:190:HGJW7DSXY:4:2145:8332:22842 1:N:0:TCTGCAAG+GCTGCACT  
GATATCTAGACTTTAATTCGAACTATATTCGAATAACGCATGGTATAACATCATAGATGACGTAAGC  
CCTTCATATCTTCAAAGAAACATTGGAAGGAGCTTATTGGGGTCCAGCACAATTGGGTATCCAATGT  
GAAGTACGGCAAACC

[illegible]

@A00721:190:HGJW7DSXY:4:1532:19542:14920 1:N:0:TCTGCAAG+GCTGCACT  
CGGATATCTAGACTTTAATTCGAACTATATTCGAATAACGCATGGTATAACATCATAGATGACGTAA  
GCCCTTCATATCTTCAAAAGAAACATTGGAAGGAGCTTATTGGGGTCCAGCACAATTGGGTATCCAAT  
GTGAAGTACGGCAA

[illegible]

@A00721:190:HGJW7DSXY:4:1544:7184:36605 1:N:0:TCTGCAAG+GCTGCACT  
CGGATATCTAGACTTTAATTCGAACTATATTCGAATAACGCATGGTATAACATCATAGATGACGTAA  
GCCCTTCATATCTTCAAAAGAAACATTGGAAGGAGCTTATTGGGGTCCAGCACAATTGGGTATCCAAT  
GTGAAGTACGGCAAA

```

FFFFFFFFFFFFFFFFFFFFFFFFFFFFFFFF:FFFFFFFFFFFFFF:FFFFFFFFFFFFFFFFFFFFFFFFFFFF
FFFFFFFFFFFFFFFFFFFFFFFFFFFFFFFF:FFFFFFFFFFFF,FFFFFFFFFFFFFFFFFFFFFFFFFFFFF.:FFFFF
FFFFFFFFFFFFFFFFFFFF

```

@A00721:190:HGJW7DSXY:4:1566:3016:32643 1:N:0:TCTGCAAG+GCTGCACT  
CGGATATCTAGACTTTAATTCGAACTATATTCGAATAACGCATGGTATAACATCATAGATGACGTAA  
GCCCTTCATATCTTCAAAGAAACATTGGAAGGAGCTTATTGGGGTCCAGCACAATTGGGTATCCAAT  
GTGAAGTACGGCAA

```

FFFFFFFF:FFFFFFFF,FFF,FFFFFFFF::FFFFFFFFFFFFFFFF:FFFFFFFF:FFFFFFFFFFFFFF
FFFFFFFFFFFFFFFFFFFFFFFFFFFFFFFF:FFFFFFFFFFFFFFFF:FFFFFFFFFFFFFFFF,FFFFFFFFFFFFFF
FFFFFFF.FFFFFFFF

```

@A00721:190:HGJW7DSXY:4:1625:9914:18537 1:N:0:TCTGCAAG+GCTGCACT  
CGGATATCTAGACTTTAATTCGAACTATATTCGAATAACGCATGGTATAACATCATAGATGACGCAA  
GCCCTTCATATCTTCAAAGAAACATTGGAAGGAGCTTATTGGGGTCCAGCACAATTGGGTATCCAAT  
GTGAAGTACGGCAA

[illegible]



@A00721:190:HGJW7DSXY:4:2357:5023:20337 1:N:0:TCTGCAAG+GCTGCACT  
CGGATATCTAGACTTTAATTCGAACTATATTCGAATAACGCATGGTATAACATCATAGATGACGTAA  
GCCCTTCATATCTTCAAAAGAAACATTGGAAGGAGCTTATTGGGGTCCAGCACAATTGGGTATCCAAT  
GTGAAGTACGGCAA

@A00721:190:HGJW7DSXY:4:2471:17327:34162 1:N:0:TCTGCAAG+GCTGCACT  
CGGATATCTAGACTTTAATTCGAACTATATTCGAATAACGCATGGTATAACATCATAGATGACGTAA  
GCCCTTCATATCTTCAAAAGAAACATTGGAAGGAGCTTATTGGGGTCCAGCACAATTGGGTATCCAAT  
GTGAAGTACGGCAAA

@A00721:190:HGJW7DSXY:4:2633:30029:2237 1:N:0:TCTGCAAG+GCTGCACT  
CGGATATCTAGACTTTAATTCGAACTATATTCGAATAACGCATGGTATAACATCATAGATGACGCAA  
GCCCTTCATATCTTCAAAAGAAACATTGGAAGGAGCTTATTGGGGTCCAGCACAATTGGGTATCCAAT  
GTGAAGTACGGCAAA

@A00721:190:HGJW7DSXY:4:2635:21124:30530 1:N:0:TCTGCAAG+GCTGCACT  
CGGATATCTAGACTTTAATTCGAACTATATTCGAATAACGCATGGTATAACATCATAGATGACGCAA  
GCCCTTCATATCTTCAAAAGAAACATTGGAAGGAGCTTATTGGGGTCCAGCACAATTGGGTATCCAAT  
GTGAAGTACGGCAA

@A00721:190:HGJW7DSXY:4:1122:10755:29700 1:N:0:TCTGCAAG+GCTGCACT  
GCCGTACTTCACATTGGATACCCAATTGTGCTGGACCCAATAAGCTCCTTCCAATGTTTCTTTTGAA  
GATATGAAGGGCTTACGTCATCTATGATGTTATACCATGCGTTATTCGAATATAGTTTCGAATTAAAG  
TCTAGATATCCGAAC

@A00721:190:HGJW7DSXY:4:1173:28999:30044 1:N:0:TCTGCAAG+GCTGCACT  
GCCGTACTTCACATTGGATACCCAATTGTGCTGGACCCAATAAGCTCCTTCCAATGTTTCTTTTGAA  
GATATGAAGGGCTTACGTCATCTATGATGTTATACCATGCGTTATTCGAATATAGTTTCGAATTAAAG  
TCTAGATATCCGAAC

@A00721:190:HGJW7DSXY:4:1304:13196:22780 1:N:0:TCTGCAAG+GCTGCACT  
GCCGTACTTCACATTGGATACCCAATTGTGCTGGACCCAATAAGCTCCTTCCAATGTTTCTTTTGAA  
GATATGAAGGGCTTACGTCATCTATGATGTTATACCATGCGTTATTCGAATATAGTTTCGAATTAAAG  
TCTAGATATCCGAAC

+  
FFFFFFFFFFFFFFFFFFFFFFFFFFFFFFFFFFFFFFFFFFFFFFFFFFFFFFFFFFFFFFFFFFFFFFFFF:  
FFFFFFFFFFFFFFFFFFFFFFFFFFFFFFFFFFFFFFFFFFFFFFFFFFFFFFFFFFFFFFFFFFFFFFFFF:FFFFFFFFFFFFFFFFFFFFFFFFFFFFF  
FFFFFFF,FFFFFFF  
@A00721:190:HGJW7DSXY:4:1307:16749:17879 1:N:0:TCTGCAAG+GCTGCACT  
GCCATACTTCACATTGGATACCCAATTGTGCTGGACCCCAAAAAGCTCCTTCCAATGTTTCTTTTGAA  
GATATGAAGGGCTTACGTCATCTATGATGTTATACCATGCGTTATTCTGAATATAGTTTCTGAATTAAAG  
TCTAGATATCCGAAC  
+  
FFFF:FF,FFFFFF:F:FF:F:FFFFFFFFFFFF:F,:FFFF,FF::FFFF,FFFF,F::,F:FFFFF  
FFFFFF:F:FFFFFFFF:FFFFFFFFFFFF:,FFFF:FFFFFF:FFF:,F:FFFFFF:FFFF,F:FFF:FF  
FFFFFFFFF,F,FF:  
@A00721:190:HGJW7DSXY:4:1431:29857:13307 1:N:0:TCTGCAAG+GCTGCACT  
GCCGTACTTCACATTGGATACCCAATTGTGCTGGACCCCAATAAGCTCCTTCCAATGTTTCTTTTGAA  
GATATGAAGGGCTTACGTCATCTATGATGTTATACCATGCGTTATTCTGAATATAGTTTCTGAATTAAAG  
TCTAGATATCCGAAC  
+  
FFFFFFFFFFFFFFFF:FFFFFFFFFFFFFFFFFFFFFFFFFFFFFFFFFFFFFFFFFFFFFFFFFFFFFFFFF  
FFFFFFFFFFFFFFFFFFFFFFFFFFFFFFFFFFFFFFFFFFFFFFFFFFFFFFFFFFFFFFFFFFFFFFFFF  
FFFFFFFFFFFFFFFFF  
@A00721:190:HGJW7DSXY:4:1507:10972:36245 1:N:0:TCTGCAAG+GCTGCACT  
GCCGTACTTCACATTGGATACCCAATTGTGCTGGACCCCAATAAGCTCCTTCCAATGTTTCTTTTGAA  
GATATGAAGGGCTTACGTCATCTATGATGTTATACCATGCGTTATTCTGAATATAGTTTCTGAATTAAAG  
TCTAGATATCCGAAC  
+  
FFFFFFFFFFFFFFFFFFFFFFFFFFFFFFFFFFFFFFFFFFFFFFFFFFFFFFFFFFFFFFFFFFFFFFFFF:FFFFFFFFFFFF:  
FFFFFF:F:FFFF:FFFFFFFFFFFFFFFFFFFFF:,FFFF:FFFFFFFFFFFFFFFF:FFFFFFFFFFFF,  
FFFFFFFFFFFF,FFFF  
@A00721:190:HGJW7DSXY:4:1510:9218:1141 1:N:0:TCTGCAAG+GCTGCACT  
GCCGTACTTCACATTGGATACCCAATTGTGCTGGACCCCAATAAGCTCCTTCCAATGTTTCTTTTGAA  
GATATGAAGGGCTTACGTCATCTATGATGTTATACCATGCGTTATTCTGAATATAGTTTCTGAATTAAAG  
TCTAGATATCCGAAC  
+  
F,FFFFFFFFFFFFFFFFFFFFFFFFFFFFFFFFFFFFFFFFFFFFFFFFFFFFFFFFFFFFFFFFFFFFFFFFF  
FFFF:F:FFFFFFFF:FFFFFFFFFFFF:FFFFFFFFFFFFFFFFFFFFFFFFFFFFFFFFFFFF,FFFFFFF  
FFFFFFFFFFFF:F  
@A00721:190:HGJW7DSXY:4:1556:21097:7592 1:N:0:TCTGCAAG+GCTGCACT  
GCCGTACTTCACATTGGATACCCAATTGTGCTGGACCCCAATAAGCTCCTTCCAATGTTTCTTTTGAA  
GATATGAAGGGCTTACGTCATCTATGATGTTATACCATGCGTTATTCTGAATATAGTTTCTGAATTAAAG  
TCTAGATATCCGAAC  
+  
FFFFFFFFFFFFFFFFFFFFFFFFFFFFFFFFFFFFFFFFFFFFFFFFFFFFFFFFFFFFFFFFFFFFFFFFF  
FFFFFFFFFFFFFFFFFFFFFFFFFFFFFFFFFFFFFFFFFFFFFFFFFFFFFFFFFFFFFFFFFFFFFFFFF  
FFFFFFFFFFFFFFFFF  
@A00721:190:HGJW7DSXY:4:1577:2031:24737 1:N:0:TCTGCAAG+GCTGCACT  
GCCATACTTCACATTGGATACCCAATTGTGCTGGACCCCAATAAGCTCCTTCCAATGTTTCTTTTGAA  
GATATGAAGGGCTTACGTCATCTATGATGTTATACCATGCGTTATTCTGAATATAGTTTCTGAATTAAAG  
TCTAGATATCCGAAC  
+  
FFFFFFFFFFFFFFFFFFFFFFFFFFFFFFFFFFFFFFFFFFFFFFFFFFFFFFFFFFFFFFFFFFFFFFFFF  
FFFFFFFFFFFFFFFFFFFFFFFFFFFFFFFFFFFFFFFFFFFFFFFFFFFFFFFFFFFFFFFFFFFFFFFFF  
FFFFFFFFFFFFFFFFF  
@A00721:190:HGJW7DSXY:4:1654:4589:27445 1:N:0:TCTGCAAG+GCTGCACT  
GCCGTACTTCACATTGGATACCCAATTGTGCTGGACCCCAATAAGCTCCTTCCAATGTTTCTTTTGAA

+

 $+$  $+$  $+$ 
$$+$$

+

 $+$ [illegible]

$+$ 

+

+

+

+

+

+

[illegible]

@A00721:190:HGJW7DSXY:4:2578:28203:26850 1:N:0:TCTGCAAG+GCTGCACT  
GCCGTACTTCACATTGGATACCCAATTGTGCTGGACCCCAATAAGCTCCTTCCAATGTTTCTTTTGAA  
GATATGAAGGGCTTACGTCATCTATGATGTTATACCATGCGTTATTGCAATATAGTTTCGAATTAAG  
TCTAGATATCCGAAC

@A00721:190:HGJW7DSXY:4:2611:30346:30342 1:N:0:TCTGCAAG+GCTGCACT  
GCCGTACTTCACATTGGATACCCAATTGTGCTGGACCCCAATAAGCTCCTTCCAATGTTTCTTTTGAA  
GATATGAAGGGCTTACGTCATCTATGATGTTATACCATGCGTTATTGAATATAGTTTGAATTAAAG  
TCTAGATATCCGAAC

@A00721:190:HGJW7DSXY:4:2613:27769:10723 1:N:0:TCTGCAAG+GCTGCACT  
GCCGTACTTCACATTGGATACCCAATTGTGCTGGACCCAATAAGCTCCTTCCAATGTTTCTTTTGAA  
GATATGAAGGGCTTACGTCATCTATGATGTTATACCATGCGTTATTCGAATATAGTTTCGAATTAAAG  
TCTAGATATCCGAAC

@A00721:190:HGJW7DSXY:4:2613:5394:21073 1:N:0:TCTGCAAG+GCTGCACT  
GCCGTACTTCACATTGGATACCCAATTGTGCTGGACCCCAATAAGCTCCTTCCAATGTTTCTTTTGAA  
GATATGAAGGGCTTACGTCATCTATGATGTTATACCATGCGTTATTCGAATATAGTTTCGAATTAAG  
TCTAGATATCCGAAC

@A00721:190:HGJW7DSXY:4:2649:12952:8954 1:N:0:TCTGCAAG+GCTGCACT  
GCCATACTTCACATTGGATACCCAATTGTGCTGGACCCCAATAAGCTCCTTCCAATGTTTCTTTTGAA  
GATATGAAGGGCTTACGTCATCTATGATGTTATACCATGCGTTATTGAATATAGTTTCGAATTAAAG  
TCTAGATATCCGAAC

@A00721:190:HGJW7DSXY:4:1113:27570:4304 1:N:0:TCTGCAAG+GCTGCACT  
CCGTA CTT CACATTGGATACCCAATTGTGCTGGACCCCAATAAGCTCCTTCCAATGTTTCTTTTGAAG  
ATATGAAGGGCTTACGTCATCTATGATGTTATACCATGCGTTATTCGAATATAGTTTCGAATTAAAGT  
CTAGATATCCGAACA

@A00721:190:HGJW7DSXY:4:1134:4164:35383 1:N:0:TCTGCAAG+GCTGCACT  
CCGTACTTCACATTGGATACCCAATTGTGCTGGACCCCAATAAGCTCCTTCCAATGTTTCTTTGAAG  
ATATGAAGGGCTTACGTCATCTATGATGTTATACCATGCGTTATTCGAATATAGTTTCGAATTAAAGT  
CTAGATATCCGAACA

+  
FFFFFFFFFFFFFFFFFFFFFFFFFFFFFFFFFFFFFFFFFFFFFFFFFFFFFFFFFFFFFFFFFFFFFFFF:F  
FFFFFFFFFFFFFFFFFFFFFFFFFFFFFFFFFFFFFFFFFFFFFFFFFFFFFFFFFFFFFFFFFFFFFFFFF  
FFFFFFFFFFFFFFFFF  
@A00721:190:HGJW7DSXY:4:1178:31756:17534 1:N:0:TCTGCAAG+GCTGCACT  
CCGTA CTTACATTGGATACCCAATTGTGCTGGACCCCAATAAGCTCCTTCCAATGTTTCTTTTGAAG  
ATATGAAGGGCTTACGTCATCTATGATGTTATACCATGCGTTATTCTGAATATAGTTTCTGAATTAAAGT  
CTAGATATCCGAACA

+  
FFFFFFFFFFFFFFFFFFFFFFFFFFFFFFFFFFFFFFFFFFFFFFFFFFFFFFFFFFFFFFFFFFFFFFFF:F  
:FFFFFFFFFFFFFFFFFFFFFFFFFFFFFFFFFFFFFFFFFFFFFFFFFFFFFFFFFFFFFFFFFFFFFFFFF  
FFFFFFFFFFFFFFFFF  
@A00721:190:HGJW7DSXY:4:1348:28809:34882 1:N:0:TCTGCAAG+GCTGCACT  
CCGTA CTTACATTGGATACCCAATTGTGCTGGACCCCAATAAGCTCCTTCCAATGTTTCTTTTGAAG  
ATATGAAGGGCTTACGTCATCTATGATGTTATACCATGCGTTATTCTGAATATAGTTTCTGAATTAAAGT  
CTAGATATCCGAACA

+  
FFFFFFFFFFFFFFFFFFFFFFFFFFFFFFFFFFFFFFFFFFFFFFFFFFFFFFFFFFFFFFFFFFFFFFFFF  
FFFFFFFFFFFFFFFFFFFFFFFFFFFFFFFFFFFFFFFFFFFFFFFFFFFFFFFFFFFFFFFFFFFFFFFFF  
FFFFFFFFFFFFFFFFF  
@A00721:190:HGJW7DSXY:4:2121:28619:3333 1:N:0:TCTGCAAG+GCTGCACT  
CCGTA CTTACATTGGATACCCAATTGTGCTGGACCCCAATAAGCTCCTTCCAATGTTTCTTTTGAAG  
ATATGAAGGGCTTACGTCATCTATGATGTTATACCATGCGTTATTCTGAATATAGTTTCTGAATTAAAGT  
CTAGATATCCGAACA

+  
FFFFFFFFFFFFFFFFFFFF:FFFFFFFFFFFFFFFFFFFFFFFFFFFFFFFFFFFFFFFFFFFFFFFFFFFFF  
FFFFF::FFFFFFFFFFFFFFFFFFFFFFFFFFFFFFFFFFFFFFFFFFFFFFFFFFFFFFFFFFFFFFFFF:F:F:FF  
FFFFFFFFF::FF::F  
@A00721:190:HGJW7DSXY:4:2273:11433:4100 1:N:0:TCTGCAAG+GCTGCACT  
CCGTA CTTACATTGGATACCCAATTGTGCTGGACCCCAATAAGCTCCTTCCAATGTTTCTTTTGAAG  
ATATGAAGGGCTTACGTCATCTATGATGTTATACCATGCGTTATTCTGAATATAGTTTCTGAATTAAAGT  
CTAGATATCCGAACA

+  
FFFFFFFFFFFFFFFFFFFFFFFFFFFFFFFFFFFFFFFFFFFFFFFFFFFFFFFFFFFFFFFFFFFFFFFFF  
FFFFFFFFFFFFFFFFFFFFFFFFFFFFFFFFFFFFFFFFFFFFFFFFFFFFFFFFFFFFFFFFFFFFFFFFF  
FFFFFFFFFFFFFFFFF  
@A00721:190:HGJW7DSXY:4:2346:32922:13479 1:N:0:TCTGCAAG+GCTGCACT  
CCGTA CTTACATTGGATACCCAATTGTGCTGGACCCCAATAAGCTCCTTCCAATGTATCTTTTGAAG  
ATATGAAGGGCTTACGTCATCTATGATGTTATACCATGCGATATTCTGAATATATTTTCTGAATTAAAGT  
CTAGATATCCGAA

+  
FFFF, :FF:FFF:, FFFFFFF:FFFFFF:FF:F, FF, FFF:FFFFFFFF, FFF::, FFF::FFFF  
FF:FF, FF::, FFFFFFF:F:FFFF:F:FFF:F, :FF, ::, FFF, FFFFFFF, :, FFFFFFF:F, :, F  
F:F, :FFF::, FF  
@A00721:190:HGJW7DSXY:4:2547:19244:22576 1:N:0:TCTGCAAG+GCTGCACT  
CCGTA CTTACATTGGATACCCAATTGTGCTGGACCCCAATAAGCTCCTTCCAATGTTTCTTTTGAAG  
ATATGAAGGGCTTACGTCATCTATGATGTTATACCATGCGTTATTCTGAATATAGTTTCTGAATTAAAGT  
CTAGATATCCGAACA

+  
FFFFFFFFFFFFFFFFFFFFFFFFFFFFFFFFFFFFFFFFFFFFFFFFFFFFFFFFFFFFFFFFFFFFFFFFF  
FFFFFFFFFFFFFFFFFFFFFFFFFFFFFFFFFFFFFFFFFFFFFFFFFFFFFFFFFFFFFFFFFFFFFFFFF  
FFFFFFFFFFFFFFFFF  
@A00721:190:HGJW7DSXY:4:2631:8070:11240 1:N:0:TCTGCAAG+GCTGCACT  
CCGTA CTTACATTGGATACCCAATTGTGCTGGACCCCAATAAGCTCCTTCCAATGTTTCTTTTGAAG

ATATGAAGGGCTTACGTCATCTATGATGTTATACCATGCGTTATTTCGAATATAGTTTCGAATTAAAGT  
CTAGATATCCGAACA

+

FFFFFFFFFFFFFF:FFFFFFFFFFFFFFFFFFFFFFFFFFFFFFFFFFFFFFFFFFFFFFFFFFFFFFFF  
FFFFF:FFFFFFFFFFFFFFFFFFFFFFFFFFFFFFFFFFFFFFFFFFFFFFFFFFFFFFFFFFFFFFFF:FF  
FFF:FFFFFFFFFFFF

@A00721:190:HGJW7DSXY:4:2674:16215:16141 1:N:0:TCTGCAAG+GCTGCACT  
CCGTACTTCACATTGGATACCCAATTGTGCTGGACCCCAATAAGCTCCTTCCAATGTTTCTTTTGAAG  
ATATGAAGGGCTTACGTCATCTATGATGTTATACCATGCGTTATTTCGAATATAGTTTCGAATTAAAGT  
CTAGATATCCGAACA

+

FFFFFFFFFFFFFFFFFFFFFFFFFFFFFFFFFFFFFFFFFFFFFFFFFFFFFFFFFFFFFFFF:FFFFFFF  
:FFFFFFFFFFFFFFFFFFFFFFFFFFFFFFFFFFFFFFFFFFFFFFFFFFFFFFFFFFFFFFFF:FFFFFFF  
FFFFFFFFFFFFFFFF

@A00721:190:HGJW7DSXY:4:1204:5367:19586 1:N:0:TCTGCAAG+GCTGCACT  
CGTACTTCACATTGGATACCCAATTGTGCTGGACCCCAATAAGCTCCTTCCAATGTTTCTTTTGAAGA  
TATGAAGGGCTTACGTCATCTATGATGTTATACCATGCGTTATTTCGAATATAGTTTCGAATTAAAGTC  
TAGATATCCGAACAT

+

FFFFFFFFFFFF: :FFFFFFFFFFFFFFFFFFFFFFFFFFFFFFFFFFFFFFFFFFFFFFFFFFFFFFFF  
FFFFFFFFFFFFFFFFFFFFFFFFFFFFFFFFFFFFFFFFFFFFFFFFFFFFFFFFFFFFFFFF:FFFFFFF  
FFFFFFFFFFFFFFFF

@A00721:190:HGJW7DSXY:4:1227:18738:30091 1:N:0:TCTGCAAG+GCTGCACT  
CGTACTTCACATTGGATACCCAATTGTGCTGGACCCCAATAAGCTCCTTCCAATGTTTCTTTTGAAGA  
TATGAAGGGCTTACGTCATCTATGATGTTATACCATGCGTTATTTCGAATATAGTTTCGAATTAAAGTC  
TAGATATCCGAACAT

+

FFFFFFFFFFFFFFFFFFFFFFFFFFFFFFFFFFFFFFFFFFFFFFFFFFFFFFFFFFFFFFFF  
FFFFFFFFFFFFFFFFFFFFFFFFFFFFFFFFFFFFFFFFFFFFFFFFFFFFFFFFFFFFFFFF:FFFFFFF  
FFFF:FFFFFFFF

@A00721:190:HGJW7DSXY:4:1375:27914:35055 1:N:0:TCTGCAAG+GCTGCACT  
CGTACTTCACATTGGATACCCAATTGTGCTGGACCCCAATAAGCTCCTTCCAATGTTTCTTTTGAAGA  
TATGAAGGGCTTACGTCATCTATGATGTTATACCATGCGTTATTTCGAATATAGTTTCGAATTAAAGTC  
TAGATATCCGAACA

+

FFFFFFFFFFFFFFFFFFFFFFFFFFFFFFFFFFFFFFFFFFFFFFFFFFFFFFFFFFFFFFFF  
FFFFFFFFFFFFFFFFFFFFFFFFFFFFFFFFFFFFFFFFFFFFFFFFFFFFFFFFFFFFFFFF:FFFFFFF  
F:FFFFFFFFFFFF

@A00721:190:HGJW7DSXY:4:1460:24758:30968 1:N:0:TCTGCAAG+GCTGCACT  
CGTACTTCACATTGGATACCCAATTGTGCTGGACCCCAATAAGCTCCTTCCAATGTTTCTTTTGAAGA  
TATGAAGGGCTTACGTCATCTATGATGTTATACCATGCGTTATTTCGAATATAGTTTCGAATTAAAGTC  
TAGATATCCGAACAT

+

FFFFFFFFFFFFFFFFFFFFFFFFFFFFFFFFFFFFFFFFFFFFFFFFFFFFFFFFFFFFFFFF:FF  
FFFFFFFFFFFFFFFFFFFFFFFFFFFFFFFFFFFFFFFFFFFFFFFFFFFFFFFFFFFFFFFF:FFFFFFF  
FFFFFFFFFFFFFF:FF

@A00721:190:HGJW7DSXY:4:1541:25635:34992 1:N:0:TCTGCAAG+GCTGCACT  
CGTACTTCACATTGGATACCCAATTGTGCTGGACCCCAATAAGCTCCTTCCAATGTTTCTTTTGAAGA  
TATGAAGGGCTTACGTCATCTATGATGTTATACCATGCGTTATTTCGAATATAGTTTCGAATTAAAGTC  
TAGATATCCGAACAT

+

FFFFFFFFFFFFFFFFFFFFFFFFFFFFFFFFFFFFFFFFFFFFFFFFFFFFFFFFFFFFFFFF  
FFFFFFFFFFFFFFFFFFFFFFFFFFFFFFFFFFFFFFFFFFFFFFFFFFFFFFFF:FFF:FFFFFFFFFFFFFFFF  
FF:FFFFFFFF:FFF

@A00721:190:HGJW7DSXY:4:1541:25979:36182 1:N:0:TCTGCAAG+GCTGCACT  
CGTACTTCACATTGGATACCCAATTGTGCTGGACCCCAATAAGCTCCTTCCAATGTTTCTTTTGAAGA  
TATGAAGGGCTTACGTCATCTATGATGTTATACCATGCGTTATTTCGAATATAGTTTTCGAATTAAAGTC  
TAGATATCCGAACAT

+

FFFFFFFFFFFF:FFFFFFFFFFFFFFFFFFFFFFFFFFFFFFFFFFFFFFFFFFFFFFFFFFFFFFFFFFFF  
FFFFFFFFFFFFFFFFFFFFFFFFFFFFFFFFFFFFFFFFFFFFFFFFFFFFFFFFFFFFFFFFFFFFFFFFFFFF  
FFFFFFFFFFFFFFFFFFFF:

@A00721:190:HGJW7DSXY:4:2230:29197:13886 1:N:0:TCTGCAAG+GCTGCACT  
CGTACTTCACATTGGATACCCAATTGTGCTGGACCCCAATAAGCTCCTTCCAATGTTTCTTTTGAAGA  
TATGAAGGGCTTACGTCATCTATGATGTTATACCATGCGTTATTTCGAATATAGTTTTCGAATTAAAGTC  
TAGATATCCGAACAT

+

FFFFFFFFFFFFFFFFFFFFFFFFFFFFFFFFFFFFFFFFFFFFFFFFFFFFFFFFFFFFFFFFFFFFFFFFFFFF  
FFFFFFFFFFFFFFFFFFFFFFFFFFFFFFFFFFFFFFFFFFFFFFFFFFFFFFFFFFFFFFFFFFFFFFFFFFFF  
FFFFFFFFFFFFFFFFFFFF:F:

@A00721:190:HGJW7DSXY:4:2265:7392:1830 1:N:0:TCTGCAAG+GCTGCACT  
CGTACTTCACATTGGATACCCAATTGTGCTGGACCCCAATAAGCTCCTTCCAATGTTTCTTTTGAAGA  
TATGAAGGGCTTACGTCATCTATGATGTTATACCATGCGTTATTTCGAATATAGTTTTCGAATTAAAGTC  
TAGATATCCGAACAT

+

FFFFFFFFFFFFFFFFFFFFFFFFFFFFFFFFFFFFFFFFFFFFFFFFFFFFFFFFFFFFFFFFFFFFFFFFFFFF  
FFFFFFFFFFFFFFFFFFFFFFFFFFFFFFFFFFFFFFFFFFFFFFFFFFFFFFFFFFFFFFFFFFFFFFFFFFFF  
FFF:FFFFFFFFFFFF

@A00721:190:HGJW7DSXY:4:2542:24270:3004 1:N:0:TCTGCAAG+GCTGCACT  
CGTACTTCACATTGGATACCCAATTGTGCTGGACCCCAATAAGCTCCTTCCAATGTTTCTTTTGAAGA  
TATGAAGGGCTTACGTCATCTATGATGTTATACCATGCGTTATTTCGAATATAGTTTTCGAATTAAAGTC  
TAGATATCCGAACAT

+

FFFFFFFFFFFFFFFFFFFFFFFFFFFFFFFFFFFFFFFFFFFFFFFFFFFFFFFFFFFFFFFFFFFFFFFFFFFF  
FFFFFFFFFFFFFFFFFFFFFFFFFFFFFFFFFFFFFFFFFFFFFFFFFFFFFFFFFFFFFFFFFFFFFFFFFFFF  
::FFFFFFFFFFFF

@A00721:190:HGJW7DSXY:4:2622:28944:7717 1:N:0:TCTGCAAG+GCTGCACT  
CGTACTTCACATTGGATACCCAATTGTGCTGGACCCCAATAAGCTCCTTCCAATGTTTCTTTTGAAGA  
TATGAAGGGCTTACGTCATCTATGATGTTATACCATGCGTTATTTCGAATATAGTTTTCGAATTAAAGTC  
TAGATATCCGAACAT

+

FFFFFFFFFFFFFFFFFFFFFFFFFFFFFFFFFFFFFFFFFFFFFFFFFFFFFFFFFFFFFFFFFFFFFFFFFFFF  
FFFFFFFFFFFFFFFFFFFFFFFFFFFFFFFFFFFFFFFFFFFFFFFFFFFFFFFFFFFFFFFFFFFFFFFFFFFF  
FFFFFFFFFFFFFFFFFFFF

@A00721:190:HGJW7DSXY:4:1252:22254:1454 1:N:0:TCTGCAAG+GCTGCACT  
GATACCCAATTGTGCTGGACCCCAATAAGCTCCTTCCAATGTTTCTTTTGAAGATATGAAGGGCTTAC  
GTCATCTATGATGTTATACCATGCGTTATTTCGAATATAGTTTTCGAATTAAAGT

+

FFFFFFFFFFFFFFFFFFFFFFFFFFFFFFFFFFFFFFFFFFFFFFFFFFFFFFFFFFFFFFFFFFFFFFFFFFFF  
FFFFFFFFFFFFFFFFFFFFFFFFFFFFFFFFFFFFFFFFFFFFFFFFFFFFFFFFFFFFFFFFFFFFFFFFFFFF

@A00721:190:HGJW7DSXY:4:1332:25590:4006 1:N:0:TCTGCAAG+GCTGCACT  
GATACCCAATTGTGCTGGACCCCAATAAGCTCCTTCCAATGTTTCTTTTGAAGATATGAAGGGCTTAC  
GTCATCTATGATGTTATACCATGCGTTATTTCGAATATAGTTTTCGAATTAAAGT

+

FFF:FFFFFFFFFFFFFFFFFFFFFFFFFFFFFFFFFFFFFFFFFFFFFFFFFFFFFFFFFFFFFFFFFFFF  
FFFFFFFFFFFFFFFFFFFFFFFFFFFFFFFFFFFFFFFFFFFFFFFFFFFFFFFFFFFFFFFFFFFFFFFFFFFF

@A00721:190:HGJW7DSXY:4:1647:28745:34491 1:N:0:TCTGCAAG+GCTGCACT  
GATACCCAATTGTGCTGGACCCCAATAAGCTCCTTCCAATGTTTCTTTTGAAGATATGAAGGGCTTAC



GTCATCTATGATGTTATACCATGCGTTATTCTGAATATAGTTTCTGAATTAAAGT

[illegible]

GATACCCAATTGTGCTGGACCCCAATAAGCTCCTTCCAATGTTTCTTTTGAAGATATGAAGGGCTTAC  
GTCATCTATGATGTTATACCATGCGTTATTTCGAATATAGTTTCGAATTAAAGT

```

FFFFFFFFFFFFFFFFFFFFFFFF:FFFFFFFFFFFFFFFF::FFFF:FFFFFFFFFFFFFFFF:FFFFFFFF:FFFFFFFF
:FFFFFFFF:FFFFFFFFFFFF,,FFFFFFFFFFFF:FFFFFFFFFFFF:FFFFFFFFFFFF

```

GATACCCAATTGTGCTGGACCCCAATAAGCTCCTTCCAATGTTTCTTTTGAAGATATGAAGGGCTTAC  
GTCATCTATGATGTTATACCATGCGTTATTTCGAATATAGTTTCAATTAAAGT

[illegible]

GTGCTGGACCCCAATAAGCTCCTTCCAATGTTTCTTTTGAAGATATGAAGGGCTTACGTCATCTATGA  
TGTTATACCATGCGTTATTCGAATATAGTTTTCGAATTAAGTCTAGATATCCGAACATGTAATTATGT  
GGGCCTAGAGATCTA

[illegible]

GTGCTGGACCCCAATAAGCTCCTTCCAATGTTTCTTTTGAAGATATGAAGGGCTTACGTCATCTATGA  
TGTTATACCATGCGTTATTCGAATATAGTTTCGAATTAAGTCTAGATATCCGAACATGTAATTATGT  
GGGCCTAGAGATCTA

```

FFFFFFFFFFFFFFFFFFFFFFFF:FFFFFFFFFFFFFFFFFFFFFFFFFFFFFFFF
FFFFFFFFFFFFFFFFFFFFFFFF:FFFFFFFFFFFFFFFFFFFFFFFFFFFF,FFFFFFFF
FFFFF::E:FFFFFF

```

GTGCTGGACCCCAATAAGCTCCTTCCAATGTTTCTTTGAAGATATGAAGGGCTTACGTCATCTATGA  
TGTTATACCATGCGTTATTCGAATATAGTTTCGAATTAAGTCTAGATATCCGAACATGTAATTATGT  
GGGCCTAGAGATCTA

[illegible]

GTGCTGGACCCCAATAAGCTCCTTCCAATGTTTCTTTTGAAGATATGAAGGGCTTACGTCATCTATGA  
TGTTATACCATGCGTTATTCGAATATAGTTTCGAATTAAGTCTAGATATCCGAACATGTAATTATGT  
GGGCCTAGAGATCTA

```

FFFFFFFFFFFFFFFFFFFFFFFFFFFFFFFFFFFFFFFFFFFFFFFFFFFFFFFFFFFFFFFF:FFFFFF
FFFFFFFFFFFFFFFF:FFFFFFFFFFFFFFFF,FFFFFFFF,FFFFFFFF:FFFFFFFFF:F,FFFF:FF
FFFFFFFFFFFFFFFF

```

GTGCTGGACCCCAATAAGCTCCTTCCAATGTTTCTTTTGAAGATATGAAGGGCTTACGTCATCTATGA  
TGTTATACCATGCGTTATTCGAATATAGTTTTCGAATTAAGTCTAGATATCCGAACATGTAATTATGT  
GGGCCTAGAGATCTA

```
FFFFFFFFFFFFFFFFFFFFFFFFFFFFFFFF:FFFFFFFFFFFF:FF:FFFFFFFFFFFFFFFFFFFFFFFF:FFFFFFF
```

FFFFFFFFFFFFFFFFFFFFFFFFFFFFFFFFFFFFFFFFFFFFFFFFFFFFFFFFFFFFFFFF:FFFFFFF  
FFFFFFF,FFFFFFF

@A00721:190:HGJW7DSXY:4:1213:14877:14450 1:N:0:TCTGCAAG+GCTGCACT  
AGGACCCCAATAAGCTCCTTCCAATGTTTCTTTTGAAGATATGAAGGGCTTACGTCATCTATGATGTT  
ATACCATGCGTTATTTCGAATATAGTTTTCGAATTAAAGTCTAGATATCCGAACATGTAATTATGTGGGC  
CTAGAGATCTAGCCC

+  
FFFFFFFFFFFFFFFFFFFFFFFFFFFFFFFFFFFFFFFFFFFFFFFFFFFFFFFFFFFFFFFF:FFFFFFF  
FFFFFFFFFFFFFFF:FFFFFFFFFFFFFFFFFFFFFFFFFFFFFFFFFFFFFFFFFFFFFFFFFFFFFFFFF  
F:,FFFFFFFFF

@A00721:190:HGJW7DSXY:4:1420:21558:36542 1:N:0:TCTGCAAG+GCTGCACT  
AGGACCCCAATAAGCTCCTTCCAATGTTTCTTTTGAAGATATGAAGGGCTTACGTCATCTATGATGTT  
ATACCATGCGTTATTTCGAATATAGTTTTCGAATTAAAGTCTAGATATCCGAACATGTAATTATGTGGGC  
CTAGAGATCTAGCCC

+  
F:,FFFFFFFFF,FF,FF,FFFF,,:FFFFF:F,:FFFFF,,:F:F,,FFF,:FFFFFFFF,F:FFFF  
FFFFFFFFF::FFFF:FFFFFFFFFFFFFFFFFFFFFFFFFFFFFFFFFFFFFFFFFFFFFFFFFFFFF  
F,,:FFFFF,FFF,F

@A00721:190:HGJW7DSXY:4:1459:30888:16689 1:N:0:TCTGCAAG+GCTGCACT  
AGGACCCCAATAAGCTCCTTCCAATGTTTCTTTTGAAGATATGAAGGGCTTACGTCATCTATGATGTT  
ATACCATGCGTTATTTCGAATATAGTTTTCGAATTAAAGTCTAGATATCCGAACATGTAATTATGTGGGC  
CTAGAGATCTAGCCC

+  
FFFFFFFFFFFFFFFFFFFFFFFFFFFFFFFFFFFFFFFFFFFFFFFFFFFFFFFFFFFFFFFF:FFFFF  
FFFFFFFFFFFFFFFFFFFFFFFFFFFFFFFFFFFFFFFFFFFFFFFFFFFFFFFF:FFFFFFFFFFFFFFFFF  
F:,F:F,FFFF:FFF

@A00721:190:HGJW7DSXY:4:1542:27172:27884 1:N:0:TCTGCAAG+GCTGCACT  
AGGACCCCAATAAGCTCCTTCCAATGTTTCTTTTGAAGATATGAAGGGCTTACGTCATCTATGATGTT  
ATACCATGCGTTATTTCGAATATAGTTTTCGAATTAAAGTCTAGATATCCGAACATGTAATTATGTGGGC  
CTAGAGATCTAGCCC

+  
FFFFFFFFFFFFFFFFFFFFFFFFFFFFFFFFFFFFFFFFFFFFFFFFFFFFFFFFFFFFFFFF:FFFF  
FFFFFFFFFFFFFFFFFFFFFFFFFFFFFFFFFFFFFFFFFFFFFFFFFFFFFFFF:FFFFFFFFFFFFFFF  
F,:FFFFFFFFF

@A00721:190:HGJW7DSXY:4:1611:2844:36041 1:N:0:TCTGCAAG+GCTGCACT  
AGGACCCCAATAAGCTCCTTCCAATGTTTCTTTTGAAGATATGAAGGGCTTACGTCATCTATGATGTT  
ATACCATGCGTTATTTCGAATATAGTTTTCGAATTAAAGTCTCGATATCCGAACATGTAATTATGTGGGC  
CTAGAGATCTAGCCC

+  
FFFFFFFFFFFFFFFFFFFFFFFFFFFFFFFFFFFFFFFFFFFFFFFFFFFFFFFFFFFFFFFF:FFF,FFFFFFFFFFFFFFFFFFFFFFFFFFFFFFFF:FFFFF  
FFFFFFFFFFFFFFFFFFFFFFFFFFFFFFFFFFFFFFFFFFFFFFFFFFFFFFFF,FFFFFFFFFFFFFFFFFFFFFFFFFFFFFFFFF  
F,,FFFFFFFFF

@A00721:190:HGJW7DSXY:4:2205:6723:17581 1:N:0:TCTGCAAG+GCTGCACT  
AGGACCCCAATAAGCTCCTTCCAATGTTTCTTTTGAAGATATGAAGGGCTTACGTCATCTATGATGTT  
ATACCATGCGTTATTTCGAATATAGTTTTCGAATTAAAGTCTAGATATCCGAACATGTAATTATGTGGGC  
CTAGAGATCTAGCCC

+  
FFFFFFFFFFFFFFFFFFFFFFFFFFFFFFFFFFFFFFFFFFFFFFFFFFFFFFFFFFFFFFFF:FFFFF  
FFFFFFFFFFFFFFFFF:FFFFFFFFFFFFFFFFFFFFFFFFFFFFFFFFFFFFFFFFFFFFFFFFFFFFF  
FFFFFFFFFFFFFFF:FF

@A00721:190:HGJW7DSXY:4:2219:7536:19429 1:N:0:TCTGCAAG+GCTGCACT  
AGGACCCCAATAAGCTCCTTCCAATGTTTCTTTTGAAGATATGAAGGGCTTACGTCATCTATGATGTT  
ATACCATGCGTTATTTCGAATATAGTTTTCGAATTAAAGTCTAGATATCCGAACATGTAATTATGTGGGC  
CTAGAGATCTAGCCC

+  
FFFFFFFFFFFFFFFFFFFF::FFFF:FFFFFFFFFFFFFFFFFFFFFFFFFFFFFFFFFFFFFFFF  
FFFFFFFFFFFFFFFFFFFFFFFFFFFFFFFFFFFFFFFFFFFFFFFFFFFFFFFFFFFFFFFF::FFF,:FFFFFFFF  
F,:FFFFFFFFFFFF

@A00721:190:HGJW7DSXY:4:2219:7383:19539 1:N:0:TCTGCAAG+GCTGCACT  
AGGACCCCAATAAGCTCCTTCCAATGTTTCTTTTGAAGATATGAAGGGCTTACGTCATCTATGATGTT  
ATACCATGCGTTATTTCGAATATAGTTTTCGAATTAAAGTCTAGATATCCGAACATGTAATTATGTGGGC  
CTAGAGATCTAGCCC

+  
F,F,:FF,FF:FFFFFFFF,FF:FF,,F,FFFF:FFFFFFFF,F:FFFFFFFF,FFFFFFFF  
FFFF,F:F:,FFFFFFFFFFFFFFFF:FFFFFFFF:FF,FF,:F:FFF::FFFF,F,,:F,FFF:,FFFF:  
,:,FFFFFFFFFFFF

@A00721:190:HGJW7DSXY:4:2471:5502:26991 1:N:0:TCTGCAAG+GCTGCACT  
AGGACCCCAATAAGCTCCTTCCAATGTTTCTTTTGAAGATATGAAGGGCTTACGTCATCTATGATGTT  
ATACCATGCGTTATTTCGAATATAGTTTTCGAATTAAAGTCTAGATATCCGAACATGTAATTATGTGGGC  
CTAGAGATCTAGCCC

+  
FFFFFFFFFFFFFFFFFFFFFFFF:FFFFFFFFFFFFFFFFFFFFFFFFFFFFFFFFFFFFFFFF:FFFFFFFF  
FFFFFFFFFFFFFFFFFFFFFFFFFFFFFFFFFFFFFFFFFFFFFFFFFFFFFFFFFFFFFFFF:FFFFFFFF  
F:FFFFFFFFFFFF

@A00721:190:HGJW7DSXY:4:2544:16550:15781 1:N:0:TCTGCAAG+GCTGCACT  
AGGACCCCAATAAGCTCCTTCCAATGTTTCTTTTGAAGATATGAAGGGCTTACGTCATCTATGATGTT  
ATACCATGCGTTATTTCGAATATAGTTTTCGAATTAAAGTCTAGATATCCGAACATGTAATTATGTGGGC  
CTAGAGATCTAGCCC

+  
FFFFFFFFFFFFFFFFFFFFFFFF:FFFFFFFFFFFF:FFFFFFFFFFFFFFFFFFFFFFFFFFFF,F:FFFF  
FFFF:FFFFFFFFFFFFFFFFFFFFFFFFFFFFFFFF:FFFFFFFFFFFFFFFFFFFF,FFFFFFFFFFFF  
FFFFFFFFFFFFFFFF

@A00721:190:HGJW7DSXY:4:1441:24641:30733 1:N:0:TCTGCAAG+GCTGCACT  
GACCCCAATAAGCTCCTTCCAATGTTTCTTTTGAAGATATGAAGGGCTTACGTCATCTATGATGTTAT  
ACCATGCGTTATTTCGAATATAGTTTTCGAATTAAAGTCTAGATATCCGAACATGTAATTATGTGGGCCT  
AGAGATCTAGCCCAC

+  
FFFFFFFFFFFFFFFFFFFFFFFFFFFFFFFFFFFFFFFFFFFFFFFFFFFFFFFFFFFFFFFF,FFFFFFFF  
FFFFFFFFFFFFFFFFFFFFFFFFFFFFFFFFFFFFFFFF:FFFFFFFFFFFFFFFFFFFF:FFFFFFFFFFFFF,  
FFFFFFFFFFFFFFFF

@A00721:190:HGJW7DSXY:4:1462:29098:19507 1:N:0:TCTGCAAG+GCTGCACT  
GACCCCAATAAGCTCCTTCCAATGTTTCTTTTGAAGATATGAAGGGCTTACGTCATCTATGATGTTAT  
ACCATGCGTTATTTCGAATATAGTTTTCGAATTAAAGTCTAGATATCCGAACATGTAATTATGTGGGCCT  
CGAGATCTAGCCCAC

+  
FFFFFFFFFFFFFFFFFFFFFFFF:FFFFFFFFFFFFFFFFFFFFFFFFFFFFFFFFFFFFFFFF:FFFFFFF,FFF  
FFF,FFFFFFFFFFFFFFFFFFFFFFFFFFFFFFFF:FFFFFFFF:FFFF:FFFFFFFFFFFFFFFFFFFF:  
,FFFFFFFFFFFF

@A00721:190:HGJW7DSXY:4:1511:16975:18490 1:N:0:TCTGCAAG+GCTGCACT  
GACCCCAATAAGCTCCTTCCAATGTTTCTTTTGAAGATATGAAGGGCTTACGTCATCTATGATGTTAT  
ACCATGCGTTATTTCGAATATAGTTTTCGAATTAAAGTCTAGATATCCGAACATGTAATTATGTGGGCCT  
AGAGATCTAGCCCAC

+  
FFFFFFFFFFFFFFFFFFFF:FFFFFFFFFFFFFFFFFFFFFFFFFFFFFFFFFFFFFFFF:FFFFFFFFFFFF  
FFFFFFFFFFFFFFFFFFFFFFFFFFFFFFFFFFFFFFFF:FFFFFFFFFFFFFFFFFFFFFFFFFFFF:FFF,  
FFF:FFFFFFFFFFFF

@A00721:190:HGJW7DSXY:4:1625:18213:31939 1:N:0:TCTGCAAG+GCTGCACT  
GACCCCAATAAGCTCCTTCCAATGTTTCTTTTGAAGATATGAAGGGCTTACGTCATCTATGATGTTAT



$+$ 

+

+

+

+

+

+

[illegible]



+  
:F:FFFFFF:FFFFFF:FFF:FFF:FFFFFF::F:FFFFFFFF:FFFFFF::FF:FFFF:FFFFFFFFF,  
FFFFFF,FFFF:FFFFFFFF,FFFFFFFFFFF:FFF::FFFF,:FFF,F,:FFF:FFFF,,F:FFF,FF  
FFFFFF,FF:FFF:F  
@A00721:190:HGJW7DSXY:4:2420:6189:1564 1:N:0:TCTGCAAG+GCTGCACT  
CCCAATAAGCTCCTTCCAATGTTTCTTTTGAAGATATGAAGGGCTTACGTCATCTATGATGTTATACC  
ATGCGTTATTCTGAATATAGTTTCTGAATTAAAGTCTAGATATCCGAACATGTAATTATGTGGGCCTAGA  
GATCTAGCCCACAGA

+  
FFFFFFFFFFFFFFFF:FFFFFFFFFFFFFFFFFFFFFFFFFFFFFFFF:FFFFFFFFFFFFFFFFFFFFFFFFFFFFFFFF  
FFFFFFFFFFFFFFFFFFFFFFFFFFFFFFFFFFFFFFFFFFFFFFFFFFFFFFFF:FFFFFFFFFFFFFFFF:FF  
FFFFFFFFFFFFFFFF  
@A00721:190:HGJW7DSXY:4:2443:28664:35289 1:N:0:TCTGCAAG+GCTGCACT  
CCCAATAAGCTCCTTCCAATGTTTCTTTTGAAGATATGAAGGGCTTACGTCATCTAAGATGTTATACC  
ATGCGTTATTCTGAATATAGTTTCTGAATTAAAGTCTAGATATCCGAACATGTAATTATGTGTGCCTAGA  
GATCTAGCCAACAGA

+  
FFFFF:FFFFFFFF,FFFFF,F:F,,FFFFFFFFFFFFFFFF,,FF:F,FFFFFFF:,FF::FF:FFF:  
F,,:F:FFF,:FF:FFFFFF,FFFF,:F,,,F,FFFF,,F,FF:FF,FF:F,FFFF:,F,,FFF  
FFFFFF:FF,FFFF  
@A00721:190:HGJW7DSXY:4:2444:23249:12258 1:N:0:TCTGCAAG+GCTGCACT  
CCCAATAAGCTCCTTCCAATGTTTCTTTTGAAGATATGAAGGGCTTACGTCATCTATGATGTTATACC  
ATGCGTTATTCTGAATATAGTTTCTGAATTAAAGTCTAGATATCCGAACATGTAATTATGTGGGCCTAGA  
GATCTAGCCCACAGA

+  
FFFFFFFFFFFFFFFF:FFFFFFFFFFFFFFFFFFFFFFFFFFFFFFFF:FFFFFFFFFFFFFFFFFFFFFFFF:FFFFFFFFFFFF  
FFFFFFFFFFFFFFFFFFFFFFFFFFFFFFFFFFFFFFFFFFFFFFFFFFFFFFFF:FFFFFFF:FFFFFFFFFFFFFFFF,,FF  
FFFFFFFFFFFFFFFF  
@A00721:190:HGJW7DSXY:4:2513:1877:31266 1:N:0:TCTGCAAG+GCTGCACT  
CCCAATAAGCTCCTTCCAATGTTTCTTTTGAAGATATGAAGGGCTTACGTCATCTATGATGTTATACC  
ATGCGTTATTCTGAATATAGTTTCTGAATTAAAGTCTAGATATCCGAACATGTAATTATGTGGGCCTCGA  
GATCTAGCCCACAGA

+  
FFFFFFFFFFFFFFFF:FFFFFFFFFFFFFFFFFFFFFFFFFFFFFFFFFFFFFFFFFFFFFFFFFFFFFFFFFFFFFFFF  
F:FFFFFFFFFFFFFFFFFFFFFFFF:FFFFFFFFFFFFFFFFFFFFFFFFFFFFFFFF:FF,FFFFFFFFFFFF,,FF  
FFFFFFFFFFFFFFFF  
@A00721:190:HGJW7DSXY:4:2650:20636:13996 1:N:0:TCTGCAAG+GCTGCACT  
CCCAATAAGCTCCTTCCAATGTTTCTTTTGAAGATATGAAGGGCTTACGTCATCTATGATGTTATACC  
ATGCGTTATTCTGAATATAGTTTCTGAATTAAAGTCTAGATATCCGAACATGTAATTATGTGGGCCTAGA  
GATCTAGCCCACAGA

+  
FFFFFFFFFFFFFFFFFFFFFFFFFFFFFFFFFFFFFFFFFFFFFFFFFFFFFFFFFFFFFFFFFFFFFFFFFFFFFFFF  
FFFFFFFFFFFFFFFFFFFFFFFFFFFFFFFFFFFFFFFFFFFFFFFFFFFFFFFFFFFFFFFF,FFFFFFFFFFFF,:FF  
FFFFFFFFFFFFFFFF  
@A00721:190:HGJW7DSXY:4:1154:30309:34225 1:N:0:TCTGCAAG+GCTGCACT  
TTCTTGAAGATATGAAGGGCTTACGTCATCTATGATGTTATAGCATGCGTTATTCTGAATATAGTTTCTG  
AATTAAAGTCTAGATATCCGAACATGTAATTATGTGGGCCTAGAGATCTAGCCCACAGAGTTTTTCCA  
C

+  
FFFFFFFFFFFFFFFFFFFFFFFF:FFFFFFFFFFFFFFFFFFFFFFFFFFFFFFFFFFFFFFFFFFFFFFFF:FFFFF  
FFFFFFFFFF,FFFFFFFFFFFFFFFF:FFFFFFF,FFFFFFFFFFFFFFFFFFFFFFFFFFFFFFFFFFFFFFFF,F  
F  
@A00721:190:HGJW7DSXY:4:1154:30770:36495 1:N:0:TCTGCAAG+GCTGCACT  
TTCTTGAAGATATGAAGGGCTTACGTCATCTATGATGTTATAGCATGCGTTATTCTGAATATAGTTTCTG

AATTAAAGTCTAGATATCCGAACATGTAATTATGTGGGCCTAGAGATCTAGCCCACAGAGTTTTTCCA  
C  
+  
FFFFFFFFFFFFFFFFFFFFFFFFFFFFFFFFFFFFFFFFFFFFFFFFFFFFFFFFFFFFFFFFFFFFFFFF  
FFFFFFFFFFFFFFFFFFFFFFFFFFFFFFFFFFFFFFFFFFFFFFFFFFFFFFFFFFFFFFFFFFFFFFFF  
:  
@A00721:190:HGJW7DSXY:4:1174:10963:24893 1:N:0:TCTGCAAG+GCTGCACT  
TTCTTGAAGATATGAAGGGCTTACGTCATCTATGATGTTATAGCATGCGTTATTCGAATATAGTTTCG  
AATTAAAGTCTAGATATCCGAACATGTAATTATGTGGGCCTAGAGATCTAGCCCACAGAGTTTTTCCA  
C  
+  
FFFFFFFFFFFFFFFFFFFFFFFFFFFFFFFFFFFFFFFFFFFFFFFFFFFFFFFFFFFFFFFFFFFFFFFF  
FFFFFFFFFFFFFFFFFFFFFFFFFFFFFFFFFFFFFFFFFFFFFFFFFFFFFFFFFFFFFFFFFFFFFFFF  
F  
@A00721:190:HGJW7DSXY:4:2143:4065:24283 1:N:0:TCTGCAAG+GCTGCACT  
TTCTTGAAGATATGAAGGGCTTACGTCATCTATGATGTTATAGCATGCGTTATTCGAATATAGTTTCG  
AATTAAAGTCTAGATATCCGAACATGTAATTATGTGGGCCTAGAGATCTAGCCCACAGAGTTTTTCCA  
C  
+  
FFFFFFFFFFFFFFFFFFFFFFFFFFFFFFFFFFFFFFFFFFFFFFFFFFFFFFFFFFFFFFFFFFFFFFFF  
FFFFFFFFFFFFFFFFFFFFFFFFFFFFFFFFFFFFFFFFFFFFFFFFFFFFFFFFFFFFFFFFFFFFFFFF  
F  
@A00721:190:HGJW7DSXY:4:2163:8006:30170 1:N:0:TCTGCAAG+GCTGCACT  
TTCTTGAAGATATGAAGGGCTTACGTCATCTATGATGTTATAGCATGCGTTATTCGAATATAGTTTCG  
AATTAAAGTCTAGATATCCGAACATGTAATTATGTGGGCCTAGAGATCTAGCCCACAGAGTTTTTCCA  
C  
+  
FFFFFFFFFFFFFFFFFFFFFFFFFFFFFFFFFFFFFFFFFFFFFFFFFFFFFFFFFFFFFFFFFFFFFFFF  
FFFFFFFFFFFFFFFFFFFFFFFFFFFFFFFFFFFFFFFFFFFFFFFFFFFFFFFFFFFFFFFFFFFFFFFF  
F  
@A00721:190:HGJW7DSXY:4:2228:28908:11945 1:N:0:TCTGCAAG+GCTGCACT  
TTCTTGAAGATATGAAGGGCTTACGTCATCTATGATGTTATAGCATGCGTTATTCGAATATAGTTTCG  
AATTAAAGTCTAGATATCCGAACATGTAATTATGTGGGCCTAGAGATCTAGCCCACAGAGTTTTTCCA  
C  
+  
FFFFFFFFFFFFFFFFFFFFFFFFFFFFFFFFFFFFFFFFFFFFFFFFFFFFFFFFFFFFFFFFFFFFFFFF  
FFFFFFFFFFFFFFFFFFFFFFFFFFFFFFFFFFFFFFFFFFFFFFFFFFFFFFFFFFFFFFFFFFFFFFFF  
F  
@A00721:190:HGJW7DSXY:4:2403:17933:8469 1:N:0:TCTGCAAG+GCTGCACT  
TTCTTGAAGATATGAAGGGCTTACGTCATCTATGATGTTATAGCATGCGTTATTCGAATATAGTTTCG  
AATTAAAGTCTAGATATCCGAACATGTAATTATGTGGGCCTAGAGATCTAGCCCACAGAGTTTTTCCA  
C  
+  
FFFFFFFFFFFFFFFFFFFFFFFFFFFFFFFFFFFFFFFFFFFFFFFFFFFFFFFFFFFFFFFFFFFFFFFF  
FFFFFFFFFFFFFFFFFFFFFFFFFFFFFFFFFFFFFFFFFFFFFFFFFFFFFFFFFFFFFFFFFFFFFFFF  
F  
@A00721:190:HGJW7DSXY:4:2403:17770:8563 1:N:0:TCTGCAAG+GCTGCACT  
TTCTTGAAGATATGAAGGGCTTACGTCATCTATGATGTTATAGCATGCGTTATTCGAATATAGTTTCG  
AATTAAAGTCTAGATATCCGAACATGTAATTATGTGGGCCTAGAGATCTAGCCCACAGAGTTTTTCCA  
C  
+  
::FFFFFFFFFFFFFFFFFFFFFFFFFFFFFFFFFFFFFFFFFFFFFFFFFFFFFFFFFFFFFFFFFFFF,F:FFFF:FFFFFFFF:FFF,:F::FFFFFFFF  
FFFFFFFF:FFFF,FFFF:FFFFFFFF:FFFFFFFF:F:F,FFFFFFFFFFFF,FFFFFFFF:FFFF  
F





FFFFFFFF:FFFFFFFFFFFFFFFFFFFFFFFFFFFFFFFFFFFFFFFFFFFFFFFFFFFFFFFFFFFFFFFF  
FFFFFFFFFFFFFFFF

@A00721:190:HGJW7DSXY:4:2175:30364:11459 1:N:0:TCTGCAAG+GCTGCACT  
TGGGCTTACGTCATCTATGATGTTATACCATGCGTTATTCTGAATATAGTTTCTGAATTAAAGTCTAGAT  
ATCCGAACATGTAATTATGTGGGCCTAGAGATCTAGCCACAGAGTTTTTCCACTTCTAGATGGACCT  
TCGAGTATCAGACTC

+

FFFFFFFFFFFFFFFFFFFFFFFFFFFFFFFFFFFFFFFFFFFFFFFFFFFFFFFFFFFFFFFFFFFFFFFF  
FFFFFFFFFFFFFFFFFFFFFFFF:FFFFF,FFFFFFFFFFFFFFFF:FF,FFFFFFFF:FFFFFFFF,FFFFF  
:FFFFFFFFFFFFFFFF

@A00721:190:HGJW7DSXY:4:1401:15637:31422 1:N:0:TCTGCAAG+GCTGCACT  
GGGCTTACGTCATCTATGATGTTATACCATGCGTTATTCTGAATATAGTTTCTGAATTAAAGTCTAGATA  
TCCGAACATGTAATTATGTGGGCCTAGAGATCTAGCCACAGAGTTTTTCCACTTCTAGATGGACCT  
CGAGTATCAGACTCT

+

FFFF,,,:FFFF,FFFFFF:FFFFFF,FFFFFF,FFFFFF,FF:FFFFFFFFFFFFFFFF  
FFFFFFFF:FFFFFF:FF,,F:FFFF:FFFFFF,FFFF,FF:FFFF:,FF,FFFFFF:F:FFFF  
FFFFFFFF:FFFFF

@A00721:190:HGJW7DSXY:4:2459:9462:33786 1:N:0:TCTGCAAG+GCTGCACT  
GGGCTTACGTCATCTATGATGTTATACCATGCGTTATTCTGAATATAGTTTCTGAATTAAAGTCTAGATA  
TCCGAACATGTAATTATGTGGGCCTAGAGATCTAGCCACAGAGTTTTTCCACTTCTAGATGGACCT  
CGAGTATCAGACTCT

+

FFFFFFFFFFFFFFFFFFFFFFFFFFFFFFFFFFFFFFFFFFFFFFFFFFFFFFFFFFFFFFFFFFFFFFFF  
FFFFFFFF:FFFFFF:FFFFFFFF:FFFFFFFFFFFFFFFFFFFFFFFFFFFFFFFFFFFFFFFF  
FFFFFFFFFFFFFFFF

@A00721:190:HGJW7DSXY:4:2551:12572:7952 1:N:0:TCTGCAAG+GCTGCACT  
GGGCTTACGTCATCTATGATGTTATACCATGCGTTATTCTGAATATAGTTTCTGAATTAAAGTCTAGATA  
TCCGAACATGTAATTATGTGGGCCTAGAGATCTAGCCACAGAGTTTTTCCACTTCTAGATGGACCT  
CGAGTATCAGACTCT

+

FFFFFFFFFFFFFFFFFFFFFFFFFFFFFFFFFFFFFFFFFFFFFFFFFFFFFFFFFFFFFFFFFFFFFFFF  
FFFFFFFF:FFFF:FFFFFFFF:FFFFFFFFFFFFFFFFFFFFFFFFFFFFFFFFFFFFFFFF  
FFFFFFFFFFFFFFFF

@A00721:190:HGJW7DSXY:4:2562:28492:20556 1:N:0:TCTGCAAG+GCTGCACT  
GGGCTTACGTCATCTATGATGTTATACCATGCGTTATTCTGAATATAGTTTCTGAATTAAAGTCTAGATA  
TCCGAACATGTAATTATGTGGGCCTAGAGATCTAGCCACAGAGTTTTTCCACTTCTAGATGGACCT  
CGAGTATCAGACTCT

+

FFFFFFFFFFFFFFFFFFFFFFFFFFFFFFFFFFFFFFFFFFFFFFFFFFFFFFFFFFFFFFFFFFFFFFFF  
FFFFFFFF,FFFFFFFFFFFFFF:,FFFFFFFFFFFFFFFFFFFFFFFFFFFFFFFFFFFFFFFF  
FFFFFFFFFFFFFFFF

@A00721:190:HGJW7DSXY:4:1167:8639:9721 1:N:0:TCTGCAAG+GCTGCACT  
GGTTTACGTCATCTATGATGTTATACCATGCGTTATTCTGAATATAGTTTCTGAATTAAAGTCTAGATAT  
CCGAACATGTAATTATGTGGGCCTCGAGATCTAGCCACAGAGTTTTTCCACTTCTAGATGGACCTC  
GAGTATCAGACTCTT

+

FFFFFFFFFFFFFFFFFFFFFFFFFFFFFFFFFFFFFFFFFFFFFFFFFFFFFFFFFFFFFFFFFFFFFFFF  
FFFFFFFFFFFFFFFFFFFFFFFF,FFFFFFFFFFFFFFFFFFFFFFFFFFFFFFFFFFFFFFFF  
FFFFFFFFFFFFFFFF

@A00721:190:HGJW7DSXY:4:1226:28266:19069 1:N:0:TCTGCAAG+GCTGCACT  
GGCTTACGTCATCTATGATGTTATACAGGCGTTATTCTGAATATAGTTTCTGAATTAAAGTCTAGATAT  
CCGTACATGTAATTATGTGGGCCTAGAGATCTAGCCACAGAGTTTTTCCACTTCTAGAAGGACCTTC  
GAGTATCAGACTCT

+  
FF,FFFF:F::FFFFFF:FFFF,FFFF,:FF,FF:FFFFFFF,F,,F:F:FFFF:FF,::F::FF:  
,F::,F,FFFFFF,FFFF:FF,,FFF,FFFFFF,FF:FFFF:FF,FF,:F,:F:F::FFF,FF::F,:F  
FFFFFFFFFFFF::,F

@A00721:190:HGJW7DSXY:4:1323:25527:33270 1:N:0:TCTGCAAG+GCTGCACT  
GGCTTACGTCATCTATGATGTTATACCATGCGTTATTCGAATATAGTTTCGAATTAAAGTCTAGATAT  
CCGAACATGTAATTATGTGGGCCTAGAGATCTAGCCACAGAGTTTTTCCACTTCTAGATGGACCTTC  
GAGTATCAGACTCTT

+  
FFFFFFFFFFFFFFFFFFFFFFFFFFFFFFFFFFFFFFFFFFFFFFFFFFFFFFFFFFFFFFFFFFFFFFFF  
FFFFFFFFFFFFFFFFFFFFFFFFFFFF:,FFFFFFFFFFFFFFFFFFFFFFFFFFFFFFFFFFFFFFFFFFFF  
FFFFFFFFFFFFFFFFFFFF

@A00721:190:HGJW7DSXY:4:1405:28718:22576 1:N:0:TCTGCAAG+GCTGCACT  
GGTTTACGTCATCTATGATGTTATACCATGCGTTATTCGAATATAGTTTCGAATTAAAGTCTAGATAT  
CCGAACATGTAATTATGTGGGCCTAGAGATCTAGCCACAGAGTTTTTCCACTTCTAGATGGACCTTC  
GAGTATCAGACTCTT

+  
FFFFFFFFFFFFFFFFFFFFFFFFFFFFFFFFFFFFFFFFFFFFFFFFFFFFFFFFFFFFFFFFFFFFFFFF  
FFFFFFFFFFFFFFFFFFFFFFFFFFFF::FFFFFFFFFFFFFFFFFFFFFFFFFFFFFFFFFFFFFFFFFFFF  
FFFFFFFFFFFFFFFFFFFF

@A00721:190:HGJW7DSXY:4:1511:23592:11882 1:N:0:TCTGCAAG+GCTGCACT  
GGCTTACGTCATCTATGATGTTATACCATGCGTTATTCGAATATAGTTTCGAATTAAAGTCTAGATAT  
CCGAACATGTAATTATGTGGGCCTAGAGATCTAGCCACAGAGTTTTTCCACTTCTAGATGGACCTTC  
GAGTATCAGACTCTT

+  
FFFFFFFFFFFFFFFFFFFFFFFFFFFFFFFFFFFFFFFFFFFFFFFFFFFFFFFFFFFFFFFFFFFFFFFF  
FFFFFFFFFFFFFFFFFFFFFFFFFFFF,,FFFFFFFFFFFFFFFFFFFFFFFFFFFFFFFFFFFFFFFFFFFF  
FFFFFFFFFFFFFFFFFFFF

@A00721:190:HGJW7DSXY:4:1536:23647:13354 1:N:0:TCTGCAAG+GCTGCACT  
GGTTTACGTCATCTATGATGTTATACCATGCGTTATTCGAATATAGTTTCGAATTAAAGTCTAGATAT  
CCGAACATGTAATTATGTGGGCCTAGAGATCTAGCCACAGAGTTTTTCCACTTCTAGATGGACCTTC  
GAGTATCAGACTCTT

+  
FFFFFFFFFFFFFFFFFFFFFFFFFFFFFFFFFFFFFFFFFFFFFFFFFFFFFFFFFFFFFFFFFFFFFFFF  
FFFFFFFFFFFFFFFFFFFFFFFFFFFFFFFFFFFFFFFFFFFFFFFFFFFFFFFFFFFFFFFFFFFFFFFF,FFF  
FFFFFFFFFFFFFFFFFFFF

@A00721:190:HGJW7DSXY:4:1636:1579:6198 1:N:0:TCTGCAAG+GCTGCACT  
GGCTTACGTCATCTATGATGTTATACCATGCGTTATTCGAATATAGTTTCGAATTAAAGTCTAGATAT  
CCGAACATGTAATTATGTGGGCCTAGAGATCTAGCCACAGAGTTTTTCCACTTCTAGATGGACCTTC  
GAGTATCAGACTCTT

+  
FFFFFFFFFFFFFFFFFFFFFFFFFFFFFFFFFFFFFFFFFFFFFFFFFFFFFFFFFFFFFFFFFFFFFFFF  
FFFFFFFFFFFF:FFFFFFFFFFFFFFFF,FFFFFFFFFFFFFFFFFFFFFFFFFFFFFFFF:FFFFFFFFFFFFFFFF  
FFFFFFFFFFFFFFFFFFFF

@A00721:190:HGJW7DSXY:4:1668:20302:6433 1:N:0:TCTGCAAG+GCTGCACT  
GGCTTACGTCATCTATGATGTTATACCATGCGTTATTCGAATATAGTTTCGAATTAAAGTCTAGATAT  
CCGAACATGTAATTATGTGGGCCTAGAGATCTAGCCACAGAGTTTTTCCACTTATAGATGTACATTC  
GAGTATCAGACTC

+  
FFFFFFFFFFFFFFFFFFFF::FFF:FF,FFFFFF,,FFF::F,FF,FFFF,FFF:FFFFFFFF:FFFFFFF:  
,F,FFFF:FF:F:FFFFFF,:F,,,FFFF::FFFF,:F,F,,FF:F:FFFF,,F:F:F,FF,,:F  
:FF,:FFF,FFFF

@A00721:190:HGJW7DSXY:4:2126:16080:15311 1:N:0:TCTGCAAG+GCTGCACT  
GGCTTACGTCATCTATGATGTTATACCATGCGTTATTCGAATATAGTTTCGAATTAAAGTCTAGATAT



@A00721:190:HGJW7DSXY:4:2474:19633:36777 1:N:0:TCTGCAAG+GCTGCACT  
TTACGTCATCTATGATGTTATACCATGCGTTATTCGAATATAGTTTCGAATTAAGTCTAGATATCCG  
AACATGTAATTATGTGGGCCTAGAGATCTAGCCCACAGAGTTTTTCCACTTCTAGATGGACCTTCGAG  
TATCAGACTCTTGGT

@A00721:190:HGJW7DSXY:4:1338:19759:4867 1:N:0:TCTGCAAG+GCTGCACT  
TCTATGATGTTATACCATGCGTTATTCGAATATAGTTTTCGAATTAAGTCTAGATATCCGAACATGTA  
ATTATGTGGGCCTAGAGATCTAGCCACAGAGTTTTTCCACTTCTAGATGGACCTTCGAGTATCAGAC  
TCTTGGTCCTG

@A00721:190:HGJW7DSXY:4:1419:5475:25755 1:N:0:TCTGCAAG+GCTGCACT  
TCTATGATGTTATACCATGCGTTATTCGAATATAGTTTCGAATTAAGTCTAGATATCCGAACATGTA  
ATTATGTGGGCCTAGAGATCTAGCCACAGAGTTTTTCCACTTCTAGATGGACCTTCGAGTATCAGAC  
TCTTGGTCCTG

@A00721:190:HGJW7DSXY:4:1423:31403:14638 1:N:0:TCTGCAAG+GCTGCACT  
TCTATGATGTTATACCATGCGTTATTCGAATATAGTTTCGAATTAAGTCTAGATATCCGAACATGTA  
ATTATGTGGGCCTAGAGATCTAGCCACAGAGTTTTTCCACTTCTAGATGGACCTTCGAGTATCAGAC  
TCTTGGTCCTG

@A00721:190:HGJW7DSXY:4:1526:6479:31093 1:N:0:TCTGCAAG+GCTGCACT  
TCTATGATGTTATACCATGCGTTATTCGAATATAGTTTTCGAATTAAGTCTAGATATCCGAACATGTA  
ATTATGTGGGCCTAGAGATCTAGCCACAGAGTTTTTCCACTTCTAGATGGACCTTCGAGTATCAGAC  
TCTTGGTCCTG

@A00721:190:HGJW7DSXY:4:1576:16595:25567 1:N:0:TCTGCAAG+GCTGCACT  
TCTATGATGTTATACCATGCGTTATTCGAATATAGTTTTCGAATTAAGTCTAGATATCCGAACATGTA  
ATTATGTGGGCCTAGAGATCTAGCCACAGAGTTTTTCCACTTCTAGATGGACCTTCGAGTATCAGAC  
TCTTGGTCCTG

@A00721:190:HGJW7DSXY:4:2123:14714:27445 1:N:0:TCTGCAAG+GCTGCACT  
TCTATGATGTTATACCATGCGTTATTCGAATATAGTTTTCGAATTAAAGTCTAGATATCCGAACATGTA  
ATTATGTGGGCCTAGAGATCTAGCCACAGAGTTTTTCCACTTCTAGATGGACCTTCGAGTATCAGAC  
TCTTGGTCCTG

@A00721:190:HGJW7DSXY:4:2223:24144:33536 1:N:0:TCTGCAAG+GCTGCACT  
TCTATGATGTTATACCATGCGTTATTCGAATATAGTTTTCGAATTAAGTCTAGATATCCGAACATGTA  
ATTATGTGGGCCTAGAGATCTAGCCACAGAGTTTTTCCACTTCTAGATGGACCTTCGAGTATCAGAC  
TCTTGGTCCTG

@A00721:190:HGJW7DSXY:4:2278:20790:10848 1:N:0:TCTGCAAG+GCTGCACT  
TCTATGATGTTATACCATGCGTTATTGCAATATAGTTTCGAATTAAGTCTAGATATCCGAACATGTA  
ATTATGTGGGCCTAGAGATCTAGCCACAGAGTTTTTCCACTTCTAGATGGACCTTCGAGTATCAGAC  
TCTTGGTCCTG

@A00721:190:HGJW7DSXY:4:2319:12536:11459 1:N:0:TCTGCAAG+GCTGCACT  
TCTATGATGTTATACCATGCGTTATTCGAATATAGTTTTCGAATTAAAGTCTAGATATCCGAACATGTA  
ATTATGTGGGCCTAGAGATCTAGCCACAGAGTTTTTCCACTTCTAGATGGACATTCGAGTATCAGAC  
TCTTGGTCCTG

@A00721:190:HGJW7DSXY:4:2319:12843:11522 1:N:0:TCTGCAAG+GCTGCACT  
TCTATGATGTTATACCATGCGTTATTCGAATATAGTTTCGAATTAAAGTCTAGATATCCGAACATGTA  
ATTATGTGGGCCTAGAGATCTAGCCACAGAGTTTTTCCACTTCTAGATGGACCTTCGAGTATCAGAC  
TCTTGGTCCTG

@A00721:190:HGJW7DSXY:4:2319:12988:11772 1:N:0:TCTGCAAG+GCTGCACT  
TCTATGATGTTATACCATGCGTTATTCGAATATAGTTTTCGAATTAAGTCTAGATATCCGAACATGTA  
ATTATGTGGGCCTAGAGATCTAGCCACAGAGTTTTTCCACTTCTAGATGGACCTTCGAGTATCAGAC  
TCTTGGTCCTG

@A00721:190:HGJW7DSXY:4:2332:31222:16986 1:N:0:TCTGCAAG+GCTGCACT  
TCTATGATGTTATACCATGCGTTATTCGAATATAGTTTTCGAATTAAAGTCTAGATATCCGAACATGTA  
ATTATGTGGGCCTAGAGATCTAGCCACAGAGTTTTTCCACTTCTAGATGGACCTTCGAGTATCAGAC  
TCTTGGTCCTG

@A00721:190:HGJW7DSXY:4:2354:30038:23829 1:N:0:TCTGCAAG+GCTGCACT  
TCTATGATGTTATACCATGCGTTATTCGAATATAGTTTTCGAATTAAAGTCTAGATATCCGAACATGTA  
ATTATGTGGGCCTAGAGATCTAGCCACAGAGTTTTTCCACTTCTAGATGGACCTTCGAGTATCAGAC  
TCTTGGTCCTG

+  
FF:FFFFFFFFFFFFFFFFFFFFFFFF:FFFFFFFFF:, :FFFFFF:FFFFFFFF,FFFF:FFFFFF:F  
FFFFFFFF:FFFFFF,FF:FFFFFF:FFFFFFFFFFFF,FFFFFF,FFFFFF:FFFFFFFFFFFFF  
F,FFF::FFF

@A00721:190:HGJW7DSXY:4:2516:18430:28776 1:N:0:TCTGCAAG+GCTGCACT  
TCTATGATGTTATACCATGCGTTATTCGAATATAGTTTCGAATTAAAGTCTAGATATCCGAACATGTA  
ATTATGTGGGCCTAGAGATCTAGCCACAGAGTTTTTCCACTTCTAGATGGACCTTCGAGTATCAGAC  
TCTTGGTCCTG

+  
FFFFFFFFFFFFFFFFFFFFFFFFFFFFFFFFFFFFFFFFFFFFFFFFFFFFFFFFFFFFFFFFFFFF  
FFFFFFFFFFFFFFFFFFFFFFFFFFFFFFFF:FFFFFFFFFFFFFFFF:FFFFFFFFFFFFFFFFFFFF  
FFFFFFFFFFFF

@A00721:190:HGJW7DSXY:4:2622:1551:12947 1:N:0:TCTGCAAG+GCTGCACT  
TCTATGATGTTATACCATGCGTTATTCGAATATAGTTTCGAATTAAAGTCTAGATATCCGAACATGTA  
ATTATGTGGGCCTAGAGATCTAGCCACAGAGTTTTTCCACTTCTAGATGGACCTTCGAGTATCAGAC  
TCTTGGTCCTG

+  
FFFFFFFFFFFFFFFFFFFFFFFFFFFFFFFFFFFFFFFFFFFFFFFFFFFFFFFFFFFFFFFFFFFF  
FFFFFFFFFFFFFFFFFFFFFFFFFFFFFFFFFFFFFFFFFFFFFFFFFFFFFFFFFFFFFFFFFFFF  
FFFFFFFFFFFF

@A00721:190:HGJW7DSXY:4:2643:26368:17096 1:N:0:TCTGCAAG+GCTGCACT  
TCTATGATGTTATACCATGCGTTATTCGAATATAGTTTCGAATTAAAGTCTAGATATCCGAACATGTA  
ATTATGTGGGCCTAGAGATCTAGCCACAGAGTTTTTCCACTTCTAGATGGACCTTCGAGTATCAGAC  
TCTTGGTCCTG

+  
FFFFFFFFFFFFFFFFFFFFFFFFFFFFFFFFFFFFFFFFFFFFFFFFFFFFFFFFFFFFFFFFFFFF  
F:FFFFFFFFFFFFFFFFFFFFFFFFFFFFFFFFFFFFFFFFFFFFFFFFFFFFFFFFFFFFFFFFFFFF  
FFFFFFFFFFFF

@A00721:190:HGJW7DSXY:4:1241:9688:28510 1:N:0:TCTGCAAG+GCTGCACT  
TGATGTTATACCATGCGTTATTCGAATATAGTTTCGAATTAAAGTCTAGATATCCGAACATGTAATTA  
TGTGGGCCTAGAGATCTAGCCACAGAGTTTTTCCACTTCTAGATGGACCTTCGAGTATCAGACTCTT  
GGTCCTGTAAGGTCT

+  
FFFFFFFFFFFFFFFFFFFFFFFFFFFFFFFFFFFFFFFFFFFFFFFFFFFFFFFFFFFFFFFFFFFF  
FFFFFFFFFF,FFFFFFFFFFFFFFFFFFFFFFFFFFFFFFFF:FFFFFFFFFFFFFFFF:FFFFFFFF  
FFFFFFFFFFFF

@A00721:190:HGJW7DSXY:4:1271:27796:31375 1:N:0:TCTGCAAG+GCTGCACT  
TGATGTTATACCATGCGTTATTCGAATATAGTTTCGAATTAAAGTCTAGATATCCGAACATGTAATTA  
TGTGGGCCTAGAGATCTAGCCACAGAGTTTTTCCACTTCTAGATGGACCTTCGAGTATCAGACTCTT  
GGTCCTGTAAGGTCT

+  
FFFFFFFFFFFFFFFFFFFFFFFFFFFFFFFFFFFFFFFFFFFFFFFFFFFFFFFFFFFFFFFFFFFF  
FFFFFFFFFF:FFFFFFFFFFFFFFFFFFFFFFFFFFFFFFFFFFFFFFFFFFFFFFFFFFFFFFFFFFFF  
FFFFFFFFFFFF

@A00721:190:HGJW7DSXY:4:2453:12753:9173 1:N:0:TCTGCAAG+GCTGCACT  
TGATGTTATACCATGCGTTATTCGAATATAGTTTCGAATTAAAGTCTAGATATCCGAACATGTAATTA  
TGTGGGCCTAGAGATCTAGCCACAGAGTTTTTCCACTTCTAGATGGACCTTCGAGTATCAGACTCTT  
GGTCCTGTAAGGTCT

+  
FFF:F:FF:FFFF:FFFF:FFF:FFFFFFFFFFFF:FFFFFFFFFF,FFFFFFFFF:F:F:FFFF  
FFFFFFFFF,FFFF:FF:FFFFFFFF:F:FFFFFFFFFFFF:FFFF:FFFFFFFFFFFF::FFFFF  
FFFFFFFFF,F,FFFF

@A00721:190:HGJW7DSXY:4:2633:28131:14512 1:N:0:TCTGCAAG+GCTGCACT  
TGATGTTATACCATGCGTTATTCGAATATAGTTTCGAATTAAAGTCTAGATATCCGAACATGTAATTA

TGTGGGCCTAGAGATCTAGCCACAGAGTTTTTACACTTCTAGATGGACCTTCGAGTATCAGACTCTT  
GGTCCTGTAAGGTCT

+

:FFFFFFFFFFFF,F,FF:FFFFFFFF:FFFFFFFF:FFFFFFFF:FFF:FFFF,FFF  
FFFF:FFFFFFFFFFFFFFFF:FFF,FFFF,FFFF,:FFFFFFFF:FFFF:F:F,FF  
F,FFF,FFFF:FFF

@A00721:190:HGJW7DSXY:4:1341:26341:17237 1:N:0:TCTGCAAG+GCTGCACT  
GATGTTATACCATGCGTTATTCGAATATAGTTTCGAATTAAAGTCTAGATATCCGAACATGGAATTAT  
GTGGGCCTAGAGATCTAGCCACAGAGTTTTTCCACTTCTAGATGGACCTTCGAGTATCAGACTCTTG  
GTCCTGTAAGGTCT

+

FFFFFFFFFFFFFFFF:FFFFFF,FFFF:FFFF:FFF:F,FFFFFFFF,FFFFF,,FFFFF  
FF:FFFF::,FFFFFFFFFFFF:F,F::FFFF,,F,F:FFFFFFFFFFFFFFFF:FF  
,,:FF,:FFFFFFF

@A00721:190:HGJW7DSXY:4:1676:26576:3521 1:N:0:TCTGCAAG+GCTGCACT  
CACCATGCGTTATTCGAATATAGTTTCGAATTAAAGTCTAGATATCCGAACATGTAATTATGTGGGCC  
TAGAGATCTAGCCACAGAGTTTTTCCACTTCTAGATGGACCTTCGAGTATCAGACTCTTGGTCCTGT  
AAGGTCTGGACTCAG

+

FFFFFFFFFFFFFFFFFFFFFFFFFFFFFFFFFFFFFFFFFFFFFFFFFFFFFFFF:FFFFFFFFFFFF  
:FFFFFFFFFFFFFFFFFFFFFFFFFFFFFFFFFFFFFFFFFFFFFFFFFFFFFFFFFFFFFFFFFFFFF  
FFFFFFFFFFFFFFFF

@A00721:190:HGJW7DSXY:4:2135:16758:26819 1:N:0:TCTGCAAG+GCTGCACT  
CACCATGCGTTATTCGAATATAGTTTCGAATTAAAGTCTAGATATCCGAACATGTAATTATGTGGGCC  
TAGAGATCTAGCCACAGAGTTTTTCCACTTCTAGATGGACCTTCGAGTATCAGACTCTTGGTCCTGT  
AAGGTCTGGACTCAG

+

FFFFFFFFFFFFFFFFFFFFFFFFFFFFFFFFFFFFFFFFFFFFFFFFFFFFFFFFFFFFFFFFFFFFF  
FFFFFFFFFFFFFFFFFFFFFFFFFFFFFFFFFFFFFFFFFFFFFFFFFFFFFFFFFFFFFFFFFFFFF:FFFFFFFF  
FFFFFFFFFFFFFFFF

@A00721:190:HGJW7DSXY:4:2164:18656:15107 1:N:0:TCTGCAAG+GCTGCACT  
CACCATGCGTTATTCGAATATAGTTTCGAATTAAAGTCTAGATATCCGAACATGTAATTATGTGGGCC  
TAGAGATCTAGCCACAGAGTTTTTCCACTTCTAGATGGACCTTCGAGTATCAGACTCTTGGTCCTGT  
AAGGTCAGGACTCAG

+

FFFFF,F,:FFFFFF,:F:FFFF,,FFFFFFFFFFFFFFFF:FFF,,FFFF::FF:FFFF:F,F,:  
FF:F:FFFF,,F,F:F,FFFF,FFFFFFFF:F:FF:FFFFFFFFFFFFFFFF:F,,FFF,:FF,FFF  
FF,,FF,FFFFFF:

@A00721:190:HGJW7DSXY:4:1107:15185:28385 1:N:0:TCTGCAAG+GCTGCACT  
ACCATGCGTTATTCGAATATAGTTTCGAATTAAAGTCTAGATATCCGAACATGTAATTATGTGGGCCT  
AGAGATCTAGCCACAGAGTTTTTCCACTTCTAGATGGACCTTCGAGTATCAGACTCTTGGTCCTGTA  
AGGTCTGGACTCAGG

+

FFFFFFFFFFFFFFFFFFFFFFFFFFFFFFFFFFFFFFFFFFFFFFFFFFFFFFFF:FFFFFFFFFFFF  
FFFFFFFFFFFFFFFFFFFFFFFFFFFFFFFFFFFFFFFFFFFFFFFFFFFFFFFFFFFFFFFFFFFFF  
FFFFFFFFFFFFFFFF

@A00721:190:HGJW7DSXY:4:1659:2474:30013 1:N:0:TCTGCAAG+GCTGCACT  
CCTGAGTCCAGACCTTACAGGACCAAGAGTCTGATACTCGAAGTCCATCTAGAAGTGAAAACTCT  
GTGGGCTAGATCTCTAGGCCACATAATTACATGTTGCGATATCTAGACTTTAATTCGAACTATATT  
CGAATAACGCATGGT

+

FFFFFFFFFFFFFFFFFFFFFFFFFFFFFFFFFFFFFFFFFFFFFFFFFFFFFFFFFFFFFFFFFFFFF  
FFFFFFFFF:FFFFFFFFFFFFFFFFFFFFFFFF:FFFFFFFFFFFFFFFFFFFFFFFF,FFFF  
FFFFFFFFFFFFFFFF



@A00721:190:HGJW7DSXY:4:2128:12644:16313 1:N:0:TCTGCAAG+GCTGCACT  
ACCATGCGTTATTTCGAATATAGTTTCGAATTAAAGTCTAGATATCCGAACAGGTAATTATGTGGGCCT  
AGAGATCTAGCCCACAGAGTTTTTCCACTTCTAGATGGACCTTCGAGTATCAGACTCTTGGTCCTGTA  
AGGTATGGACTCAGG

```
FF:FFFFFFFF:FFFFFFFFFFFF,FFFFFFFFFFFFFFFF,:FFFFFFF:,FF,F,,FF,FFFFFF,FF:
,FF:FFFFFFFF,FFF:FFFFF,F:FF,:FFFF:FFF,F:FF:,:,:FFFF,,F:FFF:F:FF,:F:
FF:F,F,:FF:FF,F
```

```
FFFFFFFFFFFFFFFFFFFFFFFFFFFFFFFFFFFFFFFFFFFFFFFFFFFFFFFFFFFFFFFFFFFFF
FFFFFFFFFFFFFFFFFFFFFFFFFFFFFF:FFFFFFFFFFFFFFFFFFFFFFFFFFFFFFFFFFFFF
:FFFFFFFFFFFFFF:FF
```

[illegible][illegible]

```

FFFFFFFFFFFFFFFFFFFFFFFFFFFFFFFFFFFFFFFFFFFFFFFFFFFFFFFFFFFFFFFF:FFFFFFFF:FFFF
FFFFFFFFFFFFFFFFFFFFFFFFFFFFFFFFFFFFFFFFFFFFFFFFFFFFFFFFFFFFFFFF:FFFFFFFFFFFFFFFFFFFFFFFFFFFFFFFFFFFFFFFF
FFF:FFFFFFF:FFF

```

```
FFFFFFFFFFFFFFFFFFFFFFFFFFFFFFFF:FFFFFFFFFFFFFFFFFFFFFFFFFFFFFFF
FFFFFFFFFFFFFFFFFFFFFFFFFFFFFFFF:FFFFFFFFFFFFFF:FFFFFFFFFFFF
FFFFFFFFFFFFFFFF
```

FFFFFFFFFFFFFFFFFFFFFFFF.FFFFFFFFFFFFFFFFFFFFFFFFFFFFFF;FFFFFFFFFFFFFFFFFFFFFFFF

[illegible]

+

@A00721:190:HGJW7DSXY:4:1567:30870:8797 1:N:0:TCTGCAAG+GCTGCACT  
CCATGCGTTATTTCGAATATAGTTTCGAATTAAGTCTAGATATCCGAACATGTAATTATGTGGGCCTA  
GAGATCTAGCCACAGAGTTTTTCCACTTCTAGATGGACCTTCGAGTATCAGACTCTTGGTCCTGTAA  
GGTCTGGACTCAGGT

```

FFFFFFFF:FFFFFF:FFFFFFFFFFFFFFFFFFFFFFFFFFFFFFFFFFFFFFFF:FFFFFFFFFF:FFFFFFFFFF::
FFFFFF:FF:FFF:FFFF:FFFFFFFFF:FFFF:FFFF,FF:FFFFFF:FFFFFFFFFFFFFFFFFFFF,FFFFFF
FFF:FF,F:FF:FFF

```

+

@A00721:190:HGJW7DSXY:4:1111:18213:23046 1:N:0:TCTGCAAG+GCTGCACT  
ATGCGTTATTTCGAATATAGTTTTCGAATTAAGTCTAGATATCCGAACATGTAATTATGTGGGCCTAGA  
GATCTAGCCACAGAGTTTTTCCACTTCTAGATGGACCTTCGAGTATCAGACTCTTGCTCCTGTAAGG  
TCTGGACTCAGGTGA

```

FFFFFFFFFFFFFFFFFFFFFFFFFFFFFFFFFFFFFFFF:FFF,F,FFFFFFFFFFFFFFFF
FFFFFFFFFFFFFFFFFFFFFFFFFFFFFFFF:FFFFFFFFFFFFFFFFFFFFF:FFFFF:FFFFF
FFFFFFFFFFFFFFFF

```

 $+$ 

@A00721:190:HGJW7DSXY:4:1421:16523:25504 1:N:0:TCTGCAAG+GCTGCACT  
ATGCGTTATTTCGAATATAGTTTTCGAATTAAGTCTAGATATCCGAACATGTAATTATGTGGGCCTAGA  
GATCTAGCCACAGAGTTTTTCCACTTCTAGATGGACCTTCGAGTATCAGACTCTTGCTCCTGTAAGG  
TCTGGACTCAGGTGA

```
FFFFFFFFFFFFFFFFFFFFFFFFF:FFFFFFFFFFFFFFFFFFFF,F:FFFFFFFFFFFFFF:F  
FFFFFFFFFFFFFFFFFFFFFFFFF:FFFFFFFFFFFFFFFFFFFFFFFFFFFFFFFFFFFFF:  
FF:FFFFFFFF
```

+  
FFFFFFFFFFFFFFFF:FFFFFFFFFFFFFFFF:FFFFFFFFFFFFFFFF:F,:FFF  
FFFFFFFFFFFFFFFF:FFF:FFF:FFFFFFFFFFFFFFFF:FFFFFFF:FFF,FFFF:FFFF  
F:FFFFFFFF,F:F

@A00721:190:HGJW7DSXY:4:1608:29894:35102 1:N:0:TCTGCAAG+GCTGCACT  
ATGCGTTATTCGAATATAGTTTTCGAATTAAAGTCTAGATATCCGAACATGTAATTATGTGGGCCTAGA  
GATCTAGCCACAGAGTTTTTCCACTTCTAGATGGACCTTCGAGTATCAGACTCTTGGTCCTGTAAGG  
TCTGGACTCAGGTGA

+  
FFFFFFFFFFFFFFFFFFFFFFFFFFFFFFFFFFFFFFFFFFFFFFFFFFFFFFFFFFFFFFFF: ,FF  
FFFFFFFFFFFFFFFFFFFFFFFFFFFFFFFFFFFFFFFF:FFFFFFFF:FFFFFFFFFFFFFFFF:FFFFFFF  
FFFFFFFFFFFFFFFF

@A00721:190:HGJW7DSXY:4:2378:15546:30138 1:N:0:TCTGCAAG+GCTGCACT  
ATGCGTTATTCGAATATAGTTTTCGAATTAAAGTCTAGATATCCGAACATGTAATTATGTGGGCCTAGA  
GATCTAGCCACAGAGTTTTTCCACTTCTAGATGGACCTTCGAGTATCAGACTCTTGGTCCTGTAAGG  
TCTGGACTCAGGTGA

+  
FF:FFFFFFFFF:FFFFFFFF:FFFFFFFFFFFFFFFF:FFFFFF,FF::FFFFFFFFFFF,FFF  
FFFFFFFF:FFF:FFFFFFFF,FFFFFFFFFFFFFFFF:FFFFFFFFFFFFFFFF:FFFFF,FFFFF:F  
F:F:FFFFFF::F:

@A00721:190:HGJW7DSXY:4:2504:10999:36761 1:N:0:TCTGCAAG+GCTGCACT  
ATGCGTTATTCGAATATAGTTTTCGAATTAAAGTCTAGATATCCGAACATGTAATTATGTGGGCCTAGA  
GATCTAGCCACAGAGTTTTTCCACTTCTAGATGGACCTTCGAGTATCAGACTCTTGGTCCTGTAAGG  
TCTGGACTCAGGTGA

+  
FFFFFFFFFFFFFFFFFFFFFFFFFFFFFFFFFFFFFFFF:FFFFFFFFFFFFFFFF:FFFFFFFFFFFFFFFF:FFF  
FFFFFFFFFFFFFFFFFFFFFFFFFFFFFFFFFFFFFFFFFFFFFFFFFFFFFFFFFFFFFFFF:FFFFFFF  
FF:F:FFFFFFFF

@A00721:190:HGJW7DSXY:4:2626:23267:30921 1:N:0:TCTGCAAG+GCTGCACT  
ATGCGTTATTCGAATATAGTTTTCGAATTAAAGTCTAGATATCCGAACATGTAATTATGTGGGCCTAGA  
GATCTAGCCACAGAGTTTTTCCACTTCTAGATGGACCTTCGAGTATCAGACTCTTGGTCCTGTAAGG  
TCTGGACTCAGGTGA

+  
FFFFFFFFFFFFFFFFFFFFFFFFFFFFFFFFFFFFFFFFFFFFFFFFFFFFFFFFFFFFFFFF  
FFFFFFFFFFFFFFFFFFFFFFFFFFFFFFFFFFFFFFFFFFFFFFFFFFFFFFFFFFFFFFFF  
FFFFFFFFFFFFFFFF

@A00721:190:HGJW7DSXY:4:2626:24062:31234 1:N:0:TCTGCAAG+GCTGCACT  
ATGCGTTATTCGAATATAGTTTTCGAATTAAAGTCTAGATATCCGAACATGTAATTATGTGGGCCTAGA  
GATCTAGCCACAGAGTTTTTCCACTTCTAGATGGACCTTCGAGTATCAGACTCTTGGTCCTGTAAGG  
TCTGGACTCAGGTG

+  
:FFFFFFFFFFFFFFFFFFFFFFFF,FFFF:FFFFFFFFFFFFFFFF:FFFFFFFFFFFFFFFF:F:F:FF  
FFFFFFFFF:FFFFFFFFFFFFFFFF:FFF:FFFFFFFF:FFFFFFFFFFFFFFFF:FFFFF,:F:FFF::FF  
FF:FFF:,FFFFF

@A00721:190:HGJW7DSXY:4:1616:23529:4476 1:N:0:TCTGCAAG+GCTGCACT  
GCGTTATTCGAATATAGTTTTCGAATTAAAGTCTAGATATCCGAACATGTAATTATGTGGGCCTAGAGA  
TCTAGCCACAGAGTTTTTCCACTTCTAGATGGAGCTTCGAGTATCAGACTCTTGGTCCTGTAAGGTC  
TGGACTCAGGTGAGA

+  
FFFFFFFFFFFFFFFFFFFFFFFFFFFFFFFF:FFFFFFFFFFFFFFFF,FFFFFFFFFFFFFFFF,,FFFF  
FFFFFFFFFFFFFFFFFFFFFFFFFFFFFFFF,FFFFFFFFFFFFFFFFFFFFFFFFFFFFFFFF  
FFFFFFFFFFFF:FFFF

@A00721:190:HGJW7DSXY:4:1629:16396:17581 1:N:0:TCTGCAAG+GCTGCACT  
GCGTTATTCGAATATAGTTTTCGAATTAAAGTCTAGATATCCGAACATGTAATTATGTGGGCCTAGAGA



@A00721:190:HGJW7DSXY:4:2458:8874:36088 1:N:0:TCTGCAAG+GCTGCACT  
AATATATTCTCACCTGAGTCCAGACCTTACAGGACCAAGAGTCTGATACTCGAAGGTCCATCTAGAAG  
TGGAAAACTCTGTGGGCTAGATCTCTAGGCCACATAATTACATGTTTCGGATATCTAGACTTTAATT  
CGAACTATATTCGA

[illegible]

+

[illegible]

+

```

FFFFFFFFFFFFFFFFFFFFFFFFFFFFFFFF:FFFFFFFFFFFFFFFFFFFFFFFFFFFFFFFFFFFFFFFF
FFFFFFFFFFFFFFFFFFFFFFFFFFFFFFFF:FFFFFFFFFFFFFFFFFFFFFFFFFFFFFFFFFFFFFFFF
,FFF:FF:FFFFFFFF

```

+

[illegible]

+

[illegible] $+$ 

```

FFFFFFFFFFFFFFFFFFFFFFFFFFFFFFFFFFFFFFFFFFFFFFFFFFFFFFFFFFFFFFFFFFFFFFFFFFFF
FFFFFFFFFFFFFFFFFFFFFF:FFFFFFFFFF:FFFFFFFFFFFFFFFFFF:FFFFFFFFFFFFFFFFFFFFFF:FFFFFFF:FF
FFFF F•F•FFFFFF

```

 $+$ [illegible]



```

FFFFFFFFFFFF:FFFFFFFFFFFFFFFF,FFFFFFFFFFFFFFFFFFFFFFFF:FFFFFFF:FFFFFFF
FF:FFFF:F::FFFFFFFFFFFFFFFFFFFFFFFFFFFFFFFFFFFFFFFF:FFFFFFF:FFFFFFFFFFFFFFFFFFFFFFFF
FFFFFF,FFFF:FFF:

```

[illegible][illegible]

```
FFFFFFFFFFFFFFFF:FFFFFFFFFFFFFFFFFFFFFFFFFFFFFFFFFFFFFFFFFFFFF
FFFFFFFFFFFFFFFFFFFFFFFFFFFFFFFFFF:,FFFFFFFFFFFFFFFFFFFFFFF:FFFFFFFFFFF
FFF:FFFFFFFFFFFF
```

[illegible][illegible][illegible]

@A00721:190:HGJW7DSXY:4:2405:6885:21966 1:N:0:TCTGCAAG+GCTGCACT  
CTAGATATCCGAACATGTAATTATGTGGGCCTAGAGATCTAGCCACAGAGTTTTTCCACTTCTAGAT





@A00721:190:HGJW7DSXY:4:1128:29559:20744 1:N:0:TCTGCAAG+GCTGCACT  
CCGAACATGTAATTATGTGGGCCTAGAGATCTAGCCACAGAGTTTTTCCACTTCTAGATGGACCTTC  
GAGTATCAGACTCTTGGTCCTGTAAGGTCTGGACTCAGGTGAGAATATATTATGGGTCACCCAATACT  
GTAACCTCTGTGGAA

+

FFFFFFFFFFFFFFFFFFFFFFFFFFFFFFFFFFFFFFFFFFFFFFFFFFFFFFFFFFFFFFFFFFFFFFFF  
FFFFFFFFFFFFFFFFFFFFFFFFFFFFFFFFFFFFFFFFFFFFFFFFFFFFFFFFFFFFFFFFFFFFFFFF  
FFFFFFFFFFFFFFFF:

@A00721:190:HGJW7DSXY:4:1170:25753:19413 1:N:0:TCTGCAAG+GCTGCACT  
CCGAACATGTAATTATGTGGGCCTAGAGATCTAGCCACAGAGTTTTTCCACTTCTAGATGGACCTTC  
GAGTATCAGACTCTTGGTCCTGTAAGGTCTGGACTCAGGTGAGAATATATTATGGGTCACCCAATACT  
GTAACCTCTGTGGAA

+

FFFFFFFFFFFFFFFFFFFFFFFFFFFFFFFFFFFFFFFFFFFFFFFFFFFFFFFFFFFFFFFFFFFFFFFF  
FFFFFFFFFFFFFFFFFFFFFFFFFFFFFFFFFFFFFFFFFFFFFFFFFFFFFFFFFFFFFFFFFFFFFFFF  
FFFFFFFFFFFFFFFF

@A00721:190:HGJW7DSXY:4:1248:5547:35994 1:N:0:TCTGCAAG+GCTGCACT  
CCGAACATGTAATTATGTGGGCCTAGAGATCTAGCCACAGAGTTTTTCCACTTCTAGATGGACCTTC  
GAGTATCAGACTCTTGGTCCTGTAAGGTCTGGACTCAGGTGAGAATATATTATGGGTCACCCAATACT  
GTAACCTCTGTGGAA

+

FFFFFFFFFFFF:FFFFFFFFFFFFFFFFFFFFFFFFFFFFFFFFFFFFFFFFFFFFFFFFFFFFFFFFFFFF  
FFFFFFFFFFFFFFFFFFFFFFFFFFFFFFFFFFFFFFFFFFFFFFFFFFFFFFFFFFFFFFFFFFFFFFFF  
FFFFFFFFFFFFFFFF:

@A00721:190:HGJW7DSXY:4:1256:15736:8265 1:N:0:TCTGCAAG+GCTGCACT  
CCGAACATGTAATTATGTGGGCCTAGAGATCTAGCCACAGAGTTTTTCCACTTCTAGATGGACCTTC  
GAGTATCAGACTCTTGGTCCTGTAAGGTCTGGACTCAGGTGAGAATATATTATGGGTCACCCAATACT  
GTAACCTCTGTGGAA

+

FFFFFFFFFFFFFFFFFFFFFFFFFFFF:FFFFFFFFFFFFFFFFFFFFFFFFFFFFFFFFFFFFFFFFFFFF  
FFFFFFFFFFFFFFFFFFFFFFFFFFFFFFFFFFFFFFFFFFFFFFFFFFFFFFFFFFFFFFFFFFFFFFFF  
FFFFFFFFFFFFFFFF:

@A00721:190:HGJW7DSXY:4:1258:29387:23891 1:N:0:TCTGCAAG+GCTGCACT  
CCGAACATGTAATTATGTGGGCCTAGAGATCTAGCCACAGAGTTTTTCCACTTCTAGATGGACCTTC  
GAGTATCAGACTCTTGGTCCTGTAAGGTCTGGACTCAGGTGAGAATATATTATGGGTCACCCAATACT  
GTAACCTCTGTGGAA

+

FFFFFFFFFFFF:FFFFFFFFFFFFFFFFFFFFFFFFFFFFFFFFFFFFFFFFFFFFFFFFFFFFFFFFFFFF  
FFFFFFFFFFFFFFFFFFFFFFFFFFFFFFFFFFFFFFFFFFFFFFFFFFFFFFFFFFFFFFFFFFFFFFFF  
FFFFFFFFFFFFFFFF

@A00721:190:HGJW7DSXY:4:1262:29432:21371 1:N:0:TCTGCAAG+GCTGCACT  
CCGAACATGTAATTATGTGGGCCTAGAGATCTAGCCACAGAGTTTTTCCACTTCTAGATGGACCTTC  
GAGTATCAGACTCTTGGTCCTGTAAGGTCTGGACTCAGGTGAGAATATATTATGGGTCACCCAATACT  
GTAACCTCTGTGGAA

+

FF:FF:F:F,FFFF:F:FFF:FFFF,FFFFFFFFFFFFFFFFFFFF::FF:F,FFF:FFFF:F::FFF,FF  
FF:FFFFFFFFFFFFFFFFFFFFFFFF,FF:FFFF:FFFFFFFFFFFFF:,FFF::FFF:FF,,FFF  
:,FF:,,FFF::,FF

@A00721:190:HGJW7DSXY:4:1306:8766:13542 1:N:0:TCTGCAAG+GCTGCACT  
CCGAACATGTAATTATGTGGGCCTAGAGATCTAGCCACAGAGTTTTTCCACTTCTAGATGGACCTTC  
GAGTATCAGACTCTTGGTCCTGTAAGGTCTGGACTCAGGTGAGAATATATTATGGGTCACCCAATACT  
GTAACCTCTGTGGA

+

FFFFFFFFFFFF,FFFFFFFFFFFF:FFFFFFFFFFFFFFFFFFFFFFFFFFFFFFFFFFFFFFFFFFFF



+  
FFFFFFFFFFFFFFFFFFFFFFFFFFFFFFFFFFFFFFFFFFFFFFFFFFFFFFFFFFFFFFFFFFFFFFFF  
FFFFFFFFFFFFFFFFFFFFFFFFFFFFFFFFFFFFFFFFFFFFFFFFFFFFFFFFFFFFFFFFFFFFFFFF:FFFFFFFFFFFFFFF  
FFFFFFFFFFFFFFF:FF

@A00721:190:HGJW7DSXY:4:1575:17309:28025 1:N:0:TCTGCAAG+GCTGCACT  
CCGAACATGTAATTATGTGGGCCTAGAGATCTAGCCACAGAGTTTTTCCACTTCTAGATGGACCTTC  
GAGTATCAGACTCTTGGTCCTGTAAGGTCTGGACTCAGGTGAGAATATATTATGGGTACCCCAATACT  
GTAACCTCTGTGGA

+  
FFFFFFFFFFFFFFFFFFFFFFFFFFFFFFFFFFFFFFFFFFFFFFFFFFFFFFFFFFFFFFFFFFFFFFFF:FFFFFFFFFFFFFFF,FFFFFFF  
FFFFFFFFFFFFFFFFFFFFFFFFFFFFFFFFFFFFFFFFFFFFFFFFFFFFFFFFFFFFFFFFFFFFFFFF:FFFFFFFFFFFFFFF:FFFFFFFFFFFFFFF  
F:FFFFFFFFFFFFFFF

@A00721:190:HGJW7DSXY:4:1604:15501:11741 1:N:0:TCTGCAAG+GCTGCACT  
CCGAACATGTAATTATGTGGGCCTAGAGATCTAGCCACAGAGTTTTTCCACTTCTAGATGGACCTTC  
GAGTATCAGACTCTTGGTCCTGTAAGGTCTGGACTCAGGTGAGAATATATTATGGGTACCCCAATACT  
GTAACCTCTGTGGA

+  
FFFFFFF,FFFFFFFFFFFFFFFFFFFFFFFFFFFFFFFFFFFFFFFFFFFFFFFFFFFFFFFFFFFFFFFFFFFFFFFF  
FFFFFFFFFFFFFFFFFFFFFFFFFFFFFFFFFFFFFFFFFFFFFFFFFFFFFFFFFFFFFFFFFFFFFFFF:FFF:FFFFFFFFFFFFFFF:FF  
FFFFFFFFFFFFFFF:

@A00721:190:HGJW7DSXY:4:2111:30183:23328 1:N:0:TCTGCAAG+GCTGCACT  
CCGAACATGTAATTATGTGGGCCTAGAGATCTAGCCACAGAGTTTTTCCACTTCTAGATGGACCTTC  
GAGTATCAGACTCTTGGTCCTGTAAGGTCTGGACTCAGGTGAGAATATATTATGGGTACCCCAATACT  
GTAACCTCTGTGGA

+  
F:FFFF:F:FFFFFF,FFFFFFFFFFFFFFFFFFFFFFFFFFFFFFFFFFFFFFFFFFFFFFFFFFFFFFFFFFFFFFFF:FFFFFFF:FFFFFFFFFFFFFFF::F  
FFFFFFFFFFFFFFFFFFFFFFFFFFFFFFFFFFFFFFFFFFFFFFFFFFFFFFFFFFFFFFFFFFFFFFFF:,,FF,F::FFFFFFFF  
FFFFFFFF:FFF,:FFF

@A00721:190:HGJW7DSXY:4:2143:15293:15608 1:N:0:TCTGCAAG+GCTGCACT  
CCGAACATGTAATTATGTGGGCCTAGAGATCTAGCCACAGAGTTTTTCCACTTCTAGATGGACCTTC  
GAGTATCAGACTCTTGGTCCTGTAAGGTCTGGACTCAGGTGAGAATATATTATGGGTACCCCAATACT  
GTAACCTCTGTGGA

+  
FFFFFFFFFFFFFFFFFFFFFFFFFFFFFFFFFFFFFFFFFFFFFFFFFFFFFFFFFFFFFFFFFFFFFFFF  
FFFFFFFFFFFFFFFFFFFFFFFFFFFFFFFFFFFFFFFFFFFFFFFFFFFFFFFFFFFFFFFFFFFFFFFF:FFFFFFF:FFF:FFFFFFFF  
FFF:FFFFFFFFFFFF:

@A00721:190:HGJW7DSXY:4:2145:27100:31892 1:N:0:TCTGCAAG+GCTGCACT  
CCGAACATGTAATTATGTGGGCCTAGAGATCTAGCCACAGAGTTTTTCCACTTCTAGATGGACCTTC  
GAGTATCAGACTCTTGGTCCTGTAAGGTCTGGACTCAGGTGAGAATATATTATGGGTACCCCAATACT  
GTAACCTCTGTGGA

+  
FFFFFFFFFFFFFFFFFFFFFFFFFFFFFFFFFFFFFFFFFFFFFFFFFFFFFFFFFFFFFFFFFFFFFFFF:FFFFFFFFFFFFFFF  
FFFFFFFFFFFFFFF:FFFFFFFFFFFFFFFFFFFFFFFFFFFFFFFFFFFFFFFFFFFFFFFFFFFFFFFFFFFFFFFF:FFFFFFFFFFFF,:F:  
FFFFFFFFFFFFFFF

@A00721:190:HGJW7DSXY:4:2161:8305:27774 1:N:0:TCTGCAAG+GCTGCACT  
CCGAACATGTAATTATGTGGGCCTAGAGATCTAGCCACAGAGTTTTTCCACTTCTAGATGGACCTTC  
GAGTATCAGACTCTTGGTCCTGTAAGGTCTGGACTCAGGTGAGAATATATTATGGGTACCCCAATACT  
GTAACCTCTGTGGA

+  
FFFFFFFFFFFFFFFFFFFFFFFFFFFFFFFFFFFFFFFFFFFFFFFFFFFFFFFFFFFFFFFFFFFFFFFF  
FFFFFFFFFFFFFFFFFFFFFFFFFFFFFFFFFFFFFFFFFFFFFFFFFFFFFFFFFFFFFFFFFFFFFFFF  
FFFFFFFFFFFFFFF:F:

@A00721:190:HGJW7DSXY:4:2201:6840:27430 1:N:0:TCTGCAAG+GCTGCACT  
CCGAACATGTAATTATGTGGGCCTAGAGATCTAGCCACAGAGTTTTTCCACTTCTAGATGGACCTTC



@A00721:190:HGJW7DSXY:4:2454:21866:3881 1:N:0:TCTGCAAG+GCTGCACT  
CCGAACATGTAATTATGTGGGCCTAGAGATCTAGCCACAGAGTTTTTCCACTTCTAGATGGACCTTC  
GAGTATCAGACTCTTGGTCCTGTAAGGTCTGGACTCAGGTGAGAATATATTATGGGTACCCAATACT  
GTAACCTTGTGGAA

+

:FF:FFF:FFFFFFFF:F:,FFFFFFFFFFFF,F:FFFFFFFFFFFFFFFF:FFFFFF:FFFFFFF  
,FFFFFFFFFFFF,FF:FFF:FFFFFFFF,FF:FF:FF,FFFFFFFFFFFF:FF:FFFFFFFFFFFF,FFFFFF  
F,FFF:F:FFF::FF

@A00721:190:HGJW7DSXY:4:2545:23909:20697 1:N:0:TCTGCAAG+GCTGCACT  
CCGAACATGTAATTATGTGGGCCTAGAGATCTAGCCACAGAGTTTTTCCACTTCTAGATGGACCTTC  
GAGTATCAGACTCTTGGTCCTGTAAGGTCTGGACTCAGGTGAGAATATATTATGGGTACCCAATACT  
GTAACCTTGTGGAA

+

FFFFFFFF:FFFFFFFFFFFFFFFFFFFFFFFFFFFFFFFFFFFFFFFFFFFFFFFFFFFFFFFFFFFFFFFF  
FFFFFFFFFFFFFFFFFFFFFFFFFFFFFFFFFFFFFFFFFFFFFFFFFFFFFFFFFFFFFFFFFFFFFFFFFFFF,FFFFFFFFFFFFFFFFFFFFFFFFFFFFFFFF  
FFFFFFFFFFFFFFFFFFFF

@A00721:190:HGJW7DSXY:4:2553:4209:14888 1:N:0:TCTGCAAG+GCTGCACT  
CCGAACATGTAATTATGTGGGCCTAGAGATCTAGCCACAGAGTTTTTCCACTTCTAGATGGACCTTC  
GAGTATCAGACTCTTGGTCCTGTAAGGTCTGGACTCAGGTGAGAATATATTATGGGTACCCAATACT  
GTAACCTTGTGGAA

+

FFFFFFFF:FFFFFFFFFFFFFFFFFFFFFFFFFFFFFFFFFFFFFFFFFFFFFFFFFFFFFFFFFFFFFFFF  
FFFFFFFFFFFFFFFFFFFFFFFFFFFFFFFFFFFFFFFFFFFFFFFFFFFFFFFFFFFFFFFFFFFFFFFFFFFF:FFFFFFF  
FFFFFFFFFFFFFFFFFFFF

@A00721:190:HGJW7DSXY:4:2556:26268:29262 1:N:0:TCTGCAAG+GCTGCACT  
CCGAACATGTAATTATGTGGGCCTAGAGATCTAGCCACAGAGTTTTTCCACTTCTAGATGGACCTTC  
GAGTATCAGACTCTTGGTCCTGTAAGGTCTGGACTCAGGTGAGAATATATTATGGGTACCCAATACT  
GTAACCTTGTGGAA

+

FFFFFFFFFFFF:FFFFFFFFFFFFFFFFFFFFFFFFFFFFFFFFFFFFFFFFFFFFFFFFFFFFFFFFFFFF  
FFFFFFFFFFFFFFFFFFFFFFFFFFFFFFFFFFFFFFFFFFFFFFFFFFFFFFFFFFFFFFFFFFFFFFFFFFFF:FFFFF:FFFF:FFFFFFF,FFFF  
FFFFFFFFFFFFFFFFFFFF

@A00721:190:HGJW7DSXY:4:2578:7979:13056 1:N:0:TCTGCAAG+GCTGCACT  
CCGAACATGTAATTATGTGGGCCTAGAGATCTAGCCACAGAGTTTTTCCACTTCTAGATGGACCTTC  
GAGTATCAGACTCTTGGTCCTGTAAGGTCTGGACTCAGGTGAGAATATATTATGGGTACCCAATACT  
GTAACCTTGTGGAA

+

FFFFFFF,FFFFF,F:FFFFFFFFFFFFFFFF:FFFFFFFFFFFFFFFF:FFFFFFFFFFFFFFFFFFFFFFFF  
FFFFFFFFF:FF:FFFFF:FFF:FFFFFFFFFFFFFFFFFFFFFFFFFFFFFFFF:FFFFFFFFFFFFFFFFFFFFFFFF  
:FFFFFFFFFFFF:F:

@A00721:190:HGJW7DSXY:4:2616:12590:18975 1:N:0:TCTGCAAG+GCTGCACT  
CCGAACATGTAATTATGTGGGCCTAGAGATCTAGCCACAGAGTTTTTCCACTTCTAGATGGACCTTC  
GAGTATCAGACTCTTGGTCCTGTAAGGTCTGGACTCAGGTGAGAATATATTATGGGTACCCAATACT  
GTAACCTTGTGGAA

+

FFFFFFFFFFFFFFFFFFFFFFFFFFFFFFFFFFFFFFFFFFFFFFFFFFFFFFFFFFFFFFFFFFFFFFFF  
FFFFFFFFFFFFFFFFFFFFFFFFFFFFFFFFFFFFFFFFFFFFFFFFFFFFFFFFFFFFFFFFFFFFFFFFFFFF  
FFFFFFFFFFFFFFFFFFFF

@A00721:190:HGJW7DSXY:4:2628:9299:9173 1:N:0:TCTGCAAG+GCTGCACT  
CCGAACATGTAATTATGTGGGCCTAGAGATCTAGCCACAGAGTTTTTCCACTTCTAGATGGACCTTC  
GAGTATCAGACTCTTGGTCCTGTAAGGTCTGGACTCAGGTGAGAATATATTATGGGTACCCAATACT  
GTAACCTTGTGGAA

+

FFFFFFF:FFFFFFFFFFFFFFFFFFFF:FFFFFFF:FFFFFFFFFFFFFFFFFFFFFFFFFFFFFFFFFFFF

@A00721:190:HGJW7DSXY:4:2647:25735:17691 1:N:0:TCTGCAAG+GCTGCACT  
CCGAACATGTAATTATGTGGGCCTAGAGATCTAGCCACAGAGTTTTTCCACTTCTAGATGGACCTTC  
GAGTATCAGACTCTTGGTCCTGTAAGGTCTGGACTCAGGTGAGAATATATTATGGGTCACCCAATACT  
GTA ACTCTTGTGGAA

@A00721:190:HGJW7DSXY:4:2658:23665:21339 1:N:0:TCTGCAAG+GCTGCACT  
CCGAACATGTAATTATGTGGGCCTAGAGATCTAGCCACAGAGTTTTTCCACTTCTAGATGGACCTTC  
GAGTATCAGACTCTTGGTCTGTAAAGTCTGGACTCAGGTGAGAATATATTATGGGTCACCCAATACT  
GTAACCTCTTGTGGA

@A00721:190:HGJW7DSXY:4:2663:3287:13354 1:N:0:TCTGCAAG+GCTGCACT  
CCGAACATGTAATTATGTGGGCCTAGAGATCTAGCCACAGAGTTTTTCCACTTCTAGATGGACCTTC  
GAGTATCAGACTCTTGGTCCTGTAAGGTCTGGACTCAGGTGAGAATATATTATGGGTCACCCAATACT  
GTAACCTCTTGTGGAA

@A00721:190:HGJW7DSXY:4:2663:12210:21198 1:N:0:TCTGCAAG+GCTGCACT  
CCGAACATGTAATTATGTGGGCCTAGAGATCTAGCCACAGAGTTTTTCCACTTCTAGATGGACCTTC  
GAGTATCAGACTCTTGGTCCTGTAAGGTCTGGACTCAGGTGAGAATATATTATGGGTCACCCAATACT  
GTAACCTCTTGTGGAA

@A00721:190:HGJW7DSXY:4:1108:2184:30295 1:N:0:TCTGCAAG+GCTGCACT  
CGAACATGTAATTATGTGGGCCTAGAGATCTAGCCACAGAGTTTTTCCACTTCTAGATGGACCTTCG  
AGTATCAGACTCTTGGTCCTGTAAGGTCTGGACTCAGGTGAGAATATATTATGGGTCACCCAATACTG  
TAACTCTTGTGGAAC

@A00721:190:HGJW7DSXY:4:1155:4942:28087 1:N:0:TCTGCAAG+GCTGCACT  
CGAACATGTAATTATGTGGGCCTAGAGATCTAGCCACAGAGTTTTTCCACTTCTAGATGGACCTTCG  
AGTATCAGACTCTTGGTCCTGTAAGGTCTGGACTCAGGTGAGAATATATTATGGGTCACCCAATACTG  
TAACTCTTGTGGAAC

@A00721:190:HGJW7DSXY:4:1155:5367:28385 1:N:0:TCTGCAAG+GCTGCACT  
CGAACATGTAATTATGTGGGCCTAGAGATCTAGCCACAGAGTTTTTCCACTTCTAGATGGACCTTCG  
AGTATCAGACTCTTGGTCCTGTAAGGTCTGGACTCAGGTGAGAATATATTATGGGTCACCCAATACTG  
TAACTCTTGTGGAAC

```
FFFF:F,FFFFFFFFFFFFFFFFFFFFFFFFFFFFFFFFFFFFFFFFFFFFFFFFFFFFFFFFFFFFFFFF:FFFFFFFFFFFFFFF
FFFFFFFFFFFFFFFFFFFFFFFFFFFFFFFFFFFFFFFFFFFFFFFFFFFFFFFFFFFFFFFF:FFFFFFFFFFFF:FFFFFFFFFFFF:FFF
FFFFFFFFFFFFFFFF:F
```

[illegible][illegible][illegible][illegible][illegible][illegible]

@A00721:190:HGJW7DSXY:4:1450:1380:35321 1:N:0:TCTGCAAG+GCTGCACT  
CGAACATGTAATTATGTGGGCCTAGAGATCTAGCCCACAGAGTTTTTCCACTTCTAGATGGACCTTCG

AGTATCAGACTCTTGGTCTGTAAGGTCTGGACTCAGGTGAGAATATATTATGGGTCACCCAATACTG  
TAACTCTTGTGGAAC

[illegible] $+$ [illegible] $+$ [illegible] $+$ 

```

FFFFFFFF:F:FFFFFF:FFFFFFFF:FFFFFFFFFFFFFFFFFFFFFFFFFFFFFFFF:FFFF:FFFFFFFFFFFF
FFFFFFFFFFFFFFFFFFFFFFFF:FFFFFFFFFFFFFFFFFFFFFFFF:FFFFFFFFFFFFFFFFFFFFFFFFFFFF
FFF:;FFFFFFFFFFFF

```

+

[illegible]

+

[illegible]

+

[illegible]



@A00721:190:HGJW7DSXY:4:2151:21649:28526 1:N:0:TCTGCAAG+GCTGCACT  
CGAACATGTAATTATGTGGGCCTAGAGATCTAGCCCACAGAGTTTTTCCACTTCTAGATGGACCTTCG  
AGTATCAGACTCTTGGTCCTGTAAGGTCTGGACTCAGGTGAGAATATATTATGGGTCACCCAATACTG  
TAACTCTTGTGGAAC

@A00721:190:HGJW7DSXY:4:2221:11668:5196 1:N:0:TCTGCAAG+GCTGCACT  
CGAACATGTAATTATGTGGGCCTAGAGATCTAGCCACAGAGTTTTTCCACTTCTAGATGGACCTTCG  
AGTATCAGACTCTTGGTCCTGTAAGGTCTGGACTCAGGTGAGAATATATTATGGGTCAACCAATACTG  
TAACTCTTGTGGAAC

@A00721:190:HGJW7DSXY:4:2302:8802:22341 1:N:0:TCTGCAAG+GCTGCACT  
CGAACATGTAATTATGTGGGCCTAGAGATCTAGCCCACAGAGTTTTTCCACTTCTAGATGGACCTTCG  
AGTATCAGACTCTTGGTCCTGTAAGGTCTGGACTCAGGTGAGAATATATTATGGGTCAACCAATACTG  
TAACTCTTGTGGAAC

@A00721:190:HGJW7DSXY:4:2302:8856:22341 1:N:0:TCTGCAAG+GCTGCACT  
CGAACATGTAATTATGTGGGCCTAGAGATCTAGCCCACAGAGTTTTTCCACTTCTAGATGGACCTTCG  
AGTATCAGACTCTTGGTCCTGTAAGGTCTGGACTCAGGTGAGAATATATTATGGGTCACCCAATACTG  
TAACTCTTGTGGAAC

@A00721:190:HGJW7DSXY:4:2337:19090:31861 1:N:0:TCTGCAAG+GCTGCACT  
CGAACATGTAATTATGTGGGCCTAGAGATCTAGCCCACAGAGTTTTTCCACTTCTAGATGGACCTTCG  
AGTATCAGACTCTTGGTCCTGTAAGGTCTGGACTCAGGTGAGAATATATTATGGGTCAACCAATACTG  
TAACTCTTGTGGAAC

@A00721:190:HGJW7DSXY:4:2442:11035:8140 1:N:0:TCTGCAAG+GCTGCACT  
CGAACATGTAATTATGTGGGCCTAGAGATCTAGCCCACAGAGTTTTTCCACTTCTAGATGGACCTTCG  
AGTATCAGACTCTTGGTCCTGTAAGGTCTGGACTCAGGTGAGAATATATTATGGGTCACCCAATACTG  
TAACTCTTGTGGAAC

@A00721:190:HGJW7DSXY:4:2624:23439:31093 1:N:0:TCTGCAAG+GCTGCACT  
CGAACATGTAATTATGTGGGCCTAGAGATCTAGCCACAGAGTTTTTCCACTTCTAGATGGACCTTCG  
AGTATCAGACTCTTGGTCCTGTAAGGTCTGGACTCAGGTGAGAATATATTATGGGTCACCCAATACTG  
TAACTCTTGTGGAAC

FFFFFFFFFFFFFFFFFFFFFFFFFFFFFFFFFFFFFFFFFFFFFFFFFFFFFFFFFFFFFFFFFFFFFFFF  
FFFFFFFF:FFFF

@A00721:190:HGJW7DSXY:4:1443:7048:34240 1:N:0:TCTGCAAG+GCTGCACT  
ATGTGGGCCTAGAGATCTAGCCACAGAGTTTTTCCACTTCTAGATGGACCTTCGAGTATCAGACTCT  
TGGTCCTGTAAGGTCTGGACTCAGGTGAGAATATATTATGGGTCACCCAATACTGTAACCTTTGTGGA  
ACAACGAATGATTG

+  
FFFFFFFF,FFFFFFFFFFFFFFFFFFFFFFFFFFFFFFFFFFFFFFFFFFFFFFFFFFFFFFFFFFFF  
FFFFFFFFFFFFFFFFFFFFFFFFFFFFFFFFFFFFFFFFFFFFFFFFFFFFFFFFFFFFFFFF:FFFFFFFFFFFFFFFF  
:FFFFFFFF

@A00721:190:HGJW7DSXY:4:2335:6650:32487 1:N:0:TCTGCAAG+GCTGCACT  
ATGTGGGCCTAGAGATCTAGCCACAGAGTTTTTCCACTTCTAGATGGACCTTCGAGTATCAGACTCT  
TGGTCCTGTAAGGTCTGGACTCAGGTGAGAATATATTATGGGTCACCCAATACTGTAACCTTTGTGGA  
ACAACGAATGATTG

+  
FFFFFFFF,FFFFFFFFFFFFFFFFFFFFFFFFFFFFFFFFFFFFFFFFFFFFFFFFFFFFFFFFFFFF  
FFFFFFFFFFFFFFFFFFFFFFFFFFFFFFFFFFFFFFFFFFFFFFFFFFFFFFFFFFFFFFFF:FFFFFFFFFFFFFFFF  
FFFFFFFF

@A00721:190:HGJW7DSXY:4:2337:30563:13526 1:N:0:TCTGCAAG+GCTGCACT  
ATGTGGGCCTAGAGATCTAGCCACAGAGTTTTTCCACTTCTAGATGGACCTTCGAGTATCAGACTCT  
TGGTCCTGTAAGGTCTGGACTCAGGTGAGAATATATTATGGGTCACCCAATACTGTAACCTTTGTGGA  
ACAACGAATGATTG

+  
FFFFFFFFFFFFFFFFFFFFFFFFFFFFFFFFFFFFFFFFFFFFFFFFFFFFFFFFFFFFFFFFFFFF  
FFFFFFFFFFFFFFFFFFFFFFFFFFFFFFFFFFFFFFFFFFFFFFFFFFFFFFFFFFFFFFFF:FFFFFFFFFFFFFFFF  
FFFFFFFF

@A00721:190:HGJW7DSXY:4:2347:1705:21136 1:N:0:TCTGCAAG+GCTGCACT  
ATGTGGGCCTAGAGATCTAGCCACAGAGTTTTTCCACTTCTAGATGGACCTTCGAGTATCAGACTCT  
TGGTCCTGTAAGGTCTGGACTCAGGTGAGAATATATTATGGGTCACCCAATACTGTAACCTTTGTGGA  
ACAACGAATGATTG

+  
FFFFFFFF,,FFFFFFFFFFFFFFFFFFFFFFFFFFFFFFFFFFFFFFFFFFFFFFFFFFFFFFFFFFFF:  
FFFFFFFFFFFFFFFFFFFFFFFFFFFFFFFFFFFFFFFFFFFFFFFFFFFFFFFFFFFFFFFF:FFFFFFFFFFFFFFFF  
:FFFFF:FFFFF

@A00721:190:HGJW7DSXY:4:2432:25798:20400 1:N:0:TCTGCAAG+GCTGCACT  
ATGTGGGCCTAGAGATCTAGCCACAGAGTTTTTCCACTTCTAGATGGACCTTCGAGTATCAGACTCT  
TGGTCCTGTAAGGTCTGGACTCAGGTGAGAATATATTATGGGTCACCCAATACTGTAACCTTTGTGGA  
ACAACGAATGATTG

+  
FFFFFFFF:FFFFFFFFFFFFFFFFFFFFFFFFFFFFFFFFFFFFFFFFFFFFFFFFFFFFFFFFFFFF  
FFFFFFFFFFFFFFFFFFFFFFFFFFFFFFFFFFFFFFFFFFFFFFFFFFFFFFFFFFFFFFFF:FFFFFFFFFFFFFFFF  
FFFFFFFF:

@A00721:190:HGJW7DSXY:4:2528:2338:31407 1:N:0:TCTGCAAG+GCTGCACT  
ATGTGGGCCTAGAGATCTAGCCACAGAGTTTTTCCACTTCTAGATGGACCTTCGAGTATCAGACTCT  
TGGTCCTGTAAGGTCTGGACTCAGGTGAGAATATATTATGGGTCACCCAATACTGTAACCTTTGTGGA  
ACAACGAATGATTG

+  
FFFFFFFF:FFFFFFFFFFFFFFFFFFFFFFFFFFFFFFFFFFFFFFFFFFFFFFFFFFFFFFFFFFFF  
FFFFF:FFFFFFFFFFFFFFFFFFFFFFFFFFFFFFFFFFFFFFFFFFFFFFFFFFFFFFFFFFFFFFFF:FFFFF  
FFFFFFFF:

@A00721:190:HGJW7DSXY:4:1411:24270:23422 1:N:0:TCTGCAAG+GCTGCACT  
GTTTCGATCCACAATCATTCGTTGTTCCACAAGAGTTACAGTATTGGGTGACCCATAATATATTCTCAC  
CTGAGTCCAGACCTTACAGGACCAAGAGTCTGATACTCGAAGGTCCATCTAGAAGTGGAACCTCTG  
TGGCTAGATCTCTA

+  
FFFFFFFFFFFFFFFFFFFFFFFFFFFFFFFFFFFFFFFFFFFFFFFFFFFFFFFFFFFFFFFFFFFFFFFF  
FFFFFFFFFFFFFF:FFFFFFFFFFFFFFFFFFFFFFFF:FFF:FFFFFFFFFFFFFFFFFFFFFF,FFFFFF  
FFFFFFFF:FFFFF  
@A00721:190:HGJW7DSXY:4:1439:1316:19680 1:N:0:TCTGCAAG+GCTGCACT  
GCCGTTTCGATCCACAATCATTCGTTGTTCCACAAGAGTTACAGTATTGGGTGACCCATAATATATTCT  
CACCTGAGTCCAGACCTTACAGGACCAAGAGTCTGATACTCGAAGGTCCATCTAGAAGTGAAAAACT  
CTGTGGGCTAGATCT  
+  
:F,F:FFFFFF:F:F:F:FFFF,:FFFFFFFFF,:F,FFFF,FF,:FFF:FFF,F:FFFFFFFFF  
:FFF:FFF:FFFF:FFFFFF,F:FFFF:FFFFFFFFFFFF::FFFF:FFFFFF:FFF:FF:FFF:  
FF,F,FFFFFFFF:F  
@A00721:190:HGJW7DSXY:4:1518:3983:8672 1:N:0:TCTGCAAG+GCTGCACT  
GCCGTTTCGATCCACAATCATTCGTTGTTCCACAAGAGTTACAGTATTGGGTGACCCATAATATATTCT  
CACCTGAGTCCAGACCTTACAGGACCAAGAGTCTGATACTCGAAGGTCCATCTAGAAGTGAAAAACT  
CTGTGGGCTAGATCT  
+  
FFFFFFFFFFFFFFFFFFFFFFFFFFFFFFFFFFFFFFFF:FFFFFFFFFFFFFFFFFFFFFFFFFFFFFFF  
FFFFFFFFFFFFFFFFFFFFFFFFFFFFFFFFFFFFFFFFFFFFFFFFFFFFFFFFFFFFFFFFFFFFFFF  
FFFFFFFFFFFFFFFFF  
@A00721:190:HGJW7DSXY:4:2309:10583:34225 1:N:0:TCTGCAAG+GCTGCACT  
GCCGTTTCGATCCACAATCATTCGTTGTTCCACAAGAGTTACAGTATTGGGTGACCCATAATATATTCT  
CACCTGAGTCCAGACCTTACAGGACCAAGAGTCTGATACTCGAAGGTCCATCTAGAAGTGAAAAACT  
CTGTGGGCTAGATCT  
+  
FFFFFFFFFFFFFFFFFFFFFFFFFFFFFFFFFFFFFFFF:FFFFFFFFFFFFFFFFFFFFFFFFFFFFFFF  
FFFFFFFFFFFFFFFFFFFFFFFFFFFFFFFFFFFFFFFFFFFFFFFFFFFFFFFFFFFFFFFFFFFFFFF  
FFFFFFFFFFFFFFFFF  
@A00721:190:HGJW7DSXY:4:1128:11903:2159 1:N:0:TCTGCAAG+GCTGCACT  
CCCACAGAGTTTTTCCACTTCTAGATGGACCTTCGAGTATCAGACTCTTGGTCCTGTAAGGTCTGGAC  
TCAGGTGAGAATATATTATGGGTACCCAATACTGTAACCTTTGTGGAACAACGAATGATTGTGGATC  
GAACGGCGATAGATA  
+  
FFFFFFFFFFFFFFFFFFFFFFFFFFFFFFFFFFFFFFFFFFFFFFFFFFFFFFFFFFFFFFFFFFFFFF:F:FFFFFFFFF  
FFFFFFFFFFFFFFFFFFFFFFFFFFFFFFFFFFFFFFFFFFFFFFFFFFFFFFFFFFFFFFFFFFFFFFF  
FFFFFFFFFFFFFFFFF  
@A00721:190:HGJW7DSXY:4:1144:23619:2033 1:N:0:TCTGCAAG+GCTGCACT  
CCCACAGAGTTTTTCCACTTCTAGATGGACCTTCGAGTATCAGACTCTTGGTCCTGTAAGGTCTGGAC  
TCAGGTGAGAATATATTATGGGTACCCAATACTGTAACCTTTGTGGAACAACGAATGATTGTGGATC  
GAACGGCGATAGATA  
+  
FFFFFFFFFFFFFFFFFFFFFF:FFFFFFFFFFFFFFFFFFFFFFFFFFFFFFFFFFFFFFFFFFFFFFFFF  
FFFFFFFFFFFFFFFFFFFFFFFFFFFFFFFFFFFFFFFFFFFFFFFFFFFFFFFFFFFFFFFFFFFFFFF  
FFFFFFFFFFFFFFFFF  
@A00721:190:HGJW7DSXY:4:1425:26838:3599 1:N:0:TCTGCAAG+GCTGCACT  
CCCACAGAGTTTTTCCACTTCTAGATGGACCTTCGAGTATCAGACTCTTGGTCCTGTAAGGTCTGGAC  
TCAGGTGAGAATATATTATGGGTACCCAATACTGTAACCTTTGTGGAACAACGAATGATTGTGGATC  
GAACGGCGATAGATA  
+  
FFF,FFFFFFFFFFFFFF:FFFFFFFFF:FFFFFFFFFFFFFFFFFFFFFFFFFFFFFFFFFFFFFF:FFFFF:FF  
,FFF:FFFFFFFFFFFFFF:F,FFFF:FFFF,F:FFFFFFFFFFFFFFFFFFFFFFFFFFFFFFFFF  
FF:FFFFFFFFFFFFF  
@A00721:190:HGJW7DSXY:4:1641:12798:18490 1:N:0:TCTGCAAG+GCTGCACT  
CCCACAGAGTTTTTCCACTTCTAGATGGACCTTCGAGTATCAGACTCTTGGTCCTGTAAGGTCTGGAC



@A00721:190:HGJW7DSXY:4:1676:16396:32988 1:N:0:TCTGCAAG+GCTGCACT  
CACTTCTAGATGGACCTTCGAGTATCAGACTCTTGGTCCTGTAAGGTCTGGACTCAGGTGAGAATATA  
TTATGGGTCACCCAATACTGTAACCTCTTGTGGAACAACGAATGATTGTGGATCGAACGGCGATAGATA  
TTCTTGTATTGGTTC

```

FFFFFFFFFFFFFFFFFFFFFFFFFFFFFFFF:FFFFFFFFFFFF:FFFFFFFFFFFFFFFFFFFFFFFFFFFF
FFFFFFFFFFFFFFFFFFFFFFFFFFFFFFFF:FFFFFFFFFFFF:FFFFFFFFFFFFFFFFFFFFFFFFFFFF
:FF,FFFFFFFFFFFF

```

@A00721:190:HGJW7DSXY:4:2212:4227:7091 1:N:0:TCTGCAAG+GCTGCACT  
CACTTCTAGATGGACCTTCGAGTATCAGACTCTTGGTCCTGTAAGGTCTGGACTCAGGTGAGAATATA  
TTATGGGTCACCCAATACTGTAACCTCTTGTGGAACAACGAATGATTGTGGATCGAACGGCGATAGATA  
TTCTTGTATTGGTTC

```
FFFFFFFFFFFFFFFFFFFFFFFFFFFFFFFFFFFFFFFFFFFFFFFFFFFFFFFFFFFFFFF
FFFFFFFFFFFFFFFFFFFFFFFFFFFFFFFFFFFF,FFFFFFFFFFFFFFFFFFFFFFFFFFFF
FFFFFFFFFFFFFFFF
```

@A00721:190:HGJW7DSXY:4:2654:22670:13009 1:N:0:TCTGCAAG+GCTGCACT  
CACTTCTAGATGGACCTTCGAGTATCAGACTCTTGGTCCTGTAAGGTCTGGACTCAGGTGAGAATATA  
TTATGGGTCACCCAATACTGTAACCTCTTGTGGAACAACGAATGATTGTGGATCGAACGGCGATAGATA  
TTCTTGTATTGGTTC

```
FFFFFFFFFFFFFFFFFFFFFFFFFFFFFFFFFFFFFFFFFFFFFFFFFFFFFFFFFFFFFFF
FFFFFFFFFFFFFFFFFFFFFFFFFFFFFFFFFFFF:F:FFFFFFFFFFFFFFFFFFFFFFFFF
FF:FFFFFFFFFFFFFF
```

@A00721:190:HGJW7DSXY:4:1176:4237:26334 1:N:0:TCTGCAAG+GCTGCACT  
AGTCCTGTAAGGTCTGGACTCAGGTGAGAATATATTATGGGTCACCCAATACTGTAACCTTTGTGGAA  
CAACGAATGATTGTGGATCGAACGGCGATAGATATTCTTGTATTGGTTCTGGAAATAATCTATCTGCA  
TTTGCAGATATGTTG

```

FFFFFFFFFFFFFFFFFFFFFFFF,FFFFFFFFFFFFFFFFFFFFFFFFFFFFFFFF:FFFFFFFFFFFF
FFFFFFFFFFFFFFFFFFFFFFFFFFFFFFFF:FFFFFFF,FFFF:FFFFFFFFFFFFFFFFFFFFFFFF
FFFFFFFFFFFFFFFF,FF

```

@A00721:190:HGJW7DSXY:4:1370:32931:22075 1:N:0:TCTGCAAG+GCTGCACT  
AGTCCTGTAAGGTCTGGACTCAGGTGAGAATATATTATGGGTCACCCAATACTGTAACCTTTGTGGAA  
CAACGAATGATTGTGGATCGAACGGCGATAGATATTCTTGTATTGGTTCTGGAAATAATCTATCTGCA  
TTTGCAGATATGTTG

```

FFFFFFFFFFFFFF:FFFF:FFFFFFFFFFFFFFFFFFFFFFFFFFFFFFFF:FFFFFFFFFFFFFFF,
FFFFFFFFFFFFFFFFFFFFFFFFFFFFFFFFFFFFFFFF:FFFF:FFFFFFFFFF:FFFFFFFFFFFFFFFFFF:FF
FFFFFFFFEE:FFFFFF

```

@A00721:190:HGJW7DSXY:4:2143:24451:29997 1:N:0:TCTGCAAG+GCTGCACT  
AGTCCTGTAAGGTCTGGACTCAGGTGAGAATATATTATGGGTCACCCAATACTGTAACCTTTGTGGAA  
CAACGAATGATTGTGGATCGAACGGCGATAGATATTCTTGTATTGGTTCTGGAAATAATCTATCTGCA  
TTTGCAGATATGTTG

```
FFFF:FFFFFFFFFFFFFFFFFFFFFFFFFFFFFFFFFFFFFFFF:FFFFFFFFFFFFFFFF
FFFFFFFF:FFFFFFFFFFFFFFFFFFFFFFFFFFFFFFFF:FFFFFFF:FFFFFFFFFFFFF:F:FFFFFFFFFFFF
FFFFFFFFF:FFFFFFF
```

@A00721:190:HGJW7DSXY:4:2234:24297:26162 1:N:0:TCTGCAAG+GCTGCACT  
AGTCCTGTAAGGTCTGGACTCAGGTGAGAATATATTATGGGTCACCCAATACTGTAACCTTTGTGGAA  
CAACGAATGATTGTGGATCGAACGGCGATAGATATTCTTGTATTGGTTCTGGAAATAATCTATCTGCA  
TTTGCAGATATGTT

FFFFFFFFFFFFFFFFFFFFFFFF:;FFFFFFFFFFFFFFFFFFFFFFFF:.,FFFFFFFFFFFFFFFF,FFFFFF

FFFFFFFFF:FFFFFFFFF:,F:FFFFFFFF:FFFFFFF,FFFFFFFFFFFFFFFFF:F::F  
F::FFFFFFFF

@A00721:190:HGJW7DSXY:4:2303:1443:28698 1:N:0:TCTGCAAG+GCTGCACT  
CACAAATATCTGCAATGCAGATAGATTATTTCCAGAACCAATACAAGAATATCTATCGCCGTTCTGA  
TCCACAATCATTGTTGTTCCACAAGAGTTACAGTATTGGGTGACCCATAATATATTCTCACCTGAGT  
CCAGACCTTACAGGA

+

FFFFFFFFFFFFFFFFFFFFFFFFFFFFFFFFFFFFFFFFFFFFFFFFFFFFFFFFFFFFFFFFF:  
FFFFFFFFFFFFFFFFFFFFFFFFFFFFFFFFFFFFFFFFFFFFFFFFF,FFFFFFFFFFFFFFFFFFFFFFFFF  
FFFFFFFFFFFFFFFFF

@A00721:190:HGJW7DSXY:4:2537:16432:3020 1:N:0:TCTGCAAG+GCTGCACT  
CACAAATATCTGCAATGCAGATAGATTATTTCCAGAACCAATACAAGAATATCTATCGCCGTTCTGA  
TCCACAATCATTGTTGTTCCACAAGAGTTACAGTATTGGGTGACCCATAATATATTCTCACCTGAGT  
CCAGACCTTACAGGA

+

FFFFFFFFFFFFFFFFFFFFFFFFFFFFFFFFFFFFFFFFFFFFFFFFFFFFFFFFFFFFFFFFF  
FFFFFFFFFFFFFFFFFFFFFFFFFFFFFFFFFFFFFFFFFFFFFFFFF:FFFFFFFFFFFFFFFFFFFFFFFFF  
FFFFFFFFFFFFFFFFF

@A00721:190:HGJW7DSXY:4:1101:9453:17957 1:N:0:TCTGCAAG+GCTGCACT  
TCACAACATATCTGCAATGCAGATAGATTATTTCCAGAACCAATACAAGAATATCTATCGCCGTTCTG  
ATCCACAATCATTGTTGTTCCACAAGAGTTACAGTATTGGGTGACCCATAATATATTCTCACCTGAG  
TCCAGACCTTACAGA

+

FFFFFFFFFFFFFFFFFFFFFFFFF:FFFFFFFFFFFFFFFFFFFFFFFFFFFFFFFFFFFFFFFFF  
:FFFFFFFFFFFFF:FFFFFFFFFFFFFFFFFFFFFFFFFFFFFFFFF:FFFFFFFFFFFFFFFFFFFFFFFFF  
FFFFFFFFFFFFFFFFF

@A00721:190:HGJW7DSXY:4:2207:14362:6417 1:N:0:TCTGCAAG+GCTGCACT  
TCACAACATATCTGCAATGCAGATAGATTATTTCCAGAACCAATACAAGAATATCTATCGCCGTTCTG  
ATCCACAATCATTGTTGTTCCACAAGAGTTACAGTATTGGGTGACCCATAATATATTCTCACCTGAG  
TCCAGACCTTACAGA

+

FFFFFFFFFFFFFFFFF:FFFFFFF:FFFFFFFFFFFFFFFFFFFFFFFFFFFFFFFFFFFFFFFFF  
FFFFFFFFFFFFFFFFFFFFFFFFFFFFFFFFFFFFFFFFFFFFFFFFF:FFFF:FFFFFFFF:FFFFFFFFF  
FF:FFFFFFFFFFFFF

@A00721:190:HGJW7DSXY:4:1362:25057:18270 1:N:0:TCTGCAAG+GCTGCACT  
CTGGACTCAGGTGAGAATATATTATGGGTCACCAATACTGTAACCTTTGTGGAACAACGAATGATTG  
TGGATCGAACGGCGATAGATATTCTTGATTGTTCTGGAAATAATCTATCTGCATTTGCAGATATGT  
TGTGATGCTGAAGGT

+

FFFFFFFFFFFFFFFFFFFFFFFFFFFFFFFFFFFFFFFFFFFFFFFFFFFFFFFFFFFFFFFFF  
FFFFFFFFFFFFFFFFF:FFFFFFFFFFFFFFFFFFFFFFFFFFFFFFFFFFFFFFFFFFFFFFFFF  
FFFFFFF:FFF:FFFF

@A00721:190:HGJW7DSXY:4:1444:10357:9878 1:N:0:TCTGCAAG+GCTGCACT  
CTGGACTCAGGTGAGAATATATTATGGGTCACCAATACTGTAACCTTTGTGGAACAACGAATGATTG  
TGGATCGAACGGCGATAGATATTCTTGATTGTTCTGGAAATAATCTATCTGCATTTGCAGATATGT  
TGTGATGCTGAAGGT

+

FFFFFFFFFFFFFFFFF:FFFFFFFFFFFFFFFFF:FFFFFFFFFFFFFFFFFFFFFFFFFFFFF,,F  
FFFFFFFFFFFFFFFFF:FFFFFFFFFFFFFFFFFFFFFFFFFFFFFFFFF:FFFFFFFFFFFFFFFFFFFFF  
FFFFFFFFFFFFFFFFF

@A00721:190:HGJW7DSXY:4:1610:20428:5149 1:N:0:TCTGCAAG+GCTGCACT  
CTGGACTCAGGTGAGAATATATTATGGGTCACCAATACTGTAACCTTTGTGGAACAACGAATGATTG  
TGGATCGAACGGCGATCGATATTCTTGATTGTTCTGGAAATAATCTATCTGCATTTGCAGATATGT  
TGTGATGCTGAAGGT

+  
FFFFFFFFF:,,FFFFF,FF:FFFF,FF::F::F:FFFFFF:FFFFFFFFF,:FFFFFFFFFFFFFF:FFFF  
FFFFFFFFFFFFFF:FFFF,FFFFFFFFFFFFFFFFF,FF:FF:FFFF:FFFFFF,,:FFFF:F,:F,FF:F  
F:FF:FF,F,,FFFF

@A00721:190:HGJW7DSXY:4:2211:16731:23390 1:N:0:TCTGCAAG+GCTGCACT  
CTGGACTCAGGTGAGAATATATTATGGGTCACCCAATACTGTAACCTTTGTGGAACAACGAATGATTG  
TGGATCGAACGGCGATAGATATTCTTGTATTGGTTCTGGAAATAATCTATCTGCATTTGCAGATATGT  
TGTGATGCTGAAGG

+  
FF:FFFFFF::F,F,:FFFF::FF,FF,FFF:,,FFFFF,:F,FFFF,,FFFFF:FFFFFF:,FFFF  
FF,FFF:FFF:FF:F,FFF:F,FF,F:F:FFFF,,F,FFFF,FFFFFFFFF,FFFFFFFF:FFF,,,  
F,FFF,,,FFFF,:F

@A00721:190:HGJW7DSXY:4:1207:5990:11741 1:N:0:TCTGCAAG+GCTGCACT  
AGAATATATTATGGGTCACCCAATACTGTAACCTTTGTGGAACAACGAATGATTGTGGATCGAACGGC  
GATAGATATTCTTGTATTGGTTCTGGAAATAATCTATCTGCATTTGCAGATATGTTGTGATGCTGAAG  
GTAGAACGTTCTTGG

+  
FFFFFFFFFFFFFFFFFFFFFFFFFFFFFFFFFFFFFFFFFFFFFFFFFFFFFFFFFFFFFFFFFFFFFFFF  
FFFFFFFFF,FFFFFFFFFFFFFFFFFFFFFFFFFFFFFFFFFFFFFFFFFFFFFFFFFFFFFFFFFFFFFFFF  
FFFFFFFFFFFFFFFFF

@A00721:190:HGJW7DSXY:4:2508:4725:25989 1:N:0:TCTGCAAG+GCTGCACT  
AGAATATATTATGGGTCACCCAATACTGTAACCTTTGTGGAACAACGAATGATTGTGGATCGAACGGC  
GATAGATATTCTTGTATTGGTTCTGGAAATAATCTATCTGCATTTGCAGATATGTTGTGATGCTGAAG  
GTAGAACGTTCTTGG

+  
FFFFFFFFFFFFFFFFFFFFFFFFFFFFFFFFFFFFFFFFFFFFFFFFFFFFFFFFFFFFFFFFFFFFFFFF  
FFFFFFFFFFFFFFFFFFFFFFFFFFFFFFFFFFFFFFFFFFFFFFFFFFFFFFFFFFFFFFFFFFFFFFFF  
FFFFFFFFFFFFFFFFF:

@A00721:190:HGJW7DSXY:4:2534:29342:9846 1:N:0:TCTGCAAG+GCTGCACT  
AGAATATATTATGGGTCACCCAATACTGTAACCTTTGTGGAACAACGAATGATTGTGGATCGAACGGC  
GATAGATATTCTTGTATTGGTTCTGGAAATAATCTATCTGCATTTGCAGATATGTTGTGATGCTGAAG  
GTAGAACGTTCTTGG

+  
FFFFFFFFFFFFFFFFFFFFFFFFFFFFFFFFFFFFFFFFFFFFFFFFFFFFFFFFFFFFFFFFFFFFFFFF  
FFFFFFFFFFFFFFFFFFFFFFFFFFFFFFFFFFFFFFFFFFFFFFFFFFFFFFFFFFFFFFFFFFFFFFFF  
FF:FFFFFFFFFFFFF

@A00721:190:HGJW7DSXY:4:1145:29948:14685 1:N:0:TCTGCAAG+GCTGCACT  
GAATATATTATGGGTCACCCAATACTGTAACCTTTGTGGAACAACGAATGATTGTGGATCGAACGGCG  
ATAGATATTCTTGTATTGGTTCTGGAAATAATCTATCTGCATTTGCAGATATGTTGTGATGCTGAAG

+  
FF:FF,FF:FFFFFF:FFFFFFFFFFFFF:F:FFFFFFFF:FFFFFF:FFFFFFFF:FFFFFF,:F:F  
FFF,FFFF,F:F:F::FF:FFF,,FFFFFFFFFFFFFFFFFFFFFFFF:FFFF:FFF::FFF,F:FFF

@A00721:190:HGJW7DSXY:4:1334:17879:22936 1:N:0:TCTGCAAG+GCTGCACT  
GAATATATTATGGGTCACCCAATACTGTAACCTTTGTGGAACAACGAATGATTGTGGATCGAACGGCG  
ATAGATATTCTTGTATTGGTTCTGGAAATAATCTATCTGCATTTGCAGATATGTTGTGATGCTGAAG

+  
FFFF,FFFFFFFFFFFFFFFFF::FFFFFFFFFFFFFFFFFFFFFFFFFFFFFFFFFFFFFFFF:FFF:FFFFFF  
FFFFFFFFFFFFFFFFFFFFFFFFFFFFFFFFFFFFFFFF:FFFFFFFFFFFFFFFFF,FFFFFFFFFFFFFFFFF

@A00721:190:HGJW7DSXY:4:1503:11351:34585 1:N:0:TCTGCAAG+GCTGCACT  
GAATATATTATGGGTCACCCAATACTGTAACCTTTGTGGAACAACGAATGATTGTGGATCGAACGGCG  
ATAGATATTCTTGTATTGGTTCTGGAAATAATCTATCTGCATTTGCAGATATGTTGTGATGCTGAAG

+  
FFFFFFFFFFFFFFFFFFFFFFFFFFFFFFFFFFFFFFFF,FFFFFFFFFFFFFFFFFFFFFFFFFFFFF  
FF:FFFFFFFFFFFFF:FFFFFFFFFFFFFFFFFFFFFFFFFFFFFFFFFFFFFFFFFFFFFFFF:FFFF

@A00721:190:HGJW7DSXY:4:2313:7030:24283 1:N:0:TCTGCAAG+GCTGCACT  
GAATATATTATGGGTCACCCAATACTGTAACCTTTGTGGAACAACGAATGATTGTGGATCGAACGGCG  
ATAGATATTCTTGTATTGGTTCTGGAAATAATCTATCTGCATTTGCAGATATGTTGTGATGCTGAAG  
+

@A00721:190:HGJW7DSXY:4:1131:23258:20603 1:N:0:TCTGCAAG+GCTGCACT  
TGTAACCTCTTGTTGGAACAACGAATGATTGTGGATCGAACGGCGAGAGATATTCTTGATTGGTTCTGG  
AAATAATCTATCTGCATTTGCAGATATGTTGTGATGCTGAAGGTAGAACGTTCTTGATCGTTCTTCC  
GGATTATTTCTAGAG

[illegible]

@A00721:190:HGJW7DSXY:4:1421:7997:10363 1:N:0:TCTGCAAG+GCTGCACT  
TGTAACCTCTTGTGGAACAACGAATGATTGTGGATCGAACGGCGATAGATATTCTTGTATTGGTTCTGG  
AAATAATCTATCTGCATTTGCAGATATGTTGTGATGCTGAAGGTAGAACGTTCTTGGATCGTTCTTCC  
GGATTATTTCTAGAG

[illegible]

@A00721:190:HGJW7DSXY:4:2139:13639:14904 1:N:0:TCTGCAAG+GCTGCACT  
TGTA ACTCTTGTGGAACAACGAATGATTGTGGATCGAACGGCGATAGATATTCTTGTATTGGTTCTGG  
AAATAATCTATCTGCATTTGCAGATATGTTGTGATGCTGAAGGTAGAACGTTCTTGGATCGTTCTTCC  
GGATTATTTCTAGAG

[illegible]

@A00721:190:HGJW7DSXY:4:2456:30915:32017 1:N:0:TCTGCAAG+GCTGCACT  
TGTAACCTCTTGTGGAACAACGAATGATTGTGGATCGAACGGCGATAGATATTCTTGTATTGGTTCTGG  
AAATAATCTATCTGCATTTGCAGATATGTTGTGAACCTGAAGGTAGAACGTTCTTGGATCGTTCTTCC  
GGATTATTTCTAGAG

```
+
FFFFFFFFFFFFFFFF:FFFFFFFFFFFF:FFFFFFFFFFFFFFFFFFFFFFFFFFFFFFFF:FFFFFFFFFFFFFFFF
FFFFFFFFFFFFFFFFFFFFFFFFFFFFFFFF:FFFFFFFFFFFF,FF:FFFFFF,FF,FFFFFFFFFFFF:FFFFF::
FFFFFFFFFFFFFFFF:F
```

@A00721:190:HGJW7DSXY:4:2475:12454:4648 1:N:0:TCTGCAAG+GCTGCACT  
TGTAACCTCTTGTGGAACAACGAATGATTGTGGATCGAACGGCGATAGATATTCTTGTATTGTTCTGG  
AAATAATCTATCTGCATTTGCAGATATGTTGTGATGCTGAAGGTAGAACGTTCTTGGATCGTTCTTCC  
GGATTATTTCTAGAG

[illegible]

@A00721:190:HGJW7DSXY:4:2549:3965:26396 1:N:0:TCTGCAAG+GCTGCACT  
TGTAACCTCTTGTGGAACAACGAATGATTGTGGATCGAACGGCGATAGATATTCTTGTATTGGTTCTGG  
AAATAATCTATCTGCATTTGCAGATATGTTGTGATGCTGAAGGTAGAACGTTCTTGGATCGTTCTTCC  
GGATTATTTCTAGAG

[illegible]



$+$ 

+

 $+$ 

+

+

+

+

,,F,:FFFFFFFF,FF:FFF:FFFFFF,FF:F:, ,FFFF:FF,FFF:FFFF,F:FFFFFFFF  
FFFFFFFFFFFFFFFF

@A00721:190:HGJW7DSXY:4:2443:13376:12947 1:N:0:TCTGCAAG+GCTGCACT  
CGTGAACAACGAATGATTGTGGATCGAACGGCGATAGATATTCTTGTATTGGTTCTGGAAATAATCT  
ATCTGCATTTGCAGATATGTTGTGATGCTGAAGGTAGAACGTTCTTGGATCGTTCTTCCGGATTATTT  
CTAGAGACTCTGTCT

+

FFFFFFFFFFFFFFFFFFFFFFFFFFFFFFFFFFFFFFFFFFFFFFFFFFFFFFFFFFFFFFFFFFFFFFFF  
FFFFFFFFFFFFFFFFFFFFFFFFFFFFFFFFFFFFFFFFFFFFFFFFFFFFFFFFFFFFFFFFFFFFFFFF  
FFFFFFFFFFFFFFFF

@A00721:190:HGJW7DSXY:4:2559:20844:6621 1:N:0:TCTGCAAG+GCTGCACT  
CGTGAACAACGAATGATTGTGGATCGAACGGCGATAGATATTCTTGTATTGGTTCTGGAAATAATCT  
ATCTGCATTTGCAGATATGTTGTGATGCTGAAGGTAGAACGTTCTTGGATCGTTCTTCCGGATTATTT  
CTAGAGACTCTGTCT

+

FFFFFF:FFFFFFFFFFFFFFFFFFFFFFFFFFFFFFFFFFFFFFFFFFFFFFFFFFFFFFFFFFFFFFFF  
FFFFFFFFFFFFFFFFFFFFFFFFFFFFFFFFFFFFFFFFFFFFFFFFFFFFFFFFFFFFFFFFFFFFFFFF  
FFFFFFFFFFFFFFFF

@A00721:190:HGJW7DSXY:4:1252:4924:24799 1:N:0:TCTGCAAG+GCTGCACT  
GTGAACAACGAATGATTGTGGATCGAACGGCGATAGATATTCTTGTATTGGTTCTGGAAATAATCTA  
TCTGCATTTGCAGATATGTTGTGATGCTGAAGGTAGAACGTTCTTGGATCGTTCTTCCGGATTATTT  
TAGAGACTCTGTCTT

+

FFFFFFFFFFFFFFFFFFFFFFFFFFFFFFFFFFFFFFFFFFFFFFFFFFFFFFFFFFFFFFFFFFFFFFFF  
FFFFFFFFFFFFFFFFFFFFFFFFFFFFFFFFFFFFFFFFFFFFFFFFFFFFFFFFFFFFFFFFFFFFFFFF  
FFFFFFFFFFFFFFFF

@A00721:190:HGJW7DSXY:4:1610:15483:25300 1:N:0:TCTGCAAG+GCTGCACT  
GTGAACAACGAATGATTGTGGATCGAACGGCGATAGATATTCTTGTATTGGTTCTGGAAATAATCTA  
TCTGCATTTGCAGATATGTTGTGATGCTGAAGGTAGAACGTTCTTGGATCGTTCTTCCGGATTATTT  
TAGAGACTCTGTCTT

+

FFFFF:FFFFFFFFFFFFFFFFFFFFFFFFFFFFFFFFFFFFFFFFFFFFFFFFFFFFFFFFFFFFFFFF  
FFFFFFFFFFFFFFFFFFFFFFFFFFFFFFFFFFFFFFFFFFFFFFFFFFFFFFFFFFFFFFFFFFFFFFFF  
FFFFFFFFFFFFFFFF

@A00721:190:HGJW7DSXY:4:2228:6397:18959 1:N:0:TCTGCAAG+GCTGCACT  
GTGAACAACGAATGATTGTGGATCGAACGGCGATAGATATTCTTGTATTGGTTCTGGAAATAATCTA  
TCTGCATTTGCAGATATGTTGTGATGCTGAAGGTAGAACGTTCTTGGATCGTTCTTCCGGATTATTT  
TAGAGACTCTGTCTT

+

FFFFFFFFFFFFFFFFFFFFFFFFFFFFFFFFFFFFFFFFFFFFFFFFFFFFFFFFFFFFFFFFFFFFFFFF  
FFFFFFFFFFFFFFFFFFFFFFFFFFFFFFFFFFFFFFFFFFFFFFFFFFFFFFFFFFFFFFFFFFFFFFFF  
FFFFFFFFFFFFFFFF

@A00721:190:HGJW7DSXY:4:2257:24279:33144 1:N:0:TCTGCAAG+GCTGCACT  
GTGAACAACGAATGATTGTGGATCGAACGGCGATAGATATTCTTGTATTGGTTCTGGAAATAATCTA  
TCTGCATTTGCAGATATGTTGTGATGCTGAAGGTAGAACGTTCTTGGATCGTTCTTCCGGATTATTT  
TAGAGACTCTGTCTT

+

FF:FFFFFFFFF:F:,FF:,FFF,FF:FFF,FFFF, :FF::FF,FFFF, :FFFF,FF:F,F::  
,FF:FFFF:F,F,F:FF:F:FFFFFFFFFFFFFFFFFFFFFFFFFFFFFFFFFFFFFFFF:FFF:FFFFFFF:FFF:FF:F:FFFFFFFF,FF  
FFFF:F,FFFF::,F

@A00721:190:HGJW7DSXY:4:2328:1452:31908 1:N:0:TCTGCAAG+GCTGCACT  
GTGAACAACGAATGATTGTGGATCGAACGGCGATAGATATTCTTGTATTGGTTCTGGAAATAATCTA  
TCTGCATTTGCAGATATGTTGTGATGCTGAAGGTAGAACGTTCTTGGATCGTTCTTCCGGATTATTT  
TAGAGACTCTGTCTT

+  
FFFFFFFFFFFFFFFFFFFFFFFFFFFFFFFFFFFFFFFFFFFFFFFFFFFFFFFFFFFFFFFFFFFFFFFF:F  
FFFFFFFFFFFFFFFFFFFFFFFFFFFFFFFFFFFFFFFFFFFFFFFFFFFFFFFFFFFFFFFFFFFFFFFF:FFFFFFFFFFFFFFFFFFFFFFFF  
FFFFFFFFFFFFFFFF

@A00721:190:HGJW7DSXY:4:2438:12418:18521 1:N:0:TCTGCAAG+GCTGCACT  
GTGGAACAACGAATGATTGTGGATCGAACGGCGATAGATATTCTTGTATTGGTTCTGGAAATAATCTA  
TCTGCATTTGCAGATATGTTGTGATGCTGAAGGTAGAACGTTCTTGGATCGTTCTTCCGGATTATTTC  
TAGAGACTCTGTCTT

+  
FFFFFFFFFFFFFFFFFFFFFFFFFFFFFFFFFFFFFFFFFFFFFFFFFFFFFFFFFFFFFFFFFFFFFFFF:F:FF:FFF:FFFFFFFFFFFFFFFFFFFF  
F,F,FFF:FF,FFFFFF,:FFFFFFFFFFFFFFFFFFFFFFFFFFFFFFFFFFFFFFFF:FFFF:,:F:FF,FFFFFFFF  
FFFFFFFF:FF,:FFFF

@A00721:190:HGJW7DSXY:4:2464:29134:10833 1:N:0:TCTGCAAG+GCTGCACT  
GTGGAACAACGAATGATTGTGGATCGAACGGCGATAGATATTCTTGTATTGGTTCTGGAAATAATCTA  
TCTGCATTTGCAGATATGTTGTGATGCTGAAGGTAGAACGTTCTTGGATCGTTCTTCCGGATTATTTC  
TAGAGACTCTGTCTT

+  
FFFFF:FFFFFFFFFFFFFFFFFFFFFFFFFFFFFFFFFFFFFFFFFFFFFFFFFFFFFFFFFFFFFFFFFFFF,FFFFFFFF:FFFFFFFFFFFFFFFFFFFF  
FFFFFFFFFFFFFFFFFFFFFFFFFFFFFFFFFFFFFFFFFFFFFFFFFFFFFFFFFFFFFFFFFFFFFFFF:FFFFFFFFFFFFFFFFFFFFFFFFFFFF  
FFFF:FFFFFFFFFFFF

@A00721:190:HGJW7DSXY:4:2520:28456:1861 1:N:0:TCTGCAAG+GCTGCACT  
GTGGAACAACGAATGATTGTGGATCGAACGGCGATAGATATTCTTGTATTGGTTCTGGAAATAATCTA  
TCTGCATTTGCAGATATGTTGTGATGCTGAAGGTAGAACGTTCTTGGATCGTTCTTCCGGATTATTTC  
TAGAGACTCTGTCTT

+  
FFFFFFFFFFFFFFFFFFFFFFFFFFFFFFFFFFFFFFFFFFFFFFFFFFFFFFFFFFFFFFFFFFFFFFFFFFFF  
FFFFFFFFFFFFFFFFFFFFFFFFFFFFFFFFFFFFFFFFFFFFFFFFFFFFFFFFFFFFFFFFFFFFFFFFFFFF  
FFFFFFFFFFFFFFFFFFFF

@A00721:190:HGJW7DSXY:4:1657:20103:18051 1:N:0:TCTGCAAG+GCTGCACT  
TGGAACAACGAATGATTGTGGATCGAACGGCGATAGATATTCTTGTATTGGTTCTGGAAATAATCTAT  
CTGCATTTGCAGATATGTTGTGATGCTGAAGGTAGAACGTTCTTGGATCGTTCTTCCGGATTATTCT  
AGAGACTCTGTCTT

+  
FFFFFFFFF:F::FFF::,F,FF,FFFFFFFFFFFFF,FFF,:F,FF:FFFFFFFFFFFFFFFFFFFF:F,  
FFF:F:F:FFF,F:F:F,F,FF:FFFFFFFF:FF,FFF:F:FF:FFFF,F:,FFFF,F:FFFF:F:F  
FF:FFFFFFFF,FFF

@A00721:190:HGJW7DSXY:4:1160:6985:36542 1:N:0:TCTGCAAG+GCTGCACT  
GGAACAACGAATGATTGTGGATCGAACGGCGATAGATATTCTTGTATTGGTTCTGGAAATAATCTATC  
TGCATTTGCAGATATGTTGTGATGATGAAGGTAGAACGTTCTTGGATCGTTCTTCCGGATTATTCTA  
GAGACTCTGTCTT

+  
F:FFFFF:F:FF,FFF,FF:FFFFFFFF,F,,F,FFF,F,F,F,,,FF:F:FFFFF,FFFFFFFFFF,:  
F,,F,FFF,F:FFF,FF:,,,,:,,FF,F,FFF:F:F,,FF::,FFF:,FF:FF::FFFFFF,F:FF  
FFFFF:F:FF,FFF

@A00721:190:HGJW7DSXY:4:1456:9534:15499 1:N:0:TCTGCAAG+GCTGCACT  
GGAACAACGAATGATTGTGGATCGAACGGCGATAGATATTCTTGTATTGGTTCTGGAAATAATCTATC  
TGCATTTGCAGATATGTTGTGATGCTGAAGGTAGAACGTTCTTGGATCGTTCTTCCGGATTATTCTA  
GAGACTCTGTCTTG

+  
FFFFFFFFFFFFFFFFFFFFFFFFFFFFFFFFFFFFFFFFFFFFFFFFFFFFFFFFFFFFFFFFFFFFFFFFFFFF  
FFFFFFFFFFFFFFFF:FFFFFFFFFFFFFFFFFFFFFFFFFFFFFFFFFFFFFFFF:FFFFFF:FFFFFFFFFFFFFFFFFFFF  
FFFFFFFFFFFFFFFFFFFF

@A00721:190:HGJW7DSXY:4:2154:6732:6950 1:N:0:TCTGCAAG+GCTGCACT  
GGAACAACGAATGATTGTGGATCGAACGGCGATAGATATTCTTGTATTGGTTCTGGAAATAATCTATC

TGCATTTGCAGATATGTTGTGATGCTGAAGGTAGAACGTTCTTGGATCGTTCTTCCGATTATTTCTA  
GAGACTCTGTCTTTG

```

FFFFFFFFFFFFFFFFFFFFFFFFFFFFFFFF:FFFFFFFFFFFFFFFFFFFFFFFFFFFFFFFF
FFFFFFFFFFFFFFFFFFFFFFFFFFFFFFFF:FFFFFFFFFFFFFFFFFFFFFFFFFFFFFFFF
FFFFFFFFFFFFFFFF:FF

```

 $+$ 

@A00721:190:HGJW7DSXY:4:1115:13521:21496 1:N:0:TCTGCAAG+GCTGCACT  
CGTGGATCGAACGGCGATAGATATTCTTGTATTGTTCTGGAAATAATCTATCTGCATTTGCAGATAT  
GTTGTGATGCTGAAGGTAGAACGTTCTTGGATCGTTCTTCCGATTATTTCTAGAGACTCTGTCTTTG  
ACCTAGCTGATAAAG

```

FFFFFFFFFFFFFFFFFFFFFFFFFFFFFFFFFFFFFFFFFFFFFFFFFFFFFFFFFFFFFFFF
FFFFFFFFFFFFFFFFFFFFFFFF:FFFFFFFFFFFFFFFFFFFFFFFFFFFFFFFFFFFFFFFF
FFFFFFFFFFFFFFFF

```

+

@A00721:190:HGJW7DSXY:4:1231:1579:14121 1:N:0:TCTGCAAG+GCTGCACT  
CGTGGATCGAACGGCGATAGATATTCTTGTATTGGTTCTGGAAATAATCTATCTGCATTTGCAGATAT  
GTTGTGATGCTGAAGGTAGAACGTTCTTGGATCGTTCTTCCGGATTATTTCTAGAGACTCTGTCTTTG  
ACCTAGCTGATAAAG

```

FFFFFFFF:FFFFFFFFFFFFFFFF:F:FFFFFFFFFFFFFFFFFFFFFFFFFFFFFFFF
FFFFFFFFFFFFFFFF,FFFF,,FFFFFFFFFFFF:,FFFFFFFFFFFFFFFFFFFFFF
FFFFF:FFFFF,FFF

```

+

@A00721:190:HGJW7DSXY:4:1373:4887:7670 1:N:0:TCTGCAAG+GCTGCACT  
CGTGGATCGAACGGCGATAGATATTCTTGTATTGTTCTGGAAATAATCTATCTGCATTTGCAGATAT  
GTTGTGATGCTGAAGGTAGAACGTTCTTGGATCGTTCTTCCGGATTATTTCTAGAGACTCTGTCTTTG  
ACCTAGCTGATAAAG

[illegible]

@A00721:190:HGJW7DSXY:4:1420:24957:15405 1:N:0:TCTGCAAG+GCTGCACT  
CGTGGATCGAACGGCGATAGATATTCTTGTATTGGTTCTGGAAATAATCTATCTGCATTTGCAGATAT  
GTTGTGATGCTGAAGGTAGAACGTTCTTGGATCGTTCTTCCGATTATTTCTAGAGACTCTGTCTTTG  
ACCTAGCTGATAAAG

@A00721:190:HGJW7DSXY:4:1502:17381:29684 1:N:0:TCTGCAAG+GCTGCACT  
CGTGGATCGAACGGCGATAGATATTCTTGTATTGTTCTGGAAATAATCTATCTGCATTTGCAGATAT  
GTTGTGATGCTGAAGGTAGAACGTTCTTGGATCGTTCTTCCGATTATTTCTAGAGACTCTGTCTTTG  
ACCTAGCTGATAAAG

@A00721:190:HGJW7DSXY:4:1529:15383:4398 1:N:0:TCTGCAAG+GCTGCACT  
CGTGGATCGAACGGCGATAGATATTCTTGTATTGGTTCTGGAAATAATCTATCTGCATTTGCAGATAT  
GTTGTGATGCTGAAGGTAGAACGTTCTTGGATCGTTCTTCCGGATTATTTCTAGAGACTCTGTCTTTG  
ACCTAGCTGATAAAG

@A00721:190:HGJW7DSXY:4:2102:10936:34522 1:N:0:TCTGCAAG+GCTGCACT  
CGTGGATCGAACGGCGATAGATATTCTTGTATTGTTCTGGAAATAATCTATCTGCATTTGCAGATAT  
GTTGTGATGCTGAAGGTAGAACGTTCTTGGATCGTTCTTCCGGATTATTTCTAGAGACTCTGTCTTTG  
ACCTAGCTGATAAAG

@A00721:190:HGJW7DSXY:4:2109:30517:7592 1:N:0:TCTGCAAG+GCTGCACT  
CGTGGATCGAACGGCGATAGATATTCTTGTATTGTTCTGGAAATAATCTATCTGCATTTGCAGATAT  
GTTGTGATGCTGAAGGTAGAACGTTCTTGGATCGTTCTTCCGGATTATTTCTAGAGACTCTGTCTTTG  
ACCTAGCTGATAAA

@A00721:190:HGJW7DSXY:4:2109:30463:7780 1:N:0:TCTGCAAG+GCTGCACT  
CGTGGATCGAACGGCGATAGATATTCTTGTATTGTTCTGGAAATAATCTATCTGCATTTGCAGATAT  
GTTGTGATGCTGAAGGTAGAACGTTCTTGGATCGTTCTTCCGATTATTTCTAGAGACTCTGTCTTG  
ACCTAGCTGATAAAG

@A00721:190:HGJW7DSXY:4:2343:17372:35462 1:N:0:TCTGCAAG+GCTGCACT  
CGTGGATCGAACGGCGATAGATATTCTTGTATTGGTTCTGGAAATAATCTATCTGCATTTGCAGATAT  
GTTGTGATGCTGAAGGTAGAACGTTCTTGGATCGTTCTTCCGGATTATTTCTAGAGACTCTGTCTTTG  
ACCTAGCTGATAAAG



+  
F,FFFFFFFFFFFFFFFFFFFFF:,FF,FFFFFFFFFFFFF::F:FFFFFFFFFFFFF::FFFF:FFFFF:FFF  
,:FFFFFFFF,FFFFFF:FF:FFFFFFFFF:FFF,FFF,:FFFFFFFF:FFFFFFFFFFFFFFFFFFFFF:FFF  
FFF:FF:FFFFFFF:

@A00721:190:HGJW7DSXY:4:2452:28637:25347 1:N:0:TCTGCAAG+GCTGCACT  
GTGGATCGAACGGCGATAGATATTCTTGTATTGGTTCTGGAAATAATCTATCTGCATTTGCAGATATG  
TTGTGATGCTGAAGGTAGAACGTTCTTGGATCGTTCTTCCGATTATTTCTAGAGACTCTGTCTTTGA  
CCTAGCTGATAAAG

+  
FFFFFFFFFFFFFFFFF:FFFFFFFFFFFFFFFFFFFFFFFFF:,FFFFFFFF:FFFFFFFF:F:F,:FFFF:F  
:FFFFFFFF:FFFFFFFFFFFFFFFFFFFFF:FFFF:,FFFFFF:FF:FFFFFFFF,F:FFFFFFFFFFFF,F  
:FF,,F:FFFFFFF

@A00721:190:HGJW7DSXY:4:2539:26377:20619 1:N:0:TCTGCAAG+GCTGCACT  
GTGGATCGAACGGCGATAGATATTCTTGTATTGGTTCTGGAAATAATCTATCTGCATTTGCAGATATG  
TTGTGATGCTGAAGGTAGAACGTTCTTGGATCGTTCTTCCGATTATTTCTAGAGACTCTGTCTTTGA  
CCTAGCTGATAAAGC

+  
FFFFFFFFFFFFFFFFFFFFFFFFF,FFFFFF:FFFFFFFFFFFFFFFFFFFFFFFFFFFFFFFFFFFFFFFFFFFFF  
FFFFFFFFFFFFFFFFF:F:FFFF:FFFFFFFFFFFFF:FFF:FFFFFFFFFFFFFFFFFFFFF:FFFFFFFFFFFFF  
FFF,:FFFFFFFFF

@A00721:190:HGJW7DSXY:4:2542:29767:13244 1:N:0:TCTGCAAG+GCTGCACT  
GTGGATCGAACGGCGATAGATATTCTTGTATTGGTTCTGGAAATAATCTATCTGCATTTGCAGATATG  
TTGTGATGCTGAAGGTAGAACGTTCTTGGATCGTTCTTCCGATTATTTCTAGAGACTCTGTCTTTGA  
CCTAGCTGATAAAGC

+  
FFFFFFFFFFFFFFFFFFFFF::FFF,F,FFF,FFFF:FFFFFFFFFFFFFFFFFFFFFFFFFFFFFFFFFFFFF:FFF:FFF  
FFFFFFFFFFFFFFFFFFFFF:F:FFFF::FFFFFFFFFFFFFFFFF,FFFFFF:FFFF:FFFFFFFF:FFFFFFF  
::FFFFF:FFF:FFF

@A00721:190:HGJW7DSXY:4:1136:19705:25504 1:N:0:TCTGCAAG+GCTGCACT  
GGATCGAACGGCGATAGATATTCTTGTATTGGTTCTGGAAATAATCTATCTGCATTTGCAGATATGTT  
GTGATGCTGAAGGTAGAACGTTCTTGGATCGTTCTTCCGATTATTTCTAGAGACTCTGTCTTTGACC  
TAGCTGATAAAGCTT

+  
FFFFFFFFFFFF:FFFFFFFFFFFFFFFFF:F,:FFFF,FF,:FF,FFFFFFFF:F,FFFF::FFFFF,F:,F  
:FFFFFFFFFFFFFFFFF:FFFFF,F:F:FF::FFF:FFFFFFF,FF,FF,FFF:FFFFFFFFF:F,FFF  
:F::FFFFFFFFFFFFF

@A00721:190:HGJW7DSXY:4:1136:20256:26052 1:N:0:TCTGCAAG+GCTGCACT  
GGATCGAACGGCGATAGATATTCTTGTATTGGTTCTGGAAATAATCTATCTGCATTTGCAGATATGTT  
GTGATGCTGAAGGTAGAACGTTCTTGGATCGTTCTTCCGATTATTTCTAGAGACTCTGTCTTTGACC  
TAGCTGATAAAGCTT

+  
FFFFFFFFFFFFFFFFFFFFFFFFFFFFFFFFFFFFF:FFFFFFFFFFFFFFFFFFFFFFFFFFFFFFFFFFFFF  
FFFFFFFFFFFFFFFFF:FFFFFFFFF:FFFFFFFFFFFFFFFFFFFFFFFFFFFFFFFFFFFFFFFFFFFFF  
FFFFFFFFFFFFFFFFF

@A00721:190:HGJW7DSXY:4:1310:14778:25175 1:N:0:TCTGCAAG+GCTGCACT  
GGATCGAACGGCGATAGATATTCTTGTATTGGTTCTGGAAATAATCTATCTGCATTTGCAGATATGTT  
GTGATGCTGAAGGTAGAACGTTCTTGGATCGTTCTTCCGATTATTTCTAGAGACTCTGTCTTTGACC  
TAGCTGATAAAGCTT

+  
FFFFFFFFFFFFFFFFFFFFFFFFFFFFFFFFFFFFFFFFFFFFFFFFFFFFFFFFFFFFFFFFFFFFF:FFFF  
FFF:FFFFFFFFF:FFFFFFFFFFFFFFFFFFFFFFFFFFFFFFFFFFFFFFFFFFFFFFFFFFFFFFFFF  
F:FFFFFFFFFFFFF

@A00721:190:HGJW7DSXY:4:1336:3332:32659 1:N:0:TCTGCAAG+GCTGCACT  
GGATCGAACGGCGATAGATATTCTTGTATTGGTTCTGGAAATAATCTATCTGCATTTGCAGATATGTT





@A00721:190:HGJW7DSXY:4:1339:21278:2362 1:N:0:TCTGCAAG+GCTGCACT  
ATCGAACGGCGATAGATATTCTTGTATTGGTTCTGGAAATAATCTATCTGCATTTGCAGATATGTTGT  
GATGCTGAAGGTAGAACGTTCTTGGATCGTTCTTCCGATTATTTCTAGAGACTCTGTCTTTGACCTA  
GCTGATAAAGCTTTA

+

FFFFFFFFFFFFFFFF:FFFFFFFFFFFFFFFFFFFFFFFFFFFFFFFFFFFFFFFFFFFFFFFF  
FFFFFFFFFFFFFFFFFFFFFFFFFFFFFFFFFFFFFFFFFFFFFFFFFFFFFFFFFFFFFFFF  
FFFFFFFFFFFF:FFFF

@A00721:190:HGJW7DSXY:4:1402:1877:15327 1:N:0:TCTGCAAG+GCTGCACT  
ATCGAACGGCGATAGATATTCTTGTATTGGTTCTGGAAATAATCTATCTGCATTTGCAGATATGTTGT  
GATGCTGAAGGTAGAACGTTCTTGGATCGTTCTTCCGATTATTTCTAGAGACTCTGTCTTTGACCTA  
GCTGATAAAGCTTTA

+

FFFFFFFFFFFFFFFFFFFF:FF:FFF,FFFFFFFFFFFFFFFFFFFFFFFFFFFFFFFFFFFFF:  
FFFFFFFF:FFF:FFFFFFFFFFFFFFFFFFFFFFFFFFFFFFFFFFFFFFFFFFFFFFFFFFFFF,  
:FFF:FFFF,FFFF

@A00721:190:HGJW7DSXY:4:2152:10022:6073 1:N:0:TCTGCAAG+GCTGCACT  
ATCGAACGGCGATAGATATTCTTGTATTGGTTCTGGAAATAATCTATCTGCATTTGCAGATATGTTGT  
GATGCTGAAGGTAGAACGTTCTTGGATCGTTCTTCCGATTATTTCTAGAGACTCTGTCTTTGACCTA  
GCTGATAAAGCTTTA

+

FFFFFFFFFFFFFFFFFFFFFFFFFFFFFFFFFFFFFFFFFFFFFFFFFFFFFFFFFFFFFFFF  
FFFFFFFFFFFFFFFFFFFFFFFFFFFFFFFFFFFFFFFFFFFFFFFFFFFFFFFFFFFFFFFF  
FFFFFFFFFFFF:FFFF

@A00721:190:HGJW7DSXY:4:2175:6714:3662 1:N:0:TCTGCAAG+GCTGCACT  
ATCGAACGGCGATAGATATTCTTGTATTGGTTCTGGAAATAATCTATCTGCATTTGCAGATATGTTGT  
GATGCTGAAGGTAGAACGTTCTTGGATCGTTCTTCCGATTATTTCTAGAGACTCTGTCTTTGACCTA  
GCTGATAAAGCTTTA

+

:FFFFFFFF:FFFFFFFFFFFFFFFFFFFFFFFF:FFFF:FFFFFFFF:FFFFFFFF:FFFFFFFF  
FFFFFFFFFFFFFFFFFFFFFFFFFFFFFFFFFFFFFFFF:FFFFFFFFFFFFFFFFFFFFFFFFFFFFFFFF  
F,FFFFFFFFFFFF:F

@A00721:190:HGJW7DSXY:4:2222:1579:9204 1:N:0:TCTGCAAG+GCTGCACT  
ATCGAACGGCGATAGATATTCTTGTATTGGTTCTGGAAATAATCTATCTGCATTTGCAGATATGTTGT  
GATGCTGAAGGTAGAACGTTCTTGGATCGTTCTTCCGATTATTTCTAGAGACTCTGTCTTTGACCTA  
GCTGATAAAGCTTTA

+

FFFFFFFFFFFFFFFFFFFFFFFFFFFFFFFFFFFFFFFFFFFFFFFFFFFFFFFFFFFFFFFF  
FFFFFFFFFFFFFFFFFFFFFFFFFFFFFFFFFFFFFFFFFFFFFFFFFFFFFFFFFFFFFFFF  
FFFFFFFFFFFFFFFF

@A00721:190:HGJW7DSXY:4:2222:1732:9721 1:N:0:TCTGCAAG+GCTGCACT  
ATCGAACGGCGATAGATATTCTTGTATTGGTTCTGGAAATAATCTATCTGCATTTGCAGATATGTTGT  
GATGCTGAAGGTAGAACGTTCTTGGATCGTTCTTCCGATTATTTCTAGAGACTCTGTCTTTGACCTA  
GCTGATAAAGCTTTA

+

FFFFFFFFFFFFFFFFFFFFFFFFFFFFFFFFFFFFFFFFFFFFFFFFFFFFFFFFFFFFFFFF  
FFFFFFFFFFFFFF:FFFFFFFFFFFFFFFFFFFFFFFFFFFFFFFFFFFFFFFFFFFFFFFF:FFFFFFF  
FFFFFFFFFFFFFFFF

@A00721:190:HGJW7DSXY:4:2222:1461:9752 1:N:0:TCTGCAAG+GCTGCACT  
ATCGAACGGCGATAGATATTCTTGTATTGGTTCTGGAAATAATCTATCTGCATTTGCAGATATGTTGT  
GATGCTGAAGGTAGAACGTTCTTGGATCGTTCTTCCGATTATTTCTAGAGACTCTGTCTTTGACCTA  
GCTGATAAAGCTTTA

+

F:FFFFFFFFFFFF,FFFFFF:FFFF:FFFFFF:FFFFFF,FFFFFFFFFFFFFFFFFFFFFFFF:FFF,

FFFFFFFFFFFF,F,FFFF:FFFFFFFFFFFF:FFFFFF:FFFF:FFFFFFFFFFFF,FFF,F:F:FFF  
FFFFFFFF:FFFFFFFF

@A00721:190:HGJW7DSXY:4:2376:2546:12540 1:N:0:TCTGCAAG+GCTGCACT  
ATCGAACGGCGATAGATATTCTTGTATTGGTTCTGGAAATAATCTATCTGCATTTGCAGATATGTTGT  
GATGCTGAAGGTAGAACGTTCTTGGATCGTTCTTCCGATTATTTCTAGAGACTCTGTCTTTGACCTA  
GCTGATAAAGCTTTA

+

FFFFFFFFFFFFFFFFFFFF:,FFFFFFFFFFFFFFFFFFFFFFFFFFFFFFFFFFFFFFFFFFFFFFFFFFFF:FFFFFFF  
FFFFFFFFFFFFFFFFFFFF:FFFFFFFFFFFFFFFFFFFFFFFFFFFFFFFFFFFFFFFFFFFFFFFFFFFFFFFFFFFF  
FFFFFFFFFFFFFFFFFFFF

@A00721:190:HGJW7DSXY:4:2453:28763:19366 1:N:0:TCTGCAAG+GCTGCACT  
ATCGAACGGCGATAGATATTCTTGTATTGGTTCTGGAAATAATCTATCTGCATTTGCAGATATGTTGT  
GATGCTGAAGGTAGAACGTTCTTGGATCGTTCTTCCGATTATTTCTAGAGACTCTGTCTTTGACCTA  
GCTGATAAAGCTTTA

+

FFFFFFFFFFFFFFFFFFFFFFFFFFFFFFFFFFFFFFFFFFFFFFFFFFFFFFFFFFFFFFFFFFFFFFFFFFFF  
FFFFFFFFFFFFFFFFFFFFFFFFFFFFFFFFFFFFFFFFFFFFFFFFFFFFFFFFFFFFFFFFFFFFFFFFFFFF  
FFFFFFFFFFFFFFFFFFFF

@A00721:190:HGJW7DSXY:4:1547:7328:36605 1:N:0:TCTGCAAG+GCTGCACT  
CGGCGATAGATATTCTTGTATTGGTTCTGGAAATAATCTATCTGCATTTGCAGATATGTTGTGATGCT  
GAAGGTAGAACGTTCTTGGATCGTTCTTCCGATTATTTCTAGAGACTCTGTCTTTGACCTAGCTGAT  
AAAGCTTTATTATAA

+

FFFFFFFFFFFFFFFFFFFFFFFFFFFFFFFFFFFFFFFFFFFFFFFFFFFFFFFFFFFFFFFFFFFFFFFFFFFF  
FFF:FFFFFFFFFFFFFFFFFFFFFFFFFFFFFFFFFFFFFFFFFFFFFFFFFFFFFFFFFFFFFFFFFFFF:FFFFFFF  
FFFFFFFFFFFFFFFFFFFF

@A00721:190:HGJW7DSXY:4:1541:16767:30123 1:N:0:TCTGCAAG+GCTGCACT  
ACGTTGTTTATAATAAAGCTTTATCAGCTAGGTCAAAGACAGAGTCTCTAGAAATAATCCGGAAGAAC  
GATCCAAGAACGTTCTACCTTCAGCATCACAAATATCTGCAAATGCAGATAGATTATTTCCAGAACC  
AATACAAGAATATCT

+

FFFFFFFFFFFFFFFFFFFFFFFFFFFFFFFFFFFFFFFFFFFFFFFFFFFFFFFFFFFFFFFFFFFFFFFFFFFF  
FFFFFFFFFFFFFFFFFFFFFFFFFFFFFFFFFFFFFFFFFFFFFFFFFFFFFFFFFFFFFFFFFFFF:FFFFFFF:  
FFFFFFFFFFFFFFFFFFFF

@A00721:190:HGJW7DSXY:4:2541:18502:35008 1:N:0:TCTGCAAG+GCTGCACT  
ACGTTGTTTATAATAAAGCTTTATCAGCTAGGTCAAAGACAGAGTCTCTAGAAATAATCCGGAAGAAC  
GATCCAAGAACGTTCTACCTTCAGCATCACAAATATCTGCAAATGCAGATAGATTATTTCCAGAACC  
AATACAAGAATATCT

+

FFFFFFFFFFFFFFFFFFFFFFFFFFFFFFFFFFFFFFFFFFFFFFFFFFFFFFFFFFFFFFFFFFFF:FFFFFFF  
FFFFFFFFFFFFF:FFFFFFFFFFFFFFFFFFFFFFFFFFFF:FFFFF:F:FFFFFFFFFFFFFFFFFFFF:FFFFFFF  
FF:FFFF:FFFFFF:

@A00721:190:HGJW7DSXY:4:1128:27525:25019 1:N:0:TCTGCAAG+GCTGCACT  
TTGGTTCTGGAAATAATCTATCTGCATTTGCAGATATGTTGTGATGCTGAAGGTAGAACGTTCTTGGAT  
TCGTTCTTCCGATTATTTCTAGAGACTCTGTCTTTGACCTAGCTGATAAAGCTTTATTATAAACAAC  
GTCTAGTTTCGATACG

+

FFFFFFFFFFFFFFFFFFFFFFFFFFFFFFFFFFFFFFFFFFFFFFFFFFFFFFFFFFFFFFFFFFFF:FFFFFFF  
FFF:FFFFFFFFFFFFFFFFFFFFFFFFFFFFFFFFFFFFFFFFFFFF:FFFFFFFFF:FFFFFFFFFFFFF  
FFFFFFFFFFFFFFFFFFFF

@A00721:190:HGJW7DSXY:4:1348:26684:22623 1:N:0:TCTGCAAG+GCTGCACT  
TTTTGGAAATAATCTATCTGCATTTGCAGATATGTTGTGATGCTGAAGGTAGAACGTTCTTGGATCGT  
TCTTCCGATTATTTCTAGAGACTCTGTCTTTGACCTAGCTGATAAAGCTTTATTATAAACAACGCTCT  
AGTTTCGATACGATCA

+  
FFFFFFFFFFFFFFFFFFFFFFFFFFFFFFFFFFFFFFFFFFFFFFFFFFFFFFFFFFFFFFFFFFFFFFFF  
FFFFFFFFFFFFFFFFFFFFFFFFFFFFFFFFFFFFFFFFFFFFFFFFFFFFFFFFFFFFFFFFFFFFFFFF:FFFFFFFFFFFFFF:FFFF  
FFFFFFFFFFFFFFFF

@A00721:190:HGJW7DSXY:4:1358:18050:24925 1:N:0:TCTGCAAG+GCTGCACT  
TTTTGGAAATAATCTATCTGCATTTGCAGATATGTTGTGATGCTGAAGGTAGAACGTTCTTGGATCGT  
TCTTCCGGATTATTTCTAGAGACTCTGTCTTTGACCTAGCTGATAAAGCTTTATTATAAACAACGTCT  
AGTTCGATACGATCA

+  
FFFFFFFFFFFFFFFFFFFFFFFFFFFFFFFFFFFFFFFFFFFFFFFFFFFFFFFFFFFFFFFFFFFFFFFF  
FFFFFFFFFFFFFFFFFFFFFFFFFFFFFFFFFFFFFFFFFFFFFFFFFFFFFFFFFFFFFFFFFFFFFFFF:FFFFFFFF:FFFFFF:FFFFFF:FFFFFFF  
FFFFFFFFFFFFFFFF

@A00721:190:HGJW7DSXY:4:2130:28745:1767 1:N:0:TCTGCAAG+GCTGCACT  
TTTTGGAAATAATCTATCTGCATTTGCAGATATGTTGTGATGCTGAAGGTAGAACGTTCTTGGATCGT  
TCTTCCGGATTATTTCTAGAGACTCTGTCTTTGACCTAGCTGATAAAGCTTTATTATAAACAACGTCT  
AGTTCGATACGATCA

+  
FFFFFFFFFFFFFFFFFFFFFFFFFFFFFFFFFFFFFFFFFFFFFFFFFFFFFFFFFFFFFFFFFFFFFFFF  
FF,:FFFFFFFFFFFFFFFFFFFFFFFFFFFFFFFFFFFFFFFFFFFFFFFFFFFFFFFFFFFFFFFF,FF:FFFFFFFFFFFFFF:FFFFFFFFFFFFFFF:  
FFFFFFFFFFFFFFFF

@A00721:190:HGJW7DSXY:4:2153:18502:24236 1:N:0:TCTGCAAG+GCTGCACT  
TTTTGGAAATAATCTATCTGCATTTGCAGATATGTTGTGATGCTGAAGGTAGAACGTTCTTGGATCGT  
TCTTCCGGATTATTTCTAGAGACTCTGTCTTTGACCTAGCTGATAAAGCTTTATTATAAACAACGTCT  
AGTTCGATACGATCA

+  
FFFFFFFFFFFFFFFFFFFFFFFFFFFFFFFFFFFFFFFFFFFFFFFFFFFFFFFFFFFFFFFFFFFFFFFF  
FFFFFFFFFFFFFFFFFFFFFFFFFFFFFFFFFFFFFFFFFFFFFFFFFFFFFFFFFFFFFFFFFFFFFFFF:FF:FFFFFFFF  
FFFFFFFFFFFFFFFF

@A00721:190:HGJW7DSXY:4:2228:9625:22482 1:N:0:TCTGCAAG+GCTGCACT  
TTTTGGAAATAATCTATCTGCATTTGCAGATATGTTGTGATGCTGAAGGTAGAACGTTCTTGGATCGT  
TCTTCCGGATTATTTCTAGAGACTCTGTCTTTGACCTAGCTGATAAAGCTTTATTATAAACAACGTCT  
AGTTCGATACGATCA

+  
FFFFFFFFFFFFFFFFFFFFFFFFFFFFFFFFFFFFFFFFFFFFFFFFFFFFFFFFFFFFFFFFFFFFFFFF  
FFFFFFFFFFFFFFFFFFFFFFFFFFFFFFFFFFFFFFFFFFFFFFFFFFFFFFFFFFFFFFFFFFFFFFFF:FFFFFF,F:FFFFFFFFFFFFFFFFFFFFFFF  
FFFFF:FFFFFFFF

@A00721:190:HGJW7DSXY:4:2356:8739:22858 1:N:0:TCTGCAAG+GCTGCACT  
TTTTGGAAATAATCTATCTGCATTTGCAGATATGTTGTGATGCTGAAGGTAGAACGTTCTTGGATCGT  
TCTTCCGGATTATTTCTAGAGACTCTGTCTTTGACCTAGCTGATAAAGCTTTATTATAAACAACGTCT  
AGTTCGATACGATCA

+  
FFFFFFFFFFFFFFFFFFFFFFFFFFFFFFFFFFFFFFFFFFFFFFFFFFFFFFFFFFFFFFFFFFFFFFFF  
FF,FFFFFFFFFFFFFFFFFFFFFFFFFFFFFFFFFFFFFFFFFFFFFFFFFFFFFFFFFFFFFFFF:FFFFF:FFFFFF:FFFF:FFF  
FF:FFFFFFFF

@A00721:190:HGJW7DSXY:4:2460:21757:12117 1:N:0:TCTGCAAG+GCTGCACT  
TTTTGGAAATAATCTATCTGCATTTGCAGATATGTTGTGATGCTGAAGGTAGAACGTTCTTGGATCGT  
TCTTCCGGATTATTTCTAGAGACTCTGTCTTTGACCTAGCTGATAAAGCTTTATTATAAACAACGTCT  
AGTTCGATACGATCA

+  
FFFFFFFFFFFFFFFFFFFFFFFFFFFFFFFFFFFFFFFFFFFFFFFFFFFFFFFFFFFFFFFFFFFFFFFF  
FF:FFFFFFFFFFFFFFFFFFFFFFFFFFFFFFFFFFFFFFFFFFFFFFFFFFFFFFFFFFFFFFFFFFFFFFFF  
FFFFFFFFFFFFFFFF

@A00721:190:HGJW7DSXY:4:1411:6180:3082 1:N:0:TCTGCAAG+GCTGCACT  
CTGGAAATAATCTATCTGCATTTGCAGATATGTTGTGATGCTGAAGGTAGAACGTTCTTGGATCGTTC





FFFFFFFFFFFFFFFFFFFFFFFF:FFF:FFF,FFF:FF:FFFFF:F:FFFFFFFFFFFF:FF:FFFF:F,F  
F,,,FFF:F,F,F:

@A00721:190:HGJW7DSXY:4:2430:29378:28040 1:N:0:TCTGCAAG+GCTGCACT  
CCGAAAAGAAAGTGTGATCGTATCGAACTAGACGTTGTTTATAATAAAGCTTTATCAGCTAGGTCAA  
AGACAGAGTCTCTAGAAATAATCCGGAAGAACGATCCAAGAACGTTCTACCTTCAGCATCACAAACATA  
TCTGCAAATGCAGAT

+

FFFFFFFFFFFFFFFFFFFFFFFFFFFFFFFFFFFFFFFFFFFFFFFFFFFFFFFFFFFFFFFFFFFFFFFF  
FFFFFFFFFFFFFFFFFFFFFFFFFFFFFFFFFFFFFFFFFFFFFFFFFFFFFFFFFFFFFFFFFFFFFFFF:F  
FFFFFFFFFFFFFFFF

@A00721:190:HGJW7DSXY:4:2471:4725:14810 1:N:0:TCTGCAAG+GCTGCACT  
CCGAAAAGAAAGTGTGATCGTATCGAACTAGACGTTGTTTATAATAAAGCTTTATCAGCTAGGTCAA  
AGACAGAGTCTCTAGAAATAATCCGGAAGAACGATCCAAGAACGTTCTACCTTCAGCATCACAAACATA  
TCTGCAAATGCAGAT

+

FFFFFFFFFFFFFFFFFFFFFFFFFFFFFFFFFFFFFFFFFFFFFFFFFFFFFFFFFFFFFFFFFFFFFFFF  
FFFFFFFFFFFFFFFFFFFFFFFFFFFFFFFFFFFFFFFFFFFFFFFFFFFFFFFFFFFFFFFFFFFFFFFF:F  
FFF:FFFFFFFF

@A00721:190:HGJW7DSXY:4:2512:23619:11866 1:N:0:TCTGCAAG+GCTGCACT  
CCGAAAAGAAAGTGTGATCGTATCGAACTAGACGTTGTTTATAATAAAGCTTTATCAGCTAGGTCAA  
AGACAGAGTCTCTAGAAATAATCCGGAAGAACGATCCAAGAACGTTCTACCTTCAGCATCACAAACATA  
TCTGCAAATGCAGAT

+

FFFFFFFFFFFFFFFFFFFFFFFFFFFFFFFFFFFFFFFFFFFFFFFFFFFFFFFFFFFFFFFFFFFFFFFF  
FF:FFFFFFFFFFFFFFFFFFFFFFFFFFFFFFFFFFFFFFFFFFFFFFFFFFFFFFFFFFFFFFFF:F  
FFFFFFFFFFFFFFFF

@A00721:190:HGJW7DSXY:4:2631:4146:2503 1:N:0:TCTGCAAG+GCTGCACT  
CCGAAAAGAAAGTGTGATCGTATCGAACTAGACGTTGTTTATAATAAAGCTTTATCAGCTAGGTCAA  
AGACAGAGTCTCTAGAAATAATCCGGAAGAACGATCCAAGAACGTTCTACCTTCAGATCACAAACATA  
TCTGCAAATGCAGAT

+

FFFFFFFFFFFFFFFFFFFFFFFFFFFFFFFFFFFFFFFFFFFFFFFFFFFFFFFFFFFFFFFFFFFFFFFF  
FFFF: :FFFFFFFFFFFFFFFFFFFFFFFFFFFFFFFFFFFFFFFFFFFFFFFFFFFFFFFF:F  
FF: :FF: ,FF:FF

@A00721:190:HGJW7DSXY:4:1440:30852:13683 1:N:0:TCTGCAAG+GCTGCACT  
CAGATATGTTGTGATGCTGAAGGTAGAACGTTCTTGATCGTTCTTCCGATTATTTCTAGAGACTCT  
GTCTTTGACCTAGCTGATAAAGCTTTATTATAAACAACGTCTAGTTCGATACGATCACACTTTCTTT  
CCGGCCGTCTTCTTG

+

FFFFFFFFFFFFFFFFFFFFFFFFFFFFFFFFFFFFFFFFFFFFFFFFFFFFFFFFFFFFFFFFFFFFFFFF  
FFFFFFFFFFFFFFFFFFFFFFFFFFFFFFFFFFFFFFFFFFFFFFFFFFFFFFFFFFFFFFFFFFFFFFFF  
FFFFFFFFFFFFFFFF

@A00721:190:HGJW7DSXY:4:1603:7835:15468 1:N:0:TCTGCAAG+GCTGCACT  
CAGATATGTTGTGATGCTGAAGGTAGAACGTTCTTGATCGTTCTTCCGATTATTTCTAGAGACTCT  
GTCTTTGACCTAGCTGATAAAGCTTTATTATAAACAACGTCTAGTTCGATACGATCACACTTTCTTT  
CCGGCCGTCTTCTTG

+

FFFFFFFFFFFFFFFFFFFFFFFFFFFFFFFFFFFFFFFFFFFFFFFFFFFFFFFFFFFFFFFFFFFFFFFF  
FFFFFFFFFFFFFFFFFFFFFFFFFFFFFFFFFFFFFFFF:F:F:FFFFFFFFFFFFFFFFFFFFFFFF:F  
F:FFFFFFFF

@A00721:190:HGJW7DSXY:4:1634:32669:15765 1:N:0:TCTGCAAG+GCTGCACT  
CAGATATGTTGTGATGCTGAAGGTAGAACGTTCTTGATCGTTCTTCCGATTATTTCTAGAGACTCT  
GTCTTTGACCTAGCTGATAAAGCTTTATTATAAACAACGTCTAGTTCGATACGATCACACTTTCTTT  
CCGGCCGTCTTCTTG

[illegible][illegible][illegible]

```
FFFFFFFFFFFF:FFFFFFFFFFFFFFFFFFFFFFFFFFFFFFFFFFFFFFFFFFFFFFFFFFFFFFF
FFFFFFFFFFFFFFFFFFFFFFFFFFFFFFFFFFFFFFFFFFFFFFFFFFFFFFFFFFFF:FFFFFFF,
FFFFFFFFFFFFFFFFFFFF
FFFFFFFFFFFFFF
```

[illegible][illegible][illegible]

@A00721:190:HGJW7DSXY:4:2207:22652:11600 1:N:0:TCTGCAAG+GCTGCACT  
ATTTCAAGAAGACGGCCGAAAAAGAAAGTGTGATCGTATCGAACTAGACGTTGTTTATAATAAAGCTT





@A00721:190:HGJW7DSXY:4:1366:28944:14356 1:N:0:TCTGCAAG+GCTGCACT  
GTGATGCTGAAGGTAGAACGTTCTTGGATCGTTCTTCCGATTATTTCTAGAGACTCTGTCTTTGACC  
TAGCTGATAAAGCTTTATTATAAACACGCTCTAGTTCGATACGATCACACTTTCTTTTCCGGCCGTCT  
TCTTGAAATTGACCG

[illegible]

@A00721:190:HGJW7DSXY:4:1501:1344:22138 1:N:0:TCTGCAAG+GCTGCACT  
GTGATGCTGAAGGTAGAACGTTCTTGGATCGTTCTTCCGATTATTTCTAGAGACTCTGTCTTTGACC  
TAGCTGATAAAGCTTTATTATAAACAACGCTCTAGTTCGATACGATCACACTTTCTTTTCCGGCCGTCT  
TCTTGAAATTGACC

F:FF,,FFFFFF:F:FFFFFF:FFF:FF:FFF,F:FF,FFFF:FF:F:FFFFFFFFFFFF:FFF,FFFF  
 FFFFFFF:FFFFFFFF:F,:FFFF:FFFFFFFF:FFFFFFFFFFFFFFFFFFFFFFFF:FFFFFF,,::FF:F:  
 FFF,FFF,,FFFF

@A00721:190:HGJW7DSXY:4:1556:18701:15812 1:N:0:TCTGCAAG+GCTGCACT  
GTGATGCTGAAGGTAGAACGTTCTTGGATCGTTCTTCCGATTATTTCTAGAGACTCTGTCTTTGACC  
TAGCTGATAAAGCTTTATTATAAACACGCTCTAGTTCGATACGATCACACTTTCTTTTCCGGCCGTCT  
TCTTGAAATTGACCG

[illegible]

@A00721:190:HGJW7DSXY:4:2254:3495:2660 1:N:0:TCTGCAAG+GCTGCACT  
GTGATGCTGAAGGTAGAACGTTCTTGGATCGTTCTTCCGATTATTTCTAGAGACTCTGTCTTTGACC  
TAGCTGATAAAGCTTTATTATAAACACGCTCTAGTTCGATACGATCACACTTTCTTTTCCGGCCGTCT  
TCTTGAAATTGACCG

[illegible]

@A00721:190:HGJW7DSXY:4:2303:3766:18349 1:N:0:TCTGCAAG+GCTGCACT  
GTGATGCTGAAGGTAGAACGTTCTTGGATCGTTCTTCCGATTATTTCTAGAGACTCTGTCTTTGACC  
TAGCTGATAAAGCTTTATTATAAACACGTCTAGTTCGATACGATCACACTTTCTTTTCCGGCCGTCT  
TCTTGAAATTGACCG

[illegible]

@A00721:190:HGJW7DSXY:4:2308:24288:21449 1:N:0:TCTGCAAG+GCTGCACT  
GTGATGCTGAAGGTAGAACGTTCTTGATCGTTCTTCCGATTATTTCTAGAGACTCTGTCTTTGACC  
TAGCTGATAAAGCTTTATTATAAACAACGTCTAGTTCGATACGATCACACTTTCTTTTCCGGCCGTCT  
TCTTGAAATTGACCG

```
FFFFFFFFFFFFFFFFFFFFFFFFFFFFFFFFFFFFFFFFFFFFFFFFFFFFFFFFFFFFFFF
FFFFFFFFFFFFFFFFFFFF:FFFFFFFFFFFFFFFFFFFFFFFFFFFFFFFFFFFFFFFF:F
FFFFFFFFFFFFFFFF
```

@A00721:190:HGJW7DSXY:4:1335:5927:27696 1:N:0:TCTGCAAG+GCTGCACT  
TGATGCTGAAGGTAGAACGTTCTTGATCGTTCTTCCGATTATTTCTAGAGACTCTGTCTTTGACCT  
AGCTGATAAAGCTTTATTATAAACACGTCTAGTTCGATACGATCACACTTTCTTTTCCGGCCGTCTT  
CTTGAAATTGACCGT

[illegible]

FFFFFFFFFFFFFFFFFFFFFFFFFFFFFFFFFFFFFFFFFFFFFFFFFFFFFFFFFFFFFFFFFFFFFFFF  
FFFFFFFFFFFFFFFF

@A00721:190:HGJW7DSXY:4:1446:5801:7404 1:N:0:TCTGCAAG+GCTGCACT  
TGATGCTGAAGGTAGAACGTTCTTGGATCGTTCTTCCGGATTATTTCTAGAGACTCTGTCTTTGACCT  
AGCTGATAAAGCTTTATTATAAACAACGTCTAGTTCGATACGATCACACTTTCTTTTCCGGCCGTCTT  
CTTGAAATTGACCGT

+

FFFFFFFFFFFFFFFFFFFFFFFFFFFFFFFFFFFFFFFFFFFFFFFFFFFFFFFFFFFFFFFFFFFFFFFF  
FFFFFFFFFFFFFFFFFFFFFFFFFFFFFFFFFFFFFFFFFFFFFFFFFFFFFFFFFFFFFFFFFFFFFFFF  
FFFFFFFFFFFFFFFF

@A00721:190:HGJW7DSXY:4:2221:10140:27352 1:N:0:TCTGCAAG+GCTGCACT  
TGATGCTGAAGGTAGAACGTTCTTGGATCGTTCTTCCGGATTATTTCTAGAGACTCTGTCTTTGACCT  
AGCTGATAAAGCTTTATTATAAACAACGTCTAGTTCGATACGATCACACTTTCTTTTCCGGCCGTCTT  
CTTGAAATTGACCGT

+

FFFFFFFFFFFFFFFFFFFFFFFFFFFFFFFFFFFFFFFFFFFFFFFFFFFFFFFFFFFFFFFFFFFFFFFF  
FFFFFFFFFFFFFFFF:FF:FFFFFFFFFFFFFFFFFFFFFFFFFFFFFFFFFFFFFFFFFFFFFFFFFFFF  
FFFFFFFFFFFFFFFF

@A00721:190:HGJW7DSXY:4:2446:16477:7420 1:N:0:TCTGCAAG+GCTGCACT  
TGATGCTGAAGGTAGAACGTTCTTGGATCGTTCTTCCGGATTATTTCTAGAGACTCTGTCTTTGACCT  
AGCTGATAAAGCTTTATTATAAACAACGTCTAGTTCGATACGATCACACTTTCTTTTCCGGCCGTCTT  
CTTGAAATTGACCGT

+

F::FFFFFFFF:FFFFFFFFFFFFFFFF:FFFFF,FFFF:FF:FFFFFFFFFFFFFFFF:FFFFF:FFF,  
F:,FFF,F:FF::,FF:FFFFFFFF,FFF,FF::,:FFFF:F,:FFFF,: ,FF,F,F::,F:,FFFF  
FFF,FFF:FFF:,FF

@A00721:190:HGJW7DSXY:4:2560:27877:29888 1:N:0:TCTGCAAG+GCTGCACT  
TGATGCTGAAGGTAGAACGTTCTTGGATCGTTCTTCCGGATTATTTCTAGAGACTCTGTCTTTGACCT  
AGCTGATAAAGCTTTATTATAAACAACGTCTAGTTCGATACGATCACACTTTCTTTTCCGGCCGTCTT  
CTTGAAATTGACCGT

+

FFFFFFFFFFFFFFFFFFFFFFFFFFFFFFFFFFFFFFFFFFFFFFFFFFFFFFFFFFFFFFFFFFFFFFFF  
FFFFFFFFFFFFFFFFFFFFFFFFFFFFFFFFFFFFFFFFFFFFFFFFFFFFFFFFFFFFFFFFFFFFFFFF  
FFFFFFFFFFFFFFFF

@A00721:190:HGJW7DSXY:4:2655:7093:32972 1:N:0:TCTGCAAG+GCTGCACT  
TGATGCTGAAGGTAGAACGTTCTTGGATCGTTCTTCCGGATTATTTCTAGAGACTCTGTCTTTGACCT  
AGCTGATAAAGCTTTATTATAAACAACGTCTAGTTCGATACGATCACACTTTCTTTTCCGGCCGTCTT  
CTTGAAATTGACCGT

+

FFFFFFFFFFFFFFFFFFFFFFFFFFFFFFFFFFFFFFFFFFFFFFFFFFFFFFFFFFFFFFFFFFFFFFFF  
:FFFFFFFFFFFFFFFFFFFFFFFFFFFFFFFFFFFFFFFFFFFFFFFFFFFFFFFFFFFFFFFFFFFFFFFF  
FFFFFFFFFFFFFFFF

@A00721:190:HGJW7DSXY:4:2656:1488:12618 1:N:0:TCTGCAAG+GCTGCACT  
TGATGCTGAAGGTAGAACGTTCTTGGATCGTTCTTCCGGATTATTTCTAGAGACTCTGTCTTTGACCT  
AGCTGATAAAGCTTTATTATAAACAACGTCTAGTTCGATACGATCACACTTTCTTTTCCGGCCGTCTT  
CTTGAAATTGACCGT

+

FFFFFFFFFFFFFFFFFFFFFFFFFFFFFFFFFFFFFFFFFFFFFFFFFFFFFFFFFFFFFFFFFFFFFFFF  
FFFFFFFFFFFFFFFFFFFFFFFFFFFFFFFFFFFFFFFFFFFFFFFFFFFFFFFFFFFFFFFFFFFFFFFF  
FFFFFFFFFFFFFFFF

@A00721:190:HGJW7DSXY:4:1262:31430:35571 1:N:0:TCTGCAAG+GCTGCACT  
GCTGAAGGTAGAACGTTCTTGGATCGTTCTTCCGGATTATTTCTAGAGACTCTGTCTTTGACCTAGCT  
GATAAAGCTTTATTATAAACAACGTCTAGTTCGATACGATCACACTTTCTTTTCCGGCCGTCTTCTTG  
AAATTGACCGTGATC

+  
FFFFFFFFFFFFFFFFFFFFFFFFFFFFFFFFFFFFFFFFFFFFFFFFFFFFFFFFFFFFFFFFFFFFFFFF  
FFFFFFFFFFFFFFFFFFFFFFFFFFFFFFFFFFFFFFFFFFFFFFFFFFFFFFFFFFFFFFFFFFFFFFFF  
FFFFFFFFFFFFFFFF  
@A00721:190:HGJW7DSXY:4:1263:26096:11960 1:N:0:TCTGCAAG+GCTGCACT  
GCTGAAGGTAGAACGTTCTTGGATCGTTCTTCCGGATTATTTCTAGAGACTCTGTCTTTGACCTAGCT  
GATAAAGCTTTATTATAAACACGTCTAGTTCGATACGATCACACTTTCTTTTCCGGCCGTCTTCTTG  
AAATTGACCGTGATC  
+  
FFFFFFFFFFFFFFFFFFFFFFFFFFFFFFFFFFFFFFFFFFFFFFFFFFFFFFFFFFFFFFFFFFFFFFFF  
FFFFFFFFFFFFFFFFFFFFFFFFFFFFFFFFFFFFFFFFFFFFFFFFFFFFFFFFFFFFFFFFFFFFFFFF,  
FFFFFFFFFFFFFFFF  
@A00721:190:HGJW7DSXY:4:1308:2383:35274 1:N:0:TCTGCAAG+GCTGCACT  
GCTGAAGGTAGAACGTTCTTGGATCGTTCTTCCGGATTATTTCTAGAGACTCTGTCTTTGACCTAGCT  
GATAAAGCTTTATTATAAACACGTCTAGTTCGATACGATCACACTTTCTTTTCCGGCCGTCTTCTTG  
AAATTGACCGTGATC  
+  
FFFFFFFFFFFFFFFFFFFFFFFFFFFFFFFFFFFFFFFFFFFFFFFFFFFFFFFFFFFFFFFFFFFFFFFF  
FFFFFFFFFFFFFFFFFFFFFFFFFFFFFFFFFFFFFFFFFFFFFFFFFFFFFFFFFFFFFFFFFFFFFFFF:FFF  
FFFFFFFFFFFFFFFF  
@A00721:190:HGJW7DSXY:4:1645:19027:21230 1:N:0:TCTGCAAG+GCTGCACT  
GCTGAAGGTAGAACGTTCTTGGATCGTTCTTCCGGATTATTTCTAGAGACTCTGTCTTTGACCTAGCT  
GATAAAGCTTTATTATAAACACGTCTAGTTCGATACGATCACACTTTCTTTTCCGGCCGTCTTCTTG  
AAATTGACCGTGATC  
+  
FFFFFFFFFFFFFFFFFFFFFFFFFFFFFFFFFFFFFFFFFFFFFFFFFFFFFFFFFFFFFFFFFFFFFFFF  
FFFFFFF:FFF:FFFFFFFFFFFFFFFFFFFFFFFFFFFFFFFFFFFFFFFFFFFFFFFFFFFFFFFF:FFFFF  
FFFFFFFFFFFFFFFF  
@A00721:190:HGJW7DSXY:4:2130:31611:23234 1:N:0:TCTGCAAG+GCTGCACT  
GCTGAAGGTAGAACGTTCTTGGATCGTTCTTCCGGATTATTTCTAGAGACTCTGTCTTTGACCTAGCT  
GATAAAGCTTTATTATAAACACGTCTAGTTCGATACGATCACACTTTCTTTTCCGGCCGTCTTCTTG  
AAATTGACCGTGATC  
+  
FFFFFFFFFFFFFFFFFFFFFFFFFFFFFFFFFFFFFFFFFFFFFFFFFFFFFFFFFFFFFFFFFFFFFFFF  
FFFFFFFFFFFFFFFFFFFFFFFFFFFFFFFFFFFFFFFFFFFFFFFFFFFFFFFFFFFFFFFFFFFFFFFF:F  
FFFFFF,F:FFFFFF  
@A00721:190:HGJW7DSXY:4:2518:2935:14967 1:N:0:TCTGCAAG+GCTGCACT  
GCTGAAGGTAGAACGTTCTTGGATCGTTCTTCCGGATTATTTCTAGAGACTCTGTCTTTGACCTAGCT  
GATAAAGCTTTATTATAAACACGTCTAGTTCGATACGATCACACTTTCTTTTCCGGCCGTCTTCTTG  
AAATTGACCGTGATC  
+  
FFFFFFFFFFFFFFFFFFFFFFFFFFFFFFFFFFFFFFFFFFFFFFFFFFFFFFFFFFFFFFFFFFFFFFFF  
FFFFFFFFFFFFFFFFFFFFFFFFFFFFFFFFFFFFFFFFFFFFFFFFFFFFFFFFFFFFFFFFFFFFFFFF  
FFFFFFFFFFFF:FFFF  
@A00721:190:HGJW7DSXY:4:2539:14507:36730 1:N:0:TCTGCAAG+GCTGCACT  
GCTGAAGGTAGAACGTTCTTGGATCGTTCTTCCGGATTATTTCTAGAGACTCTGTCTTTGACCTAGCT  
GATAAAGCTTTATTATAAACACGTCTAGTTCGATACGATCACACTTTCTTTTCCGGCCGTCTTCTTG  
AAATTGACCGTGATC  
+  
FFFFFFFFFFFFFFFFFFFFFFFFFFFFFFFFFFFFFFFFFFFFFFFFFFFFFFFFFFFFFFFFFFFFFFFF  
FFFFFFFFFFFFFFFFFFFFFFFFFFFFFFFFFFFFFFFFFFFFFFFFFFFFFFFFFFFFFFFFFFFFFFFF  
FFFFFFF:FFFFFF  
@A00721:190:HGJW7DSXY:4:2549:23674:26490 1:N:0:TCTGCAAG+GCTGCACT  
GCTGAAGGTAGAACGTTCTTGGATCGTTCTTCCGGATTATTTCTAGAGACTCTGTCTTTGACCTAGCT

GATAAAGCTTTATTATAAACAACGTCTAGTTCGATACGATCACACTTTCTTTTCCGGCCGTCTTCTTG  
AAATTGACCGTGATC

+

FFFFFFFFFFFFFFFFFFFFFFFFFFFFFFFFFFFFFFFFFFFFFFFFFFFFFFFFFFFFFFFFFFFFFFFF  
FFFFFFFFFFFFFFFFFFFFFFFFFFFFFFFFFFFFFFFFFFFFFFFFFFFFFFFFFFFFFFFFFFFFFFFF  
FFFFFF:FFFFFFF

@A00721:190:HGJW7DSXY:4:1131:14163:25144 1:N:0:TCTGCAAG+GCTGCACT  
CTGAAGGTAGAACGTTCTTGGATCGTTCTTCCTGATTATTACTAGAGACTGTGTCTTTGACCTAGCTG  
ATAAAGCTTTATTATAAACAACGTCTAGTTCGATACGATCACACTTTCTTTTCCGGCCGTCTTCTTGA  
AATTGACCGTGATCA

+

FFFFFFFFFFFFFFFFFFFFFFFFFFFFFFFFFFFFFFFFFFFFFFFFFFFFFFFFFFFFFFFFFFFFFFFF  
FFFFFFFFFFFFFFFFFFFFFFFFFFFFFFFFFFFFFFFFFFFFFFFFFFFFFFFFFFFFFFFFFFFFFFFF  
FFFFFFFFFFFFFFFFFFFFFFFF

@A00721:190:HGJW7DSXY:4:1427:16504:18834 1:N:0:TCTGCAAG+GCTGCACT  
CTGAAGGTAGAACGTTCTTGGATCGTTCTTCCGATTATTTCTAGAGACTCTGTCTTTGACCTAGCTG  
ATAAAGCTTTATTATAAACAACGTCTAGTTCGATACGATCACACTTTCTTTTCCGGCCGTCTTCTTGA  
AATTGACCGTGATCA

+

FFFFFFFFFFFFFFFFFFFFFFFFFFFFFFFFFFFFFFFFFFFFFFFFFFFFFFFFFFFFFFFFFFFFFFFF  
FFFFFFFFFFFFFFFFFFFFFFFFFFFFFFFFFFFFFFFFFFFFFFFFFFFFFFFFFFFFFFFFFFFFFFFF  
FFFFFFFFFFFFFFFFFFFFFFFF

@A00721:190:HGJW7DSXY:4:1436:22941:3176 1:N:0:TCTGCAAG+GCTGCACT  
CTGAAGGTAGAACGTTCTTGGATCGTTCTTCCGATTATTTCTAGAGACTCTGTCTTTGACCTAGCTG  
ATAAAGCTTTATTATAAACAACGTCTAGTTCGATACGATCACACTTTCTTTTCCGGCCGTCTTCTTGA  
AATTGACCGTGATCA

+

FFFFFFFFFFFFFFFFFFFFFFFFFFFFFFFFFFFFFFFFFFFFFFFFFFFFFFFFFFFFFFFFFFFFFFFF  
FFFFFFFFFFFFFFFFFFFFFFFFFFFFFFFFFFFFFFFFFFFFFFFFFFFFFFFFFFFFFFFFFFFFFFFF  
FFFFFFFFFFFFFFFFFFFFFFFF

@A00721:190:HGJW7DSXY:4:1563:19081:9549 1:N:0:TCTGCAAG+GCTGCACT  
CTGAAGGTAGAACGTTCTTGGATCGTTCTTCCGATTATTTCTAGAGACTCTGTCTTTGACCTAGCTG  
ATAAAGCTTTATTATAAACAACGTCTAGTTCGATACGATCACACTTTCTTTTCCGGCCGTCTTCTTGA  
AATTGACCGTGATCA

+

FFFFFFFFFFFFFFFFFFFFFFFFFFFFFFFFFFFFFFFFFFFFFFFFFFFFFFFFFFFFFFFFFFFFFFFF  
FFFFFFFFFFFFFFFFFFFFFFFFFFFFFFFFFFFFFFFFFFFFFFFFFFFFFFFFFFFFFFFFFFFFFFFF  
FFFFFFFFFFFFFFFFFFFFFFFF

@A00721:190:HGJW7DSXY:4:1625:5990:25958 1:N:0:TCTGCAAG+GCTGCACT  
CTGAAGGTAGAACGTTCTTGGATCGTTCTTCCGATTATTTCTAGAGACTCTGTCTTTGACCTAGCTG  
ATAAAGCTTTATTATAAACAACGTCTAGTTCGATACGATCACACTTTCTTTTCCGGCCGTCTTCTTGA  
AATTGACCGTGATCA

+

FFFFFFFFFFFFFFFFFFFFFFFFFFFFFFFFFFFFFFFFFFFFFFFFFFFFFFFFFFFFFFFFFFFFFFFF  
FFFFFFFFFFFFFFFFFFFFFFFFFFFFFFFFFFFFFFFFFFFFFFFFFFFFFFFFFFFFFFFFFFFFFFFF  
FFFFFFFFFFFFFFFFFFFFFFFF

@A00721:190:HGJW7DSXY:4:1651:25057:12070 1:N:0:TCTGCAAG+GCTGCACT  
CTGAAGGTAGAACGTTCTTGGATCGTTCTTCCGATTATTTCTAGAGACTCTGTCTTTGACCTAGCTG  
ATAAAGCTTTATTATAAACAACGTCTAGTTCGATACGATCACACTTTCTTTTCCGGCCGTCTTCTTGA  
AATTGACCGTGATCA

+

FFFFFFF,FFFFFFFFFFFFFFFF:FFFF:F,FFFFFFFFFFFFFFFF,F,FFFFFF:FFFFFF:FF,:FF  
FFFFFFFFF,FFFFFFFFFFFF:FF:FF:F::FFF:FFFFFF:FFFF:FFFF,FFFFFFFFFFFF  
FFF::FF:FFFFFFF

@A00721:190:HGJW7DSXY:4:2325:16640:13150 1:N:0:TCTGCAAG+GCTGCACT  
CTGAAGGTAGAACGTTCTTGGATCGTTCTTCCGGATTATTTCTAGAGACTCTGTCTTTGACCTAGCTG  
ATAAAGCTTTATTATAAACAAACGTCTAGTTCGATACGATCACACTTTCTTTTCCGGCCGTCTTCTTGA  
AATTGACCGTGATCA

[illegible]

+

```

FFFFFFFFFFFFFFFFFFFFFFFF:FF:FFFFFFFFFF:FFFFFFFFFFFFFFFFFFFFFFFFFFFF
FFFFFFFFFFFFFFFFFFFFFFFFFFFFFFFFFFFFFFFF:FFFFFFFFFFFF:FFFFFFFFFFFFFFFFF:
FFFFFFFFFFFFFFFF

```

+

```

FFFFFFFFFFFFFFFF:FFFFFFFFFFFFFFFFFFFFFFFFFFFFFFFFFFFFFFFF
FFFFFFFFFFFFFFFFFFFFFFFFFFFFFFFFFFFFFFFFFFFFFFFF:FFFFFFFFFFFFFFFFFFFFFFFFFFFFFFFF
FFFFFFFFFFFFFFFF

```

+

```

FFFFFFFFFFFFFFFFFFFFFFFFFFFFFFFFFFFFFFFFFFFFFFFFFFFFFFFFFFFFFFFFFFFFFFFF
FFFFFFFFFFFFFFFFFFFFFFFF:FFFFFFFF:FFFFFFFFF:FFFFFFFFFFFFFFFFFFFF:FFFFFFFFFFFFFFFF
FFFF:FFFFFFFFFFFF

```

+

[illegible]

+

[illegible]

+

[illegible]

FFFFFFFFFFFFFFFFFFFFFFFFFFFFFFFFFFFFFFFFFFFFFFFFFFFFFFFFFFFFFFFFFFFFFFFF  
FFFF:FFFFFFFF

@A00721:190:HGJW7DSXY:4:2627:1434:25300 1:N:0:TCTGCAAG+GCTGCACT  
CTGAAGGTAGAACGTTCTTGGATCGTTCTTCCGGATTATTTCTAGAGACTCTGTCTTTGACCTAGCTG  
ATAAAGCTTTATTATAAACACGTCTAGTTCGATACGATCACACTTTCTTTTCCGGCCGTCTTCTTGA  
AATTGACCGTGATCA

+  
FFFFFFFF,FFFFFFFF:FFFFFF:FFFFFFFFFFFFFFFF:FFFFFFFFFFFFFFFFFFFFFFFF: F  
FFFFFFFFFFFFFFFFFFFFFFFF:FFFFFFFFFFFF:FFFFFFFFFFFFFFFF:FFFFFFFFFFFFFFFF  
FFFFFFFFFFFFFFFF

@A00721:190:HGJW7DSXY:4:2627:1561:25394 1:N:0:TCTGCAAG+GCTGCACT  
CTGAAGGTAGAACGTTCTTGGATCGTTCTTCCGGATTATTTCTAGAGACTCTGTCTTTGACCTAGCTG  
ATAAAGCTTTATTATAAACACGTCTAGTTCGATACGATCACACTTTCTTTTCCGGCCGTCTTCTTGA  
AATTGACCGTGATCA

+  
FFFFFFFFFFFFFFFFFFFFFFFFFFFFFFFFFFFFFFFFFFFFFFFFFFFFFFFFFFFFFFFFFFFFFFFF  
FFFFFFFFFFFFFFFFFFFFFFFFFFFFFFFFFFFFFFFFFFFFFFFFFFFFFFFFFFFFFFFFFFFFFFFF: FFFFFFFF  
FFFFF:FF:FFFFFF

@A00721:190:HGJW7DSXY:4:2677:24044:35055 1:N:0:TCTGCAAG+GCTGCACT  
CTGAAGGTAGAACGTTCTTGGATCGTTCTTCCGGATTATTTCTAGAGACTCTGTCTTTGACCTAGCTG  
ATAAAGCTTTATTATAAACACGTCTAGTTCGATACGATCACACTTTCTTTTCCGGCCGTCTTCTTGA  
AATTGACCGTGATCA

+  
F,FFFFFF::FFFF,FFFFFFFF:FFFF:FFF,FFFF:,,:FF:F:FFFFFFFF,FFF:F:F,FFF  
FFFF,,F,FFFF,FFFFFFFF,FFFFFF,FFF:FFF::FFFF:FF:F:F,FF,,FFFF,:F,FFF  
FFF:,F,:,,:FFFF

@A00721:190:HGJW7DSXY:4:1154:30463:18771 1:N:0:TCTGCAAG+GCTGCACT  
CCTTGGATCGTTCTTCCGGATTATTTCTAGAGACTCTGTCTTTGACCTAGCTGATAAAGCTTTATTAT  
AAACAACGTCTAGTTCGATACGATCACACTTTCTTTTCCGGCCGTCTTCTTGAATTGACCGTGATCA  
ATATAAGATCCTCCT

+  
FFFFFFFFFFFFFF:FFFFFFFFFFFFFFFFFFFFFFFFFFFFFFFFFFFFFFFF,FFFFFFFFFFFFFFFF  
FFFFFFFFFFFFFF:FF:FFFF:FFFFFFFFFFFFFFFFFFFFFFFFFFFFFFFF:FFFFFFFF:FFFFFFFF  
FFFFFFFFFFFFFF:FFF

@A00721:190:HGJW7DSXY:4:1259:31774:2848 1:N:0:TCTGCAAG+GCTGCACT  
CCTTGGATCGTTCTTCCGGATTATTTCTAGAGACTCTGTCTTTGACCTAGCTGATAAAGCTTTATTAT  
AAACAACGTCTAGTTCGATACGATCACACTTTCTTTTCCGGCCGTCTTCTTGAATTGACCGTGATCA  
ATATAAGATCCTCCT

+  
FFFFFFFFFFFFFFFFFFFFFFFFFFFFFFFFFFFFFFFFFFFFFFFFFFFFFFFFFFFFFFFFFFFFFFFF  
FF:FFFFFFFFFFFFFFFFFFFFFFFFFFFFFFFF:FFFFFFFFFFFFFFFF:FFFF,FFFFFFFF  
FFFFFF,FFFFFF

@A00721:190:HGJW7DSXY:4:1303:25473:13604 1:N:0:TCTGCAAG+GCTGCACT  
CCTTGGATCGTTCTTCCGGATTATTTCTAGAGACTCTGTCTTTGACCTAGCTGATAAAGCTTTATTAT  
AAACAACGTCTAGTTCGATACGATCACACTTTCTTTTCCGGCCGTCTTCTTGAATTGACCGTGATCA  
ATATAAGATCCTCCT

+  
:FFFFFFFF,,FFFFF:FF,FFFF:FFFFFFFFFFFFFFFF:FFFF:FF:,F:FFFFFF:F::FF,FFF  
FFFFFFFFF:F:F:F:FFFF,FFFF:FFF,FFFFFFFF:F:FF,FF:FFFF,F,F:F,F,F:F:,  
FFFFFF,FFF,FFFF

@A00721:190:HGJW7DSXY:4:1328:3947:24643 1:N:0:TCTGCAAG+GCTGCACT  
CCTTGGATCGTTCTTCCGGATTATTTCTAGAGACTCTGTCTTTGACCTAGCTGATAAAGCTTTATTAT  
AAACAACGTCTAGTTCGATACGATCACACTTTCTTTTCCGGCCGTCTTCTTGAATTGACCGTGATCA  
ATATAAGATCCTCCT

+  
FFFFFFFFF:FFFFFFFFFFFFFFFFFFFFFFFFFFFFFFFFFFFFFFFFFFFFFFFFFFFFFFFFF  
FFFFFFFFF:FFFFFFF:FFFFFFFFFFFFFFFFF:FFFFFFF:FFFFFFFFFFFFFFFFFFFFFFF::FF:FF,F  
FFFFFFFFFFFFFFFFF  
@A00721:190:HGJW7DSXY:4:2140:6696:25989 1:N:0:TCTGCAAG+GCTGCACT  
CCTTGGATCGTTCTTCCGGATTATTTCTAGAGACTCTGTCTTTGACCTAGCTGATAAAGCTTTATTAT  
AAACAACGTCTAGTTCGATACGATCACACTTTCTTTTCCGGCCGTCTTCTTGAAATTGACCGTGATCA  
ATATAAGATCCTCCT  
+  
FFFFF:FFFFFFFFF:FF:F,F:,F:FFFFF:FF,FFFFFFFFFFFFFFFFFFFFFFFFFFFFF,F:FFFFF  
FFF:FFF,:FFF:FFFFFFFFFFFFFFFFFFFFFFFFF:FF,FFFFF:FF::FFFFFFF,,,:FFF:,FFFF  
F,FFFFFFFFFFFF:FF  
@A00721:190:HGJW7DSXY:4:2360:22480:21950 1:N:0:TCTGCAAG+GCTGCACT  
CCTTGGATCGTTCTTCCGGATTATTTCTAGAGACTCTGTCTTTGACCTAGCTGATAAAGCTTTATTAT  
AAACAACGTCTAGTTCGATACGATCACACTTTCTTTTCCGGCCGTCTTCTTGAAATTGACCGTGATCA  
ATATAAGATCCTCCT  
+  
FFFFFFFFFFFFFFFFFFFFFFFFFFFFFFFFFFFFFFFFFFFFFFFFFFFFFFFFFFFFFFFFFFFF  
FFFFFFFFFFFFFFFFFFFFFFFFFFFFFFFFFFFFFFFFFFFFFFFFFFFFFFFFFFFFFFFFFFFF  
FFFFFFF:FF,FFFFF  
@A00721:190:HGJW7DSXY:4:1327:27236:16219 1:N:0:TCTGCAAG+GCTGCACT  
GATCGTTCTTCCGGATTATTTCTAGAGACTCTGTCTTTGACCTAGCTGATAAAGCTTTATTATAAACA  
ACGTCTAGTTCGATACGATCACACTTTCTTTTCCGGCCGTCTTCTTGAAATTGACCGTGATCAATATA  
AGATCCTCCTTTTGT  
+  
FFFFFFFFFFFFFFFFFFFFFFFFFFFF:FFFFFF:FF,F:FFFFFFFFFFFF:FFFFFFFFFFFF::FFF:FFFF:F  
FFF:FFFFFF:FFFFFFFFF,F:,F,FFFFFFFFFFFF:FFF:FF,FFF:FFFF:,F:,FF,FFFF,FFF  
FFFFFFFFFFFFFFFFF  
@A00721:190:HGJW7DSXY:4:1347:18683:27649 1:N:0:TCTGCAAG+GCTGCACT  
GATCGTTCTTCCGGATTATTTCTAGAGACTCTGTCTTTGACCTAGCTGATAAAGCTTTATTATAAACA  
ACGTCTAGTTCGATACGATCACACTTTCTTTTCCGGCCGTCTTCTTGAAATTGACCGTGATCAATATA  
AGATCCTCCTTTTGT  
+  
FFFFFFFFFFFFFFFFFFFFFFFFFFFFFFFFFFFFFFFFFFFFFFFFFFFFFFFFFFFFFFFFFFFF  
F:FFFFFFFFFFFFFFFFFFFFFFFFFFFFFFFFFFFFFFFFFFFFFFFFFFFFFFFFFFFFFFFFFFFF  
F,FF:FFFFFFFFFFFF  
@A00721:190:HGJW7DSXY:4:1410:27462:4617 1:N:0:TCTGCAAG+GCTGCACT  
GATCGTTCTTCCGGATTATTTCTAGAGACTCTGTCTTTGACCTAGCTGATAAAGCTTTATTATAAACA  
ACGTCTAGTTCGATACGATCACACTTTCTTTTCCGGCCGTCTTCTTGAAATTGACCGTGATCAATATA  
AGATCCTCCTTTTGT  
+  
FFFFFFFFFFFFFFFFFFFFFFFFFFFFFFFFFFFFFFFFFFFFFFFFFFFFFFFFFFFFFFFFFFFF  
FFFFFFF:FFFFFFFFFFFFFFFFFFFFFFFFFFFF:FFFFFFFFFFFFFFFFFFFF:FFFFFFFFFFFF:F:FF,FF  
FFFFFFF:FF:FFFFF  
@A00721:190:HGJW7DSXY:4:1428:1787:34710 1:N:0:TCTGCAAG+GCTGCACT  
GATCGTTCTTCCGGATTATTTCTAGAGACTCTGTCTTTGACCTAGCTGATAAAGCTTTATTATAAACA  
ACGTCTAGTTCGATACGATCACACTTTCTTTTCCGGCCGTCTTCTTGAAATTGACCGTGATCAATATA  
AGATCCTCCTTTTGT  
+  
FFFFFFFFFFFFFFFFFFFFFFFFFFFFFFFFFFFFFFFFFFFFFFFFFFFFFFFFFFFFFFFFFFFF:FFFFFFFFFFFF,FF  
FFFFFFFFFFFFFFFFFFFFFFFFFFFFFFFFFFFFFFFFFFFFFFFFFFFFFFFFFFFFFFFFFFFF:F:FFFFFFFFFFFF  
FFFFFFFFFFFFFFFFF  
@A00721:190:HGJW7DSXY:4:1463:14570:32581 1:N:0:TCTGCAAG+GCTGCACT  
GATCGTTCTTCCGGATTATTTCTAGAGACTCTGTCTTTGACCTAGCTGATAAAGCTTTATTATAAACA

ACGTCTAGTTCGATACGATCACACTTTCTTTTCCGGCCGTCTTCTTGAAATTGACCGTGATCAATATA  
AGATCCTCCTTTTGT

```

FFFFFFFFFFFFFF:FFFFFFFF,FFFFFFFFFFFFFFFF:F,FFFFFFFF,:FF::FFFFFF
FFFFFFFF::FFFF:FFFFFFFF:F:FFFF:,FFF:F:FFFFFFFF,FFFFFFFF
:FFF:FFFFFF:F

```

+

@A00721:190:HGJW7DSXY:4:1560:15510:16141 1:N:0:TCTGCAAG+GCTGCACT  
GATCGTTCTTCCGGATTATTTCTAGAGACTCTGTCTTTGACCTAGCTGATAAAGCTTTATTATAAACA  
ACGTCTAGTTCGATACGATCACACTTTCTTTTCCGGCCGCTCTTCTTGAAATTGACCGTGATCAATATA  
AGATCCTCCTTTTGT

[illegible]

+

@A00721:190:HGJW7DSXY:4:1640:27868:20760 1:N:0:TCTGCAAG+GCTGCACT  
GATCGTTCCTCCGGATTATTTCTAGAGACTCTGTCTTTGACCTAGCTGATAAAGCTTTATTATAAACA  
ACGTCTAGTTCGATACGATCACACTTTCTTTTCCGGCCGTCTTCTTGAAATTGACCGTGATCAATATA  
AGATCCTCCTTTTGT

[illegible]

+

@A00721:190:HGJW7DSXY:4:2225:31439:18239 1:N:0:TCTGCAAG+GCTGCACT  
GATCGTTCTTCCGGATTATTTCTAGAGACTCTGTCTTTGACCTAGCTGATAAAGCTTTATTATAAACA  
ACGTCTAGTTCGATACGATCACACTTTCTTTTCCGGCCGTCTTCTTGAAATTGACCGTGATCAATATA  
AGATCCTCCTTTTGT

[illegible]



@A00721:190:HGJW7DSXY:4:2434:28013:9455 1:N:0:TCTGCAAG+GCTGCACT  
GATCGTTCTTCCGGATTATTTCTAGAGACTCTGTCTTTGACCTAGCTGATAAAGCTTTATTATAAACA  
ACGTCTAGTTCGATACGATCACACTTTCTTTTCCGGCCGTCTTCTTGAAATTGACCGTGATCAATATA  
AGATCCTCCTTTTGT

FFFFFFFFFFFFFFFFFFFFFFFFFFFFFFFFFFFFFFFFFFFFFFFFFFFFFFFFFFFFFFFFFFFFFFFF  
:FFFFFFFFFFFFFFFF

@A00721:190:HGJW7DSXY:4:2377:12346:23218 1:N:0:TCTGCAAG+GCTGCACT  
ATCGTTCTTCCGATTATTTCTAGAGACTCTGTCTTTGACCTAGCTGATAAAGCTTTATTATAAACAA  
CGTCTAGTTCGATACGATCACACTTTCTTTTCCGGCCGTCTTCTTGAAATTGACCGTGATCAATATAA  
GATCCTCCTTTTGTG

+  
FFFFFFFF:FFFFFFFFFFFFFFFFFFFFFFFFFFFFFFFFFFFFFFFFFFFFFFFFFFFFFFFFFFFFFFFF  
FFFFFFFFFFFFFFFFFFFFFFFFFFFFFFFFFFFFFFFFFFFFFFFFFFFFFFFFFFFFFFFFFFFFFFFF  
FFFFFFFFFFFFFFFF

@A00721:190:HGJW7DSXY:4:2377:10456:23829 1:N:0:TCTGCAAG+GCTGCACT  
ATCGTTCTTCCGATTATTTCTAGAGACTCTGTCTTTGACCTAGCTGATAAAGCTTTATTATAAACAA  
CGTCTAGTTCGATACGATCACACTTTCTTTTCCGGCCGTCTTCTTGAAATTGACCGTGATCAATATAA  
GATCCTCCTTTTGTG

+  
FFFF:FFFFFFFFFFFFFFFFFFFFFFFFFFFFFFFFFFFFFFFFFFFFFFFFFFFFFFFFFFFFFFFF  
FFFFFFFFFFFFFFFFFFFFFFFFFFFFFFFFFFFFFFFFFFFFFFFFFFFFFFFFFFFFFFFFFFFFFFFF  
FFFFFFFFFFFFFFFF

@A00721:190:HGJW7DSXY:4:2405:27606:34992 1:N:0:TCTGCAAG+GCTGCACT  
ATCGTTCTTCCGATTATTTCTAGAGACTCTGTCTTTGACCTAGCTGATAAAGCTTTATTATAAACAA  
CGTCTAGTTCGATACGATCACACTTTCTTTTCCGGCCGTCTTCTTGAAATTGACCGTGATCAATATAA  
GATCCTCCTTTTGTG

+  
FFFFFFFF:FFFFFFFFFFFFFFFFFFFFFFFFFFFFFFFFFFFFFFFFFFFFFFFFFFFFFFFFFFFFF:FFFFFFFF  
FFFFFFFFFFFFFFFFFFFFFFFFFFFFFFFFFFFFFFFFFFFFFFFFFFFFFFFFFFFFFFFFFFFFFFFF  
FFFFFFFFFFFF:F:FF

@A00721:190:HGJW7DSXY:4:2441:16224:7889 1:N:0:TCTGCAAG+GCTGCACT  
ATCGTTCTTCCGATTATTTCTAGAGACTCTGTCTTTGACCTAGCTGATAAAGCTTTATTATAAACAA  
CGTCTAGTTCGATACGATCACACTTTCTTTTCCGGCCGTCTTCTTGAAATTGACCGTGATCAATATAA  
GATCCTCCTTTTGT

+  
F:FFFFFFFFFFFFFFFFFFFFFFFFFFFFFFFFFFFF,FF:FFFFFFFFFFFFFFFF:FFFFFFFF:FFFFF  
FFFFF,FFF:FFF:FFF:FFF,,:FFFFFF:,FF:FFFFFFFFFFFF,FF,,:FFF:FFF:FFF  
FFF,FFFF,,:FFFF

@A00721:190:HGJW7DSXY:4:2446:1344:14434 1:N:0:TCTGCAAG+GCTGCACT  
ATCGTTCTTCCGATTATTTCTAGAGACTCTGTCTTTGACCTAGCTGATAAAGCTTTATTATAAACAA  
CGTCTAGTTCGATACGATCACACTTTCTTTTCCGGCCGTCTTCTTGAAATTGACCGTGATCAATATAA  
GATCCTCCTTTTGTG

+  
FFFFFF,::FF:FFFF,FF,FFFFFF::FF:FFFF:FFFFFF,,:FFFF:,,:FFFFFFFF  
F::FFF:F:F,FFFF,FFFFFFFF:F,F,FFFF::FFFF,F:,,:FFFF:FFF:FFFF:FFFF  
:FF::FF:FFFF,FF

@A00721:190:HGJW7DSXY:4:2556:7988:14544 1:N:0:TCTGCAAG+GCTGCACT  
ATCGTTCTTCCGATTATTTCTAGAGACTCTGTCTTTGACCTAGCTGATAAAGCTTTATTATAAACAA  
CGTCTAGTTCGATACGATCACACTTTCTTTTACGGCCGTCTTCTTGAAATTGACCGTGATCAATATAA  
GATCCTCCTTTTGTG

+  
FFF::FFF::FF,FFFF:F:FFF:F:FFFFFFFF,,:FFFF:FFFFFF,F:FFFFFFFF:FF  
F,F:FFFF:FFF::F,F,,F::F,F:FFFF,FFFFFFFFFFFF,FFFF,:FFF:,FFFFFF:FFF  
FFF:FFF,F,FF:FF

@A00721:190:HGJW7DSXY:4:1120:27868:21512 1:N:0:TCTGCAAG+GCTGCACT  
CTTCCGATTATTTCTAGAGACTCTGTCTTTGACCTAGCTGATAAAGCTTTATTATAAACACGTCTA  
GTTTCGATACGATCACACTTTCTTTTCCGGCCGTCTTCTTGAAATTGACCGTGATCAATATAAGATCCT  
CCTTTTGTGATATAA

+  
FFFFFFFFFFFFFFFFFFFFFFFFFFFFFFFFFFFFFFFFFFFFFFFFFFFFFFFFFFFFFFFFFFFFFFFF  
FFFFFFFF:FFFFFFFFFFFFFFFFFFFFFFFFFFFFFFFFFFFFFFFFFFFFFFFFFFFFFFFFFFFFFFFF,FFF,FFFF  
FFFF,FFFFFFFF  
@A00721:190:HGJW7DSXY:4:1126:26585:9987 1:N:0:TCTGCAAG+GCTGCACT  
CTTCCGGATTATTTCTAGAGACTCTGTCTTTGACCTAGCTGATAAAGCTTTATTATAAACAACGTCTA  
GTTTCGATACGATCACACTTTCTTTTCCGGCCGTCTTCTTGAAATTGACCGTGATCAATATAAGATCCT  
CCTTTTGTGATATAA

+  
FFFFFFFFFFFFFFFFFFFFFFFFFFFFFFFFFFFFFFFFFFFFFFFFFFFFFFFFFFFFFFFFFFFFFFFF  
FFFFFFFF:FFFFFFFFFFFFFFFFFFFFFFFFFFFFFFFFFFFFFFFFFFFFFFFFFFFFFFFFFFFFFFFF:FF  
FFF,FFFFFFFF  
@A00721:190:HGJW7DSXY:4:1146:30924:25426 1:N:0:TCTGCAAG+GCTGCACT  
CTTCCGGATTATTTCTAGAGACTCTGTCTTTGACCTAGCTGATAAAGCTTTATTATAAACAACGTCTA  
GTTTCGATACGATCACACTTTCTTTTCCGGCCGTCTTCTTGAAATTGACCGTGATCAATATAAGATCCT  
CCTTTTGTGATATAA

+  
FFFFFFFFFFFFFFFFFFFFFFFFFFFFFFFFFFFFFFFFFFFFFFFFFFFFFFFFFFFFFFFFFFFFFFFF  
FFFFFFFF:FFFFFFFFFFFFFFFFFFFFFFFFFFFFFFFFFFFFFFFFFFFFFFFFFFFFFFFFFFFFFFFF:FF  
FFFFFFFF  
@A00721:190:HGJW7DSXY:4:1156:25880:24925 1:N:0:TCTGCAAG+GCTGCACT  
CTTCCGGATTATTTCTAGAGACTCTGTCTTTGACCTAGCTGATAAAGCTTTATTATAAACAACGTCTA  
GTTTCGATACGATCACACTTTCTTTTCCGGCCGTCTTCTTGAAATTGACCGTGATCAATATAAGATCCT  
CCTTTTGTGATATAA

+  
FFFFFFFFFFFFFFFFFFFFFFFFFFFFFFFFFFFFFFFFFFFFFFFFFFFFFFFFFFFFFFFFFFFFFFFF  
FFFFFFFF:FFFFFFFFFFFFFFFFFFFFFFFFFFFFFFFFFFFFFFFFFFFFFFFFFFFFFFFFFFFFFFFF:FF  
FFFFFFFF  
@A00721:190:HGJW7DSXY:4:2272:3025:15812 1:N:0:TCTGCAAG+GCTGCACT  
CTTCCGGATTATTTCTAGAGACTCTGTCTTTGACCTAGCTGATAAAGCTTTATTATAAACAACGTCTA  
GTTTCGATACGATCACACTTTCTTTTCCGGCCGTCTTCTTGAAATTGACCGTGATCAATATAAGATCCT  
CCTTTTGTGATATAA

+  
FFFFFFFFFFFFFFFFFFFFFFFFFFFFFFFFFFFFFFFFFFFFFFFFFFFFFFFFFFFFFFFFFFFFFFFF  
FFFFFFFF:FFFFFFFFFFFFFFFFFFFFFFFFFFFFFFFFFFFFFFFFFFFFFFFFFFFFFFFFFFFFFFFF:FF  
FFFFFFFF  
@A00721:190:HGJW7DSXY:4:2326:2899:3349 1:N:0:TCTGCAAG+GCTGCACT  
CTTCCGGATTATTTCTAGAGACTCTGTCTTTGACCTAGCTGATAAAGCTTTATTATAAACAACGTCTA  
GTTTCGATACGATCACACTTTCTTTTCCGGCCGTCTTCTTGAAATTGACCGTGATCAATATAAGATCCT  
CCTTTTGTGATATAA

+  
FFFFFFFFFFFFFFFFFFFFFFFFFFFFFFFFFFFFFFFFFFFFFFFFFFFFFFFFFFFFFFFFFFFFFFFF  
FFFFFFFF:FFFFFFFFFFFFFFFFFFFFFFFFFFFFFFFFFFFFFFFFFFFFFFFFFFFFFFFFFFFFFFFF:FFFF  
FFFF:,FFF:FFFF  
@A00721:190:HGJW7DSXY:4:2662:4679:13135 1:N:0:TCTGCAAG+GCTGCACT  
CTTCCGGATTATTTCTAGAGACTCTGTCTTTGACCTAGCTGATAAAGCTTTATTATAAACAACGTCTA  
GTTTCGATACGATCACACTTTCTTTTCCGGCCGTCTTCTTGAAATTGACCGTGATCAATATAAGATCCT  
CCTTTTGTGATATAA

+  
FFFFFFFFFFFFFFFFFFFFFFFFFFFFFFFFFFFFFFFFFFFFFFFFFFFFFFFFFFFFFFFFFFFFFFFF  
FFFFFFFF:FFFFFFFFFFFFFFFFFFFFFFFFFFFFFFFFFFFFFFFFFFFFFFFFFFFFFFFFFFFFFFFF:FFFF  
FFFF:FFFFFFFF  
@A00721:190:HGJW7DSXY:4:1118:11614:2879 1:N:0:TCTGCAAG+GCTGCACT  
GTCCGGATTATTTCTAGAGACTCTGTCTTTGACCTAGCTGATAAAGCTTTATTATAAACAACGTCTAG

TTCGATACGATCACACTTTCTTTTCCGGCCGTCTTCTTGAAATTGACCGTGATCAATATAAGATCCTC  
CTTTTGTGATATAAT

+

FFFFFFFFFFFFFFFFFFFFFFFFFFFFFFFFFFFFFFFFFFFFFFFFFFFFFFFFFFFFFFFFFFFFFFFF  
FFFFFFFFFFFFFFFFFFFFFFFFFFFFFFFFFFFFFFFFFFFFFFFFFFFFFFFFFFFFFFFFFFFFFFFF  
FF,F,:FFFFFFFF

@A00721:190:HGJW7DSXY:4:1138:18909:22153 1:N:0:TCTGCAAG+GCTGCACT  
GTCCGGATTATTTCTAGAGACTCTGTCTTTGACCTAGCTGATAAAGCTTTATTATAAACAACGTCTAG  
TTCGATACGATCACACTTTCTTTTCCGGCCGTCTTCTTGAAATTGACCGTGATCAATATAAGATCCTC  
CTTTTGTGATATAAT

+

FFFFFFFFFFFFFFFFFFFFFFFFFFFFFFFFFFFFFFFFFFFFFFFFFFFFFFFFFFFFFFFFFFFFFFFF  
FFF:FFFFFFFFFFFFFFFFFFFFFFFFFFFFFFFFFFFFFFFFFFFFFFFFFFFFFFFFFFFFFFFF:FFF  
FFFFFFFFFFFFFFFF:

@A00721:190:HGJW7DSXY:4:1603:11333:28886 1:N:0:TCTGCAAG+GCTGCACT  
GTCCGGATTATTTCTAGAGACTCTGTCTTTGACCTAGCTGATAAAGCTTTATTATAAACAACGTCTAG  
TTCGATACGATCACACTTTCTTTTCCGGCCGTCTTCTTGAAATTGACAGTGATCAATATAAGATCCTC  
CTTTTGTGATATAAT

+

F,FFFF:FFFFFFFFFFFFFFFFFFFFFFFFFFFFFFFFFFFFFFFFFFFFFFFFFFFFFFFFFFFFFFFF  
FFFFFFFFF:FFFF,FFFFFFFFFF,FF:FF::FFF:,F:FFFF:FF,,F:FF,FFFFFFFF,FF,FF  
FFFFF,F,FFFFFF:

@A00721:190:HGJW7DSXY:4:1619:26386:31000 1:N:0:TCTGCAAG+GCTGCACT  
GTCCGGATTATTTCTAGAGACTCTGTCTTTGACCTAGCTGATAAAGCTTTATTATAAACAACGTCTAG  
TTCGATACGATCACACTTTCTTTTCCGGCCGTCTTCTTGAAATTGACCGTGATCAATATAAGATCCTC  
CTTTTGTGATATAAT

+

FFFFFFFFFFFFFFFFFFFFFFFFFFFFFFFFFFFFFFFFFFFFFFFFFFFFFFFFFFFFFFFFFFFFFFFF  
FFF:FFFF:FFFFFFFFFFFFFFFFFFFFFFFFFFFFFFFFFFFFFFFFFFFFFFFFFFFFFFFFFFFFF,FFFFF:FF:FFF  
FFFFFFFFFFFFFFFF

@A00721:190:HGJW7DSXY:4:2127:28311:35837 1:N:0:TCTGCAAG+GCTGCACT  
GTCCGGATTATTTCTAGAGACTCTGTCTTTGACCTAGCTGATAAAGCTTTATTATAAACAACGTCTAG  
TTCGATACGATCACACTTTCTTTTCCGGCCGTCTTCTTGAAATTGACCGTGATCAATATAAGATCCTC  
CTTTTGTGATATAAT

+

FFFFFFFFFFFFFFFFFFFFFFFFFFFFFFFFFFFFFFFFFFFFFFFFFFFFFFFFFFFFFFFFFFFFFFFF  
FFFFFFFFFFFFFFFFFFFFFFFFFFFFFFFFFFFFFFFFFFFFFFFFFFFFFFFFFFFFFFFFFFFFFFFF:FFF  
FFFFF:FFFFFFFF:

@A00721:190:HGJW7DSXY:4:2521:31304:18067 1:N:0:TCTGCAAG+GCTGCACT  
GTCCGGATTATTTCTAGAGACTCTGTCTTTGACCTAGCTGATAAAGCTTTATTATAAACAACGTCTAG  
TTCGATACGATCACACTTTCTTTTCCGGCCGTCTTCTTGAAATTGACCGTGATCAATATAAGATCCTC  
CTTTTGTGATATAAT

+

FFFFFFFFFFFFFFFFFFFFFFFFFFFFFFFFFFFFFFFFFFFFFFFFFFFFFFFFFFFFFFFFFFFFFFFF  
FFFFFFFFFFFFFFFFFFFFFFFFFFFFFFFFFFFFFFFFFFFFFFFFFFFFFFFFFFFFFFFFFFFFFFFF,FFFFF  
FFFFFFFF:FFFFF

@A00721:190:HGJW7DSXY:4:2562:28971:7357 1:N:0:TCTGCAAG+GCTGCACT  
GTCCGGATTATTTCTAGAGACTCTGTCTTTGACCTAGCTGATAAAGCTTTATTATAAACAACGTCTAG  
TTCGATACGATCACACTTTCTTTTCCGGCCGTCTTCTTGAAATTGACCGTGATCAATATAAGATCCTC  
CTTTTGTGATATAAT

+

FFFFFFFFFFFFFFFFFFFFFFFFFFFFFFFFFFFFFFFFFFFFFFFFFFFFFFFFFFFFFFFFFFFFFFFF  
FFFFFFF:FFFFFFFFFFFFFFFFFFFFFFFFFFFFFFFFFFFFFFFFFFFFFFFFFFFFFFFFFFFF:FF:FFFFFF:FFFFFFFFFF:FFF  
FFFFFFFFFFFFFFFF

$+$ 

+

+

+

+

+

+

FFFFFFFFFFFFFFFF:FFFFFFFFFFFFFFFFFFFFFFFFFFFFFFFFFFFFFFFF:FFF:FFFFFFFFF  
FFFFFFFFFFFFFFFF

@A00721:190:HGJW7DSXY:4:1620:9362:20462 1:N:0:TCTGCAAG+GCTGCACT  
TCCGGATTATTTCTAGAGACTCTGTCTTTGACCTAGCTGATAAAGCTTTATTATAAACAACGTCTAGT  
TCGATACGATCACACTTTCTTTTCCGGCCGTCTTCTTGAAATTGACCGTGATCAATATAAGATCCTCC  
TTTTGTGATATAATC

+

FFFFFFFFFFFFFFFFFFFFFFFFFFFFFFFFFFFFFFFFFFFFFFFFFFFFFFFFFFFFFFFF  
FFFFFFFFFFFFFFFFFFFFFFFFFFFFFFFFFFFFFFFFFFFFFFFFFFFFFFFFFFFFFFFF  
FFFFFFFFFFFFFFFF

@A00721:190:HGJW7DSXY:4:1624:24053:8578 1:N:0:TCTGCAAG+GCTGCACT  
TCCGGATTATTTCTAGAGACTCTGTCTTTGACCTAGCTGATAAAGCTTTATTATAAACAACGTCTAGT  
TCGATACGATCACACTTTCTTTTCCGGCCGTCTTCTTGAAATTGACCGTGATCAATATAAGATCCTCC  
TTTTGTGATATAATC

+

FFFFFFF,FF:FFFFFFFFFFFFFFFFFFFFFFFFFFFFFFFFFFFFFFFFFFFFFFFFFFFFFFFF  
FFFFFFFFFFFFFFFFFFFFFFFFFFFFFFFFFFFFFFFFFFFFFFFFFFFFFFFFFFFFFFFF  
FFFFFFFFF:FFFFFFF

@A00721:190:HGJW7DSXY:4:2101:24017:5071 1:N:0:TCTGCAAG+GCTGCACT  
TCCGGATTATTTCTAGAGACTCTGTCTTTGACCTAGCTGATAAAGCTTTATTATAAACAACGTCTAGT  
TCGATACGATCACACTTTCTTTTCCGGCCGTCTTCTTGAAATTGACCGTGATCAATATAAGATCCTCC  
TTTTGTGATATAATC

+

FFFFFFFFFFFFFFFFFFFFFFFFFFFFFFFFFFFFFFFFFFFFFFFFFFFFFFFFFFFFFFFF  
FFFFFFFFFFFFFFFFFFFFFFFFFFFFFFFFFFFFFFFFFFFFFFFFFFFFFFFFFFFFFFFF:F:FFFFFFFFFFFFFFFFFFFFFFFFF,  
:FFFFFFFFFFFFFFFF

@A00721:190:HGJW7DSXY:4:2111:25834:9157 1:N:0:TCTGCAAG+GCTGCACT  
TCCGGATTATTTCTAGAGACTCTGTCTTTGACCTAGCTGATAAAGCTTTATTATAAACAACGTCTAGT  
TCGATACGATCACACTTTCTTTTCCGGCCGTCTTCTTGAAATTGACCGTGATCAATATAAGATCCTCC  
TTTTGTGATATAATC

+

FFFFFFFFFFFFFFFFFFFFFFFFFFFFFFFFFFFFFFFFFFFFFFFFFFFFFFFFFFFFFFFF  
FF:FFF:FFFFFFFFFFFFFFFFF,FFFFFFFFFFFFF:FFFFFFFFFFFFFFFFFFFFFFFF:FF:FFFF  
FFFF:FFFFFFFFF:

@A00721:190:HGJW7DSXY:4:2139:12915:1971 1:N:0:TCTGCAAG+GCTGCACT  
TCCGGATTATTTCTAGAGACTCTGTCTTTGACCTAGCTGATAAAGCTTTATTATAAACAACGTCTAGT  
TCGATACGATCACACTTTCTTTTCCGGCCGTCTTCTTGAAATTGACCGTGATCAATATAAGATCCTCC  
TTTTGTGATATAATC

+

FFFFFFFFFFFFFFFFFFFFFFFFFFFFFFFFFFFFFFFFFFFFFFFFFFFFFFFFFFFFFFFF:FF  
FFFFFFFFFFFFFFFFFFFFFFFFFFFFFFFFFFFFFFFFFFFFFFFFFFFFFFFFFFFFFFFF:FFFFFFFFFFFFFFFFFFFFFFFF  
FFFFFFFFFFFFFFFF

@A00721:190:HGJW7DSXY:4:2157:23204:9486 1:N:0:TCTGCAAG+GCTGCACT  
TCCGGATTATTTCTAGAGACTCTGTCTTTGACCTAGCTGATAAAGCTTTATTATAAACAACGTCTAGT  
TCGATACGATCACACTTTCTTTTCCGGCCGTCTTCTTGAAATTGACCGTGATCAATATAAGATCCTCC  
TTTTGTGATATAATC

+

FFFFFFFFFFFFFFFFFFFFFFFFFFFFFFFFFFFFFFFFFFFFFFFFFFFFFFFFFFFFFFFF  
FFFFFFFFFFFFFFFFFFFFFFFFFFFFFFFFFFFFFFFFFFFFFFFFFFFFFFFFFFFFFFFF:FFFFFFFFFFFFFFFFFFFFFFFF  
FFFFFFFFFFFFFFFF

@A00721:190:HGJW7DSXY:4:2202:8323:26396 1:N:0:TCTGCAAG+GCTGCACT  
TCCGGATTATTTCTAGAGACTCTGTCTTTGACCTAGCTGATAAAGCTTTATTATAAACAACGTCTAGT  
TCGATACGATCACACTTTCTTTTCCGGCCGTCTTCTTGAAATTGACCGTGATCAATATAAGATCCTCC  
TTTTGTGATATAATC

+  
FFFFFFFFFFFFFFFFFFFFFFFFFFFFFFFFFFFFFFFFFFFFFFFFFFFFFFFFFFFFFFFFFFFFFFFF  
FFFFFFFFFFFFFFFFFFFFFFFFFFFFFFFFFFFFFFFFFFFFFFFFFFFFFFFFFFFFFFFFFFFFFFFF:FFFFFFF  
FFFFFFFFFFFFFFFF  
@A00721:190:HGJW7DSXY:4:2311:4092:11397 1:N:0:TCTGCAAG+GCTGCACT  
TCCGATTATTTCTAGAGACTCTGTCTTTGACCTAGCTGATAAAGCTTTATTATAAACAACGTCTAGT  
TCGATACGATCACACTTTCTTTTCCGGCCGTCTTCTTGAAATTGACCGTGATCAATATAAGATCCTCC  
TTTTGTGATATAATC  
+  
FFFFFFFFFFFFFFFFFFFFFFFFFFFFFFFFFFFFFFFFFFFFFFFFFFFFFFFFFFFFFFFFFFFFFFFF  
FFFFFFFFFFFFFFFFFFFFFFFFFFFFFFFFFFFFFFFFFFFFFFFFFFFFFFFFFFFFFFFFFFFFFFFF:  
:FFFFFFFFFFFFFFFF  
@A00721:190:HGJW7DSXY:4:2510:10321:30765 1:N:0:TCTGCAAG+GCTGCACT  
TCCGATTATTTCTAGAGACTCTGTCTTTGACCTAGCTGATAAAGCTTTATTATAAACAACGTCTAGT  
TCGATACGATCACACTTTCTTTTCCGGCCGTCTTCTTGAAATTGACCGTGATCAATATAAGATCCTCC  
TTTTGTGATATAATC  
+  
FFFFFFFFFFFFFFFFFFFFFFFFFFFFFFFFFFFFFFFFFFFFFFFFFFFFFFFFFFFFFFFFFFFFFFFF,  
FFFFFFFFFFFFFFFFFFFFFFFFFFFFFFFFFFFFFFFFFFFFFFFFFFFFFFFFFFFFFFFFFFFFFFFF:  
:FFFFFFFFFFFFFFFF  
@A00721:190:HGJW7DSXY:4:2510:10095:31532 1:N:0:TCTGCAAG+GCTGCACT  
TCCGATTATTTCTAGAGACTCTGTCTTTGACCTAGCTGATAAAGCTTTATTATAAACAACGTCTAGT  
TCGATACGATCACACTTTCTTTTCCGGCCGTCTTCTTGAAATTGACCGTGATCAATATAAGATCCTCC  
TTTTGTGATATAATC  
+  
FFFFFFFFFFFFFF,FFFFFFFFFFFFFFFFFFFFFFFFFFFFFFFFFFFFFFFFFFFFFFFFFFFFFFFF  
FFFFFFFFFFFFFFFFFFFFFFFFFFFFFFFFFFFFFFFFFFFFFFFFFFFFFFFFFFFFFFFFFFFFFFFF:  
:FFFFFFFFFFFFFFFF  
@A00721:190:HGJW7DSXY:4:1101:21133:3145 1:N:0:TCTGCAAG+GCTGCACT  
CCGGATTATTTCTAGAGACTCTGTCTTTTACCTAGCTGATAAAGCTTTATTATAAACAACGTCTAGTT  
CGATACGATCACACTTTCTTTTCCGGCCGTCTTCTTGAAATTGACCGTGATCAATATAAGATCCTCCT  
TTTGTGATATAATCG  
+  
FFFFFFFFFFFFFFFFFFFFFFFFFFFFFFFFFFFFFFFFFFFFFFFFFFFFFFFFFFFFFFFFFFFFFFFF:FFF  
FFFFFFFFFFFFFFFFFFFFFFFFFFFFFFFFFFFFFFFFFFFFFFFFFFFFFFFFFFFFFFFFFFFFFFFF:  
FFFFFFFFFFFFFFFF:F  
@A00721:190:HGJW7DSXY:4:1110:16477:29559 1:N:0:TCTGCAAG+GCTGCACT  
CCGGATTATTTCTAGAGACTCTGTCTTTGACCTAGCTGATAAAGCTTTATTATAAACAACGTCTAGTT  
CGATACGATCACACTTTCTTTTCCGGCCGTCTTCTTGAAATTGACCGTGATCAATATAAGATCCTCCT  
TTTGTGAGATCGGAA  
+  
FFFFFFFFFFFFFFFFFFFFFFFFFFFFFFFFFFFFFFFFFFFFFFFFFFFFFFFFFFFFFFFFFFFFFFFF:  
FFFFFFFFFFFFFFFFFFFFFFFFFFFFFFFFFFFFFFFFFFFFFFFFFFFFFFFFFFFFFFFFFFFFFFFF:FF,FF  
FFFF,FF:FFFFFF  
@A00721:190:HGJW7DSXY:4:1112:26106:14951 1:N:0:TCTGCAAG+GCTGCACT  
CCGGATTATTTCTAGAGACTCTGTCTTTTACCTAGCTGATAAAGCTTTATTATAAACAACGTCTAGTT  
CGATACGATCACACTTTCTTTTCCGGCCGTCTTCTTGAAATTGACCGTGATCCATATAAGATCCTACT  
TTTGTGATATAATAG  
+  
FF:FFFFFF:,FFF:FF::,F,FFF:FFFFFF:,F,F:FF:FFFFFF,FFFF,,FF,FFFFFF:,  
::FFFFFF:,FFFFFFFF:F,FF,FFFFFF:F,::FFFF,FF,F,FFFF,,FFFF:,F:,::,,F  
,:F,F:FFFFFF,F  
@A00721:190:HGJW7DSXY:4:1166:24261:32330 1:N:0:TCTGCAAG+GCTGCACT  
CCGGATTATTTCTAGAGACTCTGTCTTTGACCTAGCTGATAAAGCTTTATTATAAACAACGTCTAGTT

CGATACGATCACACTTTCTTTTCCGGCCGTCTTCTTGAAATTGACCGTGATCAATATAAGATCCTCCT  
TTTGTGATATAATCG

+

FFFFFFFFFFFFFFFFFFFFFFFFFFFFFFFFFFFFFFFFFFFFFFFFFFFFFFFFFFFFFFFFFFFFFFFFFFFFFFFF,FFFFFFFFFFFF  
FFFFFFFFFFFF:FFFFFFFFFFFFFFFFFFFFFFFFFFFFFFFFFFFFFFFFFFFFFFFFFFFFFFFFFFFFFFFFFFFFFFFFFFFFFFFF  
FFFFFFFFFFFFFFFFFFFF

@A00721:190:HGJW7DSXY:4:1278:31132:35399 1:N:0:TCTGCAAG+GCTGCACT  
CCGGATTATTTCTAGAGACTCTGTCTTTGACCTAGCTGATAAAGCTTTATTATAAACAACGTCTAGTT  
CGATACGATCACACTTTCTTTTCCGGCCGTCTTCTTGAAATTGACCGTGATCAATATAAGATCCTCCT  
TTTGTGATATAATCG

+

FFFFF:FFFFFFFFFFFFFFFFFFFFFFFFFFFFFFFFFFFFFFFFFFFFFFFFFFFFFFFFFFFFFFFFFFFFFFFFFFFFFFFF  
FFFFFFFFFFFFFFFFFFFFFFFFFFFFFFFFFFFFFFFFFFFFFFFFFFFFFFFFFFFFFFFFFFFFFFFFFFFFFFFF:FFFFFFFFFFFF  
FFFFFFFFFFFFFFFFFFFF

@A00721:190:HGJW7DSXY:4:1305:10303:19147 1:N:0:TCTGCAAG+GCTGCACT  
CCGGATTATTTCTAGAGACTCTGTCTTTGACCTAGCTGATAAAGCTTTATTATAAACAACGTCTAGTT  
CGATACGATCACACTTTCTTTTCCGGCCGTCTTCTTGAAATTGACCGTGATCAATATAAGATCCTCCT  
TTTGTGATATAATCG

+

FFFFFFFFFFFFFFFFFFFFFFFFFFFFFFFFFFFFFFFFFFFFFFFFFFFFFFFFFFFFFFFFFFFFFFFFFFFFFFFFFFFF  
FFFFFFFFFFFFFFFFFFFFFFFFFFFFFFFFFFFFFFFFFFFFFFFFFFFFFFFFFFFFFFFFFFFFFFFFFFFFFFFF:FFFFFFFFFFFF  
FFFFFFFFFFFFFFFFFFFF,F

@A00721:190:HGJW7DSXY:4:1322:16016:5368 1:N:0:TCTGCAAG+GCTGCACT  
CCGGATTATTTCTAGAGACTCTGTCTTTGACCTAGCTGATAAAGCTTTATTATAAACAACGTCTAGTT  
CGATACGATCACACTTTCTTTTCCGGCCGTCTTCTTGAAATTGACCGTGATCAATATAAGATCCTCCT  
TTTGTGAGATCGGAA

+

FFFFFFFFFFFFFFFFFFFFFFFFFFFFFFFFFFFFFFFFFFFFFFFFFFFFFFFFFFFFFFFFFFFFFFFFFFFFFFFFFFFF  
FFFFFFFFFFFFFFFFFFFFFFFFFFFFFFFFFFFFFFFFFFFFFFFFFFFFFFFFFFFFFFFFFFFFFFFFFFFFFFFF:FFFFFFFFFFFF  
FFFF,FFFFFFFFFFFF

@A00721:190:HGJW7DSXY:4:1447:13422:3537 1:N:0:TCTGCAAG+GCTGCACT  
CCGGATTATTTCTAGAGACTCTGTCTTTTACCTAGCTGATAAAGCTTTATTATAAACAACGTCTAGTT  
CGATACGATCACACTTTCTTTTCCGGCCGTCTTCTTGAAATTGACCGTGATCAATATAAGATCCTCCT  
TTTGTGATATAATCG

+

FFFFFFFFFFFFFFFFFFFFFFFFFFFFFFFFFFFFFFFFFFFFFFFFFFFFFFFFFFFFFFFFFFFFFFFFFFFFFFFFFFFF  
FFFFFFFFFFFFFFFFFFFFFFFFFFFFFFFFFFFFFFFFFFFFFFFFFFFFFFFFFFFFFFFFFFFFFFFFFFFFFFFF:FFFFFFFFFFFF  
FFFFFFFFFFFFFFFFFFFF

@A00721:190:HGJW7DSXY:4:1517:29658:19507 1:N:0:TCTGCAAG+GCTGCACT  
CCGGATTATTTCTAGAGACTCTGTCTTTGACCTAGCTGATAAAGCTTTATTATAAACAACGTCTAGTT  
CGATACGATCACACTTTCTTTTCCGGCCGTCTTCTTGAAATTGACCGTGATCAATATAAGATCCTCCT  
TTTGTGATATAATCG

+

FFFFFFFFFFFFFFFFFFFFFFFFFFFFFFFFFFFFFFFFFFFFFFFFFFFFFFFFFFFFFFFFFFFFFFFFFFFFFFFFFFFF  
FFFFFFFFFFFFFFFFFFFFFFFFFFFFFFFFFFFFFFFFFFFFFFFFFFFFFFFFFFFFFFFFFFFFFFFFFFFFFFFF:FFFFFFFFFFFF  
FFFFFFFFFFFFFFFFFFFF

@A00721:190:HGJW7DSXY:4:1547:13865:20494 1:N:0:TCTGCAAG+GCTGCACT  
CCGGATTATTTCTAGAGACTCTGTCTTTGACCTAGCTGATAAAGCTTTATTATAAACAACGTCTAGTT  
CGATACGATCACACTTTCTTTTCCGGCCGTCTTCTTGAAATTGACCGTGATCAATATAAGATCCTCCT  
TTTGTGATATAATCG

+

FFFFFFFFFFFFFFFFFFFFFFFFFFFFFFFFFFFFFFFFFFFFFFFFFFFFFFFFFFFFFFFFFFFFFFFFFFFFFFFFFFFF  
FFFFFFFFFFFFFFFFFFFFFFFFFFFFFFFFFFFFFFFFFFFFFFFFFFFFFFFFFFFFFFFFFFFFFFFFFFFFFFFF:FFFFFFFFFFFF:FF,FFFFF  
FFFFFFFFFFFFFFFFFFFF



@A00721:190:HGJW7DSXY:4:1549:8540:10676 1:N:0:TCTGCAAG+GCTGCACT  
CCGATTATTTCTAGAGACTCTGTCTTTGACCTAGCTGATAAAGCTTTATTATAAACACGTCTAGTT  
CGATACGATCACACTTTCTTTCCGGCCGTCTTCTTGAAATTGACCGTGATCAATATAAGATCCTCCT  
TTTGTGAGATCGGAA

@A00721:190:HGJW7DSXY:4:1551:8901:1658 1:N:0:TCTGCAAG+GCTGCACT  
CCGATTATTTCTAGAGACTCTGTCTTTTACCTAGCTGATAAAGCTTTATTATAAACACGTCTAGTT  
CGATACGATCACACTTTCTTTTCCGGCCGTCTTCTTGAAATTGACCGTGATCAATATAAGATCCTCCT  
TTTGTGATATAATCG

@A00721:190:HGJW7DSXY:4:1578:13575:23688 1:N:0:TCTGCAAG+GCTGCACT  
CCGATTATTTCTAGAGACTCTGTCTTTGACCTAGCTGATAAAGCTTTATTATAAACACGTCTAGTT  
CTATACGATCACACTTTCTTTTCCGGCCGTCTTATTGAAATTTAACGTGATCAATATAATATCCTCCT  
TTTGAGATATAATCG

@A00721:190:HGJW7DSXY:4:2135:18376:30561 1:N:0:TCTGCAAG+GCTGCACT  
CCGATTATTTCTAGAGACTCTGTCTTTGACCTAGCTGATAAAGCTTTATTATAAACACGTCTAGTT  
CGATACGATCACACTTTCTTTTCCGGCCGTCTTCTTGAAATTGACCGTGATAAATATAATATCCTCCT  
TTTGTGATATAATC

@A00721:190:HGJW7DSXY:4:2221:23321:12258 1:N:0:TCTGCAAG+GCTGCACT  
CCGATTATTTCTAGAGACTCTGTCTTTTACCTAGCTGATAAAGCTTTATTATAAACACGTCTAGTT  
CGATACGATCACACTTTCTTTTCCGGCCGTCTTCTTGAAATTGACCGTGATCAATATAAGATCCTCCT  
TTTGTGATATAATCG

@A00721:190:HGJW7DSXY:4:2255:23529:22952 1:N:0:TCTGCAAG+GCTGCACT  
CCGATTATTTCTAGAGACTCTGTCTTTGACCTAGCTGATAAAGCTTTATTATAAACACGTCTAGTT  
CGATACGATCACACTTTCTTTTCCGGCCGTCTTCTTGAAATTGACCGTGATCAATATAAGATCCTCCT  
TTTGTGATATAATCG

@A00721:190:HGJW7DSXY:4:2404:28058:11068 1:N:0:TCTGCAAG+GCTGCACT  
CCGGATTATTTCTAGAGACTCTGTCTTTTACCTAGCTGATAAAGCTTTATTATAAACACGTCTAGTT  
CGATACGATCACACTTTCTTTTCCGGCCGTCTTCTTGAAATTGACCGTGATCAATATAAGATCCTCCT  
TTTGTGATATAATCG

@A00721:190:HGJW7DSXY:4:2434:14253:33880 1:N:0:TCTGCAAG+GCTGCACT  
CCGATTATTTCTAGAGACTCTGTCTTTGACCTAGCTGATAAAGCTTTATTATAAACACGTCTAGTT  
CGATACGATCACACTTTCTTTCCGGCCGTCTTCTTGAAATTGACCGTGATCAATATAAGATCCTCCT  
TTTGTGATATAATCG

[illegible]

+

[illegible]

+

```
FFFFFFFFFFFFFFFFFFFFFFFFFFFFFFFFFFFFFFFFFFFFFFFFFFFFFFFFFFFFFFFFFFFFF
FFFFFFFFFFFFFFFFFFFFFFFFFFFFFFFFFFFFFF:FFFFFFFFFFFFFFFFFFFFFFFFFFFFFF,FF,FFFF
:FFFFFFFFFFFFFFFF
```

+

```

FFFFFFFFFFFFFFFFFFFFFFFFFFFFFFFF:F,:FFFFFFFF:FFFFFFFFFFFFFF,FFFFFF
FFFFFF:FFFFFFFFFFFFFF:FFF:FFF:FFFFFFFFFFFFFF:,FFF:F,,FF:FFFFFF:FF,:FFF
FFFFFFFFFFFFFF:F

```

+

```

FFFFFFFF:FFFFFFFFFFFFFFFFFFFFFFFFFFFFFFFF:FFFFFFFF:FFF:FFFFF:FFFFFF
FFFFFFFFFFFFF:FFFFFFFFFFFFFFFFFFFFFFFF:FFFFFF,,FFFFFFFF:FFF:FFFFFFFFFFFFF:
::FFFFFFFFFFFFF

```

+

[illegible]

[illegible][illegible]

```
FF:FFFFFFFFFFFFFFFFFFFFFFFF:FFFFFFFFFFFFFFFFFFFFFFFF:FFFFFFFFFFFFFFF
FFFFFFFFFFFFFFFFFFFF:FFFFF:FFFFFFFFFFFFFFFFFFFFFFFF:FFFFF:FFFFF,F:FFF
FFFF:FFFFFFFFF:
```

```

FFFFFFFFFFFFFFFFFFFFFFFFFFFFFFFFFFFFFFFFFFFFFFFFFFFFFFFFFFFFFFFFFFFFFFFF
FFFFFFFFFFFFFFFFFFFFFFFFFFFFFFFF:FFFFFFFFFF:FFFFFFFFFFFFFFFFFFFFFFFF:FFFFFF,FF
FFFFFFFFFFFFFF:FF

```

[illegible]

```

FFFFFFFFFFFFFFFFFFFFFFFFFFFFFFFF:FFFFFFFFFFFFFFFFFFFFFFFFFFFFFFFF
FFFFFFFFFFFFFFFFFFFFFFFFFFFFFFFF:FFFFFFFFFFFFFFFFFFFFFFFFFFFFFFFF
FFFFF:FFFFFFFFF

```

[illegible]

@A00721:190:HGJW7DSXY:4:2253:25581:11036 1:N:0:TCTGCAAG+GCTGCACT  
CGGATTATTTCTAGAGACTCTGTCTTTGACCTAGCTGATAAAGCTTTATTATAAACAACGTCTAGTTC



[illegible]

FFFFFFFFFFFFFFFFFFFFFFFFFFFFFFFFFFFFFFFFFFFFFFFFFFFFFFFFFFFFFFFFFFFFFFFF  
F:FFFFFFFFFFFFFF

@A00721:190:HGJW7DSXY:4:1517:30273:11177 1:N:0:TCTGCAAG+GCTGCACT  
GGATTATTTCTAGAGACTCTGTCTTTGACCTAGCTGATAAAGCTTTATTATAAACAACGTCTAGTTTCG  
ATACGATCACACTTTCTTTTCCGGCCGTCTTCTTGAAATTGACCGTGATCAATATAAGATCCTCCTTT  
TGTGATATAATCGGC

+

FFFFFFFFFFFFFFFFFFFFFFFFFFFFFFFFFFFFFFFFFFFFFFFFFFFFFFFFFFFFFFFFFFFFFFFF  
FFFFFFFFFFFFFFFFFFFFFFFFFFFFFFFFFFFFFFFFFFFFFFFFFFFFFFFFFFFFFFFFFFFFFFFF  
FFFFFFFFFFFFFFFFFFFFFFFFFFFFFFFFFFFFFFFFFFFFFFFFFFFFFFFFFFFFFFFFFFFFFFFF  
FFFFFFFFF:FFFF::

@A00721:190:HGJW7DSXY:4:1531:3739:6308 1:N:0:TCTGCAAG+GCTGCACT  
GGATTATTTCTAGAGACTCTGTCTTTGACCTAGCTGATAAAGCTTTATTATAAACAACGTCTAGTTTCG  
ATACGATCACACTTTCTTTTCCGGCCGTCTTCTTGAAATTGACCGTGATCAATATAAGATCCTCCTTT  
TGTGATATAATCGGC

+

FFFFFFFFFFFFFFFFFFFFFFFFFFFFFFFFFFFFFFFFFFFFFFFFFFFFFFFFFFFFFFFFFFFFFFFF  
FFFFFFFFFFFFFFFFFFFFFFFFFFFFFFFFFFFFFFFFFFFFFFFFFFFFFFFFFFFFFFFFFFFFFFFF  
FFFFFFFFFFFFFFFFFFFFFFFFFFFFFFFFFFFFFFFFFFFFFFFFFFFFFFFFFFFFFFFFFFFFFFFF  
FFFFFFFFF:FFFFF

@A00721:190:HGJW7DSXY:4:1553:13232:14794 1:N:0:TCTGCAAG+GCTGCACT  
GGATTATTTCTAGAGACTCTGTCTTTGACCTAGCTGATAAAGCTTTATTATAAACAACGTCTAGTTTCG  
ATACGATCACACTTTCTTTTCCGGCCGTCTTCTTGAAATTGACCGTGATCAATATAAGATCCTCCTTT  
TGTGATATAATCGGC

+

FFFFFFFFFFFFFFFFFFFFFFFFFFFFFFFFFFFFFFFFFFFFFFFFFFFFFFFFFFFFFFFFFFFFFFFF  
FFFFFFFFFFFFFFFFFFFFFFFFFFFFFFFFFFFFFFFFFFFFFFFFFFFFFFFFFFFFFFFFFFFFFFFF  
FFFFFFFFFFFFFFFFFFFFFFFFFFFFFFFFFFFFFFFFFFFFFFFFFFFFFFFFFFFFFFFFFFFFFFFF  
FFFFFFFFF:FFFFF

@A00721:190:HGJW7DSXY:4:1669:15474:15233 1:N:0:TCTGCAAG+GCTGCACT  
GGATTATTTCTAGAGACTCTGTCTTTGACCTAGCTGATAAAGCTTTATTATAAACAACGTCTAGTTTCG  
ATACGATCACACTTTCTTTTCCGGCCGTCTTCTTGAAATTGACCGTGATCAATATAAGATCCTCCTTT  
TGTGATATAATCGGC

+

FFFFFFFFFFFFFFFFFFFFFFFFFFFFFFFFFFFFFFFFFFFFFFFFFFFFFFFFFFFFFFFFFFFFFFFF  
FFFFFFFFFFFFFFFFFFFFFFFFFFFFFFFFFFFFFFFFFFFFFFFFFFFFFFFFFFFFFFFFFFFFFFFF  
FFFFFFFFFFFFFFFFFFFFFFFFFFFFFFFFFFFFFFFFFFFFFFFFFFFFFFFFFFFFFFFFFFFFFFFF  
FFFFFFFFF:FF

@A00721:190:HGJW7DSXY:4:2134:3568:26835 1:N:0:TCTGCAAG+GCTGCACT  
GGATTATTTCTAGAGACTCTGTCTTTGACCTAGCTGATAAAGCTTTATTATAAACAACGTCTAGTTTCG  
ATACGATCACACTTTCTTTTCCGGCCGTCTTCTTGAAATTGACCGTGATCAATATAAGATCCTCCTTT  
TGTGATATAATCGGC

+

FFFFFFFFFFFFFFFFFFFFFFFFFFFFFFFFFFFFFFFFFFFFFFFFFFFFFFFFFFFFFFFFFFFFFFFF  
FFFFFFFFFFFFFFFFFFFFFFFFFFFFFFFFFFFFFFFFFFFFFFFFFFFFFFFFFFFFFFFFFFFFFFFF  
FFFFFFFFFFFFFFFFFFFFFFFFFFFFFFFFFFFFFFFFFFFFFFFFFFFFFFFFFFFFFFFFFFFFFFFF  
FFFFFFFFF,FF,FFFF:F

@A00721:190:HGJW7DSXY:4:2204:15637:28385 1:N:0:TCTGCAAG+GCTGCACT  
GGAATATTTCTAGAGACTCTGTCTTTGACCTATCAGATAAAGCTTTATTATAAACAACGTCTAGTACG  
ATACGATCACACTTTCTTTTCCGGCCGTCTTCTTGAAATAGACCGTGATCAATATAAGATCCTCCTTT  
TGTGATATAATAGG

+

FFF,,F,,FFFF,F,FFF:F,::F:,FF:F:,F,,::FFFFFF,,FFFF::FF,,F,,,F:F,,,F:  
:,::,FFF:F::F:FFFF,:F,FF,F:,FFFFFF,:F:,::F,FF,FF,,F,,FF,,,FF:::,F,FF  
F,FFF,:F,F,:F:

@A00721:190:HGJW7DSXY:4:2242:2022:32612 1:N:0:TCTGCAAG+GCTGCACT  
GGATTATTTCTAGAGACTCTGTCTTTGACCTAGCTGATAAAGCTTTATTATAAACAACGTCTAGTTTCG  
ATACGATCACACTTTCTTTTCCGGCCGTCTTCTTGAAATTGACCGTGATCAATATAAGATCCTCCTTT  
TGTGATATAATCGGC

[illegible][illegible]

```

FFFFFFFFFFFFFFFFFFFFFFFFFFFFFFFFFFFFFFFF:FFFFFFFFFFFFFFFFFFFFFFFFFFFFFFFF
FFFFFFFFFFFFFFFFFFFFFFFFFFFFFFFFFFFFFFFF:FFFFFFFFFFFFFFFFFFFFFFFFFFFFFFFF:FFFFF
FFFFFFFFFFFFFFFF

```

```

FFFFFFFFFFFFFFFFFFFFFFFF:FFFFFFFFFFFFFFFFFFFFFFFFFFFFFFFFFFFFFFFF:FF
FFFFFFFFFFFFFFFFFFFFFFFFFFFFFFFFFFFFFFFF:FFFFFFFFFFFFFFFFFFFFFFFF:FFFFFFFFFFFF
:FFFFFFFFFFFFFFFF:

```

[illegible][illegible][illegible]

@A00721:190:HGJW7DSXY:4:2678:22092:36276 1:N:0:TCTGCAAG+GCTGCACT  
CTAGAGACTCTGTCTTTGACCTAGCTGATAAAGCTTTATTATAAACCAACGTCTAGTTCGATACGATCA

CACTTTCTTTTCCGGCCGTCTTCTTGAAATTGACCGTGATCAATATAAGATCCTCCTTTTGTGATATA  
ATCGACGACGTCATT

```

FFFFFFFFFFFFFFFFFFFFFFFFFFFFFFFFFFFFFFFF:FFFFFFFFFFFF:FFFFFFFFFFFFFFFFFFFFFFFF
FFFFFFFF, :FFFFFFFFFFFFFFFFFFFFFFFFFFFFFFFFFFFFFFFF:FFFFFFFFFFFFFFFFFFFF:FFFF
FFFFFFFFFFFFFFFFFFFF

```

 $+$ [illegible]

+

```
FFF:FFFFFFFFFFFFFFFFFFFFFFFFFFFFFFFFFFFFFFFFFFFFFFFFFFFFFFFFFFFFFFFF
FFFFFFFFFFFFFFFFFFFFFFFFFFFFFFFFFFFFFFFF:FF:FFFFFFFFFF:FFFFFFFFFFFFFF
FFFFF:FFFFFFFFF
```

+

```
FFFFFFFFFFFFFFFFFFFFFFFFFFFFFFFFFFFFFFFFFFFFFFFFFFFFFFFFFFFFFFF
FFFFFFFFFFFFFFFFFFFFFFFFFFFFFFFF:FFFFFFFFFFFFFFFFFFFFFFFFFFFFFFFF
FFFFFFFFFFFFFFFF
```

+

```

FFFFF:F,FFFFF:FFF:FFFFFFFFFFFFFF:FFFF:F:FFFFFFFFFFFFFFFFFFFFFFFFFFFFF:F
FFF,FF:FFFFFFFFFFFFFFFFFFFFFFFFFFFFFFFFF,F:FFFFFFFFFFFF,FFFF,FF::F:,F
FF:E:FFFF:FFF,F

```

+

```

FFFFFFFF:FFFFFFFFFFFFFFFF:FFFFFFFFFFFFFFFFFFFFFFFFFFFFFFFFFFFFFFFF
FFFFFFFFFFFFFFFFFFFFFFFFFFFFFFFFFFFFFFFF:FFFF:FFFFFFFFFFFFFFFFFFFFFFF
FFFFFFFFFFFFFFFF

```

+

```

FFFFFFFF:FFFFFFFFFFFFFFFFFFFFFFFFFFFFFFFFFFFFFFFFFFFFFFFFFFFFFFFF
FFFFFFFFFFFFFFFFFFFFFFFFFFFFFFFF:FFFFFFFFFFFFFFFFFFFFFFFFFFFFFFFF
FFFFFFFFFFFFFFFF

```



@A00721:190:HGJW7DSXY:4:2510:1271:14935 1:N:0:TCTGCAAG+GCTGCACT  
CCTAGCTGATAAAGCTTTATTATAAACAACGTCTAGTTCGATACGATCACACTTTCTTTTCCGGCCGT  
CTTCTTGAAATTGACCGTGATCAATATAAGATCCTCCTTTGTGATATAATCGGCGACGTCAGTCGCC  
GATCTCGCACTTTGA

@A00721:190:HGJW7DSXY:4:1108:9878:4038 1:N:0:TCTGCAAG+GCTGCACT  
CTAGCTGATAAAGCTTTATTATAAACACGCTCTAGTTCGATACGATCACACTTTCTTTTCCGGCCGTC  
TTCTTGAAATTGACCGTGATCAATATAAGATCCTCCTTTTGTGATATAATCGGCACGTCATTCGCCG  
ATCTCGCACTTTGAA

@A00721:190:HGJW7DSXY:4:1255:7889:21637 1:N:0:TCTGCAAG+GCTGCACT  
CTAGCTGATAAAGCTTTATTATAAACAAACGTCTAGTTCGATACGATCACACTTTCTTTTCCGGCCGTC  
TTCTTGAAATTGACCGTGATCAATATAAGATCCTCCTTTTGTGATATAATCGGCACGTCATTCGCCG  
ATCTCGCACTTTGAA

@A00721:190:HGJW7DSXY:4:1320:24108:17879 1:N:0:TCTGCAAG+GCTGCACT  
CTAGCTGATAAAGCTTTATTATAAACAAACGTCTAGTTCGATACGATCACACTTTCTTTTCCGGCCGTC  
TTCTTGAAATTGACCGTGATCAATATAAGATCCTCCTTTTGTGATATAATCGGCGACGTCATTCGCCG  
ATCTCGCACTTTGAA

@A00721:190:HGJW7DSXY:4:1410:12997:19022 1:N:0:TCTGCAAG+GCTGCACT  
CTAGCTGATAAAGCTTTATTATAAACAAACGTCTAGTTCGATACGATCACACTTTCTTTTCCGGCCGTC  
TTCTTGAAATTGACCGTGATCAATATAAGATCCTCCTTTTGTGATATAATCGGCGACGTCATTGCGCG  
ATCTCGCACTTTGAA

@A00721:190:HGJW7DSXY:4:1551:12174:35978 1:N:0:TCTGCAAG+GCTGCACT  
CTAGCTGATAAAGCTTTATTATAAACAAACGTCTAGTTCGATACGATCACACTTTCTTTTCCGGCCGTC  
TTCTTGAAATTGACCGTGATCAATATAAGATCCTCTTTTGTGATATAATCGGCGACGTCATTCGCCG  
ATCTCGCACTTTGAA

@A00721:190:HGJW7DSXY:4:1650:14552:19867 1:N:0:TCTGCAAG+GCTGCACT  
CTAGCTGATAAAGCTTTATTATAAACAAACGTCTAGTTCGATACGATCACACTTTCTTTTCCGGCCGTC  
TTCTTGAAATTGACCGTGATCAATATAAGATCCTCCTTTTGTGATATAATCGGCGACGTCATTCGCCG  
ATCTCGCACTTTGAA

FFFFFFFFFFFFFFFFFFFFFFFFFFFFFFFFFFFFFFFFFFFFFFFFFFFFFFFFFFFFFFFFFFFFFFFF  
FFFFFFFFFFFFFFFF

@A00721:190:HGJW7DSXY:4:1669:29921:19147 1:N:0:TCTGCAAG+GCTGCACT  
CTAGCTGATAAAGCTTTATTATAAACAACGTCTAGTTCGATACGATCACACTTTCTTTTCCGGCCGTC  
TTCTTGAAATTGACCGTGATCAATATAAGATCCTCCTTTTGTGATATAATCGGCGACGTCATTCGCCG  
ATCTCGCACTTTGAA

+

FFFFFFFFFFFFFFFFFFFFFFFFFFFFFFFFFFFFFFFFFFFFFFFFFFFFFFFFFFFFFFFFFFFFFFFF  
FFFFFFFFFFFFFFFFFFFFFFFFFFFFFFFFFFFFFFFFFFFFFFFFFFFFFFFFFFFFFFFFFFFFFFFF:FFF  
FFFFFFFFFFFFFFFF

@A00721:190:HGJW7DSXY:4:2152:29270:35963 1:N:0:TCTGCAAG+GCTGCACT  
CTAGCGGATAAAGCTTTATTATAAACAACGTCTAGTTCGATACGATCACACTTTCTTTTCCGGCCGTC  
TTCTTGAAAATGACCGTGATCAATATAATATACTCCTTTTGTGATATAATCGGCGACGACATTCGCCG  
ATCTCGCACTTTGAA

+

FFFFF,,FFFFFF:F,,FFFFFFFFF,F:FFFF,FF,:FFFFFFFFFFFFFFFFF,FFFFFF,F:FFF  
FF,F,FFFF,:FF:F,,FFFFFFFF,FF,F,:FF:FFF,,,:FF:FF,:FFFFFF,FFF,,F,,  
FFF:F:FFF,:FF

@A00721:190:HGJW7DSXY:4:1476:15456:25191 1:N:0:TCTGCAAG+GCTGCACT  
GATAAAGCTTTATTATAAACAACGTCTAGTTCGATACGATCACACTTTCTTTTCCGGCCGTCCTTCTTG  
AAATTGACCGTGATCAATATAAGATCCTCCTATTGTGATATAATCGGCGACGTCAGTCGCCGATCTCG  
CACTTTG

+

FFFFFF:FFFFFFFFF:FFFFFFFFF:,F,,FFF,FFFFFFFFF:FFFFFFFFF:,F,,FF,,,  
:FFF,:F,F,:FF:FFFFFFFF,F,F,FF:F,F:,F:FFFF:FFF,:F,F,:FFFF:FFFF:FF:  
:F:,F:F

@A00721:190:HGJW7DSXY:4:1153:25491:20588 1:N:0:TCTGCAAG+GCTGCACT  
GCTTTATTATAAACAACGTCTAGTTCGATACGATCACACTTTCTTTTCCGGCCGTCCTTCTTGAAATTG  
ACCGTGATCAATATAAGATCCTCCTTTTGTGATATAATCGGCGACGTCATTCGCCGATCTCGCACTTT  
GAATATTTGGGTGAA

+

FFFFFFFFFFFFFFFFFFFFFFFFFFFFFFFFFFFFFFFFFFFFFFFFFFFFFFFFFFFFFFFFFFFFFFFF  
FFFFFFFFFFFFFFFFFFFFFFFFFFFFFFFFFFFFFFFFFFFFFFFFFFFFFFFFFFFFFFFFFFFFFFFF  
FFFFFFFFFFFFFFFF

@A00721:190:HGJW7DSXY:4:1552:24144:27211 1:N:0:TCTGCAAG+GCTGCACT  
GCTTTATTATAAACAACGTCTAGTTCGATACGATCACACTTTCTTTTCCGGCCGTCCTTCTTGAAATTG  
ACCGTGATCAATATAAGATCCTCCTTTTGTGATATAATCGGCGACGTCATTCGCCGATCTCGCACTTT  
GAATATTTGGGTGAA

+

FFFFFFFFF:FFFFFFFFF:FFFFFFFFF:FFFF:FFFFFFFFF:,FFFFFFFFF  
FFFFFFFFFFFFFFFF:FFFFFFF,FFFFFFFFFFFFFFFFFFFFFFFFFFFFFFFFFFFFFFFFFFFFF  
:FFFF:F:FFFFF

@A00721:190:HGJW7DSXY:4:2105:3920:3991 1:N:0:TCTGCAAG+GCTGCACT  
GCTTTATTATAAACAACGTCTAGTTCGATACGATCACACTTTCTTTTCCGGCCGTCCTTCTTGAAATTG  
ACCGTGATCAATATAAGATCCTCCTTTTGTGATATAATCGGCGACGTCATTCGCCGATCTCGCACTTT  
GAATATTTGGGTGAA

+

FFFFFFFFFFFFFFFFFFFFFFFFFFFFFFFFFFFFFFFFFFFFFFFFFFFFFFFFFFFFFFFFFFFFFFFF  
FFFFFFFFFFFFFFFFFFFFFFFFFFFFFFFFFFFFFFFFFFFFFFFFFFFFFFFFFFFFFFFFFFFFFFFF  
FFFFFFFFFFFF:FFF

@A00721:190:HGJW7DSXY:4:2231:23312:5478 1:N:0:TCTGCAAG+GCTGCACT  
GCTTTATTATAAACAACGTCTAGTTCGATACGATCACACTTTCTTTTCCGGCCGTCCTTCTTGAAATTG  
ACCGTGATCAATATAAGATCCTCCTTTTGTGATATAATCGGCGACGTCATTCGCCGATCTCGCACTTT  
GAATATTTGGGTGAA

+  
FFFFFFFFFFFFFF:FFFFFFFFFFFFFFFFFFFFFFFFFFFFFFFFFFFFFFFFFFFFFFFFFFFFFFFF  
FFFFFFFFFFFFFFFFFFFFFFFFFFFFFFFFFFFFFFFFFFFFFFFFFFFFFFFFFFFFFFFF:FFFFFFFFFFFFFF:FF  
FFFFFFFFFFFFFF  
@A00721:190:HGJW7DSXY:4:2643:29351:25739 1:N:0:TCTGCAAG+GCTGCACT  
GCTTTATTATAACAACGTCTAGTTCGATACGATCACACTTTCTTTTCCGGCCGTCTTCTTGAAATTG  
ACCGTGATCAATATAAGATCCTCCTTTTGTGATATAATCGGCGACGTCATTCGCCGATCTCGCACTTT  
GAATATTTGGGTGAA

+  
FFFFFFFFFFFFFFFFFFFFFFFFFFFFFFFFFFFFFFFFFFFFFFFFFFFFFFFFFFFFFFFFFFFFFFFF  
FFFFFFFFFFFFFFFFFFFFFFFF,FFFFFFFFFFFFFFFFFFFFFFFF:FFFFFFFFFFFFFFFFFFFFFFFF  
FFFFFFFFFFFFFF  
@A00721:190:HGJW7DSXY:4:1202:4010:19554 1:N:0:TCTGCAAG+GCTGCACT  
AACGTCTAGTTCGATACGATCACACTTTCTTTTCCGGCCGTCTTCTTGAAATTGACCGTGATCAATAT  
AAGATCCTCCTTTTGTGATATAATCGGCGACGTCAGTCGCCGATCTCGCACTTTGAATATTTGGGTGA  
AAAGATTCGTCGGAA

+  
FFFFFFFFFFFFFFFFFFFFFFFFFFFFFFFFFFFFFFFFFFFFFFFFFFFFFFFFFFFFFFFFFFFFFFFF  
FFFFFFFFFFFF,FFFFFFFFFFFFFFFFFFFFFFFFFFFFFFFFFFFFFFFFFFFFFFFFFFFFFFFFFFFF  
FFFFFFFF:FFFFF  
@A00721:190:HGJW7DSXY:4:1274:32298:28338 1:N:0:TCTGCAAG+GCTGCACT  
AACGTCTAGTTCGATACGATCACACTTTCTTTTCCGGCCGTCTTCTTGAAATTGACCGTGATCAATAT  
AAGATCCTCCTTTTGTGATATAATCGGCGACGTCAGTCGCCGATCTCGCACTTTGAATATTTGGGTGA  
AAAGATTCGTCGGAA

+  
FFF:FFFFFFFFFFFFFF:FFFFFFFFFFFFFFFFFFFFFFFFFFFFFFFFFFFFFFFFFFFFFFFFFFFF  
FFFFFFFFFFFFFFFFFFFFFFFFFFFFFFFFFFFFFFFFFFFFFFFFFFFFFFFFFFFFFFFFFFFF,FFFFFFFFFFFF  
FF:FFFFFFFFFFFFFF  
@A00721:190:HGJW7DSXY:4:1336:8513:9189 1:N:0:TCTGCAAG+GCTGCACT  
AACGTCTAGTTCGATACGATCACACTTTCTTTTCCGGCCGTCTTCTTGAAATTGACCGTGATCAATAT  
AAGATCCTCCTTTTGTGATATAATCGGCGACGTCAGTCGCCGATCTCGCACTTTGAATATTTGGGTGA  
AAAGATTCGTCGGAA

+  
FFFFFFFFFFFFFFFFFFFFFFFFFFFFFFFFFFFFFFFFFFFFFFFFFFFFFFFFFFFFFFFFFFFFFFFF  
FF:FFFFFFFFFFFFFFFFFFFFFFFFFFFFFFFFFFFFFFFF:FFFFFFFFFFFFFFFFFFFFFFFFFFFF  
FFFFFFFFFFFFFF  
@A00721:190:HGJW7DSXY:4:2314:24080:7968 1:N:0:TCTGCAAG+GCTGCACT  
AACGTCTAGTTCGATACGATCACACTTTCTTTTCCGGCCGTCTTCTTGAAATTGACCGTGATCAATAT  
AAGATCCTCCTTTTGTGATATAATCGGCGACGTCAGTCGCCGATCTCGCACTTTGAATATTTGGGTGA  
AAAGATTCGTCGGAA

+  
FFFFFFFFFFFFFFFFFFFFFFFFFFFFFFFFFFFFFFFFFFFFFFFF:FFFFFFFFFFFFFFFFFFFFFFFF  
FFFFFFFFFFFFFFFFFFFFFFFFFFFFFFFFFFFFFFFF:FF:FFFFFFFFFF:FFFFFFFFFFFFFFFF:FFFF  
FFFFFF,FFFFFF  
@A00721:190:HGJW7DSXY:4:2330:14371:1391 1:N:0:TCTGCAAG+GCTGCACT  
AACGTCTAGTTCGATACGATCACACTTTCTTTTCCGGCCGTCTTCTTGAAATTGACCGTGATCAATAT  
AAGATCCTCCTTTTGTGATATAATCGGCGACGTCAGTCGCCGATCTCGCACTTTGAATATTTGGGTGA  
AAAGATTCGTCGGA

+  
FFFFFFFFFFFFFFFFFFFFFFFFFFFFFFFFFFFFFFFF:FFFFFFFFFFFFFFFFFFFFFFFFFFFF,FFFFFF  
FF:FFF:FFFFFFFFFFFFFFFF:FFFFFFFFFFFFFFFFFFFFFFFF:FFFFFFFFFFFFFFFFFFFFFFFF  
FFF:FFFF:FFFFF  
@A00721:190:HGJW7DSXY:4:2338:19298:25989 1:N:0:TCTGCAAG+GCTGCACT  
AACGTCTAGTTCGATACGATCACACTTTCTTTTCCGGCCGTCTTCTTGAAATTGACCGTGATCAATAT

AAGATCCTCCTTTTGTGATATAATCGGCGACGTCAGTCGCCGATCTCGCACTTTGAATATTTGGGTGA  
AAAGATTCGTCGGAA

+

FFFFFFFFFFFFFFFFFFFFFFFFFFFFFFFFFFFFFFFFFFFFFFFFFFFFFFFFFFFFFFFFFFFFFFFF:FFF  
FFFFFFFFFFFFFFFFFFFFFFFFFFFFFFFFFFFFFFFFFFFFFFFFFFFFFFFFFFFFFFFFFFFFFFFF  
FFFFFFFFFFFFFFFF

@A00721:190:HGJW7DSXY:4:2338:19913:26428 1:N:0:TCTGCAAG+GCTGCACT  
AACGTCTAGTTCGATACGATCACACTTTCTTTTCCGGCCGTCTTCTTGAAATTGACCGTGATCAATAT  
AAGATCCTCCTTTTGTGATATAATCGGCGACGTCAGTCGCCGATCTCGCACTTTGAATATTTGGGTGA  
AAAGATTCGTCGGAA

+

FFFFFFFFFFFFFFFFFFFFFFFFFFFFFFFFFFFFFFFFFFFFFFFFFFFFFFFFFFFFFFFFFFFFFFFF  
FFFFFFFFFFFFFFFFFFFFFFFFFFFFFFFFFFFFFFFFFFFFFFFFFFFFFFFFFFFFFFFFFFFFFFFF  
FFFFFFFFFFFFFFFF

@A00721:190:HGJW7DSXY:4:2602:14036:17848 1:N:0:TCTGCAAG+GCTGCACT  
AACGTCTAGTTCGATACGATCACACTTTCTTTTCCGGCCGTCTTCTTGAAATTGACCGTGATAAATAT  
AAGATCCTCCTTTTGTGATATAATCGGCGACGTCAGTCGCCGATCTCGCACTTTGAATATTTGGGTGA  
AAAGATTCGTCGGAA

+

F,FFFFFFFF,FFFF::,F:F:FFFF:FFFFFFFFFF,F::FF,,FFF,FFF,F:FFFFFFFF,FF:FF  
FFFF,,FF,FFFF,FF,FFFF,:F:FFF:F,FFFFFFFF,FF:F:F,:F:FFF:F,F::F,FFF::  
FFFFFFFFFFFF:F

@A00721:190:HGJW7DSXY:4:1132:20265:13009 1:N:0:TCTGCAAG+GCTGCACT  
CGTCTAGTTCGATACGATCACACTTTCTTTTCCGGCCGTCTTCTTGAAATTGACCGTGATCAATATAA  
GATCCTCCTTTTGTGATATAATCGGCGACGTCATTGCCGATCTCGCACTTTGAATATTTGGGTGAAA  
AGATTCGTCGGAAT

+

FFFFFFFFFFFFFFFFFFFF:FFFFFFFFFFFFFFFFFFFFFFFFFFFFFFFFFFFFFFFFFFFFFFFFFFFF  
FFFFFFFFFFFFFFFFFFFFFFFFFFFFFFFFFFFFFFFFFFFFFFFFFFFF,F:FFFFFFFFFFFFFFFF:FFF,FFFFFFFF  
FF:FFFFFFFF,F

@A00721:190:HGJW7DSXY:4:1166:12689:28040 1:N:0:TCTGCAAG+GCTGCACT  
CGTCTAGTTCGATACGATCACACTTTCTTTTCCGGCCGTCTTCTTGAAATTGACCGTGATCAATATAA  
GATCCTCCTTTTGTGATATAATCGGCGACGTCATTGCCGATCTCGCACTTTGAATATTTGGGTGAAA  
AGATTCGTCGGAATC

+

FFFFFFFFFFFFFFFFFFFFFFFFFFFFFFFFFFFFFFFFFFFFFFFFFFFFFFFFFFFFFFFFFFFFFFFF  
FFFFFFFFFFFFFFFFFFFFFFFFFFFFFFFFFFFFFFFFFFFFFFFFFFFFFFFFFFFFFFFFFFFFFFFF:FFFFFFFFFFFF  
FFFFFFFFFFFFFFFF

@A00721:190:HGJW7DSXY:4:1253:23312:35008 1:N:0:TCTGCAAG+GCTGCACT  
CGTCTAGTTCGATACGATCACACTTTCTTTTCCGGCCGTCTTCTTGAAATTGACCGTGATCAATATAA  
GATCCTCCTTTTGTGATATAATCGGCGACGTCATTGCCGATCTCGCACTTTGAATATTTGGGTGAAA  
AGATTCGTCGGAATC

+

FFFFFFFFFFFFFFFFFFFF:FFFFFFFFFFFFFFFFFFFFFFFFFFFFFFFFFFFFFFFFFFFFFFFFFFFF  
FFFFFFFFFFFFFFFFFFFF:FFFFFFFFFFFFFFFFFFFFFFFFFFFFFFFFFFFFFFFFFFFFFFFFFFFF,FFFFFFFF  
:FF:FFFFFFFF:FF

@A00721:190:HGJW7DSXY:4:1269:3938:33865 1:N:0:TCTGCAAG+GCTGCACT  
CGTCTAGTTCGATACGATCACACTTTCTTTTCCGGCCGTCTTCTTGAAATTGACCGTGATCAATATAA  
GATCCTCCTTTTGTGATATAATCGGCGACGTCATTGCCGATCTCGCACTTTGAATATTTGGGTGAAA  
AGATTCGTCGGAATC

+

FFFFFFFFFFFFFFFFFFFFFFFFFFFFFFFFFFFFFFFFFFFFFFFFFFFFFFFFFFFFFFFFFFFFFFFF  
FFFFFFFFFFFFFFFFFFFFFFFFFFFFFFFFFFFFFFFFFFFFFFFFFFFF:FFFFFFFFFFFFFFFF:FFFFFFFFFFFF  
FFFFFFFFFFFF:F



@A00721:190:HGJW7DSXY:4:2174:31973:32283 1:N:0:TCTGCAAG+GCTGCACT  
CGTCTAGTTCGATACGATCACACTTTCTTTTCCGGCCGTCTTCTTGAAATTGACCGTGATCAATATAA  
GATCCTCCTTTTGTGATATAATCGGCGACGTCATTGCGCGATCTCGCACTTTGAATATTTGGGTGAAA  
AGATTCGTCGGAATC

@A00721:190:HGJW7DSXY:4:2231:5113:31203 1:N:0:TCTGCAAG+GCTGCACT  
CGTCTAGTTCGATACGATCACACTTTCTTTTCCGGCCGTCTTCTTGAAATTGACCGTGATCAATATAA  
GATCCTCCTTTTGTGATATAATCGGCGACGTCATTGCGCGATCTCGCACTTTGAATATTTGGGTGAAA  
AGATTCGTCGGAATC

@A00721:190:HGJW7DSXY:4:2251:11740:33599 1:N:0:TCTGCAAG+GCTGCACT  
CGTCTAGTTCGATACGATCACACTTTCTTTTCCGGCCGTCTTCTTGAAATTGACCGTGATCAATATAA  
GATCCTCCTTTTGTGATATAATCGGCGACGTCATTGCGCGATCTCGCACTTTGAATATTTGGGTGAAA  
AGATTCGTCGGAATC

@A00721:190:HGJW7DSXY:4:2370:12545:25723 1:N:0:TCTGCAAG+GCTGCACT  
CGTCTAGTTCGATACGATCACACTTTCTTTTCCGGCCGTCTTCTTGAAATTGACCGTGATCAATATAA  
GATCCTCCTTTTGTGATATAATCGGCGACGTCATTGCGCGATCTCGCACTTTGAATATTTGGGTGAAA  
AGATTCGTCGGAATC

@A00721:190:HGJW7DSXY:4:2370:2917:28401 1:N:0:TCTGCAAG+GCTGCACT  
CGTCTAGTTCGATACGATCACACTTTCTTTTCCGGCCGTCTTCTTGAAATTGACCGTGATCAATATAA  
GATCCTCCTTTTGTGATATAATCGGCGACGTCATTGCGCGATCTCGCACTTTGAATATTTGGGTGAAA  
AGATTCGTCGGAATC

@A00721:190:HGJW7DSXY:4:2404:24017:1219 1:N:0:TCTGCAAG+GCTGCACT  
CGTCTAGTTCGATACGATCACACTTTCTTTTCCGCCGCTTTCTTGAAATTGACCGTGATCAATATAA  
GATCCTCCTTTTGTGATATAATCGGCGACGTCATTGCCGATCTCGCACTTTGAATATTTGGGTGAAA  
AGATTCGTCGGAAT

@A00721:190:HGJW7DSXY:4:2457:5556:24079 1:N:0:TCTGCAAG+GCTGCACT  
CGTCTAGTTCGATACGATCACACTTTCTTTTCCGCCGCTTTCTTGAAATTGACCGTGATCAATATAA  
GATCCTCCTTTTGTGATATAATCGGCGACGTCATTGCGCGATCTCGCACTTTGAATATTTGGGTGAAA  
AGATTCGTCGGAAT

+  
FF:FFFFFFFFFFFFFFFFFFFFFFFFFFFFFFFFFFFFFFFFFFFFFFFFFFFFFFFFFFFFFFFF,FFF,F:F:  
FFFFFFFFFFFFFFFF:F:FFFFFFFFFFFF:FFF:FFFFFFFFF::FFFFFFFF:F:F::FFFFFFFFF  
FFFFFFFFFFFFFF:

@A00721:190:HGJW7DSXY:4:2470:12192:29716 1:N:0:TCTGCAAG+GCTGCACT  
CGTCTAGTTCGATACGATCACACTTTCTTTTCCGGCCGTCTTCTTGAAATTGACCGTGATCAATATAA  
GATCCTCCTTTTGTGATATAATCGGCGACGTCATTGCGCGATCTCGCACTTTGAATATTTGGGTGAAA  
AGATTCGTCGGAATC

+  
FFFFFFFFFFFFFFFFFFFFFFFFFFFFFFFFFFFFFFFFFFFFFFFFFFFFFFFFFFFFFFFF:FFFFFFFFFFFFFFFFFFFFFFFF  
FFFFFFFFFFFFFFFFFFFFFFFFFFFFFFFFFFFFFFFFFFFFFFFFFFFFFFFFFFFFFFFFFFFFFFFFFFFFFFFFFFFFFFFF  
FFFFFFFFFFFFFF::F

@A00721:190:HGJW7DSXY:4:2516:3631:12633 1:N:0:TCTGCAAG+GCTGCACT  
CGTCTAGTTCGATACGATCACACTTTCTTTTCCGGCCGTCTTCTTGAAATTGACCGTGATCAATATAA  
GATCCTCCTTTTGTGATATAATCGGCGACGTCATTGCGCGATCTCGCACTTTGAATATTTGGGTGAAA  
AGATTCGTCGGAATC

+  
FFFFFFFFFFFFFFFFFFFFFFFFFFFFFFFFFFFFFFFFFFFFFFFFFFFFFFFFFFFFFFFF:FFFFFFF  
FFFFFFFFFFFFFFFFFFFFFFFFFFFFFFFFFFFFFFFFFFFFFFFFFFFFFFFFFFFFFFFF:FFFFFFFFF:FFFFFFFFFFFFFFF  
FFFFFFFFFFFFFFF

@A00721:190:HGJW7DSXY:4:2543:16785:14559 1:N:0:TCTGCAAG+GCTGCACT  
CGTCTAGTTCGATACGATCACACTTTCTTTTCCGGCCGTCTTCTTGAAATTGACCGTGATCAATATAA  
GATCCTCCTTTTGTGATATAATCGGCGACGTCATTGCGCGATCTCGCACTTTGAATATTTGGGTGAAA  
AGATTCGTCGGAATC

+  
FFFFFFFFFFFFFFFFFFFFFFFFFFFFFFFFFFFFFFFFFFFFFFFFFFFFFFFFFFFFFFFFFFFFFFFFFFFFFFFFFFFFFFFF  
FFFFFFFFFFFFFFFFFFFFFFFFFFFFFFFFFFFFFFFFFFFFFFFFFFFFFFFFFFFFFFFFFFFFFFFFFFFFFFFFFFFFFFFF  
FFFFF:FFFFFFFFF

@A00721:190:HGJW7DSXY:4:1129:5330:10661 1:N:0:TCTGCAAG+GCTGCACT  
GTCTAGTTCGATACGATCACACTTTCTTTTCCGGCCGTCTTCTTGAAATTGACCGTGATCAATATAAG  
ATCCTCCTTTTGTGATATAATCGGCGACGTCATTGCGCGATCTCGCACTTTGAATATTTGGGTGAAA  
GATTCGTCGGAATC

+  
FFFFF:FFFFF:FFFFFFFFFFFFFFFFFFFFFFFF:FFFFFFFFFFFFF:FFFFFFFFF:F:F:F:FFF:FFFFF  
:F:,F:, :FFFFFFFFFFFF:, , FFFFFF:FFFFF:FFFFFFFFF:F:FFFFFFFFF,FFFF::FFF  
:FFFF,FF:FFFF:F

@A00721:190:HGJW7DSXY:4:1129:5692:11130 1:N:0:TCTGCAAG+GCTGCACT  
GTCTAGTTCGATACGATCACACTTTCTTTTCCGGCCGTCTTCTTGAAATTGACCGTGATCAATATAAG  
ATCCTCCTTTTGTGATATAATCGGCGACGTCATTGCGCGATCTCGCACTTTGAATATTTGGGTGAAA  
GATTCGTCGGAATC

+  
FFFFFFFFFFFFFFFFFFFFFFFFFFFFFFFFFFFFFFFFFFFFFFFFFFFFFFFFFFFFFFFFFFFFFFFFFFFFFFFFFFFFFFFF  
FFFFFFFF:FFFFFFFFFFFFFFFFFFFFFFFFFFFFFFFF:FFFFFFFFFFFFFFFFFFFFFFFF:FFFFFFFFFFFFFFFF  
FFFFFFFFFFFFFFF

@A00721:190:HGJW7DSXY:4:1209:12572:6699 1:N:0:TCTGCAAG+GCTGCACT  
GTCTAGTTCGATACGATCACACTTTCTTTTCCGGCCGTCTTCTTGAAATTGACCGTGATCAATATAAG  
ATCCTCCTTTTGTGATATAATCGGCGACGTCATTGCGCGATCTCGCACTTTGAATATTTGGGTGAAA  
GATTCGTCAGATCGG

+  
FFFFFFFFFFFFFFFFFFFFFFFFFFFFFFFFFFFFFFFFFFFFFFFFFFFFFFFFFFFFFFFFFFFFFFFFFFFFFFFFFFFF,  
FFFFFFFFF::FFFFFFFFFFFFFFFFFFFFFFFFFFFFFFFFFFFFFFFFFFFFFFFFFFFFFFFF:FFF:FFFFFFFFF  
:FFFFFFFFFFFFFFF

@A00721:190:HGJW7DSXY:4:1220:30689:20885 1:N:0:TCTGCAAG+GCTGCACT  
GTCTAGTTCGATACGATCACACTTTCTTTTCCGGCCGTCTTCTTGAAATTGACCGTGATCAATATAAG

ATCCTCCTTTTGTGATATAATCGGCGACGTCATTGCGCGATCTCGCACTTTGAATATTTGGGTGAAAA  
GATTCGTCGGAATCT

[illegible]

+

@A00721:190:HGJW7DSXY:4:1244:25437:23437 1:N:0:TCTGCAAG+GCTGCACT  
GTCTAGTTCGATACGATCACACTTTCTTTTCCGGCCGTCTTCTTGAAATTGACCGTGATCAATATAAG  
ATCCTCCTTTTGTGATATAATCGGCGACGTCATTCGCCGATCTCGCACTTTGAATATTTGGGTGAAAA  
GATTCGTCGGAATCT

[illegible]

+

```

FFFFFFFFFFFFFFFFFFFFFFFFFFFFFFFFFFFFFFFFFFFFFFFFFFFFFFFFFFFFFFFFFFFFFFFF
FFFFFFFF:FFFFFFFFFFFF:FFFFFFFFFFFFFFFF:FF:FFFFFFFFFFFFFFFFFFFFFFFFFFFFFF
FFFF:FFFFFFFFFFFF

```

+

[illegible]

+

[illegible]

+

[illegible]



@A00721:190:HGJW7DSXY:4:1372:13241:25676 1:N:0:TCTGCAAG+GCTGCACT  
GTCTAGTTCGATACGATCACACTTTCTTTTCCGGCCGTCTTCTTGAAATTGACCGTGATCAATATAAG  
ATCCTCCTTTTGTGATATAATCGGCGACGTCATTCGCCGATCTCGCACTTTGAATATTTGGGTGAAAA  
GATTCGTCGGAATCT

[illegible]

@A00721:190:HGJW7DSXY:4:1428:15022:20243 1:N:0:TCTGCAAG+GCTGCACT  
GTCTAGTTCGATACGATCACACTTTCTTTTCCGGCCGTCTTCTTGAAATTGACCGTGATCAATATAAG  
ATCCTCCTTTTGTGATATAATCGGCGACGTCATTCGCCGATCTCGCACTTTGAATATTTGGGTGAAAA  
GATTCGTCGGAATCT

```

FFFFFFFFFFFFFFFFFFFFFFFFFFFFFFFFFFFFFFFF:FFFFFFFF,FFFFFFFFFFFF:FFFF
FFF,FFFFFFFFFFFFFFFFFFFFFFFF:FFFFFFFF,FFFFFFFFFFFFFFFF,FFFFFF,FFFFFFFF
FFFF,FFFFFF:FFF

```

@A00721:190:HGJW7DSXY:4:1444:23873:26897 1:N:0:TCTGCAAG+GCTGCACT  
GTCTAGTTCGATACGATCACACTTTCTTTTCCGGCCGTCTTCTTGAAATTGACCGTGATCAATATAAG  
ATCCTCCTTTTGTGATATAATCGGCGACGTCATTCGCCGATCTCGCACTTTGAATATTTGGGTGAAAA  
GATTCGTCGGAATCT

[illegible]

@A00721:190:HGJW7DSXY:4:1445:13485:17237 1:N:0:TCTGCAAG+GCTGCACT  
GTCTAGTTCGATACGATCACACTTTCTTTTCCGGCCGTCTTCTTGAAATTGACCGTGATCAATATAAG  
ATCCTCCTTTTGTGATATAATCGGCGACGTCATTGCGCGATCTCGCACTTTGAATATTTGGGTGAAA  
GATTCGTCGGAATC

```
FFFFFFFFFFFFFFFFFFFFFFFFFFFFFFFFFFFFFFFFFFFFFFFFFFFFFFFFFFFFF
FFFFFFFFFFFFFFFFFFFFFF;FFFFFFFFFFFFFFFFFFFFFFFFFFFFFFFFFFFFF
FFFFFFFFFFFFFF;FF
```

@A00721:190:HGJW7DSXY:4:1449:13132:18505 1:N:0:TCTGCAAG+GCTGCACT  
GTCTAGTTCGATACGATCACACTTTCTTTTCCGGCCGTCTTCTTGAAATTGACCGTGATCAATATAAG  
ATCCTCCTTTTGTGATATAATCGGCGACGTCATTCGCCGATCTCGCACTTTGAATATTTGGGTGAAA  
GATTCGTCGGAATC

[illegible]

@A00721:190:HGJW7DSXY:4:1461:22227:18630 1:N:0:TCTGCAAG+GCTGCACT  
GTCTAGTTCGATACGATCACACTTTCTTTTCCGGCCGTCTTCTTGAAATTGACCGTGATCAATATAAG  
ATCCTCCTTTTGTGATATAATCGGCGACGTCATTCGCCGATCTCGCACTTTGAATATTTGGGTGAAA  
GATTCGTCGGAATCT

[illegible]

@A00721:190:HGJW7DSXY:4:1510:17002:24236 1:N:0:TCTGCAAG+GCTGCACT  
GTCTAGTTCGATACGATCACACTTTCTTTCCGGCCGTCTTCTTGAAATTGACCGTGATCAATATAAG  
ATCCTCCTTTTGTGATATAATCGGCGACGTCATTCGCCGATCTCGCACTTTGAATATTTGGGTGAAAA  
GATTCGTCGGAATCT

[illegible]

FFFFFFFF,FFFFFFFFFFFFFFFFFFFFFFFFFFFFFFFFFFFFFFFFFFFFFFFFFFFFFFFFFFFFFFFF  
FFFFFFFFFFFF:F,:

@A00721:190:HGJW7DSXY:4:1513:14579:2942 1:N:0:TCTGCAAG+GCTGCACT  
GTCTAGTTCGATACGATCACACTTTCTTTTCCGGCCGTCTTCTTGAAATTGACCGTGATCAATATAAG  
ATCCTCCTTTTGTGATATAATCGGCGACGTCATTGCGCCGATCTCGCACTTTGAATATTTGGGTGAAAA  
GATTCGTCGGAATCT

+

FFFFFFFFFFFFFFFFFFFFFFFFFFFFFFFFFFFFFFFFFFFFFFFFFFFFFFFFFFFFFFFFFFFFFFFF  
FFFFFFFFFFFFFFFFFFFFFFFFFFFFFFFFFFFFFFFFFFFFFFFFFFFFFFFFFFFFFFFFFFFFFFFF  
FFFF:FFFFFFFFFFFFFFFFFFFFFFFFFFFFFFFFFFFFFFFFFFFFFFFFFFFFFFFFFFFFFFFF:F

FFFF:FFFFFFFFFFFF  
@A00721:190:HGJW7DSXY:4:1520:20383:12743 1:N:0:TCTGCAAG+GCTGCACT  
GTCTAGTTCGATACGATCACACTTTCTTTTCCGGCCGTCTTCTTGAAATTGACCGTGATCAATATAAG  
ATCCTCCTTTTGTGATATAATCGGCGACGTCATTGCGCCGATCTCGCACTTTGAATATTTGGGTGAAAA  
GATTCGTCAGATCGG

+

FFFFFFFFFFFFFFFFFFFFFFFFFFFFFFFFFFFFFFFFFFFFFFFFFFFFFFFFFFFFFFFFFFFFFFFF  
FF:FFFFFFFFFFFFFFFFFFFFFFFFFFFFFFFFFFFFFFFFFFFFFFFFFFFFFFFFFFFFFFFF:FFFF  
FFFFFFFFFFFFFFFF

@A00721:190:HGJW7DSXY:4:1520:25084:17660 1:N:0:TCTGCAAG+GCTGCACT  
GTCTAGTTCGATACGATCACACTTTCTTTTCCGGCCGTCTTCTTGAAATTGACCGTGATCAATATAAG  
ATCCTCCTTTTGTGATATAATCGGCGACGTCATTGCGCCGATCTCGCACTTTGAATATTTGGGTGAAAA  
GATTCGTCAGATCGG

+

FFFFFFFFFFFFFFFFFFFFFFFFFFFFFFFFFFFFFFFFFFFFFFFFFFFFFFFFFFFFFFFFFFFFFFFF  
FFFFFFFFFFFFFFFFFFFFFFFFFFFFFFFFFFFFFFFFFFFFFFFFFFFFFFFFFFFFFFFFFFFFFFFF  
FFFFFFFFFFFFFFFFF:

@A00721:190:HGJW7DSXY:4:1526:29179:14325 1:N:0:TCTGCAAG+GCTGCACT  
GTCTAGTTCGATACGATCACACTTTCTTTTCCGGCCGTCTTCTTGAAATTGACCGTGATCAATATAAG  
ATCCTCCTTTTGTGATATAATCGGCGACGTCATTGCGCCGATCTCGCACTTTGAATATTTGGGTGAAAA  
GATTCGTCGGAATCT

+

FFFFFFFFFFFFFFFFFFFFFFFFFFFFFFFFFFFFFFFFFFFFFFFFFFFFFFFFFFFFFFFFFFFFFFFF  
FFF:FFF:FFFFFFFFFFFFFFFFFFFFFFFFFFFFFFFFFFFFFFFFFFFFFFFFFFFFFFFF:FFFF  
FFFFFFFFFFFFFFFF

@A00721:190:HGJW7DSXY:4:1534:22110:35149 1:N:0:TCTGCAAG+GCTGCACT  
GTCTAGTTCGATACGATCACACTTTCTTTTCCGGCCGTCTTCTTGAAATTGACCGTGATCAATATAAG  
ATCCTCCTTTTGTGATATAATCGGCGACGTCATTGCGCCGATCTCGCACTTTGAATATTTGGGTGAAAA  
GATTCGTCGGAATCT

+

F:FFFFFFFFFFFFFFFFFFFFFFFFFFFFFFFFFFFFFFFFFFFFFFFFFFFFFFFFFFFFFFFFFFFF  
FFF,FFFF:FFFFFFFFFFFF,F,FFFFFFFFFFFFFFFF:FFFFFFFFFFFFFFFF:FFFF,:FFFF  
FFFF,FFFF,F

@A00721:190:HGJW7DSXY:4:1669:18141:28401 1:N:0:TCTGCAAG+GCTGCACT  
GTCTAGTTCGATACGATCACACTTTCTTTTCCGGCCGTCTTCTTGAAATTGACCGTGATCAATATAAG  
ATCCTCCTTTTGTGATATAATCGGCGACGTCATTGCGCCGATCTCGCACTTTGAATATTTGGGTGAAAA  
GATTCGTCGGAATCT

+

FFFFFFFFFFFFFFFFFFFFFFFFFFFFFFFFFFFFFFFFFFFFFFFFFFFFFFFFFFFFFFFFFFFFFFFF  
FFFFFFFFFFFFFFFFFFFFFFFFFFFFFFFFFFFFFFFFFFFFFFFFFFFFFFFFFFFFFFFFFFFFFFFF  
FFFFFFFFFFFF:FFF

@A00721:190:HGJW7DSXY:4:1670:16957:8625 1:N:0:TCTGCAAG+GCTGCACT  
GTCTAGTTCGATACGATCACACTTTCTTTTCCGGCCGTCTTCTTGAAATTGACCGTGATCAATATAAG  
ATCCTCCTTTTGTGATATAATCGGCGACGTCATTGCGCCGATCTCGCACTTTGAATATTTGGGTGAAAA  
GATTCGTCAGATCGG

+  
FFFFFFFFFFFFFFFFFFFFFFFFFFFFFFFFFFFFFFFFFFFFFFFFFFFFFFFFFFFFFFFFFFFFFFFF  
FFFFFFFFFFFFFFFFFFFFFFFFFFFFFFFFFFFFFFFFFFFFFFFFFFFFFFFFFFFFFFFFFFFFFFFF:FFFFFFFF  
FF:FFFFFFFFFFFF  
@A00721:190:HGJW7DSXY:4:2106:27968:14074 1:N:0:TCTGCAAG+GCTGCACT  
GTCTAGTTCGATACGATCACACTTTCTTTTCCGGCCGTCTTCTTGAAATTGACCGTGATCAATATAAG  
ATCCTCCTTTTGTGATATAATCGGCGACGTCATTGCGCCGATCTCGCACTTTGAATATTTGGGTGAAAA  
GATTCGTCGGAATCT

+  
FFFFFFFFFFFFFFFFFFFFFFFFFFFFFFFFFFFFFFFFFFFFFFFFFFFFFFFFFFFFFFFFFFFFFFFF  
FFFFFFFFFFFFFFFFFFFFFFFFFFFFFFFFFFFFFFFFFFFFFFFFFFFFFFFFFFFFFFFFFFFFFFFF  
FFFFFFFFFFFFF:FFF  
@A00721:190:HGJW7DSXY:4:2111:4155:28573 1:N:0:TCTGCAAG+GCTGCACT  
GTCTAGTTCGATACGATCACACTTTCTTTTCCGGCCGTCTTCTTGAAATTGACCGTGATCAATATAAG  
ATCCTCCTTTTGTGATATAATCGGCGACGTCATTGCGCCGATCTCGCACTTTGAATATTTGGGTGAAAA  
GATTCGTCAGATCGG

+  
FFFFFFFFFFFFFFFFFFFFFFFFFFFFFFFFFFFFFFFFFFFFFFFFFFFFFFFFFFFFFFFFFFFFFFFF:  
FFF::FFFFFFFFFFFFFFFFFFFFFFFFFFFFFFFFFFFFFFFFFFFFFFFFFFFFFFFFFFFF,FFFF:FFFFFFFF  
FFFFFFFFFFFFFFFFFFFF  
@A00721:190:HGJW7DSXY:4:2148:8784:32330 1:N:0:TCTGCAAG+GCTGCACT  
GTCTAGTTCGATACGATCACACTTTCTTTTCCGGCCGTCTTCTTGAAATTGACCGTGATCAATATAAG  
ATCCTCCTTTTGTGATATAATCGGCGACGTCATTGCGCCGATCTCGCACTTTGAATATTTGGGTGAAAA  
GATTCGTCGGAATCT

+  
FFFFFFFFFFFFFFFFFFFFFFFFFFFFFFFFFFFFFFFFFFFFFFFFFFFFFFFFFFFFFFFFFFFFFFFF:  
FFFFFFFFFFFFFFFFFFFFFFFFFFFFFFFFFFFFFFFFFFFFFFFFFFFFFFFFFFFFFFFFFFFF,FF,FFFFFFFF  
FFFF,FFFFFFFFFFFF  
@A00721:190:HGJW7DSXY:4:2148:8820:32863 1:N:0:TCTGCAAG+GCTGCACT  
GTCTAGTTCGATACGATCACACTTTCTTTTCCGGCCGTCTTCTTGAAATTGACCGTGATCAATATAAG  
ATCCTCCTTTTGTGATATAATCGGCGACGTCATTGCGCCGATCTCGCACTTTGAATATTTGGGTGAAAA  
GATTCGTCGGAATC

+  
FFFFFFFFFFFFFFFFFFFFFFFFFFFFFFFFFFFFFFFFFFFFFFFFFFFFFFFFFFFFFFFFFFFFFFFF:  
FFFFFFFFFFFFFFFFFFFFFFFFFFFFFFFFFFFFFFFFFFFFFFFFFFFFFFFFFFFFFFFFFFFF:FFFFFFFFFFFFFFFF  
FFFFFFFFFFFF:,F  
@A00721:190:HGJW7DSXY:4:2154:23222:33379 1:N:0:TCTGCAAG+GCTGCACT  
GTCTAGTTCGATACGATCACACTTTCTTTTCCGGCCGTCTACTTGAAATTGACCGTGATCAATATAAG  
ATCCTCCTTTTGTGATATAATCGGCGACGTCATTGCGCCGATCTCGCACTTTGAATATTTGGGTGAAAA  
GATTCGTCGGAATCT

+  
F:F:FF:FFFF,F:FF:FFFFFF,FF:FFFFFFFFFFFF,:::FFFFFF,FFF::FFFFFFFFFFFF,  
F:FFFF::F:FF,FFFF,FFF:::F:F,F,FFFFFFFF,FFFF,F:FFF::F:F,FF,:FFFFFFFF  
:F,FF:,,:FF::FF  
@A00721:190:HGJW7DSXY:4:2217:28348:22435 1:N:0:TCTGCAAG+GCTGCACT  
GTCTAGTTCGATACGATCACACTTTCTTTTCCGGCCGTCTTCTTGAAATTGACCGTGATCAATATAAG  
ATCCTCCTTTTGTGATATAATCGGCGACGTCATTGCGCCGATCTCGCACTTTGAATATTTGGGTGAAAA  
GATTCTTCAGATCG

+  
FF,FFFFFFFFFFFFFFFFFFFFFFFFFFFFFFFFFFFFFFFFFFFFFFFFFFFFFFFFFFFF:FFFFFF:FFFFFFF,:::FFFFFFFF:  
FF,FF,FF:FFFFFFFFFFFFFFFFFFFFFFFFFFFFFFFFFFFFFFFFFFFFFFFFFFFF:::FFF,FF:FFFF:::FFFFFFFF  
FFFFF,F,FFFFFF  
@A00721:190:HGJW7DSXY:4:2224:27760:5760 1:N:0:TCTGCAAG+GCTGCACT  
GTCTAGTTCGATACGATCACACTTTCTTTTCCGGCCGTCTTCTTGAAATTGACCGTGATCAATATAAG

ATCCTCCTTTTGTGATATAATCGGCGACGTCATTGCGCGATCTCGCACTTTGAATATTTGGGTGAAAA  
GATTCGTCGGAATCT

[illegible] $+$ 

@A00721:190:HGJW7DSXY:4:2332:1624:25003 1:N:0:TCTGCAAG+GCTGCACT  
GTCTAGTTCGATACGATCACACTTTCTTTTCCGGCCGTCTTCTTGAAATTGACCGTGATCAATATAAG  
ATCCTCCTTTTGTGATATAATCGGCGACGTCATTCGCCGATCTCGCACTTTGAATATTTGGGTGAAAA  
GATTCGTCGGAATC

```

FFFFFFFFFFFFFFFFFFFFFFFFFFFFFFFF:FFFFFFFFFFFF,FFF,FFFFFFFF:FFFFFF:FF,FFFF:
FF:FFFFFF:,FFFF:FFFFFFFFFFFFFFFF:FF::F:FFFFFFFF:FFFFFF:FFFFFFFF:FFFFFFFF
:FF,:FFF:FF:::

```

+

@A00721:190:HGJW7DSXY:4:2418:3314:16971 1:N:0:TCTGCAAG+GCTGCACT  
GTCTAGTTCGATACGATCACACTTTCTTTTCCGGCCGTCTTCTTGAAATTGACCGTGATCAATATAAG  
ATCCTCCTTTTGTGATATAATCGGCGACGTCATTGCGCGATCTCGCACTTTGAATATTTGGGTGAAAA  
GATTCGTCGGAATCT

[illegible] $+$ 

@A00721:190:HGJW7DSXY:4:2538:12509:32142 1:N:0:TCTGCAAG+GCTGCACT  
GTCTAGTTCGATACGATCACACTTTCTTTCCGGCCGTCTTCTTGAAATTGACCGTGATCAATATAAG  
ATCCTCCTTTTGTGATATAATCGGCGACGTCATTCGCCGATCTCGCACTTTGAATATTTGGGTGAAA  
GATTCGTCGGAATCT

[illegible]

$+$ 

@

+

6

 $+$ 

6

+

94

+

9

+

9

+

@A00721:190:HGJW7DSXY:4:1527:14742:20885 1:N:0:TCTGCAAG+GCTGCACT  
CTAGTTCGATACGATCACACTTTCTTTTCCGGCCGTCTTCTTGAAATTGACCGTGATCAATATAAGAT  
ACTCCTTTTGTGATATAATCGGCGACGTCATTCGCCGATCTCGCAATTTGAATATTTGGGTGAAAAGA  
TTAGTCGGAA

@A00721:190:HGJW7DSXY:4:1564:26006:33912 1:N:0:TCTGCAAG+GCTGCACT  
CTAGTTCGATACGATCACACTTTCTTTTCCGGCCGTCTTCTTGAAATTGACCGTGATCAATATAAGAT  
CCTCCTTTTGTGATATAATCGGCGACGTCATTCGCCGATCTCGCACTTTGAATATTTGGGTGAAAAGA  
TTCGTCGGAATCTGG

@A00721:190:HGJW7DSXY:4:1643:29993:13354 1:N:0:TCTGCAAG+GCTGCACT  
CTAGTTCGATACGATCACACTTTCTTTTCCGGCCGTCTTCTTGAAATTGACCGTGATCAATATAAGAT  
CCTCCTTTTGTGATATAATCGGCGACGTCATTCGCCGATCTCGCACTTTGAATATTTGGGTGAAAAGA  
TTCGTCGGAATCTGG

@A00721:190:HGJW7DSXY:4:2130:13160:36057 1:N:0:TCTGCAAG+GCTGCACT  
CTAGTTCGATACGATCACACTTTCTTTTCCGGCCGTCTTCTTGAAATTGACCGTGATCAATATAAGAT  
CCTCCTTTTGTGATATAATCGGCGACGTCATTCGCCGATCTCGCACTTTGAATATTTGGGTGAAAAGA  
TTCGTCGGAATCTGG

@A00721:190:HGJW7DSXY:4:2554:31602:7623 1:N:0:TCTGCAAG+GCTGCACT  
CTAGTTCGATACGATCACACTTTCTTTTCCGGCCGTCTTCTTGAAATTGACCGTGATCAATATAAGAT  
CCTCCTTTTGTGATATAATCGGCGACGTCATTCGCCGATCTCGCACTTTGAATATTTGGGTGAAAAGA  
TTCGTCGGAATCTGG

@A00721:190:HGJW7DSXY:4:2614:24632:4319 1:N:0:TCTGCAAG+GCTGCACT  
CTAGTTCGATACGATCACACTTTCTTTTCCGGCCGTCTTCTTGAAATTGACCGTGATCAATATAAGAT  
CCTCCTTTTGTGATATAATCGGCGACGTCATTCGCCGATCTCGCACTTTGAATATTTGGGTGAAAAGA  
TTCGTCGGAATCTGG

@A00721:190:HGJW7DSXY:4:2618:25735:3223 1:N:0:TCTGCAAG+GCTGCACT  
CTAGTTCGATACGATCACACTTTCTTTTCCGGCCGTCTTCTTGAAATTGACCGTGATCAATATAAGAT  
CCTCCTTTTGTGATATAATCGGCGACGTCATTCGCCGATCTCGCACTTTGAATATTTGGGTGAAAAGA  
TTCGTCGGAATCTGG

```

FFFFFFFFFFFFFFFFFFFFFFFFFFFFFFFFFFFFFFFF:FFFFFFFFFFFFFFFF:FFFFFF:F:
FFFFFFFFFFFFFFFFFFFFFFFFFFFFFFFFFFFFFFFF:FFFFFFFFFFFFFFFFFFFFFFFFFFFFFF
FFFF:FFFFFFFF

```

```
FF,F,F:F,FF,FFFFFFFF:F,F:,FFF:FFFFFFFF,FFF:FF:FF,F,FF,F,:FF,FF:FFF
F:FF,,,,,FFFF:,FF,,:,F,FF,,:F:FF,,,,F,F,F,:FF,,,F,F,F,,,:::,F,FF,FF
FFFFF:FFFF
```

[illegible][illegible][illegible][illegible]

```
FFFFFFFFFFFFFFFFFFFFFFFFFFFFFFFFFFFFFFFFFFFFFFFFFFFFFFFFFFFFFFF
FFFFFFFFFFFFFFFFFFFF:FFFFFFFFFFFFFFFFFFFFFFFFFFFFFFFFFFFFFFFF
FFFFFFFFE.:FFFFFF
```

@A00721:190:HGJW7DSXY:4:2319:29225:18317 1:N:0:TCTGCAAG+GCTGCACT  
AGTTTCGATACGATCACACTTTCTTTTCCGGCCGTCTTCTTGAAATTGACCGTGATCAATATAAGATCC





$+$ 

+

+

+

+

+

+

FFFFF:FFFFFFFFFFFFFFFFFFFFFFFFFFFFFFFFFFFFFFFFFFFFFFFFFFFFFFFFFFFFFFFF,FFFF  
F:FFF:F:FFFFFFF

@A00721:190:HGJW7DSXY:4:2357:5963:1172 1:N:0:TCTGCAAG+GCTGCACT  
ATACGATCACACTTTCTTTTCCGGCCGTCTTCTTGAAATTGACCGTGATCAATATAAGATCCTCCTTT  
TGTGATATAATCGGCGACGTCATTGCGCGATCTCGCACTTTGAATATTTGGGTGAAAAGATTCGTCGG  
AATCTGGGTTGATTA

+

FFFFFFFFFFFFFFFFFFFFFFFFFFFFFFFFFFFFFFFFFFFFFFFFFFFFFFFFFFFFFFFFFFFFF  
FFFFFFFFFFFFFFFFFFFFFFFFFFFFFFFFFFFFFFFFFFFFFFFFFFFFFFFFFFFFFFFFFFFFF  
FFFFFFFFFFFFFFFFFFFF

@A00721:190:HGJW7DSXY:4:2407:28402:3333 1:N:0:TCTGCAAG+GCTGCACT  
ATACGATCACACTTTCTTTTCCGGCCGTCTTCTTGAAATTGACCGTGATCAATATAAGATCCTCCTTT  
TGTGATATAATCGGCGACGTCATTGCGCGATCTCGCACTTTGAATATTTGGGTGAAAAGATTCGTCGG  
AATCTGGGTTGATTA

+

FFFFFFFFFFFFFFFFFFFFFFFFFFFFFFFFFFFFFFFFFFFFFFFFFFFFFFFFFFFFFFFFFFFFF:FFFFF:FFFFFFFFF:FFFFFFFF:FF  
F:FF:FFFFFFFFFFFFFFFFFFFFFFFFFFFFFFFFFFFFFFFFFFFFFFFFFFFFFFFFFFFFF:FFFFF:FFFF,:F::FFFFFFFFF  
FFF:FFFF:FFFFFFF

@A00721:190:HGJW7DSXY:4:2562:22019:8813 1:N:0:TCTGCAAG+GCTGCACT  
ATACGATCACACTTTCTTTTCCGGCCGTCTTCTTGAAATTGACCGTGATCAATATAAGATCCTCCTTT  
TGTGATATAATCGGCGACGTCATTGCGCGATCTCGCACTTTGAATATTTGGGTGAAAAGATTCGTCGG  
AATCTGGGTTGATTA

+

FFFFFFFFFFFFFFFFFFFFFFFFFFFFFFFFFFFFFFFFFFFFFFFFFFFFFFFFFFFFFFFFFFFFF:FF  
FFFFFFFFFFFFFFFFFFFFFFFFFFFFFFFFFFFFFFFFFFFFFFFFFFFFFFFFFFFFFFFFFFFFF  
FFFFFFFFFFFFFFFFFFFF

@A00721:190:HGJW7DSXY:4:1304:10294:17816 1:N:0:TCTGCAAG+GCTGCACT  
ACGATCACACTTTCTTTTCCGGCCGTCTTCTTGAAATTGACCGTGATCAATATAAGATCCTCCTTTTG  
TGATATAATCGGCGACGTCATTGCGCGATCTCGCACTTTGAATATTTGGGTGAAAAGATTCGTCGGAA  
TCTGGGTTGATTATG

+

FFFFFFFFFFFFFFFFFFFFFFFFFFFFFFFFFFFFFFFFFFFFFFFFFFFFFFFFFFFFFFFFFFFFF:FFFFF:FFFFFFFFF:FFFFFFFF:FFFF  
FFFFFFFFFFFFFFFFFFFFFFFFFFFFFFFFFFFFFFFFFFFFFFFFFFFFFFFFFFFFFFFFFFFFF,FFFF:FFFFFFFFFFFF  
FFFFFFFFFFFFFFFFF:

@A00721:190:HGJW7DSXY:4:1356:31078:31673 1:N:0:TCTGCAAG+GCTGCACT  
ACGATCACACTTTCTTTTCCGGCCGTCTTCTTGAAATTGACCGTGATCAATATAAGATCCTCCTTTTG  
TGATATAATCGGCGACGTCATTGCGCGATCTCGCACTTTGAATATTTGGGTGAAAAGATTCGTCGGAA  
TCTGGGTTGATTATG

+

FFFFFFFFFFFFFFFFFFFFFFFFFFFFFFFFFFFFFFFFFFFFFFFFFFFFFFFFFFFFFFFFFFFFF  
FFFFFFFFFFFFFFFFFFFFFFFFFFFFFFFFFFFFFFFFFFFFFFFFFFFFFFFFFFFFFFFFFFFFF:FFFFFFFFFFFFFFFFFFFFFFFFFFFFF  
FFFFFFFFFFFFFFFFFFFF

@A00721:190:HGJW7DSXY:4:1374:23619:14403 1:N:0:TCTGCAAG+GCTGCACT  
ACGATCACACTTTCTTTTCCGGCCGTCTTCTTGAAATTGACCGTGATCAATATAAGATCCTCCTTTTG  
TGATATAATCGGCGACGTCATTGCGCGATCTCGCACTTTGAATATTTGGGTGAAAAGATTCGTCGGAA  
TCTGGGTTGATTATG

+

FFFFFFFFFFFFFFFFFFFFFFFFFFFFFFFFFFFFFFFFFFFFFFFFFFFFFFFFFFFFFFFFFFFFF  
:F:FFFFFFFFFFFFFFFFFFFFFFFFFFFFFFFFFFFFFFFFFFFFFFFFFFFFFFFFFFFFFFFFFFFFF  
FFFFFFFFFFFFFFFFFFFF

@A00721:190:HGJW7DSXY:4:1420:32723:23688 1:N:0:TCTGCAAG+GCTGCACT  
ACGATCACACTTTCTTTTCCGGCCGTCTTCTTGAAATTGACCGTGATCAATATAAGATCCTCCTTTTG  
TGATATAATCGGCGACGTCATTGCGCGATCTCGCACTTTGAATATTTGGGTGAAAAGATTCGTCGGAA  
TCTGGGTTGATTATG

[illegible]

```

FFFFFFFFFFFFFFFFFFFFFFFFFFFFFFFFFFFFFFFFFFFFFFFFFFFFFFFFFFFFFFFF:FFFFFF:FFF
FFFFFFFFFFFFFFFFFFFFFFFFFFFFFFFFFFFFFFFFFFFFFFFFFFFFFFFFFFFFFFFF:FFFFFFFFFFFFFFFFFFFFFFFFFFFFFFFF,
FFFFFFFFFFFFFFFF

```

[illegible]

```
FF:FFFF,,FFFF,FFF::FFF,FFFF,F,FFFFFF:FF,:F,F,,FF:FFFF,F::FFFF,FFF::,
F,FFFF:FFFF:F,,FFF::FFF,F:FFF:FF::F:,FF:FFFFFF:F,FFFF:F,:F,:F,FFF,
FFFFFF:FF,,:F:
```

[illegible]

```
FFF:FFFFFFFF,FFF,FFFFF:FF,FFFFFFFFF:FFFF,FF:FFFF:,FF:F:,F,FFFFFFFF
FFFFFFFF:FFFFFFFFFFFFFF,FFF,FFFFFFFF,FFFFFF,FF:FF,FFFFFFFF:FFFF:FFF:,FF
F:FF:,,:FFFFFFFF
```

[illegible]

@A00721:190:HGJW7DSXY:4:1432:29243:26146 1:N:0:TCTGCAAG+GCTGCACT  
CCACACTTTTCTTTTCCGGCCGTCTTCTTGAAATTGACCGTGATCAATATAAGATCCTCCTTTTGTGAT





FFFFFFFFFFFFFFFFFFFFFFFFFFFFFFFFFFFFFFFF,FF,FFFF:FFFFFFFFFFFFFFFF:F:F:F:FF  
FFF:FFFFFFFF

@A00721:190:HGJW7DSXY:4:1402:12834:24001 1:N:0:TCTGCAAG+GCTGCACT  
CTTTCTTTTCCGGCCGTCTTCTTGAAATTGACCGTGATCAATATAAGATCCTCCTTTTGTGATATAAT  
CGGCGACGTCATTGCGCGATCTCGCACTTTGAATATTTGGGTGAAAAGATTCGTCGGAATCTGGGTTG  
ATTATGTCGAAGAAC

+

FFFFFFFFFFFFFFFFFFFFFFFFFFFFFFFFFFFFFFFF,FFFFFFFFFFFFFFFFFFFFFFFF:FFFFFFFFFFFFFFFF  
FFFFFFFFFFFFFFFFFFFFFFFFFFFFFFFFFFFFFFFF:FF:FFFFFFFFFFFFFFFFFFFFFFFF:FFFF,FF  
FFFFFFFFFFFF:FFF

@A00721:190:HGJW7DSXY:4:1402:13060:24205 1:N:0:TCTGCAAG+GCTGCACT  
CTTTCTTTTCCGGCCGTCTTCTTGAAATTGACCGTGATCAATATAAGATCCTCCTTTTGTGATATAAT  
CGGCGACGTCATTGCGCGATCTCGCACTTTGAATATTTGGGTGAAAAGATTCGTCGGAATCTGGGTTG  
ATTATGTCGAAGAAC

+

FFFFFFFFFFFFFFFFFFFFFFFFFFFFFFFFFFFFFFFF:FFFFFFFFFFFFFFFF: ,FFFF:FF:FFF  
FFFFFFFF,FFFFFFFFFFFFFFFFFFFFFFFFFFFFFFFF:FFF:FFFFFFFFFFFFFFFF:FFFFFF  
FFFFFFFFFFFFFFFF

@A00721:190:HGJW7DSXY:4:2176:15393:31469 1:N:0:TCTGCAAG+GCTGCACT  
CTTTCTTTTCCGGCCGTCTTCTTGAAATTGACCGTGATCAATATAAGATCCTCCTTTTGTGATATAAT  
CGGCGACGTCATTGCGCGATCTCGCACTTTGAATATTTGGGTGAAAAGATTCGTCGGAATCTGGGTTG  
ATTATGTCGAAGAAC

+

FFFFFFFFFFFFFFFFFFFFFFFFFFFFFFFFFFFFFFFF:FFFFFFFFFFFFFFFFFFFFFFFF  
FFFFFFFFFFFFFFFFFFFFFFFFFFFFFFFF:FFFFFFFFFFFFFFFFFFFFFFFF:FFFFFF:FFFFFF  
F,FFF:FFFFFF:F:

@A00721:190:HGJW7DSXY:4:2369:5764:15922 1:N:0:TCTGCAAG+GCTGCACT  
CTTTCTTTTCCGGCCGTCTTCTTGAAATTGACCGTGATCAATATAAGATCCTCCTTTTGTGATATAAT  
CGGCGACGTCATTGCGCGATCTCGCACTTTGAATATTTGGGTGAAAAGATTCGTCGGAATCTGGGTTG  
ATTATGTCGAAGAAC

+

FFF:FFFFFFFFFFFFFFFFFFFFFFFFFFFFFFFFFFFFFFFF:FFFFFFFFFFFF  
FFFFFFFFFFFFFFFFFFFFFFFFFFFFFFFFFFFFFFFF:FFFFFFFFFFFF  
FFFFFFFFFFFFFFFF

@A00721:190:HGJW7DSXY:4:1108:26720:26631 1:N:0:TCTGCAAG+GCTGCACT  
TTTCTTTTCCGGCCGTCTTCTTGAAATTGACCGTGATCAATATAAGATCCTCCTTTTGTGATATAATC  
GGCGACGTCATTGCGCGATCTCGCACTTTGAATATTTGGGTGAAAAGATTCGTCGGAATCTGGGTTGA  
TTATGTCGAAGAACC

+

FFFFFFFFFFFFFFFFFFFF:FFF:FFFF:FFFFFFFFFFFFFFFFFFFFFFFFFFFFFFFF:FF  
FFFF:FFFFFFFFFFFFFFFFFFFFFFFFFFFFFFFF:FFFF:F:FFFFFFFFFFFFFFFFFFFF,F:FFFF,FF:  
FFFFFFFF:FFF,F,F

@A00721:190:HGJW7DSXY:4:1168:7798:35070 1:N:0:TCTGCAAG+GCTGCACT  
TTTCTTTTCCGGCCGTCTTCTTGAAATTGACCGTGATCAATATAAGATCCTCCTTTTGTGATATAATC  
GGCGACGTCATTGCGCGATCTCGCACTTTGAATATTTGGGTGAAAAGATTCGTCGGAATCTGGGTTGA  
TTATGTCGAAGAACC

+

FFFFFFFFFFFFFFFFFFFFFFFFFFFFFFFFFFFFFFFFFFFFFFFFFFFFFFFFFFFFFFFF  
FFFFFFFFFFFFFFFFFFFFFFFFFFFFFFFF:FFFFFFFFFFFFFFFFFFFFFFFFFFFFFFFF  
FFFF:FFF,FF:FFF

@A00721:190:HGJW7DSXY:4:1168:8034:35665 1:N:0:TCTGCAAG+GCTGCACT  
TTTCTTTTCCGGCCGTCTTCTTGAAATTGACCGTGATCAATATAAGATCCTCCTTTTGTGATATAATC  
GGCGACGTCATTGCGCGATCTCGCACTTTGAATATTTGGGTGAAAAGATTCGTCGGAATCTGGGTTGA  
TTATGTCGAAGAACC

```

FFFFFFFFFFFFFFFFFFFFFFFFFFFFFFFFFFFFFFFFFFFFFFFFFFFFFFFFFFFFFFFF:FFFFFFFFFFFFFFFFFFFFFFFFFFFFFF
FFFFFFF:FFFFFFFFFFFFFFFFFFFFFFFFFFFFFFFFFFFFFFFFFFFFFFFFFFFFFFFF:FFFFFFFFFFFFFFFFF:FFF:FFFFFFFFFFFFF,FFFFFFFFFFFF
FFFFFFFFFFFFFFFFFFFF

```

```

FFFFFFFFFFFFFFFFFFFFFFFFFFFFFFFFFFFFFFFFFFFFFFFFFFFFFFFFFFFFFFFFFFFFFFFF
FFFFFFFFFFFFFFFFFFFFFFFFFFFFFFFFFFFFFFFF,F:FFFFFFFFFFFFFFFFFFFFFFFF:FFFFFFFF
FFFFFFFFFFFFFF:F

```

```
FFFFFFFFFFFFFFFF,FFFFFFFFFFFFFFFFFFFFFFFFFFFF,FFFFF,FFFFFFFFFFFFFFFF
FFFFFFFFFFFFFFFF:FFFFFFFFFFFFFF:FFFFFFFFFFFFFFFFFFFFFFFFFFFFFFFF:F,FFFFFFF
FFFFFFFFF:FFFFFFF
```

[illegible][illegible]

```
FFFFFFFFFFFFFFFFFFFFFFFFFFFFF:FFFFFF:FFFF:F:FFFF:FF:FFFFFFFFFFFFF,  
FFFFFFFFFFFFF:FFFFFFFFFFFF:F:FFFFFFFFFFFFFFFFFFFF:FFFFFF:FFF:FFFFFFF  
FFFFFFFFF:FFF,F
```

[illegible]

@A00721:190:HGJW7DSXY:4:2219:3884:3302 1:N:0:TCTGCAAG+GCTGCACT  
TTTCTTTTCCGGCCGTCTTCTTGAAATTGAACGTGATCAATATAAGATCCTCCTTTTGTGATATAATC

GGCGACGTCATTCGCCGATCTCGCACTTTGAATATTTGGGTGAAAAGATTTCGTCGGAATCTGGGTTGA  
TTATGTCGAAGAACC

+

F,F:F:FFFFFFFF:FFF:F::,FFF,,:F,F,,F,::::F:FF,FFFF,FF,FFF,FF,F:FFFF  
,FF,F:F,FFFF,F:F:FF::F:F,,, :FF,: ,FF,F:,F::,FF,F:F::,,F:F,,FF:FFFF,,  
,F:F,F,FFFF:,F

@A00721:190:HGJW7DSXY:4:2268:30698:4836 1:N:0:TCTGCAAG+GCTGCACT  
TTTCTTTTCCGGCCGTCTTCTTGAAATTGACCGTGATCAATATAAGATCCTCCTTTTGTGATATAATC  
GGCGACGTCATTCGCCGATCTCGCACTTTGAATATTTGGGTGAAAAGATTTCGTCGGAATCTGGGTTGA  
TTATGTCGAAGAACC

+

FFFFFFFFFFFFFFFFFFFFFFFFFFFFFFFFFFFFFFFFFFFFFFFFFFFFFFFFFFFFFFFFFFFFFFFF  
FFFFFFFFFFFFFFFFFFFFFFFFFFFFFFFFFFFFFFFFFFFFFFFFFFFFFFFFFFFFFFFFFFFFFFFF  
:F:FFFFFFFF,FFF

@A00721:190:HGJW7DSXY:4:2322:27272:19852 1:N:0:TCTGCAAG+GCTGCACT  
TTTCTTTTCCGGCCGTCTTCTTGAAATTGACCGTGATCAATATAAGATCCTCCTTTTGTGATATAATC  
GGCGACGTCATTCGCCGATCTCGCACTTTGAATATTTGGGTGAAAAGATTTCGTCGGAATCTGGGTTGA  
TTATGTCGAAGAACC

+

FFFFFFFFFFFFFFFFFFFFFFFFFFFFFFFFFFFFFFFFFFFFFFFFFFFFFFFFFFFFFFFFFFFFFFFF  
FFFFFFFFFFFFFFFFFFFFFFFFFFFFFFFFFFFFFFFFFFFFFFFFFFFFFFFFFFFFFFFFFFFFFFFF  
FFFFFFFFFFFFFFFF

@A00721:190:HGJW7DSXY:4:2510:24894:15139 1:N:0:TCTGCAAG+GCTGCACT  
TTTCTTTTCCGGCCGTCTTCTTGAAATTGACCGTGATCAATATAAGATCCTCCTTTTGTGATATAATC  
GGCGACGTCATTCGCCGATCTCGCACTTTGAATATTTGGGTGAAAAGATTTCGTCGGAATCTGGGTTGA  
TTATGTCGAAGAACC

+

FFFFFFFFFFFFFFFFFFFFFFFFFFFFFFFFFFFFFFFFFFFFFFFFFFFFFFFFFFFFFFFFFFFFFFFF  
FFFFFFFFFFFFFFFFFFFFFFFFFFFFFFFFFFFFFFFFFFFFFFFFFFFFFFFFFFFFFFFFFFFFFFFF  
FF,FFFFFFFF:F

@A00721:190:HGJW7DSXY:4:1217:4797:17033 1:N:0:TCTGCAAG+GCTGCACT  
AGGCCGTCTTCTTGAAATTGACCGTGATCAATATAAGATCCTCCTTTTGTGATATAATCGACGACGTC  
ATTCGCCGATCTCGCACTTTGAATATTTGGGTGAAAAGATTTCGTCGGAATCTGGGTTGATTATGTGCGA  
AGAACCTTGGATTCC

+

FFFFFFFFFFFFFFFFFFFFFFFFFFFFFFFFFFFFFFFFFFFFFFFFFFFFFFFFFFFFFFFFFFFFFFFF  
F:FFFFFFFFFFFFFFFFFFFFFFFFFFFFFFFFFFFFFFFFFFFFFFFFFFFFFFFFFFFFFFFFFFFFFFFF  
FFFFFFFFFFFFFFFF

@A00721:190:HGJW7DSXY:4:1278:22236:13761 1:N:0:TCTGCAAG+GCTGCACT  
AGGCCGTCTTCTTGAAATTGACCGTGATCAATATAAGATCCTCCTTTTGTGATATAATCGACGACGTC  
ATTCGCCGATCTCGCACTTTGAATATTTGGGTGAAAAGATTTCGTCGGAATCTGGGTTGATTATGTGCGA  
AGAACCTTGGATTCC

+

FFFFFFFFFFFFFFFFFFFFFFFFFFFFFFFFFFFFFFFFFFFFFFFFFFFFFFFFFFFFFFFFFFFFFFFF  
FFFFFFFFFFFFFFFFFFFFFFFFFFFFFFFFFFFFFFFFFFFFFFFFFFFFFFFFFFFFFFFFFFFFFFFF  
:F,:FFFFFFFF

@A00721:190:HGJW7DSXY:4:1541:2908:25003 1:N:0:TCTGCAAG+GCTGCACT  
AGGCCGTCTTCTTGAAATTGACCGTGATCAATATAAGATCCTCCTTTTGTGATATAATCGACGACGTC  
ATTCGCCGATCTCGCACTTTGAATATTTGGGTGAAAAGATTTCGTCGGAATCTGGGTTGATTATGTGCGA  
AGAACCTTGGATTCC

+

FFFFFFFFFFFFFFFFFFFFFFFFFFFFFFFFFFFFFFFFFFFFFFFFFFFFFFFFFFFFFFFFFFFFFFFF  
FFFFFFFFFFFFFFFFFFFFFFFFFFFFFFFFFFFFFFFFFFFFFFFFFFFFFFFFFFFFFFFFFFFFFFFF  
:FFFFF:FFFF:FFF:F,FFF,:FF:FFFFFFFFFFFFFFFFFFFFFFFF





@A00721:190:HGJW7DSXY:4:1252:16694:35352 1:N:0:TCTGCAAG+GCTGCACT  
GCCGTCTTCTTGAAATTGACCGTGATCAATATAAGATCCTCCTTTTGTGATATAATCGGCGACGTCAT  
TCGCCGATCTCGCACTTTGAATATTTGGGTGAAAAGATTCTGTCGAATCTGGGTTGATTATGTCGAAG  
AACCTTGGATTCCGA

@A00721:190:HGJW7DSXY:4:1261:2175:14528 1:N:0:TCTGCAAG+GCTGCACT  
GCCGTCTTCTTGAAATTGACCGTGATCAATATAAGATCCTCCTTTTGTGATATAATCGGCGACGTCAT  
TCGCCGATCTCGCACTTTGAATATTTGGGTGAAAAGATTTCGTCGGAATCTGGGTTGATTATGTCTGAAG  
AACCTTGGATTCCGA

@A00721:190:HGJW7DSXY:4:1410:25464:5854 1:N:0:TCTGCAAG+GCTGCACT  
GCCGTCTTCTTGAAATTGACCGTGATCAATATAAGATCCTCCTTTTGTGATATAATCGGCGACGTCAT  
TCGCCGATCTCGCACTTTGAATATTTGGGTGAAAAGATTTCGTCGGAATCTGGGTTGATTATGTCTGAAG  
AACCTTGGATTCCGA

@A00721:190:HGJW7DSXY:4:1676:22435:18114 1:N:0:TCTGCAAG+GCTGCACT  
GCCGTCTTCTTGAAATTGACCGTGATCAATATAAGATCCTCCTTTTGATATAATCGGCGACGTCAT  
TCGCCGATCTCGCACTTTGAATATTTGGGTGAAAAGATTTCGTCGGAATCTGGGTTGATTATGTCTGAAG  
AACCTTGGATTCCGA

@A00721:190:HGJW7DSXY:4:2167:22625:22357 1:N:0:TCTGCAAG+GCTGCACT  
GCCGTCTTCTTGAAATTGACCGTGATCAATATAAGATCCTCCTTTTGATATAATCGGCGACGTCAT  
TCGCCGATCTCGCACTTTGAATATTTGGGTGAAAAGATTCTGTCGGAATCTGGGTTGATTATGTCGAAG  
AACCTTGGATTCCGA

@A00721:190:HGJW7DSXY:4:2176:28067:20541 1:N:0:TCTGCAAG+GCTGCACT  
GCCGTCCTTCTTGAAATTGACCGTGATCAATATAAGATCCTCCTTTTGATATAATCGGCGACGTCAT  
TCGCCGATCTCGCACTTTGAATATTTGGGTGAAAAGATTCTGTCGGAATCTGGGTTGATTATGTCGAAG  
AACCTTGGATTCCGA

@A00721:190:HGJW7DSXY:4:2334:13865:29731 1:N:0:TCTGCAAG+GCTGCACT  
GCCGTCTTCTTGA AATTGACCGTGATCAATATAAGATCCTCTTTTGATATAATCGGCGACGTCAT  
TCGCCGATCTCGCATTTGAATATTTGGGTGAAAAGATTCTGCGGAATCTGGGTTGATTATGTCTGAAG  
TACCTTGGATTCCGA

+  
FFFFFFFFFFFFFFFFFFFFFFFFFFFFFFFFFFFFFFFFFFFFFFFFFFFFFFFFFFFFFFFFFFFFFFFF  
FFFFFFFFFFFFFFFFFFFFFFFFFFFFFFFFFFFFFFFFFFFFFFFFFFFFFFFFFFFFFFFFFFFFFFFF  
FF:FF,FFFFFFFF

@A00721:190:HGJW7DSXY:4:2357:29704:15828 1:N:0:TCTGCAAG+GCTGCACT  
GCCGTCTTCTTGAAATTGACCGTGATCAATATAAGATCCTCCTTTTGTGATATAATCGGCGACGTCAT  
TCGCCGATCTCGCACTTTGAATATTTGGGTGAAAAGATTTCGTCGGAATCTGGGTTGATTATGTCGAAG  
AACCTTGGATTCCGA

+  
FFFFFFFFFFFFFFFFFFFFFFFFFFFFFFFFFFFFFFFFFFFFFFFFFFFFFFFFFFFFFFFFFFFFFFFF  
FFFFFFFFFFFFFFFFFFFFFFFFFFFFFFFFFFFFFFFFFFFFFFFFFFFFFFFFFFFFFFFFFFFFFFFF  
FFFFFFFF:FFFFFFFF

@A00721:190:HGJW7DSXY:4:2357:29722:16016 1:N:0:TCTGCAAG+GCTGCACT  
GCCGTCTTCTTGAAATTGACCGTGATCAATATAAGATCCTCCTTTTGTGATATAATCGGCGACGTCAT  
TCGCCGATCTCGCACTTTGAATATTTGGGTGAAAAGATTTCGTCGGAATCTGGGTTGATTATGTCGAAG  
AACCTTGGATTCCGA

+  
FFFFFFFFFFFFFFFFFFFFFFFFFFFFFFFFFFFFFFFFFFFFFFFFFFFFFFFFFFFFFFFFFFFFFFFF  
FFFFFFFFFFFFFFFFFFFFFFFFFFFFFFFFFFFFFFFFFFFFFFFFFFFFFFFFFFFFFFFFFFFFFFFF  
FFFFFFFF:FFFFFFFF

@A00721:190:HGJW7DSXY:4:2369:2953:12117 1:N:0:TCTGCAAG+GCTGCACT  
GCCGTCTTCTTGAAATTGACCGTGATCAATATAAGATCCTCCTTTTGTGATATAATCGGCGACGTCAT  
TCGCCGATCTCGCACTTTGAATATTTGGGTGAAAAGATTTCGTCGGAATCTGGGTTGATTATGTCGAAG  
AACCTTGGATTCCGA

+  
FFFF:FFFFFFFFFFFFFFFFFFFFFFFFFFFFFFFFFFFFFFFFFFFFFFFFFFFFFFFFFFFFFFFF  
FFFF:FFFFFFFFFFFFFFFFFFFFFFFFFFFFFFFFFFFFFFFFFFFFFFFFFFFFFFFFFFFFFFFF  
FFFFFFFF:FFFFFFFF

@A00721:190:HGJW7DSXY:4:2415:6533:26459 1:N:0:TCTGCAAG+GCTGCACT  
GCCGTCTTCTTGAAATTGACCGTGATCAATATAAGATCCTCCTTTTGTGATATAATCGGCGACGTCAT  
TCGCCGATCTCGCACTTTGAATATTTGGGTGAAAAGATTTCGTCGGAATCTGGGTTGATTATGTCGAAG  
AACCTTGGATTCCGA

+  
FFFFFF,FF,:FFFFFFFF:FFFFFFFFFFFFFFFF:F::F,,F:,FFF,FF:FFFFFF,FFFF,:FF:  
,FFF:FFFFFFFF:FF:FFF,FF,,,F,FFFF:F:F,F:FFFF:F,FF::F::FFF:FF,FFF,FFF  
FFF,FFFFFFFF

@A00721:190:HGJW7DSXY:4:2415:6280:27336 1:N:0:TCTGCAAG+GCTGCACT  
GCCGTCTTCTTGAAATTGACCGTGATCAATATAAGATCCTCCTTTTGTGATATAATCGGCGACGTCAT  
TCGCCGATCTCGCACTATGTATATTTGGGTGAAAAGATTTCGTCGGAATCTGGGTTGATTATGTCGAAG  
AACATTGGATTCCGA

+  
FF:F,FFF:F,FFF,FFFF:FFFFFFFFFFFFFFFF,FF:F,FF:FFF:FF:FFFFFF,,,FF:FFF,:F:  
FF:::FF:FF:FFFF,,,FFFF,F:FFFFFFFF:,F::F:FF,FFF:,FFFF:FFF,:F,FF,F,:  
:F:::F:,FF,:F

@A00721:190:HGJW7DSXY:4:2433:20971:13510 1:N:0:TCTGCAAG+GCTGCACT  
GCCGTCTTCTTGAAATTGACCGTGATCAATATAAGATCCTCCTTTTGTGATATAATCGGCGACGTCAT  
TCGCCGATCTCGCACTTTGAATATTTGGGTGAAAAGATTTCGTCGGAATCTGGGTTGATTATGTCGAAG  
AACCTTGGATTCCGA

+  
FFFFFFFFFFFFFFFFFFFFFFFFFFFFFFFFFFFFFFFFFFFFFFFFFFFFFFFFFFFFFFFFFFFFFFFF  
FFFFFFFFFFFFFFFFFFFFFFFF:F,:FFFFFFFFFFFFFFFFFFFFFFFF:FFFFFF,FF:FFFFFFFF  
FFFFFFFF

@A00721:190:HGJW7DSXY:4:2444:14145:12148 1:N:0:TCTGCAAG+GCTGCACT  
GCCGTCTTCTTGAAATTGACCGTGATCAATATAAGATCCTCCTTTTGTGATATAATCGGCGACGTCAT

TCGCCGATCTCGCACTTTGAATATTTGGGTGAAAAGATTCTGTCGGAATCTGGGTTGATTATGTCGAAG  
AACCTTGGATTCCGA

+

FF:FFFFFFFFFFFF,FFFFFFFFFFFFFFFFFFFF:FFFFFF:FFFFFFFFFFFFFFFFFFFF:FFFFFF  
:FFFFFF:FFF,:FFF:FFFFFFFF,FFFFFFFFFFFFFFFFFFFF::FF:FFFFFFFFFFFFFFFF:FFFF  
FF:FFFFFFFFFFFF

@A00721:190:HGJW7DSXY:4:1377:31602:36338 1:N:0:TCTGCAAG+GCTGCACT  
CGGCAAGTATAAATGTCGGAATCCAAGGTTCTTCGACATAATCAACCCAGAATCCGACGAATCTTTTC  
ACCCAATATTCAAAGTGCGAGATCGGCGAATGACGTCGCCGATTATATCACAAAAGGAGGATCTGAT  
AATGATCACGGACAA

+

F:F:F,F,FFF::F,,F:FFF,FFFF:F,F:FF,F,,,FF,,FFFFFF:F,,F,F::FF,,F,,FFF  
F,FF,F,,,,:F:FFFF:,F,F,F:,F:,FFF,FF::F:,FFF:,F,FFF,FFFF,FFFFFFFF,FF  
F:F:FFF,F,F,FFF

@A00721:190:HGJW7DSXY:4:1377:31394:36542 1:N:0:TCTGCAAG+GCTGCACT  
CGGCAAGTATAAATGTCGGAATCCAAGGTTCTTCGACATAATCAACCCAGATTCCGACGAATCTTTTC  
ACCCAATATTCAAAGTGCGAGATCGGCGAATGACGTCGCCGATTATATCACAAAAGGAGGATCTTAT  
ATTGATCACGGTCAA

+

FFFFFFFFFFFFFF,FFFFFFFFFFFFFFFFFFFF:FFFFFFFFFFFFFFFFFFFFFFFFFFFFFFFFFFFF  
FFFFFFFFFFFFFFFFFFFFFFFFFFFFFFFFFFFFFFFFFFFFFFFFFFFFFFFFFFFFFFFFFFFFFFFFFFFF  
FFFFFFFFFFFFFF

@A00721:190:HGJW7DSXY:4:2167:15094:15139 1:N:0:TCTGCAAG+GCTGCACT  
CGGCAAGTATAAATGTCGGAATCCAAGGTTCTTCGACATAATCAACCCAGATTCCGACGAATCTTTTC  
ACCCAATATTCAAAGTGCGAGATCGGCGAATGACGTCGCCGATTATATCACAAAAGGAGGATCTTAT  
ATTGATCACGGTCAA

+

FFFFFFFFFFFFFF,FFFFFFFFFFFFFFFFFFFF:FFFFFF:FFFFFFFFFFFFFFFFFFFFFFFFFFFF  
FFFF:,FFFFFFFFFFFFFFFFFFFF:FFFFFFFFFFFFFFFFFFFFFFFFFFFFFFFFFFFF,FF,FFFFFFFF  
FFFFFF:FFFFFF

@A00721:190:HGJW7DSXY:4:2167:13693:16595 1:N:0:TCTGCAAG+GCTGCACT  
CGGCAAGTATAAATGTCGGAATCCAAGGTTCTTCGACATAATCAACCCAGATTCCGACGAATCTTTTC  
ACCCAATATTCAAAGTGCGAGATCGGCGAATGACGTCGCCGATTATATCACAAAAGGAGGATCTTAT  
ATTGATCACGGTCAA

+

FFFFFFFFFFFFFFFFFFFFFFFFFFFFFFFFFFFFFFFFFFFFFFFFFFFFFFFFFFFFFFFFFFFF,FFFFFF  
FFFFFFFFFFFFFFFFFFFFFFFFFFFFFFFFFFFFFFFFFFFFFFFFFFFFFFFFFFFFFFFFFFFF:FFFFFFF:  
FFFFFFFFFFFFFF

@A00721:190:HGJW7DSXY:4:2218:12084:15937 1:N:0:TCTGCAAG+GCTGCACT  
CGGCAAGTATAAATGTCGGAATCCAAGGTTCTTCGACATAATCAACCCAGATTCCGACGAATCTTTTC  
ACCCAATATTCAAAGTGCGAGATCGGCGAATGACGTCGCCGATTATATCACAAAAGGAGGATCTTAT  
ATTGATCACGGTCAA

+

FFFFFFFFFFFFFF:FFFFFFFFFFFFFFFFFFFFFFFFFFFFFFFFFFFFFFFFFFFFFFFFFFFFFFFFFFFF  
FFFFFFFFFFFFFFFFFFFFFFFFFFFF:FFFFFF:FF:FFFFFFFFFFFFFFFFFFFFFFFFFFFFFFFFFFFF:FF  
FFFFFFFFFFFFFF

@A00721:190:HGJW7DSXY:4:2457:16360:3583 1:N:0:TCTGCAAG+GCTGCACT  
CGGCAAGTATAAATGTCGGAATCCAAGGTTCTTCGACATAATCAACCCAGATTCCGACGAATCTTTTC  
ACCCAATATTCAAAGTGCGAGATCGGCGAATGACGTCGCCGATTATATCACAAAAGGAGGATCTTAT  
ATTGATCACGGTCAA

+

FFFFFFFFFFFFFFFFFFFFFFFFFFFFFFFFFFFFFFFFFFFFFFFFFFFFFFFFFFFFFFFFFFFF  
FFFF:FFFFFFFF:FFFFFFFFFFFFFFFFFFFF:FF,FFFFFFFF:FFFFFFFF:F,FF,FF,FF::FF  
FFFF,F:FFFFFF



@A00721:190:HGJW7DSXY:4:1231:26051:32268 1:N:0:TCTGCAAG+GCTGCACT  
CTCCTTTTGTGATATAATCGGCGACGTCATTCGCCGATCTCGCACTTTGAATATTTGGGTGAAAAGAT  
TCGTCGGAATCTGGGTTGATTATGTCGAAGAACCTTGATTCCGACATTTATACTTGCCGGAAAATTG  
GAGAAGACAGTGAAG

@A00721:190:HGJW7DSXY:4:1261:11921:13369 1:N:0:TCTGCAAG+GCTGCACT  
CTCCTTTTGTGATATAATCGGCGACGTCATTCGCCGATCTCGCACTTTGAATATTTGGGTGAAAAGAT  
TCGTCGGAATCTGGGTTGATTATGTCGAAGAACCTTGATTCCGACATTTATACTTGCCGGAAAATTG  
GAGAAGACAGTGAAG

@A00721:190:HGJW7DSXY:4:1273:10945:35728 1:N:0:TCTGCAAG+GCTGCACT  
CTCCTTTTGTGATATAATCGGCGACGTCATTGCCGATCTCGCACTTTGAATATTTGGGTGAAAAGAT  
TCGTCGGAATCTGGGTTGATTATGTCGAAGAACCTTGATTCCGACATTTATACTTGCCGGAAAATTG  
GAGAAGACAGTGAAG

@A00721:190:HGJW7DSXY:4:1278:5665:16689 1:N:0:TCTGCAAG+GCTGCACT  
CTCCTTTTGTGATATAATCGGCGACGTCATTCGCCGATCTCGCACTTTGAATATTTGGGTGAAAAGAT  
TCGTCGGAATCTGGGTTGATTATGTCGAAGAACCTTGATTCCGACATTTATACTTGCCGGAAAATTG  
GAGAAGACAGTGAAG

@A00721:190:HGJW7DSXY:4:1316:20166:3599 1:N:0:TCTGCAAG+GCTGCACT  
CTCCTTTTGTGATATAATCGGCGACGTCATTGCCGATCTCGCACTTTGAATATTTGGGTGAAAAGAT  
TCGTCGGAATCTGGGTTGATTATGTCTGAAGAACCTTGATTCCGACATTTATACTTGCCGGAAAATTG  
GAGAAGACAGTGAAG

@A00721:190:HGJW7DSXY:4:1316:20365:4288 1:N:0:TCTGCAAG+GCTGCACT  
CTCCTTTTGTGATATAATCGGCGACGTCATTGCCGATCTCGCACTTTGAATATTTGGGTGAAAAGAT  
TCGTCGGAATCTGGGTTGATTATGTCGAAGAACCTTGATTCCGACATTTATACTTGCCGGAAAATTG  
GAGAAGACAGTGAAG

@A00721:190:HGJW7DSXY:4:1319:5150:23281 1:N:0:TCTGCAAG+GCTGCACT  
CTCCTTTTGTGATATAATCGGCGACGTCATTCGCCGATCTCGCACTTTGAATATTTGGGTGAAAAGAT  
TCGTCGGAATCTGGGTTGATTATGTCGAAGAACCTTGATTCCGACATTTATACTTGCCGGAAAATTG  
GAGAAGACAGTGAAG

+  
FFFFFFFFFFFFFFFFFFFFFFFFFFFFFFFFFFFFFFFFFFFFFFFFFFFFFFFFFFFFFFFFFFFFFFFF  
FFFFFFFFFFFFFFFFFFFFFFFFFFFFFFFFFFFFFFFFFFFFFFFFFFFFFFFFFFFFFFFFFFFFFFFF:FFFFFFFF  
FFFFFFFFFFFFFFFF  
@A00721:190:HGJW7DSXY:4:1348:25663:24831 1:N:0:TCTGCAAG+GCTGCACT  
CTCCTTTTGTGATATAATCGGCGACGTCATTGCCGATCTCGCACTTTGAATATTTGGGTGAAAAGAT  
TCGTCGGAATCTGGGTTGATTATGTCTGAAGAACCTTGGATTCCGACATTTATACTTGCCGGAAAATTG  
GAGAAGACAGTGAAG

+  
FFFFFFFFFFFFFFFFFFFFFFFFFFFFFFFFFFFFFFFFFFFFFFFFFFFFFFFFFFFFFFFFFFFFFFFF  
FFFFFFFFFFFFFFFFFFFFFFFFFFFFFFFFFFFFFFFFFFFFFFFFFFFFFFFFFFFFFFFFFFFFFFFF:FFFF,:FFFFFFFFFFFFFFFF:FFFF  
FFFFFFFF::FFFF  
@A00721:190:HGJW7DSXY:4:1401:29559:26913 1:N:0:TCTGCAAG+GCTGCACT  
CTCCTTTTGTGATATAATCGGCGACGTCATTGCCGATCTCGCACTTTGAATATTTGGGTGAAAAGAT  
TCGTCGGAATCTGGGTTGATTATGTCTGAAGAACCTTGGATTCCGACATTTATACTTGCCGGAAAATTG  
GAGAAGACAGTGAAG

+  
FFFFFFFFFFFFFFFFFFFFFFFFFFFFFFFFFFFFFFFFFFFFFFFFFFFFFFFFFFFFFFFFFFFFFFFF  
FFFFFFFFFFFFFFFFFFFFFFFFFFFFFFFFFFFFFFFFFFFFFFFFFFFFFFFFFFFFFFFFFFFFFFFF:FFFFFFFF:FFFF,FFFF  
FFFFFFFFFFFFFFFF  
@A00721:190:HGJW7DSXY:4:1404:3125:12884 1:N:0:TCTGCAAG+GCTGCACT  
CTCCTTTTGTGATATAATCGGCGACGTCATTGCCGATCTCGCACTTTGAATATTTGGGTGAAAAGAT  
TCGTCGGAATCTGGGTTGATTATGTCTGAAGAACCTTGGATTCCGACATTTATACTTGCCGGAAAATTG  
GAGAAGACAGTGAAG

+  
FFFFFFFF:FFFFFFFFFFFFFFFFFFFFFFFFFFFFFFFFFFFFFFFFFFFFFFFFFFFFFFFFFFFFFFFF:FFFFFFFFFFFFFFFF:  
FFFFFFFFFFFFFFFFFFFFFFFFFFFFFFFFFFFFFFFFFFFFFFFFFFFFFFFFFFFFFFFFFFFFFFFF:F:FF:FFFFFFFF  
FFFFFFFFFFFFFFFF  
@A00721:190:HGJW7DSXY:4:1410:27272:35947 1:N:0:TCTGCAAG+GCTGCACT  
CTCCTTTTGTGATATAATCGGCGACGTCATTGCCGATCTCGCACTTTGAATATTTGGGTGAAAAGAT  
TCGTCGGAATCTGGGTTGATTATGTCTGAAGAACCTTGGATTCCGACATTTATACTTGCCGGAAAATTG  
GAGAAGACAGTGAAG

+  
FFFFFFFFFFFFFFFFFFFFFFFFFFFFFFFFFFFFFFFFFFFFFFFFFFFFFFFFFFFFFFFFFFFFFFFF  
FFFFFFFFFFFFFFFFFFFFFFFFFFFFFFFFFFFFFFFFFFFFFFFFFFFFFFFFFFFFFFFFFFFFFFFF  
FFFFFFFFFFFFFFFF  
@A00721:190:HGJW7DSXY:4:1430:11595:28870 1:N:0:TCTGCAAG+GCTGCACT  
CTCCTTTTGTGATATAATCGGCGACGTCATTGCCGATCTCGCACTTTGAATATTTGGGTGAAAAGAT  
TCGTCGGAATCTGGGTTGATTATGTCTGAAGAACCTTGGATTCCGACATTTATACTTGCCGGAAAATTG  
GAGAAGACAGTGAAG

+  
FFFFFFFFFFFFFFFFFFFFFFFFFFFFFFFFFFFFFFFFFFFFFFFFFFFFFFFFFFFFFFFFFFFFFFFF  
FFFFFFFFFFFFFFFFFFFFFFFFFFFFFFFFFFFFFFFFFFFFFFFFFFFFFFFFFFFFFFFFFFFFFFFF  
FFFFF:FFFFFFFF  
@A00721:190:HGJW7DSXY:4:1438:4571:14857 1:N:0:TCTGCAAG+GCTGCACT  
CTCCTTTTGTGATATAATCGGCGACGTCATTGCCGATCTCGCACTTTGAATATTTGGGTGAAAAGAT  
TCGTCGGAATCTGGGTTGATTATGTCTGAAGAACCTTGGATTCCGACATTTATACTTGCCGGAAAATTG  
GAGAAGACAGTGAAG

+  
FFFFFFFFFFFFFFFFFFFFFFFFFFFFFFFFFFFFFFFFFFFFFFFFFFFFFFFFFFFFFFFFFFFFFFFF  
FFFFFFFFFF,FFFFFFFFFFFFFFFFFFFFFFFFFFFFFFFFFFFFFFFFFFFFFFFFFFFFFFFF:FFFFFFFF:FFFFFFFF  
F:FFFFFFFF  
@A00721:190:HGJW7DSXY:4:1452:8865:18818 1:N:0:TCTGCAAG+GCTGCACT  
CTCCTTTTGTGATATAATCGGCGACGTCATTGCCGATCTCGCACTTTGAATATTTGGGTGAAAAGAT





$+$ 

+

 $+$ 

+

+

+

+

FFFFFFFF,FFFFFFFFFFFFFFFFFFFFFFFFFFFFFFFFFFFFFFFFFFFFFFFFFFFFFFFFFFFFFFFF, F:FFF,FFFFFFFF

@A00721:190:HGJW7DSXY:4:2303:15040:3928 1:N:0:TCTGCAAG+GCTGCACT CTCCTTTTGTGATATAATCGGCGACGTCATTGCCGATCTCGCACTTTGAATATTTGGGTGAAAAGAT TCGTCGGAATCTGGGTTGATTATGTCGAAGAACCTTGGATTCCGACATTTATACTTGCCGGAAAATTG GAGAAGACAGTGAAG

+

FFFFFFFFFFFFFFFFFFFFFFFFFFFFFFFFFFFFFFFFFFFFFFFFFFFFFFFFFFFFFFFFFFFFFFFF FFFFFFFFFFFFFFFFFFFFFFFFFFFFFFFFFFFFFFFFFFFFFFFFFFFFFFFFFFFFFFFFFFFFFFFFF:FFFFF :FFFFFFFFFFFFFFFF

@A00721:190:HGJW7DSXY:4:2315:22381:28823 1:N:0:TCTGCAAG+GCTGCACT CTCCTTTTGTGATATAATCGGCGACGTCATTGCCGATCTCGCACTTTGAATATTTGGGTGAAAAGAT TCGTCGGAATCTGGGTTGATTATGTCGAAGAACCTTGGATTCCGACATTTATACTTGCCGGAAAATTG GAGAAGACAGTGAAG

+

FFFFFFFFFFFFFFFFFFFFFFFFFFFFFFFFFFFFFFFFFFFFFFFFFFFFFFFFFFFFFFFFFFFFFFFF:FFF FFFFFFFFFFFFFFFFFFFFFFFFFFFFFFFFFFFFFFFFFFFFFFFFFFFFFFFFFFFFFFFFFFFFFFFFF FFFFFFFFFFFFFFFFF

@A00721:190:HGJW7DSXY:4:2343:29324:26882 1:N:0:TCTGCAAG+GCTGCACT CTCCTTTTGTGATATAATCGGCGACGTCATTGCCGATCTCGCACTTTGAATATTTGGGTGAAAAGAT TCGTCGGAATCTGGGTTGATTATGTCGAAGAACCTTGGATTCCGACATTTATACTTGCCGGAAAATTG GAGAAGACAGTGAAG

+

FFFFFFFFFFFFFFFFFFFFFFFFFFFFFFFFFFFFFFFFFFFFFFFFFFFFFFFFFFFFFFFFFFFFFFFF FFFFFFFFFFFFFFFFFFFFFFFFFFFFFFFFFFFFFFFFFFFFFFFFFFFFFFFFFFFFFFFFFFFFFFFFF:FFFFFFF:FFFFFFFFFFFFFFFF FFFFFFFFFFFFFFFFF

@A00721:190:HGJW7DSXY:4:2428:30752:13197 1:N:0:TCTGCAAG+GCTGCACT CTCCTTTTGTGATATAATCGGCGACGTCATTGCCGATCTCGCACTTTGAATATTTGGGTGAAAAGAT TCGTCGGAATCTGGGTTGATTATGTCGAAGAACCTTGGATTCCGACATTTATACTTGCCGGAAAATTG GAGAAGACAGTGAAG

+

FFFFFFFFFFFFFFFFFFFFFFFFFFFFFFFFFFFFFFFFFFFFFFFFFFFFFFFFFFFFFFFFFFFFFFFF FFFFFFFF:FFFFFFFFFFFFFFFFFFFFFFFFFFFFFFFFFFFFFFFFFFFFFFFFFFFFFFFF,F,FFFFFFFF : :FFFFFFFFFFFFFFFF

@A00721:190:HGJW7DSXY:4:2447:32533:33098 1:N:0:TCTGCAAG+GCTGCACT CTCCTTTTGTGATATAATCGGCGACGTCATTGCCGATCTCGCACTTTGAATATTTGGGTGAAAAGAT TCGTCGGAATCTGGGTTGATTATGTCGAAGAACCTTGGATTCCGACATTTATACTTGCCGGAAAATTG GAGAAGACAGTGAAG

+

FFFFFFFFFFFFFFFFFFFFFFFFFFFFFFFFFFFFFFFFFFFFFFFFFFFFFFFFFFFFFFFFFFFFFFFF FFFFFFFFFFFFFFFFFFFFFFFFFFFFFFFFFFFFFFFFFFFFFFFFFFFFFFFFFFFFFFFFFFFFFFFFF FF:FFFFFFFFFFFFFFFF

@A00721:190:HGJW7DSXY:4:2504:14570:5368 1:N:0:TCTGCAAG+GCTGCACT CTCCTTTTGTGATATAATCGGCGACGTCATTGCCGATCTCGCACTTTGAATATTTGGGTGAAAAGAT TCGTCGGAATCTGGGTTGATTATGTCGAAGAACCTTGGATTCCGACATTTATACTTGCCGGAAAATTG GAGAAGACAGTGAAG

+

F,FFFFFFFF:FFF:FF,FFFFFFFF:FFFF,FFFFFF,:FFFFFFFF:FF:FFFF,FFFFFF: FFFFFFFFFFFFFFFFF:FFF::FFFF,F:FFFFFFFFFFFFFFFF,FFF:,FFFF::FF:FFFF,,F ,FFFFFFFF::FFFF

@A00721:190:HGJW7DSXY:4:2510:31078:33270 1:N:0:TCTGCAAG+GCTGCACT CTCCTTTTGTGATATAATCGGCGACGTCATTGCCGATCTCGCACTTTGAATATTTGGGTGAAAAGAT TCGTCGGAATCTGGGTTGATTATGTCGAAGAACCTTGGATTCCGACATTTATACTTGCCGGAAAATTG GAGAAGACAGTGAAG

```
+
FFFFFFFFFFFFFFFFFFFFFFFFFFFFFFFFFFFFFFFFFFFFFFFFFFFFFFFFFFFFFFFFFFFFFFFF:FFFFFFFFFFFFFFFF
FFFFFFFFFFFFFFFFFFFFFFFFFFFFFFFFFFFFFFFFFFFFFFFFFFFFFFFFFFFFFFFFFFFFFFFF:FFFFFFFFFFFFFFFF
FFFF:,FFFFFFFF
@A00721:190:HGJW7DSXY:4:2648:28818:28228 1:N:0:TCTGCAAG+GCTGCACT
CTCCTTTTGTGATATAATCGGCGACGTCATTCGCCGATCTCGCACTTTGAATATTTGGGTGAAAAGAT
TCGTCGGAATCTGGGTTGATTATGTCGAAGAACCTTGATTCCGACATTTATACTTGCCGGAAAATTG
GAGAAGACAGTGAAG
```

```
+
F,F,:FFF,FFFF:FFFFF,:F::FF,::,FF:FF,: ,F:FF,F,FFFFFF:F:,,,F:F:FFFFF:F
,F,,,FFF:FFFFF,,F,:FFFFFFFF,F:FF,,FFF:F::FFF,:F:F,:,:F,,,FFF,FFF:FF,
F:::F,FFF,:FFFF
@A00721:190:HGJW7DSXY:4:1537:1199:19601 1:N:0:TCTGCAAG+GCTGCACT
CTTTGAATATTTGGGTGAAAAGATTCGTCGGAATCTGGGTTGATTATGTCTGAAGAACCTTGATTCCG
ACATTTATACTTGCCGGAATAATTGGAGAAGACAGTGAAGGTGATTATCACCGTCTGAATGTTGTTCT
GACATACTCTGATGA
```

```

+
FFFFFFFFFFFFFFFFFFFFFFFFFFFFFFFFFFFFFFFFFFFFFFFFFFFFFFFFFFFFFFFF
FFFFFFFFFFFFFFFFFFFFFFFFFFFFFFFFFFFFFFFFFFFFFFFFFFFFFFFFFFFFFFFF
FFFFFFFFFFFFFFFF
@A00721:190:HGJW7DSXY:4:2439:13702:15608 1:N:0:TCTGCAAG+GCTGCACT
CTTTGAATATTTGGGTGAAAAGATTCGTCGGAATCTGGGTGATTATGTCGAAGAACCTTGATTCCG
ACATTTATACTTGCCGGA AAATTGGAGAAGACAGTGAAGGTGATTATCACCGTCTGAATGTTGTTCT
GACATACTCTGATGA

```

```
+
FFFFFFFF:FF,FFFFFFFFFFFFFFFFFFFFFFFFFFFFFFFFFFFFFFFFFFFFFFFF
FFFFFFFFFFFFFFFFFFFFFFFFFFFFFFFFFFFFFFFFFFFFFFFFFFFFFFFFFFFF
FFFFFFFFFFFFFFFF
@A00721:190:HGJW7DSXY:4:2551:11894:19774 1:N:0:TCTGCAAG+GCTGCACT
CTTTGAATATTTGGGTGAAAAGATTCGTCGGAATCTGGGTTGATTATGTCGAAGAACCTTGGATTCCG
```



@A00721:190:HGJW7DSXY:4:2233:18548:4711 1:N:0:TCTGCAAG+GCTGCACT  
GTTAATTTGGCGTTCATCAGAGTATGTCAGGAACAACATTCAGACGGTGATAATCACCTTCACTGTCT  
TCTCCAATTTTCCGGAAGTATAAATGTCGGAATCCAAGGTTCTTCGACATAATCAACCCAGATTCCG  
ACGAATCTTTTCACC

[illegible]

+

```

FFFFFFFFFFFFFFFFFFFFF:FFFFFFFFF:FFFFFFF:FFFFFFFFFFFFFFFFF:FFFFFFFFFFFFFFF
FFFFFFFFFFFFFFFFF:FFFFFFF:FFFFFFF:FF:FFFFFFFFF,FFFFFFFF:FFFFFFFFFFFFFFFFFFFFF
:FFFFFFF:FFFFFFF:F

```

+

[illegible]

+

```
FFFFFFFFFFFFFFFFFFFFFFFFFFFFFFFFFFFFFFFFFFFFFFFFFFFFFFFFFFFFFFFFFFFFF:FFF
FFFFFFFFFFFFFFFFFFFFFFFFFFFFFF,FFFFFFFFFFFFFF:FFFFFFFFFFFFFFFFFFFFFFFFFFFF
EEEEEEEEE.FEE:F
```

+

[illegible]

+

```
FFFFFFFFFFFFFFFFFFFFFFFFFFFFFFFFFFFFFFFFFFFFFFFFFFFFFFFFFFFFF:,FF  
FFFFFFFFFFFFFFFFFFFFFF:FFFFFFFFFFFFFFFFFFFFFFFFFFFFFFFFFFFFFFF  
FFFFFFFFFFFFFFFF
```

+

[illegible]

FFFFFFFFFFFFFFFF, :FFFFFFFFFFFFFFFFFFFFFFFFFFFFFFFFFFFFFFFFFFFFFFFF  
FFFFFFFFFFFFFFFF

@A00721:190:HGJW7DSXY:4:1619:12834:33270 1:N:0:TCTGCAAG+GCTGCACT  
AGTTAATTTGGCGTTCATCAGAGTATGTCAGGAACAACATTCAGACGGTGATAATCACCTTCACTGTC  
TTCTCCAATTTTCCGGCAAGTATAAATGTCGGAATCCAAGGTTCTTCGACATAATCAACCCAGATTCC  
GACGAATCTTTTCAC

+

FFFFFFFFFFFFFFFFFFFFFFFFFFFFFFFFFFFFFFFFFFFFFFFFFFFFFFFFFFFFFFFF  
FFFFFFFFFFFFFFFFFFFFFFFFFFFFFFFFFFFFFFFFFFFFFFFFFFFFFFFFFFFFFFFF  
FFFFFFF:FFFFFFFFF

@A00721:190:HGJW7DSXY:4:1675:10022:24486 1:N:0:TCTGCAAG+GCTGCACT  
AGTTAATTTGGCGTTCATCAGAGTATGTCAGGAACAACATTCAGACGGTGATAATCACCTTCACTGTC  
TTCTCCAATTTTCCGGCAAGTATAAATGTCGGAATCCAAGGTTCTTCGACATAATCAACCCAGATTCC  
GACGAATCTTTTCAC

+

FFFFFFF:FFFFFFFFFFFFFFFFFFFFFFFFFFFFFFFFFFFFFFFFFFFFFFFFFFFFFFFF  
FFFFFFFFF:FFFFFFFFF:FFF, FF:FFFFFFFFFFFFFFFF:FFF:FFFFFF:FFFFFFFFFFFFFFFF  
FFFFFFFFFF, FFFFF

@A00721:190:HGJW7DSXY:4:1675:6813:24533 1:N:0:TCTGCAAG+GCTGCACT  
AGTTAATTTGGCGTTCATCAGAGTATGTCAGGAACAACATTCAGACGGTGATAATCACCTTCACTGTC  
TTCTCCAATTTTCCGGCAAGTATAAATGTCGGAATCCAAGGTTCTTCGACATAATCAACCCAGATTCC  
GACGAATCTTTTCAC

+

FFFFFFFFFFFFFFFFFFFFFFFFFFFFFFFFFFFFFFFFFFFFFFFFFFFFFFFFFFFFFFFF  
FFFFFFFFFFFFFFFFFFFFFFFFFFFFFFFFFFFFFFFFFFFFFFFFFFFFFFFFFFFFFFFF  
FFFFFFF:FFF:FFFFF

@A00721:190:HGJW7DSXY:4:2166:24460:29418 1:N:0:TCTGCAAG+GCTGCACT  
GTGAAAAGATTCGTCGGAATCTGGGTTGATTATGTCGAAGAACCTTGATTCCGACATTTATACTTGC  
CGGAAAATTGGAGAAGACAGTGAAGGTGATTATCACCGTCTGAATGTTGTTCTGACATACTCTGATG  
AACGCCAAATTAAC

+

FFFFFFFFFFFFFFFFFFFFFFFFFFFFFFFFFFFFFFFFFFFFFFFFFFFFFFFFFFFFFFFF  
FFFFFFF:FFFFFFFFFFFFFFFFFFFFFFFFFFFFFFFFFFFFFFFFFFFFFFFFFFFFFFFF  
FFFFFFFFFFFFFFFF:FF

@A00721:190:HGJW7DSXY:4:2171:18421:29074 1:N:0:TCTGCAAG+GCTGCACT  
AGTTAATTTGGCGTTCATCAGAGTATGTCAGGAACAACATTCAGACGGTGATAATCACCTTCACTGTC  
TTCTCCAATTTTCCGGCAAGTATAAATGTCGGAATCCAAGGTTCTTCGACATAATCAACCCAGATTCC  
GACGAATCTTTTCAC

+

FFFFFFFFF:FFFFFFFFF:FFFFFFFFFFFFFFFFFFFFFFFFFFFFFFFFFFFFFFFF  
:FFFFFFFFFFFFFFFF:FFF:FFFFFFFFF:FFFFFFFFFFFFFFF, FFFFFFFFFFFFFFFFFF  
FFFFFFF:FFFFFFFFF

@A00721:190:HGJW7DSXY:4:2226:32461:1908 1:N:0:TCTGCAAG+GCTGCACT  
GTGAAAAGATTCGTCGGAATCTGGGTTGATTATGTCGAAGAACCTTGGAATCCGACATTTATACTTGC  
CGGAAAATTGGAGAAGACAGTGAAGGTGATTATCACCGTCTGAATGTTGTTCTGACATACTCTGATG  
AACGCCAAATTAAC

+

FFFFFFFFF:FFFFF, F:FFFFFFFFFFFFFFFFFFFFFFFFFFFF, FFFF, FFF:, FFFFF, :F:FFFFFFFF,  
: :FFFFFFFFFFFFFFFFFFFFFFFFFFFFFFFF:FFFFFFF:FFF: :FFFFFFFFFFFF, :FF: :FFFFFFFFFFFF  
FFF, FFFF, FFF:, F

@A00721:190:HGJW7DSXY:4:2241:18114:23249 1:N:0:TCTGCAAG+GCTGCACT  
GTGAAAAGATTCGTCGGAATCTGGGTTGATTATGTCGAAGAACCTTGGAATCCGACATTTATACTTGC  
CGGAAAATTGGAGAAGACAGTGAAGGTGATTATCACCGTCTGAATGTTGTTCTGACATACTCTGATG  
AACGCCAAATTAAC

[illegible]

TAATCACCTTCACTGTCTTCTCCAATTTTCCGGCAAGTATAAATGTCGGAATCCAAGGTTCTTCGACA  
TAATCAACCCAGATT

[illegible]

AAAAATTTTAGTTTTCCAGTTAATTTGGCGTTCATCAGAGTATGTCAGGAACAACATTCAGACGGTGA  
TAATCACCTTCACTGTCTTCTCCAATTTCCGGCAAGTATAAATGTCGGAATCCAAGGTTCTTCGACA  
TAATCAACCCAGAT

```

FFFFFFFFFFFFFFFF:FFFFFFFFFFFFFFFFFFFFFFFFFFFFFFFFFFFFFFFFFFFFFFFF
F:FFFFFF,FFFFFFFF:FFFF:FFFF:FFFFFFFFFFFFFFFF:FFFFFFFFFFFFFFFF
FFFF:FFFFFFFF

```

CTCGACCAAATTAAAAATTTAGTTTTCCAGTTAATTTGGCGTTCATCAGAGTATGTCAGGAACAACA  
TTCAGACGGTGATAATCACCTTCACTGTCTTCTCCAATTTTCCGGCAAGTATAAATGTCGGAATCCAA  
GGTTCTTCGACAAGA

[illegible]

CTCGACCAAATTA AAAATTTTAGTTTTCCAGTTAATTTGGCGTTCATCAGAGTATGTCAGGAACAACA  
TTCAGACGGTGATAATCACCTTCACTGTCTTCTCCAATTTTCCGGCAAGTATAAATGTCGGAATCCAA  
GTTTCTTCGACAAGA

[illegible]

CTCGACCAAATTA AAAATTTTAGTTTTCCAGTTAAATTGGCGTTCATCAGAGTATGTCAGGAACAACA  
ATCAGACGGTGATAATCACCTTCACTGTCTTCTCAAATTTTCCGGCAAGTATAAATGTCGGAATCCAA  
TTTTCTTCGACAAGA

FF,FF:FFFF:FFFFFF:F:,F:,F,,F,FFFFFF,:F,:FFF,FF,FF:F,:F:,F:F,,:FFFF,F  
 ,:::,F:F,:.FFF:FFF,F:FFFF,,F,FFFF,FF,F,F,,F,FFF,:FFFFFFF,:::FFFFFF,,:  
 ,,:.FF:FFF:F,F

GGAAAATTGGAGAAGACAGTGAAGGTGATTATCACCGTCTGAATGTTGTTCTGACATACTCTGATGA  
ACGCCAAATTAAGTGGAAACTAAAATTTTAAATTTGGTCGAGAACAATTTCTTTGGAAATTGGACAT  
CTTGAATAAGTTAAG

[illegible]

GGAAAATTGGAGAAGACAGTGAAGGTGATTATCACCGTCTGAATGTTGTTCTGACATACTCTGATGA  
ACGCCAAATTAAGTGAAGAACTAAATTTTAAATTTGGTCGAGAACAATTTCTTTGGAAATTGGACAT  
CTTGAATAAGTTAA

[illegible]



@A00721:190:HGJW7DSXY:4:1324:3215:20055 1:N:0:TCTGCAAG+GCTGCACT  
GGAAAATTGGAGAAGACAGTGAAGGTGATTATCACCGTCTGAATGTTGTTCTGACATACTCTGATGA  
ACGCCAAATTAAGTGGAAACTAAAATTTTAAATTTGGTCGAGAACAATTTCTTTGGAAATTGGACAT  
CTTGAATAAGTTAAG

@A00721:190:HGJW7DSXY:4:1330:11270:20322 1:N:0:TCTGCAAG+GCTGCACT  
GGAAAATTGGAGAAGACAGTGAAGGTGATTATCACCGTCTGAATGTTGTTCTTGACATACTCTGATGA  
ACGCCAAATTA ACTGGAAAACTAAAATTTTTAATTTGGTCGAGAACAATTTCTTTGGAAATTGGACAT  
CTTGAATAAGTTAAG

@A00721:190:HGJW7DSXY:4:1665:27181:27649 1:N:0:TCTGCAAG+GCTGCACT  
GGAAAATTGGAGAAGACAGTGAAGGTGATTATCACCGTCTGAATGTTGTTCTTGACATACTCTGATGA  
ACGCCAAATTA ACTGGAAAACTAAAATTTTTAATTTGGTCGAGAACAATTTCTTTGGAAATTGGACAT  
CTTGAATAAGTTAAG

@A00721:190:HGJW7DSXY:4:2538:18493:19241 1:N:0:TCTGCAAG+GCTGCACT  
GGAAAATTGGAGAAGACAGTGAAGGTGATTATCACCGTCTGAATGTTGTTCTTGACATACTCTGATGA  
ACGCCAAATTA ACTGGAAAACTAAAATTTTTAATTTGGTCGAGAACAATTTCTTTGGAAATTGGACAT  
CTTGAATAAGTTAAG

@A00721:190:HGJW7DSXY:4:2568:21450:11459 1:N:0:TCTGCAAG+GCTGCACT  
GGAAAATTGGAGAAGACAGTGAAGGTGATTATCACCGTCTGAATGTTGTTCTGACATACTCTGATGA  
ACGCCAAATTA ACTGGAAACTAAAATTTTTAATTTGGTCGAGAACAATTTCTTTGGAAATTGGACAT  
CTTGAATAAGTTAAG

@A00721:190:HGJW7DSXY:4:2669:10945:23923 1:N:0:TCTGCAAG+GCTGCACT  
GGAAAATTGGAGAAGACAGTGAAGGTGATTATCACCGTCTGAATGTTGTTCTGACATACTCTGATGA  
ACGCCAAATTA ACTGGAAA CTAAATTTTTAATTTGGTCGAGAACAAATTTCTTTGGAAATTGGACAT  
CTTGAATAAGTTAAG

@A00721:190:HGJW7DSXY:4:1239:14859:17613 1:N:0:TCTGCAAG+GCTGCACT  
TTCCTGACATACTCTGATGAACGCCAAATTAAGTGGAAACTAAAATTTTAAATTTGGTCGAGAACAA  
TTTCTTTGGAAGTTGGACATCTGAATAAGTTAAGAAATAATTCTTCGCGTTAATGCAGAAACGCGAT  
GAAGAAGATGAAGGA

FFF,::FFFFF,,F:FFFFFFFFFFFFFFF:F:FF:FFFFFFFFF:FFFFFFFFF:FFFFFFFFFFFFFF:F  
FFFFFFFF:F,FFF:FF

@A00721:190:HGJW7DSXY:4:1460:12192:27712 1:N:0:TCTGCAAG+GCTGCACT  
TTCCTGACATACTCTGATGAACGCCAAATTAAGTGAAGAAATAATTCTTCGCGTTAATGCAGAAACGCGAT  
TTTCTTTGGAAATTGGACATCTTGAATAAGTGAAGAAATAATTCTTCGCGTTAATGCAGAAACGCGAT  
GAAGAAGATGAAGGA

+

FFFFFFFFFFFFFFFFFFFFFFFFFFFFFFFFFFFFFFFFFFFFFFFFFFFFFFFFFFFFFFFFFFFFFFFFF  
FFFFFFFFFFFFFFFFFFFFFFFFFFFFFFFFFFFFFFFFFFFFFFFFFFFFFFFFFFFFFFFFFFFFFFFFF  
FFFFFFFFFFFFFFFFFFFFFFFF

@A00721:190:HGJW7DSXY:4:1475:32217:5588 1:N:0:TCTGCAAG+GCTGCACT  
TTCCTGACATACTCTGATGAACGCCAAATTAAGTGAAGAAATAATTCTTCGCGTTAATGCAGAAACGCGAT  
TTTCTTTGGAAATTGGACATCTTGAATAAGTGAAGAAATAATTCTTCGCGTTAATGCAGAAACGCGAT  
GAAGAAGATGAAGGA

+

FFFFFFFFFFFFFFFFFFFFFFFFFFFFFFFFFFFFFFFFFFFFFFFFFFFFFFFFFFFFFFFFFFFFFFFFF  
FFFFFFFFFFFFFFFFFFFFFFFFFFFFFFFFFFFFFFFFFFFFFFFFFFFFFFFFFFFFFFFFFFFFFFFFF  
FFF:FFF:FFFFFFFF

@A00721:190:HGJW7DSXY:4:1507:23981:15718 1:N:0:TCTGCAAG+GCTGCACT  
TTCCTGACATACTCTGATGAACGCCAAATTAAGTGAAGAAATAATTCTTCGCGTTAATGCAGAAACGCGAT  
TTTCTTTGGAAATTGGACATCTTGAATAAGTGAAGAAATAATTCTTCGCGTTAATGCAGAAACGCGAT  
GAAGAAGATGAAGGA

+

FFFFFFFFFFFFFFFFFFFFFFFFFFFFFFFFFFFFFFFFFFFFFFFFFFFFFFFFFFFFFFFFFFFFFFFFF  
FFFFFFFFFFFFFFFFFFFFFFFFFFFFFFFFFFFFFFFFFFFFFFFFFFFFFFFFFFFFFFFFFFFFFFFFF  
FFFFFFFFFFFF:FFFFFFFF

@A00721:190:HGJW7DSXY:4:1535:19470:26694 1:N:0:TCTGCAAG+GCTGCACT  
TTCCTGACATACTCTGATGAACGCCAAATTAAGTGAAGAAATAATTCTTCGCGTTAATGCAGAAACGCGAT  
TTTCTTTGGAAATTGGACATCTTGAATAAGTGAAGAAATAATTCTTCGCGTTAATGCAGAAACGCGAT  
GAAGAAGATGAAGGA

+

FFFFFFFFFFFFFFFFFFFFFFFFFFFFFFFFFFFFFFFFFFFFFFFFFFFFFFFFFFFFFFFFFFFFFFFFF  
FFFFFFFFFFFFFFFFFFFFFFFFFFFFFFFFFFFFFFFFFFFFFFFFFFFFFFFFFFFFFFFFFFFFFFFFF  
FFFFFFFFFFFFFFFF

@A00721:190:HGJW7DSXY:4:2650:28031:10050 1:N:0:TCTGCAAG+GCTGCACT  
TTCCTGACATACTCTGATGAACGCCAAATTAAGTGAAGAAATAATTCTTCGCGTTAATGCAGAAACGCGAT  
TTTCTTTGGAAATTGGACATCTTGAATAAGTGAAGAAATAATTCTTCGCGTTAATGCAGAAACGCGAT  
GAAGAAGATGAAGGA

+

FFFFFFFFFFFFFFFFFFFFFFFFFFFFFFFFFFFFFFFFFFFFFFFFFFFFFFFFFFFFFFFFFFFFFFFFF  
FFFFFFFFFFFFFFFFFFFFFFFFFFFFFFFFFFFFFFFFFFFFFFFFFFFFFFFFFFFFFFFFFFFFFFFFF  
FFFFFFFFFFFF:FFFF

@A00721:190:HGJW7DSXY:4:1103:26377:25034 1:N:0:TCTGCAAG+GCTGCACT  
CTCTGATGAACGCCAAATTAAGTGAAGAAATAATTCTTCGCGTTAATGCAGAAACGCGATGAAGAAGATGA  
ATTGGACATCTTGAATAAGTGAAGAAATAATTCTTCGCGTTAATGCAGAAACGCGATGAAGAAGATGA  
AGGAGTCCCCATTAC

+

FFFFFFFFFFFFFFFFFFFFFFFFFFFFFFFFFFFFFFFFFFFFFFFFFFFFFFFFFFFFFFFFFFFFFFFFF  
:FFFFFFFFF:FFFFFFFFFFFFFFFFFFFFFFFFFFFFFFFFFFFFFFFFFFFFFFFFFFFFFFFFF  
FFFFFFFFFFFFFFFF

@A00721:190:HGJW7DSXY:4:1228:14407:20462 1:N:0:TCTGCAAG+GCTGCACT  
CTCTGATGAACGCCAAATTAAGTGAAGAAATAATTCTTCGCGTTAATGCAGAAACGCGATGAAGAAGATGA  
ATTGGACATCTTGAATAAGTGAAGAAATAATTCTTCGCGTTAATGCAGAAACGCGATGAAGAAGATGA  
AGGAGTCCCCATTAC

```
FFFFFFFFFFFFFFFFFFFFFFFFFFFFFFFFFFFFFFFFFFFFFFFFFFFFFFFFFFFFFFF
FFFFFFFFFFFFFFFFFFFF:FFFFFFFFFFFFFFFFFFFFFFFFFFFFFFFFFFFFFFFFF
FFFFFFF:FFFFFF
```

[illegible][illegible][illegible]

```

FFFFFFFFFFFFFFFFFFFFFFFFFFFFFFFFFFFFFFFF:FFFFFFFFFFFFFFFFFFFFFFFFFFFFFFFF:FFFFF
FFFFFFFFFFFFFFFFFFFFFFFF: ,FFFF:FFFFFFFFFFFFFFFFFFFFFFFF:FFFFFFFFF:FFFFFFFFFFFF:FFF
FFFFFFFFFFFFFFFFFFFF

```

[illegible][illegible]

@A00721:190:HGJW7DSXY:4:1263:8567:28667 1:N:0:TCTGCAAG+GCTGCACT  
CCTCAATATAATGCTTAATATGCGAATGTCCCTGATTTAACAGTAATGGGGACTCCTTCATCTTCTTC



TCGCGTTTCTGCATTAACCTCGAAGAATTAATTCTTAACCTATTCAAGATGTCCAAATTACAAAGAAAA  
TGATCTCTAACAAA

```

:F:FF,F:FF,: ,FFFFFFFFFFFFFF,:FFF,:FF:FF,F,: :FF,F: , ,F ,,:FFFFFF:F , ,FFFF
F , ,F ,: :F:F,FFF,FF , ,,:F: :FFFFFF,FFFFFFFF: ,FFFF,FF,FF,F: ,FF: : , ,:FF: , ,F,
F , ,FF,F:F ,: ,F:

```

 $+$ [illegible] $+$ [illegible]

+

```

FFFFFFFFFFFFFFFFFFFFFFFFFFFFFFFFFFFFFFFFFFFFFFFFFFFFFFFFFFFFFFFFFFFFFFFF
FFFFFFFFFFFFFFFFFFFFFFFFFFFFFFFFFFFFFFFFFFFFFFFFFFFFFFFFFFFFFFFFFFFFFFFF:
FFFFFFFFFFFFFFFF:F,FF,FFFFFF,FFF:FFF
FFFFFFFFFFFFFFFF:

```

+

```
FFFFFFFFFFFFFFFFFFFFFFFFFFFFFFFFFFFFFFFFFFFFFFFFFFFFFFFFFFFFFFF
FFFFFFFFFFFFFFFFFFFFFFFFFFFF:FFFFFFFFFFFFFFFFFFFFFFFFFFFFFFFFFFF
FF:FFFFFFFFFFFFFF
```

+

```
FFFFFFFFFFFFFFFFFFFFFFFFFFFFFFFFFFFFFFFFFFFFFFFFFFFFFFFFFFFFFFF
FFFFFFFFFFFFFFFFFFFFFFFFFFFFFFFFFFFF:FFFFFFFFFFFFFFFFFFFFFFFFFFFF
FFFFFFFFFFFFFFFF
```

+

[illegible]

$+$ 

+

 $+$ 

+

+

 $+$  $+$ [illegible]

FFFFFFFFFFFFFFFFFFFFFFFFFFFFFFFFFFFFFFFFFFFFFFFFFFFFFFFFFFFFFFFFFFFFFFFF  
FFFFFFFFFFFFFFFF

@A00721:190:HGJW7DSXY:4:1607:25265:16438 1:N:0:TCTGCAAG+GCTGCACT  
GGACATCTTGAATAAGTTAAGAAATAATTCTTCGCGTTAATGCAGAAACGCGATGAAGAAGATGAAGG  
AGTCCCCATTACTGTTAAATCAGGGACATTTCGCATATTAAGCATTATATTGGGGACTGGGGACCTATA  
TATATGTATAGAGTA

+

::FFFFFFFF::F:FFFFFFFFFFFFFFFFFFFFFFFFFFFFFFFFFFFFFFFFFFFFFFFF:FFFFFF:FFFFFF,FFFF::FFFF  
FFFFFFFF,FFFFFF:FFF:FFFFFFFFFFFFFFFFFFFFFFFF:FFFFFFFFFF,F:F:FFFFFF:FFFFFFFF  
FFFFF:FFFFFF,F

@A00721:190:HGJW7DSXY:4:2302:14416:26021 1:N:0:TCTGCAAG+GCTGCACT  
GGACATCTTGAATAAGTTAAGAAATAATTCTTCGCGTTAATGCAGAAACGCGATGAAGAAGATGAAGG  
AGTCCCCATTACTGTTAAATCAGGGACATTTCGCATATTAAGCATTATATTGGGGACTGGGGACCTATA  
TATATGTATAGAGTA

+

FFFFFFFFFFFFFFFFFFFFFFFFFFFFFFFFFFFFFFFFFFFFFFFFFFFFFFFFFFFFFFFFFFFFFFFF  
FFFFFFFFFFFFFFFFFFFFFFFFFFFFFFFFFFFFFFFFFFFFFFFFFFFFFFFFFFFFFFFFFFFFFFFF  
FFFFFFFFFFFFFFFF

@A00721:190:HGJW7DSXY:4:2549:18295:28635 1:N:0:TCTGCAAG+GCTGCACT  
GGACATCTTGAATAAGTTAAGAAATAATTCTTCGCGTTAATGCAGAAACGCGATGAAGAAGATGAAGG  
AGTCCCCATTACTGTTAAATCAGGGACATTTCGCATATTAAGCATTATATTGGGGACTGGGGACCTATA  
TATATGTATAGAGTA

+

FFFFFFFFFFFFFFFFFFFFFFFFFFFFFFFFFFFFFFFFFFFFFFFFFFFFFFFFFFFFFFFFFFFFFFFF  
FFFFFFFFFFFFFFFFFFFFFFFFFFFFFFFFFFFFFFFFFFFFFFFFFFFFFFFFFFFFFFFFFFFFFFFF  
FFFFFFFFFFFFFFFF:F

@A00721:190:HGJW7DSXY:4:1133:12066:21574 1:N:0:TCTGCAAG+GCTGCACT  
CTCCGGATTACTCTATACATATATATAGGTCCCCAGTCCCCAATATAATGCTTAATATGCGAATGTCC  
CTGATTTAACAGTAATGGGGACTCCTTCATCTTCTTCATCGCGTTTCTGCATTAACGCGAAGAATTAT  
TTCTTAACCTATTCA

+

FFFFFFFFFFFFFFFFFFFFFFFFFFFFFFFFFFFFFFFFFFFFFFFFFFFFFFFFFFFFFFFFFFFFFFFF  
FFFFFFFFFFFFFFFF:FFFF:F::FFF:FFFFFFFFFFFFFFFFFFFFFFFF,FFFFFFFFFFFFFFFF  
FFFFFFFFFFFFFFFF

@A00721:190:HGJW7DSXY:4:1136:24505:32659 1:N:0:TCTGCAAG+GCTGCACT  
CTCCGGATTACTCTATACATATATATAGGTCCCCAGTCCCCAATATAATGCTTAATATGCGAATGTCC  
CTGATTTAACAGTAATGGGGACTCCTTCATCTTCTTCATCGCGTTTCTGCATTAACGCGAAGAATTAT  
TTCTTAACCTATTCA

+

FFFFFFFFF:FFFF:FFFFFFFFF:FF:FF:F:F:FFFFFFFFF:FFFFFFFFF:FFF:F:,  
FFFFFFFFF:FFFFFF,FFFF:FF,FFFFFFFFF:FFF,FFFFFFFF:F:FFF,F:FF:FFFF:  
FFFFFFFFFFFF,F

@A00721:190:HGJW7DSXY:4:1213:15076:32612 1:N:0:TCTGCAAG+GCTGCACT  
CTCCGGATTACTCTATACATATATATAGGTCCCCAGTCCCCAATATAATGCTTAATATGCGAATGTCC  
CTGATTTAACAGTAATGGGGACTCCTTCATCTTCTTCATCGCGTTTCTGCATTAACGCGAAGAATTAT  
TTCTTAACCTATTCA

+

FFFFFFFFFFFFFFFFFFFFFFFFFFFFFFFFFFFFFFFFFFFFFFFFFFFFFFFFFFFFFFFFFFFFFFFF  
FFFFFFF:FFFFFFFFFFFFFFFFFFFFFFFFFFFFFFFF:FFFFFFFFF:FFFF,FFFFFFFFF:,FFF  
::FFFFFFFFF:F

@A00721:190:HGJW7DSXY:4:1264:29234:26475 1:N:0:TCTGCAAG+GCTGCACT  
CTCCGGATTACTCTATACATATATATAGGTCCCCAGTCCCCAATATAATGCTTAATATGCGAATGTCC  
CTGATTTAACAGTAATGGGGACTCCTTCATCTTCTTCATCGCGTTTCTGCATTAACGCGAAGAATTAT  
TTCTTAACCTATTCA

+  
FFFFFFFFFFFFFFFFFFFFFFFFFFFFFFFFFFFFFFFFFFFFFFFFFFFFFFFFFFFFFFFFFFFFFFFF  
FFFFFFF:FFFFFFFFFFFFFFF::FFFFFFFFFFFFFFFFFFFFFFFFFFFFFFFFFFFFFFFFFFFFFFF::FFF  
F:FFFFFFFFFFFFFFF

@A00721:190:HGJW7DSXY:4:1277:23122:32800 1:N:0:TCTGCAAG+GCTGCACT  
CTCCGGATTACTCTATACATATATATAGGTCCCCAGTCCCCAATATAATGCTTAATATGCGAATGTCC  
CTGATTTAACAGTAATGGGGACTCCTTCATCTTCTTCATCGCGTTTCTGCATTAACGCGAAGAATTAT  
TTCTTAACTTATTCA

+  
FFFFFFFFFFFFFFFFFFFFFFFFFFFFFFFFFFFFFFFFFFFFFFFFFFFFFFFFFFFFFFFFFFFFFFFF  
FFFFF:FFFFFFFFFFFFFFF:F:FF::FFFFFFFFFFFFFFFFFFFFFFFFFFFFFFFFFFFFFFFFFFFF  
FFFFFFFFFFFFFFFFF

@A00721:190:HGJW7DSXY:4:1342:13557:26944 1:N:0:TCTGCAAG+GCTGCACT  
CTCCGGATTACTCTATACATATATATAGGTCCCCAGTCCCCAATATAATGCTTAATATGCGAATGTCC  
CTGATTTAACAGTAATGGGGACTCCTTCATCTTCTTCATCGCGTTTCTGCATTAACGCGAAGAATTAT  
TTCTTAACTTATTCA

+  
FFFFFFFFFFFFFFFFFFFFFFFFFFFFFFFFFFFFFFFFFFFFFFFFFFFFFFFFFFFFFFFFFFFFFFFF  
FFFFFFFFFFFFFFFFFFFFFFF:FFFFFFFFFFFFFFFFFFFFFFFFFFFFFFFFFFFFFFFFFFFFFFF:FFFFFFFFFFFFFFF  
FFFFFFFFFFFFFFFFF

@A00721:190:HGJW7DSXY:4:1347:23421:11397 1:N:0:TCTGCAAG+GCTGCACT  
CTCCGGATTACTCTATACATATATATAGGTCCCCAGTCCCCAATATAATGCTTAATATGCGAATGTCC  
CTGATTTAACAGTAATGGGGACTCCTTCATCTTCTTCATCGCGTTTCTGCATTAACGCGAAGAATTAT  
TTCTTAACTTATTCA

+  
FFFFFFFFFFFFFFFFFFFFFFFFFFFFFFFFFFFFFFFFFFFFFFFFFFFFFFFFFFFFFFFFFFFFFFFF  
FFFFFFFFFFFFFFFFFFFFFFF:FFFFFFFFFFFFFFFFFFFFFFFFFFFFFFFFFFFFFFFFFFFFFFF:FFFFFFFFFFFFFFF  
FFFFFFFFFFFFFFFFF

@A00721:190:HGJW7DSXY:4:1374:15908:28447 1:N:0:TCTGCAAG+GCTGCACT  
CTCCGGATTACTCTATACATATATATAGGTCCCCAGTCCCCAATATAATGCTTAATATGCGAATGTCC  
CTGATTTAACAGTAATGGGGACTCCTTCATCTTCTTCATCGCGTTTCTGCATTAACGCGAAGAATTAT  
TTCTTAACTTATTCA

+  
FFFFFFFFFFFFFFFFFFFFFFFFFFFFFFFFFFFFFFFFFFFFFFFFFFFFFFFFFFFFFFFFFFFFFFF:FFFFFFFFFFFF  
FFFFFFFFFFFFFFFFFFFFFFF,F:F:FFFFFFFFFFFFFFFFFFFFFFFFFFFFFFFFFFFFFFF,FFFFFFFFFFFFFFF  
FFFFFFFFFFFFFFFFF

@A00721:190:HGJW7DSXY:4:1435:19199:32643 1:N:0:TCTGCAAG+GCTGCACT  
CTCCGGATTACTCTATACATATATATAGGTCCCCAGTCCCCAATATAATGCTTAATATGCGAATGTCC  
CTGATTTAACAGTAATGGGGACTCCTTCATCTTCTTCATCGCGTTTCTGCATTAACGCGAAGAATTAT  
TTCTTAACTTATTCA

+  
FFFFFFFFFFFFFFFFFFFFFFFFFFFFFFFFFFFFFFFFFFFFFFFFFFFFFFFFFFFFFFFFFFFFFFFF  
FFFFFFFFFFFFFFFFFFFFFFFFFFFFFFFFFFFFFFFFFFFFFFFFFFFFFFFFFFFFFFFFFFFFFFFF:FF  
FF:FFFFFFFFFFFFFFF

@A00721:190:HGJW7DSXY:4:1539:19488:29074 1:N:0:TCTGCAAG+GCTGCACT  
CTCCGGATTACTCTATACATATATATAGGTCCCCAGTCCCCAATATAATGCTTAATATGCGAATGTCC  
CTGATTTAACAGTAATGGGGACTCCTTCATCTTCTTCATCGCGTTTCTGCATTAACGCGAAGAATTAT  
TTCTTAACTTATTCA

+  
FFFFFFFFFFFFFFFFFFFFFFFFFFFFFFFFFFFFFFFFFFFFFFFFFFFFFFFFFFFFFFFFFFFFFFF:FFFFFFFFFFFF  
FFFF,:FFFFFFF:FFFFFF::,FFFFFFFFFFFFFFFFFFFFFFFFFFFFFFFFFFFFFFFFFFFFFFF  
FFFFFFFFFFFFFFFFF

@A00721:190:HGJW7DSXY:4:1545:10601:21543 1:N:0:TCTGCAAG+GCTGCACT  
CTCCGGATTACTCTATACATATATATAGGTCCCCAGTCCCCAATATAATGCTTAATATGCGAATGTCC







FFFFFFFFFFFFFFFFFFFFFFFFFFFFFFFFFFFFFFFFFFFFFFFFFFFFFFFFFFFFFFFFFFFFFFFFFFFFFFFF  
FFFFFFFFFFFFFFFF

@A00721:190:HGJW7DSXY:4:1656:15311:9627 1:N:0:TCTGCAAG+GCTGCACT  
GAAGAGATGAAAGTAAATTTCTGAATATGATGTTAGCGTTAATGGAGAAACGCGATGAAGAAGATGAA  
GGAGTCCCCATTACTGTTAAATCAGGGACATCCGCATATTAAGCATTATATTGGGGACTGGGGACCTA  
TATATATGTATAGAG

+

FFFFFFFFFFFFFFFFFFFFFFFFFFFFFFFFFFFFFFFFFFFFFFFFFFFFFFFFFFFFFFFFFFFFFFFFFFFFFFFF  
F,FF:FFFFFFFFFFFF:FFFFFFFFF,FFFFFFFFFFFF,FFFFF:FFFFFFFFFFFFFFFFFFFFFFFFFFFF  
FF:FFF:F,FFFF:F

@A00721:190:HGJW7DSXY:4:2265:17445:18208 1:N:0:TCTGCAAG+GCTGCACT  
GAAGAGATGAAAGTAAATTTCTGAATATGATGTTAGCGTTAATGGAGAAACGCGATGAAGAAGATGAA  
GGAGTCCCCATTACTGTTAAATCAGGGACATCCGCATATTAAGCATTATATTGGGGACTGGGGACCTA  
TATATATGTATAGAG

+

FFFFFFFFFFFFFFFFFFFFFFFFFFFFFFFFFFFFFFFFFFFFFFFFFFFFFFFFFFFFFFFFFFFFFFFFFFFFFFFF  
FFFFFFFFFFFFFFFFFFFFFFFFFFFFFFFFFFFFFFFFFFFFFFFFFFFFFFFFFFFFFFFFFFFFFFFFFFFFFFFF  
FFFFFFFFFFFFFFFF

@A00721:190:HGJW7DSXY:4:2601:1353:36401 1:N:0:TCTGCAAG+GCTGCACT  
GAAGAGATGAAAGTAAATTTCTGAATATGATGTTAGCGTTAATGGAGAAACGCGATGAAGAAGATGAA  
GGAGTCCCCATTACTGTTAAATCAGGGACATCCGCATATTAAGCATTATATTGGGGACTGGGGACCTA  
TATATATGTATAGAG

+

FFFFFFFFFFFFFFF::FFF,FF::FF:::FFFFFF:FFFFFFFFFFFFFFFFFFFFFFFFFFFFFFFFFFFFF  
FFFFFFFFFFFFFF:FFFFFFFFFFFFFFFFFFFFFFFFF,FFFFF:FFFFFFFFFFFF:FFFFFFFFFFFFFFFF  
FFFFFFFFFFFFFFFF

@A00721:190:HGJW7DSXY:4:1163:32407:35697 1:N:0:TCTGCAAG+GCTGCACT  
CCGGATTACTCTATACATATATATAGGTCCCCAGTCCCCAATATAATGCTTAATATGCGGATGTCCCT  
GATTTAACAGTAATGGGGACTCCTTCATCTTCTTCATCGCGTTTCTCCATTAACGCTAACATCATATT  
CAGAAATTTACTTTC

+

FFFFFFFFFFFFFFFFFFFFFFFFFFFFFFFFFFFFFFFFFFFFFFFFFFFFFFFFFFFFFFFFFFFFFFFFFFFFF  
FFFFFFFFFFFFFFFFFFFFFFFFFFFFFFFFFFFFFFFFFFFFFFFFFFFF,FFFF,FF:FFF,,FFFF:FFFF  
FFFFF,FFFFFFFF

@A00721:190:HGJW7DSXY:4:1325:12861:10958 1:N:0:TCTGCAAG+GCTGCACT  
CCGGATTACTCTATACATATATATAGGTCCCCAGTCCCCAATATAATGCTTAATATGCGGATGTCCCT  
GATTTAACAGTAATGGGGACTCCTTCATCTTCTTCATCGCGTTTCTCCATTAACGCTAACATCATATT  
CAGAAATTTACTTTC

+

FFFFFFFFFFFFFFFFFFFF:FFFFFFFFFFFFFFFFFFFFFFFFFFFFFFFFFFFFFFFFFFFFFFFFFFFFF  
FFFFFFFFFFFFFFFFFFFFFFFFFFFFFFFFFFFFFFFFFFFF:FFFFFFFFF:FFFFFFFFF:FFFFFF:FFFFFFF  
FFFFFFFFFFFFFFFF

@A00721:190:HGJW7DSXY:4:1331:2239:14982 1:N:0:TCTGCAAG+GCTGCACT  
CCGGATTACTCTATACATATATATAGGTCCCCAGTCCCCAATATAATGCTTAATATGCGGATGTCCCT  
GATTTAACAGTAATGGGGACTCCTTCATCTTCTTCATCGCGTTTCTCCATTAACGCTAACGTCATATT  
CAGAAATTTACTTTC

+

FFFFFFFFFFFFFFFFFFFFFFF:FFFFFFFFFFFFFFFFFFFFFFFFFFFFFFFFFFFFFFFFFFFFFFFFFFFF  
FFFFFFFFFFFFFFFFFFFFFFFFFFFFFFFFFFFFFFFFFFFF:FFFFFFFFFFFFFFFFFFFFFFFFFFFFFFFF  
FFFFFFFFFFFFFFFF

@A00721:190:HGJW7DSXY:4:1341:2266:1626 1:N:0:TCTGCAAG+GCTGCACT  
CCGGATTACTCTATACATATATATAGGTCCCCAGTCCCCAATATAATGCTTAATATGCGGATGTCCCT  
GATTTAACAGTAATGGGGACTCCTTCATCTTCTTCATCGCGTTTCTCCATTAACGCTAACATCATATT  
CAGAAATTTAGATCG

[illegible]

```
FFFFFFFFFFFFFFFFFFFFFFFFFFFFFFFFFFFFFFFFFFFFFFFFFFFFFFFFFFFFF
FFFFFFFFFFFFFFFFFFFFFFFFFFFFFFFFFFFFFFFFFFFFFFFFFFFFFFFFFFFFF:FF,FF,FFFFFFFFFFFFFFFFFFFF
FFFFFFFFFFFFFFFFFFFF
```

[illegible]

```

FFFFFFFFFFFFFFFFFFFFFFFFFFFFFFFFFFFFFFFFFFFFFFFFFFFFFFFFFFFFFFFF
FFFFFFFFFFFFFFFFFFFFFFFFFFFFFFFFFFFFFFFFFFFFFFFFFFFFFFFFFFFFFFFF:
FFFFFFFFFFFFFFFFFFFFFFFFFFFFFFFFFFFFFFFF
FFFFFFFFFFFFFFFF

```

[illegible][illegible][illegible]

@A00721:190:HGJW7DSXY:4:2417:14163:36542 1:N:0:TCTGCAAG+GCTGCACT  
CCGGATTACTCTGTACATATATATAGGTCCCCAGTCCCCAATATAATGCTTAATATGCGGATGTCCCT

GATTTAACAGTAATGGGGACTCCTTCATCTTCTTCATCGCGTTTCTCCATTAACGCTAACATCATATT  
CAGAAATTTAGATC

```

FFFFFFFF:FF:F,: ,FFFFFFFF:FFFFFFFFFFFFFFFFFFFFFFFF:FF:F:F,FFFFFFFFFFFF:FFFFFF
FFFFFFFFFFFFFFFFFFFFFFFFFFFFFFFFFFFFFFFFFFFFFFFF:FFF:FFFFFFFFFFFFFFFF:FFFFFFFFFFFF
FFF,:FFFF:,FFF

```

 $+$ [illegible]

+

```

FFFFFFFFFFFFFFFFFFFFFFFFFFFFFFFFFFFFFFFFFFFFFFFFFFFFFFFFFFFFFFFFFFFFFFFF
FFFFFFFFFFFFFFFF:FFFFFFFFFFFFFFFF:FFFFFFFFFFFFFFFF:FFFFFF:F,FFF:FFFF,F,FFF
FFFFFFFFFFFF:FFFF

```

 $+$ [illegible]
$$+$$

```

FFFFFFFFFFFFFF,FFFFFFFF:FFFFFF:FFFFFFFFFFFFFFFFFFFFFF:FFFFFFFF:FFF:FFFFFFFF
FFF:F:FF,FFFFFFFFFFFFFFFFFFFFFFFFFFFFFFFF,FFFFFF,F:FFF:,F::FF:F,:FFFFFFFF
F:FFFFFF:FFFFFF

```

+

```

FFFFFFFFFFFFFFFFFFFFFFFFFFFFFFFFFFFFFFFFFFFFFFFFFFFFFFFFFFFFFFFF:FFFFFFFFFFFFFF:F
FFFFFFFFFFFFFFFFFFFFFFFFFFFFFFFFFFFFFFFFFFFFFFFFFFFFFFFFFFFFFFFF:FFFFFFFFF:F:FFFFFF:FFFFFF
FFFFFFFFFFFF:FFFF

```

+

[illegible]

@A00721:190:HGJW7DSXY:4:2575:21495:25160 1:N:0:TCTGCAAG+GCTGCACT  
CTCCGGATTACTCTATACATATATATAGGTCCTCCAGTCCCAATATAATGCTTAATATGCGGATGTCC  
CTGATTTAACAGTAATGGGGACTCCTTCATCTTCTTCATCGCGTTTCTCCATTAACGCTAACATCATA  
TTCAGAAATTTACTT

```

FFFFFFFFFFFFFFFFFFFFFFFF,FFFFFFFFFFFFFFFFFFFFFFFFFFFFFFFF:FFFFFFFF
FFFF:FFFFFFFF:FFFFFFFFFFFF:F:FFFFF:FFFFFFFF,FF:FFFFF,FFF:F,F,:FF:F
FFFFFFFFF::FFFF

```

+

[illegible]

+

[illegible]

+

[illegible] $+$ [illegible]

+

[illegible]

+

[illegible]

FFFFFFFFFFFFFFFFFFFFFFFFFFFFFFFFFFFFFFFFFFFFFFFFFFFFFFFFFFFFFFFF:FFFFFF:FFFFFFFFF  
F:FFFFFFFFFFFFFFF

@A00721:190:HGJW7DSXY:4:2654:5891:16172 1:N:0:TCTGCAAG+GCTGCACT  
CTGATGTTAGCGTTAATGGAGAAACGCGATGAAGAAGATGAAGGAGTCCCCATTACTGTTAAATCAGG  
GACATCCGCATATTAAGCATTATATTGGGGACTGGGGACCTATATATATGTATAGAGTAATCCGGAGG  
AATCTATCCCCAAGA

+

FFFFFFFFFFFFFFFFFFFFFF:FF:FFFFFF:FF::FFFFFFFFFFFFFFFF:FFFFFF:FFFFFFFFFFFFFFFFFFFFFFF  
FFFFFFFFFFFFFFFFFFFFFFFFFFFFFFFFFFFFFFFFFFFFFFFFFFFFFFFFFFFFFFFF:FFFFFFFFFFFFFFFFF  
FFFFFFFFFFFFFFFF:F

@A00721:190:HGJW7DSXY:4:1212:23936:33364 1:N:0:TCTGCAAG+GCTGCACT  
GACTATTCCAATTGGGGATAGATTCTCCGGATTACTCTATACATATATATAGGTCCCCAGTCCCCAA  
TATAATGCTTAATATGCGAATGTCCCTGATTAAACAGTAATGGGGACTCCTTCATCTTCTTCATCGCG  
TTTCTGCATTAACGC

+

FFFFFF:FFFFFFFFFFFFFFFFFFFFFFFFFFFFFFFFFFFFFFFFFFFFFFFFFFFFFFFFFFFFFFFFF  
FFFFFFFF:FFFFFFFFFFFFFFFFFFFFFFFFFFFFFFFFFFFFFFFFFFFFFFFFFFFFFFFF:FFFF:FFFFFF:FFFFFFFFFFFFFFFFFFFFFFF:  
FFFFFFFFFFFFFFFFF

@A00721:190:HGJW7DSXY:4:1351:12825:11490 1:N:0:TCTGCAAG+GCTGCACT  
GACTATTCCAATTGGGGATAGATTCTCCGGATTACTCTATACATATATATAGGTCCCCAGTCCCCAA  
TATAATGCTTAATATGCGAATGTCCCTGATTAAACAGTAATGGGGACTCCTTCATCTTCTTCATCGCG  
TTTCTGCATTAACGC

+

FFFF,FFFFFFFFFFFFFFFFFFFFFFFFFFFFFFFFFFFFFFFFFFFFFFFFFFFFFFFFFFFFFFFFF  
FFFFFFFFFFFFFFFFFFFFFFFFFFFFFFFFFFFFFFFFFFFFFFFFFFFFFFFF:FFF:FFFF:F:FFFFFFFFF:FFFFFFFFFFFFFFFFF  
FF:FFFFFF:FFFF

@A00721:190:HGJW7DSXY:4:2136:30382:23641 1:N:0:TCTGCAAG+GCTGCACT  
GACTATTCCAATTGGGGATAGATTCTCCGGATTACTCTATACATATATATAGGTCCCCAGTCCCCAA  
TATAATGCTTAATATGCGAATGTCCCTGATTAAACAGTAATGGGGACTCCTTCATCTTCTTCATCGCG  
TTTCTGCATTAACGC

+

FFFFFFFFFFFFFFFFFFFFFFFFFFFFFFFFFFFFFFFFFFFFFFFFFFFFFFFFFFFFFFFFF  
FFFFFFFFFFFFFFFFFFFFFFFFFFFFFFFFFFFFFFFFFFFFFFFFFFFFFFFF:FFFFFF:F:FFFFFFFFFFFFFFFFFFFFFFF  
FFFFFFFFFFFFFFFFF

@A00721:190:HGJW7DSXY:4:2262:31964:24815 1:N:0:TCTGCAAG+GCTGCACT  
GACTATTCCAATTGGGGATAGATTCTCCGGATTACTCTATACATATATATAGGTCCCCAGTCCCCAA  
TATAATGCTTAATATGCGAATGTCCCTGATTAAACAGTAATGGGGACTCCTTCATCTTCTTCATCGCG  
TTTCTGCATTAACGC

+

FFFFFFFFFFFFFFFFFFFFFFFFFFFFFFFFFFFFFFFFFFFFFFFFFFFFFFFFFFFFFFFF:FFFFFFFFFFFFFFFFFFFFFFF  
FFFFFFFFFFFFFFFFFFFFFFFFFFFFFFFFFFFFFFFFFFFFFFFFFFFFFFFF:FFFFFFFFFFFFFFFFFFFFFFF  
FFF:FF::FFFF::

@A00721:190:HGJW7DSXY:4:2536:8784:4022 1:N:0:TCTGCAAG+GCTGCACT  
GACTATTCCAATTGGGGATAGATTCTCCGGATTACTCTATACATATATATAGGTCCCCAGTCCCCAA  
TATAATGCTTAATATGCGAATGTCCCTGATTAAACAGTAATGGGGACTCCTTCATCTTCTTCATCGCG  
TTTCTGCATTAACGC

+

FFFFFFFFFFFFFFFFFFFFFFFFFFFFFFFFFFFFFFFFFFFFFFFFFFFFFFFFFFFFFFFFF  
FFFFFFFFFFFFFFFFFFFFFFFFFFFFFFFFFFFFFFFFFFFFFFFFFFFFFFFF,FFFFFF:FFFFFFFFFFFFFFFFFFFFFFF  
FFFFFFFFFFFFFF:F

@A00721:190:HGJW7DSXY:4:1111:14986:12853 1:N:0:TCTGCAAG+GCTGCACT  
GCGGGATATTTTCAAATTTGAAATTTGAAATCATTACTATTCCAATTGGGGATAGATTCTCCGGATT  
ACTCTATACATATATATAGGTCCCCAGTCCCCAATATAATGCTTAATATGCGAATGTCCCTGATTAA  
CAGTAATGGGGACTC

+  
FFFFFFFFFFFFFFFFFFFFFFFFFFFFFFFFFFFFFFFFFFFFFFFFFFFFFFFFFFFFFFFFFFFFFFFF  
FFFFFFFFFFFFFFFFFFFFFFFFFFFFFFFFFFFFFFFFFFFFFFFFFFFFFFFFFFFFFFFFFFFFFFFF  
FFFF:FFFFFFFF  
@A00721:190:HGJW7DSXY:4:2242:18837:25285 1:N:0:TCTGCAAG+GCTGCACT  
GCGGGATATTTTCAAATTTGAAATTTGAAATCATTACTATTCCAATTGGGGATAGATTCTCCGGATT  
ACTCTATACATATATATAGGTCCCCAGTCCCCAATATAATGCTTAATATGCGAATGTCCCTGATTAA  
CAGTAATGGGGACTC

+  
FFFFFFFFFFFFFFFFFFFFFFFFFFFFFFFFFFFFFFFFFFFFFFFFFFFFFFFFFFFFFFFFFFFFFFFF  
FFFFFFFFFFFFFFFFFFFFFFFFFFFFFFFFFFFFFFFFFFFFFFFFFFFFFFFFFFFFFFFFFFFFFFFF  
FFFFFFFFFFFFFFFF  
@A00721:190:HGJW7DSXY:4:2457:1253:6355 1:N:0:TCTGCAAG+GCTGCACT  
GCGGGATATTTTCAAATTTGAAATTTGAAATCATTACTATTCCAATTGGGGATAGATTCTCCGGATT  
ACTCTATACATATATATAGGTCCCCAGTCCCCAATATAATGCTTAATATGCGAATGTCCCTGATTAA  
CAGTAATGGGGACTC

+  
FFFFFFFFFFFFFFFFFFFFFFFFFFFFFFFFFFFFFFFFFFFFFFFFFFFFFFFFFFFFFFFFFFFFFFFF  
FFFFFFFFFFFFFFFFFFFFFFFFFFFFFFFFFFFFFFFFFFFFFFFFFFFFFFFFFFFFFFFFFFFFFFFF  
FFFFFFFFFFFFFFFF  
@A00721:190:HGJW7DSXY:4:2548:14787:14262 1:N:0:TCTGCAAG+GCTGCACT  
GCGGGATATTTTCAAATTTGAAATTTGAAATCATTACTATTCCAATTGGGGATAGATTCTCCGGATT  
ACTCTATACATATATATAGGTCCCCAGTCCCCAATATAATGCTTAATATGCGAATGTCCCTGATTAA  
CAGTAATGGGGACTC

+  
FFFFFFFFFFFFFFFFFFFFFFFFFFFFFFFFFFFFFFFFFFFFFFFFFFFFFFFFFFFFFFFFFFFFFFFF  
FFFFFFFFFFFFFFFFFFFFFFFFFFFFFFFFFFFFFFFFFFFFFFFFFFFFFFFFFFFFFFFFFFFFFFFF  
FFFFFFFFFFFFFFFF  
@A00721:190:HGJW7DSXY:4:1212:28212:23140 1:N:0:TCTGCAAG+GCTGCACT  
GGGCGGGATATTTTCAAATTTGAAATTTGAAATCATTACTATTCCAATTGGGGATAGATTCTCCGGA  
TACTCTATACATATATATAGGTCCCCAGTCCCCAATATAATGCTTAATATGCGAATGTCCCTGATT  
AACAGTAATGGGGAC

+  
FFFFFFFFFFFFFFFFFFFFFFFF,,:FFFFFFFF:FFFF,FFFFFFFFFFFFFFFFFFFFFFFF,FF:FFFF:F  
FFFFFFFF:FF:F:FFFFFFFF,FFFFFF:FFFFFF,FFF:FF,F:F,:FFFFFFFF,FF  
F,F:F,FFFFFFFF  
@A00721:190:HGJW7DSXY:4:1240:8983:33301 1:N:0:TCTGCAAG+GCTGCACT  
GGGCGGGATATTTTCAAATTTGAAATTTGAAATCATTACTATTCCAATTGGGGATAGATTCTCCGGA  
TACTCTATACATATATATAGGTCCCCAGTCCCCAATATAATGCTTAATATGCGAATGTCCCTGATT  
AACAGTAATGGGGAC

+  
FFFFFFFFFFFFFFFFFFFFFFFFFFFFFFFFFFFFFFFFFFFFFFFFFFFFFFFFFFFFFFFFFFFFFFFF  
FFFFFFFFFFFFFFFFFFFFFFFFFFFFFFFFFFFFFFFFFFFFFFFFFFFFFFFFFFFFFFFFFFFFFFFF  
FFFFFFFFFFFFFFFF  
@A00721:190:HGJW7DSXY:4:1304:14443:22467 1:N:0:TCTGCAAG+GCTGCACT  
GGGCGGGATATTTTCAAATTTGAAATTTGAAATCATTACTATTCCAATTGGGGATAGATTCTCCGGA  
TACTCTATACATATATATAGGTCCCCAGTCCCCAATATAATGCTTAATATGCGAATGTCCCTGATT  
AACAGTAATGGGGAC

+  
FFFFFFFFFFFFFFFFFFFFFFFFFFFFFFFFFFFFFFFFFFFFFFFFFFFFFFFFFFFFFFFFFFFFFFFF  
FFFFFFFFFFFFFFFFFFFFFFFFFFFFFFFFFFFFFFFFFFFFFFFFFFFFFFFFFFFFFFFFFFFFFFFF  
FFFFFFFFFFFFFFFF  
@A00721:190:HGJW7DSXY:4:1415:14543:33160 1:N:0:TCTGCAAG+GCTGCACT  
GGGCGGGATATTTTCAAATTTGAAATTTGAAATCATTACTATTCCAATTGGGGATAGATTCTCCGGA







@A00721:190:HGJW7DSXY:4:1529:9091:8594 1:N:0:TCTGCAAG+GCTGCACT  
CGGACATTTCGCATATTAAGCATTATATTGGGGACTGGGGACCTATATATATGTATAGAGTAATCCGGA  
GGAATCTATCCCCAATTGGAATAGTAATGATTTCAAATTTCAAATTTGAAAATATCCCGCCCTACAGT  
ATACCAATTCAAATT

@A00721:190:HGJW7DSXY:4:1547:18900:14309 1:N:0:TCTGCAAG+GCTGCACT  
CGGACATTTCGCATATTAAGCATTATATTGGGGACTGGGGACCTATATATATGTATAGAGTAATCCGGA  
GGAATCTATCCCCAATTGGAATAGTAATGATTTCAAATTTCAAATTTGAAAATATCCCGCCCTACAGT  
ATACCAATTCAAATT

@A00721:190:HGJW7DSXY:4:1565:11686:23109 1:N:0:TCTGCAAG+GCTGCACT  
CGGACATTCGCATATTAAGCATTATATTGGGGACTGGGGACCTATATATATGTATAGAGTAATCCGGA  
GGAATCTATCCCCAATTGGAATAGTAATGATTTCAAATTTCAAATTTGAAAATATCCCGCCCTACAGT  
ATACCAATTCAAATT

@A00721:190:HGJW7DSXY:4:1347:18954:30123 1:N:0:TCTGCAAG+GCTGCACT  
ATCGCATATTAAGCATTATATTGGGGACTGGGGACCTATATATATGTATAGAGTAATCCGGAGGAATC  
TATCCCCAATTGGAATAGTAATGATTTCAAATTTCAAATTTGAAAATCATTACTATTCCAATTGGGGA  
TAGATTCCTCCGAGA

@A00721:190:HGJW7DSXY:4:1431:18358:3693 1:N:0:TCTGCAAG+GCTGCACT  
ATCGCATATTAAGCATTATATTGGGGACTGGGGACCTATATATATGTATAGAGTAATCCGGAGGAATC  
TATCCCCAATTGGAATAGTAATGATTTCAAATTTCAAATTTGAAAATCATTACTATTCCAATTGGGGA  
TAGATTCCTCCGAGA

@A00721:190:HGJW7DSXY:4:2446:1787:6746 1:N:0:TCTGCAAG+GCTGCACT  
ATCGCATATTAAGCATTATATTGGGGACTGGGGACCTATATATATGTATAGAGTAATCCGGAGGAATC  
AATCCCCAATTGGAATAGTAATGATTTCAAATTTCAAATTTGAAAATCATTACTATTCCAATTGGGGA  
TAGATTCCACCGAGA

@A00721:190:HGJW7DSXY:4:2239:9869:26976 1:N:0:TCTGCAAG+GCTGCACT  
GTCCGCATATTAAGCATTATATTGGGGACTGGGGACCTATATATATGTATAGAGTAATCCGGAGGAAT  
CTATCCCCAATTGGAATAGTAATGATTTCAAATTTCAAATTTGAAATATCCCGCCCTACAGTATACC  
AATTCAAATTCAAAT

+  
FFFFF,FFFFFFFFFFFFFFFFFFFFFFFFFFFFFFFFFFFFFFFFFFFFFFFFFFFFFFFFFFFFFFFF  
FFFFFFFFFFFFFFFFFFFFFFFFFFFFFFFFFFFFFFFFFFFFFFFFFFFFFFFFFFFFFFFFFFFFFFFF  
FFFF,FF:FFFFFFFF  
@A00721:190:HGJW7DSXY:4:2639:6433:6214 1:N:0:TCTGCAAG+GCTGCACT  
GTCCGCATATTAAGCATTATATTGGGGACTGGGGACCTATATATATGTATAGAGTAATCCGGAGGAAT  
CTATCCCCAATTGGAATAGTAATGATTTCAAATTTCAAATTTGAAAATATCCCGCCCTACAGTATACC  
AATTCAAATTCAAAT  
+  
FFFFFFFFFFFFFFFFFFFFFFFFFFFFFFFFFFFFFFFFFFFFFFFFFFFFFFFFFFFFFFFFFFFFFFFF  
FFFFFFFFFFFFFFFFFFFFFFFFFFFFFFFFFFFFFFFFFFFFFFFFFFFFFFFFFFFFFFFFFFFFFFFF  
FFFFFFFFFFFFFFFFFFFFFFFF  
@A00721:190:HGJW7DSXY:4:1140:6280:1783 1:N:0:TCTGCAAG+GCTGCACT  
CCGCATATTAAGCATTATATTGGGGACTGGGGACCTATATATATGTATAGAGTAATCCGGAGGAATCT  
ATCCCCAATTGGAATAGTAATGATTTCAAATTTCAAATTTGAAAATATCCCGCCCTACAGTATACCAA  
TTCAAATTCAAATTC  
+  
FFFFFFFFFFFFFFFFFFFFFFFFFFFFFFFFFFFFFFFFFFFFFFFFFFFFFFFFFFFFFFFFFFFFFFFF  
FFFFFFFFFFFFFFFFFFFFFFFFFFFFFFFFFFFFFFFFFFFFFFFFFFFFFFFFFFFFFFFFFFFFFFFF:  
FFFFFFFF:FF,FFFF  
@A00721:190:HGJW7DSXY:4:1239:2926:9815 1:N:0:TCTGCAAG+GCTGCACT  
CCGCATATTAAGCATTATATTGGGGACTGGGGACCTATATATATGTATAGAGTAATCCGGAGGAATCT  
ATCCCCAATTGGAATAGTAATGATTTCAAATTTCAAATTTGAAAATATCCCGCCCTACAGTATACCAA  
TTCAAATTCAAATTC  
+  
FFFFFFFFFFFFFFFFFFFFFFFFFFFFFFFFFFFFFFFFFFFFFFFFFFFFFFFFFFFFFFFFFFFFFFFF:  
FFFFFFFFFFFFFFFFFFFFFFFFFFFFFFFFFFFFFFFFFFFFFFFFFFFFFFFFFFFFFFFFFFFFFFFF:  
FFFFFFFF:FFFF  
@A00721:190:HGJW7DSXY:4:1301:1389:25441 1:N:0:TCTGCAAG+GCTGCACT  
CCGCATATTAAGCATTATATTGGGGACTGGGGACCTATATATATGTATAGAGTAATCCGGAGGAATCT  
ATCCCCAATTGGAATAGTAATGATTTCAAATTTCAAATTTGAAAATATCCCGCCCTACAGTATACCAA  
TTCAAATTCAAATTC  
+  
FFFFFFFFFFFFFFFFFFFFFFFFFFFFFFFFFFFFFFFFFFFFFFFFFFFFFFFFFFFFFFFFFFFFFFFF:  
FFFFFFFFFFFFFFFFFFFFFFFFFFFFFFFFFFFFFFFFFFFFFFFFFFFFFFFFFFFFFFFFFFFFFFFF:  
FFFFF:FFF:FFFF  
@A00721:190:HGJW7DSXY:4:1301:16278:35790 1:N:0:TCTGCAAG+GCTGCACT  
CCGCATATTAAGCATTATATTGGGGACTGGGGACCTATATATATGTATAGAGTAATCCGGAGGAATCT  
ATCCCCAATTGGAATAGTAATGATTTCAAATTTCAAATTTGAAAATATCCCGCCCTACAGTATACCAA  
TTCAAATTCAAATTC  
+  
FFFFFFFFFFFFFFFFFFFFFFFFFFFFFFFFFFFFFFFFFFFFFFFFFFFFFFFFFFFFFFFFFFFFFFFF:  
FFFFFFFFFFFFFFFFFFFFFFFFFFFFFFFFFFFFFFFFFFFFFFFFFFFFFFFFFFFFFFFFFFFFFFFF:  
:FFFFFFFFFFFFFFFF  
@A00721:190:HGJW7DSXY:4:1310:21206:18270 1:N:0:TCTGCAAG+GCTGCACT  
CCGCATATTAAGCATTATATTGGGGACTGGGGACCTATATATATGTATAGAGTAATCCGGAGGAATCT  
ATCCCCAATTGGAATAGTAATGATTTCAAATTTCAAATTTGAAAATATCCCGCCCTACAGTATACCAA  
TTCAAATTCAAATTC  
+  
FFFFFFFFFFFFFFFFFFFFFFFFFFFFFFFFFFFFFFFFFFFFFFFFFFFFFFFFFFFFFFFFFFFFFFFF:  
FFFFFFFFFFFFFFFFFFFFFFFFFFFFFFFFFFFFFFFFFFFFFFFFFFFFFFFFFFFFFFFFFFFFFFFF:  
FFFFFFFFFFFFFFFF  
@A00721:190:HGJW7DSXY:4:1612:22869:5963 1:N:0:TCTGCAAG+GCTGCACT  
CCGCATATTAAGCATTATATTGGGGACTGGGGACCTATATATATGTATAGAGTAATCCGGAGGAATCT



@A00721:190:HGJW7DSXY:4:1471:23294:3411 1:N:0:TCTGCAAG+GCTGCACT  
CGCATATTAAGCATTATATTGGGGACTGGGGACCTATATATATGTATAGAGTAATCCGGAGGAATCTA  
TCCCCAATTGGAATAGTAATGATTTCAAATTTCAAATTTGAAAATATCCCGCCCTACAGTATACCAAT  
TCAAATTCAAATTCA

```
FF:F:FFFFFFFFFFFFFFFFFFFF:FFFFFFFF:FFFFFFFFFFFFFFFFFFFF:, :FFFFFFFFFFFF
:FFF,FFFF,FFFFF:FFFFF:FFFFF:FF::F:FF,F,FFFFFFFF,FF:FF,FF,FFFF:FF:FF:
F,FFFF::F,FFFF
```

@A00721:190:HGJW7DSXY:4:2177:32045:21136 1:N:0:TCTGCAAG+GCTGCACT  
CGCATATTAAGCATTATATTGGGGACTGGGGACCTATATATATGTATAGAGTAATCCGGAGGAATCTA  
TCCCCAATTGGAATAGTAATGATTTCAAATTTCAAATTTGAAAATATCCCGCCCTACAGTATACCAAT  
TCAAATTCAAATTCA

[illegible]

@A00721:190:HGJW7DSXY:4:2201:10809:17143 1:N:0:TCTGCAAG+GCTGCACT  
CGCATATTAAGCATTATATTGGGGACTGGGGACCTATATATATGTATAGAGTAATCCGGAGGAATCTA  
TCCCCAATTGGAATAGTAATGATTTCAAATTTCAAATTTGAAAATATCCCGCCCTACAGTATACCAAT  
TCAAATTCAAATTCA

```

FFFFFFFFFFFFFFFFFFFFFFFFFFFFFFFFFFFFFFFFFFFFFFFFFFFFFFFFFFFFFFFFFFFFFFFF
FFFFFFFF:FFFFFFFFFFFFFFFFFFFFFFFFFFFFFFFF:FFFFFFFFFFFFFFFFFFFFFFFFFFFFFF
FFF:FFFFFFFF

```

@A00721:190:HGJW7DSXY:4:1222:2492:22811 1:N:0:TCTGCAAG+GCTGCACT  
GCATATTAAGCATTATATTGGGGACTGGGGACCTATATATATGTATAGAGTAATCCGGAGGAATCTAT  
CCCCAATTGGAATAGTAATGATTTCAAATTTCAAATTTGAAAATATCCCGCCCTACAGTATACCAATT  
CAAATTCAAATTCAA

[illegible]

@A00721:190:HGJW7DSXY:4:2216:32280:35477 1:N:0:TCTGCAAG+GCTGCACT  
GCATATTAAGCATTATATTGGGGACTGGGGACCTATATATATGTATAGAGTAATCCGGAGGAATCTAT  
CCCCAATTGGAATAGTAATGATTTCAAATTTCAAATTTGAAAATATCCCGCCCTACAGTATACCAATT  
CAAATTCAAATTCAA

```

FFFFFFFFFFFFFFFFFFFFFFFFFFFFFFFFFFFFFFFFFFFFFFFFFFFFFFFFFFFFFFFF:FFFFFFFFFFFFFFFF
FFFFFFFFFFFFFFFFFFFFFFFFFFFFFFFFFFFFFFFFFFFFFFFFFFFFFFFFFFFFFFFF:FFFFFFFFFFFF,FFFFFFFFFFFFFFFF
FFFFFFFFFFFFFFFF

```

@A00721:190:HGJW7DSXY:4:1528:31403:36432 1:N:0:TCTGCAAG+GCTGCACT  
GGGGACTGGGGACCTATATATGTATAGAGTAATCCGGAGGAATCTATCCCCAATTGGAATAGTAAT  
GATTTCAAATTTCAAATTTGAAAATATCCCGCCCTACAGTATACCAATTCAAATTCAAATTCAAATAG  
AATTCCATAGGCCCC

[illegible]

@A00721:190:HGJW7DSXY:4:1650:16269:12414 1:N:0:TCTGCAAG+GCTGCACT  
GGGGACTGGGGACCTATATATATGTATAGAGTAATCCGGAGGAATCTATCCCCAATTGGAATAGTAAT  
GATTTCAAATTTCAAATTTGAAAATATCCCGCCCTACAGTATACCAATTCAAATTCAAATTCAAATAG  
AATTCCATAGGCCCC

[illegible]

FFFFFFFFFFFFFFFFFFFFFFFFFFFFFFFFFFFFFFFFFFFFFFFFFFFFFFFFFFFFFFFFFFFFFFFF:F  
FFFFFFFFFFFFFFFF

@A00721:190:HGJW7DSXY:4:2465:22146:8938 1:N:0:TCTGCAAG+GCTGCACT  
GGGACTGGGGACCTATATATATGTATAGAGTAATCCGGAGGAATCTATCCCCAATTGGAATAGTAAT  
GATTTCAAATTTCAAATTTGAAAATATCCCGCCCTACAGTATACCAATTCAAATTCAAATTCAAATAG  
AATTCATAGGCCCC

+

FFFFFFFFFFFFFFFFFFFFFFFFFFFFFFFFFFFFFFFFFFFFFFFFFFFFFFFFFFFFFFFFFFFFFFFF  
FFFFFFFFFFFFFFFFFFFFFFFFFFFFFFFFFFFFFFFFFFFFFFFFFFFFFFFFFFFFFFFFFFFFFFFF  
FFFF:FFFF:FFFF

@A00721:190:HGJW7DSXY:4:1201:6406:36824 1:N:0:TCTGCAAG+GCTGCACT  
GGCTGGGGACCTATATATATGTATAGAGTAATCCGGAGGAATCTATCCCCAATTGGAATAGTAATGAT  
TTCAAATTTCAAATTTGAAAATATCCCGCCCTACAGTATACCAATTCAAATTCAAATTCAAATAGAAT  
TCCATAGGCCCCGCA

+

:FFFFFFFFFFFFFFFFFFFFFFFFFFFFFFFFFFFFFFFFFFFFFFFFFFFFFFFFFFFFFFFF:F  
FFFFFFFFFFFFFFFFFFFFFFFFFFFFFFFFFFFFFFFFFFFFFFFFFFFFFFFFFFFFFFFF:F  
:F:FFFF:FFFF

@A00721:190:HGJW7DSXY:4:1228:23647:17989 1:N:0:TCTGCAAG+GCTGCACT  
GGCTGGGGACCTATATATATGTATAGAGTAATCCGGAGGAATCTATCCCCAATTGGAATAGTAATGAT  
TTCAAATTTCAAATTTGAAAATATCCCGCCCTACAGTATACCAATTCAAATTCAAATTCAAATAGAAT  
TCCATAGGCCCCGCA

+

:F,FFFF:FFFFFFFFFFFFFFFFFFFFFFFF,FFFF,F::F,:FFFFFF:FFF:FF:FF,FF:F:FFF,:F:  
F,:F::FFFF:FFF,FF:FFFF:, ,FFFFFFFF::FFF,FFF:FFFF:FF:FFF::FFFFFF,FFF  
:, :FFF:F,F,FF:F

@A00721:190:HGJW7DSXY:4:1305:31286:30655 1:N:0:TCTGCAAG+GCTGCACT  
GGCTGGGGACCTATATATATGTATAGAGTAATCCGGAGGAATCTATCCCCAATTGGAATAGTAATGAT  
TTCAAATTTCAAATTTGAAAATATCCCGCCCTACAGTATACCAATTCAAATTCAAATTCAAATAGAAT  
TCCATAGGCCCCGCA

+

:F:FFFFFFFFFFFFFFFFFFFFFFFFFFFFFFFFFFFFFFFFFFFFFFFFFFFFFFFF:F  
FFFFF:F:FFFFFF:FFFF::FFFFFFFFF,FF:F:F:F:FFFFF,:F:FF,FFFF:FF:FF,FFF  
FF,FFF,,F:F,FFF

@A00721:190:HGJW7DSXY:4:1430:28971:2816 1:N:0:TCTGCAAG+GCTGCACT  
GGCTGGGGACCTATATATATGTATAGAGTAATCCGGAGGAATCTATCCCCAATTGGAATAGTAATGAT  
TTCAAATTTCAAATTTGAAAATATCCCGCCCTACAGTATACCAATTCAAATTCAAATTCAAATAGAAT  
TCCATAGGCCCCGCA

+

FFFFFFFFFFFFFFFFFFFFFFFFFFFFFFFFFFFFFFFFFFFFFFFFFFFFFFFF:F  
FFFFFFFFFFFFF:FFFFFFFFFFFFFFFFFFFFFFFFFFFFFFFFFFFFFFFF:F  
FF:FFFFFFFFFFFF

@A00721:190:HGJW7DSXY:4:1472:9751:28401 1:N:0:TCTGCAAG+GCTGCACT  
GGCTGGGGACCTATATATATGTATAGAGTAATCCGGAGGAATCTATCCCCAATTGGAATAGTAATGAT  
TTCAAATTTCAAATTTGAAAATATCCCGCCCTACAGTATACCAATTCAAATTCAAATTCAAATAGAAT  
TCCATAGGCCCCGCA

+

FFFFFFFFFFFFFFFFFFFFFFFFFFFFFFFFFFFFFFFFFFFFFFFFFFFFFFFF:F  
FFFFFFFFFFFFFFFFFFFFFFFFFFFFFFFFFFFFFFFFFFFFFFFFFFFFFFFF:F  
FFFFFFFFFFFFFFFF

@A00721:190:HGJW7DSXY:4:1475:29469:6684 1:N:0:TCTGCAAG+GCTGCACT  
GGCTGGGGACCTATATATATGTATAGAGTAATCCGGAGGAATCTATCCCCAATTGGAATAGTAATGAT  
TTCAAATTTCAAATTTGAAAATATCCCGCCCTACAGTATACCAATTCAAATTCAAATTCAAATAGAAT  
TCCATAGGCCCCGCA

+  
FFFFFFFFFFFFFFFFFFFFFFFFFFFFFFFFFFFFFFFFFFFFFFFFFFFFF:FFFFFFFFFFFFFFFFFFFFFFFFFFFFFFFF  
FFFFFFFFFFFFFF,FFFFFFFFFFFFFFFF:FFFFFFFFFFFFFFFFFFFFFFFFFFFFFFFFFFFFFFFFFFFFFFFFFFFFF,FFF  
FFFFFFFFFFFFFFFFFFFF  
@A00721:190:HGWJ7DSXY:4:1577:21169:5431 1:N:0:TCTGCAAG+GCTGCACT  
GGCTGGGGACCTATATATATGTATAGAGTAATCCGGAGGAATCTATCCCCAATTGGAATAGTAATGAT  
TTCAAATTTCAAATTTGAAAATATCCCGCCTACAGTATAACCAATTCAAATTCAAATTCAAATAGAAT  
TCCATAGGCCCCCGCA  
+  
FFFFFFFFFFFFFFF,FFFFFFFFFFFFFFFFFFFFFFFFFFFFFFFFFFFFFFFFFFFFFFFFFFFFFFFFFFFFFFFFFFFF  
FFFFFFFFFFFFFFFFFFFFFFFFFFFFFFFFFFFFFFFFFFFFFFFFFFFFFFFFFFFFFFFFFFFFFFFFFFFFFFFFFFFFF:FFF  
FFFFFFFFFFFFFF:FFFF  
@A00721:190:HGWJ7DSXY:4:1635:8205:22874 1:N:0:TCTGCAAG+GCTGCACT  
GGCTGGGGACCTATATATATGTATAGAGTAATCCGGAGGAATCTATCCCCAATTGGAATAGTAATGAT  
TTCAAATTTCAAATTTGAAAATATCCCGCCTACAGTATAACCAATTCAAATTCAAATTCAAATAGAAT  
TCCATAGGCCCCCGCA  
+  
FFFFFFFFFFFFFFFFFFFFFFFFFFFFFFFFFFFFFFFFFFFFFFFFFFFFFFFFFFFFFFFFFFFFFFFFFFFFFFFFFFFF  
FFFFFFFFFFFFFFFFFFFFFFFFFFFFFFFFFFFFFFFFFFFFFFFFFFFFFFFFFFFFFFFFFFFFFFFFFFFFFFFFFFFFF,FFF  
FF:F:FFFFFFFFFFFF  
@A00721:190:HGWJ7DSXY:4:2108:14425:34554 1:N:0:TCTGCAAG+GCTGCACT  
GGCTGGGGACCTATATATATGTATAGAGTAATCCGGAGGAATCTATCCCCAATTGGAATAGTAATGAT  
TTCAAATTTCAAATTTGAAAATATCCCGCCTACAGTATAACCAATTCAAATTCAAATTCAAATAGAAT  
TCCATAGGCCCCCGCA  
+  
FFFFFFFFFFFFFFFFFFFFFFFFFFFFFFFFFFFFFFFFFFFFFFFFFFFFFFFFFFFFFFFFFFFFFFFFFFFFFFFFFFFF  
FFFFFFFFFFFFFFFFFFFFFFFFFFFFFFFFFFFFFFFFFFFFFFFFFFFFFFFFFFFFFFFFFFFFFFFFFFFFFFFFFFFF  
FFFFFFFFFFFF:FFFFFFFFFFFF  
@A00721:190:HGWJ7DSXY:4:2211:19777:13135 1:N:0:TCTGCAAG+GCTGCACT  
GGCTGGGGACCTATATATATGTATAGAGTAATCCGGAGGAATCTATCCCCAATTGGAATAGTAATGAT  
TTCAAATTTCAAATTTGAAAATATCCCGCCTACAGTATAACCAATTCAAATTCAAATTCAAATAGAAT  
TCCATAGGCCCCCGCA  
+  
FFFFFFF:FFFFFFFFFFFFFFFFFFFFFFFFFFFFFFFFFFFFFFFFFFFFFFFFFFFFFFFFFFFFFFFFFFFFFFFFFFFF  
FFF:FFF:FFFFFF:FFFFFFFFFFFFFFFFFFFFFFFFFFFFFFFFFFFFFFFFFFFFFFFFFFFFF,FFFFFFFFFFFF:FFFFFFFFFFFF::F:FFF  
FFFFFFFFFFFF:FFFF  
@A00721:190:HGWJ7DSXY:4:2222:9281:5760 1:N:0:TCTGCAAG+GCTGCACT  
GGCTGGGGACCTATATATATGTATAGAGTAATCCGGAGGAATCTATCCCCAATTGGAATAGTAATGAT  
TTCAAATTTCAAATTTGAAAATATCCCGCCTACAGTATAACCAATTCAAATTCAAATTCAAATAGAAT  
TCCATAGGCCCCCGCA  
+  
FFFFFFFFFFFFFFFFF:FFFFFFFFFFFFFFFFFFFFFFFFFFFFFFFFFFFFFFFFFFFFFFFFFFFFFFFFFFFFFFFFFFFF  
FFFFFFFFFFFFFFFFFFFFFFFFFFFFFFFFFFFFFFFFFFFFFFFFFFFFFFFFFFFFFFFFFFFFFFFFFFFF:FFFFFFFFFFF  
F,FFFFFFFFFFFFFFFF  
@A00721:190:HGWJ7DSXY:4:2236:6207:29277 1:N:0:TCTGCAAG+GCTGCACT  
GGCTGGGGACCTATATATATGTATAGAGTAATCCGGAGGAATCTATCCCCAATTGGAATAGTAATGAT  
TTCAAATTTCAAATTTGAAAATATCCCGCCTACAGTATAACAAATTCAAATTCAAATTCAAATAGAAT  
TACATATGCCCCCGCA  
+  
FFFFFFFFFFFFF::FFFFFF:FFFFFFFFFFFFFFFFFFFFFFFFFFFFFFFFFFFFFFFFFFFFFFFFFFFFFFFFFFFFF  
FFFFFFFFFFFF,FFFFFFF:FFFFFFF,,F:FFFFFF:FFFFFF,F,FFFF::FFFFFFFFFFFFFFFFFFFFF  
,,,FFF,:F:F:  
@A00721:190:HGWJ7DSXY:4:2655:29053:6339 1:N:0:TCTGCAAG+GCTGCACT  
GGCTGGGGACCTATATATATGTATAGAGTAATCCGGAGGAATCTATCCCCAATTGGAATAGTAATGAT



TTCAAATTTCAAATTTGAAAATATCCCGCCCTACAGTATACCAATTCAAATTCAAATTCAAATAGAAT  
TCCATAGGCCCCCGCA

+

FFFFFFFFFFFFFFFFFFFFFFFFFFFFFFFFFFFFFFFFFFFFFFFFFFFFFFFFFFFFFFFFFFFFFFFF:FFFFFFFFFFFFFFFF  
FFFFFFFFFFFFFFFFFFFFFFFFFFFFFFFFFFFFFFFFFFFFFFFFFFFFFFFFFFFFFFFFFFFFFFFF:F:FFFFFFFF,FFFFFF  
F:FFFFFFFFFFFFFFFF

@A00721:190:HGJW7DSXY:4:2226:21025:23030 1:N:0:TCTGCAAG+GCTGCACT  
GCTGGGGACCTATATATATGTATAGAGTAATCCTGAGGAATCTATCCCAATTGGAATAGTAATGATT  
TCAAATTTCAAATTTGAAAATATCACGCACTACAGTATACCAATTCAAATTCAAATTCAAATAGAATT  
CCATAGGCCCCCGCA

+

FFF,F:FFFF:FFFFFFFF:FFFFFFFFF,,F,,:F,:FFF:FFFF,FFFFFF:FFFF:,FFF:FFF  
F,FF:,FFFFFF,FFFFFF,F:::,::,FF:FF,F,FF:FFF:,FFFFFF,FFF,,,FFFFFF:FFF  
F:F,F:FFFFFFFF

@A00721:190:HGJW7DSXY:4:1214:22996:14606 1:N:0:TCTGCAAG+GCTGCACT  
GGGCGTATGGAATTCTATTTGAATTTGAATTTGAATTTGAATTGGTATACTGTAGGGCGGGATATTTT  
CAAATTTGAAATTTGAAATCATTACTATTCCAATTGGGGATAGATTCTCCGATTACTCTATACATA  
TATATAGGTCCCCAG

+

FFFFFFFFFFFFFFFFFFFFFFFFFFFFFFFFFFFFFFFFFFFFFFFFFFFFFFFFFFFFFFFFFFFFFFFF  
FFFFFFFFFFFFFFFFFFFFFFFFFFFFFFFFFFFFFFFFFFFFFFFFFFFFFFFFFFFFFFFFFFFFFFFF  
FFFFFFFFFFFFFFFFFFFFFFFF

@A00721:190:HGJW7DSXY:4:1244:17463:10347 1:N:0:TCTGCAAG+GCTGCACT  
GGGCGTATGGAATTCTATTTGAATTTGAATTTGAATTTGAATTGGTATACTGTAGGGCGGGATATTTT  
CAAATTTGAAATTTGAAATCATTACTATTCCAATTGGGGATAGATTCTCCGATTACTCTATACATA  
TATATAGGTCCCCAG

+

FFFFFFFFFFFFFFFFFFFFFFFFFFFFFFFFFFFFFFFFFFFFFFFFFFFFFFFFFFFFFFFFFFFFFFFF  
FFFFFFFFFFFFFFFFFFFFFFFFFFFFFFFFFFFFFFFFFFFFFFFFFFFFFFFFFFFFFFFFFFFFFFFF  
FF:FFF:FFFFFFFF

@A00721:190:HGJW7DSXY:4:1436:6017:29481 1:N:0:TCTGCAAG+GCTGCACT  
CTGGGGACCTATATATATGTATAGAGTAATCCGGAGGAATCTATCCCAATTGGAATAGTAATGATTT  
CAAATTTCAAATTTGAAAATATCCCGCCCTACAGTATACCAATTCAAATTCAAATTCAAATAGAATTC  
CATAGGCCCCCGCAGG

+

FFFFFFFFFFFFFFFFFFFFFFFFFFFFFFFFFFFFFFFFFFFFFFFFFFFFFFFFFFFFFFFFFFFFFFFF  
FFFFFFFFFFFFFFFFFFFFFFFFFFFFFFFFFFFFFFFFFFFFFFFFFFFFFFFFFFFFFFFFFFFFFFFF  
FFFFFFFFFFFFFFFFFFFFFFFF

@A00721:190:HGJW7DSXY:4:1606:21043:24408 1:N:0:TCTGCAAG+GCTGCACT  
CTGGGGACCTATATATATGTATAGAGTAATCCGGAGGAATCTATCCCAATTGGAATAGTAATGATTT  
CAAATTTCAAATTTGAAAATATCCCGCCCTACAGTATACCAATTCAAATTCAAATTCAAATAGAATTC  
CATAGGCCCCCGCAGG

+

FFFFFFFFFFFFFFFFFFFFFFFFFFFFFFFFFFFFFFFFFFFFFFFFFFFFFFFFFFFFFFFFFFFFFFFF  
FFFFFFFFFFFFFFFFFFFFFFFFFFFFFFFFFFFFFFFFFFFFFFFFFFFFFFFFFFFFFFFFFFFFFFFF:FFFFF  
FFFFFFFFFFFFFFFF

@A00721:190:HGJW7DSXY:4:1651:23927:18004 1:N:0:TCTGCAAG+GCTGCACT  
CTGGGGACCTATATATATGTATAGAGTAATCCGGAGGAATCTATCCCAATTGGAATAGTAATGATTT  
CAAATTTCAAATTTGAAAATATCCCGCCCTACAGTATACCAATTCAAATTCAAATTCAAATAGAATTC  
CATAGGCCCCCGCAGG

+

FFFFFFFFFFFFFFFFFFFFFFFFFFFFFFFFFFFFFFFFFFFFFFFFFFFFFFFFFFFFFFFFFFFFFFFF  
FFFFFFFFFFFFFFFFFFFFFFFFFFFFFFFFFFFFFFFFFFFFFFFFFFFFFFFFFFFFFFFFFFFFFFFF,F:FFFFFFFFFFFFFFFF:FFFFFFFFFFFFFFFF  
FFFFFFFFFFFFFFFF

@A00721:190:HGJW7DSXY:4:1674:29116:17472 1:N:0:TCTGCAAG+GCTGCACT  
GGGCGTATGGAATTCTATTTGAATTTGAATTTGAATTTGAATTGGTATACTGTAGGGCGGGATATTTT  
CAAATTTGAAATTTGAAATCATTACTATTCCAATTGGGGATAGATTCTCCGGATTACTCTATACATA  
TATATAGGTCCCCAG

[illegible]

+

[illegible]

+

```

FFFFFFFFFFFFFFFFFFFFFFFFFFFFFFFFFFFFFFFFFFFFFFFFFFFFFFFFFFFFFFFFFFFFFFFF
FFFFFFFFFFFFFFFFFFFFFFFFFFFFFFFFFFFFFFFFFFFFFFFFFFFFFFFFFFFFFFFFFFFFFFFF,
FFFFFFFFFFFFFFFFFFFFFFFF:FFF
FFFFFFFFF,FFFFFFF

```

+

[illegible]

+

[illegible]

+

[illegible]

+

[illegible]



[illegible]

```
FFFFFFFFFFFFFFFFFFFFFFFFFFFFFFFFFFFFFFFFFFFFFFFFFFFFFFFFFF;FFFFFFFFFFFFFFFFF
FFFFFFFFFFFFFFFFFFFFFFFFFFFFFFFFFFFFFFFFFFFFFFFF;FFFFFFFFFFFFFFFFFFFFFFFFFFFF
FFFFFFFFFFFFFFFF
```

[illegible][illegible][illegible]

```

FFFFFFFFFFFFFFFFFFFFFFFFFFFFFFFFFFFFFFFFFFFFFFFFFFFFFFFFFFFFFFFFFFFFFFFF
FFFFFFFFFFFFFFFF:FFFFFFFFFFFFFFFFFFFFFFFF:FFFFFFFF:FFFF,FFFFFFFFFFFFFFFF
,FF,FF,FFF,FFFF

```

[illegible]

@A00721:190:HGJW7DSXY:4:2437:23448:23813 1:N:0:TCTGCAAG+GCTGCACT  
GTATAGAGTAATCCGGAGGAATCTATCCCCAATTGGAATAGTAATGATTTCAAATTTCAAATTTGAAA

ATATCCCGCCCTACAGTATACCAATTCAAATTCAAATTCAAATAGAATTCCATAGGCCCCCGCAGGGGC  
ATCTTACCGCAGACC

+

FF:FFFFFFFFFFFFFFFFFFFFFFFFFFFFFFFFFFFFFFFFFFFFFFFFFFFFFFFFFFFFFFFF  
FFFFFFFFFFFFFFFFFFFFFFFFFFFFFFFFFFFFFFFFFFFFFFFFFFFFFFFFFFFFFFFF:FFFFFFFFFFFFFFFFFFFFFFFF  
FFFFFFFFFFFFFFFF

@A00721:190:HGJW7DSXY:4:2441:19379:23657 1:N:0:TCTGCAAG+GCTGCACT  
GTATAGAGTAATCCGGAGGAATCTATCCCCAATTGGAATAGTAATGATTTCAAATTTCAAATTTGAAA  
ATATCCCGCCCTACAGTATACCAATTCAAATTCAAATTCAAATAGAATTCCATAGGCCCCCGCAGGGGC  
ATCTTACCGCAGACC

+

FFFFFFFFFF:FFFFFFFFFFFFFFFFFFFFFFFFFFFFFFFFFFFFFFFFFFFFFFFFFFFFFFFF  
FFFFFFFFFFFFFFFFFFFFFFFFFFFFFFFFFFFFFFFFFFFFFFFFFFFFFFFFFFFFFFFF  
FFFFFFFFFFFFFFFF

@A00721:190:HGJW7DSXY:4:2647:29288:9251 1:N:0:TCTGCAAG+GCTGCACT  
GTATAGAGTAATCCGGAGGAATCTATCCCCAATTGGAATAGTAATGATTTCAAATTTCAAATTTGAAA  
ATATCCCGCCCTACAGTATACCAATTCAAATTCAAATTCAAATAGAATTCCATAGGCCCCCGCAGGGGC  
ATCTTACCGCAGACC

+

FFFFF:FFFF:FFFFFFFF:FFFFFFFFFFFFFFFFFFFFFFFFFFFFFFFFFFFFFFFFFFFF  
FFFFFFFFFFFFFFFFFFFFFFFFFFFFFFFFFFFFFFFFFFFFFFFFFFFFFFFFFFFFFFFF  
FFFFFFFFFFFFFFFF

@A00721:190:HGJW7DSXY:4:1148:19994:35994 1:N:0:TCTGCAAG+GCTGCACT  
ATAGAGTAATCCGGAGGAATCTATCCCCAATTGGAATAGTAATGATTTCAAATTTCAAATTTGAAAAT  
ATCCCGCCCTACAGTATACCAATTCAAATTCAAATTCAAATAGAATTCCATAGGCCCCCGCAGGGGCAT  
CTTACCGCAGACCGT

+

FFFFFFFFFFFFFFFFFFFFFFFF:FFFFFFFFFFFFFFFFFFFFFFFFFFFFFFFFFFFFFFFF  
FFFFFFFFFFFFFFFFFFFFFFFFFFFFFFFFFFFFFFFFFFFFFFFFFFFFFFFFFFFFFFFF  
FFFFFFFFFFFFFFFF

@A00721:190:HGJW7DSXY:4:1168:24306:15060 1:N:0:TCTGCAAG+GCTGCACT  
ATAGAGTAATCCGGAGGAATCTATCCCCAATTGGAATAGTAATGATTTCAAATTTCAAATTTGAAAAT  
ATCCCGCCCTACAGTATACCAATTCAAATTCAAATTCAAATAGAATTCCATAGGCCCCCGCAGGGGCAT  
CTTACCGCAGACCGT

+

FFFFFFFFFFFFFFFFFFFFFFFFFFFFFFFFFFFFFFFFFFFFFFFFFFFFFFFFFFFFFFFF  
FFFFFFFFFFFFFFFFFFFFFFFFFFFFFFFFFFFFFFFFFFFFFFFFFFFFFFFFFFFFFFFF:FFFFFFFFFFFF,F  
FFFFFFFFFFFFFFFF

@A00721:190:HGJW7DSXY:4:1178:23294:28494 1:N:0:TCTGCAAG+GCTGCACT  
ATAGAGTAATCCGGAGGAATCTATCCCCAATTGGAATAGTAATGATTTCAAATTTCAAATTTGAAAAT  
ATCCCGCCCTACAGTATACCAATTCAAATTCAAATTCAAATAGAATTCCATAGGCCCCCGCAGGGGCAT  
CTTACCGCAGACCGT

+

FFFFFFF:FFFFFFFFFFFFFFFFFFFFFFFFFFFFFFFFFFFFFFFFFFFFFFFFFFFFFFFF  
FFFFFFFFFF,FFFFFFF,FFFFFFFFFFFFFFFFFFFFFFFFFFFFFFFF:FF:FFFFFF:FFFFFFFFFFFFFF:F  
FFF:FFFFFFFF

@A00721:190:HGJW7DSXY:4:1228:6632:16861 1:N:0:TCTGCAAG+GCTGCACT  
ATAGAGTAATCCGGAGGAATCTATCCCCAATTGGAATAGTAATGATTTCAAATTTCAAATTTGAAAAT  
ATCCCGCCCTACAGTATACCAATTCAAATTCAAATTCAAATAGAATTCCATAGGCCCCCGCAGGGGCAT  
CTTACCGCAGACCGT

+

FFFFFFF:FFFFFFF:::FFF:F,FF:FFF,FFFFFFFFFFFF:F:FFFFFF:FFFFFFFFFFFFFF  
FF:FFF:F::FFF:FFFFFFFFFFFFFFFFFFFFFFFFFFFFFFFF:FF:F:F:FFFF,FFFFFFFFF:FFFF  
FFFFFFFFF:FFFFF

$+$ 

@

+

©

 $+$ 

6

+

©

+

@

+

©

+

1

```

FFFFFFFFFFFFFFFFFFFFFFFFFFFFFFFFFFFFFFFFFFFFFFFFFFFFFFFFFFFFFFFF:FFFFFFFFFFFFFFFFFFFFFFFFFFFFFFFF
FFFFFFFFFFFFFFFF

```

+

+

+

+

+

+

+  
FFFFFFFFFFFFFFFFFFFFFFFFFFFFFFFFFFFFFFFFFFFFFFFFFFFFFFFFFFFFFFFFFFFFFFFF  
FFFFFFFFFFFFFFFF:FFFFFFFFFFFFFFFFFFFFFFFFFFFFFFFFFFFFFFFFFFFFFFFFFFFFFFFF  
FFFFFFFFFFFFFF:FFF

@A00721:190:HGJW7DSXY:4:1172:20961:16344 1:N:0:TCTGCAAG+GCTGCACT  
CCGGAGGAATCTATCCCCAATTGGAATAGTAATGATTTCAAATTTCAAATTTGAAAATATCCCGCCCT  
ACAGTATACCAATTCAAATTCAAATTCAAATAGAATTCCATAGGCCCCGCAGGGGCATCTTACCGCAG  
ACCGTGGGGCAAGCC

+  
FFFFFFFFFFFFFFFFFFFFFFFFFFFFFFFFFFFFFFFFFFFFFFFFFFFFFFFFFFFFFFFFFFFFFFFF  
FFFFFFFF:FFFFFFFFFFFFFFFFFFFFFFFFFFFFFFFFFFFFFFFFFFFFFFFFFFFFFFFFFFFFFFFF  
FFFFFFFFFFFFFF:F:FF

@A00721:190:HGJW7DSXY:4:1263:30581:8766 1:N:0:TCTGCAAG+GCTGCACT  
CCGGAGGAATCTATCCCCAATTGGAATAGTAATGATTTCAAATTTCAAATTTGAAAATATCCCGCCCT  
ACAGTATACCAATTCAAATTCAAATTCAAATAGAATTCCATAGGCCCCGCAGGGGCATCTTACCGCAG  
ACCGTGGGGCAAGCC

+  
FFFFFFFFFFFFFFFFFFFFFFFFFFFFFFFFFFFFFFFFFFFFFFFFFFFFFFFFFFFFFFFFFFFFFFFF  
FFFFF:FFFFFFFFFFFFFFFFFFFFFFFFFFFFFFFFFFFFFFFFFFFFFFFFFFFFFFFFFFFFFFFF  
FFFFFFFFFFFFFFF

@A00721:190:HGJW7DSXY:4:1317:17535:17738 1:N:0:TCTGCAAG+GCTGCACT  
CCGGAGGAATCTATCCCCAATTGGAATAGTAATGATTTCAAATTTCAAATTTGAAAATATCCCGCCCT  
ACAGTATACCAATTCAAATTCAAATTCAAATAGAATTCCATAGGCCCCGCAGGGGCATCTTACCGCAG  
ACCGTGGGGCAAGCC

+  
FFFFFFFFFFFFFFFFFFFFFFFFFFFFFFFFFFFFFFFFFFFFFFFFFFFFFFFFFFFFFFFFFFFFFFFF  
FFFFFF:FFFF:FFFFFFFFFFFFFFFFFFFFFFFFFFFFFFFFFFFFFFFFFFFFFFFFFFFFFFFFFFFF  
FFFFFFFFFFFFFFF

@A00721:190:HGJW7DSXY:4:2655:7229:20838 1:N:0:TCTGCAAG+GCTGCACT  
CCGGAGGAATCTATCCCCAATTGGAATAGTAATGATTTCAAATTTCAAATTTGAAAATATCCCGCCCT  
ACAGTATACCAATTCAAATTCAAATTCAAATAGAATTCCATAGGCCCCGCAGGGGCATCTTACCGCAG  
ACCGTGGGGCAAGCC

+  
FFFFFFFFFFFFFFFFFFFFFFFFFFFFFFFFFFFFFFFFFFFFFFFFFFFFFFFFFFFFFFFFFFFFFFFF  
FFFFFFF:,FFFFFFFFFFFFFFFFFFFFFFFFFFFFFFFFFFFFFFFFFFFFFFFFFFFFFFFFFFFFFF  
FFFFFFFFFFFFFFF

@A00721:190:HGJW7DSXY:4:1504:2862:4946 1:N:0:TCTGCAAG+GCTGCACT  
CGGAGGAATCTATCCCCAATTGGAATAGTAATGATTTCAAATTTCAAATTTGAAAATATCCCGCCCTA  
CAGTATACCAATTCAAATTCGAATTCAAATAGAATTCCATAGGCCCCGCAGGGGCATCTTACCGCAGA  
CCGTGGGGCAAGCCA

+  
FFFFFFFFFFFFFFFFFFFFFFFFFFFFFFFFFFFFFFFFFFFFFFFFFFFFFFFFFFFFFFFFFFFFFFFF  
FFFFFFFFFFFFFFFFFFFFFFFFFFFFFFFF:FFFF,FFFFFFFFFFFFFFFFFFFFFFFFFFFFFFFFFFFF  
FFFFFFFFFFFFFFF

@A00721:190:HGJW7DSXY:4:2120:31611:18693 1:N:0:TCTGCAAG+GCTGCACT  
CGGAGGAATCTATCCCCAATTGGAATAGTAATGATTTCAAATTTCAAATTTGAAAATATCCCGCCCTA  
CAGTATACCAATTCAAATTCGAATTCAAATAGAATTCCATAGGCCCCGCAGGGGCATCTTACCGCAGA  
CCGTGGGGCAAGCC

+  
FFFFFFFFFFFFFFFFFFFFFFFFFFFFFFFFFFFFFFFFFFFFFFFFFFFFFFFFFFFFFFFFFFFFFFFF  
FFF:FFFFFFFFFFFFFFFFFFFFFFFFFFFFFFFFFFFFFFFFFFFFFFFFFFFFFFFFFFFFFFFFFFFF  
FFFFFFFFFFFFFFF

@A00721:190:HGJW7DSXY:4:2242:18105:7482 1:N:0:TCTGCAAG+GCTGCACT  
CGGAGGAATCTATCCCCAATTGGAATAGTAATGATTTCAAATTTCAAATTTGAAAATATCCCGCCCTA







FFFFFFFFFFFFFFFF:FFFFF:FFF:FFFFF:FFFFFFFFFFFFFFFFFFFFFFFFFFFFFFFF,F:FFFFFFFF:F,  
FF:FFFFFFFFFFFF

@A00721:190:HGJW7DSXY:4:1432:15374:8359 1:N:0:TCTGCAAG+GCTGCACT  
ATTGGAATAGTAATGATTTCAAATTTCAAATTTGAAAATATCACGCCCTACAGTATACCAATTCAAAT  
TCAAATTCAAATAGAAATTCCATAGGCCCGCAGGGGCATCTTACCGCAGACCGTGGGGCAAGCCAATA  
TAATATTACTGGCTT

+

FFF:FFFFFFFF:FF:FFFFFF,FFFFFFFFFFFFFFFFF:,F,F,FFFFFFFFFFFF,,:FFFFF  
,FFFFF,:FF,FFFFF:F:FFFF,,FFFF,FF,FFFFFF:F,FFFF:FFFFF:F:FF,FFF,F,FF,F  
,FFFFFF:FFF,:F,F

@A00721:190:HGJW7DSXY:4:1668:7374:34240 1:N:0:TCTGCAAG+GCTGCACT  
ATTGGAATAGTAATGATTTCAAATTTCAAATTTGAAAATATCCCGCCCTACAGTATACCAATTCAAAT  
TCAAATTCAAATAGAAATTCCATAGGCCCGCAGGGGCATCTTACCGCAGACCGTGGGGCAAGCCAATA  
TAATATTACTGGCTT

+

FFFFFFFFFFFFFFFFFFFFFFFFFFFFFFFFFFFFFFFFFFFFFFFFFFFFFFFFFFFFFFFFFFFFFFFF  
FFFFFFFFFFFFFFFFFFFFFFFFFFFFFFFFFFFFFFFFFFFFFFFFFFFFFFFFFFFFFFFFFFFFFFFF:FFF  
FFFFFFFFFFFFFFFF

@A00721:190:HGJW7DSXY:4:1677:32208:4758 1:N:0:TCTGCAAG+GCTGCACT  
ATTGGAATAGTAATGATTTCAAATTTCAAATTTGAAAATATCCCGCCCTACAGTATACCAATTCAAAT  
TCAAATTCAAATAGAAATTCCATAGGCCCGCAGGGGCATCTTACCGCAGACCGTGGGGCAAGCCAATA  
TAATATTACTGGCTT

+

FFFFFFFFFFFFFFFFFFFFFFFFFFFFFFFFFFFFFFFFFFFFFFFFFFFFFFFFFFFFFFFF,FF,F:FFFFF:FFFFFFFF  
FFFFFFFFFFFFFFFF:FFFFFFFFFFFFFFFFFFFFFFFFFFFFFFFFFFFFFFFF:FFFFFFFFFFFFFFFF:FFFFF  
F:FFFFFFFFFFFFFF

@A00721:190:HGJW7DSXY:4:2174:5267:34601 1:N:0:TCTGCAAG+GCTGCACT  
ATTGGAATAGTAATGATTTCAAATTTCAAATTTGAAAATATCCCGCCCTACAGTATACCAATTCAAAT  
TCAAATTCAAATAGAAATTCCATAGGCCCGCAGGGGCATCTTACCGCAGACCGTGGGGCAAGCCAATA  
TAATATTACTGGCTT

+

FFFFFFFFFFFFFFFFFFFFFFFFFFFFFFFFFFFFFFFFFFFFFFFFFFFFFFFFFFFFFFFFFFFFFFFF  
FFFFFFFFFFFFFFFFFFFFFFFFFFFFFFFFFFFFFFFFFFFFFFFFFFFFFFFFFFFFFFFF,FFF,FFF  
F,FFFFFFFFFFFFFF

@A00721:190:HGJW7DSXY:4:2267:5575:17534 1:N:0:TCTGCAAG+GCTGCACT  
ATTGGAATAGTAATGATTTCAAATTTCAAATTTGAAAATATCCCGCCCTACAGTATACCAATTCAAAT  
TCAAATTCAAATAGAAATTCCATAGGCCCGCAGGGGCATCTTACCGCAGACCGTGGGGCAAGCCAATA  
TAATATTACTGGCTT

+

FFFFFFFFFFFFFFFFFFFFFFFFFFFFFFFFFFFFFFFFFFFFFFFFFFFFFFFFFFFFFFFFFFFFFFFF  
FFFFFFFFFFFFFFFFFFFFFFFFFFFFFFFFFFFFFFFFFFFFFFFFFFFFFFFFFFFFFFFFFFFFFFFF  
FFFFFFFFFFFFFFFF

@A00721:190:HGJW7DSXY:4:2327:10077:6324 1:N:0:TCTGCAAG+GCTGCACT  
ATTGGAATAGTAATGATTTCAAATTTCAAATTTGAAAATATCCCGCCCTACAGTATACCAATTCAAAT  
TCAAATTCAAATAGAAATTCCATAGGCCCGCAGGGGCATCTTACCGCAGACCGTGGGGCAAGCCAATA  
TAATATTACTGGCTT

+

FFFFFFFFFFFFFFFFFFFFFFFFFFFFFFFFFFFFFFFFFFFFFFFFFFFFFFFFFFFFFFFFFFFFFFFF  
FFFFFFFFFFFFFFFFFFFFFFFFFFFFFFFFFFFFFFFFFFFFFFFFFFFFFFFFFFFFFFFF,FFFFFFFF  
F:FFFFFFFFFFFFFF

@A00721:190:HGJW7DSXY:4:2533:6506:11600 1:N:0:TCTGCAAG+GCTGCACT  
ATTGGAATAGTAATGATTTCAAATTTCAAATTTGAAAATATCCCGCCCTACAGTATACCAATTCAAAT  
TCAAATTCAAATAGAAATTCCATAGGCCCGCAGGGGCATCTTACCGCAGACCGTGGGGCAAGCCAATA  
TAATATTACTGGCTT

+  
FFFFFFFFFFFFFFFFFFFFFFFFFFFFFFFFFFFFFFFFFFFFFFFFFFFFFFFFFFFFFFFFFFFFFFFF  
FFFFFFFFFFFF:FFFF,FFFFFFFFFFFFFFFFFFFFFFFFFFFFFFFFFFFFFFFFFFFFFFFFFFFF  
FFF,FFFFFFFFFFFF

@A00721:190:HGJW7DSXY:4:2670:10131:26647 1:N:0:TCTGCAAG+GCTGCACT  
ATTGGAATAGTAATGATTTCAAATTTCAAATTTGAAAATATCCCGCCCTACAGTATACCAATTCAAAT  
TCAAATTCAAATAGAATTCCATAGGCCCGCAGGGGCATCTTACCGCAGACCGTGGGGCAAGCCAATA  
TAATATTACTGGCTT

+  
FFFFFFFFFFFFFFFFFFFFFFFFFFFFFFFFFFFFFFFFFFFFFFFFFFFFFFFFFFFFFFFFFFFFFFFF  
FFFFFFFFFFFFFFFFFFFFFFFF:FFFF:FFFFFFFFFFFF  
FFFFFFFFFFFFFFFFFFFFFFFF:FFF::FFFFFFFFFFFFFFFFFFFFFFFFFFFFFFFFFFFFFFFF:FF  
FFFFFFFFFFFFFFFFFFFF

@A00721:190:HGJW7DSXY:4:1536:32786:27806 1:N:0:TCTGCAAG+GCTGCACT  
CCCGGCGCGGGCAAGCCAGTAATATTATATTGGCTTGCCCCACGGTCTGCGGTAAGATGCCCTGCGG  
GGCCTATGGAATTCTATTTGAATTTGAATTGGTATACTGTAGGGCGGGATATTTTCAAATTTGAAATT  
TGAAATCATTACTAT

+  
FFFFFFFFFFFFFFF:F:FFFF:FFFFFFFFFFFFFFFFFFFFFFFFFFFFFFFFFFFFFFFF,FF:FFFF:::F:FFF,FFFF  
FFFF:F:FF:FFF:FFFFFF:FFFFFFFFFF:FFFFFFFFFF:FFFFFFFFFFFFFFFFFFFF,:FFFF:FFFFF  
F::,FFFF:FF,FFF

@A00721:190:HGJW7DSXY:4:1537:22625:19914 1:N:0:TCTGCAAG+GCTGCACT  
CCCGGCGCGGGCAAGCCAGTAATATTATATTGGCTTGCCCCACGGTCTGCGGTAAGATGCCCTGCGG  
GGCCTATGGAATTCTATTTGAATTTGAATTGGTATACTTTAGGGCGGGATATTTTCAAATTTGAAATT  
TGAAATCATTACTAT

+  
FFFFFFFFFFFFFFFFFFFF,FFF:FFFFFFFFFFFFFF,FFFF,FFFFFF:FF::FFF:FF,FFFFFFFF:FFF  
FF:F,F:,FFFFF,:FF:F,,FFFF,FFFF:FFFFFF,,FFF,FFFFFFFF:FFF,FFFFFFFF:FFF,F  
F:FFFF:F:FFF,F:

@A00721:190:HGJW7DSXY:4:2278:23873:2848 1:N:0:TCTGCAAG+GCTGCACT  
CCCGGCGCGGGCAAGCCAGTAATATTATATTGGCTTGCCCCACGGTCTGCGGTAAGATGCCCTGCGG  
GGCCTATGGAATTCTATTTGAATTTGAATTGGTATACTGTAGGGCGGGATATTTTCAAATTTGAAATT  
TGAAATCATTACTAT

+  
FFFFFFFFFFFFFFFFFFFF:FFFFFFFFFFFFFFFFFFFFFFFFFFFFFFFFFFFFFFFFFFFFFFFFFFFF  
FFFFFFFFFFFFFFFFFFFF:FFFFFFFFFFFFFFFFFFFF:FFFFFFFFFFFFFFFFFFFFFFFFFFFFFFFFFFFF  
FFFFFFFFFFFFFFFFFFFF

@A00721:190:HGJW7DSXY:4:2665:7862:7185 1:N:0:TCTGCAAG+GCTGCACT  
CCCGGCGCGGGCAAGCCAGTAATATTATATTGGCTTGCCCCACGGTCTGCGGTAAGATGCCCTGCGG  
GGCCTATGGAATTCTATTTGAATTTGAATTGGTATACTGTAGGGCGGGATATTTTCAAATTTGAAATT  
TGAAATCATTACTAT

+  
FFFFFFFFFFFFFFF,:FFF:F::,,F,FFFF:FFFF:FFFFFF:F:F:F,FFFF,FFFFFFFF:FFF  
FFFF,:,,FFFF::FFFF:FF,F:FFFF:FFFF,F:F,F:,FFFFFFFFFFFF:F:FFFFFFFF:FFF  
F:,FF::FFFF,FF

@A00721:190:HGJW7DSXY:4:1162:21649:31970 1:N:0:TCTGCAAG+GCTGCACT  
CCCGGCGCGGGCAAGCCAGTAATATTATATTGGCTTGCCCCACGGTCTGCGGTAAGATGCCCTGCGG  
GGCCTATGGAATTCTATTTGAATTTGAATTTGAATTGGTATACTGTAGGGCGGGATATTTTCAAATTT  
GAAATTTGAAATCAT

+  
FFFFFFFFFFFFFFFFFFFF:FFF,:FFFF:FFFFFFFFFFFFFFFFFFFFFFFFFFFFFFFFFFFFFFFF  
FFFFFFFFFFFFFFFFFFFF:FFFFFFFFFFFFFFFFFFFF:FFFFFF:FFFFFFFFFFFFFFFFFFFFFFFF  
FFFFFFFFFF:FFFFFFF

@A00721:190:HGJW7DSXY:4:1223:7346:19038 1:N:0:TCTGCAAG+GCTGCACT  
CCCGGCGCGGGCAAGCCAGTAATATTATATTGGCTTGCCCCACGGTCTGCGGTAAGATGCCCTGCGG

GGCCTATGGAATTCTATTTGAATTTGAATTTGAATTGGTATACTGTAGGGCGGGATATTTTAAAATTT  
GAAATTTGAAATAAT

+

FFFFFFFFFFFFFF:F::FF,FFF,FFFFFF,F:F:FFFFFFFFFF:FF:::FFFFF,:::FFF,,FFF  
FFFF,FF::FF,F,FFFFFF,:F:FF,:F:FF,FF:F:FFFFFF,:::FFFFFFFFFFFF,FFF,FFFFFF  
,,FF:F::FFFF,FF

@A00721:190:HGJW7DSXY:4:1257:2745:13761 1:N:0:TCTGCAAG+GCTGCACT  
CCCGGCGCGGGCAAGCCAGTAATATTATATTGGCTTGCCCCACGGTCTGCGGTAAGATGCCCCTGCGG  
GGCCTATGGAATTCTATTTGAATTTGAATTTGAATTGGTATACTGTAGGGCGGGATATTTTCAAATTT  
GAAATTTGAAATCAT

+

FFFFFFFFFFFFFF:FFFFFFFF:FFFFFFFFFFFFFFFFFFFFFFFFFFFFFFFFFFFFFFFF:FFFFFFFFFFFF  
FFFF,FFFFFFFF::F:F:F:FFFFFFFF:FFFFFFFFFFFFFFFFFFFFFFFFFFFFFFFFFFFFFFFF:FFFFF  
FFFFFFFF,:FF,FFF

@A00721:190:HGJW7DSXY:4:1346:30129:22326 1:N:0:TCTGCAAG+GCTGCACT  
CCTGGCGCGGGCAAGCCAGTAATATTATATTGGCTTGCCCCACGGTCTGCGGTAAGATGCCCCTGCGG  
GGCCTATGGAATTCTATTTGAATTTGAATTTGAATTGGTATACTGTAGGGCGGGATATTTTCAAATTT  
GAAATTTGAAATCAT

+

FFFFFFFFFFFFFF:FFF:FFFF:FFFF:FFFFFFFFFFFFFFFFFFFFFFFF:F,FFFFF,F,FFFFF,FFFF  
FFFF,FFFFFF:FF:FF:FF:FFFF:FF:FF::FFFFFFFF:FFFFFFFFFFFF:FFFFFF,FFF:FF  
,FFFFFF,FFFFFF:

@A00721:190:HGJW7DSXY:4:1348:27850:2597 1:N:0:TCTGCAAG+GCTGCACT  
CCCGGCGCGGGCAAGCCAGTAATATTATATTGGCTTGCCCCACGGTCTGCGGTAAGATGCCCCTGCGG  
GGCCTATGGAATCTATTTGAATTTGAATTTGAATTGGTATACTGTAGGGCGGGATATTTTCAAATTT  
GAAATTTGAAATCAT

+

FFFFFFFFFFFFFF::FFF,FF,:FFF:FFFFFFFFFFFFFFFFFFFFFFFF:FFFF:F::FFFFFFFF:FFFF  
FFFF,FFFFF,,FF:::FFFF::FFF:F,FF:FFFFFFFFFF:FF:FFFFFFFF:FFFFFF,:FF:FF  
FFFFFFFF:FFFFFF

@A00721:190:HGJW7DSXY:4:1351:19560:3677 1:N:0:TCTGCAAG+GCTGCACT  
CCTGGCGCGGGCAAGCCAGTAATATTATATTGGCTTGCCCCACGGTCTGCGGTAAGATGCCCCTGCGG  
GGCCTATGGAATTCTATTTGAATTTGAATTTGAATTGGTATACTGTAGGGCGGGATATTTTCAAATTT  
GAAATTTGAAATCAT

+

FFFFFFFFFFFFFF:FFF:FFF:FFFFFFFFFFFF,FFFFFF:FFFFFFFF:FFFFFFFFFFFF,FFFF  
FFFFFFFF:FFFFF,FFFFFFFFFFFFFFFFFFFFFFFFFFFFFFFF:FFFFFFFFFFFFFFFFFFFFFFFFFFFF:FF  
FFFFFFFF:FFFF,F:

@A00721:190:HGJW7DSXY:4:1451:3414:23312 1:N:0:TCTGCAAG+GCTGCACT  
CCCGGCGCGGGCAAGCCAGTAATATTATATTGGCTTGCCCCACGGTCTGCGGTAAGATGCCCCTGCGG  
GGCCTATGGAATTCTATTTGAATTTGAATTTGAATTGGTATACTGTAGGGCGGGATATTTTCAAATTT  
GAAATTTGAAATCAT

+

FFFFFFFFFFFFFFFFFFFFFFFFFFFFFFFFFFFFFFFF,FFFF:FFFFFFFFFFFF:FFFFFFF,F:FFFF::FFF  
FFFFFFFFFFFF,FFFFF::FF:FFFFFF:FFFF:FFFFFFFFFFFF:FFFFFFFFFFFFFFFFFFFF:FF  
,FFFFFFFFFFFFFFFF

@A00721:190:HGJW7DSXY:4:1564:11478:14700 1:N:0:TCTGCAAG+GCTGCACT  
CCTGGCGCGGGCAAGCCAGTAATATTATATTGGCTTGCCCCACGGTCTGCGGTAAGATGCCCCTGCGG  
GGCCTATGGAATTCTATTTGAATTTGAATTTGAATTGGTATACTGTAGGGCGGGATATTTTCAAATTT  
GAAATTTGAAATCAT

+

FFFFFFFFFFFFFF:FFFF:FFFF:F:FFFF:FFFFFFFFFFFFFFFFFFFFFFFFFFFFFFFF:FFFF  
FFFF:FFFF:FFFFFFFFFFFFFFFFFFFFFFFFFFFFFFFFFFFFFFFF:FFFFFFFFFFFFFFFFFFFF  
:FFFFFFFFFFFFFFFF

@A00721:190:HGJW7DSXY:4:2130:29035:30953 1:N:0:TCTGCAAG+GCTGCACT  
CCTGGCGCGGGCAAGCCAGTAATATTATATTGGCTTGCCCCACGGTCTGCGGTAAGATGCCCCTGCGG  
GGCCTATGGAATTCTATTTGAATTTGAATTTGAATTGGTATACTGTAGGGCGGGATATTTCAAATTT  
GAAATTTGAAATCAT

+

FFFFFFFFFFFFFFFF,FF,FFFFFFFFFFFFFFFF:FFFFFFFFF::FFFFFFFFFFFFFFFF::FFFF:FFFF  
FFFFFFFFFFFF::F,FFFF,FFFF:FFFF,FF:F,FFFFF,FFFFFFFFFFFFFFFFFFFF::FF:  
,:FF:FF,,FFFFFF

@A00721:190:HGJW7DSXY:4:2571:32931:26772 1:N:0:TCTGCAAG+GCTGCACT  
CCCGGCGCGGGCAAGCCAGTAATATTATATTGGCTTGCCCCACGGTCTGCGGTAAGATGCCCCTGCGG  
GGCCTATGGAATTCTATTTGAATTTGAATTTGAATTGGTATACTGTAGGGCGGGATATTTCAAATTT  
GAAATTTGAAATCAT

+

FFFFFFFFFFFFFFFFFFFFFFFF:FFFFFFFFF:FFFFFFFFFFFFFFFFFFFFFFFF:FFFFFFFFFFFFFFFFFFFFF  
FFFFFF:FFFFFFFFFFFFFFFFFFFFFFFF:FFFFFFFFF,FFFF:F:FF:FFFFFFFFFFFFFFFFFFFFF  
:FFFFFF,:FF:,FF

@A00721:190:HGJW7DSXY:4:2656:3821:23265 1:N:0:TCTGCAAG+GCTGCACT  
CCTGGCGCGGGCAAGCCAGTAATATTATATTGGCTTGCCCCACGGTCTGCGGTAAGATGCCCCTGCGG  
GGCCTATGGAATTCTATTTGAATTTGAATTTGAATTGGTATACTGTAGGGCGGGATATTTCAAATTT  
GAAATTTGAAATCAT

+

FFFFFFFFFFFFFFFFFFFFFFFFFFFFFFFF:F:FFFFFFFFFFFFFFFFFFFFFFFFFFFFFFFF:FFFFFFFFF  
FFFF:FFFF:F:FFFFFFFFFFFFFFFFFFFFFFFFFFFFFFFF:F,:FFFFFFFFFFFFFFFFFFFFF  
F,FFFFFFFFF:FF

@A00721:190:HGJW7DSXY:4:2142:13304:34240 1:N:0:TCTGCAAG+GCTGCACT  
CCCGGCGCGGGCAAGCCCGTAATATTATATTGGCTTTCCCCACGGTCTGCGGTAAGATGCCCCTGCGG  
GGCCTATGGAATTCTATTTGAATTTGAATTTGAATTGGTATACTGTAGGGCGGGATATTTCAAATTT  
GTAATTTGAAATCA

+

FFFFFFFFFFFFF,F:,F,,:FFFFF,,F,F::FFF,FFFFF,FF:F,FFF,FFFF:,FFF,,FFF  
FFFF,F:FFFF:F,F,,FF:,F,FF,,F:FF,:FFFF,:FF,:FFFFFF:FFF,FF:FFF,FFFFF  
:,,FF,F,F:FFFF

@A00721:190:HGJW7DSXY:4:1259:26449:18646 1:N:0:TCTGCAAG+GCTGCACT  
GTCCCCGGCGCGGGCAAGCCAGTAATATTATATTGGCTTGCCCCACGGTCTGCGGTAAGATGCCCCTG  
CGGGGCCTATGGAATTCTATTTGAATTTGAATTTGAATTGGTATACTGTAGGGCGGGATATTTCAA  
TTTGAAATTTGAAAT

+

FFFFFFFFFFFFFFFFFFFF:F,FFFF::FFFFFFFFFFFFFFFFFFFFFFFFFFFFFFFF:FFFFFF:FFFFFFF  
FFFFFFF:F:FFFFFF,:FFFF:FFFFFFFFFFFFFFFFFFFF::FFF,FF:FFFFFFFFFFFFFFFF:FFF  
FFFF,FFFFFFFFF

@A00721:190:HGJW7DSXY:4:1413:26621:28463 1:N:0:TCTGCAAG+GCTGCACT  
GTCCCCGGCGCGGGCAAGCCAGTAATATTATATTGGCTTGCCCCACGGTCTGCGGTAAGATGCCCCTG  
CGGGGCCTATGGAATTCTATTTGAATTTGAATTTGAATTGGTATACTGTAGGGCGGGATATTTCAA  
TTTGAAATTTGAAAT

+

FFFFFFFFFFFFFFFFF,F,FFF,:F,:FF::F,F,F:,F:FFFFFF,FF,:FFFF::F,F:,FFF,:  
F,FFF:F:F,:FFF,:FFFF:FFFF,:F,FF,:F,F,FF:FF,F:F:,FF:FF,FF:FFF,FFF  
,FFF:FF,FF,:FF:

@A00721:190:HGJW7DSXY:4:2366:25256:34961 1:N:0:TCTGCAAG+GCTGCACT  
GTCCCCGGCGCGGGCAAGCCAGTAATATTATATTGGCTTGCCCCACGGTCTGCGGTAAGATGCCCCTG  
CGGGGCCTATGGAATTCTATTTGAATTTGAATTTGAATTGGTATACTGTAGGGCGGGATATTTCAA  
TTTGAAATTTGAAAT

+

FFFFFFFFFFFFFFFFFFFFFFFFFFFFFFFF:FFFFFFFFFFFF:F:FFFF:FFF:FFFFFFFFFFFF:FFFFFFF

:FFFFFF::FFFFFF::FFFFFF:FFFF:FFFFFFFFFFFFFFF::FFFFFFFFFFFFFFFFFFFFFFF  
FFF:FFFFFFFFFFFF

@A00721:190:HGJW7DSXY:4:2366:24587:35994 1:N:0:TCTGCAAG+GCTGCACT  
GTCCCCGGCGCGGGCAAGCCAGTAATATTATATTGGCTTGCCCCACGGTCTGCGGTAAGATGCCCTG  
CGGGGCCTATGGAATTCTATTTGAATTTGAATTTGAATTGGTATACTGTAGGGCGGGATATTTTCAA  
TTTGAATTTGAAT

+

FFFFFFFFFFFFFFFFFFFFFFF:FFFFFF:FFFFFFFFFFFFFFFFFFFFFFF:FFFFFFFFFFFFFFFFFFFF  
FFFFFFFFF:FFFFFFFFFFFF,FFF::FFFF,FFFFFFFFFFFF:FFFFFFFFFFFFFFFFFFFFFFFFF  
FFFF,FFFFFF:FFF

@A00721:190:HGJW7DSXY:4:2221:32117:31876 1:N:0:TCTGCAAG+GCTGCACT  
CCTGGCGCGGGCAAGCCCGTAATATTAAATTGGCTTGCCCCAAGGTCTGCGGTAATATTCCCCTGCGG  
GGCCTATGGAATTCTATTTGAATTTGAATTTTAATTGGTATACATTATGGCGGGATATTTTCAAATTT  
TAAATTTTAAATAAT

+

FFFFFFFFFFFFFFF,,FF,FFFF:FFF:,F,F,:,:,F:FFF,,:,,,:F:FF,,F,F:,F,,F:F  
FFFF,FFF:FFFF,F::FFF:FFFF,FFFF,,:FF,,FFFFF,,FF,:::FFF:F,FFFF,FFFFFFF  
,,FFFFF,,FF:FF

@A00721:190:HGJW7DSXY:4:2225:18376:12273 1:N:0:TCTGCAAG+GCTGCACT  
ACGGAGGTGTCCCCGGCGCGGGCAAGCCAGTAATATTATATTGGCTTGCCCCACGGTCTGCGGTAAGA  
TGCCCCAGCGGGCCTATGGAATTCTATTTGAATTTGTATTTGAATTTGTATACTGTAGGGCGGGATA  
TTTTCAAATTTGAAA

+

FFFFFFFFFFFFFFFFFFFFFFF:,F,,F,,,F,F,FF:F:F,F,,F:FFFF:F:FF:,F,FF:::F  
:F,FFF,FFFFFF,F,,:FF:FFF,,F,FF,,F:FF,,:F:F,,FFF,FF:FF,,:,,,FF,FFF,:F  
,:FF,:F::FF,,FF

@A00721:190:HGJW7DSXY:4:2264:32832:25974 1:N:0:TCTGCAAG+GCTGCACT  
ACGGAGGTGTCCCCGGCGCGGGCAAGCCAGTAATATTATATTGGCTTGCCCCACGGTCTGCGGTAAGA  
TGCCCCCTGCGGGCCTATGGAATTCTATTTGAATTTGAATTTGAATTGGTATACTGTAGGGCGGGATA  
TTTTCAAATTTGAAA

+

FFFFFFFFF:FFFF:FFFFFFFFFFFFFFF:F:,FFFF:,F:FFFFFFFF:FFFFFFFF:FFF,,,,FFFFF,:  
FF:FFFFFFFFFFFFF,F:FFFF:F,F,F:FFFFFFFFF,,FFF:FFFF:FFFF:FFFF,,FFFFFFFFF  
F:FFFF,:FFFF,FF

@A00721:190:HGJW7DSXY:4:2664:30346:14372 1:N:0:TCTGCAAG+GCTGCACT  
ACGGAGGTGTCCCCGGCGCGGGCAAGCCAGTAATATTATATTGGCTTGCCCCACGGTCTGCGGTAAGA  
TGCCCCCTGCGGGCCTATGGAATTCTATTTGAATTTGAATTTGAATTGGTATACTGTAGGGCGGGATA  
TTTTCAAATTTGAAA

+

FFFFFFFFFFFFFFFFFFFFFFF,FF:F,FF:F::F,FF,F:FFFFFF:FF:FF:FF:FFFF  
FFFFFF,FFFFFFFFFFFF,,FFF,F,,:FFF:FFFF:,F:FF,FFFF,FFFFFFFF,F:FF:FFFFFFF  
FFFF,F,FFFF:F:F

@A00721:190:HGJW7DSXY:4:1503:30056:17253 1:N:0:TCTGCAAG+GCTGCACT  
ACGGAGGTGTCCCCGGCGCGGGCAAGCCAGTAATATTATATTTGGTTGCCCCACGGTCTGCGGTAAGA  
TGGCCCGCGGGCCTATGGAATTATATTTGTATTTTATTTTAATTTGTATAATGTAGGGGGGGGTA  
TTTTAAAATTT

+

FFFFFFFFFFFFFFFFFFFFFFF,,F:,F,,,::,,F,:,:F,,,:::FF::,F,,,F,FF,,F:,  
,,,FF,,::FFF,F,,,,,F:F,:FFFF,,FFF,,,FF,:,:F,,,:::F,FFF,::  
:FFF,:F:,FF

@A00721:190:HGJW7DSXY:4:1128:6958:6026 1:N:0:TCTGCAAG+GCTGCACT  
ATCCCGCCCTACAGTATACCAATTCAAATTCAAATTCAAATAGAAATTCATAGGCCCGCAGGGGCAT  
CTTACCGCAGACCGTGGGGCAAGCCAATATAATATTACTGGCTTGCCCGCGCCGGGGACACCTCCGTA  
CGCTTACGTGTCGAT

+  
FFFFFFFFFFFFFFFFFFFFFFFFFFFFFFFFFFFFFFFFFFFFFFFFFFFFFFFFFFFFFFFFFFFFFFFF  
FFFFFFFFFFFFFFFFFFFFFFFFFFFFFFFFFFFFFFFFFFFFFFFFFFFFFFFFFFFFFFFFFFFFFFFF  
FFFFFFFFFFFFFFFF

@A00721:190:HGJW7DSXY:4:1435:2220:11475 1:N:0:TCTGCAAG+GCTGCACT  
ATCCCGCCCTACAGTATACCAATTCAAATTCAAATTCAAATAGAATTCCATAGGCCCGCAGGGGCAT  
CTTACCGCAGACCGTGGGGCAAGCCAATATAATATTACTGGCTTGCCCGCGCCGGGGACACCTCCGTA  
CGCTTACGTGTCGAT

+  
FFFFFFFFFFFFFFFFFFFFFFFFFFFFFFFFFFFFFFFFFFFFFFFFFFFFFFFFFFFFFFFFFFFFFFFF  
FFFFFFFFFFFFFFFF:FFFFFFFFFFFFFF,FFFFFFFFFFFFFFFFFFFFFFFFFFFFFFFFFFFFFFFF  
FFFFFFFFFFFFFFFF:

@A00721:190:HGJW7DSXY:4:1471:23493:29684 1:N:0:TCTGCAAG+GCTGCACT  
ATCCCGCCCTACAGTATACCAATTCAAATTCAAATTCAAATAGAATTCCATAGGCCCGCAGGGGCAT  
CTTACCGCAGACCGTGGGGCAAGCCAATATAATATTACTGGCTTGCCCGCGCCGGGGACACCTCCGTA  
CGCTTACGTGTCGAT

+  
FFFFFFFFFFFFFFFFFFFFFFFFFFFFFFFFFFFFFFFFFFFFFFFFFFFFFFFFFFFFFFFFFFFFFFFF  
FFFFFFFFFFFFFFFFFFFFFFFF:FFFFFFFFFFFFFFFFFFFFFFFFFFFFFFFFFFFFFFFFFFFFFFFF  
FFF,FF:FFFFFFFF

@A00721:190:HGJW7DSXY:4:1641:5231:35790 1:N:0:TCTGCAAG+GCTGCACT  
ATCCCGCCCTACAGTATACCAATTCAAATTCAAATTCAAATAGAATTCCATAGGCCCGCAGGGGCAT  
CTTACCGCAGACCGTGGGGCAAGCCAATATAATATTACTGGCTTGCCCGCGCCGGGGACACCTCCGTA  
CGCTTACGTGTCGAT

+  
FFFFFFFFFFFFFFFFFFFFFFFF:FFFFFFFFFFFFFFFFFFFFFFFFFFFFFFFFFFFFFFFFFFFFFFFF  
FFFFFFFFFFFFFFFFFFFFFFFFFFFFFFFFFFFFFFFFFFFFFFFFFFFFFFFFFFFFFFFFFFFFFFFF  
FFFFFFFFFFFFFFFF

@A00721:190:HGJW7DSXY:4:2133:1542:32409 1:N:0:TCTGCAAG+GCTGCACT  
ATCCCGCCCTACAGTATACCAATTCAAATTCAAATTCAAATAGAATTCCATAGGCCCGCAGGGGCAT  
CTTACCGCAGACCGTGGGGCAAGCCAATATAATATTACTGGCTTGCCCGCGCCGGGGACACCTCCGTA  
CGCTTACGTGTCGAT

+  
FFFFFFFFFFFFFFFFFFFFFFFFFFFFFFFFFFFFFFFFFFFFFFFFFFFFFFFFFFFFFFFFFFFFFFFF  
FFFFFFFFFFFFFFFFFFFFFFFF:FFFFFFFFFFFFFFFFFFFFFFFFFFFFFFFFFFFFFFFFFFFFFFFF  
FFFFFFFFFFFFFFFF

@A00721:190:HGJW7DSXY:4:2455:26775:12477 1:N:0:TCTGCAAG+GCTGCACT  
ATCCCGCCCTACAGTATACCAATTCAAATTCAAATTCAAATAGAATTCCATAGGCCCGCAGGGGCAT  
CTTACCGCAGACCGTGGGGCAAGCCAATATAATATTACTGGCTTGCCCGCGCCGGGGACACCTCCGTA  
CGCTTACGTGTCGAT

+  
FFFFFFFFFFFFFF:FFFFFFF:FFFFFFFFFFFFFFFFFFFFFFFFFFFFFFFFFFFFFFFFFFFFFFFF  
FFFFFFFFFFFFFFFFFFFFFFFFFFFFFFFF:FFFFFFFFFFFFFFFFFFFFFFFFFFFFFFFFFFFFFFFF  
FFFF:FFFFFFFF

@A00721:190:HGJW7DSXY:4:1611:23149:18004 1:N:0:TCTGCAAG+GCTGCACT  
CCCGCCCTACAGTATACCAATTCAAATTCAAATTCAAATAGAATTCCATAGGCCCGCAGGGGCATCT  
TACCGCAGACCGTGGGGCAAGCCAATATAATATTACTGGCTTGCCCGCGCCGGGGACACCTCCGTACG  
CTTACGTGTCGATTT

+  
FFFFFFFFFFF:FFFFFFFFFFFFFFFFFFFFFFFFFFFFFFFFFFFFFFFFFFFFFFFFFFFFFFFF  
FFFFFFFFFFFFFFFFFFFFFFFFFFFFFFFF,FFFFFFFFFFFFFFFFFFFFFFFFFFFFFFFF,FFFFFFFF  
FFFFFF:FFFFFFFF

@A00721:190:HGJW7DSXY:4:2216:14642:25629 1:N:0:TCTGCAAG+GCTGCACT  
CCCGCCCTACAGTATACCAATTCAAATTCAAATTCAAATAGAATTCCATAGGCCCGCAGGGGCATCT



TACCGCAGACCGTGGGGCAAGCCAATATAATATTACTGGCTTGCCCGCGCCGGGGACACCTCCGTACG  
CTTACGTGTCGATTT

```

FFFFFFFFFFFFFFFFFFFFFFFF:FFFFFFFFFFFFFFFFFFFFFFFF:FFFF:FF:FFFFFFFFFFFFFFFF
FFFFFFFFFFFFFFFF:FFFFFFFFFFFFFFFF:FFFFFFFFFFFFFFFFFFFFFFFFFFFFFFFFFFFFFFFF
FFFFFFFFFFFFFFFF:

```

 $+$ [illegible]
$$+$$
[illegible]

+

```

FFFFFFFFFFFFFFFFFFFFFFFFFFFFFFFFFFFFFFFFFFFFFFFFFFFFFFFFFFFFFFFF
FFFFFFFFFFFFFFFFFFFFFFFF:FFFFFFFFFFFFFFFFFFFFFFFFFFFFFFFFFFFFFFF
.FFFF:FFFFFFFF

```

+

[illegible]

+

```

FFFFFFFFFFFFFFFFFFFFFFFFFFFFFFFF:FFFFFFFFFFFFFFFFFFFFFFFF:FFFFFFFF
FFFFFFFFFFFFFFFFFFFFFFFF:FFFFFFFFFFFF:FFFFFFFFFFFF:FFFFFFFFFFFFFFFF
::FFFFFFFF

```

+

[illegible]



FFFFFFFFFFFFFFFFFFFFFFFFFFFFFFFFFFFFFFFFFFFFFFFFFFFFFFFFFFFFFFFFFFFFFFFFFFFFFFFF  
FFFFF,FFFFFFFFF

@A00721:190:HGJW7DSXY:4:2163:26856:11647 1:N:0:TCTGCAAG+GCTGCACT  
CCGCCCTACAGTATACCAATTCAAATTCAAATTCAAATAGAATTCCATAGGCCCGCAGGGGCATCTT  
ACCGCAGACCGTGGGGCAAGCCAATATAATATTACTGGCTTGCCCGCGCCGGGGACACCTCCGTACGC  
TTACGTGTCGATTTG

+

FFFFFFFFFFFFFFFFFFFFFFFFFFFFFFFFFFFFFFFFFFFFFFFFFFFFFFFFFFFFFFFFFFFFFFFFFFFFFFFF  
FFFFFFFFFFFFFFFFFFFFFFFFFFFFFFFFFFFFFFFFFFFFFFFFFFFFFFFFFFFFFFFFFFFFFFFFFFFFFFFF  
FFFFFFFFFFFFFFFFFFFF

@A00721:190:HGJW7DSXY:4:2205:16224:6574 1:N:0:TCTGCAAG+GCTGCACT  
CCGCCCTACAGTATACCAATTCAAATTCAAATTCAAATAGAATTCCATAGGCCCGCAGGGGCATCTT  
ACCGCAGACCGTGGGGCAAGCCAATATAATATTACTGGCTTGCCCGCGCCGGGGACACCTCCGTACGC  
TTACGTGTCGATTTG

+

FFFFFFFFFFFFFFFFFFFFFFFFFFFFFFFFFFFFFFFFFFFFFFFFFFFFFFFFFFFFFFFFFFFFFFFFFFFFFFFF  
FFFFFFFFFFFFFFFFFFFFFFFFFFFFFFFFFFFFFFFFFFFFFFFFFFFFFFFFFFFFFFFFFFFFFFFFFFFFFFFF  
FFFFFFFFFFFFFFFFFFFF

@A00721:190:HGJW7DSXY:4:2210:15917:11240 1:N:0:TCTGCAAG+GCTGCACT  
CCGCCCTACAGTATACCAATTCAAATTCAAATTCAAATAGAATTCCATAGGCCCGCAGGGGCATCTT  
ACCGCAGACCGTGGGGCAAGCCAATATAATATTACTGGCTTGCCCGCGCCGGGGACACCTCCGTACGC  
TTACGTGTCGATTTG

+

FFFFFFFFFFFFFFFFFFFFFFFFFFFFFFFFFFFFFFFFFFFFFFFFFFFFFFFFFFFFFFFFFFFFFFFFFFFFFFFF  
FFFFFFFFFFFFFFFFFFFFFFFFFFFFFFFFFFFFFFFFFFFFFFFFFFFFFFFFFFFFFFFFFFFFFFFFFFFFFFFF  
F:FFFFFFFFFFFFFF:

@A00721:190:HGJW7DSXY:4:2240:17481:27759 1:N:0:TCTGCAAG+GCTGCACT  
CCGCCCTACAGTATACCAATTCAAATTCAAATTCAAATAGAATTCCATAGGCCCGCAGGGGCATCTT  
ACCGCAGACCGTGGGGCAAGCCAATATAATATTACTGGCTTGCCCGCGCCGGGGACACCTCCGTACGC  
TTACGTGTCGATTTG

+

FFFFFFFFFFFFFFFFFFFFFFFFFFFFFFFFFFFFFFFFFFFFFFFFFFFFFFFFFFFFFFFFFFFFFFFFFFFFFFFF  
FFFFFFFFFFFFFFFFFFFFFFFFFFFFFFFFFFFFFFFFFFFFFFFFFFFFFFFFFFFFFFFFFFFFFFFFFFFFFFFF  
FFFFFFFFFFFFFFFFFFFF

@A00721:190:HGJW7DSXY:4:2240:14769:29074 1:N:0:TCTGCAAG+GCTGCACT  
CCGCCCTACAGTATACCAATTCAAATTCAAATTCAAATAGAATTCCATAGGCCCGCAGGGGCATCTT  
ACCGCAGACCGTGGGGCAAGCCAATATAATATTACTGGCTTGCCCGCGCCGGGGACACCTCCGTACGC  
TTACGTGTCGATTTG

+

FFFFFFFFFFFFFFFFFFFFFFFFFFFFFFFFFFFFFFFFFFFFFFFFFFFFFFFFFFFFFFFFFFFFFFFFFFFFFFFF  
FFFFFFFFFFFFFFFFFFFFFFFFFFFFFFFFFFFFFFFFFFFFFFFFFFFFFFFFFFFFFFFFFFFFFFFFFFFFFFFF  
FFFFFFFFFFFFFFFFFFFF

@A00721:190:HGJW7DSXY:4:2307:20925:27492 1:N:0:TCTGCAAG+GCTGCACT  
CCGCCCTACAGTATACCAATTCAAATTCAAATTCAAATAGAATTCCATAGGCCCGCAGGGGCATCTT  
ACCGCAGACCGTGGGGCAAGCCAATATAATATTACTGGCTTGCCCGCGCCGGGGACACCTCCGTACGC  
TTACGTGTCGATTTG

+

FFFFFFFFFFFFFFFFFFFFFFFFFFFFFFFFFFFFFFFFFFFFFFFFFFFFFFFFFFFFFFFFFFFFFFFFFFFFFFFF  
FFFFFFFFFFFFFFFFFFFFFFFFFFFFFFFFFFFFFFFFFFFFFFFFFFFFFFFFFFFFFFFFFFFFFFFFFFFFFFFF  
FFFFFFFFFFFFFFFFFFFF

@A00721:190:HGJW7DSXY:4:2324:28085:34757 1:N:0:TCTGCAAG+GCTGCACT  
CCGCCCTACAGTATACCAATTCAAATTCAAATTCAAATAGAATTCCATAGGCCCGCAGGGGCATCTT  
ACCGCAGACCGTGGGGCAAGCCAATATAATATTACTGGCTTGCCCGCGCCGGGGACACCTCCGTACGC  
TTACGTGTCGATTTG

```
+
FFFFFFFF,FFFFFFFFFFFFFFFFFFFFFFFFFFFFFFFFFFFFFFFFFFFFFFFFFFFFFFFFFFFFFFFF:FFFFFFFF,FFFFFFFF,FFFFFFF
FFFFFFFFFFFFFFFF,FFFFFFFF:FFFFFFFFFFFFFFFFFFFFFFFF:F:FFFFFF:FFFFFFFFFFFFFF:F,FFFFFFFFFFFFFFF
FFFFFFFFFFFFFFFF:FF
```

[illegible][illegible]

```
+
FFFFFFFFFFFFFFFFFFFFFFFFFFFFFFFFFFFFFFFFFFFFFFFF:FFFFFFFF:FFFFFFFFFFFFFFFFFFFFFFFF:FFFFFFF
FFFFFFFFFFFFFFFFFFFFFFFFFFFFFFFFFFFFFFFFFFFFFFFF:FFFFF:FFFFFFFFFFFFFFFFFFFFFFFFFFFFFFFF
FFFFFFFFFFFFFFFFFFFFFFFF
```

[illegible][illegible][illegible]

ACCGCAGACCGTGGGGCAAGCCAATATAATATTACTGGCTTGCCCGCGCCGGGGACACCTCCGTACGC  
TTACGTGTCGATTTG

+

FFFFFFFFFFFFFFFFFFFFFFFFFFFFFFFFFFFFFFFFFFFFFFFFFFFFFFFFFFFFFFFFFFFFFFFF  
FFFFFFFFFFFFFFFFFFFFFFFFFFFFFFFFFFFFFFFFFFFFFFFFFFFFFFFFFFFFFFFFFFFFFFFF  
FFFFFFFFFFFF:FFF

@A00721:190:HGJW7DSXY:4:2506:8377:16219 1:N:0:TCTGCAAG+GCTGCACT  
CCGCCCTACAGTATACCAATTCAAATTCAAATTCAAATAGAATTCCATAGGCCCGCAGGGGCATCTT  
ACCGCAGACCGTGGGGCAAGCCAATATAATATTACTGGCTTGCCCGCGCCGGGGACACCTCCGTACGC  
TTACGTGTCGATTTG

+

FFFFFFFFFFFFFFFFFFFFFFFFFFFFFFFFFFFFFFFFFFFFFFFFFFFFFFFFFFFFFFFFFFFFFFFF  
FFFFFFFFFFFFFFFFFFFFFFFFFFFFFFFFFFFFFFFFFFFFFFFFFFFFFFFFFFFFFFFFFFFFFFFF  
FFFFFFFFFFFFFFFF

@A00721:190:HGJW7DSXY:4:2519:28230:22044 1:N:0:TCTGCAAG+GCTGCACT  
CCGCCCTACAGTATACCAATTCAAATTCAAATTCAAATAGAATTCCATAGGCCCGCAGGGGCATCTT  
ACCGCAGACCGTGGGGCAAGCCAATATAATATTACTGGCTTGCCCGCGCCGGGGACACCTCCGTACGC  
TTACGTGTCGATTTG

+

FFFFFFFFFFFFFFFFFFFFFFFFFFFFFFFFFFFFFFFFFFFFFFFFFFFFFFFFFFFFFFFFFFFFFFFF  
FFFFFFFFFFFFFFFFFFFFFFFFFFFFFFFFFFFFFFFFFFFFFFFFFFFFFFFFFFFFFFFFFFFFFFFF  
FFFFFFFFFFFFFFFF

@A00721:190:HGJW7DSXY:4:2521:8865:25488 1:N:0:TCTGCAAG+GCTGCACT  
CCGCCCTACAGTATACCAATTCAAATTCAAATTCAAATAGAATTCCATAGGCCCGCAGGGGCATCTT  
ACCGCAGACCGTGGGGCAAGCCAATATAATATTACTGGCTTGCCCGCGCCGGGGACACCTCCGTACGC  
TTACGTGTCGATTTG

+

FFFFFFFFFFFFFFFFFFFFFFFFFFFFFFFFFFFFFFFFFFFFFFFFFFFFFFFFFFFFFFFFFFFFFFFF  
FFFFFFFFFFFFFFFFFFFFFFFFFFFFFFFFFFFFFFFFFFFFFFFFFFFFFFFFFFFFFFFFFFFFFFFF  
FFFFFFFFFFFFFFFF

@A00721:190:HGJW7DSXY:4:2525:27525:32659 1:N:0:TCTGCAAG+GCTGCACT  
CCGCCCTACAGTATACCAATTCAAATTCAAATTCAAATAGAATTCCATAGGCCCGCAGGGGCATCTT  
ACCGCAGACCGTGGGGCAAGCCAATATAATATTACTGGCTTGCCCGCGCCGGGGACACCTCCGTACGC  
TTACGTGTCGATTTG

+

FFFFFFFFF:FFFFFFFFFFFFFFFFFFFFFFFFFFFFFFFFFFFFFFFFFFFFFFFFFFFFFFFFFFFFF  
FFFFFFFFFFFFFFFFFFFFFFFFFFFFFFFFFFFFFFFFFFFFFFFFFFFFFFFFFFFFFFFFFFFFFFFF  
FFFFF,FFFFFFFF

@A00721:190:HGJW7DSXY:4:2577:16333:29058 1:N:0:TCTGCAAG+GCTGCACT  
CCGCCCTACAGTATACCAATTCAAATTCAAATTCAAATAGAATTCCATAGGCCCGCAGGGGCATCTT  
ACCGCAGACCGTGGGGCAAGCCAATATAATATTACTGGCTTGCCCGCGCCGGGGACACCTCCGTACGC  
TTACGTGTCGATTTG

+

FFFFFFFFFFFFFFFFFFFFFFFFFFFFFFFFFFFFFFFFFFFFFFFFFFFFFFFFFFFFFFFFFFFFFFFF  
FFFFF:FFFFFFFFFFFFFFFFFFFFFFFFFFFFFFFFFFFFFFFFFFFFFFFFFFFFFFFFFFFFFFFFF  
FFFFFFFFFFFFFFFF

@A00721:190:HGJW7DSXY:4:2647:30680:3239 1:N:0:TCTGCAAG+GCTGCACT  
CCGCCCTACAGTATACCAATTCAAATTCAAATTCAAATAGAATTCCATAGGCCCGCAGGGGCATCTT  
ACCGCAGACCGTGGGGCAAGCCAATATAATATTACTGGCTTGCCCGCGCCGGGGACACCTCCGTACGC  
TTACGTGTCGATTTG

+

FFFFFFFFF:FFFFFFFFFFFFFFFFFFFFFFFFFFFFFFFFFFFFFFFFFFFFFFFFFFFFFFFFFFFFF  
FFFFF:FF:FFFFFFFFF,FFFFFFFFFFFFFFFFF:FFF:FFFFFFFFFFFFFFFFFFFFFFFFF:FFFF  
FFFFFFFFFFFFFFFF

@A00721:190:HGJW7DSXY:4:2653:17544:34194 1:N:0:TCTGCAAG+GCTGCACT  
CCGCCCTACAGTATACCAATTCAAATTCAAATTCAAATAGAAATTCATAGGCCCGCAGGGGCATCTT  
ACCGCAGACCGTGGGGCAAGCCAATATAATATTACTGGCTTGCCCGCGCCGGGGACACCTCCGTACGC  
TTACGTGTCGATTTG

[illegible]

+

[illegible]

+

```

FFFFFFFF:FFFFFFFF:FFFFFFFFFFFFFFFFFFFFFFFFFFFFFFFFFFFFFFFFFFFFFFFF
FFFFFFFFFFFFFFFFFFFFFFFFFFFFFFFF:FFFFFFFFFFFFFFFFFFFFFFFFFFFFFFFF
FFFFFFFFFFFFFFFF

```

+

```

FFFFFFFFFFFFFFFFFFFFFFFFFFFFFFFFFFFFFFFFFFFFFFFFFFFFFFFFFFFFFFFF
FFFFFFFFFFFFFFFFFFFFFFFFFFFFFFFF:FFFFFFFFFFFFFFFFFFFFFFFFFFFFFFFF
FFFFFFFFFFFFFFFF

```

+

[illegible]

+

[illegible]

+

[illegible]

FFFFFFFFFFFFFFFFFFFFFFFFFFFFFFFFFFFFFFFFFFFFFFFFFFFFFFFFFFFFFFFFFFFFFFFFFFFFFFFF  
FFFFFFFFFFFFFFFF

@A00721:190:HGJW7DSXY:4:2510:11116:9001 1:N:0:TCTGCAAG+GCTGCACT  
CGCCCTACCGTATACCAATTCAAATTCAAATTCAAATAGAATTCCATAGGCCCGCAGGGGCATCTTA  
CCGAGACCGTGGGGCAAGCCAATATAATATTACTGGCTTGCCCGCGCCGGGGACACCTCCGTACGCT  
TACGTGTCGATTTGT

+  
FFFFFFFFF,:.FFFFFFFFFFFFFFFFF:,FFFFFFFFFFFFFFFFF:FFF,FFF,FFFFFFFFFFFFF:FF,,:FF  
:FFFFFFFFFFFFF,FFFFF:FFFF:FFFF,,F,FFFFFFFF:FFF:FFFF:F,F:F,F:FF,FFF,F:FFF  
,FFFF:FFFF:FFF

@A00721:190:HGJW7DSXY:4:2673:9715:5447 1:N:0:TCTGCAAG+GCTGCACT  
CGCCCTACAGTATACCAATTCAAATTCAAATTCAAATAGAATTCCATAGGCCCGCAGGGGCATCTTA  
CCGAGACCGTGGGGCAAGCCAATATAATATTACTGGCTTGCCCGCGCCGGGGACACCTCCGTACGCT  
TACGTGTCGATTTGT

+  
FFFFFFFFFFFFFFFFFFFFFFFFFFFFFFFFFFFFFFFFFFFFFFFFFFFFFFFFFFFFFFFFFFFFFFFFFFFFFFFF  
FFFFFFFFFFFFF:FFFFFFFFFFFFF:FFFFFFFFFFFFF:FFFFFFFFFFFFF:FFFFFFFFFFFFF  
FFFF:FFFFF:FFF

@A00721:190:HGJW7DSXY:4:1253:25129:27007 1:N:0:TCTGCAAG+GCTGCACT  
GCCCTACAGTATACCAATTCAAATTCAAATTCAAATAGAATTCCATAGGCCCGCAGGGGCATCTTAC  
CGCAGACCGTGGGGCAAGCCAATATAATATTACTGGCTTGCCCGCGCCGGGGACACCTCCGTACGCTT  
ACGTGTCGATTTGTC

+  
FFFFFFFFFFFFFFFFFFFFFFFFFFFFFFFFFFFFFFFFFFFFFFFFFFFFFFFFFFFFFFFFFFFFFFFFFFFFFFFF  
FFFFFFFFFFFFFFFFFFFFFFFFFFFFFFFFFFFFFFFFFFFFFFFFFFFFFFFFFFFFFFFFFFFFFFFFFFFFFFFF  
FFFFFFFFFFFFFFFF

@A00721:190:HGJW7DSXY:4:1255:23628:12633 1:N:0:TCTGCAAG+GCTGCACT  
GCCCTACAGTATACCAATTCAAATTCAAATTCAAATAGAATTCCATAGGCCCGCAGGGGCATCTTAC  
CGCAGACCGTGGGGCAAGCCAATATAATATTACTGGCTTGCCCGCGCCGGGGACACCTCCGTACGCTT  
ACGTGTCGATTTGTC

+  
FFFFFFFFFFFFFFFFFFFFFFFFFFFFFFFFFFFFFFFFFFFFFFFFFFFFFFFFFFFFFFFFFFFFFFFFFFFFFFFF  
FFFFFFFFFFFFFFFFFFFFFFFFFFFFFFFFFFFFFFFFFFFFFFFFFFFFFFFFFFFFFFFFFFFFFFFFFFFFF,FFFFFFFFFFFFFFFF  
FFFFFFFFFFFFFFFF

@A00721:190:HGJW7DSXY:4:1460:12391:12680 1:N:0:TCTGCAAG+GCTGCACT  
GCCCTACAGTATACCAATTCAAATTCAAATTCAAATAGAATTCCATAGGCCCGCAGGGGCATCTTAC  
CGCAGACCGTGGGGCAAGCCAATATAATATTACTGGCTTGCCCGCGCCGGGGACACCTCCGTACGCTT  
ACGTGTCGATTTGTC

+  
FFFFFFFFFFFFFFFFFFFFFFFFFFFFFFFFFFFFFFFFFFFFFFFFFFFFFFFFFFFFFFFFFFFFFFFFFFFFFFFF  
FFFFFFFFFFFFFFFFFFFFFFFFFFFFFFFFFFFFFFFFFFFFFFFFFFFFFFFFFFFFFFFFFFFFFFFFFFFFF:FFFF:FFFFFFFFFFFF  
FFFFFFFFFFFFFFFF

@A00721:190:HGJW7DSXY:4:2673:31810:15374 1:N:0:TCTGCAAG+GCTGCACT  
GCCCTACAGTATACCAATTCAAATTCAAATTCAAATAGAATTCCATAGGCCCGCAGGGGCATCTTAC  
CGCAGACCGTGGGGCAAGCCAATATAATATTACTGGCTTGCCCGCGCCGGGGACACCTCCGTACGCTT  
ACGTGTCGATTTGTC

+  
FFFFFFFFFFFFFFFFFFFFFFFFFFFFFFFFFFFFFFFFFFFFFFFFFFFFFFFFFFFFFFFFFFFFFFFFFFFFFFFF  
FFFFFFFFFFFFFFFFFFFFFFFFFFFFFFFFFFFFFFFFFFFFFFFFFFFFFFFFFFFFFFFFFFFFFFFFFFFFF  
FFFFFFFFFFFFFFFF

@A00721:190:HGJW7DSXY:4:1237:4661:7310 1:N:0:TCTGCAAG+GCTGCACT  
CCTACAGTATACCAATTCAAATTCAAATTCAAATAGAATTCCATAGGCCCGCAGGGGCATCTTACCG  
CAGACCGTGGGGCAAGCCAATATAATATTACTGGCTTGCCCGCGCCGGGGACACCTCCGTACGCTTAC  
GTGTCGATTTGTGTCAG

+  
FFFFFFF,FFFFFF::FFFFFF:FFF,FFFFF,FFFFFF:FF,F,FFFFFF:FFFF,FFFF:FFF:FF  
:FFF::FF:FFFFFFF,FFFFFFFFFFFF:FFF:FF:FF:FFF:F,FFFFFFFF:FF:FFFF:FF:FF  
FFFFF:FFFF,FFFF

@A00721:190:HGJW7DSXY:4:1336:25464:1720 1:N:0:TCTGCAAG+GCTGCACT  
CCTACAGTATACCAATTCAAATTCAAATTCAAATAGAATTCCATAGGCCCGCAGGGGCATCTTACCG  
CAGACCGTGGGGCAAGCCAATATAATATTACTGGCTTGCCCGCGCCGGGGACACCTCCGTACGCTTAC  
GTGTCGATTTGTCAG

+  
FFFFFFFFFFFFFF:FFFFFFFFFFFFFFFFFFFFFFFFFFFFFFFFFFFFFFFFFFFFFFFFFFFFFFFF  
FFFFFFFFFFFFFFFFFFFFFFF,FFFFFFFFFFFFFF:FF:FFFFFFFFFFFFFFFFFFFFFFFFFFFFFFF:FF  
FFFFFFFF:FFFFFFF

@A00721:190:HGJW7DSXY:4:1371:16676:26678 1:N:0:TCTGCAAG+GCTGCACT  
CCTACAGTATACCAATTCAAATTCAAATTCAAATAGAATTCCATAGGCCCGCAGGGGCATCTTACCG  
CAGACCGTGGGGCAAGCCAATATAATATTACTGGCTTGCCCGCGCCGGGGACACCTCCGTACGCTTAC  
GTGTCGATTTGTCAG

+  
FFFFFFFFFFFFFFFFFFFFFFFFFFFFFFFFFFFFFFFFFFFFFFFFFFFFFFFFFFFFFFFFFFFFFFFF  
FFFFFFFFFFFFFFFFFFFFFFFFFFFFFFFFFFFFFFFFFFFFFFFFFFFFFFFFFFFFFFFFFFFFFFFF  
FFFFFFFFFFFFFFFFFFFF

@A00721:190:HGJW7DSXY:4:1430:18927:10567 1:N:0:TCTGCAAG+GCTGCACT  
CCTACAGTATACCAATTCAAATTCAAATTCAAATAGAATTCCATAGGCCCGCAGGGGCATCTTACCG  
CAGACCGTGGGGCAAGCCAATATAATATTACTGGCTTGCCCGCGCCGGGGACACCTCCGTACGCTTAC  
GTGTCGATTTGTCAG

+  
FFFFFFFFFFFFFFFFFFFFFFFFFFFFFFFFFFFFFFFFFFFFFFFFFFFFFFFFFFFFFFFFFFFFFFFF  
FFFFFFFFFFFFFFFFFFFFFFFFFFFFFFFFFFFFFFFFFFFFFFFFFFFFFFFFFFFFFFFFFFFFFFFF  
FFFFFFFFFFFFFFFFFFFF

@A00721:190:HGJW7DSXY:4:1530:3938:2487 1:N:0:TCTGCAAG+GCTGCACT  
CCTACAGTATACCAATTCAAATTCAAATTCAAATAGAATTCCATAGGCCCGCAGGGGCATCTTACCG  
CAGACCGTGGGGCAAGCCAATATAATATTACTGGCTTGCCCGCGCCGGGGACACCTCCGTACGCTTAC  
GTGTCGATTTGTCAG

+  
FFFFF:FFFFFFFFFFFFFFFFFFFFFFFFFFFFFFFFFFFFFFFFFFFFFFFFFFFFFFFFFFFFFFFF  
FFFFFFFFFFFFFFFFFFFFFFF:FFFFF:FFFFFFFFFFFFFFFFFFFFFFFFFFFFFFFFFFFFFFFF  
FFFFFFFFFFFFFFFFFFFF

@A00721:190:HGJW7DSXY:4:1677:20799:11522 1:N:0:TCTGCAAG+GCTGCACT  
CCTACAGTATACCAATTCAAATTCAAATTCAAATAGAATTCCATAGGCCCGCAGGGGCATCTTACCG  
CAGACCGTGGGGCAAGCCAATATAATATTACTGGCTTGCCCGCGCCGGGGACACCTCCGTACGCTTAC  
GTGTCGATTTGTCAG

+  
FFFFFFFFFFFFFFFFFFFFFFFFFFFFFFFFFFFFFFFFFFFFFFFFFFFFFFFFFFFFFFFFFFFFFFFF  
FFFFFFFFFFFFFFFFFFFFFFF:FFFFFFFFFFFFFFFFFFFFFFFFFFFFFFFFFFFFFFFFFFFFFFFF  
FFFFFFFFFFFFFFFFFFFF

@A00721:190:HGJW7DSXY:4:1128:23402:8923 1:N:0:TCTGCAAG+GCTGCACT  
CTACAGTATACCAATTCAAATTCAAATTCAAATAGAATTCCATAGGCCCGCAGGGGCATCTTACCGC  
AGACCGTGGGGCAAGCCAATATAATATTACTGGCTTGCCCGCGCCGGGGACACCTCCGTACGCTTACG  
TGTCGATTTGTCATT

+  
F:FFFFFFFFFFFFFFFFFFFFF::FFFFFFFFFFFFFFFFFFFFF:FFFFFFFFFFFFF:FFFFFFFFFFFFF  
FFFFFFFFFFFFFFFFFFFFFFFFFFFFFFFFFFFFFFFFFFFF:FF:FFFFFFFFFFFFFFFFFFFFFFFF  
FFFFFFFFFFFFFFFFFFFF:

@A00721:190:HGJW7DSXY:4:1231:6415:31391 1:N:0:TCTGCAAG+GCTGCACT  
CTACAGTATACCAATTCAAATTCAAATTCAAATAGAATTCCATAGGCCCGCAGGGGCATCTTACCGC



AGACCGTGGGGCAAGCCAATATAATATTACTGGCTTGCCCGCGCCGGGGACACCTCCGTACGCTTACG  
TGTCGATTTGTCATT

[illegible]

CTACAGTATACCAATTCAAATTCAAATTCAAATAGAATTCATAGGCCCCGCAGGGGCATCTTACCGC  
AGACCGTGGGGCAAGCCAATATAATATTACTGGCTTGCCCGCGCCGGGACACCTCCGTACGCTTACG  
TGTCGATTTGTCATT

[illegible]

CTACAGTATACCAATTCAAATTCAAATTCAAATAGAATTCATAGGCCCCGCAGGGGCATCTTACCGC  
AGACCGTGGGGCAAGCCAATATAATATTACTGGCTTGCCGCGCCGGGACACCTCCGTACGCTTACG  
TGTCGATTTGTCATT

```

FFFFFFFFFFFFFFFFFFFFFFFFFFFFFFFF:FFF:FFF:FFFFFFFFFFFFFFFFFFFFFFFF
FFFFFFFFFFFFFFFFFFFFFFFFFFFFFFFF:FFFFFFFFFFF:FFFFFFFFFFFFFF:FFF
FFFFFFFFFFFFFFFF

```

CTACAGTATACCAATTCAAATTCAAATTCAAATAGAATTCATAGGCCCCGCAGGGGCATCTTACCGC  
AGACCGTGGGGCAAGCCAATATAATATTACTGGCTTGCCCGCGCCGGGACACCTCCGTACGCTTACG  
TGTCGATTTGTCATT

[illegible]

CTACAGTATACCAATTCAAATTCAAATTCAAATAGAATTCCATAGGCCCGCAGGGGCATCTTACCGC  
AGACCGTGGGGCAAGCCAATATAATATTACTGGCTTGCCCGCGCCGGGACACCTCCGTACGCTTACG  
TGTCGATTTGTCATT

```
FFFFFFFFFFFFFFFFFFFFFFFFFFFFFFFFFFFF:FFFFFFFFFFFFFFFFFFFFFFFFFFFFFFF
FFFFFFFFFFFFFFFFFFFFFFFFFFFFFFFFFFFFF
FFFFFFFFFFFFFFFF
```

CTACAGTATACCAATTCAAATTCAAATTCAAATAGAATTCCATAGGCCCCGCAGGGGCATCTTACCGC  
AGACCGTGGGGCAAGCCAATATAATATTACTGGCTTGCCCGCGCCGGGGACACCTCCGTACGCTTACG  
TGTCGATTTGTCAAT

```

FFFFFFFFFFFFFFFF:F:FFFFFFFFFFFF::FFFFFFFFFFFF:F:FF:FFFFFFFFFFFFFFFFFFFFFFFF
FFFFFFFFFFFFFFFFFFFFFFFFFFFFFFFF:FFFFFFFFFFFFFFFF,FFFFFFFFFFFFFFFFFFFFFFFF:FFFF
FFFFFFFF:FFFFF

```

CTACAGTATACCAATTCAAATTCAAATTCAAATAGAATTCCATAGGCCCCGCAGGGGCATCTTACCGC  
AGACCGTGGGGCAAGCCAATATAATATTACTGGCTTGCCCGCGCCGGGGACACCTCCGTACGCTTACG  
TGTCGATTTGTCATT

```
F:FFFFFFFFFFFFFFFFFFFFFFFFFFFFFFFF:FFFFFFFFFFFFFFFFFFFFFFFFFFFFFFFF
FFFFFFFFFFFFFFFFFFFFFFFFFFFFFFFF:FFFFFFFFFFFFFFFFFFFFFFFFFFFFFFFFFFFF
:FFFFFFFFFFFFFFFF
```

@A00721:190:HGJW7DSXY:4:2202:15863:18975 1:N:0:TCTGCAAG+GCTGCACT  
CTACAGTATACCAATTCAAATTCAAATTCAAATAGAATTCCATAGGCCCGCAGGGGCATCTTACCGC  
AGACCGTGGGGCAAGCCAATATAATATTACTGGCTTGCCCGCGCCGGGGACACCTCCGTACGCTTACG  
TGTCGATTTGTCATT

+

FFFFFFFFFFFFFFFFFFFFFFFFFFFFFFFFFFFFFFFFFFFFFFFFFFFFFFFFFFFFFFFFFFFFFFFFFFFFFFFF  
FFFFFFFFFFFFFFFFFFFFFFFFFFFFFFFFFFFFFFFFFFFFFFFFFFFFFFFFFFFFFFFFFFFFFFFFFFFFFFFF  
FFFFFFFFFFFFFFFFFFFFFFFFFFFFFFFFFFFFFFFFFFFFFFFFFFFFFFFFFFFFFFFFFFFFFFFFFFFFFFFF

@A00721:190:HGJW7DSXY:4:2230:26250:3176 1:N:0:TCTGCAAG+GCTGCACT  
CTACAGTATACCAATTCAAATTCAAATTCAAATAGAATTCCATAGGCCCGCAGGGGCATCTTACCGC  
AGACCGTGGGGCAAGCCAATATAATATTACTGGCTTGCCCGCGCCGGGGACACCTCCGTACGCTTACG  
TGTCGATTTGTCATT

+

FFFFFFFFFFFFFFFFFFFFFFFFFFFFFFFFFFFFFFFFFFFFFFFFFFFFFFFFFFFFFFFFFFFFFFFFFFFFFFFF  
FFFFFFFFFFFFFFFFFFFFFFFFFFFFFFFFFFFFFFFFFFFFFFFFFFFFFFFFFFFFFFFFFFFFFFFFFFFFFFFF  
FFFFFFFFFFFFFFFFFFFFFFFFFFFFFFFFFFFFFFFFFFFFFFFFFFFFFFFFFFFFFFFFFFFFFFFFFFFFFFFF

@A00721:190:HGJW7DSXY:4:2458:3224:24142 1:N:0:TCTGCAAG+GCTGCACT  
CTACAGTATACCAATTCAAATTCAAATTCAAATAGAATTCCATAGGCCCGCAGGGGCATCTTACCGC  
AGACCGTGGGGCAAGCCAATATAATATTACTGGCTTGCCCGCGCCGGGGACACCTCCGTACGCTTACG  
TGTCGATTTGTCA

+

:FFFF:FFFF:FFFFFFFF,FFFF,,FFFF,FF,FF:FFFFFFFFFFFF:F:FFF:FFF:FFFF  
F:FFFFFFFF:FFF,F:FF,F,FFFF:FF:::,F,FFFFFFFF,FFFFFFFF,FF:FF:FF,:FFF  
FFFF,FF:FFFF

@A00721:190:HGJW7DSXY:4:2658:18132:9502 1:N:0:TCTGCAAG+GCTGCACT  
CTACAGTATACCAATTCAAATTCAAATTCAAATAGAATTCCATAGGCCCGCAGGGGCATCTTACCGC  
AGACCGTGGGGCAAGCCAATATAATATTACTGGCTTGCCCGCGCCGGGGACACCTCCGTACGCTTACG  
TGTCGATTTGTCATT

+

FFFFFFFFFFFFFFFFFFFFFFFFFFFFFFFFFFFFFFFFFFFFFFFFFFFFFFFFFFFFFFFFFFFFFFFFFFFFFFFF  
FFFFFFFFFFFFFFFFFFFFFFFFFFFFFFFFFFFFFFFFFFFFFFFFFFFFFFFFFFFFFFFFFFFFFFFFFFFFFFFF  
FFFF:FFFFFFFF

@A00721:190:HGJW7DSXY:4:1119:8558:22200 1:N:0:TCTGCAAG+GCTGCACT  
TACCAATTCAAATTCAAATTCAAATAGAATTCCATAGGCCCGCAGGGGCATCTTACCGCAGACCGTG  
GGGCAAGCCAATATAATATTACTGGCTTGCCCGCGCCGGGGACACCTCCGTACGCTTACGTGTCGATT  
TGTCATTAGACCAG

+

FFFFFFFFFFFFFFFFFFFFFFFFFFFFFFFFFFFFFFFFFFFFFFFFFFFFFFFFFFFFFFFFFFFFFFFFFFFFFFFF  
FFFFFFFFFFFFFFFFFFFFFFFFFFFFFFFFFFFFFFFFFFFFFFFFFFFFFFFFFFFFFFFFFFFFFFFFFFFFFFFF  
FFFFFFFF:FFFFF,F  
FFFFFFFF:FFFFF

@A00721:190:HGJW7DSXY:4:1344:4562:35133 1:N:0:TCTGCAAG+GCTGCACT  
TACCAATTCAAATTCAAATTCAAATAGAATTCCATAGGCCCGCAGGGGCATCTTACCGCAGACCGTG  
GGGCAAGCCAATATAATATTACTGGCTTGCCCGCGCCGGGGACACCTCCGTACGCTTACGTGTCGATT  
TGTCATTAGACAGAT

+

FFFFFFFFFFFFFFFFFFFFFFFFFFFFFFFFFFFFFFFFFFFFFFFFFFFFFFFFFFFFFFFFFFFFFFFFFFFFFFFF  
FFFFFFFFFFFFFFFFFFFFFFFFFFFFFFFFFFFFFFFFFFFFFFFFFFFFFFFFFFFFFFFFFFFFFFFFFFFFFFFF  
FFFFF:FFFFFFFF

@A00721:190:HGJW7DSXY:4:1647:11939:23703 1:N:0:TCTGCAAG+GCTGCACT  
TACCAATTCAAATTCAAATTCAAATAGAATTCCATAGGCCCGCAGGGGCATCTTACCGCAGACCGTG  
GGGCAAGCCAATATAATATTACTGGCTTGCCCGCGCCGGGGACACCTCCGTACGCTTACGTGTCGATT  
TGTCATTAGACCAG

+

:FF:F::F:FFFF:FFFF:FFF,FFFFFFFF,F,FFF:FFFF:FF::F,:FFFF:FFFF,F

F:F:FF,FFFF:FFFFFFFFFFFF:FFFF,F,FFFFFFFF:FFF:FF,FFFF,FFFF:,FFF:FFF,FFF  
FFFFFFFFFFFF:FF:

@A00721:190:HGJW7DSXY:4:1648:5692:33144 1:N:0:TCTGCAAG+GCTGCACT  
TACCAATTCAAATTCAAATTCAAATAGAAATTCATAGGCCCGCAGGGGCATCTTACCGCAGACCGTG  
GGGCAAGCCAATATAATATTACTGGCTTGCCCGCGCCGGGACACCTCCGTACGCTTACGTGTGCGATT  
TGTCATTAGACAGAT

+

FFFFFFFFFFFFFFFFFFFFFFFFFFFFFFFFFFFFFFFFFFFFFFFFFFFFFFFFFFFFFFFFFFFFFFFF  
FFFFFFFFFFFFFFFFFFFFFFFFFFFFFFFFFFFFFFFFFFFFFFFFFFFFFFFFFFFFFFFFFFFFFFFF:FFFFFFFFFFFF:F  
FFFFFFFFFFFFFFFF

@A00721:190:HGJW7DSXY:4:2648:7780:27336 1:N:0:TCTGCAAG+GCTGCACT  
TACCAATTCAAATTCAAATTCAAATAGAAATTCATAGGCCCGCAGGGGCATCTTACCGCAGACCGTG  
GGGCAAGCCAATATAATATTACTGGCTTGCCCGCGCCGGGACACCTCCGTACGCTTACGTGTGCGATT  
TGTCATTAGACAGAT

+

FFFFFFFFFFFFFFFFFFFFFFFFFFFFFFFFFFFFFFFFFFFFFFFFFFFFFFFFFFFFFFFFFFFFFFFF  
FFFFFFFFFFFF,F:FFFFFFFFFFFFFFFFFFFFFFFFFFFFFFFFFFFFFFFFFFFFFFFFFFFFFFFF:FFFFFFFFFFFF  
FFFFFFFFFFFFFFFF

@A00721:190:HGJW7DSXY:4:2664:18177:3317 1:N:0:TCTGCAAG+GCTGCACT  
TACCAATTCAAATTCAAATTCAAATAGAAATTCATAGGCCCGCAGGGGCATCTTACCGCAGACCGTG  
GGGCAAGCCAATATAATATTACTGGCTTGCCCGCGCCGGGACACCTCCGTACGCTTACGTGTGCGATT  
TGTCATTAGACCACG

+

FFFFF,FFFFFFFFFFFFFFFFFFFFFFFFFFFFFFFFFFFFFFFFFFFFFFFFFFFFFFFFFFFFFFFF  
FFFFFFFFFFFFFFFFFFFFFFFFFFFFFFFFFFFFFFFFFFFFFFFFFFFFFFFFFFFFFFFFFFFFFFFF  
FFFFFFFFFFFFFFFF

@A00721:190:HGJW7DSXY:4:1123:2618:33896 1:N:0:TCTGCAAG+GCTGCACT  
GGTCATGATCGTGACGCGTGGTCTAATGACAAATCGACACGTAAGCGTACGGAGGTGTCCCCGGCGCG  
GGCAAGCCAGTAATATTATATTGGCTTGCCCCACGGTCTGCGGTAAGATTCCCCTGCGGGGCCTATGG  
AATTCTATTTGAATT

+

FFFFFFFFFFFFFFFFFFFFFFFFFFFFFFFFFFFFFFFFFFFFFFFFFFFFFFFFFFFFFFFFFFFFFFFF  
FFFFF:FF,,FF,F,FFFF:F:F::F,FFFF:FFFF,:F:FFFF:FF,:FFF:FF:FFF:F:F,,F  
FF:F:FF,FF,,F:F

@A00721:190:HGJW7DSXY:4:1142:27263:14387 1:N:0:TCTGCAAG+GCTGCACT  
GGTCATGATCGTGACGCGTGGTCTAATGACAAATCGACACGTAAGCGTACGGAGGTGTCCCCGGCGCG  
GGCAAGCCAGTAATATTATATTGGCTTGCCCCACGGTCTGCGGTAAGATGCCCTGCGGGGCCTATGG  
AATTCTATTTGAATT

+

FFFFFF:FFFF:FFFFFF:FFFFFFFFFFFF:FFFFFFFFFFFFFFFFFFFFFFFFFFFFFFFFFFFF  
FFFFFFFFF,,FFF,FFF:,,:F,FF,F,FF::,,F::F,FF,:FF::FF:FFFFFFFF:FFF,F:::  
FF:F:FF,FF:FF,F

@A00721:190:HGJW7DSXY:4:2362:28357:34757 1:N:0:TCTGCAAG+GCTGCACT  
GGTCATGATCGTGACGCGTGGTCTAATGACAAATCGACACGTAAGCGTACGGAGGTGTCCCCGGCGCG  
GGCAAGCCAGTAATATTATATTGGCTTGCCCCACGGTCTGCGGTAAGATGCCCTGCGGGGCCTATGG  
AATTCTATTTGAATT

+

FFFFFFFFFFFFFFFFFFFFFFFFFFFFFFFFFFFFFFFFFFFFFFFFFFFFFFFFFFFFFFFFFFFFFFFF  
FFFFFFFFFFFFFF:FFFFFFFFFFFFFFFFFFFFFFFFFFFFFFFFFFFFFFFFFFFFFFFFFFFFFFFF  
F:FFFF:FFFFFFF

@A00721:190:HGJW7DSXY:4:2412:30689:25332 1:N:0:TCTGCAAG+GCTGCACT  
GGTCATGATCGTGACGCGTGGTCTAATGACAAATCGACACGTAAGCGTACGGAGGTGTCCCCGGCGCG  
GGCAAGCCAGTAATATTATATTGGCTTGCCCCACGGTCTGCGGTAAGATGCCCTGCGGGGCCTATGG  
AATTCTATTTGAATT

+  
FFFFFFFFFFFFFFFFFFFFFFFFFFFFFFFFFFFFFFFFFFFFFFFFFFFFFFFFFFFFFFFFFFFFFFFF  
FF:FF,FF::,FF:F,::,FF,FF:F,FFFF::,::,,::FF::FFF:,FFF,FFFFFF,F,FFFF  
F:,FFF,,F:,::,F  
@A00721:190:HGJW7DSXY:4:2441:26666:24251 1:N:0:TCTGCAAG+GCTGCACT  
GGTCATGATCGTGACGCGTGGTCTAATGACAAATCGACACGTAAGCGTACGGAGGTGTCCCCGGCGCG  
GGCAAGCCAGTAATATTATATTGGCTTGCCCCACGGTCTGCGGTAAGATGCCCTGCGGGGCCTATGG  
AATTCTATTTGAATT

+  
FFFFFFFFFFFFFFFFFFFFFFFFFFFFFFFFFFFFFFFFFFFFFFFFFFFFFFFFFFFFFFFFFFFFFFFF  
FFFFF,FF:FFFF:FFF:FFF:,::FFFFFFFF:FF:F:,FFFF:FF,,FFF,:FFFFFFFF,FFFF  
FF,FFF::FFFF:F  
@A00721:190:HGJW7DSXY:4:1214:3179:35180 1:N:0:TCTGCAAG+GCTGCACT  
TACGATCATAACCATCTAAAAAATGAATTCTATAGTCCCCGCAGGGGCATCTTACCGCAGACCGTGGG  
GCAAGCCAATATAATATTACTGGCTTGCCCGCGCCGGGGACACCTCCGTACGCTTACGTGTGATTG  
TCATTAGACCACGCG

+  
FFFFFFFFFFFFFFFFFFFFFFFFFFFFFFFFFFFFFFFFFFFFFFFFFFFFFFFFFFFFFFFFFFFFFFFF  
FFF:FFFFFFFFFFFFFFFFFFFFFFFFFFFFFFFFFFFFFFFFFFFFFFFFFFFFFFFFFFFFFFFFFFF:FFF  
FFFFFFFFFFFFFFFFF  
@A00721:190:HGJW7DSXY:4:1417:10936:12884 1:N:0:TCTGCAAG+GCTGCACT  
TACGATCATAACCATCTAAAAAATGAATTCTATAGTCCCCGCAGGGGCATCTTACCGCAGACCGTGGG  
GCAAGCCAATATAATATTACTGGCTTGCCCGCGCCGGGGACACCTCCGTACGCTTACGTGTGATTG  
TCATTAGACCACGCG

+  
FFFFFFFFFFFFFFFFFFFFFFFFFFFFFFFFFFFFFFFFFFFFFFFFFFFFFFFFFFFFFFFFFFFFFFFF  
FFFFFFFFFFFFFFFFFFFFFFFFFFFFFFFFFFFFFFFFFFFFFFFFFFFFFFFFFFFFFFFFFFFFFFFF  
FFFFFFFFFFFFFFFFF  
@A00721:190:HGJW7DSXY:4:1621:25852:28729 1:N:0:TCTGCAAG+GCTGCACT  
TCCATAGGCCCCGCAGGGGCATCTTACCGCAGACCGTGGGGCAAGCCAATATAATATTACTGGCTTGC  
CCGCGCCGGGGACACCTCCGTACGCTTACGTGTGATTGTCTATTAGACCACGCGTCACGATCATAAC  
CATCTAAAAAATGAA

+  
FFFFFFFFFFFFFFFFFFFFFFFFFFFFFFFFFFFFFFFFFFFFFFFFFFFFFFFFFFFFFFFFFFFFFFFF  
FFFFFFFFFFFFFFFFFFFFFFFFFFFFFFFFFFFFFFFFFFFFFFFFFFFFFFFFFFFFFFFFFFFFFFFF  
FFFFFFFFF:FFFFF  
@A00721:190:HGJW7DSXY:4:1656:13892:10770 1:N:0:TCTGCAAG+GCTGCACT  
TCCATAGGCCCCGCAGGGGCATCTTACCGCAGACCGTGGGGCAAGCCAATATAATATTACTGGCTTGC  
CCGCGCCGGGGACACCTCCGTACGCTTACGTGTGATTGTCTATTAGACCACGCGTCACGATCATAAC  
CATCTAAAAAATGAA

+  
FFFFFFFFFFFFFFFFFFFFFFFFFFFFFFFFFFFFFFFFFFFFFFFFFFFFFFFFFFFFFFFFFFFFFFFF  
FFFFFFFFFFFFFFFFFFFFFFFFFFFFFFFFFFFFFFFFFFFFFFFFFFFFFFFFFFFFFFFFFFFFFFFF  
FFFFF:FFFFFFFFF  
@A00721:190:HGJW7DSXY:4:2253:9100:6104 1:N:0:TCTGCAAG+GCTGCACT  
TCCATAGGCCCCGCAGGGGCATCTTACCGCAGACCGTGGGGCAAGCCAATATAATATTACTGGCTTGC  
CCGCGCCGGGGACACCTCCGTACGCTTACGTGTGATTGTCTATTAGACCACGCGTCACGATCATAAC  
CATCTAAACAATGAA

+  
F:FFFFFFFFFFFFFFFFFFFFFFFFFFFFFFFFFFFFFFFFFFFFFFFFFFFFFFFFFFFFFFFFFFFF  
FFFFF,,F:F:FF:F:FFF::,F:FF,FF,F::,FF:FFFF,,F:F:FFFFFFFFFFFFFFFFFFFF,FF:F  
FFF::FFF,FFFFF  
@A00721:190:HGJW7DSXY:4:1103:9561:34867 1:N:0:TCTGCAAG+GCTGCACT  
CCATAGGCCCCGCAGGGGCATCTTACCGCAGACCGTGGGGCAAGCCAATATAATATTACTGGCTTGCC

CGCGCCGGGGACACCTCCGTACGCTTACGTGTCGATTTGTCATTAGACCACGCGTCACGATCATAACC  
ATCTAAAAAATGAAT

+

FFFFFFFFFFFFFFFFFFFFFFFFFFFFFFFFFFFFFFFFFFFFFFFFFFFFFFFFFFFFFFFF:FFF:FFFFFFFFFFFF  
FFFFFFFFFFFFFFFFFFFFFFFFFFFFFFFFFFFFFFFFFFFFFFFFFFFFFFFFFFFFFFFF:FF:FFFFFFFFFFFFFFFFFFFF  
FFFFFFFFFFFFFFFFFFFF

@A00721:190:HGJW7DSXY:4:1121:22996:18646 1:N:0:TCTGCAAG+GCTGCACT  
CCATAGGCCCCGCAGGGGCATCTTACCGCAGACCGTGGGGCAAGCCAATATAATATTACTGGCTTGCC  
CGCGCCGGGGACACCTCCGTACGCTTACGTGTCGATTTGTCATTAGACCACGCGTCACGATCATAACC  
ATCTAAAAAATGAAT

+

FFFFFFFFFFFFFFFFFFFFFFFFFFFFFFFFFFFFFFFFFFFFFFFFFFFFFFFFFFFFFFFFFFFF  
FFFFFFFFFFFFFFFFFFFFFFFFFFFFFFFFFFFFFFFFFFFFFFFFFFFFFFFFFFFFFFFFFFFF  
FFFFFFFFFFFFFFFFFFFF

@A00721:190:HGJW7DSXY:4:1210:2862:33442 1:N:0:TCTGCAAG+GCTGCACT  
CCATAGGCCCCGCAGGGGCATCTTACCGCAGACCGTGGGGCAAGCCAATATAATATTACTGGCTTGCC  
CGCGCCGGGGACACCTCCGTACGCTTACGTGTCGATTTGTCATTAGACCACGCGTCACGATCATAACC  
ATCTAAAAAATGAA

+

FFFFFFFFFFFFFFFFFFFFFFFFFFFFFFFFFFFFFFFFFFFFFFFFFFFFFFFFFFFFFFFFFFFF  
FFFFFFFFFFFFFFFFFFFFFFFFFFFFFFFFFFFFFFFFFFFFFFFFFFFFFFFFFFFFFFFFFFFF:F:FFFFFFFFFFFFFFFFFFFF  
FFFFFFFFFFFFFFFFFFFF

@A00721:190:HGJW7DSXY:4:1223:10917:35900 1:N:0:TCTGCAAG+GCTGCACT  
CCATAGGCCCCGCAGGGGCATCTTACCGCAGACCGTGGGGCAAGCCAATATAATATTACTGGCTTGCC  
CGCGCCGGGGACACCTCCGTACGCTTACGTGTCGATTTGTCATTAGACCACGCGTCACGATCATAACC  
ATCTAAAAAATGAAT

+

FFFFFFFFFFFFFFFFFFFFFFFFFFFFFFFFFFFFFFFFFFFFFFFFFFFFFFFFFFFFFFFFFFFF:FF  
FFFFFFFFFFFFFFFFFFFFFFFFFFFFFFFFFFFFFFFFFFFFFFFFFFFFFFFFFFFFFFFFFFFF:FFFFFFFFFFFFFFFFFFFF  
FFFFFFFFFFFFFFFFFFFF

@A00721:190:HGJW7DSXY:4:1234:28827:29277 1:N:0:TCTGCAAG+GCTGCACT  
CCATAGGCCCCGCAGGGGCATCTTACCGCAGACCGTGGGGCAAGCCAATATAATATTACTGGCTTGCC  
CGCGCCGGGGACACCTCCGTACGCTTACGTGTCGATTTGTCATTAGACCACGCGTCACGATCATAACC  
ATCTAAAAAATGAAT

+

FFFFFFFFFFFFFFFFFFFFFFFFFFFFFFFFFFFFFFFFFFFFFFFFFFFFFFFFFFFFFFFFFFFF  
FFFFFFFFFFFFFFFFFFFFFFFFFFFFFFFFFFFFFFFFFFFFFFFFFFFFFFFFFFFFFFFFFFFF,FFFFFFFFFFFFFFFFFFFF::FF:FFFFFFFFFFFFFFFFFFFF  
FFFFFFFFFFFFFFFFFFFF

@A00721:190:HGJW7DSXY:4:1240:2790:33505 1:N:0:TCTGCAAG+GCTGCACT  
CCATAGGCCCCGCAGGGGCATCTTACCGCAGACCGTGGGGCAAGCCAATATAATATTACTGGCTTGCC  
CGCGCCGGGGACACCTCCGTACGCTTACGTGTCGATTTGTCATTAGACCACGCGTCACGATCATAACC  
ATCTAAAAAATGAAT

+

FFFFFFFFFFFFFFFFFFFFFFFFFFFFFFFFFFFFFFFFFFFFFFFFFFFFFFFFFFFFFFFFFFFF  
FFFFFFFFFFFFFFFFFFFFFFFFFFFFFFFFFFFFFFFFFFFFFFFFFFFFFFFFFFFFFFFFFFFF:FFFF::FFFFFFFFFFFF:FFFFFF,FFFF:FF  
FFFFFFFFFFFF:FFF:

@A00721:190:HGJW7DSXY:4:1246:3739:17049 1:N:0:TCTGCAAG+GCTGCACT  
CCATAGGCCCCGCAGGGGCATCTTACCGCAGACCGTGGGGCAAGCCAATATAATATTACTGGCTTGCC  
CGCGCCGGGGACACCTCCGTACGCTTACGTGTCGATTTGTCATTAGACCACGCGTCACGATCATAACC  
ATCTAAAAAATGAAT

+

FF:FFFFFFFFFFFFFFFFFFFF:FFFFFFFFFFFFFFFFFFFFFFFFFFFFFFFFFFFFFFFF:FFFFFFFFFFFF:FFFF  
FFFFFFFFFFFFFFFFFFFFFFFFFFFFFFFFFFFFFFFFFFFFFFFFFFFFFFFFFFFFFFFFFFFF:F:FFFFFFFFFFFFFFFFFFFF  
FFFFFFFFFFFFFFFFFFFF

@A00721:190:HGJW7DSXY:4:1530:25048:7670 1:N:0:TCTGCAAG+GCTGCACT  
CCATAGGCCCGCAGGGGCATCTTACCGCAGACCGTGGGGCAAGCCAATATAATATTACTGGCTTGCC  
CGCGCCGGGGACACCTCCGTACGCTTACGTGTCGATTTGTCATTAGACCACGCGTCACGATCATAACC  
ATCTAAAAAATGAAT

```

FFFFFFFFFFFFFFFFFFFFFFFFFFFFFFFF:FFFFFFFFFFFFFFFFFFFFFFFFFFFFFFFF
FFFFFFFFFFFFFFFFFFFFFFFFFFFFFFFF:FFFFFFFFFFFFFFFFFFFFFFFFFFFFFFFF
FFFFFFFFFFFFFFFF

```

+

[illegible]

+

[illegible]

+

[illegible]

+

[illegible]

+

[illegible]

+

[illegible]



[illegible]

```

FFFFFFFFFFFFFFFFFFFFFFFFFFFFFFFFFFFFFFFF:FFFFFFFFFFFFFFFFFFFFFFFFFFFFFFFF
FFFFFFFFFFFFFFFFFFFFFFFFFFFFFFFFFFFFFFFF:FFFFFFFFFFFFFFFFFFFFFFFFFFFFFFFF
FFFFFFFFFFFFFFFF

```

[illegible][illegible][illegible][illegible]

```
FFFFFFFFFFFFFFFFFFFFFFFFFFFFFFFFFFFFFFFFFFFFFFFFFFFFFFFFFFFFFFFFFF:FFFFFFFFFFFFFFFFFF  
FFFFFFFFFFFFFFFFFFFFFFFFFFFFFFFFFFFFFFFFFFFFFFFFFFFFFFFFFFFFFFFFFF:FFFFFFFFFFFFFFFFFFFFF,FFFFFFFFFFFF  
:FFFFFFFFFFFFFFFFFFFF
```

@A00721:190:HGJW7DSXY:4:2355:14805:9283 1:N:0:TCTGCAAG+GCTGCACT  
GGCCCTGCAGGGGCATCTTACCGCAGACCGTGGGGCAAGCCAATATAATATTACTGGCTTGCCCGCGC



CGGGGACACCTCCGTACGCTTACGTGTCGATTTGTCATTAGACCACGCGTCACGATCATAACCATCTA  
AAAAATGAATAGATC

[illegible] $+$ [illegible]

+

[illegible]

+

[illegible] $+$ [illegible]

+

[illegible]

+

[illegible]

$+$ 

+

+

+

+

+

+

[illegible]

FFFFFFFFFFFFFFFF,FFFFFFFFFFFFFFFFFFFFFFFFFFFFFFFFFFFFFFFF  
FFFFFFFFF::FFF

@A00721:190:HGJW7DSXY:4:1262:31575:33661 1:N:0:TCTGCAAG+GCTGCACT  
CCCCGCAGGGGCATCTTACCGCAGACCGTGGGGCAAGCCAATATAATATTACTGGCTTGCCCGCGCCG  
GGGACACCTCCGTACGCTTACGTGTCGATTTGTCATTAGACCACGCGTCACGATCATGACCATCTAAA  
AAATGAATTCTATAG

+  
FFFFFFFFFFFFFFFFFFFFFFFFFFFFFFFFFFFFFFFFFFFFFFFFFFFFFFFFFFFFFFFF  
FFFFFFFFFFFFFFFFFFFFFFFFFFFFFFFFFFFFFFFFFFFFFFFFFFFFFFFFFFFFFFFF:FFFFFFFFF:FF  
FFFFFFFFFFFFFFFF

@A00721:190:HGJW7DSXY:4:1311:4851:26396 1:N:0:TCTGCAAG+GCTGCACT  
CCCCGCAGGGGCATCTTACCGCAGACCGTGGGGCAAGCCAATATAATATTACTGGCTTGCCCGCGCCG  
GGGACACCTCCGTACGCTTACGTGTCGATTTGTCATTAGACCACGCGTCACGATCATAACCATCTAAA  
AAATGAATTCTATAG

+  
FFFFFFFFFFFFFFFFFFFFFFFFFFFFFFFFFFFFFFFFFFFFFFFFFFFFFFFFFFFFFFFF  
FFFFFFFFFFFFFFFFFFFFFFFFFFFFFFFFFFFFFFFFFFFFFFFFFFFFFFFFFFFFFFFF  
FFFFFFFFFFFFFF,FF

@A00721:190:HGJW7DSXY:4:1522:2410:36793 1:N:0:TCTGCAAG+GCTGCACT  
CCCCGCAGGGGCATCTTACCGCAGACCGTGGGGCAAGCCAATATAATATTACTGGCTTGCCCGCGCCG  
GGGACACCTCCGTACGCTTACGTGTCGATTTGTCATTAGACCACGCGTCACGATCATGACCATCTAAA  
AAATGAATTCTATAG

+  
FFFFFFFFFFFFFFFFFFFFFFFFFFFFFFFFFFFFFFFFFFFFFFFFFFFFFFFFFFFFFFFF  
FFFFFFFFFFFFFFFFFFFFFFFFFFFFFFFFFFFFFFFFFFFFFFFFFFFFFFFFFFFFFFFF  
FFFFFFF,FF:F::FF

@A00721:190:HGJW7DSXY:4:1614:4833:35790 1:N:0:TCTGCAAG+GCTGCACT  
CCCCGCAGGGGCATCTTACCGCAGACCGTGGGGCAAGCCAATATAATATTACTGGCTTGCCCGCGCCG  
GGGACACCTCCGTACGCTTACGTGTCGATTTGTCATTAGACCACGCGTCACGATCATGACCATCTAAA  
AAATGAATTCTATAG

+  
FFFFFFFFFFFFFFFFFFFFFFFFFFFFFFFFFFFFFFFFFFFFFFFFFFFFFFFFFFFFFFFF  
FFFFFFFFFFFFFFFFFFFFFFFFFFFFFFFFFFFFFFFFFFFFFFFFFFFFFFFFFFFFFFFF  
FFFFFFFFFF:F:,FF

@A00721:190:HGJW7DSXY:4:1616:6894:26710 1:N:0:TCTGCAAG+GCTGCACT  
CCCCGCAGGGGCATCTTACCGCAGACCGTGGGGCAAGCCAATATAATATTACTGGCTTGCCCGCGCCG  
GGGACACCTCCGTACGCTTACGTGTCGATTTGTCATTAGACCACGCGTCACGATCATAACCATCTAAA  
AAATGAATTCTATAG

+  
FFFFFFFFFFFFFFFFFFFFFFFFFFFFFFFFFFFFFFFFFFFFFFFFFFFFFFFFFFFFFFFF  
FFFFFFFFFFFFFFFFFFFFFFFFFFFFFFFFFFFFFFFFFFFFFFFFFFFFFFFFFFFFFFFF  
FFFFFFFFFFFF,FFF

@A00721:190:HGJW7DSXY:4:2123:21151:29168 1:N:0:TCTGCAAG+GCTGCACT  
CCCCGCAGGGGCATCTTACCGCAGACCGTGGGGCAAGCCGATATAATATTACTGGCTTGCCCGCGCCG  
GGGACACCTCCGTACGCTTACGTGTCGATTTGTCATTAGACCACGCGTCACGATCATGACCATCTAAA  
AAATGAATTCTATAG

+  
FFFFFFFFFFFFFFFFFFFFFFFFFFFFFFFFFFFFFFFFFFFFFFFFFFFFFFFFFFFFFFFF  
FFFFFFFFFFFFFFFFFFFFFFFFFFFFFFFFFFFFFFFFFFFFFFFFFFFFFFFFFFFFFFFF,FF  
FFFFFFFFFFFFFFFF

@A00721:190:HGJW7DSXY:4:2206:16794:32675 1:N:0:TCTGCAAG+GCTGCACT  
CCCCGCAGGGGCATCTTACCGCAGACCGTGGGGCAAGCCAATATAATATTACTGGCTTGCCCGCGCCG  
GGGACACCTCCGTACGCTTACGTGTCGATTTGTCATTAGACCACGCGTCACGATCATAACCATCTAAA  
AAATGAATTCTATAG

+  
FFFFFFFFFFFFFFFFFFFFFFFFFFFFFFFFFFFFFFFFFFFFFFFFFFFFFFFFFFFFFFFFFFFFFFFF  
FFFFFFFFFFFFFFFFFFFFFFFFFFFFFFFFFFFFFFFFFFFFFFFFFFFFFFFFFFFFFFFFFFFFFFFF:FFF:FFFFFFFF  
FFFF:FFFF:FFFF  
@A00721:190:HGJW7DSXY:4:2209:17635:1438 1:N:0:TCTGCAAG+GCTGCACT  
CCCCGCAGGGGCATCTTACCGCAGACCGTGGGGCAAGCCAATATAATATTACTGGCTTGCCCGCGCCG  
GGGACACCTCCGTACGCTTACGTGTCGATTTGTCATTAGACCACGCGTCACGATCATGACCATCTAAA  
AAATGAATTCTAT

+  
FFFFFFFFFFFFFFFFFFFFFFFFFFFFFFFFFFFFFFFFFFFFFFFFFFFFFFFFFFFFFFFFFFFFFFFF  
FFFFFFFFFFFFFFFFFFFFFFFFFFFFFFFFFFFFFFFFFFFFFFFFFFFFFFFFFFFFFFFFFFFFFFFF:F:FFFFFFFF  
FF:FFFFFFFF:  
@A00721:190:HGJW7DSXY:4:2209:16911:1783 1:N:0:TCTGCAAG+GCTGCACT  
CCCCGCAGGGGCATCTTACCGCAGACCGTGGGGCAAGCCAATATAATATTACTGGCTTGCCCGCGCCG  
GGGACACCTCCGTACGCTTACGTGTCGATTTGTCATTAGACCACGCGTCACGATCATGACCATCTAAA  
AAATGAATTCTATAG

+  
FFFFFFFFFFFFFFFFFFFFFFFFFFFFFFFFFFFFFFFFFFFFFFFFFFFFFFFFFFFFFFFFFFFFFFFF  
FFFFFFFFFFFFFFFFFFFFFFFF,FFFFFFFFFFFFFFFFFFFFFFFFFFFFFFFFFFFFFFFFFFFFFFFF  
FFFFFFFFFFFFFFFF  
@A00721:190:HGJW7DSXY:4:2304:12084:33254 1:N:0:TCTGCAAG+GCTGCACT  
CCCCGCAGGGGCATCTTACCGCAGACCGTGGGGCAAGCCAATATAATATTACTGGCTTGCCCGCGCCG  
GGGACACCTCCGTACGCTTACGTGTCGATTTGTCATTAGACCACGCGTCACGATCATAACCATCTAAA  
AAATGAATTCTATAG

+  
FFFFFFFFFFFFFFFFFFFFFFFFFFFFFFFFFFFFFFFFFFFFFFFFFFFFFFFFFFFFFFFFFFFFFFFF  
FFFFFFFFFFFFFFFFFFFFFFFFFFFFFFFFFFFFFFFFFFFFFFFFFFFFFFFFFFFFFFFFFFFFFFFF:FFFFFFFF  
FFFFFFFFFFFFFFFFFFFFFFFFFFFFFFFFFFFFFFFFFFFFFFFFFFFFFFFFFFFFFFFFFFFFFFFF:FFFFFFFF  
FFFFFFFFFFFFFFFF:  
@A00721:190:HGJW7DSXY:4:2509:10384:30686 1:N:0:TCTGCAAG+GCTGCACT  
CCCCGCAGGGGCATCTTACCGCAGACCGTGGGGCAAGCCAATATAATATTACTGGCTTGCCCGCGCCG  
GGGACACCTCCGTACGCTTACGTGTCGATTTGTCATTAGACCACGCGTCACGATCATAACCATCTAAA  
AAATGAATTCTATAG

+  
FFFFFFFFFFFFFFFFFFFFFFFFFFFFFFFFFFFFFFFFFFFFFFFFFFFFFFFFFFFFFFFFFFFFFFFF,FFFFFFFF  
FFFFFFFFFFFFFFFFFFFFFFFFFFFFFFFFFFFFFFFFFFFFFFFFFFFFFFFFFFFFFFFFFFFFFFFF:FF  
FFFFFF:FFF:FFFF  
@A00721:190:HGJW7DSXY:4:2608:5484:6887 1:N:0:TCTGCAAG+GCTGCACT  
CCCCGCAGGGGCATCTTACCGCAGACCGTGGGGCAAGCCAATATAATATTACTGGCTTGCCCGCGCCG  
GGGACACCTCCGTACGCTTACGTGTCGATTTGTCATTAGACCACGCGTCACGATCATGACCATCTAAA  
AAATGAATTCTATA

+  
FFFFFFFFFFFFFFFFFFFFFFFFFFFFFFFFFFFFFFFFFFFFFFFFFFFFFFFFFFFFFFFFFFFFFFFF  
FFFFFFFFFFFFFFFFFFFFFFFF,FFFFFFFFFFFFFFFFFFFFFFFFFFFFFFFFFFFFFFFFFFFFFFFF  
FFFFFFFFFFFFFF:F  
@A00721:190:HGJW7DSXY:4:2647:25852:7028 1:N:0:TCTGCAAG+GCTGCACT  
CCCCGCAGGGGCATCTTACCGCAGACCGTGGGGCAAGCCAATATAATATTACTGGCTTGCCCGCGCCG  
GGGACACCTCCGTACGCTTACGTGTCGATTTGTCATTAGACCACGCGTCACGATCATGACCATCTAAA  
AAATGAATTCTAGAG

+  
FFFFFFFFFFFFFFFFFFFFFFFFFFFFFFFFFFFFFFFFFFFFFFFFFFFFFFFFFFFFFFFFFFFFFFFF  
FFFFFFFFFFFFFFFFFFFFFFFFFFFFFFFFFFFFFFFFFFFFFFFF,FFFFFFFFFFFFFFFF,FFFFFFFF  
FF:FFF,:FFFF,FF  
@A00721:190:HGJW7DSXY:4:1123:28791:14653 1:N:0:TCTGCAAG+GCTGCACT  
CCCCGCAGGGGCATCTTACCGCAGACCGTGGGGCAAGCCAATATAATATTACTGGCTTGCCCGCGCCG

GGACACCTCCGTACGCTTACGTGTCGATTTGTCATTAGACCACGCGTCACGATCATAACCATCTAAAA  
AATGAATTCTATAGT

+

FFFFFFFFFFFFFFFFFFFFFFFFFFFFFFFFFFFFFFFFFFFFFFFFFFFFFFFFFFFFFFFFFFFFFFFF  
FFFFFFFFFFFFFFFFFFFFFFFFFFFFFFFFFFFFFFFFFFFFFFFFFFFFFFFFFFFFFFFFFFFFFFFF  
FFFFFFFFFFFFFF::F

@A00721:190:HGJW7DSXY:4:1367:31656:30514 1:N:0:TCTGCAAG+GCTGCACT  
CCCGCAGGGGCATCTTACCGCAGACCGTGGGGCAAGCCAATATAATATTACTGGCTTGCCCGCGCCGG  
GGACACCTCCGTACGCTTACGTGTCGATTTGTCATTAGACCACGCGTCACGATCATAACCATCTAAAA  
AATGAATTCTATAGT

+

FFFFFFFFFFFFFFFFFFFFFFFFFFFFFFFFFFFFFFFFFFFFFFFFFFFFFFFFFFFFFFFFFFFFFFFF  
FFFFFFFFFFFFFFFFFFFFFFFFFFFFFFFFFFFFFFFFFFFFFFFFFFFFFFFFFFFFFFFFFFFFFFFF  
FFFFFFFFFFFFFF::FF

@A00721:190:HGJW7DSXY:4:1402:4146:21793 1:N:0:TCTGCAAG+GCTGCACT  
CCCGCAGGGGCATCTTACCGCAGACCGTGGGGCAAGCCAATATAATATTACTGGCTTGCCCGCGCCGG  
GGACACCTCCGTACGCTTACGTGTCGATTTGTCATTAGACCACGCGTCACGATCATAACCATCTAAAA  
AATGAATTCTATAGT

+

FFFFFFFFFFFFFFFFFFFFFFFFFFFFFFFFFFFFFFFFFFFFFFFFFFFFFFFFFFFFFFFFFFFFFFFF  
FFFFFFFFFFFFFFFFFFFFFFFFFFFFFFFFFFFFFFFFFFFFFFFFFFFFFFFFFFFFFFFFFFFFFFFF  
FFFFFFF,FF,FFFF

@A00721:190:HGJW7DSXY:4:1464:24804:36276 1:N:0:TCTGCAAG+GCTGCACT  
CCCGCAGGGGCATCTTACCGCAGACCGTGGGGCAAGCCAATATAATATTACTGGCTTGCCCGCGCCGG  
GGACACCTCCGTACGCTTACGTGTCGATTTGTCATTAGACCACGCGTCACGATCATAACCATCTAAAA  
AATGAATTCTATAGT

+

FFFFFFFFFFFFFFFFFFFFFFFFFFFFFFFFFFFFFFFFFFFFFFFFFFFFFFFFFFFFFFFFFFFFFFFF  
FFFFFFFFFFFFFFFFFFFFFFFFFFFFFFFFFFFFFFFFFFFFFFFFFFFFFFFFFFFFFFFFFFFFFFFF  
FFFFFFFFFFFFFFF

@A00721:190:HGJW7DSXY:4:1470:32072:7811 1:N:0:TCTGCAAG+GCTGCACT  
CCCGCAGGGGCATCTTACCGCAGACCGTGGGGCAAGCCAATATAATATTACTGGCTTGCCCGCGCCGG  
GGACACCTCCGTACGCTTACGTGTCGATTTGTCATTAGACCACGCGTCACGATCATAACCATCTAAAA  
AATGAATTCTATAGT

+

FFFFFFFFFFFFFFFFFFFFFFFFFFFFFFFFFFFFFFFFFFFFFFFFFFFFFFFFFFFFFFFFFFFFFFFF  
FFFFFFFFFFFFFFFFFFFFFFFFFFFFFFFFFFFFFFFFFFFFFFFFFFFFFFFFFFFFFFFFFFFFFFFF  
FFFFF,FF:FFFFF

@A00721:190:HGJW7DSXY:4:1566:24053:9893 1:N:0:TCTGCAAG+GCTGCACT  
CCCGCAGGGGCATCTTACCGCAGACCGTGGGGCAAGCCAATATAATATTACTGGCTTGCCCGCGCCGG  
GGACACCTCCGTACGCTTACGTGTCGATTTGTCATTAGACCACGCGTCACGATCATAACCATCTAAAA  
AATGAATTCTATAGT

+

FFFFFFFFFFFFFFFFFFFFFFFFFFFFFFFFFFFFFFFFFFFFFFFFFFFFFFFFFFFFFFFFFFFFFFFF  
FFFFFFFFFFFFFFFFFFFFFFFFFFFFFFFFFFFFFFFFFFFFFFFFFFFFFFFFFFFFFFFFFFFFFFFF  
FFFFFFFFFFFFFF:FF

@A00721:190:HGJW7DSXY:4:1667:12301:20948 1:N:0:TCTGCAAG+GCTGCACT  
CCCGCAGGGGCATCTTACCGCAGACCGTGGGGCAAGCCAATATAATATTACTGGCTTGCCCGCGCCGG  
GGACACCTCCGTACGCTTACGTGTCGATTTGTCATTAGACCACGCGTCACGATCATGACCATCTAAAA  
AATGAATTCTATAG

+

FFFFFFFFFFFFFFFFFFFFFFF,FFFFFF,,FFFFFFFF:FF:,FFFFFF,FFFFFF:,FFFF:FFFFF  
:FFFF:FFFFF,F:FF,F:FF:F:FFF:,FFFF:FF,FFFFFFFFFFFFFFFFFFFF,FF:FFFFF  
FF:FFFF:FF:,F:

$+$ 

+

 $+$ 

+

 $+$  $+$ 

+

FFFFFF:FFFFFFFFFFFFFFFFFFFFFFFF:FFFF:FFFF,FFFFFF:FFFFFFFFFFFF,FFFFFFF  
FFFFFF,F:FFFFFF

@A00721:190:HGJW7DSXY:4:2344:31873:27007 1:N:0:TCTGCAAG+GCTGCACT  
CGTCACTATAGAATTCATTTTTTAGATGGTCATGATCGTGACGCGTGGTCTAATGACAAATCGACACG  
TAAGCGTACGGAGGTGTCCCCGGCGCGGGCAAGCCAGTAATATTATATTGGCTTGCCCCACGGTCTGC  
GGTAAGATGCCCTG

+

FFFFFFFFFFFFFFFFFFFFFFFFFFFFFFFFFFFFFFFFFFFFFFFFFFFFFFFFFFFFFFFF:FFFFFFFFFFFFF  
F:FFFFFFFFFFFFFFFFFFFFFFFFFFFFFFFFFFFFFFFFFFFFFFFFFFFFFFFFFFFFF,FFFF,FFFFFFFF:FF:  
FFFFFFFFF:FFFFF

@A00721:190:HGJW7DSXY:4:2355:20971:13479 1:N:0:TCTGCAAG+GCTGCACT  
CGTCACTATAGAATTCATTTTTTAGATGGTCATGATCGTGACGCGTGGTCTAATGACAAATCGACACG  
TAAGCGTACGGAGGTGTCCCCGGCGCGGGCAAGCCAGTAATATTATATTGGCTTGCCCCACGGTCTGC  
GGTAAGATGCCCTG

+

FFFFFFFFFFFFFFFFFFFFFFFFFFFFFFFFFFFFFFFFFFFFFFFFFFFFFFFFFFFFFFFFFFFFFFFF  
FFFFFFFFFFFFFFFFFFFFFFFFFFFFFFFFFFFFFFFFFFFFFFFFFFFFFFFFFFFFFFFF:FFFFFFFFFFFF:FFFFFFFFFFFFFFFF  
FFFFF:FFFFFFFFF

@A00721:190:HGJW7DSXY:4:2167:4200:32847 1:N:0:TCTGCAAG+GCTGCACT  
AGGGGCATCTTACCGCAGACCGTGGGGCAAGCCAATATAATATTACTGGCTTGCCCGCGCCGGGGACA  
CCTCCGTACGCTTACGTGTCGATTTGTCATTAGACCACGCGTCACGATCATAACCATCTAAAAAATGA  
ATTCTATAGTG

+

FF:F,:F,FFFF:FFFF,FFF:,FFFF::,,F:FFFFFF,FF,FF:FFFFFF:FF:FF,F:,FFF:F  
FFFF:FFFFFFF,FFFFFFFFF,F,FFFFFFFF:FFFF:FF::FFFFFFFFFFFFFFFFF,:FFFFFFFFF:  
F,FF,FFF:FF

@A00721:190:HGJW7DSXY:4:1147:31837:24972 1:N:0:TCTGCAAG+GCTGCACT  
ACCGCAGACCGTGGGGCAAGCCAATATAATATTACTGGCTTGCCCGCGCCGGGGACACCTCCGTACGC  
TTACGTGTCGATTTGTCATTAGACCACGCGTCACGATCATAACCATCTAAAAAATGAATTCTATAGTG  
ACGCAGTAGAATCGA

+

FFFFFF:FFFF::FFFF:FFFF:FFFF:FFFFFF:FFF,FFFFFFFFF::FFFFFFFFFFFFFFFFF  
:FFFFFFFFFFFFFFFFFFFF:FF:FFFFFFFFFFFFFFFFFFFF:FFFFFFFFFFFFFFFFFFFF,FF,, :FFF  
:::FF:FFF:FFFFF

@A00721:190:HGJW7DSXY:4:1147:31783:25160 1:N:0:TCTGCAAG+GCTGCACT  
ACCGCAGACCGTGGGGCAAGCCAATATAATATTACTGGCTTGCCCGCGCCGGGGACACCTCCGTACGC  
TTACGTGTCGATTTGTCATTAGACCACGCGTCACGATCATAACCATCTAAAAAATGAATTCTATAGTG  
ACGCAGTAGAATCGA

+

FFFFFFFFFFFFFFFFFFFFFFFFFFFFFFFFFFFFFFFFFFFFFFFFFFFFFFFFFFFFFFFFFFFFFFFF  
FFFFFFFFFFFFFFFFFFFFFFFFFFFFFFFFFFFFFFFFFFFFFFFFFFFFFFFFFFFFFFFFFFFFFFFF  
FFFFFFFFFFFFFFFFF

@A00721:190:HGJW7DSXY:4:1526:22272:35462 1:N:0:TCTGCAAG+GCTGCACT  
ACCGCAGACCGTGGGGCAAGCCAATATAATATTACTGGCTTGCCCGCGCCGGGGACACCTCCGTACGC  
TTACGTGTCGATTTGTCATTAGACCACGCGTCACGATCATAACCATCTAAAAAATGAATTCTATAGTG  
ACGCAGTAGAATCGA

+

FFFFFFFFFFFFFFFFFFFFFFFFFFFFFFFFFFFFFFFFFFFFFFFFFFFFFFFFFFFFFFFFFFFFFFFF  
FFFFFFFFF:FFFFFFFFFFFFFFFFFFFFFFFFFFFFFFFFFFFFFFFFFFFFFFFFFFFFFFFFFFFF:FFFF  
FFFFFFFFFFFFFFFFF

@A00721:190:HGJW7DSXY:4:1620:30427:20337 1:N:0:TCTGCAAG+GCTGCACT  
ACCGCAGACCGTGGGGCAAGCCAATATAATATTACTGGCTTGCCCGCGCCGGGGACACCTCCGTACGC  
TTACGTGTCGATTTGTCATTAGACCACGCGTCACGATCATAACCATCTAAAAAATGAATTCTATAGTG  
ACGCAGTAGAATCGA

+  
FFFFFFFFFFFFFFFFFFFFFFFFFFFFFFFFFFFFFFFFFFFFFFFFFFFFFFFFFFFFFFFFFFFFFFFF  
FFFFFFFFFFFFFFFFFFFFFFFFFFFFFFFFFFFFFFFFFFFFFFFFFFFFFFFFFFFFFFFFFFFFFFFF  
FFFFFFFFFFFFFFFF

@A00721:190:HGJW7DSXY:4:1110:23321:23406 1:N:0:TCTGCAAG+GCTGCACT  
GCCGCAGACCGTGGGGCAAGCCAATATAATATTACTGGCTTGCCCGCGCCGGGGACACCTCCGTACGC  
TTACGTGTCGATTTGTCATTAGACCACGCGTCACGATCATAACCATCTAAAAAATGAATTCTATAGTG  
ACGCAGTAGAATCGA

+  
FFFFFFFFFFFFFFFFFFFFFFFFFFFFFFFFFFFFFFFFFFFFFFFFFFFFFFFFFFFFFFFFFFFFFFFF  
FFFFFFFFFFFFFFFFFFFFFFFFFFFFFFFFFFFFFFFFFFFFFFFFFFFFFFFFFFFFFFFFFFFFFFFF  
FFFF,FFFFFFFF

@A00721:190:HGJW7DSXY:4:2320:20745:14027 1:N:0:TCTGCAAG+GCTGCACT  
GCCGCAGACCGTGGGGCAAGCCAATATAATATTACTGGCTTGCCCGCGCCGGGGACACCTCCGTACGC  
TTACGTGTCGATTTGTCATTAGACCACGCGTCACGATCATAACCATCTAAAAAATGAATTCTATAGTG  
ACGCAGTAGAATCGA

+  
FFFFFFFFFFFFFFFFFFFFFFFFFFFFFFFFFFFFFFFFFFFFFFFFFFFFFFFFFFFFFFFFFFFFFFFF  
FFFFFFFFFFFFFFFFFFFFFFFFFFFFFFFFFFFFFFFFFFFFFFFFFFFFFFFFFFFFFFFFFFFFFFFF  
FFFFFFFFFFFFFFFF

@A00721:190:HGJW7DSXY:4:2331:11668:20447 1:N:0:TCTGCAAG+GCTGCACT  
GCCGCAGACCGTGGGGCAAGCCAATATAATATTACTGGCTTGCCCGCGCCGGGGACACCTCCGTACGC  
TTACGTGTCGATTTGTCATTAGACCACGCGTCACGATCATAACCATCTAAAAAATGAATTCTATAGTG  
ACGCAGTAGAATCGA

+  
FFFFFFFFFFFFFFFFFFFFFFFFFFFFFFFFFFFFFFFFFFFFFFFFFFFFFFFFFFFFFFFFFFFFFFFF  
FFFFFFFFFFFFFFFFFFFFFFFFFFFFFFFFFFFFFFFFFFFFFFFFFFFFFFFFFFFFFFFFFFFFFFFF  
FFFFFFFFFFFFFFFF

@A00721:190:HGJW7DSXY:4:2472:18331:9377 1:N:0:TCTGCAAG+GCTGCACT  
GCCGCAGACCGTGGGGCAAGCCAATATAATATTACTGGCTTGCCCGCGCCGGGGACACCTCCGTACGC  
TTACGTGTCGATTTGTCATTAGACCACGCGTCACGATCATAACCATCTAAAAAATGAATTCTATAGTG  
ACGCAGTAGAATCGA

+  
:FFFFFFFFFFFFFFFFFFFFFFFFFFFFFFFFFFFFFFFFFFFFFFFFFFFFFFFFFFFFFFFFFFFFFFFF  
FFFFFFFFFFFFFFFFFFFFFFFFFFFFFFFFFFFFFFFFFFFFFFFFFFFFFFFFFFFFFFFFFFFFFFFF  
FF:FFFFFFFF

@A00721:190:HGJW7DSXY:4:2472:18285:9424 1:N:0:TCTGCAAG+GCTGCACT  
GCCGCAGACCGTGGGGCAAGCCAATATAATATTACTGGCTTGCCCGCGCCGGGGACACCTCCGTACGC  
TTACGTGTCGATTTGTCATTAGACCACGCGTCACGATCATAACCATCTAAAAAATGAATTCTATAGTG  
ACGCAGTAGAATCGA

+  
FFFFFFFFFFFFFFFFFFFFFFFFFFFFFFFFFFFFFFFFFFFFFFFFFFFFFFFFFFFFFFFFFFFFFFFF  
FFFFFFFFFFFFFFFFFFFFFFFFFFFFFFFFFFFFFFFFFFFFFFFFFFFFFFFFFFFFFFFFFFFFFFFF  
FFFFFFFFFFFFFFFF

@A00721:190:HGJW7DSXY:4:1338:16685:19899 1:N:0:TCTGCAAG+GCTGCACT  
CCGCAGACCGTGGGGCAAGCCAATATAATATTACTGGCTTGCCCGCGCCGGGGACACCTCCGTACGCT  
TACGTGTCGATTTGTCATTAGACCACGCGTCACGATCATGACCATCTAAAAAATGAATTCTATAGTGA  
CGCAGTAAATAGAT

+  
FFFFFFFFFFFFFFFFFFFFFFFFFFFFFFFFFFFFFFFFFFFFFFFFFFFFFFFFFFFFFFFFFFFFFFFF  
FFFFFFFFFFFFFFFFFFFFFFFFFFFFFFFFFFFFFFFFFFFFFFFFFFFFFFFFFFFFFFFFFFFFFFFF  
FFFFFFFFFFFFFFFF

@A00721:190:HGJW7DSXY:4:2424:28022:34679 1:N:0:TCTGCAAG+GCTGCACT  
CCGCAGACCGTGGGGCAAGCCAATATAATATTACTGGCTTGCCCGCGCCGGGGACACCTCCGTACGCT



TACGTGTCGATTTGTCATTAGACCACGCGTCACGATCATGACCATCTAAAAAATGAATTCTATAGTGA  
CGCAGTAAAATAGAT

[illegible] $+$ [illegible]

+

[illegible]

+

```

FFFFFFFFFFFFFFFF:FFFFFFFFFFFFFFFF,FF:FF:FFFFFFFFFF:FF:FFFF:FFFFF:F:FF
FFFFFF:F:FFFFFFFFFFFFFFFF,FFFF:FFFFFFFF:F:FFFF:FFFFFFFF:FFFFFFFFFFFF
FFFFFFFF,FFFFF

```

$$+$$
[illegible]
