# Supplementary material for: Characterization of Spanish Olive Virome by High Throughput Sequencing Opens New Insights and Uncertainties
Source: MDPI journal article supplement (doi:10.3390/v13112233), 2021-11-06
Supplement: s1 [file s1]

$+$ 

@A00721:190:HGJW7DSXY:4:1449:27751:18865\_2:N:0:TCTGCAAG+GCTGCACT  
GCTCCAACTGGCACGCCAGACGTAGGGTCAAACCTACTACCGCCGGTCGGCAGATCGGCACCACTGGT  
CTCTACGTTACGGGACCCGCTGTGCAGAATAACCTTCCCAAATCTAGA

+

@A00721:190:HGJW7DSXY:4:1239:2175:22420\_2:N:0:TCTGCAAG+GCTGCACT  
CTGAAGGTCGTTACCGGACGACCACTCAAAGGAAACGGGCTGTTGCCAGAGGAAAGCAGCGACCACC  
GAGGTCGCTCGTAACATTGACGGCAGTCCCCTCATCTCTGTGGGAAC

+

@A00721:190:HGJW7DSXY:4:1107:27489:25864\_1:N:0:TCTGCAAG+GCTGCACT  
GCTCTTCCGATCTATTCACTCTCCATACCAATCAATGATGTGACTATACAGTTCGGCCATTTCAAG  
AGTGGTCAATACGTCGTGGGAGGTACTGAAGCCTTCCCCTCCGCTGGCACGAAGAACACTCCCAAGCC  
AAT

+

@A00721:190:HGJW7DSXY:4:1414:14751:34648\_2:N:0:TCTGCAAG+GCTGCACT  
TCTGACCAGAAATGAAAAGGGGTTTACCAGGGTAGTCTCTAAGTCTACCAGGAAGAGGGGAAATGTCCA  
CAAACTGAGAAGAATAAAGGGAAAGGTCCATCAGGACCTAAGAAGGG

+

@A00721:190:HGJW7DSXY:4:1332:10312:14873\_1:N:0:TCTGCAAG+GCTGCACT  
CTAATTCTGAAGGAAGATCTCCCACCATCTGGGGTTGGGAATAAGAAATCTGCACGGGCCAAAGAGGC  
CGCTGCTACGAAGTCGCTGAAGGCGGCTTGGGTCATTAAGGGTAGCTGTAAAGTTGCGCCTGCCGACC  
CCA

+

@A00721:190:HGJW7DSXY:4:1316:22137:7138\_2:N:0:TCTGCAAG+GCTGCACT  
GACTCTCTACAGTAGGTTCTGTCCTACTATGAGCAAATCTGTTGAATTCGTCCTGAGGACGAAGGTG  
AGAGGACTTTTGGCTACTGGCGACAAACAGATCGGAAGAGCGTCGTGT

+

@A00721:190:HGJW7DSXY:4:1158:6723:13980\_1:N:0:TCTGCAAG+GCTGCACT  
ATCTTGCAAGTGAAGTTCAGACGTGTGCTCTTCCGATCTTGTCAACGGCGTTTGGAGGATTTT  
ATCCGCGCTTAAGTATGGGGCGAAGATCCCCTATGGAGTCTTGAAGGACTTAGGTTGGCATATTTATG  
CCG

+

[illegible]



@A00721:190:HGJW7DSXY:4:1152:18873:9690\_2:N:0:TCTGCAAG+GCTGCACT  
ACCTTACAAGTTGAGGAGACTTTACAGCGGCTTATTGTCGCGCAGTTTCCAGAATTGCGGTTGAAGT  
TCACCCATTCTATCTTGAATGCTCACGCCGTCGCAGCCATATCGAGAC

@A00721:190:HGJW7DSXY:4:1314:3947:36824\_2:N:0:TCTGCAAG+GCTGCACT  
AAAGTACAGATTTAGTGATTTAGATATTATTGATATTGGAGGCGATATTCGTTTTCATATCCAAAAC  
CCTTGAATGGAGTACATATTTGCAACCCTATTCTTGATGTGAAAGATG

@A00721:190:HGJW7DSXY:4:1564:20808:3396\_2:N:0:TCTGCAAG+GCTGCACT  
AACATTGATTGGGAACGTACCTACTCACGAGACGTCATGAAAGCTATCGGAGGGAAGCAAAATGTTTC  
GTTCTGTTACAAGAACGCTTTGGATTGTGACCATAAAGCCTCAGTTGC

@A00721:190:HGJW7DSXY:4:1369:16984:36793\_2:N:0:TCTGCAAG+GCTGCACT  
ACGATATCTCTCTTGATGATGTAGCCACTATAATGCTTAAGAGAGAGATTGATGTATGTCATTTCTGC  
TTAGTTTGTCCCGGCGAATTATTGGACACGATGAAAAATGACATACCC

@A00721:190:HGJW7DSXY:4:1209:19877:26772\_1:N:0:TCTGCAAG+GCTGCACT  
TCGTTATCCGTCATGGAGATGATGGCGCATCACTTGATTACTATATGCCCGAAGGATTGGTTATTCT  
CACAACAAAGATAAGATTTTATCTTCTTCAAACACCCTGTTTTCTTAAGGGCGGACAATTGTTCCA  
TTG

@A00721:190:HGJW7DSXY:4:1234:6777:22028\_2:N:0:TCTGCAAG+GCTGCACT  
ATTGAGCATTAATGAGTTCCGAATAACTCGTAATAAATCTTTCTCTAGTGGACAATTCAGAATACCTA  
TTTCCGTACCAAGAGCCACTGCCAATCTCATCGCTATACGCATACCTG

@A00721:190:HGJW7DSXY:4:1141:14660:10222\_1:N:0:TCTGCAAG+GCTGCACT  
GAGGTTTCGTTCTCAATAAAAAATTTTTCTCAAGAGATTATGTTGATAAAGTTTTCTTCATAAGGGCT  
ATTCAGTACGTCATGGGGATCACTTCTTCGGTCAATGACAAAACCTTCGAATATGTTACGACATGGCT  
TCG

@A00721:190:HGJW7DSXY:4:1258:2474:25191\_2:N:0:TCTGCAAG+GCTGCACT  
AGGATTGTCATCTCGGGGAAAGTGATTCACCAAGATGTTTCATATAGATACGAGATACCTAGAGAAGGT  
CGCAGCGATCTTACTCGTTATCGGAGCTAAGAAGAAGACTTTGGGTAC

```
FFFFFFFFFFFFFFFFFFFFFFFFFFFFFFFF:FFFFFFFFFFFFFFFFFFFFFFFFFFFFFFFFFFFFFFFFFFFFF  
FFFFFFFFFFFFFFFFFFFFFFFFFFFFFFFF:FFFFFFF
```



AAAGATCCTTTGCACAAGCAATACCTTCCACTGAGTTCATCACCCAGAGTTTCGACGTCGCGGAAAAC  
GAT

+

FFFFFFFFFFFFFFFFFFFF,FFFFFFFFFFFFFFFFFFFFFFFFFFFFFFFFFFFFFFFFFFFF  
FFFFFFFFFFFFFFFFFFFF:FF:FFFFFFFFFFFFFFFFFFFFFFFFFFFFFFFFFFFFFFFFFFFF  
FFF

@A00721:190:HGJW7DSXY:4:1257:15908:18145\_2:N:0:TCTGCAAG+GCTGCACT  
CACTGTTGAGAATCTTCTGATGCTGAATTTGAGGAAAATTTTCGGAAGTTTTTGGTATAAATCCTG  
ATGGCTCAGTACAGGGAGGAGATCGGAAGAGCGTCGTGTAGGGAAGA

+

FFFFFFFFFFFFFFFFFFFFFFFFFFFFFFFFFFFFFFFFFFFFFFFFFFFFFFFFFFFFFFFFFFFF  
FFFFFFFFFFFFFFFFFFFFFFFFFFFFFFFFFFFFFFFFFFFFFFFFFFFFFFFFFFFFFFFFFFFF:FFFF,:FF:

@A00721:190:HGJW7DSXY:4:1107:17490:33348\_1:N:0:TCTGCAAG+GCTGCACT  
ATGGACAAAATCTGGGATCATAGGTATGTGTCACGCTACACTCGAAATATGGGCCCTCATAAGGAAGT  
ATAGTTGGCGTCTTGTCGTTGACGTCATTACAGTCTGGAAGTTAGATCATTTGTTTCAGGAAGATCTCT  
ACA

+

FFFFFFFFFFFFFFFFFFFFFFFFFFFFFFFFFFFFFFFFFFFFFFFFFFFFFFFFFFFFFFFFFFFF  
FFFFFFFFFFFF:FFFFFFFFFFFFFFFFFFFFFFFFFFFFFFFFFFFFFFFFFFFFFFFFFFFFFFFFFFFF  
FFF

@A00721:190:HGJW7DSXY:4:1267:28989:7232\_1:N:0:TCTGCAAG+GCTGCACT  
CTTTAGCAACTTTAGATAAATTCTTCCGGGCTCAATGACCTTTGCTATGTACGTGGATCTAATCCTT  
GGTGATCTGAATCTGACCATCGCAAAGAAGACTTTATTAGTTCATGAAGTTCTTACACTTCTCGCGAC  
TAA

+

FFFFFFFFFFFFFFFFFFFFFFFFFFFFFFFFFFFFFFFFFFFFFFFFFFFFFFFFFFFFFFFFFFFF  
FFFFFFFFFFFFFFFFFFFFFFFFFFFFFFFFFFFFFFFFFFFFFFFFFFFFFFFFFFFFFFFFFFFF:FFFFFFFFFFFFFFFFFFFF  
FFF

@A00721:190:HGJW7DSXY:4:1435:10276:35133\_1:N:0:TCTGCAAG+GCTGCACT  
GCTTTATCTTAAAGCATTACCACCAAATTTAGCACTTTTGAATATGACAGAAGCTCGCCATATCAGA  
TTAGAGACATGCCAGTTAGAGTTCTTCTAACCAGGACTGATGGTGAGATTCTTTTACCTTTTGGAGGT  
CCA

+

FFFFFFFFF:FFFFFFFFFFFF,FFFFFFFFFFFFFFFFFFFFFFFFFFFFFFFFFFFFFFFFFFFF  
FFFFFFFFFFFFFFFFFFFFFFFFFFFFFFFFFFFFFFFFFFFFFFFFFFFFFFFFFFFFFFFFFFFF:FFFFFFFFFFFFFFFFFFFF  
FFF

@A00721:190:HGJW7DSXY:4:1261:22281:28369\_2:N:0:TCTGCAAG+GCTGCACT  
CCTAGTGTCTTTCTAGAGTCCAAGGACGTTTCCGTCGGAGGATGACAGGTGGGAGACCGCTCAATAA  
CACTCTATTGAATCCCTTTTCCACGATGAAAGCTCTTTATGAGGTGCT

+

FF:FFFFF:FFFFFFFFFFFFFFFFFFFFFFFFFFFFFFFFFFFFFFFFFFFFFFFFFFFFFFFFFFFF  
FFFFFFFFFFFFFFFFFFFFFFFFFFFFFFFFFFFFFFFFFFFFFFFFFFFFFFFFFFFFFFFFFFFF:FFFFF:FFF:F

@A00721:190:HGJW7DSXY:4:1447:29161:32424\_1:N:0:TCTGCAAG+GCTGCACT  
TCTTTGGTGATATCGCCTCTGTCCTTTCTCCTTTAATCGTGAGGTTACGAGAGTTTCGTACTTGGGTT  
TATCGGTTGTATTTTGATAAATTTGTTGGAATCGATAATGATACTGACGAAGGTTCTATTACCACCCT  
TGT

+

FFFFFFFFFFFFFFFFFFFFFFFFFFFFFFFFFFFFFFFFFFFFFFFFFFFFFFFFFFFFFFFFFFFF  
FFFFFFFFFFFFFFFFFFFFFFFFFFFFFFFFFFFFFFFFFFFFFFFFFFFFFFFFFFFFFFFFFFFF:FFFFFFFFFFFFFFFFFFFF  
,FF

@A00721:190:HGJW7DSXY:4:1159:17680:14418\_2:N:0:TCTGCAAG+GCTGCACT  
GTGATGCTTTCTTAGAGGCTCGTCTAGCCGCTGAGATTCGTCTTACCTATTTACAATCTGTAGAGAGA  
GAGGTTAATCAGAATTTGAGTGATAACGATTTAGTACTGGGAAATGGT

+

FFFFFFFFFFFFFFFFFFFFFFFFFFFFFFFFFFFFFFFFFFFFFFFFFFFFF:F:F:FFFFFFFFFFFFFF:FFFFFFFF  
 FFFF:FFFFFFFF:FFFFFFFFFFFFFFFFFFFFFFFFFFFFFFFFFFFF:F,:FF  
 @A00721:190:HGW7DSXY:4:1156:17264:36839\_1:N:0:TCTGCAAG+GCTGCACT  
 TTTTCTTTCCCTCCCCTTTTTTCGATTGGATTCGACGGGGTCTTCGTCTCACGACTAATTTGATAAGGT  
 TTTTCTTTTATGGGACTCTTGTTTGTACTTATGAAGGAGGTATTACTTCGGAAGTTCTTAATGTAGGT  
 CTC  
 +  
 FFFFFF,FFFFFF:F:FFF:FFFFFFFFFFFFFFFFFFFFFFFFFFFF:FFFFFFFFFFFFFFFFFFFFFFFFFFFF  
 FFFFFFFFFF:FFFFFFFFFFFFFFFFFFFFFFFFFFFFFFFFFFFF:FFFFFFFFFFFFFFFFFFFF:FFFFFF:FFF  
 FFF  
 @A00721:190:HGW7DSXY:4:1401:3631:9784\_2:N:0:TCTGCAAG+GCTGCACT  
 GGTTTATGTTTCGGTTTCAGCTGGATGGATCTTTTGATGGTATGTTTCACATTGCGTGATCACTTCCC  
 GTGGACTTGGAAGAGATTAAACATAAAAATCCAGCGATTCTATTATGT  
 +  
 FF:FFFFFFFFFFFFFFFFFFFFFFFFFFFFFFFFFFFFFFFFFFFFFFFFFFFFFFFFFFFFFFFFFFFFFFFFFFFF:FFF  
 FFFFFFFFFFFFFFFFFFFFFFFFFFFFFFFFFFFFFF:F:FFFFFFFFFFFFFFFFFFFF:  
 @A00721:190:HGW7DSXY:4:1150:16821:35102\_2:N:0:TCTGCAAG+GCTGCACT  
 TCGATGATGTTGGGGCTGTGGGGATTAACCTCCTCGTGAACTTACGACGATGTTCTCGCTCGCATT  
 TCACAAGGATTACTAAGTCTGAGATCTGCCACTTCTAATTTTAGGAAA  
 +  
 FFFFFFFFFFFFFFFFFFFFFFFFFFFFFFFFFFFFFFFFFFFFFFFFFFFFFFFFFFFFFFFFFFFFFFFFFFFFFF  
 FFFFFFFFFFFFFFFFFFFFFFFFFFFFFFFFFFFFFF:FFFFFFFFFFFFFFF  
 @A00721:190:HGW7DSXY:4:1127:11153:24001\_2:N:0:TCTGCAAG+GCTGCACT  
 AGAAAGTTCATGAGGATGTCTTGGTCGAAAAATATCGCCGGGAACCTCGAATAGAGGATCCTGATGAC  
 ATTATTTCAACGATACCGATCTCAGTTCTACCACAGAAACCGTCTCA  
 +  
 FFF:FFFFFFFF:FF,FFFF:FFFFFFFF:FFFFF,FFFF::FFF,FFF,:F:FFFF:F:::FFF  
 FFFFFFFFFF:FFFFFF:FFFFFFFFFFFFFFFFFFFF:FFF:FFFFF  
 @A00721:190:HGW7DSXY:4:1446:11758:30843\_2:N:0:TCTGCAAG+GCTGCACT  
 ACTGATTCGGAATTAGAGAAAGACGACCTTCTTGTTGGGGACTGAGACCTCTGAATTTTCAGGGTGCCC  
 TGATGAGGACGTTGAAAGGATAATTTCAACTCTGAGACTTCTAAGAG  
 +  
 FFFFF,FFFFFFFFFFFFFFFFFFFFFFFFFFFFFFFFFFFFFFFFFFFFFFFFFFFFFFFFFFFFFFFFFFFFF  
 FFF:FFFFFFFFF:FFFFFFFFFFFFFFFFFFFFFFFFFFFFFFFFFFFFF  
 @A00721:190:HGW7DSXY:4:1125:9073:17519\_2:N:0:TCTGCAAG+GCTGCACT  
 ACCAGAAACGTAACAAGAATAAAGGTAGGAAGGGGAGAAAACAGAACAGCGAGCGGTTGAAGAG  
 AAAACTGATATGGTTGCGGCTGATCGTACCCAATTCTGCTAGAAAG  
 +  
 FFFFFFFFFFFFFFFFFFFFFFFFFFFFFFFFFFFFFFFFFFFFFFFFFFFFFFFFFFFFFFFFFFFFFFFFFFFFFF  
 FFFFFFFFFFFFFFFFFFFFFFFFFFFFFFFFFFFFFF,FFFFFFF  
 @A00721:190:HGW7DSXY:4:1103:23231:6308\_1:N:0:TCTGCAAG+GCTGCACT  
 ATACCACTGATCTTCCAGAGTTACGTAGTGGTCGTTCTTTTGGTGATTTTATCAAAGAGAAAGTTTCT  
 GCTAGTCGCGACGATAGTATTTATCGGAGTGATATTAACAAGTTAACTTCGAAGTACCACCTTACAA  
 GAG  
 +  
 F:FFFFFFFFFFFFFFFFFFFFFFFFFFFFFFFFFFFF:FFFFFF:FFFFFFFF:FFFFFFFFFFFFFFFFFFFF:F  
 FFFFFFFFFFFFFF:FFFFFFFFFFFFFFFFFFFFFFFFFFFFFFFFFFFFFFFFFFFFFFFFFFFFFFFFFFFFF  
 FFF  
 @A00721:190:HGW7DSXY:4:1117:16957:34992\_1:N:0:TCTGCAAG+GCTGCACT  
 GCAACATGGATCAGTTTTCCAAAAAGCTATTAATAGCAGTTGCGGGGCTATAATACCGCCTCCAGATT  
 ACTCTAAACTGAATCCACTCTCTTGGGATATAAATGAGTACATCTATAATAGAGTTTTGGAAGTGTGT  
 AAT  
 +  
 FFFFFFFFFFFFFFFF,FFFFFFFFFFFFFFFFFFFFFFFFFFFF:FFFFFF:FFFFFFFFFFFFFFFFFFFF



ATCTTTACGATACTTTGTTATCAATGTAAAGTTAAACGATGCTACTTG  
+  
FFFFFFFFFFFFFFFFFFFFFFFFFFFFFFFFFFFFFFFFFFFFFFFFFFFFFFFFFFFFFFFF  
FFFFFFFFFFFFFFFFFFFFFFFFFFFFFFFFFFFFFFFFFFFFFFFFFFFFFFFF  
@A00721:190:HGJW7DSXY:4:1547:9263:14998\_2:N:0:TCTGCAAG+GCTGCACT  
TAAGGAAGTGTACGTTTAGCACGGAGGTTGCAGATTCAACCCCTTATATCGAGGCTATCGAGGACG  
ATGAGTATCTTGAAGTTGTTGACGACAAGCCTCAAGAGGGTAGAGGAC  
+  
FFFFFFFFFFFFFFFFFFFFFFFFFFFFFFFFFFFFFFFFFFFFFFFFFFFFFFFFFFFFFFFF  
FFFFFFFFFFFFFFFFFFFFFFFFFFFFFFFFFFFFFFFFFFFFFFFFFFFFFFFF  
@A00721:190:HGJW7DSXY:4:1205:13277:14528\_2:N:0:TCTGCAAG+GCTGCACT  
GGTTATTCTGGAACACCTTAACGTCACTCGGTAATCTTTCAGCCGAATTAAGTACTAATGAGTTCA  
AGTCGGTTGTCGATCGAATTAAGATCAAGGCTAATACCTTTATAGGTA  
+  
FFFFFFFFFFFFFFFFFFFFFFFFFFFFFFFFFFFFFFFFFFFFFFFFFFFFFFFFFFFFFFFF  
FFFFFFFFFFFFFFFFFFFFFFFFFFFFFFFFFFFFFFFFFFFFFFFFFFFFFFFF:FFFFFFFF  
@A00721:190:HGJW7DSXY:4:1108:26530:14967\_2:N:0:TCTGCAAG+GCTGCACT  
GCCGCGTAGTCAGCGCGTTTAGCTGTATCATCAGTCAGAGTATACCCGATAGGGTACCGAGTCTCCAA  
GAGAATATTTATTCTTATGAGGCTCGAACTTCAACGTTTTCACAACG  
+  
FFFFFFFFFFFFFFFFFFFFFFFFFFFFFFFFFFFFFFFFFFFFFFFFFFFFFFFFFFFFFFFF  
FFFFFFFFFFFFFFFFFFFFFFFFFFFFFFFFFFFFFFFFFFFFFFFFFFFFFFFF:FFFFFFFF  
@A00721:190:HGJW7DSXY:4:1110:27100:14575\_2:N:0:TCTGCAAG+GCTGCACT  
TCGACCCGAAATTTTTGGGCAGAATGCTCTTAACGCGGTTCTTGAACGGTGTGTTTGATCAGTCTAAG  
TTGGATAAAGTTATAGGAGACTCAGTTAACCTGAGAGCTCCTCAATTG  
+  
FFFFFFFFFFFF:FFFFFFFFFFFFFFFFFFFFFFFFFFFFFFFFFFFFFFFFFFFFFFFFFFFF  
FFFFFFFFFFFFFFFFFFFFFFFFFFFFFFFFFFFFFFFFFFFFFFFFFFFFFFFF  
@A00721:190:HGJW7DSXY:4:1456:3513:30906\_1:N:0:TCTGCAAG+GCTGCACT  
AACAATAGGGACGCTAGTATACTTCGTAAAGTCGACAGCGAAATGGTCAATATTGATAATTGGACCGA  
CTATATGACCTATTTTAAGCTCATGGTGAAAAGGGAAGCTAAGGTTAAACTTGATGCTTCAGCCTTT  
CGA  
+  
FFFFFFFFFFFFFFFFFFFFFFFFFFFFFFFFFFFFFFFFFFFFFFFFFFFFFFFFFFFFFFFF  
FFFFFFFFFFFFFFFFFFFFFFFFFFFFFFFFFFFFFFFFFFFFFFFFFFFFFFFF:FFFFFFFF  
FFF  
@A00721:190:HGJW7DSXY:4:1246:15754:6981\_1:N:0:TCTGCAAG+GCTGCACT  
AGAATATCGTTTATCACTCAAATTTATTAATGCAATTTTCGGACCTATCTTTAAGGTTCTTGTGAGG  
AGAGTCAAACAGTGTCTTTTACCCAACATTTTATGTATACAGAGATGACCAGTGACGATTTCTCCCG  
GAA  
+  
FFFFFFF,F,FFFFF:F,::FFFFFFFFFFFFFFFFFFFFFFFFFFFFFFFF:FFFFFF:F:F:FFFFFF:FFFFFF,FFFFFFFF  
FFFFFFFFFFFFFFFFFFFFFFFF:FF:FFFFFFFFFFFFFFFF,FFFFFFFFFFFFFFFF:FFFF:FFF:FFFF:F:  
FFF  
@A00721:190:HGJW7DSXY:4:2333:14832:10081\_1:N:0:TCTGCAAG+GCTGCACT  
CTCTTAGGAGGTCATGATGACTACTATAAGGGTGAAATCGATTTTTCGAAGTTTGACAAATCTCAAGA  
TTTCTTTTGTAAGCCTATGAGATAAAGATGTATTCTTATTTAGGCTTCGATGCTGAATTTCTTGAAC  
TTT  
+  
FFFFFFFFFFFF,FFFFFFFFFFFF:FFFFFFFFFFFFFFFFFFFFFFFFFFFFFFFF:FFFFFF:FFFFFFFF  
FFFF:FFFFFFFFFFFFFFFFFFFFFFFFFFFFFFFFFFFFFFFFFFFFFFFFFFFFFFFF:FFFFFF  
FFF  
@A00721:190:HGJW7DSXY:4:1232:26060:6762\_2:N:0:TCTGCAAG+GCTGCACT  
TGTCACGCCAGGAGTATCCATAACGATTTGTCATTTACCACCTTTGCTCAACGACGAAGTGGAACGGC



$+$ 

@A00721:190:HGJW7DSXY:4:1136:17137:35556\_1:N:0:TCTGCAAG+GCTGCACT  
CTTGGAAAGTTTTCGGCTGTGGTTGTCGCTGGGACGATTCCATTCTGTTTTCAAAGACTCCAATAAC  
TGATCATTCTGATCATATGATTTTGGACAATGGTTTCGAAGCGAAATTTTTGAGGGATAAACACGCGT  
ACT

+

@A00721:190:HGJW7DSXY:4:1439:16532:23109\_2:N:0:TCTGCAAG+GCTGCACT  
CCTGATCCTTACAAGATCATCGTTAAGTTAGGTAAACCCCTAACCGATGTTACTCTTGTAGGACTTTG  
GGAGAGATTCGTTAGTTTTAAAGACTATACTAAATATCTCCACTACGA

+

@A00721:190:HGJW7DSXY:4:1562:6017:21997\_2:N:0:TCTGCAAG+GCTGCACT  
CGATTAGCTCTTGCGACTAATATTCGATATTCGATTGAGGGTCGTTATACCTATTCGGCTATCTGTGC  
TTTGAATTGTATAAGATCAAATTTTAAACGATTCCGAGAGGTTTATCC

+

@A00721:190:HGJW7DSXY:4:1215:30807:8343\_1:N:0:TCTGCAAG+GCTGCACT  
GGAGTTCTTGAAGCATCCCTACCTTTCTTGTGAAAATTTTGATGCGGTTTCATAAGATTATCAGTAA  
TCCTGATTCTACTACGGATTTCATGGACCTTCCATCCTGTACCTCTTCTGGAGAGACGTATCTCAAAGA  
TCG

+

@A00721:190:HGJW7DSXY:4:1444:11966:28855\_1:N:0:TCTGCAAG+GCTGCACT  
GGTGATATTGTTGAGCGAGAGCGACCAAGATCTAAATTCGGTAACGGTGCGTGGCGCTTTATTTTAAA  
AAGCTCCCTCCTCTCGCAAGTTTGATCTGATACTTATCACGAAAGGACTTGAGTCTTTTGATCAGTCT  
CTG

+

@A00721:190:HGJW7DSXY:4:1335:4616:6355\_2:N:0:TCTGCAAG+GCTGCACT  
TAAATGACGATCATTAAGACTCTCTTTCTTTCTTTGTTTCCTTCTTTGCACTGATTTTCTCATCAGC  
TTGTGTTTTACCTAATCTGTGTTTTTACGATAACAACATATCAGTTGAT

+

@A00721:190:HGJW7DSXY:4:2249:9498:33035\_1:N:0:TCTGCAAG+GCTGCACT  
TTCCGATCTGAACCTTTGGGAATTTGAAGCTCAGGGTGAAGCACACGTTTGACCGTGACGAAGTGTGG  
TGTTCTTGATCTACGTTACGGATATACTCTCCTTGAGTTCACCTCGTAAGGACACTACCACTTATTACG  
AT

+

[illegible]

$+$ 

@A00721:190:HGJW7DSXY:4:1329:6451:27727\_2:N:0:TCTGCAAG+GCTGCACT  
TGTTTACCACCGAAATATCAAGGTTCTTGTCCTTCAAACGATTGGAAGGTTAGTTATCTTAATAGTAC  
TAAAGGGGTTTACTTACAACCCTATGACGATAGTTTCTCTTTACACAC

+

@A00721:190:HGJW7DSXY:4:1421:7581:33692\_2:N:0:TCTGCAAG+GCTGCACT  
TGTTTTCTTCTAATGTGGCTGAACACGTTTCACCTTGTGTGTACTTGTCTCTATTTAAGTTTTGT  
CTTCCTTGTTGTCTTATTCTATTAATCACTCATTTTGTGAGATTAT

+

@A00721:190:HGJW7DSXY:4:1116:25048:20729\_2:N:0:TCTGCAAG+GCTGCACT  
CTAAACGTCTTCGACAACAGCAGGGGTTTTCGAATAGTGATAGCCACCCGCCTTACAGAGGGGCAGC  
AGCATGACCATAATTGGTATTGACTTTGGTACCACCTTTTCTACTGTC

+

@A00721:190:HGJW7DSXY:4:1123:31765:16391\_1:N:0:TCTGCAAG+GCTGCACT  
TTCGAATGAAGTTTTAATGCTTAACAACAATGATAGTGAATTTATACCTACAATCATTGGTTTTTCTA  
ATAATGATGACACTATTGTTTATGGATATGATGCTATTACTCATGATGGTTACGGTCAGGGAGGATTC  
TCA

+

@A00721:190:HGJW7DSXY:4:1443:25545:20776\_1:N:0:TCTGCAAG+GCTGCACT  
CTATGGATCGGGGTTAATTCTAAACATTACCCGAAAGACGTGCTAAATTAACCATTTGTACGATGT  
CGTCTGTCTCGGCGATCACTTTTCTACTAAGAATTGGTCCTACTTTTGGACAAGGCCAACTTCGTAATC  
TTC

 $+$ 

@A00721:190:HGJW7DSXY:4:1435:20763:4069\_2:N:0:TCTGCAAG+GCTGCACT  
TCTTTATCTCTTTGGTTGTTAGGGATTTTGAGAGAGTGAAAGGCTTCAATTGTAGTGGTTTGGTCGTT  
TCAGTACCCAGTCAGTATACCTCTACGCAAAGATATTTTCATGAAAAC

+

@A00721:190:HGJW7DSXY:4:1111:15013:34569\_1:N:0:TCTGCAAG+GCTGCACT  
CCGGATTACCTGTCTTTCATATTATGAATGAACCTTCGGCCGCTCTCTTTGCTTCGATGTTGGATGTC  
AAGAAGGGTTCAGAATGGGATTCTACGTAGTTTATGACTTTGGTGGTGGTACTTTCGATACTTCTAT  
CGT

+

[illegible]

@A00721:190:HGJW7DSXY:4:1125:31358:13307\_2:N:0:TCTGCAAG+GCTGCACT  
TACTATAGTGTTATTTATTCTGGTGGTGATGATAATCTTGGAGTCGTGACGTTGATGAAGCTATAAG  
AGCGTTCTTATTACGGCGCACTTCTTTACCCGCCACCACACAACCTTC

+

:F,FFFFF:F:FFFFF:FFFFF:FFFFFFFFFFFFFFFFFFFFFFFFFFFFFFFF:FFFFFFFFF:FFFFF  
FFFFFFFFFFFFF,F,,FFF,F,,FFF:FFFFF:FFFFFFFF:FFF:FF

@A00721:190:HGJW7DSXY:4:1152:24858:17394\_1:N:0:TCTGCAAG+GCTGCACT  
TGAAGGAGGAGGTTTCTGTTACTGGAAAACCTCGTCAATACTTTTCAATAATATACGTCTTGAACCTC  
ACTTATGACGATCTAGTGAAATTAACGCGTCCTTTTCTGGAACGTAGTTTACTATTATGAACAAAGT  
TAT

+

FFFFFFFFFFFFFFFFFFFFFFFFFFFFFFFFFFFFFFFFFFFFFFFFFFFFFFFF:FFF:FFFF,FFFFFFFFFFFFFFFF  
FFFFFFFFFFFFFFFFFFFFFFFFFFFFFFFFFFFFFFFFFFFFFFFFFFFFFFFFFFFFFFFFFFFFFFFF:FFFFFFF  
FFF

@A00721:190:HGJW7DSXY:4:1353:27679:11036\_2:N:0:TCTGCAAG+GCTGCACT  
GCAAACTTACCCTGATTCCGGCCGGTGGTAGCTCATTTCTACCAGGGGCTATTACTCTTGCTGAAACA  
GCTATTAAAGCTGTTGAGCGGGTAATTACACCTAAACGAGCTCGATCT

+

FFFFFFFFFFFFFFF:FFF:FFFF:FF:FFFFFFFFFFFFFFFFFFFFFFFFFFFFFFFF:F:FFFFF:FFFFFFF  
FFFFFFFFFFFFFFFFFFFFFFFFFFFFFFFF:F:FFFFF:FFFFFFFFFFFFFFFFFFFF

@A00721:190:HGJW7DSXY:4:1139:20726:29403\_1:N:0:TCTGCAAG+GCTGCACT  
AAGGATGTGCACTCTTTTCTGCTACTTTAACGGAGCGTAGTGTACTCTTCGTCGATTGTATCAACAGT  
AACATTACTTCTAATAAAGGTCTCTATCAAGCTCGTATTATCGTCGCTGCTGGATCTGCGTTACCGTT  
GAA

+

FFFFFFFFFFFFFFFFFFFFFFFFFFFFFFFFFFFFFFFFFFFFFFFFFFFFFFFFFFFFFFFFFFFFFFFFFFFFFFFF  
FFFFFFFFFFFFFFFFFFFFFFFFFFFFFFFFFFFFFFFFFFFFFFFFFFFFFFFFFFFFFFFFFFFFFFFFFFFFFFFF  
FFF

@A00721:190:HGJW7DSXY:4:1241:7708:7639\_2:N:0:TCTGCAAG+GCTGCACT  
AGGTAATTATGAAGACTGTGATTTATCTTTCACCTCTGGCCTTGTATGAGGGTGTCTTCTAATCGTAACA  
TTAATAATTTCAATCTTCTTAAAAAGAAGATAGAGAGTCATACTTTGG

+

FFFFFFFFFFFFFFFFFFFFFFFFFFFFFFFFFFFFFFFFFFFFFFFFFFFFFFFF:FFFFFFF,FFFFFFFFFFFFFFFF:FFFFFFF  
FFFFFFFFFFFFFFFF:FFFFFFFFFFFFFFFFFFFFFFFFFFFFFFFF:FFFF:

@A00721:190:HGJW7DSXY:4:1136:28013:24612\_2:N:0:TCTGCAAG+GCTGCACT  
GATAGCCAATATTGAAGTGACACCTCTGGTAGTATCGAAGTAAAGATAACCAATAAGGAAGGAGCTT  
ATACTATGGTTGAATCAACTAAGCATACTACTTTTGCTTTGATTACTC

+

FFF:FFFFFFFFFFFFFFFFFFFFFFFFFFFFFFFFFFFFFFFFFFFFFFFFFFFFFFFFFFFFFFFFFFFFFFFF  
FFFFFFFFFFFFFFF:F:FFFFFFFF:FFFFF:FFFFFFFFFFFFFFFFFFFF:

@A00721:190:HGJW7DSXY:4:1339:18385:29262\_1:N:0:TCTGCAAG+GCTGCACT  
CTTCCGATCTGTTAAAGAGTCGATTAAACAAGTTGTACTTATCAATGATTTTATCGCTGGTTGTTATC  
TCGAAAAGTCTCTTCTAAAAGGAACGTCAAGTCTAACCCTAAAGAGAATATCTAAAATATTTACAAAAT  
CTT

+

FFFFFFFFFFFFFFFFFFFF,FFFFFFFFFFFFFFFFFFFFFFFFFFFFFFFF:FFFFFFFF:FF:FFFFFFFF:  
FFFFFFFFFFFFFF:FFFFFFFFFFFFFFFFFFFFFFFF:FFFFFFFFFFFFFFFFFFFFFFFFFFFFFFFFFFFF  
FFF

@A00721:190:HGJW7DSXY:4:2247:17119:9909\_1:N:0:TCTGCAAG+GCTGCACT  
ACGAGATCTTGCAGAGTGACTGGAGTTCAGACGTGTGCTCTTCCGATCTGTACAATCTTACTTGGAAC  
GAAGGCGACCTGTTCCGAGTTTTTACGGGATCCGGAATGTTCTGTCTATATTAGGTGAAGCGAAATA  
CGA

+

FFF,FFFFF,FFFFFFFFFFFFFFFF:FFFFFFFFFFFFFFFFFFFFFFFFFFFFFFFF,FFFFFFFFF



CATTTTCTTGCTGAAATTTATAGAAGATTATTTTTGACAGAATCAATAAGAATCATCGATTCTCGATTCT  
GTA

[illegible]

+

[illegible]

+

```

FFFFFFFFFFFF:FFFFFFFFFFFFFFFFFFFFFFFFFFFFFFFFFFFFFFFFFFFFFFFF
FFFFFFFFFFFFFFFFFFFFFFFFFFFFFFFFFFFFFFFFFFFFFFFF

```

+

[illegible]

+

```
FFF:FFFFFFFFFFFFFFFFFFFFFFFFFFFFFFFFFFFFFFFFFFFFFFFFFFFFFFFFFFFFF:FFF
FFFFFFFFFFFFFFFFFFFFFFFFFFFFFFFFFFFFFFFFFFFFFFFFFFFFFFFFFFFF
```

+

[illegible]

+

```
F:F:FFFFF,,FFFFF:FFFFF:FFFFF,FFFFFFFFF:,F:FFFFFFFFFFFFFFFFFFFFF,FFFFF
:FFFFFFFFFFFFFFFFFFFFF:FFFFF::F,,,:FFFFFF:FFFFFF:FFFFFFFFF:FF,,FFFF::F
FFF
```

+

[illegible]

TAGTGAACGCGTTTCGTAGAACCAAGTACTTTCCGTCTGAAGAGTTTAG  
+  
FFFFFFFFFFFFFFFFFFFFFFFFFFFFFFFFFFFFFFFF:FFFFFFFF,,FFFFFFFFFFFFFFFFFFFFFFFF  
:FFFFFFFFFFFFFFFFFFFFFFFFFFFFFFFFFFFFFFFF:FFFF,FFF  
@A00721:190:HGJW7DSXY:4:1352:21703:4601\_1:N:0:TCTGCAAG+GCTGCACT  
TAACCGATAGGAGTTGTATAGTTGAAGATGTGGCTTTAGACGATAATCCTTTAAGGACTATGTTGACT  
GACGAAGATTTTCCACAGATTTGTCTACGTTGCAGATCGCCACTCCAAACACTATATACATTAATA  
ATA  
+  
FFFFFFFFFFFFFF:FF,FFFFFFFF:FFFFFFFF:FFFFFFFFFFFFFFFF:FFFFFFFF,FFFFFFFF  
FFFFFFFFFFFFFFFFFFFFFFFFFFFFFFFFFFFFFFFFFFFFFFFFFFFFFFFFFFFFFFFFFFFFFFFF  
FFF  
@A00721:190:HGJW7DSXY:4:1566:12301:1564\_2:N:0:TCTGCAAG+GCTGCACT  
AGTCATAACTTTTGTACCAAATTCTTGGCTTTCAACGAAGTCTCTGATTTTATTAATCATTACTTTA  
ACGATCTCTCGGTCATTTACTCTGTACTTGATCTACGTCGTTTAACTG  
+  
FFFFFFFFFFFFFFFFFFFFFFFFFFFFFFFFFFFFFFFF:FFFFFFFFFFFFFFFFFFFFFFFFFFFFFFFF  
FFFFFFFFFFFF:FFFFFFFFFFFFFFFFFFFFFFFFFFFFFFFF:FFFF:FFFFF  
@A00721:190:HGJW7DSXY:4:1147:31430:22670\_2:N:0:TCTGCAAG+GCTGCACT  
CTTAGAATGACTCTATCTTTTCAGACACTTCTTATATTATTACAATAGTTAATATCATATTAGTAAT  
ACTCACTATCGTTTTCTGCTTTTTCTTAGCTAATAGATTAATAAAGGA  
+  
FFFFFFFFFFFFFFFFFFFFFFFFFFFFFFFFFFFFFFFF:FFFFFFFF:FFFFFFFFFFFFFFFF  
FFFFFFFFFFFFFFFFFFFFFFFFFFFFFFFF:FFFFFFFFFFFFFFFFFFFFFFFF:FF  
@A00721:190:HGJW7DSXY:4:1325:4408:23750\_2:N:0:TCTGCAAG+GCTGCACT  
ACCAACTCTTCGTTACGAGACCTGATGGTAGAATAGATTTAGTCTCTACACCCATCTCAACGAGGATA  
AAGCGAGTTTTCCGTCCTGAACGTAATACACGAAGAGATCATCCGCAA  
+  
FFFFFFFFFFFFFFFFFFFFFFFFFFFFFFFFFFFFFFFFFFFFFFFFFFFFFFFFFFFFFFFFFFFFFFFF  
FFFFFFFFFFFFFFFFFFFFFFFFFFFFFFFFFFFFFFFFFFFFFFFFFFFFFFFFFFFFFFFF  
@A00721:190:HGJW7DSXY:4:2344:31928:32863\_2:N:0:TCTGCAAG+GCTGCACT  
ATAAAAGTCCCTTAAAAATTTAGATTATTAATACTTCCTTTAATCAATTTATAGAAGTTATTTATTT  
GTACTTTTTATAATTTATAAACATAATATAAATTTTGGTATTTTTTTT  
+  
::,FFF,F:F::F,,F,,F,,FFFFFF,:F,,::,F:,FF::,F,FFF:FF,,F,,:::FF,,FF  
,F,:FFFF,FFF:FF,F:FFF,F,,F:F,,,FFFF,:FFF:FFF,F  
@A00721:190:HGJW7DSXY:4:1212:27896:17049\_2:N:0:TCTGCAAG+GCTGCACT  
GAAGACATTATCTCTTATGTACTTATTGTAACGATCATTCTTTCGAGTTTGTGATTCTTATTCTTTT  
ATTCCTTTAACTGTGTATGAGGAGATTATAATGCTTTTCGATAGTG  
+  
FFFFFFF,FF:FFFFFFFFFFFFFFFFFFFFFFFFFFFFFFFFFFFFFFFFFFFFFFFFFFFFFFFFFFFF  
FFFFF,FFFFFFFFF:F:F,FFFFFFFFFFFFFFFFFFFFFFFF:FFFFFFF  
@A00721:190:HGJW7DSXY:4:1565:19244:24862\_2:N:0:TCTGCAAG+GCTGCACT  
ATTACTGTTTCAAATCATCTTTACTCACAGACTCCGAAAATGGTTTCAAATGAGGTCAAAGCTCTATT  
TATTAAACGAATATTATCCGATTCTTCGAGGGTATCACTACCACTGA  
+  
FFFFFFF::FFFFFFFFFFFF,FF:FFFF:FFFFFFFFFFFF::FFF:FFFFFFFF,,FFFF:F,FF:F  
FFF:FFFFFF:FF::F:F::FFFF,FFFF,FFF,FFFFF:,FFFF  
@A00721:190:HGJW7DSXY:4:1302:10682:14481\_2:N:0:TCTGCAAG+GCTGCACT  
CAAGGAACCTTCAATTCCTTCGATGTTTATATTTTCTATAAGGGAAAATAGCAATAATCAAATTCGA  
CAAATTTTAGAATTTATTTTCAAGAACTCTCTCCGATCACCTTGGTGTG  
+  
FFFFF,F:FFF:,::FF,FFFFFFFFFFFFFFFFFFFF,FFFFF:F::FFFF,FFFFFFFF:FFFF:F,F  
::FF:FF:F:FFFF:,FF,F,F:FFFFFFFF,FFFF,FF,:FF,FFFF

@A00721:190:HGJW7DSXY:4:1178:16993:33739\_1:N:0:TCTGCAAG+GCTGCACT  
TCTTTTCAATAAGATGTATGATGATAATCTACTATTTTTAAATAGTGATATTCAGCGTATACTTGAAT  
ACTTTATCAAAGATTTGGCTTGGTCTATTTACCGCAAAAAGTTGGAAGAGGTCTATGATATTTATTTT  
ACT

+

:FFFFFFFF:FFFFFFFFFFFFFFFFFFFFFFFFFFFFFFFFFFFFFFFFFFFFFFFFFFFFFFFFFFFFFFFF  
FFFFFFFFFFFFFFFFFFFFFFFFFFFFFFFFFFFFFFFFFFFFFFFFFFFFFFFFFFFFFFFFFFFFFFFF:FFFFFFFFFFFFFFFF  
FFF

@A00721:190:HGJW7DSXY:4:1418:21386:26944\_2:N:0:TCTGCAAG+GCTGCACT  
CACCGATTATAACTTGACTGTTGATAATATTACAATAGCTCTTCTCAGAAGATTAGAGAAGTAACCG  
GTGAACACGTCGGTAGCATTGATTTACTTTTACCGTTAGAACTGAAAA

+

FFFFFFFFFFF:FFFFFF:FFFF,FFFFFFFFF:,FFFFFFFFFFFF:FF:FFF::FFF:FFFFFFFF, :F:  
FFFFFFFFFFF:FFFFFFFFFFFFFFFFFFFFFFFFFFFF:F:FFFF:FFFFFF

@A00721:190:HGJW7DSXY:4:1260:3468:24878\_1:N:0:TCTGCAAG+GCTGCACT  
ACCTATAAGTTACAAACGATTCTTCGACTATATTAAGAAATAAAAATACTTCAAGTACCTGAACTTT  
ACATTTTAAATGGTATGGTATAATGTGTCTTACAAATAGAACCTTCACTCTCGGTAATGAGAGTGTAT  
TCC

+

FF:FFFFFFFFFFFFFFFFFFFFFFFFFFFFFFFFFFFFFFFFFFFFFFFFFFFFFFFFFFFFFFFFFFFFFFF  
FFFFFFFFFFFFFFFFFFFFFFFFFFFFFFFFFFFFFFFF:FFFFF:FFFF:FFFFFFFFFFFFFFFFFFFFFFFFFFFFF  
FFF

@A00721:190:HGJW7DSXY:4:1251:32072:32142\_1:N:0:TCTGCAAG+GCTGCACT  
GGCATTACTAGGATTTATCACACTCCTAAATTTGATAGCAATTTATGTTTTAAATGCTAGGAAAATTT  
TAGAAAAACTCCATTGTATAGTTCAAGGAGTACTTAATTCAATAGCTTTAGTATTATTTACTATCGCC  
TTT

+

:FFFFFFFF:FFFFFFFFFFFFFFFF:FFFFF,:FFFFFFFFFFFFFFFFFFFFFFFFFFFFFFFFFFFFFFFF  
FFFFFFFFFFFFFFFFFFFFFFFF,F:FFFFFFFFFFFFFFFFFFFFFFFF:FFFF:,FF:FF:FFFFFFFFFFFFFFFF  
FFF

@A00721:190:HGJW7DSXY:4:1234:24623:27915\_2:N:0:TCTGCAAG+GCTGCACT  
AGTTAATTGCTTACACAAAAGTGACGCGGAAGGAATCTTAATTGATTGAAGCTAGGCGTTGGGGAGA  
ATGAACTGCCGCTTCCCGGAAGAAACGATCTATTTACAGAGTATTTAG

+

FFFFFFFFFFFFFFFFFFFFFFFFFFFFFFFFFFFFFFFFFFFFFFFFFFFFFFFFFFFFFFFFFFFFF:FFFF,FFFFFFFFFFFFFFFF  
FFFFFFFFFFFFFFFFFFFFFFFFFFFFFFFF:FFFFFF,FFFFFFFFFFFFFFFF

@A00721:190:HGJW7DSXY:4:1234:9706:14920\_1:N:0:TCTGCAAG+GCTGCACT  
CAGACGTGTGCTCTTCCGATCTCGCTAACTAGGTGAATTCCTGGCGAACCGCAAATCAATTGAAGAAA  
ACCACTCCCTTCAATTCAATAACATAACATACCATACACTCCCCAAACATAACATACCATAACCTACC  
ATG

+

FFFF:FFFFFFFFFFF:FFFF:F:,FFFFF::FFFF:FFFFFFFFFFF:FFF,F:FFFFFFFFF:,FFF:FF  
FFFFFFFFFFFFFFFF:FFFFFFFFFFFFFFFFFFFFFFFFFFFFFFFFFFFFFFFFFFFFFFFFFFFFFFFF  
:FF

@A00721:190:HGJW7DSXY:4:1453:22724:9189\_2:N:0:TCTGCAAG+GCTGCACT  
GCTCCAAGTGGCAGCCAGACGTAGGGTCAAACCTACTACCGCCGGTCGGCAGATCGGCACCACTGGT  
CTCTACGTTACAGGACCCGCTGTGCAGAATAACCTTCCCAAATCTAGA

+

FFFFFFFFFFFFFFFFFFFFFFFFFFFFFFFFFFFFFFFFFFFFFFFFFFFFFFFFFFFFFFFFFFFFFFF  
FFFFFFFFFFFFFFFFFFFFFFFFFFFFFFFFFFFFFFFFFFFFFFFFFFFFFFFFFFFFFFFF:FFFFFF

@A00721:190:HGJW7DSXY:4:1322:19388:27712\_2:N:0:TCTGCAAG+GCTGCACT  
CTGAAGGTCGTTACCGGACGACCACTCAAAGGAAACGGGCTGTTGCCAGAGGAAAGCAGCGACCACC  
GAGGTCGCTCGTAACATATACGGCAGTCACGTCATCTCTGTGGGAAC

+

:F,FF,:,:,FFFF,,,,FF,FF:FFFFFFFF,:FFF:,F:,FFFF:,:,:,F:,FFF,FFF::FF,FF:  
,F,FFF,FFF:FFF,FF,,FF,,FF,FF,:,:,F:,FF,:F:,,F:,,  
@A00721:190:HGJW7DSXY:4:1167:31430:24048\_1:N:0:TCTGCAAG+GCTGCACT  
GCTCTTCCGATCTATTCACCACTCCCATACCAATCAATGATGTGACTATACAGTTCGGCCATTTCAAG  
AGTGGTCAATACGTCGTGGGAGGTACTGAAGCCTTCCCCTCCGCTGGCACGAAGAACACTCCCAAGCC  
AAT

+

FFFFFFFF:FFFFFFFFFFFFFFFFFFFFFFFFFFFFFFFFFFFFFFFFFFFFFFFFFFFFFFFFFFFFFFFF  
FFFFFFFFFFFFFFFFFFFFFFFFFFFFFFFFFFFFFFFFFFFFFFFFFFFFFFFFFFFFFFFFFFFFFFFF  
FFF

@A00721:190:HGJW7DSXY:4:1414:15257:36839\_2:N:0:TCTGCAAG+GCTGCACT  
TCTGACCAGAATGAAAAGGGGTTTACCAGGGTAGTCTCTAAGTCTACCAGGAAGAGGGGAAATGTCCC  
CAAACTGAGAAGAATAAAGGGAAAGGTCCATCAGGACCTAAGAAGGG

+

FFFFFFFFFFFFFFFFFFFFFFFFFFFFFFFFFFFFFFFFFFFFFFFFFFFFFFFFFFFFFFFFFFFFFFFF  
FFFF,FFFFFFFFFFFFFFFFFFFFFFFFFFFFFFFFFFFFFFFFFFFFFFFFFFFFFFFFFFFFFFFF

@A00721:190:HGJW7DSXY:4:1422:28375:29340\_1:N:0:TCTGCAAG+GCTGCACT  
CTAATTCTGAAGGAAGATCTCCCACCATCTGGGGTTGGGAATAAGAAATCTGCACGGGCCAAAGAGGC  
CGCTGCTACGAAGTCGCTGAAGGCGGCTTGGGTCTTAAGGGTAGCTGTAAAGTTGCGCCTGCCGACC  
CCA

+

FFFFFFFFFFFFFFFFFFFFFFFFFFFFFFFFFFFFFFFFFFFFFFFFFFFFFFFFFFFFFFFFFFFFFFFF  
FFFFFFFFFFFFFFFFFFFFFFFFFFFFFFFFFFFFFFFFFFFFFFFFFFFFFFFFFFFFFFFFFFFFFFFF  
FFF

@A00721:190:HGJW7DSXY:4:1316:24261:8688\_2:N:0:TCTGCAAG+GCTGCACT  
GACTCTCTACAGTAGGTTCTGCTACTATGAGCAAATCTGTTGAATTCGTCACTGAGGACGAAGGTG  
AGAGGACTTTTGGCTACTGGCGACAAACAGATCGGAAGAGCGTCGTGT

+

FFFFFF:FFFFFFFFFFFFFFFFFFFFFFFFFFFFFFFFFFFFFFFFFFFFFFFFFFFFFFFFFFFFFFFF  
F:FFFF:FF:FF:,FFFF:F:FFFF:FFFF:FFF:FFF:FFF:FF

@A00721:190:HGJW7DSXY:4:2647:23583:15718\_1:N:0:TCTGCAAG+GCTGCACT  
ATCTTGCAGAGTGAAGTTCAGACGTGTGCTCTTCCGATCTTGTCAACGGCGTTTGGAGGATTTT  
ATCCGCGCTTAATCTATGGGGCGAAGATCCCCTATGGAGTCTTGAAGGACTTAGGTTGGCATATTTATG  
CCG

+

FFFFFFFFFFFFFFFFFFFFFFFFFFFFFFFFFFFFFFFFFFFFFFFFFFFFFFFFFFFFFFFFFFFFFFFF  
FFFFFFFFFFFFFFFFFFFFFFFFFFFFFFFFFFFFFFFFFFFFFFFFFFFFFFFFFFFFFFFFFFFFFFFF  
FFF

@A00721:190:HGJW7DSXY:4:1514:32841:2722\_1:N:0:TCTGCAAG+GCTGCACT  
GCATGTCACCCTTAAGCACCGAGGTAAGCTCGGGACTTACAAGAGAGAGTGTGAGAGAGTCGCTCTCA  
CTATTTTTTCCCAGAATGCGGGCTTTCTGACTGATGAGGTTAAACTCTTGCTGCTTCGGTGGGTGAG  
GG

+

FFFFFFFFFFFFFFFFFFFFFFFFFFFFFFFFFFFFFFFFFFFFFFFFFFFFFFFFFFFFFFFFFFFFFFFF  
F:FF  
F:FFFFF,FFFF:FFFF:FFF,,FF,FFF::F,F,,,FFF:FFF,,,FF,F,F:F,,,FFF:F,F  
FF

@A00721:190:HGJW7DSXY:4:2259:22833:30232\_2:N:0:TCTGCAAG+GCTGCACT  
ATTCACTGGTTCTGGGAGGCTGCTTTCCTCCATAATTACAACCTCTTTAGAGAGCATTAGAAGGAA  
GTTGGGCAAATCCCACATATGGTAGACGTTGTCACTTTTCTTGAA

+

FFFFFFFFFFFFFFFFFFFFFFFFFFFFFFFFFFFFFFFFFFFFFFFFFFFFFFFFFFFFFFFFFFFFFFFF  
FFFFFFFFFFFFFFFFFFFFFFFFFFFFFFFFFFFFFFFFFFFFFFFFFFFFFFFFFFFFFFFF

@A00721:190:HGJW7DSXY:4:1528:25889:1423\_1:N:0:TCTGCAAG+GCTGCACT  
TTCTCCGCTTTGGGGATTTTCGATGTGAGAAGGTGGTAGGTGTCAAGGGTGTTATTATGCTGATCT



TTAAGGACCTAATCACATCATGATTGATAGTTACGGCTCGTATCGAGTTGGAGGGAGGAAGTTCTCCG  
AA

+

F:F,F:,FF:,::,,F,FFFF:,F,::FF::F,FFFF:,,,FF,FFFFFF::F,FF,FF,F::FFF:F:F  
,F,FFFF:FFFFFF,F,FF,FF:FFFF:F,,:FFFF:FFFFFFFFFFFFFF,FFF:FF,F::FFFFFFFF:F  
:F

@A00721:190:HGJW7DSXY:4:1217:22155:3286\_1:N:0:TCTGCAAG+GCTGCACT  
GCTGTAACTGTCATTTTCAGAGAGGGGAGCTCTGAAAAGGAACTTCGTCAGAAGATGAGGAAGTCTAA  
GAGGAGGAGTTTGAGGAAGGCTCTAGAGAAGATCTCACCACCTGGAGAAGGCAAGTGGAGAGTCCAGA  
AGT

+

: ,FFFF,,F,FF:FFFFFF:F:F:F:FFFFFFFFFFFFFFF, :FFFFFF:FFFFFFFFFFFFFFFFFFFFFFF  
FFFFFFFFFFFFF:,F:FFFF:FF:FFFFFF:FFF:F:, :F:FFFFFF:FF:FFFFFFFFFFFF, :F:FFF,  
F:F

@A00721:190:HGJW7DSXY:4:1456:29243:24737\_2:N:0:TCTGCAAG+GCTGCACT  
GGATTATTTGAAGCAGGGGTTACCACTTCCTAAGGTGGATGAGGGAGGTTGTTTCTTTGGAGTTTTAG  
ATAATCTTTTGAGAAGGGGTCATAGAGCCAGCAAGAGAAGCTTATATG

+

FFFFFFFFFFFFFFFFFFFFFFFFFFFFFFFFFFFFFFFFFFFFFFFFFFFFFFFFFFFFFFFFFFFFFFFFFFFF  
FFF:FFFFFFFFFFFFFFFFFFFFFFFFFFFFFFFFFFFFFFFFFFFFFFFFFFFFFFFFFFFFFFFFFFFF

@A00721:190:HGJW7DSXY:4:1165:26178:25880\_2:N:0:TCTGCAAG+GCTGCACT  
CCTTGAGAAGACAAGCCACATTAAGATATAATTTAGGTCAACTTGGGGTTTCGAATGTCATTAGTGCC  
TTACGATTGAAAGAGGTCCTTTTGAGTATCGACAGATCTTTCGATCTT

+

FFFFFFFFFFFFFFF:FFFFFFFFF::FF:FFFFFFF:F:FFFFFFFFF:FF:FFFF:FFFFFF:FFFFF:  
FFF:FFFFFFFFFFFF:FFFF:FFFFFFFFFFFF:FFFFFFFFFFFFF,FFF

@A00721:190:HGJW7DSXY:4:1211:25021:32424\_2:N:0:TCTGCAAG+GCTGCACT  
TTAACGTGGCAGAATTCGGTAACCTTACCATATTGTTCTTCCGGAAGTTGTGGGATTTAACTTTGAC  
TCAACTACTCCGATCAGATCCGATGGTTTGATTGGTATGGACTACTC

+

FFFFFFFFFFFFFFFFFFFFFFFFFFFFFFFFFFFFFFFFFFFFFFFFFFFFFFFFFFFFFFFFFFFFFFFFFFFF  
FFFFFFFFFFFFFFFFFFFFFFFFFFFFFFFFFFFFFFFFFFFFFFFFFFFFFFFFFFFFFFFFFFFF

@A00721:190:HGJW7DSXY:4:1368:7048:23500\_1:N:0:TCTGCAAG+GCTGCACT  
TAGTTGTCTAGGGTCATGGCAGATACTACCGATAAGGTGAAAAATATGCAGGTCAAAGATTCTGTAGC  
TCTGAGGGCGGTTGAGGGAGCCGTTTTGCGCGACTTTAACTATTCTAAGAGTCTTTATGATTCAAAC  
CTA

+

FFFFFFFFFFFFFFFFFFFFFFFFFFFFFFFFFFFFFFFFFFFFFFFFFFFFFFFFFFFFFFFFFFFFFFFFFFFF  
FFFFFFFFFFFFFFFFFFFFFFFFFFFFFFFFFFFFFFFFFFFFFFFFFFFFFFFFFFFFFFFFFFFF:FF  
FFF

@A00721:190:HGJW7DSXY:4:1212:3016:13385\_2:N:0:TCTGCAAG+GCTGCACT  
ACCTTACAAGTTGAGGAGACTTTACAGCGCTTATTGTGCGCAGTTTTCCAGAATTGCGGTTGAAGT  
TCACCCATTCTATCTTGAATGCTCACGCCGTCGCAGCCATATCGAGAC

+

FFFFFFFFFFFFFFFFFFFFFFFFFFFFFFFFFFFFFFFFFFFFFFFFFFFFFFFFFFFFFFFFFFFFFFFFFFFF  
FFFFFFFFFFFFFFFFFFFFFFFFFFFFFFFFFFFFFFFFFFFFFFFFFFFFFFFFFFFFFFFFFFFF

@A00721:190:HGJW7DSXY:4:1445:5801:21214\_2:N:0:TCTGCAAG+GCTGCACT  
AAAGTACAGATTTAGTGATTTAGATATTATTGATATTGGAGGCGATATTCGTTTTCATATCCAAAAC  
CCTTGAATGGAGTACATATTTGCAACCCTATTCTTGATGTGAAAGATG

+

FFFFF::FFFFFFFFFFFFFFFFFFFFFFFFFFFFFFFFFFFFFFFFFFFFFFFFFFFFFFFFFFFF:FFFFFFF:FF  
FFFFFFFFFFFFFFFFFFFFFFFFFFFFFFFFFFFFFFFFFFFF:FFFFF,F::FFFFF

@A00721:190:HGJW7DSXY:4:2336:30553:35305\_2:N:0:TCTGCAAG+GCTGCACT  
AACATTGATTGGGAACGTACCTACTCACGAGACGTCATGAAAGCTATCGGAGGAAGCAAAATGTTTC

GTTCTGTTACAAGAACGCTTTGGATTGTGACCATAAAGCCTCAGTTGC  
+  
FFFFFFFF:FFFFFFFFFFFFFFFFFFFFFFFFFFFFFFFFFFFFFFFFFFFFFFFFFFFFFFFFFFFFFFFF  
FFFFFFFFFFFFFFFFFFFFFFFFFFFFFFFFFFFFFFFFFFFFFFFFFFFFFFFFFFFFFFFF  
@A00721:190:HGJW7DSXY:4:1371:29514:24768\_2:N:0:TCTGCAAG+GCTGCACT  
ACGATATCTCTCTTGATGATGTAGCCACTATAATGCTTAAGAGAGAGATTGATGTATGTCATTTTCGTC  
TTAGTTTGTCCCGGCGAATTATTGGACACGATGAAAAATGACATACCC  
+  
FFFFFFFFFFFFFF:FFFFFFFFFFFFFF:FFFF:FFFFFF:FF,FFFFFFFFFFFFFFFFFFFFFF,FFFF  
FFFFFFFFFFFFFFFFFFFFFF:FFFFFFFFFFFFFF,FFFFFFFF:FFFFFF  
@A00721:190:HGJW7DSXY:4:1416:8558:13839\_1:N:0:TCTGCAAG+GCTGCACT  
TCGTTATCCGTCATGGAGATGATGGCGCATCACTTGATTACTATATGCCCGAAGGATTGGGTTATTCT  
CACAACAAAGATAAGATTTTATCTTTCTTCAAACACCCTGTTTTCTTAAGGGCGGACAATTGTTCCA  
TTG  
+  
F,FFFFFF::FFF:F:F:FFF:FFF,FFFF,FFFFFFFF:FFFFFFFFFFFFFF:FFFF:FFFFFF:  
:FFFFFF,:FFFF:FFFFFF:FFFFFF:FFFF:F:FFFF,FFF:F:FFFFFFFFFFFFFF:FFFF  
FFF  
@A00721:190:HGJW7DSXY:4:1621:16477:16282\_2:N:0:TCTGCAAG+GCTGCACT  
ATTGAGCATTAATGAGTTCCGAATAACTCGTAATAAATCTTCTCTAGTGGACAATTCAGAATACCTA  
TTTCCGTACCAAGAGCCACTGCCAATCTCATCGCTATACGCATACCTG  
+  
FFFFFFFFFFFFFFFFFFFFFFFFFFFFFFFFFFFFFFFFFFFFFFFFFFFFFFFFFFFFFFFFFFFFFFFF  
FFFFFFFFFFFFFFFFFFFFFFFFFFFFFFFFFFFFFFFFFFFFFFFFFFFFFFFFFFFFFFFF  
@A00721:190:HGJW7DSXY:4:1348:2392:36793\_1:N:0:TCTGCAAG+GCTGCACT  
GAGGTTTCGTTCTCAATAAAAATTTTCTCAAGAGATTATGGTTGATAAAGTTTCTTCATAAGGGCT  
ATTCAGTACGTCATGGGGATCACTTCTTCGGTCAATGACAAAACCTTCGAATATGTTACGACATGGCT  
TCG  
+  
FFFFFFFF:FFFFFFFFFFFFFFFFFFFFFFFF:FFFFFFFFFFFFFFFF:FFFFFFFFFFFFFF:FFFF  
FFFFFFFFFFFFFFFFFFFFFFFFFFFFFFFFFFFFFFFFFFFFFFFFFFFFFFFFFFFFFFFFFFFFFFFF  
FFF  
@A00721:190:HGJW7DSXY:4:1519:23032:23343\_2:N:0:TCTGCAAG+GCTGCACT  
AGGATTGTCATCTCGGGGAAAGTGATTCACCAAGATGTTTCATATAGATACGAGATACCTAGAGAAGGT  
CGCAGCGATCTTACTCGTTATCGGAGCTAAGAAGAAGACTTTGGGTAC  
+  
FFFFFFFFFFFFFFFFFFFFFFFFFFFFFFFFFFFFFFFFFFFFFFFFFFFFFFFFFFFFFFFFFFFFFFFF  
FFFFFFFFFFFFFFFFFFFFFFFFFFFFFFFF:FFFFFFFF:FFFFFFFFFFFFFF  
@A00721:190:HGJW7DSXY:4:1231:12111:25535\_2:N:0:TCTGCAAG+GCTGCACT  
AAACTTAACGTTAGTACCGGAGGTGATCTCTCTGCTTCTGCGTTACTGAGAGAAAAGATTCAGGACGC  
CTACGGTGACTTTATGGACAAGATGCAAGTTCTTGGGAAATACTTGTT  
+  
FF:FFFFFF:FFFFFFFFFFFFFFFFFFFFFFFFFFFFFFFFFFFFFFFFFFFFFFFFFFFFFFFFFFFF  
FFFFFFFFFFFFFFFFFFFFFFFFFFFFFFFFFFFFFFFFFFFFFFFFFFFFFFFFFFFFFFFF  
@A00721:190:HGJW7DSXY:4:1223:18783:30358\_2:N:0:TCTGCAAG+GCTGCACT  
TCGATTCTTTGTATAGGGAGTGTGAGAAGACAACGAATCTTGAAACTACGGTCCTTATCAAAGAAAAT  
GGTGAACCGGTCTCTAAATCTTTGAGATTGAGAAGATTGAAGAACAC  
+  
FFFFFF,FFFFFFFFFFFFFFFFFFFFFFFFFFFFFFFFFFFFFFFFFFFFFFFFFFFFFFFFFFFF,FFFF  
FFFFFFFFFFFFFFFFFFFFFFFFFFFFFFFFFFFFFFFFFFFFFFFFFFFFFFFFFFFFFFFF  
@A00721:190:HGJW7DSXY:4:1476:14109:31532\_2:N:0:TCTGCAAG+GCTGCACT  
GCTCGGCGTTGTTCTTGAAAACCAAGTTAAGAAGGAGGCTGATCATGGAGTCTTGTACCTTCTGTCA  
AACTTCGAGGTTAGCTACGAGAGGTGATCCCGGATGTGGATTGAAGG  
+

FFFFFFFFFFFFFFFFFFFFFFFFFFFFFFFFFFFFFFFFFFFFFFFFFFFFFFFFFFFFFFFFFFFFFFFF  
FFFFFFFFFFFFFFFFFFFFFFFFFFFFFFFFFFFFFFFFFFFFFFFFFFFFFFFFFFFFFFFFFFFFFFFF  
@A00721:190:HGJW7DSXY:4:1339:16640:5478\_2:N:0:TCTGCAAG+GCTGCACT  
GGAGACTCCTTCTTTTGAATGTTGTAAAGAATTGGGTTGAGAAGTGTGCTTTACAAGGAGTTAGACT  
CTTCTTCAAGTTTTTAGATCTTCTTGATAATCTTAAAGAAAAATTTTC  
+  
FFFFFFFFFFFFFFFFFFFFFFFFFFFFFFFFFFFFFFFFFFFFFFFFFFFFFFFFFFFFFFFFFFFFFFFF  
FFFFFFFFFFFFFFFFFFFFFFFFFFFFFFFFFFFFFFFFFFFFFFFFFFFFFFFFFFFFFFFFFFFFFFFF  
@A00721:190:HGJW7DSXY:4:1653:10737:21057\_1:N:0:TCTGCAAG+GCTGCACT  
AGTCTGTACTTACATTCTTTACGCCAGATTCTTCATGGGGCGACGCTGTTTCTCTTGGTATTTCTGAA  
ATAGTTTATCAGAGCGTCATTTTCCTTTGGGATCTTTCCTCTGTAAGGGAATTATTAAATCATTCTT  
CTC  
+  
FFFFFFFFFFFFFFFFFFFFFFFFFFFFFFFFFFFFFFFFFFFFFFFFFFFFFFFFFFFFFFFFFFFFFFFF  
FFFFFFFFFFFFFFFFFFFFFFFFFFFFFFFFFFFFFFFFFFFFFFFFFFFFFFFFFFFFFFFFFFFFFFFF  
FFF  
@A00721:190:HGJW7DSXY:4:1315:31693:33896\_2:N:0:TCTGCAAG+GCTGCACT  
ATTATTACTGTTTTCTCTACCCATAACTTCTTTTTCAAAAATGCGGATGGGTCTACTGATGTTTTCTC  
ACAGAGTGCAGTCGTTTCAACACTTATCACCACCTTTGAAAGGAAAAT  
+  
FFFFFFFFFFFFFFFFFFFFFFFFFFFFFFFFFFFFFFFFFFFFFFFFFFFFFFFFFFFFFFFFFFFFFFFF  
F:FFFFFFFFFFFFFFFFFFFFFFFFFFFFFFFFFFFFFFFFFFFFFFFFFFFFFFFFFFFFFFFF  
F:FFFFFFFFFFFFFFFF:F,FFFFFFFFF,F,FF:,FFFF:F,,F,FFF:  
@A00721:190:HGJW7DSXY:4:1509:10285:8030\_1:N:0:TCTGCAAG+GCTGCACT  
AAATACGTATGTCGGTGGGTTCTCAAGGCTCTCATCGCCACTGGGATTCTAAGGGTTCCATAAGAT  
ATTATCTGACATTGTGGTTCAATGATCAGGATTCTTCTTTTGGTCCTTACGTCTTAAGTAATTTGGAT  
GTT  
+  
FFFFFFFFF:FFFFFFFFFFFFFFFFFFFFFFFFFFFFFFFFFFFFFFFFFFFFFFFFFFFFFFFFFFFF  
FFFFFFFFFFFFFFFFFFFFFFFFFFFFFFFFFFFFFFFFFFFFFFFFFFFFFFFFFFFFFFFFFFFFFFFF  
FFF  
@A00721:190:HGJW7DSXY:4:1267:19000:36777\_2:N:0:TCTGCAAG+GCTGCACT  
GTTCTTGTACGATTCTTAAAAGAAGTTTATTA AAACTTCAGAGTCTCTTGGAAGTCCAGGTAGCTAA  
TGTTCTTGCAATAGCCACAGACTTTCTGGGAAAAGAGACCTCTGTTGG  
+  
FFFFFFFFFFFFFFFFFFFFFFFFFFFFFFFFFFFFFFFFFFFFFFFFFFFFFFFFFFFFFFFFFFFFFFFF  
FFFFFFFFFFFFFFFFFFFFFFFFFFFFFFFFFFFFFFFFFFFFFFFFFFFFFFFFFFFFFFFFFFFFFFFF  
FFFF  
@A00721:190:HGJW7DSXY:4:1405:10872:2722\_1:N:0:TCTGCAAG+GCTGCACT  
GAGAATTACTCAGATTCAATCTGGCATCACTGAACGTCTACAACGAGTTAGGGAGTGGCTAGGTTTTA  
AAAGATCCTTTGCACAAGCAATACCTTCCACTGAGTTCATCACCAGAGTTTCGACGTCGCGGAAAAC  
GAT  
+  
FFFFFFFFFFFFFFFFFFFFFFFFFFFFFFFFFFFFFFFFFFFFFFFFFFFFFFFFFFFFFFFFFFFFFFFF  
FFFFFFFFFFFFFFFFFFFFFFFFFFFFFFFFFFFFFFFFFFFFFFFFFFFFFFFFFFFFFFFFFFFFFFFF  
FFF  
@A00721:190:HGJW7DSXY:4:1314:3685:14920\_2:N:0:TCTGCAAG+GCTGCACT  
CACTGTTGAGAATCTTCTGATGCTGAATTTGAGGAAAATTTTCGGAAGTTTTTGGTATAAATCCTG  
ATGGCTCAGTACAGGGAGGAGATCGGAAGAGCGTCGTGTAGGGAAGA  
+  
FFFFFFFFFFFFFFFFFFFFFFFFFFFFFFFFFFFFFFFFFFFFFFFFFFFFFFFFFFFFFFFFFFFFFFFF  
FFFFFFFFFFFFF:FFFFFFFFFFFFFFFFFFFFFFFFFFFFFFFFFFFFFFFFFFFFFFFFFFFFFFFF  
FFFF  
@A00721:190:HGJW7DSXY:4:1139:12726:20556\_1:N:0:TCTGCAAG+GCTGCACT  
ATGGACAAAATCTGGGATCATAGGTATGTGTCACGCTACACTCGAAATATGGGCCCTCATAAGGAAGT  
ATAGTTGGCGTCTTGTCGTTGACGTCATTACAGTCTGGAAGTTAGATCATTTGTTTCAGGAAGATCTCT  
ACA

+  
FFFFFFFFFFFFFFFFFFFFFFFFFFFFFFFFFFFFFFFFFFFFFFFFFFFFFFFFFFFFF:FFFFFFFFFFFFFFFF:FFFFFF  
FFFFFFFFFFFFFFFFFFFFFFFFFFFFFFFFFFFFFFFFFFFFFFFFFFFFFFFFFFFFFFFFFFFFFFFFFFFFFFFF  
FFF  
@A00721:190:HGJW7DSXY:4:1267:30852:4131\_1:N:0:TCTGCAAG+GCTGCACT  
CTTTAGCAACTTTAGATAAAATTCTTCCGGGCTCAATGACCTTTGCTATGTACGTGGATCTAATCCTT  
GGTGATCTGAATCTGACCATCGCAAAGAAGACTTTATTAGTTCATGAAGTCTTACACTTCTCGCGAC  
TAA  
+  
FFFFFFFFFFFFFFFFFFFFFFFFFFFFFFFFFFFFFFFFFFFFFFFFFFFFFFFFFFFFFFFFFFFFFFFFFFFFFFFF  
FFFFFFFFFFFFFFFFFFFFFFFFFFFFFFFFFFFFFFFFFFFFFFFFFFFFFFFFFFFFFFFFFFFFFFFFFFFFFFFF  
FFF  
@A00721:190:HGJW7DSXY:4:2208:22245:26271\_1:N:0:TCTGCAAG+GCTGCACT  
GCTTTATCTTAAAGCATTAACACCAAATTTAGCACTTTTTGAATATGACAGAAGCTCGCCATATCAGA  
T TAGAGACATGCCAGTTAGAGTTCTTCTAACAGGACTGATGGTGAGATTCTTTTACCTTTTGGAGGT  
CCA  
+  
FFFFFFFFFFFFFFFFFFFFFFFFFFFFFFFFFFFFFFFFFFFFFFFFFFFFFFFFFFFFFFFFFFFFFFFFFFFFFFFF  
FFFFFFFFFFFFFFFFFFFFFFFFFFFFFFFFFFFFFFFFFFFFFFFFFFFFFFFFFFFFFFFFFFFFFFFFFFFFFFFF  
FFF  
@A00721:190:HGJW7DSXY:4:1403:31937:20791\_2:N:0:TCTGCAAG+GCTGCACT  
CCTAGTGTCTTTTCTAGAGTCCAAGGACGTTTCCGTCGGAGGATGACAGGTGGGAGACCGCTCAATAA  
CACTCTATTGAATCCCTTTTCCACGATGAAAGCTCTTTATGAGGTGCT  
+  
FFFFFFFFFFFFFFFFFFFFFFFF:FFFFFFFFFFFF:FFFFFFFFFFFFFFFFFFFFFFFFFFFFFFFFFFFFFFFF  
FFFFFFFF,FFFF,F:FFFF,F:FFFFFFFF,FFFFFFFF:FFFF:FF  
@A00721:190:HGJW7DSXY:4:2110:17463:10755\_1:N:0:TCTGCAAG+GCTGCACT  
CTTTTGGTGATATCGCCTCTGTCTTTCTCCTTTAATCGTGAGGTTACGAGAGTTTCGTACTTGGGT  
TATCGGTTGTATTTTGATAAATTTGTTGGAATCGATAATGATACTGACGAAGGTTCTATTACCACCT  
TGT  
+  
:F:FFFFFFFF:,FFFFFFFF:,FFFFFFFF,,,:F:FFFFFFFFFFFFFFFFFFFFFFFF:FFFFFFFF:F  
F:FFFF:FFFF:FFFFFFFFF:FFFFFFFF:FFFFFFFF,FFFFFFFFFFFFFFFF:FFFFFFF  
FFF  
@A00721:190:HGJW7DSXY:4:1562:27814:14810\_2:N:0:TCTGCAAG+GCTGCACT  
GTGATGCTTCTTAGAGGCTCGTCTAGCCGCTGAGATTCGTCTTACCTATTTACAATCTGTAGAGAGA  
GAGGTTAATCAGAATTTGAGTGATAACGATTTAGTACTGGGAAATGGT  
+  
FFFFFFFFFFFFFFFFFFFFFFFFFFFFFFFFFFFFFFFFFFFFFFFFFFFFFFFFFFFFFFFFFFFFFFFFFFFFFFFF  
FFFFFFFFFFFFFFFF:FFFFFFFFFFFF:FFFFFFFFFFFFFFFFFFFF,FFFF  
@A00721:190:HGJW7DSXY:4:1253:12970:19351\_1:N:0:TCTGCAAG+GCTGCACT  
TTTTCTTTCCCTCCCCTTTTTCGATTGGATTGCACGGGGTCTTCGTCTCACACTAATTTGATAAGGT  
TTTTCTTTTATGGGACTCTTGTTTGACTTATGAAGGAGGTATTACTTCGGAAGTCTTAATGTAGGT  
CTC  
+  
FFFFFFFFFFFFFFFFFFFFFFFFFFFFFFFFFFFFFFFFFFFFFFFFFFFFFFFFFFFFFFFFFFFFFFFFFFFFFFFF  
FFFFFFFFFFFFFFFFFFFFFFFFFFFFFFFFFFFFFFFFFFFFFFFFFFFFFFFF,FFFF:FFFFFFFFFFFFFFFF  
FFF  
@A00721:190:HGJW7DSXY:4:1478:11930:28197\_2:N:0:TCTGCAAG+GCTGCACT  
GGTTTATGTTTCGGTTTCAGCTGGATGGATCTTTTGATGGTATGTTTCACATTGCGTGATCACTTCCC  
GTGGACTTGGGAAGAGATTAAACATAAAATCCAGCGATTCTATTATGT  
+  
FFFFFFFFFFFFFFFFFFFFFFFFFFFFFFFFFFFFFFFFFFFFFFFFFFFFFFFFFFFFFFFFFFFFFFFFFFFFFFFF  
FFFFFFFFFFFFFFFF:FFFFFFFFFFFF:FFFFFFFFFFFFFFFFFFFF,FF

@A00721:190:HGJW7DSXY:4:2168:23701:7373\_2:N:0:TCTGCAAG+GCTGCACT  
TCGATGATGTTTCGGGCTGTGGGGATTAACCTCCCTCGTGAACTTACGACGATGTTCTCGCTCGCATT  
TCACAAGGATTACTAAGTCTGAGATCTGCCACTTCTAATTTTAGGAAA

+

FFFFFFFFFFFFFFFFFFFFFFFFFFFFFFFFFFFFFFFFFFFFFFFFFFFFFFFFFFFFFFFFFFFFFFFF  
FFFFFFFFFFFFFFFFFFFFFFFFFFFFFFFFFFFFFFFFFFFFFFFFFFFFFFFFFFFFFFFF

@A00721:190:HGJW7DSXY:4:1349:14696:4586\_2:N:0:TCTGCAAG+GCTGCACT  
AGAAAGTTCATGAGGATGTCTTGGTCGAAAAATATCGCCGGGAACCTTCTAATAGAGGATCCTGATGAC  
ATTATTTCAACGGATACCGATCTCAGTTCTACCACAGAAACCGTCTCA

+

:FFFFFFFFFFFFFFFFFFFFFFFFFFFFFFFFFFFFFFFFFFFFFFFFFFFFFFFFFFFFFFFF  
FFFFFFFFFFFFFFFFFFFFFFFFFFFFFFFFFFFFFFFFFFFFFFFFFFFFFFFFFFFFFFFF

@A00721:190:HGJW7DSXY:4:1627:6876:7639\_2:N:0:TCTGCAAG+GCTGCACT  
ACTGATTCGGAATTAGAGAAAGACGACCTTCTTGTGGGGACTGAGACCTCTGAATTTTCAGGGTGCCC  
TGATGAGGACGTTGAAAGGATAATTTCAACTCTGAGACTTCTAAGAG

+

FFFFF,FFFFFFFFFFFFFFFFFFFFFFFFFFFFFFFFFFFFFFFFFFFFFFFFFFFFFFFFFFFFFFFF  
FFFFFFFFFFFFFFFFFFFFFFFFFFFFFFFFFFFFFFFFFFFFFFFFFFFFFFFFFFFFFFFF

@A00721:190:HGJW7DSXY:4:1168:3486:36777\_2:N:0:TCTGCAAG+GCTGCACT  
ACCAGAAACGTAACAAGAATAAAGGTAGGAAGGGGAGAAAACAGAACAAAGCGAGCGGTTGAAGAG  
AAAAGTATGATTGCGGCTGATCGTACCCCAATTCTGCTAGAAAG

+

FFFFFFFFFFFFFF:FFFFFFFFFFFF:FFFFFFFFFFFFFFFFFFFFFFFFFFFFFFFFFFFFFFFF  
FFFFFFFFFFFFFFFFFFFFFF:FFFFFFFFFFFFFFFFFFFFFFFFFFFFFFFFFFFFFFFF

@A00721:190:HGJW7DSXY:4:1129:11785:8437\_1:N:0:TCTGCAAG+GCTGCACT  
ATACCACTGATCTTCCAGAGTTACGTAGTGGTCGTTCTTTTGGTGATTTTATCAAAGAGAAAGTTTCT  
GCTAGTCGCGACGATAGTATTTATCGGAGTGATATTAACAAGTTAACTTCAACTGACCACTTACAA  
GAG

+

FFFFFFFFFFFFFFFFFFFFFFFFFFFFFFFFFFFFFFFFFFFFFFFFFFFFFFFFFFFFFFFF  
FFFFFFFFFFFFFFFFFFFFFF:FFFFFFFFFFFFFFFFFFFFFFFFFFFFFFFFFFFFFFFF  
FFF

@A00721:190:HGJW7DSXY:4:1554:25708:34710\_1:N:0:TCTGCAAG+GCTGCACT  
GCAACATGGATCAGTTTTCCAAAAGCTATTAATAGCAGTTGCGGGGCTATAATACCGCCTCCAGATT  
ACTCTAAACTGAATCCACTCTCTTGGGATATAAATGAGTACATCTATAATAGAGTTTTGGAAGTGT  
AAT

+

FFFFFFFFF:FFFFFFFFFFFFFFFFFFFFFFFFFFFFFFFFFFFFFFFFFFFFFFFFFFFFFFFF  
FFFFFFFFFFFFFFFFFFFFFFFFFFFFFFFFFFFFFFFFFFFFFFFFFFFFFFFFFFFFFFFF  
FFF

@A00721:190:HGJW7DSXY:4:1240:9787:18098\_1:N:0:TCTGCAAG+GCTGCACT  
GGCTTCTCTAAAGAACAGCAACTTTCAACATGAATTAGTTATTGAAAGTCTTGACCCTCACGTCTCAC  
TTTATCACCTTGAGATGGTAAAGTCATTAACAAAGGAAATGTTAAGGCTGATGACTTAAATTCGCA  
TTC

+

F:FFFFFFFFF:FF:FFFFFFFFFFFFFFFFFFFFFFFFFFFFFFFFFFFFFFFFFFFFFFFF  
FFFFFFFFFFFFFFFFFFFFFFFFFFFFFFFFFFFFFFFFFFFFFFFFFFFFFFFFFFFFFFFF  
FFF

@A00721:190:HGJW7DSXY:4:1459:20094:26553\_2:N:0:TCTGCAAG+GCTGCACT  
AGACCTTTCTGGGGGAGTAAAGAGGGTTTGAAGATTACGGAACCTTCTCGTTCTTCATGAAGATCT  
TCGAGTGTTTTATAGTGAGTTATTCTTGCGAAGGTTCAAGTCGATTGA

+

FFFFFFF:F,,FFFF:FFFF,F:FF:FFFFFFFFFFFFFFFFFFFFFFFFFFFFFFFF,FFFFFF,F::FF:F:FFF:  
F:FFF,FFF,FFFFFFFFFFFFFFFFFFFFFFFFFFFFFFFF,,FFFF,FF:FF,:F,



@A00721:190:HGJW7DSXY:4:1430:19623:7420\_2:N:0:TCTGCAAG+GCTGCACT  
GCCGCGTAGTCAGCGCGTTTAGCTGTATCATCAGTCAGAGTATACCCGATAGGGTACCGAGTCTCCAA  
GAGAATATTTATTCTTATGAGGCTCGAACTTCAACGTTTTTACAACG

+

FFFFFFFFFFFFFFFFFFFFFFFFFFFFFFFFFFFFFFFFFFFFFFFFFFFFFFFFFFFFFFFFFFFFFFFF  
FFFFFFFFFFFFFFFFFFFFFFFFFFFFFFFFFFFFFFFFFFFFFFFFFFFFFFFFFFFFFFFF

@A00721:190:HGJW7DSXY:4:1268:18728:36182\_2:N:0:TCTGCAAG+GCTGCACT  
TCGCACCCGAAATTTTTGGGCAGAATGCTCTTAACGCGGTTCTTGAACGGTGTTTTGATCAGTCTAAG  
TTGGATAAAGTTATAGGAGACTCAGTTAACCTGAGAGCTCCTCAATTG

+

:FFFFFFFFFFFFFFFFFFFFFFFFFFFFFFFFFFFFFFFFFFFFFFFFFFFFFFFFFFFFFFFF:FFFFFF:FFFFFFFFFFFFFFFF  
FFFFFFFFFFFFFFFFFFFFFFFFFFFFFFFFFFFFFFFFFFFFFFFFFFFFFFFFFFFFFFFF

@A00721:190:HGJW7DSXY:4:2150:1181:33254\_1:N:0:TCTGCAAG+GCTGCACT  
AACAATAGGGACGCTAGTATACTTCGTAAAGTCGACAGCGAAATGGTCAATATTGATAATTGGACCGA  
CTATATGACCTATTTTAAGCTCATGGTGAAAAGGGAAGCTAAGGTTAAACTTGATGCTTCAGCCTTTT  
CGA

+

FFFF,FFFFFFFFFFFFFFFFFFFFFFFFFFFFFFFFFFFFFFFFFFFFFFFFFFFFFFFFFFFFFFFF  
FFFFFFFFFFFFFFFFFFFFFFFFFFFFFFFFFFFFFFFFFFFFFFFFFFFFFFFFFFFFFFFF:FFFFFFFFFFFFFFFF  
FFF

@A00721:190:HGJW7DSXY:4:1368:6596:22842\_1:N:0:TCTGCAAG+GCTGCACT  
AGAATATCGTTTATCACGCAAAATTTATTAATGCAATTTTCGGACCTATCTTTAAGGTTCTTGTGAGG  
AGAGTCAAACAGTGCTTTTACCCAACATTTTATGTATACAGAGATGACCAGTGACGATTTCTCCCG  
GAA

+

FFFFF:FFFFFFFFFFFFFFFFFFFFFFFFFFFFFFFFFFFFFFFFFFFFFFFFFFFFFFFFFFFFFFFF  
FFFFFFFFFFFFFFFFFFFFFFFFFFFFFFFFFFFFFFFFFFFFFFFFFFFFFFFFFFFFFFFF:FFFFFFFFFFFFFFFF  
FFF

@A00721:190:HGJW7DSXY:4:2363:18340:35728\_1:N:0:TCTGCAAG+GCTGCACT  
CTCTTAGGAGGTCATGATGACTACTATAAGGGTGAAATCGATTTTTCGAAGTTTGACAAATCTCAAGA  
TTTCTTTTGTAAGCCTATGAGATAAAGATGTATTCTTATTTAGGCTTCGATGCTGAATTTCTTGAAC  
TTT

+

FFFFFFFFFFFFFFFFFFFFFFFFFFFFFFFFFFFFFFFFFFFFFFFFFFFFFFFFFFFFFFFF:FFFFFFFFFFFFFFFF  
FF:F:FFFFFFFFFFFFFFFFFFFFFFFFFFFFFFFFFFFFFFFFFFFFFFFFFFFFFFFFFFFFFFFF:FFFFFFFF  
FFF

@A00721:190:HGJW7DSXY:4:1336:30147:11898\_2:N:0:TCTGCAAG+GCTGCACT  
TGTCACGCCAGGAGTATCCATAACGATTTGTCAATTTACCACCTTTGCTCAACGACGAAGTGGAACGGC  
CAACACTTTCTTTGGTAATTGTATGATCACTTTGATGATTTTATCACT

+

FFFFFFFFFFFFFFFFFFFFFFFFFFFFFFFFFFFFFFFFFFFFFFFFFFFFFFFFFFFFFFFF:FFFFFFFFFFFF  
FFFFFFFFFFFFFFFFFFFFFFFFFFFFFFFFFFFFFFFFFFFFFFFFFFFFFFFFFFFFFFFF

@A00721:190:HGJW7DSXY:4:1170:18991:30217\_1:N:0:TCTGCAAG+GCTGCACT  
CTTGAAAGTTTTCGGCTGTGGTTGTCGCTGGGGACGATTCCATTCTGTTTTCAAAGACTCCAATAAC  
TGATCATTCTGATCATATGATTTTGACAATGGTTTCGAAGCGAAATTTTGAGGGATAAACCAGCGT  
ACT

+

FFFFFFFFFFFFFFFFFFFFFFFFFFFFFFFFFFFFFFFFFFFFFFFFFFFFFFFFFFFFFFFF:FFFFFFFFFFFF  
FFFFFFFFFFFFFFFFFFFFFFFFFFFFFFFFFFFFFFFFFFFFFFFFFFFFFFFFFFFFFFFF:FFFFFFFFFFFF  
FFF

@A00721:190:HGJW7DSXY:4:1446:18466:3599\_2:N:0:TCTGCAAG+GCTGCACT  
CCTGATCCTTACAAGATCATCGTTAAGTTAGGTAAACCCCTAACCGATGTTACTCTTGTAGGACTTTG  
GGAGAGATTCTGTTAGTTTTAAAGACTATACTAAATATCTCCACTACGA

+

FFFFFFFFFFFFFFFFFFFFFFFFFFFFFFFFFFFFFFFF:FFFFFFFF:FFFFFFFFFFFFFFFF:FF:FFFFFFFF  
:FFFFFFFFFFFFFFFFFFFFFFFF:F:FFFFFFFF:FFFFFFFFFFFFFFFF:FF  
@A00721:190:HGJW7DSXY:4:1272:25518:22608\_2:N:0:TCTGCAAG+GCTGCACT  
TTGCGACTAATATTCGATATTCGATTGAGGGTCGTTATACCTATTCGGCTATCTGTGCTTTGAATTGT  
ATAAGATCAAATTTTAAACGATTCCGAGAGGTTTATCCTGATGTGGAG  
+  
FFFFFFFFFFFFFFFFFFFFFFFFFFFFFFFFFFFFFFFF:FFFFFFFFFFFFFFFFFFFFFFFFFFFFFFFF:FFFFFFFFFFFFFFFF  
FFFFFFFFFFFFFFFFFFFFFFFF:FFFF:FF:FFFFFFFFFFFFFFFF,FFF  
@A00721:190:HGJW7DSXY:4:1311:28474:26850\_1:N:0:TCTGCAAG+GCTGCACT  
ATCCCGACCTTTCCTTGTGAAAATTTTGATGCGGTTTCATAAGATTATCAGTAATCCTGATTCTACTA  
CGGATTCATGGACCTTCCATCCTGTACCTCTTCTGGAGAGACGTATCTCAAAGATCGACTTCGAGACA  
GGT  
+  
FFFFFFFFFFF:FFFFFFFFFFFFFFFFFFFFFFFFFFFFFFFFFFFFFFFFFFFFFFFFFFFFFFFFFFFFFFFF  
FFFFFFFFFFFFFFFFFFFFFFFFFFFFFFFFFFFFFFFFFFFFFFFFFFFFFFFFFFFFFFFFFFFFFFFFFFFFFFFF  
FFF  
@A00721:190:HGJW7DSXY:4:2659:22842:34757\_1:N:0:TCTGCAAG+GCTGCACT  
AGCGTTAGCGACCAAGATCTAAATTCGTTAACGGTTCGCGCTTTATTTTAAAAAGCTCCCTCCTC  
TCGCAAGTTTGATCTTATACTTATCACGATAGGACTTGAGTCTTTTGATCAGTCTCTGACTTGACCAT  
+  
FF,:,,FFF:F,F,F,:FFF,F,,FFF,FFF,F:F::FF,,,,:FFF:F:FF,F:F:F,F:,FFFF,  
FFF,F,FFFFFF:,F,FF,:FF,F,F,,,:FFF,FFF,FFFFFFFF,FFFF:FF,:FFF::,,F  
@A00721:190:HGJW7DSXY:4:1178:21323:34068\_1:N:0:TCTGCAAG+GCTGCACT  
TGACGATCATTAAGACTCTCTTTCTTCTTTGTTTCCTTCTTTGCACTGATTTTCTCATCAGCTTGT  
GTTTTACCTAATCTGTGTTTTTACGATAACAACATCAGTTGATTAAGACTCTCCGAAAGGCGAACT  
TTG  
+  
FFFFFFFFFFFFFFFFFFFFFFFFFFFFFFFFFFFFFFFFFFFFFFFFFFFFFFFFFFFFFFFFFFFFFFFF  
FFFFFFFFFFFFFFFFFFFFFFFFFFFFFFFFFFFFFFFFFFFFFFFFFFFFFFFFFFFFFFFFFFFFFFFF  
FFF  
@A00721:190:HGJW7DSXY:4:1357:2835:4679\_2:N:0:TCTGCAAG+GCTGCACT  
GGGTGAAGCACAACGTTTGACCGTGACGAAGTGTGGTGTCTTGATCTACGTTACGGATATACTCTCC  
TTGAGTTCACCTCGTAAGGACACTACCACTTATTACGATATTTCTTTAG  
+  
FFFFFFFFFFFFFFFFFFFFFFFFFFFFFFFFFFFFFFFFFFFFFFFFFFFFFFFFFFFFFFFFFFFFFFFF  
FFFFFFFFFFFFFFFFFFFF:FFFFFFFFFFFFFFFFFFFFFF,FFF:FFFFF  
@A00721:190:HGJW7DSXY:4:2224:12002:28166\_2:N:0:TCTGCAAG+GCTGCACT  
CCTTTAAGCGTCTTCTGTTCATCGCAACCAGATGATATCTTCTATTGCAACTTATGTTTCGATCAGTG  
TTTCTTCTATCAGGAGGAAAACACTTGTCTAGTCCTTGTAAGATTAA  
+  
FFFFFFFFFFFFFFFFFFFFFFFFFFFFFFFFFFFFFFFFFFFFFFFFFFFFFFFFFFFFFFFFFFFFFFFF:FFFF  
FFFFFFFFFFFFFFFFFFFFFFFFFFFFFFFFFFFFFFFF:FFFFFFFFFFFFFF:F:FF  
@A00721:190:HGJW7DSXY:4:1550:24216:3286\_2:N:0:TCTGCAAG+GCTGCACT  
TGTTTACCACCGAAATATCAAGGTTCTTGTCTTCAAACGATTGGAAGGTTAGTTATCTTAATAGTAC  
TAAAGGGGTTTACTTACAACCCTATGACGATAGTTTCTCTTTACACAC  
+  
FFFFF:,FFFFFFFFFFFFFF::F:FFFFFF,FFFFFFFFFFFFFFFF::F:FF:FF:FFFFFF,FF:  
FFFFFF:FFFFFF,FFFFFF::FF,FFF,FF:FFF,FFF:FF:F  
@A00721:190:HGJW7DSXY:4:1603:22046:5321\_2:N:0:TCTGCAAG+GCTGCACT  
TGTTTTCTTCTAATGTGGCCTGAAGTACGTTTCACTTTGTGTGTACTTGTCTCTATTTAAGTTTTGT  
CTTCCTTGTGTCTTATTCTATTAATCACTCATTTTAGTGAGATTAT  
+  
FF:FFFFFFFFFFFF:FFFFFFFFFFFFFFFFFFFFFFFF,FFFFFF:FFFFFFFFFFFFFFFFFFFFFFFF  
FFFF:FFFFFFFFFFFFFF:FFF:FF:FFF:FFFFFFFF,FFF:FF





@A00721:190:HGJW7DSXY:4:1139:20808:27853\_1:N:0:TCTGCAAG+GCTGCACT  
AAGGATGTGCACTCTTTTCTGCTACTTTAACGGAGCGTAGTGTACTCTTCGTCGATTGTATCAACAGT  
AACATTACTTCTAATAAAGGTCTCTATCAAGCTCGTATTATCGTCGCTGCTGGATCTGCGTTACCGTT  
GAA

+

FFFFFFFFFFFFFFFFFFFFFFFFFFFFFFFFFFFFFFFFFFFFFFFFFFFFFFFFFFFFFFFFFFFFFFFF  
FFFFFFFFFFFFFFFFFFFFFFFFFFFFFFFFFFFFFFFFFFFFFFFFFFFFFFFFFFFFFFFFFFFFFFFF  
FFF

@A00721:190:HGJW7DSXY:4:1355:21676:20713\_2:N:0:TCTGCAAG+GCTGCACT  
AGGTAATTATGAAGACTGTGATTTATCTTCACTCTGGCCTTGATGAGGGTGTTTCTAATCGTAACA  
TTAATAATTTCAATCTTCTTAAAAAGAAGATAGAGAGTCATACTTTGG

+

FFFFFFFFFFFFFFFFFFFFFFFFFFFFFFFFFFFFFFFFFFFFFFFFFFFFFFFFFFFFFFFFFFFFFFFF  
FFFFFFFFFFFFFFFFFFFFFFFFFFFFFFFFFFFFFFFFFFFFFFFFFFFFFFFFFFFFFFFFFFFFFFFF  
FFF

@A00721:190:HGJW7DSXY:4:1154:8241:27884\_2:N:0:TCTGCAAG+GCTGCACT  
GATAGCCAATATTGAAGTGACACCTCTGGTAGTATCGAAGTAAAGATAACCAATAAGGAAGGAGCTT  
ATACTATGGTTGAATCAACTAAGCATACTACTTTTGCTTTGATTACTC

+

FFFFFFFFFFFFFFFFFFFFFFFFFFFFFFFFFFFFFFFFFFFFFFFFFFFFFFFFFFFFFFFFFFFFFFFF  
FFFFFFFFFFFFFFFFFFFFFFFFFFFFFFFFFFFFFFFFFFFFFFFFFFFFFFFFFFFFFFFFFFFFFFFF  
FFF

@A00721:190:HGJW7DSXY:4:1562:28664:36980\_1:N:0:TCTGCAAG+GCTGCACT  
CTTCCGATCTGTTAAAGAGTCGATTAAACAAGTTGTACTTATCAATGATTTTATCGCTGGTTGTTATC  
TCGAAAAGTCTCTTCTAAAAGGAACGTCAGTTCTAACCCAAAGAGAATATCTAAAATATTTACAAAAT  
CTT

+

FFFFFFFFFFFFFFFFFFFFFFFFFFFFFFFFFFFFFFFFFFFFFFFFFFFFFFFFFFFFFFFFFFFFFFFF  
FFFFFFFFFFFFFFFFFFFFFFFFFFFFFFFFFFFFFFFFFFFFFFFFFFFFFFFFFFFFFFFFFFFFFFFF  
FFF

@A00721:190:HGJW7DSXY:4:2540:23692:31250\_1:N:0:TCTGCAAG+GCTGCACT  
ACGAGATCTTGCAGAGTGACTGGAGTTCAGACGTGTGCTCTTCCGATCTGTACAATCTTACTTGGAAC  
GAAGGCGACCTGTTCCGGAGTTTTTACGGGATCCGGAATGTTCTGTCTATATTAGGTGAAGCGAAATA  
CGA

+

FF,,FFFFFFFFFFFFFFFFFFFFFFFFFFFFFFFFFFFFFFFFFFFFFFFFFFFFFFFFFFFFFFFF  
FFFFFFFFFFFFFFFFFFFFFFFFFFFFFFFFFFFFFFFFFFFFFFFFFFFFFFFFFFFFFFFFFFFFFFFF  
FFF

@A00721:190:HGJW7DSXY:4:1257:7355:33865\_1:N:0:TCTGCAAG+GCTGCACT  
TCGTACCTTGATGCTGACTTTCGTCAATATGATTTGATCTGGTTGCTCAATTCTAAGCGTGTTCGCT  
TAGTGCGAGGCCTCTCTTCTACGAGTATTGCTATTTATACGGTTACGAGAAGAAGGTTGAAAGTTTG  
AGA

+

FFFFFFFFFFFFFFFFFFFFFFFFFFFFFFFFFFFFFFFFFFFFFFFFFFFFFFFFFFFFFFFFFFFFFFFF  
FFFFFFFFFFFFFFFFFFFFFFFFFFFFFFFFFFFFFFFFFFFFFFFFFFFFFFFFFFFFFFFFFFFFFFFF  
FFF

@A00721:190:HGJW7DSXY:4:1409:10050:1579\_2:N:0:TCTGCAAG+GCTGCACT  
CTATACGTGACATACTAAATACTAGATATTTGGATGATCTTGATAAAGAACTTCATGAATTTTCAGAG  
GATGAAAAATTTCTTCTTGATTTTAATATAAAGAATCTTTACCAG

+

FFFFFFFFFFFFFFFFFFFFFFFFFFFFFFFFFFFFFFFFFFFFFFFFFFFFFFFFFFFFFFFFFFFFFFFF  
FFFFFFFFFFFFFFFFFFFFFFFFFFFFFFFFFFFFFFFFFFFFFFFFFFFFFFFFFFFFFFFFFFFFFFFF

@A00721:190:HGJW7DSXY:4:2238:28953:6762\_1:N:0:TCTGCAAG+GCTGCACT  
AGGAGGCAGTCTTCTGATCGTAAGAAGTTTATAAGGAACATATCCATTTGTTGTAATAGGGTCATCAA  
CTTAGAACTCGAACTCTAAGTGGAATACTGTCTTTCCAAGCTTACCTGTATCTTCAATGAAATTGG  
ACT

[illegible]



ACTCACTATCGTTTTCTGCTTTTTCTTAGCTAATAGATTAATAAAGGA  
+  
FFFF:FFFF:FFFFFFFFFFFFFFFFFFFFFFFF: , FFFFFFFFFFFFFFFFFFFFFFFFFF, FFFFF  
F:FFFFFFFFFFFFFFFFFFFFFFFF:FFFF, FFFF, , FFFFFFFFFF  
@A00721:190:HGJW7DSXY:4:1407:27670:14058\_2:N:0:TCTGCAAG+GCTGCACT  
ACCAACTCTTCGTTACGAGACCTGATGGTAGAATAGATTTAGTCTCTACACCCATCTCAACGAGGATA  
AAGCGAGTTTTCCGTCCTGAACGTAATACACGAAGAGATCATCCGCAA  
+  
FFFFFFFFFFFFFFFFFFFFFFFFFFFFFFFFFFFFFFFFFFFFFFFFFFFFFFFFFFFFFFFF  
FFFFFFFFFFFFFFFFFFFFFFFF: FFFFFFFFFFFFFFFFFF  
@A00721:190:HGJW7DSXY:4:1135:11080:31203\_2:N:0:TCTGCAAG+GCTGCACT  
AAAGTCCCTTCTAACTTTAGATTATGAATCCTGCCTTTACTCATTTTATAGCAGTTATTTATGTTGTA  
CTTTTATAATTTATAACCTTCTTATACTTTTGGGTATGTTTGTGAA  
+  
FFFFFFFFFFFFFFFFFFFFFFFF: FFFFFFFFFFFFFFFFFF, FFFFFFFFFF  
FFFFFFFFFFFFFFFF: FFFFFFFFFF: FFF: FFF: FFFFFFFFFF  
@A00721:190:HGJW7DSXY:4:1275:11198:18505\_2:N:0:TCTGCAAG+GCTGCACT  
GAAGACATTATCTCTTATGTACTTATTGTAACGATCATTCTTTCGAGTTTGTGATTCTTATTCTTTT  
ATTCCTTTAACTGTGTATGAGGAGGATTTATAATGCTTTTCGATAGTG  
+  
FFFFFFFFFFFFFFFFFFFFFFFFFFFFFFFFFFFFFFFF: FFFFF, FF: F: FFFFFFFF  
FFFFFFFFFFFFFFFF: FFFFF: FFFFFFFFF: FFF: FFFFFFFF  
@A00721:190:HGJW7DSXY:4:1612:10592:24909\_2:N:0:TCTGCAAG+GCTGCACT  
ATTACTGTTTCAAATCATCTTTACTCACAGACTCCGAAAATGGTTTCAAATGAGGTCAAAGCTCTATT  
TATTAACGAACATTATCCGATTCTTCGAGGGTATCACTACCACTGA  
+  
FFFFFFFFFFFFFFFFFFFFFFFFFFFFFFFFFFFFFFFF: FFFFFFFFFF: F: F: FFFFFF  
FFFFFFFFFFFFFFFFFFFFFFFF: FFFFFFFFFFFFFFFFFF  
@A00721:190:HGJW7DSXY:4:1377:1208:2362\_2:N:0:TCTGCAAG+GCTGCACT  
CAAGGAAC TTCAATTCCTTCGATGTTTATATTTTCTATAAGGGAAAATAGCAATAATCAAATTCGA  
CAAATTTTAGA ACTTTATTT CAGAACTCTCTCCGATCACCTTG GTGTG  
+  
FFFFFFFFFFFFFFFFFFFFFFFFFFFFFFFF: FFFFFFFFFFFFFFFFFF  
FFFFFFFFFFFF: FFFFFFFFFFFFFFFFFF: FFFFFF  
@A00721:190:HGJW7DSXY:4:1504:5141:8641\_1:N:0:TCTGCAAG+GCTGCACT  
TCTTTTCAATAAGATGTATGATGATAATCTACTATTTTAAATAGTGATATTCAGCGTATACTTGAAT  
ACTTTATCAAAGATTTGGCTTGGTCTATTTACCGCAAAAAGTTGGAAGAGGTCTATGATATTTATTT  
ACT  
+  
FFFFFFFFFFFFFFFFFFFFFFFFFFFFFFFF: FFFFFFFFFFFFFFFFFF  
FFFFFFFFFFFFFFFFFFFFFFFFFFFFFFFFFFFFFFFFFFFFFFFFFFFFFFFFFFFFFFFF  
FFF  
@A00721:190:HGJW7DSXY:4:2120:28727:22842\_2:N:0:TCTGCAAG+GCTGCACT  
CACCGATTATAACTTGACTGTTGATAATATTACAATAGCTCTTCTCAGAAGATTAGAGAAGTAACCG  
GTGAACACGTGCGTAGCATTGATTTACTTTTACCGTTAGAACTGAAAA  
+  
FF: F, FFFFFFFFFFFFFFFFFFFFFFFFFFFFFFFFFF  
FFFFFFFFFFFFFFFFFFFFFFFF: FFFFFFFFFF  
@A00721:190:HGJW7DSXY:4:1429:27254:1720\_1:N:0:TCTGCAAG+GCTGCACT  
ACCTATAAGTTACAAACGATTCTTCGACTATATTAAGAAATAAAAATACTTCAAGTACCTGAAC TTT  
ACATTTTAAATGGTATGGTATAATGTGTCTTACAAATAGAACCTTCACTCTCGGTAATGAGAGTGTAT  
TCC  
+  
FFFFF:FFF: , F: , FF, F, FFFFFFF: FFFFFFF: FFFFFFFF: FFFFFFFF

FFFFFFFFFFFFFFFF,FFFFFFFFFFFFFFFF:FFFF,FFFFFFFF:FFFFFFFFFFFFFFFF  
FFF

@A00721:190:HGJW7DSXY:4:1370:7916:24721\_1:N:0:TCTGCAAG+GCTGCACT  
GGCATTACTAGGATTTATCACACTCCTAAATTTGATAGCAATTTATGTTTTAAATGCTAGGAAAATTT  
TAGAAAACTCCATTGTATAGTTCAAGGAGTACTTAATTCAATAGCTTTAGTATTATTACTATCGCC  
TTT

+

FFFF:FFFF:FFFFFFFFFFFFFFFFFFFFFFFFFFFFFFFFFFFFFFFF:FFFFFFFFFFFFFFFF  
FFFFFFFFFFFFFFFFFFFFFFFFFFFFFFFFFFFFFFFFFFFFFFFF:FFFFFFFFFFFFFFFFFFFFFFFF  
FFF

@A00721:190:HGJW7DSXY:4:1302:32542:8218\_2:N:0:TCTGCAAG+GCTGCACT  
AGTTAATTGCTTACACAAAAGTGACGCGCGAAGGAATCTTAATTGATTGAAGCTAGGCGTTGGGGAGA  
ATGAACTGCCGCTTCCCGGAAGAAACGATCTATTTACAGAGTATTTAG

+

FFFFFF:FFFFFFFFFFFFFFFFFFFFFFFFFFFFFFFFFFFFFFFFFFFFFFFF:FFFFFFFF  
FFFFFFFFFFFFFFFFFFFFFFFFFFFFFFFFFFFFFFFFFFFFFFFF:FFFFFFFF

@A00721:190:HGJW7DSXY:4:1102:7916:34773\_2:N:0:TCTGCAAG+GCTGCACT  
GAATTCCTGGCGAACCGCAAATCAATTGAAGAAAACCACTCCCTTCAATTCAATAACATAACATACCA  
TACACTCCCCAACATAACATAACCATAACCTACCATGACCAATCATCG

+

FFFFFFFFFFFFFFFFFFFFFFFFFFFFFFFFFFFFFFFFFFFFFFFFFFFFFFFF:FFFFFFFF  
FFFFFFFFFFFFFFFFFFFFFFFFFFFFFFFF:FFFFFFFFFFFFFFFFFFFFFFFF

@A00721:190:HGJW7DSXY:4:1132:17436:26835\_1:N:0:TCTGCAAG+GCTGCACT  
ACGCCAGACGTAGGGTCAAACCTACTACCGCCGTCGGCAGATCGGCACCACTGGTCTCTACGTTACG  
GGACCCGCTGTGCAGAATAACCTTCCCAAATCTAGATCTGCACAGAAGAAGGCTGAAGGTCGTTACCG  
GAC

+

:FFFFFFFF, :FFFFFFFF:FF,FFFFFFFF,FFF,FFFF:FFF,FFFFFFFF:FFF  
FFFFFF,FFFFFFFF,FF:,FFFFFF:FFFF:F:F:FFFFFFFFFFFFFFFFFFFFFFFF:F:FFF  
FFF

@A00721:190:HGJW7DSXY:4:1203:3685:17112\_1:N:0:TCTGCAAG+GCTGCACT  
GGCTGTTGCCAGAGGAAAGCAGCGACCACCGAGGTCGCTCGTAACATTGACGGCAGTCCCGTCATCT  
CTGTGGGAAGTGAAGGAGTACCTCAGTCAAAAGTCACATTCACCACTCCCATGCCAATCAATGATGTG  
ACT

+

FFF:FF:FFFFFFFFFFFFFFFFFFFFFFFFFFFFFFFFFFFFFFFF:FFFFFFFFFFFFFFFF  
FFFFFFFFFFFFFFFF:FFFFFFFFFFFFFFFF:FFFF,FFFFFFFF:FFFFFF  
FFF

@A00721:190:HGJW7DSXY:4:2357:9191:32628\_2:N:0:TCTGCAAG+GCTGCACT  
GTGGTCAATACGTCGTGGGAGGTACTGAAGCCTTCCCTCCGCTGGCACGAAGAACTCCCAAGCCA  
ATCAATAGTTCTTCTGACCAGAATGAAAAGGGTTTACCAGGGAGATC

+

FFFFFFFFFFFFFFFFFFFFFFFFFFFFFFFFFFFFFFFFFFFFFFFF:FFFFFFFF  
FFFFFFFFFFFFFFFFFFFFFFFFFFFFFFFF:FFFFFFFF

@A00721:190:HGJW7DSXY:4:1217:10348:29121\_2:N:0:TCTGCAAG+GCTGCACT  
CAGGAAGAGGGGAAATGTCCCCAAACTGAGAAGAATAAGGGAAAGGTCCATCAGGACCTAAGAAGG  
GGAAATTACCCCTAATTCTGAAGGAAGATCTCCCACCATCTGGGGTTG

+

FFFFFFFFFFFFFFFFFFFFFFFFFFFFFFFFFFFFFFFFFFFFFFFF:FFFFFFFF  
FFFFFFFFFFFFFFFFFFFFFFFFFFFFFFFF:FFFFFFFF

@A00721:190:HGJW7DSXY:4:1259:28212:14810\_2:N:0:TCTGCAAG+GCTGCACT  
ATCTGCACGGCCAAAGAGGCCGCTGCTACGAAGTCGCTGAAGGCGGCTTGGGTCATTAAGGGTAGCT  
GTAAAGTTGCGCCTGCCGACCCCATCTTTGAGACCAAGACTCTCTACA

+

FFFFFFFFFFFFFFFF:FFFFFFFFFFFFFFFFFFFFFFFFFFFFFFFFFFFFFFFFFFFFFFFF  
FF:FFFFFFFFFFFFFFFFFFFFFFFFFFFFFFFFFFFFFFFFFFFFFFFFFFFFFFFF  
@A00721:190:HGJW7DSXY:4:1608:14488:24330\_1:N:0:TCTGCAAG+GCTGCACT  
TACTATGAGCAAATCTGTTGAATTCGTCACTGAGGACGAAGGTGAGAGGACTTTTGGCTACTGGCGAC  
AAACTGAGAGCAGTCGCTGGGGAAAGAGAATTGCGTGGGTGAAGGCCGACGCTTCGAGCTTGAGTGT  
GAC  
+  
FFFFFFFFFFFFFFFFFFFFF:,FFFFFFFFFFFFFFFFFFFFFFFFFFFFFFFFFFFFFFFFFFFFFFFF  
FFFFFFFFFFFFFFFFFFFFFFFFFFFFFFFFFFFFFFFFFFFFFFFFFFFFFFFFFFFFFFFF  
FFF  
@A00721:190:HGJW7DSXY:4:1148:29441:1814\_2:N:0:TCTGCAAG+GCTGCACT  
GTTTTGTCAACGGCGTTTGGAGGATTTTATCCGCGCTTAACATATGGGGCGAAGATCCCCTATGGAGT  
CTTGAAGGACTTAGGTTGGCATATTTATGCCGACGATAATAAGCATGT  
+  
FFFF:FFFFFFFFFFFFF,FFF:FFFFFFFFFFFFFFFFFFFFFFFFFFFFFFFFFFFFFFFFFFFFFFFF  
FFFFF,FFFFFFFFFFFFFFFFFFFFFFFFFFFFFFFFFFFFFFFFFFFFFFFFFFFFFFFF  
@A00721:190:HGJW7DSXY:4:1242:25825:17347\_1:N:0:TCTGCAAG+GCTGCACT  
CCGAGGTAAGCTCGGGACTTACAAGAGAGAGTGTGAGAGAGTCGCTCTCACTATTTTTGCCAGAATG  
CGGGCTTTCTGACTGATGAGGTTAAACTCTTGCTCCTTCTGTGGGTGAGGGTTTTTGTATATTCAC  
TGG  
+  
FFFFFFFFFFFFFFFFFFFFFFFFFFFFFFFFFFFFFFFFFFFFFFFFFFFFFFFFFFFFFFFF:FFFFFFFFFFFF  
FFFFFFFFFFFFFFFFFFFFFFFFFFFFFFFFFFFFFFFFFFFFFFFFFFFFFFFFFFFFFFFFFFFFFFFF  
FFF  
@A00721:190:HGJW7DSXY:4:1129:7880:26130\_2:N:0:TCTGCAAG+GCTGCACT  
TCCTCCATAATTACAACCTCTCTTTAGAGAGCATTAGAAGGAAGTTGGGCAAATCCCACATATGGTA  
GACGTTGTCACACTTTTCTTGAAAATTTTCTTTCTCCTCGTCATTGG  
+  
FFFFFFFFFFFFFFFFFFFFFFFFFFFFFFFFFFFFFFFFFFFFFFFFFFFFFFFFFFFFFFFF:FFFFFFFF  
FFFFFFFFFFFFFFFF:FFFFFFFF:FFFFFFFFFFFFFFFFFFFFFFFF:F,FF  
@A00721:190:HGJW7DSXY:4:1530:10402:27430\_2:N:0:TCTGCAAG+GCTGCACT  
GTGAGAAGGTGGAAGGTGTCAAGGCTACTTCATGCTGATCTTTCAGGACCTAATCACATCATGATT  
GATAGTTACGGCTCGTATCGAGTTGGAGGGAGGAAGTTCTCCGAAATT  
+  
FFFF:FFFF,F:FFFFFFFF:FFFF,F,,FF,FFF:FFFFFFFF,,FFFFFFFF:FFFF,F,FFFF  
FFFFF,FFFFFFFFFFFFFFFFFFFFFFFFFFFFF,FFF,FFFFFFFF,F:FF  
@A00721:190:HGJW7DSXY:4:1269:2745:22404\_1:N:0:TCTGCAAG+GCTGCACT  
GCTGTAAGTGTCAATTCAGAGAGGGGAGCTCTGAAAAGGAACTTCGTCAGAAGATGAGGAAGTCTAA  
GAGGAGGAGTTTGAGGAAGGCTCTAGAGAAGATCTCACCACCTGGAGAAGGCAAGTGGAGAGTCCAGA  
AGT  
+  
FFFFFFFFFFFFFFFF:FFFFFFFFFFFFFFFFFFFFFFFFFFFFFFFFFFFFFFFF:FFFFFFFFFFFFFFFF  
FFFFFFFFFFFFFFFFFFFFFFFFFFFFFFFFFFFFFFFFFFFFFFFF,FFFFFFFFFFFFFFFFFFFFFFFF  
FFF  
@A00721:190:HGJW7DSXY:4:1511:16034:36307\_2:N:0:TCTGCAAG+GCTGCACT  
GGATTATTTGAAGCAGGGTTACCACTTCCTAAGGTGGATGAGGGAGGTTGTTTCTTTGGAGTTTTAG  
ATAATCTTTTGAGAAGGGGTCATAGAGCCAGCAAGAGAAGCTTATATG  
+  
FFFFFFFFFFFFFFFFFFFFFFFFFFFFFFFFFFFFFFFFFFFFFFFFFFFFFFFFFFFFFFFF,FFFF  
FFFFFFFF,FFFFFFFFFFFFFFFFFFFFFFFFFFFFFFFFFFFFFFFFFFFFFFFF  
@A00721:190:HGJW7DSXY:4:1212:4490:27461\_2:N:0:TCTGCAAG+GCTGCACT  
CCTTGAGAAGACAAGCCACATTAAGATATAATTTAGGTCAACTTGGGGTTTCAATGTCATTAGTGCC  
TTACGATTGAAAGAGGTCCTTTTGAGTATCGACAGATCTTTCGATCTT  
+

FFFFFFFFFFFFFFFFFFFFFFFFFFFFFFFFFFFFFFFFFFFFFFFFFFFFFFFFFF:FFFFFFFFFFFFFFFFFFFF  
 FFFFFFFFFF:FFF,FF:FFFFFFFFFFFF:FFFFFFFFFF:FF:FF  
 @A00721:190:HGJW7DSXY:4:1308:18204:12696\_2:N:0:TCTGCAAG+GCTGCACT  
 TTAACGTGGCAGAATTCGGTAACCTACCATATTGTTCTTCCGGAAGTTGTGGGATTTAACCTTGAC  
 TCAACTACTCCGATCAGATCCGGATGGTTTGATTGGTTGGACTACTC



@A00721:190:HGJW7DSXY:4:1643:7970:13479\_1:N:0:TCTGCAAG+GCTGCACT  
GAGGTTTCGTTCTCAATAAAAATTTTCTCAAGAGATTATGGTTGATAAAGTTTTCTTCATAAGGGCT  
ATTCAGTACGTCATGGGGATCACTTCTTCGGTCAATGACAAAACCTTCGAATATGTTACGACATGGCT  
TCG

+

FFFFFFFFFFFFFFFFFFFF,FFFFFF:FFFFFF:FFFFFFFFFFFFFFFFFFFFFFFFFFFFFFFFFFFFFFFF:FFFFFF  
FFFFFFFFFFFFFFFFFFFFFFFFFFFFFFFFFFFFFFFFFFFFFFFFFFFFFFFFFFFFFFFFFFFFFFFFFFFFFFFF  
FFF

@A00721:190:HGJW7DSXY:4:1628:19958:17957\_2:N:0:TCTGCAAG+GCTGCACT  
AGGATTGTCATCTCGGGGAAAGTGATTCACCAAGATGTTTCATATAGATACGAGATACCTAGAGAAGGT  
CGCAGCGATCTTACTCGTTATCGGAGCTAAGAAGAAGACTTTGGGTAC

+

FFFFFFFFFFFFFFFFFFFFFFFFFFFFFFFFFFFFFFFFFFFFFFFFFFFFFFFFFFFFFFFFFFFFFFFFFFFFFFFF  
FFF:FFFFFFFFFFFFFFFFFFFFFFFFFFFFFFFFFFFFFFFFFFFFFFFFFFFFFFFFFFFFFFFFFFFFFFFF:F

@A00721:190:HGJW7DSXY:4:1460:18945:2268\_2:N:0:TCTGCAAG+GCTGCACT  
AAACTTAACGTTAGTACCGGAGGTGATCTCTCTGCTTCTGCGTTACTGAGAGAAAAGATTCAGGACGC  
CTACGGTGACTTTATGGACAAGATGCAAGTCTTGGGAAATACTTGTT

+

FFFFFFFFFFFFFFFFFFFFFFFFFFFFFFFFFFFFFFFFFFFFFFFFFFFFFFFFFFFFFFFFFFFFFFFFFFFFFFFF  
FFFFFFFFFFFFFFFFFFFF:FFFFFFFFFFFFFFFFFFFFFFFFFFFFFFFFFFFFFFFFFFFFFFFFFFFFFFFF

@A00721:190:HGJW7DSXY:4:1432:2917:9643\_2:N:0:TCTGCAAG+GCTGCACT  
TCGATTCTTTGTATAGGGAGTGTGAGAAGACAACGAATCTTGAAACTACGGTCCTTATCAAAGAAAAT  
GGTGAACCGGTCTCTAAATCTTTTGAGATTGAGAAGATTGAAGAACAC

+

FFFFFFF:FF:FF,FFFFFFFFFFFFFFFFFFFFFFFFFFFFFFFFFFFFFFFFFFFFFFFFFFFFFFFFFFFFFFFF  
FFFFFFFFFFFFFFFFFFFFF:FFFFFFFFFFFFFFFFFFFFFFFFFFFFFFFFFFFFFFFFFFFFFFFFFFFFFFFF

@A00721:190:HGJW7DSXY:4:1538:32949:33285\_2:N:0:TCTGCAAG+GCTGCACT  
GCTCGGCGTTGTTCTTGAAAACCAAGTTAAGGAGGAGGCTGATCATGGAGTCTTTGTACCTTCTGTCA  
AACTTCGAGGTTACGCTACGAGAGGTGATCCCGGATGTGGATTGAAGG

+

FFFFFFFFFFFFFFFFFFFF:FFFFFF:FF,FFFFFFFFFFFFFFFFFFFFFFFFFFFFFFFFFFFFFFFFFFFFFFFF  
FFFFFFFFFFFFFFFFFFFFFFFFFFFFFFFFFFFFFFFFFFFFFFFFFFFFFFFFFFFFFFFFFFFFFFFF:FFFF

@A00721:190:HGJW7DSXY:4:1454:27823:26913\_2:N:0:TCTGCAAG+GCTGCACT  
GGAGACTCCTTCTTTTTGAATGTTGTAAAGAATTGGGTTGAGAAGTGTGCTTTACAAGGAGTTAGACT  
CTTCTTCAAGTTTTTAGATCTTCTTGATAATCTTAAAGAAAAATTTTC

+

FFFFFFFFFFFFFFFFFFFF:FFFFFFFFFFFF:FFF,FFFFFFFFFFFFFFFFFFFFFFFFFFFFFFFFFFFFFFFF  
FFFFFFFFFFFF,FFFFFFFFFFFFFFFFFFFFFFFFFFFFFFFFFFFFFFFFFFFFFFFFFFFFFFFF

@A00721:190:HGJW7DSXY:4:2436:15275:10535\_1:N:0:TCTGCAAG+GCTGCACT  
AGTCTGTACTTACATTCTTTACGCCAGATTCTTCATGGGGCGACGCTGTTTCTCTTGGTATTTCTGAA  
ATAGTTTATCAGAGCGTCATTTTCCTTTGGGATCTTTCCTCTGGTAAGGGAATTATTAAATCATTCTT  
CTC

+

FFFFFFFFFFFFFFFFFFFFFFFFFFFFFFFFFFFFFFFFFFFFFFFFFFFFFFFFFFFFFFFFFFFFFFFFFFFFFFFF  
FFFFFFFFFFFFFFFFFFFFFFFFFFFFFFFFFFFFFFFFFFFFFFFFFFFFFFFFFFFFFFFFFFFFFFFFFFFFFFFF  
FFF

@A00721:190:HGJW7DSXY:4:1526:11442:23281\_2:N:0:TCTGCAAG+GCTGCACT  
ATTATTACTGTTTTCTCTACCCATAACTTCTTTTTCAAAAATGCGGATGGGTCTACTGATGTTTTCTT  
ACAGAGTGCAGTCGTTTCAACACTTATCACCACCTTTGAAAGGAAAAT

+

FFFFFFFFFFFFFFFFFFFFFFFFFFFFFFFFFFFFFFFFFFFFFFFFFFFFFFFFFFFFFFFFFFFFFFFFFFFFFFFF  
FFFFFFF:FFFFFFFFFFFFFFFFFFFF,,FFF,FF:FF,FFF,FFFFFFFF

@A00721:190:HGJW7DSXY:4:1624:5475:14043\_1:N:0:TCTGCAAG+GCTGCACT  
AAATACGTATGTCGGTGGGGTTCTCAAGGCTCTCATCGCCACTGGGATTCTAAGGGGTTCCATAAGAT

ATTATCTGACATTGTGGTTCAATGATCAGGATTCTTCTTTTGGTCCTTACGTCTTAAGTAATTTGGAT  
GTT

+

FFFFFFFFFFFFFFFFFFFFFFFFFFFFFFFFFFFFFFFFFFFFFFFFFFFFFFFFFFFFFFFFFFFFFFFFFFFFFFFF  
FFFFFFFFFFFFFFFFFFFFFFFFFFFFFFFFFFFFFFFFFFFFFFFFFFFFFFFFFFFFFFFFFFFFFFFFFFFFFFFF  
FFF

@A00721:190:HGJW7DSXY:4:1301:16758:31767\_2:N:0:TCTGCAAG+GCTGCACT  
GTTCTTGTACGATTCTTAAAAGAAGTTTATTAAACTTCAGAGTCTCTTGGAAGTCCAGGTAGCTAA  
TGTTCTTGCAATAGCCACAGACTTTCTGGGAAAAGAGACCTCTGTTGG

+

FFFFFFFFFFFFFFFFFFFFFFFFFFFFFFFFFFFFFFFFFFFFFFFFFFFFFFFFFFFFFFFFFFFFFFFFFFFFFFFF  
FFFFFFFFFFFFFFFFFFFFFFFFFFFFFFFFFFFFFFFFFFFFFFFFFFFFFFFFFFFFFFFFFFFFFFFFFFFFFFFF

@A00721:190:HGJW7DSXY:4:1439:23366:31876\_1:N:0:TCTGCAAG+GCTGCACT  
GAGAATTACTCAGATTCAATCTGGCATCACTGAACGTCTACAACGAGTTAGGGAGTGGCTAGGTTTTTA  
AAAGATCCTTGCACAAGCAATACCTTCCACTGAGTTCATCACCCAGAGTTTCGACGTCGCGGAAAAC  
GAT

+

FFFFFFFFFFFFFFFFFFFFFFFFFFFFFFFFFFFFFFFFFFFFFFFFFFFFFFFFFFFFFFFFFFFFFFFFFFFFFFFF  
FFFFFFFFFFFFFFFFFFFFFFFFFFFFFFFFFFFFFFFFFFFFFFFFFFFFFFFFFFFFFFFFFFFFFFFFFFFFFFFF  
FFF

@A00721:190:HGJW7DSXY:4:1649:10393:6903\_2:N:0:TCTGCAAG+GCTGCACT  
CACTGTTGAGAATCTTCTGATGCTGAATTTGAGGAAAATTTTCGGAAGTTTTTGGTATAAATCCTG  
ATGGCTCAGTACAGGGAGGAGATCGGAAGAGCGTCGTGTAGGGAAAGA

+

FFFFFFFFFFFFFFFFFFFFFFFFFFFFFFFFFFFFFFFFFFFFFFFFFFFFFFFFFFFFFFFFFFFFFFFFFFFFFFFF  
FFFFF,FFFFF::FFFFFFFFFFFFFFFFFFFFFFFFFFFFFFFF:F:FFFFFFFFF

@A00721:190:HGJW7DSXY:4:1142:29839:24017\_1:N:0:TCTGCAAG+GCTGCACT  
ATGGACAAAATCTGGGATCATAGGTATGTGTCACGCTACACTCGAAATATGGGCCCTCATAAGGAAGT  
ATAGTTGGCGTCTTGTCGTTGACGTCATTACAGTCTGGAAGTTAGATCATTTGTTTCAGGAAGATCTCT  
ACA

+

FFFFFFFFFFFFFFFFFFFFFFFFFFFFFFFFFFFFFFFFFFFFFFFFFFFFFFFFFFFFFFFFFFFFFFFFFFFFFFFF  
FFFFFFFFFFFFFFFFFFFFFFFFFFFFFFFFFFFFFFFFFFFFFFFFFFFFFFFFFFFFFFFFFFFFFFFFFFFFFFFF  
FFF

@A00721:190:HGJW7DSXY:4:1430:26142:35243\_1:N:0:TCTGCAAG+GCTGCACT  
CTTTAGCAACTTTAGATAAATTCTTCCGGGCTCAATGACCTTTGCTATGTACGTGGATCTAATCCTT  
GGTGATCTGAATCTGACCATCGCAAAGAAGACTTTATTAGTTCATGAAGTTCTTACACTTCTCGCGAC  
TAA

+

FFFFFFFFFFFFFFFFFFFFFFFFFFFFFFFFFFFFFFFFFFFFFFFFFFFFFFFFFFFFFFFFFFFFFFFFFFFFFFFF  
FFFFFFFFFFFFFFFFFFFFFFFFFFFFFFFFFFFFFFFFFFFFFFFFFFFFFFFFFFFFFFFFFFFFFFFFFFFFFFFF  
FFF

@A00721:190:HGJW7DSXY:4:2470:15980:19617\_1:N:0:TCTGCAAG+GCTGCACT  
GCTTTATCTTAAAGCATTACCACCAAATTTAGCACTTTTGAATATGACAGAAGCTCGCCATATCAGA  
TTAGAGACATGCCAGTTAGAGTTCTTCTAACCAGGACTGATGGTGAGATTCTTTACCTTTTGAGGT  
CCA

+

FFFFFFFFFFFFFFFFFFFFFFFFFFFFFFFFFFFFFFFFFFFFFFFFFFFFFFFFFFFFFFFFFFFFFFFFFFFFFFFF  
FFFFFFFFFFFFFFFFFFFFFFFFFFFFFFFFFFFFFFFFFFFFFFFFFFFFFFFFFFFFFFFFFFFFFFFFFFFFFFFF  
FFF

@A00721:190:HGJW7DSXY:4:1623:18376:32878\_2:N:0:TCTGCAAG+GCTGCACT  
CCTAGTGTCTTTTCTAGAGTCCAAGGACGTTTCCGTCGGAGGATGACAGGTGGGAGACCGCTCAATAA  
CACTCTATTGAATCCCTTTTCCACGATGAAAGCTCTTTATGAGGTGCT

+

```

FFFFFFFFFFFFFFFFFFFFFFFFFFFFFFFFFFFFFFFFFFFFFFFFFFFFFFFFFFFFFFFF
FFFFFFFFFFFFFFFFFFFFFFFFFFFFFFFFFFFFFFFFFFFFFFFFFFFFFFFFFFFFFFFF
@A00721:190:HGJW7DSXY:4:2538:31946:32111_1:N:0:TCTGCAAG+GCTGCACT
TCTTTGGTGATATCGCCTCTGTCCTTTCTCCTTTAATCGTGAGGTTACGAGAGTTTCGTA
TATCGGTTGTATTTTGATAAATTTGTTGGAATCGATAATGATACTGACGAAGGTTCTATT
TGT
+
FF:FFFFFFFFFFFFFFFFFFFFFFFFFFFFFFFFFFFFFFFFFFFFFFFFFFFFFFFFFFFF
FFFFFFFFFFFFFFFFFFFFFFFFFFFFFFFFFFFFFFFFFFFFFFFFFFFFFFFFFFFFFFFF
:FF
@A00721:190:HGJW7DSXY:4:2136:27525:17127_2:N:0:TCTGCAAG+GCTGCACT
GTGATGCTTTCTTAGAGGCTCGTCTAGCCGCTGAGATTCGTCTTACCTATTTACAATCTGT
GAGGTTAATCAGAATTTGAGTGATAACGATTTAGTACTGGGAAATGGT
+
FFFFFFFFFFFFFFFFFFFFFFFFFFFFFFFFFFFFFFFFFFFFFFFFFFFFFFFFFFFFFFFF
FFFFFFFFFFFFFFFFFFFFFFFFFFFFFFFFFFFFFFFFFFFFFFFFFFFFFFFFFFFFFFFF
:FF
@A00721:190:HGJW7DSXY:4:1326:8974:8766_1:N:0:TCTGCAAG+GCTGCACT
TTTTCTTTCCCTCCCTTTTTCGATTGGATTGACGGGGTCTTCGTCTCAGACTAATTTGATA
TTTTCTTTTATGGGACTCTTGTGTGACTTATGAAGGAGTATTACTTCGGAAGTTCTTAATG
CTC
+
FFFFFF:FFFFFFFF,FFFFFFFF:FF:FFFFFFFF:FFFFFFFFFFFFFFFFFFFFFFFF
FFFFFFFFFFFFFFFFFFFFFFFFFFFFFFFFFFFFFFFFFFFFFFFFFFFFFFFFFFFFFFFF
FFF
@A00721:190:HGJW7DSXY:4:2153:27588:33708_2:N:0:TCTGCAAG+GCTGCACT
GGTTTATGTTTCGGTTTCAGCTGGATGGATCTTTTGATGGTATGTTTCACATTGCGTGATC
GTGGACTTGGGAAGAGATTAAACATAAAATCCAGCGATTCTATTATGT
+
FFFFFFFFFFFFFFFFFFFFFFFFFFFFFFFFFFFFFFFFFFFFFFFFFFFFFFFFFFFFFFFF
FFFFFFFFFFFFFFFFFFFFFFFFFFFFFFFFFFFFFFFFFFFFFFFFFFFFFFFFFFFFFFFF
,FFF:FFFF:FFFFFFFFFFFF
@A00721:190:HGJW7DSXY:4:2417:32407:6292_2:N:0:TCTGCAAG+GCTGCACT
TCGATGATGTTCTGGGCTGTGGGGATTAACCTCCCTCGTGAACTTACGACGATGTTCTCGC
TCACAAGGATTACTAAGTCTGAGATCTGCCACTTCTAATTTTAGGAAA
+
FFFFFFFFFFFFFFFFFFFFFFFFFFFFFFFFFFFFFFFFFFFFFFFFFFFFFFFFFFFFFFFF
FFFFFFFFFFFFFFFFFFFFFFFFFFFFFFFFFFFFFFFFFFFFFFFFFFFFFFFFFFFFFFFF
,FF
@A00721:190:HGJW7DSXY:4:1476:22164:16203_2:N:0:TCTGCAAG+GCTGCACT
AGAAAGTTTCATGAGGATGTCTTGGTCGAAAAATATCGCCGGGAACTTCTAATAGAGGATC
ATTATTTCAACGGATACCGATCTCAGTTCTACCACAGAAACCGTCTCA
+
FFFFF:FFFFFFFF:FFFF:::FFFFFFFF:FFFFFF::F,,F,FFFFFF:FF:FFFF
FFFF,FFF:FFFFFF:FFFF,,FFFFFFFF:F:FFF,,:FFF
@A00721:190:HGJW7DSXY:4:1676:1398:20666_2:N:0:TCTGCAAG+GCTGCACT
ACTGATTCGGAATTAGAGAAAGACGACCTTCTGTGGGACTGAGACCTCTGAATTTTCAGG
TGATGAGGACGTTGAAAGGATAATTTCAACTCTGAGACTTCTAAGAG
+
FFFFFFFFFFFFFFFFFFFFFFFFFFFFFFFFFFFFFFFFFFFFFFFFFFFFFFFFFFFFFFFF
FFFFFFFFFFFFFFFFFFFFFFFFFFFFFFFFFFFFFFFFFFFFFFFFFFFFFFFFFFFFFFFF
:FFFF
@A00721:190:HGJW7DSXY:4:1169:2410:1532_2:N:0:TCTGCAAG+GCTGCACT
ACCAGAAACGTAACAAGAATAAAGGTAGGAAGGGGAGAAAACAGAACAGCGAGCGGTTGA
AAACTGATATGGTTGCGGCTGATCGTACCCCAATTCCTGCTAGAAAG
+
FFFFF,FFFFFF:F:FFFFFFFFFFFF,,F:FFFFFFFFFFFFFFFF,FFF,:FF:FF:FF,
FFFFFFFFFFFFFFFFFFFFFFFF:FFF:FFFFFFFF,FFFF,FFF

```

@A00721:190:HGJW7DSXY:4:1129:4526:12085\_1:N:0:TCTGCAAG+GCTGCACT  
ATACCACTGATCTTCCAGAGTTACGTAGTGGTCGTTCTTTTGGTGATTTTATCAAAGAGAAAGTTTCT  
GCTAGTCGCGACGATAGTATTTATCGGAGTGATATTAACAAGTTAACTTCGAACTGACCACTTACAA  
GAG

+

FFFFFFFFFFFFFFFFFFFFFFFFFFFFFFFFFFFFFFFFFFFFFFFFFFFFFFFFFFFFFFFFFFFFFFFF  
FFFFFFFFFFFFFFFFFFFFFFFFFFFFFFFFFFFFFFFFFFFFFFFFFFFFFFFFFFFFFFFFFFFFFFFF  
FFF

@A00721:190:HGJW7DSXY:4:2108:32624:20635\_1:N:0:TCTGCAAG+GCTGCACT  
GCAACATGGATCAGTTTTCCAAAAAGCTATTAATAGCAGTTGCGGGGCTATAATACCGCCTCCAGATT  
ACTCTAACTGAATCCACTCTCTTGGGATATAAATGAGTACATCTATAATAGAGTTTTGGAAGTGTGT  
AAT

+

F::FFFF:FFFFFFFF:FFFF:FFFFFFFF:FFFF:FF:FFFF:FFFFFFFFFFFFFFFFFFFFFFFF  
FFFFFFFFFFFFFFFFFFFFFFFFFFFFFFFFFFFFFFFFFFFFFFFFFFFFFFFFFFFFFFFFFFFFFFFF  
FF,

@A00721:190:HGJW7DSXY:4:1263:31611:7420\_1:N:0:TCTGCAAG+GCTGCACT  
GGCTTCTCTAAAGAACAGCAACTTTCAACATGAATTAGTTATTGAAAGTCTTGACCCTCACGTCTCAC  
TTTATCACCTTGAGATGGTAAAGTCATTAACAAAGGAAATGTTAAGGCTGATGACTTAAATTCGCA  
TTC

+

FFFFFFFFFFFFFFFFFFFFFFFFFFFFFFFFFFFFFFFFFFFFFFFFFFFFFFFFFFFFFFFFFFFFFFFF  
FFFFFFFFFFFFFFFFFFFFFFFFFFFFFFFFFFFFFFFFFFFFFFFFFFFFFFFFFFFFFFFFFFFFFFFF  
FFF

@A00721:190:HGJW7DSXY:4:1633:12581:32894\_2:N:0:TCTGCAAG+GCTGCACT  
AGACCTTCTTGGGGAGTAAAGAGGGTTTGAAAATTACGGAACCTTTCCTCGTTCTTCATGAAGATCT  
TCGAGTGTTTTATAGTGAGTTATTCTTGCGAAGGTTCAAGTCGATTGA

+

FFFFFFFFFFFFFFFFFFFFFFFFFFFFFFFFFFFFFFFFFFFFFFFFFFFFFFFFFFFFFFFFFFFFFFFF  
FFFFFFFFFFFFFFFFFFFFFFFFFFFFFFFFFFFFFFFFFFFFFFFFFFFFFFFFFFFFFFFFFFFFFFFF

@A00721:190:HGJW7DSXY:4:2312:8820:4805\_1:N:0:TCTGCAAG+GCTGCACT  
ACGAGATCTTGCAGAGTGACTGGAGTTCAGACGTGTGCTCTTCCGATCTGTGGAGGGAAGACCACTGA  
ACTTATAGCGACTTTTGTGCAATTTTTCGCAAAGGTCTTGAAGTACGTATTGTCACTGCTAATCGTA  
ATT

+

:FF,FFFFFFFFFFFFFFFFFFFFFFFFFFFFFFFFFFFFFFFFFFFFFFFFFFFFFFFFFFFFFFFF  
FFFFFFFFFFFFFFFFFFFFFFFFFFFFFFFFFFFFFFFFFFFFFFFFFFFFFFFFFFFFFFFFFFFFFFFF  
FFF

@A00721:190:HGJW7DSXY:4:1463:11957:9612\_1:N:0:TCTGCAAG+GCTGCACT  
GTGACTAAAGTTTTGGCACTTCTAGTTCATCGCGGTATTTGTGAAATTAAGACAGACGTGAAAGTTAT  
GATGAGTGATCGTATTAGAACAGCTGATTCTTATTGCATGAACGTCGCTGAGGTCAAACCTGTGGACG  
TTC

+

FFFFFFFFFFFFFFFFFFFFFFFFFFFFFFFFFFFFFFFFFFFFFFFFFFFFFFFFFFFFFFFFFFFFFFFF  
FFFFFFFFFFFFFFFFFFFFFFFFFFFFFFFFFFFFFFFFFFFFFFFFFFFFFFFFFFFFFFFFFFFFFFFF  
F:F

@A00721:190:HGJW7DSXY:4:1672:10041:23735\_2:N:0:TCTGCAAG+GCTGCACT  
CTGGTCAGACCCTTTTTCTTACACATCTACTTAAGGCGGCTTATACCATAGGTTACGGTGATTCCAAT  
CAAATCGGATTCATCAATCGTATTGATCTCCAAGTCGAACTACTTC

+

FFFFFFFFFFFFFFFFFFFFFFFFFFFFFFFFFFFFFFFFFFFFFFFFFFFFFFFFFFFFFFFFFFFFFFFF  
FFFFFFFFFFFFFFFFFFFFFFFFFFFFFFFFFFFFFFFFFFFFFFFFFFFFFFFFFFFFFFFFFFFFFFFF

@A00721:190:HGJW7DSXY:4:1402:8395:26459\_1:N:0:TCTGCAAG+GCTGCACT  
GTGTGCTCTTCCGATCTTCTTATCGAAGTCTCAGTTATCGCTGCCCGGCCGACGTTTGTGCGCAACT

CTCAGAGGTTTACGGCAGAAAAATTTCTCCTGCTTGTAATTCGAGAGAGGACACTATGGAAATTAGAC  
CTA

+

FFFFFFFFFFFFFFFFFFFFFFFFFFFFFFFFFFFFFFFFFFFFFFFFFFFFFFFFFFFFFFFFFFFFFFFF  
FFFFFFFFFFFFFFFFFFFFFFFFFFFFFFFFFFFFFFFFFFFFFFFFFFFFFFFFFFFFFFFFFFFFFFFF  
FFF

@A00721:190:HGJW7DSXY:4:1629:27407:22341\_2:N:0:TCTGCAAG+GCTGCACT  
ATATTACTTTCACTCAAGGTGAAAAGTTTGAAATTAACAAAGTCCTTGGTAAGAGTAAGGTTAAATGT  
GAAGATGCTCAGACTATTCATGAAGTTCAAGGTAATACTTACCAGCAC

+

FFFFFFFFFFFFFFFF:FFFFFFFFFFFFFFFFFFFFFFFFFFFFFFFFFFFFFFFFFFFFFFFFFFFFF  
FFFFFFFFFFFFFFFFFFFFFFFFFFFFFFFFFFFFFFFFFFFFFFFFFFFFFFFFFFFFFFFFFFFF

@A00721:190:HGJW7DSXY:4:1677:27064:29136\_2:N:0:TCTGCAAG+GCTGCACT  
AAACCTCAAGATGACCCTGTTTTTGATCACAACACATATTACCGTTGCTCTATCACGACACGTTGA  
ATCTTTACGATACTTTGTTATCAATGTAAAGTTAAACGATGCTACTTG

+

FFFFFFFFFFFFFFFFFFFFFFFFFFFFFFFFFFFFFFFFFFFFFFFFFFFFFFFFFFFFFFFFFFFFFFFF  
FFFFFFFFFFFFFFFFFFFFFFFFFFFFFFFFFFFFFFFFFFFFFFFFFFFFFFFFFFFFFFFFFFFF

@A00721:190:HGJW7DSXY:4:2214:18738:35415\_2:N:0:TCTGCAAG+GCTGCACT  
TAAGGAAGTGTACGTTTAGCACGGGAGGTTGCAGATTCAACCCCTTATATCGAGGCTATCGAGGACG  
ATGAGTATCTTGAAGTTGTTGACGACAAGCCTCAAGAGGGTAGAGGAC

+

FFFFFFFFFFFFFFFFFFFFFFFFFFFFFFFFFFFFFFFFFFFFFFFFFFFFFFFFFFFFFFFFFFFFFFFF:F:F  
F,FFFFFFFFFFFFFFFF:FFFFFFFFFFFFFFFFFFFFFFFFFFFFFFFFFFFFFFFFFFFF

@A00721:190:HGJW7DSXY:4:1504:12138:18411\_2:N:0:TCTGCAAG+GCTGCACT  
GGTTATTCCTGGAACACCTTAACGTCACTCGGTAATCTTTCAGCCGAATTAAGTACTAATGAGTTCA  
AGTCGGTTGTCGATCGAATTAAGATCAAGGCTAATACCTTTATAGGTA

+

FFFFFFFFFFFFFFFFFFFFFFFFFFFFFFFFFFFFFFFFFFFFFFFFFFFFFFFFFFFFFFFFFFFFFFFF  
FFFFFFFFFFFFFFFF:FFFFFFFFFFFFF:FFFFFFFFFFFFFFFF

@A00721:190:HGJW7DSXY:4:1547:2383:3646\_2:N:0:TCTGCAAG+GCTGCACT  
GCCGCGTAGTCAGCGCGTTTAGCTGTATCATCAGTCAGAGTATACCCGATAGGGTACCGAGTCTCCAA  
GAGAATATTTATTCTTATGAGGCTCGAAACTTCAACGTTTTTACAACG

+

FFFFFFFFFFFFFFFFFFFFFFFFFFFFFFFFFFFFFFFFFFFFFFFFFFFFFFFFFFFFFFFFFFFFFFFF:F:FFFFFFFFFFFFFFFFFFFFFFFFFFFFFFFF  
FFFF:FFFFFFFFFFFFFFFFFFFFFFFFFFFFFFFFFFFFFFFFFFFFFFFFFFFFFFFF:FF

@A00721:190:HGJW7DSXY:4:1277:30436:7827\_2:N:0:TCTGCAAG+GCTGCACT  
TCGACCCGAAATTTTTGGGCAGAATGCTCTTAACGCGTTCTTGAACGGTGTGTTTGATCAGTCTAAG  
TTGGATAAAGTTATAGGAGACTCAGTTAACCTGAGAGCTCCTCAATTG

+

FFFFFFFFFFFFFFFFFFFFFFFFFFFFFFFFFFFFFFFFFFFFFFFFFFFFFFFFFFFFFFFFFFFFFFFF:FFF  
F,FFFFFFFFFFFFFFFFFFFFFFFFFFFFFFFFFFFFFFFFFFFFFFFFFFFFFFFFFFFFFFFF

@A00721:190:HGJW7DSXY:4:2174:25943:3020\_1:N:0:TCTGCAAG+GCTGCACT  
AACAATAGGGACGCTAGTATACTTCGTAAAGTCGACAGCGAAATGGTCAATATTGATAATTGGACCGA  
CTATATGACCTATTTTAAGTCTATGGTGAAAAGGGAAGCTAAGGTTAAACTTGATGCTTCAGCCTTTT  
CGA

+

FF,FFFFF,FFF:FFFFFFFFFFFFFFFF:FFFF:FFFFFFF:FFFFFF:FFFFFFFFFFFFFFFFFFFFF::FF  
FFFFFFFFFFFFFFFFFFFFFFFFFFFFFFFFFFFFFFFFFFFFFFFFFFFFFFFFFFFFFFFFFFFFFFFF:FFF  
FFF

@A00721:190:HGJW7DSXY:4:1373:3079:1720\_1:N:0:TCTGCAAG+GCTGCACT  
AGAATATCGTTTTATCACGCAAAATTTATTAATGCAATTTTCGGACCTATCTTTAAGGTTCTTGTGAGG  
AGAGTCAAACAGTGTCTTTTACCCAACATTTTTATGTATACAGAGATGACCAGTGACGATTTCTCCCG  
GAA

```
+
FFFFFFFFFFFFFFF:FFFFFFFFFFFFFFF:FFFFFFFFFFFFFFF:FF:FFFFFFFFFFFFFFF:FF
FFFFFFFFFFFFFFFFFFFFFFFFFFFFF,FFFFFFFFFFFFFFF:FFFFFFFFFFFFFFFFFFFFFFFF
FFF
@A00721:190:HGJW7DSXY:4:1106:12292:25441_1:N:0:TCTGCAAG+GCTGCACT
CGAGATCTTGCAGAGTGACTGGAGTTTCAGACGTGTGCTCTTCCGATCTTTTTCTTTTGTAAAGCCTATG
AGATAAAGATGTATTCTTATTTAGGCTTCGATGCTGAATTTCTTGAACCTTTGGAGTGCCAGTGAATAT
TTT
+
:F:FFFFFFF:FFFFFFFFFFFFFFFFFFFFFFFFFFFFF:FFFFFFF,FFFFFFFFFFFFFFFFFFFFFFFF
F:FFFFFFFFFFFFFFFFFFFFFFFFFFFFFFFFFFFFFFFFFFFFFFFFFFFFFFFFFFFFFFFFFFFFF:FFFFFF
FFF
@A00721:190:HGJW7DSXY:4:1139:11116:13228_1:N:0:TCTGCAAG+GCTGCACT
GAGTATCCATAACGATTTGTCAATTTACCACCTTTGCTCAACGACGAAGTGGAACGGCCAACACTTTCT
TTGGTAATTGTATGATCACTTTGATGATTTTATCACTTTATTATGACCTTGGAAGTTTTCGGCTGTG
GTT
+
FFFFFFFFFFFFFFFFFFFFFFFFFFFFFFFFFFFFF:FFFFFFFFFFFFFFFFFFFFFFFFFFFFFFFFFFFF
FFFFFFFFFFFFFFFFFFFFFFFFFFFFFFFFFFFFFFFFFFFFFFFFFFFFFFFFFFFFFFFFFFFFFFFFFFFF
FFF
@A00721:190:HGJW7DSXY:4:1234:23873:23703_1:N:0:TCTGCAAG+GCTGCACT
CCATTCTGTTTTCAAAGACTCCAATAACTGATCATTTCTGATCATATGATTTTGGACAATGTTTTCGAA
GCGAAATTTTGGAGGATAAACAGCGTACTTCTGCTCGCGATTTATTCTTTTTGTCAATGATTACAT
CTA
+
:FFF,:F:FFFF:FFF,FF,:FFFF,,::,F:FFF:FFFFFF,FF:FFFF:FF:FFF,FFFF:FFF
F:F:,FFFFFFFFF,FFF:,FF:F:F:FF:FF:FFFFFFFFF:FFF,F,:FFF:,F,FFFFFFFFF
FFF
@A00721:190:HGJW7DSXY:4:1231:10484:29982_1:N:0:TCTGCAAG+GCTGCACT
CCTTACAAGATCATCGTTAAGTTAGGTAAACCCCTAACCGATGTTACTCTTGTAGGACTTTGGGAGAG
ATTCGTTAGTTTTAAAGACTATACTAAATATCTCCACTACGAGGTTGTTGTTTGGCGATTAGCTCTTG
CGA
+
FFFFFFFFFFFFFFFFFFFFFFFFFFFFFFFFFFFFFFFFFFFFFFFFFFFFFFFFFFFFFFFFFFFFFFFFFFFF
FFFFFFFFFFFFFFFFFFFFFFFFFFFFFFFFFFFFFFFFFFFFFFFFFFFFFFFFFFFFFFFFFFFFFFFFFFFF
FFF
@A00721:190:HGJW7DSXY:4:1224:11225:15045_1:N:0:TCTGCAAG+GCTGCACT
TATTCGATTGAGGTCTTTATACCTTTTCGGCTTTCTGGGCTTTGAATTGTATAAGATCTAATTTTAA
ACGATTCCGAGAGGTTTATCCTGATGTGGAGGGAGTTCTTGAAGCATCACGACATTTCTTGTGAAAA
+
F,FF,FFFF:,,:F,,FFFF:,::,F:,FFFF,F:FF,,::FF,FFFF:F,,FF,,FF,,FFFF,,
F,F:FF,FFF:F:,F,FFFFFFFFF:FFFFFFFF:FF,F,FFFF,F,F,,F:,F:,FF,,,F:FFFF,:
@A00721:190:HGJW7DSXY:4:1134:4065:32299_1:N:0:TCTGCAAG+GCTGCACT
TTTCATAAGATTATCAGTAATCCTGATTCTACTACGGATTTCATGGACCTTCCATCCTGTACCTCTTCT
GGAGAGACGTATCTCAAAGATCGACTTCGAGACAGGTGATATTGTTGAGCGAGAGCGACCAAGATCTA
AAT
+
FF:FFFFFFFFFFFFFFFFFFFFFFFFFFFFFFFFFFFFFFFFFFFFFFFFFFFFFFFFFFFFFFFFFFFF
FFFFFFFFFFFFFFFFFFFFFFFFFFFFFFFFFFFFFFFFFFFFFFFFFFFFFFFFFFFFFFFFFFFFFFFFFFFF
FFF
@A00721:190:HGJW7DSXY:4:1127:18511:25128_1:N:0:TCTGCAAG+GCTGCACT
CGTGGCGCTTTATTTTAAAAAGCTCCCTCCTCTCGCAAGTTTGATCTGATACTTATCACGAAAGGACT
TGAGTCTTTTGATCAGTCTCTGACTTGACCATCTTTCATTTTAAATGACGATCATTAAGACTCTCTTT
CTT
```

+  
FFFFFFFFFFFFFFFFFFFFFFFFFFFFFFFFFFFFFFFFFFFFFFFFFFFFFFFFFFFFFFFF:FFFF  
FFFFFFFFFFFFFFFFFFFFFFFFFFFFFFFFFFFFFFFFFFFFFFFFFFFFFFFFFFFFFFFF  
FFF  
@A00721:190:HGJW7DSXY:4:1217:32651:5055\_2:N:0:TCTGCAAG+GCTGCACT  
CTTTGCACTGATTTTTCTCATCAGCTTGTGTTTTACCTAATCTGTGTTTTACGATAACAACATCA  
GTTGATTAAGACTCTTCCGAAAGGCGAACTTTGGAATTTGAAGCTCA  
+  
FFFFFFFFFFFFFFFFFFFFFFFFFFFFFFFFFFFFFFFFFFFFFFFFFFFFFFFFFFFFFFFF  
FFFFFFFFFFFFFFFFFFFFFFFF:,:FFF:FFFFFFFF:FFFFFFFFFFFFFFFF  
@A00721:190:HGJW7DSXY:4:1232:17065:15139\_1:N:0:TCTGCAAG+GCTGCACT  
CGTTTGACCGTGACGAAGTGTGTTCTTGATCTACGTTACGGATATACTCTCCTTGAGTTCACTCG  
TAAGGACACTACCACTTATTACGATATTTCTTTAGTCGATGGGTTTTCGACTCCTTTAAGCGTCTTCT  
GTT  
+  
FFFFFFFFFFFFFFFFFFFFFFFFFFFFFFFFFFFFFFFFFFFFFFFFFFFFFFFFFFFFFFFF  
FFFFFFFFFFFFFFFFFFFFFFFFFFFFFFFFFFFFFFFFFFFFFFFFFFFFFFFFFFFFFFFF  
FFF  
@A00721:190:HGJW7DSXY:4:1557:8919:21042\_2:N:0:TCTGCAAG+GCTGCACT  
AATCCTAACGTAGAAGATTGTTGTTTACCACCGAAATATCAAGGTTCTTGTCTTCAAACGATTGGAA  
GGTACTTATCTTAATAGTACTAAAGGGGTTTACTTACAACCCTATGA  
+  
FFFFFFFFFFFFFFFFFFFFFFFFFFFFFFFFFFFFFFFFFFFFFFFFFFFFFFFFFFFFFFFF  
FFFFFFFFFFFFFFFFFFFFFFFFFFFFFFFFFFFFFFFFFFFFFFFFFFFFFFFF  
@A00721:190:HGJW7DSXY:4:1631:15058:11256\_2:N:0:TCTGCAAG+GCTGCACT  
TGTTTTCTTCTAATGTGGCCTGAAGTACGTTTCACTTTGTGTGTACTTGTCTCTATTTTAAGTTTGT  
CTTCCTTGTTTGTCTTATTCTATTAATCACTCATTTTAGTGAGATTAT  
+  
FFFFFFFFFFFFFFFFFFFFFFFFFFFFFFFFFFFFFFFFFFFFFFFFFFFFFFFFFFFFFFFF  
:FFFFFFFFFFFFFFFF:FFFFFFFFFFFFFFFFFFFFFFFF:FFFF  
@A00721:190:HGJW7DSXY:4:1214:22607:28056\_2:N:0:TCTGCAAG+GCTGCACT  
CTAAAACGTCTTCGACAACAGCAGGGGTTTTCGAATAGTGATAGCCACCCGCCTTACAGAGGGGCAGC  
AGCATGACCATAATTGGTATTGACTTTGGTACCACCTTTTCTACTGTC  
+  
FFFFFFFFFFFFFFFFFFFFFFFFFFFFFFFFFFFFFFFFFFFFFFFFFFFFFFFFFFFFFFFF:FFFFFFFF  
FFFFFFFFFFFF,FFFFFFFFFFFFFFFF:,:FFFFFFFFFFFFFFFF  
@A00721:190:HGJW7DSXY:4:1453:13666:21277\_1:N:0:TCTGCAAG+GCTGCACT  
TTCGAATGAAGTTTTAATGCTTAACAACAATGATAGTGAATTTATACCTACAATCATTGGTTTTCTA  
ATAATGATGACACTATTGTTTATGGATATGATGCTATTACTCATGATGGTTACGGTCAGGGAGGATTCTCA  
TCA  
+  
FF:FFFFFFFFFFFFFFFFFFFFFFFFFFFFFFFFFFFFFFFFFFFFFFFFFFFFFFFF,FFFFFFFFFFFFFFFF  
F,F:FFFFFFFFFFFFFFFFFFFFFFFFFFFFFFFFFFFFFFFFFFFFFFFFFFFFFFFFFFFFFFFF  
FFF  
@A00721:190:HGJW7DSXY:4:1510:12753:10645\_2:N:0:TCTGCAAG+GCTGCACT  
ACATTACCCGAAAGACGTGCTAAATTAACCACTTGTACGATGTCGTCTGTCTCGGCGATCACTTTTC  
ACTAAGAATTGGTCCTACTTTTGGACAAGGCCAACTTCGTAATCTTCA  
+  
FFFF:F:FF,FFFFFFFF:F:FFFFFFFF:F:,:FFFFFF,FFFFFFFF:F:FFFFFF:FF,F  
FFFFFFFFFFFFFFFFFFFFFFFFFFFFFFFF,F:FFFFFF:,:FFFFFFFF  
@A00721:190:HGJW7DSXY:4:2604:14461:23657\_2:N:0:TCTGCAAG+GCTGCACT  
TCTTTATCTCTTTGGTTGTTAGGGATTTTGAGAGAGTGAAAGGCTTCAATTGTAGTGGTTTGGTCGTT  
TCAGTACCCAGTCAGTATACCTCTACGCAAAGATATTTTCATGAAAAC  
+

FFFFFFFFF:FFFFFFFFFFFFFFFFFFFFFFFFFFFFFFFFFFFFFFFFFFFFFFFFFFFFFFFFFFFFFFFF  
FFFFFFFFFFFFFFFFFFFFFFFFFFFFFFFFFFFFFFFFFFFFFFFFFFFFFFFFFFFFFFFF:FFFF  
@A00721:190:HGJW7DSXY:4:1403:5891:11475\_1:N:0:TCTGCAAG+GCTGCACT  
CCGGATTACCTGTCTTTTCATATTATGAATGAACCTTCGGCCGCTCTCTTTGCTTCGATGTTGGATGTC  
AAGAAGGGTTCAGAATGGGATTCTACGTAGTTTATGACTTTGGTGGTGGTACTTTGATACTTCTAT  
CGT  
+  
FFFFFFFFFFFFFFFFFFFFFFFFFFFFFFFFFFFFFFFFFFFFFFFFFFFFFFFFFFFFFFFFFFFFFFFF:FFF  
FFFFFFFFFFFFFFFFFFFFFFFFFFFFFFFFFFFFFFFFFFFFFFFFFFFFFFFFFFFFFFFFFFFFFFFF  
FFF  
@A00721:190:HGJW7DSXY:4:1467:19759:7404\_2:N:0:TCTGCAAG+GCTGCACT  
TACTATAGTGTATTATTTCTGGTGGTGTATGATAATCTTGGAGGTCGTGACGTTGATGAAGCTATAAG  
AGCGTTCTTATTACGGCGCACTTCTTTACCCGCCACCACACAACCTTC  
+  
FFFF:FFFFFFFFFFFFFFFFFFFFFFFFFFFFFFFFFFFFFFFFFFFFFFFFFFFFFFFFFFFFFFFFFFFF  
FFFFFFFFFFFFFFFFFFFFFFFFFFFFFFFFFFFFFFFFFFFFFFFFFFFFFFFFFFFFFFFFFFFFFFFF  
FFFF  
@A00721:190:HGJW7DSXY:4:1201:32606:36104\_1:N:0:TCTGCAAG+GCTGCACT  
TGAAGGAGGAGGTTTCTGTTACTGGAAACCCTCGTCAATACTTTTCAATAATATACGTCTTGAACCTC  
ACTTATGACGATCTAGTGAAATTAACGCGTCCTTTTCTGGAACGTAGTTTACTATTATGAACAAAGT  
TAT  
+  
FFFFFFFFFFFFFFFFFFFFFFFF:FFF:FFFFFFFFF,FFFFFF,F:FFFFFFFFFFFFFFFFFFFFFFF  
FFFF:FFFFFFFFFFFFFFFFFFFFFFFFFFFFFFFFFFFFFFFFFFFFFFFFFFFFFFFFFFFFFFFFFFFF  
FFF  
@A00721:190:HGJW7DSXY:4:1649:10276:18286\_2:N:0:TCTGCAAG+GCTGCACT  
GCAAACCTACCCTGATTCCGGCCGGTGGTAGCTCATGTCTACCAGGGGCTATTACTCTTGCTGAAACA  
GCTATTAAAGCTGTTGAGCGGGTAATTACACCTAAACGAGCTCGATCT  
+  
FF,FFF:FFFFFFFFF,F:FF,:F::FF:F:FFF,FF:,F,F,:FFF,,F,F,,FFFF,FFFF,F  
:FFFFFFFF,:FFF,F:,FF:FFFFFFFF:F::FFF,F,F,,,FF,:F  
@A00721:190:HGJW7DSXY:4:1255:8793:36949\_1:N:0:TCTGCAAG+GCTGCACT  
AAGGATGTGCACTCTTTTCTGCTACTTTAACGGAGCGTAGTGTACTCTTCGTCGATTGTATCAACAGT  
AACATTACTTCTAATAAAGGTCTCTATCAAGCTCGTATTATCGTCGCTGCTGGATCTGCGTTACCGTT  
GAA  
+  
FFFFFFFFFFFFFFFFFFFFFFFFFFFFFFFFFFFFFFFFFFFFFFFFFFFFFFFFFFFFFFFFFFFFFFFF  
FFFFFFFFFFFFFFFFFFFFFFFFFFFFFFFFFFFFFFFFFFFFFFFFFFFFFFFFFFFFFFFFFFFFFFFF,F  
FFF  
@A00721:190:HGJW7DSXY:4:2109:13295:17347\_2:N:0:TCTGCAAG+GCTGCACT  
AGGTAATTATGAAGACTGTGATTTATCTTTCACTCTGGCCTTGATGAGGGTGTCTAATCGTAACA  
TTAATAATTTCAATCTTCTTAAAAAGAAGATAGAGAGTCATACTTTGG  
+  
FFFFFFFFFFFFFFFFFFFFFFFFFFFFFFFFFFFFFFFFFFFFFFFFFFFFFFFFFFFFFFFFFFFFFFFF  
FFFFFFFFFFFFFFFFFFFFFFFFFFFFFFFFFFFFFFFFFFFFFFFFFFFFFFFFFFFFFFFF  
@A00721:190:HGJW7DSXY:4:1223:32524:28103\_2:N:0:TCTGCAAG+GCTGCACT  
GATAGCCAATATTGAAGTGGACACCTCTGGTAGTATCGAAGTAAAGATAACCAATAAGGAAGGAGCTT  
ATACTATGGTTGAATCAACTAAGCATACTACTTTTGCTTTGATTACTC  
+  
FFFFFFFFFFFFFFFFFFFFFFFFFFFFFFFFFFFFFFFFFFFFFFFFFFFFFFFFFFFFFFFFFFFFFFFF  
FFFFFFFFFFFFFFFFFFFFFFFFFFFFFFFFFFFFFFFFFFFFFFFFFFFFFFFFFFFFFFFF  
@A00721:190:HGJW7DSXY:4:2177:5032:4758\_1:N:0:TCTGCAAG+GCTGCACT  
CTTCCGATCTGTTAAAGAGTCGATTAAACAAGTTGTACTTATCAATGATTTTATCGCTGGTTGTTATC  
TCGAAAAGTCTCTTCTAAAAGGAACGTCAGTTCTAACCCAAAGAGAATATCTAAAATATTTACAAAAT  
CTT



[illegible]



FFFFFFFFFFFFFFFFFFFFFFFFFFFFFFFFFFFFFFFFFFFFFFFFFFFFFFFFFFFFFFFFFFFFFFFF  
FFF  
@A00721:190:HGJW7DSXY:4:2413:4752:35963\_2:N:0:TCTGCAAG+GCTGCACT  
TCAAACAAGCCCAGACTCAAGGAGTCCAATCAAAGGTTTTGAATTTAGCTCAACTGGGGAGACGTGCT  
TAAATGGGTGATAAAAATTATTTAGAGATCTTTTCTACTTACAAAGGA  
+  
FFFF:FFFFFFFFFFFFFFFF:FFFFFFFFFF:FF,FFFFFFFFFFFFFFFFFFFFFFFFFFFFFFFF  
FF:FFFFFFFFFF,FF:FF:FFFFFFFFFFFFFFFFFFFFFFFFFFFFFFFFFFFFFFFF  
@A00721:190:HGJW7DSXY:4:1572:30346:35383\_2:N:0:TCTGCAAG+GCTGCACT  
AATTCTACGAAAAGTCCGGAGTATATTGTATGTTAATAGATAGTGGGATAATAGTTCTACCGATACG  
TAGTGAACGCGTTTCGTAGAACCAAGTACTTCCGTCTGAAGAGTTTAG  
+  
F:FFFFFFFFFFFFFFFFFFFFFFFFFFFFFFFFFFFFFFFF:FFFFFFFFFFFFFFFFFFFFFFFF  
:FFFF:FFFFFFFFFFFFFFFFFFFFFFFFFFFFFFFFFFFFFFFF:F:FFFF  
@A00721:190:HGJW7DSXY:4:1434:25418:25379\_1:N:0:TCTGCAAG+GCTGCACT  
TAACCGATAGGAGTTGTATAGTTGAAGATGTGGCTTTAGACGATAATCCTTTAAGGACTATGTTGACT  
GACGAAGATTTTCCACAGATTTGTCTACGTTGCAGATCGCCACTCCAAACACTATATACATTAAT  
ATA  
+  
FFFFFFFFFFFFFFFFFFFFFFFFFFFFFFFFFFFFFFFFFFFFFFFFFFFFFFFFFFFFFFFFFFFFFFFF  
FFFFFFFFFFFFFFFFFFFFFFFFFFFFFFFFFFFFFFFFFFFFFFFFFFFFFFFFFFFFFFFFFFFFFFFF  
FFF  
@A00721:190:HGJW7DSXY:4:2129:30047:2080\_2:N:0:TCTGCAAG+GCTGCACT  
AGTCATAACTTTTGTACCAAATTCTTGCTTTCAACGAAGTCTCTGATTTTATTAATCATTACTTTA  
ACGATCTCTCGGTCATTTACTCTGTACTTGATCTACGTCGTTTAACTG  
+  
FFFFFFFFFFFFFFFFFFFFFFFFFFFFFFFFFFFFFFFFFFFFFFFFFFFFFFFFFFFFFFFFFFFFFFFF  
F:FFFFF:FF:FFFFFFFFFFFFFFFFFFFFFFFF:FFFFF,FFFFFFFFF,FF  
@A00721:190:HGJW7DSXY:4:1344:21052:24079\_2:N:0:TCTGCAAG+GCTGCACT  
CTTAGAATGACTCTATCTTTTCAGACACTTCTTATATTATTTACAATAGTTAATATCATATTAGTAAT  
ACTCACTATCGTTTTCTGCTTTTTCTTAGCTAATAGATTAATAAAGGA  
+  
FFFFFFFFFFFFFFFFFFFFFFFFFFFFFFFFFFFFFFFFFFFFFFFFFFFFFFFFFFFFFFFFFFFFFFFF  
FFFFFFFFFFFFFFFFFFFFFFFFFFFFFFFFFFFFFFFF:FFFFFFFFFFFFFFFF  
@A00721:190:HGJW7DSXY:4:2173:26639:21699\_2:N:0:TCTGCAAG+GCTGCACT  
ACCAACTCTTCGTTACGAGACCTGATGGTAGAATAGATTTAGTCTCTACACCCATCTCAACGAGGATA  
AAGCGAGTTTTCCGTCCTGAACGTAATACACGAAGAGATCATCCGCAA  
+  
FFFFFFFFFFFFFFFFFFFFFFFFFFFFFFFF:FFFFFFFFFFFFFFFFFFFFFFFFFFFFFFFFFFFFFFFF  
FFFFFFFFFFFFFFFFFFFFFFFFFFFFFFFFFFFFFFFFFFFFFFFFFFFFFFFFFFFFFFFF  
@A00721:190:HGJW7DSXY:4:1364:11234:17785\_2:N:0:TCTGCAAG+GCTGCACT  
AAAGTCCCTTCTAACTTTAGATTATGAATCCTGCCTTTACTCATTTTATAGCAGTTATTTATGTTGTA  
CTTTTATAATTTATAACCTTCTTATACTTTTGGGTATGTTTTGTGAA  
+  
FFFFFFFFFFFFFFFFFFFF:FFFFFFFFFFFFFFFFFFFFFFFFFFFFFFFF:FFFFFFFFFFFFFFFF:FF:FFFFFFFF  
FFFFFFFFFFFFFFFFFFFFFFFFFFFFFFFFFFFFFFFFFFFFFFFFFFFFFFFFFFFFFFFF:F:FF  
@A00721:190:HGJW7DSXY:4:1446:28782:23782\_2:N:0:TCTGCAAG+GCTGCACT  
GAAGACATTATCTCTTATGTACTTATTGTAACGATCATTCTTTCGAGTTTTGTATTCTTATTCTTT  
ATTCCTTTAACTGTGTATGAGGAGGATTTATAATGCTTTTCGATAGTG  
+  
FFFFFFF:FFFF:FFFFFFFFFFFFFFFFFFFFFFFFFFFFFFFFFFFFFFFFFFFFFFFF:FFFFFFFF  
FFFFFFFFFF,:FFFFFFFFF:FF:FFFFFFFFFFFFFFFFFFFFFFFFFFFFFFFF  
@A00721:190:HGJW7DSXY:4:2450:19253:2206\_2:N:0:TCTGCAAG+GCTGCACT  
ATTACTGTTTCAAATCATCTTTACTCACAGACTCCGAAAATGGTTTCAAATGAGGTCAAAGCTCTATT

$+$ 

@A00721:190:HGJW7DSXY:4:1412:2401:25817\_2:N:0:TCTGCAAG+GCTGCACT  
CAAGGAACCTTCAATTCCTTCGATGTTTATATTTTTCTATAAGGGAAAATAGCAATAATCAAATTTTGA  
CAAATTTTAGAACTTTATTTTCAAGAACTCTCTCCGATCACCTTGGTGTG

+

@A00721:190:HGJW7DSXY:4:2148:12753:3129\_1:N:0:TCTGCAAG+GCTGCACT  
TCTTTTCAATAAGATGTATGATGATAATCTACTATTTTTAAATAGTGATATTCAGCGTATACTTGAAT  
ACTTTATCAAAGATTTGGCTTGGTCTATTTACCGCAAAAAGTTGGAAGAGGTCTATGATATTTATTTT  
ACT

+

@A00721:190:HGJW7DSXY:4:2156:26178:14544\_2:N:0:TCTGCAAG+GCTGCACT  
CACCGATTATAACTTGACTGTTGATAATATTACAATAGCTCTTCTCAGAAGATTAGAGAAGTAACCG  
GTGAACACGTCGGTAGCATTGATTTACTTTTACCGTTAGAACTGAAAA

+

@A00721:190:HGJW7DSXY:4:1471:20446:32737\_1:N:0:TCTGCAAG+GCTGCACT  
ACCTATAAGTTACAAACGATTCTTCGACTATATTAAGAAATAAAAAATACTTCAAGTACCTGAACTTT  
ACATTTTTAATGGTATGGTATAATGTGTCTTACAAATAGAACCTTCACTCTCGGTAATGAGAGTGTAT  
TCC

+

@A00721:190:HGJW7DSXY:4:1372:30526:27774\_1:N:0:TCTGCAAG+GCTGCACT  
GGCATTACTAGGATTTATCACACTCCTAAATTTGATAGCAATTTATGTTTTAAATGCTAGGAAATTT  
TAGAAAACTCCATTGTATAGTTCAAGGAGTACTTAATTCAATAGCTTTAGTATTATTTACTATCGCC  
TTT

+

@A00721:190:HGJW7DSXY:4:1309:17788:1235\_2:N:0:TCTGCAAG+GCTGCACT  
AGTTAATTGCTTACACAAAAGTGACGCGCAAGGAATCTTAATTGATTGAAGCTAGGCGTTGGGGAGA  
ATGAACTGCCGCTTCCCGGAAGAAACGATCTATTTACAGAGTATTTAG

+

@A00721:190:HGJW7DSXY:4:1234:9706:14920\_2:N:0:TCTGCAAG+GCTGCACT  
GAATTCCTGGCGAACCGCAAATCAATTGAAGAAAACCACTCCCTTCAATTCAATAACATAACATACCA  
TACACTCCCCAAACATAACATAACCATAACCTACCATGACCAATCATCG

+

@A00721:190:HGJW7DSXY:4:1266:7970:11945\_1:N:0:TCTGCAAG+GCTGCACT  
ACGCCAGACGTAGGGTCAAACCTACTACCGCCGGTCGGCAGATCGGCACCACTGGTCTCTACGTTCAAG



@A00721:190:HGJW7DSXY:4:1129:8052:26146\_2:N:0:TCTGCAAG+GCTGCACT  
TCCTCCATAATTACAACCTCTCTTTAGAGAGCATTAGAAGGAAGTTGGGCAAATTCCCACATATGGTA  
GACGTTGTCACACTTTTCTTGAAAATTTTCTTTCTCCGTCATTGG

+

FFFFFF,FFFFFFFFFFFFFFFFFFFFFFFFFFFFFFFFFFFFFFFFFFFFFFFF:F,FFFFFF  
FFFFFFFFFFFFFFFFFFFFFFFFFFFFFFFFFFFFFFFFFFFFFFFFFFFFFFFF:FFFF

@A00721:190:HGJW7DSXY:4:2649:15157:11021\_2:N:0:TCTGCAAG+GCTGCACT  
GTGAGAAGGTGGAAGGTGTCAAGGGTCTTCTTCATGCTGATCTTTCAGGACCTAATCACATCATGATT  
GATAGTTACGGCTCGTATCGAGTTGGAGGGAGGAAGTTCTCCGAAATT

+

FFFFFFFFFFFFFFFFFFFFFFFFFFFFFFFFFFFFFFFFFFFFFFFFFFFFFFFFFFFFFFFF  
FFFFFFFFFFFFFFFFFFFFFFFFFFFFFFFFFFFFFFFFFFFFFFFFFFFFFFFF

@A00721:190:HGJW7DSXY:4:1656:2582:4586\_1:N:0:TCTGCAAG+GCTGCACT  
GCTGTAAGTGTCAATTCAGAGAGGGGAGCTCTGAAAAGGAACTTCGTCAGAAAGATGAGGAAGTCTAA  
GAGGAGGAGTTTGAGGAAGGCTCTAGAGAAGATCTCACCACCTGGAGAAGGCAAGTGGAGAGTCCAGA  
AGT

+

FFF:FFFFFFFFF:FFFFFFFFFFFFFFFFFFFFFFFFFFFFFFFFFFFFFFFFFFFFFFFF:FFFFFF  
FFFFFFFFF:FFFFFFFFFFFFFFFFFFFFFFFFFFFFFFFFFFFFFFFF,FFFFFFFFFFFFFFFFFFFFFFFF  
FFF

@A00721:190:HGJW7DSXY:4:2266:9353:15562\_2:N:0:TCTGCAAG+GCTGCACT  
GGATTATTTGAAGCAGGGGTTACCACTTCCTAAGGTGGATGAGGGAGGTTGTTTCTTTGGAGTTTTAG  
ATAATCTTTTGAGAAGGGGTCATAGAGCCAGCAAGAGAAGCTTATATG

+

FFFFFFFFFFFFFFFFFFFFFFFFFFFFFFFFFFFFFFFFFFFFFFFF,FFFFFFFFFFFFFFFFFFFFFFFF  
FFFFFFFF:FFFFFFFFFFFFFFFF:FFFFFFFFFFFFFFFFFFFFFFFF

@A00721:190:HGJW7DSXY:4:1306:6831:34835\_2:N:0:TCTGCAAG+GCTGCACT  
CCTTGAGAAGACAAGCCACATTAAGATATAATTTAGGTCAACTTGGGGTTTCGAATGTCATTAGTGCC  
TTACGATTGAAAGAGGTCCTTTTGAGTATCGACAGATCTTTCGATCTT

+

F:FFFFFF,FFFF:FFFFFFFFFFFFFFFFFFFFFFFFFFFFFFFFFFFFFFFFFFFFFFFF:FF  
FF::F::FFFFFF:FFFF:FFFFFFFFFFFFFFFFFFFFFFFF

@A00721:190:HGJW7DSXY:4:1342:12626:29653\_2:N:0:TCTGCAAG+GCTGCACT  
TTAACGTGGCAGAATTCGGTAACCTACCATATTGTTCTTCCGGAAGTTGTGGGATTTAACTTTGAC  
TCAACTACTCCGATCAGATCCGATGGTTTGATTGGTATGGACTACTC

+

:FFFFFFFFFFFFFFFF:FFFFFFFFFFFFFFFFFFFFFFFFFFFFFFFF,FFFFFFFFFFFFFFFF  
FFFFFFFFFFFFFFFFFFFFFFFF:FFFFFFFFFFFFFFFF

@A00721:190:HGJW7DSXY:4:1439:19587:11898\_1:N:0:TCTGCAAG+GCTGCACT  
TAGTTGTCTAGGGTCATGGCAGATACTACCGATAAGGTGAAAAATATGCAGGTCAAAGATTCTGTAGC  
TCTGAGGGCGGTTGAGGGAGCCGTTTTGGCCGACTTTAACTATTCTAAGAGTCTTATGATTCAAAC  
CTA

+

FFFFFFFFFFFFFFFFFFFFFFFFFFFFFFFFFFFFFFFFFFFFFFFFFFFFFFFFFFFFFFFF  
FFFFFFFFFFFFFFFFFFFFFFFFFFFFFFFFFFFFFFFFFFFFFFFFFFFFFFFF:FFF  
FFF

@A00721:190:HGJW7DSXY:4:1447:24189:19523\_2:N:0:TCTGCAAG+GCTGCACT  
ACCTTACAAGTTGAGGAGACTTTACAGCGGCTTATTGTGCGCGAGTTTCCAGAATTGCGGTTGAAGT  
TCACCCATTCTATCTTGAATGCTCACGCCGTCGAGCCATATCGAGAC

+

FFFFFFFFFFFFFFFFFFFFFFFFFFFFFFFFFFFFFFFFFFFFFFFFFFFFFFFFFFFFFFFF  
FFFFFFFFFFFFFF:FFFFFFF:FF:FFFFFFFFFFFFFFFF

@A00721:190:HGJW7DSXY:4:1552:2962:30295\_2:N:0:TCTGCAAG+GCTGCACT  
AAAGTACAGATTTAGTGATTTAGATATTATTGATATTGGAGGCGATATTCGTTTTCATATCCAAAAC

CCTTGAATGGAGTACATATTTGCAACCCTATTCTTGATGTGAAAGATG  
+  
FFFFFFFFFFFFFFFF:FFFFFFFFFFFFFFFFFFFFFFFFFFFFFFFFFFFFFFFF  
FFFFFFFF:FFFFFFFFFFFFFFFFFFFFFFFFFFFFFFFFFFFFFFFF  
@A00721:190:HGJW7DSXY:4:2368:31024:9126\_2:N:0:TCTGCAAG+GCTGCACT  
AACATTGATTGGGAACGTACCTACTCACGAGACGTCATGAAAGCTATCGGAGGGAAGCAAAATGTTTC  
GTTCTGTTACAAGAACGCTTTGGATTGTGACCATAAAGCCTCAGTTGC  
+  
FFFFFFFFFFFFFFFFFFFFFFFFFFFFFFFFFFFFFFFFFFFFFFFFFFFFFFFF,FFFF:FFFFFF  
FFFFFFFFFFFFFFFF:FFFFFFFFFFFFFFFFFFFFFFFFFFFFFFFF:FFFFFF  
@A00721:190:HGJW7DSXY:4:2358:27037:9987\_2:N:0:TCTGCAAG+GCTGCACT  
ACGATATCTCTCTTGATGATGTAGCCACTATAATGCTTAAGAGAGAGATTGATGTATGTCATTTCTGTC  
TTAGTTTGTCCCGCGGAATTATTGGACACGATGAAAAATGACATACCC  
+  
FFFFFFFFFFFFFFFF:FFFFF:FFFFFF:FFFFFF:FFFFFF,FFFFFFFFFFFF:F:FFFF  
FFFFFFFFFFFFFFFFFFFFF:FFFFF:FFFFFFFFFFFFFFFFFFFFF  
@A00721:190:HGJW7DSXY:4:1564:17291:36605\_1:N:0:TCTGCAAG+GCTGCACT  
TCGTTATCCGTCATGGAGATGATGGCGCATCACTTGATTACTATATGCCCGAAGGATTGGGTTATTCT  
CACAACAAAGATAAGATTTTATCTTTCTTCAAACACCCTGTTTTCTTAAGGGCGGACAATTGTTCCA  
TTG  
+  
FFFFFFFFFFFFFFFFFFFFFFFFFFFFFFFFFFFFFFFFFFFFFFFFFFFFFFFFFFFFFFFF  
FFFFFFFF:FFFFFFFFFFFFFFFFFFFFFFFFFFFFFFFFFFFFFFFFFFFFFFFFFFFFFFFF  
FFF  
@A00721:190:HGJW7DSXY:4:2627:1642:19993\_2:N:0:TCTGCAAG+GCTGCACT  
ATTGAGCATTAAATGAGTTCCGAATAACTCGTAATAAATCTTCTCTAGTGGACAATTCAGAATACCTA  
TTTCCGTACCAAGAGCCACTGCCAATCTCATCGCTATACGCATACCTG  
+  
FFFFFFFFFFFFFFFFFFFFFFFFFFFFFFFFFFFFFFFFFFFFFFFFFFFFFFFFFFFFFFFF  
FFFF:FFFFFFFFFFFFFFFF:FFFFFFFFF,F:FFFFFFFFFFFF  
@A00721:190:HGJW7DSXY:4:2450:3821:28839\_1:N:0:TCTGCAAG+GCTGCACT  
GAGGTTTCGTTCTCAATAAAAATTTTCTCAAGAGATTATGTTGATAAAGTTTTCTTCATAAGGGCT  
ATTCAGTACGTCATGGGATCACTTCTTCGGTCAATGACAAAACCTTCGAATATGTTACGACATGGCT  
TCG  
+  
FFFF:FFFFFFFFFFFF::FFFFFFFFFFFFFFFF,FFFFFFFFFFFFFFFF,FFFFFFFF  
FFFFFFFFFFFFFFFFFFFFFFFFFFFFFFFFFFFFFFFFFFFFFFFFFFFFFFFF:FFFFFFFFFFFF  
FFF  
@A00721:190:HGJW7DSXY:4:1664:27859:33927\_2:N:0:TCTGCAAG+GCTGCACT  
AGGATTGTCATCTCGGGGAAAGTGATTCACCAAGATGTTTCATATAGATACGAGATACCTAGAGAAGGT  
CGCAGCGATCTTACTCGTTATCGGAGCTAAGAAGAAGACTTTGGGTAC  
+  
FFFFFFFFFFFFFFFFFFFF:FFFFFFFFFFFFFFFF,FFFFFFFFFFFFFFFFFFFFFFFF  
FFFFFFFFFFFFFFFFFFFF:FFFFFFFFF:FFFFFFFFF:FFFFFF  
@A00721:190:HGJW7DSXY:4:1615:6298:21731\_2:N:0:TCTGCAAG+GCTGCACT  
AAACTTAACGTTAGTACCGGAGGTGATCTCTCTGCTTCTGCGTTACTGAGAGAAAAGATTCAGGACGC  
CTACGGTGACTTTATGGACAAGATGCAAGTTCTTGGGAAATACTTGTT  
+  
FFFFFFFFFFFFFFFFFFFFFFFFFFFFFFFFFFFFFFFFFFFFFFFFFFFFFFFFFFFFFFFF  
FFFFFFFFFFFFFFFFFFFFFFFFFFFFFFFFFFFF:FFFFFFFFF:FFFFFFFFF  
@A00721:190:HGJW7DSXY:4:2353:8865:11490\_2:N:0:TCTGCAAG+GCTGCACT  
TCGATTCTTTGTATAGGGAGTGTGAGAAGACAACGAATCTTGAAACTACGGTCCTTATCAAAGAAAAT  
GGTGAACCGGTCTCTAAATCTTTTGAGATTGAGAAGATTGAAGAACAC  
+

FFFFFFFF,FF:F,FFFFFFFFFFFFFFFFFFFFFFFFFFFFFFFFFFFFFFFFFFFFFFFFFFFFFFFFFFFFFFFF:FFFF,FFFF:  
FFFFFFFFFFFFFFFFFFFFFFFF:FFF::FFFF,FFF,FFFFFFFFFFFFFFFF  
@A00721:190:HGJW7DSXY:4:1570:3477:12117\_2:N:0:TCTGCAAG+GCTGCACT  
GCTCGGCGTTGTTCTTGAAAACCAAGTTAAGAAGGAGGCTGATCATGGAGTCTTTGTACCTTCTGTCA  
AACTTCGAGGTTACGCTACGAGAGGTGATCCCGGATGTGGATTGAAGG  
+  
FFFFFFFFFFFFFFFFFFFFFFFFFFFFFFFFFFFFFFFFFFFFFFFFFFFFFFFFFFFFFFFFFFFFFFFF  
FFFFFFFFFFFFFFFFFFFFFFFFFFFFFFFFFFFFFFFFFFFFFFFF,FFFFFFFFFFFFFFF  
@A00721:190:HGJW7DSXY:4:1568:13386:30279\_2:N:0:TCTGCAAG+GCTGCACT  
GGAGACTCCTTCTTTTGAATGTTGTAAAGAATTGGGTTGAGAAGTGTGCTTTACAAGGAGTTAGACT  
CTTCTTCAAGTTTTTAGATCTTCTTGATAATCTTAAAGAAAAATTTTC  
+  
FFFFFFFFFFFFFFFFFFFFFFFFFFFFFFFFFFFFFFFFFFFFFFFFFFFFFFFFFFFFFFFFFFFFFFFF:FFFFFFFFF  
FFFFFFFFFFFFFFFFFFFF,FFFFFFFFFFFFFFFFFFFFFFFF:FFFFFFFFF:  
@A00721:190:HGJW7DSXY:4:2456:28791:27618\_1:N:0:TCTGCAAG+GCTGCACT  
AGTCTGTACTTACATTCTTTACGCCAGATTCTTCATGGGCGACGCTGTTTCTCTTGGTATTTCTGAA  
ATAGTTTATCAGAGCGTCATTTTCTTTGGGATCTTTCCTCTGGTAAGGGAATTATTAAATCATTCTT  
CTC  
+  
FFF:FFFFFFFFFFFFFFFFFFFFFFFFFFFFFFFFFFFFFFFFFFFFFFFFFFFFFFFFFFFFFFFFFFFFF  
FFFFF:FFFFFFFFFFFFFFFFFFFFFFFFFFFFFFFFFFFFFFFFFFFFFFFFFFFFFFFFFFFFFFFFFFFFF  
FFF  
@A00721:190:HGJW7DSXY:4:1535:6903:5995\_2:N:0:TCTGCAAG+GCTGCACT  
ATTATTACTGTTTTCTCTACCCATAACTTCTTTTTCAAAAATGCGGATGGGTCTACTGATGTTTTCT  
ACAGAGTGCAGTCGTTTCAACACTTATCACCACCTTTTGAAAGGAAAAT  
+  
FFFFFFFFFFFFFFFFFFFFFFFFFFFFFFFFFFFFFFFFFFFFFFFFFFFFFFFFFFFFFFFFFFFFFFFF  
FFFFFFFFFFFFFFFFFFFF:FFFF::FF:FFFFFF:FFFFFFF:FFF  
@A00721:190:HGJW7DSXY:4:2438:7509:18443\_1:N:0:TCTGCAAG+GCTGCACT  
AAATACGTATGTCGGTGGGTTCTCAAGGCTCTCATCGCCACTGGGATTCTAAGGGGTTCCATAAGAT  
ATTATCTGACATTGTGGTTCAATGATCAGGATTCTTCTTTTGGTCCTTACGTCTTAAGTAATTTGGAT  
GTT  
+  
FFFFFFFFF:FFFFFFFFFFFFFFFFFFFFFFFFFFFFFFFFFFFFFFFFFFFFFFFFFFFFFFFFFFFFFFFF  
FFFFFFFFFFFFFFFFFFFFFFFFFFFFFFFFFFFFFFFFFFFFFFFFFFFFFFFFFFFFFFFFFFFFFFFF  
FFF  
@A00721:190:HGJW7DSXY:4:2423:4689:22451\_2:N:0:TCTGCAAG+GCTGCACT  
GTTCTTGTACGATTCTTAAAAGAAGTTTATTAAAACTTCAGAGTCTCTTGGAAGTCCAGGTAGCTAA  
TGTTCTTGCAATAGCCACAGACTTTCTGGGAAAAGAGACCTCTGTTGG  
+  
FFFFFFFFFFFFFFFFFFFFFFFFFFFFFFFFFFFFFFFFFFFFFFFFFFFFFFFFFFFFFFFFFFFFFFFF  
:FFFFFFFFF:FFFFF,FFFFFFFFFFFFFFFFFFFFFFFFFFFFFFFFFFFFFFFF  
@A00721:190:HGJW7DSXY:4:1502:24071:7044\_1:N:0:TCTGCAAG+GCTGCACT  
GAGAATTACTCAGATTCAATCTGGCATCACTGAACGTCTACAACGAGTTAGGGAGTGGCTAGGTTTTTA  
AAAGATCCTTTGCACAAGCAATACCTTCCACTGAGTTCATCACCCAGAGTTTCGACGTGCGGAAAAC  
GAT  
+  
FFFFFFFFFFFFFFFF,FFFFFF:FFFFFFFFFFFFFFFFFFFFFFFFFFFFFFFFFFFFFFFFFFFFFFFF  
FFFFFFFFFFFFFFFFFFFFFFFFFFFFFFFFFFFFFFFFFFFFFFFFFFFFFFFFFFFFFFFFFFFFFFFF  
FFF  
@A00721:190:HGJW7DSXY:4:1672:6931:17440\_2:N:0:TCTGCAAG+GCTGCACT  
CACTGTTTCGAGAATCTTCTGATGCTGAATTTGAGGAAAATTTTTCGGAAGTTTTTGGTATAAATCCTG  
ATGGCTCAGTACAGGGAGGAGATCGGAAGAGCGTCGTGTAGGGAAAGA  
+



[illegible]

+

+

+

+

+

+

+

+

•

@A00721:190:HGJW7DSXY:4:2234:31168:8343\_2:N:0:TCTGCAAG+GCTGCACT  
AGACCTTTCTTGGGGAGTAAAGAGGGTTTGGAAATTACGGAACCTTCTCGTTCTTCATGAAGATCT  
TCGAGTGTTTTATAGTGAGTTATTCTTGCGAAGGTTCAAGTCGATTGA

+

FFFFFFFFFFFFFFFFFFFFFFFF:FFFFFFFFFFFFFFFF:FF:FFFFFFFFFFFFFFFFFFFFFFFF  
:FFFFFFFFFFFFFFFFFFFFFFFF:FFFFFFFFFFFFFFFFFFFFFFFF: :

@A00721:190:HGJW7DSXY:4:2622:30318:35931\_1:N:0:TCTGCAAG+GCTGCACT  
ACGAGATCTTGCAGAGTGACTGGAGTTCAGACGTGTGCTCTTCCGATCTGTGGAGGGAAGACCACTGA  
ACTTATAGCGACTTTTGTGCAATTTTTCGAAAAGGTCTTGAAGTACGTATTGCTACTGCTAATCGTA  
ATT

+

FF: :FFFF,FFFFFFFF:FFFFFFFFFFFFFFFFFFFFFFFFFFFFFFFFFFFFFFFFFFFFFFFF: F  
FFFFFFFFFFFFFFFFFFFFFFFFFFFFFFFFFFFFFFFFFFFFFFFFFFFFFFFFFFFFFFFFFFFFFFFF  
FFF

@A00721:190:HGJW7DSXY:4:2456:12237:21652\_1:N:0:TCTGCAAG+GCTGCACT  
GTGACTAAAGTTTTGGCACTTCTAGTTCATCGCGGTATTTGTGAAATTAAGACAGACGTGAAAGTTAT  
GATGAGTGATCGTATTAGAACAGCTGATTCTTATTGCATGAACGTCGCTGAGGTCAAACCTGTGGACG  
TTC

+

FFFFFFFFFFFFFFFFFFFFFFFF:FFFFFFFFFFFFFFFFFFFFFFFFFFFFFFFFFFFFFFFFFFFFFFFF  
FFFFFFFFFFFFFFFF:FFFFFFFFFFFFFFFFFFFFFFFFFFFFFFFFFFFFFFFFFFFFFFFFFFFFFFFF  
FFF

@A00721:190:HGJW7DSXY:4:1672:10050:23750\_2:N:0:TCTGCAAG+GCTGCACT  
CTGGTCAGACCCTTTTTCTTACACATCTACTTAAGGCGCTTATACCATAGGTTACGGTGATTCCAAT  
CAAATCGGATTCATCAATCGTATTGATCTCCAAGTCGAAACTACTTC

+

FFFFFFFFFFFFFFFF:FFFFFFFFFFFFFFFFFFFFFFFF:FFFFFFFFFFFFFFFF:FFFFFFFFFFFFFFFF  
FFFFFFFFFFFFFFFFFFFFFFFFFFFFFFFFFFFFFFFFFFFFFFFFFFFFFFFFFFFFFFFF

@A00721:190:HGJW7DSXY:4:1230:17029:17581\_2:N:0:TCTGCAAG+GCTGCACT  
TTGATGAGTGTCGTTCTTATCGAAGTCTCAGTTATCGCTGCCGCGCGACGTTTGTGCGGAACTCTCA  
GAGGTTTACGGCAGAAAAATTTCTCCTGCTTGTAATTGAGAGAGGAC

+

FFFFFFFFFFFFFFFFFFFFFFFFFFFFFFFFFFFFFFFFFFFFFFFFFFFFFFFFFFFFFFFFFFFFFFFF  
FFFF:FFFFFFFFFFFFFFFFFFFFFFFFFFFFFFFFFFFFFFFFFFFFFFFFFFFFFFFF

@A00721:190:HGJW7DSXY:4:1237:28311:10598\_1:N:0:TCTGCAAG+GCTGCACT  
TTAGACCTATCAGATGTCTTGACGACTTCGAATTTGAGGACGGAGTTAAATATATTACTTTCACTCAA  
GGTGAAAAGTTTGAAATTAACAAAGTCCTTGGTAAGAGTAAGGTTAAATGTGAAGATGCTCAGACTAT  
TCA

+

FFFFFFFFFFFFFFFFFFFFFFFFFFFFFFFFFFFFFFFFFFFFFFFFFFFFFFFFFFFFFFFFFFFFFFFF  
FFFFFFFFFFFFFFFFFFFFFFFFFFFFFFFFFFFFFFFFFFFFFFFFFFFFFFFFFFFFFFFFFFFFFFFF  
FFF

@A00721:190:HGJW7DSXY:4:1214:29912:33661\_2:N:0:TCTGCAAG+GCTGCACT  
ACTTACCAGCACGTTTCGGCTGGTTAGAATTAAACCTCAAGATGACCCTGTTTTGCATCACAAACACA  
TATTACCGTTGCTCTATCACGACACGTTGAATCTTTACGATACTTTGT

+

FFFFFFFFFFFFFFFFFFFFFFFFFFFFFFFFFFFFFFFFFFFFFFFFFFFFFFFFFFFFFFFF:FFFFFFFFFFFF  
:FFFFFFFFFFFFFFFFFFFFFFFFFFFFFFFF:FFFFFFFFFFFFFFFF

@A00721:190:HGJW7DSXY:4:1302:15049:17002\_1:N:0:TCTGCAAG+GCTGCACT  
TTAAACGATGCTACTTGTGAGAGGATCAATCACAGTAAGTAACTGTCACGTTTAGCACGGGAGGTTGC  
AGATTCAACCCCTTATATCGAGGCTATCGAGGACGATGAGTATCTTGAAGTTGTTGACGACAAGCCTC  
AAG

+

:FFFFFFFF,FFFFF:FF:F,FFFF:F:FF::FFF:F:FF:FFFFFFFFFFFFFFFF:FFFFF

,FFFFFF:FFF:FFFF,FFF:FFFFFFFF:FFFFFFFFFFFF,FFF:F::FFFFFF:FFFFFFFFFFFF  
FFF

@A00721:190:HGJW7DSXY:4:1527:19822:6449\_2:N:0:TCTGCAAG+GCTGCACT  
TCTTCTACTGTCTCTGCCTTCCAAGATTTCTTAGAAGAGGTTATTCCTGGAACCACTTAACGTCAC  
CGTAATCTTTCAGCCGAATTAAGTACTAATGAGTTCAAGTCGTTGT

+  
FFFFFFFFFFFFFFFFFFFFFFFFFFFFFFFFFFFFFFFFFFFFFFFFFFFFFFFFFFFFFFFFFFFF  
FFFFFFFFF,,FFFFFFFFF,F:FFFFFFFFFFFFFFFFFFFF:FFF,FFF

@A00721:190:HGJW7DSXY:4:1119:9986:29684\_1:N:0:TCTGCAAG+GCTGCACT  
GATCAAGGCTAATACCTTTATAGGTAAGAAGCCCCTTGAGCCGCGTAGTCAGCAGGTTTAGCTGTATC  
ATCAGTCAGAGTATACCCGATAGGGTACCGAGTCTCCAAGAGAATATTTATTCTTATGAGGCTCGAAA  
CTT

+  
FFF:FFFFFFFFFFFFF:F:FFFFFFFFFFFFFFFFFFFFFFFFFFFFFFFFFFFFFFFFFFFF  
FFFFFFFFFFFFFFFFFFFF:FFFFFFFFFFFF:FFFFFFFFFFFFFFFFFFFF:FFFFFFFFFFFFFFFFFFFF  
FFF

@A00721:190:HGJW7DSXY:4:1343:27597:7670\_1:N:0:TCTGCAAG+GCTGCACT  
CAACGGAAAGACATATCGCACCCGAAATTTTGGGCAGAATGCTCTTAACGCGGTTCTTGAACGGTGT  
TTTGATCAGTCTAAGTTGGATAAAGTTATAGGAGACTCAGTTAACCTGAGAGCTCCTCAATTGATAGA  
TTG

+  
FFFF:FFF:FFFFF,FFFFFFFFFFFFFFFFF:FFFFFFFFFFFFFFFFF:FFFFFFFFFFFFFFFFFFFF  
FFFFFFFFFFFFFFFFFFFFFFFFFFFFFFFFFFFFFFFFFFFFFFFFFFFFFFFFFFFFFFFFFFFF:FFFF,:FF  
:FF

@A00721:190:HGJW7DSXY:4:1143:16631:28322\_2:N:0:TCTGCAAG+GCTGCACT  
CTAGTATACTTCGTAAAGTCGACAGCGAAATGGTCAATATTGATAATTGGACCGACTATATGACCTAT  
TTTAAGCTCATGGTGAAAAGGGAAGCTAAGGTTAAACTTGATGCTTCA

+  
F:FFFFFFFFFFFFFFFFFFFFFFFFFFFFFFFFFFFFFFFFFFFFFFFFFFFFFFFFFFFFFFFFFFFF  
FFFFFFFFFFFF,FFFFFFFFFFFF:FFFFFFFFFFFF:FFFFFFFFF:FFF

@A00721:190:HGJW7DSXY:4:1316:6352:30624\_2:N:0:TCTGCAAG+GCTGCACT  
CATAACCCCGCACAGAATATCGTTTATCACGCAAAATTTATTAATGCAATTTTCGGACCTATCTTTAA  
GGTTCTTGTGAGGAGAGTCAAACAGTGTCTTTTACCCAACATTTTTAT

+  
FFFFFFFFFFFFFFFFFFFFFFFFFFFFFFFFFFFFFFFFFFFFFFFFFFFFFFFFFFFFFFFFFFFF  
FFFFF:FFFFFFFFFFFFFFFFFFFFFFFFFFFF,FFFF:FFFFFFFFFFFFF

@A00721:190:HGJW7DSXY:4:1209:8332:15013\_1:N:0:TCTGCAAG+GCTGCACT  
TGACCAGTGACGATTTCTCCCGAAGCTCTTCTCTCTCTTAGGAGGTCATGATGACTACTATAAGGT  
GAAATCGATTTTTCGAAGTTTGACAAATCTCAAGATTTCTTTGTAAAGCCTATGAGATAAAGATGTA  
TT

+  
FFFFFFFFFFFFFFFFFFFFFFFFFFFFFFFFFFFFFFFFFFFFFFFFFFFFFFFFFFFFFFFFFFFF  
F:FFFFFFFFFFFF:FFFFFFFFFFFFFFFFFFFFFFFFFFFFFFFFFFFF,FF,FFFFFFFFFFFFFFFF  
FF

@A00721:190:HGJW7DSXY:4:1177:16568:21010\_2:N:0:TCTGCAAG+GCTGCACT  
TTCGATGCTGAATTTCTTGAACCTTGAGTGCCAGTGAATATTTTGTACGCGCAGGAGTATCCATAA  
CGATTTGTCAATTTACCACCTTTGCTCAACGACGAAGTGAACGGCCAA

+  
FFFFFFFFFFFFFFFFFFFFFFFFFFFFFFFFFFFFFFFFFFFFFFFFFFFFFFFFFFFFFFFFFFFF  
FFFFFFFFFFFFFFFFFFFF:FFFFFFFFFFFFFFFFFFFFFFFFFFFFFFFFFFFF

@A00721:190:HGJW7DSXY:4:1309:21061:14638\_2:N:0:TCTGCAAG+GCTGCACT  
TAATTGTATGATCACTTTGATGATTTTATCACTTTATTATGACCTTGAAAGTTTTCGGCTGTGGTTG  
TCGCTGGGACGATTCCATTCTGTTTTCAAAGACTCCAATAACTGATC

+

FFFFFFFFFFFFFFFFFFFFFFFFFFFFFFFFFFFFFFFFFFFFFFFFFFFFFFFFFFFFFFFF  
FFFFFFFFFFFFFFFFFFFFFFFFFFFFFFFFFFFFFFFFFFFFFFFFFFFFFFFFFFFF  
@A00721:190:HGJW7DSXY:4:1325:11469:11177\_2:N:0:TCTGCAAG+GCTGCACT  
CAGCGTACTTCTGCTCGCGATTTATTCTTTTTGTCAATGATTACATCTACTTCGTTCTGATCCTTAC  
AATATCATCGTTAAGTTAGGTAAACCCCTAACCGATGTTACTCTTGTA

+  
FF:FF:FFF:,::F,F,FFF,:FF,,FFF,F,FFFFFF:F:FFFF:FFF::FF:F:::, :F:F,FFF,  
FF,F:,FFFF,,FF::FF:, :FFFF,,FFFF:,FFF,F,F:F,FF:FF  
@A00721:190:HGJW7DSXY:4:1378:10845:5181\_1:N:0:TCTGCAAG+GCTGCACT  
TTCGTTAGTTTTAAAGACTATACTAAATATCTCCACTACGAGGTTGTTGTTGGCGATTAGCTCTTGC  
GACTAATATTCGATATTCGATTGAGGGTCGTTATACCTATTCGGCTATCTGTGCTTTGAATTGTATAA  
TAT

+  
FFF:FF:FFFF:FFF,,F,FFFFFFFFFFFF:FF:FF:FFFFF,FFFFFFFF:, :F,FFFF:FFF:F:  
:F:FFFF:FFFFFFFFFFFF:FFF,:FF,FF,FFFFFFFF:F,:FF:FFFF:F,F:FFFFFFFFF,:FFFF  
,FF  
@A00721:190:HGJW7DSXY:4:1134:7717:36119\_2:N:0:TCTGCAAG+GCTGCACT  
GATTCCGAGAGGTTTATCCTGATGTGGAGGGAGTTCTTGAAGCATCCCGACCTTTCCTTGTAATAATT  
TTGATGCGGTTTCATAAGATTATCAGTAATCCTGATTCTACTACGGAT

+  
FFFFFFFFFFFFFFFFFFFFFFFFFFFFFFFFFFFFFFFFFFFFFFFFFFFFFFFFFFFF,FFFFFFFFFFFF  
FFFFFFFFFFFF,FFFFFFFFFFFFFFFFFFFFFFFFFFFFFFFFFFFFFFFFFFFF  
@A00721:190:HGJW7DSXY:4:1562:6017:21997\_1:N:0:TCTGCAAG+GCTGCACT  
CCATCCTGTACCTCTTCTGGAGAGACGTATCTCAAAGATCGACTTCGAGACAGGTGATATTGTTGAGC  
GAGAGCGACCAAGATCTAAATTCGGTAACGGTGCGTGGCGCTTTATTTTAAAAAGCTCCCTCCTCTCG  
CAA

+  
FFFFFFFFFFFFFFFFFFFF:FFFFFFFFFFFF,FFFFFF:FFFFFFFFFFFFFFFFFFFFFFFFFFFFFFFFFFFF  
FFFFFFFFFFFFFFFFFFFFFFFFFFFFFFFFFFFF:FFFFFFFFFFFFFFFFFFFFFFFFFFFFFFFFFFFF  
FFF  
@A00721:190:HGJW7DSXY:4:2202:22616:23938\_1:N:0:TCTGCAAG+GCTGCACT  
ATACTTATCACGAAAGGACTTGAGTCTTTTGATCAGTCTCTGACTTGACCATCTTTCATTTTAAATGA  
AGATCATTAAGACTCTCTTTCTTCTTTGTTCTTCTTTGCACTGATTTTCTCCTCATCAGCTTGTTGTT  
TT

+  
FFFFFFFFFFFF:FFFF,F,:FFF:FF:F,FFFFFF:FFFFFFFFFFFFFFFFFFFF:FFFFFFFFFFFF:FFF:  
,FFFFFFFFFFFF,F:FFFFFFFF,F,FFFFFF:FFF:FFF:::FFFFFFFFFFFFFFFFFFFF:FFFFF  
FF  
@A00721:190:HGJW7DSXY:4:1171:27751:9220\_1:N:0:TCTGCAAG+GCTGCACT  
GTTTTTACGATAACAACATCAGTTGATTAAGACTCTTCCGAAAGCGAACTTTGGGAATTTGAAGCT  
CAGGGTGAAGCACAACGTTTGACCGTGACGAAGTGTGGTGTTCTTGATCTACGTTACGGATATACTCT  
CCT

+  
FFFFFF:FFFFFFFFFFFF,FFFF:FFFFFFFFFFFFFFFFFFFFFFFFFFFFFFFFFFFFFFFFFFFF  
FFFFFFFFFFFFFFFFFFFFFFFFFFFFFFFFFFFFFFFFFFFFFFFFFFFFFFFFFFFFFFFFFFFF  
FFF  
@A00721:190:HGJW7DSXY:4:1113:6515:12493\_1:N:0:TCTGCAAG+GCTGCACT  
ACACTACCACTTATTACGATATTTCTTTAGTCGATGGGTTTTGACGCCTTTAAGCGTCTTCTGTTCA  
TCGCAACCAGATGATATCTTCTATTCTGAAGTATGTTTCGATCAGTGTCTTCTATCAGGAGGAAAA  
CAC

+  
FFFFFFFFFFFFFFFFFFFF:,FFFFFFFFFFFFFFFFFFFFFFFFFFFFFFFFFFFF:FFFFFFFFFFFFFFFFFFFF  
FFFFFFFFF:FFFFFFFFFFFFFFFFFFFFF,F:F:FF:FFFFFFFFFFFFFFFFFFFFFFFFFFFFFFFFFFFF  
FFF

@A00721:190:HGJW7DSXY:4:2342:11849:17002\_2:N:0:TCTGCAAG+GCTGCACT  
AATCCTAACGTAGAAGATTGTTGTTTACCACCGAAATATCAAGTTCTTGTCTTCAAACGATTGGAA  
GGTTACTTATCTTAATAGTACTAAAGGGGTTTACTTACAACCCTATGA

+

FFFFFFFFFFFFFFFF:FFFFFFFFFFFFFFFFFFFFFFFFFFFFFFFFFFFFFFFF  
FFFFFFFFFFFFFFFFFFFFFFFFFFFFFFFFFFFFFFFFFFFFFFFFFFFFFFFF

@A00721:190:HGJW7DSXY:4:1643:4164:9267\_2:N:0:TCTGCAAG+GCTGCACT  
TGTTTTCTTCTAATGTGGCCTGAACCTACGTTTCACTTTGTGTGTACTTGTCTCTATTTTAAGTTTTGT  
CTTCCTTGTTTGTCTTATTCTATTAATCACTCATTTTAGTGAGATTAT

+

,FFFFFFFF,FFFFFFFFFFFFFFFFFFFFFFFFFFFFFFFFFFFFFFFFFFFFFFFF  
F:FFF::FF:FFFF:FF:FF,FFFFFFFF:F:FFF:FF::FFFFFF:

@A00721:190:HGJW7DSXY:4:2312:9290:5494\_2:N:0:TCTGCAAG+GCTGCACT  
CTAAAACGTCTTCGACAACAGCAGGGGTTTTCGAATAGTGATAGCCACCCGCCTTACAGAGGGGCAGC  
AGCATGACCATAATTGGTATTGACTTTGGTACCACCTTTTCTACTGTC

+

FFF:FFFFFFFFFFFFFFFF:FFFFFFFFFFFFFFFFFFFFFFFFFFFFFFFFFFFFFFFF  
FFFFFFFFFFFFFF,FFFFFFFFFFFF:FFFFFFFFFFFFFFFFFFFFFFFFFFFF

@A00721:190:HGJW7DSXY:4:1472:8648:16908\_1:N:0:TCTGCAAG+GCTGCACT  
TTCGAATGAAGTTTTAATGCTTAACAACAATGATAGTGAATTTATACCTACAATCATTGGTTTTCTA  
ATAATGATGACACTATTGTTTATGGATATGATGCTATTACTCATGATGGTTACGGTCAGGGAGGATTCT  
TCA

+

FFFFFFFFFFFFFFFFFFFF:FFFF::FFFFFFFF::FFFFFFFFFFFFFFFFFFFFFFFFFFFFFFFF  
FFFFFFFFFFFF:FFFFFF:FFFFFFFFFFFF,FFFFFF,FFFFFFFFFFFFFFFFFFFF:FFFFFF:FFFF  
FFF

@A00721:190:HGJW7DSXY:4:1601:27489:14716\_2:N:0:TCTGCAAG+GCTGCACT  
ACATTACCCGAAAGACGTGCTAAATTAACCATTGTACGATGTCGTCTGTCTCGGCGATCACTTTTC  
ACTAAGAATTGGTCCTACTTTTGGACAAGGCCAACTTCGTAATCTTCA

+

FFFFFFFFFFFFFFFFFFFF:FFFFFF:FFFFFFFF,F:FFFFFFFFFFFFFFFFFFFFFFFFFFFFFFFF  
FF:FFFF:FFFFFFFF:FFFFFFFFFFFFFFFFFFFFFFFFFFFFFFFFFFFF:

@A00721:190:HGJW7DSXY:4:1202:31259:20431\_2:N:0:TCTGCAAG+GCTGCACT  
TTTATCTCTTTGGTTGTTAGGGATTTTGAGAGAGTGAAAGGCTTCAATTGTAGTGGTTTGGTCGTTTC  
AGTACCCAGTCAGTATACCTCTACGCAAAGATATTTTCATGAAAACCTAC

+

FFFFFF,F:FFF,:FFFFFFFFFFFFFFFF:FFFFFFFFFFFFFFFFFFFFFFFFFFFFFFFFFFFF  
FFFFFFFF:FFFFFFFF:FFFFFFF::FFFFFFFFFFFF,FF,:FFF

@A00721:190:HGJW7DSXY:4:1572:22580:11694\_1:N:0:TCTGCAAG+GCTGCACT  
CCGGATTACCTGTCTTTCATATTATGAATGAACCTTCGGCCGCTCTCTTTGCTTCGATGTTGGATGTC  
AAGAAGGGTTCAGAATGGGATTCTACGTAGTTTATGACTTTGGTGGTGGTACTTTCGATACTTCTAT  
CGT

+

:,FFFFFF:FFFF:FFFF,F,FF:FFF:F,FFFFFFFFFFFFFFFFFFFFFFFFFFFFFFFFFFFF:F  
FF:FFFFFFFFFFFFFFFF:FFFFFFFFFFFF,FFFFFFFFFFFFFFFFFFFFFFFFFFFFFFFFFFFF  
FFF

@A00721:190:HGJW7DSXY:4:1554:17219:24267\_2:N:0:TCTGCAAG+GCTGCACT  
TACTATAGTGTTATTAATTCTGGTGGTGATGATAATCTTGGAGTCGTGACGTTGATGAAGCTATAAG  
AGCGTTCTTATTACGGCGCACTTCTTTACCCGCCACCACACAACCTATC

+

:FFFFFFFF:FF:F,:,,FFFF,FFFF:F:F,:FFFFFF,:FFFFFFFF::FF::,,FFF:FFFF:FFFF  
F:F,FFFFFF:FFFFFF:FFF,F:,F:FFFF,:FFF:FFFF:,,:F

@A00721:190:HGJW7DSXY:4:1535:22589:27524\_1:N:0:TCTGCAAG+GCTGCACT  
TGAAGGAGGAGGTTTCTGTTACTGGAAAACCCTCGTCAATACTTTTCAATAATATACGTCTTGAACCTC



FFFFFFFFFFFFFFFF:FFFFFFFFFFFFFFFFFFFFFFFFFFFFFFFFFFFFFFFF:FFFFF  
FFF

@A00721:190:HGJW7DSXY:4:2659:10610:33144\_2:N:0:TCTGCAAG+GCTGCACT  
CTATACGTGACATACTAAATACTAGATATTTGGATGATCTTGATAAAGAACTTCATGAATTTTCAGAG  
GATGAAAAATTTTCTTCCTTGATTTTAATATAAAGAATCTTTACCAG

+

FFFFFFFFF:FFFFFF:FFFFFFFFFFFFFFFFFFFFFFFFFFFFFFFFFFFFFFFF:FF:FFFFFFFFF  
FF:FFFFFFFFFFFFFFFF,FFFFFF,:FFFFFFFFF:FF:FFFFFFF

@A00721:190:HGJW7DSXY:4:2441:1985:14669\_1:N:0:TCTGCAAG+GCTGCACT  
AGGAGGCAGTCTTCTGATCGTAAGAAGTTTATAAGGAACATATCCATTTGTTGTAATAGGGTCATCAA  
CTTAGAACTCGAACTCTAAGTGGAATACTGTCTTTCCAAGCTTACCTGTATCTTCAATGAAATTGG  
ACT

+

FFFFFFFFF,FFFFFFFFFFFFFFFF:FFFFFFFFFFFFFFFFFFFFFFFFFFFFFFFFFFFFFFFF  
FFFFFFFFFFFFFFFFFFFFFFFFFFFFFFFFFFFFFFFFFFFFFFFFFFFFFFFFFFFFFFFF  
FFF

@A00721:190:HGJW7DSXY:4:1545:11433:20666\_2:N:0:TCTGCAAG+GCTGCACT  
GTGGGCTTTCCGTAAAGGAAGATCTGTTATCGACGGTTTATCGTTTACGAAGTATCACTCCACCGGTG  
AATGGTTTAAAGAATACTATAAATAGAATAGCTATTACTACTAATGGCG

+

FFF:FFFFFFFF:FF:FFFFFFFFF:FFFFFFFFFFFFFFFFFFFFFFFFFFFFFFFFFFFFFFFF  
F:FFFFFFFFFFFFFFFFFFFFFFFFFFFFFFFFFFFFFFFFFFFFFFFFFFFFFFFF

@A00721:190:HGJW7DSXY:4:1645:17490:9048\_2:N:0:TCTGCAAG+GCTGCACT  
TAGTGACATCTGGTCAATTTCTTTTTAGGTGGTCTTTATTCTATTATTGATTTTTATGAGATTGATA  
CGTTAACAGAAGATGATGTTAGAGTAGAATTCCTGAAGAGTCCTTCCG

+

FFFFFFFFFFFFFFFFF,FFFFFFFFF:FFFFFFFFFFFFFFFFFFFFFFFFF,FFFFFFFFFFFFFFFFF  
FFFFFFFFF:FFFF,FFFFFF:FF::FFFF:FFFFFFFFFFFFFFFFF

@A00721:190:HGJW7DSXY:4:1170:24930:4993\_1:N:0:TCTGCAAG+GCTGCACT  
TTAAATCTAGGATTATGTCTGTGTTGAAAGACTTTCTACCGATAAGGGTCACTAGTCTTACACAATTA  
AGAAATAATCCTACATTGACTGATTATCTAAAGATTGAAGGAAAATTTTATCCTCGTTTAACTTACTT  
AGA

+

FFFFFFFFFFFFFFFFFFFFFFFFFFFFFFFFFFFFFFFF,FFFFFFFFFFFFFFFFFFFFFFFF  
FFFFFFFFFFFFF:FFFFFFFFF:FF:FFFFFFFFFFFFFFFFFFFFFFFFFFFFFFFF  
FFF

@A00721:190:HGJW7DSXY:4:1146:26476:17409\_1:N:0:TCTGCAAG+GCTGCACT  
ATACAAATGATAACTTCTAATTTACGTTTGCTACTCAGAGCTGGTCCTCTCAGCAAAGGGATGCATGG  
TGTTATCTCCTCAGGAGTCCCGCATTTGATAATAATGACGAGACTTTCGTCATAATCGCTGCATATT  
ACG

+

FFFFFFFFFFFFFFFFFFFFFFFFFFFFFFFFFFFFFFFF:FFFFFF:FFFFFFFFFFFFF  
FFFFFFFFFFFFFFFFFFFFFFFFFFFFFFFFFFFFFFFF:FFFFFFFFFFFFFFFFFFFFF:FFFFFFF  
FFF

@A00721:190:HGJW7DSXY:4:1310:13512:1877\_2:N:0:TCTGCAAG+GCTGCACT  
CCAGCGCATCTCGTGTGAGCCTCGACCCGATTATATGGTATTAACCTATAAAGGTGAGGAGACCATT  
TTCTTGCTGAAATTTATAGAAGATTATTTTGACAGAATCAATAAGAAT

+

FFFFFFFFFFFFFFFFFFFFFFFFFFFFFFFFFFFFFFFF:FFFFFFFFFFFFFFFFFFFFF  
FFFFFFFFFFFFFFFFFFFFFFFFFFFFFFFF:FFFFFFFFFFFFFFFFFFFFF

@A00721:190:HGJW7DSXY:4:1178:13910:35509\_1:N:0:TCTGCAAG+GCTGCACT  
TATGCTGATCTAAAATTTGATCTAGATGGATCCACTCCTCGAGTTATCATGATGTTAGTATGTTATA  
TACTGATTTACAACGATATAGGAGTAATCTACGAGAAGATTCTAGAATTCTTAATTATAATATTCAAC  
CTC



[illegible]

FFFFFFFF:FFFFFFFFFFFFFFFFFFFFFFFFFFFFFFFFFFFFFFFFFFFFFFFFFFFFFFFFFFFFFFFF  
FFF

@A00721:190:HGJW7DSXY:4:2170:19840:19069\_2:N:0:TCTGCAAG+GCTGCACT  
AGTCATAACTTTTGTACCAAATTCTTGGCTTTCAACGAAGTCTCTGATTTTATTAATCATTACTTTA  
ACGATCTCTCGGTCATTTACTCTGTACTTGATCTACGTCGTTTAACTG

+  
FFFFFFFFFFFFFFFFFFFFFFFFFFFFFFFFFFFFFFFFFFFFFFFFFFFFFFFFFFFFFFFFFFFFFFFF  
FFFF:FFFFFFFFFFFFFFFFFFFFFFFFFFFFFFFFFFFFFFFFFFFFFFFFFFFFFFFFFFFFFFFF

@A00721:190:HGJW7DSXY:4:1406:22941:26506\_2:N:0:TCTGCAAG+GCTGCACT  
CTTAGAATGACTCTATCTTTTCAGACACTTCTTATATTATTACAATAGTTAATATCATATTAGTAAT  
ACTCACTATCGTTTTCTGCTTTTTCTTAGCTAATAGATTAATAAAGGA

+  
FFFFFFFFFFFFFFFFFFFFFFFFFFFFFFFFFFFFFFFFFFFFFFFFFFFFFFFFFFFFFFFFFFFFFFFF:FFFF  
FFFFFFFFFFFFFFFFFFFFFFFFFFFFFFFFFFFFFFFFFFFFFFFFFFFFFFFFFFFFFFFFFFFFFFFF

@A00721:190:HGJW7DSXY:4:2274:31430:32064\_2:N:0:TCTGCAAG+GCTGCACT  
ACCAACTCTTCGTTACGAGACCTGATGGTAGAATAGATTTAGTCTCTACACCCATCTCAACGAGGATA  
AAGCGAGTTTTCCGTCCTGAACGTAATACACGAAGAGATCATCCGCA

+  
FFFFFFFFFFFFFFFFFFFFFFFFFFFFFFFFFFFFFFFFFFFFFFFFFFFFFFFFFFFFFFFFFFFFFFFF  
FFFFFFFFFFFFFFFFFFFFFFFFFFFFFFFFFFFFFFFFFFFFFFFFFFFFFFFFFFFFFFFFFFFFFFFF

@A00721:190:HGJW7DSXY:4:2136:11993:25989\_2:N:0:TCTGCAAG+GCTGCACT  
AAAGTCCCTTCTAACTTTAGATTATGAATCCTGCCTTTACTCATTTTATAGCAGTTATTTATGTTGTA  
CTTTTATAATTTATAACCTTCTTATACTTTTGGGTATGTTTTGTGAA

+  
FFFFFFFFFFFFFFFFFFFFFFFFFFFFFFFFFFFFFFFFFFFFFFFFFFFFFFFFFFFFFFFFFFFFFFFF:FFFF::F,FFFFFFFFFFFF,FFFFFFFF:FF  
FFFFFFFFFFFF,FFFFFFFFFF,FF:FFF:FFFF:,FFFFFFFFFFFFFFFF

@A00721:190:HGJW7DSXY:4:2269:4942:16971\_2:N:0:TCTGCAAG+GCTGCACT  
GAAGACATTATCTCTTATGTACTTATTGTAACGATCATTCTTTCGAGTTTTGTCACTTCTTATTCTTTT  
ATTCCTTTAACTGTGTATGAGGAGGATTTATAATGCTTTTCGATAGTG

+  
FFFFFFFFFFFFFFFFFFFFFFFFFFFFFFFFFFFFFFFFFFFFFFFFFFFFFFFFFFFFFFFFFFFFFFFF:FFFFFFFFFFFF:FFFFFFF  
FFF:F:FFFFFFFFFFFFFFFFFFFFFFFFFFFFFFFFFFFFFFFFFFFFFFFFFFFFFFFFFFFFFFFF

@A00721:190:HGJW7DSXY:4:2623:28592:1125\_2:N:0:TCTGCAAG+GCTGCACT  
ATTACTGTTTCAAATCATCTTTACTCACAGACTCCGAAAATGGTTTCAAATGAGGTCAAAGCTCTATT  
TATTAAACGAATATTATCCGATTCTTCGAGGGTATCACTACCACTGA

+  
FFFFFFFFFFFFFFFFFFFFFFFFFFFFFFFFFFFFFFFFFFFFFFFFFFFFFFFFFFFFFFFFFFFFFFFF:FFFFFFFFFFFF:FFFFFFF  
FFFFFFFFFFFFFFFFFFFFFFFFFFFFFFFFFFFFFFFFFFFFFFFFFFFFFFFFFFFFFFFFFFFFFFFF

@A00721:190:HGJW7DSXY:4:1427:26178:14450\_2:N:0:TCTGCAAG+GCTGCACT  
CAAGGAACCTTCAATTCCTTCGATGTTTATATTTTCTATAAGGGAAAATAGCAATAATCAAATTTCTGA  
CAAATTTTAGAATTTATTTTCTCAGAACTCTCTCCGATCACCTTGGTGTG

+  
FFFFFFFFFFFFFFFFFFFFFFFFFFFFFFFFFFFFFFFFFFFFFFFFFFFFFFFFFFFFFFFFFFFFFFFF  
FFFF:FFFFFFF:FFFFFFFFFFFFFFFFFFFFFFFFFFFFFFFFFFFFFFFFFFFFFFFFFFFFFFFF

@A00721:190:HGJW7DSXY:4:2415:14931:24909\_1:N:0:TCTGCAAG+GCTGCACT  
TCTTTTCAATAAGATGTATGATGATAATCTACTATTTTTAAATAGTGATATTCAGCGTATACTTGAAT  
ACTTTATCAAAGATTTGGCTTGGTCTATTTACCGCAAAAAGTTGGAAGAGGTCTATGATATTTATTTT  
ACT

+  
::FFF:FFFFFF,FFFFFF,FF:FFFFFFFFFFFFFFFFFFFFFFFFFFFFFFFF, :FFFFFFFFFFFF:FFF:FFFFFFF  
FFFFFFFFFFFF,FFFFF:FFFFFFF:FFFFFFFFF,FFFFFFFFF:FFFF:FFFFFFFFFFFFFFFFFFFF  
FFF

@A00721:190:HGJW7DSXY:4:2457:23809:18082\_2:N:0:TCTGCAAG+GCTGCACT  
CACCGATTATAACTTGACTGTTGATAATATTACAATAGCTCTTCTCAGAAGATTAGAGAAGTAACCG

GTGAACACGTCGGTAGCATTGATTTACTTTTACCGTTAGAACTGAAAA

+

FFFFFFFFFFFFFFFFFFFFFFFFFFFFFFFFFFFFFFFFFFFFFFFFFFFFFFFFFFFFFFFFFFFFFFFF  
FFFFFFFFFFFFFFFFFFFFFFFFFFFFFFFFFFFFFFFFFFFFFFFFFFFFFFFFFFFFFFFF

@A00721:190:HGJW7DSXY:4:1511:24894:20400\_1:N:0:TCTGCAAG+GCTGCACT  
ACCTATAAGTTACAAACGATTCTTCGACTATATTAAAGAAATAAAAATACTTCAAGTACCTGAACTTT  
ACATTTTAAATGGTATGGTATAATGTGTCTTACAAATAGAACCTTCACTCTCGGTAATGAGAGTGTAT  
TCC

+

FFFFFFFFFFF:FFF:FFFFFFFFFFFFFFFFFFFFFFFFFFFFFFFFFFFFFFFFFFFFFFFFFFFFFFFF  
FFFFFFFFFFFFFFFFFFFFFFFFFFFFFFFFFFFFFFFFFFFFFFFFFFFFFFFFFFFFFFFFFFFFFFFF  
FFF

@A00721:190:HGJW7DSXY:4:1406:18747:3302\_1:N:0:TCTGCAAG+GCTGCACT  
GGCATTACTAGGATTTATCACACTCCTAAATTTGATAGCAATTTATGTTTTAAATGCTAGGAAAATTT  
TAGAAAAACTCCATTGTATAGTTCAAGGAGTACTTAATTCAATAGCTTTAGTATTATTTACTATCGCC  
TTT

+

FFFFFFFFFFFFFFFFFFF:FFFFFFFFFFFFFFFFFFF,FFFFFFFFFFFFFFFFFFFFFFFFFFFFFFFF  
FFFFFFFFFFFFFFFFFFF:FFFFFFFFFFFFFFFFFFFFFFFFFFFFFFFFFFFFFFFFFFFFFFFFFFFF  
FFF

@A00721:190:HGJW7DSXY:4:1352:28782:4523\_2:N:0:TCTGCAAG+GCTGCACT  
AGTTAATTGCTTACACAAAAGTGACGCGCGAAGGAATCTTAATTGATTGAAGCTAGGCGTTGGGGAGA  
ATGAACTGCCGCTTCCCGGAAGAAACGATCTATTTACAGAGTATTTAG

+

FFFFFFFFFFFFFFFFFFFFFFFFFFFFFFFFFFFFFFFFFFFFFFFFFFFFFFFFFFFFFFFFFFFFFFFF  
FFFFFFFFFFFFFFFFFFFFFFFFFFFFFFFFFFF,FFFFFFFF:FFFFFFFFFFFFFFFFFFF,FFFF

@A00721:190:HGJW7DSXY:4:1103:16712:20885\_2:N:0:TCTGCAAG+GCTGCACT  
CCGCAAAATCAATTGAAGAAAACCACTCCCTTCAATTCAATAACATAACATACCATACACTCCCCAAAC  
ATAACATACCATAACCTACCATGACCAATCATCGCTCCAACCTGGCACG

+

FFFFFFFFFFFFFFFFFFFFFFFFFFF:,FF:FF,FFFFFFFFFFF,FFFFFFFFFFFFFFFFFFFFFFFF  
FFFFFFFFFFF,FFFFF:FFFFFFFFFFFFF:FF:FF:FFFFFFFFFFF,FFFFFFFFFFF

@A00721:190:HGJW7DSXY:4:1125:12337:27085\_1:N:0:TCTGCAAG+GCTGCACT  
CTACTACCGCCGGTCGGCAGATCGGCACCACTGGTCTCTACGTTACAGGGACCCGCTGTGCAGAATAAC  
CTTCCCAAATCTAGATCTGCACAGAAGAAGGCTGAAGGTCGTTACCGGACGACCACTCAAAGGAAACG  
GGC

+

F:FFFFFFFFFFFFFFFFFFFFF:FFFFFFFFFFFFFFFFFFFFFFFFFFFFFFFFFFFFFFFFFFFFF  
FFFFFFFFF:FFFFFFFFFFFFFFFFFFFFFFFFFFFFFFFFFFFFFFFFFFFFFFFFFFFFFFFFFFFF  
FFF

@A00721:190:HGJW7DSXY:4:1239:2175:22420\_1:N:0:TCTGCAAG+GCTGCACT  
GAGGTCGCTCGTAACATTGACGGCAGTCCCGTCATCTCTGTGGGAAGTACCTCAGTCAAA  
AGTCACATTACCACTCCCATACCAATCAATGATGTGACTATACAGTTTCGGCCATTTCAAGAGTGGTC  
AAT

+

FFFFFFFFFFFFFFFFFFFFFFFFFFFFF:FFFFFFFFFFFFFFFFFFFFFFFFFFFFFFFFFFFFFFFF  
FFFFFFFFF:FFFFFFFFFFFFFFFFFFFFFFFFFFFFFFFFFFFFFFFFFFFFFFFFFFFFFFFFFFFF  
FFF

@A00721:190:HGJW7DSXY:4:1119:29830:9533\_1:N:0:TCTGCAAG+GCTGCACT  
GTACTGAAGCCTTCCCCTCCGCTGGCACGAAGAACTCCCAAGCCAATCAATAGTTCTTCTGACCAG  
AATGAAAAGGGGTTTACCAGGGTAGTCTCTAAGTCTACCAGGAAGAGGGGAAATGTCCCCAAAAC  
TGA  
GAA

+

FFFFFFFFFFFFF:FFFFFFFFF:FFFF:FFFFFFFFFFFFFFFFFFFFFFFFFFFFFFFFFFFFFFFF  
FFFFFFFFFFF



TTATTTGAAGCAGGGGTTACCACTTCCTAAGGTGGATGAGGGAGGTTG  
+  
FFF,FFFF:FFFF:FF,,,:FFF:FF:FFFFFFF::FFFF:FF:FFF:,FF,F::,,,FFFF::FFFF  
FFFF,FFF::F::FFFFFFF:FF:FFFFFF:FF,FF:F,,FFFFFFF  
@A00721:190:HGJW7DSXY:4:1378:16450:36808\_1:N:0:TCTGCAAG+GCTGCACT  
TTTTGAGAAGGGGTCATAGAGCCAGCAAGAGAAGCTTATATGCTGGTTTAAGTGATGATTATCACTCC  
TTGAGAAGACAAGCCACATTAAGATATAATTTAGGTCAACTTGGGGTTTTCGAATGTCATTAGTGCCTT  
ACG  
+  
FFFFFFFFFFFF:F:FF:FF:FFFFFFFFFFFFFFFFFFFFFFFFFFFFFFFFFFFFFFFFFFFF  
FFFFFFFFFFFFFFFFFFFFFFFF:FFFFFFFFFFFFFFFFFFFFFFFFFFFFFFFFFFFFFFFF:FFFFFFFF  
FFF  
@A00721:190:HGJW7DSXY:4:1253:31810:17347\_2:N:0:TCTGCAAG+GCTGCACT  
TCCTTTTGAGTATCGACAGATCTTTCGATCTTGAGGACGTACATTTAACGTGGCAGAATTCGGTAACT  
TACCATATTGTTCTTCCGGAAGTTGTGGGATTTAACTTTGACTCAA  
+  
FFFFFFFFFFFFFFFFFFFF,FFFFFFFFFFFFFFFFFFFFFFFFFFFFFFFFFFFFFFFFFFFF  
FFFF:FFFFFFFFFFFFFFFF::FFFFFFFFFFFFFFFFFFFFFFFFFFFF  
@A00721:190:HGJW7DSXY:4:2372:17101:6558\_2:N:0:TCTGCAAG+GCTGCACT  
ATTGGTATGGACTACTCGACTTTTGATCTGGAGTTGTCTAGGGTCATGGCAGATACTACCGATAAGGT  
GAAAAATATGCAGGTCAAAGATTCTGTAGCTCTGAGGGCGGTTGAGGA  
+  
FFFFFFFFFFFFFFFFFFFFFFFFFFFFFFFFFFFFFFFFFFFFFFFFFFFFFFFFFFFFFFFFFFFF  
FFFFFFFFFFFFFFFFFFFFFFFFFFFFFFFFFFFFFFFFFFFFFFFFFFFFFFFFFFFF  
@A00721:190:HGJW7DSXY:4:1261:7798:32033\_1:N:0:TCTGCAAG+GCTGCACT  
TTCTAAGAGTCTTTATGATTCAAAACCTATCGTTGTCTGACCTTACAAGGTTGAGGAGACTTTACAGC  
GGCTTATTGTCGCGCAGTTTCCAGAATTGCGGTTGAAGTTCACCCATTCTATCTTGAATGCTCACGCC  
GTC  
+  
FFFFFFFFFFFFFFFFFFFFFFFFFFFFFFFFFFFFFFFFFFFFFFFFFFFFFFFFFFFFFFFFFFFF  
FFFFFFFFFFFFFFFFFFFFFFFFFFFFFFFFFFFFFFFFFFFFFFFFFFFFFFFFFFFFFFFFFFFF  
FFF  
@A00721:190:HGJW7DSXY:4:1127:26919:1329\_2:N:0:TCTGCAAG+GCTGCACT  
TTATAATCACTTGTTAAAGTACAGATTTAGTGATTTAGATATTATTGATATTGGAGGCGATATTCGTT  
TTCATATCCAAAACCTCCTTGAATGGAGTACATATTTGCAACCCTATTC  
+  
FFFFFFFFFFFFFFFFFFFFFFFFFFFFFFFFFFFF,FFFFFFFFFFFFFFFFFFFF:FFFF:FFFF:FFFFFFFF  
FFFFFFFFFFFFFFFFFFFFFFFFFFFFFFFFFFFFFFFFFFFF:FFFFFFFFFFFF,  
@A00721:190:HGJW7DSXY:4:1106:21423:14043\_1:N:0:TCTGCAAG+GCTGCACT  
GATGCATCGAGGTATACGTCTAGGAACATTGATTGGGAACGTACCTACTCACGAGACGTCATGAAAGC  
TATCGGAGGGAAGCAAAATGTTTCGTTCTGTTACAAGAACGCTTTGGATTGTGACCATAAAGCCTCAG  
TTG  
+  
FFFFFFFFFFFFFFFFFFFFFFFF,FFFFFFFFFFFFFFFFFFFFFFFFFFFFFFFFFFFFFFFFFFFF  
FFFFFFFFFFFFFFFFFFFFFFFFFFFFFFFFFFFFFFFFFFFFFFFFFFFFFFFFFFFFFFFFFFFF  
FFF  
@A00721:190:HGJW7DSXY:4:2419:30490:33536\_2:N:0:TCTGCAAG+GCTGCACT  
ACGATATCTCTCTTGATGATGTAGCCACTATAATGCTTAAGAGAGAGATTGATGTATGTCATTTCTGTC  
TTAGTTTGTCCCGCGGAATTATTGGACACGATGAAAAATGACATACCC  
+  
FFFFFFFFFFFFFFFFFFFFFFFFFFFFFFFFFFFFFFFFFFFFFFFFFFFFFFFFFFFFFFFFFFFF  
FFFFFFFFFFFFFFFFFFFF:F:F,FFFFFFFFFFFFFFFFFFFFFFFFFFFF  
@A00721:190:HGJW7DSXY:4:2214:12915:29966\_1:N:0:TCTGCAAG+GCTGCACT  
TCGTTATCCGTCATGGAGATGATGGCGCATCACTTGATTACTATATGCCCGAAGGATTGGGTTATTCT

CACAACAAAGATAAGATTTTATCTTTCTTCAAACACCCTGTTTTCTTAAGGGCGGACAATTGTTCCA  
TTG

+

F:FFFFFFFF:FFFFFFFFFFFFFFFFFFFFFFFFFFFFFFFFFFFFFFFFFFFFFFFFFFFFFFFFFFFFFFFF  
FFFFFFFF:FFFFFFFFFFFFFFFFFFFFFFFFFFFFFFFFFFFFFFFFFFFFFFFFFFFFFFFFFFFFFFFF,FFFF  
FFF

@A00721:190:HGJW7DSXY:4:2631:21242:31861\_2:N:0:TCTGCAAG+GCTGCACT  
ATTGAGCATTAAATGAGTTCCGAATAACTCGTAATAAATCTTTCTCTAGTGGACAATTCAGAATACCTA  
TTTCCGTACCAAGAGCCACTGCCAATCTCATCGCTATACGCATACCTG

+

FFFFFFFF:FFF:FFFFFFFFFFFFFFFFFFFFFFFFFFFFFFFFFFFFFFFFFFFFFFFFFFFFFFFF:FF:FFFFFFFFFFFFFFFF  
FFF:FFFFFFFFFFFFFFFFFFFFFFFFFFFFFFFFFFFFFFFFFFFFFFFFFFFFFFFFFFFFFFFF,F:FF:,FFFFFFFFFFFF:FF

@A00721:190:HGJW7DSXY:4:1275:15221:9345\_2:N:0:TCTGCAAG+GCTGCACT  
AGGTTCTGTTCTCAATAAAAATTTTTCTCAAGAGATTATGGTTGATAAAGTTTTCTTCATAAGGGCTA  
TTCAGTACGTCATGGGGATCACTTCTTCGGTCAATGACAAAACCTTCG

+

FFFFFFFFFFFFFFFFFFFFFFFFFFFFFFFFFFFFFFFFFFFFFFFFFFFFFFFFFFFFFFFF,F:FFFFFFFFFFFFFFFFFFFFFFFF  
FFFFFFFFFFFFFFFFFFFFFFFFFFFFFFFFFFFFFFFFFFFFFFFFFFFFFFFFFFFFFFFFFFFFFFFF

@A00721:190:HGJW7DSXY:4:1119:20961:23703\_2:N:0:TCTGCAAG+GCTGCACT  
CTTCGTAACAACAGTGCAGGATTGTCATCTCGGGGAAAGTGATTCACCAAGATGTTTCATATAGATAC  
GAGATACCTAGAGAAGGTCGCAGCGATCTTACTCGTTATCGGAGCTAA

+

FFFFFFFFFFFFFFFFFFFFFFFFFFFFFFFFFFFFFFFFFFFFFFFFFFFFFFFFFFFFFFFFFFFFFFFFFFFF  
FFFFFF:FFFFFFFFFFFFFFFFFFFFFFFFFFFFFFFFFFFFFFFFFFFFFFFFFFFFFFFFFFFFFFFF

@A00721:190:HGJW7DSXY:4:2318:7111:7420\_2:N:0:TCTGCAAG+GCTGCACT  
TACACGTTATGCTCGCAAACCTAACGTTAGTACCGGAGGTGATCTCTCTGCTTCTGCGTTACTGAGAG  
AAAAGATTACAGGACGCCTACGGTGACTTTATGGACAAGATGCAAGTTC

+

FFFFFFFFFFFFFFFFFFFFFFFFFFFFFFFFFFFFFFFFFFFFFFFFFFFFFFFFFFFFFFFFFFFFFFFFFFFF  
FFFFFFFFFFFFFFFFFFFFFFFFFFFFFFFFFFFFFFFFFFFFFFFFFFFFFFFFFFFFFFFFFFFFFFFF

@A00721:190:HGJW7DSXY:4:1113:21151:7654\_2:N:0:TCTGCAAG+GCTGCACT  
TTTAGGTTTAGTAGGTGATCTTGACGTCGATTCTTTGTATAGGGAGTGTGAGAAGACAACGAATCTTG  
AACTACGGTCCTTATCAAAGAAAATGGTGAACCGGTCTCTAAATCTT

+

FFFFFFFFFFFFFFFFFFFFFFFFFFFFFFFFFFFFFFFFFFFFFFFFFFFFFFFFFFFFFFFFFFFFFFFFFFFF  
FFFFFFFFFFFFFFFFFFFFFFFFFFFFFFFFFFFFFFFFFFFFFFFFFFFFFFFFFFFFFFFFFFFFFFFF

@A00721:190:HGJW7DSXY:4:1240:28556:29684\_2:N:0:TCTGCAAG+GCTGCACT  
GAAGATTGAAGAACACGTCAAGAAGTCGCTCGGCGTTGTTCTTGAAAACCAAGTTAAGAAGGAGGCTG  
ATCATGGAGTCTTTGTACCTTCTGTCAAACCTTCGAGGTTTCAGCTACGA

+

FFFFFFFFFFFFFFFFFFFFFFFFFFFFFFFFFFFFFFFFFFFFFFFFFFFFFFFFFFFFFFFFFFFFFFFFFFFF  
FFFFFFFFFFFFFFFFFFFFFFFFFFFFFFFFFFFFFFFFFFFFFFFFFFFFFFFFFFFFFFFFFFFFFFFF

@A00721:190:HGJW7DSXY:4:1265:6813:11099\_1:N:0:TCTGCAAG+GCTGCACT  
TGGATTGAAGGCTGGCTCTAAGGGAGACTCCTTCTTTTTGAATGTTGTAAAGAATTGGGTTGAGAAGT  
GTGCTTTACAAGGAGTTAGACTCTTCTTCAAGTTTTTAGATCTTCTTGATAATCTTAAAGAAAAATTT  
TCG

+

FFFFFFFFFFFFF:FFFFFFFFFFFFFFFFFFFFFFFFFFFFFFFFFFFFFFFFFFFFFFFFFFFFFFFFFFFF  
FFFFFFFFFFFFFFFFFFFFFFFFFFFFFFFFFFFFFFFFFFFFFFFFFFFFFFFFFFFFFFFFFFFFFFFFFFFF  
FFF

@A00721:190:HGJW7DSXY:4:1119:1750:24314\_1:N:0:TCTGCAAG+GCTGCACT  
GTCTGTACTTACATTCTTTACGCCAGATTCTTCATGGGGCGACGCTGTTTCTCTTGGTATTTCTGAAA  
TAGTTTATCAGAGCGTCATTTTCTTTGGGATCTTCTCTGGTAAGGGAATTATTAATCATTCTTC  
TCA

[illegible]

@A00721:190:HGJW7DSXY:4:2664:18484:27336\_1:N:0:TCTGCAAG+GCTGCACT  
GCTTTATCATAAAGCATTACCACCAATTTAGCACTTTTTGAATATGACAGAAGCTCGCCATATCAGA  
TTAGAGACATGCCAGTTAGAGTTCTTCTAACCAGGACTGATGGTGAGATTCTTTTACCTTTTGGAGGT  
CCA

+

FFF:FFF,,FFFFFF:FFF:FF,F:,F:,F::,FFFFFF,FFFFFF,, ,FFFFFF:FFFFFFF  
FFFFFFF::FFF:FFFFFF::FF:FF,FFF:FF:F::FFFFFF:FFF:FFFFFFFFFFFFFFF::FF  
F,F

@A00721:190:HGJW7DSXY:4:2209:5376:20697\_2:N:0:TCTGCAAG+GCTGCACT  
CCTAGTGTCTTTTCTAGAGTCCAAGGACGTTTCCGTGCGAGGATGACAGGTGGGAGACCGCTCAATAA  
CACTCTATTGAATCCCTTTTCCACGATGAAAGCTCTTTATGAGGTGCT

+

FFFFFFFFF:FFFFFFFFFFFFFFFFFFFFFFFFFFFFFFFFFFFFFFFFFFFFFFFFFFFFFFFFF  
FFFFFFFFFFFFFFFFFFFFFFFFFFFFFFFFFFFFFFFFFFFFFFFFFFFFFFFFF

@A00721:190:HGJW7DSXY:4:2633:19587:15718\_1:N:0:TCTGCAAG+GCTGCACT  
TCTTTGGTGATATCGCCTCTGTCCTTTCTCCTTAATCGTGAGGTTACGAGAGTTTCGTACTTGGGT  
TATCGGTTGTATTTTGATAAATTTGTTGGAATCGATAATGATACTGACGAAGTTCTATTACCACCT  
TGT

+

FFFFFFFFFFFFFFF:FFFFFFFFF::FFFFFFFF:FFFFFFFFFFFFFFFFFFFFFFFFFFFFFFF  
FFFFFFFFFFFFFFFFFFFFFFFFFFFFFFFFFFFFFFFFFFFFFFFFFFFFFFFFF  
FFF

@A00721:190:HGJW7DSXY:4:1156:17264:36839\_2:N:0:TCTGCAAG+GCTGCACT  
TGATGCTTTCTTAGAGGCTCGTCTAGCCGCTGAGATTCTGCTTACCTATTTACAATCTGTAGAGAGAG  
AGGTTAATCAGAATTTGAGTGATAACGATTTAGTACTGGGAAATGGTG

+

FFFFFFFFFFFFFFFFFFFFFFFFFFFFFFFFFFFFFFFFFFFFFFFFFFFFFFFFF:FFFFFFFFFFFFFFF  
FFFFFFFFFFFFFFF,FFFFFFFFFFFFFFFFFFFFFFFFF:FFFFFFFFFFFFFFF

@A00721:190:HGJW7DSXY:4:1610:3323:14011\_1:N:0:TCTGCAAG+GCTGCACT  
TTTTCTTTCCCTCCCTTTTTCGATTGGATTGACGGGGTCTTCGTCTCACGACTAATTTGATAAGGT  
TTTTCTTTTATGGGACTCTTGTTTGTACTTATGAAGGAGGTATTACTTCGGAAGTTCTTAATGTAGGT  
CTC

+

FFFFFFFFFFFFFFFFFFFFFFFFFFFFFFFFFFFFFFFFFFFFFFFFFFFFFFFFF  
FFFFFFFFFFFFFFFFFFFFFFFFFFFFFFFFF:FFF:FFFFFFFFF:FFFFFFFFFFFFFFFFFFFFF  
FFF

@A00721:190:HGJW7DSXY:4:1473:31684:4570\_1:N:0:TCTGCAAG+GCTGCACT  
GGTTTATGTTTCGGTTTCAGCTGGATGGATCTTTTGATGGTATGTTTCACATTGCGTGATCACTTCCC  
GTGGACTTGGGAAGAGATTAAACATAAAATCCAGCGATTCTATTATGTCGCTAAAGCCTGTCCAGTTG  
TCG

+

FFFFFFFFFFFFFFFFFFFFFFFFFFFFFFFFFFFFFFFFFFFFFFFFFFFFFFFFF:FFFFFFFFFFFFFFF,FFFF  
FFFFFFFFFFFFFFFFFFFFFFFFF:FFFFFFFFFFFFFFF:FFFFFFFFFFFFFFFFFFFFFFFFF  
FFF

@A00721:190:HGJW7DSXY:4:1130:19750:18787\_2:N:0:TCTGCAAG+GCTGCACT  
GGCTGTGGGATTAACCTCCCTCGTGAAACTTACGACGATGTTCTCGCTCGCATTTCACAAGGATTAC  
TAAGTCTGAGATCTGCCACTTCTAATTTTAGGAAACGTCGCGAAAAGA

+

FFF:FFFFFFFFFFFFFFFFFFFFFFFFFFFFFFFFFFFFFFFFFFFFFFFFFFFFF  
FFFFFFFFFFFFFFFFFFFFFFFFFFFFFFFFF:FFFFFFFFF:FFFF

@A00721:190:HGJW7DSXY:4:1117:16016:11350\_2:N:0:TCTGCAAG+GCTGCACT  
GTCTTGGTCGAAAAATATCGCCGGGAACCTTCTAATAGAGGATCCTGATGACATTATTTCAACGATAC  
CGATCTCAGTTCTACCACAGAAACCGTCTCAGGAACGTCTCCACTGA

+



FFFFFFFFFFFFFFFFFFFFFFFFFFFFFFFFFFFFFFFFFFFFFFFFFFFFFFFFFFFFF  
FFFFFFFFFFFFFFFFFFFFFFFFFFFFFFFFFFFFFFFFFFFFFFFFFFFFFFFFFFFFFFF  
@A00721:190:HGJW7DSXY:4:1130:9037:28667\_2:N:0:TCTGCAAG+GCTGCACT  
AAAGACGACCTTCTTGTTGGGACTGAGACCTCTGAATTTTCAGGGTGCCTGATGAGGACGTGAAAG  
GGATAATTTCAACTCTGAGACTTCTAAGAGTGTTCAAAAGACCAGAA  
+  
FFFFFFFFFFFFFFFFFFFFFFFFFFFFFFFFFFFFFFFFFFFFFFFFFFFFFFFFFFFFF  
FFFFFFFFFFFFFFFFFFFFFFFFFFFFFFFFFFFFFFFFFFFFFFFFFFFFFFFFFFFFFFF  
@A00721:190:HGJW7DSXY:4:1121:26323:32299\_1:N:0:TCTGCAAG+GCTGCACT  
TAAAGGTAGGAAGGGGAGAAAAACAAGAACAAGCGAGCGGTTGAAGAGAAAACCTGATATGGTTGCGGCTG  
ATCGTACCCCAATTCTGCTAGAAAGATCACTCTCGGCGATACCACTGATCTCAGAGTTACGTAGT  
GGT  
+  
FFFFFFFFFFFFFFFFFFFFFFFFFFFFFFFFFFFFFFFFFFFFFFFFFFFFFFFFFFFFF  
FFFFFFFFFFFFFFFFFFFFFFFFFFFFFFFFFFFFFFFFFFFFFFFFFFFFFFFFFFFFFFF  
FFF  
@A00721:190:HGJW7DSXY:4:1310:26793:23563\_1:N:0:TCTGCAAG+GCTGCACT  
TTTTATCAAAGAGAAAGTTTCTGCTAGTCGCGACGATAGTATTTATCGGAGTGATATTAACAAGTTAA  
ACTTCGAACTGACCACTTACAAGAGTGTTGAAGTACCGCAACATGGATCAGTTTTCCAAAAAGCTATT  
AAT  
+  
FFFFFFFFFFFFFFFFFFFFFFFFFFFFFFFFFFFFFFFFFFFFFFFFFFFFFFFFFFFFF  
FFFFFFFFFFFFFFFFFFFFFFFFFFFFFFFFFFFFFFFFFFFFFFFFFFFFFFFFFFFFFFF  
FFF  
@A00721:190:HGJW7DSXY:4:1224:18593:29966\_2:N:0:TCTGCAAG+GCTGCACT  
AAACTGAATCCACTCTCTTGGGATATAAATGAGTACATCTATAATAGAGTTTGGAACTGTGTAATGT  
CCTACGTACTGTTCAAGGTGTTTGGGCTTCTCTAAAGAACAGCAACTT  
+  
FFFFFFF,FFFFFFFFF:FFFFFFFFFFFFFFFFFFFFFFFFFFFFFFFFFFFFFFFFFFFFF  
FFFFFFFFFFFFFFFFFFFFFFFFF:FFFFFFFFFFFFFFFFFFFFFFFFFFFFFFFFFFFFF  
@A00721:190:HGJW7DSXY:4:1126:25274:35775\_2:N:0:TCTGCAAG+GCTGCACT  
GGCTGATGACTTAAATTTGCATTCTGCTTCGACGGTAATTCATAAGACCTTCTTGGGGAGTAAAG  
AGGGTTTGAAAATTACGGAACCTTCTCTGTTCTTCATGAAGATCTTC  
+  
FFFFFFFFFFFFFFFFFFFFFFFFFFFFFFFFFFFFFFFFFFFFFFFFFFFFF:FFFFFFFFFFFFFFFFFFFFFFFFF  
FFFFFFFFFFFFFFFFFFFFFFFFFFFFFFFFFFFFFFFFFFFFFFFFFFFFF::F:FF  
@A00721:190:HGJW7DSXY:4:1236:21748:32268\_2:N:0:TCTGCAAG+GCTGCACT  
GTTATTCTTGCGAAGGTTCAAGTCGATTGATTTTGTTGACTACGATCTCTTGTGAATAAGAAGTTCT  
TCGCAGTTGAATCTCCACCAGGTGGAGGGAAGACCACTGAAC TTATAG  
+  
FFFFFFFFFFFFFFFFFFFFFFFFFFFFFFFFFFFFFFFFFFFFFFFFFFFFF:FFFFFFFFFFFFFFFFFFFFFFFFF  
FFFFFFFFFFFFFFFFFFFFFFFFFFFFFFFFFFFFFFFFFFFFFFFFFFFFF:,FFFF:FFFFFFFFFFFFF  
@A00721:190:HGJW7DSXY:4:1237:18276:1078\_1:N:0:TCTGCAAG+GCTGCACT  
TTCGAAAAGTCTTGAAGTACGTATTGTCACTGCTAATCGTAATTCTCGAGAAGAGATAGTACTAA  
AGTTTTGGCACTTCTAGTTCATCGCGGTATTTGTGAAATTAAGACAGACGTGAAAGTTATGATGAGTG  
ATC  
+  
FFFFFFF,FFFFFFFFF,,FF:FFFF::FF,F,FFFFFFFFF:, :F:FFFF,FFFFFFFFF,  
FFFFFFFFF:FFFFFFFFF::F::F:FFFFFFFF:FFFFF,:F,FF:FFFF,:FFFFFFFF,FFFF:  
FF:  
@A00721:190:HGJW7DSXY:4:1225:13657:24173\_2:N:0:TCTGCAAG+GCTGCACT  
AGCTGATTCTTATTGCATGAACGTCGCTGAGGTCAAACCTGTGGACGTTCTTTTCATCGACGAATTAT  
TCATGATTCACGCTGGTCAGACCCTTTTTCTTACACATCTACTTAAGG  
+

FFFFFFFFFFFFFFFFFFFFFFFFFFFFFFFFFFFFFFFFFFFFFFFFFFFFFFFFFFFFFFFF  
FFFFFFFFFFFFFFFFFFFFFFFFFFFFFFFFFFFFFFFFFFFFFFFFFFFFFFFFFFFFFFFF  
@A00721:190:HGJW7DSXY:4:1112:30644:9283\_2:N:0:TCTGCAAG+GCTGCACT  
GTTACGGTGATTCCAATCAAATCGGATTCATCAATCGTATTGATCTCCAAGTCGAAACTACTTCAAC  
ATCAACGACATCATTCTTGATGAGTGTCTTCTTATCGAAGTCTCAGT  
+  
FFFFFFFFFFFFFFFFFFFFFFFFFFFFFFFFFFFFFFFFFFFFFFFFFFFFFFFFFFFFFFFF  
FFFFFFFFFFFFFFFFFFFFFFFFFFFFFFFFFFFFFFFFFFFFFFFFFFFFFFFFFFFFFFFF  
@A00721:190:HGJW7DSXY:4:1237:28311:10598\_2:N:0:TCTGCAAG+GCTGCACT  
CGGCCGACGTTTGTGCGGAACCTCTCAGAGGTTTACGGCAGAAAAATTTCTCCTGCTTGTAATTCGAGA  
GAGGACACTATGGAAATTAGACCTATCAGATGTCTTGACGACTTCGAA  
+  
FFFFFFF:FFFFFFFFFFFFFFFFFFFFFFFFFFFFFFFFFFFFFFFFFFFFFFFFFFFFFFFFFFFF  
FFFFFFFFFFF:FFFFFF:FFFFFF:FFFFFFFFFFFFFFFFFFFFFFFFFFFF,F:FF  
@A00721:190:HGJW7DSXY:4:2320:3215:30326\_2:N:0:TCTGCAAG+GCTGCACT  
ATATTACTTTCACCTCAAGGTGAAAAGTTTGAATAAACAAAGTCCTTGTAAGAGTAAGGTTAAATGT  
GAAGATGCTCAGACTATTCATGAAGTTCAAGGTAATACTTACCAGCAC  
+  
FFFFFFFFFFFFFFFFFFFFFFFFFFFF:FFFFFFFFFFFFFFFFFFFFFFFFFFFFFFFFFFFFFFFFFFFF  
FFFFFFFFFFFFFFFFFFFFFFFFFFFFFFFFFFFF,FFF:FFFFFFFFFFFFFFFFFFFF  
@A00721:190:HGJW7DSXY:4:1326:3992:2049\_1:N:0:TCTGCAAG+GCTGCACT  
ATGACCCTGTTTTGCATCACAAACACATATTACCGTTGCTCTATCACACACGTTGAATCTTTACGAT  
ACTTTGTTATCAATGTAAAGTTAAACGATGCTACTTGTGAGAGGATCAATCACAGTAAGGAACTGTCA  
CGT  
+  
FFFFFFFFFFFFFFFFFFFFFFFFFFFFFFFFFFFF:FFFFFFFFFFFFFFFFFFFFFFFFFFFFFFFFFFFF  
FFFFFFFFFFFFFFFFFFFFFFFFFFFFFFFFFFFF,FFFFFFFFFFFFFFFFFFFFFFFFFFFF  
FFF  
@A00721:190:HGJW7DSXY:4:1252:21016:36730\_1:N:0:TCTGCAAG+GCTGCACT  
TGCAGATTCAACCCCTTATATCGAGGCTATCGAGGACGATGAGTATCTTGAAGTTGTTGACGACAAGC  
CTCAAGAGGGTAGAGGACCACCTGGATCTTCTACTGTCTCTGCCTTCCAAGATTTCTTAGAAGAGGTT  
ATT  
+  
FFFFFFFFFFFFFFFFFFFFFFFFFFFFFFFFFFFF:FFFFFFFFFFFFFFFFFFFFFFFFFFFFFFFFFFFF  
FFFFFFFFFFFFFFFFFFFFFFFFFFFFFFFFFFFF,FFFFFFFFFFFFFFFFFFFFFFFFFFFF  
FFF  
@A00721:190:HGJW7DSXY:4:1263:16568:17284\_1:N:0:TCTGCAAG+GCTGCACT  
CTTAACGTCACCTCGGTAATCTTTAGCCGAATTAAGTACTAATGAGTTCAAGTCGGTTGTGATCGAA  
TTAAGATCAAGGCTAATACCTTTATAGGTAAGAAGCCCCCTGAGCCGCGTAGTCAGCGCGTTTAGCTG  
TAT  
+  
FFFFF:FFFFFFFFFFFFFFFFFFFFFFFFFFFFFFFFFFFF,FFFFFF:FFFFFFFFFFFFFFFFFFFF:FFF  
FFFFFFFFFFFFFFFFFFFF,F:FFFFFF:FFFFFFFFFFFFFFFFFFFFFFFFFFFFFFFFFFFFFFFFFFFF  
FFF  
@A00721:190:HGJW7DSXY:4:1148:26404:34976\_1:N:0:TCTGCAAG+GCTGCACT  
TATACCCGATAGGGTACCGAGTCTCCAAGAGAATATTTATTCTTATGAGGCTCGAAACTTCAACGTTT  
TCACAACGGAAAGACATATCGCACCCGAAATTTTTGGGCAGAATGCTCTTAACGCGGTTCTTGAACGG  
TGT  
+  
FFFFFFFFFFFFFFFFFFFFFFFFFFFFFFFFFFFF:FFFFFFFFFFFFFFFFFFFFFFFFFFFFFFFFFFFF  
FFFFFFFFFFFFFFFFFFFFFFFFFFFFFFFFFFFF:FFFFFFFFFFFFFFFFFFFFFFFFFFFFFFFFFFFF  
FFF  
@A00721:190:HGJW7DSXY:4:1338:8467:20259\_2:N:0:TCTGCAAG+GCTGCACT  
CTAAGTTGGATAAAGTTATAGGAGACTCAGTTAACCTGAGAGCTCCTCAATTGATAGATTGGGTCAAC

AATAGGGACGCTAGTATACTTCGTAAAGTCGACAGCGAAATGGTCAAT  
+  
FFFFFFFF:FFFFFFFFFFFFFFFFFFFFFFFFFFFFFFFFFFFFFFFFFFFFFFFFFFFFFFFF  
FFFFFFFFFFFFFFFFFFFFFFFFFFFFFFFFFFFFFFFFFFFFFFFFFFFFFFFFFFFFFFFF  
@A00721:190:HGJW7DSXY:4:1314:7997:1877\_1:N:0:TCTGCAAG+GCTGCACT  
ATATGACCTATTTTAAGCTCATGGTGAAGGGAAGCTAAGTTAACTTGATGCTTCAGCCTTTTCG  
AAGCATAACCCCGCACAGAATATCGTTTATCACGCAAAATTTATTAATGCAATTTTCGGACCTATCTT  
TAA  
+  
FFFFFFFFFFFFFFFFFFFFFFFFFFFFFFFFFFFFFFFFFFFFFFFFFFFFFFFFFFFFFFFF  
FFFFFFFFFFFFFFFFFFFFFFFFFFFFFFFFFFFFFFFFFFFFFFFFFFFFFFFFFFFFFFFF  
FFF  
@A00721:190:HGJW7DSXY:4:1150:26612:13385\_1:N:0:TCTGCAAG+GCTGCACT  
TGTCTTTTACCCAACATTTTATGTATACAGAGATGACCACTGACGATTTCTCCCGAAGCTCTTCTC  
TCTCTTAGGAGGTCATGATGACTACTATAAGGGTGAAATCGATTTTTCGAAGTTTGACAAATCTCAAG  
ATT  
+  
FF:FFFFFFFFFFFFFFFFFFFFFFFFFFFFFFFFFFFFFFFFFFFFFFFFFFFFFFFFFFFFFFFF,FFF  
FFFFFFFFFFFFFFFFFFFFFFFFFFFFFFFFFFFFFFFFFFFFFFFFFFFFFFFFFFFFFFFF  
FFF  
@A00721:190:HGJW7DSXY:4:1106:12292:25441\_2:N:0:TCTGCAAG+GCTGCACT  
AGCCTATGAGATAAAGATGTATTCTTATTTAGGCTTCGATGCTGAATTTCTTGAACCTTGAGTGCCA  
GTGAATATTTTGTACGCCAGGAGATCGGAAGAGCGTCGTGTAGGGA  
+  
FFFFFFFFFFFFFFFFFFFFFFFFFFFFFFFFFFFFFFFFFFFFFFFFFFFFFFFFFFFFFFFF,FFFF  
FFFFFFFFFFFFFFFFFFFFFFFFFFFFFFFFFFFFFFFFFFFFFFFFFFFFFFFFFFFFFFFF,F,FFFF  
@A00721:190:HGJW7DSXY:4:1268:10890:8265\_2:N:0:TCTGCAAG+GCTGCACT  
ACGCCAACACTTTCTTTGGTAATTGTATGATCACTTTGATGATTTTATCACTTTATTATGACCTTGG  
AAAGTTTTTCGGCTGTGGTTGTCGCTGGGACGATTCCATTCTGTTTTTC  
+  
FFFFFFFFFFFFFFFFFFFFFFFFFFFFFFFFFFFFFFFFFFFFFFFFFFFFFFFFFFFFFFFF,FFFFFFF,FFF  
F,FFFFFFFFFFFFFFFFFFFFFFFFFFFFFFFFFFFFFFFFFFFFFFFFFFFFFFFFFFFFFFFF  
@A00721:190:HGJW7DSXY:4:1378:26910:1063\_2:N:0:TCTGCAAG+GCTGCACT  
CAGCGTACTTCTGCTCGCGATTTATTCTTTTTGTCAATGATTACATCTACTTCGTTCTGATCCTTAC  
AAGATCATCGTTAAGTTAGGTAAACCCCTAACCGATGTTACTCTTGTA  
+  
FFFFFFFFFFFFFFFFFFFFFFFFFFFFFFFFFFFFFFFFFFFFFFFFFFFFFFFFFFFFFFFF:FFFFFFF  
FFF:FFFFFFFFFFFFFFFFFFFFFFFFFFFFFFFFFFFFFFFFFFFFFFFFFFFFFFFFFFFFFFFF  
@A00721:190:HGJW7DSXY:4:1524:30101:16110\_1:N:0:TCTGCAAG+GCTGCACT  
TTCGTTAGTTTTAAAGACTATACTAAATATCTCCACTACGAGGTTGTTGTTGGCGATTAGCTCTTGC  
GACTAATATTCGATATTCGATTGAGGGTCGTTATACCTATTCGGCTATCTGTGCTTTGAATTGTATAA  
GAT  
+  
FFFFFFFFFFFFFFFFFFFFFFFFFFFFFFFFFFFFFFFFFFFFFFFFFFFFFFFFFFFFFFFF  
FFFFFFFFFFFFFFFFFFFFFFFFFFFFFFFFFFFFFFFFFFFFFFFFFFFFFFFFFFFFFFFF:FFFFFFFFFFFF  
FFF  
@A00721:190:HGJW7DSXY:4:1166:18159:5415\_2:N:0:TCTGCAAG+GCTGCACT  
GATTCCGAGAGGTTTATCCTGATGTGGAGGGAGTTCTTGAAGCATCCCGACCTTTCCTTGTAAGAAAT  
TTGATGCGGTTTCATAAGATTATCAGTAATCCTGATTCTACTACGGAT  
+  
FFFFFFFFFF:FFFFF:FFFFFFFFFFFFFFFFFFFFFFFFFFFFFFFFFFFFFFFFFFFFFFFF,F:FFFFFFF  
FFFFFFFFFFFFFFFFFFFFFFFFFFFFFFFFFFFFFFFFFFFFFFFFFFFFFFFFFFFFFFFF  
@A00721:190:HGJW7DSXY:4:1116:27651:27398\_1:N:0:TCTGCAAG+GCTGCACT  
GACTGGAGTTCAGACGTGTGCTCTCCGATCTCAAAGATCGACTTCGAGACAGGTGATATTGTTGAGC

GAGAGCGACCAAGATCTAAATTCGGTAACGGTGCGTGGCGCTTTATTTTAAAAAGCTCCCTCCTCTCG  
CAA

+

F::FFFFFF:F,FFFFFFFFFFFFFF:F,FF:::,F::FFFFFFFF:FFF:FFFFFF:F:FFFFFF  
FFFFFFFFFFFFFF:FFFFFFFF:F:FFFFFFFFFFFFFFFFFFFFFFFF:FFFF:FFFFFFFF  
FFF

@A00721:190:HGJW7DSXY:4:1178:21323:34068\_2:N:0:TCTGCAAG+GCTGCACT  
ACTTGAGTCTTTTGATCAGTCTCTGACTTGACCATCTTTCATTTTAAATGACGATCATTAAGACTCTC  
TTTCTTCTTTGTTTCCTTCTTTGCACTGATTTTCTCATCAGCTTGT

+

FFFFFFFFFFFFFFFFFFFFFFFFFFFFFFFFFFFFFFFFFFFFFFFFFFFFFFFFFFFFFFFF  
F,:F,FFFFFFFFFFFFFFFFFFFFFFFFFFFFFFFFFFFFFFFF

@A00721:190:HGJW7DSXY:4:1373:28953:8390\_1:N:0:TCTGCAAG+GCTGCACT  
GTTTTTACGATAACAACATCAGTTGATTAAGACTCTTCCGAAAGCGAACTTTGGGAATTTGAAGCT  
CAGGGTGAAGCACAACGTTTGACCGTGACGAAGTGTGGTGTCTTGATCTACGTTACGGATATACTCT  
CCT

+

FFF:FFFFFFFFFFFFFFFFFFFFFFFFFFFFFFFFFFFFFFFFFFFFFFFFFFFFFFFF  
FFFFFFFFFFFFFF,FFF:FFFFFFFFFFFFFFFFFFFFFFFFFFFFFFFFFFFFFFFF  
FFF

@A00721:190:HGJW7DSXY:4:1155:29306:35305\_1:N:0:TCTGCAAG+GCTGCACT  
ACACTACCACTTATTACGATATTTCTTTAGTCGATGGGTTTCGACGCCTTTAAGCGTCTTCTGTTCA  
TCGCAACCAGATGATATCTTCTATTCGAACTTATGTTTCGATCAGTGTCTTCTATCAGGAGGAAAA  
CAC

+

FFFFFFFFFFFFFFFFFFFFFFFFFFFFFFFFFFFFFFFFFFFFFFFFFFFFFFFF  
FFFFFFFFFFFFFFFFFFFFFFFFFFFFFFFF,FFFFFFFFFFFFFFFFFFFFFFFF  
FFF

@A00721:190:HGJW7DSXY:4:2111:18231:27586\_2:N:0:TCTGCAAG+GCTGCACT  
TGTTTACCACCGAAATATCAAGGTTCTTGTCCTTCAAACGATTGGAAGGTTAGTTATCTTAATAGTAC  
TAAAGGGGTTTACTTACAACCCTATGACGATAGTTTCTCTTTACACAC

+

FFFFFFFFFFFFFFFFFFFFFFFFFFFFFFFFFFFFFFFFFFFFFFFFFFFFFFFF  
FFFFF:FFFFFFFFFFFFFFFFFFFFFFFFFFFF:FF,FFFFFF

@A00721:190:HGJW7DSXY:4:2401:31403:12947\_2:N:0:TCTGCAAG+GCTGCACT  
TGTTTTCTTCTAATGTGGCCTGAACTACGTTTCACTTTGTGTGTAAGTTTCTATTTTAAAGTTTGT  
CTTCCTTGTGTCTTATTCTATTAATCACTCATTTTAGTGAGATTAT

+

FFFFFFFFFFFFFFFFFFFF:FFFFFFFFFFFFFFFF:FFFFFFFFFFFFFFFF  
FFF:,FFFFFFF:FFFF:FFFFFFFF:FFFFFFF,FFF,FF:FF

@A00721:190:HGJW7DSXY:4:2441:14669:26396\_2:N:0:TCTGCAAG+GCTGCACT  
CTAAAACGTCTTCGACAACAGCAGGGGTTTTCGAATAGTGATAGCCACCCGCCTTACAGAGGGGCAGC  
AGCATGACCATAATTGGTATTGACTTTGGTACCACCTTTTCTACTGTC

+

FFFFFFFFFFFFFFFFFFFF:FF:FFFFFFFFFFFFFFFFFFFFFFFFFFFFFFFF  
FFFFFFFFFFFF:FFFF:FFFFFFFFFFFFFFFF,FFFFFFFF

@A00721:190:HGJW7DSXY:4:1570:10357:3114\_1:N:0:TCTGCAAG+GCTGCACT  
TTCGAATGAAGTTTTAATGCTTAACAACAATGATAGTGAATTTATACCTACAATCATTGGTTTTCTA  
ATAATGATGACACTATTGTTTATGGATATGATGCTATTACTCATGATGGTTACGGTCAGGGAGGATTC  
TCA

+

FFFFF:FFFFFFFFFFFFFFFF:F::FFFFFFF,FFFF:FFFFFF:FFFFFFFF  
FFFFFFFFFFFF,:FFFFFFF,FFFFFFFFFFFFFFFFFFFFFFFF  
FFF

@A00721:190:HGJW7DSXY:4:1601:27751:14763\_2:N:0:TCTGCAAG+GCTGCACT  
ACATTACCCGAAAGACGTGCTAAATTAACCATTGTACGATGTCGTCTGTCTCGGCGATCACTTTTC  
ACTAAGAATTGGTCCTACTTTTGGACAAGGCCAACTTCGTAATCTTCA

+

FFFFFFFFFFFFFFFFFFFF,FFFFFFFFFFFF:FFFFFFFF:FFFFFFFFFFFFFFFFFFFF:FFF  
FFFFFFFFFFFFFFFFFFFFFFFFFFFFFFFFFFFFFFFFFFFFFFFFFFFFFFFF

@A00721:190:HGJW7DSXY:4:1325:1325:27305\_2:N:0:TCTGCAAG+GCTGCACT  
TTTATCTCTTTGGTTGTTAGGGATTTTGAGAGAGTGAAAGGCTTCAATTGTAGTGGTTTGGTCGTTTC  
AGTACCCAGTCAGTATACCTCTACGCAAAGATATTTTCATGAAACTAC

+

FFFFFFFFFFFFFFFFFFFF:,FFF:FFFF:FFFFFFFFFFFFFFFF,FFF:FFF:FFFFFFFFFFFFFFFFFFFF  
F:FFFFFFFFFFFFFFFFFFFFFFFFFFFFFFFFFFFFFFFFFFFFFFFF

@A00721:190:HGJW7DSXY:4:1636:19533:28494\_1:N:0:TCTGCAAG+GCTGCACT  
CCGGATTACCTGTCTTTTCATATTATGAATGAACCTTCGGCCGCTCTCTTTGCTTCGATGTTGGATGTC  
AAGAAGGGTTCAGAATGGGATTCCTACGTAGTTTATGACTTTGGTGGTGGTACTTTTCGATACTTCTAT  
CGT

+

FFFFFFFFFFFFFFFFFFFFFFFFFFFFFFFFFFFFFFFFFFFFFFFFFFFFFFFFFFFFFFFF:FFFF  
FFFFFFFFFFFFFFFFFFFF:FFFFFFFFFFFFFFFFFFFFFFFFFFFFFFFFFFFFFFFFFFFFFFFF  
FFF

@A00721:190:HGJW7DSXY:4:1562:11379:10332\_2:N:0:TCTGCAAG+GCTGCACT  
TACTATAGTGTTATTTATTCTGGTGGTGATGATAATCTTGAGGTCGTGACGTTGATGAAGCTATAAG  
AGCGTTCTTATTACGGCGCACTTCTTTACCCGCCACCACACAACCTTTC

+

FFFFFFFFFFFFFFFFFFFFFFFFFFFFFFFFFFFFFFFFFFFFFFFFFFFFFFFFFFFFFFFF:F:FFF:  
FFFFFFFFFFFFFFFFFFFFFFFFFFFFFFFFFFFFFFFFFFFFFFFF

@A00721:190:HGJW7DSXY:4:1569:6533:28181\_1:N:0:TCTGCAAG+GCTGCACT  
TGAAGGAGGAGGTTTCTGTTACTGGAACCTTCGTCAATACTTTTCAATAATATACGTCTTGAACCTC  
ACTTATGACGATCTAGTGAAATTAACGCGTCCTTTTCTGGAACGTAGTTTACTATTATGAACAAAGT  
TAT

+

FFFFFFFFFFFFFFFFFFFFFFFFFFFFFFFFFFFFFFFFFFFFFFFFFFFFFFFFFFFFFFFF:FFFFFFFF  
FFFFFFFFFFFF:FFFFFFFFFFFFFFFFFFFFFFFFFFFFFFFFFFFFFFFFFFFFFFFFFFFFFFFF:FFFF  
FFF

@A00721:190:HGJW7DSXY:4:1353:27679:11036\_1:N:0:TCTGCAAG+GCTGCACT  
CCCTGATTCCGGCCGGTGGTAGCTCATTTCTACCAGGGGCTATTACTCTTGCTGAAACAGCTATTAAA  
GCTGTTGAGCGGGTAATTACACCTAAACGAGCTCGATCTGCCATCGCTGAAGGATGTGCACTCTTTTC  
TGC

+

FFFFFFFFFFFFFFFFFFFF:FFFFFFFFF:FFFFFFFF:FFFFFFFFFFFFFFFFFFFFFFFF:FFF:FF,  
FFFFF:FFFFFFFFFFFFFFFFFFFFFFFFFFFF,FFFFFFFFFFFFFFFFFFFFFFFF:FFFFFFFF  
FFF

@A00721:190:HGJW7DSXY:4:1358:24279:2268\_1:N:0:TCTGCAAG+GCTGCACT  
CTTCGTGCTGATTGTATCAACAGTAACATTACTTCTAATAAAGGTCTCTATCAAGCTCGTATTATCGTCG  
CTGCTGGATCTGCGTTACCGTTGAAGGCTAACTCCAAGGTAATTATGAAGACTGTGATTTATCTTTC  
ACT

+

FFFFFFFFFFFFFFFFFFFFF:FFFFFFFFFFFFFFFFFFFFFFFFFFFFFFFFFFFFFFFF  
FFFFFFFFFFFFFFFFFFFFFFFFFFFFFFFFFFFFFFFFFFFFFFFFFFFFFFFF  
FFF

@A00721:190:HGJW7DSXY:4:1252:30689:37012\_1:N:0:TCTGCAAG+GCTGCACT  
ACGTGTGCTCTTCCGATCTATAATTTCAATCTTCTTAAAAAGAAGATAGAGAGTCATACTTTGGGCTA  
TCGTTCAAGTGTCATGGGGTTGGATAGCCAATATTGAAGTGGACACCTNTGGTAGTATCGAAGTAAAGA  
TAA

+  
.:FFFFFFFF:FFF:FFFFFFFFFFFFFFFFFFFFFFFFFFFFFFFFFFFFFFFFFFFFFFFFFFFFFFFFFFFFFFFFFFFFFFFF  
F:FFFFFFFFFFFFFFFFFFFFFFFFFFFFFFFFFFFFFFFFFFFFFFFFFFFFFFFFFFFFFFFFFFFFFFFFFFFFFFFF#FFFFFFFFFFFFFFFFFFFFFFFF  
FFF  
@A00721:190:HGJW7DSXY:4:1136:28013:24612\_1:N:0:TCTGCAAG+GCTGCACT  
ATACTATGGTTGAATCAACTAAGCATACTACTTTTGCTTTGATTACTCTACCGCCTTACAAGTCTAAG  
GTAAAGAGTCGATTAAACAAGTTGTACTTATCAATGATTTTATCGCTGGTTGTTATCTCGAAAAGTC  
TCT  
+  
FFFFF:FFFFFFFFFFFFFFFFFFFFFFFFFFFFFFFFFFFFFFFFFFFFFFFFFFFFFFFFFFFFFFFFFFFFFFFFFFFFFFFF  
FFFFFFFFFFFFFFFFFFFFFFFFFFFFFFFFFFFFFFFFFFFFFFFFFFFFFFFFFFFFFFFFFFFFFFFFFFFFFFFF:  
FFF  
@A00721:190:HGJW7DSXY:4:1204:6325:4085\_2:N:0:TCTGCAAG+GCTGCACT  
TCAGTTCTAACCCAAAGAGAATATCTAAAATATTTACAAAATCTTACCACTATCTACGAACCTAAAGT  
TCTGAAGACGTTGCTTGTGCTTCCTCCTTTAATGGCACTACCTCGGT  
+  
FFFFFFFFFFFFFFFFFFFFFFFFFFFFFFFFFFFFFFFFFFFFFFFFFFFFFFFFFFFFFFFFFFFFFFFFFFFFFFFF  
FFFFFFFFFFFFFFFFFFFFFFFFFFFFFFFFFFFFFFFFFFFFFFFFFFFFFFFFFFFFFFFFFFFFFFFFFFFFFFFF  
@A00721:190:HGJW7DSXY:4:2247:17119:9909\_2:N:0:TCTGCAAG+GCTGCACT  
TTGGAACGAAGGCGACCTGTTCCGGAGTTTTACGGGATCCGGAATGTTCTGTCTATATTAGGTGAAG  
CGAAATACGATTTCGAACGTCAAGATCGGAAGAGCGTCGTGTAGGGAA  
+  
FFFFFFFFFFFFFFFFFFFFFFFFFFFFFFFFFFFFFFFFFFFFFFFFFFFFFFFFFFFFFFFFFFFFFFFFFFFFFFFF  
FFF:FFFFFFFFFFFFFFFFFFFFFFFFFFFFFFFFFFFFFFFFFFFFFFFFFFFFFFFFFFFFFFFFFFFFFFFF:  
@A00721:190:HGJW7DSXY:4:1163:11840:12853\_2:N:0:TCTGCAAG+GCTGCACT  
ATTTGATCTGGTTGCTCAATTCTAAGCGTGTTCCGCTTAGTGCGAGGCCTCTTCTACGAGTATTGC  
TATTTATACGTTACGAGAAGAAGGTTCGAAAGTTTGAGAACTTAGTT  
+  
FF:FFFFFFFFFFFFFFFFFFFFFFFFFFFFFFFFFFFFFFFFFFFFFFFFFFFFFFFFFFFFFFFFFFFFFFFFFFFFFFFF  
FFFFF:FFFFFFFFFFFFFFFFFFFFFFFFFFFFFFFFFFFFFFFFFFFFFFFFFFFFFFFFFFFFFFFFFFFFFFFF  
@A00721:190:HGJW7DSXY:4:1262:15293:5400\_2:N:0:TCTGCAAG+GCTGCACT  
ACATACTAAATACTAGATATTTGGATGATCTTGATAAAGAACTTCATGAATTTTCAGAGGATGAAAAA  
TTTTCTTCCTTGATTTTAATATAAAGAATCTTTACCAGGACTCCTAC  
+  
FFFFFFFFFFFFFFFFFFFFFFFFFFFFFFFFFFFFFFFFFFFFFFFFFFFFFFFFFFFFFFFFFFFFFFFF:FF:FFFFFFFFFFFFFFFFFFFFFFFFFFFFFFFF:FF:  
FFFFFFFFFF:FFFFFFFFFF:FFFFFFFFFFFFFFFFFFFFFFFFFFFFFFFFFFFFFFFFFFFFFFFF  
@A00721:190:HGJW7DSXY:4:1170:1561:36761\_2:N:0:TCTGCAAG+GCTGCACT  
TCTGATCGTAAGAAGTTTATAAGGAACATATCCATTTGTTGTAATAGGGTCATCACTTAGAACTCGA  
AACTCTAAGTGGAATACTGTCTTTCCAAGCTTACCTGTATCTTCAAT  
+  
FFFFFFFFFFFFFFFFFFFFFFFFFFFFFFFFFFFFFFFFFFFFFFFFFFFFFFFFFFFFFFFFFFFFFFFFFFFFFFFF  
FFFFFFFFFFFFFFFFFFFFFFFFFFFFFFFFFFFFFFFFFFFFFFFFFFFFFFFFFFFFFFFFFFFFFFFF:  
@A00721:190:HGJW7DSXY:4:1458:31638:1611\_1:N:0:TCTGCAAG+GCTGCACT  
TTCGATAGGGGACATTTTATCGTGGGCTTCCGTAAAGGAAGATCTGTTATCGACGGTTTATCGTTTA  
CGAAGTATCACTCCACCGGTGAATGGTTTAAAGAATACTATAAATAGAATAGCTATTACTACTAATGGC  
GTT  
+  
FFFFFFFFFFFFFFFFFFFFFFFFFFFFFFFFFFFFFFFFFFFFFFFFFFFFFFFFFFFFFFFFFFFFFFFFFFFFFFFF  
FFFFFFFFFFFFFFFFFFFFFFFFFFFFFFFFFFFFFFFFFFFFFFFFFFFFFFFFFFFFFFFFFFFFFFFFFFFFFFFF  
FFF  
@A00721:190:HGJW7DSXY:4:1650:11749:12226\_2:N:0:TCTGCAAG+GCTGCACT  
TAGTGACATCTGGTCAATTTCTGTTTTTAGGTGGTCTTTATTCTATTATTGATTTTTATGAGATTGATA  
CGTTAACAGAAGATGATGTTAGAGTAGAATTCCTGAAGAGTCCTTCCG  
+

FFFF:FFFFFFFFFFFFFFFFFFFFFFFFFFFFFFFF:FFFFFFFFFFFFFFFFFFFFFFFF:FFFFFFFFF  
F:FFF,FFFFFFFFFFFFFFFFFFFFFFFFFFFFFFFF:F:FFF  
@A00721:190:HGJW7DSXY:4:1205:16848:4022\_1:N:0:TCTGCAAG+GCTGCACT  
TTAAATCTAGGATTATGTCTGTGTTGAAAGACTTTCTACCGATAAGGGTCACTAGTCTTACACAATTA  
AGAAATAATCCTACATTGACTGATTATCTAAAGATTGAAGGAAAATTTTATCCTCGTTTAACTTACTT  
AGA  
+  
FFFFFFFFFFFFFFFFFFFFFFFFFFFFFFFFFFFFFFFFFFFFFFFFFFFFFFFFFFFFFFFFFFFFFFFF  
FFFFFFFFFFFFFFFFFFFFFFFFFFFFFFFF:FFFFFFFFFFFFFFFFFFFFFFFFFFFFFFFFFFFFFFFF  
FFF  
@A00721:190:HGJW7DSXY:4:1414:3676:18630\_1:N:0:TCTGCAAG+GCTGCACT  
ATACAAATGATAACTTCTAATTTACGTTTGCTACTCAGAGCTGGTCCTCTCAGCAAAGGGATGCATGG  
TGTTATCTCCTCAGGAGTCCCGGCATTTGATAATAATGACGAGACTTTCGTCATAATCGCTGCATATT  
ACG  
+  
FFFFFFFFFFFFFFFFFFFFFFFFFFFFFFFFFFFFFFFF,FFFFFFFFFFFFFFFFFFFFFFFFFFFFFFFF:FFF:FFFF  
FFFFFFFFFFFFFFFF:FFFFFFFF:FFFFFFFFFFFFFFFFFFFFFFFFFFFFFFFFFFFFFFFFFFFFFFFF  
:FF  
@A00721:190:HGJW7DSXY:4:1342:12979:20494\_2:N:0:TCTGCAAG+GCTGCACT  
CCAGCGCATCTCGTGTGAGCCTCGACCCGATTATATGGTATTAACCTATAAAGGTGAGGAGACCATT  
TTCTTGCTGAAATTTATAGAAGATTATTTTGACAGAATCAATAAGAAT  
+  
FFFFFFFFFFFFFFFFFFFFFFFFFFFFFFFFFFFFFFFFFFFFFFFFFFFFFFFF:F:FFFFFFFFFFFFFFFF  
FFFFFFFFFFFFFFFFFFFFFFFFFFFFFFFFFFFFFFFFFFFFFFFFFFFFFFFFFFFFFFFF  
@A00721:190:HGJW7DSXY:4:1538:11243:24721\_1:N:0:TCTGCAAG+GCTGCACT  
TATGCTGATCTAAAATTTGATCTAGATGGATCCACTCCTCGAGTTATCATGATGTTAGTATGTTATA  
TACTGATTTACAACGATATAGGAGTAATCTACGAGAAGATTCTAGAATTCTTAATTATAATATTCAAC  
CTC  
+  
FFFF:FFFFFFFFFFFFFFFFFFFFFFFFFFFFFFFF,F::FFFFFFFF:FFFFFFFFFFFFFFFF  
FFFFFFFF:FFFFFFFFFFFFFFFF,FFFF:FFFFFFFFFFFFFFFFFFFFFFFFFFFFFFFF  
FFF  
@A00721:190:HGJW7DSXY:4:1363:4345:4914\_2:N:0:TCTGCAAG+GCTGCACT  
GAGATCACACATTTTGAGAACTAACTATGTTATGTTCTCTGATCATTTTGACAATCTCTTCTTATAAT  
AAATAAATAAATAATATTACTAATGGCAAATAGTGGAAGGCTCCAGT  
+  
FFFFFFFFFFFFFFFFFFFFFFFF:FF:FFFFFFFFFFFFFFFFFFFFFFFFFFFFFFFF:FFFFFFFFFFFFFFFF  
FFFFFFFFFFFFFFFFFFFFFFFF:FFFFFFFFFFFF:FFFFFFFF:FFFFFFFF  
@A00721:190:HGJW7DSXY:4:2407:8052:17910\_2:N:0:TCTGCAAG+GCTGCACT  
CTGCTTTGGATTACGATGACGTGAGAATAGGTGAAGGGATAGTTTTTACCTCGACCAACATTAAGGCG  
GCGGCGACTAATCTTAAAGCTTCACCCAAAATGAAGGACACTTCGAAA  
+  
FFFFFFFFFFFFFFFFFFFFFFFFFFFFFFFFFFFFFFFFFFFFFFFFFFFFFFFFFFFFFFFFFFFFFFFF  
FFFFFFFFFFFFFFFFFFFFFFFFFFFFFFFFFFFFFFFFFFFFFFFFFFFFFFFFFFFFFFFF  
@A00721:190:HGJW7DSXY:4:2146:15872:25755\_2:N:0:TCTGCAAG+GCTGCACT  
AAAAGGCTCTAAAGGACACTATACAATATCCAGACGACGACGAAGCTTATACTACTTTAATTTTGGGT  
ATTATGTGGAGATATCGTGATATCAGTACGTCCAGATCCTCTGCTTT  
+  
FFFFFFFFFFFFFFFFFFFFFFFF:FFFFFFFFFFFFFFFFFFFFFFFFFFFFFFFFFFFFFFFF:FFF:  
FF:FFFFFFFF:FFFFFFFFFFFFFFFFFFFFFFFFFFFFFFFFFFFFFFFF  
@A00721:190:HGJW7DSXY:4:2430:2139:10833\_2:N:0:TCTGCAAG+GCTGCACT  
ATCAAATATAAAGAAAAGGACTATGAAATAAAAGATTTGGTGCTTAGGGATATAATGAATTCAGCACC  
ACATTTTGGTCAAGTCAATCCGTTGAGAAAATTTCTTAGAGGATATTC  
+

F:FFFFFFFFFFFFFFFFFFFFFFFFFFFFFFFFFFFFFFFFFFFFFFFFFFFFFFFFFFFFFFFF  
FFFFFFFFFFFFFFFFFFFFFFFFFFFFFFFFFFFFFFFFFFFFFFFFFFFFFFFFFFFFFFFF  
@A00721:190:HGJW7DSXY:4:2118:32922:11162\_1:N:0:TCTGCAAG+GCTGCACT  
CCAACATTTACCACCAAATCTTTTGATACAACCTAGCCTTCAAGTGGGGTATGCCTGCGGAATACG  
CTTGCTATTCACCAGATTGGTTCGAACCCGTTGATGCTATGTCAGAAGAAGCTATTCAAGCTTGTCGT  
TTA  
+  
FFFFFFFFFFFFFFFFFFFFFFFFFFFFFFFFFFFFFFFFFFFFFFFFFFFFFFFFFFFFFFFF  
FFFFFFFFFFFFFFFFFFFFFFFFFFFFFFFFFFFFFFFFFFFFFFFFFFFFFFFFFFFFFFFF:  
FFF  
@A00721:190:HGJW7DSXY:4:1162:29469:16266\_2:N:0:TCTGCAAG+GCTGCACT  
AAACAAGCCCAGACTCAAGGAGTCCAATCAAAGGTTTTGAATTTAGCTCAACTGGGGAGACGTGCTTA  
AATGGGTGATAAAAATTATTTAGAGATCTTTTCTACTTACAAAGGACA  
+  
FF:FFFFFFFF:FFFFFFFFFFFFFFFF:F:FF:FFFFFF:FFFFFF:FFFFFFFFFFFFFFFF  
F,FFFFFFFF,FFFFFFFF:FFFFFFFF:FFFFF  
@A00721:190:HGJW7DSXY:4:2131:23321:11162\_2:N:0:TCTGCAAG+GCTGCACT  
AATTCTACGAAAAGTCCGGAGTATATTGTATGTTAATAGATAGTGGGATAATAGTTCTACCGATACG  
TAGTGAACGCGTTCGTAGAACCAAGTACTTCCGTCTGAAGAGTTTAG  
+  
FFFFFFFFFFFFFFFFFFFFFFFFFFFFFFFFFFFFFFFFFFFFFFFFFFFFFFFFFFFFFFFF  
FFFFFFFFFFFFFFFFFFFFFFFFFFFFFFFFFFFFFFFFFFFFFFFFFFFFFFFFFFFFFFFF  
@A00721:190:HGJW7DSXY:4:2161:18394:1063\_1:N:0:TCTGCAAG+GCTGCACT  
TAACCGATAGGAGTTGTATAGTTGAAGATGTGGCTTTAGACGATAATCCTTTAAGGACTATGTTGACT  
GACGAAGATTTTCCACAGATTTGTCTACGTTGCAGATCGCCACTCCAAACACTATATACATTAATA  
ATA  
+  
FFFFFFFFFFFFFFFFFFFFFFFFFFFFFFFFFFFFFFFFFFFFFFFFFFFFFFFFFFFFFFFF  
FFFFFFFFFFFFFFFFFFFFFFFFFFFFFFFFFFFFFFFFFFFFFFFFFFFFFFFFFFFFFFFF:  
FFF  
@A00721:190:HGJW7DSXY:4:2278:19144:6496\_2:N:0:TCTGCAAG+GCTGCACT  
AGTCATAACTTTTGTTACCAAATCTTGGCTTTCAACGAAGTCTCTGATTTTATTAATCATTACTTTA  
ACGATCTCTCGGTCATTTACTCTGTACTTGATCTACGTCGTTTAACTG  
+  
FFFFFFFFFFFFFFFFFFFFFFFFFFFFFFFFFFFFFFFFFFFFFFFFFFFFFFFFFFFFFFFF  
FFFF:FFFFFFFF:FFFFFFFF:FFF:FFFFFFFF  
@A00721:190:HGJW7DSXY:4:2103:1181:6136\_2:N:0:TCTGCAAG+GCTGCACT  
CTTAGAATGACTCTATCTTTTCAGACACTTCTTATATTATTTACAATAGTTAATATCATATTAGTAAT  
ACTCACTATCGTTTTCTGCTTTTTCTTAGCTAATAGATTAATAAAGGA  
+  
F:FFFFFFFF:F::FFFFFF,F:FFFFFFFF:FFFFFF:FFF:FFFFFFFF  
FF,FF,FFFFF:FFF:F,FFFFFF,,FFFF,F:FFFFFF,F  
@A00721:190:HGJW7DSXY:4:2314:29252:8187\_2:N:0:TCTGCAAG+GCTGCACT  
ACCAACTCTTCGTTACGAGACCTGATGGTAGAATAGATTTAGTCTCTACACCCATCTCAACGAGGATA  
AAGCGAGTTTTCCGTCCTGAACGTAATACACGAAGAGATCATCCGCAA  
+  
FFFFFFFFFFFFFFFFFFFFFFFFFFFFFFFFFFFFFFFFFFFFFFFFFFFFFFFFFFFFFFFF  
FFFFFFFFFFFFFFFFFFFFFFFFFFFFFFFFFFFFFFFFFFFFFFFFFFFFFFFFFFFFFFFF  
@A00721:190:HGJW7DSXY:4:2136:13856:26083\_2:N:0:TCTGCAAG+GCTGCACT  
AAAGTCCCTTCTAACTTTAGATTATGAATCCTGCCTTTACTCATTTTATAGCAGTTATTTATGTTGTA  
CTTTTTATAATTTATAACCTTCTTATACTTTTGGGTATGTTTTGTGAA  
+  
FFFFFFFFFFFFFFFF,FFFFFFFFFFFFFFFFFFFFFFFFFFFFFFFFFFFFFFFF:FFFFFFF  
FFFFFFFFFFFFFFFFFFFFFFFFFFFFFFFFFFFFFFFF:FFFFF:F,FFFF



@A00721:190:HGJW7DSXY:4:2511:31485:29966\_2:N:0:TCTGCAAG+GCTGCACT  
GAAGACATTATCTCTTATGTACTTATTGTAACGATCATTCTTTCGAGTTTTGTCATTCTTATTCTTTT  
ATTCCTTTAACTGTGTATGAGGAGGATTTATAATGCTTTTCGATAGTG

@A00721:190:HGJW7DSXY:4:1612:5240:11694\_2:N:0:TCTGCAAG+GCTGCACT  
CCGCAATCAATTGAAGAAAACCACTCCCTTCAATTCAATAACATAACATACCATACACTCCCCAAAC  
ATAACATACCATAACCTACCATGACCAATCATCGCTCCAACCTGGCACG

@A00721:190:HGJW7DSXY:4:1149:13838:9392\_1:N:0:TCTGCAAG+GCTGCACT  
CTACTACCGCCGGTCGGCAGATCGGCACCACTGGTCTCTACGTTTCAGGGACCCGCTGTGCAGAATAAC  
CTTCCCAAATCTAGATCTGCACAGAAGAAGGCTGAAGGTCGTTACCGGACGACCACTCAAAGGAAACG  
GGC

@A00721:190:HGJW7DSXY:4:1322:19388:27712\_1:N:0:TCTGCAAG+GCTGCACT  
GAGGTCGCTCGTAACATTGACGTCAGTCCCGTCATCTCTGTGGGAAGTACAGGCAGTACCACAGTCAAA  
AGTCACATTCACCACTACCATACCAATCAATGATGTGACTATACAGTTCGCCATTTCAGAGTGAGTCA  
AAT

@A00721:190:HGJW7DSXY:4:1633:31819:1110\_1:N:0:TCTGCAAG+GCTGCACT  
GTACTGAAGCCTTCCCCTCCGCTGGCACGAAGAACACTCCCAAGCCAATCAATAGTTCTTCTGACCAG  
AATGAAAAGGGGTTTACCAGGGTAGTCTCTAAGTCTACCAGGAAGAGGGGAAATGTCCCCAAACTGA  
GAA

@A00721:190:HGJW7DSXY:4:1326:20537:2675\_2:N:0:TCTGCAAG+GCTGCACT  
AGGTCCATCAGGACCTAAGAAGGGGAAATTACCCCTAATTCTGAAGGAAGATCTCCACCATCTGGGG  
TTGGGAATAAGAAATCTGCACGGGCCAAAGAGGCCGCTGCTACGAAGT

@A00721:190:HGJW7DSXY:4:1343:30129:25113\_1:N:0:TCTGCAAG+GCTGCACT  
GCTTGGGTCATTAAGGGTAGCTGTAAAGTTGCGCCTGCCGACCCCATCTTTGAGACCAAGACTCTCTA  
CAGTAGGTTCTGTCCTACTATGAGCAAATCTGTTGAATTCGTCACTGAGGACGAAGGTGAGAGGACTT  
TTG

@A00721:190:HGJW7DSXY:4:1408:30987:9533\_1:N:0:TCTGCAAG+GCTGCACT  
CAAAGTGAAGAGCAGTCGCTGGGGAAAGAGAATTGCGTGGGTTGAAGGCCGACGCTTCGAGCTTGAGTG  
TGACGAGGCCGGTGACGTTTTTGTCAACGGCGTTTGGAGGATTTTATCCGCGCTTAAGTATGGGGCGA  
AGA

[illegible]

@A00721:190:HGJW7DSXY:4:1410:2953:11898\_1:N:0:TCTGCAAG+GCTGCACT  
AGTCTTGAAGGACTTAGGTTGGCATATTTATGCCGACGATAATAAGCATGTCACCCTTAAGCACCGAG  
GTAAGCTCGGGACTTACAAGAGAGAGTGTGAGAGAGTCGCTCTCACTATTTTTGCCCAGAATGCGGGC  
TTT

+

FFFFFFFFFFFFFFFF:FFFFFFFFFFFF,F,FFFFFFFFFFFFFF:FFFFFFFFFFFFFFFF,FFFFFFFFF  
FFF:FFFFFFFFFFFFFFFFFFFFFFFFFFFFFFFFFFFFFFFFFFFFFFFFFFFFFFFFFFFFFFFF  
FFF

@A00721:190:HGJW7DSXY:4:1314:23972:25473\_2:N:0:TCTGCAAG+GCTGCACT  
GCTCCTTCTGTGGGTGAGGGTTTTTGTATATTCACTGGTTCTGGGAGGCTGCTTTCCTCCATAATTA  
CAACCTCTCTTTAGAGAGCATTAGAAAGATCGGAAGAGCGTCGTGTAG

+

FFFFFFFFFFFFFFFFFFFFFFFFFFFFFFFFFFFFFFFF:FF:FFFFFFFFFFFFFFFF:FFFFFFFFF  
FFFFFFFF:FFFFFF:FFFFFFFFFFFFFFFFFFFFFFFF,FF:FFFFF:

@A00721:190:HGJW7DSXY:4:2466:5620:33082\_2:N:0:TCTGCAAG+GCTGCACT  
GTTGTCACACTTTTCTTGAAAATTTTCTTTCCTCCGTCATTGGGGATTTCGATGTGAGAAGGTGGA  
AGGTGTCAAGGTCTTCTTCATGCTGATCTTTCAGGACCTAATCACAT

+

FFFFFFF:FFFFFFFFF,FFFFFFFFF:,FFFFFFF,FFFFFF,F,:FFFFFFFF:F:FFF:F:FF:F  
:FFF:FFFF::FFFFFFFFF:FFFFFFF,FFFFFF,F::FFFFFF:FF

@A00721:190:HGJW7DSXY:4:1244:14461:29324\_1:N:0:TCTGCAAG+GCTGCACT  
ACGGCTCGTATCGAGTTGGAGGGAGGAAGTTCTCCGAAATTAAGACGGGGGGATTAAGAGTCCAGCT  
GTAAGTGTCAATTCAGAGAGGGGAGCTCTGAAAAGGAACTTCGTGAGAAGATGAGGAAGTCTAAGAG  
GAG

+

:FFFFFFFFFFFFFFFFFFFFFFFFFFFFFFFFFFFFFFFFFFFFFFFFFFFFFFFFFFFFFFFFFFFF  
FFFFFFFFFFFFFFFFFFFFFFFFFFFFFFFFFFFFFFFFFFFFFFFFFFFFFFFFFFFFFFFFFFFF  
FFF

@A00721:190:HGJW7DSXY:4:1316:17861:34084\_1:N:0:TCTGCAAG+GCTGCACT  
AAGGCTCTAGAGAAGATCTCCCCACCTGGAGAAGGCAAGTGGAGAGTCCAGAAGTTGATGAAGAAGGA  
TTATTTGAAGCAGGGGTTACCACTTCCTAAGGTGGATGAGGGAGGTTGTTTCTTTGGAGTTTTAGATA  
ATC

+

FFFFFFFFFFFFFFFFFFFFFF,FFFFFFFFFFFFFFFFFFFFFFFFFFFFFFFF:FFFFFFFFFFFFFFFF  
FFFFFFFFFFFFFFFFFFFF:FFFFFFFFFFFFFFFFFFFFFFFFFFFFFFFF:FFFFFFFFFFFFFFFFFFFF:F  
FFF

@A00721:190:HGJW7DSXY:4:1671:23005:3317\_2:N:0:TCTGCAAG+GCTGCACT  
GGTCATAGAGCCAGCAAGAGAAGCTTATATGCTGGTTTAAGTGATGATTATCACTCCTTGAGAAGACA  
AGCCACATTAAGATATAATTTAGGTCAACTTGGGGTTTCGAATGTCAT

+

FFFFFFF:FFFFFFFFFFFFFFFFFFFFFFFFFFFFFFFF:FFFFFFFFFFFFFFFFFFFFFFFFFFFF  
FFFFFFFFFFFFFFFFFFFFFFFFFFFFFFFFFFFFFFFFFFFFFFFFFFFFFFFFFFFF

@A00721:190:HGJW7DSXY:4:1106:7771:5024\_2:N:0:TCTGCAAG+GCTGCACT  
AGGTCCTTTTGAGTATCGACAGATCTTTCGATCTTGAGGACGTACATTTAACGTGGCAGAATTCGGTA  
ACTTACCATATTGTTCTTCCGGGAAGTTGTGGGATTAACTTTGACT

+

FFFFFFFFFFFFFFFFFFFFFFFFFFFFFFFFFFFFFFFFFFFFFFFFFFFFFFFFFFFFFFFFFFFF  
FFFFFFFFFFFFFFFFFFFFFFFFFFFFFFFF,FFFFFFFFFFFFFFFFFFFFFFFF

@A00721:190:HGJW7DSXY:4:1338:19859:1564\_2:N:0:TCTGCAAG+GCTGCACT  
GGTATGGACTACTCGACTTTTGATCTGGAGTTGTCTAGGGTCATGGCAGATACTACCGATAAGGTGAA  
AAATATGCAGGTCAAAGATTCTGTAGCTCTGAGGGCGGTTGAGGGAGC

+

FFFFFFF:FFFFFFFFFFFF:FFFFFFFFFFFF,FFFFFFFFFFFF:FFFFFFFFFFFF,FFFFFFF  
FFF:FFFFFFF::FFFFFFFFFFFF:FFFFFFF,FFFFFFFFFFFF

$+$ 

@A00721:190:HGJW7DSXY:4:1420:15121:13182\_2:N:0:TCTGCAAG+GCTGCACT  
TTATAATCACTTGTTAAAGTACAGATTTAGTGATTTAGATATTATTGATATTGGAGGCGATATTCGTT  
TTCATATCCAAAACCTCCTTGAATGGAGTACATATTTGCAACCCTATTC

+

@A00721:190:HGJW7DSXY:4:1343:8223:12320\_1:N:0:TCTGCAAG+GCTGCACT  
GATGCATCGAGGTATACGTCTAGGAACATTGATTGGGAACGTACCTACTCACGAGACGTCATGAAAGC  
TATCGAGGGAAGCAAAATGTTTCGTTCTGTTACAAGAACGCTTTGGATTGTGACCATAAAGCCTCAG  
TTG

+

@A00721:190:HGJW7DSXY:4:2524:19361:35837\_2:N:0:TCTGCAAG+GCTGCACT  
ACGATATCTCTCTTGATGATGTAGCCACTATAATGCTTAAGAGAGAGATTGATGTATGTCATTTGCTC  
TTAGTTTGTCCCGGCGAATTATTGGACACGATGAAAAATGACATACCC

+

@A00721:190:HGJW7DSXY:4:2467:16776:32863\_1:N:0:TCTGCAAG+GCTGCACT  
TCGTTATCCGTCATGGAGATGATGGCGCATCACTTGATTACTATATGCCCGAAGGATTGGGTTATTCT  
CACAACAAAGATAAGATTTTATCTTTCTTCAAACACCCTGTTTTCTTAAGGGCGGACAATTGTTCCA  
TTG

+

@A00721:190:HGJW7DSXY:4:1140:11433:12242\_2:N:0:TCTGCAAG+GCTGCACT  
GCATTAATGAGTTCCGAATAACTCGTAATAAATCTTTCTCTAGTGGACAATTCAGAATACCTATTTCC  
GTACCAAGAGCCACTGCCAATCTCATCGCTATACGCATACCTGATTGG

+

@A00721:190:HGJW7DSXY:4:1115:10872:33473\_2:N:0:TCTGCAAG+GCTGCACT  
AAATTTTCTCAAGAGATTATGGTTGATAAAGTTTCTTCATAAGGGCTATTCAGTACGTCATGGGA  
TCACCTCTTCGGTCAATGACAAAACCTTCGAATATGTTACGACATGGC

+

@A00721:190:HGJW7DSXY:4:1672:25021:11663\_2:N:0:TCTGCAAG+GCTGCACT  
AGGATTGTCATCTCGGGGAAAGTGATTCACCAAGATGTTTCATATAGATACGAGATACCTAGAGAAGGT  
CGCAGCGATCTTACTCGTTATCGGAGCTAAGAAGAAGACTTTGGGTAC

+

[illegible]

@A00721:190:HGJW7DSXY:4:1252:2121:5854\_2:N:0:TCTGCAAG+GCTGCACT  
TAACGTTAGTACCGGAGGTGATCTCTCTGCTTCTGCGTTACTGAGAGAAAAGATTGAGGACGCCTACG  
GTGACTTTATGGACAAGATGCAAGTTCTTGGGAAATACTTGTTCCT

+

FFFFFFFFFFFFFFFFFFFFFFFFFFFFFFFFFFFFFFFFFFFFFFFFFFFFFFFFFFFFFFFFFFFFFFFF  
FFFFFFFFFFFFFFFFFFFFFFFFFFFFFFFFFFFFFFFFFFFFFFFFFFFFFFFFFFFFFFFF

@A00721:190:HGJW7DSXY:4:2474:14705:4351\_2:N:0:TCTGCAAG+GCTGCACT  
TCGATTCTTTGTATAGGGAGTGTGAGAAGACAACGAATCTTGAACTACGGTCCTTATCAAAGAAAAT  
GGTGAACCGGTCTCTAAATCTTTGAGATTGAGAAGATTGAAGAACAC

+

FFFFFFFFFFFF, :FFFFFFFFFFFFFFFFFFFFFFFFFFFFFFFFFFFFFFFFFFFFFFFFFFFFFFFF  
FFFFFFFFFFFFFFFFFFFFFFFFFFFFFFFFFFFFFFFFFFFFFFFFFFFFFFFFFFFFFFFF

@A00721:190:HGJW7DSXY:4:1638:32994:8469\_2:N:0:TCTGCAAG+GCTGCACT  
GCTCGGCGTTGTTCTTGAAAACCAAGTTAAGAAGGAGGCTGATCATGGAGTCTTTGTACCTTCTGTCA  
AACTTCGAGGTTGAGTACGAGAGGTGATCCCGGATGTGGATTGAAGG

+

FFFFFFFFFFFFFFFFFFFFFFFFFFFFFFFFFFFFFFFFFFFFFFFFFFFFFFFFFFFFFFFFFFFFFFFF  
:FFFFFFFFFFFFFFFFFFFFFFFFFFFFFFFFFFFFFFFFFFFFFFFFFFFFFFFFFFFFFFFF:FFF

@A00721:190:HGJW7DSXY:4:2465:28402:21715\_2:N:0:TCTGCAAG+GCTGCACT  
GGAGACTCCTTCTTTTGAATGTTGTAAAGAATTGGGTTGAGAAGTGTGCTTTACAAGGAGTTAGACT  
CTTCTTCAAGTTTTTAGATCTTCTTGATAATCTTAAAGAAAATTTTC

+

FFFFFFFFFFFFFFFFFFFFFFFFFFFFFFFFFFFFFFFFFFFFFFFFFFFFFFFFFFFFFFFFFFFFFFFF  
FFFFFFFFFFFFFFFFFFFFFFFFFFFFFFFFFFFFFFFFFFFFFFFFFFFFFFFFFFFFFFFF:FFFFFFFF  
FFFFFFFFFFFFFFFFFFFFFFFFFFFFFFFFFFFFFFFFFFFFFFFFFFFFFFFF, FFFFFFFFFF,

@A00721:190:HGJW7DSXY:4:1162:29921:13197\_1:N:0:TCTGCAAG+GCTGCACT  
GTCTGTACTTACATTCTTTACGCCAGATTCTTCATGGGGCGACGCTGTTTCTTGGTATTTCTGAAA  
TAGTTTATCAGAGCGTCATTTTCCTTTGGGATCTTCTCTGTTAAGGGAATTATTAATCATTCTTC  
TCA

+

FFFFFFFFFFFFFFFFFFFFFFFFFFFFFFFFFFFFFFFFFFFFFFFFFFFFFFFFFFFFFFFFFFFFFFFF  
FFFFFFFFFFFFFFFFFFFFFFFFFFFFFFFFFFFFFFFFFFFFFFFFFFFFFFFFFFFFFFFF:FFFFFFFF  
FFF

@A00721:190:HGJW7DSXY:4:1647:19669:33896\_2:N:0:TCTGCAAG+GCTGCACT  
ATTATTACTGTTTTCTCTACCCATAACTTCTTTTTCAAAAATGCGGATGGGTCTACTGATGTTTTCTC  
ACAGAGTGCAGTCGTTTCAACACTTATCACCACCTTTGAAAGGAAAAT

+

FFFFFFFFFFFFFFFFFFFFFFFFFFFFFFFFFFFFFFFFFFFFFFFFFFFFFFFFFFFFFFFFFFFFFFFF  
FFF:FFFFFFFFFFFF:F,FFFFF,FFFFFFFFFFFF:FFF:FF,FFFFFF

@A00721:190:HGJW7DSXY:4:1326:16821:10989\_2:N:0:TCTGCAAG+GCTGCACT  
AATACGTATGTCGGTGGGGTTCTCAAGGCTCTCATGCCACTGGGATTCTAAGGGGTTCCATAAGATA  
TTATCTGACATTGTGGTTCAATGATCAGGATTCTTCTTTTGGTCCTTA

+

FFFFFFFFFFFFFFFFFFFFFFFFFFFFFFFFFFFFFFFFFFFFFFFFFFFFFFFFFFFFFFFFFFFFFFFF  
FFFFFFFFFFFFFFFFFFFFFFFFFFFFFFFFFFFFFFFFFFFFFFFFFFFFFFFFFFFFFFFF

@A00721:190:HGJW7DSXY:4:1162:22535:32095\_1:N:0:TCTGCAAG+GCTGCACT  
ATTTGGATGTTGTGAAAACATCAGGTTCTTGTCACGATTCTTAAAAGAAGTTTATTAAACTTCAG  
AGTCTCTTGAAGTCCAGGTAGCTAATGTTCTTGCAATAGCCACAGACTTTCTGGGAAAAGAGACCTC  
TGT

+

FFFFFFFFFFFFFFFFFFFFFFFFFFFFFFFFFFFFFFFFFFFFFFFFFFFFFFFFFFFFFFFFFFFFFFFF  
FFFFFFFFFFFFFFFFFFFFFFFFFFFFFFFFFFFFFFFFFFFFFFFFFFFFFFFFFFFFFFFF:FFFFFFFF  
FFF

@A00721:190:HGJW7DSXY:4:1504:29098:17566\_1:N:0:TCTGCAAG+GCTGCACT  
GAGAATTACTCAGATTCAATCTGGCATCACTGAACGTCTACAACGAGTTAGGGAGTGGCTAGGTTTTTA



@A00721:190:HGJW7DSXY:4:1675:12436:35806\_1:N:0:TCTGCAAG+GCTGCACT  
TTTTCTTCCCTCCCTTTTTCGATTGGATTTCGACGGGGTCTTCGTCTCACGACTAATTTGATAAGGT  
TTTTCTTTATGGGACTCTTGTGTGACTTATGAAGGAGGTATTACTTCGGAAGTTCTTAATGTAGGT  
CTC

+

FFFFFFFFFFFFFFFFFFFFFFFFFFFFFFFFFFFFFFFFFFFFFFFFFFFFFFFFFFFFFFFFFFFFFFFF  
FFFFFFFFFFFFFFFFFFFFFFFFFFFFFFFFFFFFFFFFFFFFFFFFFFFFFFFFFFFFFFFFFFFFFFFF  
FFF

@A00721:190:HGJW7DSXY:4:1610:16929:26209\_1:N:0:TCTGCAAG+GCTGCACT  
GGTTTATGTTTCGGTTTCAGCTGGATGGATCTTTTGATGGTATGTTTCACATTGCGTGATCACTTCCC  
GTGGACTTGGGAAGAGATTAAACATAAAATCCAGCGATTCTATTATGTCGCTAAAGCCTGTCCAGTTG  
TCG

+

FFFFF:FFFFFFFFFFFFFFFFFFFFFFFFFFFFFFFFFFFFFFFFFFFFFFFFFFFFFFFFFFFFFFFF  
FFFFFFFF:FFFFFFFFFFFFFFFFFFFFFFFFFFFFFFFFFFFFFFFFFFFFFFFFFFFFFFFFFFFFFF  
FFF

@A00721:190:HGJW7DSXY:4:1229:14199:16282\_2:N:0:TCTGCAAG+GCTGCACT  
GGCTGTGGGGATTAACCTCCCTCGTGAACTTACGACGATGTTCTCGCTCGCATTTACAAGGATTAC  
TAAGTCTGAGATCTGCCACTTCTAATTTTAGGAAACGTCGCGAAAAGA

+

FFFFFFFFFFFFFFFFFFFFFFFFFFFFFFFFFFFFFFFFFFFFFFFFFFFFFFFFFFFFFFFFFFFFFFFF  
FFFFFFFF:FFFFFFFFFFFF:FFFFFFFFFFFF:FFFFFFFFFFFF:FFFFFFFFFFFF:FFFF

@A00721:190:HGJW7DSXY:4:1362:19940:12790\_2:N:0:TCTGCAAG+GCTGCACT  
GTCTTGTCGAAAAATATCGCCGGAACCTTCTAATAGAGGATCCTGATGACATTATTTCAACGGATAC  
CGATCTCAGTTCTACCACAGAAACCGTCTCAGGAACGTCTCCACTGA

+

FFFFFFFFFFFFFFFFFFFFFFFFFFFFFFFFFFFFFFFFFFFFFFFFFFFFFFFFFFFFFFFFFFFFFFFF  
F:FFFFFFFFFFFFFFFFFFFFFFFFFFFFFFFFFFFFFFFFFFFFFFFFFFFFFFFFFFFF:FFFFF

@A00721:190:HGJW7DSXY:4:1321:23647:5932\_2:N:0:TCTGCAAG+GCTGCACT  
AAAGACGACCTTCTTGTGGGACTGAGACCTCTGAATTTTCAGGGTGCCTGATGAGGACGTTGAAAG  
GGATAATTTCAACTCTGAGACTTCTAAGAGTGTTTCAAAGACCAGAA

+

FFFFFFFFFFFFFFFFFFFFFFFFFFFFFFFFFFFFFFFFFFFFFFFFFFFFFFFFFFFFFFFFFFFFFFFF  
FFFFFFFFFFFFFFFFFFFFFFFFFFFFFFFFFFFFFFFFFFFFFFFFFFFFFFFFFFFFFFFF

@A00721:190:HGJW7DSXY:4:1314:26530:35008\_1:N:0:TCTGCAAG+GCTGCACT  
TAAAGGTAGGAAGGGGAGAAAACAGAACAGCGAGCGGTTGAAGAGAAAACCTGATATGGTTGCGGCTG  
ATCGTACCCCAATTCTGCTAGAAAGATCACTCTCGGCGATACCACTGATCTTCAGAGTTACGTAGT  
GGT

+

FFF,FFFFFFFFFFFFFFFFFFFFFFFFFFFFFFFFFFFFFFFFFFFFFFFFFFFFFFFFFFFFFFFF  
FFFFFFFFFFFFFFFFFFFFFFFFFFFFFFFFFFFFFFFFFFFFFFFFFFFFFFFFFFFFFFFFFFFFFFFF  
FFF

@A00721:190:HGJW7DSXY:4:1316:29288:22654\_1:N:0:TCTGCAAG+GCTGCACT  
TTTTATCAAAGAGAAAGTTTCTGCTAGTCGCGACGATAGTATTTATCGGAGTGATATTAACAAGTTAA  
ACTTCGAACTGACCACTTACAAGAGTGTTGAAGTACCGCAACATGGATCAGTTTTCCAAAAGCTATT  
AAT

+

FFFFFFFFFFFFFFFFFFFFFFFFFFFFFFFFFFFFFFFFFFFFFFFFFFFFFFFFFFFFFFFFFFFFFFFF  
FFFFFFFFFFFFFFFFFFFFFFFFFFFFFFFFFFFFFFFFFFFFFFFFFFFFFFFFFFFFFFFFFFFFFFFF  
FFF

@A00721:190:HGJW7DSXY:4:1460:8061:27070\_2:N:0:TCTGCAAG+GCTGCACT  
AAACTGAATCCACTCTCTTGGGATATAAATGAGTACATCTATAATAGAGTTTGGAACTGTGTAATGT  
CCTACGTACTGTTCAAGGTGTTTGGGCTTCTCTAAAGAACAGCAACTT

+

```

FFFFFFFFFFFFFFFFFFFFFFFFFFFFFFFFFFFFFFFFFFFFFFFFFFFFFFFFFFFFF:FFFFFFFFFFFF
FFFFFFFFFFFFFFFFFFFFFFFFFFFFFFFFFFFFFFFFFFFFFFFFFFFFFFFFFFFFF:FFFFFFFFFFFF
@A00721:190:HGJW7DSXY:4:1614:5990:23766_2:N:0:TCTGCAAG+GCTGCACT
GGCTGATGACTTAAATTTTCGATTCTGCTTCGACGGTCATTCCATAAGACCTTTCTTGGGGAGTACAG
AGGGTTTTGAAAATTACGGAACCTTTCCTCGTTCCTCCTGAAGATCTTC
+
,FF,FFF:F:F,FFFFFFFFFFFFFFF,:F,:::FFF,FF,F,FFFFFF,FFF,,, :FFFF,F,F:F,F,
F:, ,FF:FFFFFF,F:::FF::F,F:,FFF,FFFF,FF:FFF:F,, :
@A00721:190:HGJW7DSXY:4:1423:13919:15013_2:N:0:TCTGCAAG+GCTGCACT
GTTATTCTTGCGAAGGTTCAAGTCGATTGATTTTGTGACTACGATCTCTTGTATAAGAAGTTCT
TCGCAGTTGAATCTCCACCAGGTGGAGGGAAGACCACTGAAC TTATAG
+
FFFFFFFFFFFFFFFFFFFFFFFFFFFFFFFFFFFFFFFFFFFFFFFFFFFFFFFFFFFFF:FFFFFFFFFFFF
F:FFFFFFFFFFFFFFFFFFFFFFFFFFFFFFFFFFFFF:F:FFF:FFFFFFFFFFFF
@A00721:190:HGJW7DSXY:4:1239:12879:1564_1:N:0:TCTGCAAG+GCTGCACT
TTCGCAAAGGTCTTGAAGTACGTATTGTCACTGCTAATCGTAATTCGCGAGAAGAGATAGTGACTAA
AGTTTTGGCACTTCTAGTTCATCGCGGTATTTGTGAAATTAAGACAGACGTGAAAGTTATGATGAGTG
ATC
+
FFFFFFFF:F:F,FFFFFFFFFFFF:FFFFFFFFFFFFFFFFFFFF:FFFFFFFF:FFFFFFFFFFFFFFFFFFFF
FFFFFFFFFFFFFFFFFFFF:FFFFFFFFFFFF:FFFFFFFFFFFFFFFFFFFFFFFFFFFFFFFFFFFFF:F
FFF
@A00721:190:HGJW7DSXY:4:1226:25744:26631_2:N:0:TCTGCAAG+GCTGCACT
AGCTGATTCTTATTGCATGAACGTCGCTGAGGTCAAACCTGTGGACGTTCTTTTCATCGACGAATTAT
TCATGATTCACGCTGGTCAGACCCTTTTCTTACACATCTACTTAAGG
+
FFFFFFFFFFFFFFFFFFFFFFFFFFFFFFFFFFFFFFFFFFFFFFFFFFFFFFFFFFFFF:FFFFFFFFFFFF
FFFFFFFFFFFFFFFFFFFFFFFFFFFFFFFFFFFFFFFFFFFFFFFFFFFFFFFFFFFFF
@A00721:190:HGJW7DSXY:4:1261:7437:3286_2:N:0:TCTGCAAG+GCTGCACT
GTTACGGTGATTCCAATCAAATCGGATTCATCAATCGTATTGATCTCCAAGTCGCAAAC TACTTCAAC
ATCAACGACATCATTTCTTGATGAGTGTCGTTTCGTATCGAAGTCTCAGT
+
F:FFFFFFFF:FFFFFFFFFFFF:,FF:FFFFFFFFFFFF:,FFFFFFFFFFFF:FFFFFFFFFFFFFFFF
FFFFF::FFFF:FFFF:,FFFFFFFF:FFFFF,FFFFFF:FF:FFFF,
@A00721:190:HGJW7DSXY:4:1266:5240:8782_2:N:0:TCTGCAAG+GCTGCACT
CGGCCGACGTTTGTGCGGAACTCTCAGAGTTTACGGCAGAAAAATTTCTCCTGCTTGTAATTCGAGA
GAGGACACTATGGAAATTAGACCTATCAGATGTCTTGACGACTTCGAA
+
FFFFFFFFFFFFFFFFFFFFFFFFFFFFFFFFFFFFFFFFFFFFFFFFFFFFFFFFFFFFF:FFFFFFFFFFFF
FFFFFFFFF:FFFFFFFFFFFFFFFFFFFFFFFFFFFFF:FFFFFFFF,FFFF
@A00721:190:HGJW7DSXY:4:2456:15356:15718_2:N:0:TCTGCAAG+GCTGCACT
ATATTACTTTCACTCAAGGTGAAAAGTTTGAATTAACAAAGTCCTTGGTAAGAGTAAGGTTAAATGT
GAAGATGCTCAGACTATTCATGAAGTTCAAGGTAATACTTACCAGCAC
+
FF:FFFFFFFF:FFFFFF:FF,FFFFFFFF:FFFFFF:FFFF:FFFFFFFFFFFFFFFFFFFFFFFF
FFFFFFFF:FFFFFF:FFFFF,FFFFFFFFFFFFFFFFFFFFFFFFFFFFF
@A00721:190:HGJW7DSXY:4:2615:13358:22060_1:N:0:TCTGCAAG+GCTGCACT
ATGACCCTGTTTTTGCATCACAAACACATATTACCGTTGCTCTATCACACACGTTGAATCTTTACGAT
ACTTTGTTATCAATGTAAAGTTAAACGATGCTACTTGTGAGAGGATCAATCACAGTAAGGAACTGTCA
CGT
+
FFFFFFFFFFFFFFFFFFFFFFFFFFFF,FFFFFFFFFFFFFFFFFFFFFFFFFFFFFFFFFFFF:FFFFFFF
FFF:FFFFFFFFFFFF:FFFFFFFF:FFFFFFFF:FFFFFFFFFFFFFFFFFFFFFFFFFFFFFFFFFFFF
FFF

```



@A00721:190:HGJW7DSXY:4:1351:32036:20870\_1:N:0:TCTGCAAG+GCTGCACT  
TGCAGATTCAACCCCTTATATCGAGGCTATCGAGGACGATGAGTATCTTGAAGTTGTTGACGACAAGC  
CTCAAGAGGGTAGAGGACCACCTGGATCTTCTACTGTCTCTGCCTTCCAAGATTTCTTAGAAGAGGTT  
ATT

+

FFFFFF:FFFFFFFFFFFFFFFFFFFFFFFFFFFFFFFFFFFFFFFFFFFFFFFFFFFFFFFFFFFFFFFF  
FFFFFFFFFFFFFFFFFFFFFFFFFFFFFFFFFFFFFFFFFFFFFFFFFFFFFFFFFFFFFFFFFFFFFFFF  
FFF

@A00721:190:HGJW7DSXY:4:1454:32334:32189\_1:N:0:TCTGCAAG+GCTGCACT  
CTTAACGTCACCTCGGTAATCTTTCAGCCGAATTAAGTACTAATGAGTTCAAGTCGGTTGTGATCGAA  
TTAAGATCAAGGCTAATACCTTTATAGGTAAGAAGCCCTTGAGCCGCGTAGTCAGCGCGTTTAGCTG  
TAT

+

FFFFFFFFFFFFFFFFFFFFFFFFFFFFFFFFFFFFFFFFFFFFFFFFFFFFFFFFFFFFFFFF:FFFFFF  
FFFFFFFFFFFFFFFFFFFFFFFFFFFFFFFFFFFFFFFFFFFFFFFFFFFFFFFFFFFFFFFF:FFFFFF  
FFF

@A00721:190:HGJW7DSXY:4:1374:21938:11647\_1:N:0:TCTGCAAG+GCTGCACT  
TATACCCGATAGGGTACCGAGTCTCCAAGAGAATATTTATCTTATGAGGCTCGAACTTCAACGTTT  
TCACAACGGAAAGACATATCGCACCCGAAATTTTTGGGCAGAATGCTCTTAACGCGTTCTTGAACGG  
TGT

+

FFFFFFFFF:FFFFFFFFFFFFFFFFFFFFFFFFFFFFFFFFFFFFFFFFFFFFFFFFFFFFFFFFFFFF  
FFFFFFFFFFFFFFFFFFFFFFFFFFFFFFFFFFFFFFFFFFFFFFFFFFFFFFFFFFFFFFFF:FFFFFFF  
FFF

@A00721:190:HGJW7DSXY:4:1533:12283:15468\_2:N:0:TCTGCAAG+GCTGCACT  
CTAAGTTGGATAAAGTTATAGGAGACTCAGTTAACCTGAGAGCTCCTCAATTGATAGATTGGGTCAAC  
AATAGGGACGCTAGTATACTTCGTAAAGTCGACAGCGAAATGGTCAAT

+

FFFFFFFFFFFF:FFFFFFFFFFFFFFFFFFFFFFFFFFFFFFFFFFFFFFFFFFFFFFFFFFFFFFFFFFFF  
FFFFFFFFFFFFFFFFFFFFFFFFFFFFFFFFFFFFFFFFFFFFFFFFFFFFFFFFFFFFFFFF

@A00721:190:HGJW7DSXY:4:2242:14651:16689\_1:N:0:TCTGCAAG+GCTGCACT  
ATATGACCTATTTTAAAGTCATGGTGAAAAGGGAAGCTAAGGTTAAACTTGATGCTTCAGCCTTTTCG  
AAGCATAACCCCGCACAGAATATCGTTTATCACGCAAAATTTATTAATGCAATTTTCGACCTATCTT  
TAA

+

FFFFFFF,F:FFFFFFFFFFFF:F:FFFF:FFFFFFFFFFFF:F:FFF:FFF,FFFFFFFFFFFFFFFF  
FF,FFFFF::F,FFFFFFFFFFFF:FFFF::F,FFFFFFFFFFFFFFFF:FFFFFFF,FFFFFF  
FFF

@A00721:190:HGJW7DSXY:4:1150:27561:14559\_1:N:0:TCTGCAAG+GCTGCACT  
TGTCTTTTACCCAACATTTTATGTATACAGAGATGACCAGTGACGATTTCTCCCGGAAGCTCTTCTC  
TCTCTTAGGAGGTCATGATGACTACTATAAGGGTGAAATCGATTTTTCGAAGTTTGACAAATCTCAAG  
ATT

+

FFFFFFF:FFFFFFFFFFFFFFFF:FFFFFFFFFFFF:FFFFFFFFFFFFFFFFFFFFFFFFFFFFFFFF  
FFFFFFFFFFFFFFFFFFFFFFFFFFFFFFFFFFFFFFFFFFFFFFFFFFFFFFFFFFFFFFFF:FFFFFFF  
FFF

@A00721:190:HGJW7DSXY:4:1138:31204:10003\_2:N:0:TCTGCAAG+GCTGCACT  
AGCCTATGAGATAAAGATGTATTCTTATTAGGCTTCGATGCTGAATTTCTTGAATTTGGAGTGCCA  
GTGAATATTTTGTACGCCAGGAGATCGGAAGAGCGTCGTGTAGGGA

+

FFFFFFFFFFFFFFFFFFFFFFFFFFFFFFFFFFFFFFFFFFFFFFFFFFFFFFFFFFFFFFFFFFFF  
FFFFFFFFFFFFFFFFFFFFFFFFFFFFFFFFFFFF:FF,FFF,FFFFFFFFFFFF

@A00721:190:HGJW7DSXY:4:2278:26666:18114\_2:N:0:TCTGCAAG+GCTGCACT  
ACGGCCAACACTTTCTTTGTAATTGTATGATCACTTTGATGATTTTATCACTTTATTATGACCTTGG

AAAGTTTTTCGGCTGTGGTTGTCGCTGGGGACGATTCCATTCTGTTTTTC  
+  
FFFFFFFFFFFFFFFFFFFFFFFFFFFFFFFFFFFFFFFFFFFFFFFFFFFFFFFFFFFFFFFFFFFFFFFF  
FFFFFFFFFFFFFFFFFFFFFFFFFFFFFFFFFFFFFFFFFFFFFFFFFFFFFFFFFFFFFFFF  
@A00721:190:HGJW7DSXY:4:1428:32949:15217\_2:N:0:TCTGCAAG+GCTGCACT  
CAGCGTACTTCTGCTCGCGATTTATTCTTTTTGTCAATGATTACATCTACTTCGTTCTGATCCTTAC  
AAGATCATCGTTAAGTTAGGTAAACCCCTAACCGATGTTACTCTTGTA  
+  
FFFFF:FFFFFFFFFFFFFFFFFFFFFFFFFFFFFFFFFFFFFFFFFFFFFFFFFFFFFFFFFFFFFFFF  
FFFFFFFFFFFFFFFFFFFFFFFFFFFFFFFFFFFFFFFFFFFFFFFFFFFFFFFFFFFFFFFF  
@A00721:190:HGJW7DSXY:4:1229:31792:36793\_1:N:0:TCTGCAAG+GCTGCACT  
TTTAAAGACTATACTAAATATCTCCACTACGAGGTTGTTGTTTGGCGATTAGCTCTTGCGACTAATAT  
TCGATATTCGATTGAGGGTCGTTATACCTATTCGCGCTATCTGTGCTTTGAATTGTATAAGATCAAATT  
TTA  
+  
FFFFF::F,FFFF:FFFFFF:::FF:FFFF,F,FF:FFFF:FFF:FFFFFFFFFFFFF,F,FF,FFF  
FF::FFFFFFFF:FFF,FFFF:FFF,FFF:F,F:FFF:F,F:FFFF:FFFF,FF:FFFF:,F::FF,FF  
FFF  
@A00721:190:HGJW7DSXY:4:1322:4869:36886\_2:N:0:TCTGCAAG+GCTGCACT  
CCTGATGTGGAGGGAGTTCTTGAAGCATCCCGACCTTTCCTTGTAATAATTTTGATGCGGTTTCATAA  
GATTATCAGTAATCCTGATTCTACTACGATTTCATGGACCTTCCATCC  
+  
FFFFFFFFFFFFFFFFFFFFFFFFFFFFFFFFFFFFFFFFFFFFFFFFFFFFFFFFFFFFFFFFFFFFFFFF  
FFFFFFFFFFFFFFFFFFFFFFFFFFFFFFFFFFFFFFFFFFFFFFFFFFFFFFFFFFFFFFFF  
@A00721:190:HGJW7DSXY:4:1444:11966:28855\_2:N:0:TCTGCAAG+GCTGCACT  
GAGAGACGTATCTCAAAGATCGACTTCGAGACAGGTGATATTGTTGAGCGAGACGACCAAGATCTAA  
ATTCGGTAACGGTGCGTGGCGCTTTATTTTAAAAAGCTCCCTCCTCTC  
+  
FFFFFFFFFFFFFFFFFFFFFFFFFFFFFFFFFFFFFFFFFFFFFFFFFFFFFFFFFFFFFFFFFFFFFFFF  
FFFFFFFFFFFFFFFFFFFFFFFFFFFFFFFFFFFFFFFFFFFFFFFFFFFFFFFFFFFFFFFF  
@A00721:190:HGJW7DSXY:4:1171:27751:9220\_2:N:0:TCTGCAAG+GCTGCACT  
CTGATACTTATCACGAAAGGACTTGAGTCTTTTGATCAGTCTCTGACTTGACCATCTTTCATTTTAA  
TGACGATCATTAAGACTCTCTTCTTCTTTGTTTCTTCTTTGCACTG  
+  
FFFFFFFFFFFFFFFFFFFFFFFFFFFFFFFFFFFFFFFFFFFFFFFFFFFFFFFFFFFFFFFFFFFFFFFF  
FF:FFFFFFFFFFFFFFFFFFFFFFFFFFFFFFFFFFFFFFFFFFFFFFFFFFFFFFFFFFFFFFFF  
@A00721:190:HGJW7DSXY:4:2310:5620:26287\_2:N:0:TCTGCAAG+GCTGCACT  
CAGCTTGTGTTTTACCTAATCTGTGTTTTTACGATAACAACATCAGTTGATTAAGACTCTTCCGAAA  
GGCGAACTTTGGGAATTTGAAGCTCAGGGTGAAGCACAACGTTTGACC  
+  
FFFFFFFFFFFFFFFFFFFF,FFF:FFFFFFFFF:FFFFF:FFFFFFFFFFFFF:FFFFFFFFFFFFFFFF  
FFFFFFFFF,:FFFFFFFFFFFFFFFFFFFFFFFF:FFFFFFFFF:,FFFF,F  
@A00721:190:HGJW7DSXY:4:1477:23276:5635\_1:N:0:TCTGCAAG+GCTGCACT  
GTTACGGATATACTCTCCTTGAGTTCACCTCGTAAGGACACTACCACTTATTACGATATTTCTTTAGTC  
GATGGGTTTTTCGACGCCTTTAAGCGTCTTCTGTTTCATCGCAACCAGATGATATCTTCTATTGAACTT  
ATG  
+  
FFFFFFFFFFFFFFFFFFFFFFFFFFFFFFFFFFFFFFFFFFFFFFFFFFFFFFFFFFFFFFFFFFFFFFFF  
FFFFFFFF:FFFFFFFFFFFFFFFFFFFFFFFFFFFFFFFFFFFFFFFFFFFFFFFFFFFFFFFFFFFFFFFF  
FFF  
@A00721:190:HGJW7DSXY:4:2250:23131:20666\_2:N:0:TCTGCAAG+GCTGCACT  
TGTTTACCACCGAAATATCAAGGTTCTTGTCCTTCAAACGATTGGAAGGTTAGTTATCTTAATAGTAC  
TAAAGGGGTTTACTTACAACCCTATGACGATAGTTTCTCTTTACACAC  
+

[illegible]

FFFFFFFFFFFFFFFFFFFFFFFFFFFFFFFFFFFFFFFFFFFFFFFFFFFFFFFFFFFFFFFFFFFFFFFFFFFFFFFF  
FFF

@A00721:190:HGJW7DSXY:4:1474:5837:11694\_1:N:0:TCTGCAAG+GCTGCACT  
CCCTGATTCCGGCCGGTGGTAGCTCATTTCTACCAGGGGCTATTACTCTTGCTGAAACAGCTATTAAA  
GCTGTTGAGCGGGTAATTACACCTAAACGAGCTCGATCTGCCATCGCTGAAGGATGTGCACTCTTTTC  
TGC

+  
FFFFFF,:FFFFFFFFFFFFFFFFFFFFFFFFFFFFFFFFFFFFFFFFFFFFFFFFFFFFFFFFFFFFFFFF  
FFFFFFFFFFFFFFFFFFFFFFFFFFFFFFFFFFFFFFFFFFFFFFFFFFFFFFFFFFFFFFFFFFFFFFFF  
FFF

@A00721:190:HGJW7DSXY:4:1437:21395:16564\_1:N:0:TCTGCAAG+GCTGCACT  
CTTCGTCGATTGTATCAACAGTAACATTACTTCTAATAAAGGTCTCTATCAAGCTCGTATTATCGTCG  
CTGCTGGATCTGCGTTACCGTTGAAGGCTAACTCCAAGGTAATTATGAAGACTGTGATTTATCTTTC  
ACT

+  
FFFFFFFFFFFFFF:FFFFFFFF:FFFFFFFFFFFFFFFFFFFFFFFFFFFFFFFFFFFFFFFFFFFFFFFF  
FFFFFFFFFFFFFFFFFFFFFFFFFFFFFFFFFFFFFFFFFFFFFFFFFFFFFFFFFFFFFFFFFFFFFFFF  
FFF

@A00721:190:HGJW7DSXY:4:1266:23710:11334\_1:N:0:TCTGCAAG+GCTGCACT  
ACGTGTGCTCTTCCGATCTATAATTTCAATCTTCTTAAAAAGAAGATAGAGAGTCATACTTTGGGCTA  
TCGTTCAAGTGCATGGGGTTGGATAGCCAATATTGAAGTGGACACCTCTGGTAGTATCGAAGTAAAGA  
TAA

+  
FFFFFFFFFFFF:FF:F,FFFFFFFFFFFF,FFF:FFF:FFF:FFF:FFFFFFFFFFFFFFFFFFFFFF  
FFFFFFFFFFFFFFFFFFFFFFFFFFFFFFFFFFFFFFFFFFFFFFFFFFFFFFFFFFFFFFFFFFFFFFFF  
FFF

@A00721:190:HGJW7DSXY:4:1154:8241:27884\_1:N:0:TCTGCAAG+GCTGCACT  
ATACTATGGTTGAATCAACTAAGCATACTACTTTTGCTTTGATTACTCTACCGCCTTACAAGTCTAAG  
GTAAAGAGTCGATTAAACAAGTTGTACTTATCAATGATTTTATCGCTGGTTGTTATCTCGAAAAGTC  
TCT

+  
FFFFFF:FFFFFFFFFFFF:FFFFFFFFFFFFFFFFFFFFFFFFFFFFFFFFFFFFFFFFFFFFFFFFFFFF  
FFFFFFFFFFFFFFFFFFFFFFFFFFFFFFFFFFFFFFFFFFFFFFFFFFFFFFFFFFFFFFFFFFFFFFFF  
FFF

@A00721:190:HGJW7DSXY:4:1270:23773:24659\_2:N:0:TCTGCAAG+GCTGCACT  
TCAGTTCTAACCCAAAGAGAATATCTAAAATATTTACAAAATCTTACCACTATCTACGAACCTAAAGT  
TCTGAAGACGTTGCTTGTGCTTCTCCTTTAATGGCACTACCTCGGT

+  
FFFFFFFFFFFFFFFFFFFFFFFFFFFFFFFFFFFFFFFFFFFFFFFFFFFFFFFFFFFFFFFFFFFFFFFF  
FFFFFFFFFFFFFFFFFFFFFFFFFFFFFFFFFFFFFFFFFFFFFFFFFFFFFFFFFFFFFFFFFFFFFFFF

@A00721:190:HGJW7DSXY:4:2540:23692:31250\_2:N:0:TCTGCAAG+GCTGCACT  
TTGGAACGAAGGCGACCTGTTCCGGAGTTTTACGGGATCCGGAATGTTCTGTCTATATTAGGTGAAG  
CGAAATACGATTTCAACGTCAAGATCGGAAGAGCGTCGTGTAGGGAA

+  
FFFFFFFFFFFFFFFFFFFFFFFFFFFFFFFFFFFFFFFFFFFFFFFFFFFFFFFFFFFFFFFFFFFFFFFF  
FFFFFFFFFFFFFFFFFFFFFFFFFFFFFFFFFFFFFFFFFFFFFFFFFFFFFFFFFFFFFFFFFFFFFFFF

@A00721:190:HGJW7DSXY:4:1227:19334:31626\_2:N:0:TCTGCAAG+GCTGCACT  
ATTTGATCTGGTTGCTCAATTCTAAGCGTGTTCCGCTTAGTGCGAGGCCTCTCTTCTACGAGTATTGC  
TATTTATACGTTACGAGAAGAAGGTTGAAAGTTTGAGAACTTAGTT

+  
FFFFFFFFFFFFFFFFFFFFFFFFFFFFFFFFFFFFFFFFFFFFFFFFFFFFFFFFFFFFFFFFFFFFFFF:FFF  
FFFFFFFFFFFFFFFFFFFFFFFFFFFFFFFFFFFFFFFFFFFFFFFFFFFFFFFFFFFFFFFFFFFFFFFF

@A00721:190:HGJW7DSXY:4:2204:8034:33786\_2:N:0:TCTGCAAG+GCTGCACT  
ACATACTAAATACTAGATATTTGGATGATCTTGATAAAGAACTTCATGAATTTTCAGAGGATGAAAAA

TTTTCTTCCTTGATTTTAATATAAAGAATCTTTACCAGGACTCCTAC  
+  
FFFFFFFFFFFFFFFFFFFF,FFFFFFFFFFFFFFFFFFFF:FFFFFF:FFF::FFFFFFFFFFFFFFFFFFFF  
:FFFFFFFF:FFFFFFFF,F:FF,F:FFFFFFFFFFFFFFFF:FF:FFF  
@A00721:190:HGJW7DSXY:4:1447:2799:28260\_2:N:0:TCTGCAAG+GCTGCACT  
TCTGATCGTAAGAAGTTTATAAGGAACATATCCATTTGTTGTAATCGGGTCATCAACTTAGAACTCGA  
AACTCTAAGTGGTAATACTGTCTTTCCAAGCTTACCTGTATCTTCAAT  
+  
FFFFFFFFFFFFFFFFFFFF,FFFFFFFFFFFFFFFF,F,FF:F,FFF,FFFFFFFFFFFFFFFFFFFF  
FFFFF::FFFFFF:FFFFFF,FFFF:FF:FFFFFF::FFFFFF  
@A00721:190:HGJW7DSXY:4:1478:6298:32315\_1:N:0:TCTGCAAG+GCTGCACT  
TTCGATAGGGGACATTTTATCGTGGGCTTTCGTAAGGAAGATCTGTTATCGACGGTTTATCGTTTA  
CGAAGTATCACTCCACCGGTGAATGGTTTAAGAATACTATAAATAGAATAGCTATTACTACTAATGGC  
GTT  
+  
FFFFFFFFFFFFFF:FFFFFFFFFFFFFF:FFFFFFFFFFFFFFFFFFFFFFFFFFFFFFFFFFFFFFFFFFFF  
FFFFFFFFFFFFFFFFFFFFFFFFFFFFFFFF:FFFFFFFFFFFFFFFFFFFFFFFF:FFFFFFFFFFFFFFFFFFFF  
FFF  
@A00721:190:HGJW7DSXY:4:1653:24740:6042\_2:N:0:TCTGCAAG+GCTGCACT  
TAGTGACATCTGGTCAATTTCTGTTTTAGGTGGTCTTTATTCTATTATTGATTTTTATGAGATTGATA  
CGTTAACAGAAGATGATGTTAGAGTAGAATTCCTGAAGAGTCCTTCG  
+  
FFFFFFFFFFFFFFFFFFFFFFFF:FFFFFFFFFFFFFF:FFFFFFFFFFFFFFFFFFFFFF:FFFFFFFF  
F:FFFFFFFFFFFFFFFFFFFFFFFF:FFFFFFFFFFFF,FFFFFFFFF:  
@A00721:190:HGJW7DSXY:4:1545:11433:20666\_1:N:0:TCTGCAAG+GCTGCACT  
TTAAATCTAGGATTATGTCTGTGTTGAAAGACTTTCTACCGATAAGGGTCACTAGTCTTACACAATTA  
AGAAATAATCCTACATTGACTGATTATCTAAAGATTGAAGGAAAATTTTATCCTCGTTTAACTACTT  
AGA  
+  
FFFFF:FFFFFFFFF:FFFFFFFFFFFFFFFFFFFFFFFFFFFFFFFFFFFFFFFFFFFFFFFFFFFF  
FFFFFFFFFFFFFFFFFFFFFFFFFFFFFFFFFFFFFFFFFFFFFFFFFFFFFFFFFFFFFFFFFFFF,FFFFF  
FFF  
@A00721:190:HGJW7DSXY:4:1523:30987:25254\_1:N:0:TCTGCAAG+GCTGCACT  
ATACAAATGATAACTTCTAATTTACGTTTGCTACTCAGAGCTGGTCCTCTCAGCAAAGGGATGCATGG  
TGTTATCTCCTCAGGAGTCCCGGCATTTGATAATAATGACGAGACTTTCGTCATAATCGCTGCATATT  
ACG  
+  
F:FFFFFFFFFFFFFFFFFFFFFFFFFFFFFFFFFFFFFFFFFFFFFFFFFFFFFFFFFFFFFFFFFFFF  
FFFFFFFFFFFF,FFFFFFFFFFFFFFFFFFFFFFFFFFFFFFFFFFFFFFFFFFFFFFFFFFFFFFFFFFFF  
FFF  
@A00721:190:HGJW7DSXY:4:1342:12997:20556\_2:N:0:TCTGCAAG+GCTGCACT  
CCAGCGCATCTCGTGTGAGCCTCGACCCGATTATATGGTATTAACCTTATAAAGGTGAGGAGACCATT  
TTCTTGCTGAAATTTATAGAAGATTATTTTGACAGAATCAATAAGAAT  
+  
FFFFF:FFFFFF:FFFFFFFFFFFFFFFFFFFFFFFFFFFFFF:FFF:FFFFFFFFFFFFFFFFFFFFFFFF  
FFFFFFFFFFFFFFFFFFFFFF:FFFFFFFFFFFFFFFFFFFFFFFFFFFFFFFF  
@A00721:190:HGJW7DSXY:4:1620:3396:20932\_1:N:0:TCTGCAAG+GCTGCACT  
TATGCTGATCTAAAATTTGATCTAGATGGATCCACTCCTCGAGTTATCATGATGTTAGTATGTTATA  
TACTGATTTACAACGATATAGGAGTAATCTACGAGAAGATTCTAGAATTCTTAATTATAATATTCAAC  
CTC  
+  
FFF,FFFF:FF:FFFFFFFFFFFFFFFFFFFFFFFF:F:F:FF:F:FFFF:FFF:FFFFFF:F,F:FFF  
F:FFFFFFFF:F,FFFFFFFFF::FFFFFF:F:FFFFFFFFFFFFFFFFFFFFFFFFFFFFFFFFFFFF  
FFF

@A00721:190:HGJW7DSXY:4:1367:27190:14606\_2:N:0:TCTGCAAG+GCTGCACT  
GAGATCACACATTTTGAGAACTAACTATGTTATGTTCTCTGATCATTTTGACAATCTCTTCTTATAAT  
AAATAAATAAATAATTACTAATGGCAAATAGTGGAAGGCTCCAGT

+

F:FFFFFFFFFFFFFFFFFFFFFFFFFFFFFFFFFFFFFFFFFFFFFFFFFFFFFFFFFFFFFFFF  
FFFFFFFFFFFFFFFFFFFFFFFF,FFFFFFF,:FFFFFFFFFFFFFFFFFFFFFFFF

@A00721:190:HGJW7DSXY:4:2569:22263:6324\_2:N:0:TCTGCAAG+GCTGCACT  
CTGCTTTGGATTACGATGACGTGAGAATAGGTGAAGGGATAGTTTTTACCTCGACCAACATTAAGGCG  
GCGGCGACTAATCTTAAAGCTTCACCCAAAATGAAGGACACTTCGAAA

+

FFFFFFFFFFFFFFFFFFFFFFFFFFFFFFFFFFFFFFFFFFFFFFFFFFFFFFFFFFFFFFFF  
FFFFFFFFFFFFFFFFFFFFFFFFFFFFFFFFFFFFFFFFFFFFFFFFFFFFFFFF

@A00721:190:HGJW7DSXY:4:2208:23122:26819\_2:N:0:TCTGCAAG+GCTGCACT  
AAAAGGCTCTAAAGGACACTATACAATATCCAGACGACGACGAAGCTTATACTACTTTAATTTTGGGT  
ATTATGTGGAGATATCGTGATATCAGTACGTCCAGATCCTCTGCTTTT

+

FFFFFFFFFFFFFFFFFFFFFFFFFFFFFFFFFFFFFFFFFFFFFFFFFFFFFFFFFFFFFFFF  
,FFFF:FFFFFFFFFFFFFFFFFFFFFFFFFFFFFFFFFFFFFFFFFFFFFFFF

@A00721:190:HGJW7DSXY:4:2449:14181:11146\_2:N:0:TCTGCAAG+GCTGCACT  
ATCAAATATAAAGAAAAGGACTATGAAATAAAAGATTTGGTGCTTAGGGATATAATGAATTCAGCACC  
ACATTTTGGTCAAGTCAATCCGTTGAGAAAATTTCTTAGAGGATATTC

+

FFFFFFFFFFFFFFFFFFFFFFFFFFFFFFFFFFFFFFFFFFFFFFFFFFFFFFFFFFFFFFFF  
FFFFFFFFFFFFFFFFFFFFFFFFFFFFFFFFFFFFFFFFFFFFFFFFFFFFFFFF

@A00721:190:HGJW7DSXY:4:2167:25554:2848\_1:N:0:TCTGCAAG+GCTGCACT  
CCAACATTTACCACCAAATCTTTTGATACAACCTAGCCTTCAAGTGGGGTATGCCTGCGGAATACG  
CTTGCTATTACACGATTGGTTCAACCCGTTGATGCTATGTCAGAAGAAGCTATTCAAGCTTGTCGT  
TTA

+

FFFFFFFFF:FFFFFFFFFFFFFFFFFFFFFFFFFFFFFFFFFFFFFFFFFFFFFFFFFFFFFFFF  
FFFFFFFFFFFFFFFFFFFFFFFFFFFFFFFFFFFFFFFFFFFFFFFFFFFFFFFFFFFFFFFF  
FFF

@A00721:190:HGJW7DSXY:4:1275:25581:11381\_2:N:0:TCTGCAAG+GCTGCACT  
AAACAAGCCCAGACTCAAGGAGTCCAATCAAAGGTTTTGAATTTAGCTCAACTGGGGAGACGTGCTTA  
AATGGGTGATAAAAATTATTTAGAGATCTTTTCTACTTACAAAGGACA

+

FFFFFFFFFFFFFFFFFFFFFFFFFFFFFFFFFFFFFFFFFFFFFFFFFFFFFFFFFFFFFFFF  
FF:FFFFFFFFFFFFFFFFFFFFFFFFFFFFFFFFFFFFFFFFFFFFFFFF

@A00721:190:HGJW7DSXY:4:2211:16450:14481\_2:N:0:TCTGCAAG+GCTGCACT  
AATTCTACGAAAAGTCCGGAGTATATTGTATGTTAATAGATAGTGGGATAATAGTTCTACCGATACG  
TAGTGAACGCGTTCTGTAACCAAGTACTTCCGTCTGAAGAGTTTAT

+

F:FFF,:,:FFFFFF,:F:,F,:FFFF:FF:FF,F,:,,F,FFF,FFFFFFFFF:FF,F,FFFF  
FF:F:FFF:FFFF:FFFFFFFFF,F:FF,F,:F,F,F,:F,FFFF,

@A00721:190:HGJW7DSXY:4:2161:19533:1626\_1:N:0:TCTGCAAG+GCTGCACT  
TAACCGATAGGAGTTGTATAGTTGAAGATGTGGCTTTAGACGATAATCCTTTAAGGACTATGTTGACT  
GACGAAGATTTTCCACAGATTTGTCTACGTTGCAGATCGCCACTCCAAACACTATATACATTAAT  
ATA

+

FFFFFFFFFFFFFFFFFFFFFFFFFFFFFFFFFFFFFFFFFFFFFFFFFFFFFFFFFFFFFFFF:  
FFFFFFFFFFFFFFFFFFFFFFFFFFFFFFFFFFFFFFFFFFFFFFFFFFFFFFFFFFFFFFFF  
FFF

@A00721:190:HGJW7DSXY:4:2533:9028:23265\_2:N:0:TCTGCAAG+GCTGCACT  
AGTCATAACTTTTGTTACCAAATTCTTGGCTTTCAACGAAGTCTCTGATTTTATTAATCATTACTTTA

ACGATCTCTCGGTCATTTACTCTGTACTTGATCTACGTCGTTTAACTG  
+  
FFFFFFFFFFFFFFFFFFFFFFFFFFFFFFFFFFFFFFFFFFFFFFFFFFFFFFFFFFFFFFFFFFFFFFFF  
F:F:FFFFFFFFFFFFFFFFFFFFFFFFFFFFFFFFFFFFFFFFFFFFFFFFFFFFFFFFFFFFFFFF  
@A00721:190:HGJW7DSXY:4:2112:17047:33739\_2:N:0:TCTGCAAG+GCTGCACT  
CTTAGAATGACTCTATCTTTTCAGACACTTCTTATATTATTTACAATAGTTAATATCATATTAGTAAT  
ACTCACTATCGTTTTCTGCTTTTTCTTAGCTAATAGATTAATAAAGGA  
+  
FFFFFFFFFFFFFFFFFFFFFFFFFFFFFFFFFFFFFFFFFFFFFFFFFFFFFFFFFFFFFFFFFFFFFFFF:,F  
FFFFFFFFFFFFFF:FFFFFFFFFFFF,FFFF:FFFFFFFF:FFFF,FF  
@A00721:190:HGJW7DSXY:4:1139:30436:20854\_1:N:0:TCTGCAAG+GCTGCACT  
CCAACCTCTTCGTTACGATACTTGTGTTGATAATATATTTAGTCTCTACACCCATCTCAACGAGTAAAA  
AGCGAGTTTTCCGTCCTTAACGTAATACACGAAGAGAACATCCGCAAACGACTCGAAACCGAGACGCC  
GTA  
+  
F,FF:F:F,,,FFFF,F::,F,,,,,FF,F,F,,,FFF::,F::,FFFF,F,,,FF,F,,,::,,F:  
,,::,,FFFF::,F,,,F:::FFFF:FFF::,,:,F::,FF,,F,FFFFFFFFFFFFFFFFFFFFFFF  
FFF  
@A00721:190:HGJW7DSXY:4:1544:19027:24518\_2:N:0:TCTGCAAG+GCTGCACT  
TTTAGATTATGAATCCTGCCTTTACTCATTTTATAGCAGTTATTTATGTTGTACTTTTTATAATTTAT  
AACCTTCTTATACTTTTGGGTATGTTTTGTGAAAAACATGAGATACCC  
+  
FFFFFFFFFFFFFFFFFFFFFFFFFFFFFFFFFFFFFFFFFFFFFFFFFFFFFFFFFFFFFFFFFFFFFFFF  
FFFFFFFFFFFFFFFFFFFFFFFFFFFFFFFFFFFFFFFFFFFFFFFFFFFFFFFFFFFFFFFF,F  
@A00721:190:HGJW7DSXY:4:1208:26702:21621\_1:N:0:TCTGCAAG+GCTGCACT  
TATGTACTTATTGTAACGATCATTCTTTTCGAGTTTTGTCACTTATTCTTTTATTCCTTTAACTGTG  
TATGAGGAGGATTTATAATGCTTTTCGATAGTGATTGTTATCAATTTAAATACATTACTGTTTCAAAT  
CAT  
+  
FFFFFFFFFFFFFFFFFFFFFFFFFFFFFFFFFFFFFFFFFFFFFFFFFFFFFFFFFFFFFFFFFFFFFFFF  
FFFFFFFFFFFFFFFFFFFFFFFFFFFFFFFFFFFFFFFFFFFFFFFFFFFFFFFFFFFFFFFFFFFFFFFF  
FFF  
@A00721:190:HGJW7DSXY:4:1318:4634:25708\_2:N:0:TCTGCAAG+GCTGCACT  
GACTCCGAAAATGGTTTCAAATGAGGTCAAAGCTCTATTTATTAAACGAACATTATCCGATTCTTCG  
AGGGTATCACTACCACTGATCTGCCGACTTTAGTCAAGGAACCTCAAT  
+  
FFFFFFFFFFFFFFFFFFFFFFFFFFFFFFFFFFFFFFFFFFFFFFFFFFFFFFFFFFFFFFFFFFFFFFFF  
FFFFFFFFFFFFFFFFFFFFFFFFFFFFFFFFFFFFFFFFFFFFFFFFFFFFFFFFFFFFFFFF,FFFFFFF  
@A00721:190:HGJW7DSXY:4:1117:10673:20854\_2:N:0:TCTGCAAG+GCTGCACT  
TATTTTCTATAAGGGAAAATAGCAATAATCAAATTTTCGACAAATTTAGAACTTTATTTCAGAACTC  
TCTCCGATCACCTTGGTGTGATCTCCCGAGGATCTTTTCAATAAGAT  
+  
FFFFFFFFFFFFFFFFFFFFFFFFFFFFFFFFFFFFFFFFFFFFFFFFFFFFFFFFFFFFFFFFFFFFFFFF  
FFFFFFFFFFFFFFFFFFFFFFFFFFFFFFFFFFFFFFFFFFFFFFFFFFFFFFFFFFFFFFFF  
@A00721:190:HGJW7DSXY:4:1124:8386:34053\_2:N:0:TCTGCAAG+GCTGCACT  
ATTTTTAAATAGTGATATTACGCGTATACTTGAATACTTTATCAAAGATTTGGCTTGGTCTATTTACC  
GCAAAAAGTTGGAAGAGGTCTATGATATTTATTTTACTTATACTTTAA  
+  
FFF:FFFFFFFFFFFFFFFFFFFFFFFFFFFFFFFFFFFFFFFFFFFFFFFFFFFFFFFFFFFFFFFF  
FFFFFFFFFFFFFFFFFFFFFFFFFFFFFFFFFFFFFFFFFFFFFFFFFFFFFFFFFFFFFFFF:FFFFF  
@A00721:190:HGJW7DSXY:4:1266:13801:12148\_1:N:0:TCTGCAAG+GCTGCACT  
AACTTGACTGTTTATAATATTACAATAGCTCTTTCTCAGAAGATTAGAGAAGTAACCGGTGAACACGT  
CGGTAGCATTGATTTACTTTTACCGTTAGAACTGAAAAAGATTCTTTTCGAAAAGAAACCTATAAGTT  
ACA

+  
F:, :FFFFFFFF,FFFFFFFF:FFFF:FFFFFFFFFFFF,FFFFFFFF:FFF:FF:FFFFFFFF,FF  
FFFFFFFFFFFF:FFFFFFFF:F:,FFFFFFFFFFFF,FFFFFFFFFFFFFFFFFFFFFFFFFFFF:FFFFFFFFFFFF  
FFF  
@A00721:190:HGJW7DSXY:4:1148:20880:22529\_1:N:0:TCTGCAAG+GCTGCACT  
TATATTAAAGAAATAAAAATACTTCAAGTACCTGAACCTTTACATTTTTAATGGTATGGTATAATGTGT  
CTTACAAATAGAACCTTCACTCTCGGTAATGAGAGTGTATTCCTTAATATTCTAGTAACCGCTATGTG  
GGC  
+  
FFFFFFFFFFFFFFFFFFFFFFFFFFFFFFFFFFFFFFFFFFFFFFFFFFFFFFFFFFFFFFFFFFFFFFFF  
FFFFFFFFFFFFFFFFFFFFFFFFFFFFFFFFFFFFFFFFFFFFFFFFFFFFFFFFFFFFFFFFFFFFFFFF  
FFF  
@A00721:190:HGJW7DSXY:4:1435:27480:10629\_2:N:0:TCTGCAAG+GCTGCACT  
TCCTAAATTTGATAGCAATTTATGTTTTAAATGCTAGGAAAATTTAGAAAACTCCATTGTATAGTT  
CAAGGAGTACTTAATTCAATAGCTTTAGTATTATTTACTATCGCCTTT  
+  
FFFFFFF,:FFFFFFFF,:::FFFFFFF,FFFFF,:FFFFFFFFFFFFFFFFFFFFFFFFFFFF,FF:FFFFFF  
FFFFFFFFFFFFFFFFFFFFFFFFFFFFFFFFFFFFFFFF:FFFFFF:FFFFF:,F  
@A00721:190:HGJW7DSXY:4:1361:28827:4194\_2:N:0:TCTGCAAG+GCTGCACT  
AGTTAATTGCTTACACAAAAGTGACGCGGAAGGAATCTTAATTGATTGAAGCTAGGCGTTGGGAGA  
ATGAACTGCCGCTTCCCGGAAGAAACGATCTATTTACAGAGTATTTAG  
+  
FFFFFFFFFFFFFFFFFFFF:FFFF:FFFFFFFFFFFF:FFFFFFFFFFFFFFFFFFFFFFFFFFFFFFFF  
FFFFFFFFFFFFFFFFFFFFFFFFFFFFFFFFFFFFFFFFFFFFFFFFFFFFFFFFFFFFFFFF:FF  
@A00721:190:HGJW7DSXY:4:2676:27507:17190\_2:N:0:TCTGCAAG+GCTGCACT  
CCGCAAATCAATTGAAGAAAACCACTCCCTTCAATTCAATAACATAACATACACTCCCCAAAC  
ATAACATACCATAACCTACCATGACCAATCATCGCTCCAACCTGGCACG  
+  
FFFFFFFFFFFFFFFFFFFF:FFFFFFF,F:FFFFFFFF:FFFFFFFFFFFF,FFFFFFFFFFFF:FFFFFFFFFFFF  
F:FFFFFFFFFFFF,FFFFFFFFFFFFFFFFFFFFFFFFFFFFFFFFFFFFFFFFFFFF,FF  
@A00721:190:HGJW7DSXY:4:1149:13856:9455\_1:N:0:TCTGCAAG+GCTGCACT  
CTACTACCGCCGGTCGGCAGATCGGCACCACTGGTCTCTACGTTACGGGACCCGCTGTGCAGAATAAC  
CTTCCCAAATCTAGATCTGCACAGAAGAAGGCTGAAGGTCGTTACCGGACGACCACTCAAAGGAAACG  
GGC  
+  
FFFFFFFFFFFFFFFFFFFFFFFFFFFFFFFFFFFFFFFFFFFFFFFFFFFFFFFFFFFFFFFFFFFFFFFF  
FFFFFFFFFFFFFFFFFFFF: :FFFFFFFFFFFFF,FFFFFFFFFFFFFFFFFFFFFFFFFFFFFFFFFFFF  
FFF  
@A00721:190:HGJW7DSXY:4:2632:3070:31923\_1:N:0:TCTGCAAG+GCTGCACT  
GAGGTCGCTCGTAACATTGACGACAGTCCCGTCATCTCTGTGGGAAGTGAAGGAGTACCTCAGTCAAA  
AGTCACATTCACCACTCCCATACCAATCAATGATGTGACTATACAGTTCGGCCATTTCAAGAGTGGTC  
AAT  
+  
FFFFFFFFFFFFFFFFFFFFFFFFFFFFFFFFFFFFFFFFFFFFFFFFFFFFFFFFFFFFFFFFFFFFFFFF  
FFFFFFFFFFFFFFFFFFFFFFFFFFFFFFFFFFFF:FFFFFFFFFFFFFFFFFFFFFFFFFFFFFFFFFFFF  
FF:  
@A00721:190:HGJW7DSXY:4:2517:30192:14356\_1:N:0:TCTGCAAG+GCTGCACT  
GTACTGAAGCCTTCCCCTCCGCTGGCACGAAGAACTCCCAAGCCAATCAATAGTTCTTCTGACCAG  
AATGAAAAGGGGTTTACCAGGGTAGTCTCTAAGTCTACCAGGAAGAGGGGAAATGTCCCCAAAAGTGA  
GAA  
+  
FFFFFFFFFFFF:F:FFFFFFFFFFFFFFFFFFFFFFFFFFFFFFFFFFFFFFFFFFFFFFFFFFFFFFFF  
FFFFFFFFFFFFFFFFFFFF:FFFFFFFF:FFFFFFFFFFFFFFFFFFFFFFFFFFFFFFFFFFFFFFFF  
FFF



$+$ 

@A00721:190:HGJW7DSXY:4:1343:31467:23610\_1:N:0:TCTGCAAG+GCTGCACT  
GCTTGGGTCATTAAGGGTAGCTGTAAAGTTGCGCCTGCCGACCCCATCTTTGAGACCAAGACTCTCTA  
CAGTAGGTTCTGTCCTACTATGAGCAAATCTGTTGAATTCGTCACTGAGGACGAAGGTGAGAGGACTT  
TTG

 $+$ 

@A00721:190:HGJW7DSXY:4:1622:10908:1971\_1:N:0:TCTGCAAG+GCTGCACT  
CAAAGTGAAGAGCAGTCGCTGGGGAAAGAGAATTGCGTGGGTTGAAGGCCGACGCTTCGAGCTTGAGTG  
TGACGAGGCCGGTGACGTTTTTGTCAACGGCGTTTGAGGATTTTATCCGCGCTTAAGTATGGGGCGA  
AGA

 $+$ 

@A00721:190:HGJW7DSXY:4:1414:32533:21355\_1:N:0:TCTGCAAG+GCTGCACT  
AGTCTTGAAGGACTTAGGTTGGCATATTTATGCCGACGATAATAAGCATGTCACCCTTAAGCACCGAG  
GTAAGCTCGGGACTTACAAGAGAGAGTGTGAGAGAGTCGCTCTCACTATTTTTGCCAGAAATGCGGGC  
TTT

+

@A00721:190:HGJW7DSXY:4:2124:32506:25661\_2:N:0:TCTGCAAG+GCTGCACT  
GCTCCTTCTGTGGGTGAGGGTTTTTGTATATTCCTGTTCTGGGAGGCTGCTTTCCTCCATAATTA  
CAACCTCTCTTTAGAGAGCATTAGAAAGATCGGAAGAGCGTCGTGTAG

+

@A00721:190:HGJW7DSXY:4:2466:5954:33473\_2:N:0:TCTGCAAG+GCTGCACT  
GTTGTCACACATTTCTTTAAATTTTACCTTTCATCCTACATTGGGGATTTTCGATGTTAGAAGGTGGA  
ATGTGTCAAGGGTCTTCTTCATTATGATCTTTAATGACCTAATCACAT

 $+$ 

@A00721:190:HGJW7DSXY:4:1447:29541:17394\_1:N:0:TCTGCAAG+GCTGCACT  
ACGGCTCGTATCGAGTTGGAGGGAGGAAGTTCTCCGAAATTAAAGACGGGGGGATTAAGAGTCCAGCT  
GTAAGTGTCAATTCAGAGAGGGGAGCTCTGAAAAGGAAACTTCGTGAGAAGATGAGGAAGTCTAAGAG  
GAG

+

@A00721:190:HGJW7DSXY:4:1366:3097:27774\_1:N:0:TCTGCAAG+GCTGCACT  
AAGGCTCTAGAGAAGATCTCACCACCTGGAGAAGGCAAGTGGAGAGTCCAGAAGTTGATGAAGAAGGA  
TTATTTGAAGCAGGGGTTACCACTTCCTAAGGTGGATGAGGGAGGTTGTTTCTTTGGAGTTTATAGATA  
ATC

+  
FFFFFFFFFFFFFF,FFFFFF,FFFF:FFFFFFFFFFFFFFFFFFFFFFFFFFFFFFFFFFFFFFFF, :F:FF  
FFF:FFF:FFFFFFFFFFFFFFFFFFFFFFFF:FFFFFFFFFFFFFFFFFFFFFFFFFFFFFFFF:FFFFFFFF  
FFF  
@A00721:190:HGJW7DSXY:4:2477:20546:10676\_2:N:0:TCTGCAAG+GCTGCACT  
GGTCATAGAGCCAGCAAGAGAAGCTTATATGCTGGTTTAAGTGATGATTATCACTCCTTGAGAAGACA  
AGCCACATTAAGATATAATTTAGGTCAACTTGGGGTTTCGAATGTCAT  
+  
FFFFFFFFFFFFFFFFFFFFFFFFFFFFFFFFFFFFFFFFFFFFFFFFFFFFFFFFFFFFFFFFFFFFFFFF  
FFFFFFFFFFFFFFFFFFFFFFFFFFFFFFFFFFFFFFFFFFFFFFFFFFFFFFFFFFFFFFFF  
@A00721:190:HGJW7DSXY:4:1501:20799:24612\_2:N:0:TCTGCAAG+GCTGCACT  
AGGTCCTTTTGAGTATCGACAGATCTTTCGATCTTGAGGACGTACATTTAACGTGGCAGAATTCGGTA  
ACTTACCATATTGTTCTTCCGGGAAGTTGTGGGATTAACTTTGACT  
+  
FFFFFFFFFFFFFFFFFFFFFFFFFFFFFFFF: :FFFFFFFFFFFFFFFFFFFFFFFFFFFFFFFFFFFFFFFF: FFF  
FFFFFFFF:FFFFFFFFFFFFFFFFFFFFFFFFFFFFFFFF: FFFFFFFFFFFFFFFF  
@A00721:190:HGJW7DSXY:4:2146:6271:32299\_2:N:0:TCTGCAAG+GCTGCACT  
GGTATGGACTACTCGACTTTTGATCTGGAGTTGTCTAGGGTCATGGCAGATACTACCGATAAGGTGAA  
AAATATGCAGGTCAAAGATTCTGTAGCTCTGAGGGCGGTTGAGGGAGC  
+  
FFFFFFFFF: FFF: FFFFFFFFFFFFFFFFFF: FFFFFFFFF: FFFFFFFFFFFFFFFFFFFFFFFFFF: FF: FF  
FFFFFFFFFFFFFFFF: FFFFFFFFFFFFFF: FFF: FF: : FFFFFFFFFF  
@A00721:190:HGJW7DSXY:4:1535:18032:19288\_1:N:0:TCTGCAAG+GCTGCACT  
TTCTAAGAGTCTTTATGATTCAAAACCTATCGTTGTCTGACCTTACAAGTTGAGGAGACTTTACAGC  
GGCTTATTGTCGCGCAGTTTCCAGAATTGCGGTTGAAGTTCACCCATTCTATCTTGAATGCTCACGCC  
GTC  
+  
FFFFFFFFFFFF: FFFFFFFFFFFFFFFFFFFFFFFFFFFFFFFFFFFFFFFFFFFFFFFFFFFFFFFFFF  
FFFFFFFF: FFFF: FFFFFFFFFFFFFFFFFFFFFFFFFFFFFFFFFFFFFFFFFFFFFFFFFFFFFFFFF  
FFF  
@A00721:190:HGJW7DSXY:4:1575:3088:7968\_2:N:0:TCTGCAAG+GCTGCACT  
TTATAATCACTTGTTAAAGTACAGATTTAGTGATTTAGATATTATTGATATTGGAGGCGATATTCGTT  
TTCATATCCAAAACCTCCTTGAATGGAGTACATATTTGCAACCCTATTC  
+  
FFFFFFFFFFFFFFFFFFFFFFFFFFFFFFFFFFFFFFFFFFFFFFFFFFFFFFFFFFFFFFFFFFFFFFFF  
FFFFFFFFFFFFFFFFFFFFFFFF: FFFFFFFFFFFFFFFFFFFFFFFF, FFF  
@A00721:190:HGJW7DSXY:4:2456:9968:13714\_1:N:0:TCTGCAAG+GCTGCACT  
GATGCATCGAGGTATACGTCTAGGAACATTGATTGGGAACGTACCTACTCACGAGACGTGATGAAAGC  
TATCGGAGGGAAGCAAAATGTTTCGTTCTGTTACAAGAACGCTTTGATTGTGACCATAAAGCCTCAG  
TTG  
+  
FFFFFFFFFFFFFFFFFFFFFFFFFFFFFFFFFFFFFFFFFFFFFFFFFFFFFFFFFFFFFFFFFFFFFFFF  
FFFFFFFFFFFFFFFFFFFFFFFFFFFFFFFFFFFFFFFFFFFFFFFFFFFFFFFFFFFFFFFFFFFFFFFF  
FFF  
@A00721:190:HGJW7DSXY:4:1314:1027:16110\_2:N:0:TCTGCAAG+GCTGCACT  
ATATCTCTCTTGATGATGTAGCCACTATAATGCTTAAGAGAGAGATTGATGTATGTCATTTTCGTCTTA  
GTTTGTCCCGCGCAATTATTGGACACGATGAAAAATGACATACCCGTT  
+  
FFFFFFFFFFFFFFFFFFFFFFFFFFFFFFFFFFFFFFFFFFFFFFFFFFFFFFFFFFFFFFFFFFFFFFFF  
FFFFFFFFFFFFFFFFFFFFFFFFFFFFFFFFFFFFFFFFFFFFFFFFFFFFFFFF: FFFF  
@A00721:190:HGJW7DSXY:4:1364:24026:4022\_2:N:0:TCTGCAAG+GCTGCACT  
TCATGGAGATGATGGCGCATCACTTGATTACTATATGCCCAGGATTGGGTTATTCTCACAACAAAG  
ATAAGATTTTATCTTTCTTCAAACACCCTGTTTTCTTAAGGGCGGAC  
+

FFFFFFFFFFFFFFFFFFFFF:FFF:FF:FFFFFFFFFFFF,FFFFFFFFFFFFFF,FFFFFFFFFFFFFF  
 FFFFFFFFFFFFFFFFFFFFFF:FFFFFFFFFFFF:FFFFF:FFFFFFFFF  
 @A00721:190:HGJW7DSXY:4:1604:31015:23202\_2:N:0:TCTGCAAG+GCTGCACT  
 TGTGAACCTTGGGGACTAGATTGAGCATTAATGAGTTCCGAATAACTCGTAATAAATCTTTCTCTAG  
 TGGACAATTCAGAATACCTATTTCCGTACCAAGAGCCTGCCAATCT  
 +  
 FFFFFFFFF:FFFFFF,FFFFFFFFFFFFFFFFFFFFFF:FF:FFFFFFFFFFFFFFFFFFFFFFFFFFFFFFFF  
 FFFFFFFFFFFFFFFFFFFFFFFFFFFFFFFFFFFFFFFFFFFFFFFFFFFFFFFFFF  
 @A00721:190:HGJW7DSXY:4:1312:13639:36573\_2:N:0:TCTGCAAG+GCTGCACT  
 CGCATACCTGATTGGAAGAAGCGAGTTTCGTTCTCAATAAAAATTTTTCTCAAGAGATTATGGTTGA  
 TAAAGTTTTCTTCATAAGGGCTATTAGTACGTCATGGGGATCACTTC  
 +  
 FFFFFFFFFFFFFFFFFFFFF:,FFFFFFFFFFFFFFFFFFFFFFFFFFFFFFFFFFFF:FFFFFFFF,FFFFFF  
 FFFFFFFFFFFFFFFFFFFFF:FFFFFFFFFFFFFFFFFFFFFFFFFFFFFFFFF  
 @A00721:190:HGJW7DSXY:4:1256:29785:16282\_2:N:0:TCTGCAAG+GCTGCACT  
 ACAAACCTTCGAATATGTTACGACATGGCTTCGTAACAACAGTGCGAGGATTGTCATCTCGGGGAAA  
 GTGATTCACCAAGATGTTTATATAGATACGAGATACCTAGAGAAGGTC  
 +  
 FFFFF:FFFFFFFFFFFFFFFFFFFFFFFFFFFFFFFFFFFFFFFFFFFFFFFFFFFFFFFFFFFFFFFFFFFF,F  
 FFFFFFFFFFFFFF,FFFFFFFFFF:FFFFFFFFFFFF:FFFFFFFF:F  
 @A00721:190:HGJW7DSXY:4:1357:31358:27806\_1:N:0:TCTGCAAG+GCTGCACT  
 CTCGTTATCGGAGCTAAGAAGAAGACTTTGGGTACACGTTATGCTCGCAAACCTAACGTTAGTACCGG  
 AGGTGATCTCTCTGCTTCTGCGTTACTGAGAGAAAAGATTCAGGACGCCTACGGTGACTTTATGGACA  
 AGA  
 +  
 FF:FFFFFFFFFFFFFFFFFFFFFFFFFFFFFFFFFFFFFFFFFFFFFFFFFFFFFFFFFFFFFFFFFFFF  
 FFFFFFFFFFFFFFFFFFFFFFFFFFFFFFFFFFFFFFFFFFFFFFFFFFFFFFFFFFFFFFFFFFFFFF  
 FFF  
 @A00721:190:HGJW7DSXY:4:1337:30120:28447\_2:N:0:TCTGCAAG+GCTGCACT  
 TTAGGTTTAGTAGGTGATCTTGACGTCGATTCTTTGTATAGGGAGTGAGAGAAGACAACGAATCTTG  
 AAACACGGTCCTTATCAAAGAAAATGGTGAACCGGTCTCTAAATCTT  
 +  
 FFFFFFFFFFFFFFFFFFFFFFFFFFFFFFFFFFFFFFFFFFFFFFFFFFFFFFFFFFFFFFFFFFFFFF  
 FFFFFFFFFFFFFFFFFFFFFF:F:FFFFF,FFFFFFFFFFFFFFFFFFFF:FF  
 @A00721:190:HGJW7DSXY:4:1616:7979:22639\_2:N:0:TCTGCAAG+GCTGCACT  
 GAAGATTGAAGAACACGTCAAGAAGTCGCTCGGCGTTGTTCTTGAAAACCAAGTTAAGAAGGAGGCTG  
 ATCATGGAGTCTTTGTACCTTCTGTCAAACCTTCGAGGTTTACGCTACGA  
 +  
 FFFFFFFFFFFFFFFFFFFFFFFFFFFFFFFFFFFFFF:FFFFFFFFFFFFFFFFFFFFFFFFFFFFF:FFFFFFFFFFFFFFFF  
 FFFF:FFFF:FFFFFFFFFFFFFFFFFFFFFFFFFFFFFFFFFFFFF:FFFF  
 @A00721:190:HGJW7DSXY:4:1347:18059:20306\_1:N:0:TCTGCAAG+GCTGCACT  
 TGGATTGAAGGCTGGCTTAAGGGAGACTCCTTCTTTTGAATGTTGTAAAGAATTGGGTTGAGAAGT  
 GTGCTTTACAAGGAGTTAGACTCTTCTTCAAGTTTTTAGATCTTCTTGATAATCTTAAAGAAAAATTT  
 TCG  
 +  
 FFFFFFFFFFFFFFFFFFFFFFFFFFFFFFFFFFFFFF:FFFFFFFFFFFFFFFFFFFFFFFFFFFFF:FFFFFFFFFFFFFFFF  
 FFFFFFFFFFFFFFFFFFFFFF:FFFFFFFF:FFFFFFFFFFFFFFFFFFFFFFFFFFFFFFFFFFFFF  
 FFF  
 @A00721:190:HGJW7DSXY:4:1311:31647:8328\_1:N:0:TCTGCAAG+GCTGCACT  
 GTCTGTACTTACATTCTTTACGCCAGATTCTTCATGGGGCGACGCTGTTTCTTGGTATTTCTGAAA  
 TAGTTTATCAGAGCGTCATTTTCTTTGGGATCTTCTCTGGTAAGGGAATTATTAATCATTTCTTC  
 TCA  
 +  
 FFFFFFFFFFFFFFFFFFFFFFFFFFFFFFFFFFFFFF:FFFFFFFFFFFFFFFFFFFFFFFFFFFFF:FFFFFFFFFFFFFFFF  
 FFFFFFFFFFFFFFFFFFFFFF:FFFFFFFF:FFFFFFFFFFFFFFFFFFFFFFFFFFFFFFFFFFFFF

FFFFFFFFFFFFFFFFFFFFFFFFFFFFFFFFFFFFFFFFFFFFFFFFFFFFFFFFFFFFFFFFFFFFFFFFFFFFFFFF  
FFF

@A00721:190:HGJW7DSXY:4:2375:8106:7795\_2:N:0:TCTGCAAG+GCTGCACT  
ATTATTACTGTTTTCTCTACCCATAACTTCTTTTTCAAAAATGCGGATGGGTCTACTGATGTTTTCT  
ACAGAGTGCAGTCGTTTCAACACTTATCACCACATTTGAAAGGAAAAT

+  
FFFFFFFFFFFFFFFFFFFFFFFFFFFFFFFFFFFFFFFFFFFFFFFFFFFFFFFFFFFFFFFFFFFFFFFFFFFFFFFF  
FFFFFFFFFFFFFFFFFFFFFFFF:FFFFF:FFF,F:FF,,FFFFFFFF:FFFFF:

@A00721:190:HGJW7DSXY:4:1343:10728:25864\_2:N:0:TCTGCAAG+GCTGCACT  
AATACGTATGTCGGTGGGGTTCTCAAGGCTCTCATCGCCACTGGGATTCTAAGGGGTTCCATAAGATA  
TTATCTGACATTGTGGTTCAATGATCAGGATTCTTCTTTTGGTCCTTA

+  
FFFFFFFFFFFFFFFFFFFFFFFFFFFFFFFFFFFFFFFFFFFFFFFFFFFFFFFFFFFFFFFFFFFFFFFFFFFFFFFF  
FFFFFFFFFFFFFFFFFFFFFFFFFFFFFFFFFFFFFFFFFFFFFFFFFFFFFFFFFFFFFFFFFFFFFFFFFFFFFFFF  
FFFFF

@A00721:190:HGJW7DSXY:4:2372:2474:29293\_1:N:0:TCTGCAAG+GCTGCACT  
ATTTGGATGTTGTGCAAAACTATCAGGTTCTTGTACGATTCTTAAAAGAAGTTTATTA AAAACTTCAG  
AGTCTCTTGAAGTCCAGGTAGCTAATGTTCTTGCAATAGCCACAGACTTTCTGGGAAAAGAGACCTC  
TGT

+  
F:FFFFFF:FFFF,FFFFFFFFFFFFFFFF,FFFFFFFF,FFFFFF:F,,,FFFFFFFF,,FFFFFF  
FFFFFFFF,FFFF,F:F:F:F:F:FFFFFFFFFFFFFFFF:FFFF,FFFFFFFFFFFF:FFFFFFFF  
FFF

@A00721:190:HGJW7DSXY:4:1527:24704:12085\_1:N:0:TCTGCAAG+GCTGCACT  
GAGAATTACTCAGATTCAATCTGGCATCACTGAACGTCTACAACGAGTTAGGGAGTGGCTAGGTTTTA  
AAAGATCCTTTGCACAAGCAATACCTTCCACTGAGTTCATCACCCAGAGTTTCGACGTCGCGGAAAAC  
GAT

+  
FFFFFFFFFFFFFFFFFFFFFFFFFFFFFFFFFFFFFFFFFFFFFFFFFFFFFFFFFFFFFFFFFFFFFFFFFFFFFFFF  
FFFFFFFFFFFFFFFFFFFFFFFFFFFFFFFFFFFFFFFFFFFFFFFFFFFFFFFFFFFFFFFFFFFFFFFFFFFFFFFF  
FFF

@A00721:190:HGJW7DSXY:4:1269:4029:24596\_2:N:0:TCTGCAAG+GCTGCACT  
ACTGTTGAGAATCTTCTGATGCTGAATTTGAGGAAAATTTTTCGGAAGTTTTTGGTATAAATCCTGA  
TGGCTCAGTACAGGGAGGAGGTAATAGTTATAAAACCTTCTTTTATCA

+  
FFFFFFFFFFFFFFFFFFFFFFFFFFFFFFFFFFFFFFFFFFFFFFFFFFFFFFFFFFFFFFFFFFFFFFFFFFFFFFFF  
FFFFFFFFFFFFFFFFFFFFFFFFFFFFFFFF:FFFFF:FFFFFFFFFFFFFFFFFFFFFFFFFFFFFFFF  
FFFFFFFFFFFFFFFFFFFFFFFFFFFFFFFF:FFFFF:FFFFFFFFFFFFFFFFFFFFFFFF

@A00721:190:HGJW7DSXY:4:2116:4716:30765\_1:N:0:TCTGCAAG+GCTGCACT  
ATGGACAAAATCTGGGATCATAGGTATGTGTCACGCTACACTCGAAATATGGGCCCTCATAAGGAAGT  
ATAGTTGGCGTCTTGTGCGTTGACGTCATTACAGTCTGGAAGTTAGATCATTTGTTT CAGGAAGATCTCT  
ACA

+  
FFFFFFFFFFFFFF:FFFFFFFFFFFFFFFFFFFFFFFFFFFFFFFFFFFFFFFFFFFFFFFFFFFFFFFFFFFFFFFF  
FFFFFFFFFFFFFFFFFFFFFFFFFFFFFFFFFFFFFFFFFFFFFFFFFFFFFFFFFFFFFFFFFFFFFFFFFFFFFFFF  
FFF

@A00721:190:HGJW7DSXY:4:2254:32922:22091\_1:N:0:TCTGCAAG+GCTGCACT  
TTTAGCAACTTTAGATAAATCTTTCCGGGCTCAATGACCTTTGCTATGTACGTGGATCTAATCCTTG  
GTGATCTGAATCTGACCATCGCAAAGAAGACTTTATTAGTTCATGAAGTTCTTACACTTCTCGCGACT  
AA

+  
FFFFFFFFFFFFFFFF,FFFFFFFFFFFFFFFFFFFFFFFFFFFFFFFFFFFFFFFF,FFFF,FFFFFFFF  
FFFFFFFFFFFFFFFFFFFFFFFF:FFFFFFFFFFFFFFFFFFFFFFFFFFFFFFFFFFFFFFFFFFFFFFFF  
FF

@A00721:190:HGJW7DSXY:4:2217:3866:28761\_2:N:0:TCTGCAAG+GCTGCACT  
CTTTATCTTAAAGCATTACCACCAAATTTAGCACTTTTTGAATATGACAGAAGCTCGCCATATCAGAT

$+$ 

@A00721:190:HGJW7DSXY:4:1605:28320:10488\_2:N:0:TCTGCAAG+GCTGCACT  
GGAGGTCCAGGAACCTTTACTCTAGTGTCTTTTCTAGAGTCCAAGGACGTTTCCGTCGGAGGATGAC  
AGGTGGGAGACCGCTCAATAACACTCTATTGAATCCCTTTTCCACGAT

+

@A00721:190:HGJW7DSXY:4:1476:20916:19429\_1:N:0:TCTGCAAG+GCTGCACT  
GATATCGCCTCTGTCCTTTCTCCTTTAATCGTGAGGTTACGAGAGTTTCGTACTTGGGTTTATCGGTT  
GTATTTTGATAAATTTGTTGGAATCGATAATGATACTGACGAAGGTTCTATTACCACCCTTGTCATTG  
ATA

+

@A00721:190:HGJW7DSXY:4:1326:8974:8766\_2:N:0:TCTGCAAG+GCTGCACT  
TGATGCTTTCTTAGAGGCTCGTCTAGCCGCTGAGATTCGTCTTACCTATTTACAATCTGTAGAGAGAG  
AGGTTAATCAGAATTTGAGTGATAACGATTTAGTACTGGGAAATGGTG

+

@A00721:190:HGJW7DSXY:4:2660:26476:36699\_1:N:0:TCTGCAAG+GCTGCACT  
TTTTCTTTCCCTCCCTTTTTTCGATTGGATTGACGGGGTCTTCGTCTCACGACTAATTTGATAAGGT  
TTTTCTTTTATGGGACTCTTGTTGTACTTATGAAGGAGGTATTACTTCGGAAGTTCCTAATGTAGGT  
CTC

+

@A00721:190:HGJW7DSXY:4:1610:17906:28056\_1:N:0:TCTGCAAG+GCTGCACT  
GTTTTATGTTTCGGTTTCAGCTGGATGGATCTTTTGATGGTATGTTTCACATTGCGTGATCACTTCCC  
GTGGACTTGGGAAGAGATTAAACATAAAATCCAGCGATTCTATTATGTCGCTAAAGCCTGTCCAGTTG  
TCG

+

@A00721:190:HGJW7DSXY:4:1455:7780:5321\_2:N:0:TCTGCAAG+GCTGCACT  
GGCTGTGGGGATTAACCTCCCTCGTGAACTTACGACGATGTTCTCGCTCGCATTTACAAGGATTAC  
TAAGTCTGAGATCTGCCACTTCTAATTTTAGGAAACGTCGCGAAAAGA

+

@A00721:190:HGJW7DSXY:4:2109:28718:36135\_2:N:0:TCTGCAAG+GCTGCACT  
GTCTTGGTCGAAAAATATCGCCGGAAGTTCTAATAGAGGATCCTGATGACATTATTTCAACGGATAC  
CGATCTCAGTTCTACCACAGAAACCGTCTCAGGAAGTGTCTCCACTGA

+

@A00721:190:HGJW7DSXY:4:1462:12102:35321\_2:N:0:TCTGCAAG+GCTGCACT  
AAAGACGACCTTCTTGTGGGGACTGAGACCTCTGAATTTTCAGGGTGCCCTGATGAGGACGTTGAAAG

GGATAATTTCAACTCTGAGACTTCTAAGAGTGTTTCAAAAGACCAGAA

+

FFFFFFFFFFFFFFFFFFFFFFFFFFFFFFFFFFFFFFFFFFFFFFFFFFFFFFFFFFFFFFFF:FFFFFFFF:FFFFFF  
:FFFFFF:FFFFFFFFFFFFFFFFFFFFFFFFFFFFFFFFFFFFFFFFFFFFFFFFFFFFFFFF:

@A00721:190:HGJW7DSXY:4:1662:21974:20071\_1:N:0:TCTGCAAG+GCTGCACT  
TAAAGGTAGGAAGGGGAGAAAACAGAACAGCGAGCGGTTGAAGAGAAAAGTATGTTGCGGCTG  
ATCGTACCCCAATTCTGCTAGAAAGATCACTCTCGGCGATACCACTGATCTTCCAGAGTTACGTAGT  
GGT

+

FF:FFFFFFFF:,FFFFFF:F:F,FFFFFFFF,:FF:FFFFFFFF:FFFFFF:,FF:FFF,F::FFFFFFFF:FF  
,FF::F:FFFF:FF::FFFFFFFF:FFFF:FFFFFFFF::FFFFFF:F:FFFFFFFFFFFF,,:FFF:F:FFFF  
,FF

@A00721:190:HGJW7DSXY:4:1373:13819:2033\_1:N:0:TCTGCAAG+GCTGCACT  
TTTTATCAAAGAGAAAAGTTTCTGCTAGTCGCGACGATAGTATTTATCGGAGTGATATTAACAAGTTAA  
ACTTCGAACTGACCACTTACAAGAGTGTTGAAGTACCGCAACATGGATCAGTTTTCCAAAAAGCTATT  
AAT

+

FFFFFFFFFFFFFFFFFFFFFFFFFFFFFFFFFFFFFFFFFFFFFFFFFFFFFFFFFFFFFFFF:FFFFFFFFFFFFFFFFFFFFFFFFFFFFFFFF  
FFFFFFFFFFFFFFFFFFFFFFFFFFFFFFFFFFFFFFFFFFFFFFFFFFFFFFFFFFFFFFFFFFFFFFFFFFFFFFFFFFFFFFFF  
FF:

@A00721:190:HGJW7DSXY:4:1648:7988:9220\_2:N:0:TCTGCAAG+GCTGCACT  
AAACTGAATCCACTCTCTTGGGATATAAATGAGTACATCTATAATAGAGTTTTGGAAGTGTGTAATGT  
CCTACGTACTGTCCAAGGTGTTTGGGCTTCTCTAAAGAACAGCAACTT

+

FFFFFFFFFFFFFFFFFFFFFFFFFFFFFFFFFFFFFFFFFFFFFFFFFFFFFFFFFFFFFFFFFFFFFFFFFFFFFFFFFFFFFFFF  
FFFFFFFFFF:FF,FF:FFFF:FFFFFFFFFFFFFFFFFFFFFFFFFFFFFFFFFFFFFFFF

@A00721:190:HGJW7DSXY:4:1630:22752:11616\_2:N:0:TCTGCAAG+GCTGCACT  
GGCTGATGACTTAAATTCGCATTCTGCTTCGACGGTAATTCATAAGACCTTCTTGGGGAGTAAAG  
AGGGTTTGAAAATTACGGAACCTTCTCGTTCCTCATGAAGATCTTC

+

FFFFFFFFFFFFFFFFFFFFFFFFFFFFFFFFFFFFFFFFFFFFFFFFFFFFFFFFFFFFFFFFFFFFFFFFFFFFFFFFFFFFFFFF  
FFFFFFFFFFFFFFFFFFFFFFFFFFFFFFFFFFFFFFFFFFFFFFFFFFFFFFFFFFFFFFFF:FF

@A00721:190:HGJW7DSXY:4:1423:14009:14638\_2:N:0:TCTGCAAG+GCTGCACT  
GTTATTCTTGCGAAGGTTCAAGTCGATTGATTTTGTGACTACGATCTCTCTTGTATAAAGAAGTTCT  
TCGCAGTTGAATCTCCACCAGGTGGAGGGAAGACCACTGAACCTATAG

+

FFFFFFFFFFFFFFFFFFFFFFFFFFFFFFFFFFFFFFFFFFFFFFFFFFFFFFFFFFFFFFFFFFFFFFFFFFFFFFFFFFFFFFFF  
FFFFFFFF:FFFFFFFFFFF:FFF:FFF,FFFFFFFFFF:F:FFFF

@A00721:190:HGJW7DSXY:4:1433:24207:5306\_1:N:0:TCTGCAAG+GCTGCACT  
TTCGAAAAGGTCTTGAAGTACGTATTGTCACTGCTAATCGTAATTCGCGAGAAGAGATAGTGACTAA  
AGTTTTGGCACTTCTAGTTCATCGCGGTATTTGTGAATTAAGACAGACGTGAAAGTTATGATGAGTG  
ATC

+

FFFFFFFFFFFFFFFFFFFFFFFFFFFFFFFFFFFFFFFFFFFFFFFFFFFFFFFFFFFFFFFFFFFFFFFFFFFFFFFFFFFFFFFF  
FF:FFFFFFFFFFFFFFFFFFFFFFFFFFFFFFFFFFFFFFFFFFFFFFFFFFFFFFFFFFFFFFFFFFFFFFFFFFFFFFFF  
FFF

@A00721:190:HGJW7DSXY:4:1262:9155:28087\_2:N:0:TCTGCAAG+GCTGCACT  
AGCTGATTCTTATTGCATGAACGTCGCTGAGGTCAAACCTGTGGACGTTCTTTTCATCGACGAATTAT  
TCATGATTCACGCTGGTCAGACCCTTTTCTTACACATCTACTTAAGG

+

FFFF,F::FFFF:FFFF:FFFF,FFFFFFFFFFFF,FF:,F:FFFFFFFF:FF,FFFFFF:F,FFFFFF  
F,FFFFFFFFFFFF:F,F:FFFFFFFFFFFF,FF:FFF,,FF:FFFFFFFF,F

@A00721:190:HGJW7DSXY:4:1361:10782:23578\_2:N:0:TCTGCAAG+GCTGCACT  
GTTACGGTGATTCCAATCAAATCGGATTCATCAATCGTATTGATCTCCAAGTCGAACTACTTCAAC

ATCAACGACATCATTCTTGATGAGTGTGCGTTCTTATCGAAGTCTCAGT  
+  
FFFFFFFFFFFFFFFFFFFFFFFFFFFFFFFFFFFFFFFFFFFFFFFFFFFFFFFFFFFFFFFFFFFFFFFF  
FFFFFFFFFFFFFFFFFFFFFFFFFFFFFFFFFFFFFFFFFFFFFFFFFFFFFFFFFFFFFFFFFFFFFFFF  
@A00721:190:HGJW7DSXY:4:1266:5882:7200\_2:N:0:TCTGCAAG+GCTGCACT  
CGGCCGACGTTTGTGCGGAAGTCTCAGAGGTTTACGGCAGAAAAATTTCTCCTGCTTGTAAATTCGAGA  
GAGGACACTATGGAAATTAGACCTATCAGATGTCTTGACGACTTCGAA  
+  
FFFFFFFFFFFFFFFFFFFFFFFFFFFFFFFFFFFFFFFFFFFFFFFFFFFFFFFFFFFFFFFFFFFFFFFF:FFFFFFFFFFFFFFFFFFFFFFFF:FFFFFFF  
FFFFFF,FFFFFFFFFFFFFFFFFFFFFFFFFFFFFFFFFFFFFFFFFFFFFFFFFFFFFFFFFFFFFFFF  
@A00721:190:HGJW7DSXY:4:2605:1994:32659\_2:N:0:TCTGCAAG+GCTGCACT  
ATATTACTTTCACTCAAGGTGAAAAGTTTGAATTAACAAAGTCCTTGGAAGAGTAAGGTTAAATGT  
GAAGATGCTCAGACTATTCAATGAAGTTCAAGGTAATACTTACCAGCAC  
+  
FFFFFFFFFFFFFFFFFFFFFFFFFFFFFFFFFFFFFFFFFFFFFFFFFFFFFFFFFFFFFFFFFFFFFFFF:F:FFFFFFFFFFFFFFFFFFFFFFFFFFFFFFFFFFFFFFFFFFFFFFFF:FFFFFFFFFFFFFFFF:FFFFFFF  
FFFF:FFFFFFFFFFFFFFFF:FF:FFFFFFFFFFFFFFFF:FFFFFFFF:FFFFFF  
@A00721:190:HGJW7DSXY:4:2631:9968:21042\_1:N:0:TCTGCAAG+GCTGCACT  
ATGACCCTGTTTTTGCATCACAAACACATATTACCGTTGCTCTATCACACACGTTGAATCTTTACGAT  
ACTTTGTTATCAATGTAAAGTTAAACGATGCTACTTGTGAGAGGATCAATCACAGTAAGGAACTGTCA  
CGT  
+  
FFF:FFFFFF:FFFFFFFFFFFFFFFFFFFFFFFFFFFFFFFFFFFFFFFFFFFFFFFFFFFFFFFFFFFFFFFF:FFFFFFF  
FFFFFFFFFFFFFFFFFFFFFFFFFFFFFFFFFFFFFFFFFFFFFFFFFFFFFFFFFFFFFFFFFFFFFFFF:FFFFFFFFFFFFFFFFFFFFFFFFFFFFFFFFFFFFFFFFFFFFFFFF  
FFF  
@A00721:190:HGJW7DSXY:4:1555:11822:20212\_1:N:0:TCTGCAAG+GCTGCACT  
TGCAGATTCAACCCCTTATATCGAGGCTATCGAGGACGATGAGTATCTTGAAGTTGTTGACGACAAGC  
CTCAAGAGGGTAGAGGACCACCTGGATCTTCTACTGTCTCTGCCTTCCAAGATTTCTTAGAAGAGGTT  
ATT  
+  
FFFFFFFFFFFFFFFFFFFFFFFFFFFFFFFFFFFFFFFFFFFFFFFFFFFFFFFFFFFFFFFFFFFFFFFFFFFFFFFFFFFFFFFFFFFFFFFFFFFFFFFFFFFFFFFF  
FFFFFFFFFFFFFFFFFFFFFFFFFFFFFFFFFFFFFFFFFFFFFFFFFFFFFFFFFFFFFFFFFFFFFFFF:FFFFFFFFFFFFFFFFFFFFFFFF  
FFF  
@A00721:190:HGJW7DSXY:4:1641:13901:10222\_1:N:0:TCTGCAAG+GCTGCACT  
CTTAACGTCACTCGGTAATCTTTCAGCCGAATTAAGTACTAATGAGTTCAAGTCGGTTGTCGATCGAA  
TTAAGATCAAGGCTAATACCTTTATAGGTAAGAAGCCCTTGAGCCGCGTAGTCAGCGCGTTTAGCTG  
TAT  
+  
FFFFFFFFFFFFFFFFFFFFFFFFFFFFFFFFFFFFFFFFFFFFFFFFFFFFFFFFFFFFFFFFFFFFFFFFFFFFFFFFFFFFFFFFFFFFFFFFFFFFFFFFFFFFFFFF  
FFFFFFFFFFFFFFFFFFFFFFFFFFFFFFFFFFFFFFFFFFFFFFFFFFFFFFFFFFFFFFFFFFFFFFFF:FFFFFFFFFFFFFFFFFFFFFFFF  
FFF  
@A00721:190:HGJW7DSXY:4:1446:4101:18302\_1:N:0:TCTGCAAG+GCTGCACT  
TATACCCGATAGGGTACCGAGTCTCCAAGAGAATATTTATCTTATGAGGCTCGAACTTCAACGTTT  
TCACAACGGAAAGACATATCGCACCCGAAATTTTGGGCAGAATGCTCTTAACGCGGTTCTTGAACGG  
TGT  
+  
F:FFFFFFFFFFFFFFFFFFFFFFFFFFFFFFFFFFFFFFFFFFFFFFFFFFFFFFFFFFFFFFFFFFFFFFFF:FFFFFFF  
FFFFFFFFFFFFFFFFFFFFFFFFFFFFFFFFFFFFFFFFFFFFFFFFFFFFFFFFFFFFFFFFFFFFFFFF:FFFFFFFFFFFFFFFFFFFFFFFF  
FFF  
@A00721:190:HGJW7DSXY:4:1621:29441:3004\_2:N:0:TCTGCAAG+GCTGCACT  
CTAAGTTGATAAAGTTATAGGAGACTCAGTTAACCTGAGAGCTCCTCAATTGATAGATTGGGTCAAC  
AATAGGGACGCTAGTATACTTCGTAAAGTCGACAGCGAAATGGTCAAT  
+  
FFFFFFFFFFFFFFFFFFFFFFFFFFFFFFFFFFFFFFFFFFFFFFFFFFFFFFFFFFFFFFFFFFFFFFFFFFFFFFFFFFFFFFFFFFFFFFFFFFFFFFFFFFFFFFFF  
FFFFFFFFFFFF:FFF:FFFFFFFFFFFFFFFFFFFFFFFFFFFFFFFF,FFFFFF,FF

@A00721:190:HGJW7DSXY:4:2450:27579:31187\_1:N:0:TCTGCAAG+GCTGCACT  
ATATGACCTATTTTAAAGCTCATGGTGAAAAGGGAAGCTAAGGTTAAACTTGATGCTTCAGCCTTTTCG  
AAGCATAACCCCGCACAGAATATCGTTTATCACGCAAATTTATTAATGCAATTTTCGACCTATCTT  
TAA

+

FFFFFFFFFFFFFFFFFFFFFFFFFFFFFFFFFFFFFFFFFFFFFFFFFFFFFFFFFFFFFFFFFFFFFFFF  
FFFFFFFFFFFFFFFFFFFFFFFFFFFFFFFFFFFFFFFFFFFFFFFFFFFFFFFFFFFFFFFFFFFFFFFF  
FFF

@A00721:190:HGJW7DSXY:4:1240:3884:3521\_1:N:0:TCTGCAAG+GCTGCACT  
TGTCTTTTACCCAACATTTTATGTATACAGAGATGACCAGTGACGATTTCTCCCGGAAGCTCTTCTC  
TCTCTTAGGAGGTCATGATGACTACTATAAGGGTGAAATCGATTTTTCGAAGTTTGACAAATCTCAAG  
ATT

+

FFFFFFFFFFFFFFFFFFFFFFFFFFFFFFFFFFFFFFFFFFFFFFFFFFFFFFFFFFFFFFFFFFFFFFFF  
FFFFFFFFFFFFFFFFFFFFFFFFFFFFFFFFFFFFFFFFFFFFFFFFFFFFFFFFFFFFFFFFFFFFFFFF  
FFF

@A00721:190:HGJW7DSXY:4:1152:18665:30311\_2:N:0:TCTGCAAG+GCTGCACT  
AGCCTATGAGATAAAGATGTATTCTTATTTAGGCTTCGATGCTGAATTTCTTGAACCTTGAGTGCCA  
GTGAATATTTTGTACGCCAGGAGATCGGAAGAGCGTCGTGTAGGGA

+

FFFFFFFFFFFFFFFFFFFFFFFFFFFFFFFFFFFFFFFFFFFFFFFFFFFFFFFFFFFFFFFFFFFFFFFF  
FFFF:FFFFFFFFFFFFFFFFFFFFFFFFFFFFFFFFFFFFFFFFFFFFFFFFFFFFFFFFFFFFFFFF  
FFF

@A00721:190:HGJW7DSXY:4:1108:2736:3380\_1:N:0:TCTGCAAG+GCTGCACT  
TAACACATTCTTTGGTAATTGTATGATCACTCTTATGATGCTCTCTCTTTATTACGACCTTCGGAAGT  
TTAGAGCCGTCGCTGTCGCCGAGACGATTCGATCCTCTTTTCGGACGTACCGGTCCAGGATTATTCA  
GAT

+

FFFFFFFFFFFFFFFFFFFFFFFFFFFFFFFFFFFFFFFFFFFFFFFFFFFFFFFFFFFFFFFFFFFFFFFF  
FFFFFFFFFFFFFFFFFFFFFFFFFFFFFFFFFFFFFFFFFFFFFFFFFFFFFFFFFFFFFFFFFFFFFFFF  
FFF

@A00721:190:HGJW7DSXY:4:1553:21450:14810\_2:N:0:TCTGCAAG+GCTGCACT  
CAGCGTACTTCTGCTCGCGATTTATTCTTTTTGTCAATGATTACATCTACTTCGTTCTGATCCTTAC  
AAGATCATCGTTAAGTTAGGTAAACCCCTAACCGATGTTACTCTTGTA

+

FFFFFFFFFFFFFF,FF::FFFFFFFF:FFFFFFFFFFFFFFFFFFFFFFFF:FFFFFFFFFFFFFFFF  
FFFFFFFFFFFFFF:FFFFFF:FFFFFFFFFFFFFFFFFFFFFFFF:FFFFFFF

@A00721:190:HGJW7DSXY:4:1265:15167:7435\_1:N:0:TCTGCAAG+GCTGCACT  
TTTAAAGACTATACTAAATATCTCCACTACGAGGTTGTTGTTTGGCGATTAGCTCTTGCGACTAATAT  
TCGATATTCGATTGAGGGTCGTTATACCTATTCGCTATCTGTGCTTTGAATTGTATAAGATCAAATT  
TTA

+

FFFFF,FFFFFFFFFFFF:FFFFFF:FF:F,FFFF,FF,FF:FFF,FFF::FF,FFFFFF,FFFFFF  
F:FFFFFF:FFFF:FF:FF:FFFFFF:FFFFFF:FFFFFFFFFFFF,F,FFFFFFFFFFFFFFFF  
FFF

@A00721:190:HGJW7DSXY:4:1633:22833:30733\_2:N:0:TCTGCAAG+GCTGCACT  
CCTGATGTGGAGGGAGTTCTTGAAGCATCCCGACCTTCTTGTGAAAATTTTGATGCGGTTTCATAA  
GATTATCAGTAATCCTGATTCTACTACGATTCATGGACCTTCCATCC

+

FFFFFFFFFFFFFFFFFFFFFFFFFFFFFFFFFFFFFFFFFFFFFFFFFFFFFFFFFFFFFFFFFFFFFFFF  
FFFF:FFFFFFFFFFFFFFFFFFFFFFFFFFFFFFFFFFFFFFFFFFFFFFFFFFFFFFFF

@A00721:190:HGJW7DSXY:4:1444:12048:28870\_2:N:0:TCTGCAAG+GCTGCACT  
GAGAGACGTATCTCAAAGATCGACTTCGAGACAGGTGATATTGTTGAGCGAGAGCGACCAAGATCTAA  
ATTCGGTAACGGTGC GTGGCGCTTTATTTTAAAAAGCTCCCTCCTCTC

+



FFFFFFFFFFFFFFFFFFFFFFFFFFFFFFFFFFFFFFFFFFFFFFFFFFFFFFFFFFFFFFFFFFFFFFFF  
FFFFFFFFFFFFFFFFFFFFFFFFFFFFFFFFFFFFFFFFFFFFFFFFFFFFFFFFFFFFFFFF  
@A00721:190:HGJW7DSXY:4:1373:28953:8390\_2:N:0:TCTGCAAG+GCTGCACT  
CTGATACTTATCACGAAAGGACTTGAGTCTTTTGATCAGTCTCTGACTTGACCATCTTTCATTTTAAA  
TGACGATCATTAAGACTCTCTTCTTCTTTGTTTCCTTCTTTGCACTG  
+  
FFFFFFF:FFFFFFFFFFFFFFFFFFFFFFFFFFFFFFFFFFFFFFFFFFFFFFFFFFFFFFFFFFFFFFFF  
FF:FFFFFFFFF:FFFFFFFFF:FFFFFFFFF:FFFFFFFFFFFFFFFFFFFFF  
@A00721:190:HGJW7DSXY:4:2524:26160:24189\_2:N:0:TCTGCAAG+GCTGCACT  
CAGCTTGTGTTTTACCTAATCTGTGTTTTACGATAACAACCTATCAGTTGATTAAGACTCTTCCGAAA  
GGCGAACTTTGGGAATTTGAAGCTCAGGGTGAAGCACAACTTTGACC  
+  
FFFFFFFFFFFFFFFFFFFFF:FFFFFFFFFFFFFFFFFFFFFFFFFFFFFFFFFFFFFFFFFFFFFFFFFFFFF  
FFFFFFFFFFFFFFFFFFFFFFFFFFFFFFFFFFFFFFFFFFFFFFFFFFFFFFFFFFFFFFFF  
@A00721:190:HGJW7DSXY:4:1558:21603:27445\_1:N:0:TCTGCAAG+GCTGCACT  
GTTACGGATATACTCTCCTTGAGTTCACTCGTAAGGACACTACCACTTATTACGATATTTCTTTAGTC  
GATGGGTTTTCGACGCCTTTAAGCGTCTTCTGTTCATCGCAACCAGATGATATCTTCTATTCGAACTT  
ATG  
+  
FFFFFFFFFFFFFFFFFFFFFFFFFFFFFFFFFFFFFFFFFFFFFFFFFFFFFFFFFFFFFFFFFFFFFFFF  
FFFFFFFFFFFFFFFFFFFFFFFFFFFFFFFFFFFFFFFFFFFFFFFFFFFFFFFFFFFFFFFFFFFFFFFF  
FFF  
@A00721:190:HGJW7DSXY:4:1557:8919:21042\_1:N:0:TCTGCAAG+GCTGCACT  
GTTTACCACCGAAATATCAAGGTTCTTGTCTTCAAACGATTGGAAGGTTACTTATCTTAATAGTACT  
AAAGGGGTTTACTTACAACCCTATGACGATAGTTTCTCTTTACACACTTGTGAAGCCAATTTAGTTGT  
TTT  
+  
FFFFFFFFF:FFFFF:FFFFFFFFFFFFFFFFFFFFFFFFFFFFFFFFFFFFFFFFFFFFFFFFFFFFFFFF  
FFFFFFFFFFFFFFFFFFFFFFFFFFFFFFFFFFFFFFFFFFFFFFFFFFFFFFFFFFFFFFFFFFFFFFFF  
FFF  
@A00721:190:HGJW7DSXY:4:1142:32235:13072\_2:N:0:TCTGCAAG+GCTGCACT  
TCACTTTGTGTGTACTTGTCTCTATTTTAAGTTTTGTCTTCTTGTGTTGTCTTATTCTATTAATCACT  
CATTTTAGTGAGATTATTAACCAACGCACTAAACGCTCTTCGACAACAG  
+  
FFFFFFFFFFFFFFFFF,:FFFFFFFFFFFFFFFFF:FFF:FFFFFFFFFFFFFFFFFFFFFFFFFFFFFFFF  
FFFFFFFFFFFFFFFFFFFFFFFFF,,FFFFFFFFFFFFFFFFFFFFFFFFFFFFFFFF  
@A00721:190:HGJW7DSXY:4:1411:19425:33191\_2:N:0:TCTGCAAG+GCTGCACT  
TGATAGCCACCCGCCTTACAGAGGGCAGCAGCATGACCATAATTGGTATTGACTTTGGTACCACCTT  
TTCTACTGTCTGTCTCGCCTCTTGAATGAAGTTTAAATGCTTAACAA  
+  
FFFFFFFFFFFFFFFFFFFFFFFFFFFFFFFFFFFFFFFFFFFFFFFFFFFFFFFFFFFFFFFFFFFFFFFF  
FFFFFFFFFFFFFFFFFFFFFFFFFFFFFFFFFFFFFFFFF,FFFFFFFFFFFFFFFFFFFFF  
@A00721:190:HGJW7DSXY:4:1405:22236:2644\_2:N:0:TCTGCAAG+GCTGCACT  
CTACAATCATTGGTTTTTCTAATAATGATGACACTATTGTTTATGGATATGATGCTATTACTCATGAT  
GGTTACGGTCAGGGAGGATTCTCAGTTTACAAGGACCTTAAGCGATGG  
+  
FFFFFFFFFFFFFFFFFFFFFFFFFFFFFFFFFFFFFFFFFFFFFFFFFFFFFFFFFFFFFFFFFFFFFFFF  
FFFFFFFFFFFFFFFFFFFFFFFFFFFFFFFFFFFFFFFFF:FFFFFFFFFFFFFFFFFFFFFFFFF  
@A00721:190:HGJW7DSXY:4:2273:12617:35900\_2:N:0:TCTGCAAG+GCTGCACT  
ACATTACCCGAAAGACGTGCTAAATTAACCACTTGTACGATGTCGTCTGTCTCGGCGATCACTTTTC  
ACTAAGAATTGGTCCTACTTTTGGACAAGGCCAACTTCGTAATCTTCA  
+  
:FFFFFFFFFFFFFFFFFFFFFFFFFFFFFFFFF:FFFFFFFFFFFFFFFFFFFFFFFFFFFFFFFFFFFFF:FFFF  
FFFF:FFFFF:FFFFFFFFFFFFF:FFFFFFFFFFFFFFFFFFFFF:FFFFFFFFFFFFF

@A00721:190:HGJW7DSXY:4:1575:31485:1971\_2:N:0:TCTGCAAG+GCTGCACT  
TTTATCTCTTTGGTTGTTAGGGATTTTGAAGAGTGAAGGCTTCAATTGTAGTGGTTTGGTCGTTTC  
AGTACCCAGTCAGTATACCTCTACGCAAAGATATTTATGAAAACCTAC

+

FFFFFFFFFFFF,FF:FFFFFFFFFFFFFFFFFFFFFFFFFFFFFFFFFFFFFFFFFFFFFFFFFFFFFFFF  
FFFF:FFFFFFFFFFFFFFFFFFFFFFFFFFFFFFFFFFFFFFFFFFFFFFFFFFFFFFFFFFFFFFFF

@A00721:190:HGJW7DSXY:4:2369:31114:14951\_1:N:0:TCTGCAAG+GCTGCACT  
CCGGATTACCTGTCTTTCATATTATGAATGAACCTTCGGCCGCTCTCTTTGCTTCGATGTTGGATGTC  
AAGAAGGGTTCAGAATGGGATTCCTACGTAGTTTATGACTTTGGTGGTGGTACTTTCGATACTTCTAT  
CGT

+

FFFFFFFFFFFFFFFF,FF:FFFFFFFFFFFFFFFFFFFFFFFFFFFFFFFFFFFFFFFFFFFFFFFFFFFFFFFF  
FFFFFFFFFFFFFFFFFFFFFFFFFFFFFFFFFFFFFFFFFFFFFFFFFFFFFFFFFFFFFFFFFFFFFFFF:FF  
FFF

@A00721:190:HGJW7DSXY:4:2416:1624:28291\_2:N:0:TCTGCAAG+GCTGCACT  
TACTATAGTGTTATTTATTCTGGTGGTGTATGATAATCTTGGAGGTCGTGACGTTGATGAAGCTATAAG  
AGCGTTCTTATTACGGCGCACTTCTTTACCCGCCACCAACAACCTTC

+

FFFFFFFFFFFFFFFFFFFFFFFFFFFFFFFFFFFFFFFFFFFFFFFFFFFFFFFFFFFFFFFFFFFFFFFFFFFF  
FFFFFFFFFFFFFFFFFFFFFFFFFFFFFFFFFFFFFFFFFFFFFFFFFFFFFFFFFFFFFFFFFFFFFFFF

@A00721:190:HGJW7DSXY:4:2333:32371:9017\_1:N:0:TCTGCAAG+GCTGCACT  
TGAAGGAGGAGGTTTCTGTTACTGGAACCCCTCGTCAATACTTTTCAATAATATACGTCTTGAACCTC  
ACTTATGACGATCTAGTGAAATTAACGCGTCCTTTTCTGGAACGTAGTTTACTATTATGAACAAAGT  
TAT

+

:FFFFFFFFFFFFFFFFFFFFFFFFFFFFFFFFFFFFFFFFFFFFFFFFFFFFFFFFFFFFFFFFFFFFFFFF  
FFFFFFFFFFFFFFFFFFFFFFFFFFFFFFFFFFFFFFFFFFFFFFFFFFFFFFFFFFFFFFFFFFFFFFFF  
FFF

@A00721:190:HGJW7DSXY:4:2158:28583:1266\_1:N:0:TCTGCAAG+GCTGCACT  
CCCTGATTCCGGCCGGTGGTAGCTCATTTCTACCAGGGGCTATTACTCTTGCTGAAACAGCTATTAAA  
GCTGTTGAGCGGGTAATTACACCTAAACGAGCTCGATCTGCCATCGCTGAAGGATGTGCACTCTTTTC  
TGC

+

FFFFFFFFFFFFFFFFFFFFFFFFFFFFFFFFFFFFFFFFFFFFFFFFFFFFFFFFFFFFFFFFFFFFFFFF  
FFF:FFFFFFFFFFFFFFFFFFFFFFFFFFFFFFFFFFFFFFFFFFFFFFFFFFFFFFFFFFFFFFFF  
FFF

@A00721:190:HGJW7DSXY:4:1476:11252:8703\_1:N:0:TCTGCAAG+GCTGCACT  
CTTCGTCGATTGTATCAACAGTAACATTACTTCTAATAAAGGTCTCTATCAAGCTCGTATTATCGTCG  
CTGCTGGATCTGCGTTACCGTTGAAGGCTAACTCCAAGGTAATTATGAAGACTGTGATTTATCTTTC  
ACT

+

FFFFFFFFFFFFFFFFFFFFFFFFFFFFFFFFFFFFFFFFFFFFFFFFFFFFFFFFFFFFFFFFFFFFFFFF  
FFFFFFFFFFFFFFFFFFFFFFFFFFFFFFFFFFFFFFFFFFFFFFFFFFFFFFFFFFFFFFFFFFFFFFFF  
FF:

@A00721:190:HGJW7DSXY:4:1308:14561:15092\_1:N:0:TCTGCAAG+GCTGCACT  
ACGTGTGCTCTTCCGATCTATAATTTCAATCTTCTTAAAAAGAAGATAGAGAGTCATACTTTGGGCTA  
TCGTTCAAGTGCATGGGGTTGGATAGCCAATATTGAAGTGGACACCTCTGGTAGTATCGAAGTAAAGA  
TAA

+

FFFFFFFFFFFFFFFF:FFF:FFFFFFFFFFFFFFFFFFFFFFFFFFFFFFFFFFFFFFFFFFFFFFFF  
F:FFFFFFFFFFFFFFFFFFFFFFFFFFFFFFFFFFFFFFFFFFFFFFFFFFFFFFFFFFFFFFFF  
FFF

@A00721:190:HGJW7DSXY:4:1223:32524:28103\_1:N:0:TCTGCAAG+GCTGCACT  
ATACTATGGTTGAATCAACTAAGCATACTACTTTTGCTTTGATTACTCTACCGCCTTACAAGTCTAAG

GTAAAGAGTCGATTAAACAAGTTGTACTTATCAATGATTTTATCGCTGGTTGTTATCTCGAAAAGTC  
TCT

+

FFFFFFFFFFFFFFFFFFFFFFFFFFFFFFFFFFFFFFFFFFFFFFFFFFFFFFFFFFFFFFFFFFFFFFFF  
FFFFFFFFFFFFFFFFFFFFFFFFFFFFFFFFFFFFFFFFFFFFFFFFFFFFFFFFFFFFFFFFFFFFFFFF  
FFF

@A00721:190:HGJW7DSXY:4:2156:29107:29512\_2:N:0:TCTGCAAG+GCTGCACT  
TCAGTTCTAACCCAAAGAGAATATCTAAAATATTTACAAAATCTTACCACTATCTACGAACCTAAAGT  
TCTGAAGACGTTGCTTGTCTGCTTCCTCCTTAATGGCACTACCTCGGT

+

FFFFFFFFFFFFFFFFFFFFFFFFFFFFFFFFFFFFFFFFFFFFFFFFFFFFFFFFFFFFFFFFFFFFFFFF  
FFFFFFFFFFFF:FFFFFFFFF:FFFFFFFFFFFFFFFFFFFFFFFFFFFFFFFFFFFFFFFF

@A00721:190:HGJW7DSXY:4:2675:13105:26788\_2:N:0:TCTGCAAG+GCTGCACT  
TTGGAACGAAGGCGACCTGTTCCGGAGTTTTACGGGATCCGGAATGTTCTGTCTATATTAGGTGAAG  
CGAAATACGATTTCAACGTCAAGATCGGAAGAGCGTCGTGTAGGGAA

+

FFFFFFF:FFFFFF:FFFFFFFFFFFFFFFFFFFFFFFFFFFFFFFFFFFFFFFFFFFFFFFFFFFFFFF  
FFFFFFFFFFFFFFFFFFFFFFFFFFFFFFFFFFFFFFFFFFFFFFFFFFFFFFFFFFFFFFFFFFFF:

@A00721:190:HGJW7DSXY:4:1237:22064:13432\_2:N:0:TCTGCAAG+GCTGCACT  
ATTTGATCTGGTTGCTCAATTCTAAGCGTGTTCCGCTTAGTGCGAGGCCTCTCTTCTACGAGTATTGC  
TATTTATACGTTACGAGAAGAAGGTTGAAAGTTTGAGAACTTAGTT

+

FFFFFFFFFFFFFFFFFFFFFFFFFFFFFFFFFFFFFFFFFFFFFFFFFFFFFFFFFFFFFFFFFFFFFFF  
FFFFFFFFFFFFFFFFFFFFFFFFFFFFFFFFFFFFFFFFFFFFFFFFFFFFFFFFFFFFFFFFFFFF:

@A00721:190:HGJW7DSXY:4:2208:5014:33348\_2:N:0:TCTGCAAG+GCTGCACT  
ACATACTAAATACTAGATATTTGGATGATCTTGATAAAGAACTTCATGAATTTTCAGAGGATGAAAAA  
TTTTCTTCCTTGATTTTAATATAAAGAATCTTTACCAGGACTCCTAC

+

FFFFFFFFFFFFFFFFFFFFFFFFFFFFFFFFFFFFFFFFFFFFFFFFFFFFFFFFFFFFFFFFFFFFFFF  
FFFFFFFFFFFFFFFFFFFFFFFFFFFFFFFFFFFFFFFFFFFFFFFFFFFFFFFFFFFFFFFFFFFF:

@A00721:190:HGJW7DSXY:4:1455:7862:13917\_2:N:0:TCTGCAAG+GCTGCACT  
TCTGATCGTAAGAAGTTTATAAGGAACATATCCATTTGTTGTAATAGGGTCATCAACTTAGAACTCGA  
AACTCTAAGTGGAATACTGTCTTTCCAAGCTTACCTGTATCTTCAAT

+

FFFFFFFFFFFFFFFFFFFFFFFFFFFFFFFFFFFFFFFFFFFFFFFFFFFFFFFFFFFFFFFFFFFFFFF  
FFFFF:FFFFFFFFFFFFFFFFFFFF:FFFFFFFFF:FFFFFFFFFFFFFFFFFFFF:F

@A00721:190:HGJW7DSXY:4:2167:17273:20353\_1:N:0:TCTGCAAG+GCTGCACT  
TTCGATAGGGACATTTTATCGTGGGCTTTCGTAAGGAAGATCTGTTATCGACGTTTATCGTTTA  
CGAAGTATCACTCCACCGGTGAATGGTTTAAGAATACTATAAATAGAATAGCTATTACTACTAATGGC  
GTT

+

FFFFFFFFFFFFFFFFFFFFFFFFFFFFFFFFFFFFFFFFFFFFFFFFFFFFFFFFFFFFFFFFFFFFFFF  
FFFFFFFFFFFFFFFFFFFFFFFFFFFFFFFFFFFFFFFFFFFFFFFFFFFFFFFFFFFFFFFFFFFF:  
FFF

@A00721:190:HGJW7DSXY:4:2141:9842:26365\_2:N:0:TCTGCAAG+GCTGCACT  
TAGTGACATCTGGTCAATTTGTTTTAGGTGGTCTTTATTCTATTATTGATTTTTATGAGATTGATA  
CGTTAACAGAAGATGATGTTAGAGTAGAATTCCTGAAGAGTCCTTCG

+

FFFFFFFFFFFFFFFFFFFFFFFFFFFFFFFFFFFFFFFFFFFFFFFFFFFFFFFFFFFFFFFFFFFFFFF  
FFFFFFFFFFFFFFFFFFFFFFFFFFFFFFFFFFFFFFFFFFFFFFFFFFFFFFFFFFFFFFFFFFFF:  
FFF,FF

@A00721:190:HGJW7DSXY:4:2341:28980:10191\_1:N:0:TCTGCAAG+GCTGCACT  
TTAAATCTAGGATTATGTCTGTGTTGAAAGACTTTCTACCGATAAGGGTCACTAGTCTTACACAATTA  
AGAAATAATCCTACATTGACTGATTATCTAAAGATTGAAGGAAAATTTTATCCTCGTTTAACTTACTT  
AGA

[illegible]

[illegible]



@A00721:190:HGJW7DSXY:4:1320:23683:15421\_2:N:0:TCTGCAAG+GCTGCACT  
GAAGAAAACCACTCCCTTCAATTCAATAACATAACATACCATACACTCCCCAAACATAACATACCATA  
ACCTACCATGACCAATCATCGCTCCAACCTGGCACGCCAGACGTAGGGT

+

FFFFFFFFF,FFFF,FFFF,FFFFFFFFFFFFFFFFFFFFFFFFFFFFFFFF:FFFFFFFFFFFFFFF  
FFFFFFFFFFFFFFFFFFFFFFFFFFFFFFFFFFFFFFFFFFFFFFFF:FFFFFFF

@A00721:190:HGJW7DSXY:4:1115:17083:35587\_2:N:0:TCTGCAAG+GCTGCACT  
ACCGCCGGTCGGCAGATCGGCACCACTGGTCTCTACGTTACGGGACCGCTGTGCAGAATAACCTTCC  
CAAATCTAGATCTGCACAGAAGAAGGCTGAAGGTCGTTACCGGACGAC

+

:FF:FFF::F:F:FFF:F,FFFFFFFF::,FFFFFFFF,FFFFFFFF,FFFFFFFFFFFF:FFFF:FF  
:F,F:FFFFFFFF:FF:FFF:FF::FF:FFF,FFFFFFFF:FFFF

@A00721:190:HGJW7DSXY:4:2164:14353:29168\_1:N:0:TCTGCAAG+GCTGCACT  
GGCTGTTGCCAGAGGAAAGCAGCGACCACCGAGTCTGCTCGTAACATTGACGGCAGTCCCGTCATCT  
CTGTGGGAACCTGAGGCAGTACCTCAGTCAAAAGTCACATTCACCACTCCCATGCCAATCAATGATGTG  
ACT

+

FFFFF:FFFFFFFFFFFFFFFFFFFFFFFFFFFFFFFFFFFFFFFF:FFFFFFFFFFFFFFFFFFFFFFF  
FFFFFFFFFFFFFFFFFFFFFFFFFFFFFFFFFFFFFFFFFFFFFFFFFFFFFFFFFFFFFFFFFFFFFFFFF  
FFF

@A00721:190:HGJW7DSXY:4:1630:28357:9173\_2:N:0:TCTGCAAG+GCTGCACT  
TCAATACGTCGTGGGAGGTACTGAAGCCTTCCCCTCCGCTGGCACGAAGAACACTCCCAAGCCAATCA  
ATAGTTCTTCTGACCAGAATGAAAAGGGGTTTACCAGGGTAGTCTCTA

+

FFFFFFFFFFFFFFFFFFFFFFFFFFFFFFFFFFFFFFFFFFFFFFFFFFFFFFFFFFFFFFFFFFFFFFFFF  
FFFFFFFFFFFFFFFFFFFFFFFFFFFFFFFF:FFFFFFFFFFFFFFFFFFFFFFFFFFFFFFF

@A00721:190:HGJW7DSXY:4:1414:15257:36839\_1:N:0:TCTGCAAG+GCTGCACT  
GAAGAGGGGAAATGTCCCCAAACTGAGAAGAATAAAGGGAAAGGTCCATCAGGACCTAAGAAGGGGA  
AATTACCCCTAATTCTGAAGGAAGATCTCCACCATCTGGGGTTGGAATAAGAAATCTGCACGGGCC  
AAA

+

FFFFFFFFF:FFF:FFFFFFFFFFFFFF::FF,,:FFFF:FFFFFFFFFFFFFFFFFFFFFFFFFFFFF  
:F,FFFFFFFFFFFFFFFF:FFFFFFFFFFFFFFFFFFFFFFFFFFFFFFFFFFFFFFFFFFFFFFFFFFFFF  
FF:

@A00721:190:HGJW7DSXY:4:1142:12798:10410\_2:N:0:TCTGCAAG+GCTGCACT  
CTACGAAGTCGCTGAAGCGGCTTGGGTCATTAAGGGTAGCTGTAAAGTTGCGCCTGCCGACCCCATC  
TTTGAGACCAAGACTCTCTACAGTAGGTCGTGCCTACTATGAGCAAT

+

FFFFFFFFFFFFFFFFFFFFFFFFFFFF:FFFFFFF,FFFFFF,FFFFFFFFFFFFFFFFFFFFFFFFFFFFF  
FFFFFFFFFFFFFFFFFFFFFFFFFFFF:FFFFFFFFFFFFFFFFFFFFFFFFFFFFFFF

@A00721:190:HGJW7DSXY:4:1275:11650:27555\_2:N:0:TCTGCAAG+GCTGCACT  
TCGTCACTGAGGACGAAGGTGAGAGGACTTTTGGCTACTGGCGACAACTGAGAGCAGTCGCTGGGGA  
AAGAGAATTGCGTGGGTGAAGGCCGACGCTTCGAGCTTGAGTGTGAC

+

F:FFFFFF:FFFFFFFFFFFFFFFFFFFFFFFFFFFFFFFFFFFFFFFFFFFFFFFFFFFFFFFFFFFFF  
,FFFFFFFFFFFFFFFFFFFFFFFFFFFFFFFFFFFFFFFFFFFFFFFFFFFFFFFFFFFFFFF

@A00721:190:HGJW7DSXY:4:1574:21305:13870\_2:N:0:TCTGCAAG+GCTGCACT  
GTTTTGTCAACGGCGTTTGGAGATTTTATCCGCGCTTAACATATGGGGCGAAGATCCCCTATGGAGT  
CTTGAAGGACTTAGGTTGGCATATTTATGCCGACGATAATAAGCATGT

+

FFFFFFFFFFFFFFFFFFFF:FFFFFFFFFFFFFFFFFFFFFFFFFFFFFFFFFFFFFFFFFFFF:F:FFFFF  
FFFFFFFFFFFFFFFFFFFF:FFFFFFFFFFFFFFFFFFFFFFFFFFFFFFFFFFFFFFF

@A00721:190:HGJW7DSXY:4:1529:4345:4758\_1:N:0:TCTGCAAG+GCTGCACT  
CCGAGGTAAGCTCGGGACTTACAAGAGAGAGTGTGAGAGAGTCGCTCTCACTATTTTTGCCAGAATG

CGGGCTTTCTGACTGATGAGGTAAAACTCTTGCTCCTTCTGTGGGTGAGGGTTTTTGTATATTCAC  
TGG

+

FFFFFF,FFFFFFFF:FF:FFFFFFFF:FFFFFFFFFFFFFF:FFFFFF,FFFFFFFFFFFFFFF  
,FFFFFFFFFFFFFF:FFFFFFFF, :FFF:FFFFFFFF:FFFFFF:FF:FFFFFFFFFFFFFF  
FFF

@A00721:190:HGJW7DSXY:4:1234:29839:20165\_2:N:0:TCTGCAAG+GCTGCACT  
TCCTCCATAATTACAACCTCTCTTTAGAGAGCATTAGAAGGAAGTTGGGCAAATCCCACATATGGTA  
GACGTTGTCACACTTTTCTTGAAAATTTTCTTTCTCCGTCATTGG

+

FFFFFFFF:FFFFFFFFFFFFFF:FFFFFFFFFFFFFF,FFFFFFFFFFFFFFF  
FFFFFFFFFFFFFF,FFF:FFFFFFFFFFFFFF:FFF:FFF:F,FFF

@A00721:190:HGJW7DSXY:4:2649:15447:11083\_2:N:0:TCTGCAAG+GCTGCACT  
GTGAGAAGGTGGAAGGTGTCAAGGTCTTCTTCATGCTGATCTTTCAGGACCTAATCACATCATGATT  
GATAGTTACGGCTCGTATCGAGTTGGAGGGAGGAAGTTCTCCGAAATT

+

FFFFFFFFFFFFFFFFFFFFFFFFFFFFFFFFFFFFFFFFFFFFFFFFFFFFFFFFFFFFFFFF  
FFFFFFFFFFFFFFFFFFFFFFFF:FFF:FFFFFFFFFFFFFFFF

@A00721:190:HGJW7DSXY:4:2315:15022:30765\_1:N:0:TCTGCAAG+GCTGCACT  
GCTGTAAGTGTCAATTCAGAGAGGGGAGCTCTGAAAAGGAACTTCGTCAGAAGATGAGGAAGTCTAA  
GAGGAGGAGTTTGAGGAAGGCTCTAGAGAAGATCTCACCACCTGGAGAAGGCAAGTGGAGAGTCCAGA  
AGT

+

FFFFF:FFF:FFFFF:FF:FFFFFFFF:FFFFFFFFFFFFFF:FFFFFFFFFFFFFF: :FFFFF:  
FFFFFFFFFFFFFFFFFFFFFF:FFFFFFFFFFFFFF,FFFFFFFFFFFFFFFFFFFFFF:FFF:  
:FF

@A00721:190:HGJW7DSXY:4:2418:32515:17409\_2:N:0:TCTGCAAG+GCTGCACT  
GGATTATTTGAAGCAGGGTTACCACTTCCTAAGGTGGATGAGGGAGGTTGTTCTTTGGAGTTTATG  
ATAATCTTTTGAGAAGGGTCATAGAGCCAGCAAGAGAAGCTTATATG

+

FFFFFFFFFFFFFFFFFFFFFFFFFFFFFFFFFFFFFFFFFFFFFFFFFFFFFFFFFFFFFF  
F:FFFFFFFF:FFFFFF:FFFFFF:FFFFFF,FFFFFFFFFFFFFF

@A00721:190:HGJW7DSXY:4:1319:29568:7576\_2:N:0:TCTGCAAG+GCTGCACT  
CCTTGAGAAGACAAGCCACATTAAGATATAATTTAGGTCAACTTGGGGTTTCAATGTCATTAGTGCC  
TTACGATTGAAAGAGGTCCTTTTGAGTATCGACAGATCTTTCGATCTT

+

FFFFFFFFFFFFFFFFFFFFFFFFFFFFFFFFFFFFFFFFFFFFFFFFFFFFFFFFFFFFFF  
FFFFFFFFFFFFFFFFFFFFFF:F,FFFFFFFFFFFFFFFFFFFFFF:FFFF

@A00721:190:HGJW7DSXY:4:1455:7789:27633\_2:N:0:TCTGCAAG+GCTGCACT  
TTAACGTGGCAGAATTCGGTAACTTACCATATTGTTCTTCCGGAAGTTGTGGGATTAACTTTGAC  
TCAACTACTCCGATCAGATCCGATGGTTTGATTGGTATGGACTACTC

+

FFFFFFFFFFFFFFFFFFFFFFFFFFFFFFFFFFFFFFFFFFFFFFFFFFFFFFFFFFFFFF  
FFFFFFFFFFFFFFFFFFFFFFFFFFFFFF, :FFFFFFFFFFFFFFFF

@A00721:190:HGJW7DSXY:4:1439:19623:12242\_1:N:0:TCTGCAAG+GCTGCACT  
TAGTTGTCTAGGGTCATGGCAGATACTACCGATAAGGTGAAAAATATGCAGGTCAAAGATTCTGTAGC  
TCTGAGGGCGGTTGAGGGAGCCGTTTTGGCCGACTTTAACTATTCTAAGAGTCTTATGATTCAAAC  
CTA

+

FFF:FFFFFFFFFFFFFF:FFFFFFFFFFFFFF:FFFFFFFFFFFFFF:FFFFFFFF  
FFFFFFFFFFFFFFFFFFFFFFFFFFFFFFFFFFFFFFFFFFFFFFFFFFFFFFFFFFFFFF:FFFFFF  
FFF

@A00721:190:HGJW7DSXY:4:1553:25943:8719\_2:N:0:TCTGCAAG+GCTGCACT  
ACCTTACAAGTTGAGGAGACTTTACAGCGGCTTATTGTCGCGCAGTTTCCAGAATTGCGGTTGAAGT



TCACCCATTCTATCTTGAATGCTCACGCCGTCGCAGCCATATCGAGAC  
+  
FFFFFFFF:FFFFFFFFFFFFFFFFFFFFFFFFFFFFFFFFFFFFFFFFFFFFFFFFFFFFFFFFFFFFFFFF  
FFFFFFF,FFFFFFFFFFFFFFFFFFFFFFFFFFFFFFFFFFFFFFFFFFFFFFFFFFFFFFFFFFFFFFFF  
@A00721:190:HGJW7DSXY:4:1609:15320:13714\_2:N:0:TCTGCAAG+GCTGCACT  
AAAGTACAGATTTAGTGATTTAGATATTATTGATATTGGAGGCGATATTCGTTTTCATATCCAAAAC  
CCTTGAATGGAGTACATATTTGCAACCCTATTCTTGATGTGAAAGATG  
+  
FFFFFFFFFFFFFFFFFFFFFFFFFFFFFFFFFFFFFFFFFFFFFFFFFFFFFFFFFFFFFFFF:FFFFFFFF:FFFFFFFF:FFFFFF  
FFFFFFFFFFFFFFFFFFFFFFFFFFFFFFFFFFFFFFFFFFFFFFFFFFFFFFFFFFFFFFFF,FFFFFFFF  
@A00721:190:HGJW7DSXY:4:2670:20401:13056\_2:N:0:TCTGCAAG+GCTGCACT  
AACATTGATTGGGAACGTACTCACGAGACGTCATGAAAGCTATCGGAGGGAAGCAAAATGTTTC  
GTTCTGTTACAAGAACGCTTTGGATTGTGACCATAAAGCCTCAGTTGC  
+  
F:FFFF:F:FFFFFFFFFFFFFFFFFFFFFFFFFFFFFFFFFFFFFFFFFFFFFFFFFFFFFFFF,F:FFFF:FFF:,,,FFFF  
F,FF:FFFFFFFFFFFFFFFF,FFFF:FFFFFFFFFFFFFFFFFFFFFFFF: ,FFF  
@A00721:190:HGJW7DSXY:4:1102:12255:33176\_1:N:0:TCTGCAAG+GCTGCACT  
CTCTCTTGATGATGTAGCCACTATAATGCTTAAGAGAGAGATTGATGTATGTCATTTTCGTCTTAGTTT  
GTCCCGCGCAATTATTGGACACGATGAAAAATGACATACCCGTTCTGACCTTGGTATCGTTATCCGT  
CAT  
+  
FFFF:FFFFFFFFFFFFFFFFFFFFFFFFFFFFFFFFFFFFFFFFFFFFFFFFFFFFFFFFFFFFFFFF  
FFFFFFFFFFFF:FFFFFFFFFFFFFFFFFFFFFFFFFFFFFFFFFFFFFFFFFFFFFFFFFFFFFFFFFFFF  
FFF  
@A00721:190:HGJW7DSXY:4:1119:4716:32706\_2:N:0:TCTGCAAG+GCTGCACT  
CGAAGGATTGGGTTATTCTCACAACAAAGATAAGATTTTATCTTTCTTCAAACACCCTGTTTTCCTTA  
AGGGCGGACAATTGTTCCATTGTGAACCTCTTGGGGACTAGATTGAGCA  
+  
FFFFFFFFFFFFFFFFFFFFFFFFFFFFFFFFFFFFFFFFFFFFFFFFFFFFFFFFFFFFFFFF:FFFFFFFF:FFFFFFFFFFFFFFFFFFFFFFFFFFFFFFFFFFFFFFFF  
FFFFFFFFFFFFFFFFFFFFFFFFFFFFFFFFFFFFFFFFFFFFFFFFFFFFFFFFFFFFFFFF:FFFFF  
@A00721:190:HGJW7DSXY:4:1147:6451:31485\_1:N:0:TCTGCAAG+GCTGCACT  
AGTGACTGGAGTTCAGACGTGTGCTCTTCCGATCTATTCAGAATACCTATTTCCGTACCAAGAGCCAC  
TGCCAATCTCATCGCTATACGCATACCTGATTGGAAGAAGCGAGGTTCTGTTCTCAATAAAAAATTTT  
CTC  
+  
F:FFFFFFFFFFFFFFFFFFFFFFFFFFFFFFFFFFFFFFFFFFFFFFFFFFFFFFFFFFFFFFFF:FFFFFFFF:FFFFFFFFFFFFFFFFFFFFFFFFFFFFFFFFFFFFFFFF  
FFFFFFFFFFFFFFFF:FFFFFFFFFFFFFFFFFFFFFFFFFFFFFFFFFFFFFFFFFFFFFFFFFFFFFFFFFFFFFFFFFFFFFFFFFFFFFFFFFFFFFFFF  
FFF  
@A00721:190:HGJW7DSXY:4:1535:17951:27821\_1:N:0:TCTGCAAG+GCTGCACT  
TAAAGTTTTCTTCATAAGGGCTATTCAGTACGTCATGGGGATCACTTCTTCGGTCAATGACAAAACCT  
TCGAATATGTTACGACATGGCTTCGTAACAACAGTGCGAGGATTGTCATCTCGGGGAAAGTGATTCAC  
CAA  
+  
FFFFFFFFFFFFFFFFFFFFFFFFFFFFFFFFFFFFFFFFFFFFFFFFFFFFFFFFFFFFFFFF,FFFFFFFFFFFFFFFFFFFFFFFFFFFFFFFFFFFFFFFFFFFFFFFF  
FFFF:FFFFFFFFFFFFFFFFFFFFFFFFFFFFFFFFFFFFFFFFFFFFFFFFFFFFFFFFFFFFFFFFFFFFFFFFFFFFFFFFFFFFFFFFFFFFFFFF  
FFF  
@A00721:190:HGJW7DSXY:4:1323:27633:6261\_1:N:0:TCTGCAAG+GCTGCACT  
GAGATACCTAGAGAAGGTCGCAGCGATCTTACTCGTTATCGGAGCTAAGAAGAAGACTTTGGGTACAC  
GTTATGCTCGAAACTTAACGTTAGTACCGGAGGTGATCTCTCTGCTTCTGCGTTACTGAGAGAAAAG  
ATT  
+  
FFFF:FFFFFFFFFFFFFFFF:FFFFFFFFFFFFFFFFFFFFFFFFFFFFFFFFFFFFFFFFFFFFFFFF:FFFFFFFFFFFF  
FFFFFFFFFFFFFFFFFFFFFFFFFFFFFFFFFFFFFFFFFFFFFFFFFFFFFFFF:FFFFFFFFFFFFFFFFFFFFFFFFFFFFFFFFFFFFFFFF  
FFF

$+$  $+$ 

+

+

+

+

 $+$ 

+

[illegible]

@A00721:190:HGJW7DSXY:4:1221:1280:33677\_1:N:0:TCTGCAAG+GCTGCACT  
AGCAATACCTTCCACTGAGTTCATCACCCAGAGTTTCGACGTCGCGGAAACGATGAAGATTTCCACA  
CTGTTGAGAAATCTTCTGATGCTGAATTTGAGGAAAATTTTCGGAAGTTTTTGGTATAAATCCTGAT  
GGC

[illegible] $+$ 

```

FFFFFFFFFFFFFFFFFFFFFFFF:FFFFFFFFFFFFFFFFFFFFFFFF:FFFFFFFFFFFF:FF:FFFFFFFFFFFF
FFFFF::FFFFFFFFFFFFFFFFFFFFFFFF:FFFFFFFFFFFFFFFFFFFFFFFF:

```

+

```
FFF,:FF,:FFFFFFFF:FFFF:FFFF,FFFFFFFFFFFF:FFFFFFFFFFFF,F,FFFF,FF:FFFFFFFF
FFFF,FFFFFFFF:FFFFFFFFFFFF,F:FFFFFF:FF:FFF,FFF:FFFFFFFF,F:FFFFFFFFFFFF
FFF
```

+

[illegible]

+

[illegible]

+

[illegible] $+$ [illegible]



@A00721:190:HGJW7DSXY:4:2164:7491:25207\_2:N:0:TCTGCAAG+GCTGCACT  
GGCTGATGACTTAAATTCGCATTCTGCTTCGACGGTAATTCATAAGACCTTCTTGGGGAGTAAAG  
AGGGTTTGAAAATTACGGAACCTTTCCTCGTTCCTTCATGAAGATCTTC

CTCAAGAGGGTAGAGGACCACCTGGATCTTCTACTGTCTCTGCCTTCCAAGATTTCTTAGAAGAGGTT  
ATT

+

FFFFFFFFFFFFFFFF,FFFFFFFFFFFF:FFFFFFFFFFFFFFFFFFFFFFFFFFFFFFFFFFFFFFFFFFFF  
FFFF:FFFFFFFFFFFFFFFFFFFF:FFFFFFFFFFFFFFFFFFFFFFFFFFFF:FFFFF:FFFFFFFFFFFFF  
FFF

@A00721:190:HGJW7DSXY:4:2523:16712:16532\_1:N:0:TCTGCAAG+GCTGCACT  
CTTAACGTCACTCGGTAATCTTTCAGCCGAATTAAGTACTAATGAGTTCAAGTCGGTTGTCGATCGAA  
TTAAGATCAAGGCTAATACCTTTATAGGTAAGAAGCCCTTGAGCCGCGTAGTCAGCGCGTTTAGCTG  
TAT

+

FFFFFFFFFFFFFFFFFFFFFFFFFFFF:FFFFFFFFFFFFFFFFFFFF:FFFFFFFFFFFFFFFFFFFFFFFF  
FFFFFFFFFFFFFFFFFFFFFFFFFFFFFFFFFFFFFFFFFFFFFFFFFFFFFFFFFFFFFFFFFFFFFFFFFFFF  
FFF

@A00721:190:HGJW7DSXY:4:2549:29197:14826\_1:N:0:TCTGCAAG+GCTGCACT  
TATACCCGATAGGGTACCGAGTCTCCAAGAGAATATTTATTCTTATGAGGCTCGAACTTCAACGTTT  
TCACAACGGAAAGACATATCGCACCCGAAATTTTTGGGCAGAATGCTCTTAACGCGGTTCTTGAACGG  
TGT

+

FFFFFFFFFFFFFFFF:FFFFFFFFFFFFFFFFFFFF:FFFFFFFFFFFFFFFFFFFFFFFFFFFFFFFFFFFF  
FFFFF,FFFFFFFFFFFFFFFFFFFFFFFFFFFFFFFFFFFFFFFFFFFFFFFFFFFFFFFFFFFFFFFFFFFF  
FFF

@A00721:190:HGJW7DSXY:4:1654:28248:11334\_2:N:0:TCTGCAAG+GCTGCACT  
CTAAGTTGGATAAAGTTATAGGAGACTCAGTTAACCTGAGAGCTCCTCAATTGATAGATTGGGTCAAC  
AATAGGGACGCTAGTATACTTCGTAAAGTCGACAGCGAAATGGTCAAT

+

FFFFF:FFFFFFFFFFFFFFFFFFFFFFFFFFFFFFFFFFFFFFFFFFFFFFFFFFFFFFFFFFFF:FFFFFFF  
FFFFFFFFFFFFFFFFFFFFFFFFFFFF:FFFFFFFFFFFFFFFFFFFF,FF:FF

@A00721:190:HGJW7DSXY:4:2563:21703:25770\_1:N:0:TCTGCAAG+GCTGCACT  
ATATGACCTATTTTAAAGTCATGGTGAAAAGGGAAGCTAAGGTTAACTTGATGCTTCAGCCTTTTCG  
AAGCATAACCCCGCACAGAATATCGTTTATCACGCAAAATTTATTAATGCAATTTTCGACCTATCTT  
TAA

+

FFFFF:FFF:FFFFFFFFFFFF:FFFF: :FFFFFFFFFFFFFFFFFFFFFFFFFFFFFFFFFFFFFFFFFFFF  
FFFFFFFFFFFFFFFFFFFFFFFFFFFFFFFFFFFFFFFFFFFFFFFFFFFFFFFFFFFFFFFFFFFFFFFFFFFF  
FFF

@A00721:190:HGJW7DSXY:4:1546:18448:30499\_1:N:0:TCTGCAAG+GCTGCACT  
TGTCTTTTACCCAACATTTTATGTATACAGAGATGACCAGTGACGATTTCTCCCGGAAGCTCTTCTC  
TCTCTTAGGAGGTCATGATGACTACTATAAGGGTGAAATCGATTTTTCGAAGTTTGACAAATCTCAAG  
ATT

+

FFFFFFFFFFFFFFFFFFFFFFFFFFFFFFFFFFFFFFFFFFFFFFFFFFFFFFFFFFFFFFFFFFFFFFFFFFFF  
FFFFFFFFFFFFFFFFFFFFFFFFFFFFFFFFFFFFFFFFFFFFFFFFFFFFFFFFFFFFFFFFFFFFFFFFFFFF  
FFF

@A00721:190:HGJW7DSXY:4:1477:26720:24659\_2:N:0:TCTGCAAG+GCTGCACT  
AGCCTATGAGATAAAGATGTATTCTTATTTAGGCTTCGATGCTGAATTTCTTGAACCTTGGAGTGCCA  
GTGAATATTTTGTACGCCAGGAGATCGGAAGAGCGTCGTGTAGGGA

+

FFFFFFFFFFFFFFFFFFFFFFFFFFFF:FFFFFFFFFFFFFFFFFFFF:FFFFFFFFF:FFFF:FFFFFFFFF  
FFFFFFFFFFFFFFFFFFFFFFFFFFFFFFFFFFFFFFFFFFFFFFFFFFFFFFFFFFFF,FFFFF

@A00721:190:HGJW7DSXY:4:1108:8160:7420\_1:N:0:TCTGCAAG+GCTGCACT  
TAACACATTCTTTGGTAATTGTATGATCACTCTTATGATGCTCTCTTTTATTACGACCTTCGGAAGT  
TTAGAGCCGTCGCTGTGCGCGGAGACGATTCGATCCTCTTTTCGGACGTACCGGTCCAGGATTATTCA  
GAT

+  
FFFFFFFFFFFFFFFFFFFFFFFFFFFFFFFFFFFFFFFFFFFFFFFFFFFFFFFFFFFFFFFFFFFFFFFF  
FFFFFFFF:FFFFFFFFFFFFFFFFFFFFFFFFFFFFFFFFFFFFFFFFFFFFFFFFFFFFFFFFFFFFFFFF  
FFF  
@A00721:190:HGJW7DSXY:4:1577:32172:24361\_2:N:0:TCTGCAAG+GCTGCACT  
CAGCGTACTTCTGCTCGCGATTTATTCTTTTTGTCAATGATTACATCTACTTCGTTCTGATCCTTAC  
AAGATCATCGTTAAGTTAGGTAAACCCCTAACCGATGTTACTCTTGTA  
+  
FFFFFF:FFFFFF,:F:FFFFFFFFF:FFFFFFFFFFFFFFFFFFFFFFFFFFFFFFFFFFFFFFFF:FFF:FFFFFF:FF  
FFFFFF:FFFFFFFFFFFFFFFFFFFFFFFFFFFFFFFFFFFFFFFFFFFFFFFFFFFFFFFFFFFFFFFF  
@A00721:190:HGJW7DSXY:4:1274:8097:19085\_1:N:0:TCTGCAAG+GCTGCACT  
TTTAAAGACTATACTAAATATCTCCACTACGAGGTTGTTGTTGGCGATTAGCTCTTGCGACTAATAT  
TCGATATTCGATTGAGGGTCGTTATACCTATTCGCTATCTGTGCTTTGAATTGTATAAGATCAAATT  
TTA  
+  
FFFFFFFFFFFFFFFFFFFFFFFFFFFFFFFFFFFFFFFFFFFFFFFFFFFFFFFFFFFFFFFFFFFFFFFF:FFFFFF  
FFFFFFFFFFFFFFFFFFFFFFFFFFFFFFFFFFFFFFFFFFFFFFFFFFFFFFFFFFFFFFFFFFFFFFFF  
FFF  
@A00721:190:HGJW7DSXY:4:1645:7129:14873\_2:N:0:TCTGCAAG+GCTGCACT  
CCTGATGTGGAGGGAGTTCTTGAAGCATCCCGACCTTCTTGTGAAAATTTTGATGCGGTTTCATAA  
GATTATCAGTAATCCTGATTCTACTACGATTTCATGGACCTTCCATCC  
+  
FFFFFFFFFFFFFFFFFFFFFFFFFFFFFFFFFFFFFFFFFFFFFFFFFFFFFFFFFFFFFFFFFFFFFFFF:FFF:FFFFFFFF  
FFF:FFFFFFFFFFFFFFFFFFFFFFFFFFFFFFFFFFFFFFFFFFFFFFFFFFFFFFFFFFFFFFFF  
@A00721:190:HGJW7DSXY:4:1230:30960:1219\_2:N:0:TCTGCAAG+GCTGCACT  
GACGTATCTCAAAGATCGACTTCGAGACAGGTGATATTGTTGAGCGAGAGCGACCAAGATCTAAATTC  
GGTAACGGTGCGTGCGCTTTATTTTAAAAAGCTCCCTCCTCTCCCAA  
+  
FFFFFFFFFFFFFFFFFFFFFFFFFFFFFFFFFFFFFFFFFFFFFFFFFFFFFFFFFFFFFFFFFFFFFFFF:FFFF:FFFF:FFFF:FF:FFFFFF:F:F  
FFFF:FF:F:FFFFFFFFFFFFFFFFFFFFFFFF,FF:FFFFFFFFFFFFFFFF  
@A00721:190:HGJW7DSXY:4:1207:12129:3709\_2:N:0:TCTGCAAG+GCTGCACT  
ACTTGAGTCTTTTGATCAGTCTCTGACTTGACCATCTTTCATTTTAAATGACGATCATTAAGACTCTC  
TTTCTTCTTTGTTTCTTCTTGCATGATTTTCTCATCAGCTTGT  
+  
FFFFFFFFFFFFFFFFFFFFFFFFFFFFFFFFFFFFFFFFFFFFFFFFFFFFFFFFFFFFFFFFFFFFFFFF  
FFFFFFFFFFFFFFFFFFFFFFFFFFFFFFFFFFFFFFFFFFFFFFFFFFFFFFFFFFFFFFFF  
@A00721:190:HGJW7DSXY:4:1546:5710:34898\_1:N:0:TCTGCAAG+GCTGCACT  
GTTTTTACGATAACAACATCAGTTGATTAAGACTCTTCCGAAAGCGAACTTTGGGAATTTGAAGCT  
CAGGGTGAAGCACAACGTTTGACCGTGACGAAGTGTGGTGTCTTGATCTACGTTACGGATATACTCT  
CCT  
+  
FFFFFFFFFFFFFFFFFFFFFFFFFFFFFFFFFFFFFFFFFFFFFFFFFFFFFFFFFFFFFFFFFFFFFFFF  
FFFFFFFFFFFFFFFFFFFFFFFFFFFFFFFFFFFFFFFFFFFFFFFFFFFFFFFFFFFFFFFF:FFFFFFFFFFFFFFFF  
FFF  
@A00721:190:HGJW7DSXY:4:1315:1597:21104\_1:N:0:TCTGCAAG+GCTGCACT  
ACACTACCACTTATTACGATATTTCTTTAGTCGATGGGTTTTCGACGCCTTTAAGCGTCTTCTGTTCA  
TCGCAACCAGATGATATCTTCTATTGAACTTATGTTTCGATCAGTGTCTTCTATCAGGAGGAAAA  
CAC  
+  
FFFFFFFFFFFFFFFFFFFFFFFFFFFFFFFFFFFFFFFFFFFFFFFFFFFFFFFFFFFFFFFFFFFFFFFF  
FFFFFFFFFFFFFFFFFFFFFFFFFFFFFFFFFFFFFFFFFFFFFFFFFFFFFFFFFFFFFFFF:FFFFFFFFFFFFFFFF  
FFF  
@A00721:190:HGJW7DSXY:4:2342:11849:17002\_1:N:0:TCTGCAAG+GCTGCACT  
GTTTACCACCGAAATATCAAGTTCTTGTCTTCAAACGATTGGAAGTTACTTATCTTAATAGTACT





@A00721:190:HGJW7DSXY:4:2315:28330:22968\_1:N:0:TCTGCAAG+GCTGCACT  
TGGATTTTCAGACGTGTTCTCTTCCGATCTGTGAAATTAACGCGTCCTTTTCTGGAACGTAGTTTTACT  
ATTATGAACAAAGTTATCAAAGATAGTGGCATTCAAGGCTATCTTACCCTGATTCCGGCCGGTGGTAG  
CT

+

F:,,,:FF:FFFF,F,,FFFFF:FFF,F,:FFF,F:,F,F,FF,F,FF,FF,FFF,FF:FFFF,,:  
F:F,F,:F,F:F,F:,FFFF,FFFFFFFFF,:FFF:,FF,,F,,FF,,,FF,FF:F::F,FFFFFFFF  
:F

@A00721:190:HGJW7DSXY:4:1225:23348:8359\_2:N:0:TCTGCAAG+GCTGCACT  
AGGGGCTATTACTCTTGCTGAAACAGCTATTAAAGCTGTTGAGCGGTAATTACACCTAAACGAGCTC  
GATCTGCCATCGCTGAAGGATGTGCACTCTTTTCTGCTACTTTAACGG

+

FFFFFFFFFFFFFFFF:FFFFFFFFFFFFFFFFFFFFFFFFFFFFFFFFFFFFFFFFFFFFFFFF:FFFFFFFF  
FFFFFFFF:FFFFFFFF:FFFFFFFFFFFF:FFFFFFFFFFFFFFFF:FFF

@A00721:190:HGJW7DSXY:4:2110:31774:10081\_1:N:0:TCTGCAAG+GCTGCACT  
CTTCGTCGATTGTATCAACAGTAACATTACTTCTAATAAAGGTCTCTATCAAGCTCGTATTATCGTCG  
CTGCTGGATCTGCGTTACCGTTGAAGGCTAACTCCAAGGTAATTATGAAGACTGTGATTTATCTTTC  
ACT

+

FFFFF:FFFFFFFFFFFFFFFF:FFFFFFFFFFFFFFFFFFFFFFFFFFFFFFFFFFFFFFFFFFFFFFFF  
FFFFFFFFFFFFFFFFFFFFFFFFFFFFFFFFFFFFFFFFFFFFFFFFFFFFFFFFFFFFFFFFFFFFFFFF  
FFF

@A00721:190:HGJW7DSXY:4:1470:29821:29121\_1:N:0:TCTGCAAG+GCTGCACT  
ACGTGTGCTCTTCCGATCTATAATTTCAATCTTCTTAAAAAGAAGATAGAGAGTCATACTTTGGGCTA  
TCGTTACAGGTGCATGGGGTTGGATAGCCAATATTGAAGTGGACACCTCTGGTAGTATCGAAGTAAAGA  
TAA

+

FFFFFFFF:FFFFFFFFFFFFFFFFFFFFFFFFFFFFFFFFFFFFFFFFFFFFFFFF:FFFFFFFFFFFFFFFF  
FFFFFFFFFFFFFFFFFFFFFFFFFFFFFFFFFFFFFFFFFFFFFFFFFFFFFFFFFFFFFFFFFFFFFFFF  
FFF

@A00721:190:HGJW7DSXY:4:1324:23448:35023\_1:N:0:TCTGCAAG+GCTGCACT  
ATACTATGGTTGAATCAACTAAGCATACTACTTTTGCTTTGATTACTCTACCGCCTTACAAGTCTAAG  
GTAAAGAGTCGATTAAACAAGTTGTACTTATCAATGATTTTATCGCTGGTTGTTATCTCGAAAAGTC  
TCT

+

:FFFFFFFFFFFFFFFF:FF:FFFFFFFFFFFFFFFFFFFFFFFFFFFFFFFFFFFFFFFFFFFFFFFF  
FFFFFFFFFFFFFFFFFFFFFFFFFFFFFFFFFFFFFFFFFFFFFFFF:FFFFFFFFFFFFFFFFFFFFFFFF  
FFF

@A00721:190:HGJW7DSXY:4:2431:31195:8923\_2:N:0:TCTGCAAG+GCTGCACT  
TCAGTTCTAACCCAAAGAGAATATCTAAAATATTTACAAAATCTTACCACTATCTACGAACCTAAAGT  
TCTGAAGACGTTGCTTGTGCTTCCTCCTTTAATGGCACTACCTCGGT

+

FFFFFFFFFFFFFFFFFFFFFFFFFFFFFFFFFFFFFFFFFFFFFFFFFFFFFFFFFFFFFFFFFFFFFFFF  
FFFF:FF:FFFFFFFFFFFFFFFFFFFFFFFFFFFFFFFFFFFFFFFFFFFFFFFFFFFFFFFF

@A00721:190:HGJW7DSXY:4:1531:10954:35806\_1:N:0:TCTGCAAG+GCTGCACT  
TTGGAACGAAGGCGACCTGTTCCGGAGTTTTACGGGATCCGGAATGTTCTGTCTATATTAGGTGAAG  
CGAAATACGATTTGAACGTCAACGTTACCGAGTTTCGTTTCGTACCTTGATGCTGACTTTCGTCAA  
TAT

+

F:FFF:FFFFFFFFFFFFFFFFFFFFFFFF:FFFFFFFFFFFFFFFFFFFFFFFFFFFFFFFFFFFFFFFF  
FFFFFFFFFFFFFFFFFFFFFFFF:FFFFFFFFFFFFFFFFFFFFFFFFFFFFFFFFFFFFFFFFFFFFFFFF  
FFF

@A00721:190:HGJW7DSXY:4:1122:17842:28635\_1:N:0:TCTGCAAG+GCTGCACT  
TAGTGCGAGGCCTCTCTTCTACGAGTATTGCTATTTATACGGTTACGAGAAGAAGGTTCGAAAGTTTG

AGAACTTAGTTTACGAACTTGACTCTACTATACGTGACATACTAAATACTAGATATTTGGATGATCTTGAT

+

FFFFFFFFFFFFFFFFFFFFFFFFFFFFFFFFFFFFFFFFFFFFFFFFFFFFFFFFFFFFFFFFFFFFFFFFFFFFFFFF  
FFFFFFFFFFFFFFFFFFFFFFFFFFFFFFFFFFFFFFFFFFFFFFFFFFFFFFFFFFFFFFFFFFFFFFFFFFFFFFFF,  
FFFFFFFFFFFFFFFFFFFFFFFFFFFFFFFF

@A00721:190:HGJW7DSXY:4:1121:29342:19492\_2:N:0:TCTGCAAG+GCTGCACT  
TTCAGAGGATGAAAAATTTCTTCCTTGATTATTAATATAAAGAATCTTTACCAGGACTCCTACTACA  
GGAGGCAGTCTTCTGATCGTAAGAAGTTTATAAGGAACATATCCATTT

+

FFF,:FF:FFFFFF:FFFFFFFFFFFFFFFF:F:FFFFFFFFFFFF:FFFF,F:FFFFFFFF:FFFF  
FFFFFFFFFFFFFFFFFFFFFFFFFFFFFFFFFFFFFFFFFFFFFFFFFFFFFFFFFFFFFFFFFFFFFFFF

@A00721:190:HGJW7DSXY:4:1113:29912:11271\_1:N:0:TCTGCAAG+GCTGCACT  
ACTCGAACTCTAAGTGGAATACTGTCTTTCCAAGCTTACCTGTATCTTCAATGAAATTGGACTCTT  
CGATAGGGGACATTTTATCGTGGGCTTTCCGTAAAGGAAGATCTGTTATCGACGGTTTATCGTTTACG  
AAG

+

F:F::FFFF::F:FFFFFFFF,FFFFFFFF::FF,FFFFFFFF::FFFF,FFFFFFFFFFFFFF:FF  
:F:FF:F:FFFFFFFFFFFFFFFFFFFFFFFFFFFFFFFF,FFF,FFFFFFFF:::FFFFFF:FFFF,F  
:FF

@A00721:190:HGJW7DSXY:4:1647:16640:15624\_2:N:0:TCTGCAAG+GCTGCACT  
GTTTAAGAATACTATAAATAGAACTATTACTACTAATGGCGTTGGCCTAGTGGATGTTATTAGTG  
ACATCTGGTCAATTTCTGTTTTAGGTGGTCTTTATTCTATTATTGATT

+

FFFFFFFFFFFFFFFFFFFFFFFFFFFFFFFFFFFFFFFFFFFFFFFFFFFFFFFFFFFFFFFFFFFFFFFFFFFF  
FFFFFFFFFFFFFFFFFFFFFFFFFFFFFFFFFFFFFFFFFFFFFFFFFFFFFFFFFFFFFFFFFFFFFFFF

@A00721:190:HGJW7DSXY:4:1110:29939:8124\_1:N:0:TCTGCAAG+GCTGCACT  
ACAGAAGATGATGTTAGAGTAGAATTCCTGAAGAGTCCTTCCGTAACCAACTTCTTGACAATTTCTT  
CAATCCTTCGATAATAGTTAAATCTAGGATTATGTCTGTGTGAAAGACTTTCTACCGATAAGTGTCA  
CTA

+

FFFFFFFFFFFFFFFFFFFFFFFFFFFFFFFFFFFFFFFFFFFFFFFFFFFFFFFFFFFFFFFFFFFFFFFFFFFF  
FFFF:FFFFFFFFFFFFFFFF:FFFFFFFFFF:F:FFFFFFFF::F,FFFFFFFF,FFF,FFFF  
FFF

@A00721:190:HGJW7DSXY:4:1101:22290:27665\_2:N:0:TCTGCAAG+GCTGCACT  
TAAGAAATAATCCTACATTGACTGATTATCTAAAGATTGAAGGAAAATTTTATCCTCGTTTAACTTAC  
TTAGACTTTCCTACGATACAAATGATAACTTCTAATTTACGTTTGCTA

+

FFFFFFFFFFFFFFFFFFFFFFFFFFFFFFFFFFFFFFFFFFFFFFFFFFFFFFFFFFFFFFFFFFFFFFFFFFFF  
FFFFFFFFFFFFFFFFFFFFFFFFFFFFFFFFFFFFFFFFFFFFFFFFFFFFFFFFFFFFFFFFFFFFFFFF

@A00721:190:HGJW7DSXY:4:1135:11369:12070\_2:N:0:TCTGCAAG+GCTGCACT  
CAAAGGGATGCATGGTGTATCTCCTCAGGAGTCCCGGCATTTGATAATAATGACGAGACTTTCGTCA  
TAATCGCTGCATATTACGGATTACACGGTACCAGCGCATCTCGTGTGCG

+

FFFFFFFFFFFFFFFFFFFF:FFFFFFFFFFFFFFFFFFFFFFFFFFFFFFFF:FFFFFFFFFFFFFFFFFFFF  
FFFFFFFFFFFFFFFFFFFFFFFFFFFFFFFFFFFFFFFF:FFFFFFFFFFFFFFFFFFFF

@A00721:190:HGJW7DSXY:4:1347:20871:16971\_1:N:0:TCTGCAAG+GCTGCACT  
GTATTAATTATAAAGGTGAGGAGACCATTTCTTGCTGAAATTTATAGAAGATTATTTTGACAGAAT  
CAATAAGAATCATCGATTCTCGATTCTGATAGCTTATCTAGGTACTCTCATTTACTATGTTGATTTAG  
TCT

+

F,FFFFFFFFFFFFFFFFFFFFFFFFFFFFFFFF:FFFFFFFFFFFFFFFFFFFFFFFFFFFFFFFF:FF  
FFFFFFFFFFFFFFFFFFFFFFFFFFFFFFFF:FFFFFFFFFFFFFFFFFFFFFFFFFFFFFFFFFFFF  
FFF

@A00721:190:HGJW7DSXY:4:1351:26332:12994\_2:N:0:TCTGCAAG+GCTGCACT  
TGATCTAAAATTTTCGATCTAGATGGATCCACTCCTCGAGTTATCATGATGTTAGTATGTTATATACTG  
ATTTACAACGATATAGGAGTAATCTACGAGAAGATTCTAGAATTCTTA

+

FFFFFFFFFFFFFFFFFFFFFFFFFFFFFFFFFFFFFFFFFFFFFFFFFFFFFFFFFFFFFFFFFFFFFFFF  
FFFFFFFF,FFFFFFFF,FFFFFFFFFFFFFFFFFFFFFFFFFFFFFFFFFFFFFFFFFFFFFFFF

@A00721:190:HGJW7DSXY:4:1440:27037:22138\_2:N:0:TCTGCAAG+GCTGCACT  
GAGATCACACATTTTGAGAACTAACTATGTTATGTTCTCTGATCATTTTGACAATCTCTTCTTATAAT  
AAATAAATAAATAATATTACTAATGGCAAATAGTGGAAGGCTCCAGT

+

FFFFFFFFFFFFFFFFFFFFFFFFFFFFFFFFFFFFFFFFFFFFFFFFFFFFFFFFFFFFFFFFFFFFFFFF  
FFFFFFFFFFFFFFFFFFFFFFFFFFFFFFFFFFFFFFFFFFFFFFFFFFFFFFFFFFFFFFFF

@A00721:190:HGJW7DSXY:4:1301:13467:21433\_2:N:0:TCTGCAAG+GCTGCACT  
TGCTTTGGATTACGATGACGTGAGAATAGGTGAAGGGATAGTTTTTACCTCGACCAACATTAAGGCGG  
CGGCGACTAATCTTAAAGCTTCACCCAAAATGAAGGACACTTCGAAAC

+

FFFFFFFFFFFFFFFFFFFFFFFFFFFFFFFFFFFFFFFFFFFFFFFFFFFFFFFFFFFFFFFFFFFFFFFF  
FFFFFFFF:FFFF:FFFFFFFFFFFFFFFFFFFFFFFFFFFFFFFFFFFFFFFFFFFFFFFF:FF

@A00721:190:HGJW7DSXY:4:2244:30083:12258\_2:N:0:TCTGCAAG+GCTGCACT  
AAAAGGCTCTAAAGGACACTATACAATATCCAGACGACGACGAAGCTTATACTACTTTAATTTTGGGT  
ATTATGTGGAGATATCGTGATATCAGTACGTCCAGATCCTCTGCTTTT

+

FFFFFFFFFFFFFFFFFFFFFFFFFFFFFFFFFFFFFFFFFFFFFFFFFFFFFFFFFFFFFFFFFFFFFFFF  
,FFFFFFFFFFFFFFFFFFFFFFFFFFFFFFFFFFFFFFFFFFFFFFFFFFFFFFFFFFFFFFFF

@A00721:190:HGJW7DSXY:4:2672:10791:17863\_2:N:0:TCTGCAAG+GCTGCACT  
ATCAAATATAAAGAAAAGGACTATGAAATAAAAGATTTGGTGCTTAGGGATATAATGAATTCAGCACC  
ACATTTTGGTCAAGTCAATCCGTTGAGAAAATTTCTTAGAGGATATTC

+

FFFF:FFFFFFFFFFFFFFFFFFFFFFFFFFFFFFFFFFFFFFFFFFFFFFFFFFFFFFFFFFFFFFFF  
FFFFFFFF:FFFFFFFF:FFFFFFFFFFFFFFFFFFFFFFFFFFFFFFFFFFFFFFFF,FFFFFFFF

@A00721:190:HGJW7DSXY:4:2445:9579:28228\_1:N:0:TCTGCAAG+GCTGCACT  
CCAACATTTACCACCAAATTTCTTTTGATACAACCTCTAGCCTTCAAGTGGGTATGCCTGCGGAATACG  
CTTGCTATTACACGATTGTTTCGAACCCGTTGATGCTATGTCAGAAGAAGCTATTCAAGCTTGTCGT  
TTA

+

FFFFFFFFF::FF:F,F:FFFFFFFFFFFFFFFFFFFFFFFFFFFFFFFFFFFFFFFF,FFFFFF:FFFFFF:FFFFFF,  
FFFFFFFFFFFFFFFFFFFFFFFFFFFFFFFFFFFFFFFF,F:FFFFF,FFFF:FFFFFF:F:FFFFFF:FFFFFFF:FFFFF  
FF:

@A00721:190:HGJW7DSXY:4:1644:15826:16971\_2:N:0:TCTGCAAG+GCTGCACT  
AAACAAGCCCAGACTCAAGGAGTCCAATCAAAGGTTTTGAATTTAGCTCAACTGGGGAGACGTGCTTA  
AATGGGTGATAAAAATTATTTAGAGATCTTTTCTACTTACAAAGGACA

+

FF:FFFFFFF:FFFFFF:FFFFFFFFFFFFFFFFFFFFFFFFFFFFFFFFFFFFFFFFFFFFFFFFFFFF  
FFFFFFFFFFFFFFFFFFFF,FF:FF:FFFFFFFFFFFFFFFFFFFFFFFFFFFFFFFFFFFFFFFF,

@A00721:190:HGJW7DSXY:4:2422:6225:17691\_2:N:0:TCTGCAAG+GCTGCACT  
AATTCTACGAAAAGTCCGGAGTATATTGTATGTTAATAGATAGTGGGATAATAGTTCTACCGATACG  
TAGTGAACGCGTTTCGTAGAACCAAGTACTTCCGTCTGAAGAGTTTAG

+

FFFFFFFFFFFFFFFFFFFFFFFFFFFFFFFFFFFFFFFFFFFFFFFFFFFFFFFFFFFFFFFFFFFFFFFF  
:FFFFFFFFFFFFFFFF:FFFFFFFFFFFFFFFFFFFFFFFFFFFFFFFFFFFFFFFF:FFF

@A00721:190:HGJW7DSXY:4:2320:13792:6151\_1:N:0:TCTGCAAG+GCTGCACT  
TAACCGATAGGAGTTGTATAGTTGAAGATGTGGCTTTAGACGATAATCCTTTAAGGACTATGTTGACT  
GACGAAGATTTTCCACAGATTTGTCTACGTTGCAGATCGCCACTCCAAACACTATATACATTAAT  
ATA

[illegible]

@A00721:190:HGJW7DSXY:4:2120:28727:22842\_1:N:0:TCTGCAAG+GCTGCACT  
ACTTTATCAAAGATTTGGCTTGGTCTATTTACCGCAAAAAGTTGGAAGAGGTCTATGATATTTATTTT  
ACTTATACTTTAAATAGCACCGATTATAACTTGACTGTTGATAATATTACAATAGCTCTTTCTCAGAA  
GAT

+

FFFFFFFFFFFFFFFFFFFFFFFFFFFFFFFFFFFFFFFFFFFFFFFFFFFFFFFFFFFFFFFFFFFFFFFFFFFFFFFF  
FFFFFFFFFFFFFFFFFFFFFFFFFFFFFFFFFFFFFFFFFFFFFFFFFFFFFFFFFFFFFFFFFFFFFFFFFFFFFFFF  
FFF

@A00721:190:HGJW7DSXY:4:1304:5303:6793\_1:N:0:TCTGCAAG+GCTGCACT  
ACCGGTGAACACGTGCGTAGCATTGATTTACTTTTACCGTTAGAACTGAAAAAGATTCTTTTCGAAAA  
GAAACCTATAAGTTACAAACGATTCTTCGACTATATTAAAGAAATAAAAATACTTCAAGTACCTGAAC  
TTT

+

FFFFFFFFFFFF::FF:FFFF, :FF:FFFF:FFFFFFFFFFFF:FFFF:FFFFFFFFFFFF:FF,FFFF  
FFFF:FFFF::F:,FF,FFFFFFFFFFFFFFFFFFFFFFFFFFFFFFFFFFFFFFFFFFFFFFFFFFFFFFFFFFFF  
FFF

@A00721:190:HGJW7DSXY:4:1342:32913:27336\_1:N:0:TCTGCAAG+GCTGCACT  
ATGGTATAATGTGTCTTACAAATAGAACCTTCACTCTCGGTAATGAGAGTGTATTCCTTAATATTCTA  
GTAACCGCTATGTGGGCATTACTAGGATTTATCACACTCCTAAATTTGATAGCAATTTATGTTTTAAA  
TGC

+

FFFFFFFFF::FFFFFFFFFFFFFFFFFFFFFFFFFFFFFFFFFFFFFFFFFFFFFFFFFFFFFFFFFFFFFFFFFFFF  
FFFFFFFFFFFFFFFFFFFFFFFFFFFFFFFFFFFFFFFFFFFFFFFFFFFFFFFFFFFFFFFFFFFFFFFFFFFFFFFF  
FFF

@A00721:190:HGJW7DSXY:4:1170:26449:11099\_2:N:0:TCTGCAAG+GCTGCACT  
AAAAACTCCATTGTATAGTTCAAGGAGTACTTAATTCAATAGCTTTAGTATTATTTACTATCGCCTTT  
ATTGAAAATTGTATAAGAGTTAATTGCTTACACAAAAGTGACGCGCGA

+

FFFFFFFFFFFFFFFFFFFFFFFFFFFFFFFFFFFFFFFFFFFFFFFFFFFFFFFFFFFFFFFFFFFFFFFFFFFFFFFF  
FFFFFFFFFFFFFFFFFFFFFFFFFFFFFFFFFFFFFFFFFFFFFFFFFFFFFFFFFFFFFFFFFFFFFFFFFFFFFFFF

@A00721:190:HGJW7DSXY:4:1542:23185:28839\_1:N:0:TCTGCAAG+GCTGCACT  
GGGGAGAATGAAGTCCCGCTTCCCGGAAGAAACGATCTATTTACAGAGTATTTAGAGTAGTCCAAAGT  
TTGTATAAATTTATATGATTTTCTATATATATACCACATATATATATATATAAAATCCTATAAATTTG  
TAC

+

FFFFFFFFFFFFFFFFFFFFFFFFFFFFFFFFFFFFFFFFFFFFFFFFFFFFFFFFFFFFFFFFFFFFFFFFFFFFFFFF  
FFFFFFFFFFFFFFFFFFFFFFFFFFFFFFFFFFFFFFFFFFFFFFFFFFFFFFFFFFFFFFFFFFFFFFFFFFFFFFFF  
FFF

@A00721:190:HGJW7DSXY:4:1551:32741:26287\_2:N:0:TCTGCAAG+GCTGCACT  
GAAGAAAACCACTCCCTTCAATTCAATAACATAACATACCATACACTCCCCAAACATAACATACCATA  
ACCTACCATGACCAATCATCGCTCCAAGTGGCAGCCAGACGTAGGGT

+

FFFFFFF::FF:FFFFFFFFFFFFFFFFFFFFFFFFFFFFFFFFFFFFFFFFFFFFFFFFFFFFFFFFFFFFFFFF  
:FFFFFFFFF:FF::FFFFFFFFFFFFFFFFFFFFFFFFFFFFFFFFFFFFFFFFFFFFFFFFFFFFFFFFFFFF

@A00721:190:HGJW7DSXY:4:1323:21685:2127\_2:N:0:TCTGCAAG+GCTGCACT  
ACCGCCGGTTCGGCAGATCGGCACCACTGGTCTCTACGTTACAGGACCCGCTGTGCAGAATAACCTTCC  
CAAATCTAGATCTGCACAGAAGAAGGCTGAAGTCTGTTACCGGACGAC

+

FFFFFFFFFFFFFFFFFFFFFFFFFFFFFFFFFFFFFFFFFFFFFFFFFFFFFFFFFFFFFFFFFFFFFFFFFFFFFFFF  
F:FF:FFFFFFFFFFFFFFFFFFFFFFFFFFFFFFFFFFFFFFFFFFFFFFFFFFFFFFFFFFFFFFFFFFFFFFFF

@A00721:190:HGJW7DSXY:4:2456:22336:31219\_1:N:0:TCTGCAAG+GCTGCACT  
GGCTGTTGCCAGAGGAAAGCAGCGACCACCGAGGTCGCTCGTAACATTGACGGCAGTCCCGTCATCT  
CTGTGGGAAGTGAAGGAGTACCTCAGTCAAAAGTCACATTCACCACTCCCATGCCAATCAATGATGTG  
ACT

FFFFFFFFFFFFFFFFFF:FFFFFFFFF,F:FFFFFFFF,FFFFFFFF:FFF:FFFF::FFFFFFFFF  
 ,FFFFFFFFFFFFFFFFFFFFFFFFFFFFFFFFFFFFFFFF:FFF:FFFFFFFF:FFFFFFFF,FF:FFF  
 FFF  
 @A00721:190:HGJW7DSXY:4:2134:28610:5415\_2:N:0:TCTGCAAG+GCTGCACT  
 TCAATACGTCGTGGGAGGTACTGAAGCCTTCCCCTCCGCTGGCACGAAGAACTCCCAAGCCAATCA  
 ATAGTTCTTCTGACCAGAATGAAAAGGGGTTTACCAGGGTAGTCTCTA  
 +  
 FFFFFFFFFFFFFFFFFFFFFFFFFFFFFFFFFFFFFFFFFFFFFFFFFFFFFFFFFFFFFFFFFF,FFF  
 FFFFFFFFFFFFFFFFFFFFFFFFFFFFFFFFFFFFFFFFFFFFFFFFFF:FFFFFFF  
 @A00721:190:HGJW7DSXY:4:1414:14751:34648\_1:N:0:TCTGCAAG+GCTGCACT  
 AGAGGGGAAATGTACCCAAAAGTGAAGAATAAAGGGAAAGGTCCATCAGGACCTAAGAAGGGGAAA  
 TTACCCCTAATTCTGAAGGAAGATCTCCCACCATCTGGGGTTGGAATAAGAAATCTGCACGGGCCAA  
 A  
 +  
 FFFF,FFFFFF:F,FFFFFFFFFFFF,FFFFFFFF:FFFFFFFFF:,FFFF::FFFF:FF::F:F:FF  
 FFFF::F:FFFFFFFF:F,FFFFFFFFFFFF::FFFFFFFFFFFF,FF:FFFFFFFFFFFFFFFF:FFF  
 F  
 @A00721:190:HGJW7DSXY:4:1369:20636:3129\_2:N:0:TCTGCAAG+GCTGCACT  
 CTACGAAGTCGCTGAAGGCGGCTTGGGTCATTAAGGGTAGCTGTAAAGTTGCGCCTGCCGACCCCATC  
 TTTGAGACCAAGACTCTCTACAGTAGGTCGTGCCTACTATGAGCAAT  
 +  
 FFFFFFFFFFFFFFFFFFFFFFFFFFFFFF:FFFF:FFFFFFFFFFFF:F:FFFFFFFFFFFFFFFFFFFF  
 FFFFFFFFFFFFFFFFFFFFFFFFFF:FFFFFFFFFFFFF:FFFF:F:  
 @A00721:190:HGJW7DSXY:4:1416:29008:17315\_2:N:0:TCTGCAAG+GCTGCACT  
 TCGTCACTGAGGACGAAGGTGAGAGGACTTTTGGCTACTGGCGACAACTGAGAGCAGTCGCTGGGA  
 AAGAGAATTGCGTGGGTGAAGGCCGACGCTTCGAGCTTGAGTGTGAC  
 +  
 FFFFFFFFFFFFFFFFFFFFFFFFFFFFFFFFFFFFFFFFFFFFFFFFFFFFFFFFFFFFFFFFFF:FFFFF  
 FFFFFFFFFFFFFFFFFFFFFFFFFFFFFFFFFFFFFFFFFFFFFFFFFF  
 @A00721:190:HGJW7DSXY:4:2229:24686:8985\_2:N:0:TCTGCAAG+GCTGCACT  
 GTTTTTGTCAACGGCGTTTGGAGATTTTATCCGCGCTTAAGTATGGGGCGAAGATCCCTATGGAGT  
 CTTGAAGGACTTAGGTTGGCATATTTATGCCGACGATAATAAGCATGT  
 +  
 FFFFFFFFFFFFFFFFFF::FFFFFFFFFFFFFFFFFFFFFFFFFFFFFFFFFFFFFFFFFFFFFFFFF  
 FFFFFFFFFFFFFFFFFF:F:FFFFFFFFFFFFFFFFFFFFFFFFF:FFFF  
 @A00721:190:HGJW7DSXY:4:2272:26558:8782\_1:N:0:TCTGCAAG+GCTGCACT  
 CCGAGGTAAGCTCGGGACTTACAAGAGAGAGTGTGAGAGAGTCGCTCTCACTATTTTTGCCAGAATG  
 CGGGCTTTCTGACTGATGAGGTTAAAGTCTTGCTCCTTCTGTGGGTGAGGGTTTTTGTATATTAC  
 TGG  
 +  
 FFFFFFFFFFFFFFFFFFFFFFFFFFFFFFFFFFFFFFFFFFFFFFFFFFFFFFFFFFFFFFFFFF:FFFFFFFFFFFF  
 FFFFFFFFFFFFFFFFFFFFFFFFFFFFFFFFFFFFFFFFFFFFFFFFFFFFFFFFFFFFFFFFFF  
 FFF  
 @A00721:190:HGJW7DSXY:4:1320:25843:27899\_2:N:0:TCTGCAAG+GCTGCACT  
 TCCTCCATAATTACAACCTCTCTTTAGAGAGCATTAGAAGGAAGTTGGGCAAATTCCCACATATGGTA  
 GACGTTGTCACACTTTTCTTGAAGATTTTCTTTCTCCTCGTCATTGG  
 +  
 FFFFFFFF,FFFFFFFFFFFFFFFFFFFFFFFFFFFFFFFFFFFFFFFFFFFFFFFFF:F:FFFFFF:FFFFFFFFFFFFFFFFF  
 F:FFFFFFFFFFFF,FFFFFF:FFFF:FFFFFFFFFFFFFFFFFFFF,FFF  
 @A00721:190:HGJW7DSXY:4:2669:14543:26710\_2:N:0:TCTGCAAG+GCTGCACT  
 GTGAGAAGGTGGAAGGTGTCAAGGCTTCTTTCATGCTGATCTTTCAGGACCTAATCACATCATGATT  
 GATAGTTACGGCTCGTATCGAGTTGGAGGGAGGAAGTTCTCCGAATT  
 +

[illegible]

GTCCCGGCGAATTATTGGACACGATGAAAAATGACATACCCGTTCTGACCTTGGTATCGTTATCCGT  
CAT

+

FF,FFFFFFFFFF:FF,FFFFFF:FF:FF:F::FFFFFFFFF:FFFFFFFFF:FFFFFFFFF  
:FF:FF,:FFF::FF:FFFFFFFFFFFFFFFFF:F:,F::FFF:,FFF:FFF:F:F:FFF:F:F,F  
FF,

@A00721:190:HGJW7DSXY:4:2529:13829:20744\_2:N:0:TCTGCAAG+GCTGCACT  
CGAAGGATTGGGTTATTCTCACAACAAAGATAAGATTTTATCTTTCTTCAAACACCCTGTTTTCCTTA  
AGGGCGGACAATTGTTCCATTGTGAACCTTGGGGACTAGATTGAGCA

+

FFFFFFFFFFFFFFFFFFFFFFFFFFFFFFFFFFFFFFFFFFFFFFFFFFFFFFFFFFFFFFFFFFFFFFFF  
FFFFF:FFFFFFFFF:FFFFFFFFFFFFFFFFFFFFFFFFFFFFFFFFFFFFFFFFFFFFFFFF

@A00721:190:HGJW7DSXY:4:1331:13973:4586\_1:N:0:TCTGCAAG+GCTGCACT  
AGTGACTGGAGTTCAGACGTGTGCTCTTCCGATCTATTCAGAATACCTATTTCCGTACCAAGAGCCAC  
TGCCAATCTCATCGCTATACGCATACCTGATTGGAAGAAGCGAGGTTCTGTTCTCAATAAAAAATTTT  
CTC

+

FFFFFFFFFFFFFFFFFFFFFFFFFFFFFFFFFFFFFFFFFFFFFFFFFFFFFFFFFFFFFFFFFFFFFFFF  
FFFFFFFFFFFFFFFFFFFFFFFFFFFFFFFFFFFFFFFFFFFFFFFFFFFFFFFFFFFFFFFFFFFFFFFF  
FFF

@A00721:190:HGJW7DSXY:4:2519:10574:36025\_1:N:0:TCTGCAAG+GCTGCACT  
TAAAGTTTCTTCATAAGGGCTATTAGTACGTATGGGGATCACTTCTTCGGTCAATGACAAAACCT  
TCGAATATGTTACGACATGGCTTCGTAACAACAGTGCGAGGATTGTCATCTCGGGGAAAGTGATTCAC  
CAA

+

FFFFFFFFFFFFFFFFFFFFFFFFFFFFFFFFFFFFFFFFFFFFFFFFFFFFFFFFFFFFFFFFFFFFFFFF  
FFFFFFFFFFFFFFFFFFFFFFFFFFFFFFFFFFFFFFFFFFFFFFFFFFFFFFFFFFFFFFFFFFFFFFFF  
FFF

@A00721:190:HGJW7DSXY:4:1324:13964:2816\_1:N:0:TCTGCAAG+GCTGCACT  
GAGATACCTAGAGAAGGTCGCAGCGATCTTACTCGTTATCGGAGCTAAGAAGAAGACTTTGGGTACAC  
GTTATGCTCGAAACTTAACGTTAGTACCGGAGGTGATCTCTCTGCTTCTGCGTTACTGAGAGAAAAG  
ATT

+

FFFFFFFFFFFFFFFFFFFFFFFFFFFFFFFFFFFFFFFFFFFFFFFFFFFFFFFFFFFFFFFFFFFFFFFF  
FFFFFFFFFFFFFFFFFFFFFFFFFFFFFFFFFFFFFFFFFFFFFFFFFFFFFFFFFFFFFFFFFFFFFFFF  
FFF

@A00721:190:HGJW7DSXY:4:1335:10700:8218\_2:N:0:TCTGCAAG+GCTGCACT  
ACGGTGACTTTATGGACAAGATGCAAGTCTTGGGAAATACTTGTTTCCCTTTTAGGGTTAGTAGGT  
GATCTTGACGTCGATTCTTTGTATAGGGAGTGTGAGAAGACAACGAAT

+

FFFFFFFFFFFFFFFFFFFFFFFFFFFFFFFFFFFFFFFFFFFFFFFFFFFFFFFFFFFFFFFFFFFFFFFF  
F,F:FFFFFFFFFFFFFFFFF:FFFFFFFFFFFFFFFFF,FFF:FFFF

@A00721:190:HGJW7DSXY:4:2444:23529:27993\_2:N:0:TCTGCAAG+GCTGCACT  
TATCAAAGAAAATGGTGAACCGGTCTCTAAATCTTTGAGATTGAGAAGATTGAAGAACACGTCAAGA  
AGTCGCTCGGCGTTGTTCTTGAAAACCAAGTTAAGAAGGAGGCTGATC

+

FFFFFFFFFFFFFFFFFFFFFFFFFFFFFFFFFFFFFFFFFFFFFFFFFFFFFFFFFFFFFFFFFFFFFFFF  
FFFFFFFFFFFFFFFFFFFFFFFFFFFFFFFFFFFFFFFFFFFFFFFFFFFFFFFFFFFFFFFF

@A00721:190:HGJW7DSXY:4:1575:8730:27821\_2:N:0:TCTGCAAG+GCTGCACT  
GTACCTTCTGTCAAACCTTCGAGGTTCACTACGAGAGGTGATCCCGGATGTGGATTGAAGGCTGGCTC  
TAAGGGAGACTCCTTCTTTTGAATGTTGTAAAGAATTGGGAGATCGG

+

FFFFFFFFFFFFFFFFFFFFFFFFFFFFFFFFFFFFFFFFFFFFFFFFFFFFFFFFFFFFFFFFFFFFFFFF  
FF,FF:FFFFFFFFFFFFFFFF,FFFFFFFFFFFF:FFFF:FFFFFFFFF





+  
FFFFF,FFFFFFFFFFFFFFFFFFFFFFFFFFFFFFFFFFFFFFFFFFFFFFFFFFFFFFFFFFFFFFFF  
FFFFFFFFFFFFFFFFFFFFFFFFFFFFFFFFFFFFFFFFFFFFFFFFFFFFFFFFFFFFFFFFFFFFFFFF  
FFF  
@A00721:190:HGJW7DSXY:4:1168:19804:2534\_1:N:0:TCTGCAAG+GCTGCACT  
TCTGACCATCGCAAAGAAGACTTTATTAGTTCATGAAGTTCTTACACTTCTCGCGACTAATGTCAGCT  
TCACTACAAAGGCGTTACGTAAAGTAGTTTTACGCTTTATCTTAAAGCATTACCACCAAATTTAGCA  
CTT  
+  
FFFFFFFFFFFFFFFFFFFFFFFFFFFFFFFFFFFFFFFFFFFFFFFFFFFFFFFFFFFFFFFFFFFF::  
:FFFFFFFFFFFFFFFFFFFFFFFFFFFFFFFFFFFFFFFFFFFFFFFFFFFFFFFFFFFFFFFFFFFF  
FFF  
@A00721:190:HGJW7DSXY:4:1266:5403:12602\_1:N:0:TCTGCAAG+GCTGCACT  
GAAGCTCGCCATATCAGATTAGAGACATGCCAGTTAGAGTTCTTCTAACCAGGACTGATGGTGAGATT  
CTTTTACCTTTTGGAGGTCCAGGAACCTTTACTCCTAGTGTCTTTTCTAGAGTCCAAGGACGTTTCCG  
TCG  
+  
FFFFFFFFFFFFFFFFFFFFFFFFFFFFFFFFFFFFFFFFFFFFFFFFFFFFFFFFFFFFFFFFFFFF  
FFFFFFFFFFFFFFFFFFFFFFFFFFFFFFFFFFFFFFFFFFFFFFFFFFFFFFFFFFFFFFFFFFFF  
FFF  
@A00721:190:HGJW7DSXY:4:1173:2537:34006\_1:N:0:TCTGCAAG+GCTGCACT  
GTGGGAGACCGCTCAATAACACTCTATTGAATCCCTTTTCCACGATGAAAGCTCTTTATGAGGTGCTC  
CATGCAAATTTACAGTTCCTCTTTGGTGATATCGCCTCTGTCCTTTCTCCTTTAATCGTGAGGTTACG  
AGA  
+  
FFFFFFFFFFFFFFFFFFFFFFFFFFFFFFFFFFFFFFFFFFFFFFFFFFFFFFFFFFFFFFFFFFFF:,FFFFFFFF  
F::FFFFFFFF,F,FFFFFFFFFFFFFFFFFFFFFFFFFFFFFFFFFFFFFFFFFFFFFFFFFFFFFFFF  
FFF  
@A00721:190:HGJW7DSXY:4:1157:12943:6527\_2:N:0:TCTGCAAG+GCTGCACT  
GGTTTATCGGTTGTATTTTGATAAATTTGTTGGAATCGATAATGATACTGACGAAGGTTCTATTACCA  
CCCTTGTCATTGATACAAACATTCTAGGTGATGCTTTCTTAGAGGCTC  
+  
FFFFFFFFFFFFFFFFFFFF:FFFFFFFFFFFFFFFFFFFFFFFFFFFFFFFFFFFFFFFFFFFFFFFFFFFF:FFFFFFFF  
FFFFFFFFFFFFFFFFFFFFFFFFFFFFFFFFFFFFFFFFFFFFFFFFFFFFFFFFFFFFFFFFFFFF::FF:  
@A00721:190:HGJW7DSXY:4:1221:21757:14372\_2:N:0:TCTGCAAG+GCTGCACT  
TATTTACAATCTGTAGAGAGAGAGGTTAATCAGAATTTGAGTGATAACGATTTAGTACTGGGAAATGG  
TGGTAGTCAGTTTACTACTTTTCTTCCCTCCCCTTTTTTCGATTGGAT  
+  
FFFFFFFFFFFF:FFFFFFFFFFFF,FFFFFFFFFFFFFFFFFFFF:FFFFFFFFFFFF:FFFFFFFFFFFFFFFF  
,FF:FFFFFFFFFFFFFFFFFFFFFFFFFFFFFFFFFFFFFFFFFFFFFFFFFFFFFFFFFFFF  
@A00721:190:HGJW7DSXY:4:1473:31684:4570\_2:N:0:TCTGCAAG+GCTGCACT  
CGTCTCACGACTAATTTGATAAGGTTTTCTTTTATGGGACTCTTGTTTGTACTTATGAAGGAGGTAT  
TACTTCGGAAGTTCTTAATGTAGGTCTCCTAGTACTTAAGGTTTATG  
+  
FFFFFFFFFFFF,FFFFFFFFFFFFFFFFFFFFFFFFFFFFFFFFFFFFFFFFFFFFFFFFFFFFFFFFFFFF  
FFFFF:FFFFFFFFFFFFFFFFFFFFFFFFFFFFFFFFFFFFFFFFFFFFFFFFFFFFFFFFFFFF  
@A00721:190:HGJW7DSXY:4:1127:19271:31109\_2:N:0:TCTGCAAG+GCTGCACT  
TTTTGATGGTATGTTTCACATTGCGTGATCACTTCCCGTGGACTTGGGAAGAGATTAAACATAAAATC  
CAGCGATTCTATTATGTCGCTAAAGCCTGTCCAGTTGTCGATGATGTT  
+  
:FFFFFFFFF:FFFFFFFFFFFFFFFFFFFFFFFFFFFFFFFFFFFFFFFFFFFFFFFFFFFFFFFFFFFF  
:FFFF,,FF:FFFFFFFFFFFFFFFFFFFFFFFFFFFFFFFFFFFFFFFFFFFFFFFFFFFF  
@A00721:190:HGJW7DSXY:4:1468:6180:26256\_2:N:0:TCTGCAAG+GCTGCACT  
TCGTGAAACTTACGACGATGTTCTCGCTCGCATTTACAAGGATTACTAAGTCTGAGATCTGCCACTT

CTAATTTTAGGAAACGTCGCGAAAAGAAAGTTCATGAGGATGTCTTG

```

FFFFFFFFFFFFFFFFFFFFFFFFFFFFFFFFFFFFFFFF:FFFFFFFFFFFFFFFFFFFFFFFFFFFFFFFF:FFF
FFFF:FFFFFFFFFFFFFFFFFFFFFFFFFFFFFFFF,FFFFFFFFFFFF:F:FFF

```

+

```
F:FFF:FF:FFFFFFFFFFFFFFFFFFFFFFFFFFFFFFFFFFFFFFFFFFFFFFFFFFFFFFFFFFFF
FFFFFFFFFFFFFFFFFFFFFFFFFFFFFFFFFFFFFFFFFFFFFFFFFFFFFFFFFFFF
```

+

[illegible]

+

```

FFFFFFFFFFFFFFFFFFFFFFFFFFFFFFFFFFFFFFFFFFFFFFFFFFFFFFFFFFFFFFFFFFFFFFFF
FFFFFF:FFFFFFFFFFFFFFFFFFFFFFFF:FFFFFFFFFFFFFFFFFFFF::FF

```

+

[illegible]

+

[illegible] $+$ 

```

FFFFFFFFFFFFFFFF,FFFFFFFFFFFFFFFF:FFFFFFFFFFFFFFFFFFFFFFFFFFFFFFFF
F:FFFFFF:FFFFFFFFFFFFFFFFFFFFFFFFFFFFFFFF:FFFF::FF,F

```

+

```
FFFFFFFFFFFFFFFFFFFFFFFFFFFF:FFFFFF:FFFFFFFFFFFFFFFFFFFFFFFFFFFFFFFFFFFF  
FFFFFFFFFFFFFFFFFFFFFFFFFFFFFFFFFFFF:FFFFFFFFFFFFFFFFFFFFFFFFFFFFFFFFFFFF  
FFF
```

CGGTATTTGTGAAATTAAGACAGACGTGAAAGTTATGATGAGTGATCG  
+  
FFFFFFFFFFFFFFFFFFFFFFFFFFFFFFFFFFFFFFFFFFFFFFFFFFFFFFFFFFFFFFFF  
FFFFFFFFFFFFFFFFFFFFFFFFFFFFFFFFFFFFFFFFFFFFFFFFFFFFFFFF  
@A00721:190:HGJW7DSXY:4:1342:7374:1861\_2:N:0:TCTGCAAG+GCTGCACT  
ACGTCGCTGAGGTCAAACCTGTGGACGTTCTTTTCATCGACGAATTATTCATGATTCACGCTGGTCAG  
ACCCTTTTCTTACACATCTACTTAAGGCGGCTTATACCATAGGTTAC  
+  
FFFFFFFFFFFFFFFFFFFFFF:FF:FFFFFFFFFFFFFFFFFFFFFFFFFFFFFFFF:FFFFFF:FFFFF:  
FF::FFFFFFFF:FFF:FFFF,FFFF:FFF:FFFFFFFF:FFFFFFFF  
@A00721:190:HGJW7DSXY:4:1315:13313:32941\_2:N:0:TCTGCAAG+GCTGCACT  
CAAATCGGATTCATCAATCGTATTGATCTCCAAGTCGAACTACTTCAACATCAACGACATCATTCT  
TGATGAGTGTCGTTCTTATCGAAGTCTCAGTTATCGCTGCCCCGCCGA  
+  
FFFFFFFFFFFFFFFF:FF::FFFFFFFF:FFF:FF:FFF:,FFFFFFFF:FFFFFFFF:FFFF  
FFF:F:FFFFFFFF:FFFF:FFF:,F:FFFFFFFF:FFFFFFFF  
@A00721:190:HGJW7DSXY:4:1363:12328:10128\_2:N:0:TCTGCAAG+GCTGCACT  
GAACTCTCAGAGTTTACGGCAGAAAAATTTCTCCTGCTTGTAAATTCGAGAGAGGACACTATGGAAAT  
TAGACCTATCAGATGTCTTGACGACTTCGAATTTGAGGACGGAGTTAA  
+  
FFFFFFFFFFFFFFFF:FFFFFFFFFFFFFFFF:FFFFFFFFFFFFFFFF:FFFFFFFFFFFF  
FFFFFFFFFFFFFFFFFFFFFFFFFFFFFFFFFFFFFFFFFFFFFFFFFFFFFFFF  
@A00721:190:HGJW7DSXY:4:1326:3992:2049\_2:N:0:TCTGCAAG+GCTGCACT  
AATTAACAAAGTCCTTGTAAGAGTAAGTTAAATGTGAAGATGCTCAGACTATTCATGAAGTTCAAG  
GTAATACTTACCAGCACGTTCCGGCTGGTTAGAATTAACCTCAAGATG  
+  
FFFFFFFFFFFFFFFF:FFFFFFFFFFFFFFFFFFFFFFFFFFFFFFFFFFFFFFFF  
FFF:FFFFFFFFFFFFFFFFFFFFFFFFFFFFFFFFFFFFFFFF  
@A00721:190:HGJW7DSXY:4:1305:29396:9251\_2:N:0:TCTGCAAG+GCTGCACT  
CACAAACACATATTACCGTTGCTCTATCACGACACGTTGAATCTTACGATACTTTGTTATCAATGTA  
AAGTTAAACGATGCTACTTGTGAGAGGATCAATCACAGTAAGGAAGTCTG  
+  
FFFFFFFFFFFFFFFFFFFFFFFFFFFFFFFFFFFFFFFFFFFFFFFFFFFFFFFF,FFFFFFFFFFFF  
FFFFFF:FFFFFFFFFFFFFFFFFFFFFFFFFFFFFFFFFFFFFFFF  
@A00721:190:HGJW7DSXY:4:1156:10890:23985\_2:N:0:TCTGCAAG+GCTGCACT  
ACGGGAGGTTGCAGATTCAACCCCTTATATCGAGGCTATCGAGGACGATGAGTATCTTGAAGTTGTTG  
ACGACAAGCCTCAAGAGGGTAGAGGACCACCTGGATCTTCTACTGTCT  
+  
FFFFFFFFFFFFFFFFFFFFFFFFFFFFFFFFFFFFFFFFFFFFFFFFFFFFFFFFFFFFFFFF  
FFFFFFFFFFFFFFFF:FFFFFFFFFFFFFFFFFFFFFFFFFFFFFFFF  
@A00721:190:HGJW7DSXY:4:1525:2365:1767\_2:N:0:TCTGCAAG+GCTGCACT  
GGTTATTCCTGGACCCACCTTAACGTCACTCGGTAATCTTTCAGCCGAATTAAGTACTAATGAGTTCA  
AGTCGGTTGTCGATCGAATTAAGATCAAGGCTAATACCTGTATAGGTA  
+  
:FFFFFF:FFFF,FFFFFF:FFFFFFFFFFFF,FFF,,FFFFFF:FFFFFFFFFFFFFFFF  
FFFF::,FFFFFFFF,FFFFFFFFFFFF:,FFF:,FF:FF:,F  
@A00721:190:HGJW7DSXY:4:2166:28167:4742\_2:N:0:TCTGCAAG+GCTGCACT  
GCCGCGTAGTCAGCGCGTTTAGCTGTATCATCAGTCAGAGTATACCCGATAGGGTACCGAGTCTCCAA  
GAGAATATTTATTCTTATGAGGCTCGAACTTCAACGTTTTCAACG  
+  
FFFFFFFFFFFFFFFFFFFFFFFFFFFFFFFFFFFFFFFFFFFFFFFFFFFFFFFFFFFFFFFF  
FFFFFFFFFFFFFFFFFFFFFFFFFFFFFFFFFFFFFFFFFFFFFFFFFFFFFFFF  
@A00721:190:HGJW7DSXY:4:1569:18041:16830\_2:N:0:TCTGCAAG+GCTGCACT  
TCGCACCCGAAATTTTTGGGCAGAATGCTCTTAACGCGGTTCTTGAACGGTGTTTTGATCAGTCTAAG

+

@A00721:190:HGJW7DSXY:4:2335:11695:9502\_1:N:0:TCTGCAAG+GCTGCACT  
AACAAATAGGGACGCTAGTATACTTCGTAAAGTCGACAGCGAAATGGTCAATATTGATAATTGGACCGA  
CTATATGACCTATTTTAAGCTCATGGTGAAAAGGGAAGCTAAGGTTAAACTTGATGCTTCAGCCTTTT  
CGA

+

@A00721:190:HGJW7DSXY:4:1544:3540:15013\_1:N:0:TCTGCAAG+GCTGCACT  
AGAATATCGTTTATCACGCAAAATTTATTAATGCAATTTTCGGACCTATCTTTAAGGTTCTTGAGG  
AGAGTCAAACAGTGTCTTTTACCCAACATTTTTATGTATACAGAGATGACCAGTGACGATTTCTCCCG  
GAA

+

@A00721:190:HGJW7DSXY:4:1138:31204:10003\_1:N:0:TCTGCAAG+GCTGCACT  
CGAGATCTTGCAGAGTGACTGGAGTTT CAGACGTGTGCTCTTCCGATCTTTTCTTTTGTAAAGCCTATG  
AGATAAAGATGTATTCTTATTTAGGCTTCGATGCTGAATTTCTTGAACCTTTGGAGTGCCAGTGAATAT  
TTT

+

@A00721:190:HGJW7DSXY:4:1139:11342:13526\_1:N:0:TCTGCAAG+GCTGCACT  
GAGTATCCATAACGATTTGTCATTTACCACCTTTGCTCAACGACGAAGTGGAAACGGCCAACTTTCT  
TTGGTAATTGTATGATCACTTTGATGATTTTATCACTTTATTATGACCTTGGAAAGTTTTCGGCTGTG  
GTT

+

@A00721:190:HGJW7DSXY:4:1420:27498:29888\_1:N:0:TCTGCAAG+GCTGCACT  
CCATTCTGTTTTCAAAGACTCCAATAACTGATCATTCTGATCATATGATTTTGGACAATGGTTTCGAA  
GCGAAATTTTGGAGGGATAAACACGCGTACTTCTGCTCGCGATTTATTCTTTTTGTCAATGATTACAT  
CTA

+

@A00721:190:HGJW7DSXY:4:1311:2392:31814\_1:N:0:TCTGCAAG+GCTGCACT  
CCTTACAAGATCATCGTTAAGTTAGGTAAACCCCTAACCGATGTTACTCTTGTAGGACTTTGGGAGAG  
ATTCGTTAGTTTTAAAGACTATACTAAATATCTCCACTACGAGGTTGTTGTTTGGCGATTAGCTCTTG  
CGA

+

@A00721:190:HGJW7DSXY:4:2213:15619:18020\_1:N:0:TCTGCAAG+GCTGCACT  
TATTCGATTGAGGGTCGTTATACCTATTCGGCTATCTGTGCTTTGAATTGTATAAGATCAAATTTTAA

[illegible]

@A00721:190:HGJW7DSXY:4:2273:12626:35916\_2:N:0:TCTGCAAG+GCTGCACT  
ACATTACCCGAAAGACGTGCTAAATTAACCATTGTACGATGTCGTCTGTCTCGGCGATCACTTTTC  
ACTAAGAATTGGTCCTACTTTTGGACAAGGCCAACTTCGTAATCTTCA

+

FFFFFFFFFFFFFFFFFFFFFFFFFFFFFFFFFFFFFFFFFFFFFFFFFFFFFFFFFFFFFFFFFFFFFFFF  
:FFFFFFFFFFFFFFFFFFFFFFFFFFFFFFFFFFFFFFFFFFFFFFFFFFFFFFFFFFFFFFFFFFFFFFFF  
FFF

@A00721:190:HGJW7DSXY:4:1640:24035:16063\_2:N:0:TCTGCAAG+GCTGCACT  
TTTATCTCTTTGGTTGTTAGGGATTTTGAGAGAGTGAAAGGCTTCAATTGTAGTGGTTTGGTCGTTTC  
AGTACCCAGTCAGTATACCTCTACGCAAAGATATTTTCATGAAAACCTAC

+

FFFFFFFFFFFFFFFFFFFFFFFFFFFFFFFFFFFFFFFFFFFFFFFFFFFFFFFFFFFFFFFFFFFFFFFF  
FFFFFFFFFFFFFFFFFFFFFFFFFFFFFFFFFFFFFFFFFFFFFFFFFFFFFFFFFFFFFFFFFFFFFFFF  
FFFF

@A00721:190:HGJW7DSXY:4:2628:27570:15264\_1:N:0:TCTGCAAG+GCTGCACT  
CGGATTACCTGTCTTTTCATATTATGAATGAACCTTCGGCCGCTCTCTTTGCTTCGATGTTGGATGTCA  
AGAAGGGTTCAGAATGGGATTCTACGTAGTTTATGACTTTGGTGGTGGTACTTTTCGATACTTCTATC  
GT

+

:F:FFFFFFFFFFFFFFFFFFFFFFFFFFFFFFFFFFFFFFFFFFFFFFFFFFFFFFFFFFFFFFFFFFFF  
FF,FFF:,FFFFFFFFFFFFFFFFFFFFFFFFFFFFFFFFFFFFFFFFFFFFFFFFFFFFFFFFFFFFFFFF  
FF

@A00721:190:HGJW7DSXY:4:2607:15935:10332\_2:N:0:TCTGCAAG+GCTGCACT  
TACTATAGTGTTATTTATTCTGGTGGTGTATGATAATCTTGGAGGTCGTGACGTTGATGAAGCTATAAG  
AGCGTTCTTATTACGGCGCACTTCTTTACCCGCCACCACACAACCTTTC

+

FFFFFFFFFFFF,FFFFFFFFFFFFFFFFFFFFFFFFFFFFFFFFFFFFFFFFFFFFFFFFFFFFFFFFFFFF  
FFFFFFFFFFFFFFFFFFFFFFFFFFFFFFFFFFFFFFFFFFFFFFFFFFFFFFFFFFFFFFFFFFFFFFFF  
FFFF

@A00721:190:HGJW7DSXY:4:2410:25852:17080\_1:N:0:TCTGCAAG+GCTGCACT  
TGAAGGAGGAGGTTTCTGTTACTGGAACCCCTCGTCAATACTTTTCAATAATATACGTCTTGAACCTC  
ACTTATGACGATCTAGTGAAATTAACGCGTCCTTTTCTGGAACGTAGTTTACTATTATGAACAAAGT  
TAT

+

FFFFFFFFFFFFFFFFFFFFFFFFFFFFFFFFFFFFFFFFFFFFFFFFFFFFFFFFFFFFFFFFFFFFFFFF  
FFFFFFFFFFFFFFFFFFFFFFFFFFFFFFFFFFFFFFFFFFFFFFFFFFFFFFFFFFFFFFFFFFFFFFFF  
FFF

@A00721:190:HGJW7DSXY:4:1260:27796:26929\_1:N:0:TCTGCAAG+GCTGCACT  
CCTGATTCCGGCCGGTGGTAGCTCATTTCTACCAGGGGCTATTACTCTTGCTGAAACAGCTATTAAAG  
CTGTTGAGCGGTAATTACACCTAAACGAGCTCGATCTGCCATCGCTGAAGGATGTGCACTCTTTTCT  
GCT

+

FFFFF:FFFFFFFFFF:FF,FFFFFFFFFFFFFFFFFFFFFFFFFFFFFFFFFFFFFFFFFFFFFFFFFFFF  
FFFFFFFFFFFFFFFFFFFFFFFFFFFFFFFFFFFFFFFFFFFFFFFFFFFFFFFFFFFFFFFFFFFFFFFF  
FFF

@A00721:190:HGJW7DSXY:4:2137:26549:17785\_1:N:0:TCTGCAAG+GCTGCACT  
CTTCGTCGATTGTATCAACAGTAACATTACTTCTAATAAAGGTCTCTATCAAGCTCGTATTATCGTCG  
CTGCTGGATCTGCGTTACCGTTGAAGGCTAACTCCAAGGTAATTATGAAGACTGTGATTTATCTTTC  
ACT

+

FFFFFFFFFFFFFFFFFFFFFFFFFFFFFFFFFFFFFFFFFFFFFFFFFFFFFFFFFFFFFFFFFFFFFFFF  
FFFFFFFFFFFFF:FF:FFFFFFFFFFFFFFFFFFFFFFFFFFFFFFFFFFFFFFFFFFFFFFFFFFFFFFFF  
FFF

@A00721:190:HGJW7DSXY:4:1506:15582:5963\_1:N:0:TCTGCAAG+GCTGCACT  
ACGTGTGCTCTTCCGATCTATAATTTCAATCTTCTTAAAAAGAAGATAGAGAGTCATACTTTGGGCTA  
TCGTTCAAGTGATGGGGTTGGATAGCCAATATTGAAGTGGACACCTCTGGTAGTATCGAAGTAAAGA  
TAA

+  
FFFFFFFFFFFFFFFFFFFFFFFFFFFFFFFFFFFFFFFFFFFFFFFFFFFFFFFFFFFFFFFF:FFFFFFFF:FFFFFFFFFFFF  
FFFFFFFFFFFFFFFFFFFFFFFFFFFFFFFFFFFFFFFFFFFFFFFFFFFFFFFFFFFFFFFFFFFFFFFFFFFFFFFFFFFF  
FFF  
@A00721:190:HGJW7DSXY:4:1342:24921:26240\_1:N:0:TCTGCAAG+GCTGCACT  
ATACTATGGTTGAATCAACTAAGCATACTACTTTTGCTTTGATTACTCTACCGCCTTACAAGTCTAAG  
GTAAAGAGTCGATTAAACAAGTTGTACTTATCAATGATTTTATCGCTGGTTGTTATCTCGAAAAGTC  
TCT  
+  
FFFFFF:FFFFFFFFFFFFFFFFFFFFFFFFFFFFFFFFFFFFFFFFFFFFFFFFFFFFFFFFFFFFFFFFFFFFF  
FFFFFFFFFFFFFFFFFFFFFFFFFFFFFFFFFFFFFFFFFFFFFFFFFFFFFFFFFFFFFFFFFFFFFFFFFFFFF  
FFF  
@A00721:190:HGJW7DSXY:4:1140:9444:18975\_2:N:0:TCTGCAAG+GCTGCACT  
TTCTAACCCAAAGAGAATATCTAAAATATTTACAAAATCTTACCACTATCTACGAACCTAAAGTTCTG  
AAGACGTTGCTTGTGCTTCCTCCTTTAATGGCACTACCTCGGTACAA  
+  
FFFFF:FFFFFFFFFFFFF:FFFFFFFFFFFFF:FFFFFFFFFFFFF:FFFFFF:FFFFFFFFFFFFF  
FFFFFFFFFFFFFFFFFFFFFFFFFFFFF:FFFFFFFFFFFFF,FFFFFFFF:FFF  
@A00721:190:HGJW7DSXY:4:1563:13286:25567\_2:N:0:TCTGCAAG+GCTGCACT  
GAAGGCGACCTGTTCCGAGTTTTTACGGGATCCGAATGTTCTGTCTATATTAGGTGAAGCGAAATA  
CGATTTCGAACGTCAACGTTACCGAGTTTCGTTTCGTACCTTGATGA  
+  
FFFFFFFFFFFFFFFFFFFFFFFFFFFFFFFFFFFFF:FFFFFFFFFFFFFFFFFFFFFFFFFFFFFFFFFFFFF  
FFFFFFFFFFFFFFFFFFFFFFFFFFFFFFFFFFFFFFFFFFFFFFFFFFFFFFFFFFFFF  
@A00721:190:HGJW7DSXY:4:1453:13720:29418\_2:N:0:TCTGCAAG+GCTGCACT  
ATTTGATCTGGTTGCTCAATTCTAAGCGTGTTCCGCTTAGTGCGAGGCCTCTCTTCTACGAGTATTGC  
TATTTATACGTTACGAGAAGAAGGTTCGAAAGTTTGAGAACTTAGTT  
+  
FFFFFFFFFFFFFFFFFFFFFFFFFFFFFFFFFFFFFFFFFFFFFFFFFFFFFFFFFFFFFFFFFFFFFFFFFFFFF  
FFFFFFFFFFFFFFFFFFFFFFFFFFFFFFFFFFFFFFFFFFFFFFFFFFFFFFFFFFFFF  
@A00721:190:HGJW7DSXY:4:2515:10357:1485\_2:N:0:TCTGCAAG+GCTGCACT  
ACATACTAAATACTAGATATTTGGATGATCTTGATAAAGAACTTCATGAATTTTCAGAGGATGAAAAA  
TTTTCTTCCTTGATTTTAATATAAAGAATCTTTACCAGGACTCCTAC  
+  
FFFFFFFFFFFFFFFFFFFFFFFFFFFFFFFFFFFFFFFFFFFFFFFFFFFFFFFFFFFFFFFFFFFFFFFFFFFFF:F:FF  
FFFFFFFFFFFFFFFFFFFFFFFFFFFF,FFFFFFFFFFFFFFFFFFFFFFFFFFFFF  
@A00721:190:HGJW7DSXY:4:2122:15863:11397\_2:N:0:TCTGCAAG+GCTGCACT  
TCTGATCGTAAGAAGTTTATAAGGAACATATCCATTTGTTGTAATAGGGTCATCACTTAGAACTCGA  
AACTCTAAGTGGAATACTGTCTTCCAAGCTTACCTGTATCTTCAAT  
+  
FFFFFFFFFFFFFFFFFFFFFFFFFFFFF,FFFFF:FFFFFFFFFFFFF:FFFFFFFFFFFFF:FFFFFFFFFFFF:F  
FF:FFFFFFFFFFFFFFFFFFFFFFFFFFFFFFFFFFFFFFFFFFFFFFFFFFFFFFFFFFFFF  
@A00721:190:HGJW7DSXY:4:2236:7491:30561\_1:N:0:TCTGCAAG+GCTGCACT  
TTCGATAGGGGACATTTTATCGTGGGCTTCCGTAAAGGAAGATCTGTTATCGACGGTTTATCGTTTA  
CGAAGTATCACTCCACCGGTGAATGGTTTAAGAATACTATAAATAGAATAGCTATTACTACTAATGGC  
GTT  
+  
F:FFFFFFFFFFFFFFFFFFFFFFFFFFFFFFFFFFFFFFFFFFFFFFFFFFFFFFFFFFFFFFFFFFFFF:FFF  
FFFFFFFFFFFFFFFFFFFFFFFFFFFFFFFFFFFFFFFFFFFFFFFFFFFFFFFFFFFFF:FFFFFFFFFFFFF:FFFFFFFFFFFFF  
FFF  
@A00721:190:HGJW7DSXY:4:2254:20509:28119\_2:N:0:TCTGCAAG+GCTGCACT  
TAGTGACATCTGGTCAATTTCTGTTTTTAGGTGGTCTTTATTCTATTATTGATTTTTATGAGATTGATA  
CGTTAACAGAAGATGATGTTAGAGTAGAATTCCTGAAGAGTCCTTCCG  
+



FFFFFFFFFFFFFFFFFFFFFFFFFFFFFFFFFFFFFFFFFFFFFFFFFFFFFFFFFFFFFFFF  
FFFFFFFFFFFFFFFFFFFFFFFFFFFFFFFFFFFFFFFFFFFFFFFFFFFFFFFFFFFFFFFF  
@A00721:190:HGJW7DSXY:4:1136:30156:32362\_2:N:0:TCTGCAAG+GCTGCACT  
CTAGGATTATGTCTGTGTTGAAAGACTTTCTACCGATAAGGGTCACTAGTCTTACACAATTAAGAAAT  
AATCCTACATTGACTGATTATCTAAAGATTGAAGGAAAATTTTATCCT

+  
FFFFFFFFFFFFFFFFFFFFFFFFFFFFFFFFFFFFFFFFFFFFFFFFFFFFFFFFFFFFFFFF  
FFFFFFFF,FFFFFFFF:FFFFFFFFFFFFFFFFFFFFFFFFFFFFFFFFFFFFFFFF  
@A00721:190:HGJW7DSXY:4:1101:22290:27665\_1:N:0:TCTGCAAG+GCTGCACT  
GACTTTCCTACGATACAAATGATAACTTCTAATTTACGTTTGCTACTCAGAGCTGGTCTCTCAGCAA  
AGGGATGCATGGTGTATCTCCTCAGGAGTCCCGGCATTTGATAATAATGACGAGACTTTCGTCATAA  
TCG

+  
FFFFFFFFFFFFFFFFFFFFFFFFFFFFFFFFFFFFFFFFFFFFFFFFFFFFFFFFFFFFFFFF  
FFFFFFFFFFFFFFFFFFFFFFFFFFFFFFFFFFFFFFFFFFFFFFFFFFFFFFFFFFFFFFFF  
FFF  
@A00721:190:HGJW7DSXY:4:2301:11460:20275\_1:N:0:TCTGCAAG+GCTGCACT  
GATTACACGGTACCAGCGCATCTCGTGTCGAGCCTCGACCCGATTATATGGTATTAAGGT  
GAGGAGACCATTTTCTTGCTGAAATTTATAGAAGATTATTTTGACAGAATCAATAAGAATCATCGATT  
CT

+  
FFFFFFFFFFFFFFFFFFFFFFFFFFFFFFFFFFFFFFFFFFFFFFFFFFFFFFFFFFFFFFFF  
FFFFFFFFFFF:FFF,FFF:FFFFFFFFFFF,:FFFFFFFFFFF,FFF,FF,FFF,FF,FF,,F,,:F,F  
:F  
@A00721:190:HGJW7DSXY:4:2630:5249:35008\_1:N:0:TCTGCAAG+GCTGCACT  
TATGCTGATCTAAAATTTGATCTAGATGGATCCACTCCTCGAGTTATCATGATGTTAGTATGTTATA  
TACTGATTTACAACGATATAGGAGTAATCTACGAGAAGATTCTAGAATTCTTAATTATAATATTCAAC  
CTC

+  
FFFF,F,F:,FFFFFFFF,FFFFFFFFFFFFFFFFFFFFFFFFFFFFFFFFFFFFFFFF:FFFF:FF::FFFFFFFFFFFFFFFF:FFFFFFF  
FFFFFFFFFFFFFFFFFFFFFFFFFFFFFFFFFFFFFFFFFFFFFFFFFFFFFFFFFFFFFFFF:FFFFFFFFFFFFFFFFFFFFFFFF  
FFF  
@A00721:190:HGJW7DSXY:4:1528:15492:25692\_2:N:0:TCTGCAAG+GCTGCACT  
GAGATCACACATTTTGAGAACTAACTATGTTATGTTCTCTGATCATTTTGACAATCTCTTCTTATAAT  
AAATAAATAAATAATATTACTAATGGCAAATAGTGGAAGGCTCCAGT

+  
FFFFFFFFFFFF:FFFFFFFFFFFFFFFFFFFFFFFFFFFFFFFFFFFFFFFFFFFFFFFF:FFFFFFFFFFFFFFFFFFFFFFFF  
FFFFFFFFF:FFFFFFFFFFFFFFFFFFFFFFFFFFFFFFFFFFFFFFFF:FFFFFFFFFFFFFFFF  
@A00721:190:HGJW7DSXY:4:2669:9516:2816\_2:N:0:TCTGCAAG+GCTGCACT  
TGCTTTGGATTACGATGACGTGAGAATAGGTGAAGGGATAGTTTTTACCTCGACCAACATTAAGGCGG  
CGGCGACTAATCTTAAAGCTTCACCCAAAATGAAGGACACTTCGAAAC

+  
FFFFFFFFFFFFFFFFFFFFFFFFFFFFFFFFFFFFFFFFFFFFFFFFFFFFFFFFFFFFFFFF  
FFFFFFFFFFFFFFFFFFFFFFFFFFFFFFFFFFFFFFFF:FFFFFFFFFFFFFFFFFFFFFFFF  
@A00721:190:HGJW7DSXY:4:1169:13169:23672\_1:N:0:TCTGCAAG+GCTGCACT  
GGCTCTAAAGGACACTATACAATATCCAGACGACGACGAAGCTTATACTACTTTAATTTTGGGTATTA  
TGTGGAGATATCGTGATATCAGTACGTCCAGATCCTCTGCTTTTACCGATAACGATAAATTCGTCATC  
AAA

+  
FFFFFFFFFFFFFFFFFFFFFFFFFFFFFFFFFFFFFFFFFFFFFFFFFFFFFFFFFFFFFFFF  
FFFFFFFFFFFFFFFFFFFFFFFFFFFFFFFFFFFFFFFFFFFFFFFFFFFFFFFFFFFFFFFF  
FFF  
@A00721:190:HGJW7DSXY:4:1155:25644:27586\_1:N:0:TCTGCAAG+GCTGCACT  
TTGGTGCTTAGGGATATAATGAATTCAGCACCACATTTTGGTCAAGTCAATCCGTTGAGAAAATTTCT

TAGAGGATATTCGCCATTGTGGTACGAATTGGTCCAACATTTACCACCAAATTCTTTTGATACAACCTC  
TAG

+

FFFFFFFFFFFFFFFFFFFFFFFFFFFFFFFFFFFFFFFFFFFFFFFFFFFFFFFFFFFFFFFFFFFFFFFFFFFF  
FFFFFFFFFFFFFFFFFFFFFFFFFFFFFFFFFFFFFFFFFFFFFFFFFFFFFFFFFFFFFFFFFFFFFFFFFFFF  
FFF

@A00721:190:HGJW7DSXY:4:1457:14470:3630\_1:N:0:TCTGCAAG+GCTGCACT  
TGCCTGCGGAATACGCTTGCTATTACCAGATTGGTTCAACCCGTTGATGCTATGTCAGAAGAAGCT  
ATTCAGCTTGTCTGTTTAAAGACTGCAGAGGCTGTCAAACAAGCCCAGACTCAAGGAGTCCAATCAAA  
GGT

+

FFFFFFFFFFFFFFFFFFFFFFFFFFFFFFFFFFFFFFFFFFFFFFFFFFFFFFFFFFFFFFFFFFFFFFFFFFFF  
FFFFFFFFFFFFFFFFFFFFFFFFFFFFFFFFFFFFFFFFFFFFFFFFFFFFFFFFFFFFFFFFFFFFFFFFFFFF  
:FF

@A00721:190:HGJW7DSXY:4:1352:21703:4601\_2:N:0:TCTGCAAG+GCTGCACT  
TGGGTGATAAAAATTATTTAGAGATCTTTTCTACTTACAAAGGACAATTCAGTTTCATTAATTCTACG  
GAAAAGTCCGGAGTATATTGTATGTTAATAGATAGTGGGATAATAGTT

+

FFFFFFFFFFFF:FFFFFFFFFFFFFFFFFFFFFFFFFFFFFFFFFFFFFFFFFFFFFFFFFFFFFFFFFFFFF  
FFFFFFFFF:FFFFFFFFFFFFFFFFFFFFFFFFFFFFFFFFFFFFFFFFFFFFFFFFFFFFFFFFFFFFF  
:FFF

@A00721:190:HGJW7DSXY:4:1437:12753:20415\_1:N:0:TCTGCAAG+GCTGCACT  
GTAGTGAACGCGTTCGTAGAACCAAGTACTTTCGCTCTGAAGAGTTTAGAGCTGCTATTGATTATGTA  
ACCGATAGGAGTTGTATAGTTGAAGATGTGGCTTTAGACGATAATCCTTTAAGGACTATGTTGACTGA  
CGA

+

FFFFFFF:FFFFFFFFFFFFFFFFFFFFFFFFFFFFFFFFFFFFFFFFFFFFFFFFFFFFFFFFFFFFF  
FFFFFFFFFFFFFFFFFFFFFFFFFFFFFFFFFFFFFFFFFFFFFFFFFFFFFFFFFFFFFFFFFFFFFFFFFFFF  
FFF

@A00721:190:HGJW7DSXY:4:1313:3549:26146\_2:N:0:TCTGCAAG+GCTGCACT  
TTGTCTACGTTGCAGATCGCCACTCCAAACACTATATACATTATAAAATATAAAAATAAGGGAGTCAT  
AACTTTTGTACCAAATTCTTGGCTTTCAACGAAGTCTCTGATTTTAT

+

FFFFFFFFFFFFFFFFFFFFFFFFFFFFFFFFFFFFFFFFFFFFFFFFFFFFFFFFFFFFFFFFFFFFFFFFFFFF  
FFFFFFFFFFFFFFFFFFFFFFFFFFFFFFFFFFFFFFFFFFFFFFFFFFFFFFFFFFFFFFFFFFFFFFFFFFFF

@A00721:190:HGJW7DSXY:4:1105:11849:30091\_1:N:0:TCTGCAAG+GCTGCACT  
TAACGATCTCTCGGTCAATTTACTCTGTACTTGATCTACGTCGTTTAACTGTCGGAACAACCTTTACTT  
AGAATGACTCTATCTTTTCAGACACTTCTTATATTATTTACAATAGTTAATATCATATTAGTAATACT  
CAC

+

FFFFFFFFFFFFFFFFFFFFFFFFFFFF:FFFFFFFFFFFFF:FFFFFFFFFFFFFFFFFFFFFFFFFFFFF  
FFFFFFF:FFFFFFFFFFFFFFFFFFFFFFFFFFFFFFFFFFFFFFFFFFFFFFFFFFFFFFFFFFFFF  
FFF

@A00721:190:HGJW7DSXY:4:1125:5385:7592\_2:N:0:TCTGCAAG+GCTGCACT  
GCTTTTCTTAGCTAATAGATTAATAAAGGATGAGTACGAAAACCAACTCTTCGTTACGAGACCTGAT  
GGTAGAATAGATTTAGTCTCTACACCCATCTCAACGAGGATAAAGCGA

+

FFFFFFFFFFFFFFFFFFFFFFFFFFFFFFFFFFFFFFFFFFFFFFFFFFFFFFFFFFFFFFFFFFFFFFFFFFFF  
FFFFFFFFFFFFFFFFFFFFFFFFFFFFFFFFFFFFFFFFFFFFFFFFFFFFFFFFFFFFFFFFFFFFFFFFFFFF

@A00721:190:HGJW7DSXY:4:2130:23565:24518\_1:N:0:TCTGCAAG+GCTGCACT  
TTAACTTAATACACCAATAGAAAATCCGCAAACGACTCGAAACCGAGACGCCGTAGATCAAAGTCCCT  
TCTAACTTTAGATTATGAATCCTGCCTTTACTCATTTT

+

:,:,:,::F:,:,,:,,,,,F,F:,,F,FFFFFFFF:FFFFFFFFFFFF:FFFFFFFFFFFFFFFFFFFF  
FFFFFFFFF:FFFFFFFFFFFFFFFFFFFFFFFFFFFFFFFFFFFFFFFFFFFF

@A00721:190:HGJW7DSXY:4:1239:9498:26866\_2:N:0:TCTGCAAG+GCTGCACT  
TTTTTATAATTTATAACCTTCTTATACTTTTGGGTATGTTTGTGAAAAACATGAGATACCCAAGTCT  
ATCGAAGACATTATCTCTTATGTACTTATTGTAACGATCATTCTTTTCG

+

FFFFFFFF:FFFFFFFFFFFFFFFFFFFFFFFF:FF:F:FFFFFFFFFFFFFFFFFFFFFFFFFFFFFFFF  
FFFFFFFFFFFFFFFF:F:FFF:FFFFFFFFFFFFFFFFFFFFFFFFFFFFFFFF

@A00721:190:HGJW7DSXY:4:1617:7211:4899\_1:N:0:TCTGCAAG+GCTGCACT  
TTCTTATTCTTTTATTCTTTAACTGTGTATGAGGAGGATTTATAATGCTTTTCGATAGTGATTGTTA  
TCAATTTAAATACATTACTGTTTCAAATCATCTTTACTCACAGACTCCGAAAATGGTTTCAAATGAGG  
TCA

+

FFFFFFFFFFFFFFFFFFFFFFFFFFFFFFFF:FF:FFFFFFFF:FFFFFFFF:FFFFFFFF  
FFFFFFFFFFFFFFFFFFFFFFFFFFFFFFFFFFFFFFFFFFFFFFFFFFFFFFFFFFFFFFFF:FFFFF:  
FFF

@A00721:190:HGJW7DSXY:4:1617:7211:4899\_2:N:0:TCTGCAAG+GCTGCACT  
TATTAACGAACATTATCCGATTCTTCGAGGGTATCACTACCACTGATCTGCCGACTTTAGTCAAGG  
AACTTCAATTCCTTCGATGTTTATATTTTCTATAAGGGAAAATAGCA

+

FFFFFFFFFFFFFFFFFFFFFFFFFFFFFFFF:FFFFFFFFFFFFFFFF:FFFFFFFF  
F:F:FFF:FFFFFFFFFFFFFFFFFFFFFFFF:FFFFFFFF

@A00721:190:HGJW7DSXY:4:1318:1723:30812\_2:N:0:TCTGCAAG+GCTGCACT  
TTCGACAAATTTAGAACTTTATTTAGAAGTCTCTCCGATCACCTTGGTGTGATCTCCCGGAGGATC  
TTTTCAATAAGATGTATGATGATAATCTACTATTTTAAATAGTGATA

+

FFFFFFFF:FFFFFFFFFFFFFFFFFFFFFFFFFFFFFFFFFFFFFFFFFFFFFFFFFFFFFFFF  
FFFFFFFFFFFFFFFFFFFFFFFFFFFFFFFFFFFFFFFFFFFFFFFFFFFFFFFF

@A00721:190:HGJW7DSXY:4:2156:26178:14544\_1:N:0:TCTGCAAG+GCTGCACT  
ACTTTATCAAAGATTTGGCTTGGTCTATTTACCGCAAAAAGTTGGAAGAGGTCTATGATATTTATTT  
ACTTATACTTTAAATAGCACCGATTATAACTTGACTGTTGATAATATTACAATAGCTCTTCTCAGAA  
GAT

+

FFFFFFFFFFFF,FFFFFFFFFFFFFFFFFFFFFFFF,FFFFFFFFFFFF:FFFFFFFFFFFF  
F::FFFFFFF,FFFFFFFFFFFFFFFFFFFFFFFFFFFFFFFFFFFFFFFF:FFFFFFFFFFFF  
FFF

@A00721:190:HGJW7DSXY:4:1425:19958:25003\_1:N:0:TCTGCAAG+GCTGCACT  
ACCGGTGAACACGTCGGTAGCATTGATTTACTTTTACCGTTAGAACTGAAAAAGATTCTTTTCGAAAA  
GAAACCTATAAGTTACAAACGATTCTTCGACTATATTAAGAAATAAAAATACTTCAAGTACCTGAAC  
TTT

+

F:FF,F:FFFFFF::FFFF,FFF,FFFF:FFFF:FF:F:FFF,FF,FFF:,FF,F:FFFFFF:,  
FFFF,F:FF,:FF:F,FFF,FFFFFFFF:F::FFFFFFFFFFFFFFFFFFFFFFFF,FFFFFFFFFFFF  
FFF

@A00721:190:HGJW7DSXY:4:1403:22607:31375\_1:N:0:TCTGCAAG+GCTGCACT  
ATGGTATAATGTGTCTTACAAATAGAACCTTCACTCTCGGTAATGAGAGTGATTCTTAAATATTCTA  
GTAACCGCTATGTGGGCATTACTAGGATTTATCACACTCCTAAATTTGATAGCAATTTATGTTTTAAA  
TGC

+

FF::FFFF,FFF:FFFF,FFFFFFFF,F:FFFFFF:FFFFFFFF:FFFFFFFF:F:  
FFFF:,FFF,FFFFFFFF:FFF:FFFFFFFF,FFFF,::FFFF::FFF:,FFFFFFFF,  
FFF

@A00721:190:HGJW7DSXY:4:1426:7102:33207\_2:N:0:TCTGCAAG+GCTGCACT  
AAAACTCCATTGTATAGTTCAAGGAGTACTTAATTCAATAGCTTTAGTATTATTTACTATCGCCTTT  
ATTGAAAATTGTATAAGAGTTAATTGCTTACACAAAAGTGACGCGCA

+

FFFF:FFFF:FFFFFFFF,FFFFFFFFFFFFFFFFFFFFFFFF:FFFFFFFFFFFF:FF,FF:FFFF  
FF:FFFF:FFFFFFFFFFFFFFFF, :FF:F:FF:FFFF:FFFF  
@A00721:190:HGJW7DSXY:4:2570:29333:28025\_1:N:0:TCTGCAAG+GCTGCACT  
GGGGAGAATGAACTGCCGCTTCCCGGAAGAAACGATCTATTTACAGAGTATTTAGAGTAGTCCAAAGT  
TTGTATAAATTTATATGATTTTCTATATATATACCACATATATATATATAAAATCCTATAAATTTG  
TAC  
+  
FFFFFF:FFFF,FFFFFFFFFFFF:FFFFFF:FFFFFFFFFFFFFFFFFFFFFFFFFFFFFFFF  
FFFFFFFFFFFFFFFFFFFFFFFFFFFFFFFFFFFFFFFFFFFFFFFFFFFFFFFFFFFFFFFF  
FFF  
@A00721:190:HGJW7DSXY:4:2274:12798:19085\_2:N:0:TCTGCAAG+GCTGCACT  
GAAGAAAACCACTCCCTTCAATTCAATAACATAACATACCATACCTCCCAAACATAACATACCATA  
ACCTACCATGACCAATCATCGCTCCAACCTGGCACGCCAGACGTAGGGT  
+  
FFFFFFFFF, :FFFF:,FFFFFFFFFFFFFFFFFFFFFFFFFFFFFFFFFFFFFFFFFFFFFFFF  
FFFFFFFFFFFFFFFFFFFFFFFFFFFFFFFF:FFFFFFFFFFFFFFFF:FFFF  
@A00721:190:HGJW7DSXY:4:2338:1099:33959\_2:N:0:TCTGCAAG+GCTGCACT  
ACCGCCGGTCGGCAGATCGGCACCACTGGTCTCTACGTTCAAGGACCCGCTGTGCAGAATAACCTTCC  
CAAATCTAGATCTGCACAGAAGAAGGCTGAAGGTCGTTACCGGACGAC  
+  
FFFFFFFFFFFFFFFFFFFFFFFFFFFFFFFFFFFFFFFFFFFFFFFFFFFFFFFFFFFFFFFF  
FFFFFFFFFFFFFFFFFFFFFFFFFFFFFFFFFFFFFFFFFFFFFFFFFFFFFFFF  
@A00721:190:HGJW7DSXY:4:2472:11008:20212\_1:N:0:TCTGCAAG+GCTGCACT  
GGCTGTTGCCAGAGGAAAGCAGCGACCACCGAGGTCGCTCGTAACATTGACGGCAGTCCCGTCATCT  
CTGTGGGAAGTGAAGGACGTACCTCAGTCAAAAGTCACATTCACCACTCCCATGCCAATCAATGATGTG  
ACT  
+  
FFFFFFFFFFFFFFFFFFFFFFFFFFFFFFFFFFFFFFFFFFFFFFFFFFFFFFFFFFFFFFFF  
FFFFFFFFFFFFFFFFFFFFFFFFFFFFFFFFFFFFFFFFFFFFFFFFFFFFFFFFFFFFFFFF  
FFF  
@A00721:190:HGJW7DSXY:4:2544:1732:9784\_2:N:0:TCTGCAAG+GCTGCACT  
TCAATACGTCGTGGGAGGTACTGAAGCCTTCCCTCCGCTGGCACGAAGAACTCCCAAGCCAATCA  
ATAGTTCTTCTGACCAGAATGAAAAGGGGTTTACCAGGGTAGTCTCTA  
+  
FFFFFFFFFFFFFFFFFFFFFFFFFFFFFFFFFFFFFFFF,FFFFFFFFFFFF:FFFFFFFF:F  
FFFF:FFFFFFFFFFFFFFFF:FFF:,FF:F:FFFFFF,FFFFFF  
@A00721:190:HGJW7DSXY:4:1318:22851:36683\_1:N:0:TCTGCAAG+GCTGCACT  
AGAGGGGAAATGTCCCCAAACTGAGAAGAATAAAGGGAAAGTCCATCAGGACCTAAGAAGGGGAAA  
TTACCCCTAATTCTGAAGGAAGATCTCCACCATCTGGGGTTGGAATAAGAAATCTGCACGGGCCAA  
AGA  
+  
FFFFFFFFFFFFFFFF,FFFFFFFFFFFF, :FF:FFFF:FFFFFFFFFFFFFFFFFFFFFFFF  
FFFFFFFFFFFFFFFFFFFFFFFFFFFFFFFFFFFFFFFFFFFFFFFFFFFFFFFFFFFFFFFF  
FFF  
@A00721:190:HGJW7DSXY:4:1154:21404:25222\_1:N:0:TCTGCAAG+GCTGCACT  
CGAAGTCGCTGAAGGCGGCTTGGGTCATTAAGGGTAGCTGTAAAGTTGCGCCTGCCGACCCCATCTTT  
GAGACCAAGACTCTCTACAGTAGGTTCTGTCCTACTATGAGCAAATCTGTTGAATTCGTCACTGAGGA  
CGA  
+  
FFFFFFFFFFFFFFFFFFFFFFFFFFFF:F:FFFFFFFFFFFFFFFFFFFFFFFFFFFFFFFF:FF  
FFFFFFFFFFFFFFFF:FFFFFFFFFFFFFFFFFFFFFFFFFFFFFFFFFFFFFFFFFFFFFFFF  
FFF  
@A00721:190:HGJW7DSXY:4:1350:2410:5822\_1:N:0:TCTGCAAG+GCTGCACT  
ACTTTTGGCTACTGGCGACAACTGAGAGCAGTCGCTGGGGAAAGAGTATTGCGTGGGTTGTAGGCCG

ACGCTTCGAGCTTGAGTGTGACGAGGCCGGTGACGTTTTTTGTCAACGGCGTTTGGAGGATTTTATCCGC  
+  
:FFFFFFFFFFFFFFF:FFFF,FF:FFFFF::F,,FFFF::FFF:FF,FF,,F,FF:FF,FFFFFF,:FFFFFF  
,FFFFFF,FFFFFF,FFFFFF,,F,FFF:FF:FF:FFFFFFFF:FF:FFFFFF,F,:FFFFFFFF:,F  
F  
@A00721:190:HGIW7DSXY:4:1235:18765:3615\_2:N:0:TCTGCAAG+GCTGCACT  
GCGAAGATCCCCTATGGAGTCTTGAAGGACTTAGGTTGGCATATTTATGCCGACGATAATAAGCATGT  
CACCCTTAAGCACCGAGGTAAGCTCGGGACTTACAAGAGAGAGTGTGA  
+  
FFFFFFFFFFFFFFFFFFFFFFFFFFFFFFFFFFFFFFFFFFFFFFFFFFFFFFFFFFFFFFFFFFFFFFFF:F:FFFF:FF  
FFFFFFFFFFFFFFFFFFFFFFFFFFFFFFFFFFFFFFFFFFFFFFFFFFFFFFFFFFFFFFFFFFFFFFFF  
@A00721:190:HGIW7DSXY:4:1167:19741:16172\_1:N:0:TCTGCAAG+GCTGCACT  
CACTATTTTTGCCAGAATGCGGGCTTTCTGACTGATGAGGTTAAACTCTTGCTCCTTCTGTGGGTG  
AGGGTTTTTGTATATTCACTGGTTCTGGGAGGCTGCTTCTCCTACATAATTACAACCTCTCTTTAGAG  
AGC  
+  
FFFFF:FFFFFFFFFFFFFFFFFFFFFFFFFFFFFFFFFFFFFFFFFFFFFFFFFFFFFFFFFFFFFFFFFFFF  
FFFFFFFFFFFFFFFFFFFFFFFFFFFFFFFFFFFFFFFFFFFFFFFFFFFFFFFFFFFFFFFFFFFFFFFFFFFF  
FFF  
@A00721:190:HGIW7DSXY:4:1109:8477:7560\_2:N:0:TCTGCAAG+GCTGCACT  
AGTTGGGCAAATTCACATATGGTAGACGTTGTCACTTTTCTTGAAAATTTTCTTTCCTCCGT  
CATTGGGGATTTCGATGTGAGAAGGTGGAAGGTGTCAAGGGTCTTCTT  
+  
FFFFFFFFFFFFFFFFFFFFFFFFFFFFFFFFFFFFFFFFFFFFFFFFFFFFFFFFFFFFFFFFFFFFFFFFFFFF  
FFF:FFFFFFFFFFFFFFF,FFFF,FFFFFFFFFFFFFFFFFFFFFFFFFFFFFFFFFFFFFFFFFFFF  
@A00721:190:HGIW7DSXY:4:1136:23158:9157\_2:N:0:TCTGCAAG+GCTGCACT  
TTTCAGGACCTAATCACATCATGATTGATAGTTACGGCTCGTATCGAGTTGGAGGGAGGAAGTTCTCC  
GAAATTAAGACGGGGGGATTAAGAGTCCAGCTGTAAGTGTCAATTTCA  
+  
:FFFFFFFFFFFFFFFFFFFFFFFFFFFFFFFFFFFFFFFFFFFFFFFFFFFFFFFFFFFFFFFFFFFFFFFFFFFF  
FFFFFFFFF:FFFFFFFFFFFFFFFFFFFFFFFFFFFFFFFFFFFFFFFFFFFFFFFFFFFFFFFFFFFF  
@A00721:190:HGIW7DSXY:4:1226:11993:13307\_2:N:0:TCTGCAAG+GCTGCACT  
AAGAAAACTTCGTGAGAAGATGAGGAAGTCTAAGAGGAGGAGTTTGAGGAAGGCTCTAGAGAAGATCT  
CACCACCTGGAGAAGGCAAGTGGAGAGTCCAGAAGTTGATGAAGAAG  
+  
FFFFFFF:FFFFFFFFFFFFFFFFFFFFFFFFFFFFFFFFFFFFFFFFFFFFFFFFFFFFFFFFFFFFFFFFFFFF  
FFFFFFFFFFFFFFFFFFFFFFFFFFFFFFFFFFFFFFFFFFFFFFFFFFFFFFFFFFFFFFFFFFFFFFFFFFFF  
@A00721:190:HGIW7DSXY:4:1226:8404:18396\_2:N:0:TCTGCAAG+GCTGCACT  
CAGGGGTTACCACTTCCTAAGGTGGATGAGGGAGGTTGTTTCTTTGGAGTTTTAGATAATCTTTTGAG  
AAGGGGTCATAGAGCCAGCAAGAGAAGCTTATATGCTGGTTTAAGTGA  
+  
FFFFFFFFFFFFFFFFFFFFFFFFFFFFFFFFFFFFFFFFFFFFFFFFFFFFFFFFFFFFFFFFFFFFFFFFFFFF  
FFFFFFFFFFFFFFFFFFFFFFFFFFFFFFFFFFFFFFFFFFFFFFFFFFFFFFFFFFFFFFFFFFFFFFFFFFFF  
@A00721:190:HGIW7DSXY:4:1414:14986:35180\_2:N:0:TCTGCAAG+GCTGCACT  
CCTTGAGAAGACAAGCCACATTAAGATATAATTTAGGTCAACTTGGGGTTTGAATGTCATTAGTGCC  
TTACGATTGAAAGAGGTCCTTTTGAGTATCGACAGATCTTTCGATCTT  
+  
FFFFFFFFFFFFFFF:FFFFFFFFFFFFFFFFFFFFFFFFFFFFFFFFFFFFFFFFFFFFFFFFFFFFFFFFFFFF  
FFFFFFFFFFFFFFF::FFFFFFF:FFFFFFFFFFFFFFFFFFFFFFFFFFFFFFFFFFFFFFFFFFFF  
@A00721:190:HGIW7DSXY:4:2321:25870:1454\_2:N:0:TCTGCAAG+GCTGCACT  
TTAACGTGGCAGAATTCGGTAAGTACCATATTGTTCTTCCGGGAAGTTGTGGGATTTAAGTTTGAC  
TCAACTACTCCGATCAGATCCGGATGGTTTGATTGGTATGGACTACTC  
+

FFFFFFFFFFFFFFFFFFFFFFFFFFFFFFFFFFFFF:FFFFFFFFFFFFFFFFFFFFFFFFFFFFFFFFFFFF  
 FFFFFFFFFFFFFFFFFFFFFFFFFFFFFFFFFF:FFFFFFF,FFFFF:FFFFFFFFFFF  
 @A00721:190:HGJW7DSXY:4:2437:3947:35884\_1:N:0:TCTGCAAG+GCTGCACT  
 TAGTTGTCTAGGGTCATGGCAGATACTACCGATAAGGTGAAAAATATGCAGGTCAAAGATTCTGTAGC  
 TCTGAGGGCGGTTGAGGGAGCCGTTTTGCCGACTTTAACTATTCTAAGAGTCTTTATGATTCAAAC  
 CTA  
 +  
 F:FFFFFFFFFFFFFFFFFFFFFFFFFFFFFFFFFFFFFFFFFFFFFFFFFFFFFFFFFFFFFFFFFFFFF:FFF:FFFFFFF:FFF  
 FF:FFFFFFFFFFFFFFFFFFFFFFFFFFFFFFFFFFFFFFFFFFFFFFFFFFFFFFFFFFFFFFFFFFFFF:FFFFFFFFFFFFFFFFFFFFF  
 FFF  
 @A00721:190:HGJW7DSXY:4:2657:23963:14184\_2:N:0:TCTGCAAG+GCTGCACT  
 ACCTTACAAGGTTGAGGAGACTTTACAGCGGCTTATTGTCGCGCAGTTTCCAGAATTGCGGTTGAAGT  
 TCACCCATTCTATCTTGAATGCTCACGCCGTCGACCCCATATCGAGAC  
 +  
 FFFFFFFFFFFFFFFFFFFFFFFFFFFFFFFFFFFFFFFFFFFFFFFFFFFFFFFFFFFFFFFFFFFFFFFFFF  
 FFFFFFFF:FFFFFFFFFFFFFFFFFFFFFFFFFFFFFFFFFFFFFFFFFFFFFFFFFFFFFFFFFFFFF  
 @A00721:190:HGJW7DSXY:4:2314:23547:31751\_2:N:0:TCTGCAAG+GCTGCACT  
 AAAGTACAGATTTAGTGATTTAGATATTATTGATATTGGAGGCGATATTCGTTTTCATATCCAAAAC  
 CCTTGAATGGAGTACATATTTGCAACCCTATTCTTGATGTGAAAGATG  
 +  
 FFFFFFFFFFFFFFFFFFFFFFFFFFFFFFFFFFFFFFFFFFFFFFFFFFFFFFFFFFFFFFFFFFFFFFFFFF  
 FFFFFFFFFFFFFFFFFFFFFFFFFF:FFFFFFFFFFFFFFFFFFFFFFFFFFFFFFFFFFFFFFFF:  
 @A00721:190:HGJW7DSXY:4:1340:32479:30185\_1:N:0:TCTGCAAG+GCTGCACT  
 ATTGATTGGAACGTACCTACTCACGAGACGTCATGAAAGCTATCGGAGGGAAGCAAATGTTTCGTT  
 CTGTTACAAGAACGCTTTGATTGTGACCATAAAGCCTCAGTTGCGATAGCTGTAGAGGTATACGATA  
 TCT  
 +  
 FFFFFFFFFFFFFFFFFFFFFFFFFF:FFFFFFFFFFFFFFFFFFFFFFFFFFFFFFFFFFFFFFFFFFFFFFFFF  
 FFFFFFFFFFFFFFFFFFFFFFFFFFFFFFFFFFFFFFFFFFFFFFFFFFFFFFFFFFFFFFFFFFFFFFFFFF:FFFFFFF  
 FFF  
 @A00721:190:HGJW7DSXY:4:1333:27905:27367\_2:N:0:TCTGCAAG+GCTGCACT  
 GCCACTATAATGCTTAAGAGAGAGATTGATGTATGTCATTTCGTCTTAGTTTGTCCCGGCGAATTATT  
 GGACACGATGAAAAATGACATACCCGTTCTGACCTTGGTATCGTTAT  
 +  
 FFFFFFFFFFFFFFFFFFFFFF:FFFFFFFFFFFFFFFFFFFF:FFFFFFFFFFFFFFFF:F:FFFFF:FFFFFF::F:FF  
 FFFFFFFFFFFFFFFFFFFFFF,FFFFFFFFFFFFFFFFFFFFFFFFFFFFFFFFFF  
 @A00721:190:HGJW7DSXY:4:1223:26024:29215\_2:N:0:TCTGCAAG+GCTGCACT  
 GGTTATTCTCACACAAAGATAAGATTTTATCTTTCTTCAAACACCCTGTTTTCTTAAGGGCGGACA  
 ATTGTTCCATTGTGAACTCTTGGGGACTAGATTGAGCATTAATGAGTT  
 +  
 FFFFFFFFFFFFFFFFFFFFFFFFFFFFFFFFFFFFFFFFFFFFFFFFFFFFFFFFFFFFFFFFFFFFFFFFFF  
 FFFFFFFFFFFFFFFFFFFFFFFFFF:FFFFFFFFFFFFFFFFFFFFFFFFFFFFFFFFFFFFF  
 @A00721:190:HGJW7DSXY:4:1125:13702:10692\_2:N:0:TCTGCAAG+GCTGCACT  
 CTTTCTCTAGTGGACAATTCAGAATACCTATTTCCGTACCAAGAGCCACTGCCAATCTCATCGCTATA  
 CGCATACCTGATTGGAATAAGCGAGGTTTCGTTCTCAATAAAAATTTT  
 +  
 FFFFFFFFFFFFFFFFFFFFFFFFFFFFFFFFFFFFFFFFFFFFFFFFFFFFFFFFFFFFFFFFFFFFFFFFFF  
 FFFFFFFFFFFFFFFFFFFFFFFFFFFFFFFFFFFFFFFFFFFFFFFFFFFFFFFFFFFFFFFFFFFFFFFFFF  
 @A00721:190:HGJW7DSXY:4:1214:25301:14340\_1:N:0:TCTGCAAG+GCTGCACT  
 AAGTTTTCTTCATAAGGGCTATTCAGTACGTCATGGGGATCACTTCTTCGGTCAATGACAAAACCTTC  
 GAATATGTTACGACATGGCTTCGTAACAACAGTGCAGGATTGTCATCTCGGGGAAAGTGATTCACCA  
 AGA  
 +  
 FFFFFFFFFFFFFF:FFFFFFFFFFFFFFFFF:FFFFFFFFFFFFFFFFFFFFFFFFFFFFFFFFFFFFFFFFF

FFFFFFFFFFFFFFFFFFFFFFFFFFFFFFFFFFFFFFFFFFFFFFFFFFFFFFFFFFFFFFFFFFFFFFFFFFFFFFFF  
FFF

@A00721:190:HGJW7DSXY:4:1365:6750:25739\_1:N:0:TCTGCAAG+GCTGCACT  
GAGATACCTAGAGAAGGTCGCAGCGATCTTACTCGTTATCGGAGCTAAGAAGAAGACTTTGGGTACAC  
GTTATGCTCGCAAACCTTAACGTTAGTACCGGAGGTGATCTCTCTGCTTCTGCGTTACTGAGAGAAAAG  
ATT

+  
FFFFFFFFFFFFFFFFFFFFFFFFFFFFFFFFFFFFFFFFFFFFFFFFFFFFFFFFFFFFFFFFFFFFFFFFFFFFFFFF  
FFFFFFFFFFFFFFFFFFFFFFFFFFFFFFFFFFFFFFFFFFFFFFFFFFFFFFFFFFFFFFFFFFFFFFFFFFFFFFFF  
FFF

@A00721:190:HGJW7DSXY:4:1553:1841:2581\_2:N:0:TCTGCAAG+GCTGCACT  
ACGGTGACTTTATGGACAAGATGCAAGTTCTTGGGAAATACTTGTTTCCCTTTTATAGGTTTAGTAGGT  
GATCTTGACGTCGATTCTTTGTATAGGGAGTGTGAGAAGACAACGAAT

+  
FFFFFFFFFFFFFFFFFFFFFFFFFFFFFFFFFFFFFFFFFFFFFFFFFFFFFFFFFFFFFFFFFFFFFFFFFFFFFFFF  
:F:FFFFFFFFFFFFFFFF:F:FFFF:FFFF,FFF:FFFFFFFFFFFFFFFF

@A00721:190:HGJW7DSXY:4:2444:28999:12508\_2:N:0:TCTGCAAG+GCTGCACT  
TATCAAAGAAAATGGTGAACCGTCTCTAAATCTTTGAGATTGAGAAGATTGAAGAACACGTCAAGA  
AGTCGCTCGGCGTTGTTCTTGAAAACCAAGTTAAGAAGGAGGCTGATC

+  
FFFFF::FFFFFFFFFFFFFFFFFFFFFFFFFFFFFFFFFFFFFFFFFFFFFFFFFFFFFFFFFFFFFFFFFFFFFFFF  
FFFFFFFFFFFFFFFFFFFFFFFFFFFFFFFFFFFFFFFFFFFFFFFFFFFFFFFFFFFFFFFFFFFFFFFFFFFFFFFF

@A00721:190:HGJW7DSXY:4:1639:16197:15765\_2:N:0:TCTGCAAG+GCTGCACT  
GTACCTTCTGTCAAACCTTCGAGGTTCACTACGAGAGGTGATCCCGGATGTGGATTGAAGGCTGGCTC  
TAAGGGAGACTCCTTCTTTTGAATGTTGTAAAGAATTGGGAGATCGG

+  
FFFFF::FFFFFFFFFFFFFFFF,FF,FFFFFFFFFFFFFFFFFFFFFFFFFFFFFFFFFFFFFFFFFFFFFFFF  
:FFF,FF:FFFFFFFF:F:FFFFFFFFFFFFFFFFFFFFFFFFFFFFFFFFFFFFFFFFFFFFFFFF:FFF

@A00721:190:HGJW7DSXY:4:1564:25807:13526\_1:N:0:TCTGCAAG+GCTGCACT  
AGTTTTTAGATCTTCTTGATAATCTTAAAGAAAAATTTTGAATAAACTAATGAGAGGTATAGGCTTA  
GTCAAGTCTGTACTTACATTCTTTACGCCAGATTCTTCATGGGCGACGCTGTTTCTCTTGGTATTTC  
TGA

+  
FFFFFFFFFFFFFFFFFFFFFFFFFFFFFFFFFFFFFFFFFFFFFFFFFFFFFFFFFFFFFFFFFFFFFFFFFFFFFFFF  
FFFFFFFFFFFFFFFFFFFFFFFFFFFFFFFFFFFFFFFFFFFFFFFFFFFFFFFFFFFFFFFFFFFFFFFFFFFFFFFF  
FFF

@A00721:190:HGJW7DSXY:4:1456:25771:32158\_2:N:0:TCTGCAAG+GCTGCACT  
CAGAGCGTCATTTTCTTTGGGATCTTCTCTGGAAGGGAATTATTAAATCATTCTTCTCACTCTT  
GACGAGAATTATTACTGTTTTCTCTACCCATAACTTCTTTTCAAAAA

+  
FFFFFFFFFFFFFFFFFFFFFFFFFFFFFFFFFFFFFFFFFFFFFFFFFFFFFFFFFFFFFFFFFFFFFFFFFFFFFFFF  
:FFFFFFFFFFFFFFFFFFFFFFFFFFFFFFFFFFFFFFFFFFFFFFFF:F:FFFFFFFFFFFFFFFF

@A00721:190:HGJW7DSXY:4:1126:18150:20243\_1:N:0:TCTGCAAG+GCTGCACT  
CTGATGTTTTCTACAGAGTGCAGTCGTTCAACACTTATCACCACCTTTGAAAGGAAAATAATTGGT  
GATGAAAATACGTATGTCGGTGGGGTTCTCAAGGCTCTCATGCCACTGGGATTCTAAGGGGTTCCAT  
AAG

+  
FFFFFFFFFFFFFF:FFFFFFFFFFFFFFFFFFFFFFFFFFFFFFFFFFFFFFFFFFFFFFFFFFFFFFFFFFFFFFF  
FFFFFFFFFFFFFFFFFFFFFFFFFFFFFFFFFFFFFFFFFFFFFFFFFFFFFFFFFFFFFFFFFFFFFFFFFFFFFF  
FFF

@A00721:190:HGJW7DSXY:4:2574:2899:22545\_2:N:0:TCTGCAAG+GCTGCACT  
TTCAATGATCAGGATTCTTCTTTTGGTCTTACGTCTTAAGTAATTTGGATGTTGTCGAAAACATCA  
GGTTCTTGTCACGATTCTTAAAGAAGTTTATTAAAACTTCAGAGTCT

+

FFFFFFFFFFFFFFFFFFFFFFFFFFFFFFFFFFFFFFFFFFFFFFFFFFFFFFFFFFFFFFFFFFFFFFFF  
FFFFFFFFFFFFFFFFFFFFFFFFFFFFFFFFFFFFFFFFFFFFFFFFFFFFFFFFFFFFFFFF

@A00721:190:HGJW7DSXY:4:1158:11379:29716\_1:N:0:TCTGCAAG+GCTGCACT  
GGTAGCTAATGTTCTTGAATAGCCACAGACTTTCTGGGAAAAGAGACCTCTGTTGTAGAGGAGTTGA  
GAGAATTACTCAGATTCAATCTGGCATCACTGAACGTCTACAACGAGTTAGGGAGTGGCTAGGTTTTA  
AAA

+

FFFFF:FFFFFFFFFFFFFFFFFFFFFFFFFFFFFFFFFFFFFFFFFFFFFFFFFFFFFFFFFFFFFFFF  
FFFFFFFFFFFFFFFFFFFFFFFF,FFFFFFFFFFFFFFFFFFFFFFFFFFFFFFFFFFFFFFFFFFFFFFFF  
FFF

@A00721:190:HGJW7DSXY:4:1267:6858:8046\_1:N:0:TCTGCAAG+GCTGCACT  
AGCAATACCTTCCACTGAGTTCATCACCCAGAGTTTCGACGTCGCGGAAAACGATGAAGATTTCCACA  
CTGTTGAGAATCTTCTGATGCTGAATTTGAGGAAAATTTTCGGAAGTTTTTGGTATAAATCCTGAT  
GGC

+

FFFFFFFFFFFFFFFFFFFFFFFFFFFFFFFF,FFFFFFFFFFFF:FFFFFFFFFFFF:F:FFFFFFFFF:  
FFFFFFFFFFFFFFFFFFFFF:FFFFFFFFFFFF:FFFFFFFFFFFFFFFFFFFFFFFFFFFFFFFFFFFFF:FFFFF  
FFF

@A00721:190:HGJW7DSXY:4:1150:2510:36151\_1:N:0:TCTGCAAG+GCTGCACT  
TAAACCTTCTTTTATCATTGCAACAGGACTTTGAGAAGACTGTTGAAATGGACAAAATCTGGGATCA  
TAGGTATGTGTCACGCTACACTCGAAATATGGGCCCTCATAAGGAAGTATAGTTGGCGTCTTGTCTGTT  
GAC

+

FFFFFFFFFFFFFFFFFFFFFFFFFFFFFFFFFFFFFFFFFFFFFFFFFFFFFFFFFFFFFFFFFFFFFFFF  
FFFFFFFFFFFFFFFFFFFFFFFFFFFFFFFFFFFFFFFFFFFFFFFFFFFFFFFFFFFFFFFFFFFFFFFF  
FFF

@A00721:190:HGJW7DSXY:4:1218:19208:33035\_2:N:0:TCTGCAAG+GCTGCACT  
AGTTAGATCATTTGTTGAGGAAGATCTCTACAGAGATTATCGAGAGTTGTGATCTAGTTCTAAATTTA  
GGTCGACGGACTTTAGCAACTTTAGATAAATCCTTTCCGGGCTCAATG

+

FFFFFFFFFFFFFFFFFFFFFFFFFFFFFFFFFFFFFFFFFFFFFFFFFFFFFFFFFFFFFFFFFFFFFFFF  
FFFFFFFFFFFFFFFFFFFFFFFFFFFFFFFFFFFFFFFFFFFFFFFFFFFFFFFFFFFFFFFF

@A00721:190:HGJW7DSXY:4:1227:11514:1423\_1:N:0:TCTGCAAG+GCTGCACT  
TCTGACCATCGCAAAGAAGACTTTATTAGTTCATGAAGTTCTTACACTTCTCGCGACTAATGTCAGCT  
TCACTACAAAGGCGTTACGTAAAGTAGTTTTACGCTTTATCTTAAAGCATTACCACCAAATTTAGCA  
CTT

+

FFFFF:FFFFFFFFFFFFFFFFFFFFFFFFFFFFFFFFFFFFFFFFFFFFFFFFFFFFFFFFFFFFFFFF  
FFFFFFFFFFFFFFFFFFFFFFFFFFFFFFFFFFFFFFFFFFFFFFFFFFFFFFFFFFFFFFFFFFFFFFFF  
FFF

@A00721:190:HGJW7DSXY:4:2246:7554:19586\_1:N:0:TCTGCAAG+GCTGCACT  
GAAGCTCGCCATATCAGATTAGAGACATGCCAGTTAGAGTTCTTCTAACCAGGACTGATGGTGAGATT  
CTTTTACCTTTTGGAGGTCCAGGAACCTTTACTCCTAGTGTCTTTTCTAGAGTCCAAGGACGTTTCCG  
TCG

+

FF:FFFFFFFFF:FFFFFFFFFFFFFFFFFFFFFFFFFFFFFFFFFFFFFFFF,FFFFF:FFFFFFFFF  
FFFFFFFFF:FFFFFFFFFFFFFFFFFFFFFFFFFFFFFFFFFFFFFFFFFFFFFFFFFFFFFFFFFFFFF  
FFF

@A00721:190:HGJW7DSXY:4:1362:16152:7200\_1:N:0:TCTGCAAG+GCTGCACT  
GTGGGAGACCGCTCAATAACACTCTATTGAATCCCTTTTCCACGATGAAAGCTCTTTATGAGGTGCTC  
CATGCAAATTTACAGTTCTCTTTGGTGATATCGCCTCTGTCCTTTCTCCTTTAATCGTGAGGTTACG  
AGA

+

FFFFFFFFFFFFF:FFFFF,:FFFFFFFFFFFFFFFFFFFFFFFFFFFFFFFFFFFFFFFFFFFFFFFFF:FFF



@A00721:190:HGJW7DSXY:4:1432:23610:22686\_2:N:0:TCTGCAAG+GCTGCACT  
GGTTTATCGGTTGTATTTGATAAATTTGTTGGAATCGATAATGATACTGACGAAGTTCTATTACCA  
CCCTTGTCATTGATACAAACATTCTAGGTGATGCTTTCTTAGAGGCTC

@A00721:190:HGJW7DSXY:4:1235:10013:3364\_2:N:0:TCTGCAAG+GCTGCACT  
TATTTACAATCTGTAGAGAGAGAGGTTAATCAGAATTTGAGTGATAACGATTTAGTACTGGGAAATGG  
TGGTAGTCAGTTTACTACTTTTCTTTCCCTCCCTTTTTTCGATTGGAT

@A00721:190:HGJW7DSXY:4:1610:16929:26209\_2:N:0:TCTGCAAG+GCTGCACT  
CGTCTCAGCTAATTTGATAAGGTTTTCTTTATGGGACTCTTGTTTGTACTTATGAAGGAGGTAT  
TACTTCGGAAGTTCCTAATGTAGGTCTCCTAGTACTTAAGGGTTTATG

@A00721:190:HGJW7DSXY:4:1259:3097:10895\_2:N:0:TCTGCAAG+GCTGCACT  
TTTTGATGGTATGTTTCACATTGCGTGATCACTTCCCGTGGACTTGGGAAGAGATTAAACATAAAATC  
CAGCGATTCTATTATGTCGCTAAAGCCTGTCCAGTTGTCGATGATGTT

@A00721:190:HGJW7DSXY:4:2124:13648:10441\_2:N:0:TCTGCAAG+GCTGCACT  
TCGTGAAACTTACGACGATGTTCTCGCTCGCATTTACAAGGATTACTAAGTCTGAGATCTGCCACTT  
CTAATTTTAGGAAACGTCGCGAAAAGAAAAGTTCATGAGGATGTCTTGG

@A00721:190:HGJW7DSXY:4:1315:14995:27931\_2:N:0:TCTGCAAG+GCTGCACT  
GAACCTCTAATAGAGGATCCTGATGACATTATTTCAACGGATACCGATCTCAGTTCTACCACAGAAAC  
CGTCTCAGGAAGTCTCCACTGATTCGGAATTAGAGAAAAGACGACCT

@A00721:190:HGJW7DSXY:4:1340:28592:7983\_1:N:0:TCTGCAAG+GCTGCACT  
GAGACCTCTGAATTTTCAGGGTGCCCTGATGAGGACGTTGAAAGGGATAATTTCAACTCTGAGACTTC  
TAAGAGTGTTTCAAAGACCAGAAACGTAACAAGAAGAATAAAGGTAGGAAGGGGAGAAAAACAGAACA

```

#####
FFFFFFFFFFFFFFFFFFFFF:FFFFFFFFFFFFFFFFFFFFFFFFFFFFFFFFFFFFFFFFFFFFF
FFF
@A00721:190:HG1W7DSXY:4:1421:25129:11381 3:N:0:TCTGCAAG+GCTGCACT

```

```

FFFFFFFFFFFF:FFFFFFFFFFFFFFFFFFFFFFFFFFFFFFFFFFFFFFFFFFFFFFFF
FFFFFFFFFFFFFFFFFFFFFFFFFFFFFFFFFFFFFFFFFFFFFFFFFFFFFFFFFFFF
@A00721:190:HG1W7DSXY:4:2170:3106:24408 2:N:0:TCTGCAAG+GCTGCACT

```

AAGCTATTAATAGCAGTTGCGGGGCTATAATACCGCCTCCAGATTACT  
+  
FFFFFFFF:FFFFFFFFFFFFFFFFFFFFFFFF:FFFFFFFFFFFFFFFFFFFFFFFF,FFFFFFFFFFFFFFFFFFFFFFFF  
FFFFFFFFFFFFFFFFFFFFFFFFFFFFFFFF:FFFFFFFFFFFFFFFFFFFFFFFFFFFFFFFF  
@A00721:190:HGJW7DSXY:4:1460:8061:27070\_1:N:0:TCTGCAAG+GCTGCACT  
AGAGTTTTGGAAGTGTGTAATGTCCTACGTACTGTTCAAGGTGTTGGGCTTCTCTAAAGAACAGCAA  
CTTTCAACATGAATTAGTTATTGAAAGTCTTGACCCTCACGTCTCACTTTATCACCTTGGAGATGGTA  
AAG  
+  
FFFFFFFFFFFFFFFFFFFFFFFFFFFFFFFFFFFFFFFFFFFFFFFFFFFFFFFF:FFFFFFFFFFFFFFFFFFFFFFFFFFFFFFFF  
FFFFFFFFFFFFFFFFFFFFFFFFFFFFFFFFFFFFFFFFFFFFFFFFFFFFFFFFFFFFFFFFFFFFFFFFFFFFFFFFFFFFFFFF  
FFF  
@A00721:190:HGJW7DSXY:4:1264:13738:11663\_2:N:0:TCTGCAAG+GCTGCACT  
TAAATTTTCGATTCTGCTTCGACGTAATTCATAAGACCTTTCTTGGGGAGTAAAGAGGGTTTGAAA  
ATTACGGAACCTTCTCGTTCTTCATGAAGATCTTCGAGTGTTTTAT  
+  
FFFFFFFFFFFFFFFFFFFFFFFFFFFFFFFFFFFFFFFFFFFFFFFFFFFFFFFF:FFFFFFFFFFFFF:FFFFFFFFFFFF:FF  
FFFFF:FFFFFFFFFFFFFFFFFFFFFFFFFFFFFFFF:FFFFFFFFFFFFF,FFFF  
@A00721:190:HGJW7DSXY:4:1523:26865:23406\_1:N:0:TCTGCAAG+GCTGCACT  
TCTTGCGAAGGTTCAAGTCGATTGATTTTGTGACTACGATCTCTCTTGTAAATAAGAAGTTCTTCGCA  
GTTGAATCTCCACCAGGTGGAGGGAAGACCACTGAACCTTATAGCGACTTTTGTCAATTTTTCGCAAA  
AGG  
+  
FFFFF:FFFFFFFFFFFFFFFFFFFFFFFFFFFFFFFFFFFFFFFFFFFFFFFFFFFFFFFFFFFFFFFFFFFFFFFFFFFFFFFF  
FFFFFFFFFFFFFFFFFFFFFFFFFFFFFFFFFFFFFFFFFFFFFFFFFFFFFFFFFFFFFFFFFFFFFFFFFFFFFFFFFFFFFFFF  
FFF  
@A00721:190:HGJW7DSXY:4:1168:2736:17190\_2:N:0:TCTGCAAG+GCTGCACT  
ATTGTCAGTCTAATCGTAATTCGCGAGAAGAGATAGTGAAGTTTGGCACTTCTAGTTCATCG  
CGGTATTTGTGAAATTAAGACAGACGTGAAAGTTATGATGAGTGATCG  
+  
FFFFFFFFFFFFFFFFFFFFFFFFFFFFFFFFFFFFFFFFFFFFFFFFFFFFFFFFFFFFFFFFFFFFFFFFFFFFFFFFFFFFFFFF  
FFFFFFFFFFFFFFFFFFFFFFFFFFFFFFFFFFFFFFFFFFFFFFFFFFFFFFFFFFFFFFFFFFFFFFFFFFFFFFFFFFFFFFFF  
@A00721:190:HGJW7DSXY:4:1450:15266:24079\_2:N:0:TCTGCAAG+GCTGCACT  
ACGTCGCTGAGGTCAAACCTGTGGACGTTCTTTTCATCGACGAATTATTCATGATTCACGCTGGTCAG  
ACCCTTTTCTTACACATCTACTTAAGGCGGCTTATACCATAGGTTAC  
+  
::FFF:FFFFFFFFFFFFFFFFFFFFFFFFFFFFFFFF:FFFFFFFFFFFFF:FFFF,FF:FFFFFF::FFFFFFFF  
FFF,,FF,F:F:,FFF::FFFFFFFFF:FFFFF,F,FF:F:FF,F:FF  
@A00721:190:HGJW7DSXY:4:1370:2935:31000\_2:N:0:TCTGCAAG+GCTGCACT  
CAAATCGGATTCATCAATCGTATTGATCTCCAAGTCGAACTACTTCAACATCAACGACATCATTCT  
TGATGAGTGTCGTTCTTATCGAAGTCTCAGTTATCGCTGCCCCGCCGA  
+  
FFFFFFFFFFFFFFFFFFFFFFFFFFFFFFFFFFFFFFFFFFFFFFFFFFFFFFFFFFFFFFFFFFFFFFFFFFFFFFFFFFFFFFFF  
FFFFFFFFFFFFF::FFFFFFFFFFFFFFFFFFFFFFFFFFFFFFFFFFFFFFFFFFFFFFFFFFFFFFFF  
@A00721:190:HGJW7DSXY:4:1378:13783:19601\_2:N:0:TCTGCAAG+GCTGCACT  
GAACTCTCAGAGGTTTACGGCAGAAAAATTTCTCCTGCTTGTAATTCGAGAGAGGACACTATGGAAAT  
TAGACCTATCAGATGTCTTGACGACTTCGAATTTGAGGACGGAGTTAA  
+  
FFFFFFFFFFFFFFFFFFFFFFFFFFFFFFFFFFFFFFFFFFFFFFFFFFFFFFFFFFFFFFFFFFFFFFFFFFFFFFFFFFFFFFFF  
FFFFFFFFFFFFFFFFFFFFFFFFFFFFFFFFFFFFFFFFFFFFFFFFFFFFFFFFFFFFFFFFFFFFFFFFFFFFFFFF  
@A00721:190:HGJW7DSXY:4:1417:8323:33974\_2:N:0:TCTGCAAG+GCTGCACT  
AATTAACAAAGTCCTTGTAAGAGTAAGGTTAAATGTGAAGATGCTCAGACTATTCATGAAGTTCAAG  
GTAATACTTACCAGCACGTTTCGGCTGGTTAGAATTAACCTCAAGATG  
+

[illegible]

FFFFFFFFFFFFFFFFFFFFFFFFFFFFFFFFFFFFFFFFFFFFFFFFFFFFFFFFFFFFFFFFFFFFFFFF  
FFF

@A00721:190:HGJW7DSXY:4:1267:16785:10958\_1:N:0:TCTGCAAG+GCTGCACT  
GAGTATCCATAACGATTTGTCATTTACCACCTTTGCTCAACGACGAAGTGGAAACGGCCAACACTTTCT  
TTGGTAATTGTATGATCACTTTGATGATTTTATCACTTTATTATGACCTTGGAAGTTTTCGGCTGTG  
GTT

+  
FFFFFFFFFFFFFFFFFFFFFFFFFFFFFFFFFFFFFFFFFFFFFFFFFFFFFFFFFFFFFFFFFFFFFFFF  
F:FFFFFFFFFFFFFFFFFFFFFFFFFFFFFFFFFFFFFFFFFFFFFFFFFFFFFFFFFFFFFFFFFFFFFFFF  
FFF

@A00721:190:HGJW7DSXY:4:1566:13856:23547\_1:N:0:TCTGCAAG+GCTGCACT  
CCATTCTGTTTTCAAAGACTCCAATAACTGATCATTCTGATCATATGATTTTGGACAATGGTTTCGAA  
GCGAAATTTTTGAGGGATAAACCAGCGTACTTCTGCTCGCGATTTATTCTTTTTGTCAATGATTACAT  
CTA

+  
FFFFFFFFFFFFFFFFFFFFFFFFFFFFFFFFFFFFFFFFFFFFFFFFFFFFFFFFFFFFFFFFFFFFFFFF  
FFFFFFFFFFFFFFFFFFFFFFFFFFFFFFFFFFFFFFFFFFFFFFFFFFFFFFFFFFFFFFFFFFFFFFFF  
FFF

@A00721:190:HGJW7DSXY:4:1311:4282:27946\_1:N:0:TCTGCAAG+GCTGCACT  
CCTTACAAGATCATCGTTAAGTTAGGTAAACCCCTAACCGATGTTACTCTTGTAGGACTTTGGGAGAG  
ATTCGTTAGTTTTAAAGACTATACTAAATATCTCCACTACGAGTTGTTGTTTGGCGATTAGCTCTTG  
CGA

+  
FFF:FFFFFFFFFFFFFFFFFFFFFFFFFFFFFFFFFFFFFFFFFFFFFFFFFFFFFFFFFFFFFFFFFFFF  
FFFFFFFFFFFFFFFFFFFFFFFFFFFFFFFFFFFFFFFFFFFFFFFFFFFFFFFFFFFFFFFFFFFFFFFF  
FFF

@A00721:190:HGJW7DSXY:4:2304:4969:4398\_1:N:0:TCTGCAAG+GCTGCACT  
TATTCTATTGAGGGTCGTTATACCTATTCGGCTATCTGTGCTTTGAATTGTATAAGATCAAATTTTAA  
ACGATTCCGAGAGGTTTATCCTGATGTGGAGGGAGTTCTTGAAGCATCCCGACCTTTCCTTGTGAAAA

+  
::FFF,,FFFFFFFFFFFFFFFFFFFFFFFFFFFFFFFFFFFFFFFFFFFFFFFFFFFFFFFFFFFFFFFF  
:FFFFFFFFFFFFFFFFFFFFFFFFFFFFFFFFFFFFFFFFFFFFFFFFFFFFFFFFFFFFFFFFFFFFFFFF  
@A00721:190:HGJW7DSXY:4:2163:9914:5415\_1:N:0:TCTGCAAG+GCTGCACT

TTTCATAAGATTATCAGTAATCCTGATTCTACTACGGATTTCATGGACCTTCCATCCTGTACCTCTTCT  
GGAGAGACGTATCTCAAAGATCGACTTCGAGACAGGTGATATTGTTGAGCGAGAGCGACCAAGATCTA  
AAT

+  
FFFFFFFFFFFFFFFFFFFFFFFFFFFFFFFFFFFFFFFFFFFFFFFFFFFFFFFFFFFFFFFFFFFFFFFF  
FFFFFFFFFFFFFFFFFFFFFFFFFFFFFFFFFFFFFFFFFFFFFFFFFFFFFFFFFFFFFFFFFFFFFFFF  
FFF

@A00721:190:HGJW7DSXY:4:1314:3803:1908\_1:N:0:TCTGCAAG+GCTGCACT  
CGTGGCGCTTTATTTTAAAAAGCTCCCTCCTCTCGCAAGTTTGATCTGATACTTATCACGAAAGGACT  
TGAGTCTTTTGATCAGTCTGACTTGACCATCTTTCATTTTAAATGACGATCATTAAGACTCTCTTT  
CTT

+  
FFFFFFFFFFFFFFFFFFFFFFFFFFFFFFFFFFFFFFFFFFFFFFFFFFFFFFFFFFFFFFFFFFFFFFFF  
FFFFFFFFFFFFFFFFFFFFFFFFFFFFFFFFFFFFFFFFFFFFFFFFFFFFFFFFFFFFFFFFFFFFFFFF  
FFF

@A00721:190:HGJW7DSXY:4:1274:28483:17315\_2:N:0:TCTGCAAG+GCTGCACT  
CTTTGCACTGATTTTTCTCATCAGCTTGTTTACCTAATCTGTGTTTTTACGATAACAACATCA  
GTTGATTAAGACTCTTCCGAAAGGCGAACTTTGGGAATTTGAAGCTCA

+  
FFFFFFF:::FFFFFFFFFFFFFFFFFFFFFFFFFFFFFFFFFFFFFFFFFFFFFFFFFFFFFFFFFFFF  
FFFFFFF::FF:FFFFFFFF:FFFFFFFFFFFFFFFF:FF,FFFFFFFF

@A00721:190:HGJW7DSXY:4:1471:2727:13291\_1:N:0:TCTGCAAG+GCTGCACT  
CGTTTGACCGTGACGAAGTGGTGTCTTGATCTACGTTACGGATATACTCTCCTTGAGTTCACTCG  
TAAGGACACTACCACTTATTACGATATTTCTTTAGTCGATGGGTTTTCGACTCCTTTAAGCGTCTTCT  
GTT

@A00721:190:HGJW7DSXY:4:1318:5159:12336\_2:N:0:TCTGCAAG+GCTGCACT  
TTTCTTCTAATGTGGCCTGAACACGTTTCACTTTGTGTGTACTTGTCTCTATTTTAAGTTTTGTCTT  
CCTTGTTTGTCTTATTCTATTAATCACTCATTTTAGTGAGATTATTAA

@A00721:190:HGJW7DSXY:4:1368:16315:25927\_1:N:0:TCTGCAAG+GCTGCACT  
GTCTTCGACAACAGCAGGGGTTTTCGAATAGTGATAGCCACCCGCCTTACAGAGGGGCAGCAGCATGA  
CCATAATTGGTATTGACTTTGGTACCACCTTTTCTACTGTCTGTCTCGCCTCTTCGAATGAAGTTTAA  
ATG

@A00721:190:HGJW7DSXY:4:1142:6216:10222\_2:N:0:TCTGCAAG+GCTGCACT  
TGATAGTGAATTTATACCTACAATCATTGGTTTTTCTAATAATGATGACACTATTGTTTATGGATATG  
ATGCTATTACTCATGATGGTTACGGTCAGGGAGGATTCTCAGTTTACA

@A00721:190:HGJW7DSXY:4:2274:13150:1564\_2:N:0:TCTGCAAG+GCTGCACT  
ACATTACCCGAAAGACGTGCTAAATTAACCATTTGACGATGTCTGTCTCGGCGATCACTTTTC  
ACTAAGAATTGGTCCTACTTTTGGACAAGGCCAACTTCGTAATCTTCA

@A00721:190:HGJW7DSXY:4:2201:11478:36182\_2:N:0:TCTGCAAG+GCTGCACT  
TTTATCTCTTTGGTTGTTAGGGATTTTGAGAGAGTGAAAGGCTTCAATTGTAGTGGTTTGGTCGTTTC  
AGTACCCAGTCAGTATACCTCTACGCAAAGATATTTTCATGAAAACCTAC

@A00721:190:HGJW7DSXY:4:1433:14018:31657\_2:N:0:TCTGCAAG+GCTGCACT  
ATTACCTGTCTTTCATATTATGAATGAACCTTCGCCGCTCTCTTTGCTTCGATGTTGGATGTCAAGA  
AGGGTTTCAGAATGGGATTCTACGTAGTTTATGACTTTGAGATCGGAA

@A00721:190:HGJW7DSXY:4:1114:26250:26130\_1:N:0:TCTGCAAG+GCTGCACT  
TCTTACGTTACGTAATTACTATAGTGTTATTTATTCTGGTGGTGATGATAATCTTGGAGGTCGTGAC  
GTTGATGAAGCTATAAGAGCGTTCCTTATTACGGCGCACTTCTTTACCCGCCACCACACAACCTTTCAGT  
TTC

@A00721:190:HGJW7DSXY:4:2123:20690:8516\_2:N:0:TCTGCAAG+GCTGCACT  
TGTTACTGGAAAACCCTCGTCAATACTTTTCAATAATATACGTCTTGAACCTACTTATGACGATCTAG  
TGAAATTAACGCGTCCTTTTCTGGAACGTAGTTTTACTATTATGAACA

+

FFFFFFFFFFFFFFFFFFFFFFFFFFFFFFFFFFFFFFFFFFFFFFFFFFFFFFFFFFFFFFFFFFFFFFFF  
FFFFFFFFFFFFFFFFFFFFFFFFFFFFFFFFFFFFFFFFFFFFFFFFFFFFFFFFFFFFFFFF

@A00721:190:HGJW7DSXY:4:1252:16776:12258\_1:N:0:TCTGCAAG+GCTGCACT  
ACGTGTGCTCTTCCGATCTAACTTACCCTGATTCCGGCCGGTGGTAGCTCATTTCTACCAGGGGCTAT  
TACTCTTGCTGAAACAGCTATTAAAGCTGTTGAGCGGGTAATTACACCTAAACGAGCTCGATCTGCCA  
TCG

+

FFFFFFFF:FFFFFFFFFFFFFFFF:FFFFFFFFFFFFFFFFFFFFFFFFFFFFFFFFFFFFFFFF:  
FFFFF:FFFFFFFFFFFFFFFFFFFFFFFFFFFFFFFFFFFFFFFFFFFFFFFFFFFFFFFF:FFFF  
FFF

@A00721:190:HGJW7DSXY:4:1114:23023:9298\_2:N:0:TCTGCAAG+GCTGCACT  
CACTCTTTTCTGCTACTTTAACGGAGCGTAGTGTACTCTTCGTCGATTGTATCAACAGTAACATTACT  
TCTAATAAAGGTCTCTATCAAGCTCGTATTATCGTCGCTGCTGGATCT

+

FFFFFFFFFFFFFFFFFFFFFFFFFFFFFFFFFFFFFFFFFFFFFFFF:FF:FFFFFFFFFFFFFFFFFFFF  
FFFFFFFFFFFFFFFFFFFFFFFFFFFFFFFFFFFFFFFFFFFFFFFF:FFFFFF

@A00721:190:HGJW7DSXY:4:1274:12789:28588\_1:N:0:TCTGCAAG+GCTGCACT  
AAGGCTAAACTCCAAGGTAATTATGAAGACTGTGATTTATCTTTCACTCTGGCCTTGTATGAGGGTGT  
TTCTAATCGTAACATTAATAATTTCAATCTTCTTAAAAAGAAGATAGAGAGTCATACTTTGGGCTATC  
GTT

+

FFFFFFFFF:F:FFF:FFFFFFFFFFFFFFFFFFFFFFFFFFFFFFFF:FFFFFFFFFFFFFFFFFFFF  
FFFFFFFFFF::FFFFFFFFFFFFFFFFFFFFFFFF:FFFFF:FFFFFFFFFFFFFFFFFFFFFFFF  
FFF

@A00721:190:HGJW7DSXY:4:1342:24921:26240\_2:N:0:TCTGCAAG+GCTGCACT  
GATAGCCAATATTGAAGTGGACACCTCTGGTAGTATCGAAGTAAAGATAACCAATAAGGAAGGAGCTT  
ATACTATGGTTGAATCAACTAAGCATACTACTTTTGCTTTGATTACTC

+

FFFFFFFFFFFFFFFFFFFFFFFFFFFFFFFFFFFFFFFFFFFFFFFFFFFFFFFFFFFFFFFFFFFF:FFFF  
FFFFFFFFFFFFFFFFFFFFFFFFFFFFFFFF:FFFFFF::FFF:FFFFFFFFFFF:F

@A00721:190:HGJW7DSXY:4:2342:1624:36808\_1:N:0:TCTGCAAG+GCTGCACT  
CTTCCGATCTGTTAAAGAGTCGATTAACAAGTTGTACTTATCAATGATTTTATCGCTGGTTGTTATC  
TCGAAAAGTCTCTTCTAAAAGGAACGTCAGTTCTAACCCAAAGAGAATATCTAAAATATTTACAAAAT  
CTT

+

:FFFFFFFFFFFFFFFFFFFFFFFF:FFFFFFFFFFFFFFFFFFFFFFFFFFFFFFFFFFFF:FFF:FFFFFFFF  
FFFFFFFFFFFFFFFFFFFFFFFFFFFFFFFF:FFFFFFFFFFFFFFFFFFFFFFFFFFFFFFFFFFFFFFFF  
FFF

@A00721:190:HGJW7DSXY:4:1425:9444:6825\_1:N:0:TCTGCAAG+GCTGCACT  
GATCTGTTGCTTGCTCGCTCCTCTTTAATGGCACTACCTCGGTACAATCTTACTTGGAACGAAGGCG  
ACCTGTTCCGGAGTTTTTACGGGATCCGGAATGTTCTGTCTATATTAGGTGAAGCGAAATACGATTT  
GAA

+

FFFFFFFFFFFFFFFFFFFFFFFFFFFFFFFFFFFFFFFFFFFFFFFF:FFFFFFFFFFFFFFFFFFFF  
FFFFFFFFFFFFFFFFFFFFFFFFFFFFFFFFFFFFFFFFFFFFFFFFFFFFFFFFFFFFFFFFFFFF  
FFF

@A00721:190:HGJW7DSXY:4:1261:2582:3646\_1:N:0:TCTGCAAG+GCTGCACT  
TCGTACCTTGATGCTGACTTTTCGTCAATATGATTTGATCTGTTGCTCAATTCTAAGCGTGTTCCGCT  
TAGTGCGAGGCCTCTCTTCTACGAGTATTGCTATTTATACGTTACGAGAAGAAGGTTGAAAGTTTG  
AGA

+  
 FFFFFFFFFFFFFFFFFF:FFFFFFFFFFFFFF:FFFFFFFFFFFFFFFF:FFFFFFFF:FFFFF  
 FFFFFFFFFFFFFFFFFFFFFFFFFFFFFFFFFFFFFFFFFFFFFFFFFFFFFFFFFFFFFF,FFFF  
 FFF  
 @A00721:190:HGJW7DSXY:4:1220:3070:36370\_2:N:0:TCTGCAAG+GCTGCACT  
 TACTAAATACTAGATATTTGGATGATCTTGATAAAGAACTTCATGAATTTTCAGAGGATGAAAAATTT  
 TCTTCCTTGATTTTAATATAAAGAATCTTTACCAGGACTCCTACTAC  
 +  
 FFFFFFFFFFFFFFFF:FFFFFFFFFFFFFFFFFFFFFFFFFFFFFFFFFFFFFFFFFFFFFFFF  
 FFFFFFFFFFFFFFFFFFFFFFFFFFFFFFFFFFFFFFFFFFFFFFFFFFFFFF  
 @A00721:190:HGJW7DSXY:4:2213:29215:11475\_2:N:0:TCTGCAAG+GCTGCACT  
 TCTGATCGTAAGAAGTTTATAAGGAACATATCCATTTGTTGTAATAGGGTCATCAACTTAGAACTCGA  
 AACTCTAAGTGGTAATACTGTCTTTCCAAGCTTACCTGTATCTTCAAT  
 +  
 FFFFFFFFFFFFFF:FFFFFFFFFFFFFFFFFFFFFFFFFFFFFFFFFFFF:F:FFFFFFFFFFFFFFFF  
 FFFFFFFFFFFFFFFFFFFFFFFFFFFFFF:FFFFFFFFFFFFFFFFFFFFFFFFF  
 @A00721:190:HGJW7DSXY:4:2374:31891:32362\_1:N:0:TCTGCAAG+GCTGCACT  
 TTCGATAGGGGACATTTTATCGTGGGCTTTCCGTAAGGAAGATCTGTTATCGACGGTTTATCGTTTA  
 CGAAGTATCACTCCACCGGTGAATGGTTTAAGAATACTATAAATAGAATAGCTATTACTACTAATGGC  
 GTT  
 +  
 FF:FFF,FFF:F::FFFFFF:FF,:F:FFFF,,FFFF,FFFFFF:FFFFFF,FFF:FFFFFFFFF:  
 F::FFFFFF:FF:::F,:FFFF::FFF:FFFFFFFFF:FFFFFFFFF:FFF:FF:FFFFFF  
 FFF  
 @A00721:190:HGJW7DSXY:4:2319:11550:33426\_2:N:0:TCTGCAAG+GCTGCACT  
 TAGTGACATCTGGTCAATTTCTTTTTAGGTGGTCTTTATTCTATTATTGATTTTTATGAGATTGATA  
 CGTTAACAGAAGATGATGTTAGAGTAGAATTCCTGAAGAGTCCTTCCG  
 +  
 FFFFFFFFFFFFFFFFFFFFFFFFFFFFFF:FFFFFFFFF:FFFFFFFFFFFFFFFFFFFFFFFF  
 FFFFF:FFFF:FF:FFFFFFFFFFFFFFFFFFFFFFFF:FFF:FFF,F  
 @A00721:190:HGJW7DSXY:4:1219:9896:22200\_2:N:0:TCTGCAAG+GCTGCACT  
 CTAGGATTATGTCTGTGTTGAAAGACTTTCTACCGATAAGGGTCACTAGTCTTACACAATTAAGAAAT  
 AATCCTACATTGACTGATTATCTAAAGATTGAAGGAAAATTTTATCCT  
 +  
 FFFFFFFFFFFFFF:FFFFFFFFF:FFFFFFFFFFFFFFFFFFFFFFFFFFFFFFFFFFFFFFFF  
 FFFFFFFFFFFFFFFFFFFFFFFFFFFFFFFFFFFFFFFFFFFFFFFFFFFFFF  
 @A00721:190:HGJW7DSXY:4:1102:9796:11412\_1:N:0:TCTGCAAG+GCTGCACT  
 GACTTTCCTACGATACAAATGATAACTTCTAATTTACGTTTGCTACTCAGAGCTGGTCCTCTCAGCAA  
 AGGGATGCATGGTGTATCTCCTCAGGAGTCCCGCATTTGATAATAATGACGAGACTTTCGTCATAA  
 TCG  
 +  
 FFFFFFFFFFFFFFFFFFFFFFFFFFFFFF:FFF:F:FFFFFFFFFFFFFFFFFFFFFFFFFFFFFFFF  
 FF:FFFFFFFFFFFFFFFFFFFFFFFFFFFFFFFFFFFFFFFFFFFFFFFFFFFFFFFFF:FFF:  
 FFF  
 @A00721:190:HGJW7DSXY:4:1310:13512:1877\_1:N:0:TCTGCAAG+GCTGCACT  
 GATTACACGGTACCAGCGCATCTCGTGTGAGCCTCGACCCGATTATATGGTATTAACCTATAAAGGT  
 GAGGAGACCATTTTCTTGCTGAAATTTATAGAAGATTATTTTGACAGAATCAATAAGAATCATCGATT  
 CTC  
 +  
 FFFFFFFFFFFFFFFF:FFFFFFFFFFFFFFFFFFFFFFFFFFFFFFFFFFFFFFFFFFFFFFFF  
 FF:FFFFFFF:FFFFFFF:FFFFFFFFFFFFF,FFFFFFFF:F:F:FFFFFFFFF:FFF:FF,FFFF  
 ,F:  
 @A00721:190:HGJW7DSXY:4:1659:17219:5321\_1:N:0:TCTGCAAG+GCTGCACT  
 CTAGATGGATCCACTCCTCGAGTTATCATGATGTTAGTATGTTATATACTGATTTACAACGATATAGG







@A00721:190:HGJW7DSXY:4:2457:23809:18082\_1:N:0:TCTGCAAG+GCTGCACT  
ACTTTATCAAAGATTTGGCTTGGTCTATTTACCGCAAAAAGTTGGAAGAGGTCTATGATATTTATTTT  
ACTTATACTTTAAATAGCACCGATTATAACTTGACTGTTGATAATATTACAATAGCTCTTTCTCAGAA  
GAT

+

FFFFFFFFFFFFFFFFFFFFFFFFFFFFFFFFFFFFFFFFFFFFFFFFFFFFFFFFFFFFFFFFFFFFFFFF  
FFFFFFFFFFFFFFFFFFFFFFFFFFFFFFFFFFFFFFFFFFFFFFFFFFFFFFFFFFFFFFFFFFFFFFFF  
FFF

@A00721:190:HGJW7DSXY:4:1431:5999:22686\_1:N:0:TCTGCAAG+GCTGCACT  
ACCGGTGAACACGTCTGGTAGCATTGATTTACTTTTACCGTTAGAACTGAAAAAGATTCTTTTCGAAAA  
GAAACCTATAAGTTACAAACGATTCTTCGACTATATTAAAGAAATAAAAATACTTCAAGTACCTGAAC  
TTT

+

FFFFFFFFFFFFFFFFFFFFFFFFFFFFFFFFFFFFFFFFFFFFFFFFFFFFFFFFFFFFFFFFFFFFFFFF  
FFFFFFFFFFFFFFFFFFFFFFFFFFFFFFFFFFFFFFFFFFFFFFFFFFFFFFFFFFFFFFFFFFFFFFFF  
FFF

@A00721:190:HGJW7DSXY:4:1418:2239:35837\_1:N:0:TCTGCAAG+GCTGCACT  
ATGGTATAATGTGTCTTACAAATAGAACCTTCACTCTCGGTAATGAGAGTGTATTCCTTAATATTCTA  
GTAACCGCTATGTGGGCATTACTAGGATTTATCACACTCCTAAATTTGATAGCAATTTATGTTTTAAA  
TGC

+

FFFFFFF, :FFFFFFFFFFFFFF, FFFFFFFF:FFFFFFFFFFFFFFFFFFFFFFFFFFFFFFFF:FFFFFFF  
FFFFFFFFFFFFFFFFFFFFFFFFFFFFFFFFFFFFFFFFFFFFFFFFFFFFFFFFFFFFFFFFFFFFFFFF  
FFF

@A00721:190:HGJW7DSXY:4:1602:32551:2722\_2:N:0:TCTGCAAG+GCTGCACT  
AAAAACTCCATTGTATAGTTCAAGGAGTACTTAATTCAATAGCTTTAGTATTATTTACTATCGCCTTT  
ATTGAAAATTGTATAAGAGTTAATTGCTTACACAAAAGTGACGCGCGA

+

FFFFFFFFFFFFFFFFFFFFFFFFF, :FF:FFFFFFFFFFFFFFFFFFFFFFFFFFFFFFFFFFFFFFFF:FFF  
FFFFFFFFFFFFFFFFFFFFFFFFF:FFFFFFF:FF:F: :FFFFFFFFFFFF

@A00721:190:HGJW7DSXY:4:2656:29930:7451\_1:N:0:TCTGCAAG+GCTGCACT  
GGGGAGAATGAAGTCCCGCTTCCCGGAAGAAACGATCTATTTACAGAGTATTTAGAGTAGTCCAAAGT  
TTGTATAAATTTATATGATTTTCTATATATATACCACATATATATATATAAAATCCTATAAATTTG  
TAC

+

FF:FF:FF::, ,F::FFF:FFFF:, FF, FFFFF:FFFFFFFFF:FFFFFFFF:FFFFFFFF:FF  
FF::FFFFFFFFFFFFFFFFFFFFFFFFFFFFFFFFFFFFFFFFFFFFFFFFFFFFFFFFFFFFFFFF  
FFF

@A00721:190:HGJW7DSXY:4:2335:2582:20212\_2:N:0:TCTGCAAG+GCTGCACT  
GAAGAAAACCACTCCCTTCAATTCAATAACATAACATACACTCCCCAAACATAACATACCATA  
ACCTACCATGACCAATCATCGCTCCAAGTGGCAGCCAGACGTAGGGT

+

FFFFFFFFFFFF, FFFFFFFF: :FFF:, FFFF:FFFFFFFF:F:FFFF:FFFFFFFFFFFFFFFF  
FFFF, F:F:FFFFFFFFFFFFFFFFFFFFFFFFFFFFFFFF:FF:FF:FFFF:F

@A00721:190:HGJW7DSXY:4:2338:2257:35556\_2:N:0:TCTGCAAG+GCTGCACT  
ACCGCCGGTTCGGCAGATCGGCACCACTGGTCTCTACGTTACAGGACCCGCTGTGCAGAATAACCTTCC  
CAAATCTAGATCTGCACAGAAGAAGGCTGAAGGTCGTTACCGGACGAC

+

FFFFFFFFFFFFFFFFFFFFFFFFFFFFFFFFFFFFFFFFFFFFFFFFFFFFFFFFFFFFFFFFFFFFFFFF  
FFFFFFFFFFFF:FFFFFFFFF:FFFFFFFFFFFFFFFFFFFFFFFF:FFFF

@A00721:190:HGJW7DSXY:4:1136:6099:13714\_1:N:0:TCTGCAAG+GCTGCACT  
GACGTGTGCTCTTCCGATCTCCGCGACCACCGAGGTCGCTCGTAACATTGACGGCAGTCCCGTCATCT  
CTGTGGGAAGTGAAGGACGTACCTCAGTCAAAAGTCACATTCACCACTCCCATGCCAATCAATGATGTG  
ACT

+  
FFFFFFFFF:FFFFFFFFF,FFFFFFFFFFFFFFFFFFFFFFFFFFFFFFFFFFFFFFFFFFFFFFFFF  
FFFFFFFFFFFFFFFFFFFFFFFFFFFFFFFFFFFFFFFFFFFFFFFFFFFFFFFFFFFFFFFFFFFFFFF  
FFF  
@A00721:190:HGJW7DSXY:4:2545:11731:31955\_2:N:0:TCTGCAAG+GCTGCACT  
TCAATACGTCGTGGGAGGTACTGAAGCCTTCCCCTCCGCTGGCACGAAGAACAACCTCCCAAGCCAATCA  
ATAGTTCTTCTGACCAGAATGAAAAGGGGTTTACCAGGGTAGTCTCTA  
+  
FFFFFFFFFFFFFFFFFFFFFFFFFFFFFFFFFFFFFFFFFFFFFFFFFFFFFFFFFFFFFFFFFFFFFFF  
FFFFFFFFFFFFFFFFFFFFFFFF:FFFF:FFFFFFFFFFFFFFFFFFFFFFFFFFFF  
@A00721:190:HGJW7DSXY:4:1334:15664:23891\_1:N:0:TCTGCAAG+GCTGCACT  
AGAGGGGAAATGTCCCCAAAACCTGAGAAGAATAAAGGGAAAGGTCCATCAGGACCTAAGAAGGGGAAA  
TTACCCCTAATTCTGAAGGAAGATCTCCCACCATCTGGGGTTGGGAATAAGAAATCTGCACGGGCCAA  
AGA  
+  
FFFFF:FFFFFFFFFFFFFFFFFFFFFFFF:FFFFFFFFFFFFFFFF:FFFFFFFFFFFFFFFF:FFF,  
FFFFFFFF:FFFFFFFFFFFFFFFFFFFFFFFFFFFFFFFFFFFFFFFFFFFFFFFFFFFFFFFFFFFFF:FFFFFFFFFFFFFFFF  
FF:  
@A00721:190:HGJW7DSXY:4:1246:2618:18928\_1:N:0:TCTGCAAG+GCTGCACT  
CGAAGTCGCTGAAGGCGGCTTGGGTCTTAAGGGTAGCTGTAAAGTTGCGCCTGCCGACCCCATCTTT  
GAGACCAAGACTCTCTACAGTAGGTTCTGTCCTACTATGAGCAAATCTGTTGAATTCGTCACTGAGGA  
CGA  
+  
FFFFFFFFFFFFFFFFFFFFFFFFFFFFFFFFFFFFFFFF:FFFFFFFFFFFFFFFFFFFFFFFFFFFFFFFFFFFFF  
FFFFFFFFFFFFFFFFFFFF:FFFFFFFFF:FFFFFFFFFFFFFFFFFFFFFFFFFFFFFFFFFFFFFFFFFFFFF  
FFF  
@A00721:190:HGJW7DSXY:4:1124:3549:14121\_1:N:0:TCTGCAAG+GCTGCACT  
ACTTTTGGCTACTGGCGACAACTGAGAGCAGTCGCTGGGGAAAGAGAATTGCGTGGGTGAAGGCCG  
ACGCTTCGAGCTTGAGTGTGACGAGGCCGGTGACGTTTTTGTCAACGGCGTTTGGAGGATTTATCCG  
CGC  
+  
FF:F,FFFFFFFFFFFFFFFFFFFFFFFFFFFFFFFFFFFFFFFFFFFFFFFFFFFFFFFFFFFFF:FFFFFFFFFFFFFFFFFFFFF  
FFFFFFFFFFFFFFFFFFFFF:FFFFFFFFFFFFFFFFFFFFF:FFFFFFFFFFFFFFFFFFFFF:FFFFFFFFFFFFFFFFFFFFF  
FFF  
@A00721:190:HGJW7DSXY:4:1304:20889:31782\_2:N:0:TCTGCAAG+GCTGCACT  
GCGAAGATCCCCTATGGAGTCTTGAAGGACTTAGGTTGGCATATTTATGCCGACGATAATAAGCATGT  
CACCCCTAAGCACCGAGGTAAGCTCGGGACTTACAAGAGAGAGTGTGA  
+  
FFFFFFFFFFFFFFFFFFFFFFFFFFFFFFFFFFFFFFFFFFFFFFFFFFFFFFFFFFFFFFFFFFFFFFF  
FFFFFFFFFFFFFFFFFFFFFFFFFFFFFFFFFFFFFFFFFFFF,FF:FFFFFFFFFFFFF  
@A00721:190:HGJW7DSXY:4:1216:28266:17409\_1:N:0:TCTGCAAG+GCTGCACT  
CACTATTTTTGCCCAGAATGCGGGCTTTCTGACTGATGAGGTTAAACTCTTGCTCCTTCTGTGGGTG  
AGGGTTTTTGTATATTCACTGGTTCTGGGAGGCTGCTTCTCCTCATAATTACAACCTCTCTTTAGAG  
AGC  
+  
FFFFFFF,FFFFFFFFFFFFFFFFFFFFFFFFFFFFFFFFFFFFFFFFFFFFFFFFFFFFFFFFFFFFFFF  
FFFFFFFFFFFFFFFFFFFFFFFFFFFFFFFFFFFFFFFFFFFFFFFFFFFFFFFFFFFFFFFFFFFFFFF  
FFF  
@A00721:190:HGJW7DSXY:4:1275:4029:37027\_2:N:0:TCTGCAAG+GCTGCACT  
AGTTGGGCAAATTCCCACATATGGTAGACGTTGTCACTTTTCTTGAAAATTTTCTTTTCTCCGT  
CATTGGGGATTTGATGTGAGAAGGTGGAAGGTGTCAAGGGTCTTCTT  
+  
F::FFF:FF:FF:F:FF,FFFFFFFFF:FFF:FFFFFFFFF,:FFFFFFFFF:,FF:FFFFFFFFFFFF  
,F,,FFF:FF:::FFFFFFFFF,:F,FFF,FF,FFF:FFF,FFFFFFF

@A00721:190:HGJW7DSXY:4:1269:18005:1360\_2:N:0:TCTGCAAG+GCTGCACT  
TTTCAGGACCTAATCACATCATGATTGATAGTTACGGCTCGTATCGAGTTGGAGGGAGGAAGTTCTCC  
GAAATTAAGACGGGGGGATTAAGAGTCCAGCTGTAAGTGTCAATTTCA

@A00721:190:HGJW7DSXY:4:1239:32425:6856\_1:N:0:TCTGCAAG+GCTGCACT  
ATGTTTCGTTCTGTTACAAGAACGCTTTGGATTGTGACCATAAAGCCTCAGTTGCGATAGCTGTAGAG  
GTATACGATATCTCTCTTGATGATGTAGCCACTATAATGCTTAAGAGAGAGATTGATGTATGTCATTT  
CGT

+

FF,F:F::FF:FFF,:FFFFFFFF:FFFF:FFFFFFFFFFFF,,F:::FF:FFFFFFFFFFFF:F:FFFFFF  
,FF:FF:FFFFFFFFFFFF:FFF:F:FFFF:FFF,FFF:FFFFFFFFFFFFFFFFFFFFFFFFFFFFF  
FF,

@A00721:190:HGJW7DSXY:4:1254:2112:16297\_1:N:0:TCTGCAAG+GCTGCACT  
GAATTATTGGACACGATGAAAAATGACATACCCGTTCTGACCTTGGTATCGTTATCCGTCATGGAGA  
TGATGCCGCATCACTTGATTACTATATGCCCGAAGGATTGGGTATTCTCACAACAAAGATAAGATTT  
TAT

+

FFFF:FFFFFFFFFFFFFFFFFFFFFFFFFFFFFFFFFFFFFFFFFFFFFFFFFFFFFFFFFFFFFFFFFFFF  
FFFFFFFFFFFFFFFFFFFFFFFFFFFFFFFFFFFFFFFFFFFFFFFFFFFFFFFFFFFFFFFFFFFFFFFFFFFF  
FFF

@A00721:190:HGJW7DSXY:4:1233:17002:32565\_1:N:0:TCTGCAAG+GCTGCACT  
GTTTTCTTAAGGGCGGACAATTGTTCCATTGTGAACCTCTGGGGACTAGATTGAGCATTAATGAGTT  
CCGAATAACTCGTAATAAATCTTCTCTAGTGGACAATTCAGAATACCTATTTCCGTACCAAGAGCCA  
CTG

+

FF::FF:FFFFFF:F:FFFFFFFF,FFFF:FFFFF,F:FFFF:FFFF:FFF:F,FFFF:FFFFF  
F:FFFF,,FF:FF:FFFFFF:FFF:F,FFFF:FFFF:FFFFFFFFFFFFFFFF:FFFF,:FFF::  
FFF

@A00721:190:HGJW7DSXY:4:1657:29776:10410\_2:N:0:TCTGCAAG+GCTGCACT  
CGCATACCTGATTGGAAGAAGCGAGGTTCTGTTCTCAATAAAAATTTTCTCAAGAGATTATGGTTGA  
TAAAGTTTCTTCATAAGGGCTATTAGTACGTCATGGGGATCACTTC

+

FFFFFFFFFFFFFFFFFFFFFFFFFFFFFFFFFFFFFFFFFFFFFFFFFFFFFFFFFFFFFFFFFFFFFFFFFFFF  
FFFFFFFFFFFFFFFFFFFFFFFFFFFFFFFFFFFFFFFFFFFFFFFFFFFFFFFFFFFFFFFFFFFFFFFFFFFF

@A00721:190:HGJW7DSXY:4:1337:31919:34632\_2:N:0:TCTGCAAG+GCTGCACT  
ACAAAACCTTCGAATATGTTACGACATGGCTTCGTAACAACAGTGCGAGGATTGTCATCTCGGGGAAA  
GTGATTCACCAAGATGTTTCATATAGATACGAGATACCTAGAGAAGGTC

+

FFFFFFFFFFFFFFFFFFFFFFFFFFFFFFFFFFFFFFFFFFFFFFFFFFFFFFFFFFFFFFFFFFFFFFFFFFFF  
FFFFFFFF:FF,FFFFFFFFFFFF:FFFFFFFFFFFF:FFFFFFFFFFFF

@A00721:190:HGJW7DSXY:4:1456:17897:15577\_1:N:0:TCTGCAAG+GCTGCACT  
CTCGTTATCGGAGCTAAGAAGAAGACTTTGGGTACACGTTATGCTCGAACTTAACGTTAGTACCGG  
AGGTGATCTCTGCTTCTGCGTTACTGAGAGAAAAGATTCAGGACGCCTACGGTGACTTTATGGACA  
AGA

+

FFFFFFFFFFFFFFFFFFFFFFFFFFFFFFFFFFFFFFFFFFFFFFFFFFFFFFFFFFFFFFFFFFFFFFFFFFFF  
FFFFFFFFFFFFFFFFFFFFFFFFFFFFFFFFFFFFFFFFFFFFFFFFFFFFFFFFFFFFFFFFFFFFFFFFFFFF  
FFF

@A00721:190:HGJW7DSXY:4:1338:4218:20008\_2:N:0:TCTGCAAG+GCTGCACT  
TTTAGGTTTAGTAGGTGATCTTGACGTCGATTCTTTGTATAGGGAGTGAGAAGACAACGAATCTTG  
AACTACGGTCCTTATCAAAGAAAATGGTGAACCGGTCTCTAAATCTT

+

FFFFF,FFFFFFFFFFFFFFFFFFFFFFFFFFFFFFFFFFFFFFFFFFFFFFFFFFFFFFFFFFFFFFFFFFFF  
F:FFFFFFFF:F:FFFFFF:FFFFF,FFFFFFFFFFFFFFFFFFFFFFFF

@A00721:190:HGJW7DSXY:4:2154:26341:10974\_2:N:0:TCTGCAAG+GCTGCACT  
GAAGATTGAAGAACACGTCAAGAAGTCGCTCGGCGTTGTTCTTGAAAACCAAGTTAAGAAGGAGGCTG  
ATCATGGAGTCTTTGTACCTTCTGTCAAACCTTCGAGGTTTCAGCTACGA

+

FFFFFFFFFFFFFFFFFFFFFFFFFFFFFFFFFFFFFFFFFFFFFFFFFFFFFFFFFFFFFFFFFFFFFFFF  
FFFFFFFFFFFFFFFFFFFFFFFFFFFFFFFFFFFFFFFFFFFFFFFFFFFFFFFFFFFFFFFF  
@A00721:190:HGJW7DSXY:4:1347:31078:34522\_1:N:0:TCTGCAAG+GCTGCACT  
TGGATTGAAGGCTGGCTCTAAGGGAGACTCCTTCTTTTTGAATGTTGTAAAGAATTGGGTTGAGAAGT  
GTGCTTTACAAGGAGTTAGACTCTTCTTCAAGTTTTTAGATCTTCTTGATAATCTTAAAGAAAAATTT  
TCG  
+  
FFFFFFFFFFFFFFFFFFFFFFFFFFFFFFFFFFFFFFFFFFFFFFFFFFFFFFFFFFFFFFFF:FFFFFFF:FFFF:FF  
FFFF:FFFFFFFFFFFFFFFFFFFFFFFFFFFFFFFFFFFFFFFFFFFFFFFFFFFFFFFF:FFFFFFFFFFFF  
FFF  
@A00721:190:HGJW7DSXY:4:2277:17644:13730\_1:N:0:TCTGCAAG+GCTGCACT  
GTCTGTACTTACATTCTTTACGCCAGATTCTTCATGGGGCGACGCTGTTTCTTGGTATTTCTGAAA  
TAGTTTATCAGAGCGTCATTTTCCTTTGGGATCTTCTCTGGTAAGGAATTATTAATCATTCTTC  
TCA  
+  
FFFFFFFFFFFFFFFFFFFFFFFFFFFFFFFFFFFFFFFFFFFFFFFFFFFFFFFFFFFFFFFF:FFFFFFF:FFFF:FF  
FFFFFFFFFFFFFFFFFFFFFFFFFFFFFFFFFFFFFFFFFFFFFFFFFFFFFFFF:FFFFFFFFFFFF  
FFF  
@A00721:190:HGJW7DSXY:4:1328:9146:23375\_2:N:0:TCTGCAAG+GCTGCACT  
TTTTCTCTACCCATAACTTCTTTTTCAAAAATGCGGATGGGTCTACTGATGTTTTCTACAGAGTGCA  
GTCGTTTCAACACATATCACCCTTTTCAAAGGAAAATAATTGGTGAT  
+  
FFFFFFFFFFFFFFFFFFFFFFFFFFFFFFFFFFFFFFFFFFFFFFFFFFFFFFFFFFFFFFFF:FFFFFFF:FFFF:FF  
FFFF:F,FF:FF,FFF,FFF,:FFF,:FF:FFFF,FFFF:FF:FF  
@A00721:190:HGJW7DSXY:4:2124:9986:30874\_1:N:0:TCTGCAAG+GCTGCACT  
GTCGGTGGGGTCTCAAGGCTCTCATCGCCACTGGGATTCTAAGGGGTTCCATAAGATATTATCTGAC  
ATTGTGGTTCAATGATCAGGATTCTTCTTTGGTCCTTACGTCTTAAGTAATTTGGATGTTGTCGAAA  
ACT  
+  
FFFFFFFFFFFFFF,FF,FFF:FFFFFFFFFFFFFFFF:FFFFFFFF:FFF:FFFFFFFFFFFFFFFFFFFF  
:FFFFFFFFFFFFFFFFFFFFFFFFFFFFFFFFFFFFFFFFFFFFFFFFFFFFFFFFFFFFFFFFFFFFFFFF  
FFF  
@A00721:190:HGJW7DSXY:4:2520:24325:3693\_2:N:0:TCTGCAAG+GCTGCACT  
TGTCACGATTCTTAAAAGAAGTTTATTAAACTTCAGAGTCTCTTGGAAGTCCAGGTAGCTAATGTTC  
TTGCAATAGCCACAGACTTTCTGGGAAAAGAGACCTCTGTTGGTAGAG  
+  
FFFFFFFFFFFFFFFFFFFFFFFFFFFFFFFFFFFFFFFFFFFFFFFFFFFFFFFFFFFFFFFF:FFFFFF  
FFFFFFFFFFFFFFFFFFFFFFFFFFFFFFFFFFFFFFFFFFFFFFFFFFFFFFFF:FFFF  
@A00721:190:HGJW7DSXY:4:1173:7880:33238\_2:N:0:TCTGCAAG+GCTGCACT  
ATTACTCAGATTCAATCTGGCATCACTGAACGTCTACAACGAGTTAGGGAGTGGCTAGGTTTTAAAAG  
ATCCTTTGCACAAGCAATACCTTCCACTGAGTTCATCACCCAGAGTTT  
+  
,FFFFFFFF:FFFFFFFF:FFFFFFFFFFFFFFFF:FFF:FF:FFFF:FFFFFFFFFFFFFFFF:FFFF:  
FFFFFFFFFFFFFFFFFFFFFFFFFFFFFFFF:FFFFFFFFFFFFFFFFFFFFFFFF,FF  
@A00721:190:HGJW7DSXY:4:1275:31295:32362\_2:N:0:TCTGCAAG+GCTGCACT  
ACTGTTGAGAATCTTCTGATGCTGAATTTGAGGAAAATTTTCGGAAGTTTTGGTATAAATCCTGA  
TGGCTCTGTACAGGGAGGAGGTAATAGTTATAAAACCTTCTTTTATCA  
+  
FFFF,FFFFFFFF:F:FF,:F:FF:FF,F,: ,FFF:FF,FF,FF:FFFF,: ,F:F:FFFF,FF:FF  
:F: , ,F,FFF:FF:FFF,FFFFFF:FFF:FFFFFF: ,FFF,FFFFF  
@A00721:190:HGJW7DSXY:4:1107:17490:33348\_2:N:0:TCTGCAAG+GCTGCACT  
GGACAAAATCTGGGATCATAGGTATGTGTCACGCTACACTCGAAATATGGGCCCTCATAAGGAAGTAT  
AGTTGGCGTCTTGTGCTTGACGTCATTACAGTCTGGAAGTTAGATCAT  
+

[illegible]







@A00721:190:HGJW7DSXY:4:1620:26341:23249\_2:N:0:TCTGCAAG+GCTGCACT  
TCGCACCCGAAATTTTGGGCAGAATGCTCTTAACGCGGTTCTTGAACGGTGTGTTTGATCAGTCTAAG  
TTGGATAAAGTTATAGGAGACTCAGTTAACCTGAGAGCTCCTCAATTG

@A00721:190:HGJW7DSXY:4:1336:15438:9878\_1:N:0:TCTGCAAG+GCTGCACT  
CAATAGGGACGCTAGTATACTTCGTAAAGTCGACAGCGAAATGGTCAATATTGATAATTGGACCGACT  
ATATGACCTATTTTAAGCTCATGGTGAAAAGGGAAGCTAAGGTTAACTTGATGCTTCAGCCTTTTCG  
AAG

@A00721:190:HGJW7DSXY:4:2254:17309:4476\_1:N:0:TCTGCAAG+GCTGCACT  
AGAATATCGTTTATCACGCAAAATTTATTAATGCAATTTTCGGACCTATCTTTAAGGTTCTTGAGG  
AGAGTCAAACAGTGTCTTTTACCCAACATTTTTATGTATACAGAGATGACCAGTGACGATTTCTCCCG  
GAA

@A00721:190:HGJW7DSXY:4:1477:26720:24659\_1:N:0:TCTGCAAG+GCTGCACT  
CGAGATCTTGCAGAGTGA CTGGAGTT CAGACGTGTGCTCTTCCGATCTTTTTCTTTTGTAAGCCTATG  
AGATAAAGATGTATTCTTATTTAGGCTTCGATGCTGAATTTCTTGAAGTTTGGAGTGCCAGTGAATAT  
TTT

@A00721:190:HGJW7DSXY:4:1267:17363:10802\_1:N:0:TCTGCAAG+GCTGCACT  
GAGTATCCATAACGATTTGTCATTTACCACCTTTGCTCAACGACGAAGTGGAAACGGCCAACTTTCT  
TTGGTAATTGTATGATCACTTTGATGATTTTATCACTTTATTATGACCTTGGAAAGTTTTCGGCTGTG  
GTT

@A00721:190:HGJW7DSXY:4:2330:23158:17550\_1:N:0:TCTGCAAG+GCTGCACT  
CCATTCTGTTTTCAAAGACTCCAATAACTGATCATTCTGATCATATGATTTTGGACAATGGTTTCGAA  
GCGAAATTTTGGAGGGATAAACACGCGTACTTCTGCTCGCGATTTATTCTTTTTGTCAATGATTACAT  
CTA

@A00721:190:HGJW7DSXY:4:1353:24316:12571\_1:N:0:TCTGCAAG+GCTGCACT  
CCTTACAAGATCATCGTTAAGTTAGGTAAACCCCTAACCGATGTTACTCTTGTAGGACTTTGGGAGAG  
ATTCGTTAGTTTTAAAGACTATACTAAATATCTCCACTACGAGGTTGTTGTTTGGCGATTAGCTCTTG  
CGA



[illegible]



CGTTAACAGAAGATGATGTTAGAGTAGAATTCCTGAAGAGTCCTTCG

@A00721:190:HGJW7DSXY:4:1516:19542:4930\_1:N:0:TCTGCAAG+GCTGCACT  
TTGGTGCTTAGGGATATAATGAATTCAGCACCACATTTTGGTCAAGTCAATCCGTTGAGAAAATTTCT  
TAGAGGATATTCGCCATTGTGGTACGAATTGGTCCAACATTTACCACCAAATTTCTTTTGATACAACCTC  
TAG

+

FFFFFFFFFFFFFFFFFFFFFFFFFFFFFFFFFFFFFFFFFFFFFFFFFFFFFFFFFFFFFFFFFFFFFFFF  
FFFFFFFFFFFFFFFFFFFFFFFFFFFFFFFFFFFFFFFFFFFFFFFFFFFFFFFFFFFFFFFFFFFFFFFF  
FFF

@A00721:190:HGJW7DSXY:4:1531:32371:33098\_1:N:0:TCTGCAAG+GCTGCACT  
TGCCTGCGGAATACGCTTGCTATTACCAGATTGGTTCAACCCGTTGATGCTATGTCAGAAGAAGCT  
ATTCAGCTTGTCGTTTAAAGACTGCAGAGGCTGTCAAACAAGCCCAGACTCAAGGAGTCCAATCAAA  
GGT

+

FFFFFFFF:FFFFF:,FFFFFFFF:FFFF:FFFFFFFFFFFFFFFFFFFFFFFFFFFFFFFFFFFFFFFF  
F:FFFFFFFFFFFFFFFFFFFFFFFFFFFFFFFFFFFFFFFFFFFFFFFFFFFFFFFFFFFFFFFFFFFFFFFF  
FFF

@A00721:190:HGJW7DSXY:4:1434:25418:25379\_2:N:0:TCTGCAAG+GCTGCACT  
TGGGTGATAAAAATTATTTAGAGATCTTTCTACTTACAAAGGACAATTCAGTTTCATTAATTCTACG  
GAAAGTCCGGAGTATATTGTATGTTAATAGATAGTGGGATAATAGTT

+

FFFFFFFFFFFFFFFFFFFFFFFFFFFFFFFFFFFFFFFFFFFFFFFFFFFFFFFFFFFFFFFFFFFFFFFF:FFFFFFF  
FFFFFFFFFFFFFFFFFFFFFFFFFFFFFFFFFFFFFFFFFFFFFFFFFFFFFFFFFFFFFFFFFFFFFFFF,FFFF:F,FFFFFFFF

@A00721:190:HGJW7DSXY:4:1572:30346:35383\_1:N:0:TCTGCAAG+GCTGCACT  
GTAGTGAACGCGTTCGTAGAACCAAGTACTTTCCGTCTGAAGAGTTTAGAGCTGCTATTGATTATGTA  
ACCGATAGGAGTTGTATAGTTGAAGATGTGGCTTTAGACGATAATCCTTTAAGGACTATGTTGACTGA  
CGA

+

FFFFFFF,FFFFFFFFFFFFFFFFFFFFFFFFFFFFFFFFFFFFFFFFFFFFFFFFFFFFFFFFFFFFFFFF  
FFFFFFFFFFFFFFFFFFFFFFFFFFFFFFFFFFFFFFFFFFFFFFFFFFFFFFFFFFFFFFFFFFFFFFFF,FFFFFFFFFFFFFFFF  
FFF

@A00721:190:HGJW7DSXY:4:1420:22941:24815\_2:N:0:TCTGCAAG+GCTGCACT  
TTGTCTACGTTGCAGATCGCCACTCCAAACACTATATACATTATAAAATATAAAAATAAGGGAGTCAT  
AACTTTTGTACCAAATCTTGGCTTTCAACGAAGTCTCTGATTTAT

+

F:FF:FF:FF:FFFF,FFFFFFFFFFFFFFFFFFFFFFFFFFFFFFFFFFFFFFFFFFFFFFFFFFFFFFFF:FFFFFFFFFFFF  
FFF,FFF,FFF:FFFFFFFFFFFF:FFFF:FFFFFFFFFFFFFFFF:FFFFFFF

@A00721:190:HGJW7DSXY:4:1354:7600:17378\_1:N:0:TCTGCAAG+GCTGCACT  
TAACGATCTCTCGGTCATTTACTCTGTACTTGATCTACGTCGTTTAACTGTCGGAACAACCTTTACTT  
AGAATGACTCTATCTTTTCAGACACTTCTTATATTATTTACAATAGTTAATATCATATTAGTAATACT  
CAC

+

FFFFFFFFFFFFFFFFFFFFFFFFFFFFFFFFFFFFFFFFFFFFFFFFFFFFFFFFFFFFFFFFFFFFFFFF  
FFFFFFFFFFFFFFFFFFFFFFFFFFFFFFFFFFFFFFFFFFFFFFFFFFFFFFFFFFFFFFFFFFFFFFFF  
FFF

@A00721:190:HGJW7DSXY:4:1460:14597:8547\_2:N:0:TCTGCAAG+GCTGCACT  
GCTTTTCTTAGCTAATAGATTAATAAAGGATGAGTACGAAAACCAACTCTTCGTTACGAGACCTGAT  
GGTAGAATAGATTTAGTCTCTACACCCATCTCAACGAGGATAAAGCGA

+

FFFFFFFFFFFFFFFFFFFFFFFFFFFFFFFFFFFFFFFFFFFFFFFFFFFFFFFFFFFFFFFFFFFFFFFF:FFFFFFF  
FFFFFFFFFFFFFFFFFFFFFFFFFFFFFFFFFFFFFFFFFFFFFFFFFFFFFFFFFFFFFFFFFFFFFFFF,FFFFFFFFFFFF:FFFFFFFF

@A00721:190:HGJW7DSXY:4:1165:22200:11819\_1:N:0:TCTGCAAG+GCTGCACT  
TACACGAAGAGATAATCCGCAAACGACTCGAAACGAGACGCCGTAGATCAAAGTCCCTTCTAACTTT  
AGATTATGAATCCTGCCTTTACTCATTTTATAGCAGTTATTTATGTTGTACTTTTTATAATTTATAAC  
CTT

[illegible]

```
FFFF:FFFFFFFF,FFFF,FFFFFFFFFFFFFF:FFFF:FFFFFFFFFFFFFFFFFFFFFF:FFF:FFFFFF
FFFFFFFFFFFFFFFF:FFFF,F:FFF,FFF:FFFFFF:FF:F:FF:FFFFFFFF:FFFF:FFFFFFFF
FFF
```

@A00721:190:HGJW7DSXY:4:1247:16098:27524\_2:N:0:TCTGCAAG+GCTGCACT  
TATTTTCTATAAGGGAAATAGCAATAATCAAATTCGACAAATTTAGAACTTTATTTCAGAACTC  
TCTCCGATCACCTTGGTGTGATCTCCCGAGGATCTTTTCAATAAGAT

@A00721:190:HGJW7DSXY:4:1364:30101:20807\_2:N:0:TCTGCAAG+GCTGCACT  
ATTTTTAAATAGTGATATTCAGCGTATACTTGAATACTTTATCAAAGATTTGGCTTGGTCTATTTACC  
GCAAAAAGTTGGAAGAGGTCTATGATATTTATTTTACTTATACTTTAA

```
FF,FF:FFF:FF:FFFFFFFF:FFFF,F:FFFFFFFF:FFFFFFFFFFFFFFFF:FF:FFFFFF
FFFFFFFF:FFFF:FFFFFFFF:FFF,FFFFFFFF:FFFFFFFFFFFFFFFF:FFFFFFFF
FFF
```

```
FFFFFFFFFFFFFFFFFFFFFFFFFFFFFFFFFFFFFFFFFFFFFFFFFFFFFFFFFFFFFFFFFFFFF
FFFFFFFFFFFFFFFFFFFFFFFFFFFFFF,FFFFFFFFFFFFFFFFFFFFFFFFFFFFFFFFFFFFFF:FFFFFFFFF
FFF
```

```

FFFFFFFF:FF:FFFFFFFFFFFFFFFFFFFFFFFFFFFFFFFF:FFFFFFFFFFFFFFFFFFFFFFFF
FFFFFFFFFFFFFFFFFFFFFFFF:FFFFFFFFFFFFFFFFFFFFFFFFFFFFFFFF,FFFFFF,FF:FFFF
FFF

```



+

 $+$ 

+

 $+$ 

+

+

+

+

[illegible]

@A00721:190:HGJW7DSXY:4:1421:13006:18098\_1:N:0:TCTGCAAG+GCTGCACT  
AGTCTTGAAGGACTTAGGTTGGCATATTTATGCCGACGATAATAAGCATGTCACCCTTAAGCACCGAG  
GTAAGCTCGGGACTTACAAGAGAGAGTGTGAGAGAGTCTGCTCTCACTATTTTTGCCCAGAATGCGGGC  
TTT

+

FFFFFFFFFFFFFFFFFFFFFFFFFFFFFFFFFFFFFFFFFFFFFFFFFFFFFFFFFFFFFFFFFFFFFFFFFFFFFFFF:FFFFFFFFF  
FFF:FFFFFFFFFFFFFFFF,FFFFFFFFFFFFFFFFFFFFFFFFFFFFFFFFFFFFFFFFFFFFFFFFFFFFFFFF  
FFF

@A00721:190:HGJW7DSXY:4:2124:32759:25911\_2:N:0:TCTGCAAG+GCTGCACT  
GCTCCTTCTGTGGGTGAGGGTTTTGTTATATTCACTGGTCTGGGAGGCTGCTTTCCTCCATAATTA  
CAACCTCTCTTTAGAGAGCATTAGAAAGATCGGAAGAGCGTCGTGTAG

+

FFFFFFFFFFFFFFFFFFFFFFFFFFFFFFFFFFFFFFFFFFFFFFFFFFFFFFFFFFFFFFFFFFFFFFFFFFFFFFFF:FFFFFFF  
FFFFFFFFF:FFFFFF:FFFFFFFF:FFFFFFFFFFFFFFFFFFFFFFFF

@A00721:190:HGJW7DSXY:4:2652:32877:17942\_2:N:0:TCTGCAAG+GCTGCACT  
GTTGTCACACTTTTCTTGAAAATTTTCTTCTCCTCCGTCATTGGGGATTTCGATGTGAGAAGGTGGA  
AGGTGTCAAGGTCTTCTTCATGCTGATCTTTCAGGACCTAATCACAT

+

FFFF:FFFFFFFFFFFFFFFFFFFFFFFFFFFFFFFF:FFF:,F:FF,FFFFFFFFFFFFFFFFFFFFFFFF,FFFFFF:FFFFF  
FFFFFFFFF,:F:FFFFFFFFF,FF:F,FFFFFFFFF,FFFFFF,FF

@A00721:190:HGJW7DSXY:4:2159:24478:21057\_1:N:0:TCTGCAAG+GCTGCACT  
ACGGCTCGTATCGAGTTGGAGGGAGGAAGTTCTCCGAAATTAAGACGGGGGGATTAAGAGTCCAGCT  
GTAAGTGTCAATTCAGAGAGGGGAGCTCTGAAAAGGAACTTCGTGAGAAGATGAGGAAGTCTAAGAG  
GAG

+

:FFFFFFFFFFFF:FFFFFFFFF:FF:F,:FFFFFFFFFFFFFFFFFFFFFFFFFFFFFFFFFFFFFFFFFFFFFFFF  
FFFFFFFFFFFFF:FFFFF:FFFFFFFFFFFFFFFFFFFFFFFF:FFFFFFFFFFFFFFFF:FFFFFFFFFFFFF  
FFF

@A00721:190:HGJW7DSXY:4:1374:18882:30248\_1:N:0:TCTGCAAG+GCTGCACT  
AAGGCTCTAGAGAAGATCTCCCCACCTGGAGAAGGCAAGTGGAGAGTCCAGAAGTTGATGAAGAAGGA  
TTATTTGAAGCAGGGGTTACCACTTCCTAAGGTGGATGAGGGAGGTTGTTTCTTTGGAGTTTTAGATA  
ATC

+

FF:FFFFFFFFFFFFFFFFFFFF,,F:FFFFF::FF:FFFFFFFFFFFFFFFFFFFFFFFFFFFFFFFF::FFFFF:FFFF  
,F,FF:FFFFFFFFFFFF,:FFFFF:FFFF:F:FFFFFFFFFFFFFFFFFFFFFFFF,FFFFFFFFFFFFFFFFF:  
FF:

@A00721:190:HGJW7DSXY:4:1206:9869:26757\_2:N:0:TCTGCAAG+GCTGCACT  
AGCAAGAGAAGCTTATATGCTGGTTAAGTGATGATTATCACTCCTTGAGAAGACAAGCCACATTAAG  
ATATAATTTAGGTCAACTTGGGAGATCGGAAGAGCGTCGTGTAGGGAA

+

FFFFFFFFFFFFFFFFFFFFFFFFFFFFFFFFFFFFFFFFFFFFFFFFFFFFFFFFFFFFFFFFFFFFFFFFFFFFFFFF  
FFFFFFFFFFFFFFFFFFFFFFFFFFFFFFFFFFFFFFFFFFFFFFFF:FF,F::FFFF,

@A00721:190:HGJW7DSXY:4:1334:21748:36808\_2:N:0:TCTGCAAG+GCTGCACT  
TCCTTTTGAGTATCGACAGATCTTTCGATCTTGAGGACGTACATTTAACGTGGCAGAATTCGGTAACT  
TACCATATTGTTCTTCCGGAAGTTGTGGGATTTAACTTTGACTCAA

+

FFFFFFFFFFFFFFFFFFFFFFFFFFFFFFFFFFFFFFFFFFFFFFFFFFFFFFFFFFFFFFFFFFFFFFFFFFFFFFFF  
FFF:FFFFFFFFFFFFFFFF:FFFFFFFFF:FFFFFFFFFFFFFFFF

@A00721:190:HGJW7DSXY:4:2250:14000:9768\_2:N:0:TCTGCAAG+GCTGCACT  
GGTATGGACTACTCTACTTTTGATCTGGAGTTGTCTAGGGTCATTGCAGATACTACCGATAAGGTGAA  
AAATATGCAGGTCAAAGATTCTGTAGCTCTGAGGGCGGTAGAGGGAGC

+

FF,F,:FFF,FFFF,FFFF,FFFFFFFFF,F,:,,FFF,F,F,F,:F:FF:FF:,FF,F,:F:F:,,:F  
F,F,F,,F:F,,FF:F,F,FF:,FF,:FFFF:F,FF:FF,FFFFFF,

@A00721:190:HGJW7DSXY:4:1568:25870:31140\_1:N:0:TCTGCAAG+GCTGCACT  
TTCTAAGAGTCTTTATGATTCAAACCTATCGTTGTCGTACCTTACAAGGTTGAGGAGACTTTACAGC  
GGCTTATTGTCGCGCAGTTTCCAGAATTGCGGTTGAAGTTCACCCATTCTATCTTGAATGCTCACGCC  
GTC

+

FFFF:FFFFFFFFFFFFFFFFFFFFFFFFFFFFFFFFFFFFFFFFFFFFFFFFFFFFFFFFFFFFFFFFFFFFFFFF  
FFFFFFFFFFFFFFFFFFFFFFFFFFFFFFFFFFFFFFFFFFFFFFFFFFFFFFFFFFFFFFFFFFFFFFFFFFFFFFFF  
FFF

@A00721:190:HGJW7DSXY:4:2141:20302:18208\_2:N:0:TCTGCAAG+GCTGCACT  
TTATAATCACTTGTTAAAGTACAGATTTAGTGATTTAGATATTATTGATATTGGAGGCGATATTCGTT  
TTCATATCCAAACTCCTTGAATGGAGTACATATTTGCAACCCTATTC

+

FFFFFFFFFFFFFFFFFFFFFFFFFFFFFFFFFFFFFFFFFFFFFFFFFFFFFFFFFFFFFFFFFFFFFFFFFFFF  
FF:FFFFFFFFFFFFFFFFFFFFFFFFFFFFFFFFFFFFFFFFFFFFFFFFFFFFFFFFFFFFFFFFFFFFFFFF  
:FF

@A00721:190:HGJW7DSXY:4:2460:10755:35994\_1:N:0:TCTGCAAG+GCTGCACT  
GATGCATCGAGGTATACGTCTAGGAACATTGATTGGGAACGTACCTACTCACGAGACGTCATGAAAGC  
TATCGGAGGGAAGCAAAATGTTTCGTTCTGTTACAAGAACGCTTTGGATTGTGACCATAAAGCCTCAG  
TTG

+

FF:, :FFFFF:FFFFFFFFFFFFFFFFFFFFFFFFFFFFFFFFFFFFFFFFFFFFFFFFFFFFFFFFFFFFFFFF  
FFFFFFFFFFFFFFFFFFFFFFFFFFFFFFFFFFFFFFFFFFFFFFFFFFFFFFFFFFFFFFFFFFFFFFFFFFFF  
FFF

@A00721:190:HGJW7DSXY:4:1250:29116:29152\_1:N:0:TCTGCAAG+GCTGCACT  
CTCTCTTGATGATGTAGCCACTATAATGCTTAAGAGAGAGATTGATGTATGTCATTTCTGCTTAGTTT  
GTCCCGGCGAATTATTGGACACGATGAAAAATGACATACCCGTTCTGACCTTGGTATCGTTATCCGT  
CAT

+

FFFFFFFFFFFFFFFFFFFFFFFFFFFFFFFFFFFFFFFFFFFFFFFFFFFFFFFFFFFFFFFFFFFFFFFFFFFF  
FFFFFFFFFFFFFFFFFFFFFFFFFFFFFFFFFFFFFFFFFFFFFFFFFFFFFFFFFFFFFFFFFFFFFFFFFFFF  
FFF

@A00721:190:HGJW7DSXY:4:2132:31539:17221\_2:N:0:TCTGCAAG+GCTGCACT  
GGTTATTCTCACAAACAAAGATAAGATTTTATCTTTCTTCAAACACCCTGTTTTCTTAAGGGCGGACA  
ATTGTTCCATTGTGAACCTCTTGGGGACTAGATTGAGCATTAATGAGTT

+

FFFFFFFFFFFFFFFFFFFFFFFFFFFFFFFFFFFFFFFFFFFFFFFFFFFFFFFFFFFFFFFFFFFFFFFFFFFF  
FFFFFFFFFFFFFFFFFFFFFFFFFFFFFFFFFFFFFFFFFFFFFFFFFFFFFFFFFFFFFFFFFFFFFFFFFFFF  
F::F:FF,

@A00721:190:HGJW7DSXY:4:2101:2709:4836\_2:N:0:TCTGCAAG+GCTGCACT  
CTTTCTCTAGTGACAATTCAGAATACCTATTTCCGTACCAAGAGCCACTGCCAATCTCATCGCTATA  
CGCATACCTGATTGGAATAAGCGAGGTTTCGTTCTCAATAAAAATTTT

+

FFFFFFFFFFFFFFFFFFFFFFFFFFFFFFFFFFFFFFFFFFFFFFFFFFFFFFFFFFFFFFFFFFFFFFFFFFFF  
FFF:F:FFFFFFFFFFFF:FFFFFFFFFFFFFFFFFFFFFFFFFFFFFFFFFFFFFFFFFFFFFFFFFFFFFFFF  
FFFFFFFF

@A00721:190:HGJW7DSXY:4:1128:32624:10457\_2:N:0:TCTGCAAG+GCTGCACT  
TTTCTTCATAAGGGCTATTCAGTACGTCATGGGGATCACTTCTTCGGTCAATGACAAAACCTTCGAAT  
ATGTTACGACATGGCTTCGTAACAACAGTGCGAGGATTGTCATCTCGG

+

FFFFFFFFFFFFFFFFFFFFFFFFFFFFFFFFFFFFFFFFFFFFFFFFFFFFFFFFFFFFFFFFFFFFFFFFFFFF  
FFFFFFFF:FFFFFFFFFFFFFFFFFFFFFFFFFFFFFFFFFFFFFFFFFFFFFFFFFFFFFFFFFFFFFFFFFFFF

@A00721:190:HGJW7DSXY:4:1119:20961:23703\_1:N:0:TCTGCAAG+GCTGCACT  
TCACCAAGATGTTTCATATAGATACGAGATACCTAGAGAAGGTCGAGCGATCTTACTCGTTATCGGAG  
CTAAGAAGAAGACTTTGGGTACACGTTATGCTCGAAACTTAACGTTAGTACCGGAGGTGATCTCTCT  
GCT

+

FFF,F:FFFFFFFF:FFFFFFFFFFFF:FFFFFFFFFFFF:FFF,FFFFFFFFFFFFFFFFFFFFFFFFFFFF

@A00721:190:HGJW7DSXY:4:1404:24722:18662\_1:N:0:TCTGCAAG+GCTGCACT  
GAGAGAAAAGATTACAGGACGCCTACGGTGACTTTATGGACAAGATGCAAGTTCTTGGGAAATACTTGT  
TTCCCTTTTTAGGTTTAGTAGGTGATCTTGACGTCGATTCTTTGTATAGGGAGTGTGAGAAGACAACG  
AAT

+

[illegible]

@A00721:190:HGJW7DSXY:4:1111:30861:14074\_1:N:0:TCTGCAAG+GCTGCACT  
GAACCGGTCTCTAAATCTTTTGAGATTGAGAAGATTGAAGAACACGTCAAGAAGTCGCTCGGCGTTGT  
TCTTGA AAACCAAGTTAAGAAGGAGGCTGATCATGGAGTCTTTGTACCTTCTGTCAA ACTTCGAGGTT  
CAG

+

[illegible]

@A00721:190:HGJW7DSXY:4:1442:9200:13448\_2:N:0:TCTGCAAG+GCTGCACT  
GATCCCGGATGTGGATTGAAGGCTGGCTCTAAGGGAGACTCCTTCTTTTGAATGTTGTAAAGAATTG  
GGTTGAGAAGTGTGCTTTACAAGGAGAGATCGGAAGAGCGTCGTGTAG

+

```
FFFFFFFF:F,FFFFFFFFFFFFFFFFFFFF,FFFFFFFFFFFFFFFFFFFFFFFFFFFFFFF  
FFFFFFFFFFFFFFFFFFFFFFFFFFFFFFFFFFFFFFFFFFFFFFFFFFFF,FFFF
```

@A00721:190:HGJW7DSXY:4:1168:20799:2910\_2:N:0:TCTGCAAG+GCTGCACT  
TAAAGAAAAATTTTCGAATAAACTAATGAGAGGTATAGGCTTAGTCAAGTCTGTACTTACATTCTTA  
CGCCAGATTCTTCATGGGGCGACGCTGTTTCTCTTGGTATTTCTGAAA

+

```

FFFFFFFFFFFFFFFF:FFFFFFFF:FFFFFFFFFFFFFFFFFFFFFFFFFFFFFFFFFFFFFFFFFFFFFFFF
F::FFFFFFFFFFFFFFFFFFFFFFFFFFFFFFFF:F:FFFFFFFF:FFFFFFFF

```

@A00721:190:HGJW7DSXY:4:1314:6479:2722\_2:N:0:TCTGCAAG+GCTGCACT  
CGTCATTTTCCTTTGGGATCTTCTCTGGTAAGGGAATTATTAATCATTCTTCTCACTCTTGACGA  
GAATTATTACTGTTTTCTCTACCCATAACTTCTTTTTAAAAAATGCGG

+

```

FFFFFFFF,FFFFFFFF,FFFFF:FFFFFFFFFFFFFFFFFFFFF::FFFFFF,FF:FFFF
FFF:FFFFFFFFFFFFFFFF:FFF,FFF:FFFFFFFF,FFFFFFFF

```

@A00721:190:HGJW7DSXY:4:1168:21594:5102\_2:N:0:TCTGCAAG+GCTGCACT  
TGATGTTTTCTACAGAGTGCAGTCGTTTCAACACTTATCACCCTTTTCAAAGGAAAATAATTGGTG  
ATGAAAATACGTATGTCGGTGGGGTTCTCAAGGCTCTCATCGCCACTG

+

```

FFFFFFFFFFFFFFFFFFFFFFFFFFFFFFFFFFFFFFFFFFFFF:F:FFFFFFFF:FFFFF,:FFFFFF:FFFF:FFF,F
,FFFFFFFF,F::FFF:FFFFFFFFFFFFFFFFFFFFFFFF:FF,,,E:FF::,,F,F

```

@A00721:190:HGJW7DSXY:4:1130:11234:11835\_2:N:0:TCTGCAAG+GCTGCACT  
GGGTTCCATAAGATATTATCTGACATTGTGGTTCAATGATCAGGATTCTTCTTTGGTCCTTACGTCT  
TAAGTAATTTGGATGTTGTCGAAACTATCAGGTTCTTGTCACGATTC

 $+$ 

```

FFF:FFFFFFFFFFFFFFFFFFFFFFFFFFFFFFFFFFFFFFFFFFFFFFFFFFFFFFFFFFFFFFFF
FFFFFFFFFFFFFFFFFFFFFFFF:FFFFFFF:FFFFFFFFFFFFFFFF:FF

```

@A00721:190:HGJW7DSXY:4:1111:26919:13855\_2:N:0:TCTGCAAG+GCTGCACT  
TTAAAACTTCAGAGTCTCTTGGAAAGTCCAGGTAGCTAATGTTCTTGCAATAGCCACAGACTTTCTGGG  
AAAAGAGACCTCTGTTGTAGAGGAGTTGAGAGAATTACTCAGATTCAA

+

[illegible]



@A00721:190:HGJW7DSXY:4:2666:32199:31767\_1:N:0:TCTGCAAG+GCTGCACT  
TTTTCTTCCCTCCCTTTTTTCGATTGGATTGACGGGGTCTTCGTCTCACGACTAATTTGATAAGGT  
TTTTCTTTATGGGACTCTTGTGTGACTTATGAAGGAGGTATTACTTCGGAAGTTCTTAATGTAGGT  
CTC

+

FFFF:F,FFFFFF:FFF:FFFF:FFFFFFFF:FFFFFFFFFFFFFFFF:FFFFFF:FFFFFF  
FFFFFFFFFFFFFFFFFFFFFFFFFFFFFFFF:FFFFFFFFF,:FF:FFFF:FFFFFFFFFFFFFFFF  
FFF

@A00721:190:HGJW7DSXY:4:1617:27444:31579\_1:N:0:TCTGCAAG+GCTGCACT  
GGTTTATGTTTCGGTTTCAGCTGGATGGATCTTTTGATGGTATGTTTCACATTGCGTGATCACTTCCC  
GTGGACTTGGGAAGAGATTAAACATAAAATCCAGCGATTCTATTATGTCGCTAAAGCCTGTCCAGTTG  
TCG

+

FFFFFFFFFFFFFFFFFFFFFFFFFFFFFFFFFFFFFFFF:FFFFFFFFFFFFFFFFFFFFF,:FFF  
FFFFFFFFFFFFFFFFFFFFFFFFFFFFFFFF:FFFFFFFFFFFFFFFFFFFFFFFF:FFFFFFFFFFFFF  
FFF

@A00721:190:HGJW7DSXY:4:1463:10022:17785\_2:N:0:TCTGCAAG+GCTGCACT  
GGCTGTGGGGATTAACCTCCCTCGTGAACTTACGACGATGTTCTCGCTCGCATTTACAAGGATTAC  
TAAGTCTGAGATCTGCCACTTCTAATTTTAGGAAACGTCGCGAAAAGA

+

FFFFFFFFFFFFFFFFFFFFFFFFFFFFFFFFFFFFFFFF:FFFFFF:FFFFFFFFFFFFF  
FFFFFFFFFFFFFFFFFFFFFFFFFFFFFFFF:FF:FFFFFFFFFFFFF:F

@A00721:190:HGJW7DSXY:4:1127:11153:24001\_1:N:0:TCTGCAAG+GCTGCACT  
TCTTGGTCGAAAAATATCGCCGGGAACCTTAATAGAGGATCCTGATGACATTATTTCAACGGATACC  
GATCTCAGTTCTACCACAGAAACCGTCTCAGGAACTGTCTCCACTGATTCGGAATTAGAGGAAGACGA  
CCT

+

FFFF:FFF:FFFFFFFFFFFF::FFFF:FFFFFFFFFFFFFFFFFFFFFFFFFFFFFFFF,FFFF  
FFFFFFFFFFFFFFFFFFFFFFFFFFFF::FFFF:FFFF:FFFFFFFFFFFFFFFFFFFF:F,F:F:FFF  
F:F

@A00721:190:HGJW7DSXY:4:1669:13250:19586\_1:N:0:TCTGCAAG+GCTGCACT  
GAGACCTCTGAATTTTCAGGGTGCCCTGATGAGGACGTTGAAAGGGATAATTTCAACTCTGAGACTTC  
TAAGAGTGTTTCAAAAGACCAGAAACGTAACAAGAAGAATAAAGGTAGGAAGGGGAGAAAACAGAAC  
AGC

+

FFFFFFFFFFFFFFFFFFFFFFFFFFFFFFFFFFFFFFFFFFFFFFFFFFFFFFFFFFFFFFFFFFFFF  
FF:FFFFFFFFFFFFFFFFFFFFFFFFFFFFFFFFFFFFFFFFFFFFFFFFFFFFFFFFFFFFFFFFFFFF  
FFF

@A00721:190:HGJW7DSXY:4:1520:25970:5008\_2:N:0:TCTGCAAG+GCTGCACT  
ACTGATATGGTTGCGGCTGATCGTACCCCAATTCCTGCTAGAAAGATCACTCTCGGCGATACCACTGA  
TCTTCCAGAGTTACGTAGTGGTCGTTGTTGATTTTATCAAAGA

+

FF:FFFFFFFF:FFFFFFFFF,:FFFFFFFFFFFF:FFFFFFFFFFFF,FFFFFFFFFFFFFFFF  
FFFF:FFFFFFFFFFFF,FF:FFFF:,,:FFFFFFFFFFFF,FFF

@A00721:190:HGJW7DSXY:4:2404:17933:5368\_2:N:0:TCTGCAAG+GCTGCACT  
CAAGTTAACTTCGAAGTACCACTTACAAGAGTGTTGAAGTACCGCAACATGGATCAGTTTTCCAAA  
AAGCTATTAATAGCAGTTGCGGGCTATAATACCGCCTCCAGATTACT

+

FFFFFFFFFFFFFFFFFFFFFFFFFFFFFFFFFFFFFFFFFFFFFFFFFFFFFFFFFFFFFFFFFFFFF  
FFFFFFFFFFFFFFFFFFFFFFFFFFFFFFFFFFFFFFFFFFFFFFFFFFFFFFFFFFFF

@A00721:190:HGJW7DSXY:4:2139:1823:14043\_1:N:0:TCTGCAAG+GCTGCACT  
AGAGTTTTGGAAGTGTGAATGTCTACGTACTGTTCAAGGTGTTGGGCTTCTCTAAAGAACAGCAA  
CTTTCAACATGAATTAGTTATTGAAAGTCTTGACCCTCACGTCTCACTTTATCACCTTGAGATGGTA  
AAG

+  
FFFFFFFFFFFFFFFFFFFFFFFFFFFFFFFFFFFFFFFFFFFFFFFFFFFFFFFFFFFFFFFF  
FFFFFFFFFFFFFFFFFFFFFFFFFFFFFFFFFFFFFFFFFFFFFFFFFFFFFFFFFFFFFFFF  
FFF  
@A00721:190:HGJW7DSXY:4:1523:26865:23406\_2:N:0:TCTGCAAG+GCTGCACT  
ATTCTGCTTCGACGGTAATTCATAAGACCTTTCTTGCGGAGTAAAGAGGGTTTGAAAATTACGGAAC  
CTTTCCTCGTTCTTCATGAAGATCTTCGAGTGTTTTATAGTGATTTAT  
+  
FFFFFFFFFFFFFFFFFFFFFFFFFFFFFFFFFFFFFFFF:FFFFFFFFFFFFFFF,FFFFFFFFFFFFFFFFFFFFFFFF  
FFFFFFFFFFFFFFFFFFFF:FFFFFFFFFFFFFFFFFFFFFFFFFFFFFFFFFFFFFFFF  
@A00721:190:HGJW7DSXY:4:1266:32633:34084\_1:N:0:TCTGCAAG+GCTGCACT  
CAAGTCGATTGATTTTGTGACTACGATCTCTTGTAATAAGAAGTTCTTCGCAGTTGAATCTCCAC  
CAGGTGGAGGGAAGACCACTGAACCTATAGCGACTTTTGTGCAATTTTCGCAAAGGCTTGAAGTA  
CGT  
+  
FFFFFFFFFFFFFFF,FFFFFFFFFFFFFFFFFFFFFFFFFFFFFFFFFFFFFFFF:FFFFFFFFFFFF:FFFFFFFFFFFF  
FFFFFFFFFFFFFFFFFFFFFFFFFFFFFFFFFFFFFFFFFFFF:FFFFFFFFFFFFFFFFFFFFFFFFFFFFFFFFFFFF  
FFF  
@A00721:190:HGJW7DSXY:4:1358:30092:25363\_2:N:0:TCTGCAAG+GCTGCACT  
TCGTAATTCGCGAGAAGAGATAGTACTAAAGTTTGGCACTTCTAGTTCATCGCGGTATTTGTGAAA  
TTAAGACAGACGTGAAAGTTATGATGAGTGATCGTATTAGAACAGCTG  
+  
FFFFFFFFFFFFFFFFFFFFFFFFFFFFFFFFFFFFFFFFFFFFFFFFFFFFFFFFFFFFFFFF  
FFFFFFFFFFFFFFFFFFFFFFFFFFFFFFFFFFFFFFFFFFFFFFFFFFFFFFFFFFFF  
@A00721:190:HGJW7DSXY:4:1662:22525:9471\_2:N:0:TCTGCAAG+GCTGCACT  
ACGTCGCTGAGGTCAAACCTGTGGACGTTCTTTTCATCGACGAATTATTCATGATTCACGCTGGTCAG  
ACCCTTTTCTTACACATCTACTTAAGGCGGCTTATACCATAGGTTAC  
+  
FFFFFFFFFFFFFFFFFFFFFFFFFFFF:FFFFFFFFFFFF:FFFFF:FFFFF:F:FFFFFFFFFFFF:FFFFFFF,F  
FFFFFFFFFFFFFFFFFFFFFFFFFFFFFFFFFFFFFFFFFFFFFFFFFFFFFFFFFFFF  
@A00721:190:HGJW7DSXY:4:2353:13476:28463\_2:N:0:TCTGCAAG+GCTGCACT  
CAAATCGGATTCATCAATCGTATTGATCTCCAAGTCGAAACTACTTCAACATCAACGACATCATTCT  
TGATGAGTGTCGTTCTTATCGAAGTCTCAGTTATCGCTGCCCGGCCGA  
+  
FFFFFFFFFFFFFFF:FFFFFFFFFFFFFFFFFFFFFFFFFFFFFFFFFFFFFFFF: :FFFFFFFFFFFFFFFFFFFFFFFF  
FFFFFFFFFFFFFFFFFFFF:FF:FFFFFFFFFFFFFFFF:FFFFFFFFFFFFFFF  
@A00721:190:HGJW7DSXY:4:2513:26169:20134\_2:N:0:TCTGCAAG+GCTGCACT  
GAACTCTCAGAGTTTACGGCAGAAAAATTTCTCCTGCTTGTAATTCGAGAGAGGACACTATGGAAAT  
TAGACCTATCAGATGTCTTGACGACTTCGAATTTGAGGACGGAGTTAA  
+  
FFFFFFFFF:FFFFFFFFFFFFFFFFFFFFFFFFFFFFFFFFFFFFFFFFFFFFFFFFFFFFFFFF  
FFFFFFFFFFFFFFFFFFFFFFFFFFFF,FF:FFF:FFFFFFFFFFFF:F:  
@A00721:190:HGJW7DSXY:4:2631:9968:21042\_2:N:0:TCTGCAAG+GCTGCACT  
AATTAACAAAGTCCTTGTAAGAGTAAGGTTAAATGTGAAGATGCTCAGACTATTCATGAAGTTCAAG  
GTAATACTTACCAGCACGTTGGCTGGTTAGAATTAAACCTCAAGATG  
+  
FFFFFFFFFFFFFFFFFFFFFFFFF,F:FFFFFFFFFFFFFFF:FFFFFFF:FFFFFFFFFFFFFFF:FFFFFFFFF  
FFFFFFFFFFFFFFFFFFFFFFFFFFFFFFFFFFFFFFFFFFFFFFFFFFFFFFFFFFFF  
@A00721:190:HGJW7DSXY:4:2622:9498:13526\_2:N:0:TCTGCAAG+GCTGCACT  
CACAAACACATATTACCGTTGCTCTATCACGACACGTTGAATCTTTACGATACTTTGTTATCAATGTA  
AAGTTAAACGATGCTACTTGTGAGAGGATCAATCACAGTAAGGAAC TG

@A00721:190:HGJW7DSXY:4:1511:21640:26506\_2:N:0:TCTGCAAG+GCTGCACT  
ACGGGAGGTTGCAGATTCAACCCCTTATATCGAGGCTATCGAGGACGATGAGTATCTTGAAGTTGTTG  
ACGACAAGCCTCAAGAGGGTAGAGGACCACCTGGATCTTCTACTGTCT

+

FFFFFFFF:FFFFFFFFFFFFFFFFFFFFFFFFFFFFFFFFFFFFFFFFFFFFFFFFFFFFFFFFFFFFFFFF  
FFFFFFFFFFFFFFFFFFFFFFFFFFFFFFFFFFFFFFFFFFFFFFFFFFFFFFFFFFFFFFFFFFFFFFFF

@A00721:190:HGJW7DSXY:4:1606:7075:27398\_2:N:0:TCTGCAAG+GCTGCACT  
GGTTATTCCTGGAACCACCTTAACGTCACTCGGTAATCTTTCAGCCGAATTAAGTACTAATGAGTTCA  
AGTCGGTTGTGCGATCGAATTAAGATCAAGGCTAATACCTGTATAGGTA

+

FFFFFFFFFFFFFFFFFFFFFFFFFFFFFFFFFFFFFFFFFFFFFFFFFFFFFFFFFFFFFFFFFFFFFFFF  
FFFFFFFFFFFFFFFFFFFFFFFFFFFFFFFFFFFFFFFFFFFFFFFFFFFFFFFFFFFFFFFFFFFFFFFF

@A00721:190:HGJW7DSXY:4:2310:26856:32346\_2:N:0:TCTGCAAG+GCTGCACT  
GCCGCGTAGTCAGCGCGTTTAGCTGTATCATCAGTCAGAGTATACCCGATAGGGTACCGAGTCTCCAA  
GAGAATATTTATTCTTATGAGGCTCGAACTTCAACGTTTTTCAACG

+

FFFFFFFFFFFFFFFFFFFFFFFFFFFFFFFFFFFFFFFFFFFFFFFFFFFFFFFFFFFFFFFFFFFFFFFF  
FFFFFFFFFFFFFFFFFFFFFFFFFFFFFFFFFFFFFFFFFFFFFFFFFFFFFFFFFFFFFFFFFFFFFFFF

@A00721:190:HGJW7DSXY:4:2242:22589:29904\_2:N:0:TCTGCAAG+GCTGCACT  
TCGCACCCGAAATTTTTGGGCAGAATGCTCTTAACGCGTTCTTGAACGGTGTGTTTGATCAGTCTAAG  
TTGGATAAAGTTATAGGAGACTCAGTTAACCTGAGAGCTCCTCAATTG

+

FFFFFFFFFFFFFFFFFFFFFFFFFFFFFFFFFFFFFFFFFFFFFFFFFFFFFFFFFFFFFFFFFFFFFFFF  
FFFFFFFFFFFFFFFFFFFFFFFFFFFFFFFFFFFFFFFFFFFFFFFFFFFFFFFFFFFFFFFFFFFFFFFF

@A00721:190:HGJW7DSXY:4:2120:19443:12367\_1:N:0:TCTGCAAG+GCTGCACT  
CAATAGGGACGCTAGTATACTTCGTAAAGTCGACAGCGAAATGGTCAATATTGATAATTGGACCGACT  
ATATGACCTATTTTAAGCTCATGGTGAAAAGGGAAGCTAAGGTTAACTTGATGCTTCAGCCTTTTCG  
AAG

+

FFF:FFFFFFFFFFFFFFFFFFFFFFFFFFFFFFFFFFFFFFFFFFFFFFFFFFFFFFFFFFFFFFFF  
FFFFFFFFFFFFFFFFFFFFFFFFFFFFFFFFFFFFFFFFFFFFFFFFFFFFFFFFFFFFFFFFFFFFFFFF  
FFF

@A00721:190:HGJW7DSXY:4:2366:13340:28886\_1:N:0:TCTGCAAG+GCTGCACT  
AGAATATCGTTTTATCACGCAAAATTTATTAATGCAATTTTCGGACCTATCTTTAAGGTTCTTGTGAGG  
AGAGTCAAACAGTGTCTTTTACCCAACATTTTATGTATACAGAGATGACCAGTGACGATTTCTCCCG  
GAA

+

FFFFFFFFFFFFFFFFFFFFFFFFFFFFFFFFFFFFFFFFFFFFFFFFFFFFFFFFFFFFFFFFFFFFFFFF  
FFFFFFFFFFFFFFFFFFFFFFFFFFFFFFFFFFFFFFFFFFFFFFFFFFFFFFFFFFFFFFFFFFFFFFFF  
FFF

@A00721:190:HGJW7DSXY:4:2346:15148:29356\_1:N:0:TCTGCAAG+GCTGCACT  
CGAGATCTTGAGAGTGACTGGAGTTGAGACGTGTGCTCTTCCGATCTTTTCTTTTGTAAGCCTATG  
AGATAAAGATGTATTCTTATTTAGGCTTCGATGCTGAATTTCTTGAACCTTGAGTGCCAGTGAATAT  
TTT

+

FF:FFFFFFFFFFFFFFFFFFFFFFFFFFFFFFFFFFFFFFFFFFFFFFFFFFFFFFFFFFFFFFFF  
FFFFFFFFFFFFFFFFFFFFFFFFFFFFFFFFFFFFFFFFFFFFFFFFFFFFFFFFFFFFFFFFFFFFFFFF  
FFF

@A00721:190:HGJW7DSXY:4:1273:26503:10817\_1:N:0:TCTGCAAG+GCTGCACT  
GAGTATCCATAACGATTTGTCAATTTACCACCTTTGCTCAACGACGAAGTGGAACGGCCAACACTTTCT  
TTGGTAATTGTATGATCACTTTGATGATTTTATCACTTTATTATGACCTTGAAAGTTTTTCGGCTGTG  
GTT

+

FFFFFFFFFFFF:FFFFFFFFFFFF:FFFFFFFFFFFFFFFFFFFFFFFFFFFFFFFFFFFFFFFFFFFF:



FFFFFFFFFFFFFFFFFFFFFFFFFFFFFFFFFFFFFFFFFFFFFFFFFFFFFFFFFFFFFFFFFFFFFFFFFFFFFFFF  
FFF

@A00721:190:HGJW7DSXY:4:2335:3305:17895\_1:N:0:TCTGCAAG+GCTGCACT  
CCATTCTGTTTTCAAAGACTCCAATAACTGATCATTCTGATCATATGATTTTGGACAATGGTTTCGAA  
GCGAAATTTTTGAGGGATAAACCAGCGTACTTCTGCTCGCGATTTATTCTTTTTGTCAATGATTACAT  
CTA

+  
:FFFFFFFF:FFFFFFFFFFFFFFFF,FFFFFFFFFFFF,FFFFFFFFFFFFFFFF:FFFFFF:FFFFFFFF  
FFFFFFFFFFFFFFFFFFFFFFFF,FFFFFFFFFFFFFFFFFFFFFFFF:FFFFFFFFFFFFFFFF:FFFF  
FFF

@A00721:190:HGJW7DSXY:4:1377:23809:26256\_1:N:0:TCTGCAAG+GCTGCACT  
CCTTACAAGATCATCGTTAAGTTAGGTAAACCCCTAACCGATGTTACTCTTGTAGGACTTTGGGAGAG  
ATTCGTTAGTTTTAAAGACTATACTAAATATCTCCACTACGAGGTTGTTGTTTGGCGATTAGCTCTTG  
CGA

+  
FFFFFFFFFFFFFFFFFFFFFFFF,FFFFFF:FFFFF,:FFFFFFFFFFFFFFFFFFFFFFFFFFFFFFFF  
FFFFFFFFFFFFFFFFFFFFFFFFFFFFFFFFFFFFFFFFFFFFFFFFFFFFFFFFFFFFFFFFFFFFFFFF  
FFF

@A00721:190:HGJW7DSXY:4:1428:27118:12195\_2:N:0:TCTGCAAG+GCTGCACT  
ATTGAGGGTCGTTATACCTATTCGGCTATCTGTGCTTTGAATTGTATAAGATCAAATTTTAAACGATT  
CCGAGAGGTTTATCCTGATGTGGAGGGAGTTCTTGAAGCATCCCGACC

+  
F:FFFFFFFFFFFFFFFFFFFFFFFFFFFFFFFF:FFFFF,FFFFFF:FF:FFFFFFFFFFFF  
F:FFFFFFFFFFFFFFFF:FFFFFFFF,FFFFFFFF,,FFFF:FFFF

@A00721:190:HGJW7DSXY:4:1542:15248:8578\_1:N:0:TCTGCAAG+GCTGCACT  
TGATGCGGTTTCATAAGATTATCAGTAATCCTGATTCTACTACGGATTCATGGACCTTCCATCCTGTA  
CCTCTTCTGGAGAGACGTATCTCAAAGATCGACTTCGAGACAGGTGATATTGTTGAGCGAGAGCGACC  
AAG

+  
FFFFFF:FFFFFFFFFFFF:FFFFFFFFFFFFFFFFFFFFFFFFFFFFFFFFFFFFFFFF:FFFFFF  
FFFFFFFFFFFFFFFFFFFFFFFFFFFFFFFFFFFFFFFFFFFFFFFFFFFFFFFFFFFFFFFFFFFFFFFF  
FFF

@A00721:190:HGJW7DSXY:4:1508:20518:22968\_1:N:0:TCTGCAAG+GCTGCACT  
CGTGGCGCTTTATTTTAAAAAGCTCCCTCCTCTCGCAAGTTTGATCTGATACTTATCACGAAAGGACT  
TGAGTCTTTTGATCAGTCTCTGACTTGACCATCTTTCATTTTAAATGACGATCATTAAGACTCTCTTT  
CTT

+  
FFFFFFFFFFFFFFFFFFFFFFFFFFFFFFFF:FFFFFFFFFFFFFFFFFFFFFFFFFFFFFFFFFFFFFFFF  
FFFFFFFFFFFFFFFFFFFFFFFFFFFFFFFFFFFFFFFFFFFFFFFFFFFFFFFFFFFFFFFFFFFFFFFF  
FFF

@A00721:190:HGJW7DSXY:4:1448:4164:31939\_2:N:0:TCTGCAAG+GCTGCACT  
CTTTGCACTGATTTTTCCTCATCAGCTTGTGTTTTACCTAATCTGTGTTTTTACGATAACAACATCA  
GTTGATTAAGACTCTTCCGAAAGGCGAACTTTGGGAATTTGAAGCTCA

+  
FFFFFFFFFFFFFFFFFFFFFFFFFFFFFFFFFFFFFFFFFFFFFFFFFFFFFFFFFFFFFFFFFFFFFFFF  
FFFFFFFFFFFFFFFFFFFF:FFFF:FFFFFFFFFFFF,FFFFFFFFFFFF

@A00721:190:HGJW7DSXY:4:2416:25789:3881\_1:N:0:TCTGCAAG+GCTGCACT  
CGTTTGACCGTGAATAACTGTGGTGTTCTTGATATAAGTTACGGATATACTCTCCTTGAGTTCACTCG  
TAAGGACACTACCACTTATTACGATATTTCTTTAGTCGATGGGTTTTCGACTCCTTTTAGCGTCTTCT  
GTT

+  
FF,FFFF:FFFF,,FFFFFF,:FFF:FFF,FF,F:,FFFF,,FFF:FFF:FF,FF,FFFF,,FFF  
FFFF:,,:F:,FFFFFF:FF:,FFFFFFFFFF,FF:FFFFFFFFF:F,FF:FFFF,,::,F,FF,F  
FFF

@A00721:190:HGJW7DSXY:4:1417:21884:7795\_2:N:0:TCTGCAAG+GCTGCACT  
TTTCTTCTAATGTGGCCTGAACTACGTTTCACTTTGTGTGTACTTGTCTCTATTTTAAGTTTTGTCTT  
CCTTGTTTGTCTTATTCTATTAATCACTCATTTTAGTGAGATTATTAA

+

FFFFFFFFFFFFFFFFFFFFFFFFFFFFFFFFFFFFFFFFFFFFFFFFFFFFFFFFFFFFFFFFFFFFFFFFFFFFFFFF  
FFFFFFFFFFFFFFFFFFFFFFFFFFFFFFFFFFFFFFFFFFFFFFFFFFFFFFFFFFFFFFFFFFFFFFFFFFFFFFFF  
@A00721:190:HGJW7DSXY:4:1607:5511:26287\_1:N:0:TCTGCAAG+GCTGCACT

GTCTTCGACAACAGCAGGGGTTTTCGAATAGTGATAGCCACCCGCCTTACAGAGGGGCAGCAGCATGA  
CCATAATTGGTATTGACTTTGGTACCACCTTTTCTACTGTCTGTCTCGCCTCTTCAATGAAGTTTTTA  
ATG

+

FFFFFFFFFFFFFFFFFFFFFFFFFFFFFFFFFFFFFFFFFFFFFFFFFFFFFFFFFFFFFFFFFFFFFFFFFFFFFFFF  
FFFFFFFFFFFFFFFFFFFFFFFFFFFFFFFFFFFFFFFFFFFFFFFFFFFFFFFFFFFFFFFFFFFFFFFFFFFFFFFF  
FFF

@A00721:190:HGJW7DSXY:4:1412:9697:24674\_2:N:0:TCTGCAAG+GCTGCACT  
TGATAGTGAATTTATACCTACAATCATTGGTTTTTCTAATAATGATGACACTATTGTTTATGGATATG  
ATGCTATTACTCATGATGGTTACGGTCAGGGAGGATTCTCAGTTTACA

+

FFFFFFFFFFFFFFFFFFFFFFFFFFFFFFFFFFFFFFFFFFFFFFFFFFFFFFFFFFFFFFFFFFFFFFFFFFFFFFFF  
FFFFF:FFFFFFFFFFFFFFFFFFFFFFFFFFFFFFFFFFFFFFFFFFFFFFFFFFFFFFFFFFFFFFFFFFFFFFFF

@A00721:190:HGJW7DSXY:4:2323:19488:25034\_2:N:0:TCTGCAAG+GCTGCACT  
ACATTACCCGAAAGACGTGCTAAATTAAAACCATTTGACGATGTCGTCTGTCTCGGCGATCACTTTTC  
ACTAAGAATTGGTCCTACTTTTGGACAAGGCCAACTTCGTAATCTTCA

+

FFFFFFFFFFFFFFFFFFFFFFFFFFFFFFFFFFFFFFFFFFFFFFFFFFFFFFFFFFFFFFFFFFFFFFFFFFFFFFFF  
FFFFFFFFFFFFFFFFFFFFFFFFFFFFFFFFFFFFFFFFFFFFFFFFFFFFFFFFFFFFFFFFFFFFFFFFFFFFFFFF

@A00721:190:HGJW7DSXY:4:2325:7500:21496\_2:N:0:TCTGCAAG+GCTGCACT  
TTTATCTCTTTGGTTGTTAGGGATTTTGAGAGAGTGAAAGGCTTCAATTGTAGTGGTTTGGTCGTTTC  
AGTACCCAGTCAGTATACCTCTACGCAAAGATATTTTCATGAAACTAC

+

FFFFFFF::FFFFF,F::FFFFFFFFFFFFFFFFFFFFFFFFFFFFFFFFFFFFFFFFFFFFFFFFFFFFFFFF  
FFFFFFFFFFFFFFFFFFFFFFFFFFFFFFFFFFFFFFFFFFFFFFFFFFFFFFFFFFFFFFFFFFFFFFFFFFFFFFFF

@A00721:190:HGJW7DSXY:4:1637:15230:36417\_2:N:0:TCTGCAAG+GCTGCACT  
ATTACCTGTCTTTTCATATTATGAATGAACCTTCGGCCGCTCTCTTTGCTTCGATGTTGGATGTCAAGA  
AGGGTTTCAGAATGGGATTCCTACGTAGTTTATGACTTTGGTGGTGGTA

+

FFFFFFFFFFFFFFFFFFFFFFFFFFFFFFFFFFFFFFFFFFFFFFFFFFFFFFFFFFFFFFFFFFFFFFFFFFFFFFFF  
FFFFF:FFFFFFFFFFFFFFFFFFFFFFFFFFFFFFFFFFFFFFFFFFFFFFFFFFFFFFFFFFFFFFFFFFFFFFFF  
@A00721:190:HGJW7DSXY:4:1250:24207:29136\_1:N:0:TCTGCAAG+GCTGCACT

TCTTACGTTACGTAATTACTATAGTGTTATTTATTCTGGTGGTGATGATAATCTTGGAGGTCGTGAC  
GTTGATGAAGCTATAAGAGCGTTCTTATTACGGCGCACTTCTTTACCCGCCACCACACAACCTTTAGT  
TTC

+

F:FF:FFFFFFF:FFFFFFFFFFFFFFFFFFFFFFFFFFFFFFFFFFFFFFFFFFFFFFFFFFFFFFFFFFFFFFF  
FFFFFFFFFFFFFFFFFFFFFFFFFFFFFFFFFFFFFFFFFFFFFFFFFFFFFFFFFFFFFFFFFFFFFFFFFFFFFF  
FFF

@A00721:190:HGJW7DSXY:4:2325:17255:9549\_2:N:0:TCTGCAAG+GCTGCACT  
TGTTACTGGAAAACCTCGTCAATACTTTTCAATAATATACGTCTTGAACCTCACTTATGACGATCTAG  
TGAAATTAACGCGTCCTTTTCTGGAACGTAGTTTTACTATTATGAACA

+

FFFFFFFFFFFFFFFFFFFFFFFFFFFFFFFFFFFFFFFFFFFFFFFFFFFFFFFFFFFFFFFFFFFFFFFFFFFFFF  
FFFFFFFFFFFFFFFFFFFFFFFFFFFFFFFFFFFFFFFFFFFFFFFFFFFFFFFFFFFFFFFFFFFFFFFFFFFFFF

@A00721:190:HGJW7DSXY:4:1619:31882:33692\_1:N:0:TCTGCAAG+GCTGCACT  
ACGTGTGCTCTTCCGATCTAACTTACCCTGATTCCGGCCGGTGGTAGCTCATTTCTACCAGGGGCTAT

TACTCTTGCTGAAACAGCTATTAAAGCTGTTGAGCGGGTAATTACACCTAAACGAGCTCGATCTGCCA  
TCG

+

FFFFFFFFFFFFFFFFFFFFFFFFFFFFFFFFFFFFFFFFFFFFFFFFFFFFFFFFFFFFFFFFFFFFFFFF  
FFFFFFFFFFFFFFFFFFFFFFFFFFFFFFFFFFFFFFFFFFFFFFFFFFFFFFFFFFFFFFFFFFFFFFFF  
FFF

@A00721:190:HGJW7DSXY:4:1456:27254:16438\_2:N:0:TCTGCAAG+GCTGCACT  
CACTCTTTTCTGCTACTTTAACGGAGCGTAGTGTACTCTTCGTCGATTGTATCAACAGTAACATTACT  
TCTAATAAAGGTCTCTATCAAGCTCGTATTATCGTCGCTGCTGGATCT

+

FFFFFFFFFFFFFFFFFFFFFFFFFFFFFFFFFFFFFFFFFFFFFFFFFFFFFFFFFFFFFFFFFFFFFFFF  
FFFFFFFFFFFFFFFFFFFFFFFFFFFFFFFFFFFFFFFFFFFFFFFFFFFFFFFFFFFFFFFFFFFFFFFF

@A00721:190:HGJW7DSXY:4:1629:20889:15843\_1:N:0:TCTGCAAG+GCTGCACT  
AAGGCTAAACTCCAAGGTAATTATGAAGACTGTGATTTATCTTTCACTCTGGCCTTGTATGAGGGTGT  
TTCTAATCGTAACATTAATAATTTCAATCTTCTTAAAAAGAAGATAGAGAGTCATACTTTGGGCTATC  
GTT

+

FFFFFFFFFFFFFFFFFFFFFFFFFFFFFFFFFFFFFFFFFFFFFFFFFFFFFFFFFFFFFFFFFFFFFFFF  
FFFFFFFFFFFFFFFFFFFFFFFFFFFFFFFFFFFFFFFFFFFFFFFFFFFFFFFFFFFFFFFFFFFFFFFF  
FFF

@A00721:190:HGJW7DSXY:4:1447:11234:23015\_2:N:0:TCTGCAAG+GCTGCACT  
GATAGCCAATATTGAAGTGGACACCTCTGGTAGTATCGAAGTAAAGATAACCAATAAGGAAGGAGCTT  
ATACTATGGTTGAATCAACTAAGCATACTACTTTTGCTTTGATTACTC

+

FFFFFFFFFFFFFFF:FFFFFFFFFFFFFFFFFFFFFFFFFFFFFFFFFFFFFFFFFFFFFFFFFFFFFFF,FFFFFFFFFFFFFFFFFFFFFFFF  
FFFFFFFFFFFFFFFFFFFFFFFFFFFFFFFFFFFFFFFFFFFFFFFFFFFFFFFFFFFFFFFFFFFFFFFFF:FFFFFFFFFFFFFFFF

@A00721:190:HGJW7DSXY:4:2540:20193:4930\_1:N:0:TCTGCAAG+GCTGCACT  
CTTCCGATCTGTTAAAGAGTCGATTAAACAAGTTGTACTTATCAATGATTTTATCGCTGGTTGTTATC  
TCGAAAAGTCTCTTCTAAAAGGAACGTCAGTTCTAACCCAAAGAGAATATCTAAAATATTTACAAAAT  
CTT

+

FFFF: :FFFFF:FFFFFFFFFFFFFFFFFFFFFFFFFFFFFFFFFFFFFFFFFFFFFFFFFFFFFFFFF  
FFFFFFFFFFFFFFFFFFFFFFFFFFFFFFFFFFFFFFFFFFFFFFFFFFFFFFFFFFFFFFFFFFFFFFFFF:FFFFFFFFFFFFFFFFFFFFFFFF  
FFF

@A00721:190:HGJW7DSXY:4:1624:24894:32612\_1:N:0:TCTGCAAG+GCTGCACT  
GATCTGTTGCTTGTGCTTCCTCCTTTAATGGCACTACCTCGGTACAATCTTACTTGAACGAAGGCG  
ACCTGTTCCGGAGTTTTTACGGGATCCGGAATGTTCTGTCTATATTAGGTGAAGCGAATACGATTTC  
GAA

+

FFFFF:FFFFFFFFFFFFFFFFFFFFFFFFFFFFFFFFFFFFFFFFFFFFFFFFFFFFFFFFFFFFFFFFF  
FFFFFFFFFFFFFFFFFFFFFFFFFFFFFFFFFFFFFFFFFFFFFFFFFFFFFFFFFFFFFFFFFFFFFFFFF  
FFF

@A00721:190:HGJW7DSXY:4:1403:14579:23923\_1:N:0:TCTGCAAG+GCTGCACT  
TCGTACCTTGATGCTGACTTTCGTCAATATGATTTGATCTGGTTGCTCAATTCTAAGCGTGTTCGCT  
TAGTGCGAGGCCTCTCTTCTACGAGTATTGCTATTTATACGGTTACGAGAAGAAGGTTGAAAGTTTG  
AGA

+

FFFFF:FFFFFFFFFFFFFFFFFFFFFFFFFFFFFFFFFFFFFFFFFFFFFFFFFFFFFFFFFFFFFFFFF  
FFFFFFFFFFFFFFFFFFFFFFFFFFFFFFFFFFFFFFFFFFFFFFFFFFFFFFFFFFFFFFFFFFFFFFFFF,FFFFF  
FFF

@A00721:190:HGJW7DSXY:4:2401:26313:10802\_2:N:0:TCTGCAAG+GCTGCACT  
TACTAAATACTAGATATTTGGATGATCTTGATAAAGAACTTCATGAATTTTCAGAGGATGAAAAATTT  
TCTTCCTTGGATTTTAATATAAAGAATCTTACCAGGACTCCTACTAC

+

[illegible]

$+$ 

```

:FFFFFFFFFFFFFFFFFFFF:FFFFFF:F,FFFFFFFFFFFF::FFFFF

```

+

FFFFFFFFFFFFFFFFFFFFFFFF:FFFFF:FFFFFFFFFFFFFFFFFFFFFFFF

+

FFF

+

FFF

+

FFF

+

```
FFFFFFFFFFFFFFFF:FFFFFFFF:FFFFFFFFFF:FF:FFFF
```

+

FFF

+

FFFFFFFFFFFFFFFF:FFFFF:FFFFFFFF:FFFFFFFFFFFFFFFF

@A00721:190:HGJW7DSXY:4:1355:2781:31829\_1:N:0:TCTGCAAG+GCTGCACT  
TAACGATCTCTCGGTCATTTACTCTGTACTTGATCTACGTCGTTTAACTGTCGGAACAACCTTTACTT  
AGAATGACTCTATCTTTTCAGACACTTCTTATATTATTTACAATAGTTAATATCATATTAGTAATACT  
CAC

+

:FFFFFFFFFFFFFF:FFFFFFFFFFFFFF:FFFFFFFFFFFFFF:FFFFFFFFFFFFFF:FFFFFFFFFFFFFF  
FFFFFFFFFFFFFF:FFFFFFFFFFFFFF:FFFFFFFFFFFFFF:FFFFFFFFFFFFFF:FFFFFFFFFFFFFF  
FFF

@A00721:190:HGJW7DSXY:4:2348:28989:21104\_2:N:0:TCTGCAAG+GCTGCACT  
GCTTTTCTTAGCTAATAGATTAATAAAGGATGAGTACGAAAACCAACTCTTCGTTACGAGACCTGAT  
GGTAGAATAGATTTAGTCTCTACACCCATCTCAACGAGGATAAAGCGA

+

FFFFFFFFFFFFFFFFFFFFFFFFFFFFFFFF:FFFFFFFFFFFFFFFFFFFFFFFFFFFFFFFFFFFFFFFF  
FFFFFFFFFFFFFF:FFFFFFFFFFFFFFFFFFFFFFFFFFFFFFFFFFFFFFFFFFFFFFFF

@A00721:190:HGJW7DSXY:4:1325:16459:4382\_1:N:0:TCTGCAAG+GCTGCACT  
TACACTAATATATCATCCGCAAACGACTCGAAACGAGACGCCGTAGATCAAAGTCCCTTCTAACTTT  
AGATTATGAATCCTGCCTTTACTCATTTTATAGCAGTTATTTATGTTGTACTTTTTATAATTTATAAC  
CTT

+

FF::F,F,,,F:FF,FF,FF,FFFFFFFFFFFFFFFFFFFFFFFFFFFFFFFFFFFFFFFFFFFFFFFF  
FFFFFFFFFFFFFF:FFFFFFFFFFFFFFFFFFFFFFFFFFFFFFFFFFFFFFFFFFFFFFFFFFFFFFFF  
FFF

@A00721:190:HGJW7DSXY:4:1674:27651:34945\_1:N:0:TCTGCAAG+GCTGCACT  
TATGTACTTATTGTAACGATCATTCTTTTCGAGTTTTGTCATTCTTATTCTTTTATTCTTTAACTGTG  
TATGAGGAGGATTTATAATGCTTTTCGATAGTGATTGTTATCAATTTAAATACATTACTGTTTCAAAT  
CAT

+

:FFFFFFFFFFFFFFFFFFFFFFFFFFFFFFFF:FFFFFFFFFFFFFFFFFFFFFFFF:FFFFFFF  
FFFFFFFFFFFFFF:FFFFFFFFFFFFFFFFFFFFFFFFFFFFFFFFFFFFFFFFFFFFFFFFFFFFFFFF  
FFF

@A00721:190:HGJW7DSXY:4:1409:3522:34115\_2:N:0:TCTGCAAG+GCTGCACT  
GACTCCGAAAATGGTTTCAAATGAGGTCAAAGCTCTATTTATTAAACGAACTATTATCCGATTCTTCG  
AGGGTATCACTACCACTGATCTGCCGACTTTAGTCAAGGAACTTCAAT

+

FFFFFFFFFFFFFFFFFFFFFF:FF:FFFFFF:FFFFFFFFFFFFFFFFFFFFFFFFFFFFFFFFFFFF  
FFFFFFFFFFFFFFFFFFFFFF:FFF:FFFF:FFFFFFFFFFFFFFFFFFFFFF

@A00721:190:HGJW7DSXY:4:2564:12011:25175\_2:N:0:TCTGCAAG+GCTGCACT  
TATTTTCTATAAGGGAAAATAGCAATAATCAAATTTGACAAATTTAGAACTTTATTTCAGAACTC  
TCTCCGATCACCTTGGTGTGATCTCCCGAGGATCTTTTCAATAAGAT

+

FFFFFFFFFFFFFFFFFFFFFFFFFFFFFFFF:FFFFFFFFFFFFFFFFFFFFFFFFFFFFFFFFFFFF  
FFFFFFFFFFFFFFFFFFFFFFFFFFFFFFFFFFFFFFFFFFFFFFFFFFFFFFFF

@A00721:190:HGJW7DSXY:4:1420:4562:6699\_2:N:0:TCTGCAAG+GCTGCACT  
ATTTTAAATAGTGATATTCAGCGTATACTTGAATACTTTATCAAAGATTTGGCTTGGTCTATTTACC  
GCAAAAAGTTGGAAGAGGTCTATGATATTTATTTACTTATACTTTAA

+

FFFFFFFFFFFFFFFFFFFFFFFFFFFFFFFF:FFFFFFFFFFFFFFFFFFFFFFFFFFFFFFFFFFFF  
FFFFFFFFFFFFFFFFFFFFFFFFFFFFFFFFFFFFFFFFFFFFFFFFFFFFFFFF

@A00721:190:HGJW7DSXY:4:1425:27055:12743\_1:N:0:TCTGCAAG+GCTGCACT  
AACTTGACTGTTGATAATATTACAATAGCTCTTCTCAGAAGATTAGAGAAGTAACCGGTGAACACGT  
CGGTAGCATTGATTTACTTTTACCGTTAGAACTGAAAAAGATTCTTTTCGAAAAGAAACCTATAAGTT  
ACA

+

FF:FF:F:FFFF:FFFFFFFFFFFF:FFFF:FFFFFFFFFFFFFFFFFFFFFFFFFFFFFFFFFFFF

@A00721:190:HGJW7DSXY:4:1202:21269:34319\_1:N:0:TCTGCAAG+GCTGCACT  
TATATTAAAGAAATAAAAACTTCAAGTACCTGAACCTTTACATTTTTAATGGTATGGTATAATGTGT  
CTTACAAATAGAACCTTCACTCTCGGTAATGAGAGTGTATTCCCTTAATATTCTAGTAACCTCTATGTG  
GGC

@A00721:190:HGJW7DSXY:4:1452:32913:11678\_1:N:0:TCTGCAAG+GCTGCACT  
GATAGCAATTTATGTTTTAAATGCTAGGAAAATTTTAGAAAACTCCATTGTATAGTTCAAGGAGTAC  
TTAATTCAATAGCTTTAGTATTATTTACTATCGCCTTTATTGAAAATTGTATAAGAGTTAATTGCTTA  
CAC

@A00721:190:HGJW7DSXY:4:2110:29170:9612\_2:N:0:TCTGCAAG+GCTGCACT  
TTAATTGATTGAAGCTAGGCGTTGGGGAGAATGAAGTCCGCTTCCCGAAGAAACGATCTATTTACA  
GAGTATTTAGAGTAGTCCAAAGTTTGTATAAATTTATATGATTTTCTA

@A00721:190:HGJW7DSXY:4:2464:21007:9596\_2:N:0:TCTGCAAG+GCTGCACT  
TTCAATAACATAACATACCATCCTCCCAAACATAACATACCATAACCTACCATGACCAATCATCG  
CTCCAACCTGGCAGCCAGACGTAGGGTCAAACCTACTACCGCCGGTGC

@A00721:190:HGJW7D\$XY:4:1515:12436:34366\_1:N:0:TCTGCAAG+GCTGCACT  
TACGTTTACGGACCGCTGTGCAGAATAACCTTCCCAAATCTAGATCTGCACAGAAGAAGGCTGAAGG  
TCGTTACCGACGACCACTCAAAGGAAACGGGCTGTTGCCAGAGGAAAGCAGCGACCACCGAGGTCG  
CTC

@A00721:190:HGJW7DSXY:4:1311:30517:7373\_2:N:0:TCTGCAAG+GCTGCACT  
GCAGTCCCGTCATCTCTGTGGGAAGTGAAGCAGTACCTCAGTCAAAAGTCACATTACCACTCCCATG  
CCAATCAATGATGTGACTATACAGTTTCGCCATTTCAAGAGTGGTCAA

@A00721:190:HGJW7DSXY:4:1551:6388:34851\_1:N:0:TCTGCAAG+GCTGCACT  
GAGGTACTGAAGCCTTCCCCTCCGCTGGCACGAAGAACACTCCCAAGCCAATCAATAGTTCTTCTGAC  
CAGAATGAAAAGGGGTTTACCAGGGTAGTCTCTAAGTCTACCAGGAAGAGGGGAAATGTCCCCAAAC  
TGA

@A00721:190:HGJW7DSXY:4:1459:18530:19836\_2:N:0:TCTGCAAG+GCTGCACT  
AGGTCCATCAGGACCTAAGAAGGGGAAATTACCCCTAATTCTGAAGGAAGATCTCCACCATCTGGGG

TTGGAATAAGAAATCTGCACGGGCCAAAGAGCCGCTGCTACGAAGT  
+  
FFFFFFFFFFFFFFFFFFFFFFFFFFFFFFFFFFFFFFFFFFFFFFFFFFFFFFFFFFFFFFFF:FFFF  
FFFFFFFFFFFFFFFFFFFFFFFFFFFFFFFFFFFFFFFFFFFFFFFFFFFFFFFFFFFFFFFF  
@A00721:190:HGJW7DSXY:4:1633:6668:21527\_1:N:0:TCTGCAAG+GCTGCACT  
GCTTGGGTCATTAAGGGTAGCTGTAAAGTTGCGCCTGCCGACCCCATCTTTGAGACCAAGACTCTCTA  
CAGTAGGTTCTGTCCTACTATGAGCAAATCTGTTGAATTCGTCACTGAGGACGAAGGTGAGAGGACTT  
TTG  
+  
FFFFFFFFF:FFFFFFFFFFFFFFFFFFFFFFFFFFFFFFFFFFFFFFFFFFFFFFFFFFFFFFFF:FFFFFFFFFFFFFFFFF:  
FFFFFFFFFFFFFFFFFFFFFFFFFFFFFFFFFFFFFFFFFFFFFFFFFFFFFFFFFFFFFFFFFFFFFFFFFFFFFFFF  
FFF  
@A00721:190:HGJW7DSXY:4:2154:15808:26804\_1:N:0:TCTGCAAG+GCTGCACT  
CAAAGTGAAGCAGTCGCTGGGAAAGAGAATTGCGTGGGTTGAAGGCCGACGCTTCGAGCTTGAGTG  
TGACGAGGCCGCTGACGTTTTTGTCAACGGCGTTTGAGGATTTTATCCGCGCTTAAGTATGGGGCGA  
AGA  
+  
FFFFFFFFFFFFFFFFFFFFFFFFFFFFFFFFFFFFFFFFFFFFFFFFFFFFFFFFFFFFFFFFFFFFFFFF  
FFFFFFFFFFFFFFFFFFFFFFFF:FFFFFFFFFFFFFFFF:FFFFFFFFFFFFFFFFFFFFFFFFFFFFFFFFFFFF  
FFF  
@A00721:190:HGJW7DSXY:4:1470:5791:25113\_1:N:0:TCTGCAAG+GCTGCACT  
AGTCTTGAAGGACTTAGGTTGGCATATTTATGCCGACGATAATAAGCATGTCACCCTTAAGCACCGAG  
GTAAGCTCGGGACTTACAAGAGAGAGTGTGAGAGAGTCGCTCTCACTATTTTTGCCCAGAATGCGGGC  
TTT  
+  
FF:FFFF:FF,FFF,FFFFFFFFFFFF::FFF:F:F:FF,F,FFFF::F:FF:FFFFFFFFFF:FF  
FFFF:FFF:FFFFFFFF:F:FFFFFFFFFFFFFFFFFFFFFFFFFFFFFFFFFFFFFFFF:FFFF:FFFF  
FF:  
@A00721:190:HGJW7DSXY:4:2303:12048:17190\_2:N:0:TCTGCAAG+GCTGCACT  
GCTCCTTCTGTGGGTGAGGGTTTTTGTATATTTCACTGGTCTGGGAGGCTGCTTCTCCTCCATAATTA  
CAACCTCTCTTTAGAGAGCATTAGAAAGATCGGAAGAGCGTCGTGTAG  
+  
FFFFFFFFFFFFFFFFFFFFFFFFFFFFFFFFFFFFFFFFFFFFFFFFFFFFFFFFFFFFFFFF:FFFFF  
FFFFFFFFFFFFFFFFFFFFFFFFFFFFFFFFFFFFFFFFFFFFFFFFFFFFFFFFFFFF:,  
@A00721:190:HGJW7DSXY:4:1202:24605:4335\_1:N:0:TCTGCAAG+GCTGCACT  
CACACTTTTCTTGAATTTTTCTTTCTCCGTCATTGGGATTTGATGTGAGAAGGTGGAAGGTG  
TCAAGGGTCTTCTTCATGCTGATCTTTCAGGACCTAATCATCATGATTGATAGTTACGGCTCGTAT  
CGA  
+  
FFFFFFFFFFFFFFFFFFFFFFFFFFFFFFFF:FFFFFFFFFFFFFFFFFFFFFFFFFFFFFFFF:FFFFFFFF:FFFFFFFF  
FFFFFFFF:FFFFFFFFFFFFFFFF:FFFFFFFFFFFFFFFFFFFFFFFFFFFFFFFFFFFFFFFFFFFFFFFF  
FFF  
@A00721:190:HGJW7DSXY:4:1207:32136:31375\_2:N:0:TCTGCAAG+GCTGCACT  
AAGTTCTCCGAAATTAAGACGGGGGGATTAAGAGTCCAGCTGTAAGTGTCAATTCAGAGAGGGGAGC  
TCTGAAAAGGAACTTCGTCAGAAGATGAGGAAGTCTAAGAGGAGAGA  
+  
FFFFFFFFFFFFFFFFFFFFFFFFFFFFFFFF:FFFFFFFFFFFFFFFFFFFFFFFFFFFFFFFFFFFFFFFF  
FF:FFFFFFFFFFFFFFFFFFFFFFFFFFFFFFFFFFFFFFFF:FFFFFFFF  
@A00721:190:HGJW7DSXY:4:1166:31331:6402\_1:N:0:TCTGCAAG+GCTGCACT  
CTCTAGAGAAGATCTCACCACCTGGAGAAGGCAAGTGGAGAGTCCAGAAGTTGATGAAGAAGGATTAT  
TTGAAGCAGGGGTTACCACTTCCTAAGGTGGATGAGGGAGGTTGTTTCTTTGGAGTTTTAGATAATCT  
TTT  
+  
FFFFFFFFFFFFFFFFFFFF,FF:FFF:FFFFFFFF:FFFFFFFFFFFFFFFFFFFFFFFF:FFFFFFFFFFFFFFFF



@A00721:190:HGJW7DSXY:4:1429:20826:11318\_2:N:0:TCTGCAAG+GCTGCACT  
CCTTGAGAAGACAAGCCACATTAAGATATAATTTAGGTCAACTTGGGGTTTCGAATGTCATTAGTGCC  
TTACGATTGAAAGAGGTCTTTTGGTATCGACAGATCTTTCGATCTT

@A00721:190:HGJW7DSXY:4:2601:31891:18897\_2:N:0:TCTGCAAG+GCTGCACT  
TTAACGTGGCAGAATTCGGTAACTTACCATATTGTTCTTCCGGAAGTTGTGGGATTAACTTTGAC  
TCAACTACTCCGATCAGATCCGGATGGTTTGATTGGTATGGACTACTC

@A00721:190:HGJW7DSXY:4:2341:4146:16250\_2:N:0:TCTGCAAG+GCTGCACT  
GTTGTCTAGGGTCATGGCAGATACTACCGATAAGGTGAAAAATATGCAGGTCAAAGATTTTGTAGCTC  
TGAGGGCGGTTGAGGGAGCCGTTTTGGCCGACTTTAACTATTCTAAGA

@A00721:190:HGJW7DSXY:4:1115:1850:32534\_2:N:0:TCTGCAAG+GCTGCACT  
 CAAACCTATCGTTGTCGTACCTTACAAGGTTGAGGAGACTTTACAGCGGCTTATTGTCGCGCAGTTT  
 CCAGAATTGCGGTTGAAGTTCACCCATTCTATCTTGAATGCTCACGCC

@A00721:190:HGJW7DSXY:4:2342:30481:15076\_2:N:0:TCTGCAAG+GCTGCACT  
TTATAATCACTTGTTAAAGTACAGATTTAGTGATTAGATATTATTGATATTGGAGGCGATATTCGTT  
TTCATATCCAAAACCTCCTTGAATGGAGTACATATTTGCAACCCTATTC

@A00721:190:HGJW7DSXY:4:2460:9697:36730\_1:N:0:TCTGCAAG+GCTGCACT  
GATGCATCGAGGTATACGTCTAGGAACATTGATTGGGAACGTACCTACTCACGAGACGTCATGAAAGC  
TATCGGAGGGAAGCAAAATGTTTCGTTCTGTTACAAGAACGCTTTGGATTGTGACCATAAAGCCTCAG  
TTG

@A00721:190:HGJW7DSXY:4:1459:6940:19617\_1:N:0:TCTGCAAG+GCTGCACT  
CTCTCTTGATGATGTAGCCACTATAATGCTTAAGAGAGAGATTGATGTATGTCATTTTCGTCTTAGTTT  
GTCCCGGCGAATTATTGGACACGATGAAAAATGACATACCCGTTCTGACCTTGGTATCGTTATCCGT  
CAT

@A00721:190:HGJW7DSXY:4:2211:3721:5368\_2:N:0:TCTGCAAG+GCTGCACT  
GGTTATTCTCACAAAGATAAGATTTTATCTTTCTTCAAACACCCTGTTTTCTTAAGGGCGGACA  
ATTGTTCCATTGTGAACCTCTGGGGACTAGATTGAGCATTAAATGAGTT

[illegible]

@A00721:190:HGJW7DSXY:4:1234:6777:22028\_1:N:0:TCTGCAAG+GCTGCACT  
TCTCTAGTGGACAATTCAGAATACCTATTTCCGTACCAAGAGCCACTGCCAATCTCATCGCTATACGC  
ATACCTGATTGGAAGAAGCGAGGTTCTGTTCTCAATAAAAAATTTTTCTCAAGAGATTATGGTTGATAA  
AGT

+

FFFF:FFFFFFFFFFFFFFFF,FFFFFFFFFFFFFFFFFFFFFFFFFFFFFFFFFFFFFFFF:FFFFFFFFF  
FFFFFFFFFFFFFFFFFFFFFFFFFFFFFFFFFFFFFFFFFFFFFFFFFFFFFFFFFFFFFFFF:F:FFFFFFFFFFFFF  
FFF

@A00721:190:HGJW7DSXY:4:1115:11695:33927\_1:N:0:TCTGCAAG+GCTGCACT  
AGGGCTATTCAGTACGTCATGGGGATCACTTCTTCGGTCAATGACAAAACCTTCGAATATGTTACGAC  
ATGGCTTCGTAACAACAGTGCGAGGATTGTCATCTCGGGGAAAGTGATTCACCAAGATGTTTCATATAG  
AT

+

::FFFFFFFF:FF,FFFFFF,FFFF:FFFF:FFFFFFFFFFFFFFFFFFFFFFFF:FFFFFF:F:F:FFFFFFF  
FFF,FFF,FFFF,FFFFFFFF:FFFFFFFFFFFFFFFFFFFFFFFFFFFFFFFFFFFFFFFFFFFFFFFFFFFFF  
FF

@A00721:190:HGJW7DSXY:4:1258:5773:21010\_1:N:0:TCTGCAAG+GCTGCACT  
GAAGGTCGCAGCGATCTTACTCGTTATCGGAGCTAAGAAGAAGACTTTGGGTACACGTTATGCTCGCA  
AACTTAACGTTAGTACCGGAGGTGATCTCTCTGCTTCTGCGTTACTGAGAGAAAAGATTGAGGACGCC  
TAC

+

FFFFFFFFFFFFFFFFFFFFFFFFFFFFFFFFFFFFFFFFFFFFFFFFFFFFFFFFFFFFFFFF:FFFFFFFFFFFFFFFFFFFFFFFF  
FFFFFFFF,FFFFFF:FFFFFFFFFFFFFFFFFFFFFFFFFFFFFFFFFFFFFFFFFFFFFFFFFFFFFFFFFFFFFFFF  
FFF

@A00721:190:HGJW7DSXY:4:1645:26892:25332\_2:N:0:TCTGCAAG+GCTGCACT  
TTTAGGTTTAGTAGGTGATCTTGACGTCGATTCTTTGTATAGGGAGTGTGAGAAGACAACGAATCTTG  
AACTACGGTCCTTATCAAAGAAAATGGTGAACCGGTCTCTAAATCTT

+

FFFFFFFFFFFF:FFFFFFFFFFFFFFFFFFFFFFFFFFFFFFFFFFFFFFFFFFFFFFFFFFFFFFFF,FFFFFFFFFFFFF:  
:FFFFFFFFFFFFFFFFFFFFFFFFFFFFFFFFFFFFFFFFFFFFFFFFFFFFFFFFFFFFFFFF

@A00721:190:HGJW7DSXY:4:2351:2953:26240\_2:N:0:TCTGCAAG+GCTGCACT  
GAAGATTGAAGAACACGTCAAGAAGTCGCTCGCGCTTGTCTTGAAAACCAAGTTAAGAAGGAGGCTG  
ATCATGGAGTCTTTGTACCTTCTGTCAAACCTTCGAGGTTTCAGCTACGA

+

FFFFFFFFF:FFFFFFFFFFFFFFFFFFFFFFFFFFFFFFFFFFFFFFFFFFFFFFFFFFFFFFFFFFFFFFFFFFFFFFFF  
FFFFFFFFFFFFFFFFFFFFFFFFFFFFFFFFFFFFFFFF:FFFFFFFFFFFFFFFFFFFFFFFFFFFFFFFF

@A00721:190:HGJW7DSXY:4:1430:14507:27461\_1:N:0:TCTGCAAG+GCTGCACT  
TGGATTGAAGGCTGGCTCTAAGGGAGACTCCTTCTTTTGAATGTTGTAAAGAATTGGGTTGAGAAGT  
GTGCTTTACAAGGAGTTAGACTCTTCTTCAAGTTTTTAGATCTTCTTGATAATCTTAAAGAAAAATTT  
TCG

+

FFFFFFFFFFFFFFFFFFFFFFFFFFFFFFFFFFFFFFFFFFFFFFFFFFFFFFFFFFFFFFFFFFFFFFFF  
FFFFFFFFFFFFFFFFFFFFFFFFFFFFFFFFFFFFFFFF:FFFFFFFFFFFFFFFFFFFFFFFFFFFFFFFF  
FFF

@A00721:190:HGJW7DSXY:4:2537:28556:28087\_1:N:0:TCTGCAAG+GCTGCACT  
GTCTGTACTTACATTCTTTACGCCAGATTCTTCATGGGGCGACGCTGTTTCTTGGTATTTCTGAAA  
TAGTTTATCAGAGCGTCATTTTCCTTTGGGATCTTCTCTGTAAGGAATTATTAATCATTCTTC  
TCA

+

:FFFFFFFFFFFFFFFFFFFFFFFFFFFFFFFF,FFFFFFFFFFFFFFFFFFFFFFFFFFFFFFFFFFFFFFFF  
FFFFFFFFFFFFFFFFFFFFFFFFFFFFFFFFFFFFFFFF:FFFFFFFFFFFFFFFFFFFFFFFFFFFFFFFF  
FFF

@A00721:190:HGJW7DSXY:4:1336:19316:5666\_2:N:0:TCTGCAAG+GCTGCACT  
TTTTCTCTACCCATAACTTCTTTTCAAAAATGCGGATGGGTCTACTGATGTTTTCTACAGAGTGCA

+

@A00721:190:HGJW7DSXY:4:2242:25057:20995\_1:N:0:TCTGCAAG+GCTGCACT  
GTCGGTGGGGTTCTCAAGGCTCTCATCGCCACTGGGATTCTAAGGGGTTCCATAAGATATTATCTGAC  
ATTGTGGTTCAATGATCAGGATTCTTCTTTTGGTCCTTACGTCTTAAGTAATTTGGATGTTGTCGAAA  
ACT

+

@A00721:190:HGJW7DSXY:4:2620:21549:11162\_2:N:0:TCTGCAAG+GCTGCACT  
TGTCACGATTCTTAAAAGAAGTTTATTAAACTTCAGAGTCTCTTGGAGTCCAGGTAGCTAATGTTC  
TTGCAATAGCCACAGACTTTCTGGGAAAAGAGACCTCTGTTGGTAGAG

+

@A00721:190:HGJW7DSXY:4:1214:27651:17848\_2:N:0:TCTGCAAG+GCTGCACT  
ATTACTCAGATTCAATCTGGCATCACTGAACGTCTACAACGAGTTAGGGAGTGGCTAGGTTTTAAAG  
ATCCTTTGCACAAGCAATACCTTCCACTGAGTTCATCACCCAGAGTTT

+

@A00721:190:HGJW7DSXY:4:1508:9299:28995\_2:N:0:TCTGCAAG+GCTGCACT  
ACTGTTTCGAGAATCTTCTGATGCTGAATTTGAGGAAAATTTTCGGAAGTTTTTGGTATAAATCCTGA  
TGGCTCAGTACAGGGAGGAGGTAATAGTTATAAAACCTTCTTTTATCA

+

@A00721:190:HGJW7DSXY:4:1139:12726:20556\_2:N:0:TCTGCAAG+GCTGCACT  
GGACAAAATCTGGGATCATAGGTATGTGTCACGCTACACTCGAAATATGGGCCCTCATAAGGAAGTAT  
AGTTGGCGTCTTGTCGTTGACGTCATTACAGTCTGGAAGTTAGATCAT

 $+$ 

@A00721:190:HGJW7DSXY:4:1267:30852:4131\_2:N:0:TCTGCAAG+GCTGCACT  
CGAGAGTTGTGATCTAGTTCTAAATTTAGGTCGACGGACTTTAGCAACTTTAGATAAATTCTTTCCGG  
GCTCAATGACCTTTGCTATGTACGTGGATCTAATCCTTGGTGATCTGA

+

@A00721:190:HGJW7DSXY:4:1355:25418:19867\_2:N:0:TCTGCAAG+GCTGCACT  
TATTAGTTCACGAAGTTCTTACACTTCTCGCGACTAATGTCAGCTTCACTACAAAGGCGTTACGTAAA  
GTAGTTTTTACGCTTTATCTTAAAGCATTACCACCAAATTTAGCACTT

$$+$$

@A00721:190:HGJW7DSXY:4:2264:1524:30405\_1:N:0:TCTGCAAG+GCTGCACT  
GAAGCTCGCCATATCAGATTAGAGACATGCCAGTTAGAGTTCTTCTAACCAGGACTGATGGTGAGATT  
CTTTTACCTTTTGGAGGTCCAGGAACCTTTACTCCTAGTGTCTTTTCTAGAGTCCAAGGACGTTTCCG  
TCG

+

[illegible]

@A00721:190:HGJW7DSXY:4:1621:22290:29543\_1:N:0:TCTGCAAG+GCTGCACT  
GTGGGAGACCGCTCAATAACACTCTATTGAATCCCTTTCCACGATGAAAGCTCTTTATGAGGTGCTC  
CATGCAAATTTACAGTTCCTCTTTGGTGATATCGCCTCTGTCCTTTCTCTTTAATCGTGAGGTTACG  
AGA

@A00721:190:HGJW7DSXY:4:1471:2736:28307\_2:N:0:TCTGCAAG+GCTGCACT  
GGTTTATCGGTTGTATTTGATAAATTTGTTGGAATCGATAATGATACTGACGAAGTTCTATTACCA  
CCCTTGTCATTGATACAAACATTCTAGGTGATGCTTTCTTAGAGGCTC

@A00721:190:HGJW7DSXY:4:2130:15356:8954\_2:N:0:TCTGCAAG+GCTGCACT  
TATTTACAATCTGTAGAGAGAGAGGTTAATCAGAATTTGAGTGATAACGATTTAGTACTGGGAAATGG  
TGGTAGTCAGTTTACTACGTTTCTTTCCCTCCCCCTTTTTCGATTGGAT

@A00721:190:HGJW7DSXY:4:1617:27444:31579\_2:N:0:TCTGCAAG+GCTGCACT  
CGTCTCACGACTAATTTGATAAGGTTTTCTTTATGGGACTCTTGTTTGTACTTATGAAGGAGGTAT  
TACTTCGGAAGTTCCTAATGTAGGTCTCCTAGTACTTAAGGGTTTATG

@A00721:190:HGJW7DSXY:4:1558:11577:16658\_2:N:0:TCTGCAAG+GCTGCACT  
TTTTGATGGTATGTTTCACATTGCGTGATCACTTCCCGTGGACTTGGGAAGAGATTAAACATAAAATC  
CAGCGCTTCTATTATGTCGCTAAAGCCTGTCCAGTTGTCGATGATGTT

@A00721:190:HGJW7DSXY:4:1614:1307:10895\_2:N:0:TCTGCAAG+GCTGCACT  
AAACTTACGACGATGTTCTCGCTCGCATTTCAAGGATTACTAAGTCTGAGATCTGCCACTTCTAAT  
TTTAGGAAACGTCGCGAAAAGAAAGTTCATGAGGATGTCTTGGTCTGAA

@A00721:190:HGJW7DSXY:4:1368:7916:12414\_2:N:0:TCTGCAAG+GCTGCACT  
GAACTTCTAATAGAGGATCCTGATGACATTATTTCAACGATACCGATCTCAGTTCTACCACAGAAAC  
CGTCTCAGGAACTGTCTCCACTGATTCGGAATTAGAGAAAAGACGACCT

@A00721:190:HGJW7DSXY:4:2211:15040:35274\_1:N:0:TCTGCAAG+GCTGCACT  
GAGACCTCTGAATTTTCAGGGTGCCCTGATGAGGACGTTGAAAGGGATAATTTCAACTCTGAGACTTC  
TAAGAGTGTTTCAAAGAGACCAGAAACGTAACAAGAAGAATAAAGGTAGGAAGGGGAGAAAACAGAACA  
AGC

```
F:FFF,F:F,F:FFFFFF,F:FFFF:FFF:FFFF:F::FFF:F:FF:FFFFFFFFFFFF,FFFFFFFF,FFF
FF:FFFFFFFFFFFFFFFF:FFFF:FFFFFFFFFFFFFFFF:FFFFFFFFFFFFFFFFFFFFFFFFFFFF
FFF
```

@A00721:190:HGJW7DSXY:4:2260:8196:30937\_2:N:0:TCTGCAAG+GCTGCACT  
ACTGATATGGTTGCGGCTGATCGTACCCCAATTCTGCTAGAAAGATCACTCTCGGCGATACCACTGA  
TCTTCCAGAGTTACGTAGTGGTCGTTCTTTTGTGATTATCAAAGA

@A00721:190:HGJW7DSXY:4:2353:13476:28463\_1:N:0:TCTGCAAG+GCTGCACT  
AATTTCTCCTGCTTGTAAATTCGAGAGAGGACACTATGGAAATTAGACCTATCAGATGTCTTGACGACT  
TCGAATTTGAGGACGGAGTTAAATATATTACTTTCACTCAAGGTGAAAAGTTTGAAATTAACAAAGTC  
CTT

+

FFFFFFFFFFFF,FFFFFFFFFFFFFFFFFFFFFFFFFFFFFFFFFFFFFFFFFFFFFFFFFFFFFFFFFFFF  
FFFFFFFFFFFFFFFFFFFFFFFFFFFFFFFFFFFFFFFFFFFFFFFFFFFFFFFFFFFFFFFFFFFFFFFFFFFF  
FFF

@A00721:190:HGJW7DSXY:4:1220:18511:19648\_1:N:0:TCTGCAAG+GCTGCACT  
GTTCAAGGTAATACTTACCAGCACGTTGCGCTGGTTAGAATTAAACCTCAAGATGACCCTGTTTTTGC  
ATCACAACACATATTACCGTTGCTCTATCACGACACGTTGAATCTTTACGATACTTTGTTATCAATG  
TAA

+

FFFFFFFFFFFFFFFFFFFFFFFFFFFFFFFFFFFFFFFFFFFFFFFFFFFFFFFFFFFFFFFFFFFFFFFFFFFF  
FFFFFFFFFFFFFFFFFFFFFFFFFFFFFFFFFFFFFFFFFFFFFFFFFFFFFFFFFFFFFFFFFFFFFFFFFFFF  
FFF

@A00721:190:HGJW7DSXY:4:1252:21016:36730\_2:N:0:TCTGCAAG+GCTGCACT  
TGAGAGGATCAATCACAGTAAGGAAGTGTACGTTTAGCACGGGAGGTTGCAGATTCAACCCCTTATA  
TCGAGGCTATCGAGGACGATGAGTATCTTGAAGTTGTTGACGACAAGC

+

:FFFFFFFFFFFFFFFFFFFFFFFFFFFFFFFFFFFFFFFFFFFFFFFFFFFFFFFFFFFFFFFFFFFFFFFFFFFF  
FFFFFFFFFFFFFFFFFFFFFFFFFFFFFFFFFFFFFFFFFFFFFFFFFFFFFFFFFFFFFFFFFFFFFFFFFFFF

@A00721:190:HGJW7DSXY:4:1210:6813:30420\_1:N:0:TCTGCAAG+GCTGCACT  
TAGAGGACCACCTGGATCTTCTACTGTCTCTGCCTTCCAAGATTTCTTAGAAGAGGTTATTCCTGGAA  
CCACCTTAACGTCACCTCGGTAATCTTTAGCCGAATTAAGTACTAATGAGTTCAAGTCGGTTGTCGAT  
CGA

+

:FFFFFFFFFFFFFFFFFFFFFFFFFFFFFFFFFFFFFFFFFFFFFFFFFFFFFFFFFFFFFFFFFFFFFFFFFFFF  
FFFFFFFFFFFFFFFFFFFFFFFFFFFFFFFFFFFFFFFFFFFFFFFFFFFFFFFFFFFFFFFFFFFFFFFFFFFF  
FFF

@A00721:190:HGJW7DSXY:4:1364:32371:28494\_2:N:0:TCTGCAAG+GCTGCACT  
GGCTAATACCTTTATAGGTAAGAAGCCCTTGAGCCGCGTAGTCAGCGCGTTTAGCTGTATCATCAGT  
CAGAGTATACCCGATAGGGTACCGAGTCTCCAAGAGAATATTTATTCT

+

FFFFFFFFFFFFFFFFFFFFFFFFFFFFFFFFFFFFFFFFFFFFFFFFFFFFFFFFFFFFFFFFFFFFFFFFFFFF  
FFFFFFFFFFFFFFFFFFFFFFFFFFFFFFFFFFFFFFFFFFFFFFFFFFFFFFFFFFFFFFFFFFFFFFFFFFFF,  
FFFFFFFFFFFFFFFFFFFF

@A00721:190:HGJW7DSXY:4:1132:25003:28166\_1:N:0:TCTGCAAG+GCTGCACT  
ACGTTTTACACGAAAGACATATCGCACCCGAAATTTTGGGCAGAATGCTCTTAACGCGGTTCTT  
GAACGGTGTGTTGATCAGTCTAAGTTGGATAAAGTTATAGGAGACTCAGTTAACCTGAGAGCTCCTCA  
ATT

+

FFF:FF:FFFFFFFF:F:FFFFFFFFFFFFFFFFFFFFFFFFFFFFFFFFFFFFFFFFFFFFFFFFFFFFFFFF  
FF:FFFF,:FFFF,F:FFFF:FF:FFFF:FFFF:FFFFFFFFFFFFFFFFFFFFFFFFFFFFFFFFFFFF  
FFF

@A00721:190:HGJW7DSXY:4:2204:23773:12289\_1:N:0:TCTGCAAG+GCTGCACT  
CAATAGGGACGCTAGTATACTTCGTAAAGTCGACAGCGAAATGGTCAATATTGATAATTGGACCGACT  
ATATGACCTATTTTAAGCTCATGGTGAAAAGGGAAGCTAAGGTTAACTTGATGCTTCAGCCTTTTCG  
AAG

+

FFF:F:FFFFFFFFFFFFFFFFFFFFFFFFFFFFFFFFFFFFFFFFFFFFFFFFFFFFFFFFFFFFFFFFFFFF  
FFFFFFFFFFFFFFFFFFFFFFFFFFFFFFFFFFFFFFFFFFFFFFFFFFFFFFFFFFFFFFFFFFFFFFFFFFFF  
FFF

@A00721:190:HGJW7DSXY:4:1316:6352:30624\_1:N:0:TCTGCAAG+GCTGCACT  
GCAATTTTCGACCTATCTTTAAGGTTCTTGTGAGGAGAGTCAAACAGTGTCTTTTACCCAACATTTT

TATGTATACAGAGATGACCAAGTGACGATTCTCCCGGAAGCTCTTCTCTCTCTTAGGAGGTCATGATG  
ACT

+

FFFFFFFF,FFFFFFFFFFFFFFFFFFFFFFFFFFFFFFFFFFFFFFFFFFFFFFFFFFFFFFFFFFFFFFFF  
FFFFFFFFFFFFFFFFFFFFFFFFFFFFFFFFFFFFFFFFFFFFFFFFFFFFFFFFFFFFFFFFFFFFFFFF  
FFF

@A00721:190:HGJW7DSXY:4:1263:16839:19194\_2:N:0:TCTGCAAG+GCTGCACT  
TTTCGAAGTTTGACAAATCTCAAGATTTCTTTGTAAAGCCTATGAGATAAAGATGTATTCTTATTTA  
GGCTTCGATGCTGAATTTCTTGAACCTTGGAGTGCCAGTGAATATTTT

+

FFFFFFFFFFFFFFFFFFFFFFFFFFFFFFFFFFFFFFFFFFFFFFFFFFFFFFFFFFFFFFFFFFFFFFFF  
FFFFFFFFFFFFFFFFFFFFFFFFFFFFFFFFFFFFFFFFFFFFFFFFFFFFFFFFFFFFFFFF:FFFFFF:FFF

@A00721:190:HGJW7DSXY:4:1302:21658:20650\_1:N:0:TCTGCAAG+GCTGCACT  
GAGTATCCATAACGATTTGTCAATTTACCACCTTGTCTCAACGACGAAGTGGAAACGGCAACACTTTCT  
TTGGTAATTGTATGATCACTTTGATGATTTTATCACTTTATTATGACCTTGAAAGTTTTTCGGCTGTG  
GTT

+

FFFFFFFFFFFFFFFFFFFFFFFFFFFFFFFF:FFF,FF::FFFFFF,FFFFFFFFFFFFFFFFFFFFFFFF  
FFFFFFFF,FFFFFFFFFFFFFFFFFFFFFFFFFFFFFFFFFFFFFFFFFFFFFFFFFFFFFFFFFFFFFFFF  
FFF

@A00721:190:HGJW7DSXY:4:2461:4444:11287\_1:N:0:TCTGCAAG+GCTGCACT  
CCATTCTGTTTTCAAAGACTCCAATAACTGATCATTCTGATCATATGATTTTGGACAATGGTTTTCGAA  
GCGAAATTTTTGAGGGATAAACCAGCGTACTTCTGCTCGCGATTTATTCTTTTTGTCAATGATTACAT  
CTA

+

F:FFFFFFFFFFFFFFFFFFFFFFFF,FFFFFFFF:FFF:FFFFFFFFFFFFFFFF,FFFF,FFFFFFFF  
FFFFFFFFFFFFFFFF:FFF:F:F:FFFFFFFF:FFFFFFFF:FFFFFFFFFFFFFFFF:FFFFFFFF  
FF:

@A00721:190:HGJW7DSXY:4:1459:19849:10410\_1:N:0:TCTGCAAG+GCTGCACT  
CCTTACAAGATCATCGTTAAGTTAGGTAAACCCCTAACCGATGTTACTCTTGTAGGACTTTGGGAGAG  
ATTCGTTAGTTTTAAAGACTATACTAAATATCTCCACTACGAGTTGTTGTTTGGCGATTAGCTCTTG  
CGA

+

FFFF:FFFFFFFFFFFFFFFFFFFFFFFF,FFFFFFFFFFFFFFFFFFFFFFFFFFFFFFFF  
FFFFFFFFFFFFFFFFFFFFFFFFFFFFFFFFFFFFFFFFFFFFFFFFFFFFFFFFFFFFFFFF  
FFF

@A00721:190:HGJW7DSXY:4:1449:8974:11960\_2:N:0:TCTGCAAG+GCTGCACT  
ATTGAGGGTCGTTATACCTATTCGGCTATCTGTGCTTTGAATTGTATAAGATCAAATTTTAAACGATT  
CCGAGAGGTTTATCCTGATGTGGAGGGAGTTCTTGAAGCATCCCGACC

+

FFFFFFFFFFFFFFFFFFFFFFFFFFFFFFFF:FFFFFFFFFFFFFFFFFFFFFFFFFFFFFFFF  
FFFFFFFFFFFFFFFFFFFFFFFF,FFFFFFFFFFFFFFFF,FFFFFFFFFFFFFF

@A00721:190:HGJW7DSXY:4:1624:19334:14403\_1:N:0:TCTGCAAG+GCTGCACT  
TGATGCGGTTTCATAAGATTATCAGTAATCCTGATTCTACTACGGATTCATGGACCTTCCATCCTGTA  
CCTCTTCTGGAGAGACGTATCTCAAAGATCGACTTCGAGACAGGTGATATTGTTGAGCGAGAGCGACC  
AAG

+

FFFFFFFFFFFFFFFFFFFFFFFFFFFFFFFFFFFFFFFFFFFFFFFFFFFFFFFFFFFFFFFF  
FFF,FFFFFFFFFFFFFFFFFFFFFFFFFFFFFFFF:FFFFFFFFFFFFFFFFFFFFFFFF  
FFF

@A00721:190:HGJW7DSXY:4:1534:7744:36104\_1:N:0:TCTGCAAG+GCTGCACT  
CGTGGCGCTTTATTTTAAAAAGCTCCCTCCTCTCGCAAGTTTGATCTGATACTTATCACGAAAGGACT  
TGAGTCTTTTGATCAGTCTCTGACTTGACCATCTTTCATTTTAAATGACGATCATTAAGACTCTCTT  
CTT

+  
F:FFFFF:FFFFFFFFF:FFFFFFFFFFFFFFFFFFFFFFFFFFFFFFFFFFFFFFFF,FFFFFFFFFFFFFFFFF  
FFFFFFFFFFFFFFFFF:FFFFFFFFFFFF,FFFFFFFFF:FFFF:FFFFFFFFFFFFFFFFFFFFF  
FFF  
@A00721:190:HGJW7DSXY:4:1448:4345:31814\_2:N:0:TCTGCAAG+GCTGCACT  
CTTTGCACTGATTTTTCTCATCAGCTTGTGTTTTACCTAATCTGTGTTTTACGATAACAACATCA  
GTTGATTAAGACTCTTCCGAAAGGCGAACTTTGGAATTTGAAGCTCA  
+  
FFFFFFFFFFFFFFFFFFFFFFFFF:F::F:FFFFFFFFF:FFFFFFF:FFFFFFF,FFFFFFFFF:F  
FFF:FFF,FFFFFF:FFFFFF:, :FFFFFFFFFFFFFFFFFFFFF  
@A00721:190:HGJW7DSXY:4:2531:5656:33896\_1:N:0:TCTGCAAG+GCTGCACT  
CGTTTGACCGTGACGAAGTGGTGTCTTGATCTACGTTACGGATATACTCTCCTTGAGTTCACG  
TAAGGACACTACCACTTATTACGATATTTCTTTAGTCGATGGGTTTTCGACTCCTTTAAGCGTCTCT  
GTT  
+  
FFFFFFFFFFFFFFFFFFFFFFFFFFFFFFFFFFFFFFFFFFFFFFFFFFFFFFFFFFFFFFFF  
FFFFFFFFFFFFFFFFFFFFFFFFFFFFFFFFFFFFFFFFFFFFFFFFFFFFFFFFFFFFFFFF  
FFF  
@A00721:190:HGJW7DSXY:4:1517:22996:15546\_2:N:0:TCTGCAAG+GCTGCACT  
TTTCTTCTAATGTGGCCTGAAGTACGTTTCACTTTGTGTGTACTTGTCTCTATTTTAAGTTTTGTCTT  
CCTTGTTGTCTTATTCTATTAATCACTCATTTTAGTGAGATTATTAA  
+  
FFFFFFFFFFFFFFFFFFFFFFFFFFFFFFFFFFFFFFFFFFFFFFFFFFFFFFFFFFFFFFFF  
FFF:FFFF,FFFFFF:F:FFFFFFFFF:FF:FFFFFFFFFFFFF  
@A00721:190:HGJW7DSXY:4:1607:6045:30436\_1:N:0:TCTGCAAG+GCTGCACT  
GTCTTCGACAACAGCAGGGGTTTTCGAATAGTGATAGCCACCGCCTTACAGAGGGGCAGCAGCATGA  
CCATAATTGGTATTGACTTTGGTACCACCTTTCTACTGTCTGTCTCGCCTCTTCGAATGAAGTTTTA  
ATG  
+  
FFFFFFFFFFFFF:FFFFFFFFFFFFFFF:FFFFFFFFFFFFFFFFFFFFFFFFFFFFFFFFFFFFF  
FFFFFFFFFFFFFFFFFFFFFFFFFFFFFFFFFFFFFFFFFFFFFFFFFFFFFFFFFFFFF:FFFFFFFFFFFFF  
FFF  
@A00721:190:HGJW7DSXY:4:1417:27742:4977\_2:N:0:TCTGCAAG+GCTGCACT  
TGATAGTGAATTTATACCTACAATCATTGGTTTTTCTAATAATGATGACACTATTGTTTATGGATATG  
ATGCTATTACTCATGATGGTAACGGTCAGGGAGGATTCTCAGTTTACA  
+  
F:F:FF,FFF::F:FFFFFFFFFFFF,FFFFFFFFFFFFFFFFFFFFFFFFFFFF, ,FFFFFFFFFFFFF:  
:FFFFF,FFFFFFFFFFFF,FFF,FFFFFFFFFFFFFFFFF::,FFFF  
@A00721:190:HGJW7DSXY:4:1176:17137:6057\_2:N:0:TCTGCAAG+GCTGCACT  
CCGAAAGACGTGCTAAATTAACCATTTGTACGATGTCTGTCTCGGCGATCACTTTTCACTAAGA  
ATTGGTCCTACTTTTGGACAAGGCCAACTTCGTAATCTTCATGAGATC  
+  
FFFFFFFFFFFFFFFFFFFFFFFFF:FFFFFFF,FFFFFFF:F:FFFFFFFFFFFFFFFFF:FFFFF,  
FFFFFFFFF:FF:FFFFFFFFFFFFFFFFF:FFFFF:FFFFFFFFF  
@A00721:190:HGJW7DSXY:4:1128:13593:26694\_2:N:0:TCTGCAAG+GCTGCACT  
TATCTCTTTGGTTGTTAGGGATTTTGAGAGAGTGAAAGGCTTCAATTGTAGTGGTTTGGTCGTTTCAG  
TACCCAGTCAGTATACCTCTACGCAAAGATATTTATGAAAACACTACAG  
+  
FFFFFFFFFFFFFFFFFFFFF:FFFFFFFFFFFFFFFFF:FFFF:FFFFFFFFF:F:FFF:FFFFF  
FFFFFFFFFFFFFFFFF,FFFFFFFFFFFFFFFFF:FFFFFFFFFFFFFFFFF  
@A00721:190:HGJW7DSXY:4:2130:4698:17801\_2:N:0:TCTGCAAG+GCTGCACT  
ATTACCTGTCTTTATATTATGAATGAACCTTCGGCCGCTCTCTTTGCTTCGATGTTGGATGTCAAGA  
AGGGTTCAGAATGGGATTCCTACGTAGTTTATGACTTTGGTGGTGTA  
+



FFFFF:FFFFFFFF:FFFFFFFFFFFFFFFFFFFFFFFFFFFFFFFF:F:FFF,FF:FFFF:FFFFFFFFFFFF  
FFF:FFFFFFFFFFFFFFFFFFFF,FFFF:FFFFFF,:FFFFFFFFFFFF  
@A00721:190:HGJW7DSXY:4:1519:14136:24972\_1:N:0:TCTGCAAG+GCTGCACT  
TCTTACGTTACGGTAATTACTATAGTGTTATTTATTCTGGTGGTGATGATAATCTTGGAGGTCGTGAC  
GTTGATGAAGCTATAAGAGCGTTCTTATTACGGCGCACTTCTTTACCCGCCACCACACAACCTTTCAGT  
TTC

+

FFFFFFFFFFFFFFFFFFFFFFFF:FFFFFFFFFFFFFFFFFFFFFFFFFFFFFFFF:FFFFFFFFFFFFFFFFFFFF  
FFFFFFFFFFFFFFFFFFFFFFFFFFFFFFFFFFFFFFFFFFFFFFFFFFFFFFFFFFFFFFFFFFFFFFFFFFFF  
FFF

@A00721:190:HGJW7DSXY:4:2333:31548:15045\_2:N:0:TCTGCAAG+GCTGCACT  
TGTTACTGGAAAACCTCGTCAATACTTTTCAATAATATACGTCTTGAACCTCACTTATGACGATCTAG  
TGAAATTAACGCGTCCTTTTCTGGAACGTAGTTTTACTATTATGAACA

+

FFFFFFFFFFFFF:FFFF:FFFF:FFFFFFFFFFFFFFFFFFFFFFFFFFFFFFFFFFFFFFFFFFFFFFFFFFFF  
F:FFFFFFFF:F:FFFF,F:FFF:FFFF:FFFF:FFF,FFFFFFFF:F

@A00721:190:HGJW7DSXY:4:1620:32099:9737\_1:N:0:TCTGCAAG+GCTGCACT  
ACGTGTGCTCTTCCGATCTAATTACCCTGATTCCGGCCGGTGGTAGCTCATTTCTACCAGGGGCTAT  
TACTCTTGCTGAAACAGCTATTAAAGCTGTTGAGCGGGTAATTACACCTAAACGAGCTCGATCTGCCA  
TCG

+

FFFFFFFFFFFFFFFFFFFFFFFFFFFFFFFFFFFFFFFFFFFFFFFFFFFFFFFFFFFFFFFFFFFFFFFFFFFF  
FFFFFFFFFFFFFFFFFFFFFFFFFFFFFFFFFFFFFFFFFFFFFFFFFFFFFFFFFFFFFFFFFFFFFFFFFFFF  
FFF

@A00721:190:HGJW7DSXY:4:1477:26458:18223\_2:N:0:TCTGCAAG+GCTGCACT  
CACTCTTTTCTGCTACTTTAACGGAGCGTAGTGTACTCTTCGTCGATTGTATCAACAGTAACATTACT  
TCTAATAAAGGTCTCTATCAAGCTCGTATTATCGTCGCTGCTGGATCT

+

FFFFFFFFFFFFFFFFFFFFFFFFFFFFFFFFFFFFFFFFFFFFFFFFFFFFFFFFFFFFFFFFFFFFFFFFFFFF  
FFFFFFFFFFFFFFFFFFFFFFFFFFFFFFFFFFFFFFFFFFFFFFFFFFFFFFFFFFFFFFFFFFFFFFFFFFFF

@A00721:190:HGJW7DSXY:4:1638:7410:31923\_1:N:0:TCTGCAAG+GCTGCACT  
AAGGCTAAACTCCAAGGTAATTATGAAGACTGTGATTTATCTTTCACTCTGGCCTTGTATGAGGGTGT  
TTCTAATCGTAACATTAATAATTTCAATCTTCTTAAAAAGAAGATAGAGAGTCATACTTTGGGCTATC  
GTT

+

FFFFFFF:FFFFFFFFFFFFFFFFFFFFFFFFFFFFFFFFFFFFFFFFFFFFFFFFFFFFFFFFFFFFFFFFFFFF  
FFFFFFFFFFFFFFFFFFFFFFFFFFFFFFFFFFFFFFFFFFFFFFFFFFFFFFFFFFFFFFFFFFFFFFFFFFFF  
FFF

@A00721:190:HGJW7DSXY:4:1578:17815:3192\_2:N:0:TCTGCAAG+GCTGCACT  
GATAGCCAATATTGAAGTGGACACCTCTGGTAGTATCGAAGTAAAGATAACCAATAAGGAAGGAGCTT  
ATACTATGGTTGAATCAACTAAGCATACTACTTTTGCTTTGATTACTC

+

FFFFFFFFFFFFFFFFFFFFFFFFFFFFFFFFFFFFFFFFFFFFFFFFFFFFFFFFFFFFFFFFFFFFFFFFFFFF  
FFFFF:FF:FFFFFFFFFFFFFFFFFFFFFFFFFFFFFFFF:F:FFFFFFFF

@A00721:190:HGJW7DSXY:4:2638:21730:14356\_1:N:0:TCTGCAAG+GCTGCACT  
CTTCCGATCTGTTAAAGAGTCGATTAAACAAGTTGTACTTATCAATGATTTTATCGCTGGTTGTTATC  
TCGAAAAGTCTCTTCTAAAAGGAACGTCAGTTCTAACCCAAAGAGAATATCTAAAATATTTACAAAAT  
CTT

+

FFFF:FFFFFFFFFFFFFFFFFFFFFFFFFFFFFFFF,FF:FF:FFFFFFFFFFFF:FFFFFFFFFFFF  
FFFFFFFFFFFF:FFFFFFFFFFFFFFFFFFFFFFFFFFFFFFFFFFFFFFFFFFFFFFFFFFFFFFFFFFFF  
FFF

@A00721:190:HGJW7DSXY:4:1160:22797:12759\_2:N:0:TCTGCAAG+GCTGCACT  
AGACGTTGCTTGTGCTTCCTCTTAAATGGCACTACCTCGGTACAATCTTACTTGGAACGAAGGCGA

CCTGTTCCGGAGTTTTTACGGGATCCGGAATGTTCTGTCTATATTAGG

```

FFFFFFFFFFFFFFFFFFFFFFFFFFFFFFFF:FFFFFFFFFFFFFFFFFFFFFFFFFFFFFFFF
FFFFFFFFFFFFFFFFFFFFFFFFFFFFFFFF,FFFFFF,FFFF,FFFFFFFFFFFFFF

```

+

[illegible]

+

```
FFFFFFFFFFFFFFFFFFFFFFFFFFFFFFFFFFFFFFFFFFFFFFFFFFFFFFFFFFFFFFFFFFFFF  
FFFFFFFFFFFFFFFFFFFFFFFFFFFFFFF;FFFFFFFFFF;FFFFFFFFFFF
```

+

```
FF:FFFF:FFF:FFFFFFFFFFFFFFFFFFFFFFF,F:FFFFFFFF,FFFFFFFFFFFFFFFFFFFFFFFFF
FFFFFFFF::FFF:FF,FFF:FF,FFF:FF:F,,FFFFFFFFFFFFFFFFFFF,
```

 $+$ [illegible]

+

```
F:FFFFFFFFFFFFFFFF:FFFFFFFFFFFFFFFFFFFFFFFFFFFFFFFF:FFFFFFFFFFFFFFFFFFFFFFFFFFFFFFFFFFFFFFFF
FFFFFFFFFFFFFFFFFFFFFFFFFFFFFFFFFFFFFFFFFFFFFFFF
```

+

[illegible]

+

```

FFFFFFFFFFFFFFFF,FFFFFF:FFFFFFFFFFFF,FFFFFF:, :FF: :FFFF,FFF:FFFFFFFF
F:FFFF: :FFFF.FFFFFFFFFF:FFFF.FFFF:FF.FFFFFFFFFFFFFFFF

```

+

FFFFFFFFFFFFFFFFFFFFFFFFFFFFFFFFFFFFFFFFFFFFFFFFFFFFFFFFFFFFFFFFFFFFFFFFFFFF  
FFFFFFFFFFFFFFFFFFFFFFFFFFFFFFFFFFFFFFFFFFFFFFFFFFFFFFFFFFFFFFFFFFFFFFFFFFFF  
@A00721:190:HGJW7DSXY:4:1532:9118:22451\_1:N:0:TCTGCAAG+GCTGCACT  
GTATTAACCTTATAAAGGTGAGGAGACCATTTCCTTGCTGAAATTTATAGAAGATTATTTTGACAGAAT  
CAATAAGAATCATCGATTCTCGATTCTGATAGCCTTATCTAGGTACTCTCATTTACTATGTTGATTTAG  
TCT  
+  
FFFFFFFFFFFFFFFFFFFFFFFFFFFFFFFFFFFFFFFFFFFFFFFFFFFFFFFFFFFFFFFFFFFFFFFFFFFF:  
FFFFFFFFFFFFFFFFFFFFFFFFFFFFFFFFFFFFFFFFFFFFFFFFFFFFFFFFFFFFFFFFFFFFFFFFFFFF  
FFF  
@A00721:190:HGJW7DSXY:4:1404:26332:27962\_2:N:0:TCTGCAAG+GCTGCACT  
GGATCCACTCCTCGAGTTATCATGATGTTAGTATGTTATATACTGATTTACAACGATATAGGAGTAAT  
CTACGAGAAGATTCTAGAATTCTTAATTATAATTATTCAACCTCAAAG  
+  
F:FF,FFFFFF:FFFF,FFFF:FFF:F,FFFFFFFF:FFF:FFFFFFFF::FFFFFFFFFFFFFFFF  
FFFFFF:FFFFFFFFFFFFFFFF::FFFFFFFFFFFFFFFFFFFFFFFF:FF:FFF  
@A00721:190:HGJW7DSXY:4:1643:13060:21856\_2:N:0:TCTGCAAG+GCTGCACT  
GAGATCACACATTTTGAGAACTAACTATGTTATGTTCTCTGATCATTTTGACAATCTCTTCTTATAAT  
AAATAAATAAATAATTACTAATGGCAAATAGTGGAAAGGCTCCAGT  
+  
FFFFFFFFFFFFFFFF,FFFFFFFFFFFFFFFFFFFFFFFFFFFFFFFFFFFFFFFFFFFFFFFFFFFFFFFFFFFF:  
FFFFFFFFFFFFFFFFFFFFFFFFFFFFFFFFFFFFFFFFFFFFFFFFFFFFFFFFFFFFFFFFFFFFFFFFFFFF  
FFFFFFFFFFFFFFFFFFFFFFFFFFFFFFFFFFFFFFFFFFFFFFFFFFFFFFFFFFFFFFFFFFFFFFFFFFFF,  
FFFF:FF  
@A00721:190:HGJW7DSXY:4:1652:13015:27414\_2:N:0:TCTGCAAG+GCTGCACT  
TACGATGACGTGAGAATAGGTGAAGGGATAGTTTTTACCTCGACCAACATTAAGGCGGCGGCGACTAA  
TCTTAAAGCTTCACCCAAAATGAAGGACACTTCGAAACTGAATAATGA  
+  
FFFFFFFFFFFFFFFFFFFFFFFFFFFFFFFFFFFFFFFFFFFFFFFFFFFFFFFFFFFFFFFFFFFFFFFFFFFF  
FFFFFFFFFFFFFFFFFFFFFFFFFFFFFFFFFFFFFFFFFFFFFFFFFFFFFFFFFFFFFFFFFFFFFFFFFFFF  
@A00721:190:HGJW7DSXY:4:2208:23122:26819\_1:N:0:TCTGCAAG+GCTGCACT  
GGCTCTAAAGGACACTATACAATATCCAGACGACGACGAAGCTTATACTACTTTAATTTTGGGTATTA  
TGTGGAGATATCGTGATATCAGTACGTCCAGATCCTCTGCTTTTACCGATAACGATAAATTCGTCATC  
AAA  
+  
:FFFFFFFFFFFF:FFFFFFFFFFFFFFFFFFFFFFFFFFFFFFFFFFFFFFFFFFFFFFFFFFFFFFFFFFFF:  
FFFFFFFFFFFFFFFFFFFFFFFFFFFFFFFFFFFFFFFFFFFFFFFFFFFFFFFFFFFFFFFFFFFFFFFFFFFF  
FFF  
@A00721:190:HGJW7DSXY:4:2430:2139:10833\_1:N:0:TCTGCAAG+GCTGCACT  
TTGGTGCTTAGGGATATAATGAATTCAGCACCACATTTTGGTCAAGTCAATCCGTTGAGAAAATTTCT  
TAGAGGATATTCGCCATTGTGGTACGAATTGGTCCAACATTTACCACCAAATTCTTTTGATACTC  
TAG  
+  
FFFFFFFFFFFFFFFFFFFFFFFFFFFFFFFFFFFFFFFFFFFFFFFFFFFFFFFFFFFFFFFFFFFFFFFFFFFF:  
FFFFFFFFFFFFFFFFFFFFFFFFFFFFFFFFFFFFFFFFFFFFFFFFFFFFFFFFFFFFFFFFFFFFFFFFFFFF  
FFF  
@A00721:190:HGJW7DSXY:4:1155:30454:32127\_2:N:0:TCTGCAAG+GCTGCACT  
CGGAATACGCTTGCTATTACACGATTGGTTCAACCCGTTGATGCTATGTCAGAAGAAGCTATTCAA  
GCTTGTCGTTTAAAGACTGCAGAGGCTGTCAAACAAGCCCAGACTCAA  
+  
FFFFFFFFFFFFFFFFFFFFFFFFFFFFFFFFFFFFFFFFFFFFFFFFFFFFFFFFFFFFFFFFFFFFFFFFFFFF:  
FFFFFFFFFFFFFFFFFFFFFFFFFFFFFFFFFFFFFFFFFFFFFFFFFFFFFFFFFFFFFFFFFFFFFFFFFFFF  
@A00721:190:HGJW7DSXY:4:1316:24795:10770\_1:N:0:TCTGCAAG+GCTGCACT  
CAAAGGTTTTGAATTTAGCTCAACTGGGAGACGTGCTTAAATGGGTGATAAAAATTATTTAGAGATC  
TTTTCTACTTACAAAGGACAATTCAGTTTCATTAATTCTACGAAAAGTCCGGAGTATATTGTATGTT  
AAT

+  
FFFFFFFFFFFFFFFFFFFFFFFFFFFFFFFFFFFFFFFFFFFFFFFFFFFFFFFFFFFFFFFFFFFFFFFF  
FF:FFFFFFFF, :FFFFF:FFFF:FFFFFFFFFFFFFFFFFFFFFFFFFFFFFFFFFFFFFFFF  
FFF  
@A00721:190:HGJW7DSXY:4:1239:4381:14121\_1:N:0:TCTGCAAG+GCTGCACT  
AATAGTTCTACCGATACGTAGTGAACGCGTTCGTAGAACCAAGTACTTTCCGTCTGAAGAGTTTAGAG  
CTGCTATTGATTATGTAACCGATAGGAGTTGTATAGTTGAAGATGTGGCTTTAGACGATAATCCTTTA  
AGG  
+  
FFFFFFFFFFFFFFFFFFFFFFFFFFFFFFFFFFFFFFFFFFFFFFFFFFFFFFFFFFFFFFFFFFFFFFFF:  
FFFFFFFFFFFFFFFFFFFFFFFFFFFFFFFFFFFFFFFFFFFFFFFFFFFFFFFFFFFFFFFFFFFFFFFF:  
FFF  
@A00721:190:HGJW7DSXY:4:1125:15049:22200\_1:N:0:TCTGCAAG+GCTGCACT  
GAAGATTTTCCACAGATTTGTCTACGTTGCAGATCGCCACTCCAAACACTATATACATTATAAAATA  
TAAAAATAAGGGAGTCATAACTTTTGTTACCAAATTCTTGGCTTTCAACGAAGTCTCTGATTTTATTA  
ATC  
+  
FFFFFFFFFFFFFFFFFFFFFFFFFFFFFFFFFFFFFFFFFFFFFFFFFFFFFFFFFFFFFFFFFFFFFFFF  
FFFFFFFFFFFFFFFFFFFFFFFFFFFFFFFFFFFFFFFFFFFFFFFFFFFFFFFFFFFFFFFFFFFFFFFF:  
FFF  
@A00721:190:HGJW7DSXY:4:1566:12301:1564\_1:N:0:TCTGCAAG+GCTGCACT  
CGATCTCTCGGTCATTTACTCTGTACTTGATCTACGTCGTTTAACTGTCGGAACAACCTTTACTTAGA  
ATGACTCTATCTTTTCAGACACTTCTTATATTATTTACAATAGTTAATATCATATTAGTAATACTCAC  
TAT  
+  
FFFFFFFFFFFFFFFFFFFFFFFFFFFFFFFFFFFFFFFFFFFFFFFFFFFFFFFFFFFFFFFFFFFFFFFF:  
FFFFFFFFFFFFFFFFFFFFFFFFFFFFFFFFFFFFFFFFFFFFFFFFFFFFFFFFFFFFFFFFFFFFFFFF:  
FF:  
@A00721:190:HGJW7DSXY:4:1457:32027:3286\_2:N:0:TCTGCAAG+GCTGCACT  
TTTTTCTTAGCTAATAGATTAATAAAGGATGAGTACGAAAACCAACTCTTCGTTACGAGACCTGATGG  
TAGAATAGATTTAGTCTCTACCCATCTCAACGAGGATAAAGCGAGT  
+  
FFFFF:FF:FFFFFFFFFFFFFFFFFFFFFFFFFFFFFFFFFFFFFFFFFFFFFFFFFFFFFFFFFFFF  
FF: :FFFFF:FFFFFFFFFFFFFFFFFFFFFFFFFFFFFFFFFFFFFFFFFFFFFFFFFFFF, FFF  
@A00721:190:HGJW7DSXY:4:1369:2835:3176\_1:N:0:TCTGCAAG+GCTGCACT  
TACACGAAGAGATCATCCGCAAACGACTCGAAACCGAGACGCCGTAGATCAAAGTCCCTTCTAACTTT  
AGATTATGAATCCTGCCTTTACTCATTTTATAGCAGTTATTTATGTTGTACTTTTTATAATTTATAAC  
CTT  
+  
:F:, ,F,F,:F,,,FF,,,:FFFFFFFFFFFFFFFFFFFFFFFFFFFFFFFFFFFFFFFFFFFF  
FFFFFFFFFFFFFFFFFFFFFFFFFFFFFFFFFFFFFFFFFFFFFFFFFFFFFFFFFFFFFFFFFFFF  
FFF  
@A00721:190:HGJW7DSXY:4:2534:3115:25488\_1:N:0:TCTGCAAG+GCTGCACT  
TATGTACTTATTGTAACGATCATTCTTTCGAGTTTGTCAATTCTTATTCTTTTATTCTTTAACTGTG  
TATGAGGAGGATTTATAATGCTTTTCGATAGTGATTGTTATCAATTTAAATACATTACTGTTTCAAT  
CAT  
+  
FFFFFFFFFFFFFFFFFFFFFFFFFFFFFFFFFFFFFFFFFFFFFFFFFFFFFFFFFFFFFFFFFFFFFFFF  
FFFFFFFFFFFFFFFFFFFFFFFFFFFFFFFFFFFFFFFFFFFFFFFFFFFFFFFFFFFFFFFFFFFF  
FFF  
@A00721:190:HGJW7DSXY:4:2246:1904:1470\_2:N:0:TCTGCAAG+GCTGCACT  
GACTCCGAAAATGGTTTCAAATGAGGTCAAAGCTCTATTTATTAAACGAACATTATCCGATTCTTCG  
AGGGTATCACTACCACTGATCTGCCGACTTTAGTCAAGGAACCTCAAT  
+

```

FFFFFFFFFFFFFFFFFFFFFFFFFFFFFFFFFFFFFFFFFFFFFFFFFFFFFFFFFFFFF:FFFFFFF
FFFFFFFFFFFFFFFFFFFFFFFFFFFFFFFFFFFFFFFFFFFFFFFFFFFFFFFFFFFFF:FFFFFFF
@A00721:190:HGJW7DSXY:4:2564:12943:26443_2:N:0:TCTGCAAG+GCTGCACT
TATTTTCTATAAGGGAAAATAGCAATAATCAAATTCGACAAATTTTAGAACTTTATTTCAGAACTC
TCTCCGATCACCTTGGTGTGATCTCCCGGAGGATCTTTTCAATAAGAT
+
FFFFFFFFFFFFFFFFFFFFFFFFFFFFFFFFFFFFFFFFFFFFFFFFFFFFFFFFFFFFF:FF:FFFFFFFFF,FFFFFFFFFFFFF
FFFFFFFFFFFFFFFFFFFFFFFFFFFFFFFFFFFFFFFFFFFFFFFFFFFFFFFFFFFFF
@A00721:190:HGJW7DSXY:4:1610:2266:14810_2:N:0:TCTGCAAG+GCTGCACT
ATTTTTAAATAGTGATATTACGCGTATACTTGAATACTTTATCAAAGATTGGCTTGCTATTAC
GCAAAAAGTTGGAAGAGGTCTATGATATTTATTTACTTATACTTTAA
+
FFFFFFFFFFFFFFFFFFFFFFFFFFFFFFFFFFFFFFFFFFFFFFFFFFFFFFFFFFFFF
FFFFFFFFFFFFFFFFFFFFFFFFFFFFFFFFFFFFFFFFFFFFFFFFFFFFFFFFFFFFF
@A00721:190:HGJW7DSXY:4:1501:22327:28667_1:N:0:TCTGCAAG+GCTGCACT
AACTTGACTGTTGATAATATTACAATAGCTCTTCTCAGAAGATTAGAGAAGTAACCGGTGAACACGT
CGGTAGCATTGATTTACTTTTACCGTTAGAACTGAAAAAGATTCTTTTCGAAAAGAACCTATAAGTT
ACA
+
FF,FFF::F,FF,FFFFFFFFF::FFFF:F:FFFF:FFFF:FFFFF:F::FFFFF:FF:F:F:FF
FF:F:F,:FF,:FFFF:FFFFF:,FF::FF,F:FFFF,F,FF:FFFFFFFFF:,FFFF:FFF::F:
FFF
@A00721:190:HGJW7DSXY:4:1424:6840:34194_1:N:0:TCTGCAAG+GCTGCACT
TATATTAAAGAAATAAAAATACTTCAAGTACCTGAACCTTACATTTTTAATGGTATGGTATAATGTGT
CTTACAAATAGAACCTTCACTCTCGGTAATGAGAGTGTATTCCTTAATATTCTAGTAACCGCTATGTG
GGC
+
FFFFFFFFFFFFFFFFFFFFFFFFFFFFFFFFFFFFFFFFFFFFFFFFFFFFFFFFFFFFF
FFFFFFFFFFFFFFFFFFFFFFFFFFFFFFFFFFFFFFFFFFFFFFFFFFFFFFFFFFFFF
FFF
@A00721:190:HGJW7DSXY:4:1460:7374:6464_1:N:0:TCTGCAAG+GCTGCACT
GATAGCAATTTATGTTTTAAATGCTAGGAAAATTTTAGAAAACTCCATTGTATAGTTCAAGGAGTAC
TTAATTCAATAGCTTTAGTATTATTTACTATCGCCTTTATTGAAAATTGTATAAGAGTTAATTGCTTA
CAC
+
FFFFFFFFF:FFFFFFFFFFFFFFFFF::F,FFFFFFFFFFFFFFFFFFFFF,F:F:FFFFF:FFFFF
FFF:FFFF:F,FFFFFFFFFFFFFFFFFFFFF:FFFFFFFFFFFFFFFFFFFFFFFFFFFFF
FFF
@A00721:190:HGJW7DSXY:4:2570:29333:28025_2:N:0:TCTGCAAG+GCTGCACT
TTAATTGATTGAAGCTAGGCGTTGGGGAGAATGAAGTCCGCTTCCCGGAAGAAACGATCTATTTACA
GAGTATTTAGAGTAGTCCAAAGTTTGTATAAATTTATATGATTTTCTA
+
FFFFFFFFFFFFFFFFFFFFFFFFFFFFFFFFFFFFFFFFFFFFFFFFFFFFFFFFFFFFF:FFF
FFF,FFFFFFFFFFFFFFFFFFFFFFFFFFFFFFFFFFFFFFFFFFFFFFFFFFFFF
@A00721:190:HGJW7DSXY:4:1255:1298:25379_2:N:0:TCTGCAAG+GCTGCACT
AACATACCATACTCCCCAACATAACATACCATAACCTACCATGACCAATCATCGCTCCAACCTGGC
ACGCCAGACGTAGGGTCAAACCTACTACCGCCGGTCGGCAGATCGGCA
+
FFFFFFFFFFFFFFFFFFFFFFFFFFFFFFFFFFFFFFFFFFFFFFFFFFFFFFFFFFFFF
FFFFFFFFFFFFFFFFFFFFFFFFFFFFFFFFFFFFFFFFFFFFFFFFFFFFF
@A00721:190:HGJW7DSXY:4:2370:25861:35759_1:N:0:TCTGCAAG+GCTGCACT
TACGTTACGGACCGCTGTGCAGAATAACCTTCCCAAATCTAGATCTGCACAGAAGAAGGCTGAAGG
TCGTTACCGGACGACCACTCAAAGGAAACGGGCTGTTGCCAGAGGAAAGCAGCGACCACCGAGGTCG
CTC

```

+  
FFFFFFFF:,FFF:, ,FFFFFFFFFFFFFFFF,F,FF,FFFF,FF:,FFF::F:FFFFFF:FFFFFFFF,,  
F:FFF:FFFFFFFFFFFFFFFF,::F:FFFFFF,FFFFFF,FFFFFFFFFFFFFFFF::FFFFFFFFFFFF  
:FF  
@A00721:190:HGJW7DSXY:4:1526:7048:1548\_2:N:0:TCTGCAAG+GCTGCACT  
GCAGTCCCGTCATCTCTGTGGGAAGTGAAGCAGTACCTCAGTCAAAAGTCACATTCACCACTCCCATG  
CCAATCAATGATGTGACTATACAGTTCGGCCATTTCAAGAGTGGTCAA  
+  
FFFFFFFFFFFFFFFF:FFFFFFFFFFFFFFFFFFFFFFFFFFFFFFFFFFFFFFFFFFFFFFFFFFFFF  
FFFFFFFF:FFFF:FFFFFFFFFFFFFFFF:FFFFFFFFFFFF  
@A00721:190:HGJW7DSXY:4:1629:8241:19335\_1:N:0:TCTGCAAG+GCTGCACT  
GAGGTACTGAAGCCTTCCCTCCGCTGGCACGAAGAACTCCCAAGCCAATCAATAGTTCTTCTGAC  
CAGAATGAAAAGGGGTTTACCAGGGTAGTCTCTAAGTCTACCAGGAAGAGGGGAAATGTCCCCAAAAC  
TGA  
+  
FFFFFFFFFFFFFFFF:FFFFFFFFFFFFFFFFFFFFFFFFFFFFFFFFFFFFFFFFFFFFFFFFFFFFF  
FFFFFFFF:FFFFFFFFFFFFFFFFFFFFFFFFFFFFFFFFFFFFFFFFFFFFFFFFFFFFFFFFFFFFF  
FFF  
@A00721:190:HGJW7DSXY:4:1503:10212:16924\_2:N:0:TCTGCAAG+GCTGCACT  
AGGTCCATCAGGACCTAAGAAGGGGAAATTACCCCTAATTCTGAAGGAAGATCTCCCACTCTGGGG  
TTGGAATAAGAAATCTGCACGGGCCAAAGAGCGCTGCTACGAAGT  
+  
FFFFFFFFFFFFFFFFFFFFFFFFFFFFFFFFFFFFFFFFFFFFFFFFFFFFFFFFFFFFFFFFFFFFF  
FFFFFF:FFFFFFFFFFFFFFFFFFFFFFFFFFFFFFFFFFFFFFFFFFFF:FF  
@A00721:190:HGJW7DSXY:4:2113:18900:9674\_1:N:0:TCTGCAAG+GCTGCACT  
GCTTGGGTCATTAAGGGTAGCTGTAAAGTTGCGCCTGCCGACCCCATCTTTGAGACCAAGACTCTCTA  
CAGTAGGTTCTGCTACTATGAGCAAATCTGTTGAATTCGTCACTGAGGACGAAGGTGAGAGGACTT  
TTG  
+  
FFFFFF:FFFFFFFF:FFFFFF,FFFFFFFFFFFFFFFFFFFFFFFFFFFFFFFFFFFFFFFFFFFF,F  
FFFFFFFFFFFFFFFFFFFFFFFFFFFFFFFFFFFFFFFFFFFFFFFFFFFFFFFFFFFFFFFFFFFFF  
FFF  
@A00721:190:HGJW7DSXY:4:2278:9860:8923\_1:N:0:TCTGCAAG+GCTGCACT  
CAAAGTGAAGCAGTCGCTGGGGAAGAGAATTGCGTGGGTTGAAGGCCGACGCTTCGAGCTTGAGTG  
TGACGAGGCCGGTGACGTTTTGTCAACGGCGTTTGAGAGATTTTATCCGCGCTTAAGTATGGGGCGA  
AGA  
+  
FFF:FFFFFFFFFFFFFFFFFFFFFFFFFFFFFFFFFFFFFFFFFFFFFFFFFFFFFFFFFFFFFFFFF  
FF,FFFFFFFFFFFFFFFFFFFFFFFFFFFFFFFF,FFFFFFFFFFFF:FFFFFFFFFFFFFFFFFFFFF  
FFF  
@A00721:190:HGJW7DSXY:4:1503:23402:16157\_1:N:0:TCTGCAAG+GCTGCACT  
AGTCTTGAAGGACTTAGGTTGGCATATTTATGCCGACGATAATAAGCATGTCACCTTAAGCACCGAG  
GTAAGCTCGGGACTTACAAGAGAGAGTGTGAGAGAGTGCCTCTCACTATTTTGGCCAGAATGCGGGC  
TTT  
+  
FFFFFFFFFFFF:FFFF:FFFFFFFF:FFFFFFFFFFFFFFFFFFFFFFFFFFFFFFFFFFFF:FFFF  
FFF,FFFFFFFFFFFF::FF:FFFFFFFFFFFFFFFF:FF:FFFFFFFFFFFFFFFFFFFFFFFF  
FFF  
@A00721:190:HGJW7DSXY:4:2369:3351:35884\_2:N:0:TCTGCAAG+GCTGCACT  
GCTCCTTCTGTGGGTGAGGGTTTTGTTATATTCAGTGGTCTGGGAGGCTGCTTCTCCATAATTA  
CAACCTCTCTTTAGAGAGCATTAGAAAGATCGGAAGAGCGTCGTGTAG  
+  
FFFFFFFFFFFFFFFFFFFFFFFFFFFFFFFFFFFFFFFFFFFFFFFFFFFFFFFFFFFFFFFFFFFFF  
FFFFFFFFFFFFFFFFFFFFFFFFFFFFFFFFFFFFFFFFFFFFFFFFFFFF:FF

@A00721:190:HGJW7DSXY:4:1229:10212:11287\_1:N:0:TCTGCAAG+GCTGCACT  
CACACTTTTCTTGAAAATTTTCTTTCTCCGTCATTGGGGATTTGATGTGAGAAGGTGGAAGGTG  
TCAAGGGTCTTCTTCATGCTGATCTTTCAGGACCTAATCATCATGATTGATAGTTACGGCTCGTAT  
CGA

+

FFFFFFFFFFFFFFFFFFFFFFFFFFFFFFFFFFFFFFFFFFFFFFFFFFFFFFFFFFFFFFFFFFFFFFFF  
FFFFFFFFFFFFFFFF:FFFFFFFFFFFF::FFFFFFFF:FFFF:FFFFFFFFFFFFFFFF:FFFFFFFFFFFFFFFF  
FFF

@A00721:190:HGJW7DSXY:4:1351:24117:12258\_2:N:0:TCTGCAAG+GCTGCACT  
AAGTTCTCCGAAATTAAGACGGGGGATTAAGAGTCCAGCTGTAAGTGTCAATTCAGAGAGGGGAGC  
TCTGAAAAGGAACTTCGTCAGAAGATGAGGAAGTCTAAGAGGAGAGA

+

FFFFFFFFFFFFFFFFFFFFFFFFFFFFFFFFFFFFFFFFFFFFFFFFFFFFFFFFFFFFFFFFFFFFFFFF:FFFFFFFFFFFF:FFFFF  
FFFFFFFFFFFFFFFFFFFFFFFFFFFFFFFFFFFFFFFF:FFFFFFFFFFFFFFFFFFFFFFFFFFFFFFFF

@A00721:190:HGJW7DSXY:4:1169:24831:17628\_1:N:0:TCTGCAAG+GCTGCACT  
CTCTAGAGAAGATCTCCCCACCTGGAGAAGGCAAGTGGAGAGTCCAGAAGTTGATGAAGAAGGATTAT  
TTGAAGCAGGGGTTACCACTTCCTAAGGTGGATGAGGGAGGTTGTTTCTTTGGAGTTTTAGATAATCT  
TTT

+

FFFFFFFFFFFFFFFFFFFF,FFFFFFFFFFFFFFFFFFFFFFFFFFFFFFFFFFFFFFFFFFFFFFFFFFFFFFFF:FFFF  
FFFFFFFFFFFFFFFFFFFFFFFFFFFFFFFFFFFFFFFFFFFFFFFFFFFFFFFFFFFFFFFFFFFFFFFFFFFFFFFF  
FFF

@A00721:190:HGJW7DSXY:4:1429:21097:11569\_2:N:0:TCTGCAAG+GCTGCACT  
CCTTGAGAAGACAAGCCACATTAAGATATAATTTAGGTCAACTTGGGGTTTTGAATGTCATTAGTGCC  
TTACGATTGAAAGAGGTCCTTTTGAGTATCGACAGATCTTTCGATCTT

+

FFFFFFFFFFFFFFFFFFFFFFFFFFFFFFFFFFFFFFFFFFFFFFFFFFFFFFFFFFFFFFFFFFFFFFFF  
FFFFFFFFFFFFFFFFFFFFFFFFFFFFFFFFFFFFFFFFFFFFFFFFFFFFFFFFFFFFFFFFFFFFFFFF:FFFF  
FFFFFFFFFFFFFFFFFFFFFFFFFFFFFFFFFFFFFFFFFFFFFFFFFFFFFFFFFFFFFFFFFFFFFFFF

@A00721:190:HGJW7DSXY:4:2667:5339:13870\_2:N:0:TCTGCAAG+GCTGCACT  
TTAACGTGGCAGAATTCGGTAACCTTACCATATTGTTCTTCCGGAAGTTGTGGGATTTAACTTTGAC  
TCAACTACTCCGATCAGATCCGGATGGTTTGATTGGTATGGACTACTC

+

FFFFFFFFFFFFFFFFFFFFFFFFFFFFFFFFFFFFFFFFFFFFFFFFFFFFFFFFFFFFFFFFFFFFFFFF:FFFFFFFFFFFF  
FFFFFFFFFFFFFFFFFFFFFFFFFFFFFFFFFFFFFFFFFFFFFFFFFFFFFFFFFFFFFFFFFFFFFFFF:FFF:FFFFFFFF

@A00721:190:HGJW7DSXY:4:1134:7591:8656\_1:N:0:TCTGCAAG+GCTGCACT  
TAGGGTCATGGCAGATACTACCGATAAGGTGAAAAATATGCAGGTCAAAGATTCTGTAGCTCTGAGGG  
CGGTTGAGGGAGCCGTTTTGGCCGACTTTAACTATTCTAAGAGTCTTTATGATTCAAACCTATCGTT  
GTC

+

FFFFFFFFFFFFFFFFFFFF,FFFFFFFFFFFFFFFFFFFFFFFFFFFFFFFFFFFFFFFFFFFFFFFFFFFFFFFF  
FFFFFFFFFFFFFFFFFFFFFFFFFFFFFFFFFFFFFFFFFFFFFFFFFFFFFFFFFFFFFFFFFFFFFFFF  
FFF

@A00721:190:HGJW7DSXY:4:1140:2049:9580\_1:N:0:TCTGCAAG+GCTGCACT  
TACAGCGCTTATTGTGCGCAGTTTCCAGAATTGCGGTTGAAGTTCACCCATTCTATCTTGAATGCT  
CACGCCGTGCGAGCCATATCGAGACTATGTTATAATCACTTGTTAAAGTACAGATTTAGTGATTAGG  
TAT

+

:FFFFFFFF:FFFFFFFFFFFFFFFFFFFFFFFFFFFFFFFFFFFFFFFFFFFFFFFFFFFFFFFF:FFFFFFFF:FFFFFFFF  
FFFFFFFFFFFFFFFFFFFFFFFFFFFFFFFFFFFFFFFF:FFFFF:FFFFFFFFFFFFFFFFFFFFFFFFFFFFFFFF  
FFF

@A00721:190:HGJW7DSXY:4:1320:13829:24220\_1:N:0:TCTGCAAG+GCTGCACT  
GGAGGCGATATTCGTTTTCATATCCAAACTCCTTGAATGGAGTACATATTTGCAACCCTATTCTTGA  
TGTGAAAGATGCATCGAGGTATACGTCTAGGAACATTGATTGGGAACGTACCTACTCACGAGACGTCA  
TGA





@A00721:190:HGJW7DSXY:4:2374:25229:16720\_2:N:0:TCTGCAAG+GCTGCACT  
GAAGATTGAAGAACACGTCAAGAAGTCGCTCGGCGTTGTTCTTGAAAACCAAGTTAAGAAGGAGGCTG  
ATCATGGAGTCTTTGTACCTTCTGTCAAACCTTCGAGGTTTCAGCTACGA

+

FFFFFFFFFFFFFFFFFFFFFFFFFFFFFFFFFFFFFFFFFFFFFFFFFFFFFFFFFFFFFFFFFFFFFFFF:F  
:FFFFFFFFFFFFFFFFFFFFFFFFFFFFFFFFFFFFFFFFFFFFFFFFFFFFFFFFFFFFFFFF

@A00721:190:HGJW7DSXY:4:1506:17689:2096\_1:N:0:TCTGCAAG+GCTGCACT  
TGGATTGAAGGCTGGCTCTAAGGGAGACTCCTTCTTTTTGAATGTTGTAAAGAATTGGGTTGAGAAGT  
GTGCTTTACAAGGAGTTAGACTCTTCTTCAAGTTTTTAGATCTTCTTGATAATCTTAAAGAAAAATTT  
TCG

+

FFF,FFFFFFFFFFFFFFFF,FF:FFFFFFFFFFFFFFFFFFFFFFFFFFFFFFFFFFFFFFFFFFFFFFFFF  
FFFFFFFFF::FFFFFF:FFFFFFFFFFFFFFFFFFFFFFFF,FFF:FFFFFFFFFFFFFFFFFFFFFFFFF  
FFF

@A00721:190:HGJW7DSXY:4:1224:1949:24659\_2:N:0:TCTGCAAG+GCTGCACT  
CTGTACTTACATTCTTTACGCCAGATTCTTCATGGGGCGACGCTGTTTCTCTTGGTATTTCTGAAATA  
GTTTATCAGAGCGTCATTTTCCTTTGGGATCTTCTCTGGTAAGGGA

+

:FFFFFF:FFFFFFFFFFFFFFFFFFFFFFFFFFFFFFFFFFFFFFFFFFFFFFFFFFFFFFFFFFFFFFFFF  
::FFFFFFFF:FF:FFF,FFF:F,:F:FFFFFFFF:FFFFFFFFF::

@A00721:190:HGJW7DSXY:4:1107:18900:5478\_2:N:0:TCTGCAAG+GCTGCACT  
ATTCTTCTCACTCTTGACGAGAATTACTGTTTTCTCTACCCATAACTTCTTTTTCAAAAATGCGG  
ATGGGTCTACTGATGTTTTCTACAGAGTGCAGTCGTTTCAACACTTA

+

FFFFFFFFFFFFFFFFFFFFFFFFFFFFFFFFFFFFFFFFFFFFFFFFFFFFFFFFFFFFFFFFFFFFFFFFF  
FFFFFFFFF,FFFFFFFFFFFFFFFFFFFFFFFFFFFFFFFFFFFFFFFF,FF:,F,FF

@A00721:190:HGJW7DSXY:4:1238:2311:31046\_2:N:0:TCTGCAAG+GCTGCACT  
GGAAAATAATTGGTGATGAAAATACGTATGTCGGTGGGGTTCTCAAGGCTCTCATCGCCACTGGGATT  
CTAAGGGGTTCCATAAGATATTATCTGACATTGTGGTTCAATGATCAG

+

FFFFFFFFFFFFFFFFFFFFFFFFFFFFFFFFFFFFFFFFFFFFFFFFFFFFFFFFFFFFFFFFFFFFFFFFF  
FFFFFFFFFFFFFFFFFFFFFFFFFFFFFFFFFFFFFFFFFFFFFFFFFFFFFFFFFFFFFFFF

@A00721:190:HGJW7DSXY:4:1303:27651:26396\_2:N:0:TCTGCAAG+GCTGCACT  
TGGTCCTTACGTCTTAAGTAATTTGGATGTTGTGAAAACATCAGGTTCTTGTCACGATTCTTAAAA  
GAAGTTTATTAAACTTCAGAGTCTCTTGGAAGTCCAGGTAGCTAATG

+

FFFFFFFFFFFFFFFFFFFFFFFFFFFFFFFFFFFFFFFFFFFFFFFFFFFFFFFFFFFFFFFFFFFFFFFFF  
FFFFFFFFFFFFFFFFFFFFFFFFFFFFFFFFFFFFFFFFFFFFFFFFFFFFFFFFFFFFFFFF

@A00721:190:HGJW7DSXY:4:1231:25382:33395\_2:N:0:TCTGCAAG+GCTGCACT  
GCCACAGACTTTCTGGGAAAAGAGACCTCTGTTGGTAGAGGAGTTGAGAGAATTACTCAGATTCAATC  
TGGCATCACTGAACGTCTACAACGAGTTAGGGAGTGGCTAGAGATCGG

+

FFFFFFFFFFFFFFFF:FFFFFFFFFFFFFFFFFFFFFFFFFFFFFFFFFFFFFFFFFFFFFFFFFFFFFFFFF  
FFFFFFFFFFFFFFFFFFFFFFFFFFFFFFFFFFFFFFFFFFFFFFFFFFFFFFFFFFFFFFFF

@A00721:190:HGJW7DSXY:4:1276:11098:18114\_1:N:0:TCTGCAAG+GCTGCACT  
AGCAATACCTTCCACTGAGTTCATCACCCAGAGTTTCGACGTCGCGGAAAACGATGAAGATTTCCACA  
CTGTTGAGAATCTTCTGATGCTGAATTTGAGGAAAATTTTCGGAAGTTTTTGGTATAAATCCTGAT  
GGC

+

FFFFF:FFFFFFFFFFFFFFFF:FFFFFF:FFFFFFFFFFFFFFFFFFFFFFFFFFFFFFFF:F:FFFFFF:FFF:  
FFFFF:FFFFFFFFF:FFFFFFFFFFFFFFFFFFFFFFFFFFFFFFFFFFFFFFFF:FFFFFFFFFFFFFFFF:FFFF  
FF:

@A00721:190:HGJW7DSXY:4:1150:2519:36198\_1:N:0:TCTGCAAG+GCTGCACT  
TAAACCTTCTTTTATCATTGCAACAGGACTTTGAGAAGACTGTTGAAATGGACAAAATCTGGGATCA

TAGGTATGTGTCACGCTACACTCGAAATATGGGCCCTCATAAGGAAGTATAGTTGGCGTCTTGTCGTT  
GAC

+

FFFFFFFFFFFFFFFFFFFFFFFFFFFFFFFFFFFFFFFFFFFFFFFFFFFFFFFFFFFFFFFFFFFFFFFF  
FFFFFFFFFFFFFFFFFFFFFFFFFFFFFFFFFFFFFFFFFFFFFFFFFFFFFFFFFFFFFFFFFFFFFFFF  
FFF

@A00721:190:HGJW7DSXY:4:1258:15239:27383\_2:N:0:TCTGCAAG+GCTGCACT  
AGTTAGATCATTTGTTTCAGGAAGATCTCTACAGAGATTATCGAGAGTTGTGATCTAGTTCTAAATTTA  
GGTCGACGGACTTTAGCAACTTTAGATAAATTCTTTCCGGGCTCAATG

+

FFFFFFFFFFFFFFFFFFFFFFFFFFFFFFFFFFFFFFFFFFFFFFFFFFFFFFFFFFFFFFFFFFFFFFFF  
FFFFFFFFFFFFFFFFFFFFFFFFFFFFFFFFFFFFFFFFFFFFFFFFFFFFFFFFFFFFFFFFFFFFFFFF

@A00721:190:HGJW7DSXY:4:1273:11939:27524\_1:N:0:TCTGCAAG+GCTGCACT  
TCTGACCATCGCAAAGAAGACTTTATTAGTTCATGAAGTTCTTACACTTCTCGCGACTAATGTCAGCT  
TCACTACAAAGGCGTTACGTAAAGTAGTTTTACGCTTTATCTTAAAGCATTACCACCAAATTTAGCA  
CTT

+

:FFFFFFFFFFFFFFFFFFFFFFFFFFFFFFFFFFFFFFFFFFFFFFFFFFFFFFFFFFFFFFFFFFFFFFFF  
FFFFFFFFFFFFFFFFFFFFFFFFFFFFFFFFFFFFFFFFFFFFFFFFFFFFFFFFFFFFFFFFFFFFFFFF  
FFF

@A00721:190:HGJW7DSXY:4:1138:10682:36652\_1:N:0:TCTGCAAG+GCTGCACT  
CTCGCCATATAAGATTAGAGACATGCCAGTTAGAGTTCTTCTAACCAGGTCTGATGGTGAGATTCTTT  
TTCCTTTTGGAGGTCCAGGAACCTTTACTCCTAGTGTCTTTTCTAGAGTCCAAGGACGTTTCCGTCG

+

FF,F,,,F,F,FFF,F,FFFF,FFF:FFFFFF:F,FF,FF,F:F,,,,:,,,FFFFFF,:FFFF,F:F  
F,:F,,FFFF:FFFFFF:FF,FFFF:F,:FF,FF,FFF:,:FF:FF:,FF,F,FFFFFF,FF:F

@A00721:190:HGJW7DSXY:4:1644:14461:27633\_1:N:0:TCTGCAAG+GCTGCACT  
GTGGGAGACCGCTCAATAACACTCTATTGAATCCCTTTCCACGATGAAAGCTCTTTATGAGGTGCTC  
CATGCAAATTTACAGTTCCTCTTTGGTGATATCGCCTCTGTCCTTTCTCCTTAATCGTGAGGTTACG  
AGA

+

FFFFFFFFFFFF:FFFFFFFFFFFFFFFFFFFFFFFFFFFFFFFFFFFFFFFFFFFFFFFFFFFFFFFF  
FFFFFFFFFFFFFFFFFFFFFFFFFFFFFFFFFFFFFFFFFFFFFFFFFFFFFFFFFFFFFFFFFFFFFFFF  
FFF

@A00721:190:HGJW7DSXY:4:2257:11803:19304\_2:N:0:TCTGCAAG+GCTGCACT  
GGTTTATCGGTTGTATTTTGATAAATTTGTTGGAATCGATAATGATACTGACGAAGTTCTATTACCA  
CCCTTGTCATTGATACAAACATTCTAGGTGATGCTTTCTTAGAGGCTC

+

FFFFFFFFFFFFFFFFFFFFFFFFFFFFFFFFFFFFFFFFFFFFFFFFFFFFFFFFFFFFFFFFFFFFFFFF  
FFFFFFFFFFFFFFFFFFFFFFFFFFFFFFFFFFFFFFFFFFFFFFFFFFFFFFFFFFFFFFFFFFFFFFFF

@A00721:190:HGJW7DSXY:4:2451:32289:36495\_2:N:0:TCTGCAAG+GCTGCACT  
TATTTACAATCTGTAGAGAGAGAGGTTAATCAGAATTTGAGTGATAACGATTTAGTACTGGGAAATGG  
TGGTAGTCAGTTTACTACTTTTCTTTCCCTCCCCTTTTTCGATTGGAT

+

FFFFFFFFFFFFFFFFFFFFFFFFFFFFFFFFFFFFFFFFFFFFFFFFFFFFFFFFFFFFFFFFFFFFFFFF  
FFFFFFFFFFFFFFFFFFFFFFFFFFFFFFFFFFFFFFFFFFFFFFFFFFFFFFFFFFFFFFFFFFFFFFFF

@A00721:190:HGJW7DSXY:4:2346:12943:2049\_2:N:0:TCTGCAAG+GCTGCACT  
CGTCTCACGACTAATTTGATAAGGTTTTCTTTTATGGGACTCTTGTTTGTACTTATGAAGGAGGTAT  
TACTTCGGAAGTTCTTAATGTAGGTCTCCTAGTACTTAAGGTTTATG

+

FFFFFFF:FFFFFF:FFFFFFFFFFFFFFFFFFFFFFFFFFFFFFFFFFFFFFFF,F:FFFFFF:FFFFFF  
FFFFFFFFFFFFFFFFFFFFFFFFFFFFFFFFFFFFFFFFFFFFFFFFFFFFFFFFFFFFFFFF:FFFF,FFFF

@A00721:190:HGJW7DSXY:4:2177:21974:31876\_2:N:0:TCTGCAAG+GCTGCACT  
TTTTGATGGTATGTTTCACATTGCGTGATCACTTCCCGTGGACTTGGAAGAGATTAAACATAAAATC

CAGCGATTCTATTATGTCGCTAAAGCCTGTCCAGTTGTCGATGATGTT  
+  
FFFFFFFFFFFFFFFF:FFFFFFFFFFFFFFFFFFFFFFFFFFFFFFFFFFFFFFFFFFFFFFFF  
FFFFFFFFFFFFFFFFFFFFFFFFFFFFFFFFFFFFFFFFFFFFFFFFFFFFFFFF  
@A00721:190:HGJW7DSXY:4:1641:14262:31422\_2:N:0:TCTGCAAG+GCTGCACT  
AAACTTACGACGATGTTCTCGCTCGCATTTTACAAGGATTACTAAGTCTGAGATCTGCCACTTCTAAT  
TTTAGGAAACGTCGCGAAAAGAAAGTTCATGAGGATGTCTTGGTCGAA  
+  
FFFFFFFFFFFFFFFFFFFFFFFFFFFFFFFFFFFFFFFFFFFFFFFF:FFFFFFFFFFFFFFFFFFFFFFFF  
FFFFFFFFFFFFFFFFFFFFFFFFFFFFFFFF:FFFFFFFFFFFFFFFFFFFFFFFF  
@A00721:190:HGJW7DSXY:4:1436:31096:10504\_2:N:0:TCTGCAAG+GCTGCACT  
GAACTTCTAATAGAGGATCCTGATGACATTATTTCAACGGATACCGATCTCAGTTCTACCACAGAAAC  
CGTCTCAGGAAGTGTCTCCACTGATTTCGGAATTAGAGAAAGACGACCT  
+  
FF,FFFFFFFFFFFFFFFFFFFFFFFFFFFFFFFFFFFFFFFFFFFFFFFFFFFFFFFFFFFFFFFF  
FFFFFFFFFFFFFFFFFFFFFFFFFFFFFFFF:FFFFFFFF:FFFFFFF  
@A00721:190:HGJW7DSXY:4:2371:19985:22545\_1:N:0:TCTGCAAG+GCTGCACT  
GAGACCTCTGAATTTTCAGGGTGCCCTGATGAGGACGTTGAAAGGGATAATTTCAACTCTGAGACTTC  
TAAGAGTGTTCAAAAGACCAGAAACGTAACAAGAAGAATAAAGGTAGGAAGGGGAGAAAACAGAAC  
AGC  
+  
FFFFF:F:F:FFFFFFFFFFFFFFFFFFFFFFFFFFFFFFFFFFFFFFFF:FFFFFFFFFFFFFFFFFFFF  
FFFFFFFFFFFFFFFFFFFFFFFFFFFFFFFF,FFFFFFFF:FFFFFFFFFFFFFFFFFFFFFFFFFFFF  
FFF  
@A00721:190:HGJW7DSXY:4:1329:17291:23202\_2:N:0:TCTGCAAG+GCTGCACT  
ATGTTGCGGCTGATCGTACCCCAATTCCTGCTAGAAAGATCACTCTCGGCGATACCACTGATCTTCC  
AGAGTTACGTAGTGGTCGTTCTTTTGGTGATTTTATCAAAGAGAAAGT  
+  
F:FFFFFF:FFF:FFFFFFFFFFFFFFFFFFFFFFFFFFFFFFFFFFFFFFFF:FFFFFFFFFFFFFFFF  
FFFFFFF:FFFFFFFFFFFFF:FFFFFFFFF:FFFFFFFFFFFFF:FF  
@A00721:190:HGJW7DSXY:4:2549:23592:25254\_2:N:0:TCTGCAAG+GCTGCACT  
CAAGTTAACTTCGAACTGACCACTTACAAGAGTGTTGAAGTACCGCAACATGGATCAGTTTTCCAAA  
AAGCTATTAATAGCAGTTGCGGGGCTATAATACCGCCTCCAGATTACT  
+  
FFFFFFFFFFFFFFFFFFFFFFFFFFFFFFFF:FFFFFFFFFF,FFFFFFFFFFFFFFFFFFFFFFFFFFFF:FFFF:F  
FFFFFFFFFFFFFFFFFFFFFFFFFFFFFFFFFFFFFFFFFFFFFFFFFFFFFFFF  
@A00721:190:HGJW7DSXY:4:2207:29306:29199\_1:N:0:TCTGCAAG+GCTGCACT  
AGAGTTTTGGAAGTGTGTAATGTCTACGTACTGTTCAAGGTGTTGGGCTTCTCTAAAGAACAGCAA  
CTTTCAACATGAATTAGTTATTGAAAGTCTTGACCCTCACGTCTCACTTTATCACCTTGGAGATGGTA  
AAG  
+  
FFFFFFFFFF,FFFFFFFFFFFFFFFFFFFFFFFFFFFFFFFFFFFFFFFF:FFFFFFFFFFFFFFFFFFFF  
FFFFFFFFFFFFFFFFFFFFFFFFFFFFFFFFFFFFFFFFFFFFFFFFFFFFFFFF  
FFF  
@A00721:190:HGJW7DSXY:4:2209:4887:29653\_2:N:0:TCTGCAAG+GCTGCACT  
ATTCTGCTTCGACGGTAATTCATAAGACCTTTCTTGGGAGTAAAGAGGGTTTGAAAATTACGGAAC  
CTTTCCTCGTTCTTCATGAAGATCTTCGAGTGTTTTATAGTGATTTAT  
+  
FFFFFFFFFFFFFFFFFFFFFFFFFFFFFFFF:FFFFFFFFFFFF:FFFFFFFFFFFFFFFFFFFFF:F  
FFFFFFFFFFFFFFFFFFFFFFFFFFFFFFFF:FFFFFFFFF:FFFFFFF  
@A00721:190:HGJW7DSXY:4:2150:29677:16000\_1:N:0:TCTGCAAG+GCTGCACT  
CAAGTCGATTGATTTTGTGACTACGATCTCTTGTGTAATAAGAAGTTCTTCGAGTTGAATCTCCAC  
CAGGTGGAGGGAAGACCACTGAACCTTATAGCGACTTTTGTGCAATTTTTCGAAAAGGTCTTGAAGTA  
CGT

+  
FFFFFFFFFFFFFFFFFFFFFFFFFFFFFFFFFFFFFFFFFFFFFFFFFFFFFFFFFFFFFFFFFFFFFFFF  
FFFFFFFFFFFFFFFFFFFFFFFFFFFFFFFFFFFFFFFFFFFFFFFFFFFFFFFFFFFFFFFFFFFFFFFF  
FFF  
@A00721:190:HGJW7DSXY:4:1567:29668:36464\_2:N:0:TCTGCAAG+GCTGCACT  
TCGTAATTCGCGAGAAGAGATAGTGAATAAGTTTTGGCACTTCTAGTTCATCGCGGTATTTGTGAAA  
TTAAGACAGACGTGAAAGTTATGATGAGTGATCGTATTAGAACAGCTG  
+  
FFFFFFFFFFFFFFFFFFFFFFFFFFFFFFFFFFFFFFFFFFFFFFFFFFFFFFFFFFFFFFFFFFFFFFFF  
FFFFFFFFFFFFFFFFFFFFFFFFFFFFFFFFFFFFFFFFFFFFFFFFFFFFFFFFFFFFFFFFFFFFFFFF  
@A00721:190:HGJW7DSXY:4:1307:14181:12305\_2:N:0:TCTGCAAG+GCTGCACT  
CTGAGGTCAAACCTGTGGACGTTCTTTTCATCGACGAATTATTCATGATTCACGCTGGTCAGACCCTT  
TTTCTTACACATCTACTTAAGCGGCTTATACCATAGGTTACGGTGAT  
+  
FFFFFFFFFFFFFFFFFFFFFFFFFFFFFFFFFFFFFFFFFFFFFFFFFFFFFFFFFFFFFFFFFFFFFFFF  
FFFFF:F:F,F:FFFFFFFF:FF:FFFFFFFF:,FFFFFFFF:FFFFF  
@A00721:190:HGJW7DSXY:4:1226:15121:14058\_1:N:0:TCTGCAAG+GCTGCACT  
GACGTGTGCTCTTCCGATCTCCAAGTCGAACTACTTCAACATCAACGACATCATTCTTGATGAGTG  
TCGTTCTTATCGAAGTCTCAGTTATCGCTGCCCGCCGACGTTTGTGCGAACTCTCAGAGGTTTACG  
GCA  
+  
FFFFFFFFFFFFFFFFFFFFFFFF:FFFFFFFFFFFFFFFF:FFFFFFFFFFFF,FFFFFFFFFFFF  
FFFFFFFFFFFFFFFFFFFFFFFFFFFFFFFFFFFFFFFFFFFFFFFFFFFFFFFFFFFFFFFFFFFFFFFF  
FFF  
@A00721:190:HGJW7DSXY:4:1519:3513:32440\_1:N:0:TCTGCAAG+GCTGCACT  
AATTCGAGAGAGGACACTATGGAAATTAGACCTATCAGATGTCTTGACGACTTCGAATTTGAGGACGG  
AGTTAAATATATTACTTTCACTCAAGGTGAAAAGTTTGAATTAACAAAGTCCTTGGAAGAGTAAGG  
TTA  
+  
:FFFFFFFFFFFFFFFFFFFF:F:FFFFFFFFFFFFFFFF:FFF,FFF:F:FFF:FF,FFFFFFFF:F:  
FFFFFFFFFFFFFFFFFFFFFFFFFFFFFFFFFFFFFFFFFFFFFFFFFFFFFFFF, :FFFFFFFFFFFFFFFF  
FFF  
@A00721:190:HGJW7DSXY:4:1241:31620:15640\_1:N:0:TCTGCAAG+GCTGCACT  
GTTCAAGGTAATACTTACCAGCACGTTGCTGCTGTTAGAATTAAACCTCAAGATGACCCTGTTTTTGC  
ATCACAAACACATATTACCGTTGCTCTATCACGACACGTTGAATCTTTACGATACTTTGTTATCAATG  
TAA  
+  
FFFFFFFFFFF,F:FFFFF:F:FF:FFFFFFFFFFFFFFFFFFFFFFFFFFFFFFFF:FFFFFFFFFFFF:F:  
FFFFFFFF:FFF:FFFFFFFFFFFFFFFFFFFFFFFFFFFF,FFFFFFFFFFF:FFFFFFFFFFFF:FFFFF  
FFF  
@A00721:190:HGJW7DSXY:4:1351:32036:20870\_2:N:0:TCTGCAAG+GCTGCACT  
TGAGAGGATCAATCACAGTAAGGAAGTGTACGTTTAGCACGGGAGGTTGCAGATTCAACCCCTTATA  
TCGAGGCTATCGAGGACGATGAGTATCTTGAAGTTGTTGACGACAAGC  
+  
FFFFFFFFFFFFFFFFFFFFFFFF:FFFFFFFFFFFFFFFFFFFFFFFFFFFFFFFF:FFFFFFFFFF  
FFFFFFFFFFFFFFFFFFFFFFFFFFFFFFFFFFFFFFFFFFFFFFFF:FFFFFFFFF  
@A00721:190:HGJW7DSXY:4:1506:10917:10066\_1:N:0:TCTGCAAG+GCTGCACT  
TAGAGGACCACCTGGATCTTCTACTGTCTCTGCCTTCCAAGATTTCTTAGAAGAGGTTATTCCTGGAA  
CCACCTTAACGTCACTCGGTAATCTTTCAGCCGAATTAAGTACTAATGAGTTCAAGTCGGTTGTCGAT  
CGA  
+  
FFFF:FFFFFFFF:FFFFFFFFFFFFFFFF:FFFFFFFFFFFFFFFF,FFFF:FFFFFFFFFFFF  
:FFFFFFFFFFFFFFFF:FFFFFFFFFFFFFFFF:FFF:FFF:FFF:FFFFFFFF:FFFFFFFF  
FFF

@A00721:190:HGJW7DSXY:4:1527:23511:11647\_2:N:0:TCTGCAAG+GCTGCACT  
GGCTAATACCTTTATAGGTAAGAAGCCCTTGAGCCGCGTAGTCAGCGCGTTTAGCTGTATCATCAGT  
CAGAGTATACCCGATAGGGTACCGAGTCTCCAAGAGAATATTTATTCT

+

FFFFFFFFFFFFFFFFFFFFFFFFFFFFFFFFFFFFFFFFFFFFFFFFFFFFFFFFFFFFFFFFFFFFFFFF  
FFFFFFFFFFFFFFFFFFFFFFFFFFFFFFFFFFFFFFFFFFFFFFFFFFFFFFFFFFFFFFFFFFFFFFFF

@A00721:190:HGJW7DSXY:4:1570:21251:27524\_1:N:0:TCTGCAAG+GCTGCACT  
ACGTTTTACAAACGGAAGACATATCGCACCCGAAATTTTGGGCAGAATGCTCTTAACGCGGTTCTT  
GAACGGTGTGTTTATCAGTCTAAGTTGGATAAAGTTATAGGAGACTCAGTTAACCTGAGAGCTCCTCA  
ATT

+

FFFFFFFFFFFFFFFFFFFFFFFFFFFFFFFFFFFFFFFFFFFFFFFFFFFFFFFFFFFFFFFFFFFFFFFF:FFF  
FFFFFFFFFFFFFFFFFFFFFFFFFFFFFFFFFFFFFFFFFFFFFFFFFFFFFFFFFFFFFFFFFFFFFFFF  
FFF

@A00721:190:HGJW7DSXY:4:2529:27968:20525\_1:N:0:TCTGCAAG+GCTGCACT  
CAATAGGGACGCTAGTATACTTCGTAAAGTCGACAGCGAAATGGTCAATATTGATAATTGGACCGACT  
ATATGACCTATTTTAAGCTCATGGTGAAAAGGGAAGCTAAGGTTAACTTGATGCTTCAGCCTTTTCG  
AAG

+

FFFFFFFFFFFF,FFFFFFFFFFFFFFFFFFFFFFFFFFFFFFFFFFFFFFFFFFFFFFFFFFFFFFFFFFFF  
FFFFFFFFFFFFFFFFFFFFFFFFFFFFFFFFFFFFFFFFFFFFFFFFFFFFFFFFFFFFFFFFFFFFFFFF  
FFF

@A00721:190:HGJW7DSXY:4:1376:4481:5149\_1:N:0:TCTGCAAG+GCTGCACT  
GCAATTTTCGACCTATCTTTAAGGTTCTTGTGAGGAGAGTCAAACAGTGTCTTTTACCCAACATTTT  
TATGTATACAGAGATGACCAGTGACGATTTCTCCCGAAGCTCTTCTCTCTCTTAGGAGGTCATGATG  
ACT

+

FFFFFFFFFFFFFFFFFFFFFFFFFFFFFFFFFFFFFFFFFFFFFFFFFFFFFFFFFFFFFFFFFFFFFFFF  
FFFFFFFFFFFFFFFFFFFFFFFFFFFFFFFFFFFFFFFFFFFFFFFFFFFFFFFFFFFFFFFFFFFFFFFF  
FFF

@A00721:190:HGJW7DSXY:4:1355:32859:4038\_2:N:0:TCTGCAAG+GCTGCACT  
TTTCGAAGTTTGACAAATCTCAAGATTTCTTTTGTAAGCCTATGAGATAAAGATGTATTCTTATTTA  
GGCTTCGATGCTGAATTTCTTGAACCTTTGGAGTGCCAGTGAATATTTT

+

FFFFFFFFFFFFFFFFFFFFFFFFFFFFFFFFFFFFFFFFFFFFFFFFFFFFFFFFFFFFFFFFFFFFFFFF  
FFFFFFFFFFFFFFFFFFFFFFFFFFFFFFFFFFFFFFFFFFFFFFFFFFFFFFFFFFFFFFFFFFFFFFFF

@A00721:190:HGJW7DSXY:4:1348:31675:6621\_1:N:0:TCTGCAAG+GCTGCACT  
GAGTATCCATAACGATTTGTCATTTACCACCTTTGCTCAACGACGAAGTGAACGGCCAACACTTTCT  
TTGGTAATTGTATGATCACTTTGATGATTTTATCACTTTATTATGACCTTGAAAGTTTTCGGCTGTG  
GTT

+

FFF:FFFFFFFFFFFFFFFFFFFFFFFFFFFFFFFFFFFFFFFFFFFFFFFFFFFFFFFFFFFFFFFF  
:FFFFFFFFFFFFFFFFFFFFFFFFFFFFFFFFFFFFFFFFFFFFFFFFFFFFFFFFFFFFFFFFFFFF  
FFF

@A00721:190:HGJW7DSXY:4:2517:32108:33176\_1:N:0:TCTGCAAG+GCTGCACT  
CCATTCTGTTTTCAAAGACTCCAATAACTGATCATTCTGATCATATGATTTTGGACAATGGTTTCGAA  
GCGAAATTTTGGAGGATAAACCAGCGTACTTCTGCTCGCGATTTATTCTTTTGTCAATGATTACAT  
CTA

+

FFF:FFFF,FFFFFFFFFFFFFFFFFFFFFFFFFFFFFFFFFFFFFFFFFFFFFFFFFFFFFFFFFFFF  
FFFFFFFFFFFFFFFFFFFFFFFFFFFFFFFFFFFFFFFFFFFFFFFFFFFFFFFFFFFFFFFFFFFFFFFF  
FFF

@A00721:190:HGJW7DSXY:4:1509:27661:4429\_1:N:0:TCTGCAAG+GCTGCACT  
CCTTACAAGATCATCGTTAAGTTAGGTAAACCCCTAACCGATGTTACTCTTGTAGGACTTTGGGAGAG



@A00721:190:HGJW7DSXY:4:1417:28293:3208\_2:N:0:TCTGCAAG+GCTGCACT  
TGATAGTGAATTTATACCTACAATCATTGGTTTTTCTAATAATGATGACACTATTGTTTATGGATATG  
ATGCTATTACTCATGATGGTTACGGTCAGGGAGGATTCTCAGTTTACA

[illegible]

+

[illegible]

+

[illegible]

+

```

FFFFFFFFFFFFFFFF:FFFFFFFFFFFFFFFFFFFFFFFFFFFFFFFF:FFFFFFFFFFFF,:FFFFFFFFFFFF:
FFFFFFFFFFFF:FFFFFFFFFFFFFFFF:FFFFFFFFF,:FFFFFFFFFFFF

```

+

[illegible]

+

```
FF:FFFFFFFFFFFFFFFFFFFFFFFFFFFFFFFFFFFFFFFFFFFFFFFFFFFFFFFFFFFFF
FFFFFFFFFFFFFFFFFFFFFFFFFFFFFFFFFFFFFFFFFFFFFFFF,FFFFFFFFFF
```

+

[illegible]

+

```

:FF:FFFF:FFFFFF:FFFFFFFFFFFFFFFFFFFFFFFF:FF:FFFFFFFFFFFFFFFF:FFFF
:,:FFFFFFFFFFFFFFFF:FF,FF,:F:FFFFFFFF,F:F:FF,FFFFF

```

TTCTAATCGTAACATTAATAATTTCAATCTTCTTAAAAAGAAGATAGAGAGTCATACTTTGGGCTATC  
GTT

+

FFFFFFFFFFFFFFFFFFFFFFFFFFFFFFFFFFFFFFFFFFFFFFFFFFFFFFFFFFFFFFFFFFFFFFFF  
FFFFFFFFFFFFFFFFFFFFFFFFFFFFFFFFFFFFFFFFFFFFFFFFFFFFFFFFFFFFFFFFFFFFFFFF  
FFF

@A00721:190:HGJW7DSXY:4:2104:5394:36385\_2:N:0:TCTGCAAG+GCTGCACT  
GATAGCCAATATTGAAGTGGACACCTCTGGTAGTATCGAAGTAAAGATAACCAATAAGGAAGGAGCTT  
ATACTATGGTTGAATCAACTAAGCATACTACTTTTGCTTTGATTACTC

+

FFFFFFFFFFFFFFFFFFFFFFFFFFFFFFFFFFFFFFFFFFFFFFFFFFFFFFFFFFFFFFFFFFFFFFFF  
FFFFFFFFF,FFFFFFFFFFFFFFFFF,FF,F,FFFFF,FFFFFFFFF:F:

@A00721:190:HGJW7DSXY:4:2611:8838:6308\_1:N:0:TCTGCAAG+GCTGCACT  
TTCCGATCTGTAAATAGTCTATTAAACAAGTTGTACTTATCAATGATTTTATCGCTGTTTGTATCT  
CGAAAAGTCTCTTCTAAAAGGAACGTCAGTTCTAACCCAAAGAGAATATCTAAAATATTTACAAAATC  
TT

+

FF,,FFFFF,:FF:F,F,FF,FFFFFFFFF:FF,FF,FFFFF,FFF:FFFFFFFF,FFF,FFFFFFFF:F  
FFFFFFFF,F,F,FFFFFFFF,FF,:F,FF,F,FFFFF::FFFFFFFFFFFFFFFF:FFFFFFFFFFF:F:FFF,  
FF

@A00721:190:HGJW7DSXY:4:1160:23158:13135\_2:N:0:TCTGCAAG+GCTGCACT  
AGACGTTGCTTGTGCTTCCTCCTTTAATGGCACTACCTCGGTACAATCTTACTTGGAACGAAGGCGA  
CCTGTTCCGGAGTTTTTAAGGGATCCGGAATGTTCTGTCTATATTAGG

+

F,FF,:FF,FFFFF:FFFFFFFFF:,FFF,FFFFF,FFFFFFFFFFFF,FF:FFFFF:FFF:FFFF:FF:  
:F::FFF::FF,:F,FFFF,,FF:,F,F:F,:F,FF:FF:FF:FF:FFF

@A00721:190:HGJW7DSXY:4:1255:18349:35399\_2:N:0:TCTGCAAG+GCTGCACT  
TCGAACGTCAACGTTACCGAGTTTCGTTTCGTACCTTGATGCTGACTTTCGTCAATATGATTTGATC  
TGGTTGCTCAATTCTAAGCGTGTTCGCTTAGTGCGAGGCCTCTCTTC

+

FFFFFFFFFFFFFFFFFFFFFFFFFFFFFFFFFFFFFFFFFFFFFFFFFFFFFFFFFFFFFFFFFFFFFFFF  
FFFFFFFFFFFFFFFFFFFFFFFFFFFFFFFFFFFFFFFFFFFFFFFFFFFFFFFFFFFFFFFFFFFFFFFF

@A00721:190:HGJW7DSXY:4:1310:4137:16892\_2:N:0:TCTGCAAG+GCTGCACT  
AGTTTACGAACCTTGACTCTACTATACGTGACATACTAAATACTAGATATTTGGATGATCTTGATAAAG  
AACTTCATGAATTTTCAGAGGATGAAAAATTTCTTCCTTGATTTTA

+

FFFFF:FFFFFFFFFFFFFFFFFFFFFFFFFFFFFFFFFFFFFFFFFFFFFFFFFFFFFFFFFFFFFFFF  
FFF:FFFFF:FFFFFFFFFFFFFFFFFFFFFFFFF,FFFF,FFFFFFFFF:FFF

@A00721:190:HGJW7DSXY:4:1565:11686:35196\_1:N:0:TCTGCAAG+GCTGCACT  
TACAGGAGGCAGTCTTCTGATCGTAAGAAGTTTATAAGGAACATATCCATTTGTTGTAATAGGGTCAT  
CAACTTAGAACTCGAAACTCTAAGTGGTAATACTGTCTTTCCAAGCTTACCTGTATCTTCAATGAAAT  
TGG

+

FF:F:FFF:FF:FFFFFF:FF,F:,FFFFFFFFF:F,FFFFFFFFF:,FFFFFFFFFFFFFF,,FFFF:  
FF:FFFFFFFFFFFFFFFFFFFFFFFFFFFFFFFFFFFFFFFFF,FFFF,FFF:FFF:F:FFF:FFFFFFFF:FF  
FFF

@A00721:190:HGJW7DSXY:4:2139:31168:10285\_2:N:0:TCTGCAAG+GCTGCACT  
GTGGGCTTTCCGTAAAGGAAGATCTGTTATCGACGGTTTATCGTTTACGAAGTATCACTCCACCGGTG  
AATGGTTTAAAGAATACTATAAATAGAATAGCTATTACTACTAATGGCG

+

FFFFFFFFFFFFFFFFFFFFFFFFFFFFFFFFFFFFFFFFFFFFFFFFFFFFFFFFFFFFFFFFFFFFFFFF  
FFFFFFFFFFFFFFFFFFFFFFFFFFFFFFFFFFFFFFFFFFFFFFFFFFFFFFFFFFFFFFFFFFFFFFFF

@A00721:190:HGJW7DSXY:4:1369:24614:5916\_1:N:0:TCTGCAAG+GCTGCACT  
TAGTGACATCTGGTCAATTTCTGTTTTAGGTGGTCTTTATTCTATTATTGATTTTTATGAGATTGATA





@A00721:190:HGJW7DSXY:4:2449:14181:11146\_1:N:0:TCTGCAAG+GCTGCACT  
TTGGTGCTTAGGGATATAATGAATTCAGCACCACATTTTGGTCAAGTCAATCCGTTGAGAAAATTTCT  
TAGAGGATATTCGCCATTGTGGTACGAATTGGTCCAACATTTACCACCAAATTTCTTTTGATACAACCTC  
TAG

+

FFFFFFFFFFFFFFFF:FFFFFFFFFFFFFFFFFFFFFFFFFFFFFFFFFFFFFFFFFFFFFFFFFFFFFFFF  
FFFFFFFFFFFFFFFFFFFFFFFFFFFFFFFFFFFFFFFFFFFFFFFFFFFFFFFFFFFFFFFFFFFFFFFF  
FFF

@A00721:190:HGJW7DSXY:4:1169:12744:30671\_2:N:0:TCTGCAAG+GCTGCACT  
CGGAATACGCTTGCTATTCACCAGATTGGTTCGAACCCGTTGATGCTATGTCAGAAGAAGCTATTCAA  
GCTTGTGCTTTAAAGACTGCAGAGGCTGTCAAACAAGCCCAGACTCAA

+

FFFFFFFFFFFFFFFFFFFFFFFF:FF:FFFFFFFFFFFFFFFFFFFFFFFF:FFFFFFFFFFFFFFFF  
FFFFFFFFFFFFFFFFFFFFFFFFFFFFFFFFFFFFFFFFFFFFFFFFFFFFFFFFFFFFFFFF:FFFF

@A00721:190:HGJW7DSXY:4:1370:20528:22044\_1:N:0:TCTGCAAG+GCTGCACT  
CAAAGGTTTTGAATTTAGCTCAACTGGGAGACGTGCTTAAATGGGTGATAAAAATTATTTAGAGATC  
TTTTCTACTTACAAAGGACAATTCAGTTTCATTAATTCTACGAAAAGTCCGAGTATATTGTATGTT  
AAT

+

FFFFFFFFFFFFFFFFFFFFFFFFFFFFFFFFFFFFFFFFFFFFFFFFFFFFFFFFFFFFFFFF:FFFFFFFF  
FFFFF,FFFFFFFFFFFFFFFFFFFFFFFFFFFFFFFFFFFFFFFFFFFFFFFFFFFFFFFFFFFFFFFF  
FFF

@A00721:190:HGJW7DSXY:4:1308:13349:14841\_1:N:0:TCTGCAAG+GCTGCACT  
AATAGTTCTACCGATACGTAGTGAACGCGTTCGTAGAACCAAGTACTTTCCGTCTGAAGAGTTTAGAG  
CTGCTATTGATTATGTAACCGATAGGAGTTGTATAGTTGAAGATGTGGCTTTAGACGATAATCCTTTA  
AGG

+

FFFFFFFFFFFFFFFFFFFFFFFFFFFFFFFFFFFFFFFFFFFFFFFFFFFFFFFFFFFFFFFF:FFFFFFFF  
FFFFFFFFFFFFFFFFFFFFFFFFFFFFFFFFFFFFFFFFFFFFFFFFFFFFFFFFFFFFFFFFFFFFFFFF  
FFF

@A00721:190:HGJW7DSXY:4:1213:18466:21198\_1:N:0:TCTGCAAG+GCTGCACT  
GAAGATTTTCCCACAGATTTGTCTACGTTGCAGATCGCCACTCCAAACACTATATACATTATAAAATA  
TAAAAATAAGGGAGTCATAACTTTTGTTACCAAATTCTTGGCTTTCAACGAAGTCTCTGATTTTATTA  
ATC

+

FFFFFFFFFFFFFFFFFFFFFFFFFFFFFFFFFFFFFFFFFFFFFFFFFFFFFFFFFFFFFFFF,FFFFFFFF  
FFFFFFFFFFFFFFFFFFFFFFFFFFFFFFFFFFFFFFFFFFFFFFFFFFFFFFFFFFFFFFFFFFFFFFFF  
FFF

@A00721:190:HGJW7DSXY:4:2129:29423:2440\_1:N:0:TCTGCAAG+GCTGCACT  
CGATCTCTCGGTCATTTACTCTGTACTTGATCTACGTCGTTTAACTGTCGGAACAACCTTTACTTAGA  
ATGACTCTATCTTTTCAGACACTTCTTATATTATTTACAATAGTTAATATCATATTAGTAATACTCAC  
TAT

+

FFFFFFFFFFFFFFFFFFFFFFFFFFFFFFFFFFFFFFFFFFFFFFFFFFFFFFFFFFFFFFFF:FFFFFFFF  
FFFFFFFFFFFFFFFFFFFFFFFFFFFFFFFFFFFFFFFFFFFFFFFFFFFFFFFFFFFFFFFF:FFFFFFFF  
FFF

@A00721:190:HGJW7DSXY:4:2272:3043:14027\_2:N:0:TCTGCAAG+GCTGCACT  
TTTTTCTTAGCTAATAGATTAATAAAGGATGAGTACGAAAACCAACTCTTCGTTACGAGACCTGATGG  
TAGAATAGATTTAGTCTCTACCCATCTCAACGAGGATAAAGCGAGT

+

FFFFFFFFFFFFFFFFFFFF,FFFFFFFFFFFFFFFFFFFFFFFFFFFFFFFFFFFFFFFFFFFFFFFF  
FFFF:FFFFFFFFFFFFFFFFFFFFFFFFFFFFFFFFFFFFFFFFFFFFFFFFFFFFFFFF

@A00721:190:HGJW7DSXY:4:1659:8666:22639\_1:N:0:TCTGCAAG+GCTGCACT  
TACACGAAGAGATCATCCGCAAACGACTCGAAACGAGACGCCGTAGATCAAAGTCCCTTCTAACTTT

AGATTATGAATCCTGCCTTTACTCATTTTATAGCAGTTATTTATGTTGTACTTTTTATAATTTATAAC  
CTT

+

:FFF:,FF::FFFF:FF:,F:FFFFFFFFFFFFFFFFFFFFFFFFFFFFFFFF:FF:FFFFFFFFFFFF  
FFFFFFFFFFFFFFFFFFFFFFFFFFFFFFFFFFFFFFFFFFFFFFFFFFFFFFFFFFFFFFFFFFFF  
FFF

@A00721:190:HGJW7DSXY:4:1135:11080:31203\_1:N:0:TCTGCAAG+GCTGCACT  
TACTTATTGTAACGATCATTTCTTCGAGTTTTGTCATTCTTATTCTTTTATTCCTTTAACTGTGTATG  
AGGAGGATTTATAATGCTTTTCGATAGTGATTGTTATCAATTTAAATACATTACTGTTTCAAATCATC  
TTT

+

FFFFFFFFFFFFFFFFFFFFFFFFFFFFFFFFFFFFFFFFFFFFFFFFFFFFFFFFFFFFFFFFFFFF  
FFFFFFFFFFFFFFFFFFFFFFFFFFFFFFFFFFFFFFFFFFFFFFFFFFFFFFFFFFFFFFFFFFFF  
FFF

@A00721:190:HGJW7DSXY:4:1470:21621:5400\_1:N:0:TCTGCAAG+GCTGCACT  
GAAATGGTTTCAAATGAGGTCAAAGCTCTATTTATTAACGAACATTATCCGATTCTTCGAGGGTA  
TCACTACCACTGATCTGCCGACTTTAGTCAAGGAACCTCAATTCCTTCGATGTTTATATTTTCTATA  
AGG

+

FFFFFFFFFFFFFF:FFFFFFFF:FFFFFFFFFFFFFFFFFFFFFFFF:FFFFFFFFFFFFFFFFFFFF  
FFFFFFFFFFFFFFFFFFFFFFFFFFFFFFFFFFFFFFFFFFFFFFFF,FFFFFFFFFFFFFFFF:FFFFFFF  
:FF

@A00721:190:HGJW7DSXY:4:1105:1199:6511\_2:N:0:TCTGCAAG+GCTGCACT  
TAATCAAATTTGACAAATTTAGAACTTTATTTAGAAGCTCTCTCCGATCACCTTGGTGTGATCTCC  
CGGAGGATCTTTTCAATAAGATGTATGATGATAATCTACTATTTTTAA

+

FFFFFFFFFFFFFFFFFFFF,FFFFFFFFFFFFFFFFFFFFFFFFFFFFFFFF:FFFFFFFFFFFFFFFF  
FFFFFFFFFFFFFFFFFFFFFFFFFFFFFFFFFFFFFFFFFFFFFFFFFFFFFFFFFFFF

@A00721:190:HGJW7DSXY:4:1227:25039:1955\_1:N:0:TCTGCAAG+GCTGCACT  
AGCGTATACTTGAATACTTTATCAAAGATTTGGCTTGGTCTATTTACCGCAAAAAGTTGGAAGAGGTC  
TATGATATTTATTTTACTTATACTTTAAATAGCACCGATTATAACTTGACTGTTGATAATATTACAAT  
AGC

+

FFFFFFFFFFFFFFFFFFFFFF:FFFFFFFFFFFFFFFFFFFFFFFFFFFFFFFFFFFFFFFFFFFF  
FFFFFFFFFFFFFFFFFFFFFFFFFFFFFFFFFFFFFFFFFFFFFFFFFFFFFFFFFFFFFFFFFFFF  
FFF

@A00721:190:HGJW7DSXY:4:1147:14308:15687\_2:N:0:TCTGCAAG+GCTGCACT  
AAGATTAGAGAAGTAACTCGGTGAACACGTCGGTAGCATTGATTTACTTTTACCGTTAGAAGTAAAA  
AGATTCTTTTCGAAAAGAAACCTATAAGTTACAAACGATTCTTCGACT

+

FFFFFFFFFFFFFFFFFFFFFF:FFFFFFFFFFFFFFFFFFFFFFFFFFFFFFFFFFFFFFFFFFFF  
FFFFF:FFFFFFFFFFFFFFFF:FFFFFFFFFFFFFFFFFFFFFFFFFFFF

@A00721:190:HGJW7DSXY:4:1144:27254:19257\_1:N:0:TCTGCAAG+GCTGCACT  
AATAAAAATACTTCAAGTACCTGAACCTTACATTTTAAATGGTATGGTATAATGTGTCTTACAAATAG  
AACCTTCACTCTCGGTAATGAGAGTGATTCTTAATATTCTAGTAACCGCTATGTGGGCATTACTAG  
GAT

+

FFFFFFFFFFFFFFFFFFFFFFFFFFFFFFFFFFFFFFFF:FFFFFFFFFFFFFFFFFFFFFFFFFFFF  
FFFFFFFFFFFFFFFFFFFFFFFFFFFFFFFFFFFFFFFFFFFFFFFFFFFFFFFFFFFFFFFFFFFF  
FFF

@A00721:190:HGJW7DSXY:4:1532:28176:7889\_1:N:0:TCTGCAAG+GCTGCACT  
GATAGCAATTTATGTTTTAAATGCTAGGAAAATTTTAGAAAACTCCATTGTATAGTTCAAGGAGTAC  
TTAATTCAATAGCTTTAGTATTATTTACTATCGCCTTTATTGAAAATTGTATAAGAGTTAATTGCTTA  
CAC



TGACGAGGCCGGTGACGTTTTTGTCAACGGCGTTTGGAGGATTTTATCCGCGCTTAACTATGGGGCGA  
AGA

+

FFFFFFFFFFFFFF,FFFFFFFFFFFFFF:,F:F:FF,F,FFF::FFFFFF:FFF:F::F:FFFF,F:  
FFFFFFFFFFFFFFFFFFFFFFFFFFFFFF::FFFFFF,::FFF:FFFFFFFFFFFF,FF:FFFF:FFF  
FFF

@A00721:190:HGJW7DSXY:4:1516:27787:15295\_1:N:0:TCTGCAAG+GCTGCACT  
AGTCTTGAAGGACTTAGGTTGGCATATTTATGCCGACGATAATAAGCATGTCACCCTTAAGCACCGAG  
GTAAGCTCGGGACTTACAAGAGAGAGTGTGAGAGAGTCGCTCTCACTATTTTTGCCGAGAATGCGGGC  
TTT

+

FFFFFFFFFFFFFF:FFF:FFFFFF,FF:F,FFFFFFFF:FFFFFFFFFFFFFFFFFFFFFFFFFFFF  
F:F:FFFFFFFF:FF:FFFFFFFFFFFF:FFFFFFFFFFFFFFFFFFFF:FF:FFFFFF,FFFFFF  
FFF

@A00721:190:HGJW7DSXY:4:2440:24279:20431\_2:N:0:TCTGCAAG+GCTGCACT  
GCTCCTTCTGTGGGTGAGGGTTTTTGTATATTCACTGGTTCTGGGAGGCTGCTTCTCCATAATTA  
CAACCTCTCTTTAGAGAGCATTAGAAAGATCGGAAGAGCGTCGTGTAG

+

FFFFFFFFFFFFFFFFFFFFFFFFFFFFFFFFFFFFFFFFFFFFFFFFFFFFFFFFFFFFFFFFFFFF:F:FFFF  
F:FFFFFFFFFFFFFFFFFFFFFFFFFFFFFFFFFFFFFFFFFFFFFFFFFFFF:F,:F

@A00721:190:HGJW7DSXY:4:1306:9634:29825\_1:N:0:TCTGCAAG+GCTGCACT  
CACACTTTTCTTGAATAATTTTCTTTCTCCGTCATTGGGGATTTGATGTGAGAAGGTGGAAGGTG  
TCAAGGGTCTTCTTCATGCTGATCTTTCAGGACCTAATCACATCATGATTGATAGTTACGGCTCGTAT  
CGA

+

FFFFFFFFFFFFFFFFFFFFFFFFFFFF,FFFFFF:FFFFFFFFFFFFFFFF:FFFFFFFFFFFFFFFFFFFF  
FFFFFFFFFFFFFFFFFFFFFFFFFFFFFFFFFFFFFFFFFFFF:FFFFFFFFFFFFFFFFFFFFFFFFFFFF  
FFF

@A00721:190:HGJW7DSXY:4:1436:32551:3474\_2:N:0:TCTGCAAG+GCTGCACT  
AAGTTCTCCGAAATTAAGACGGGGGGATTAAGAGTCCAGCTGTAAGTGTCAATTCAGAGAGGGGAGC  
TCTGAAAAGGAACTTCGTCAGAAGATGAGGAAGTCTATGAGGAGAGA

+

FFFFFFFFFFFFFFFFFFFFFFFFFFFFFFFFFFFFFFFFFFFFFFFFFFFFFFFFFFFFFFFFFFFF  
FFFF:FF,FFFFFFFFFFFFFFFFFFFFFFFFFFFF,FFFF:,F:FFFFFF

@A00721:190:HGJW7DSXY:4:1368:10131:22263\_1:N:0:TCTGCAAG+GCTGCACT  
CTCTAGAGAAGATCTCACCACTGGAGAAGGCAAGTGGAGAGTCCAGAAGTTGATGAAGAAGGATTAT  
TTGAAGCAGGGGTTACCACTTCCTAAGGTGGATGAGGGAGGTTGTTTCTTTGGAGTTTATAGATAATCT  
TTT

+

FFFFFFF:FFFFFF,FFFFFFFFFFFFFFFFFFFFFFFFFFFFFFFFFFFFFFFFFFFFFFFFFFFF  
FFFFFFFFFFFFFFFFFFFFFFFFFFFFFFFFFFFFFFFFFFFFFFFFFFFFFFFFFFFFFFFFFFFF,FFF  
FFF

@A00721:190:HGJW7DSXY:4:1441:12897:1470\_2:N:0:TCTGCAAG+GCTGCACT  
CCTTGAGAAGACAAGCCACATTAAGATATAATTTAGGTCAACTTGGGGTTTCGAATGTCATTAGTGCC  
TTACGATTGAAAGAGGTCCTTTTGAGTATCGACAGATCTTTCGATCTT

+

FFFFFFFFFFFFFFFFFFFFFFFFFFFFFFFFFFFFFFFFFFFFFFFFFFFFFFFFFFFFFFFFFFFF  
FFFFFFFFFFFFFFFFFFFF:FFFFFFFFFFFF:FFFFFFFFFFFF

@A00721:190:HGJW7DSXY:4:1340:16541:34679\_2:N:0:TCTGCAAG+GCTGCACT  
ACGTGGCAGAATTCCGTAACCTACCATATTGTTCTTCCGGGAAGTTGTGGGATTTAACTTTGACTCA  
ACTACTCCGATCAGATCCGATGGTGTGATTGGTATGGACTACTCGAC

+

FFFFF:FFFFFFFFFFFFFFFFFFFFFFFFFFFFFFFFFFFFFFFFFFFFFFFFFFFFFFFFFFFF  
FFFFFFFFFFFFFFFFFFFFFFFFFFFF,FFFFFFFF:FFFFFFFF:FF



@A00721:190:HGJW7DSXY:4:1258:25274:31266\_1:N:0:TCTGCAAG+GCTGCACT  
AATATGTTACGACATGGCTTCGTAACAACAGTGCAGGATTGTCATCTCGGGGAAAGTGATTCACCAA  
GATGTTTCATATAGATACGAGATACCTAGAGAAGGTCGCAGCGATCTTACTCGTTATCGAGCTAAGAA  
GAA

+

FFFFFFFFFFFFFFFFFFFFFFFFFFFFFFFFFFFFFFFFFFFFFFFFFFFFFFFFFFFFFFFFFFFFFFFF  
FFFFFFFFFFFFFFFFFFFFFFFFFFFFFFFFFFFFFFFFFFFFFFFFFFFFFFFFFFFFFFFFFFFFFFFF  
FFF

@A00721:190:HGJW7DSXY:4:1468:17852:34663\_2:N:0:TCTGCAAG+GCTGCACT  
GTTATGCTCGCAAACCTAACGTTAGTACCGGAGGTGATCTCTCTGCTTCTGCGTTACTGAGAGAAAAG  
ATTCAGGACGCCTACGGTGACTTTATGGACAAGATGCAAGAGATCGGA

+

FFFFFFFFFFFFFFFFFFFFFFFFFFFFFFFFFFFFFFFFFFFFFFFFFFFFFFFFFFFFFFFFFFFFFFFF  
FFFFFFFFFFFFFFFFFFFFFFFFFFFFFFFFFFFFFFFFFFFFFFFFFFFFFFFFFFFFFFFFFFFFFFFF

@A00721:190:HGJW7DSXY:4:2151:11189:20181\_2:N:0:TCTGCAAG+GCTGCACT  
TTTAGGTTTAGTAGGTGATCTTGACGTCGATTCTTTGTATAGGGAGTGTGAGAAGACAACGAATCTTG  
AAACTACGGTCCTTATCAAAGAAAATGGTGAACCGGTCTCTAAATCTT

+

FFFFFFF,FFFFFFFFFFFFFFFFFFFFFFFFFFFFFFFFFFFFFFFFFFFFFFFFFFFFFFFFFFFFFFFF  
FFFFFFFFFFFFFFFFFFFFFFFFFFFFFFFFFFFFFFFFFFFFFFFFFFFFFFFFFFFFFFFFFFFFFFFF

@A00721:190:HGJW7DSXY:4:1161:20781:25582\_2:N:0:TCTGCAAG+GCTGCACT  
AGATTGAAGAACACGTCAAGAAGTCGCTCGGCGTTGTTCTTGAAAACCAAGTTAAGAAGGAGGCTGAT  
CATGGAGTCTTTGTACCTTCTGTCAAACCTTCGAGGTTTCTGCTACGAGA

+

FFFFFFFFFFFFFFFFFFFFFFFFFFFFFFFFFFFFFFFFFFFFFFFFFFFFFFFFFFFFFFFFFFFFFFFF  
FFFFFFFFFFFFFFFFFFFFFFFFFFFFFFFFFFFFFFFFFFFFFFFFFFFFFFFFFFFFFFFFFFFFFFFF

@A00721:190:HGJW7DSXY:4:1524:18313:22936\_1:N:0:TCTGCAAG+GCTGCACT  
TGGATTGAAGGCTGGCTCTAAGGGAGACTCCTTCTTTTTGAATGTTGTAAAGAATTGGGTTGAGAAGT  
GTGCTTTACAAGGAGTTAGACTCTTCTTCAAGTTTTTAGATCTTCTTGATAATCTTAAAGAAAAATTT  
TCG

+

:F:FFFF:FF:,FFFF,::,FFFFFFFFFFFFFFFFFFFFFFFFFFFFFFFFFFFFFFFF,FFFFFFFFFFFFFFFF  
FFFFFFFFFFFFFFFFFFFFFFFFFFFFFFFFFFFFFFFFFFFFFFFFFFFFFFFFFFFFFFFFFFFFFFFF:FFFFF  
FFF

@A00721:190:HGJW7DSXY:4:1260:3061:9204\_2:N:0:TCTGCAAG+GCTGCACT  
CTGTAATTACATTCTTTACGCCAGATTCTTCATGGGGCGACGCTGTTTCTTGGTATTTCTGAAATA  
GTTTATCAGAGCGTCATTTTCCTTTGGGATCTTCTCTGGTAAGGGA

+

FFFFFFFFFFFFFFFFFFFFFFFFFFFFFFFFFFFFFFFFFFFFFFFFFFFFFFFFFFFFFFFFFFFFFFFF  
FFFFFFFFFFFFFFFFFFFFFFFFFFFFFFFFFFFFFFFFFFFFFFFFFFFFFFFFFFFFFFFFFFFFFFFF

@A00721:190:HGJW7DSXY:4:1273:26422:5259\_2:N:0:TCTGCAAG+GCTGCACT  
ATTCTTCTCACTCTTGACGAGAATTATTACTGTTTTCTCTACCCATAACTTCTTTTTCAAAAATGCGG  
ATGGGTCTACTGATGTTTTCTACAGAGTGCAGTCGTTTCAACACTTA

+

FFFFFFFFFFFFFFFFFFFFFFFFFFFFFFFFFFFFFFFFFFFFFFFFFFFFFFFFFFFFFFFFFFFFFFFF  
FFFFFFFFFFFFFFFFFFFFFFFFFFFFFFFFFFFFFFFFFFFFFFFFFFFFFFFFFFFFFFFFFFFFFFFF

@A00721:190:HGJW7DSXY:4:1509:10285:8030\_2:N:0:TCTGCAAG+GCTGCACT  
GGAAAATAATTGGTGATGAAAATACGTATGTCGGTGGGGTTCTCAAGGCTCTCATCGCCACTGGGATT  
CTAAGGGGTTCCATAAGATATTATCTGACATTGTGGTTCAATGATCAG

+

FFFFFFFFFFFFFFFFFFFFFFFFFFFFFFFFFFFFFFFFFFFFFFFFFFFFFFFFFFFFFFFFFFFFFFFF  
FF:FF:FFFFFFFFFFFFFFFFFFFFFFFFFFFFFFFFFFFFFFFFFFFFFFFFFFFFFFFFFFFFFFFF

@A00721:190:HGJW7DSXY:4:1328:28429:21950\_2:N:0:TCTGCAAG+GCTGCACT  
TGGTCCTTACGTCTTAAGTAATTTGGATGTTGTGCGAAACTATCAGGTTCTTGTCACGATTCTTAAAA

$+$ 

@A00721:190:HGJW7DSXY:4:1401:12192:32628\_2:N:0:TCTGCAAG+GCTGCACT  
GCCACAGACTTTCTGGGAAAAGAGACCTCTGTTGGTAGAGGAGTTGAGAGAATTACTCAGATTCAATC  
TGGCATCACTGAACGTCTACAACGAGTTAGGGAGTGGCTAGAGATCGG

+

@A00721:190:HGJW7DSXY:4:2627:12147:31516\_1:N:0:TCTGCAAG+GCTGCACT  
AGCAATACCTTCCACTGAGTTCATCACCCAGAGTTTCGACGTCGCGGAAAACGATGAAGATTTCCACA  
CTGTTTCGAGAATCTTCTGATGCTGAATTTGAGGAAAATTTTTCGGAAGTTTTTGGTATAAATCCTGAT  
GGC

+

@A00721:190:HGJW7DSXY:4:1150:3549:36354\_1:N:0:TCTGCAAG+GCTGCACT  
TAAACCTTCTTTTATCATTGCAACAGGACTTTGAGAAGACTGTTGAAATGGACAAAATCTGGGATCA  
TAGGTATGTGTCACGCTACACTCGAAATATGGGCCCTCATAAGGAAGTATAGTTGGCGTCTTGTCGTT  
GAC

+

@A00721:190:HGJW7DSXY:4:1317:11243:23782\_2:N:0:TCTGCAAG+GCTGCACT  
AGTTAGATCATTTGTT CAGGAAGATCTCTACAGAGATTATCGAGAGTTGTGATCTAGTTCTAAATTTA  
GGTCGACGGACTTTAGCAACTTTAGATAAATTCTTTCCGGGCTCAATG

+

@A00721:190:HGJW7DSXY:4:1273:12120:29590\_1:N:0:TCTGCAAG+GCTGCACT  
TCTGACCATCGCAAAGAAGACTTTATTAGTTCATGAAGTTCTTACACTTCTCGCGACTAATGTCAGCT  
TCACTACAAAGGCGTTACGTAAAGTAGTTTTACGCTTTATCTTAAAGCATTACCACCAAATTTAGCA  
CTT

+

@A00721:190:HGJW7DSXY:4:1220:25482:3630\_1:N:0:TCTGCAAG+GCTGCACT  
CTCGCCATATCAGATTAGAGACATGCCAGTTAGAGTTCTTCTAACCAGGACTGATGGTGAGATTCTTT  
TACCTTTTGGAGGTCCAGGAACCTTTACTCCTAGTGTCTTTTCTAGAGTCCAAGGACGTTTCCGTCGG  
AGG

+

@A00721:190:HGJW7DSXY:4:1616:20745:30780\_1:N:0:TCTGCAAG+GCTGCACT  
GAGACCGCTCAATAACACTCTATTGAATCCCTTTTCCACGATGAAAGCTCTTTATGAGGTGCTCCATG  
CAAATTTACAGTTCCTCTTTGGTGATATCGCCTCTGTCTTTCTCCTTTAATCGTGAGGTTACGAGAG  
TTT

+

```
FF:FFF:F::FF:FFFF:F::F:FFFFFF:FF:FFFFFFFF:F,FFFFFFFFF::F:::FFFFFFFFFFFFFFFF
```





+  
FFFFFFFF,FFFFFFFFFFFFFFFFFFFFFFFFFFFFFFFFFFFFFFFFFFFFFFFFFFFFFFFFFFFFFFFF  
FFFFFFFFFFFFFFFFFFFFFFFF:FFFFFFFFFFFFFFFFFFFFFFFFFFFFFFFFFFFFFFFFFFFFFFFF:FFFFFFFF  
FFF  
@A00721:190:HGJW7DSXY:4:1117:16957:34992\_2:N:0:TCTGCAAG+GCTGCACT  
TTGAAGTACCGCAACATGGATCAGTTTTCCAAAAAGCTATTAATAGCAGTTGCGGGGCTATAATACCG  
CCTCCAGATTACTCTAAACTGAATCCACTCTCTTGGGATATAAATGAG  
+  
FFFFFFFFFFFFFFFFFFFFFFFFFFFFFFFFFFFFFFFFFFFFFFFFFFFFFFFFFFFFFFFFFFFFFFFF  
FFFFFFFFFFFFFFFFFFFFFFFFFFFFFFFFFFFFFFFFFFFFFFFFFFFFFFFFFFFFFFFF  
@A00721:190:HGJW7DSXY:4:2210:21748:28573\_1:N:0:TCTGCAAG+GCTGCACT  
AGAGTTTTGGAGCTGTGTAATGTCCTACGTACTGTTCAAGGTGTTGGGCTTCTCTAAAGAACAGCAA  
CTTTCACATGAATTAGTTATTGAAAGTCTTGACCCTCACGTCTCACTTTATCACCTTGGAGATGGTA  
AAG  
+  
FFFFFFFFFFFFFFFFFFFFFFFFFFFFFFFFFFFFFFFFFFFFFFFFFFFFFFFFFFFFFFFFFFFFFFFF  
FFFFFFFFFFFFFFFFFFFFFFFFFFFFFFFFFFFFFFFFFFFFFFFFFFFFFFFFFFFFFFFFFFFFFFFF  
FFF  
@A00721:190:HGJW7DSXY:4:2209:4960:28870\_2:N:0:TCTGCAAG+GCTGCACT  
ATTCTGCTTCGACGGTAATTCCATAAGACCTTTCTTGGGAGTAAAGAGGGTTTGAAAATTACGGAAC  
CTTTCCTCGTTCTTCATGAAGATCTTCGAGTGTTTTATAGTGATTTAT  
+  
FFFFFFFFFFFFFFFFFFFFFFFFFFFFFFFFFFFFFFFFFFFFFFFFFFFFFFFFFFFFFFFFFFFFFFFF:  
FFFFFFFFFFFFFFFFFFFFFFFFFFFFFFFFFFFFFFFFFFFFFFFFFFFFFFFFFFFFFFFF:  
@A00721:190:HGJW7DSXY:4:2447:20799:24017\_1:N:0:TCTGCAAG+GCTGCACT  
CAAGTCGATTGATTTTGTGACTACGATCTCTCTGTAATAAGAAGTTCTTCGCAGTTGAATCTCCAC  
CAGGTGGAGGGAAGACCACTGAACCTATAGCGACTTTTGTGCAATTTTTCGAAAAGGTCTTGAAGTA  
CGT  
+  
FFFFFFFFFFFFFFFFFFFFFFFFFFFFFFFFFFFFFFFFFFFFFFFFFFFFFFFFFFFFFFFFFFFFFFFF:  
FFFFFFFFFFFFFFFFFFFFFFFFFFFFFFFFFFFFFFFFFFFFFFFFFFFFFFFFFFFFFFFFFFFFFFFF:  
FFF  
@A00721:190:HGJW7DSXY:4:2555:19226:30561\_2:N:0:TCTGCAAG+GCTGCACT  
TCGTAATTCGCGAGAAGAGATAGTGAATAAGTTTTGGCACTTCTAGTTCATCGCGGTATTTGTGAAA  
TTAAGACAGACGTGAAAGTTATGATGAGTGATCGTATTAGAACAGCTG  
+  
FFFFFFFFFFFFFFFFFFFFFFFFFFFFFFFFFFFFFFFFFFFFFFFFFFFFFFFFFFFFFFFFFFFFFFFF:  
FFFFFFFFFFFFFFFFFFFFFFFFFFFFFFFFFFFFFFFFFFFFFFFFFFFFFFFFFFFFFFFFFFFFFFFF:  
@A00721:190:HGJW7DSXY:4:1361:4553:13761\_2:N:0:TCTGCAAG+GCTGCACT  
CTGAGGTCAAACCTGTGGACGTTCTTTTCATCGACGAATTATTCATGATTCACGCTGGTCAGACCCTT  
TTTCTTACACATCTACTTAAGGCGGCTTATACCATAGGTTACGGTGAT  
+  
FFFFFFFFFFFFFFFFFFFFFFFFFFFFFFFFFFFFFFFFFFFFFFFFFFFFFFFFFFFFFFFFFFFFFFFF:  
FFFFFFFFFFFFFFFFFFFFFFFFFFFFFFFFFFFFFFFFFFFFFFFFFFFFFFFFFFFFFFFFFFFFFFFF:  
@A00721:190:HGJW7DSXY:4:1365:6451:23625\_1:N:0:TCTGCAAG+GCTGCACT  
GACGTGTGCTCTTCCGATCTCCAAGTCGAACTACTTCAACATCAACGACATCATTCTTGATGAGTG  
TCGTTCTTATCGAAGTCTCAGTTATCGCTGCCCGCCGACGTTTGTGCGAACTCTCAGAGGTTTACG  
GCA  
+  
FFFFFFFFFFFFFFFFFFFFFFFFFFFFFFFF,FFFFFFFFFFFFFFFFFFFFFFFFFFFFFFFFFFFFFFFF  
FFFFFFFFFFFFFFFFFFFFFFFFFFFFFFFFFFFFFFFFFFFFFFFFFFFFFFFFFFFFFFFFFFFFFFFF:  
FFF  
@A00721:190:HGJW7DSXY:4:1601:6406:2221\_1:N:0:TCTGCAAG+GCTGCACT  
AATTCGAGAGAGGACACTATGGAAATTAGACCTATCAGATGTCTTGACGACTTCGAATTTGAGGACGG



@A00721:190:HGJW7DSXY:4:1164:10728:5885\_2:N:0:TCTGCAAG+GCTGCACT  
CCAGTGACGATTTCTCCCGGAAGCTCTTCTCTCTTAGGAGGTCATGATGACTACTATAAGGGTGAA  
ATCGATTTTTTCGAAGTTTGACAAATCTCAAGATTTCTTTTGTAAGCC

+

FFFFFFFFFFFFFFFFFFFFFFFFFFFFFFFFFFFFFFFFFFFFFFFFFFFFFFFFFFFFFFFFFFFFFFFF  
FFFFFFFFFFFFFFFFFFFFFFFFFFFFFFFFFFFFFFFFFFFFFFFFFFFFFFFFFFFFFFFFFFFFFFFF

@A00721:190:HGJW7DSXY:4:1209:8332:15013\_2:N:0:TCTGCAAG+GCTGCACT  
TATTCTTATTTAGGCTTCGATGCTGAATTTCTTGAACCTTGGAGTGCCAGTGAATATTTTTGTCACGC  
CAGGAGTATCCATAACGATTTGTCATTTACCACCTTTGCTCAACGACG

+

FFFFFFFFFFFFFFFFFFFFFFFFFFFFFFFFFFFFFFFFFFFFFFFFFFFFFFFFFFFFFFFFFFFFFFFF  
FFFFFFFFFFFFFFFFFFFFFFFFFFFFFFFFFFFFFFFFFFFFFFFFFFFFFFFFFFFFFFFFFFFFFFFF

@A00721:190:HGJW7DSXY:4:1122:10230:4178\_1:N:0:TCTGCAAG+GCTGCACT  
TAACACATTCTTTGGTAATTGTATGATCACTCTTATGATGCTCTCTTTATTACGACCTTCGGAAGT  
TTAGAGCCGTCGCTGTCGCCGAGACGATTGATCCTCTTTTCGGACGTACCGGTCCAGGATTATTCA  
GAT

+

FFFFFFFFFFFFFFFFFFFFFFFFFFFFFFFFFFFFFFFFFFFFFFFFFFFFFFFFFFFFFFFFFFFFFFFF  
FFFFFFFFFFFFFFFFFFFFFFFFFFFFFFFFFFFFFFFFFFFFFFFFFFFFFFFFFFFFFFFFFFFFFFFF  
FFF

@A00721:190:HGJW7DSXY:4:1630:8648:16438\_2:N:0:TCTGCAAG+GCTGCACT  
CAGCGTACTTCTGCTCGCGATTTATTCTTTTTGTCAATGATTACATCTACTTCGTTCTGATCCTTAC  
AAGATCATCGTTAAGTTAGGTAAACCCCTAACCGATGTTACTCTTGTA

+

FFFFFFFFFFFFFFFFFFFFFFF:FFFFFFFFFFFFFFFFFFFFFFF:FFFFFFFFFFFFFFFFFFFFFFF  
FF:FFFFFFFFFFFFFFFFFFFFFFFFFFFFFFFFFFFFFFFFFFFFFFFFFFFFFFFFFFFFFFFF

@A00721:190:HGJW7DSXY:4:1536:1380:26772\_1:N:0:TCTGCAAG+GCTGCACT  
TTTAAAGACTATAATAAATATCTCCACTACGAGGTTGTTGTTGGCGATTAGCTCTTGCGACTAATAT  
TCGATATTCGATTGAGGGTCGTTATACCTATTCGCTATCTGTGCTTTGAATTGTATAAGATCAAATT  
TTA

+

FFFFF,F,FFFF,FFFFFFF:FF:FFF:FF:FFFFFFFFFFFFFFF:,FF,F:F,FFFFFFFFFFFF,F  
FFFFFFFFF:F,FFF,FF:FFFFF,FFFFFFFFFFFFFFFFF,FFFF:FFFFFFFFFFFF,FFF:,FFFFFFF  
F:F

@A00721:190:HGJW7DSXY:4:2128:20175:7999\_2:N:0:TCTGCAAG+GCTGCACT  
CCTGATGTGGAGGGAGTTCTTGAAGCATCCCGACCTTCTCTGTGAAAATTTTGATGCGGTTTCATAA  
GATTATCAGTAATCCTGATTCTACTACGATTCATGGACCTTCCATCC

+

FFFFFFFFFFFFFFFFFFFFFFFFFFFFFFFFFFFFFFFFFFFFFFFFFFFFFFFFFFFFFFFFFFFFFFF  
:FFFFFFFFFFFFFFFFFFFFFFFFFFFFFFFFFFFFFFFFFFFFFFFFFFFFFFFFFFFFFFFF

@A00721:190:HGJW7DSXY:4:1362:29731:1752\_2:N:0:TCTGCAAG+GCTGCACT  
GACGTATCTCAAAGATCGACTTCGAGACAGGTGATATTGTTGAGCGAGAGCGACCAAGATCTAAATTC  
GGTAACGGTGCGTGGCGCTTTATTTTAAAAAGCTCCCTCCTCTCCCA

+

FFFFFFFFFFFFFFFFFFFFFFFFFFFFFFFFFFFFFFFFFFFFFFFFFFFFFFFFFFFFFFFFFFFFFFFF  
FFFFFFFFFFFFFFFFFFFFFFFFFFFFFFFFFFFFFFFFFFFFFFFFFFFFFFFFFFFFFFFF

@A00721:190:HGJW7DSXY:4:1214:28212:2221\_2:N:0:TCTGCAAG+GCTGCACT  
ACTTGAGTCTTTTGATCAGTCTCTGACTTGACCATCTTTCATTTTAAATGACGATCATTAAGACTCTC  
TTTCTTCTTTGTTTCTTCTTTGCACTGATTTTCTCATCAGCTTGT

+

FFFFFFFFF:FFFFFFFFFFFF,FFFFFFFFFFFFFFFFFFFFFFFFFFFFFFFFFFFFFFFFFFFF,FFFFFFF:FFFFF  
F:,F:FF,,FF:FFFFFFFFFFFFFFFFFFFF,FF:F,FFFFFFFFF,FFF

@A00721:190:HGJW7DSXY:4:2143:18593:4507\_1:N:0:TCTGCAAG+GCTGCACT  
GTTTTTACGATAACAACATATCAGTTGATTAAGACTCTTCCGAAAGGCGAACTTTGGGAATTTGAAGCT

CAGGGTGAAGCACAAACGTTTGACCGTGACGAACTGTGGTGTTCTTGATCTACGTTACGGATATACTCT  
CCT

+

FFFFFFFFFFFFFFFFFFFFFFFFFFFFFFFFFFFFFFFFFFFFFFFFFFFFFFFFFFFFFFFF  
FFFFFFFFFFFFFFFFFFFFFFFFFFFFFFFFFFFFFFFFFFFFFFFFFFFFFFFFFFFFFFFF  
FFF

@A00721:190:HGJW7DSXY:4:1452:3378:11162\_1:N:0:TCTGCAAG+GCTGCACT  
ACACTACCACTTATTACGATATTTCTTTAGTCGATGGGTTTTCGACGCCTTTAAGCGTCTTCTGTTCA  
TCGCAACCAGATGATATCTTCTATTCTGAACCTTATGTTTCGATCAGTGTCTTCTATCAGGAGGAAAA  
CAC

+

FFFFFFFFFFFFFFFFFFFFFFFFFFFFFFFFFFFFFFFFFFFFFFFFFFFFFFFFFFFFFFFF  
FFFFFFFFFFFFFFFFFFFFFFFFFFFFFFFFFFFFFFFFFFFFFFFFFFFFFFFFFFFFFFFF  
FFF

@A00721:190:HGJW7DSXY:4:2113:3893:7138\_2:N:0:TCTGCAAG+GCTGCACT  
TTTCTTCTAATGTGGCCTGAACTACGTTTCACTTTGTGTGTACTTGTCTCTATTTTAAGTTTTGTCTT  
CCTTGTTTGTCTTATTCTATTAATCACTCATTTTGTAGTGAGATTATTAA

+

FFFFFFFFFFFFFFFFFFFFFFFFFFFFFFFFFFFFFFFFFFFFFFFFFFFFFFFFFFFFFFFF  
FFFFFFFFFFFFFFFFFFFFFFFFFFFFFFFFFFFFFFFFFFFFFFFFFFFFFFFFFFFFFFFF  
FFF

@A00721:190:HGJW7DSXY:4:2249:19678:8797\_1:N:0:TCTGCAAG+GCTGCACT  
GTCTTCGACAACAGCAGGGGTTTTCGAATAGTGATAGCCACCGCCTTACAGAGGGGCAGCAGCATGA  
CCATAATTGGTATTGACTTTGGTACCACCTTTTCTACTGTCTGTCTCGCCTCTTGAATGAAGTTTTA  
ATG

+

F:, , FFFFFFF:FFF:::, , FF:F:FF:, F, :FFFF, FFF, F:FFFFFFFF:F, :, :FFFF:F:  
FF:FFFF:FFFFFFFFFFFFFFFF:FF, , FFFF:F, F, :FFFFFFFF:F, FFFF:FF:F, FFFF:  
FFF

@A00721:190:HGJW7DSXY:4:2105:15763:35462\_2:N:0:TCTGCAAG+GCTGCACT  
TGATAGTGAATTTATACCTACAATCATTGGTTTTTCTAATAATGATGACACTATTGTTTATGGATATG  
ATGCTATTACTCATGATGGTTACGGTCAGGGAGGATTCTCAGTTTACA

+

FFF, FFFFFFFFFFFFFFFFFFFFFFFFFFFFFFFFFFFFFFFFFFFFFFFFFFFFFFFFFF, FF:F, FFF:FFFF  
FFFFFFFFFFFFFFFFFFFFFFFFFFFFFFFFFFFFFFFFFFFFFFFFFFFFFFFFFFFFFFFF

@A00721:190:HGJW7DSXY:4:1260:1199:35978\_2:N:0:TCTGCAAG+GCTGCACT  
CCGAAAGACGTGCTAAATTAACCATTTGACGATGTCGTCTGTCTCGGCGATCACTTTTCACTAAGA  
ATTGGTCCTACTTTTGACAAGGCCAACTTCGTAATCTTCATGAGATC

+

FFFFFFFFFFFFFFFFFFFFFFFFFFFFFFFFFFFFFFFFFFFFFFFFFFFFFFFFFFFFFFFF  
FFFFFFFFFFFFFFFFFFFFFFFFFFFFFFFFFFFFFFFFFFFFFFFFFFFFFFFFFFFFFFFF

@A00721:190:HGJW7DSXY:4:1368:20003:31031\_2:N:0:TCTGCAAG+GCTGCACT  
TATCTCTTTGGTTGTTAGGGATTTTGAGAGAGTGAAAGGCTTCAATTGTAGTGGTTTGGTCGTTTCAG  
TACCCAGTCAGTATACCTCTACGCAAAGATATTTTCATGAAAACCTACAG

+

FFFFFFFFFFFFFFFFFFFFFFFFFFFFFFFFFFFFFFFFFFFFFFFFFFFFFFFFFFFFFFFF  
FFFFFFFFFFFFFFFFFFFFFFFFFFFFFFFFFFFFFFFFFFFFFFFFFFFFFFFFFFFFFFFF

@A00721:190:HGJW7DSXY:4:2314:19759:6997\_2:N:0:TCTGCAAG+GCTGCACT  
ATTACCTGTCTTTCATATTATGAATGAACCTTCGGCCGCTCTCTTTGCTTCGATGTTGGATGTCAAGA  
AGGGTTCAGAATGGGATTCCTACGTAGTTTATGACTTTGGTGGTGTA

+

FFFFFFFFFFFFFFFFFFFFFFFFFFFFFFFFFFFFFFFFFFFFFFFFFFFFFFFFFFFFFFFF  
FFFFFFFFFFFFFFFFFFFFFFFFFFFFFFFFFFFFFFFFFFFFFFFFFFFFFFFFFFFFFFFF

@A00721:190:HGJW7DSXY:4:2527:7636:12179\_1:N:0:TCTGCAAG+GCTGCACT  
TCTTACGTTACGGTAATTACTATAGTGTTATTTATTCTGGTGGTGATGATAATCTTGGAGGTCGTGAC

GTTGATGAAGCTATAAGAGCGTTCTTATTACGGCGCACTTCTTTACCCGCCACCACACAACCTTTCAGT  
TTC

+

FFFFFFFFFFFFFFFFFFFFFFFFFFFFFFFFFFFFFFFFFFFFFFFFFFFFFFFFFFFFFFFFFFFFFFFFFFFFFFFF  
FFFFFFFFFFFFFFFFFFFFFFFFFFFFFFFFFFFFFFFFFFFFFFFFFFFFFFFFFFFFFFFFFFFFFFFFFFFFFFFF  
FFF

@A00721:190:HGJW7DSXY:4:2664:19497:34350\_2:N:0:TCTGCAAG+GCTGCACT  
TGTTACTGGAAAACCCTCGTCAATACTTTCAATAATATACGTCTTGAACCTCACTTATGACGATCTAG  
TGAAATTAACGCGTCCTTTTCTGGAACGTAGTTTTACTATTATGAACA

+

FFFFFFFFFFFFFFFFFFFFFFFFFFFFFFFFFFFFFFFFFFFFFFFFFFFFFFFFFFFFFFFFFFFFFFFFFFFFFFFF  
FFFFFFFFFFFFFFFFFFFFFFFFFFFFFFFFFFFFFFFFFFFFFFFFFFFFFFFFFFFFFFFFFFFFFFFFFFFFFFFF

@A00721:190:HGJW7DSXY:4:1647:19859:4695\_1:N:0:TCTGCAAG+GCTGCACT  
ACGTGTGCTCTTCCGATCTAATTACCCTGATTCCGGCCGGTGGTAGCTCATTTCTACCAGGGGCTAT  
TACTCTTGCTGAAACAGCTATTAAAGCTGTTGAGCGGGTAATTACACCTAAACGAGCTCGATCTGCCA  
TCG

+

FFFFFFFFFFFFFFFFFFFFFFFFFFFFFFFFFFFFFFFFFFFFFFFFFFFFFFFFFFFFFFFFFFFFFFFFFFFFFFFF  
FFFFFFFFFFFFFFFFFFFFFFFFFFFFFFFFFFFFFFFFFFFFFFFFFFFFFFFFFFFFFFFFFFFFFFFFFFFFFFFF  
:FF

@A00721:190:HGJW7DSXY:4:1647:8296:27132\_2:N:0:TCTGCAAG+GCTGCACT  
CACTCTTTTCTGCTACTTTAACGGAGCGTAGTGTACTCTTCGTCGATTGTATCAACAGTAACATTACT  
TCTAATAAAGGTCTCTATCAAGCTCGTATTATCGTCGCTGCTGGATCT

+

FFFFFFFFFFFFFFFFFFFFFFFFFFFFFFFFFFFFFFFFFFFFFFFFFFFFFFFFFFFFFFFFFFFFFFFFFFFFFFFF  
FFFFFFFFFFFFFFFFFFFFFFFFFFFFFFFFFFFFFFFFFFFFFFFFFFFFFFFFFFFFFFFFFFFFFFFFFFFFFFFF

@A00721:190:HGJW7DSXY:4:2303:6858:35102\_1:N:0:TCTGCAAG+GCTGCACT  
AAGGCTAAACTCCATGGTAATTATGAAGACTGTGATTTATCTTTCACTCTGGCCTTGTATGCGGGTGT  
TTCTAATCGTAACATTAATAATTTCAATCTTCTTAAAAAGAAGATAGAGAGTCATACTTTGGGCTATC  
GTT

+

FF,FFF,FFFFFFFF,,FFF,FFFFFF:F,FFFF,F:FFFF:FFFFFFFF,F,F:, ,FFFFFF,F,FFFF  
FF:FF:F,FF,: ,:FF,FFF,:FFF,FFFF,FF,:F,: :F:::FFFF::FF::FF,FFFF,: :FFF:  
FFF

@A00721:190:HGJW7DSXY:4:2133:14100:25097\_2:N:0:TCTGCAAG+GCTGCACT  
GATAGCCAATATTGAAGTGGACACCTCTGGTAGTATCGAAGTAAAGATAACCAATAAGGAAGGAGCTT  
ATACTATGGTTGAATCAACTAAGCATACTACTTTTGCTTTGATTACTC

+

FFFFFFFFFFFFFFFFFFFFFFFFFFFFFFFFFFFFFFFFFFFFFFFFFFFFFFFFFFFFFFFFFFFFFFFFFFFFFFFF  
FFFFFFFFFFFFFFFFFFFFFFFFFFFFFFFFFFFFFFFFFFFFFFFFFFFFFFFFFFFFFFFFFFFFFFFFFFFFFFFF

@A00721:190:HGJW7DSXY:4:1508:18548:1391\_1:N:0:TCTGCAAG+GCTGCACT  
TCCGATCTGTAAAGAGTCGATTAAACAAGTTGTACTTATCAATGATTTTATCGCTGGTTGTTATCTC  
GAAAAGTCTCTTCTAAAAGGAACGTCAAGTCTAACCCAAAGAGAATATCTAAAATATTTACAAAATCT  
T

+

FFFFFFFF:FFFFFFFFFFFFFFFFFFFFFFFFFFFFFFFFFFFFFFFFFFFFFFFFFFFFFFFFFFFFFFFFFFFF  
FFFFFFFF:FFF:FFFFFFFFFFFFFFFFFFFFFFFFFFFFFFFFFFFFFFFFFFFFFFFFFFFFFFFFFFFFFFFF  
F

@A00721:190:HGJW7DSXY:4:1257:7220:35039\_2:N:0:TCTGCAAG+GCTGCACT  
AGACGTTGCTTGTGCTTCTCTTTAATGGCACTACCTCGGTACAATCTTACTTGAACGAAGGCGA  
CCTGTTCCGGAGTTTTTACGGGATCCGGAATGTTCTGTCTATATTAGG

+

FFFFFFFFFFFFFFFFFFFFFFFFFFFFFFFFFFFFFFFFFFFFFFFFFFFFFFFFFFFFFFFFFFFFFFFFFFFF  
FF,FFFFFFFF:FFFFFFFF,FFFF,FF:,FFFFFFFFFFFFFFFF

@A00721:190:HGJW7DSXY:4:1255:18629:35258\_2:N:0:TCTGCAAG+GCTGCACT  
TCGAACGTCAACGTTACCGAGTTTCGTTTCGTACCTTGATGCTGACTTTTCGTCAATATGATTTGATC  
TGGTTGCTCAATTCTAAGCGTGTTCCGCTTAGTGCGAGGCCTCTCTTC

+

FFFFFFFFF,FFFFFFFFFFFFFFFFFFFFFFFFFFFFFFFFFFFFFFFFFFFFFFFFFFFFFFFFFFFFFFFF:F  
FFFFFFFFFFFFFFFFFFFFFFFFFFFFFFFFFFFFFFFFFFFFFFFFFFFFFFFFFFFFFFFF

@A00721:190:HGJW7DSXY:4:1338:18367:6214\_2:N:0:TCTGCAAG+GCTGCACT  
AGTTTACGAACCTTGACTCTACTATACGTGACATACTAAATACTAGATATTTGGATGATCTTGATAAAG  
AACTTCATGAATTTTCAGAGGATGAAAAATTTTCTTCCTTGATTTTA

+

FFFFFFFFFFFFFFFFFFFFFFFFFFFFFFFFFFFFFFFFFFFFFFFFFFFFFFFFFFFFFFFFFFFFFFFF:F  
FFFFFFFFFFFFFFFFFFFFFFFFFFFFFFFFFFFFFFFFFFFFFFFFFFFFFFFFFFFFFFFF

@A00721:190:HGJW7DSXY:4:1662:32208:24518\_1:N:0:TCTGCAAG+GCTGCACT  
TACAGGAGGCAGTCTTCTGATCGTAAGAAGTTTATAAGGAACATATCCATTTGTTGTAATAGGGTCAT  
CAACTTAGAACTCGAAACTCTAAGTGGAATACTGTCTTTCCAAGCTTACCTGTATCTTCAATGAAAT  
TGG

+

:FFFFFFFFFFFFFFFFFFFFFFFFFFFFFFFFFFFFFFFFFFFFFFFFFFFFFFFFFFFFFFFFFFFFFFFFF  
FFFFFFFFFFFFFFFFFFFFFFFFFFFFFFFFFFFFFFFFFFFFFFFFFFFFFFFFFFFFFFFFFFFFFFFFF  
FFF

@A00721:190:HGJW7DSXY:4:2341:28980:10191\_2:N:0:TCTGCAAG+GCTGCACT  
GTGGGCTTTCGTAAGGAAGATCTGTTATCGACGGTTTATCGTTTACGAAGTATCACTCCACCGGTG  
AATGGTTTAAGAATACTATAAATAGAATAGCTATTACTACTAATGGCG

+

FFFFFFFFFFFFFFFFFFFFFFFFFFFFFFFFFFFFFFFFFFFFFFFFFFFFFFFFFFFFFFFFFFFFFFFFF  
FFFFFFFFFFFFFFFFFFFFFFFFFFFFFFFFFFFFFFFFFFFFFFFFFFFFFFFFFFFFFFFF:F  
F

@A00721:190:HGJW7DSXY:4:1447:15293:32393\_1:N:0:TCTGCAAG+GCTGCACT  
TAGTGACATCTGGTCAATTTCTGTTTTAGGTGGTCTTTATTCTATTATTGATTTTTATGAGATTGATA  
CGTTAACAGAAGATGATGTTAGAGTAGAATTCCTGAAGAGTCCTTCCGTAACCAACTTCTTGACAATT  
TTC

+

FFFFFFFFFFF:FFFFFFFFFFFFFFFFFFFFFFFFFFFFFFFFFFFFFFFFFFFFFFFFFFFFFFFF:F  
FFFFFFFFFFFFFFFFFFFFFFFFFFFFFFFFFFFFFFFFFFFFFFFFFFFFFFFFFFFFFFFFFFFFFFFFF  
F:F

@A00721:190:HGJW7DSXY:4:2674:3125:23594\_2:N:0:TCTGCAAG+GCTGCACT  
CTAGGATTATGTCTGTGTGAAAGACTTTCTACCGATAAGGGTCACTAGTCTTACACAATTAAGAAAT  
AATCCTACATTGACTGATTATCTAAAGATTGAAGGAAAATTTTATCCT

+

FFFFFFFFFFFFFFFFFFFFFFFFFFFFFFFFFFFFFFFFFFFFFFFFFFFFFFFFFFFFFFFFFFFFFFFFF  
FFFFFFFFFFFFFFFFFFFFFFFFFFFFFFFFFFFFFFFFFFFFFFFFFFFFFFFFFFFFFFFF

@A00721:190:HGJW7DSXY:4:2546:14931:20932\_1:N:0:TCTGCAAG+GCTGCACT  
GACTTTCCTACGATACAAATGATAACTTCTAATTTACGTTTGCTACTCAGAGCTGGTCCTCTCAGCAA  
AGGGATGCATGGTGTTATCTCCTCAGGAGTCCCGGCATTTGATAATAATGACGAGACTTTCGTCATAA  
TCG

+

FFFFFFFFFFFFFFFFFFFFFFFFFFFFFFFFFFFFFFFFFFFFFFFFFFFFFFFFFFFFFFFFFFFFFFFFF  
FFFF,FFFFFFFFFFFFFFFFFFFFFFFFFFFFFFFFFFFFFFFFFFFFFFFFFFFFFFFFFFFFFFFFF  
FFF

@A00721:190:HGJW7DSXY:4:1651:19072:23375\_1:N:0:TCTGCAAG+GCTGCACT  
GATTACACGGAACCAGCGCATCTCGTGTGAGACTCGACCCGATTATATTGTATTAATTATAAAAGT  
GAGGAGACCATTATCTTGCTGAAATATATAGAAGATTATTTTGACAGAATCAATAAGAATCATCGATT  
CTC

+

,:FF:FF,,,,F:FF,F,:F:FF,F,:F,:FF,FF:,F,F::FFF,,F,,FF,F,FF,,,FFF:F,,F

:FF,::F:FFFF,:FFFF,,,FFFF,FFFF,FFFFFFFF,FFFF:,F,FF,:FF:FF,F:FFFF,:F:  
:,::

@A00721:190:HGJW7DSXY:4:2473:15167:24533\_2:N:0:TCTGCAAG+GCTGCACT  
GGATCCACTCCTCGAGTTATCATGATGTTAGTATGTTATATACTGATTTACAACGATATAGGAGTAAT  
CTACGAGAAGATTCTAGAATTCTTAATTATAATATTCAACCTCAAAG

+

FFFFFFFFFFFFFFFF:FFF:FFFFFFFFFFFFFFFFFFFFFFFFFFFFFFFFFFFFFFFFFFFFFFFF  
FFFFFFFFFFFF:FFFFFFFFFFFFFFFFFFFFFFFFFFFFFFFFFFFFFFFFFFFF,FF

@A00721:190:HGJW7DSXY:4:2165:17725:9173\_2:N:0:TCTGCAAG+GCTGCACT  
GAGATCACACATTTTGAGAACTAACTATGTTATGTTCTCTGATCATTTTGACAATCTCTTCTTATAAT  
AAATAAATAAATAATTACTAATGGCAAATAGTGGAAGGCTCCAGT

+

FFFFFFFFFFFFFFFFFFFFFFFFFFFFFFFFFFFFFFFFFFFFFFFFFFFFFFFFFFFFFFFFFFFF  
FFFFFFFFFFFFFFFFFFFFFFFFFFFF:FFF:FFFFFFFFFFFFFFFFFFFF

@A00721:190:HGJW7DSXY:4:2654:18846:11240\_2:N:0:TCTGCAAG+GCTGCACT  
TACGATGACGTGAGAATAGGTGAAGGGATAGTTTTTACCTCGACCAACATTAAGGCGGCGGCGACTAA  
TCTTAAAGCTTACCCAAAATGAAGGACACTTCGAAACTGAATAATGA

+

FFFFFFFFFFFFFFFFFFFFFFFFFFFFFFFFFFFFFFFFFFFFFFFFFFFFFFFFFFFFFFFFFFFF  
FFFFFFFFFFFFFFFFFFFFFFFFFFFFFFFFFFFFFFFFFFFFFFFFFFFFFFFFFFFF

@A00721:190:HGJW7DSXY:4:2244:30083:12258\_1:N:0:TCTGCAAG+GCTGCACT  
GGCTCTAAAGGACACTATACAATATCCAGACGACGACGAAGCTTATACTACTTTAATTTTGCGTATTA  
TGTGGAGATATCGTGATATCAGTACGTCCAGATCCTCTGCTTTTACCGATAACGATAAATTCGTCATC  
AAA

+

FFFFFFFFFFFFFFFFFFFFFFFFFFFFFFFFFFFFFFFFFFFFFFFFFFFF:FFF:FFF:FFFFFFFFFFFF  
FFFFFFFFFFFFFFFFFFFFFFFFFFFFFFFFFFFFFFFFFFFFFFFFFFFFFFFFFFFF:FFFFFFFF  
FFF

@A00721:190:HGJW7DSXY:4:2475:11849:18599\_1:N:0:TCTGCAAG+GCTGCACT  
TTGGTGCTTAGGGATATAATGAATTCAGCACCACATTTTGGTCAAGTCAATCCGTTGAGAAAATTTCT  
TAGAGGATATTCGCCATTGTGGTACGAATTGGTCCAACATTTACCACCAAATTTCTTTTGATACAATC  
TAG

+

FFFFFFFFFFFFFFFFFFFF:FFFFFFFFF::FFFF:FFFFFFFFFFFFFFFF:FFFFFFFFF,FFFF  
FFFFFFFFF:FFFFFFFFFFFF:FF:F:FFFFFFFFFFFF:F:FF:FFFFFFFFFFFF:FFFFFFFF  
FFF

@A00721:190:HGJW7DSXY:4:1340:4779:16877\_2:N:0:TCTGCAAG+GCTGCACT  
CGGAATACGCTTGCTATTACCCAGATTGGTTCGAACCCGTTGATGCTATGTCAGAAGAAGCTATTCAA  
GCTTGTCGTTTAAAGACTGCAGAGGCTGTCAAACAAGCCCAGACTCAA

+

FFFFFFFFFFFFFFFFFFFF,FFFF:FFFFFFFFFFFF, :FFFFFFFFFFFF:FFFF  
FFFFFFFFFFFFFFFFFFFFFFFFFFFFFFFFFFFFFFFFFFFFFFFFFFFFFFFFFFFF

@A00721:190:HGJW7DSXY:4:1544:7717:33677\_1:N:0:TCTGCAAG+GCTGCACT  
CAAAGGTTTTGAATTTAGCTCAACTGGGAGACGTGCTTAAATGGGTGATAAAAATTATTTAGAGATC  
TTTTCTACTTACAAAGGACAATTCAGTTTCATTAATTCTACGAAAAGTCCGAGTATATTGTATGTT  
AAT

+

FFFFFFFFFFFFFFFFFFFFFFFFFFFFFFFFFFFFFFFFFFFFFFFFFFFFFFFFFFFFFFFFFFFF  
FFFFFFFFFFFFFFFFFFFFFFFFFFFF:FFFFFFFFFFFFFFFFFFFFFFFFFFFF:FFFFFFFF  
FFF

@A00721:190:HGJW7DSXY:4:1308:13693:14967\_1:N:0:TCTGCAAG+GCTGCACT  
AATAGTTCTACCGATACGTAGTGAACGCGTTCGTAGAACCAAGTACTTTCCGTCTGAAGAGTTTAGAG  
CTGCTATTGATTATGTAACCGATAGGAGTTGTATAGTTGAAGATGTGGCTTTAGACGATAATCCTTTA  
AGG



+  
FFFFFFFFFFFFFFFFFFFFFFFFFFFFFFFFFFFFFFFFFFFFFFFFFFFFFFFFFFFFFFFF  
FFFF,FFFFFFFFFFFFFFFF:FFFFFFFFFFFFFFFFFFFFFFFFFFFFFFFFFFFFFFF  
FFF  
@A00721:190:HGJW7DSXY:4:1242:22932:1720\_1:N:0:TCTGCAAG+GCTGCACT  
GAAGATTTTCCCACAGATTTGTCTACGTTGCAGATCGCCACTCCAAACACTATATACATTATAAAATA  
TAAAAATAAGGGAGTCATAACTTTTGTTACCAAATTCTTGGCTTTCAACGAAGTCTCTGATTTTATTA  
ATC  
+  
FFFFFFFFFFFFFFFFFFFFFFFFFFFFFFFFFFFFFFFFFFFFFFFFFFFFFFFFFFFFFFFF  
FFFFFFFFFFFFFFFFFFFFFFFF:FFFFFFFFFFFFFFFFFFFFFFFFFFFFFFFFFFFFFFF  
FFF  
@A00721:190:HGJW7DSXY:4:2129:30047:2080\_1:N:0:TCTGCAAG+GCTGCACT  
CGATCTCTCGTTCATTTACTCTGTACTTGATCTACGTCGTTTAACTGTCGGAACAACCTTTACTTAGA  
ATGACTCTATCTTTTCAGACACTTCTTATATTATTTACAATAGTTAATATCATATTAGTAATACTCAC  
TAT  
+  
FFFFFFFFFFFFFFFFFFFFFFFFFFFFFFFFFFFFFFFFFFFFFFFFFFFFFFFFFFFFFFFF  
FFFFFFFFFFFFFFFFFFFFFFFF:FFFFFFFFFFFFFFFFFFFFFFFFFFFFFFFFFFFFFFF  
FFFFFFFFFFFFFFFFFFFFFFFFFFFFFFFFFFFFFFFFFFFFFFFFFFFFFFFFFFFFFFFF  
FFF  
@A00721:190:HGJW7DSXY:4:2361:20030:10347\_2:N:0:TCTGCAAG+GCTGCACT  
TTTTTCTTAGCTAATAGATTAATAAAGGATGAGTACGAAAACCAACTCTTCGTTACGAGACCTGATGG  
TAGAATAGATTTAGTCTCTACACCCATCTCAACGAGGATAAAGCGAGT  
+  
FFFFFFFFFFFFFFF:FFFFFFFFFFFF:F:FFFFFFFFFFFFFFFFFFFFFFFFFFFFFFFF  
FFFFFFF,FFFFFFFFFFFFFFFFFFFFFFFFFFFFFFFF:FFFFFFFF:FFFF  
@A00721:190:HGJW7DSXY:4:1121:32732:11804\_2:N:0:TCTGCAAG+GCTGCACT  
ACACGAAGAGATCATCCGCAAACGACTCGAAACCGAGACGCCGTAGATCAAAGTCCCTTCTAACTTTA  
GATTATGAATCCTGCCTTTACTCATGTTATAGCAGTTATTTCTGTTGT  
+  
FFFFFFFFFFFF:FFFFFFFFFFFFFFFFFFFFFFFFFFFFFFFFFFFFFFFFFFFFFFFFFFFF,F  
FFFFFFFFFFFFFFFFFFFF:FF:FFFF,,FFFFFFFFF,FFF,F,FFFF:F  
@A00721:190:HGJW7DSXY:4:1228:17400:25332\_1:N:0:TCTGCAAG+GCTGCACT  
TTTATAACCTTCTTATACTTTTGGGTATGTTTTGTGAAAAACATGAGATACCCAAGTCTATCGAAGAC  
ATTATCTCTTATGTACTTATTGTAACGATCATTCTTTCGAGTTTGTCACTTATTCTTTTATTCTCT  
TTA  
+  
FFFFFFFFFFFFFFFFFFFFFFFFFFFFFFFFFFFFFFFFFFFFFFFFFFFFFFFFFFFF:FFFFFFFFFFFFFFFF  
FFFFFFFFFFFFFFFFFFFFFFFFFFFFFFFFFFFFFFFFFFFFFFFFFFFFFFFFFFFF:FFFFFFFFFFFFFFF  
FFF  
@A00721:190:HGJW7DSXY:4:1161:14127:12461\_2:N:0:TCTGCAAG+GCTGCACT  
TTTATAATGCTTTTCGATAGTGATTGTTATCAATTTAAATACATTACTGTTTCAAATCATCTTTACTC  
ACAGACTCCGAAAATGTTTCAAATGAGGTCAAAGCTCTATTTATTAA  
+  
FFFFFFFFFFFFFFFFFFFFFFFFFFFFFFFFFFFFFFFFFFFFFFFFFFFFFFFFFFFF:F:FFFFFFFFFFFFFFF  
FFFFFFFFFFFFFFFFFFFFFFFF:FFF:FFFFFFFFFFFFFFFFFFFFFFF  
@A00721:190:HGJW7DSXY:4:1251:16450:7185\_1:N:0:TCTGCAAG+GCTGCACT  
ATCCGATTCTTCGAGGGTATCACTACCACTGATCTGCCGACTTTAGTCAAGGAACCTTCAATTCCTTCG  
ATGTTTATATTTTTCTATAAGGGAAAATAGCAATAATCAAATTTGACAAAATTTAGAACCTTTATTTC  
AGA  
+  
FFFFFFFFFFFFFFF:FFFFFFFFFFFF,FFF:FFFFFFFFFFFFFFFFFFFFFFFFFFFFFFF,FFFFFFF  
FFF:FFFFFFFFFFFF::FFFFFFFFFFFFFFFFFFFFFFFFFFFFFFFFFFFFFFFFFFFFFFF  
FFF

$+$ 

@A00721:190:HGJW7DSXY:4:1147:14308:15687\_1:N:0:TCTGCAAG+GCTGCACT  
CAAAAAGTTGGAAGAGGTCTATGATATTTATTTTACTTATACTTTAAATAGCACCGATTATAAATTGA  
CTGTTGATAATATTACAATAGCTCTTCTCAGAAGATTAGAGAAGTAACTCGGTGAACACGTCGGTAG  
CAT

 $+$ 

@A00721:190:HGJW7DSXY:4:1170:9064:21418\_1:N:0:TCTGCAAG+GCTGCACT  
AGAAGTGAAGAAAGATTCTTTTCGAAAAGAAACCTATAAGTTACAAACGATTCTTCGACTATATTAAG  
AAATAAAAAATACTTCAAGTACCTGAAGTTTACATTTTAAATGGTATGGTATAATGTGTCTTACAAATA  
GAA

 $+$ 

@A00721:190:HGJW7DSXY:4:1470:31123:7952\_2:N:0:TCTGCAAG+GCTGCACT  
TAATGAGAGTGTATTCCTTAATATTCTAGTAACCGCTATGTGGGCATTACTAGGATTTATCACACTCC  
TAAATTTGATAGCAATTTATGTTTTAAATGCTAGGAAAATTTTAGAAA

+

@A00721:190:HGJW7DSXY:4:1670:18511:12477\_1:N:0:TCTGCAAG+GCTGCACT  
TATAGTTCAAGGAGTACTTAATTTCAATAGCTTTAGTATTATTTACTATCGCCTTTATTGAAAATTGTA  
TAAGAGTTAATTGCTTACACAAAAGTGACGCGCAAGGAATCTTAATTGATTGAAGCTAGGCGTTGGG  
GA

+

@A00721:190:HGJW7DSXY:4:2110:29170:9612\_1:N:0:TCTGCAAG+GCTGCACT  
ATACAAGATATATTTACAGATTATTTAGTGTAGTCCAAAGTTTGTATAAATTTATTTGATTTTATATA  
TATATCCACATATATATATATATAAAATCCTATAAATTTGTAC

 $+$ 

@A00721:190:HGJW7DSXY:4:2448:20302:13886\_2:N:0:TCTGCAAG+GCTGCACT  
AACATACCATACTCCCCAACATAACATACCATAACCTACCATGACCAATCATCGCTCCAACTGGC  
ACGCCAGACGTAGGGTCAAACCTACTACCGCCGGTCTGGCAGATCGGCA

 $+$ 

@A00721:190:HGJW7DSXY:4:1578:31015:27899\_2:N:0:TCTGCAAG+GCTGCACT  
ACCCGCTGTGCAGAATAACCTTCCCAAATCTAGATCTGCACAGAAGAAGGCTGAAGGTCGTTACCGGA  
CGACCACTCAAAGGAAACGGGCTGTTGCCAGAGGAAAGCAGCGACCA

+

```

FFFFFFFFFFFFFFFF:FFFFFFFFFFFFFFFF:FFFFFFFFFFFFFFFF:FFF::FFFFFFFFFFFF
FFFFFFFFFFFF:FFFFFFFFFFFFFFFFFFFFFFFFFFFFFFFF:FF:FFFF

```

@A00721:190:HGJW7DSXY:4:1403:11433:12399\_2:N:0:TCTGCAAG+GCTGCACT  
GTAACATTGACGGCAGTCCCGTCATCTCTGTGGGAACTGAGGCAGTACCTCAGTCAAAGTCACATTC  
ACCACTCCCATGCCAATCAATGATGTGACTATACAGTTCGGCCATTTC

+

FFFFFFFFFFFFFFFFFFFFFFFFFFFFFFFFFFFFFFFFFFFFFFFFFFFFFFFFFFFFFFFFFFFFFFFF  
FFFFFFFFFFFFFFFFFFFFFFFFFFFFFFFFFFFFFFFFFFFFFFFFFFFFFFFFFFFFFFFFFFFFFFFF

@A00721:190:HGJW7DSXY:4:1152:32570:29841\_1:N:0:TCTGCAAG+GCTGCACT  
ATACGTCGTGGGAGGTACTGAAGCCTTCCCCTCCGCTGGCACGAAGAACAACCTCCCAAGCCAATCAATA  
GTTCTTCTGACCAGAATGAAAAGGGGTTTACCAGGGTAGTCTCTAAGTCTACCAGGAAGAGGGGAAAT  
GTC

+

FFFFFFFFFFFFFFFF:FFF:FFFFFFFFFFFFFFFFFFFFFFFFFFFFFFFFFFFFFFFFFFFFFFFF:FFFFFF,FFF:  
FFF,FFFFFFFFFFFFFFFFFFFFFFFFFFFFFFFFFFFFFFFFFFFFFFFFFFFFFFFFFFFFFFFF:FFFFFFFF:FFFFFF:FFF  
FFF

@A00721:190:HGJW7DSXY:4:1245:24162:7513\_1:N:0:TCTGCAAG+GCTGCACT  
AAAGGGAAAGGTCCATCAGGACCTAAGAAGGGGAAATTACCCCTAATTCTGAAGGAAGATCTCCCACC  
ATCTGGGGTTGGGAATAAGAAATCTGCACGGGCCAAAGAGGCCGCTGCTACGAAGTCGCTGAAGGCGG  
CTT

+

F:FF,FFFF:,FFFFFFFFFFFFFFFFFFFFFFFFFFFFFFFFFFFFFFFFFFFFFFFFFFFFFFFFFFFF  
FFFFFFFFFFFFFFFFFFFFFFFFFFFFFFFFFFFFFFFFFFFFFFFFFFFFFFFFFFFFFFFFFFFFFFFF  
FFF

@A00721:190:HGJW7DSXY:4:1346:17128:28557\_2:N:0:TCTGCAAG+GCTGCACT  
TGTAAGTTGCGCCTGCCGACCCCATCTTTGAGACCAAGACTCTCTACAGTAGGTTCTGCCTACTAT  
GAGCAAATCTGTTGAATTCGTCACTGAGGACGAAGGTGAGAGGACTTT

+

FFFFFFFFF:FFFFFFFFFFFFFFFFFFFFFFFFFFFFFFFFFFFFFFFFFFFFFFFFFFFFFFFFFFFF:FF  
FFFFFFFFFFFFFFFFFFFFFFFFFFFFFFFFFFFFFFFFFFFFFFFFFFFFFFFFFFFFFFFFFFFFFFFF

@A00721:190:HGJW7DSXY:4:2312:18367:7153\_1:N:0:TCTGCAAG+GCTGCACT  
CAAAGTGAAGGAGTGCCTGGGGAAGAGAATTGCGTGGGTTGAAGGCCGACGCTTCGAGCTTGAGTG  
TGACGAGGCCGGTGACGTTTTTGTCAACGGCGTTTGAGGATTTTATCCGCGCTTAAGTATGGGGCGA  
AGA

+

FFFFFFFFFFFFFFFFFFFFFFFFFFFFFFFFFFFFFFFFFFFFFFFFFFFFFFFFFFFFFFFFFFFFFFFF  
FFFFFFFFFFFFFFFFFFFF,FFFFFFFFFFFFFFFFFFFFFFFFFFFFFFFFFFFFFFFFFFFFFFFFFFFF  
FFF

@A00721:190:HGJW7DSXY:4:1550:22525:14951\_1:N:0:TCTGCAAG+GCTGCACT  
AGTCTTGAAGGACTTAGGTTGGCATATTTATGCCGACGATAATAAGCATGTCACCCTTAAGCACCGAG  
GTAAGCTCGGGACTTACAAGAGAGAGTGTGAGAGAGTCGCTCTCACTATTTTGGCCAGAATGCGGGC  
TTT

+

FFFFFFFFFFFFFFFFFFFFFFFFFFFFFFFFFFFFFFFFFFFFFFFFFFFFFFFFFFFFFFFFFFFFFFFF  
FFFFFFFFFFFFFFFFFFFFFFFFFFFFFFFFFFFFFFFFFFFFFFFFFFFFFFFFFFFFFFFFFFFFFFFF  
:FF

@A00721:190:HGJW7DSXY:4:2440:25355:21355\_2:N:0:TCTGCAAG+GCTGCACT  
GCTCCTTCTGTGGGTGAGGGTTTTTGTATATTCACTGGTTCTGGGAGGCTGCTTTCCTCCATAATTA  
CAACCTCTCTTAGAGAGCATTAGAAAGATCGGAAGAGCGTCGTGTAG

+

FFFFFFFFFFFFFFFFFFFFFFFFFFFFFFFFFFFFFFFFFFFFFFFFFFFFFFFFFFFFFFFFFFFFFFFF  
FFFFFFFFFFF:FFFFFFFFFFFFFFFFFFFFFFFFFFFFFFFFFFFFFFFFFFFFFFFF:FFFF

@A00721:190:HGJW7DSXY:4:2167:17418:34663\_1:N:0:TCTGCAAG+GCTGCACT  
CACACTTTTCTTGAATAATTTTCTTTCTCCGTCAATTGGGATTTTCGATGTGAGAAGGTGGAAGGTG  
TCAAGGGTCTTCTTCATGCTGATCTTTCAGGACCTAATCACATCATGATTGATGATTACGGCTCGTAT  
CGA

+  
FFFFFFFFFFFFFFFFFFFF:FFFF,FFFFFFFFFFFFFFFFFFFFFFFFFFFFFFFFFFFFFFFFFFFFFFFF  
FFFFFFFFFFFFFFFFFFFFFFFFFFFFFFFFFFFFFFFFFFFFFFFFFFFFFFFFFFFFFFFF:FFFF:FFFFFFFF  
FFF  
@A00721:190:HGJW7DSXY:4:1642:30373:31485\_2:N:0:TCTGCAAG+GCTGCACT  
AAGTTCTCCGAAATTAAGACGGGGGATTAAGAGTCCAGCTGTAAGTGTCAATTCAGAGAGGGGAGC  
TCTGAAAAGGAACTTCGTCAGAAGATGAGGAAGTCTAAGAGGAGAGA  
+  
FFFFFFFFFFFFFFFFFFFF:FFFFFFFFFFFFFFFFFFFFFFFFFFFFFFFFFFFFFFFFFFFFFFFFFFFF  
FFFF:FFFFFFFFFFFFFFFFFFFFFFFFFFFF::FFF::FFFFFFFF  
@A00721:190:HGJW7DSXY:4:1368:11849:23046\_1:N:0:TCTGCAAG+GCTGCACT  
CTCTAGAGAAGATCTCCCCACCTGGAGAAGGCAAGTGGAGAGTCCAGAAGTTGATGAAGAAGGATTAT  
TTGAAGCAGGGGTTACCACTTCCTAAGGTGGATGAGGGAGGTTGTTTCTTTGGAGTTTATAGATAATCT  
TTT  
+  
FFFFFFFFFFFFFFFFFFFF,FFFFFFFFFFFFFFFFFFFFFFFFFFFFFFFFFFFFFFFFFFFFFFFFFFFF  
:FF,FFFFFFFFFFFFFFFFFFFFFFFFFFFFFFFFFFFFFFFFFFFFFFFFFFFFFFFFFFFFFFFFFFFF  
FFF  
@A00721:190:HGJW7DSXY:4:1519:10484:12665\_2:N:0:TCTGCAAG+GCTGCACT  
CCTTGAGAAGACAAGCCACATTAAGATATAATTTAGGTCAACTTGGGGTTTCGAATGTCATTAGTGCC  
TTACGATTGAAAGAGGTCCTTTTGAGTATCGACAGATCTTTCGATCTT  
+  
FFFFFFFFFFFFFFFFFFFFFFFFFFFFFFFFFFFFFFFFFFFFFFFFFFFFFFFFFFFFFFFFFFFFFFFF  
FFFFFFFFFFFFFFFFFFFFFFFFFFFFFFFFFFFFFFFFFFFFFFFFFFFF:FFFF  
@A00721:190:HGJW7DSXY:4:2511:6045:1438\_2:N:0:TCTGCAAG+GCTGCACT  
ACGTGGCAGAATTCGGTAACCTACCATATTGTTCTTCCGGGAAGTTGTGGGATTAACTTTGACTCA  
ACTACTCCGATCAGATCCGATGGTTTGATTGGTATGGACTACTCGAC  
+  
FFFFFFFFFFFFFFFFFFFFFFFFFFFFFFFFFFFF,FFFFFFFFFFFFFFFFFFFFFFFF::FFFFFF:FFFFFFFF  
FFFFFFFFFFFFFFFFFFFFFFFF,FF,,FFFFFFFFFFFF:FFFFFFFF  
@A00721:190:HGJW7DSXY:4:1325:18032:34569\_1:N:0:TCTGCAAG+GCTGCACT  
TAGGGTCATGGCAGATACTACCGATAAGGTGAAAAATATGCAGGTCAAAGATTCTGTAGCTCTGAGGG  
CGGTTGAGGGAGCCGTTTTGGCCGACTTTAACTATTCTAAGAGTCTTTATGATTCAAACCTATCGTT  
GTC  
+  
FFFFFFFFFFFFFFFFFFFFFFFFFFFFFFFFFFFFFFFFFFFFFFFFFFFFFFFFFFFFFFFFFFFFFFFF  
FFFFFFFFFFFFFFFFFFFFFFFFFFFFFFFFFFFFFFFFFFFFFFFFFFFFFFFFFFFFFFFFFFFFFFFF  
:FF  
@A00721:190:HGJW7DSXY:4:1512:3441:4413\_1:N:0:TCTGCAAG+GCTGCACT  
TACAGCGGCTTATTGTCGCGCAGTTTCCAGAATTGCGGTTGAAGTTCACCCATTCTATCTTGAATGCT  
CACGCCGTGCGAGCCATATCGAGACTATGTTATAATCACTTGTTAAAGTACAGATTTAGTGATTAGAT  
TAT  
+  
FFFFFFFFFFFFFFFFFFFFFFFFFFFFFFFFFFFFFFFFFFFFFFFFFFFFFFFFFFFFFFFFFFFFFFFF  
FFFFFFFFFFFFFFFFFFFFFFFFFFFFFFFFFFFFFFFFFFFFFFFFFFFFFFFFFFFFFFFFFFFFFFFF  
:FF  
@A00721:190:HGJW7DSXY:4:1368:10402:27806\_1:N:0:TCTGCAAG+GCTGCACT  
GGAGGCGATATTCGTTTTTCATATCCAAACTCCTTGAATGGAGTACATATTTGCAACCCTATTCTTGA  
TGTGAAAGATGCATCGAGGTATACGTCTAGGAACATTGATTGGGAACGTACCTACTCACGAGACGTCA  
TGA  
+  
FFFFFFFFFFFFFF:FFFFFFFFFFFFFFFFFFFFFFFFFFFFFFFFFFFFFFFFFFFFFFFFFFFFFFFF  
FFFFFFFFFFFFFFFFFFFFFFFFFFFF:,FFFFFFFFFFFFFFFFFFFFFFFFFFFFFFFFFFFFFFFF  
FFF

@A00721:190:HGJW7DSXY:4:1437:32642:22294\_1:N:0:TCTGCAAG+GCTGCACT  
ATGTTTCGTTCTGTTACAAGAACGCTTTGGATTGTGACCATAAAGCCTCAGTTGCGATAGCTGTAGAG  
GTATACGATATCTCTCTTGATGATGTAGCCACTATAATGCTTAAGAGAGAGATTGATGTATGTCATTT  
CGT

+

FFFFFFFFFFFFFFFFFFFFFFFFFFFFFFFFFFFFFFFFFFFFFFFFFFFFFFFFFFFFFFFFFFFFFFFF  
FFFFFFFFFFFFFFFFFFFFFFFFFFFFFFFFFFFFFFFFFFFFFFFFFFFFFFFFFFFFFFFFFFFFFFFF  
FFF

@A00721:190:HGJW7DSXY:4:1522:7401:4100\_1:N:0:TCTGCAAG+GCTGCACT  
GAATTATTGGACACGATGAAAAATGACATACCCGTTCTGACCTTGGTATCGTTATCCGTCATGGAGA  
TGATGCCGCATCACTTGATTACTATATGCCCGAAGGATTGGGTTATTCTCACAACAAAGATAAGATTT  
TAT

+

:FFFFFFFFFFFFFFFFFFFFFFFFFFFFFFFFFFFFFFFFFFFFFFFFFFFFFFFFFFFFFFFFFFFFFFFF  
FFFFFFFFFFFFFFFFFFFFFFFFFFFFFFFFFFFFFFFFFFFFFFFFFFFFFFFFFFFFFFFFFFFFFFFF  
FF:

@A00721:190:HGJW7DSXY:4:1659:12029:9862\_1:N:0:TCTGCAAG+GCTGCACT  
GTTTTCTTAAGGGCGGACAATTGTTCCATTGTGAACCTCTGGGGACTAGATTGAGCATTAAATGAGTT  
CCGAATAACTCGTAATAAATCTTCTCTAGTGGACAATTCAGAATACCTATTTCCGTACCAAGAGCCA  
CTG

+

FFF:FFFFFFFFFFFFFF:FF,FFFFFFFFFFFFFFFFFFFFFFFFFFFFFFFFFFFFFFFFFFFFFFFF  
FFFFFFFFFFFFFFFFFFFFFFFFFFFFFFFFFFFFFFFFFFFFFFFFFFFFFFFFFFFFFFFFFFFFFFFF  
FFF

@A00721:190:HGJW7DSXY:4:1548:10890:8359\_2:N:0:TCTGCAAG+GCTGCACT  
TGGAAGAAGCGAGGTTTCCTCAATAAAAAATTTTTCTCAAGAGATTATGGTTGATAAAGTTTTCTT  
CATAAGGGCTATTCAGTACGTCATGGGGATCACTTCTTCGGTCAATGA

+

FFFFFFFFFFFFFFFFFFFFFFFFFFFFFFFFFFFFFFFFFFFFFFFFFFFFFFFFFFFFFFFFFFFFFFFF  
FF:FFFFFFFFFFFFFFFFFFFFFFFFFFFFFFFFFFFFFFFFFFFFFFFFFFFFFFFFFFFFFFFF

@A00721:190:HGJW7DSXY:4:1262:17372:26256\_1:N:0:TCTGCAAG+GCTGCACT  
AATATGTTACGACATGGCTTCGTAACAACAGTGCAGGATTGTCATCTCGGGGAAAGTGATTCACCAA  
GATGTTTCATATAGATACGAGATACCTAGAGAAGGTCGCAGCGATCTTACTCGTTATCGGAGCTAAGAA  
GAA

+

FFFFFF,FFFFFFFFFFFFFFFFFFFFFFFFFFFFFFFFFFFFFFFFFFFFFFFFFFFFFFFFFFFFFFFF  
FFFFFFFFFFFF,FFFFFFFFFFFFFFFF:FFFFFFFFFFFFFFFFFFFFFFFFFFFFFFFFFFFFFFFF  
FFF

@A00721:190:HGJW7DSXY:4:1668:24795:15969\_2:N:0:TCTGCAAG+GCTGCACT  
GTTATGCTCGAACTTAACGTTAGTACCGGAGGTGATCTCTCTGCTTCTGCGTTACTGAGAGAAAAG  
ATTCAGGACGCCTACGGTGACTTTATGGACAAGATGCAAGAGATCGGA

+

FFFFFFFFFFFFFFFFFFFFFFFFFFFFFFFFFFFFFFFFFFFFFFFFFFFFFFFFFFFFFFFFFFFFFFFF  
,FFFFFFFFFFFFFFFFFFFFFFFFFFFFFFFFFFFFFFFFFFFFFFFFFFFFFFFFFFFFFFFF

@A00721:190:HGJW7DSXY:4:2234:8621:3959\_2:N:0:TCTGCAAG+GCTGCACT  
TTTAGGTTTAGTAGGTGATCTTGACGTCGATTCTTTGTATAGGGAGTGAGAAGACAACGAATCTTG  
AACTACGGTCCTTATCAAAGAAAATGGTGAACCGGTCTCTAAATCTT

+

F:FFFFFFFFFFFFFFFFFFFFFFFFFFFFFFFFFFFFFFFFFFFFFFFFFFFFFFFFFFFFFFFF  
FFFFFFFFFFFFFFFFFFFFFFFFFFFFFFFFFFFFFFFFFFFFFFFFFFFFFFFFFFFFFFFF:FF

@A00721:190:HGJW7DSXY:4:2446:26431:24158\_2:N:0:TCTGCAAG+GCTGCACT  
AGATTGAAGAACACGTCAAGAAGTCGCTCGCGTTGTTCTTGAAAACCAAGTTAAGAAGGAGGCTGAT  
CATGGAGTCTTTGTACCTTCTGTCAAACCTCGAGGTTTCAGCTACGAGA

+

FFFFFFFF:FFFFFFFF:FFFFFFFFFFFFFFFFFFFFFFFFFFFFFFFFFFFFFFFFFFFFFFFF  
FFFFFFFFFFFFFFFFFFFFFFFFFFFFFFFF:FFFFFFFFFFFFFFFFFFFFFFFF  
@A00721:190:HGJW7DSXY:4:1533:16369:32409\_1:N:0:TCTGCAAG+GCTGCACT  
TGGATTGAAGGCTGGCTCTAAGGGAGACTCCTTCTTTTGAATGTTGTAAAGAATTGGGTTGAGAAGT  
GTGCTTTACAAGGAGTTAGACTCTTCTTCAAGTTTTTAGATCTTCTTGATAATCTTAAAGAAAAATTT  
TCG  
+  
FFFFFFFFFFFFFFFFFFFFFFFFFFFFFFFFFFFFFFFFFFFFFFFFFFFFFFFFFFFFFFFF  
FFFFFFFFFFFFFFFFFFFFFFFFFFFFFFFF:FFFF:FFFFFFFFFFFFFFFF  
FFF  
@A00721:190:HGJW7DSXY:4:1446:3640:32847\_2:N:0:TCTGCAAG+GCTGCACT  
CTGTACTTACATTCTTTACGCCAGATTCTTCATGGGGCGACGCTGTTTCTTGGTATTTCTGAAATA  
GTTTATCAGAGCGTCATTTTCCTTTGGGATCTTCTCTGGTAAGGGA  
+  
FFFFFFFF:FFFFFFFFFFFFFFFFFFFFFFFFFFFFFFFFFFFFFFFFFFFFFFFFFFFFFFFF  
FFFFFFFFFFFFFFFFFFFFFFFF:FFFFFFFFFFFFFFFFFFFFFFFF  
@A00721:190:HGJW7DSXY:4:1520:8829:12712\_2:N:0:TCTGCAAG+GCTGCACT  
ATTCTTCTCACTCTTGACGAGAATTATTACTGTTTTCTCTACCCATAACTTCTTTTCAAAAATGCGG  
ATGGGTCTACTGATGTTTTCTACAGAGTGCAGTCGTTTCAACACTTA  
+  
FFFFFFFFFFFFFFFF:FFFFF:FFFFFFFFFFFFFFFFFFFFFFFFFFFFFFFF:FFFFFFFF  
FFF:FFFFFFFFFFFFFFFF,FFFFFFFFFFFFFFFF:FFFF:F::F  
@A00721:190:HGJW7DSXY:4:1624:5475:14043\_2:N:0:TCTGCAAG+GCTGCACT  
GGAAAATAATTGGTGATGAAAATACGTATGTCGGTGGGGTTCTCAAGGCTCTCATCGCCACTGGGATT  
CTAAGGGGTTCCATAAGATATTATCTGACATTGTGGTTCAATGATCAG  
+  
FFFFFFFFFFFFFFFFFFFFFFFFFFFFFFFFFFFFFFFFFFFFFFFF:FFFF:FFFFFFFF  
FFFFFFFFFFFFFFFFFFFFFFFFFFFFFFFFFFFFFFFF:FF  
@A00721:190:HGJW7DSXY:4:1534:8567:16423\_2:N:0:TCTGCAAG+GCTGCACT  
TGGTCCTTACGTCTTAAGTAATTTGGATGTTGTGCGAAACTATCAGGTTCTTGTCACGATTCTTAAAA  
GAAGTTTATTAACACTTCAGAGTCTCTTGGAAGTCCAGGTAGCTAATG  
+  
FFFFFFFFFFFFFFFFFFFFFFFFFFFFFFFFFFFFFFFFFFFFFFFFFFFFFFFFFFFFFFFF  
FFFFF,:FFFFFFFF,FFFFFFFFFFFFFFFFFFFFFFFF  
@A00721:190:HGJW7DSXY:4:1453:27444:27602\_2:N:0:TCTGCAAG+GCTGCACT  
GCCACAGACTTTCTGGGAAAAGAGACCTCTGTTGGTAGAGGAGTTGAGAGAATTACTCAGATTCAATC  
TGGCATCACTGAACGTCTACAACGAGTTAGGGAGTGGCTAGAGATCGG  
+  
FFF:FFFF:FFFFFFFF:FFFFFFFFFFFFFFFFFFFFFFFF,F,FFFFFFFF:FFFFF:  
FFFFFFFF:FFFFFFFF,FFFFF:FFFFFFFF  
@A00721:190:HGJW7DSXY:4:1119:30138:27164\_1:N:0:TCTGCAAG+GCTGCACT  
CAATACCTTCCACTGAGTTCATCACCCAGAGTTTCGACGTCGCGGAAAACGATGAAGATTTCCACACT  
GTTGAGAAATCTTCTGATGCTGAATTTGAGGAAAATTTTCGGAAGTTTTTGGTATAAATCCTGATGG  
CTC  
+  
FFFFFFFFFFFFFFFFFFFFFFFFFFFFFFFF:FFFFFFFF:FFFFF:FF  
FFFFFFFFFFFFFFFFFFFFFFFFFFFFFFFF:FFFFFFFF  
FFF  
@A00721:190:HGJW7DSXY:4:1276:5231:1658\_1:N:0:TCTGCAAG+GCTGCACT  
TAAACCTTCTTTTATCATTGCAACAGGACTTTGAGAAGACTGTTGAAATGGACAAAATCTGGGATCA  
TAGGTATGTGTCACGCTACACTCGAAATATGGGCCCTCATAAGGAAGTATAGTTGGCGTCTTGTCGTT  
GAC  
+  
FFFFFFFFFFFFFFFFFFFFFFFFFFFFFFFFFFFFFFFFFFFFFFFFFFFFFFFF

@A00721:190:HGJW7DSXY:4:1356:20076:5228\_2:N:0:TCTGCAAG+GCTGCACT  
AGTTAGATCATTTGTT CAGGAAGATCTCTACAGAGATTATCGAGAGTTGTGATCTAGTTCTAAATTTA  
GGTCGACGGACTTTAGCAACTTTAGATAAATTCTTTCCGGGCTCAATG

@A00721:190:HGJW7DSXY:4:1308:29225:4977\_1:N:0:TCTGCAAG+GCTGCACT  
TCTGACCATCGCAAAGAAGACTTTATTAGTTCATGAAGTTCTTACACTTCTCGCGACTAATGTCAGCT  
TCACTACAAAGGCGTTACGTAAAGTAGTTTTACGCTTTATCTTAAAGCATTACCACCAAATTTAGCA  
CTT

@A00721:190:HGJW7DSXY:4:1250:22218:8093\_1:N:0:TCTGCAAG+GCTGCACT  
CTCGCCATATCAGATTAGAGACATGCCAGTTAGAGTTCTTCTAACCAGGACTGATGGTGAGATTCTTT  
TACCTTTTGGAGGTCCAGGAACCTTTACTCCTAGTGTCTTTTCTAGAGTCCAAGGACGTTTCCGTCGG  
AGG

@A00721:190:HGJW7DSXY:4:2242:21368:9502\_1:N:0:TCTGCAAG+GCTGCACT  
GAGACCGCTCAATAACACTCTATTGAATCCCTTTTCCACGATGAAAGCTCTTTATGAGGTGCTCCATG  
CAAATTTACAGTTCCTCTTTGGTGATATCGCCTCTGTCCTTTCTCCTTTAATCGTGAGGTTACGAGAG  
TTT

@A00721:190:HGJW7DSXY:4:1408:26115:14653\_1:N:0:TCTGCAAG+GCTGCACT  
GTATTTTGATAAATTTGTTGGAATCGATAATGATACTGACGAAGGTTCTATTACCACCCTTGTCATTG  
ATACAAACATTCTAGGTGATGCTTCTTAGAGGCTCGTCTAGCCGCTGAGATTCTGCTTACCTATTTA  
CAA

@A00721:190:HGJW7DSXY:4:1408:29297:2691\_2:N:0:TCTGCAAG+GCTGCACT  
TTTGAGTGATAACGATTTAGTACTGGGAAATGGTGGTAGTCAGTTTACTACTTTTCTTTCCCTCCCCT  
TTTTCGATTGGATTCGACGGGGTCTTCGTCTCACGACTAATTTGATAA

@A00721:190:HGJW7DSXY:4:1339:28908:24752\_2:N:0:TCTGCAAG+GCTGCACT  
TACTTATGAAGGAGGTATTACTTCGGAAGTTCTTAATGTAGGTCTCCTAGTACTTAAGGGTTTATGTT  
TCGGTTTCAGCTGGATGGATCTTTTGATGGTATGTTTCACATTGCTTG

@A00721:190:HGJW7DSXY:4:1606:1118:4617\_2:N:0:TCTGCAAG+GCTGCACT  
TGGACTTGGAAGAGATTAAACATAAAATCCAGCGATTCTATTATGTCGCTAAAGCCTGTCCAGTTGT

$+$ 

@

+

@

+

@

+

@

+

©

+

@

+

©

+





```

+
FFFFFFFFFFFFFFFFFFFFFFFFFFFFFFFFFFFFFFFFFFFFFFFFFFFFF:FFFFFF:FFFFFFFF:FFFFFFFFFFFFFFFFFFFFF
FFFFFFFFFFFFFFFFFFFFFFFFFFFFFFFFFFFFFFFFFFFFFFFFFFFFFFFFFFFFFFFFFFFFFFFFFFFFFFFFFFFFFFFFFFFFF
FFF
@A00721:190:HGJW7DSXY:4:2107:12147:31391_2:N:0:TCTGCAAG+GCTGCACT
GGCTAATACCTTTATAGGTAAAGAAGCCCTTGAGCCGCGTAGTCAGCGCGTTTAGCTGTATCATCAGT
CAGAGTATAACCGATAGGGTACCGAGTCTCCAAGAGAATATTTATTCT
+
FFFFFFFFFFFFFFFFFFFFFFFFFFFFFFFFFFFFFFFFFFFFFFFFFFFFF:FFFFFF,FFFFFFFF
FFFFFFFFFFFFFFFFFFFFFFFFFFFFFFFFFFFFFFFFFFFFFFFFFFFFF
@A00721:190:HGJW7DSXY:4:1674:31819:28416_1:N:0:TCTGCAAG+GCTGCACT
ACGTTTTACAACGGAAAGACATATCGCACCCGAAATTTTGGGCAGAATGCTCTTAACGCGGTTCTT
GAACGGTGTTTTGATCAGTCTAAGTTGGATAAAGTTATAGGAGACTCAGTTAACCTGAGAGCTCCTCA
ATT
+
FFFFFFFFFFFFFFF:FFFFFFFFFFFFFFFFFFFFFFFFFFFFFFFFFFFFFFFFFFFFFFFFFFFFF:FFFFFF
FFFFFFFF:FFFFFFFFFFFF:FFFFFFFFFFFFFFFFFFFF:FFFFFFFFFFFF:FFFFFFFFFFFFFFFFFF:FFFF
FFF
@A00721:190:HGJW7DSXY:4:1468:10456:15123_2:N:0:TCTGCAAG+GCTGCACT
AATAGGGACGCTAGTATACTTCGTAAAGTCGACAGCGAAATGGTCAATATTGATAATTGGACCGACTA
TATGACCTATTTTAAGCTCATGGTGAAAAGGAAGCTAAGGTTAACT
+
FFFFFFFFFFFFFFFFFFFFFFFFFFFFFFFFFFFFFFFFFFFFFFFFFFFF,FFFFFFFFFFFFFFFFFFFFFFFF
FFFFFFFFFFFFFFFFFFFFFFFFFFFFFFFFFFFFFFFFFFFF,FFFFFFFF:FFFFF
@A00721:190:HGJW7DSXY:4:2452:6985:35603_2:N:0:TCTGCAAG+GCTGCACT
CATAACCCCGCACAGAATATCGTTTATCACGCAAATTTATTAATGCAATTTTCGGACCTATCTTTAA
GTTCTTGAGGAGAGTCAAACAGTGTCTTTACCCAACATTTTAT
+
FFFFFFFFFFFFFFFFFFFFFFFFFFFFFFFFFFFFFFFFFFFFFFFFFFFF:FFFF:FFFFFFFFFFFF:F:FFF,
FFFFFFFFFFFFFFFFFFFFFFFFFFFFFFFFFFFF,FFF:FFFFFFFFFFFFF
@A00721:190:HGJW7DSXY:4:2160:7039:30279_2:N:0:TCTGCAAG+GCTGCACT
CCAGTGACGATTTCTCCCGAAGCTCTTCTCTCTCTTAGGAGGTCATGATGACTACTATAAGGGTGAA
ATCGATTTTTCGAAGTTTGACAAATCTCAAGATTTCTTTTGTAAGCC
+
FFFFFFFFFFFFFFFFFFFFFFFFFFFFFFFFFFFFFFFFFFFFFFFFFFFFF:FFFFFFFFFFFFFFFF
FFFFFFFFFFFFFFFFFFFFFFFFFFFFFFFFFFFFFFFFFFFFFFFFFFFFF
@A00721:190:HGJW7DSXY:4:1177:16568:21010_1:N:0:TCTGCAAG+GCTGCACT
ATTTAGGCTTCGATGCTGAATTTCTTGAAGTTTGAGTGCCAGTGAATATTTTGTACGCCAGGAGT
ATCCATAACGATTTGTCATTTACCACCTTTGCTCAACGACGAAGTGGAACGGCCAACACTTTCTTTGG
TAA
+
FFFFFFFFFFFFFFFFFFFFFFFFFFFFFFFFFFFFFFFFFFFFFFFFFFFFF:FFFFFFFFFFFFFFFF
FFFFFFFFFFFFFFFFFFFFFFFFFFFFFFFFFFFFFFFFFFFFFFFFFFFFF
FFF
@A00721:190:HGJW7DSXY:4:1655:10176:26005_1:N:0:TCTGCAAG+GCTGCACT
ACTTTGATGATTTTATCACTTTATTATGACCTTGAAAGTTTTCGGCTGTGGTTGTGCTGGGGACGA
TTCCATTCTGTTTTCAAAGACTCCAATAACTGATCATTCTGATCATATGATTTTGGACAATGGTTTCG
AA
+
FFFFFFFFF,FFFFFF::F:FF,FF:FFF,:F,F,F:FFFFFFFF:FFFFFFFFFFFFFFFFFFFF:FFF
FF:,FFFF::FFFFFFFF,F:FF,,FFF:FFFF,F:FFFFFFFFFFFF::FFFF,FFF,FFFFFFFF
F,
@A00721:190:HGJW7DSXY:4:1630:8666:16689_2:N:0:TCTGCAAG+GCTGCACT
CAGCGTACTTCTGCTCGCGATTTATTCTTTTTGTCAATGATTACATCTACTTCGTTCTGATCCTTAC

```

AAGATCATCGTTAAGTTAGGTAAACCCCTAACCGATGTTACTCTTGTA  
+  
: FFFF, FFFF: , F, F: FFF, FFFF, F: , FFF, FFFF, FFF, F: FFF, FF: F, FFFFFFFFFF: , , FF  
FF: FFFF, FFFFFFF: : : : FFFFF, FFFFFFFFFF, F, , FFFFF: FFF  
@A00721:190:HGJW7DSXY:4:2133:20374:5494\_1:N:0:TCTGCAAG+GCTGCACT  
TTTAAAGACTATAATATATATGTCCACTACGAGGTTGTTGTTTGGGTATTAGCTCTTGCGACTAATAT  
TCGTTATTCGATTGAGGGTCTTTATACCTATTCGGCTATCTGTGCTTTTAATTGTATAAGATCAAATT  
TTA  
+  
F: FF: , , F, F, F, , FF, , FFF, FF, F, FFF, : : : FF: FF: FF, FF, , , FF: F, F: FFF, FF, F, , F, F  
F, : , F, FF, , , FFF, FF: F, , FFFFF: , FF: FFF: , FFFFF: FF, FFF, : , F, : F: FFF: : F: FF, FF  
FFF  
@A00721:190:HGJW7DSXY:4:2454:22598:33364\_2:N:0:TCTGCAAG+GCTGCACT  
CCTGATGTGGAGGGAGTTCTTGAAGCATCCCGACCTTTCTTGTGAAAATTTTGATGCGGTTTCATAA  
GATTATCAGTAATCCTGATTCTACTACGATTTCATGGACCTTCCATCC  
+  
FFFFFFFFFFFFFFFFFFFFFFFFFFFFFFFFFFFFFFFFFFFFFFFFFFFFFFFFFFFFFFFFFFFFFFFF  
FFFFFFFFFFFFFFFFFFFFFFFFFFFFFFFFFFFFFFFFFFFFFFFFFFFFFFFFFFFFFFFFFFFFFFFF  
@A00721:190:HGJW7DSXY:4:1655:7600:33974\_2:N:0:TCTGCAAG+GCTGCACT  
GACGTATCTCAAAGATCGACTTCGAGACAGGTGATATTGTTGAGCGAGAGCGACCAAGATCTAAATTC  
GGTAACGGTGCGTGGCGCTTTATTTTAAAAAGCTCCCTCCTCTCCCAA  
+  
FFFFFFFFFFFFFFFFFFFFFFFFFFFFFFFFFFFFFFFFFFFFFFFFFFFFFFFFFFFFFFFFFFFFFFFF  
: FFFFFFFFFFFFFFFFFFFFFFFFFFFFFFFFFFFFFFFFFFFFFFFFFFFFFFFFFFFFFFFFFFFFF  
@A00721:190:HGJW7DSXY:4:1257:3730:12555\_2:N:0:TCTGCAAG+GCTGCACT  
ACTTGAGTCTTTTGATCAGTCTCTGACTTGACCATCTTTCATTTTAAATGACGATCATTAAGACTCTC  
TTTCTTCTTTGTTTCTTCTTTGCACTGATTTTCTCATCAGCTTGT  
+  
FFFFFFFFFFFFFFFFFFFFFFFFFFFFFFFFFFFFFFFFFFFFFFFFFFFFFFFFFFFFFFFFFFFFFFFF  
F: FFFFFFFFFFFFFFFFFFFFFFFFFFFFFFFFFFFFFFFFFFFFFFFFFFFFFFFFFFFFFFFFFFFFF  
@A00721:190:HGJW7DSXY:4:2369:12246:3411\_1:N:0:TCTGCAAG+GCTGCACT  
GTTTTTACGATCACAACCTATCAGTTGATTAAGACTCTTCCGAAAGCGAACTTTGGGAATTTGAAGCT  
CAGGGTGAAGCACAACGTTTGACCGTGACGAAGTGTGGTGTTCTTGATCTACGTTACGGATATACTCT  
CCT  
+  
FFFFF: FFFF: , , FFFFF: F: : FF: FFF: FFF, , , F: F, , FF, FF: , FFFFFFFFF, FFF, FFF, FFFF  
F, FF, : , FFFFFFFFF, F: F, : , FF: F: : FFF: FFFFFFFFF: : FF: FF, F: FFFFFFFFF: FFFF, : FF:  
 , FF  
@A00721:190:HGJW7DSXY:4:2412:27597:3349\_1:N:0:TCTGCAAG+GCTGCACT  
ACACTACCACTTATTACGATATTTCTTTAGTCGATGGGTTTTCGACGCCTTTAAGCGTCTTCTGTTCA  
TCGCAACCAGATGATATCTTCTATTGAACTTATGTTTCGATCAGTGTTTCTTCTATCAGGAGGAAAA  
CAC  
+  
FFFFF: FFFFF, : FFFFFFFFF: FFF: FFFFF, FFFFFFFFF: FFFFF: FFFFFFFFFFFFFFFFFFFFFF  
FFFF: FFF: FFFFFFFFFFFFFFFFFFFFFFFFFFFFFFFFFFFFFFFFFFFFFFFFFFFFFFFFFFFFFF  
FFF  
@A00721:190:HGJW7DSXY:4:2174:2645:2315\_2:N:0:TCTGCAAG+GCTGCACT  
TTTCTTCTAATGTGGCCTGAACTACGTTTCACTTTGTGTGTACTTGTCTCTATTTTAAGTTTTGTCTT  
CCTTGTTGTCTTATTCTATTAATCACTCATTTTAGTGAGATTATTA  
+  
FFFFFFFFFFFFFFFFFFFFFFFFFFFFFFFFFFFFFFFFFFFFFFFFFFFFFFFFFFFFFFFFFFFFFFFF  
FFFFFFFFFFFFFFFF: FFFFFFFFFFFFFFFFF: FFFFFFFFFFFFFFFFFFFFFF  
@A00721:190:HGJW7DSXY:4:2626:4246:5682\_1:N:0:TCTGCAAG+GCTGCACT  
GTCTTCGACAACAGCAGGGGTTTTGAATAGTGATAGCCACCCGCCTTACAGAGGGGCAGCAGCATGA



$+$ 

+

+

+

+

 $+$ 

+

+

• • •

@A00721:190:HGJW7DSXY:4:2545:7419:7513\_2:N:0:TCTGCAAG+GCTGCACT  
GTGGGCTTTCCGTAAAGGAAGATCTGTTATCGACGGTTTATCGTTTACGAAGTATCACTCCACCGGTG  
AATGGTTTAAAGAATACTATAAATAGAATAGCTATTACTACTAATGGCG

+

FFFFFFFFFFFFFFFFFFFFFFFFFFFFFFFFFFFFFFFFFFFFFFFFFFFFFFFFFFFFFFFFFFFFFFFF  
FF,FFFFFFFFFFFFFFFFFFFFFFFFFFFFFFFFFFFFFFFFFFFFFFFFFFFFFFFFFFFFFFFF

@A00721:190:HGJW7DSXY:4:1670:28140:35289\_1:N:0:TCTGCAAG+GCTGCACT  
TAGTGACATCTGGTCAATTTTCGTTTTTAGGTGGTCTTTATTCTATTATTGATTTTTATGAGATTGATA  
CGTTAACAGAAGATGATGTTAGAGTAGAATTCCTGAAGAGTCCTTCCGTAACCAACTTCTTGACAATT  
TTC

+

FFFFFFFFFFFFFFFFFFFFFFFFFFFFFFFFFFFFFFFFFFFFFFFFFFFFFFFFFFFFFFFFFFFFFFFF  
FFFFFFFFFFFFFFFFFFFFFFFFFFFFFFFFFFFFFFFFFFFFFFFFFFFFFFFFFFFFFFFFFFFFFFFF  
FFF

@A00721:190:HGJW7DSXY:4:2674:3450:24251\_2:N:0:TCTGCAAG+GCTGCACT  
CTAGGATTATGTCTGTGTTGAAAGACTTTCTACCGATAAGGGTCACTAGTCTTACACAATTAAGAAAT  
AATCCTACATTGACTGATTATCTAAAGATTGAAGGAAAATTTTATCCT

+

FFFFFFFFFFFF:FFFFFFFFFFFFFFFFFFFFFFFFFFFFFFFFFFFFFFFFFFFFFFFFFFFFFFFFFFFF  
FFFFFFFFFFFFFFFFFFFFFFFFFFFFFFFFFFFFFFFFFFFFFFFFFFFFFFFFFFFFFFFFFFFFFFFF

@A00721:190:HGJW7DSXY:4:2674:27597:26271\_1:N:0:TCTGCAAG+GCTGCACT  
GACTTTCCTACGATACAAATGATAACTTCTAATTTACGTTTGCTACTCAGAGCTGGTCTCTCAGCAA  
AGGGATGCATGGTGTTATCTCCTCAGGAGTCCCGGCATTTGATAATAATGACGAGACTTTCGTCATAA  
TCG

+

FFFFFFFFFFFFFFFFFFFFFFFFFFFFFFFFFFFFFFFFFFFFFFFFFFFFFFFFFFFFFFFFFFFFFFFF  
FFFFFFFFFFFFFFFFFFFFFFFFFFFFFFFFFFFFFFFFFFFFFFFFFFFFFFFFFFFFFFFFFFFFFFFF  
FFF

@A00721:190:HGJW7DSXY:4:1660:26449:2080\_1:N:0:TCTGCAAG+GCTGCACT  
GATTACACGGTACCAGCGCATCTCGTGTCGAGCCTCGACCCGATTATATGGTATTAATTATAAAGGT  
GAGGAGACCATTTTCTTGCTGAAATTTATAGAAGATTATTTTGACAGAATCAATAAGAATCATCGATT  
CTC

+

FFFFFFFFFFFFFFFFFFFFFFFFFFFFFFFFFFFFFFFFFFFFFFFFFFFFFFFFFFFFFFFFFFFFFFFF  
FFFFFFFFFFFFFFFFFFFFFFFFFFFFFFFFFFFFFFFFFFFFFFFFFFFFFFFFFFFFFFFFFFFFFFFF  
FFF

@A00721:190:HGJW7DSXY:4:1337:5041:25567\_2:N:0:TCTGCAAG+GCTGCACT  
GATTTACAACGATATAGGAGTAATCTACGAGAAGATTCTAGAATTCTTAATTATAATATTCAACCTCA  
AAAGTTACGTGTTTACAGTAACGAGATCACACATTTTGAGAACTAACT

+

FFFFFFFFFFFFFFFFFFFFFFFFFFFFFFFFFFFFFFFFFFFFFFFFFFFFFFFFFFFFFFFFFFFFFFFF  
FF:F:FFFFFFFFFFFFFFFFFFFFFFFFFFFFFFFFFFFFFFFFFFFFFFFFFFFFFFFFFFFFFFFF  
FFF

@A00721:190:HGJW7DSXY:4:2310:14290:20384\_1:N:0:TCTGCAAG+GCTGCACT  
CTGATCATTTTGACAATCTCTTCTTATAATAAATAAATAAATAATATTACTAATGGCAAATAGTGGA  
AGGCTCCAGTCAACACTAGTTCGAGTGCTGCTTTGGATTACGATGACGTGAGAATAGGTGAAGGGATA  
GTT

+

FFFFFFFFFF:FFFFFFFF:FFFFFFFFFFFFFFFFFFFFFFFFFFFFFFFF:FF:F,FFFFFFFFFFFFFFFF  
FFFFFFFFFFFFFFFFFFFFFFFFFFFFFFFFFFFFFFFFFFFFFFFFFFFFFFFFFFFFFFFFFFFFFFFF  
FFF

@A00721:190:HGJW7DSXY:4:1148:28384:32706\_1:N:0:TCTGCAAG+GCTGCACT  
GATCTATTAAGGCGGCGGCGACTAATCTTAAAGCTTCACCCAAAATGAAGTACACTTCGAAACTGAAT  
AATGATGCACTACAAACAAGTATCGCTAATCATCTTAAAAAGGCTCTAAAGGACACTATACAATATCC  
AGA

+  
F,F,FFFF::F,FFFF,FFF,FFFF::FF:FF:FFF:F,,F,:,,FF,,,:FFFF,FF,F:FFFF  
FFFFF::,,,:FFF:F,F,F,FFFF,:FFFFFFFF,FFFFF:F,F:FFFFF::,,FFFF:FFFFFFFF:  
FFF  
@A00721:190:HGJW7DSXY:4:1378:32967:35884\_2:N:0:TCTGCAAG+GCTGCACT  
TGCTTTTACCGATAACGATAAATTCGTCATCAAATATAAAGAAAAGGACTATGAAATAAAAGATTTGG  
TGCTTAGGGATATAATGAATTCAGCACCACATTTTGGTCAAGTCAATC  
+  
FFFFFFFFFFFFFFFFFFFFFFFFFFFFFFFFFFFFFFFF:FF,FFFFFFFFFFFFFFFFFFFFFFFFFFFFFFFF  
FFFFFFFFFFFFFFFFFFFFFFFFFFFFFFFFFFFFFFFFFFFFFFFFFFFFFFFF:FFFFF:F  
@A00721:190:HGJW7DSXY:4:1120:25843:19100\_2:N:0:TCTGCAAG+GCTGCACT  
TCTTAGAGGATATTCGCCATTGTGGTACGAATTGGTCCAACATTTACCACCAAATTCCTTTTGATACAA  
CTCTAGCCTTCAAGTGGGGTATGCCTGCGGAATACGCTTGCTATTAC  
+  
FFFFFFFFFFFFFFFFFFFFFFFFFFFFFFFFFFFFFFFFFFFFFFFFFFFFFFFFFFFFFFFF:FFFFFFFFFFFFFFFF  
FFFFFFFF:FFFFFFFFFFFFFFFFFFFFFFFFFFFFFFFFFFFFFFFFFFFFFFFFFFFFFFFF  
@A00721:190:HGJW7DSXY:4:1106:26142:24721\_2:N:0:TCTGCAAG+GCTGCACT  
CGAACCCGTTGATGCTATGTCAGAAGAAGCTATTCAAGCTTGTCGTTTAAAGACTGCAGAGGCTGTCA  
AACAAGCCCAGACTCAAGGAGTCCAATCAAAGTTTTGAATTTAGCTC  
+  
FFFFFFFFFFFFFFFFFFFFFFFFFFFFFFFFFFFFFFFFFFFFFFFFFFFFFFFFFFFFFFFF:FF:FFFFFFFF  
FFFFFFFFFFFFFFFFFFFFFFFFFFFFFFFFFFFFFFFF:FFFFFFFF:FFFFFFFF  
@A00721:190:HGJW7DSXY:4:2161:18394:1063\_2:N:0:TCTGCAAG+GCTGCACT  
TGGGTGATAAAAATTATTAGAGATCTTTTCTACTTACAAAGGACAATTCAGTTTCATTAATTCTACG  
GAAAAGTCCGGAGTATATTGTATGTTAATAGATAGTGGGATAATAGTT  
+  
FFFFFFFFFFFFFFFFFFFFFFFFFFFFFFFFFFFFFFFFFFFFFFFFFFFFFFFFFFFFFFFF  
FFFF:FFFF:FFFFFFFFFFFFFFFFFFFFFFFFFFFFFFFF:FFFFFFFF:FF  
@A00721:190:HGJW7DSXY:4:2131:23321:11162\_1:N:0:TCTGCAAG+GCTGCACT  
GTAGTGAACGCGTTCGTAGAACCAAGTACTTCCGTCTGAAGAGTTTAGAGCTGCTATTGATTATGTA  
ACCGATAGGAGTTGTATAGTTGAAGATGTGGCTTTAGACGATAATCCTTTAAGGACTATGTTGACTGA  
CGA  
+  
FFFFFFFFFFFFFFFFFFFFFFFFFFFFFFFFFFFFFFFFFFFFFFFFFFFFFFFFFFFFFFFF:FFFFFFFFFFFFFFFF  
FFFFFFFFFFFFFFFFFFFFFFFFFFFFFFFFFFFFFFFFFFFFFFFFFFFFFFFFFFFFFFFF  
FFF  
@A00721:190:HGJW7DSXY:4:1105:11849:30091\_2:N:0:TCTGCAAG+GCTGCACT  
GATCGCCACTCCAAACACTATATACATTATAAAATATAAAAATAAGGGAGTCATAACTTTTGTTACCA  
AATTCTTGCTTTCAACGAAGTCTCTGATTTTATTAATCATTACTTTA  
+  
FFFFFFFFFFFFFFFFFFFFFFFFFFFFFFFFFFFFFFFFFFFFFFFFFFFFFFFFFFFFFFFF  
FFFFFFFFFFFFFFFFFFFFFFFFFFFFFFFFFFFFFFFFFFFFFFFFFFFFFFFF  
@A00721:190:HGJW7DSXY:4:1218:31033:26584\_2:N:0:TCTGCAAG+GCTGCACT  
GGTCATTTACTCTGTACTTGATCTACGTCGTTTAACTGTCGGAACAACCTTTACTTAGAATGACTCTA  
TCTTTTCAGACACTTCTTATATTATTTACAATAGTTAATATCATATTA  
+  
FFFFFFFFFFFFFFFFFFFFFFFFFFFFFFFFFFFFFFFFFFFFFFFFFFFFFFFFFFFFFFFF:FFFF:F:FFFFFFFF  
FFFFFFFFFFFFFFFF,FFFFFFFFFFFFFFFFFFFFFFFFFFFFFFFF  
@A00721:190:HGJW7DSXY:4:1139:3748:34068\_2:N:0:TCTGCAAG+GCTGCACT  
CTATCGTTTTCTGCTTTTCTTAGCTAATAGATTAATAAAGGATGAGTACGAAAACCAACTCTTCGTT  
ACGAGACCTGATGGTAGAATAGATTTAGTCTCTACACCCATCTCAACG  
+  
FFFFFFFFFFFFFFFFFFFFFFFFFFFFFFFF,FFF:FFFFFFFFFFFFFFFFFFFFFFFFFFFFFFFF  
FFFFFFFFFFFF:FFFFFFFFFFFFFFFFFFFFFFFFFFFFFFFF





@A00721:190:HGJW7DSXY:4:1606:17011:3114\_1:N:0:TCTGCAAG+GCTGCACT  
GATAGCAATTTATGTTTTAAATGCTAGGAAAATTTTAGAAAACTCCATTGTATAGTTCAAGGAGTAC  
TTAATTCAATAGCTTTAGTATTATTTACTATCGCCTTTATTGAAAATTGTATAAGAGTTAATTGCTTA  
CAC

+

FFFFFFFFFFFFFFFFFFFFFFFFFFFFFFFFFFFFFFFFFFFFFFFFFFFFFFFFFFFFFFFFFFFFFFFFFFFF:FFFFFFFFFFFF  
FFFFFFFFFFFF,FF:FFFFFFFFFFFFFFFFFFFFFFFFFFFFFFFFFFFFFFFFFFFFFFFFFFFFFFFFFFFFFFFFFFFF  
FFF

@A00721:190:HGJW7DSXY:4:2656:31150:6277\_2:N:0:TCTGCAAG+GCTGCACT  
TTAATTGATTGAAGCTAGGCGTTGGGGAGAATGAAGTCCGCTTCCCGGAAGAAACGATCTATTTACA  
GAGTATTAGAGTAGTCCAAAGTTTGTATAAATTTATATGATTTTCTA

+

FFFFF:FFFF:FFFFF,FFFFFFFFFFFFFFFFFFFFFFFFFFFFFFFFFFFFFFFFFFFFFFFFFFFFFFFFFFFF:FFFFFFFFFFF:  
FFFFFFFFFFFF:FFFFFFFFFFFFFFFFFFFFFFFFFFFFFFFFFFFFFFFFFFFFFFFFFFFFFFFFFFFF:FFFF

@A00721:190:HGJW7DSXY:4:2462:29423:2785\_2:N:0:TCTGCAAG+GCTGCACT  
AACATACCATACTCCCCAAACATAACATACCATAACCTACCATGACCAATCATCGCTCCAACCTGGC  
ACGCCAGACGTAGGGTCAAACCTACTACCGCCGGTCGGCAGATCGGCA

+

FFFFFFFFFFFFFFFFFFFFFFFFFFFFFFFFFFFFFFFFFFFFFFFFFFFFFFFFFFFFFFFFFFFFFFFFFFFF  
FFFFFFFFFFFFFFFFFFFFFFFFFFFFFFFFFFFFFFFFFFFFFFFFFFFFFFFFFFFFFFFFFFFFFFFFFFFF

@A00721:190:HGJW7DSXY:4:1619:7319:3145\_2:N:0:TCTGCAAG+GCTGCACT  
ACCCGCTGTGCAGAATAACCTTCCCAAATCTAGATCTGCACAGAAGAAGGCTGAAGGTCGTTACCGGA  
CGACCACTCAAAGGAAACGGGCTGTTGCCAGAGGAAAGCAGCGACCA

+

FFF:FFFFFFFFFFFFFFFFFFFFFFFFFFFFFFFFFFFFFFFFFFFFFFFFFFFFFFFFFFFFFFFFFFFFFFFFFFFF  
FFFFFFFFFFFF:FFFFFFFFFFFFFFFFFFFFFFFFFFFFFFFFFFFFFFFFFFFFFFFFFFFFFFFFFFFF,FFFFFFFFFFFF

@A00721:190:HGJW7DSXY:4:1509:19470:10222\_2:N:0:TCTGCAAG+GCTGCACT  
GTAAACATTGACGGCAGTCCCGTCATCTCTGTGGGAAGTGAAGGACGTACCTCAGTCAAAAGTCACATTC  
ACCACTCCCATGCCAATCAATGATGTGACTATACAGTTCGGCCATTTC

+

FFFFFFFFFFFFFFFFFFFFFFFFFFFFFFFFFFFFFFFFFFFFFFFFFFFFFFFFFFFFFFFFFFFFFFFFFFFF  
FFFFFFFFFFFFFFFFFFFFFFFFFFFFFFFFFFFFFFFFFFFFFFFFFFFFFFFFFFFFFFFFFFFFFFFFFFFF

@A00721:190:HGJW7DSXY:4:1168:7880:16360\_1:N:0:TCTGCAAG+GCTGCACT  
ATACGTCGTGGGAGGTACTGAAGCCTTCCCCTCCGCTGGCACGAAGAACTCCCAAGCCAATCAATA  
GTTCTTCTGACCAGAATGAAAAGGGGTTTACCAGGGTAGTCTCTAAGTCTACCAGGAAGAGGGGAAAT  
GTC

+

FFFFFFFFFFFFFFFFFFFFFFFFFFFFFFFFFFFFFFFFFFFFFFFFFFFFFFFFFFFFFFFFFFFFFFFFFFFF  
FFFFFFFFFFFFFFFFFFFFFFFFFFFFFFFFFFFFFFFFFFFFFFFFFFFFFFFFFFFFFFFFFFFFFFFFFFFF:FFFFF  
FFF

@A00721:190:HGJW7DSXY:4:1371:25183:29763\_1:N:0:TCTGCAAG+GCTGCACT  
AAAGGGAAAGGTCCATCAGGACCTAAGAAGGGGAAATTACCCCTAATTCTGAAGGAAGATCTCCCACC  
ATCTGGGGTTGGGAATAAGAAATCTGCACGGGCCAAAGAGGCCGCTGCTACGAAGTCGCTGAAGGCGG  
CTT

+

FFFFFFFFFFFFFFFFFFFFFFFFFFFFFFFFFFFFFFFFFFFFFFFFFFFFFFFFFFFFFFFFFFFFFFFFFFFF  
FFFFFFFFFFFFFFFFFFFFFFFFFFFFFFFFFFFFFFFFFFFFFFFFFFFFFFFFFFFFFFFFFFFFFFFFFFFF  
FFF

@A00721:190:HGJW7DSXY:4:1403:2058:32925\_2:N:0:TCTGCAAG+GCTGCACT  
TGTAAGTTGCGCCTGCCGACCCCATCTTTGAGACCAAGACTCTCTACAGTAGGTTCTGCTACTAT  
GAGCAAATCTGTTGAATTCGTCACTGAGGACGAAGGTGAGAGGACTTT

+

FFFFFFFFFFFFFFFFFFFFFFFFFFFFFFFFFFFFFFFFFFFFFFFFFFFFFFFFFFFFFFFFFFFFFFFFFFFF:FFFFFFFFF  
FFFFF:FFFFF:FFFFF,FFFFFFFFFFFFFFFFFFFFFFFFFFFFFFFFFFFFFFFFFFFFFFFFFFFF

@A00721:190:HGJW7DSXY:4:2354:26467:21934\_1:N:0:TCTGCAAG+GCTGCACT  
CAAAGTGAAGAGCAGTCGCTGGGGAAGAGAATTGCGTGGGTTGAAGGCCGACGCTTCGAGCTTGAGTG  
TGACGAGGCCGGTGACGTTTTGTCAACGGCGTTTGAGGATTTTATCCGCGCTTAAGTATGGGGCGA  
AGA

+

FFF,FFFFFFFFFFFFFFFFFFFFFFFFFFFFFFFFFFFFFFFFFFFFFFFFFFFFFFFFFFFFFFFF:FFFFFF  
FFFFFFFFFFFFFFFFFFFFFFFFFFFFFFFFFFFFFFFFFFFFFFFFFFFFFFFFFFFFFFFF:FFFFFF  
FFF

@A00721:190:HGJW7DSXY:4:1551:24117:36088\_1:N:0:TCTGCAAG+GCTGCACT  
AGTCTTGAAGGACTTAGGTTGGCATATTTATGCCGACGATAATAAGCATGTCACCCTTAAGCACCGAG  
GTAAGCTCGGGACTTACAAGAGAGAGTGTGAGAGAGTGCCTCTCACTATTTTGGCCAGAATGCGGGC  
TTT

+

FFFFFFFFFFFFFFFFFFFFFFFFFFFFFFFFFFFFFFFFFFFFFFFFFFFFFFFFFFFFFFFF:FFFFFF  
FFFFFFFFFFFFFFFFFFFFFFFFFFFFFFFFFFFFFFFFFFFFFFFFFFFFFFFFFFFFFFFF:FFFFFF  
FFF

@A00721:190:HGJW7DSXY:4:2408:13413:8030\_2:N:0:TCTGCAAG+GCTGCACT  
ATTCAGTGGTTCTGGGAGGCTGCTTCTCCATAATTACAACCTCTCTTTAGAGAGCATTAGAAGGAA  
GTTGGCAAATCCACATATGGTAGACGTTGTCACACTTTTCTTGAA

+

:F,:F:,F::FF,FFF:F,FFFF::FFFF:FFFFFFFFFFFFFFFF,FF:FFFFFFFF,FFFF:  
FFF::FFFFFFFFFFFFFFFF:FFFFFFFFFFFFFFFF:F:F:F:FFF

@A00721:190:HGJW7DSXY:4:2336:14479:14231\_1:N:0:TCTGCAAG+GCTGCACT  
TTCCTCCGTCATTGGGGATTTGATGTGAGAAGGTGGAAGGTGTCAAGGGTCTTCTTCATGCTGATCT  
TTCAGGACCTAATCACATCATGATTGATAGTTACGGCTCGTATCGAGTTGGAGGGAGGAAGTTCTCCG  
AA

+

FFFF:,FFFFFFFFFFFFFFFF:FFFFFFFFFF,FF,F:FFFFFFFF::FFFFFFFF:FFFF:FF:F  
FFFF,FF:FFF,FFFFFF:FFFFFFFFFF,FFF:FF:F,:FFFFFFFFFFFFFFFF,FFF:FFFF:F  
FF

@A00721:190:HGJW7DSXY:4:1345:6126:18051\_2:N:0:TCTGCAAG+GCTGCACT  
TCAGAGAGGGGAGCTCTGAAAAGGAACTTCGTCAGAAGATGAGGAAGTCTAAGAGGAGGAGTTTGAG  
GAAGGCTCTAGAGAAGATCTCACCACTGGAGTAGGCAAGTGGAGAGT

+

FFFFFFFFFFFFFFFFFFFFFFFF:FFF:FFFFFFFF:FF:FFFF,FFFF,F,FFFFFFFFFFFFFFFF  
F,FFFFFF::F:F:, ,FFFFFFFF:F:FFFF,:FFF::FFFF,F:FF

@A00721:190:HGJW7DSXY:4:1327:26087:10254\_2:N:0:TCTGCAAG+GCTGCACT  
AAGAAGGATTATTTGAAGCAGGGTTACCACTTCCTAAGGTGGATGAGGGAGGTTGTTTCTTTGGAGT  
TTAGATAATCTTTGAGAAGGGTCTAGAGCCAGCAAGAGAAGCTT

+

FFFFF:FFFFFFFFFFFFFFFFFFFFFFFFFFFFFFFFFFFFFFFFFFFFFFFFFFFFFFFF:FFFF  
FFFFFFFFFFFFFFFF:FFFFFFFFFFFF,FFFFFFFFFFFFFFFF

@A00721:190:HGJW7DSXY:4:1522:26060:8390\_2:N:0:TCTGCAAG+GCTGCACT  
CCTTGAGAAGACAAGCCACATTAAGATATAATTTAGGTCAACTTGGGGTTTCGAATGTCATTAGTGCC  
TTACGATTGAAAGAGGTCCTTTTGAGTATCGACAGATCTTTCGATCTT

+

FFFFFFFFFFFFFFFFFFFFFFFFFFFFFFFFFFFFFFFFFFFFFFFFFFFFFFFFFFFFFFFF:FFFF  
FFFFFFFFFFFFFFFFFFFFFFFFFFFFFFFFFFFFFFFFFFFFFFFFFFFFFFFF:FFFF

@A00721:190:HGJW7DSXY:4:1217:22327:30232\_2:N:0:TCTGCAAG+GCTGCACT  
GTGGCAGAATTCCGTAACCTACCATATTGTTCTTCCGGGAAGTTGTGGGATTTAACTTTGACTCAAC  
TACTCCGATCAGATCCGATGGTTTGATTGGTATGGACTACTCGACTT

+

FFFFFFFFFFFFFFFFFFFFFFFFFFFFFFFFFFFFFFFFFFFFFFFFFFFFFFFFFFFFFFFF:FFFF  
FFFFFFFFFFFFFFFFFFFFFFFFFFFFFFFFFFFFFFFFFFFFFFFF:FFFF

@A00721:190:HGJW7DSXY:4:1325:2230:22388\_1:N:0:TCTGCAAG+GCTGCACT  
TAGGGTCATGGCAGATACTACCGATAAGGTGAAAAATATGCAGGTCAAAGATTCTGTAGCTCTGAGGG  
CGGTTGAGGGAGCCGTTTTGGCCGACTTTAACTATTCTAAGAGTCTTTATGATTCAAACCTATCGTT  
GTC

+

FFFFFFFFFFFFFFFFFFFFFFFFFFFFFFFFFFFFFFFFFFFFFFFFFFFFFFFFFFFFFFFFFFFFFFFF:FFFFFFFFFFFF  
FFFFFFFFFFFFFFFFFFFFFFFFFFFFFFFFFFFFFFFFFFFFFFFFFFFFFFFFFFFFFFFFFFFFFFFFFFFFFFFF  
FFF

@A00721:190:HGJW7DSXY:4:1577:20699:22467\_1:N:0:TCTGCAAG+GCTGCACT  
TACAGCGGCTTATTGTCGCGCAGTTTCCAGAATTGCGGTTGAAGTTCACCCATTCTATCTTGAATGCT  
CACGCCGTCGAGCCATATCGAGACTATGTTATAATCACTTGTTAAAGTACAGATTTAGTGATTTAGA  
TAT

+

FFFFFFFFFFFFFFFFFFFFFFFFFFFFFFFFFFFFFFFFFFFFFFFFFFFFFFFFFFFFFFFFFFFFFFFF:FFFFFFF:FFFFFFFFFFFFF:FFFFFFFFFFFF  
FFFFFFFFFFFFFFFFFFFFFFFFFFFFFFFFFFFFFFFFFFFFFFFFFFFFFFFFFFFFFFFFFFFFFFFFFFFFFFFF  
FFF

@A00721:190:HGJW7DSXY:4:1368:11731:30389\_1:N:0:TCTGCAAG+GCTGCACT  
GGAGGCGATATTCGTTTTTCATATCCAAACTCCTTGAATGGAGTACATATTTGCAACCCTATTCTTGA  
TGTGAAAGATGCATCGAGGTATACGTCTAGGAACATTGATTGGGAACGTACCTACTCACGAGACGTCA  
TAA

+

FFFFF:FFFFFFFFF:FFFFFFFFFFFFFFFFFFFFFFFFFFFFFFFFFFFFFFFFFFFFFFFFFFFFFFFFFFFFFFFF:FFFFFFF  
FFFFFFFFFFFFFFFFFFFFFFFFFFFFFFFFFFFFFFFFFFFFFFFFFFFFFFFFFFFFFFFFFFFFFFFFFFFFFFFF  
F,F

@A00721:190:HGJW7DSXY:4:1564:20808:3396\_1:N:0:TCTGCAAG+GCTGCACT  
ATGTTTCGTTCTGTTACAAGAACGCTTTGGATTGTGACCATAAAGCCTCAGTTGCGATAGCTGTAGAG  
GTATACGATATCTCTCTTGATGATGTAGCCACTATAATGCTTAAGAGAGAGATTGATGTATGTCATTT  
CGT

+

FFFFFFFFF::FFFFFFFFFFFFFFFFFFFFFFFFFFFFFFFFFFFFFFFFFFFFFFFFFFFFFFFFFFFFFFFF:FFFFFFFFFFFFFFFFFFFF  
FFFFFFFFFFFFFFFFFFFFFFFFFFFFFFFFFFFFFFFFFFFFFFFFFFFFFFFFFFFFFFFFFFFFFFFFFFFFFFFF  
FFF

@A00721:190:HGJW7DSXY:4:1544:20220:6981\_1:N:0:TCTGCAAG+GCTGCACT  
GAATTATTGGACACGATGAAAAATGACATACCCGTTCTGACCTTGGTATCGTTATCCGTCATGGAGA  
TGATGGCGCATCACTTGATTACTATATGCCCGAAGGATTGGGTTATTCTCACAACAAAGATAAGATTT  
TAT

+

FFFFFFF:FFFFFFFFFFFFFFFFFFFFFFFFFFFFFFFFFFFFFFFFFFFFFFFFFFFFFFFFFFFFFFFFFFFFFFFF  
FFFFFFFFFFFFFFFFFFFFFFFFFFFFFFFFFFFFFFFFFFFFFFFFFFFFFFFFFFFFFFFFFFFFFFFFFFFFFFFF  
FF:

@A00721:190:HGJW7DSXY:4:2620:31313:17801\_1:N:0:TCTGCAAG+GCTGCACT  
GTTTTCTTAAGGGCGGACAATTGTTCCATTGTGAACCTCTGGGGACTAGATTGAGCATTAATGAGTT  
CCGAATAACTCGTAATAAATCTTTCTCTAGTGGACAATTCAGAATACCTATTTCCGTACCAAGAGCCA  
CTG

+

FFFFFFFFFFFFFFFFFFFFFFFFFFFFFFFFFFFFFFFFFFFFFFFFFFFFFFFFFFFFFFFFFFFFFFFF:FFFFF:FFFFFFFFFFFFFFFFFFFF  
FFFFFFFFFFFFFFFFFFFFFFFFFFFFFFFFFFFFFFFFFFFFFFFFFFFFFFFFFFFFFFFFFFFFFFFFFFFFFFFF  
FFF

@A00721:190:HGJW7DSXY:4:1548:11008:8688\_2:N:0:TCTGCAAG+GCTGCACT  
TGGAAGAAGCGAGGTTCTGTTCTCAATAAAAATTTTTCTCAAGAGATTATGGTTGATAAAGTTTTCTT  
CATAAGGCTATTGAGTACGTCATGGGGATCACTTCTTCGGTCAATGA

+

FFF:FFF,FFFFFF:FFFFFF:FFFFFFFFFFFFFFFFFFFFFFFFFFFFFFFFFFFFFFFF:FF,FFFFFFFFFFFFFFFF  
F,:::FFFFF:FFFFFFFFFFFFFFFFFFFFFFFFFFFFFFFFFFFFFFFF,FFFFFFF,FFF

@A00721:190:HGJW7DSXY:4:1562:15411:35790\_1:N:0:TCTGCAAG+GCTGCACT  
AATATGTTACGACATGGCTTCGTAACAACAGTGCGAGGATTGTCATCTCGGGGAAAGTGATTCACCAA  
GATGTTTCATATAGATACGAGATACCTAGAGAAGGTCGCAGCGATCTTACTCGTTATCGGAGCTAAGAA  
GAA

+

FFFFFFF,FFFFFFFFFFFFFFFFFFFFFFFFFFFFFFFFFFFFFFFFFFFFFFFFFFFFFFFFFFFFFFFF  
FFFFFFFFFFFFFFFFFFFFFFFFFFFFFFFFFFFFFFFFFFFFFFFFFFFFFFFFFFFFFFFFFFFFFFFF  
FFF

@A00721:190:HGJW7DSXY:4:2376:3495:15186\_2:N:0:TCTGCAAG+GCTGCACT  
GTTATGCTCGCAAACCTAACGTTAGTACCGGAGGTGATCTCTCTGCTTCTGCGTTACTGAGAGAAAAG  
ATTCAGGACGCCTACGGTGACTTTATGGACAAGATGCAAGAGATCGGA

+

FFFFFFFFFFFFFFFFFFFFFFFFFFFFFFFFFFFFFFFFFFFFFFFFFFFFFFFFFFFFFFFFFFFFFFFF  
FFFFFFFFFFFFFFFFFFFFFFFFFFFFFFFFFFFFFFFFFFFFFFFFFFFFFFFFFFFFFFFFFFFFFFFF  
FFF

@A00721:190:HGJW7DSXY:4:2240:4182:34882\_2:N:0:TCTGCAAG+GCTGCACT  
TTTAGGTTTAGTAGGTGATCTTGACGTCGATTCTTTGTATAGGGAGTGTGAGAAGACAACGAATCTTG  
AAACTACGGTCCTTATCAAAGAAAATGGTGAACCGGTCTCTAAATCTT

+

F,FFFF:FFF:FFFFFF:FFFFFF:FFF:F:FF:FFFFFFFF:FFFF:FFF::F:F:FF:FFFF  
F:F:FFF,FFFF:FFFF:FFFF:F:,F:FF,FFFFFFFF:FFFF

@A00721:190:HGJW7DSXY:4:2647:32027:5415\_2:N:0:TCTGCAAG+GCTGCACT  
AGATTGAAGAACACGTCAAGAAGTCGCTCGGCGTTGTTCTTGAAAACCAAGTTAAGAAGGAGGCTGAT  
CATGGAGTCTTTGTACCTTCTGTCAAACCTTCGAGGTTTCAGCTACGAGA

+

FFFFFFFFFFFFFFFFFFFFFFFFFFFFFFFFFFFFFFFFFFFFFFFFFFFFFFFFFFFFFFFFFFFFFFFF  
FFFFFFFFFFFFFFFFFFFFFFFFFFFFFFFFFFFFFFFFFFFFFFFFFFFFFFFFFFFFFFFFFFFFFFFF  
FFF

@A00721:190:HGJW7DSXY:4:2364:2844:19382\_1:N:0:TCTGCAAG+GCTGCACT  
TGGATTGAAGGCTGGCTCTAAGGGAGACTCCTTCTTTTTGAATGTTGTAAAGAATTGGGTTGAGAAGT  
GTGCTTTACAAGGAGTTAGACTCTTCTTCAAGTTTTTAGATCTTCTTGATAATCTTAAAGAAAAATTT  
TCG

+

FFFFFFFFFFFFFFFFFFFFFFFFFFFFFFFFFFFFFFFFFFFFFFFFFFFFFFFFFFFFFFFFFFFFFFFF  
FFFFFFFFFFFFFFFFFFFFFFFFFFFFFFFFFFFFFFFFFFFFFFFFFFFFFFFFFFFFFFFFFFFFFFFF  
FFF

@A00721:190:HGJW7DSXY:4:1543:29803:31501\_2:N:0:TCTGCAAG+GCTGCACT  
CTGTACTTACATTCTTTACGCCAGATTCTTCATGGGGCGACGCTGTTTCTCTTGGTATTTCTGAAATA  
GTTTATCAGAGCGTCATTTTCCTTTGGGATCTTCTCTGGTAAGGGA

+

FFFFFFFFFFFFFFF,FFFFFFF,FFFFFFFFF:FFFFFFFFF,FFFF:FF:FFFFFFFFFFFFFFFF  
FFFFFFFFFFFFFFFFFFFFFFFFF,:FFFFFFFFFFFFFFFFFFFFFFFFF

@A00721:190:HGJW7DSXY:4:2107:16577:10786\_2:N:0:TCTGCAAG+GCTGCACT  
ATTCTTCTCACTCTTGACGAGAATTATTACTGTTTTCTCTACCCATAACTTCTTTTTCAAAAATGCGG  
ATGGGTCTACTGATGTTTTCTACAGAGTGCAGTCGTTTAAACACTTA

+

FFFFFFFFFFFFFFFFFFFFFFFFF::FFFFFFFFFFFFFFFFFFFFFFFFFFFFFFFFFFFFFFFFF,FF:FFFF  
FFFFFFFFFFFFFFFFFFFFFFFFF:FFFFFFFFF:F,,FF,FF

@A00721:190:HGJW7DSXY:4:2438:7509:18443\_2:N:0:TCTGCAAG+GCTGCACT  
GGAAAATAATTGGTGATGAAAATACGTATGTCGGTGGGGTTCTCAAGGCTCTCATCGCCACTGGGATT  
CTAAGGGGTTCCATAAGATATTATCTGACATTGTGGTTCAATGATCAG

+

FFFFFFFFFFFFFFFFFFFFFFFFFFFFFFFFFFFFFFFFFFFFFFFFFFFFFFFFFFFFFFFFFFFFFFFF  
FFFFFFFFFFFFFFFFFFFFFFFFFFFFFFFFFFFFFFFFFFFFFFFFFFFFFFFFFFFFFFFFFFFFFFFF

@A00721:190:HGJW7DSXY:4:2168:27037:36292\_2:N:0:TCTGCAAG+GCTGCACT  
TGGTCCTTACGTCTTAAGTAATTTGGATGTTGTGCGAAACTATCAGGTTCTTGTCACGATTCTTAAAA



FFFFFFFFFFFFFFFFFFFFFFFFFFFFFFFFFFFFFFFFFFFFFFFFFFFFFFFFFFFFFFFFFFFFFFFFFFFFFFFF  
FFF

@A00721:190:HGJW7DSXY:4:1421:8811:24298\_1:N:0:TCTGCAAG+GCTGCACT  
GTATTTTGATAAATTTGTTGGAATCGATAATGATACTGACGAAGGTTCTATTACCACCCTTGTCATTG  
ATACAAACATTCTAGGTGATGCTTTCTTAGAGGCTCGTCTAGCCGCTGAGATTCGTCTTACCTATTTA  
CAA

+  
FFFFFFFFFFFFFFFF:FFFFFFFF:F:FFFFFFFFFFFFFFFF,FFFFFFFF,FFF::FFFFFFFFFFFFFFFF  
FFFFFFFF:FFFFFFFFFFFFFFFFFFFFFFFFFFFFFFFFFFFFFFFFFFFFFFFFFFFFFFFF:FFFFFFFF  
F:F

@A00721:190:HGJW7DSXY:4:1416:17101:33896\_2:N:0:TCTGCAAG+GCTGCACT  
TTTGAGTGATAACGATTTAGTACTGGGAAAGGGTGGTAGTCAGTTTACTACTTTTCTTCCCTCCCCT  
TTTTCGATTGGATTCGACGGGGTCTTCGTCTCACGACTAATTTGATAA

+  
FFFFFFFFFFFFFFFF:,FFFFFFFFFFFFFFFF,FF:FFFFFFFFFFFFFFFF,F:FF:FFFFFFFF  
FFFFFFFF:FFFFFFFFFFFFFFFF:FFFFFFFF:FFFFFFFF

@A00721:190:HGJW7DSXY:4:1421:32054:2644\_2:N:0:TCTGCAAG+GCTGCACT  
TACTTATGAAGGAGGTATTACTTCGGAAGTTCTTAATGTAGGTCTCCTAGTACTTAAGGGTTTATGTT  
TCGGTTTCAGCTGGATGGATCTTTTGATGGTATGTTTCACATTGCTTG

+  
FF::FF:FFF:FFF:FFFFFF,FFFF::F,FFFFFF,F::,FFF:, ,FFFF::,::FFFF,F:F  
FF:F,FFF:F:F,:FFF:F:FFFFFFFF:,FF:,F:FFF::F,F,::

@A00721:190:HGJW7DSXY:4:2121:27362:14841\_2:N:0:TCTGCAAG+GCTGCACT  
TGGACTTGGAAGAGATTAAACATAAAATCCAGCGATTCTATTATGTCGCTAAAGCCTGTCCAGGTGT  
CGATGATGTTCGGGCTGTGGGGATTAACCTCCCTCGTGAACTTACGA

+  
FFFFFFFFFFFFFFFFFFFFFFFFFFFFFFFFFFFFFFFF:FFFFFFFFFFFFFFFF:FFFFFFFFFFF,F:F  
FFFFFF,FFFFFFFF:FFFF:FFFFFFFFFFFFFFFF:FFFFFF

@A00721:190:HGJW7DSXY:4:1313:28149:1830\_1:N:0:TCTGCAAG+GCTGCACT  
CACAAGGATTACTAAGTCTGAGATCTGCCACTTCTAATTTTAGGAAACGTCGCGAAAAGAAAGTTTCAT  
GAGGATGTCTTGTCGAAAAATATCGCCGGGAACCTCTAATAGAGGATCCTGATGACATTATTTCAAC  
GGA

+  
:FFFFFF,,F::FF,FFFFFFFFFFFF,F:FFFFFFFFFFFF:FFFFFF:F:FF,FFFFFFFF:FF  
FFF:F,,F:FFFF:FFFFFFFF:FF:FF,FFFFFFFFFFFF,F::FFFFFF:FFFFFF,:FF  
F:F

@A00721:190:HGJW7DSXY:4:1465:15429:27837\_2:N:0:TCTGCAAG+GCTGCACT  
AGTTCTACCACAGAAACCGTCTCAGGAAGTGTCTCCACTGATTCGGAATTAGAGAAAGACGACCTTCT  
TGTGGGACTGAGACCTCTGAATTTTCAGGGTGCCCTGATGAGGACGT

+  
FFFFFFFFFFFFFFFFFFFFFFFFFFFFFFFFFFFFFFFF:FFFFFFFFFFFFFFFFFFFFFFFF  
:FFFFFFFFFFFFFFFF,FFFF:FFFFFFFFFFFFFFFF:FFFFFF

@A00721:190:HGJW7DSXY:4:1355:27082:23782\_1:N:0:TCTGCAAG+GCTGCACT  
ACTCTGAGACTTCTAAGAGTGTTTCAAAGACCAGAAACGTAACAAGAAGAATAAAGGTAGGAAGGGG  
AGAAAACAGAACAAAGCGAGCGGTTGAAGAGAAAACCTGATATGGTTGCGGCTGATCGTACCCCAATTCC  
TGC

+  
FFF:FFFF:FF,FFFFFFFF:FF:FFFF:FFFFFFFF,F:FFFF,::FFF:FF,,,FFFF,FFF,:F  
FFFF:FF:F:FF,FFF:FFF:FFFFFFFF:FFF,::FFF:FFF:F:FFFF:FF,FFFF,FFF:FF,  
F:F

@A00721:190:HGJW7DSXY:4:2319:12897:11522\_1:N:0:TCTGCAAG+GCTGCACT  
TCTCGGCGATAACCACTGATCTTCAGAGTTACGTAGTGGTCTTCTTTTGGTGATTTTATCAAAGAGA  
AAGTTTCTGCTAGTCGCGACGATAGTATTTATCGGAGTGATATTAACAAGTTAACTTCGAACTGACC  
ACT

+  
FFF:F,FFF:F,::::FFF:FF,F::FFFF:FF,:FF:F::FFF:FFFFFFFF:FFF,FFFF,F:  
:FFFF:F:F,FFF:FFFFFF,,FFFFFFFFFFFFFFFF:FFFFFFFFF:,F,,:FFF::FFF:,F  
FFF  
@A00721:190:HGJW7DSXY:4:2108:32624:20635\_2:N:0:TCTGCAAG+GCTGCACT  
TTGAAGTACCGCAACATGGATCAGTTTTCCAAAAAGCTATTAATAGCAGTTGCGGGCTATAATACCG  
CCTCCAGATTACTCTAAACTGAATCCACTCTCTTGGGATATAAATGAG  
+  
,F::FFFFFF:FFFFFFFFFFFFFFFFFFFFFFFFFFFFFFFFFFFFFFFF:FFFFFFFFFFFF  
FFFFFFFFF:,FFFFFFFFF,F:FFFFFFFFF:FFFFFFFFFFFFF  
@A00721:190:HGJW7DSXY:4:2256:32796:35399\_1:N:0:TCTGCAAG+GCTGCACT  
AGAGTTTTGGAAGTGTGTAATGTCCTACGTACTGTTCAAGGTGTTGGGCTTCTCTAAAGAACAGCAA  
CTTTCAACATGAATTAGTTATTGAAAGTCTTGACCCTCACGTCTCACTTTATCACCTTGGAGATGGTA  
AAG  
+  
FFFFFFFFFFFFFFFFFFFFFFFFFFFFFFFFFFFFFFFFFFFFFFFFFFFFFFFFFFFFFFFFFFFF  
FFFFFFFFFFFFFFFFFFFFFFFFFFFFFFFFFFFFFFFFFFFFFFFFFFFFFFFFFFFFFFFFFFFF  
FFF  
@A00721:190:HGJW7DSXY:4:2354:17897:36432\_2:N:0:TCTGCAAG+GCTGCACT  
AGACCTTCTTGGGGAGTAAAGAGGGTTTGA AAATTACGGAACCTTCTCGTTCTTCATGAAGATCT  
TCGAGTGTTTTATAGTGAGTTATTCTTGCGAAGGTTCAAGTCGATTGA  
+  
FFFFFFFFF,FFFFFFFF::FFFFFFFFFFFFFFFFFFFFFFFFFFFFFFFFFFFFFFFFFFFFFFFF  
FFFFFFFFFFFFFFFFFFFFFFFFFFFFFFFFFFFFFFFF:FFFFFFFFF,FFF  
@A00721:190:HGJW7DSXY:4:2143:12689:5807\_1:N:0:TCTGCAAG+GCTGCACT  
CGAGATCTTGCAAGTGAAGTGGAGTTCAGACGTGTGCTCTCCGATCTGTGGAGGGAAGACCACTGAA  
CTTATAGCGACTTTTGTGCAATTTTTCGAAAAGGTCTTGAAGTACGTATTGTCACTGCTAATCGTAA  
TT  
+  
FF,F:F,FF,FFFF:FF,FFFFFFFF:FFFFFFFF:F,FFFFFFFFFFFFFFFF,FFFFFFFFFFFF  
FFFFFFFFF,:FFFFFFFFF:FFFFFFFFF:FFFF:F:FF:F,FFFFFFFFFFFFFFFFF,:  
,F  
@A00721:190:HGJW7DSXY:4:2527:29351:20760\_1:N:0:TCTGCAAG+GCTGCACT  
GTGACTAAAGTTTTGGCACTTCTAGTTCATCGCGTATTTGTGAAATTAAGACAGACGTGAAAGTTAT  
GATGAGTGATCGTATTAGAACAGCTGATTCTTATTGCATGAACGTCGCTGAGGTCAAACCTGTGGACG  
TTC  
+  
FFFF,FF:FFFFFFFFFFFFFFFFFFFFFFFFFFFFFFFFFFFFFFFFFFFFFFFFFFFFFFFFFFFF  
FFFFFFFFFFFFFFFFFFFFFFFFFFFFFFFFFFFFFFFF,FFFFFFFFFFFFFFFFFFFFFFFFFFFF  
FFF  
@A00721:190:HGJW7DSXY:4:2151:12933:28244\_2:N:0:TCTGCAAG+GCTGCACT  
CTGGTCAGACCCTTTTTCTTACACATCTACTTAAGGCGGCTTATACCATAGGTTACGGTGATTCCAAT  
CAAATCGGATTCAATCGTATTGATCTCCAAGTCGAACTACTTC  
+  
FFFFFFFFFFFFFFFFFFFFFFFF:FFFFFFF:F::FF:,,:F,,F:F,:F,FF:,FFFF,FF,,FFF:F  
FFFFFFFF,F,FFFFFF:F:FFFFFFFFFFFF::FFF,FFF,FF:FFF  
@A00721:190:HGJW7DSXY:4:1230:18457:16297\_2:N:0:TCTGCAAG+GCTGCACT  
TTGATGAGTGTGCTTCTTATCGAAGTCTCAGTTATCGCTGCCGCGGACGTTTGTGCGGAACTCTCA  
GAGGTTTACGGCAGAAAAATTTCTCCTGCTTGTAATTGAGAGAGGAC  
+  
FFFFFFFFFFFFFFFFFFFFFFFFFFFFFFFFFFFFFFFFFFFFFFFFFFFFFFFFFFFFFFFFFFFF  
FFFF:FFFFFFFFFFFFFFFFFFFFFFFF:FFFFFFFFFFFFFFFFF::  
@A00721:190:HGJW7DSXY:4:1266:5240:8782\_1:N:0:TCTGCAAG+GCTGCACT  
TTAGACCTATCAGATGTCTTGACGACTTCGAATTTGAGGACGGAGTTAAATATATTACTTTCACTCAA





[illegible][illegible][illegible][illegible]

```

+
:FF:F:FFFFFFFFFFFFFFFF:FFFFFFFFFFFFFFFF,FFFFFFFFFFFF:FFFF:FF:FFFFFFFFFFFF
FFFFFFFFFFFFFFFFFFFFFFFFFFFFFFFF:FFFF:F:FFFFFFFFFFFFFFFFFFFFFFFFFFFFFFFFFFFF
FFF

```

```
+
FFF,FF,FFFFFFFF:FFF,FFFFFFFF,FFFFFFFFFFFFFF:FFFF:FFFFFFFFFFFFFFFFFFFF
,:FFFF:,:FFFF::F:F:FFFFFFFF:FFFF:FFF:FF,F:F::FFF
```

[illegible][illegible]

@A00721:190:HGJW7DSXY:4:1621:13874:6918\_2:N:0:TCTGCAAG+GCTGCACT  
CTTTGCACTGATTTTTCTCATCAGCTTGTGTTTTACCTAATCTGTGTTTTTACGATAACAACATCA  
GTTGATTAAGACTCTTCCGAAAGGCGAACTTTGGGAATTTGAAGCTCA

+

FFFFFFFFFFFFFFFFFFFFFFFFFFFFFFFFFFFFFFFFFFFFFFFFFFFFFFFFFFFFFFFFFFFFFFFF  
FFFFFFFFFFFFFFFFFFFFFFFFFFFFFFFFFFFFFFFFFFFFFFFFFFFFFFFFFFFFFFFFFFFFFFFF  
@A00721:190:HGJW7DSXY:4:1558:21603:27445\_2:N:0:TCTGCAAG+GCTGCACT

ACCGTGACGAACTGTGGTGTCTTGATCTACGTTACGGATATACTCTCCTTGAGTTCACTCGTAAGGA  
CACTACCACTTATTACGATATTTCTTTAGTCGATGGGTTTTTCGACGCC

+

FFFFFFFFFFFFFFFFFFFFFFFFFFFFFFFFFFFFFFFFFFFFFFFFFFFFFFFFFFFFFFFFFFFFFFFF  
FFFFFFFFFFFFFFFFFFFFFFFFFFFFFFFFFFFFFFFFFFFFFFFFFFFFFFFFFFFFFFFFFFFFFFFF  
@A00721:190:HGJW7DSXY:4:2517:27597:29215\_2:N:0:TCTGCAAG+GCTGCACT

TTTCTTCTAATGTGGCCTGAACTACGTTTCACTTTGTGTGTACTTGTCTCTATTTTAAGTTTTGTCTT  
CCTTGTTGTCTTATTCTATTAATCACTCATTTTAGTGAGATTATTA

+

FFFFFFFFFFFFFFFFFFFFFFFFFFFFFFFFFFFFFFFFFFFFFFFFFFFFFFFFFFFFFFFFFFFFFFFF  
FFFFFFFFFFFFFFFFFFFFFFFFFFFFFFFFFFFFFFFFFFFFFFFFFFFFFFFFFFFFFFFFFFFFFFFF  
@A00721:190:HGJW7DSXY:4:1411:19425:33191\_1:N:0:TCTGCAAG+GCTGCACT

ACGTGTGCTCTTCCGATCTGTTTTCGAATAGTGATAGCCACCCGCCTTACAGAGGGGCAGCAGCATGA  
CCATAATTGGTATTGACTTTGGTACCACCTTTCTACTGTCTGTCTCGCCTCTTCAATGATGTTTTA  
ATG

+

FFFFFFFFFFFFFFFFFFFFFFFFFFFFFFFFFFFFFFFFFFFFFFFFFFFFFFFFFFFFFFFFFFFFFFFF  
FFFFF:FFFFFFFFFFFFFFFFFFFFFFFFFFFFFFFFFFFFFFFFFFFFFFFFFFFFFFFFFFFFFFFF  
FFF

@A00721:190:HGJW7DSXY:4:2323:2202:13291\_2:N:0:TCTGCAAG+GCTGCACT  
TGATAGTGAATTTATACCTACAATCATTGGTTTTTCTAATAATGATGACACTATTGTTTATGGATATG  
ATGCTATTACTCATGATGGTTACGGTCAGGGAGGATTCTCAGTTTACA

+

FFFF:FFFFFFFFFFFFFFFFFFFFFFFFFFFFFFFFFFFFFFFFFFFFFFFFFFFFFFFFFFFFFFFF  
FFFFFFFFFFFFFFFFFFFFFFFFFFFFFFFFFFFFFFFFFFFFFFFFFFFFFFFFFFFFFFFFFFFFFFFF  
@A00721:190:HGJW7DSXY:4:1271:7780:17002\_2:N:0:TCTGCAAG+GCTGCACT

CCGAAAGACGTGCTAAATTAACCATTGTACGATGTGCTGTCTCGGCGATCACTTTTCACTAAGA  
ATTGATCCTACTTTTGGACAAGGCCAACTTCGTAATCTTCATGAGATC

+

FFFFFFFFFFFF,FFFFF,FFFFFFFFFFFF:FFFFFFFF:FF:F,,F:FF:F:FFFFF,:FFFFF,FFF,F  
FFF,,F:,FF:F::F:FFFFFF,F:FFF:FF::FFF:FFFFF,F,FF:

@A00721:190:HGJW7DSXY:4:1515:10601:26115\_2:N:0:TCTGCAAG+GCTGCACT  
TATCTCTTTGGTTGTTAGGGATTTTGAGAGAGTGAAAGGCTTCAATTGTAGTGGTTTGGTCGTTTCAG  
TACCCAGTCAGTATACCTCTACGCAAAGATATTTATGAAAACACTACAG

+

FFFFFFFFF,FFFFFF,FFFFF:FFFFFFFFFFFFFFFFFFFFFFFF:F,FFF:FFFFF,FFFFFFFFFFFF  
FFFFFFFFFFFFFFFFFFFFFFFF:FFFFFFFFFFFF:FFFFFFFFFFFFFFFF

@A00721:190:HGJW7DSXY:4:2612:5972:16344\_2:N:0:TCTGCAAG+GCTGCACT  
ATTACCTGTCTTTCATATTATGAATGAACCTTCGGCCGCTCTCTTTGCTTCGATGTTGGATGTCAAGA  
AGGGTTCAGAAATGGGATTCCTACGTAGTTTATGACTTTGAGATCGGAA

+

FFFFFFFFFFFFFFFF:FFFFFFFFFFFFFFFFFFFFFFFFFFFFFFFFFFFFFFFFFFFFFFFFFFFFF,FFFFFFFF:FFFF  
FFFF,FFFFF,FFFFFFFFFFFFFFFFFFFFFFFFFFFFFFFFFFFFFFFFFFFFFFFF:FFFF

@A00721:190:HGJW7DSXY:4:1305:13150:26897\_1:N:0:TCTGCAAG+GCTGCACT  
ACGTGTGCTCTTCCGATCTTATAGTGTTATTTATTCTGGTGGTGATGATAATCTTGGAGGTCGTGACG  
TTGATGAAGCTATAAGAGCGTTCTTATTACGGCGCACTTCTTTACCGCCACCACACAACCTTTCAGTT  
TCA

[illegible]





F:FF:F::FFFF:FF:F::,,FF,FFF,F,FFFF,,FFFF:FFF,FFF:FF,FF,F:FFFFFFF:  
FFF  
@A00721:190:HGJW7DSXY:4:1641:14778:21104\_2:N:0:TCTGCAAG+GCTGCACT  
GATCGCCACTCCAAACACTATATACATTATAAAATATAAAAATAAGGGAGTCATAACTTTTGTACCA  
AATTCTTGGCTTTCAACTAAGTCTCTGATTTTATTAATCATTACTTTA  
+  
FFFFFFFFFFFFFFFF,FFFFFFFFFFFFFFFFFFFFFFFFFFFFFFFF:FFFF:FFFFFFFFFFFF:FFFFFFFF  
FFFFFFFFFFFFFFFFFFFF,FF:F:FFF:FFFFFFFFFFFFFFFFFFFF,FFFF  
@A00721:190:HGJW7DSXY:4:1515:28709:22842\_2:N:0:TCTGCAAG+GCTGCACT  
GGTCATTTACTCTGTACTTGATCTACGTCGTTTAACTGTCGGAACAACCTTTACTTAGAATGACTCTA  
TCTTTTCAGACACTTCTTATATTATTTACAATAGTTAATATCATATTA  
+  
FFFFFFFFF:FFFFFFFFFFFFFFFFFFFFFFFFFFFFFFFFFFFFFFFFFFFFFFFFFFFFFFFFFFFFF  
FFFFF:FFFFFFFFFFFFFFFFFFFF:FFFFFFFFFFFFFFFFFFFFF  
@A00721:190:HGJW7DSXY:4:1212:30635:35352\_2:N:0:TCTGCAAG+GCTGCACT  
CTATCGTTTTCTGCTTTTTCTTAGCTAATAGATTAATAAAGGATGAGTACGAAAACCAACTCTTCGTT  
ACGAGACCTGATGGTAGAATAGATTTAGTCTCTACACCCATCTCAACG  
+  
FF,FFF:FFFFFFFFFFFFFFFFFFFF,FFFFFFFFFFFFFFFFFFFFFFFFFFFFFFFFFFFFFFFFFFFF  
FFFFFFFFFFFFFFFFFFFF:FFFFFFFFFFFFFFFFFFFFFFFFFFFFFFFFFFFFF  
@A00721:190:HGJW7DSXY:4:1241:15591:1188\_1:N:0:TCTGCAAG+GCTGCACT  
GTGTGCTCTTCCGATCTCTTAATACACGAACACACAACCCCCACACGACTCGAAACCGAGACGCCGTA  
GATCAAAGTCCCTTCTAACTTTAGATT  
+  
:F:FF,:,:,F,,F,,,,,F:,:,:,F,:,:,F,F,:F,FFFFFFFFFFFFFFFFFFFFFFFFFFFF  
FF:FFFFFFFFFFFFFFFFFFFFFFFFFFFFF  
@A00721:190:HGJW7DSXY:4:2216:31937:17816\_1:N:0:TCTGCAAG+GCTGCACT  
CTTTACTCATTTTATAGCAGTTATTTATGTTGTACTTTTTATAATTTATAACCTTCTTATACTTTTGG  
GTATGTTTTGTGAAAAACATGAGATACCCAAGTCTATCGAAGACATTATCTCTTATGTACTTATTGTA  
ACG  
+  
::FFFFFFF:FFFFFFFFFFFFFFFFFFFFFFFFFFFF,FFFFFFFFFFFFFFFFFFFFFFFFFFFFFFFFFFFF,  
FFFFFFFFFFFFFFFFFFFFFFFFFFFFFFFFFFFFFFFFFFFFFFFFFFFFFFFFFFFFFFFFFFFFFFFFFFFF  
FFF  
@A00721:190:HGJW7DSXY:4:2462:16938:2926\_1:N:0:TCTGCAAG+GCTGCACT  
TTCTTATTCTTTTATTCCTTTAACTGTGTATGAGGAGGATTTATAATGCTTTTCGATAGTGATTGTTA  
TCAATTTAAATACATTACTGTTTCAAATCATCTTTACTCACAGACTCCGAAAATGGTTTCAAATGAGG  
TCA  
+  
FFFF,FFFFFFFFFFFF,FFFFFF:FFFFFFF:,FF:FF,,FFF:F:,FF:FFFFFF:,FFFFFFF  
F,FFFFFFFFFFFF,FFFFF,FFFFFFFFF:FFFF,F:F::FFF,FF,F,FFFFFF,,:FFFFFF,FFFFF  
FFF  
@A00721:190:HGJW7DSXY:4:2462:16938:2926\_2:N:0:TCTGCAAG+GCTGCACT  
TATTAAACGAACATGATCCGATTCTTCGAGGGTATCACTACCACTGATCTGCCGACTTTAGTCAAGG  
AACTTCAATTCTTCGATGTTTATATTTTCTATAAGGGAAAATAGCA  
+  
FFFFFF,FFF:FF,F,FFFFFFFFF:FFFFFFF:FFFFFFF:F::FF,FFFF:FFFF:FFFFFFFFFFFF  
F::FFF:,FF:,FFFFFFFFFFFFFFFFFFFFFFFFFFFFFFFF:FFFFFFFFFFFF  
@A00721:190:HGJW7DSXY:4:1631:12319:11052\_2:N:0:TCTGCAAG+GCTGCACT  
TTTCGACAAATTTTAGAACTTTATTTTCAGAACTCTCTCCGATCACCTTGGTGTGATCTCCCGGAGGATC  
TTTTCAATAAGATGTATGATGATAATCTACTATTTTTTAAATAGTGATA  
+  
FFFFFF,FFF:,FF:F,FFFFFFFFFFFFFFFF,FFFFFFFFFFFFF:FFF,FFFFFF:FFF,FFFF,F,F  
FFFF,FFFFF:FFFFF:FFF:FFFFFFFFF,FFFF,FFFF:FFFFFFFFF

@A00721:190:HGJW7DSXY:4:2236:15691:34554\_1:N:0:TCTGCAAG+GCTGCACT  
CTTTATCAAAGATTTGGCTTGGTCTATTTACCGCAAAAAGTTGGAAGAGGTCTATGATATTTATTTTA  
CTTATACTTTAAATAGCACCGATTATAACTTGACTGTTGATAATATTACAATAGCTCTTTCTCAGAAG  
ATT

+

FFFFFF:F,FF:FFF:,FFFFFF:F:FFFF:FFFF:FFF,FFFFFFF,:F:FFFF,FFFFFFFFFFFF  
FFFFFF:FFFFFFFF:FFFF:FFFFFFFF:FFFFFFFFFFFFFFFF:FFFFFF:FFF:FFFFFFFFFFFF  
FFF

@A00721:190:HGJW7DSXY:4:1578:16586:31594\_2:N:0:TCTGCAAG+GCTGCACT  
GGTGAACACGTCGGTAGCATTGATTTACTTTTACCGTTAGAACTGAAAAAGATTCTTTTCGAAAAGAA  
ACCTATAAGTTACAAACGATTCTTCGACTATATTAAAGAAATAAAAAT

+

FFFFFFFFFFFFFFFFFFFFFFFFFFFFFFFFFFFFFFFF:FFFFFFFFFFFFFFFF:FFFFFFFFFFFF  
FFFFFFFFFFFFFFFFFFFFFFFFFFFFFFFF:FFFFFFFFFFFFFFFFFFFFFFFF:F

@A00721:190:HGJW7DSXY:4:1417:27525:35884\_2:N:0:TCTGCAAG+GCTGCACT  
CTTTACATTTTTAATGGTATGGTATAATGTGTCTTACAAATAGAACCTTCACTCTCGGTAATGAGAGT  
GTATTCCTAATATTCTAGTAACCGCTATGTGGGCATTACTAGGATTT

+

FFFFFFFFFFFFFFFFFFFFFFFFFFFFFFFFFFFFFFFF:FFFFFFFFFFFFFFFF:FFFFFFFFFFFF  
FFFFFFFFFFFFFFFFFFFFFFFFFFFFFFFF:FFFF:FFFFFFF

@A00721:190:HGJW7DSXY:4:2148:7157:14137\_1:N:0:TCTGCAAG+GCTGCACT  
GATAGCAATTTATGTTTTAAATGCTAGGAAAATTTAGAAAACTCCATTGTATAGTTCAAGGAGTAC  
TTAATTCAATAGCTTTAGTATTATTTACTATCGCCTTTATTGAAAATTGTATAAGAGTTAATTGCTTA  
CAC

+

FFFFF,FFFFFFFFFFFFFFFF:FFFFFFFFFFFFFFFF:FFFFFFFFFFFFFFFF:FFFFFFFFFFFF  
FFFFFFFFF:FFF:FFFFFFFFFFFFFFFFFFFFFFFFFFFFFFFFFFFFFFFFFFFFFFFFFFFFFFFF  
FFF

@A00721:190:HGJW7DSXY:4:2656:31150:6277\_1:N:0:TCTGCAAG+GCTGCACT  
GGGGAGAATGAACTGCCGCTTCCCGGAAGAAACGATCTATTTACAGAGTATTTAGAGTAGTCCAAAGT  
TTGTATAAATTTATATGATTTTCTATATATATACCACATATATATATATAAAATCCTATAAATTTG  
TAC

+

::,FFFFFFFF,F:FFF,FFF:FF:FF,,FFF::FFF:F:FFFF,F,FFFFFFFF:FF::,FFF:FF  
,F:F,FFFF:FFFFFF,FFFFFF,F:FFFFFFFFFFFFFFFF,FFF:FFF,FFF:FFFFFFFFFFFF  
FFF

@A00721:190:HGJW7DSXY:4:2510:1407:33207\_2:N:0:TCTGCAAG+GCTGCACT  
AACATACCATACTCCCCAAACATAACATACCATAACCTACCATGACCAATCATCGCTCCAACGGC  
ACGCCAGACGTAGGGTCAAACCTACTACCGCCGGTCGGCAGATCGGCA

+

FFFFFFFFFFFFFFFFFFFFFFFFFFFFFFFFFFFFFFFF:FFFFFFFFFFFFFFFF:FFFFFFFFFFFF  
FFFFFFF:FFFFFFFFFFFFFFFFFFFFFFFFFFFFFFFF:FF:FFF

@A00721:190:HGJW7DSXY:4:2102:29523:35775\_2:N:0:TCTGCAAG+GCTGCACT  
ACCCGCTGTGCAGAATAACCTTCCCAAATCTAGATCTGCACAGAAGAAGGCTGAAGGTCGTTACCGGA  
CGACCACTCAAAGGAAACGGGCTGTTGCCAGAGGAAAGCAGCGACCA

+

FFFFFFFFFFFFFFFF:FFFFFFFFFFFFFFFF:FFFFFFFFFFFFFFFF:FFFFFFFFFFFF  
FFFFFFFFF:FFFFFFFFFFFFFFFFFFFFFFFFFFFFFFFF:FFFFFFFFFFFF

@A00721:190:HGJW7DSXY:4:2153:26539:36933\_2:N:0:TCTGCAAG+GCTGCACT  
GTAACATTGACGGCAGTCCCGTCATCTCTGTGGGAACTGAGGCAGTACCTCAGTCAAAGTCACATTC  
ACCACTCCCATAACCAATCAATGATGTGACTATACAGTTCGGCCATTTC

+

FFFFFFFFFFFF:FFFFFFFFFFFFFFFF:FFFFFFFFFFFF,FFFFFFFFFFFFFFFFFFFFFFFF  
FFFFFFFFFFFFFFFFFFFFFFFF:FFFFFFFFFFFFFFFF:FFFFFFFFFFFF:F

@A00721:190:HGJW7DSXY:4:1402:5638:3740\_1:N:0:TCTGCAAG+GCTGCACT  
ATACGTCGTGGGAGGTACTGAAGCCTTCCCCTCCGCTGGCACGAAGAACACTCCCAAGCCAATCAATA  
GTTCTTCTGACCAGAATGAAAAGGGTTTACCAGGCTAGTCTCTAAGTCTACCAGGAAGAGGGGAAAT  
GTC

+

FFFFFFFFFFFFFFFFFFFFFFFFFFFFFFFFFFFFFFFFFFFFFFFFFFFFFFFFFFFFFFFFFFFFFFFF  
FFFFFFFFFFFFFFFFFFFFFFFFFFFFFFFFFFFFFFFFFFFFFFFFFFFFFFFFFFFFFFFFFFFFFFFF  
FFF

@A00721:190:HGJW7DSXY:4:2505:25220:3114\_1:N:0:TCTGCAAG+GCTGCACT  
AAAGGGAAAGGTCCATCAGGACCTAAGAAGGGGAAATTACCCCTAATTCTGAAGGAAGATCTCCACCC  
ATCTGGGGTTGGGAATAAGAAATCTGCACGGGCCAAAGAGGCCGCTGCTACGAAGTCGCTGAAGGCGG  
CTT

+

F,FF:FFFF:FFFF:FFFFFFFFFFFFFFFFFFFFFFFFFFFFFFFFFFFFFFFFFFFFFFFFFFFFFFFF  
FFFFFFFFFFFFFFFFFFFFFFFFFFFFFFFFFFFFFFFFFFFFFFFFFFFFFFFFFFFFFFFFFFFFFFFF  
FFF

@A00721:190:HGJW7DSXY:4:1426:8522:10520\_2:N:0:TCTGCAAG+GCTGCACT  
TGTAAGTTGCGCCTGCCGACCCCATCTTTGAGACCAAGACTCTCTACAGTAGGTTCTGCCTACTAT  
GAGCAAATCTGTTGAATTCGTCACTGAGGACGAAGGTGAGAGGACTTT

+

FFFFFFFFFFFFFFFFFFFFFFFFFFFFFFFFFFFFFFFFFFFFFFFFFFFFFFFFFFFFFFFFFFFFFFFF  
F:FFFFFFFFFFFFFF:FF:FFFFFFFFFFFFFFFFFFFFFFFFFFFFFFFFFFFFFFFFFFFFFFFF  
FFF

@A00721:190:HGJW7DSXY:4:2509:22733:36667\_1:N:0:TCTGCAAG+GCTGCACT  
CAAAGTGAAGCAGTCGCTGGGGAAGAGAATTGCGTGGGTTGAAGGCCGACGCTTCGAGCTTGAGTG  
TGACGAGGCCGGTGACGTTTTTGTCAACGGCGTTTGAGGATTTTATCCGCGCTTAAGTATGGGGCGA  
AGA

+

FF,FFFFFFFFFFFFFFFFFFFFFFFFFFFFFFFFFFFFFFFFFFFFFFFFFFFFFFFFFFFFFFFFFFFF  
FFFFFFFFFFFFFFFFFFFF,FFFFFFFFFFFFFF:FFFFFFFFFFFFFFFFFFFFFFFFFFFFFFFFFFFF  
FFF

@A00721:190:HGJW7DSXY:4:2111:17219:28557\_1:N:0:TCTGCAAG+GCTGCACT  
AGTCTTGAAGGACTTAGGTTGGCATATTTATGCCGACGATAATAAGCATGTCACCCTTAAGCACCGAG  
GTAAGCTCGGGACTTACAAGAGAGAGTGTGAGAGAGTCGCTCTCACTATTTTTGCCGAGAATGCGGGC  
TTT

+

FFFFFFFFFFFFFFFFFFFFFFFFFFFFFFFFFFFFFFFFFFFFFFFFFFFFFFFFFFFFFFFFFFFFFFFF  
F,FFFFFFFFFFFF:FFFFFFFFFFFFFFFFFFFFFFFFFFFFFFFFFFFFFFFFFFFFFFFFFFFFFFFF  
FFF

@A00721:190:HGJW7DSXY:4:2456:14009:1454\_2:N:0:TCTGCAAG+GCTGCACT  
ATTCAGTGGTTCTGGGAGGCTGCTTTCCTCCATAATTACAACCTCTCTTTAGAGAGCATTAGAAGGAA  
GTTGGGCAAATCCACATATGGTAGACGTTGTCACACTTTTCTTGAA

+

FFF:FFFFFFFFFFFFFFFFFFFF::FFFFF::FFFFFFFFF:FFFFFFF,FFFFFFFFFFFF:FFF:FF:  
:FFFFFFFFF:FFFFFFFFFFFF::FFFFFFFFFFF:F::,FFFFFFFFF

@A00721:190:HGJW7DSXY:4:1244:7988:10848\_1:N:0:TCTGCAAG+GCTGCACT  
CTCTTCCGATCTTTGGGATTTGATGTGAGAAGGTGGAAGGTGTCAAGGCTCTTCTTCATGCTGATC  
TTTCAGGACCTAATCACATCATGATTGATAGTTACGGCTCGTATCGAGTTGGAGGGAGGAAGTTCTCC  
GAA

+

FFFFFFFFFFFFFFFFFFFFFFFFFFFFFFFFFFFFFFFFFFFFFFFFFFFFFFFFFFFFFFFFFFFFFFFF  
FFFFFFFFFFFFFFFFFFFFFFFFFFFFFFFFFFFFFFFFFFFFFFFFFFFFFFFFFFFFFFFFFFFFFFFF  
FFF

@A00721:190:HGJW7DSXY:4:1406:8974:6010\_2:N:0:TCTGCAAG+GCTGCACT  
TCAGAGAGGGGAGCTCTGAAAAGGAAACTTCGTCAGAAGATGAGGAAGTCTAAGAGGAGGAGTTGAG



+

@A00721:190:HGJW7DSXY:4:1327:26151:10426\_2:N:0:TCTGCAAG+GCTGCACT  
AAGAAGGATTATTTGAAGCAGGGGTACCACCTTCTAAGTTGGATGAGGGAGGTTGTTTCTTTGGAGT  
TTTAGATAATCTTTTGAGAAGGGGTCATAGAGCCAGCAAGAGAAGCTT

+

@A00721:190:HGJW7DSXY:4:1537:32054:36558\_2:N:0:TCTGCAAG+GCTGCACT  
CCTTGAGAAGACAAGCCACATTAAGATATAATTTAGGTCAACTTGGGGTTTCGAATGTCATTAGTGCC  
TTACGATTGAAAGAGGTCCTTTTGAGTATCGACAGATCTTTCGATCTT

+

@A00721:190:HGJW7DSXY:4:1245:8693:34616\_2:N:0:TCTGCAAG+GCTGCACT  
GTGGCAGAATTCGGTAACTTACCATATTGTTCTTCCGGGAAGTTGTGGGATTTAACTTTGACTCAAC  
TACTCCGATCAGATCCGGATGTTTTGATTGGTATGGACTACTCGACTT

+

@A00721:190:HGJW7DSXY:4:1562:31123:4633\_1:N:0:TCTGCAAG+GCTGCACT  
TAGGGTCATGGCAGATACTACCGATAAGGTGAAAAATATGCAGGTCAAAGATTCTGTAGCTCTGAGGG  
CGGTTGAGGGAGCCGTTTTGGCCGACTTTAACTATTCTAAGAGTCTTTATGATTCAAACCTATCGTT  
GTC

 $+$ 

@A00721:190:HGJW7DSXY:4:2216:16233:18208\_1:N:0:TCTGCAAG+GCTGCACT  
TACAGCGGCTTATTGTCGCGCAGTTTCCAGAATTGCGGTTGAAGTTCACCCATTCTATCTTGAATGCT  
CACGCCGTCGCAGCCATATCGAGACTATGTTATAATCACTTGTTAAAGTACAGATTTAGTGATTTAGA  
TAT

+

@A00721:190:HGJW7DSXY:4:1415:19000:36965\_1:N:0:TCTGCAAG+GCTGCACT  
GGAGGCGATATTCGTTTTCATATCCAAAACTCCTTGAATGGAGTACATATTTGCAACCCTATTCTTGA  
TGTGAAAGATGCATCGAGGTATACGTCTAGGAACATTGATTGGGAACGTACCTACTCACGAGACGTCA  
TGA

+

@A00721:190:HGJW7DSXY:4:1644:14579:13745\_1:N:0:TCTGCAAG+GCTGCACT  
ATGTTTCGTTCTGTTACAAGAACGCTTTGGATTGTGACCATAAAGCCTCAGTTGCGATAGCTGTAGAG  
GTATACGATATCTCTCTTGATGATGTAGCCACTATAATGCTTAAGAGAGAGATTGATGTATGTCATTT  
CGT

+

[illegible]

@A00721:190:HGJW7DSXY:4:1560:18674:8907\_1:N:0:TCTGCAAG+GCTGCACT  
GAATTATTGGACACGGTGAAAAATGACATACCCGTTCTGACCTTGGTATCGTTATCCGTCATGGAGA  
TGATGGCGCATCACTTGATTACTATATGCCCGAAGGATTGGGTTATTCTCACAACAAAGATAAGATTT  
TAT

+

FFFFFF:FFFFFFF:F:FFFFFFF,FFFFFFF:FFFFFFF  
FFFFFFF:FFFFFFF:FFFFFFF:FFFFFFF:FFFFFFF:FFFFFFF  
FF:

@A00721:190:HGJW7DSXY:4:1604:15709:36526\_1:N:0:TCTGCAAG+GCTGCACT  
TTTTATTAAAGTGGGACAATTGTTCCATTGTGAACCTTGGGGACTAGATTGAGCATTAAATGAGTTC  
CGAATAACTCGTATTAAATCTTCTCTAGTGGACAATTCAGATTACCTATTTCCGTACCAAGAGCCAC  
TG

+

FF:F,,FFFF,FF,:F,F,FF::FF,,FF,F:FFFF:FFF,FF:,FF::F,F,F,:FFFFFF:FFFF  
,,,FFF:F:FFF,FF,FFFFFF:FFF,F,FF,F:FF:FFF,FF,FFFF:FF:FF::,,F,FFF::  
F,

@A00721:190:HGJW7DSXY:4:2160:17092:32503\_2:N:0:TCTGCAAG+GCTGCACT  
TGGAAGAAGCGAGGTTCTTCCTCAATAAAAAATTTTCTCAAGAGATTATGGTTGATAAAGTTTTCTT  
CATAAGGGCTATTAGTACGTCATGGGGATCACTTCTTCGGTCAATGA

+

FFFFFFFFFFFFFFFFFFFFFFFFFFFFFFFFFFFFFFFFFFFFFFFFFFFFFFFFFFFFFFFF:FFFFFFFF  
FFFFFFFFFFFFFFFFFFFFFFFFFFFFFFFFFFFFFFFFFFFFFFFFFFFFFFFF:FFFFFFF

@A00721:190:HGJW7DSXY:4:1675:8097:20337\_1:N:0:TCTGCAAG+GCTGCACT  
AATATGTTACGACATGGCTTCGTAACAACAGTGCAGGATTGTCTCTCGGGAAAGTGATTCACCAA  
GATGTTTCATATAGATACGAGATACCTAGAGAAGGTCGCAGCGATCTTACTCGTTATCGGAGCTAAGAA  
GAA

+

FFFFFFFFFFFFFFFFFFFFFFFFFFFFFFFFFFFFFFFFFFFFFFFFFFFFFFFFFFFFFFFF  
FFFFFFFFFFFFFFFFFFFFFFFFFFFFFFFFFFFFFFFFFFFFFFFFFFFFFFFF:FFFFFFFF  
FFF

@A00721:190:HGJW7DSXY:4:2466:25644:9862\_2:N:0:TCTGCAAG+GCTGCACT  
GTTATGCTCGAACTTAACGTTAGTACCGGAGGTGATCTCTCTGCTTCTGCGTTACTGAGAGAAAAG  
ATTCAGGACGCCTACGGTGACTTTATGGACAAGATGCAAGAGATCGGA

+

FFFFFFFFFFFFFFFFFFFFFFFFFFFFFFFFFFFFFFFFFFFFFFFFFFFFFFFFFFFFFFFF  
FFFFFF:FFFFFFFFFFFFFF:FFFFFFFFFFFFFF:FFFFFF:FFF

@A00721:190:HGJW7DSXY:4:2455:7690:14497\_2:N:0:TCTGCAAG+GCTGCACT  
TTTAGGTTTAGTAGGTGATCTTGACGTCGATTCTTTGTATAGGGAGTGTGAGAAGACAACGAATCTTG  
AACTACGGTCCTTATCAAAGAAAATGGTGAACCGGTCTCTAAATCTT

+

FFFFFFFFFFFFFFFFFFFFFFFFFFFFFFFFFFFFFFFFFFFFFFFFFFFFFFFFFFFFFFFF  
FFFFFFFFFFFFFFFFFFFFFFFF:FFF:F,FFFFFF::FFF:FFFFFFFF

@A00721:190:HGJW7DSXY:4:2651:15619:13103\_2:N:0:TCTGCAAG+GCTGCACT  
AGATTGAAGAACACGTCAAGAAGTCGCTCGGCGTTGTTCTTGAAAACCAAGTTAAGAAGGAGGCTGAT  
CATGGAGTCTTGTACCTTCTGTCAAACCTTCGAGGTTTACGCTACGAGA

+

FFFFFFF:FFFFFFFFFFFFFFFFFFFFFFFFFFFFFFFFFFFFFFFFFFFFFFFFFFFFFFFF  
FFFFFFFFFFFFFFFFFFFFFFFFFFFFFFFFFFFFFFFFFFFFFFFF:F:FFFF

@A00721:190:HGJW7DSXY:4:2404:6072:9095\_1:N:0:TCTGCAAG+GCTGCACT  
TGGATTGAAGGCTGGCTCTAAGGGAGACTCCTTCTTTTGAATGTTGTAAAGAATTGGGTTGAGAAGT  
GTGCTTTACAAGGAGTTAGACTCTTCTTCAAGTTTTTAGATCTTCTTGATAATCTTAAAGAAAAATTT  
TCG

+

F,FFFFFFFFF:FFFFFFFFF:F:FFFFFFFFFFFFFFFFFFFFFFFF:FFFFFFFFF:F



@A00721:190:HGJW7DSXY:4:2105:13530:3161\_1:N:0:TCTGCAAG+GCTGCACT  
TCTGACCATCGCAAAGAAGACTTTATTAGTTCATGAAGTTCTTACACTTCTCGCGACTAATGTCAGCT  
TCACTACAAAGGCGTTACGTAAAGTAGTTTTACGCTTTATCTTAAAGCATTACCACCAAATTTAGCA  
CTT

+

FFFFF,FFFFFFFFFFFFF:F:FFFFFFFF:FFFFFFFFFFFF,FFFFFFFFFFFFF:FFFFFFFF:F:FFF  
:F,FFFFFFFFFFFF, :FFFFFFFFFFFFF:FFFFFF:FFFFFFFFFFFFFFFFFFFFFFFFF:F:FFFFFF:FF  
FFF

@A00721:190:HGJW7DSXY:4:1552:15293:10034\_1:N:0:TCTGCAAG+GCTGCACT  
CTCGCCATATCAGATTAGAGACATGCCAGTTAGAGTTCTTCTAACCAGGACTGATGGTGAGATTCTTT  
TACCTTTTGGAGGTCCAGGAACCTTTACTCCTAGTGTCTTTTCTAGAGTCCAAGGACGTTTCCGTCGG  
AGG

+

FFFFFFFFFFFFFFFFFFFFFFFFFFFFFFFFFFFFFFFFFFFFFFFFFFFFFFFFFFFFFFFFFFFFFFFFF  
FFFFFFFF:FFFFFFFFFFFFFFFFFFFFFFFFFFFFFFFFFFFFFFFFFFFFFFFFFFFFFFFFFFFFFFFFF  
FFF

@A00721:190:HGJW7DSXY:4:1105:20437:36949\_2:N:0:TCTGCAAG+GCTGCACT  
GACCGCTCAATAACACTCTATTGAATCCCTTTCCACGATGACAGCTCTTTATGAGGTGCTCCATGCA  
AATTTACAGTTCCTCTTTGGTGATATCGCCTCTGTCCTTTCTCCTTTA

+

FFFFFFFFFFFFFFFFFFFF,FFFFFFFFFFFF:FFFFFFFFFFFF,FFFFFFFFFFFFFFFFFFFFFFFFF  
FFFFFFFFFFFFFFFFFFFF,FFFFFFFFFFFFFFFFFFFFFFFFFFFFFFFFFFFFFFFFFFFFFFFFF

@A00721:190:HGJW7DSXY:4:1372:31412:2472\_2:N:0:TCTGCAAG+GCTGCACT  
ACTTGGGTTTATCGGTTGTATTTTGATAAATTTGTTGGAATCGATAATGATACTGACGAAGGTTCTAT  
TACCACCCTTGTCATTGATACAAACATTCTAGGTGATGCTTTCTTAGA

+

FFFFFFFFFFFFFFFFFFFF:FFFFFFFFFFFFFFFFFFFF:FFFFFFFFFFFFFFFFFFFFF:FFF:FFFFFFFFFFFFF  
FFFFFFFFFFFFFFFFFFFFFFFFFFFFFFFFFFFFFFFFFFFFFFFFFFFFFFFFFFFFFFFFFFFF:FFFF

@A00721:190:HGJW7DSXY:4:1120:22200:33458\_2:N:0:TCTGCAAG+GCTGCACT  
TTACAATCTGTAGAGAGAGAGGTTAATCAGAATTTGAGTGATAACGATTTAGTACTGGGAAATGGTGG  
TAGTCAGTTTACTACTTTTCTTTCCCTCCCCATTTTCGATTGGATTG

+

FFFFFFFFFFFF,FFFFF:FFF:FFFFFFFF:F:FFFFFFFFFFFFFFFFFFFFFFFFFFFF:FFF::FFFFF,FFF  
FFF:FF,:::FFFFFFFF, :F,F,:::FF:F:,FF::, :F,FF,FFFF:

@A00721:190:HGJW7DSXY:4:1156:29785:10207\_2:N:0:TCTGCAAG+GCTGCACT  
TTGATAAGTTTTTTCTTTTATGGGACTCTGTTTGTACTTATGAAGGAGGTATTACTTCGGAAGTTCT  
TAATGTAGGTCTCCTAGTACTTAAGGGTTTATGTTTCGGTTTCAGCTG

+

FFFFFFFFFFFFFFFFFFFFFFFFFFFFFFFFFFFFFFFFFFFFFFFFFFFFFFFFFFFFFFFFFFFFFFFFF  
FFFFFFFFF:FFFFFFFFFFFF:FFFFFFFFFFFFF,FFFFF:FFFFFFF

@A00721:190:HGJW7DSXY:4:1129:32235:28698\_2:N:0:TCTGCAAG+GCTGCACT  
TGTTTTACATTGCGTGATCACTTCCCGTGGACTTGGAAGAGATTAAACATAAAATCCAGCGATTCTA  
TTATGTCGCTAAAGCCTGTCCAGTTGTCGATGATGTTCGGGCTGTGGG

+

FFFFFFFFFFFFFFFFFFFFFFFFFFFFFFFFFFFFFFFFFFFFFFFFFFFFFFFFFFFFFFFFFFFFF:FFFFFFFFFFFFF  
FFFFFFFFFFFFFFFFFFFFFFFFFFFFFFFFFFFFFFFFFFFFFFFFFFFFFFFFFFFFFFFFFFFF

@A00721:190:HGJW7DSXY:4:1641:14434:32002\_2:N:0:TCTGCAAG+GCTGCACT  
AAACTTACGACGATGTTCTCGCTCGCATTTCAAGGATTACTAAGTCTGAGATCTGCCACTTCTAAT  
TTAGGAAACGTCGCGAAAAGAAAGTTCATGAGGATGTCTTGGTCGAA

+

FFF:FFFFFFF:FFFFFFFFFFFFFFFFFFFFFFFFFFFFFFFFFFFFFFFFFFFFFFFFFFFFFFFFFFFFF  
FFFFFFFFFFFFFFFFFFFFFFFFFFFFFFFFFFFFFFFFFFFFFFFFFFFFFFFFFFFF::FFFFF

@A00721:190:HGJW7DSXY:4:1469:10366:6668\_2:N:0:TCTGCAAG+GCTGCACT  
GAACTTCTAATAGAGGATCCTGATGACATTATTTCAACGATACCGATCTCAGTTCTACCACAGAAAC

CGTCTCAGGAAGTGTCTCCACTGATTCGGAATTAGAGAAAGACGACCT

+

FF,FF:FF,FFFFFFFFFFFFFFFF:FFFFFFFFFFFFFFFFFFFFFFFFFFFFFFFFFFFFFFFF  
FFFFFFFFFFFFFFFFFFFFFFFFFFFFFFFF,FFFFFF:FFFFFFFF

@A00721:190:HGJW7DSXY:4:2547:32931:1438\_1:N:0:TCTGCAAG+GCTGCACT  
GAGACCTCTGAATTTTCAGGGTGCCTGATGAGGACGTTGAAAGGGATAATTTCAACTCTGAGACTTC  
TAAGAGTGTTCAAAAGACCAGAAACGTAACAAGAAGAATAAAGGTAGGAAGGGGAGAAAACAGAACA  
AGC

+

FFFFFFFFFFFF:FFF:F,FFFFFFFF,FFFF:F,FFFFFF:F,FFFFFFFFFFFF:F:F:FFF  
FFFFFFFFFFFFFFFFFFFFFFFF:FFFFFFFF:FFFFFFFFFFFFFFFFFFFFFFFFFFFFFFFF  
:FF

@A00721:190:HGJW7DSXY:4:2403:28330:1548\_2:N:0:TCTGCAAG+GCTGCACT  
ATGGTTGCGGCTGATCGTACCCCAATTCCTGCTAGAAAGATCACTCTCGGCGATACCACTGATCTTCC  
AGAGTTACGTAGTGGTCTTTCTTTTGGTGATTTTATCAAAGAGAAAGT

+

FF,F:FF,F,FFFFFFFF:F::F,FFFF:F:,FF,FFFFFF:F,FFF,F,:FF:F,FF::FFF:FFF:  
F:FF:FF::,F,F:,FF,FFFF:FF::F,F:F,FFFFFF:F:FF:,

@A00721:190:HGJW7DSXY:4:1231:23285:24752\_1:N:0:TCTGCAAG+GCTGCACT  
CAAGTTAACTTCGAACTGACCACTTACAAGAGTGTTGAAGTACGCAACATGGATCAGTTTTCCAAA  
AAGCTATTAATAGCAGTTGCGGGGCTATAATACCGCCTCCAGATTACTCTAACTGAATCCACTCTCT  
TGG

+

FFFFFFFFFFFFFFFFFFFFFFFFFFFFFFFFFFFFFFFFFFFFFFFFFFFFFFFFFFFFFFFFFFFF  
FFFFFFFFFFFF:FFFFFFFFFFFF:FFFFFFFFFFFFFFFFFFFFFFFFFFFFFFFFFFFFFFFFFFFF  
FFF

@A00721:190:HGJW7DSXY:4:2345:16089:13291\_1:N:0:TCTGCAAG+GCTGCACT  
AGAGTTTTGGAAGTGTGTAATGTCCTACGTACTGTTCAAGGTGTTGGGCTTCTCTAAAGAACAGCAA  
CTTTCAACATGAATTAGTTATTGAAAGTCTTGACCCTCACGTCTCACTTTATCACCTTGGAGATGGTA  
AAG

+

FFF:FFFFFFFFFFFFFFFFFFFFFFFFFFFFFFFFFFFFFFFF:F:FFFF:FFFFFFFFFFFFFFFF  
FFFFFFFFFFFFFFFFFFFFFFFFFFFFFFFFFFFFFFFFFFFFFFFFFFFFFFFFFFFFFFFFFFFF  
FFF

@A00721:190:HGJW7DSXY:4:2354:26087:13823\_2:N:0:TCTGCAAG+GCTGCACT  
AGACCTTTCTTGGGGAGTAAAGAGGGTTTGGAAATTACGGAACCTTCTCCTGTTCTTCATGAAGATCT  
TCGAGTGTTTTATAGTGAGTTATTCTTGCGAAGGTTCAAGTCGATTGA

+

FFFFFFFF:FFFFFFFF:FFFFFFFFFFFFFFFFFFFFFFFFFFFFFFFFFFFFFFFF:FFFFFFFF:  
FF:FFFFFFFFFFFFFFFFFFFFFFFFFFFFFFFFFFFFFFFF,FFFFFFFF,

@A00721:190:HGJW7DSXY:4:2304:29894:15248\_1:N:0:TCTGCAAG+GCTGCACT  
CGCGATCTTGAGAGTGACTGGAGTTCAGACGTGTGCTCTTCCGATCTGTGGAGGGAAGACCACTGAA  
CTTATAGCGACTTTTGTGCAATTTTTCGAAAAGGTCTTGAAGTACGTATTGTCACTGCTAATCGTAA  
TT

+

FF,FFFF,FFFFFFFFFFFFFFFFFFFFFFFFFFFFFFFFFFFFFFFFFFFFFFFFFFFFFFFFFFFF  
FFFFFFFFFFFFFFFFFFFFFFFFFFFFFFFFFFFFFFFFFFFFFFFFFFFFFFFFFFFFFFFFFFFF  
FF

@A00721:190:HGJW7DSXY:4:1151:28004:13698\_2:N:0:TCTGCAAG+GCTGCACT  
TTGGCACTTCTAGTTCATCGCGGTATTTGTGAAATTAAGACAGACGTGAAAGTTATGATGAGTGATCG  
TCTTAGAACAGCTGATTCTTATTGCATGAACGTCGCTGAGGTCAAACC

+

FF:FFFFFFFFFFFFFFFFFFFFFFFF,FFFFFFFFFFFFFFFFFFFFFFFF:FFFFFFFF:FFFF:FF  
F,FFFFFFFFFFFF:FFF,:FF:FFFFFFFFFFFFFFFFFFFFFFFF

@A00721:190:HGJW7DSXY:4:1138:24306:25363\_2:N:0:TCTGCAAG+GCTGCACT  
TTTTCATCGACGAATTATTCATGATTCACGCTGGTCAGACCTTTTTCTTACACATCTACTTAAGCGG  
GCTTATACCATAGGTTACGGTGATTCCAATCAAATCGGATTCATCAAT

@A00721:190:HGJW7DSXY:4:1167:7880:22592\_2:N:0:TCTGCAAG+GCTGCACT  
TCCAAGTCGCAAACACTACTTCAACATCAACGACATCATTCTTGATGAGTGTCGTTCTTATCGAAGTCTC  
AGTTATCGCTGCCCCGCCGACGTTTGTGCGCAACTCTCAGAGGTTTAC

@A00721:190:HGJW7DSXY:4:1168:10800:23954\_2:N:0:TCTGCAAG+GCTGCACT  
CTATGGAAATTAGACCTATCAGATGTCTTGACGACTTCGAATTTGAGGACGGAGTTAAATATATTACT  
TTCACTCAAGGTGAAAAGTTTGAAATTAACAAAGTCCTTGGTAAGAGT

@A00721:190:HGJW7DSXY:4:2261:29631:32957\_1:N:0:TCTGCAAG+GCTGCACT  
GTTCAAGGTAATACTTACCAGCACGTTGGCTGGTTAGAAATTAAACCTCAAGATGACCCTGTTTTTGC  
ATCACAAACACATATTACCGTTGCTCTATCACGACACGTTGAATCTTTACGATACTTTGTTATCAATG  
TAA

@A00721:190:HGJW7DSXY:4:2430:9136:15969\_2:N:0:TCTGCAAG+GCTGCACT  
TGAGAGGATCAATCACAGTAAGGAAGTGTACGTTTAGCACGGGAGGTTGCAGATTCAACCCCTTATA  
TCGAGGCTATCGAGGACGATGAGTATCTTGAAGTTGTTGACGACAAGC

@A00721:190:HGJW7DSXY:4:1617:19551:19100\_1:N:0:TCTGCAAG+GCTGCACT  
TAGAGGACCACCTGGATCTTCTACTGTCTCTGCCTTCCAAGATTTCTTAGAAGAGGTTATTCCTGGAA  
CCACCTTAACGTCACTCGGTAATCTTTCAGCCGAATTAAGTACTAATGAGTTCAAGTCGGTTGTCGAT  
CGA

@A00721:190:HGJW7DSXY:4:2277:9914:27492\_2:N:0:TCTGCAAG+GCTGCACT  
GGCTAATACCTTTATAGGTAAGAAGCCCCCTTGAGCCGCGTAGTCAGCGCGTTTAGCTGTATCATCAGT  
CAGAGTATACCCGATAGGGTACCGAGTCTCCAAGAGAATATTTATTCT

@A00721:190:HGJW7DSXY:4:2171:9914:5979\_1:N:0:TCTGCAAG+GCTGCACT  
ACGTTTTTCAACGGAAGACATATCGCACCCGAAATTTTGGGCAGAATGCTCTTAACGCGGTTCTT  
GAACGGTGTGTTTGATCAGTCTAAGTTGGATAAAGTTATAGGAGACTCAGTTAACCTGAGAGCTCCTCA  
ATT

@A00721:190:HGJW7DSXY:4:2127:28854:8124\_2:N:0:TCTGCAAG+GCTGCACT  
AATAGGGACGCTAGTATACTTCGTAAAGTCGACAGCGAAATGGTCAATATTGATAATTGGACCGACTA  
TATGACCTATTTTAAGCTCATGGTGAAAAGGGAAGCTAAGGTAAACT

+

FFFFFFFFFFFFFFFF:FFFFFFFFFFFFFFFFFFFFFFFFFFFFFFFFFFFFFFFFFFFFFFFF  
FFFFFFFFFFFFFFFFFFFFFFFFFFFFFFFFFFFFFFFFFFFFFFFF:FFFFFFFF:FFFF

@A00721:190:HGJW7DSXY:4:1103:1768:6809\_2:N:0:TCTGCAAG+GCTGCACT  
CCTATCTTTAAGGTTCTTGTGAGGAGAGTCAAACAGTGTCTTTACCCAACATTTTATGTATACAGA  
GATGACCAGTGACGATTTCTCCCGGAAGCTCTTCTCTCTTAGGAGG

+

FFFFFFF:FFFFFFFFFFFFFFFFFFFFFFFFFFFFFFFFFFFFFFFFFFFFFFFFFFFFFFFF  
FFFFFFFFFFFFFFFFFFFFFFFFFFFFFFFFFFFFFFFF:FFFFFFFFFFFFFFFFFFFF

@A00721:190:HGJW7DSXY:4:1511:29071:18928\_2:N:0:TCTGCAAG+GCTGCACT  
TTTCGAAGTTTGACAAATCTCAAGATTTCTTTGTAAAGCCTATGAGATAAAGATGTATTCTTATTTA  
GGCTTCGATGCTGAATTTCTTGAACCTTTGGAGTGCCAGTGAATATTTT

+

FFFFFFFFF:FFFFFFFFFFFFFFFFFFFFFFFFFFFFFFFFFFFFFFFFFFFFFFFFFFFFFFFF  
FFFFFFFFFFFFFFFFFFFFFFFFFFFFFFFFFFFFFFFF:FFFFFFFFFFFFFFFFFFFF:FFF  
FFFFFFFFFFFFFFFFFFFFFFFFFFFFFFFF,FFFFFFFFFFFFFFFFFFFFFFFFFFFF

@A00721:190:HGJW7DSXY:4:1510:12364:13448\_1:N:0:TCTGCAAG+GCTGCACT  
GAGTATCCATAACGATTTGTCATTTACCACCTTGTCTCAACGACGAAGTGGAACGGCCAACACTTTCT  
TTGGTAATTGTATGATCACTTTGATGATTTTATCACTTTATTATGACCTTGAAAGTTTTCGGCTGTG  
GTT

+

FFFFFFFFFFFFFFFF:FFFFFFFFFFFFFFFF,FFFFFFFFFFFFFFFFFFFFFFFFFFFFFFFF: F:  
:FFFFFFFFFFFFFFFFFFFFFFFFFFFFFFFFFFFFFFFFFFFFFFFFFFFFFFFFFFFFFFFF  
FFF

@A00721:190:HGJW7DSXY:4:2546:17707:4163\_1:N:0:TCTGCAAG+GCTGCACT  
CCATTCTGTTTTCAAAGACTCCAATAACTGATCATTCTGATCATATGATTTTGGACAATGGTTTTCGAA  
GCGAAATTTTGGAGGATAAACCAGCGTACTTCTGCTCGCGATTTATTCTTTTGTCAATGATTACAT  
CTA

+

FFFFFFFFFFFFFFFF:FFFF:FFFFFFFFFFFFFFFFFFFFFFFFFFFFFFFFFFFFFFFF  
FFFFFFFFFFFFFFFFFFFFFFFFFFFFFFFFFFFFFFFFFFFFFFFFFFFFFFFFFFFFFFFF  
FFF

@A00721:190:HGJW7DSXY:4:2146:20347:8202\_1:N:0:TCTGCAAG+GCTGCACT  
CCTTACAAGATCATCGTTAAGTTAGGTAAACCCCTAACCGATGTTACTCTTGTAGGACTTTGGGAGAG  
ATTCGTTAGTTTTAAAGACTATACTAAATATCTCCACTACGAGTTGTTGTTTGGCGATTAGCTCTTG  
CGA

+

FFFFFFFFFFFFFFFFFFFFFFFFFFFFFFFFFFFFFFFF:FFFFFFFFFFFFFFFFFFFFFFFF  
FFFFFFFFFFFFFFFFFFFFFFFFFFFFFFFFFFFFFFFFFFFFFFFFFFFFFFFFFFFFFFFF  
FFF

@A00721:190:HGJW7DSXY:4:2209:29062:29246\_2:N:0:TCTGCAAG+GCTGCACT  
ATTGAGGGTCGTTATACCTATTCGGCTATCTGTGCTTTGAATTGTATAAGATCAAATTTTAAACGATT  
CCGAGAGGTTTATCCTGATGTGGAGGGAGTTCTTGAAGCATCCCGACC

+

F:FFFFFFFFFFFFFFFFFFFFFFFFFFFFFFFF,FFFFFFFFFFFFFFFFFFFFFFFFFFFFFFFF  
:FFFFFFFFFFFFFFFFFFFFFFFFFFFFFFFF:FFFFFFF:FFFFFFFFFFFFFFFF

@A00721:190:HGJW7DSXY:4:2120:18249:6198\_1:N:0:TCTGCAAG+GCTGCACT  
TGATGCGGTTTCATAAGATTATCAGTAATCCTGATTCTACTACGATTTCATGGACCTTCCATCCTGTA  
CCTCTTCTGGAGAGACGTATCTCAAAGATCGACTTCGAGACAGGTGATATTGTTGAGCGAGAGCGACC  
AAG

+

FFFFFFFFFFF:,F,, ,FFFFFFFFF,:FFF:FFFFFFFFFFFFFFFF:FFFFFFFFFFF:, ,FFFFF,

FFFF:FFFFFFFF,FFFFFFFF:FFFF:, ,FF:FFFFFFFFFFFFFFFF:FFFFFFFF:FFFFF  
FFF

@A00721:190:HGJW7DSXY:4:2376:23990:28009\_1:N:0:TCTGCAAG+GCTGCACT  
CGTGGCGCTTTATTTTAAAAAGCTCCCTCCTCTCGCAAGTTTGATCTGATACTTATCACGAAAGGACT  
TGAGTCTTTTGATCAGTCTCTGACTTGACCATCTTTCATTTTAAATGACGATCATTAAGACTCTCTTT  
CTT

+

FFFFFFFF:FFFFFFFFFFFFFFFFFFFFFFFFFFFFFFFFFFFFFFFFFFFFFFFFFFFFFFFF  
FFFFFFFFFFFFFFFFFFFFFFFFFFFFFFFF:FFFFFFFFFFFFFFFFFFFFFFFFFFFFFFFF:  
FFF

@A00721:190:HGJW7DSXY:4:2103:12481:21261\_2:N:0:TCTGCAAG+GCTGCACT  
CTTTGCACTGATTTTCTCATCAGCTTGTGTTTTACCTAATCTGTGTTTTACGATAACAACATATCA  
GTTGATTAAGACTCTTCCGAAAGGCGAACTTTGGGAATTTGAAGCTCA

+

FFFFFFFFFFFFFFFF:FFFFFFFFFFFFFFFFFFFFFFFFFFFFFFFFFFFFFFFFFFFFFFFF:FFFFF,FFF  
FFFFFFFFFFFFFFFFFFFFFFFF:FFF:FFFFFFFF:FFFF:FF:FFF

@A00721:190:HGJW7DSXY:4:1611:20989:11256\_2:N:0:TCTGCAAG+GCTGCACT  
ACCGTGACGAAGTGTGGTGTCTTGATCTACGTTACGGATATACTCTCCTTGAGTTCACCTCGTAAGGA  
CACTACCACTTATTACGATATTTCTTTAGTCGATGGGTTTTCGACGCC

+

FFFFFFFFFFFFFFFF:FFFFFFFFFFFFFFFFFFFFFFFFFFFFFFFFFFFFFFFFFFFFFFFF  
FFFFFFFFFFFFFFFFFFFFFFFFFFFFFFFF,FFFFFFFFFFFFFFFF

@A00721:190:HGJW7DSXY:4:2519:29234:35775\_2:N:0:TCTGCAAG+GCTGCACT  
TTTCTTCTAATGTGGCCTGAACTACGTTTCACTTTGTGTGTACTTGTCTCTATTTTAAGTTTTGTCTT  
CCTTGTTTGTCTTATTCTATTAATCACTCATTTTAGTGAGATTATTAA

+

FFFFFFFFFFFFFFFFFFFFFFFFFFFFFFFFFFFFFFFFFFFFFFFFFFFFFFFFFFFFFFFF  
FFFFFFFFFFFFFFFFFFFFFFFFFFFFFFFF:FFFF:FFFFFFFFFFFF

@A00721:190:HGJW7DSXY:4:1142:32235:13072\_1:N:0:TCTGCAAG+GCTGCACT  
TCTTCGACAACAGCAGGGGTTTTCGAATAGTGATAGCCACCCGCTTACAGAGGGGCAGCAGCATGAC  
CATAATTGGTATTGACTTTGGTACCACCTTTTCTACTGTCTGTCTCGCCTCTTGAATGAAGTTTTAA  
TGC

+

FFFFFFFFFFFFFFFFFFFFFFFF:FFFFFFFFFFFFFFFFFFFFFFFFFFFFFFFFFFFFFFFF  
FFFFFFFFFFFFFFFFFFFFFFFFFFFFFFFFFFFFFFFFFFFFFFFFFFFFFFFFFFFFFFFF: :FFFFF  
FFF

@A00721:190:HGJW7DSXY:4:2435:23999:4069\_2:N:0:TCTGCAAG+GCTGCACT  
TGATAGTGAATTTATACCTACAATCATTGGTTTTTCTAATAATGATGACACTATTGTTTATGGATATG  
ATGCTATTACTCATGATGGTTACGGTCAGGGAGGATTCTCAGTTTACA

+

FF:FFFF:FFFFFFFFFFFFFFFFFFFFFFFFFFFFFFFFFFFFFFFF:FF,FFFFFFFFFFFFF  
FFFFFFFFFFFFFFFFFFFFFFFF:FFFFFFFFFFF:F:FFFFFFFFFFFF

@A00721:190:HGJW7DSXY:4:1363:6135:11616\_2:N:0:TCTGCAAG+GCTGCACT  
CCGAAAGACGTGCTAAATTAACCATTGTACGATGTCTGTCTCGGCGATCACTTTTCACTAAGA  
ATTGGTCCTACTTTTGGACAAGGCCAACTTCGTAATCTTCATGAGATC

+

FFFFFFFFFFFFFFFFFFFFFFFF,FFF,FFFFFFF:F:FFFF:FFFFFFFFFFFFFFFFFFFFFFFF  
FFFFFFFFFFFF,FFFFFFFFFFFFFFFF:FFFFFFF:FFFFFFFF

@A00721:190:HGJW7DSXY:4:1527:22200:4366\_2:N:0:TCTGCAAG+GCTGCACT  
TATCTCTTTGGTTGTTAGGGATTTTGAGAGAGTGAAAGGCTTCAATTGTAGTGGTTTGGTCGTTTCAG  
TACCCAGTCAGTATACCTCTACGCAAAGATATTTCATGAAAACCTACAG

+

FFFFF:, ,FFFFFF,FFFFF:FFFFFFFF:FFF:FFF:FFFF,FF:FFFFFFFF:FFFFFFFFFFFF  
:FFFFFF::FFFF:FFFF:FFFFFFFF:FFFFFFFFFFFF,FFF,FFFFF



@A00721:190:HGJW7DSXY:4:1419:22688:34867\_1:N:0:TCTGCAAG+GCTGCACT  
ACCTGTCTTTTCATATTATGAATGAACCTTCGGCCGCTCTCTTTGCTTCGATGTTGGATGTCAAGAAGG  
GTTCAAGATGGGATTCTACGTAGTTTATGACTTTGGTGGTGGTACTTTGATACTTCTATCGTCTTA  
CGT

+

FFFFFFFFFFFFFFFFFFFFFFFFFFFFFFFFFFFFFFFFFFFFFFFFFFFFFFFFFFFFFFFFFFFFFFFF  
FFFFFFFFFFFFFFFF:FFFFFFFFFFFFFFFFFFFFFFFFFFFFFFFFFFFFFFFFFFFFFFFFFFFFFFFF  
FFF

@A00721:190:HGJW7DSXY:4:1159:27308:4351\_2:N:0:TCTGCAAG+GCTGCACT  
AGTGTTATTTATTCTGGTGGTGATGATAATCTTGAGGTCGTGACGTTGATGAAGCTATAAGAGCGTT  
CTTATTACGGCGCACTTCTTTACCCGCCACCACACAACCTTTCAGTTTC

+

FFFFFFFFFFFFFFFFFFFFFFFFFFFFFFFFFFFFFFFFFFFFFFFFFFFFFFFFFFFFFFFFFFFFFFFF  
FFFFFFFFFFFFFFFFFFFFFFFFFFFFFFFFFFFFFFFFFFFFFFFFFFFFFFFFFFFFFFFF:FFF

@A00721:190:HGJW7DSXY:4:1227:25545:30201\_1:N:0:TCTGCAAG+GCTGCACT  
ACTGGAAAACCCTCGTCAATACTTTTCAATAATATACGTCTTGAACCTCACTTATGACGATCTAGTGAA  
ATTAACGCGTCCTTTTCTGGAACGTAGTTTACTATTATGAACAAAGTTATCAAAGATAGTGGCATT  
AAG

+

FFFFFFFFFFFFFFFFFFFFFFFFFFFFFFFFFFFFFFFFFFFFFFFFFFFFFFFFFFFFFFFFFFFFFFFF  
FFFFFFFFFFFFFFFFFFFFFFFFFFFFFFFF:FFFF:FFF:FFFFFFFFFFFFFFFFFFFFFFFFFFFF  
FFF

@A00721:190:HGJW7DSXY:4:2173:2003:5024\_1:N:0:TCTGCAAG+GCTGCACT  
CCTGATTCCGGCCGGTGGTAGCTCATTTCTACCAGGGGCTATTACTCTTGCTGAAACAGCTATTAAAG  
CTGTTGAGCGGGTAATTACACCTAAACGAGCTCGATCTGCCATCGCTGAAGGATGTGCACTCTTTTCT  
GCT

+

FFFFFFFFFFFFFFFFFFFFFFFFFFFFFFFFFFFFFFFFFFFFFFFFFFFFFFFFFFFFFFFFFFFFFFFF  
FFFFFFFFFFFFFFFFFFFFFFFFFFFFFFFFFFFFFFFFFFFFFFFFFFFFFFFFFFFFFFFFFFFFFFFF  
FFF

@A00721:190:HGJW7DSXY:4:1327:13774:18114\_2:N:0:TCTGCAAG+GCTGCACT  
TCGATTGTATCAACAGTAACATTACTTCTAATAAGGGTCTCTATCAAGCTCGTATTATCGTCGCTGCT  
GGATCTGCGTTACCGTTGAAGGCTAACTCCAAGGTAATTATGAAGAC

+

FFFF:FFFFFFFFFFFF:FFFFFFFFFFFFFFFF:F,FFFFFFFFFFFFFFFFFFFFFFFFFFFFFFFF  
FFFFFFFFFFFFFFFFFFFFFFFFFFFFFFFF:FFFFFFFFFFFF:FFFFF::FFF

@A00721:190:HGJW7DSXY:4:2608:11677:29763\_1:N:0:TCTGCAAG+GCTGCACT  
CGTGTGCTCTTCCGATCTGGTGTCTTAATCGTAACATTAATAATTTCAATCTTCTTAAAAAGAAGAT  
AGAGAGTCATACTTTGGGCTATCGTTCAGGTGCATGGGGTTGGATAGCCAATATTGAAGTGGACACCT  
CTG

+

FFFFFFFFFFFFFFFFFFFF:FFFFFFFFFFFFFFFFFFFFFFFFFFFFFFFF:FFFFFFFFFFFFFFFF  
FFFFFFFFF:FFFFFFFFFFFFFFFFFFFFFFFFFFFFFFFFFFFFFFFFFFFFFFFFFFFFFFFFFFFF  
FFF

@A00721:190:HGJW7DSXY:4:1361:32877:25426\_1:N:0:TCTGCAAG+GCTGCACT  
AGATAACCAATAAGGAAGGAGCTTATACTATGGTTGAATCATCTAAGCATACTACTTTTGCTTTGATT  
ACTCTACCGCCTTACAAGTCTAAGGTTAAAGAGTCGATGAAACAAGTTGTAATTATCAATGATTTTAT  
CGC

+

FFFFFFF:FFF::F:,F,FFF:FFFFFFFF:FFFF:F:FFF,FF:::FFFF:FFF:FFFFF:FFFFF  
:F::FFFF:F:F:FFFF,FFFFFF:FFF:FFFFFFFF,FFFFFFFFFFFFFFFFFFFFFFFFFFFF  
FF:

@A00721:190:HGJW7DSXY:4:1426:8169:27727\_2:N:0:TCTGCAAG+GCTGCACT  
TTCTAACCCTAAAGAGAATATCTAAAATATTTACAAAATCTTACCCTATCTACGAACCTAAAGTTCTG

AAGACGTTGCTTGTGCTTCCTCCTTTAATGGCACTACCTCGGTACAA  
+  
FFFFFFFFFFFFFFFFFFFFFFFFFFFFFFFFFFFFFFFFFFFFFFFFFFFFFFFFFFFFFFFFFFFFFFFF  
FFF:FFFFFFFFFFFFFFFFFFFFFFFFFFFFFFFFFFFFFFFFFFFFFFFFFFFFFFFFFFFFFFFF:  
@A00721:190:HGJW7DSXY:4:2518:29378:7592\_2:N:0:TCTGCAAG+GCTGCACT  
GAAGGCGACCTGTTCCGGAGTTTTTACGGGATCCGGAATGTTCTGTCTATATTAGGTGAAGCGAAATA  
CGATTTTCAACGTCAACGTTACCGAGTTTCGTTTCGTACCTTGATGA  
+  
FFFFFFFFFFFFFFFFFFFFFFFFFFFFFFFFFFFFFFFF,FFFFFF,FFFFF:FFFFFFFFFFFFFFFFFFFFFFFF,F,F  
FFFFFFFFFFFFFFFFFFFFFFFFFFFFFFFFFFFFFFFF:FFFFFFFFFFFF:FF:  
@A00721:190:HGJW7DSXY:4:2333:16830:6903\_2:N:0:TCTGCAAG+GCTGCACT  
ATTTGATCTGGTTGCTCAATTCTAAGCGTGTTCCGCTTAGTGCGAGGCCTCTCTTCTACGAGTATTGC  
TATTTATACGGTTACGAGAAGAAGGTTGAAAGTTTGAGAACTTAGTT  
+  
,FFFFFF,FF:FF:FFFFFFFF:F:FFF:FFFFFFFF:FFFFF:FF::FFFFFF:FFFFFFFFFFFF,F,F  
FFF:F:FFFFFF:F:FFFFFFFFFFFFFFFFFFFFFFFF:F:FFFFFFFFFFFF  
@A00721:190:HGJW7DSXY:4:2647:2003:7686\_2:N:0:TCTGCAAG+GCTGCACT  
TACTAAATACTAGATATTTGGATGATCTTGATAAAGAACTTCATGAATTTTCAGAGGATGAAAAATTT  
TCTTCCTTGGATTTTAATATAAAGAATCTTACCAGGACTCCTACTAC  
+  
FFFFFFFFFFFFFFFFFFFFFFFFFFFFFFFFFFFFFFFFFFFFFFFFFFFFFFFFFFFFFFFFFFFFFFFF  
FFFFFFFFFFFFFFFFFFFFFFFFFFFFFFFFFFFFFFFF:FFFFFFFFFFFF  
@A00721:190:HGJW7DSXY:4:1128:12762:2080\_1:N:0:TCTGCAAG+GCTGCACT  
TGATCGTAAGAAGTTTATAAGGAACATATCCATTTGTTGTAATAGGGTCATCACTTAGAACTCGAAA  
CTCTAAGTGGTAATACTGTCTTTCCAAGCTTACCTGTATCTTCAATGAAATTGGAATCTTCGATAGGG  
GAC  
+  
FFFFFFFFFFFFFFFFFFFFFFFF:FFFF:FFFFFFFFFFFF:FFFFFFFFFFFF:FFFFFFFFFFFFFFFFFFFF  
FFFFFF,FFFFFFFFFFFFFFFFFFFFFFFFFFFFFFFF,FFFFFFFFFFFFFFFFFFFF:FFFFFFFFFFFF  
FFF  
@A00721:190:HGJW7DSXY:4:1553:16324:6621\_2:N:0:TCTGCAAG+GCTGCACT  
TAAAGGAAGATCTGTTATCGACGTTTATCGTTTACGAAGTATCACTCCACCGGTGAATGTTTAAAGA  
ATACTATAAATAGAATAGCTATTACTACTAATGGCGTTGGCCGAGTGG  
+  
FFFFFFFFFFFFFFFFFFFFFFFFFFFFFFFFFFFFFFFF:FFFFFFFFFFFFFFFFFFFF:FFFFFFFFFFFF  
FF:FFFF:FF::,FF:FF,FFFFFFFFFFFF:FFFF:FFFF,,FFFF  
@A00721:190:HGJW7DSXY:4:1266:26648:31767\_1:N:0:TCTGCAAG+GCTGCACT  
TTTAGGTGGTCTTTATTCTATTATTGATTTTTATGAGATTGATACGTTAACAGAAGATGATGTTAGAG  
TAGAATTCCTGAAGAGTCCTTCCGTAACCAACTTCTTGACAATTTCTTCAATCCTTCGATAATAGTT  
AAA  
+  
FFFFFFFFFFFFFFFFFFFFFFFF,FFFFFFFFFFFFFFFFFFFFFFFFFFFFFFFFFFFF:FFFFFFFFFFFF  
FFFFFFFFFFFFFFFFFFFFFFFFFFFFFFFFFFFFFFFF:F:FFFFFFFFFFFFFFFFFFFFFFFFFFFF  
FFF  
@A00721:190:HGJW7DSXY:4:1225:24849:22670\_1:N:0:TCTGCAAG+GCTGCACT  
CCGATAAGGGTCACTAGTCTTACACAATTAAGAAATAATCCTACATTGACTGATTATCTAAAGATTGA  
AGGAAAATTTTATCCTCGTTTAACTTACTTAGACTTTCTACGATACAAATGATAACTTCTAATTTAC  
GTT  
+  
F,FFF:FFFFFF,FFFFFFFF:FFFFFFFFFFFFFFFFFFFF,FFF,FFFF:FFFFFFFF:FFF,FFFFFF  
FFF:FFF:FFFFFFFFFFFFFFFFFFFFFFFF,FFFFFFFFFFFF:FFFF:FFFFFFFFFFFFFFFFFFFF  
FFF  
@A00721:190:HGJW7DSXY:4:1644:20103:34773\_2:N:0:TCTGCAAG+GCTGCACT  
CAAAGGGATGCATGGTGTATCTCCTCAGGAGTCCCGGCATTTGATAATAATGACGAGACTTTCGTCA

$+$ 

@A00721:190:HGJW7DSXY:4:1573:16288:10504\_1:N:0:TCTGCAAG+GCTGCACT  
GTATTAACCTTATAAAGGTGAGGAGACCATTTTCTTGCTGAAATTTATAGAAGATTATTTTGACAGAAT  
CAATAAGAATCATCGATTCTCGATTCTAGAGCTTATCTAGGTACTCTCATTTACTATGTTGATTTAG  
TCT

+

@A00721:190:HGJW7DSXY:4:1678:28709:35055\_2:N:0:TCTGCAAG+GCTGCACT  
GATTTACAACGATATAGGAGTAATCTACGAGAAGATTCTAGAATTCTTAATTATAATATTCAACCTCA  
AAAGTTACGTGTTTACAGTAACGAGATCACACATTTTGAGAACTAACT

+

@A00721:190:HGJW7DSXY:4:2645:4300:1642\_1:N:0:TCTGCAAG+GCTGCACT  
CTGATCATTTTGACAATCTCTTCTTATAATAAATAAATAAATATTACTAATGGCAAATAGTGGA  
AGGCTCCAGTCAACACTAGTTCGAGTGCTGCTTTGGATTACGATGACGTGAGAATAGGTGAAGGGATA  
GTT

+

@A00721:190:HGJW7DSXY:4:1240:15067:30843\_1:N:0:TCTGCAAG+GCTGCACT  
GATCTATTAAGGCGGCGGCGACTAATCTTAAAGCTTCACCCAAAATGAAGGACACTTCGAAACTGAAT  
AATGATGCACTACAAACAAGTATCGCTAATCATCTGAAAAAGGCTCTAAAGGACACTATACAATATCC  
AGA

+

@A00721:190:HGJW7DSXY:4:2365:12472:28291\_2:N:0:TCTGCAAG+GCTGCACT  
TGCTTTTACCGATAACGATAAATTCGTCATCAAATATAAAGAAAAGGACTATGAAATAAAAGATTTGG  
TGCTTAGGGATATAATGAATTCAGCACCATTTTTGGTCAAGTCAATC

+

@A00721:190:HGJW7DSXY:4:1507:28510:17080\_2:N:0:TCTGCAAG+GCTGCACT  
TCTTAGAGGATATTCGCCATTGTGGTACGAATTGGTCCAACATTTACCACCAATTCTTTTGATACAA  
CTCTAGCCTTCAAGTGGGGTATGCCTGCGGAATACGCTTGCTATTAC

+

@A00721:190:HGJW7DSXY:4:1235:1072:1188\_2:N:0:TCTGCAAG+GCTGCACT  
CGAACCCGTTGATGCTATGTCAGAAGAAGCTATTCAAGCTTGTCGTTTAAAGACTGCAGAGGCTGTCA  
AACAAGCCCAGACTCAAGGAGTCCAATCAAAGGTTTTTAATTTAGCTC

+

@A00721:190:HGJW7DSXY:4:2222:10267:24972\_2:N:0:TCTGCAAG+GCTGCACT  
TGGGTGATAAAAAATTATTTAGAGATCTTTTCTACTTACAAAGGACAATTCAGTTTCATTAATTCTACG

+

@A00721:190:HGJW7DSXY:4:2309:16387:35383\_1:N:0:TCTGCAAG+GCTGCACT  
GTAGTGAACGCGTTCTAGAACCAAGTACTTTCCGTCTGAAGAGTTTAGAGCTGCTATTGATTATGTA  
ACCGATAGGAGTTGTATAGTTGAAGATGTGGCTTTAGACGATAATCCTTTAAGGACTATGTTGACTGA  
CGA

+

@A00721:190:HGJW7DSXY:4:2353:19108:19366\_2:N:0:TCTGCAAG+GCTGCACT  
GATCGCCACTCCAAACACTATATACATTATAAAATATAAAAATAAGGGAGTCATAACTTTTGTTACCA  
AATTCTTGGCTTTCACGAAGTCTCTGATTTTATTAATCATTACTTTA

+

@A00721:190:HGJW7DSXY:4:1140:26838:23390\_2:N:0:TCTGCAAG+GCTGCACT  
TCATTTACTCTGTACTTGATCTACGTCGTTTAACTGTCGGAACAACCTTTACTTAGAATGACTCTATC  
TTTTCAGACACTTCTTATATTATTTACAATAGTTAATATCATATTAGT

+

@A00721:190:HGJW7DSXY:4:2422:30373:13479\_2:N:0:TCTGCAAG+GCTGCACT  
GCTTTTCTTAGCTAATAGATTAATAAAGGATGAGTACGAAAACCAACTCTTCGTTACGATACCTGAT  
GGTATAATAGATTTATTCTCTACCCCATCTCAACGAGGATAAAGCGA

+

@A00721:190:HGJW7DSXY:4:1208:16080:21480\_2:N:0:TCTGCAAG+GCTGCACT  
ACACGAAGAGATCATCCGCAAACGACTCGAAACCGAGACGCCGTAGATCAAAGTCCCTTCTAACTTTA  
GATTATGAATCCTGCCTTTACTCATTTTATAGCAGTTATTTATGTTGT

+

@A00721:190:HGJW7DSXY:4:1470:28022:17331\_1:N:0:TCTGCAAG+GCTGCACT  
TTTATAACCTTCTTATACTTTTGGGTATGTTTTGTGAAAAACATGAGATACCCAAGTCTATCGAAGAC  
ATTATCTCTTATGTACTTATTGTAACGATCATTCTTTCGAGTTTGTCACTTCTTATTCTTTTATTCTT  
TTA

+

@A00721:190:HGJW7DSXY:4:1219:32289:19022\_2:N:0:TCTGCAAG+GCTGCACT  
TTTATAATGATTTTCGATAGTGATTGTTATCAATTTAAATACATTACTGTTTCAAATCATCTTTACTC  
ACAGACTCCGAAAATGGTTTCAAATGAGGTCAAAGCTCTATTTATTAA

+

@A00721:190:HGJW7DSXY:4:1336:24722:18474\_1:N:0:TCTGCAAG+GCTGCACT  
ATCCGATTCTTCGAGGGTATCACTACCACTGATCTGCCGACTTTTGTCAAGGAAGTTCAATTCCTTCG  
ATGTTTATATTTTCTATAAGGGAAATAGCAATAATCAAATTCGACTAATTTTAGATCTTTATTTT  
AGA

+  
:FF,FFFF,FF,F,F:FFFF,,FF:,,:F,F:,FFF:,F,:FFFF,FF,,,FF:,FF:,,:F:FFF,FF:  
FF,,FFF:FFFFFF:FFF,F,F:FFFF:FFFF,:F,FF:F,:FF,:,,,:FFFF,F,FFFFFFF::  
FFF

@A00721:190:HGJW7DSXY:4:2201:2275:27320\_2:N:0:TCTGCAAG+GCTGCACT  
ATCACCTTGGTGTGATCTCCCGGAGGATCTTTTCAATAAGATGTATGATGATAATCTACTATTTTAA  
ATAGTGATATTCAAGCTATACTTGAATACTTTATCAAAGATTTGGCTT

+  
FFFFFF,FFFFFFFFFFFFFFFFFFFFFFFF,F:FFFFFFFFFFFFFFFFFFFFFFFFFFFFFFFF:FFF  
FFFFFFFFFFFF:FFF::FFFFFF:FFFFFFFF:FFFFFFFFFFFF

@A00721:190:HGJW7DSXY:4:1210:18765:1924\_1:N:0:TCTGCAAG+GCTGCACT  
CAAAAAGTTGGAAGAGGTCTATGATATTTATTTTACTTATACTTTAAATAGCACCGATTATAACTTGA  
CTGTTGATAATATTACAATAGCTCTTCTCAGAAGATTAGAGAAGTAACCTCGGTGAACACGTCGGTAG  
CAT

+  
FFFFFFFFFFFFFFFFFFFFFFFFFFFFFFFFFFFFFFFFFFFFFFFFFFFFFFFFFFFFFFFFFFFF  
FFFFFFFFFFFFFFFFFFFFFFFFFFFFFFFFFFFFFFFF:FFF:FFFFFFFFFFFFFFFFFFFFFFFFFFFF:F  
FFF

@A00721:190:HGJW7DSXY:4:1269:18439:7216\_1:N:0:TCTGCAAG+GCTGCACT  
AGAACTGAAAAAGATTCTTTTCGAAAAGAAACCTATAAGTTACAAACGATTCTTCGACTATATTAAAG  
AAATAAAAATACTTCAAGTACCTGAACCTTACATTTTAAATGGTATGGTATAATGTGTCTTACAAATA  
GAA

+  
FFFFFFFFFFFFFFFFFFFF:FFFFFFFFFFFFFFFFFFFFFFFFFFFFFFFFFFFFFFFF:FFF:FFF  
FFFFFFFFFFFFFFFFFFFF:FFFFFFFFFFFFFFFFFFFFFFFFFFFFFFFFFFFFFFFFFFFFFFFFFFFFF  
FFF

@A00721:190:HGJW7DSXY:4:1528:32904:25316\_2:N:0:TCTGCAAG+GCTGCACT  
TAATGAGAGTGTATTCCTTAATATTCTAGTAACCGCTATGTGGGCATTACTAGGATTTATCACACTCC  
TAAATTTGATAGCAATTTATGTTTTAAATGCTAGGAAAATTTAGAAA

+  
FFFFFFFFFFFFFFFFFFFF:FFFFFFFFFFFFFFFFFFFFFFFFFFFFFFFFFFFFFFFFFFFFFFFFFFFF  
FFF:FFFFFFFF:FFFFFFFFFFFF:FFFFFFFF,FF,FFFFFFFF

@A00721:190:HGJW7DSXY:4:1435:27480:10629\_1:N:0:TCTGCAAG+GCTGCACT  
AAGGAGTACTTAATTCAATAGCTTTAGTATTATTTACTATCGCCTTTATTGAAAATTGTATAAGAGTT  
AATTGCTTACACAAAAGTGACGCGCAAGGAATCTTAATTGATTGAAGCTAGGCGTTGGGGAGAATGA  
ACT

+  
FF:FFFFFFFFFFFF,FFF,FFFFFFFFFFFFFFFFFFFFFFFFFFFFFFFFFFFFFFFF:FFFFFFF  
FFFFFFFFFFFFFFFFFFFF:FF:FFFFFF:FFFFFFFFFFFFFFFFFFFFFFFFFFFFFFFFFFFFF  
FFF

@A00721:190:HGJW7DSXY:4:1255:1298:25379\_1:N:0:TCTGCAAG+GCTGCACT  
AACATACCATACTCCCCAAACATAACATACCATAACCTACCATGACCAATCATCGCTCCAACCTGGC  
ACGCCAGACGTAGGGTCAAACCTACTACCGCCGGTCGGCAGATCGGCACCACTGGTCTCTACGTTGAG  
GGA

+  
F:F:FFFFFFFFFFFFFFFF,F:F:,F,:FFFFFF:FFFFFF:FFFFFFFFFFFFFFFFFFFFFFFF  
FFFFFFFFFFFFFFFFFFFFFFFFFFFFFFFFFFFFFFFFFFFFFFFFFFFFFFFFFFFFFFFFFFFFF  
FFF

@A00721:190:HGJW7DSXY:4:1602:27832:31782\_1:N:0:TCTGCAAG+GCTGCACT  
CCTATCTCCTTCCCAAATCTAGATCTGCACAGAAGAAGGCTGAAGGTCGTTACCGGACGACCACTCAA  
AGGAAACGGGCTGTTGCCAGAGGAAAGCAGCGACCAACCGAGGTCGCTCGTAACATTGACGGCAGTCC  
CGT

+  
FF,FFFF:,,FFFF,FFFF:FFFFFFFFFFFFFFFF:FF::F,FFF:FFFFFF:FFFFFF,FFF:FF

FFFFF:FFFF:, :FFFF, FFFFFFFF::FF: FFFFFFFF: FFFFF, FF: FFF: FFFFFFFF:: FFFF  
FFF

@A00721:190:HGJW7DSXY:4:1260:26268:8813\_1:N:0:TCTGCAAG+GCTGCACT  
AACTGAGGCAGTACCTCAGTCAAAAGTCACATTCACCACTCCCATACCAATCAATGATGTGACTATAC  
AGTTTCGGCCATTTCAAGAGTGGTCAATACGTCGTGGGAGGTACTGAAGCCTTCCCCTCCGCTGGCAGC  
AAG

+  
FFFFFFFFFFFFFFFFFFFFFFFFFFFFFFFFFFFFFFFFFFFFFFFFFFFFFFFFFFFFFFFFFFFFFFFFFFFFFFFF  
FFFFFFFFFFFFFFFFFFFFFFFFFFFFFFFFFFFFFFFFFFFFFFFFFFFFFFFFFFFFFFFFFFFFFFFFFFFFFFFF  
FFF

@A00721:190:HGJW7DSXY:4:1120:24352:10473\_2:N:0:TCTGCAAG+GCTGCACT  
GCCAATCAATAGTTCTTCTGACCAGAATGAAAAGGGTTTACCAGGCTAGTCTCTAAGTCTACCAGGA  
AGAGGGGAAATGTCCCCAAAACCTGAGAAGAATAAAGGGAAAGGTCCAT

+  
FFFFFFFFFFFFFFFFFFFFFFFFFFFFFFFFFFFFFFFFFFFFFFFFFFFFFFFFFFFFFFFFFFFFFFFFFFFFFFFF  
FFFFFFFFFFFFFFFFFFFFFFFFFFFFFFFFFFFFFFFFFFFFFFFFFFFFFFFFFFFFFFFFFFFFFFFFFFFFFFFF

@A00721:190:HGJW7DSXY:4:1559:23529:12399\_2:N:0:TCTGCAAG+GCTGCACT  
GAAGGGGAAATTATCCCTAATTCTGAAGGAAGATCTCCACCATCTGGGGTTGGGAATAAGAAATCTG  
CACGGGCCAAAGAGGCCGCTGCTACGAAGTCGCTGAAGGCGGCTTGGG

+  
: FFFFFFFFFFFFFFFFFFFFFFFFFFFFFFFFFFFFFFFFFFFFFFFFFFFFFFFFFFFFFFFFFFFFFFFFFF: F: FF: FF, FFFFFFFFFF:  
FFFFFFFF: FFFF: FFFFFFFFFFFFFFFFFFFFFFFFFFFFFFFFFFFFFFFFFFFFFFFFFF: FFF

@A00721:190:HGJW7DSXY:4:1445:31015:26459\_2:N:0:TCTGCAAG+GCTGCACT  
TGTAAGTTGCGCCTGCCGACCCCATCTTTGAGACCAAGACTCTCTACAGTAGGTTCTGCTACTAT  
GAGCAAATCTGTTGAATTCGTCACTGAGGACGAAGGTGAGAGGACTTT

+  
FFFFFFFFFFFFFFFFFFFFFFFFFFFFFFFFFFFFFFFFFFFFFFFFFFFFFFFFFFFFFFFFFFFFFFFFFFFFFFFF:  
FFFFFFFF: FFFFFFFFFF: FFFFFFFFFF: FFFFFF: FFFFFFFF

@A00721:190:HGJW7DSXY:4:2509:23357:36683\_1:N:0:TCTGCAAG+GCTGCACT  
CAAACCTGAGAGCAGTCGCTGGGGAAGAGAATTGCGTGGGTTGAAGGCCGACGCTTCGAGCTTGAGTG  
TGACGAGGCCGCTGACGTTTTTGTCAACGGCGTTTGAGGATTTTATCCGCGCTTAACCTATGGGGCGA  
AGA

+  
FFF, FFFFFFFFFFFFFFFFFFFFFFFFFFFFFFFFFFFFFFFFFFFFFFFFFFFFFFFFFFFFFFFFFFFFFFFFFF  
FFFFFFFFFFFFFFFFFFFFFFFFFFFFFFFFFFFFFFFFFFFFFFFFFFFFFFFFFFFFFFFFFFFFFFFFFFFFFFFF  
FFF

@A00721:190:HGJW7DSXY:4:2511:22200:30358\_1:N:0:TCTGCAAG+GCTGCACT  
AGTCTTGAAGGACTTAGGTTGGCATATTTATGCCGACGATAATAAGCATGTCACCCTTAAGCACCGAG  
GTAAGCTCGGACTTACAAGAGAGAGTGTGAGAGAGTCGCTCTCACTATTTTGGCCAGAATGCGGGC  
TTT

+  
FFFFFFFFFFFFFFFFFFFFFFFFFFFFFFFFFFFFFFFFFFFFFFFFFFFFFFFFFFFFFFFFFFFFFFFFFFFFFFFF:  
FFFFFFFFFFFFFFFFFFFFFFFFFFFFFFFFFFFFFFFFFFFFFFFFFFFFFFFFFFFFFFFFFFFFFFFFFFFFFFFF:  
FFF

@A00721:190:HGJW7DSXY:4:2671:11496:25097\_2:N:0:TCTGCAAG+GCTGCACT  
ATTCAGTGGTTCTGGGAGGCTGCTTTCCTCCATAATTACAACCTCTCTTTAGAGAGCATTAGAAGGAA  
GTTGGGCAAATCCCACATATGGTAGACGTTGTCACTTTTCTTGAA

+  
FFFFFFFFFFFFFFFFFFFFFFFFFFFFFFFFFFFFFFFFFFFFFFFFFFFFFFFFFFFFFFFFFFFFFFFFFFFFFFFF  
FFFFFFFFFFFFFFFFFFFFFFFFFFFFFFFFFFFFFFFFFFFFFFFFFFFFFFFFFFFFFFFFFFFFFFFFFFFFFFFF

@A00721:190:HGJW7DSXY:4:1605:3450:28698\_1:N:0:TCTGCAAG+GCTGCACT  
CTCTTCCGATCTTTGGGATTTGATGTGAGAAGGTGGAAGGTGTCAAGGTCTTCTTTCATGCTGATC  
TTTCAGGACCTAATCACATCATGATTGATAGTTACGGCTCGTATCGAGTTGGAGGGAGGAAGTTCTCC  
GAA

+  
FFFFFFFFFFFFFFFFFFFFFFFFFFFFFFFFFFFFFFFFFFFFFFFFFFFFFFFFFFFFFFFFFFFFFFFF  
FFFFFFFFFFFFFF:FFFFFFFFFFFFFFFFFFFFFFFFFFFFFFFFFFFFFFFFFFFFFFFFFFFFFFFF  
FFF  
@A00721:190:HGJW7DSXY:4:1467:16206:8359\_2:N:0:TCTGCAAG+GCTGCACT  
TCAGAGAGGGGAGCTCTGAAAAGGAACTTCGTCAGAAGATGAGGAAGTCTAAGAGGAGGAGTTTGAG  
GAAGGCTCTAGAGAAGATCTCACCACTGGAGAAGGCAAGTGGAGAGT  
+  
:FFFF:FFFFFFFFFFFFFFFFFFFFFFFFFFFFFFFFFFFFFFFFFFFFFFFFFFFFFFFFFFFFFFFF  
FFFFFFFFFFFFFFFFFFFFFFFFFFFFFFFFFFFFFFFFFFFFFFFFFFFFFFFFFFFFFFFFFFFFFFFF  
@A00721:190:HGJW7DSXY:4:1353:31177:14058\_2:N:0:TCTGCAAG+GCTGCACT  
AAGAAGGATTATTTGAAGCAGGGTTACCACTTCCTAAGGTGGATGAGGGAGGTTGTTTCTTTGGAGT  
TTAGATAATCTTTTGAGAAGGGTTCATAGAGCCAGCAAGAGAAGCTT  
+  
FFFFFFFFFFFFFFFFFFFFFFFFFFFFFFFFFFFFFFFFFFFFFFFFFFFFFFFFFFFFFFFFFFFFFFFF  
FFFFFFFFFFFFFFFFFFFFFFFFFFFFFFFFFFFFFFFFFFFFFFFFFFFFFFFFFFFFFFFFFFFFFFFF  
@A00721:190:HGJW7DSXY:4:1554:31828:6386\_2:N:0:TCTGCAAG+GCTGCACT  
CCTTGAGAAGACAAGCCACATTAAGATATAATTTAGGTCAACTTGGGGTTTCGAATGTCATTAGTGCC  
TTACGATTGAAAGAGGTCCTTTTGAGTATCGACAGATCTTTCGATCTT  
+  
FFFFFFFFFFFFFFFFFFFFFFFFFFFFFFFFFFFFFFFFFFFFFFFFFFFFFFFFFFFFFFFFFFFFFFFF  
FFFFFFFFFFFFFFFFFFFFFFFFFFFFFFFFFFFFFFFFFFFFFFFFFFFFFFFFFFFFFFFFFFFFFFFF  
@A00721:190:HGJW7DSXY:4:1347:17137:5776\_2:N:0:TCTGCAAG+GCTGCACT  
GTGGCAGAATTTCGGTAACTTACCATATAGTTCCTTCCGGGACGTTGTGGGATTAACTTTGACTCAAC  
TACTCCGATCAGATCCGATGGTTTGATTGGTATGGACTACTCGACTT  
+  
:FFF:FFF:,FFF,FFFFFFFFFF,FF,FF:FFF,FF:,FF:,F,F::F,F:FF,::,FFF,FFFF  
FF,FFFFFFFF:FFFF:FFFFF:FFFFF:FF:,F,FFF,FFFF:  
@A00721:190:HGJW7DSXY:4:2142:27760:19006\_1:N:0:TCTGCAAG+GCTGCACT  
TAGGGTCATGGCAGATACTACCGATAAGGTGAAAAATATGCAGGTCAAAGATTCTGTAGCTCTGAGGG  
CGGTTGAGGGAGCCGTTTTGGCCGACTTTAACTATTCTAAGAGTCTTTATGATTCAAACCTATCGTT  
GTC  
+  
FFFFFF:FFFFFFFFFFFF:FFFFFF:FFFFFFFFFFFFFFFFFFFFFFFFFFFFFFFFFFFFFFFFFFFF  
FFFFFFFFFFFFFFFFFFFFFFFFFFFFFFFFFFFFFFFFFFFFFFFFFFFFFFFFFFFFFFFFFFFFFFFF  
FFF  
@A00721:190:HGJW7DSXY:4:2221:29559:13510\_1:N:0:TCTGCAAG+GCTGCACT  
TACAGCGGCTTATTGTCGCGCAGTTTCCAGAATTGCGGTTGAAGTTCACCCATTCTATCTTGAATGCT  
CACGCCGTCGAGCCATATCGAGACTATGTTATAATCACTTGTTAAAGTACAGATTTAGTGATTAGA  
TAT  
+  
FFFFFFFFFFFF,FFFFFFFFFFFFFFFFFFFFFFFFFFFFFFFFFFFFFFFFFFFFFFFFFFFFFFFFFFFF  
FFFFFFFFFFFFFFFFFFFFFFFFFFFFFFFFFFFFFFFFFFFFFFFFFFFFFFFFFFFFFFFFFFFFFFFF  
FFF  
@A00721:190:HGJW7DSXY:4:1515:19732:22733\_1:N:0:TCTGCAAG+GCTGCACT  
GGAGGCGATATTCGTTTTTCATATCCAAACTCCTTGAATGGAGTACATATTTGCAACCCTATTCTTGA  
TGTGAAAGATGCATCGAGGTATACGTCTAGGAACATTGATTGGGAACGTACCTACTCACGAGACGTCA  
TGA  
+  
FFFFFFFFFFFFFFFFFFFF:FFFFFFFFFFFFFFFFFFFFFFFFFFFFFFFFFFFFFFFFFFFFFFFFFFFF  
FFFFFFFFFFFFFFFFFFFFFFFFFFFFFFFFFFFFFFFFFFFFFFFFFFFFFFFFFFFFFFFFFFFFFFFF  
FFF  
@A00721:190:HGJW7DSXY:4:2168:12988:2472\_1:N:0:TCTGCAAG+GCTGCACT  
ATGTTTCGTTCTGTTACAAGAACGCTTTGGATTGTGACCATAAAGCCTCAGTTGCGATAGCTGTAGAG





@A00721:190:HGJW7DSXY:4:1339:10782:19194\_2:N:0:TCTGCAAG+GCTGCACT  
TCCTTCTTTTTGAATGTTGTAAAGAATTGGGTTGAGAAGTGTGCTTTACAAGGAGTTAGACTCTTCTT  
CAAGTTTTTTAGATCTTCTTGATAATCTTAAAGAAAAATTTTCGAATAA

+

FFFFFFFFFFFFFFFFFFFFFFFFFFFFFFFFFFFFFFFFFFFFFFFFFFFFFFFFFFFFFFFFFFFFFFFF  
FFFFFFFFFFFFFFFFFFFFFFFFFFFFFFFFFFFFFFFFFFFFFFFFFFFFFFFFFFFFFFFFFFFFFFFF

@A00721:190:HGJW7DSXY:4:2265:26006:24424\_2:N:0:TCTGCAAG+GCTGCACT  
CTGTACTTACATTCTTTACGCCAGATTCTTCATGGGGCGACGCTGTTTCTCTTGGTATTTCTGAAATA  
GTTTATCAGAGCGTCATTTTCCTTTGGGATCTTTCCTCTGTTAAGGGA

+

FFFFFFFFFFFFFFFFFFFFFFFFFFFFFFFFFFFFFFFFFFFFFFFFFFFFFFFFFFFFFFFFFFFFFFFF  
FFFFFFFFFFFFFFFFFFFFFFFFFFFFFFFFFFFFFFFFFFFFFFFFFFFFFFFFFFFFFFFFFFFFFFFF

@A00721:190:HGJW7DSXY:4:2566:13160:35086\_2:N:0:TCTGCAAG+GCTGCACT  
TTCTCACTCTTGACGAGAATTATAACTGTTTTCTCTACCCATAACTTCTTTTTCAAAAATGCGGATGG  
GTCTACTGAAGTTATCCTACAGAGTGCAGTCGTTTCAAACTTATCAC

+

,FF,FFF,:FFFFFFFF:FFFF:,FF,,,FF:FFFFFF:FFFF:F,FFFF:F::FFFFFF,,,F,FF,  
FFFFFFFF:,FF,:,,FF,F:FFF:FF:FF,F:,,FF,FFFF,,:F

@A00721:190:HGJW7DSXY:4:1151:3369:31250\_1:N:0:TCTGCAAG+GCTGCACT  
AATAATTGGTGATGAAAATACGTATGTCGGTGGGGTTCTCAAGGCTCTCATCGCCACTGGGATTCTAA  
GGGGTTCCATAAGATATTATCTGACATTGTGGTTCAATGATCAGGATTCTTCTTTTGGTCCTTACGTC  
TTA

+

FFFFFFFFFFFFFFFFFFFFFFFFFFFFFFFFFFFFFFFFFFFFFFFFFFFFFFFFFFFFFFFFFFFFFFFF  
FFFFFFFFFFFFFFFFFFFFFFFFFFFFFFFFFFFFFFFFFFFFFFFFFFFFFFFFFFFFFFFFFFFFFFFF  
FFF

@A00721:190:HGJW7DSXY:4:2472:22336:34820\_2:N:0:TCTGCAAG+GCTGCACT  
GTTCTTGTACGATTCTTAAAGAAGTTTATTAACCTTCAGAGTCTCTTGGAAGTCCAGGTAGCTAA  
TGTTCTTGCAATAGCCACAGACTTTCTGGGAAAAGAGACCTCTGTTGG

+

F,FFFFFFFFFFFFFFFFFFFFFFFFFFFFFFFFFFFFFFFFFFFFFFFFFFFFFFFFFFFFFFFFFFFF  
FFFFFFFFFFFFFFFFFFFFFFFFFFFFFFFFFFFFFFFFFFFFFFFFFFFFFFFFFFFFFFFFFFFFFFFF

@A00721:190:HGJW7DSXY:4:1533:29613:29356\_1:N:0:TCTGCAAG+GCTGCACT  
GAGAATTACTCAGATTCAATCTGGCATCACTGAACGTCTACAACGAGTTAGGGAGTGGCTAGGTTTTTA  
AAAGATCCTTGCACAAGCAATACCTTCCACTGAGTTCATCACCCAGAGTTTCGACGTCGCGGAAAAC  
GAT

+

FFFFFFFFFFFFFFFFFFFF,FFFFFF,FFFFFFFFFFFFFFFFFFFFFFFFFFFFFFFFFFFFFFFFFFFF  
F:FFFFFFFFFFFFFFFFFFFFFFFFFFFFFFFFFFFFFFFFFFFFFFFFFFFFFFFFFFFFFFFFFFFF  
FFF

@A00721:190:HGJW7DSXY:4:2149:7383:4131\_2:N:0:TCTGCAAG+GCTGCACT  
ACTGTTGAGAATCTTCTGATGCTGAATTTGAGGAAAATTTTCGGAAGTTTTTGGTATAAATCCTGA  
TGGCTCAGTACAGGGAGGAGGTAATAGTTATAAAACCTTCTTTTATCA

+

FFFFFFFFFFFFFFFFFFFFFFFFFFFFFFFFFFFFFFFFFFFFFFFFFFFFFFFFFFFFFFFFFFFFFFFF  
FFFFFFFFFFFFFFFFFFFFFFFFFFFFFFFFFFFFFFFFFFFFFFFFFFFFFFFFFFFFFFFFFFFFFFFF

@A00721:190:HGJW7DSXY:4:1142:29839:24017\_2:N:0:TCTGCAAG+GCTGCACT  
GGACAAAATCTGGGATCATAGGTATGTGTCACGCTACACTCGAAATATGGGCCCTCATAAGGAAGTAT  
AGTTGGCGTCTTGTCGTTGACGTCATTACAGTCTGGAAGTTAGATCAT

+

FFFFFFFFFFFFFFFFFFFFFFFFFFFFFFFFFFFFFFFFFFFFFFFFFFFFFFFFFFFFFFFFFFFFFFFF  
FFFFFFFFFFFFFFFFFFFFFFFFFFFFFFFFFFFFFFFFFFFFFFFFFFFFFFFFFFFFFFFFFFFFFFFF

@A00721:190:HGJW7DSXY:4:1430:26142:35243\_2:N:0:TCTGCAAG+GCTGCACT  
CGAGAGTTGTGATCTAGTTCTAAATTTAGGTCGACGACTTTAGCAACTTTAGATAAATTCTTTCCGG

$+$ 

@A00721:190:HGJW7DSXY:4:1534:15293:16454\_2:N:0:TCTGCAAG+GCTGCACT  
TATTAGTTTCATGAAGTTCTTACACTTCTCGCGACTAATGTCAGCTTCACTACAAAGGCGTTACGTAAA  
GTAGTTTTTACGCTTTATCTTAAAGCATTACCACCAAATTTAGCACTT

+

@A00721:190:HGJW7DSXY:4:2103:28899:12524\_1:N:0:TCTGCAAG+GCTGCACT  
CTCGCCATATCAGATTAGAGACATGCCAGTTAGAGTTCTTCTAACCAGGACTGATGGTGAGATTCTTT  
TACCTTTTGGAGGTCCAGGAACCTTTACTCCTAGTGTCTTTTCTAGAGTCCAAGGACGTTTCCGTCGG  
AGG

+

@A00721:190:HGJW7DSXY:4:1476:20916:19429\_2:N:0:TCTGCAAG+GCTGCACT  
GACCGCTCAATAACACTCTATTGAATCCCTTTCCACGATGAAAGCTCTTTATGAGGTGCTCCATGCA  
AATTTACAGTTCCTCTTTGGTGATATCGCCTCTGTCCTTTCTCCTTTA

+

@A00721:190:HGJW7DSXY:4:1408:26115:14653\_2:N:0:TCTGCAAG+GCTGCACT  
ACTTGGGTTTATCGGTTGTATTTTGATAAATTTGTTGGAATCGATAATGATACTGACGAAGTTCTAT  
TACCACCCTTGTCATTGATACAAACATTCTAGGTGATGCTTTCTTAGA

+

@A00721:190:HGJW7DSXY:4:1214:4698:13260\_2:N:0:TCTGCAAG+GCTGCACT  
TTACAATCTGTAGAGAGAGAGGTTAATCAGAATTTGAGTGATAACGATTTAGTACTGGGAAATGGTGG  
TAGTCAGTTTACTACTTTTCTTCCCTCCCTTTTTCGATTGGATTCTG

+

@A00721:190:HGJW7DSXY:4:1156:29794:10347\_2:N:0:TCTGCAAG+GCTGCACT  
TTGATAAGGTTTTCTTTATGGGACTCTTGTTTGTACTTATGAAGGAGGTATTACTTCGGAAGTTCT  
TAATGTAGGTCTCCTAGTACTTAAGGGTTTATGTTTCGGTTTCAGCTG

+

@A00721:190:HGJW7DSXY:4:1129:32606:26584\_2:N:0:TCTGCAAG+GCTGCACT  
TGTTTCACATTGCGTGATCACTTCCCGTGGACTTGGGAAGAGATTAAACATAAAATCCAGCGATTCTA  
TTATGTCGCTAAAGCCTGTCCAGTTGTCGATGATGTTTCGGGCTGTGGG

+

@A00721:190:HGJW7DSXY:4:2256:19452:9032\_2:N:0:TCTGCAAG+GCTGCACT  
AAACTTACGACGATGTTCTCGCTCGCATTTCAAGGATTACTAAGTCTGAGATCTGCCACTTCTAAT  
TTTAGGAAACGTCGCGAAAAGAAAGTTCATGAGGATGTCTTGGTCAAA

+

[illegible]

@A00721:190:HGJW7DSXY:4:1640:21251:29778\_2:N:0:TCTGCAAG+GCTGCACT  
GAACCTCTAATAGAGGATCCTGATGACATTATTTCAACGGATACCGATCTCAGTTCTACCACAGAAAC  
CGTCTCAGGAAGTGTCTCCACTGATTCGGAATTAGAGAAAGACGACCT

+

FFFFFFFF:FFFFFFFFF:FFFFFFFFFFFFFFFFFFFFFFFFFFFFFFFFFFFFFFFF:FFFFFFFFFFFFFFFFFFFFFFFF:FFFF  
FF:FFFFF:FFFFFFFFFFFFFFFFF:F:FFFFFFFF,FFFFF:FFFFF:F

@A00721:190:HGJW7DSXY:4:1276:17571:19398\_2:N:0:TCTGCAAG+GCTGCACT  
AGACCTCTGAATTTTCAGGGTGCCCTGATGAGGACGTTGAAAGGGATAATTTCAACTCTGAGACTTCT  
AAGAGTGTTTCAAAAGACCAGAAACGTAACAAGAAGAATAAAGGTAGG

+

FFFFFFFFFFFFFFFFFFFFFFFFFFFFFFFFFFFFFFFFFFFFFFFFFFFFFFFFFFFFFFFFFFFFFFFFFFFFFFFF  
FFFFF:FFFFFFFFFFFFFFFFFFFFFFFFFFFFFFFFFFFFFFFF:FFFFF:FFF

@A00721:190:HGJW7DSXY:4:1129:11785:8437\_2:N:0:TCTGCAAG+GCTGCACT  
AGCGAGCGGTTGAAGAGAAAAGTATGTTGCGGCTGATCGTACCCCAATTCCTGCTAGAAAGATC  
ACTCTCGGCGATACCACTGATCTTCCAGAGTTACGTAGTGGTCTTCT

+

FFFFFFFFFFFFFFFFFFFFFFFFFFFFFFFFFFFFFFFFFFFFFFFFFFFFFFFFFFFFFFFFFFFFFFFFFFFFFFFF  
FFFFFFFFFFFFFFFFFFFFFFFFFFFFFFFFFFFFFFFFFFFFFFFFFFFFFFFFFFFFFFFFFFFFFFFF,

@A00721:190:HGJW7DSXY:4:1154:3821:36730\_1:N:0:TCTGCAAG+GCTGCACT  
AAGTTTCTGCTAGTCGCGACGATAGTATTTATCGGAGTGATATTAACAAGTTAACTTCGAAGTACC  
ACTTACAAGAGTGTTGAAGTACCGCAACATGGATCAGTTTTCCAAAAGCTATTAATAGCAGTTGCGG  
GGC

+

FFFFF,FFFFFFFFFFFFFFFFFFFFFFFFFFFFFFFF,FFFFFFFFFFFFFFFFFFFFF::FFFFFFFFFFFFFFFFFFFF  
FFFFFFFFFFFFFFFFFFFFFFFFFFFFFFFFFFFFFFFFFFFFFFFFFFFFFFFFFFFFFFFFFFFFFFFF:FFFFFFFFFFFF  
FFF

@A00721:190:HGJW7DSXY:4:2165:15962:33113\_2:N:0:TCTGCAAG+GCTGCACT  
AAACTGAATCCACTCTCTTGGGATATAAATGAGTACATCTATAATAGAGTTTTGGAAGTGTGTAATGT  
CCTACGTACTGTTCAAGGTGTTTGGGCTTCTCTAAAGAACAGCAACTT

+

FFFF:FFFFFFFF:FFF:FF:FFFFFFFFFFFFFFFFFFFFFFFFFFFFFFFFFFFFFFFF:F:FFFF::FFFFFF:  
FFFFF,FFF::FFFFF:FFFFF,FFFFFFFFFFFFF:FFFFF:FF:

@A00721:190:HGJW7DSXY:4:2359:14633:15468\_2:N:0:TCTGCAAG+GCTGCACT  
AGACCTTTCTTGGGGAGTAAAGAGGGTTTGGAAATTACGGAACCTTCTCTGTTCTTCATGAAGATCT  
TCGAGTGTTTTATAGTGAGTTATTCTTGCGAAGGTTCAAGTCGATTGA

+

FFFFF:FFF:FFFFFFFFF::FFFFFFFFFFFFFFFFFFFFFFFF,FFFFFFFFFFFFFFFFFFFFFFFFFFFFF:  
FFFFFFFFFFFFFFFFFFFFFFFF:FFFFFFFFFFFFFFFFFFFFFFFF:FFF

@A00721:190:HGJW7DSXY:4:1148:14470:19132\_2:N:0:TCTGCAAG+GCTGCACT  
AATAAGAAGTTCTTCGCAGTTGAATCTCCACCAGGTGGAGGGAAGACCACTGAAGTATAGCGACTTT  
TGTCGAATTTTTCGCAAAAGGTCTTGAAGTACGTATTGTCACTGCTAA

+

FF:FFFFFFFF:FFF,FFFFF:FFFFFFFFFFFF:FFFFF,F:FFFFFFFFFFFF::FFFF,F:F,FFFF:FF  
::F,FFFF:FFFF,FFFF:FFFFFFFFFFFFFFFF:FFF,FFFFFFFF:F:F

@A00721:190:HGJW7DSXY:4:2626:31439:26099\_2:N:0:TCTGCAAG+GCTGCACT  
CGAGAAGAGATAGTACTAAAGTTTTGGCACTTCTAGTTCATCGCGGTATTTGTGAAATTAAGACAGA  
CGTGAAATTTATGATGAGTGATCGTATTAGAACAGCTGATTCTTATTG

+

FFFFFFFF:FFFFFFFFFFFFFFFFFFFFFFFFFFFFFFFFFFFFFFFFFFFFFFFFFFFFFFFFFFFFFFFFFFFFF:FFFFFFFFFFFFFFFFFFFF:FFF  
FFFFFFFFFFFFFFFF:FFF:FFFFFFFF:FFFFFFFFFFFFFFFFFFFFFFFF::FF

@A00721:190:HGJW7DSXY:4:1527:17969:2206\_2:N:0:TCTGCAAG+GCTGCACT  
CTGAGGTCAAACCTGTGGACGTTCTTTTCATCGACGAATTATTCATGATTCACGCTGGTCAGACCCTT  
TTTCTTACACATCTACTTAAGGCGGCTTATACCATAGGTTACGGTGAT

+

@A00721:190:HGJW7DSXY:4:1576:4679:27727\_1:N:0:TCTGCAAG+GCTGCACT  
GACGTGTGCTCTTCCGATCTCCAAGTCGAACTACTTCAACATCAACGACATCATTCTTGATGAGTG  
TCGTTCTTATCGAAGTCTCAGTTATCGCTGCCCGCCGACGTTTGTGCGAACTCTCAGAGTTTACG  
GCA

@A00721:190:HGJW7DSXY:4:1201:9010:16219\_2:N:0:TCTGCAAG+GCTGCACT  
CTATGGAAATTAGACCTATCAGATGTCTTGACGACTTCGAATTTGAGGACGGAGTTAAATATATTACT  
TTCACCTCAAGGTGAAAAGTTTGAAATTAACAAAGTCCTTGGTAAGAGT

@A00721:190:HGJW7DSXY:4:2336:23032:29888\_1:N:0:TCTGCAAG+GCTGCACT  
GTTCAAGGTAATACTTACCAGCACGTTGCGTGGTTAGAAATTAACCTCAAGATGACCCTGTTTTTGC  
ATCACAAACACATATTACCGTTGCTCTATCACGACACGTTGAATCTTTACGATACTTTGTTATCAATG  
TAA

@A00721:190:HGJW7DSXY:4:2631:1687:30154\_2:N:0:TCTGCAAG+GCTGCACT  
TAAGGAAGTGTACGTTTAGCACGGGAGGTTGCAGATTCAACCCCTTATATCGAGGCTATCGAGGACG  
ATGAGTATCTTGAAGTTGTTGACGACAAGCCTCAAGAGGGTAGAGGAC

@A00721:190:HGJW7DSXY:4:2131:12807:18411\_2:N:0:TCTGCAAG+GCTGCACT  
GGTTATTCCTGGAACCACTTAACGTCACCTCGGTAATCTTTCAGCCGAATTAAGTACTAATGAGTTCA  
AGTCGGTTGTCGATCGAATTAAGATCAAGGCTAATACATTTATAGGTA

@A00721:190:HGJW7DSXY:4:2327:1805:1673\_2:N:0:TCTGCAAG+GCTGCACT  
GCCGCGTAGTCAGCGCGTTTAGCTGTATCATCAGTCAGAGTATACCCGATAGGGTACCGAGTCTCCAA  
GAGAATATTTATTCTTATGAGGCTCGAAACTTCAACGTTTTTCACAACG

@A00721:190:HGJW7DSXY:4:2276:10004:12461\_2:N:0:TCTGCAAG+GCTGCACT  
TCGCACCCGAAATTTTGGGCAGAATGCTCTTAACGCGGTTCTTGAACGGTGTGTTTGATCAGTCTAAG  
TTGGATAAAGTTATAGGAGACTCAGTTAACCTGAGAGCTCCTCAATTG

@A00721:190:HGJW7DSXY:4:2304:10836:34256\_2:N:0:TCTGCAAG+GCTGCACT  
AATAGGGACGCTAGTATACTTCGTAAAGTCGACAGCGAAATGGTCAATATTGATAATTGGACCGACTA  
TATGACCTATTTTAAGCTCATGGTGAAAAGGGAAGCTAAGGTTAACT

```
FFFFFFFFFFFFFF,FFFFFFFFFFFFFFFFFFFFFFFFFFFFF:FFFF:FFFF:FFFFFFFFFFFFFFFFFF:FF  
FFFFFFFFFFFFFFFFFFFFFFFFFFFFFFFFF,F::F:FFFFFFFFFFFFFF
```

@A00721:190:HGJW7DSXY:4:1135:12997:9533\_2:N:0:TCTGCAAG+GCTGCACT  
CCTATCTTTAAGGTTCTTGTGAGGAGAGTCAAACAGTGTCTTTTACCCAACATTTTTATGTATACAGA  
GATGACCAGTGACGATTTCTCCCGAAGCTCTTCTCTCTTAGGAGG

+

FFFFFFFFFFFFFFFFFFFFFFFFFFFFFFFFFFFFFFFFFFFFFFFFFFFFFFFFFFFFFFFFFFFFFFFF  
FFFFFFFFFFFFFFFFFFFFFFFFFFFFFFFFFFFFFFFFFFFFFFFFFFFFFFFFFFFFFFFF

@A00721:190:HGJW7DSXY:4:1566:4526:18662\_2:N:0:TCTGCAAG+GCTGCACT  
TTTCGAAGTTTGACAAATCTCAAGATTTCTTTGTAAAGCCTATGAGATAAAGATGTATTCTTATTTA  
GGCTTCGATGCTGAATTTCTTGAACCTTTGGAGTGCCAGTGAATATTTT

+

FFFFFFFFFFFF:FFFFFFFFFFFFFFFFFFFFFFFFFFFFFFFFFFFFFFFFFFFFFFFFFFFFFFFF  
FFF:FFFFFFFFFFFFFFFFFFFFFFFFFFFFFFFFFFFFFFFFFFFFFFFFFFFFFFFF

@A00721:190:HGJW7DSXY:4:1619:2049:27837\_1:N:0:TCTGCAAG+GCTGCACT  
GAGTATCCATAACGATTTGTCAATTTACCACCTTGTCTCAACGACGAAGTGGAACGGCCAACACTTTCT  
TTGGTAATTGTATGATCACTTTGATGATTTTATCACTTTATTATGACCTTGGAAGTTTTCTGGCTGTG  
GTT

+

FF,FFF,FFFF,,FFFF:FFFF:,FF:FFF::FFFFF,FFFF:FFFFFFFF:FFF:FF:FFF,F  
FFF:FF:FFFFF:FFF::FFFFFFFFFFFFFFFFFFFFFFFFFFFFFFFFFFFFFFFF,FFFFFFFF:FFF  
,FF

@A00721:190:HGJW7DSXY:4:2601:1280:28103\_1:N:0:TCTGCAAG+GCTGCACT  
CCATTCTGTTTTCAAAGACTCCAATAACTGATCATTCTGATCATATGATTTTGGACAATGGTTTCGAA  
GCGAAATTTTTGAGGGATAAACCAGCGTACTTCTGCTCGCGATTTATTCTTTTTGTCAATGATTACAT  
CTA

+

F:FFFFFFFFFFFFFFFFFFFFFFFFFFFFFFFFFFFFFFFFFFFFFFFFFFFFFFFF::F:FFFFFFFF  
F:FFFFFFFFFFFFFFFFFFFFFFFFFFFFFFFFFFFFFFFFFFFFFFFFFFFFFFFFFFFFFFFFFFFFFFFF  
FFF

@A00721:190:HGJW7DSXY:4:2313:5538:2096\_1:N:0:TCTGCAAG+GCTGCACT  
CCTTACAAGATCATCGTTAAGTTAGGTAAACCCCTAACCGATGTTACTCTTGTAGGACTTTGGGAGAG  
ATTCGTTAGTTTTAAAGACTATACTAAATATCTCCACTACGAGTTGTTGTTTGGCGATTAGCTCTTG  
CGA

+

FFFFF::FFFFFFFFFFFF:F,FFFFFFFFFFFFFFFFFFFFFFFFFFFFFFFFFFFFFFFFFFFFFFFF  
FFFFFFFFFFFFFFFFFFFFFFFFFFFFFFFFFFFFFFFFFFFFFFFFFFFFFFFFFFFFFFFFFFFFFFFF  
FFF

@A00721:190:HGJW7DSXY:4:2244:31132:36808\_2:N:0:TCTGCAAG+GCTGCACT  
ATTGAGGGTCGTTATACCTATTCGGCTATCTGTGCTTTGAATTGTATAAGATCAAATTTTAAACGATT  
CCGAGAGGTTTATCCTGATGTGGAGGGAGTTCTTGAAGCATCCCGACC

+

FFFFFFFFF:FFFFFFFFFFFFFFFFFFFFFFFFFFFFFFFFFFFFFFFFFFFFFFFFFFFFFFFFFFFF  
FFFFFFFFFFFFFFFFFFFFFFFFFFFFFFFFFFFFFFFFFFFFFFFFFFFFFFFFFFFFFFFFFFFFFFFF  
FFF

@A00721:190:HGJW7DSXY:4:2365:28899:34945\_1:N:0:TCTGCAAG+GCTGCACT  
TGATGCGGTTTCATAAGATTATCAGTAATCCTGATTCTACTACGGATTATGGACCTTCCATCCTGTA  
CCTCTTCTGGAGAGACGTATCTCAAAGATCGACTTCGAGACAGGTGATATTGTTGAGCGAGAGCGACC  
AAG

+

FFFFF,:FF:FFFFFFFFFFFF:F,FF:FF,FFFFFFFFFFFFFFFFFFFFFFFFFFFFFFFFFFFFF,FFFF  
:FF::FFFFFFFFF,:FFF,FFF:FFF:F:FFF:F:FFFF,FFFF,  
:F:

@A00721:190:HGJW7DSXY:4:2378:31656:34115\_1:N:0:TCTGCAAG+GCTGCACT  
CGTGGCGCTTTATTATAAAAAGCTCCCTCCTCTCGCAAGTTTGATCTGATACTTATCACGAAAGGACT  
TGAGTCTTTTGATCAGTCTCTGACTTGACCATCTTTCATTTTAAATGACGATCATTAAGACTCTCTT  
CTT

[illegible]

FFFFFFFFFFFFFFFFFFFFFFFFFFFFFFFFFFFFFFFFFFFFFFFFFFFFFFFFFFFFFFFF:FFFFFFF  
FFF

@A00721:190:HGJW7DSXY:4:1257:23131:18724\_2:N:0:TCTGCAAG+GCTGCACT  
AGTGTATTATTCTGGTGGTGATGATAATCTTGGAGGTCGTGACGTTGATGAAGCTATAAGAGCGTT  
CTCATTACGGCGCACTTCTTTACCCGCCACCACACAACCTTTCAGTTTC

+

FFFFFFFFF:FFFFFFFFFFFFFFFFFFFFFFFFFFFFFFFFFFFFFFFFFFFFFFFFFFFFFFFF:FFFFFFF  
FFFFFFFFF:FFFFF:FFFFFFFFFFFFFFFFFFFFFFFFFFFFFFFF:FFF:FFFFFFF

@A00721:190:HGJW7DSXY:4:1247:2094:7373\_1:N:0:TCTGCAAG+GCTGCACT  
ACTGGAACCCCTCGTCAATACTTTTCAATAATATACGTCTTGAACCTCACTTATGACGATCTAGTGAA  
ATTAACGCGTCCTTTTCTGGAACGTAGTTTACTATTATGAACAAGGTTATCAAAGATAGTGGCATTCAAG

+

FFFFFFFFFFFFF:FFFFFFFFFFFFFFFFFFFFFFFFFFFFFFFFFFFFFFFFFFFFFFFFFFFFFFFF  
FFFFFFFFF:FF::FFFFFFFFFFFFFFFFFFFFFFFFFFFFFFFFFFFFFFFFFFFFFFFF:FFFF:FFFFFFFFFFFF  
FFF

@A00721:190:HGJW7DSXY:4:2476:15817:22936\_1:N:0:TCTGCAAG+GCTGCACT  
CCTGATTCCGGCCGGTGGTAGCTCATTTCTACCAGGGGCTATTACTCTTGCTGAAACAGCTATTAAAG  
CTGTTGAGCGGTAATTACACCTAAACGAGCTCGATCTGCCATCGCTGAAGGATGTGCACTCTTTTCT  
GCT

+

FFFFF,FF:,F,FFFFFFFFFFFF,FFFFFFF:FFFFFFF,FFFF:FFFFFFFFFFFF,FFFFFFFFFFFFF  
FFFFFFFFFFFFF:FFFF:FFF:,FFFF:FFF:F:FFF:FF:FFF:,:FFFFFFFF:F:FFF,FFFF  
F,F

@A00721:190:HGJW7DSXY:4:1358:24279:2268\_2:N:0:TCTGCAAG+GCTGCACT  
TCGATTGTATCAACAGTAACATTACTTCTAATAAAGGTCTCTATCAAGCTCGTATTATCGTCGCTGCT  
GGATCTGCGTTACCGTTGAAGGCTAACTCCAAGGTAATTATGAAGAC

+

FFFF:FFFFFFFFFFFFFFFFFFFFFFFFFFFFFFFFFFFFFFFFFFFFFFFFFFFFFFFFFFFFFFFF  
FFFFFFFFFFFFF:FFFFFFFFFFFFFFFFFFFFFFFFFFFFFFFFFFFFFFFF

@A00721:190:HGJW7DSXY:4:2625:30951:8719\_1:N:0:TCTGCAAG+GCTGCACT  
CGTGTGCTCTTCCGATCTGGTGTCTTAATCGTAACATTAATAATTTCAATCTTCTTAAAAAGAAGAT  
AGAGAGTCATACTTTGGGCTATCGTTTCAGGTGCATGGGGTTGGATAGCCAATATTGAAGTGGACACCT  
CTG

+

FFFFFFF:FFFF:FFFFFFFFFFFFFFFFFFFFFFFFFFFFFFFFFFFFFFFFFFFFFFFFFFFFFFFF  
FFFFFFFFFFFFF:FFFFFFFFFFFFFFFFFFFFFFFFFFFFFFFFFFFFFFFFFFFFFFFFFFFFFFFF  
FFF

@A00721:190:HGJW7DSXY:4:1446:19849:12352\_1:N:0:TCTGCAAG+GCTGCACT  
AGATAACCAATAAGGAAGGAGCTTATACTATGGTTGAATCAACTAAGCATACTACTTTTGCTTTGATT  
ACTCTACCGCCTTACAAGTCTAAGGTTAAAGAGTCGATTAAACAAGTTGTACTTATCAATGATTTTAT  
CGC

+

FFFFF:FFFFF::FFFFFFFFFFFFFFFFFFFFFFFFFFFFFFFFFFFFFFFFFFFFFFFFFFFFFFFF,FFFFFFFFF  
FFFFFFFFFFFFFFFFFFFFFFFFFFFFFFFFFFFFFFFFFFFFFFFFFFFFFFFFFFFFFFFF:FFFFFFFFFFFF  
FFF

@A00721:190:HGJW7DSXY:4:2364:12111:19304\_2:N:0:TCTGCAAG+GCTGCACT  
TTCTAACCCAAAGAGAATATCTAAAATATTTACAAAATCTTACCACTATCTACGAACCTAAAGTTCTG  
AAGACGTTGCTTGTGCTTCCTCCTTTAATGGCACTACCTCGGTACAA

+

FFFFFFFFFFFFFFFFF:FFFFF:FFFFFFFFFFFFFFFFFFFFFFFFFFFFFFFFFFFFFFFFFFFFFFFF:FFFFFFF  
FFFFFFFFF::FFFFFFFFFFFFFFFFFFFFFFFFFFFFFFFFFFFFFFFFFFFFFFFF

@A00721:190:HGJW7DSXY:4:2638:4264:8563\_2:N:0:TCTGCAAG+GCTGCACT  
GAAGGCGACCTGTTCCGAGTTTTTACGGGATCCGAATGTTCTGTCTATATTAGGTGAAGCGAAATA

CGATTTCGAACGTCAACGTTACCGAGTTTCGTTTCGTACCTTGATGA

```
FFFFFFFFFFFFFFFFFFFFFFFFFFFFFFFFFFFFFFFFFFFFFFFFFFFFF:FFFFFFFFFFFFFFFFFFFFFFF  
FFFFFFFFFFFFFFFFFFFFFFFFFFFFFFFFFFFFFFFFFFFFFFFFFFFFF
```

+

```

FFFFFFFFFFFFFFFFFFFFFFFF:FFFFFFFFFFFFFFFFFFFFFFFFFFFFFFFF:FFFFFFFF
FFFFFFFFFFFFFFFFFFFFFFFFFFFFFFFFFFFFFFFFFFFFFFFFFFFFFFFF

```

+

```
F:FFFFFFFFFFFFFFFFFFFFFFFFFFFFFFFFFFFFFFFFFFFFFFFFFFFFFFFFFFFFF
::FFFFFFFFFFFFFFFFFFFFFFFFFFFFFFFFFFFFFFFFFFFFFFFFFFFFFF
```

 $+$ 

```
FFFF:FFFFFFFFFFFFFFFF:FFFFFFFFFFFFFFFFFFFFFFFFFFFFFFFFFFFFF:
FFFFFF:FFFFFFFFFFFFFFFFFFFFFFFFFFFFFFFFFFFFFFFFFFFFFFFFFFFFF
FFF
```

+

```
FF,:FFFFF:FFFFFFFFFFFFFFFFFFFFFFFFFFFFFFFFFFFFFFFFFFFFFFFFFFFFFFFFFFFF
F:FFFFFFFFFFFFFFFFFFFFF:FFFFFFFFF:FFFFFFFFFFFFFFFFFFFFF
```

+

```

FFFFFFFFFFFFFFFFFFFFFFFFFFFFFFFFFFFFFFFFFFFFFFFFFFFFFFFFFFFFFFFFFFFFFFFF
FF:FFFF:F:FFFFFFFF:FFFFFFFFFF,FFFFFFFFFFFFFFFF:FF:FFFF::FFFF,FFFFFFFF
FFF

```

+

[illegible]

+

[illegible]





ACCGATAGGAGTTGTATAGTTGAAGATGTGGCTTTAGACGATAATCCTTTAAGGACTATGTTGACTGACGA

@A00721:190:HGJW7DSXY:4:2453:30716:14544\_2:N:0:TCTGCAAG+GCTGCACT  
GATCGCCACTCCAAACACTATATACATTATAAAATATAAAAATAAGGGAGTCATAACTTTTGTTACCA  
AATTCTTGCTTTCAACGAAGTCTCTGATTTTATTAATCATTACTTTA

@A00721:190:HGJW7DSXY:4:1140:27118:22529\_2:N:0:TCTGCAAG+GCTGCACT  
TCATTTACTCTGTACTTGATCTACGTCGTTTAACTGTCGGAACAACCTTTACTTAGAATGACTCTATC  
TTTTCAGACACTTCTTATATTATTTACAATAGTTAATATCATATTAGT

@A00721:190:HGJW7DSXY:4:1177:10447:4053\_2:N:0:TCTGCAAG+GCTGCACT  
TTTTCTTAGCTAATAGATTAATAAAGGATGAGTACGAAAACCACTCTTCGTTACGAGACCTGATGGT  
AGAATAGATTTAGTCTCTACACCCATCTCAACGAGGATAAAGCGAGTT

@A00721:190:HGJW7DSXY:4:1221:1443:20901\_2:N:0:TCTGCAAG+GCTGCACT  
ACACGAAGAGATCATCCGCAAACGACTCGAAACCGAGACGCCGTAGATCAAAGTCCCTTCTAACTTTA  
GATTATGAATCCTGCCTTTACTCATTTCATAGCAGTTATTGATGTTGT

@A00721:190:HGJW7DSXY:4:1567:27163:19789\_1:N:0:TCTGCAAG+GCTGCACT  
TTTATAACCTTCTTATACTTTTGGGTATGTTTTGTGAAAAACATGAGATACCCAAGTCTATCGAAGAC  
ATTATCTCTTATGTACTTATTGTAACGATCATTCTTTCGAGTTTGTCACTTCTTATTCTTTTATTCTCT  
TTA

F:F  
@A00721:190:HGJW7DSXY:4:1272:23249:36213\_2:N:0:TCTGCAAG+GCTGCACT  
TTTATAATGCTTTTCGATAGTGATTGTTATCAATTTAAATACATTACTGTTTCAAATCATCTTTACTC

```
:FFFFFFFFFFFFFF,FFFFFFFFFFFFFFFFFFFF:FFFFFFF:FFFF:FFF
@A00721:190:HGJW7DSXY:4:1318:4634:25708_1:N:0:TCTGCAAG+GCTGCACT
CACTACCACTGATCTGCCGACTTTAGTCAAGGAACCTCAATTCCTTCGATGTTTATATTTTCTATAA
GGGAAATATCAATAATCAAATTTGACAAATTTTGAACTTTATTTCAGAACTCTCTCCGATCACCT
```

```
FFFFFFFFFFFFFFFFFFFFFFFFFFFFFFFFFFFFFFFF:FFFFFFFFFFFFFFFFFFFFFFFFFFFFFFFF:F:FFF  
FFF
```

$+$ 

@A00721:190:HGJW7DSXY:4:2471:32461:33066\_2:N:0:TCTGCAAG+GCTGCACT  
CTATGATATTTATTTTACTTATACTTTAAATAGCACCGATTATAACTTGACTGTTGATAATATTACAA  
TAGCTCTTTCTCAGAAGATTAGAGAAGTAACCGGTGAACACGTCGGTA

+

@A00721:190:HGJW7DSXY:4:1146:7265:1172\_1:N:0:TCTGCAAG+GCTGCACT  
ACTTTTACCGTTAGAACTGAAAAAGATTCTTTTCGAAAAGAAACCTATAAGTTACAAACGATTCTTCG  
ACTATATTAAAGAAATAAAAAATACCTCAAGTACCTGAACCTTACATTTTTAATGGTATGGTATAATGT  
GTC

+

@A00721:190:HGJW7DSXY:4:1130:30391:12195\_1:N:0:TCTGCAAG+GCTGCACT  
TTCACCTCTCGGTAATGAGAGTGTATTCCTTAATATTCTAGTAACCGCTATGTGGGCATTACTAGGATT  
TATCACACTCCTAAATTTGATAGCAATTTATGTTTTAAATGCTAGGAAAATTTTAGAAAACTCCATT  
GTA

+

@A00721:190:HGJW7DSXY:4:1438:11975:11929\_2:N:0:TCTGCAAG+GCTGCACT  
GTACTTAATTCAATAGCTTTAGTATTATTTACTATCGCCTTTATTGAAAATTGTATAAGAGTTAATTG  
CTTACACAAAAGTGACGCGCGAAGGAATCTTAATTGATTGAAGCTAGG

+

@A00721:190:HGJW7DSXY:4:1634:14100:26068\_1:N:0:TCTGCAAG+GCTGCACT  
AACATACCATACTCCCCAACATAACATACCATAACCTACCATGACCAATCATCGCTCCAAGTGGC  
ACGCCAGACGTAGGGTCAAACCTACTACCGCCGGTCTGGCAGATCGGCACCACTGGTCTCTACGTTGAG  
GGA

+

@A00721:190:HGJW7DSXY:4:1133:5095:17394\_2:N:0:TCTGCAAG+GCTGCACT  
TAACCTTCCCAAATCTAGATCTGCACAGAAGAAGGCTGAAGGTCGTTACCGGACGACCACTCAAAGGA  
AACGGGCTGTTGCCAGAGGAAAGCAGCGACCACCGAGGTCGCTCGTA

+

@A00721:190:HGJW7DSXY:4:1166:4363:16219\_1:N:0:TCTGCAAG+GCTGCACT  
AGTCCCGTCATCTCTGTGGGAAGTGAAGGAGTACCTCAGTCAAAAGTCACATTCACCACTCCCATGCC  
AATCAATGATGTGACTATACAGTTCGGCCATTTCAAGAGTGGTCAATACGTCGTGGGAGGTACTGAAG  
CCT

+

[illegible]

@A00721:190:HGJW7DSXY:4:1361:11089:12680\_1:N:0:TCTGCAAG+GCTGCACT  
CACGAAGAACTCCCAAGCCAATCAATAGTTCTTCTGACCAGAATGAAAAGGGTTTACCAGGGTAG  
TCTCTAAGTCTACCAGGAAGAGGGGAAATGTCCCCAAACTGAGAAGAATAAAGGGAAAGGTCCATCA  
GGA

+

FFFFFFFFFFFFFFFFFFFFFFFFFFFFFFFFFFFFFFFFFFFFFFFFFFFFFFFFFFFFFFFFFFFFFFFF  
FFFFFFFFFFFFFFFFFFFFFFFFFFFFFFFFFFFFFFFFFFFFFFFFFFFFFFFFFFFFFFFFFFFFFFFF  
FFF

@A00721:190:HGJW7DSXY:4:1154:21404:25222\_2:N:0:TCTGCAAG+GCTGCACT  
ATTACCCCTAATTCTGAAGGAAGATCTCCACCATCTGGGGTTGGGAATAAGAAATCTGCACGGGCCA  
AAGAGGCCGCTGCTACGAAGTCGCTGAAGGCGGCTTGGGTCATTAAGG

+

FFFFFFFFFFFFFFFFFFFFFFFFFFFFFFFFFFFFFFFFFFFFFFFFFFFFFFFFFFFFFFFFFFFFFFFF:  
FFFFFFFFFFFFFFFFFFFFFFFFFFFFFFFFFFFFFFFFFFFFFFFFFFFFFFFFFFFFFFFFFFFFFFFF,  
FFF,FF:FFF:FF

@A00721:190:HGJW7DSXY:4:1130:7808:27633\_1:N:0:TCTGCAAG+GCTGCACT  
AGTTGCGCCTGCCGACCCCATCTTTGAGACCAAGACTCTCTACAGTAGGTTCTGCTACTATGAGCA  
AATCTGTTGAATTCTGCTACTGAGGACGAAGGTGAGAGGACTTTTGGCTACTGGCGACAACTGAGAGC  
AGT

+

FFFFFFFFFFFFFFFFFFFF:F:F,FFFFFFFF:F::FF,FFFF:F:FF,:FFFF:FFFF:FFFF:FF:FFF  
F,F:FFFFFFFFFFFFFFFF:FFFFFFFFF:FFFFFFFF:FF:,FFFFFFFFFFFFFFFFFFFFFFFF:F:FF  
FFF

@A00721:190:HGJW7DSXY:4:1272:4634:13275\_2:N:0:TCTGCAAG+GCTGCACT  
AGAATTGCGTGGGTTGAAGGCCGACGCTTCGAGCTTGAGTGTGACGAGGCCGGTGACGTTTTTGTCAA  
CGGCGTTTGGAGGATTTTATCCGCGCTTAACATATGGGGCGAAGATCCC

+

FFFFFFFFFFFFFFFFFFFFFFFFFFFFFFFFFFFFFFFFFFFFFFFFFFFFFFFFFFFFFFFFFFFFFFFF:  
FFFFFFFFFFFFFFFFFFFFFFFFFFFFFFFFFFFFFFFFFFFFFFFFFFFFFFFFFFFFFFFFFFFFFFFF,  
FFFFFFFFF:FFFFF

@A00721:190:HGJW7DSXY:4:1367:8052:13589\_2:N:0:TCTGCAAG+GCTGCACT  
AAGGACTTAGGTTGGCATATTTATGCCGACGATAATAAGCATGTCACCCTTAAGCACCGAGGTAAGCT  
CGGGAATTACAAGAGAGAGTGTGAGAGAGTCGCTCTCACTATTTTTGC

+

:FFFFFFFFFFFFFFFFFFFFFFFFFFFFFFFFFFFFFFFFFFFFFFFFFFFFFFFFFFFFFFFFFFFFFFFF  
FFFFFFFFFFFFFFFFFFFFFFFFFFFFFFFFFFFFFFFFFFFFFFFFFFFFFFFFFFFFFFFFFFFFFFFF,  
F

@A00721:190:HGJW7DSXY:4:1261:4996:23453\_1:N:0:TCTGCAAG+GCTGCACT  
TTTCTGACTGATGAGGTAAACTCTTGCTCCTTCTGTGGGTGAGGGTTTTTGTATATTCACTGGTT  
CTGGGAGGCTGCTTTCCTCCATAATTACAACCTCTCTTTAGAGAGCATTAGAAGGAAGTTGGGCAAT  
TCC

+

FFFFFFFFFFFFFFFFFFFF:FF,FFFFFFFFFFFFFFFFFFFFFFFFFFFFFFFFFFFFFFFF:FFFFFFF,  
FFFFFFFFFFFFFFFFFFFFFFFFFFFFFFFFFFFFFFFFFFFFFFFFFFFFFFFFFFFFFFFFFFFFFFFF  
FFF

@A00721:190:HGJW7DSXY:4:2306:27588:18082\_1:N:0:TCTGCAAG+GCTGCACT  
CACACTTTTCTTGAAAATTTTCTTTCTCCGTCATTGGGGATTTGATGTGAGAAGGTGGAAGGTG  
TCAAGGGTCTTCTTCATGCTGATCTTTCAGGACCTAATCATCATGATTGATAGTTACGGCTCGTAT  
CGA

+

FFFFFFFFFFFFFFFFFFFF:FFF:FFFFFF:FFFFFFFFFFFFFFFFFFFFFFFFFFFFFFFFFFFFFF  
FFFFFFFFFFFFFFFFFFFFFFFFFFFFFFFFFFFFFFFFFFFFFFFFFFFFFFFFFFFFFFFFFFFFFFFF:  
FFFFFFF,FFFFFFFFFFF

@A00721:190:HGJW7DSXY:4:2642:30499:24752\_2:N:0:TCTGCAAG+GCTGCACT  
AAGTTCTCCGAAATTAAGACGGGGGGATTAAGAGTCCAGCTGTAAGTGTCAATTCAGAGAGGGGAGC  
TCTGAAAAGGAACTTCGTCAGAAGATGAGGAAGTCTAAGAGGAGAGA

+

[illegible]

@A00721:190:HGJW7DSXY:4:2223:17219:14309\_1:N:0:TCTGCAAG+GCTGCACT  
GAATTATTGGACACGATGAAAAATGACATACCCGTTCTGACCTTGGTATCGTTATCCGTCATGGAGA  
TGATGCCGCATCACTTGATTACTATATGCCCAGGATTGGGTTATTCTCACAACAAAGATAAGATTT  
TAT

+

FFFFFFFFFFFFFFFFFFFFFFFFFFFFFFFFFFFFFFFFFFFFFFFFFFFFFFFFFFFFFFFFFFFFFFFF  
FFFFFFFFFFFFFFFFFFFFFFFFFFFFFFFFFFFFFFFFFFFFFFFFFFFFFFFFFFFFFFFFFFFFFFFF  
FFF

@A00721:190:HGJW7DSXY:4:1223:26024:29215\_1:N:0:TCTGCAAG+GCTGCACT  
TAAGGGCGGACAATTGTTCCATTGTGAACCTTGGGGACTAGATTGAGCATTAATGAGTTCGAATAA  
CTCGTAATAAATCTTTCTCTAGTGGACAATTCAGAATACCTATTTCCGTACCAAGAGCCACTGCCAAT  
CTC

+

FFFFFFFFFFFFFFFFFFFFFFFFFFFFFFFFFFFFFFFFFFFFFFFFFFFFFFFFFFFFFFFFFFFFFFFF  
FFFFFFFFFFFFFFFFFFFFFFFFFFFFFFFFFFFFFFFFFFFFFFFFFFFFFFFFFFFFFFFFFFFFFFFF  
FFF

@A00721:190:HGJW7DSXY:4:2454:17644:5556\_2:N:0:TCTGCAAG+GCTGCACT  
AGGTTTCGTTCTCAATAAAAAATTTTCTCAAGAGATTATGGTTGATAAAGTTTTCTTCATAAGGGCTA  
TTCAGTACGTCATGGGGATCACTTCTTCGGTCAATGACAAAACCTTCG

+

FFFFF:FFFFFFFFFFFFFFF:F:FFFF,FF:FF:FFF::FFF:FF:F,,FF,F:F:FF,,,F:F,:FFF  
:FFFFFFFF:F,,:F:FFFFFFFF::F:FFFFFFFF:FF:FFFF:F

@A00721:190:HGJW7DSXY:4:1406:29143:18051\_2:N:0:TCTGCAAG+GCTGCACT  
CTTCGTAACAACAGTGCAGGATTGTCATCTCGGGGAAAGTGATTCACCAAGATGTTCATATAGATAC  
GAGATACCTAGAGAAGGTCGCAGCGATCTTACTCGTTATCGGAGCTAA

+

FFFFFFFFFFFFFFFFFFFFFFFFFFFFFFFFFFFFFFFFFFFFFFFFFFFFFFFFFFFFFFFFFFFFFFF:FFFFFFFFFFFFFFFFFFFF  
FFFFFFFFFFFFFFFFFFFFFFFFFFFFFFFFFFFFFFFFFFFFFFFFFFFFFFFFFFFFFFFFFFFF

@A00721:190:HGJW7DSXY:4:2432:7166:5040\_2:N:0:TCTGCAAG+GCTGCACT  
TACACGTTATGCTCGCAAACTTAACGTTAGTACCGGAGGTGATCTCTCTGCTTCTGCGTTACTGAGAG  
AAAAGATTACAGGACGCCTACGGTGACTTTATGGACAAGATGCAAGTTC

+

FFFFFFFFFFFFFFFFFFFFFFFFFFFFFFFFFFFFFFFFFFFFFFFFFFFFFFFFFFFFFFFFFFFFFFFF  
FFFFFFFFFFFFFFFFFFFFFFFFFFFFFFFFFFFFFFFFFFFFFFFFFFFFFFFFFFFFFFFFFFFF

@A00721:190:HGJW7DSXY:4:2550:12924:6402\_2:N:0:TCTGCAAG+GCTGCACT  
TTTAGGTTTAGTAGGTGATCTTGACGTCGATTCTTTGTATAGGGAGTGAGAGAAGACAACGAATCTTG  
AACTACGGTCCTTATCAAAGAAAATGGTGAACCGGTCTCTAAATCTT

+

FFFFFFFFFFFFFFFFFFFFFFF:FFFFFFFFFFFFFFFFFFFFFFFFFFFFFFFFFFFFFFFFFFFFFFFF  
FF:FFFFFFFFFFFFFFFFFFFFFFFFFFFFFFFFFFFFFFFF:FFFFFFFF:FFFFF

@A00721:190:HGJW7DSXY:4:1360:2564:11099\_1:N:0:TCTGCAAG+GCTGCACT  
GATTGAAGAACACGTCAAGAAGTCGCTCGGCGTTGTTCTTGAAAACCAAGTTAAGAAGGAGGCTGATC  
ATGGAGTCTTTGTACCTTCTGTCAAACCTTCGAGGTTACGCTACGAGAGGTGATCCCGGATGTGGATTG  
AAG

+

FFFFFFFFFFFFFFFFFFFFFFFFFFFFFFFFFFFFFFFFFFFFFFFFFFFFFFFFFFFFFFFFFFFFFFF:F:FF::FFFF:F,FF:F  
FFFFFFFFFFFFFFFFFFFFFFFFFFFFFFFFFFFFFFFFFFFFFFFFFFFFFFFFFFFFFFFFFFFFFFFF  
FFF

@A00721:190:HGJW7DSXY:4:1653:10737:21057\_2:N:0:TCTGCAAG+GCTGCACT  
TCCTTCTTTTTGAATGTTGTAAAGAATTGGGTTGAGAAGTGCTTTACAAGGAGTTAGACTCTTCTT  
CAAGTTTTTAGATCTTCTTGATAATCTTAAAGAAAAATTTTCAAATAA

+

FFFFFFFFFFFFFFF:FFFFFFFFF,FFFFFFFFFFFFFFFFFFFFFFFFFFFFFFFFFFFFFFFFFFFFF  
FFFFFFFFFFFFFFFFF:FFFFFFFFFFFFFFFFFFFFF:FFFFFFFFF,FFFFF



```
:FFFFFFFFFFFFFFFFFFFFFFFFFFFFFFFFFFFFFFFFFFFFFFFFFFFFFFFFFFFFFFFFF:FFFFFFFFF
FFFFFFFFFFFFFFFFFFFFFFFFFFFFFFFFFFFFFFFFFFFFFFFFFFFFFFFFFFFFFFFFF
@A00721:190:HGJW7DSXY:4:2613:22824:18818_2:N:0:TCTGCAAG+GCTGCACT
CTTTATCTTAAAGCATTACCACCAAATTTAGCACTTTTTGAATATGACAGAAGCTCGCCATATCAGAT
TAGAGACATGCCAGTTAGAGTTCTTCTAACCAAGGACTGATGGTGAGAT
+
:FFFFFFFFFFFFFFFFFFFFFFFFFFFFFFFFFFFFFFFFFFFFFFFFFFFFFFFFFFFFFFFFF:FFFFFFFFF
FFFFFFFFFFFFFFFFFFFFFFFFFFFFFFFFFFFFFFFFFFFFFFFFFFFFFFFFFFFFFFFFF
@A00721:190:HGJW7DSXY:4:2108:19714:3756_2:N:0:TCTGCAAG+GCTGCACT
GGAGGTCCAGAACCTTTACTCCTAGTGTCTTTTCTAGAGTCCAAGGACGTTTCCGTCGGAGGATGAC
AGGTGGGAGACCGCTCAATAACACTCTATTGAATCCCTTTTCCACGAT
+
FFFFFFFFFFFFFFFFFFFFFFFFFFFFFFFFFFFFFFFFFFFFFFFFFFFFFFFFFFFFFFFFF
FFFFFFFFFFFFFFFFFFFFFFFFFFFFFFFFFFFFFFFFFFFFFFFFFFFFFFFFFFFFFFFFF
@A00721:190:HGJW7DSXY:4:1576:18891:34867_1:N:0:TCTGCAAG+GCTGCACT
GATATCGCCTCTGTCTTTTCTCTTTAATCGTGAGGTTACGAGAGTTTCGTACTTGGGTTTATCGGTT
GTATTTTGATAAATTTGTTGGAATCGATAATGATACTGACGAAGGTTCTATTACCACCCTTGTCATTG
ATA
+
FFFFFFFFFFFFFFFFFFFFFFFFFFFFFFFFFFFFFFFFFFFFFFFFFFFFFFFFFFFFFFFFF
FFFFFFFFFFFFFFFFFFFFFFFFFFFFFFFFFFFFFFFFFFFFFFFFFFFFFFFFFFFFFFFFF
FFF
@A00721:190:HGJW7DSXY:4:1610:3323:14011_2:N:0:TCTGCAAG+GCTGCACT
TGATGCTTTCTTAGAGGCTCGTCTAGCCGCTGAGATTCTGCTTACCTATTTACAATCTGTAGAGAGAG
AGGTTAATCAGAATTTGAGTGATAACGATTTAGTACTGGGAAATGGTG
+
FFFFFFFFFFFFFFFFFFFFFFFFFFFFFFFFFFFFFFFFFFFFFFFFFFFFFFFFFFFFFFFFF:FFF
FFFFFFFFFFFFFFF,FFFFF:FFFFFFFF:FFFF,FFFFF,F:FFFF
@A00721:190:HGJW7DSXY:4:1141:10429:20149_1:N:0:TCTGCAAG+GCTGCACT
CCTTTTTCGATTGGATTGCACGGGTCTTCGTCTCACGACTAATTTGATAAGGTTTTTCTTTTATGGG
ACTCTTGTTTGTACTTATGAAGGAGGTATTACTTCGGAAGTTCTTAATGTAGGTCTCCTAGTACTTAA
GGG
+
FFFFFFFFFFFFFFFFFFFFFFFFFFFFFFFFFFFFFFFFFFFFFFFFFFFFFFFFFFFFFFFFF
FFFFFFFFFFFFFFFFFFFFFFFFFFFFFFFFFFFFFFFFFFFFFFFFFFFFFFFFFFFFFFFFF
FFF
@A00721:190:HGJW7DSXY:4:1370:1380:21668_2:N:0:TCTGCAAG+GCTGCACT
GTTTCAGCTGGATGGATCTTTTGATGGTATGTTTCACATTGCGTGATCACTTCCCGTGGACTTGGGAA
GAGATTAAACATAAAATCCAGCGATTCTATTATGTCGCTAAAGCCTGT
+
FFFFFFFFFFFFFFFFFFFFFFFFFFFFFFFFFFFFFFFFFFFFFFFFFFFFFFFFFFFFFFFFF:FFFFFFFFF
FFFFFFFFF:FFFFFFFFFFFFFFFFF:FFFFFFFFFFFFFFFFFFFFFFFFF
@A00721:190:HGJW7DSXY:4:1167:28320:34444_2:N:0:TCTGCAAG+GCTGCACT
GTTCCGGGCTGTGGGGATTAACCTCCCTCGTGAACTTACGACGATGTTCTCGCTCGCATTTCAACAGG
ATTACTAAGTCTGAGATCTGCCACTTCTAATTTTAGGAAACGTGCGCA
+
FFFFFFFFFFFFFFFFFFFFFFFFFFFFFFFFFFFFFFFFFFFFFFFFFFFFFFFFFFFFFFFFF,FFFFFFFFF:FFFFFFFFF:FFFFF
FFFFFFFFFFFFFFF:FFFF:FFFFFFFF:FFFFFFFFFFFFFFFFFFFFF
@A00721:190:HGJW7DSXY:4:1459:24415:11271_2:N:0:TCTGCAAG+GCTGCACT
ATGAGGATGTCTTGGTCGAAAAATATCGCCGGGAACCTCTAATAGAGGATCCTGATGACATTATTCA
ACGATACCGATCTCAGTTCTACCACAGAAACCGTCTCAGGAACGTGC
```



@A00721:190:HGJW7DSXY:4:1343:25690:22842\_1:N:0:TCTGCAAG+GCTGCACT  
GGAATTAGAGAAAGACGACCTTCTTGTGGGACTGAGACCTCTGAATTTTCAGGGTGCCCTGATGAGG  
ACGTTGAAACGGATAATTTCAACTCTGAGACTTCTAAGAGTGTTCAAAAGACCAGAAACGTAACAAG  
AAG

+

FFFFFFFFFFFFFFFFFFFFFFFFFFFFFFFFFFFFFFFFFFFFFFFFFFFFFFFFFFFFFFFFFFFFFFFF  
FFFFFFFFFFFFFFFFFFFFFFFFFFFFFFFFFFFFFFFFFFFFFFFFFFFFFFFFFFFFFFFFFFFFFFFF  
FFF

@A00721:190:HGJW7DSXY:4:1103:23231:6308\_2:N:0:TCTGCAAG+GCTGCACT  
GGAAGGGGAGAAAACAGAACAGCGAGCGTTGAAGAGAAAAGTATGATTGCGGCTGATCGTACC  
CCAATTCCTGCTAGAAAGATCACTCTCGGCGATACCACTGATCTTCCA

+

FFFFFFFFFFFFFFFFFFFF:FFFFFFFFFFFFFFFFFFFF:F:FFFFFFFFFFFFFFFF:FFFFFFFFFFFF  
FFFFFF:FFFFFFFFFFFFFFFFFFFFFFFFFFFFFFFFFFFFFFFF:FFFFFFF

@A00721:190:HGJW7DSXY:4:1308:21242:22905\_1:N:0:TCTGCAAG+GCTGCACT  
GGTCGTTCTTTTGGTGATTTTATCAAAGAGAAAGTTTCTGCTAGTCGCGACGATAGTATTTATCGGAG  
TGATATTAACAAGTTAACTTCGAAGTACCACCTACAAGAGTGTGAAGTACCGCAACATGGATCAG  
TTT

+

FFFFFFFFFFFFFFFFFFFFFFFFFFFFFFFFFFFFFFFFFFFFFFFFFFFFFFFFFFFFFFFFFFFFFFFF  
FFFFFFFFFFFFFFFFFFFFFFFFFFFFFFFFFFFFFFFFFFFFFFFFFFFFFFFFFFFFFFFFFFFFFFFF  
FFF

@A00721:190:HGJW7DSXY:4:2207:29306:29199\_2:N:0:TCTGCAAG+GCTGCACT  
AAACTGAATCCACTCTCTTGGGATATAAATGAGTACATCTATAATAGAGTTTGGAACTGTGTAATGT  
CCTACGTAAGTGTCAAGGTGTTTGGGCTTCTCTAAAGAACAGCAACTT

+

FFFFFFFFFFFFFFFFFFFFFFFFFFFFFFFFFFFFFFFFFFFFFFFFFFFFFFFFFFFFFFFFFFFFFFFF  
FFFFFFFFFFFFFFFFFFFFFFFFFFFFFFFFFFFFFFFFFFFFFFFF:FFFFFFFFFFFFF

@A00721:190:HGJW7DSXY:4:2376:11812:22733\_2:N:0:TCTGCAAG+GCTGCACT  
AGACCTTTCTTGGGGAGTAAAGAGGGTTTGAAGATTACGGAACCTTCTCTCGTTCTTCATGAAGATCT  
TCGAGTGTTTTATAGTGAGTTATTCTTGCGAAGGTTCAAGTCGATTGA

+

FFFFFFFFFFFFFFFFFFFFFFFFFFFFFFFFFFFFFFFFFFFFFFFFFFFFFFFFFFFFFFFFFFFFFFFF  
FFFFF:FFFFFF:FFFFFFFFFFFFFFFFFFFFFFFFFFFFFFFFFFFFFFFF:FFF

@A00721:190:HGJW7DSXY:4:1217:12879:26553\_2:N:0:TCTGCAAG+GCTGCACT  
AATAAGAAGTTCTTCGCAGTTGAATCTCCACCAGGTGGAGGGAAGACCACTGAACCTATAGCGACTTT  
TGTCGAATTTTCGCAAAAGGTCTTGAAGTACGTATTGTCACTGCTAA

+

FFFFFFFFFFFFFFFFFFFFFFFFFFFFFFFFFFFFFFFFFFFFFFFFFFFFFFFFFFFFFFFFFFFF,FFFFFF  
FFFFFFFFFFFFF:FFFFFFFFFFFFFFFFFFFFFFFFFFFF:FFFFFFFFFFFF

@A00721:190:HGJW7DSXY:4:1465:13214:24627\_2:N:0:TCTGCAAG+GCTGCACT  
TTGGCACTTCTAGTTTCATCGCGGTATTTGTGAAATTAAGACAGACGTGAAAGTTATGATGAGTGATCG  
TATTAGAACAGCTGATTCTTATTGCATGAACGTCGCTGAGGTCAAACC

+

FFFFFFFFFFFFFFFFFFFF:FFFFFFFFFFFFFFFFFFFFFFFFFFFFFFFFFFFFFFFF:FFFFFFFFFFFFFFFF:FFFF  
FFFFFFFFFFFFFFFFFFFFFFFFFFFF:FFFFFFFFFFFF:FFFFFFFFFFFF,FF

@A00721:190:HGJW7DSXY:4:1634:6253:1767\_2:N:0:TCTGCAAG+GCTGCACT  
TTTTCATCGACGAATTATTCATGATTCACGCTGGTCAGACCCTTTTCTTACACATCTACTTAAGGCG  
GCTTATACCATAGGTTACGGTGATTCCAATCAAATCGGATTCATCAAT

+

FFFFFFFFFFFFF:FFFFFFFFFFFFFFFFFFFFFFFFFFFFFFFFFFFFFFFFFFFFFFFFFFFFFFFF  
FFFFFFFFFFFFFFFFFFFFFFFFFFFFFFFFFFFFFFFF:F:FFFFFFFFFFFF

@A00721:190:HGJW7DSXY:4:1167:8323:22357\_2:N:0:TCTGCAAG+GCTGCACT  
TCCAAGTCGCAAACTACTTCAACATCAACGACATCATTCTTGATGAGTGTCGTTCTTATCGAAGTCTC

+

@A00721:190:HGJW7DSXY:4:1458:5285:9518\_2:N:0:TCTGCAAG+GCTGCACT

+

@A00721:190:HGJW7DSXY:4:2373:2510:8437\_1:N:0:TCTGCAAG+GCTGCACT

+

@A00721:190:HGJW7DSXY:4:2677:7319:5838 2:N:0:TCTGCAAG+GCTGCACT

+

@A00721:190:HGJW7DSXY:4:2358:3450:24126 2:N:0:TCTGCAAG+GCTGCACT

+

@A00721:190:HGJW7DSXY:4:2521:9625:14810\_2:N:0:TCTGCAAG+GCTGCACT

+

@A00721:190:HGJW7DSXY:4:2563:5394:12837\_2:N:0:TCTGCAAG+GCTGCACT

+

@A00721:190:HGJW7DSXY:4:2470:22742:15013 2:N:0:TCTGCAAG+GCTGCACT

+

@A00721:190:HGJW7DSXY:4:1236:14724:16125\_2:N:0:TCTGCAAG+GCTGCACT

+

,F,FF,,, :F,FF:FF::,FFFF,FF,FFFFFF:FF:,FFFFFF:,FFF

@A00721:190:HGJW7DSXY:4:2675:26494:20760\_2:N:0:TCTGCAAG+GCTGCACT  
TTTCGAAGTTTGACAAATCTCAAGATTTCTTTTGTAAGCCTATGAGATAAAGATGTATTCTTATTTA  
GGCTTCGATGCTGAATTTCTTGAACCTTTGGAGTGCCAGTGAATATTTT

+

FFFFFFFFFFFFFFFFFFFFFFFFFFFFFFFFFFFFFFFFFFFFFFFFFFFFFFFFFFFFFFFFFFFFFFFF  
FFFFFFFFFFFFFFFFFFFFFFFFFFFFFFFFFFFFFFFFFFFFFFFFFFFFFFFFFFFFFFFFFFFFFFFF  
@A00721:190:HGJW7DSXY:4:1662:31828:32189\_1:N:0:TCTGCAAG+GCTGCACT

GAGTATCCATAACGATTTGTCATTTACCACCTTTGCTCAACGACGAAGTGGAACGGCCAACACTTTCT  
TTGGTAATTGTATGATCACTTTGATGATTTTATCACTTTATTATGACCTTGAAAGTTTTCGGCTGTG  
GTT

+

FFFFFFFFFFFF:FFFFFFFFFFFFFFFFFFFFFFFFFFFFFFFFFFFFFFFFFFFFFFFFFFFFFFFF  
F,FFFFFFFFFFFFFFFFFFFFFFFFFFFFFFFFFFFFFFFFFFFFFFFFFFFFFFFFFFFFFFFFFFFF  
F,FFFFFFFFFFFFFFFFFFFFFFFFFFFFFFFFFFFFFFFFFFFFFFFFFFFFFFFFFFFFFFFFFFFF  
FFF

@A00721:190:HGJW7DSXY:4:2503:28610:22357\_1:N:0:TCTGCAAG+GCTGCACT  
CATTCTGTTTTCAAAGACTCCAATAACTGATCATTCTGATCATATGATTTTGACAATGGTTTCGAAG  
CGAAATTTTTGAGGGATAAACCAGCGTACTTCTGCTCGCGATTTATTCTTTTTGTCAATGATTACATC  
TAC

+

FFFFFFFFFFFFFFFFFFFFFFFFFFFFFFFFFFFFFFFFFFFFFFFFFFFFFFFFFFFFFFFFFFFFFFFF  
FFFFFFFFFFFFFFFFFFFFFFFFFFFFFFFFFFFFFFFFFFFFFFFFFFFFFFFFFFFFFFFFFFFFFFFF  
FFF

@A00721:190:HGJW7DSXY:4:2622:12454:19335\_1:N:0:TCTGCAAG+GCTGCACT  
CCTTACAAGATCATCGTTAAGTTAGGTAAACCCCTAACCGATGTTACTCTTGTAGGACTTTGGGAGAG  
ATTCGTTAGTTTTAAAGACTATACTAAATATCTCCACTACGAGTTGTTGTTTGGCGATTAGCTCTTG  
CGA

+

FFFFFFFFFFFFFFFFFFFFFFFFFFFFFFFFFFFFFFFFFFFFFFFFFFFFFFFFFFFFFFFFFFFFFFFF  
FFFFFFFFFFFFFFFFFFFFFFFFFFFFFFFFFFFFFFFFFFFFFFFFFFFFFFFFFFFFFFFFFFFFFFFF  
FFF

@A00721:190:HGJW7DSXY:4:2474:31430:21042\_2:N:0:TCTGCAAG+GCTGCACT  
ATTGAGGGTCGTTATACCTATTCGGCTATCTGTGCTTTGAATTGTATAAGATCAAATTTTAAACGATT  
CCGAGAGGTTTATCCTGATGTGGAGGGAGTTCTTGAAGCATCCCGACC

+

FFFFF:FFFFFFFFFFFFFFFFFFFFFFFFFFFFFFFFFFFFFFFFFFFFFFFFFFFFFFFFFFFFFFFF  
FFFFFFFFFFFFFFFFFFFFFFFFFFFFFFFFFFFFFFFFFFFFFFFFFFFFFFFFFFFFFFFFFFFFFFFF  
FF:FFFFFFFF,FFF:FFFFFF:

@A00721:190:HGJW7DSXY:4:1218:22950:26804\_2:N:0:TCTGCAAG+GCTGCACT  
GGTTTCATAAGATTATCAGTAATCCTGATTCTACTACGGATTATGGACCTTCCATCCTGTACCTCTT  
CTGGAGAGACGTATCTCAAAGATCGACTTCGAGACAGGTGATATTGTT

+

FFFFFFFFFFFFFFFFFFFFFFFFFFFFFFFFFFFFFFFFFFFFFFFFFFFFFFFFFFFFFFFFFFFFFFFF  
FFFF:FFFFFFFFFFFFFFFFFFFFFFFFFFFFFFFFFFFFFFFFFFFFFFFFFFFFFFFFFFFFFFFF

@A00721:190:HGJW7DSXY:4:1139:28212:3129\_1:N:0:TCTGCAAG+GCTGCACT  
ACCAAGATCTAAATTCGGTAACGGTGCGTGGCGCTTTATTTTAAAAAGCTCCCTCCTCTCGCAAGTTT  
GATCTGATACTTATCACGAAAGGACTTGAGTCTTTTGATCAGTCTCTGACTTGACCATCTTTCATTTT  
AAA

+

:FFFFFFFF,FFFFF:FFFF:FFFFFFFF,FFFFFFFFFFFF:FFFFFFFF:FF:FFFF:F:FFFF  
FFFFFFFFF:FFF:FFFFF:FFFFFFF,FFFFFFFFFFFFFFFFFFFF:FFFF,FFFFFFFFFFFFF  
FFF

@A00721:190:HGJW7DSXY:4:1274:4426:21371\_2:N:0:TCTGCAAG+GCTGCACT  
TTTCTTCTTTGTTTCCTTCTTTGCACTGATTTTCTCATCAGCTTGTTTACCTAATCTGTGTTT  
TTACGATAACAACATATCAGTTGATTAAGACTCTTCCGAAAGGCGAACT

+

[illegible]

@A00721:190:HGJW7DSXY:4:1435:20835:28244\_2:N:0:TCTGCAAG+GCTGCACT  
AGTGTATTATTCTGGTGGTGATGATAATCTTGGAGGTCGTGACGTTGATGAAGCTATAAGAGCGTT  
CTTATTACGGCGCACTTCTTTACCCGCCACCACACAACCTTTCAGTTTC

+

FFFF:FFFFFFFFFFFFFFFFFFFFFFFFFFFFFFFFFFFFFFFFFFFFFFFFFFFFFFFFFFFFFFFFFFFFFFFF  
FF:FFFF,FFFFFFFFFFFFFFFFFFFFFFFFFFFFFFFFFFFFFFFFFFFFFFFFFFFFFFFFFFFFFFFFFFFF

@A00721:190:HGJW7DSXY:4:1323:29098:31031\_1:N:0:TCTGCAAG+GCTGCACT  
ACTGAAAACCTCGTCAATACTTTTCAATAATATACGTCTTGAACCTCACTTATGACGATCTAGTGAA  
ATTAACGCGTCCTTTTCTGGAACGTAGTTTACTATTATGAACAAAGTTATCAAAGATAGTGGCATTCAAG

+

FF:FFFFFFFFFFFFFFFFFFFFFFFFFFFFFFFFFFFFFFFFFFFFFFFFFFFFFFFFFFFFFFFFFFFFFFFF  
FFFFFFFFFFFFFFFFFFFFFFFFFFFFFFFFFFFFFFFFFFFFFFFFFFFFFFFFFFFFFFFFFFFFFFFFFFFF  
FFF

@A00721:190:HGJW7DSXY:4:1625:6696:30874\_1:N:0:TCTGCAAG+GCTGCACT  
AGATCTTGACAGAGTGAAGTTCAGACGTGTGCTCTTCCGATCTCTTGCTGAAACAGCTATTAAAG  
CTGTTGAGCGGTAATTACACCTAAACGAGCTCGATCTGCCATCGCTGAAGGATGTGCACTCTTTTCT  
GCT

+

:FFFFFFFFFFFFFFFFFFFFFFFFFFFFFFFFFFFFFFFFFFFFFFFFFFFFFFFFFFFFFFFFFFFFFFFF  
FFFFFFFFFFFFFFFFFFFFFFFFFFFFFFFFFFFFFFFFFFFFFFFFFFFFFFFFFFFFFFFFFFFFFFFFFFFF  
FFF

@A00721:190:HGJW7DSXY:4:1437:21395:16564\_2:N:0:TCTGCAAG+GCTGCACT  
TCGATTGTATCAACAGTAACATTACTTCTAATAAAGGTCTCTATCAAGCTCGTATTATCGTCGCTGCT  
GGATCTGCGTTACCGTTGAAGGCTAAACTCCAAGGTAATTATGAAGAC

+

FFFFFFFFFFFFFFFFFFFFFFFFFFFFFFFFFFFFFFFFFFFFFFFFFFFFFFFFFFFFFFFFFFFFFFFF  
FFFFFFFFFFFFFFFFFFFFFFFFFFFFFFFFFFFFFFFFFFFFFFFFFFFFFFFFFFFFFFFFFFFFFFFFFFFF

@A00721:190:HGJW7DSXY:4:1209:15148:15890\_1:N:0:TCTGCAAG+GCTGCACT  
GTATGAGGGTGTCTTAATCGTAACATTAATAATTTCAATCTTCTTAAAAAGAAGATAGAGAGTCATA  
CTTTGGGCTATCGTTCAAGTGCATGGGGTTGGATAGCCAATATTGAAGTGGACACCTCTGGTAGTATC  
GAA

+

FFFFFFFFFFFFFFFFFFFFFFFFFFFFFFFFFFFFFFFFFFFFFFFFFFFFFFFFFFFFFFFFFFFFFFFF  
FFFFFFFFFFFFFFFFFFFFFFFFFFFFFFFFFFFFFFFFFFFFFFFFFFFFFFFFFFFFFFFFFFFFFFFFFFFF  
FFF

@A00721:190:HGJW7DSXY:4:1356:32090:36245\_1:N:0:TCTGCAAG+GCTGCACT  
ATACTATGGTTGAATCAACTAAGCATACTACTTTTGCTTTGATTACTCTACCGCCTTACAAGTCTAAG  
GTTAAAGAGTCGATTAAACAAGTTGTACTTATCAATGATTTTATCGCTGGTTGTTATCTCGAAAAGTC  
TCT

+

FFFFFFFFFFFFFFFFFFFFFFFFFFFFFFFFFFFFFFFFFFFFFFFFFFFFFFFFFFFFFFFFFFFFFFFF  
FFFFFFFFFFFFFFFFFFFFFFFFFFFFFFFFFFFFFFFFFFFFFFFFFFFFFFFFFFFFFFFFFFFFFFFFFFFF  
FFF

@A00721:190:HGJW7DSXY:4:2406:9968:17033\_2:N:0:TCTGCAAG+GCTGCACT  
TTCTAACCCAAAGAGAATATCTAAAATATTTACAAAATCTTACCACTATCTACGAACCTAAAGTTCTG  
AAGACGTTGCTTGTGCTTCTCCTTTAATGGCACTACCTCGGTACAA

+

FFFFFFFFFFFFFFFFFFFFFFFFFFFFFFFFFFFFFFFFFFFFFFFFFFFFFFFFFFFFFFFFFFFFFFFF  
FFFFFFFFFFFFFFFFFFFFFFFFFFFFFFFFFFFFFFFFFFFFFFFFFFFFFFFFFFFFFFFFFFFFFFFFFFFF

@A00721:190:HGJW7DSXY:4:2676:9362:19398\_2:N:0:TCTGCAAG+GCTGCACT  
GAAGGCGACCTGTTCCGGGTTTTTACGGGATCCGGAATGTTCTGTCTATATTAGGTGAAGCGAAATA  
CGATTTCAACGTCAACGTTACCGAGTTTCGTTTCGTACCTTGATGA

+

FFF,FFFFFFFFFFFFFF,FFFFFFFFFFFFFFFFFFFFFFFFFFFFFFFFFFFFFFFFFFFF  
FFFFFFFFFFFFFFFFFFFFFFFFFFFFFFFFFFFFFFFFFFFFFFFFFFFFFFFFFFFF  
@A00721:190:HGJW7DSXY:4:1255:18349:35399\_1:N:0:TCTGCAAG+GCTGCACT  
TAGTGCGAGGCCTCTCTTCTACGAGTATTGCTATTTATACGGTTACGAGAAGAAGGTTGAAAGTTTG  
AGAACTTAGTTTACGAACCTGACTCTACTATACGTGACATACTAAATACTAGATATTTGGATGATCTT  
GAT  
+  
FFFFFFFFFF:FFFFFFFFFFFFFF:FFFFFFFFFFFFFFFFFFFFFFFFFFFFFFFFFFFF  
FFFFFFFFFFFFFFFFFFFFFFFFFFFFFFFFFFFFFFFFFFFFFFFFFFFFFFFFFFFF:FF  
FFF  
@A00721:190:HGJW7DSXY:4:2238:5602:23531\_2:N:0:TCTGCAAG+GCTGCACT  
TTCAGAGTATGAAAAATTTCTTCCTTGATTATTAATAAAGAATCTTTACCAGGACTCCTACTACA  
GGAGGCAGTCTTCTGATCGTAAGAAGTTTATAAGGAACATATCCATTT  
+  
:FFFFFF,FFFF:FFFFFF:FF:FFFFFFFFFFFF:FFFFFFFFFFFF:FFF,FF:FFFFFFFFFFFF  
FFFFFFFF:FFFFFFFFFFFF:FFF,FFFFFFFFFFFF:FFF  
@A00721:190:HGJW7DSXY:4:1569:2718:12837\_1:N:0:TCTGCAAG+GCTGCACT  
ACTCGAAACTCTAAGTGGAATACTGTCTTCCAAGCTTACCTGTATCTTCAATGAAATTGGACTCTT  
CGATAGGGGACATTTTATCGTGGGCTTCCGTAAAGGAAGATCTGTTATCGACGGTTTATCGTTTACG  
AAG  
+  
FFFFFFFFFFFFFFFFFFFFFFFFFFFFFFFFFFFF:FFFFFFFFFFFFFFFFFFFFFFFFFFFF  
FFFFFFFFFFFFFFFFFFFFFFFFFFFFFFFFFFFFFFFFFFFFFFFFFFFFFFFFFFFF  
FFF  
@A00721:190:HGJW7DSXY:4:2319:7889:26303\_2:N:0:TCTGCAAG+GCTGCACT  
GTTTAAGAATACTATAAATAAGATAGCTATTACTACTAATGGCGTTGGCCTAGTGGATGTTATTAGTG  
ACATCTGGTCAATTTCTGTTTTAGGTGGTCTTTATTCTATTATTGATT  
+  
FFFFFFFFFFFFFFFFFFFFFFFFFFFF:FFFFFFFFFFFF:FFFFFFFFFFFFFFFFFFFFFFFFFFFF  
FFFFFFFFFFFFFFFFFFFF:FFFFFFFFFFFFFFFFFFFFFFFFFFFFFFFFFFFF  
@A00721:190:HGJW7DSXY:4:1260:8938:31532\_1:N:0:TCTGCAAG+GCTGCACT  
ACAGAAGATGATGTTAGAGTAGAATTCCTGAAGAGTCCTTCCGTAACCAACTTCTTGACAATTTTCTT  
CAATCCTTCGATAATAGTTAAATCTAGGATTATGTCTGTGTTGAAAGACTTTCTACCGATAAGGGTCA  
CTA  
+  
FFFFFFFFFFFFFFFFFFFFFFFFFFFFFFFFFFFFFFFFFFFFFFFFFFFFFFFFFFFF  
FFFFFFFFFFFFFFFFFFFFFFFFFFFFFFFFFFFFFFFFFFFF:FFFFFFFFFFFFFFFFFFFF  
FFF  
@A00721:190:HGJW7DSXY:4:1221:30282:5337\_2:N:0:TCTGCAAG+GCTGCACT  
TAAGAAATAATCCTACATTGACTGATTATCTAAAGATTGAAGGAAATTTTATCCTCGTTTAACTTAC  
TTAGACTTTCCTACGATACAAATGATAACTTCTAATTTACGTTTGCTA  
+  
FFFFFFFFFFFFFFFFFFFFFFFFFFFF:FF:FFFFFFFFFFFFFFFFFFFF:FFFFFFFFFFFFFFFFFFFF  
FFFFFFFFFFFFFFFFFFFFFFFFFFFFFFFFFFFFFFFFFFFFFFFFFFFF  
@A00721:190:HGJW7DSXY:4:2333:27453:25895\_2:N:0:TCTGCAAG+GCTGCACT  
CAAAGGGATGCATGGTGTATCTCCTCAGGAGTCCGGCATTTGATAATAATGACGAGACTTTCGTCA  
TAATCGCTGCATATTACGGATTACACGGTACCAGCGCATCTCGTGTG  
+  
FFFFFFFFFFFF:FFFF:FF:FFFFFFFFFFFFFFFFFFFFFFFFFFFFFFFFFFFF:FF  
FFFFFFFFFFFF:FFFFFFFFFFFFFFFF:FFFFFFFFFFFFFFFFFFFF  
@A00721:190:HGJW7DSXY:4:2250:6777:4116\_1:N:0:TCTGCAAG+GCTGCACT  
GTATTAACCTATAAAGGTGAGGAGACCATTTTCTTGCTGAAATTTATAGAAGATTATTTTGACAGAAT  
CAATAAGAATCATCGATTCTCGATTCTAGAGCTTATCTAGGTACTCTCATTTACTATGTTGATTTAG  
TCT

```

+
FFFFFFFFFFFFFFFFFFFFFFFFFFFFFFFFFFFFFFFFFFFFFFFFFFFFFFFFFFFFF:FFFFFFFFFFFFFFFFFFFF
FFFFFFFFFFFFFFFFFFFFFFFFFFFFFFFFFFFFFFFFFFFFFFFFFFFFFFFFFFFFFFFFFFFFFFFFFFFFFFFFFFFF
FFF
@A00721:190:HGJW7DSXY:4:2456:29677:33849_2:N:0:TCTGCAAG+GCTGCACT
GATTTACAACGATATAGGAGTAATCTACGAGAAGATTCTAGAATTCTTAATTATAATATTCAACCTCA
AAAGTTACGTGTTTACAGTAACGAGATCACACATTTTGAGAACTAACT
+
FFFFFFFFFFFFFFFFFFFFFFFFFFFFFFFFFFFFFFFFFFFFFFFFFFFFFFFFFFFFFFFFFFFFFFFFFFFFFFFFFFFF
FFFFFFFFFFFFFFFFFFFFFFFFFFFFFFFFFFFFFFFFFFFFFFFFFFFFFFFFFFFFF:FFFFFFFFFF
@A00721:190:HGJW7DSXY:4:1306:12924:5525_1:N:0:TCTGCAAG+GCTGCACT
CAATCTCTTCTTATAATAAATAAATAAATAATATTACTAATGGCAAATAGTGGAAGGCTCCAGTCAA
CACTAGTTCGAGTGCTGCTTTGGATTACGATGACGTGAGAATAGGTGAAGGGATAGTTTTTACCTCGA
CCA
+
FFFFFFFFFFFFFFFFFFFFFFFFFFFFFFFFFFFFFFFFFFFFFFFFFFFFFFFFFFFFFFFFFFFFFFFFFFFFFFFFFFFF
FFFFFFFFFFFFFFFFFFFFFFFFFFFFFFFFFFFFFFFFFFFFFFFFFFFFFFFFFFFFFFFFFFFFFFFFFFFFFFFFFFFF
FFF
@A00721:190:HGJW7DSXY:4:1148:28384:32706_2:N:0:TCTGCAAG+GCTGCACT
GCGACTAATCTTAAAGCTTCACCCAAAATGAAGGACACTTCGAAACTGAATAATGATGCACTACAAAC
AAGTATCGCTAATCATCTGAAAAAGGCTCTAAAGGACACTATACAATA
+
,F:FFFFFF:FFFFFF:FFFFFFFFFFFFFFFFFFFFFFFFFFFFFFFFFFFFFFFFFFFFFFFFFFFFFFFFFFFFF
:FFFFFFFFFFFFFFFFFFFFFFFFFFFFFFFFFFFFFFFFFFFFFFFFFFFFFFFFFFFFFFFFFFFFFFFFFFFFFFFF
@A00721:190:HGJW7DSXY:4:2641:32244:29309_2:N:0:TCTGCAAG+GCTGCACT
TGCTTTTACCGATAACGATAAATTCGTCAATATAAAGAAAAGGACTATGAAATAAAAGATTTGG
TGCTTAGGGATATAATGAATTCAGCACCACATTTTGGTCAAGTCAATC
+
FFFFFFFFFFFFFFFFFFFFFFFFFFFFFFFFFFFFFFFFFFFFFFFFFFFFFFFFFFFFFFFFFFFFFFFFFFFFFFFFFFFF
FFF:F:FFFFFFFFFFFFFFFFFFFFFFFFFFFFFFFFFFFFFFFFFFFFFFFFFFFFFFFFFFFFFFFFFFFFFFFFFFFF
@A00721:190:HGJW7DSXY:4:1378:32967:35884_1:N:0:TCTGCAAG+GCTGCACT
TCTTAGAGGATATTCGCCATTGTGGTACGAATTGGTCCAACATTTACCACCAAATTCTTTTGATACAA
CTCTAGCCTTCAAGTGGGGTATGCCTGCGGAATACGCTTGCTATTACCAGATTGGTTCGAACCCGTT
GAT
+
FFFFFFFFFFFFFFFFFFFFFFFFFFFFFFFFFFFFFFFFFFFFFFFFFFFFFFFFFFFFFFFFFFFFFFFFFFFFFFFFFFFF
FFFFFFFFFFFFFFFFFFFFFFFFFFFFFFFFFFFFFFFFFFFFFFFFFFFFFFFFFFFFFFFFFFFFFFFFFFFFFFFFFFFF
FFF
@A00721:190:HGJW7DSXY:4:1161:9344:7780_1:N:0:TCTGCAAG+GCTGCACT
AGCTATTCAAGCTTGTCGTTTAAAGACTGCAGAGGCTGTCAAACAAGCCCAGACTCAAGGAGTCCAAT
CAAAGGTTTTGAATTTAGCTCAACTGGGAGACGTGCTTAAATGGGTGATAAAAATTATTTAGAGATC
TTT
+
FFFFFFFFFFFFFFFFFFFF,FFFFFFFFFFFF,FFFFFFFFFFFFFFFFFFFFFFFFFFFFFFFFFFFFFFFFFFFFFFFF
FFFFFFFFFFFFFFFFFFFFFFFFFFFFFFFFFFFFFFFFFFFFFFFFFFFFFFFFFFFFFFFFFFFFFFFFFFFFFFFFFFFF
FFF
@A00721:190:HGJW7DSXY:4:1668:18656:29105_2:N:0:TCTGCAAG+GCTGCACT
CTACGGAAGTCCGGAGTATATTGTATGTTAATAGATAGTGGGATAATAGTTCTACCGATACGTAGT
GAACGCGTTCGTAGAACCAAGTACTTTCCGTCTGAAGAGTTTAGAGCT
+
FFFFFFFFFFFFFFFFF:FFFFFFFFFFFFFFFFFFFFFFFFFFFFFFFFFFFFFFFFFFFFFFFFFFFFFFFFFFFFFFFF
FFFF:FFFFFFFFFFFFFFFFFFFFFFFFFFFFFFFFFFFFFFFFFFFFFFFFFFFFFFFFFFFFFFFFFFFFFFFFFFFF
FFF
@A00721:190:HGJW7DSXY:4:2326:31241:31798_1:N:0:TCTGCAAG+GCTGCACT
TAACCGATAGGAGTTGTATAGTTGAAGATGTGGCTTTAGACGATAATCCTTTAAGGACTATGTTGACT

```

GACGAAGATTTTCCCACAGATTTGTCTACGTTGCAGATCGCCACTCCAAACACTATATACATTAAAAT  
ATA

+

FFFFFF:F::FF:FFFF:FFFFFFFFFFFFFFFFFFFFFFFFFFFFFFFFFFFFFFFFFFFFFFFF  
FFFFFFFFFFFFFFFFFFFFFFFFFFFFFFFFFFFFFFFFFFFFFFFFFFFFFFFFFFFFFFFFFFFF:  
FFF

@A00721:190:HGJW7DSXY:4:1370:17788:8155\_1:N:0:TCTGCAAG+GCTGCACT  
CATAACTTTTGTACCAAATTCTTGGCTTCAACGAAGTCTCTGATTTTATTAATCATTACTTTAACG  
ATCTCTCGGTCATTTACTCTGTACTTGATCTACGTCGTTTAACTGTCGGAACAACCTTTACTTAGAAT  
GAC

+

:FFFFFFFFFFFFFFFFFFFF:FFFFFFFFFFFFFFFFFFFF:FFFFFFFFFFFFFFFFFFFF:FFF  
FFFFF:FFFFFFFFFFFFFFFFFFFFFFFFFFFFFFFFFFFFFFFFFFFFFFFFFFFFFFFFFFFFF  
FFF

@A00721:190:HGJW7DSXY:4:1323:24252:8453\_2:N:0:TCTGCAAG+GCTGCACT  
TTCTTATATTATTTACAATAGTTAATATCATATTAGTAATACTCACTATCGTTTTCTGCTTTTCTTA  
GCTAATAGATTAATAAAGGATGAGTACGAAAACCAACTCTTCGTTACG

+

FFFFFFFFFFFFFFFFFFFFFFFFFFFFFFFFFFFFFFFFFFFFFFFFFFFFFFFFFFFFFFFFFFFF  
FFFFFFFFFFFFFFFFFFFFFFFFFFFFFFFFFFFFFFFFFFFFFFFFFFFFFFFFFFFF:

@A00721:190:HGJW7DSXY:4:2452:5132:30452\_1:N:0:TCTGCAAG+GCTGCACT  
GTAGAATATATTTATTCTCTACACCCATCTCAACGTGGATAAAGCGATTTTCCGTCCTGAACGTAAT  
ACACTAAGAGATCATCCGAAAACGACTCGAAACCGAGACGCCGTAGATCAAAGTCCCTTCTAACTTTA  
GAT

+

FF,,F,F,:,FFF,,,:,,,:FFFF,F::,,F:F,,:,F,FF,F:,,,FF:,F:F,F,F:F,:,FF,:  
F,,:,F,,F,F,,:,F,:,,:FFFFFFFFFFFFFFFFFFFFFFFFFFFFFFFFFFFFFFFFFFFFF  
FFF

@A00721:190:HGJW7DSXY:4:2467:25880:25269\_1:N:0:TCTGCAAG+GCTGCACT  
CTTTACTCATTTTATAGCAGTTATTTATGTTGTACTTTTATAATTTATAACCTTCTTATACTTTTGG  
GTATGTTTTGTGAAAAACATGAGATACCCAAGTCTATCGAAGACATTATCTCTTATGTACTTATTGTA  
ACG

+

FFFFFFFFFFFFFFFFFFFFFFFFFFFFFFFFFFFFFFFFFFFFFFFFFFFFFFFFFFFFFFFFFFFF  
FFFFFF:FFFFFFFFFFFFFFFFFFFFFFFFFFFFFFFFFFFFFFFFFFFFFFFFFFFFFFFFFFFFF  
FFF

@A00721:190:HGJW7DSXY:4:2556:9191:2848\_1:N:0:TCTGCAAG+GCTGCACT  
TTCTTATTCTTTTATTCCTTTAACTGTGTATGAGGAGGATTTATAATGCTTTTCGATAGTGATTGTTA  
TCAATTTAAATACATTACTGTTTCAAATCATCTTTACTCACAGACTCCGAAAATGGTTTCAAATGAGG  
TCA

+

FFFFFFFFFFFFFFFFFFFFFFFFFFFFFFFFFFFFFFFFFFFFFFFFFFFFFFFFFFFFFFFFFFFF  
FFFFFFFFF:FFFFFFFFFFFFFF:FF:FFFFFFFFFFFF:FFF:FFFFFFF,FFFFFFFFFFFFFF:F  
FFF

@A00721:190:HGJW7DSXY:4:2556:9191:2848\_2:N:0:TCTGCAAG+GCTGCACT  
TATTAAACGAACATTATCCGATTCTTCGAGGGTATCACTACCACTGATCTGCCGACTTTAGTCAAGG  
AACTTCAATTCCTTCGATGTTTATATTTTCTATAAGGGAAAATAGCA

+

FF:FFFFFFFFFFFFFFFFFFFF:FFFFFFFFFFFFFFFFFFFF:F:FFFFFF:FFF:FFFFFF  
FFF:FFF,FFFFFFFFF,FFFFFFFFF,:FFFF:FFFFFFFFFFFF

@A00721:190:HGJW7DSXY:4:2122:24279:15828\_2:N:0:TCTGCAAG+GCTGCACT  
TTCGACAAATTTTAGAACTTTATTTCAGAACTCTCTCCGATCACCTTGGTGTGATCTCCCGGAGGATC  
TTTTCAATAAGATGTATGATGATAATCTACTATTTTTAAATAGTGATA

+



FFFFFFFFFFFFFFFFFFFFFFFFFFFFFFFFFFFFFFFFFFFFFFFFFFFFFFFFFFFFFFFFFFFFFFFF  
FFFFFFFFFFFFFFFFFFFFFFFFFFFFFFFFFFFFFFFF, FFFF: FFFFFFFF  
@A00721:190:HGJW7DSXY:4:2462:2320:2159\_1:N:0:TCTGCAAG+GCTGCACT  
CTTTATCAAAGATTTGGCTTGGTCTATTTACCGCAAAAAGTTGGAAGAGGTCTATGATATTTATTTTA  
CTTATACTTTAAATAGCACCGATTATAACTTGACTGTTGATAATATTACAATAGCTCTTTCTCAGAAG  
ATT  
+  
FFFFFFFFFFFFFFFF, FF, FFFFFFFFFFFFFFFFFF: FFFFFFF: F: FF: FFFFFFFFFFFFFFFFFF  
: F: FFF: FFFFFFFFFFFFFFFFFF: FFF: FFFFFFFFFFFFFFFFFF: FFFFFFFFFFFFFFFFFF:  
FFF  
@A00721:190:HGJW7DSXY:4:1306:32163:13792\_2:N:0:TCTGCAAG+GCTGCACT  
GGTGAACACGTCGGTAGCATTGATTTACTTTTACCGTTAGAACTGAAAAGATTCTTTTCGAAAAGAA  
ACCTATAAGTTACAAACGATTCTTCGACTATATTAAGAAATAAAAAT  
+  
F, F: FFFF: FFFFFFFFF: FFFFFFFFFFFFFFFFF, : F, FFFFFFFFFFFFFFFFFF: FF  
: FFFFFFFFFFFFFFFFFF, FFFF: FFFFFFFFFFFFFFFFFF  
@A00721:190:HGJW7DSXY:4:1452:32913:11678\_2:N:0:TCTGCAAG+GCTGCACT  
CTTTACATTTTTAATGGTATGGTATAATGTGTCTTACAAATAGAACCTTCACTCTCGGTAATGAGAGT  
GTATTCCTTAATATTCTAGTAACCGCTATGTGGGCATTACTAGGATTT  
+  
F: FFFFFFFFF: FFFFFFFFFFFFFFFFFF: FFFFFFFFFF, FFFFFFFFFFFFFFFFFF  
FFFFFFFFF: FFFFFFFFFFFFFFFFFF: FFFFFFFFFF: FFFF  
@A00721:190:HGJW7DSXY:4:2435:20564:21480\_1:N:0:TCTGCAAG+GCTGCACT  
GATAGCAATTTATTTTTTAAATGCTAGGAAAATTTTAGAAAACTCCATTGTATAGTTCAAGGAGTAC  
TTAATTCAATAGCTTTAGTATTATTTACTATCGCCTTTATTGAAAATTGTATAAGAGTTAATTGCTTA  
CAC  
+  
FFFF, FFFFFFF, F: FFFFFFF, FF, FFFF: FFFFFFFFFFFFFFFFF, FFFFFFFFFF: FF: FFF  
FFFFFFFFF: : FFFFFFFFFFFFFFFFFF: FFFFFFFFF: FF: FFFF, FFFFFFFFFF  
FFF  
@A00721:190:HGJW7DSXY:4:1302:32542:8218\_1:N:0:TCTGCAAG+GCTGCACT  
GGGAGAATGAACTGCCGCTTCCCGGAAGAACTATCTATTTACAGAGTATTTAGAGTAGTCCAAAGTT  
TGTATAAATTTATATGATTTTCTATATATATACACATATATATATATAAAATCCTATAAATTTGT  
ACA  
+  
:: FF: FFF, FFFF: FFF, F: F: F, : FF, FFF: , F: , FFF: FF: F, : , FFFFF: FFFF: F: F: F: FF  
: FFFFF: FFFFFFFFFF: FF: FFFF: FF: FFFFFFFFFF: FFFFFFFFFF: FFFFFFFFF: F  
F: F  
@A00721:190:HGJW7DSXY:4:2448:20302:13886\_1:N:0:TCTGCAAG+GCTGCACT  
AACATACCATACTCCCCAACATAACATACCATAACCTACCATGACCAATCATCGCTCCAAGTGGC  
ACGCCAGACGTAGGGTCAAACCTACTACCGCCGGTCGGCAGATCGGCACCACTGGTCTCTACGTTGAG  
GGA  
+  
F, FFF: FFFFF: F: FFFFF, FFFF, FF: FFF: FF, FF: FFF, , , FFFFFFF: FFFFFFF: FFFF  
FFFFFFFFFFFFFFFFF: FFFFFFFFFFFFFFFFFF: FFFFFFFFFFFFFFFFFF: FFFFFFF  
FFF  
@A00721:190:HGJW7DSXY:4:1633:10529:30311\_2:N:0:TCTGCAAG+GCTGCACT  
TAACCTTCCCAAATCTAGATCTGCACAGAAGAAGGCTGAAGTCTGTTACCGGACGACCACTCAAAGGA  
AACGGGCTGTTGCCAGAGGAAAGCAGCGACCACGAGGTCGCTCGTA  
+  
FFFFFFFFFFFFFFFFFFFFFFFFF: FFFFFFFFFFFFFFFFFF  
FFFFFFFFFFFFFFFFFFFFFFFFF  
@A00721:190:HGJW7DSXY:4:1311:30517:7373\_1:N:0:TCTGCAAG+GCTGCACT  
AGTCCCGTCATCTCTGTGGAACTGAGGCAGTACCTCAGTCAAAAGTCACATTACCACTCCCATGCC

AATCAATGATGTGACTATACAGTTCGGCCATTTCAAGAGTGGTCAATACGTCGTGGGAGGTACTGAAG  
CCT

+

FFFFFFFF:FFFFFFFFFFFFFFFFFFFFFFFFFFFFFFFFFFFFFFFFFFFFFFFFFFFFFFFFFFFFFFFF  
FFFFFFFFFFFFFFFFFFFFFFFFFFFFFFFFFFFFFFFFFFFFFFFFFFFFFFFFFFFFFFFFFFFFFFFF  
FF:

@A00721:190:HGJW7DSXY:4:1558:27670:14278\_1:N:0:TCTGCAAG+GCTGCACT  
ATCTAAGAACTCCCAAGCCAATCAATAGTTCTTCTGACCAGAATGAAAAGGGGTTTACCAGGGTAG  
TCTCTAAGTCTACCAGGAAGAGGGGAAATGTCCCCAAACTGAGAAGACTAAAGGGAAAGGTCCATCA  
GGA

+

FFFFFFFF::FFFFFFF,FFFF,FFF:FFFFFFFFFFFFFFFF:FFFFFFFF:FFFFFFFF:FFFF:F  
FFFFFF,FF:FF:FFFFFFFFFFFFFFFFFFFFFFFFFFFFFFFF:FFF:FFF:F,FF:,FFFF:FFFFFFFF  
FFF

@A00721:190:HGJW7DSXY:4:1246:2618:18928\_2:N:0:TCTGCAAG+GCTGCACT  
ATTACCCCTAATTCTGAAGGAAGATCTCCACCATCTGGGGTTGGGAATAAGAAATCTGCACGGGCCA  
AAGAGGCCGCTGCTACGAAGTCGCTGAAGGCGGCTTGGGTCATTAAGG

+

F:FFFFFFFFFFFFFFFF:FFFFFFFFFFFFFFFFFFFFFFFFFFFFFFFFFFFFFFFFFFFFFFFF  
FFFFFFFFFFFFFFFFFFFFFFFFFFFFFFFF:FFFFFFFFFFFFFFF

@A00721:190:HGJW7DSXY:4:1224:17598:33004\_1:N:0:TCTGCAAG+GCTGCACT  
AGTTGCGCCTGCCGACCCCATCTTTGAGACCAAGACTCTCTACAGTAGGTTCTGTCCTACTATGAGCA  
AATCTGTTGAATTCGTCACTGAGGACGAAGGTGAGAGGACTTTTGGCTACTGGCGACAACTGAGAGC  
AGT

+

FFFFFFFFFFFFFFFFFFFFFFFFFFFFFFFFFFFFFFFFFFFFFFFFFFFFFFFFFFFFFFFF  
FFFFFFFFFFFFFFFFFFFFFFFF:FF:FFFFFFFFFFFFFFFFFFFFFFFFFFFFFFFFFFFFFFFF  
FFF

@A00721:190:HGJW7DSXY:4:1549:29152:13401\_2:N:0:TCTGCAAG+GCTGCACT  
AGAATTGCGTGGGTTGAAGGCCGACGCTTCGAGCTTGAGTGTGACGAGGCCGGTGACGTTTTTGTCAA  
CGGCGTTTGGAGGATTTTATCCGCGCTTAACCTATGGGGCGAAGATCCC

+

FFFFFFFFFFFFFFFFFFFFFFFFFFFFFFFF:FFFFFFFF:FFFFFFFFFFFFFFFFFFFFFFFF  
FFFFFFFFFFFFFFFFFFFFFFFFFFFFFFFFFFFFFFFFFFFFFFFFFFFFFFFF

@A00721:190:HGJW7DSXY:4:2253:28239:19930\_2:N:0:TCTGCAAG+GCTGCACT  
AAGGACTTAGGTTGGCATATTTATGCCGACGATAATAAGCATGTCACCCTTAAGCACCGAGGTAAGCT  
CGGGACTIONACAAGAGAGAGTGTGAGAGAGTCGCTCTCACTATTTTTGC

+

FFFFFFFFFFFFFFFFFFFFFFFFFFFFFFFFFFFFFFFFFFFFFFFFFFFFFFFFFFFFFFFF:FFF  
FFFFFFFFFFFFFFFFFFFFFFFFFFFFFFFF:FFFF,FFFFFFFF

@A00721:190:HGJW7DSXY:4:2515:5367:1141\_1:N:0:TCTGCAAG+GCTGCACT  
TTTCTGACTGATGAGGTTAAACTCTTGCTCCTTCTGTGGGTGAGGGTTTTTGTATATTTCACTGGTT  
CTGGGAGGCTGCTTTCCTCCATAATTACAACCTCTCTTTAGAGAGCATTAGAAGGAAGTTGGGCAAAT  
TCC

+

FFFFFFFF:FF:FFF:FFFFFFFFFFFFFFFFFFFFFFFFFFFFFFFFFFFFFFFFFFFFFFFF  
FFFFFFFFFFFFFFFFFFFFFFFF:FFFFFFFFFFFFF::FFFFFFFFFFFFFFFF

@A00721:190:HGJW7DSXY:4:2362:19886:26099\_1:N:0:TCTGCAAG+GCTGCACT  
CACACTTTTCTTGAAAATTTTCTGTCTCCGTCAATTGGGGATTTGATGTGAGAAGGTGGAAGGTG  
TCAAGGGTCTTCTTCATGCTGATCTTTCAGGACCTAATCACATCATGATTGATGATTACGGCTCGTAT  
CGA

+

FFFFFFFFFFF,FFFFFFFFFFFF,FFFFFFFFFFF:FFFFFFFFFFFFFFFFFFFFFFFF

FF,FFFFFFFFFFFFFFFFFFFFFFFFFFFFFFFFFFFFFFFFFFFFFFFFFFFFFFFFFFFFFFFF:FFFFFFFFF  
FFF

@A00721:190:HGJW7DSXY:4:1127:24704:6793\_2:N:0:TCTGCAAG+GCTGCACT  
CGAAATTAAAGACGGGGGATTAAGAGTCCAGCTGTAAGTGTCAATTCAGAGAGGGGAGCTCTGAAAA  
GAAACTTCGTCAGAAGATGAGGAAGTCTAAGAGATCGGAAGAGCGTC

+  
FFFFFFFFFFFFFF,FFFFFFFFFFFFFFFFFFFFFFFFFFFFFFFFFFFFFFFFFFFFFFFFFFFFFFFF  
FFF:FFFFFFFFFFFFFFFFFFFFFFFFFFFFFFFF:FFFFFFFF:FFFFFFF

@A00721:190:HGJW7DSXY:4:1132:18765:18302\_2:N:0:TCTGCAAG+GCTGCACT  
TCTCACCACCTGGAGAAGGCAAGTGGAGAGTCCAGAAGTTGATGAAGAAGGATTATTTGAAGCAGGGG  
TTACCACTTCCTAAGGTGGATGAGGGAGGTTGTTTCTTTGGAGTTT

+  
FFFFFFFFFFFFFF:FFFFFFFFFFFFFFFFFFFFFFFFFFFFFFFFFFFFFFFFFFFFFFFFFFFFFFFF:FF  
FFFFFFFFFFF:FFFFFFFFF:FFFFFFFFFFFFFFFFFFFFFFFFFFFFFFFF:FF

@A00721:190:HGJW7DSXY:4:1635:3378:3583\_2:N:0:TCTGCAAG+GCTGCACT  
CCTTGAGAAGACAAGCCACATTAAGATATAATTTAGGTCAACTTGGGGTTTCGAATGTCATTAGTGCC  
TTACGATTGAAAGAGGTCCTTTTGAGTATCGACAGATCTTTCGATCTT

+  
FFFFF:FFFFFFFFFFFFFFFFFFFFFFFFFFFFFFFF:FFFF,FFFFFFFFFFFFFFFFFFFFFFFFFFFFF  
FFF:FFFFFFFFFFFFFFFFF:FFFF:FFFFFFFFFFFFFFFFF:FFFFFFF

@A00721:190:HGJW7DSXY:4:1376:21160:34632\_2:N:0:TCTGCAAG+GCTGCACT  
GTGGCAGAATTCGGTAACTTACCATATTGTTCTTCCGGGAAGTTGTGGGATTTAACCTTGACTCAAC  
TACTCCGATCAGATCCGGATGGTTTGATTGGTATGGACTACTCGACTT

+  
FFFFFFFFFFFFFFFFFFFFFFFFFFFFFFFFFFFFFFFFFFFFFFFFFFFFFFFFFFFFFFFFFFFFF  
FFFFFFFFFFFFFFFFFFFFFFFFFFFF,FFFFFFF:FFFFFFFFFFFFFFFFF

@A00721:190:HGJW7DSXY:4:2278:7066:29262\_1:N:0:TCTGCAAG+GCTGCACT  
TAGGGTCATGGCAGATACTACCGATAAGGTGAAAAATATGCAGGTCAAAGATTCTGTAGCTCTGAGGG  
CGGTTGAGGGAGCCGTTTTGGCCGACTTTAACTATTCTAAGAGTCTTTATGATTCAAACCTATCGTT  
GTC

+  
:FFFFFFFFFFFFFFFFFFFFFFFFFFFFFFFFFFFFFFFFFFFFFFFFFFFFFFFFFFFFFFFFFFFFF  
FFFFFFFFFFFFFFFFFFFFFFFFFFFFFFFFFFFFFFFFFFFFFFFFFFFFFFFFFFFFFFFFFFFFF  
FFF

@A00721:190:HGJW7DSXY:4:2363:17264:5118\_1:N:0:TCTGCAAG+GCTGCACT  
TACAGCGCTTATTGTCGCGCAGTTTCCAGAATTGCGGTTGAAGTTCACCCATTCTATCTTGAATGCT  
CACGCCGTCGAGCCATATCGAGACTATGTTATAATCACTTGTTAAAGTACAGATTTAGTGATTAGAT  
TAT

+  
FFFFFFFFFFFFFFFFFFFFFFFFFFFFFFFF:FFFFFFFFF:FFFFFFFFFFFFFFFFFFFFFFFFFFFFF  
FFFFFFFFFFFFFFFFFFFFFFFFFFFFFFFF:FFFFFFFFF:FFFFFFFFFFFFFFFFFFFFFFFFFFFFF  
FFF

@A00721:190:HGJW7DSXY:4:1539:8395:27461\_1:N:0:TCTGCAAG+GCTGCACT  
GGAGGCGATATTCGTTTTCATATCCAAACTCCTTGAATGGAGTACATATTTGCAACCCTATTCTTGA  
TGTGAAAGATGCATCGAGGTATACGTCTAGGAACATTGATTGGGAACGTACCTACTCACGAGACGTCA  
TGA

+  
FFFFFFFFFFFFFFFFFFFFFFFFFFFFFFFFFFFFFFFFFFFFFFFFFFFFFFFFFFFFFFFFFFFFF  
FFFFFFFFFFFFFFFFFFFFFFFFFFFFFFFFFFFFFFFFFFFFFFFFFFFFFFFFFFFFFFFFFFFFF  
FFF

@A00721:190:HGJW7DSXY:4:2365:12536:7138\_1:N:0:TCTGCAAG+GCTGCACT  
ATGTTTCGTTCTGTTACAAGAACGCTTTGGATTGTGACCATAAAGCCTCAGTTGCGATAGCTGTAGAG  
GTATACGATATCTCTCTTGATGATGTAGCCACTATAATGCTTAAGAGAGAGATTGATGTATGTCATTT  
CGT

+  
FFFFFFFFFFFFFF,FFFFFF,:FF:FFFFFFFF:FFFF,FFFF:,FFFF:F:FFFFFFFF:F:FFFFFFFF  
FFFFFFFF:FFFFFFFFFFFFFFFFFFFFFFFFFFFFFFFF:FFFFFFFF,FFFF,F:FFFFFFFFFFFFFFFF,  
FFF  
@A00721:190:HGJW7DSXY:4:2252:12500:26365\_1:N:0:TCTGCAAG+GCTGCACT  
GAATTATTGGACACGATTAAAAATGACATACCCGTTCTGACCTTGGTATCGTTATCCGTCATGGAGA  
TGATGGCGCATCACTTGATTACTATATGCCCGAAGGATTGGGTTATTCTCACAACAAAGATAAGATTT  
TAT  
+  
FFFFFFFFFFF:FFFF:,F,F,FFFFFFFF,FFFFFFFF,FF:F,FFFF:FFFFFFFF:FFFFFFFFFFF  
FFFFFFFFF:FFFFFF,FF:FF:FFFFFFFFFFFFFFFFFFFFFFFFFFFFFFFF,FF,FFFFF:FFF:  
FFF  
@A00721:190:HGJW7DSXY:4:2132:31539:17221\_1:N:0:TCTGCAAG+GCTGCACT  
TAAGGGCGGACAATTGTTCCATTGTGAACCTTGGGGACTAGATTGAGCATTAATGAGTTCCGAATAA  
CTCGTAATAAATCTTTCTCTAGTGGACAATTCAGAATACCTATTTCCGTACCAAGAGCCACTGCCAAT  
CTC  
+  
FFFFFFFFFFFF:F:F:F:FFFFFFFFFFFFFFFFFFFFFFFFFFFFFFFF:FFFFFFFFFFFFFFFFFFFF  
FFFFFFFFFFFFFFFFFFFFFFFFFFFFFFFFFFFFFFFFFFFFFFFFFFFFFFFFFFFFFFFFFFFFFFFFFFFF  
FFF  
@A00721:190:HGJW7DSXY:4:1115:11695:33927\_2:N:0:TCTGCAAG+GCTGCACT  
AAATTTTCTCAAGAGATTATGGTTGATAAAGTTTCTTCATAAGGGCTATTCAGTACGTCATGGGGA  
TCACTTCTTCGGTCAATGACAAAACCTTCGAATATGTTACGACATGGC  
+  
FFFFFFFFFFFF::FFFFFFFFFFFF:FFFFFF:FFFFFFFFFFFFFFFFFFFFFFFFFFFFFFFF,FFF  
FFFFFFFF:FFFFFFFFFFFFFFFFFFFFFFFFFFFFFFFF:FFFFFFFF:F  
@A00721:190:HGJW7DSXY:4:2326:14796:28494\_2:N:0:TCTGCAAG+GCTGCACT  
AGGATTGTCATCTCGGGGAAAGTGATTCACCAAGATGTTTCATATAGATACGAGATACCTAGAGAAGGT  
CGCAGCGATCTTACTCGTTATCGGAGCTAAGAAGAAGACTTTGGGTAC  
+  
FFFFFFFFFFFFFFFFFFFFFFFFFFFFFFFFFFFFFFFFFFFFFFFFFFFFFFFFFFFFFFFFFFFFFFFFFFFF  
FFFFFFFFFFFFFFFFFFFFFFFFFFFFFFFFFFFFFFFFFFFFFFFFFFFFFFFFFFFFFFFFFFFF  
@A00721:190:HGJW7DSXY:4:1371:30671:10050\_2:N:0:TCTGCAAG+GCTGCACT  
TAACGTTAGTACCGGAGGTGATCTCTCTGCTTCTGCGTTACTGAGAGAAAAGATTACAGGACGCCTACG  
GTGACTTTATGGACAAGATGCAAGTTCTTGGGAAATACTTGTTCCT  
+  
FF,FFFFFFFFFFFFFFFFFFFFFFFFFFFFFFFFFFFFFFFFFFFFFFFFFFFFFFFFFFFFFFFFFFFF  
FFFFFF:FFFFFFFFFFFFFFFFFFFFFFFFFFFFFFFFFFFFFFFFFFFFFFFFFFFF  
@A00721:190:HGJW7DSXY:4:1129:21404:6872\_2:N:0:TCTGCAAG+GCTGCACT  
TCTTTGTATAGGGAGTGTGAGAAGACAACGAATCTTGAACTACGGTACTTATCAAAGAAAATGGTGA  
ACCGGTCTCTAAATCTTTTGAGATTGAGAAGATTGAAGAAAACGTCAA  
+  
:F:FF::FFFFFFFF:FF:FFFFFFFF:FF:F,FFFFFFFF,F,,F:F,FFFF:FF,,F,F,::  
FFF,,:F:F::FF:F::,FFF,,:FFF,: ,FF::FF,FF::FFF  
@A00721:190:HGJW7DSXY:4:1116:6578:35149\_2:N:0:TCTGCAAG+GCTGCACT  
TTGTTCTTGAAAACCAAGTTAAGAAGGAGGCTGATCATGGAGTCTTTGTACCTTCTGTCAAACCTTCGA  
GGTTCAGCTACGAGAGGTGATCCCGGATGTGGATTGAAGGCTGGCTCT  
+  
:FFFF:FFFFFFFF:FFFF:FFFFFFFFFFFFFFFFFFFFFFFFFFFFFFFF:FFF:FFFFFF:FFF:FF  
FFFFFFFFFFFF:FFFFFFFFFFFF:FFF:FFFFFFFFFFFFFFFFFFFFFFFF  
@A00721:190:HGJW7DSXY:4:1214:14769:16673\_2:N:0:TCTGCAAG+GCTGCACT  
CTTTTTGAATGTTGTAAAGAATTGGGTTGAGAAGTGTGCTTTACAAGGAGTTAGACTCTTCTTCAAGT  
TTTTAGATCTTCTTGATAATCTTAAAGAAAAATTTTCGAATAAACTAA  
+

```

+
FF:FFFFFFFF:FFFFFFFFFFFFFFFFFFFFFFFF:FFFFFFFFFFFFFFFF:FF:FFFFF:FFFFFFFFF
FFFFFFFFFFFFFFFFFFFFFFFFF:,FFF,FFFFFFFF:F::FFF:FFFF:FF
@A00721:190:HGJW7DSXY:4:1268:16839:9142_1:N:0:TCTGCAAG+GCTGCACT
ACGAGAATTATTACTGTTTTCTCTACCCATAACTTCTTTTTCAAAAATGCGGATGGGTCTACTGATGT
TTTCTACAGAGTGCAGTCGTTTCAACACTTATCACCACCTTTTGAAAGGAAAATAATTGGTGATGAAA
ATA

```

@A00721:190:HGJW7DSXY:4:1646:2844:3630\_2:N:0:TCTGCAAG+GCTGCACT  
GGGTTCTCAAGGCTCTCATCGCCACTGGGATTCTAAGGGGTTCCATAAGATATTATCTGACATTGTGG  
TTCAATGATCAGGATTCTTCTTTTGGTCCTTACGTCTTAAGTAATTTG

@A00721:190:HGJW7DSXY:4:1228:5801:7341\_1:N:0:TCTGCAAG+GCTGCACT  
TCTTGTACGATTCTTAAAAAGAAGTTTATTAACCTTCAGAGTCTCTTGGAAGTCCAGGTAGCTAATG  
TTCTTGCAATAGCCACAGACTTTCTGGGAAAAGAGACCTCTGTTGGTAGAGGAGTTGAGAGAATTACT  
CAG

@A00721:190:HGJW7DSXY:4:2415:15474:35775\_1:N:0:TCTGCAAG+GCTGCACT  
ACGTCTACAACGAGTTAGGGAGTGGCTAGGTTTTAAAGATCCTTTGCACAAGCAATACCTTCCACTG  
AGTTCATCACCCAGAGTTTCGACGTCGCGAAAACGATGAAGATTTCCACACTGTTGAGAATCTTCT  
GAT

@A00721:190:HGJW7DSXY:4:2274:16984:11271\_1:N:0:TCTGCAAG+GCTGCACT  
TGTGCTCTTCCGATCTCCTGATGGCTCAGTACAGGGAGGAGTAATAGTTATAAAACCTTCTTTTATC  
ATTGCAACAGGACTTTGAGAAGACTGTTGAAATGGACAAAATCTGGGATCATAGGTATGTGTCACGCT  
ACA

@A00721:190:HGJW7DSXY:4:1501:1380:10363\_2:N:0:TCTGCAAG+GCTGCACT  
GTTGGCGTCTTGTCGTTGACGTCATTACAGTCTGGAAGTTAGATCATTTGTTGAGGAAGATCTCTACA  
GAGATTATCGAGAGTTGTGATCTAGTTCTAAATTTAGGTCGACGGACT

@A00721:190:HGJW7DSXY:4:1570:24840:11162\_2:N:0:TCTGCAAG+GCTGCACT  
ATGTACGTGGATCTAATGCTTGGTGATCTGAATCTGACCATCGCAAAGAAGACTTTATTAGTTCATGA

AGTTCTTACACTTCTCGCGACTAATGTCAGCTTCACTACAAAGGCGTT  
+  
FF:FFF,FFFFFFFFFFFFFFF,,FF:FFFF:FFFFFFFF,:F,:FFFF,:FFFF:,FF:F,F::FF,F  
FFFF:F:F,F:F::F,,,:FF,FF:,FFF,:FFFF:F,:FF,,,:F,  
@A00721:190:HGJW7DSXY:4:2410:31964:14575\_1:N:0:TCTGCAAG+GCTGCACT  
GATCTTGCAGAGTGACTGGAGTTCAGACGTGTGCTCTTCCGATCTGAAGCTCGCCATATCAGATTAGA  
GACATGCCAGTTAGAGTTCTTCTAACCAGGACTGATGGTGAGATTCTTTTACCTTTTGGAGGTCCAGG  
AAC  
+  
:FF:FFFFFFFF:FFFFFFFFFFFFFFFFFFFFFFFFF::F:FFFFFFFF:FFFFF::FFFFFFFFFFFFFFFF  
:F:,FFF,:FFFFFFFFFFFFFF,FFFF,F:FFFFFFFF:FFFFFFFF,FFFFFFFF:FFFF:FFFFF  
FFF  
@A00721:190:HGJW7DSXY:4:1111:19343:12665\_2:N:0:TCTGCAAG+GCTGCACT  
CCAAGGACGTTTCCGTCGGAGGATGACAGGTGGGAGACCGCTCAATAACACTCTATTGAATCCCTTTT  
CCACGATGAAAGCTCTTTATGAGGTGCTCCATGCAAATTTACAGTTCC  
+  
FFFFFFFFFFFFFFFFFFFFFFFFFFFFFFFFFFFFFFFFFFFFFFFFFFFFFFFFFFFFFFFFFFFFFFFFF  
FFFFFFFFFFFFFFFFFFFFFFFF:FFFFFFFFFFFF:FFFFFFFFFFFFF  
@A00721:190:HGJW7DSXY:4:1221:13349:17065\_2:N:0:TCTGCAAG+GCTGCACT  
TTCTCCTTTAATCGTGAGGTTACGAGAGTTTCGTA CTGTTTATCGGTTGTATTTTGATAAATTTG  
TTGGAATCGATAATGATACTGACGAAGGTTCTATTACCACCCTTGTC  
+  
FFFFFFFFFFFFFFFF:FFFFF:FFFFFFFF:FFFFFFFFFFFFFFFFFFFFFFFFFFFFFFFF:FFFFFFFFFFFF  
FFF,FFF::F:FFFFFFFF:FF,FFFFFFFFFFFFFFFF::FFF,FFFFF  
@A00721:190:HGJW7DSXY:4:1675:12436:35806\_2:N:0:TCTGCAAG+GCTGCACT  
TGATGCTTTCTTAGAGGCTCGTCTAGCCGCTGAGATTCTGCTTACCTATTTACAATCTGTAGAGAGAG  
AGGTTAATCAGAATTTGAGTGATAACGATTTAGTACTGGGAAATGGTG  
+  
FFFFFFFFFFFFFFFF:FFFFFFFFFFFFFFFFFFFFFFFF:FFFFFFFFFFFF,FFFFFFFFFFFF:,FF:FFFFF  
:F:FFFFFFFFFFFFFFFFFFFFFFFF:FFF,F,FFFFFFFFFFFFFFFF:F,FF  
@A00721:190:HGJW7DSXY:4:1156:24008:22874\_1:N:0:TCTGCAAG+GCTGCACT  
CCTTTTTCGATTGGATTGACGGGTCTTCGTCTCAGCTAATTTGATAAGGTTTTCTTTTATGGG  
ACTCTTGTTTGTACTTATGAAGGAGGTATTACTTCGGAAGTTCTTAATGTAGGTCTCCTAGTACTTAA  
GGG  
+  
F:F:FFFFFFFFFFFFFFFFFFFFFFFF:FFFFFFFFFFFFFFFF:FFFFFFFFFFFFFFFF:FFFFFFFFFFFFF  
FFFFFFFFFFFFFFFFFFFFFFFFFFFFFFFFFFFFFFFFFFFFFFFFFFFFFFFFFFFFFFFFFFFFFFFFF  
FFF  
@A00721:190:HGJW7DSXY:4:1374:3721:4805\_2:N:0:TCTGCAAG+GCTGCACT  
GTTTCAGCTGGATGGATCTTTTGATGGTATGTTTCACATTGCGTGATCACTTCCCGTGGACTTGGGAA  
GAGATTAAACATAAAATCCAGCGATTCTATTATGTCGCTAAAGCCTGT  
+  
FFFFFFFF:FFFFFFFFFFFFFFFFFFFFFFFF:FFFFFFFFFFFF:FFFFFFFFFFFFFFFF:FFFFFFFFFFFF  
FFFFF:FFFFFFFFFFFF::FF:F:F,FFFFFFFF:F,FFFFF,:FFF  
@A00721:190:HGJW7DSXY:4:1306:4408:3521\_2:N:0:TCTGCAAG+GCTGCACT  
GTTTCGGGCTGTGGGGATTAACCTCCCTCGTGAACTTACGACGATGTTCTCGCTCGCATTTACAAGG  
ATTACTAAGTCTGAGATCTGCCACTTCTAATTTTAGGAAACGTCGCGA  
+  
FFFFFFFF:FFFFFFFFFFFFFFFFFFFFFFFF:FFFFFFFF:FFFFFFFFFFFFFFFFFFFFFFFFFFFFFFFF  
FFFFFFFFFFFFFFFFFFFF:FFFFFFFFFFFF:FFFFFFF:FFFFFFFFFFFFF  
@A00721:190:HGJW7DSXY:4:1542:4200:15530\_2:N:0:TCTGCAAG+GCTGCACT  
ATGAGGATGTCTTGGTCGAAAAATATCGCCGGGAACCTCTAATAGAGGATCCTGATGACATTATTTCA  
ACGGATACCGATCTCAGTTCTACCACGGAAACCGTCTCAGGAACGTGC  
+

[illegible]

@A00721:190:HGJW7DSXY:4:1470:32832:11663\_2:N:0:TCTGCAAG+GCTGCACT  
TCCAAGTCGCAAACTACTTCAACATCAACGACATCATTCTTGATGAGTGTCTTCTTATCGAAGTCTC  
AGTTATCGCTGCCCGGCCGACGTTTGTGCGCAACTCTCAGAGGTTTAC

+

FFFFFFFFFFFFFFFFFFFFFFFFFFFFFFFFFFFFFFFFFFFFFFFFFFFFFFFFFFFFFFFFFFFFFFFF:FF:FF  
FFFFFFFFFFFFFFFFFFFFFFFFFFFFFFFFFFFFFFFFFFFFFFFFFFFFFFFFFFFFFFFFFFFFFFFF

@A00721:190:HGJW7DSXY:4:1627:10818:11678\_2:N:0:TCTGCAAG+GCTGCACT  
CTATGGAAATTAGACCTATCAGATGTCTTGACGACTTCGAATTTGAGGACGGAGTTAAATATATTACT  
TTCCTCAAGGTGAAAAGTTTGAAATTAACAAAGTCCTTGGAAGAGT

+

FFFFFFFF:FFFFFFFFFFFFFFFFFFFFFFFFFFFFFFFFFFFFFFFFFFFFFFFFFFFFFFFFFFFFFFFF  
FFFFFFFFFFFFFFFFFFFFFFFFFFFFFFFFFFFFFFFFFFFFFFFFFFFFFFFFFFFFFFFFFFFFFFFF

@A00721:190:HGJW7DSXY:4:2373:3387:8234\_1:N:0:TCTGCAAG+GCTGCACT  
GTTCAAGGTAATACTTACCAGCACGTTCCGGCTGGTTAGAATTAAACCTCAAGATGACCCTGTTTTTGC  
ATCACAAACACATATTACCGTTGCTCTATCACGACACGTTGAATCTTTACGATACTTTGTTATCAATG  
TAA

+

FFFFFFFFFFFFFFFFFFFFFFFFFFFFFFFFFFFFFFFFFFFFFFFFFFFFFFFFFFFFFFFFFFFFFFFF  
FFFFFFFFFFFFFFFFFFFFFFFFFFFFFFFFFFFFFFFFFFFFFFFFFFFFFFFFFFFFFFFFFFFFFFFF  
FFF

@A00721:190:HGJW7DSXY:4:1438:11984:22435\_2:N:0:TCTGCAAG+GCTGCACT  
AAGGAAGTGTACGTTTAGCACGGGAGGTTGCAGATTCAACCCCTTATATCGAGGCTATCGAGGACGA  
TGAGTATCTTGAAGTTGTTGACGACAAGCCTCAAGAGGGTAGAGGACC

+

FFFFFFFFFFFFFFFFFFFFFFFFFFFFFFFFFFFFFFFFFFFFFFFFFFFFFFFFFFFFFFFFFFFFFFFF:FFFFFFFF  
FFFFF,FFFFFFFFFFFFFFFFFFFFFFFF,FFFFFFFFFFFFFFFFFFFFFFFF

@A00721:190:HGJW7DSXY:4:2374:1090:10019\_2:N:0:TCTGCAAG+GCTGCACT  
GGTTATTCCTGGAACACCTTAACGTCACTCGGTAATCTTTCAGCCGAATTAAGTACTAATGAGTTCA  
AGTCGGTTGTCGATCGAATTAAGATCAAGGCTAATACCTTTATAGGTA

+

FFFFFFFFFFFFFFFFFFFFFFFFFFFFFFFFFFFFFFFFFFFFFFFFFFFFFFFFFFFFFFFFFFFFFFFF  
FFFFFFFFFFFFFFFFFFFFFFFFFFFFFFFFFFFFFFFFFFFFFFFFFFFFFFFFFFFFFFFFFFFFFFFF

@A00721:190:HGJW7DSXY:4:1271:24433:18223\_1:N:0:TCTGCAAG+GCTGCACT  
TCATCAGTCAGAGTATACCCGATAGGGTACCGAGTCTCCAAGAGAATATTTATTCTTATGAGGCTCGA  
AACTTCAACGTTTTTCAACGGAAGACATATCGCACCCGAAATTTTTGGGCAGAATGCTCTTAACGC  
GGT

+

FFFFFFFFFFFFFFFFFFFFFFFFFFFFFFFFFFFFFFFFFFFFFFFFFFFFFFFFFFFFFFFFFFFFFFFF:FFFFFFFF  
FFFFFFFFFFFFFFFFFFFFFFFF:FFFFFFFFF,FFFFFFFFFFFFFFFFFFFFFFFFFFFFFFFFFFFFFFFF  
FFF

@A00721:190:HGJW7DSXY:4:1213:1280:2174\_2:N:0:TCTGCAAG+GCTGCACT  
GATCAGTCTAAGTTGGATAAAGTTATAGGAGACTCAGTTAACCTGAGAGCTCCTCAATTGATAGATTG  
GGTCAACAATAGGGACGCTAGTATACTTCGTAAAGTCGACAGCGAAAT

+

FFFFFFFFFFFF:FFFFF,FFFFFFFFFFFFFFFFFFFFFFFFFFFFFFFFFFFFFFFFFFFFFFFFFFFF  
FFFFFFFFFFFFFFFFFFFFFFFFFFFFFFFFFFFFFFFFFFFFFFFFFFFFFFFFFFFFFFFF:FFFFF

@A00721:190:HGJW7DSXY:4:1143:31684:10989\_2:N:0:TCTGCAAG+GCTGCACT  
TAATTGGACCGACTATATGACCTATTTAAGCTCATGGTGAAAAGGGAAGCTAAGGTTAACTTGATG  
CTTCAGCCTTTTCGAAGCATAACCCCGCACAGAATATCGTTTATCACG

+

FFFFFFFFFFFFFFFFFFFFFFFFFFFFFFFFFFFFFFFFFFFFFFFFFFFFFFFFFFFFFFFFFFFFFFFF:FFF  
FF,FF:FFFFFFFFFFFFFFFFFFFFFFFFFFFFFFFFFFFFFFFFFFFFFFFFFFFFFFFF

@A00721:190:HGJW7DSXY:4:1259:5918:29027\_2:N:0:TCTGCAAG+GCTGCACT  
CCTATCTTTAAGGTTCTTGTGAGGAGAGTCAAACAGTGTCTTTTACCCAACATTTTTATGTATACAGA



GATGACCAGTGACGATTTCTCCCGGAAGCTCTTCTCTCTTAGGAGG  
+  
FFFFFFFFFFFFFFFFFFFFFFFFFFFFFFFFFFFFFFFFFFFFFFFFFFFFFFFFFFFFFFFFFFFFFFFF:FFFF  
FFFFFFFFFFFFFFFFFFFFFFFFFFFFFFFFFFFFFFFFFFFFFFFFFFFFFFFFFFFFFFFFFFFFFFFF  
@A00721:190:HGJW7DSXY:4:2207:27263:35336\_2:N:0:TCTGCAAG+GCTGCACT  
TCAAGATTTCTTTTGTAAGCCTATGAGATAAAGATGTATTCTTATTTAGGCTTCGATGCTGAATTC  
TTGAACCTTTGGAGTGCCAGTGAATATTTTTGTACGCCAGGAGTATCC  
+  
FFFFFFFFFFFFFFFFFFFFFFFFFFFFFFFFFFFFFFFFFFFFFFFFFFFFFFFFFFFFFFFFFFFFFFFF  
FFFFFFFFFFFFFFFFFFFFFFFFFFFFFFFFFFFFFFFFFFFFFFFFFFFFFFFFFFFFFFFFFFFFFFFF  
@A00721:190:HGJW7DSXY:4:1220:13602:33786\_1:N:0:TCTGCAAG+GCTGCACT  
ATTTACCACCTTTGCTCAACGACGAAGTGGAACGCCAACACTTTCTTTGGTAATTGTATGATCACTT  
TGATGATTTTATCACTTTATTATGACCTTGAAAGTTTTTCGGCTGTGGTTGTCGCTGGGGACGATTCC  
ATT  
+  
FFFFFFFFFFFFFFFFFFFF,FFFFFFFFFFFFFFFFFFFFFFFFFFFFFFFFFFFF,FFFF:FFFFFFFFFFFF  
FFFFFFFFFFFFFFFFFFFFFFFFFFFFFFFFFFFFFFFFFFFFFFFFFFFFFFFFFFFFFFFFFFFFFFFF  
FFF  
@A00721:190:HGJW7DSXY:4:2210:28646:35383\_2:N:0:TCTGCAAG+GCTGCACT  
AGACTCCAATAACTGATCATTCTGATCATATGATTTTGACAATGGTTTCGAAGCGAAATTTTTGAGG  
GATAAACGACGTACTTCTGCTCGCGATTTATTCTTTTTGTCAATGAT  
+  
FF,FF:FFFFFFFFFFFF,,FFFF,FFF:FFFFFFFFFFFF:FFFFFFFFFFFFFFFF,F:FFFFFFFF  
FFFFFFFF:F,FFFF,F,FFF,FF:FFF:,F:FF:FFFFFFFFFFFF  
@A00721:190:HGJW7DSXY:4:1646:26404:12680\_2:N:0:TCTGCAAG+GCTGCACT  
CCTGATCCTTACAAGATCATCGTTAAGTTAGGTAAACCCCTAACCGATGTTACTCTTGTAGGACTTTG  
GGAGAGATTCTGTTAGTTTTAAAGACTATACTAAATATCTCCACTACGA  
+  
FFFFFFFFFFFFFFFFFFFFFFFFFFFFFFFFFFFFFFFFFFFFFFFFFFFFFFFFFFFFFFFFFFFF::FFFFFFFF  
FFFFFFFFFFFFFFFFFFFFFFFFFFFFFFFFFFFFFFFFFFFFFFFFFFFFFFFFFFFFFFFF:FF  
@A00721:190:HGJW7DSXY:4:1220:1208:34898\_2:N:0:TCTGCAAG+GCTGCACT  
GCGACTAATATTCGATATTCGATTGAGGGTCGTTATACCTATTCGGCTATCTGTGCTTTGAATTGTAT  
AAGATCAAATTTTAAACGATTCCGAGAGGTTTATCTGATGTGGAGGG  
+  
FFFFFFFFFFFFFFFFFFFFFFFFFFFFFFFFFFFFFFFFFFFFFFFFFFFFFFFFFFFFFFFF:FF:F:FFF:F::FFF:FFF:FFFFFF  
FFFFFFFF,FF,F,F,FFFFFFFFFFFFFFFFFFFFFFFF:FFFFFFFFFFFF  
@A00721:190:HGJW7DSXY:4:1467:22516:16814\_1:N:0:TCTGCAAG+GCTGCACT  
ATCCCGACCTTTCTTGTGAAAATTTTGATGCGGTTTCATAAGATTATCAGTAATCCTGATTCTACTA  
CGGATTCATGGACCTTCCATCCTGTACCTCTTCTGGAGAGACGTATCTCAAAGATCGACTTCGAGACA  
GGT  
+  
FFFFFFFFFFFFFFFFFFFFFFFFFFFFFFFFFFFFFFFFFFFFFFFFFFFFFFFFFFFFFFFFFFFFFFFF  
FFFFFFFFFFFFFFFFFFFFFFFFFFFFFFFFFFFFFFFFFFFFFFFFFFFFFFFFFFFFFFFFFFFFFFFF  
FFF  
@A00721:190:HGJW7DSXY:4:1141:14073:19194\_2:N:0:TCTGCAAG+GCTGCACT  
GCGAGAGCGACCAAGATCTAAATTCGGTAACGGTGCGTGCGCTTTATTTTAAAAGCTCCCTCCTCT  
CGCAAGTTTGATCTGATACTTATCACGAAAGGACTTGAGTCTTTTGAT  
+  
FFFFFFFFFFFFFFFFFFFFFFFFFFFFFFFFFFFFFFFFFFFFFFFFFFFFFFFFFFFFFFFFFFFFFFFF  
FFFFFFFFFFFF:FFFFFFFFFFFF:FFFFFFFFFFFFFFFFFFFFFFFF  
@A00721:190:HGJW7DSXY:4:1146:4652:14904\_2:N:0:TCTGCAAG+GCTGCACT  
TCTTTTCATTTTAAATGACGATCATTAAGACTCTCTTTCTTCTTTGTTTCCTTCTTTGCACTGATTTTT  
TCCTCATCAGCTTGTGTTTTACCTAATCTGTGTTTTTACGATAACAAC  
+

[illegible]

FFFFFF:FFFFFFFF,FFFFFFFFFFFFFFFFFFFFFFFFFFFFFFFFFFFFFFFF:FFFFFFF:  
FFF  
@A00721:190:HGJW7DSXY:4:1477:18909:16329\_2:N:0:TCTGCAAG+GCTGCACT  
AGTGTATTATTCTGGTGGTGATGATAATCTTGAGGTCGTGACGTTGATGAAGCTATAAGAGCGTT  
CTTATTACGGCGCACTTCTTTACCCGCCACCACACAACCTTTCAGTTTC  
+  
:FFFFFF:FFFFFFFFFFFFFFFFFFFFFFFFFFFFFFFF,FFFF:FFF:FFFF:FFFFFFFF:FFFF  
FFFF:FFFFFFFFFFFFFFFFFFFFFFFFFFFFFFFFFFFFFFFF:FFFFF  
@A00721:190:HGJW7DSXY:4:1427:7618:15436\_1:N:0:TCTGCAAG+GCTGCACT  
ACTGGAACCCCTCGTCAATACTTTTCAATAATATACGTCTTGAACCTACTTATGACGATCTAGTGAA  
ATTAACGCGTCCTTTTCTGGAACGTAGTTTACTATTATGAACAAAGTTATCAAAGATAGTGGCATT  
AAG  
+  
FFFFFFFFFFFFFFFFFFFFFFFF:FFFF:FFFFFF:FFFFFFFFFFFFFFFFFFFFFFFF  
FFFFFFFFFFFFFFFF:FFFFFFFFFFFFFFFFFFFFFFFFFFFFFFFFFFFFFFFFFFFFFFFF  
FFF  
@A00721:190:HGJW7DSXY:4:1655:1904:17347\_1:N:0:TCTGCAAG+GCTGCACT  
AGATCTTGACAGAGTGAAGTTCAGACGTGTGCTCTTCCGATCTCTTGCTGAAACAGCTATTAAAG  
CTGTTGAGCGGTAATTACACCTAAACGAGCTCGATCTGCCATCGCTGAAGGATGTGCACTCTTTCT  
GCT  
+  
:FFFFFFFFFFFFFFFFFFFFFFFFFFFFFFFFFFFFFFFF,FFFFFFFFFFFFFFFF  
FFFFFFFFFFFFFFFFFFFFFFFFFFFFFFFFFFFFFFFFFFFFFFFFFFFFFFFF  
FFF  
@A00721:190:HGJW7DSXY:4:1472:30996:1063\_2:N:0:TCTGCAAG+GCTGCACT  
TCGATTGTATCAACAGTAACATTACTTCTAATAAAGGTCTCTATCAAGCTCGTATTATCGTCGCTGCT  
GGATCTGCGTTACCGTTGAAGGCTAACTCCAAGGTAATTATGAAGAC  
+  
FFFFFFFFFFFF:FFFFFFFFFFFFFFFFFFFFFFFFFFFFFFFFFFFFFFFFFFFFFFFF:FF  
FFFFFFFF:FFFF,FF:FFFFFFFF,FFFFFFFF:FFF:  
@A00721:190:HGJW7DSXY:4:1304:7853:35164\_1:N:0:TCTGCAAG+GCTGCACT  
GTATGAGGGTGTCTTAATCGTAACATTAATAATTTCAATCTTCTTAAAAAGAAGATAGAGAGTCATA  
CTTTGGGCTATCGTTTCAAGTGCATGGGGTTGGATAGCCAATATTGAAGTGGACACCTCTGGTAGTATC  
GAA  
+  
FF:FFFFFFFFFFFFFFFFFFFFFFFFFFFFFFFFFFFFFFFFFFFFFFFFFFFFFFFF  
FFFFFFFFFFFFFFFFFFFFFFFFFFFFFFFFFFFFFFFFFFFFFFFFFFFFFFFF  
FFF  
@A00721:190:HGJW7DSXY:4:1447:11234:23015\_1:N:0:TCTGCAAG+GCTGCACT  
ATACTATGGTTGAATCAACTAAGCATACTACTTTTGCTTTGATTACTCTACCGCCTTACAAGTCTAAG  
GTTAAAGAGTCGATTAAACAAGTTGTACTTATCAATGATTTTATCGCTGGTTGTATCTCGAAAAGTC  
TCT  
+  
FFFFFFFFFFFFFFFFFFFF:F,FFFFFFFFFFFFFFFFFFFFFFFFFFFFFFFF  
FFFFFFFFFFFFFFFFFFFFFFFFFFFFFFFFFFFFFFFFFFFFFFFF  
FFF  
@A00721:190:HGJW7DSXY:4:2555:15139:2409\_2:N:0:TCTGCAAG+GCTGCACT  
TTCTAACCCAAAGAGAATATCTAAAATATTTACAAAATCTTACCACTATCTACGAACCTAAAGTTCTG  
AAGACGTTGCTTGTGCTTCCTCCTTTAATGGCACTACCTCGGTACAA  
+  
FFFFFFFFFFFFFFFFFFFFFFFFFFFFFFFFFFFFFFFFFFFFFFFFFFFFFFFF  
FFFFFFFFFFFFFFFF:FFFFFFFFFFFFFFFF:FFFFFFFF  
@A00721:190:HGJW7DSXY:4:1429:23014:17080\_2:N:0:TCTGCAAG+GCTGCACT  
GCGACCTGTTCCGGAGTTTTACGGGATCCGAATGTTCTGTCTATATTAGGTGAAGCGAAATACGAT

$+$ 

@A00721:190:HGJW7DSXY:4:1255:18629:35258\_1:N:0:TCTGCAAG+GCTGCACT  
TAGTGCGAGGCCTCTCTTCTACGAGTATTGCTATTTATACGGTTACGAGAAGAAGGTTCGAAAGTTTG  
AGGACTTAGTTTACGAACCTGACTCTACTATACGTGACATACTAAATACTAGATATTTGGATGATCTT  
GAT

+

@A00721:190:HGJW7DSXY:4:2650:14516:3051\_2:N:0:TCTGCAAG+GCTGCACT  
TTCAGAGGATGAAAAATTTCTTCCTTGGATTTTAATATAAAGAATCTTTACCAGGACTCCTACTACA  
GGAGGCAGTCTTCTGATCGTAAGAAGTTTATAAGGAACATATCCATTT

+

@A00721:190:HGJW7DSXY:4:2146:25798:29857\_1:N:0:TCTGCAAG+GCTGCACT  
ACTCGAAACTCTAAGTGGTAATACTGTCTTTCCAAGCTTACCTGTATCTTCAATGAAATTGGACTCTT  
CGATAGGGGACATTTTATCGTGGGCTTTCGTAAGGAAGATCTGTTATCGACGGTTTATCGTTTACG  
AAG

+

@A00721:190:HGJW7DSXY:4:2414:2600:4178\_2:N:0:TCTGCAAG+GCTGCACT  
GTTTAAGAATACTATAAATAGAATAGCTATTACTACTAATGGCGTTGGCCTAGTGGATGTTATTAGTG  
ACATCTGGTCAATTTTCGTTTTTAGGTGGTCTTTATTCTATTATTGATT

+

@A00721:190:HGJW7DSXY:4:1419:14787:4523\_1:N:0:TCTGCAAG+GCTGCACT  
ACAGAAGATGATGTTAGAGTAGAATTCCTGAAGAGTCCTTCCGTAACCAACTTCTTGACAATTTTCTT  
CAATCCTTCGATAATAGTTAAATCTAGGATTATGTCTGTGTTGAAAGACTTTCTACCGATAAGGGTCA  
CTA

+

@A00721:190:HGJW7DSXY:4:1449:18747:15734\_2:N:0:TCTGCAAG+GCTGCACT  
TAAGAAATAATCCTACATTGACTGATTATCTAAAGATTGAAGGAAAATTTTATCCTCGTTTAACTTAC  
TTAGACTTTCCTACGATACAAATGATAACTTCTAATTTACGTTTGCTA

+

@A00721:190:HGJW7DSXY:4:2436:31928:11694\_2:N:0:TCTGCAAG+GCTGCACT  
CAAAGGGATGCATGGTGTATCTCCTCAGGAGTCCCGGCATTTGATAATAATGACGAGACTTTCGTCA  
TAATCGCTGCATATTACGGATTACACGGTACCAGCGCATCTCGTGTCG

+

@A00721:190:HGJW7DSXY:4:2309:4345:10708\_1:N:0:TCTGCAAG+GCTGCACT  
GTATTAACCTTATAAAGGTGAGGAGACCATTTTCTTGCTGAAATTTATAGAAGATTATTTTGACAGAAT

CAATAAGAATCATCGATTCTCGATTCTGATAGCTTATCTAGGTACTCTCATTACTATGTTGATTAG  
TCT

+

FFFFFFFFF:F,FF:FFFFFFFF,,FFFFFFFFF,F,FF:FFFFFFFFF:,FFFFFF:FFF:,F  
:FFFF:FFF,FFF:,FFFF:FFFFFFFFFFFF:FFFFFFFFFFFFFFFFFF:FFF:FFF,FFFF  
F:F

@A00721:190:HGJW7DSXY:4:2529:22399:2707\_2:N:0:TCTGCAAG+GCTGCACT  
GATTTACAACGATATAGGAGTAATCTACGAGAAGATTCTAGAATTCTTAATTATAATATTCAACCTCA  
AAAGTTACGTGTTTACAGTAACGAGATCACACATTTTGAGAACTAACT

+

FFFFFFFFFFFFFFFFFFFFFFFFFFFFFFFFFFFFFFFFFFFFFFFFFFFFFFFFFFFFFFFFFFFF  
FFFFFFFFFFFFFFFFFFFFFFFFFFFFFFFFFFFFFFFFFFFFFFFFFFFFFFFFFFFF

@A00721:190:HGJW7DSXY:4:1634:3341:21527\_1:N:0:TCTGCAAG+GCTGCACT  
CAATCTCTTCTTATAATAAATAAATAAATAATTACTAATGGCAAATAGTGGAAGGCTCCAGTCAA  
CACTAGTTCGAGTGCTGCTTTGGATTACGATGACGTGAGAATAGGTGAAGGATAGTTTTTACCTCGA  
CCA

+

FFFFFFFFF:FF:FFFFFFFFFFFFFFFFFFFFFFFFFFFF:FFFFFFFFFFFFFFFFFFFFFFFFFFFF  
FFFFFFFFFFFFFFFFFFFFFFFFFFFFFFFFFFFFFFFFFFFFFFFFFFFFFFFFFFFF:FFFFFFFFFFFFF  
FFF

@A00721:190:HGJW7DSXY:4:1148:28899:29966\_2:N:0:TCTGCAAG+GCTGCACT  
GCGACTAATCTTAAAGCTTCACCCAAAATGAAGGACACTTCGAACTGAATAATGATGCACTACAAAC  
AAGTATCGCTAATCATCTGAAAAAGGCTCTAAAGGACACTATACAATA

+

FFFFFFFFFFFFFFFFFFFFFFFFFFFFFFFFFFFFFFFFFFFFFFFFFFFFFFFFFFFFFFFFFFFF  
FFFFFFFFFFFFFFFFFFFFFFFFFFFFFFFFFFFFFFFFFFFFFFFFFFFFFFFFFFFF

@A00721:190:HGJW7DSXY:4:2675:10203:1846\_2:N:0:TCTGCAAG+GCTGCACT  
ATCAAATATAAAGAAAAGGACTATGAAATAAAAGATTTGGTGCTTAGGGATATAATGAATTCAGCACC  
ACATTTTGGTCAAGTCAATCCGTTGAGAAAATTTCTTAGAGGATATTC

+

FFFFFFFFFFFFFFFFFFFFFFFFFFFFFFFFFFFF:FFFFFFFFFFFFFFFFFFFFFFFFFFFFFFFFFFFF  
FFFFFF:FFFFFFFFFFFFFFFFFFFFFFFFFFFFFFFFFFFF:FFFFFF

@A00721:190:HGJW7DSXY:4:1329:4761:20102\_2:N:0:TCTGCAAG+GCTGCACT  
CAACATTTACCACCAAATTCTTTTGATACAACTCTAGCCTTCAAGTGGGGTATGCCTGCGGAATACGC  
TTGCTATTACACGATTGGTTCGAACCCGTTGATGCTATGTCAGAAGA

+

FFFFFFFFFFFFFFFFFFFFFFFFFFFFFFFFFFFFFFFFFFFFFFFFFFFFFFFFFFFFFFFFFFFF  
FFFFFFFFF:FFFFFF:FFFFFFFFFFFF:FFFFFFFFFFFFFFFFFFFF

@A00721:190:HGJW7DSXY:4:1128:1570:21183\_2:N:0:TCTGCAAG+GCTGCACT  
TGTCGTTTAAAGACTGCAGAGGCTGTCAAACAAGCCAGACTCAAGGAGTCCAATCAAAGGTTTTGAA  
TTTAGCTCAACTGGGGAGACGTGCTTAAATGGGTGATAAAAATTATTT

+

FFFFF:FFFFFFFFFFFFFFFFFFFF:FFFFFFFFF:FFF,FFFFFFFFFFFFFFFFFFFF:FFFFFFFFFFFF  
FFFFFFFFF:,FFFFFFFFFFFFFFFFFFFF,FFFFFFFFFFFF:FFFF

@A00721:190:HGJW7DSXY:4:1544:19488:21277\_1:N:0:TCTGCAAG+GCTGCACT  
TACTTACAAAGGACAATTCAGTTTCATTAATTCTACGGAAAAGTCCGGAGTATATTGTATGTTAATAG  
ATAGTGGGATAATAGTTCTACCGATACGTAGTGAACGCGTTCTGTAACCAAGTACTTCCGTCTGAA  
GAG

+

FFFFFFFFFFFFFFFFFFFFFFFFFFFFFFFFFFFFFFFFFFFF:FFFFFFFFFFFFFFFFFFFFFFFFFFFF  
FFFFFFFFFFFFFFFFFFFFFFFFFFFFFFFFFFFFFFFFFFFFFFFFFFFFFFFFFFFF:FFFFFFFFFFFF  
FFF

@A00721:190:HGJW7DSXY:4:1144:30011:13041\_2:N:0:TCTGCAAG+GCTGCACT  
TATTGATTATGTAACCGATAGGAGTTGTATAGTTGAAGATGTGGCTTTAGACGATAATCCTTTAAGGA

$+$ 

@

+

@

+

@

+

@

+

@

+

@

+

©

+

```
FF:FFFF,FFF:,FFF,FF,F:FF,FFF,FFFFFF:FFFFFFFFFFFF,FFFFFF:FFFFFFFFFFFF:FFF
FFFFFFFF,FF:FFFFFFFFFF:F:FFFFFFFFFF,:FF:FFFF:FF:F,F:FF,FFFFFFFF:FFFFFF,F
FFF
```

@A00721:190:HGJW7DSXY:4:1248:15483:30906\_2:N:0:TCTGCAAG+GCTGCACT  
ATGTATGATGATAATCTACTATTTTTAAATAGTGATATTCAGCGTATACTTGAATACTTTATCAAAGA  
TTTGGCTTGGTCTATTTACCGCAAAAAGTTGGAAGAGGTCTATGATAT

+

FFFFFFFFFFFFFFFFFFFFFFFFFFFFFFFFFFFFFFFFFFFFFFFFFFFFFFFFFFFFFFFFFFFFFFFF:FFFFFFFF:FFFFFFFFFFFF  
F,FFFFFFFFFFFFFFFFFFFFFFFFFFFFFFFFFFFFFFFFFFFFFFFFFFFFFFFFFFFFFFFFFFFFFFFF:F:FFFFFFFFFFFFFFFFFFFFFFFF:F

@A00721:190:HGJW7DSXY:4:1345:12283:13870\_2:N:0:TCTGCAAG+GCTGCACT  
TATACTTTAAATAGCACCGATTATAACTTGACTGTTGATAATATTACAATAGCTCTTTCTCAGAAGAT  
TAGAGAAGTAACCGGTGAACACGTCGGTAGCATTGATTTACTTTTACC

+

FFFFFFFFFFFFFFFFFFFFFFFFFFFFFFFFFFFFFFFFFFFFFFFFFFFFFFFFFFFFFFFFFFFFFFFF:FFFFFFFFFFFFFFFFFFFFFFFF  
FFFFFFFFFFFFFFFFFFFFFFFFFFFFFFFFFFFFFFFFFFFFFFFFFFFFFFFFFFFFFFFFFFFFFFFF:

@A00721:190:HGJW7DSXY:4:1221:18204:8907\_2:N:0:TCTGCAAG+GCTGCACT  
TTTCGAAAAGAAACCTATAAGTTACAAACGATTCTTCGACTATATTAAAGAAATAAAAATACTTCAAG  
TACCTGAACCTTACATTTTAAATGGTATGGTATAATGTGTCTTACAAA

+

FFFFFFFFFFFFFFFFFFFFFFFFFFFFFFFFFFFFFFFFFFFFFFFFFFFFFFFFFFFFFFFFFFFFFFFF:FFFFFFFFFFFFF  
FFFFFFFFF:FFFFFFFFFFFFFFFFFFFFFFFFFFFFFFFFFFFFFFFFFFFFFFFFFFFFFFFFFFFFFFFF

@A00721:190:HGJW7DSXY:4:1166:28266:9455\_2:N:0:TCTGCAAG+GCTGCACT  
CTCTCGGTAATGAGAGTGTATTCCTTAATATTCTAGTAACCGCTATGTGGGCATTACTAGGATTTATC  
ACACTCCTAAATTTGATAGCAATTTATGTTTTAAATGCTAGGAAAATT

+

FFFFFFFFFFFFFFFFFFFFFFFFFFFFFFFFFFFFFFFFFFFFFFFFFFFFFFFFFFFFFFFFFFFFFFFF:FFFFFFFFFFFFF  
FFFFFFFFFFFFFFFFFFFFFFFFFFFFFFFFFFFFFFFFFFFFFFFFFFFFFFFFFFFFFFFFFFFFFFFF:

@A00721:190:HGJW7DSXY:4:1572:29713:19132\_2:N:0:TCTGCAAG+GCTGCACT  
TTGTATAGTTCAAGGAGTACTTAATTCAATAGCTTTAGTATTATTTACTATCGCCTTTATTGAAAATT  
GTATAAGAGTTAATTGCTTACACAAAAGTGACGCGCAAGGAATCTTA

+

FFFFFFFFFFFFFFFFFFFFFFFFFFFFFFFFFFFFFFFFFFFFFFFFFFFFFFFFFFFFFFFFFFFFFFFF:FFFFF:FFFFFFFFFFFFFFFFFFFFFFFF  
FFFFFFFFFFFFFFFFFFFFFFFFFFFFFFFFFFFFFFFFFFFFFFFFFFFFFFFFFFFFFFFFFFFFFFFF:FFFFFFFFF,FFF,F

@A00721:190:HGJW7DSXY:4:1352:28782:4523\_1:N:0:TCTGCAAG+GCTGCACT  
GGGAGAATGAAGTCCGCTTCCCGGAAGAAACGATCTATTTACAGAGTATTTAGAGTAGTCCAAAGTT  
TGTATAAATTTATATGATTTTCTATATATATATACCATATATATATATATAAAATCCTATAAATTTGT  
ACA

+

FFFFFFFFFFFFFFFFFFFFFFFFFFFFFFFFFFFFFFFFFFFFFFFFFFFFFFFFFFFFFFFFFFFFFFFF:FFFFFFF:FFFFFFFFF:FFFFFFFFF,FFFFFFFFFFFFFFFF  
F:FFFFFFF,FFFFFFFFF:FF:F:FFFFFFFFF:F:FFFFFFFFFFFFFFFFFFFFFFFFFFFFFFFF:FFFF  
FFF

@A00721:190:HGJW7DSXY:4:2462:29423:2785\_1:N:0:TCTGCAAG+GCTGCACT  
AACATACCATACTCCCCAAACATAACATACCATAACCTACCATGACCAATCATCGCTCCAAGTGGC  
ACGCCAGACGTAGGGTCAAACCTACTACCGCCGGTCGGCAGATCGGCACCACTGGTCTCTACGTTTCAG  
GGA

+

:FF,,FFFFFFFFFFFFFFFFFFFFFFFFFFFFFFFFFFFFFFFFFFFFFFFFFFFFFFFFFFFFFFFF:FFFFFFFFF:FFFFFFFFF:FFFFFFFFF:FFFFF  
FFFFFFFFFFFFFFFFFFFFFFFFFFFFFFFFFFFFFFFFFFFFFFFFFFFFFFFFFFFFFFFFFFFFFFFF,FFFFFFFF  
FFF

@A00721:190:HGJW7DSXY:4:1675:18385:5212\_2:N:0:TCTGCAAG+GCTGCACT  
TAACCTTCCCAAATCTAGATCTGCACAGAAGAAGGCTGAAGGTCGTTACCGGACGACCACTCAAAGGA  
AACGGGCTGTTGCCAGAGGAAAGCAGCGACCACCGAGGTCGCTCGTA

+

FFFFFFFFFFFFFFFFFFFFFFFFFFFFFFFFFFFFFFFFFFFFFFFFFFFFFFFFFFFFFFFFFFFFFFFF:FFFFFFFFFFFFFFFFFFFFFFFF  
FFFFFFFFFFFFFFFFFFFFFFFFFFFFFFFFFFFFFFFFFFFFFFFFFFFFFFFFFFFFFFFFFFFFFFFF:

@A00721:190:HGJW7DSXY:4:1526:7048:1548\_1:N:0:TCTGCAAG+GCTGCACT  
AGTCCCGTCATCTCTGTGGGAAGTACCTCAGTCAAAAGTCACATTACCACTCCCATGCC

AATCAATGATGTGACTATACAGTTCGGCCATTTCAAGAGTGGTCAATACGTCGTGGGAGGTACTGAAG  
CCT

+

FFFFFFFFFFFFFFFFFFFFFFFFFFFFFFFFFFFFFFFFFFFFFFFFFFFFFFFFFFFFFFFFFFFFFFFF  
FFFFFFFFFFFFFFFFFFFFFFFFFFFFFFFFFFFFFFFFFFFFFFFFFFFFFFFFFFFFFFFFFFFFFFFF  
FFF

@A00721:190:HGJW7DSXY:4:1657:24523:33098\_1:N:0:TCTGCAAG+GCTGCACT  
ATCTAAGAACTCCCAAGCCAATCAATAGTTCTTCTGACCAGAATGAAAAGGGGTTTACCAGGGTAG  
TCTCTAAGTCTACCAGGAAGAGGGGAAATGTCCCCAAACTGAGAAGAATAAAGGGAAAGGTCCATCA  
GGA

+

FFFFF:FFFFFFFFFFFF:FFFFFFFFFFFFFFFFFFFFFFFFFFFFFFFFFFFFFFFFFFFFFFFFFFFF  
FFFFFFFFFFFFFFFFFFFFFFFFFFFFFFFFFFFFFFFFFFFFFFFFFFFFFFFFFFFFFFFFFFFFFFFF  
FFF

@A00721:190:HGJW7DSXY:4:1319:13856:28557\_2:N:0:TCTGCAAG+GCTGCACT  
ATTACCCCTAATTCTGAAGGAAGATCTCCACCATCTGGGGTTGGGAATAAGAAATCTGCACGGGCCA  
AAGAGGCCGCTGCTACGAAGTCGCTGAAGGCGGCTTGGGTCATTAAGG

+

FFFFFFFFFFFF:FF:FFFFFFFFFFFFFFFFFFFFFFFFFFFFFFFFFFFFFFFFFFFFFFFFFFFFF:FFFFFFFFFFFF  
FFF,FFFFFFFFFFFFFFFFFFFFFFFFFFFFFFFFFFFFFFFFFFFFFFFFFFFF:FF

@A00721:190:HGJW7DSXY:4:2176:5493:9095\_1:N:0:TCTGCAAG+GCTGCACT  
AGTTGCGCCTGCCGACCCCATCTTTGAGACCAAGACTCTCTACAGTAGGTTCTGTCCTACTATGAGCA  
AATCTGTTGAATTCGTCACTGAGGACGAAGGTGAGAGGACTTTTGGCTACTGGCGACAACTGAGAGC  
AGT

+

FFFFFFFFFFFFFFFFFFFFFFFFFFFFFFFFFFFFFFFFFFFFFFFFFFFFFFFFFFFFFFFFFFFFFFFF  
FFFFFFFFFFFFFFFFFFFFFFFFFFFFFFFFFFFFFFFFFFFFFFFFFFFFFFFFFFFFFFFFFFFFFFFF  
FFF

@A00721:190:HGJW7DSXY:4:2566:8712:20212\_2:N:0:TCTGCAAG+GCTGCACT  
AGAATTGCGTGGGTTGAAGGCCGACGCTTCGAGCTTGAGTGTGACGAGGCCGGTGACGTTTTTGTCAA  
CGGCGTTTGGAGGATTTTATCCGCGCTTAACATATGGGGCGAAGATCCC

+

FFFFFFFFFFFFFFFFFFFFFFFFFFFFFFFFFFFFFFFFFFFFFFFFFFFFF:FFFFFFFFFFFFFFFFFFFF  
FFFFFFFFFFFFFFFFFFFFF:FFFFFFFFFFFFFFFFFFFF:FFFFFFFFF:F

@A00721:190:HGJW7DSXY:4:2559:24026:7560\_2:N:0:TCTGCAAG+GCTGCACT  
AAGGACTTAGGTTGGCATATTTATGCCGACGATAATAAGCATGTCACCCTTAAGCACCGAGGTAAGCT  
CGGGACTIONACAAGAGAGAGTGTGAGAGAGTCGCTCTCACTATTTTTGC

+

FFFFFFFFFFFFFFFFFFFFFFFFFFFFFFFFFFFFFFFFFFFFFFFFFFFFF:FFFFFFFFFFFFFFFFFFFF  
FFFFFFFFFFFFFFFFFFFFFFFFFFFFFFFFFFFFFFFFFFFFFFFFFFFFF,F

@A00721:190:HGJW7DSXY:4:1166:25798:12790\_2:N:0:TCTGCAAG+GCTGCACT  
TTCTGACTGATGAGGTTAAACTCTTGCTCCTTCTGTGGGTGAGGGTTTTTGTATATTCACTGGTTC  
TGGGAGGCTGCTTCTCCATAATTACAACCTCTCTTTAGAGAGCATT

+

FFFFFFFFFFFFFFFFFFFFFFFFFFFFFFFFFFFFFFFFFFFFFFFFFFFFF:FFFFFFFFFFFFFFFFFFFF  
FFFFFFFFFFFFFFFFFFFFFFFFFFFFFFFFFFFFFFFFFFFFF:FFFFFFF:FF:F

@A00721:190:HGJW7DSXY:4:1207:27859:27164\_2:N:0:TCTGCAAG+GCTGCACT  
AAATTCCACATATGGTAGACGTTGTACACTTTTCTTGAAAATTTTCTTTCTCCGTCATTGGGG  
ATTTGATGTGAGAAGGTGGAAGGTGTCAAGGGTCTTCTTCATGCTGA

+

F,FFFFFFFFFFFF,FFFFFFFFFFFFFFFFFFFF:F:FFFFFFFFFFFFFFFFFFFFFFFFFFFFF,FFFF:  
:FFFFFF,FFFFFFFFFFFF,FFFFFFFFFFFFFFFFFFFFFFFFFFFFF

@A00721:190:HGJW7DSXY:4:1152:30318:20149\_1:N:0:TCTGCAAG+GCTGCACT  
TTCAGACGTGTGCTCTCCGATCTCGGCTCGTATCGAGTTGAGGGAGGAAGTTCTCCGAAATTAAAG



ACGGGGGGGATTAAGAGTCCAGCTGTAAGTGTCAATTCAGAGAGGGGAGCTCTGAAAAGGAACTTCGT  
CAG

+

FFFFFFFFFFFFFFFFFFFFFFFFFFFFFFFFFFFFFFFFFFFFFFFFFFFFFFFFFFFFFFFFFFFFFFFF  
FFFFFFFFFFFFFFFFFFFFFFFFFFFFFFFFFFFFFFFFFFFFFFFFFFFFFFFFFFFFFFFFFFFFFFFF  
FFF

@A00721:190:HGJW7DSXY:4:1578:3929:14591\_2:N:0:TCTGCAAG+GCTGCACT  
AGAGGGGAGGAGTTTGAGGAAGGCTCTAGAGAAGATCTCACCACCTGGAGAAGGCAAGTGGAGAGTCC  
AGAAGTTGATGAAGAAGGATTATTTGAAGCAGGGGTACCACCTCCTA

+

FFFFFFFFFFFFFFFFFFFFFFFF:FFFFFFFFFFFFFFFFFFFFFFFFFFFFFFFFFFFFFFFFFFFFF  
FFFFFFFFFFFF:FFFFFFFFFFFFFFFFFFFFFFFFFFFFFFFFFFFFFFFFFFFFFFFFFFFF

@A00721:190:HGJW7DSXY:4:1378:16450:36808\_2:N:0:TCTGCAAG+GCTGCACT  
TTCTTTGGAGTTTGTAGATAATCTTTGAGAAGGGGTATAGAGCCAGCAAGAGAAGCTTATATGCTGG  
TTTAAGTGATGATTATCACTCCTTGAGAAGACAAGCCACATTAAGATA

+

FFFFFFFFFFFFFFFFFFFFFFFFFFFFFFFFFFFFFFFFFFFFFFFFFFFFFFFFFFFFFFFFFFFFFFFF  
FFFFFFFFFFFFFFFFFFFFFFFFFFFFFFFFFFFFFFFFFFFFFFFF:FFFFFFFFFFFFFFFF

@A00721:190:HGJW7DSXY:4:1361:27208:7905\_2:N:0:TCTGCAAG+GCTGCACT  
CTTGGGGTTTGAATGTCATTAGTGCCTTACGATTGAAAGAGGTCCTTTGAGTATCGACAGATCTTT  
CGATCTTGAGGACGTACATTAACTGCGCAGAATTTCGGTAACTTACCA

+

FFFFFFFFFFFFFFFFFFFFFFFFFFFFFFFFFFFFFFFFFFFFFFFFFFFFFFFFFFFFFFFFFFFFFFFF  
FFFFFFFFFFFFFFFFFFFFFFFFFFFFFFFFFFFFFFFFFFFFFFFF:FFFFFFFF

@A00721:190:HGJW7DSXY:4:1206:25274:33865\_2:N:0:TCTGCAAG+GCTGCACT  
CGGGAAGTTGTGGGATTTAACTTTGACTCAACTACTCCGATCAGATCCGGATGGTTTGATTGGTATGG  
ACTACTCGACTTTTGATCTGGAGTTGTCTAGGGTCATGGCAGATACTA

+

FFFFFFFFFFFFFFFFFFFFFFFFFFFFFFFFFFFFFFFFFFFFFFFFFFFFFFFFFFFFFFFFFFFFF:FFFFFFFF  
FFFFFFFFFFFF:FFFFFFFFFFFFFFFFFFFFFFFFFFFFFFFFFFFFFFFFFFFFFFFFFFFF

@A00721:190:HGJW7DSXY:4:1535:8929:22654\_2:N:0:TCTGCAAG+GCTGCACT  
AAAATATGCAGGTCAAAGATTCTGTAGCTCTGAGGGCGGTTGAGGGAGCCGTTTTGGCCGACTTTAAC  
TATTCTAAGAGTCTTTATGATTCAAACCTATCGTTGTCGTACCTTAC

+

FFFFFFFFFFFFFFFFFFFFFFFFFFFFFFFFFFFFFFFFFFFFFFFFFFFFFFFFFFFFFFFFFFFFF:  
FFFFF:FFFFFFFFFFFFFFFF:FFFFFFFFFFFFFFFFFFFFFFFFFFFFFFFFFFFF

@A00721:190:HGJW7DSXY:4:2408:17246:6621\_1:N:0:TCTGCAAG+GCTGCACT  
TACAGCGGCTTATTGTGCGCAGTTTCCAGAATTGCGGTTGAAGTTCACCCATTCTATCTTGAATGCT  
CACGCCGTGCGAGCCATATCGAGACTATGTTATAATCACTTGTTAAAGTACAGATTTAGTGATTAGA  
TAT

+

FFFFFFFFFFFFFFFFFFFFFFFFFFFFFFFFFFFFFFFFFFFFFFFFFFFFFFFFFFFFFFFFFFFFF  
FFFFFFFFFFFFFFFFFFFFFFFFFFFFFFFFFFFFFFFFFFFFFFFF:FFFFFFFFFFFFFFFFFFFFF  
FFF

@A00721:190:HGJW7DSXY:4:2303:1434:14528\_1:N:0:TCTGCAAG+GCTGCACT  
GGAGGCGATATTCGTTTTATATCCAAACTCCTTGAATGGAGTACATATTTGCAACCCTATTCTTGA  
TGTGAAAGATGCATCGAGGTATACGTCTAGGAACATTGATTGGGAACGTACCTACTCACGAGACGTCA  
TGA

+

:F::,::FFFF:FFFF:FFFF:FFFF,F:FFFF,FF:FFFFF:FFFF,:F:FF:FFFFF:FF  
FFF:FFF:FFFFFFFF,F::F:FF,FFFFFFFF:FFFF,FFFF:::FFFFFFFF:FFF,FFFFFFFF  
FFF

@A00721:190:HGJW7DSXY:4:2368:31024:9126\_1:N:0:TCTGCAAG+GCTGCACT  
ATGTTTCGTTCTGTTACAAGAAGCCTTTGGATTGTGACCATAAAGCCTCAGTTGCGATAGCTGTAGAG

GTATACGATATCTCTCTTGATGATGTAGCCACTATAATGCTTAAGAGAGAGATTGATGTATGTCATTT  
CGT

+

FFFFFFFFFFFFFFFFFFFFFFFF, F: FFFFFFFFFFFFFFFFFF: FFFFFFFFFFFFFFFFFF  
FFFFFFFFFFFFFFFFFFFFFFFFFFFFFFFFFFFFFFFFFFFFFFFFFFFFFFFFFFFFFFFF: FFFF  
FFF

@A00721:190:HGJW7DSXY:4:2268:13376:20149\_1:N:0:TCTGCAAG+GCTGCACT  
GAATTATTGGACACGATGAAAAATGACATACCCGTTCTGACCTTGGTATCGTTATCCGTCATGGAGA  
TGATGGCGCATCACTTGATTACTATATGCCCGAAGGATTGGGTTATTCTCACAACAAAGATAAGATTT  
TAT

+

FFFFFFFFFFFFFFFFFFF: FFF: FFFFFFFFFFFFFFFFFF: FFFFFFFFFFFFFFFFFF  
FFFFFFFFFFFFFFFFFFFFFFFFFFFFFFFFFFFFFFFFFFFFFFFFFFFFFFFFFFFFFFFF  
FFF

@A00721:190:HGJW7DSXY:4:2211:3721:5368\_1:N:0:TCTGCAAG+GCTGCACT  
TAAGGGCGGACAATTGTTCCATTGTGAACTCTTGGGGACTAGATTGAGCATTAAATGAGTTCCGAATAA  
CTCGTAATAAATCTTTCTCTAGTGGACAATTCAGAATACCTATTTCCGTACCAAGAGCCACTGCCAAT  
CTC

+

FFFFFFFF: FFFF: F: FFFF, FFFFFFFFFFFFFFFFFF: FFFFFFFFFFFFFFFFFF  
FFFFFFFFFFFFFFFFFFFFFFFFFFFFFFFFFFFFFFFF: FFFFFFFFFFFFFFFFFF  
FFF

@A00721:190:HGJW7DSXY:4:1156:2718:16877\_2:N:0:TCTGCAAG+GCTGCACT  
AAATTTTTCTCAAGAGATTATGGTTGATAAAGTTTTCTTCATAAGGGCTATTCAGTACGTCATGGGGA  
TCACTTCTTCGGTCAATGACAAAACCTTCGAATATGTTACGACATGGC

+

FFFFFFFFFFFFFFFFFFF: : FFFFFFF: FFFFFFF: FFFFFFFFFFFFFFFFFF  
FFFFFFFFFFFFFFFFFFFFFFFFFFFFFFFFFFFFFFFF

@A00721:190:HGJW7DSXY:4:2425:7581:30530\_2:N:0:TCTGCAAG+GCTGCACT  
AGGATTGTCATCTCGGGGAAAGTGATTCACCAAGATGTTTCATATAGATACGAGATACCTAGAGAAGGT  
CGCAGCGATCTTACTCGTTATCGGAGCTAAGAAGAAGACTTTGGGTAC

+

FFFFFFFFFFFFFFFFFFF, FFFFFFFFFFFFF, F: FFFFFFFFFFFFFFFFFF  
FFFFFFFFFFFFFFFFFFFFFFFFFFFFFFFFFFFFFFFF: FFFFFFFF

@A00721:190:HGJW7DSXY:4:1405:2230:36761\_2:N:0:TCTGCAAG+GCTGCACT  
TAACGTTAGTACCGGAGGTGATCTCTCTGCTTCTGCGTTACTGAGAGAAAAGATTGAGGACGCCTACG  
GTGACTTTATGGACAAGATGCAAGTTCTTGGGAAATACTTGTTCCT

+

FFFFFFFFFFFFFFFFFFFFFFFFFFFFFFFFFFFFFFFFFFFFFFFFFFFFFFFFFFFFFFFF  
FFFFFF, FFFFFFFFFFFFF: FFFFFFFFFFFFFFFFFF

@A00721:190:HGJW7DSXY:4:1330:13494:29089\_2:N:0:TCTGCAAG+GCTGCACT  
TCTTTGTATAGGGAGTGTGAGAAGACAACGAATCTTGAAACTACGGTCCTTATCAAAGAAAATGGTGA  
ACCGGTCTCTAAATCTTTGAGATTGAGAAGATTGAAGAACACGTCAA

+

FF, FFF, FFFFFFFFFFFFFFFFFF: FFFFFFFFFF  
F: FFFFFFFFFFFFFFFFFF: FFFFFFFF: FFFFFFFF

@A00721:190:HGJW7DSXY:4:1408:24334:9095\_2:N:0:TCTGCAAG+GCTGCACT  
TTGTTCTTGAAAACCAAGTTAAGAAGGAGGCTGATCATGGAGTCTTGTACCTTCTGTCAAACCTTCGA  
GGTTCAGCTACGAGAGGTGATCCCGGATGTGGATTGAAGGCTGGCTCT

+

FFFFFFFFFFFFFFFFFFFFFFFFFFFFFFFFFFFFFFFFFFFFFFFFFFFFFFFF: FFFFFF  
FFFFFFFFFFFFFFFFFFFFFFFFFFFFFFFFFFFFFFFF

@A00721:190:HGJW7DSXY:4:1362:17047:29825\_2:N:0:TCTGCAAG+GCTGCACT  
CTTTTGAATGTTGTAAAGAATTGGGTTGAGAAGTGTGCTTACAAGGAGTTAGACTCTTCTTCAAGT

TTTTAGATCTTCTTGATAATCTTAAAGAAAAATTTTCGAATAAACTAA  
+  
FFFF:FFFF,FF:FFFFFFFF:F:F:FFFFFFFFFFFFFFFFFFFFFFFFFFFFFFFFFFFFFFFF:F  
FFFF,FFFFFFFF:FFFFFFFF,F,FFFFFFFFFFFFFFFF:FFF  
@A00721:190:HGJW7DSXY:4:2614:32497:19695\_2:N:0:TCTGCAAG+GCTGCACT  
CTGTACTTACATTCTTTACGCCAGATTCTTCATGGGGCGACGCTGTTTCTCTTGGTATTTCTGAAATA  
GTTTATCAGAGCGTCATTTTCCTTTGGGATCTTCTCTGGTAAGGGA  
+  
FFFFFFFFF:FFFFFFFFFFFFFFFFFFFFFFFFFFFFFFFFF:FFFF:F:FFFFF:FFFFFFFF:FF  
FFFFFFFFFFFFFFFFFFFFFFFF:FFFFFFFFFFFF:FFFFFFFFF:FF  
@A00721:190:HGJW7DSXY:4:2566:13160:35086\_1:N:0:TCTGCAAG+GCTGCACT  
ACGAGAATTACTGTCTTCTACCCATAACTTCTTTTCAAAAATGCGGATGGGTCTACTGATGT  
TTTCTACAGAGTGCAGTCGTTTCAACACTTATCACCACCTTTGAAAGGAAAATAATTGGTGATGAAA  
ATA  
+  
:FF:,F,:FFFF,FF,FFFF:FFF:F,F:,FFFF,F,FFFFFF::FF:FF,FFFFFF,FFFFFF,  
FFF::F:FFFFFFFF:FFFFFFFFF:,FF::F,FFFF:,FF::F:,FFF,FFFFFFFFF,FFFF  
FFF  
@A00721:190:HGJW7DSXY:4:2177:23999:33505\_2:N:0:TCTGCAAG+GCTGCACT  
GGGTTCTCAAGGCTCTCATCGCCACTGGGATTCTAAGGGGTTCCATAAGATATTATCTGACATTGTGG  
TTCAATGATCAGGATTCTTCTTTGGTCCTTACGTCTTAAGTAATTG  
+  
FFFF,FFFF:FFFFFFFFFFFFFF,FFFFFFFFF:FFFFFFFFF:FFFF:FFFFFFFFF:FFF::  
FF:FFFFFF:FFFFFF:FFFF,F:FFFFFFFFFFFF:F:FF:FFFF  
@A00721:190:HGJW7DSXY:4:1248:16658:34820\_1:N:0:TCTGCAAG+GCTGCACT  
TCTTGTCACGATTCTTAAAGAAGTTTATTAACCTTCAAGTCTCTTGGAAGTCCAGGTAGCTAATG  
TTCTTGCAATAGCCACAGACTTTCTGGGAAAAGAGACCTCTGTTGGTAGAGGAGTTGAGAGAATTACT  
CAG  
+  
FFFFFFFFFFFFFFFFFFFFFFFFFFFFFF,FFFFFFFFFFFFFFFFFFFFFFFFFFFFFFFFF  
FFFFFFFFFFFFFFFFFFFFFFFFFFFFFFFFFFFFFFFFFFFFFFFFFFFFFFFFFFFFFFFFF  
FFF  
@A00721:190:HGJW7DSXY:4:1233:11261:7216\_2:N:0:TCTGCAAG+GCTGCACT  
ACAACGAGTTAGGGAGTGGCTAGGTTTTAAAAGATCCTTGCACAAGCAATACCTTCCACTGAGTTCA  
TCAACCAGAGTTTCGACGTCGCGGAAAACGATGAAGATTTCCACACTG  
+  
FFFFFFFFF:FFFFFFFFFFFFFFFFFFFFFFFFFFFFFFFFFFFFFFFFFFFFFFFFFFFFFFFFF  
FFFFFFFFFFFFFFFFFFFFFFFFFFFFFFFFFFFFFFFFFFFFFFFFFFFFFFFFF  
@A00721:190:HGJW7DSXY:4:2246:9579:2268\_1:N:0:TCTGCAAG+GCTGCACT  
TTCTGATGCTGAATTTGAGGAAAATTTTCTGATGTTTTTGGTATATATCCTGATGGCTCAGTTCAGG  
GTGGTGTTATAGTTATAAACCTTCTTTTATCATTGCAACAGGACTTTGAGAAGTCTGTTGAAATGG  
AC  
+  
FF,FF:FF,FF:FFFF:,FFFF,FF,FF,,F,,FFFFFF:,FFF,,FF:,F,,F,FF:FF:,FF  
F,:F,F,F,:F,FFF,FFFF,,FF:FF,F:FFFFFF,FFF:,FFFFFF,,:F:,F,FFFFFFFFF  
FF  
@A00721:190:HGJW7DSXY:4:1228:15429:4131\_2:N:0:TCTGCAAG+GCTGCACT  
TCATAGGTATGTGTACGCTACACTCGAAATATGGGCCCTCATAAGGAAGTATAGTTGGCGTCTTGTC  
GTTGACGTCATTACAGTCTGGAAGTTAGATCATTTGTTGAGGAAGATC  
+  
FFFFFFFFFFFFFFFFFFFFFFFFFFFF:FFFFFFFFFFFFFFFFFFFFFFFFFFFFFFFFF  
FFFFFFFFFFFFFFFFFFFFFFFFFFFFFFFFF:FFFFFFFFFFFFFFFFF  
@A00721:190:HGJW7DSXY:4:1565:25292:14982\_2:N:0:TCTGCAAG+GCTGCACT  
CGAGAGTTGTGATCTAGTTCTAAATTTAGGTCGACGACTTTAGCAACTTTAGATAAATTCTTCCGG

+

@A00721:190:HGJW7DSXY:4:1647:12500:29152\_2:N:0:TCTGCAAG+GCTGCACT  
TATTAGTTCATGAAGTTCTTACACTTCTCGCGACTAATGTCAGCTTCACTACAAAGGCGTTACGTAAA  
GTAGTTTTTCACGCTTTATCTTAAAGCATTACCACCAAATTTAGCACTT

+

@A00721:190:HGJW7DSXY:4:2407:12626:5071\_1:N:0:TCTGCAAG+GCTGCACT  
CTCGCCATATCAGATTAGAGACATGCCAGTTAGAGTTCTTCTAACCAGGACTGATGGTGAGATTCTTT  
TACCTTTTGGAGGTCCAGGAACCTTTACTCCTAGTGTCTTTTCTAGAGTCCAAGGACGTTTCCGTCGG  
AGG

+

@A00721:190:HGJW7DSXY:4:1478:22905:7279\_2:N:0:TCTGCAAG+GCTGCACT  
GACCGCTCAATAACACTCTATTGAATCCCTTTCCACGATGAAAGCTCGTTATGAGGTGCTCCATGCA  
AATTTACAGTTCCTCTTTGGTGATATCGCCTCTGTCTTTCTCCTTTA

+

@A00721:190:HGJW7DSXY:4:1421:8811:24298\_2:N:0:TCTGCAAG+GCTGCACT  
ACTTGGGTTTATCGGTTGTATTTTGATAAATTTGTTGGAATCGATAATGATACTGACGAAGTTCTAT  
TACCACCCTTGTCATTGATACAAACATTCTAGGTGATGCTTTCTTAGA

+

@A00721:190:HGJW7DSXY:4:2170:10936:2581\_2:N:0:TCTGCAAG+GCTGCACT  
TTACAATCTGTAGAGAGAGAGGTTAATCAGAATTTGAGTGATAACGATTTAGTACTGGGAAATGGTGG  
TAGTCAGTTTACTACTTTTCTTTCCCTCCCCTTTTTCGATTGGATTCTG

 $+$ 

@A00721:190:HGJW7DSXY:4:1163:28393:28745\_2:N:0:TCTGCAAG+GCTGCACT  
TTGATAAGGTTTTCTTTATGGGACTCTTGTTTGTACTTATGAAGGAGGTATTACTTCGGAAGTTCT  
TAATGTAGGTCTCCTAGTACTTAAGGGTTTATGTTTCGGTTTCAGCTG

+

@A00721:190:HGJW7DSXY:4:1204:26078:3912\_2:N:0:TCTGCAAG+GCTGCACT  
TGTTTCACATTGCGTGATCACTTCCCGTGGACTTGGGAAGAGATTAAACATAAAATCCAGCGATTCTA  
TTATGTCGCTAAAGCCTGTCCAGTTGTCGATGATGTTTCGGGCTGTGGG

 $+$ 

@A00721:190:HGJW7DSXY:4:2266:16161:16172\_2:N:0:TCTGCAAG+GCTGCACT  
AAACTTACGACGATGTTCTCGCTCGCATTTCAAGGATTACTAAGTCTGAGATCTGCCACTTCTAAT  
TTTAGGAAACGTCGCGAAAAGAAAGTTCATGAGGATGTCTTGGTGGAA

+

```
FFFFFFFFFFFFFFFFFFFFFFFFFFFFFFFFFFFFFFFFFFFFFFFFFFFFF:FFFFFFFFFFFFFFFFFFFFF  
FFFFFFFFFFFFFFFFFFFFFFFFFFFFFFFFFFFFFFFFFFFFFFFFFFFFFF
```

@A00721:190:HGJW7DSXY:4:2264:14434:35446\_2:N:0:TCTGCAAG+GCTGCACT  
GAACCTCTAATAGAGGATCCTGATGACATTATTTCAACGGATACCGATCTCAGTTCTACCACAGAAAC  
CGTCTCAGGAAGTGTCTCCACTGATTCGGAATTAGAGAAAGACGACCT

+

FF,FFFFF:FFFFFFFFFFFFFFFFFFFFFFFFFFFFFFFFFFFFFFFFFFFFFFFFFFFFFFFFFFFFFFFF  
FFFFFFFFFFFFFFFFFFFFFFFFFFFFFFFFFFFFFFFFFFFFFFFFFFFFFFFFFFFFFFFFFFFFFFFF

@A00721:190:HGJW7DSXY:4:1466:21929:12665\_2:N:0:TCTGCAAG+GCTGCACT  
AGACCTCTGAATTTTCAGGGTGCCCTGATGAGGACGTTGAAAGGGATAATTTCAACTCTGAGACTTCT  
AAGAGTGTTTCAAAGACCAGAAACGTAACAAGAAGATAAGGTAGG

+

FFFFFFFFFFFFFFFFFFFFFFFFFFFFFFFFFFFFFFFFFFFFFFFFFFFFFFFFFFFFFFFFFFFFFFFF  
FFFFFFFFFFFFFFFFFFFFFFFFFFFFFFFFFFFFFFFFFFFFFFFFFFFFFFFFFFFFFFFFFFFFFFFF

@A00721:190:HGJW7DSXY:4:1129:4526:12085\_2:N:0:TCTGCAAG+GCTGCACT  
AGCGAGCGGTTGAAGAGAAAAGTATGTTGCGGCTGATCGTACCCCAATTCCTGCTAGAAAGATC  
ACTCTCGGCGATACCACTGATCTTCCAGAGTTACGTAGTGGTCTTCT

+

FFFFFFFFFFFFFFFFFFFFFFFFFFFFFFFFFFFFFFFFFFFFFFFFFFFFFFFFFFFFFFFFFFFFFFFF  
FFFFFFFFFFFFFFFFFFFFFFFFFFFFFFFFFFFFFFFFFFFFFFFFFFFFFFFFFFFFFFFFFFFFFFFF

@A00721:190:HGJW7DSXY:4:1605:14959:9706\_1:N:0:TCTGCAAG+GCTGCACT  
AAGTTTCTGCTAGTCGCGACGATAGTATTTATCGGAGTGATATTAACAAGTTAACTTCGAAGTACC  
ACTTACAAGAGTGTTGAAGTACCGCAACATGGATCAGTTTTCCAAAAGCTATTAATAGCAGTTGCGG  
GGC

+

FFFFFFFFF:FFFFFFFFF:FFFFFFFFFFFFFFFFFFFFFFFFFFFFFFFFFFFFFFFFFFFFFFFFFFFF  
FFFFFFFFFFFFFFFFFFFFFFFFFFFFFFFFFFFFFFFFFFFFFFFFFFFFFFFFFFFFFFFFFFFFFFFF  
FFF

@A00721:190:HGJW7DSXY:4:2225:29993:16861\_2:N:0:TCTGCAAG+GCTGCACT  
AAACTGAATCCACTCTCTTGGGATATAAATGAGTACATCTATAATAGAGTTTGGAACTGTGTAATGT  
CCTACGTACTGTTCAAGGTGTTTGGGCTTCTCTAAAGAACAGCAACTT

+

FFFFFFFFFFFFFFFFFFFFF:FFFFFFFFFFFFFFFFFFFFFFFFFFFFFFFFFFFFFFFFFFFFFFFFFFFF  
FFFFFFFFFFFFFFFFFFFFFFFFFFFFFFFFFFFFFFFFFFFFFFFFFFFFFFFFFFFFFFFFFFFFFFFF

@A00721:190:HGJW7DSXY:4:2425:29577:23406\_2:N:0:TCTGCAAG+GCTGCACT  
AGACCTTTCTTGGGGAGTAAAGAGGGTTTGGAAATTACGGAACCTTTCCTCGTTCTTCATGAAGATCT  
TCGAGTGTTTTATAGTGAGTTATTCTTGCGAAGGTTCAAGTCGATTGA

+

FFFFFFFFFFFFFFFFFFFF:F:F:FF:FFFF:FFFFFFFFFFFFFFFFFFFFFFFFFFFFFFFFFFFFF:  
FFFFFFFFF:FFFFFFFFFFFFFFFFFFFFFFFFFFFFFFFFFFFFFFFFFFFFFFFFFFFFFFFFFFFFF

@A00721:190:HGJW7DSXY:4:1611:29225:33505\_2:N:0:TCTGCAAG+GCTGCACT  
AATAAGAAGTTCTTCGCAGTTGAATCTCCACCAGGTGGAGGGAAGACCACTGAAGTTATAGCGACTTT  
TGTCGAATTTTTCGCAAAAGGTCTTGAAGTACGTATTGTCACTGCTAA

+

FFFFFFFFFFFFFFFFFFFFFFFFFFFFFFFFFFFFFFFFFFFFFFFFFFFFFFFFFFFFFFFFFFFFFFFF:  
FFFFFFFFFFFFFFFFFFFFFFFFFFFFFFFFFFFFFFFFFFFFFFFFFFFFFFFFFFFFFFFFFFFFFFFF

@A00721:190:HGJW7DSXY:4:1612:2808:35634\_2:N:0:TCTGCAAG+GCTGCACT  
TTGGCACTTCTAGTTCATCGCGGTATTTGTGAAATTAAGACAGACGTGAAAGTTATGATGAGTGATCG  
TATTAGAACAGCTGATTCTTATTGCATGAACGTCGCTGAGGTCAAACC

+

FFFFFFFFFFFFFFFFFFFFFFFFFFFFFFFFFFFFFFFFFFFFFFFFFFFFFFFFFFFFFFFFFFFFFFFF,  
FFFFFFFFF,FFFFFFFFFFFFFFFFFFFFFFFFFFFFFFFFFFFFFFFFFFFFFFFFFFFFFFFFFFFFF

@A00721:190:HGJW7DSXY:4:2543:6144:28917\_2:N:0:TCTGCAAG+GCTGCACT  
TTTTCATCGACGAATTATTCATGATTCACGCTGGTCAGACCCTTTTTCTTACACATCTACTTAAGGCG  
GCTTATACCATAGGTTACGGTGATTCCAATCAAATCGGATTCATCAAT

+

FFFFFFFFFFFFFFFFFFFFFFFFFFFFFFFFFFFFFFFFFFFFFFFFFFFFFFFFFFFFFFFFFFFFFFFF  
FFFFFFFFFFFFFFFFFFFFFFFFFFFFFFFFFFFFFFFFFFFFFFFFFFFFFFFFFFFFFFFF  
@A00721:190:HGJW7DSXY:4:1477:1615:20290\_2:N:0:TCTGCAAG+GCTGCACT  
TCCAAGTCGCAAACTACTTCAACATCAACGACATCATTCTTGATGAGTGTCTTCTTATCGAAGTCTC  
AGTTATCGCTGCCCGGCCGACGTTTGTCTGCGAACTCTCAGAGGTTTAC  
+  
FFFFFFFFFFFFFFFFFFFFFFFFFFFFFFFFFFFFFFFFFFFFFFFFFFFFFFFFFFFFFFFFFFFFFFFF:FFFFFFFFFFFFF  
FFFFFFFFFFFFFFFFFFFFFFFFFFFFFFFFFFFFFFFFFFFFFFFFFFFFFFFFFFFFFFFFFFFFFFFF  
@A00721:190:HGJW7DSXY:4:1635:30282:12540\_2:N:0:TCTGCAAG+GCTGCACT  
CTATGGAAATTAGACCTATCAGATGTCTTGACGACTTCAATTTGAGGACGGAGTTAAATATATTACT  
TTCCTCAAGGTGAAAAGTTTGAATTAACAAAGTCCTTGTAAGAGT  
+  
FFFFFFFFFFFFFFFFFFFFFFFFFFFFFFFFFFFFFFFFFFFFFFFFFFFFFFFFFFFFFFFFFFFFFFFF:FFFFFFFFFFFFF  
FFF:FFFFFFFFFFFFF:FFFFFFFFFFFFF:FFFFFFFFFFFFF:FFFFFFFFFFFFF  
@A00721:190:HGJW7DSXY:4:2417:6153:20290\_1:N:0:TCTGCAAG+GCTGCACT  
GTTCAAGGTAATACTTACCAGCACGTTCTGGCTGGTTAGAATTAAACCTCAAGATGACCCTGTTTTTGC  
ATCACAAACACATATTACCGTTGCTCTATCACGACACGTTGAATCTTTACGATACTTTGTTATCAATG  
TAA  
+  
FFFFFFFFFFFFFFFFFFFFFFFFFFFFFFFFFFFFFFFFFFFFFFFFFFFFFFFFFFFFFFFFFFFFFFFF:FFFFFFFFFFFFF  
FFFFFFFFFFFFFFFFFFFFFFFFFFFFFFFFFFFFFFFFFFFFFFFFFFFFFFFFFFFFFFFFFFFFFFFF:FF  
FFF  
@A00721:190:HGJW7DSXY:4:1606:32796:23625\_2:N:0:TCTGCAAG+GCTGCACT  
AAGGAAGTGTACGTTTAGCACGGGAGGTTGCAGATTCAACCCCTTATATCGAGGCTATCGAGGACGA  
TGAGTATCTTGAAGTTGTTGACGACAAGCCTCAAGAGGGTAGAGGACC  
+  
FFFFFFFFFFFFFFFFFFFF,FFFFFFFFFFFFF:F,FFFFFFFFFFFFFFFFFFFFFFFFFFFF,FFFFFFFFFFFFF  
,FF,FFFFFFFFFFFFFFFFFFFF:FFFFFFFFFFFF:FFFFF:FF,FF:FF:FFF  
@A00721:190:HGJW7DSXY:4:2442:28818:1799\_2:N:0:TCTGCAAG+GCTGCACT  
GGTTATTCCTGGAACCACTTAACGTCACTCGGTAATCTTTCAGCCGAATTAAGTACTAATGAGTTCA  
AGTCGGTTGTGATCGAATTAAGATCAAGGCTAATACCTTTATAGGTA  
+  
FFFFFFFFFFFFFFFFFFFFFFFFFFFFFFFFFFFFFFFFFFFFFFFFFFFFFFFFFFFFFFFFFFFFFFFFF:  
F:FFFFFFFFFFFFF:FFFFFFFFFFFFFFFFFFFFFFFFFFFFFFFFFFFFFFFFFFFF,FFF  
@A00721:190:HGJW7DSXY:4:1344:32407:27837\_1:N:0:TCTGCAAG+GCTGCACT  
TCATCAGTCAGAGTATACCCGATAGGGTACCGAGTCTCCAAGAGAATATTTATTCTTATGAGGCTCGA  
AACTTCAACGTTTTTACAACGGAAAGACATATCGCACCCGAAATTTTTGGGCAGAATGCTCTTAACGC  
GGT  
+  
FFF:FFFFFFFFF:FFFFFFFFFFFF:FFF:FFFFFF:FFFFFFF,FFFFFFFFF:FFFFFFFFFFFFFFFFFFFF  
FFFFFFFFFFFF,FFFFFFFFFFFFFFFFFFFFFFFFFFFFFFFFFFFFFFFFFFFF,FFFFFFFFFFFFFFFFFFFF:FFFFFFFFF  
FFF  
@A00721:190:HGJW7DSXY:4:1347:17363:7169\_2:N:0:TCTGCAAG+GCTGCACT  
GATCAGTCTAAGTTGGATAAAGTTATAGGAGACTCAGTTAACCTGAGAGCTCCTCAATTGATAGATTG  
GGTCAACAATAGGGACGCTAGTATACTTCGTAAAGTCGACAGCGAAAT  
+  
FFFFF:FFFFFFFFF:FFFFFFFFFFFF:FFFFFFFFFFFFFFFFFFFFFFFFFFFFFFFFFFFFFFFFFFFFF  
FFFFFFFFFFFFFFFFFFFFF:FFFFFFFFFFFFF:FFFFFFFFFFFFFFFFFFFFF  
@A00721:190:HGJW7DSXY:4:1143:32117:13338\_2:N:0:TCTGCAAG+GCTGCACT  
TAATTGGACCGACTATATGACCTATTTTAAGCTCATGGTGAAAAGGGAAGCTAAGGTTAACTTGATG  
CTTCAGCCTTTTTCGAAGCATAACCCCGCACAGAATATCGTTTATCACG  
+  
FFFFFFFFFF,FF,FFFFFF:FFFFF:FFFFFFFFFFFFFFFFFFFFF,FFFFFFFFFFFFF:FF::FFFFFFF  
FFFFFFFFFFFFFFFFFFFFF:FFFFFFFFFFFFF,FFFFFFFFFF,FFFFFFF

@A00721:190:HGJW7DSXY:4:1320:16288:5838\_2:N:0:TCTGCAAG+GCTGCACT  
CCTATCTTTAAGTTCTTGTGAGGAGAGTCAAACAGTGTCTTTTACCCAACATTTTATGTATACAGA  
GATGACCAGTGACGATTTCTCCCGGAAGCTCTTCTCTCTTAGGAGG

[illegible] $+$ 

```
FFFFFFFFFFFFFFFFFFFFFFFFFFFFFFFFFFFFFFFFFFFFFFFFFFFFFFFFFFFFF,FF:FFFFFFFFFFFFFFF
:FFFFFFFFFFFFFFFFFFFFFFFFFFFFFFFFFFFFFFFFFFFFFFFFFFFFFFFFFFFF
```

+

[illegible]

+

[illegible]

+

```
FFFF:FFFFFFFFFFFFFFFFFFFFFFFFFFFFFFFF:FFFFFFFFFFFFFFFFFFFFFFFFFFFFFFFF
FFFFFFFFFFFFFFFF,FFFFFFFFFFFFFFFFFFFFFFFFFFFFFFFFFFFFFFFFFFFFFFFF
FFF
```

+

```
F,FFFFFFFFFFFFFFFFFFFFFFFFFFFFFFFFFFFFFFFFFFFFFFFFFFFFFFFFFFFFFFF  
FFFFFFFFFFFFFFFFFFFFFFFFFFFF:FFFFFFFFFFFFFFFFFFFFFFFF:F
```

+

[illegible]

+

[illegible]





TGGTGGTACTTTTCGATACTTCTATCGTCTTACGTTACGGTAATTACTATAGTGTTATTTATTCTGGTG  
GTG

+

FFFFFFFFFFFFFFFFFFFFFFFFFFFFFFFFFFFFFFFFFFFFFFFFFFFFFFFFFFFFFFFFFFFFFFFFFFFF  
FFFFFFFFFFFFFFFFFFFFFFFFFFFFFFFFFFFFFFFFFFFFFFFFFFFFFFFFFFFFFFFFFFFFFFFFFFFF  
FFF

@A00721:190:HGJW7DSXY:4:1202:30101:32487\_2:N:0:TCTGCAAG+GCTGCACT  
AGGTCGTGACGTTGATGAAGCTATAAGAGCGTTCTTATTACGGCGCACTTCTTTACCCGCCACCACAC  
AACTTTCAGTTTCACAACTGAAGGAGGAGGTTTCTGTTACTGGAAAAC

+

FFFFFFFFFFFFFFFFFFFFFFFFFFFFFFFFFFFFFFFFFFFFFFFFFFFFFFFFFFFFFFFFFFFFFFFFFFFF  
FFFFFFFFFFFFFFFFFFFFFFFFFFFFFFFFFFFFFFFFFFFFFFFFFFFFFFFFFFFFFFFFFFFFFFFFFFFF

@A00721:190:HGJW7DSXY:4:1112:30400:33285\_1:N:0:TCTGCAAG+GCTGCACT  
ACTTTTCAATAATATACGCTTGAACCTCACTTATGACGATCTAGTGAAATTAACGCGTCCTTTTCTGG  
AACGTAGTTTTACTATTATGAACAAAGTTATCAAAGATAGTGCATTCAAGGCAAACCTTACCCTGATT  
CCG

+

F,FFFFFFFFFFFFFFFFFFFFFFFFFFFFFFFFFFFFFFFFFFFFFFFFFFFFFFFFFFFFFFFFFFFFFFFFFFFF  
FFFFFFFFFFFFFFFFFFFFFFFFFFFFFFFFFFFFFFFFFFFFFFFFFFFFFFFFFFFFFFFFFFFFFFFFFFFF  
FFF

@A00721:190:HGJW7DSXY:4:1137:30888:34475\_1:N:0:TCTGCAAG+GCTGCACT  
TTCTACCAGGGGCTATTACTCTTGCTGAAACAGCTATTAAGCTGTTGAGCGGGTAATTACACCTAAA  
CGAGCTTGATCTGCCATCGCTGAAGGATGTGCACTCTTTTCTGCTACTTTAACGGAGCGTAGTGTACT  
CTT

+

FFFFFFFFFFFFFFFFFFFFFFFFFFFFFFFFFFFFFFFFFFFFFFFFFFFFFFFFFFFFFFFFFFFFFFFFFFFF  
FFFFFFFFFFFFFFFFFFFFFFFFFFFFFFFFFFFFFFFFFFFFFFFFFFFFFFFFFFFFFFFFFFFFFFFFFFFF  
FFF

@A00721:190:HGJW7DSXY:4:1114:23023:9298\_1:N:0:TCTGCAAG+GCTGCACT  
CAACAGTAACATTACTTCTAATAAAGGTCTCTATCAAGCTCGTATTATCGTCGCTGCTGGATCTGCGT  
TACCGTTGAAGGCTAACTCCAAGGTAATTATGAAGACTGTGATTTATCTTTCCTCTGGCCTTGTAT  
GAG

+

FFFFFFFFFFFFFFFFFFFFFFFFFFFFFFFFFFFFFFFFFFFFFFFFFFFFFFFFFFFFFFFFFFFFFFFFFFFF  
FFFFFFFFFFFFFFFFFFFFFFFFFFFFFFFFFFFFFFFFFFFFFFFFFFFFFFFFFFFFFFFFFFFFFFFFFFFF  
FFF

@A00721:190:HGJW7DSXY:4:2111:18539:1877\_2:N:0:TCTGCAAG+GCTGCACT  
ATCGTAACATTAATAATTTCAATCTTCTTAAAAAGAAGATAGAGAGTCATACTTTGGGCTATCGTTCA  
GGTGCATGGGGTTGGATAGCCAATATTGAAGTGGACACCTCTGGTAGT

+

FFFFFFFFFFFFFFFFFFFFFFFFFFFFFFFFFFFFFFFFFFFFFFFFFFFFFFFFFFFFFFFFFFFFFFFFFFFF  
FFFFFFFFFFFFFFFFFFFFFFFFFFFFFFFFFFFFFFFFFFFFFFFFFFFFFFFFFFFFFFFFFFFFFFFFFFFF

@A00721:190:HGJW7DSXY:4:2602:27959:29496\_1:N:0:TCTGCAAG+GCTGCACT  
AGATAACCAATAAGGAAGGAGCTTATACTATGGTTGAATCAACTAAGCATACTACTTTTGCTTTGATT  
ACTCTACCGCCTTACAAGTCTAAGGTTAAAGAGTCGATTAAACAAGTTGTACTTATCAATGATTTTAT  
CGC

+

FFFFFFFFF:FFFFFFF:FFFFFFFFFFFFFFFFFFFFFFFFFFFFFFFFFFFFFFFFFFFFFFFFFFFFFFFFFFFF  
FFFFFFFFFFFFFFFFFFFFFFFFFFFFFFFFFFFFFFFFFFFFFFFFFFFFFFFFFFFFFFFFFFFFFFFFFFFF  
FFF

@A00721:190:HGJW7DSXY:4:1478:32533:3881\_1:N:0:TCTGCAAG+GCTGCACT  
ACCCAAAGAGAATATCTAAAATATTTACAAAATCTTACCCTATCTACGAACCTAAAGTTCTGAAGAC  
GTTGCTTGTGCGTTCTCCTTTAATGGCACTACCTCGGTACAATCTTACTTGAACGAAGGCGACCTG  
TTC

++++  
 @A00721:190:HGJW7DSXY:4:1163:11840:12853\_1:N:0:TCTGCAAG+GCTGCACT  
 TGTTCTGTCTATATTAGGTGAAGCGAAATACGATTTTCAAACGTCAACGTTCCACCGAGTTTTCGTTTCGT  
 ACCTTGATGCTGACTTTTCGTCAATATGATTTGATCTGGTTGCTCAATTCTAAGCGTGTTCCGCTTAGT  
 GCG  
 +  
 FFFFFFFFFFFFFFFF:FFFFFFFFFFFFFFF:FFFFFFFFFFFFFFF:FFFFFFFFFFFFFFF  
 FFFFFFFFFFFFFFFF:FFFFFFFFFFFFFFF:FFFFFFFFFFFFFFF:FFFFFFFFFFFFFFF  
 FF:  
 @A00721:190:HGJW7DSXY:4:1218:31331:11663\_2:N:0:TCTGCAAG+GCTGCACT  
 GAGTATTGCTATTTATACGTTACGAGAAGAAGGTTTCAAAGTTTGAGAACTTAGTTTACGAACCTGA  
 CTCTACTATACGTGACATACTAAATACTAGATATTTGGATGATCTTGA  
 +  
 FFFFFFFFFFFFFFFF:FFFFFFFFFFFFFFF:FFFFFFFFFFFFFFF:FFFFFFFFFFFFFFF  
 FFFFFFFFFFFFFFFF:FFFFFFFFFFFFFFF:FFFFFFFFFFFFFFF:FFFFFFFFFFFFFFF  
 @A00721:190:HGJW7DSXY:4:1243:26060:18474\_2:N:0:TCTGCAAG+GCTGCACT  
 CATGAATTTTCAGAGGATGAAAAATTTCTCCTTGGAATTTAATAAAGAATCTTTACCAGGACTC  
 TACTACAGGAGGCAGTCTTCTGATCGTAAGAAGTTTATAAGGAACAT  
 +  
 FFFFFFFFFFFFFFFF:FFFFFFFFF:FFFFFFFFFFFFFFF:FFFFFFFFFFFFFFF:FFFFF:FF  
 FFFFFF:FFFFFFFFFFFFFFF:FFFFFFFFFFFFFFF:FFFFFFFFFFFFFFF:FFFFFFFFF  
 @A00721:190:HGJW7DSXY:4:2177:16152:19006\_1:N:0:TCTGCAAG+GCTGCACT  
 ACTCGAACTCTAAGTGGTAATACTGTCTTTCCAAGCTTACCTGTATCTTCAATGAAATTGGACTCTT  
 CGATAGGGGACATTTTATCGTGGGCTTTCCGTAAAGGAAGATCTGTTATCGACGTTTATCGTTTACG  
 AAG  
 +  
 FFFFFFFFFFFFFFFF:FFFFFFFFF,FFFFFFFFFFFFFFF:FFF,FFFFFFFFFFFFFFF  
 FFFFFFFFFFFFFFFF,FFFFFFFFF:FFFFFFFFFFFFFFF:FFFFF  
 FFF  
 @A00721:190:HGJW7DSXY:4:2452:3314:11115\_2:N:0:TCTGCAAG+GCTGCACT  
 GTTTAAGAATACTATAAATAGAACTAGCTATTACTACTAATGGCGTTGGCCTAGTGGATGTTATTAGTG  
 ACATCTGGTCAATTTCTGTTTTTAGGTGGTCTTTATTCTATTATTGATT  
 +  
 FFFFFFFFFFFFFFFF:FFFFFFFFF:FFFFFFFFFFFFFFF:FFFFFFFFFFFFFFF  
 FFFFFFFFFFFFFFFF:FFFFFFFFF:FFFFFFFFFFFFFFF:FFFFFFFFFFFFFFF  
 @A00721:190:HGJW7DSXY:4:1457:6750:27774\_1:N:0:TCTGCAAG+GCTGCACT  
 ACAGAAGATGATGTTAGAGTAGAATTCCTGAAGAGTCCTTCCGTAACCAACTTCTTGACAATTTCTT  
 CAATCCTTCGATAATAGTTAAATCTAGGATTATGTCTGTGTTGAAAGACTTCTACCGATAAGGGTCA  
 CTA  
 +  
 FFFFFFFFFFFFFFFF:FFFFFFFFF:FFFFFFFFFFFFFFF:FFFFFFFFFFFFFFF  
 FFFFF:FFFFFFFFFFFFFFF:FFFFFFFFFFFFFFF:FFFFFFFFFFFFFFF:FFFFFFFFF  
 FFF  
 @A00721:190:HGJW7DSXY:4:2356:32009:3411\_2:N:0:TCTGCAAG+GCTGCACT  
 TAAGAAATAATCCTACATTGACTGATTATCTAAAGATTGAAGGAAAATTTTATCCTCGTTTAACTTAC  
 TTAGACTTTCCTACGATACAAATGATAACTTCTAATTTACGTTTGCTA  
 +  
 FFFF:FFFFFFFFFFFFFFF:FFFFFFFFF:FFFFFFFFFFFFFFF:FFFF:FF:FFFFFFFFFFFFFFF  
 FFFFFFFFFFFFFFFF:FFFFFFFFF:FFFFFFFFF:FFFF,FF  
 @A00721:190:HGJW7DSXY:4:2441:24695:27696\_2:N:0:TCTGCAAG+GCTGCACT  
 CAAAGGGATGCATGGTGTATCTCCTCAGGAGTCCC GGCAATTTGATAATAATGACGAGACTTTCGTCA

$+$ 

@A00721:190:HGJW7DSXY:4:1314:6207:14904\_1:N:0:TCTGCAAG+GCTGCACT  
ATTAACCTTATAAAGGTGAGGAGACCATTTTCTTGCTGAAATTTATAGAAGATTATTTTGACAGAATCA  
ATAAGAATCATCGATTCTCGATTCTGATAGAGCTTATCTAGGTACTCTCATTTACTATGTTGATTTAGTC  
TAC

+

@A00721:190:HGJW7DSXY:4:2532:2456:7623\_2:N:0:TCTGCAAG+GCTGCACT  
GATTTACAACGATATAGGAGTAATCTACGAGAAGATTCTAGAATTCTTAATTATAATATTCAACCTCA  
AAAGTTACGTGTTTACAGTAACGAGATCACACATTTTGAGAACTAACT

+

@A00721:190:HGJW7DSXY:4:2666:11912:30326\_1:N:0:TCTGCAAG+GCTGCACT  
CAATCTCTTCTTATAATAAAATAAATAAATAATATTACTAATGGCAAATAGTGGAAAGGCTCCAGTCAA  
CACTAGTTCGAGTGCTGCTTTGGATTACGATGACGTGAGAATAGGTGAAGGGATAGTTTTTACCTCGA  
CCA

+

@A00721:190:HGJW7DSXY:4:1240:15067:30843\_2:N:0:TCTGCAAG+GCTGCACT  
GCGACTAATCTTAAAGCTTCACCCAAAATGAAGGACACTTCGAACTGAATAATGATGCACTACAAAC  
AAGTATCGCTAATCATCTGAAAAAGGCTCTAAAGGACACTATACAATA

+

@A00721:190:HGJW7DSXY:4:2672:10791:17863\_1:N:0:TCTGCAAG+GCTGCACT  
TTGGTGCTTAGGGATATAATGAATTCAGCACCACATTTTGGTCAAGTCAATCCGTTGAGAAAATTTCT  
TAGAGGATATTCGCCATTGTGGTACGAATTGGTCCAACATTTACCACCAAATTCCTTTGATACAACCTC  
TAG

+

@A00721:190:HGJW7DSXY:4:1528:29722:23907\_2:N:0:TCTGCAAG+GCTGCACT  
CGGAATACGCTTGCTATTACCAGATTGGTTCGAACCCGTTGATGCTATGTCAGAAGAAGCTATTCAA  
GCTTGTCGTTTTAAAGACTGCAGAGGCTGTCAAACAAGCCCAGACTCAA

+

@A00721:190:HGJW7DSXY:4:1127:23068:6433\_1:N:0:TCTGCAAG+GCTGCACT  
AATTTAGCTCAACTGGGGAGACGTGCTTAAATGGGTGATAAAAATTATTTAGAGATCTTTTCTACTTA  
CAAAGGACAATTCAGTTTCATTAATTCTACGGAAAAGTCCGGAGTATATTGTATGTTAATAGATAGTG  
GGA

+

[illegible]



F:FFFFFFFFFFFFFFFFFFFFFFFFFFFFFFFFFFFFFFFFFFFFFFFFFFFFFFFFFFFFFFFF  
FFF

@A00721:190:HGJW7DSXY:4:1513:21730:23500\_2:N:0:TCTGCAAG+GCTGCACT  
GGAGGATCTTTTCAATAAGATGTATGATGATAATCTACTATTTTAAATAGTGATATTCAGCGTATAC  
TTGAATACTTTATCAAAGATTTGGCTTGGTCTATTTACCGCAAAAAGT

+  
FFFFFFFFFFFFFFFFFFFFFFFFFFFFFFFFFFFFFFFFFFFFFFFFFFFFFFFFFFFFFFFF:FFFFFFFFFFFFFFFFFFFFFFFF  
FFFFFFFFFFFFFFFFFFFFFFFFFFFFFFFFFFFFFFFFFFFFFFFFFFFFFFFF:F:FFFFFF

@A00721:190:HGJW7DSXY:4:1304:5303:6793\_2:N:0:TCTGCAAG+GCTGCACT  
TATGATATTTATTTTACTTATACTTTAAATAGCACCGATTATAACTTGACTGTTGATAATATTACAAT  
AGCTCTTCTCAGAAGATTAGAGAAGTAACCGGTGAACACGTCGGTAG

+  
FFFFFF:FFFFFFFFFFFFFFFFFFFFFFFF,FFFF:FFF:FFFFFFFFFFFFFFFFFFFFFFFF:FFFFFFFFFFFFFF:F  
FFFFFFFFFFFFFFFFFFFFFFFFFFFFFFFF:FFFFFFFF,FFFFFFFFF:FFFF

@A00721:190:HGJW7DSXY:4:1232:15908:27101\_1:N:0:TCTGCAAG+GCTGCACT  
CTTTTACCGTTAGAAGTGAAGAAAGATTCTTTTCGAAAAGAAACCTATAAGTTACAAACGATTCTTCGA  
CTATATTAAAGAAATAAAAATACTTCAAGTACCTGAACCTTACATTTTAAATGGTATGGTATAATGTG  
TCT

+  
FFFFFFFFFFFFFFFFFFFFFFFFFFFFFFFF:FF::FFFFFFFFFFFFFFFFFFFFFFFF,,:FFFFFFFFF,FFFFFF  
FFFFFFFFFFFFFFFFFFFFFFFF:FFFFFFFFFFFFFFFF:FFFFFFFFFFFFFFFFFFFFFFFFFFFFFFFFFFFFFFFF  
FFF

@A00721:190:HGJW7DSXY:4:1232:4155:7654\_1:N:0:TCTGCAAG+GCTGCACT  
TTCCTCTCGGTAATGAGAGTGTATTCCTTAATATTCTAGTAACCGCTATGTGGGCATTACTAGGATT  
TATCACACTCCTAAATTTGATAGCAATTTATGTTTTAAATGCTAGGAAAATTTAGAAAACTCCATT  
GTA

+  
FFFFFFFFFFFFFFFFFFFFFFFFFFFFFFFF:FFFF:FFFFFFFFFFFFFFFFFFFFFFFFFFFFFFFFFFFFFFFFFFFFFFFF  
FFFFFFFFFFFFFFFFFFFFFFFFFFFFFFFFFFFFFFFFFFFFFFFFFFFFFFFFFFFFFFFFFFFFFFFFFFFFFFFF:F  
FFF

@A00721:190:HGJW7DSXY:4:2219:9480:18035\_2:N:0:TCTGCAAG+GCTGCACT  
GTACTTAATTCAATAGCTTTAGTATTATTTACTATCGCCTTTATTGAAAATTGTATAAGAGTTAATTG  
CTTACACAAAAGTGACGCGGAAGGAATCTTAATTGATTGAAGCTAGG

+  
FFFFFFFFFFFFFFFFFFFFFFFFFFFFFFFF:FFFFFFFFFFFFFFFFFFFFFFFFFFFFFFFFFFFFFFFFFFFFFFFF  
FFFFFFFFFFFFFFFFFFFFFFFFFFFFFFFFFFFFFFFFFFFFFFFF:FFFF:FFFFFF

@A00721:190:HGJW7DSXY:4:2510:1407:33207\_1:N:0:TCTGCAAG+GCTGCACT  
AACATACCATACTCCCCAACATAACATACCATAACCTCCCATGACCAATCATCGCTCCAACCTGGC  
ACGCCAGACGTAGGGTCAAACCTACTACCGCCGGTCGGCAGATCGGCACCACTGGTCTCTACGTTACG  
GGA

+  
FFFFFFFFFFF:F:F:FF::,,FFFF::,F,FFFF::FFF,FFFF,:FFF:,FF,FFF:FFF:F:F,F  
FFFFFFFFFFF,FFFFFFFFF:FF:F,FFFFFFFF:FFFF,::FFFFFF:FFFFFFFFFFFFFFFFFFFF  
FFF

@A00721:190:HGJW7DSXY:4:2175:7211:18114\_2:N:0:TCTGCAAG+GCTGCACT  
TAACCTTCCCAAATCTAGATCTGCACAGAAGAAGGCTGAAGGTCGTTACCGGACGACCACTCAAAGGA  
AACGGGCTGTTGCCAGAGGAAAGCAGCGACCACCGAGGTCGCTCGTA

+  
FFFFFFFFFFFFFFFFFFFFFFFFFFFFFFFFFFFFFFFFFFFFFFFFFFFFFFFFFFFFFFFFFFFFFFFF  
:FFFFFFFFFFFFFFFFFFFFFFFFFFFFFFFFFFFFFFFFFFFFFFFFFFFFFFFF

@A00721:190:HGJW7DSXY:4:2369:6189:12900\_1:N:0:TCTGCAAG+GCTGCACT  
AGTCCCGTCATCTCTGTGGGAAGTGAAGGACGACCTCAGTCAAAAGTCACATTACCACTCCCATGCC  
AATCAATGATGTGACTATACAGTTCGGCCATTTCAAGAGTGGTCAATACGTCGTGGGAGGTACTGAAG  
CCT

[illegible]

@A00721:190:HGJW7DSXY:4:1130:8232:24298\_2:N:0:TCTGCAAG+GCTGCACT  
CGAAATTAAAGACGGGGGGATTAAGAGTCCAGCTGTAAGTGTCAATTCAGAGAGGGGAGCTCTGAAAA  
GAAAACTTCGTCAAGAGATGAGGAAGTCTAAGAGGAGGAGTTTGAGGA

+

FFFFFFFFFFFFFFFFFFFFFFFFFFFFFFFFFFFFFFFFFFFFFFFFFFFFFFFFFFFFFFFFFFFFFFFF  
FFFFFFFFFFFFFFFFFFFFFFFFFFFFFFFFFFFFFFFFFFFFFFFFFFFFFFFFFFFFFFFFFFFFFFFF

@A00721:190:HGJW7DSXY:4:1132:6361:8782\_2:N:0:TCTGCAAG+GCTGCACT  
GAAGTTGATGAAGAAGGATTATTTGAAGCAGGGGTTACCACTTCCTAAGGTGGATGAGGGAGGTTGTT  
TCTTTGGAGTTTTAGATAATCTTTTGAGAAGTGGTCATAGAGCCAGCA

+

,,,FFF:,F,,,F,:,,F,:F:F,,F::FF,F:F,:,,F:::F,:FFF,F,FF,FFF,F,F::FF  
:,FF:FF,FF::F,,,F,:,,FF:FF,F:,F,:F:F,,,F,:::F:

@A00721:190:HGJW7DSXY:4:2112:16062:33630\_2:N:0:TCTGCAAG+GCTGCACT  
CCTTGAGAAGACAAGCCACATTAAGATATAATTTAGGTCAACTTGGGGTTTCGAATGTCATTAGTGCC  
TTACGATTGAAAGAGGTCCTTTTGAGTATCGACAGATCTTTCGATCTT

+

FFFFFFFFFFFFFFFFFFFFFF:FFFFFFFFFFFFFFFFFFFFFFFFFFFFFFFFFFFFFFFFFFFFFFFF  
FFFFFFFFFFFFFFFFFFFFFFFFFFFFFFFFFFFFFFFFFFFFFFFFFFFFFFFFFFFFFFFFFFFFFFFF

@A00721:190:HGJW7DSXY:4:2171:28375:1376\_2:N:0:TCTGCAAG+GCTGCACT  
GTGGCAGAATTCGGTAACTTACCATATTGTTCTTCCGGGAAGTTGTGGGATTAACTTTGACTCAAC  
TACTCCGATCAGATCCGGATGTTTGATTGGTATGGACTACTCGACTT

+

FFFFFFFFFFFFFFFFFFFFFFFFFFFFFFFFFFFFFFFFFFFFFFFFFFFFFFFFFFFFFFFFFFFFFFFF  
FFFFFFF:FFFFFFFFFFFFFFFF:FFFFFFFFFFFFFFFFFFFFFFFFFFFFFFFFFFFFFFFF

@A00721:190:HGJW7DSXY:4:2301:7437:3912\_1:N:0:TCTGCAAG+GCTGCACT  
TAGGGTCATGGCAGATACTACCGATAAGGTGAAAAATATGCAGGTCAAAGATTCTGTAGCTCTGAGGG  
CGGTTGAGGGAGCCGTTTTGGCCGACTTTAACTATTCTAAGAGTCTTTATGATTCAAACCTATCGTT  
GTC

+

FFFFFFFFFFFFFFFF:FFFFFFFFFFFFFFFFFFFFFFFFFFFFFFFFFFFFFFFFFFFFFFFFFFFFFF  
FFFFFFFFFFFFFFFFFFFFFFFF:FFFFFFFFFFFFFFFFFFFFFFFFFFFFFFFFFFFFFFFFFFFFFF  
FFF

@A00721:190:HGJW7DSXY:4:2534:7301:7122\_1:N:0:TCTGCAAG+GCTGCACT  
TACAGCGGCTTATTGTCGCGCAGTTTCCAGAATTGCGGTTGAAGTTCACCCATTCTATCTTGAATGCT  
CACGCCGTCGCAGCCATATCGAGACTATGTTATAATCACTTGTTAAAGTACAGATTTAGTGATTAGAT  
TAT

+

FFFFFFFFFFFFFFFFFFFFFFFFFFFFFFFFFFFFFFFFFFFFFFFFFFFFFFFFFFFFFFFFFFFFFF  
FFFFFFFFFFFFFFFFFFFFFFFFFFFFFFFFFFFFFFFFFFFFFFFFFFFFFFFFFFFFFFFFFFFFFF  
FFF

@A00721:190:HGJW7DSXY:4:1250:16947:4852\_1:N:0:TCTGCAAG+GCTGCACT  
GAGGCGATATTGTTTTTCATATCCAAAACCTCTTGAATGGAGTACATATTTGCAACCCTATTCTTGAT  
GTGAAAGATGCATCGAGGTATACGTCTAGGAACATTGATTGGGAACGTACCTACTCACGAGACGTCAT  
GAA

+

FFFFFFFFF:FFFFFFFFFFFFFFFFFFFFFFFFFFFFFFFFFFFFFFFFFFFFFFFFFFFFFFFFFFFF  
FFFFFFFFFFFFFFFFFFFFFFFFFFFFFFFFFFFFFFFFFFFFFFFFFFFFFFFFFFFFFFFFFFFFFF:  
FFF

@A00721:190:HGJW7DSXY:4:2670:20401:13056\_1:N:0:TCTGCAAG+GCTGCACT  
ATGTTTCGTTCTGTTACAAGAACGCTTTGGATTGTGACCATAAAGCCTCAGTTGCGATAGCTGTAGAG  
GTATACGATATCTCTCTTGATGATGTAGCCACTATAATGCTTAAGAGAGAGATTGATGTATGTCATTT  
CGT

+

FFFFFFFFF:FFFF::,F:,F,F,FFFFFFFFF:FF,FF:FFFF:FFFFFFFFF:FFFF:FFFF,

,F,FF,FFFF:FFFFFFFFFFFFFFFF:FFFFFFFF,FFFF:FFFF:FFF,FFFF:FF:FFFF  
FFF

@A00721:190:HGJW7DSXY:4:2364:10538:3145\_1:N:0:TCTGCAAG+GCTGCACT  
GAATTATTGGACACGATGAAAAATGACATACCCGTTCTGACCTTGGTATCGTTATCCGTCATGGAGA  
TGATGCCGCATCACTTGATTACTATATGCCCGAAGGATTGGGTTATTCTCACAACAAAGATAAGATTT  
TAT

+

FFFFFFFF:FFFFFFFF:FFFFFFFFFFFFFFFF:FFFFFFFF,FFFFFFFFFFFFFFFF:FFFFFFFF  
FFFFFFFF:FFFFFFFFFFFFFFFF:FFFFFFFFFFFFFFFFFFFFFFFFFFFFFFFFFFFFFFFF  
FFF

@A00721:190:HGJW7DSXY:4:2335:16197:30044\_1:N:0:TCTGCAAG+GCTGCACT  
TAAGGGCGGACAATTGTTCCATTGTGAACCTTGGGGAATAGATTGAGCATTAAATGAGTTCCGAATAA  
CTCGTAATAAATCTTTCTCTAGTGGACAATTCAGAATACCTATTTCCGTACCAAGAGCCACTGCCAAT  
CTC

+

FFFFFFFFFFFFFFFF:FFFF:FFFFFFFFFFFFFFFF,FFFFFFFFFFFFFFFFFFFFFFFF  
FFFFFFFFFFFFFFFFFFFFFFFFFFFFFFFFFFFFFFFFFFFFFFFFFFFFFFFFFFFFFFFF  
FFF

@A00721:190:HGJW7DSXY:4:1323:18331:16799\_2:N:0:TCTGCAAG+GCTGCACT  
AAATTTTCTCAAGAGATTATGGTTGATAAAGTTTCTTCATAAGGGCTATTGAGTACGTCATGGGGA  
TCACTTCTTCGGTCAATGACAAAACCTTCGAATATGTTACGACATGGC

+

FFFFFFFFFFFFFFFF:FFFF:FFFFFFFFFFFFFFFF:FF:FFFFFFFFFFFFFFFF:FFFFFFFF  
FFFFFFFFFFFFFFFFFFFFFFFFFFFFFFFF:FFF:FFFFFFFFFFFFFFFF

@A00721:190:HGJW7DSXY:4:2425:7925:30780\_2:N:0:TCTGCAAG+GCTGCACT  
AGGATTGTCATCTCGGGGAAAGTGATTCACCAAGATGTTTCATATAGATACGAGATACCTAGAGAAGGT  
CGCAGCGATCTTACTCGTTATCGGAGCTAAGAAGAAGACTTTGGGTAC

+

FFFFFFFFFFFFFFFFFFFFFFFFFFFFFFFFFFFFFFFFFFFFFFFF:FFFFFF:FFFFFFFF  
FFFFFFFFFFFFFFFFFFFFFFFF:FFFFFF,:FFFF:FFF:FFFFFFFF

@A00721:190:HGJW7DSXY:4:1458:18267:34350\_2:N:0:TCTGCAAG+GCTGCACT  
TAACGTTAGTACCGGAGGTGATCTCTCTGCTTCTGCGTTACTGAGAGAAAAGATTGAGGACGCCTACG  
GTGACTTTATGGACAAGATGCAAGTTCTTGGGAAATACTTGTTCCT

+

FFFFFFFFFFFFFFFFFFFFFFFFFFFFFFFFFFFFFFFFFFFFFFFFFFFFFFFFFFFFFFFF  
FFFFFFFFFFFFFFFFFFFFFFFFFFFFFFFFFFFFFFFFFFFFFFFFFFFFFFFF

@A00721:190:HGJW7DSXY:4:1369:3504:20149\_2:N:0:TCTGCAAG+GCTGCACT  
TCTTTGTATAGGGAGTGTGAGAAGACAACGAATCTTGAACTACGGTCCTTATCAAAGAAAATGGTGA  
ACCGGTCTCTAAATCTTTGAGATTGAGAAGATTGAAGAACACGTCAA

+

F,F,FFFF:FFFFFFFFFFFFFFFFFFFFFFFFFFFFFFFFFFFFFFFF, :FFFF:F:FFFF  
,FFF:FFF:FFFF: :FFFFFFFF,FFFF:FFFFFF:F:F

@A00721:190:HGJW7DSXY:4:1558:29080:16125\_2:N:0:TCTGCAAG+GCTGCACT  
TTGTTCTTGAAAACCAAGTTAAGAAGGAGGCTGATCATGGAGTCTTGTACCTTCTGTCAAACCTCGA  
GGTTCAGCTACGAGAGGTGATCCCGGATGTGGATTGAAGGCTGGCTCT

+

FFFFFFFFFFFFFFFFFFFFFFFFFFFFFFFFFFFFFFFFFFFFFFFFFFFFFFFFFFFFFFFF  
FFFFFFFF:FFFFFFFFFFFFFFFF,FFFFFFFFFFFFFFFF

@A00721:190:HGJW7DSXY:4:1636:17336:27101\_2:N:0:TCTGCAAG+GCTGCACT  
CTTTTTGAATGTTGTAAAGAATTGGGTTGAGAAGTGTGCTTTACAAGGAGTTAGACTCTTCTTCAAGT  
TTTTAGATCTTCTTGATAATCTTAAAGAAAAATTTTGAATAAACTAA

+

FF,FFFFFFFFFFFFFFFF:FFFFFFFFFFFFFFFFFFFFFFFF,FFFFFFFFFFFFFFFF:  
FFFFFFFFFFFFFFFFFFFFFFFF,FFFFF:FF:FF:FFFFFFFF



@A00721:190:HGJW7DSXY:4:2636:4065:17519\_2:N:0:TCTGCAAG+GCTGCACT  
CTGTACTTACATTCTTTACGCCAGATTCTTCATGGGGCGACGCTGTTTCTCTTGGTATTTCTGAAATA  
GTTTATCAGAGCGTCATTTTCCTTTGGGATCTTCTCTGGTAAGGGA

+

F::FFFFFFFF::FF:FFFFFFFFFFFFFFFF:FFFF,FFFFFFFFFFFF::FF:F:F:FFFFFF::FF  
FFFFFFFFFFFF,FFFFFF,FFFFFFFFFFFFFFFFFFFF,FFF,FFF,:FFF

@A00721:190:HGJW7DSXY:4:1126:18150:20243\_2:N:0:TCTGCAAG+GCTGCACT  
CGAGAATTATTACTGTTTTCTCTACCCATAACTTCTTTTTCAAAAATGCGGATGGGTCTACTGATGTT  
TTCCTACAGAGTGCAGTCGTTTCAACACTTATCACCACCTTTTGAAGG

+

FFFFFFFFFFFFFFFFFFFFFFFFFFFFFFFFFFFFFFFFFFFFFFFFFFFFFFFFFFFFFFFFFFFFFFFF  
FFFFFFFFFFFFFFFFFFFFFFFFFFFFFFFFFFFFFFFFFFFFFFFFFFFFFFFFFFFFFFFFFFFFFFFF

@A00721:190:HGJW7DSXY:4:1443:25355:9549\_1:N:0:TCTGCAAG+GCTGCACT  
GTGATGAAAATACGTATGTCGGTGGGGTCTCAAGGCTCTCATCGACACTGGGATTCTAAGGGGTTC  
ATAAGATTTTATCTGACATTGTGGTTCAATGATCAGGATTCTTCTTTTGGTCCTTACGTCTTAAGTAA  
TT

+

FF,FFFF,FFF,:FF,FFFF,,:::FFFFFF:::FF,FFF,FF:F,F,FFF:F,FFF::FFFF:,FFF  
:F:FF:F,F:,FFFFFF:F,FFF,FFF:,FF:FFFFFF:F:,FF,FFFFFFFFFFFF,FFF:FFF:FFF:  
FF

@A00721:190:HGJW7DSXY:4:1410:4725:25363\_1:N:0:TCTGCAAG+GCTGCACT  
TCTTGTCACGATTCTTAAAAGAAGTTTATTAAACTTCAGAGTCTCTTGAAGTCCAGGTAGCTAATG  
TTCTTGCAATAGCCACAGACTTTCTGGGAAAAGAGACCTCTGTTGGTAGAGGAGTTGAGAGAATTACT  
CAG

+

FFFFFFFF,FF:FFFFFFFFFFFFFFFFFFFFFFFFFFFFFFFFFFFFFFFFFFFFFFFFFFFFFFFFFFFF  
FFFFFFFFFFFFFFFFFFFFFFFFFFFFFFFFFFFFFFFFFFFFFFFFFFFFFFFFFFFFFFFFFFFFFFFF  
FFF

@A00721:190:HGJW7DSXY:4:1233:11550:7936\_2:N:0:TCTGCAAG+GCTGCACT  
ACAACGAGTTAGGGAGTGGCTAGGTTTTAAAAGATCCTTGCACAAGCAATACCTTCCACTGAGTTCA  
TCACCCAGAGTTTCGACGTCGCGGAAAACGATGAAGATTTCCACACTG

+

FFFF:FFF:FFFFFFFFFFFFFFFFFFFFFFFFFFFFFFFFFFFFFFFFFFFFFFFFFFFFFFFFFFFF  
FFFFFFFFFFFFFFFFFFFFFFFFFFFFFFFFFFFFFFFFFFFFFFFFFFFFFFFFFFFFFFFF

@A00721:190:HGJW7DSXY:4:1204:22670:18803\_2:N:0:TCTGCAAG+GCTGCACT  
TCTGATGCTGAATTTGAGGAAAATTTTTCGGAAGTTTTTGGTATAAATCCTGATGGCTCAGTACAGGG  
AGGAGGTAATAGTTATAAAACCTTCTTATATCATTGCAACAGGACTTT

+

FFFFFFFFFFFFFF,FFFFFFFF:FFF,FFFFFFFF:FF:F,FFFF:FFF:FFF::FFF::F::FF  
FFFFFFFFFFFFFF:FFFFFF,FFFFFF,FFF,FF,:FFF:FFFFFF::

@A00721:190:HGJW7DSXY:4:1232:28311:5744\_2:N:0:TCTGCAAG+GCTGCACT  
GGACAAAATCTGGGATCATAGGTATGTGTCACGCTACACTCGAAATATGGGCCCTCATAAGGAAGTAT  
AGTTGGCGTCTTGTCGTTGACGTCATTACAGTCTGGAAGTTAGATCAT

+

FFFFFFFFFFFFFFFFFFFFFFFFFFFFFFFFFFFFFFFFFFFFFFFFFFFFFFFFFFFFFFFFFFFF:FFFFF:FFFFFFFF  
FFFFFFFFFFFFFFFFFFFFFFFFFFFFFFFFFFFFFFFFFFFFFFFFFFFFFFFFFFFFFFFF:FFF:

@A00721:190:HGJW7DSXY:4:2254:32922:22091\_2:N:0:TCTGCAAG+GCTGCACT  
CGAGAGTTGTGATCTAGTTCTAAATTTAGGTCGACGACTTAGCAACTTTAGATAAATCTTTCCGG  
GCTCAATGACCTTTGCTATGTACGTGGATCTAATCCTTGGTGATCTGA

+

FFFFFFFFFFFFFFFFFFFFFFFFFFFFFFFFFFFFFFFFFFFFFFFFFFFFFFFFFFFFFFFF::,FFFFFFFFFFFFFFFFFFFF  
FFFFFFFF:FF:FF:FFFFFFFFFFFFFFFFFFFF:FFFFFF:FFFFFF

@A00721:190:HGJW7DSXY:4:1677:13702:2832\_2:N:0:TCTGCAAG+GCTGCACT  
TATTAGTTCATGAAGTTCTTACACTTCTCGGACTAATGTCAGCTTCACTACAAAGGCGTTACGTAAA

GTAGTTTTACGCTTTATCTTAAAGCATTACCACCAAATTTAGCACTT  
+  
FFFFFFFFFFFFFF:FFFFFFFFFFFFFF,FFFFFFFFFFFF  
FF:FFFFFFFFFFFFFF:FFFFFFFF:FFFFFFFF  
@A00721:190:HGJW7DSXY:4:2436:22254:5462\_1:N:0:TCTGCAAG+GCTGCACT  
CTCGCCATATCAGATTAGAGACATGCCAGTTAGAGTTCTTCTAACCAGGACTGATGGTGAGATTCTTT  
TACCTTTTGGAGGTCCAGGAACCTTTACTCCTAGTGTCTTTCTAGAGTCCAAGGACGTTTCCGTCTCG  
AGG  
+  
FFFFFFFFFFFFFFFFFFFFFFFFFFFFFFFFFFFFFFFFFFFFFFFFFFFFFFFFFFFFFFFF  
FFFFFFFF:FFFFFFFFFFFFFFFFFFFFFFFFFFFFFFFFFFFFFFFFFFFFFFFFFFFFFFFF  
FFF  
@A00721:190:HGJW7DSXY:4:1576:18891:34867\_2:N:0:TCTGCAAG+GCTGCACT  
GACCGCTCAATAACACTCTATTGAATCCCTTTCCACGATGAAAGCTCTTTATGAGGTGCTCCATGCA  
AATTTACAGTTCCTCTTTGGTGATATCGCCTCTGTCCTTTCTCCTTTA  
+  
FFFFFFFFFFFFFFFFFFFFFFFFFFFFFFFFFFFFFFFFFFFFFFFFFFFFFFFFFFFFFFFF  
FFFFFFFFFFFFFFFF: ,FFFFFFFF:FFFF:FFFFFFFFFFFFFFFF  
@A00721:190:HGJW7DSXY:4:1478:24252:28025\_2:N:0:TCTGCAAG+GCTGCACT  
ACTTGGGTTTATCGTTGTATTTTGATAAATTTGTTGGAATCGATAATGATACTGACGAAGTTCTAT  
TACCACCCTTGTCATTGATACAAACATTCTAGGTGATGCTTTCTTAGA  
+  
FFFFFFFFFFFFFFFFFFFFFFFFFFFFFFFFFFFFFFFFFFFFFFFFFFFFFFFFFFFFFFFF:FFFFFFFF:FFFF  
FFFFFFFFFFFFFFFFFFFFFFFFFFFFFFFFFFFFFFFFFFFFFFFFFFFFFFFFFFFFFFFF:  
@A00721:190:HGJW7DSXY:4:2212:13819:32189\_2:N:0:TCTGCAAG+GCTGCACT  
TTACAATCTGTAGAGAGAGAGGTTAATCAGAATTTGAGTGATAACGATTTAGTACTGGGAAATGGTGG  
TAGTCAGTTTACTACTTTTCTTCCCTCCCTTTTTCGATTGGATTCTG  
+  
FFFFFFFFFFFFFF:FFFFFFFF:FFFFFFFFFFFFFFFFFFFFFFFFFFFFFFFFFFFFFFFF  
FFFFFFFFFFFFFFFFFFFFFFFFFFFFFFFF:FFFF:FFFFFFFFFFFFFFFF  
@A00721:190:HGJW7DSXY:4:1207:1877:30671\_2:N:0:TCTGCAAG+GCTGCACT  
TTGATAAGGTTTTCTTTTATGGGACTCTTGTTTGTACTTATGAAGGAGGTATTACTTCGGAAGTTCT  
TAATGTAGGTCTCCTAGTACTTAAGGGTTTATGTTTCGGTTTCAGCTG  
+  
FFFFFFFFFFFF:FFF:FFFFFFFF: :FFFFFFFF:FFFFFFFFFFFFFFFFFFFFFFFF:FFFFFFFF  
FFFFFFFFFFFFFFFFFFFFFFFFFFFFFFFFFFFFFFFFFFFFFFFFFFFFFFFF:FF,  
@A00721:190:HGJW7DSXY:4:1250:5782:24251\_2:N:0:TCTGCAAG+GCTGCACT  
TGTTTCACAATGCGTGATCACTTCCCGTGGACTTGGGAAGAGATTAAACATAAAATCCAGCGATTCTA  
TTATGTCGCTAAAGCCTGTCCAGTTGTCGATGATGTTAGGGCTGTGGG  
+  
F:,,F,FFF,:,,FF,FFFF,FFFFFF,,FF:F,F,,:,FFFFFFFF,FF:FFFF:,FFFF,F  
FFFF:F: :FFFF,FFFFFFFF: ,FFFF,F,,FF,F,:FFF:F:F  
@A00721:190:HGJW7DSXY:4:2420:22580:28541\_2:N:0:TCTGCAAG+GCTGCACT  
AAACTTACGACGATGTTCTCGCTCGCATTTACAAGGATTACTAAGTCTGAGATCTGCCACTTCTAAT  
TTAGGAAACGTCGCGAAAAGAAAGTTCATGAGGATGTCTTGGTCGAA  
+  
FFFFFFFFFFFFFFFFFFFFFFFFFFFFFFFFFFFFFFFFFFFFFFFFFFFFFFFFFFFFFFFF  
FFFFFFFFFFFFFFFFFFFFFFFF: :FFFFFFFFFFFFFFFFFFFFFFFF  
@A00721:190:HGJW7DSXY:4:2353:12599:8782\_2:N:0:TCTGCAAG+GCTGCACT  
GAACTTCTAATAGAGGATCCTGATGACATTATTTCAACGATACCGATCTCAGTTCTACCACAGAAAC  
CGTCTCAGGAAGTGTCTCCACTGATTTCGAATTAGAGAAAGACGACCT  
+  
FF:FF:FF,FFFFFFFFFFFFFFFFFFFFFFFF:FFFFFFFFFFFFFFFFFFFFFFFF  
FFFFFFFFFF:FFFFFFFFFFFFFFFFFFFFFFFF:FFFFFFFFFFFFFFFF

@A00721:190:HGJW7DSXY:4:2463:7066:33959\_2:N:0:TCTGCAAG+GCTGCACT  
AGACCTCTGAATTTTCAGGGTGCCCTGATGAGGACGTTGAAAGGGATAATTTCAACTCTGAGACTTCT  
AAGAGTGTTTCAAAGACCAGAAACGTAACAAGAATAAAGGTAGG

+

FFFFFFFFFFFFFFFFFFFFFFFFFFFFFFFFFFFFFFFFFFFFFFFFFFFFFFFFFFFFFFFFFFFFFFFF  
FFFFFFFFFFFFFFFFFFFFFFFFFFFFFFFFFFFFFFFFFFFFFFFFFFFFFFFFFFFFFFFFFFFFFFFF

@A00721:190:HGJW7DSXY:4:2103:22245:14372\_2:N:0:TCTGCAAG+GCTGCACT  
AGCGAGCGGTTGAAGAGAAAAGTATGGTTGCGGCTGATCGTACCCCAATTCCTGCTAGAAAGATC  
ACTCTCGGCGATACCACTGATCTTCCAGAGTTACGTAGTGGTCGTTCT

+

FFFFFFFFF,FFFFFFFFFFFFFFFFFFFFFFFFFFFFFFFFFFFFFFFFFFFFFFFFFFFFFFFFFFFF  
FFFFFFFFFFFFFFFFFFFFFFFFFFFFFFFFFFFFFFFFFFFFFFFFFFFFFFFFFFFFFFFFFFFFFFFF

@A00721:190:HGJW7DSXY:4:2219:30834:22013\_1:N:0:TCTGCAAG+GCTGCACT  
AAGTTTCTGCTAGTCGCGACGATAGTATTTATCGGAGTGATTAACAAGTTAACTTCGAACTGACC  
ACTTACAAGAGTGTTGAAGTACCGCAACATGGATCAGTTTTCCAAAAGCTATTAATAGCAGTTGCGG  
GGC

+

:FFFFFFFFFFFFFFFF:FF:FFFFFFFFF:FFFFFFFFFFFFFFFFFFFFF:FFFFFFFFFFFFFFFFFFFF  
FFFFFFFFFFFFFFFFFFFFFFFFFFFFFFFFFFFFFFFFFFFFFFFFFFFFFFFFFFFFFFFFFFFFFFFF  
FFF

@A00721:190:HGJW7DSXY:4:2256:32796:35399\_2:N:0:TCTGCAAG+GCTGCACT  
AACTGAATCCACTCTCTTGGGATATAAATGAGTACATCTATAATAGAGTTTTGGAAGTGTGTAATGT  
CCTACGTACTGTTTATGTTGTTTGGGCTTCTCTAAAGAACAGCAACTT

+

FFFFFFFFFFFFFFFFF:F:FFFFFFFFFFFFFFFFFFFFFFFFFFFFFFFFFFFFFFFFFFFFFFFFFFFFF:FFF:FFF  
FFFFFFFFFFFFFFFFF:,FFFF:FFFFFFFFFFFFFFFFF:,F,FFFFFFFFF

@A00721:190:HGJW7DSXY:4:2436:21866:27398\_2:N:0:TCTGCAAG+GCTGCACT  
AGACCTTTCTTGGGGAGTAAAGAGGGTTTGAAGTTACGGAACCTTCTCTGTTCTTTCATGAAGATCT  
TCGAGTGTTTTATAGTGAGTTATTCTTGCGAAGGTTCAAGTCGATTGA

+

FFFFFFFFFFFFFFFFFFFFFFFFFFFFFFFFFFFFFFFFFFFFFFFFFFFFFFFFFFFFFFFFFFFFFFFF  
FFFFFFFFFFFFFFFFFFFFFFFFFFFFFFFFFFFFFFFFFFFFFFFFFFFFFFFFFFFFFFFFFFFFFFFF

@A00721:190:HGJW7DSXY:4:1639:25382:27696\_2:N:0:TCTGCAAG+GCTGCACT  
AATAAGAAGTTCTTCGCAGTTGAATCTCCACCAGGTGGAGGGAAGACCACTGAACCTTATAGCGACTTT  
TGTCGAATTTTTCGCAAAAGGTCTTGAAGTACGTATTGTCACTGCTCA

+

FFFFFFFFFFFFFFFFFFFFFFFFFFFFFFFFFFFFFFFFFFFFFFFFFFFFFFFFFFFFFFFFFFFFF:FFF:FFFFFFFFFFFFFFFFFFFF  
FFFFFFFFFFFFFFFFFFFFF,FFFFFFFFFFFFFFFFFFFFFFFFFFFFFFFFFFFFF,F

@A00721:190:HGJW7DSXY:4:2228:25382:34115\_2:N:0:TCTGCAAG+GCTGCACT  
TTGGCACTTCTAGTTCATCGCGGTATTTGTGAAATTAAGACAGACGTGAAAGTTATGATGAGTGATCG  
TATTAGAACAGCTGATTCTTATTGCATGAACGTCGCTGAGGTCAAACC

+

FFFFF:F:FFFFFFFFFFFFFFFFFFFFFFFFFFFFFFFFFFFFFFFFFFFFFFFFFFFFFFFFFFFFF:F:FFFFFFFFFFFFF  
:FFFFFFF,FFFFFFFFF:FFF:FFFFFFFFFFFFFFFFFFFFFFFFFFFFFFFFFFFFFFFF

@A00721:190:HGJW7DSXY:4:1328:18493:29731\_2:N:0:TCTGCAAG+GCTGCACT  
TTCATCGACGAATTATTCATGATTCACGCTGGTCAGACCCTTTTCTTACACATCTACTTAAGCGGCG  
TTATACCATAGGTTACGGTGATTCCAATCAAATCGGATTCATCAATCG

+

FFFFFFFFFFFFFFFFFFFFFFFFFFFFFFFFFFFFFFFFFFFFFFFFFFFFFFFFFFFFFFFFFFFFF  
FFFFFFF:FFFFFFFFFFFFFFFFFFFFFFFFFFFFFFFFFFFFFFFFFFFFFFFFFFFFFFFF

@A00721:190:HGJW7DSXY:4:1105:13720:12884\_2:N:0:TCTGCAAG+GCTGCACT  
CAAGTCGCAAACTACTTCAACATCAACGACATCATTCTTGATGAGTGTCGTTCTTATCGAAGTCTCAG  
TTATCGCTGCCCGGCCGACGTTTGTGCGCAACTCTCAGAGGTTTACGG

+

F:FFFFFFFFFFFFFFFFFFFFFFFFFFFFFFFFFFFFFFFFFFFFFFFFFFFFFFFFFFFFFFFF:FFFF  
FFFFFFFFFFFFFFFFFFFFFFFFFFFFFFFFFFFFFFFFFFFFFFFFFFFFFFFFFFFFFFFF  
@A00721:190:HGJW7DSXY:4:1635:30960:10770\_2:N:0:TCTGCAAG+GCTGCACT  
CTATGGAAATTAGACCTATCAGATGTCTTGACGACTTGAATTTGAGGACGGAGTTAAATATATTACT  
TTCACCTCAAGGTGAAAAGTTTGAATTAACAAAGTCCTTGGTAAGAGT  
+  
:FFFFFFFFFFFFFFFFFFFFFFFFFFFFFFFFFFFFFFFFFFFFFFFFFFFFFFFFFFFFFFFF:FF:,FFFF,FFFFFFFFFFFFFFFFFFFFFFFFFFFFFFFFFFFFFFFF,F:,FF,  
F::FFFFFFFF:FFFFFFFFFFFFFFFFFFFFFFFFFFFFFFFFFFFFFFFF:FFFFF:,FFFF,FFF:FFF  
@A00721:190:HGJW7DSXY:4:2451:19343:18020\_1:N:0:TCTGCAAG+GCTGCACT  
GTTCAAGGTAATACTTACCAGCACGTTTCGGCTGGTTAGAATTAAACCTCAAGATGACCCTGTTTTTGC  
ATCACAAACACATATTACCGTTGCTCTATCACGACACGTTGAATCTTTACGATACTTTGTTATCAATG  
TAA  
+  
:FFFFFFFFFFFFFFFFFFFFFFFFFFFFFFFFFFFFFFFFFFFFFFFFFFFFFFFFFFFFFFFFFFFFFFFFFFFFFFFFFFFFFFFFFFFFFFFFFFFFFFFFFFFFFFFF  
FFFFFFFFFFFFFFFFFFFFFFFFFFFFFFFFFFFFFFFFFFFFFFFFFFFFFFFFFFFFFFFFFFFFFFFFFFFFFFFFFFFFFFFFFFFFFFFFFFFFFFFFFFFFFFFF  
FFF  
@A00721:190:HGJW7DSXY:4:1678:9182:31548\_2:N:0:TCTGCAAG+GCTGCACT  
AAGGAACTGTCACGTTTAGCACGGGAGGTTGCAGATTCAACCCCTTATATCGAGGCTATCGAGGACGA  
TGAGTATCTTGAAGTTGTTGACGACAAGCCTCAAGAGGGTAGAGGACC  
+  
FFFFFFFFFFFFFFFFFFFFFFFFFFFFFFFFFFFFFFFFFFFFFFFFFFFFFFFFFFFFFFFFFFFFFFFFFFFFFFFFFFFFFFFFFFFFFFFFFFFFFFFFFFFFFFFF  
FFFFFFFFFFFFFFFFFFFFFFFFFFFFFFFFFFFFFFFFFFFFFFFFFFFFFFFFFFFFFFFFFFFFFFFFFFFFFFFFFFFFFFFFFFFFFFFFFFFFFFFFFFFFFFFF  
@A00721:190:HGJW7DSXY:4:2472:2745:1485\_2:N:0:TCTGCAAG+GCTGCACT  
GGTTATTCCTGGAACACCTTAACGTCACCTCGTAATCTTTAGCCGAATTAAGTACTAATGAGTTCA  
AGTCGGTTGTCGATCGAATTAAGATCAAGGCTAATACCTTTATAGGTA  
+  
FFFFF:F:FFF:FFFFFFFFFFFFFFFF:FFFFFFFFF,FFF:FFFFFFFFFFF:F:FFFFFFFFFFFFFFFF  
FF:FFFF,FF:FFFFFFFFFFFFFFFFFFFFFFFFFFFFFFFF,FF,F,FFFF:FF  
@A00721:190:HGJW7DSXY:4:2522:18656:4742\_1:N:0:TCTGCAAG+GCTGCACT  
TCATCAGTCAGAGTATACCCGATAGGGTACCGAGTCTCCAAGAGAATATTTATTCTTATGAGGCTCGA  
AACTTCAACGTTTTTACAACGGAAAGACATATCGCACCCGAAATTTTTGGGCAGAATGCTCTTAACGC  
GGT  
+  
FFFFFFFFFFFFFFFFFFFFFFFFFFFFFFFFFFFFFFFFFFFFFFFFFFFFFFFFFFFFFFFFFFFFFFFFFFFFFFFFFFFFFFFFFFFFFFFFFFFFFFFFFFFFFFFF  
,FFFF:FFFFFFFFFFFFFFFFFFFFFFFFFFFFFFFFFFFFFFFFFFFFFFFFFFFFFFFFFFFFFFFFFFFFFFFFFFFFFFFFFFFFFFFFFFFFFFFF  
FFF  
@A00721:190:HGJW7DSXY:4:1623:2049:36542\_2:N:0:TCTGCAAG+GCTGCACT  
GATCAGTCTAAGTTGGATAAAGTTATAGGAGACTCAGTTAACCTGAGAGCTCCTCAATTGATAGATTG  
GGTCAACAATAGGGACGCTAGTATACTTCGTAAAGTCGACAGCGAAAT  
+  
FFFFFFFFFFFFFFFFFFFFFFFFFFFFFFFFFFFFFFFFFFFFFFFFFFFFFFFFFFFFFFFFFFFFFFFFFFFFFFFFFFFFFFFFFFFFFFFFFFFFFFFFFFFFFFFF  
FFFFFFFFFFF:FFFFFFFFF:FFFFFFFFFFFFFFFFFFFFFFFFFFFFFFFFFFFFFFFF  
@A00721:190:HGJW7DSXY:4:1640:6741:7654\_2:N:0:TCTGCAAG+GCTGCACT  
TAATTGGACCGACTATATGACCTATTTTAAGCTCATGGTGAAAAGGGAAGCTAAGGTTAAACTTGATG  
CTTCAGCCTTTTCGAAGCATAACCCCGCACAGAATATCGTTTATCACG  
+  
F,FFFFFFFFFFFFFFFFFFFFFFFF:F:FFFFFFFFF:FFFFFFFFF:FFFFFFFFFFFFFFFFFFFFFFFF  
FFFFFFFFFFF,FF:FFFFFFFFFFFFFFFFFFFFFFFFFFFFFFFFFFFFFFFF:FFFF,  
@A00721:190:HGJW7DSXY:4:1535:18891:12101\_2:N:0:TCTGCAAG+GCTGCACT  
CCTATCTTTAAGGTTCTTGTGAGGAGAGTCAAACAGTGTCTTTTACCCAACATTTTTATGTATACAGA  
GATGACCAGTGACGATTTCTCCCGGAAGCTCTTCTCTCTTAGGAGG  
+  
FFFFFFFFFFFFFFFFFFFFFFFFFFFFFFFFFFFFFFFFFFFFFFFFFFFFFFFFFFFFFFFFFFFFFFFFFFFFFFFFFFFFFFFFFFFFFFFFFFFFFFFFFFFFFFFF  
FFF:FFFF:FFFFFF:FFFFFFFFFFFFFFFFFFFFFFFFFFFFFFFFFFFFFFFF:,FFF

@A00721:190:HGJW7DSXY:4:1511:2419:16736\_2:N:0:TCTGCAAG+GCTGCACT  
TTTCTTTTGTAAGCCTATGAGATAAGATGTATTCTTATTTAGGCTTCGATGCTGAATTTCTTGAAC  
TTTGGAGTGCCAGTGAATATTTTTGTCACGCCAGGAGTATCCATAACG

@A00721:190:HGJW7DSXY:4:1564:22625:22388\_2:N:0:TCTGCAAG+GCTGCACT  
TACCACCTTTGCTCAACGACGAAGTGGACGGCCAACACTTTCTTTGGTAATTGTATGATCACTTTGA  
TGATTTTATCACTTTATTATGACCTTGAAAAGTTTTCGGCTGTGGTTG

@A00721:190:HGJW7DSXY:4:2129:7039:14152\_1:N:0:TCTGCAAG+GCTGCACT  
TCTGTTTTCAAAGACTCCAATACTGATCATTCTGATAATTTGATTTGGACAATGTTTCGAAGCGA  
AATTTTTGAGGGATAAACCAGCGTACTTCTGCTCGCGATTATTCTTTTTGTCAATGATTACATCTA

@A00721:190:HGJW7DSXY:4:2643:4734:21433\_1:N:0:TCTGCAAG+GCTGCACT  
CCTTACAAGATCATCGTTAAGTTAGGTAAACCCCTAACCGATGTTACTCTTGTAGGACTTTGGGAGAG  
ATTCGTTAGTTTTAAAGACTATACTAAATATCTCCACTACGAGGTTGTTGTTTGGCGATTAGCTCTTG  
CGA

@A00721:190:HGJW7DSXY:4:2619:30174:32957\_2:N:0:TCTGCAAG+GCTGCACT  
ATTGAGGGTCGTTATACCTATTCGGCTATCTGTGCTTTGAATTGTATAAGATCAAATTTTAAACGATT  
CCGAGAGGTTTATCCTGATGTGGAGGGAGTTCTTGAAGCATCCCGACC

@A00721:190:HGJW7DSXY:4:2125:6677:35008\_2:N:0:TCTGCAAG+GCTGCACT  
GGTTTCATAAGATTATCAGTAATCCTGATTCTACTACGGATTCATGGACCTTCCATCCTGTACCTCTT  
CTGGAGAGACGTATCTCAAAGATCGACTTCGAGACAGGTGATATTGTT

@A00721:190:HGJW7DSXY:4:1310:19289:6026\_1:N:0:TCTGCAAG+GCTGCACT  
ACCAAGATCTAAATTCGGTAACGGTGCCTGGCGCTTTATTTTAAAAAGCTCCCTCCTCTCGCAAGTTT  
GATCTGATACTTATCACGAAAGGACTTGAGTCTTTTGATCAGTCTCTGACTTGACCATCTTTCATTTT  
AAA

@A00721:190:HGJW7DSXY:4:1403:11586:2018\_2:N:0:TCTGCAAG+GCTGCACT  
TTTCTTCTTTGTTTCCTTCTTTCGACTGATTTTCTCATCAGCTTGTTTTACCTAATCTGTGTTT  
TTACGATAACAACATCAGTTGATTAAGACTCTTCCGAAAGGCCAACT

@A00721:190:HGJW7DSXY:4:1533:19922:5901\_2:N:0:TCTGCAAG+GCTGCACT  
GAAGCTCAGGGTGAAGCACAACTTTGACCGTGACGAACGTGTTGTTCTTGATCTACGTTACGGATA

TACTCTCCTTGAGTTCACTCGTAAGGACACTACCACTTATTACGATAT

```
FFFFFFFFFFFFFFFFFFFFFFFFFFFFFFFFFFFFF:FFFFFFFFFFFFFFFFFFFFFFFFFFFFFFFFFFFF  
FFFFFFFFFFFFFFFFFFFFFFFFFFFFFFFFFFFFF:FFFFFFF
```

+

```

FFFFFFFFFFFFFF:FFFFFFFFF:F:FFFFFFFFFFFFFFFFFFFFFF:FFF:FFFFFFFFFFFFFF:FFF
FFF:FF,FFFF:FFFFFFFFF:FFFFFFFFF,F:FFFFFFFFF:,;FFFF:

```

+

```

FFFFFFFFFFFFFF:FFFFFFFFFFFFFFFFFFFFFFFFFFFFFFFF:FFFFFFFFFFFFFFFFFFFFFFFFFFFFFF::
FFFF:FFFFFFFFFFFFFFFFFFFFFFFFFFFFFFFF:FFFFFFFFFFFFFF

```

+

[illegible]

+

```

FFFFFFFFFFFFFFFFFFFFFFFFFFFFFFFF:FFFFFFFFFFFFFFFFFFFFFFFF:FFFFFFFF
FFFFFFFFFFFFFFFFFFFFFFFFFFFFFFFF:FFFFFFFF:FFFFFFFF:F:FFFF

```

+

```

FFFFFFFFF:FFFFFFFFFFFFFFFF:FFFFFFFFF:FFFFFFFFFFFFFFFFFFFFFFFFFFFFFFFF:FFF
FFFFFFFFFFFFFFFF:FFFFFFFFF:FFFFFFFFF:FFFFFFFFFFFFFFFF

```

+

```

FFFFFFFFFFFFFFFFFFFFFFFFFFFFFFFF:FFFFFFFFFFFFFFFFFFFFFFFFFFFFFFFF
FFFFFFFFFFFFFFFF:FFFFFFFFFFFFFFFFFFFFFFFFFFFFFFFFFFFFFFFFFFFFFFFF
FFF

```

+

[illegible]

AACTTTCAGTTTCACAACTGAAGGAGGAGGTTTCTGTTACTGGAAAAC

+

FFFFFFFFFFFFFFFF:FFFFFFFFFFFFFFFFFFFFFFFFFFFFFFFFFFFFFFFFFFFFFFFF  
FFFFFFFFFFFFFFFFFFFFFFFFFFFFFFFFFFFFFFFFFFFFFFFF:FFFFFFFF

@A00721:190:HGJW7DSXY:4:1419:25943:1924\_1:N:0:TCTGCAAG+GCTGCACT  
ACTTTTCAATAATATACGTCTTGAACCTCACTTATGACGATCTAGTGAAATTAACGCGTCCTTTTCTGG  
AACGTAGTTTTACTATTATGAACAAAGTTATCAAAGATAGTGGCATTCAAGGCAAACCTTACCCTGATT  
CCG

+

FFFFFFFFFFFFFFFFFFFFFFFFFFFFFFFFFFFFFFFFFFFFFFFFFFFFFFFFFFFFFFFF:FFFF  
FFFFFFFFFFFFFFFFFFFFFFFFFFFFFFFFFFFFFFFFFFFFFFFFFFFFFFFFFFFFFFFF,FFF  
FFF

@A00721:190:HGJW7DSXY:4:1212:30201:8735\_1:N:0:TCTGCAAG+GCTGCACT  
TTCTACCAGGGGCTATTACTCTTGCTGAAACAGCTATTAAAGCTGTTGAGCGGGTAATTACACCTAAA  
CGAGCTTGATCTGCCATCGCTGAAGGATGTGCACTCTTTTCTGCTACTTTAACGGAGCGTAGTGTACT  
CTT

+

FFFFFFFFFFFFFFFFFFFFFFFFFFFFFFFFFFFFFFFFFFFFFFFFFFFFFFFFFFFFFFFF:FFF,FF:FFFFFFFFFFFFFFFFFFFFFFFFFFFFFFFF  
FFFFFFFFFFFFFFFFFFFFFFFFFFFFFFFFFFFFFFFFFFFFFFFFFFFFFFFFFFFFFFFF,FFFFFFFFFFFFFFFFFFFFFFFFFFFFFFFF  
F:F

@A00721:190:HGJW7DSXY:4:1155:32389:14309\_1:N:0:TCTGCAAG+GCTGCACT  
CAACAGTAACATTACTTCTAATAAAGGTCTCTATCAAGCTCGTATTATCGTCGCTGCTGGATCTGCGT  
TACCGTTGAAGGCTAACTCCAAGGTAATTATGAAGACTGTGATTTATCTTTCACTCTGGCCTTGTAT  
GAG

+

FFFFFFFFFFFFFFFF:FFFFFFFFFFFFFFFFFFFFFFFFFFFFFFFFFFFFFFFFFFFFFFFF  
FFFFFFFFFFFFFFFFFFFFFFFFFFFFFFFFFFFFFFFFFFFFFFFFFFFFFFFFFFFFFFFF  
FFF

@A00721:190:HGJW7DSXY:4:2145:15510:12665\_2:N:0:TCTGCAAG+GCTGCACT  
ATCGTAACATTAATAATTTCAATCTTCTTAAAAAGAAGATAGAGAGTCATACTTTGGGCTATCGTTCA  
GGTGCATGGGGTTGGATAGCCAATATTGAAGTGGACACCTCTGGTAGT

+

FFFFFFFFFFFFFFFFFFFFFFFFFFFFFFFFFFFFFFFFFFFFFFFFFFFFFFFFFFFFFFFF  
FFFFFFFFFFFFFFFFFFFFFFFFFFFFFFFFFFFFFFFFFFFFFFFFFFFFFFFF

@A00721:190:HGJW7DSXY:4:2659:22860:11334\_1:N:0:TCTGCAAG+GCTGCACT  
AGATAACCAATAAGGAAGGAGCTTATACTATGGTTGAATCAACTAAGCATACTACTTTTGCTTTGATT  
ACTCTACCGCCTTACAAGTCTAAGGTTAAAGAGTCGATTAACAAGTTGTACTTATCAATGATTTTAT  
CGC

+

FFFFFFF:FFF:FFFFFFFFFFFFFFFFFFFFFFFFFFFFFFFFFFFFFFFF:FFF:FFFFFFFFFFFFFFFF  
FFFFFFFFFFFF:FFFFFFFFFFFFFFFFFFFFFFFFFFFFFFFFFFFFFFFFFFFFFFFFFFFFFFFF  
FFF

@A00721:190:HGJW7DSXY:4:1510:16125:31704\_1:N:0:TCTGCAAG+GCTGCACT  
ACCCAAAGAGAATATCTAAAATATTTACAAAATCTTACCACTATCTACGAACCTAAAGTTCTGAAGAC  
GTTGCTTGTGCTTCCTCCTTTAATGGCACTACCTCGGTACAATCTTACTTGAACGAAGGCGACCTG  
TTC

+

FFFFF:FFFFFFFFFFFFFFFFFFFFFFFFFFFFFFFFFFFFFFFF,FFFFFF:FFFFFFFFFFFFFFFF  
FFFFFFFFFFFFFFFFFFFFFFFFFFFFFFFFFFFFFFFFFFFFFFFFFFFFFFFF:FFFFFFFFFFFFFFFF  
FFF

@A00721:190:HGJW7DSXY:4:1227:19334:31626\_1:N:0:TCTGCAAG+GCTGCACT  
TGTTCTGTCTATATTAGGTGAAGCGAAATACGATTTGCAACGTCAACGTTACCGAGTTTCGTTTCGT  
ACCTTGATGCTGACTTTCGTCAATATGATTTGATCTGGTTGCTCAATTCTAAGCGTGTTCCGCTTAGT  
GCG

FFFFFFFFFFFFFFFFFFFFFFFFFF:FFFFFFFFFFFFFFFFFFFFFFFFFFFFFFFF:FFFFFFFFFFFFFFFFFFFF  
 FFFFFFFFFFFFFFFFFFFFFFFFFF,FFFFFFFFFFFFFFFFFFFFFFFFFFFFFFFF:FFFFFFFFFFFFFF:FFFFFFF  
 FF:  
 @A00721:190:HGJW7DSXY:4:1638:28953:18850\_2:N:0:TCTGCAAG+GCTGCACT  
 GAGTATTGCTATTTATACGGTTACGAGAAGAAGGTTGAAAGTTTGAGAACTTAGTTTACGAACTTGA  
 CTCTACTATACGTGACATACTAAATACTAGATATTTGGATGATCTTGA  
 +  
 FFFFFFFFFFFFFFFFFFFFFFFFFF:FFFFFFFFFFFFFFFFFFFFFFFFFFFFFFFF:FFFFFFFFFFFFFFFFFFFF  
 FFFFFFFFFFFFFFFFFFFFFFFFFF:FFFFFFFFFFFFFFFFFFFFFFFFFFFFFFFF:FFFFFFF  
 @A00721:190:HGJW7DSXY:4:1533:10149:15843\_2:N:0:TCTGCAAG+GCTGCACT  
 CATGAATTTTCAGAGGATGAAAAATTTCTTCCTTGGAATTTAATATAAAGAATCTTTACCAGGACTC  
 TACTACAGGAGGCAGTCTTCTGATCGTAAGAAGTTTATAAGGAACAT  
 +  
 FFFFFFFFFFFFFFFFFFFFFF:FFFFFFFFFFFFFFFFFFFFFFFFFFFFFFFF:FFFFFFFFFFFFFFFFFFFF  
 FFFFFFFFFFFFFFFFFFFFFF:FFFFFFFFFFFFFFFFFFFFFFFFFFFFFFFF:FFFFFFF  
 @A00721:190:HGJW7DSXY:4:2327:6668:24846\_1:N:0:TCTGCAAG+GCTGCACT  
 ACTCGAACTCTAAGTGGTAATACTGTCTTTCCAAGCTTACCTGTATCTTCAATGAAATTGGACTCTT  
 CGATAGGGGACATTTTATCGTGGGCTTTCCGTAAGGAAGATCTGTTATCGACGTTTATCGTTTACG  
 AAG  
 +  
 FFFFFFFFFFFFFF::FFF:FFFFF:FF:FFFFF:F:FF:FF:FF,F:FF:FFF:FFFFFFFFFFFFF,F  
 FFFFFFFFF:FFFFFFFFFFFFFFFFFFFFFFFF:FFFFFFFFFFFFFFFFFFFFFFFF:FFFFFFFFFFFFFFFFFFFF  
 FFF  
 @A00721:190:HGJW7DSXY:4:2678:26838:6887\_2:N:0:TCTGCAAG+GCTGCACT  
 GTTTAAGAATACTATAAATAGAACTAGCTATTACTACTAATGGCGTTGGCCTAGTGGATGTTATTAGTG  
 ACATCTGGTCAATTTCTGTTTTTAGGTGGTCTTTATTCTATTATTGATT  
 +  
 F,F,FFFFFFFF:FFFFF:FFFF:FFFFFFFFFFFF,FFFFFFFFFFFFFFFFFFFF:FFFFFFFFFFFFFFFFFFFF  
 FFFFFFFFFFFFFFFFFFFFFFFFFF:FFFFFFF  
 @A00721:190:HGJW7DSXY:4:1550:12879:32440\_1:N:0:TCTGCAAG+GCTGCACT  
 ACAGAAGATGATGTTAGAGTAGAATTCCTGAAGAGTCCTTCCGTAACCAACTTCTTGACAATTTTCTT  
 CAATCCTTCGATAATAGTTAAATCTAGGATTATGTCTGTGTTGAAAGACTTTCTACCGATAAGGGTCA  
 CTA  
 +  
 FFFFFFFFFF:FFFFFFFFFFFFFFFFFFFFFFFFFFFFFFFFFFFFFFFFFFFFFFFFFFFFFFFFFFFFFFFFFFFF  
 FFFFFFFFFFFFFFFFFFFFFFFFFF:FFFFFFF  
 FF:  
 @A00721:190:HGJW7DSXY:4:2359:14118:24001\_2:N:0:TCTGCAAG+GCTGCACT  
 TAAGAAATAATCCTACATTGACTGATTATCTAAAGATTGAAGGAAAATTTTATCCTCGTTTAACTTAC  
 TTAGACTTTCCTACGATACAAATGATAACTTCTAATTTACGTTTGCTA  
 +  
 FFFFFFFFFFFFFFFFFFFFFFFFFF,FFFFFFFFFFFFFFFFFFFFF  
 FFFFFFFFFFFFFF:FF:FFFFFFFFFFFFFFFFFFFFFFFF:FFFFFFF  
 @A00721:190:HGJW7DSXY:4:2556:30743:1063\_2:N:0:TCTGCAAG+GCTGCACT  
 CAAAGGGATGCATGGTGTATCTCCTCAGGAGTCCCGGCATTTGATAATAATGACGAGACTTTCGTCA  
 TAATCGCTGCATATTACGGATTACACGGTACCAGCGCATCTCGTGTGCG  
 +  
 FFFFFFFFFFFFFFFFFFFFFFFFFF:FFFFFFFFFFFFFFFFFFFFFFFFFFFFFFFF:FFFFFFFFFFFFFFFFFFFF  
 FFFF:FFFFFFFFFFFFFFFFFFFFFFFFFFFFFFFFFFFFFFFFFFFFFFFFFFFFFFFF  
 @A00721:190:HGJW7DSXY:4:1648:19895:4288\_1:N:0:TCTGCAAG+GCTGCACT  
 ATTAACTTATAAAGGTGAGGAGACCATTTTCTTGCTGAAATTTATAGAAGATTATTTTGACAGAATCA  
 ATAAGAATCATCGATTCTCGATTCTGATAGAGCTTATCTAGGTACTCTCATTTACTATGTTGATTAGTC  
 TAC



```
+
FFFFFFFFF:::FFFFFFFFFFFFFFFFFFFFFFFFFF:FFFFFFFFFFFFFFFFFFFF:FFFFFFFFFFFFFFF
FFFFFFFFFFFFFFFFFFFFFFFFFFFFFFFFFFFFFFFFFFFFFFFFFFFFFFFFFFFFFFFFFFFFFFFFFFF
FFF
@A00721:190:HGJW7DSXY:4:2559:2248:20760_2:N:0:TCTGCAAG+GCTGCACT
GATTTACAACGATATAGGAGTAATCTACGAGAAGATTCTAGAATTCTTAAATTATAATATTCAACTCA
AAAGTTACGTGTTTTACAGTAACGAGATCACACATTTTGAGAACTAACT
+
FFFFFFFFFFFFFFFFFFFFFFFFFFFFFFFFFFFF,FFFFFFFFFFFFFFFFFFFFFFFFFFFFFFFFFFFF
FFFFFFFFFFFFFFFFFFFFFFFFFFFFFFFFFFFFFFFFFFFFFFFFFFFFFFFFFFFFFFFFFFFF
@A00721:190:HGJW7DSXY:4:1238:13819:3505_1:N:0:TCTGCAAG+GCTGCACT
TCTCTTCTTATAATAAATAAATAAATAATATTACTAATGGCAAATAGTGGAAGGCTCCAGTCAACAC
TAGTTCGAGTGCTGCTTTGGATTACGATGACGTGAGAATAGGTGAAGGGATAGTTTTTACCTCGACCA
ACA
+
FFF:FFFFFFFFFFFFFFFFFFFFFFFFFFFFFFFFFFFFFFFFFFFFFFFFFFFFFFFFFFFFFFFFFFFF
FFFFFFFFFFFFFFFFFFFFFFFFFFFF:FFFFFFFFFFFFFFFFFFFFFFFFFFFFFFFFFFFFFFFFFFFF:F
FFF
@A00721:190:HGJW7DSXY:4:1441:13024:13714_2:N:0:TCTGCAAG+GCTGCACT
GCGACTAATCTTAAAGCTTCACCCAAAATGAAGGACACTTCGAAACTGAATAATGATGCACTACAAAC
AAGTATCGCTAATCATCTGAAAAAGGCTCTAAAGGACACTATACAATA
+
FFFFFFFFFFFFFFFFFFFFFFFFFFFFFFFFFFFFFFFFFFFFFFFFFFFFFFFFFFFFFFFFFFFFFFFFFFFF
FFFFFFFFFFFFFFFFFFFFFFFFFFFFFFFFFFFFFFFFFFFFFFFFFFFFFFFFFFFFFFFFFFFF
@A00721:190:HGJW7DSXY:4:2675:10203:1846_1:N:0:TCTGCAAG+GCTGCACT
TTGGTGCTTAGGGATATAATGAATTCAGCACCACATTTTGGTCAAGTCAATCCGTTGAGAAAATTTCT
TAGAGGATATTCGCCATTGTGGTACGAATTGGTCCAACATTTACCACCAAATTTCTTTTGATACAAC TC
TAG
+
FFFFFFFFFFFFFFFFFFFFFFFFFFFFFFFFFFFFFFFFFFFFFFFFFFFFFFFFFFFFFFFFFFFF:FFFFF
FFFFFFFFFF:FFFFFFFFFFFFFFFFFFFFFFFFFFFFFFFFFFFF:FFFFFFFFFFFFFFFFFFFFFFFFFFFF
FFF
@A00721:190:HGJW7DSXY:4:1602:12319:15311_2:N:0:TCTGCAAG+GCTGCACT
CGGAATACGCTTGCTATTCACCAGATTGGTTCGAACCCGTTGATGCTATGTCAGAAGAAGCTATTCAA
GCTTGTCGTTTAAAGACTGCAGAGGCTGTCAAACAAGCCCAGACTCAA
+
FFFFFFFFFFFFFFFFFFFFFFFFF::FFFFFFFFFFFFFFFFFFFFFFFFFFFFFFFFFFFFFFFFFFFFF
FFFFFFFFFFFFFF,F,F,FFFF,FFF:F,FF,FFF:FFFFFFFFFFFF
@A00721:190:HGJW7DSXY:4:2257:13928:3161_1:N:0:TCTGCAAG+GCTGCACT
AATTTAGCTCAACTGGGGAGACGTGCTTAAATGGGTGATAAAAATTATTTAGAGATCTTTTCTACTTA
CAAAGGACAATTCAGTTTCATTAATTCTACGAAAAGTCCGGAGTATATTGTATGTTAATAGATAGTG
GGA
+
FFFFFFFFFFF:FFFFFFFFFFFFFFFFFFFFFFFFFFFFFFFFFFFFFFFFFFFFFFFFFFFFFFFFFFFFF
FF:FFFFFFFFFFFFFFFFFFFFFFFFFFFFFFFFFFFFFFFFFFFFFFFFFFFFFFFFFFFFFFFFFFFF
FFF
@A00721:190:HGJW7DSXY:4:1311:28999:29763_2:N:0:TCTGCAAG+GCTGCACT
GAACGCGTTCGTATAACCAAGTACTTTCCGTCTGAAGAGTTTAGAGCTGCTATTGATTATGTAACCGA
TAGGAGTTGTATAGTTGAAGATGTGGCTTTAGACGATAATCCTTTAAG
+
FFFFFFFFFFFFFFFFFFFFFFFFFFFFFFFFFFFFFFFFFFFFFFFFFFFFFFFFFFFF:FFFFFFFFFFFFFF:FF
FFFFFFFFFFFFFFFFFFFFFFFFFFFFFFFFFFFFFFFFFFFFFFFFFFFFFFFFFFFFFFFFFFFF
@A00721:190:HGJW7DSXY:4:1356:2175:23234_1:N:0:TCTGCAAG+GCTGCACT
GAAGATTTTCCCAAAGATTTGTCTACGTTGCAGATCGCCACTCCAAACACTATATACATTATAAAAATA
```



@A00721:190:HGJW7DSXY:4:1158:24469:13808\_2:N:0:TCTGCAAG+GCTGCACT  
CCGATTATAACTTGACTGTTGATAATATTACAATAGCTCTTTCTCAGAAGATTAGAGAAGTAACCGGT  
GAACACGTCGGTAGCATTGATTTACTTTTACCGTTAGAAGTAAAAAG

@A00721:190:HGJW7DSXY:4:1653:28393:30091\_1:N:0:TCTGCAAG+GCTGCACT  
ACCTATAAGTTACAAACGATTCTTCGACTATATTAAGAAATAAAAATACTTCAAGTACCTGAACTTT  
ACATTTTTAATGGTATGGTATAATGTGTCTTACAAATAGAACCTTCACTCTCGGTAATGAGAGTGTAT  
TCC

@A00721:190:HGJW7DSXY:4:1547:24623:25911\_1:N:0:TCTGCAAG+GCTGCACT  
GGCATTACTAGGATTTATCACACTCCTAAATTTGATAGCAATTTATGTTTTAAATGCTAGGAAATTT  
TAGAAAACTCCATTGTATAGTTCAAGGAGTACTTAATTCAATAGCTTTAGTATTATTTACTATCGCC  
TTT

@A00721:190:HGJW7DSXY:4:1361:28926:6089\_2:N:0:TCTGCAAG+GCTGCACT  
AGTTAATTGCTTACACAAAAGTGACGCGGAAGGAATCTTAATTGATTGAAGCTAGGCGTTGGGGAGA  
ATGAACTGCCGCTTCCCGGAAGAAACGATCTATTTACAGAGTATTTAG

@A00721:190:HGJW7DSXY:4:1153:4155:14857\_2:N:0:TCTGCAAG+GCTGCACT  
TACACTCCCCAAACATAACATAACCATAACCTACCATGACCAATCATCGCTCCAAGTGGCAGCCAGAC  
GTAGGGTCAAACCTACTACCGCCTGTCGGCAGATCGGCACCACTGGTC

@A00721:190:HGJW7DSXY:4:2249:24153:5869\_2:N:0:TCTGCAAG+GCTGCACT  
ACCCGCTGTGCAGAATAACCTTCCCAAATCTAGATCTGCACAGAAGAAGGCTGAAGGTCGTTACCGGA  
CGACCACTCAAAGGAAACGGGCTGTTGCCAGAGGAAAGCAGCGACCA

@A00721:190:HGJW7DSXY:4:2172:27091:34538\_2:N:0:TCTGCAAG+GCTGCACT  
GTAACATTGACGGCAGTCCCGTCATCTCTGTGGGAACTGAGGCAGTACCTCAGTCAAAGTCACATTC  
ACCACTCCCATACCAATCAATGATGTGACTATACAGTTCGGCCATTC

@A00721:190:HGJW7DSXY:4:1504:6705:29011\_1:N:0:TCTGCAAG+GCTGCACT  
ATACGTCGTGGGAGGTACTGAAGCCTTCCCCTCCGCTGGCACGAAGAACTCCCAAGCCAATCAATA  
GTTCTTCTGACCAGAATGAAAAGGGGTTTACCAGGGTAGTCTCTAAGTCTACCAGGAAGAGGGGAAAT  
GTC

[illegible]

@A00721:190:HGJW7DSXY:4:2659:25156:19257\_1:N:0:TCTGCAAG+GCTGCACT  
AAAGGGAAAGTCCATCAGGACCTAAGAAGGGGACATTACCCCTAATTCTGAAGGAAGATCTCCCACC  
ATCTGGGGTTGGGAATAAGAAATCTGCACGGGCCAAAGAGGCCGCTGCTACGAAGTCGCTGAAGGCGG  
CTT

+

```

FFFFFFFFFFFFFFFFFFFFFFFFFFFFFFFFFFFFFFFF,FFFFFFFFFFFF:FFFFFFFFFFFFFFFFFFFFFFFFFFFF
FFFFFFFFFFFFFFFFFFFFFFFFFFFF:,FFFFFFFFFFFFFFFFFFFFFFFFFFFFFFFFFFFFFFFFFFFFFFFFFFFFFFF
FFF

```

@A00721:190:HGJW7DSXY:4:1452:3323:34554\_2:N:0:TCTGCAAG+GCTGCACT  
TGTAAGTTGCGCCTGCCGACCCCATCTTTGAGACCAAGACTCTCTACAGTAGGTCGTGCCTACTAT  
GAGCAATCTGTTGAATTCGTCACTGAGGACGAAGGTGAGAGGACTTT

+

[illegible]

@A00721:190:HGJW7DSXY:4:1127:4173:6057\_1:N:0:TCTGCAAG+GCTGCACT  
CTGAGAGCAGTCGCTGGGGAAAGAGAATTGCGTGGGTGTAAGGCCGACGCTTCGAGCTTGAGTGTGAC  
GAGGCCGGTGACGTTTTTGTCAACGGCGTTTGGAGGATTTTATCCGCGCTTA ACTATGGGGCGAAGAT  
CCC

+

[illegible]

@A00721:190:HGJW7DSXY:4:1259:26648:33802\_2:N:0:TCTGCAAG+GCTGCACT  
AGGTTGGCATATTTATGCCGACGATAATAAGCATGTCAACCCTTAAGCACCGAGGTAAGCTCGGGACTT  
ACAAGAGAGAGTGTGAGAGAGTCGCTCTCACTATTTTTGCCCAGAATG

+

```
FFFFFFFFFFFFFFFFFFFFFFFFFFFFF:FFFFFFFFFFFFFFFFFFFFFFFFFFFFFFFFFFFFFF
FFFFFFFFFFFFFFFFFFFF:FFFFFFFFFFFFFFFFFFFFFFFFFFFFFFFFFFFF
```

@A00721:190:HGJW7DSXY:4:2544:31069:3724\_1:N:0:TCTGCAAG+GCTGCACT  
CTGATGAGGTTAAACTCTTGCTCCTTCTGTGGGTGAGGGTTTTTGTATATTCCTGTTCTGGGAG  
GCTGCTTTCCTCCATAATTACAACCTCTCTTTAGAGATCATTAGAAGGAAGTTGGGCAAATCCCACA  
TAT

+

[illegible]

@A00721:190:HGJW7DSXY:4:2570:4001:3662\_1:N:0:TCTGCAAG+GCTGCACT  
CACACTTTTCTTGAAAATTTTCTTTCTCCGTCATTGGGGATTTTCGATGTGAGAAGGTGGAAGGTG  
TCAAGGGTCTTCTTCATGCTGATCTTTCAGGACCTAATCACATCATGATTGATAGTTACGGCTCGTAT  
CGA

+

[illegible]

@A00721:190:HGJW7DSXY:4:1233:5240:16705\_2:N:0:TCTGCAAG+GCTGCACT  
CGAAATTAAGACGGGGGATTAAGAGTCCAGCTGTAAGTGTCAATTCAGAGAGGGGAGCTCTGAAAA  
GGAAACTTCGTCAGAAGATGAGGAAGTCTAAGAGGAGGAGTTTGAGGA

+

```

FFFFFFFFFFFFFFFFFFFFFFFF:FFFFFF:FFF,FFFF:FFF,FFFFFFFFFFFFFFFF:FFFFFF,FFFFFF
FFFFFFFF:FFFFFFFFFFFFFFFFFFFFFFFF:F,FFFFFF:FFF:FFFFFF

```

@A00721:190:HGJW7DSXY:4:1318:2492:15013\_2:N:0:TCTGCAAG+GCTGCACT  
GAAGTTGATGAAGAAGGATTATTTGAAGCAGGGGTTACCACTTCCTAAGGTGGATGAGGGAGGTTGTT

+

@A00721:190:HGJW7DSXY:4:2121:31222:35963\_2:N:0:TCTGCAAG+GCTGCACT  
CCTTGAGAAGACAAGCCACATTAAGATATAATTTAGGTCAACTTGGGGTTTCGAATGTCATTAGTGCC  
TTACGATTGAAAGAGGTCTTTTTGAGTATCGACAGATCTTTCGATCTT

+

@A00721:190:HGJW7DSXY:4:2308:18909:12383\_2:N:0:TCTGCAAG+GCTGCACT  
GTGGCAGAATTCGGTAACTTACCATATTGTTCTTCCGGGAAGTTGTGGGATTTAACTTTGACTCAAC  
TACTCCGATCAGATCCGGATGGTTTGATTGGTATGGACTACTCGACTT

+

@A00721:190:HGJW7DSXY:4:2566:9869:25629\_1:N:0:TCTGCAAG+GCTGCACT  
TAGGGTCATGGCAGATACTACCGATAAGGTGAAAAATATGCAGGTCAAAGATTCTGTAGCTCTGAGGG  
CGGTTGAGGGAGCCGTTTTGGCCGACTTTAACTATTCTAAGAGTCTTTATGATTCAAACCTATCGTT  
GTC

 $+$ 

@A00721:190:HGJW7DSXY:4:1236:17381:13902\_2:N:0:TCTGCAAG+GCTGCACT  
GCGGCTTATTGTCGCGCAGTTTCCAGAATTGCGGTTGAAGTTCACCCATTCTATCTTGAATGCTCACG  
CCGTCGCAGCCATATCGAGACTATGTTATAATCACTTGTTAAAGTACA

+

@A00721:190:HGJW7DSXY:4:1239:32425:6856\_2:N:0:TCTGCAAG+GCTGCACT  
TTAGATATTATTGATATTGGAGGCGATATTCGTTTTCATATCCAAACTCCTTGAATGGAGTACATAT  
TTGCAACCTATTCTTGATGTGAAAGATGCATCGAGGTATACGTCTAG

+

@A00721:190:HGJW7DSXY:4:2525:3405:32346\_1:N:0:TCTGCAAG+GCTGCACT  
GGGAACGTACCTACTCACGAGACGTCATGAAAGCTATCGGAGGGAAGCAAAATGTTTCGTTCTGTTAC  
AAGAACGCTTTGGATTGTGACCATAAAGCCTCAGTTGCGATAGCTGTAGAGGTATACGATATCTCTCT  
TGA

+

@A00721:190:HGJW7DSXY:4:1166:19669:28604\_2:N:0:TCTGCAAG+GCTGCACT  
AATGCTTAAGAGAGAGATTGATGTATGTCATTCGTCTTAGTTTGTCCCGGCGAATTATTGGACACGA  
TGAAAAATGACATACCCGTTCTGACCTTGGTATCGTTATCCGTCATG

+

@A00721:190:HGJW7DSXY:4:2335:16197:30044\_2:N:0:TCTGCAAG+GCTGCACT  
GGTTATTCTCACAAAGATAAGATTTTATCTTTCTTCAAACACCCTGTTTTCTTAAGGGCGGACA  
ATTGTTCCATTGTGAACCTCTTGGGGACTAGATTGAGCATTAATGAGTT

+



+

FFFFFFFFFFFFFFFFFFFFFFFFFFFFFFFFFFFFFFFFFFFFF:,FFF:FFFF

+

```
FFFFFFFF:FFFF:FFFFFFFFFFFFFFFF,FFFF:FFFFFFFF:FFFFFFFF
```

+

FFF

+

FFF

+

[illegible]

+

```

:FFFFFFFF:FFFFFFFFFFFFFFFF:FFFFFFFFFFFFFFFFFFFFFFFF

```

+

```
FFFFFFFFFFFFFFFF:FFFFFFFF:FFFFFFFFFFFFFFFFFFFFFFFF:FF
```

+

```
FFFFFFFFFFFFFF:FFFF:FFFFFF.FFFFFFFFFF:F:FFFFFFFFF:F:FF
```

@A00721:190:HGJW7DSXY:4:2515:18123:5478\_1:N:0:TCTGCAAG+GCTGCACT  
CTCGCCATATCAGATTAGAGACATGCCAGTTAGAGTTCTTCTAACCAGGACTGATGGTGAGATTCTTT  
TACCTTTTGGAGGTCCAGGAACCTTTACTCCTAGTGCTTTTCTAGAGTCCAAGGACGTTTCCGTCGG  
AGG

+  
FFFFFFFFFFFFFFFFFFFFFFFFFFFFFFFFFFFFFFFFFFFFFFFFFFFFFFFFFFFFFFFFFFFFFFFF  
FFFFFFFFFFFFFFFFFFFFFFFFFFFFFFFFFFFFFFFFFFFFFFFFFFFFFFFFFFFFFFFFFFFFFFFF:FFFFFFFF  
FFF  
@A00721:190:HGJW7DSXY:4:2134:30942:19664\_2:N:0:TCTGCAAG+GCTGCACT  
GACCGCTCAATAACACTCTATTGAATCCCTTTTCCACGATGAAAGCTCTTTATGAGGTGCTCCATGCA  
AATTTACAGTTCCTCTTTGGTGATATCGCCTCTGTCCTTTCTCCTTTA  
+  
FFFFFFFFFFFFFFFFFFFFFFFFFFFFFFFFFFFFFFFFFFFFFFFFFFFFFFFFFFFFFFFFFFFFFFFF:FFFFF  
FFFFFFFFFFFFFFFFFFFFFFFFFFFFFFFFFFFFFFFFFFFFFFFFFFFFFFFFFFFFFFFF  
@A00721:190:HGJW7DSXY:4:1519:20030:13886\_2:N:0:TCTGCAAG+GCTGCACT  
ACTTGGGTTTATCGGTTGTATTTTGATAAATTTGTTGGAATCGATAATGATACTGACGAAGGTTCTAT  
TACCACCCTTGTCATTGATACAAACATTCTAGGTGATGCTTTCTTAGA  
+  
FFFFF:FF::FFFFFFFF:FFFFF:FFFFFFFF,FF:F:FFFF:F,FFFF:FF,F,FFFFFFFFFFFFF:  
FFF:FFFFF,,FFFF,F:FFFFFFFFF,FFF,,FFFFFFFFFFFFFFFFF  
@A00721:190:HGJW7DSXY:4:2565:22842:23140\_2:N:0:TCTGCAAG+GCTGCACT  
TTACAATCTGTAGAGAGAGAGGTTAATCAGAATTTGAGTGATAACGATTTAGTACTGGGAAATGGTGG  
TAGTCAGTTTACTACTTTTCTTTCCCTCCCCTTTTTCGATTGGATTG  
+  
FFFFFFF,FFFFFFFFFFFFFFFFF,FFFFFFFFFFFFFFFFFFFFF,F:, :FFFFFF::FFFFFFFFFFFF  
FF:FFFF:FFFFFFFFF:FFFFF,FFFFF:FF:FFF:FFFFFFFFF,  
@A00721:190:HGJW7DSXY:4:1568:10782:16282\_2:N:0:TCTGCAAG+GCTGCACT  
TTGATAAGTTTTTCTTTTATGGGACTCTTGTTTGTACTTATGAAGGAGGTATTACTTCGGAAGTTCT  
TAATGTAGGTCTCCTAGTACTTAAGGGTTTATGTTTCGGTTTCAGCTG  
+  
FFFFFFFFFFFFFFFFFFFFFFFFFFFFFFFFFFFFFFFFFFFFF:FFFFFFFFFFFFFFFFFFFF,FFFFFFFFFFFF  
FFFFFFFFFFFFFFFFFFFFFFFFFFFFFFFFFFFFFFFFFFFFFFFFFFFFFFFFFFFFF  
@A00721:190:HGJW7DSXY:4:1636:11858:33395\_2:N:0:TCTGCAAG+GCTGCACT  
TGTTTTCACATTGCGTGATCACTTCCCGTGGACTTGGGAAGAGATTAAACATAAAATCCAGCGATTCTA  
TTATGTCGCTAAAGCCTGTCCAGTTGTCGATGATGTTTCGGGCTGTGGG  
+  
FFFFFFFFFFFFFFFFFFFFFFFFFFFFFFFFFFFFFFFFFFFFFFFFFFFFF:FFFFFFFFF:FFFFFFFFF  
FFFFFFFFFFFFFFFFFFFFFFFFFFFFFFFFFFFFFFFFFFFF,FFFFFFFFFFFFFFFFF  
@A00721:190:HGJW7DSXY:4:2442:12906:19429\_2:N:0:TCTGCAAG+GCTGCACT  
AAACTTACGACGATGTTCTCGCTCGCATTTCAACAAGGATTACTAAGTCTGAGATCTGCCACTTCTAAT  
TTAGGAAACGTCGCGAAAAGAAAGTTCATGAGGATGTCTTGTCGAA  
+  
FFFFFFFFFFFFFFFFFFFFFFFFFFFFFFFFFFFFFFFFFFFFFFFFFFFFFFFFFFFFFFFFFFFFFFFFFFFF  
FFFFFFFFFFFFFFFFFFFFFFFFFFFFFFFFFFFFFFFFFFFFFFFFFFFFFFFFFFFFF  
@A00721:190:HGJW7DSXY:4:2536:22679:20071\_2:N:0:TCTGCAAG+GCTGCACT  
GAACCTCTAATAGAGGATCCTGATGACATTATTTCAACGGATACCGATCTCAGTTCTACCACAGAAAC  
CGTCTCAGGAACTGTCTCCACTGATTGGAATTAGAGAAAGACGACCT  
+  
FFFFFFFFFFFFFFFFFFFFFFFFFFFFFFFFFFFFF:FFFFFFFFFFFFFFFFFFFFFFFFFFFFFFFFFFFFF  
FFFFFFFFFFFF:FFFFFFFFFFFFFFFFFFFFF,FFFFFFFFFFFFFFFFFFFFF  
@A00721:190:HGJW7DSXY:4:1340:26738:9878\_1:N:0:TCTGCAAG+GCTGCACT  
AGACCTCTGATTTTTAGGGTGCCCTGATGAGGACGTTGAAAGGGATAATTTCAACTCTGAGACTTCT  
AAGAGTGTTCAAAAGACCAGAAACGTAACAAGAAGATAAAGGTAGGAAGGGGAGAAAACAGAACAA  
GC  
+  
F,F,,F:F,F,FFFFFFFF:FF:F,FFFFFFFF:FFF::F,FFF:FFFFF:FFFFFF,FFF,F,F,FF:F  
FF:FFFFFFFF,FFFFFFFF::FFFFFFFFF:FF:F::FFFFFF:,FFF:F:FFFFFFFFFFFFFFF,:FFF  
FF





+

@A00721:190:HGJW7DSXY:4:1515:7988:12007\_2:N:0:TCTGCAAG+GCTGCACT  
ACTTACCAGCACGTTTCGGCTGGTTAGAATTAACCTCAAGATGACCCTGTTTTTGCATCACAAACACA  
TATTACCGTTGCTCTATCACGACACGTTGAATCTTTAAGATACTTTGT

+

@A00721:190:HGJW7DSXY:4:1669:13096:33755\_1:N:0:TCTGCAAG+GCTGCACT  
TTAAACGATGCTACTTGTGAGAGGATCAATCACAGTAAGTAACTGTCACGTTTAGCACGGGAGGTTGC  
AGATTCAACCCCTTATATCGAGGCTATCGAGGACGATGAGTATCTTGAAGTTGTTGACGACAAGCCTC  
AAG

+

@A00721:190:HGJW7DSXY:4:2512:10872:15624\_2:N:0:TCTGCAAG+GCTGCACT  
TCTTCTACTGTCTCTGCCTTCCAAGATTTCTTAGAAGAGGTTATTCCTGGAACCACTTAACGTCCT  
CGGTAATCTTTCAGCCGAATTAAGTACTAATGAGTTC AAGTCGGTTGT

+

@A00721:190:HGJW7DSXY:4:1507:17074:13150\_1:N:0:TCTGCAAG+GCTGCACT  
GATCAAGGCTAATACCTTTATAGGTAAGAAGCCCCTTGAGCCGCGTAGTCAGCGCGTTTAGCTGTATC  
ATCAGTCAGAGTATACCCGATAGGCTACCGAGTCTCCAAGAGAATATTTATTCTTATGAGGCTCGAAA  
CTT

+

@A00721:190:HGJW7DSXY:4:1546:18991:5948\_1:N:0:TCTGCAAG+GCTGCACT  
CAACGGAAAGACATATCGCACCCGAAATTTTTGGGCAGAATGCTCTTAACGCGGTTCTTGAACGGTGT  
TTTGATCAGTCTAAGTTGGATAAAGTTATAGGAGACTCAGTTAACCTGAGAGCTCCTCAATTGATAGA  
TTG

+

@A00721:190:HGJW7DSXY:4:2120:19443:12367\_2:N:0:TCTGCAAG+GCTGCACT  
CTAGTATACTTCGTAAAGTCGACAGCGAAATGGTCAATATTGATAATTGGACCGACTATATGACCTAT  
TTTAAGCTCATGGTGAAAAGGGAAGCTAAGGTTAAACTTGATGCTTCA

+

@A00721:190:HGJW7DSXY:4:1567:5647:4570\_2:N:0:TCTGCAAG+GCTGCACT  
CCTATCTTTAAGTTCTTGTGAGGAGAGTCAAACAGTGTCTTTACCCAACATTTTATGTATACAGA  
GATGACCAGTGACGATTTCTCCCGGAAGCTCTTCTCTCTTAGGAGG

+

@A00721:190:HGJW7DSXY:4:2212:2094:9471\_2:N:0:TCTGCAAG+GCTGCACT  
TTTCTTTTGTAAGCCTATGAGATAAAGATGTATTCTTATTTAGGCTTCGATGCTGAATTTCTTGAAC



@A00721:190:HGJW7DSXY:4:1202:14552:20118\_1:N:0:TCTGCAAG+GCTGCACT  
CACTTATTACGATATTTCTTTAGTCGATGGGTTTTCGACGCCTTTAAGCGTCTTCTGTTTCATCGCAAC  
CAGATGATATCTTCTATTCTGAACCTATGTTTCGATCAGTGTTTCTTCTATCAGGAGGAAAACACTTGT  
TCT

+

FF:FFFFFF,FFFFFF:FFFFFF,FFFFFFFFFFFFFFFFFFFFFFFFFFFFFFFFFFFFFFFF  
FFFFFFFFFFFFFFFFFFFFFFFFFFFFFFFFFFFFFFFFFFFFFFFFFFFFFFFFFFFFFFFF  
FFF

@A00721:190:HGJW7DSXY:4:1272:6578:19680\_2:N:0:TCTGCAAG+GCTGCACT  
TCTTCTAATGTGGCCTGAACCTACGTTTCACTTTGTGTGTACTTGTCTCTATTTTAAGTTTTGTCTTCC  
TTGTTTGTCTTATTCTATTAATCACTCATTTTAGTGAGATTATTAATA

+

FFFFFFFFFFFFFFFF:FFFFFFFFFFFFFFFF,,FFF,FFFFFFFFFFFFFFFFFFFFFFFF  
FFFFFF:FFFFFFFF,FFF::FFFFFF:F:FFFFFFFF:FFFFFF

@A00721:190:HGJW7DSXY:4:2270:3821:16783\_1:N:0:TCTGCAAG+GCTGCACT  
TCTTCGACAACAGCAGGGGTTTTCGAATAGTGATAGCCACCCGCTTACAGAGGGGCAGCAGCATGAC  
CATAATTGGTATTGACTTTGGTACCACCTTTTCTACTGTCTGTCTCGCCTCTTCAATGAAGTTTTAA  
TGC

+

FFFFFFFFFFFFFFFFFFFFFFFFFFFFFFFFFFFFFFFFFFFFFFFFFFFFFFFFFFFFFFFF  
FFFFFFFFFFFFFFFFFFFFFFFFFFFFFFFFFFFFFFFFFFFFFFFFFFFFFFFFFFFFFFFF:FFFFFFFFFFFFFFFF  
FFF

@A00721:190:HGJW7DSXY:4:2318:19153:22294\_2:N:0:TCTGCAAG+GCTGCACT  
CTACAATCATTGGTTTTTCTAATAATGATGACACTATTGTTTATGGATATGATGCTATTACTCATGAT  
GGTTACGGTCAGGGAGGATTCTCAGTTTACAAGGACCTTAAGCGATGG

+

FFFFFFFFFFFFFFFFFFFFFFFFFFFFFFFFFFFFFFFFFFFFFFFFFFFFFFFFFFFFFFFF:FF:FFFF:F:FFF,FFFFFFFF  
FFFFFFFFFFFFFFFFFFFFFFFFFFFFFFFFFFFFFFFFFFFFFFFFFFFFFFFF:F:FFFF:

@A00721:190:HGJW7DSXY:4:1553:13268:8249\_2:N:0:TCTGCAAG+GCTGCACT  
CCGAAAGACGTGCTAAATTAACCATTTGACGATGTCTGTCTCGGCGATCACTTTTCACTAAGA  
ATTGGTCCTACTTTTGGACAAGGCCAATTTCGTAATCTTCATGAGATC

+

FFFFFFFFFFF:FFFFFFFFFFFFFFFFFFFFFFFFFFFFFFFFFFFFFFFFFFFFFFFFFFFFFFFF:FFFFFF  
FFFFFFFFFFF:FFFFFFFFFFFFFFFFFFFFFFFFFFFFFFFFFFFFFFFFFFFFFFFF

@A00721:190:HGJW7DSXY:4:2604:14461:23657\_1:N:0:TCTGCAAG+GCTGCACT  
TGTTAGGGATTTTGAAGAGTGAAAGGCTTCAATTGTAGTGTTTGGTCGTTTACGTACCCAGTCAGT  
ATACCTCTACGCAAAGATATTTTCATGAAAACCTACAGAGGAACGTACCGGATTACCTGTCTTTCATATT  
ATG

+

FFFFFFFFFFFFFFFFFFFFFFFFFFFFFFFFFFFFFFFFFFFFFFFFFFFFFFFFFFFFFFFF:FFFFFFFFFFFFFFFF  
FFFFFFFFFFFFFFFFFFFFFFFFFFFFFFFFFFFFFFFFFFFFFFFFFFFFFFFFFFFFFFFF  
FFF

@A00721:190:HGJW7DSXY:4:1672:10176:10379\_1:N:0:TCTGCAAG+GCTGCACT  
CTCTTTGCTTCGATGTTGGATGTCAAGAAGGGTTCAGAATGGGATTCCTACGTAGTTTATGACTTTGG  
TGGTGGTACTTTGATACTTCTATCGTCTTACGTTACGGTAATTACTATAGTGTTATTTATTCTGGTG  
GTG

+

FF:FFFFFFFFFFFFFFFFFFFFFFFFFFFFFFFFFFFFFFFFFFFFFFFFFFFFFFFF:FF:FFFF:FFFFFFFF  
FFFFFFFFFFFFFFFFFFFFFFFFFFFFFFFFFFFFFFFFFFFFFFFFFFFFFFFF,FFFFFFFFFFFFFFFF  
FFF

@A00721:190:HGJW7DSXY:4:2163:6750:9079\_2:N:0:TCTGCAAG+GCTGCACT  
AGGTCGTGACGTTGATGAAGCTATAAGAGCGTTCTTATTACGGCGCACTTCTTTACCCGCCACCACAC  
AACTTTCAGTTTCACTGAAGGAGGAGGTTTCTGTACTGGAAAAC

+

@A00721:190:HGJW7DSXY:4:1445:21441:31360\_1:N:0:TCTGCAAG+GCTGCACT  
ACTTTTCAATAATATACGTCTTGAACCTCACTTATGACGATCTAGTGAAATTAACGCGTCCTTTTCTGG  
AACGTAGTTTTACTATTATGAACAAAGTTATCAAAGATAGTGGCATTCAAGGCAAACCTTACCCTGATT  
CCG

+

[illegible]

@A00721:190:HGJW7DSXY:4:1212:30861:17613\_1:N:0:TCTGCAAG+GCTGCACT  
TTCTACCAGGGGCTATTACTCTTGCTGAAACAGCTATTAAAGCTGTTGAGCGGGTAATTACACCTAAA  
CGAGCTTGATCTGCCATCGCTGAAGGATGTGCACTCTTTTCTGCTACTTTAACGGAGCGTAGTGTACT  
CTT

+

[illegible]

@A00721:190:HGJW7DSXY:4:1456:27254:16438\_1:N:0:TCTGCAAG+GCTGCACT  
CAACAGTAACATTACTTCTAATAAAGGTCTCTATCAAGCTCGTATTATCGTCGCTGCTGGATCTGCGT  
TACCGTTGAAGGCTAAACTCCAAGGTAATTATGAAGACTGTGATTTATCTTTCCTACTCTGGCCTTGAT  
GAG

+

[illegible]

@A00721:190:HGJW7DSXY:4:2220:32371:13182\_2:N:0:TCTGCAAG+GCTGCACT  
ATCGTAACATTAATAATTTCAATCTTCTTAAAAAGAAGATAGAGAGTCATACTTTGGGCTATCGTTCA  
GGTGCATGGGGTTGGATAGCCAATATTGAAGTGGACACCTCTGGTAGT

+

```
FF:::FFFFFFFFFFFFFF,FFFFF,:F::FF,FFFFFFFFF:FFFFFFFFFFFFFFFFFFFFFFFFF
FF:FF:FFFFFFFFFFFFFFFFFFFFFFFFFFFFF:FFF:FFFFFFF
```

@A00721:190:HGJW7DSXY:4:2104:5394:36385\_1:N:0:TCTGCAAG+GCTGCACT  
ATACTATGGTTGAATCAACTAAGCATACTACTTTTGCTTTGATTACTCTACCGCCTTACAAGTCTAAG  
GTAAAGAGTCGATTAAACAAGTTGTACTTATCAATGATTTTATCGCTGGTTGTTATCTCGAAAAGTC  
TCT

+

```

FFFFFFFF:FF,FFFFFFFF:FFFF:FFFFFFFFFFFFFFFFFFFFFFFFFFFFFFFF:FFFFFFFFFF:FF
FFFFFF:FFFF,FFFF,FFFFFFFFFFFFFFFFFFFFFFFF:FFFFFFFFFFFFFFFFFFFFFFFFFFFF
FFF

```

@A00721:190:HGJW7DSXY:4:2149:26006:1376\_1:N:0:TCTGCAAG+GCTGCACT  
ACCCAAAGAGAATATCTAAAATATTTACAAAATCTTACCACTATCTACGAACCTAAAGTTCTGAAGAC  
GTTGCTTGTCGCTTCCTCCTTTAATGGCACTACCTCGGTACAATCTTACTTGGAACGAAGGCGACCTG  
TTC

+

[illegible]

@A00721:190:HGJW7DSXY:4:1237:22064:13432\_1:N:0:TCTGCAAG+GCTGCACT  
TGTTCTGTCTATATTAGGTGAAGCGAAATACGATTTTGAACGTCAACGTTACCCGAGTTTCGTTTCGT  
ACCTTGATGCTGACTTTCGTCAATATGATTTGATCTGGTTGCTCAATTCTAAGCGTGTTCCGCTTAGT  
GCG

+

FFFFFFFFFFFFFFFFFFFFFFFF:FFFFFFFFFFFFFFFFFFFFFFFFFFFFFFFFFFFFFFFFFFFFFFFFFFFFFFFF

FFFFFFFFF:FFFFFFFFFFFFFFFFF:FFFFFFFFFFFF:FFFFF:FFFFFFFFFFFFFFFFF  
FFF

@A00721:190:HGJW7DSXY:4:1660:26829:4679\_2:N:0:TCTGCAAG+GCTGCACT  
GAGTATTGCTATTTATACGGTTACGAGAAGAAGGTTGAAAGTTTGAGAACTTAGTTTACGAACTTGA  
CTCTACTATACGTGACATACTAAATACTAGATATTTGGATGATCTTGA

+  
FFFFFFFFFFFFFFFFFFFFFFFFFFFFFFFFFFFFFFFFFFFFFFFFFFFFFFFFFFFFFFFF  
FFFFFFFFFFFFFFFFFFFFFFFFFFFFFFFFFFFFFFFFFFFFFFFFFFFFFFFF

@A00721:190:HGJW7DSXY:4:1646:16875:17785\_2:N:0:TCTGCAAG+GCTGCACT  
CATGAATTTTCAGAGGATGAAAAATTTCTTCCTTGATTTTAATATAAAGAATCTTTACCAGGACTC  
CTACTACAGGAGGCAGTCTTCTGATCGTAAGAAGTTTATAAGGAACAT

+  
FFF:FFFF:FFFFFFFF:FF,FFFFFFFF:F:FFFFFFFF,FF,FFF,FF:FFFF,FF,FF:FFFF  
,FF,FFFFFFFF:FFFFFF,FFFF:FF,,FFF:,FFFF,:FFFF

@A00721:190:HGJW7DSXY:4:2344:31340:13495\_1:N:0:TCTGCAAG+GCTGCACT  
ACTCGAACTCTAAGTGGAATACTGTCTTTCCAAGCTTACCTGTATCTTCAATGAAATTGGACTCTT  
CGATAGGGGACATTTTATCGTGGGCTTTCCGTAAAGGAAGATCTGTTATCGACGGTTTATCGTTTACG  
AAG

+  
FFFFFFFFFFFFFFFFFFFFFFFFFFFFFFFFF:FF:FFFFFFFFFFFF:FF:FFFFFFFFFFFFFFFF  
FFFFFFFFFFFFFFFFFFFFFFFFFFFFFFFFFFFFFFFFFFFFFFFFFFFFFFFFFFFFFFFF  
FFF

@A00721:190:HGJW7DSXY:4:1107:7916:1924\_1:N:0:TCTGCAAG+GCTGCACT  
GTTTAAGAATACTATAAATAGAACTATTACTACTAATGGCGTTGGCCTAGTGGATGTTATTAGTG  
ACATCTGGTCAATTTCTGTTTTAGGTGGTCTTTATTCTATTATTGATTTTTATGAGATTGATACGTTA  
ACA

+  
FFFFFFFFFFFFFFFFFFFFFFFFFFFFFFFFFFFFFFFFFFFFFFFFFFFFFFFFFFFFFFFF,FFFFFFFF  
FFFFFFFFFFFF,FFFFFFFFFFFFFFFF:FFFFFFFF:FF:FFFF:FFFFFFFF:FFFF,FFFFFFFF  
FFF

@A00721:190:HGJW7DSXY:4:1202:13295:27899\_1:N:0:TCTGCAAG+GCTGCACT  
TAGAGTAGAATTCCTGAAGAGTCCTTCCGTAAACCACTTCTTGACAATTTTCTTCAATCCTTCGATAA  
TAGTTAAATCTAGGATTATGTCTGTGTTGAAAGACTTTCTACCGATAAGGGTCACTAGTCTTACACAA  
TTA

+  
FFFFFFFFFFFFFFFFFFFFFFFFFFFFFFFFFFFF,FFFF:FFFFFFFFFFFFFFFFFFFFFFFFFFFF  
FFFFFFFFFFFFFFFFFFFFFFFFFFFFFFFFFFFFFFFFFFFFFFFFFFFFFFFF:FFFFFFFFFFFFFFFF  
FFF

@A00721:190:HGJW7DSXY:4:1215:17906:14434\_2:N:0:TCTGCAAG+GCTGCACT  
ATTGACTGATTATCTAAAGATTGAAGGAAAATTTATCCTCGTTTAACTTACTTAGACTTTCCTACGA  
TACAAATGATAACTTCTAATTTACGTTTGCTACTCAGAGCTGGTCCTC

+  
FFFFFFFFFFFFFFFFFFFFFFFFFFFFFFFFF:FFFFFFFFFFFFFFFFFFFFFFFFFFFFFFFFFFFF  
FFFFF:FFFFFFFFFFFFFFFFFFFFFFFFFFFFFFFFFFFFFFFFFFFFFFFF

@A00721:190:HGJW7DSXY:4:1139:2446:19727\_1:N:0:TCTGCAAG+GCTGCACT  
GATGCATGGTGTTATCTCCTCAGGAGTCCCGGCATTTGATAATAATGACGAGACTTTCGTACATAATCG  
CTGCATATTACGATTACACGGTACCAGCGCATCTCGTGTGAGCCTCGACCCGATTATATGGTATTA  
ACT

+  
FFFFFFFFFFFFFFFFFFFFFFFFFFFFFFFFFFFFFFFFFFFFFFFFFFFFFFFFFFFFFFFF:FFF  
FFFFFFFFFFFFFFFFFFFFFFFFFFFFFFFFFFFFFFFFFFFFFFFFFFFFFFFFFFFFFFFF  
FFF

@A00721:190:HGJW7DSXY:4:1157:26738:26224\_1:N:0:TCTGCAAG+GCTGCACT  
TGAAATTTATAGAAGATTATTTTGACAGAATCAATAAGAATCATCGATTCTCGATTCTGAGAGCTTAT

CTAGGTACTCTCATTTACTATGTTGATTTAGTCTACATTTATGCTGATCTAAAATTTGATCTAGATG  
GAT

+

FFFFFFFFFFFFFF:FFFF:FFFFFFFFFFFFFFFFFFFFFFFFFFFFFFFFFFFFFFFFFFFFFFFF  
FFFFFFFFFFFFFFFFFFFFFFFFFFFFFFFFFFFFFFFFFFFFFFFFFFFFFFFFFFFFFFFFFFFFFF  
FFF

@A00721:190:HGJW7DSXY:4:2568:29894:7012\_2:N:0:TCTGCAAG+GCTGCACT  
GATTTACAACGATATAGGAGTAATCTACGAGAAGATTCTAGAATTCTTAATTATAATATTCAACCTCA  
AAAGTTACGTGTTTACAGTAACGAGATCACACATTTTGAGAACTAACT

+

FFFFFFFFFFFF:FFFFFFFFFFFFFFFF:FFFFFFFFFFFFFFFFFFFFFFFFFFFFFFFFFFFFFF  
FFFFFFFF:FFFFFFFF:FFFFFFFFFFFFFFFFFFFFFFFFFFFFFFFF:FFFF

@A00721:190:HGJW7DSXY:4:1238:15103:4445\_1:N:0:TCTGCAAG+GCTGCACT  
TCTCTTCTTATAATAAATAAATAAATAATATTACTAATGGCAAATAGTGGAAGGCTCCAGTCAACAC  
TAGTTCGAGTGCTGCTTTGATTACGATGACGTGAGAATAGGTGAAGGGATAGTTTTTACCTCGACCA  
ACA

+

FFFFFFFFFFFFFFFFFFFFFFFFFFFFFF:FF,FF:FFFFFFFFFFFFFFFF:FFFFFFFFFFFFFFFF  
FFFFFFFFFFFFFFFFFFFFFFFFFFFFFFFFFFFFFFFFFFFFFFFFFFFFFFFFFFFFFFFF:FFFFFFF  
FFF

@A00721:190:HGJW7DSXY:4:1452:14940:7138\_2:N:0:TCTGCAAG+GCTGCACT  
GCGACTAATCTTAAAGCTTCACCCAAAATGAAGGACACTTCGAACTGAATAATGATGCACTACAAAC  
AAGTATCGCTAATCATCTGAAAAAGGCTCTAAAGGACACTATACAATA

+

FFFFFFFFFFFFFFFFFFFFFFFFFFFFFFFFFFFFFFFFFFFFFFFFFFFFFFFFFFFFFFFFFFFFFF:F  
FFFFFFFFFFFFFF:FFFFFFFFFFFFFFFFFFFFFFFFFFFFFFFFFFFFFFFF

@A00721:190:HGJW7DSXY:4:1223:12744:25473\_2:N:0:TCTGCAAG+GCTGCACT  
ATTCAGCACCACATTTTGGTCAAGTCAATCCGTTGAGAAAATTTCTTAGAGGATATTCGCCATTGTGG  
TACGAATTGGTCCAACATTTACCACCAAATTTCTTTTGATACAACCTCTA

+

FFFFFFFFFFFFFFFFFFFFFFFFFFFFFF:FFFFFFFFFFFFFFFFFFFFFFFFFFFFFFFFFFFFFF  
FFFFFFFFFFFFFFFFFFFFFFFFFFFFFFFFFFFFFFFFFFFFFFFFFFFFFFFF

@A00721:190:HGJW7DSXY:4:1644:24334:19586\_2:N:0:TCTGCAAG+GCTGCACT  
CGGAATACGCTTGCTATTACACGATTGGTTGCAACCCGTTGATGCTATGTCAGAAGAAGCTATTCAA  
GCTTGTCGTTTAAAGACTGCAGAGGCTGTCAAACAAGCCCAGACTCAA

+

FFFFFFFFFFF,FFFFFF:FFFF,,FFFFFF,F,FFF,FFF:FFFFFF,:FFFFFFFFFF:FF::FF  
,FFFFFFF,:FFF:,F,:FFFFFF:,F,,FFF:FF,:FFFF:FFFF

@A00721:190:HGJW7DSXY:4:2445:32886:24095\_1:N:0:TCTGCAAG+GCTGCACT  
AATTTAGCTCAACTGGGAGACGTGCTTAAATGGGTGATAAAAATTATTTAGAGATCTTTCTACTTA  
CAAAGGACAATTCAGTTTCATTAATTCTACGAAAAGTCCGGAGTATATTGTATGTTAATAGATAGTG  
GGA

+

FFFFFFFFFFFF,FFFFFFFFFFFFFFFF:FFFFFFFFFFFFFFFFFFFFFFFF:FFFFFFFFFFFFFFFF  
FFFF:FFFFFFFFFFFFFFFFFFFFFFFFFFFFFFFFFFFFFFFFFFFFFFFFFFFFFFFFFFFFFFFF  
FFF

@A00721:190:HGJW7DSXY:4:1324:24713:1423\_2:N:0:TCTGCAAG+GCTGCACT  
GAACGCGTTTCGTATAACCAAGTACTTTCCGTCTGAAGAGTTTAGAGCTGCTATTGATTATGTAACCGA  
TAGGAGTTGTATAGTTGAAGATGTGGCTTTAGACGATAATCCTTTAAG

+

FFFFFFFFFFFFFF,FFFFFFFFFFFFFFFF,FFFF,F::FFFFFFFFFFFFFFFFFFFFFF:FFFF:FFFF  
,FFFF::FFFFFFFFFFFF:FF:FF,FFFFFF:FFFFFFF,F:FF:F

@A00721:190:HGJW7DSXY:4:1362:28230:6699\_1:N:0:TCTGCAAG+GCTGCACT  
GAAGATTTTCCACAGATTTGTCTACGTTGCAGATCGCCACTCCAAACACTATATACATTATAAAATA







@A00721:190:HGJW7DSXY:4:1203:26820:26052\_1:N:0:TCTGCAAG+GCTGCACT  
GCATACGAGATCTTGCAGAGTGACTGGAGTTCAGACGTGTGCTCTTCCGATCTGGAAGATCTCCCACC  
ATCTGGGGTTGGGAATAAGAAATCTGCACGGGCCAAAGAGGCCGCTGCTACGAAGTCGCTGAAGGCGG  
CTT

+

```
:FF::F,,FFFFFF:FFFFFFFFFFFFFFFFFFFFFFFFFFFFFFFFFFFFFFFFFFFF  
FFFFFFFFF:FFFFFFFFFFFFFFFFFFFFFFFF,FFFFFFFFFFFFFFFFFFFFFFFF  
FFF
```

@A00721:190:HGJW7DSXY:4:2169:15365:7404\_2:N:0:TCTGCAAG+GCTGCACT  
TGTAAGTTGCGCCTGCCGACCCCATCTTTGAGACCAAGACTCTCTACAGTAGGTTCTGTCCTACTAT  
GAGCAATCTGTTGAATTCGTCACTGAGGACGAAGGTGAGAGGACTTT

+

```
FFFFFFFFFFFFFFFFFFFFFFFFFFFFFFFFFFFFFFFFFFFFFFFFFFFFFFFFFFFFFFF  
FFFFFFFFFFFFFFFFFFFF:FFFFFFFFFFFFFFFFFFFFFFFFFFFFFFFF
```

@A00721:190:HGJW7DSXY:4:1356:19587:4695\_1:N:0:TCTGCAAG+GCTGCACT  
CTGAGAGCAGTCGCTGGGGAAAGAGAATTGCGTGGGTTGAAGGCCGACGCTTCGAGCTTGAGTGTGAC  
GAGGCCGGTGACGTTTTTGTCAACGGCGTTTGGAGGATTTTATCCGCGCTTA ACTATGGGGCGAAGAT  
CCC

+

[illegible]

@A00721:190:HGJW7DSXY:4:1641:8386:6402\_2:N:0:TCTGCAAG+GCTGCACT  
AGGTTGGCATATTTATGCCGACGATAATAAGCATGTCAACCCTTAAGCACCGAGGTAAGCTCGGGACTT  
ACAAGAGAGAGTGTGAGAGAGTCGCTCTCACTATTTTTGCCCAGAATG

+

[illegible]

@A00721:190:HGJW7DSXY:4:2502:2727:4961\_2:N:0:TCTGCAAG+GCTGCACT  
GATGAGGTTAAACTCTTGCTCCTTCTGTGGGTGAGGGTTTTTGTATATTCACTGGTTCTGGGAGGC  
TGAGATCGGAAGAGCGTCGTGTAGGGAAAGAGTGAAGTGGAGGGGGGGG

+

```

FFFFFFFFFFFFFFFFFFFFFFFF:FFFFFFFFFFFFFFFFFFFFFFFF:FFFF,FFFFFFFF
FFFF:FFFFFFFF:FFFF,:FFF:FFFFF:,FF::F,F,F:FFF

```

@A00721:190:HGJW7DSXY:4:1207:27859:27164\_1:N:0:TCTGCAAG+GCTGCACT  
TCCACATATGGTAGACGTTGTCACACTTTTCTTGAAAATTTTTCTTTCTCCGTCATTGGGGATTT  
CGATGTGAGAAGGTGGAAGGTGTCAAGGGTCTTCTTCATGCTGATCTTTCAGGACCTAATCACATCAT  
GAT

+

[illegible]

@A00721:190:HGJW7DSXY:4:1351:2094:31391\_1:N:0:TCTGCAAG+GCTGCACT  
GCTCGTATCGAGTTGGAGGGAGGAAGTTCTCCGAAATTAAAGACGGGGGGATTAAGAGTCCAGCTGTA  
ACTGTCAATTCAGAGAGGGGAGCTCTGAAAAGGAACTTCGTCAGAAGATGAGGAAGTCTAAGAGGAG  
GAG

+

[illegible]

@A00721:190:HGJW7DSXY:4:1504:18005:9846\_1:N:0:TCTGCAAG+GCTGCACT  
CTCTAGAGAAGATCTCACCACCTGGAGAAGGCAAGTGGAGAGTCCAGAAGTTGATGAAGAAGGATTAT

TTGAAGCAGGGGTTACCACTTCCTAAGGTGGATGAGGGAGGTTGTTTCTTTGGAGTTTTAGATAATCT  
TTT

+

FFFFFFFFFFFFFFFF,FFFFFFFFFFFFFFFFFFFFFFFFFFFFFFFFFFFFFFFFFFFFFFFF  
FFFFFFFFFFFFFFFFFFFFFFFFFFFFFFFFFFFFFFFFFFFFFFFFFFFFFFFFFFFFFFFF  
FFF

@A00721:190:HGJW7DSXY:4:2131:21893:6652\_2:N:0:TCTGCAAG+GCTGCACT  
CCTTGAGAAGACAAGCCACATTAAGATATAATTTAGGTCAACTTGGGGTTTCGAATGTCATTAGTGCC  
TTACGATTGAAAGAGGTCCTTTTGAGTATCGACAGATCTTTCGATCTT

+

FFFFFFFFFFFFFFFFFFFFFFFF:FFFFFFFFFFFFFFFFFFFFFFFFFFFFFFFFFFFFFFFF  
FFFFFFFFFFFFFFFFFFFFFFFFFFFFFFFFFFFFFFFFFFFFFFFFFFFFFFFF

@A00721:190:HGJW7DSXY:4:2366:26142:32174\_2:N:0:TCTGCAAG+GCTGCACT  
GTGGCAGAATTCGGTAACTTACCATATTGTTCTTCCGGGAAGTTGTGGGATTAACTTTGACTCAAC  
TACTCCGATCAGATCCGATGGTTTGATTGGTATGGACTACTCGACTT

+

FFFFFFFFFFFFFFFFFFFFFFFF:FFFFFFFFFFFFFFFFFFFFFFFFFFFFFFFFFFFFFFFF  
FFFFFFFFFFFFFFFFFFFFFFFF:FFF:FF:FFFFFFFFFFFFFFFFFFFF,

@A00721:190:HGJW7DSXY:4:1144:18819:33802\_1:N:0:TCTGCAAG+GCTGCACT  
AGGGTCATGGCAGATACTACCGATAAGGTGAAAATATGCAGGTCAAAGATTCTGTAGCTCTGAGGGC  
GGTTGAGGGAGCCGTTTTGGCCGACTTTAACTATTCTAAGAGTCTTTATGATTCAAACCTATCGTTG  
TC

+

FFFFFFFFFFFFFFFFFFFFFFFF:FFFFFFFFFFFFFFFFFFFFFFFFFFFFFFFF:FFFFFFFFFFFFFFFF  
FFFFFFFFFFFFFFFFFFFFFFFFFFFFFFFFFFFFFFFFFFFFFFFFFFFFFFFFFFFFFFFF  
FF

@A00721:190:HGJW7DSXY:4:1406:11342:32847\_2:N:0:TCTGCAAG+GCTGCACT  
GCGGCTTATTGTGCGCGAGTTTCCAGAATTGCGGTTGAAGTTCACCCATTCTATCTTGAATGCTCACG  
CCGTGCGAGCCATATCGAGACTATGTTATAATCACTTGTTAAAGTACA

+

FF:FFFFF::FF,FF:F::FF::,FFFFFFFFFF:FF,FFFFFFFF,,,:FFF::,FFFF:FF::  
FF:FFF:FFFF,FF:FFFFF,FFFFF,FFFF,,:FFFFFFFFF,,

@A00721:190:HGJW7DSXY:4:1406:7663:32456\_2:N:0:TCTGCAAG+GCTGCACT  
TTAGATATTATTGATATTGGAGGCGATATTCGTTTTCATATCCAAAACCTCCTTGAATGGAGTACATAT  
TTGCAACCCTATTCTTGATGTGAAAGATGCATCGAGGTATACGTCTAG

+

FFFFFFFFFFFFFFFFFFFFFFFFFFFFFFFFFFFFFFFFFFFFFFFFFFFFFFFFFFFFFFFF:FFFF  
FF:FFF:FFFFFFFFFFFFFFFFFFFFFFFFFFFFFFFFFFFFFFFF,F:FFF

@A00721:190:HGJW7DSXY:4:2572:25554:18693\_1:N:0:TCTGCAAG+GCTGCACT  
AACGTACCTACTCACGAGACGTCATGAAAGCTATCGAGAGGAAGCAAATGTTTCGTTCTGTTACAAG  
AACGCTTTGGATTGTGACCATAAAGCCTCAGTTGCGATAGCTGTAGAGGTATACGATATCTCTCTTGA  
TGA

+

::F,FFFF,F,FFFF::F:FFF,FFF::FFFF,F:FFFFFFFFF:FF:FF,FFFFFFFF:FFFFFF::  
FFFF:FFFFFFFFFFFFFFFFFFFFFFFF:FFFF,FF:FFFFFFFFFFFFFFFF,FFFFFFFF:FFFF  
FF:

@A00721:190:HGJW7DSXY:4:1311:21748:9032\_2:N:0:TCTGCAAG+GCTGCACT  
AATGCTTAAGAGAGAGATTGATGTATGTCATTTCTGCTTAGTTTGTCCCGCGCAATTATTGGACACGA  
TGA AAAATGACATACCCGTTCTGACCTTGATCGTTATCCGTCATG

+

FFFFFFFFFFFFFFFFFFFFFFFFFFFFFFFFFFFFFFFFFFFFFFFFFFFFFFFF:FFFFFFFFFFFF  
FFFFFFFFFFFFFFFFFFFFFFFFFFFFFFFFFFFFFFFFFFFFFFFF

@A00721:190:HGJW7DSXY:4:2349:31937:15499\_2:N:0:TCTGCAAG+GCTGCACT  
GGTTATTCTCACAAAGATAAGATTTTATCTTTCTTCAAACACCCTGTTTTCTTAAGGGCGGACA

$+$ 

+

+

+

+

 $+$  $+$ 

+

```

::FFFF:FFFFFFFF,FFFFFF:FF::FFFFFFFFFFFF:FFFFFFFFFFFFFF,FFFFFF:F:FFFFFFFF

```

FFFFFFFFFFFFFFFFFFFFFFFFFFFFFFFFFFFFFFFFFFFFFFFFFFFFFFFFFFFFFFFFFFFFFFFF  
FFF

@A00721:190:HGJW7DSXY:4:1541:31195:3912\_1:N:0:TCTGCAAG+GCTGCACT  
ACTGGAGTTCAGACGTGTGCTCTTCCGATCTGTTTCAACACTTATCACCACCTTTTGAAGGAAAATAA  
TTGGTGATGAAAATACGTATGTCGGTGGGGTCTCAAGGCTCTCATCGCCACTGGGATTCTAAGGGGT  
TCC

+

FFFFFFFFFFFFFFFFFFFFFFFFFFFFFFFFFFFFFFFFFFFFFFFFFFFFFFFFFFFFFFFFFFFFFFFF  
FFFFFFFFFFFFFFFFFFFFFFFFFFFFFFFFFFFFFFFFFFFFFFFFFFFFFFFFFFFFFFFFFFFFFFFF  
FFF

@A00721:190:HGJW7DSXY:4:2574:3323:22686\_2:N:0:TCTGCAAG+GCTGCACT  
TTCAATGATCAGGATTCTTCTTTTGGTCCTTACGTCTTAAGTAATTTGGATGTTGTCGAAAACATCA  
GGTTCTTGTACGATTCTTAAAAGAAGTTTATTAAAACTTCAGAGTCT

+

FFFFFFFFFFFFFFFFFFFFFFFFFFFFFFFFFFFFFFFFFFFFFFFFFFFFFFFFFFFFFFFFFFFFFFFF  
FFFFFFFFFFFFFFFFFFFFFFFFFFFFFFFFFFFFFFFFFFFFFFFFFFFFFFFFFFFFFFFFFFFFFFFF

@A00721:190:HGJW7DSXY:4:1348:16947:19727\_1:N:0:TCTGCAAG+GCTGCACT  
GGTAGATAATGTTCTTGCAATAGCCACAGACTTTCTGGGAAAAGAGACCTCTGTTGTAGAGGAGTTGA  
GAGAATTACTCAGATTCAATCTGGCATCACTGAACGTCTACAACGAGTTAGGGAGTGGCTAGGTTTAA  
AAA

+

FFFFF,FFFFFFFFFFFFFFFFFFFFFFFFFFFFFFFFFFFFFFFFFFFFFFFFFFFFFFFFFFFFFFFF  
FFFFFFFFFFFFFFFFFFFFFFFFFFFFFFFFFFFFFFFFFFFFFFFFFFFFFFFFFFFFFFFFFFFFFFFF  
FFF

@A00721:190:HGJW7DSXY:4:1230:29794:2394\_1:N:0:TCTGCAAG+GCTGCACT  
CAATACCTTCCACTGAGTTCATCACCAGAGTTTCGACGTCGCGGAAAACGATGAAGATTTCCACACT  
GTTTCGAGAATCTTCTGATGCTGAATTTGAGGAAAATTTTCGGAAGTTTTTGGTATAAATCCTGATGG  
CTC

+

FFFFFFFFFFFFFFFFFFFFFFFFFFFFFFFFFFFFFFFFFFFFFFFFFFFFFFFFFFFFFFFFFFFFFFFF  
FFFFFFFFFFFFFFFFFFFFFFFFFFFFFFFFFFFFFFFFFFFFFFFFFFFFFFFFFFFFFFFFFFFFFFFF  
FFF

@A00721:190:HGJW7DSXY:4:2514:20410:36652\_1:N:0:TCTGCAAG+GCTGCACT  
TAAACCTTCTTTTATCATTGCAACAGGACTTTGAGAAGACTGTTGAAATGGACAAAATCTGGGATCA  
TAGGTATGTGTCACGCTACACTCGAAATATGGGCCCTCATAAGGAAGTATAGTTGGCGTCTTGTCTGTT  
GAC

+

FFF:FFFFFFFFFFFFFFFFFFFFFFFFFFFFFFFFFFFFFFFFFFFFFFFFFFFFFFFFFFFFFFFF  
FFFFFFFFFFFFFFFFFFFFFFFFFFFFFFFFFFFFFFFFFFFFFFFFFFFFFFFFFFFFFFFFFFFFFFFF  
FFF

@A00721:190:HGJW7DSXY:4:2560:15826:3975\_2:N:0:TCTGCAAG+GCTGCACT  
AGTTAGATCATTTGTTTCAAGGAGATCTCTACAGAGATTATCGAGAGTTGTGATCTAGTTCTAAATTTA  
GGTCGACGGACTTTAGCAACTTTAGATAAATCTTTCCGGGCTCAATG

+

FFFFF:F:FFFFFFFFFFFFFFFFFFFFFFFFFFFFFFFFFFFFFFFFFFFFFFFFFFFFFFFFFFFF  
F:FFFFFFFFFFFFFFFFFFFFFFFFFFFFFFFFFFFFFFFFFFFFFFFFFFFFFFFFFFFFFFFFFFFF

@A00721:190:HGJW7DSXY:4:2468:20419:26710\_1:N:0:TCTGCAAG+GCTGCACT  
TCTGACCATCGCAAAGAAGACTTTATTAGTTCATGAAGTTCTTACACTTCTCGCGACTAATGTCAGCT  
TCACTACAAAGGCGTTACGTAAAGTAGTTTTACGCTTTATCTTAAAGCATTACCACCAAATTTAGCA  
CTT

+

FFFFF:FFF,F:F,FFFF,FF,FFFFFFFFFFFFFFFFFFFFFFFFFFFFFFFFFFFFFFFFFFFF  
FF:F:FFFF::F:F:FF:FFFF:FFFFFFF:F,FFFF:FFFF:FFFFFFFFFFFF,FFFFFFFFFFFF:,  
FFF

@A00721:190:HGJW7DSXY:4:1126:18475:24095\_1:N:0:TCTGCAAG+GCTGCACT  
CGTGTGCTCTTCCGATCTAGACATGCCAGTTAGAGTTCTTCTAACCAGGACTGATGGTGAGATTCTTT  
TACCTTTTGGAGGTCCAGGAACCTTTACTCCTAGTGTCTTTTCTAGAGTCCAAGGACGTTTCCGTCGG  
AGG

+

FFFFFFFFFFFFFFFFFFFFFFFFFFFFFFFFFFFFFFFFFFFFFFFFFFFFFFFFFFFFFFFFFFFFFFFF,FF  
F:FF:FFFFFFFFFFFFFFFFFFFFFFFFFFFFFFFFFFFFFFFFFFFFFFFFFFFFFFFFFFFFFFFF:FFFFFFF  
FFF

@A00721:190:HGJW7DSXY:4:2350:18231:24612\_2:N:0:TCTGCAAG+GCTGCACT  
GACCGCTCAATAACACTCTATTGAATCCCTTTCCACGATGAAAGCTCTTTATGAGGTGCTCCATGCA  
AATTTACAGTTCCTCTTTGGTGATATCGCCTCTGTCTTTCTCCTTTA

+

FFFFFFFFFFFFFFFFFFFFFFFFFFFFFFFFFFFFFFFFFFFFFFFFFFFFFFFFFFFFFFFFFFFFFFFF  
FFFFFFFFFFFFFFFFFFFFFFFFFFFFFFFFFFFFFFFFFFFFFFFFFFFFFFFFFFFFFFFF

@A00721:190:HGJW7DSXY:4:1627:29387:19633\_2:N:0:TCTGCAAG+GCTGCACT  
ACTTGGGTTTATCGGTTGTATTTTGATAAATTTGTTGGAATCGATAATGATACTGACGAAGGTTCTAT  
TACCACCCTTGTCATTGATACAAACATTCTAGGTGATGCTTTCTTAGA

+

FFFFFFFFFFFFFFFFFFFFFFFFFFFFFFFFFFFFFFFFFFFFFFFFFFFFFFFFFFFFFFFFFFFFFFFF:FFFFFFFFFFFF  
FFFFFFFFFFFFFFFFFFFFFFFFFFFFFFFFFFFFFFFFFFFFFFFFFFFFFFFFFFFFFFFF

@A00721:190:HGJW7DSXY:4:1103:4218:3192\_2:N:0:TCTGCAAG+GCTGCACT  
TACAATCTGTAGAGAGAGAGGTTAATCAGAATTTGAGTGATAACGATTTAGTACTGGGAAATGGTGGT  
AGTCAGTTTACTACTTTTCTTCCCTCCCCTTTTTTCGATTGGATTCTGA

+

FFFFFFFFFFFFFFFFFFFFFFFFFFFFFFFFFFFFFFFFFFFFFFFFFFFFFFFFFFFFFFFFFFFFFFFF,FFFFFF,FFFFFF,FFFFFF  
FFFFFFFFFFFFFFFFFFFFFFFFFFFFFFFFFFFFFFFFFFFFFFFFFFFFFFFFFFFFFFFF:FFFF,FF,FFFFFF:FFF,

@A00721:190:HGJW7DSXY:4:2219:32181:26099\_2:N:0:TCTGCAAG+GCTGCACT  
TTGATAAGGTTTTCTTTTATGGGACTCTGTTTGTACTTATGAAGGAGGTATTACTTCGGAAGTTCT  
TAATGTAGGTCTCCTAGTAATTAAGGGTTTATGTTTCGGTTTCAGCTG

+

F:FFFF,FFFFFF:FFFF:,F,F:FFFF,FF:FFFF:FF,FF,:FF:FFFF::FFFF,F,F  
FFF:F,F::FFF,FFF:FF,:FFF,: ,FFFFFF:F:F:,FFF,F:,FF

@A00721:190:HGJW7DSXY:4:2147:20211:16986\_2:N:0:TCTGCAAG+GCTGCACT  
TGTTTCACATTGCGTGATCACTTCCCGTGGACTTGGAAGAGATTAAACATAAAATCCAGCGATTCTA  
TTATGTCGCTAAAGCCTGTCCAGTTGTCGATGATGTTTCGGGCTGTGGG

+

FFFFFFFFFFFFFFFFFFFFFFFFFFFFFFFFFFFFFFFFFFFFFFFFFFFFFFFFFFFFFFFFFFFFFFFF  
:FFFFFF:FFFFFFFFFFFFFFFFFFFFFFFFFFFFFFFFFFFFFFFFFFFFFFFFFFFFFFFF

@A00721:190:HGJW7DSXY:4:2442:13440:19194\_2:N:0:TCTGCAAG+GCTGCACT  
AAACTTACGACGATGTTCTCGCTCGCATTTACAAGGATTACTAAGTCTGAGATCTGCCACTTCTAAT  
TTTAGGAAACGTCGCGAAAAGAAAGTTCATGAGGATGTCTTGTCGAA

+

FFFFFFFFFFFFFFFFFFFFFFFFFFFFFFFFFFFFFFFFFFFFFFFFFFFFFFFFFFFFFFFFFFFFFFFF:FFFFFF  
FFFFFFFFFFFFFFFFFFFFFFFFFFFFFFFFFFFFFFFFFFFFFFFFFFFFFFFFFFFFFFFF,F,FFFFFF

@A00721:190:HGJW7DSXY:4:2649:22227:19194\_2:N:0:TCTGCAAG+GCTGCACT  
GAACTTCTAATAGAGGATCCTGATGACATTATTTCAACGGATACCGATCTCAGTTCTACCACAGAAAC  
CGTCTCAGGAAGTGTCTCCACTGATTCCGAATTAGAGAAAGACGACCT

+

FFFFFFFFFFFFFFFFFFFFFFFFFFFFFFFFFFFFFFFFFFFFFFFFFFFFFFFFFFFFFFFFFFFFFFFF  
FFFFFFFFFFFFFFFFFFFFFFFFFFFFFFFFFFFFFFFFFFFFFFFFFFFFFFFFFFFFFFFF

@A00721:190:HGJW7DSXY:4:2517:24659:24408\_1:N:0:TCTGCAAG+GCTGCACT  
AGACCTCTTAATTTTCAAGGTGCCCTGATGAGGACGTTGAAAGGGATAATTTCAACTCTGAGACTTCT  
AAGAGTGTTCAAAAGACCAGAAACGTAACAAGAAGAATAAAGGTAGGAAGGGGAGAAAACAGAACAA  
GC

+  
FFF,FF,F,:,FFFFFF::FFFFFF:FF,FFFFFF,FFF,:FF:FFFF,FFFFFFFFF:F,:FFFFFF  
FFFFFF,FFFFFFFF,FF,FFFFFFFFFFFFFFFF,:F:FF,F:FF:FFF,:FF:FFFF:FF:F:FFF  
:F  
@A00721:190:HGJW7DSXY:4:2628:1154:34679\_2:N:0:TCTGCAAG+GCTGCACT  
ATGGTTGCGGCTGATCGTACCCCAATTCCTGCTAGAAAGATCACTCTCGGCGATACCACTGATCTTCC  
AGAGTTACGTAGTGGTCGTTCTTTTGGTGATTTTATCAAAGAGAAAGT  
+  
FFFFFFFFFFFFFFFFFFFFFFFFFFFFFFFFFFFFFFFFFFFFFFFFFFFFFFFFFFFFFFFFFFFFFFFF  
FFFFFFFFFFFFFFFFFFFFFFFFFFFFFFFFFFFFFFFFFFFFFFFFFFFFFFFFFFFFFFFF  
@A00721:190:HGJW7DSXY:4:1422:2672:1329\_1:N:0:TCTGCAAG+GCTGCACT  
CAAGTTAACTTCGAACTGACCACTTACAAGAGTGTTGAAGTACCGCAACATGGATCAGTTTTCCAAA  
AAGCTATTAATAGCAGTTGCGGGGCTATAATACCGCCTCCAGATTACTCTAACTGAATCCACTCTCT  
TGG  
+  
FFFFFFFFFFFFFFFFFFFFFFFFFFFFFFFFFFFFFFFFFFFFFFFFFFFFFFFFFFFFFFFFFFFFFFFF  
FFFFFFFFFFFFFFFFFFFFFFFFFFFFFFFF,FFFFFFFFFFFFFFFF:FF,FFFFFFFFFFFFFFFFFFFF  
FFF  
@A00721:190:HGJW7DSXY:4:2420:11288:1063\_1:N:0:TCTGCAAG+GCTGCACT  
AGAGTTTTGGAAGTGTGAATGTCTACGTACTGTTCAAGGTGTTGGGCTTCTCTAAAGAACAGCAA  
CTTTCAACATGAATTAGTTATTGAAAGTCTTGACCCTCACGTCTCACTTTATCACCTTGGAGATGGTA  
AAG  
+  
FFFFFFFFFFFFFFFFFFFFFFFFFFFFFFFFFFFFFFFFFFFFFFFFFFFFFFFFFFFFFFFFFFFFFFFF  
FFFFFFFFFFFFFFFFFFFFFFFFFFFFFFFF:FFFFFFFFFFFFFFFFFFFFFFFFFFFFFFFFFFFF  
FFF  
@A00721:190:HGJW7DSXY:4:2628:1624:24345\_2:N:0:TCTGCAAG+GCTGCACT  
AGACCTTTCTTGCGGAGTAAAGAGGGTTTGAATAACGGAACCTTCTCGTTCCTCATGAAGATCT  
TCGAGTGTTTTATAGTGAGTTATTCTTGCGAAGGTTCAAGTCGATTGA  
+  
FFFFFFFFFFFFFFFFFFFFFFFFFFFFFFFFFFFFFFFFFFFFFFFFFFFFFFFFFFFFFFFFFFFFFFFF  
FFFFFFFFFFFFFFFFFFFFFFFFFFFFFFFFFFFFFFFFFFFFFFFFFFFFFFFFFFFFFFFF  
@A00721:190:HGJW7DSXY:4:2524:32208:4257\_2:N:0:TCTGCAAG+GCTGCACT  
AATAAGAAGTTCTTCGCAGTTGAATCTCCACCAGGTGGAGGGAAGACCACTGAACCTTATAGCGACTTT  
TGTCGAATTTTTCGCAAAAGGTCTTGAAGTACGTATTGTCACTGCTAA  
+  
FFFFFFFFFFFFFFFFFFFFFFFFFFFFFFFFFFFFFFFFFFFFFFFFFFFFFFFFFFFFFFFFFFFFFFFF  
FFFFFFFFFFFFFFFFFFFFFFFFFFFFFFFF,FFFFFFFFFFFFFFFF:FFFFFFFFFFFF  
FFFFFFFFFFFFFFFFFFFF,FFFFFFFFFFFFFFFF:FFFFFFFF  
@A00721:190:HGJW7DSXY:4:2468:3694:10958\_2:N:0:TCTGCAAG+GCTGCACT  
TTGGCACTTCTAGTTCATCGCGGTATTTGTGAAATTAAGACAGACGTGAAAGTTATGATGAGTGATCG  
TATTAGAACAGCTGATTCTTATTGCATGAACGTCGCTGAGGTCAAACC  
+  
FFFFFFFFFFFFFFFFFFFFFFFFFFFFFFFFFFFFFFFFFFFFFFFFFFFFFFFFFFFFFFFFFFFFFFFF  
FFFFFFF:FFFFFFFFFFFFFFFF:FFFFFFFFFFFF:FFFFF:FFF:FF  
@A00721:190:HGJW7DSXY:4:1401:7148:35415\_2:N:0:TCTGCAAG+GCTGCACT  
TTCATCGACGAATTATTCATGATTCACGCTGGTCAGACCCTTTTTCTTACACATCTACTTAAGGCGGC  
TTATACCATAGGTTACGGTGATTCCAATCAAATCGGATTCATCAATCG  
+  
FFFFFFFFFFFFFFFFFFFFFFFFFFFFFFFFFFFFFFFFFFFFFFFFFFFFFFFFFFFFFFFFFFFFFFFF  
:FFFFFFFF:FFFFFFFF:FFFFF,FFF:F::FFFF:FFFFFFFF:FFF:F  
@A00721:190:HGJW7DSXY:4:1263:30282:23218\_2:N:0:TCTGCAAG+GCTGCACT  
CAAGTCGCAAACTACTTCAACATCAACGACATCATTCTTGATGAGTGTGCTTCTTATCGAAGTCTCAG  
TTATCGCTGCCGCGCCGACGTTTGTGCGCAACTCTCAGAGGTTTACGG  
+

FFFFFFFFFFFFFFFFFFFFFFFFFFFFFFFFFFFFFFFFFFFFFFFFFFFFFFFFFFFFFFFFFFFFFFFF  
FFFFFFFFFFFFFFFFFFFFFFFFFFFFFFFFFFFFFFFFFFFFFFFFFFFFFFFFFFFFFFFFFFFFFFFF  
@A00721:190:HGJW7DSXY:4:2535:3830:9815\_2:N:0:TCTGCAAG+GCTGCACT  
CTATGGAAATTAGACCTATCAGATGTCTTGACGACTTCAATTTGAGGACGGAGTTAAATATATTACT  
TTCACCTCAAGGTGAAAAGTTTGAATTAACAAAGTCCTTGGTAAGAGT  
+  
FFFFFFFFFFFFFFFFFFFFFFFFFFFFFFFFFFFFFFFFFFFFFFFFFFFFFFFFFFFFFFFFFFFFFFFF  
FFFFFFFFFFFFFFFFFFFFFFFFFFFFFFFFFFFFFFFFFFFFFFFFFFFFFFFFFFFFFFFFFFFFFFFF  
@A00721:190:HGJW7DSXY:4:1646:10899:18865\_2:N:0:TCTGCAAG+GCTGCACT  
ACTTACCAGCACGTTTCGGCTGGTTAGAATTAACCTCAAGATGACCCTGTTTTTGCATCACAAACACA  
TATTACCGTTGCTCTATCACGACACGTTGAATCTTTACGATACTTTGT  
+  
FFFFFFFFFFFFFFFFFFFFFFFFFFFFFFFFFFFFFFFFFFFFFFFFFFFFFFFFFFFFFFFFFFFFFFFF  
FFFFFFFFFFFFFFFFFFFFFFFFFFFFFFFFFFFFFFFFFFFFFFFFFFFFFFFFFFFFFFFFFFFFFFFF  
@A00721:190:HGJW7DSXY:4:2159:17345:27586\_2:N:0:TCTGCAAG+GCTGCACT  
AAACGATGCTACTTGTGAGAGGATCAATCACAGTAAGGAAGTGTACGTTTAGCACGGGAGGTTGCAG  
ATTCAACCCCTTATATCGAGGCTATCGAGGACGATGAGTATCTTGAAG  
+  
FFFFFFFFFFFFFFFFFFFFFFFFFFFFFFFFFFFFFFFFFFFFFFFFFFFFFFFFFFFFFFFFFFFFFFFF  
FFFFFFFFFFFFFFFFFFFFFFFFFFFFFFFFFFFFFFFFFFFFFFFFFFFFFFFFFFFFFFFFFFFFFFFF  
@A00721:190:HGJW7DSXY:4:1630:4535:32080\_1:N:0:TCTGCAAG+GCTGCACT  
TAGAGGACCACCTGGATCTTCTACTGTCTCTGCCTTCCAAGATTTCTTAGAAGAGGTTATTCCTGGAA  
CCACCTTAACGTCACCTCGGTAATCTTTCAGCCGAATTAAGTACTAATGAGTTCAAGTCGGTTGTCGAT  
CGA  
+  
FFFFFFFFFFFFFFFFFFFFFFFFFFFFFFFFFFFFFFFFFFFFFFFFFFFFFFFFFFFFFFFFFFFFFFFF  
FFFFFFFFFFFFFFFFFFFFFFFFFFFFFFFFFFFFFFFFFFFFFFFFFFFFFFFFFFFFFFFFFFFFFFFF  
FFF  
@A00721:190:HGJW7DSXY:4:2440:15736:36855\_2:N:0:TCTGCAAG+GCTGCACT  
GGCTAATACCTTTATAGGTAAGAAGCCCTTGAGCCGCGTAGTCAGCGCGTTTAGCTGTATCATCAGT  
CAGAGTATACCCGATAGGGTACCGAGTCTCCAAGAGAATATTTATTCT  
+  
FFFFFFFFFFFF:FFFFFFFF:FFFFFFFFFFFFFFFFFFFFFFFF:FFFFFFFFFFFFFFFFFFFFFFFF:FFFFF  
FFFFFFFFFFFFFFFFFFFFFFFFFFFFFFFFFFFFFFFFFFFFFFFFFFFFFFFFFFFFFFFFFFFFFFFF  
@A00721:190:HGJW7DSXY:4:1314:7997:1877\_2:N:0:TCTGCAAG+GCTGCACT  
GTTTTCACAAACGAAAGACATATCGCACCCGAAATTTTGGGCAGAATGCTCTTAACGCGGTTCTTGA  
ACGGTGTTTTGATCAGTCTAAGTTGGATAAAGTTATAGGAGACTCAGT  
+  
FFFFFFFFFFFFFFFF:FFFF:FFFFFFFFFFFFFFFF:FFFFFFFFFFFFFFFFFFFFFFFFFFFFFFFF  
FFFFFFFF:FFFFFFFF:FFFFFFFFFFFF,FFFFFFFFFFFFFFFFFFFFFFFF  
@A00721:190:HGJW7DSXY:4:1170:31114:8469\_2:N:0:TCTGCAAG+GCTGCACT  
GCTCCTCAATTGATAGATTGGGTCAACAATAGGGACGCTAGTATACTTCGTAAAGTCGACAGCGAAAT  
GGTCAATATTGATAATTGACCGACTATATGACCTATTTTAAGCTCAT  
+  
FFF:FFFFFF:FFFF:FFFFFFFF:FFFFFFFFFFFFFFFFFFFFFFFFFFFFFFFF:FFF:FFFFFFFFFFFF  
,FF:FFFF::FFFF:FF:FFFFFFFF:FFFFFFFFFFFFFFFF  
@A00721:190:HGJW7DSXY:4:1246:15754:6981\_2:N:0:TCTGCAAG+GCTGCACT  
CTAAGGTAAACTTGATGCTTCAGCCTTTTCAAGCATAACCCCGCACAGAATATCGTTTATCACGCA  
AAATTTATTAATGCAATTTTCGGACCTATCTTTAAGGTTCTTGTGAGG  
+  
FFFFF:FFFFF:,FFFF,FF:FFFFFFFFFFFFFFFFFFFFFFFF,FFFFFFFFFFFFFFFF:F,FFFFFF,F  
FF:FFFFFFFF:FF:F,FFFF:F:FFFF,F:FFF::FFFF:F,F:F  
@A00721:190:HGJW7DSXY:4:1639:15393:27618\_1:N:0:TCTGCAAG+GCTGCACT  
TGTCTTTTACCCAACATTTTTATGTATACAGAGATGACCAGTGACGATTTCTCCCGGAAGCTCTTCTC



TCTATTAGGAGGTCATGATGACTACTATAAGGGTGAAATCGATTTTTTCGAAGTTTGACAAATCTCAAG  
ATT

+

FFFFFFFFF, :FF:F:FFFFFF, FFF:F, FFFFFFF:FFFFFF, , :FFFFFFFF::FFF, F:FFFF  
:, F, FFFFFFF, :F:FFFFFF, FFFFF, FFFF, FFFFFFFFFFFFFFF:FFFFFFFF, :FFF:FFF  
, FF

@A00721:190:HGJW7DSXY:4:2346:15148:29356\_2:N:0:TCTGCAAG+GCTGCACT  
AGCCTATGAGATAAAGATGTATTCTTATTTAGGCTTCGATGCTGAATTTCTTGAACCTTGGAGTGCCA  
GTGAATATTTTTGTACGCCAGGAGATCGGAAGAGCGTCGTGTAGGGA

+

FFFFFFFFFFFFFFFFFFFFFFFFFFFFFFFFFFFFFFFFFFFFFFFFFFFFFFFFFFFFFFFFFFFFFFFF  
FFFFFFFFFFFFFFFFFFFFFFFFFFFFFFFFFFFFFFFFFFFFFFFFFFFFFFFFFFFFFFFFFFFFFFFF

@A00721:190:HGJW7DSXY:4:1122:8495:4241\_1:N:0:TCTGCAAG+GCTGCACT  
TAACACATTCTTTGGTAATTGTATGATCACTCTTATGATGCTCTCTTTATTACGACCTTCGGAAGT  
TTAGAGCCGTCGCTGTCGCCGAGACGATTGATCCTCTTTTCGGACGTACCGGTCCAGGATTATTCA  
GAT

+

FFFFFFFFFFFFFFFFFFFFFFFFFFFFFFFFFFFFFFFFFFFFFFFFFFFFFFFFFFFFFFFFFFFFFFFF  
FFFFFFFFFFFFFFFFFFFFFFFFFFFFFFFFFFFFFFFFFFFFFFFFFFFFFFFFFFFFFFFFFFFFFFFF  
FFF

@A00721:190:HGJW7DSXY:4:2261:3233:28917\_2:N:0:TCTGCAAG+GCTGCACT  
CAGCGTACTTCTGCTCGCGATTTATTCTTTTTGTCAATGATTACATCTACTTCGTTCTGATCCTTAC  
AAGATCATCGTTAAGTTAGGTAAACCCCTAACCGATGTTACTCTTGTA

+

FFFFFFFFFFFFFFFFFFFFFFFFFFFFFFFFFFFFFFFFFFFFFFFFFFFFFFFFFFFFFFFFFFFFFFFF  
FFFFFFFFFFFFFFFFFFFFFFFFFFFFFFFFFFFFFFFFFFFFFFFFFFFFFFFFFFFFFFFFFFFFFFFF

@A00721:190:HGJW7DSXY:4:2153:22950:32597\_1:N:0:TCTGCAAG+GCTGCACT  
TTTAAAGACTATAATAAATATCTCCACTACGAGGTTGTTGTTGGCTATTAGCTATTGCGACTAATAT  
TCGATATTCGATTGAGGGTCGTTATACCTATTCGGCTATCTGTGCTTTGAATTGTATAAGATCAAATT  
TTA

+

FF:FFF, :, F:FF, FFFFF:F, F, F:, FFF::F, FF:FFFF, FF:, :FF, F, F, FFF::F, F::F, F  
FFF:F, FF, , F, F:, FFFFF:FF, FFF:F, F:FFF, FFF, F, FF, FFF, F, FF, F, FF:FFF:F::FF  
FFF

@A00721:190:HGJW7DSXY:4:2646:10520:7341\_2:N:0:TCTGCAAG+GCTGCACT  
CCTGATGTGGAGGGAGTTCTTGAAGCATCCCGACCTTCTTGTGAAAATTTTGATGCGGTTTCATAA  
GATTATCAGTAATCCTGATTCTACTACGATTCATGGACCTTCCATCC

+

FFFFFFFFFFFFFFFFFFFFFFFFFFFFFFFFFFFFFFFFFFFFFFFFFFFFFFFFFFFFFFFFFFFFFFFF  
FFFFFF:FFFFFFFFFFFFFFFFFFFFFFFFFFFFFFFFFFFFFFFFFFFFFFFFFFFFFFFFFFFFFFFF

@A00721:190:HGJW7DSXY:4:1669:12093:20556\_2:N:0:TCTGCAAG+GCTGCACT  
GACGTATCTCAAAGATCGACTTCGAGACAGGTGATATTGTTGAGCGAGAGCGACCAAGATCTAAATTC  
GGTAACGGTGCGTGGCGCTTTATTTTAAAAAGCTCCCTCCTCTCCCA

+

FFFFFFFFFFFFFFFFFFFFFFFFFFFFFFFFFFFFFFFFFFFFFFFFFFFFFFFFFFFFFFFFFFFFFFFF  
FFFFFFFFFFFFFFFFFFFFFFFFFFFFFFFFFFFFFFFFFFFFFFFFFFFFFFFFFFFFFFFFFFFFFFFF

@A00721:190:HGJW7DSXY:4:1308:3649:31109\_2:N:0:TCTGCAAG+GCTGCACT  
ACTTGAGTCTTTTGATCAGTCTCTGACTTGACCATCTTTCATTTTAAATGACGATCATTAAGACTCTC  
TTTCTTCTTTGTTTCTTCTTTGCACTGATTTTCTCATCAGCTTGT

+

FFFFFFFFF:FFFFFFFFFFFFFFFFFFFFFFFFFFFFFFFFFFFFFFFFFFFFFFFFFFFFFFFFFFFF  
, FF:FF::, FFFFF::FFFFFFFF:FFFFFFFFFFFF:FFFFFFFF, FFF

@A00721:190:HGJW7DSXY:4:2567:6912:12399\_1:N:0:TCTGCAAG+GCTGCACT  
GTTTTTACGATAACAACATATCAGTTGATTAAGACTCTTCCGAAAGCGAACTTTGGGAATTTGAAGCT

CAGGGTGAAGCACAAACGTTTGACCGTGACGAACTGTGGTGTTCTTGATCTACGTTACGGATATACTCT  
CCT

+

FFFFFFFFFFFFFFFFFFFFFFFFFFFFFFFFFFFFFFFFFFFFFFFFFFFFFFFFFFFFFFFFFFFFFFFF  
FFFFFFFFFFFFFFFFFFFFFFFFFFFFFFFFFFFFFFFFFFFFFFFFFFFFFFFFFFFFFFFFFFFFFFFF  
FFF

@A00721:190:HGJW7DSXY:4:1331:10122:15765\_1:N:0:TCTGCAAG+GCTGCACT  
CACTACCACTTATTACGATATTTCTTTAGTCGATGGGTTTTCGACGCCTTTAAGCGTCTTCTGTTCAT  
CGCAACCAGATGATATCTTCTATTGAACTTATGTTTCGATCAGTGTTTCTTCTATCAGGAGGAAAAC  
ACT

+

FFFFFFFFFFFFFFFFFFFFFFFFFFFFFFFFFFFFFFFFFFFFFFFFFFFFFFFFFFFFFFFFFFFFFFFF  
FFFFFFFFFFFFFFFFFFFFFFFFFFFFFFFFFFFFFFFFFFFFFFFFFFFFFFFFFFFFFFFFFFFFFFFF  
FFF

@A00721:190:HGJW7DSXY:4:1305:14127:27680\_2:N:0:TCTGCAAG+GCTGCACT  
TCTTCTAATGTGGCCTGAACTACGTTTCACTTTGTGTGTACTTGTCTCTATTTTAAGTTTTGTCTTCC  
TTGTTTGTCTTATTCTATTAATCACTCATTTTAGTGAGATTATTAATA

+

FFFFFFFFFFFFFFFFFFFFFFFFFFFFFFFFFFFFFFFFFFFFFFFFFFFFFFFFFFFFFFFFFFFFFFFF  
FFFFFFFFFFFFFFFFFFFFFFFFFFFFFFFFFFFFFFFFFFFFFFFFFFFFFFFFFFFFFFFFFFFFFFFF

@A00721:190:HGJW7DSXY:4:1134:31331:23500\_2:N:0:TCTGCAAG+GCTGCACT  
CGACAACAGCAGGGGTTTTCGAATAGTGATAGCCACCCGCCTTACAGAGGGGCAGCAGCATGACCATA  
ATTGGTATTGACTTTGGTACCACCTTTTCTACTGTCTGTCTCGCCTCT

+

FFFFFFFFFFFFFFFFFFFFFFFFFFFFFFFFFFFFFFFFFFFFFFFFFFFFFFFFFFFFFFFFFFFFFFFF  
:FFFFFFFFFFFFFFFFFFFFFFFFFFFFFFFFFFFFFFFFFFFFFFFFFFFFFFFFFFFFFFFFFFFFFFFF

@A00721:190:HGJW7DSXY:4:1449:32398:30702\_1:N:0:TCTGCAAG+GCTGCACT  
CGTGTGCTCTTCCGATCTGTGAATTTATACCTACAATCATTTGGTTTTTCTAATAATGATGACACTATT  
GTTTATGGATATGATGCTATTACTCATGATGGTTACGGTCAGGGAGGATTCTCAGTTTACAAGGACCT  
TAA

+

FFFFFFFFFFFFFFFFFFFFFFFFFFFFFFFFFFFFFFFFFFFFFFFFFFFFFFFFFFFFFFFFFFFFFFFF  
FFFFFFFFFFFFFFFFFFFFFFFFFFFFFFFFFFFFFFFFFFFFFFFFFFFFFFFFFFFFFFFFFFFFFFFF  
FFF

@A00721:190:HGJW7DSXY:4:1553:5005:17832\_2:N:0:TCTGCAAG+GCTGCACT  
CCGAAAGACGTGCTAAATTAACCACTTGTACGATGTCGTCTGTCTCGGCGATCACTTTTCACTAAGA  
ATTGGTCCTACTTTTGGACAAGGCCAACTTCGTAATCTTCATGAGATC

+

FFFFFFFFFFFFFFFFFFFFFFFFFFFFFFFFFFFFFFFFFFFFFFFFFFFFFFFFFFFFFFFFFFFFFFFF  
FFFFFFFFFFFFFFFFFFFFFFFFFFFFFFFFFFFFFFFFFFFFFFFFFFFFFFFFFFFFFFFFFFFFFFFF

@A00721:190:HGJW7DSXY:4:1121:17273:20666\_1:N:0:TCTGCAAG+GCTGCACT  
TTAGGGATTTTGGAGAGAGTGAAAGGCTTCAATTGTAGTGTTTGGTCGTTTACGTACCCAGTCAGTAT  
ACCTCTACGCAAAGATATTTTCATGAAACTACAGAGGAACGTACCGGATTACCTGTCTTTTCATATTAT  
GAA

+

FFFFFFFFFFFFFFFFFFFFFFFFFFFFFFFFFFFFFFFFFFFFFFFFFFFFFFFFFFFFFFFFFFFFFFFF  
FFFFFFFFFFFFFFFFFFFFFFFFFFFFFFFFFFFFFFFFFFFFFFFFFFFFFFFFFFFFFFFFFFFFFFFF  
FFF

@A00721:190:HGJW7DSXY:4:2668:6840:2785\_1:N:0:TCTGCAAG+GCTGCACT  
CTCTTTGCTTCGATGTTGGATGTCAAGTTGTTTTCAGAATTGGATTCTACGTAGTTTATGACTTTGG  
TGTTGGTACTTTTCGATACTTCTATCGTATTACGTTACGGTAATTACTATAGTGTATTATTCTGGTG  
GTG

+

FF:,FF,,FF,:FFF,FFF,,:F,,,::,,F,:,:FFF,,:,FF,,F,,,FFF:F,: :FF,FF:F,

F:FFFF,,F,FFF,FF::FFF,FF:F,FFF:FFF:,,:F,F,FF,F,:,:F,FF,F:FFFFFFFFF  
FF,  
@A00721:190:HGJW7DSXY:4:2310:9760:5838\_2:N:0:TCTGCAAG+GCTGCACT  
AGGTCGTGACGTTGATGAAGCTATAAGAGCGTTCTTATTACGGCGCACTTCTTTACCCGCCACCACAC  
AACTTTCAGTTTCACAACTGAAGGAGGAGGTTTCTGTTACTGGAAAAC  
+  
FFFFFFFFFFFFFFFFFFFFFFFF:FFFFFFFFFFFFFFFFFFFFFFFFFFFFFFFFFFFFFFFF  
FFFFFFFFFFFFFFFFFFFFFFFFFFFFFFFFFFFFFFFFFFFFFFFF:FFF  
@A00721:190:HGJW7DSXY:4:1629:16016:25567\_1:N:0:TCTGCAAG+GCTGCACT  
ACTTTTCAATAATATACGTCTTGAACCTCACTTATGACGATCTAGTGAAATTAACGCGTCCTTTTCTGG  
AACGTAGTTTTACTATTATGAACAAAGTTATCAAAGATAGTGGCATTCAAGGCAAACCTACCTGATT  
CCG  
+  
FFFFFFFFFFF:FF:FFFFFFFFFFFFFFFF:FFFFFFFFFFFFFFFFFFFFFFFFFFFFFFFF  
FFFFFFFFFFFFFFFFFFFFFFFFFFFFFFFFFFFFFFFF:FFFFFFFFFFFFFFFF:FFFFFFFFFFFFFFFF  
FFF  
@A00721:190:HGJW7DSXY:4:1425:14995:4006\_1:N:0:TCTGCAAG+GCTGCACT  
TTCTACCAGGGGCTATTACTCTTGCTGAAACAGCTATTAAAGCTGTTGAGCGGTAATTACACCTAAA  
CGAGCTTGATCTGCCATCGCTGAAGGATGTGCACTCTTTTCTGCTACTTTAACGGAGCGTAGTGTACT  
CTT  
+  
FFFFFFF:FFFFFFFFFFFFFFFFFFFFFFFFFFFFFFFFFFFFFFFFFFFFFFFF:FFFFFFFFFFFF  
FFFFFFFFFFFFFFFFFFFFFFFFFFFFFFFFFFFFFFFFFFFFFFFF:FFFFFFFFFFFFFFFFFFFFFFFF  
FFF  
@A00721:190:HGJW7DSXY:4:1477:26458:18223\_1:N:0:TCTGCAAG+GCTGCACT  
CAACAGTAACATTACTTCTAATAAAGGTCTCTATCAAGCTCGTATTATCGTCGCTGCTGGATCTGCGT  
TACCGTTGAAGGCTAACTCCAAGGTAATTATGAAGACTGTGATTTATCTTCACTCTGGCCTTGAT  
GAG  
+  
FFFFFFFFFFFFFFFFFFFFFFFFFFFFFFFFFFFFFFFFFFFFFFFFFFFFFFFFFFFFFFFF  
FFFFFFFFFFFFFFFFFFFFFFFFFFFFFFFFFFFFFFFFFFFFFFFFFFFFFFFFFFFFFFFF:FFFFF  
FFF  
@A00721:190:HGJW7DSXY:4:2502:10881:3615\_2:N:0:TCTGCAAG+GCTGCACT  
ATCGTAACATTAATAATTTCAATCTTCTTAAAAAGAAGATAGAGAGTCATACTTTGGGCTATCGTTCA  
GGTGCATGGGGTTGGATAGCCAATATTGAAGTGGACACCTCTGGTAGT  
+  
FF:,F,F::FFFFFFFFFFFFFFFF:FFFFF:FF:FFF:FFFFFFFF:FFFFFFFFFFFFFFFF  
FFF:F:FFFFFFFF::FFFFF:FFFFFFFFFFFF:::FFFFFFFFFFFF  
@A00721:190:HGJW7DSXY:4:2133:14100:25097\_1:N:0:TCTGCAAG+GCTGCACT  
ATACTATGGTTGAATCAACTAAGCATACTACTTTTGCTTTGATTACTCTACCGCCTTACAAGTCTAAG  
GTTAAAGAGTCGATTAAACAAGTTGTACTTATCAATGATTTTATCGCTGGTTGTTATCTCGAAAAGTC  
TCT  
+  
FFFFFFFFFFFFFFFFFFFFFFFF:FFFFFFFFFFFFFFFFFFFFFFFFFFFF,FFFFFFFFFFFFFFFF  
FFFFFFFFFFFFFFFFFFFFFFFFFFFFFFFFFFFFFFFFFFFFFFFFFFFFFFFFFFFFFFFF  
FFF  
@A00721:190:HGJW7DSXY:4:2250:9616:9032\_1:N:0:TCTGCAAG+GCTGCACT  
ACCCAAAGAGAATATCTAAAATATTTACAAAATCTTACCACTATCTACGAACCTAAAGTTCTGAAGAC  
GTTGCTTGTCGCTTCCTCCTTTAATGGCACTACCTCGGTACAATCTTACTTGAACGAAGGCGACCTG  
TTC  
+  
FFFFFFFFFFFFFFF:FFFFFFFFFFFFFFFFFFFF:,FFFFFFFFF,FFF,FFFFFFFFF,FFFFFFFFF  
FFFFFFFFFFFFFFFFFFFF:FFFFFFFFF:FF:FFFFFFFFF:FFFFFFFF:FFFFFFFFFFFFFFFF  
FFF

@A00721:190:HGJW7DSXY:4:1453:13720:29418\_1:N:0:TCTGCAAG+GCTGCACT  
TGTTCTGTCTATATTAGGTGAAGCGAAATACGATTTGAAACGTCAACGTTACCGAGTTTCGTTTCGT  
ACCTTGATGCTGACTTTCGTCAATATGATTTGATCTGGTTGCTCAATTCTAAGCGTGTTCGCTTAGT  
GCG

+

FFFFFFFFFFFFFFFFFFFFFFFFFFFFFFFFFFFFFFFFFFFFFFFFFFFFFFFFFFFFFFFFFFFFFFFF  
FFFFFFFFFFFFFFFFFFFFFFFFFFFFFFFFFFFFFFFFFFFFFFFFFFFFFFFFFFFFFFFFFFFFFFFF  
FFF

@A00721:190:HGJW7DSXY:4:2204:12463:27305\_2:N:0:TCTGCAAG+GCTGCACT  
GAGTATTGCTATTTATACGGTTACGAGAAGAAGGTTGAAAGTTTGAGAACTTAGTTTACGAACTTGA  
CTCTACTATACGTGACATACTAAATACTAGATATTTGGATGATCTTGA

+

FFFF:FFFFFFFFFFFFFFFFFFFFFFFFFFFFFFFFFFFFFFFFFFFFFFFFFFFFFFFFFFFFFFFF  
FFFFFFFFFFFFFFFFFFFFFFFFFFFFFFFFFFFFFFFFFFFFFFFFFFFFFFFFFFFFFFFFFFFFFFFF  
FFF

@A00721:190:HGJW7DSXY:4:2139:24279:33708\_2:N:0:TCTGCAAG+GCTGCACT  
CATGAATTTTCAGAGGATGAAAAATTTTCTTCCTTGATTTTAATATAAAGAATCTTTACCAGGACTC  
CTACTACAGGAGGCAGTCTTCTGATCGTAAGAAGTTTATAAGGAACAT

+

FFFFFFFFFFFFFFFFFFFFFFFFFFFFFFFFFFFFFFFFFFFFFFFFFFFFFFFFFFFFFFFFFFFFFFFF  
FFFFFFFFFFFFFFFFFFFFFFFFFFFFFFFFFFFFFFFFFFFFFFFFFFFFFFFFFFFFFFFFFFFFFFFF  
FFF

@A00721:190:HGJW7DSXY:4:2359:10077:17284\_1:N:0:TCTGCAAG+GCTGCACT  
ACTCGAACTCTAAGTGGAATACTGTCTTTCCAAGCTTACCTGTATCTTCAATGAAATTGGACTCTT  
CGATAGGGGACATTTTATCGTGGGCTTTCCGTAAAGGAAGATCTGTTATCGACGGTTTATCGTTTACG  
AAG

+

FFFFFFFFFFFFFF:FFFFFFFFFFFFFFFFFFFFFFFFFFFFFFFFFFFFFFFFFFFFFFFFFFFFFFFF  
FFFFFFFFFFFFFFFFFFFFFFFFFFFFFFFFFFFFFFFFFFFFFFFFFFFFFFFFFFFFFFFFFFFFFFFF  
FFF

@A00721:190:HGJW7DSXY:4:1272:17490:30060\_1:N:0:TCTGCAAG+GCTGCACT  
GTTTAAGAATACTATAAATAGAACTAGCTATTACTACTAATGGCGTTGGCCTAGTGGATGTTATTAGTG  
ACATCTGGTCAATTTTCGTTTTTAGGTGGTCTTTATTCTATTATTGATTTTTATGAGATTGATACGTTA  
ACA

+

F,:FFFFFF:FFFFFFFFFFFFFFFFFFFFFFFFFFFFFFFFFFFFFFFFFFFFFFFFFFFFFFFF  
FF:FFFFFFFFFFFFFFFF,::FFFF:FFFFFFF,F:,F:FFFFFF:FFFF:FFF,FFF,F,FF::FF  
,FF

@A00721:190:HGJW7DSXY:4:1619:32859:17159\_1:N:0:TCTGCAAG+GCTGCACT  
TAGAGTAGAATTCCTGAAGAGTCCTTCCGTAACCAACTTCTTGACAATTTTCTTCAATCCTTCGATAA  
TAGTTAAATCTAGGATTATGTCTGTGTTGAAAGACTTTCTACCGATAAGGGTCACTAGTCTTACACAA  
TTA

+

FFFFFFFFFFFFFFFFFFFFFFFFFFFFFFFFFFFFFFFF:F:FFFFFFFFFFFFFFFFFFFFFFFF  
FFFFFFFFFFFFFFFFFFFFFFFFFFFFFFFFFFFFFFFF:FFFFFFFFFFFFFFFFFFFFFFFF  
FFF

@A00721:190:HGJW7DSXY:4:1525:12924:21997\_2:N:0:TCTGCAAG+GCTGCACT  
ATTGACTGATTATCTAAAGATTGAAGGAAAATTTATCCTCGTTTAACTTAGACTTTCCTACGA  
TACAAATGATAACTTCTAATTTACGTTTGCTACTCAGAGCTGGTCCTC

+

,FFFFFFFFFFFFFFFF:FFFFFFFFFFFFFFFFFFFFFFFFFFFFFFFFFFFFFFFFFFFFFFFF  
FFFFFFFFFFFFFFFF:FFFFFFFF:FFFF:FFFFFFFFFFFFFFFFFFFFFFFF

@A00721:190:HGJW7DSXY:4:1154:31494:10066\_1:N:0:TCTGCAAG+GCTGCACT  
GATGCATGGTGTATCTCCTCAGGAGTCCCGGCATTTGATAATAATGACGAGACTTTCGTCATAATCG  
CTGCATATTACGGATTACACGGTACCAGCGCATCTCGTGTGAGCCTCGACCCGATTATATGGTATTA  
ACT

+  
FFFFFFFF:FFFFFFFF:FFFFFFFFFFFFFFFFFFFFFFFFFFFFFFFFFFFFFFFFFFFFFFFF  
FFFFFFFFFFFFFFFFFFFFFFFFFFFFFFFFFFFFFFFFFFFFFFFFFFFFFFFFFFFFFFFF  
FFF  
@A00721:190:HGJW7DSXY:4:1363:29839:2910\_1:N:0:TCTGCAAG+GCTGCACT  
TGAAATTTATAGAAGATTATTTTGACAGAATCAATAAGAATCATCGATTCTCGATTCTGATAGCTTAT  
CTAGGTACTCTCATTTACTATGTTGATTTAGTCTACATTTATGCTGATCTAAAATTTGATCTAGATG  
GAT  
+  
FFFFFFFFFFFFFFFFFFFFFFFFFFFFFFFFFFFFFFFFFFFFFFFFFFFFFFFFFFFFFFFF, FFF  
FFFFFFFFFFFFFFFFFFFFFFFFFFFFFFFFFFFFFFFFFFFFFFFFFFFFFFFFFFFFFFFF, FFF  
FFF  
@A00721:190:HGJW7DSXY:4:2675:9254:19085\_2:N:0:TCTGCAAG+GCTGCACT  
GATTTACAACGATATAGGAGTAATCTACGAGAAGATTCTAGAATTCTTAATTATAATATTCAACCTCA  
AAAGTTACGTGTTTACAGTAACGAGATCACACATTTTGAGAACTAACT  
+  
FFFFFFFFFFFFFFFFFFFFFFFFFFFFFFFFFFFFFFFFFFFFFFFFFFFFFFFFFFFFFFFF  
FFFFFFFFFFFFFFFFFFFFFFFFFFFFFFFFFFFFFFFFFFFFFFFFFFFFFFFFFFFFFFFF  
@A00721:190:HGJW7DSXY:4:1251:24713:6277\_1:N:0:TCTGCAAG+GCTGCACT  
TCTCTTCTTATAATAAATAAATAAATAATATTACTAATGGCAAATAGTGGAAGGCTCCAGTCAACAC  
TAGTTCGAGTGCTGCTTTGGATTACGATGACGTGAGAATAGGTGAAGGGATAGTTTTTACCTCGACCA  
ACA  
+  
FFF, FF:FFFF:FFFFFFFFFFFF:FF:FFFFFFFFFFFF:FFFFFFFFFFFFFFFFFFFF, :FFFF:FF,  
FFFFFFFFFFFFFFFFFFFF::FFFF::FFFF:FF::F:FFFFFFFFFFFFFFFF:FFFF, FFFFFFFFFF  
FFF  
@A00721:190:HGJW7DSXY:4:1560:27995:17315\_2:N:0:TCTGCAAG+GCTGCACT  
GCGACTAATCTTAAAGCTTCACCCAAAATGAAGGACACTTCGAAACTGAATAATGATGCACTACAAAC  
AAGTATCGCTAATCATCTGAAAAAGGCTCTAAAGGACACTATACAATA  
+  
FFFFFFFFFFFFFF:FFFFFFFF:FFFFFFFFFFFFFFFF:FFF:FFFFFF:FFFFFFFFFFFFFFFF  
FFFFFFFFFFFFFFFFFFFFFFFFFFFF:FFFF:FFFFFF, FFFFFFF:F  
@A00721:190:HGJW7DSXY:4:1512:16875:5415\_2:N:0:TCTGCAAG+GCTGCACT  
ATTCAGCACCACATTTTGGTCAAGTCAATCCGTTGAGAAAATTTCTTAGAGGATATTCGCCATTGTGG  
TACGAATTGGTCCAACATTTACCACCAAATTCATTTGATACAACCTCTA  
+  
FFFFFFFFFFFFFFFFFFFFFFFFFFFFFFFFFFFFFFFFFFFFFFFFFFFFFFFFFFFFFFFF  
FFFF:FFFFFFFFFFFFFFFFFFFFFFFFFFFF, :FFFFFFFFFFFF  
@A00721:190:HGJW7DSXY:4:2470:25120:4131\_2:N:0:TCTGCAAG+GCTGCACT  
CGGAATACGCTTGCTATTACCCAGATTGGTTGCAACCCGTTGATGCTATGTCAGAAGAAGCTATTCAA  
GCTTGTCTGTTTAAAGACTGCAGAGGCTGTCAAACAAGCCCAGACTCAA  
+  
FFFFFFFFFFFFFFFFFFFFFFFFFFFFFFFFFFFFFFFFFFFFFFFFFFFFFFFFFFFFFFFF, FFFF  
FFFFFFFFFFFFFFFFFFFFFFFFFFFF:FFFFFFFFFFFFFFFFFFFFFFFF  
@A00721:190:HGJW7DSXY:4:2326:31241:31798\_2:N:0:TCTGCAAG+GCTGCACT  
TGGGTGATAAAAATTATTTAGAGATCTTTTCTACTTACAAAGGACAATTCAGTTTCATTAATTCTACG  
GAAAAGTCCGGAGTATATTGTATGTTAATAGATAGTGGGATAATAGTT  
+  
FFFFFFFFFFFFFFFFFFFFFFFFFFFFFFFFFFFFFFFFFFFFFFFFFFFFFFFFFFFF: FFFFFFFF: FFFF  
FFFF:FFFFFFFFFFFFFFFF, FFFFF:FFF:FFFFFFFFFFFF  
@A00721:190:HGJW7DSXY:4:1365:25979:20181\_2:N:0:TCTGCAAG+GCTGCACT  
GAACGCGTTTCGTATAACCAAGTACTTTCCGTCTGAAGAGTTTAGAGCTGCTATTGATTATGTAACCGA  
TAGGAGTTGTATAGTTGAAGATGTGGCTTTAGACGATAATCCTTTAAG  
+





@A00721:190:HGJW7DSXY:4:1541:28031:6417\_1:N:0:TCTGCAAG+GCTGCACT  
ATACGTCGTGGGAGGTACTGAAGCCTTCCCCTCCGCTGGCACGAAGAACAACCTCCCAAGCCAATCAATA  
GTTCTTCTGACCAGAATGAAAAGGGGTTTACCAGGGTAGTCTCTAAGTCTACCAGGAAGAGGGGAAAT  
GTC

+

FFFFFFFFFFFFFFFFFFFFFFFFFFFFFFFFFFFFFFFFFFFFFFFFFFFFFFFFFFFFFFFFFFFFFFFF  
FFFFFFFFFFFFFFFFFFFFFFFFFFFFFFFFFFFFFFFFFFFFFFFFFFFFFFFFFFFFFFFFFFFFFFFF  
FFF

@A00721:190:HGJW7DSXY:4:1369:14127:2942\_1:N:0:TCTGCAAG+GCTGCACT  
GCATACGAGATCTTGACAGAGTGACTGGAGTTCAGACGTGTGCTCTTCCGATCTGGAAGATCTCCCACC  
ATCTGGGGTTGGGAATAAGAAATCTGCACGGGCCAAAGAGGCCGCTGCTACGAAGTCGCTGAAGGCGG  
CTT

+

FFF:FFF,F,:FFFFFFFFFFFFFFFFFFFFFFFFFFFFFFFFFFFFFFFFFFFFFFFFFFFFFFFFFFFF  
FFFFFFFFFFFFFFFFFFFFFFFFFFFFFFFFFFFFFFFFFFFFFFFFFFFFFFFFFFFFFFFFFFFFFFFF  
FFF

@A00721:190:HGJW7DSXY:4:2367:21432:6167\_2:N:0:TCTGCAAG+GCTGCACT  
TGTAAGTTGCGCCTGCCGACCCCATCTTTGAGACCAAGACTCTCTACAGTAGGTTCTGCCTACTAT  
GAGCAAATCTGTTGAATTCGTCACTGAGGACGAAGGTGAGAGGACTTT

+

FFFFFFFFFFFFFFFFFFFFFFFFFFFFFFFFFFFFFFFFFFFFFFFFFFFFFFFFFFFFFFFFFFFFFFFF  
FFFFFFFFFFFFFFFFFFFFFFFFFFFFFFFFFFFFFFFFFFFFFFFFFFFFFFFFFFFFFFFFFFFFFFFF  
FFFF

@A00721:190:HGJW7DSXY:4:1529:2013:10394\_1:N:0:TCTGCAAG+GCTGCACT  
CTGAGAGCAGTCGCTGGGGAAGAGAATTGCGTGGGTTGAAGGCCGACGCTTCGAGCTTGAGTGTGAC  
GAGGCCGGTGACGTTTTTGTCAACGGCGTTTGGAGGATTTATCCGCGCTTAAGTATGGGGCGAAGAT  
CCC

+

:FFFFFFFFFFFFFFFFFFFFFFFFFFFFFFFFFFFFFFFFFFFFFFFFFFFFFFFFFFFFFFFFFFFF  
FFFFFFFFFFFFFFFFFFFFFFFFFFFFFFFFFFFFFFFFFFFFFFFFFFFFFFFFFFFFFFFFFFFFFFFF  
FFF

@A00721:190:HGJW7DSXY:4:2128:3423:26146\_2:N:0:TCTGCAAG+GCTGCACT  
AGGTTGGCATATTTATGCCGACGATAATAAGCATGTCAACCCTTAAGCACCGAGGTAAGCTCGGGACTT  
ACAAGAGAGAGTGTGAGAGAGTCGCTCTCACTATTTTTTGGCCAGAATG

+

FFFFFFFFFFFFFFFFFFFFFFFFFFFFFFFFFFFFFFFFFFFFFFFFFFFFFFFFFFFFFFFFFFFFFFFF  
FFFFFFFFFFFFFFFFFFFFFFFFFFFFFFFFFFFFFFFFFFFFFFFFFFFFFFFFFFFFFFFFFFFFFFFF  
FFFFFFFFFFFFFFFFFFFFFFFFFFFFFFFF

@A00721:190:HGJW7DSXY:4:2366:14281:17644\_1:N:0:TCTGCAAG+GCTGCACT  
ATGAGGTAAAACCTCTTGCTCCTTCTGTGGGTGAGGGTTTTTGTATATTCACTGGTTCTGGGAGGCT  
GCTTCTCCTCATAATTACAACCTCTCTTTAGAGAGCATTAGAAGGAAGTTGGGCAAATCCCACATAT  
GGT

+

FFFFFFFFFFFFFFFFFFFFFFFFFFFFFFFFFFFFFFFFFFFFFFFFFFFFFFFFFFFFFFFFFFFFFFFF  
FFFFFFFFFFFFFFFFFFFFFFFFFFFFFFFFFFFFFFFFFFFFFFFFFFFFFFFFFFFFFFFFFFFFFFFF  
FFF

@A00721:190:HGJW7DSXY:4:1126:2944:24408\_2:N:0:TCTGCAAG+GCTGCACT  
ACACTTTTCTTGAAAATTTTCTTTTCTCCGTCATTGGGGATTTCGATGTGAGAAGGTGGAAGGTGT  
CAAGGGTCTTCTTCATGCTGATCTTTCAGGACCTAATCACATCATGAT

+

FFFFFFFFFFFFFFFFFFFFFFFFFFFFFFFFFFFFFFFFFFFFFFFFFFFFFFFFFFFFFFFFFFFFFFFF  
FFFFFFFFFFFFFFFFFFFFFFFFFFFFFFFFFFFFFFFFFFFFFFFFFFFFFFFFFFFFFFFFFFFFFFFF

@A00721:190:HGJW7DSXY:4:1558:21169:16423\_1:N:0:TCTGCAAG+GCTGCACT  
GCTCGTATCGAGTTGGAGGGAGGAAGTTCTCCGAAATTAAGACGGGGGGATTAAGAGTCCAGCTGTA  
ACTGTCATTTAGAGAGGGGAGCTCTGAAAAGGAACTTCGTCAGAAGATGAGGAAGTCTAAGAGGAG  
GAG



+  
F,F,:FFF,FFFF:::F,FFFF:FFFFF:F:,FFFFFF:FF,F:FFFFFFFFFFFF::FFFFFF,FFF:  
F,FFF,FFFF,FFF:FFFF:FFFFFFFFFF,FF,F,:FFFFFFFFFFFF:FFFFFFFFFFFFF,F  
FFF  
@A00721:190:HGJW7DSXY:4:1504:19443:9768\_1:N:0:TCTGCAAG+GCTGCACT  
CTCTAGAGAAGATCTCACCACTGGAGAAGGCAAGTGGAGAGTCCAGAAGTTGATGAAGAAGGATTAT  
TTGAAGCAGGGGTTACCACTTCCTAAGGTGGATGAGGGAGGTTGTTTCTTTGGAGTTTTAGATAATCT  
TTT  
+  
FFF:FFFFFFFFFFFF:FFFFFFFFFFFFFFFFFF:FFFFFFFFFFFFFFFFFFFFFFFFFFFFFFFFFFFF  
FFFFFFFFFFFFFFFFFFFFFFFFFFFFFFFFFFFFFFFFFFFFFFFFFFFFFFFFFFFFFFFFFFFF  
FFF  
@A00721:190:HGJW7DSXY:4:2227:18159:8265\_2:N:0:TCTGCAAG+GCTGCACT  
CCTTGAGAAGACAAGCCACATTAAGATATAATTTAGGTCAACTTGGGGTTTCGAATGTCATTAGTGCC  
TTACGATTGAAAGAGGTCCTTTTGAGTATCGACAGATCTTTCGATCTT  
+  
FFFFFFFFFFFFFFFFFFFFFFFFFFFFFFFFFFFFFFFFFFFFFFFFFFFFFFFFFFFFFFFFFFFF  
FFFFFFFFFFFFFFFFFFFFFFFFFFFFFFFFFFFFFFFFFFFFFFFFFFFFFFFFFFFFFFFFFFFF  
@A00721:190:HGJW7DSXY:4:2461:9670:14450\_2:N:0:TCTGCAAG+GCTGCACT  
GTGGCAGAATTCGGTAACTTACCATATTGTTCTTCCGGGAAGTTGTGGGATTAACTTTGACTCAAC  
TACTCCGATCAGATCCGATGGTTTGATTGGTATGGACTACTCGACTT  
+  
FFFFFFFFFFFFFFFFFFFFFFFFFFFF:FFFFFFFFFFFF,FFFFFFFFFFFFFFFFFFFFFFFFFFFF  
:FFFFFFFFFFFFFFFFFFFFFFFFFFFFFFFFFFFFFFFFFFFFFFFFFFFFFFFFFFFF  
@A00721:190:HGJW7DSXY:4:1249:16767:17628\_2:N:0:TCTGCAAG+GCTGCACT  
TCATGGCAGATACTACCGATAAGGTGAAAAATATGCAGGTCAAAGATTCTGTAGCTCTGAGGGCGGTT  
GAGGGAGCCGTTTTGGCCGACTTTAACTATTCTAAGAGTCTTTATGAT  
+  
FFFFFFFFFFFFFFFFFFFFFFFFFFFF:FFFFFFFFFFFF:FFFF:FFFFFFFFFFFFFFFFFFFFFFFFFFFF  
FFFFFFFFFFFFFFFFFFFF:FFFFFFFFFFFF:F:FFFF,FFFFFFFF:FF  
@A00721:190:HGJW7DSXY:4:1122:12310:25535\_2:N:0:TCTGCAAG+GCTGCACT  
CGTTGTCGTACCTTACAAGTTGAGGAGACTTTACAGCGGCTTATTGTGCGCAGTTTCCAGAATTGC  
GGTTGAAGTTCACCCATTCTATCTTGAATGCTCACGCCGTCGCAGCCA  
+  
FFFFFFFFFFFFFFFFFFFFFFFFFFFFFFFFFFFFFFFFFFFFFFFFFFFF:FFFFFFFFFFFFFFFFFFFF  
FFF:FFFFFFFFFFFFFFFFFFFFFFFFFFFFFFFFFFFF,FFFFFFFF  
@A00721:190:HGJW7DSXY:4:2619:21124:27931\_2:N:0:TCTGCAAG+GCTGCACT  
TTATAATCACTTGTTAAAGTACAGATTTAGTGATTTAGATATTATTGATATTGGAGCGATATTCGTT  
TTCATATCCAAAACCTCCTGAATGGAGTACATATTTGCAACCCTATTC  
+  
FFFFFFFFFFFFFFFFFFFFFFFFFFFF:FFFFF:FFFFFFFFFFFFFFFF,FFFFFFFFFFFFFFFFFFFF  
FFFFFFFFFFFFFFFFFFFFFFFFFFFF:FFFFFFFFFFFFFFFFFFFFFFFFFFFF  
@A00721:190:HGJW7DSXY:4:2604:22978:30545\_1:N:0:TCTGCAAG+GCTGCACT  
GATGCATCGAGGTATACGTCTAGGAACATTGATTGGGAACGTACCTACTCACGAGACGTCATGAAAGC  
TATCGGAGGGAAGCAAAATGTTTCGTTCTGTTACAAGAACGTTTGGATTGTGACCATAAAGCCTCAG  
TTG  
+  
FFFFFFFFFFFFFFFFFFFFFFFFFFFFFFFFFFFFFFFFFFFFFFFFFFFF:FFFFFFFFFFFFFFFFFFFF  
:FFFFFFFFFFFFFFFFFFFFFFFFFFFFFFFFFFFFFFFFFFFF:FFFFFFFFFFFFFFFFFFFFFFFFFFFF  
FFF  
@A00721:190:HGJW7DSXY:4:1656:1145:32597\_1:N:0:TCTGCAAG+GCTGCACT  
CTCTCTTGATGATGTAGCCACTATAATGCTTAAGAGAGAGATTGATGTATGTCATTTTCGTCTTAGTTT  
GTCCCGGCGAATTATTGGACACGATGAAAAATGACATACCCGTTCTGACCTTGGTATCGTTATCCGT  
CAT

+  
FFFFFFFFFFFFFFFFFFFFFFFFFFFFFFFFFFFFFFFFFFFFFFFFFFFFFFFFFFFFFFFFFFFFFFFF  
FFFFFFFFF:FFFF:FFFFFFFFFFFFFFFFFFFFFFFFFFFFFFFFFFFFFFFFFFFFFFFFFFFFFFFF  
FFF  
@A00721:190:HGJW7DSXY:4:2636:24153:18239\_2:N:0:TCTGCAAG+GCTGCACT  
GGTTATTCTCACAAACAAAGATAAGATTTTATCTTTCTTCAAACACCCTGTTTTCTTAAGGGCGGACA  
ATTGTTCCATTGTGAACTCTTGGGGACTAGATTGAGCATTAAATGAGTT  
+  
FFFFFFFFFFFFFFFFFFFFFFFFFFFFFFFFFFFFFFFFFFFFFFFFFFFFFFFFFFFFFFFFFFFFFFFF  
FFFFFFFFF:FFFFFFFFFFFFFFFFFFFFFFFFFFFFFFFFFFFFFFFFFFFFFFFFFFFFFFFF  
@A00721:190:HGJW7DSXY:4:2627:1642:19993\_1:N:0:TCTGCAAG+GCTGCACT  
TCTCTAGTGGACAATTCAGAATACCTATTTCGGTACCAAGAGCCACTGCCAATCTCATCGCTATACGC  
ATACCTGATTGGAAGAAGCGAGGTTCTGTTCTCAATAAAAATTTTTCTCAAGAGATTATGGTTGATAA  
AGT  
+  
:FFFFFFFF:FFFF:FFFFF,FFFFF:FFFFFFFFFFFFFFFFFFFFFFFFFFFFFFFFFFFFFFFF  
FFFFFFFFFFFFFFFFFFFFFFFFFFFFFFFFFFFFFFFFFFFFFFFFFFFFFFFFFFFFFFFFFFFFFFFF  
FFF  
@A00721:190:HGJW7DSXY:4:2617:12391:32972\_1:N:0:TCTGCAAG+GCTGCACT  
CGGCATACGAGATCTTGCAGAGTGAAGTTCAGACGTGTGCTCTTCCGATCTGTTACGACATGGC  
TTCGTAACAACAGTGCAGAGATTGTCATCTCGGGGAAAGTGATTACCAAGATGTTATATAGATACG  
AGA  
+  
FFF,FFFFFFFFFFFFFFFFFFFFFFFFFFFFFFFFFFFFFFFFFFFFFFFFFFFFFFFFFFFFFFFF  
FFFFFFFFFFFFFFFFFFFFFFFFFFFFFFFFFFFFFFFFFFFFFFFFFFFFFFFFFFFFFFFFFFFFFFFF  
FFF  
@A00721:190:HGJW7DSXY:4:2261:4237:6167\_1:N:0:TCTGCAAG+GCTGCACT  
AGGTGCGCAGCGATCTTACTCGTTATCGGAGCTAAGAAGAAGACTTTGGGTACACGTTATGCTCGCAA  
CTTAACGTTAGTACCGGAGGTGATCTCTGCTTCTGCGTTACTGAGAGAAAAGATTACAGGACGCCTA  
CG  
+  
FFFFFFFFFFFFFFFFFFFFFFFFFFFFFFFFFFFFFFFFFFFFFFFFFFFFFFFFFFFFFFFFFFFFFFFF  
FFFFFFFFFFFFFFFFFFFFFFFFFFFFFFFFFFFFFFFFFFFFFFFFFFFFFFFFFFFFFFFFFFFFFFFF  
FF  
@A00721:190:HGJW7DSXY:4:2657:6470:7623\_2:N:0:TCTGCAAG+GCTGCACT  
TTTAGGTTTAGTAGGTGATCTTGACGTCGATTCTTTGTATAGGGAGTGTGAGAAGACAACGAATCTTG  
AACTACGGTCCTTATCAAAGAAAATGGTGAACCGGTCTCTAAATCTT  
+  
FFFFF,:FFFFFFFFF:FFFFFFFFFFFFFFFFFFFFFFFFF:FFFFFFFFFFFFFFFFF::FFF,FFF:  
FFFFFFFFFFFFFFFFF:FFFFF:FFFFFFFF:FFFFF:FFFF:F  
@A00721:190:HGJW7DSXY:4:2629:12816:30953\_1:N:0:TCTGCAAG+GCTGCACT  
GATTGAAGAACACGTCAAGAAGTCGCTCGGCGTTGTTCTTGAAAACCAAGTTAAGAAGGAGGCTGATC  
ATGGAGTCTTTGTACCTTATGTCAAACCTCGAGGTTGAGTACGAGAGGTGATCCCGGATGTGGATTG  
AAG  
+  
FFF,:FFFFF,F,FF:F:,FFFFFFFFF,:F:FFF,FF,FFFFFFFF,FF:,FF::F:FF:F,:F:F,:  
FF::F,F,F:FFFF::FF,FFF,FFFFFFFFFFFFFFFFFFFFF:FF,FFFFFFFFFFFFF:F:FFFF  
FF,  
@A00721:190:HGJW7DSXY:4:2130:7292:22294\_2:N:0:TCTGCAAG+GCTGCACT  
CTTTTTGAATGTTGTAAAGAATTGGGTTGAGAAGTGTGCTTTACAAGGAGTTAGACTCTTCTTCAAGT  
TTTTAGATCTTCTTGATAATCTTAAAGAAAAATATTAGAATAAAATAA  
+  
FFFFF:FFFFF:FFFFF:FFF,F:F,FFFFF:,::FF,FFF:FF,:F:FFF:F,F::FFF,,FF,F  
,:FFF,F:,:::,F,FF::,,FFF,FFFFF,,F,,FF:FFF,,FF



@A00721:190:HGJW7DSXY:4:2476:12744:33144\_1:N:0:TCTGCAAG+GCTGCACT  
TCTGACCATCGCAAAGAAGACTTTATTAGTTCATGAAGTTCTTACACTTCTCGCGACTAATGTCAGCT  
TCACTACAAAGGCGTTACGTAAAGTAGTTTTACGCTTTATCTTAAAGCATTACCACCAAATTTAGCA  
CTT

+

FFFFFFFFFFFFFFFFFFFFFFFFFFFFFFFFFFFFFFFFFFFFFFFFFFFFFFFFFFFFFFFFFFFFFFFF:FFFF  
FFFFFFFFFFFFFFFFFFFFFFFFFFFFFFFFFFFFFFFFFFFFFFFFFFFFFFFFFFFFFFFFFFFFFFFF  
FFF

@A00721:190:HGJW7DSXY:4:1372:30454:7545\_1:N:0:TCTGCAAG+GCTGCACT  
CGTGTGCTCTTCCGATCTAGACATGCCAGTTAGAGTTCTTCTAACCAGGACTGATGGTGAGATTCTTT  
TACCTTTTGGAGGTCCAGGAACCTTTACTCCTAGTGTCTTTCTAGAGTCCAAGGACGTTTCCGTCGG  
AGG

+

FFFFFFFF:FFFF,FFFFFFFF:FFFFFFFFFFFFFFFFFFFFFFFFFFFFFFFF:FFFFFFFF:FFFFFFFF  
FFFF:FFFFFFFFFFFFFFFFFFFFFFFFFFFFFFFFFFFFFFFFFFFFFFFFFFFFFFFF:FFFFFFFF  
FFF

@A00721:190:HGJW7DSXY:4:2671:28664:4946\_2:N:0:TCTGCAAG+GCTGCACT  
GACCGCTCAATAACACTCTATTGAATCCCTTTCCACGATGAAAGCTCTTTATGAGGTGCTCCATGCA  
AATTTACAGTTCCTCTTTGGTGATATCGCCTCTGTCCTTTCTCCTTTA

+

FFFFFFFFFFFFFFFFFFFFFFFFFFFFFFFFFFFFFFFFFFFFFFFFFFFFFFFFFFFFFFFFFFFFFFFF  
FFFFFFFFFFFF:FFFFFFFFFFFFFFFFFFFF:FFFFF:FFFFFFFFFFFF:FFFF

@A00721:190:HGJW7DSXY:4:1628:31873:29919\_2:N:0:TCTGCAAG+GCTGCACT  
ACTTGGGTTTATCGGTTGTATTTTGATAAATTTGTTGGAATCGATAATGATACTGACGAAGTTCTAT  
TACCACCCTTGTCATTGATACAAACATTCTAGGTGATGCTTTCTTAGA

+

FFFFFFFFFFFFFFFFFFFFFFFFFFFFFFFFFFFFFFFFFFFFFFFFFFFFFFFFFFFFFFFFFFFFFFFF  
FFFFFFFFFFFFFFFFFFFFFFFFFFFFFFFFFFFFFFFFFFFF:F:FFFFFFFFFFFFFFFF

@A00721:190:HGJW7DSXY:4:1103:4237:3192\_2:N:0:TCTGCAAG+GCTGCACT  
TACAATCTGTAGAGAGAGAGGTTAATCAGAATTTGAGTGATAACGATTTAGTACTGGGAAATGGTGGT  
AGTCAGTTCACTACTTTTCTTTCCCTCCCCTTTTTTCGATTGGATTCTGA

+

FFFFFF:, ,FFFFFF:FFFF,FF:F:FFFFFF,, ,FFF:FFFF,FFFF,FFFF:F,FFFFFF:FF::F  
F:FFFF:FFFF,F:FF,,F:FF,:FFF:FFFFFF:FF:FFFFFFFFFFFF

@A00721:190:HGJW7DSXY:4:2253:25301:24330\_2:N:0:TCTGCAAG+GCTGCACT  
TTGATAAGTTTTTCTTTTATGGGACTCTGTTTGTACTTATGAAGGAGGTATTACTTCGGAAGTTCT  
TAATGTAGGTCTCCTAGTACTTAAGGGTTTATGTTTCGGTTTCAGCTG

+

FFFFFFFFFFFFFFFFFFFFFFFFFFFFFFFFFFFFFFFFFFFFFFFFFFFFFFFFFFFFFFFFFFFFFFFF  
FFFFFFFFFFFFFFFFFFFFFFFFFFFFFFFFFFFF:FF:FFF:FFFFFF:FFFFFFFFF,

@A00721:190:HGJW7DSXY:4:2244:16966:8766\_2:N:0:TCTGCAAG+GCTGCACT  
TGTTTTACATTGCGTGATCACTTCCCGTGGACTTGGAAGAGATTAAACATAAAATCCAGCGATTCTA  
TTATGTCGCTAAAGCCTGTCCAGTTGTCGATGATGTTCTGGGCTGTGGG

+

FFFFFFFFFFFF:FFFFFFFFFFFFFFFFFFFFFFFFFFFFFFFFFFFF:FF,FF:FFF:F:FFFFFFFFFFFFFFFF:FFFF  
FFFFFFFFFFFFFFFFFFFFFFFFFFFFFFFFFFFF:FFFFFFFFFFFFFFFFFFFFFFFFFFFF

@A00721:190:HGJW7DSXY:4:2502:31593:35540\_2:N:0:TCTGCAAG+GCTGCACT  
AAACTTACGACGATGTTCTCGCTCGCATTTCAACAAGGATTACTAAGTCTGAGATCTGCCACTTCTAAT  
TTAGGAAACGTCGCGAAAAGAAAGTTCATGAGGATGTCTTGGTCGAA

+

FFFFFFFFFFFFFFFFFFFFFFFFFFFFFFFFFFFFFFFFFFFFFFFFFFFFFFFFFFFFFFFFFFFFFFFF  
FFFFFFFFFFFFFFFFFFFFFFFFFFFF:FFFFFFFFFFFFFFFFFFFFFFFFFFFF

@A00721:190:HGJW7DSXY:4:2649:22462:19194\_2:N:0:TCTGCAAG+GCTGCACT  
GAACTTCTAATAGAGGATCCTGATGACATTATTTCAACGATACCGATCTCAGTTCTACCACAGAAAC

CGTCTCAGGAAGTGTCTCCACTGATTCGGAATTAGAGAAAGACGACCT  
+  
FFFFFFFFFFFFFFFF:FFFFFF,FFFFFFFFFFFFFFFF,FFF:FFFFFF:FFF,FFFF:FFFF  
FFFFFFFFFFFFFFFFFFFFFFFFFFFFFFFF:FFFFFFFFFFFF:FFFFF  
@A00721:190:HGJW7DSXY:4:2111:3803:35665\_1:N:0:TCTGCAAG+GCTGCACT  
GACCTCTGAATTTTCAGGGTGGCCTGATGAGGACGTTGAAAGGGATAATTTCAACTCTGAGACTTCTA  
AGAGTGTTTCAAAGACCAGAAACGTAACAAGAAGAATAAAGGTAGGAAGGGGAGAAAACAGAACAAAG  
C  
+  
FFF:F,F,FFFF:F::FFFFFF::F:FF:FFF:::FFFFFF:FF,FFFFFFFFFFFFFFFFFFFFFFFFF:  
FFFF:FFFFFFFFFFFFFFFFFFFFFFFFFFFFFFFF:FFFFFFFFFFFFFFFFFFFFFFFFFFFFFFFF  
F  
@A00721:190:HGJW7DSXY:4:1310:26793:23563\_2:N:0:TCTGCAAG+GCTGCACT  
TGGTTGCGGCTGATCGTACCCCAATTCCTGCTAGAAAGATCACTCTCGGCGATACCACTGATCTTCCA  
GAGTTACGTAGTGGTCGTTCTTTTGGTGATTTTATCAAAGAGAAAGTT  
+  
FFFFFFFFFFFFFF:FFFFFFFFFFFFFFFFFFFFFFFFFFFFFFFFFFFFFFFFFFFFFFFFFFFFFFFF  
F:FFFFFFFFFFFFFFFF,FFFFFFFFFFFFFFFFFFFFFFFFFFFFFFFF  
@A00721:190:HGJW7DSXY:4:1520:25970:5008\_1:N:0:TCTGCAAG+GCTGCACT  
CAAGTTAACTTCGAACTGACCACTTACAAGAGTGTTGAAGTACCGCAACATGGATCAGTTTTCCAAA  
AAGCTATTAATAGCAGTTGCGGGGCTATAATACCGCCTCCAGATTACTCTAACTGAATCCACTCTCT  
TGG  
+  
FFF,F,FFFFFF:::FF::,F,FFFF:F,FF:FF,,:FFFF:F,,,FFFFFF:,F:FFFFFF:,  
FFF:FFFF,,F,,,FFFFFF:F:,,,FFF,FFFFFF,F,F,,:F:F:F::FFF,,::,F,FF:F::,F  
FFF  
@A00721:190:HGJW7DSXY:4:1506:25120:6386\_2:N:0:TCTGCAAG+GCTGCACT  
TTTGAAGTGTGTAATGTCCTACGTACTGTTCAAGGTGTTGGGCTTCTCTAAAGAACAGCAACTTTC  
AACATGAATTAGTTATTGAAAGTCTTGACCCTCACGTCTCACTTTATC  
+  
FFFFFFFFFFFFFFFFFFFFFFFFFFFFFFFFFFFFFFFFFFFFFFFFFFFFFFFFFFFFFFFFFFFF  
FFFFFFFFFFFFFFFFFFFFFFFFFFFFFFFFFFFFFFFFFFFFFFFFFFFFFFFFFFFFFFFF  
@A00721:190:HGJW7DSXY:4:2635:16613:13479\_2:N:0:TCTGCAAG+GCTGCACT  
AGACCTTCTTGGGGAGTAAAGAGGGTTTGGAAATTACGGAACCTTCTCTCGTTCTTCATGAAGATCT  
TCGAGTGTTTTATAGTGAGTTATTCTTGCGAAGGTTCAAGTCGATTGA  
+  
FFFFFFFFFFFFFFFFFFFFFFFFFFFFFFFFFFFFFFFFFFFFFFFFFFFFFFFFFFFFFFFF:FFFFFFF  
FFFFFFFFFFFFFFFFFFFFFFFFFFFFFFFFFFFFFFFFFFFFFFFFFFFFFFFFFFFFFFFF  
@A00721:190:HGJW7DSXY:4:2642:17734:8688\_2:N:0:TCTGCAAG+GCTGCACT  
AATAAGAAGTTCTTCGCAGTTGAATCTCCACCAGGTGGAGGGAAGACCACTGAACCTATAGCGACTTT  
TGTCGAATTTTTCGCAAAAGGTCTTGAAGTACGTATTGTCACTGCTAA  
+  
FFFFFFFFFFFFFFF,:FFFFFFFFFFFFFFFFFFFFFFFFFFFFFFFFFFFFFFFFFFFFFFFFFFFFF  
FFFFFFFFFFFFFFFFFFFFFFFFFFFFFFFFFFFFFFFFFFFFFFFFFFFFFFFFFFFFFFFF  
@A00721:190:HGJW7DSXY:4:2631:2754:11115\_2:N:0:TCTGCAAG+GCTGCACT  
TTGGCACTTCTAGTTCATCGCGGTATTTGTGAAATTAAGACAGACGTGAAAGTTATGATGAGTGATCG  
TATTAGAACAGCTGATTCTTATTGCATGAACGTCGCTGAGGTCAAACC  
+  
FFFFFFFFFFFFFFFFFFFF:FFFFFF:FFFFFFFFFFFFFFFFFFFFFFFFFFFFFFFFFFFFFFFFFFFF  
FFFFFFF:FFFFFFFFFFFFFFFF,FFFFFFFFFFFFFFFFFFFFFFFFFFFFF  
@A00721:190:HGJW7DSXY:4:1514:9833:3020\_2:N:0:TCTGCAAG+GCTGCACT  
TTCATCGACGAATTATTCATGATTCACGCTGGTCAGACCTTTTTCTTACACATCTACTTAAGCGGGC  
TTATACCATAGGTTACGGTGATTCCAATCAAATCGGATTCATCAATCG  
+

[illegible]

$+$ 

@A00721:190:HGJW7DSXY:4:2302:15899:21230\_1:N:0:TCTGCAAG+GCTGCACT  
TGTCTTTTACCCAACATTTTATGTATACAGAGATGACCAGTGACGATTTCTCCCGGAAGCTCTTCTC  
TCTCTTAGGAGGTCATGATGACTACTATAAGGGTGAAATCGATTTTTCGAAGTTTGACAAATCTCAAG  
ATT

 $+$ 

@A00721:190:HGJW7DSXY:4:2417:19162:24408\_2:N:0:TCTGCAAG+GCTGCACT  
AGCCTATGAGATAAAGATGTATTCTTATTTAGGCTTCGATGCTGACTTTCTTGAACCTTTGGAGTGCCA  
GTGAATATTTTTGTACGCCAGGAGATCGGAAGAGCGTCGTGTAGGGA

+

@A00721:190:HGJW7DSXY:4:1376:25328:7592\_1:N:0:TCTGCAAG+GCTGCACT  
TAACACATTCTTTGGTAATTGTATGATCACTCTTATGATGCTCTCTCTTTATTACGACCTTCGGAAGT  
TTAGAGCCGTCGCTGTCGCCGAGACGATTCGATCCTCTTTTCGGACGTACCGGTCCAGGATTATTCA  
GAT

+

@A00721:190:HGJW7DSXY:4:2353:3106:27383\_2:N:0:TCTGCAAG+GCTGCACT  
CAGCGTACTTCTGCTCGCGATTTATTCTTTTTGTCAATGATTACATCTACTTCGTTCTGATCCTTAC  
AAGATCATCGTTAAGTTAGGTAAACCCCTAACCGATGTTACTCTTGTA

+

@A00721:190:HGJW7DSXY:4:2315:13187:32252\_1:N:0:TCTGCAAG+GCTGCACT  
TTTAAAGACTATACTAAATATCTCCACTACGTGGTTGTTGTTTGGCGATTAGCTCTTGCGACTAATAT  
TCGATATTCGATTGAGGGTCGTTATACCTATTCGGCTATCTGTGCTTTGAATTGTATAAGATCAAATT  
TTA

+

@A00721:190:HGJW7DSXY:4:1378:10845:5181\_2:N:0:TCTGCAAG+GCTGCACT  
TGATGTGGAGGGAGTTCTTGAAGCATCCCGACCTTTCCTTGTGAAATTTTGATGCGGTTTCATAAGA  
TTATCAGTAATCCTGATTCTACTACGGATTCATGGACCTTCCATCCTG

+

@A00721:190:HGJW7DSXY:4:2105:8938:24330\_2:N:0:TCTGCAAG+GCTGCACT  
GACGTATCTCAAAGATCGACTTCGAGACAGGTGATATTGTTGAGCGAGAGCGACCAAGATCTAAATTC  
GGTAACGGTGCGTGGCGCTTTATTTTAAAAAGCTCCCTCCTCTCCCAA

+

```
FFFFFFFFFFFFFFFFFFFFFFFFFFFFFFFFFFFFFFFFFFFFFFFFFFFFFFFFFFFFFFF
FFFFFFFFFFFFFFFFFFFFFFFFFFFFFFFFFFFFFFFFFFFFFFFFFFFF
```

[illegible]





GTTGCTTGTGCGCTTCCTCCTTTAATGGCACTACCTCGGTACAATCTTACTTGGAACGAAGGCGACCTG  
TTC

+

FFFFFF:FFFFFFFFFFFFFFFFFFFFFFFFFFFFFFFFFFFFFFFFFFFFFFFFFFFFFFFFFFFFFFFFFFFFFFFF  
FFFFFFFFFFFFFFFFFFFFFFFFFFFFFFFFFFFFFFFFFFFFFFFFFFFFFFFFFFFFFFFFFFFFFFFFFFFFFFFF  
FFF

@A00721:190:HGJW7DSXY:4:1622:32931:35321\_1:N:0:TCTGCAAG+GCTGCACT  
TGTTCTGTCTATATTAGGTGAAGCGAAATACGATTTGAAAGTTCACCGAGTTTCGTTTCGT  
ACCTTGATGCTGACTTTCGTCAATATGATTTGATCTGGTTGCTCAATTCTAAGCGTGTTCGCTTAGT  
GCG

+

FFFFFFFFFFFFFFFFFFFFFFFFFFFFFFFFFFFFFFFFFFFFFFFFFFFFFFFFFFFFFFFFFFFFFFFFFFFFFFFF  
FFFFFFFFFFFFFFFFFFFFFFFFFFFFFFFFFFFFFFFFFFFFFFFFFFFFFFFFFFFFFFFFFFFFFFFFFFFFFFFF  
FFF

@A00721:190:HGJW7DSXY:4:2224:31575:4507\_2:N:0:TCTGCAAG+GCTGCACT  
GAGTATTGCTATTTATACGTTACGAGAAGAAGGTTGAAAGTTTGAGAACTTAGTTTACGAACTTGA  
CTCTACTATACGTGACATACTAAATACTAGATATTTGGATGATCTTGA

+

FFFFFFFFFFFFFFFFFFFFFFFFFFFFFFFFFFFFFFFFFFFFFFFFFFFFFFFFFFFFFFFFFFFFFFFFFFFFFFFF  
FFFFFFFFFFFFFFFFFFFFFFFFFFFFFFFFFFFFFFFFFFFFFFFFFFFFFFFFFFFFFFFFFFFFFFFFFFFFFFFF

@A00721:190:HGJW7DSXY:4:2273:26530:32690\_2:N:0:TCTGCAAG+GCTGCACT  
CATGAATTTTCAGAGGATGAAAAATTTCTTCCTTGATTTTAATATAAAGAATCTTTACCAGGACTC  
CTACTACAGGAGGCAGTCTTCTGATCGTAAGAAGTTTATAAGGAACAT

+

FFFFFFFFFFFFFFFFFFFFFFFFFFFFFFFFFFFFFFFFFFFFFFFFFFFFFFFFFFFFFFFFFFFFFFFFFFFFFFFF  
FFFFFFFFFFFFFFFFFFFFFFFFFFFFFFFFFFFFFFFFFFFFFFFFFFFFFFFFFFFFFFFFFFFFFFFFFFFFFFFF

@A00721:190:HGJW7DSXY:4:2502:17499:7686\_1:N:0:TCTGCAAG+GCTGCACT  
ACTCGAACTCTAAGTGGTAATACTGTCTTCCAAGCTTACCTGTATCTTCAATGAAATTGGACTCTT  
CGATAGGGGACATTTTATCGTGGGCTTTCGTAAGAAGATCTGTTATCGACGTTTATCGTTTACG  
AAG

+

FFFFFFFFFFFFFFFFFFFFFFFFFFFFFFFFFFFFFFFFFFFFFFFFFFFFFFFFFFFFFFFFFFFFFFFFFFFFFFFF  
FFFFFFFFFFFFFFFFFFFFFFFFFFFFFFFFFFFFFFFFFFFFFFFFFFFFFFFFFFFFFFFFFFFFFFFFFFFFFFFF  
FFF

@A00721:190:HGJW7DSXY:4:1647:16640:15624\_1:N:0:TCTGCAAG+GCTGCACT  
TAAGAATACTATAAATAGAATAGCTATTACTACTAATGGCGTTGGCCTAGTGATGTTATTAGTGACA  
TCTGGTCAATTTCTGTTTTAGGTGGTCTTTATTCTATTATTGATTTTTATGAGATTGAGATCGGAAGA  
GCA

+

FFFFFFFFFFFFFFFFFFFFFFFFFFFFFFFFFFFFFFFFFFFFFFFFFFFFFFFFFFFFFFFFFFFFFFFFFFFFFFFF  
FFFFFFFFFFFFFFFFFFFFFFFFFFFFFFFFFFFFFFFFFFFFFFFFFFFFFFFFFFFFFFFFFFFFFFFFFFFFFFFF  
FFF

@A00721:190:HGJW7DSXY:4:1149:26784:1908\_2:N:0:TCTGCAAG+GCTGCACT  
TTCCTGAAGAGTCCTTCCGTAACCAACTTCTTGACAATTTCTTCAATCCTTCGATAATAGTTAAATC  
TACGATTATGTCTGTGTTGAAAGACTTTCTACCGATAAGGGTCACTAG

+

FFFFFFFFFFFF:FFFFFFFF:FFFFFFFFFFFFFFFFFFFFFFFFFFFFFFFFFFFFFFFFFFFFFFFFFFFFFFFF  
FFFFF::FFFFFFFF:FFFFFFFF:FFFFFFFFFFFFFFFF

@A00721:190:HGJW7DSXY:4:2412:5394:26177\_2:N:0:TCTGCAAG+GCTGCACT  
TAAGAAATAATCCTACATTGACTGATTATCTAAAGATTGAAGGAAAATTTTATCCTCGTTTAACTTAC  
TTAGACTATCCTACGATACAAATGATAACTTCTAATTTACGTTTGCTA

+

FFF,FF:FFFF,,FFF:FFFFFFFFFFFFFFFF:F:F:FF:,FF:,F,FFFF,F::FF:FFF,FFF  
F:FFFF,FFFFFFFF:FF,,FF::FFFF:FFFF,FFFF,FF:::

@A00721:190:HGJW7DSXY:4:1221:3396:11663\_2:N:0:TCTGCAAG+GCTGCACT  
AAGGGATGCATGGTGTATCTCCTCAGGAGTCCCGGCATTTGATAATAATGACGAGACTTTCGTCATA  
ATCGCTGCATATTACGGATTACACGGTACCAGCGCATCTCGTGTGAG

+

FFFFFFFFFFFFFFFFFFFFFFFFFFFFFFFFFFFFFFFFFFFFFFFFFFFFFFFFFFFFFFFFFFFFFFFF  
FFFFFFFFFFFFFFFFFFFFFFFFFFFFFFFFFFFFFFFFFFFFFFFFFFFFFFFFFFFFFFFF

@A00721:190:HGJW7DSXY:4:2130:24668:4194\_1:N:0:TCTGCAAG+GCTGCACT  
TGAAATTTATAGAAGATTATTTTGACAGAATCAATAAGAATCATCGATTCTCGATTCTAGAGCTTAT  
CTAGGTAATCTCATTACTATGTTGATTAGTCTACATTTATGCTGATCTAAAATTTGATCTAGATG  
GAT

+

: ,FFF:FFFFFFFF: ,FFF, :FFFF:F:FFFFFFFF,FFF:FFFFFFFFFFFFFFFFFFFFFFFF  
FFFFFFFFFFFFFFFFFFFFFFFFFFFFFFFFFFFFFFFFFFFFFFFFFFFFFFFFFFFFFFFFFFFFFFFF  
FFF

@A00721:190:HGJW7DSXY:4:1319:17508:24455\_2:N:0:TCTGCAAG+GCTGCACT  
TTTACAACGATATAGGAGTAATCTACGAGAAGATTCTAGAATTCTTAATTATAATATTCAACCTCAA  
AGTTACGTGTTTACAGAAACGAGATCACACATTATGATAACTAACTAT

+

F,FFFFFFFFFFFFFFFF:FFF:F,F,:FFFF,FFFF,F,FF,FF,:FFF,F,FFFF,FFFFFFFF  
F,,,F,,F:FFFFFF,,FFF,F:F,,F:FFFF,,,F,FFF,FF,FF,

@A00721:190:HGJW7DSXY:4:1371:27299:28541\_1:N:0:TCTGCAAG+GCTGCACT  
TCTCTTCTTATAATAAAATAAATAAATAATATTACTAATGGCAAATAGTGGAAGGCTCCAGTCAACAC  
TAGTTCGAGTGCTGCTTTGATTACGATGACGTGAGAATAGGTGAAGGGATAGTTTTTACCTCGACCA  
ACA

+

FFFFFFFFFFFFFFFFFFFFFFFF:FF,FFFF,FFFFFFFFFFFFFFFFFFFFFFFFFFFFFFFFFFFF  
FFFFFFFFFFFFFFFFFFFFFFFFFFFFFFFFFFFFFFFFFFFFFFFFFFFFFFFFFFFFFFFFFFFFFFFF  
FFF

@A00721:190:HGJW7DSXY:4:1569:2917:16438\_2:N:0:TCTGCAAG+GCTGCACT  
GCGACTAATCTTAAAGCTTCACCCAAAATGAAGGACACTTCGAAACTGAATAATGATGCACTACAAAC  
AAGTATCGCTAATCATCTGAAAAGGCTCTAAAGGACACTATACAATA

+

FFFFFFFFFFFFFFFFFFFFFFFFFFFFFFFFFFFFFFFFFFFFFFFFFFFFFFFFFFFFFFFFFFFFFFFF  
FFFFFFFFFFFFFFFFFFFFFFFFFFFFFFFFFFFFFFFFFFFFFFFFFFFFFFFFFFFFFFFF:

@A00721:190:HGJW7DSXY:4:2430:32940:16235\_2:N:0:TCTGCAAG+GCTGCACT  
ATTCAGCACCACATTTTGGTCAAGTCAATCCGTTGAGAAAATTTCTTAGAGGATATTCGCCATTGTGG  
TACGAATTGGTCCAACATTTACCACCAAATTTCTTTGATACAACCTCTA

+

FFFFFFFFFFFFFFFFFFFFFFFFFFFFFFFF,FFFFFFFFFFFFFFFFFFFFFFFFFFFFFFFF:FFFFF  
FFFFFFFFFFFFFFFFFFFFFFFFFFFFFFFFFFFFFFFFFFFFFFFFFFFFFFFFFFFFFFFF:FFFFF

@A00721:190:HGJW7DSXY:4:1113:19714:16376\_1:N:0:TCTGCAAG+GCTGCACT  
ATACGCTTGCTATTACACGATTGGTTGCAACCCGTTGATGCTATGTCAGAAGAAGCTATTCAAGCTT  
GTCGTTTAAAGACTGCAGAGGCTGTCAAACAAGCCCAGACTCAAGGAGTCCAATCAAAGGTTTGAAT  
TTA

+

FFFF:FFFF:FFFFFFFFFFFFFFFF:FFFFFFFFFFFF:FFFFFFFFFFFF:FFFFFFFFFFFFFFFF  
FFFF,FFFFFFFFFFFFFFFFFFFFFFFFFFFFFFFFFFFFFFFFFFFFFFFFFFFFFFFF:FFFFFFFFFFFF  
FFF

@A00721:190:HGJW7DSXY:4:2424:2031:36010\_2:N:0:TCTGCAAG+GCTGCACT  
TGGGTGATAAAAATTATTTAGAGATCTTTTCTACTTACAAAGGACAATTCAGTTTCATTAATTCTACG  
GAAAAGTCCGGAGTATATTGTATGTTAATAGATAGTGGGATAATAGTT

+

FFFFFFFFFFFFFF:FFFFFFFFFFFFFFFFFFFFFFFFFFFF:FFF,FFFFFFFFFFFFFFFFFFFFFFFF  
FF:FFFFFFFFFFFF:FFFFFFFF,FFFFFFFFFFFFFFFFFFFFFFFF



CGGAGGATCTTTTCAATAAGATGTATGATGATAATCTACTATTTTTTAA

+

FFFFFFFFFFFFFFFF:FF:FFFFFFFFFFFFFFFFFFFFFFFFFFFFFFFF,FFFFFFFFFFFFFF  
FFFFFFFFFFFFFFFFFFFFFFFF:FFFFFFFFFFFFFFFFFFFFFFFFFFFFFFFF

@A00721:190:HGJW7DSXY:4:1635:30201:33223\_1:N:0:TCTGCAAG+GCTGCACT  
AGCGTATACTTGAATACTTTATCAAAGATTTGGCTTGGTCTATTTACCGCAAAAAGTTGGAAGAGGTC  
TATGATATTTATTTTACTTATACTTTAAATAGCACCGATTATAACTTGACTGTTGATAATATTACAAT  
AGC

+

FFF,FFFFFFFFFFFFFFFF:FFFF:FFFFFFFFFFFFFFFFFFFFFFFF,F:FFFFFFFFFFFFFFFFFFFFFFFF  
FFFFFFFF:FFFFFFFFFFFFFFFFFFFFFFFF:FFFFFFFFFFFFFFFFFFFFFFFF:FFFFFFFFFFFFFFFF  
,FF

@A00721:190:HGJW7DSXY:4:1448:3812:10441\_2:N:0:TCTGCAAG+GCTGCACT  
AAGATTAGAGAAGTAACCTCGGTGAACACGTCGGTAGCATTGATTTACTTTTACCGTTAGAACTGAAAA  
AGATTCTTTTCGAAAAGAAACCTATAAGTTACAAACGATTCTTCGACT

+

FFFFFFFFFFFFFFFFFFFFFFFFFFFFFFFFFFFFFFFF:FFFF:FFFFFFFFFFFFFFFFFFFFFFFFFFFFFFFF  
FFFFFFFFFFFFFFFFFFFFFFFF,FFFFFF:FFFFFFFFFFFFFFFFFFFFFFFF:FFFF

@A00721:190:HGJW7DSXY:4:2111:4562:14246\_1:N:0:TCTGCAAG+GCTGCACT  
AATAAAAATACTTCAAGTACCTGAACCTTTACATTTTTAATGGTATGGTATAATGTGTCTTACAAATAG  
AACCTTCACTCTCGGTAATGAGAGTGTATTCCTTAATATTCTAGTAACCGCTATGTGGGCATTACTAG  
GAT

+

FFFFFFFFFFFFFFFFFFFFFFFFFFFFFFFFFFFFFFFFFFFFFFFFFFFFFFFFFFFFFFFFFFFFFFFFFFFF  
FFFFFFFFFFFFFFFFFFFFFFFFFFFFFFFFFFFFFFFFFFFFFFFFFFFFFFFFFFFFFFFFFFFFFFFFFFFF  
FFF

@A00721:190:HGJW7DSXY:4:1311:23493:14810\_2:N:0:TCTGCAAG+GCTGCACT  
TTTAAATGCTAGGAAAATTTTAGAAAACTCCATTGTATAGTTCAAGGAGTACTTAATTCAATAGCTT  
TAGTATTATTTACTATCGCCTTTATTGAAAATTGTATAAGAGTTAATT

+

FFFFFFFFF,FFFFFFFFFFFFFFFFFFFFFFFF:FFF:FFFFFFFFFFFFFFFFFFFFFFFFFFFFFFFFFFFF  
FFFFFFFFFFFFFFFFFFFF:,FFFFFFFFF:FFFFFFFFFFFF:FFFFFF:F

@A00721:190:HGJW7DSXY:4:2122:11252:34475\_1:N:0:TCTGCAAG+GCTGCACT  
GGGAGAATGAAGTCCGCTTCCCGGAAGAAACGATCTATTTACAGAGTATTTAGAGTAGTCCAAAGTT  
TGTATAAATTTATATGATTTTATATATATATACCACATATATATATATAAAATCCTATAAATTTGT  
ACA

+

F:FF,FFF:F,F:,FFF,F,FFF::F,FF,,:F,FF:F::F:F,, ,FFFFFFFF,F:,,, ,FFF,FFF  
F,FF,FFFFFFFF::,FFFF:,FFFFFFFF:F:FF,FFFFFFFFFFFFFFFFFFFFFFFF:FFFFFFFFFFF  
FFF

@A00721:190:HGJW7DSXY:4:1362:22399:29042\_2:N:0:TCTGCAAG+GCTGCACT  
TACACTCCCCAAACATAACATAACCTACCATGACCAATCATCGCTCCAAGTGGCACGCCAGAC  
GTAGGGTCAAACCTACTACCGCCTGTGCGCAGATCGGCACCACTGGTC

+

FFFFFFFFFFFFFFFFFFFFFFFFFFFFFFFFFFFFFFFFFFFFFFFFFFFFFFFFFFFFFFFFFFFFFFFF:F  
FFFFFFFFFFFFFFFFFFFFFFFFFFFFFFFFFFFFFFFFFFFFFFFFFFFFFFFFFFFFFFFF

@A00721:190:HGJW7DSXY:4:2474:7527:14058\_2:N:0:TCTGCAAG+GCTGCACT  
ACCCGCTGTGCAGAATAACCTTCCCAAATCTAGATCTGCACAGAAGAAGGCTGAAGGTCGTTACCGGA  
CGACCACTCAAAGGAAACGGGCTGTTGCCAGAGGAAAGCAGCGACCA

+

FFFFFFFFFFFFFFFF,FFFFFFFFFFFF:FFFFFFFFFFFFFFFF:FFFFFFFFFFFFFFFFFFFFFFFF  
FFFFFFFFFFFFFFFFFFFFFFFFFFFFFFFFFFFFFFFFFFFFFFFFFFFFFFFF

@A00721:190:HGJW7DSXY:4:2432:12210:22357\_2:N:0:TCTGCAAG+GCTGCACT  
GTAACATTGACGGCAGTCCCGTCATCTCTGTGGGAAGTGAAGCAGTACCTCAGTCAAAGTCACATTC

+

@A00721:190:HGJW7DSXY:4:1549:21612:10958\_1:N:0:TCTGCAAG+GCTGCACT  
ATACGTCGTGGGAGGTACTGAAGCCTTCCCCTCCGCTGGCACAAGAACAACCTCCAAGCCAATCAATA  
GTTCTTCTGACCAGAATGAAAAGGGGTTTACCAGGGTAGTCTCTAAGTCTACCAGGAAGAGGGGAAAT  
GTC

+

@A00721:190:HGJW7DSXY:4:1147:2031:12493\_1:N:0:TCTGCAAG+GCTGCACT  
AAGGGAAAGGTCCATCAGGACCTAAGAAGGGGAAATTACCCCTAATTCTGAAGGAAGATCTCCACCA  
TCTGGGGTTGGAATAAGAAATCTGCACGGGCCAAAGAGGCCGCTGCTACGAAGTCGCTGAAGGCGGC  
TT

+

@A00721:190:HGJW7DSXY:4:2376:15483:2848\_2:N:0:TCTGCAAG+GCTGCACT  
TGTAAGTTGCGCCTGCCGACCCCATCTTTGAGACCAAGACTCTCTACAGTAGGTTCTGTCCTACTAT  
GAGCAATCTGTTGAATTCGTCACTGAGGACGAAGGTGAGAGGACTTT

 $+$ 

@A00721:190:HGJW7DSXY:4:1573:23583:18474\_1:N:0:TCTGCAAG+GCTGCACT  
CTGAGAGCAGTCGCTGGGGAAAGAGAATTGCGTGGGTTGAAGGCCGACGCTTCGAGCTTGAGTGTGAC  
GAGGCCGGTGACGTTTTTGTCAACGGCGTTTGGAGGATTTTATCCGCGCTTA ACTATGGGGCGAAGAT  
CCC

+

@A00721:190:HGJW7DSXY:4:2240:18683:18035\_2:N:0:TCTGCAAG+GCTGCACT  
AGGTTGGCATATTTATGCCGACGATAATAAGCATGTCAACCTTAAGCACCGAGGTAAGCTCGGGACTT  
ACAAGAGAGAGTGTGAGAGAGTCGCTCTCACTATTTTTGCCAGAATG

+

@A00721:190:HGJW7DSXY:4:2451:13883:4022\_1:N:0:TCTGCAAG+GCTGCACT  
ATGAGGTTAAAACTCTTGCTCCTTCTGTGGGTGAGGGTTTTTGTATATTCACCTGGTTCTGGGAGGCT  
GCTTTCCTCCATAATTACAACCTCTCTTTAGAGAGCATTAGAAGGAAGTTGGGCAAATTCACATAT  
GGT

+

@A00721:190:HGJW7DSXY:4:1250:19479:11647\_2:N:0:TCTGCAAG+GCTGCACT  
ACACTTTTCTTGAAAATTTTTCCTTTCCTCCGTCATTGGGGATTTCGATGTGAGAAGGTGGAAGGTGT  
CAAGGGTCTTCTTCATGCTGATCTTTCAGGACCTAATCACATCATGAT

+

[illegible]



FFFFFFFF,F:FFFF,FFFFFFFFFFFFFFFFFFFFFFFFFFFFFFFFFFFFFFFFFFFFFFFFFFFFFFFF  
FFF

@A00721:190:HGJW7DSXY:4:2103:19840:6042\_2:N:0:TCTGCAAG+GCTGCACT  
GCCACTATAATGCTTAAGAGAGAGATTGATGTATGTCATTTCTGCTTAGTTTGTCCCGCGAATTATT  
GGACACGATGAAAAATGACATACCCGTTCTGACCTTGGTATCGTTAT

+  
FFFFFFFFFFFFFFFFFFFFFFFFFFFFFFFFFFFFFFFFFFFFFFFFFFFFFFFFFFFFFFFFFFFFFFFF  
FFFFFFFFFFFFFFFFFFFFFFFFFFFFFFFFFFFFFFFFFFFFFFFFFFFFFFFFFFFFFFFFFFFFFFFF  
FFF

@A00721:190:HGJW7DSXY:4:1364:24026:4022\_1:N:0:TCTGCAAG+GCTGCACT  
GGTTATTCTCACAAAGATAAGATTTTATCTTTCTTCAAACACCCTGTTTTCTTAAGGGCGGACA  
ATTGTTCCATTGTGAACCTCTGGGGACTAGATTGAGCATTAAATGAGTTCGAATAACTCGTAATAAAT  
CTT

+  
FFFFFFFFFFFFFFFFFFFFFFFFFFFFFFFFFFFFFFFFFFFFFFFFFFFFFFFFFFFFFFFFFFFFFFFF  
FFFFFFFFFFFFFFFFFFFFFFFFFFFFFFFFFFFFFFFFFFFFFFFFFFFFFFFFFFFFFFFFFFFFFFFF  
FFF

@A00721:190:HGJW7DSXY:4:1140:11433:12242\_1:N:0:TCTGCAAG+GCTGCACT  
ATTCAGAATACCTATTTCCGTACCAAGAGCCACTGCCAATCTCATCGCTATACGCATACCTGATTGGA  
AGAAGCGAGGTTCTGTTCTCAATAAAAATTTTTCTCAAGAGATTATGGTTGATAAAGTTTTCTTCATA  
AGG

+  
FFFFFFFFFFFFFFFFFFFFFFFFFFFFFFFFFFFFFFFFFFFFFFFFFFFFFFFFFFFFFFFFFFFFFFFF  
FFFFFFFFFFFFFFFFFFFFFFFFFFFFFFFFFFFFFFFFFFFFFFFFFFFFFFFFFFFFFFFFFFFFFFFF  
:FF

@A00721:190:HGJW7DSXY:4:1178:17933:7404\_2:N:0:TCTGCAAG+GCTGCACT  
ACGTCATGGGGATCACTTCTTCGGTCAATGACAAAACCTTCGAATATGTTACGACATGGCTTCGTAAC  
AACAGTGCGAGGATTGTCATCTCGGGGAAAGTGATTCACCAAGATGTT

+  
FFFFFFFFFFFFFFFFFFFFFFFFFFFFFFFFFFFFFFFFFFFFFFFFFFFFFFFFFFFFFFFFFFFFFFFF  
FFFFFFFFFFFFFFFFFFFFFFFFFFFFFFFFFFFFFFFFFFFFFFFFFFFFFFFFFFFFFFFFFFFFFFFF  
FFF

@A00721:190:HGJW7DSXY:4:2210:15203:2863\_1:N:0:TCTGCAAG+GCTGCACT  
GAGATACCTAGAGAAGGTCGCAGCGATCTTACTCGTTATCGGAGCTAAGAAGAAGACTTTGGGTACAC  
GTTATGCTCGAAACTTAACGTTAGTACCGGAGGTGATCTCTCTGCTTCTGCGTTACTGAGAGAAAAG  
ATT

+  
FF:FFFFFFFFFFFFFFFFFFFFFFFFFFFFFFFFFFFFFFFFFFFFFFFFFFFFFFFFFFFFFFFFFFFF  
FFFFFFFFFFFFFFFFFFFFFFFFFFFFFFFFFFFFFFFFFFFFFFFFFFFFFFFFFFFFFFFFFFFFFFFF  
FFF

@A00721:190:HGJW7DSXY:4:2114:26323:36151\_2:N:0:TCTGCAAG+GCTGCACT  
ACGGTGACTTTATGGACAAGATGCGAGTTCTTGGGAAATACTTGTTTCCCTTTTTAGGTTTAGTAGGT  
GATCTTGACGTCGATTCTTTGTATAGGGAGTGAGAGAAGACAACGAAT

+  
:FFFFFFFFFFFFFFFFFFFFFFFFFFFFFFFFFFFFFFFFFFFFFFFFFFFFFFFFFFFFFFFFFFFF,F,FFF:FFF  
FFFFFFFFFFFFFFFFFFFFFFFFFFFFFFFFFFFFFFFFFFFFFFFFFFFFFFFFFFFFFFFFFFFFFFFF  
FFF

@A00721:190:HGJW7DSXY:4:1159:10004:3975\_1:N:0:TCTGCAAG+GCTGCACT  
GAACCGGTCTCTAAATCTTTTGAGATTGAGAAGATTGAAGAACACGTCAAGAAGTCGCTCGGCGTTGT  
TCTTGAAAACCAAGTTAAGAAGGAGGCTGATCATGGAGTCTTTGTACCTTCTGTCAAACCTTCGAGGTT  
CAG

+  
FFFFFFFFFFFFFFFFFFFFFFFFFFFFFFFFFFFFFFFFFFFFFFFFFFFFFFFFFFFFFFFFFFFFFFFF  
FFFFFFFFFFFFFFFFFFFFFFFFFFFFFFFFFFFFFFFFFFFFFFFFFFFFFFFFFFFFFFFFFFFFFFFF  
FFF

@A00721:190:HGJW7DSXY:4:1650:28248:30342\_2:N:0:TCTGCAAG+GCTGCACT  
GATCCCGGATGTGGATTGAAGGCTGGCTCTAAGGGAGACTCCTTCTTTTTGAATGTTGTAAAGAATTG



GGTTGAGAAGTGTGCTTTACAAGGAGAGATCGGAAGAGCGTCGTGTAG  
+  
FFFFFFFFFFFFFFFFFFFFFFFFFFFFFFFFFFFFFFFFFFFFFFFFFFFFFFFFFFFFFFFF  
:FFFFFFFFFFFFFFFFFFFFFFFFFFFFFFFFFFFFFFFFFFFFFFFFFFFFFFFF  
@A00721:190:HGJW7DSXY:4:1548:29894:11365\_2:N:0:TCTGCAAG+GCTGCACT  
TAAAGAAAAATTTTCGAATAAACTAATGAGAGGTATAGGCTTAGTCAAGTCTGTACTTACATTCTTTA  
CGCCAGATTCTTCATGGGGCGACGCTGTTTCTCTTGGTATTTCTGAAA  
+  
FFFFFFF:FFFFFFFFFFFFFFF:FFFFFFFFF::FFFFFFFFFFFFFFFFFFFFFFFFFFFFFFFF  
FFFFFFFFFFFFFFFFFFFFFFF:FFFFFFFFF::FFFFFFFFFFFFFFFFFFFF  
@A00721:190:HGJW7DSXY:4:1314:6488:2707\_2:N:0:TCTGCAAG+GCTGCACT  
CGTCATTTTCCTTTGGGATCTTCTCTGTAAGGGAATTATTAATCATTCTTCTCACTCTTGACGA  
GAATTATTACTGTTTTCTCTACCCATAACTTCTTTTTCAAAAATGCGG  
+  
FFFFFFFFFFFFFFF:FFFFFFFFFFFFFFFFFFFFFFFFFFFFFFFFFFFFFFFFFFFFFFFF  
FFFFFFFFF:FFFFFFFFFFFFFFF:FFFFFFF:FFFFFFFFFFFFFFF:FF  
@A00721:190:HGJW7DSXY:4:1410:24731:28510\_2:N:0:TCTGCAAG+GCTGCACT  
TGATGTTTTCTACAGAGTGCAGTCGTTTCAAACTTATAACCACTTTTGAAAGGAAAATAATTGGTG  
TTGTAAATAAGTATGTCGGTGGGGTTATCAAGGCTCTCATCGCCACAG  
+  
FFFFFFFFFFFFFFFFFFFFFFFFFFFFFFF:F,::FF,FF,FFF,F:FFF,,FF,FFF,FFFF:FFF:F:F:,  
,,,,FF,FF,::F:FF,FF,F:FF,F,:F:F,F,FF,,,FF:,FFF,F  
@A00721:190:HGJW7DSXY:4:1609:3369:8202\_2:N:0:TCTGCAAG+GCTGCACT  
GGGTTCCATAAGATATTATCTGACATTGTGGTTCAATGATCAGGATTCTTCTTTTGGTCCTTACGTCT  
TAAGTAATTTGGATGTTGTGCGAAACTATCAGGTTCTTGTACGATTCT  
+  
FFFFFFFFFFFFFFFFFFFFFFFFFFFFFFFFFFFFFFFFFFFFFFFFFFFFFFFFFFFFFFFF  
FFFFFFFFFFFFFFFFFFFFFFFFFFFFFFFFFFFFFFFFFFFFFFFFFFFFFFFF  
@A00721:190:HGJW7DSXY:4:1111:27769:13166\_2:N:0:TCTGCAAG+GCTGCACT  
TTAAAACTTCAGAGTCTCTTGGAAGTCCAGGTAGCTAATGTTCTTGCAATAGCCACAGACTTTCTGGG  
AAAAGAGACCTCTGTTGTAGAGGAGTTGAGAGAATTACTCAGATTCAA  
+  
FFFFFFFFFFFFFFFFFFFFFFFFFFFFFFF:FFFFFFF,F,FFFFFFFFFFFFFFFFFFFFFFFF  
F:FFFFFFFFFFFFFFFFFFFFFFFFFFFFFFFFFFFFFFFFFFFFFFFFFFFFFFFF  
@A00721:190:HGJW7DSXY:4:1259:12255:28667\_2:N:0:TCTGCAAG+GCTGCACT  
ACAACGAGTTAGGGAGTGGCTAGGTTTTAAAAGATCCTTGCACAAGCAATACCTTCCACTGAGTTCA  
TCACCCAGAGTTTCGACGTCGCGGAAAACGATGAAGATTTCACACTG  
+  
FFF:FFFFF:FFFFFFFFF:FFFFFFFFFFFFFFF:FFFFFFFFFFFFFFFFFFFFFFFF  
FFFFFFFFFFFFFFFFFFFFFFFFFFFFFFFFFFFFFFFFFFFFFFFF:FFFFF  
@A00721:190:HGJW7DSXY:4:1243:31810:13088\_2:N:0:TCTGCAAG+GCTGCACT  
TCTGATGCTGAATTTGAGGAAAATTTTTCGGAAGTTTTTGGTATAAATCCTGATGGCTCAGTACAGGG  
AGGAGGTAATAGTTATAAAACCTTCTTTTATCATTGCAACAGGACTTT  
+  
FFFFFFFFFFFFFFFFFFFFFFFFFFFFFFF:FFFFFFFFFFFFFFFFFFFFFFFFFFFFFFFF  
FFF,FFFF:FFFFFFFFF:FFFFFFFFFFFFFFFFFFFFFFFFFFFF,F  
@A00721:190:HGJW7DSXY:4:1619:5267:27806\_2:N:0:TCTGCAAG+GCTGCACT  
GGACAAAATCTGGGATCATAGGTATGTGTCACGCTACACTCGAAATATGGGCCCTCATAAGGAAGTAT  
AGTTGGCGTCTTGTCTGACGTCATTACAGTCTGGAAGTTAGATCAT  
+  
F:FFFFFFFFF:FFFFFFFFFFFFFFFFF:F:FFFFF::FFFFF,FFFFFFFFFFFFF:FFF:FF,  
FFFFF:F::FFFFF:FF:FF:FFFFFFFFF,FFFFFFF,,:F:F:FFF  
@A00721:190:HGJW7DSXY:4:2575:23773:13260\_2:N:0:TCTGCAAG+GCTGCACT  
CGAGAGTTGTGATCTAGTTCTAAATTTAGGTCGACGGAAGTTAGCAACTTTAGATAAATTCTTTCCGG

GCTCAATGACCTTTGCTATGTACGTGGATCTAATCCTTGGTGATCTGA  
+  
FFFFFFFFFFFFFFFFFFFFFFFF:FFFF:FFFFFFFF:FFFFFFFF:FFFFFFFF  
FFFFFFFFFFFFFFFF:FFFFFFFFFFFFFFFFFFFFFFFF:FF  
@A00721:190:HGJW7DSXY:4:2150:7862:31516\_2:N:0:TCTGCAAG+GCTGCACT  
TATTAGTTCATGAAGTTCTTACACTTCTCGCGACTAATGTCAGCTTCACTACAAAGGCGTTACGTAAA  
GTAGTTTTACGCTTTATCTTAAAGCATTACCACCAAATTTAGCACTT  
+  
FFFFFFFFFFFFFFFFFFFFFFFFFFFFFFFFFFFFFFFFFFFFFFFFFFFFFFFF  
FFFFFFFFFFFFFFFFFFFFFFFFFFFFFFFFFFFFFFFF  
@A00721:190:HGJW7DSXY:4:2573:17761:25520\_1:N:0:TCTGCAAG+GCTGCACT  
CGTGTGCTCTTCCGATCTAGACATGCCAGTTAGAGTTCTTCTAACCAGGACTGATGGTGAGATTCTTT  
TACCTTTTGGAGGTCCAGGAACCTTTACTCCTAGTGTCTTTCTAGAGTCCAAGGACGTTTCCGTCGG  
AGG  
+  
FFFFFFF:F:FFFFFFFFFFFFFFFFFFFFFFFF:FFFFFFFF:FFFFFFFFFFFFFFFF:FF  
:FFFFFFFFFFFFFFFF:FFFFFF:FFFFFFFFFFFFFFFFFFFFFFFF  
FFF  
@A00721:190:HGJW7DSXY:4:2671:28980:4993\_2:N:0:TCTGCAAG+GCTGCACT  
GACCGCTCAATAACACTCTATTGAATCCCTTTCCACGATGAAAGCTCTTTATGAGGTGCTCCATGCA  
AATTTACAGTTCCTCTTTGGTGATATCGCCTCTGTCCTTTCTCCTTA  
+  
FFFFFFFFFFFFFFFFFFFF:FFFFFFFFFFFFFFFFFFFFFFFF:FFFFFFFFFFFF  
FFFFFFFFFFFFFFFF:FFF:FFFFFFFFFFFFFFFFFFFFFFFF:FF  
@A00721:190:HGJW7DSXY:4:1649:10212:28917\_2:N:0:TCTGCAAG+GCTGCACT  
ACTTGGGTTTATCGGTTGTATTTTGATAAATTTGTTGGAATCGATAATGATACTGACGAAGGTTCTAT  
TACCACCCTTGTCATTGATACAAACATTCTAGGTGATGCTTTCTTAGA  
+  
FFFFFFFFFFFFFFFFFFFF:FFFFFFFFFFFFFFFFFFFFFFFF:FFFFF  
:FFFFFFFF:FFFFFFFFFFFFFFFFFFFFFFFF  
@A00721:190:HGJW7DSXY:4:1309:18285:6668\_2:N:0:TCTGCAAG+GCTGCACT  
TACAATCTGTAGAGAGAGAGGTTAATCAGAATTTGAGTGATAACGATTTAGTACTGGGAAATGGTGGT  
AGTCAGTTTACTACTTTTCTTCCCTCCCCTTTTTCGATTGGATTCTGA  
+  
FFFFFFF:,FFFFFFFFFFFFFFFFFFFFFFFFFFFFFFFF:FFFFFFFFFFFF  
FFFFFFFFFFFFFFFF:FFFFFFFFFFFFFFFFFFFFFFFF:FFFF,F  
@A00721:190:HGJW7DSXY:4:2274:9498:34037\_2:N:0:TCTGCAAG+GCTGCACT  
TTGATAAGTTTTCTTTTATGGGACTCTGTTTGTACTTATGAAGGAGGTATTACTTCGGAAGTTCT  
TAATGTAGGTCTCCTAGTACTTAAGGGTTTATGTTTCGGTTTCAGCTG  
+  
FFFFFFFFFFFFFFFFFFFFFFFFFFFFFFFFFFFFFFFFFFFFFFFF:FFFFFFF  
FFFFFFFFFFFFFFFFFFFF,FFFF:FFFFFFFFFFFFFFFF  
@A00721:190:HGJW7DSXY:4:1370:1380:21668\_1:N:0:TCTGCAAG+GCTGCACT  
TTCACATTGCGTGATCACTTCCCGTGGACTTGGAAGAGATTAAACATAAAATCCAGCGATTCTATTA  
TGTCGCTAAAGCCTGTCCAGTTGTCGATGATGTTGCGGCTGTGGGGATTAACTTCCCTCGTGAACTT  
ACG  
+  
F:FFFFFFFFFFFFFFFF:FFFFFFFFFFFFFFFFFFFFFFFFFFFFFFFF:FFFF:  
FFFFFFFFFFFFFFFFFFFFFFFFFFFFFFFFFFFFFFFF:FFFFFFFFFFFF  
FFF  
@A00721:190:HGJW7DSXY:4:1313:30789:3803\_1:N:0:TCTGCAAG+GCTGCACT  
CACAAGGATTACTAAGTCTGAGATCTGCCACTTCTAATTTTAGGAAACGTCGCGAAAAGAAAGTTCAT  
GAGGATGTCTTGGTCGAAAAATATCGCCGGGAACCTCTAATAGAGGATCCTGATGACATTATTTCAAC  
GGA

FFFFFFFFFFFFFFFFFFFFFFFFFFFFFFFFFFFFFFFFFFFFFFFFFFFFFFFFFFFFFFFF  
FFFFFFFFFFFFFFFFFFFFFFFFFFFFFFFFFFFFFFFFFFFFFFFFFFFFFFFFFFFFFFFF  
FFF  
@A00721:190:HGJW7DSXY:4:2256:24243:22905\_2:N:0:TCTGCAAG+GCTGCACT  
AGTTCTACCACAGAAACCGTCTCAGGAAGTGTCTCCACTGATTCGGAATTAGAGAAAGACGACCTTCT  
TG TGGGGACTGAGACCTCTGAATTTTCAGGGTGCCCTGATGAGGACGT  
+  
FFFFFFFFFFFFFFFFFFFFFFFFFFFFFFFFFFFFFFFFFFFFFFFFFFFFFFFFFFFFF, FFFFFFFFFFFFFFFFFFFFFFF:  
FFFFFFFFFFFFFFFFFFFFFFFFFFFFFFFFFFFFFFFFFFFFFFFFFFFFFFFFFFFFF  
@A00721:190:HGJW7DSXY:4:1443:26386:36323\_1:N:0:TCTGCAAG+GCTGCACT  
ACTCTGAGACTTCTAAGAGTGTTC AAAAGACCAGAAACGTAAACAAGAATAAAGGTAGGAAGGGG  
AGAAAACAGAACAAAGCGAGCGGTTGAAGAGAAAACTGATATGGTTGCGGCTGATCGTACCCCAATTCC  
TGC  
+  
: FFFFFFFFFFFFFFFFFFFFFFFFFF: FFFFFFFFFFFFFFFFFFFFFFFFFF: FFFFFFFFFFFFFFFF  
F: FFFFFFFFFFFFFFFFFFFFFFFFFF: : FFFFFFFFFFFFFFFFFFFFFFFFFF  
FFF  
@A00721:190:HGJW7DSXY:4:2535:17020:27273\_1:N:0:TCTGCAAG+GCTGCACT  
TCTCGGCGATACCACTGATCTTCCAGAGTTACGTAGTGGTCTTTTGGTGATTTTTATCAAAGAGA  
AAGTTTCTGCTAGTCGCGACGATAGTATTTATCGGAGTGATATTAACAAGTTAACTTCGAACTGACC  
ACT  
+  
FFFFFFFFFFFFFFFFFFFFFFFFFFFFFFFFFFFFFFFFFFFFFFFFFFFFFFFFFFFFF: FFFFFFFFFFFFFFFF: FFFFFFFFFFFFFFFFFFFFFFFF  
FFFFFFFFFFFFFFFFFFFFFFFFFFFFFFFFFFFFFFFFFFFFFFFFFFFFFFFFFFFFF: F  
FFF  
@A00721:190:HGJW7DSXY:4:2472:24279:9533\_2:N:0:TCTGCAAG+GCTGCACT  
TTGAAGTACCGCAACATGGATCAGTTTTCCAAAAGCTATTAATAGCAGTTGCGGGGCTATAATACCG  
CCTCCAGATTACTCTAAACTGAATCCACTCTCTTGGGATATAAATGAG  
+  
FFFFFFFFFFFFFFFFFFFFFFFFFFFFFFFFFFFFFFFFFFFFFFFFFFFFFFFFFFFFF  
FFFFFFFFFFFFFFFFFFFFFFFFFFFFFFFFFFFFFFFFFFFFFFFFFFFFFFFFFFFFF: F  
@A00721:190:HGJW7DSXY:4:1569:10068:29794\_2:N:0:TCTGCAAG+GCTGCACT  
TTTGAAGTGTGTAATGTCCTACGTACTGTTCAAGGTGTTGGGCTTCTCTAAAGAACAGCAACTTTC  
AACATGAATTAGTTATTGAAAGTCTTGACCCTCACGTCTCACTTTATC  
+  
FFFFFFFFFFFFFFFFFFFFFFFFFFFFFFFFFFFFFFFFFFFFFFFFFFFFFFFFFFFFF  
FFFFFFFFFFFFFFFFFFFF: FFFFFFFFFFFFFFFFFFFFFFFFFFFFFFFFFF  
@A00721:190:HGJW7DSXY:4:2635:16721:13542\_2:N:0:TCTGCAAG+GCTGCACT  
AGACCTTTCTTGGGGAGTAAAGAGGGTTTGAAAATTACGGAACCTTTCCTCGTTCTTCATGAAGATCT  
TCGAGTGTTTTATAGTGAGTTATTCTTGCGAAGGTTCAAGTCGATTGA  
+  
: FFFFFFFFFFFFFFFFFFFFFF: F: FFFFFFFFFFFFFFFFFFFFFFFFFFFFFFFFFF: FFFFFFFFFFFFFFFF  
FFFFFFFFFFFFFFF: FFFFFFFFFFFFFFFFFF: FFFFFFFFFFFFF: FFFFFFFFFFFFF  
@A00721:190:HGJW7DSXY:4:1512:29324:16141\_2:N:0:TCTGCAAG+GCTGCACT  
AAGAAGTTCTTCGCAGTTGAATCTCCACCAGGTGGAGGGAAGACCACTGAACTTATAGCGACTTTTGT  
CGAATTTTTCGCAAAAGGTCTTGAAGTACGTATTGTCACTGCTAATCG  
+  
FFFFFFFFFFFFFFFFFFFFFFFFFFFFFFFFFFFFFFFFFFFFFFFFFFFFFFFFFFFFF  
FFFFFFFFFFFFFFFFFFFFFFFFFFFF, FFFFFF: FFFFFFFFFFFFFFFFFFFFFFFF  
@A00721:190:HGJW7DSXY:4:1146:19217:1673\_2:N:0:TCTGCAAG+GCTGCACT  
CACTTCTAGTTCATCGCGGTATTTGTGAAATTAAGACAGACGTGAAAGTTATGATGAGTGATCGTATT  
AGAACAGCTGATTCTTATTGCATGAACGTCGCTGAGGTCAAACCTGTG



FFFFF:FFFFFFFFFFFFFFFFFFFFFFFFFFFFFFFFFFFFFFFFFFFFFFFFFFFFFFFFFFFFFFFF  
FFF  
@A00721:190:HGJW7DSXY:4:2263:10294:14685\_2:N:0:TCTGCAAG+GCTGCACT  
CTAAGTTGGATAAAGTTATAGGAGACTCAGTTAACCTGAGAGCTCCTCAATTGATAGATTGGGTCAAC  
AATAGGGACGCTAGTATACTTCGTAAAGTCGACAGCGAAATGGTCAAT  
+  
FFFFFFFFFFFFFFFFFFFFFFFFFFFFFFFFFFFFFFFFFFFFFFFFFFFFFFFFFFFFFFFF:FFFFFFFF  
FFFFFFFFFFFFFFFFFFFFFFFFFFFFFFFFFFFFFFFFFFFFFFFFFFFFFFFFFFFFFFFF  
@A00721:190:HGJW7DSXY:4:2604:25753:31125\_1:N:0:TCTGCAAG+GCTGCACT  
ATATGACCTATTTTAAGCTCATGGTGAAAAGGGAAGCTAAGGTTAACTTGATGCTTCAGCCTTTTCG  
AAGCATAACCCCGCACAGAATATCGTTTATCACGCAAATTTATTAATGCAATTTTCGACCTATCTT  
TAA  
+  
FFFFFFFFFFFFFFFFFFFFFFFFFFFFFFFFFFFFFFFFFFFFFFFFFFFFFFFFFFFFFFFF:FFFFF  
FFFFFFFFFFFFFFFFFFFFFFFFFFFFFFFFFFFFFFFFFFFFFFFFFFFFFFFFFFFFFFFF  
FFF  
@A00721:190:HGJW7DSXY:4:2308:29423:25989\_1:N:0:TCTGCAAG+GCTGCACT  
TGTCTTTTACCCAACATTTTATGTATACAGAGATGACCAGTGACGATTTCTCCCGGAAGCTCTTCTC  
TCTCTTAGGAGGTCATGATGACTACTATAAGGGTGAAATCGATTTTTCGAAGTTTGACAAATCTCAAG  
ATT  
+  
FFFFFFFFFFFFFFFFFFFFFFFFFFFFFFFFFFFFFFFFFFFFFFFFFFFFFFFFFFFFFFFF:FFFFF  
FFFFF:FFFFFFFFFFFFFFFFFFFFFFFFFFFFFFFFFFFFFFFFFFFFFFFFFFFFFFFFFFFFFFFF  
FFF  
@A00721:190:HGJW7DSXY:4:1158:24560:13369\_1:N:0:TCTGCAAG+GCTGCACT  
GATAAAGATGTATTCTTATTTAGGCTTCGATGCTGAATTTCTTGAACCTTTGGAGTGCCAGTGAATATT  
TTTGTACGCCAGGAGTATCCATAACGATTTGTCAATTTACCACCTTTGCTCAACGACGAAGTGAACG  
GCC  
+  
FFFFFFFFFFFFFFFFFFFFFFFFFFFFFFFFFFFFFFFFFFFFFFFFFFFFFFFFFFFFFFFF:FFFFF  
FFFFFFFFFFFFFFFFFFFFFFFFFFFFFFFFFFFFFFFFFFFFFFFFFFFFFFFFFFFFFFFF:FFFFF  
FFF  
@A00721:190:HGJW7DSXY:4:2469:6334:28651\_2:N:0:TCTGCAAG+GCTGCACT  
TGGTAATTGTATGATCACTTTGATGATTTTATCACTTTATTATGACCTTGAAAGTTTTTCGGCTGTGG  
TTGTGCTGGGGACGATTCCATTCTGTTTTCAAAGACTCCAATAACTG  
+  
FFFFFFFFFFFFFFFFFFFFFFFFFFFFFFFFFFFFFFFFFFFFFFFFFFFFFFFFFFFFFFFF:FFFFF  
FFFFFFFFFFFFFFFFFFFFFFFFFFFFFFFFFFFFFFFFFFFFFFFFFFFFFFFFFFFFFFFF:FFFFF  
@A00721:190:HGJW7DSXY:4:2369:3369:2566\_2:N:0:TCTGCAAG+GCTGCACT  
CAGCGTACTTCTGCTCGCGATTTATTCTTTTTGTCAATGATTACATCTACTTCGTTCTGATCCTTAC  
AAGATCATCGTTAAGTTAGGTAAACCCCTAACCGATGTTACTCTTGTA  
+  
FFFFF:FFFFFFFFFFFFFFFFFFFFFFFFFFFFFFFFFFFFFFFFFFFFFFFFFFFFFFFFFFFFFFFF  
FFFFFFFFFFFFFFFFFFFFFFFFFFFFFFFFFFFFFFFFFFFFFFFFFFFFFFFFFFFFFFFF:FFFFF  
@A00721:190:HGJW7DSXY:4:2556:29234:18646\_1:N:0:TCTGCAAG+GCTGCACT  
TTTAAAGACTATACTAAATATCTCCACTACGAGGTTGTTGTTTGGCGATTAGCTCTTGCGACTAATAT  
TCGATATTCGATTGAGGGTCGTTATACCTATTCGCTATCTGTGCTTTGAATTGTATAAGATCAAATT  
TTA  
+  
FFFFF:F,FFFFFFFFF:FFFF:F:FF:F,FFFFFFFFFFFFFFFF:FFFF:F:F::FFF,F,FFFFFF  
FFFFFFFFF:FFFFFFFFF:FFFFFFFFFFFFFFFFFFFFFFFF:FFF:FFFFFFFFFFFFFFFF:F,,FFFF  
FFF  
@A00721:190:HGJW7DSXY:4:1524:30101:16110\_2:N:0:TCTGCAAG+GCTGCACT  
TGATGTGGAGGGAGTTCTTGAAGCATCCCGACCTTCTTGTGAAAATTTTGATGCGGTTTCATAAGA

TTATCAGTAATCCTGATTCTACTACGGATTCATGGACCTTCCATCCTG  
+  
FFFFFFFFFFFFFFFF:FFFFFFFFFFFFFFFF,FFFFFFFFFFFFFFFF:FFFFFFFFFFFFFFFF  
FFFFFFFFFFFFFFFFFFFFFFFFFFFFFFFFFFFFFFFFFFFFFFFF  
@A00721:190:HGJW7DSXY:4:2256:4345:8923\_2:N:0:TCTGCAAG+GCTGCACT  
GACGTATCTCAAAGATCGACTTCGAGACAGGTGATATTGTTGAGCGAGAGCGACCAAGATCTAAATTC  
GGTAACGGTGCGTGGCGCTTTATTTTAAAAAGCTCCCTCCTCTCCCAA  
+  
FFFFF,F:FFFFFFFFFFFF,FFFFFFFFF,FFFF:FF:FFF::FFFFF:FFFFF:FFFFFFFFF  
,FFFFFFFFF:FFFFFFFFFFFFFFFFFFFFFFFF:FF,FFFFF,:FFF  
@A00721:190:HGJW7DSXY:4:1635:6858:18912\_2:N:0:TCTGCAAG+GCTGCACT  
ACTTGAGTCTTTTGATCAGTCTCTGACTTGACCATCTTTCATTTTAAATGACGATCATTAAGACTCTC  
TTTCTTCTTTGTTTCCTTCTTTGCACTGATTTTCTCTCATCAGCTTGT  
+  
FFFFFFFFFFFFFFFFFFFFFFFFFFFFFFFF:FFFFFFFFFFFFFFFFFFFFFFFF:FFFF:::  
F:FFFF:F:FFFFFFFFFFFFFFFFFFFFFFFF:FFFFFFFFFFFFF  
@A00721:190:HGJW7DSXY:4:1405:22363:11381\_2:N:0:TCTGCAAG+GCTGCACT  
TTTTACGATAACAACATCAGTTGATTAAGACTCTTCCGAAAGCGCAACTTTGGGAATTTGAAGCTCA  
GGGTGAAGCACACGTTTGACCGTGACGAAGTGTGGTGTCTTGATCT  
+  
FFFFFFFFFFFFFFFFFFFFFFFFFFFFFFFFFFFFFFFF,FFFFFFFFFFFFFFFFFFFF,FFFF  
:FFFFFFFFFFFF:FFFFFFFFFFFF:FFFFFFFFFFFFFFFFFFFF:  
@A00721:190:HGJW7DSXY:4:1336:15628:24424\_1:N:0:TCTGCAAG+GCTGCACT  
ATACTCTCCTTGAGTTCACTCGTAAGGACACTACCATTATTACGATATTTCTTTAGTCGATGGGTTT  
TCGACTCCTTTAAGCGTCTTCTGTTTCATCGCAACCAGATGATATCTTCTATTCGAAGTTATGTTTCGA  
TCA  
+  
FFFFFFFF,:FFF:FF:FFFFFFFFFFFFFFFFFFFFFFFFFFFFFFFF:F:FFF:FFFFFFFFFFFFFFFF  
:FFFFFFFF:FFF:F:,FFFFF,FFFFFFFF:FF:FFFFF,F:FFFFFFFFFFFFFFFFFFFF,FFFF,FFFF:F  
FFF  
@A00721:190:HGJW7DSXY:4:1376:26657:23547\_2:N:0:TCTGCAAG+GCTGCACT  
TCTTCTAATGTGGCCTGAACTACGTTTCACTTTGTGTGTAAGTCTCTATTTTAAAGTTTTGTCTTCC  
TTGTTTGTCTTATTCTATTAATCACTCATTTTAGTGAGATTATTA  
+  
:F,FFFFFFFF:FFFFFFFFFFFFFFFF,FFFF,FFFFFFFF:F:F:FFFFFFFFFFFFFFFF:FFFF,FF  
FFF:,FFFF:FF,FFFF:FF:FFFFF:F,FFFFFFFFF,FFFFFFF  
@A00721:190:HGJW7DSXY:4:1242:30246:25441\_2:N:0:TCTGCAAG+GCTGCACT  
CGACAACAGCAGGGTTTTCGAATAGTGATAGCCACCCGCTTACAGAGGGCAGCAGCATGACCATA  
ATTGGTATTGACTTTGGTACCACCTTTTCTACTGTCTGTCTCGCCTCT  
+  
FFFFFFFFFFFFFFFFFFFFFFFFFFFFFFFFFFFFFFFF:F:FFFFFFF,FFFFFFFFFFFFFFFF  
FFFFFFFFFFFFFFFFFFFFFFFFFFFFFFFFFFFFFFFFFFFFFFFF  
@A00721:190:HGJW7DSXY:4:2361:31494:6183\_1:N:0:TCTGCAAG+GCTGCACT  
CGTGTGCTCTTCCGATCTGTGAATTTATACCTACAATCATTTGGTTTTCTAATAATGATGACACTATT  
GTTTATGGATATGATGCTATTACTCATGATGGTTACGGTCAGGAGGATTCTCAGTTTACAAGGACCT  
TAA  
+  
FFFFFFF:F:FFFFFFFFFFFF:FFFFFFFFFFFFFFFFFFFFFFFFFFFFFFFFFFFFFFFFFFFFFFFF  
F:FFFFFFFFFFFFFFFFFFFFFFFFFFFFFFFFFFFFFFFFFFFFFFFFFFFFFFFFFFFFFFFF  
FFF  
@A00721:190:HGJW7DSXY:4:1566:26756:10598\_2:N:0:TCTGCAAG+GCTGCACT  
CCGAAAGACGTGCTAAATTAACCATTGTACGATGTGCTGTCTCGGCGATCACTTTTCACTAAGA  
ATTGGTCCTACTTTTGGACAAGGCCAACTTCGTAATCTTCATGAGATC  
+

FFFFFFFFFFFFFFFFFFFFFFFFFFFFFFFFFFFFFFFFFFFFFFFFFFFFFFFFFFFFFFFFFFFFFFFFFFFFFFFF  
FFFFF:FFFFFF::FFFFFFFFFFFFFFF:F:FFFFFF:FFFFFFFFFFFF  
@A00721:190:HGJW7DSXY:4:1224:7997:1532\_1:N:0:TCTGCAAG+GCTGCACT  
TTAGGGATTTTGAGAGAGTGAAAGGCTTCAATTGTAGTGGTTTGGTCGTTTCAGTACCCAGTCAGTAT  
ACCTCTACGCAAAGATATTTTCATGAAAACCTACAGAGGAACGTACCGGATTACCTGTCTTTCATATTAT  
GAA  
+  
F,FFFFFFFFFFFFFFFFFFFFFFFFFFFFFFFFFFFFFFFFFFFFFFFFFFFFFFFFFFFFFFFFFFFFFFFFFFFF  
FFFFFFFFFFFFFFFFFFFFFFFFFFFFFFFFFFFFFFFFFFFFFFFFFFFFFFFFFFFFFFFFFFFFFFFFFFFF  
FFF  
@A00721:190:HGJW7DSXY:4:2234:10375:16924\_2:N:0:TCTGCAAG+GCTGCACT  
TCTTTGCTTCGATGTTGGATGTCAAGAAGGGTTCAGAATGGGATTCTACGTAGTTTATGACTTTGGT  
GGTGGTACTTTCGATACTTCTATCGTCTTACGTTACGGTAATTACTAT  
+  
FFFFFFFFFFFFFFFFFFFFFFFFFFFFFFFFFFFFFFFFFFFFFFFFFFFFFFFFFFFFFFFFFFFFFFFFFFFF,FFFFFFFFFFFFFFFFFFFFFFFFFFFFFFFFFFFFFFFFFFFFFFFFFFFFFFFFFFFFFFFFFFFFFFFFFFFF:FFFFF,FFF:  
FFFFFFFFFFFFFFFFFFFFFFFFFFFFFFFFFFFFFFFFFFFFFFFFFFFFFFFFFFFFFFFFFFFFFFFFFFFF::F,F  
@A00721:190:HGJW7DSXY:4:1464:8160:23547\_1:N:0:TCTGCAAG+GCTGCACT  
ATAATCTTGGAGGTCGTGACGTTGATGAAGCTATAAGAGCGTTCTTATTACGGCGCACTTCTTTACCC  
GCCACCACACAACCTTTCAGTTTCACAACCTGAAGGAGGAGGTTTCTGTTACTGGAAAACCCTCGTCAAT  
ACT  
+  
FFFFFFFFFFFFFFFFFFFFFFFFFFFFFFFFFFFFFFFFFFFFFFFFFFFFFFFFFFFFFFFFFFFFFFFFFFFF  
FFFFFFFFFFFFFFFFFFFFFFFFFFFFFFFFFFFFFFFFFFFFFFFFFFFFFFFFFFFFFFFFFFFFFFFFFFFF:FFFFFFFFFFFFFFFFFFFFFFFFFFFFFFFFFFFFFFFFFFFFFFFFFFFFFFFFFFFFFFFFFFFFFFFFFFFF:FFFF  
FFF  
@A00721:190:HGJW7DSXY:4:2277:11143:4633\_1:N:0:TCTGCAAG+GCTGCACT  
TCTTATGACGATCTAGTGAAATTAACGCGTCCTTTTCTGGAACGTAGTTTACTATTATGAACAAAGT  
TATCAAAGATAGTGGCATTCAAGGCAAACCTTACCCTGATTCCGGCCGGTGGTAGCTCATTTCTACCAG  
GGG  
+  
FFF:FFFFFFFFFFFFFFFFFFFFFFFFFFFFFFFFFFFFFFFFFFFFFFFFFFFFFFFFFFFFFFFFFFFFFFFFFFFF  
FFFFFFFFFFFFFFFFFFFFFFFFFFFFFFFFFFFFFFFFFFFFFFFFFFFFFFFFFFFFFFFFFFFFFFFFFFFF:FFFFFFFFFFFF  
FFF  
@A00721:190:HGJW7DSXY:4:1515:16423:2848\_2:N:0:TCTGCAAG+GCTGCACT  
TGCTGAAACAGCTATTAAAGCTGTTGAGCGGTAATTACACCTAAACGAGCTCGATCTGCCATCGCTG  
AAGGATGTGCACTCTTTTCTGCTACTTTAACGGAGCGTAGTGTACTCT  
+  
FFFFFFFFFFFFFFFFFFFF:FFFFFFFFFFFFFFFFFFFFFFFFFFFFFFFFFFFFFFFFFFFFFFFFFFFFFFFFFFFFFFFFFFFFFFFFFFFF  
FFFFFFFFFFFFFFFFFFFFFFFFFFFFFFFFFFFFFFFFFFFFFFFFFFFFFFFFFFFFFFFFFFFFFFFFFFFF  
@A00721:190:HGJW7DSXY:4:1647:8296:27132\_1:N:0:TCTGCAAG+GCTGCACT  
CAACAGTAACATTACTTCTAATAAAGGTCTCTATCAAGCTCGTATTATCGTCGCTGCTGGATCTGCGT  
TACCGTTGAAGGCTAAACTCCAAGGTAATTATGAAGACTGTGATTTATCTTTCACTCTGGCCTTGTAT  
GAG  
+  
:FFFFFFFFFFFFFFFFFFFFFFFFFFFFFFFFFFFFFFFFFFFFFFFFFFFFFFFFFFFFFFFFFFFFFFFFFFFF  
FFFFFFFFFFFFFFF,FFFFFFFFFFFFFFFFFFFFFFFFFFFFFFFFFFFFFFFFFFFFFFFFFFFFFFFFFFFFFFFFFFFFFFFFFFFF  
FFF  
@A00721:190:HGJW7DSXY:4:1432:28637:2206\_2:N:0:TCTGCAAG+GCTGCACT  
CGTAACATTAATAATTTCAATCTTCTTAAAAAGAAGATAGAGAGTCATACTTTGGGCTATCGTTCAGG  
TGCATGGGGTTGGATAGCCAATATTGAAGTGGACACCTCTGGTAGTAT  
+  
FFFFFFFFFFFFFFFFFFFFFFFFFFFFFFFFFFFFFFFFFFFFFFFFFFFFFFFFFFFFFFFFFFFFFFFFFFFF:FFFF:FFFFFFFFFFFFFFFFFFFF,FFFFFFFFFFFFFFFFFFFFFFFFFFFFFFFFFFFF  
FFFFFFFFFFFFFFFFFFFF:FFFFFFFFFFFFFFFFFFFFFFFFFFFFFFFFFFFFFFFFFFFFFFFFFFFFFFFFFFFF  
@A00721:190:HGJW7DSXY:4:2411:19976:10410\_1:N:0:TCTGCAAG+GCTGCACT  
ATACTATGGTTGAATCAACTAAGCATACTACTTTTGCTTTGATTACTCTACCGCCTTACAAGTCTAAG

GTAAAGAGTCGATTAAACAAGTTGTACTTATCAATGATTTTATCGCTGGTTGTTATCTCGAAAAGTC  
TCT

+

F,FFFFFFFFFFFFFFFFFFFFFFFFFFFFFFFFFFFFFFFFFFFFFFFFFFFFFFFFFFFFFFFF  
FFFFFFFFFFFFFFFFFFFFFFFFFFFFFFFFFFFFFFFFFFFFFFFFFFFFFFFFFFFFFFFF  
FFF

@A00721:190:HGJW7DSXY:4:1140:8305:3881\_1:N:0:TCTGCAAG+GCTGCACT  
CCCAAAGAGAATATCTAAAATATTTACAAAATCTTACCACTATCTACGAACCTAAAGTTCTGAAGACG  
TTGCTTGTGCTTCCTCTTAATGGCACTACCTCGGTACAATCTTACTTGGAACGAAGGCGACCTGT  
TCC

+

FFFFFFFFFFFFFFFFFFFFFFFFFFFFFFFFFFFFFFFFFFFFFFFFFFFFFFFFFFFFFFFF  
FFFFFFFFFFFFFFFFFFFFFFFFFFFFFFFFFFFFFFFFFFFFFFFFFFFFFFFFFFFFFFFF  
FFF

@A00721:190:HGJW7DSXY:4:2333:16830:6903\_1:N:0:TCTGCAAG+GCTGCACT  
TGTTCTGTCTATATTAGGTGAAGCGAAATACGATTTTCAACGTCAACGTTTACCGAGTTTCGTTTCGT  
ACCTTGATGCTGACTTTCGTCATATGATTTGATCTGGTTGCTCAATTCTAAGCGTGTTCCGCTTAGT  
GCG

+

FFFF,FFFFFFFF:FFFF:F:FFFFFFFFFFFFFFFFFFFFFFFFFFFFFFFF:FFF:FFFFFFFF  
FFFFFFFFFFFFFFFFFFFFFFFFFFFFFFFFFFFFFFFFFFFFFFFFFFFFFFFF,FF::FF,F:FFFFFFFF  
FFF

@A00721:190:HGJW7DSXY:4:2351:30951:2143\_2:N:0:TCTGCAAG+GCTGCACT  
GAGTATTGCTATTTATACGTTACGAGAAGAAGGTTTCAAGTTTGAGAACTTAGTTTACGAACTTGA  
CTCTACTATACGTGACATACTAAATACTAGATATTTGGATGATCTTGA

+

FFFFFFFFFFFFFFFFFFFFFFFFFFFFFFFFFFFFFFFFFFFFFFFFFFFFFFFF:FFFFFFFF  
FFFFFFFFFFFFFFFFFFFFFFFFFFFFFFFF:F:FFFF:,FFFFFFFF

@A00721:190:HGJW7DSXY:4:2616:15492:32456\_2:N:0:TCTGCAAG+GCTGCACT  
CATGAATTTTCAGAGGATGAAAATTTTCTTCTTGATTTTAAATATAAAGAATCTTTACCAGGACTC  
CTACTACAGGAGGCAGTCTTCTGATCGTAAGAAGTTTATAAGGAACAT

+

FFFFFFFFFFFFFFFFFFFFFFFFFFFFFFFFFFFFFFFFFFFFFFFFFFFFFFFF:FFFFFFFF  
FFFFFFFFFFFFFFFFFFFFFFFFFFFFFFFFFFFFFFFF,FFFF:

@A00721:190:HGJW7DSXY:4:1142:20021:8484\_2:N:0:TCTGCAAG+GCTGCACT  
CGAACTCTAAGTGGTAATACTGTCTTTCCAAGCTTACCTGTATCTTCAATGAAATTGGACTCTTCGA  
TAGGGGACATTTTATCGTGGGCTTCCGTAAAGGAAGATCTGTTATCG

+

FFFFFFFF:FFFFFFFFFFFFFFFFFFFFFFFF:FFF:FFFFFFFF,FFFFFFFF:F  
FFFFFFFFFFFFFFFFFFFFFFFFFFFFFFFF,F,FFFF:FFFFFFFF

@A00721:190:HGJW7DSXY:4:1142:20021:8484\_1:N:0:TCTGCAAG+GCTGCACT  
ACCGGTGAATGGTTTAAAGAATACTATAAATAGAACTATTACTACTAATGGCGTTGGCCTAGTGGA  
TGTTATTAGTGACATCTGGTCAATTTCTTTTTAGGTGGTCTTTATTCTATTATTGATTTTATGAGA  
TTG

+

FFFFFFFFFFFFFFFFFFFFFFFFFFFFFFFFFFFFFFFFFFFFFFFFFFFFFFFF  
FFFFF:FFFFFFFFFFFFFFFFFFFFFFFFFFFFFFFFFFFFFFFFFFFFFFFF  
FFF

@A00721:190:HGJW7DSXY:4:1152:24722:13651\_2:N:0:TCTGCAAG+GCTGCACT  
TGTTAGAGTAGAATTCCTGAAGAGTCCTTCCGTAAACCACTTCTTGACAATTTCTTCAATCCTTCGA  
TAATAGTTAAATCTAGGATTATGTCTGTGTGAAAGACTTTCTACCGA

+

FFFFF:FFFFF:F:FFFFFFFFFFFFFFFF,::FFFF,FF:FFFFFF:,FFFFFFFF:FFFFF  
FFFFF:FF,::F:FFFF:FFFFFF:FFFFFFFFFFFFFFFF:FFFF



$+$ 

@A00721:190:HGJW7DSXY:4:1559:21296:3803\_2:N:0:TCTGCAAG+GCTGCACT  
AAGGGATGCATGGTGTATCTCCTCAGGAGTCCCGGCATTTGATAATAATGACGAGACTTTTCGTCATA  
ATCGCTGCATATTACGGATTACACGGTACCAGCGCATCTCGTGTGCGAG

+

@A00721:190:HGJW7DSXY:4:1131:23032:7748\_1:N:0:TCTGCAAG+GCTGCACT  
AAATTTATAGAAGATTATTTTGACAGAATCAATAAGAATCATCGATTCTCGATTCTGATAGAGCTTATCT  
AGGTACTCTCATTTACTATGTTGCTTTAGGCTTCAGTGCTGCTGATCGAAAATTTGATCTAGCTGGA  
TCC

+

@A00721:190:HGJW7DSXY:4:1509:10330:27085\_2:N:0:TCTGCAAG+GCTGCACT  
TTTACAACGATATAGGAGTAATCTACGAGAAGATTCTAGAATTCTTAATTATAATATTCAACCTCAA  
AGTTACGTGTTTACAGTAACGAGATCACACATTTTGAGAACTAACTAT

+

@A00721:190:HGJW7DSXY:4:1440:27037:22138\_1:N:0:TCTGCAAG+GCTGCACT  
TCTCTTCTTATAATAAAATAAAATAATATTACTAATGGCAAATAGTGGAAGGCTCCAGTCAACAC  
TAGTTCGAGTGCTGCTTTGGATTACGATGACGTGAGAATAGGTGAAGGGATAGTTTTTACCTCGACCA  
ACA

 $+$ 

@A00721:190:HGJW7DSXY:4:2105:15890:12446\_2:N:0:TCTGCAAG+GCTGCACT  
GCGACTAATCTTAAAGCTTCACCCAAAATGAAGGACACTTCGAAACTGAATAATGATGCACTACAAAC  
AAGTATCGCTAATCATCTGAAAAAGGCTCTAAAGGACACTATACAATA

+

@A00721:190:HGJW7DSXY:4:2505:10185:11835\_2:N:0:TCTGCAAG+GCTGCACT  
ATTCAGCACCACATTTTGGTCAAGTCAATCCGTTGAGAAAATTTCTTAGAGGATATTCGCCATTGTGG  
TACGAATTGGTCCAACATTTACCACCAAATTCCTTTGATACAACCTCTA

+

@A00721:190:HGJW7DSXY:4:1329:7780:20353\_1:N:0:TCTGCAAG+GCTGCACT  
ATACGCTTGCTATTCACCAGATTGGTTCGAACCCGTTGATGCTATGTCAGAAGAAGCTATTCAGCTT  
GTCGTTTAAAGACTGCAGAGGCTGTCAAACAAGCCCAGACTCAAGGAGTCCAATCAAAGTTTTGAAT  
TTA

+

[illegible]

@A00721:190:HGJW7DSXY:4:2557:2437:1736\_2:N:0:TCTGCAAG+GCTGCACT  
TGGGTGATAAAATTATTTAGAGATCTTTCTACTTACAAAGGACAATTCAGTTTCATTAATTCTACG  
GAAAAGTCCGGAGTATATTGTATGTTAATAGATAGTGGGATAATAGTT

```
FFFFFFFFFFFFFF:FFFFFFFFFFFFFFFFFFFFFFFFFFFFFFFFFFFFF,F:FFFFFF:FFFFFFFFFFFFFFFFFFFF
FFFFFFFFFFFFFFFFFFFFFFFFFFFFFFFFFFFFFFFF:F:FFF
```

@A00721:190:HGJW7DSXY:4:2351:32678:13745\_2:N:0:TCTGCAAG+GCTGCACT  
GAACGCGTTCGTATAACCAAGTACTTTCCGTCTGAAGAGTTTAGAGCTGCTATTGATTATGTAACCGA  
TAGGAGTTGTATAGTTGAAGATGTGGCTTTAGACGATAATCCTTTAAG

[illegible]

@A00721:190:HGJW7DSXY:4:1654:29785:28213\_1:N:0:TCTGCAAG+GCTGCACT  
GAAGATTTTCCCACAGATTTGTCTACGTTGCAGATCGCCACTCCAAACACTATATACATTATAAAATA  
TAAAAATAAGGGAGTCATAACTTTTGTTACCAAATTCTTGGCTTTC AACGAAGTCTCTGATTTTATTA  
ATC

```

FFFFFFFFFFFFFFFFFFFFFFFF,FFFFFFFFFFFFFFFFFFFFFFFF:FFFFFFFF
FFFFFFFF:FFFFFFFF:FFFFFFFFFFFFFFFFFFFFFFFFFFFFFFFFFFFFFFFF
FFF

```

@A00721:190:HGJW7DSXY:4:2170:19840:19069\_1:N:0:TCTGCAAG+GCTGCACT  
GATCTCTCGGTCATTTACTCTGTACTTGATCTACGTCGTTTAACTGTCGGAACAACCTTTACTTAGAA  
TGACTCTATCTTTTCAGACACTTCTTATATTATTTACAATAGTTAATATCATATTAGTAATACTCACT  
AT

[illegible]

@A00721:190:HGJW7DSXY:4:1409:5773:35446\_2:N:0:TCTGCAAG+GCTGCACT  
TTTTCTTAGCTAATAGATTAATAAAGGATGAGTACGAAAACCACTCTTCGTTACGAGACCTGATGGT  
AGAATAGATTTAGTCTCTACACCCATCTCAACGAGGATAAAGCGAGTT

[illegible]

@A00721:190:HGJW7DSXY:4:2523:25201:17425\_1:N:0:TCTGCAAG+GCTGCACT  
ACACTAATATATAATCCGCACACGACTCGAAACCGAGACGCCGTAGATCAAAGTCCCTTCTAACTTTA  
GATTATGAATCCTGCCTTTACTCATTTTATAGCAGTTATTTATGTTGTACTTTTTATAATTTATAACC  
TT

[illegible]

@A00721:190:HGJW7DSXY:4:2136:13856:26083\_1:N:0:TCTGCAAG+GCTGCACT  
TACTTATTGTAACGATCATTCTTTCGAGTTTTGTCATTCTTATTCTTTTATTCTTTAACTGTGTATG  
AGGAGGATTTATAATGCTTTTCGATAGTGATTGTTATCAATTTAAATACATTACTGTTTCAAATCATC  
TTT

```
+
FFFFFFFFFFFFFF,FFFFFFFFFFFF,FFFFFFFFF:FFFFFFFFFFFFFFFFFFF:F:FFFFFFFFFFFFFFFFFF
FFFF:F:F:FFFFFFFFFFFFFFFFFF:FFFFFFFFFFFFFFFFFFFFFFFFFFFFFFFFFFFFFFFFFFFFFFFFFFFF
FFF
```

@A00721:190:HGJW7DSXY:4:2269:8124:18317\_1:N:0:TCTGCAAG+GCTGCACT  
GAAATGGTTTCAAATGAGTCAAAGCTCTATTTATTAACGAAGCTATTATCCGATTCTTCGAGGGTA  
TCACTACCACTGATCTGCCGACTTTAGTCAAGGAAGCTTCAATTCCTTCGATGTTTATATTTTCTATA  
AGG

+  
FFFFFFFFFFFFFFFFFFFFFFFFFFFFFFFFFFFFFFFFFFFFFFFFFFFFF:FFFFFFFFFFFFFFF:FFFFFFFFFFFFFFFFFFFF  
FFFFFFFFFFFFFFFFFFFFFFFFFFFFFFFFFFFFFFFFFFFFFFFFFFFFF:FFF:FFFFFFFFFFFFFFFFFFFFFFFFFFFF  
:FF  
@A00721:190:HGW7DSXY:4:1423:28863:25426\_2:N:0:TCTGCAAG+GCTGCACT  
TAATCAAATTTTCACAAATTTTAGAACCTTTATTTCAGAACTCTCTCCGATCACCTTGGTGATCTCC  
CGGAGGATCTTTTCAATAAGATGTATGATGATAATCTACTATTTTTAA  
+  
FFFFFFFFFFFFFFFFFFFFFFFFFFFFFFFFFFFFFFFFFFFFFFFFFFFFF:FFFFFFFFFFFFFFF  
FFFFFFFFFFFFFFFFFFFFFFF:FF:FFFFFFFFFFFFFFFFFFFFFFFFFFFFF  
@A00721:190:HGW7DSXY:4:1670:14850:6230\_1:N:0:TCTGCAAG+GCTGCACT  
AGCGTATACTTGAATACTTTATCAAAGATTGGCTTGGTCTATTTACCGCAAAAAGTTGGAAGAGGTC  
TATGATATTTATTTTACTTATACTTTAAATAGCACCGATTATAACTTGACTGTTGATAATATTACAAT  
AGC  
+  
FFFFFFFFFFFFFFFFFFFFFFFFFFFFFFFFFFFFFFFFFFFFFFFFFFFFF,  
FFFFFFFFFFFFFFFFFFFFFFFFFFFFFFFFFFFFFFFFFFFFFFFFFFFFF  
FFF  
@A00721:190:HGW7DSXY:4:2217:8106:28181\_2:N:0:TCTGCAAG+GCTGCACT  
AAGATTAGAGAAGTAGCTCGGTGAACACGTCGGTAGCATTTGATTTACTTTTACCGTTAGAACTGAAAA  
AGATTCTTTTCGAAAAGAAACCTATAAGTTACAAACGATTCTTCGACT  
+  
F:F:FFFFFFFFFFFF,FFFFFFFFFFFFFFFFFFFFFFFFFFFFFFFFFFFFF::FFFF:FFFFFFFFFFFFFFF  
:FFFFFFFFFFFFFFFFFFFFFFFFFFFFFFFFFFFFF:FFFFFFFFFFFFFFFFFFFFF  
@A00721:190:HGW7DSXY:4:1126:26323:20306\_1:N:0:TCTGCAAG+GCTGCACT  
AATAAAAATACTTCAAGTACCTGAACCTTTACATTTTTAATGGTATGGTATAATGTGTCTTACAAATAG  
AACCTTCACTCTCGGTAATGAGAGTGTATTCCTTAATATTCTAGTAACCGCTATGTGGGCATTACTAG  
GAT  
+  
FFFFFFFFFFFFFFFFFFFFFFFFFFFFFFFFFFFFFFFFFFFFFFFFFFFFF:FFFFFFFFFFFFFFF  
FFFFFFFFFFFFFFFFFFFFFFFFFFFFFFFFFFFFF:FFFFFFFFFFFFFFFFFFFFFFFFFFFFF  
FFF  
@A00721:190:HGW7DSXY:4:1362:6750:2597\_2:N:0:TCTGCAAG+GCTGCACT  
TTTAAATGCTAGGAAAATTTTAGAAAACTCCATTGTATAGTTCAAGGAGTACTTAATTCAATAGCTT  
TAGTATTATTTACTATCGCCTTTATTGAAAATTGTATAAGAGTTAATT  
+  
:FFFFFFFFF:FFFFFFFFFFFFFFFFFFFFFFFFFFFFFFFFFFFFFFFFFFFFF:FFFFFFFFF  
FFFFFFFFFFFFFFFFFFFFFFFFFFFFFFFFFFFFFFFFFFFFFFFFFFFFF  
@A00721:190:HGW7DSXY:4:2175:14009:7592\_1:N:0:TCTGCAAG+GCTGCACT  
GGGAGAATGAAGTACCGCTTCCCGGAAGAAACGATCTATTTACAGAGTATTTAGAGTAGTCCAAAGTT  
TGTATAAAATTTATATGATTTTCTATATATATACCACATATATATATATAAAAATCCTATAAATTTGT  
ACA  
+  
FFFFFFFFFFFFFFFFFFFFFFFFFFFFFFFFFFFFF:FFFFF,FFFFF:F:FFFFF:FFFFFFFFFF:FFFF,:F  
FFFFFFFFFFFFFFFFFFFFF:FFFFFFFFFFFFFFFFFFFFF:FFFFFFFFFFFFFFFFFFFFFFFFFFFFF  
FFF  
@A00721:190:HGW7DSXY:4:1403:8938:27242\_2:N:0:TCTGCAAG+GCTGCACT  
TAACTCCCCAAACATAACATAACCTACCATGACCAATCATCGCTCCAAGTGGCAGGCCAGAC  
GTAGGGTCAAACCTACTACCGCCTGTGCGCAGATCGGCACCACTGGTC  
+  
FFFFFFFFFFFFFFFFFFFFFFFFFFFFFFFFFFFFFFFFFFFFFFFFFFFFF:FF  
FFFFFFFFFFFFFFFFFFFFF:FFFFFFFFFFFFFFFFFFFF,FFFFFFFFFFFFFFF  
@A00721:190:HGW7DSXY:4:2561:28185:18552\_2:N:0:TCTGCAAG+GCTGCACT  
ACCGCTGTGCAGAATAACCTTCCCAAATCTAGATCTGCACAGAAGAAGGCTGAAGGTCGTTACCGGA

CGACCACTCAAAGGAAACGGGCTGTTGCCAGAGGAAAGCAGCGACCA  
+  
FFFFFFFFFFFFFFFFFFFFFFFFFFFFFFFFFFFFFFFFFFFFFFFFFFFFFFFFFFFFFFFF  
FFFFFFFFFFFFFFFFFFFFFFFFFFFFFFFFFFFFFFFFFFFFFFFFFFFFFFFF  
@A00721:190:HGJW7DSXY:4:1427:4227:29356\_2:N:0:TCTGCAAG+GCTGCACT  
ACGGCAGTCCCGTCATCTCTGTGGGAAGTACCTCAGTCAAAAGTCACATTCACCACTCCC  
ATACCAATCAATGATGTGACTATACAGTTCGGCCATTTCAAGAGTGGT  
+  
FFFFFFFFFFFFFFFFFFFFF:F:FFFFFFFFFFFFFFFFFFFFF:FFF:FFFFFFFFFFFFF:FFFFFF  
FFFFFFF::F:FFF,:FFFFFFFFFFFF::FFFFFFFFFFFFFFFFFFFFF  
@A00721:190:HGJW7DSXY:4:1245:3486:35368\_2:N:0:TCTGCAAG+GCTGCACT  
GGAGGTACTGAAGCCTTCCCCTCCGCTGGCACGAAGAACTCCCAAGCCAATCAATAGTTCTTCTGA  
CCAGAATGAAAAGGGGTTTACCAGGGTAGTCTCTAAGTCTACCAGGAA  
+  
FFFFFFFFFFFFFFFFFFFFFFFFFFFFFFFFFFFFF:FFFFFF,FFFFFFFFFFFFFFFFFFFFFFFF  
FFFFFFFFF:F:FFFFFFFFFFFFFFFFFFFF:FFFFF,FFFFFFFFFFFFFFFFFFFF  
@A00721:190:HGJW7DSXY:4:1163:20066:25347\_2:N:0:TCTGCAAG+GCTGCACT  
CAAACTGATAAGAATAAAGGGAAAGGTCCATCAGGACCTAAGAAGGGGAAATTACCCCTAATTCTGA  
AGGAAGATCTCCACCATCTGGGGTTGGAATAAGAAATCTGCAGATC  
+  
FFFFFFFFFFFFFFFFFFFFFFFFFFFFFFFFFFFFFFFFFFFFFFFFFFFFFFFFFFFFF,FFFFFFFFFFFFFFFF  
FFFFFFFFFFFFFFFFFFFF,FFFFFFFFFFFFFFFFF:FFFFFFFFFFFFFFFFFFFFF  
@A00721:190:HGJW7DSXY:4:1407:7003:22326\_2:N:0:TCTGCAAG+GCTGCACT  
CTACGAAGTCGCTGAAGGCGGCTTGGGTCATTAAGGGTAGCTGTAAAGTTGCGCCTGCCGACCCCATC  
TTTGAGACCAAGACTCTCTACAGTAGGTTCTGCCTACTATGAGCAAT  
+  
FFFFF,FFFFFFFFF:FFFFFFFFFFFFFFFF,FFFFFFFFFFFFFFFFFFFFF:FFFFFFFFFFFFFFFF:FFFFF  
FFFFFFFFF:FFFFFFFFFFFFFFFFFFFFFFFFFFFFF:FF:FFFF,FFFFF  
@A00721:190:HGJW7DSXY:4:2160:17815:16031\_2:N:0:TCTGCAAG+GCTGCACT  
TCGTCACTGAGGACGAAGGTGAGAGGACTTTTGGCTACTGGCGACAACTGAGAGCAGTCGCTGGGGA  
AAGAGAATTGCGTGGGTTGAAGGCCGACGCTTCGAGCTTGAGTGTGAC  
+  
FFFFFFFFFFFFFFFFFFFFFFFFFFFFF:FFFFFFFFFFFF:FFFFFFFFFFFFFFFFFFFFFFFFFFFFFFFFFFFFF  
F:FFFF:FFFFF,FFF:FFFFFFFFFFFFFFFFFFFFFFFFFFFF,FFFFFFFF:F  
@A00721:190:HGJW7DSXY:4:2416:7817:1908\_2:N:0:TCTGCAAG+GCTGCACT  
GTTTTTGTCAACGGCGTTTGGAGGATTTTATCCGCGCTTAACCTATGGGGCGAAGATCCCTATGGAGT  
CTTGAAGGACTTAGGTTGGCATATTTATGCCGACGATAATAAGCATGT  
+  
FFFFFFFFF:FFFFFFFFFFFFFFFFFFFFFFFFFFFFFFFFFFFFFFFFFFFFFFFFFFFFFFFFFFFFF  
FFFFFFF:FFF,FFFFFFFFFFFFFFFFFFFFFFFFFFFFF:FFFFFFFFFFFFF  
@A00721:190:HGJW7DSXY:4:1167:19741:16172\_2:N:0:TCTGCAAG+GCTGCACT  
CGGGACTTACAAGAGAGAGTGTGAGAGAGTCGCTCTCACTATTTTTGCCAGAAATGCGGGCTTTCTGA  
CTGATGAGGTTAAACTCTTGCTCCTTCTGTGGGTGAGGGTTTTTGT  
+  
FFFFFFFFFFFFFFFFFFFFFFFFFFFFFFFFFFFFF:FFF,FFFFFFFFFFFFFFFFFFFFFFFFFFFFF  
FFFFFFFFFFFFFFFFFFFFFFFFFFFFF:FFFF:FFFFFFFFF:FFFFFFFFFFFFF  
@A00721:190:HGJW7DSXY:4:2110:29243:29340\_2:N:0:TCTGCAAG+GCTGCACT  
TCCTCCATAATTACAACCTCTCTTTAGAGAGCAGTAGAAGGAAGTTGGGCAATTCCCACATATGGTA  
GACGTTGTCACTTTTCTTGAATAATTTTCTTTTCTCCGGCATTGG  
+  
FFFFFFFFFFFFFFFFFFFFFFFFFFFFFFFFFFFFF:FFFFFFFF,FFFFFFFFFFFFFFFFFFFFFFFFFFFFF:FFFFFFFF  
FFFFFFFFFFFFFFFFFFFFFFFFFFFFF:FFFFFFFFFFFFFFFFFFFFF,FF,FF:  
@A00721:190:HGJW7DSXY:4:1135:29695:26866\_2:N:0:TCTGCAAG+GCTGCACT  
AAGGTGGAAGGTGTCAAGGGTCTTCTTCATGCTGATCTTTCAGGACCTAATCACATCATGATTGATAG

TTACGGCTCGTATCGAGTTGGAGGGAGGAAGTTCTCCGAAATTAAAGA  
+  
FFFFFFFFFFFFFFFFFFFFFFFFFFFFFFFFFFFFFFFFFFFFFFFFFFFFFFFFFFFFFFFFFFFFFFFF  
FFFFFFFFF:FFFFFFFFFFFFFFFFFFFFFFFFFFFFFFFFFFFFFFFFFFFFFFFF:F  
@A00721:190:HGJW7DSXY:4:1507:27742:27680\_2:N:0:TCTGCAAG+GCTGCACT  
TCAGAGAGGGGAGCTCTGAAAAGGAACTTCGTCAGAAGATGAGGAAGTCTAAGAGGAGGAGTTTGAG  
GAAGGCTCTAGAGAAGATCTCACCACCTGGAGAAGGCAAGTGGAGAGT  
+  
FFFFFFFFFFFFFFFFFFFFFFFFFFFFFFFF:FFFFFFFFFFFFFFFF:FFFFFFFFFFFF:FFFFFFFFFFFF:FFF  
FF:FFFFFFFFFFFF,FFFFFFFFFFFFFFFFFFFF:FFFFF,FFFFFFFFF:  
@A00721:190:HGJW7DSXY:4:1405:26196:22060\_2:N:0:TCTGCAAG+GCTGCACT  
AAGAAGGATTATTTGAAGCAGGGGTTACCACTTCCTAAGGTGGATGAGGGAGGTTGTTTCTTTGGAGT  
TTAGATAATCTTTTGAGAAGGGGTCATAGAGCCAGCAAGAGAAGCTT  
+  
FFFFFFFFFFFFFFFFFFFFFFFFFFFFFFFFFFFFFFFFFFFFFFFFFFFFFFFFFFFFFFFFFFFFFFFF  
FFFF:FF:FFFFFFFF:FFFFFFFF:FFFFFFFFFFFFFFFFFFFFFFFF:FFFF  
@A00721:190:HGJW7DSXY:4:2323:9516:22858\_2:N:0:TCTGCAAG+GCTGCACT  
CCTTGAGAAGACAAGCCACATTAAGATATAATTTAGGTCAACTTGGGGTTTCGAATGTCATTAGTGCC  
TTACGATTGAAAGAGGTCCTTTTGAGTATCGACAGATCTTTCGATCTT  
+  
FFFFFFFFFFFFFFFFFFFFFFFFFFFFFFFFFFFFFFFFFFFFFFFFFFFFFFFFFFFFFFFFFFFF:FFFFF  
FFFFFFFFFFFFFFFFFFFFFFFFFFFFFFFFFFFFFFFFFFFFFFFFFFFFFFFFFFFF  
@A00721:190:HGJW7DSXY:4:2557:22788:26960\_2:N:0:TCTGCAAG+GCTGCACT  
GTGGCAGAATTCGGTAACTTACCATATTGTTCTTCCGGGAAGTTGTGGGATTAACTTTGACTCAAC  
TACTCCGATCAGATCCGATGGTTTGATTGGTATGGACTACTCGACTT  
+  
FFFFFFFFFFFFFFFFFFFFFFFFFFFFFFFF:FFFFFFFFFFFFFFFFFFFFFFFFFFFFFFFFFFFFFFFF  
FFFFFFFFFFFFFFFFFFFFFFFFFFFFFFFF:FFFFFFFFFFFFFFFFFFFFFFFFFFFF  
@A00721:190:HGJW7DSXY:4:1426:4616:28087\_2:N:0:TCTGCAAG+GCTGCACT  
TCATGGCAGATACTACCGATAAGGTGAAAAATATGCAGGTCAAAGATTCTGTAGCTCTGAGGGCGGTT  
GAGGGAGCCGTTTTGGCCGACTTTAACTATTCTAAGAGTCTTTATGAT  
+  
FFFFFFFFFFFFFFFFFFFFFFFFFFFFFFFFFFFFFFFFFFFFFFFFFFFFFFFFFFFFFFFFFFFFFFFF  
FFFFFFFFFFFFFFFFFFFFFFFFFFFFFFFFFFFFFFFFFFFF,FFF:FFFF  
@A00721:190:HGJW7DSXY:4:1132:19768:11960\_2:N:0:TCTGCAAG+GCTGCACT  
CGTTGTCGTACCTTACAAGTTGAGGAGACTTTACAGCGGCTTATTGTGCGCAGTTTCCAGAATTGC  
GGTTGAAGTTCACCCATTCTATCTTGAATGCTCACGCCGTCGCAGCCA  
+  
FFFFFFFFFFFFFFFFFFFFFFFFFFFFFFFFFFFFFFFFFFFFFFFFFFFFFFFFFFFF:FFFF:FFFFFFFFFFFFFFFF  
FFFFFFF,FFFFFFFFF,FFFFFFFFFFFFFFFFFFFFFFFFFFFFFFFFFFFF  
@A00721:190:HGJW7DSXY:4:1268:24840:23844\_1:N:0:TCTGCAAG+GCTGCACT  
ATCACTTGTTAAAGTACAGATTTAGTGATTTAGATATTATTGATATTGGAGGCGATATTCGTTTTTCAT  
ATCCAAAACCTCCTTGAATGGAGTACATATTTGCAACCCTATTCTTGATGTGAAAGATGCATCGAGGT  
TAC  
+  
FFFFFFFFFFFFFFFFFFFFFFFFFFFFFFFFFFFFFFFFFFFFFFFFFFFFFFFFFFFFFFFFFFFFFFFF  
FFFFFFFFFFFFFFFFFFFFFFFFFFFFFFFFFFFFFFFFFFFFFFFFFFFFFFFFFFFFFFFFFFFF  
FFF  
@A00721:190:HGJW7DSXY:4:2158:30002:11052\_1:N:0:TCTGCAAG+GCTGCACT  
ATTGATTGGGAACGTACCTACTCACGAGACGTCATGAAAGCTATCGGAGGGAAGCAAAATGTTTCGTT  
CTGTTACAAGAACGCTTTGATTGTGACCATAAAGCCTCAGTTGCGATAGCTGTAGAGGTATACGATA  
TCT  
+  
:FFFFFFFFFFFF,FFFFFF,FF:FFFFFFFFFFFFFFFFFFFFFFFF:F,FFFFFFFFFFFFFFFFFFFFFFFF

@A00721:190:HGJW7DSXY:4:2255:20663:5400\_2:N:0:TCTGCAAG+GCTGCACT  
GCCACTATAATGCTTAAGAGAGAGATTGATGTATGTCATTTCGTCTTAGTTTGTCCCGCGCAATTATT  
GGACACGATGAAAAATGACATACCCGTTCTTGACCTTGGTATCGTTAT

@A00721:190:HGJW7DSXY:4:1506:15754:19914\_1:N:0:TCTGCAAG+GCTGCACT  
GGTTATTCTCACAAAGATAAGATTTTATCTTTCTTCAAACACCCTGTTTTCTTAAGGGCGGACA  
ATTGTTCCATTGTGAACCTTTGGGGACTAGATTGAGCATTAAATGAGTTCCGAATAACTCGTAATAAAT  
CTT

@A00721:190:HGJW7DSXY:4:2155:22254:17394\_1:N:0:TCTGCAAG+GCTGCACT  
ATTCAGAATACCTATTTCCGTACCAAGAGCCACTGCCAATCTCATCGCTATACGCATACCTGATTGGA  
AGAAGCGAGGTTCTGTTCTCAATAAAAAATTTTTCTCAAGAGATTATGGTTGATAAAGTTTTCTTCATA  
AGG

@A00721:190:HGJW7DSXY:4:1258:25274:31266\_2:N:0:TCTGCAAG+GCTGCACT  
ACGTCATGGGGATCACTTCTTCGGTCAATGACAAAACCTTCGAATATGTTACGACATGGCTTCGTAAC  
AACAGTGCGAGGATTGTCATCTCGGGGAAAGTGATTACCAAGATGTT

@A00721:190:HGJW7DSXY:4:2368:30083:26694\_1:N:0:TCTGCAAG+GCTGCACT  
GAGATACCTAGAGAAGGTCGCAGCGATCTTACTCGTTATCGGAGCTAAGAAGAAGACTTTGGGTACAC  
GTTATGCTCGCAAACCTTAACGTTAGTACCGGAGGTGATCTCTCTGCTTCTGCGTTACTGAGAGAAAAG  
ATT

@A00721:190:HGJW7DSXY:4:2620:31629:18881\_2:N:0:TCTGCAAG+GCTGCACT  
ACGGTGACTTTATGGACAAGATGCAAGTTCTTGGGAAATACTTGTTTTCCCTTTTTAGGTTTAGTAGGT  
GATCTTGACGTCGATTCTTTGTATAGGGAGTGTGAGAAGACAACGAAT

@A00721:190:HGJW7DSXY:4:1320:3369:12931\_1:N:0:TCTGCAAG+GCTGCACT  
GAACCGGTCTCTAAATCTTTTGAAGATTGAGAAGATTGAAGAACACGTCAAGAAGTCGCTCGGCGTTGT  
TCTTGAAAACCAAGTTAAGAAGGAGGCTGATCATGGAGTCTTTGTACCTTCTGTCAAACCTTCGAGGTT  
CAG

@A00721:190:HGJW7DSXY:4:2121:7862:18709\_2:N:0:TCTGCAAG+GCTGCACT  
GATCCCGGATGTGGATTGAAGGCTGGCTCTAAGGGAGACTCCTTCTTTTTGAATGTTGTAAAGAATTG

GGTTGAGAAGTGTGCTTTACAAGGAGAGATCGGAAGAGCGTCGTGTAG  
+  
FFFFFFFFFFFFFFFFFFFFFFFFFFFFFFFFFFFFFFFFFFFFFFFFFFFFFFFFFFFFFFFFFFFFFFFF  
FFFFFFFFFFFFFFFFFFFFFFFFFFFFFFFFFFFFFFFFFFFFFFFFFFFFFFFFFFFFFFFFFFFFFFFF  
@A00721:190:HGJW7DSXY:4:1548:30445:11381\_2:N:0:TCTGCAAG+GCTGCACT  
TAAAGAAAAATTTTCGAATAAACTAATGAGAGGTATAGGCTTAGTCAAGTCTGTACTTACATTCTTTA  
CGCCAGATTCTTCATGGGGCGACGCTGTTTCTCTTGGTATTTCTGAAA  
+  
FFFFFFFFFFFFFFFFFFFFFFFFFFFFFFFFFFFFFFFFFFFFFFFFFFFFFFFFFFFFFFFFFFFFFFFF  
FFFFFFFFFFFFFFFFFFFFFFFFFFFFFFFFFFFFFFFFFFFFFFFFFFFFFFFFFFFFFFFFFFFFFFFF  
@A00721:190:HGJW7DSXY:4:2522:8250:34632\_2:N:0:TCTGCAAG+GCTGCACT  
CGTCATTTTCCTTTGGGATCTTCTCTGCTAAGGGAATTATTAATCATTCTTCTCACTCTTGACGA  
GAATTATTACTGTTTTCTCTACCCATAACTTCTTTTTCAAAAATGCGG  
+  
FFFFFFFF:F:F,FFFFFFFFFFFFFFFFFFFFFFFFFFFFFFFFFFFFFFFFFFFFFFFFFFFFFFFF  
FFFF,FFFFFFFFFFFFFFFFFFFFFFFFFFFFFFFFFFFFFFFFFFFFFFFFFFFFFFFFFFFFFFFF:  
@A00721:190:HGJW7DSXY:4:1526:16224:17628\_2:N:0:TCTGCAAG+GCTGCACT  
TGATGTTTTCTACAGAGTGCAGTCGTTTCAACACATATCACCCTTTTGAAAGGAAAATAATTGGTG  
ATGAAAATACGTATGTCGGTGGGGTTCTCAAGGCTCTCATCGCCACGG  
+  
FFFFFFF:FFFFFFFFFFFFFFFFFFFFFFFFFFFFFFFFFFFFFFFFFFFFFFFFFFFFFFFFFFFFFFFF  
FF:FFFF:FF::F:FF:F::F::,F,F,FFF,FF:,FF:,FFF,F,F  
@A00721:190:HGJW7DSXY:4:2415:15474:35775\_2:N:0:TCTGCAAG+GCTGCACT  
GGGTTCCATAAGATATTATCTGACATTGTGGTTCAATGATCAGGATTCTTCTTTTGGTCCTTACGTCT  
TAAGTAATTTGGATGTTGTGCGAAACTATCAGGTTCTTGTACGATTCT  
+  
FFF:FFFFF,FFFFFFFFFFFFFFFFFFFFFFFFFFFFFFFFFFFFFFFFFFFFFFFFFFFFFFFFFFFFF:F  
FF:FFF,,FFFFFFF:FFFFFFF:FFFFFFFFFFFFFFF,FFFFFFF:F,FF  
@A00721:190:HGJW7DSXY:4:1158:11379:29716\_2:N:0:TCTGCAAG+GCTGCACT  
TTAAAACTTCAGAGTCTCTTGGAAGTCCAGGTAGCTAATGTTCTTGCAATAGCCACAGACTTTCTGGG  
AAAAGAGACCTCTGTTGTAGAGGAGTTGAGAGAATTACTCAGATTCAA  
+  
FFFFFFFFFFFFFFFFFFFFFFFFFFFFFFFFFFFFFFFFFFFFFFFFFFFFFFFFFFFFFFFFFFFFFFFF  
FFF:FFFFFFFFFFFFFFFFFFFFFFFFFFFFFFFFFFFFFFFFFFFFFFFFFFFFFFFFFFFFFFFF:  
@A00721:190:HGJW7DSXY:4:1465:7536:12477\_2:N:0:TCTGCAAG+GCTGCACT  
ACAACGAGTTAGGGAGTGGCTAGGTTTTAAAAGATCCTTTGCACAAGCAATACCTTCCACTGAGTTCA  
TCACCCAGAGTTTCGACGTCGCGGAAAACGATGAAGATTTCCACACTG  
+  
FFFFFFFFF:FFFFFFFFFFFFFFFFFFFFFFFFFFFFFFFFFFFFFFFFFFFFFFFFFFFFFFFFFFFFFFFF  
FFFFFFFFFFFFFFFFFFFFFFFFFFFFFFFFFFFFFFFFFFFFFFFFFFFFFFFFFFFFFFFFFFFFFFFF  
@A00721:190:HGJW7DSXY:4:1402:24894:18333\_2:N:0:TCTGCAAG+GCTGCACT  
TCTGATGCTGAATTTGAGGAAAATTTTTTCGGAAGTTTTTGGTATAAATCCTGATGGCTCAGTACAGGG  
AGGAGGTAATAGTTATAAAACCTTCTTTTATCATTGCAACAGGACTTT  
+  
FFFFFFFFFFFFFFFFFFFFFFFFFFFFFFFFFFFFFFFFFFFFFFFFFFFFFFFFFFFFFFFFFFFFFFFF  
FFFFFFFFF:FFFFFFFFFFFFFFFFFFFFFFFFFFFFFFFFFFFFFFFFFFFFFFFFFFFFFFFFFFFFF  
@A00721:190:HGJW7DSXY:4:2116:4716:30765\_2:N:0:TCTGCAAG+GCTGCACT  
GGACAAAATCTGGGATCATAGGTATGTGTCACGCTACACTCGAAATATGGGCCCTCATAAGGAAGTAT  
AGTTGGCGTCTTGTCTGTTGACGTCATTACAGTCTGGAAGTTAGATCAT  
+  
FFFFFFFFFFFFFFFFFFFFFFFFFFFFFFFFFFFFFFFFFFFFFFFFFFFFFFFFFFFFFFFFFFFFFFFF  
FFFFFFFFFFFFFFFFFFFFFFFFFFFFFFFFFFFFFFFFFFFFFFFFFFFFFFFFFFFFFFFFFFFFFFFF  
@A00721:190:HGJW7DSXY:4:1218:19208:33035\_1:N:0:TCTGCAAG+GCTGCACT  
TTTAGATAAATCTTTCCGGGCTCAATGACCTTTGCTATGTACGTGGATCTAATGCTTGGTGATCTGA

ATCTGACCATCGCAAAGAAGACTTTATTAGTTCATGAAGTTCTTACACTTCTCGCGACTAATGTCAGC  
TTC

+

FFFFFFFFFFFFFFFFFFFFFFFFFFFFFFFFFFFFFFFFFFFFFFFFFFFFFFFFFFFFFFFFFFFFFFFF  
FFFFFFFFFFFFFFFFFFFFFFFFFFFFFFFFFFFFFFFFFFFFFFFFFFFFFFFFFFFFFFFFFFFFFFFF  
FFF

@A00721:190:HGJW7DSXY:4:1157:14678:13385\_2:N:0:TCTGCAAG+GCTGCACT  
CCAAATTTAGCACTTTTTGAATATGACAGAAGCTCGCCATATCAGATTAGAGACATGCCAGTTAGAGT  
TCTTCTAACCAGGACTGATGGTGAGATTCTTTACCTTTTGAGGTCC

+

FFFFFFFFFFFFFFFFFFFFFFFFFFFFFFFFFFFFFFFFFFFFFFFFFFFFFFFFFFFFFFFFFFFFFFFF  
FFFFFFFFFFFFFFFFFFFFFFFFFFFFFFFFFFFFFFFFFFFFFFFFFFFFFFFFFFFFFFFFFFFFFFFF

@A00721:190:HGJW7DSXY:4:2261:18710:22216\_2:N:0:TCTGCAAG+GCTGCACT  
CCTAGTGTCTTTCTAGAGTCCAAGGACGTTTCCGTCGGAGGATGACAGGTGGGAGACCGCTCAATAA  
CACTCTATTGAATCCCTTTTCCACGATGAAAGCTCTTTATGAGGTGCT

+

FF:FFFFFFFFFFFFFFFFFFFFFFFFFFFFFFFFFFFFFFFFFFFFFFFFFFFFFFFFFFFFFFFFFFFF  
FFFFFFFFFFFFFFFFFFFFFFFFFFFFFFFFFFFFFFFFFFFFFFFFFFFFFFFFFFFFFFFFFFFFFFFF

@A00721:190:HGJW7DSXY:4:2134:30942:19664\_1:N:0:TCTGCAAG+GCTGCACT  
GATATCGCCTCTGTCTTTCTCCTTTAATCGTGAGGTTACGAGAGTTTCGTACTTGGGTTTATCGGTT  
GTATTTTGATAAATTTGTTGGAATCGATAATGATACTGACGAAGGTTCTATTACCACCCTTGTCATTG  
ATA

+

FFFFFFFFFFFFFFFFFFFFFFFFFFFFFFFFFFFFFFFFFFFFFFFFFFFFFFFFFFFFFFFFFFFFFFFF  
FFFFFFFFFFFFFFFFFFFFFFFFFFFFFFFFFFFFFFFFFFFFFFFFFFFFFFFFFFFFFFFFFFFFFFFF  
FFF

@A00721:190:HGJW7DSXY:4:2660:26476:36699\_2:N:0:TCTGCAAG+GCTGCACT  
TGATGCTTTCTTAGAGGCTCGTCTAGCCGCTGAGATTCTGCTTACCTATTTACAATCTGTAGAGAGAG  
AGGTTAATCAGAATTTGAGTGATAACGATTTAGTACTGGGACATGGTG

+

FFFFFFFFFFFFFFFFFFFFFFFFFFFFFFFFFFFFFFFFFFFFFFFFFFFFFFFFFFFFFFFFFFFFFFFF  
FFFFFFFFFFFFFFFFFFFFFFFFFFFFFFFFFFFFFFFFFFFFFFFFFFFFFFFFFFFFFFFFFFFFFFFF

@A00721:190:HGJW7DSXY:4:1428:27941:30029\_1:N:0:TCTGCAAG+GCTGCACT  
CCTTTTTCGATTGGATTCGACGGGTCTTCGTCTCACGACTAATTTGATAAGGTTTTCTTTTATGGG  
ACTCTTGTTTGTACTTATGAAGGAGGTATTACTTCGGAAGTTCTTAATGTAGGTCTCCTAGTACTTAA  
GGG

+

FFFFF:FFFFFFFFFFFFFFFFFFFFFFFFFFFFFFFFFFFFFFFFFFFFFFFFFFFFFFFFFFFFFFFF  
FFFFFFFFFFFFFFFFFFFFFFFFFFFFFFFFFFFFFFFFFFFFFFFFFFFFFFFFFFFFFFFFFFFFFFFF  
FFF

@A00721:190:HGJW7DSXY:4:1418:23249:28134\_2:N:0:TCTGCAAG+GCTGCACT  
GTTTCAGCTGGATGGATCTTTTGATGGTATGTTTCACATTGCGTGATCACTTCCCGTGGACTTGGGAA  
GAGATTAAACATAAAATCCAGCGATTCTATTATGTCGCTAAAGCCTGT

+

FFFFFFFFFFFFFFFFFFFFFFFFFFFFFFFFFFFFFFFFFFFFFFFFFFFFFFFFFFFFFFFFFFFFFFFF  
FFFFFFFFFFFFFFFFFFFFFFFFFFFFFFFFFFFFFFFFFFFFFFFFFFFFFFFFFFFFFFFFFFFFFFFF

@A00721:190:HGJW7DSXY:4:1404:30933:36871\_2:N:0:TCTGCAAG+GCTGCACT  
GTTTCGGGCTGTGGGGATTAACCTCCCTCGTGAAACTTACGACGATGTTCTCGCTCGCATTTACAAAGG  
ATTACTAAGTCTGAGATCTGCCACTTCTAATTTTAGGAAACGTCGCGA

+

FFFFFFFFFFFFFFFFFFFFFFFFFFFFFFFFFFFFFFFFFFFFFFFFFFFFFFFFFFFFFFFFFFFF  
FFFFFFFFFFFFFFFFFFFFFFFFFFFFFFFFFFFFFFFFFFFFFFFFFFFFFFFFFFFFFFFFFFFFFFFF

@A00721:190:HGJW7DSXY:4:2307:2519:24392\_2:N:0:TCTGCAAG+GCTGCACT  
ATGAGGATGTCTTGGTCGAAAAATATCGCCGGGAAGTTCTAATAGAGGATCCTGATGACATTATTTCA



+

@A00721:190:HGJW7DSXY:4:1369:8015:10426\_1:N:0:TCTGCAAG+GCTGCACT  
GGAATTAGAGAAAGACGACCTTCTTGTGGGACTGAGACCTCTGAATTTTCAGGGTGCCCTGATGAGG  
ACGTTGAAACGGATAATTTCAACTCTGAGACTTCTAAGAGTGTTTCAAAGACCAGAAACGTAACAAG  
AAG

+

@A00721:190:HGJW7DSXY:4:1502:23312:5321\_2:N:0:TCTGCAAG+GCTGCACT  
GGAAGGGGAGAAAACAGAACAGCGAGCGTTGAAGAGAAACTGATAAGGATGCGGTGATAGTACC  
CCAATTCCTGCAAGAAAGATCACTCTCGTCGATACCACTGATCTTCCA

+

@A00721:190:HGJW7DSXY:4:2362:8287:19820\_1:N:0:TCTGCAAG+GCTGCACT  
GGTCGTTCTTTTGGTGATTTTATCAAAGAGAAAGTTTCTGCTAGTCGCGACGATAGTATTTATCGGAG  
TGATATTAACAAGTTAAACTTCGAACTGACCACTTACAAGAGTGTTGAAGTACCGCAACATGGATCAG  
TTT

+

@A00721:190:HGJW7DSXY:4:2345:16089:13291\_2:N:0:TCTGCAAG+GCTGCACT  
AAACTGAATCCACTCTCTTGGGATATAAATGAGTACATCTATAATAGAGTTTTGGAAGTGTGAATGT  
CCTACGTACTGTTCAAGGTGTTTGGGCTTCTCTAAAGAACAGCAACTT

 $+$ 

@A00721:190:HGJW7DSXY:4:2635:18738:25238\_2:N:0:TCTGCAAG+GCTGCACT  
AGACCTTTCTTG GGGAGTAAAGAGGGTTTGAAAATTACGGAACCTTTCCTCGTTCTTCATGAAGATCT  
TCGAGTGTTTTATAGTGAGTTATTCTTGCGAAGGTTCAAGTCGATTGA

 $+$ 

@A00721:190:HGJW7DSXY:4:1520:7545:6230\_2:N:0:TCTGCAAG+GCTGCACT  
AAGAAGTTCTTCGCAGTTGAATCTCCACCAGGTGGAGGGAAGACCACTGAACTTATAGCGACTTTTGT  
CGAATTTTTCGCAAAAGGTCTTGAAGTACGTATTGTCACTGCTAATCG

+

@A00721:190:HGJW7DSXY:4:1505:30680:31454\_2:N:0:TCTGCAAG+GCTGCACT  
CACTTCTAGTTCATCGCGGTATTTGTGAAATTAAGACAGACGTGAAAGTTATGATGAGTGATCGTATT  
AGAACAGCTGATTCTTATTGCATGAACGTCGCTGAGGTCAAACCTGTG

+

@A00721:190:HGJW7DSXY:4:2321:9815:7279\_1:N:0:TCTGCAAG+GCTGCACT  
CATCGACGAATTATTCATGATTCACGCTGGTCAGACCCTTTTCTTACACATCTACTTAAGGCGGCTT  
ATACCATAGGTTACGGTGATTCCAATCAAATCGGATTCATCAATCGTATTGATCTCCAAGTCGCAAAC  
TAC

```

+
:FF,FFFFFFFFFFFF:FFFFFFFFFFFFFFFFFFFFFFFFFFFFFFFFFFFFFFFFFFFFFFFFFFFF
FFFFFFFF:FFFFFFFFFFFFFFFFFFFFFFFFFFFFFFFFFFFFFFFFFFFFFFFFFFFFFFFFFFFF
FFF
@A00721:190:HGJW7DSXY:4:2308:3775:28980_2:N:0:TCTGCAAG+GCTGCACT
TTGATGAGTGTCTGTTCTTATCGAAGTCTCAGTTATCGCTGCCCGCCGACGTTTGTGCGAACTCTCA
GAGGTTTACGGCAGAAAAATTTCTCCTGCTTGTAAATTCGAGAGAGGAC
+
FFFFFFFFFFFFFFFFFFFFFFFFFFFFFFFFFFFFFFFFFFFFFFFFFFFFFFFFFFFFFFFFFFFF
FFFFFFFFFFFFFFFFFFFFFFFFFFFFFFFFFFFFFFFFFFFFFFFFFFFFFFFFFFFF
@A00721:190:HGJW7DSXY:4:1470:26955:22216_1:N:0:TCTGCAAG+GCTGCACT
TTAGACCTATCAGATGTCTTGACGACTTCGAATTTGAGGACGGAGTTAAATATATTACTTTCACCTCAA
GGTGAAAAGTTTGAATTAACAAAGTCCTTGTAAGAGTAAGGTTAAATGTGAAGATGCTCAGACTAT
TCA
+
FFFFFFFFFFFFFFFFFFFFFFFFFFFFFFFFFFFFFFFFFFFFFFFFFFFFFFFFFFFFFFFFFFFF:FFFFFFFFFFFFFFFF
FFFFFFFF:FFFFFFFFFFFFFFFFFFFFFFFFFFFFFFFFFFFFFFFFFFFFFFFFFFFFFFFFFFFF
FFF
@A00721:190:HGJW7DSXY:4:1303:23294:29183_1:N:0:TCTGCAAG+GCTGCACT
TGACCCTGTTTTTGCATCACAAACACATATTACCGTTGCTCTATCACGACACGTTGAATCTTTACGAT
ACTTTGTTATCAATGTAAAGTTAAACGATGCTACTTGTGAGAGGATCAATCACAGTAAGGAAGTGTCA
CGT
+
FFFF,FFFFFFFF,FFFFFF:FF:F:FFFFFF,FFFFFF,FF:FFFFFF:FFF:FFFFFF:F:,F
:FFFFFFFF,FFFFF:FFFFFFFFFFFFFFFF:FFF:FFFFFFFF:FFFFFFFFFFFFFFFFFFFF
FFF
@A00721:190:HGJW7DSXY:4:1402:22589:16501_2:N:0:TCTGCAAG+GCTGCACT
AGATTCAACCCCTTATATCGAGGCTATCGAGGACGATGAGTATCTTGAAGTTGTTGACGACAAGCCTC
AAGAGGGTAGAGGACCACCTGGATCTTCTACTGTCTCTGCCTTCCAAG
+
FFFFFFFFFFFFFFFFFFFFFFFFFFFFFFFFFFFFFFFFFFFFFFFFFFFF,FFFFFFFFFFFFFFFFFFFF
FFFF:FFFFFFFFFFFFFFFFFFFFFFFFFFFFFFFFFFFFFFFFFFFFFFFFFFFF
@A00721:190:HGJW7DSXY:4:1137:16957:6277_2:N:0:TCTGCAAG+GCTGCACT
TTATTCCTGGAACACCTTAACGTCACTCGGTAATCTTTCAGCCGAATTAAGTACTAATGAGTTCAAG
TCGGTTGTCGATCGAATTAAGATCAAGGCTAATACCTTTATAGGTAAG
+
FFFFFFFFFFFFFFFFFFFFFFFFFFFFFFFFFFFFFFFFFFFFFFFFFFFF:FFFFFFFFFFFFFFFF:FFFFFFF
FF:FFFFFFFFFFFFFFFFFFFFFFFF:FFFFFFFFFFFFFFFFFFFFFFFFFFFF
@A00721:190:HGJW7DSXY:4:2642:24532:14450_1:N:0:TCTGCAAG+GCTGCACT
TCATCAGTCAGAGTATACCCGATAGGGTACCGAGTCTCCAAGAGAATATTTATTCTTATGAGGCTCGA
AACTTCAACGTTTTACAACGGAAGACATATCGCACCCGAAATTTTGGGCAGAATGCTCTTAACGC
GGT
+
FFFFFFFFFFFFFFFFFFFFFFFFFFFFFFFFFFFFFFFFFFFFFFFFFFFFFFFFFFFFFFFFFFFF
FFFFFFFFFFFFFFFFFFFFFFFFFFFFFFFFFFFFFFFFFFFFFFFFFFFFFFFFFFFF
FFF
@A00721:190:HGJW7DSXY:4:2375:15130:26725_2:N:0:TCTGCAAG+GCTGCACT
GATCAGTCTAAGTTGGATAAAGTTATAGGAGACTCAGTTAACCTGAGAGCTCCTCAATTGATAGATTG
GGTCAACAATAGGGACGCTAGTATACTTCGTAAAGTCGACAGCGAAAT
+
FFFFFFFFFFFFFFFFFFFFFFFFFFFFFFFFFFFFFFFFFFFFFFFFFFFF:FFFFFFFFFFFFFFFFFFFF
FFFFFFFFFFFFFFFFFFFFFFFF:FFFF:FFFFFF:FFFFFFFFFFFF
@A00721:190:HGJW7DSXY:4:2431:13060:19413_2:N:0:TCTGCAAG+GCTGCACT
TAATTGGACCGACTATATGACCTATTTTAAGCTCATGGTGAAAAGGGAAGCTAAGGTTAACTTGATG

```

$+$ 

```
FFFFFFFFFFFFFFFFFFFFFFFFFFFFF,FFFFFFFFFFFFFFFFFFFFFFFFFF:
```

+

FFFFFFFFFFFFFFFFFFFFFFFFFFFFF:FFFFFFFFFFFFFFFFFFFFF:FFFFFF

+

[illegible]

+

[illegible]

+

```
FFFF:FFFFFFFFFFFFFFFFFFFFFFFF,FFFFFFFFFFFF,FF:FFFFFFF
```

+

```
FFFFFFFFFFFFFFFFFFFFFFFFFFFFFFFFFFFFFFFFFFFFFFFFFFFFF:FFF
```

+

FFFFFFFF,FFFFFFFFFFFFFFFF:FF:FFFFFF:FFFFFFFF

+

FFFFFFFFFFFFFFFFFFFFFFFFFFFFFFFFFFFFFFFF,FFFFFFFFFFFFFFFF

+

FFFFFFFF:FFFFFFFFFFFFFFFF::FFFFFFFFFFFFFFFF

@A00721:190:HGJW7DSXY:4:2145:3577:10974\_2:N:0:TCTGCAAG+GCTGCACT  
TCTTTTCAATTTTAAATGACGATCATTAAGACTCTCTTTCTTCTTTGTTTCCTTCTTTGCACTGATTTTT  
TCCTCATCAGCTTGTGTTTTACCTAATCTGTGTTTTTACGATAACAAC

+

FFFFFFFFFFFFFFFFFFFFFFFFFFFFFFFFFFFFFFFFFFFFFFFFFFFFFFFFFFFFFFFFFFFFFFFF  
F::FFFFFFFFFFFFFFFFFFFFFFFFFFFFFFFFFFFFFFFFFFFFFFFFFFFFFFFFFFFFFFFFF,

@A00721:190:HGJW7DSXY:4:1232:17065:15139\_2:N:0:TCTGCAAG+GCTGCACT  
TCTTCCGAAAGGCGAACTTTGGGAATTTGAAGCTCAGGGTGAAGCACAACTTTGACCGTGACGAACT  
GTGGTGTCTTGATCTACGTTACGGATATACTCTCCTTGAGTTCACTC

+

FFFFFFFFFFFFFFFFFFFFFFFFFFFFFFFFFFFFFFFFFFFFFFFFFFFFFFFFFFFFFFFFFFFFFFFF  
FFFF:F,FFFFFFFFFFFFFFFFFFFFFFFFFFFFFFFFFFFFFFFFFFFFFFFFFFFFFFFFFFFFFFFF

@A00721:190:HGJW7DSXY:4:1473:15664:26741\_1:N:0:TCTGCAAG+GCTGCACT  
CACTTATTACGATATTTCTTTAGTCGATGGGTTTTTCGACGCCTTTAAGCGTCTTCTGTTTCATCGCAAC  
CAGATGATATCTTCTATTCTGAACCTTATGTTTCGATCAGTGTTTCTTCTATCAGGAGGAAAACACTTGT  
TCT

+

FFFFFFFFFFFFFFFFFFFFFFFFFFFFFFFFFFFFFFFFFFFFFFFFFFFFFFFFFFFFFFFFFFFFFFFF  
FFFFFFFFFFFFFFFFFFFFFFFFFFFFFFFFFFFFFFFFFFFFFFFFFFFFFFFFFFFFFFFFFFFFFFFF  
,FF

@A00721:190:HGJW7DSXY:4:1441:27055:31782\_2:N:0:TCTGCAAG+GCTGCACT  
TCTTCTAATGTGGCCTGAACCTACGTTTCACTTTGTGTGTAAGTCTCTATTTTAAGTTTTGTCTTCC  
TTGTTTGTCTTATTCTATTAATCACTCATTTTAGTGAGATTATTAATA

+

FFFFFFFFFFFFFFFFFFFFFFFFFFFFFFFFFFFFFFFFFFFFFFFFFFFFFFFFFFFFFFFFFFFFFFFF  
FFFFFFFFFFFFFFFFFFFFFFFFFFFFFFFFFFFFFFFFFFFFFFFFFFFFFFFFFFFFFFFFFFFFFFFF

@A00721:190:HGJW7DSXY:4:1325:2636:22748\_2:N:0:TCTGCAAG+GCTGCACT  
CGACAACAGCAGGGGTTTTTCGAATAGTGATAGCCACCCGCCTTACAGAGGGGCAGCAGCATGACCATA  
ATTGGTATTGACTTTGGTACCACCTTTTCTACTGTCTGTCTCGCCTCT

+

FFFFFFFFFFFFFFFFFFFFFFFFFFFFFFFFFFFFFFFFFFFFFFFFFFFFFFFFFFFFFFFFFFFFFFFF  
FFFFFFFFFFFFFFFFFFFFFFFFFFFFFFFFFFFFFFFFFFFFFFFFFFFFFFFFFFFFFFFFFFFFFFFF

@A00721:190:HGJW7DSXY:4:2573:32181:2832\_1:N:0:TCTGCAAG+GCTGCACT  
CGTGTGCTCTTCCGATCTGTGAATTTATACCTACAATCATTGGTTTTTCTAATAATGATGACACTATT  
GTTTATGGATATGATGCTATTACTCATGATGGTTACGGTCAGGGAGGATTCTCAGTTTACAAGGACCT  
TAA

+

FFFFFFFFFFFFFFFFFFFFFFFFFFFFFFFFFFFFFFFFFFFFFFFFFFFFFFFFFFFFFFFFFFFFFFFF  
FFFFFFFFFFFFFFFFFFFFFFFFFFFFFFFFFFFFFFFFFFFFFFFFFFFFFFFFFFFFFFFFFFFFFFFF  
FFF

@A00721:190:HGJW7DSXY:4:1668:16776:8093\_2:N:0:TCTGCAAG+GCTGCACT  
CCGAAAGACGTGCTAAATTAACCATTGTACGATGTCTGTCTCGGCGATCACTTTTCACTAAGA  
ATTGGTCCTACTTTTGGACAAGGCCAACTTCGTAATCTTCATGAGATC

+

FFFFFFF,FFFFFFFFFFFFFFFFFFFFFFFFFFFFFFFFFFFFFFFFFFFFFFFFFFFFFFFFFFFFFFFF  
FFFFFFFFFFFFFFFFFFFFFFFFFFFFFFFFFFFFFFFFFFFFFFFFFFFFFFFFFFFFFFFFFFFFFFFF

@A00721:190:HGJW7DSXY:4:1577:16089:8750\_1:N:0:TCTGCAAG+GCTGCACT  
TTAGGGATTTTGAAGAGAGTAGAGCTTCAATTGTAGTGGTTTGGTCTGTTTCAGTACCCAGTCAGTAT  
ACCTCTACGCAAAGATTTTTCATGAAAACCTACAGAGGAACGTACCGGATTACCTGTCTTTTCATATTAT  
GAA

+

FFF::FFF:FF,FF,FF:FFF,,FFFFFFFFF,FF:FFFFFFFFF:FFFFFF:FF,FFFFFFFFF  
FF,F,FFF,F,F:::,FFFFFFFFF,FFF,FFF,F:FF::F:::F,FF,:F:FFFFFFFFF:F  
F:F







TAAAAATAAGGGAGTCATAACTTTTGTACCAAATTCTTGGCTTTCAACGAAGTCTCTGATTTTATTA  
ATC

+

FFF:FFFFFFFF:FFFFFFFFFFFFFFFFFFFFFFFF:FFFFFFFF:FFFFFFFFFFFFFFFF  
FFFFFFFFFFFFFFFFFFFFFFFFFFFFFFFFFFFFFFFFFFFFFFFFFFFFFFFFFFFFFFFF  
FFF

@A00721:190:HGJW7DSXY:4:1121:24831:11365\_2:N:0:TCTGCAAG+GCTGCACT  
ATCTCTCGGTCATTTACTCTGTACTTGATCTACGTCGTTTAACTGTCGGAACAACCTTTACTTAGAAT  
GACTCTATCTTTTCAGACACTTCTTATATTATTTACAATAGTTAATAT

+

FFFFFFFFFFFFFFFFFFFFFFFFFFFFFFFF:FF:FFFFFFFFFFFFFFFFFFFFFF,FFFFFFFF  
F:FFFFFFFFFFFFFFFFFFFFFFFF:FFFFFFFFFFFFFFFFFFFFFF

@A00721:190:HGJW7DSXY:4:2460:10212:10347\_1:N:0:TCTGCAAG+GCTGCACT  
ATACTCTCTATCGTTTTCTGCTTTTTCTTAGCTAATAGATTAATTAAGGATGAGTACGAAAACCACT  
CTTCGTTACGAGACCTGATGGTATTATAGATTTAGTCTCTACACCCATCTCAACGAGGATAAAGCGAG  
TT

+

FFFFF:,F,F,,FF:FFF,FFF:FFFFFFFFF:,,,FF:FF,:F,F,F::FF,FFF,FFFF:FF  
,:F:FFFF,FFF:,F,FFFF,:F,,FFFFFFFFFFFFFFFF:FFFFFFFFF:FFFFFFFFFFFFFFFF  
:F

@A00721:190:HGJW7DSXY:4:2463:22092:24659\_1:N:0:TCTGCAAG+GCTGCACT  
CACGAAGATAACATCCGCAAACGACTCGAAACCGAGACGCCGTAGATCAAAGTCCCTTCTAACTTTAG  
ATTATGAATCCTGCCTTTACTCATTTTATAGCAGTTATTTATGTTGTACTTTTTATAATTTATAACCT  
T

+

FF:,F,,F,F,,F:FF:,FFFFFFFFFFFFFFFFFFFFFFFFFFFFFFFF:FFFFFFFFFFFF  
FFFFFFFFFFFFFFFFFFFFFFFFFFFFFFFFFFFFFFFFFFFFFFFFFFFFFFFFFFFFFFFF  
F

@A00721:190:HGJW7DSXY:4:2247:8901:1125\_1:N:0:TCTGCAAG+GCTGCACT  
TACTTATTGTAACGATCATTCTTTCGAGTTTTGTCACTTATTCTTTTATTCCTTTAACTGTGTATG  
AGGAGGATTTATAATGCTTTTCGATAGTGATTGTTATCAATTTAAATACATTACTGTTTCAAATCATC  
TTT

+

FF:FFFFFFFF,FFFFFFFFFFFFFFFFFFFFFFFFFFFFFFFF:FFFFFFFFFFFF  
FFFFFFFFFFFFFFFFFFFFFFFFFFFFFFFFFFFFFFFFFFFFFFFFFFFFFFFFFFFFFFFF  
FFF

@A00721:190:HGJW7DSXY:4:2456:10384:6292\_1:N:0:TCTGCAAG+GCTGCACT  
GAAATGGTTTCAAATGAGGTCAAAGCTCTATTTATTAACGAAGTATTATCCGATTCTTCGAGGGTA  
TCACTACCACTGATCTGCCGACTTTAGTCAAGGAAGTCAATTCCTTCGATGTTTATATTTTCTATA  
AGG

+

FFFFFFFFF:FF:FFFFFF:FFFF:FFFFFFFFFFFFFFFFFFFFFFFFFFFFFFFF  
FFFFFFFFFFFFFFFFFFFFFFFFFFFFFFFFFFFFFFFF,FFFFFFFFFFFFFF:FFFFFFFF  
FFF

@A00721:190:HGJW7DSXY:4:2143:31033:17284\_2:N:0:TCTGCAAG+GCTGCACT  
TAATCAAATTTGACAAATTTTAGAACTTTATTTCAGAACTCTCTCCGATCACCTTGGTGTGATCTCC  
CGGAGGATCTTTCAATAAGATGTATGATGATAATCTACTATTTTAA

+

:FFFFFFFFF,FFFFF,:FF:FFFFFFFFFFFFFFFF:~:FFFFF:F:FFFFFFFF:FFFF,  
:FFFFFFFFFFFF:FFFF:F:FFF:~:FFF:FFFF:FFFF:FFFF:F

@A00721:190:HGJW7DSXY:4:2351:25753:32346\_1:N:0:TCTGCAAG+GCTGCACT  
AGCGTATACTTGAATACTTTATCAAAGATTTGGCTTGGTCTATTTACCGCAAAAAGTTGGAAGAGGTC  
TATGATATTTATTTTACTTATACTTTAAATAGCACCGATTATAACTTGACTGTTGATAATATTACAAT  
AGC



FF:FFFFFFFFFFFFFFFFFFFFFFFFFFFFFFFFFFFFFFFFFFFFFFFFFFFFFFFFFFFFF:FFFFFFFFFFFFFFFFFFFFFF  
FFFFFFFFFFFFFFF,FFFFFFFFFFFFFFFFFFFFFFFFFFFFFFFFFFFFFFFFFFFFFFFFFFFFFFFFFFFFFFFFFFFFFFF  
FFF

@A00721:190:HGJW7DSXY:4:2221:24424:16955\_2:N:0:TCTGCAAG+GCTGCACT  
AAGATTAGAGAAGTAACCTCGGTGAACACGTCGGTAGCATTGATTTACTTTTTACCGTTAGAACTGAAAA  
AGATTCTTTTCGAAAAGAACCTATAAGTTACAAACGATTCTTCGACT

+

FF,FFFF:F,FF:FF:FF:F,F:FF::,FF,,,FF,,,:FF:FFFF,FFFF:,,:FFF:FF:FFFFFF  
F,FFF,FFFF::FFFFFFFFF:FFFFFFFFFFFFFFFFFFFFFFFFFFFFFFFFF

@A00721:190:HGJW7DSXY:4:1264:32913:11146\_1:N:0:TCTGCAAG+GCTGCACT  
AATAAAAATACTTCAAGTACCTGAACCTTTACATTTTTAATGGTATGGTATAATGTGTCTTACATATAG  
AACCTTCACTCTCGGTAATGAGAGTGATTCTTAATATTCTAGTAACCGCTATGTGGGCATTACTAG  
GAT

+

FFFFFFFFF:F:,F:,FFF,:F:FF,FFFFFFFF:F:FF,FF,FFFFFFFF,FFFFFFFFF::FFF,,,FFF:  
F,:,FFF:,F,F:FF,FFF:FFF:F,FFFF,,FFFFFFFF::FFF:,FF::FFFF:FFFFF::FFFF,FF  
F:F

@A00721:190:HGJW7DSXY:4:1509:13838:31375\_2:N:0:TCTGCAAG+GCTGCACT  
TTTAAATGCTAGGAAAATTTTAGAAAACTCCATTGTATAGTTCAAGGAGTACTTAATTCAATAGCTT  
TAGTATTATTTACTATCGCCTTTATTGAAAATTGTATAAGAGTTAATT

+

FFFFFFFFF:FFFFFFFFFFFFFFFFFFFFFFFFFFFFFFFFFFFFFFFFFFFFFFFFFFFFFFFFFFFFFFFFFFFFFFF  
FFFFFFFFFFFFFFFFFFFFFFFFFFFFFFFFFFFFFFFFFFFFFFFFFFFFFFFFFFFFFFFFF

@A00721:190:HGJW7DSXY:4:2573:6994:6120\_1:N:0:TCTGCAAG+GCTGCACT  
GGGAGAATGAAGTCCGCTTCCCAGGAAACGATCTATTTACAGAGTATTTAGAGTAGTCCAAAGTT  
TGATAAAATTTATATGATTTTCTATATATATACCACATATATATATATATAAAATCCTATAAATTTGT  
ACA

+

FFFFFFFFFFFFFFFFFFFFFFFFFFFFFFFFFFFFFFFFFFFFFFFFFFFFFFFFFFFFFFFFFFFF,FFFFFFFFFFFFFFF:FFFF  
::FFFFFFFFFFFFFFFFF:FFFFFFFFFFFFFFFFFFFFFFFFFFFFFFFFFFFFFFFFFFFFFFFFFFFFFFFFFFFFFFF  
FFF

@A00721:190:HGJW7DSXY:4:2231:15953:18004\_2:N:0:TCTGCAAG+GCTGCACT  
TACTACTCCCCAAACATAACATAACCATAACCTACCATGACCAATCATCGCTCCAAGTGGCACGCCAGAC  
GTAGGGTCAAACCTACTACCGCCTGTCGGCAGATCGGCACCACTGGTC

+

FFFFFFFFFFFFFFFFFFFFFFFFFFFFFFFFFFFFFFFFFFFFFFFFFFFFFFFFFFFFFFFFFFFFFFFFFFFFFFF  
FFFFFFFFFFFFFFFFFFFFFFFFFFFFFFFFFFFFFFFFFFFFFFFFFFFFFFFFFFFFFFFFF

@A00721:190:HGJW7DSXY:4:2606:2410:6355\_2:N:0:TCTGCAAG+GCTGCACT  
ACCCGCTGTGCAGAATAACCTTCCCAAATCTAGATCTGCACAGAAGAAGGCTGAAGGTCGTTACCGGA  
CGACCACTCAAAGGAAACGGGCTGTTGCCAGAGGAAAGCAGCGACCA

+

FFFFFFFFFFFFFFFFFFFFFFFFF:FFFFFFFFFFFFFFFFFFFFFFFFFFFFFFFFFFFFFFFFFFFFFFFFF:FFFFF  
FFFFFFFFFFFFFFFFFFFFFFFFFFFFFFFFFFFFFFFFFFFFFFFFFFFFFFFFFFFFFFFFF

@A00721:190:HGJW7DSXY:4:1658:4562:18192\_2:N:0:TCTGCAAG+GCTGCACT  
ACGGCAGTCCCGTCATCTCTGTGGGAAGTGAAGGAGTACCTCAGTCAAAAGTCACATTCACCACTCCC  
ATACCAATCAATGATGTGACTATACAGTTCGGCCATTTCAAGAGTGGT

+

FFFFFFFFFFFFFFFFFFFFFFFFFFFFFFFFFFFFFFFFFFFFFFFFFFFFFFFFFFFFFFFFFFFFFFFFFFFFFFF  
FFFFFFFFFFFFFFFFFFFFFFFFF:FFFFFFFFFFFFFFFFFFFFFFFFFFFFFFFFF:

@A00721:190:HGJW7DSXY:4:1272:17978:15749\_2:N:0:TCTGCAAG+GCTGCACT  
GGAGGTAAGCCTTCCCCTCCGCTGGCACGAAGAACTCCCAAGCCAATCAATAGTTCTTCTGA  
CCAGAATGAAAAGGGGTTTACCAGGGTAGTCTCTAAGTCTACCAGGAA

+

FFFFFFFFF:FFFFFFFFFFFFFFFFFFFFFFFFFFFFFFFFFFFFFFFFFFFFFFFFFFFFFFFFF  
FFFFFFFFF,FFFFFFFFFFFFFFFFFFFFFFFFFFFFFFFFFFFFFFFFFFFFFFFFF  
@A00721:190:HGJW7DSXY:4:1619:13150:10488\_2:N:0:TCTGCAAG+GCTGCACT  
CAAACTGATAAGAATAAAGGGAAAGGTCCATCAGGACCTAAGAAGGGGAAATTACCCCTAATTCTGA  
AGGAAGATCTCCCACCATCTGGGGTTGGAATAAGAAATCTGCAGATC  
+  
FFFFFFFFFFFFFFFFFFFFFFFFFFFFFFFFFFFFFFFFFFFFFFFFFFFFFFFFFFFFFFFFF  
FFFFFFFFFFFFFFFFFFFFFFFFFFFFFFFFFFFFFFFFFFFFFFFFFFFFFFFFF  
@A00721:190:HGJW7DSXY:4:1427:13774:4867\_2:N:0:TCTGCAAG+GCTGCACT  
CTACGAAGTCGCTGAAGGCGGCTTGGGTCAATTAAGGGTAGCTGTAAAGTTGCGCCTGCCGACCCATC  
TTTGAGACCAAGACTCTCTACAGTAGGTCGTGCCTACTATGAGCAAT  
+  
FFFFFFFFFFFFFF:FFFFFFFF:FF:FFFF:FFFFFFFF:F:FF,F:FFF:FFFFFFFFF:FF  
FFFFFFFFF:FFFFFFFFF:FFFF:FFFFFFFFF:F  
@A00721:190:HGJW7DSXY:4:1111:11180:29810\_1:N:0:TCTGCAAG+GCTGCACT  
TCGTCACTGAGGACGAAGGTGAGAGGACTTTTGGCTACTGGCGACAACTGAGAGCAGTCGCTGGGA  
AAGAGAATTGCGTGGGTGAAGGCCGACGCTTCGAGCTTGAGTGTGACGAGGCCGGTGACGTTTTGT  
CAA  
+  
FFFFFFFFFFFFFFFFFFFFFFFFFFFFFFFFFFFFFFFFFFFFFFFFFFFFFFFFFFFFFFFFF  
FFFFFFF,FFFFFFFFFFFFFFFFFFFFFFFFFFFFFFFFFFFFFFFFFFFFFFFFF  
FFF  
@A00721:190:HGJW7DSXY:4:2239:12328:20243\_1:N:0:TCTGCAAG+GCTGCACT  
GATTTTATCCGCGCTTAATACTATGGGGCGAAGATCCCCTATGGAGTCTTGAAGGACTTAGGTTGTCATA  
TTTATGCCGACGATAATAAGCATGTCACCCTTAAGCACCGAGGTAAGCTCGGACTTACAAGAGAGAG  
TGT  
+  
FFFFFF:F:FFF,,FFFF,FFFF,FF,,FFFF:FFFF,,FFFFFF:F:F:FFFF,:FFF,,:FF  
FFFF::F,,F,FFF,FF:FF:F:FFF::FFFFFFFF:FF::,FFF:FFF,F,:FFF,,,FFFFFF  
FFF  
@A00721:190:HGJW7DSXY:4:2178:23303:24126\_2:N:0:TCTGCAAG+GCTGCACT  
CTCTCACTATTTTTGCCGAGAATTGGGCTTTCTTACTGATGAGGTTAAACTCTTGCTCCTTCTGGG  
GGTGAGGGTTTTTGTATATTAATACTGGTTCTGGGAGGCTGCTTTCCTC  
+  
FF:FFF,FF:FFFF,:FFF:FFF,F:FFFFFF:F,FFF,F,FFFF:FFFF:F,F:FFFFFFF,F,F  
::FFF,FFFFFF:FFFFFF,F,,:FFF:FFF:F,:FFFFFF:FFF  
@A00721:190:HGJW7DSXY:4:1174:5511:2394\_2:N:0:TCTGCAAG+GCTGCACT  
TTTAGAGAGCATTAGAAGGAAGTTGGGCAAATCCACATATGGTAGACGTTGTCACACTTTTCTTGA  
AAATTTTCTTTCTCCGTCATTGGGGATTTCGATGTGAGAAGGTGG  
+  
FFFFFFFFFFFFFFFFFFFF:FFFFFFFFFFFFFFFFFFFFFFFFFFFFFFFFFFFFFFFFF  
FFFFFFFFFFFFFFFFFFFF,FFFFFFFFFFFFFFFFFFFFFFFFF  
@A00721:190:HGJW7DSXY:4:1558:21169:16423\_2:N:0:TCTGCAAG+GCTGCACT  
GGGTCTTCTTCATGCTGATCTTTCAGGACCTAATCACATCATGATTGATAGTTACGGCTCGGATCGAG  
TTGGAGGGAGGAAGTTCTCCGAAATTAAGACGGGGGATTAAGAGTC  
+  
F::F:FFFFFF:FFFF:FFFFFFFFFFFFFFFFFFFF:FFFFFFFFF:F,F:F:FFF,FFFF,  
FFFF,FFFF:FFFFFF::F,FFFFFFFF::F:F:FFFFFF  
@A00721:190:HGJW7DSXY:4:1670:25220:3646\_2:N:0:TCTGCAAG+GCTGCACT  
TCAGAGAGGGGAGCTCTGAAAAGGAACTTCGTGAGAAGATGAGGAAGTCTAAGAGGAGGAGTTTGA  
GAAGGCTCTAGAGAAGATCTCACCACTGGAGAAGGCAAGTGAGAGT  
+  
FFFFFFFFFFFFFFFFFFFFFFFFFFFFFFFFFFFFFFFFFFFFFFFFFFFFFFFFF  
FFFFFFFFFFFFFFFFFFFFFFFFFFFFFFFFFFFFFFFFF

@A00721:190:HGJW7DSXY:4:1449:15365:23093\_2:N:0:TCTGCAAG+GCTGCACT  
AAGAAGGATTATTTGAAGCAGGGTTACCACTTCCTAAGGTGGATGAGGGAGGTTGTTTCTTTGGAGT  
TTAGATAATCTTTTGAGAAGGGGTCATAGAGCCAGCAAGAGAAGCTT

+

FFFFFFFFFFFFFFFFFFFFFFFFFFFFFFFFFFFFFFFFFFFFFFFFFFFFFFFFFFFFFFFFFFFFFFFF  
FFFFFFFFFFFFFFFFFFFFFFFFFFFFFFFFFFFFFFFFFFFFFFFFFFFFFFFFFFFFFFFFFFFFFFFF

@A00721:190:HGJW7DSXY:4:2341:16984:13839\_2:N:0:TCTGCAAG+GCTGCACT  
CCTTGAGAAGACAAGCCACATTAAGATATAATTTAGGTCAACTTGGGGTTTCGAATGTCATTAGTGCC  
TTACGATTGAAAGAGGTCCTTTTGAGTATCGACAGATCTTTCGATCTT

+

FFFFFFFFFFFFFFFFFFFFFFFFFFFFFFFFFFFFFFFFFFFFFFFFFFFFFFFFFFFFFFFFFFFFFF:FFFFFFFF  
FFFFFFFFFFFFFFFFFFFFFFFFFFFFFFFFFFFFFFFFFFFFFFFFFFFFFFFFFFFFFFFFFFFFFFFF

@A00721:190:HGJW7DSXY:4:2612:18376:12054\_2:N:0:TCTGCAAG+GCTGCACT  
GTGGCAGAATTCGGTAACTTACCATATTGTTCTTCCGGGAAGTTGTGGGATTAACTTTGACTCAAC  
TACTCCGATCAGATCCGATGGTTTGATTGGTATGGACTACTCGACTT

+

FFFFFFFFFFFFFFFFFFFFFFFFFFFFFFFFFFFFFFFFFFFFFFFFFFFFFFFFFFFFFFFFFFFFFF:FFFFF  
FFFFFFFFFFFFFFFFFFFFFFFFFFFFFFFFFFFFFFFFFFFFFFFFFFFFFFFFFFFFFFFFFFFFFFFF:

@A00721:190:HGJW7DSXY:4:1439:19587:11898\_2:N:0:TCTGCAAG+GCTGCACT  
TCATGGCAGATACTACCGATAAGGTGAAAAATATGCAGGTCAAAGATTCTGTAGCTCTGAGGGCGGTT  
GAGGGAGCCGTTTGGCCGACTTTAACTATTCTAAGAGTCTTTATGAT

+

FFFFFFFFFFFFFFFFFFFFFFFFFFFFFFFFFFFFFFFFFFFFFFFFFFFFFFFFFFFFFFFFFFFFFF:  
FFFFFFFFFFFFFFFFFFFFFFFFFFFFFFFFFFFFFFFFFFFFFFFFFFFFFFFFFFFFFFFFFFFFFFFF

@A00721:190:HGJW7DSXY:4:1224:16911:17221\_2:N:0:TCTGCAAG+GCTGCACT  
CGTTGTCGTACCTTACAAGGTTGAGGAGACTTTACAGCGGCTTATTGTCGCGCAGTTTCCAGAATTGC  
GGTTGAAGTTCACCCATTCTATCTTGAATGCTCACGCCGTCGCAGCCA

+

FFFFFFFFFFFFFFFFFFFFFFFFFFFFFFFFFFFFFFFFFFFFFFFFFFFFFFFFFFFFFFFFFFFFFF:F,FFFFFFFFFFFFFFFFFFFFFFFF  
FFF,FFFF:FFFFFFFFFFFFFFFFFFFFFFFFFFFFFFFFFFFFFFFFFFFFFFFFFFFFFFFFFFFF

@A00721:190:HGJW7DSXY:4:1268:24894:23156\_1:N:0:TCTGCAAG+GCTGCACT  
ATCACTTGTTAAAGTACAGATTTAGTGATTTAGATATTATTGATATTGGAGGCGATATTCGTTTTTCAT  
ATCCAAAACCTCTTGAATGGAGTACATATTTGCAACCCTATTCTTGATGTGAAAGATGCATCGAGGTA  
TAC

+

FFFFFFFFF:FF:FFFFFFFFFFFFFFFFFFFFFFFFFFFFFFFFFFFFFFFFFFFFFFFFFFFFFFFF  
FFFFFFFFFFFFFFFFFFFFFFFFFFFFFFFFFFFFFFFFFFFFFFFFFFFFFFFFFFFFFFFFFFFFFFFF  
FFF

@A00721:190:HGJW7DSXY:4:2158:30472:11772\_1:N:0:TCTGCAAG+GCTGCACT  
ATTGATTGGGAACGTACCTACTCACGAGACGTATGAAAGCTATCGGAGGGAAGCAAAATGTTTCGTT  
CTGTTACAAGAACGCTTTGGATTGTGACCATAAAGCCTCAGTTGCGATAGCTGTAGAGGTATACGATA  
TCT

+

FFFFFFFFFFFFFFFFFFFFFFFFFFFFFFFFFFFFFFFFFFFFFFFFFFFFFFFFFFFFFFFFFFFFFF  
FFFFFFFFFFFF:FFFFFFFFFFFFFFFFFFFFFFFFFFFFFFFFFFFFFFFFFFFFFFFFFFFFFFFF  
FFF

@A00721:190:HGJW7DSXY:4:2347:30816:16595\_2:N:0:TCTGCAAG+GCTGCACT  
GCCACTATAATGCTTAAGAGAGAGATTGATGTATGTCATTTCGTCTTAGTTTGTCCCGGCGAATTATT  
GGACACGATGAAAAATGACATACCCGTTCTGACCTTGGTATCGTTAT

+

FFFFFFFFFFFFFFFFFFFF:FFFFFFFFFFFFFFFFFFFFFFFFFFFFFFFFFFFFFFFFFFFFFFFF:FFFFF  
FFFFFF:FFFFFFFFFFFFFFFFFFFFFFFFFFFFFFFFFFFFFFFFFFFFFFFFFFFFFFFFFFFF:F

@A00721:190:HGJW7DSXY:4:1524:18258:27070\_1:N:0:TCTGCAAG+GCTGCACT  
GGTTATTCTCACAAACAAAGATAAGATTTTATCTTTCTTCAAACACCCTGTTTTCTTAAGGGCGGACA



GGGAATTATTAAATCATTCTTCTCACTCTTGACGAGAATTATTACTGTTTTCTCTACCCATAACTTCT  
TTT

+

FF:FFFFFFFFFFFFFFFFFFFFFFFFFFFFFFFFFFFFFFFFFFFFFFFFFFFFFFFFFFFFFFFF  
FFFFFFFFFFFFFFFFFFFFFFFFFFFFFFFFFFFFFFFFFFFFFFFFFFFFFFFFFFFFFFFF  
FFF

@A00721:190:HGJW7DSXY:4:1643:15600:15515\_1:N:0:TCTGCAAG+GCTGCACT  
ACTGGAGTTCAGACGTGTGCTCTTCCGATCTGTTTCAACACTTATCACCACCTTTTGAAAGGAAAATAA  
TTGGTGATGAAAATACGTATGTCGGTGGGGTCTCAAGGCTCTCATCGCCACTGGGATTCTAAGGGGT  
TCC

+

FFFFFFFFFFFFFFFFFFFFFFFFFFFFFFFFFFFFFFFFFFFFFFFFFFFFFFFFFFFFFFFF  
FFFFFFFFFFFFFFFFFFFFFFFFFFFFFFFFFFFFFFFFFFFFFFFFFFFFFFFFFFFFFFFF  
FFF

@A00721:190:HGJW7DSXY:4:2662:30327:29904\_2:N:0:TCTGCAAG+GCTGCACT  
TTCAATGATCAGGATTCTTCTTTTGGTCCCTACGTCTTAAGTAATTTGGATGTTGTGCGAAACTATCA  
GGTTCTTGTCACGATTCTTAAAGAAGTTTATTAAACTTCAGAGTCT

+

FFFFFFFFFFFFFFFFFFFFFFFFFFFFFFFFFFFFFFFFFFFFFFFFFFFFFFFFFFFFFFFF  
FFFFFFFFFFFFFFFFFFFFFFFFFFFFFFFFFFFFFFFFFFFFFFFFFFFFFFFFFFFFFFFF  
FFF

@A00721:190:HGJW7DSXY:4:2215:13087:4366\_1:N:0:TCTGCAAG+GCTGCACT  
GGTAGCTAATGTTCTTGCAATAGCCACAGACTTTCTGGGAAAAGAGACCTCTGTTGTAGAGGAGTTGA  
GAGAATTACTCAGATTCAATCTGGCATCACTGAACGTCTACAACGAGTTAGGGAGTGGCTAGGTTTTA  
AAA

+

FFFFF:FFFFFFFFFFFFFFFFFFFFFFFFFFFFFFFFFFFFFFFFFFFFFFFFFFFFFFFF  
FFFFFFFFFFFFFFFFFFFFFFFFFFFFFFFFFFFFFFFFFFFFFFFFFFFFFFFFFFFFFFFF  
FFF

@A00721:190:HGJW7DSXY:4:2176:15854:15327\_1:N:0:TCTGCAAG+GCTGCACT  
CAATACCTTCCACTGAGTTCATCACCCAGAGTTTCGACGTCGCGGAAAACGATGAAGATTTCCACACT  
GTTTCGAGAATCTTCTGATGCTGAATTTGAGGAAAATTTTCGGAAGTTTTTGGTATAAATCCTGATG  
CTC

+

FFFFFFFFFFFFFFFFFFFFFFFFFFFFFFFFFFFFFFFFFFFFFFFFFFFFFFFFFFFFFFFF  
FFFFFFFFFFFFFFFFFFFFFFFFFFFFFFFFFFFFFFFFFFFFFFFFFFFFFFFFFFFFFFFF  
FFF

@A00721:190:HGJW7DSXY:4:2265:16351:2440\_2:N:0:TCTGCAAG+GCTGCACT  
AAAACCTTCTTTTATCATTGCAACAGGACTTTGAGTAGACTGTTGAAATGGACAAAATCTGGGATCAT  
AGGTATGTGTACGCTACACTCGAAATATGGGCCCTCATAAGGAAGTA

+

FFFFFFFFFFFFFFFFFFFFFFFFFFFFFFFFFFFFFFFFFFFFFFFFFFFFFFFFFFFFFFFF  
FFFFF:FFFFFFFFFFFFFFFFFFFFFFFFFFFFFFFFFFFFFFFFFFFFFFFFFFFFFFFF  
FFF

@A00721:190:HGJW7DSXY:4:2131:24044:9314\_1:N:0:TCTGCAAG+GCTGCACT  
CGTCATTACAGTCTGGAAGTTAGATCATTTGTTTCAAGGAGATCTCTACAGAGATTATCGAGAGTTGTG  
ATCTAGTTCTAAATTTAGGTCGACGACTTTAGCAACTTTAGATAAATTCTTCCGGGCTCAATGACC  
TTT

+

:FFFFFFFFFFFFFFFFFFFFFFFFFFFFFFFFFFFFFFFFFFFFFFFFFFFFFFFFFFFFFFFF  
FFFFFFFFF:FFFFFFFFFFFFFFFFFFFFFFFFFFFFFFFFFFFFFFFFFFFFFFFFFFFFFFFF  
FFF

@A00721:190:HGJW7DSXY:4:2537:24451:11741\_1:N:0:TCTGCAAG+GCTGCACT  
TCTGACCATCGCAAAGAAGACTTTATTAGTTCATGAAGTTCTTACACTTCTCGCGACTAATGTCAGCT  
TCACTACAAAGGCGTTACGTAAAGTAGTTTTACGCTTTATCTTAAAGCATTACCACCAAATTTAGCA  
CTT

+  
FFFFFFFFFFFFFFFFFFFFFFFFFFFFFFFFFFFFFFFFFFFFFFFFFFFFFFFFFFFFFFFFFFFFFFFF  
FFFFFFFFFFFFFFFFFFFFFFFFFFFFFFFFFFFFFFFFFFFFFFFFFFFFFFFFFFFFFFFFFFFFFFFF  
FFF  
@A00721:190:HGJW7DSXY:4:2617:5068:20102\_1:N:0:TCTGCAAG+GCTGCACT  
CGTGTGCTCTTCCGATCTAGACATGCCAGTTAGAGTTCTTCTAACCAGGACTGATGGTGAGATTCTTT  
TACCTTTTGGAGGTCCAGGAACCTTTACTCCTAGTGTCTTTTCTAGAGTCCAAGGACGTTTCCGTCGG  
AGG  
+  
FFFFFFFFFFFFFFFF:F,FFFF:FF:FFFFFFFFFFFFFFFFFFFFFFFF,FFFFFFFFFFFF:FF:FF  
,FFFFFFFFFFFFFFFFFFFFFFFFFFFFFFFFFFFFFFFF:FFFFFFFFFFFFFFFFFFFFFFFF  
FFF  
@A00721:190:HGJW7DSXY:4:2678:31919:10175\_2:N:0:TCTGCAAG+GCTGCACT  
GACCGCTCAATAACACTCTATTGAATCCCTTTCCACGATGAAAGCTCTTTATGAGGTGCTCCATGCA  
AATTTACAGTTCCTCTTTGGTGATATCGCCTCTGTCCTTTCTCCTTTA  
+  
,FF:FFFFFFFFFFFFFFFF:FFFFFF:FFF:FFFFFFFFFFFFFFFFFFFFFFFF:FFFFFFFFFFFF  
FFFFFFFF:F,:F,F:F::FFFFFFFF,:FFFFFF,:FFFF,FF,,F  
@A00721:190:HGJW7DSXY:4:2406:9109:36902\_2:N:0:TCTGCAAG+GCTGCACT  
ACTTGGGTTTATCGGTTGATTTTGATAAATTTGTTGGAATCGATAATGATACTGACGAAGGTTCTAT  
TACCACCCTTGTCATTGATACAAACATTCTAGGTGATGCTTTCTTAGA  
+  
FFF:::FF:FF:FFFF,FFFFFFFFFFFF:F,FF,FFF::,F,FFF::FF::FF,FF,:FFF:FF  
FFF,F::F:F,:FFF:FFF:FFFFFF::FF::F:F:,F,F:FFFF,F  
@A00721:190:HGJW7DSXY:4:1309:18575:6605\_2:N:0:TCTGCAAG+GCTGCACT  
TACAATCTGTAGAGAGAGAGGTTAATCAGAATTTGAGTGATAACGATTTAGTACTGGGAAATGGTGGT  
AGTCAGTTTACTACTTTTCTTTCCCTCCCCTTTTTCGATTGGATTCTGA  
+  
FFF,FF,:F:FFFFFFFF,,FFFFFF:FFFF:F,,FFFFFFFF:F:F:FFF,:FFFF,F::F  
FFF:FFFFFFFF:FFFF:FFFF,F::F::F:FFFFFF,FFFF  
@A00721:190:HGJW7DSXY:4:2512:1118:35837\_2:N:0:TCTGCAAG+GCTGCACT  
TTGATAAGGTTTTCTTTTATGGGACTCTTGTGTTGACTTATGAAGGAGGTATTACTTCGGAAGTTCT  
TAATGTAGGTCTCCTAGTACTTAAGGGTTTATGTTTCGGTTTCAGCTG  
+  
FFFFFFFFFFFFFFFFFFFFFFFFFFFFFFFFFFFFFFFF:FFFFFFFFFFFFFFFF:FFFFFFFFFFFFFFFF  
FFFFFFFF:F:FFFFFFFF:FFFFFFFFFFFFFFFF,FF  
@A00721:190:HGJW7DSXY:4:1674:22146:25755\_1:N:0:TCTGCAAG+GCTGCACT  
TTCACATTGCGTGATCACTTCCCGTGGACTTGGAAGAGATTAAACATAAAATCCAGCGATTCTATTA  
TGTCGCTAAAGCCTGTCCAGTTGTGATGATGTTTCGGGCTGTGGGATTAACCTCCCTCGTGAACTT  
ACG  
+  
FFFFFFFFFFFFFFFFFFFFFFFFFFFFFFFFFFFFFFFFFFFFFFFFFFFFFFFFFFFFFFFFFFFFFFFF,  
FFFFFFFFFFFFFFFFFFFFFFFFFFFFFFFFFFFFFFFFFFFFFFFFFFFFFFFFFFFFFFFF,FFFFFFFFFFFF  
FFF  
@A00721:190:HGJW7DSXY:4:1521:17996:12806\_1:N:0:TCTGCAAG+GCTGCACT  
CACAAGGATTACTAAGTCTGAGATCTGCCACTTCTAATTTTATGAAACGTCGCGAAAATAAAGTTCAT  
GAGGATGTCTTGGTCGAAAAATATCGCCGGGAACCTCTAATAGAGGATCCTGATGACATTATTTCAAC  
GGA  
+  
FFFFF,,:FFF:,,:FFF,:FFFF:FF::FFF::,FFFF,,:FF:,FF,,FFF:F,FFF,FF,FF  
::FF,F,FF:FF:F::F,,FFFFFF,,F,F::,FFF,:FFFF,F:,FF,:FF:F:,::FFFF::F,,  
FF:  
@A00721:190:HGJW7DSXY:4:2256:24605:23844\_2:N:0:TCTGCAAG+GCTGCACT  
AGTTCTACCACAGAAACCGTCTCAGGAAGTGTCTCCACTGATTCGGAATTAGAGAAAGACGACCTTCT

TGTGGGGACTGAGACCTCTGAATTTTCAGGGTGCCCTGATGAGGACGT  
+  
FFFFFFFFFFFFFFFFFFFFFFFFFFFFFFFFFFFFFFFFFFFFFFFFFFFFFFFFFFFFFFFFFFFFFFFF  
FFFFFFFFFFFFFFFFFFFFFFFFFFFFFFFFFFFFFFFFFFFFFFFFFFFFFFFFFFFFFFFFFFFFFFFF  
@A00721:190:HGJW7DSXY:4:1457:26738:23907\_1:N:0:TCTGCAAG+GCTGCACT  
ACTCTGAGACTTCTAAGAGTGTTC AAAAGACCAGAAACGTAACAAGAAGAATAAAGGTAGGAAGGGG  
AGAAAACAGAACAAGCGAGCGGTTGAAGAGAAAACCTGATATGGTTGCGGCTGATCGTACCCCAATTCC  
TGC  
+  
FFFFFFFFFFFFFFFF:F:FFFFFFFF:FFFFFFFFFFFFFFFFFFFFFFFFFFFFFFFFFFFFFFFFFFFF  
FFFFFFFFFFFFFFFFFFFFFFFFFFFFFFFFFFFFFFFFFFFFFFFFFFFFFFFFFFFFFFFFFFFFFFFF  
FFF  
@A00721:190:HGJW7DSXY:4:1513:10267:3959\_2:N:0:TCTGCAAG+GCTGCACT  
CTCGGCGATACCACTGATCTTCCAGAGTTACGTAGTGGTCGTTCTTTTGGTGATTTTATCAAAGAGAA  
AGTTTCTGCGAGTCGCGACGATAGTATTTATCGGAGTGATATTAACAA  
+  
FFFFFFFFFFFFFFFF:FFFFFFFFFFFFFFFFFFFFFFFFFFFFFFFFFFFFFFFFFFFFFFFFFFFFF,FFFFFFFF::FFFFFFFF  
FFFFFFFF,FF:FFFFFFFF::F:FFFFFFFF:FFFFFFFFFFFFFFFF  
@A00721:190:HGJW7DSXY:4:1167:26431:21590\_2:N:0:TCTGCAAG+GCTGCACT  
CACTTACAAGAGTGTGAAGTACCGCAACATGGATCAGTTTCTAAAAGCTATTAATAGCAGTTGCG  
GGGCTATAATACCGCCTCCAGATTACTCTAACTGAATCCACTCTCTT  
+  
FFFFFFFFF:FFFFFFFFFFFFFFFF:FFFFFFFFFFFFFFFFFFFFFFFFFFFFFFFFFFFFFFFFFFFF  
FFFFFFFFFFFFFFFFFFFFFFFFFFFFFFFFFFFFFFFFFFFFFFFFFFFFFFFFFFFFFFFFFFFF  
@A00721:190:HGJW7DSXY:4:2332:17345:14465\_2:N:0:TCTGCAAG+GCTGCACT  
TTTGGAAGTGTGTAATGTCCTACGTACTGTTCAAGGTGTTGGGCTTCTCTAAAGAACAGCAACTTTC  
AACATGAATTAGTTATTGAAAGTCTTGACCCTCACGTCTCACTTTATC  
+  
FFFFF,FFFFFFFFFFFFFFFFFFFFFFFFFFFFFFFFFFFFFFFFFFFFFFFFFFFFFFFFFFFFFFFF  
FFFFFFFFFFFFFFFFFFFFFFFFFFFFFFFFFFFFFFFFFFFFFFFFFFFFFFFFFFFFFFFFFFFF  
@A00721:190:HGJW7DSXY:4:2635:18783:14231\_2:N:0:TCTGCAAG+GCTGCACT  
AGACCTTCTTGCGAGTAAAGAGGGTTTGA AAATTACGGAACCTTCTCGTTCTTCAAGAAGATCT  
TCGAGTGTTTTATAGTGAGTTATTCTTGCGAAGGATCAATTCTATTGA  
+  
FFF:,FFF,,,F,,,FFFF::FF,FFFF::FFF:,F,F,F,:FFFFFF,F,FFF,FFF,,,FF:,F,,  
F:FF,,:F,,:FFF,F,FFFF:,F,,F,FFF::,,FFFF,,F,FF,,,  
@A00721:190:HGJW7DSXY:4:2346:12888:33364\_2:N:0:TCTGCAAG+GCTGCACT  
AAGAAGTTCTTCGCAGTTGAATCTCCACCAGGTGGAGGGAAGACCACTGAAGTTATAGCGACTTTTGT  
CGAATTTTTCGCAAAGGTCTTGAAGTACGTATTGTCACTGCTAATCG  
+  
FFFFFFFFF:FFFFFFFFFFFFFFFFFFFFFFFFFFFFFFFFFFFFFFFFFFFFFFFFFFFFFFFFFFFF  
FF:FFFFFFFFFFFFFFFFFFFFFFFFFFFFFFFFFFFFFFFFFFFFFFFFFFFFFFFFFFFF  
@A00721:190:HGJW7DSXY:4:1544:24008:35399\_2:N:0:TCTGCAAG+GCTGCACT  
CACTTCTAGTTCATCGCGGTATTTGTGAAATTAAGACAGACGTGAAAGTTATGATGAGTGATCGTATT  
AGAACAGCTGATTCTTATTGCATGAACGTCGCTGAGGTCAAACCTGTG  
+  
FFFFF,FFFFFFFFFFFFFFFFFFFFFFFFFFFFFFFFFFFFFFFFFFFFFFFFFFFFFFFFFFFF:FFFF  
FFFFFFFFFFFFFFFF:FFFF:FFFF::FFFF,F,F,:FF,FFF:::  
@A00721:190:HGJW7DSXY:4:2442:23086:34741\_1:N:0:TCTGCAAG+GCTGCACT  
CATCGACGAATTATTCATGATTCACGCTGGTCAGACCCTTTTCTTACACATCTACTTAAGGCGGCTT  
ATACCATAGGTTACGGTGATTCCAATCAAATCGGATTCATCAATCGTATTGATCTCCAAGTCGAAAC  
TAC  
+  
FFFFFFFFFFFFFFFFFFFFFFFF,FFFFFF:FFFFFFFFFFFFFFFFFFFFFFFFFFFFFFFFFFFFFFFF

@A00721:190:HGJW7DSXY:4:2308:3775:29074\_2:N:0:TCTGCAAG+GCTGCACT  
TTGATGAGTGTCTTCTTATCGAAGTCTCAGTTATCGCTGCCCGCCGACGTTTGTGCGAACTCTCA  
GAGGTTTACGGCAGAAAAATTTCTCCTGCTTGTAAATTCGAGAGAGGAC

@A00721:190:HGJW7DSXY:4:1510:30391:18333\_1:N:0:TCTGCAAG+GCTGCACT  
TTAGACCTATCAGATGTCTTGACGACTTCGAATTTGAGGACGGAGTTAAATATATTACTTTCACTCAA  
GGTGAAAAGTTTGAAATTAACAAAGTCCTTGTAAGAGTAAGGTTAAATGTGAAGATGCTCAGACTAT  
TCA

@A00721:190:HGJW7DSXY:4:1417:8323:33974\_1:N:0:TCTGCAAG+GCTGCACT  
TGACCCTGTTTTTGCATCACAAACACATATTACCGTTGCTCTATCACACACGTTGAATCTTTACGATA  
CTTTGTTATCAATGTAAAGTTAAACGATGCTACTTGTGAGAGGATCAATCACAGTAAGGAACTGTCAC  
GT

@A00721:190:HGJW7DSXY:4:1530:19497:32315\_2:N:0:TCTGCAAG+GCTGCACT  
AGATTC AACCCCTTATATCGAGGCTATCGAGGACGATGAGTATCTTGAAGTTGTTGACGACAAGCCTC  
AAGAGGGTAGAGGACCACCTGGATCTTCTACTGTCTCTGCCTTCAAAG

@A00721:190:HGJW7DSXY:4:1463:1154:23844\_2:N:0:TCTGCAAG+GCTGCACT  
TTATTCCTGGAACCACTTAACGTCACCTCGGTAATCTTTCAGCCGAATTAAGTACTAATGAGTTCAAG  
TCGGTTGTCGATCGAATTAAGATCAAGGCTAATACCTTTATAGGTAAG

@A00721:190:HGJW7DSXY:4:2321:25961:10974\_1:N:0:TCTGCAAG+GCTGCACT  
CATCAGTCAGAGTATACCCGATAGGGTACCGAGTCTCCAAGAGAATATTTATTCTTATGAGGCTCGAA  
ACTTCAACGTTTTACAAACGGAAAGACATATCGCACCCGAAATTTTTGGGCAGAATGCTCTTAACGCG  
GT

@A00721:190:HGJW7DSXY:4:2413:2428:29309\_2:N:0:TCTGCAAG+GCTGCACT  
GATCAGTCTAAGTTGGATAAAGTTATAGGAGACTCAGTTAACCTGAGAGCTCCTCAATTGATAGATTG  
GGTCAACAATAGGGACGCTAGTATACTTCGTAAAGTCGACAGCGAAAT

@A00721:190:HGJW7DSXY:4:1612:10556:20682\_2:N:0:TCTGCAAG+GCTGCACT  
AATTGGACCGACTATATGACCTATTTTAAGCTCATGGTGAAGGGAAGCTAAGGTTAACTTGATGC  
TTCAGCCTTTTCGAAGCATAACCCCGCACAGAATATCGTTTATCACGC



[illegible]

@A00721:190:HGJW7DSXY:4:1430:23466:35994\_2:N:0:TCTGCAAG+GCTGCACT  
TTTCTTCTTTGTTTCCTTCTTTGCACTGATTTTCTCATCAGCTTGTGTTTACCTAATCTGTGTTT  
TTACGATAACAACATCATCAGTTGATTAAGACTCTTCCGAAAGGCGAACT

+

,FFFFFFFF:FFFFFFFF:FFFFFFFFFFFFFFFFFFFFFFFF:FFFFFFFFFFFF:FFFFFFFF  
FFFFFFFFFFFFFFFFFFFFFFFFFFFFFFFF:F:FFFFFFFFFFFFFFFF:F

@A00721:190:HGJW7DSXY:4:1609:4698:15859\_2:N:0:TCTGCAAG+GCTGCACT  
GAAGCTCAGGGTGAAGCACAACGTTTGACCGTGACGAACTGTGGTGTCTTGATCTACGTTACGGATA  
TACTCTCCTTGAGTTCACTCGTAAGGACACTACCACTTATTACGATAT

+

FFFFFFFFFFFFFFFF:FFFFFFFF:FFFFFFFFFFFFFFFFFFFFFFFF,FFFFFFFFFFFFFFFF:FFFFFFFF:  
FFFFFFFFFFFFFFFFFFFFFFFFFFFFFFFF:FFFFFFFFFFFFFFFFFFFFFFFF

@A00721:190:HGJW7DSXY:4:1304:14642:16423\_1:N:0:TCTGCAAG+GCTGCACT  
AGCGTCTTCTGTTTCATCGCAACCAGATGATATCTTCTATTGCACTTATGTTTCGATCAGTGTCTTCT  
CTATCAGGAGGAAAACACTTGTTCTAGTCCTTGTAAGATTAATCCTAACGTAGAAGATTGTTGTTTAC  
CAC

+

FF,FF,FFFFFFFF:FFF:FFFFFFFFFFFFFFFFFFFFFFFF:FFFFFFFFFFFF:FFFFFFFFFFFF  
:FFF:FFFFFFFF:FFFFFFFF:FFFFF:FFFFFFFFFFFFFFFF:FFFFFFFFFFFFFFFFFFFF  
FFF

@A00721:190:HGJW7DSXY:4:1449:31711:25786\_2:N:0:TCTGCAAG+GCTGCACT  
TCTTCTAATGTGGCCTGAACTACGTTTCACTTTGTGTGTAAGTGTCTCTATTTTAAGTTTGTCTTCC  
TTGTTTGTCTTATTCTATTAATCACTCATTTTAGTGAGATTATTAATA

+

FFFFFFFFFFFFFFFFFFFFFFFFFFFFFFFFFFFFFFFFFFFFFFFFFFFFFFFFFFFFFFFF:FFFFFFFF,  
FFFFFFFFFFFFFFFFFFFFFFFFFFFFFFFFFFFFFFFF:FFFFFFFFFFFF

@A00721:190:HGJW7DSXY:4:1336:11993:23578\_2:N:0:TCTGCAAG+GCTGCACT  
CGACAACAGCAGGGGTTTTCGAATAGTGATAGCCACCCGCCTTACAGAGGGCAGCAGCATGACCATA  
ATTGGTATTGACTTTGGTACCACCTTTTCTACTGTCTGTCTCGCCTCT

+

FFFFFFFFFFFFFFFFFFFFFFFF:FFFFFFFFFFFFFFFFFFFFFFFFFFFFFFFFFFFFFFFF:FFF  
F,FFFFFFFF:FFFFFFFFFFFFFFFFFFFFFFFFFFFFFFFFFFFFFFFF

@A00721:190:HGJW7DSXY:4:2644:10646:7404\_1:N:0:TCTGCAAG+GCTGCACT  
CGTGTGCTCTTCCGATCTGTGAATTTATACCTACAATCATTTGGTTTTTCTAATAATGATGACACTATT  
GTTTATGGATATGATGCTATTACTCATGATGGTTACGGTCAGGGAGGATTCTCAGTTTACAAGGACCT  
TAA

+

FFFFFFFFFFFF:FFFFFFFFFFFFFFFFFFFFFFFFFFFFFFFFFFFFFFFFFFFFFFFFFFFFFFFF  
FFFFFFFFFFFFFFFFFFFFFFFFFFFFFFFFFFFFFFFFFFFFFFFFFFFFFFFFFFFFFFFFFFFF  
FFF

@A00721:190:HGJW7DSXY:4:2152:1588:5588\_2:N:0:TCTGCAAG+GCTGCACT  
CCGAAAGACGTGCTAAATTAACCATTGTACGATGTCTGTCTCGGCGATCACTTTTCACTAAGA  
ATTGGTCCTACTTTTGACAAGGCCAACTTCGTAATCTTCATGAGATC

+

FFFFFFFFFFFFFFFFFFFFFFFF:FFFFFFFFFFFFFFFFFFFFFFFFFFFFFFFFFFFFFFFFFFFF  
FFFFFFFFFFFFFFFFFFFFFFFFFFFFFFFF:FFFFFFFFFFFFFFFF

@A00721:190:HGJW7DSXY:4:1577:17146:8265\_1:N:0:TCTGCAAG+GCTGCACT  
TTAGGGATTTGAGAGAGTGAAAGGCTTCAATTGTAGTGGTTTGGTCGTTTCAGTACCCAGTCAGTAT  
ACCTCTACGCAAAGATATTTTCATGAAAACACAGAGGAACGTACCGGATTACCTGTCTTTCATATTAT  
GAA

+

FFFFFFFFFFFFFFFFFFFFFFFF:FFFF,FFFF,FFFFFFFFFFFFFFFFFFFFFFFF:FFFFFFFF  
FFFFFFFFFFFFFFFFFFFFFFFFFFFFFFFF,FFFFFFFFFFFFFFFF:FFFF:FFF:FFFFFF  
FFF

@A00721:190:HGJW7DSXY:4:2276:15817:15765\_2:N:0:TCTGCAAG+GCTGCACT  
TCTTTGCTTCGATGTTGGATGTCAAGAAGGGTTCAGAATGGGATTCTACGTAGTTTATGACTTTGGT  
GGTGGTACTTTCGATACTTCTATCGTCTTACGTTACGGTAATTACTAT

@A00721:190:HGJW7DSXY:4:1531:18846:12994\_1:N:0:TCTGCAAG+GCTGCACT  
ATAATCTTGGAGGTCGTGACGTTGATGAAGCTATAAGAGCGTTCTTATTACGGCGCACTTCTTTACCC  
GCCACCACACAACCTTTCAGTTTCACAACCTGAAGGAGGAGGTTTCTGTTACTGGAAAACCCTCGTCAAT  
ACT

@A00721:190:HGJW7DSXY:4:1176:31575:2848\_2:N:0:TCTGCAAG+GCTGCACT  
GATCTAGTGAAATTAACGCGTCCTTTCTGGAACGTAGTTTACTATTATGAACAAAGTTATCAAAGA  
TAGTGGCATTCAAGGCCAACTTACCCTGATTCCGGCCGGTGGTAGCTC

@A00721:190:HGJW7DSXY:4:1226:10013:27132\_2:N:0:TCTGCAAG+GCTGCACT  
GGCTATTACTCTTGCTGAAACAGCTATTAAAGCTGTTGAGCGGTAATTACACCTAAACGAGCTCGAT  
CTGCCATCGCTGAAGGATGTGCACTCTTTTCTGCTACTTTAACGGAGC

@A00721:190:HGJW7DSXY:4:1611:27706:12211\_2:N:0:TCTGCAAG+GCTGCACT  
TCGATTGTATCAACAGTAACATTACTTCTAATAAAGGCTCTATCAAGCTCGTATTATCGTCGCTGCT  
GGATCTGCGTTACCGTTGAAGGCTAAACTCCAAGGTAATCATGAAGAC

@A00721:190:HGJW7DSXY:4:2126:11324:9799\_1:N:0:TCTGCAAG+GCTGCACT  
GTATGAGGGTGTTCCTAATCGTAACATTAATAATTTCAATCTTCTTAAAAAGAAGATAGAGAGTCATA  
CTTTGGGCTATCGTTCAGGTGCATGGGGTTGGATAGCCAATATTGAAGTGGACACCTCTGGTAGTATC  
GAA

@A00721:190:HGJW7DSXY:4:1270:3676:3443\_1:N:0:TCTGCAAG+GCTGCACT  
CTAAGCATACTACTTTTGCTTTGATTACTCTACCGCCTTACAAGTCTAAGGTTAAAGAGTCGATTAAA  
CAAGTTGTACTTATCAATGATTTTATCGCTGGTTGTTATCTCGAAAAGTCTCTTCTAAAAGGAACGTC  
AGT

@A00721:190:HGJW7DSXY:4:1177:4707:29778\_2:N:0:TCTGCAAG+GCTGCACT  
CTAAAATATTTACAAAATCTTACCACTATCTACGAACCTAAAGTTCTGAAGACGTTGCTTGTGCGTTC  
CTCCTTTAATGGCACTACCTCGGTACAATCTTACTTGGAACGAAGGCG

@A00721:190:HGJW7DSXY:4:1151:15058:7185\_1:N:0:TCTGCAAG+GCTGCACT  
GTTCTGTCTATATTAGGTGAAGCGAAATACGATTTTGAACGTCAACGTTACCGAGTTTCGTTTCGTA  
CCTTGATGCTGACTTTCGTCAATATGATTTGATCTGGTTGCTCAATTCTAAGCGTGTTCGCTTAGTG  
CGA

+

FFFFFFFF:FFFFFFFFFFFFFFFFFFFFFFFFFFFFFFFFFFFFFFFFFFFFFFFFFFFFFFFFFFFFFFFF  
FFFFFFFFFFFFFFFFFFFFFFFFFFFFFFFFFFFFFFFFFFFFFFFFFFFFFFFFFFFFFFFFFFFFFFFF  
FFF

@A00721:190:HGJW7DSXY:4:2636:23023:31501\_2:N:0:TCTGCAAG+GCTGCACT  
GAGTATTGCTATTTATACGGTTACGAGAAGAAGGTTTCAAAGTTTGAGAACTTAGTTTACGAACTTGA  
CTCTACTATACGTGACATACTAAATACTAGATATTTGGATGATCTTGA

+

FFFFFFFFFFFFFFFFFFFFFFFFFFFFFFFFFFFFFFFFFFFFFFFFFFFFFFFFFFFFFFFFFFFFFFFF  
FFFFFFFFFFFFFFFFFFFFFFFFFFFFFFFFFFFFFFFFFFFFFFFFFFFFFFFFFFFFFFFFFFFFFFFF

@A00721:190:HGJW7DSXY:4:1569:2718:12837\_2:N:0:TCTGCAAG+GCTGCACT  
AAAATTTTCTTCCTTGGATTTTAATATAAAGAATCTTTACCAGGACTCCTACTACAGGAGGCAGTCTT  
CTGATCGTAAGAAGTTTATAAGGAACATATCCATTTGTTGTAATAGGG

+

FFFFFFFFFFFFFFFFFFFFFFFFFFFFFFFFFFFFFFFFFFFFFFFFFFFFFFFFFFFFFFFFFFFFFFFF  
FFFFFFFFFFFFFFFFFFFFFFFFFFFFFFFFFFFFFFFFFFFFFFFFFFFFFFFFFFFFFFFFFFFFFFFF

@A00721:190:HGJW7DSXY:4:1455:19642:1939\_2:N:0:TCTGCAAG+GCTGCACT  
CGAAACTCTAAGTGGAATACTGTCTTTCCAAGCTTACCTGTATCTTCAATGAAATTGGACTCTTCGA  
TAGGGGACATTTTATCGTGGGCTTCCGTAAAGGAAGATCTGTTATCG

+

FFFFFFFFFFFFFFFFFFFFFFFFFFFFFFFFFFFFFFFFFFFFFFFFFFFFFFFFFFFFFFFFFFFFFFFF  
FFF:FFFFFFFFFFFF:FFFFF:FFFFFFFFFFFFFFFFFFFFFFFFFFFF,FFFF:

@A00721:190:HGJW7DSXY:4:1455:19642:1939\_1:N:0:TCTGCAAG+GCTGCACT  
ACCGGTGAATGGTTTAAAGAATACTATAAATAAGATAGCTATTACTACTAATGGCGTTGGCCTAGTGGA  
TGTTATTAGTGACATCTGGTCAATTTTCTTTTAGGTGGTCTTTATTCTATTATTGATTTTTATGAGA  
TTG

+

FFF::F:FFFF:FFFFF:FF:FFFF:F:FFFF:FFFFF:FFFF:FFFFFFFFFFFFFFFF:FFF,FF  
FFFFFFFFFFFFFFFFFFFFFFFFFFFFFFFF:F:FFFFFFFFFFFF:FFFFFFFFFFFFFFFFFFFFFFFF:  
FFF

@A00721:190:HGJW7DSXY:4:1171:21793:9424\_2:N:0:TCTGCAAG+GCTGCACT  
TGTTAGAGTAGAATTCCTGAAGAGTCCTTCCGTAACCAACTTCTTGACAATTTTCTTCAATCCTTCGA  
TAATAGTTAAATCTAGGATTATGTCTGTGTTGAAAGACTTTCTACCGA

+

FFFFFFFFFFFFFF:FFFFFFFFFFFFFF:FFFFFFFFFFFF,FFFFFFFFFFFFFFFFFFFFFFFFFFFF  
FFFFFFFFFFFFFFFFFFFFFFFFFFFFFFFFFFFFFFFFFFFFFFFFFFFFFFFFFFFFFFFFFFFFFFFF

@A00721:190:HGJW7DSXY:4:1244:28646:7326\_2:N:0:TCTGCAAG+GCTGCACT  
TACACAATTAAGAAATAATCCTACATTGACTGATTATCTAAAGATTGAAGGAAAATTTATCCTCGTT  
TAACCTACTTAGACTTTCCTACGATACAAATGATAACTTCTAATTTAC

+

FFFFFFFFFFFFFFFFFFFFFFFFFFFFFFFFFFFFFFFFFFFFFFFFFFFFFFFFFFFFFFFFFFFFFFFF  
FFFFFFF:FFFFFFFFFFFF:FFFFFFFFFFFFFFFF:FFFFFFFFFFFF

@A00721:190:HGJW7DSXY:4:2162:12509:7153\_2:N:0:TCTGCAAG+GCTGCACT  
AAGGGATGCATGGTGTATCTCCTCAGGAGTCCCGGCATTTGATAATAATGACGAGACTTTCGTCATA  
ATCGCTGCATATTACGGATTACACGGTACCAGCGCATCTCGTGTGAG

+

FFFFFFFFFFFFFFFFFFFFFFFFFFFFFFFFFFFFFFFFFFFFFFFFFFFFFFFFFFFFFFFFFFFFFFFF  
FFFFFFFFF:FFFFFFFFFFFFFFFFFFFFFFFFFFFFFFFFFFFFFFFFFFFFFFFFFFFFFFFF

@A00721:190:HGJW7DSXY:4:1341:21477:31454\_1:N:0:TCTGCAAG+GCTGCACT  
AAATTTATAGAAGATTATTTTGACAGAATCAATAAGAATCATCGATTCTCGATTCTGAGACTTATCT



@A00721:190:HGJW7DSXY:4:1422:4906:30311\_2:N:0:TCTGCAAG+GCTGCACT  
CACTATATACATTATAAAATATAAAATAAGGGAGTCATAACTTTTGTACCAAATTCTTGGCTTTCA  
ACGAAGTCTCTGATTTTATTAATCATTACTTTAACGATCTCTCGGTCA

+

FFFF,FFFFFFFFFFFFFFFFFFFFFFFFFFFFFFFFFFFFFFFFFFFFFFFFFFFFFFFFFFFFFFFF  
FFFFFFFFFFFFFFFFFFFFFFFFFFFFFFFFFFFFFFFFFFFFFFFFFFFFFFFFFFFFFFFF

@A00721:190:HGJW7DSXY:4:1464:14009:33395\_2:N:0:TCTGCAAG+GCTGCACT  
TTGATCTACGTCGTTTAACTGTCGGAACAACCTTTACTTAGAATGACTCTATCTTTTCAGACACTTCT  
TATATTATTTACAATAGTTAATATCATATTAGTAATACTCACTATCGT

+

FFFFFFFFFFFFFFFFFFFFFFFFFFFFFFFF,FFFFFFFFFFFFFFFFFFFFFFFFFFFFFFFF:FFFFFF:  
FFFFFFFFFFFFFFFF:FFFFFFFFFFFFFFFF:FFFFFFFFFFFFFFFF

@A00721:190:HGJW7DSXY:4:2141:13006:12774\_1:N:0:TCTGCAAG+GCTGCACT  
GCTCTTCCGATCTGATTAATAAAGGATGAGTACGAAAACCACTCTTCGTTACGAGACCTGATGGTAG  
AATAGATTTAGTCTCTACACCCATCTCAACGAGGATAAAGCGAGTTTTCCGTCCTGAACGTAATACAC  
GAA

+

FFF,FFF:FFF,F:FFFFFFFFFFFFFFFF:FFFFFFFFFFFFFFFF:FFFFFFFF:FFF:F:FFFF:FFFFFFFF  
FFFFFFFFFFFFFFFFFFFFFFFF:FF,FFFFFFFF:FFFFFFFFFFFFFFFF:FFFFFFFF:FFFFFFFFFFFF  
FFF

@A00721:190:HGJW7DSXY:4:1637:31458:9408\_2:N:0:TCTGCAAG+GCTGCACT  
CAAACGACTCGAAACCGAGACGCCGTAGATCAAAGTCCCTTCTAACTTTAGATTATGAATCCTGCCTT  
TACTCATTTTATAGCAGTTATTTATGTTGTACTTTTTATAATTTATAA

+

FFFFFFFFFFFFFFFFFFFFFFFFFFFFFFFFFFFFFFFFFFFFFFFFFFFFFFFFFFFFFFFFFFFFFFFF  
FFFFFFFFFFFFFFFFFFFFFFFF:FFFFFFFFFFFFFFFFFFFFFFFFFFFFFFFF

@A00721:190:HGJW7DSXY:4:1443:5538:24674\_1:N:0:TCTGCAAG+GCTGCACT  
TTTGGGTATGTTTTGTGAAAAACATGAGATACCAAGTCTATCGAAGACATTATCTCTTATGTACTTA  
TTGTAACGATCATTCTTTCGAGTTTTGTCATTCTTATTCTTTATTCTTTAACTGTGTATGAGGAGG  
ATT

+

FFFFFFFFFFFFFFFFFFFFFFFF,FFFFFFFFFFFFFFFFFFFFFFFFFFFFFFFF:FFFFFFFFFFFFFFFF  
FFFFFF:FFFFFFFFFFFFFFFFFFFFFFFF:FFF:FFFF:FFFFFFFF,FFFFFFFFFFFFFFFF:FFFF  
FFF

@A00721:190:HGJW7DSXY:4:1239:9833:26725\_1:N:0:TCTGCAAG+GCTGCACT  
TCGATAGTGATTGTTATCAATTTAAATACATTACTGTTTCAAATCATCTTTACTCACAGACTCCGAAA  
ATGTTTCAAATGAGGTCAAAGCTCTATTTATTAACGAACATTATCCGATTCTTCGAGGGTATCAC  
TAC

+

FFFFFFFFFFFFFFFFFFFFFFFFFFFFFFFFFFFFFFFFFFFFFFFFFFFFFFFFFFFFFFFFFFFFFFFF  
FFFFFFFFFFFFFFFFFFFFFFFF:FFFFFFFFFFFFFFFFFFFFFFFFFFFFFFFFFFFFFFFFFFFFFFFF  
FFF

@A00721:190:HGJW7DSXY:4:1377:1208:2362\_1:N:0:TCTGCAAG+GCTGCACT  
GACTTTAGTCAAGGAACCTCAATTCCTTCGATGTTTATATTTTCTATAAGGGAAAATAGCAATAATC  
AAATTTGACAAATTTTAGAACTTTATTTCAAGACTCTCTCCGATCACCTTGGTGTGATCTCCCGGAG  
GAT

+

FF,FFFFFFFF:FFF:FFFF:FFFF:FFFFFFFFFFFFFFFFFFFFFFFFFFFFFFFFFFFFFFFF  
FFFFFFFFFFFFFFFFFFFFFFFFFFFFFFFF:FFFFFFFFFFFFFFFFFFFFFFFFFFFFFFFF  
FFF

@A00721:190:HGJW7DSXY:4:1377:22426:1438\_2:N:0:TCTGCAAG+GCTGCACT  
ATGTATGATGATAATCTACTATTTTTAAATAGTGATATTCAGCGTATACTTGAATACTTTATCAAAGA  
TTTGGCTTGGTCTATTTACCGCAAAAAGTTGGAAGAGGTCTATGATAT

+

[illegible]

CCAGAATGAAAAGGGGTTTACCAGGGTAGTCTCTAAGTCTACCAGGAA  
+  
FFFFFF:FFFFFFFFFFFFFFFFFFFFFFFFFFFFFFFFFFFFFFFFFFFFFFFFFFFFFFFFFFFFFFFF:  
FFFFFFFFF:F:FFFFFFFFFFFFFFFFFFFFFFFFFFFFFFFFFFFFFFFFFFFFFFFFFFFFFFFF:  
@A00721:190:HGJW7DSXY:4:2443:22101:15405\_2:N:0:TCTGCAAG+GCTGCACT  
CAAAACTGATAAGAATAAAGGGAAAGGTCCATCAGGACCTAAGAAGGGGAAATTACCCCTAATTCTGA  
AGGAAGATCTCCCACCATCTGGGGTTGGAATAAGAAATCTGCAGATC  
+  
FF:FFF:FFFFFFFF:FFFFFFFFF,FFFFFFFFFFFFFFFFFFFFFFFFFFFFFFFF:FFFFFF:FFFFFFFFFFFFFFFF  
FFFFFFFFFFFFFFFFFFFFFFFFFFFFFFFF:FFFFFFFFFFFFFFFFFFFFFFFFFFFFFFFF  
@A00721:190:HGJW7DSXY:4:1427:13937:5087\_2:N:0:TCTGCAAG+GCTGCACT  
CTACGAAGTCGCTGAAGGCGGCTTGGGTCATTAAAGGTAGCTGTAAAGTTGCGCCTGCCGACCCCATC  
TTTGAGACCAAGACTCTCTACAGTAGGTTCTGCTGCTACTATGAGCAAT  
+  
FFFFFFFFFFFFFFFFFFFFFFFFFFFFFFFFFFFFFFFFFFFFFFFFFFFFFFFFFFFFFFFFFFFFFFF  
F:FF,FFFFFFFFFFFFFFFFFFFFFFFFFFFFFFFFFFFFFFFFFFFFFFFFFFFFFFFF,FFFFFFF  
@A00721:190:HGJW7DSXY:4:1127:13259:15749\_1:N:0:TCTGCAAG+GCTGCACT  
TCGTCACTGAGGACGAAGGTGAGAGGACTTTTGGCTACTGGCGACAACTGAGAGCAGTCGCTGGGGA  
AAGAGAATTGCGTGGGTGAAGGCCGACGCTTCGAGCTTGAGTGTGACGAGGCCGGTGACGTTTTTGT  
CAA  
+  
FFFFFFFFFFFFFFFFFFFFFFFFFFFFFFFFFFFFFFFFFFFFFFFFFFFFFFFFFFFFFFFF: ,FFFFFFFFFFFFFFFF  
FFFFFF:FFFFFFFFFFFFFFFFFFFFFFFFFFFFFFFFFFFFFFFFFFFFFFFFFFFFFFFF,FFFFFFFFFFFFFFFF  
FFF  
@A00721:190:HGJW7DSXY:4:1240:26223:3850\_1:N:0:TCTGCAAG+GCTGCACT  
TTTATCCGCGCTTAAGTATGGGGCGAAGATCCCCTATTGAGTCTTGAAGGACTTAGGTTGGCATATTT  
ATGCCGACGATAATAAGCATGTCACCCTTAAGCACCGAGGTAAGCTCGGGACTTACAAGAGAGAGTGT  
GAG  
+  
FFFFFFFFFFFFFFFFFFFFFFFFFFFFFFFFFFFFFFFFFFFFFFFFFFFFFFFFFFFFFFFF:FFFFFFFFFFFFFFFF  
FFFFFFFFFFFFFFFFFFFFFFFFFFFFFFFFFFFFFFFFFFFFFFFFFFFFFFFFFFFFFFFFFFFFFFFF  
FFF  
@A00721:190:HGJW7DSXY:4:1655:26106:32581\_1:N:0:TCTGCAAG+GCTGCACT  
CACTATTTTTGCCCAGAATGCGGGCTTTCTGACTGATGAGGTTAAACTCTTGCTCCTTCTGTGGGTG  
AGGGTTTTTGTATATTCAGTGGTTCTGGGAGGCTGCTTCTCCTCATAATTACAACCTCTCTTTAGAG  
AGC  
+  
FFFFFFF:FFFFFFFFFFFFFFFFFFFFFFFFFFFFFFFFFFFFFFFFFFFFFFFFFFFFFFFFFFFFFFFF:F  
FFFFFFFFFFFFFFFFFFFFFFFFFFFFFFFFFFFFFFFFFFFFFFFFFFFFFFFFFFFFFFFF:FFFFFFFF  
FFF  
@A00721:190:HGJW7DSXY:4:1429:3531:23015\_2:N:0:TCTGCAAG+GCTGCACT  
AGTTGGGCAAATCCCACATATGGTAGACGTTGTACACTTTTCTTGAAAATTTTCTTTCTCCGT  
CATTGGGGATTTGATGTGAGAAGGTGGAAGGTGTCAAGGGTCTTCTT  
+  
,F:FFFFFFFFFFFFFFFFFFFFFFFFFFFFFFFFFFFFFFFFFFFFFFFFFFFFFFFFFFFFFFFF  
F:FFFFFFFFFFFFFFFFFFFFFFFFFFFFFFFFFFFFFFFFFFFFFFFFFFFFFFFF,FFFFFFFFF  
@A00721:190:HGJW7DSXY:4:1602:32190:34194\_2:N:0:TCTGCAAG+GCTGCACT  
TTTCAGGACCTAATCACATCATGATTGATAGTTACGGCTCGTATCGAGTTGGAGGGAGGAAGTTCTCC  
GAAATTAAGACGGGGGATTAAGAGTCCAGCTGTAAGTGTCAATTCA  
+  
F,FFFFFFFFFFFFFFFFFFFFFFFFFFFFFFFFFFFFFFFFFFFFFFFFFFFFFFFFFFFFFFFF  
FFFF:FFFF::F::,FF,:FF:FFF,FFF,F,: ,FFF:FFFF,:FF,  
@A00721:190:HGJW7DSXY:4:1374:18882:30248\_2:N:0:TCTGCAAG+GCTGCACT  
AAGGAACTTCGTCAGAAGATGAGGAAGTCTAAGAGGAGGAGTTTGAGGAAGGCTCTAGAGAAGATCT



CACCACCTGGAGAAGGCAAGTGGAGAGTCCAGAAGTTGATGAAGAAGG

```

FFFFFFFFFFFFFFFFFFFFFFFF:FFFFFFF:FF:,FFFFFFFFFFFFFFFFFFFF,FFFFFFFFFFFFFF:FFFF
FFFFFFFF:FFFFFFFFFFFFFFFF:FFFFFFFFFFFFFFF:~FFFFFFFF

```

+

@A00721:190:HGJW7DSXY:4:2441:10610:23594\_2:N:0:TCTGCAAG+GCTGCACT  
CCTTGAGAAGACAAGCCACATTAAGATATAATTTAGGTCAACTTGGGGTTTCGAATGTCATTAGTGCC  
TTACGATTGAAAGAGGTCTTTTTGAGTATCGACAGATCTTTCGATCTT

[illegible]

+

@A00721:190:HGJW7DSXY:4:1439:19623:12242\_2:N:0:TCTGCAAG+GCTGCACT  
TCATGGCAGATACTACCGATAAGGTGAAAAATATGCAGGTCAAAGATTCTGTAGCTCTGAGGGCGGTT  
GAGGGAGCCGTTTTGGCCGACTTTAACTATTCTAAGAGTCTTTATGAT

```
FFFFFFFFFFFFFFFFFFFFFFFFFFFFFFFFFFFFFFFFFFFFFFFFFFFFFFFFFFFFFFFFFFFFFFFF:F  
FFFFFFFFF:,FFFFFFFFFFFFFFFFFFFFFFFFFFFFFFFFFFFFFFFF
```

+

@A00721:190:HGJW7DSXY:4:1373:8341:10676\_1:N:0:TCTGCAAG+GCTGCACT  
ATCACTTGTTAAAGTACAGATTTAGTGATTTAGATATTATTGATATTGGAGGCGATATTCGTTTTCAT  
ATCCAAAACCTCCTTGAATGGAGTACATATTTGCAACCTATTCTTGATGTGAAAGATGCATCGAGGTA  
TAC

[illegible] $+$ 

@A00721:190:HGJW7DSXY:4:2204:11351:5525\_1:N:0:TCTGCAAG+GCTGCACT  
CTCTCTTGATGATGTAGCCACTATAATGCTTAAGAGAGAGATTGATGTATGTCATTTTCGTCTTAGTTT  
GTCCCGGCGAATTATTGGACACGATGAAAAATGACATACCCGTTCTGACCTTGGTATCGTTATCCGT  
CAT

```
FFFFFFFFFFFFFFFFFFFFFFFF:FFFFFF::FF:FFFFFFFF:FFFFFFFFFFFFFFFFFFFFFFFFFFFFFFFF
```

FFFFFFFFFFFF:FFFF:FFFFFFFFFFFFFFFFFFFFFFFFFFFFFFFF:FFFFFFFFFFFF:FFFFFFFFF,FFFFFFF  
FFF

@A00721:190:HGJW7DSXY:4:1527:18756:15311\_1:N:0:TCTGCAAG+GCTGCACT  
GGTTATTCTCACAACAAAGATAAGATTTTATCTTTCTTCAAACACCCTGTTTTCTTAAGGGCGGACA  
ATTGTTCCATTGTGAACTCTTGGGGACTAGATTGAGCATTAATGAGTTCCGAATAACTCGTAATAAAT  
CTT

+

FFFFFFFFFFFFFFFFFFFF:FFFFFFFFFFFFFFFFFFFFFFFFFFFFFFFFFFFFFFFFFFFFFFFFFFFFFFFF  
FFFF:FFFFFFFFFFFFFFFFFFFFFFFFFFFFFFFFFFFFFFFFFFFFFFFFFFFFFFFFFFFFFFFFFFFFFFFF  
FFF

@A00721:190:HGJW7DSXY:4:1604:31015:23202\_1:N:0:TCTGCAAG+GCTGCACT  
ACCTATTTCCGTACCAAGAGCCACTGCCAATCTCATCGCTATACGCATACCTGATTGGAAGAAGCGAG  
GTTTCGTTCTCAATAAAAATTTTTCTCAAGAGATTATGGTTGATAAAGTTTTCTTCATAAGGGCTATT  
CAG

+

FFFFFFF:FFFFFFFFFFFFFFFFFFFFFFFFFFFFFFFFFFFFFFFFFFFFFFFFFFFFFFFFFFFFFFFFFFFF  
FFFFFFFFFFFFFFFFFFFFFFFFFFFFFFFFFFFFFFFFFFFFFFFFFFFFFFFFFFFFFFFFFFFFFFFFFFFF  
FFF

@A00721:190:HGJW7DSXY:4:1350:10176:6965\_1:N:0:TCTGCAAG+GCTGCACT  
CTTCGGTCAATGACAAAACCTTCGAATATGTTACGACATGGCTTCGTAACAACAGTGCGAGGATTGTC  
ATCTCGGGGAAAGTGATTCACCAAGATGTTTCATATAGATACGAGATACCTAGAGAAGGTCGCAGCGAT  
CTT

+

FFFFFFFFFFFFFFFFFFFFFFFFFFFFFFFFFFFFFFFFFFFFFFFFFFFFFFFFFFFFFFFFFFFFFFFFFFFF  
FFFFFFFFFFFFFFFFFFFFFFFFFFFFFFFFFFFFFFFFFFFFFFFFFFFFFFFFFFFFFFFFFFFFFFFFFFFF  
FFF

@A00721:190:HGJW7DSXY:4:1357:31358:27806\_2:N:0:TCTGCAAG+GCTGCACT  
AGCTAAGAAGAAGACTTTGGGTACACGTTATGCTCGAACTTAACGTTAGTACCGGAGGTGATCTCT  
CTGCTTCTGCGTTACTGAGAGAAAAGATTCAGGACGCCTACGGTGACT

+

FFFFFFFFFFFFFFFFFFFFFFFFFFFFFFFFFFFFFFFFFFFFFFFFFFFFFFFFFFFFFFFFFFFFFFFFFFFF  
FFFFFFFFFFFFFFFFFFFFFFFFFFFFFFFFFFFFFFFFFFFFFFFFFFFFFFFFFFFFFFFFFFFFFFFFFFFF

@A00721:190:HGJW7DSXY:4:1567:18656:16736\_2:N:0:TCTGCAAG+GCTGCACT  
TCTTTGTATAGGGAGTGTGAGAAGACAACGAATCTTGAAACTACGTAATTAACAAAGAGATTGGTGT  
AGCGGACTCTTATACTTTTGAAGATTGAGAAGATTGATGAACACGTCAA

+

FFFFFFFFFFFFFFFFFFFFFFFFFFFFFFFFFFFFFFFFFFFFFFFFFFFFFFFFFFFFFFFFFFFF,,F,,,,:FFFF,F,F:FFF,  
F,,F,:F,,,,,,F,,,F,F,,,,,:F,FF:,F,:,:,FFF,FF

@A00721:190:HGJW7DSXY:4:2201:23294:27649\_2:N:0:TCTGCAAG+GCTGCACT  
TTGTTCTTGAAAACCAAGTTAAGAAGGAGGCTGATCATGGAGTCTTTGTACCTTCTGTCAAACCTCGA  
GGTTCAGCTACGAGAGGTGATCCCGGATGTGGATTGAAGGCTGGCTCT

+

FFFFFFFFFFFFFFFFFFFFFFFFFFFFFFFFFFFFFFFFFFFFFFFFFFFFFFFFFFFFFFFFFFFFFFFFFFFF  
FFFFFFFFFFFFFFFFFFFFFFFFFFFFFFFFFFFFFFFFFFFFFFFFFFFFFFFFFFFFFFFFFFFFFFFFFFFF

@A00721:190:HGJW7DSXY:4:2370:25726:10285\_2:N:0:TCTGCAAG+GCTGCACT  
CTTTTTGAATGTTGTAAAGAATTGGGTTGAGAAGTGTGCTTTACAAGGAGTTAGACTCTTCTTCAAGT  
TTTTAGATCTTCTTGATAATCTTAAAGAAAAATTTTCGAATAAACTAA

+

FFFF:FFFFFFFFFFFFFFFFFFFFFFFFFFFFFFFFFFFFFFFFFFFFFFFFFFFFFFFFFFFFFFFFFFFF  
FFFFFFFFFFFFFFFFFFFFFFFFFFFFFFFFFFFFFFFFFFFF,FF:FFFFFFFFFFFFFFFF

@A00721:190:HGJW7DSXY:4:1654:11487:33442\_1:N:0:TCTGCAAG+GCTGCACT  
GTTTCTCTTGGTATTTCTGAAATAGTTTATCAGAGCGTCATTTTCTTTGGGATCTTTCTCTGGTAA  
GGGAATTATTAAATCATCTTCTCACTCTTGACGAGAATTATTACTGTTTTCTCTACCCATAACTTCT  
TTT

+  
 FFFFFFFFFFFFFFFFFFFFFFFFFFFFFFFFFF:FFFFFF:FFFFFFFFFFFFFFFFFFFFFFFF:FFFFFFFFFFFFFF  
 FFFFFFFFFFFFFFFFFFFFFFFFFFFFFFFFFF:FFFFFF  
 FFF  
 @A00721:190:HGJW7DSXY:4:2477:24388:22623\_1:N:0:TCTGCAAG+GCTGCACT  
 ACTGGAGTTCAGACGTGTGCTCTTCCGATCTGTTTCAACACTTATCACCACCTTTTGAAAGGAAAATAA  
 TTGGTGATGAAAATACGTATGTCGGTGGGGTTCTCAAGGCTCTCATCGCCACTGGGATTCTAAGGGGT  
 TCC  
 +  
 F:FFF,FFFFFFFFFFFFFFFF,FFFFFFFFFFFF,FF,FFFF,F,FFFF:FFFFFFFFFFFFFF,  
 FFFFFFFFFFFFFFFFF, :FFFFFFFFFFFFFFFF:FFFFFFFFFFFFFFFF:FFFFFF  
 F:F  
 @A00721:190:HGJW7DSXY:4:1118:24026:12915\_2:N:0:TCTGCAAG+GCTGCACT  
 AGGATTCTTCTTTTGGTCCTTACGTCTTAAGTAATTTGGATGTTGTGCGAAAACCTATCAGGTTCTTGTC  
 ACGATTCTTAAAAGAAGTTTATTAAAACTTCAGAGTCTCTTGAAGTC  
 +  
 FFFFFFFFFFFFFFFFFFFFFFFFFFFFFFFFFF:FFFFFFFF:FFFFFF  
 @A00721:190:HGJW7DSXY:4:1147:30147:2566\_2:N:0:TCTGCAAG+GCTGCACT  
 TGTTCTTGCAATAGCCACAGACTTTCTGGGAAAAGAGACCTCTGTTGGTAGAGGAGTTGAGAGAATTA  
 CTCAGATTCAATCTGGCATCACTGAACGTCTACAACGAGTTAGGGAGT  
 +  
 FFFFFFFFF:FFFFFFFFFFFF,FF,FFFF:F:FFFFFFFFFFFFFFFFFFFFFFFF:FFFFFF,  
 FFFFFFFFFFFFFFFFFFFFFFFFF:FFFFFF:FFFF  
 @A00721:190:HGJW7DSXY:4:1241:2437:6151\_1:N:0:TCTGCAAG+GCTGCACT  
 AAAAGATCCTTTGCACAAGCAATACCTTCCACTGAGTTCATCACCAGAGTTTCGACGTCGCGGAAAA  
 CGATGAAGATTTCACACTGTTGAGAATCTTCTGATGCTGAATTTGAGGAAAATTTTCGGAAGTTT  
 TTG  
 +  
 FFFFFFFFFFFFFFFFF:FFFFFFFFFFFFFFFFFFFFFFFFFFFFFFFFFFFFFFFFFFFFFFFF  
 FFFFFFFFFFFFFFFFFFFFFFFFFFFFFFFFFFFFFFFFFFFFFFFFFFFFFFFFFFFFFFFFF  
 FFF  
 @A00721:190:HGJW7DSXY:4:1119:10981:14497\_1:N:0:TCTGCAAG+GCTGCACT  
 TGATGGCTCAGTACAGGGAGGAGTAATAGTTATAAAACCTTCTTTTATCATTGCAACAGGACTTTGA  
 GAAGACTGTTGAAATGGACAAAATCTGGGATCATAGGTATGTGTCACGCTACACTCGAAATATGGGCC  
 CTC  
 +  
 FFFFFF:FFFFFFFFFFFFFFFFFFFFFFFFFFFFFFFFFFFFFFFFFFFFFFFFFFFFFFFF  
 FFFFFFFFFFFFFFFFFFFFFFFFFFFFFFFFFFFFFFFFFFFFFFFFFFFFFFFFFFFFFFFFF  
 FFF  
 @A00721:190:HGJW7DSXY:4:1501:1425:10441\_2:N:0:TCTGCAAG+GCTGCACT  
 GTTGGCGTCTTGTCGTTGACGTCATTACAGTCTGGAAGTTAGATCATTTGTTTCAGGAAGATCTCTACA  
 GAGATTATCGAGAGTTGTGATCTAGTTCTAAATTTAGGTCGACTGACT  
 +  
 FFF,FFFFFFFF,FFFF:FFFFFFFFFFFFFFFFFFFFFFFF:FFFFFFF:F:FFFFFF  
 FFFFFFFFFF:FF:FFFFFFFFFFFFFFFF,FFFF,FFFF  
 @A00721:190:HGJW7DSXY:4:2537:24451:11741\_2:N:0:TCTGCAAG+GCTGCACT  
 ATGTACGTGGATCTAATGCTTGGTGATCTGAATCTGACCATCGCAAAGAAGACTTTATTAGTTCATGA  
 AGTTCTTACACTTCTCGCGACTAATGTCAGTTCACTACAAAGGCGTT  
 +  
 FFFFFFFFFFFFFFFFFFFFFFFFFFFFF,FFFFFFFFFFFFFFFF:FFFF:FFFFFFFFFFFFFF  
 FFFFFFFFFFFFFFFFFFFFFFFFFFFFFFFFFF:F  
 @A00721:190:HGJW7DSXY:4:1169:22987:5290\_2:N:0:TCTGCAAG+GCTGCACT  
 CCAAATTTAGCACTTTTGAATATGACAGAAGCTCGCCATATCAGATTAGAGACATGCCAGTTAGAGT

TCTTCTAACCAGGACTGATGGTGAGATTCTTTTACCTTTTGGAGGTCC  
+  
FFFFFFFFFFFFFFFFFFFFFFFFFFFFFFFFFFFFFFFFFFFFFFFFFFFFFFFFFFFFFFFFFFFFFFFF  
FFFFFFFFFFFFFFFFFFFFFFFFFFFFFFFFFFFFFFFFFFFFFFFFFFFFFFFFFFFFFFFFFFFFFFFF  
@A00721:190:HGJW7DSXY:4:2337:14036:13025\_2:N:0:TCTGCAAG+GCTGCACT  
CCTAGTGTCTTTTCTAGAGTCCAAGGACGTTTCCGTCGGAGGATGACAGGTGGGAGACCGCTCAATAA  
CACTCTATTGAATCCCTTTTCCACGATGAAAGCTCTTTATGAGGTGCT  
+  
FFFFFFFFFFFFFFFFFFFFFFFFFFFFFFFFFFFFFFFFFFFFFFFFFFFFFFFFFFFFFFFFFFFFFFFF  
FFFFFFF:FFFFFFFFFFFFFFF:FFFFFFFFFFFFFFFFFFFFFFFFFFFFFFFFFFFFFFFF  
@A00721:190:HGJW7DSXY:4:2350:18231:24612\_1:N:0:TCTGCAAG+GCTGCACT  
GATATCGCCTCTGTCTTTCTCCTTTAATCGTGAGGTTACGAGAGTTTTCGTACTTGGGTTTATCGGTT  
GTATTTTGATAAATTTGTTGGAATCGATAATGATACTGACGAAGGTTCTATTACCACCCTTGTCATTG  
ATA  
+  
FFFFFFFFFFFFFFFFFFFFFFFFFFFFFFFFFFFFFFFFFFFFFFFFFFFFFFFFFFFFFFFFFFFFFFFF  
FFFFFFFFFFFFFFFFFFFFFFFFFFFFFFFFFFFFFFFFFFFFFFFFFFFFFFFFFFFFFFFFFFFFFFFF  
FFF  
@A00721:190:HGJW7DSXY:4:2666:32199:31767\_2:N:0:TCTGCAAG+GCTGCACT  
TGATGCTTTCTTAGAGGCTCGTCTAGCCGCTGAGATTCTGCTTACCTATTTACAATCTGTAGAGAGAG  
AGGTTAATCAGAATTTGAGTGATAACGATTTAGTACTGGGAAATGGTG  
+  
FFFFFFFFFFFFFFF:FFFFFFFFFFFFFFF:FFFFFFFFF:F:FFFFFFFFFFFFFFFFFFFFFFFFFFFF  
FF:FFFFFFFFFFFFFFFFFFFFFFFFFFFFFFFFFFFFFFFFFFFFFFFFFFFFFFFFFFFFFFFFFFFF  
FFF  
@A00721:190:HGJW7DSXY:4:2265:14922:11522\_1:N:0:TCTGCAAG+GCTGCACT  
CCTTTTTCGATTGGATTGACGGGGTCTTCGTCTCAGCTAATTTGATAAGGTTTTCTTTTATGGG  
ACTCTTGTGTTGACTTATGAAGGAGGTATTACTTCGGAAGTTCTTAATGTAGGTCTCCTAGTACTTAA  
GGG  
+  
FFF:FFF:FFFFFFFFFFFFFFFFFFFFFFFFFFFFFFFFFFFFFFFFFFFFFFFFFFFFFFFFFFFFFFF  
FFFFFFFFFFFFFFFFFFFFFFFFFFFFFFFFFFFFFFFFFFFFFFFFFFFFFFFFFFFFFFFFFFFFFFFF  
FFF  
@A00721:190:HGJW7DSXY:4:1641:14959:25833\_2:N:0:TCTGCAAG+GCTGCACT  
GTTTCAGCTGGATGGATCTTTTGATGGTATGTTTCACATTGCGTGATCACTTCCCGTGGACTTGGGAA  
GAGATTAAACATAAAATCCAGCGATTCTATTATGTCGCTAAAGCCTGT  
+  
FFFFFFFFFFFFFFFFFFFFFFF:FFFFFFFFFFFFFFFFFFFFFFFFFFFFFFFFFFFFFFFFFFFFFFFFFFFF  
FFFFFFFFFFFFFFFFFFFF:FF:FFFFFFF,FFFFFFFFFFFFFFFFFFFF:FF,FFFFF  
@A00721:190:HGJW7DSXY:4:1405:32009:1470\_2:N:0:TCTGCAAG+GCTGCACT  
GTTCTGGGCTGTGGGGATTAACCTCCCTCGTGAAACTTACGACGATGTTCTCGCTCGCATTTCAACAAG  
ATTACTAAGTCTGAGATCTGCCACTTCTAATTTTAGGAAACGTCGCGA  
+  
FFFFFFFFFFFFFFFFFFFFFFFFFFFFFFFFFFFFFFFFFFFFFFFFFFFFFFFFFFFFFFFFFFFFFFFF  
FFFFFFFFFFFFFFFFFFFFFFFFFFFFFFFFFFFFF:FFFFFFF::FFFFFFFFFFFFFFF  
@A00721:190:HGJW7DSXY:4:1349:14696:4586\_1:N:0:TCTGCAAG+GCTGCACT  
TCTTGGTCGAAAAATATCGCCGGGAACCTCTAATAGAGGATCCTGATGACATTATTTCAACGGATACC  
GATCTCAGTTCTACCACAGAAACCGTCTCAGGAACGTCTCCACTGATTCGGAATTAGAGAAAGACGA  
CCT  
+  
FFFFFFFFFFFFFFFFFFFFFFFFFFFFFFFFFFFFFFFFFFFFFFFFFFFFFFFFFFFFFFFFFFFFFFFF  
FFFFFFF:FFFFFFFFFFFFFFFFFFFFFFFFFFFFFFFFFFFFFFFFFFFFFFFFFFFFFFFFFFFFFFF,FFFFF  
FFF  
@A00721:190:HGJW7DSXY:4:2311:32452:27665\_1:N:0:TCTGCAAG+GCTGCACT  
GACCTCTTAATTTTCAGGGTGCCCTGATGAGGACGTTGAAAGGGATAATTTCAACTCTGAGAATTCTA

AGAGTGTTCAAAAGACCATAAACGTAACAAGAAGAATAAAGGTAGGAAGGGGAGAAAACAGAACAAAG  
C  
+  
::,F:,::,,FF:F:,FF::FF,,F:,F,F,,,F:F,::FFF:FF:FFF,::,FFFFFFFFF,FF,:F  
:FFFF,FFF,FFF,FF::F,F,F:FFFFFFFF:FF:FFFF,,FFFF,FFFF:FFFFFFFFFFFFFFFF  
,  
@A00721:190:HGJW7DSXY:4:1316:29288:22654\_2:N:0:TCTGCAAG+GCTGCACT  
TGGTTGCGGCTGATCGTACCCAATTCTGCTAGAAAGATCACTCTCGGCGATACCACTGATCTTCCA  
GAGTTACGTAGTGGTCGTTCTTTTGGTGATTTTATCAAAGAGAAAGTT  
+  
F:FFFFFFFFFFFFFFFFFFFFFFFFFFFFFFFFFFFFFFFFFFFFFFFFFFFFFFFFFFFFFFFFFFFFF  
FFFFFFFFF:FFFFFF:FF:FFFFFFFFFFFFFFFFFFFFFFFFFFFFFFFFFFFFF,  
@A00721:190:HGJW7DSXY:4:2260:8196:30937\_1:N:0:TCTGCAAG+GCTGCACT  
CAAGTTAACTTCGAACTGACCACTTACAAGAGTGTTGAAGTACCGCAACATGGATCAGTTTTCCAAA  
AAGCTATTAATAGCAGTTGCGGGGCTATAATACCGCCTCCAGATTACTCTAACTGAATCCACTCTCT  
TGG  
+  
FFFFFFFFFFFFFFFFFFFFFFFFFFFFFFFFFFFFFFFFFFFFFFFFFFFFFFFFFFFFFFFFFFFFF:FFF  
FFFFFFFFFFFFFFFFFFFFFFFFFFFF:FFFFFFFFFFFFFFFFFFFFFFFFFFFFFFFFFFFFF  
FFF  
@A00721:190:HGJW7DSXY:4:2525:30156:5243\_2:N:0:TCTGCAAG+GCTGCACT  
TTTGAAGTGTGTAATGTCCTACGTACTGTTCAAGGTGTTGGGCTTCTCTAAAGAACAGCAACTTTC  
AACATGAATTAGTTATAGAAAGTCTTTACCCTCACGTCTCACTTTATC  
+  
FFFFF:F,:FFFF:FFF:FFFFFFFFFFFFFFF,F:FFFFFF,FFFFFF:FFFFFFFFF:FFFF:F:  
FFFFFFFFF:FFFFF,F:FFFFFFF,::,FFFFFFFF:FFFFFFF:  
@A00721:190:HGJW7DSXY:4:1262:20302:20932\_2:N:0:TCTGCAAG+GCTGCACT  
AAAGAGGGTTTGAAGATTACGGAACCTTCTCGTTCTTCATGAAGATCTTCGAGTGTTTTATAGTGA  
GTTATTCTTGCGAAGGTTCAAGTCGATTGATTTTGTTGACTACGATCT  
+  
FFFFFFFFFFFFFFFFFFFFFFFFFFFFFFFFFFFFFFFFFFFFFFFFFFFFFFFFFFFFFFFFFFFFF  
FFFFFFFFFFFFFFFFFFFFFFFFFFFFFFFFFFFF:FFFF:FFFF  
@A00721:190:HGJW7DSXY:4:2432:15709:27070\_2:N:0:TCTGCAAG+GCTGCACT  
AAGAAGTTCTTCGCAGTTGAATCTCCACCAGGTGGAGGGAAGACCACTGAAGTTATAGCGACTTTTGT  
CGAATTTTTCGAAAAGGTCTTGAAGTACGTATTGTCACTGCTAATCG  
+  
FFFFFFFFFFFFFFFFFFFFFFFFFFFFFFFFFFFFFFFFFFFFFFFFFFFFFFFFFFFFFFFFFFFFF  
FFFFFFFFFFFFFFFFFFFFFFFFFFFFFFFFFFFFF  
@A00721:190:HGJW7DSXY:4:1666:10122:2300\_2:N:0:TCTGCAAG+GCTGCACT  
CACTTCTAGTTCATCGCGGTATTTGTGAAATTAAGACAGACGTGAAAGTTATGATGAGTGATCGTATT  
AGAACAGCTGATTCTTATTGCATGAACGTCGCTGAGGTCAAACCTGTG  
+  
F:F:FFFFFFFFFFFFFFFFFFFFFFFFFFFF:FF,FFFFFFFF:F:FFFFFFFFFFFFFFFFFFFF  
FFF:FFFFFFFFFFFFFFFFFFFFFFFFFFFF:FFFFFF:FFFFF  
@A00721:190:HGJW7DSXY:4:1331:24216:13025\_1:N:0:TCTGCAAG+GCTGCACT  
TCGTGCAATTATTCATGATTCACGCTGGTCAGACCCTTTTCTTACACATCTAATTAAGGCGGCTTAT  
ACCATAGGTTACGGTGATTACAATCAAATCGGATTCATCAATCGTATTGATCTCCAAGTCGAAACTA  
C  
+  
F,F:,F,F,:FF,FFFFFF,FF,:F,FF,,::,,FF,FF,FFF,F::FFFF,:FF,F::,,FF::  
F,:FF,,FFF,,FF,FFF,FFF,,FFFF,FFF,,F,FF:FFFFFFFFFFFF,,FFFF,F:F,,F,  
:  
@A00721:190:HGJW7DSXY:4:2556:10710:9925\_2:N:0:TCTGCAAG+GCTGCACT  
TTGATGAGTGTCGTTCTTATCGAAGTCTCAGTTATCGCTGCCGCGGACGTTTGTGCGAACTCTCA

GAGGTTTACGGCAGAAAAATTTCTCCTGCTTGTAATTCGAGAGAGGAC

+

FFFFFFFFFFFFFFFF:FFFF,,FFFFFFFFFFFFFFFF:FFFFFFFFFFFFFFFFFFFFFFFF  
FFFF:FFFFFFFFFFFFFFFFFFFFFFFFFFFFFFFF:FFFFFFFF,FFFF

@A00721:190:HGJW7DSXY:4:1363:12328:10128\_1:N:0:TCTGCAAG+GCTGCACT  
CTTGACGACTTTCGAATTTGAGGACGGAGTTAAATATATTACTTTCACTCAAGGTGAAAAGTTTGAAAT  
TAACAAAGTCCTTGTAAGAGTAAGGTTAAATGTGAAGATGCTCAGACTATTCATGAAGTTCAAGGTA  
ATA

+

:FFFFFFF:F:FFFFFFFFFFFFFFFF:FFFFFFFFFFFFFFFFFFFFFFFFFFFFFFFF:FFFFFFF  
FFFFFFFFFFFFFFFFFFFFFFFF, :FFFFFFFFFFFFFFFFFFFFFFFFFFFFFFFFFFFFFFFF  
FFF

@A00721:190:HGJW7DSXY:4:1629:27407:22341\_1:N:0:TCTGCAAG+GCTGCACT  
TGACCCTGTTTTTGATCACAAACACATATTACCGTTGCTCTATCACGACAGTTGAATCTTTACGAT  
ACTTTGTTATCAATGTAAAGTTAAACGATGCTACTTGTGAGAGGATCAATCACAGTAAGGAACTGTCA  
CGT

+

FFFFFFFFFFFFFFFFFFFFFFFF:FFFFFFFFFFFFFFFFFFFFFFFFFFFFFFFFFFFFFFFF  
FFFFFFFFFFFFFFFFFFFFFFFFFFFFFFFFFFFFFFFFFFFFFFFFFFFFFFFFFFFFFFFF  
FFF

@A00721:190:HGJW7DSXY:4:2305:3215:24846\_2:N:0:TCTGCAAG+GCTGCACT  
AGATTCAACCCCTTATATCGAGGCTATCGAGGACGATGAGTATCTTGAAGTTGTTGACGACAAGCCTC  
AAGAGGGTAGAGGACCACCTGGATCTTCTACTGTCTCTGCCTTCCAAG

+

FFFFFFFFFFFFFFFFFFFFFFFFFFFFFFFFFFFFFFFFFFFFFFFFFFFFFFFFFFFFFFFF  
FFFFFFFFFFFFFFFFFFFFFFFFFFFFFFFFFFFFFFFFFFFFFFFFFFFFFFFF

@A00721:190:HGJW7DSXY:4:1674:15103:2033\_2:N:0:TCTGCAAG+GCTGCACT  
TTATTCCTGGAACCACTTAACGTCCTCGGTAATCTTTCAGCCGAATTAAGTACTAATGAGTTCAAG  
TCGTTGTCGATCGAATTAAGATCAAGGCTAATACCTTTATAGGTAAG

+

FFFFFFFFFFFFFFFFFFFFFFFFFFFFFFFFFFFFFFFFFFFFFFFFFFFFFFFFFFFFFFFF  
FFFFFFFFFFFFFFFFFFFFFFFFFFFFFFFFFFFFFFFFFFFFFFFFFFFFFFFF

@A00721:190:HGJW7DSXY:4:1364:32371:28494\_1:N:0:TCTGCAAG+GCTGCACT  
CCCGATAGGGTACCGAGTCTCCAAGAGAATATTTATTCTTATGAGGCTCGAACTTCAACGTTTTAC  
AACGGAAAGACATATCGCACCCGAAATTTTGGGCAGAATGCTCTTAACGCGTTCTTGAACGGTGT  
TTG

+

FF:FFFFFFFFFFFFFFFFFFFFFFFF:FFFFFFFFFFFFFFFFFFFFFFFFFFFFFFFF  
FFFFFFFFFFFFFFFFFFFFFFFFFFFFFFFFFFFFFFFFFFFFFFFFFFFFFFFF  
FFF

@A00721:190:HGJW7DSXY:4:1110:27100:14575\_1:N:0:TCTGCAAG+GCTGCACT  
GATAAAGTTATAGGAGACTCAGTTAACCTGAGAGCTCCTCAATTGATAGATTGGGTCAACAATAGGGA  
CGCTAGTATACTTCGTAAAGTCGACAGCGAAATGGTCAATATTGATAATTGACCGACTATATGACCT  
ATT

+

:FFFFFFF:FFFFF:,FFFFFFFFFFFFFFFFFFFFFFFFFFFFFFFF:FFFF:,FF,FFFFFFFFF:FFFFFF  
FFFFFFFFFFFFFFFFFFFFFFFFFFFFFFFFFFFFFFFFFFFFFFFFFFFFFFFF  
FFF

@A00721:190:HGJW7DSXY:4:1612:10556:20682\_1:N:0:TCTGCAAG+GCTGCACT  
AAGGGAAGCTAAGGTTAACTTGATGCTTCAGCCTTTTCGAAGCATAACCCCGCACAGAATATCGTTT  
ATCACGCAAATTTATTAATGCAATTTTCGACCTATCTTTAAGGTTCTTGTGAGGAGAGTCAAACAG  
TGT

+

FFFFFFFFFFFFFFFFFFFFFFFFFFFFFFFFFFFFFFFFFFFFFFFFFFFFFFFF

FFFFFFFFFFFFFFFFFFFFFFFFFFFFFFFFFFFFFFFFFFFFFFFFFFFFFFFFFFFFFFFFFFFFFFFF  
FFF

@A00721:190:HGJW7DSXY:4:1164:10728:5885\_1:N:0:TCTGCAAG+GCTGCACT  
ACATTTTATGTATACAGAGATGACCAGTGACGATTTCTCCCGAAGCTCTTCTCTCTTAGGAGGT  
CATGATGACTACTATAAGGGTGAATCGATTTTTCGAAGTTTGACAAATCTCAAGATTTCTTTTGTA  
AGC

+  
FFFFFFFFFFFFFFFFFFFFFFFFFFFFFFFFFFFFFFFFFFFFFFFFFFFFFFFFFFFFFFFFFFFFFFFF  
FFFFFFFFFFFFFFFFFFFFFFFFFFFFFFFFFFFFFFFFFFFFFFFFFFFFFFFFFFFFFFFFFFFFFFFF  
FFF

@A00721:190:HGJW7DSXY:4:1225:20112:9737\_1:N:0:TCTGCAAG+GCTGCACT  
ATTTAGGCTTCGATGCTGAATTTCTTGAACCTTTGGAGTGCCAGTGAATATTTTGTACGCCAGGAGT  
ATCCATAACGATTTGTCATTTACCACCTTTGCTCAACGACGAAGTGGAACGGCCAACACTTTCTTTG  
TAA

+  
FF:FFFFFFFFFFFFFFFFFFFFFFFFFFFFFFFFFFFFFFFFFFFFFFFFFFFFFFFFFFFFFFFFFFFF  
FFFFFFFFFFFFFFFFFFFFFFFFFFFFFFFFFFFFFFFFFFFFFFFFFFFFFFFFFFFFFFFFFFFFFFFF  
FFF

@A00721:190:HGJW7DSXY:4:1376:7545:28902\_1:N:0:TCTGCAAG+GCTGCACT  
TCTGATGATTTTATCACTTTATTATGACCTTGGAAGTTTTCGGCTGTGGTTGTCGCTGGGGACGATT  
CCATTCTGTTTTCAAAGACTCCAATAACTGATCATTCTGATCATATGATTTTGGACAATGGTTTCGA  
GCG

+  
FFFFFFFFFFFFFF:FFFFFFFFFFFFFFFFFFFFFFFFFFFFFFFFFFFFFFFFFFFFFFFFFFFFFFFF  
FFFFF:FFFFFFFFFFFFFFFFFFFFFFFFFFFFFFFFFFFFFFFFFFFFFFFFFFFFFFFFFFFFFFFF  
FFF

@A00721:190:HGJW7DSXY:4:2577:2166:33865\_2:N:0:TCTGCAAG+GCTGCACT  
CAGCGTACTTCTGCTCGCGATTTATTCTTTTTGTCAATGATTACATCTACTTCGTTCTGATCCTTAC  
AAGATCATCGTTAAGTTAGGTAAACCCCTAACCGATGTTACTCTTGTA

+  
:F:FFF:F:FFFF:FFFF,F,F,FF,FFFFFFFFFFFF:FFF:FFFFFFFFFFFF,F:FFFF,FFFF  
FF:FFFFFFF::FFFFFFFFFFFFFFFFFFFFFFFFFFFFFFFFFFFFFFFFFFFFFFFFFFFF

@A00721:190:HGJW7DSXY:4:1107:24985:1830\_2:N:0:TCTGCAAG+GCTGCACT  
TTAAAGACTATACTAAATATCTCCACTACGAGTTGTTGTTTGGCGATTAGCTCTTGCGACTAATATT  
CGATATTCGATTGAGGGTCGTTATACCTATTCGGCTATCTGTGCTTTG

+  
FFFFFFFFFFFFFFFFFFFFFFFFFFFFFFFFFFFFFFFFFFFF:FFFFFFFFFFFFFFFFFFFFFFFFFFFF  
FFFFFFFFFFFFFFFFFFFFFFFFFFFFFFFFFFFFFFFFFFFF,FF:FF:FFFF

@A00721:190:HGJW7DSXY:4:1121:23095:23390\_2:N:0:TCTGCAAG+GCTGCACT  
TCAAATTTTAAACGATTCCGAGAGGTTTATCCTGATGTGGAGGGAGTTCTTGAAGCATCCCGACCTTT  
CCTTGTGAAAATTTTGATGCGGTTTCATAAGATTATCAGTAATCCTGA

+  
FFFFFFFFFFFFFFFFFFFFFFFFFFFFFFFFFFFFFFFFFFFFFFFFFFFFFFFFFFFFFFFFFFFFFFFF  
FFF::FFFFFFFFFFFFFFFFFFFFFFFFFFFFFFFFFFFFFFFFFFFFFFFFFFFFFFFFFFFF

@A00721:190:HGJW7DSXY:4:1220:1208:34898\_1:N:0:TCTGCAAG+GCTGCACT  
ATTCATGGACCTTCCATCCTGTACCTCTTCTGGAGAGACGTATCTCAAAGATCGACTTCGAGACAGGT  
GATATTGTTGAGCGAGAGCGACCAAGATCTAAATTCCGTAACGGTGCGTGGCGCTTTATTTTAAAAAG  
CTC

+  
FFFFFFFFFFFFFFFFFFFFFFFFFFFFFFFFFFFFFFFFFFFF:FFFFFFFFFFFFFFFFFFFFFFFFFFFF  
FFFFFFFFFFFFFFFFFFFFFFFFFFFFFFFFFFFFFFFFFFFF:FFFFFFFFFFFFFFFFFFFFFFFFFFFF  
FFF

@A00721:190:HGJW7DSXY:4:1546:5710:34898\_2:N:0:TCTGCAAG+GCTGCACT  
CTGATACTTATCACGAAAGGACTTGAGTCTTTTGATCAGTCTCTGACTTGACCATCTTTCATTTTAAA

TGACGATCATTAAGACTCTCTTTCTTCTTTGTTTCCTTCTTTGCACTG





@A00721:190:HGJW7DSXY:4:1156:30318:31172\_1:N:0:TCTGCAAG+GCTGCACT  
GTTCTGTCTATATTAGGTGAAGCGAAATACGATTTTGAACGTCAACGTTACCGAGTTTCGTTTCGTA  
CCTTGATGCTGACTTTCGTCAATATGATTTGATCTGGTTGCTCAATTCTAAGCGTGTTCGCTTAGTG  
CGA

+

FFFFFFFFFFFFFFFFFFFFFFFFFFFFFFFFFFFFFFFFFFFFFFFFFFFFFFFFFFFFFFFFFFFFFFFF  
FFFFFFFFFFFFFFFFFFFFFFFFFFFFFFFFFFFFFFFFFFFFFFFFFFFFFFFFFFFFFFFFFFFFFFFF  
FFF

@A00721:190:HGJW7DSXY:4:2460:13639:15029\_2:N:0:TCTGCAAG+GCTGCACT  
AGTTTACGAACCTTGACTCTACTATACGTGACATACTAAATACTAGATATTTGGATGATCTTGATAAAG  
AACTTCATGAATTTTCAGAGGATGAAAAATTTTCTTCCTTGATTTTA

+

FFFFFFFFFFFFFFFFFFFFFFFFFFFFFFFFFFFFFFFFFFFFFFFFFFFFFFFFFFFFFFFFFFFFFFFF  
FFFFFFFFFFFFFFFFFFFFFFFFFFFFFFFFFFFFFFFFFFFFFFFFFFFFFFFFFFFFFFFFFFFFFFFF  
FFF

@A00721:190:HGJW7DSXY:4:2135:31033:5948\_1:N:0:TCTGCAAG+GCTGCACT  
TACAGGAGGCATTCTTCTGATCGTAAGAAGTTTATAAGGAACATATCCATTTGTTGTAATAGGGTCAT  
CAACTTAGAACTCGAAACTCTAAGTGGAATACTGTCTTTCCAAGCTTACCTGTATCTTCAATGAAAT  
TGG

+

FFFF,::FF,F,F,FFFFFFFF:,FFFFFF,FFFFFF,FFF:FFF,FFFF,FF,FFFF,:FFFF  
F:::FF:,FFFFFFFF,F,FFF,F,FFFFFF,FFF:F:FFFFFF:FFF:FFFFFF:FF:FFFFFFFF  
FFF

@A00721:190:HGJW7DSXY:4:2109:4010:14011\_2:N:0:TCTGCAAG+GCTGCACT  
TAAAGGAAGATCTGTTATCGACGTTTATCGTTTACGAAGTATCACTCCACCGTGAATGGTTTAAGA  
ATACTATAAATAGAATAGCTATTACTACTAATGGCGTTGGCCTAGTGG

+

FFFFFFFFFFFFFFFFFFFFFFFFFFFFFFFFFFFFFFFFFFFFFFFFFFFFFFFFFFFFFFFFFFFFFFFF  
FFFFFFFFFFFFFFFFFFFFFFFFFFFFFFFFFFFFFFFFFFFFFFFFFFFFFFFFFFFFFFFFFFFFFFFF  
FFF

@A00721:190:HGJW7DSXY:4:1557:16450:22748\_1:N:0:TCTGCAAG+GCTGCACT  
TTTAGGTGGTCTTTATTCTATTATTGATTTTATGAGATTGATACGTTAACAGAAGATGATGTTAGAG  
TAGAATTCCTGAAGAGTCCTTCCGTAACCAACTTCTTGACAATTTTCTTCAATCCTTCGATAATAGTT  
AAA

+

,FFFFFFFFFFFFFFFFFFFFFFFFFFFFFFFFFFFFFFFFFFFFFFFFFFFFFFFFFFFFFFFFFFFFFFFF  
FFFFFFFFFFFFFFFFFFFFFFFFFFFFFFFFFFFFFFFFFFFFFFFFFFFFFFFFFFFFFFFFFFFFFFFF  
FFF

@A00721:190:HGJW7DSXY:4:2226:4010:1517\_1:N:0:TCTGCAAG+GCTGCACT  
CCGATAAGGGTCACTAGTCTTACACAATTAAGAAATAATCCTACATTGACTGATTATCTAAAGATTGA  
AGGAAAATTTATCCTCGTTTAACTTACTTAGACTTTCCTACGATACAAATGATAACTTCTAATTTAC  
GTT

+

FFFFFFFFFFFFFFFFFFFFFFFFFFFFFFFFFFFFFFFFFFFFFFFFFFFFFFFFFFFFFFFFFFFFFFFF  
FFFFFFFFFFFFFFFFFFFFFFFFFFFFFFFFFFFFFFFFFFFFFFFFFFFFFFFFFFFFFFFFFFFFFFFF  
FFF

@A00721:190:HGJW7DSXY:4:2321:31873:6746\_2:N:0:TCTGCAAG+GCTGCACT  
AAGGGATGCATGGTGTATCTCCTCAGGAGTCCCGGCATTTGATAATAATGACGAGACTTTCGTCATA  
ATCGCTGCATATTACGGATTACACGGTACCAGCGCATCTCGTGTGCGAG

+

F:FFFFFFFFFFFFFFFFFFFFFFFFFFFFFFFFFFFFFFFFFFFFFFFFFFFFFFFFFFFFFFFFFFFF  
FFFFFFFFFFFFFFFFFFFFFFFFFFFFFFFFFFFFFFFFFFFFFFFFFFFFFFFFFFFFFFFFFFFFFFFF  
FFF

@A00721:190:HGJW7DSXY:4:1442:26259:16658\_1:N:0:TCTGCAAG+GCTGCACT  
AAATTTATAGAAGATTATTTTGACAGAATCAATAAGAATCATCGATTCTCGATTCTGATAGACTTATCT  
AGGTACTCTCATTTACTATGTTGATTTAGTCTACATTTATGCTGATCTAAAATTTGATCTAGATGGA  
TCC

+  
F:FFFFFF:FF::F,,:FFFFFF,,:F:F,,:F:, ,FFF:FF,FFFFFF:FFF:,FFFFFFF  
FF:FFFFFFFFFFFFFF,FFFFFFF,FFFF:FF:FFFFFFFFFFFFFFF,FFFFFFF  
FFF

@A00721:190:HGJW7DSXY:4:1222:28320:25739\_2:N:0:TCTGCAAG+GCTGCACT  
TATAGGAGTAATCTACGAGAAGATTCTAGAATTCTTAATTATAATATTCAACCTCAAAGTTACGTGT  
TTACAGTAACGAGATCACACATTTTGAGAACTAACTATGTTATGTTCT

+  
FFFF:FFF,FFFFFFFFFFFFFFFFFFFFFF,FFFF:FFFFFFFFFFFFFFFF,FFFFFFFFF  
F:FFFFFFFFFFFFFFFFFFFFFF,FFFF:FFFF:FFFFFFFFF

@A00721:190:HGJW7DSXY:4:1550:3405:21136\_1:N:0:TCTGCAAG+GCTGCACT  
TCTCTTCTTATAATAAATAAATAAATAATATTACTAATGGCAAATAGTGGAAAGGCTCCAGTCAACAC  
TAGTTCGAGTGCTGCTTTGATTACGATGACGTGAGAATAGGTGAAGGGATTGTTTTACCTCGACCA  
ACA

+  
FFFFFF:FFFF:FFFFFFFFF,FFFFFF:F:FFFF:FFFF:FF::FFFFFF:FFFFFFFFF,FF  
FFFFFFFFFFFFFFFFFFFFFFFFFFFFFFFFFFFFFFFFFFFFFFFFFFFFFFFF:FFFF:FFFF:FFF  
FFF

@A00721:190:HGJW7DSXY:4:2475:3974:6934\_2:N:0:TCTGCAAG+GCTGCACT  
GCGACTAATCTTAAAGCTTCACCCAAAATGAAGGACACTTCGAACTGAATAATGATGCACTACAAAC  
AAGTATCGCTAATCATCTGAAAAAGGCTCTAAAGGACACTATACAATA

+  
FFFFFFFFFFFFFFFFFFFFFFFFFFFFFFFF:FFFFFFFFFFFFFFFFFFFFFFFFF  
FFFFFFFFFFFFFFFFFFFFFFFFFFFFFFFFFFFFFFFFFFFFFFFFF

@A00721:190:HGJW7DSXY:4:1255:24849:19163\_2:N:0:TCTGCAAG+GCTGCACT  
CAGCACCACATTTTGGTCAAGTCAATCCGTTGAGAAAATTTCTTAGAGGATATTCGCCATTGTGGTAC  
GAATTGGTCCAACATTTACCACCAAATTTCTTTGATACAACCTCTAGCC

+  
FFFFFFFFFFF:FFFFFF:FFFFFFFFFFFFFFFF:FFFFFFFFFFFFFFFFFFFFFFFFF  
FFFFFFFFFFFFFFFFFFFFFFFFFFFFFFFFFFFFFFFFFFFFFFFFF

@A00721:190:HGJW7DSXY:4:2515:18945:3677\_1:N:0:TCTGCAAG+GCTGCACT  
ATACGCTTGCTATTCACCAGATTGGTTCGAACCCGTTGATGCTATGTCAGAAGAAGCTATTCAAGCTT  
GTCGTTTAAAGACTGCAGAGGCTGTCAAACAAGCCAGACTCAAGGAGTCCAATCAAAGGTTTTGAAT  
TTA

+  
FFFFFFFFFFF:FFFFFFFFFFFFFFFFFFFFFFFF:FFFF:FFFFFFFFFFFFFF:FFFFFFF  
FFFFFF:FFFFFFFFFFFFFFFF:FFFFFFFFFFFFFFFFFFFFFFFF:FFFF:FFFFFFF  
FFF

@A00721:190:HGJW7DSXY:4:1308:13349:14841\_2:N:0:TCTGCAAG+GCTGCACT  
GGTGATAAAAATTATTTAGAGATCTTTCTACTTACAAAGGACAATTCAGTTTCATTAATTCTACGGA  
AAAGTCCGAGTATATTGTATGTTAATAGATAGTGGGATAATAGTTCT

+  
FFFFFFFFFFF:FFFFFFFFFFFFFFFFFFFFFFFF,FFFFFFFFFFFFFFFFFFFFFFFFF  
FFFFFFFFFFFFFF:FFFFFFFFFFFFFFFFFFFFFFFF:FFFFFFF:F

@A00721:190:HGJW7DSXY:4:1311:28999:29763\_1:N:0:TCTGCAAG+GCTGCACT  
CGTCTGAAGAGTTTAGAGCTGCTATTGATTATGTAACCGATAGGAGTTGTATAGTTGAAGATGTGGCT  
TTAGACGATAATCCTTTAAGGACTATGTTGACTGACGAAGATTTTCCACAGATTGTCTACGTTGCA  
GAT

+  
FFFFFFFFFFF,FFFFFFFFFFFFFFFFFFFFFFFFFFFFFFFFFFFFFFFFF  
FFFFFFFFFFFFFFFFFFFFFFFFFFFFFFFFFFFFFFFFFFFFFFFFF  
FFF

@A00721:190:HGJW7DSXY:4:2559:22263:29590\_2:N:0:TCTGCAAG+GCTGCACT  
CACTATATACATTATAAAATATAAAATAAGGGAGTCATAACTTTTGTTACCAAATTCTTGGCTTTCA

+

@A00721:190:HGJW7DSXY:4:1107:17833:10864\_1:N:0:TCTGCAAG+GCTGCACT  
TTGATCTACGTCGTTTAACTGTCGGAACAACCTTTACTTAGAATGACTCTATCTTTTCAGACACTTCT  
TATATTATTTACAATAGTTAATATCATATTAGTAATACTCACTATCGTTTTCTGCTTTTTCTTAGCTA  
ATA

+

@A00721:190:HGJW7DSXY:4:1677:26738:23876\_1:N:0:TCTGCAAG+GCTGCACT  
GGATGAGTACGAAAACCACTCTTCGTTACGAGACCTGTTGGTAGAATAGATTTAGTCTCTACACCCA  
TCTCAACGAGGATAAAGCGAGTTTTCCGTCTGAACGTAATACACGAAGAGATCATCCGCAAACGACT  
CGA

+

@A00721:190:HGJW7DSXY:4:2247:8901:1125\_2:N:0:TCTGCAAG+GCTGCACT  
AAAGTCCCTTCTAACTTTAGATTATGAATCCTGCCTTTACTCATTTTATAGCAGTTATTTATGTTGTA  
CTTTTTATAATTTATAACCTTCTTATACTTTTGGGTATGTTTTGTGAA

+

@A00721:190:HGJW7DSXY:4:2373:21549:4867\_1:N:0:TCTGCAAG+GCTGCACT  
TACTTATTGTAACGATCATTCTTTCGAGTTTTGTCATTCTTATTCTTTTATTCCTTTAACTGTGTATG  
AGGAGGATTTATAATGCTTTTCGATAGTGATTGTTATCAATTTAAATACATTACTGTTTCAAATCATC  
TTT

+

@A00721:190:HGJW7DSXY:4:2650:1588:14011\_1:N:0:TCTGCAAG+GCTGCACT  
GAAATGGTTTCAAATGAGGTCAAAGCTCTATTTATTAACGAAGTATTATCCGATTCTTCGAGGGTA  
TCACTACCACTGATCTGCCGACTTTAGTCAAGGAAGTTCATTCCTTCGATGTTTATATTTTTCTATA  
AGG

+

@A00721:190:HGJW7DSXY:4:2357:17237:14653\_2:N:0:TCTGCAAG+GCTGCACT  
TAATCAAATTTGACAAATTTTAGAACTTTATTTGAGAACTCTCTCCGATCACCTTGGTGTGATCTCC  
CGGAGGATCTTTCAATAAGATGTATGATGATAATCTACTATTTTTAA

+

@A00721:190:HGJW7DSXY:4:2412:2691:25692\_1:N:0:TCTGCAAG+GCTGCACT  
AGCGTATACTTGAATACTTTATCAAAGATTTGGCTTGGTCTATTTACCGCAAAAAGTTGGAAGAGGTC  
TATGATATTTATTTTACTTATACTTTAAATAGCACCGATTATAACTTGACTGTTGATAATATTACAAT  
AGC

+

```
F::FFFFFFFFFFFFFFFFFFFFFFFFF:FFFFFFFFFFFFFFFFFFFFF:FFFFFFFFFFFFFFFFFFFFFFF:
```

@A00721:190:HGJW7DSXY:4:1130:8549:4210\_2:N:0:TCTGCAAG+GCTGCACT  
CTCCCCAAGCCAATCAATAGTTCTTCTGACCAGAATGAAAAGGGGTTTACCAGGGTAGTCTCTAAGTCT

ACCAGGAAGAGGGGAAATGTCCCAAACCTGAGAAGAATAAAGGGAAA

@A00721:190:HGJW7DSXY:4:2369:18394:23547\_2:N:0:TCTGCAAG+GCTGCACT  
CAGGGGTTACCACTTCCTAAGGTGGATGAGGGAGGTTGTTTCTTTGGAGTTTGTAGATAATCTTTTGAG  
AAGGGGTCATAGAGCCAGCAAGAGAAGCTTATATGCTGGTTTAAGTGA

+

FFFFFFFFFFFFFF:F:FFF:FFFFFFFF:FFFFFFFFFFFFFFFFFFFFFFFFFFFFFFFF:FFF,FF  
FFFFF:FF:FFFFFFFFFFFFFFFFFFFFFFFFFFFFFFFF:FFFFFF:FFFFFF

@A00721:190:HGJW7DSXY:4:2472:1108:25269\_2:N:0:TCTGCAAG+GCTGCACT  
CCTTGAGAAGACAAGCCACATTAAGATATAATTTAGGTCAACTTGGGGTTTCGAATGTCATTAGTGCC  
TTACGATTGAAAGAGGTCCTTTTGAGTATCGACAGATCTTTCGATCTT

+

FFFFFFFFFFFFFFFFFFFFFFFFFFFFFFFFFFFFFFFFFFFFFFFFFFFFFFFFFFFFFFFFFFFF  
FFFFFFFFFFFFFFFFFFFFFFFFFFFFFFFFFFFFFFFFFFFFFFFFFFFFFFFF

@A00721:190:HGJW7DSXY:4:2664:4598:12524\_2:N:0:TCTGCAAG+GCTGCACT  
GTGGCAGAATTCGGTAACTTACCATATTGTTCTTCCGGGAAGTTGTGGGATTAACTTTGACTCAAC  
TACTCCGATCAGATCCGATGGTTTGATTGGTATGGACTACTCGACTT

+

FFFFFFFFFFFFFFFFFFFFFFFFFFFFFFFFFFFFFFFFFFFFFFFFFFFFFFFFFFFFFFFFFFFF  
FFFFFFFFFFFF:FFFFFFFFFFFF,FFFF,FFFFFFFFFFFFFFFFFFFFFFFF

@A00721:190:HGJW7DSXY:4:1463:30120:4679\_2:N:0:TCTGCAAG+GCTGCACT  
TCATGGCAGATACTACCGATAAGGTGAAAAATATGCAGGTCAAAGATTCTGTAGCTCTGAGGGCGGTT  
GAGGGAGCCGTTTGGCCGACTTTAACTATTCTAAGAGTCTTTATGAT

+

FFFFFFFFFFFFFFFFFFFFFFFFFFFFFFFFFFFFFFFFFFFFFFFFFFFFFFFFFFFFFFFFFFFF  
F:FFFFFFFFFFFFFFFFFFFFFFFFFFFFFFFFFFFFFFFFFFFFFFFFFFFFFFFF

@A00721:190:HGJW7DSXY:4:1322:11198:22013\_2:N:0:TCTGCAAG+GCTGCACT  
CGTTGTCGTACCTTACCAGGTTGAGGAGACTTTACAGCGGCTTATTGTCGCGCAGTTTACAGAATTGC  
GGTTGAAGTTCACCCATTCTATCTTGAATGCTCACGCCGTCGCAGCCA

+

F:,FF,FFFF:,FFF,F,,:FFFF:FFF:,F:FFFFFF,FF:F:FFFF:FFFFFFF,FFF:,FFF  
FFF,:FFFFFFFF,F,FFFFFFFFFFFFFFFF:FFFFFFFF:FFFFFF:FF

@A00721:190:HGJW7DSXY:4:1564:8043:35556\_1:N:0:TCTGCAAG+GCTGCACT  
ATCACTTGTTAAAGTACAGATTTAGTGATTTAGATATTATTGATATTGGAGGCGATATTCGTTTTCAT  
ATCCAAAACCTCCTTGAATGGAGTACATATTTGCAACCCTATTCTTGATGTGAAAGATGCATCGAGGTA  
TAC

+

FFFFFFFFFFFFFFFFFFFFFFFFFFFFFFFFFFFFFFFFFFFFFFFFFFFFFFFFFFFFFFFFFFFF  
FFFFF:FFFFFFFFFFFFFFFFFFFFFFFFFFFFFFFFFFFFFFFFFFFFFFFFFFFFFFFFFFFF  
FFF

@A00721:190:HGJW7DSXY:4:1344:25681:29465\_2:N:0:TCTGCAAG+GCTGCACT  
TTGATTGGGAACGTACCTACTCACGAGACGTCATGAAAGCTATCGAGGGAAGCAAATGTTTCGTTT  
TGTTACAAGAACGCTTTGGATTGTGACCATAAAGCCTCAGTTGCGATA

+

FFFFFFFFF,FFFFFFFFFFFFFFFFFFFFFFFFFFFFFFFFFFFFFFFFFFFFFFFFFFFFFFFFFFFF  
FFFFFFFFFFFFFFFFFFFFFFFFFFFFFFFFFFFFFFFFFFFFFFFFFFFFFFFF:FFF

@A00721:190:HGJW7DSXY:4:2270:17653:5666\_1:N:0:TCTGCAAG+GCTGCACT  
CTCTCTTGATGATGTAGCCACTATAATGCTTAAGAGAGAGATTGATGTATGTCATTTCTGCTTAGTTT  
GTCCCGGCGAATTATTGGACACGATGAAAAATGACATACCCGTTCTGACCTTGGTATCGTTATCCGT  
CAT

+

FFFFFFFFFFFFFF:FFFFFFFFF:FFFFFFFFFFFFFFFFFFFFFFFFFFFFFFFFFFFFFFFFFFFF  
FFFFFFFF:FFFFFFFFFFFFFFFFFFFFFFFFFFFFFFFFFFFFFFFFFFFFFFFFFFFFFFFFFFFF  
F:F

@A00721:190:HGJW7DSXY:4:1541:7048:5337\_1:N:0:TCTGCAAG+GCTGCACT  
GGTTATTCTCACAAAGATAAGATTTTATCTTTCTTCAAACACCCTGTTTTCCTTAAGGGCGGACA

ATTGTTCCATTGTGAACTCTTGGGGACTAGATTGAGCATTAATGAGTTCCGAATAACTCGTAATAAAT  
CTT

+

FFFFFFFFFFFFFF:FFFFFFFFFFFFFFF:FFFFFFFFFFFFFFF  
FFFFFFFFFFFFFFF:FFFFFFFFFFFFFFF:FFFFFFFFFFFFFFF  
FFF

@A00721:190:HGJW7DSXY:4:1649:28565:28729\_1:N:0:TCTGCAAG+GCTGCACT  
ACCTATTTCCGTACCAAGAGCCACTGCCAATCTCATCGCTATACGCATACCTGATTGGAAGAAGCGAG  
GTTTCGTTCTCAATAAAAATTTTCTCAAGAGATTATGGTTGATAAAGTTTCTTCATAAGGGCTATT  
CAG

+

FFFFFFFFFFFF:FFFFFFFFFFFFFFF:FFFFFFFFFFFFFFF  
FFFFFFFFFFFFFFF:FFFFFFFFFFFFFFF:FFFFFFFFFFFFFFF  
FFF

@A00721:190:HGJW7DSXY:4:1572:25780:15295\_1:N:0:TCTGCAAG+GCTGCACT  
CTTCGGTCAATGACAAAACCTTCGAATATGTTACGACATGGCTTCGTAACAACAGTGCGAGGATTGTC  
ATCTCGGGAAAGTGATTCACCAAGATGTTTCATATAGATACGAGATACCTAGAGAAGGTCGCAGCGAT  
CTT

+

FFFFFFFFFFFFFFF:FFFFFFFFFFFFFFF:FFFFFFFFFFFFFFF  
FFFFFFFFFFFFFFF:FFFFFFFFFFFFFFF:FFFFFFFFFFFFFFF  
FFF

@A00721:190:HGJW7DSXY:4:1456:17897:15577\_2:N:0:TCTGCAAG+GCTGCACT  
AGCTAAGAAGAAGACTTTGGGTACACGTTATGCTCGAACTTAACGTTAGTACCGGAGGTGATCTCT  
CTGCTTCTGCGTTACTGAGAGAAAAGATTCAGGACGCCTACGGTGACT

+

FFFFFFFFFFFFFFF:FFFFFFFFFFFFFFF:FFFFFFFFFFFFFFF  
FFFFFFFFFFFFFFF:FFFFFFFFFFFFFFF:FFFFFFFFFFFFFFF

@A00721:190:HGJW7DSXY:4:1344:10031:18865\_1:N:0:TCTGCAAG+GCTGCACT  
CGTGTGCTCTTCCGATCTAACGAATCTTGAACTACGGTCCTTATCAAAGAAAATGGTGAACCGGTCT  
CTAAATCTTTGAGATTGAGAAGATTGAAGAACACGTCAAGAAGTCGCTCGGCGTTGTTCTTGAAAAC  
CAA

+

FFFFFFFFFFFF,FFFFFFFFFFFFFFF:FFFFFFFFFFFFFFF  
FFFFFFFFFFFFFFF:FFFFFFFFFFFFFFF:FFFFFFFFFFFFFFF  
FFF

@A00721:190:HGJW7DSXY:4:1638:32994:8469\_1:N:0:TCTGCAAG+GCTGCACT  
GCTGATCATGGAGTCTTTGTACCTTCTGTCAAACCTTCGAGGTTACGCTACGAGAGGTGATCCNNGATG  
TGGATTGAAGGCTGGCTCTAAGGGAGACTCCTTCTTTT

+

FFFF:FF,FFFF,FFFF:FFFFFFF,FFFFFFFFFFFFFFF##FFFF  
FFFFFFFFFFFFFFF:FFFFFFF

@A00721:190:HGJW7DSXY:4:2665:27001:20509\_1:N:0:TCTGCAAG+GCTGCACT  
AGAATTGGGTTGAGAAGTGTTCTTTACAAGGATTTAGACTCTTCTTCAAGTTTTTAGATCTTCTTGAT  
ATTCTTAAAGAAAAATTTTCAATAAACTAATGAGAGGTATAGGCTTATTCAAGTCTGTACTTTCAT

+

FF,F:FFF,F:FF:FFFFFF,,F:F:,FFFF,:FFFF:FFFF:FF,,F,FFFFFFFF,FF:FFFF  
F,F:FFFF:FFF,F,FF:FFFFFFF,:FF:FFFFFFFFFFF:FFF,FFF:FF,:FFFF,FFF

@A00721:190:HGJW7DSXY:4:2319:8757:12305\_1:N:0:TCTGCAAG+GCTGCACT  
GTTTCTCTTGGTATTTCTGAAATAGTTTATCAGAGCGTCATTTTCTTTGGGATCTTCTCTGTTAA  
GGGAATTATTAAATCATTCTTCTCACTCTTGACGAGAATTATTACTGTTTTCTCTACCCATAACTTCT  
TTT

+

FFFFFFFFF:FFFFFFFFFFFFFFF:FFFFFFFFFFFFFFF



@A00721:190:HGJW7DSXY:4:2574:14669:9173\_1:N:0:TCTGCAAG+GCTGCACT  
ACTGGAGTTCAGACGTGTGCTCTTCCGATCTGTTTCAACACTTATCACCACCTTTTGAAAGGAAAATAA  
TTGGTGATGAAAATACGTATGTCGGTGGGGTTCTCAAGGCTCTCATCGCCACTGGGATTCTAAGGGGT  
TCC

```

FFFFFFFFFFFFFFFFFFFF:FFFFFFFFFFFFFFFFFFFFFFFFFFFFFFFFFFFFFFFF
FFFFFFFFFFFFFFFFFFFF:FFFFFFFFFFFFFFFFFFFFFFFFFFFFFFFFFFFFFFFF
FFF

```

+

@A00721:190:HGJW7DSXY:4:1454:32913:29465\_2:N:0:TCTGCAAG+GCTGCACT  
TGTTCTTGCAATAGCCACAGACTTTCTGGGAAAAGAGACCTCTGTTGGTAGAGGAGTTGAGAGAATTA  
CTCAGATTCAATCTGGCATCACTGAACGTCTACAACGAGTTAGGGAGT

```

FFFFFFFFFFFFFF:FFFFFF:FFFFFF:FFFFFFFFFFFFFFFFFFFFFFFFFFFFFF:FF,FFFFFFFF
FFFFFFFF:FFFFFFFF:FF,:FF:FFF:FFFFFF:FFFFFFFFFFFFFF

```

+

@A00721:190:HGJW7DSXY:4:1121:27073:7952\_1:N:0:TCTGCAAG+GCTGCACT  
TGATGGCTCAGTACAGGGAGGAGGTAATAGTTATAAAACCTTCTTTTATCATTGCAACAGGACTTTGA  
GAAGACTGTTGAAATGGACAAAATCTGGGATCATAGGTATGTGTACGCTACACTCGAAATATGGGCC  
CTC

[illegible]

+

@A00721:190:HGJW7DSXY:4:2616:2211:3067\_1:N:0:TCTGCAAG+GCTGCACT  
TCTGACCATCGCAAAGAAGACTTTATTAGTTCATGAAGTTCTTACACTTCTCGCGACTAATGTCAGCT  
TCACTACAAAGGCGTTACGTAAAGTAGTTTTACGCTTTATCTTAAAGCATTACCACCAAATTTAGCA  
CTT

```

FFFFF:FFFF,,FFFFFF,:FFFFFF:FFF,FFF,FFFFFF:FFF,FFF:FF,:FFFF:FFFF:F,FF
FFFFFFFFF::F,,FFFFFFFFF:FF:FFFFF:::FFFFFFFFFFFFF:,FFFF,,FF,FFFFFFFF:F
:FF

```

@A00721:190:HGJW7DSXY:4:1365:13747:1157\_2:N:0:TCTGCAAG+GCTGCACT  
TCGCCATATCAGATTAGAGACATGCCAGTTAGAGTTCCTTCTAACCAGGACTGATGGTGAGATTCCTTTT

ACCTTTTGGAGGTCCAGGAACCTTTACTCCTAGTGTCTTTTCTAGAGT  
+  
FFFFFFFFFFFFFFFFFFFFFFFFFFFFFFFFFFFFFFFFFFFFFFFFFFFFFFFFFFFFFFFFFFFFFFFF  
FFFFFFFFFFFFFFFFFFFFFFFFFFFFFFFFFFFFFFFFFFFFFFFFFFFFFFFFFFFFFFFFFFFFFFFF  
@A00721:190:HGJW7DSXY:4:1616:20745:30780\_2:N:0:TCTGCAAG+GCTGCACT  
GTCGGAGGATGACAGGTGGGAGACCGCTCAATAACACTCTATTGAATCCCTTTTCCACGATGAAAGCT  
CTTTATGAGGTGCTCCATGCAAATTTACAGTTCATCTTTGGTGATATC  
+  
FFFFFFFFFFFFFFFFFFFFFFFFFFFFFFFFFFFFFFFFFFFFFFFFFFFFFFFFFFFFFFFFFFFFFFFF  
FFFF:F::FFFFFFFFFFFF:FFFFFFFFFFFF,::,FFFF:FF:FF::F  
@A00721:190:HGJW7DSXY:4:1339:12906:6057\_2:N:0:TCTGCAAG+GCTGCACT  
TTCTCCTTTAATCGTGAGGTTACGAGAGTTTCGTAAGTTTATCGGTTGTATTTTGATAAATTTG  
TTGGAATCGATAATGATACTGACGAAGGTTCTATTACCACCCTTGTCATC  
+  
FFFFFFFFFFFFFFFFFFFFFFFFFFFFFFFFFFFFFFFFFFFFFFFFFFFFFFFFFFFFFFFFFFFFFFFF  
FFFFFFFFFFFFFFFFFFFFFFFFFFFFFFFFFFFFFFFFFFFFFFFFFFFFFFFFFFFFFFFFFFFFFFFF  
@A00721:190:HGJW7DSXY:4:1159:17680:14418\_1:N:0:TCTGCAAG+GCTGCACT  
GTCTAGCCGCTGAGATTCTGCTTACCTATTTACAATCTGTAGAGAGAGAGGTTAATCAGAATTTGAGT  
GATAACGATTTAGTACTGGGAAATGGTGGTAGTCAGTTTACTACTTTTCTTCCCTCCCTTTTTCGA  
TTG  
+  
F:F:FFFFFFFF:FFFFFFFFFFFFFFFFFFFFFFFF:F::FFFFFF:FFFFFFFFFFFFFFFFFFFFFF  
FFFFFFFF:FFF:FFFFFFFFFFFFFFFFFFFFFFFF,FFFFFFFFFFFFFFFFFFFF:FF:FF:FF:FFF:FFF  
FFF  
@A00721:190:HGJW7DSXY:4:1365:16062:3317\_2:N:0:TCTGCAAG+GCTGCACT  
AGGTTTTTCTTTTATGGGACTCTTGTTTGTACTTATGAAGGAGGTATTACTTCGGAAGTTCTTAATGT  
AGGTCTCCTAGTACTTAAGGGTTTATGTTTCGGTTTCAGCTGGATGGA  
+  
FFFFFFFFFFFFFFFFFFFF:FFFFFF:FFFFFFFFFFFFFFFF,FF,FFFFFF:FFFFFFFFFFFFFFFF  
FF,FFFFFFFFFFFFFFFFFFFF,FFFFFFFFFFFFFFFFFFFFFFFFFFFFFFFF  
@A00721:190:HGJW7DSXY:4:2369:30147:35634\_1:N:0:TCTGCAAG+GCTGCACT  
TTCACATTGCGTGATCACTTCCCGTGGACTTGGAAGAGATTAAACATAAAATCCAGCGATTCTATTA  
TGTCGCTAAAGCCTGTCCAGTTGTGCGATGATGTTTCGGGCTGTGGGGATTAAGTTCCTCGTGAACTT  
ACG  
+  
:FFFFFFFFFFFFFFFFFFFFFFFFFFFF:::FF:,FFF,F,FFFFFFFF::FFFFFFFF:FF:FFFF,F:FF,  
FFFFFFFF,FFFFFFFF:FFFFFFFF:FF,:FFFFFFFFFFFFFFFFFFFF,FFFF:FFFFFF,:::F:F  
F,F  
@A00721:190:HGJW7DSXY:4:1522:11406:32737\_1:N:0:TCTGCAAG+GCTGCACT  
CACAAGGATTACTAAGTCTGAGATCTGCCACTTCTAATTTTAGGAAACGTCGCGAAAAGAAAGTTTCAT  
GAGGATGTCTTGGTCGAAAAATATCGCCGGGAAGTCTAATAGAGGATCCTGATGACATTATTTCAAC  
GGA  
+  
::FFF:FFFFFFFFFFFFFFFFFFFFFFFFFFFFFFFFFFFFFFFFFFFFFFFFFFFFFFFFFFFFFFFF  
FFFFFFFFFFFFFFFFFFFFFFFFFFFFFFFFFFFFFFFFFFFFFFFFFFFFFFFFFFFFFFFFFFFFFFFF  
FFF  
@A00721:190:HGJW7DSXY:4:2448:13223:31563\_2:N:0:TCTGCAAG+GCTGCACT  
AGTTCTACCACAGAAACCGTCTCAGGAAGTGTCTCCACTGATTCGGAATTAGAGAAAGACGACCTTCT  
TGTGGGACTGAGACCTCTGAATTTTACGGGTGCCCTGATGAGGACGT  
+  
FFFFFFFFFFFFFFFFFFFFFFFFFFFFFFFFFFFFFFFFFFFFFFFFFFFFFFFFFFFFFFFFFFFFFFFF  
FFFFFFFFFFFFFFFFFFFF:F:FFFFFFFFFFFFFFFFFFFFFFFFFFFFFFFF  
@A00721:190:HGJW7DSXY:4:1627:13648:5619\_1:N:0:TCTGCAAG+GCTGCACT  
ACTCTGAGACTTCTAAGAGTGTTTCAAAAGACCAGAAACGTAACAAGAAGAATAAAGGTAGGAAGGGG



GGTTTACGGCAGAAAAATTTCTCCTGCTTGTAATTCGAGAGAGGACAC

+

FFF:FF,:F:F:,F,FFFFFFFFF:,FF,:F,,,:FFFFFFFF,FFF,F,FFF,FFFFF,FFFF:F  
F:FFFFF:,,,:FFFFFF:,F:F:,F:F,F,FF:FF,FF,FFF:,FFFF

@A00721:190:HGJW7DSXY:4:1509:28655:9784\_1:N:0:TCTGCAAG+GCTGCACT  
CTTGACGACTTTCGAATTTGAGGACGGAGTTAAATATATTACTTTCACTCAAGGTGAAAAGTTTGAAAT  
TAACAAAGTCCTTGTAAGAGTAAGGTTAAATGTGAAGATGCTCAGACTATTCATGAAGTTCAAGGTA  
ATA

+

:FFFFFFFFF:FFFFFFFFFFFFFFF:FFFFFF:FFFFFFFFFFFFFFFFFFFFFFFFFFFFFFFFF:FFFFFFF  
FFFF:FFFF:FFFFFFFFFFFFFFFFFFFFFFFFFFFFFFFFFFFFFFFFFFFFFFFFFFFFFFFFF  
FFF

@A00721:190:HGJW7DSXY:4:2320:3215:30326\_1:N:0:TCTGCAAG+GCTGCACT  
TGACCCTGTTTTTGATCACAACACATATTACCGTTGCTCTATCACGACACGTTGAATCTTTACGAT  
ACTTTGTTATCAATGTAAAGTTAAACGATGCTACTTGTGAGAGGATCAATCACAGTAAGGAAGTGTCA  
CGT

+

FFFFFFFFFFFFFFFFFFFFF,FFF:FFFFFFFFFFFFFFFFFFFFFFFFFFFFFFFFFFFFFFFFF  
FFFFFFFFFFFFFFFFFFFFF:FFFFFFFFFFFFFFFFFFFFF:FFFFFFFFFFFFFFFFFFFFFFFFF  
FFF

@A00721:190:HGJW7DSXY:4:1105:8250:4476\_2:N:0:TCTGCAAG+GCTGCACT  
GATTCAACCCCTTATATCGAGGCTATCGAGGACGATGAGTATCTTGAAGTTGTTGACGACAAGCCTCA  
AGAGGGTAGAGGACCACCTGGATCTTCTACTGTCTCTGCCTTCCAAGA

+

FFFFFFFFFFFFFFFFFFFFFFFFFFFFFFFFFFFFF:FFFFFFFFFFFFFFFFFFFFFFFFFFFFFFFFF  
:FFFFFF:FFFFFFFFFFFFFFFFFFFFF:FFFFFFFFFFFFFFFFFFFFF

@A00721:190:HGJW7DSXY:4:2158:17987:9784\_2:N:0:TCTGCAAG+GCTGCACT  
TTATTCCTGGAACCACTTAACGTCACTCGGTAATCTTTCAGCCGAATTAAGTACTAATGAGTTCAAG  
TCGTTGTCGATCGAATTAAGATCAAGGCTAATACCTTTATAGGTAAG

+

FFFFFFFFFFFFFFFFFFFFFFFFFFFFFFFFFFFFF:FFFFFFFFFFFFFFFFFFFFFFFFFFFFFFFFF  
FFFFFFFFFFFFFFFFFFFFFFFFFFFFFFFFFFFFF:FFFFFFFFFFFFFFFFFFFFF

@A00721:190:HGJW7DSXY:4:1527:23511:11647\_1:N:0:TCTGCAAG+GCTGCACT  
CCCGATAGGGTACCGAGTCTCCAAGAGAATATTTATTCTTATGAGGCTCGAACTTCAACGTTTTTCAC  
AACGGAAAGACATATCGCACCCGAAATTTTGGGCAGAATGCTCTTAACGCGTTCTTGAACGGTGT  
TTG

+

FFFFFFFFFFFFFFFFFFFFFFFFFFFFFFFFFFFFF:FFFFFFFFFFFFFFFFF  
FFFFFFFFFFFFFFFFFFFFFFFFFFFFFFFFFFFFF:FFFFFFFFFFFFFFFFFFFFF  
FFF

@A00721:190:HGJW7DSXY:4:1268:18728:36182\_1:N:0:TCTGCAAG+GCTGCACT  
GATAAAGTTATAGGAGACTCAGTTAACCTGAGAGCTCCTCAATTGATAGATTGGGTCAACAATAGGGA  
CGCTAGTATACTTCGTAAAGTCGACAGCGAAATGGTCAATATTGATAATTGACCGACTATATGACCT  
ATT

+

FFFFFFFFFFFFFFFFFFFF,FFFFFFFFFFFFFFFFFFFFFFFFFFFFFFFFFFFFFFFFF  
FFFFFFFFF:FFFFFFFFFFFFFFFFFFFFFFFFFFFFFFFFFFFFFFFFFFFFFFFFFFFFFFFFF  
F:F

@A00721:190:HGJW7DSXY:4:2164:28592:31000\_1:N:0:TCTGCAAG+GCTGCACT  
AAGGGAAGCTAAGGTTAACTTGATGCTTCAGCCTTTTCGAAGCATAACCCCGCACAGAATATCGTTT  
ATCACGCAAATTTATTAATGCAATTTTCGACCTATCTTTAAGGTTCTTGTGAGGAGAGTCAAACAG  
TGT

+

FFFFFFFFFFFFFFFFF:FFFFFFFFFFFFFFF:FFFFFFFFFFFFFFFFFFFFFFFFFFFFFFFFF

FFFFFFFFFFFFFFFFFFFFFFFFFFFFFFFFFFFFFFFFFFFFFFFFFFFFFFFFFFFFFFFFFFFFFFFFFFFFFFFF  
FFF

@A00721:190:HGJW7DSXY:4:2160:7039:30279\_1:N:0:TCTGCAAG+GCTGCACT  
ACATTTTATGTATACAGAGATGACCAGTGACGATTTCTCCCGAAGCTCTTCTCTCTCTTAGGAGGT  
CATGATGACTACTATAAGGGTGAATCGATTTTTCGAAGTTTGACAAATCTCAAGATTTCTTTTGTA  
AGC

+  
FFFFFFFFFFFFFFFFFFFFFFFFFFFFFFFFFFFFFFFFFFFFFFFFFFFFFFFFFFFFFFFFFFFFFFFFFFFF  
FFFFFFFFFFFFFFFFFFFFFFFFFFFFFFFFFFFFFFFFFFFFFFFFFFFFFFFFFFFFFFFFFFFFFFFFFFFF  
F,F

@A00721:190:HGJW7DSXY:4:1307:21386:17801\_1:N:0:TCTGCAAG+GCTGCACT  
ATTTAGGCTTCGATGCTGAATTTCTTGAACCTTTGGAGTGCCAGTGAATATTTTGTACGCCAGGAGT  
ATCCATAACGATTTGTCATTTACCACCTTTGCTCAACGACGAAGTGGAACGGCCAACACTTTCTTTG  
TAA

+  
FFFFFFFFFFFFFFFFFFFFFFFFFFFFFFFFFFFFFFFFFFFFFFFFFFFFFFFFFFFFFFFFFFFFFFFFFFFF  
FFFFFFFFFFFFFFFFFFFFFFFFFFFFFFFFFFFFFFFFFFFFFFFFFFFFFFFFFFFFFFFFFFFFFFFFFFFF  
FFF

@A00721:190:HGJW7DSXY:4:1376:9182:29356\_1:N:0:TCTGCAAG+GCTGCACT  
TCTGATGATTTTATCACTTTATTATGACCTTGGAAGTTTTTCGGCTGTGGTTGTCGCTGGGACGATT  
CCATTCTGTTTTCAAAGACTCCAATAACTGATCATTCTGATCATATGATTTTGGACAATGGTTTCGA  
GCG

+  
FFFFFFFFFFFFFFFFFFFFFFFFFFFFFFFFFFFFFFFFFFFFFFFFFFFFFFFFFFFFFFFFFFFFFFFFFFFF  
FFFFFFFFFFFFFFFFFFFFFFFFFFFFFFFFFFFFFFFFFFFFFFFFFFFFFFFFFFFFFFFFFFFFFFFFFFFF  
FFF

@A00721:190:HGJW7DSXY:4:2615:16495:9987\_2:N:0:TCTGCAAG+GCTGCACT  
CAGCGTACTTCTGCTCGCGATTTATTCTTTTTGTCAATGATTACATCTACTTCGTTCTGATCCTTAC  
AAGATCATCGTTAAGTTAGGTAAACCCCTAACCGATGTTACTCTTGTA

+  
FFFFFFFFFFFFFFFFFFFFFFFFFFFFFFFFFFFFFFFFFFFFFFFFFFFFFFFFFFFFFFFFFFFFFFFFFFFF  
FFFFFFFFFFFFFFFFFFFFFFFFFFFFFFFFFFFFFFFFFFFFFFFFFFFFFFFFFFFFFFFFFFFFFFFFFFFF  
FFF

@A00721:190:HGJW7DSXY:4:1118:18611:21637\_2:N:0:TCTGCAAG+GCTGCACT  
TTAAAGACTATACTAAATATCTCCACTACGAGTTGTTGTTTGGCGATTAGCTCTTGCGACTAATATT  
CGATATTCGATTGAGGGTCGTTATACCTATTCGGCTATCTGTGCTTTG

+  
F:FFFFFFFFFFFFFFFFFFFFFFFFFFFFFFFFFFFFFFFFFFFFFFFFFFFFFFFFFFFFFFFFFFFFFFFF  
F:FFFFFFFFFFFFFFFFFFFFFFFFFFFFFFFFFFFFFFFFFFFFFFFFFFFFFFFFFFFFFFFFFFFFFFFF  
FFF

@A00721:190:HGJW7DSXY:4:1544:1425:16799\_2:N:0:TCTGCAAG+GCTGCACT  
TCAAATTTTAAACGATTCCGAGAGGTTTATCCTGATGTGGAGGGAGTTCTTGAAGCATCCCGACCTTT  
CCTTGTGAAAATTTTGATGCGGTTTCATAAGATTATCAGTAATCCTGA

+  
FFFFFFFFFFFFFFFFFFFFFFFFFFFFFFFFFFFFFFFFFFFFFFFFFFFFFFFFFFFFFFFFFFFFFFFFFFFF  
FF:FFFFFFFFFFFFFFFFFFFFFFFFFFFFFFFFFFFFFFFFFFFFFFFFFFFFFFFFFFFFFFFFFFFFFFFF  
FFF

@A00721:190:HGJW7DSXY:4:1505:17173:19366\_1:N:0:TCTGCAAG+GCTGCACT  
ATTCATGGACCTTCATCCTGTACCTCTTCTGGAGAGACGTATCTCAAAGATCGACTTCGAGACAGGT  
GATATTGTTGAGCGAGAGCGACCAAGATCTAAATTCCGTAACGGTGCGTGGCGCTTTATTTTAAAAAG  
CTC

+  
FFFFFFFFFFFFFFFFFFFFFFFFFFFFFFFFFFFFFFFFFFFFFFFFFFFFFFFFFFFFFFFFFFFFFFFFFFFF  
FFFFFFFFFFFFFFFFFFFFFFFFFFFFFFFFFFFFFFFFFFFFFFFFFFFFFFFFFFFFFFFFFFFFFFFFFFFF  
FFF

@A00721:190:HGJW7DSXY:4:2143:18593:4507\_2:N:0:TCTGCAAG+GCTGCACT  
CTGATACTTATCACGAAAGGACTTGAGTCTTTTGATCAGTCTCTGACTTGACCATCTTTCATTTTAAA

$+$ 

@A00721:190:HGJW7DSXY:4:1640:20464:10379\_1:N:0:TCTGCAAG+GCTGCACT  
CTCTTCCGATCTCTTATATGTGTTTTTACTATAACAACATCAGTTGATTAAGACTCTTCCGAAAGGC  
GAACTTTGGGAATTTGAAGCTCAGGGTGAAGCACAACTTTGACCGTGACGAAGTGTGGTGTCTTGA  
TCT

+

@A00721:190:HGJW7DSXY:4:1533:19922:5901\_1:N:0:TCTGCAAG+GCTGCACT  
ATACTCTCCTTGAGTTCACCTCGTAAGGACACTACCACTTATTACGATATTTCTTTAGTCGATGGGTTT  
TCGACTCCTTTAAGCGTCTTCTGTTCATCGCAACCAGATGATATCTTCTATTCTGAACCTTATGTTTCGA  
TCA

+

@A00721:190:HGJW7DSXY:4:1610:27154:26788\_2:N:0:TCTGCAAG+GCTGCACT  
TCTTCTAATGTGGCCTGAAC TACGTTTCACTTTGTGTG TACTTGTCTCTATTTTAAGTTTTGTCTTCC  
TTGTTTGTCTTATTCTATTAATCACTCATTTTAGTGAGATTATTAAAA

 $+$ 

@A00721:190:HGJW7DSXY:4:1415:23095:21512\_2:N:0:TCTGCAAG+GCTGCACT  
CGACAACAGCAGGGGTTTTCTGAATAGTGATAGCCACCCGCCTTACAGAGGGGCAGCAGCATGACCATA  
ATTGGTATTGACTTTGGTACCACCTTTTCTACTGTCTGTCTCGCCTCT

+

@A00721:190:HGJW7DSXY:4:1175:14036:34319\_1:N:0:TCTGCAAG+GCTGCACT  
CTTAACAACAATGATAGTGAATTTATACCTACAATCATTGGTTTTTCTAATAATGATGACACTATTGT  
TTATGGATATGATGCTATTACTCATGATGGTTACGGTCAGGGAGGATTCTCAGTTTACAAGGACCTTA  
AGC

+

@A00721:190:HGJW7DSXY:4:2347:21585:25598\_2:N:0:TCTGCAAG+GCTGCACT  
CCGAAAGACGTGCTAAATTAACCATTTGTACGATGTCGTCTGTCTCGGCGATCACTTTTCTACTAAGA  
ATTGGTCCTACTTTTGGACAAGGCCAACTTCGTAATCTTCATGAGATC

+

@A00721:190:HGJW7DSXY:4:2359:13006:13432\_1:N:0:TCTGCAAG+GCTGCACT  
TTAGGGATTTTGAGAGAGTGAAAGGCTTCAATTGTAGTGGTTTGGTCGTTTCAGTACCCAGTCAGTAT  
ACCTCTACGCAAAGATATTTTCATGAAAACACAGAGGAACGTACCGGATTACCTGTCTTTCATATTAT  
GAA

+

[illegible]

@A00721:190:HGJW7DSXY:4:2447:5936:34726\_2:N:0:TCTGCAAG+GCTGCACT  
TCTTTGCTTCGATGTTGGATGTCAAGAAGGGTTCAGAATGGGATTCTACGTAGTTTATGACTTTGGT  
GGTGGTACTTTCGATACTTCTATCGTCTTACGTTACGGTAATTACTAT







@A00721:190:HGJW7DSXY:4:2676:28890:21652\_2:N:0:TCTGCAAG+GCTGCACT  
CACTATATACATTATAAAATATAAAATAAGGGAGTCATAACTTTTGTACCAAATTCTTGGCTTTCA  
ACGAAGTCTCTGATTTTATTAATCATTACTTTAACGATCTCTCGGTCA

+

FFFFFFFFFFFFFFFFFFFFFFFFFFFFFFFFFFFFFFFFFFFFFFFFFFFFFFFFFFFFFFFFFFFFFFFF  
FFFFFFFFFFFFFFFFFFFFFFFFFFFFFFFFFFFFFFFFFFFFFFFFFFFFFFFFFFFFFFFFFFFFFFFF

@A00721:190:HGJW7DSXY:4:1140:14660:26631\_1:N:0:TCTGCAAG+GCTGCACT  
TTGATCTACGTCGTTTAACTGTCGGAACAACCTTTACTTAGAATGACTCTATCTTTTCAGACACTTCT  
TATATTATTTACAATAGTTAATATCATATTAGTAATACTCACTATCGTTTTCTGCTTTTTCTTAGCTA  
ATA

+

FFFFFFF:,FFFF:FF:FFFFFFFFFFFFFFFFFFFFFFFFFFFFFFFFFFFFFFFFFFFFFFFFFFFFF  
FFFFFFFF:FFFFFFFFFFFFFFFFFFFFFFFFFFFFFFFFFFFFFFFFFFFFFFFFFFFFFFFFFFFFFFFF  
FFF

@A00721:190:HGJW7DSXY:4:2461:20012:35869\_1:N:0:TCTGCAAG+GCTGCACT  
GTATGAGTACTAAAACAACTCTTCTTTACTAGACCTGTTGGTAGAATATTTTTAGTCTCTACACCCT  
TCTCACCGAGGATAACGCTATTTTTCCGTCCTTAACCTAATACACGAAGATATCAGCCGCAAACGACT  
CGA

+

::F::,,:F,,FFFFFF,F,,,F::,,FFF,,,,::,F,,FFF:F,F,F,,,FFF::,,F::,,FF,,  
:,F,F::,,:,FFF:,F,,,FFF:F:,F,F,F,,,FF:F:,F::,FF:F,F:::,FFFFFF  
FFF

@A00721:190:HGJW7DSXY:4:2373:21549:4867\_2:N:0:TCTGCAAG+GCTGCACT  
AAAGTCCCTTCTAACTTTAGATTATGAATCCTGCCTTTACTCATTTTATAGCAGTTATTTATGTTGTA  
CTTTTTATAATTTATAACCTTCTTATACTTTTGGGTATGTTTTGTGAA

+

FFFFFFFF:FFFFFFFFFFFFFFFFFFFFFFFFFFFFFFFFFFFFFFFFFFFFFFFFFFFFFFFFFFFFF  
FFFFFFFFFFFFFFFFFFFFFFFFFFFFFFFFFFFFFFFFFFFFFFFFFFFFFFFFFFFFFFFFFFFFFFFF

@A00721:190:HGJW7DSXY:4:1251:16450:7185\_2:N:0:TCTGCAAG+GCTGCACT  
CTTATTGTAACGATCATTCTTTCGAGTTTTGTCATTCTTATTCTTTTATTCCTTTAACTGTGTATGAG  
GAGGATTATAATGCTTTTCGATAGTGATTGTTATCAATTTAAATACA

+

FFFFFFFFFFFFFFFFFFFFFFFFFFFFFFFFFFFFFFFFFFFFFFFFFFFFFFFFFFFFFFFFFFFFF  
FFFFFFFFFFFFFFFFFFFFFFFFFFFFFFFFFFFFFFFFFFFFFFFFFFFFFFFFFFFFFFFFFFFFFFFF

@A00721:190:HGJW7DSXY:4:1443:5538:24674\_2:N:0:TCTGCAAG+GCTGCACT  
CTTTACTCACAGACTCCGAAAATGGTTTCAAATGAGGTCAAAGCTCTATTTATTAACGAACATTAT  
CCGATTCTTCGAGGGTATTACTACCACTGATCTGCCGACTTTAGTCAA

+

FFFFFFFFFFFFFFFFFFFFFFFFFFFFFFFFFFFFFFFFFFFFFFFFFFFFFFFFFFFFFFFFFFFFF  
FFFFFFFFFFFFFFFFFFFFFFFFFFFFFFFFFFFFFFFFFFFFFFFFFFFFFFFFFFFFFFFFFFFFFFFF

@A00721:190:HGJW7DSXY:4:1461:25156:4758\_2:N:0:TCTGCAAG+GCTGCACT  
TTCCTTCGATGTTTATATTTTTCTATAAGGGAAAATAGCAATAATCAAATTCGACAAATTTAGAAC  
TTTATTTCAGAACTCTCTCCGATCACCTTGGTGTGATCTCCCGGAGGA

+

FFFFFFFFFFFFFFFFFFFFFFFFFFFFFFFFFFFFFFFFFFFFFFFFFFFFFFFFFFFFFFFFFFFFF  
FFF,FFFFFFFFFFFFFFFFFFFFFFFFFFFFFFFFFFFFFFFFFFFFFFFFFFFFFFFFFFFFFFFF

@A00721:190:HGJW7DSXY:4:1418:2130:9784\_2:N:0:TCTGCAAG+GCTGCACT  
ATGTATGATGATAATCTACTATTTTTAAATAGTGATATTCAGCGTATACTTGAATACTTTATCAAAGA  
TTTGGCTTGGTCTATTTACCGCAAAAAGTTGAAGAGGTCTATGATAT

+

FFFFFFFFFFFFFFFFFFFFFFFFFFFFFFFFFFFFFFFFFFFFFFFFFFFFFFFFFFFFFFFFFFFFF  
FFFFFFFFFFFFFFFFFFFFFFFFFFFFFFFFFFFFFFFFFFFFFFFFFFFFFFFFFFFFFFFFFFFFFFFF

@A00721:190:HGJW7DSXY:4:2207:3233:31172\_2:N:0:TCTGCAAG+GCTGCACT  
TATACTTTAAATAGCACCGATTATAACTTGACTGTTGATAATATTACAATAGCTCTTCTCAGAAGAT

TAGAGAAGTAACCGGTGAACACGTCGGTAGCATTGATTTACTTTTACC  
+  
FFFFFFFFFFFFFFFFFFFFFFFFFFFFFFFFFFFFFFFFFFFFFFFFFFFFFFFFFFFFFFFFFFFFFFFF  
FFFFFFFFFFFFFFFFFFFFFFFFFFFFFFFFFFFFFFFFFFFFFFFFFFFFFFFFFFFFFFFF  
@A00721:190:HGJW7DSXY:4:1436:29152:9111\_2:N:0:TCTGCAAG+GCTGCACT  
TTTCGAAAAGAAACCTATAAGTTACAAACGATTCTTCGACTATATTAAAGAAATAAAAATACTTCAAG  
TACCTGAACCTTTACATTTTTATTGGTATGGTATAATGTGTCTTACAAA  
+  
FFFFFFFFFFFFFFFFFFFFFFFFFFFFFFFFFFFFFFFFFFFFFFFFFFFFFFFFFFFFFFFFFFFFFFFF  
FFFFFFFF:FFFFFFFFFFFF,FFFFFFFFFFFFFFFFFFFFFFFFFFFF:FF  
@A00721:190:HGJW7DSXY:4:1424:6840:34194\_2:N:0:TCTGCAAG+GCTGCACT  
CTCTCGGTAATGAGAGTGTATTCCTTAATATTCTAGTAACCGCTATGTGGGCATTACTAGGATTTATC  
ACACTCCTAAATTTGATAGCAATTTATGTTTTAAATGCTAGGAAAATT  
+  
FFFFFFFFFFFFFFFFFFFFFFFFFFFFFFFFFFFFFFFFFFFFFFFFFFFFFFFFFFFFFFFFFFFFFFFF  
FFFFFFFFFFFFFFFFFFFFFFFFFFFF:FFFFFFFFFFFFFFFFFFFFFFFFFFFF  
@A00721:190:HGJW7DSXY:4:1317:5466:12649\_1:N:0:TCTGCAAG+GCTGCACT  
TGTATAGTTCAAGGAGTACTTAATTCAATAGCTTTAGTATTATTTACTATCGCCTTTATTGAAAATTG  
TATAAGAGTTAATTGCTTACACAAAAGTGACGCGCAAGGAATCTTAATTGATTGAAGCTAGGCGTTG  
GGG  
+  
FFFFFFF:FFFFFFFFFFFFFFFFFFFF,FFFFFFFFFFFFFFFFFFFFFFFFFFFFFFFFFFFFFFFFFFFF  
FFFFFFFFFFFFFFFFFFFFFFFFFFFFFFFFFFFFFFFFFFFF:FFFF,F:FFFFFFFFFFFFFFFFFFFF  
FFF  
@A00721:190:HGJW7DSXY:4:1513:5864:34225\_1:N:0:TCTGCAAG+GCTGCACT  
ACTCCCCAAACATAACATAACCTACCATGACCAATCATCGCTCCAAGTGGCAGCCAGACGTA  
GGGTCAAACCTACTACCGCCGGTCGGCAGATCGGCACCACTGGTCTCTACGTTACGGGACCCGCTGTG  
CAG  
+  
FFFFFFFFF:,F,F:,F:,F:F:F::FF::FF,,,FFFFFF,F,FFFFFFFF:FFFFFF,FF:FF:FFF:  
FFFF:FF,:F:,FF:FFF:FF,:FF,F,,F:::FFFFFFFFFFFFFFFF:FFFF,FFFF:FFFFFFFF  
F:F  
@A00721:190:HGJW7DSXY:4:1133:5095:17394\_1:N:0:TCTGCAAG+GCTGCACT  
CCAAATCTAGATCTGCACAGAAGAAGGCTGAAGGTGCTTACCGGACGACCACTCAAAGGAAACGGGCT  
GTTGCCAGAGGAAAGCAGCGACCACCGAGGTCGCTCGTAACATTGACGGCAGTCCCGTCATCTCTGT  
GGG  
+  
FFFFFFFFF,F,FF,FFFFFFFFFFFFFFFFFFFFFFFFFFFF,FFFFFFFF:FFFFFF:FFFF,FFFFFF  
FFFFFFFFFFFF:FFFFFFFFFFFFFFFFFFFFFFFFFFFFFFFFFFFFFFFFFFFFFFFFFFFFFFFFFFFF  
FFF  
@A00721:190:HGJW7DSXY:4:1452:1940:13589\_1:N:0:TCTGCAAG+GCTGCACT  
GCTCTTCCGATCTATTCACTACTCCATACCAATCAATGATGTGACTATACAGTTGGGCCATTTCAAG  
AGTGGTCAATACGTGCGGGAGGTACTGAAGCCTTCCCCTCCGCTGGCACGAAGAACAACCTCCAAGCC  
AAT  
+  
FFFFFFFFFFFFFFFFFFFFFFFFFFFF:F:FFFFFFFFFFFFFFFFFFFFFFFFFFFFFFFFFFFFFFFFFFFF  
FF,FFFFFFFFFFFFFFFFFFFFFFFFFFFF:FFFFFFFFFFFFFFFFFFFFFFFFFFFFFFFFFFFFFFFFFFFF  
FFF  
@A00721:190:HGJW7DSXY:4:1259:22761:19774\_2:N:0:TCTGCAAG+GCTGCACT  
TGACCAGAATGAAAAGGGTTTACCAGGGTAGTCTCTAAGTCTACCAGGAAGAGGGGAAATGTCCCCA  
AACTGAGAAGAATAAAGGGAAAGGTCCATCAGGACCTAAGAAGGGGA  
+  
FFFFFFFFFFFFFFFFFFFFFFFFFFFFFFFFFFFFFFFFFFFFFFFFFFFFFFFFFFFFFFFFFFFFFFFF  
FFFFFFFFFFFFFFFFFFFF:FFFFFFFFFFFFFFFFFFFFFFFFFFFFFFFFFFFFFFFFFFFF

@A00721:190:HGJW7DSXY:4:1231:26151:27743\_2:N:0:TCTGCAAG+GCTGCACT  
AATTCTGAAGGAAGATCTCCCACCATCTGGGGTTGGGAATAAGAAATCTGCACGGGCCAAAGAGGCCG  
CTGCTACGAAGTCGCTGAAGGCGGCTTGGGTCATTAAGGGTAGCTGTA

+

FF:FFFFFFFF:FFFFFFFFFFFFFFFF:FFFFFFFFFFFFFFFFFFFFFFFFFFFFFFFF  
FFFFFFFFFFFFFFFFFFFFFFFF:FFFFFF:FFFFFFFFFFFFFFFFFFFFFFFF

@A00721:190:HGJW7DSXY:4:1130:19316:4539\_1:N:0:TCTGCAAG+GCTGCACT  
CCGACCCCATCTTTGAGACCAAGACTCTCTACAGTAGGTTCTGCCTACTATGAGCAAATCTGTTGAA  
TTCGTCACTGAGGACGAAGGTGAGAGGACTTTTGGCTACTGGCGACAACTGAGAGCAGTCGCTGGGG  
AAA

+

FFFFFFFFFFFFFFFFFFFFFFFFFFFFFFFFFFFFFFFFFFFFFFFFFFFFFFFFFFFFFFFF  
FFFFFFFFFFFFFFFFFFFFFFFFFFFFFFFFFFFFFFFFFFFFFFFFFFFFFFFF:FFFFFFFFFFFFFFFF  
FFF

@A00721:190:HGJW7DSXY:4:1154:15935:29058\_2:N:0:TCTGCAAG+GCTGCACT  
ACGCTTCGAGCTTGAGTGTGACGAGGCCGGTGACGTTTTTGTCAACGGCGTTTGGAGGATTTTATCCG  
CGCTTAACATATGGGGCGAAGATCCCCTATGGAGTCTTGAAGGACTTAG

+

FFFFFFFFFFFFFFFFFFFFFFFFFFFFFFFFFFFFFFFFFFFFFFFFFFFFFFFFFFFFFFFF  
FFFFFFFFFFFFFFFFFFFFFFFFFFFFFFFFFFFFFFFFFFFFFFFFFFFFFFFF:FFFF:FFF

@A00721:190:HGJW7DSXY:4:2424:29324:18145\_1:N:0:TCTGCAAG+GCTGCACT  
GCATGTCACCCTTAAGCACCAGGTAAGCTCGGGACTTACAAGAGAGAGTGTGAGAGAGTCGCTCTCA  
CGATTTTGGCCAGAATGCGGGCTTTATGACTGATGAGGTTAAAAATCATGCTCCGTCTGTGGGTGCG  
GG

+

FFFFFFFF:FFFFFFFFFFFFFF,FFFFFF:FFFFFF:FFFFFFFFFFFFFFFFFFFFFF:FFFFFF,,FF  
F,:,FFF:,F,:,FFF,:FFFFFF,,F::,,::,F,FF::FFF:,,,,F,,,::,F,FFF,F,,  
FF

@A00721:190:HGJW7DSXY:4:1105:3459:27712\_2:N:0:TCTGCAAG+GCTGCACT  
TTCACTGGTTCTGGGAGGCTGCTTTCCTCCATAATTACAACCTCTCTTTAGAGAGCATTAGAAGGAAG  
TTGGGCAAATTCCCACATATGGTAGACGTTGTACACAGATCGGAAGA

+

FFFFFFFFFFFFFFFFFFFFFFFFFFFFFFFFFFFFFFFFFFFFFFFFFFFFFFFFFFFFFFFF  
FFFFFFFFFFFFFFFFFFFFFFFFFFFFFFFFFFFFFFFFFFFFFFFFFFFFFFFF

@A00721:190:HGJW7DSXY:4:2477:31349:14231\_1:N:0:TCTGCAAG+GCTGCACT  
TCCTCCGTCATTGGGGATTTGATGTGAGAAGGTGGAAGGTGTCAAGGGTCTTCTTCATGCTGATCTT  
TCAGGACCTAATCACATCATGATTGATAGTTACGGCTCGTATCGAGTTGGAGGGAGGAAGTTCTCCGA  
A

+

FFFFFFFFFFFFFFFFFFFFFFFFFFFFFFFFFFFFFFFFFFFFFFFF:FFFFFFFF:FFFFFFFFFFFFFF  
FFFFFFFFFFFFFFFFFFFFFFFFFFFFFFFFFFFFFFFF:FFFFFFFFFFFFFFFFFFFFFFFFFFFFFF:  
F

@A00721:190:HGJW7DSXY:4:2115:11053:10551\_2:N:0:TCTGCAAG+GCTGCACT  
TCAGAGCGGGAGCTCTGAAAAGGAACTTCGTCAGAAGATGTGAAGTCTAAGAGGAGGAGGTTGAG  
GAAGGCTCTAGAGAAGATCTCACCACCTGGAGAAGGCAAGTGGAGAGT

+

FFF:F:,,FFFFFFFFF:::,FFFFFFF::,F,:F,FFFF,F:FFFFFF::F:F:F::,FF,F:FF:  
FFF,FFFFFFFFFFFFFFFFFFFFFF:FFFFFF,FFFF,FFFF:FFFF

@A00721:190:HGJW7DSXY:4:1453:15655:34773\_2:N:0:TCTGCAAG+GCTGCACT  
AAGAAGGATTATTTGAAGCAGGGTTACCACTTCTTAAGGTGGATGAGGGAGGTTGTTTCTTTGGAGT  
TTAGATAATCTTTTGAAGAAGGGTCATAGAGCCAGCAAGAGAAGCTT

+

FFFFFFFF:FFFFFFFFFFFFFFFFFFFFFFFFFFFFFFFF:FFFFFFFF:FFF:FFFFFFFFFFFFFFFF  
FFFFFFFFFFFFFFFF:FFFFFF:FFF:F:FFFFFFFF:FFFF:FFFF

+

@A00721:190:HGJW7DSXY:4:2664:5728:12070\_2:N:0:TCTGCAAG+GCTGCACT  
GTGGCAGAATTCGGTAACTTACCATATTGTTCTTCCGGGAAGTTGTGGGATTTAACTTTGACTCAAC  
TACTCCGATCAGATCCGGATGTTTTGATTGGTATGGACTACTCGACTT

+

@A00721:190:HGJW7DSXY:4:2437:3947:35884\_2:N:0:TCTGCAAG+GCTGCACT  
TCATGGCAGATACTACCGATAAGGTGAAAAATATGCAGGTCAAAGATTCTGTAGCTCTGAGGGCGGTT  
GAGGGAGCCGTTTTGGCCGACTTTAACTATTCTAAGAGTCTTTATGAT

+

@A00721:190:HGJW7DSXY:4:1608:5113:36683\_2:N:0:TCTGCAAG+GCTGCACT  
CGTTGTCGTACCTTACAAGTTGAGGAGACTTTACAGCGGCTTATTGTCGCGCAGTTTCCAGAATTGC  
GGTTGAAGTTCACCCATTCTATCTTGAATGCTCACGCCGTCGCAGCCA

+

@A00721:190:HGJW7DSXY:4:1574:32560:29543\_1:N:0:TCTGCAAG+GCTGCACT  
ATCACTTGTTAAAGTACAGATTTAGTGATTTAGATATTATTGATATTGGAGGCGATATTCGTTTTCAT  
ATCCAAAACCTCTTGAATGGAGTACATATTTGCAACCCTATTCTTGATGTGAAAGATGCATCGAGGTA  
TAC

+

@A00721:190:HGJW7DSXY:4:1344:25861:29434\_2:N:0:TCTGCAAG+GCTGCACT  
TTGATTGGGAACGTACCTACTCACGAGACGTCATGAAAGCTATCGGAGGGAAGCAAAATGTTTCGTTCTGTTACAAGAACGCTTTGGATTGTGACCATAAAGCCTCAGTTGCGATA

+

@A00721:190:HGJW7DSXY:4:2357:30373:26224\_1:N:0:TCTGCAAG+GCTGCACT  
CTCTCTTGATGATGTAGCCACTATAATGCTTAAGAGAGAGATTGATGTATGTCATTTTCGTCTTAGTTT  
GTCCCGGCGAATTATTGGACACGATGAAAAATGACATACCCGTTCTTGACCTTGGTATCGTTATCCGT  
CAT

+

@A00721:190:HGJW7DSXY:4:1546:20039:27899\_1:N:0:TCTGCAAG+GCTGCACT  
GGTTATTCTCACAAACAAAGATAAGATTTTATCTTTCTTCAAACACCCTGTTTTCTTAAGGGCGGACA  
ATTGTTCCATTGTGAACCTCTGGGGACTAGATTGAGCATTAAATGAGTTCCGAATAACTCGTAATAAAT  
CTT

+

[illegible]

@A00721:190:HGJW7DSXY:4:1125:13702:10692\_1:N:0:TCTGCAAG+GCTGCACT  
CCTATTTCCGTACCAAGAGCCACTGCCAATCTCATCGCTATACGCATACCTGATTGGAATAAGCGAGG  
TTCGTTCTCAATAAAAAATTTTCTCAAGAGATTATGGTTGATAAAGTTTCTTCATAAGGGCTATTC  
AGT

+

FFFFFFFFFFFFFFFFFFFFFFFFFFFFFFFFFFFFFFFFFFFFFFFFFFFFFFFFFFFFFFFFFFFFFFFF  
FFFFFFFFFFFFFFFFFFFFFFFFFFFFFFFFFFFFFFFFFFFFFFFFFFFFFFFFFFFFFFFFFFFFFFFF  
FFF

@A00721:190:HGJW7DSXY:4:1622:32832:1141\_1:N:0:TCTGCAAG+GCTGCACT  
CTTCGGTCAATGACAAAACCTTCGAATATGTTACGACATGGCTTCGTAACAACAGTGCAGGATTGTC  
ATCTCGGGGAAAGTGATTCACCAAGATGTTTCATATAGATACGAGATACCTAGAGAAGGTGCAGCGAT  
CTT

+

FFFFF:FFFFFFFFFFFFFFFFFFFFFFFFFFFFFFFFFFFFFFFFFFFFFFFFFFFFFFFFFFFFFFFF  
FFFFFFFFFFFFFFFFFFFFFFFFFFFFFFFFFFFFFFFFFFFFFFFFFFFFFFFFFFFFFFFFFFFFFFFF  
FFF

@A00721:190:HGJW7DSXY:4:1576:8693:36526\_2:N:0:TCTGCAAG+GCTGCACT  
AGCTAAGAAGAAGACTTTGGGTACACGTTATGCTCGCAAACCTTAACGTTAGTACCGAGGTGATCTCT  
CTGCTTCTGCGTTACTGAGAGAAAAGATTCAGGACGCCTACGGTGACT

+

FFFFFFFFFFFFFFFFFFFFFFFFFFFFFFFFFFFFFFFFFFFFFFFFFFFFFFFFFFFFFFFFFFFFFFFF  
FFFFFFFFFFFFFFFFFFFFFFFFFFFFFFFFFFFFFFFFFFFFFFFFFFFFFFFFFFFFFFFFFFFFFFFF

@A00721:190:HGJW7DSXY:4:1350:10619:6198\_1:N:0:TCTGCAAG+GCTGCACT  
CGTGTGCTCTTCCGATCTAACGAATCTTGAACTACGGTCCTTATCAAAGAAAATGGTGAACCGGTCT  
CTAAATCTTTTGAGATTGAGAAGATTGAAGAACACGTCAAGAAGTCGCTCGGCGTTGTTCTTTAAAC  
CAA

+

FFFFFFFFFFFFFFFFFFFFFFFFFFFFFFFFFFFFFFFFFFFFFFFFFFFFFFFFFFFFFFFFFFFFFFFF  
FFFFFFFFFFFFFFFFFFFFFFFFFFFFFFFFFFFFFFFFFFFFFFFFFFFFFFFFFFFFFFFFFFFFFFFF  
FFF

@A00721:190:HGJW7DSXY:4:1232:14714:22091\_1:N:0:TCTGCAAG+GCTGCACT  
GCTGATCATGGAGTCTTTGTACCTTCTGTCAAACCTTCGAGGTTACGTACGAGAGGTGATCCCGGATG  
TGGATTGAAGGCTGGCTCTAAGGGAGACTCCTTCTTTTTGAATGTTGTAAAGAATTGGGTTGAGAAGT  
GTG

+

:F,F:,FFFFFFFF:FFFFFFFF:FFFFF,FFFFFFFFFFFFFFFFFFFFFFFF,FFFFFFFFFFFFFFFFFFFFFFFF  
FFF:FFFFFFFFFFFFFFFFFFFFFFFFFFFFFFFFFFFFFFFFFFFFFFFFFFFFFFFFFFFFFFFF:FFFFF  
FFF

@A00721:190:HGJW7DSXY:4:2304:12237:25160\_1:N:0:TCTGCAAG+GCTGCACT  
AGTTTTTTAGATCTTCTTGATAATCTTAAAGAAAAATTTTTCGAATAAACTAATGAGAGGTATAGGCTTA  
GTCAAGTCTGTACTTACATTCTTTACGCCAGATTCTTCATGGGGCGACGCTGTTTCTCTTGATTTC  
TGA

+

FFFFF:FFFFFFFFFFFFFFFFFFFFFFFFFFFFFFFFFFFFFFFFFFFFFFFFFFFFFFFFFFFFFFFF  
FFFFFFFFFFFFFFFFFFFFFFFFFFFFFFFFFFFFFFFFFFFFFFFFFFFFFFFFFFFFFFFFFFFFFFFF  
FFF

@A00721:190:HGJW7DSXY:4:1522:30843:36151\_2:N:0:TCTGCAAG+GCTGCACT  
CAGAGCGTCATTTTCTTTGGGATCTTTCCTCTGGTAAGGGAATTATTAAATCATTCTTCTCACTCTT  
GACGAGAATTATTACTGTTTTCTCTACCCATAACTTCTTTTTCAAAA

+

F:FFFFFFFFFFFF:,FFF:FFFFFFFFFFFFFFFFFFFFFFFFFFFFFFFFFFFFFFFFFFFFFFFF  
FFFFFFFF, :FFFFFF:FFFF,FFFFFFFFFFFF,FFFFFFFFF: :FFFF

@A00721:190:HGJW7DSXY:4:1249:4896:13792\_1:N:0:TCTGCAAG+GCTGCACT  
CTGATGTTTTCTACAGAGTGCAGTCGTTTCAACACTTATCACCACCTTTTGAAAGGAAAATAATTGGT

GATGAAAATACGTATGTCGGTGGGGTTCTCAAGGCTCTCATCGCCACTGGGATTCTAAGGGGTTCAT  
AAG

+

FFFFFFFFFFFF:FFFFFFFFFFFFFFFFFFFFFFFFFFFFFFFFFFFFFFFFFFFFFFFFFFFFFFFF  
FFFFFFFFFFFFFFFFFFFFFFFFFFFFFFFFFFFFFFFFFFFFFFFFFFFFFFFFFFFFFFFFFFFFFFFF  
FFF

@A00721:190:HGJW7DSXY:4:1278:12590:10175\_2:N:0:TCTGCAAG+GCTGCACT  
AGGATTCTTCTTTTGGTCCTTACGTCTTAAGTAATTTGGATGTTGTGCGAAACTATCAGGTTCTTGTC  
ACGATTCTTAAAAGAAGTTTATTA AAAACTTCAGAGTCTCTTGAAGTC

+

FFFFFFFFFFFF,FFFFFFFFFFFFFFFFFFFFFFFFFFFFFFFFFFFFFFFFFFFFFFFFFFFFFFFF  
FFFFFFFFFFFFFFFFFFFFFFFFFFFFFFFFFFFFFFFFFFFFFFFF:FFFF:FFFFFF

@A00721:190:HGJW7DSXY:4:1609:24777:19288\_2:N:0:TCTGCAAG+GCTGCACT  
TGTTCTTGCAATAGCCACAGACTTTCTGGGAAAAGAGACCTCTGTTGGTAGAGGAGTTGAGAGAATTA  
CTCAGATTCAATCTGGCATCACTGAACGTCTACAACGAGTTAGGGAGT

+

F:,FFFFFFFFFFFF:FFFFFFFF:FF,F,FFFFFFFFFFFFFFFFFFFFFFFFFFFFFFFFFFFF  
:FFFFFFFFFFFF:F::FFFFFFFF:F,FF:F:FF,:FFFFFFFF

@A00721:190:HGJW7DSXY:4:1358:24099:2331\_1:N:0:TCTGCAAG+GCTGCACT  
AAAAGATCCTTTCACAAGCAATACCTTCCACTGAGTTCATCACCAGAGTTTCGACGTCGCGAAAA  
CGATGAAGATTTCCACACTGTTGAGAATCTTCTGATGCTGAATTTGAGGAAAATTTTTCGGAAGTTT  
TTG

+

FF:FFFFFFFFFFFFFFFFFFFFFFFFFFFFFFFFFFFFFFFFFFFFFFFFFFFFFFFFFFFFFFFF  
FFFFFFFFFFFFFFFFFFFFFFFFFFFFFFFFFFFFFFFFFFFFFFFFFFFFFFFFFFFFFFFFFFFFFFFF  
FFF

@A00721:190:HGJW7DSXY:4:2172:23954:15170\_1:N:0:TCTGCAAG+GCTGCACT  
TGATGGCTCAGTACAGGGAGGAGTAATAGTTATAAAACCTTCTTTTATCATTGCAACAGGACTTTGA  
GAAGACTGTTGAAATGGACAAAATCTGGGATCATAGGTATGTGTACGCTACACTCGAAATATGGGCC  
CTC

+

FFFFFFFFFFFFFFFFFFFFFFFFFFFFFFFFFFFFFFFFFFFFFFFFFFFFFFFFFFFFFFFF  
FFFFFFFFFFFFFFFFFFFFFFFFFFFFFFFFFFFFFFFFFFFFFFFFFFFFFFFFFFFFFFFFFFFFFFFF  
FFF

@A00721:190:HGJW7DSXY:4:1634:7979:12085\_2:N:0:TCTGCAAG+GCTGCACT  
GTTGGCGTCTTGTCGTTGACGTCATTACAGTCTGGAAGTTAGATCATTTGTTGAGGAAGATCTCTACA  
GAGATTATCGAGAGTTGTGATCTAGTTCTAAATTTAGGTCGACGGACT

+

FFFFFFFFFFFFFFFFFFFFFFFFFFFFFFFFFFFFFFFFFFFFFFFFFFFFFFFF:::FFFFFFFF  
FFFF:FFFFFFFFFFFFFFFFFFFFFFFFFFFF,FF:F:FFFFFFFF

@A00721:190:HGJW7DSXY:4:2327:29351:25238\_1:N:0:TCTGCAAG+GCTGCACT  
CTGACCATCGCAAAGAAGACTTTATTAGTTCATGAAGTTCTTACACTTCTCGCGACTAATGTCAGCTT  
CACTACAAAGGCGTTACGTAAAGTAGTTTTACGCTTTATCTTAAAGCATTACCACCAATTTAGCAC  
TT

+

FFFFFFF,FFFFFFFFFFFF:FF:FFFFFFFFFFFFFFFFFFFFFFFFFFFFFFFFFFFFFFFF  
FFFFFFFFFFFFFFFFFFFFFFFFFFFFFFFFFFFFFFFFFFFFFFFFFFFFFFFFFFFFFFFF:FFFFFFFF  
FF

@A00721:190:HGJW7DSXY:4:1616:10691:4319\_2:N:0:TCTGCAAG+GCTGCACT  
TCGCCATATCAGATTAGAGACATGCCAGTTAGAGTTCTTCTAACCAGGACTGATGGTGAGATTCTTTT  
ACCTTTTGGAGGTCCAGGAACCTTTACTCCTAGTGTCTTTTCTAGAGT

+

FFFFFFFFFFFFFFFFFFFFFFFFFFFFFFFFFFFFFFFFFFFFFFFFFFFFFFFF:FFFFFFF:FFFFFF  
FFFFFFFFFFFFFFFFFFFFFFFFFFFFFFFFFFFFFFFFFFFFFFFFFFFFFFFF

@A00721:190:HGJW7DSXY:4:2242:21368:9502\_2:N:0:TCTGCAAG+GCTGCACT  
GTCGGAGGATGACAGGTGGGAGACCGCTCAATAACACTCTATTGAATCCCTTTCCACGATGAAAGCT  
CTTTATGAGGTGCTCCATGCAAATTTACAGTTCCTCTTTGGTGATATC

+

FFFFFF:FFFFFFF,FFFF,FFFFFF:FFF:FFFFFFFFF,FFFFFF:FF:FFFFFFF  
FF:FF:FFFFFFFFFFFFFFFF:FFF,FFF,F:FFFFFFFFF

@A00721:190:HGJW7DSXY:4:1649:30490:24267\_2:N:0:TCTGCAAG+GCTGCACT  
TTCTCCTTTAATCGTGAGGTTACGAGAGTTTCGTACTTGGGTTTATCGGTTGTATTTTGATAAATTTG  
TTGGAATCGATAATGATACTGACGAAGGTTCTATTACCACCTTGTC

+

FFFFFFFFFFFFFFFFFFFFFFFFFFFFFFFF:FFF,F:FFFFFFFFF:FFFFFFFFFFFFFFFF  
F::FFFFFFFF,FFFFFFFFFFFFFFFF:FFFFFFFF:FFF

@A00721:190:HGJW7DSXY:4:1562:27814:14810\_1:N:0:TCTGCAAG+GCTGCACT  
GTCTAGCCGCTGAGATTCTGCTTACCTATTTACAATCTGTAGAGAGAGAGGTTAATCAGAATTTGAGT  
GATAACGATTTAGTACTGGGAAATGGTGGTAGTCAGTTTACTACTTTTCTTCCCTCCCTTTTTCGA  
TTG

+

FFFFFFFFFFFFFFFFFFFFFFFFFFFFFFFFFFFFFFFFFFFFFFFFFFFFFFFFFFFFFFFF  
FFFFFFFFFFFFFFFFFFFFFFFFFFFFFFFF:FFFFFFFF:FFF:FFFFFFFFFFFFFFFF  
F:F

@A00721:190:HGJW7DSXY:4:1443:25509:34240\_2:N:0:TCTGCAAG+GCTGCACT  
AGGTTTTCTTTTATGGGACTCTTGTGTACTTATGAAGGAGGTATTACTTCGGAAGTTCTTAATGT  
AGGTCTCCTAGTACTTAAGGTTTATGTTTCGTTTCAGCTGGATGGA

+

FFFFFFFFFFFFFFFFF:FFFF:FFFFFFF,FFFFFFFFFFFFFFFF:FFFFFFFFFFFFFFFF  
FFFFFFFFF:FFFFFFFFFFFFFFFFFFFFFFFFFFFFFFFF:FFFFF

@A00721:190:HGJW7DSXY:4:1366:20211:24158\_1:N:0:TCTGCAAG+GCTGCACT  
ATACGAGATCTTGCAGAGTGACTGGAGTTCAGACGTGTGCTCTTCCGATCTTATTATGTGCTAAAGC  
CTGTCCAGTTGTGATGATGTTCCGGCTGTGGGATTAACCTCCCTCGTGAACTTACGACGATGTT  
TCG

+

F,FF::FFFF:FFFFFFFFFFFFFFFFFFFFFFFFFFFFFFFF:FF:FFFFFF:FFF  
FFFFFFFFFFFFFFFF:F:FFFFFFFFFFFFFFFFFFFFFFFFFFFFFFFF:FFFFFFFFF  
FFF

@A00721:190:HGJW7DSXY:4:1123:3152:14935\_1:N:0:TCTGCAAG+GCTGCACT  
ATTACTAAGTCTGAGATCTGCCACTTCTAATTTTAGGAAACGTCGCGAAAAGAAAGTTTATGAGGATG  
TCTTGGTCGAAAAATATCGCCGGAACTTCTAATAGAGGATCCTGATGACATTATTTCAACGGATACC  
GAT

+

FFFFFFFFFFFFFFFFFFFFFFFFFFFFFFFFFFFFFFFFFFFFFFFFFFFFFFFFFFFFFFFF  
FFFFFFFFFFFFFFFFFFFFFFFFFFFFFFFFFFFFFFFFFFFFFFFFFFFFFFFFFFFFFFFF  
FFF

@A00721:190:HGJW7DSXY:4:1114:30156:34460\_2:N:0:TCTGCAAG+GCTGCACT  
CACAGAAACCGTCTCAGGAACTGTCTCCACTGATTCGGAATTAGAGAAAGACGACCTTCTTGTGGGA  
CTGAGACCTCTGAATTTTCAGGCTGCCCTGATGAGGACGTTGAAAGGG

+

FFFFFFFFFFFFFFFFF:FFFFFFFFFFFFFFFFFFFFFFFFFFFFFFFFFFFFFFFFF  
FFFFFFFFF,FFFFFFFFFFFFFFFFFFFFFFFFFFFFFFFFF

@A00721:190:HGJW7DSXY:4:1625:11234:6511\_2:N:0:TCTGCAAG+GCTGCACT  
AGACTTCTAAGAGTGTTCAAAAGACCAGAAACGTAACAAGAATAAAGGTAGGAAGGGGAGAAAA  
CAGAACAAGCGAGCGGTTGAAGAGAAACTGATATGTTGCGGCTGAT

+

FFFFFFFFFFFFFFFFF:FFFFFFFFFFFFFFFFFFFFFFFFFFFFFFFF:FFFFFFFFF  
FFFFFFFFFFFFFFFFFFFFFFFFFFFFFFFFFFFFFFFFF





@A00721:190:HGJW7DSXY:4:2513:26169:20134\_1:N:0:TCTGCAAG+GCTGCACT  
CTTGACGACTTCGAATTTGAGGACGGAGTTAAATATATTACTTTCACTCAAGGTGAAAAGTTTGAAAT  
TAACAAAGTCCTTGGAAGAGTAAGGTTAAATGTGAAGATGCTCAGACTATTCATGAAGTTCAAGGTA  
ATA

+

FFFFFFFFFFFFFFFFFFFFFFFFFFFFFFFFFFFFFFFFFFFFFFFFFFFFFFFFFFFFFFFFFFFFFFFF  
FFFFFFFFFFFFFFFFFFFFFFFFFFFFFFFFFFFFFFFFFFFFFFFFFFFFFFFFFFFFFFFFFFFFFFFF  
FFF

@A00721:190:HGJW7DSXY:4:2456:15356:15718\_1:N:0:TCTGCAAG+GCTGCACT  
TGACCCTGTTTTTGCATCACAAACACATATTACCGTTGCTCTATCACGACACGTTGAATCTTTACGAT  
ACTTTGTTATCAATGTAAAGTTAAACGATGCTACTTGTGAGAGGATCAATCACAGTAAGGAAGTGTCA  
CGT

+

FFFFFFFF:FFFFFF,FFF,FFFFFFFFFFFF:FFFFFFFFFFFFFFFFFFFFFFFFFFFFFFFFFFFF  
FFFFFFFFFFFFFFFFFFFFFFFFFFFFFFFFFFFF:FFFFFFFFFFFFFFFFFFFFFFFFFFFFFFFFFFFF  
FFF

@A00721:190:HGJW7DSXY:4:1354:30472:1313\_2:N:0:TCTGCAAG+GCTGCACT  
GATTCAACCCCTTATATCGAGGCTATCGAGGACGATGAGTATCTTGAAGTTGTTGACGACAAGCCTCA  
AGAGGGTAGAGGACCACCTGGATCTTCTACTGTCTCTGCCTTCCAAGA

+

FFF:FFFFFFFFFFFFFFFFFFFFFFFFFFFF:FFFFFFFFFFFF:FFFFFF:FFFFFFFFFFFFFFFFFFFF  
FF:FFFFFFFFFFFFFFFFFFFFFFFFFFFFFFFFFFFF:FFFFFFFFFFFFFFFFFFFF

@A00721:190:HGJW7DSXY:4:2421:10538:29011\_2:N:0:TCTGCAAG+GCTGCACT  
TTATTCCTGGAACACCTTAACGTCCTCGGTAATCTTTCAGCCGAATTAAGTACTAATGAGTTCAAG  
TCGGTTGTCGATCGAATTAAGATCAAGGCTAATACCTTTATAGGTAAG

+

FFFFFFFFFFFFFFFFFFFFFFFFFFFFFFFFFFFFFFFFFFFFFFFFFFFFFFFFFFFFFFFFFFFFFFFF  
FFFFFFFFFFFFFFFFFFFFFFFFFFFFFFFFFFFFFFFFFFFF,FFFFFFFFFFFF

@A00721:190:HGJW7DSXY:4:2104:3685:35430\_1:N:0:TCTGCAAG+GCTGCACT  
CCCGATAGGGTACCGAGTCTCCAAGAGAATATTTATTCTTATGAGGCTCGAACTTCAACGTTTTAC  
AACGGAAAGACATATCGCACCCGAAATTTTGGGCAGAATGCTCTTAACGCGTTCTTGAACGGTGT  
TTG

+

FFF:FFFFFFFFFFFFFFFFFFFFFFFFFFFF:FFFFFFFFFFFFFFFFFFFFFFFFFFFFFFFFFFFF:FFFFFF  
FFFFFFFFFFFF:FFFFFFFFFFFFFFFFFFFFFFFFFFFFFFFFFFFFFFFFFFFFFFFFFFFFFFFFFFFF  
FFF

@A00721:190:HGJW7DSXY:4:1277:30436:7827\_1:N:0:TCTGCAAG+GCTGCACT  
GATAAAGTTATAGGAGACTCAGTTAACCTGAGAGCTCCTCAATTGATAGATTGGGTCAACAATAGGGA  
CGCTAGTATACTTCGTAAAGTCGACAGCGAAATGGTCAATATTGATAATTGGACCGACTATATGACCT  
ATT

+

FFFFFFFFFFFFFFFFFFFFFFFFFFFFFFFFFFFFFFFFFFFFFFFFFFFFFFFFFFFFFFFFFFFF,FFFFFFFFFFFFFFFFFFFF  
FFFFFFFFFFFFFFFFFFFFFFFFFFFFFFFFFFFFFFFFFFFFFFFFFFFFFFFFFFFFFFFFFFFFFFFF  
FFF

@A00721:190:HGJW7DSXY:4:2237:18801:4460\_1:N:0:TCTGCAAG+GCTGCACT  
AAGGGAAGCTAAGGTTAACTTGATGCTTCAGCCTTTTCGAAGCATAACCCCGCACAGAATATCGTTT  
ATCACGCAAATTTATTAATGCAATTTTCGGACCTATCTTTAAGGTTCTTGTGAGGAGAGTCAAACAG  
TGT

+

FFFFFFFFFFFFFFFF:FFFFFFFFFFFFFFFFFFFFFFFFFFFFFFFFFFFFFFFFFFFFFFFFFFFFFFFF  
FFFFFFFFFFFFFFFFFFFFFFFFFFFFFFFFFFFFFFFFFFFFFFFFFFFFFFFFFFFFFFFFFFFFFFFF  
FFF

@A00721:190:HGJW7DSXY:4:2441:31403:24784\_1:N:0:TCTGCAAG+GCTGCACT  
ACATTTTATGTATACAGAGATGACCAGTGACGATTTCTCCCGAAGCTCTTCTCTCTCTTAGGAGGT

CATGATGACTACTATAAGGGTGAAATCGATTTTTTCGAAGTTTGACAAATCTCAAGATTTCTTTTGTAAGC  
AGC  
+  
FFFFFFFFFFFFFFFFFFFFFFFFFFFFFFFFFFFFFFFFFFFFFFFFFFFFFFFFFFFFFFFFFFFFFFFFFFFFFFFF  
FFFFFFF::FFFFFFFFFFFFFF:F,F,FFFFFFFF::F:FFFF:FFFF:FFFFFFFF,F,FFFFFF  
F,F  
@A00721:190:HGJW7DSXY:4:1225:20112:9737\_2:N:0:TCTGCAAG+GCTGCACT  
TTCGATGCTGAATTTCTTGAACCTTTGGAGTGCCAGTGAATATTTTTGTCACGCCAGGAGTATCCATAA  
CGATTTGTCATTTACCACCTTTGCTCAACGACGAAGTGAACGGCCAA  
+  
FFFFF:FFFFFFFFFFFFFFFFFFFFFFFFFFFFFFFFFFFFFFFFFFFFFFFFFFFFFFFFFFFFFFFFFFFFFFFF  
FFFFFFFFFFFFFFFFFFFFFFFFFFFFFFFFFFFFFFFFFFFFFFFFFFFFFFFFFFFFFFFF:FFFFFFF  
@A00721:190:HGJW7DSXY:4:2534:18873:16172\_2:N:0:TCTGCAAG+GCTGCACT  
TAATTGTATGATCACTTTGATGATTTTATCACTTTATTATGACCTTGAAAGTTTTTCGGCTGTGGTTG  
TCGCTGGGGACGATTCCATTCTGTTTTCAAAGACTCCAATAACTGATC  
+  
FFFFFFFFFFFFFFFFFFFFFFFFFFFFFFFFFFFFFFFFFFFFFFFFFFFFFFFFFFFFFFFFFFFFFFFF:FFFFFF:FFFFFFFF  
FFFFFFFF:FFFF:FFFFFFFF:FFFFFFFF:FF:FFFFFFFF,F,FFF  
@A00721:190:HGJW7DSXY:4:1231:10484:29982\_2:N:0:TCTGCAAG+GCTGCACT  
TGCTCGCGATTTATTCTTTTTGTCAATGATTACATCTACTTCGTTCTGATCCTTACAAGATCATCGT  
TAAGTTAGGTAAACCCCTAACCGATGTTACTCTTGTAGGACTTTGGGA  
+  
FFFFFFFFFFFFF:FFFFFF:FFFFFFFFFFFFFFFFFFFFFFFFFFFFFFFFFFFFFFFFFFFFFFFFFFFFFFFF  
FFFFFF:FF:FFFF:FFFF:FFFFFFFFFFFFFFFFFFFFFFFFFFFFFFFF:FF  
@A00721:190:HGJW7DSXY:4:1177:28302:11898\_2:N:0:TCTGCAAG+GCTGCACT  
TTAAAGACTATACTAAATATCTCCACTACGAGTTGTTGTTTGGCGATTAGCTCTTGCGACTAATATT  
CGATATTCGATTGAGGGTCGTTATACCTATTCGGCTATCTGTGCTTTG  
+  
FFFFFFFFFFFFFFFFFFFFFFFFFFFFFFFFFFFFFFFFFFFFFFFFFFFFFFFFFFFFFFFFFFFFFFFFFFFF  
FFFFFFFFFFFFFFFFFFFFFFFFFFFFFFFFFFFFFFFFFFFFFFFFFFFFFFFFFFFFFFFF:FFF  
@A00721:190:HGJW7DSXY:4:1562:20582:7200\_2:N:0:TCTGCAAG+GCTGCACT  
TCAAATTTTAAACGATTCCGAGAGGTTTATCCTGATGTGGAGGGAGTTCTTGAAGCATCCCGACCTTT  
CCTTGTGAAAATTTTGATGCGTTTCATAAGATTATCAGTAATCCTGA  
+  
FFFF:FFFFFFFFFFFFFFFFFFFFFFFFFFFFFFFFFFFFFFFFFFFFFFFFFFFFFFFFFFFFFFFFFFFF  
FFFFFFFFFFFFFFFFFFFFFFFF:FFFFFFFFFFFFFFFFFFFFFFFFFFFFFFFF  
@A00721:190:HGJW7DSXY:4:1545:12617:35243\_1:N:0:TCTGCAAG+GCTGCACT  
ATTCATGGACCTTCCATCCTGTACCTCTTCTGGAGAGACGTATCTCAAAGATCGACTTCGAGACAGGT  
GATATTGTTGAGCGAGAGCGACCAAGATCTAAATTCGGTAACGGTGCGTGCGCTTTATTTTAAAAAG  
CTC  
+  
FFFFFFFFFFFFFFFFFFFFFFFFFFFFFFFFFFFFFFFFFFFFFFFFFFFFFFFFFFFFFFFFFFFFFFFF:FFF:FFF  
FFFFFFFFFFFFFFFFFFFFFFFFFFFFFFFFFFFFFFFFFFFFFFFFFFFFFFFFFFFFFFFFFFFFFFFFFFFF  
FFF  
@A00721:190:HGJW7DSXY:4:2369:12246:3411\_2:N:0:TCTGCAAG+GCTGCACT  
CTGATACTTATCACGAAAGACTTGAGTCTTTAGATCAGTCTCTGACTTGACCATCTTTCATTTTAA  
TGACGATCATTAAGACTCTCTATCTTCTTTGTTTCCTTCTTTGCACTG  
+  
F,FFFF,FFFFFFFF:FFF::,F:F,FF:F,FF,FFFF,,F::FFFFFFFFF,:FF,FFFFFF,,,FF  
::FFFF,FF,:FFFF,FFFF,,FF,F,FF,FFFFFF:F,FFF:F,F:  
@A00721:190:HGJW7DSXY:4:1642:1090:5666\_1:N:0:TCTGCAAG+GCTGCACT  
CTCTTCCGATCTCTAATCTGTGTTTTTACGATAACAACATCAGTTGATTAAGACTCTTCCGAAAGGC  
GAACCTTGGGAATTTGAAGCTCAGGGTGAAGCACACGTTTGACCGTGACGAACTGTGGTGTCTTGA  
TCT

+  
F:FFFFF:::FFF:::FF:FFF::FFFFFFFFFFFFFFFFFFFF, :FFFFFFFFFFFFFFF:FFFFFFFF:FFFF  
FFFFFFFFFFFFFFFFFFFFFFFFFFFFFFFFFFFFFFFFFFFFFFFFFFFFFFFFFFFFFFFFFFFFFFFF  
FFF  
@A00721:190:HGJW7DSXY:4:1609:4698:15859\_1:N:0:TCTGCAAG+GCTGCACT  
ATACTCTCCTTGAGTTCACCTCGTAAGGACACTACCACTTATTACGATATTTCTTTAGTCGATGGGTTT  
TCGACTCCTTTAAGCGTCTTCTGTTCATCGCAACCAGATGATATCTTCTATTCTGAACCTATGTTTCGA  
TCA  
+  
FFFFFFFFFFFFFFFFF:FFFF:FFFFFFFFFFFFFFFFFFFFFFFFFFFFFFFFFFFFFFFFFFFFFFFF  
FFFFFFFFFFFF:FFFFFFFFFFFFFFFFFFFFFFFFFFFFFFFFFFFFFFFFFFFFFFFFFFFFFFFF  
FF:  
@A00721:190:HGJW7DSXY:4:1636:21730:35931\_2:N:0:TCTGCAAG+GCTGCACT  
TCTTCTAATGTGGCCTGAACTACGTTTCACTTTGTGTGTAAGTTTCTATTCTTCTAAGTTTGTCTTCC  
TTGTTTGTCTTATTCTATTAATCACTCATTTTAGTGAGATTATTA  
+  
FFFFFFFFFFFFFFFFFFFFFFFFFFFFFFFFFFFFFFFFFFFFFFFFFFFFFFFFFFFFFFFFFFFFFFFF  
FFFFFFFFFFFFFFFFFFFFFFFFFFFFFFFFFFFFFFFFFFFFFFFFFFFFFFFFFFFFFFFF:FFFFF  
@A00721:190:HGJW7DSXY:4:1429:29134:34100\_2:N:0:TCTGCAAG+GCTGCACT  
CGACAACAGCAGGGGTTTTCGAATAGTGATAGCCACCCGCTTACAGAGGGGCAGCAGCATGACCATA  
ATTGGTATTGACTTTGGTCCCACCTTTTCTACTGTCTGTCTCGCCTCT  
+  
FFFFFFFFFFFFFFFFFFFFFFFFFFFFFFFFFFFFFFFFFFFFFFFFFFFFFFFFFFFFFFFFFFFFFFFF  
F:FFFFFFFFF:FFFFFFF, FFFFFFFFFFFFFFFFFFFFFFFFFFFFFFFFFFFFFFFFFF  
@A00721:190:HGJW7DSXY:4:1178:21169:31015\_1:N:0:TCTGCAAG+GCTGCACT  
CTTAACAACAATGATAGTGAATTTATACCTACAATCATTGGTTTTCTAATAATGATGACACTATTGT  
TTATGGATATGATGCTATTACTCATGATGGTTACGGTCAGGGAGGATTCTCAGTTTACAAGGACCTTA  
AGC  
+  
FFFFFFFFFFFFFFFFFFFFFFFFFFFFFFFFFFFFFFFFFFFFFFFFFFFFFFFFFFFFFFFFFFFFFFFF  
FFFFFFFFFFFFFFFFFFFFFFFFFFFFFFFFFFFFFFFFFFFFFFFFFFFFFFFFFFFFFFFFFFFFFFFF  
FFF  
@A00721:190:HGJW7DSXY:4:2366:9019:29606\_2:N:0:TCTGCAAG+GCTGCACT  
CCGAAAGACGTGCTAAATTAACCATTGTACGATGTCGTCTGTCTCGGCGATCACTTTTCACTAAGA  
ATTGGTCCTACTTTTGGACAAGGCCAACTTCGTAATCTTCATGAGATC  
+  
FFFFFFFFFFFFFFFFFFFFFFFFFFFFFFFFFFFFFFFFFFFFFFFFFFFFFFFFFFFFFFFFFFFFFFFF  
FFFFFFFFFFFFFFFFFFFFFFFFFFFFFFFFFFFFFFFFFFFFFFFFFFFFFFFFFFFFFFFF  
@A00721:190:HGJW7DSXY:4:2452:18954:6668\_1:N:0:TCTGCAAG+GCTGCACT  
TTAGGGATTTTGAGAGAGTGAAAGGCTTCAATTGTAGTGTTTGGTCGTTTCAGTACCCAGTCAGTAT  
ACCTCTACGCAAAGATATTTTCATGAAAACCTACAGAGGAACGTACCGGATTACCTGTCTTTTCATATTAT  
GAA  
+  
FFFFFFFFFFFFFFFFFFFFFFFFFFFFFFFFFFFFFFFFFFFFFFFFFFFFFFFFFFFFFFFFFFFFFFFF  
FFFFFFFFFFFFFFFFFFFFFFFFFFFFFFFFFFFFFFFFFFFFFFFFFFFFFFFFFFFFFFFFFFFFFFFF  
FFF  
@A00721:190:HGJW7DSXY:4:2541:29930:25050\_2:N:0:TCTGCAAG+GCTGCACT  
TCTTTGCTTCGATGTTGGATGTCAAGAAGGGTTCAGAATGGGATTCTACGTAGTTTATGACTTTGGT  
GGTGGTACTTTCGATACTTCTATCGTCTTACGTTACGGTAATTACTAT  
+  
FFFFFFFFFFFFFFFFF:FFFFFFFFFFFFFFFFFFFFFFFFFFFFFFFFFFFFFFFFFFFFFFFFFFFF, FFFF  
FFFFFFFFFFFFFFFFFFFFFFFFFFFFFFFFFFFFFFFFFFFFFFFFFFFFFFFFFFFFFFFF:  
@A00721:190:HGJW7DSXY:4:1633:26350:12555\_1:N:0:TCTGCAAG+GCTGCACT  
ATAATCTTGGAGGTCGTGACGTTGATGAAGCTATAAGAGCGTTCTTATTACGGCGCACTTCTTTACCC



@A00721:190:HGJW7DSXY:4:1344:32398:13041\_1:N:0:TCTGCAAG+GCTGCACT  
TACTAACTTGACTCTACTATACGTGACATACTAAATACTAGATATTTGGATGATCTTGATAAAGAACT  
TCATGAATTTTCAGAGGATGAAAAATTTTCTTCCTTGGATTTTAATATAAAGAATCTTTACCAGGACT  
CCT

+

FFF,:F:FFFF,FFFFFFFFF,FFFFFFFFFFFFFFF::F:FFF:FFF:FFFFFFFF:FFFFFFFF::FFF  
FFFFFFFF:FFFFFFFFFFFFFFF,FFFFFFFFFFFFFFF,,FFFFFFFFFFF:FFFFFFFFFFFFFFF  
FFF

@A00721:190:HGJW7DSXY:4:1461:4571:4492\_1:N:0:TCTGCAAG+GCTGCACT  
TGATCGTAAGAAGTTTATAAGGAACATATCCATTTGTTGTAATAGGGTCATCAACTTAGAACTCGAAA  
CTCTAAGTGGTAATACTGTCTTTCCAAGCTTACCTGTATCTTCAATGAAATTGGACTCTTCGATAGGG  
GAC

+

FF:FFFFFFFFF,FF:FFFFFFFFF:FFFFFFFFFFFFFFF,FFFFFFFFFFFFFFF  
FFFFFFFFFFFFFFF:FFFF:FFFFFFF:FF:FFFFFFFFFFFFFFF  
FFF

@A00721:190:HGJW7DSXY:4:2325:27543:28181\_2:N:0:TCTGCAAG+GCTGCACT  
TAAAGGAAGATCTGTTATCGGCGGTTTATCGTTTACGAAGTATCACTCCCCCGGTGAATGGTTTAAGA  
ATACTATAAATAGAATAGCTATTACTACTAATGGCGTTGCCTAGTGG

+

FFFFF:FFFFFF::FFFFFF,F:FFF,FFF,F,F:FFFF,FFFF,FFF,:FF,FFF,F,,,F,:F:F  
:,,FF:FFFF,FFFFFF:FF,F:F::F,:FFFFFF,FF:F,F:FFFF

@A00721:190:HGJW7DSXY:4:2612:32832:27696\_1:N:0:TCTGCAAG+GCTGCACT  
TTTAGGTGGTCTTTATTCTATTATTGATTTTTATGAGATTGATACGTTAACAGAAGATGATGTTAGAG  
TAGAATTCCTGAAGAGTCCTTCCGTAACCAACTTCTTGACAATTTTCTTCAATCCTTCGATAATAGTT  
AAA

+

FFFFFFFFFFFFFFFFFFFFFFFFFFFFFFFFFFFFFFFFFFFFFFFFFFFFFFFFFFFFFFFFF:FFFFFFFFF:F  
FFFFFFFFFFFFFFFFF:FFFFFFFFFFF,FFFFFFFFFFFFFFF:FFF:F::FF:,FFFF,FFFFFFFFF  
FFF

@A00721:190:HGJW7DSXY:4:2517:10004:25708\_1:N:0:TCTGCAAG+GCTGCACT  
CCGATAAGGGTCACTAGTCTTACACAATTAAGAAATAATCCTACATTGACTGATTATCTAAAGATTGA  
AGGAAAATTTATCCTCGTTTAACTTACTTAGACTTTTCTACGATACAAATGATAACTTCTAATTTAC  
GTT

+

FF,FFFF,F:FFFFFFFF:FFFFFF:FFFFFFFFFFFFFFFFF:FFFFFFFF:FFFF:FFFFFFFFF  
FFFFFFFF:FFFFFFFFF:FFFFFFFFFFFFFFFFFFFFFFFFFFFFFFFFF,FFFFFFFFFFFFFFFFF  
FFF

@A00721:190:HGJW7DSXY:4:2521:5339:21825\_2:N:0:TCTGCAAG+GCTGCACT  
AAGGGATGCATGGTGTATCTCCTCAGGAGTCCCGGCATTTGATAATAATGACGAGACTTTCGTCATA  
ATCGCTGCATATTACGGATTACACGGTACCAGCGCATCTCGTGTGAG

+

FFFFFFFFFFFFFFFFFFFFFFFFFFFFFFFFFFFFFFFFFFFFFFFFFFFFFFFFFFFFFFFFF:  
FFFFFFFFF:,FFF:FFFFFFFFF:FFFFFFFFFFFFFFFFF:FF

@A00721:190:HGJW7DSXY:4:2113:11017:23390\_1:N:0:TCTGCAAG+GCTGCACT  
AAATTTATAGAAGATTATTTGACAGAATCAATAAGAATCATCGATTCTCGATTCTGATAGCTTATCT  
AGGTACTCTCATTTACTATGTTGATTTAGTCTACATTTATGCTGATCTAAAATTTGATCTAGATGGA  
TCC

+

FFFFF,FF:FFFF:FFFFF,FFFF:,F:FFFFFFFFFFFFFFFFFFFFFFFFFFFFFFFFF  
FFFFFFFFFFFFFFFFFFFFFFFFFFFFFFFFFFFFFFFFFFFFFFFFFFFFFFFFF  
FFF

@A00721:190:HGJW7DSXY:4:1319:17508:24455\_1:N:0:TCTGCAAG+GCTGCACT  
TTATAGAATTATTAATTATAATATTCAACCTCAAAGTTACGTGTTTACAGTAACGAGATCACACATT

CTGAGAACTAACTATGTTATGTTCTCTGATCATTTTGACAATCTCTTCTTATAATAAAATAAAATA  
ATA

+

FF,F,FFFF,FFFFFFFFFFFFFFFF,FF:::FFFFFF::F:FFF:,FFFF,,F:FFFFFF,FFF  
,FFFF:,FFFFFF:FFFFFFFF,FFFF:FFFFFFFF:F:FFFFFF,FF,FFFFFF:FFFFFF:F:  
,FF

@A00721:190:HGJW7DSXY:4:1362:31403:9815\_2:N:0:TCTGCAAG+GCTGCACT  
CAAATAGTGGAAAGGCTCCAGTCAACACTAGTTCGAGTGCTGCTTTGGATTACGATGACGTGAGAATA  
GGTGAAGGGATAGTTTTTACCTCGACCAACATTAAGGCGGCGGCGACT

+

FFFFFFFFFFFFFFFFFFFFFFFFFFFFFFFFFFFFFFFFFFFFFFFFFFFFFFFFFFFFFFFF:FFFFFFFF  
FFFFFFFFFFFFFFFFFFFFFFFFFFFFFFFFFFFFFFFFFFFFFFFFFFFFFFFF

@A00721:190:HGJW7DSXY:4:1323:2266:7169\_2:N:0:TCTGCAAG+GCTGCACT  
CTTCACCCAAATGAAGGACACTTCGAACTGAATAATGATGCACTACAAACAAGTATCGCTAATCAT  
CTGAAAAGGCTCTAAAGGACACTATACAATATCCAGACGACGACGAA

+

FFFFFFFFFFFFFFFFFFFFFFFFFFFFFFFFFFFFFFFFFFFFFFFFFFFFFFFFFFFFFFFF:FFFFFFF  
FFFFFFFFFFFFFFFFFFFFFFFFFFFFFFFFFFFFFFFFFFFFFFFFFFFFFFFF

@A00721:190:HGJW7DSXY:4:2117:5692:30420\_2:N:0:TCTGCAAG+GCTGCACT  
CAGCACCACATTTTGGTCAAGTCAATCCGTTGAGAAAATTTCTTAGAGGATATTCGCCATTGTGGTAC  
GAATTGGTCCAACATTTACCACCAAATTTCTTTGATACAACCTAGCC

+

FFFFFFFFFFFFFFFFFFFFFFFFFFFFFFFFFFFFFFFFFFFFFFFFFFFFFFFFFFFFFFFF:FFFFFFFF  
FFFFFFFFFFFFFFFF:FFFFF:FF:FFFFFFFFFFFFFFFF:FFFFFFF

@A00721:190:HGJW7DSXY:4:2648:22227:4914\_1:N:0:TCTGCAAG+GCTGCACT  
ATACGCTTGCTATTCACCAGATTGGTTCGATCACGTTGTTGCTATGTCAGAAAGTAGCTATTCAAGCTT  
GTCGTTTTAAGTCTGCAGAGGCTGTCATTCAAGCCAAGACTCTAGGTGTCCAATCAAAGGTTTTGAAT  
TTA

+

FF,FF,FFF::,FF::,FF,,:F,FFF,F,,,,,FF,,,FF,F,FF,,,FF,F:FFF::FF:F:FF  
FF,:FFF,,FF,:F::,:FF::,FFF,,,FF,,,,:FFF::,FF,F::,,,F,FF:FFF:F,,F  
,FF

@A00721:190:HGJW7DSXY:4:1408:24985:21214\_2:N:0:TCTGCAAG+GCTGCACT  
GGTGATAAAAATTATTTAGAGATCTTTTCTACTTACAAAGGACAATTCAGTTTCATTAATTCTACGGA  
AAAGTCCGGAGTATATTGTATGTTAATAGATAGTGGGATAATAGTTAT

+

F:FFFFFFFFFFFFFFFFFFFFFFFFFFFFFFFFFFFFFFFFFFFFFFFF:F:FF:F:FFFF:FFFFFFFF,::F  
FFF,F,:F,FF:FFFF:,FFF,FFFFFF,FFF:::,FFFFFF,FF,F

@A00721:190:HGJW7DSXY:4:1365:25979:20181\_1:N:0:TCTGCAAG+GCTGCACT  
CGTCTGAAGAGTTTAGAGCTGCTATTGATTATGTAACCGATAGGAGTTGTATAGTTGAAGATGTGGCT  
TTAGACGATAATCCTTTAAGGACTATGTTGACTGACGAAGATTTTCCACAGATTTGTCTACGTTGCA  
GAT

+

FF:FFFFFFFFFFFFFFFFFFFFFFFFFFFFFFFFFFFFFFFFFFFFFFFFFFFFFFFFFFFFFFFF  
FFFFFFFFFFFFFFFFFFFFFFFFFFFFFFFFFFFFFFFFFFFFFFFFFFFFFFFFFFFFFFFF  
FFF

@A00721:190:HGJW7DSXY:4:1102:5249:19820\_2:N:0:TCTGCAAG+GCTGCACT  
CTATATACATTATAAAATATAAAATAAGGGAGTCATAACTTTTGTTACCAATTCTTGGCTTTCAAC  
GAAGTCTCTGATTTTATTAATCATTACTTTAACGATCTCTCGGTCATT

+

FFFFFFFFFFFFFFFFFFFFFFFFFFFFFFFFFFFFFFFFFFFFFFFFFFFFFFFFFFFFFFFF  
FFFFFFFFFFFFFFFFFFFFFFFFFFFFFFFFFFFFFFFFFFFFFFFFFFFFFFFF:F

@A00721:190:HGJW7DSXY:4:1176:14127:32158\_1:N:0:TCTGCAAG+GCTGCACT  
TTGATCTACGTCGTTTAACTGTCGAACAACCTTTACTTAGAATGACTCTATCTTTTCAGACACTTCT

TATATTATTTACAATAGTTAATATCATATTAGTAATACTCACTATCGTTTTCTGCTTTTTCTTAGCTA  
ATA

+

FFFFFFFFFFFFFFFFFFFFFFFFFFFFFFFFFFFFFFFFFFFFFFFFFFFFFFFFFFFFFFFFFFFFFFFF:FFFF  
FFFFFFFFFFFFFFFFFFFFFFFFFFFFFFFFFFFFFFFFFFFFFFFFFFFFFFFFFFFFFFFFFFFFFFFF:FFFFFFFFFF  
FFF

@A00721:190:HGJW7DSXY:4:2475:19633:29262\_1:N:0:TCTGCAAG+GCTGCACT  
TTCCGATCTCCAAAACCAACTCTTCGTTACGAGACCTGATGGTAGAATAGATTTAGTCTCTACACCCA  
TCTCAACGAGTATAAAGCGTGTTCCTGCTGAACGTAATACACGAAGAGATCAACCGCAAACGACT  
CGA

+

::F,,::F,:,FFFF::F:::,F::,F,F,F:::,F::,F,F,,FFFF,,FFF,:::,F:,FF:F  
F,F:F:FF,F,,FFF,F::,,FFF,F:::,F,F::,FFF,:F::,F,,:F:F,FFFF,FFFFF  
FFF

@A00721:190:HGJW7DSXY:4:1642:1949:8030\_2:N:0:TCTGCAAG+GCTGCACT  
TTTAGATTATGAATCCTGCCTTTACTCATTTTATAGCAGTTAGTTATGTTGTACTTTTTATAATTTAT  
AACCTTCTTATACTTTTGGGTATGTTTTGTGAAAAACATGAGATACCC

+

FFFFFFFFFFFFFFFFFFFFFFFFFFFFFFFFFFFFFFFFFFFFFFFFFFFFFFFFFFFFFFFFFFFFFFFF  
FFFFFFFFFFFFFFFF::FFFFFFFFFFFFFFFF:FFFFF,FFFFFFFFFFFFFFFF

@A00721:190:HGJW7DSXY:4:1336:24722:18474\_2:N:0:TCTGCAAG+GCTGCACT  
CTTATTGTAACGATCATTCTTCGAGTTTTGTCATTCTTATTCTTTTATTCCTTTAACTGTGTATGAG  
GAGGATTTATAATGCTTTTCGATAGTGATTGTTATCAATTAAATAAA

+

F::F,FFFFFFFF:F::F,FF,F,FF:::,FF:FF:FF,F:FFFF::FFF,FFFF,,F:FFFFF,  
:FFFFFFFF:FFFF,F:FF,FFFFFFFF,,FF:,FFF,F:FFFF,FF,F

@A00721:190:HGJW7DSXY:4:2112:1154:11099\_2:N:0:TCTGCAAG+GCTGCACT  
CTTTACTCACAGACTCCGAAAATGGTTCAAATGAGGTCAAAGCTCTATTTATTAACGAACATTAT  
CCGATTCTTCGAGGGTATTACTACCACTGATCTGCCGACTTTAGTCAA

+

FFFFFFFFFFFFFFFFFFFFFFFFFFFFFFFFFFFFFFFFFFFFFFFFFFFFFFFFFFFFFFFFFFFFFFFF  
FFFFFFFFFFFFFFFF:FFFFFFFFFFFFFFFFFFFFFFFFFFFFFFFFFFFFFFFF

@A00721:190:HGJW7DSXY:4:1621:32271:1391\_2:N:0:TCTGCAAG+GCTGCACT  
TTCCTTCGATGTTTATATTTTCTATAAGGGAAAATAGCAATAATCAAATTCGACAAATTTAGAAC  
TTTATTTCAGAACTCTCTCCGATCACCTTGGTGTGATCTCCCGGAGGA

+

FFFFFFFFFFFFFFFFFFFFFFFFFFFFFFFFFFFFFFFFFFFFFFFFFFFFFFFFFFFFFFFFFFFFFFFF  
FFFFF:FFFFFFFFFFFFFFFFFFFFFFFF:F:FFFFFFFF:FFFFFFF

@A00721:190:HGJW7DSXY:4:1503:13946:29277\_2:N:0:TCTGCAAG+GCTGCACT  
ATGTATGATGATAATCTACTATTTTAAATAGTGATATTCAGCGTATACTTGAATACTTTATCAAAGA  
TTTGGCTTGGTCTATTTACCGCAAAAAGTTGGAAGAGGTCTATGATAT

+

FFFFFFFFFFFFFFFFFFFFFFFFFFFFFFFFFFFFFFFFFFFFFFFFFFFFFFFFFFFFFFFFFFFFFFFF  
FFFF:,FFFFFFFFFFFFFFFF:FFFFF:F::FFFFFF:FFFFFF::,F:F

@A00721:190:HGJW7DSXY:4:2334:28592:14372\_2:N:0:TCTGCAAG+GCTGCACT  
TATACTTTAAATAGCACCGATTATAACTTGACTGTTGATAATATTACAATAGCTCTTCTCAGAAGAT  
TAGAGAAGTAACCGGTGAACACGTCGGTAGCATTGATTTACTTTTACC

+

FFFFFFFFFFFFFFFFFFFFFFFFFFFFFFFFFFFFFFFFFFFFFFFFFFFFFFFFFFFFFFFFFFFFFFFF  
FFFFFFFFFFFFFFFFFFFFFFFFFFFFFFFFFFFFFFFFFFFFFFFFFFFFFFFF

@A00721:190:HGJW7DSXY:4:1436:31557:6605\_2:N:0:TCTGCAAG+GCTGCACT  
TTTCGAAAAGAAACCTATAAGTTACAAACGATTCTTCGACTATATTAAAGAAATAAAAATACTTCAAG  
TACCTGAACCTTACATTTTAAATGGTATGGTATAATGTGTCTTACAAA

+



FFFFFFFFFFFFFFFFFFFFFFFFFFFFFFFF,FFFFFFFF:FFFFFFFFFFFFFFFFFFFFFFFF:FFFFFFFFFFFFFFFF  
FFF:FFFFFFFF:FFF,FFF:FFFFFFFF:FFFFFFFF  
@A00721:190:HGJW7DSXY:4:1505:1850:18756\_2:N:0:TCTGCAAG+GCTGCACT  
CTCTCGGTAATGAGAGTGTATTCCTTAATATTCTAGTAACCGCTATGTGGGCATTACTAGGATTTATC  
ACACTCCTAAATTTGATAGCAATTTATGTTTTAAATGCTAGGAAAATT

+

FFFFFFFF:FFFFFFFF:FFFFF,FFFFFFFFFFFFFFFF:FFFFFFFF:FFFFFFFF  
FFFFFFFFFFFFFFFF,FFFFFFFF:FFFFFFFF,FFFFFFFF  
@A00721:190:HGJW7DSXY:4:1478:22453:6558\_1:N:0:TCTGCAAG+GCTGCACT  
TGTATAGTTCAAGGAGTACTTAATTCATAGCTTTAGTATTATTTACTATCGCCTTTATTGAAAATTG  
TATAAGAGTTAATTGCTTACACAAAAGTGACGCGCAAGGAATCTTAATTGATTGAAGCTAGGCGTTG  
GGG

+

FFFFFFFFFFFFFFFF:FFFFFFFFFFFFFFFF:FFFFFFFFFFFFFFFFFFFFFFFFFFFFFFFFFFFFFFFF  
FFF:FFFFFFFFFFFFFFFFFFFFFFFFFFFFFFFF,FFF,,FFFFFFFFFFFFFFFFFFFFFFFF  
FFF  
@A00721:190:HGJW7DSXY:4:2464:21007:9596\_1:N:0:TCTGCAAG+GCTGCACT  
ACTCCCCAACATAACATAACCTACCATGACCAATCATCGCTCCAAGTGGCAGCCAGACGTA  
GGGTCAAACCTACTACCGCCGGTCGGCAGATCGGCACCACTGGTCTCTACGTTACGGGACCCGCTGTG  
CAG

+

FFFFFFF:FFFF:FFFF:FFFFFFFFF,F,FFF:FF:FFFFFFFFFFFFFFFFFFFFFFFF  
FFFFFFFFFFFFFFFFFFFFFFFFFFFFFFFFFFFFFFFFFFFFFFFF:FFFFFFFFFFFFFFFF  
FFF  
@A00721:190:HGJW7DSXY:4:1675:18385:5212\_1:N:0:TCTGCAAG+GCTGCACT  
CCAAATCTAGATCTGCACAGAAGAAGGCTGAAGGTCGTTACCGGACGACCACTCAAAGGAAACGGGCT  
GTTGCCAGAGGAAAGCAGCGACCACCGAGGTCGCTCGTAACATTGACGGCAGTCCCGTCATCTCTGT  
GGG

+

FFFFFFFFFFFFFFFF:FFFFFFFFFFFFFFFFFFFFFFFFFFFFFFFFFFFFFFFFFFFFFFFF  
FFFFFFFFFFFFFFFFFFFFFFFFFFFFFFFFFFFFFFFFFFFFFFFFFFFFFFFFFFFFFFFF  
FFF  
@A00721:190:HGJW7DSXY:4:1554:10646:27132\_1:N:0:TCTGCAAG+GCTGCACT  
GCTCTTCCGATCTATTCACCACTCCCATACCAATCAATGATGTGACTATACAGTTCGGCCATTTCAAG  
AGTGGTCAATACGTCGTGGGAGGTACTGAAGCCTTCCCCTCCGCTGGCACGAAGAACAACCTCCAAGCC  
AAT

+

FFFFFFFFFFFFFFFF,FFFFFFFFFFFFFFFFFFFFFFFFFFFFFFFFFFFFFFFFFFFFFFFF  
FFFFFFFFFFFFFFFFFFFFFFFFFFFFFFFFFFFFFFFFFFFFFFFFFFFFFFFFFFFFFFFF  
FFF  
@A00721:190:HGJW7DSXY:4:1449:13512:1407\_2:N:0:TCTGCAAG+GCTGCACT  
TGACCAGAATGAAAAGGGTTTACCAGGGTAGTCTCTAAGTCTACCAGGAAGAGGGGAAATGTCCCCA  
AAACTGAGAAGAATAAAGGGAAAGGTCCATCAGGACCTAAGAAGGGGA

+

FFFFFFF,FFFFFFFFFFFFFFFFFFFFFFFFFFFFFFFFFFFFFFFFFFFFFFFF  
FFFFFFFFFFFFFFFF,FFFFFFFFFFFFFFFFFFFFFFFF  
@A00721:190:HGJW7DSXY:4:1267:19623:31093\_2:N:0:TCTGCAAG+GCTGCACT  
AATTCTGAAGGAAGATCTCCACCATCTGGGGTTGGGAATAAGAAATCTGCACGGGCCAAAGAGGCCG  
CTGCTACGAAGTCGCTGAAGGCGCTTGGGTCATTAAGGGTAGCTGTA

+

FFFFFFFFFFFFFFFFFFFFFFFFFFFFFFFFFFFFFFFFFFFFFFFFFFFFFFFF:FFFFF  
FFFFFFFFFFFFFFFFFFFFFFFFFFFFFFFFFFFFFFFF:FFFFF  
@A00721:190:HGJW7DSXY:4:1259:28212:14810\_1:N:0:TCTGCAAG+GCTGCACT  
CCGACCCCATCTTTGAGACCAAGACTCTCTACAGTAGGTCGTGCCTACTATGAGCAAATCTGTTGAA



FFFFFFFFFFFFFFFFFFFFFFFFFFFFFFFFFFFFFFFFFFFFFFFFFFFFFFFFFFFFFFFFFFFFFFFF  
FFFFFFFF:FFFFFFFFFFFFFFFFFFFFFFFF:FFFFFFFFFFFFFFF  
@A00721:190:HGJW7DSXY:4:2510:19560:14920\_2:N:0:TCTGCAAG+GCTGCACT  
TCATGGCAGATACTACCGATAAGGTGAAAAATATGCAGGTCAAAGATTCTGTAGCTCTGAGGGCGGTT  
GAGGGAGCCGTTTTGGCCGACTTTAACTATTCTAAGAGTCTTTATGAT

+  
FFFFFFFFFFFFFFFFFFFFFFFFFFFFFFFFFFFFFFFFFFFFFFFFFFFFFFFFFFFFFFFFFFFFFFFF  
FFFFFFFFFFFFFFFFFFFFFFFFFFFFFFFFFFFFFFFFFFFFFFFFFFFFFFFFFFFFFFFF  
@A00721:190:HGJW7DSXY:4:2101:15646:17534\_2:N:0:TCTGCAAG+GCTGCACT  
CGTTGTCGTACCTTACAAGTTGAGGAGACTTTACAGCGGCTTATTGTGCGCAGTTTCCAGAATTGC  
GGTTGAAGTTCACCCATTCTATCTTGAATGCTCACGCCGTCGCAGCCA

+  
FFFFFFFFFFFFFFFFFFFFFFFFFFFFFFFFFFFFFFFFFFFFFFFFFFFFFFFFFFFFFFFFFFFFFFFF  
FFFFFFFFFFFFFFFFFFFFFFFFFFFFFFFFFFFFFFFFFFFFFFFFFFFFFFFFFFFFFFFF  
@A00721:190:HGJW7DSXY:4:2137:1479:26694\_1:N:0:TCTGCAAG+GCTGCACT  
ATCACTTGTTAAAGTACAGATTTAGTGATTTAGATATTATTGATATTGGAGGCGATATTCGTTTTTCAT  
ATCCAAAACCTCCTTGAATGGAGTACATATTTGCAACCCTATTCTTGATGTGAAAGATGCATCGAGGTA  
TAC

+  
FFFFFFFFFFFFFFFFFFFFFFFFFFFFFFFFFFFFFFFFFFFFFFFFFFFFFFFFFFFFFFFFFFFFFFFF  
FFFFFFFFFFFFFFFFFFFFFFFFFFFFFFFFFFFFFFFFFFFFFFFFFFFFFFFFFFFFFFFFFFFFFFFF  
FFF  
@A00721:190:HGJW7DSXY:4:1439:9787:17284\_2:N:0:TCTGCAAG+GCTGCACT  
TTGATTGGGAACGTACCTACTCACGAGACGTCATGAAAGCTATCGAGGGAAGCAAATGTTTCGTTC  
TGTTACAAGAACGCTTTGGATTGTGACCATAAAGCCTCAGTTGCGATA

+  
:FFFFFFFFFFFF:,FFFFFFFFFFFF,FFFFFFFFFFFFFFFFFFFFFFFFFFFFFFFFFFFFFFFF:FFFFFF,F,FFF:FFF  
FFFFFFFFFFFFFFFF:FFF:FFF:FFFFFFFFFFFFFFFFFFFFFFFF:FFFF,  
@A00721:190:HGJW7DSXY:4:2525:15691:14231\_1:N:0:TCTGCAAG+GCTGCACT  
CTCTCTTGATGATGTAGCCACTATAATGCTTAAGAGAGAGATTGATGTATGTCATTTTCGTCTTAGTTT  
GTCCCGGCGAATTATTGGACACGATGAAAAATGACATACCCGTTCTGACCTTGGTATCGTTATCCGT  
CAT

+  
FFFFFFFFFFFFFFFFFFFFFFFFFFFFFFFFFFFFFFFFFFFFFFFFFFFFFFFFFFFFFFFFFFFFFFFF  
FFFFFFFFFFFFFFFFFFFFFFFFFFFFFFFFFFFFFFFFFFFFFFFFFFFFFFFFFFFFFFFF:FFFFFFFFFFFFFFFF:FFFFFFF  
FFF  
@A00721:190:HGJW7DSXY:4:1671:31557:21073\_1:N:0:TCTGCAAG+GCTGCACT  
GGTTATTCTCACAACAAAGATAAGATTTTATCTTTCTTCAAACACCCTGTTTTCTTAAGGGCGGACA  
ATTGTTCCATTGTGAACCTTTGGGGACTAGATTGAGCATTAATGAGTTCCGAATAACTCGTAATAAAT  
CTT

+  
FFFFFFFFFFFFFFFFFFFFFFFFFFFFFFFFFFFFFFFFFFFFFFFFFFFFFFFFFFFFFFFF:FF:FFFFFFFFFFFF,FFFFFFFFFFFFF  
FFFF:FFFFFFFFFFFFFFFFFFFFFFFFFFFFFFFFFFFFFFFFFFFFFFFFFFFFFFFF:FFFFFFFFFFFFFFFF:FFFFFFF  
FFF  
@A00721:190:HGJW7DSXY:4:2101:2709:4836\_1:N:0:TCTGCAAG+GCTGCACT  
CCTATTTCCGTACCAAGAGCCACTGCCAATCTCATCGCTATACGCATACCTGATTGGAATAAGCGAGG  
TTCGTTCTCAATAAAAAATTTTCTCAAGAGATTATGGTTGATAAAGTTTTCTTCATAAGGGCTATTC  
AGT

+  
FFFFF,FFFFFFFFFFFFFFFFFFFFFFFFFFFFFFFFFFFFFFFFFFFFFFFFFFFFFFFFFFFFFFFF  
FFFFFFFFFFFFFFFFFFFFFFFFFFFFFFFFFFFFFFFFFFFFFFFFFFFFFFFFFFFFFFFFFFFFFFFF  
FFF  
@A00721:190:HGJW7DSXY:4:2136:9815:34334\_1:N:0:TCTGCAAG+GCTGCACT  
CTTCGGTCAATGACAAAACCTTCGAATATGTTACGACATGGCTTCGTAACAACAGTGCGAGGATTGTC

ATCTCGGGGAAAGTGATTCACCAAGATGTTTCATATAGATACGAGATACCTAGAGAAGGTCGCAGCGAT  
CTT

+

FFFFFFFF:FFF,FFFFFFFF,FFFFFFFF:FF:FFF:F:FFFF:FFFFFFFFFFFF:FFF:  
FFFF,FFF,FFFFFFFF,FFFF,FFFFFFFFFFFF:FFF,FFFFFF:FFF,FFFF:FFFF  
FFF

@A00721:190:HGJW7DSXY:4:2261:16288:7529\_2:N:0:TCTGCAAG+GCTGCACT  
AGCTAAGAAGAAGACTTTGGGTACACGTTATGCTCGCAAACCTAACGTTAGTACCGGAGGTGATCTCT  
CTGCTTCTGCGTTACTGAGAGAAAAGATTCAGGACGCCTACGGTGACT

+

FFFFFFFFFFFF:FFFFFFFFFFFF:F::FFFFFFFF:FFFFFFFF:FFFFFFFFFFFFFFFF  
FFFFFFFFFFFFFFFFFFFFFFFF,FFFFFFFFFFFFFFFFFFFFFFFF

@A00721:190:HGJW7DSXY:4:1350:11740:7263\_1:N:0:TCTGCAAG+GCTGCACT  
CGTGTGCTCTTCCGATCTAACGAATCTTGAACTACGGTCTTATCAAAGAAAATGGTGAACCGGTCT  
CTAAATCTTTGAGATTGAGAAGATTGAAGAACACGTCAAGAAGTCGCTCGGCGTTGTTCTTGAAAC  
CAA

+

:FFFFFFFFFFFFFFFFFFFFFFFFFFFFFFFFFFFFFFFFFFFFFFFFFFFFFFFFFFFFFFFF  
FF:FFFFFFFFFFFFFFFFFFFFFFFFFFFFFFFFFFFFFFFFFFFFFFFFFFFFFFFFFFFFFFFF  
FFF

@A00721:190:HGJW7DSXY:4:1236:27769:35430\_1:N:0:TCTGCAAG+GCTGCACT  
GCTGATCATGGAGTCTTTGTACCTTCTGTCAAACCTTCGAGGTTACGCTACGAGAGGTGATCCCGGATG  
TGGATTGAAGGCTGGCTCTAAGGGAGACTCCTTCTTTTGAATGTTGTAAAGAATTGGGTTGAGAAGT  
GTG

+

FFFFFF:,FFFFFFFFFFFFFFFFFFFF:FFFFFFFFFFFFFFFFFFFFFFFFFFFFFFFFFFFF  
FFFFFFFFFFFFFFFFFFFFFFFFFFFFFFFFFFFF:F:FFFFFFFFFFFFFFFFFFFF:FFFFFFFFFFFFFFFF  
FFF

@A00721:190:HGJW7DSXY:4:2456:7654:30906\_1:N:0:TCTGCAAG+GCTGCACT  
AGTTTTTAGATCTTCTTGATAATCTTAAAGAAAAATTTTGAATAAACTAATGAGAGGTATAGGCTTA  
GTCAAGTCTGTACTTACATTCTTTACGCCAGATTCTTCATGGGGCGACGCTGTTTCTTCTTGATTTC  
TGA

+

FFFFF::FFF,FF,FFFF:FFFF,FFFFFFFFFFFFFFFFFFFFFFFFFFFFFFFFFFFF::FF:  
FF,FFFFFFFFFFFF:FFFFFFFFFFFFFFFFFFFFFFFFFFFFFFFFFFFF,FFFF:FFFF:FFFFFFFFFFFF  
FFF

@A00721:190:HGJW7DSXY:4:1623:15157:32002\_2:N:0:TCTGCAAG+GCTGCACT  
CAGAGCGTCATTTTCTTTGGGATCTTCTCTGGTAAGGACTTATTAAATCATTCTTCTCACTCTT  
GACGAGAATTATTACTGTTTTCTCTACCCATAACTTCTTTTCAAAA

+

FFFF,FFFFFFFF:FFF:FFFF:FFFF:FFFF:FFFF,FFF:F,FFFFFF:FFF:FFFFFF  
FFFFFFFFFF,FF,:F:FFFFFFFFFFFFFFFFFFFFFFFFFFFF,FFFFF:

@A00721:190:HGJW7DSXY:4:1249:5421:27508\_1:N:0:TCTGCAAG+GCTGCACT  
CTGATGTTTTCTACAGAGTGCAGTCGTTCAACACTTATCACCACCTTTGAAAGGAAAATAATTGGT  
GATGAAAATACGTATGTCGGTGGGGTTCTCAAGGCTCTCATCGCCACTGGGATTCTAAGGGGTTCCAT  
AAG

+

FFFFF:FFFFFFFFFFFFFFFFFFFFFFFFFFFFFFFFFFFF:FFFFFFFFFFFFFFFFFFFFFFFFFFFF  
FFFFFFFFFFFFFFFFFFFFFFFFFFFFFFFFFFFFFFFFFFFFFFFFFFFFFFFFFFFFFFFFFFFF  
FFF

@A00721:190:HGJW7DSXY:4:1473:26006:9518\_2:N:0:TCTGCAAG+GCTGCACT  
AGGATTCTTCTTTTGGTCCTTACGTCTTAAGTAATTTGGATGTTGTGCAAACTATCAGGTTCTTGTC  
ACGATTCTTAAAGAAGTTTATTAAAACTTCAGAGTCTCTTGGAAGTC

+



@A00721:190:HGJW7DSXY:4:1378:23321:13542\_2:N:0:TCTGCAAG+GCTGCACT  
TACAATCTGTAGAGAGAGAGGTTAATCAGAATTTGAGTGATAACGATTTAGTACTGGGAAATGGTGGT  
AGTCAGTTTACTACTTTTCTTCCCTCCCCTTTTTCGATTGGATTCTGA

+

FFFFFFFF:FFFFFFFFFFFFFFFFFFFFFFFFFFFFFFFFFFFFFFFFFFFFFFFFFFFFFFFFFFFFFFFF  
FFFFFFFFFFFFFFFFFFFFFFFFFFFFFFFFFFFFFFFFFFFFFFFFFFFFFFFFFFFFFFFF

@A00721:190:HGJW7DSXY:4:1527:22399:6057\_2:N:0:TCTGCAAG+GCTGCACT  
AGGTTTTCTTTTATGGGACTCTTGTGTGACTTATGAAGGAGGTATTACTTCGGAAGTTCTTAATGT  
AGGTCTCCTAGTACTTAAGGGTTTATGTTTCGGTTTCAGCTGGATGGA

+

FFFFFFF:FFFFFFFFFFFFFFFFFFFFFFFFFFFFFFFFFFFFFFFFFFFFFFFFFFFFFFFFFFFFFFFF  
FFFFFFFFFF:FF,FFFFFFFFFFFFFFFFFFFFFFFFFFFFFFFFFFFFFFFFFFFFFFFF

@A00721:190:HGJW7DSXY:4:1539:29613:20901\_1:N:0:TCTGCAAG+GCTGCACT  
ATACGAGATCTTGCAGAGTGACTGGAGTTCAGACGTGTGCTCTTCCGATCTTATTATGTCGCTAAAGC  
CTGTCCAGTTGTCGATGATGTTCCGGCTGTGGGGATTAACCTCCCTCGTGAAACTTACGACGATGTTC  
TCG

+

FFFF:,FFFFFFFFFFFFFFFFFFFFFFFFFFFFFFFFFFFFFFFFFFFFFFFFFFFFFFFFFFFFFFFF  
FF::FFFFF,FF::FFFFFFFF:FFFFFFFFFFFFFFFFFFFFFFFFFFFFFFFFFFFFFFFF:FFFFF:FFF  
FFF

@A00721:190:HGJW7DSXY:4:1477:24623:14638\_1:N:0:TCTGCAAG+GCTGCACT  
ATTACTAAGTCTGAGATCTGCCACTTCTAATTTTAGGAAACGTCGCGAAAAGAAAGTTCATGAGGATG  
TCTTGGTCGAAATATATCGCCGGGATCTTCTAATAGAGGATCCTGATGACATTATTTCAACGGATACC  
GAT

+

:FFFFF:FFFFFFFFFFFFFFFF,FFFF:FFFFFFF:F:FFFFFFFFF:F:,F,FFFFFF:FFF,F:FF  
F:FFFFF:FFFF,FFFFFF:FFFF,F:F,FF:FFFFFFFF:FFFF:F::FFFFFFFF:FFFFFFF  
F,F

@A00721:190:HGJW7DSXY:4:1143:28348:1548\_2:N:0:TCTGCAAG+GCTGCACT  
CACAGAAACCGTCTCAGGAAGTGTCTCCACTGATTCCGAATTAGAGAAAGACGACCTTCTTGTGGGGA  
CTGAGACCTCTGAATTTTCAGGGTGCCTGATGAGGACGTTGAAAGGG

+

FFFFFFFFFFFFFFFFFFFFFFFFFFFFFFFFFFFFFFFFFFFFFFFFFFFFFFFFFFFFFFFFFFFFFFFF  
FFF,FFFFFFFFFFFFFFFFFFFFFFFFFFFFFFFFFFFFFFFF,FFFFFFFFFFFFFFFF

@A00721:190:HGJW7DSXY:4:1657:17291:26365\_2:N:0:TCTGCAAG+GCTGCACT  
AGACTTCTAAGAGTGTTTCAAAGACCAGAAACGTAACAAGAATAAAGGTAGGAAGGGGAGAAAA  
CAGAACAAGCGAGCGGTTGAAGAGAAAAGTATGTTGCGGCTGAT

+

:FFFF:F,FF,:FFFF:F:FFFFFFF,FF,FFFFFFFF:FF:FFF,FF::FFF:F::FFFFFFFFF  
FFFFFFFFFFFFFFFFFFFFFFFF,FFFF:FFFFFFFFF:FFFFFFFFFFFF

@A00721:190:HGJW7DSXY:4:1544:28103:6386\_2:N:0:TCTGCAAG+GCTGCACT  
TAGAAAGATCACTCTCGGCGATACCACTGATCTTCCAGAGTTACGTAGTGGTCGTTCTTTTGGTGATT  
TTATCAAAGAGAAAGTTTCTGCTAGTCGCGACGATAGTATTTATCGGA

+

FFFFFFFFFFFFFFFFFFFFFFFFFFFFFFFFFFFFFFFFFFFFFFFFFFFFFFFFFFFFFFFFFFFFFFFF  
FFFFFFFFFFFFFFFFFFFFFFFFFFFFFFFF,F:FFFFFFFFFFFFFFFF:FFF

@A00721:190:HGJW7DSXY:4:1628:7102:20588\_2:N:0:TCTGCAAG+GCTGCACT  
CACTTACAAGAGTGTTAAGTACCGCAACATGGATCAGTTTCTAAAAAGCTATTAATAGCAGTTGCG  
GGGCTATAATACCGCTCCAGATTACTCTAACTGAATCCACTCTCTT

+

FFFFFFFFFFFFFFFFF,,:FFFFFFFFFFFFFFFF:FFF:FFF,FFF:FFFFFFFFFFFFFFFF,FFFF  
,FFFF:FFF::FFFFFFFF:FFFF:,FFF:FF:FFFF:FFFFF

@A00721:190:HGJW7DSXY:4:2613:10312:17534\_2:N:0:TCTGCAAG+GCTGCACT  
TTTGAACTGTGTAATGTCCTACGTACTGTTCAAGGTGTTGGGCTTCTCTAAAGAACAGCAACTTTC

+

@A00721:190:HGJW7DSXY:4:2252:16803:20322\_2:N:0:TCTGCAAG+GCTGCACT  
AAAGAGGGTTTGGAAATTACGGAACCTTCTCGTTCTTCATGAAGATCTTCGAGTGTTCATAGTGA  
GTTATTCTTGCGAAGGTTCAAGTCGATTGATTTTGTTGACTACGATCT

+

@A00721:190:HGJW7DSXY:4:2234:31168:8343\_1:N:0:TCTGCAAG+GCTGCACT  
AGAAGTTCTTCGCAGTTGAATCTCCACCAGGTGGAGGGAAGACCACTGAAC TTATAGCGACTTTTGTG  
GAATTTTTCGCAAAGGTCTTGAAGTACGTATTGTCACTGCTAATCGTAATTCGCGAGAAGAGATAGT  
GAC

+

@A00721:190:HGJW7DSXY:4:2227:7581:28839\_2:N:0:TCTGCAAG+GCTGCACT  
CACTTCTAGTTCATCGCGGTATTTGTGAAATTAAGACAGACGTGAAAGTTATGATGAGTGATCGTATT  
AGAACAGCTGATTCTTATTGCATGAACGTCGCTGAGGTCAAACCTGTG

+

@A00721:190:HGJW7DSXY:4:1361:4553:13761\_1:N:0:TCTGCAAG+GCTGCACT  
CGACGAATTATTCATGATTCACGCTGGTCAGACCCTTTTCTTACACATCTACTTAAGGCGGCTTATA  
CCATAGGTTACGGTGATTCCAATCAAATCGGATTCATCAATCGTATTGATCTCCAAGTCGAAACTAC  
TTC

+

@A00721:190:HGJW7DSXY:4:1473:19768:1282\_2:N:0:TCTGCAAG+GCTGCACT  
GATGAGTGTCTTCTTATCGAAGTCTCAGTTATCGCTGCCCGCGCGACGTTTGTGCGAACTCTCAGA  
GGTTTACGGCAGAAAAATTTCTCCTGCTTGTAATTCGAGAGAGGACAC

 $+$ 

@A00721:190:HGJW7DSXY:4:2578:1099:9565\_1:N:0:TCTGCAAG+GCTGCACT  
CTTGACGACTTCGAATTTGAGGACGGAGTTAAATATATTACTTTCACTCAAGGTGAAAAGTTTGAAAT  
TAACAAAGTCCTTGGTAAGAGTAAGGTTAAATGTGAAGATGCTCAGACTATTCATGAAGTTCAAGGTA  
ATA

 $+$ 

@A00721:190:HGJW7DSXY:4:2605:1994:32659\_1:N:0:TCTGCAAG+GCTGCACT  
TGACCCTGTTTTTGCATCACAAACACATATTACCGTTGCTCTATCACGACACGTTGAATCTTTACGAT  
ACTTTGTTATCAATGTAAAGTTAAACGATGCTACTTGTGAGAGGATCAATCACAGTAAGGAACTGTCA  
CGT

+

[illegible]





```

:FFFFFFFFFFFFFFFFFFFFFFFFFFFFFFFFFFFFFFFFFFFFFFFFFFFFFFFFFFFFFFFF:FFFF,FF
:FFFFFFFFFFFFFFFFFFFFFFFFFFFFFFFFFFFFFFFFFFFFFFFFFFFFFFFFFFFFFFFF:FFFFF
@A00721:190:HGJW7DSXY:4:1261:15483:19633_2:N:0:TCTGCAAG+GCTGCACT
TGCTCGCGATTTATTCTTTTTGTCAATGATTACATCTACTTCGTTCTGATCCTTACAAGATCATCGT
TAAGTTAGGTAAACCCCTAACCGATGTTACTCTTGTAGGACTTTGGGA
+
FFFFFFFFFF,FFFF:FF:FFFFFFFFFFFFFFFFFFFFFFFFFFFFFFFFFFFFFFFF:FFF:FF,:::F:FFFF:FFFFFFF
,FFFFFFFFF:F:F:FFFFFFFFFFFFFFFFFFFFFFFF,FFFF:FFFFF:F
@A00721:190:HGJW7DSXY:4:1177:30047:13917_2:N:0:TCTGCAAG+GCTGCACT
TTAAAGACTATACTAAATATCTCCACTACGAGGTTGTTGTTTGGCGATTAGCTCTTGCGACTAATATT
CGATATTCGATTGAGGGTCGTTATACCTATTCGGCTATCTGTGCTTTG
+
FFFFFFFFFFFFFFFFFFFFFFFFFFFFFFFFFFFFFFFFFFFFFFFFFFFFFFFFFFFFFFFFFFFFFFFF
F:FFFFFFFFFFFFFFFFFFFFFFFFFFFFFFFFFFFFFFFF,FFFFFFFFFFFFFFFFF
@A00721:190:HGJW7DSXY:4:2159:20708:4006_2:N:0:TCTGCAAG+GCTGCACT
TCAAATTTTAAACGATTCCGAGAGGTTTATCCTGATGTGGAGGGAGTTCTTGAAGCATCCCGACCTTT
CCTTGTGAAAATTTTGATGCGGTTTCATAAGATTATCAGTAATCCTGA
+
FFFFFFFFFFFFFFFFFFFFFFFFFFFFFFFFFFFFFFFFFFFFFFFFFFFFFFFFFFFFFFFFFFFFFFFF
FFFFFFFFFFFFFFFFFFFFFFFFFFFFFFFFFFFFFFFFFFFFFFFFFFFFFFFFFFFFFFFF
@A00721:190:HGJW7DSXY:4:1546:30454:21919_1:N:0:TCTGCAAG+GCTGCACT
ATTCATGGACCTTCCATCCTGTACCTCTTCTGGAGAGACGTATCTCAAAGATCGACTTCGAGACAGGT
GATATTGTTGAGCGAGAGCGACCAAGATCTAAATTCGGTAACGGTGCGTGCGCTTTATTTTAAAAAG
CTC
+
FFFFFFFFFFFFFFFFFFFFFFFFFFFFFFFFFFFFFFFFFFFFFFFFFFFFFFFFFFFFFFFFFFFFFFFF
FFFFFFFFFFFFFFFFFFFFFFFFFFFFFFFFFFFFFFFFFFFFFFFFFFFFFFFFFFFFFFFF:FFFFFFFFFFFFFFFF
FFF
@A00721:190:HGJW7DSXY:4:2567:6912:12399_2:N:0:TCTGCAAG+GCTGCACT
CTGATACTTATCACGAAAGGACTTGAGTCTTTTGATCAGTCTCTGACTTGACCATCTTTCATTTTAA
TGACGATCATTAAGACTCTCTTCTTCTTTGTTTCCTTCTTTGCACTG
+
FFFFFFFFFFFFFFFFFFFFFFFFFFFFFFFFFFFFFFFFFFFFFFFFFFFFFFFFFFFFFFFF:FFFFFFFFFFFFFFFF
FFF:FF,FFFFFFFFFFFFFFFFFFFFFFFF,FFFF:FFF:FFFFFFFFF
@A00721:190:HGJW7DSXY:4:2139:32570:13777_1:N:0:TCTGCAAG+GCTGCACT
CTCTTCCGATCTCTAATATGTGTTTTTACGATAACAACATCAGTTGATTAAGACTCTTCCGAAAGGC
GAACCTTTGGGAATTTGAAGCTCAGGGTGAAGCACACGTTTGACCGTGACGAAGTGTGGTGTCTTGA
TCT
+
FFFFF,FFFFFF:FF,FFFFFFFFFFFFFFFFFFFFFFFF:FFFFFFFFFFFFFFFFFFFFFFFF:FFFFFFF
FF:FFFFFFFFFFFFFF:FFFFFFFFFFFFFFFFFFFFFFFFFFFFFFFF:FFFFFFFFFFFF:FFFFFFFFFFFF
FFF
@A00721:190:HGJW7DSXY:4:2336:18240:25254_1:N:0:TCTGCAAG+GCTGCACT
ATACTCTCCTTGAGTTCACTCGTAAGGACACTACCACTTATTACGATATTTCTTTAGTCGATGGGTTT
TCGACTCCTTTAAGCGTCTTCTGTTTCATCGCAACCAGATGATATCTTCTATTCTGAAGTATGTTTCGA
TCA
+
FFFFFFFFFFFFFFFFFFFFFFFFFFFFFFFFFFFFFFFF:FFFFFFFFFFFFFFFFFFFFFFFFFFFFFFFF
FFFFFFFFFFFFFFFFFFFFFFFFFFFFFFFF:FFFFFFFFFFFFFFFFFFFFFFFFFFFFFFFFFFFFFFFF
FFF
@A00721:190:HGJW7DSXY:4:1642:10764:2534_2:N:0:TCTGCAAG+GCTGCACT
TCTTCTAATGTGGCCTGAAGTACGTTTCACTTTGTGTGTACTTGTCTCTATTTTAAGTTTTGTCTTCC
TTGTTTGTCTTATTCTATTAATCACTCATTTTAGTGAGATTATTA
+

```

FFFFFFFFFFFFFFFF:FFFFFFFFFFFFFFFFFFFFFFFFFFFFFFFFFFFFFFFF:FFFFFFFFFFFFFFFFFFFFFFFFFFFFFFFFFFFFFFFF:F  
FFFFFFFFFFFFFFFFFFFFFFFFFFFFFFFFFFFFFFFFFFFFFFFFFFFFFFFFFFFFFFFFFFFFFFFFFFFFFFFFFFFFFFFFFFFFFFFF  
@A00721:190:HGJW7DSXY:4:1445:17454:3537\_2:N:0:TCTGCAAG+GCTGCACT  
CGACAACAGCAGGGGTTTTCTGAATAGTGATAGCCACCCGCTTACAGAGGGCAGCAGCATGACCATA  
ATTGGTATTGACTTTGGTACCACCTTTTCTACTGTCTGTCTCGCCTCT  
+  
FFFFFFFFFFFFFFFFFFFFFFFFFFFFFFFFFFFFFFFFFFFFFFFFFFFFFFFFFFFFFFFFFFFFFFFFFFFFFFFFFFFFFFFFFFFFFFFF  
FFFFFFFFFFFFFFFFFFFFFFFFFFFFFFFFFFFFFFFFFFFFFFFFFFFFFFFFFFFFFFFFFFFFFFFFFFFFFFFFFFFFFFFF:FFFFFFFF  
@A00721:190:HGJW7DSXY:4:1241:18177:2002\_1:N:0:TCTGCAAG+GCTGCACT  
CTTAACAACAATGATAGTGAATTTATACCTACAATCATTGGTTTTTCTAATAATGATGACACTATTGT  
TTATGGATATGATGCTATTACTCATGATGGTTACGGTCAGGGAGGATTCTCAGTTTACAAGGACCTTA  
AGC  
+  
FFFFFFFFFFFFFFFFFFFFFFFFFFFFFFFFFFFFFFFFFFFFFFFFFFFFFFFFFFFFFFFFFFFFFFFFFFFFFFFFFFFFFFFFFFFFFFFF  
FFFFFFFFFFFFFFFFFFFFFFFFFFFFFFFFFFFFFFFFFFFFFFFFFFFFFFFFFFFFFFFFFFFFFFFFFFFFFFFFFFFFFFFFFFFFFFFF  
FFF  
@A00721:190:HGJW7DSXY:4:2368:12997:21527\_2:N:0:TCTGCAAG+GCTGCACT  
CCGAAAGACGTGCTAAATTTAAACCATTGTACGATGTCGTCTGTCTCGGCGATCACTTTTCACTAAGA  
ATTGGTCCTACTTTTGGACAAGGCCAACTTCGTAATCTTCATGAGATC  
+  
FFFFFFF:FFFFFFFFFFFFFFFFFFFFFFFFFFFFFFFFFFFFFFFFFFFFFFFFFFFFFFFFFFFFFFFFFFFFFFFFFFFFFFFFFFFFFFFF  
FFFFFFFFFFFFFFFFFFFFFFFFFFFFFFFFFFFFFFFFFFFFFFFFFFFFFFFFFFFFFFFFFFFFFFFFFFFFFFFFFFFFFFFFFFFFFFFF  
@A00721:190:HGJW7DSXY:4:1127:13358:2581\_1:N:0:TCTGCAAG+GCTGCACT  
TAGGGATTTTGAAGAGTGAAAGGCTTCAATTGTAGTGGTTTGGTCGTTTTCAGTACCCAGTCAGTATA  
CCTCTACGCAAAGATATTTTCATGAAAACCTACAGAGGAACGTACCGGATTACCTGTCTTTTCATATTATG  
AAT  
+  
FFFFFFFFFFFFFFFFFFFFFFFFFFFFFFFFFFFFFFFFFFFFFFFFFFFFFFFFFFFFFFFFFFFFFFFFFFFFFFFFFFFFFFFFFFFFFFFF  
FFFFFFFFFFFFFFFFFFFFFFFFFFFFFFFFFFFFFFFFFFFFFFFFFFFFFFFFFFFFFFFFFFFFFFFFFFFFFFFFFFFFFFFFFFFFFFFF  
FFF  
@A00721:190:HGJW7DSXY:4:2552:1868:1846\_2:N:0:TCTGCAAG+GCTGCACT  
TCTTTGCTTCGATGTTGGATGTCAAGAAGGGTTCAGAATGGGATTCTACGTAGTTTATGACTTTGGT  
GGTGGTACTTTTCGATACTTCTATCGTCTTACGTTACGGTAATTACTAT  
+  
F,FFFFFFFFFFFF:F,F,FFFF:FFFFFFFFFFFFFFFFFFFFFFFFFFFFFFFF:F::FFFF,FFFFFFFFFFFF:FF:F:FFFF  
FFFFFFFFFFFFFFFFFFFFFFFFFFFFFFFFFFFFFFFFFFFFFFFFFFFFFFFFFFFFFFFFFFFFFFFFFFFFFFFFFFFFFFFF  
@A00721:190:HGJW7DSXY:4:1674:31919:6699\_1:N:0:TCTGCAAG+GCTGCACT  
ATAATCTTGGAGGTCGTGACGTTGATGAAGCTATAAGAGCGTTCTTATTACGGCGCACTTCTTTACCC  
GCCACCACACAACCTTTCAGTTTCACTGAAGGAGGAGGTTTCTGTTACTGGAAAACCCTCGTCAAT  
ACT  
+  
FFFFFFFFFFFFFFFFFFFFFFFFFFFFFFFFFFFFFFFFFFFFFFFFFFFFFFFFFFFFFFFFFFFFFFFFFFFFFFFFFFFFFFFFFFFFFFFF  
FFFFFFFFFFFFFFFFFFFFFFFFFFFFFFFFFFFFFFFFFFFFFFFFFFFFFFFFFFFFFFFFFFFFFFFFFFFFFFFFFFFFFFFFFFFFFFFF  
FFF  
@A00721:190:HGJW7DSXY:4:2102:20148:25801\_2:N:0:TCTGCAAG+GCTGCACT  
GATCTAGTGAAATTAACGCGTCCTTTTCTGGAACGTAGTTTACTATTATGAACAAAGTTATCAAAGA  
TAGTGGCATTCAAGGCAAACCTTACCCTGATTCCGGCCGGTGGTAGCTC  
+  
FFFFFFFFFFFFFFFFFFFFFFFFFFFFFFFFFFFFFFFFFFFFFFFFFFFFFFFFFFFFFFFFFFFFFFFFFFFFFFFFFFFFFFFFFFFFFFFF  
FFFFFFFFFFFFFFFFFFFFFFFFFFFFFFFFFFFFFFFFFFFFFFFFFFFFFFFFFFFFFFFFFFFFFFFFFFFFFFFFFFFFFFFF  
@A00721:190:HGJW7DSXY:4:1537:29125:3709\_2:N:0:TCTGCAAG+GCTGCACT  
TGCTGAAACAGCTATTAAAGCTGTTGAGCGGTAATTACACCTAAACGAGCTCGATCTGCCATCGCTG  
AAGGATGTGCACTCTTTTCTGCTACTTTAACGGAGCGTAGTGTACTCT  
+

@A00721:190:HGJW7DSXY:4:2358:24108:3098\_1:N:0:TCTGCAAG+GCTGCACT  
CAACAGTAACATTACTTCTAATAAAGGTCTCTATCAAGCTCGTATTATCGTCGCTGCTGGATCTGCGT  
TACCGTTGAAGGCTAAACTCCAAGGTAATTATGAAGACTGTGATTTATCTTTCACTCTGGCCTTGAT  
GAG

@A00721:190:HGJW7DSXY:4:2110:8712:19022\_2:N:0:TCTGCAAG+GCTGCACT  
CGTAACATTAATAATTTCAATCTTCTTAAAAAGAAGATAGAGAGTCATACTTTGGGCTATCGTTCAGG  
TGCAGGGGGTTGGATAGCCAATATTGAAGTGGACACCTCTGGTAGTAT

@A00721:190:HGJW7DSXY:4:2242:10113:3255\_1:N:0:TCTGCAAG+GCTGCACT  
CTAAGCATACTACTTTTGCTTTGATTACTCTACCGCCTTACAAGTCTAAGTTAAAGAGTCGATTA  
CAAGTTGTACTTATCAATGATTTTATCGCTGGTTGTTATCTCGAAAAGTCTCTTCTAAAAGGAACGTC  
AGT

@A00721:190:HGJW7DSXY:4:1344:13747:10426\_2:N:0:TCTGCAAG+GCTGCACT  
CTAAAATATTTACAAAATCTTACCACTATCTACGAACCTAAAGTTCTGAAGACGTTGCTTGTCGCTTC  
CTCCTTTAATGGCACTACCTCGGTACAATCTTACTTGGAACGAAGGCG

@A00721:190:HGJW7DSXY:4:1340:31864:20071\_1:N:0:TCTGCAAG+GCTGCACT  
GTTCTGTCTATATTAGGTGAAGCGAAATACGATTTTGAACGTCAACGTTACCGAGTTTCGTTTCGTA  
CCTTGATGCTGACTTTCGTC AATATGATTTGATCTGGTTGCTCAATTCTAAGCGTGTTCCGCTTAGTG  
CGA

@A00721:190:HGJW7DSXY:4:1546:21088:22294\_1:N:0:TCTGCAAG+GCTGCACT  
TACGAAC TTGACTCTACTATACGTGACATACTAAATACTAGATATTTGGATGATCTTGATAAAGAACT  
TCATGAATTTTCAGAGGATGAAAAATTTTCTTCCTTGGATTTTAATATAAAGAATCTTTACCAGGACT  
CCT

@A00721:190:HGJW7DSXY:4:1509:21088:16282\_1:N:0:TCTGCAAG+GCTGCACT  
TGATCGTAAGAAGTTTATAAGGAACATATCCATTTGTTGTAATAGGGTCATCAACTTAGAACTCGAAA  
CTCTAAGTGGTAATACTGTCTTTCCAAGCTTACCTGTATCTTCAATGAAATTGGACTCTTCGATAGG  
GAC

[illegible]

@A00721:190:HGJW7DSXY:4:2676:24478:27164\_2:N:0:TCTGCAAG+GCTGCACT  
TAAAGGAAGATCTGTTATCGACGGTTTATCGTTTACGAAGTATCACTCCACCGGTGAATGGTTTAAAGA  
ATACTATAAATAGAATAGCTATTACTACTAATGGCGTTGCCTAGTGG

+

FFFFFFFF:FFFFFFFFFFFFFFFFFFFFFFFFFFFFFFFFFFFFFFFFFFFFFFFFFFFFFFFFFFFFFFFF  
FFFFFFFFFFFFFFFF:FFFFFFFFFFFFFFFFFFFFFFFFFFFFFFFF:FFF:F:FFFFFF

@A00721:190:HGJW7DSXY:4:2643:29731:35164\_1:N:0:TCTGCAAG+GCTGCACT  
TTTAGGTGGTCTTTATTCTATTATTGATTTTATGAGATTGATACGCTAACAGAAGATGATGTTAGAG  
TAGAATTCCTGAAGAGTCCTTCCGTAACCAACTTCTTGACAATTTTCTTCAATCCTTCGATAATAGTT  
AAA

+

FFFFFFFFFFFFFFFFFFFFFFFFFFFFFFFFFFFFFFFFFFFFFFFFFFFFFFFFFFFFFFFFFFFFFFFF:FFF  
FFFFFFFFFFFFFFFFFFFFFFFFFFFFFFFF:FFFF:FFFFFFFF:FFFF:FFFFFFFFF,F:FFFF:FFFF:FF  
F:F

@A00721:190:HGJW7DSXY:4:2134:22643:9298\_1:N:0:TCTGCAAG+GCTGCACT  
CGATAAGGGTCACTAGTCTTACACAATTAAGAAATAATCCTACATTGACTGATTATCTAAAGATTGAA  
GGAAAATTTTATCCTCGTTAACTTACTTAGACTTTCTACGATACAAATGATAACTTCTAATTTACG  
TT

+

FFFFFFFFFFFFFFFFFFFFFFFFFFFFFFFFFFFFFFFFFFFFFFFFFFFFFFFFFFFFFFFFFFFFFFFF  
FFFFFFFFFFFFFFFFFFFFFFFFFFFFFFFFFFFFFFFFFFFFFFFFFFFFFFFFFFFFFFFFFFFFFFFF  
FF

@A00721:190:HGJW7DSXY:4:2576:31575:5040\_2:N:0:TCTGCAAG+GCTGCACT  
AAGGGATGCATGGTGTATCTCCTCAGGAGTCCCGGCATTTGATAATAATGACGAGACTTTCGTCATA  
ATCGCTGCATATTACGGATTACACGGTACCAGCGCATCTCGTGTCGAG

+

FFFFFFFFFFFFFFFFFFFFFFFFFFFFFFFFFFFFFFFFFFFFFFFFFFFFFFFFFFFFFFFFFFFFFFFF  
FFFF:FFFFFFFF:FFFFFF:F,FFFFFFFF:F:FFF,FFFFFFFF,FF

@A00721:190:HGJW7DSXY:4:2274:8603:8249\_1:N:0:TCTGCAAG+GCTGCACT  
AAATTTATAGAAGATTATTTGACAGAATCAATAAGAATCATCGATTCTCGATTCTGATAGCTTATCT  
AGGTAATCTCATTACTATGTTGATTTAGTCTACATTTATGCTGATCTAAAATTTGATCTAGATGGA  
TCC

+

FFFFFFFFFF,FF:FFFF:FFFFFFFF,FFFFFFFFFFFFFFFFFFFFFFFFFFFFFFFFFFFFFFFF  
FFFFFFFFFFFFFFFFFFFFFFFFFFFFFFFFFFFFFFFFFFFFFFFFFFFFFFFFFFFFFFFFFFFFFFFF  
FFF

@A00721:190:HGJW7DSXY:4:1509:10330:27085\_1:N:0:TCTGCAAG+GCTGCACT  
TTCTAGAATTCCTTAATTATAATTTCAACCTCAAAGTTACGTGTTTACAGTAACGAGATCACACATT  
TTGAGAACTAACTATGTTATGTTCTCTGATCATTTTGACAATCTCTTCTTATAATAATAATAATA  
ATA

+

FF:FF:FFFF,FF:FF:FFFFFFFFFFFFFFFFFFFFFFFFFFFFFFFF:FFFFFFFFFFFFFFFF  
FFFFFFFFFFFFFFFF,FFFFFFFFFF:FFFFFFFFFFFFFFFFFFFFFFFFFFFFFFFF:FFFFF  
FFF

@A00721:190:HGJW7DSXY:4:1364:4779:29121\_2:N:0:TCTGCAAG+GCTGCACT  
CAAATAGTGGAAGGCTCCAGTCAACACTAGTTCGAGTGCTGCTTTGGATTACGATGACGTGAGAATA  
GGTGAAGGGATAGTTTTTACCTCGACCAACATTAAGGCGGCGGCGACT

+

FFFFFFFFF:FFFFFFFFFFFFFFFFFFFFFFFFFFFFFFFFFFFFFFFFFFFFFFFFFFFFFFFF:FFFFFFFFFFF:FFF  
FF:FFFFFFFFFFFFFFFFFFFFFFFFFFFFFFFFFFFFFFFFFFFFFFFFFFFFFFFF

@A00721:190:HGJW7DSXY:4:1630:29279:24111\_2:N:0:TCTGCAAG+GCTGCACT  
CTTCACCCAAAATGAAGGACACTTCGAAACTGAATAATGATGCACTACAAACAAGTATCGCTAATCAT  
CTGAAAAAGGCTCTAAAGGACACTATACAATATCCAGACGACGACGAA

+

FFFFFFFFFFFFFFFFFFFFFFFFFFFFFFFFFFFFFFFFFFFFFFFFFFFFFFFFFFFFFFFFFFFFFFFF  
FFFFFFFFFFFFFFFFFFFFFFFFFFFFFFFFFFFFFFFFFFFFFFFFFFFFFFFFFFFFFFFF  
@A00721:190:HGJW7DSXY:4:2212:13693:13933\_2:N:0:TCTGCAAG+GCTGCACT  
CAGCACCACATTTTGGTCAAGTCAATCCGTTGAGAAAATTTCTTAGAGGATATTCGCCATTGTGGTAC  
GAATTGGTCCAACATTTACCACCAAATTCTTTTGATACAACCTCTAGCC  
+  
FFFFFFFFFFFFFFFFFFFFFFFFFFFFFFFFFFFFFFFFFFFFFFFFFFFFFFFFFFFFFFFFFFFFFFFF  
FFFFFFFFFFFFFFFFFFFFFFFFFFFFFFFFFFFFFFFFFFFFFFFFFFFFFFFFFFFFFFFF  
@A00721:190:HGJW7DSXY:4:1161:9344:7780\_2:N:0:TCTGCAAG+GCTGCACT  
CGCTTGCTATTCACCAGATTGGTTCGAACCCGTTGATGCTATGTCAGAAGAAGCTATTCAAGCTTGTC  
GTTTAAAGACTGCAGAGGCTGTCAAACAAGCCCAGACTCAAGGAGTCC  
+  
FFFFFFFFFFFFFFFFFFFFFFFFFFFFFFFFFFFFFFFFFFFFFFFFFFFFFFFFFFFFFFFFFFFFFFFF  
FFFFFFFFFFFFFFFFFFFFFFFFFFFFFFFFFFFFFFFFFFFFFFFFFFFFFFFFFFFFFFFF  
@A00721:190:HGJW7DSXY:4:1511:17472:33849\_2:N:0:TCTGCAAG+GCTGCACT  
GGTGATAAAAATTATTTAGAGATCTTTTCTACTTACAAAGGACAATTCAGTTTCATTAATTCTACGGA  
AAAGTCCGAGTATATTGTATGTTAATAGATAGTGGGATAATAGTTCT  
+  
FFFFFFFFFFFFFFFFFFFFFFFFFFFFFFFFFFFFFFFFFFFFFFFFFFFFFFFFFFFFFFFFFFFFFFFF  
FFFFFFFFFFFFFFFFFFFFFFFFFFFFFFFFFFFFFFFFFFFFFFFFFFFFFFFFFFFFFFFF  
@A00721:190:HGJW7DSXY:4:2242:25455:16172\_1:N:0:TCTGCAAG+GCTGCACT  
CGTCTGAAGAGTTTAGAGCTGCTATTGATTATGTAACCGATAGGAGTTGTATAGTTGAAGATGTGGCT  
TTAGACGATAATCCTTTAAGGACTATGTTGACTGACGAAGATTTTCCACAGATTTGTCTACGTTGCA  
GAT  
+  
FFFFFFFFFFFFFFFFFFFFFFFFFFFFFFFFFFFFFFFFFFFFFFFFFFFFFFFFFFFFFFFFFFFFFFFF  
FFFFFFFFFFFFFFFFFFFFFFFFFFFFFFFFFFFFFFFFFFFFFFFFFFFFFFFFFFFFFFFF  
FFF  
@A00721:190:HGJW7DSXY:4:1370:17788:8155\_2:N:0:TCTGCAAG+GCTGCACT  
CTATATACATTATAAAATATAAAATAAGGGAGTCATAACTTTTGTTACCAATTCTTGGCTTTCAAC  
GAAGTCTCTGATTTTATTAATCATTACTTTAACGATCTCTCGGTCATT  
+  
FF:FFFFFFFFFFFFFFFFFFFFFFFFFFFFFFFFFFFFFFFFFFFFFFFFFFFFFFFFFFFFFFFF  
FFFFFFFFFFFFFFFFFFFFFFFFFFFFFFFFFFFFFFFFFFFFFFFFFFFFFFFFFFFFFFFF  
@A00721:190:HGJW7DSXY:4:1223:13295:2660\_1:N:0:TCTGCAAG+GCTGCACT  
TTGATCTACGTCGTTTAACTGTCGGAACAACCTTTACTTAGAATGACTCTATCTTTTCAGACACTTCT  
TATATTATTTACAATAGTTAATATCATATTAGTAATACTCACTATCGTTTTCTGCTTTTCTTAGCTA  
ATA  
+  
FF:FF:FFFFF,F:FFFFFFFFF:FFFFFFFFFFFFFFF:FFFFFFFFFFFFFFF:FFF:F  
FFFFFFFFFFFFFFF:FFFFFFFFFFFFFFF:FFFFFFFFFFFFFFF:FFFFFFFFFFFFFFF  
F,F  
@A00721:190:HGJW7DSXY:4:2672:25220:16673\_1:N:0:TCTGCAAG+GCTGCACT  
TATGATTACTAAAACCAACTCTTCTTTACTTGACCTGTTGGTAGAATAGATTTAGTCTCTACACCCAT  
CTCAACGAGGATAAAGCGAGTTTTCCGTCCTGAACGTAATACACGAATAGATCATCCGCAAACGACTC  
GA  
+  
:,FF,:FF,FFF:F,F,:,:,F:,,F,F,,,,:,F,,,,F:,F:F,:FFF,,,,F,,,F:FF,F,  
:,F:,:,,,,:F:,:,,,,:FFF,FFF,F,F,F,:FF::FF,F:,,,F,,F:FF,,FFFFFFFF  
FF  
@A00721:190:HGJW7DSXY:4:2205:10013:28103\_2:N:0:TCTGCAAG+GCTGCACT  
TTTAGATTATGAATCCTGCCTTTACTCATTTTATAGCAGTTATTTATGTTGTACTTTTTATAATTTAT  
AACCTTCTTATACTTTTGGGTATGTTTTGTGAAAAACATGAGATACCC  
+

```
,FFFFFFFFFFFFFFFFFFFFFFFFFFFFF:,FFFFFFF:FF,FFFFFFFFF:FFFFFFFFFFFFFFFFFFFF  
FF:FFFFFFFFFFFFFFFFFFFFF:FFFFFFFFFFFFF:FFFFF:FFFFFFFFF  
@A00721:190:HGJW7DSXY:4:1107:30761:20729_2:N:0:TCTGCAAG+GCTGCACT  
TTGTAACGATCATTCTTTTCGAGTTTTGTCACTTCTTATTCTTTTATTCCTTTAACTGTGTATGAGGAGG  
ATTTATAATGCTTTTCGATAGTGATTGTTATCAATTTAAATACATTAC  
+  
FFFFFFFFFFFFFFFFFFFFFFFFFFFFF:FFFFFFFFF:FFFFFFFFFFFFFFFFFFFFFFFFFFFFF:FFFFF  
FFFFFFFFFFFFF:FFFFFFFFFFFFFFFFFFFFFFFFFFFFFFFFFFFFF:FFF:  
@A00721:190:HGJW7DSXY:4:2137:24126:18223_2:N:0:TCTGCAAG+GCTGCACT  
CTTTACTCACAGACTCCGAAAATGGTTCAAATGAGGTCAAAGCTCTATTTATTAAACGAACATTAT  
CCGATTCTTCGAGGGTATTACTACCCTGATCTGCCGACTTTAGTCAA  
+  
FFFFFFFFFFFFFFFFFFFFFFFFFFFFF:FFFFFFFFFFFFFFFFFFFFFFFFFFFFFFFFFFFFF:FFF  
FFFFFFFFF:FFFFFFFFFFFFFFFFFFFFFFFFFFFFFFFFFFFFFFFFFFFFF  
@A00721:190:HGJW7DSXY:4:1660:26404:16063_2:N:0:TCTGCAAG+GCTGCACT  
TTCCTTCGATGTTTATATTTTTCTATAAGGGAAAATAGCAATAATCAAATTCGACAAATTTTAGAAC  
TTTATTTCAGA ACTCTCTCCGATCACCTTGGTGTGATCTCCCGGAGGA  
+  
FFFFFFFFFFFFFFFFFFFFFFFFFFFFF:FFFFFFFFFFFFFFFFFFFFFFFFFFFFFFFFFFFFF:FFFFF  
FFFFFFFFFFFFFFFFFFFFFFFFFFFFFFFFFFFFF:FFFFF:FFFF  
@A00721:190:HGJW7DSXY:4:1548:26422:5509_2:N:0:TCTGCAAG+GCTGCACT  
ATGTATGATGATAATCTACTATTTTTAAATAGTGATATTCAGCGTATACTTGAATACTTTATCAAAGA  
TTTGGCTTGGTCTATTTACCGCAAAAAGTTGGAAGAGGTCTATGATAT  
+  
FFFFFFF,FFFFFFFFFFFFFFFFFFFFFFFFFFFFFFFFFFFFFFFFFFFFF:FFFFFFFFFFFFFFFFFFFFFFFFFFFFF  
FFF,FFFFFFFFFFFFFFFFFFFFF::,FFFFFFFFFFFFFFFFFFFFF  
@A00721:190:HGJW7DSXY:4:2439:14362:5916_2:N:0:TCTGCAAG+GCTGCACT  
TATACTTTAAATAGCACCGATTATAACTTGACTGTTGATAATATTACAATAGCTCTTCTCAGAAGAT  
TAGAGAAGTAACCGGTGAACACGTCGGTAGCATTGATTTACTTTTACC  
+  
:FFFFFF:FFFFFFFFFFFFFFFFFFFFFFFFFFFFFFFFFFFFFFFFFFFFFFFFFFFFFFFFFFFFFFFFFFFFF  
FF:FFFFFFFFFFFFFFFFFFFFFFFFFFFFF:FFFFFFFFFFFFFFFFFFFFF:  
@A00721:190:HGJW7DSXY:4:1523:18195:7232_2:N:0:TCTGCAAG+GCTGCACT  
TTTCGAAAAGAAACCTATAAGTTACAAACGATTCTTCGACTATATTAAAGAAATAAAAATACTTCAAG  
TACCTGAAC TTTACATTTTAAATGGTATGGTATAATGTGTCTTACAAA  
+  
FFFFFFFFFFFFFFFFFFFFFFFFFFFFFFFFFFFFFFFFFFFFFFFFFFFFFFFFFFFFFFFFFFFFF:FFFF  
FFFFFFFFFFFFFFFFFFFFFFFFFFFFF:FFFFFFFFFFFFF:FFFFFFFFFFFFF  
@A00721:190:HGJW7DSXY:4:2205:5177:29246_2:N:0:TCTGCAAG+GCTGCACT  
CTCTCGGTAATGAGAGTGTATTCCTTAATATTCTAGTAACCGCTATGTGGGCATTACTAGGATTTATC  
ACACTCCTAAATTTGATAGCAATTTATGTTTAAATGCTAGGAAAATT  
+  
FFFFFFFFF:FFFFFFFFFFFFFFFFFFFFFFFFFFFFFFFFFFFFFFFFFFFFFFFFFFFFFFFFFFFFFFFFFFFFF  
FFFFFFFFFFFFF:FFFFFFFFFFFFFFFFFFFFFFFFFFFFFFFFFFFFFFFFFFFFF  
@A00721:190:HGJW7DSXY:4:1502:32533:25864_1:N:0:TCTGCAAG+GCTGCACT  
TGTATAGTTCAAGGAGTACTTAATTCAATAGCTTTAGTATTATTTACTATCGCCTTTATTGAAAATTG  
TATAAGAGTTAATTGCTTACACAAAAGTGACGCGGAAGGAATCTTAATTGATTGAAGCTAGGCGTTG  
GGG  
+  
FFFFFFFFFFFFFFFFFFFFFFFFFFFFFFFFFFFFFFFFFFFFFFFFFFFFFFFFFFFFFFFFFFFFF  
FFFFFFFFFFFFF:FFF:FFFFFFFFFFFFFFFFFFFFF,FFFFF:FFFFFFFFFFFFFFFFFFFFFFFFFFFFF  
FFF  
@A00721:190:HGJW7DSXY:4:1153:4155:14857_1:N:0:TCTGCAAG+GCTGCACT  
CTCCCCAAACATAACATAACCATAACCTACCATGACCAATCATCGCTCCA ACTGGCACGCCAGACGTAG
```

GGTCAAACCTACTACCGCCTGTCGGCAGATCGGCACCACTGGTCTCTACGTTCAGGGACCCGCTGTGC  
AGA

+

FFFFFF:FFF:FFFFFFFFFFFF:FFFFFFFFFFFFFFFFFFFFFFFFFFFF,FFFFFFFFFFFFFFFFFFFF  
FFFFFF:FFFFFFFFFFFFFFFFFFFFFFFFFFFFFFFFFFFFFFFFFFFFFFFFFFFFFFFFFFFFFFFFFFFF  
F:F

@A00721:190:HGJW7DSXY:4:1119:29830:9533\_2:N:0:TCTGCAAG+GCTGCACT  
AAATCTAGATCTGCACAGAAGAAGGCTGAAGGTCGTTACCGGACGACCACTCAAAGGAAACGGGCTGT  
TGCCCAGAGGAAAGCAGCGACCACCGAGGTCGCTCGTAACATTGACGG

+

FFFFFFFFFFFFFFFFFFFFFFFFFFFFFFFFFFFFFFFFFFFFFFFFFFFFFFFFFFFFFFFFFFFF,FFFFFFFFFFFFFFF  
FFFFFFFFFFFFFFFFFFFF:FFFFFFFFFFFFFFFF:FFFFFFFFFFFFFFF

@A00721:190:HGJW7DSXY:4:1175:32940:31516\_2:N:0:TCTGCAAG+GCTGCACT  
TCTGTGGGAAGTGAAGCAGTACCTCAGTCAAAAGTCACATTCACCACTCCCATACCAATCAATAGATC  
GGAAGAGCGTCGTGTAGGGAAAGAGTGTAGTGCAGCGGGTGGTGGGGG

+

FFFFFFFFFFFFFFFFFFFFFFFFFFFFFFFFFFFFFFFFFFFFFFFFFFFFFFFFFFFFFFFFFFFF:FFFFFFFFFFFFFFF  
FFFFFF:FF:FF,FF:FFF,FFFF:FF,FFF:,F,,:,,F,,,,,F

@A00721:190:HGJW7DSXY:4:1518:10456:34538\_2:N:0:TCTGCAAG+GCTGCACT  
CCCTCCGCTGGCAGCAAGAACTCCCAAGCCAATCAATAGTTCTTCTGACCAGAATGAAAAGGGGT  
TACCAGGGTAGTCTCTAAGTCTACCAGGAAGAGGGGAAATGTCCCAA

+

FFFFFFFFFFFFFFFFFFFFFFFFFFFFFFFFFFFFFFFFFFFFFFFFFFFFFFFFFFFFFFFFFFFF  
FFFFFFFFFFFFFFFFFFFFFFFFFFFFFFFFFFFFFFFFFFFFFFFFFFFFFFFFFFFFFFF

@A00721:190:HGJW7DSXY:4:2103:6027:13025\_1:N:0:TCTGCAAG+GCTGCACT  
CATCCGAGATCTTGACAGAGTGAAGTGGAGTTCAGACGTGTGCTCTTCCGATCTGGAAGATCTCCCACCA  
TCTGGGGTTGGGAATAAGAAATCTGCACGGGCCAAAGAGGCCGCTGCTACGAAGTCGCTGAAGGCGGC  
TT

+

FF,,,FFF,F,FF,FFF:FFFFFFFFFFFF,:FF,FFFF:FFFFFFFFFFFF,FF,FFF:FFF,FF:,,,  
FF:FFFFFFFFFFFF:F:,,,FF:,F,F::,F:,FFFF:FF,FFFF:FFFFFF,FFF:FFFFFFF  
FF

@A00721:190:HGJW7DSXY:4:2376:15492:3082\_2:N:0:TCTGCAAG+GCTGCACT  
TGTAAGTTGCGCCTGCCGACCCATCTTTGAGACCAAGACTCTCTACAGTAGGTTCTGCTACTAT  
GAGCAAATCTGTTGAATTCGTCACTGAGGACGAAGGTGAGAGGACTTT

+

FFFFFFFFFFFFFFFFFFFFFFFFFFFFFFFFFFFFFFFFFFFFFFFFFFFFFFFFFFFFFFFFFFFF  
FFFFFFFFFFFFFFFFFFFFFFFFFFFFFFFFFFFFFFFFFFFFFFFFFFFFFFFFFFFFFFF

@A00721:190:HGJW7DSXY:4:2374:5113:16642\_1:N:0:TCTGCAAG+GCTGCACT  
CTGAGAGCAGTCGCTGGGGAAGAGAATTGCGTGGGTGAAGGCCGACGCTTCGAGCTTGAGTGTGAC  
GAGGCCGGTGACGTTTTTGTCAACGGCGTTTGGAGGATTTTATCCGCGCTTAAGTATGGGGCGAAGAT  
CCC

+

FFFFFFFFFFFFFFFFFFFFFFFFFFFFFFFFFFFFFFFFFFFFFFFFFFFFFFFFFFFFFFFFFFFF  
FFFFFFFFFFFFFFFFFFFFFFFFFFFFFFFFFFFFFFFFFFFFFFFFFFFFFFFFFFFFFFFFFFFF  
FFF

@A00721:190:HGJW7DSXY:4:2470:23863:22310\_2:N:0:TCTGCAAG+GCTGCACT  
AGGTTGGCATATTTATGCCGACGATAATAAGCATGTCAACCTTAAGCACCGAGGTAAGCTCGGGACTT  
ACAAGAGAGAGTGTGAGAGAGTCGCTCTCACTATTTTTGCCCAGAATG

+

FFFFFFFFFFFFFFFFFFFFFFFFFFFFFFFFFFFFFFFFFFFFFFFFFFFFFFFFFFFFFFFFFFFF:FFFFFFFFF:FFF  
:FF:FFFF:FFFFFFFFFFFFFFFFFFFF:,FFFF:FFFFFFFFF

@A00721:190:HGJW7DSXY:4:2178:23303:24126\_1:N:0:TCTGCAAG+GCTGCACT  
TGAGGTAAAACCTCTTGCTCCTTCTGTGGGTGAGGGTTTTGTTTTAGTCACTGGTTCTGGGAGGCTG

CTTTCCTCCATAATTACAACCTCTCTTTAGAGAGCATTAGAAGGAAGTTGGGCAAATTCCCACATATG  
GT

+

FFFFFFFFF,,FFF,FFFF,F:F,FFF::FFFFFF,FF:FFFFFF,FF,FF,FFF:FF,FFF,,,FFFF  
,FFFFFF,::FF,FF,FF,,:FFF:FFFFFF,FF:,,,FF:FFFFFF,FF,FFFF:FFF:::FFFFFFF  
FF

@A00721:190:HGJW7DSXY:4:1309:21884:4413\_2:N:0:TCTGCAAG+GCTGCACT  
ACACTTTTCTTGAAAATTTTCTTTCTCCGTCATTGGGGATTTCGATGTGAGAAGGTGGAAGGTGT  
CAAGGGTCTTCTTCATGCTGATCTTTCAGGACCTAATCACATCATGAT

+

FFFFFFFFFFFFFFFFFFFFFFFFFFFFFFFFFFFFFFFFFFFFFFFFFFFFFFFFFFFFFFFFFFFFFFFF::FF  
FFFFFFFFFFFFFFFFFFFFFFFFFFFFFFFFFFFFFFFFFFFFFFFFFFFFFFFFFFFFFFFFFFFFFFFF

@A00721:190:HGJW7DSXY:4:2306:5267:19006\_1:N:0:TCTGCAAG+GCTGCACT  
GCTCGTATCGAGTTGGAGGGAGGAAGTTCTCCGAAATTAAGACGGGGGGATTAAGAGTCCAGCTGTA  
ACTGTCATTTAGAGAGGGGAGCTCTGAAAAGGAACTTCGTCAGAAGATGAGGAAGTCTAAGAGGAG  
GAG

+

F:FF,FFFFFFFF:F,:FF,FFFFFF,FFFF,F,FFFFFFFFF:F:F,FF,FFFFFFFFFFFFFFFFFFFF  
FFF,FFFFFFFFFFFFFF,FFFFFFFFFFFFFF,FFFFFFFFFFFFFF:FFFFFFFF,FFFF:FFFFFF  
FFF

@A00721:190:HGJW7DSXY:4:2158:6072:4617\_1:N:0:TCTGCAAG+GCTGCACT  
CTCTAGAGAAGATCTCACCACTGGAGAAGGCAAGTGGAGAGTCCAGAAGTTGATGAAGAAGGATTAT  
TTGAAGCAGGGGTTACCACTTCCTAAGGTGGATGAGGGAGGTTGTTTCTTTGGAGTTTGTAGATAATCT  
TTT

+

FFFFFFFFFFFFFFFF,FFFFFFFFFFFFFFFFFFFFFFFFFFFFFFFFFFFFFFFFFFFFFFFFFFFFFFFF,FF  
FFFF:FFFFFFFFFFFFFFFFFFFFFFFFFFFFFFFFFFFFFFFFFFFFFFFFFFFFFFFFFFFFFFFF:FFFFF:FFFF  
FFF

@A00721:190:HGJW7DSXY:4:2541:20211:1611\_2:N:0:TCTGCAAG+GCTGCACT  
CCTTGAGAAGACAAGCCACATTAAGATATAATTTAGGTCAACTTGGGGTTTCGAATGTCATTAGTGCC  
TTACGATTGAAAGAGGTCCTTTTGAGTATCGACAGATCTTTCGATCTT

+

FF:FFFFFFFFF:FFFFFFFFFFFFFFFFFFFFFFFFFFFFFFFFFFFFFFFFFFFFFFFFFFFFFFFFFFFF  
FFFFFF,FFFF:FFFFFFFFF:FFFFFFFFFFFFFFFFFFFFFFFFFFFFFFFF

@A00721:190:HGJW7DSXY:4:1446:22752:31313\_2:N:0:TCTGCAAG+GCTGCACT  
TGGCAGAATTCGGTAACCTACCATATTGTTCTTCCGGGAAGTTGTGGGATTAACTTTGACTCAACT  
ACTCCGATCAGATCCGGATGTTTGATTGGTATGGACTACTCGACTTT

+

FFFFFFFFFFFFFFFFFFFFFFFFFFFFFFFFFFFFFFFFFFFFFFFFFFFFFFFFFFFFFFFFFFFFFFFF:F  
FFFFFFFFFFFFFFFFFFFFFFFFFFFFFFFFFFFFFFFFFFFFFFFFFFFFFFFF

@A00721:190:HGJW7DSXY:4:1338:19859:1564\_1:N:0:TCTGCAAG+GCTGCACT  
CATGGCAGATACTACCGATAAGGTGAAAAATATGCAGGTCAAAGATTCTGTAGCTCTGAGGGCGGTTG  
AGGGAGCCGTTTTGGCCGACTTTAACTATTCTAAGAGTCTTATGATTCAAAACCTATCGTTGTCGTA  
CCT

+

FFFFFFFFFFFFFFFFFFFFFFFFFFFFFFFFFFFFFFFFFFFFFFFFFFFFFFFFFFFFFFFFFFFFFFFF  
FFFFFFFFFFFFFFFFFFFFFFFFFFFFFFFFFFFFFFFFFFFFFFFFFFFFFFFFFFFFFFFFFFFFFFFF  
FFF

@A00721:190:HGJW7DSXY:4:1466:32488:13385\_2:N:0:TCTGCAAG+GCTGCACT  
GCGGCTTATTGTCGCGCAGTTTCCAGAATTGCGGTTGAAGTTCACCATTTCTATCTTGAATGCTAACG  
CCGTCGAGCCATATCGAGACTATGTTATAATCACTTGTTAAAGTACA

+

FFFFFFFFFFFFFFFFFFFFFFFFFFFFFFFFFFFFFFFFFFFFFFFFFFFFFFFFFFFFFFFFFFFFFFFF,FFF  
FFFFFFFFFFFF,FFFFFFFFFFFFFFFF:FFFFFFFFFFFFFFFF:FFFFFFF



@A00721:190:HGJW7DSXY:4:1406:7717:31673\_2:N:0:TCTGCAAG+GCTGCACT  
TTAGATATTATTGATATTGGAGGCGATATTCGTTTTCATATCCAAACTCCTTGAATGGAGTACATAT  
TTGCAACCCTATTCTTGATGTGAAAGATGCATCGAGGTATACGTCTAG

+

FFFFFFFFFFFFFFFFFFFFFFFFFFFFFFFFFFFFFFFFFFFFFFFFFFFFFFFFFFFFFFFFFFFFFFFF  
FF:FFFF:FFFFFFFFFFFFFFFFFFFFFFFFFFFFFFFFFFFFFFFFFFFFFFFFFFFFFFFF

@A00721:190:HGJW7DSXY:4:2677:29993:9471\_1:N:0:TCTGCAAG+GCTGCACT  
AACGTACCTACTCACGAGACGTCATGAAAGCTATCGGAGGGAAGCAAAATGTTTCGTTCTGTTACAAG  
AACGCTTTGGATTGTGACCATAAAGCCTCAGTTGCGATAGCTGTAGAGGTATACGATATCTCTCTTGA  
TGA

+

FF:FFFF:FFFFFFFFFFFFFFFFFFFFFFFFFFFFFFFFFFFFFFFFFFFFFFFFFFFFFFFFFFFFFFFF  
FFFFFFFFFFFFFFFFFFFFFFFFFFFFFFFFFFFFFFFFFFFFFFFFFFFFFFFFFFFFFFFFFFFFFFFF  
FFF

@A00721:190:HGJW7DSXY:4:2338:11171:12258\_2:N:0:TCTGCAAG+GCTGCACT  
AATGCTTAAGAGAGAGATTGATGTATGTCATTTCTGCTTAGTTTGTCCCGCGCAATTATTGGACACGA  
TGA AAAATGACATACCCGTTCTGACCTTGGTATCGTTATCCGTCATG

+

FFFFFF:FFFFFFFFFFFFFFFFFFFFFFFFFFFFFFFFFFFFFFFFFFFFFFFFFFFFFFFFFFFFFFFF  
FFFFFFFFFFFFFFFFFFFFFFFFFFFFFFFFFFFFFFFFFFFFFFFFFFFFFFFFFFFFFFFFFFFFFFFF  
FFF:FFFF

@A00721:190:HGJW7DSXY:4:1233:17002:32565\_2:N:0:TCTGCAAG+GCTGCACT  
GTTATTCTCACAACAAAGATAAGATTTTATCTTTCTTCAAACACCCTGTTTTCTTAAGGGCGGACAA  
TTGTTCCATTGTGAACTCTTGGGGACTAGATTGAGCATTAAATGAGTTC

+

F:FFFFFFFFFFFFFFFFFFFFFFFFFFFFFFFFFFFFFFFFFFFFFFFFFFFFFFFFFFFFFFFF:FFFFFFFFFF  
FFFFFFFFFFFFFFFFFFFFFFFFFFFFFFFFFFFFFFFFFFFFFFFFFFFFFFFFFFFFFFFF  
:FF:FFFFFFFFFFFFFFFFFFFFFFFFFFFFFFFFFFFFFFFF

@A00721:190:HGJW7DSXY:4:2631:21242:31861\_1:N:0:TCTGCAAG+GCTGCACT  
TCTCTAGTGGACAATTCAGAATACCTATTTCCGTACCAAGAGCCACTGCCAATCTCATCGCTATACGC  
ATACCTGATTGGAAGAAGCGAGGTTCTGTTCTCAATAAAAATTTTTCTCAAGAGATTATGGTTGATAA  
AGT

+

FFFFF:FFFFFFFFFFFFFFFFFFFFFFFFFFFFFFFFFFFFFFFFFFFFFFFFFFFFFFFFFFFFFFFF  
FFFFFFFFF:FFFF,FFF:FFFFFFFFFFFFFFFFFFFFFFFFFFFFFFFFFFFFFFFFFFFFFFFFFFFF  
FFF

@A00721:190:HGJW7DSXY:4:1105:16848:32831\_1:N:0:TCTGCAAG+GCTGCACT  
TTCAGTACGTCATGGGGATCACTTCTTCGGTCAATGACAAAACCTTCGAATATGTTACGACATGGCTT  
CGTAACAACAGTGCGAGGATTGTCATCTCGGGGAAAGTGATTACCAAGATGTTTCATATAGATACGAG  
ATA

+

FFFFFFFFFFFFFFFFFFFFFFFFFFFFFFFFFFFFFFFFFFFFFFFFFFFFFFFFFFFFFFFFFFFFFFFF  
FFFFFFFFFFFFFFFFFFFFFFFFFFFFFFFFFFFFFFFFFFFFFFFFFFFFFFFFFFFFFFFFFFFFFFFF  
FFF

@A00721:190:HGJW7DSXY:4:1103:24985:34178\_2:N:0:TCTGCAAG+GCTGCACT  
CAGCGATCTTACTCGTTATCGGAGCTAAGAAGAAGACTTTGGGTACACGTTATGCTCGCAAACTTAAC  
GTTAGTACCGGAGGTGATCTCTCTGCTTCTGCGTTACTGAGAGAAAAG

+

FFFFFFFFFFFFFFFFFFFFFFFFFFFFFFFFFFFFFFFFFFFFFFFFFFFFFFFFFFFFFFFFFFFFFFFF  
FFFFFFFFFFFFFFFFFFFFFFFFFFFFFFFFFFFFFFFFFFFFFFFFFFFFFFFFFFFFFFFF:FFF

@A00721:190:HGJW7DSXY:4:1126:26332:24267\_1:N:0:TCTGCAAG+GCTGCACT  
CCTACGGTGACTTTATGGACAAGATGCAAGTTCTTGGGAAATACTTGTTTCCCTTTTAGGTTTAGTA  
GGTGATCTTGACGTCGATTCTTTGTATAGGAGTGTGAGAAGACAACGAATCTTGAAACTACGGTCCT  
TAT

+

FFFFFFFFFFF:FFFFFFFFFFF,FFFFFF:FFFFFFFFFFFFFFFFFFFFFFFFFFFFFFFFFFFFFFFF

```
FFFFFFFFFFFFFFFFFFFFFFFFFFFFFFFFFFFFFFFFFFFFFFFFFFFFFFFFFFFFF:FFFFFFFFFFFFFFFFFFFFFFFFFFFFFFFFFFFF  
FF,  
@A00721:190:HGJW7DSXY:4:1608:32244:10895_1:N:0:TCTGCAAG+GCTGCACT  
GAACCGGTCTCTAAATCTTTTGAGATTGAGAAGATTGAAGAACACGTCAAGAAGTCGCTCGGC GTTGT  
TCTTGGAAAACCAAGTTAAGAAGGAGGCTGATCATGGAGTCTTTGTACCTTCTGTCAA ACTTCGAGGTT  
CAG  
+  
:FFFFFF,F,FFFFFFFFFFFFFFFFFFFFFFFFFFFFFFFFFFFFFFFFFFFFFFFFFFFFF:FFFFFFFFFFFFFFFFFFFFFFFFFFFFF:  
FFFFFFFFFFFFFFFFFFFFFFFFFFFFFFFFFFFFFFFFFFFFFFFFFFFFFFFFFFFFFFFFFFFFFFFFFFFFFFFFFFFFFFFFFFFFFFFFFFFFF:  
FFFFFFFFFFFFFFFFFFFFFFFFFFFFFFFFFFFFFFFFFFFFFFFFFFFFFFFFFFFFFFFFFFFFFFFFFFFFFFFFFFFFFFFFFFFFFFFFFFFFF  
FFF  
@A00721:190:HGJW7DSXY:4:2649:7256:16720_2:N:0:TCTGCAAG+GCTGCACT  
GATCCCGGATGTGGATTGAAGGCTGGCTCTAAGGGAGACTCCTTCTTTTTTGAATGTTGTAAAGAATTG  
GGTTGAGAAGTGTGCTTTACAAGGAGAGATCGGAAGAGCGTCGTGTAG  
+  
FFFFFFFFFFFFFFFFFFFFFFFFFFFFFFFFFFFFFFFFFFFFFFFFFFFFFFFFFFFFFFFFFFFFFFFFFFFFFFFFFFFFFFFFFFFFFFFFFFFFF:  
FFFFFFFFFFFFFFFFFFFFFFFFFFFFFFFFFFFFFFFFFFFFFFFFFFFFFFFFFFFFFFFFFFFFFFFFFFFFFFFFFFFFFFFFFFFFFFFFFFFFF,  
FFFF  
@A00721:190:HGJW7DSXY:4:1654:11487:33442_2:N:0:TCTGCAAG+GCTGCACT  
TAAAGAAAAATTTT CGAATAAACTAATGAGAGGTATAGGCTTAGTCAAGTCTGTACTTACATTCTTTA  
CGCCAGATTCTTCATGGGGCGACGCTGTTTCTCTTGGTATTTCTGAAA  
+  
FFFFFFFFFFFFFFFFFFFFFFFFFFFFFFFFFFFFFFFFFFFFFFFFFFFFFFFFFFFFFFFFFFFFFFFFFFFFFFFFFFFFFFFFFFFFFFFFFFFFF:  
FFFFFFFFFFFFFFFFFFFFFFFFFFFFFFFFFFFFFFFFFFFFFFFFFFFFFFFFFFFFFFFFFFFFFFFFFFFFFFFFFFFFFFFFFFFFFFFFFFFFF:  
FFFFFFFFFFFFFFFFFFFFFFFFFFFFFFFFFFFFFFFFFFFFFFFFFFFFFFFFFFFFFFFFFFFFFFFFFFFFFFFFFFFFFFFFFFFFFFFFFFFFF  
FFF  
@A00721:190:HGJW7DSXY:4:1111:12536:32221_1:N:0:TCTGCAAG+GCTGCACT  
TTTCTCTGGTAAGGGAATTATTA AATCATTCTTCTCACTCTTGACGAGAATTATTACTGTTTTCTCT  
ACCCATAACTTCTTTTTCAAAAATGCGGATGGGTCTACTGATGTTTTCTACAGAGTGCAGTCGTTTC  
AAC  
+  
FFFFFFFFFFFF:FFFFFFFFFFFFFFFF:F:FFFFFFFFFFFFFFFFFFFFFFFFFFFFFFFFFFFFFFFFFFFFFFFFFFFFFFFFFFFFFFFFFFFFF  
FFFFFFFFFFFFFFFFFFFFFFFFFFFFFFFFFFFFFFFFFFFFFFFFFFFFFFFFFFFFFFFFFFFFFFFFFFFFFFFFFFFFFFFFFFFFFFFFFFFFF  
FFF  
@A00721:190:HGJW7DSXY:4:1456:25771:32158_1:N:0:TCTGCAAG+GCTGCACT  
AATAATTGGTGATGAAAATACGTATGTCGGTGGGGTTCTCAAGGCTCTCATCGCCACTGGGATTCTAA  
GGGGTTCATAAGATATTATCTGACATTGTGGTTCAATGATCAGGATTCTTCTTTTGGTCCTTACGTC  
TTA  
+  
FFFFFFFFFFFFFFFFFFFFFFFFFFFFFFFFFFFFFFFFFFFFFFFFFFFFFFFFFFFFFFFFFFFFFFFFFFFFFFFFFFFFFFFFFFFFFFFFFFFFF  
FFFFFFFFFFFFFFFFFFFFFFFFFFFFFFFFFFFFFFFFFFFFFFFFFFFFFFFFFFFFFFFFFFFFFFFFFFFFFFFFFFFFFFFFFFFFFFFFFFFFF:  
FFFFFFFFFFFFFFFFFFFFFFFFFFFFFFFFFFFFFFFFFFFFFFFFFFFFFFFFFFFFFFFFFFFFFFFFFFFFFFFFFFFFFFFFFFFFFFFFFFFFF  
FFF  
@A00721:190:HGJW7DSXY:4:1646:2844:3630_1:N:0:TCTGCAAG+GCTGCACT  
TCTTGTCACGATTCTTAAAAGAAGTTTATTA AAACTTCAGAGTCTCTTGGAAGTCCAGGTAGCTAATG  
TTCTTGCAATAGCCACAGACTTTCTGGGAAAAGAGACCTCTGTTGGTAGAGGAGTTGAGAGAATTACT  
CAG  
+  
FF:FFF:F:FFFFFFFFFFFFFFFF:FFFFFFFFFFFF:FFFFFFFFFFFFFFFFFFFF:FF:FFFF:FFFFFFFFFFFFFFFF  
FFF,:FFF:F,FFFFFFFFFFFFFFFFFFFF,FFF:FFFFFFFFFFFFFFFFFFFFFFFFFFFFFFFFFFFFFFFFFFFFFFFFFFFFF  
FFF  
@A00721:190:HGJW7DSXY:4:1465:7835:13307_2:N:0:TCTGCAAG+GCTGCACT  
ACAACGAGTTAGGGAGTGGCTAGGTTTTAAAAGATCCTTTGCACAAGCAATACCTTCCACTGAGTTCA  
TACCCAGAGTTTCGACGTCGCGGAAAACGATGAAGATTTCCACACTG  
+  
FFFFFFFFFFFF,FFFFFFFFFFFFFFFFFFFFFFFFFFFFFFFFFFFFFFFFFFFFFFFFFFFFFFFFFFFFFFFFFFFFFFFFFFFFFFFFFFFFF  
FFFFFFFFFFFFFFFFFFFFFFFFFFFFFFFFFFFFFFFFFFFFFFFFFFFFFFFFFFFFFFFFFFFFFFFFFFFFFFFFFFFFFFFFFFFFFFFFFFFFF  
@A00721:190:HGJW7DSXY:4:1461:15510:4867_2:N:0:TCTGCAAG+GCTGCACT  
TCTGATGCTGAATTTGAGGAAAATTTTTCGGAAGTTTTTGGTATAAATCCTGATGGCTCAGTACAGGG
```

AGGAGGTAATAGTTATAAAACCTTCTTTTATCATTGCAACAGGACTTT  
+  
FFFFFFFFFFFFFFFFFFFFFFFFFFFFFFFFFFFFFFFFFFFFFFFFFFFFFFFFFFFFFFFF  
FFF:FFFFFFFFFFFFFFFFFFFFFFFFFFFFFFFFFFFFFFFFFFFFFFFF  
@A00721:190:HGJW7DSXY:4:1306:22309:26569\_2:N:0:TCTGCAAG+GCTGCACT  
ATCTGGGATCATAGGTATGTGTCACGCTACACTCGAAATATGGGCCCTCATAAGGAAGTATAGTTGGC  
GTCTTGTCGTTGACGTCATTACAGTCTGGAAGTTAGATCATTTGTTCA  
+  
FFFFFFFFFFFFFFFFFFFFFFFFFFFFFFFFFFFFFFFFFFFFFFFFFFFFFFFFFFFFFFFF  
FFFFFFFFFFFFFFFFFFFFFFFFFFFFFFFFFFFFFFFFFFFFFFFFFFFFFFFF  
@A00721:190:HGJW7DSXY:4:1258:15239:27383\_1:N:0:TCTGCAAG+GCTGCACT  
TTTAGATAAATTCTTTCCGGGCTCAATGACCTTTGCTATGTACGTGGATCTAATGCTTGGTGATCTGA  
ATCTGACCATCGCAAAGAAGACTTTATTAGTTTCATGAAGTTCTTACACTTCTCGCGACTAATGTCAGC  
TTC  
+  
F:FFFFFFFFFFFFFF:FFFFFFFFFFFFFFFFFFFFFFFFFFFFFFFFFFFFFFFFFFFFFFFF  
FFFFFFFFFFFFFFFFFFFFFFFFFFFFFFFFFFFFFFFFFFFFFFFFFFFFFFFFFFFFFFFF  
FFF  
@A00721:190:HGJW7DSXY:4:1217:7392:2926\_2:N:0:TCTGCAAG+GCTGCACT  
CCAAATTTAGCACTTTTGAATATGACAGAAGCTCGCCATATCAGATTAGAGACATGCCAGTTAGAGT  
TCTTCTAACCAGGACTGATGGTGAGATTCTTTTACCTTTTGGAGGTCC  
+  
FFFFFFFFFFFFFFFFFFFFFFFFFFFFFFFFFFFFFFFF:FFFFFFFFFFFFFFFFFFFFFFFF  
FFFFFFFFFFFFFFFFFFFFFFFFFFFFFFFFFFFFFFFFFFFFFFFFFFFFFFFF,FFF  
@A00721:190:HGJW7DSXY:4:2418:19352:34287\_2:N:0:TCTGCAAG+GCTGCACT  
CCTAGTGTCTTTTCTAGAGTCCAAGGACGTTCCGTGCGAGGATGACAGGTGGGAGACCGCTCAATAA  
CACTCTATTGAATCCCTTTTCCACGATGAAAGCTCTTTATGAGGTGCT  
+  
FFF,FFFFFFFFFFFFFFFFFFFFFFFF:FFFFFFFFFFFFFFFFFFFFFFFF,FFFFFFFFFFFFFFFF  
FFFFFFFF:FFFFFFFF:FFFFFF:F:FFFFFFFFFFFFFFFFFFFFFFFF  
@A00721:190:HGJW7DSXY:4:2671:28664:4946\_1:N:0:TCTGCAAG+GCTGCACT  
GATATCGCCTCTGTCTTTCTCTTTAATCGTGAGGTTACGAGAGTTTCGTACTTGGGTTTATCGGTT  
GTATTTTGATAAATTTGTTGGAATCGATAATGATACTGACGAAGGTTCTATTACCACCCTTGTCATTG  
ATA  
+  
FFFFFFFFFFFF:FFFFFF:FFFFFF:FFFFFFFFFFFFFFFFFFFFFFFFFFFFFFFFFFFFFFFF  
FFFFFFFFFFFFFFFFFFFFFFFFFFFFFFFFFFFFFFFFFFFFFFFFFFFFFFFFFFFFFFFF  
FFF  
@A00721:190:HGJW7DSXY:4:2136:27525:17127\_1:N:0:TCTGCAAG+GCTGCACT  
GTCTAGCCGCTGAGATTCTGTTACCTATTTACAATCTGTAGAGAGAGAGGTTAATCAGAATTTGAGT  
GATAACGATTTAGTACTGGGAAATGGTGGTAGTCAGTTTACTACTTTTCTTTCCCTCCCTTTTTCGA  
TTG  
+  
FFF:FFF:FFFFFF:FFFFFFFFFFFFFFFFFFFFFFFFFFFFFFFFFFFFFFFFFFFFFFFF  
FFFFFFFFFFFFFFFF:FFFFFFFFFFFFFFFFFFFFFFFF,FFFFFFFFFFFFFFFFFFFFFFFF:FFF  
:FF  
@A00721:190:HGJW7DSXY:4:2233:18331:18020\_2:N:0:TCTGCAAG+GCTGCACT  
AGGTTTTCTTTTATGGGACTCTTGTGTGTTACTTATGAAGGAGGTATTACTTCGGAAGTTCTTAATGT  
AGGTCTCCTAGTACTTAAGGTTTATGTTTCGTTTCAGCTGGATGGA  
+  
FFFFFFFFFFFFFFFFFFFFFFFFFFFFFFFFFFFFFFFFFFFFFFFFFFFFFFFFFFFFFFFF  
FFFFFFFF:FFFFFFFFFFFFFFFFFFFFFFFF:FFFFFFFFFFFFFFFF  
@A00721:190:HGJW7DSXY:4:2508:12563:6370\_1:N:0:TCTGCAAG+GCTGCACT  
ATACGAGATCTTGCAGAGTACTGGAGTTCAGACGTGTGCTCTTCCGATCTTATTATGTCGCTAAAGC



[illegible]

@A00721:190:HGJW7DSXY:4:2277:9914:27492\_1:N:0:TCTGCAAG+GCTGCACT  
CCCGATAGGGTACCGAGTCTCCAAGAGAATATTTATTCTTATGAGGCTCGAACTTCAACGTTTTTCAC  
AACGGAAGACATATCGCACCCGAAATTTTTGGGCAGAATGCTCTTAACGCGTTCTTGAACGGTGT  
TTG

[illegible]

@A00721:190:HGJW7DSXY:4:1569:29695:14278\_1:N:0:TCTGCAAG+GCTGCACT  
GATAAAGTTATAGGAGACTCAGTTAACCTGAGAGCTCCTCAATTGATAGATTGGGTCAACAATAGGGA  
CGCTAGTATACTTCGTAAAGTCGACAGCGAAATGGTCAATATTGATAATTGGACCGACTATATGACCT  
ATT

[illegible]

@A00721:190:HGJW7DSXY:4:1670:26268:18740\_2:N:0:TCTGCAAG+GCTGCACT  
AGGGAAGCTAAGGTTAACTTGATGCTTCAGCCTTTTCGAAGCATAACCCCGCACAGAATATCGTTTA  
TCACGCAAAATTTATTAATGCAATTTTCGGACCTATCTTTAAGGTTCT

```

FFFFF:FFFFFFFFFFFFFFFFFFFFFFFFFFFFFFFFFFFFFFFFFFFFFFFFFFFFFFFFFFFF
FFFFFFFFFFFFF:FFFFFFFFF:FFFFFFFFFFFFFFFFFFFFFFFFFFFFFFFFFFFF

```

@A00721:190:HGJW7DSXY:4:1378:24080:36464\_2:N:0:TCTGCAAG+GCTGCACT  
CTTTTACCCAACATTTTTATGTATACAGAGATGACCAGTGACGATTTCTCCCGGAAGCTCTTCTCTCT  
CTTAGGAGGTCATGATGACTACTATAAGGGTGAAATCGATTTTTTCGAA

```

FFFFFFFFFFFFFFFFFFFFFFFFFFFFFFFF:FFFFFFFFFFFFFFFFFFFFFFFFFFFFFFFFFFFFFFFF
FFFFFFFFFFFFFFFF:FFFFFFFFFFFFFFFFFFFFFFFFFFFFFFFFFFFFFFFF

```

@A00721:190:HGJW7DSXY:4:2207:27263:35336\_1:N:0:TCTGCAAG+GCTGCACT  
TTTTGTAAAGCCTATGAGATAAAGATGTATTCTTATTTAGGCTTCGATGCTGAATTTCTTGAACCTTG  
GAGTGCCAGTGAATATTTTTGTACGCCAGGAGTATCCATAACGATTTGTCATTTACCACCTTTGCTC  
AAC

[illegible]

@A00721:190:HGJW7DSXY:4:1552:26946:10520\_1:N:0:TCTGCAAG+GCTGCACT  
TAACACATTCTTTGGTAATTGTATGATCACTCTTATGATGCTCTCTCTTTATTACGACCTTCGGAAGT  
TTAGAGCCGTCGCTGTCGCCGGAGACGATTCGATCCTCTTTTCGGACGTACCGGTCCAGGATTATTCA  
GAT

[illegible]

@A00721:190:HGJW7DSXY:4:1311:2392:31814\_2:N:0:TCTGCAAG+GCTGCACT  
TGCTCGCGATTTATTCTTTTTGTCAATGATTACATCTACTTCGTTCTGATCCTTACAAGATCATCGT  
TAAGTTAGGTAACCCCTAACCGATGTTACTCTTGAGGACTTTGGGA

```

FFFFFFFF,FFFFFFFFFFFFFFFFFFFFFFFFFFFFFFFF:FFFFFFFF:FFFFFFFFFFFFFFFF:FFF:F
FFFFFFFFFFFFFFFF:FFFFFFFFFFFFFFFFFFFFFFFFFFFFFFFF

```

@A00721:190:HGJW7DSXY:4:1303:3803:34757\_2:N:0:TCTGCAAG+GCTGCACT  
TTAAAGACTATACTAAATATCTCCACTACGAGGTTGTTGTTGGCGATTAGCTCTTGCGACTAATATT  
CGATATTCGATTGAGGGTCGTTATACCTATTCGGCTATCTGTGCTTTG

•

FF::FFFFFFFFFFFFFFFFFFFFFFFFFFFFFFFFFFFFFFFFFFFFFFFFFFFFFFFFFFFFFFFF  
@A00721:190:HGJW7DSXY:4:2415:26332:13745\_2:N:0:TCTGCAAG+GCTGCACT  
TCAAATTTTAAACGATTCCGAGAGGTTTATCCTGATGTGGAGGGAGTTCTTGAAGCATCCCGACCTTT  
CCTTGTAATAATTTGATGCGGTTTTATAAGATTATCAGTAATCCTGA  
+  
FFFFFFFFFFFFFFFFFFFFFFFFFFFFFFFFFFFFFFFFFFFFFFFFFFFFFFFFFFFFFFFFFFFF  
FFFFFFFFFFFFFFFFFFFFFFFFFFFFFFFFFFFFFFFFFFFFFFFFFFFFFFFFFFFFFFFFFFFF  
@A00721:190:HGJW7DSXY:4:1652:15004:27414\_1:N:0:TCTGCAAG+GCTGCACT  
ATTCATGGACCTTCCATCCTGTACTCTTCTGGAGAGACGTATCTCAAAGATCGACTTCGAGACAGGT  
GATATTGTTGAGCGAGAGCGACCAAGATCTAAATTCGGTAACGGTGCGTGCGCTTTATTTTAAAAAG  
CTC  
+  
FFFFFFFFFFFFFFFFFFFFFFFFFFFFFFFFFFFFFFFFFFFFFFFFFFFFFFFFFFFFFFFFFFFF  
FFFFFFFFFFFFFFFFFFFFFFFFFFFFFFFFFFFFFFFFFFFFFFFFFFFFFFFFFFFFFFFFFFFF  
FFF  
@A00721:190:HGJW7DSXY:4:2567:7111:12868\_2:N:0:TCTGCAAG+GCTGCACT  
CTGATACTTATCACGAAAGGACTTGAGTCTTTTGATCAGTCTCTGACTTGACCATCTTTCATTTTAAA  
TGACGATCATTAAGACTCTCTTCTTCTTTGTTTCTTCTTTGCACTG  
+  
FFFFFFFFFFFFFFFFFFFFFFFFFFFFFFFFFFFFFFFFFFFFFFFFFFFFFFFFFFFFFFFFFFFF  
FFFFFFFFFFFFFFFFFFFFFFFFF:F:FFF:FFFFFF:FFFFFFFFF  
@A00721:190:HGJW7DSXY:4:2368:13286:8563\_1:N:0:TCTGCAAG+GCTGCACT  
CTCTTCCGATCTCTAATCTGTGTTTTACGATAACAACATCAGTTGATTAAGACTCTTCCGAAAGGC  
GAACCTTGGAATTTGAAGCTCAGGGTGAAGCACACGTTTGACCGTGACGAAGTGTGGTGTCTTGA  
TCT  
+  
FFFFFFFFFFFFFFF:F:FFFFFFFFFFFFFFFFFFFFFFFFFFFFFFFFFFFFFFFFFFFFFFFFFFFF  
FFFFFFFFFFFFFFFFFFFFFFFFFFFFFFFFFFFFFFFFFFFFFFFFFFFFFFFFFFFFFFFFFFFF  
FFF  
@A00721:190:HGJW7DSXY:4:2551:23873:20885\_1:N:0:TCTGCAAG+GCTGCACT  
ATACTCTCCTTGAGTTCACCTCGTAAGGACACTACCATTATTACGATATTTCTTTAGTCGATGGGTTT  
TCGACTCCTTTAAGCGTCTTCTGTTCATCGCAACCAGATGATATCTTCTATTCGAAGTTATGTTTCGA  
TCA  
+  
FFFFFFFFFFFFFFFFFFFFFFFFF:FFFFFFFFFFFFFFFFFFFFFFFFFFFFFFFFFFFFFFFFFFFFF:FFFFFFFFFFFFFFF  
FFFFFFFFF:FF:FFFFFFFFFFFF:FFFFFFFFFFFFFFFFFFFFFFFFFFFFFFFFFFFFFFFFFFFF  
FFF  
@A00721:190:HGJW7DSXY:4:1673:28999:19304\_2:N:0:TCTGCAAG+GCTGCACT  
TCTTCTAATGTGGCCTGAAGTACGTTTCACTTTGTGTGACTTGTCTCTATTTTAAGTTTTGTCTTCC  
TTGTTTGTCTTATTCTATTAATCACTCATTTTAGTGAGATTATTA AAA  
+  
FFFFFFFFFFFFFFFFFFFFF:FFF:FFFFFFFFFFFFFFFFFFFFFFFFFFFFFFFFFFFFFFFFFFFF:FFFFFFFFFFFF:  
FFFFFFFFFFFFFFFFFFFFFFFFFFFFFFFFFFFFF:FFFFFFFFFFFFFFFFFFFFFFFFF  
@A00721:190:HGJW7DSXY:4:2141:15637:5713\_2:N:0:TCTGCAAG+GCTGCACT  
CGACAACAGCAGGGGTTTTCGAATAGTGATAGCCACCCGCCCTTACAGAGGGGCAGCAGCATGACCATA  
ATTGGTATTGACTTTGGTACCACCTTTTCTACTGTCTGTCTCGCCTCT  
+  
FFFFFFFFFFFFFFFFFFFFF:FFFFFFFFFFFFFFFFFFFFFFFFFFFFFFFFFFFFFFFFFFFFFFFFFFFF,  
FFFFFFFFFFFFFFFFFFFFFFFFFFFFFFFFFFFFFFFFFFFFFFFFFFFFFFFFFFFFFFFFFFFF  
@A00721:190:HGJW7DSXY:4:2206:20708:27868\_1:N:0:TCTGCAAG+GCTGCACT  
CTTAACAACAATGATAGTGAATTTATACCTACAATCATTGGTTTTTCTAATAATGATGACACTATTGT  
TTATGGATATGATGATATTACTCATGATGGTTACGGTCAGGGAGGATTCTCAGTTTACAAGGACCTTA  
AGC

+  
::FFFFFFFFFF,FFFFFF:FFF:FFFFFFFFFF:FF::FFF,,FF,FFFFFF:FFFFFF,FFFFFF,FF,FFFFFF,,  
FFFFFF,FFFFFFFF,F:FF:,F:FFF:F::FFFFFF,F:F:F,:FF,FFFF:FFFFFF,FFFF:, :FFFF  
FF:  
@A00721:190:HGJW7DSXY:4:2468:31394:15749\_2:N:0:TCTGCAAG+GCTGCACT  
CCGAAAGACGTGCTAAATTAACCATTGTACGATGTCGTCTGTCTCGGCGATCACTTTTCACTAAGA  
ATTGGTCCTACTTTTGGACAAGGCCAACTTCGTAATCTTCATGAGATC  
+  
FFFFFFFFFFFFFFFFFFFFFFFFFFFFFFFFFFFFFFFF:FFFFFF:FFFFFFFFFFFFFFFFFFFFFFFFFFFF  
FFF::FFF:FFFFFF: :FFFFFFFFFFFFFF,FFFFFFFFFFFFFFFFFFFF  
@A00721:190:HGJW7DSXY:4:1235:6460:27868\_1:N:0:TCTGCAAG+GCTGCACT  
TAGGGATTTTGAGAGAGTGAAAGGCTTCAATTGTAGTGGTTTGGTCGTTTCAGTACCCAGTCAGTATA  
CCTCTACGCAAAGATATTTTCATGAAAACCTACAGAGGAACGTACCGGATTACCTGTCTTTCATATTATG  
AAT  
+  
FFFFFFFFFFFFFFFFFFFFFFFF:FFFF:FFF:,FFF:F,FFFFFFFF:FFFFFFFF,FFFFFFFFFFFF:F  
FFFFFFFF:FFFFFFFFFFFFFFFFFFFFFFFF:FFFFFFFFFFFF:FFFFFFFFFFFFFFFFFFFF  
FFF  
@A00721:190:HGJW7DSXY:4:1232:6280:29027\_1:N:0:TCTGCAAG+GCTGCACT  
TTTGCTTCGATGTTGGATGTCAAGAAGGGTTCAGAATGGGATTCTACGTAGTTTATGACTTTGGTGG  
TGGTACTTTCGATACTTCTATCGTCTTACGTTACGGTAATTACTATAGTGTTATTTATTCTGGTGGTG  
ATG  
+  
F,FFFFFFFFFFFFFFFFFFFF:FFFFFFFFFFFFFFFFFFFFFFFFFFFFFFFFFFFFFFFFFFFF  
FFFFFFFFFFFFFFFFFFFFFFFFFFFFFFFFFFFFFFFFFFFFFFFFFFFFFFFFFFFFFFFFFFFF  
FFF  
@A00721:190:HGJW7DSXY:4:1566:10737:18239\_2:N:0:TCTGCAAG+GCTGCACT  
GGTCGTGACGTTGATGAAGCTATAAGAGCGTTCTTATTACGGCGCACTTCTTTACCCGCCACACACA  
ACTTTCAGTTTCACAACTGAAGGAGGAGGTTTCTGTTACTGGAAAACC  
+  
FFFFFFFFFFFFFFFFFFFFFFFF:FFFFFFFFFFFFFFFFFFFFFFFFFFFFFFFFFFFFFFFFFFFF  
FFFFFFFFFFFFFFFFFFFFFFFFFFFFFFFFFFFFFFFFFFFFFFFFFFFFFFFFFFFF  
@A00721:190:HGJW7DSXY:4:1554:20627:10723\_2:N:0:TCTGCAAG+GCTGCACT  
TCAATAATATACGTCTTGAACCTCACTTATGACGATCTAGTGAAATTAACGCGTCCTTTTCTGGAACGT  
AGTTTTACTATTATGAACAAAGTTATCAAAGATAGTGGCATTCAAGGC  
+  
FFF:FFFFFFFFFFFFFFFFFFFFFFFFFFFFFFFFFFFFFFFFFFFFFFFFFFFF,FFFFFFFF:F:FF  
FFFFFFFF:FFFFFFFFFFFFFFFF:FFFFFFFFFFFFFFFFFFFF  
@A00721:190:HGJW7DSXY:4:1155:11523:32127\_1:N:0:TCTGCAAG+GCTGCACT  
TGATTCCGGCCGGTGGTAGCTCATTTCTACCAGGGGCTATTACTCTTGCTGAAACAGCTATTAAAGCT  
GTTGAGCGGTAATTACACCTAAACGAGCTCGATCTGCCATCGCTGAAGGATGTGCACTCTTTTCTGC  
TAC  
+  
FFFFFFFFFFFFFFF:FF:FFFFFFFFFFFFFFFFFFFFFFFFFFFFFFFFFFFFFFFFFFFF  
FFFFFFFFFFFFFFFFFFFFFFFFFFFFFFFFFFFFFFFFFFFFFFFFFFFFFFFFFFFF  
FFF  
@A00721:190:HGJW7DSXY:4:2110:31774:10081\_2:N:0:TCTGCAAG+GCTGCACT  
TCGATTGTATCAACAGTAACATTACTTCTAATAAAGGTCTCTATCAAGCTCGTATTATCGTCGCTGCT  
GGATCTGCGTTACCGTTGAAGGCTAACTCCAAGGTAATTATGAAGAC  
+  
FFFFFFFFFFFFFFFFFFFFFFFFFFFFFFFFFFFFFFFFFFFFFFFFFFFFFFFFFFFF  
FFFFFFF:FFFFFFFFFFFFFFFFFFFF:FFF:FFFFFFFFFFFF,F:FF  
@A00721:190:HGJW7DSXY:4:2161:21992:31000\_1:N:0:TCTGCAAG+GCTGCACT  
GTATGAGGGTGTTTCTAATCGTAACATTAATAATTTCAATCTTCTTAAAAAGAAGATAGAGAGTCATA



CTTTGGGCTATCGTTCAGGTGCATGGGGTTGGATAGCCAATATTGAAGTGGACACCTCTGGTAGTATC  
GAA

+

FFFFFFFFFFFFFFFFFFFFFFFFFFFFFFFFFFFFFFFFFFFFFFFFFFFFFFFFFFFFFFFFFFFFFFFF  
FFFFFFFFFFFFFFFFFFFFFFFFFFFFFFFFFFFFFFFFFFFFFFFFFFFFFFFFFFFFFFFFFFFFFFFF  
FFF

@A00721:190:HGJW7DSXY:4:2615:27534:28729\_1:N:0:TCTGCAAG+GCTGCACT  
CTAAGCATACTACTTTTGCTTTGATTACTCTACCGCCTTACAAGTCTAAGGTTAAAGAGTCGATTAAA  
CAAGTTGTACTTATCAATGATTTTATCGCTGGTTGTTATCTCGAAAAGTCTCTTCTAAAAGGAACGTC  
AGT

+

FFFFFFFF:F::FFFFFFFFFFFFFFFFFFFFFFFFFFFFFFFFFFFFFFFFFFFFFFFFFFFFFFFF  
FFFFFFFFFFFFFFFFFFFFFFFFFFFFFFFFFFFFFFFFFFFFFFFFFFFFFFFFFFFFFFFFFFFFFFFF  
FFF

@A00721:190:HGJW7DSXY:4:1478:12102:25520\_2:N:0:TCTGCAAG+GCTGCACT  
CTAAAATATTTACAAAATCTTACCACTATCTACGAACCTAAAGTTCTGAAGACGTTGCTTGTGCTTC  
CTCCTTTAATGGCACTACCTCGGTACAATCTTACTTGGAACGAAGGCG

+

FFFFFFFFFFFFFFFFFFFFFFFFFFFFFFFFFFFFFFFFFFFFFFFFFFFFFFFFFFFFFFFFFFFFFFFF  
FFFFFFFFFFFFFFFFFFFFFFFFFFFFFFFFFFFFFFFFFFFFFFFFFFFFFFFFFFFFFFFFFFFFFFFF

@A00721:190:HGJW7DSXY:4:1410:5186:15890\_1:N:0:TCTGCAAG+GCTGCACT  
GTTCTGTCTATATTAGGTGAAGCGAAATACGATTTCGAACGTCAACGTTACCGAGTTTCGTTTCGTA  
CCTTGATGCTGACTTTCGTCAATATGATTTGATCTGGTTGCTCAATTCTAAGCGTGTTCCGCTTAGTG  
CGA

+

FFFFFFFFFFFFFF,:FFFFFFFFFFFFFFFFFFFFFFFFFFFFFFFFFFFFFFFFFFFFFFFFFFFF  
FFFFFFFFFFFFFFFFFFFFFFFFFFFFFFFFFFFFFFFFFFFFFFFFFFFFFFFFFFFFFFFFFFFFFFFF  
FFF

@A00721:190:HGJW7DSXY:4:2140:32750:3787\_1:N:0:TCTGCAAG+GCTGCACT  
TACGAACCTTGACTCTACTATACGTGACATACTAAATACTAGATATTTGGATGATCTTGATAAAGAACT  
TCATGAATTTTCAGAGGATGAAAAATTTTCTTCCTTGATTTTAATATAAAGAATCTTTACCAGGACT  
CCT

+

:FFFFFFFF,FFFF:FFFFFFFF::FFFFFF:FFFFFF:FFFFFFFF:FFFFFFFF,FFFFFFFF  
FFFFFFFFFFFFFFFF:FFF:FFFFFFFF:FFFFFFFFFFFFFFFFFFFFFFFFFFFFFFFFFFFFFFFF  
FFF

@A00721:190:HGJW7DSXY:4:1610:14290:20478\_1:N:0:TCTGCAAG+GCTGCACT  
TGATCGTAAGAAGTTTATAAGGAACATATCCATTTGTTGTAATAGGGTCATCAACTTAGAACTCGAAA  
CTCTAAGTGGAATACTGTCTTCCAAGCTTACCTGTATCTTCAATGAAATTGGACTCTTCGATAGGG  
GAC

+

FFFFFFFFFFFFFFFF:FF:FFF:FFFFFFFFFFFFFFFFFFFFFFFFFFFFFFFF:FFFFFFFFFFFFFFFF  
FFFFFFFFFFFFFFFFFFFFFFFFFFFFFFFFFFFFFFFFFFFFFFFFFFFFFFFFFFFFFFFFFFFFFFFF  
FFF

@A00721:190:HGJW7DSXY:4:1445:10601:9862\_1:N:0:TCTGCAAG+GCTGCACT  
GGAAGATCTGTTATCGACGTTTATCGTTTACGAAGTATCACTCCACCGGTGAATGGTTTAAGAATAC  
TATAAATAGAATAGCTATTACTACTAATGGCGTTGGCCTAGTGGATGTTATTAGTGACATCTGGTCAA  
TTT

+

FFFFFFFFFFFFFFFFFFFFFFFFFFFFFFFFFFFFFFFFFFFFFFFFFFFFFFFFFFFFFFFFFFFFFFFF  
FFFFFFFFFFFF,FFFFFF:FFFFFFFFFFFFFFFFFFFFFFFFFFFFFFFFFFFFFFFFFFFFFFFFFFFF  
FFF

@A00721:190:HGJW7DSXY:4:1176:20410:6339\_1:N:0:TCTGCAAG+GCTGCACT  
TGCTCTTATTCTATTATTGATTTTTATGAGATTGATACGTTAACAGAAGATGATGTTAGAGTAGAAT

TCCTGAAGAGTCCTTCCGTAACCAACTTCTTGACAATTTTCTTCAATCCTTCGATAATAGTTAAATCT  
AGG

+

FFFFFFFFFFFF:FFFFFFFF:FFFFFFFFFFFFFFFFFFFFF:F:FFFFFFFFFFFFFFFFFFFF:FFFFFFFFFFFF  
FFFFFFFFFFFFFFFFFFFFFFFFFFFFFFFFFFFFFFFFFFFFFFFFFFFFFFFFFFFFFFFFFFFFFFFFFFFFFFFFFFFFF  
FFF

@A00721:190:HGJW7DSXY:4:1342:4218:12555\_2:N:0:TCTGCAAG+GCTGCACT  
TACACAATTAAGAAATAATCCTACATTGACTGATTATCTAAAGATTGAAGGAAAATTTTATCCTCGTT  
TAACTTACTTAGACTTTTCTACGATACAAATGATAACTTCTAATTTAC

+

FFFFFFFFFFFFFFFFFFFFFFFFFFFFFFFFFFFFFFFFFFFFFFFFFFFFFFFFFFFFFFFFFFFFFFFFFFFFFFFFFFFFF,FFFFFFFF:FFFFFFFFFFFFFFFFFFFF  
FFFFFFFFFFFFFFFFFFFFFFFFFFFFFFFFFFFFFFFFFFFFFFFFFFFFFFFFFFFFFFFFFFFFFFFFFFFFFFFFFFFFF:FFF

@A00721:190:HGJW7DSXY:4:1175:28357:36636\_1:N:0:TCTGCAAG+GCTGCACT  
GGGATGCATGGTGTATCTCCTCAGGAGTCCCGGCATTTGATAATAATGACGAGACTTTTCGTCATAAT  
CGCTGCATATTACGGATTACACGGTACCAGCGCATCTCGTGTGAGCCTCGACCCGATTATATGGTAT  
TAA

+

FFFFFFFFFFFFFFFFFFFFFFFFFFFFFFFFFFFFFFFFFFFFFFFFFFFFFFFFFFFFFFFFFFFFFFFFFFFFFFFFFFFFF  
FFFFFFFFFFFFFFFFFFFFFFFFFFFFFFFFFFFFFFFFFFFFFFFFFFFFFFFFFFFFFFFFFFFFFFFFFFFFFFFFFFFFF:FFFFFFFFFFFFFFFFFFFFFFFFFFFF  
FFF

@A00721:190:HGJW7DSXY:4:2459:2121:10895\_1:N:0:TCTGCAAG+GCTGCACT  
AAATTTATAGAAGATTATTTTGACAGAATCAATAAGAATCATCGATTCTCGATTTCGTAGAGCTTATCT  
AGGTACTCTCATTTACTATGTTGATTTAGTCTACATTTATGCTGATCTAAAATTTGATCTAGATGGA  
TCC

+

FFFFFFFFFFFFF,F,:FFFFFFFFFFFFF:FFFFFFFF,FFFFFFFFFFFFFFFFFFFFFFFFFFFFFFFFFFFFFFFFFFFFF  
FFFFFFFFFFFFFFFFF:FFFFFFFF:FFFFFFFFFFFFFFFFFFFFFFFFFFFFFFFFFFFFFFFFFFFFFFFFFFFFFFFFFFFFF:FFFFFFFFF:FFFFFFFFFFFF  
FFF

@A00721:190:HGJW7DSXY:4:1638:24261:30138\_1:N:0:TCTGCAAG+GCTGCACT  
TTCTAGAATTCCTAATTATAATATTCAACCTCAAAAGTTACGTGTTTACAGTAACGAGATCACACATT  
TTGAGAACTAACTATGTTATGTTCTCTGATCATTTTGACAATCTCTTCTTATAATAATAATAATA  
ATA

+

FF,FFFFFFFFFFFFFFFFFFFFFFFFFFFFFFFFFFFFFFFFFFFFFFFFFFFFFFFFFFFFFFFFFFFFFFFFFFFFFFFFFFFFF  
FFFFFFFFFFFFFFFFFFFFFFFFFFFFFFFFFFFFFFFFFFFFFFFFFFFFFFFFFFFFFFFFFFFFFFFFFFFFFFFFFFFFF  
FFF

@A00721:190:HGJW7DSXY:4:1409:6677:31469\_2:N:0:TCTGCAAG+GCTGCACT  
CAAATAGTGGAAGGCTCCAGTCAACACTAGTTCGAGTGCTGCTTTGGATTACGATGACGTGAGAATA  
GGTGAAGGGATAGTTTTTACCTCGACCAACATTAAGGCGGCGGCGACT

+

FFFFFFFFFFFFFFFFFFFFFFFFFFFFFFFFFFFFFFFFFFFFFFFFFFFFFFFFFFFFFFFFFFFFFFFFFFFFFFFFFFFFF:FFFFF:FFFFFFFFFFFF  
FFFFFFFFFFFFFFFFFFFFFFFFFFFF:FFFFFFFFFFFFFFFFFFFFFFFFFFFFFFFFFFFFF

@A00721:190:HGJW7DSXY:4:1636:16441:11553\_2:N:0:TCTGCAAG+GCTGCACT  
CTTCACCCAAAATGAAGGACACTTCGAAACTGAATAATGATGCACTACAAACAAGTATCGCTAATCAT  
CTGAAAAAGGCTCTAAAGGACACTATACAATATCCAGACGACGACGAA

+

FFFFFFF:FF:FFFFFFFFFFFF:FFFFFFFFF:FFFFFFFFFFFFFFFFF:FFFFFFFFFFFFFFFFF:FF:FFFFFFF  
FFFFFFFFFFFF:FFFFFFFFFFFFFFFFFFFFFFFFFFFFF:FFFFFFFFFFFFFFFFF:

@A00721:190:HGJW7DSXY:4:2431:32759:5682\_2:N:0:TCTGCAAG+GCTGCACT  
CAGCACCACATTTTGGTCAAGTCAATCCGTTGAGAAAATTTCTTAGAGGATATTCGCCATTGTGGTAC  
GAATTGGTCCAACATTTACCACCAAATTTCTTTTGATACAACCTCTAGCC

+

FFFFFFFFFFFFFFFFFFFFFFFFFFFFFFFFFFFFFFFFFFFFFFFFFFFFFFFFFFFFFFFFFFFFFFFFFFFFFFFFFFFFF:FFFFFFFFFFFFFFFFFFFFFFFFFFFFF  
FFFFFFFFFFFF,FFFFFFFFFFFFF:FFFFFFFFFFFFFFFFFFFFFFFFFFFFF

$+$ 

+

+

+

+

+

+

+

@A00721:190:HGJW7DSXY:4:2677:25301:30029\_1:N:0:TCTGCAAG+GCTGCACT  
TTCTTATTCTTTTATTCTTTAACTGTGTATGAGGAGGATTTATAATGCTTTTCGATAGTGATTGTTA

TCAATTTAAATACATTACTGTTTTCAAATCATCTTTACTCACAGACTCCGAAAATGGTTTCAAATGAGG  
TCA

+

FFF:FFFFFFFFFFFFFFFFFFFFFFFFFFFFFFFF:FFFFFFFF:F:FFFFFFFFFFFFFFFFFFFF  
FFFFFFFFFFFFFFFF:F:,FFFFFFFFFFFFFFFFFFFFFFFFFFFFFFFF:FFFFFF,FFFFFFFFFFFF  
FFF

@A00721:190:HGJW7DSXY:4:2677:25301:30029\_2:N:0:TCTGCAAG+GCTGCACT  
TATTAACGAACATTATCCGATTCTTCGAGGGTATCACTACCACTGATCTGCCGACTTTAGTCAAGG  
AACTTCAATTCCTTCGATGTTTATATTTTCTATAAGGGAAAATAGCA

+

F:FFF:FFF:F,FFFFFF::FFFFFFFF:FFFFFFFFFFFFFFFFFFFFFFFFFFFFFFFF:FFFFFFFF  
FFFFFFFFFFFFFFFFFFFFFFFFFFFFFFFFFFFFFFFFFFFFFFFFFFFFFFFF:FFFFFF

@A00721:190:HGJW7DSXY:4:2252:21694:25097\_2:N:0:TCTGCAAG+GCTGCACT  
TTCGACAAATTTAGAACTTTATTTCAGAACTCTCTCCGATCACCTTGGTGTGATCTCCCGGAGGATC  
TTTTCAATAAGATGTATGATGATAATCTACTATTTTTAAATAGTGATA

+

FFFFFFFFFFFFFFFFFFFFFFFF:FFFFFFFF:FFFFFFFFFFFFFFFFFFFFFFFFFFFFFFFFFFFFFFFF  
FFFFFFFFFFFFFFFFFFFFFFFFFFFFFFFFFFFFFFFFFFFFFFFFFFFFFFFFFFFFFFFF

@A00721:190:HGJW7DSXY:4:2473:21368:19961\_1:N:0:TCTGCAAG+GCTGCACT  
CTTTATCAAAGATTTGGCTTGGTCTATTTACCGCAAAAAGTTGGAAGAGGTCTATGATATTTATTTTA  
CTTATACTTTAAATAGCACCGATTATAACTTGACTGTTGATAATATTACAATAGCTCTTCTCAGAAG  
ATT

+

FFFF,FFFFFF:FFFFFFFFFFFFFFFFFFFFFFFF:FFFFFFFFFFFFFFFFFFFFFFFFFFFFFFFF  
FFFFFFFFFFFFFFFF,FFFFFFFFFFFFFFFFFFFFFFFFFFFFFFFFFFFFFFFFFFFFFFFFFFFFFFFF  
FFF

@A00721:190:HGJW7DSXY:4:1616:17318:31109\_2:N:0:TCTGCAAG+GCTGCACT  
GGTGAACACGTCGGTAGCATTGATTTACTTTTACCGTTAGAACTGAAAAAGATTCTTTTCGAAAAGAA  
ACCTATAAGTTACAAACGATTCTTCGACTATATTAAGAAATAAAAAT

+

FFFFF:FFFFFFFFFFFF:FFFFFFFFFFFFFFFFFFFFFFFFFFFFFFFFFFFFFFFFFFFFFFFF:FFFFF  
FF:FFFFF:FFFFFFFFFFFFFFFFFFFFFFFFFFFFFFFFFFFFFFFFFFFFFFFFFFFFFFFF

@A00721:190:HGJW7DSXY:4:1460:7374:6464\_2:N:0:TCTGCAAG+GCTGCACT  
CTTTACATTTTTAATGGTATGGTATAATGTGTCTTACAAATAGAACCTTCACTCTCGGTAATGAGAGT  
GTATTCCTTAATATTCTAGTAACCGCTATGTGGGCATTACTAGGATTT

+

F:FFFFFFFFFFFFFFFFFFFFFFFFFFFFFFFF:FFFFFFFFFFFFFFFFFFFFFFFFFFFFFFFFFFFF  
FFFFFF,FFFFFFFFFFFFFFFFFFFFFFFF:FFFFFFFFF:FFFFFFFFF

@A00721:190:HGJW7DSXY:4:1510:10972:29105\_2:N:0:TCTGCAAG+GCTGCACT  
TTTAAATGCTAGGAAAATTTAGAAAACTCCATTGTATAGTTCAAGGAGTACTTAATTCAATAGCTT  
TAGTATTATTTACTATCGCCTTTATTGAAAATTGTATAAGAGTTAATT

+

FFFFFFFFFFFFFFFFFFFFFFFFFFFFFFFFFFFFFFFFFFFFFFFFFFFFFFFFFFFFFFFFFFFFFFFF  
FFFFFFFFFFFFFFFFFFFFFFFFFFFFFFFFFFFFFFFFFFFFFFFFFFFFFFFFFFFFFFFF

@A00721:190:HGJW7DSXY:4:1361:28926:6089\_1:N:0:TCTGCAAG+GCTGCACT  
AGAATGAACGCGCTTCCCGGAAGAAACGATCTAATTACAGATTATTTAGAGTAGTCAAAAGTTTGT  
ATAAATTTATATGATTTTCTATATATATACCACATATATATATATAAAATCCTATAAATTTGTACA

+

F,FFF:F,FF,FF,,F,:F:,,FF,FFF,:F,,,F,F,F:F,F,,FFFFFFFF:FF:FF,FFF:,,F,F  
F:F:,:FFFFFF:FF,F,FFFFFF:FFFFFF:FF::F:FFFFFF:FFFFFFFF,FFF,F,FF:FFFFFF

@A00721:190:HGJW7DSXY:4:1258:1334:25254\_1:N:0:TCTGCAAG+GCTGCACT  
CTCCCCAAACATAACATAACCTACCATGACCAATCATCGCTCCAACGGCACGCCAGACGTAG  
GGTCAAACCTACTACCGCCTGTCGGCAGATCGGCACCACTGGTCTCTACGTTCAAGGACCCGCTGTGC  
AGA

+  
FFFFFFFFFFFFFFFF:FFFFFFFFFFFFFFFFFFFFFFFFFFFFFFFFFFFFFFFFFFFFFFFFFFFFFFFFFFFFFFFFFFFFFFFFFFFFFFFF  
FFFFFFFFFFFFFFFFFFFFFFFFFFFFFFFFFFFFFFFFFFFFFFFFFFFFFFFFFFFFFFFFFFFFFFFFFFFFFFFFFFFFFFFFFFFFFFFF  
FFF  
@A00721:190:HGJW7DSXY:4:1633:31819:1110\_2:N:0:TCTGCAAG+GCTGCACT  
AAATCTAGATCTGCACAGAAGAAGGCTGAAGGTCGTTACCGGACGACCACTCAAAGGAAACGGGCTGT  
TGCCCAGAGGAAAGCAGCGACCACCGAGGTCGCTCGTAACATTGACGG  
+  
FFF,FFF,FF:FFFFFFFFFF,FF:FFFFFFFFFFFFFFFF, :F:F,FFF:FFFFFFFFFFFFFFFF:FFFFFFF  
F,:FFF,FFFF,FFFF:FFFFFFF,FFFFFF,FFF:FFFFFFF,FFF:  
@A00721:190:HGJW7DSXY:4:2108:28854:2456\_2:N:0:TCTGCAAG+GCTGCACT  
TCTGTGGGAAGTGAAGCAGTACCTCAGTCAAAAGTCACATTCACCACTCCCATACCAATCAATAGATC  
GGAAGAGCGTCGTGTAGGGAAAGAGTGTAGTGGGGCGGGGGGGGGGGGG  
+  
FFFFFFFFFFFFFFFFFFFFFFFFFFFFFFFFFFFFFFFFFFFFFFFFFFFFFFFFFFFFFFFFFFFFFFFFFFFFFFFF  
FFFFFFFFFFFFFFFFFFFFFFFF:F:F:FFFFFF:FFFF,,,:FF:,FF,,,:  
@A00721:190:HGJW7DSXY:4:1629:16251:32049\_2:N:0:TCTGCAAG+GCTGCACT  
CCCTCCGCTGGCAGCAAGAACTCCCAAGCCAATCAATAGTTCTTCTGACCAGAATGAAAAGGGGTT  
TACCAGGGTAGTCTCTAAGTCTACCAGGAAGAGGGGAAATGTCCCAA  
+  
FFFFFFFFFFFFFFFFFFFFFFFFFFFFFFFFFFFFFFFFFFFFFFFFFFFFFFFFFFFFFFFFFFFFFFFFFFFFFFFF  
FFFF:FFF::FFFFFF:FFFFFFFFFFFFFFFFFFFFFFFF: ,FFFFFFFF  
@A00721:190:HGJW7DSXY:4:2316:12156:17910\_2:N:0:TCTGCAAG+GCTGCACT  
AGGTCCATCAGGACCTAAGAAGGGGAAATTACCCCTAATTCTGAAGGAAGATCTCCACCATCTGGGG  
TTGGGAATAAGAAATCTGCACGGGCCAAAGAGGCCGCTGCTACGAAGT  
+  
FFFFFFFFFFFFFFFFFFFFFFFFFFFFFFFFFFFFFFFFFFFFFFFFFFFFFFFFFFFFFFFFFFFFFFFFFFFFFFFF  
FFFFF,FFFFFF:FFFFFFFFFFFFFFFF:FFFFF:FFFFFFFFFFFFFFFF  
@A00721:190:HGJW7DSXY:4:2375:7346:7639\_1:N:0:TCTGCAAG+GCTGCACT  
GCTTGGGTCATTAAGGGTAGCTGTAAAGTTGCGCCTGCCGACCCCATCTTTGAGACCAAGACTCTCTA  
CAGTAGGTTCTGCTACTATGAGCAAATCTGTTGAATTCGTCACTGAGGACGAAGGTGAGAGGACTT  
TTG  
+  
F:FFFFFFFF:FFFFFFFFFFFFFFFFFFFFFFFFFFFFFFFFFFFFFFFFFFFFFFFFFFFFFFFFFFFFFFFF  
FFFFFFFFFFFFFFFFFFFFFFFFFFFFFFFFFFFFFFFFFFFFFFFFFFFFFFFFFFFFFFFFFFFFFFFFFFFFFFFF  
FFF  
@A00721:190:HGJW7DSXY:4:2375:30572:36965\_1:N:0:TCTGCAAG+GCTGCACT  
CTGAGAGCAGTCGCTGGGGAAAGAGAATTGCGTGGGTTGAAGGCCGACGCTTCGAGCTTGAGTGTGAC  
GAGGCCGGTGACGTTTTTGTCAACGGCGTTTGGAGGATTTATCCGCGCTTAAGTATGGGGCGAAGAT  
CCC  
+  
FFFFFFFFFFFFFFFFFFFFFFFFFFFFFFFFFFFFFFFFFFFFFFFFFFFFFFFFFFFFFFFFFFFFFFFFFFFFFFFF  
FFFFFFFFFFFFFFFFFFFF,FFFFFFFFFFFF,FFFFFFFFFFFFFFFFFFFFFFFFFFFFFFFFFFFFFFFF  
FFF  
@A00721:190:HGJW7DSXY:4:2512:1208:14638\_2:N:0:TCTGCAAG+GCTGCACT  
AGGTTGGCATATTTATGCCGACGATAATAAGCATGTCAACCTTAAGCACCGAGGTAAGCTCGGGACTT  
ACAAGAGAGAGTGTGAGAGAGTCGCTCTCACTATTTTTGCCCAGAATG  
+  
FFFFFFFFFFFFFFFFFFFFFFFFFFFFFFFFFFFFFFFFFFFFFFFFFFFFFFFFFFFFFFFFFFFFFFFFFFFFFFFF  
FFFFFFFFFFFFFFFFFFFFFFFFFFFFFFFFFFFFFFFFFFFFFFFF,FFFFFFFF  
@A00721:190:HGJW7DSXY:4:1105:3459:27712\_1:N:0:TCTGCAAG+GCTGCACT  
GTGACTGGAGTTCAGACGTGTGCTCTTCCGATCTGTTTTTGTATATTCAGTGGTCTGGGAGGCTGC  
TTTCTCCATAATTACAACCTCTCTTTAGAGAGCATTAGAAGGAAGTTGGGCAAATTCACATATGG  
TAG

+  
FFFFFFFFFFFFFFFFFFFFFFFFFFFFFFFFFFFFFFFFFFFFFFFFFFFFFFFFFFFFFFFFFFFFFFFF  
FFFFFFFFFFFFFFFFFFFFFFFFFFFFFFFFFFFFFFFFFFFFFFFFFFFFFFFFFFFFFFFFFFFFFFFF  
FFF  
@A00721:190:HGJW7DSXY:4:1257:1949:21496\_2:N:0:TCTGCAAG+GCTGCACT  
ACTTTTCTTGAAAATTTTTCCTTTCCTCCGTCATTGGGGATTTCGATGTGAGAAGGTGGAAGGTGTCA  
AGGGTCTTCTTCATGCTGATCTTTCAGGACCTAATCACATCATGATTG  
+  
FFFFFFFFFFFFFFFFFFFFFFFFFFFFFFFFFFFFFFFFFFFFFFFFFFFFFFFFFFFFFFFFFFFFFFFF  
FFFFFFFFFFFFFFFFFFFFFFFFFFFFFFFFFFFFFFFFFFFFFFFFFFFFFFFFFFFFFFFFFFFFFFFF  
@A00721:190:HGJW7DSXY:4:1144:8323:12618\_2:N:0:TCTGCAAG+GCTGCACT  
ATCGAGTTGGAGGGAGGAAGTTCTCCGAAATTAAGACGGGGGATTAAGAGTCCAGCTGTAAGTGTCA  
ATTCAGAGAGGGGAGCTCTGAAAAGGAACTTCGTGAGAAGATGAGG  
+  
FFFFFFFFFFFFFFFFFFFFFFFFFFFFFFFFFFFFFFFFFFFFFFFFFFFFFFFFFFFFFFFFFFFFFFFF  
FFFFFFFFFFFFFFFFFFFFFFFFFFFFFFFFFFFFFFFFFFFFFFFFFFFFFFFFFFFFFFFFFFFFFFFF  
@A00721:190:HGJW7DSXY:4:1370:25102:24549\_2:N:0:TCTGCAAG+GCTGCACT  
GGAGGAGTTTGAGGAAGGCTCTAGAGAAGATCTCACCACCTGGAGAAGGCAAGTGGAGAGTCCAGAAG  
TTGATGAAGAAGGATTATTTGAAGCAGGGGTTACCACTTCCTAAGGTG  
+  
FFFFFFFFFFFFFFFFFFFFFFFFFFFFFFFFFFFFFFFFFFFFFFFFFFFFFFFFFFFFFFFFFFFFFFFF  
FFFFFFFFFFFFFFFFFFFFFFFFFFFFFFFFFFFFFFFFFFFFFFFFFFFFFFFFFFFFFFFFFFFFFFFF  
@A00721:190:HGJW7DSXY:4:1426:4001:1219\_2:N:0:TCTGCAAG+GCTGCACT  
TTCTTTGGAGTTTGTAGATAATCTTTTGAGAAGGGGTCATAGAGCCAGCAAGAGAAGCTTATATGCTGG  
TTTAAGTGATGATTATCACTCCTTGAGAAGACAAGCCACATTAAGATA  
+  
FFFFF:FFFFFFFFFFFFFFFFFFFFFFFFFFFFFFFFFFFFFFFFFFFFFFFFFFFFFFFFFFFFFFFF  
FFFFFFFFFFFFFFFFFFFFFFFFFFFFFFFFFFFFFFFFFFFFFFFFFFFFFFFFFFFFFFFFFFFFFFFF  
@A00721:190:HGJW7DSXY:4:1376:25373:23265\_2:N:0:TCTGCAAG+GCTGCACT  
CTTGGGGTTTGAATGTCATTAGTGCCTTACGATTGAAAGAGGTCCTTTTGAGTATCGACAGATCTTT  
CGATCTTGAGGACGTACATTTAACGTGGCAGAATTCGGTAACCTACCA  
+  
FFFFFFFFFFFFFFFFFFFFFFFFFFFFFFFFFFFFFFFFFFFFFFFFFFFFFFFFFFFFFFFFFFFFFFFF  
FFFFFFFFFFFFFFFFFFFFFFFFFFFFFFFFFFFFFFFFFFFFFFFFFFFFFFFFFFFFFFFFFFFFFFFF  
@A00721:190:HGJW7DSXY:4:1150:30346:4100\_2:N:0:TCTGCAAG+GCTGCACT  
GGGAAGTTGTGGGATTTAACTTTGACTCAACTACTCCGATCAGATCCGGATGTTTGATTGGTATGGA  
CTACTCGACTTTTGATCTGGAGTTGTCTAGGGTCATGGCAGATACTAC  
+  
FFFFF,:F:FFFFFFFFFFFFFFFFFFFFFFFFFFFFFFFFFFFFFFFFFFFFFFFFFFFFFFFFFFFF  
FFFFFFFFFFFFFFFFFFFFFFFFFFFFFFFFFFFFFFFFFFFFFFFFFFFFFFFFFFFFFFFFFFFFFFFF  
@A00721:190:HGJW7DSXY:4:2259:24966:22811\_2:N:0:TCTGCAAG+GCTGCACT  
AAAATATGCAGGTCAAAGATTCTGTAGCTCTGAGGGCGGTTGAGGGAGCCGTTTTGGCCGACTTTAAC  
TATTCTAAGAGTCTTTATGATTCAAAACCTATCGTTGTCGTACCTTAC  
+  
FFFFFFFFFFFFFFFFFFFFFFFFFFFFFFFFFFFFFFFFFFFFFFFFFFFFFFFFFFFFFFFFFFFFFFFF  
FFFFFFFFFFFFFFFFFFFFFFFFFFFFFFFFFFFFFFFFFFFFFFFFFFFFFFFFFFFFFFFFFFFFFFFF  
@A00721:190:HGJW7DSXY:4:1471:6316:36699\_2:N:0:TCTGCAAG+GCTGCACT  
GCGGCTTATTGTCGCGCAGTTTCCAGAATTGCGGTTGAAGTTCACCCATTCTATCTTGAATGCTCAGC  
CCGTCGCAGCCATATCGAGACTATGTTATAATCACTTGTTAAAGTACA  
+  
FF:FF:FFFFFFFFFFFFFFFFFFFFFFFFFFFFFFFFFFFFFFFFFFFFFFFFFFFFFFFFFFFFFFFF  
FFFFFFFFFFFFFFFFFFFFFFFFFFFFFFFFFFFFFFFFFFFFFFFFFFFFFFFFFFFFFFFFFFFFFFFF  
@A00721:190:HGJW7DSXY:4:1437:32642:22294\_2:N:0:TCTGCAAG+GCTGCACT  
TTAGATATTATTGATATTGGAGGCGATATTCGTTTTCATATCCAAACTCCTTGAATGGAGTACATAT

$+$ 

@A00721:190:HGJW7DSXY:4:2572:25093:15828\_1:N:0:TCTGCAAG+GCTGCACT  
ACGTACCTACTAACGAGAAGTCATGAAAGCTATCGGAGTGAAGCAAAATGTTTCGTTCTGTTACAAGA  
ACGCTTTGGATTGTGACCATAAAGCCTCAGTTGCGATAGCTGTAGAGGTATACGATATCTCTCTTGAT  
GA

+

,

+

@A00721:190:HGJW7DSXY:4:1528:13069:29794\_2:N:0:TCTGCAAG+GCTGCACT  
GTTATTCTACAACAAAGATAAGATTTTATCTTTCTTCAAACACCCTGTTTTCTTAAGGGCGGACAA  
TTGTTCCATTGTGAACCTCTTGGGGACTAGATTGAGCATTAAATGAGTTC

+

@A00721:190:HGJW7DSXY:4:1149:8793:7106\_1:N:0:TCTGCAAG+GCTGCACT  
TCTAGTGGACAATT CAGAATACCTATTTCCGTACCAAGAGCCACTGCCAATCTCATCGCTATACGCAT  
ACCTGATTGGAAGAAGCGAGGTTCTGTTCTCAATAAAAAATTTTTCTCAAGAGATTATGGTTGATAAAG  
TTT

+

@A00721:190:HGJW7DSXY:4:1418:27462:13917\_1:N:0:TCTGCAAG+GCTGCACT  
TTCAGTACGTCATGGGGATCACTTCTTCGGTCAATGACAAAACCTTCGAATATGTTACGACATGGCTT  
CGTAACAACAGTGCGAGGATTGTCATCTCGGGGAAAGTGATTACCAAGATGTTCATATAGATACGAG  
ATA

+

@A00721:190:HGJW7DSXY:4:1160:6234:25817\_2:N:0:TCTGCAAG+GCTGCACT  
CAGCGATCTTACTCGTTATCGGAGCTAAGAAGAAGACTTTGGGTACACGTTATGCTCGAACTTAAC  
GTTAGTACCGGAGGTGATCTCTCTGCTTCTGCGTTACTGAGAGAAAAG

+

@A00721:190:HGJW7DSXY:4:1204:8458:21684\_1:N:0:TCTGCAAG+GCTGCACT  
CCTACGGTGACTTTATGGACAAGATGCAAGTTCCTGGGAAATACTTGTTCCCTTTTATAGGTTTAGTA  
GGTGATCTTGACGTCGATTCTTTGTATAGGGAGTGTGAGAAGACAACGAATCTTGAAACTACGGTCCT  
TAT

+

[illegible]

@A00721:190:HGJW7DSXY:4:2140:18982:11725\_1:N:0:TCTGCAAG+GCTGCACT  
GAACCGGTCTCTAAATCTTTTGAGATTGAGAAGATTGAAGAACACGTCAAGAAGTCGCTCGGCGTTGT  
TCTTGAAAACCAAGTTAAGAAGGAGGCTGATCATGGAGTCTTTGTACCTTCTGTCAAACCTTCGAGGTT  
CAG

+

FFFFFFFFFFFFFFFFFFFFFFFFFFFFFFFFFFFFFFFFFFFFFFFFFFFFFFFFFFFFFFFFFFFFFFFF  
FFFFFFFFFFFFFFFFFFFFFFFFFFFFFFFFFFFFFFFFFFFFFFFFFFFFFFFFFFFFFFFFFFFFFFFF  
FFF

@A00721:190:HGJW7DSXY:4:2649:7645:17832\_2:N:0:TCTGCAAG+GCTGCACT  
GATCCCGGATGTGGATTGAAGGCTGGCTCTAAGGGAGACTCCTTCTTTTGAATGTTGTAAAGAATTG  
GGTTGAGAAGTGTGCTTTACAAGGAGAGATCGGAAGAGCGTCGTGTAG

+

FFFF:FFFFFFFF:F,FF:F::,F:FFFF:,::F,F:F,FFF,FFF,:F:FFF:,FFF::FFF:F,  
:F,,,F:FF:,FFFF:FFFFF,F:FFFF,FFF:FF,,FFF:FFFF,  
@A00721:190:HGJW7DSXY:4:2319:8757:12305\_2:N:0:TCTGCAAG+GCTGCACT  
TAAAGAAAAATTTTCGAATAAACTAATGAGAGGTATAGGCTTAGTCAAGTCTGTACTTACATTCTTTA  
CGCCAGATTCTTCATGGGGCGACGCTGTTTCTTCTTGGTATTTCTGAAA

+

FFF:FFFFFFFFFFFFFFFFFFFFFFFFFFFFFFFFFFFFFFFFFFFFFFFFFFFFFFFFFFFFFFFFFFFF  
:FFFFFFFFFFFFFF:FFFF:FFFFFFFFFFFFFFFFFFFF,FFFFFFFFFFFF  
@A00721:190:HGJW7DSXY:4:1578:24279:19366\_1:N:0:TCTGCAAG+GCTGCACT  
TTTCTCTGGTAAGGGAATTATTAATCATTCTTCTCACTCTTGACGAGAATTATTACTGTTTTCTCT  
ACCCATAACTTCTTTTTCAAAAATGCGGATGGGTCTACTGATGTTTTCTACAGAGTGCAGTCGTTTC  
AAC

+

FFFFFFFFFFFFFFFFFFFFFFFFFFFFFFFFFFFFFFFFFFFFFFFFFFFFFFFFFFFFFFFFFFFFFFFF  
FFFFFFFFFFFFFFFFFFFFFFFFFFFFFFFFFFFFFFFFFFFFFFFFFFFFFFFFFFFFFFFFFFFFFFFF  
FFF

@A00721:190:HGJW7DSXY:4:1522:30843:36151\_1:N:0:TCTGCAAG+GCTGCACT  
AATAATTGGTGATGAAAATACGTATGTCGGTGGGGTTCTCAAGGCTCTCATCGCCACTGGGATTCTAA  
GGGGTTCCATAAGATATTATCTGACATTGTGGTTCAATGATCAGGATTCTTCTTTTGGTCCTTACGTC  
TTA

+

FFFFFFFFFFFFFFFFFFFFFFFFFFFFFFFFFFFFFFFFFFFFFFFFFFFFFFFFFFFFFFFFFFFFFFFF  
FFFFFFFFFFFFFFFFFFFFFFFFFFFFFFFFFFFFFFFFFFFFFFFFFFFFFFFFFFFFFFFFFFFFFFFF  
FFF

@A00721:190:HGJW7DSXY:4:2136:17598:12023\_1:N:0:TCTGCAAG+GCTGCACT  
TCTTGTACGATTCTTAAAAGAAGTTTATTAACCTTCAGAGTCTCTTGAAGTCCAGGTAGCTAATG  
TTCTTGCAATAGCCACAGACTTTCTGGGAAAAGAGACCTCTGTTGGTAGAGGAGTTGAGAGAATTACT  
CAG

+

FFFF:FFFFFFFFFFFFFFFFFFFFFFFFFFFFFFFFFFFFFFFFFFFFFFFFFFFFFFFFFFFFFFFFFFFF  
FFFFFFFFFFFFFFFFFFFFFFFFFFFFFFFFFFFFFFFFFFFFFFFFFFFFFFFFFFFFFFFFFFFFFFFF  
FFF

@A00721:190:HGJW7DSXY:4:2173:24632:24549\_2:N:0:TCTGCAAG+GCTGCACT  
ACAACGAGTTAGGGAGTGGCTAGGTTTTAAAAGATCCTTGCACAAGCAATACCTTCCACTGAGTTCA  
TCACCCAGAGTTTCGACGTCGCGGAAAACGATGAAGATTTCCACACTG

+

FFFFFFFFFFFFFF:FFFFFFFFFFFFFFFFFFFF:FFFFFFFFFFFFFFFFFFFF:FFFFFFFF:FFFFFFFFFFFFFFF  
FFFFFFFFFFFFFFFFFFFFFFFFFFFFFFFFFFFFFFFFFFFFFFFFFFFFFFFFFFFFFFFFFFFFFFFF  
@A00721:190:HGJW7DSXY:4:2216:23692:25520\_2:N:0:TCTGCAAG+GCTGCACT  
TCTGATGCTGAATTTGAGGAAAATTTTTCGGAAGTTTTTGGTATAAATCCTGATGGCTCAGTACAGGG  
AGGAGGTAATAGTTATAAACCTTCTTTTATCATTGCAACAGGACTTT

+



FFFFF:FFFFFF,FFFFFFFFF:FFF:FFFFFFFFF,FFFFF:FFFFFFFFFFFFFFFFF,::FFF  
FFFFFFFFFFFFFFFFFFFFF:FFFFFFFFF,FFFFFFFFF:FFFFFFFFF  
@A00721:190:HGJW7DSXY:4:1317:30698:28260\_2:N:0:TCTGCAAG+GCTGCACT  
ATCTGGGATCATAGGTATGTGTACGCTACACTCGAAATATGGGCCCTCATAAGGAAGTATAGTTGGC  
GTCTTGTCTGTTGACGTCATTACAGTCTGGAAGTTAGATCATTTGTTCA  
+  
FFFFFFFFFFFFFFFFFFFFFFFFFFFFFFFFFFFFFFFFFFFFFFFFFFFFFFFFFFFFFFFFFFFFFFFF  
FFFFFFFFFFFFFFFFFFFFFFFFFFFFFFFFFFFFFFFFFFFFFFFF,FF:FFFFFF,F  
@A00721:190:HGJW7DSXY:4:1317:11243:23782\_1:N:0:TCTGCAAG+GCTGCACT  
TTTAGATAAATTCTTTCCGGGCTCAATGACCTTTGCTATGTACGTGGATCTAATGCTTGGTGATCTGA  
ATCTGACCATCGCAAAGAAGACTTTATTAGTTTCATGAAGTTCTTACACTTCTCGCGACTAATGTCAGC  
TTC  
+  
FFFFFFFFFFFFF:FFFFFFFFF:FFFFFFFFF:FFFFFFFFFFFFF:FFFFFFFFFFFFFFFFF:FFFFFF:FF  
FFFFFFFFFFFFFFFFFFFFFFFFFFFFFFFFFFFFFFFFFFFFFFFFFFFFFFFFFFFFFFFFFFFFFFFF  
FFF  
@A00721:190:HGJW7DSXY:4:1678:14669:32503\_2:N:0:TCTGCAAG+GCTGCACT  
CCAAATTTAGCACTTTTTGAATATGACAGAAGCTCGCCATATCAGATTAGAGACATGCCAGTTAGAGT  
TCTTCTAACCAAGACTGATGGTGAGATTCTTTTACCTTTTGAGGTCC  
+  
FFF:FFFFFFFFFFFFFFFFFFFFFFFFFFFFFFFFFFFFFFFFFFFFFFFFFFFFFFFFFFFFFFFFFFFF  
FFFFFFFFFFFFFFFFFFFFFFFFFFFFFFFFFFFFFFFFFFFFFFFFFFFFFFFFFFFFFFFFFFFF  
@A00721:190:HGJW7DSXY:4:2665:25825:33880\_2:N:0:TCTGCAAG+GCTGCACT  
CCTAGTGTCTTTTCTAGAGTCCAAGGACGTTTCCGTCGGAGGATGACAGGTGGGAGACCGCTCAATAA  
CACTCTATTGAATCCCTTTTCCACGATGAAAGCTCTTTATGAGGTGCT  
+  
FFFFFFFFFFFFFFFFFFFFFFFFFFFFFFFFFFFFFFFFFFFFFFFFFFFFFFFFFFFFFFFFFFFFFFFF  
FFFFFFFFFFFFFFFFFFFFFFFFFFFFFFFFFFFFFFFFFFFFFFFFFFFFFFFFFFFFFFFFFFFF  
@A00721:190:HGJW7DSXY:4:2671:28980:4993\_1:N:0:TCTGCAAG+GCTGCACT  
GATATCGCCTCTGTCTTTCTCCTTTAATCGTGAGGTTACGAGAGTTTCGTACTTGGGTTTATCGGTT  
GTATTTTGATAAATTTGTTGGAATCGATAATGATACTGACGAAGGTTCTATTACCACCCTTGTCATTG  
ATA  
+  
FFFFFFFFFFFFFFFFF,F:FFFFFF:FFFFFFFFFFFFFFFFF:FFFF:FFFFFFFF:FFFFFFFFFFFFFFFF  
FFFFFFFFFFFFFFFFF:FFFFFFFFFFFFFFFFFFFFFFFFFFFFFFFFFFFFFFFFFFFFFFFFFFFFFFFF  
FFF  
@A00721:190:HGJW7DSXY:4:2443:15501:5102\_1:N:0:TCTGCAAG+GCTGCACT  
GTCTAGCCGCTGAGATTCTGCTTACCTATTTACAATCTGTAGAGAGAGAGGTTAATCAGAATTTGAGT  
GATAACGATTTAGTACTGGGAAATGGTGGTAGTCAGTTTACTACTTTTCTTCCCTCCCTTTTTCGA  
TTG  
+  
FFFFFFFFFFFFFFFFFFFFFFFFFFFFFFFFFFFFFFFFFFFFFFFFFFFFFFFFFFFFFFFFFFFF:FFFFFF  
FFFFFFFFFFFFFFFFF:FFFFFFFFFFFFFFFFF,FF:FFFFFFFFFFFFFFFFFFFFFFFFFFFFF::FFFF  
FFF  
@A00721:190:HGJW7DSXY:4:2268:27019:19820\_2:N:0:TCTGCAAG+GCTGCACT  
AGGTTTTCTTTTATGGGACTCTTGTGTGACTTATGAAGGAGGTATTACTTCGGAAGTTCTTAATGT  
AGGTCTCCTAGTACTTAAGGTTTATGTTTCGTTTCAGCTGGATGGA  
+  
FFFFFFFFF:FFFFFFFFFFFFFFFFFFFFFFFFFFFFFFFFFFFFFFFFFFFFFFFFFFFFFFFFFFFFF  
:FFFFFFFFFFFFFFFFFFFFF:FFFFFFFFFFFFFFFFFFFFFFFFFFFFF  
@A00721:190:HGJW7DSXY:4:2425:22435:29136\_2:N:0:TCTGCAAG+GCTGCACT  
TGGACTTGGAAGAGATTAAACATAAAATCCAGCGATTCTATTATGTCGCTAAAGCCTGTCCAGTTGT  
CGATGATGTTCCGGGCTGTGGGGATTAACTCCCTCGTGAAACTTACGA  
+

@A00721:190:HGJW7DSXY:4:1533:27923:3161\_1:N:0:TCTGCAAG+GCTGCACT  
CACAAGGATTACTAAGTCTGAGATCTGCCACTTCTAATTTTAGGAAACGTCGCGAAAAGAAAGTTCAT  
GAGGATGTCTTGTCGAAAAATATCGCCGGGAACCTCTAATAGAGGATCCTGATGACATTATTTCAAC  
GGA

+

[illegible]

@A00721:190:HGJW7DSXY:4:1101:4020:8891\_2:N:0:TCTGCAAG+GCTGCACT  
CTACCACAGAAACCGTCTCAGGAAGTGTCTCCACTGATTCGGAATTAGAGAAAGACGACCTTCTTG  
GGGACTGAGACCTCTGAATTTTCAGGGTGCCCTGATGAGGACGTTGAA

+

```

FFFFFFFFFFFFFFFFFFFFFFFFFFFFFFFFFFFFFFFFFFFFFFFF: :FFFFFFFFFFFFFFFFFFFFFFFFFFFF,FF,,F,F
FFFFFFFFFFFFFFFFFFFFFFFFFFFFFFFFFFFFFFFFFFFFFFFF: FFF

```

@A00721:190:HGJW7DSXY:4:2201:28519:23641\_1:N:0:TCTGCAAG+GCTGCACT  
ACTCTGAGACTTCTAAGAGTGTTCAAAAAGACCAGAAACGTAACAAGAAGAATAAAGGTAGGAAGGGG  
AGAAAACAGAACAAAGCGAGCGGTTGAAGAGAAAACCTGATATGGTTGCGGCTGATCGTACCCCAATTCC  
TGC

+

[illegible]

@A00721:190:HGJW7DSXY:4:1642:18448:32440\_2:N:0:TCTGCAAG+GCTGCACT  
CTCGGCGATACCACTGATCTTCCAGAGTTACGTAGTGGTCGTTCTTTTGGTGATTTTATCAAAGAGAA  
AGTTTCTGCTAGTCGCGACGATAGTATTTATCGGAGTGATATTAACAA

+

[illegible]

@A00721:190:HGJW7DSXY:4:2628:10673:9330\_2:N:0:TCTGCAAG+GCTGCACT  
CACTTACAAGAGTGTGGAAGTACCGCAACATGGATCAGTTTTCTAAAAAGCTATTAATAGCAGTTGCG  
GGGCTATAATACCGCCTCCAGATTACTCTAAACTGAATCCACTCTCTT

 $+$ 

```
FFFFFFFFFFFFFFFFFFFFFFFFFFFFFFFFFFFFFFFFFFFFF:FFFFFFF:F,FFFF  
FFFFFFFFFFFFFFFFFFFFFFFFFFFFFFFFFFFF,FFFFFFFFFFFFFFFFF
```

@A00721:190:HGJW7DSXY:4:2439:23818:10895\_2:N:0:TCTGCAAG+GCTGCACT  
TATGGAAGTGTGAATGTCCTACCACTGAACAATTTGTTAGGGCTTCTCTAAAGAACAGCAACTATC  
AACAAGAATTAGTTATTGAAAGACTTGACCCTCACGTCTCACATTATC

+

```
F,FFFFFFFF:F,FFF,,::FF:,,,FFFF,,FFF,,FFFF,,FF,FFFFFF:FFFFFF,F:FFFF,,FF
:F,F,,,F:FF,FFF,F:FFF,,FFF,FFFFFFFFFFFFFFFFFFFF,F:FF,
```

@A00721:190:HGJW7DSXY:4:2542:25907:1924\_2:N:0:TCTGCAAG+GCTGCACT  
AAAGAGGGTTTGGAAATTACGGAACCTTCTCGTTCTTCATGAAGATCTTCGAGTGTTTTATAGTGA  
GTTATTCTTGCGAAGGTTCAAGTCGATTGATTTTGTTGACTACGATCT

+

```
FFF::FFFFFFFFFFFFFFFFFFFFFFFFFFFFFFFFFFFFFFFFFFFFFFFFFFFFFFFFFFFFF:FFFFFFFFFFFFFF:FFFFFFFFFFFFFFFFFFFFFFFFFFFF  
FFFFFFFFFFFF;FFFF,FFFFFF:FFFFFFFFFFFFFF;FF,FFFF::FFFF
```

@A00721:190:HGJW7DSXY:4:2354:26087:13823\_1:N:0:TCTGCAAG+GCTGCACT  
AGAAGTTCCTTCGCAGTTGAATCTCCACCAGGTGGAGGGAAGACCACTGAACTTATAGCGACTTTTGTG  
GAATTTTTCGAAAAGGTCTTGAAGTACGTATTGTCACTGCTAATCGTAATTCGCGAGAAGAGATAGT  
GAC

+

[illegible]

FFFFFFFFFFFFFFFFFFFFFFFFFFFFFFFFFFFFFFFFFFFFFFFFFFFFFFFFFFFFFFFFFFFFFFFF  
FFF  
@A00721:190:HGJW7DSXY:4:2557:21097:5024\_2:N:0:TCTGCAAG+GCTGCACT  
CACTTCTAGTTCATCGCGGTATTTGTGAAATTAAGACAGACGTGAAAGTTATGATGAGTGATCGTATT  
AGAACAGCTGATTCTTATTGCATGAACGTCGCTGAGGTCAAACCTGTG  
+  
FFFFFF:FFFFFFFFFFFFFFFFFFFFFFFFFFFFFFFFFFFFFFFFFFFFFFFFFFFFFFFFFFFFFFFF  
FFFFFFFFFFFF,FFFFFFFFFFFFFFFFFFFF:FFFFFFFFFFFFFFFFFFFFFFFF  
@A00721:190:HGJW7DSXY:4:1505:30680:31454\_1:N:0:TCTGCAAG+GCTGCACT  
CGACGAATTATTCATGATTCACGCTGGTCAGACCCTTTTCTTACACATCTACTTAAGGCGGCTTATA  
CCATAGGTTACGGTGATTCCAATCAAATCGGATTCATCAATCGTATTGATCTCCAAGTCGAAACTAC  
TTC  
+  
FFFF,FFFFFFFFFFFFFFFFFFFFFFFFFFFFFFFFFFFFFFFFFFFFFFFFFFFFFFFFFFFFFFFF  
FFFFFFFFFFFFFFFFFFFFFFFFFFFFFFFFFFFFFFFFFFFFFFFFFFFFFFFFFFFFFFFFFFFFFFFF  
FFF  
@A00721:190:HGJW7DSXY:4:2635:16007:16125\_2:N:0:TCTGCAAG+GCTGCACT  
GATGAGTGTCTGTTCTTATCGAAGTCTCAGTTATCGCTGCCCGGCCGACGTTTGTGCGAACTCTCAGA  
GGTTTACGGCAGAAAAATTTCTCCTGCTTGTAAATTCGAGAGAGGACAC  
+  
FFFFFFFFFFFFFFFFFFFFFFFFFFFFFFFFFFFFFFFFFFFFFFFFFFFFFFFFFFFFFFFFFFFFFFFF  
FFFFFFFFFFFFFFFFFFFFFFFFFFFF:F:FFFFFFFF:FF:FFF:FFFF  
@A00721:190:HGJW7DSXY:4:1378:13783:19601\_1:N:0:TCTGCAAG+GCTGCACT  
TTGACGACTTCGAATTTGAGGACGGAGTTAAATATATTACTTTCACTCAAGGTGAAAAGTTTGAAATT  
AACAAAGTCCTTGGAAGAGTAAGGTTAAATGTGAAGATGCTCAGACTATTCATGAAGTTCAAGGTAA  
TA  
+  
FFFFFF:FFFFFFFFFFFFFFFFFFFF:FFFFFFFF:F:FFFFFFFFFFFFFFFFFFFFFFFFFFFFFFFF  
FFFFFFFFFFFFFFFFFFFF:FFFFFFFFFFFFFFFFFFFFFFFFFFFFFFFFFFFFFFFFFFFFFFFF  
FF  
@A00721:190:HGJW7DSXY:4:1117:31919:13839\_2:N:0:TCTGCAAG+GCTGCACT  
TTTTGCATCACAACACATATTACCGTTGCTCTATCACGACGTTGAATCTTTACGATACTTTGTTA  
TCAATGTAAAGTTAAACGATGCTACTTGTGAGAGGATCAATCACAGTA  
+  
FFFFF,FFFF:FFFFFFFFFFFF:FFFFFFFFFFFFFFFFFFFFFFFFFFFFFFFFFFFFFFFFFFFF  
F:FFFFFF:FFFF:F:F:FFF:FFFFFFFFFFFFFFFFFFFF,FF,FFFF  
@A00721:190:HGJW7DSXY:4:1375:19524:14982\_2:N:0:TCTGCAAG+GCTGCACT  
TTAGCACGGGAGGTTGCAGATTCAACCCCTTATATCGAGGCTATCGAGGACGATGAGTATCTTGAAGT  
TGTTGACGACAAGCCTCAAGAGGGTAGAGGACCACCTGGATCTTCTAC  
+  
FFFFFFFFFFFFFFFFFFFFFFFFFFFFFFFFFFFFFFFFFFFFFFFFFFFFFFFFFFFFFFFFFFFFFFFF  
FFFFFFFFFFFFFFFFFFFF:FFFFFF,FFFFFFFFFFFFFFFFFFFFFFFF  
@A00721:190:HGJW7DSXY:4:1340:16486:2581\_1:N:0:TCTGCAAG+GCTGCACT  
CCGATCTCTTAACGTCACTCGGTAATCTTTCAGCCGAATTAAGTACTAATGAGTTCAAGTCGGTTGTC  
GATCGAATTAAGATCAAGGCTAATACCTTTATAGGTAAGAAGCCCCTTGAGCCGCGTAGTCAGCGCGT  
TTA  
+  
FFFFFFFF:F:FFFFFFFFFFFFFFFFFFFFFFFFFFFFFFFFFFFFFFFF:FFFFFFFF:F:FFFFFFFFFFFFFFFF:  
FFFFFFFFFF:FFFFFFFFFFFF,FFFFFFFFFFFFFFFFFFFFFFFFFFFFFFFFFFFFFFFFFFFF  
FFF  
@A00721:190:HGJW7DSXY:4:2440:15736:36855\_1:N:0:TCTGCAAG+GCTGCACT  
CCCGATAGGGTACCGAGTCTCCAAGAGAATATTTATTCTTATGAGGCTCGAACTTCAACGTTTTTCAC  
AACGGAAAGACATATCGCACCCGAAATTTTGGGCAGAATGCTCTTAACGCGGTTCTTGAACGGTGT  
TTG

+  
FFFFFFFF:FFFFFFFF:FFFFFFFFFFFFFFFFFFFFFFFFFFFFFFFFFFFFFFFFFFFFFFFF  
FFFFFFFFFFFFFFFFFFFFFFFFFFFFFFFFFFFFFFFFFFFFFFFFFFFFFFFF:FFFFFFF:FFF:FFFFFFF  
FFF  
@A00721:190:HGJW7DSXY:4:1620:26341:23249\_1:N:0:TCTGCAAG+GCTGCACT  
GATAAAGTTATAGGAGACTCAGTTAACCTGAGAGCTCCTCAATTGATAGATTGGGTCAACAATAGGGA  
CGCTAGTATACTTCGTAAAGTCGACAGCGAAATGGTCAATATTGATAATTGGACCGACTATATGACCT  
ATT  
+  
FFFFFF:FFFFFF, :FFFFFFFFFFFFFFFFFFFFFFFFFFFFFFFFFFFFFFFFFFFFFFFFFFFFFFFF  
FFFFFFFFFFFFFFFFFFFFFFFFFFFFFFFFFFFFFFFFFFFFFFFFFFFFFFFFFFFFFFFFFFFFFFFF  
FFF  
@A00721:190:HGJW7DSXY:4:2144:6343:34115\_2:N:0:TCTGCAAG+GCTGCACT  
AGGGAAGCTAAGGTTAACTTGATGCTTCAGCCTTTTCGAAGCATAACCCCGCACAGAATATCGTTTA  
TCACGCAAAATTTATTAATGCAATTTTCGGACCTATCTTTAAGGTTCT  
+  
FFFFF:FFFFFFFFFFFFFFFFFFFFFFFFFFFFFFFFFFFFFFFFFFFFFFFFFFFFFFFF:FFFFFFF:FFF  
FFFFFFFFFFFFFFFFFFFFFFFF:F:FFF:FFFFFFFFFFFFFFFFFFFFFFFF  
@A00721:190:HGJW7DSXY:4:1534:32696:18787\_2:N:0:TCTGCAAG+GCTGCACT  
CTTTTACCCAACATTTTATGTATACAGAGATGACCAGTGACGATTTCTCCCGAAGCTCTTCTCTCT  
CTTAGGAGGTCATGATGACTACTATAAGGGTGAAATCGATTTTTCGAA  
+  
FFFFFF:FFFFFFFFFFFFFFFF, FF:FFFFFFFFFFFFFFFF:F:FFFFFF:FFFFFFFFFFFFFFF  
:FFFF:FFFFFFFF, FFFF:FFFFFF:FFFFFF:FFFFFF, F:F  
@A00721:190:HGJW7DSXY:4:1263:16839:19194\_1:N:0:TCTGCAAG+GCTGCACT  
TAAAGCCTATGAGATAAAGATGTATTCTTATTTAGGCTTCGATGCTGAATTTCTTGAACCTTGGAGTG  
CCAGTGAATATTTTGTACGCCAGGAGTATCCATAACGATTTGTCAATTAACACCTTGTCAACGA  
CGA  
+  
FFFFFFFFFFFFFFFFFFFFFFFFFFFFFFFFFFFFFFFFFFFFFFFFFFFFFFFFFFFFFFFF  
FFFFFFFFFFFFFFFFFFFFFFFFFFFFFFFFFFFFFFFFFFFFFFFFFFFFFFFFFFFFFFFF:FFF  
FFF  
@A00721:190:HGJW7DSXY:4:1566:5665:34475\_1:N:0:TCTGCAAG+GCTGCACT  
TAACACATTCTTTGGTAATTGTATGATCACTCTTATGATGCTCTCTTTATTACGACCTTCGGAAGT  
TTAGAGCCGTCGCTGTGCGCGGAGACGATTCGATCCTCTTTTCGGACGTACCGGTCCAGGATTATTCA  
GAT  
+  
FFFF:FFFFFFFFFFFFFFFFFFFFFFFFFFFFFFFFFFFFFFFFFFFFFFFFFFFFFFFF:FFFFFFF  
FFFFFFFFFFFFFFFFFFFFFFFFFFFFFFFFFFFFFFFFFFFFFFFFFFFFFFFFFFFFFFFF  
FFF  
@A00721:190:HGJW7DSXY:4:1311:4282:27946\_2:N:0:TCTGCAAG+GCTGCACT  
TGCTCGCGATTTATTCTTTTGTCAATGATTACATCTACTTCGTTCTGATCCTTACAAGATCATCGT  
TAAGTTAGGTAAACCCCTAACCGATGTTACTCTTGTAGGACTTTGGGA  
+  
FFFFFFFFFFFFFFFFFFFFFFFF:FFFFFFFFFFFFFFFFFFFFFFFFFFFFFFFF:FFFFFFFFFFFF  
FFFFFFFFFFFFFFFFFFFFFFFFFFFFFFFFFFFFFFFFFFFFFFFFFFFFFFFF:FFFFF  
@A00721:190:HGJW7DSXY:4:1469:3974:8155\_2:N:0:TCTGCAAG+GCTGCACT  
TTAAAGACTATACTAAATATCTCCACTACGAGGTTGTTGTTTGCGGATTAGCTCTTGCGACTAATATT  
CGATATTCGATTGAGGGTCGTTATACCTATTTCGGCTATCTGTGCTTGG  
+  
FFFFFFFFFFFFFFFFFFFFFFFFFFFFFFFF:FFFFFFF: :FFFFFF:FFFFFFFFFFFFFFFF  
FFFFFFFFF:FFFFFFFFFFFFFFFFFFFFFFFF:FFFFFFFFFFFFFFFF  
@A00721:190:HGJW7DSXY:4:2504:23014:18490\_2:N:0:TCTGCAAG+GCTGCACT  
TCAAATTTTAAACGATTCCGAGAGGTTTATCCTGATGTGGAGGGAGTTCTTGAAGCATCCCGACCTTT

CCTTGTGAAAATTTTGATGCGGTTTCATAAGATTATCAGTAATCCTGA

@A00721:190:HGJW7DSXY:4:2539:31222:34741\_2:N:0:TCTGCAAG+GCTGCACT  
CCGAAAGACGTGCTAAATTTAAACCATTGTACGATGTCGTCTGTCTCGGCGATCACTTTTCACTAAGA  
ATTGGTCCTACTTTTGGACAAGGCCAACTTCGTAATCTTCATGAGATC

+

FFFFFFFFFFFFFFFFFFFFFFFFFFFFFFFFFFFFFFFFFFFFFFFFFFFFFFFFFFFFFFFFFFFFFFFF  
FFFF:FFFFFFFFFFFFFFFFFFFFFFFFFFFFFFFFFFFFFFFFFFFFFFFFFFFFFFFFFFFFFFFF

@A00721:190:HGJW7DSXY:4:1538:6650:27602\_1:N:0:TCTGCAAG+GCTGCACT  
TAGGGATTTTGAGAGAGTGAAAGGCTTCAATTGTAGTGGTTTGGTCGTTTCAGTACCCAGTCAGTATA  
CCTCTACGCAAAGATATTTTCATGAAAACCTACAGAGGAACGTACCGGATTACCTGTCTTTCATATTATG  
AAT

+

FFFFFFF:FFFFFFFFFFFFFFFFFFFFFFFFFFFFFFFFFFFFFFFFFFFFFFFFFFFFFFFFFFFFFFFF  
FFFFFFFFFFFFFFFFFFFFFFFFFFFFFFFFFFFFFFFFFFFFFFFFFFFFFFFFFFFFFFFFFFFFFFFF  
FFF

@A00721:190:HGJW7DSXY:4:1403:13205:18129\_1:N:0:TCTGCAAG+GCTGCACT  
TTTGCTTCGATGTTGGATGTCAAGAAGGGTTCAGAATGGGATTCTACGTAGTTTATGACTTTGGTGG  
TGGTACTTTCGATACTTCTATCGTCTTACGTTACGGTAATTACTATAGTGTTATTTATTCTGGTGGTG  
ATG

+

FFFFFFFFFFFFFFFFFFFFFFFFFFFFFFFFFFFFFFFFFFFFFFFFFFFFFFFFFFFFFFFFFFFFFFFF  
FFFFFFFFFFFFFFFFFFFFFFFFFFFFFFFFFFFFFFFFFFFFFFFFFFFFFFFFFFFFFFFFFFFFFFFF  
FFF

@A00721:190:HGJW7DSXY:4:2316:29234:26162\_2:N:0:TCTGCAAG+GCTGCACT  
GGTCGTGACGTTGATGAAGCTATAAGAGCGTTCTTATTACGGCGCACTTCTTTACCCGCCACACACA  
ACTTTTCAGTTTCACAACCTGAAGGAGGAGGTTTCTGTTACTGGAAAACC

+

FFFFFFFFFFFFFFFFFFFFFFFFFFFFFFFFFFFFFFFFFFFFFFFFFFFFFFFFFFFFFFFFFFFFFFFF  
FFFFFFFFFFFFFFFFFFFFFFFFFFFFFFFFFFFFFFFFFFFFFFFFFFFFFFFFFFFFFFFFFFFFFFFF  
FFFFFFF:FFF

@A00721:190:HGJW7DSXY:4:1555:22218:5118\_2:N:0:TCTGCAAG+GCTGCACT  
TCAATAATACGTCTTGAACCTCACTTATGACGATCTAGTGAAATTAACGCGTCCTTTCTGGAACGT  
AGTTTTACTATTATGAACAAAGTTATCAAAGATAGTGGCATTCAAGGC

+

FFFFFFFFFFFFFFFFFFFFFFFFFFFFFFFFFFFFFFFFFFFFFFFFFFFFFFFFFFFFFFFFFFFFFFFF  
FFFFF:FFFFFFFFFFFFFFFFFFFFFFFFFFFFFFFFFFFFFFFFFFFFFFFFFFFFFFFFFFFFFFFF

@A00721:190:HGJW7DSXY:4:2216:6424:23954\_1:N:0:TCTGCAAG+GCTGCACT  
TGATTCCGCCGGTGGTAGCTCATTTCTACCAGGGGCTATTACTCTTGCTGAAACAGCTATTAAAGCT  
GTTGAGCGGTAATTACACCTAAACGAGCTCGATCTGCCATCGCTGAAGGATGTGCACTCTTTTCTGC  
TAC

+

FFF:FFFFFFFFFFFFFFFFFFFFFFFFFFFFFFFFFFFFFFFFFFFFFFFFFFFFFFFFFFFFFFFF  
FFFFFFFFFFFFFFFF:FFFFFFFFFFFFFFFFFFFFFFFFFFFFFFFFFFFFFFFFFFFFFFFFFFFFF  
FFF

@A00721:190:HGJW7DSXY:4:2111:6686:35524\_2:N:0:TCTGCAAG+GCTGCACT  
TCGATTGTATCAACAGTAACATTACTTCTAATAAAGGTCTCTATCAAGCTCGTATTATCGTCGCTGCT  
GGATCTGCGTTACCGTTGAAGGCTAAACTCCAAGGTAATTATGAAGAC

+

FFFF,FFFFFFFFFFFFFFFFFFFFFFFFFFFFFFFFFFFFFFFFFFFFFFFFFFFFFFFFFFFFFFFF  
FFFFF:FFFFFFFFFFFFFFFFFFFFFFFFFFFFFFFFFFFFFFFFFFFFFFFFFFFFFFFFFFFFFFFF

@A00721:190:HGJW7DSXY:4:2161:22327:31078\_1:N:0:TCTGCAAG+GCTGCACT  
GTATGAGGGTTTTCTAATCGTAACATTAATAATTTCAATCTTCTTAAAAAGAAGATAGAGAGTCATA  
CTTTGGGCTATCGTTTCAGGTGCATGGGGTTGGATAGCCAATATTGTAGTGGACACCTCTGGTAGTATC  
GAA

+

FFFFFFF,FF,FFF,F,,FF,:FFFFFFFFFFFFFFFF,FFFFFFF,FF,:FFF,,FF::FF,F,:F,,F:



FFFFFFFFFFFFFFFF:FFFFFFFFFFFFFFFFFFFFFFFFFFFFFFFFFFFFFFFFFFFFFFFFFFFFFFFF  
FFF

@A00721:190:HGJW7DSXY:4:1355:29785:31407\_2:N:0:TCTGCAAG+GCTGCACT  
TACACAATTAAGAAATAATCCTACATTGACTGATTATCTAAAGATTGAAGGAAAATTTATCCTCGTT  
TAACTTACTTAGACTTTTCTACGATACAAATGATAACTTCTAATTTAC

+

FFFFFFFFFFFFFFFF:FFFFFFFFFFFFFFFFFFFFFFFFFFFFFFFFFFFFFFFFFFFFFFFFFFFFFFFF  
FF,FFFF:,FFFFFFFFFFFFFFFF:FFFFF:FFFFFFFFFFFFFFFF

@A00721:190:HGJW7DSXY:4:1602:23348:24486\_1:N:0:TCTGCAAG+GCTGCACT  
GGGATGCATGGTGTATCTCCTCAGGAGTCCCGGCATTTGATAATAATGACGAGACTTTCTGCATAAT  
CGCTGCATATTACGGATTACACGGTACCAGCGCATCTCGTGTGAGCCTCGACCCGATTATATGGTAT  
TAA

+

FFFFFFFFFFFFFFFFFFFFFFFFFFFFFFFFFFFFFFFFFFFFFFFFFFFFFFFFFFFFFFFFFFFFFFFF  
FFFFFFFFFFFFFFFFFFFFFFFFFFFFFFFFFFFFFFFFFFFFFFFFFFFFFFFFFFFFFFFFFFFFFFFF  
FFF

@A00721:190:HGJW7DSXY:4:1349:13114:26396\_1:N:0:TCTGCAAG+GCTGCACT  
AATTTATAGAAGATTATTTTGACAGAATCAATAAGAATCATCGATTCTCGATTCTGATAGAGCTTATCTA  
GGTACTCTCATTTACTATGTTGATTTAGTCTACATTTATGCTGATCTAAATTTTCGATCTAGATGGAT  
CC

+

FFFFFFFFFF:,FFF,FF,FF:,F:,FFFFF:FFFFFFFFFFFFFFFF:FF:FFFFFF:FFF:FFFF  
F,F,FFFF,FFFF,FFFFFFFFFF,FF:F::FFFFFFFFF,FF:FFFFFFFFFF:F,FFFFFFFF  
FF

@A00721:190:HGJW7DSXY:4:1678:28709:35055\_1:N:0:TCTGCAAG+GCTGCACT  
TTCTAGAATTCTTAATTATAATATTCAACCTCAAAAGTTACGTGTTTACAGTAACGAGATCACACATT  
TTGAGAACTAACTATGTTATGTTCTCTGATCATTTTGACAATCTCTTCTTATAATAAATAAATAAATA  
ATA

+

F:FFFFFFFF:FFFFFFFFFFFFFFFFFFFFFFFFFFFFFFFFFFFFFFFFFFFFFFFFFFFFFFFF  
FFFFFFFFFFFFFFFFFFFFFFFFFFFFFFFF:FFFFFFFFFFFFFFFFFFFFFFFFFFFFFFFFFFFF  
FFF

@A00721:190:HGJW7DSXY:4:1660:6352:20478\_2:N:0:TCTGCAAG+GCTGCACT  
CAAATAGTGGAAGGCTCCAGTCAACACTAGTTCGAGTGCTGCTTTGGATTACGATGACGTGAGAATA  
GGTGAAGGGATAGTTTTTACCTCGACCAACATTAAGGCGGCGGCGACT

+

FFFFFFFFFFFFFFFFFFFFFFFFFFFFFFFFFFFFFFFFFFFFFFFFFFFFFFFFFFFFFFFFFFFFFFFF  
FFFFFFFFFFFFFFFFFFFFFFFFFFFFFFFFFFFFFFFFFFFFFFFFFFFFFFFFFFFFFFFF

@A00721:190:HGJW7DSXY:4:2316:14651:19006\_2:N:0:TCTGCAAG+GCTGCACT  
CTTCACCCAAAATGAAGGACACTTCGAAACTGAATAATGATGCACTACAAACAAGTATCGCTAATCAT  
CTGAAAAAGGCTCTAAAGGACACTATACAATATCCAGACGACGACGAA

+

FFFFFFFFFFFFFFFF:FFFFFFFFFFFFFFFFFFFFFFFFFFFFFFFFFFFFFFFFFFFFFFFFFFFFFFFF  
FFFFFFFFFFFFFFFFFFFFFFFFFFFFFFFF:FFFFFFFFFFFFFFFF:

@A00721:190:HGJW7DSXY:4:2646:15655:13823\_2:N:0:TCTGCAAG+GCTGCACT  
CAGCACCACATTTTGGTCAAGTCAATCCGTTGAGAAAATTTCTTAGAGGATATTCGCCATTGTGGTAC  
GAATTGGTCCAACATTTACCACCAAATTTCTTTGATACAACCTCTAGCC

+

FFFFFFFFFFFFFFFFFFFFFFFFFFFFFFFFFFFFFFFFFFFFFFFFFFFFFFFFFFFFFFFFFFFFFFFF  
FF:FFFFFFFFFFFFFFFFFFFFFFFF:FFFFFFFFFFFFFFFF

@A00721:190:HGJW7DSXY:4:1413:13458:12399\_2:N:0:TCTGCAAG+GCTGCACT  
GCTTGCTATTACCAGATTGGTTCGAACCGTTGATGCTATGTCAGAAGAAGCTATTCAAGCTTGTGCG  
TTTAAAGACTGCAGAGGCTGTCAAACAAGCCCAGACTCAAGGAGTCCA

+



```

FFFFFFFFFFFFFFFFFFFFFFFFFFFFFFFFFFFFFFFFFFFFFFFFFFFFFFFFFFFFF
FFFFFFFFFFFFFFFFFFFFFFFFFFFFFFFFFFFFFFFFFFFFFFFFFFFFFFFFFFFFF
@A00721:190:HGJW7DSXY:4:2122:29026:25739_2:N:0:TCTGCAAG+GCTGCACT
GGTGATAAAAATTATTTAGAGATCTTTTCTACTTACAAAGGACAATTCAGTTTCATTAATTCTACGGA
AAAGTCCGGAGTATATTGTATGTTAATAGATAGTGGGATAATAGTTCT
+
FFFFFFFFFFFFFFFFFFFFFFFFFFFFFFFFFFFFFFFFFFFFFFFFFFFFFFFFFFFFF
FFFFFFFFFFFFFFFFFFFFFFFFFFFFFFFFFFFFFFFFFFFFFFFFFFFFFFFFFFFFF
@A00721:190:HGJW7DSXY:4:2662:19687:1360_1:N:0:TCTGCAAG+GCTGCACT
CGTCTGAAGAGTTTTAGAGCTGCTATTGATTATGTAACCGATAGGAGTTGTATAGTTGAAGATGTGGCT
TTAGACGATAATCCTTTAAGGACTATGTTGACTGACGAAGATTTTCCCACAGATTTGTCTACGTTGCA
GAT
+
FFFFFFFFFFFFFFF:FFFFFFFFFFFFFFFFFFFFFFFFFFFFFFFFFFFFFFFFFFFFF
FFFFFFFFFFF:FFFFFFFFFFFFFFFFFFFFFFFFFFFFFFFFFFFFFFFFFFFFF
FFF
@A00721:190:HGJW7DSXY:4:2137:11686:11741_2:N:0:TCTGCAAG+GCTGCACT
CTATATACATTATAAAATATAAAAAATAAGGGAGTCATAACTTTTGTACCACAAATTCTTGGCTTTCAAC
GAAGTCTCTGATTTTATTAATCATTACTIONTTAACGATCTCTCGGTCATT
+
FFFFFFFFFFFFFFF:FFFFFFF:FFFFFFFFFFFFFFFFFFFFFFFFFFFFFFFFFFFFF:FFFFF
FF:FFFFFFFFFFFFFFFFFFFFFFFFFFFFFFFFFFFFF:FFFFFFFFFFFFFFF
@A00721:190:HGJW7DSXY:4:1248:25771:28902_1:N:0:TCTGCAAG+GCTGCACT
TTGATCTACGTCGTTTAACTGTCGGAACAACCTTTACTTAGAATGACTCTATCTTTTCAGACACTTCT
TATATTATTACAAATAGTTAATATCATATTAGTAATACTCACTATCGTTTTCTGCTTTTCTTAGCTA
ATA
+
FFFFF,FFFFFFF:FFFFFFFFFFFFFFFFFFFFFFFFFFFFF:FFFFFFF:FFFFFFF:FFFFFFFFFFFFFFFFFFFFF
FFFFFFFFFFFFFFFFFFFFFFFFFFFFF:FFFFFFFFFFFFFFFFFFFFFFFFFFFFFFFFFFFFF
FFF
@A00721:190:HGJW7DSXY:4:1333:32036:20337_2:N:0:TCTGCAAG+GCTGCACT
ATGAGTACGAAAACCAACTCTTCGTTACGAGACCTGATGGTAGAATAGATTTAGTCTCTACACCCATC
TCAACGAGGATAAAGCGAGTTTTCCGCCTGAACGTAATACACGAAGA
+
FFFFFFFFFFFFFFFFFFFFFFFFFFFFFFFFFFFFFFFFFFFFF:FFFFFFF:FFFFFFFFFFFFFFFFFFFFFFFFFFFFF
FFFFFFFFFFFFFFFFFFFFFFFFFFFFFFFFFFFFFFFFFFFFF
@A00721:190:HGJW7DSXY:4:2623:15691:17769_1:N:0:TCTGCAAG+GCTGCACT
AAACGACTCGAAACCGAGACGCCGTAGATCAAAGTCCCTTCTAACTTTAGATTATGAATCCTGCCTTT
ACTCATTTTATAGC
+
F,FFFF:FFFFFFFFFFFFFFFFFFFFFFFFFFFFFFFFFFFFFFFFFFFFF:FFFFFFFFFFFFFFFFFFFFF
FFFFFFFFFFFFFFF
@A00721:190:HGJW7DSXY:4:1537:28366:30921_2:N:0:TCTGCAAG+GCTGCACT
TTTTTATAATTTATAACCTTCTTATACTTTTGGGTATGTTTGTGAAAAACATGAGATACCCAAGTCT
ATCGAAGACATTATCTCTTATGTACTTATTGTAACGATCATTCTTTTCG
+
FFFFFFFFFFFFFFFFFFFFFFFFFFFFFFFFFFFFFFFFFFFFF:FFFFFFFFFFFFFFF,FFFFFFFFFFFFFFFFFFFFF
FF:FFFFFFFFFFFFFFFFFFFFFFFFFFFFF:FFFFFFFFFFFF:F:FFFFFFFFF,
@A00721:190:HGJW7DSXY:4:2264:2157:21324_1:N:0:TCTGCAAG+GCTGCACT
TTCTTTTATTCTTTAACTGTGTATGAGGAGGATTTATAATGCTTTTCGATAGTGATTGTTATCAATT
TAAATACATTACTGTTTCAAATCATCTTTACTCACAGACTCCGAAAATGTTTCAAATGAGGTCAAAG
CTC
+
FFFFFFFFFFFFFFFFFFFFFFFFFFFFF:FFFFFFFFFFFFFFFFFFFFF:FFFFFFFFFFFFFFFFFFFF::FFF

```





$+$ 

@A00721:190:HGJW7DSXY:4:1375:2546:36025\_2:N:0:TCTGCAAG+GCTGCACT  
GGAGGAGTTT GAGGAAGGCTCTAGAGAAGATCTCACCACCTGGAGAAGGCAAGTGGAGAGTCCAGAAG  
TTGATGAAGAAGGATTATTTGAAGCAGGGGTTACCACTTCCTAAGGTG

+

@A00721:190:HGJW7DSXY:4:1477:17065:1955\_2:N:0:TCTGCAAG+GCTGCACT  
TTCTTTGGAGTTTTAGATAATCTTTGAGAAGGGTCATAGAGCCAGCAAGAGAAGCTTATATGCTGG  
TTTAAGTGATGATTATCACTCCTTGAGAAGACAAGCCACATTAAGATA

+

@A00721:190:HGJW7DSXY:4:1376:25608:4539\_2:N:0:TCTGCAAG+GCTGCACT  
CTTGGGGTTTCGAATGTCATTAGTGCCTTACGATTGAAAGAGGTCTTTTGAGTATCGACAGATCTTT  
CGATCTTGAGGACGTACATTTAACGTGGCAGAATTCGGTAACTTACCA

+

@A00721:190:HGJW7DSXY:4:1607:19316:7263\_2:N:0:TCTGCAAG+GCTGCACT  
GGGAAGTTGTGGGATTTAACTTTGACTCAACTACTCCGATCAGATCCGATGGTTTGATTGGTATGGA  
CTACTCGACTTTTGATCTGGAGTTGTCTAGGGTCATGGCAGATACTAC

+

@A00721:190:HGJW7DSXY:4:2675:10719:26631\_2:N:0:TCTGCAAG+GCTGCACT  
AAAATATGCAGGTCAAAGATTCTGTAGCTCTGAGGGCGGTTGAGGGAGCCGTTTTGCCGACTTTAAC  
TATTCTAAGAGTCTTTATGATTCAAACCTATCGTTGTCGTACCTTAC

+

@A00721:190:HGJW7DSXY:4:2201:24361:25958\_2:N:0:TCTGCAAG+GCTGCACT  
GCGGCTTATTGTCGCGCAGTTTCCAGAATTGCGGTTGAAGTTCACCCATTCTATCTTGAATGCTCACG  
CCGTCGCAGCCATATCGAGACTATGTTATAATCACTTGTTAAAGTACA

+

@A00721:190:HGJW7DSXY:4:1644:14579:13745\_2:N:0:TCTGCAAG+GCTGCACT  
TTAGATATTATTGATATTGGAGGCGATATTCGTTTTCATATCCAAACTCCTTGAATGGAGTACATAT  
TTGCAACCTATTCTTGATGTGAAAGATGCATCGAGGTATACGTCTAG

+

@A00721:190:HGJW7DSXY:4:1130:27615:9267\_2:N:0:TCTGCAAG+GCTGCACT  
TCACGAGACGTCATGAAAGCTATCGGAGGGAAGCAAAATGTTTCGTTCTGTTACAAGAACGCTTTGGA  
TTGTGACCATAAAGCCTCAGTTGCGATAGCTGTAGAGGTATACGATAT

+

```

,FFFF:FFFFFF:,F:FFFFF,:FFFFFF,,FFFFFFFFF::F::FFFF,FFF,FF:FFFF:FFFFFF
F.:FFFF:FFFFFFFF:FFFFF:F:F:FFFFFFFFFFFFFFFFFFFF,FFFF

```

@A00721:190:HGJW7DSXY:4:1224:8413:15436\_2:N:0:TCTGCAAG+GCTGCACT  
CTTAAGAGAGAGATTGATGTATGTCATTTTCGTCTTAGTTTGTCCCGCGAATTATTGGACACGATGAA  
AAATGACATACCCGTTCTGACCTTGGTATCGTTATCCGTCATGGAGA

+

FFFFFFFFFFFFFFFFFFFFF, :FFFFFFFFFFFF, FFFFFFFFFFFFFFFFFF: :FFFFFFFFFFFFFFFF  
FFFFFFFFFFFFFFFFFFFFFFFFFFFFFFFFFFFFFFFFFFFFFFFFFFFFFFFFFFFFFFFFFFFFFFFF

@A00721:190:HGJW7DSXY:4:1604:15709:36526\_2:N:0:TCTGCAAG+GCTGCACT  
GTTATTCTCACAACAAAGATAAGATTTTATCTTTCTTCAAACACCCTGTTTTCCTTAAGGGCGGACAA  
TTGTTCCATTGTGAACCTTGGGGACTAGATTGAGCATTAATGAGTTC

+

FFFFFFFFFFFFFFFFFFFFF:FF: , FFFFFFFFFF:FFFFF, FFF, FF: , FFFFF:FFF:F:F:FF:FFF  
FFFFFFFF:FFFFFFFFFFFFFFFF:FFFF:FFF, ::, F, FFFFFFF, FF,

@A00721:190:HGJW7DSXY:4:2201:7202:10488\_1:N:0:TCTGCAAG+GCTGCACT  
TCTAGTGGACAATTAGAATACCTATTTCCGTACCAAGAGCCACTGCCAATCTCATCGCTATACGCAT  
ACCTGATTGGAAGAAGCGAGGTTCTGTTCTCAATAAAAAATTTTCTCAAGAGATTATGTTGATAAAG  
TTT

+

F:FFFF:F::FFF:FFF:F:F:FFFF, FFFFFFF:FFFF:FF:FF, FFFFFFFFF:FFFFFFFF  
FFFFFFFF:FFFFFFFFFFFFFFFFFFFFFFFFFFFFFFFFFFFFFFFFFFFFFFFFFFFFFFFFFFFFFFFF  
FFF

@A00721:190:HGJW7DSXY:4:1507:14290:18004\_1:N:0:TCTGCAAG+GCTGCACT  
TTCAGTACGTATGGGGATCACTTCTTCGGTCAATGACAAAACCTTGAATATGTTACGACATGGCTT  
CGTAACAACAGTGCGAGGATTGTCATCTCGGGGAAAGTGATTACCAAGATGTTATATAGATACGAG  
ATA

+

FFFFFFFFFFFFFFFFFFFFFFFFFFFFFFFFFFFFFFFFFFFFFFFFFFFFFFFFFFFFFFFFFFFFFFFF  
FFFFFFFF:FFFFFFFFFFFFFFFFFFFFFFFFFFFFFFFFFFFFFFFFFFFFFFFFFFFFFFFFFFFFFFFF  
FFF

@A00721:190:HGJW7DSXY:4:1425:10601:33129\_2:N:0:TCTGCAAG+GCTGCACT  
CAGCGATCTTACTCGTTATCGGAGCTAAGAAGAAGACTTTGGGTACACGTTATGCTCGAACTTAAC  
GTTAGTACCGGAGGTGATCTCTCTGCTTCTGCGTTACTGAGAGAAAAG

+

FFFFFFFFFFFFFFFFFFFFFFFFFFFFFFFFFFFFFFFFFFFFFFFFFFFFFFFFFFFFFFFFFFFFFFFF  
FFFFFFFFFFFFFFFFFFFFFFFFFFFFFFFFFFFFFFFFFFFFFFFFFFFFFFFFFFFFFFFFFFFFFFFF

@A00721:190:HGJW7DSXY:4:2115:9643:21699\_1:N:0:TCTGCAAG+GCTGCACT  
CCTACGGTGACTTTATGGACAAGATGCAAGTTCTTGGGAAATACTTGTTCCTTTTTAGGTTTAGTA  
GGTGATCTTGACGTCGATTCTTTGTATAGGGAGTGTGAGAAGACAACGAATCTTGAACTACGGTCCT  
TAT

+

FFF:F, FFFFFFFFFFFFFFFFFFFFFFFFFFFFFFFFFFFFFFFFFFFFFFFFFFFFFFFFFFFFFFFFF  
FFFFFFFFFFFFFFFFFFFFFFFFFFFFFFFFFFFFFFFFFFFFFFFFFFFFFFFFFFFFFFFFFFFFFFFF  
FFF

@A00721:190:HGJW7DSXY:4:2157:25500:19319\_1:N:0:TCTGCAAG+GCTGCACT  
GAACCGGTCTCTAAATCTTTTGAGATTGAGAAGATTGAAGAACACGTCAAGAAGTCGCTCGGCGTTGT  
TCTTGAAAACCAAGTTAAGAAGGAGGCTGATCATGGAGTCTTTGTACCTTCTGTCAAACCTTCGAGGT  
CAG

+

FFFFF:FFFF, FFFFFFFFFF:FFFFFFFFFFFFFFFFFFFFFFFFFFFFFFFFFFFFFFFFFFFFFFFF  
FFFFFFFFFFFFFFFFFFFFFFFFFFFFFFFFFFFFFFFFFFFFFFFFFFFFFFFFFFFFFFFFFFFFFFFF  
FFF

@A00721:190:HGJW7DSXY:4:1212:13241:10332\_1:N:0:TCTGCAAG+GCTGCACT  
TCCCGGATGTGGATTGAAGGCTGGCTCTAAGGGAGACTCCTTCTTTTTGAATGTTGTAAAGAATTGGG  
TTGAGAAGTGTGCTTTACAAGGAGTTAGACTCTTCTTCAAGTTTTTAGATCTTCTTGATAATCTTAA  
GAA

+  
FFFFFFFFFFFFFFFFFFFFFFFFFFFFFFFFFFFFFFFFFFFFFFFFFFFFFFFFFFFFFFFFFFFFFFFF  
FFFFFFFFFFFFFFFFFFFFFFFFFFFFFFFFFFFFFFFFFFFFFFFFFFFFFFFFFFFFFFFFFFFFFFFF  
FFF  
@A00721:190:HGJW7DSXY:4:2412:26386:30561\_1:N:0:TCTGCAAG+GCTGCACT  
GTTTCTCTTGGTATTTCTGAAATAGTTTATCAGAGCGTCATTTTCTTTGGGATCTTTCTCTGGTAA  
GGGAATTATTAAATCATTCTTCTCACTCTTGACGAGAATTATTACTGTTTTCTCTACCCATAACTTCT  
TTT  
+  
FFFFFFFFFFFFFFFFFFFFFFFFFFFFFFFFFFFFFFFFFFFFFFFFFFFFFFFFFFFFFFFFFFFFFFFF  
FFFFFFFFFFFFFFFFFFFFFFFFFFFFFFFFFFFFFFFFFFFFFFFFFFFFFFFFFFFFFFFFFFFFFFFF  
:FF  
@A00721:190:HGJW7DSXY:4:2574:16351:8735\_1:N:0:TCTGCAAG+GCTGCACT  
ACTGGAGTTCAGACGTGTGCTCTTCCGATCTGTTTCAACACTTATCACCACCTTTTGAAAGGAAAATAA  
TTGGTGATGAAAATACGTATGTCGGTGGGGTTCTCAAGGCTCTCATCGCCACTGGGATTCTAAGGGGT  
TCC  
+  
FFFFFFFFFFFFFFFFFFFFFFFFFFFFFFFFFFFFFFFFFFFFFFFFFFFFFFFFFFFFFFFFFFFFFFFF  
FFFFFFFFFFFFFFFFFFFFFFFFFFFFFFFFFFFFFFFFFFFFFFFFFFFFFFFFFFFFFFFFFFFFFFFF  
FFF  
@A00721:190:HGJW7DSXY:4:2238:2022:33238\_2:N:0:TCTGCAAG+GCTGCACT  
AGGATTCTTCTTTTGGTCCTTACGTCTTAAGTAATTTGGATGTTGTGCGAAACTATCAGGTTCTTGTC  
ACGATTCTTAAAAGAAGTTTATTAAAACTTCAGAGTCTCTTGGAAGTC  
+  
FFFFFFFFFFFFFFFFFFFFFFFFFFFFFFFFFFFFFFFFFFFFFFFFFFFFFFFFFFFFFFFFFFFFFFFF  
FFFF:FFF,FFFFFFFF:FFFFFFFFFFFFFFFFFFFFFFFFFFFFFFFFFFFFFFFF  
@A00721:190:HGJW7DSXY:4:1113:9607:24737\_1:N:0:TCTGCAAG+GCTGCACT  
CAATAGCCACAGACTTTCTGGGAAAAGAGACCTCTGTTGGTAGAGGAGTTGAGAGAATTACTCAGATT  
CAATCTGGCATCACTGAACGTCTACAACGAGTTAGGGAGTGGCTAGGTTTTAAAGATCCTTTGCACA  
AGC  
+  
FFFFFFF:FFFFFFFFFFFF,FFFFFFFFFFFFFFFFFFFFFFFFFFFF:FF:FFFFFFF:FFFFFFFFFFFF  
FFFFFFFFFFFFFFFFFFFFFFFFFFFF,FFFFFFFFFFFFFFFFFFFFFFFFFFFF:FFFFFFFFF:FFFFFFFFF  
FFF  
@A00721:190:HGJW7DSXY:4:1235:19162:29387\_2:N:0:TCTGCAAG+GCTGCACT  
TTTCGACGTGCGGAAAACGATGAAGATTTCCACACTGTTGAGAATCTTCTGATGCTGAATTTGAGG  
AAAATTTTTCGGAAGTTTTTGGTATAAATCCTGATGGCTCAGTACAGG  
+  
FFFFFFFFFFFFFFFFFFFFFFFFFFFFFFFFFFFFFFFFFFFFFFFFFFFFFFFFFFFFFFFFFFFFFFFF  
FFFFFFFFFFFFFFFFFFFFFFFFFFFF:FFFFFFFFFFFFFFFFFFFFFFFFFFFF  
@A00721:190:HGJW7DSXY:4:1305:13973:25911\_2:N:0:TCTGCAAG+GCTGCACT  
AAACCTTCTTTTATCATTGCAACAGGACTTTGAGAAGACTGTTGAAATGGACAAAATCTGGGATCATA  
GGTATGTGTCACGCTACACTCGAAATATGGGCCCTCATAAGGAAGTAT  
+  
FFFFFFFFFFFFFFF:FFFFFFFFFFFFFFFFFFFFFFFFFFFFFFFFFFFFFFFFFFFFFFFFFFFFF:FFF:FFF  
FFFFFFFFFFFFFFFFFFFF:FFFFFFFFFFFFFFFFFFFFFFFFFFFF:FFFF  
@A00721:190:HGJW7DSXY:4:2140:21314:29105\_1:N:0:TCTGCAAG+GCTGCACT  
CGTCATTACAGTCTGGAAGTTAGATCATTTGTTGAGGAAGATCTCTACAGAGATTATCGAGAGTTGTG  
ATCTAGTTCTAAATTTAGGTCGACGACTTTAGCAACTTTAGATAAATTCTTTCCGGGCTCAATGACC  
TTT  
+  
FFFFF:FFFFFFFFFFFFFFFFFFFFFFFFFFFF,FFFFFFFFFFFFFFFFFFFFFFFFFFFF:FFFF  
FFFFFFFFFFFFFFFFFFFF:FFFFFFFFFFFFFFFFFFFFFFFFFFFF:FFFF  
FFF

@A00721:190:HGJW7DSXY:4:1227:12156:15186\_2:N:0:TCTGCAAG+GCTGCACT  
CATCGCAAAGAAGACTTTATTAGTTCATGAAGTTCTTACACTTCTCGCGACTAATGTCAGCTTCACTA  
CAAAGGCGTTACGTAAAGTAGTTTTACGCTTTATCTTAAAGCATTAC

+

FFFFFFFFFFFFFFFFFFFFFFFFFFFFFFFFFFFFFFFFFFFFFFFFFFFFFFFFFFFFFFFFFFFFFFFF  
FFFFFFFFFFFFFFFFFFFFFFFFFFFFFFFFFFFFFFFFFFFFFFFFFFFFFFFFFFFFFFFFFFFFFFFF

@A00721:190:HGJW7DSXY:4:1138:10682:36652\_2:N:0:TCTGCAAG+GCTGCACT  
ACTTTTTGAATATGACAGAAGCTCGCCATATCAGATTAGAGACATGCCAGTTAGAGTTCTTCTAACCA  
GGACTGATGGTGAGATTCTTTACCTTTTGAGGTCCAGGAACCTTTA

+

FFFF:::FFFFFFFFF,FF:FF:FFFFFFFFFFFFFFFF:FFFFFFF,FFF:,F:FF:FFFFFFFFFFFF  
F:FF:FFF:F:FF:FF:FFF,:FFF:FFF:FF,F,FFF,:FFF,::,F

@A00721:190:HGJW7DSXY:4:1362:16152:7200\_2:N:0:TCTGCAAG+GCTGCACT  
CCAAGGACGTTTCCGTCGGAGGATGACAGGTGGGAGACCGCTCAATAACACTCTATTGAATCCCTTTT  
CCACGATGAAAGCTCTTTATGAGGTGCTCCATGCAAATTTACAGTTCC

+

FFFFFFFFFFFFFFFFFFFFFFFFFFFFFFFFFFFFFFFFFFFFFFFFFFFFFFFFFFFFFFFFFFFFFFFF  
FFFFFFFFF:FFFFFFFFF:FFFFFFFFF:FFFFFFFFF,FFFFFFFFF

@A00721:190:HGJW7DSXY:4:1478:24252:28025\_1:N:0:TCTGCAAG+GCTGCACT  
GTATTTTGATAAATTTGTTGGAATCGATAATGATACTGACGAAGGTTCTATTACCACCCTTGTCATTG  
ATACAAACATTCTAGGTGATGCTTTCTTAGAGGCTCGTCTAGCCGCTGAGATTCTGCTTACCTATTTA  
CAA

+

FFFFFFFFFFFFFFFFFFFFFFFFFFFFFFFFFFFFFFFFFFFFFFFFFFFFFFFFFFFFFFFFFFFFFFFF  
FFFFFFFFFFFFFFFFFFFFFFFFFFFFFFFFFFFFFFFFFFFFFFFFFFFFFFFFFFFFFFFFFFFFFFFF  
FFF

@A00721:190:HGJW7DSXY:4:2161:5891:1360\_2:N:0:TCTGCAAG+GCTGCACT  
TTTGAGTGATAACGATTTAGTACTGGGAAATGGTGGTAGTCAGTTTACTACTTTTCTTCCCTCCCCT  
TTTTCGATTGGATTCGACGGGGTCTTCGTCTCACGACTAATTTGATAA

+

FFFF:FFFFFFFFF,F:FFFFFFFFFFFFFFFFFFFFFFFFFFFFFFFF:FFFFFFFFFFFFFFFFFFFF:FF  
FFFFFFFFF,FFFFF:FFFFFFFFF:FF:F,F,:FF:FFFFFFFFF

@A00721:190:HGJW7DSXY:4:1459:2908:21997\_2:N:0:TCTGCAAG+GCTGCACT  
TACTTATGAAGGAGGTATTACTTCGGAAGTTCTTAATGTAGGTCTCCTAGTACTTAAGGGTTTATGTT  
TCGGTTTCAGCTGGATGGATCTTTTGATGGTATGTTTCACATTGCGTG

+

FFFFFFFFFFFFFFFFFFFFFFFFFFFFFFFFFFFFFFFFFFFFFFFFFFFFFFFFFFFFFFFFFFFFFFFF  
FFFFFFFFFFFFFFFFF:FFFFF:FFFFFFFFFFFFFFFFFFFFFFFFFFFFFFFFFFFFFFFF

@A00721:190:HGJW7DSXY:4:1374:3721:4805\_1:N:0:TCTGCAAG+GCTGCACT  
TTGGGAAGAGATTAAACATAAAATCCAGCGATTCTATTATGTCGCTAAAGCCTGTCCAGTTGTCGATG  
ATGTTCTGGGCTGTGGGGATTAACCTCCCTCGTGAAACTTACGACGATGTTCTCGCTCGCATTTACAA  
GGA

+

FFFFFFFFFFFFFFFFFFFFFFFFFFFFFFFFFFFFFFFFFFFFFFFFFFFFFFFFFFFFFFFFFFFFFFFF  
FFFFFFFFF:FFFFFFFFFFFFFFFFFFFFFFFFFFFFFFFFFFFFFFFFFFFFFFFF:FFFFF:FFFFF  
FFF

@A00721:190:HGJW7DSXY:4:1253:19099:23171\_1:N:0:TCTGCAAG+GCTGCACT  
GAGATCTGCCACTTCTAATTTTAGGAAAAGTCGCGAAAAGAAAGTTCATGAGGATGTCTTGGTCGAAA  
AATATCGCCGGAACCTTCTAATAGAGGATCCTGATGACATTATTTCAACGGATACCGATCTCAGTTCT  
ACC

+

F:,F,F:,F:,FF,:FFFFFFFF,F:F,F:,F:F,,FF:FF::FFFF,,FFF:FFF,F,FFF:F,,::F  
,:F:FF,F,FFF::FFF:FFFF:FF,FFFFFFFFF::FFFFFFFFF:FFF:FFFFFFFFFFFFFFFF  
FFF

@A00721:190:HGJW7DSXY:4:1369:16432:21465\_2:N:0:TCTGCAAG+GCTGCACT  
CAGGAAGTGTCTCCACTGATTCGGAATTAGAGAAAGACGACCTTCTTGTGGGGACTGAGACCTCTGAA  
TTTTCAGGGTGCCCTGATGAGGACGTTGAAAGGGATAATTTCAACTCT





FFFFFFFFFFFFFFFFFFFFFFFFFFFFFFFFFFFFFFFFFFFFFFFFFFFFFFFFFFFFFFFF  
FFF  
@A00721:190:HGJW7DSXY:4:2268:1832:14559\_2:N:0:TCTGCAAG+GCTGCACT  
AGGGAAGCTAAGGTTAACTTGATGCTTCAGCCTTTTCGAAGCATAACCCCGCACAGAATATCGTTTA  
TCACGCAAAATTTATTAATGCAATTTTCGGACCTATCTTTAAGGTTCT  
+  
FFFFF:FFFFFFFFFFFFFFFFFFFFFFFFFFFFFFFFFFFFFFFFFFFFFFFFFFFFFFFF  
FFFFFFFFFFFFFFFFFFFFFFFFFFFFFFFFFFFFFFFFFFFFFFFFFFFFFFFF  
@A00721:190:HGJW7DSXY:4:2402:31602:12759\_2:N:0:TCTGCAAG+GCTGCACT  
CTTTTACCCAACATTTTATGTATACAGAGATGACCAGTGACGATTTCTCCCGGAAGCTCTTCTCTCT  
CTTAGGAGGTCATGATGACTACTATAAGGGTGAAATCGATTTTTCGAA  
+  
FFFFFFF::FFFFFFFFFFFFFFFFFFFFFFFFFFFFFFFFFFFFFFFFFFFFFFFF,FFFFF:FFFFFFFFF:FFFF:  
F:FFFF,FFF,FFF:F::FFF,FFFF,,FFFFFF,:F::FFFF,,F  
@A00721:190:HGJW7DSXY:4:1355:32859:4038\_1:N:0:TCTGCAAG+GCTGCACT  
TAAAGCCTATGAGATAAAGATGTATTCTTATTTAGGCTTCGATGCTGAATTTCTTGAACCTTTGGAGTG  
CCAGTGAATATTTTTGTACGCCAGGAGTATCCATAACGATTTGTCAATTTACCACCTTTGCTCAACGA  
CGA  
+  
FFFF:FFFFFFFFFFFFFFFFFFFFFFFFFFFFFFFFFFFFFFFFFFFFFFFFFFFFFFFF  
FFFFFFFFFFFFFFFFFFFFFFFFFFFFFFFFFFFFFFFFFFFFFFFFFFFFFFFF  
FFF  
@A00721:190:HGJW7DSXY:4:1631:26928:28056\_1:N:0:TCTGCAAG+GCTGCACT  
TAACACATTCTTTGGTAATTGTATGATCACTCTTATGATGCTCTCTTTATTACGACCTTCGGAAGT  
TTAGAGCCGTCGCTGTCGCCGAGACGATTCGATCCTCTTTTCGGACGTACCGGTCCAGGATTATTCA  
GAT  
+  
FFFFFFFFFFFF:FFFFFFFFFFFFFFFFFFFFFFFFFFFFFFFFFFFFFFFFFFFFFFFF  
FFFFFFFFFFFFFFFFFFFFFFFFFFFFFFFFFFFFFFFFFFFFFFFFFFFFFFFF  
FFF  
@A00721:190:HGJW7DSXY:4:1353:24316:12571\_2:N:0:TCTGCAAG+GCTGCACT  
TGCTCGCGATTTATTCTTTTTGTCAATGATTACATCTACTTCGTTCTGATCCTTACAAGATCATCGT  
TAAGTTAGGTAAACCCCTAACCGATGTTACTCTTGATAGGACTTTGGGA  
+  
FFFFFFFFFFFFFFFFF:FFFFFFFFF:FFFFFFFFFFFFFFFFFFFFFFFFFFFFFFFF  
FFFFFFFFFFFF:FF:FFFFFF:FFFFFFF:FFFFFFFFF:FFFFFFFFF  
@A00721:190:HGJW7DSXY:4:1641:32136:5697\_2:N:0:TCTGCAAG+GCTGCACT  
TTAAAGACTATACTAAATATCTCCACTACGAGTTGTTGTTTGGCGATTAGCTCTTGCGACTAATATT  
CGATATTCGATTGAGGGTCGTTATACCTATTTCGGCTATCTGTGCTTTG  
+  
FFFFF:FFFFFFFFFFFFFFFFFFFFFFFFFFFFFFFFFFFFFFFFFFFFFFFFFFFFFFFF  
:FFFFFFFF,FFFFFFFFFFFFFFFFF:FFFFF:FFFFFFFFFFFFFFFFFFFFFFFF:FFFF  
@A00721:190:HGJW7DSXY:4:2517:30807:36213\_2:N:0:TCTGCAAG+GCTGCACT  
TCAAATTTTAAACGATTCCGAGAGGTTTATCCTGATGTGGAGGGAGTTCTTGAAGCATCCCGACCTTT  
CCTTGTAAGAAATTTTGATGCGGTTTCATAAGATTATCAGTAATCCTGA  
+  
FFFFFFFFFFFFFFFFFFFFFFFFFFFFFFFFFFFFFFFFFFFFFFFFFFFFFFFF  
FFFFFFFFFFFFFFFFFFFFFFFFFFFFFFFFFFFFFFFFFFFFFFFF  
@A00721:190:HGJW7DSXY:4:2222:26585:21887\_1:N:0:TCTGCAAG+GCTGCACT  
ATTCATGGACCTTCCATCCTGTACCTCTTCTGGAGAGACGTATCTCAAAGATCGACTTCGAGACAGGT  
GATATTGTTGAGCGAGAGCGACCAAGATCTAAATTTCGGTAACGGTGCGTGCGCTTTATTTTAAAAAG  
CTC  
+  
FFFFFFFFFFFFF:FFFFFFFFFFFFFFFFF:FFFFFFFFFFFFFFFFFFFFFFFFFFFF

FFFF:FFFFFFFFFFFFFFFFFFFFFFFFFFFFFFFFFFFFFFFFFFFFFFFFFFFFFFFFFFFF  
FFF  
@A00721:190:HGJW7DSXY:4:1678:21621:15796\_1:N:0:TCTGCAAG+GCTGCACT  
GATACTTATCACGAAAGGACTTGAGTCTTTTGATCAGTCTCTGACTTGACCATCTTTCATTTTAAATG  
ACGATCATTAAGACTCTCTTTCTTCTTTGTTTCCTTCTTTGCACTGATTTTTCCTCATCAGCTTGTGT  
TTT  
+  
FFFFFFFFFFFFFFFFFFFFFFFFFFFFFFFFFFFFFFFFFFFFFFFFFFFFFFFFFFFFFFFF:FFFFFFFFFFFF  
FFFFFFFFFFFFFFFFFFFFFFFFFFFFFFFFFFFFFFFFFFFFFFFFFFFFFFFFFFFFFFFF:FFFFFFFFFFFF  
FFF  
@A00721:190:HGJW7DSXY:4:1608:8205:17300\_2:N:0:TCTGCAAG+GCTGCACT  
TTTTACGATAACAACACTATCAGTTGATTAAGACTCTTCCGAAAGGCGAACTTTGGGAATTTGAAGCTCA  
GGGTGAAGCACACGTTTGACCGTGACGAACTGTGGTGTCTTGATCT  
+  
FFFFFFFFFFFFFFFFFFFFFFFFFFFFFFFFFFFFFFFFFFFFFFFFFFFFFFFFFFFFFFFF  
FFFFFFFFFFFFFFFFFFFFFFFFFFFFFFFFFFFFFFFFFFFFFFFFFFFFFFFFFFFFFFFF  
@A00721:190:HGJW7DSXY:4:2107:20283:7874\_1:N:0:TCTGCAAG+GCTGCACT  
CACTACCACTTATTACGATATTTCTTTAGTCGATGGGTTTTCGACGCCTTTAAGCGTCTTCTGTTCAT  
CGCAACCAGATGATATCTTCTATTGAACTTATGTTTCGATCAGTGTTCCTTCTATCAGGAGGAAAAC  
ACT  
+  
FFFFFFFFFFFFFFFFFFFF:FFFFFFFFFFFFFFFFFFFFFFFFFFFFFFFFFFFFFFFFFFFF:FFFF:F:FFFFFFFFFFFF  
FFFFFFFFFFFFFFFFFFFF:FFFFFFFFFFFFFFFFFFFFFFFFFFFFFFFFFFFFFFFFFFFFFFFFFFFFFFFFFFFF  
FFF  
@A00721:190:HGJW7DSXY:4:2203:24641:22999\_2:N:0:TCTGCAAG+GCTGCACT  
TCTTCTAATGTGGCCTGAACTACGTTTCACTTTGTGTGTACTTGTCTCTATTTTAAGTTTTGTCTTCC  
TTGTTTGTCTTATTCTATTAATCACTCATTTTAGTGAGATTATTAATA  
+  
FFFFFFFFFFFFFFFFFFFFFFFFFFFF:FFFFFFFFFFFFFFFFFFFFFFFFFFFFFFFFFFFFFFFFFFFFF:  
FFFFFFFFFFFFFFFFFFFFFFFFFFFF,FFFFFFFFFFFFFFFFFFFFFFFFFFFF:FF  
@A00721:190:HGJW7DSXY:4:2313:9941:18740\_2:N:0:TCTGCAAG+GCTGCACT  
CGACAACAGCAGGGGTTTTCGAATAGTGATAGCCACCCGCCTTACAGAGGGGAGCAGCATGACCATA  
ATTGGTATTGACTTTGGTACCACCTTTTCTACTGTCTGTCTCGCCTCT  
+  
FFFFFF:FF:FFFFFFFFFFFFFFFFFFFFFFFFFFFFFFFFFFFFFFFFFFFF:FFFFFFFFFFFFFFFFFFFF:F  
:FFFFF,FFFFFFFFFFFF,FFFFFFFFFFFFFFFFFFFFFFFFFFFFFFFFFFFF  
@A00721:190:HGJW7DSXY:4:2210:29306:3114\_1:N:0:TCTGCAAG+GCTGCACT  
CTTAACAACAATGATAGTGAATTTATACCTACAATCATTGGTTTTTCTAATAATGATGACACTATTGT  
TTATGGATATGATGCTATTACTCATGATGGTTACGGTCAGGGAGGATTCTCAGTTTACAAGGACCTTA  
AGC  
+  
FFFFFFFFFFFFFFFFFFFF:F:FFFFFFFF:FF:FFFFFFFFFFFFFFFFFFFFFFFF:FFFFFF:FFF:FFFFFF  
FFFFFFFFFFFFFFFFFFFF:FFFFFFFFFFFFFFFFFFFFFFFFFFFFFFFFFFFFFFFFFFFFFFFFFFFF  
FFF  
@A00721:190:HGJW7DSXY:4:2539:32000:33270\_2:N:0:TCTGCAAG+GCTGCACT  
CCGAAAGACGTGCTAAATTAACCATTTGTACGATGTGCTGTCTCGGCGATCACTTTTCACTAAGA  
ATTGGTCCTACTTTTGACAAGGCCAACTTCGTAATCTTCATGAGATC  
+  
FFFFFFF:FFFFFFFFFFFFFFFF:F:FFFFFFFFFFFFFFFFFFFFFFFFFFFFFFFFFFFF:FFFFFF  
FFF:FF:FFFFFF:FFFF:,FFFFFFFFFFFFFFFFFFFF:FF,F:FF  
@A00721:190:HGJW7DSXY:4:2241:6587:5259\_1:N:0:TCTGCAAG+GCTGCACT  
TAGGGATTTTGAGAGAGTGAAAGGCTTCAATTGTAGTGGTTTGGTCGTTTCAGTACCCAGTCAGTATA  
CCTCTACGCAAAGATATTTTCATGAAAACCTACAGAGGAACGTACCGGATTACCTGTCTTTCATATTATG  
AAT

```
F:F,FF:FFF::FFFFFFFF,FFFFFFFFFFFFFFFFFFFFFFFF:FFF,FFFFFFFFF:F,FFFFFFFFFFFF
FFFFFF,FFFFFF:F:FFFFFF:FFFFFF::,FFFFFFFFFFFFFFFFFFFFFFFFFFFFFFFFFFFFFFFF
FFF
```

[illegible]

```

FFFFFFFFFFFFFFFFFFFFFFFF:FFFFFFFFFFFFFFFFFFFFFFFF:FFFFFFFFFFFFFFFFFFFFFFFF
FFFFFFFFFFFFFFFFFFFFFFFF:FFFFFFFFFFFFFFFFFFFFFFFF

```

```
FFFF,FF:FFFFFF,FFF,FFF,,F:F:FFFF:,FF::F:FFFFFF:FF,FF::,F::FF:FF,FF,,:  
F:FFFFFF::FF,FF,FF,FFF,FFFF,FFF,F,F:F,,FFF,:FF,E:
```

```

:FFFF,F,FF,FFFFFFFF,FF:,F:FF::F,FFF,F:FF:,FFF,FFF,F:, ,F,: ,FFFFFFFF,F
,FFFFFF:FF:FFFFFF:F:FF:FF,FFFFFFFFFF,FF,F:FFFFF,,FFF,FFF:F,:FFFFFFFFF:
F,,

```

```

FFFFFFFFFFFFFFFFFFFFFFFFFFFFFFFFFFFFFFFFFFFFFFFFFFFFFFFFFFFFFFFFFFFFFFFF
F:FF,FFFFFFFF:FFFFFFFFFFFF:FFFFFFFFFFFFFFFFFFFF:FFFF,

```

[illegible][illegible]

@A00721:190:HGJW7DSXY:4:1531:8115:11819\_2:N:0:TCTGCAAG+GCTGCACT  
CTAAAATATTTACAAAATCTTACCACTATCTACGAACCTAAAGTTCTGAAGACGTTGCTTGTCGCTTC  
CTCCTTTAATGGCACTACCTCGGTACAATCTTACTTGGAACGAAGGCG

@A00721:190:HGJW7DSXY:4:2120:18078:25504\_1:N:0:TCTGCAAG+GCTGCACT  
GTTCTGTCTATATTAGGTGAAGCGAAATACGATTTCAACGTCAACGTTACCGAGTTTCGTTTCGTA  
CCTTGATGCTGACTTTCGTCAATATGATTTGATCTGGTTGCTCAATTCTAAGCGTGTTCCGCTTAGTG  
CGA

@A00721:190:HGJW7DSXY:4:2264:31919:27524\_1:N:0:TCTGCAAG+GCTGCACT  
TACGAACCTTGACTCTACTATACGTGACATACTAAATACTAGATATTTGGATGATCTTGATAAAGAACT  
TCATGAATTTTCAGAGGATGAAAAATTTTCTTCCTTGGATTTTAATATAAAGAATCTTTACCAGGACT  
CCT

@A00721:190:HGJW7DSXY:4:2326:15374:22106\_1:N:0:TCTGCAAG+GCTGCACT  
TGATCGTAAGAAGTTTATAAGGAACATATCCATTTGTTGTAATAGGGTCATCAACTTAGAACTCGAAA  
CTCTAAGTGGTAATACTGTCTTTCCAAGCTTACCTGTATCTTCAATGAAATTGGACTCTTCGATAGGG  
GAC

@A00721:190:HGJW7DSXY:4:2156:10538:8343\_1:N:0:TCTGCAAG+GCTGCACT  
GGAAGATCTGTTATCGACGTTTATCGTTTACGAAGTATCACTCCACCGGTGAATGGTTTAAAGAATAC  
TATAAATAGAATAGCTATTACTACTAATGGCGTTGGCCTAGTGGATGTTATTAGTGACATCTGGTCAA  
TTT

@A00721:190:HGJW7DSXY:4:1335:21133:15577\_1:N:0:TCTGCAAG+GCTGCACT  
TGGTCTTTATTCTATTATTGATTTTATGAGATTGATACGTTAACAGAAGATGATGTTAGAGTAGAAT  
TCCTGAAGAGTCCTTCCGTAACCAACTTCTTGACAATTTTCTTCAATCCTTCGATAATAGTTAAATCT  
AGG

@A00721:190:HGJW7DSXY:4:1376:21025:13917\_2:N:0:TCTGCAAG+GCTGCACT  
TACACAATTAAGAAATAATCCTACATTGACTGATTATCTAAAGATTGAAGGAAAATTTTATCCTCGTT  
TAACCTACTTAGACTTTCCTACGATACAAATGATACTTCTAATTTAC

@A00721:190:HGJW7DSXY:4:1602:24560:28557\_1:N:0:TCTGCAAG+GCTGCACT  
GGGATGCATGGTGTATCTCCTCAGGAGTCCCGGCATTTGATAATAATGACGAGACTTTTCGTCATAAT

CGCTGCATATTACGGATTACACGGTACCAGCGCATCTCGTGTGCGAGCCTCGACCCGATTATATGGTAT  
TAA

+

FFFFFFFFFFFFFFFFFFFFFFFFFFFFFFFFFFFFFFFFFFFFFFFFFFFFFFFFFFFFFFFFFFFFFFFF  
FFFFFFFFFFFFFFFFFFFFFFFFFFFFFFFFFFFFFFFFFFFFFFFFFFFFFFFFFFFFFFFFFFFFFFFF  
FFF

@A00721:190:HGJW7DSXY:4:2206:26268:5995\_1:N:0:TCTGCAAG+GCTGCACT  
AATTTATAGAAGATTATTTTGACAGAATCAATAAGAATCATCGATTCTCGATTCTAGAGCTTATCTA  
GGTACTCTCATTTACTATGTTGATTTAGTCTACATTTATGCTGATCTAAAATTTGATCTAGATGGAT  
CC

+

FFFFFF:FFF,FF:FFF,FFFFFFFF:FFFFFFFFFFFFFFFFFFFFFFFFFFFFFFFF:FFFFFF:FFFFFFFF:FFFF  
FFFFFFFFFFFFFFFF,FF,F:FFF:FFFFFFFF,FFFFFFFFFFFFFFFFFFFFFFFFFFFFFFFFFFFFFFFF  
FF

@A00721:190:HGJW7DSXY:4:2355:24659:22686\_1:N:0:TCTGCAAG+GCTGCACT  
TTCTAGAATTCTTAATTATAATTCAACCTCAAAGTTACGTGTTTACAGTAACGAGATCACACATT  
TTGAGAACTAACTATGTTATGTTCTCTGATCATTTTGACAATCTCTTCTTATAATAATAATAATA  
ATA

+

FFFFFF:FFF,FFFFFFFFFFFFFFFFFFFFFFFFFFFFFFFFFFFFFFFFFFFFFFFFFFFFFFFF:FFFF:FFFFFF:FFF  
FFFFFFFFFFFFFFFFFFFFFFFFFFFFFFFFFFFFFFFFFFFFFFFFFFFFFFFFFFFFFFFFFFFFFFFF  
FFF

@A00721:190:HGJW7DSXY:4:2357:10601:24956\_2:N:0:TCTGCAAG+GCTGCACT  
CAAATAGTGGAAGGCTCCAGTCAACACTAGTTCGAGTGCTGTTTGATTACGATGACGTGAGAATA  
GGTGAAGGGATAGTTTTTACCTCGACCAACATTAAGGCGGCGGCGACT

+

FFFF:FFFFFFFFFFFFFFFFFFFFFFFFFFFFFFFFFFFFFFFFFFFFFFFFFFFFFFFFFFFFFFFF  
FFFFFFFF:FFFFFFFFFFFFFFFFFFFFFFFFFFFFFFFF,FFFFFFFFFFFFFF

@A00721:190:HGJW7DSXY:4:2433:18873:10692\_2:N:0:TCTGCAAG+GCTGCACT  
CTTCACCCAAAATGAAGGACACTTCGAACTGAATAATGATGCACTACAAACAAGTATCGCTAATCAT  
CTGAAAAAGGCTCTAAAGGACACTATACAATATCCAGACGACGACGAA

+

FFFFFFFFFFFFFFFFFFFFFFFFFFFFFFFFFFFFFFFFFFFFFFFFFFFFFFFFFFFFFFFFFFFF:FFFFF  
FFFFFFFFFFFFFFFFFFFFFFFFFFFFFFFFFFFFFFFFFFFFFFFFFFFFFFFFFFFFFFFF

@A00721:190:HGJW7DSXY:4:2329:31141:25989\_2:N:0:TCTGCAAG+GCTGCACT  
CACCACATTTTGGTCAAGTCAATCCGTTGAGAAAATTTCTTAGAGGATATTCGCCATTGTGGTACGAA  
TTGGTCCAACATTTACCACCAATTCTTTTGATACAACCTAGCCTTC

+

FFFFFFFFFFFFFFFF:FFFF,FFFFFFFF::FFFFFFFFFFFFFFFFFFFFFFFFFFFFFFFFFFFFF,  
FFFFFFFF:FFFFFFFF:FFFFFFFFFFFFFFFF:FFFFF:FFFF:F

@A00721:190:HGJW7DSXY:4:2378:29713:2597\_2:N:0:TCTGCAAG+GCTGCACT  
GCTTGCTATTCACCAGATTGGTTCGAACCCGTTGATGCTATGTCAGAAGAAGCTATTCAAGCTTGTGCG  
TTTAAAGACTGCAGAGGCTGTCAAACAAGCCCAGACTCAAGGAGTCCA

+

FFFFFFFFFFFFFFFF:FFFFFFFFFFFFFFFF:FFFFFFFFFFFFFFFFFFFFFFFFFFFFFFFFFFFF  
FFFFFFFFFFFFFFFFFFFFFFFFFFFFFFFFFFFFFFFFFFFFFFFFFFFFFFFFFFFFFFFF

@A00721:190:HGJW7DSXY:4:2169:17418:12994\_2:N:0:TCTGCAAG+GCTGCACT  
GGTGATAAAAATTATTTAGAGATCTTTTCTACTTACAAAGGACAATTCAGTTTCATTAATTCTACGGA  
AAAGTCCGGAGTATATTGTATGTTAATAGATAGTGGGATAATAGTTCT

+

FFFFFFFFFFFFFFFF:FFFFFFFF:FFFFFFFFFFFFFFFFFFFFFFFF:FFFFFFFFFFFFFFFFFFFFF,FF  
FFFFFFFFFFFFFFFF:FFFFFFFFFFFFFFFF:FFF:FFFF:FFFF

@A00721:190:HGJW7DSXY:4:1106:13612:29262\_2:N:0:TCTGCAAG+GCTGCACT  
TGCTATTGATTATGTAACCGATAGGAGTTGTATAGTTGAAGATGTGGCTTTAGACGATAATCCTTTAA







@A00721:190:HGJW7DSXY:4:2350:26756:21778\_2:N:0:TCTGCAAG+GCTGCACT  
GAAGGGGAAATTACCCCTAATTCTGAAGGAAGATCTCCACCATCTGGGGTTGGGAATAAGAAATCTG  
CACGGGCCAAAGAGGCCGCTGCTACGAAGTCGCTGAAGGCGGCTTGGG

+

FFFFFFFFFFFFFFFFFFFFFFFFFFFFFFFFFFFFFFFFFFFFFFFFFFFFFFFFFFFFFFFFFFFFFFFFFFFFFFFF  
FFFFFFFFFFFFFFFFFFFFFFFFFFFFFFFFFFFFFFFFFFFFFFFFFFFFFFFFFFFFFFFFFFFFFFFFFFFFFFFF

@A00721:190:HGJW7DSXY:4:2521:21567:36338\_2:N:0:TCTGCAAG+GCTGCACT  
TGTAAGTTGCGCCTGCCGACCCATCTTTGAGACCAAGACTCTCTACAGTAGGTTCTGTCCTACTAT  
GAGCAAACTGTTGAATTCGTCACTGAGGACGAAGGTGAGAGGACTTT

+

FFFFFFFFFFFFFFFFFFFFFFFFFFFFFFFFFFFFFFFFFFFFFFFFFFFFFFFFFFFFFFFFFFFFFFFFFFFFFFFF  
FFFFFFFFFFFFFFFFFFFFFFFFFFFFFFFFFFFFFFFFFFFFFFFFFFFFFFFFFFFFFFFFFFFFFFFFFFFFFFFF

@A00721:190:HGJW7DSXY:4:2443:2474:28260\_1:N:0:TCTGCAAG+GCTGCACT  
CTGAGAGCAGTCGCTGGGGAAAGAGAATTGCGTGGGTGAAGGCCGACGCTTCGAGCTTGAGTGTGAC  
GAGGCCGGTGACGTTTTTTGTCAACGGCGTTTGGAGGATTTTATCCGCGCTTAAGTATGGGGCGAAGAT  
CCC

+

FFFFFFFFFFFFFFFFFFFFFFFFFFFFFFFFFFFFFFFFFFFFFFFFFFFFFFFFFFFFFFFFFFFFFFFFFFFFFFFF  
FFFFFFFFFFFFFFFFFFFFFFFFFFFFFFFFFFFFFFFFFFFFFFFFFFFFFFFFFFFFFFFFFFFFFFFFFFFFFFFF  
FFF

@A00721:190:HGJW7DSXY:4:1619:16170:7639\_2:N:0:TCTGCAAG+GCTGCACT  
GTTGGCATATTTATGCCGACGATAATAAGCCTGTCAACCTTAAGCACCGAGGTAAGCTCGGGACTTAC  
AAGAGAGAGTGTGAGAGAGTCGCTCTCACTATTTTTGCCGAGAATGCG

+

FFFFFFFFFFFFFFFFFFFFFFFFFFFFFFFFFFFFFFFFFFFFFFFFFFFFFFFFFFFFFFFFFFFFFFFFFFFFFFFF  
FF:,FFFFFFFFFFFFFFFFFFFFFFFFFFFFFFFFFFFFFFFFFFFFFFFFFFFFFFFFFFFFFFFFFFFFFFFF

@A00721:190:HGJW7DSXY:4:1668:16098:19789\_1:N:0:TCTGCAAG+GCTGCACT  
GTGACTGGAGTTCAGACGTGTCTCTTCCGATCTGTTTTGTTATATTCACTGGTTCTGGGAGGCTGC  
TTTCTCCATAATTACAACCTCTCTTTAGAGAGCATTAGAAGGAAGTTGGGCAAATTCCCACATATGG  
TAG

+

FFFFFFFFFFFFFFFFFFFFFFFFFFFFFFFFFFFFFFFFFFFFFFFFFFFFFFFFFFFFFFFFFFFFFFFFFFFFFFFF  
FFFFFFFFFFFFFFFFFFFFFFFFFFFFFFFFFFFFFFFFFFFFFFFFFFFFFFFFFFFFFFFFFFFFFFFFFFFFFFFF  
FFF

@A00721:190:HGJW7DSXY:4:1360:31675:18208\_2:N:0:TCTGCAAG+GCTGCACT  
ACTTTTCTGAAAATTTTCTTTCTCCGTCATTGGGGATTTCGATGTGAGAAGGTGGAAGGTGTCA  
AGGGTCTTCTTCATGCTGATCTTTCAGGACCTAATCACATCATGATTG

+

FFFFFFFFFFFFFFFFFFFFFFFFFFFFFFFFFFFFFFFFFFFFFFFFFFFFFFFFFFFFFFFFFFFFFFFFFFFFFFFF  
FFFFFFFFFFFFFFFFFFFFFFFFFFFFFFFFFFFFFFFFFFFFFFFFFFFFFFFFFFFFFFFFFFFFFFFFFFFFFFFF

@A00721:190:HGJW7DSXY:4:1447:29541:17394\_2:N:0:TCTGCAAG+GCTGCACT  
ATCGAGTTGGAGGGAGGAAGTTCTCCGAAATTAAAGACGGGGGATTAAGAGTCCAGCTGTAAGTGTG  
ATTTTCAGAGAGGGGAGCTCTGAAAAGGAACTTCGTGAGAAGATGAGG

+

:FFFFFFFFFFFFFFFFFFFFFFFFFFFFFFFFFFFFFFFFFFFFFFFFFFFFFFFFFFFFFFFFFFFFFFFFFFFFFFFF  
FFFFFFFFFFFFFFFFFFFFFFFFFFFFFFFFFFFFFFFFFFFFFFFFFFFFFFFFFFFFFFFFFFFFFFFFFFFFFFFF

@A00721:190:HGJW7DSXY:4:1228:19388:27054\_2:N:0:TCTGCAAG+GCTGCACT  
GAGTTTGAGGAAGGCTCTAGAGAAGATCTCACCACCTGGAGAAGGCAAGTGGAGAGTCCAGAAGTTGA  
TGAAGAAGGATTATTTGAAGCAGGGTTACCACTTCCTAAGGTGGATG

+

FFFFFFFFFFFFFFFFFFFFFFFFFFFFFFFFFFFFFFFFFFFFFFFFFFFFFFFFFFFFFFFFFFFFFFFFFFFFFFFF  
FFFFF:FFFFFFFFFFFFFFFFFFFFFFFFFFFFFFFFFFFFFFFFFFFFFFFFFFFFFFFFFFFFFFFFFFFFFFFF

@A00721:190:HGJW7DSXY:4:2230:8549:1141\_2:N:0:TCTGCAAG+GCTGCACT  
TTCTTTGGAGTTTTAGATAATCTTTTGAGAAGGGGTATAGAGCCAGCAAGAGAAGCTTATATGCTGG

TTTAAGTGATGATTATCACTCCTTGAGAAGACAAGCCACATTAAGATA  
+  
FFFFFFFFFFFF:FFFFFFFFFFFFFFFFFFFFFFFFFFFFFFFFFFFFFFFFFFFFFFFFFFFF  
FFFFFFFFFFFFFFFFFFFFFFFF:FFFF:FFFFFFF:FFFFFFFFFFFFF  
@A00721:190:HGJW7DSXY:4:2208:16116:13683\_2:N:0:TCTGCAAG+GCTGCACT  
CTTGGGGTTTCGAATGTCATTAGTGCTTACGATTGAAAGAGGTCCTTTTGAGTATCGACAGATCTTT  
CGATCTTGAGGACGTACATTAAACGTGGCAGAATTTCGGTAACTTACCA  
+  
FFFFFFFFFFFFFFFFFFFFFFFFFFFFFFFFFFFFFFFFFFFFFFFFFFFFFFFFFFFFFFFFFFFF  
FFFFFFFFFFFFFFFFFFFFFFFFFFFFFFFFFFFFFFFFFFFFFFFFFFFF:FFFF  
@A00721:190:HGJW7DSXY:4:1677:24189:26349\_2:N:0:TCTGCAAG+GCTGCACT  
GGGAAGTTGTGGGATTTAACTTTGACTCAACTACTCCGATCAGATCCGGATGGTTTGATTGGTATGGA  
CTACTCGACTTTTGATCTGGAGTTGTCTAGGGTCATGGCAGATACTAC  
+  
FFFFFFFFFFFFFFFFFFFFFFFFFFFFFFFFFFFFFFFFFFFFFFFFFFFFFFFFFFFFFFFFFFFF  
F:FFFFFFFFFFFFFFFFFFFFFFFFFFFFFFFFFFFFFFFFFFFFFFFFFFFF:  
@A00721:190:HGJW7DSXY:4:1161:7817:15123\_2:N:0:TCTGCAAG+GCTGCACT  
AATATGCAGGTCAAAGATTCTGTAGCTCTGAGGGCGGTTGAGGGAGCCGTTTGGCCGACTTTAACTA  
TTCTAAGAGTCTTTATGATTCAAACCTATCGTTGTCTGACCTTACAA  
+  
FFFFFFFFFFFFFFFFFFFFFFFFFFFFFFFFFFFFFFFFFFFFFFFFFFFFFFFFFFFFFFFFFFFF  
FFFFFF:FFFF:FFFFFFF,FFFF,:FF::F:,FF:FF,F,FF,FF  
@A00721:190:HGJW7DSXY:4:2275:9579:25723\_2:N:0:TCTGCAAG+GCTGCACT  
GCGGCTTATTGTGCGCGCAGTTTCCAGAATTGCGGTTGAAGTTCACCATTTCTATCTTGAATGCTCAG  
CCGTCGCAGCCATATCGAGACTATGTTATAATCACTTGTTAAAGTACA  
+  
FFFFFFFFFFFFFFF:FFFFFFFFFFFFFFFFFFFFFFFFFFFFFFFFFFFFFFFFFFFF:FFFFFFFFFFFFFFF:FF  
:FFFFFFFFFFFFFF:FFFF::FFFFFFFFFFFFFF,FFFF:FFFFFFF  
@A00721:190:HGJW7DSXY:4:2168:12988:2472\_2:N:0:TCTGCAAG+GCTGCACT  
TTAGATATTATTGATATTGGAGGCGATATTCGTTTTCATATCCAAAACCTCTTGAATGGAGTACATAT  
TTGCAACCCTATTCTTGATGTGAAAGATGCATCGAGGTATACGTCTAG  
+  
FFFFFFFFFFFFFFFFFFFFFFFFFFFFFFFFFFFFFFFFFFFF:FFFFFFFFFFFFFFF:FFFFFFFFFFFFFFF  
FFFFFFFFFFFF:FFFFFFFFF:,FFFFFF:FFFF,FF::FFFF:FFFFFFF  
@A00721:190:HGJW7DSXY:4:1173:32325:24314\_2:N:0:TCTGCAAG+GCTGCACT  
TCACGAGACGTATGAAAGCTATCGGAGGGAAGCAAAATGTTTCGTTCTGTTACAAGAACGCTTTGGA  
TTGTGACCATAAAGCCTCAGTTGCGATAGCTGTAGAGGTATACGATAT  
+  
FFFFF:FFFFFFFFFFFFFFFFFFFFFFFFFFFF:FFF:FFFFFFFFFFFFFFFFFFFFFFFFFFFFF  
,FFFFFFFFFFFFFFF:FFFFFFFFFF,FFFFFFFFFFFFFFFFFFFF:FFF  
@A00721:190:HGJW7DSXY:4:1405:2058:16924\_2:N:0:TCTGCAAG+GCTGCACT  
CTTAAGAGAGAGATTGATGTATGTCATTTCTGCTTAGTTTGTCCCGGCGAATTATTGGACACGATGAA  
AAATGACATACCCGTTCTGACCTTGGTATCGTTATCCGTCATGGAGA  
+  
FFFFFFFFFFFFFFFFFFFF:FF:FFFFFFFFF:FFFFFFFFFFFFFFF::F:F:FFFFFFFFF:FFFFFFFF:FF  
FF:FFFFF:FFFFFFFFFFFFFF:FFFFFFFFFFFFFFFFFFFF::FFF:FFFF  
@A00721:190:HGJW7DSXY:4:1620:30346:24706\_2:N:0:TCTGCAAG+GCTGCACT  
GTTATTCTCACAACAAAGATAAGATTTTATCTTTCTTCAAACACCCTGTTTTCTTAAGGGCGGACAA  
TTGTTCCATTGTGAACCTTGGGGACTAGATTGAGCATTAATGAGTTC  
+  
FFFFFFFFFFFFFFFFFFFFFFFFFFFFFFFFFFFFFFFFFFFF:FFFFFFFFFFFFFFF:FF:FFFFFFFFFFFF  
FFFFFFFFFFFFFFFFFFFFFFF:FFFFFFFFFFFFFFFFFFFF:FFFFFFFFF  
@A00721:190:HGJW7DSXY:4:1149:10664:20275\_2:N:0:TCTGCAAG+GCTGCACT  
TGGACAATTCAGAATACCTATTTCCGTACCAAGAGCCACTGCCAATCTCATCGCTATACGCATACCTG

+

@A00721:190:HGJW7DSXY:4:1223:28628:34194\_2:N:0:TCTGCAAG+GCTGCACT

+

@A00721:190:HGJW7DSXY:4:1366:1678:22780\_1:N:0:TCTGCAAG+GCTGCACT

+

@A00721:190:HGJW7DSXY:4:1406:6659:4883 1:N:0:TCTGCAAG+GCTGCACT

+

@A00721:190:HGJW7DSXY:4:1328:27507:6230 1:N:0:TCTGCAAG+GCTGCACT

+

@A00721:190:HGJW7DSXY:4:1361:5132:19523 1:N:0:TCTGCAAG+GCTGCACT

+

@A00721:190:HGJW7DSXY:4:2527:32226:26334 1:N:0:TCTGCAAG+GCTGCACT

 $+$ 

@A00721:190:HGJW7DSXY:4:2574:16631:7404 1:N:0:TCTGCAAG+GCTGCACT

ACTGGAGTTCAGACGTGTGCTCTTCCGATCTGTTTCAACACTTATCACCACTTTTGAAAGGAAAATAA  
TTGGTGATGAAAATACGTATGTCGGTGGGGTTCTCAAGGCTCTCATCGCCACTGGGATTCTAAGGGGT  
TCC

+  
FFFFFFFFFFFFFFFFFFFFFFFFFFFFFFFFFFFFFFFFFFFFFFFFFFFFFFFFFFFFFFFFFFFFFFFF  
FFFFFFFFFFFFFFFFFFFFFFFFFFFFFFFFFFFFFFFFFFFFFFFFFFFFFFFFFFFFFFFFFFFFFFFF  
FFF  
@A00721:190:HGJW7DSXY:4:2238:7726:25708\_2:N:0:TCTGCAAG+GCTGCACT  
AGGATTCTTCTTTTGGTCCTTACGTCTTAAGTAATTTGGATGTTGTGCGAAAACATCAGGTTCTTGTC  
ACGATTCTTAAAAGAAGTTTATTAAACTTCAGAGTCTCTTGGAAGTC  
+  
FFFFFFFFF:FF,FFFFFFFFFFFFFFFFFFFFFFFF,FFFFFFFFFFFFFFFFFFFFFFFF:FFFFF,FFFFFF  
:FFF,F:F:FFFFFFFFF:FF:FFFFFFFFFFFFFFFFFFFF,FFFF,FFF  
@A00721:190:HGJW7DSXY:4:1139:19108:22467\_1:N:0:TCTGCAAG+GCTGCACT  
CAATAGCCACAGACTTTCTGGGAAAAGAGACCTCTGTTGGTAGAGGAGTTGAGAGAATTACTCAGATT  
CAATCTGGCATCACTGAACGTCTACAACGAGTTAGGGAGTGGCTAGGTTTTAAAGATCCTTTGCACA  
AGC  
+  
FFFFFFFFFFFFFFFFFFFFFFFFFFFFFFFFFFFFFFFFFFFFFFFFFFFFFFFFFFFFFFFFFFFFFFFF  
FFFFFFFFFFFFFFFFFFFFFFFFFFFFFFFFFFFFFFFFFFFFFFFFFFFFFFFFFFFFFFFFFFFFFFFF  
FFF  
@A00721:190:HGJW7DSXY:4:1552:15176:33129\_2:N:0:TCTGCAAG+GCTGCACT  
TTTCGACGTCGCGAAAACGATGAAGATTTCCACACTGTTGAGAATCTTCTGATGCTGAATTTGAGG  
AAAATTTTTCGGAAGTTTTTGGTATAAATCCTGATGGCTCAGTACAGG  
+  
FFFFFFFFFFFFFFFFFFFF:FFFFFF:FFFFFFFFFFFFFFFFFFFFFFFFFFFFFFFFFFFFFFFFFFFF  
FFFFFFFFFFFFFFFFFFFF,FFFFFFFFFFFFFFFFFFFF:FFFFFFFFFFFFF:  
@A00721:190:HGJW7DSXY:4:1404:3052:31485\_2:N:0:TCTGCAAG+GCTGCACT  
AAACCTTCTTTTATCATTGCAACAGGACTTTGAGAAGACTGTTGAAATGGACAAAATCTGGGATCATA  
GGTATGTGTCACGCTACACTCGAAATATGGGCCCTCATAAGGAAGTAT  
+  
FFFFFFFFFFFFFFFFFFFF:FFFFFFF,F:F:FF:FFF:FF:FFFFFFFFFFFFFFFFFFFFFFFF:FFFFFF:  
FFFFF:FFFFFFFFFFFF::FF::FF,FFFF:FFFF:FFFFFFFFFFFF  
@A00721:190:HGJW7DSXY:4:2364:5086:4539\_1:N:0:TCTGCAAG+GCTGCACT  
CGTCATTACAGTCTGGAAGTTAGATCATTTGTTTCAGGAAGATCTCTACAGAGATTATCGAGAGTTGTG  
ATCTAGTTCTAAATTTAGGTCGACGACTTTAGCAACTTTAGATAAATTCTTCCGGGCTCAATGACC  
TTT  
+  
FFFFFFFFFFFFFFFFFFFFFFFFFFFFFFFFFFFFFFFFFFFFFFFFFFFFFFFFFFFFFFFFFFFFFFFF  
FFFFFFFFFFFFFFFFFFFF:FFFFFFFFFFFFFFFFFFFFFFFFFFFFFFFFFFFFFFFFFFFFFFFFFFFF  
FFF  
@A00721:190:HGJW7DSXY:4:1311:23981:15969\_2:N:0:TCTGCAAG+GCTGCACT  
CATCGCAAAGAAGACTTTATTAGTTCATGAAGTTCTTACACTTCTCGCGACTAATGTCAGCTTCACTA  
CAAAGGCGTTACGTAAAGTAGTTTTACGCTTTATCTTAAAGCATTAC  
+  
FFFFFFFFFFFFFFFFFFFFF:FFF:FFFFF:FFFFFFFFFFFFFFFFFFFFFFFFFFFFFFFFFFFFF  
FFF:FFFFFFFFFFFFFFFFFFFFFFFFFFFFFFFFFFFFF:FFFFFFFFF  
@A00721:190:HGJW7DSXY:4:1266:5403:12602\_2:N:0:TCTGCAAG+GCTGCACT  
ACTTTTGAATATGACAGAAGCTCGCCATATCAGATTAGAGACATGCCAGTTAGAGTTCTTCTAACCA  
GGACTGATGGTGAGATTCTTTTACCTTTTGGAGGTCCAGGAACCTTTA  
+  
FFFFFFFFFFFFFFFFFFFF:FFFFFF:FFF,FFFFFFFFFFFFFFFFFFFFFFFF:FFFFFFFFFFFFFFFF  
FFFFFFFFFFFFFFFFFFFFFFFFFFFFFFFFFFFFFFFFFFFFFFFFFFFFFFFF:FFFFF  
@A00721:190:HGJW7DSXY:4:1477:17517:8531\_2:N:0:TCTGCAAG+GCTGCACT  
CCAAGGACGTTTCCGTCGGAGGATGACAGGTGGGAGACCGCTCAATAACACTCTATTGAATCCCTTTT  
CCACGATGAAAGCTCTTTATGAGGTGCTCCATGCAAATTTACAGTTCC  
+

FFFFFFFFFFFFFFFFFF:FFFFFFFFFFFFFFFFFFFFFFFFFFFFFFFFFFFFFFFF  
 FFFFFFFFFFFFFFFFFF:FFFFFFFFFFFFFFFFFFFFFFFFFFFFFFFFFFFFFFFF  
 @A00721:190:HGJW7DSXY:4:1519:20030:13886\_1:N:0:TCTGCAAG+GCTGCACT  
 GTATTTTGATAAATTTGTTGGAATCGATAATGATACTGACGAAGGTTCTATTACCACCCTTGTCAATTG  
 ATACAAACATTCTAGGTGATGCTTTCTTAGAGGCTCGTCTAGCCGCTGAGATTCTGCTTACCTATTTA  
 CAA  
 +  
 FF:FFFFFFFF:FFFFFFFF,FFF,:FFFFFFFFFFFFFFFFFFFFFFFFFFFFFFFF:FFFFFF:FFF,FFFF  
 FFFFFFFFFFFFFFFFFFFFFFFFFFFFFFFFFFFFFFFFFFFFFFFFFFFFFFFFFF:FFFFFFFF:FFFF:,FFFFF  
 :FF  
 @A00721:190:HGJW7DSXY:4:2174:28456:2957\_2:N:0:TCTGCAAG+GCTGCACT  
 TTTGAGTGATAACGATTTAGTACTGGGAAATGGTGGTAGTCAGTTTACTACTTTTCTTTCCTCCCT  
 TTTTCGATTGGATTCGACGGGGTCTTCGTCTCACGACTAATTTGATAA  
 +  
 FFFFFFFFFFFFFFFFFF:FFFFFFFFFFFFFFFFFFFFFFFFFFFFFFFFFFFFFFFF:FFFF:FFFFFFFFFFFFFFFF  
 FFFFFFFFFFFFFFFFFFFFFFFFFFFFFFFFFF:F:FFFFFFFFFFFF,FFFFFFFF  
 @A00721:190:HGJW7DSXY:4:2124:3260:2284\_2:N:0:TCTGCAAG+GCTGCACT  
 TACTTATGAAGGAGGTATTACTTCGGAAGTTCTTAATGTAGGTCTCCTAGTACTTAAGGGTTTATGTT  
 TCGGTTTCAGCTGGATGGATCTTTTGATGGTATGTTTCACATTGCGTG  
 +  
 FFFFFFFFFFFFFFFFFFFFFFFFFFFFFFFFFFFFFFFFFFFFFFFFFFFFFFFFFF:FFFFFFFFFFFF  
 FFFFFFFFFFFFFFFFFF:FFFFFFFFFFFFFFFF:FFFFFFFFFFFFFFFF  
 @A00721:190:HGJW7DSXY:4:1418:23249:28134\_1:N:0:TCTGCAAG+GCTGCACT  
 TTGGGAAGAGATTAAACATAAAATCCAGCGATTCTATTATGTCGCTAAAGCCTGTCCAGTTGTCGATG  
 ATGTTGCGGCTGTGGGGATTAACCTCCCTCGTGAAACTTACGACGATGTTCTCGCTCGCATTTCACAA  
 GGA  
 +  
 FFFFFFFFFFFFFFFFFFFFFFFFFFFFFFFFFFFFFFFFFFFFFFFFFFFFFFFFFF:FFFFFFFFFFFF  
 FFFFFFFFFFFFFFFFFF:FFFFFFFFFFFFFFFF:FFFFFFFFFFFFFFFF  
 FFF  
 @A00721:190:HGJW7DSXY:4:1266:26847:17456\_1:N:0:TCTGCAAG+GCTGCACT  
 GAGATCTGCCACTTCTAATTTTAGGAAACGTCGCGAAAAGAAAGTTTCATGAGGATGTCTTGTCGAAA  
 AATATCGCCGGAACCTCTAATAGAGGATCCTGATGACATTATTTCAACGGATACCGATCTCAGTTCT  
 ACC  
 +  
 FFFFF:FFFF:FF,FFFFFFFFFFFFFFFFFFFFFFFFFFFFFFFFFFFFFFFF:FFFFFFFFFFFFFFFF  
 FFFFFFFFFFFFFF:FFFFFFFFFFFFFFFFFFFFFFFFFFFFFFFFFFFFFFFFFFFFFFFFFFFFFFFF  
 FFF  
 @A00721:190:HGJW7DSXY:4:1445:28031:23516\_2:N:0:TCTGCAAG+GCTGCACT  
 CAGGAAGTGTCTCCACTGATTCGGAATTAGAGAAAGACGACCTTCTTGTTGGGGACTGAGACCTCTGAA  
 TTTTCAGGGTGCCCTGATGAGGACGTTGAAAGGGATAATTTCAACTCT  
 +  
 FFFFF:FFFFFFFFFFFFFFFF:FFFFFFFFFFFFFFFF:FFFFFFFFFFFF,FFFFFFFFFFFFFFFF  
 FFFFFFFFFFFFFFFFFFFFFFFFFFFFFFFFFF,FFFFF:,FFFFFFFF  
 @A00721:190:HGJW7DSXY:4:1337:19777:11287\_1:N:0:TCTGCAAG+GCTGCACT  
 TGTTTCAAAAGACCAGAAACGTAACAAGAATAAAGGTAGGAAGGGGAGAAAACAGAACAGCGAG  
 CGGTTGAAGAGAAACTGATATGGTTGCGGCTGATCGTACCCCAATTCTGCTAGAAAGATCACTCTC  
 GGC  
 +  
 FFF,FFFFFFFF:FF,F,FFFFFFFF:F:FFFF:FFFF::FFFF,FF:FFFFFFFFFFFF,FFFFF  
 FFFFFFFFFFFFFFFFFF,FFF:F,FFFFFFFFFFFFFFFFFFFFFFFFFFFFFFFF:F:FF::FFFFFFFF  
 FFF  
 @A00721:190:HGJW7DSXY:4:1448:21766:25911\_2:N:0:TCTGCAAG+GCTGCACT  
 AGAGTTACGTAGTGGTCGTTCTTTTGGTGATTTTATCAAAGAGAAAGTTTCTGCTAGTCGCGACGATA

GTATTTATCGGAGTGATATTAACAAGTTAACTTCGAACTGACCACTT  
+  
FFFFFFFFFFFFFFFFFFFFFFFFFFFFFFFFFFFFFFFFFFFFFFFFFFFFFFFFFFFFFFFFFFFFFFFF:FFFFFF  
FFFFFFFF,FFF:FFFFFFFFFFFFFFFF:FFF:FFFFFFFF,FFFF  
@A00721:190:HGJW7DSXY:4:1240:9787:18098\_2:N:0:TCTGCAAG+GCTGCACT  
TCAGTTTTCCAAAAAGCTATTAATAGCAGTTGCGGGCTATAATACCGCCTCCAGATTACTCTAACT  
GAATCCACTCTCTTGGGATATAAATGAGTACATCTATAATAGAGTTTT  
+  
FFFFFFFF:FFFF:FFFFFFFFFFFFFFFFFFFFFFFFFFFFFFFFFFFFFFFFFFFFFFFFFFFFFFFF:FFFFFF  
FFF:FFFFFFFFFFFFFFFFFFFFFFFFFFFFFFFF:FFFF:F:FFFFFFFF:F  
@A00721:190:HGJW7DSXY:4:1630:4996:25488\_1:N:0:TCTGCAAG+GCTGCACT  
GGCTTCTCTAAAGAACAGCAACTTTCAACATGAATTAGTTATTGAAAGTCTTGACCCTCACGTCTCAC  
TTTATCACCTTGAGATGGTAAAGTCATTAACAAAGGAAATGTTAAGGCTGATGACTTAAATTCGCA  
TTC  
+  
FF:FFFFFFFFFFFFFFFFFFFFFFFFFFFFFFFFFFFFFFFFFFFFFFFFFFFFFFFFFFFFFFFF:FFFFFFFF:FFFFFFFFFFFFFFFF  
FFFFFFFFFFFFFFFFFFFFFFFFFFFFFFFFFFFFFFFFFFFFFFFFFFFFFFFFFFFFFFFFFFFFFFFF:FFFFFFFF  
FFF  
@A00721:190:HGJW7DSXY:4:2677:32172:24893\_2:N:0:TCTGCAAG+GCTGCACT  
AAAGAGGGTTTGAATAATTACGGAACCTTCTCGTTCTTCATGAAGATCTTCGAGTGTTTTATAGTGA  
GTTATTCTTGCGAAGGTTCAAGTCGATTGATTTTGTGACTACGATCT  
+  
FFFFFFFFFFFFFFFFFFFFFFFFFFFFFFFF:FFFFFFFFFFFFFFFF:FFFFFFFFFFFFFFFFFFFFFFFF  
FFFFFFFFFFFFFFFF:FFFFFFFFFFFFFFFF:FFF,F:FFF:FF,FFFF:FFFF  
@A00721:190:HGJW7DSXY:4:2425:29577:23406\_1:N:0:TCTGCAAG+GCTGCACT  
AGAAGTTCTTCGCAGTTGAATCTCCACCAGGTGGAGGGAAGACCACTGAACTTATAGCGACTTTTGT  
GAATTTTTCGCAAAGGTCTTGAAGTACGTATTGTCACTGCTAATCGTAATTCGCGAGAAGAGATAGT  
GAC  
+  
FFFFFFFF,FFFFFFFFFFFFFFFFFFFFFFFFFFFFFFFFFFFFFFFFFFFFFFFFFFFFFFFFFFFFFFFF  
FFFFFFFFFFFFFFFFFFFFFFFFFFFFFFFFFFFFFFFFFFFFFFFFFFFFFFFFFFFFFFFFFFFFFFFF:FFF  
FFF  
@A00721:190:HGJW7DSXY:4:1125:14968:22028\_2:N:0:TCTGCAAG+GCTGCACT  
CTAGTTCATCGCGGTATTTGTGAAATTAAGACAGACGTGAAAGTTATGATGAGTGATCGTATTAGAAC  
AGCTGATTCTTATTGCATGAACGTCGCTGAGGTCAAACCTGTGGACGT  
+  
FFFFFFFFFFFFFFFFFFFFFFFFFFFFFFFF:FFFFFFFFFFFFFFFFFFFFFFFFFFFFFFFFFFFFFFFF  
FFFFFFFFFFFFFFFF:FFFF:FFFFFFFFFFFFFFFFFFFFFFFFFFFFFFFF  
@A00721:190:HGJW7DSXY:4:1138:24306:25363\_1:N:0:TCTGCAAG+GCTGCACT  
ACGAATTATTCATGATTCACGCTGGTCAGACCCTTTTCTTACACATCTACTTAAGCGGCTTATACC  
ATAGGTTACGGTGATTCCAATCAAATCGGATTCATCAATCGTATTGATCTCCAAGTCGAACTACTT  
CAA  
+  
FFFFFFFFFF,FFFFFFFFFFFFFFFFFFFFFFFF, F:FFFFFFFFFFFFFFFFFFFFFFFFFFFFFFFF  
FFFFFFFFFFFFFFFFFFFFFFFFFFFFFFFFFFFFFFFFFFFFFFFFFFFFFFFFFFFFFFFF:FFFFFFFF  
FFF  
@A00721:190:HGJW7DSXY:4:1519:3513:32440\_2:N:0:TCTGCAAG+GCTGCACT  
TGAGTGTCGTTCTTATCGAAGTCTCAGTTATCGCTGCCCGGCCGACGTTTGTGCGCAACTCTCAGAGG  
TTTACGGCAGAAAAATTTCTCCTGCTTGTAATTGAGAGAGGACACTA  
+  
FFFFFFFFFFFF,FFFFFFFFFFFF:FFFFFFFFFFFFFFFFFFFFFFFFFFFFFFFFFFFFFFFFFFFF  
FFFFFFFFFFFFFFFFFFFFFFFFFFFFFFFF:FFFF,FF:FFF:FFFFFFFF  
@A00721:190:HGJW7DSXY:4:1264:5728:17049\_2:N:0:TCTGCAAG+GCTGCACT  
TATTACTTTCACCTCAAGGTGAAAAGTTTGAATAAACAAAGTCCTTGGAAGAGTAAGGTTAAATGTG

AAGATGCTCAGACTATTCATGAAGTTCAAGGTAATACTTACCAGCACG  
+  
FFFFFFFFFFFFFFFF:FFFFFFF::FFFFFFFFFFFFFFFFFFFFFFFFFFFFFFFF:FFFFFFFFF  
FFFFF:FFFFFFFF:FFFFFFFFFFFFFFFFFFFFFFFFFFFFFFFF:FFFFF  
@A00721:190:HGJW7DSXY:4:1463:27073:29465\_2:N:0:TCTGCAAG+GCTGCACT  
TTTTGCATCACAACACATATTACCGTTGCTCTATCACGACACGTTGAATCTTTACGATACTTTGTTA  
TCAATGTAAAGTTAAACGATGCTACTTGTGAGAGGATCAATCACAGTA  
+  
FFFFFFFFFFFFFFFFFFFFFFFFFFFFFFFFFFFFFFFFFFFFFFFFFFFFFFFF:FFFFFFFFFFFFFFFF:FFFFF  
FFFF,FFFFFFFFFFFF::FFFFFFFFFFFFFFFFFFFFFFFFFFFFFFFFFFFFF:  
@A00721:190:HGJW7DSXY:4:2239:27037:20917\_2:N:0:TCTGCAAG+GCTGCACT  
TTAGCACGGGAGGTTGCAGATTCAACCCCTTATATCGAGGCTATCGATGACGATGAGTATCTTGAAGT  
GGTTGACGACAAGCCTCAAGAGGGTAGAGGACCACCTGGATCTTCTAC  
+  
FFF:FF:FFF,:FFF,FFFFFFFF,FF::FF,F:FFF:,FFFFFFF,FFFFFFFF::FFF,FFFFFF  
,:FFFFFFF:F:FFFFFFF,:FFFFF,FFFFFFFFF:::FFFF:FF:FF  
@A00721:190:HGJW7DSXY:4:1205:13277:14528\_1:N:0:TCTGCAAG+GCTGCACT  
AACCACCTTAACGTCACTCGGTAATCTTTCAGCCGAATTAAGTACTAATGAGTTCAAGTCGGTTGTGC  
ATCGAATTAAGATCAAGGCTAATACCTTTATAGGTAAGAAGCCCCTTGAGCCGCGTAGTCAGCGCGTT  
TAG  
+  
FFFFFFFFFFFFFFFFFFFFFFFFFFFFFFFFFFFFFFFFFFFFFFFFFFFFFFFFFFFFFFFFFFFFFFFFFFFFF  
FFFFFFFFFFFFFFFFFFFFFFFFFFFFFFFFFFFFFFFFFFFFFFFFFFFFFFFFFFFFFFFFFFFFFFFFFFFFF  
FFF  
@A00721:190:HGJW7DSXY:4:2521:1904:22326\_1:N:0:TCTGCAAG+GCTGCACT  
CCCGATAGGGTACCGAGTCTCCAAGAGAATATTTATTCTTATGAGGCTCGAACTTCAACGTTTTTCAC  
AACGGAAAGACATATCGCACCCGAAATTTTGGGCAGAATGCTCTTAACGCGGTTCTTGAACGGTGTT  
TTG  
+  
FF,FFFFF,FFF,:FFFFFFFF::FFFFFFFFFFFFFFFF:FFFFFFFF:FFFFFFFF:FFF,F:,FFFFFF  
:FFF,F:F:FFFFFF,F:FF,F:F,,FF:FFF:F,FFFFFFFF:FFFFFFFF,:F:FF,:,:F,:FFF  
FFF  
@A00721:190:HGJW7DSXY:4:2276:10004:12461\_1:N:0:TCTGCAAG+GCTGCACT  
GATAAAGTTATAGGAGACTCAGTTAACCTGAGAGCTCCTCAATTGATAGATTGGGTCAACAATAGGGA  
CGCTAGTATACTTCGTAAAGTCGACAGCGAAATGGTCAATATTGATAATTGGACCGACTATATGACCT  
ATT  
+  
FFFFFFFFFFFFFFFFF::FFFFFFFFFFFFFFFFFFFFFFFFFFFFFFFFFFFFF:F:FFFFFFFFFFFFFFFFF  
FFFFFFFFFFFFFFFFFFFFFFFFFFFFFFFFFFFFFFFFFFFFFFFFFFFFFFFFFFFFFFFFFFFFFFFFFFFFF  
FFF  
@A00721:190:HGJW7DSXY:4:2564:18159:36855\_2:N:0:TCTGCAAG+GCTGCACT  
AGGGAAGCTAAGGTTAACTTGATGCTTCAGCCTTTTCGAAGCATAACCCCGCACAGAATATCGTTTA  
TCACGCAAAATTTATTAATGCAATTTTCGACCTATCTTTAAGGTTCT  
+  
FFFFF,FFFFFFFFFFFFFFFFFFFFFFFFFFFFFFFFFFFFFFFFFFFFFFFFFFFFFFFFFFFFFFFFFFFFF  
FFFFFFFFFFFFFF:FFFF,FFFF,:FFFFFFFFFFFFFFFFFFFFFFFFFFFFF  
@A00721:190:HGJW7DSXY:4:2428:10176:18490\_2:N:0:TCTGCAAG+GCTGCACT  
CTTTTACCCAACATTTTATGTATACAGAGATGACCAGTGACGATTTCTCCCGGAAGCTCTTCTCTCT  
CTTAGGAGGTCATGATGACTACTATAAGGGTGAAATCGATTTTTTCGAA  
+  
FF::FFFFFFFFFFFFFFFFFFFFFFFFFFFFFFFFFFFFFFFF:FFFFFFFFFFFFFFFFFFFFFFFFFFFFF  
FFFF::FFFFFFFFFFFFFFFFFFFFF:FFFFFFFFFFFFFFFFFFFFFFFFFFFFF  
@A00721:190:HGJW7DSXY:4:1456:30563:6887\_1:N:0:TCTGCAAG+GCTGCACT  
TAAAGCCTATGAGATAAAGATGTATTCTTATTTAGGCTTCGATGCTGAATTTCTTGAACCTTTGAGTG

CCAGTGAATATTTTTGTCACGCCAGGAGTATCCATAACGATTTGTCATTTACCACCTTTGCTCAACGA  
CGA

+

FFFFFFFFFFFFFFFFFFFFFFFFFFFFFFFFFFFFFFFFFFFFFFFFFFFFFFFFFFFFFFFFFFFFFFFF  
FFFFFFFFFFFFFFFF:FFFFFFFFFFFFFFFFFFFFFFFFFFFFFFFFFFFFFFFFFFFFFFFFFFFFFFFF  
FFF

@A00721:190:HGJW7DSXY:4:2107:32271:25629\_1:N:0:TCTGCAAG+GCTGCACT  
TAACACATTCTTTGGTAATTGTATGATCACTCTTATGATGCTCTCTCTTTATTACGACCTTCGGAAGT  
TTAGAGCCGTCGCTGTCGCCGGAGACGATTGATCCTCTTTTCGGACGTACCGGTCCAGGATTATTCA  
GAT

+

FFFFFFFFFFFFFFFFFFFFFFFFFFFFFFFFFFFFFFFFFFFFFFFFFFFFFFFFFFFFFFFFFFFFFFFF  
FFFFFFFFFFFFFFFF:FFFFFFFFFFFFFFFFFFFFFFFFFFFFFFFFFFFFFFFFFFFFFFFFFFFFFFFF  
FFF

@A00721:190:HGJW7DSXY:4:1377:23809:26256\_2:N:0:TCTGCAAG+GCTGCACT  
TGCTCGCGATTTATTCTTTTTGTCAATGATTACATCTACTTCGTTCTGATCCTTACAAGATCATCGT  
TAAGTTAGGTAAACCCCTAACCGATGTTACTCTTGTAGGACTTTGGGA

+

FFF,FFFFFFFFFFFF:FFFFFFFFFFFFFFFFFFFFFFFF:FFFFFFFF:FFFFFFFF:FFFF:FFFF:F  
FFFF::FFF:FFF::FF:FFFFFFFFFFFF:FF::FF,:FFFF:FFFF

@A00721:190:HGJW7DSXY:4:1664:30020:10081\_2:N:0:TCTGCAAG+GCTGCACT  
TTAAAGACTATACTAAATATCTCCACTACGAGTTGTTGTTGGCGATTAGCTCTTGCGACTAATATT  
CGATATTCGATTGAGGGTCGTTATACCTATTCGGCTATCTGTGCTTTG

+

FFFFFFFFFFFFFFFFFFFFFFFFFFFF,FFFFF:FFFF:F:FFFFFFFF:F:FFFFF,FFF:FFFFF:  
F,FFFFF:FFFFFFFFFFFF::FFFFF,FFFF::F:FFFFFFFF::FF:FF

@A00721:190:HGJW7DSXY:4:1215:30807:8343\_2:N:0:TCTGCAAG+GCTGCACT  
TTTTAAACGATTCCGAGAGGTTTATCCTGATGTGGAGGGAGTTCTTGAAGCATCCCTACCTTTCCTTG  
TGAAAATTTTGATGCGGTTTCATAAGATTATCAGTAATCCTGATTCTA

+

FFFFFFFFFFFFFFFFFFFFFFFFFFFFFFFFFFFFFFFFFFFFFFFFFFFFFFFFFFFFFFFFFFFFFFFF  
FFFFFFFFFFFFFFFFFFFFFFFFFFFFFFFFFFFFFFFFFFFFFFFFFFFFFFFFFFFFFFFF

@A00721:190:HGJW7DSXY:4:2268:5005:27571\_1:N:0:TCTGCAAG+GCTGCACT  
GACTGGAGTTCAGACGTGTGCTCTTCCGATCTCAAAGATCGACTTCGAGACAGGTGATATTGTTGAGC  
GAGAGCGACCAAGATCTAAATTCCGTAACGGTGCGTGGCGCTTTATTTTAAAAGCTCCCTCCTCTCG  
CAA

+

FFFFFFFFFFFFFFFFFFFFFFFFFFFFFFFFFFFFFFFFFFFFFFFFFFFFFFFFFFFFFFFFFFFFFFFF  
FFFFFFFFFFFFFFFFFFFFFFFFFFFFFFFFFFFFFFFFFFFFFFFFFFFFFFFFFFFFFFFFFFFFFFFF  
FFF

@A00721:190:HGJW7DSXY:4:2204:7238:29183\_2:N:0:TCTGCAAG+GCTGCACT  
ACTTGAGTCTTTTGATCAGTCTCTGACTTGACCATCTTTTCAATTTAAATGACGATCATTAAGACTCTC  
TTTCTTCTTTGTTTCCTTCTTTGCACTGATTTTCTCATCAGCTTGT

+

FFFFFFFFFFFFFFFFFFFFFFFFFFFFFFFFFFFFFFFFFFFFFFFFFFFFFFFFFFFFFFFFFFFFFFFF  
FFFFFFFFFFFFFFFFFFFFFFFFFFFFFFFFFFFFFFFFFFFFFFFFFFFFFFFFFFFFFFFF

@A00721:190:HGJW7DSXY:4:2318:20139:31078\_2:N:0:TCTGCAAG+GCTGCACT  
TTTTACGATAACAACATCATGTTGATTAAGACTCTTCCGAAAGGCGAACTTTGGGAATTTGAAGCTCA  
GGGTGAAGCACAACGTTTGACCGTGACGAAGTGTGGTGTCTTGATCT

+

FFFFFFFFFFFFFFFFFFFFFFFFFFFFFFFFFFFFFFFFFFFFFFFFFFFFFFFFFFFFFFFFFFFFFFFF  
FFFFFFFFFFFFFFFFFFFFFFFFFFFFFFFFFFFFFFFFFFFFFFFFFFFFFFFFFFFFFFFF

@A00721:190:HGJW7DSXY:4:2171:26992:30107\_1:N:0:TCTGCAAG+GCTGCACT  
CACTACCACTTATTCCGATATTTCTTTAGTCGATGGGTTTTCGACGCCTTTAAGCGTCTTCTGTTCAT





@A00721:190:HGJW7DSXY:4:1376:3070:25097\_1:N:0:TCTGCAAG+GCTGCACT  
CTGGAGTTCAGACGTGTGCTCTTCCGATCTGTGAAATTAACGCGTCCTTTTCTGGAACGTAGTTTAC  
TATTATGAACAAAGTTATCAAAGATAGTGGCATTCAAGGCAAACCTACCCTGATTCCGGCCGGTGGTA  
GCT

+

FFFFFFFFFFFFFFFFFFFFFFFFFFFFFFFFFFFFFFFFFFFFFFFFFFFFFFFFFFFFFFFFFFFFFFFFFFFFFFFF  
FFFFFFFFFFFFFFFFFFFFFFFFFFFFFFFFFFFFFFFFFFFFFFFFFFFFFFFFFFFFFFFFFFFFFFFFFFFFFFFF  
FFF

@A00721:190:HGJW7DSXY:4:2333:26512:35634\_2:N:0:TCTGCAAG+GCTGCACT  
AGGGGCTATTACTCTTGCTGAAACAGCTATTAAAGCTGTTGAGCGGTAATTACACCTAAACGAGCTC  
GATCTGCCATCGCTGAAGGATGTGCACTCTTTTCTGCTACTTTAACGG

+

FFFFFFFFFFFFFFFFFFFFFFFFFFFFFFFFFFFFFFFFFFFFFFFFFFFFFFFFFFFFFFFFFFFFFFFFFFFFFFFF  
FFFFFFFFFFFFFFFFFFFFFFFFFFFFFFFFFFFFFFFFFFFFFFFFFFFFFFFFFFFFFFFFFFFFFFFFFFFFFFFF

@A00721:190:HGJW7DSXY:4:2303:6858:35102\_2:N:0:TCTGCAAG+GCTGCACT  
TCGATTGTATCAACAGTAACATTACTTCTAATAAAGGTCTCTATCAAGCTCGTATTATCGTCGCTGCT  
GGATAAGCGTTACCGTTGAAGGCTAACTACAAGGTAATTATGAAGAC

+

,,FFF:FFF:F:FFF,F,,FFF,F,FF:,F,F:FF,F,:F:FFF,FFFF,FF:FF,F,FF,,,,  
,F,,,F::,FF,F,F,:F,,,F:,,,,FF,F:FF,:F,,FFFF

@A00721:190:HGJW7DSXY:4:2665:6280:28119\_1:N:0:TCTGCAAG+GCTGCACT  
GTATGAGGGTGTCTTAATCGTAACATTAATAATTTCAATCTTCTTAAAAAGAAGATAGAGAGTCATA  
CTTTGGGCTATCGTTCAGGTGCATGGGGTTGGATAGCCAATATTGAAGTGGACACCTCTGGTAGTATC  
GAA

+

FFFFFFFFFFFFFFFFFFFFFFFFFFFFFFFFFFFFFFFFFFFFFFFFFFFFFFFFFFFFFFFFFFFFFFFFFFFFFFFF  
FFFFFFFFFFFFFFFFFFFFFFFFFFFFFFFFFFFFFFFFFFFFFFFFFFFFFFFFFFFFFFFFFFFFFFFFFFFFFFFF  
FFF

@A00721:190:HGJW7DSXY:4:1221:2266:25520\_2:N:0:TCTGCAAG+GCTGCACT  
AAGCATACTACTTTTGCTTTGATTACTCTACCGCCTTACAAGTCTAAGGTTAAAGAGTCGATTAAACA  
AGTTGTACTTATCAATGATTTTATCGCTGGTTGTTATCTCGAAAAGTC

+

FFFFFFFFFFFFFFFFFFFFFFFFFFFFFFFFFFFFFFFFFFFFFFFFFFFFFFFFFFFFFFFFFFFFFFFFFFFFFFFF  
FFFFFFFFFFFFFFFFFFFFFFFFFFFFFFFFFFFFFFFFFFFFFFFFFFFFFFFFFFFFFFFFFFFFFFFFFFFFFFFF  
FFF

@A00721:190:HGJW7DSXY:4:1163:6180:3928\_1:N:0:TCTGCAAG+GCTGCACT  
CCCAAAGAGAATATCTAAAATATTTACAAAATCTTACCACTATCTACGAACCTAAAGTTCTGAAGACG  
TTGCTTGTGCTTCTCCTTTAATGGCACTACCTCGGTACAATCTTACTTGGAACGAAGGCGACCTGT  
TCC

+

FFFFFFFFFFFFFFFFFFFFFFFFFFFFFFFFFFFFFFFFFFFFFFFFFFFFFFFFFFFFFFFFFFFFFFFFFFFFFFFF  
FFFFFFFFFFFFFFFFFFFFFFFFFFFFFFFFFFFFFFFFFFFFFFFFFFFFFFFFFFFFFFFFFFFFFFFFFFFFFFFF  
FFF

@A00721:190:HGJW7DSXY:4:2120:18304:25614\_1:N:0:TCTGCAAG+GCTGCACT  
GTTCTGTCTATATTAGGTGAAGCGAAATACGATTTCAACGTTCAACGTTACCGAGTTTCGTTTCGTA  
CCTTGATGCTGACTTTCGTCATATGATTTGATCTGGTTGCTCAATTCTAAGCGTGTTCGCTTAGTG  
CGA

+

FFFFFFFFFFFFFFFFFFFFFFFFFFFFFFFFFFFFFFFFFFFFFFFFFFFFFFFFFFFFFFFFFFFFFFFFFFFFFFFF  
FFFFFFFFFFFFFFFFFFFFFFFFFFFFFFFFFFFFFFFFFFFFFFFFFFFFFFFFFFFFFFFFFFFFFFFFFFFFFFFF  
FFF

@A00721:190:HGJW7DSXY:4:2370:4101:2738\_1:N:0:TCTGCAAG+GCTGCACT  
TACGAACCTGACTCTACTATACGTGACATACTAAATACTAGATATTTGGATGATCTTGATAAAGAACT  
TCATGAATTTTCAGAGGATGAAAAATTTTCTTCCTTGGATTTTAATATAAAGAATCTTTACCAGGACT  
CCT

+  
FFF,FFFFFFFFF:FFFFFFFFFFFFFFFFFFFFFFFFFFFFF:FFFFFFFFFFFFFFFFFFFFFFFFFFFF  
FFFFFFFFFFFFFFFFFFFFFFFFFFFFFFFFFFFFFFFFFFFFFFF:FFFFFFFFFFFFFFFFFFFF  
FF  
@A00721:190:HGJW7DSXY:4:2360:7789:7341\_1:N:0:TCTGCAAG+GCTGCACT  
TGATCGTAAGAAGTTTATAAGGAACATATCCATTGTGTAATAGGGTCATCAACTTAGAACTCGAAA  
CTCTAAGTGGTAATACTGTCTTCCAAGCTTACCTGTATCTTCAATGAAATTGGACTCTTCGATAGGG  
GAC  
+  
FF:FFFFFFFFFFFFFFFFFFFFF:FFFFFFFFFFFFFFFFFFFFFFFFFFFFFFFFFFFFFFFFFFFFF  
FFFFFFFFFFFFFFFFFFFFFFFFFFFFFFFFFFFFFFFFFFFFFFF:FFFFFFFFFFFFFFFFFFFF  
FFF  
@A00721:190:HGJW7DSXY:4:2608:6343:32894\_1:N:0:TCTGCAAG+GCTGCACT  
GGAAGATCTGTTATCGACGGTTTATCGTTTACGAAGTATCACTCCACCGGTGAATGGTTTAAAGAATAC  
TATAAATAGAATAGCTATTACTACTAATGGCGTTGCCTAGTGGATGTTATTAGTGACATCTGGTCAA  
TTT  
+  
FFFFFFFFFFFFFFFFFFFFFFFFFFFFFFFFFFFFFFFFFFFFFFFFFFFFF:FFFFFFFFFFFF  
FFF:F:FFFF,F,FFFF,F,FFFFFFFFFFFFFFFFFFFFFFFFFFFFF:FFFFFFFFFFFFFFFFFFFF  
FFF  
@A00721:190:HGJW7DSXY:4:1645:17490:9048\_1:N:0:TCTGCAAG+GCTGCACT  
TGGTCTTTATTCTATTATTGATTTTTATGAGATTGATACGTTAACAGAAGATGATGTTAGAGTAGAAT  
TCCTGAAGAGTCCTTCCGTAACCAACTTCTTGACAATTTTCTTCAATCCTTCGATAATAGTTAAATCT  
AGG  
+  
F:F:FFFFFFFFFFFFFFFFFFFFFFFFFFFFFFFFFFFFF:FFFFFFFFFFFFFFFFFFFFFFFFFFFF  
FFFFFFFFFFFFFFFFFFFFFFFFFFFFFFFFFFFFFFFFFFFFFFFFFFFFF:FFFFFFFFFFFFFFFFFFFF  
FFF  
@A00721:190:HGJW7DSXY:4:1376:21712:13855\_2:N:0:TCTGCAAG+GCTGCACT  
TACACAATTAAGAAATAATCCTACATTGACTGATTATCTAAAGATTGAAGGAAAATTTTATCCTCGTT  
TACTTACTTAGACTTTCCTACGATACAAATGATAACTTCTAATTTAC  
+  
FFFFFFFFFFFF:FFFFFFFFFFFFFFFFFFFFFFFFFFFFFFFFFFFFFFFFFFFFF:FFFFFFFFFFFF,F  
:FFFFFFFFFFFF:FFFFFF:FFFFFFFFFFFF::FFFFFFFFFFFFFFFFFFFF,  
@A00721:190:HGJW7DSXY:4:2102:9299:12962\_1:N:0:TCTGCAAG+GCTGCACT  
GGGATGCATGGTGTTATCTCCTCAGGAGTCCC GG CATTTGATAATAATGACGAGACTTTCGTCATAAT  
CGCTGCATATTACGGATTACACGGTACCAGCGCATCTCGTGTGAGCCTCGACCCGATTATATGGTAT  
TAA  
+  
FFFFFFFFFFFFFFFFFFFFFFFFFFFFFFFFFFFFFFFFFFFFFFFFFFFFF:FFFFFFFFFFFFFFFFFFFF  
FFFFFFFFFFFFFFFFFFFF:FFF,FFFFFFFFFFFFFFFFFFFFFFFFFFFFFFFFFFFFFFFFFFFFF  
FFF  
@A00721:190:HGJW7DSXY:4:1166:10022:16219\_2:N:0:TCTGCAAG+GCTGCACT  
GATTCTCGATTTCGTAGAGCTTATCTAGGTACTCTCATTTACTATGTTGATTTAGTCTACATTTATGCT  
GATCTAAATTTTCGATCTAGATGGATCCACTCCTCGAGTTATCATGAT  
+  
FFFFFFFFFFFFFFFFFFFFFFFFFFFFFFFFFFFFFFFFFFFFFFFFFFFFF:FFF  
FFFFFFFFFFFFFFFFFFFF:FFFFFFFFFFFFFFFFFFFFFFFFFFFFFFFFFFFFF  
@A00721:190:HGJW7DSXY:4:2443:16785:7044\_1:N:0:TCTGCAAG+GCTGCACT  
TTCTAGAATTCTTAATTATAATATTCAACCTCAAAGTTACGTGTTTACAGTAACGAGATCACACATT  
TTGAGAACTAACTATGTTATGTTCTCTGATCATTTTGACAATCTCTTCTTATAATAATAATAATA  
ATA  
+  
FE,FFF:FFF:FFFFFFFFFFFF:FE:FFF,FE:FFFFFFFFF:FFFFFFFFFFFFFFFF:F,FFFFFFFF

[illegible]

@A00721:190:HGJW7DSXY:4:2451:18466:24142\_2:N:0:TCTGCAAG+GCTGCACT  
ATGAGTACGAAAACCAACTCTTCGTTACGAGACCTGATGGTAGAATAGATTTAGTCTCTACACCCATC  
TCAACGAGGATAAAGCGAGTTTTCCGTCCTGAACGTAATACACGAAGA  
+  
FFFFFFFFFFFFFFFFFFFFFFFFFFFFFFFFFFFFFFFFFFFFFFFFFFFFFFFFFFFFFFFFFFFFFFFF:FFFF  
FFFFFFFFFFFFFFFFFFFFFFFFFFFFFFFFFFFFFFFFFFFFFFFFFFFFFFFFFFFFFFFFFFFFFFFF  
@A00721:190:HGJW7DSXY:4:2404:16658:6480\_1:N:0:TCTGCAAG+GCTGCACT  
CACGACTCGAAACCGAGACGCCGTA  
+  
:FFFFFFFFFFFFFFFFFFFFFFFFFFFFFFFF  
@A00721:190:HGJW7DSXY:4:2269:4209:20556\_2:N:0:TCTGCAAG+GCTGCACT  
TTTAGATTATGAATCCTGCCTTTACTCATTTTATAGCAGTTATTTATGTTGTACTTTTTATAATTTAT  
AACCTTCTTATACTTTTGGGTATGTTTTGTGAAAAACATGAGATACCC  
+  
FFFFFFFFFFFFFFFFFFFFFFFFFFFFFFFFFFFFFFFF,FFFFFFFF:FFFF:FFFFFFFFFFFFFFFF:FFFFFFFFFFFFFFFF  
FFF:FFFFFFFFFFFFFFFFFFFFFFFFFFFFFFFFFFFFFFFFFFFFFFFFFFFFFFFFFFFFFFFF:F  
@A00721:190:HGJW7DSXY:4:1261:2220:20400\_2:N:0:TCTGCAAG+GCTGCACT  
TTGTAACGATCATTCTTTCGAGTTTTGTCATTCTTATTCTTTTATTCCTTTAACTGTGTATGAGGAGG  
ATTTATAATGCTTTTCGATAGTGATTGTTATCAATTTAAATACATTAC  
+  
FFFFFFFFFFFFFFFFFFFFFFFFFFFFFFFFFFFFFFFFFFFFFFFFFFFFFFFFFFFFFFFF:FFFFFFFFFFFF::FFFFFFF  
FFFFFFFFFFFFFFFFFFFFFFFFFFFFFFFFFFFFFFFF:FFFFFFFFFFFF:,FFFFFFFFFFFFFFFFFFFFF  
@A00721:190:HGJW7DSXY:4:2464:4896:15922\_2:N:0:TCTGCAAG+GCTGCACT  
CTTTACTCACAGACTCCGAAAATGGTTTCAAATGAGGTCAAAGCTCTATTTATTAAACGAACATTAT  
CCGATTCTTCGAGGGTATTACTACCACTGATCTGCCGACTTTAGTCAA  
+  
FFFFFFFFFFFFFFFFFFFFFFFFFFFFFFFFFFFFFFFFFFFFFFFFFFFFFFFFFFFFFFFF:FFFFFFFFFFFFFFFFFFFFFFFFFFFFFFFF  
FFFFFFFFFFFFFFFFFFFFFFFFFFFFFFFFFFFFFFFFFFFFFFFFFFFFFFFFFFFFFFFF  
@A00721:190:HGJW7DSXY:4:2419:8947:5901\_2:N:0:TCTGCAAG+GCTGCACT  
TTCCTTCGATGTTTATATTTTCTATAAGGGAAAATAGCAATAATCAAATTCGACAAATTTTAGAAC  
TTTATTTACAGAACTCTCTCCGATCACCTTGGTGTGATCTCCCGGAGGA  
+  
FFFFFFFFFFFFFFFFFFFFFFFFFFFFFFFFFFFFFFFFFFFFFFFFFFFFFFFFFFFFFFFF::FFFFFFFF:FFFFFFF  
FFF:FFFFFFFFFFFFFFFFFFFFFFFFFFFFFFFFFFFFFFFFFFFFFFFFFFFFFFFFFFFFFFFF  
@A00721:190:HGJW7DSXY:4:1567:12635:21465\_2:N:0:TCTGCAAG+GCTGCACT  
ATGTATGATGATAATCTACTATTTTAAATAGTGATATTCAGCGTATACTTGAATACTTTATCAAAGA  
TTTGGCTTGGTCTATTTACCGCAAAAAGTTGGAAGAGGTCTATGATAT  
+  
FFFFFFFFFFFFFFFFFFFFFFFFFFFFFFFFFFFFFFFFFFFFFFFFFFFFFFFF:FFFF,FFFFFFFFFFFFFFFFFFFFFFFF:FFFFFFF:  
FFFFFFFFFFFFFFFFFFFFFFFFFFFFFFFFFFFFFFFF::F,F:FFF,FFFFFFFF:FFFF:F  
@A00721:190:HGJW7DSXY:4:1112:5629:6511\_2:N:0:TCTGCAAG+GCTGCACT  
TTTAAATAGCACCGATTATAAATTGACTGTTGATAATATTACAATAGCTCTTCTCAGAAGATTAGAG  
AAGTAACCGGTGAACACGTCGGTAGCATTGATTTAATTTTACCGTTAG  
+  
FF:FF::FFFF:,FFFFFFFFFFFFFFFF:FFFFFFFFFFFF:FFF,FF:FF:FFFFFFFFFFFFFFFFFFFFFFFF,,  
FFFFFFFFFF:FFFFFFFFFFFF:FFFFFF::,FFF:F,,FFFFF::FFF:  
@A00721:190:HGJW7DSXY:4:2164:9064:13714\_2:N:0:TCTGCAAG+GCTGCACT  
TTTCGAAAAGAAACCTATAAGTTACAAACGATTCTTCGACTATATTAAAGAAATAAAAATACTTCAAG  
TACCTGAACCTTACATTTTAAATGGTATGGTATAATGTGTCTTACAAA  
+  
FFFFFFFFFFFFFFFFFFFFFFFFFFFFFFFFFFFFFFFFFFFFFFFFFFFFFFFFFFFFFFFF:FFFFFFFFFFFFFFFFFFFFFFFF:  
FFFFFFFFFFFFFFFFFFFFFFFFFFFFFFFF,FFFFFFFFFF:FFFFFFFFFFFFFFFFFFFFF  
@A00721:190:HGJW7DSXY:4:1128:16387:28620\_2:N:0:TCTGCAAG+GCTGCACT  
TCTCGGTAATGAGAGTGATTCTTAATATTCTAGTAACCGCTATGTGGGCATTACTAGGATTTATCA

CACTCCTAAATTTGATAGCAATTTATGTTTTAAATGCTAGGAAAATTT

+

FFFFFFFFFFFFFFFFFFFFFFFFFFFFFFFFFFFFFFFFFFFFFFFFFFFFFFFFFFFFFFFF  
FFFFFFFFFFFFFFFFFFFFFFFFFFFFFFFFFFFFFFFFFFFFFFFFFFFFFFFFFFFFFFFF

@A00721:190:HGJW7DSXY:4:2272:13467:8938\_1:N:0:TCTGCAAG+GCTGCACT  
TGTATAGTTCAAGGAGTACTTAATTCAATAGCTTTAGTATTATTTACTATCGCCTTTATTGAAAATTG  
TATAAGAGTTAATTGCTTACACAAAAGTGACGCGCGAAGGAATCTTAATTGATTGAAGCTAGGCGTTG  
GGG

+

FFFFFFFFFFFF:FFFFFF:F::FFF:F:FFFFFF:FFFFFFFFFFFFFFFF:FFFFFF:FFFFFFFFFFFF  
FFFFFF,F,FFF:FFF:FFF,FFFF:F:FFFFFFFF:FFFF,FF:FFFFFFFFFFFFFFFFFFFFFFFF  
FFF

@A00721:190:HGJW7DSXY:4:1403:8938:27242\_1:N:0:TCTGCAAG+GCTGCACT  
CTCCCCAAACATAACATAACCTACCATGACCAATCATCGCTCCAAGTGGCAGCCAGACGTAG  
GGTCAAACCTACTACCGCCTGTCGGCAGATCGGCACCACTGGTCTCTACGTTCAAGGACCCGCTGTGC  
AGA

+

FFFFFFF::F,F:FFFFFF:F,FFFFFFFFFFFFFFFFFFFFFFFFFFFFFFFFFFFFFFFF  
FFFFFFFFFFFFFFFFFFFFFFFFFFFFFFFFFFFFFFFFFFFFFFFFFFFFFFFFFFFFFFFF  
FFF

@A00721:190:HGJW7DSXY:4:1101:8513:32643\_2:N:0:TCTGCAAG+GCTGCACT  
TCTGCACAGAAGAAGGCTGAAGGTCGTTACCGGACGACCACTCAAAGGAAACGGGCTGTTGCCAGAG  
GAAAGCAGCGACCACCGAGGTCGCTCGTAACATTGACGGCAGTCCCGT

+

FFFFFFFFFFFFFFFFFFFFFFFFFFFFFFFFFFFFFFFFFFFFFFFFFFFFFFFFFFFFFFFF  
FFFFFFFFFFFFFFFFFFFFFFFFFFFFFFFF,FFFFFFFFFF:FFFFFFFFFFFF

@A00721:190:HGJW7DSXY:4:1431:14009:8093\_1:N:0:TCTGCAAG+GCTGCACT  
AACTGAGGCAGTACCTCAGTCAAAAGTCACATTACCACTCCCATACCAATCAATGATGTGACTATAC  
AGTTGCGCCATTTCAAGAGTGGTCAATACGTCGTGGGAGGTACTGAAGCCTTCCCCTCCGCTGGCAGC  
AAG

+

FFFFFFFFFFFFFFFFFFFFFFFFFFFFFFFFFFFFFFFFFFFFFFFFFFFFFFFFFFFFFFFF  
FFFFFFFFFFFFFFFFFFFFFFFFFFFFFFFFFFFFFFFFFFFFFFFFFFFFFFFFFFFFFFFF  
FFF

@A00721:190:HGJW7DSXY:4:1223:7609:6151\_2:N:0:TCTGCAAG+GCTGCACT  
GCCAATCAATAGTTCTTCTGACCAGAATGAAAAGGGGTTTACCAGGGTAGTCTCTAAGTCTACCAGGA  
AGAGGGGAAATGTCCCCAAACTGAGAAGAATAAAGGGAAAGGTCCAT

+

FFFFFFFFFFFFFFFFFFFFFFFFFFFFFFFFFFFFFFFFFFFFFFFFFFFFFFFFFFFFFFFF  
FFFFFFFFF:FFFFFFFF:FFFFFFFFFFFFFFFFFFFFFFFFFFFFFFFFFFFFFFFF

@A00721:190:HGJW7DSXY:4:2508:22073:17989\_2:N:0:TCTGCAAG+GCTGCACT  
GAAGGGGAAATTACCCCTAATTCTGAAGGAAGATCTCCACCATCTGGGGTTGGAATAAGAAATCTG  
CACGGGCCAAAGAGGCCGCTGCTACGAAGTCGCTGAAGGCGGCTTGGG

+

FFFFFFFFFFFFFFFFFFFFFFFFFFFFFFFFFFFFFFFFFFFFFFFFFFFFFFFFFFFFFFFF  
FFFFFFFFFFFFFFFFFFFFFFFFFFFFFFFFFFFFFFFFFFFFFFFFFFFFFFFF

@A00721:190:HGJW7DSXY:4:1123:12264:4006\_2:N:0:TCTGCAAG+GCTGCACT  
GTAAAGTTGCGCCTGCCGACCCCATCTTTGAGACCAAGACTCTCTACAGTAGGTTGCTGCCTACTATG  
AGCAAATCTGTTGAATTCGTCACTGAGGACGAAGGTGAGAGGACTTTT

+

FFFFFFFFFFFFFF,FF:FFFFFFFF:,FF,FFFFFFFF:F,,FF:FFFF:FFFFFFFF:FFFF:  
FFFFFFFF:F:FF:FFFF:FFF:FFFF,FFFF,,FFF:F,FFFF

@A00721:190:HGJW7DSXY:4:2458:30300:31140\_1:N:0:TCTGCAAG+GCTGCACT  
CTGAGAGCAGTCGCTGGGGAAAGAGAATTGCGTGGGTTGAAGGCCGACGCTTCGAGCTTGAGTGTGAC

GAGGCCGGTGACGTTTTGTCAACGGCGTTTGGAGGATTTTATCCGCGCTTAACTATGGGGCGAAGAT  
CCC

+

FFFFFFFFFFFFFFFFFFFFFFFFFFFFFFFFFFFFFFFFFFFFFFFFFFFFFFFFFFFFFFFFFFFFFFFF  
FFFFFFFFFFFFFFFFFFFFFFFFFFFFFFFFFFFFFFFFFFFFFFFFFFFFFFFFFFFFFFFFFFFFFFFF  
FFF

@A00721:190:HGJW7DSXY:4:2544:31069:3724\_2:N:0:TCTGCAAG+GCTGCACT  
GTTGGCATATTTATGCCGACGATAATAAGCATGTCACCCTTAAGCACCGAGGTAAGCTCGGGACTTAC  
AAGAGAGAGTGTGAGAGAGTCGCTCTCACTATTTTTGCCCAGAATGCG

+

FFFFFFFF:FFFFFFFFFFFFFFFFFFFFFFFFFFFFFFFFFFFFFFFFFFFFFFFFFFFFFFFFFFFFFFF:FFFFFFFF  
FFFFFFFFFFFFFFFFFFFFFFFFFFFFFFFFFFFFFFFFFFFFFFFFFFFFFFFFFFFFFFFFFFFFFFFF,FF:F

@A00721:190:HGJW7DSXY:4:1668:16098:19789\_2:N:0:TCTGCAAG+GCTGCACT  
TTCCTGCTTCTGGGAGGCTGCTTCTCCTCATAATTACAACCTCTCTTTAGAGAGCATTAGAAGGAAG  
TTGGGCAAATTCCCACATATGGTAGACGTTGTACACAGATCGGAAGA

+

FFFFF:FFFFFFFFFFFFFFFFFFFFFFFFFFFFFFFFFFFFFFFFFFFFFFFFFFFFFFFFFFFFFFFFF  
FFFFFFFFFFFFFFFFFFFFFFFFFFFFFFFFFFFFFFFFFFFFFFFFFFFFFFFFFFFFFFFFFFFFFFFF

@A00721:190:HGJW7DSXY:4:1169:20139:22623\_2:N:0:TCTGCAAG+GCTGCACT  
CGTCATTGGGGATTTTCGATGTGAGAAGGTGGAAGGTGTCAAGGGTCTTCTTCATGCTGATCTTTCAGG  
ACCTAATCACATCATGATTGATAGTTACGGCTCGTATCGAGTTGGAGG

+

FFFFFFFFFFFFFFFFFFFFFFFFFFFFFFFFFFFFFFFFFFFFFFFFFFFFFFFFFFFFFFFFFFFFFFFF  
FFFFFFFFFFFFFFFFFFFFFFFFFFFFFFFFFFFFFFFFFFFFFFFFFFFFFFFFFFFFFFFFFFFFFFFF

@A00721:190:HGJW7DSXY:4:1356:27489:32878\_2:N:0:TCTGCAAG+GCTGCACT  
CGAAATTAAAGACGGGGGATTAAGAGTCCAGCTGTAAGTGTCACTTCAGAGAGGGGAGCTCTGAAAA  
GGAACTTCGTCAGAAGATGAGGAAGTCTAAGAGGAGGAGTTTGAGGA

+

FFFFFFFFFFFFFFFFFFFFFFFFFFFFFFFFFFFFFFFFFFFFFFFFFFFFFFFFFFFFFFFFFFFFFFF:FFFFFFFF:FFF:F  
FFF:FFFFFFFFFFFFFFFFFFFFFFFFFFFFFFFFFFFFFFFFFFFFFFFFFFFFFFFFFFFFFFFF

@A00721:190:HGJW7DSXY:4:1642:7762:33035\_2:N:0:TCTGCAAG+GCTGCACT  
GAAGTTGATGAAGAAGGATTATTTGAAGCAGGGGTTACCACTTCCTAAGGTGGATGAGGGAGGTTGTT  
TCTTTGGAGTTTTAGATAATCTTTTGAGAAGGGGTCATAGAGCCAGCA

+

FF,FFFFFFFFFFFFFFFFFFFFFFFFFFFFFFFFFFFFFFFFFFFFFFFFFFFFFFFFFFFFFFFFFFFF  
FFFFF,FFFFFFFFFFFFFFFFFFFFFFFFFFFFFFFFFFFFFFFFFFFFFFFFFFFFFFFFFFFFFFFF

@A00721:190:HGJW7DSXY:4:2602:21649:15123\_2:N:0:TCTGCAAG+GCTGCACT  
CCTTGAGAAGACAAGCCACATTAAGATATAATTTAGGTCAACTTGGGGTTTCGAATGTCATTAGTGCC  
TTACGATTGAAAGAGGTCCTTTTGAGTATCGACAGATCTTTCGATCTT

+

FFFFFFFFFFFFFFFFFFFFFFF:FFFFFFFFFFFFFFFFFFFFFFFFFFFFFFFFFFFFFFFFFFFFFFFFF  
FFFFFFFFFFFFFFFFFFFFFFFFFFFFFFFFFFFFFFFFFFFFFFFFFFFFFFFFFFFFFFFFFFFFFF

@A00721:190:HGJW7DSXY:4:1451:21567:29700\_2:N:0:TCTGCAAG+GCTGCACT  
TGGCAGAATTCGGTAACCTTACCATATTGTTCCCTTCCGGGAAGTTGTGGGATTAACTTTGACTCAACT  
ACTCCGATCAGATCCGGATGTTTGATTGGTATGGACTACTCGACTTT

+

FFFFFFF:FFFFFFFFFFFFFFFF:FFFFFFFFFFFFFFFFFFFFFFFFFFFFFFFFFFFFFFFFFFFFF  
FFFFFFFFF,FFFFFFFFFFFFFFFFFFFFFFF:FFF,FFFFFFFFFFFFFFFF

@A00721:190:HGJW7DSXY:4:2146:6271:32299\_1:N:0:TCTGCAAG+GCTGCACT  
CATGGCAGATACTACCGATAAGGTGAAAAATATGCAGGTCAAAGATTCTGTAGCTCTGAGGGCGGTTG  
AGGGAGCCGTTTTGGCCGACTTTAACTATTCTAAGAGTCTTTATGATTCAAAACCTATCGTTGTCGTA  
CCT

+

FFFFFFFFFFFFFFFFFFFFFFFFF:FFFFFFFFFFFFFFF:FFFFFFFFFFFFFFFFFFFFFFFFFFFFF

FFFFFFFF:FFFFFFFF:FFFFFFFFFFFFFFFFFFFFFFFFFFFFFFFFFFFFFFFFFFFFFFFF  
FFF

@A00721:190:HGJW7DSXY:4:1145:7374:34491\_2:N:0:TCTGCAAG+GCTGCACT  
GGCTTATTGTCGCGCAGTTTCCAGAATTGCGGTTGAAGTTCACCCATTCTATCTTGAATGCTCACGCC  
GTCGCAGCCATATCGAGACTATGTTATAATCACTTGTTAAAGTACAGA

+

FFF:FFFFFFFFFFFFFFFFFFFFFFFFFFFFFFFFFFFFFFFFFFFFFFFFFFFFFFFFFFFFF:FFFFFFFF  
FFFFFFFFFFFFFFFFFFFFFFFFFFFFFFFFFFFFFFFFFFFFFFFFFFFFFFFFFFFFFFFF

@A00721:190:HGJW7DSXY:4:1477:13503:16297\_2:N:0:TCTGCAAG+GCTGCACT  
AGATATTATTGATATTGGAGGCGATATTCGTTTTTCATATCCAAAACCTCTTGAATGGAGTACATATTT  
GCAACCTATTCTTGATGTGAAAGATGCATCGAGGTATACGTCTAGGA

+

FF:FFFFFFFFFFFFFFFFFFFFFFFFFFFFFFFFFFFFFFFFFFFFFFFFFFFFFFFFFFFFFFFF  
FFFFFFFFFFFFFFFFFFFFFFFFFFFFFFFFFFFFFFFFFFFFFFFFFFFFFFFFFFFFFFFF

@A00721:190:HGJW7DSXY:4:1525:2953:28025\_2:N:0:TCTGCAAG+GCTGCACT  
TCACGAGACGTCATGAAAGCTATCGGAGGGAAGCAAAATGTTTCGTTCTGTTACAAGAACGCTTTGGA  
TTGTGACCATAAAGCCTCAGTTGCGATAGCTGTAGAGGTATACGATAT

+

FFFFFFFFFFFFFFFFFFFFFFFFFFFFFFFFFFFFFFFFFFFFFFFFFFFFFFFFFFFFFFFF  
FFFFFFFFFFFFFFFFFFFFFFFFFFFFFFFFFFFFFFFFFFFFFFFFFFFFFFFFFFFFFFFF

@A00721:190:HGJW7DSXY:4:2202:4209:27320\_2:N:0:TCTGCAAG+GCTGCACT  
CTTAAGAGAGAGATTGATGTATGTCATTTTCGTCTTAGTTTGTCCCGCGCAATTATTGGACACGATGAA  
AAATGACATACCCGTTCTGACCTTGGTATCGTTATCCGTCATGGAGA

+

FFFFFFFFFFFFFFFFFFFFFFFFFFFFFFFFFFFFFFFFFFFFFFFFFFFFFFFFFFFFFFFF  
FF:FFFFFFFF:F::FFFFFF,FFFFFFFFFFFFFFFFFFFFFFFF, :FF:F

@A00721:190:HGJW7DSXY:4:1659:12029:9862\_2:N:0:TCTGCAAG+GCTGCACT  
GTTATTCTCACAACAAAGATAAGATTTTATCTTTCTTCAAACACCCTGTTTTCCTTAAGGGCGGACAA  
TTGTTCCATTGTGAACCTTGGGGACTAGATTGAGCATTAATGAGTTC

+

FFFFFFFFFFFFFFFFFFFFFFFFFFFFFFFFFFFFFFFFFFFFFFFFFFFFFFFFFFFFFFFF  
FFFFFFFFFFFFFFFFFFFFFFFFFFFFFFFFFFFFFFFFFFFFFFFFFFFFFFFFFFFFFFFF

@A00721:190:HGJW7DSXY:4:1247:10691:15969\_2:N:0:TCTGCAAG+GCTGCACT  
CTATTTCCGTACCAAGAGCCACTGCCAATCTCATCGCTATACGCATACCTGATTGGAAGAAGCGAGGT  
TCGTTCTCAATAAAAATTTTTCTCAAGAGATTATGTTGATAAAGTT

+

FFFFFFFFFFFFFFFFFFFFFFFFFFFFFFFFFFFFFFFFFFFFFFFFFFFFFFFFFFFFF:F:FFFFFFFF  
FFFFFFFFFFFFFFFFFFFFFFFFFFFFFFFFFFFFFFFFFFFFFFFFFFFFFFFFFFFFFFFF

@A00721:190:HGJW7DSXY:4:1547:21721:8766\_1:N:0:TCTGCAAG+GCTGCACT  
TTCAGTACGTCATGGGGATCACTTCTTCGGTCAATGACAAAACCTTGAATATGTTACGACATGGCTT  
CGTAACAACAGTGCGAGGATTGTCATCTCGGGGAAAGTGATTCACCAAGATGTTCATATAGATACGAG  
ATA

+

FFFFFFFFFFFF, :FFFFFFFFFFFFFFFFFFFFFFFFFFFFFFFFFFFFFFFFFFFFFFFFFFFFF  
:FFFFFFFFFFFFFFFFFFFFFFFFFFFFFFFFFFFFFFFFFFFFFFFFFFFFFFFFFFFFFFFF:FFFFF  
FFF

@A00721:190:HGJW7DSXY:4:1452:15881:15280\_2:N:0:TCTGCAAG+GCTGCACT  
CAGCGATCTTACTCGTTATCGGAGCTAAGAAGAAGACTTTGGGTACACGTTATGCTCGAAACTTAAC  
GTAGTACCGGAGGTGATCTCTCTGCTTCTGCGTTACTGAGAGAAAAG

+

FFFFFFFFFFFFFFFFFFFFFFFFFFFFFFFFFFFF:,F,FFFF:FFFFFFFFFFFF:FFFFFFFF:FFFFF  
FFFFFFFFFFFF:FFFFFFFFFFFFFFFFFFFFFFFFFFFF:FFFFFFFFF:FFFF

@A00721:190:HGJW7DSXY:4:2234:16459:1251\_1:N:0:TCTGCAAG+GCTGCACT  
CCTACGGTGACTTTATGGACAAGATGCAAGTTCCTGGGAAATACTTGTTTCCCTTTTATAGTTTAGTA



GGTGATCTTGACGTCGATTCTTTGTATAGGGAGTGTGAGAAGACAACGAATCTTGAAACTACGGTCCT  
TAT

+

FFFFFFFFFFFFFFFFFFFFFFFFFFFFFFFFFFFFFFFFFFFFFFFFFFFFFFFFFFFFFFFFFFFFFFFF  
FFFFFFFFFFFFFFFFFFFFFFFFFFFFFFFFFFFFFFFFFFFFFFFFFFFFFFFFFFFFFFFFFFFFFFFF:  
FFFFFFFFFFFFFFFFFFFFFFFFFFFFFFFFFFFFFFFFFFFFFFFFFFFFFFFFFFFFFFFFFFFFFFFF  
FFF

@A00721:190:HGJW7DSXY:4:1238:28628:28275\_2:N:0:TCTGCAAG+GCTGCACT  
ACCGGTCTCTAAATCTTTTGAGATTGAGAAGATTGAAGAACACGTCAAGAAGTCGCTCGGCGTTGTTC  
TTGAAAACCAAGTTAAGAAGGAGGCTGATCATGGAGTCTTTGTACCTT

+

FFFFFFFFFFFFFF:F:FFFFFF:FFFFFFFFFFFFFFFFFFFFFFFFFFFFFFFFFFFFFFFFFFFFFF  
FFFFFFFFFFFFFFFFFFFFFFFFFFFFFFFFFFFFFFFFFFFFFFFFFFFFFFFFFFFFFFFFFFFFFFFF:  
FFFFFFFFFFFFFFFFFFFFFFFFFFFFFFFFFFFFFFFFFFFFFFFFFFFFFFFFFFFFFFFFFFFFFFFF

@A00721:190:HGJW7DSXY:4:1308:30924:5509\_2:N:0:TCTGCAAG+GCTGCACT  
GGTTCAGCTACGAGAGGTGATCCCGGATGTGGATTGAAGGCTGGCTCTAAGGGAGACTCCTTCTTTTT  
GAATGTTGTAAAGAATTGGGTTGAGAAGTGTGCTTTACAAGGAGTTAG

+

FFFFFFFFFFFFFFFFFFFFFFFFFFFFFFFFFFFFFFFFFFFFFFFFFFFFFFFFFFFFFFFFFFFFFFFF  
FFFFFFFFFFFFFFFFFFFFFFFFFFFFFFFFFFFFFFFFFFFFFFFFFFFFFFFFFFFFFFFFFFFFFFFF:  
FFFFFFFFFFFFFFFFFFFFFFFFFFFFFFFFFFFFFFFFFFFFFFFFFFFFFFFFFFFFFFFFFFFFFFFF

@A00721:190:HGJW7DSXY:4:2505:17535:23312\_1:N:0:TCTGCAAG+GCTGCACT  
AGTTTTTAGATCTTCTTGATAATCTTAAAGAAAAATTTTCAATAAACTAATGAGAGGTATAGGCTTA  
GTCAAGTCTGTACTTACATTCTTTACGCCAGATTCTTCATGGGGCGACGCTGTTTCTCTTGGTATTTC  
TGA

+

FFFFFFFFFFFFFFFF:FF,FFFFFF:FFFFFFFF:FFFFFFFF:FFFF:F:FFFFFF:FFFFFF  
FFFFFFFFFFFFFFFF:FFFFFFFF:FFFFFFFF:FFFFFFFFFFFFFFFFFFFFFFFFFFFFFFFFFFFF  
FFF

@A00721:190:HGJW7DSXY:4:1623:15619:32550\_2:N:0:TCTGCAAG+GCTGCACT  
CAGAGCGTCATTTTCTTTGGGATCTTTCCTCTGGTAAGGGAATTATTAAATCATTCTTCTCACTCTT  
GACGAGAATTATTACTGTTTTCTCTACCCATAACTTCTTTTCAAAAA

+

FFFFFFFFFFFFFFFF:FFFFFFFFFFFFFFFFFFFFFFFFFFFFFFFFFFFFFFFFFFFFFFFFFFFF  
FFFFFF:FFFFFFFFFFFFFFFFFFFFFFFFFFFFFFFFFFFFFFFFFFFFFFFFFFFFFFFFFFFF

@A00721:190:HGJW7DSXY:4:1254:9896:5509\_1:N:0:TCTGCAAG+GCTGCACT  
CTGATGTTTTCTACAGAGTGCAGTCGTTTCAACACTTATCACCACTTTTGAAAGGAAAATAATTGGT  
GATGAAAATACGTATGTCGGTGGGGTTCTCAAGGCTCTCATCGCCACTGGGATTCTAAGGGGTTCAT  
AAG

+

FFFFFFFFFFFFFFFFFFFFFFFFFFFFFFFFFFFFFFFFFFFFFFFFFFFFFFFFFFFFFFFFFFFFFF  
FFFFFFFFFFFFFFFFFFFFFFFFFFFFFFFFFFFFFFFFFFFFFFFFFFFFFFFFFFFFFFFFFFFFFF  
FFF

@A00721:190:HGJW7DSXY:4:2430:31638:5212\_2:N:0:TCTGCAAG+GCTGCACT  
AGGATTCTTCTTTTGGTCCTTACGTCTTAAGTAATTTGGATGTTGTGCGAAAATATCAGGTTCTTGTC  
ACGATTCTTAAAAGAAGTTTATTAAACTTCAGAGTCTCTTGGAAGTC

+

FFFFFFFFFFFFFFFFFFFFFFFFFFFFFFFFFFFFFFFFFFFFFFFFFFFFFFFFFFFFFFFFFFFFFF  
FF:FFFFFFFF:FFFFFFFF:F:FFFF:FFFFFF,FFF,FFFF:

@A00721:190:HGJW7DSXY:4:1265:3161:3145\_1:N:0:TCTGCAAG+GCTGCACT  
CAATAGCCACAGACTTTCTGGGAAAAGAGACCTCTGTTGGTAGAGGAGTTGAGAGAATTACTCAGATT  
CAATCTGGCATCACTGAACGTCTACAACGAGTTAGGGAGTGGCTAGGTTTTAAAGATCCTTTGCACA  
AGC

+

:F:F,F,FFFF:FFFF:FF:FFFF:F,FFFFFFFFFFFFFFFFFFFFFFFF:FFFF:FF:FFF:FFFF  
FFFF:FFFF:FFFFFFFF:FFFFFFFFFFFFFFFFFFFFFFFF:FFFFFFFF:FFFFFFFF:FFF,  
,FF



TGGATCTTTTGATGGTATGTTTCACATTGCGTGATCACTTCCCGTGGA  
+  
FFFFFFFFFFFFFFFFFFFFFFFFFFFFFFFFFFFFFFFFFFFFFFFFFFFFFFFFFFFFFFFF  
F:FFFFFFFFFFFFFFFFFFFFFFFFFFFFFFFFFFFFFFFFFFFFFFFFFFFFFFFF  
@A00721:190:HGJW7DSXY:4:1473:3323:34491\_1:N:0:TCTGCAAG+GCTGCACT  
GATTAACATAAAATCCAGCGATTCTATTATGTCGCTAAAGCCTGTCCAGTTGTCGATGATGTTTCGGG  
CTGTGGGGATTAACCTCCCTCGTGAAACTTACGACGATGTTCTCGCTCGCATTTACAAGGATTACTA  
AGT  
+  
FFFFFFFFFFFF:FFFFFFFFFFFFFFFFFFFFFFFFFFFFFFFFFFFFFFFFFFFFFFFFFFFF  
FFFFFFFFFFFFFFFFFFFFFFFFFFFFFFFFFFFFFFFFFFFFFFFFFFFFFFFFFFFFFFFF  
FFF  
@A00721:190:HGJW7DSXY:4:1266:26847:17456\_2:N:0:TCTGCAAG+GCTGCACT  
CCACTTCTAATTTTAGGAAACGTCGCGAAAAGAAAGTTCAAGGATGTCTTGGTCGAAAAATATCGC  
CGGGACCTTCTAATAGAGGATCCTGATGACATTATTTCAACGGATACC  
+  
FFFFFFFFFFFFFFFFFFFFFFFFFFFFFFFFFFFFFFFFFFFFFFFFFFFFFFFFFFFFFFFF  
FFFFF,FFFFF:FFFFFFFFFFFFFFFF:FFFFFFFFFFFFFFFFFFFFFFFFFFFF  
@A00721:190:HGJW7DSXY:4:1119:23366:25801\_2:N:0:TCTGCAAG+GCTGCACT  
CTACCACAGAAACCGTCTCAGGAAGTGTCTCCACTGATTCGGAATTAGAGAAAGACGACCTTCTTG  
GGGACTGAGACCTCTGAATTTTCAGGGTGCCCTGATGAGGACGTTGAA  
+  
FFFFFFFFFFFFFFFFF:F:FFFFFFFFFFFFFFFFFFFFFFFFFFFFFFFFFFFFFFFFFFFF  
FFFFFFFFFFFFFFFFFFFFFFFFFFFFFFFFFFFFFFFFFFFFFFFFFFFFFFFFFFFF  
@A00721:190:HGJW7DSXY:4:2443:27715:30639\_1:N:0:TCTGCAAG+GCTGCACT  
ACTCTGAGACTTCTAAGAGTGTTTCAAAAGACCAGAAACGTAACAAGAAGAATAAAGGTAGGAAGGGG  
AGAAAACAGAACAAAGCGAGCGGTTGAAGAGAAAAGTATGTTGCGGCTGATCGTACCCCAATTCC  
TGC  
+  
FFFFFFFFFFFFFFFFFFFFFFFFFFFFFFFFFFFFFFFFFFFFFFFFFFFFFFFFFFFFFFFF  
FFF:FFFFF,FF,FFFFFFFFF,FFFFFFFFFFFFFFFFFFFFFFFFFFFFFFFFFFFFF:FFF  
FFF  
@A00721:190:HGJW7DSXY:4:2126:6144:2769\_2:N:0:TCTGCAAG+GCTGCACT  
CTCGGCGATACCACTGATCTTCCAGAGTTACGTAGTGGTCGTTCTTTTGGTGATTTTATCAAAGAGAA  
AGTTTCTGCTAGTCGCGACGATAGTATTTATCGGAGTGATATTAACAA  
+  
FFFFFFFFFFFFFFFFFFFFFFFFFFFFFFFFFFFFFFFFFFFFFFFFFFFFFFFFFFFFFFFF  
FFFFFFFFFFFF::FFFFFFFFFFFFFFFFFFFFFFFFFFFFFFFFFFFF:FFFFFFFFF  
@A00721:190:HGJW7DSXY:4:1354:20166:19163\_2:N:0:TCTGCAAG+GCTGCACT  
TGTTGAAGTACCGCAACATGGATCAGTTTTCCAAAAAGCTATTAATAGCAGTTGCGGGGCTATAATAC  
CGCCTCCAGATTACTCTAAACTGAATCCACTCTCTTGGGATATAAATG  
+  
FFFFFFFFFFFFFFFFFFFFFFFFFFFFFFFFFFFFFFFFFFFFFFFFFFFFFFFFFFFFFFFF  
FFFFFFFFFFFFFFFFFFFFFFFFFFFFFFFFFFFFFFFFFFFF:FFFFFFFFF:FFF:  
@A00721:190:HGJW7DSXY:4:2226:4770:9126\_1:N:0:TCTGCAAG+GCTGCACT  
GGCTTCTCTAAAGAACAGCAACTTTCAACATGAATTAGTTATTGAAAGTCTTGACCCTCACGTCTCAC  
TTTATCACCTTGAGATGGTAAAGTCATTAACAAAGGAAATGTTAAGGCTGATGACTTAAATTTCGCA  
TTC  
+  
F:FFFFFFFFF:FFFFF:FFFFFFFFFFFFFFFFFFFFFFFFFFFFFFFFFFFFFFFFFFFF  
FFFFFFFFFFFFFFFFFFFFFFFFFFFFFFFFFFFFFFFFFFFFFFFFFFFFFFFFFFFFFFFF  
FFF  
@A00721:190:HGJW7DSXY:4:1305:23312:20478\_2:N:0:TCTGCAAG+GCTGCACT  
TTTGAAAATTACGGAACCTTTCCTCGTTCTTCATGAAGATCTTCGAGTGTTTTATAGTGAGTTATTCT

TGCGAAGGTTCAAGTCGATTGATTTTGTTGACTACGATCTCTCTTGTA

```
FFFFFFFFFFFFFFFFFFFFFFFFFFFFFFFFFFFFFFFFFFFFFFFFFFFFFFFFFFFFFFFFFFFFFFFFFFFFF
FFFFFFFFFFFFFFFFFFFFFF,FFFFFFFFFF:FFF:FFFFFFFFF,FF
```

+

[illegible]

+

```

FFFFFFFFFFFFFFFFFFFFFFFFFFFFFFFFFFFFFFFF:FFFFFFFFFFFFFFFFFFFFFFFFFFFFFFFFFFFFFFFF
FFFFFFFFFFFFFFFFFFFFFFFFFFFFFFFFFFFFFFFF:FFFF

```

+

```

FFFFFFFFFFFFFFFFFFFFFFFFFFFFFFFFFFFFFFFFFFFFFFFFFFFFFFFFFFFFFFFFFFFFFFFFFFFFFFFF
FFFFFFFFFFFF:FFFFFF:FFFFFFF,FFFFFFFFFFFFFFFFFFFFFFFFFFFF

```

+

```
FFFF:FFFFFFFFFFFFFFFFFFFFFFFFFFFFFFFFFFFFFFFF:FFFFFFFFF:FFFFFFFFFFFFFFFFFFFFF
FF:FFFFFF:FFFFFFFFFFFFFF:FFFFFFFFFFFFFFFFFFFFFFFFFFFFFFFF
```

+

[illegible]

+

```
F,F:FFFFFFFFFFFFFFFF:FF,FFF:F:FFFF:FFFFFFFFFFFFFF:FFF::FFF,FFFFFF:FFFFF:,F
:FF:FF:FFFF,FF:FFFFFFFFFFFFFF,,:,FFFFFFFF:FFFFF,FF:F:
```

$$+$$
[illegible]

+

FFFFFFFFFFFFFFFFFFFFFFFFFFFFFFFF:FFFFFFFFFFFFFFFFFFFFFFFFFFFFFFFFFFFFFFFFFFFFFFFF

FFFFFFFFFFFFFFFFFFFFFFFFFFFFFFFFFFFFFFFFFFFFFFFFFFFFFFFFFFFFFFFFFFFFFFFFFFFFFFFF  
FFF

@A00721:190:HGJW7DSXY:4:1132:25003:28166\_2:N:0:TCTGCAAG+GCTGCACT  
CCGATAGGGTACCGAGTCTCCAAGAGAATATTTATTCTTATGAGGCTCGAAACTTCAACGTTTTTCACA  
ACGGAAGACATATCGCACCCGAAATTTTTGGGCAGAATGCTCTTAAC

+  
FFFFFFFFFFFFFFFFFFFFFFFF:F:FFFFFFFFFFFFFFFF:FFFFFFFFFFFFFFFFFFFFFFFF,FFFFFFFF  
FFFF:FFFFFFFFFFFFFFFF:FFFFFFFFFFFFFFFF:FFFFFFFF:

@A00721:190:HGJW7DSXY:4:2540:1118:14575\_2:N:0:TCTGCAAG+GCTGCACT  
GATCAGTCTAAGTTGGATAAAGTTATAGGAGACTCAGTTAACCTGAGAGCTCCTCAATTGATAGATTG  
GGTCAACAATAGGGACGCTAGTATACTTCGTAAAGTCGACAGCGAAAT

+  
:FFFFFFFFFFFFFFFF:FFFFFFFFFFFFFFFF:FFFFFFFFFFFFFFFFFFFFFFFFFFFFFFFF  
FFFFFFFFFFFF:FFFFFFFFFFFFFFFF:FFFFFFFFFFFF:F:FFFF

@A00721:190:HGJW7DSXY:4:2164:28592:31000\_2:N:0:TCTGCAAG+GCTGCACT  
AATTGGACCGACTATATGACCTATTTTAAGCTCATGGTGAAAAGGGAAGCTAAGGTTAACTTGATGC  
TTCAGCCTTTTCGAAGCATAACCCCGCACAGAATATCGTTTATCACGC

+  
FFFFFFFFFFFFFFFFFFFFFFFFFFFFFFFFFFFFFFFFFFFFFFFFFFFFFFFFFFFFFFFFFFFFFFFF  
FFFFFFFFFFFFFFFFFFFFFFFFFFFFFFFFFFFFFFFFFFFFFFFFFFFFFFFFFFFFFFFF

@A00721:190:HGJW7DSXY:4:1629:9968:25488\_2:N:0:TCTGCAAG+GCTGCACT  
CCTATCTTTAAGGTTCTTGTGAGGAGAGTCAAACAGTGTCTTTTACCCAACATTTTATGTATACAGA  
GATGACCAGTGACGATTTCTCCCGGAAGCTCTTCTCTCTTAGGAGG

+  
FFFFFFFFFFFFFFFFFFFFFFFFFFFFFFFFFFFFFFFFFFFFFFFFFFFFFFFFFFFFFFFFFFFFFFFF  
FFFFFFFFFFFFFFFFFFFFFFFFFFFFFFFF:FFFFFFFFFFFFFFFFFFFFFFFF

@A00721:190:HGJW7DSXY:4:1511:29071:18928\_1:N:0:TCTGCAAG+GCTGCACT  
TAAAGCCTATGAGATAAAGATGTATTCTTATTTAGGCTTCGATGCTGAATTTCTTGAACCTTTGGAGTG  
CCAGTGAATATTTTTGTCACGCCAGGAGTATCCATAACGATTTGTCAATTTACCACCTTTGCTCAACGA  
CGA

+  
FFFFFFFFF,F:F,FFFFFFFFF,F::FF,:FFFFFFFFF:FFFFFFFFFFFFFFFFFFFFFFFF:FFF  
FFFFFFFFFFFFFFFFFFFFFFFF:FFF,FFFFFFFFFFFFFFFFFFFFFFFF:F:FF:FFFFFF:FFFF  
FFF

@A00721:190:HGJW7DSXY:4:2469:27959:17253\_1:N:0:TCTGCAAG+GCTGCACT  
TAACACATTCTTTGGTAATTGTATGATCACTCTTATGATGCTCTCTTTATTACGACCTTCGGAAGT  
TTAGAGCCGTCGCTGTCGCCGAGACGATTCGATCCTCTTTTCGGACGTACCGGTCCAGGATTATTCA  
GAT

+  
FFFFFFFFFFFFFFFFFFFFFFFFFFFFFFFFFFFFFFFFFFFFFFFFFFFFFFFFFFFFFFFFFFFFFFFF  
FFFFFFFFFFFFFFFFFFFFFFFFFFFFFFFFFFFFFFFFFFFFFFFFFFFFFFFFFFFFFFFFFFFFFFFF  
FFF

@A00721:190:HGJW7DSXY:4:1459:19849:10410\_2:N:0:TCTGCAAG+GCTGCACT  
TGCTCGCGATTTATTCTTTTTGTCAATGATTACATCTACTTCGTTCTGATCCTTACAAGATCATCGT  
TAAGTTAGGTAAACCCCTAACCGATGTTACTCTTGTAGGACTTTGGGA

+  
FFFFFFFFF:FFFFFF:FFFFFFFFFFFFFFFF:FFFF:FFFFFFFFFFFFFFFF:F:FFFF:FFFF:F  
F:FFFFFFFF,FFF:FFF:FFFFFFFF:FFFFFFFFFFFFFFFF

@A00721:190:HGJW7DSXY:4:2213:15619:18020\_2:N:0:TCTGCAAG+GCTGCACT  
TTAAAGACTATACTAAATATCTCCACTACGAGTTGTTGTTTGGCGATTAGCTCTTGCGACTAATATT  
CGATATTCGATTGAGGGTCGTTATACCTATTGGCTATCTGTGCTTTG

+  
FFFFFFFFFFFFFFFFFFFFFFFFFFFFFFFFFFFFFFFFFFFFFFFFFFFFFFFFFFFFFFFFFFFFFFFF  
FFFFFFFFFFFFFFFFFFFFFFFFFFFFFFFFFFFFFFFFFFFFFFFFFFFFFFFF

@A00721:190:HGJW7DSXY:4:1226:32714:2284\_2:N:0:TCTGCAAG+GCTGCACT  
TTTTAAACGATTCCGAGAGGTTTATCCTGATGTGGAGGGAGTTCTTGAAGCATCCCTACCTTTCCTTG  
TGAAAATTTTGATGCGGTTTCATAAGATTATCAGTAATCCTGATTCTA

@A00721:190:HGJW7DSXY:4:2435:31665:8735\_1:N:0:TCTGCAAG+GCTGCACT  
GACTGGAGTTCAGACGTGTGCTCTTCCGATCTCAAAGATCGACTTCGAGACAGGTGATATTGTTGAGC  
GAGAGCGACCAAGATCTAAATTCGGTAACGGTGCGTGGCGCTTTATTTTAAAAAGCTCCCTCCTCTCG  
CAA

@A00721:190:HGJW7DSXY:4:2215:16071:3270\_2:N:0:TCTGCAAG+GCTGCACT  
ACTTGAGTCTTTTGATCAGTCTCTGACTTGACCATCTTTCATTTTAAATGACGATCATTAAGACTCTC  
TTTCTTCTTTGTTTCCTTCTTTGCACTGATTTTTCCTCATCAGCTTGT

@A00721:190:HGJW7DSXY:4:2336:31910:7435\_2:N:0:TCTGCAAG+GCTGCACT  
TTTTACGATAACAACATCATGTTGATTAAGACTCTTCCGAAAGGCGAACTTTGGGAATTTGAAGCTCA  
GGGTGAAGCACAACTTTGACCGTGACGAACGTGTGGTGTTCTTGATCT

@A00721:190:HGJW7DSXY:4:2211:8034:11209\_1:N:0:TCTGCAAG+GCTGCACT  
CACTACCACTTATTACGATATTTCTTTAGTCGATGGGTTTTCGACGCCTTTAAGCGTCTTCTGTTCAT  
CGCAACCAGATGATATCTTCTATTCGAACTTATGTTTCGATCAGTGTTTCTTCTATCAGGAGGAAAAC  
ACT

@A00721:190:HGJW7DSXY:4:2203:25229:23829\_2:N:0:TCTGCAAG+GCTGCACT  
TCTTCTAATGTGGCCTGAAC TACGTTTCACTTTGTGTG TACTTGTCTCTATTTTAAGTTTTGTCTTC  
TTGTTTGTCTTATTCTATTAATCACTCATTTT AGTGAGATTATTAAAA

@A00721:190:HGJW7DSXY:4:1368:16315:25927\_2:N:0:TCTGCAAG+GCTGCACT  
GACAACAGCAGGGGTTTTCGAATAGTGATAGCCACCCGCCTTACAGAGGGGCAGCAGCATGACCATAA  
TTGGTATTGACTTTGGTACCACCTTTTCTACTGTCTGTCTCGCCTCTT

@A00721:190:HGJW7DSXY:4:2438:15754:15812\_1:N:0:TCTGCAAG+GCTGCACT  
CTTAACAACAATGATAGTGAATTTATACCTACAATCATTGGTTTTTCTAATAATGATGACACTATTGT  
TTATGGATATGATGCTATTACTCATGATGGTTACGGTCAGGGAGGATTCTCAGTTTACAAGGACCTTA  
AGC

@A00721:190:HGJW7DSXY:4:2603:21549:28792\_2:N:0:TCTGCAAG+GCTGCACT  
CCGAAAGACGTGCTAAATTAACCATTGTACGATGTCGTCTGTCTCGGCGATCACTTTTCTACTAAGA  
ATTGGTCCTACTTTTGGACAAGGCCAACTTCGTAATCTTCATGAGATC

+

FFFFFFFFFFFFFFFFFFFFFFFFFFFFFFFFFFFFFFFFFFFFFFFFFFFFFFFFFFFFFFFFFFFFFFFF  
:FFFFFFFFFFFFFFFFFFFFFFFFFFFFFFFFFFFFFFFFFFFFFFFFFFFFFFFFFFFFFFFF

@A00721:190:HGJW7DSXY:4:2536:2790:6417\_1:N:0:TCTGCAAG+GCTGCACT  
TAGGGATTTTGAGAGAGTGAAAGGCTTCAATTGTAGTGGTTTGGTCGTTTCAGTACCCAGTCAGTATA  
CCTCTACGCAAAGATATTTTCATGAAAACCTACAGAGGAACGTACCGGATTACCTGTCTTTCATATTATG  
AAT

+

FF::F:FFFFFF:F:FFFF,,FFFF::FFFF:FFFFFF:FFFF:FFF:FFFF::F:FFFF::,F  
::FFFFFF:FF,:F:F,:FF:FFFF::FF:F:FFFFFF:FFFFFF,F:F:FFF:FFFFFFFF:FFFF:FF  
FFF

@A00721:190:HGJW7DSXY:4:1571:26124:18897\_1:N:0:TCTGCAAG+GCTGCACT  
TTTGCTTCGATGTTGGATGTCAAGAAGGGTTCAGAATGGGATTCCTACGTAGTTTATGACTTTGGTGG  
TGGTACTTTCGATACTTCTATCGTCTTACGTTACGGTAATTACTATAGTGTTATTTATTCTGGTGGTG  
ATG

+

F:FFFFFFFFFFFFFFFFFFFFFFFFFFFFFFFFFFFFFFFFFFFFFFFFFFFFFFFFFFFFFFFFFFFF  
FFFFFFFFFFFFFFFFFFFFFFFFFFFFFFFFFFFFFFFFFFFFFFFFFFFFFFFFFFFFFFFFFFFF:FFFFFFFFFFFF  
FFF

@A00721:190:HGJW7DSXY:4:1202:30101:32487\_1:N:0:TCTGCAAG+GCTGCACT  
GGTCGTGACGTTGATGAAGCTATAAGAGCGTTCCTATTACGGCGCACTTCTTTACCCGCCACCACACA  
ACTTTTCAGTTTCACAACCTGAAGGAGGAGTTTCTGTTACTGGAAAACCTCGTCAATACTTTTCAATA  
ATA

+

FFFFFFFFFFFFFFFFFFFFFFFFFFFFFFFFFFFFFFFFFFFFFFFFFFFFFFFFFFFFFFFFFFFF  
FFFFFFFFFFFFFFFFFFFFFFFFFFFFFFFFFFFFFFFFFFFFFFFFFFFFFFFFFFFFFFFFFFFF:FFFFFFFFFFFF  
FFF

@A00721:190:HGJW7DSXY:4:2134:14398:29747\_2:N:0:TCTGCAAG+GCTGCACT  
GATCTAGTGAAATTAACGCGTCCTTTTCTGGAACGTAGTTTACTATTATGAACAAAGTTATCAAAGA  
TAGTGGCATTCAAGGCAAACCTTACCCTGATTCCGGCCGGTGGTAGCTC

+

FFFFFFFFFFFFFFFFFFFF:FFFFF:FFFFFFFFFFFFFFFFFFFFFFFF:FFFFFFFFFFFFFFFFFFFF:FFF  
FFFFF:F:FFFFFFFFFFFF:FFFFFFFFFFFFFFFFFFFFFFFFFFFF:FFF

@A00721:190:HGJW7DSXY:4:1558:31991:8234\_2:N:0:TCTGCAAG+GCTGCACT  
TGCTGAAACAGCTATTAAAGCTGTTGAGCGGTAATTACACCTAAACGAGCTCGATCTGCCATCGCTG  
AAGGATGTGCACTCTTTTCTGCTACTTTAACGGAGCGTAGTGTACTCT

+

FFFFFFFFFFFFFFFFFFFFFFFFFFFFFFFFFFFF:FFFFFFFFFFFFFFFFFFFF::FFFFFFFFFFFFFFFFFFFF  
FFFFFFFFFFFFFFFFFFFFFFFFFFFF:FFFFF:FFFFFFFFFFFFFFFFFFFF

@A00721:190:HGJW7DSXY:4:2521:21377:14685\_1:N:0:TCTGCAAG+GCTGCACT  
CAACAGTAACATTACTTCTAATAAAGGTCTCTATCAAGCTCGTATTATCGTCGCTGCTGGATCTGCGT  
TACCGTTGAAGGCTAACTCCAAGGTAATTATGAAGACTGTGATTTATCTTTCCTCTGGCCTTGTAT  
GAG

+

FFFFF::FFFFFF:FFFF,FFFFFFFFFFFFFFFFFFFFFFFF:FFFFFFFFFFFFFFFFFFFFFFFF  
,FFFFFFFFFFFFFFFFFFFFFFFFFFFFFFFFFFFF:F:FFFFFFFFFFFFFFFFFFFFFFFFFFFF  
FFF

@A00721:190:HGJW7DSXY:4:2608:11677:29763\_2:N:0:TCTGCAAG+GCTGCACT  
CGTAACATTAATAATTTCAATCTTCTTAAAAAGAAGATAGAGAGTCATACTTTGGGCTATCGTTCAGG  
TGCATGGGGTTGGATAGCCAATATTGAAGTGGACACCTCTGGTAGTAT

+

FFFF:FFFFFFFFFFFFFFFFFFFFFFFFFFFFFFFFFFFFFFFFFFFFFFFFFFFFFFFFFFFF  
FFFFFFFFFFFFFFF,,FFFFFFFFFFFF:FFFFFFFFFFFFFFFFFFFFFFFFFFFF  
@A00721:190:HGJW7DSXY:4:1242:1280:28948\_2:N:0:TCTGCAAG+GCTGCACT  
AAGCATACTACTTTTGCTTTGATTACTCTACCGCCTTACAAGTCTAAGGTTAAAGAGTCGATTAAACA  
AGTTGTACTTATCAATGATTTTATCGCTGGTTGTTATCTCGAAAAGTC  
+  
FFFFFFFFFFFFFFFFFFFFF,:FFFFFFFFFFFFFFFFFFFFFFFFFFFFFFFFFFFFF:F:FFFFFFFFFFFF,FFFF,F  
FF,FFFFFFFFFFFF,FFF:FFFFFFFFFFFF,FF,:FF,FFF,:F:F:FFF:FF  
@A00721:190:HGJW7DSXY:4:1172:18900:12837\_1:N:0:TCTGCAAG+GCTGCACT  
CCCAAAGAGAATATCTAAAATATTTACAAAATCTTACCACTATCTACGAACCTAAAGTTCTGAAGACG  
TTGCTTGTGCTTCTCCTTTAATGGCACTACCTCGGTACAATCTTACTTGGAACGAAGGCGACCTGT  
TCC  
+  
FFFF:FFFFFFFFFFFFFFFFFFFFF:FFFFFFFFFFFFFFFFFFFFF:FFFFFFFFFFFFFFFFF:FFFFFFFFFFFFF  
FFFFFFFFFFFFFFFFFFFFF:FFFFFFFFFFFFFFFFFFFFF:FFFFFFFFFFFFFFFFFFFFF  
FFF  
@A00721:190:HGJW7DSXY:4:2131:19723:28573\_1:N:0:TCTGCAAG+GCTGCACT  
GTTCTGTCTATATTAGGTGAAGCGAAATACGATTTCAACGTTCAACGTTACCGAGTTTCGTTTCGTA  
CCTTGATGCTGACTTTTCGTCATATGATTTGATCTGGTTGCTCAATTCTAAGCGTGTTCGCTTAGTG  
CGA  
+  
FFFFFFFFFFFFFFFFFFFFFFFFFFFFFFFFFFFFFFFFFFFFFFFFFFFFFFFFFFFFFFFFFFFFF  
FFFFFFFFFFFFFFFFFFFFF:FFFFFFFFFFFFFFFFFFFFF:FFFFFFFFFFFFFFFFFFFFF  
FFF  
@A00721:190:HGJW7DSXY:4:2370:4381:3129\_1:N:0:TCTGCAAG+GCTGCACT  
TACGAACCTGACTCTACTATACGTGACATACTAAATACTAGATATTTGGATGATCTTGATAAAGAACT  
TCATGAATTTTCAGAGGATGAAAAATTTCTTCCTTGGATTTAATATAAAGAATCTTTACCAGGACT  
CCT  
+  
FFF:FFFFFFFFF:FFFFFFFFFFFF:FFFFFFFFFFFFF:FFFFFFFFFFFFF:FFFFFFFFFFFFF:FFFFF  
FFFFFFFFFFFFFFFFFFFFF:FFFFFFFFFFFFFFFFFFFFF:FFFFFFFFFFFFFFFFFFFFF  
FFF  
@A00721:190:HGJW7DSXY:4:1220:3070:36370\_1:N:0:TCTGCAAG+GCTGCACT  
GATCGTAAGAAGTTTATAAGGAACATATCCATTTGTTGTAATAGGGTCATCAACTTAGAACTCGAAAC  
TCTAAGTGGAATACTGTCTTTCCAAGCTTACCTGTATCTTCAATGAAATTGGACTCTTCGATAGGGG  
ACA  
+  
FFFFFFFFFFFFFFFFFFFFF:FFFFFFFFFFFFFFFFFFFFF:FFFFFFFFFFFFFFFFFFFFF  
FFFF:FFFFFFF:FFFFFFFFFFFFF:FFFFFFFFFFFFF:FFFFFFFFFFFFF:FFFFFFFFFFFFF  
FFF  
@A00721:190:HGJW7DSXY:4:2629:11080:24502\_1:N:0:TCTGCAAG+GCTGCACT  
GGAAGATCTGTTATCGACGTTTATCGTTTACGAAGTATCACTCCACCGGTGAATGGTTTAAGAATAC  
TATAAATAGAATAGCTATTACTACTAATGGCGTTGGCCTAGTGGATGTTATTAGTGACATCTGGTCAA  
TTT  
+  
:FFFFFFFFFFFFFFFFF,FFFFFFFFFFFFFFFFFFFFFFFFFFFFFFFFFFFFF,FFFFFFFFFFFF  
FFFFFFFFF:FFFFFFFFFFFFFFFFFFFFF:FFFFFFFFFFFFFFFFFFFFF  
FFF  
@A00721:190:HGJW7DSXY:4:1650:11749:12226\_1:N:0:TCTGCAAG+GCTGCACT  
TGGTCTTTATTCTATTATTGATTTTTATGAGATTGATACGTTAACAGAAGATGATGTTAGAGTAGAAT  
TCCTGAAGAGTCCTTCCGTAACCAACTTCTTGACAATTTTCTTCAATCCTTCGATAATAGTTAAATCT  
AGG  
+  
FFFFFFFFFFFFFFFFFFFFF:FFFFFFFFFFFFFFFFFFFFF:FFFFFFFFFFFFFFFFFFFFF



FFFFFFFFFFFFFFFFFFFFFFFFFFFFFFFFFFFFFFFFFFFFFFFFFFFFFFFFFFFFFFFFFFFFFFFF  
FFF  
@A00721:190:HGJW7DSXY:4:1412:3929:19820\_2:N:0:TCTGCAAG+GCTGCACT  
TACACAATTAAGAAATAATCCTACATTGACTGATTATCTAAAGATTGAAGGAAAATTTATCCTCGTT  
TAACTTACTTAGACTTTCCTACGATACAAATGATAACTTCTAATTTAC  
+  
FFFFFFFF:FFFFFFFFF:FFFFFFFFFFFFFFFFFFFFFFFFFFFFFFFFFFFFFFFFFFFFFFFFF:  
FFFFFFFF:FFFFFFFFFFFFFFFF,FFFFFFFFFFFFFFFF,F,FF,F  
@A00721:190:HGJW7DSXY:4:2129:31123:31720\_1:N:0:TCTGCAAG+GCTGCACT  
GGGATGCATGGTGTATCTCCTCAGGAGTCCCGGCATTTGATAATAATGACGAGACTTTCGTCAATAAT  
CGCTGCATATTACGGATTACACGGTACCAGCGCATCTCGTGTGAGCCTCGACCCGATTATATGGTAT  
TAA  
+  
FFFFFFFFFFFFFFFFFFFFFFFF:FFFFFFF:F:FFFFFFFFFFFFFFFF:FFF:FFFFFF:FFFF  
,FFFF:FFFFFFFFFFFF:FFFFFFFFFFFFFFFF:FFF:FFFFFFFFFFFFFFFFFFFFFFFF  
F:F  
@A00721:190:HGJW7DSXY:4:1178:13910:35509\_2:N:0:TCTGCAAG+GCTGCACT  
GATTCTCGATTTCGTAGAGCTTATCTAGGTACTCTCATTTACTATGTTGATTAGTCTACATTTATGCT  
GATCTAAAATTTGATCTAGATGGATCCACTCCTCGAGTTATCATGAT  
+  
FFFFFFFFFFFFFFFFFFFF:FFFFFFFFFFFFFFFFFFFFFFFFFFFFFFFFFFFFFFFFFFFFFFFF  
FFFFFFFFFFFFFFFFFFFFFFFFFFFFFFFFFFFFFFFF:FFFFFFFFFFFF  
@A00721:190:HGJW7DSXY:4:2456:29677:33849\_1:N:0:TCTGCAAG+GCTGCACT  
TTCTAGAATTCTTAATTATAATATTCAACCTCAAAGTTACGTGTTTACAGTAACGAGATCACACATT  
TTGAGAACTAACTATGTTATGTTCTCTGATCATTTTGACAATCTCTTCTTATAATAATAATAATA  
ATA  
+  
FF,FF:FFF:FF:FFFFFFFF,FFFFFFFFFFFFFFFFFFFFFFFFFFFFFFFFFFFFFFFFFFFF  
FFFFFFFFFFFFFFFFFFFFFFFFFFFFFFFFFFFFFFFFFFFFFFFFFFFFFFFFFFFFFFFFFFFF  
FFF  
@A00721:190:HGJW7DSXY:4:2516:3694:24706\_2:N:0:TCTGCAAG+GCTGCACT  
CAAATAGTGGAAGGCTCCAGTCAACACTAGTTCGAGTGCTGCTTTGGATTACGATGACGTGAGAATA  
GGTGAAGGGATAGTTTTTACCTCGACCAACATTAAGGCGGCGGCGACT  
+  
FFFFFFFFFFFFFFFFFFFFFFFFFFFFFFFFFFFFFFFF:FFFFFFFFFFFFFFFFFFFFFFFFFFFF  
FFFFFFFFFFFFFFFFFFFFFFFFFFFFFFFFFFFFFFFF:FFFFFFFFFFFF  
@A00721:190:HGJW7DSXY:4:1452:14940:7138\_1:N:0:TCTGCAAG+GCTGCACT  
AGGACACTTCGAACTGAATAATGATGCACTACAAACAAGTATCGCTAATCATCTGAAAAAGGCTCTA  
AAGGACACTATACAATATCCAGACGACGACGAAGCTTATACTACTTTAATTTTGGGTATTATGTGGAG  
ATA  
+  
F:FFFFFFFFFFFF:FFFFFFFFFFFFFFFFFFFFFFFFFFFFFFFFFFFFFFFFFFFFFFFFFFFF  
FFFFFFFFFFFFFFFFFFFFFFFF:FFFFFFFFFFFFFFFFFFFFFFFF:FFFFFFFFFFFFFFFFFFFF  
FFF  
@A00721:190:HGJW7DSXY:4:1210:23909:14215\_2:N:0:TCTGCAAG+GCTGCACT  
ACCACATTTTGGTCAAGTCAATCCGTTGAGAAAATTTCTTAGAGGATATTCGCCATTGTGGTACGAAT  
TGGTCCAACATTTACCACCAAATCTTTTGATACAACCTCTAGCCTTCA  
+  
FFFFFFFFFFFFFFFFFFFFFFFFFFFFFFFFFFFFFFFFFFFFFFFFFFFFFFFFFFFFFFFFFFFF  
FFFFFFFFFFFFFFFFFFFFFFFFFFFFFFFFFFFFFFFFFFFFFFFFFFFFFFFFFFFF  
@A00721:190:HGJW7DSXY:4:1127:23068:6433\_2:N:0:TCTGCAAG+GCTGCACT  
CTTGCTATTACACGATTGGTTCGAACCCGTTGATGCTATGTCAGAAGAAGCTATTCAAGCTTGTCGT  
TTAAAGACTGCAGAGGCTGTCAAACAAGCCCAGACTCAAGGAGTCCAA  
+

FFFFFFFFFFFFFFFF:FFFFFFFFFFFFFFFF:FFFFFFFFFFFFFFFFFFFFFFFF  
FFFFF,FFFFFFFFFFFFFFFFFFFFFFFFFFFFFFFF:FFFF  
@A00721:190:HGJW7DSXY:4:2271:32750:35383\_2:N:0:TCTGCAAG+GCTGCACT  
GGTGATAAAAATTATTTAGAGATCTTTCTACTTACAAAGGACAATTCAGTTTCATTAATTCTACGGA  
AAAGTCCGGAGTATATTGTATGTTAATAGATAGTGGGATAATAGTTCT

+  
FFFFFFFFFFFFFFFFFFFFFFFFFFFFFFFFFFFFFFFFFFFFFFFFFFFFFFFF  
FFFFFFFFFFFF:FFFFFFFF:FFFFFFFFFFFFFFFFFFFFFFFF:FFF  
@A00721:190:HGJW7DSXY:4:1305:22290:17143\_2:N:0:TCTGCAAG+GCTGCACT  
TGCTATTGATTATGTAACCGATAGGAGTAGTATAGTTGAAGATGTGTCTTTAGACGATAATCCTTTAA  
GGACTATGTTGACTGACGAAGATTTTACCACAGATTTGTCTACGTTGC

+  
::,FF:F,FFFF:FFF:F,FFFFFF,F,,:FFFF,:FF,F:,,F,FF,FF,FF,:FFF,:::,:F  
,:FFFFFF:,FF,F::F,FFF:,FFF,:FF,F,FFF,,,FF,FFF:F  
@A00721:190:HGJW7DSXY:4:2620:9245:30279\_2:N:0:TCTGCAAG+GCTGCACT  
CTATATACATTATAAAATATAAAATAAGGGAGTCATAACTTTTGTTACCAAATTCTTGGCTTTCAAC  
GAAGTCTCTGATTTTATTAATCATTACTTTAACGATCTCTCGGTCATT

+  
FFFFFFFFFFFFFFFFFFFFFFFFFFFFFFFFFFFFFFFFFFFFFFFFFFFFFFFF  
FFFFFFFFFFFFFFFFFFFFFFFFFFFFFFFFFFFFFFFFFFFFFFFF,FF  
@A00721:190:HGJW7DSXY:4:2411:5122:24893\_1:N:0:TCTGCAAG+GCTGCACT  
TTGATCTACGTCGTTTAACTGTCGGAACAACCTTTACTTAGAATGACTCTATCTTTTCAGACACTTCT  
TATATTATTACAATAGTTAATATCATATTAGTAATACTCACTATCGTTTTCTGCTTTTTCTTAGCTA  
ATA

+  
FFFFFFF:FFF:FFFFFFFFFFFFFFFFFFFFFFFF:FFFFFFF:FFFFFFFFFFFFFFFFFFFFFFFF  
FFFFFFFFFFFFFFFFFFFFFFFFFFFFFFFFFFFFFFFF:FFFFFFFFFFFFFFFFFFFFFFFF  
FFF  
@A00721:190:HGJW7DSXY:4:2516:15157:3912\_2:N:0:TCTGCAAG+GCTGCACT  
ATGAGTACGAAAACCAACTCTTCGTTACGAGACCTGATGGTAGAATAGATTTAGTCTCTACACCCATC  
TCAACGAGGATAAAGCGAGTTTTCCGTCCTGAACGTAATACACGAAGA

+  
FFFFFFFFFFFFFFFFFFFFFFFFFFFFFFFFFFFFFFFFFFFFFFFFFFFFFFFF  
FFFFFFFFFFFFFFFFFFFFFFFFFFFFFFFFFFFFFFFFFFFFFFFF  
@A00721:190:HGJW7DSXY:4:1118:6903:7310\_1:N:0:TCTGCAAG+GCTGCACT  
CACGACTCGAAACCGAGACCCGTAGATCAAAGTCCCTTCTAACTTTAGATTATGAATCCTGCCTTTA  
CTCATTTTATAGCAGTTATTTA

+  
:FF:FFFF,FFFFFFFFFFFFFFFF:FF,FFF:,FFFFFF:FFFFFF:,FFFFFFFFFFFF,FFFFFF  
FF::FFFFFFFFFFFF,F::  
@A00721:190:HGJW7DSXY:4:2378:4951:36933\_1:N:0:TCTGCAAG+GCTGCACT  
TTTATAACCTTCTTATACTTTTGGGTATGTTTTGTGAAAAACATGAGATACCCAAGTCTATCGAAGAC  
ATTATCTCTTATGTACTTATTGTAACGATCATTCTTTCGAGTTTTGTCATTCTTATTCTTTTATTCCT  
TTA

+  
FFFFFFFFFFFFFFFFFFFFFFFFFFFFFFFFFFFFFFFFFFFFFFFFFFFFFFFF  
FFFFFFFFFFFFFFFFFFFFFFFFFFFFFFFFFFFFFFFFFFFFFFFFFFFFFFFF  
FFF  
@A00721:190:HGJW7DSXY:4:2334:15040:25598\_2:N:0:TCTGCAAG+GCTGCACT  
TTTATAATGCTTTTCGATAGTGATTGTTATCAATTTAAATACATTACTGTTTCAAATCATCTTTACTC  
ACAGACTCCGAAAATGGTTTCAAATGAGGTCAAAGCTCTATTTATTAA

+  
FFFFFFFFFFFFFFFFFFFFFFFFFFFFFFFFFFFFFFFF:FFFFFFFFFFFFFFFFFFFFFFFF  
FFFFFFFFFFFFFFFFFFFFFFFFFFFFFFFFFFFFFFFF,FFFFFFF

@A00721:190:HGJW7DSXY:4:2367:19913:35697\_1:N:0:TCTGCAAG+GCTGCACT  
CACTACCACTGATCTGCCGACTTTAGTCAAGGAAGTTCAATTCCTTCGATGTTTATATTTTCTATAA  
GGGAAAATATCAATAATCAAATTTGACAAATTTAGAACTTTATTTCAGAACTCTCTCCGATCACCT  
TGG

+

:F:FFF:FFFFFFFF:F:FFFFFFFF,F:FF,FF:FFFFFFFF,F:F,FF:F,FFFF,:FFF:FFF:F  
FFFF:FFFFFFFFFFFFFFFFF:,FF:::FFFF:FFFFFFFFFFFF:F:F::FFFF::FFFF,:F  
FF:

@A00721:190:HGJW7DSXY:4:2668:22978:31610\_1:N:0:TCTGCAAG+GCTGCACT  
TCTTTTCAATAAGATGTATGATGATAATCTACTATTTTAAATAGTGATATTCAGCGTATACTTGAAT  
ACTTTATCAAAGATTTGGCTTGGTCTATTTACCGCAAAAAGTTGGAAGAGGTCTATGATATTTATTTT  
ACT

+

:FFFFFFFF:FFFFFFFFFFFFFFFFFFFFFFFFFFFFFFFFFFFFFFFFFFFFFFFFFFFFFFFFFFFF  
FFFFFFFFFFFFFFFFFFFFFFFFFFFFFFFFFFFFFFFFFFFFFFFFFFFFFFFFFFFFFFFFFFFFFFFF  
FFF

@A00721:190:HGJW7DSXY:4:1552:5846:9831\_2:N:0:TCTGCAAG+GCTGCACT  
CCGATTATAAAGTACTGTTGATAATATTACAATAGCTCTTCTCAGAAGATTAGAGAAGTAACCGGT  
GAACACGTCGGTAGCATTGATTTACTTTTACCGTTAGAACTGAAAAAG

+

FFFFFFFFFFFFFFFFFFFFFFFFFFFFFFFFFFFFFFFFFFFFFFFFFFFFFFFFFFFFFFFFFFFF  
FFFFFFFFFFFFFFFFFFFFFFFFFFFFFFFFFFFFFFFFFFFFFFFFFFFFFFFFFFFFFFFFFFFF

@A00721:190:HGJW7DSXY:4:2402:14597:14497\_1:N:0:TCTGCAAG+GCTGCACT  
ACCTATAAGTTACAAACGATTCTTCGACTATATTAAAGAAATAAAAATACTTCAAGTACCTGAACTTT  
ACATTTTAAATGGTATGGTATAATGTGTCTTACAAATAGAACCTTCACTCTCGGTAATGAGAGTGTAT  
TCC

+

FF:FFF:F,FFFFFFFFFFFF:FFFFFFFFFFFFFFFFFFFFFFFFFFFFFFFFFFFFFFFFFFFF  
FFFFFFFFFFFFFFFFFFFFFFFFFFFFFFFFFFFFFFFFFFFFFFFFFFFFFFFFFFFFFFFFFFFF  
FFF

@A00721:190:HGJW7DSXY:4:1575:11243:29450\_1:N:0:TCTGCAAG+GCTGCACT  
GGCATTACTAGGATTTATCACACTCCTAAATTTGATAGCAATTTATGTTTTAAATGCTAGGAAAATTT  
TAGAAAACTCCATTGTATAGTTCAAGGAGTACTTAATTCAATAGCTTTAGTATTATTTACTATCGCC  
TTT

+

FFFFFFFFFFFFFFFFFFFFFFFFFFFFFFFFFFFFFFFFFFFFFFFFFFFFFFFFFFFFFFFFFFFF  
FFFFFFFFFFFFF:FFFFFFFFFFFFFFFFFFFFFFFFFFFFFFFFFFFF::FFFFFFFFFFFFFFFFFFFF  
FFF

@A00721:190:HGJW7DSXY:4:1453:6596:31015\_2:N:0:TCTGCAAG+GCTGCACT  
AGTTAATTGCTTACACACAAGTGACGCGGAAGGAATCTTAATTGATTGAAGCTAGGCGTTGGGGAGA  
ATGAACTGCCGCTTCCCGGAAGAAACGATCTATTTACAGAGTATTTAG

+

FF:FFFFFFFFFFFFFF,FFFFFFFFFFFFFFFFFFFFFFFFFFFFFFFFFFFFFFFFFFFF:FFFFFFF  
FFFFFFFFFFFFFFFFFFFFFFFFFFFFFFFFFFFFFFFFFFFFFFFFFFFFFFFFFFFF

@A00721:190:HGJW7DSXY:4:2231:15953:18004\_1:N:0:TCTGCAAG+GCTGCACT  
CTCCCCAACATAACATAACCTACCATGACCAATCATCGCTCCAAGTGGCACGCCAGACGTAG  
GGTCAAACCTACTACCGCCTGTGCGCAGATCGGCACCACTGGTCTCTACGTTACGGGACCCGCTGTGC  
AGA

+

FFFFFFFFFFFF,FFFFFFFFFFFFFF:FFFFFFFFFFFFFFFFFFFFFFFFFFFFFFFFFFFF  
FFFFFFFFFFFFFFFFFFFFFFFFFFFFFFFFFFFFFFFFFFFFFFFFFFFFFFFFFFFFFFFFFFFF  
FFF

@A00721:190:HGJW7DSXY:4:1176:32253:28948\_2:N:0:TCTGCAAG+GCTGCACT  
TCTGCACAGAAGAAGGCTGAAGGTCGTTACCGGACGACCACTCAAAGGAAACGGGCTGTTGCCAGAG

+

@A00721:190:HGJW7DSXY:4:1538:2329:16892\_1:N:0:TCTGCAAG+GCTGCACT  
AACTGAGGCAGTACCTCAGTCAAAGTCACATTCACCACTCCCATACCAATCAATGATGTGACTATAC  
AGTTTCGGCCATTTCAAGAGTGGTCAATACGTCGTGGGAGGTACTGAAGCCTTCCCCTCCGCTGGCAGC  
AAG

+

@A00721:190:HGJW7DSXY:4:1228:3676:32784\_2:N:0:TCTGCAAG+GCTGCACT  
GCCAATCAATAGTTCTTCTGACCAGAATGAAAAGGGGTTTACCAGGGTAGTCTCTAAGTCTACCAGGA  
AGAGGGGAAATGTCCCCAAAACAGAGAAGAATAAAGGGAAAGGTCCAT

+

@A00721:190:HGJW7DSXY:4:1103:30743:28557\_2:N:0:TCTGCAAG+GCTGCACT  
AGGGGAAATTACCCCTAATTCTGAAGGAAGATCTCCACCATCTGGGGTTGGGAATAAGAAATCTGCA  
CGGGCCAAAGAGGCCGCTGCTACGAAGTCGCTGAAGGCGGCTTGGGTC

+

@A00721:190:HGJW7DSXY:4:2174:29414:29951\_2:N:0:TCTGCAAG+GCTGCACT  
GTAAAGTTGCGCCTGCCGACCCCATCTTTGAGACCAAGACTCTCTACAGTAGGTTCTGTCCTACTATG  
AGCAAATCTGTTGAATTCGTCACTGAGGACGAAGGTGAGAGGACTTTT

+

@A00721:190:HGJW7DSXY:4:2239:12328:20243\_2:N:0:TCTGCAAG+GCTGCACT  
CTGGGGAAAGAGAATTGCGTGGGTGAAGGCCGACGCTTCGAGCTTGAGTGTGACGAGGCCGGTGACG  
TTTTTGTCAACGGCGTTTGGAGGATTTATCCGCGCTTAACATATGGGG

+

@A00721:190:HGJW7DSXY:4:1414:32533:21355\_2:N:0:TCTGCAAG+GCTGCACT  
CTATGGAGTCTTGAAGGACTTAGGTTGGCATATTTATGCCGACGATAATAAGCATGTCACCCTTAAGC  
ACCGAGGTAAGCTCGGGACTTACAAGAGAGAGTGTGAGAGAGTCGCTC

+

@A00721:190:HGJW7DSXY:4:1174:32235:16642\_2:N:0:TCTGCAAG+GCTGCACT  
TTCTGACTGATGAGGTTAAACTCTTGCTCCTTCTGTGGGTGAGGGTTTTTGTATATTCAGTGGTTC  
TGGGAGGCTGCTTTCCTCCATAATTACAACCTCTCTTTAGAGAGCATT

+

@A00721:190:HGJW7DSXY:4:1353:1416:12618\_2:N:0:TCTGCAAG+GCTGCACT  
AAATTTCCACATATGGTAGACGTTGTACACATTTTCTTGAAAATTTTTCCTTTCCTCCGTCATTGGGG  
ATTTTCGATGTGAGAAGGTGGAAGGTGTCAAGGGTCTTCTTCATGCTGA

+

```

FFFFFFFFFFFF,FFFFFFFFFFFFFFFFFFFFFFFFFFFF,FFFFFFFFFFFF:FFFFFFFFF::FFFFFFF
FFFFFFFF:F:FFFFFFFFFFFF:FFFFFFF:FFFFFFFFFFFFFFFFFFFF

```

@A00721:190:HGJW7DSXY:4:1154:23547:8265\_1:N:0:TCTGCAAG+GCTGCACT  
TTCAGACGTGTGCTCTTCCGATCTCGGCTCGTATCGAGTTGGAGGGAGGAAGTTCTCCGAAATTAAAG  
ACGGGGGGGATTAAGAGTCCAGCTGTAAGTGTCAATTCAGAGAGGGGAGCTCTGAAAAGGAACTTCGT  
CAG

+

FFFFFFFFFFFFFFFFFFFFFFFFFFFFFFFFFFFFFFFFFFFFFFFFFFFFFFFFFFFFFFFFFFFFFFFF  
FFF:FFF:FFFFFFFFFFFFFFFFFFFFFFFFFFFFFFFFFFFFFFFFFFFFFFFFFFFFFFFFFFFFFFFF  
FFF

@A00721:190:HGJW7DSXY:4:2141:19388:26741\_2:N:0:TCTGCAAG+GCTGCACT  
AGAGGGGAGGAGTTTGAGGAAGGCTCTAGAGAAGATCTCACCACCTGGAGAAGGCAAGTGGAGAGTCC  
AGAAGTTGATGAAGAAGGATTATTTGAAGCAGGGGTTACCACTTCCTA

+

FFFFFFFFFFFFFFFFFFFFFFFFFFFFFFFFFFFFFFFFFFFFFFFFFFFFFFFFFFFFFFFFFFFFFFFF  
FFFFFFFF:FFFFFFFF:FFFFFFFFFFFFFFFFFFFFFFFFFFFFFFFFFFFFFFFFFFFFFFFF:FF  
FFFFFF:FFFFFF:FFF:FF,FFF:FFFFFFFFFFFFFFFFFFFFFFFF:FFFF

@A00721:190:HGJW7DSXY:4:2649:4463:29105\_2:N:0:TCTGCAAG+GCTGCACT  
TTCTTTTGAGTTTTAGATAATCTTTTGAGAAGGGGTATAGAGCCAGCAAGAGAAGCTTATATGCTGG  
TTTAAGTGATGATTATCACTCCTTGAGAAGACAAGCCACATTAAGATA

+

FFFFFFFFFFFFFF:FFFFFFFFFFFFFFFFFFFFFFFFFFFFFFFFFFFFFFFFFFFFFFFFFFFFFFFF  
F,FFFFFFFFFFFFFFFFFFFFFFFF,FFFFFFFF:FFFFFFFFFFFFFFFF

@A00721:190:HGJW7DSXY:4:2516:20302:16078\_2:N:0:TCTGCAAG+GCTGCACT  
CTTGGGGTTTCGAATGTCATTAGTGCCTTACGATTGAAAGAGGTCCTTTGAGTATCGACAGATCTTT  
CGATCTTGAGGACGTACATTTAACGTGGCAGAATTCGGTAACTTACCA

+

FFFFFF:FFFFFFFFFFFFFFFFFFFFFFFFFFFFFFFFFFFFFFFFFFFFFFFFFFFFFFFFFFFFFFFF  
F:FFFFFFFFFFFFFFFFFFFFFFFFFFFFFFFF:FFFFFFFF:FFFFFFFF:

@A00721:190:HGJW7DSXY:4:2328:3296:8641\_2:N:0:TCTGCAAG+GCTGCACT  
GGGAAGTTGTGGGATTTAACTTTGACTCAACTACTCCGATCAGATCCGGATGGTTTGATTGGTATGGA  
CTACTCGACTTTTGATCTGGAGTTGTCTAGGGTCATGGCAGATACTAC

+

:F,F:FFFF,FFFF:FFFF,FFFFFFFFFFFFFFFFFFFFFFFF:FF::F,:FFF:FFFFFFFF:FFFF  
F:FFFFFFFF,F,FFFF:FFF,,FFF:FF,:FFFFFFFF:FFFF,FF

@A00721:190:HGJW7DSXY:4:1339:21838:28009\_2:N:0:TCTGCAAG+GCTGCACT  
AATATGCAGGTCAAAGATTCTGTAGCTCTGAGGGCGTTGAGGGAGCCGTTTGGCCGACTTTAACTA  
TTCTAAGAGTCTTTATGATTCAAAACCTATCGTTGTCTACCTTACAA

+

FFFFFFFFFFFFFFFFFFFFFFFFFFFFFFFFFFFFFFFFFFFFFFFF:FFFF:FFFFFFFFFFFFFFFF  
FFFFFFFFFFFFFFFF:FFFFFFFFFFFFFFFF,FFFF:FFFFFFFF

@A00721:190:HGJW7DSXY:4:1241:27064:10504\_2:N:0:TCTGCAAG+GCTGCACT  
GGCTTATTGTCGCGCAGTTTCCAGAATTGCGGTTGAAGTTCACCCATTCTATCTTGAATGCTCACGCC  
GTCGCAGCCATATCGAGACTATGTTATAATCACTTGTTAAAGTACAGA

+

FFFFF:FFFFFFFFFFFFFFFFFFFFFFFFFFFFFFFFFFFFFFFF,FFFFFFFF:FFFFFFFF  
FFFFFFFFFFFFFFFFFFFFFFFFFFFFFFFFFFFFFFFFFFFFFFFF

@A00721:190:HGJW7DSXY:4:2428:1208:11663\_2:N:0:TCTGCAAG+GCTGCACT  
AGATATTATTGATATTGGAGGCGATATTCGTTTTCATATCCAAACTCCTTGAATGGAGTACATATT  
GCAACCTATTCTTGATGTGAAAGATGCATCGAGGTATACGTCTAGGA

+

FFFFFFFFFFFFFFFFFFFFFFFFFFFFFFFFFFFFFFFFFFFFFFFFFFFFFFFFFFFFFFFF  
FFFFFFFFFFFFFFFFFFFFFFFFFFFFFFFFFFFFFFFF

@A00721:190:HGJW7DSXY:4:1268:24840:13698\_1:N:0:TCTGCAAG+GCTGCACT  
CACGAGACGTATGAAAGCTATCGGAGGGAAGCAAAATGTTTCGTTCTGTTACAAGAACGCTTTGGAT  
TGTGACCATAAAGCCTCAGTTGCGATAGCTGTAGAGGTATACGATATCTCTCTTGATGATGTAGCCAC  
TAT

+  
FFFFFFFFFFFFFFFFFFFFFFFFFFFFFFFFFFFFFFFFFFFFFFFFFFFFFFFFFFFFFFFFFFFFFFFF  
FFFFFFFFFFFFFFFFFFFFFFFFFFFFFFFFFFFFFFFFFFFFFFFFFFFFFFFFFFFFFFFFFFFFFFFF:FFFFFFFFFFFFFFFF  
FFF  
@A00721:190:HGJW7DSXY:4:1167:7943:33129\_2:N:0:TCTGCAAG+GCTGCACT  
GATTGATGTATGTCATTTCTGTCTTAGTTTGTCCCGCGCAATTATTGGACACGATGAAAAATGACATAC  
CCGTTCTGACCTTGGTATCGTTATCCGTCATGGAGATGATGGCGCAT  
+  
FFFFFFFFFFFFFFFFFFFFFFFFFFFFFFFFFFFFFFFFFFFFFFFFFFFFFFFFFFFFFFFFFFFFFFFF:FFFFFFFFFFFFFFFF  
FFFFFFFFFFFFFFFFFFFFFFFFFFFFFFFFFFFFFFFFFFFFFFFFFFFFFFFFFFFFFFFFFFFFFFFF  
@A00721:190:HGJW7DSXY:4:2309:31819:20118\_2:N:0:TCTGCAAG+GCTGCACT  
GTTATTCTCACAACAAAGATAAGATTTTATCTTTCTTCAAACACCCTGTTTTCTTAAGGGCGGACAA  
TTGTTCCATTGTGAACCTTGGGGACTAGATTGAGCATTAATGAGTTC  
+  
FFFFFFFFFFFFFFFFFFFFFFFFFFFFFFFFFFFFFFFFFFFFFFFFFFFFFFFFFFFFFFFFFFFFFFFF:FFFFFFFFFFFFFFFF:FFFFFFF  
FFFFFFFFFFFFFFFFFFFFFFFF:FFFF:::FFFFFFFFFFFFFFFF:FFFFFFF,FFFFFF  
@A00721:190:HGJW7DSXY:4:2146:14751:36025\_2:N:0:TCTGCAAG+GCTGCACT  
CTATTTCCGTACCAAGAGCCACTGCCAATCTCATCGCTATACGCATACCTGATTGGAAGAAGCGAGGT  
TCGTTCTCAATAAAAATTTTCTCAAGAGATTATGGTTGATAAAGTT  
+  
FFFFFFFFFFFFFFFF:FFFFFFFFFFFFFFFFFFFFFFFFFFFFFFFFFFFFFFFFFFFFFFFFFFFFFFFFFFFFFFFFFFFFFFFF  
FFFFFFFFFFFFFFFFFFFFFFFFFFFFFFFFFFFFFFFFFFFFFFFFFFFFFFFF:FFFFFFFFFFFF  
@A00721:190:HGJW7DSXY:4:1626:3323:6308\_1:N:0:TCTGCAAG+GCTGCACT  
TTCAGTACGTATGGGGATCACTTCTTCGGTCAATGACAAAACCTTCGAATATGTTACGACATGGCTT  
CGTAACAACAGTGCGAGGATTGTCATCTCGGGGAAAGTGATTACCAAGATGTTTCATATAGATACGAG  
ATA  
+  
FFFFFFFFFFFFFFFFFFFFFFFFFFFFFFFFFFFFFFFFFFFFFFFFFFFFFFFFFFFFFFFFFFFFFFFFFFFFFFFF  
FFFFFFFFFFFFFFFFFFFFFFFFFFFFFFFFFFFFFFFFFFFFFFFFFFFFFFFFFFFFFFFFFFFFFFFFFFFFFFFF  
FFF  
@A00721:190:HGJW7DSXY:4:1457:15628:2597\_2:N:0:TCTGCAAG+GCTGCACT  
CAGCGATCTTACTCGTTATCGGAGCTAAGAAGAAGACTTTGGGTACACGTTATGCTCGAAACTTAAC  
GTTAGTACCGGAGGTGATCTCTCTGCTTCTGCGTTACTGAGAGAAAAG  
+  
FFFFFFFFFFFFFFFFFFFFFFFFFFFFFFFFFFFFFFFFFFFFFFFFFFFFFFFFFFFFFFFFFFFFFFFF:FFFFFFFFF,FFFFFFF  
FFFFFFFFFFFFFFFFFFFFFFFFFFFFFFFFFFFFFFFFFFFFFFFFFFFFFFFFFFFFFFFFFFFFFFFF  
@A00721:190:HGJW7DSXY:4:2465:20591:35524\_1:N:0:TCTGCAAG+GCTGCACT  
CCTACGGTGACTTTATGGACAAGATGCAAGTTCTTGGGAAATACTTGTTCCTTTTTAGGTTTAGTA  
GGTGATCTTGACGTCGATTCTTTGTATAGGGAGTGTGAGAAGACAACGAATCTTGAAACTACGGTCCT  
TAT  
+  
FFFFFFFFFFFFFFFFFFFFFFFFF,FF:FFFFFFFFFFFFFFFFFFFFFFFFFFFFFFFFFFFFFFFFFFFFFFFFF,FFFFFFF  
F:FFFFFFFFFFFFFFFFFFFFFFFFFFFFFFFFFFFFFFFFFFFFFFFFFFFFFFFFFFFFFFFFFFFFFFFFF  
FFF  
@A00721:190:HGJW7DSXY:4:1238:28800:30514\_2:N:0:TCTGCAAG+GCTGCACT  
ACCGGTCTCTAAATCTTTTGAGATTGAGAAGATTGAAGAACACGTCAAGAAGTCGCTCGGCGTTGTTC  
TTGAAAACCAAGTTAAGAATGAGGCTGATCATGGAGTCTTTGTACCTT  
+  
:F,F:FFFFFFFFF,FFFF:::FFFFF,:FF,F:FF,,FFF:FF,FF:FF,FFF:FFFFFF,F:FFF  
FFF:FFFF,F:F:FFFFFF,:FFFF,,FF:F:,FFFFFFF,FFF,:F  
@A00721:190:HGJW7DSXY:4:1314:21206:30733\_2:N:0:TCTGCAAG+GCTGCACT  
GGTTCAGCTACGAGAGGTGATCCCGGATGTGGATTGAAGGCTGGCTCTAAGGGAGACTCCTTCTTTTT  
GAATGTTGTAAAGAATTGGGTTGAGAAGCGTGCAGATCGGAAGAGCGT  
+

```

FFF:FFF:FFF:FFFFFFFFFFFFFFFF:FFFF:FFFFFFFFFFFFFFF
@A00721:190:HGJW7DSXY:4:2603:22164:15671_1:N:0:TCTGCAAG+GCTGCACT
AGTTTTTAGATCTTCTTGATAATCTTAAGAAAAATTTTCGAATAAACTAATGAGAGGTATAGGCTTA
GTCAAGTCTGTACTTACATTCTTTACGCCAGATTCTTCATGGGGCGACGCTGTTTCTCTTGATTTC
TGA
+
F:FFFFFFFFFFFFFFFF:FFFFFFFFFFFFFFFFFFFFFFFFFFFFFFFF
FFFFFFFFFFFFFFFFFFFFFFFFFFFFFFFFFFFFFFFFFFFFFFFF
FFF
@A00721:190:HGJW7DSXY:4:1671:3170:36824_2:N:0:TCTGCAAG+GCTGCACT
CAGAGCGTCATTTTCTTTGGGATCTTTCCTCTGGTAAGGAATTATTAAATCATTCTTCTCACTCTT
GACGAGAATTATTACTGTTTTCTCTACCCATAACTTCTTTTTCAAAA
+
FFFFFFFFFFFFFFFFFFFFFFFFFFFFFFFFFFFF,FFFFF:FFFFFFFFFFFFFFFF
FFFFFFFF:FFFFFFFFFFFFFFFFFFFFFFFFFFFFFFFF
@A00721:190:HGJW7DSXY:4:1539:5240:19523_1:N:0:TCTGCAAG+GCTGCACT
CTGATGTTTTCTACAGAGTGCAGTCGTTTCAACACTTATCACCACTTTTGAAAGGAAAATAATTGGT
GATGAAAATACGTATGTCGGTGGGGTTCTCAAGGCTCTCATCGCCACTGGGATTCTAAGGGTTCCAT
AAG
+
FFFFFFFFFFFFFFFFFFFFFFFF:FFF:FFFF,FFFFFFFFFFFFFFFF
FFFFFFFFFFFFFFFF:F:FFFF,FFFFFFFFFFFFFFFF
FFF
@A00721:190:HGJW7DSXY:4:2659:19741:16454_2:N:0:TCTGCAAG+GCTGCACT
AGGATTCTTCTTTTGGTCCTTACGTCTTAAGTAATTTGGATGTTGTGCGAAAATATCAGGTTCTTGTC
ACGATTCTTAAAGAAGTTTATTA AAACTTCAGAGTCTCTTGGAAGTC
+
FFFFFFFFFFF,FFFFFFFFFFFFFFFF:FFFFFFFFFFF:FFFFFFFF
FFF:FFFFFF:FFFF:FFFFFFFFFFFFFFFF:FFFFFFFF
@A00721:190:HGJW7DSXY:4:1411:20003:8516_1:N:0:TCTGCAAG+GCTGCACT
CAATAGCCACAGACTTTCTGGGAAAAGAGACCTCTGTTGGTAGAGGAGTTGAGAGAATTACTCAGATT
CAATCTGGCATCACTGAACGTCTACAACGAGTTAGGGAGTGGCTAGGTTTTAAAGATCCTTGCACA
AGC
+
:FFFFFF:,FFFFFFFFFFF:FFFFFF:FFFFFFFF
FFFF:FF:FFF:FFFFFFFFFFFFFFFF:FFFFFFFF
,FF
@A00721:190:HGJW7DSXY:4:2140:13612:35055_2:N:0:TCTGCAAG+GCTGCACT
TTTCGACGTCGCGGAAAACGATGAAGATTTCCACACTGTTGAGAATCTTCTGATGCTGAATTTGAGG
AAAATTTTCGGAAGTTTTTGGTATAAATCCTGATGGCTCAGTACAGG
+
FFFFFFFFFFFFFFFF:FFFFFF
FFFFFFFF:FFFFFFFF
@A00721:190:HGJW7DSXY:4:2270:19180:34178_2:N:0:TCTGCAAG+GCTGCACT
AAACCTTCTTTTATCATTGCAACAGGACTTTGAGAAGACTGTTGAAATGGACAAAATCTGGGATCATA
GGTATGTGTACGCTACACTCGAAATATGGGCCCTCATAAGGAAGTAT
+
FFFFFFFFFFFFFFFF:FFFFFFFF
FFFFFFFF:FFF:FFFFFFFF
@A00721:190:HGJW7DSXY:4:1528:2293:27195_1:N:0:TCTGCAAG+GCTGCACT
GATCATTTGTT CAGGAAGATCTCTACAGAGATTATCGAGAGTTGTGATCTAGTTCTAAATTTAGGTGC
ACGGACTTTAGCAACTTTAGATAAATTCTTCCGGGCTCAATGACCTTTGCTATGTACGTGGATCTAA
TGC

```

+  
FFFFFFFFFFFFFFFFFFFFFFFF, , FFFFFFFFFFFFFFFFFFFFFFFFFFFFFFFFFFFFFFFFFF: FFFFFFFF  
FFFFFFFFFFFFFFFFFFFFFFFFFFFFFFFF: FFFFFFFFFFFFFFFFFFFFFFFFFFFFFFFFFF  
FFF  
@A00721:190:HGJW7DSXY:4:1670:32362:1861\_2:N:0:TCTGCAAG+GCTGCACT  
CATCGCAAAGAAGACTTTATTAGTTCATGAAGTTCTTACACTTCTCGCGACTAATGTCAGCTTCACTA  
CAAAGGCGTTACGTAAAGTAGTTTTACGCTTTATCTTAAAGCATTAC  
+  
FFFFFFF: FFFFFFFFFFFFFFFFFFFFFFFFFFFFFFFFFFFFFFFFFFFFFFFFFFFFFFFFFF  
FFFFFFFFFFFFFFFFFFFFFFFF, FFFFFFFFFFFFFFFFFF: FFFFFFFF  
@A00721:190:HGJW7DSXY:4:2264:1371:30890\_2:N:0:TCTGCAAG+GCTGCACT  
ACTTTTTGAATATGACAGAAGCTCGCCATATCAGATTAGAGACATGCCAGTTAGAGTTCTTCTAACCA  
GGACTGATGGTGAGATTCTTTACCTTTTGGAGGTCCAGGAACCTTA  
+  
FFFFFFFFFFFFFFF: FFFFFFFFFFFFFFFFFFFFFFFFFFFFFFFFFFFFFFFFFFFFFFFFFF  
FFFFFFFFFFFFFFFFFFFFFFFF: FFFFFFFFFFFFFFFFFF  
@A00721:190:HGJW7DSXY:4:1644:14461:27633\_2:N:0:TCTGCAAG+GCTGCACT  
CCAAGGACGTTTCCGTCGGAGGATGACAGGTGGGAGACCGCTCAATAACACTCTATTGAATCCCTTTT  
CCACGATGAAAGCTCTTTATGAGGTGCTCCATGCAAATTTACAGTTCC  
+  
FFFFFFFFFFFFFFFFFFFFFFFFFFFFFFFFFFFFFFFFFFFFFFFFFFFFFFFFFFFFFFFF: FFFFFFFFFF  
: FFFFFFFFFFFFFFFFFFFFFFFFFFFFFFFFFF: FFFFFFFFFF: F  
@A00721:190:HGJW7DSXY:4:1628:31873:29919\_1:N:0:TCTGCAAG+GCTGCACT  
GTATTTTGATAAATTTGTTGGAATCGATAATGATACTGACGAAGGTTCTATTACCACCCTTGTCTATTG  
ATACAAACATTCTAGGTGATGCTTTCTTAGAGGCTCGTCTAGCCGCTGAGATTCGTCTTACCTATTTA  
CAA  
+  
FFFFF: FFFFFFFFFFFFFFFFFFFFFFFFFFFFFFFFFFFFFFFFFFFFFFFFFFFFFFFFFF  
FFFFF: FFFFFFFFFFFFFFFFFFFFFFFFFFFFFFFFFFFFFFFFFFFFFFFFFFFFFFFFFF  
FFF  
@A00721:190:HGJW7DSXY:4:2662:31656:32017\_2:N:0:TCTGCAAG+GCTGCACT  
TTTGAGTGATAACGATTTAGTACTGGGAAATGGTGGTAGTCAGTTTACTACTTTTCTTCCCTCCCT  
TTTTCGATTGGATTCGACGGGGTCTTCGTCTCACGACTAATTTGATAA  
+  
FFFFFFFFFFFFFFFFFFFFFFFFFFFFFFFFFFFFFFFFFFFFFFFFFFFFFFFFFFFFFFFF: FFF  
FFFFFFFFFFFFFFFFFFFF: FFFFFFFFFFFFFFFFFFFFFFFFFF, FF  
@A00721:190:HGJW7DSXY:4:2171:14055:27524\_2:N:0:TCTGCAAG+GCTGCACT  
TATTACTTCGGAAGTTCTTAATGTAGGTCTCCTAGTACTTAAGGGTTTATGTTTCGGTTTCAGCTGGA  
TGGATCTTTGATGGTATGTTTCACATTGCGTGATCACTTCCCGTGGA  
+  
FFFFFFFFFFFFFFFFFFFFFFFFFFFFFFFFFFFFFFFFFFFFFFFFFFFFFFFFFFFFFFFFF  
FFFFFFFFFFFFFFFFFFFFFFFFFFFFFFFFFFFFFFFFFFFFFFFFFFFFFFFFF  
@A00721:190:HGJW7DSXY:4:1606:1118:4617\_1:N:0:TCTGCAAG+GCTGCACT  
GATTAAACATAAAATCCAGCGATTCTATTATGTCGCTAAAGCCTGTCCAGTTGTCGATGATGTTCCGG  
CTGTGGGGATTAACCTCCCTCGTGAAACTTACGACGATGTTCTCGCTCGCATTTACAAGGATTACTA  
AGT  
+  
: FFFFFFFFFFFFFFFF: FFFFFFFFFFFFFFFFFFFFFFFFFFFFFFFFFFFFFFFFFF  
FFFFFFF: FFFFFFFFFFFFFFFFFFFFFFFFFFFFFFFFFFFFFFFFFF  
FFF  
@A00721:190:HGJW7DSXY:4:1338:8241:19899\_2:N:0:TCTGCAAG+GCTGCACT  
CCACTTCTAATTTTAGGAAACGTCGCGAAAAGAAAGTTTATGAGGATGTCTTGGTCGAAAAATATCGC  
CGGGAACCTTAATAGAGGATCCTGATGACATTATTTCAACGGATACC  
+



```
FFFFFFFFFFFFFFFFFFFFFFFFFFFFFFFFFFFFFFFFFFFFF:FFFFFFFFFFFFFFFFFFFFFFFFFFFFFFFFFFFFFFF
F:FFFFFFFFFFFFFFFFFFFFFFFFFFFFFFFFFFFFFFFFFFFFF:FFFFFFF
```

+

@A00721:190:HGJW7DSXY:4:1669:28953:9173\_1:N:0:TCTGCAAG+GCTGCACT  
ATCTTCTAAGAGTGTTCAAAAGACCAGAAACGTAACAAGAAGAATAAAGGTAGGAAGGGGAGAAAAC  
AGAACAAGCGAGCGGTTGAAGAGAAAACCTGATATGGTTGCGGCTGATCGTACCCCAATTCCTGCTAGA  
AAG

```

FFFFFFFFFFFFFFFF:FFFFFFFFFFFFFFFFFFFFFFFFFFFFFFFFFFFFFFFF
FFFFFFFFFFFFFFFF:FFFFFFFF:FFFFFFFFFFFFFFFFFFFFFFFFFFFFFF
FFF

```

+

@A00721:190:HGJW7DSXY:4:1263:31611:7420\_2:N:0:TCTGCAAG+GCTGCACT  
TCAGTTTTCCAAAAGCTATTAATAGCAGTTGCGGGCTATAATACCGCCTCCAGATTACTCTAACT  
GAATCCACTCTCTTGGGATATAAATGAGTACATCTATAATAGAGTTTT

[illegible]

+

@A00721:190:HGJW7DSXY:4:1324:7392:25160\_2:N:0:TCTGCAAG+GCTGCACT  
TTTGA AATTACGGAACCTTTCCTCGTTCTTCATGAAGATCTTCGAGTGTTTTATAGTGAGTTATTCT  
TGCGAAGGTTCAAGTCGATTGATTTTGTTGACTACGATCTCTCTTGTA

```
FFFFFFFFFFFFFFFFFFFFFFFFFFFFFFFFFFFFFFFFFFFFFFFFFFFFFFFFFFFFFFFFFFFFF
FFFFFFFFFFFFFFFFFFFFFF:F000000000000000000000000000
```

+

@A00721:190:HGJW7DSXY:4:1239:1579:5196\_2:N:0:TCTGCAAG+GCTGCACT  
CGTGAAAGTTATGATGAGTGATCGTATTAGAACAGCTGATTCTTATTGCATGAACGTCGCTGAGGTCA

AACCTGTGGACGTTCTTTTCATCGACGAATTATTCATGATTCACGCTG

[illegible]

CATCTACTTAAGGCGGCTTATACCATAGGTTACGGTGATTCCAATCAAATCGGATTCATCAATCGTAT  
TGATCTCCAAGTCGCAAAC TACTTCAACATCAACGACATCATTCTTGA

```

FFFFFFFFFFFFFFFFFFFFFFFFFFFFFFFFFFFFFFFFFFFFFFFFFFFFFFFFFFFFFFFFFFFFFFFFFFFFFFFF:FFF
F:FFFFFFFFFFFFFF:FFFFFFFFFFFFFFFFFFFFFFFFFFFFFFFFFFFFFFFFFFFFFFFFFFFFFFFF

```

TTATCGAAGTCTCAGTTATCGCTGCCCCGCCGACGTTTGTGCGCAACTCTCAGAGGTTTACGGCAGAA  
AAATTTCTCCTGCTTGTAATTCGAGAGAGGACACTATGGAAATTAGAC

```
FFFFFFFFFFFFFFFFFFFFFFFFFFFFFFFFFFFFFFFFFFFFFFFFFFFFFFFFFFFFFFFFFFFFF
FFFFFFFFFFFFFFFFFFFFFFFFFFFFFFFFFFFFFF,FFFFFFFFFFFFFFFFFFF
```

TATTACTTTCACTCAAGGTGAAAAGTTTGAAATTAACAAAGTCCTTGGTAAGAGTAAGGTTAAATGTG  
AAGATGCTCAGACTATTTCATGAAGTTCAAGGTAATACTTACCAGCACG

[illegible]

TTTTCGATCACAAACACATATTACCGTTGCTCTATCACGACACGTTGAATCTTTACGATACTTTGTTA  
TCAATGTAAAGTTAAACGATGCTACTTGTGAGAGGATCAATCACAGTA

[illegible]

TTAGCACGGGAGGTTGCAGATTCAACCCCTTATATCGAGGCTATCGAGGACGATGAGTATCTTGAAGT  
TGTTGACGACAAGCCTCAAGAGGGTAGAGGACCACCTGGATCTTCTAC

```
FFFFFFFFFFFFFFFFFFFFFFFFFFFFFFFFFFFFFFFFFFFFFFFFFFFFFFFFFFFFFFFFFF:FFFFFFFFFFFF,FF  
FFFFF:FFFFFFFFF:FFF:F:FFFFFF:FFFFFFFFFFFFFFFFFFFFFFFF
```

AACCACTTAACGTCACCTCGGTAATCTTTCAGCCGAATTAAGTACTAATGAGTTCAAGTCGGTTGTCG  
 ATCGAATTAAGATCAAGGCTAATACCTTTATAGGTAAGAAGCCCTTGAGCCGCGTAGTCAGCGCGTT  
 TAG

[illegible]

CCGATAGGGTACCGAGTCTCCAAGAGAATATTTATTCTTATGAGGCTCGAAACTTCAACGTTTTCACA  
ACGGAAAGACATATCGCACCCGAAATTTTTGGGCAGAATGCTCTTAAC

```
FFFFFFFFFFFFFFFFFFFFF:FFFFFF:FFFFFF:FFFFFFFFFFFFFFFFFFFFFFFFFFFFFFFFFFFFFFFF
FFFFFFFFFFFFFFFFFFFFFFFFFFFFFFFF.FFFFFFFFFF.FFFFFFFFFFFF
```

GATCAGTCTAAGTTGGA<sup>+</sup>FAAAGTTATAGGAGACTCAGTT<sup>+</sup>AACTGAGAGCTCCTCAATTGATAGATTG  
GGTCAACAATAGGGACGCTAGTATACTTCGTAAGTCGACAGCGAAAT

```

FFFFFFFFFFFFFFFFFFFFFFFFFFFFFFFFFFFFFFFFFFFFFFFFFFFFFFFFFFFFFFFFFFFFFFFFFFFFFFFF
FFFFFFFFFFFFFF:FFFFFFFFFFFFFFFFFFFFFFFFFFFFFFFF:FFFFFFFF.FFFFFFFF

```



@A00721:190:HGJW7DSXY:4:2255:15447:27962\_2:N:0:TCTGCAAG+GCTGCACT  
ACTTGAGTCTTTTGATCAGTCTCTGACTTGACCATCTTTCATTTTAAATGACGATCATTAAGACTCTC  
TTTCTTCTTTGTTTCCTTCTTTGCACTGATTTTCTCATCAGCTTGT

+

FFFFFFFFFFFFFFFFFFFFFFFFFFFFFFFFFFFFFFFFFFFFFFFFFFFFFFFFFFFFFFFFFFFFFFFF:FF:FFFFFFFF:FF::  
FFFFFFFFFFFFFFFFFFFFFFFFFFFFFFFFFFFFFFFFFFFFFFFFFFFFFFFFFFFFFFFFFFFFFFFF,F:FFFFFFFF:FFFFFFFF

@A00721:190:HGJW7DSXY:4:2436:24126:2534\_2:N:0:TCTGCAAG+GCTGCACT  
TTTTACGATAACAACATCAGTTGATTAAGACTCTTCCGAAAGGCGAACTTTGGGAATTTGAAGCTCA  
GGGTGAAGCACACGTTTGACCGTGACGAACGTGGTGTCTTGATCT

+

FFFFFFFFFFFFFFFFFFFFFFFFFFFFFFFFFFFFFFFFFFFFFFFFFFFFFFFFFFFFFFFFFFFFFFFF:FFFFFFFFFFFFFFFF:FFFFFFFF  
FFFFFFFFFFFFFFFFFFFFFFFFFFFFFFFFFFFFFFFFFFFFFFFFFFFFFFFFFFFFFFFFFFFFFFFF::FFFFFFFFFFFFFFFF

@A00721:190:HGJW7DSXY:4:2237:20021:7169\_1:N:0:TCTGCAAG+GCTGCACT  
CACTACCACTTATTACGATATTTCTTTAGTCGATGGGTTTTTCGACGCCTTTAAGCGTCTTCTGTTCAT  
CGCAACCAGATGATATCTTCTATTGCAACTTATGTTTCGATCAGTGTCTTCTATCAGGAGGAAAAC  
ACT

+

FFFFFFF:FFFFFF:FFFFFFFFFFFFFFFFFFFFFFFFFFFFFFFFFFFFFFFFFFFFFFFFFFFFFFFF:FFFFFFFFFFFFFFFF  
FFF,FFF:FF:FFFFFFFF:FFFFFFF,FFFFFFFFFFFFFFFFFFFFFFFFFFFFFFFF:FFFFFFFFFFFFFFFF  
FFF

@A00721:190:HGJW7DSXY:4:2248:14931:26068\_2:N:0:TCTGCAAG+GCTGCACT  
TCTTCTAATGTGGCCTGAACTACGTTTCACTTTGTGTGTAAGTGTCTCTATTTTAAGTTTTGTCTTCC  
TTGTTTGTCTTATTCTATTAATCACTCATTTTAGTGAGATTATTAATA

+

FFFFFFFFFFFFFFFFFFFFFFFFFFFFFFFFFFFFFFFFFFFFFFFFFFFFFFFFFFFFFFFFFFFFFFFF:FFFFFFFFFFFFFFFF:FFFFF  
FFFFFFFFFFFFFFFFFFFFFFFFFFFFFFFFFFFFFFFFFFFFFFFFFFFFFFFFFFFFFFFFFFFFFFFF::FFFFFFFFFFFFFFFF

@A00721:190:HGJW7DSXY:4:1607:5502:26303\_2:N:0:TCTGCAAG+GCTGCACT  
GACAACAGCAGGGGTTTTCGAATAGTGATAGCCACCCGCTTACAGAGGGGCAGCAGCATGACCATAA  
TTGGTATTGACTTTGGTACCACCTTTTCTACTGTCTGTCTCGCCTCTT

+

FFFFFFFFFFFFFFFFFFFFFFFFFFFFFFFFFFFFFFFFFFFFFFFFFFFFFFFFFFFFFFFFFFFFFFFFFFFFFFFFFFFFFFFF  
FFFFFFFFFFFFFFFFFFFFFFFFFFFFFFFFFFFFFFFFFFFFFFFFFFFFFFFFFFFFFFFFFFFFFFFF

@A00721:190:HGJW7DSXY:4:2450:7762:16532\_1:N:0:TCTGCAAG+GCTGCACT  
CTTAACAACAATGATAGTGAATTTATACCTAAAATCATTGGTTTTTCTAATAATGTTGACACTATTGT  
TTATGGATATGATGCTATTACTCATGATGGTTACGGTCAGGGAGGATTCTCAGTTTACAAGGACCTTA  
AGC

+

F:F,FFF,FFFF:FFFF,FF::FFFF,:F:,F:FFFFFFFFFFFFFFFF:FF,FFFF,,F,FFFFFFFF  
FF,F:F,FFFF:FF,FFFFFFFFFFFFFFFFFFFFFFFF,FFFF:FF,FFFFF:FFF,FFFF:FFF,FFFFF  
,:F

@A00721:190:HGJW7DSXY:4:2655:26901:5963\_2:N:0:TCTGCAAG+GCTGCACT  
CCGAAAGACGTGCTAAATTAACCATTGTACGATGTCGTCTGTCTCGGCGATCACTTTTCACTAAGA  
ATTGGTCCTACTTTTGGACAAGGCCAACTTCGTAATCTTCATGAGATC

+

FFFFFFFFFFFFFFFFFFFFFFFFFFFFFFFFFFFFFFFFFFFFFFFFFFFFFFFFFFFFFFFFFFFFFFFFFFFFFFFF  
FFFFFFFFFFFFFFFFFFFFFFFFFFFFFFFFFFFFFFFFFFFFFFFFFFFFFFFFFFFFFFFFFFFFFFFF

@A00721:190:HGJW7DSXY:4:2536:2889:6151\_1:N:0:TCTGCAAG+GCTGCACT  
AGGGATTTTGAGAGAGTGAAAGGCTTCAATTGTAGTGGTTTGGTCGTTTCAGTACCCAGTCAGTATAC  
CTCTACGCAAAGATATTTTCATGAAAACACAGAGGAACGTACCGGATTACCTGTCTTTCATATTATGA  
AT

+

FFFFFFFF:FFFFFFFFFFFFFFFF,FFFF:FFFFFFFF,FFFFFFFFFFFFFFFFFFFFFFFFFFFFFFFF  
:FFFFFFFFFFFFFFFFFFFFFFFFFFFFFFFF:FFFFFFFFFFFFFFFFFFFFFFFFFFFFFFFFFFFFFFFF  
FF

+

@A

+

GA

+

@A

+

GA

+

GA

+

@A

+

@A

+

@A00721:190:HGJW7DSXY:4:2325:26503:7592\_1:N:0:TCTGCAAG+GCTGCACT  
GTTCTGTCTATATTAGGTGAAGCGAAATACGATTTTGAACGTCAACGTTACCGAGTTTCGTTTCGTA  
CCTTGATGCTGACTTTCGTCATATGATTTGATCTGGTTGCTCAATTCTAAGCGTGTTCGCTTAGTG  
CGA

+

F:FFFFFFFFFFFF, :FFFFFFFF:FFFFFFFFFFFFFFFFFFFFFFFFFFFFFFFFFFFFFFFFFFFF  
FFFFFFFFFFFFFFFF:FFFFFFFFFFFFFFFFFFFFFFFFFFFFFFFFFFFFFFFFFFFFFFFFFFFFFFFF  
FFF

@A00721:190:HGJW7DSXY:4:2403:8223:20838\_1:N:0:TCTGCAAG+GCTGCACT  
TACGAACCTGACTCTACTATACGTGACATACTAAATACTAGATATTTGGATGATCTTGATAAAGAACT  
TCATGAATTTTCAGAGGATGAAAAATTTTCTTCCTTGATTTTAATATAAAGAATCTTTACCAGGACT  
CCT

+

FFF:FFFF:FFFFFFFF, :FF, FFFFFFFFFFFFFFFFFFFFFFFFFFFFFFFFFFFFFFFFFF:FFFFFFFFFFFFFFFF  
:FFFFFFFFFFFFFFFFFFFFFFFFFFFFFFFFFFFFFFFFFFFFFFFFFFFFFFFFFFFFFFFFFFFFFFFF  
FFF

@A00721:190:HGJW7DSXY:4:1310:4137:16892\_1:N:0:TCTGCAAG+GCTGCACT  
GATCGTAAGAAGTTTATAAGGAACATATCCATTTGTTGTAATAGGGTCATCAACTTAGAACTCGAAAC  
TCTAAGTGTAATACTGTCTTTCCAAGCTTACCTGTATCTTCAATGAAATTGGACTCTTCGATAGGGG  
ACA

+

FFF:FFFFFFFFFFFF:FF:, FFFFFFFFF:FFFFFF, FFFFFFFFFFFFFFFFFFFFFFFFFF:F  
FFFFFFFFF:FF:FFFFFFFFFFFFFFFFFFFFFFFF, FF:FFF, FFFFFFFFF: :FFFFF:FFFF  
FFF

@A00721:190:HGJW7DSXY:4:1627:1958:13902\_1:N:0:TCTGCAAG+GCTGCACT  
ACCGGTGGATGGTTTAAAGAATACTATAAATAGAATAGCTATTACTACTAATGGCGTTGGCCTAGTGGA  
TGTTATTAGTGACATCTGGTCAATTTGTTTTAGGTGGTCTTTATTCTATTATTGATTTTTATGAGA  
TTG

+

FFFF:FFFF:FFFFFFFF, FFFFF:F:FFFF, FFFFFFFFFFFFFFFFFFFFFFFFFF, F, FFFFF  
FFFFFFFFFFFFFFFFFFFFFFFFFFFFFFFFFFFFFFFFFFFFFFFFFFFFFFFFFFFFFFFF:FFFF:FFFF  
F, F

@A00721:190:HGJW7DSXY:4:1224:16758:2112\_2:N:0:TCTGCAAG+GCTGCACT  
TGTTAGAGTAGAATTCCTGAAGAGTCCTTCCGTAACCAACTTCTTGACAATTTTCTTCAATCCTTCGA  
TAATAGTTAAATCTAGGATTATGTCTGTGTTGAAAGACTTTCTACCGA

+

FFFFFFFFFFFFFFFFFFFFFFFFFFFFFFFFFFFFFFFFFFFFFFFFFFFFFFFFFFFFFFFFFFFF  
FFFF:FFFFFFFFFFFFFFFF:FFFF:FFFFFFFF:FFFFFFFF

@A00721:190:HGJW7DSXY:4:1424:23511:21919\_2:N:0:TCTGCAAG+GCTGCACT  
TACACAATTAAGAAATAATCCTACATTGACTGATTATCTAAAGATTGAAGGAAAATTTATCCTCGTT  
TAACTTACTTAGACTTTCCTACGATACAAATGATAACTTCTAATTTAC

+

FFFFFF:FFFFFFFFFFFFFFFF:FFFF, FFFFFFFFF:FFFFFFFFFFFFFFFFFFFFFFFF:FFFF:  
FFFF, FFF, FFFFF:FFFFFFFFFFFFFFFFFFFFFFFFFFFFFFFF

@A00721:190:HGJW7DSXY:4:2270:6677:13808\_1:N:0:TCTGCAAG+GCTGCACT  
GGGATGCATGGTGTATCTCCTCAGGAGTCCCGGCATTTGATAATAATGACGAGACTTTCGTCATAAT  
CGCTGCATATTACGGATTACACGGTACCAGCGCATCTCGTGTGAGCCTCGACCCGATTATATGGTAT  
TAA

+

FFFFFFFFFFFFFFFFFFFFFFFFFFFFFFFFFFFFFFFFFFFFFFFFFFFFFFFFFFFFFFFFFFFF  
FFFFFFFFFFFFFFFFFFFFFFFFFFFFFFFFFFFFFFFFFFFFFFFFFFFFFFFFFFFFFFFFFFFF  
FFF

@A00721:190:HGJW7DSXY:4:1538:11243:24721\_2:N:0:TCTGCAAG+GCTGCACT  
GATTCTCGATTCTAGAGCTTATCTAGGTACTCTCATTTACTATGTTGATTAGTCTACATTTATGCT

GATCTAAAATTTTCGATCTAGATGGATCCACTCCTCGAGTTATCATGAT

+

FF,FFFFFFFFFFFFFF:FFFFFFFFFFFFFF:FFFFFFFFFFFFFF:FFFFFF:FF  
,FFFFFFFF:F,FF:FF:FFFFFF:FFFFFFFFFFFFFF,FFFF

@A00721:190:HGJW7DSXY:4:2529:22399:2707\_1:N:0:TCTGCAAG+GCTGCACT  
TTCTAGAATTCTTAATTATAATATTCAACCTCAAAGTTACGTGTTTACAGTAACGAGATCACACATT  
TTGAGAACTAACTATGTTATGTTCTCTGATCATTTTGACAATCTCTTCTTATAATAATAATAATA  
ATA

+

FFFFFF:FFFFFFFFFFFFFF:FFFFFFFFFFFFFF:FFFFFFFFFFFFFF:FFFFFF:FFFF  
FFFFFFFFFFFFFFFF:FFFFFF:FFFFFFFFFFFFFFFF:FFFFFF:FFFF  
FFF

@A00721:190:HGJW7DSXY:4:1160:19081:23985\_2:N:0:TCTGCAAG+GCTGCACT  
AGTGGAAAGGCTCCAGTCAACACTAGTTCGAGTGCTGCTTTGGATTACGATGACGTGAGAATAGGTGA  
AGGGATAGTTTTTACCTCGACCAACATTAAGGCGGCGGCGACTAATCT

+

FFFFFFFFFFFFFFFFFFFFFFFFFFFFFFFFFFFFFFFFFFFFFFFFFFFFFFFFFFFFFFFF  
FFFFFFFFFFFFFFFFFFFFFFFFFFFFFFFFFFFFFFFFFFFFFFFFFFFFFFFF

@A00721:190:HGJW7DSXY:4:1569:2917:16438\_1:N:0:TCTGCAAG+GCTGCACT  
AGGACACTTCGAACTGAATAATGATGCACTACAAACAAGTATCGCTAATCATCTGAAAAAGGCTCTA  
AAGGACACTATACAATATCCAGACGACGACGAAGCTTATACTACTTTAATTTTGGGTATTATGTGGAG  
ATA

+

FFFFFFFFFFFFFF: :FFF:FFFFFFFFFFFFFF:FFFF,FFFFFF,FFFFFF:FFFFFFFFFFFFFF  
FFFFFFFFFFFFFFFFFFFFFFFFFFFFFFFFFFFFFFFFFFFFFFFFFFFFFFFF:FFFFFFFF  
FFF

@A00721:190:HGJW7DSXY:4:1268:12020:36902\_2:N:0:TCTGCAAG+GCTGCACT  
ACCACATTTTGGTCAAGTCAATCCGTTGAGAAAATTTCTTAGAGGATATTCGCCATTGTGGTACGAAT  
TGGTCCAACATTTACCACCAAATCTTTTGATACAACCTCTAGCCTTCA

+

FFFFFFFFFFFFFFFFFFFFFFFFFFFFFFFFFFFFFFFFFFFFFFFFFFFFFFFFFFFFFFFF  
FFFFFFFFFFFFFFFFFFFFFFFFFFFFFFFFFFFFFFFFFFFFFFFF

@A00721:190:HGJW7DSXY:4:2257:13928:3161\_2:N:0:TCTGCAAG+GCTGCACT  
CTTGCTATTCACCAGATTGGTTCGAACCCGTTGATGCTATGTCAGAAGAAGCTATTCAAGCTTGTCGT  
TTAAAGACTGCAGAGGCTGTCAAACAAGCCCAGACTCAAGGAGTCCAA

+

F:FFFFFFFFFFFFFF:FFF,FFFFFFFFFFFFFFFFFFFFFFFFFFFFFFFF:FFFFFFFFFFFFFF  
:FFFF:FFFFFFFFFFFFFFFF:FFFFFFFFFFFFFF

@A00721:190:HGJW7DSXY:4:2320:5466:20165\_2:N:0:TCTGCAAG+GCTGCACT  
GGTGATAAAAATTATTAGAGATCTTTCTACTTACAAAGGACAATTCAGTTTCATTAATTCTACGGA  
AAAGTCCGGAGTATATTGTATGTTAATAGATAGTGGGATAATAGTTCT

+

:FFFFFFFFFFFFFFFFFFFFFFFFFFFFFFFFFFFFFFFFFFFFFFFFFFFFFFFF:FF  
FFFFFF:FFFFFFFFFFFFFFFF:FFFFFFFFFFFFFF: :FFFF

@A00721:190:HGJW7DSXY:4:1605:19497:34444\_2:N:0:TCTGCAAG+GCTGCACT  
TGCTATTGATTATGTAACCGATAGGAGTTGTATAGTTGAAGATGTGGCTTTAGACGATAATCCTTTAA  
GGACTATGTTGACTGACGAAGATTTCCACAGATTTGTCTACGTTGC

+

FFFFFFFF:FFFFFFFFFFFFFFFF:FFFFFFFFFFFFFF: :FFFFFFFFFFFFFF  
: :FFFFFFFFFFFFFFFF,FF:FFFF:FFFFFF,F

@A00721:190:HGJW7DSXY:4:1118:14895:10598\_1:N:0:TCTGCAAG+GCTGCACT  
CTATATACATTATAAAATATAAAATAAGGGAGTCATAACTTTTGTTACCAAATCTTGGCTTTCAAC  
GAAGTCTCTGATTTTATTAATCATTACTTTAACGATCTCTCGGTCATTTACTCTGTACTTGATCTACG  
TCG

+  
FF:FFF:FFFFFFFFFFFFFFFFFFFFFFFF:FFFFFFFF:FFFFFFFFFFFFFFFFFFFFFFFF:FF:FFFF  
FFFFF:FFFFFFFFFFFFFFFF:FFFFFFFFFFFFF,FFFFFFFFFFFFFFFFFFFFFFFF:FFFFFFFFF  
FFF  
@A00721:190:HGJW7DSXY:4:2460:10212:10347\_2:N:0:TCTGCAAG+GCTGCACT  
CTTAGAATGACTCTATCTTTTCAGACACTTCTTATATTATTTACAATAGTTAATATCATATTAGTAAT  
ACTCACTATCGTTTTCTGCTTTTTCTTAGCTAATAGATTAATAAAGGA  
+  
FFFFFF:FFFF,FFFF:,FF:F::FF:F::FFFFFFFF:FFFF::FFF:FF:FFFFFF:,FF,,FF  
F,FFFF,FFF:,FF:FF,FFFFFFFF:F:FFFF:FFFFFFFFFFFF:F  
@A00721:190:HGJW7DSXY:4:1337:23411:10911\_1:N:0:TCTGCAAG+GCTGCACT  
CCAACCTCTTCGTTACGAGACCTTTTGTATAATATTTTATTCTCTACACCCATCTCACCGAGTATAA  
AGCTAGTTTTCCGTCTGAACCTTAATACACGAAGATATCATCCGCAAACGACTCGAAACCGAGACGCC  
GTA  
+  
FFF:,,FF,,FFF:,,,F:,F,,F,F,,F:F,,,FFF,,F,,F:F,FFFF,:FFF,F,,:,F:F  
,:,,,FFF:F,::F,F,F:,::,F,:,,F,,,F,,,F:,F::FFFFFFFFFFFFFFFFFFFFF  
FFF  
@A00721:190:HGJW7DSXY:4:2339:32768:8484\_2:N:0:TCTGCAAG+GCTGCACT  
TTTAGATTATGAATCCTGCCTTTACTCATTTTATAGCAGTTATTTATGTTGTACTTTTTATAATTTAT  
AACCTTCTTATACTTTTGGGTATGTTTTGTGAAAAACATGAGATACCC  
+  
FFFFFF:FFFFFFFFFFFFFFFFFFFFFFFFFFFFFFFFFFFFFFFFFFFFFFFF:F,FFFFFFFFFFFFF  
FFF:FFFFFFFF:FFFFFFFF:FFFFFFFF,F:FFFFF:,FFF::F  
@A00721:190:HGJW7DSXY:4:2101:22327:9627\_2:N:0:TCTGCAAG+GCTGCACT  
TTGTAACGATCATTCTTTCGAGTTTTGTCATTCTTATTCTTTATTCCTTTAACTGTGTATGAGGAGG  
ATTTATAATGCTTTTCGATAGTGATTGTTATCAATTTAAATACATTAC  
+  
FFFFFFFFFFFFFFFFFFFFFFFFFFFFFFFFFFFFFFFFFFFFFFFFFFFFFFFFFFFFFFFFF  
FFFFFFFFFFFFFFFFFFFFFFFFFFFFFFFFFFFFFFFFFFFFFFFFFFFFFFFFF  
@A00721:190:HGJW7DSXY:4:2630:20175:1110\_1:N:0:TCTGCAAG+GCTGCACT  
TCTTCCGATCTCCGAAAATTGTTCAAATGAGGTCAAAGCTCTATTTATTAAACGAACCTATTATCCGA  
TTCTTCGAGGGTATCACTACCACTGATCTGCCGACTTTAGTCAAGGAACCTCAATTCCTTCGATGTTT  
ATA  
+  
F,FFF,,FF,F,,FF,:FF,FFFF,FF:F,:FFFFFFFF,,F,FFFF:FFFFFFFFFFFFFFFF:FFF  
FFFFF:::F:FFF:F,:FFFF,FFFF,FFFFF,:FFF:FFF,FFFFFFFFFFFF:FFFFFFFFF  
FFF  
@A00721:190:HGJW7DSXY:4:1324:19343:35775\_2:N:0:TCTGCAAG+GCTGCACT  
GGAAAATAGCAATAATCAAATTCGACAAATTTTAGAACTTTATTTCAGAACTCTCTCCGATCACCTT  
GGTGTGATCTCCCGGAGGATCTTTTCAATAAGATGTATGATGATAATC  
+  
FFFFFFFFFFFFFFFFFFFFFFFFFFFFFFFFFFFFFFFFFFFFFFFFFFFFFFFFFFFFFFFFF  
FFFFFFFFFFFFFFFFFFFFFFFFFFFFFFFFFFFFFFFFFFFFFFFFFFFFFFFFF  
@A00721:190:HGJW7DSXY:4:1211:8874:19241\_2:N:0:TCTGCAAG+GCTGCACT  
AGTGATATTCAGCGTATACTTGAATACTTTATCAAAGATTTGGCTTGGTCTATTTACCGCAAAAAGTT  
GGAAGAGGTCTATGATATTTATTTTACTTATACTTTAAATAGCACCGA  
+  
FFFFFFFFFFFFFFFFFFFFF:FFFFFFFFFFFFFFFFFFFFFFFFFFFFF:FFFFFFFF:FFFFFFFF:  
FFFFFFFFFFFFFFFFFFFFFFFFFFFFFFFFFFFF:FFFFFFFFFFFF:FF:FF  
@A00721:190:HGJW7DSXY:4:1137:3721:25128\_2:N:0:TCTGCAAG+GCTGCACT  
TGTTGATAATATTACAATAGCTCTTCTCAGAAGATTAGAGAAGTAACCGGTGAACACGTCGGTAGCA  
TTGATTTACTTTTACCGTTAGAACTGAAAAAGATTCTTTTCGAAAAGA  
+



@A00721:190:HGJW7DSXY:4:1128:10999:14278\_1:N:0:TCTGCAAG+GCTGCACT  
AAACGATTCTTCGACTATATTAAAGAAATAAAAATACTTCAAGTACCTGAACTTTACATTTTTTAATGG  
TATGGTATAATGTGTCTTACAAATAGAACCTTCACCTCTCGGTAATGAGAGTGTATTCTTAATATTCT  
AGT

@A00721:190:HGJW7DSXY:4:2136:25030:36918\_1:N:0:TCTGCAAG+GCTGCACT  
GGCATTACTAGGATTTATCACACTCCTAAATTTGATAGCAATTTATGTTTTAAATGCTAGGAAATTT  
TAGAAAACTCCATTGTATAGTTCAAGGAGTACTTAATTCAATAGCTTTAGTATTATTTACTATCGCC  
TTT

@A00721:190:HGJW7DSXY:4:2122:11252:34475\_2:N:0:TCTGCAAG+GCTGCACT  
AGTTAATTGCTTACACAAAAGTGACGCGGAAGGAATCTTAATTGATTGAAGCTAGGCGTTGGGGAGA  
ATGAACTGCCGCTTCCCGGAAGAAACGATCTATTTACAGAGTATTTAG

@A00721:190:HGJW7DSXY:4:2361:31331:7028\_1:N:0:TCTGCAAG+GCTGCACT  
CTCCCCAAACATAACATAACCATAACCTACCATGACCAATCATCGCTCCAACTGGCACGCCAGACGTAG  
GGTCAAACCTACTACCGCCTGTCGGCAGATCGGCACCACTGGTCTCTACGTTAGGGACCCGCTGTGC  
AGA

@A00721:190:HGJW7DSXY:4:1359:26431:33959\_2:N:0:TCTGCAAG+GCTGCACT  
TCTGCACAGAAGAAGGCTGAAGGTCGTTACCGGACGACCACTCAAAGGAAACGGGCTGTTGCCAGAG  
GAAAGCAGCGACCACCGAGGTCGCTCGTAACATTGACGGCAGTCCCGT

@A00721:190:HGJW7DSXY:4:1650:29152:36949\_1:N:0:TCTGCAAG+GCTGCACT  
AACTGAGGCAGTACCTCAGTCAAAAGTCACATTCACCACTCCCATACCAATCAATGATGTGACTATAC  
AGTTTCGGCCATTTCAAGAGTGGTCAATACGTCGTGGGAGTACTGAAGCCTTCCCCTCCGCTGGCACG  
AAG

@A00721:190:HGJW7DSXY:4:1228:4300:34209\_2:N:0:TCTGCAAG+GCTGCACT  
GCCAATCAATAGTTCTTCTGACCAGAATGAAAAGGGGTTTACCAGGGTAGTCTCTAAGTCTACCAGGA  
AGAGGGGAAATGTCCCCAAAACAGAGAAGAATAAAGGGAAAGGTCCAT

@A00721:190:HGJW7DSXY:4:1332:7283:19272\_2:N:0:TCTGCAAG+GCTGCACT  
AGGGGAAATTACCCCTAATTCTGAAGGAAGATCTCCCACTCTGGGGTTGGGAATAAGAAATCTGCA

$+$ 

@A00721:190:HGJW7DSXY:4:1612:20338:13510\_2:N:0:TCTGCAAG+GCTGCACT  
GTTGCGCCTGCCGACCCCATCTTTGAGACCAAGACTCTCTACAGTAGGTTCTGCTACTATGAGCAA  
ATCTGTTGAATTCGTCACTGAGGACGAAGGTGAGAGGACTTTTGGCTA

+

@A00721:190:HGJW7DSXY:4:1438:5141:34194\_1:N:0:TCTGCAAG+GCTGCACT  
CTGAAAGAGAAATTGCGTGGGTTGAAGGCCGACGCTTCGAGCTTGAGTGTGACGAGGCCGGTGACGTTT  
TTGTCAACGGCGTTTGGAGGATTTTATCCGCGCTTAACATATGGGGCGAAGATCCCCTATGGAGTCTTG  
AAG

+

@A00721:190:HGJW7DSXY:4:1354:29017:10097\_2:N:0:TCTGCAAG+GCTGCACT  
GGCATATTTATGCCGACGATAATAAGCATGTACCCTTAAGCACCGAGGTAAGCTCGGGACTTACAAG  
AGAGAGTGTGAGAGAGTCGCTCTCACTATTTTTGCCAGAATGCGGGC

+

@A00721:190:HGJW7DSXY:4:2246:22037:35336\_2:N:0:TCTGCAAG+GCTGCACT  
TTCACTGGTTCTGGGAGGCTGCTTCTCCTCCATAATTACAACCTCTCTTTAGAGAGCATTAGAAGGAAG  
TTGGGGCAAATTCCCACATATGGTAGACGTTGTCACACTTTTCTTGAAA

+

@A00721:190:HGJW7DSXY:4:1473:4544:36542\_2:N:0:TCTGCAAG+GCTGCACT  
CGTCATTGGGGATTTTCATGTGAGAAGGTGGAAGGTGTCAAGGGTCTTCTTCATGCTGATCTTTCAGG  
ACCTAATCACATCATGATTGATAGTTACGGCTCGTATCGAGTTGGAGG

+

@A00721:190:HGJW7DSXY:4:1416:1280:8594\_2:N:0:TCTGCAAG+GCTGCACT  
CGAAATTAAGACGGGGGGATTAAGAGTCCAGCTGTAAGTGTCAATTCAGAGAGGGGAGCTCTGAAAA  
GGAAACTTCGTCAGAAGATGAGGAAGTCTAAGAGATCGGAAGAGCGTC

+

@A00721:190:HGJW7DSXY:4:2141:30011:7310\_2:N:0:TCTGCAAG+GCTGCACT  
GAAGTTGATGAAGAAGGATTATTTGAAGCAGGGGTTACCACTTCCTAAGGTGGATGAGGGAGGTTGTT  
TCTTTGGAGTTTTAGATAATCTTTTGAGAAGGGGTCATAGAGCCAGCA

+

@A00721:190:HGJW7DSXY:4:2626:8865:28369\_2:N:0:TCTGCAAG+GCTGCACT  
CCTTGAGAAGACAATCCACATTAAGATATAATTTAGGTCAACTTGGTGTTCGAATGTCATTAGTGAC  
TTACGATTGAAAGAGGTCCTTTTGAGTATCGACAGATCTTTCGATCTT

+

```

,FFF:F,FFFF,FF,FFF:FF:FF,:FFFFFFFFFFFF,,FFF,,F,F,FF,,,FFFFFF,F::FFFF,,
:FFF:FFF,F:FF::,:FFFFFFFFF:FF,FF,F::,:FFF::FF::F

```

@A00721:190:HGJW7DSXY:4:1540:27037:15248\_2:N:0:TCTGCAAG+GCTGCACT  
TGGCAGAATTCGGTAACTTACCATATTGTTCTTCCGGGAAGTTGTGGGATTTAACTTTGACTCAACT  
ACTCCGATCAGATCCGGATGGTTTGATTGGTATGGACTACTCGACTTT

+

FFFFFFFFFFFFFFFFFFFFFFFFFFFFFFFFFFFFFFFFFFFFFFFFFFFFFFFFFFFFFFFFFFFFFFFF  
FFFFFFFFFFFFFFFFFFFFFFFFFFFFFFFFFFFFFFFFFFFFFFFFFFFFFFFFFFFFFFFFFFFFFFFF

@A00721:190:HGJW7DSXY:4:2663:6343:19774\_1:N:0:TCTGCAAG+GCTGCACT  
CATGGCAGATACTACCGATAAGGTGAAAAATATGCAGGTCAAAGATTCTGTAGCTCTGAGGGCGGTTG  
AGGGAGCCGTTTTGGCCGACTTTAACTATTCTAAGAGTCTTTATGATTCAAAACCTATCGTTGTCGTA  
CCT

+

FFFFFFFFFFFFFFFFFFFFFFFFFFFFFFFFFFFFFFFFFFFFFFFFFFFFFFFFFFFFFFFFFFFFFFFF  
FFFFFFFFFFFFFFFFFFFFFFFFFFFFFFFFFFFFFFFFFFFFFFFFFFFFFFFFFFFFFFFFFFFFFFFF  
FFF

@A00721:190:HGJW7DSXY:4:1312:27163:2065\_2:N:0:TCTGCAAG+GCTGCACT  
GGCTTATTGTGCGCGAGTTTCCAGAATTGCGGTTGAAGTTCACCCATTCTATCTTGAATGCTCACGCC  
GTCGAGCCATATCGAGACTATGTTATAATCACTTGTTAAAGTACAGA

+

FFFFFFFFFFFFFFFFFFFFFFFFFFFFFFFFFFFFFFFFFFFFFFFFFFFFFFFFFFFFFFFFFFFFFFFF  
FFFFFFFFFFFFFFFFFFFFFFFFFFFFFFFFFFFFFFFFFFFFFFFFFFFFFFFFFFFFFFFFFFFFFFFF

@A00721:190:HGJW7DSXY:4:1275:31385:24408\_2:N:0:TCTGCAAG+GCTGCACT  
ATTATTGATATTGGAGGCGATATTCGTTTTCATATCCAAACTCCTTGAATGGAGTACATATTTGCAA  
CCCTATTCTTGATGTGAAAGATGCATCGAGGTATACGTCTAGGAACAT

+

FFFFFFFFFFFFFFFFFFFFFFFFFFFFFFFFFFFFFFFFFFFFFFFFFFFFFFFFFFFFFFFFFFFFFFFF  
F:FFFFFFFFFFFFFFFFFFFFFFFFFFFFFFFFFFFFFFFFFFFFFFFFFFFFFFFFFFFFFFFF

@A00721:190:HGJW7DSXY:4:2365:6578:10316\_1:N:0:TCTGCAAG+GCTGCACT  
CACGAGACGTCATGAAAGCTATCGGAGGGAAGCAAATGTTTCGTTCTGTTACAAGAACGCTTTGGAT  
TGTGACCATAAAGCCTCAGTTGCGATAGCTGTAGAGGTATACGATATCTCTCTTGATGATGTAGCCAC  
TAT

+

FFFFFFFFFFFFFFFFFFFFFFFFFFFFFFFFFFFFFFFFFFFFFFFFFFFFFFFFFFFFFFFFFFFFFFFF  
FFFFFFFFFFFFFFFFFFFFFFFFFFFFFFFFFFFFFFFFFFFFFFFFFFFFFFFFFFFFFFFFFFFFFFFF  
FFF

@A00721:190:HGJW7DSXY:4:1327:12057:8782\_2:N:0:TCTGCAAG+GCTGCACT  
GATTGATGTATGTCATTTCTGCTTAGTTTGTCCCGCGGAATTATTGGACACGATGAAAAATGACATAC  
CCGTTCTGACCTTGGTATCGTTATCCGTCATGGAGATGATGGCGCAT

+

FFFFFFFFFFFFFFFFFFFFFFFFFFFFFFFFFFFFFFFFFFFFFFFFFFFFFFFFFFFFFFFFFFFFFFFF  
FFFFFFFFFFFFFFFFFFFFFFFFFFFFFFFFFFFFFFFFFFFFFFFFFFFFFFFFFFFFFFFFFFFFFFFF

@A00721:190:HGJW7DSXY:4:2620:31313:17801\_2:N:0:TCTGCAAG+GCTGCACT  
GTTATTCTACAACAAAGATAAGATTTTATCTTTCTTCAAACACCCTGTTTTCCTTAAGGGCGGACAA  
TTGTTCCATTGTGAACCTTGGGGACTAGATTGAGCATTAAATGAGTTC

+

FFFFFFFFFFFFFFFFFFFFFFFFFFFFFFFFFFFFFFFFFFFFFFFFFFFFFFFFFFFFFFFFFFFFFFFF  
FFFFFFFFFFFFFFFFFFFFFFFFFFFFFFFFFFFFFFFFFFFFFFFFFFFFFFFFFFFFFFFFFFFFFFFF

@A00721:190:HGJW7DSXY:4:1147:6451:31485\_2:N:0:TCTGCAAG+GCTGCACT  
TATTTCCGTACCAAGAGCCACTGCCAATCTCATCGCTATACGCATACCTGATTGGAAGAAGCGAGGTT  
CGTTCTCAATAAAAAATTTTCTCAAGAGATTATGGAGATCGGAAGAG

+

FFFFFFFFFFFFFFFFFFFFFFFFFFFFFFFFFFFFFFFFFFFFFFFFFFFFFFFFFFFFFFFFFFFFFFFF  
FFFFFFFFFFFFFFFFFFFFFFFFFFFFFFFFFFFFFFFFFFFFFFFFFFFFFFFFFFFFFFFFFFFFFFFF

@A00721:190:HGJW7DSXY:4:2374:14027:18239\_1:N:0:TCTGCAAG+GCTGCACT  
TTCAGTACGTCATGGGGATCACTTCTTCGGTCAATGACAAAACCTTGAATATGTTACGACATGGCTT

CGTAACAACAGTGCGAGGATTGTCATCTCGGGGAAAGTGATTACCAAGATGTTTCATATAGATACGAG  
ATA

+

FFFFFFFFFFFFFFFFFFFFFFFFFFFFFFFFFFFFFFFFFFFFFFFFFFFFFFFFFFFFFFFFFFFFFFFF  
FFFFFFFFFFFFFFFFFFFFFFFFFFFFFFFFFFFFFFFFFFFFFFFFFFFFFFFFFFFFFFFFFFFFFFFF  
FFF

@A00721:190:HGJW7DSXY:4:1549:25554:34663\_2:N:0:TCTGCAAG+GCTGCACT  
CAGCGATCTTACTCGTTATCGGAGCTAAGAAAGAACTTTGGGTACACGTTATGCTCGCAAACCTAAC  
GTTAGTACCGGAGGTGATCTCTCTGCTTCTGCGTTACTGAGAGAAAAG

+

FFFFFFFFFF,FF:FFFF:FFF:FF,FFFFFFFFFFFFFF:FF:F:FFFFFF:FFFF::FFFFF,F,FFFF  
FF:FFFF::F:FFFFFFFFFFFFFFFFFFFFFFFFFFFFFFFFFFFFFFFFFFFFFFFFFFFFFFFF

@A00721:190:HGJW7DSXY:4:1354:9724:12571\_1:N:0:TCTGCAAG+GCTGCACT  
ACTTTATGGACAAGATGCAAGTTCTTGGGAAATACTTGTTCCTTTTATAGTTTATAGGTGATCTT  
GACGTCGATTCTTTGTATAGGGAGTGTGAGAAGACAACGAATCTTGAAACTACGGTCCTTATCAAAGA  
AAA

+

FFFFFFFFFFFFFF:FFF:FFFFFFFFFFFFFFFFFFFFFFFFFFFFFFFFFFFFFFFFFFFFFFFF  
FFFFFFFFFFFFFFFFFFFFFFFFFFFFFFFFFFFFFFFFFFFFFFFFFFFFFFFFFFFFFFFFFFFFFFFF  
FFF

@A00721:190:HGJW7DSXY:4:1407:17671:27179\_1:N:0:TCTGCAAG+GCTGCACT  
TCTAAATCTTTTGAGATTGAGAAGATTGAAGAACACGTCAAGAAGTCGCTCGGCGTTGTTCTTGAAAA  
CCAAGTTAAGAAGGAGGCTGATCATGGAGTCTTGTACCTTCTGTCAAACCTTCGAGGTTTACGCTACGA  
GAG

+

FFFFF:FFFFFFFFFFFFFFFFFFFFFFFFFFFFFFFFFFFFFFFFFFFFFFFFFFFFFFFFFFFFFFF  
FFFFFFFF:FFF::FFFFF:FFFF:FFFFFFFFFFFFFFFFFFFFFFFF:FFFFFFFFFFFFFFFFFFFF  
FFF

@A00721:190:HGJW7DSXY:4:2560:1090:17221\_1:N:0:TCTGCAAG+GCTGCACT  
TGGATTGAAGGCTGGCTCTAAGGGAGACTCCTTCTTTTGAATGTTGTAAAGAATTGGGTTGAGAAGT  
GTGCTTTACAAGGAGTTAGACTCTTCTTCAAGTTTTTAGATCTTCTTGATAATCTTAAAGAAAAATTT  
TCG

+

FFFFFFFFFFFFFFFFFFFFFFFFFFFFFFFFFFFFFFFFFFFFFFFFFFFFFFFFFFFFFFFFFFFFFF  
FFFFFFFFFFFFFFFFFFFFFFFFFFFFFFFFFFFFFFFFFFFFFFFFFFFFFFFFFFFFFFFFFFFFFF  
FFF

@A00721:190:HGJW7DSXY:4:2630:15736:9111\_1:N:0:TCTGCAAG+GCTGCACT  
GTTTCTCTTGGTATTTCTGAAATAGTTTATCAGAGCGTCATTTTCCTTTGGGATCTTCTCTGGTAA  
GGGAATTATTAAATCATTCTTCTCACTCTTGACGAGAATTATTACTGTTTTCTTACCCATAACTTCT  
TTT

+

FFFFFFFFFFF:FFFFFFFFFFFFFFFFFFFFFFFFFFFFFFFFFFFFFFFFFFFFFFFFFFFFFFFF  
FFFFFFFFFFFFFFFFFFFFFFFF:FFFFFFFFFFFFFFFFFFFFFFFFFFFFFFFFFFFFFFFFFFFFFF  
FFF

@A00721:190:HGJW7DSXY:4:2635:20799:33849\_1:N:0:TCTGCAAG+GCTGCACT  
ACTGGAGTTCAGACGTGTGCTCTTCCGATCTGTTTCAACACTTATCACCACTTTTGAAAGGAAAATAA  
TTGGTGATGAAAATACGTATGTCGGTGGGGTTCTCAAGGCTCTCATCGCCACTGGGATTCTAAGGGGT  
TCC

+

FFFFFFFFFFFFFFFFFFFFFFFFFFFFFFFFFFFFFFFFFFFFFFFFFFFFFFFFFFFFFFFFFFFFFF  
FFFFFFFFFFFFFFFFFFFFFFFFFFFFFFFFFFFFFFFFFFFFFFFFFFFFFFFFFFFFFFFFFFFFFF  
FFF

@A00721:190:HGJW7DSXY:4:1162:23963:11397\_2:N:0:TCTGCAAG+GCTGCACT  
TTTGGTCCTTACGTCTTAAGTAATTTGGATGTTGTGCGAAAACATCAGGTTCTTGTACGATTCTTAA

AAGAAGTTTATTA AAACTTCAGAGTCTCTTGAAGTCCAGGTAGCTAA  
+  
F:FFFFFFFFFFFFFFFFFFFFFFFFFFFFFFFFFFFFFFFFFFFFFFFFFFFFFFFFFFFFFFFF  
F::FFFFFFFFFFFFFFFFFFFFFFFFFFFFFFFFFFFFFFFFFFFFFFFFFFFFFFFF  
@A00721:190:HGJW7DSXY:4:1614:25066:25739\_2:N:0:TCTGCAAG+GCTGCACT  
GCCACAGACTTTCTGGGAAAAGAGACCTCTGTTGGTAGAGGAGTTGAGAGAATTACTCAGATTCAATC  
TGGCATCACTGAACGTCTACAACGAGTTAGGGAGTGGCTAGAGATCGG  
+  
FFFFFFFFFFFFFFFFFFFFFFFFFFFFFFFFFFFFFFFFFFFFFFFFFFFFFFFFFFFFFFFF:FFFFFFFFFFFFFFFFFFFFFFFF:FFFFFFF  
FFFFFFFFFFFFFFFF:FFFFFFFFFFFFFFFFFFFFFFFFFFFFFFFFFFFFFFFFFFFFFFFF  
@A00721:190:HGJW7DSXY:4:2534:4399:8547\_1:N:0:TCTGCAAG+GCTGCACT  
CAATACCTTCCACTGAGTTCATCACCCAGAGTTTCGACGTCGCGGAAAACGATGAAGATTTCCACACT  
GTTGAGAAATCTTCTGATGCTGAATTTGAGGAAAATTTTCGGAAGTTTTTGGTATAAATCCTGATGG  
CTC  
+  
FFFFFFFFF:FFFFFFFFFFFFFFFFFFFFFFFFFFFFFFFFFFFFFFFFFFFFFFFFFFFFFFFF,FFFFFFFFF  
FFFFFFFFFFFFFFFFFFFFFFFFFFFFFFFFFFFFFFFFFFFFFFFFFFFFFFFFFFFFFFFFFFFFFFFF  
FFF  
@A00721:190:HGJW7DSXY:4:2437:1895:8437\_2:N:0:TCTGCAAG+GCTGCACT  
AAACCTTCTTTTATCATTGCAACAGGACTTTGAGAAGACTGTTGAAATGGACAAAATCTGGGATCATA  
GGTATGTGTCACGCTACACTCGAAATATGGGCCCTCATAAGGAAGTAT  
+  
FFFFFFFFFFFFFFFFFFFFFFFFFFFFFFFF:FFFFFFFFFFFFFFFFFFFFFFFFFFFFFFFFFFFFFFFFFFFFFFFF  
FFFFFFFFFFFFFFFF:FF:FFFFF,FFFFFFFFFFFF:FFFFFFFFF,:FF:  
@A00721:190:HGJW7DSXY:4:2270:19180:34178\_1:N:0:TCTGCAAG+GCTGCACT  
GATCATTTGTTGAGGAAGATCTCTACAGAGATTATCGAGAGTTGTGATCTAGTTCTAAATTTAGGTGCG  
ACGGAAGTTAGCAACTTTAGATAAATCTTCCGGGCTCAATGACCTTTGCTATGTACGTGGATCTAA  
TGC  
+  
FFFFFFFFFFFFFFFFFFFFFFFFFFFFFFFF:FFFFFFFFFFFFFFFFFFFFFFFFFFFFFFFFFFFFFFFFFFFFFFFF  
FFFFFFFFFFFFFFFFFFFFFFFFFFFFFFFFFFFFFFFFFFFFFFFFFFFFFFFFFFFFFFFFFFFFFFFF  
FFF  
@A00721:190:HGJW7DSXY:4:2174:11116:14888\_2:N:0:TCTGCAAG+GCTGCACT  
CATCGCAAAGAAGACTTTATTAGTTTATGAAGTTCTTACACTTCTCGCGACTAATGTCAGCTTCACTA  
CAAAGGCGTTACGTAAAGTAGTTTTTCACGCTTTATCTTAAAGCATTAC  
+  
FFFFFFFFFFFFFFFFFFFFFFFFFFFFFFFFFFFFFFFFFFFFFFFFFFFFFFFFFFFFFFFFFFFFFFFF,FFFFFFFFFFFFF  
FFF:FFFFFFFFFFFFFFFFFFFFFFFF:FFFFFFFFFFFF:FFFFFFFFF  
@A00721:190:HGJW7DSXY:4:2264:1524:30405\_2:N:0:TCTGCAAG+GCTGCACT  
ACTTTTTGAATATGACAGAAGCTCGCCATATCAGATTAGAGACATGCCAGTTAGAGTTCTTCTAACCA  
GGACTGATGGTGAGATTCTTTTACCTTTTGGAGGTCCAGGAACCTTTA  
+  
FFFFFFFFFFFFFFFFFFFFFFFFFFFFFFFFFFFFFFFFFFFFFFFFFFFFFFFFFFFFFFFFFFFFFFFF  
FFFFFFFFFFFFFFFFFFFFFFFFFFFFFFFFFFFFFFFFFFFFFFFFFFFFFFFFFFFFFFFF  
@A00721:190:HGJW7DSXY:4:2576:4887:3067\_2:N:0:TCTGCAAG+GCTGCACT  
CCAAGGACGTTTCCGTCGGAGGATGACAGGTGGGAGACCGCTCAATAACACTCTATTGAATCCCTTTT  
CCACGATGAAAGCTCTTTATGAGGTGCTCCATGCAAATTTACAGTTCC  
+  
FFFFFFFFFFFFFFFFFFFFFFFFFFFFFFFFFFFFFFFFFFFFFFFFFFFFFFFFFFFFFFFFFFFFFFFF  
FFFFF,FFFFFFFFFFFFFFFFFFFFFFFF:FFFFFFFFFFFFFFFFFFFFFFFF  
@A00721:190:HGJW7DSXY:4:1649:10212:28917\_1:N:0:TCTGCAAG+GCTGCACT  
GTATTTTGATAAATTTGTTGGAATCGATAATGATACTGACGAAGGTTCTATTACCACCCTTGTCATTG  
ATACAAACATTCTAGGTGATGCTTTCTTAGAGGCTCGTCTAGCCGCTGAGATTCTGCTTACCTATTTA  
CAA

[illegible]

```

FFFFFFFFFFFFFFFFFFFFFFFFFFFFFFFFFFFFFFFFFFFFFFFFFFFFFFFFFFFFFFFF:FFFFFF:FFFFFF:
FFFF:FFFFFFFFFFFFFFFFFFFFFFFFFFFFFFFFFFFFFFFFFFFFFFFFFFFFFFFFFFFF:FFFFFFFFFFFFFFFFFFFFFFFFFFFFFFFFFFFFFFFF
FFF

```

```
FFFFFFFFFFFFFFFFFFFFFFFFFFFFFFFFFFFFFFFF:FFFFFFFF:FFFFFFFFFFFF  
FFFFFFF,FFFFFFFFFFFFFFFFFFFFFFFFFFFF:FFFFFFFFFFFFFFFFFFFF
```

[illegible]

```
FFFFFFFFFFFFFFFFFFFFFFFFFFFFFFFFFFFFFFFFFFFFFFFFFFFFFFFFFFFFFFFFFFFFF
FFFF:,FFFFFF:FFFFFFFFFFFFFFFFFFFFFFFFFFFFFFFFFFFFFFFFFFFFFFFF
```

```
FFFFFFFFFFFFFFFFFFFFFFFFFFFFFFFFFFFFFFFFFFFFFFFFFFFFFFFFFFF:FFFFFFFFFFFFFFFFFF  
FFFFFFFFFFFFFFFFFFFFFFFFFFFFFFFFFFFFFFFFFFFFFFFFFFFFFFFFFFFF
```

[illegible][illegible]

@A00721:190:HGJW7DSXY:4:1530:30092:3724\_2:N:0:TCTGCAAG+GCTGCACT  
TCAGTTTTCCAAAAGCTATTAATAGCAGTTGCGGGCTATAATACCGCCTCCAGATTACTCTAACT  
GAATCCACTCTCTTGGGATATAAATGAGTACATCTATAATAGAGTTTT

+

FFFFFFFFFFFFFFFFFFFFFFFFFFFFFFFFFFFFFFFFFFFFFFFFFFFFFFFFFFFFFFFF  
FFFFFFFFFFFFFFFFFFFFFFFFFFFFFFFFFFFFFFFFFFFFFFFFFFFFFFFFFFFFFFFF

@A00721:190:HGJW7DSXY:4:2367:3622:35352\_1:N:0:TCTGCAAG+GCTGCACT  
GGATTCTCTAAAGAACAGCAACTTTCAACATGAATTAGTTATTGAAAGTCTTGACCCTCACGTCTCAC  
TTTATCACCTTGAGATGGTAAAGTCATTAACAAAGGTAATGTTAAGGCTGATGACTTAAATTCGCA  
TTC

+

FF,FF,F:FFF:,FFFFF,::FFFF,FFFFFFFF,FFF,FFF:FFFFFFFF:FFFF,FFFF,FFFF:  
:FF:F:FFFF:FF,F,F:,FFFF,F::FFF,FF,::F,::,FFF:,F,:FFF,FFF::FFF:FFF  
FFF

@A00721:190:HGJW7DSXY:4:1522:17689:4633\_2:N:0:TCTGCAAG+GCTGCACT  
TTTGAAAATTACGGAACCTTCTCTGTTCTTCATGAAGATCTTCGAGTGTTTTATAGTGAGTTATTCT  
TGCGAAGGTTCAAGTCGATTGATTTTGTTGACTACGATCTCTCTTGTA

+

FFFFFFFFFFFFFFFFFFFFFFFFFFFFFFFFFFFFFFFFFFFFFFFFFFFFFFFFFFFFFFFF  
FFFFFFFFFFFFFFFFFFFFFFFFFFFFFFFFFFFFFFFFFFFFFFFFFFFFFFFFFFFFFFFF

@A00721:190:HGJW7DSXY:4:2346:12888:33364\_1:N:0:TCTGCAAG+GCTGCACT  
AGACCACTGAACCTATAGCGACTTTTGTGCAATTTTTCGCAAAAGGTCTTGAAGTACGTATTGTCAC  
GCTAATCGTAATTCGCGAGAAGAGATAGTACTAAAGTTTTGGCACTTCTAGTTCATCGCGGTATTG  
TGA

+

FFFFFFFFFFFFFFFFFFFFFFFFFFFFFFFFFFFFFFFFFFFFFFFFFFFFFFFFFFFFFFFF  
FFFFFFFFFFFFFFFFFFFFFFFFFFFFFFFFFFFFFFFFFFFFFFFFFFFFFFFFFFFFFFFF  
FFF

@A00721:190:HGJW7DSXY:4:2172:32344:15201\_2:N:0:TCTGCAAG+GCTGCACT  
CGTGAAAGTTATGATGAGTGATCGTATTAGAACAGCTGATTCTTATTGCATGAACGTCGCTGAGGTCA  
AACCTGTGGACGTTCTTTTCATCGACGAATTATTCATGATTCACGCTG

+

FFFFFFFFFFFFFFFFFFFFFFFFFFFFFFFFFFFFFFFFFFFFFFFFFFFFFFFFFFFFFFFF  
FFFFFFFFFFFFFFFFFFFFFFFFFFFFFFFFFFFFFFFFFFFFFFFFFFFFFFFFFFFFFFFF

@A00721:190:HGJW7DSXY:4:1363:6234:25128\_2:N:0:TCTGCAAG+GCTGCACT  
CATCTACTTAAGCGGCTTATACCATAGGTTACGGTGATTCCAATCAAATCGGATTCATCAATCGTAT  
TGATCTCCAAGTCGCAAACTACTTCAACATCAACGACATCATTCTTGA

+

FFFFFFFFFFFFFFFFFFFFFFFFFFFFFFFFFFFFFFFFFFFFFFFFFFFFFFFFFFFFFFFF  
F,FFFF:FF,FFFFFFFF:,FFFFFFFFFFFFFFFFFFFFFFFFFFFFFFFF

@A00721:190:HGJW7DSXY:4:2115:13874:1063\_2:N:0:TCTGCAAG+GCTGCACT  
TTATCGAAGTCTCAGTTATCGCTGCCCGCCGACGTTTGTGCGAACTCTCAGAGGTTTACGGCAGAA  
AAATTTCTCCTGCTTGTAATTCGAGAGAGGACACTATGGAAATTAGAC

+

FFFFFFFFFFFFFFFFFFFFFFFFFFFFFFFFFFFFFFFFFFFFFFFFFFFFFFFFFFFFFFFF  
FFFFFFFFFFFFFFFFFFFFFFFFFFFFFFFFFFFFFFFFFFFFFFFFFFFFFFFF

@A00721:190:HGJW7DSXY:4:1515:2175:15374\_2:N:0:TCTGCAAG+GCTGCACT  
TATTACTTTCACTCAAGGTGAAAAGTTTGAAATTAACAAAGTCCTTGTAAGAGTAAGGTTAAATGTG  
AAGATGCTCAGACTATTCATGAAGTTCAAGGTAATACTTACCAGCACG

+

FFFFFFFFFFFFFFFFFFFFFFFFFFFFFFFFFFFFFFFFFFFFFFFFFFFFFFFFFFFFFFFF  
FFFFFFFFFFFFFFFFFFFFFFFFFFFFFFFFFFFFFFFFFFFFFFFFFFFFFFFF

@A00721:190:HGJW7DSXY:4:2138:29107:1673\_2:N:0:TCTGCAAG+GCTGCACT  
TTTTGCATCACAAACACATATTACCGTTGCTCTATCACGACACGTTGAATCTTTACGATACTTTGTTA

TCAATGTAAAGTTAAACGATGCTACTTGTGAGAGGATCAATCACAGTA  
+  
FFFFFFFFFFFFFF,FFFFFFFFFFFFFFFFFFFFFFFFFFFFFFFFFFFFFFFF:FFFFFFFFFFFFFF,FFF:FF  
FFFFFFFF,FFFFFFFFFFFFFFFFFFFFFFFFFFFFFFFFFFFFFFFFFFFFFFFF  
@A00721:190:HGJW7DSXY:4:2650:18096:4648\_2:N:0:TCTGCAAG+GCTGCACT  
TTAGCACGGGAGGTTGCAGATTCAACCCCTTATATCGAGGCTATCGAGGACGATGAGTATCTTGAAGT  
TGTTGACGACAAGCCTCAAGAGGGTAGAGGACCACCTGGATCTTCTAC  
+  
FFFFFFFFFFFFFFFFFFFFFFFFFFFFFFFFFFFFFFFF:FFFFFFFFFFFFFF:FFFFFFFFFFFFFFFFFFFFFFFF:FFF  
FFFFFFFF:FFFFFFFFFFFFFFFF:FFFFFFFFFFFFFFFFFFFFFFFF  
@A00721:190:HGJW7DSXY:4:1525:2365:1767\_1:N:0:TCTGCAAG+GCTGCACT  
AACCACCTTAACGTCACTCGGTAATCTTTCAGCCGAATTAAGTACTAATGAGTTCAAGTCGGTTGTGCG  
ATCGAATTAAGATCAAGGCTAATACCTTTATAGGTAAGAAGCCCCTTGAGCCGCGTAGTCAGCGCGTT  
TAG  
+  
F,:FFFFFF:,FFFFF:FFF:FF:F,F,F,FF,:FF:FFF::FF,FFF::,FFF:, :FFFFFFFFF:,  
FFFFFFFF:FFFFFFFF:FFFFFFFF, ,FFFF:F:FFFFFF, ,F,:FFFF,FFFF,FFFF,:FFFFFFFF  
F,F  
@A00721:190:HGJW7DSXY:4:1603:2510:28541\_2:N:0:TCTGCAAG+GCTGCACT  
CCGATAGGGTACCGAGTCTCCAAGAGAATATTTATTCTTATGAGGCTCGAACTTCAACGTTTTTACACA  
ACGGAAGACATATCGCACCCGAAATTTTGGGCAGAATGCTCTTAAC  
+  
FFFFFFFFFFFFFFFFFFFFFFFFFFFFFFFFFFFFFFFF:F:FFFFFFFFFFFFFFFF:FFFFFFF  
FFFFFFFFFFFF:FFF:FFF:FFFFFF:FFFFFFFFFFFFFFFFFFFFF:  
@A00721:190:HGJW7DSXY:4:2623:3197:29982\_2:N:0:TCTGCAAG+GCTGCACT  
GATCAGTCTAAGTTGGATAAAGTTATAGGAGACTCAGTTAACCTGAGAGCTCCTCAATTGATAGATTG  
GGTCAACAATAGGGACGCTAGTATACTTCGTAAAGTCGACAGCGAAAT  
+  
FFFFFFFFFFFFFFFFFFFFFFFFFFFFFFFFFFFFFFFF:FFFFFFFFFFFFFFFFFFFFF  
FFFFFFFFFFFF:FFFFFFFFFFFF:FFFFFFFFFFFFFFFFFFFFF:FF  
@A00721:190:HGJW7DSXY:4:2304:30246:12540\_2:N:0:TCTGCAAG+GCTGCACT  
AATTGGACCGACTATATGACCTATTTTAAGCTCATGGTGAAAAGGGAAGCTAAGGTTAACTTTATGC  
TTCAGCCTTTTTCGAAGCATAACCCCGCACAGAATATCGTTTATCACGC  
+  
FFFFF:FF::FFF::FFFFFFFFFFFFFFFFF:,FF::FFFFFFFF, :F:,FFFF, :,FFF:F,,FFF:  
FFFFF,FFFFFFFFFFFFFFFFFF,FF,F,F,F:FFF:FF:FFF,,:,F  
@A00721:190:HGJW7DSXY:4:2271:9055:33959\_2:N:0:TCTGCAAG+GCTGCACT  
CCTATCTTTAAGGTTCTTGTGAGGAGAGTCAAACAGTGTCTTTTACCCAACATTTTTATGTATACAGA  
GATGACCAGTGACGATTTCTCCCGGAAGCTCTTCTCTCTTAGGAGG  
+  
FF:FFFFFFFFFFFFFFFFFFFFFFFFFFFFFFFFFFFFFFFFFFFFFFFFFFFFFFFFFFFFFFFFFFFFFFFF  
FFFFFFFFFFFFFFFFFFFF:FF:FFFFFFFFFFFFFFFF:FFFFFFFFFFFF  
@A00721:190:HGJW7DSXY:4:2675:26494:20760\_1:N:0:TCTGCAAG+GCTGCACT  
TAAAGCCTATGAGATAAAGATGTATTCTTATTTAGGCTTCGATGCTGAATTTCTTGAACTTTGGAGTG  
CCAGTGAATATTTTTGTCACGCCAGGAGTATCCATAACGATTTGTCAATTTACCACCTTTGCTCAACGA  
CGA  
+  
FFFF:FFFF:FFFFFF:FFFFFFFFFFFFFFFF:FFFFFFFF:FFFFFFFFFFFFFFFFFFFFFFFFFFFF,  
FFFFFFFFFFFF:FFFFFFFFFFFFFFFF:FFFFFFFFFFFFFFFFFFFFFFFFFFFFFFFFFFFF:FFFFF  
FFF  
@A00721:190:HGJW7DSXY:4:2347:15944:19272\_1:N:0:TCTGCAAG+GCTGCACT  
GTTTCAGACGTGTGCTATTCCGATCTATCACTTTGATGATTTTATCACTTTATTATGACCTTGGAAGT  
TTTCGGCTGTGGTTGTCGCTGGGGACGATTCCATTCTGTTTTCAAAGACTCCAATAACTGATCATTCT  
GAT



+  
:FF,,FFF:F,FFFF,:FFF,FF,FFF,:F::FFFFFFFFFFFFFFF::FFFFFF:FFFF:F,FF:FFFF  
FFFFFFFFFFFF:FFFFF::FFFFFFFFF,,F,FF:FFFFFF,FFFF:F,:FFFFFF,FFFFFFFF:FF:  
,FF  
@A00721:190:HGJW7DSXY:4:1509:27661:4429\_2:N:0:TCTGCAAG+GCTGCACT  
TGCTCGCGATTTATTCTTTTTGTCAATGATTACATCTACTTCGTTCTGATCCTTACAAGATCATCGT  
TAAGTTAGGTAAACCCCTAACCGATGTTACTCTTGTAGGACTTTGGGA  
+  
FFFFFFFFFFFFFFFF:FFFFFFFFFFFFFFFFFFFFFFFFFFFFFFFFFFFFFFFF:FF:FF:FFFF::FFFF  
FFFFFF:FFF:FFF:F:FFFFFFFFFFFFFFFFFFFFFFFFFFFFFFFFFFFFF:  
@A00721:190:HGJW7DSXY:4:2304:4969:4398\_2:N:0:TCTGCAAG+GCTGCACT  
TTAAAGACTATACTAAATATCTCCACTACGAGGTTGTTGTTTGGCGATTAGCTCTTGCGACTAATATT  
CGATATTCGATTGAGGGTCGTTATACCTATTCGGCTATCTGTGCTTG  
+  
FFFFFFFFFFFFFFFFFFFFFFFFFFFFFFFFFFFFFFFFFFFFFFFFFFFFFFFFFFFFFFFFFFFFF  
FFFFFFFFFFFFFFFFFFFFFFFFFFFFFFFFFFFFFFFFFFFFFFFFFFFFFFFFFFFFF  
@A00721:190:HGJW7DSXY:4:1521:8115:11350\_2:N:0:TCTGCAAG+GCTGCACT  
TTTTAAACGATTCCGAGAGGTTTATCCTGATGTGGAGGGAGTTCTTGAAGCATCCCTACCTTTCCTTG  
TGAAAATTTTGATGCGGTTTCATAAGATTATCAGTAATCCTGATTCTA  
+  
FFFFFFFFFFFFFFFFFFFFFFFFFFFFFFFFFFFFFFFFFFFFFFFFFFFFFFFFFFFFFFFFFFFFF  
FFFFFFFFFFFFFFFFFFFFFFFFFFFFFFFFFFFFFFFFFFFFFFFFFFFFFFFFFFFFF  
@A00721:190:HGJW7DSXY:4:2617:31006:25911\_1:N:0:TCTGCAAG+GCTGCACT  
GACTGGAGTTCAGACGTGTGCTCTTCCGATCTCAAAGATCGACTTCGAGACAGGTGATATTGTTGAGC  
GAGAGCGACCAAGATCTAAATTCGGTAACGGTGCGTGGCGCTTTATTTTAAAAAGCTCCCTCCTCTCG  
CAA  
+  
FFFFFFFFFFFFFFFFFFFFFFFF:FFFFFFFFFFFFF:,F:FF:FFFFFFFFFFFFFF:FFFFFF:FFFFF  
FFFFFFFFFFFFFFFFFFFFFFFFFFFFFFFFFFFFFFFFFFFFFFFFFFFFFFFFFFFFFFFFFFFFF  
FFF  
@A00721:190:HGJW7DSXY:4:2405:4444:22310\_2:N:0:TCTGCAAG+GCTGCACT  
ACTTGAGTCTTTTGATCAGTCTCTGACTTGACCATCTTTCATTTTAAATGACGATAATTAAGACTCTC  
TTTCTTCTTTGTTTCTTCTTTGCACTGATTTTCTCTCATCAGCTTGT  
+  
FFFFFFFFF,,,:F,F:,FFFF:,,:FFFF:FFFF,FFFFFFFF:FFFF:FF:FFFF,FFFFF:,,:FF,,  
F,,F:F,F,F:F:FFF::FF,FFFFFF,F:FF:FF,F:FFFFFFFFF:  
@A00721:190:HGJW7DSXY:4:1531:1244:22842\_2:N:0:TCTGCAAG+GCTGCACT  
TTTACGATAACAACATCAGTTGATTAAGACTCTTCCGAAAGCGAACTTTGGGAATTTGAAGCTCAG  
GGTGAAGCACAACTTTGACCGTGACGAACTGTGGTGTCTTGATCTA  
+  
FFFFFFFFFFFFFFFFFFFFFFFF:FFFFFFFFFFFFFFFFFFFFFFFFFFFFFFFFFFFFFFFFFFFFF  
FFFFFFFFFFFFFFFFFFFFFFFFFFFFFFFFFFFFFFFF:FFFFFFFFFFFFFFFFFFFFF  
@A00721:190:HGJW7DSXY:4:2331:7102:15796\_1:N:0:TCTGCAAG+GCTGCACT  
CACTACCACTTATTACGATATTTCTTTAGTCGATGGGTTTTCGACGCCTTTAAGCGTCTTCTGTTTCAT  
CGCAACCAGATGATATCTTCTATTGAACTTATGTTTCGATCAGTGTTTCTTCTATCAGGAGGAAAAC  
ACT  
+  
FFFFFFFFFFFFFFF:FFFFFFFFFFFFFFFFFFFFFFFFFFFFFFFFFFFFFFFF:FFFFFFFFFFFFFFFFF  
FFFFFFFFFFFFFFFFFFFFFFFFFFFFFFFFFFFFFFFFFFFFFFFFFFFFFFFFFFFFFFFFFFFFF  
FFF  
@A00721:190:HGJW7DSXY:4:2624:19750:32409\_2:N:0:TCTGCAAG+GCTGCACT  
TCTTCTAATGTGGCCTGAACTACGTTTCACTTTGTGTGTACTTGTCTCTATTTTAAAGTTTTGTCTTCC  
TTGTTTGTCTTATTCTATTAATCACTCATTTTGTGAGATTATTA  
+

```
:FFFFFFFFFFFFFFFFFFFFFFFFFFFFFFFFFFFFFFFFFFFFFFFFFFFFFFFFFFFFFFFFFFFFFFFFF:FFFFFFFFFFFFFFFFFFFFFFFFFFFFFFFFFFFFFFFFFFFFFFFFFFFFFFFFFFFFFFFFFFFFFFFFF:F:FFFFFFFFFFFFFFFFFFFFFFFFFFFFFFFFFFFFFFFFFFFFFFFFFFFFFFFFFFFFFFFFFFFFFFFFF:FFFFFFFFFFFFFFFFFFFFFFFFFFFFFFFFFFFFFFFFFFFFFFFFFFFFFFFFFFFFFFFFFFFFFFFFF
FF:FFFFFFFFFFFFFFFFFFFFFFFFFFFFFFFFFFFFFFFFFFFFFFFFFFFFFFFFFFFFFFFFFFFFFFFFF:FFFF:FFFFFFFFFFFFFFFFFFFFFFFFFFFFFFFFFFFFFFFFFFFFFFFFFFFFFFFFFFFFFFFFFFFFFFFFF
@A00721:190:HGJW7DSXY:4:1607:5511:26287_2:N:0:TCTGCAAG+GCTGCACT
GACAACAGCAGGGGTTTTTCGAATAGTGATAGCCACCCGCCTTACAGAGGGGCAGCAGCATGACCATAA
TTGGTATTGACTTTGGTACCACCTTTTCTACTGTCTGTCTCGCCTCTT
+
FFFFFFFFFFFFFFFFFFFFFFFFFFFFFFFFFFFFFFFFFFFFFFFFFFFFFFFFFFFFFFFFFFFFFFFFF
FFFFFFFFFFFFFFFFFFFFFFFFFFFFFFFFFFFFFFFFFFFFFFFFFFFFFFFFFFFFFFFFFFFFFFFFF
@A00721:190:HGJW7DSXY:4:2540:28411:34350_1:N:0:TCTGCAAG+GCTGCACT
CTTAACAACAATGATAGTGAATTTATACCTACAATCATTGGTTTTTCTAATAATGATGACACTATTGT
TTATGGATATGATGCTATTACTCATGATGGTTACGGTCAGGGAGGATTCTCAGTTTACAAGGACCTTA
AGC
+
FFFFFFFFF:FFF:FFF:FFFFFFFF,FF:FFFFFF,F:FFFF:FFFFFFFFFFFFFFFFFFFFFFFFFFFFFFFFF
FFFFFFFFFFFFFFFFFFFFFFFFFFFFFFFFFFFFFFFFFFFFFFFFFFFFFFFFFFFFFFFFFFFFFFFFF
FFF
@A00721:190:HGJW7DSXY:4:1176:17137:6057_1:N:0:TCTGCAAG+GCTGCACT
AGACGTGCTAAATTAACCATTGTACGATGTCGTCTGTCTCGCGCATCACTTTTCTACTAAGAATTGG
TCCTACTTTTGGACAAGGCCAACTTCGTAATCTTCATGAGATCGTTTCTTTCTTTATCTCTTTGGTTG
TTA
+
F:FF:FF,FFFFFF,FFFF,:FFFF,:::FFFF::FFFFFF,F,F:FFFFFFFF,FFF,FF,FFFFFFFFF:
F:FF:FF,FFFF,:F:F:FFF,FF,,FFFFFFFF::FFFF,FFFF,FFFFFFFFFFFF:FFFFFFFFF
FFF
@A00721:190:HGJW7DSXY:4:1110:17282:8563_2:N:0:TCTGCAAG+GCTGCACT
GAGTGAAAGGCTTCAATTGTAGTGGTTTGGTCGTTTCAGTACCCAGTCAGTATACCTCTACGCAAAGA
TATTTTCATGAAAACCTACAGAGGAACGTACCGGATTACCTGTCTTTCAT
+
FFFFFFFFFFFFFFFFFFFFFFFFFFFFFFFFFFFFFFFFFFFFFFFFFFFFFFFFFFFFFFFFFFFFFFFFF
FFFFFFFFFFFFFFFFFFFFFFFFFFFFFFFFFFFFFFFFFFFFFFFFFFFFFFFFFFFFFFFFFFFFFFFFF
@A00721:190:HGJW7DSXY:4:1663:29514:3161_1:N:0:TCTGCAAG+GCTGCACT
CTTCGGCCGCTCTCTTTGCTTCGATGTTGGATGTCAAGAAGGGTTCAGAATGGGATTCTACGTAGTT
TATGACTTTGGTGGTGGTACTTTCGATACTTCTATCGTCTTACGTTACGGTAATTACTATAGTGTTAT
TTA
+
FFFFFFFFFFFFFFFFFFFFFFFFFFFFFFFFFFFFFFFFFFFFFFFFFFFFFFFFFFFFFFFFFFFFFFFFF
FFFFFFFFFFFFFFFFFFFFFFFFFFFFFFFFFFFFFFFFFFFFFFFFFFFFFFFFFFFFFFFFFFFFFFFFF:F,FFFFF
FFF
@A00721:190:HGJW7DSXY:4:2165:5945:36871_1:N:0:TCTGCAAG+GCTGCACT
ATAATCTTGGAGGTCGTGACGTTGATGAAGCTATAAGAGCGTTCTTATTACGGCGCACTTCTTTACCC
GCCACCACACAACCTTTCAGTTTCACAACCTGAAGGAGGAGGTTTCTGTTACTGGAAAACCTCGTCAAT
ACT
+
FFFFFFFFFFFFFF:FFFFFFFFFFF:FFF:FFFFFF:F:FFFFFF:FFFFFFFFFFFFFFFFFFFF,FFFF,F
FFFFFFFF:FFF:FFFFFF:FFFFFFFFFFFFFFFFFFFFFFFFFFFFFFFFFFFFFFFFFFFFFFFFFFFF:FF
FFF
@A00721:190:HGJW7DSXY:4:2223:15962:9565_2:N:0:TCTGCAAG+GCTGCACT
GATCTAGTGAAATTAACGCGTCCTTTTCTGGAACGTAGTTTACTATTATGAACAAAGTTATCAAAGA
TAGTGGCATTCAAGGCAAACCTTACCCTGATTCCGGCCGGTGGTAGCTC
+
FFFFFFFFFFFFFFFFFFFFFFFFFFFFFFFFF:FFFFFFFFFFF:FFFFFFFFFFFFFFFFFFFFFFFFFFFFF
FFFFFFFFFFFFFFFFFFFFFFFFFFFFFFFFFFFFFFFFFFFFFFFFFFFFFFFFFFFFFFFFFFFFFFFFF
@A00721:190:HGJW7DSXY:4:2112:21920:25801_2:N:0:TCTGCAAG+GCTGCACT
TGCTGAAACAGCTATTAAGCTGTTGAGCGGGTAATTACACCTAAACGAGCTCGATCTGCCATCGCTG
```

+

+

+

+

 $+$ 

+

+

+

[illegible]









```
+
FFFFFFFFFFFFFFFFFFFFFFFFFFFFFFFFFFFFF:,FFFFFFFFFFFFFF:FFFFFF:FFFFFF
:FFFFFFFFFFFFFFFFFFFF:F,FFFFFFFF:FFFFFFFFFFFFFFFFFFFFFFFF
```

```
+
FFFFFFFFFFFFFFFFFFFFFFFFFFFFFFFFFFFFFFFFFFFFFFFFFFFFFFFFFFFFFFFFFFFFFFFFF
FFFFFFFFFFFFFFFFFFFFFFFFFFFFFFF,FFFFFFFFFFFFFFFFFFFFFFFFF:
```

[illegible]

```
+
FFFFFFFFFFFF,FFFFFFFFFFFFFFFFFFFFFFFFFFFFFFFFFFFFFFFFFFFFFFFF
FFFFFFFFFFFFFFFFFFFFFFFFFFFFFFFFFFFFFFFF:FFFFFFFFFF,FFFFFFF
```

```
+
FF,FF,FFF,,,FFFF,,F:,,FF:,FF,,:FFFFFF,:FFFF:F,FFF::FFFFFF,FFFFFF,,,FFF
FFFFFFFF:F:F:F:F:F:F,F:FF,,FFFFFFFFFFFFFFFF:FFF,FFFF
```

```
+  
FFF:FFFFFFFFFFFFFFFFFFFFFFFFFFFFFFFFFFFFFFFFFFFFFFFFFFFFFFFFFFFF  
,FFFFFFFFFFFFFFFFFFFFFFFFFFFFFFFFFFFFFFFFFFFFFFFF
```

```
+
FFFFFFFF:FFF:, :FFFFFFFF:FF:FFFFFFFF:FFFFFFFF:FFFF, :F:FFF, FFFF:FF:F, FF, F, :F
F:FFFF, :F::FF:F::FFFFFFFFFF, F:, FFFFFFFFFFFFFF, :FFFF
```

```
+
FFFFFFFFFFFFFFFFFFFFFFFFFFFFFFFFFFFFFFFFFFFFFFFFFFFFFFFFFFFF:F:FFFFFFFFF
FFFFFFFFFFFFFFFFFFFFFFFFFFFFFFFFFFFF,FFFFFFFFFFFFFFFFFF:F
```

[illegible]



@A00721:190:HGJW7DSXY:4:2365:7509:10770\_1:N:0:TCTGCAAG+GCTGCACT  
CACGAGACGTCATGAAAGCTATCGGAGGGAAGCAAATGTTTCGTTCTGTTACAAGAACGCTTTGGAT  
TGTGACCATAAAGCCTCAGTTGCGATAGCTGTAGAGGTATACGATATCTCTCTTGATGATGTAGCCAC  
TAT

+

FFFFFFFFFFFFFFFFFFFFFFFFFFFFFFFFFFFFFFFFFFFFFFFFFFFFFFFFFFFFFFFFFFFFFFFF  
FFFFFFFFFFFFFFFFFFFFFFFFFFFFFFFFFFFFFFFFFFFFFFFFFFFFFFFFFFFFFFFFFFFFFFFF  
FFF

@A00721:190:HGJW7DSXY:4:2571:12744:21715\_2:N:0:TCTGCAAG+GCTGCACT  
GATTGATGTATGTCATTTCTGCTTAGTTTGTCCCGGCGAATTATTGGACACGATGAAAAATGACATAC  
CCGTTCTGACCTTGGTATCGTTATCCGTCATGGAGATGATGGCGCAT

+

FFFFFFFFFFFFFFFFFFFFFFFFFFFFFFFFFFFFFFFFFFFFFFFFFFFFFFFFFFFFFFFFFFFFFFFF  
FFFFFFFFFFFFFFFFFFFFFFFFFFFFFFFFFFFFFFFFFFFFFFFFFFFFFFFFFFFFFFFFFFFFFFFF

@A00721:190:HGJW7DSXY:4:2647:2130:23688\_1:N:0:TCTGCAAG+GCTGCACT  
TTATTCTCACAACAAAGATAAGATTTTATCTTTCTTCAAACACCCTGTTTTCTTAAGGGCGGACAAT  
TGTTCCATTGTGAACCTCTGGGGACTAGATTGAGCATTAAATGAGTTCCGAATAACTCGTAATAAATCT  
T

+

:FFFF:F,,,F,,,,,F,F::F:FFFF:FFFFFFFF:FF,,,F,,,F:FFF,,FFF,F,FFFF,:FFF  
FFFFF:,FFFFFFFF:FFFF:FF:FFFFFF:FF:FFFF,,FFFFFFFF,:,:FFFFFFFFFFFFFFFF:F  
F

@A00721:190:HGJW7DSXY:4:1331:13973:4586\_2:N:0:TCTGCAAG+GCTGCACT  
TATTTCCGTACCAAGAGCCACTGCCAATCTCATCGCTATACGCATACCTGATTGGAAGAAGCGAGGTT  
CGTTCCTCAATAAAAATTTTCTCAAGAGATTATGGAGATCGGAAGAG

+

FFFFFFFFFFFFFFFFFFFFFFFFFFFFFFFFFFFFFFFFFFFFFFFFFFFFFFFFFFFFFFFFFFFFFFFF  
FFFFFFFF,FF:FFFFFFFFFFFFFFFF:FFFF,FFFFFFFFFFFF:FF:FF

@A00721:190:HGJW7DSXY:4:2529:10095:35978\_1:N:0:TCTGCAAG+GCTGCACT  
TTCAGTACGTCATGGGGATCACTTCTTCGGTCAATGACAAAACCTTGAATATGTTACGACATGGCTT  
CGTAACAACAGTGCAGGATTGTCATCTCGGGGAAAGTGATTACCAAGATGTTTCATATAGATACGAG  
ATA

+

FFF:FFFFFFFFFFFFFFFFFFFFFFFFFFFFFFFFFFFFFFFFFFFFFFFFFFFFFFFFFFFFFFFF  
FFFFFFFFFFFF,FFFFFFFFFFFFFFFFFFFFFFFFFFFFFFFFFFFFFFFFFFFFFFFFFFFFFFFF  
FFF

@A00721:190:HGJW7DSXY:4:2160:4833:29152\_2:N:0:TCTGCAAG+GCTGCACT  
CAGCGATCTTACTCGTTATCGGAGCTAAGAAGAAGACTTTGGGTACACGTTATGCTCGAACTTAAC  
GTTAGTACCGAGGTGATCTCTCTGCTTCTGCGTTACTGAGAGAAAAG

+

FFFFFFFFFFFFFFFFFFFFFFFFFFFFFFFFFFFFFFFFFFFFFFFFFFFFFFFFFFFFFFFFFFFFFFFF  
FFFFFFFFFFFFFFFFFFFFFFFFFFFFFFFFFFFFFFFFFFFFFFFFFFFFFFFFFFFFFFFF

@A00721:190:HGJW7DSXY:4:2410:23538:6277\_1:N:0:TCTGCAAG+GCTGCACT  
ACTTTATGGACAAGATGCAAGTTCTTGGGAAATACTTGTTCCCTTTTTAGGTTTAGTAGGTGATCTT  
GACGTCGATTCTTTGTATAGGGAGTGTGAGAAGACAACGAATCTTGAAACTACGGTCCTTATCAAAGA  
AAA

+

FFFFFFFFFFFF:FFFF:FFFFFFFFFFFFFFFFFFFFFFFF,FFFFFFFFFFFFFFFFFFFFFFFF:FFFFFFFF  
FFFFFFFFFFFFFFFFFFFFFFFF:FFFFFFFFFFFFFFFFFFFFFFFFFFFFFFFFFFFFFFFFFFFFFFFF  
FFF

@A00721:190:HGJW7DSXY:4:1573:17924:5822\_1:N:0:TCTGCAAG+GCTGCACT  
TCTAAATCTTTTGAGATTGAGAAGATTGAAGAACACGTCAAGAAGTCGCTCGCGCTTGTTCTTGAAAA  
CCAAGTTAAGAAGGAGGCAGATCATGGAGTCTTTGTACCTTCTGTCAAACCTTCGAGGTTTACGCTACGA  
GAG



FFFFFFFFFFFFFFFFFFFFFFFFFFFFFFFFFFFFFFFFFFFFFFFFFFFFFFFFFFFFFFFF#FFFFFFFFFFFFFFFFFFFFFFFF  
FFF

@A00721:190:HGJW7DSXY:4:2437:1895:8437\_1:N:0:TCTGCAAG+GCTGCACT  
GATCATTTGTTTCAGGAAGATCTCTACAGAGATTATCGAGAGTTGTGATCTAGTTCTAAATTTAGGTCTG  
ACGGACTTTAGCAACTTTAGATAAATTCTTTCCGGGCTCAATGACCTTTGCTATGTACGTGGATCTAA  
TGC

+  
FFFFFFFFFFFFFFFFFFFFFFFFFFFFFFFFFFFFFFFFFFFFFFFFFFFFFFFFFFFFFFFFFFFFFFFF  
FFFFFFFFFFFFFFFFFFFFFFFFFFFFFFFFFFFFFFFFFFFFFFFFFFFFFFFFFFFFFFFFFFFFFFFF  
F:F

@A00721:190:HGJW7DSXY:4:2323:19343:30295\_2:N:0:TCTGCAAG+GCTGCACT  
CATCGCAAAGAAGACTTTATTAGTTTCATGAAGTTCTTACACTTCTCGCGACTAATGTCAGCTTCACTA  
CAAAGGCGTTACGTAAAGTAGTTTTCACGCTTTATCTTAAAGCATTAC

+  
FFFFFFFFFFFFFFFFFFFFFFFFFFFFFFFFFFFFFFFFFFFFFFFFFFFFFFFFFFFFFFFFFFFFFFFF  
FFFFFFFFFFFFFFFFFFFFFFFFFFFFFFFFFFFFFFFFFFFFFFFFFFFFFFFFFFFFFFFFFFFFFFFF

@A00721:190:HGJW7DSXY:4:1118:12789:29904\_1:N:0:TCTGCAAG+GCTGCACT  
ACTTTTGAATATGACAGAAGCTCGCCATATCAGATTAGAGACATGCCAGTTAGAGTTCTTCTAACCA  
GGACTGATGGTGAGATTCTTTTACCTTTTGAGGTCCAGGAACCTTTACTCCTAGTGTCTTTTCTAGA  
GTC

+  
FFFFFFFFFFFFFFFFFFFFFFFFFFFFFFFFFFFFFFFFFFFFFFFFFFFFFFFFFFFFFFFFFFFFFFFF  
FFFFFFFFFFFFFFFFFFFFFFFFFFFFFFFFFFFFFFFFFFFFFFFFFFFFFFFFFFFFFFFFFFFFFFFF  
FFF

@A00721:190:HGJW7DSXY:4:2555:19868:26036\_2:N:0:TCTGCAAG+GCTGCACT  
GTCGGAGGATGACAGGTGGGAGACCGCTCAATAACACTCTATTGAATCCCTTTCCACGATGAAAGCT  
CTTTATGAGGTGCTCCATGCAAATTTACAGTTCCCTCTTTGGTGATATC

+  
FFFFFFFFFFFFFFFFFFFFFFFFFFFFFFFFFFFFFFFFFFFFFFFFFFFFFFFFFFFFFFFFFFFFFFFF  
FFFFFFFFFFFFFFFFFFFFFFFFFFFFFFFFFFFFFFFFFFFFFFFFFFFFFFFFFFFFFFFFFFFFFFFF

@A00721:190:HGJW7DSXY:4:2406:9109:36902\_1:N:0:TCTGCAAG+GCTGCACT  
GTATTTTGATAAATTTGTTGGAATAGATAATGATACTGACGAAGGTTCTATTACCACCCTTGTCTATTG  
ATACAAACATTCTAGGTGATGCTTTCTTAGAGGCTCGTCTAGCCGCTGAGATTCTGTCTTACCTATTTA  
CAA

+  
:FFFFFFFFF:FFFF:FFFFFFF,FFFFFF:FFFF:F,FFFFFF:FF,FFF:FFFFFF:FFFFFF  
FFF:FFFFFFF:FFFFFFFFFFFFFFFFFFFFFFFFF,:F:FF,,F:FF:FFFFFFFFFFFFFFFFFFFF  
:FF

@A00721:190:HGJW7DSXY:4:1103:4237:3192\_1:N:0:TCTGCAAG+GCTGCACT  
GATAACGATTTAGTACTGGGTAATGGTGGTAGTCAGTTCACTAATTTTCTTTCCCTACCCTTTTTTCGA  
TTTGATTGACGGGGTCTTCGTCTCACGAATATTTTGATAAGGTTTTCTTTTATGGGACTCTTGTTT  
GTA

+  
FFF,F,F,FFFFFF:FF:FF,FFFF:F,FFFF:FFFFFF:FF,:FFFF,FF:::F,:,,FFFF:,F  
F:, :FFFFFF:F:FF,FF:FF:FFFFFF,FF,FFFFFF,FFFFFFFF:FFFF:FF:F:FF:FFF  
FFF

@A00721:190:HGJW7DSXY:4:2474:32009:16125\_2:N:0:TCTGCAAG+GCTGCACT  
TATTACTTCGGAAGTTCTTAATGTAGGTCTCCTAGTACTTAAGGGTTTATGTTTCGGTTTCAGCTGGA  
TGGATCTTTTGATGGTATGTTTCACATTGCGTGATCACTTCCCGTGGA

+  
FFFFFFFFFFFFFFFFFFFFFFFFFFFFFFFF:FFFF:FFFFFFFFF:FFFFFFFFFFFFFFFF,FFFFFFFFF  
FFFFFFFFFFFFFFFFFFFFFFFFFFFFFFFF:FFFFFFFFFFFF:FF,FFFF

@A00721:190:HGJW7DSXY:4:2425:22435:29136\_1:N:0:TCTGCAAG+GCTGCACT  
GATTAAACATAAAATCCAGCGATTCTATTATGTCGCTAAAGCCTGTCCAGTTGTCGATGATGTTCCGGG

CTGTGGGGATTAACCTCCCTCGTGAACTTACGACGATGTTCTCGCTCGCATTTACAAGGATTACTA  
AGT

+

FFFFFFFFFFFFFFFFFFFFFFFFFFFFFFFFFFFFFFFFFFFFFFFFFFFFFFFFFFFFFFFFFFFFFFFF  
FFFFFFFFFFFFFFFFFFFFFFFFFFFFFFFFFFFFFFFFFFFFFFFFFFFFFFFFFFFFFFFFFFFFFFFF  
FFF

@A00721:190:HGJW7DSXY:4:2146:20537:17707\_2:N:0:TCTGCAAG+GCTGCACT  
CCACTTCTAATTTTAGGAAACGTCGCGAAAAGAAAGTTCATGAGGATGTCTTGGTCGAAAAATATCGC  
CGGGAACCTCTAATAGAGGATCCTGATGACATTATTTCAACGGATACC

+

FFFFFFFFFFFFFFFFFFFFFFFFFFFFFFFFFFFFFFFFFFFFFFFFFFFFFFFFFFFFFFFFFFFFFFFF  
FFFF,:FFFFFF:FFFFFFFFFFFFFFFFFFFFFFFFFFFFFFFFFFFFFFFFFFFFFFFF

@A00721:190:HGJW7DSXY:4:1352:13422:28213\_2:N:0:TCTGCAAG+GCTGCACT  
CTACCACAGAAACCGTCTCAGGAAGTGTCTCCACTGATTCGGAATTAGAGAAAGACGACCTTCTTG  
GGGACTGAGACCTCTGAATTTTCAGGGTGCCCTGATGAGGACGTTGAA

+

FFFFFFFFFFFFFFFFFFFFFFFFFFFFFFFFFFFFFFFFFFFFFFFFFFFFFFFFFFFFFFFFFFFFFFFF  
FFFFFFFFFFFFFFFFFFFFFFFFFFFFFFFFFFFFFFFFFFFFFFFFFFFFFFFFFFFFFFFF

@A00721:190:HGJW7DSXY:4:1217:30011:12289\_2:N:0:TCTGCAAG+GCTGCACT  
CTTCTAAGAGTGTTCAAAAGACCAGAAACGTAACAAGAAGATAAAGGTAGGAAGGGAGAAAACAG  
AACAAGCGAGCGGTTGAAGAGAAAAGTATGATGTTGCGGCTGATCGT

+

FFFFFFFFFFFFFFFFFFFFFFFFFFFFFFFFFFFFFFFFFFFFFFFFFFFFFFFFFFFFFFFFFFFFFFFF  
FFFFFFFFFFFFFFFFFFFFFFFFFFFFFFFFFFFFFFFFFFFFFFFFFFFFFFFF

@A00721:190:HGJW7DSXY:4:2535:17020:27273\_2:N:0:TCTGCAAG+GCTGCACT  
TAGAAAGATCACTCTCGGCGATACCACTGATCTTCAGAGTTACGTAGTGGTCGTTCTTTTGGTGATT  
TTATCAAAGAGAAAGTTTCTGCTAGTCGCGACGATAGTATTTATCGGA

+

FFFFFFFFFFFFFFFFFFFFFFFFFFFFFFFFFFFFFFFFFFFFFFFFFFFFFFFFFFFFFFFFFFFFFFFF  
FFFFFFFFFFFFFFFFFFFFFFFFFFFFFFFFFFFFFFFFFFFFFFFF

@A00721:190:HGJW7DSXY:4:1455:24306:35571\_2:N:0:TCTGCAAG+GCTGCACT  
TGTTGAAGTACCGCAACATGGATCAGTTTTCCAAAAGCTATTAATAGCAGTTGCGGGCTATAATAC  
CGCCTCCAGATTACTCTAAACTGAATCCACTCTCTTGGGATATAAATG

+

FFFFFFFFFFFFFFFFFFFFFFFFFFFFFFFFFFFFFFFFFFFFFFFFFFFFFFFFFFFFFFFFFFFFFFFF  
FFFFFFFFFFFFFFFFFFFFFFFFFFFFFFFFFFFFFFFFFFFFFFFF

@A00721:190:HGJW7DSXY:4:2464:17942:35446\_1:N:0:TCTGCAAG+GCTGCACT  
GGCTTCTCTAAAGAACAGCAACTTCAACATGAATTAGTTATTGAAAGTCTTGACCCTCACGTCTCAC  
TTTATCACCTTGAGATGGTAAAGTCATTAACAAAGGAAATGTTAAGGCTGATGACTTAAATTCGCA  
TTC

+

FFFFFFFFFFF:FFFFFFFFFFFFFFFFFFFFFFFFFFFFFFFFFFFFFFFFFFFFFFFFFFFFFFFF  
FFFFFFFFFFFFFFFFFFFFFFFFFFFFFFFFFFFFFFFFFFFFFFFFFFFFFFFFFFFFFFFF  
FFF

@A00721:190:HGJW7DSXY:4:2272:28085:16501\_2:N:0:TCTGCAAG+GCTGCACT  
TTTGAAAATTACGGAACCTTTCCTCGTTCTTCATGAAGATCTTCGAGTGTTTATAGTGAGTTATTCT  
TGCGAAGGTTCAAGTCGATTGATTTTGTTGACTACGATCTCTTGTA

+

FFFFFFFFFFFFFFFFFFFFFFFFFFFFFFFFFFFFFFFFFFFFFFFFFFFFFFFFFFFFFFFFFFFFFFFF  
FFFFFFFFFFFFFFFFFFFFFFFFFFFFFFFFFFFFFFFFFFFFFFFF

@A00721:190:HGJW7DSXY:4:2432:15709:27070\_1:N:0:TCTGCAAG+GCTGCACT  
AGACCACTGAACCTTATAGCGACTTTTGTGCAATTTTTCGAAAAGGTCTTGAAGTACGTATTGTCACT  
GCTAATCGTAATTCGCGAGAAGAGATAGTGAATAAGTTTGGCACTTCTAGTTCATCGCGGTATTTG  
TGA

+  
FFFFFFFFFFFF:FFFFFFFFFFFF:FFFFFFFFFFFF:FFFFFFFFFFFF:FFFFFFFFFFFF  
FFFFFFFFFFFFFFFFFFFFFFFFFFFFFFFFFFFFFFFFFFFFFFFFFFFFFFFFFFFFFFFF  
FFF  
@A00721:190:HGJW7DSXY:4:2215:5900:15718\_2:N:0:TCTGCAAG+GCTGCACT  
CGTGAAAGTTATGATGAGTGATCGTATTAGAACAGCTGATTCTTATTGCATGAACGTCGCTGAGGTCA  
AACCTGTGGACGTTCTTTTCATCGACGAATTATTCATGATTCACGCTG  
+  
FFFFFFFFFFFFFFFFFFFFF::FFFFFFFFFFFF:FFFFFFFFFFFF:FFFFFFFFFFFF:FFFFFFFFFFFF  
,,FFFFFFFFFFFFFFFFFFFFFFFFFFFFFFFFFFFFFFFFFFFFFFFF:F:FFF  
@A00721:190:HGJW7DSXY:4:1419:27489:36730\_2:N:0:TCTGCAAG+GCTGCACT  
CATCTACTTAAGCGGCTTATACCATAGGTTACGGTGATTCCAATCAAATCGGATTCATCAATCGTAT  
TGATCTCCAAGTCGCAAACTACTTCAACATCAACGACATCATTCTTGA  
+  
FFFFFFFFFFFFFFFFFFFF:FFFFFF:FFFFFFFFFFFF:FFFFFFFFFFFF:FFFFFFFFFFFF:FFFFFF:  
FFFFFFFFFFFFFFFFFFFF:FFFFFF:FFFFFF:FFFFFFFFFFFF:FFFFFFFFFFFF  
@A00721:190:HGJW7DSXY:4:2412:9408:25739\_2:N:0:TCTGCAAG+GCTGCACT  
TTATCGAAGTCTCAGTTATCGCTGCCCGCCGACGTTTGTGCGCAACTCTCAGAGGTTTACGGCAGAA  
AAATTTCTCCTGCTTGTAATTCGAGAGAGGACACTATGGAAATTAGAC  
+  
FFFFFFFFFFFFFFFFFFFFFFFFFFFFFFFFFFFFFFFFFFFFFFFFFFFFFFFFFFFFFFFFFFFF  
FFFFFFFFFFFFFFFFFFFFFFFFFFFFFFFFFFFFFFFFFFFFFFFFFFFFFFFFFFFF  
@A00721:190:HGJW7DSXY:4:1631:4761:14184\_2:N:0:TCTGCAAG+GCTGCACT  
TATTACTTTCACTCAAGGTGAAAAGTTTGAAATTAACAAAGTCCTTGGAAGAGTAAGGTTAAATGTG  
AAGATGCTCAGACTATTCATGAAGTTCAAGGTAATACTTACCAGCACG  
+  
FFFFFFFFFFFFFFFFFFFFFFFFFFFF:FFFFFFFFFFFF:FFFFFFFFFFFF:FFFFFFFFFFFF:FFFF  
FFFFFFFFFFFFFFFFFFFFFFFFFFFFFFFFFFFFFFFFFFFFFFFFFFFF  
@A00721:190:HGJW7DSXY:4:2208:17598:15843\_2:N:0:TCTGCAAG+GCTGCACT  
TTTTGCATCACAACACATATTACCGTTGCTCTATCACGACGTTGAATCTTTACGATACTTTGTTA  
TCAATGTAAAGTTAAACGATGCTACTTGTGAGAGGATCAATCACAGTA  
+  
FFFFFFFFFFFF:F,FF:FFF,FFFF:F::FFFF:FFFFFFFF,FFFFFFFFFFFFFFFFFFFF,FFF  
FFFF,FFFF,FF:F::FFFFFFFFFFFF:FFFFFF,FFF:FF::  
@A00721:190:HGJW7DSXY:4:1511:21902:14779\_2:N:0:TCTGCAAG+GCTGCACT  
ACGGGAGGTTGCAGATTCAACCCCTTATATCGAGGCTATCGAGGACGATGAGTATCTTGAAGTTGTTG  
ACGACAAGCCTCAAGAGGGTAGAGGACCACCTGGATCTTCTACTGTCT  
+  
FFFFFFFFFFFFFFFFFFFFFFFFFFFFFFFFFFFFFFFFFFFFFFFFFFFFFFFFFFFFFFFFFFFF  
FFFFFFFFFFFFFFFFFFFFFFFFFFFFFFFFFFFFFFFFFFFFFFFFFFFF  
@A00721:190:HGJW7DSXY:4:1540:11840:20995\_1:N:0:TCTGCAAG+GCTGCACT  
AACCACCTTAACGTCACCTCGGTAATCTTTCAGCCGAATTAAGTACTAATGAGTTCAAGTCGGTTGTGCG  
ATCGAATTAAGATCAAGGCTAATACCTTTATAGGTAAGAAGCCCCTTGAGCCGCGTAGTCAGCGCGTT  
TAG  
+  
FFFFFFFFFFFFFFFFFFFFFFFFFFFFFFFFFFFFFFFFFFFFFFFFFFFF:FFFFFFFFFFFF  
FFFFFFFFFFFFFFFFFFFFFFFFFFFFFFFFFFFFFFFFFFFFFFFFFFFF  
FFF  
@A00721:190:HGJW7DSXY:4:1674:31819:28416\_2:N:0:TCTGCAAG+GCTGCACT  
CCGATAGGGTACCGAGTCTCCAAGAGAATATTTATTCTTATGAGGCTCGAACTTCAACGTTTTTACA  
ACGGAAAGACATATCGCACCCGAAATTTTGGGCAGAATGCTCTTAAC  
+  
FFFFFFFFFFFF:FF:FFFFFFFFFFFF:FFFFFFFFFFFF:FFFFFFFFFFFF:FFFFFFFF  
FFF:FFFFFFFFFFFF:FFFFFFFFFFFF:FFFFFFFFFFFF:FFFFFFFF:

@A00721:190:HGJW7DSXY:4:2270:13322:29857\_2:N:0:TCTGCAAG+GCTGCACT  
CTAAGTTGGATAAAGTTATAGGAGACTCAGTTAACCTGAGAGCTCCTCAATTGATAGATTGGGTCAAC  
AATAGGGACGCTAGTATACTTCGTAAAGTCGACAGCGAAATGGTCAAT

@A00721:190:HGJW7DSXY:4:1262:25545:27164\_1:N:0:TCTGCAAG+GCTGCACT  
TGACCTATTTTAAAGCTCATGGTGAAGGGAAGCTAAGGTTAACTTGATGCTTCAGCCTTTTCGAAG  
CATAACCCCGCACAGAATATCGTTTATCACGCAAATTTATTAATGCAATTTTCGGACCTATCTTTAA  
GGT

@A00721:190:HGJW7DSXY:4:2555:26928:10050\_2:N:0:TCTGCAAG+GCTGCACT  
CTTTTACCCAACATTTTATGTATACAGAGATGACCAGTGACGATTTCTCCCGGAAGCTCTTCTCTCT  
CTTAGGAGGTCATGATGACTACTATAAGGGTGAAATCGATTTTTTCGAA

@A00721:190:HGJW7DSXY:4:1511:2419:16736\_1:N:0:TCTGCAAG+GCTGCACT  
GATAAAGATGTATTCTTATTTAGGCTTCGATGCTGAATTTCTTGAACCTTTGGAGTGCCAGTGAATATT  
TTTGTACGCCAGGAGTATCCATAACGATTTGTCATTTACCACCTTTGCTCAACGACGAAGTGGAACG  
GCC

@A00721:190:HGJW7DSXY:4:2652:4824:26318\_2:N:0:TCTGCAAG+GCTGCACT  
TAATTGTATGATCACTTTGATGATTTTATCACTTTATTATGACCTTGAAAGTTTTCGGCTGTGGTTG  
TCGCTGGGGACGATTCCATTCTGTTTTCAAAGACTCCAATAACTGATC

@A00721:190:HGJW7DSXY:4:2112:29396:3583\_2:N:0:TCTGCAAG+GCTGCACT  
TGCTCGCGATTTATTCTTTTGTCAATGATTACATCTACTTCGTTCTGATCCTTACAAGATCATCGT  
TAAGTTAGGTAAACCCCTAACCGATGTTACTCTTGTAGGACTTTGGGA

@A00721:190:HGJW7DSXY:4:2345:14244:11162\_2:N:0:TCTGCAAG+GCTGCACT  
TTAAAGACTATACTAAATATCTCCACTACGAGGTTGTTGTTTGCGATTAGCTCTTGCGACTAATATT  
CGATATTCGATTGAGGGTCGTTATACCTATTCGGCTATCTGTGCTTTG

@A00721:190:HGJW7DSXY:4:2363:3152:24831\_2:N:0:TCTGCAAG+GCTGCACT  
TTTTAAACGATTCCGAGAGTTTATCCTGATGTGGAGGGAGTTCTTGAAGCATCCCGACCTTTCCTTG  
TGAAAATTTTGATGCGGTTTCATAAGATTATCAGTAATCCTGATTCTA

@A00721:190:HGJW7DSXY:4:1619:24189:28917\_1:N:0:TCTGCAAG+GCTGCACT  
ACCTCTTCTGGAGAGACGTATCTCAAAGATCGACTTCGAGACAGGTGATATTGTTGAGCGAGAGCGAC



@A00721:190:HGJW7DSXY:4:1155:5927:31360\_2:N:0:TCTGCAAG+GCTGCACT  
GAGTGAAAGGCTTCAATTGTAGTGGTTTGGTCGTTTCAGTACCCAGTCAGTATACCTCTACGCAAAGA  
TATTTTCATGAAAACTACAGAGGAACGTACCGGATTACCTGTCTTTTCAT

+

FFFFFFFFFFFFFFFFFFFFF:,FFFFFFFFFFFFFFFFFFFFFFFFFFFFFFFFFFFFFFFFFFFFFFFFF  
FFFFFFFFFFFFFFFFFFFFFFFFFFFF,FFFFFFFFFFFFFFFFFFFFFFFFFFFF:F

@A00721:190:HGJW7DSXY:4:2106:9263:20165\_1:N:0:TCTGCAAG+GCTGCACT  
CTTCGGCCGCTCTCTTTGCTTCGATGTTGGATGTCAAGAAGGGTTCAGAATGGGATTCCTACGTAGTT  
TATGACTTTGGTGGTGGTACTTTTCGATACTTCTATCGTCTTACGTTACGGTAATTACTATAGTGTTAT  
TTA

+

FFFFFFFFFFFFFFFFFFFFFFFFFFFFFFFFFFFF:FFFF:FFFFFFFFFFFFFFFFFFFFFFFFFFFFFFFFF  
FFFFFFFFFFFFFFFFFFFFFFFFFFFFFFFFFFFFFFFFFFFFFFFFFFFFFFFFFFFFFFFFFFFFFFFFFFFF:FFFFFFF  
FFF

@A00721:190:HGJW7DSXY:4:2214:16622:30686\_1:N:0:TCTGCAAG+GCTGCACT  
ATAATCTTGAGGTCGTGACGTTGATGAAGCTATAAGAGCGTTCTTATTACGGCGCACTTCTTTACCC  
GCCACCACACAACCTTTCAGTTTCACAACCTGAAGGAGGAGGTTTCTGTTACTGGAAAACCTCGTCAAT  
ACT

+

FFFFFFFFFFFFFFFFFFFFFFFFFFFFFFFFFFFFFFFFFFFFFFFFFFFFFFFFFFFFFFFFFFFFFFFFFFFF:  
FFFFFFFFFFFFFFFFFFFFFFFFFFFFFFFFFFFFFFFFFFFFFFFFFFFFFFFFFFFFFFFFFFFFFFFFFFFFF  
FFF

@A00721:190:HGJW7DSXY:4:2328:1732:13823\_2:N:0:TCTGCAAG+GCTGCACT  
GATCTAGTGAAATTAACGCGTCCTTTTCTGGAACGTAGTTTACTATTATGAACAAAGTTATCAAAGA  
TAGTGGCATTCAAGGCAAACCTTACCCTGATTCCGGCCGGTGGTAGCTC

+

FFFFFFFFFFFFFFF:FFFFFFF:FFF:FFFFFFFFFFFFFFFFFFFF:FFFFFFFFFFFF:FFFFFFFFFFFFFFFFF  
FFF:FFFFFFFFFFFFFFF:FFFFFFFFFFFFFFFFFFFFFFFFFFFF:FFFFFFFFFFFF

@A00721:190:HGJW7DSXY:4:2231:13973:14512\_2:N:0:TCTGCAAG+GCTGCACT  
TGCTGAAACAGCTATTAAAGCTGTTGAGCGGTAATTACACCTAAACGAGCTCGATCTGCCATCGCTG  
AAGGATGTGCACTCTTTTCTGCTACTTTAACGGAGCGTAGTGTACTCT

+

FFFFFFFFFFFFFFFFFFFFFFFFFFFFFFFFFFFFFFFFFFFF:FFFFFFFFFFFFFFFFFFFFFFFFFFFFFFFFF  
FFFFFFFFFFFFFFFFFFFFFFFFFFFFFFFFFFFF:FFFFFFFFFFFFFFFFFFFFF

@A00721:190:HGJW7DSXY:4:1113:7979:1720\_2:N:0:TCTGCAAG+GCTGCACT  
AAAGGTCTCTATCAAGCTCGTATTATCGTCGCTGCTGGATCTGCGTTACCGTTGAAGGCTAAACTCCA  
AGGTAATTATGAAGACTGTGATTTATCTTTCACCTCTGGCCTTGTATGA

+

FFFFFFFFFFFFFFFFFFFFFFFFFFFFFFFFFFFFFFFFFFFFFFFFFFFFFFFFFFFFFFFFFFFFFFFFFFFF:FFFFFFFFFFFFF  
:FF:FFFFFFFFFFFF:~F:FFFFFFFFFFFFFFFFFFFFFFFFFFFFFFFFFFFF

@A00721:190:HGJW7DSXY:4:2452:12780:22717\_2:N:0:TCTGCAAG+GCTGCACT  
CGTAACATTAATAATTTCAATCTTCTTAAAAAGAAGATAGAGAGTCATACTTTGGGCTATCGTTCAGG  
TGCATGGGGTTGGATAGCCAATATTGAAGTGGACACCTCTGGAGATCG

+

F::~FF:FFFF:FF,:FFFFFFFF:F:FFFF::FF:FFFF:FF,:FFF,F,:F,FFF,FF:FFF:FF  
FFF:,FF:FFFF,FFFF,FF:FFF::FFFF,FFFF:FF:,F:FFFF

@A00721:190:HGJW7DSXY:4:1558:10655:18662\_2:N:0:TCTGCAAG+GCTGCACT  
AAGCATACTACTTTTGCTTTGATTACTCTACCGCCTTACAAGTCTAAGGTTAAAGAGTCGATTAAACA  
AGTTGTACTTATCAATGATTTTATCGCTGGTTGTTATCTCGAAAAGTC

+

FFFFFFFFFFFFFFFFFFFFFFFFFFFFFFFFFFFFFFFFFFFFFFFFFFFFFFFFFFFFFFFFFFFFFFFFFFFF,F  
F,FFFFF:FFFFFFFFF,FFFFFF:,FFF:F:FFFFF:F::~FFFFFFF

@A00721:190:HGJW7DSXY:4:2276:13404:1689\_1:N:0:TCTGCAAG+GCTGCACT  
CCCAAAGAGAATATCTAAAATATTTACAAAATCTTACCACTATCTACGAACCTAAAGTTCTGAAGACG



TTGCTTGTGCTTCCTCCTTTAATGGCACTACCTCGGTACAATCTTACTTGGAACGAAGGCGACCTGT  
TCC

+

FFFFF,FFFFFFFFFFFFFFFFFFFFFFFFFFFFFFFFFFFFFFFFFFFFFFFFFFFFFFFFFFFFFFFF  
FFFFFFFFFFFFFFFFFFFFFFFFFFFFFFFFFFFFFFFFFFFFFFFFFFFFFFFFFFFFFFFFFFFFFFFF  
FFF

@A00721:190:HGJW7DSXY:4:2467:20898:17581\_1:N:0:TCTGCAAG+GCTGCACT  
GTTCTGTCTATATTAGGTGAAGCGAAATACGATTTTGAACGTCAACGTTACCGAGTTTCGTTTCGTA  
CCTTGATGCTGACTTTTCGTCATATGATTTGATCTGGTTGCTCAATTCTAAGCGTGTTCCGCTTAGTG  
CGA

+

FFFFFFFFFFFFFFFFFFFFFFFFFFFFFFFFFFFFFFFFFFFFFFFFFFFFFFFFFFFFFFFFFFFFFFFF  
FFFFFFFFFFFFFFFFFFFFFFFFFFFFFFFFFFFFFFFFFFFFFFFFFFFFFFFFFFFFFFFFFFFFFFFF  
FFF

@A00721:190:HGJW7DSXY:4:2646:12201:4053\_1:N:0:TCTGCAAG+GCTGCACT  
TACGAACCTGACTCTACTATACGTGACATACTAAATACTAGATATTTGGATGATCTTGATAAAGAACT  
TCATGAATTTTCAGAGGATGAAAAATTTTCTTCCTTGATTTTAATATAAAGAATCTTTACCAGGACT  
CCT

+

FF,:FFFFFFFFFFFFFFFFFFFFFFFFFFFFFFFFFFFFFFFFFFFFFFFFFFFFFFFFFFFFFFFF:FF:FFFFF:FFF  
FFFFFFFFFFFFFFFFFFFFFFFFFFFFFFFFFFFFFFFFFFFFFFFFFFFFFFFFFFFFFFFFFFFFFFFF  
FFF

@A00721:190:HGJW7DSXY:4:1455:22941:35556\_1:N:0:TCTGCAAG+GCTGCACT  
GATCGTAAGAAGTTTATAAGGAACATATCCATTTGTTGTAATAGGGTCATCAACTTAGAACTCGAAAC  
TCTAAGTGGAATACTGTCTTTCCAAGCTTACCTGTATCTTCAATGAAATTGACTCTTCGATAGGGG  
ACA

+

FFFFFFFFFFFFFFFFFFFFFFFFFFFFFFFFFFFFFFFFFFFFFFFFFFFFFFFFFFFFFFFFFFFFFFFF  
FFFFFFFFFFFFFFFFFFFFFFFFFFFFFFFFFFFFFFFFFFFFFFFFFFFFFFFFFFFFFFFFFFFFFFFF:FFFFFFFFFFFFFFFFFFFFF  
FFF

@A00721:190:HGJW7DSXY:4:2519:12201:8281\_1:N:0:TCTGCAAG+GCTGCACT  
ACCGGTGAATGGTTTAAAGAATACTATAAATAGAACTAGCTATTACTACTAATGGCGTTGGCCTAGTGGA  
TGTTATTAGTGACATCTGGTCAATTTTCGTTTTAGGTGGTCTTTATTCTATTATTGATTTTTATGAGA  
TTG

+

FFFFFFFFFFFFFFFFFFFFFFFFFFFFFFFFFFFFFFFFFFFFFFFFFFFFFFFFFFFFFFFFFFFFFFFF  
FFFFFFFFFFFFFFFFFFFFFFFFFFFFFFFFFFFFFFFFFFFFFFFFFFFFFFFFFFFFFFFFFFFFFFFF  
FFF

@A00721:190:HGJW7DSXY:4:2152:25319:22075\_2:N:0:TCTGCAAG+GCTGCACT  
TGTTAGAGTAGAATTCCTGAAGAGTCCTTCCGTAACCAACTTCTTGACAATTTTCTTCAATCCTTCGA  
TAATAGTTAAATCTAGGATTATGTCTGTGTTGAAAGACTTTCTACCGA

+

F:FFF,:,:F:FFFFFFFFF,FFFFF:FF:,FFFF:F:FF,FFFF,FF,,F,FFFFFFFF,F,,,FFFF  
FFFFF:FF:FFF:F:FFFFFFFFF,:F::F:FF,FFFFFFFF:F:FFFF:

@A00721:190:HGJW7DSXY:4:1526:22218:13949\_2:N:0:TCTGCAAG+GCTGCACT  
TACACAATTAAGAAATAATCCTACATTGACTGATTATCTAAAGATTGAAGGAAAATTTATCCTCGTT  
TAACTTACTTAGACTTTTCTACGATACAAATGATAACTTCTAATTTAC

+

FFFFFF:FFFFFFFFF:FFFF:FFFF:FFFFFFFFFFFFFFFFFFFFFFFFFFFFFFFFFFFFFFFF,FFFFFFFFFFFFFFF:  
FFFFFFFFFFFF:FFFFFFFFFFFFFFFFFFFFFFFFFFFFFFFFFFFFFFFFFFFFFFFF:FFFF

@A00721:190:HGJW7DSXY:4:2347:16269:24283\_1:N:0:TCTGCAAG+GCTGCACT  
GGGATGCATGGTGTTATCTCCTCAGGAGTCCCGGCATTTGATAATAATGACGAGACTTTTCGTCATAAT  
CGCTGCATATTACGGATTACACGGTACCAGCGCATCTCGTGTGAGCCTCGACCCGATTATATGGTAT  
TAA

+  
FFFFFFFFFFFFFFFFFFFFFFFFFFFFFFFFFFFFFFFFFFFFFFFFFFFFFFFFFFFFFFFF:FFFFFFF  
FFFFFFFFFFFF:FFFFFFF::FFFFFFFFF:FFFFFFFFFFFFFFFFFFFFFFFFFFFFFFFF:FFFFF  
FFF  
@A00721:190:HGJW7DSXY:4:2609:8901:32127\_2:N:0:TCTGCAAG+GCTGCACT  
GATTCTCGATTTCGTAGAGCTTATCTAGGTACTCTCATTTACTATGTTGATTAGTCTACATTTATGCT  
GATCTAAAATTTGATCTAGATGGATCCACTCCTCGAGTTATCATGAT  
+  
FFFFFFFFFFFFFFFFFFFFFFFFFFFFFFFFFFFFFFFFFFFFFFFFFFFFFFFFFFFFFFFF  
FFFFFFFFFFFFFFFFFFFFFFFFFFFFFFFFFFFFFFFFFFFFFFFFFFFFFFFF  
@A00721:190:HGJW7DSXY:4:2559:2248:20760\_1:N:0:TCTGCAAG+GCTGCACT  
TTCTAGAATTCTTAATTATAATTCAACCTCAAAGTTACGTGTTTACAGTAACGAGATCACACATT  
TTGAGAACTAACTATGTTATGTTCTCTGATCATTTTGACAATCTCTTCTTATAATAATAATAATA  
ATA  
+  
FFFFFFFFF:FFFFFFFFFFFFFFFFFFFFFFFFFFFFFFFFFFFFFFFFFFFFFFFFFFFFFFFF:FFFFFFFFF  
FFFFFFFFFFFFFFFFFFFF:FFFFFFFFFFFFFFFFFFFFFFFFFFFFFFFFFFFFFFFFFFFFFFFFFFFFF  
FFF  
@A00721:190:HGJW7DSXY:4:1659:2962:11036\_2:N:0:TCTGCAAG+GCTGCACT  
AGTGGAAGGCTCCAGTCAACACTAGTTCGAGTGCTGCTTTGGATTACGATGACGTGAGAATAGGTGA  
AGGGATAGTTTTTACCTCGACCAACATTAAGGCGGCGGCGACTAATCT  
+  
FFFFFFFFFFFFFFFFFFFFFFFFFFFFFFFFFFFFFFFFFFFFFFFFFFFFFFFFFFFFFFFF  
FFFFFFFFFFFFFFFFFFFFFFFFFFFFFFFFFFFFFFFFFFFFFFFFFFFFFFFF  
@A00721:190:HGJW7DSXY:4:1636:16441:11553\_1:N:0:TCTGCAAG+GCTGCACT  
AGGACACTTCGAAACTGAATAATGATGCACTACAAACAAGTATCGCTAATCATCTGAAAAAGGCTCTA  
AAGGACACTATACAATATCCAGACGACGACGAAGCTTATACTACTTTAATTTTGGGTATTATGTGGAG  
ATA  
+  
F:,F,: ,FFFFFF:FF:FFFFFF,F,,FF:FF:FFFF::F,:FFFFFF:FFF:FFFF:FFF:F,FF  
,F:FFFFFFFFFFFF,:FFFF:FFFF:::FFFFFF:F:FFFF,F:FFFF:FFFF,:FFFFFF:FFFFF  
FFF  
@A00721:190:HGJW7DSXY:4:1323:10917:30232\_2:N:0:TCTGCAAG+GCTGCACT  
ACCACATTTTGGTCAAGTCAATCCGTTGAGAAAATTTCTTAGAGGATATTCGCCATTGTGGTACGAAT  
TGGTCCAACATTTACCACCAAATCTTTTGATACAACCTCTAGCCTTCA  
+  
FFFFFFFFFFFFFFFFFFFFFFFFFFFFFFFFFFFFFFFFFFFFFFFFFFFFFFFFFFFFFFFF  
FFFFFFFFFFFFFFFFFFFFFFFFFFFFFFFFFFFFFFFFFFFFFFFFFFFFFFFF  
@A00721:190:HGJW7DSXY:4:1224:26621:27211\_2:N:0:TCTGCAAG+GCTGCACT  
TCACCAGATTGGTTCGAACCCGTTGATGCTATGTGAGAAGAAGCTATTCAAGCTTGTCGTTTAAAGAC  
TGCAGAGGCTGTCAAACAAGCCCAGACTCAAGGAGTCCAATCAAAGGT  
+  
FFFFFFFFFFFFFFFFFFFFFFFFFFFF:FFFFFF:FFFFFFFFFFFFFFFFFFFF,FFFFFFFFFFFFFFFFFFFF,FF  
FFFFFFFFFFFFFFFFFFFFFFFFFFFFFFFFFFFFFFFFFFFFFFFFFFFFFFFF  
@A00721:190:HGJW7DSXY:4:1344:7699:20838\_1:N:0:TCTGCAAG+GCTGCACT  
ATTATTTAGAGATCTTTTCTACTTACAAAGGACAATTCAAGTTTCATTAATTCTACGGAAAAGTCCGGA  
GTATATTGTATGTTAATAGATAGTGGGATAATAGTTCTACCGATACGTAGTGAACGCGTTCGTAGAAC  
CAA  
+  
FFF:FFFFFFFFFFFFFFFFFFFF,FFFFFFFFFFFFFFFFFFFFFFFF:FFFFFFFFFFFFFFFFFFFFFFFF  
FFFFFFFFFFFFFFFFFFFFFFFFFFFFFFFFFFFFFFFFFFFFFFFFFFFFFFFF:FFFFFFFFFFFFFFFFFFFF  
FFF  
@A00721:190:HGJW7DSXY:4:1370:29803:18067\_2:N:0:TCTGCAAG+GCTGCACT  
TATTGATTATGTAACCGATAGGAGTTGTATAGTTGAAGATGTGGCTTTAGACGATAATCCTTTAAGGA

CTATGTTGACTGACGAAGATTTTCCACAGATTTGTCTACGTTGCAGA  
+  
FF:FFFFFFFFFFFFFF:FFFFFFFFFFFFFF:FFFFFFFF:FF::FFFFFFFF  
FFFFFFFFFFFF,FFFFFFFF:FFFFFFFFFFFFFF:FF  
@A00721:190:HGJW7DSXY:4:1646:10339:19241\_1:N:0:TCTGCAAG+GCTGCACT  
CTATATACATTATAAAATATAAAATAAGGGAGTCATAACTTTTGTACCAAATTCTTGGCTTTCAAC  
GAAGTCTCTGATTTTATTAATCATTACTTTAACGATCTCTCGGTCATTTACTCTGTACTTGATCTACG  
TCG  
+  
FFFFFFFFFFFFFFFFFFFFFFFFFFFFFFFFFFFFFFFFFFFFFFFFFFFFFFFFFFFFFFFF  
FFFFFFFFFFFFFFFFFFFFFFFFFFFFFFFFFFFFFFFFFFFFFFFFFFFFFFFFFFFFFFFF:FF  
FFF  
@A00721:190:HGJW7DSXY:4:1666:25771:32659\_2:N:0:TCTGCAAG+GCTGCACT  
GAATGACTCTATCTTTTCAGACACTTCTTATATTATTTACAATAGTTAATATCATATTAGTAATACTC  
ACTATCGTTTTCTGCTTTTTCTTAGCTAATAGATTAATAAAGGATGAG  
+  
FFFFFFFFFFFFFF:FFFFFFFF:FFFFFFFFFFFFFFFFFFFFFFFFFFFFFFFF:FF:FFFFFFFF:F:  
FF:FFFFFFFF:FFFF:F:FFFFFF:FFFFFF:FFF:,F::FF  
@A00721:190:HGJW7DSXY:4:1173:28330:12352\_2:N:0:TCTGCAAG+GCTGCACT  
ACTCTTCGTTACGAGACCTGATGGTAGAATAGATTTAGTCTCTACACCCATCTCAACGAGGATAAAGC  
GAGTTTTCCGTCCTGAACGTAATACACGAAGAGATCATCCGCAAACGA  
+  
FFFFFFFFFFFFFFFFFFFFFFFFFFFFFFFFFFFFFFFFFFFFFFFFFFFFFFFFFFFFFFFF:FFFF:FFFFFFFF  
FFFFFFFFFFFFFFFFFFFFFFFFFFFFFFFFFFFFFFFFFFFFFFFFFFFFFFFF:FFF  
@A00721:190:HGJW7DSXY:4:2504:4851:15718\_2:N:0:TCTGCAAG+GCTGCACT  
TTTAGATTATGAATCCTGCCTTTACTCATTTTATAGCAGTTATTTATGTTGTACTTTTTATAATTTAT  
AACCTTCTTATACTTTTGGGTATGTTTTGTGAAAACATGAGATACCC  
+  
FFFFFFFFFFFFFFFFFFFFFFFFFFFFFFFFFFFFFFFFFFFFFFFFFFFFFFFFFFFFFFFF:FFFFFFFF:FFFFFFFFFFFFFFFF  
FFF:FFFFFFFF:FFFFFFFF:FF:F:F::FFF:FFFFFF  
@A00721:190:HGJW7DSXY:4:2178:16260:24549\_2:N:0:TCTGCAAG+GCTGCACT  
TTGTAACGATCATTCTTTTCGAGTTTTGTCATTCTTATTCTTTTATTCCTTTAACTGTGTATGAGGAGG  
ATTTATAATGCTTTTCGATAGTGATTGTTATCAATTTAAATACATTAC  
+  
FFFFFFFFFFFFFFFFFFFFFFFFFFFFFFFFFFFFFFFFFFFFFFFFFFFFFFFFFFFFFFFF::FFFFFFFF  
FFFFFFFF:FFFF:FFF:FFFFFFFF:FF::FFFFFFFF  
@A00721:190:HGJW7DSXY:4:1609:1524:6292\_2:N:0:TCTGCAAG+GCTGCACT  
TCACAGACTCCGAAATGGTTTCAAATGAGGTCAAAGCTCTATTTATTAACGAAGTATTATCCGATT  
CTTCGAGGGTATCACTACCACTGATCTGCCGACTTTAGTCAAGGAAGT  
+  
FFFFFFFFFFFFFFFFFFFFFFFFFFFFFFFFFFFFFFFFFFFFFFFFFFFFFFFFFFFFFFFF:FFFFFFFF,FF,FFFFFFFFFFFFFFFF  
FFFFFFFFFFFFFFFFFFFFFFFFFFFFFFFFFFFFFFFFFFFFFFFF:FFFFFFFF  
@A00721:190:HGJW7DSXY:4:1410:15619:25692\_2:N:0:TCTGCAAG+GCTGCACT  
CGATGTTTATATTTTCTATAAGGGAAAATAGCAATAATCAAATTCGACAAATTTAGAACTTTATT  
TCAGAACTCTCTCCGATCACCTTGGTGTGATCTCCCGAGGATCTTTT  
+  
FFFFF:FFFFFFFF:FFFFFFFF,FFFFFFFFFFFFFFFFFFFFFFFF:F,FFFFFFFF:  
:FF:FFFFF,FFFFFFFF,FF:FFFFF,FFFFFFFF  
@A00721:190:HGJW7DSXY:4:2123:9959:4492\_2:N:0:TCTGCAAG+GCTGCACT  
ATTTTTAAATAGTGATATTCAGCGTATACTTGAATACTTTATCAAAGATTTGGCTTGGTCTATTTACC  
GCAAAAAGTTGGAAGAGGTCTATGATATTTATTTACTTATACTTTAA  
+  
FFFFFFFFFFFFFFFFFFFFFFFFFFFFFFFFFFFFFFFFFFFFFFFFFFFFFFFFFFFFFFFF  
FFF:FFFFFFFF,FFFFFFFF:FFFFFFFFFFFFFFFF,FF,

@A00721:190:HGJW7DSXY:4:1639:28546:22247\_1:N:0:TCTGCAAG+GCTGCACT  
AACTTGACTGTTGATAATATTACAATAGCTCTTTCTCAGAAGATTAGAGAAGTAACCGGTGAACACGT  
CGGTAGCATTGATTTACTTTTACCGTTAGAACTGAAAAAGATTCTTTTCGAAAAGAAACCTATAAGTT  
ACA

+

FF:FFFFFFFFFFFFFFFFFFFFFFFFFFFFFFFFFFFFFFFFFFFFFFFFFFFFFFFFFFFFFFFFFFFFFFFF  
F:FFFFFFFFFFFFFFFFFFFFFFFFFFFFFFFFFFFFFFFFFFFFFFFFFFFFFFFFFFFFFFFFFFFFFFFF  
FFF

@A00721:190:HGJW7DSXY:4:1505:1850:18756\_1:N:0:TCTGCAAG+GCTGCACT  
TATATTAAAGAAATAAAAACTTCAAGTACCTGAACCTTACATTTTTAATGGTATGGTATAATGTGT  
CTTACAAATAGAACCTTCACTCTCGGTAATGAGAGTGTATTCCTTAATATTCTAGTAACCGCTATGTG  
GGC

+

FFFFF:FFFFFFFFFFFFFFFFFFFFFFFFFFFFFFFFFFFFFFFFFFFFFFFFFFFFFFFFFFFFFFFFFFFF  
FF:FFFFFFFFFFFFFFFFFFFFFFFFFFFFFFFFFFFFFFFFFFFFFFFFFFFFFFFFFFFFFFFFFFFFFFFF  
FFF

@A00721:190:HGJW7DSXY:4:1638:30472:3787\_2:N:0:TCTGCAAG+GCTGCACT  
TTTAAATGCTAGGAAAATTTAGAAAACTCCATTGTATAGTTCAAGGAGTACTTAATTCAATAGCTT  
TAGTATTATTTACTATCGCCTTTATTGAAAATTGTATAAGAGTTAATT

+

FFFFFFF:FFFFFFFFFFFFFFFFFFFFFFFFFFFFFFFFFFFFFFFFFFFFFFFFFFFFFFFFFFFFFFFFFFFF  
FFFFFFFFF:FFFFFFFFFFFFFFFFFFFFFFFFFFFFFFFFFFFFFFFFFFFFFFFFFFFFFFFFFFFFFFFFFFFF

@A00721:190:HGJW7DSXY:4:1363:21730:7404\_1:N:0:TCTGCAAG+GCTGCACT  
ACATACCATAACCTACCATGACCAATCATCGCTCCAACCTGGCAGCCAGACGTAGGGTCAAACCTACT  
ACCGCCGGTCGGCAGATCGGCACCACTGGTCTCTACGTTCAAGGACCCGCTGTGCAGAATAACCTTCC  
CAA

+

FFFFFFFFFFFFFFFFFFFFFFFFFFFFFFFFFFFFFFFFFFFFFFFFFFFFFFFFFFFFFFFFFFFFFFFFFFFF  
FFFFFFFFFFFFFFFFF:FFFFFFFFFFFFFFFFFFFFFFFFFFFFFFFFFFFFFFFFFFFFFFFFFFFFFFFFFFFF  
FFF

@A00721:190:HGJW7DSXY:4:1304:28330:21245\_2:N:0:TCTGCAAG+GCTGCACT  
CACAGAAGAAGGCTGAAGGTCGTTACCGGACGACCACTCAAAGGAAACGGGCTGTTGCCAGAGGAAA  
GCAGCGACCACCGAGGTCGCTCGTAACATTGACGGCAGTCCCGTCATC

+

FFFFFFFFFFFFFFFFFFFFF:FFFFFFFFFFFFFFFFFFFFFFFFFFFFFFFFFFFFFFFFFFFFFFFFFFFFF,FF:FFFFFFFFFFFFFFFFFFFFFFFFFFFFFFFFFFFF  
FFFFFFFFFFFFFFFFFFFFFFFFFFFFFFFFFFFFFFFFFFFFFFFFFFFFFFFFFFFFFFFFFFFFFFFFFFFF

@A00721:190:HGJW7DSXY:4:1117:15691:3991\_1:N:0:TCTGCAAG+GCTGCACT  
CTGAGGCAGTACCTCAGTCAAAGTCACATTCACCACTCCCATACCAATCAATGATGTGACTATACAG  
TTCGGCCATTTCAAGAGTGGTCAATACGTCGTGGGAGGTACTGAAGCCTTCCCCTCCGCTGGCACGAA  
GAA

+

FFFFFFFFFFFFFFFFFFFFFFFFFFFFFFFFFFFFFFFFFFFFFFFFFFFFFFFFFFFFFFFFFFFFFFFFFFFF  
FFFFFFFFFFFFFFFFFFFFFFFFF:FFFFFFFFFFFFFFFFFFFFFFFFFFFFFFFFFFFFFFFFFFFFFFFFFFFFF  
FFF

@A00721:190:HGJW7DSXY:4:1142:3125:7999\_1:N:0:TCTGCAAG+GCTGCACT  
CCAATCAATAGTTCTTCTGACCAGAATGAAAAGGGGTTTACCAGGGTAGTCTCTAAGTCTACCAGGAA  
GAGGGGAAATGTCCCCAAACTGAGAAGAATAAAGGGAAAGGTCCATCAGGACCTAAGAAGGGGAAAT  
TAC

+

F,FFFFFFFFF:FF:FFFFFFFFFFFFFFFFFFFFFFFFFFFFFFFFFFFFFFFFFFFFFFFFFFFFFFFFFFFF  
FFFF:FFFFFFFFFFFFFFFFFFFFFFFFFFFFFFFFFFFFFFFFFFFFFFFFFFFFFFFFFFFFFFFFFFFF  
FFF

@A00721:190:HGJW7DSXY:4:1114:4689:25895\_2:N:0:TCTGCAAG+GCTGCACT  
GGAAGATCTCCCACCATCTGGGGTTGGGAATAAGAAATCTGCACGGGCCAAAGAGGCCGCTGCTACGA

$+$ 

@A00721:190:HGJW7DSXY:4:1217:13114:1939\_1:N:0:TCTGCAAG+GCTGCACT  
ATCTTTGAGACCAAGACTCTCTACAGTAGGTTCTGTCCTACTATGAGCAAATCTGTTGAATTCGTCAC  
TGAGGACGAAGGTGAGAGGACTTTTGGCTACTGGCGACAACTGAGAGCAGTCGCTGGGGAAAGAGAA  
TTG

+

@A00721:190:HGJW7DSXY:4:2307:11270:28087\_2:N:0:TCTGCAAG+GCTGCACT  
ACGCTTCGAGCTTGAGTGTGACGAGGCCGGTGACGTTTTTGTCAACGGCGTTTGGAGGATTTTATCCG  
CGCTTA ACTATGGGGCGAAGATCCCCTATGGAGTCTTGAAGGACTTAG

+

@A00721:190:HGJW7DSXY:4:2174:32416:6151\_1:N:0:TCTGCAAG+GCTGCACT  
GCATGTCACCCCTTAAGCACCGAGGTAAGCTCGGGACTTACAAGAGAGAGTGTGAGAGAGTCGCTCTCA  
CTATTTTTGCCAGAATGCGGGCTTTCTGACTGATGAGGTTAAACTCTTGCTCCTTCTGTGGGTGAG  
GGT

+

@A00721:190:HGJW7DSXY:4:1249:30761:20040\_2:N:0:TCTGCAAG+GCTGCACT  
GGTTCTGGGAGGCTGCTTTCCTCCATAATTACAACCTCTCTTTAGAGAGCATTAGAAGGAAGTTGGGC  
AAATCCCACATATGGTAGACGTTGTCACACTTTTCTTGAAAATTTTT

+

@A00721:190:HGJW7DSXY:4:2112:13123:9439\_1:N:0:TCTGCAAG+GCTGCACT  
TTGGGGATTTTCGATGTGAGAAGGTGGAAGGTGTCAAGGGTCTTCTTCATGCTGATCTTTTCAGGACCTA  
ATCACATCATGATTGATAGTTACGGCTCGTATCGAGTTGGAGGGAGGAAGTTCTCCGAAATTAAGAC  
GGG

+

@A00721:190:HGJW7DSXY:4:2261:23231:7247\_2:N:0:TCTGCAAG+GCTGCACT  
TCAGAGAGGGGAGCTCTGAAAAGGAACTTCGTCAGAAGATGAGGAAGTCTAAGAGGAGGAGTTTGAG  
GAAGGCTCTAGAGAAGATCTCACCACTGGAGAAGGCAAGTGGAGAGT

 $+$ 

@A00721:190:HGJW7DSXY:4:1501:8296:4523\_2:N:0:TCTGCAAG+GCTGCACT  
AAGAAGGATTATTTGAAGCAGGGGTTACCACTTCCTAAGGTGGATGAGGGAGGTTGTTTCTTTGGAGT  
TTTAGATAATCTTTTGAGAAGGGGTCATAGAGCCAGCAAGAGAAGCTT

+

@A00721:190:HGJW7DSXY:4:1540:14913:12978\_2:N:0:TCTGCAAG+GCTGCACT  
TATAATTTAGGTCAACTTGGGGTTTTCGAATGTCATTAGTGCCTTACGCTTGAAAGAGGTCCTTTTGAG

+

@A00721:190:HGJW7DSXY:4:1436:7817:7232\_2:N:0:TCTGCAAG+GCTGCACT

+

@A00721:190:HGJW7DSXY:4:2533:12608:14935\_2:N:0:TCTGCAAG+GCTGCACT

+

@A00721:190:HGJW7DSXY:4:2107:27778:22576 2:N:0:TCTGCAAG+GCTGCACT

+

@A00721:190:HGJW7DSXY:4:1320:15628:24298 2:N:0:TCTGCAAG+GCTGCACT

 $+$ 

@A00721:190:HGJW7DSXY:4:2519:11080:15890 1:N:0:TCTGCAAG+GCTGCACT

+

@A00721:190:HGJW7DSXY:4:2636:4146:9580 2:N:0:TCTGCAAG+GCTGCACT

+

@A00721:190:HGJW7DSXY:4:1530:8142:35697 2:N:0:TCTGCAAG+GCTGCACT

 $+$ 

@A00721:190:HGJW7DSXY:4:1331:14299:3740 2:N:0:TCTGCAAG+GCTGCACT

+

```

FFFFFFFFFFFFFFFFFFFFFFFFFFFFFFFFFFFFFFFFFFFFFFFFFFFFFFFFFFFFFFFF:FFFF,FFFF:FFF,FFFFFFF
FFF:FFFFFF,FF,FFFFFFFF:FFFFF:F::FFFFFFFFFFFFFFFF

```

@A00721:190:HGJW7DSXY:4:2538:32805:14685\_1:N:0:TCTGCAAG+GCTGCACT  
TTCAGTACGTCATGGGGATCACTTCTTCGGTCAATGACAAAACCTTCGAATATGTTACGACATGGCTT  
CGTAACAACAGTGCGAGGATTGTCATCTCGGGGAAAGTGATTACCAAGATGTTTCATATAGATACGAG  
ATA

+

FFFFFF,FFFFFFFFFFFFFFFFFFFFFFFFFFFFFFFFFFFFFFFFFFFFFFFFFFFFFFFFFFFFFFFF  
FFFFFFFFFFFFFFFFFFFFFFFFFFFFFFFFFFFFFFFFFFFFFFFFFFFFFFFFFFFFFFFFFFFFFFFF  
FFF

@A00721:190:HGJW7DSXY:4:2218:31819:13761\_2:N:0:TCTGCAAG+GCTGCACT  
CAGCGATCTTACTCGTTATCGGAGCTAAGAAGAAGACTTTGGGTACACGTTATGCTCGAACTTAAC  
GTTAGTACCGGAGGTGATCTCTCTGCTTCTGCGTTACTGAGAGAAAAG

+

FFFFFFFFFFFFFFFFFFFFFFFFFFFFFFFFFFFFFFFFFFFFFFFFFFFFFFFFFFFFFFFFFFFFFFFF  
FFFFFFFFFFFFFFFFFFFFFFFFFFFFFFFFFFFFFFFFFFFFFFFFFFFFFFFFFFFFFFFFFFFFFFFF

@A00721:190:HGJW7DSXY:4:1111:27344:29684\_1:N:0:TCTGCAAG+GCTGCACT  
CTTTATGGACAAGATGCAAGTTCTTGGGAAATACTTGTTTCCCTTTTTAGGTTTAGTAGGTGATCTTG  
ACGTCGATTCTTTGTATAGGGAGTGTGAGAAGACAACGAATCTTGAACTACGGTCCTTATCAAAGAA  
AAT

+

FFFFFFFFFFFF,FFFFFFFFFFFFFFFFFFFFFFFFFFFFFFFFFFFFFFFFFFFFFFFFFFFFFFFFFFFF  
FFFFFFFFFFFFFFFFFFFFFFFFFFFFFFFFFFFFFFFFFFFFFFFFFFFFFFFFFFFFFFFFFFFFFFFF:FFFFFFFFFFFFFFFFFFFFF  
FFF

@A00721:190:HGJW7DSXY:4:2569:5041:9533\_1:N:0:TCTGCAAG+GCTGCACT  
TCTAAATCTTTTGAGATTGAGAAGATTGAAGAACACGTCAAGAAGTCGCTCGGCGTTGTTCTTGAAAA  
CCAAGTTAAGAAGGAGGCTGATCATGGAGTCTTGTACCTTCTGTCAAACCTTCGAGGTTTACGCTACGA  
GAG

+

FFFFFFFFF:FFFFFFFFFFFFFFFFFFFFFFFFFFFFFFFFFFFFFFFFFFFFFFFFFFFFFFFFFFFFF  
FFFFFFFF:FFF:FFFFF:FFFFF:FFFFFFFFFFFFFFFFFFFFFFFFFFFFFFFFFFFFFFFFFFFFF  
FFF

@A00721:190:HGJW7DSXY:4:1202:11189:37027\_2:N:0:TCTGCAAG+GCTGCACT  
TTGAAGGCTGGCTCTAAGGGAGACTCCTTCTTTTTGAATGTTGTAAAGAATTGGGTTGAGAAGTGTGC  
TTTACAAGGAGTTAGACTCTTCTTCAAGTTTTTAGATCTTCTTGATAA

+

FFFFFF:FFFF:FFFF:F,FF:FFFFFF:F,FFFF,FFFFFFFFFFFFFFFFFFFFFFFFFFFFFFFFF  
FFFFFFF,:F:FFF,F:FFF::F:FFF:FFFFFF:FF,FFFFFFFFF

@A00721:190:HGJW7DSXY:4:1224:1949:24659\_1:N:0:TCTGCAAG+GCTGCACT  
CTTGGTATTTCTGAAATAGTTTATCAGAGCGTCATTTTCTTTGGGATCTTTCCTCTGGTAAGGGAAT  
TATTAAATCATTCTTCTCACTCTTGACGAGAATTATTACTGTTTTCTCTACCCATAACTTCTTTTCA  
AAA

+

FFFFFFFFFFFFFFFFFFFFFFFFFFFFFFFFFFFFFFFFFFFFFFFFFFFFFFFFFFFFFFFFFFFFFFFF  
FFFFFFF,FFFFFFFFFFFFFFFFFFFFFFFFFFFFFFFFFFFFFFFFFFFFFFFFFFFFFFFFFFFFFFFF  
FFF

@A00721:190:HGJW7DSXY:4:1544:29794:7091\_1:N:0:TCTGCAAG+GCTGCACT  
CTGATGTTTTCTACAGAGTGCAGTCGTTCAACACTTATCACCACTTTTGAAAGGAAAATAATTGGT  
GATGAAAATACGTATGTCGGTGGGGTCTCAAGGCTCTCATCGCCACTGGGATTCTAAGGGGTTCAT  
AAG

+

FFFFFFFFFFFFFFFFFFFFFFFFFFFFFFFFFFFFFFFFFFFFFFFFFFFFFFFFFFFFFFFFFFFFFFFF  
FFFFFFFFF:FFFFFFFFFFFFFFFFFFFFFFFFFFFFFFFFFFFFFFFFFFFFFFFFFFFFFFFFFFFFF  
FFF

@A00721:190:HGJW7DSXY:4:1439:23366:31876\_2:N:0:TCTGCAAG+GCTGCACT  
TTTGGTCCTTACGTCTTAAGTAATTTGGATGTTGTGCGAAAACATCAGGTTCTTGTCACGATTCTTAA





CAAACATTCTAGGTGATGCTTTCTTAGAGGCTCGTCTAGCCGCTGAGATTCTGCTTACCTATTTACAA  
TCT

+

FFFFFFFFFFFFFFFF,FFFF,FFFFFFFFFFFFFFFFFFFFFFFFFFFFFFFFFFFFFFFFFFFFFFFF  
FFFFFFFFFFFFFFFFFFFFFFFFFFFFFFFFFFFFFFFFFFFFFFFFFFFFFFFFFFFFFFFFFFFFFFFF  
FFF

@A00721:190:HGJW7DSXY:4:1120:22200:33458\_1:N:0:TCTGCAAG+GCTGCACT  
GATAACGATTTAGTACTGGGAAATGGTGGTAGTCAGTTTACTACTTTTCTTCCCTCCCCTTTTTCGA  
TTGGATTCGACGGGGTCTTCGTCTCACGACTAATTTGATAAGGTTTTCTTTTATGGGACTCTTGTTT  
GTA

+

FFF:, ,FFFFF,:F:FFF,:FFFF:FFFFFFFFFFFFFFFF:FFFFFFFFFF:FFFFFF,FFFFFF  
FF,FFFF:::F:F,FFFFFFFF:F:,FFFFFFFFFFFFFFFF:FFFFFFFFFF:FFFFFFFFFF  
:FF

@A00721:190:HGJW7DSXY:4:2541:12644:29935\_2:N:0:TCTGCAAG+GCTGCACT  
TATTACTTCGGAAGTTCTTAATGTAGGTCTCCTAGTACTTAAGGGTTTATGTTTCGGTTTCAGCTGGA  
TGGATCTTTTGATGGTATGTTTCACATTGCGTGATCACTTCCCGTGGA

+

FFFFFFFFFFFFFFFFFFFFFFFFFFFFFFFFFFFFFFFFFFFFFFFFFFFFFFFFFFFFFFFFFFFFFFFF  
FFFFFFFFFFFFFFFFFFFFFFFFFFFFFFFFFFFFFFFFFFFFFFFFFFFFFFFFFFFFFFFF

@A00721:190:HGJW7DSXY:4:1129:32235:28698\_1:N:0:TCTGCAAG+GCTGCACT  
ATTAAACATAAAATCCAGCGATTCTATTATGTCGCTAAAGCCTGTCCAGTTGTTCGATGATGTTTCGGGC  
TGTGGGGATTAACCTCCCTCGTGAACTTACGACGATGTTCTCGCTCGCATTTACAAGGATTACTAA  
GTC

+

FFFFFFFFFFFFFFFFFFFFFFFFFFFFFFFFFFFFFFFFFFFFFFFFFFFFFFFFFFFFFFFFFFFFFFFF  
FFFFFFFFFFFFFFFF:FFFFFFFFFFFFFFFFFFFFFFFFFFFFFFFFFFFFFFFFFFFFFFFF:FFFFFFFF  
FFF

@A00721:190:HGJW7DSXY:4:1105:3088:22561\_2:N:0:TCTGCAAG+GCTGCACT  
ACTTCTAATTTTAGGAAACGTCGCGAAAAGAAAGTTTATGAGGATGTCTTGGTCGAAAATATCGCCG  
GGAACCTCTAATAGAGGATCCTGATGACATTATTTCAACGGATACCGA

+

FFFFFFFFFFFFFFFFFFFFFFFFFFFFFFFFFFFFFFFFFFFFFFFFFFFFFFFFFFFFFFFFFFFFFFFF  
FFFFFFFFFFFFFFFFFFFFFFFFFFFFFFFFFFFFFFFFFFFFFFFFFFFFFFFFFFFFFFFF

@A00721:190:HGJW7DSXY:4:2665:10348:28682\_2:N:0:TCTGCAAG+GCTGCACT  
CACAGAAACCGTCTCAGGAAGTGTCTCCACTGATTGGAATTAGAGAAAGACGACCTTCTTGTTGGGA  
CTGAGACCTCTGAATTTTACAGGTGCCCTGATGAGGACGTTGAAAGGG

+

FFFFFFFFFFFFFFFFFFFF:FFFFFFFFFFFFFFFFFFFFFFFFFFFFFFFFFFFFFFFFFFFFFFFF  
FFFFFFFFFFFFFFFFFFFFFFFFFFFFFFFFFFFFFFFFFFFFFFFFFFFFFFFFFFFFFFFF

@A00721:190:HGJW7DSXY:4:1511:3414:1266\_2:N:0:TCTGCAAG+GCTGCACT  
CTTCTAAGAGTGTTTCAAAAGACCAGAAACGTAACAAGAAGAATAAAGGTAGGAAGGGGAGAAAACAG  
AACAAGCGAGCGGTTGAAGAGAAAACGATATGGTTGCGGCTGATCGT

+

FFFFFFFFFFFFFFFFFFFFFFFFFFFFFFFFFFFFFFFFFFFFFFFFFFFFFFFFFFFFFFFFFFFFFFFF,  
FFF:FFFFFFFFFFFFFFFFFFFFFFFFFFFFFFFFFFFFFFFFFFFFFFFF

@A00721:190:HGJW7DSXY:4:2126:6334:3850\_2:N:0:TCTGCAAG+GCTGCACT  
CTCGGCGATACCACTGATCTTCCAGAGTTACGTAGTGGTCGTTCTTTTGGTGATTTTATCAAAGAGAA  
AGTTTCTGCTAGTCGCGACGATAGTATTTATCGGAGTGATATTAACAA

+

FFFFFFFFFFFFFFFFFFFFFFFFFFFFFFFFFFFFFFFFFFFFFFFF:FFFFFFFFFFFFFFFFFFFF  
FFFFFFFFFF:FFFFFFFFFFFFFFFFFFFFFFFF:FFFFFFFFFFFFFFFF

@A00721:190:HGJW7DSXY:4:1578:15736:9392\_2:N:0:TCTGCAAG+GCTGCACT  
TGTTGAAGTACCGCAACATGGATCAGTTTTCCAAAAGCTATTAATAGCAGTTGCGGGGCTATAATAC

CGCCTCCAGATTACTCTAAACTGAATCCACTCTCTTGGGATATAAATG  
+  
FFFFFFFFFFFFFFFFFFFFFFFFFFFFFFFFFFFFFFFFFFFFFFFFFFFFFFFFFFFFFFFF  
FFFFFFFFFFFFFFFFFFFFFFFFFFFFFFFFFFFFFFFFFFFFFFFFFFFFFFFFFFFFFFFF  
@A00721:190:HGJW7DSXY:4:1506:25120:6386\_1:N:0:TCTGCAAG+GCTGCACT  
AACATGAATTAGTTATTGAAAGTCTTGACCCTCACGTCTCACTTTATCACCTTGAGATGGTAAAGTC  
ATTAACAAAGGAAATGTAAAGGCTGATGACTTAAATTTTCGATTCTGCTTCGACGGTAATTCCATAAG  
ACC  
+  
FFFFFFFF:FFFFFFFFFFFFFFFFFFFFFFFFFFFFFFFFFFFFFFFFFFFFFFFFFFFFFFFF  
FFFFFFFFFFFFFFFFFFFFFFFFFFFFFFFFFFFFFFFFFFFFFFFFFFFFFFFFFFFFFFFF  
FFF  
@A00721:190:HGJW7DSXY:4:1262:20302:20932\_1:N:0:TCTGCAAG+GCTGCACT  
AACCTTTCCTCGTTCTTCATGAAGATCTTCGAGTGTTTTATAGTGAGTTATTCTTGCGAAGGTTCAAG  
TCGATTGATTTTGTGACTACGATCTCTTGTATAAAGAAGTTCTTCGCAGTTGAATCTCCACCAGG  
TGG  
+  
FFFF,:FFFFFFFFFFFFFFFFFFFFFFFFFFFFFFFFFFFFFFFFFFFFFFFFFFFFFFFF  
FFFFFFFFFFFFFFFFFFFFFFFFFFFFFFFFFFFFFFFFFFFFFFFFFFFFFFFFFFFFFFFF  
FFF  
@A00721:190:HGJW7DSXY:4:1140:19822:14121\_2:N:0:TCTGCAAG+GCTGCACT  
GCGACTTTTGTGCAATTTTCGCAAAAGTCTTGAAGTACGTATTGTCACTGCTAATCGTAATTCGCG  
AGAAGAGATAGTGACTAAAGTTTTGGCACTTCTAGTTCATCGCGGTAT  
+  
FFFFFFFFFFFFFFFFFFFFFFFFFFFFFFFFFFFFFFFFFFFFFFFFFFFFFFFFFFFFFFFF  
FFFFFFFFFFFFFFFFFFFFFFFFFFFFFFFFFFFFFFFFFFFFFFFFFFFFFFFFFFFFFFFF  
@A00721:190:HGJW7DSXY:4:1413:12147:7028\_2:N:0:TCTGCAAG+GCTGCACT  
CAGACGTGAAAGTTATGATGAGTGATCGTATTAGAACAGCTGATTCTTATTGCATGAACGTCGCTGAG  
GTCAAACCTGTGGACGTTCTTTTCATCGACGAATTATTCATGATTAC  
+  
FFFFFFFFFFFFFFFFFFFFFFFFFFFFFFFFFFFFFFFFFFFFFFFFFFFFFFFFFFFFFFFF  
FFFFFFFFFFFFFFFFFFFFFFFFFFFFFFFFFFFFFFFFFFFFFFFFFFFFFFFFFFFFFFFF  
@A00721:190:HGJW7DSXY:4:1448:21603:23500\_2:N:0:TCTGCAAG+GCTGCACT  
CATCTACTTAAGGCGGCTTATACCATAGGTTACGGTGATTCCAATCAAATCGGATTCATCAATCGTAT  
TGATCTCCAAGTCGCAAACTACTTCAACATCAACGACATCATTCTTGA  
+  
:FFFFFFFFFFFFFFFFFFFFFFFFFFFFFFFFFFFFFFFFFFFFFFFFFFFFFFFFFFFFFFFF  
FFFFFFFFFFFFFFFFFFFFFFFFFFFFFFFFFFFFFFFFFFFFFFFFFFFFFFFFFFFFFFFF  
@A00721:190:HGJW7DSXY:4:2443:14452:13714\_2:N:0:TCTGCAAG+GCTGCACT  
TTATCGAAGTCTCAGTTATCGCTGCCCGCCGACGTTTGTGCGCAACTCTCAGAGGTTTACGGCAGAA  
AAATTTCTCCTGCTTGTAATTCGAGAGAGGACACTATGGAAATTAGAC  
+  
FFFFFFFFFFFFFFFFFFFFFFFFFFFFFFFFFFFFFFFFFFFFFFFFFFFFFFFFFFFFFFFF  
FF:FFFFFFFFFFFFFFFFFFFFFFFFFFFFFFFFFFFFFFFFFFFFFFFFFFFFFFFF  
@A00721:190:HGJW7DSXY:4:2215:8006:19805\_2:N:0:TCTGCAAG+GCTGCACT  
TATTACTTTCCTCAAGGTGAAAAGTTTGAAATTAACAAAGTCCTTGTAAGAGTAAGGTTAAATGTG  
AAGATGCTCAGACTATTATCATGAAGTTCAAGGTAATACTTACCAGCACG  
+  
FFFFFFFFFFFFFFFFFFFFFFFFFFFFFFFFFFFFFFFFFFFFFFFFFFFFFFFFFFFFFFFF  
F:FFFFFFFFFFFFFFFFFFFFFFFFFFFFFFFFFFFFFFFFFFFFFFFFFFFFFFFF:F  
@A00721:190:HGJW7DSXY:4:2208:18810:17691\_2:N:0:TCTGCAAG+GCTGCACT  
TTTTGCATCACAAACACATATTACCGTTGCTCTATCACGACACGTTGAATCTTTACGATACTTTGTTA  
TCAATGTAAAGTTAAACGATGCTACTTGTGAGAGGATCAATCACAGTA  
+

[illegible]

@A00721:190:HGJW7DSXY:4:2146:20347:8202\_2:N:0:TCTGCAAG+GCTGCACT  
TGCTCGCGATTTATTCTTTTTGTCAATGATTACATCTACTTCGTTCTGATCCTTACAAGATCATCGT  
TAAGTTAGGTAAACCCCTAACAGATGTTACTCTTGTAGGACTTTGGGA

+

FFFFFFFFFFFFFFFFFFFFFFFFFFFFFFFFFFFFFFFFFFFFFFFFFFFFFFFFFFFFFFFFFFFFFFFF  
FFFFFFFFFFFFFF:FFFF,FF,FFFFFFFFFFFFFFFFFFFFFFFFFFFFFFFF

@A00721:190:HGJW7DSXY:4:1301:28646:7921\_2:N:0:TCTGCAAG+GCTGCACT  
AGGTTGTTGTTTGGCGATTAGCTCTTGCGACTAATATTCGATATTCGATTGAGGGTCGTTATACCTAT  
TCGGCTATCTGTGCTTTGAATTGTATAAGATCAAATTTTAAACGATTC

+

FFFFFFFFFFFFFFFFFFFFFFFFFFFFFFFFFFFFFFFFFFFFFFFFFFFFFFFFFFFFFFFFFFFFFFFF  
FFFFFFFFFFFFFFFFFFFFFFFFFFFFFFFFFFFFFFFFFFFFFFFFFFFFFFFFFFFFFFFF:FFFF

@A00721:190:HGJW7DSXY:4:1106:31530:2644\_1:N:0:TCTGCAAG+GCTGCACT  
TGATGTGGAGGGAGTTCTTGAAGCATCCCGACCTTTCCTTGTGAAAATTTTGATGCGGTTTCATAAGA  
TTATCAGTAATCCTGATTCTACTACGGATTCATGGACCTTCCATCCTGTACCTCTTCTGGAGAGACGT  
ATC

+

FFFFFFFFFFFFFFFFFFFFFFFFFFFFFFFFFFFFFFFFFFFFFFFFFFFFFFFFFFFFFFFFFFFFFFFF  
FFFFFFFFFFFFFFFFFFFFFFFFFFFFFFFFFFFFFFFFFFFFFFFFFFFFFFFFFFFFFFFFFFFFFFFF  
FFF

@A00721:190:HGJW7DSXY:4:1105:13358:32424\_2:N:0:TCTGCAAG+GCTGCACT  
CTTCGAGACAGGTGATATTGTTGAGCGAGAGCGACCAAGATCTAAATTCGGTAACGGTGCGTGGCGCT  
TTATTTTAAAAAGCTCCCTCCTCTCGCAAGTTTGATCTGATACTTATC

+

FFFFFFFFFFFFFFFFFFFFFFFFFFFFFFFFFFFFFFFFFFFFFFFFFFFFFFFFFFFFFFFFFFFFFFFF  
FFFFFFFFFFFFFFFFFFFFFFFFFFFFFFFFFFFFFFFFFFFFFFFFFFFFFFFFFFFFFFFFFFFFFFFF  
FFFFFFFFFFFFFFFFFFFFFFFFFFFFFFFFFFFFFFFFFFFFFFFFFFFFFFFFFFFFFFFFFFFFFFFF

@A00721:190:HGJW7DSXY:4:2177:1506:34726\_2:N:0:TCTGCAAG+GCTGCACT  
TGATCAGTCTCTGACTTGACCATCTTTCAATTTAAATGACGATCATTAAAGACTCTCTTTCTTCTTTGT  
TTCCTTCTTGCAGTATTTTTCCTCATCAGCTTGTGTTTTACCTAAT

+

FFFFFFFFFFFFFFFFFFFFFFFFFFFFFFFFFFFFFFFFFFFFFFFFFFFFFFFFFFFFFFFFFFFFFFFF  
FFFFFFFFFFFFFFFFFFFFFFFFFFFFFFFFFFFFFFFFFFFFFFFFFFFFFFFFFFFFFFFFFFFFFFFF  
FFFFFFFFFFFFFFFFFFFFFFFFFFFFFFFFFFFFFFFFFFFFFFFFFFFFFFFFFFFFFFFFFFFFFFFF

@A00721:190:HGJW7DSXY:4:1331:10122:15765\_2:N:0:TCTGCAAG+GCTGCACT  
GATAACAACATATCAGTTGATTAAGACTCTTCCGAAAGGCGAACTTTGGGAATTTGAAGCTCAGGGTGA  
AGCACAACGTTTGACCGTGACGAAGTGTGGTGTCTTGATCTACGTTA

+

FFFFFFFFFFFFFFFFFFFFFFFFFFFFFFFFFFFFFFFFFFFFFFFFFFFFFFFFFFFFFFFFFFFFFFFF  
FFFFFFFFFFFFFFFFFFFFFFFFFFFFFFFFFFFFFFFFFFFFFFFFFFFFFFFFFFFFFFFFFFFFFFFF  
FFFFFFFFFFFFFFFFFFFFFFFFFFFFFFFFFFFFFFFFFFFFFFFFFFFFFFFFFFFFFFFFFFFFFFFF

@A00721:190:HGJW7DSXY:4:2450:6198:19022\_1:N:0:TCTGCAAG+GCTGCACT  
CACTACCACTTATTACGATATTTCTTTAGTCGATGGGTTTTCGACGCCTTTAAGCGTCTTCTGTTCAT  
CGCAACCAGATGATATCTTCTATTGAACTTATGTTTCGATCAGTGTTCCTTCTATCAGGAGGAAAAC  
ACT

+

FFFFFFFFFFFFFFFFFFFFFFFFFFFFFFFFFFFFFFFFFFFFFFFFFFFFFFFFFFFFFFFFFFFFFFFF  
FFFFFFFFFFFFFFFFFFFFFFFFFFFFFFFFFFFFFFFFFFFFFFFFFFFFFFFFFFFFFFFFFFFFFFFF  
FFF

@A00721:190:HGJW7DSXY:4:1477:22860:6668\_2:N:0:TCTGCAAG+GCTGCACT  
TCACTTTGTGTGTAATTTGCTCTATTTAAGTTTTGTCTTCCTTGTGTTGCTTATTCTATTAATCACT  
CATTTTAGTGAGATTATTAACACGCACTAAACGTCTTCGACAACAG

+

FFFFFFFFFFFFFFFFFFFFFFFFFFFFFFFFFFFFFFFFFFFFFFFFFFFFFFFFFFFFFFFFFFFFFFFF  
FFFFF:FFFFFFFFFFFFFFFFFFFFFFFFFFFFFFFFFFFFFFFFFFFFFFFFFFFFFFFFFFFFFFFF  
FFFFFFFFFFFFFFFFFFFFFFFFFFFFFFFFFFFFFFFFFFFFFFFFFFFFFFFFFFFFFFFFFFFFFFFF

@A00721:190:HGJW7DSXY:4:1459:20021:23140\_1:N:0:TCTGCAAG+GCTGCACT  
GCCTTACAGAGGGGCAGCAGCATGACCATAATTGGTATTGACTTTGGTACCACCTTTTCTACTGTCTG

TCTCGCCTCTTCGAATGAAGTTTTAATGCTTAACAACAATGATAGTGAATTTATACCTACAATCATTG  
GTT

+

FFFFFFFFFFFFFFFFFFFFFFFFFFFFFFFFFFFFFFFFFFFFFFFFFFFFFFFFFFFFFFFFFFFFFFFF:FFFFFFFFFFFFFFF  
FFFFFFFFFFFFFFFFFFFFFFFFFFFFFFFFFFFFFFFFFFFFFFFFFFFFFFFFFFFFFFFFFFFFFFFF:FFF:FFFFFFFFFFFFFFFFFFFF  
FFF

@A00721:190:HGJW7DSXY:4:1205:31946:21026\_2:N:0:TCTGCAAG+GCTGCACT  
TGTTTATGGATATGATGCTATTACTCATGATGGTTACGGTCAGGGAGGATTCTCAGTTTACAAGGACC  
TTAAGCGATGGATCGGGGTTAATTCTAAAACATTACCCGAAAAGACGTG

+

FFFFFFFFFFFFFFFFFFFFFFFFFFFFFFFFFFFFFFFFFFFFFFFFFFFFFFFFFFFFFFFFFFFFFFFF:FFF:FFFF  
FFFFFFFF:FFFFFFFFFFFFFFFFFFFFFFFF:F:FFFFFFFFFFFFFFFFFFFF

@A00721:190:HGJW7DSXY:4:1162:13169:9987\_2:N:0:TCTGCAAG+GCTGCACT  
GTACGATGTCGTCTGTCTCGGCGATCACTTTTCACTAAGAATTGGTCCTACTTTTGGACAAGGCCAAC  
TTCGTAATCTTCATGAGATCGTTTCTTTCTTTATCTCTTTGGTTGTTA

+

FFFFFFFFFFFF:FFFFFFFFFFFFFFFFFFFFFFFFFFFFFFFFFFFFFFFFFFFFFFFFFFFFFFFF:FFFFFFFFFFFF:FFFFFFFFFFFFFFF  
FFFFFFFFFFFFFFFFFFFF,FFFF:FFFFFFFFFFFFFFFFFFFFFFFF:F:F:FFFF

@A00721:190:HGJW7DSXY:4:1155:7166:29309\_2:N:0:TCTGCAAG+GCTGCACT  
GAGTGAAAGGCTTCAATTGTAGTGGTTTGGTCGTTTCAGTACCCAGTCAGTATACCTCTACGCAAAGA  
TATTTTCATGAAAACACTACAGAGGAACGTACCGGATTACCTGTCTTTTCAT

+

FFFFFFFFFFFF:FFFFFFFFFFFFFFFFFFFFFFFFFFFFFFFFFFFFFFFFFFFFFFFFFFFFFFFF:FFFFFFFFFFFF:FFFFFFFFFFFF  
FFFFFFFFFFFFFFFFFFFFFFFFFFFFFFFF:FFFFFFFFFFFF:FFFFFFFFFFFFFFFFFFFF

@A00721:190:HGJW7DSXY:4:2153:26892:30592\_1:N:0:TCTGCAAG+GCTGCACT  
CTTCGGCCGCTCTCTTTGCTTCGATGTTGGATGTCAAGAAGGGTTCAGAATGGGATTCCTACGTAGTT  
TATGACTTTGGTGGTGGTACTTTCGATACTTCTATCGTCTTACGTTACGGTAATTACTATAGTGTTAT  
TTA

+

FFFFFFFFFFFFFFFFFFFFFFFFFFFFFFFFFFFFFFFFFFFFFFFFFFFFFFFFFFFFFFFFFFFFFFFF  
FFFFFFFFFFFFFFFFFFFFFFFFFFFFFFFFFFFFFFFFFFFFFFFFFFFFFFFFFFFFFFFFFFFFFFFF  
FFF

@A00721:190:HGJW7DSXY:4:2252:26494:26741\_1:N:0:TCTGCAAG+GCTGCACT  
ATAATCTTGGAGGTCGTGACGTTGATGAAGCTATAAGAGCGTTCTTATTACGGCGCACTTCTTTACCC  
GCCACCACACAACCTTTCAGTTTCACAACCTGAAGGAGGAGGTTTCTGTTACTGGAAAACCCTCGTCAAT  
ACT

+

FFFFFFFFFF:FFFFFFFFFFFF:FFFFFFFFFFFFFFFFFFFFFFFFFFFFFFFFFFFFFFFFFFFFFFFF:FF:FFF:FFFFFFFF  
FFFFFFFFFFFFFFFFFFFFFFFFFFFFFFFFFFFFFFFFFFFFFFFFFFFFFFFFFFFFFFFFFFFFFFFF:FFFFFFFFFFFFFFFFFFFF  
FFF

@A00721:190:HGJW7DSXY:4:2421:24623:27759\_2:N:0:TCTGCAAG+GCTGCACT  
GATCTAGTGAAATTAACGCGTCCTTTTCTGGAACGTAGTTTACTATTATGAACAAAGTTATCAAAGA  
TAGTGGCATTCAAGGCAAACCTTACCCTGATTCCGGCCGGTGGTAGCTC

+

FFFFFFFFFF:FFF,FFF:,FFFFF,:FFFF,FFF,,FFF::FFF,FF:FFF:FF,,FF,FFFFFFFFFFFF  
FF,FF:,FFF:FF,:::FFF:FFF,FFFF:FF,,:FFF:,F:FFF,FF

@A00721:190:HGJW7DSXY:4:1523:14787:6934\_2:N:0:TCTGCAAG+GCTGCACT  
TGAAACAGCTATTAAAGCTGTTGAGCGGGTAATTACACCTAAACGAGCTCGATCTGCCATCGCTGAAG  
GATGTGCACTCTTTTCTGCTACTTTAACGGAGCGTAGTGTACTCTTCG

+

FFFFFFFFFFFFFFFFFFFFFFFFFFFFFFFFFFFFFFFFFFFFFFFFFFFFFFFFFFFFFFFFFFFFFFFF  
FFFFFFFFFFFFFFFFFFFFFFFFFFFFFFFFFFFFFFFFFFFFFFFFFFFFFFFFFFFFFFFFFFFF

@A00721:190:HGJW7DSXY:4:1147:10610:32675\_2:N:0:TCTGCAAG+GCTGCACT  
AAAGGTCTCTATCAAGCTCGTATTATCGTCGCTGCTGGATCTGCGTTACCGTTGAAGGCTAAACTCCA

+

@A00721:190:HGJW7DSXY:4:2111:18539:1877\_1:N:0:TCTGCAAG+GCTGCACT  
CATTAAATAATTTCAATCTTCTTAAAAAGAAGATAGAGAGTCATACTTTGGGCTATCGTTCAGGTGCAT  
GGGGTTGGATAGCCAATATTGAAGTGGACACCTCTGGTAGTATCGAAGTAAAGAGATCGGAAGAGCAC  
ACG

+

@A00721:190:HGJW7DSXY:4:2113:1334:22780\_2:N:0:TCTGCAAG+GCTGCACT  
AAGCATACTACTTTTGCTTTGATTACTCTACCGCCTTACAAGTCTAAGGTTAAGAGTCGATTAAACA  
AGTTGTACTIONTATCAATGATTTTATCGCTGGTTGTTAACACGAAAAGTC

+

@A00721:190:HGJW7DSXY:4:2311:6623:12806\_1:N:0:TCTGCAAG+GCTGCACT  
CCCAAAGAGAATATCTAAATATTTACAAATCTTACCACTATCTACGAACCTAAAGTTCTGAAGACG  
TTGCTTGTCGCTTCCTCCTTTAATGGCACTACCTCGGTACAATCTTACTTGGAACGAAGGCGACCTGT  
TCC

+

@A00721:190:HGJW7DSXY:4:2515:24406:7623\_1:N:0:TCTGCAAG+GCTGCACT  
GTTCTGTCTATATTAGGTGAAGCGAAATACGATTTGGAACGTCAACGTTACCGAGTTTCGTTTCGTA  
CCTTGATGCTGACTTTCGTC AATATGATTTGATCTGGTTGCTCAATTCTAAGCGTGTTCGCTTAGTG  
CGA

+

@A00721:190:HGJW7DSXY:4:2477:20690:31031\_1:N:0:TCTGCAAG+GCTGCACT  
TTTCGATCTTGACTATACTATACGTGACATACTAAATACTAGATATTTGGATGATCTTGATAAAGAACT  
TCATGAATTTTCAGAGGATGAAAAATTTTCTTCCTTGGATTTTAATATAAAGAATCTTTACCAGGACT  
CCT

+

@A00721:190:HGJW7DSXY:4:2232:4571:7028\_1:N:0:TCTGCAAG+GCTGCACT  
GATCGTAAGAAGTTTATAAGGAACATATCCATTTGTTGTAATAGGGTCATCAACTTAGAACTCGAAAC  
TCTAAGTGGTAATACTGTCTTTCCAAGCTTACCTGTATCTTCAATGAAATTGGACTCTTCGATAGGGG  
ACA

+

@A00721:190:HGJW7DSXY:4:2252:8269:12900\_1:N:0:TCTGCAAG+GCTGCACT  
TAAGAATACTATAAATAGAATAGCTATTACTACTAATGGCGTTGGCCTAGTGGATGTTATTAGTGACA  
TCTGGTCAATTCGTTTTTAGGTGGTCTTTATTCTATTATTGATTTTTATGAGATTGAGATCGGAAGA  
GCA

```

+
FFFFFFFFFFFFFFFFFFFFFFFFF:FFFFFFFFFFFFFFFFFFFFFFFFF:FFFFFFFFFFFFFFFFFFFFFFFFF:FFF
FFF:FFFFFFFFFFFF:F,FFFFFFFFFFFFFFFFFFFFFF,F:FFFFFFFFFFFFFFFFFFFFFFFF:FFFFFFF
FFF
@A00721:190:HGJW7DSXY:4:1163:2166:20807_2:N:0:TCTGCAAG+GCTGCACT
TTCCTGAAGAGTCCTTCCGTAAACCAACTTCTTGACAATTTTCTTCAATCCTTCGATAATAGTTAAATC
TAGATTATGTCTGTGTTGAAAGACTTTCTACCGATAAGGGTCACTAG
+
FFFFFFFFFFFFFFFFFFFFFFFFFFFFFFFFFFFFFFFFFFFFFFFFFFFFFFFFFFFFFFFFFFFFFFFFFFFFFFFF
FFF:FFFFFFFFFFFFFFFFFFFFFFFFFFFFFFFFFFFFFFFFFFFFFFFFFFFFFFFFFFFFFFFFFFFFFFFF
@A00721:190:HGJW7DSXY:4:2546:14931:20932_2:N:0:TCTGCAAG+GCTGCACT
TAAGAAATAATCCTACATTGACTGATTATCTAAAGATTGAAGGAAAATTTTATCCTCGTTTAACTTAC
TTAGACTTTCTACGATACAAATGATAACTTCTAATTTACGTTTGCTA
+
FFFFFFFFFFFFFFFFFFFFFFFFFFFFFFFFFFFFFFFFFFFFFFFFFFFFFFFFFFFFFFFFFFFFFFFFFFFFFFFF
FFFFFFFFFFFFFFFFFFFFFFFFFFFFFFFFFFFFFFFFFFFFFFFFFFFFFFFFFFFFFFFFFFFFFFFF
@A00721:190:HGJW7DSXY:4:1343:20609:31454_1:N:0:TCTGCAAG+GCTGCACT
GATGCATGGTGTTATCTCCTCAGGAGTCCCGCATTTGATAATAATGACGAGACTTTCGTCATAATCG
CTGCATATTACGGATTACACGGTACCAGCGCATCTCGTGTGCGAGCCTCGACCCGATTATATGTTATTA
ACT
+
FFFFFFFFFF:FFFFFFFFFF:F:FFFFFFFFFFFFFFFFFFFFFFFFFFFFFFFFFFFFFFFFFFFFFFFFFFFFFFF
FFFFFFFFFFFFFFFFF,FFFFFFFFFFFFFFFFFFFFFFFFFFFFFFFFFFFFFFFFFFFFFFFFFFFFFFFFFFFF
FFF
@A00721:190:HGJW7DSXY:4:2630:5249:35008_2:N:0:TCTGCAAG+GCTGCACT
GATTCTCGATTTCGTAGAGCTTATCTAGGTACTCTCATTTACTATGTTGATTTAGTCTACATTTATGCT
GATCTAAATTTTCGATCTAGATGGATCCACTCCTCGAGTTATCATGAT
+
FFFFFFFFFFFFFFFFFFFF:FFFFFFFFFFFFFFFFFFFF::FFFFFFFFFFFFFF,FF:FFFFFFFFF:FFFFF:F
FFFFFFFFFFFFFFF,FFFFFFFFFF:FFFFFFFFFFFFFFFFFFFF,FFFFFFFFFF
@A00721:190:HGJW7DSXY:4:2568:29894:7012_1:N:0:TCTGCAAG+GCTGCACT
TTCTAGAATTCTTAATTATAATATTCAACCTCAAAGTTACGTGTTTACAGTAACGAGATCACACATT
TTGAGAACTAACTATGTTATGTTCTCTGATCATTTTGACAATCTCTTCTTATAATAATAAAATAAATA
ATA
+
FF:FFFFFFFFFFFFFFFFFFFFFFFFFFFFFFFFFFFFFFFFFFFFFFFFFFFFFFFFFFFFFFFFFFFFFFFFFFFF
FFFFFFFFFFFFFFFFFFFFFFFFFFFFFFFFFFFF:FFFFFFFFFFFFFFFFFFFFFFFFFFFFFFFFFFFFFFFF
FFF
@A00721:190:HGJW7DSXY:4:2251:12888:24565_2:N:0:TCTGCAAG+GCTGCACT
AGTGGAAGGCTCCAGTCAACACTAGTTCGAGTGCTGCTTTGGATTACGATGACGTGAGAATAGGTGA
AGGGATAGTTTTTACCTCGACCAACATTAAGGCGGCGGCGACTAATCT
+
FFFFFFFFFFFFFFFFF:FFFFFFFFFFFFFFFFFFFFFFFFFFFFFFFFFFFFFFFFFFFFFFFFFFFFFFFFFFFF
FFFFFFFFFFFFFFFFFFFFFFFFFFFFFFFFFFFFFFFFFFFFFFFFFFFFFFFFFFFFFFFFFFFFFFFF
@A00721:190:HGJW7DSXY:4:2105:15890:12446_1:N:0:TCTGCAAG+GCTGCACT
AGGACACTTCGAAACTGAATAATGATGCACTACAAACAAGTATCGCTAATCATCTGAAAAAGGCTCTA
AAGGACACTATACAATATCCAGACGACGACGAAGCTTATACTACTTTAATTTTGGGTATTATGTGGAG
ATA
+
:F,F:FFFF,FFF:FF,F:FFFFFFF,FFFF,FFFF:,F,FFF:F,FF,FFF:FFFFFFFFFFFFFFFFFFFF
FFFFFFFFF:FFFFFFFFFFFFFFFFFFFF:FFFF:FFFFFFFFF:FFFFFFFFFFFFFFFFFFFFFFFFFFFFF:FFFFFF
FFF
@A00721:190:HGJW7DSXY:4:1432:5565:31735_2:N:0:TCTGCAAG+GCTGCACT
ACCACATTTTGGTCAAGTCAATCCGTTGTGAAAATTTCTTAGAGGATATTGCCCATTTGTGGTACGAAT

```

TGGTCCAACATTTACCACCAAATTCCTTTTGATACAACCTCTAGCCTTCA  
+  
FF:FFFFF:FFF:FFFFFFFFFFFF:F:F,F:FFFFF::FFFF::FFFFFFFFFFFFFFFFFFFFFFFF  
FFFFFFFF,FFFFFFFFFFFFFFFF:FFFFFFFFFFFFFFFF:FFF:F::F  
@A00721:190:HGJW7DSXY:4:1224:26666:26976\_2:N:0:TCTGCAAG+GCTGCACT  
TCACCAGATTGGTTCGAACCCGTTGATGCTATGTCAGAAGAAGCTATTCAAGCTTGTCGTTTAAAGAC  
TGCAGAGGCTGTCAAACAAGCCCAGACTCAAGGAGTCCAATCAAAGGT  
+  
FFFFF:FFFFFFFFFFFFFFFFFFFFFFFFFFFFFFFFFFFFFFFFFFFFFFFFFFFFFFFFFFFFFFFF:FF  
FFFF:F:FFFFF:FFFFFFFFFFFF:FFF:FFFF:FFFFFFFFFFFFF  
@A00721:190:HGJW7DSXY:4:1556:15935:33661\_1:N:0:TCTGCAAG+GCTGCACT  
ATTATTTAGAGATCTTTTCTACTTACAAAGGACAATTCAAGTTTCTACGAAAAGTCCGGA  
GTATATTGTATGTTAATAGATAGTGGGATAATAGTTCTACCGATACGTAGTGAACGCGTTCGTAGAAC  
CAA  
+  
FFFFFFFFFFFF:FFFFFFFFFFFFFFFFFFFFFFFFFFFFFFFFFFFFFFFFFFFFFFFFFFFFFFFFFFFF  
FFFFFFFFFFFFFFFFFFFF:FFFFFFFFFFFFFFFFFFFFFFFFFFFFFFFFFFFFFFFFFFFFFFFFFFFF  
FFF  
@A00721:190:HGJW7DSXY:4:2337:17454:10457\_2:N:0:TCTGCAAG+GCTGCACT  
TATTGATTATGTAACCGATAGGAGTTGTATAGTTGAAGATGTGGCTTTAGACGATAATCCTTTAAGGA  
CTATGTTGACTGACGAAGATTTTCCACAGATTTGTCTACGTTGCAGA  
+  
FFFFFFFFFFFFFFFFFFFFFFFFFFFFFFFFFFFFFFFFFFFFFFFFFFFFFFFFFFFFFFFFFFFFFFFF  
FF:FFFFFFFFFFFFFFFFFFFFFFFFFFFFFFFFFFFFFFFFFFFFFFFFFFFFFFFFFFFF  
@A00721:190:HGJW7DSXY:4:2115:25256:18239\_1:N:0:TCTGCAAG+GCTGCACT  
CTATATACATTATAAAATATAAAAATAAGGGAGTCATAACTTTTGTACCAAATTCTTGGCTTTCAAC  
GAAGTCTCTGATTTTATTAATCATTACTTTAACGATCTCTCGGTCATTTACTCTGTACTTGATCTACG  
TCG  
+  
:FFFFFFFFFFFFFFFFFFFFFFFFFFFFFFFFFFFFFFFFFFFFFFFFFFFFFFFFFFFFFFFFFFFF  
FFFFFFFFFFFFFFFFFFFFFFFFFFFFFFFFFFFFFFFFFFFFFFFFFFFFFFFFFFFFFFFFFFFFFFFF  
FFF  
@A00721:190:HGJW7DSXY:4:2231:13847:5838\_2:N:0:TCTGCAAG+GCTGCACT  
GAATGACTCTATCTTTTCAGACACTTCTTATATTATTTACAATAGTTAATATCATATTAGTAATACTC  
ACTATCGTTTTCTGCTTTTTCTTAGCTAATAGATTAATAAAGGATGAG  
+  
FFFFFFFFFFFFFFFFFFFFFFFFFFFFFFFFFFFFFFFFFFFFFFFFFFFFFFFFFFFFFFFFFFFFFFFF  
FFFFFFFFFFFFFFFFFFFFFFFFFFFFFFFFFFFFFFFFFFFFFFFFFFFFFFFFFFFFFFFFFFFF  
@A00721:190:HGJW7DSXY:4:1271:21314:35963\_2:N:0:TCTGCAAG+GCTGCACT  
ACTCTTCGTTACGAGACCTGATGGTAGAATAGATTTAGTCTCTACACCCATCTCAACGAGGATAAAGC  
GAGTTTTCCGTCCTGAACGTAATACACGAAGAGATCATCCGCAAACGA  
+  
FFFFFFFFFFFFFFFFFFFFFFFFFFFFFFFFFFFFFFFFFFFFFFFFFFFFFFFFFFFFFFFFFFFFFFFF  
FFFFFFFFFFFFFFFFFFFFFFFFFFFFFFFFFFFFFFFFFFFFFFFFFFFFFFFFFFFFFFFFFFFF:  
@A00721:190:HGJW7DSXY:4:2535:31150:9627\_2:N:0:TCTGCAAG+GCTGCACT  
TTTAGATTATGAATCCTGCCTTTACTCATTTTATAGCAGTTATTTATGTTGTACTTTTTATAATTTAT  
AACCTTCTTATACTTTTGGGTATGTTTTGTGAAAAACATGAGATACCC  
+  
FFFFFFFFFFFFFFFFFFFFFFFFFFFFFFFFFFFFFFFFFFFFFFFFFFFFFFFFFFFFFFFFFFFF:FFFFF:FF:FFFFFFFFFFFFFFFF  
FFFFFFFFFFFFF:FFFF,FFFFFFFFFFFFFFFFFFFFFFFFFFFFF:F,F  
@A00721:190:HGJW7DSXY:4:2303:16369:14497\_2:N:0:TCTGCAAG+GCTGCACT  
TTGTAACGATCATTCTTTCGAGTTTTGTCATTCTGATTCTTTTATTCCTTAACTGTGTATGAGGAGG  
ATTTATAATGCTTTTCGATAGTGATTGTTATCAATTTAAATACATTAC  
+



F:FFFFFFFF:FFFFFFFFFFFFFFFFFFFFFFFF::,F:,F,FFFFFFFF::FFFFFFFFFFFF:FFF  
FFFF:FFFFFF:FF:FFFFFFFF:FF:FF:F:FFF:FFFF:FFF  
@A00721:190:HGJW7DSXY:4:2246:31647:13369\_2:N:0:TCTGCAAG+GCTGCACT  
TCACAGACTCCGAAAATGGTTTCAAATGAGGTCAAAGCTCTATTTATTAAACGAATATTATCCGATT  
CTTCGAGGGTATCACTACCACTGATCTGCCGACTTTAGTCAAGGAAGT  
+  
FFFF:FFFFFFFF,FFFFFFFFFFFFFFFFFFFFFFFFFFFFFFFF:FFFFFFFFFFFFFFFFFFFFF  
FFFF:FFFF:FFFFFFFFFFFF:FFFFFF::FFF,FF:FFF:F:FFFF  
@A00721:190:HGJW7DSXY:4:1668:13946:37043\_2:N:0:TCTGCAAG+GCTGCACT  
CGATGTTTATATTTTTCTATAAGGGAAAATAGCAATAATCAAATTTGACAAAATTTAGAACTTTATT  
TCAGAACTCTCTCCGATCACCTTGGTGTGATCTCCCGGAGGATCTTT  
+  
FFFFFFFFFFFFFFFFFFFFFFFFFFFFFFFF:FFFFFFFFFFFFFFFFFFFF:FFFFFFFFFFFFFFFFFFFFF  
FFFFFFFFFFFF:FFFFFFFFFFFFFFFFFFFFFFFFFFFFFFFFFFFFFFFFFFFFF  
@A00721:190:HGJW7DSXY:4:2174:20546:7670\_2:N:0:TCTGCAAG+GCTGCACT  
ATTTTTAAATAGTGATATTCAGCGTATACTTGAATACTTTATCAAAGATTTGGCTTGGTCTATTTACC  
GCAAAAAGTTGGAAGAGGTCTATGATATTTATTTACTTATACTTTAA  
+  
FFFFFFFFFFFFFFFFFFFFFFFFFFFFFFFF:FFFFFFFFFFFFFFFFFFFF:FFFFFFFFFFFFFFFFF  
FFFF:F:FFFFFFFF:FFFFFFFF:FFFFFFFFFFFFFFFFFFFFF:  
@A00721:190:HGJW7DSXY:4:2207:3233:31172\_1:N:0:TCTGCAAG+GCTGCACT  
AACTTGACTGTTGATAATATTACAATAGCTCTTTCTCAGAAGATTAGAGAAGTAACCGGTGAACACGT  
CGGTAGCATTGATTTACTTTTACCGTTAGAACTGAAAAAGATTCTTTTCGAAAAGAAACCTATAAGTT  
ACA  
+  
FF,FFFF:FFFF:FFF:FFFFFFFFFFFFFFFFFFFF,F:F:FFF,FFFFFFFFFFFF:F,F,FF,FF,F  
:F,FFF,:FF:FFFF:FFFFFF:FFF:FF:F:FFFFFF:FF:FFFFFFFF:FFFFFFFFFFFFF  
FFF  
@A00721:190:HGJW7DSXY:4:2205:5177:29246\_1:N:0:TCTGCAAG+GCTGCACT  
TATATTAAAGAAATAAAAATACTTCAAGTACCTGAACCTTACATTTTTAATGGTATGGTATAATGTGT  
CTTACAAATAGAACCTTCACTCTCGGTAATGAGAGTGTATTCCTTAATATTCTAGTAACCGCTATGTG  
GGC  
+  
FFFFFFFFFFFFFFFFFFFFFFFFFFFFFFFFFFFFFFFFFFFFFFFFFFFFFFFFFFFFFFFFFFFFF  
FFFFFFFFFFFFFFFFFFFFFFFFFFFFFFFFFFFFFFFFFFFF:FFFFFFFFFFFFFFFFFFFFFFFFFFF  
FFF  
@A00721:190:HGJW7DSXY:4:2210:3115:28432\_2:N:0:TCTGCAAG+GCTGCACT  
TTTAAATGCTAGGAAAATTTAGAAAACTCCATTGTATAGTTCAAGGAGTACTTAATTCAATAGCTT  
TAGTATTATTTACTATCGCCTTTATTGAAAATTGTATAAGAGTTAATT  
+  
FFFFFFFFFFFFFFFFFFFFFFFFFFFFFFFF::FFFFFFFFFFFFFFFFFFFFFFFFFFFFFFFFFFFFF  
FFFF,FFFFFFFFFFFFFFFFFFFF:FFFFFFF:FFFFFF:FFFF:FFF  
@A00721:190:HGJW7DSXY:4:2403:32452:2206\_1:N:0:TCTGCAAG+GCTGCACT  
ACATACCATAACCTACCATGACCAATCATCGCTCCAAGTGGCACGCCAGACGTAGGGTCAAACCTACT  
ACCGCCGGTCGGCAGATCGGCACCACTGGTCTCTACGTTACGGGACCCGCTGTGCAGAATAACCTTCC  
CAA  
+  
:FFFF:FFFFFF,FFFF,FF:FFF,,FFF:FF:FFFFFFFFFFFF,:FF:FF,FF:F,FFFF:FF:F  
FFFF:FFFFFF,FFF:FFFFFFFFFFFFFFFFFFFFFFFFFFFFFFFFFFFFFFFFFFFFF  
FFF  
@A00721:190:HGJW7DSXY:4:1307:22110:29637\_2:N:0:TCTGCAAG+GCTGCACT  
CACAGAAGAAGGCTGAAGGTGTTACCGACGACCACTCAAAGGAAACGGGCTGTTGCCAGAGGAAA  
GCAGCGACCACCGAGGTGCTCGTAACATTGACGGCAGTCCCGTCATC  
+

@A00721:190:HGJW7DSXY:4:1208:30255:29810\_1:N:0:TCTGCAAG+GCTGCACT  
CTGAGGCAGTACCTCAGTCAAAAGTCACATTCACCACTCCCATACCAATCAATGATGTGACTATACAG  
TTCGGCCATTTCAGAGTGGTCAATACGTCGTGGGAGGTACTGAAGCCTTCCCCTCCGCTGGCACGAA  
GAA

@A00721:190:HGJW7DSXY:4:1261:8458:8500\_1:N:0:TCTGCAAG+GCTGCACT  
CCAATCAATAGTTCTTCTGACCAGAATGAAAAGGGGTTTACCAGGGTAGTCTCTAAGTCTACCAGGAA  
GAGGGGAAATGTCCCCAAAACGTAGAAGAATAAAGGGAAAGGTCCATCAGGACCTAAGAAGGGGAAAT  
TAC

@A00721:190:HGJW7DSXY:4:1265:3812:15076\_2:N:0:TCTGCAAG+GCTGCACT  
GGAAGATCTCCCACCATCTGGGGTTGGGAATAAGAAATCTGCACGGGCCAAAGAGGCCGCTGCTACGA  
AGTCGCTGAAGGCGGCTTGGGTCATTAAGGGTAGCTGTAAAGTTGCGC

@A00721:190:HGJW7DSXY:4:1263:10411:22999\_1:N:0:TCTGCAAG+GCTGCACT  
ATCTTTGAGACCAAGACTCTCTACAGTAGGTTCTGTCCTACTATGAGCAAATCTGTTGAATTCGTAC  
TGAGGACGAAGGTGAGAGGACTTTTGGCTACTGGCGACAACTGAGAGCAGTCGCTGGGGAAAGAGAA  
TTG

@A00721:190:HGJW7DSXY:4:2363:13702:33614\_2:N:0:TCTGCAAG+GCTGCACT  
ACGCTTCGAGCTTGAGTGTGACGAGGCCGGTGACGTTTTTGTCAACGGCGTGTGGAGGATTTTATCCG  
CGCTTA ACTATGGGGCGAAGATCCCCTATGGAGTCTTGAAGGACTTAG

@A00721:190:HGJW7DSXY:4:2206:22761:30514\_1:N:0:TCTGCAAG+GCTGCACT  
GCATGTCACCCCTTAAGCACCGAGGTAAGCTCGGGACTTACAAGAGAGAGTGTGAGAGAGTCGCTCTCA  
CAATTTTTGCCCAGAAAGAGGGCGTTCTGAAAGATGAGGTTAAACTAATGCTCAATCTGTTGGTGAG  
GGT

@A00721:190:HGJW7DSXY:4:1273:25409:17942\_2:N:0:TCTGCAAG+GCTGCACT  
GGTTCTGGGAGGCTGCTTTCCTCCATAATTACAACCTCTCTTTAGAGAGCATTAGAAGGAAGTTGGGC  
AAATCCCACATATGGTAGACGTTGTCACACTTTTCTTGAAAATTTTT

@A00721:190:HGJW7DSXY:4:2466:5620:33082\_1:N:0:TCTGCAAG+GCTGCACT  
TTGGGGGATTCGATGTGAGAAGGTGGAAGGTGTCAAGGGTCTTCTTCATGCTGATCTTTCAGGACCTA

ATCACATCATGATTGATAGTTACGGCTCGTATCGAGTTGGAGGGAGGAAGTTCTCCGAAATTAAAGAC  
GGG

+

FFFF:FFFFFFFF,FFFF,F:,FFFF:FFFF:F,FF:,F:F:FFF,FFFFFFFF,FFF:FFFF:,FF  
:F:F:FFFFFFFFFFFFFF,FF,,F,F:FFFFFFFFF::FFFF,,FFFFFFFF::F::FFF:F,FF  
F:F

@A00721:190:HGJW7DSXY:4:2440:8169:4116\_2:N:0:TCTGCAAG+GCTGCACT  
TCAGAGAGGGGAGCTCTGAAAAGGAACTTCGTCAGAAGATGAGGAAGTCTAAGAGGAGGAGTTTGAG  
GAAGGCTCTAGAGAAGATCTCACCACCTGGAGAAGGCAAGTGGAGAGT

+

FFFFFFFFFFFFFFFFFFFFFFFFFFFFFFFFFFFFFFFFFFFFFFFFFFFFFFFFFFFFFFFFFFFFFFFF  
FFFFFFFFFFFFFFFFFFFFFFFFFFFFFFFFFFFFFFFFFFFFFFFFFFFFFFFFFFFFFFFF

@A00721:190:HGJW7DSXY:4:1535:18349:34741\_2:N:0:TCTGCAAG+GCTGCACT  
AAGAAGGATTATTTGAAGCAGGGGTTACCACTTCCTAAGGTGGATGAGGGAGGTTGTTTCTTTGGAGT  
TTTAGATAATCTTTTGAGAAGGGGTCATAGAGCCAGCAAGAGAAGCTT

+

FFFFFFF:FFFFFFFFFFFFFFFFFFFFFFFFFFFFFFFFFFFFFFFFFFFFFFFFFFFFFFFFFFFFFFFF  
FFFF,FFFFFFFFFFFF:FFFF:FFFFF:FFFFFFFFFFFF:FF:

@A00721:190:HGJW7DSXY:4:1677:20410:7686\_2:N:0:TCTGCAAG+GCTGCACT  
TATAATTTAGGTCAACTTGGGGTTTCGAATGTCATTAGTGCCTTACGCTTGAAAGAGGTCCTTTTGAG  
TATCGACAGATCTTTCGATCTTGAGGACGTACATTAACTGGCAGAA

+

FFFFFFFFFFFFFFFFFFFFFFFFFFFFFFFFFFFFFFFFFFFFFFFFFFFFFFFFFFFFFFFFFFFFFFFF:FF  
FFFFFFFFFFFFFFFFFFFFFFFFFFFFFFFF:FFFFFFFFFFFFFFFF:FFFFF

@A00721:190:HGJW7DSXY:4:1469:16043:25708\_2:N:0:TCTGCAAG+GCTGCACT  
ATATTGTTCCCTTCCGGGAAGTTGTGGGATTAACTTTGACTCAACTACTCCGATCAGATCCGGATGGT  
TTGATTGGTATGGACTACTCGACTTTTGATCTGGAGTTGTCTAGGGTC

+

FFFFFFFFFFFFFFFF:FFFF,FF,FFFF,FFFFFFFFFFFFFFFF:FFFFFFFFFFFFFFFFFFFF::FF,  
::FFFFFFFFFFFFFFFF:FF:FF:FFFFFFFFFFFF:FFFFFFFFFFFF

@A00721:190:HGJW7DSXY:4:2620:26313:32346\_2:N:0:TCTGCAAG+GCTGCACT  
CGATAAGGTGAAAAATATGCAGGTCAAAGATTCTGTAGCTCTGAGGGCGGTTGAGGGAGCCGTTTTGG  
CCGACTTTAACTATTCTAAGAGTCTTTATGATTCAAACCTATCGTTG

+

FFFFFFFFFFFFFFFFFFFFFFFFFFFFFFFFFFFFFFFFFFFFFFFFFFFFFFFFFFFFFFFFFFFFFFFF  
FFFFFFFFFFFFFFFFFFFFFFFFFFFFFFFFFFFFFFFFFFFFFFFFFFFFFFFFFFFFFFFF

@A00721:190:HGJW7DSXY:4:2226:31982:28917\_2:N:0:TCTGCAAG+GCTGCACT  
GGCTTAATGTCGCGCAGTTTCCAGAATTGCGGTTGAAGTTCACCCATTCTATCTTGTATGATCACGCC  
GTCGCAGCCATATCGAGACTATGTTATAATCACTTGTTAAAGTACAGA

+

:FFFFF,:F:FFFFF:FFF,FFFFFFFFF:FFF,,FFFF,F,,FFFF::F:F:F,,,:F,FFFFFFF  
FFF:FF:FFF,FF,FF,:FFF:F::,,FFFF,F::,FF:FFFFFFF:

@A00721:190:HGJW7DSXY:4:1368:10402:27806\_2:N:0:TCTGCAAG+GCTGCACT  
ATTATTGATATTGGAGGCGATATTCGTTTTCATATCCAAACTCCTTGAATGGAGTACATATTTGCAA  
CCCTATTCTTGATGTGAAAGATGCATCGAGGTATACGTCTAGGAACAT

+

FFFFFFFFFFFFFFFFFFFFFFFFFFFFFFFFFFFFFFFFFFFFFFFFFFFFFFFFFFFFFFFFFFFFFFFF  
FFFFFFFFFFFFFFFF:FFFF:FFFFFFFFFFFFFFFFFFFFFFFFFFFFFFFF

@A00721:190:HGJW7DSXY:4:1335:9417:18145\_2:N:0:TCTGCAAG+GCTGCACT  
GCTATCGGAGGGAAGCAAAATGTTTCGTTCTGTTACAAGAACGCTTTGGATTGTGACCATAAAGCCTC  
AGTTGCGATAGCTGTAGAGGTATACGATATCTCTCTTGATGATGTAGC

+

FFFFFFFFFFFFFFFFFFFFFFFFFFFFFFFFFFFFFFFFFFFFFFFFFFFFFFFFFFFFFFFFFFFFFFFF  
FFFFFFFFFFFFFFFFFFFFFFFFFFFFFFFFFFFFFFFFFFFFFFFFFFFFFFFF



$+$ 

@A00721:190:HGJW7DSXY:4:1623:14434:32283\_2:N:0:TCTGCAAG+GCTGCACT  
AACAGCGTCATTTTCAGATGCTAACTTTCCTCTTGTAAGTTAATTATTAATAATTCTTCTCACTCTT  
GACGAGAATTAATACTGTTTACTCTACCCATAACTTATTTTTCAAAAA

 $+$ 

@A00721:190:HGJW7DSXY:4:2448:14597:4507\_1:N:0:TCTGCAAG+GCTGCACT  
CTGATGTTTTCTACAGAGTGCAGTCGTTTCAACACTTATCACCACCTTTGAAAGGAAAATAATTGGT  
GATGAAAATACGTATGTCGGTGGGGTTCTCAAGGCTCTCATGCCACTGGGATTCTAAGGGGTTCCAT  
AAG

+

@A00721:190:HGJW7DSXY:4:1502:24071:7044\_2:N:0:TCTGCAAG+GCTGCACT  
TTTGGTCCTTACGTCTTAAGTAATTTGGATGTTGTGCGAAACTATCAGGTTCTTGTCACGATTCTTAA  
AAGAAGTTTATTAAACTTCAGAGTCTCTTGGAAGTCCAGGTAGCTAA

+

@A00721:190:HGJW7DSXY:4:1661:1154:19742\_2:N:0:TCTGCAAG+GCTGCACT  
GGGAAAAGAGACCTCTGTTGGTAGAGGAGTTGAGAGAATTACTCAGATTCAATCTGGCATCACTGAAC  
GTCTACAACGAGTTAGGGAGTGGCTAGGTTTTAAAGATCCTTTGCAC

+

@A00721:190:HGJW7DSXY:4:1345:12527:17143\_2:N:0:TCTGCAAG+GCTGCACT  
ACGTCGCGGAAAACGATGAAGATTTCCACACTGTTTCGAGAATCTTCTGATGCTGAATTTGAGGAAAAT  
TTTTCGGAAGTTTTTGGTATAAATCCTGATGGCTCAGTACAGGGAGGA

+

@A00721:190:HGJW7DSXY:4:1455:14163:5791\_1:N:0:TCTGCAAG+GCTGCACT  
AACCTTCTTTTATCATTGCAACAGGACTTTGAGAAGACTGTTGAAATGGACAAAATCTGGGATCATAG  
GTATGTGTCACGCTACACTCGAAATATGGGCCCTCATAAGGAAGTATAGTTGGCGTCTTGTCGTTGAC  
GTC

+

@A00721:190:HGJW7DSXY:4:1350:28094:27289\_1:N:0:TCTGCAAG+GCTGCACT  
TGTTCAAGGAAGATCTCTACAGAGATTATCGAGAGTTGTGATCTAGTTCTAAATTTAGGTCGACGGACT  
TTAGCAACTTTAGATAAAATCTTTCCGGGCTCAATGACCTTTGCTATGTACGTGGATCTAATGCTTGG  
TGA

+

[illegible]

@A00721:190:HGJW7DSXY:4:2459:11632:18349\_2:N:0:TCTGCAAG+GCTGCACT  
CATCGCAAAGAAGACTTTATTAGTTCATGAAGTTCTTACACTTCTCGCGACTAATGTCAGCTTCACTA  
CAAAGGCGTTACGTAAAGTAGTTTTACGCTTTATCTTAAAGCATTAC

+

FF:FFFFFFFFFFFF:FFFFFFFFFFFFFFFFFF:FFFF:FFFFFFFFFFFF::FF,FFFFFFFFFFFF,FFFFF  
FFF:F:FFFFFFFF:F,,,:FFF:FFFFFFFFFFFF:F:FFFF:FFFF

@A00721:190:HGJW7DSXY:4:1372:5837:7874\_1:N:0:TCTGCAAG+GCTGCACT  
ACTTTTTGAATATGACAGAAGCTCGCCATATCAGATTAGAGACATGCCAGTTAGAGTTCTTCTAACCA  
GGACTGATGGTGAGATTCTTTTACCTTTTGGAGGTCCAGGAACCTTTACTCCTAGTGTCTTTTCTAGA  
GTC

+

FFFFFFFFFFFFFFFFFFFFFFFFFFFFFFFFFFFFFFFFFFFFFFFFFFFFFFFFFFFFFFFFFFFFFFFFFFFF  
FFFFFFFFFFFF,FFFFFFFFFFFFFFFFFFFFFFFFFFFFFFFFFFFFFFFFFFFFFFFFFFFFFFFFFFFFFFFF  
FFF

@A00721:190:HGJW7DSXY:4:1239:29098:33254\_2:N:0:TCTGCAAG+GCTGCACT  
CGGAGGATGACAGGTGGGAGACCGCTCAATAACACTCTATTGAATCCCTTTTCCACGATGAAAGCTCT  
TTATGAGGTGCTCCATGCAAATTTACAGTTCCTCTTTGGTGATATCGC

+

FFFFFFFFF:FFFFFFFFFFFFFFFFFFFFFFFFFFFFFFFFFFFFFFFFFFFFFFFFFFFFFFFFFFFFFFFFFFFF  
:FFFFFFFFFFFFFFFFFFFFFFFFFFFFFFFFFFFFFFFFFFFFFFFFFFFFFFFFFFFFFFFFFFFF,FFFFFFFFFFFFF

@A00721:190:HGJW7DSXY:4:1239:29098:33254\_1:N:0:TCTGCAAG+GCTGCACT  
TTTTGATAAATTTGTTGGAATCGATAATGATACTGACGAAGTTCTATTACCACCCTTGTCATTGATA  
CAAACATTCTAGGTGATGCTTTCTTAGAGGCTCGTCTAGCCGCTGAGATTCGTCTTACCTATTTACAA  
TCT

+

FFFFFFFFFFFFFFFFFFFFF:FFFFFFFFFFFFFFFFFFFFFFFFFFFFFFFFFFFFFFFFFFFFFFFFFFFFFFFFFFFF  
FFFFFFFFFFFFFFFFFFFFFFFFFFFFFFFFFFFFFFFFFFFFFFFFFFFFFFFFFFFFFFFFFFFFFFFFFFFFF  
FFF

@A00721:190:HGJW7DSXY:4:1214:4698:13260\_1:N:0:TCTGCAAG+GCTGCACT  
GATAACGATTTAGTACTGGGAAATGGTGGTAGTCAGTTTACTACTTTTCTTTCCCTCCCCTTTTTTCGA  
TTGGATTCGACGGGGTCTTCGTCTCACGACTAATTTGATAAGGTTTTCTTTTATGGGACTCTTGTTT  
GTA

+

FFFFFFFFFFFFFFFFFFFFFFFFFFFFFFFFFFFFFFFFFFFFFFFFFFFFFFFFFFFFFFFFFFFF:FFFFFFFFF:FFFFFFFFFFFFFFFFFFFF  
FFFFFFFFFFFFFFFFFFFFFFFFFFFFFFFFFFFFFFFFFFFFFFFFFFFFFFFFFFFFFFFFFFFFFFFFFFFFF  
FFF

@A00721:190:HGJW7DSXY:4:2618:7229:3959\_2:N:0:TCTGCAAG+GCTGCACT  
TATTACTTCGGAAGTTCTTAATGTAGGTCTCCTAGTACTTAAGGGTTTATGTTTCGGTTTCAGCTGGA  
TGGATCTTTTGATGGTATGTTTCACATTGCGTGATCACTTCCCGTGGA

+

FFFFFFFFFFFFFFFFFFFFFFFFFFFFFFFFFFFFFFFFFFFFFFFFFFFFFFFFFFFFFFFFFFFF:FFFFFFFFFFFFFFFFFFFFFFFFFFFFF  
FFFFFFFFFFFFFFFFFFFFFFFFFFFFFFFFFFFFFFFFFFFFFFFFFFFFFFFFFFFFFFFFFFFF,FFFFFFFFFFFFFFFFFFFFF

@A00721:190:HGJW7DSXY:4:1129:32606:26584\_1:N:0:TCTGCAAG+GCTGCACT  
ATTAAACATAAAATCCAGCGATTCTATTATGTCGCTAAAGCCTGTCCAGTTGTTCGATGATGTTTCGGGC  
TGTGGGGATTAACTTCCCTCGTGAAACTTACGACGATGTTCTCGCTCGCATTTACAAAGGATTACTAA  
GTC

+

FFFFFFFFFFFFFFFFFFFFFFFFFFFF:FFFFFFFFFFFFFFFFFFFFFFFFFFFF:FF:FFFFFFFFFFFFFFFFFFFF  
FFFFFFFFFFFFFFFFFFFFFFFFFFFFFFFFFFFFFFFFFFFFFFFFFFFFFFFFFFFFFFFFFFFFFFFFFFFFF  
FFF

@A00721:190:HGJW7DSXY:4:1468:29649:35524\_2:N:0:TCTGCAAG+GCTGCACT  
ACTTCTAATTTTAGGAAACGTCGCGAAAAGAAAGTACATGATGATGTCTTTGTGCGAAAATTATCGACG  
GGAAGTTCTAATATAGGATGCTGATGACATTATGTCAACGGATACCCA

+

@A00721:190:HGJW7DSXY:4:1335:10719:17143\_1:N:0:TCTGCAAG+GCTGCACT  
AGAAACCGTCTCAGGAAGTGTCTCCACTGATTCGGAATTAGAGAAAGACGACCTTCTTGTGGGGACTG  
AGACCTCTGAATTTTCAGGGTGCCCTGATGAGGACGTTGAAAGGGATAATTTCAACTCTGAGACTTCT  
AAG

@A00721:190:HGJW7DSXY:4:1125:9073:17519\_1:N:0:TCTGCAAG+GCTGCACT  
AGACCAGAAACGTAACAAGAAGTAAGGTAGGAAGGGGAGAAAACAGAACAGCGAGCGGTTGAAG  
AGAAAAGTATGATATGGTTGCGGCTGATCGTACCCCAATTCTGCTAGAAAGATCACTCTCGGCGATACC  
ACT

@A00721:190:HGJW7DSXY:4:1154:3821:36730\_2:N:0:TCTGCAAG+GCTGCACT  
TAGTGGTCGTTCTTTTGGTGATTTTATCAAAGAGAAAGTTTCTGCTAGTCGCGACGATAGTATTTATC  
GGAGTGATATTAACAAGTTAAACTTCGAACTGACCACTTACAAGAGTG

@A00721:190:HGJW7DSXY:4:1564:9109:26788\_2:N:0:TCTGCAAG+GCTGCACT  
TCAGTTTTCCAAAAAGCTATTAATAGCAGTTGCGGGCTATAATACCGCCTCCAGATTACTCTAACT  
GAATCCACTCTCTTGGGATATAAATGAGTACATCTATAATAGAGTTTT

@A00721:190:HGJW7DSXY:4:1569:10068:29794\_1:N:0:TCTGCAAG+GCTGCACT  
AACATGAATTAGTTATTGAAAGTCTTGACCCTCACGTCTCACTTTATCACCTTGGAGATGGTAAAGTC  
ATTAACAAAGGAAATGTTAAGGCTGATGACTTAAATTTGCACTTCTGCTTCGACGGTAATTCCATAAG  
ACC

@A00721:190:HGJW7DSXY:4:1433:28519:26929\_1:N:0:TCTGCAAG+GCTGCACT  
AACCTTTCTCGTTCTTCATGAAGATCTTCGAGTGTTTTATAGTGAGTTATTCTTGCGAAGGTTCAAG  
TCGATTGATTTTGTTGACTACGATCTCTCTTGTAATAAGAAGTTCTTCGCAGTTGAATCTCCACCAGG  
TGG

@A00721:190:HGJW7DSXY:4:1242:13214:3490\_2:N:0:TCTGCAAG+GCTGCACT  
GCGACTTTTGTGCAATTTTCGCAAAAGTCTTGAAGTACGTATTGTCACTGCTAATCGTAATTCGCG  
AGAAGAGATAGTGACTAAAGTTTTGGCACTTCTAGTTCATCGCGGTAT

@A00721:190:HGJW7DSXY:4:1438:4164:10394\_2:N:0:TTCTGCAAG+GCTGCACT  
CAGACGTGAAAGTTATGATGAGTGATCGTATTAGAACAGCTGATTCTTATTGCATGAACGTCGCTGAG

GTCAAACCTGTGGACGTTCTTTTCATCGACGAATTATTCATGATTCAC  
+  
FFFFFFFFFFFFFFFFFFFFFFFFFFFFFFFFFFFFFFFFFFFFFFFFFFFFFFFFFFFFFFFF  
FFFFFFFFFFFFFFFFFFFFFFFFFFFFFFFFFFFFFFFFFFFFFFFFFFFFFFFF  
@A00721:190:HGJW7DSXY:4:1476:28971:4758\_2:N:0:TCTGCAAG+GCTGCACT  
CATCTACTTAAGGCGGCTTATACCATAGGTTACGGTGATTCCAATCAAATCGGATTCATCAATCGTAT  
TGATCTCCAAGTCGCAAACTACTTCAACATCAACGACATCATTCTTGA  
+  
:F:,FF,,FFFFFF,FFF,FFFFFFF,:,,,FFF:FFFFFF:FFFFFF:FFFFFFF,F,FF:FF:F:FFF  
F,FFFFFFFFFFFF,FFFFFFFFF,F,F:FFFFFFFFFFFFFFFFF:,,FFF  
@A00721:190:HGJW7DSXY:4:2514:13313:20635\_2:N:0:TCTGCAAG+GCTGCACT  
TTATCGAAGTCTCAGTTATCGCTGCCCGGCCGACGTTTGTGCGGAACCTCAGAGGTTTACGGCAGAA  
AAATTTCTCCTGCTTGTAAATTCGAGAGAGGACACTATGGAAATTAGAC  
+  
FFFFFFFFFFFFFFFFFFFFFFFFFFFFFFFFFFFFFFFFFFFFFFFFFFFFFFFFFFFFFFFF  
FFFFFFFFFFFFF:FFFFFF:FF,FFF:FFFFFFFFFFFFFFFFFFFFFFFF  
@A00721:190:HGJW7DSXY:4:2333:9787:21104\_2:N:0:TCTGCAAG+GCTGCACT  
TATTACTTTCACTCAAGGTGAAAAGTTTGAAATTAACAAAGTCCTTGGTAAGAGTAAGGTTAAATGTG  
AAGATGCTCAGACTATTCAAGTTCAAGGTAATACTTACCAGCACG  
+  
FFFFFFFFFFFFFFFFFFFFFFFFFFFFFFFFFFFFFFFFFFFFFFFFFFFFFFFFFFFFFFFF  
FFFFFFFFFFFFFFFFFFFFFFFFFFFFFFFFFFFFFFFFFFFFFFFFFFFFFFFF:  
@A00721:190:HGJW7DSXY:4:2228:2727:24752\_2:N:0:TCTGCAAG+GCTGCACT  
TTTTGCATCACAACACATATTACCGTTGCTCTATCACGACGTTGAATCTTTACGATACTTTGTTA  
TCAATGTAAAGTTAAACGATGCTACTTGTGAGAGGATCAATCACAGTA  
+  
FFF:FFFFFFFFFFFFFFFFFFFFFFFFFFFFFFFFFFFFFFFF:F:FFFFFFFFFFFFFF:FFFFFFFFF  
FFFFFF:FFFFFFFFFFFFFFFFFFFFFFFFFFFFFFFFFFFFFFFF:  
@A00721:190:HGJW7DSXY:4:1563:3866:31391\_2:N:0:TCTGCAAG+GCTGCACT  
ACGGGAGGTTGCAGATTCAACCCCTTATATCGAGGCTATCGAGGACGATGAGTATCTTGAAGTTGTTG  
ACGACAAGCCTCAAGAGGGTAGAGGACCACCTGGATCTTCTACTGTCT  
+  
FFFFFFFFFFFFFFFFFFFFFFFFFFFFFFFFFFFFFFFF,FFFFFFFFFFFFFFFFFFFFFFFF  
FFFFFFFFFFFFFFF:FFFFFFFFFFFFFFFFFFFFFFFFFFFFFFFFFFFFFFFF  
@A00721:190:HGJW7DSXY:4:1606:7075:27398\_1:N:0:TCTGCAAG+GCTGCACT  
AACCACCTTAACGTCACTCGGTAATCTTTCAGCCGAATTAAGTACTAATGAGTTCAAGTCGGTTGTGCG  
ATCGAATTAAGATCAAGGCTAATACCTTTATAGGTAAGAAGCCCCTTGAGCCGCGTAGTCAGCGCGTT  
TAG  
+  
FFFFFFFFFFFFFFFFFFFFFFFFFFFFFFFFFFFFFFFFFFFFFFFFFFFFFFFFFFFFFFFF  
FFFFFFFFFFFFFFFFFFFFFFFFFFFFFFFFFFFFFFFFFFFFFFFFFFFFFFFF  
FFF  
@A00721:190:HGJW7DSXY:4:1512:24578:3787\_1:N:0:TCTGCAAG+GCTGCACT  
TACCGAGTCTCCAAGAGAATATTTATTCTTATGAGGCTCGAACTTCAACGTTTTCACAAACGGAAAGA  
CATATCGCACCCGAAATTTTGGGCAGAATGCTCTTAACGCGGTTCTTGAACGGTGTTTTGATCAGTC  
TAA  
+  
FFFFFFFFFFFFFFFFFFFFFFFFFFFFFFFFFFFFFFFFFFFFFFFFFFFFFFFFFFFFFFFF  
FFFFFFFFFFFFFFFFFFFFFFFFFFFFFFFFFFFFFFFFFFFFFFFFFFFFFFFF  
FFF  
@A00721:190:HGJW7DSXY:4:1267:11677:15765\_2:N:0:TCTGCAAG+GCTGCACT  
TATAGGAGACTCAGTTAACCTGAGAGCTCCTCAATTGATAGATTGGGTCAACAATAGGGACGCTAGTA  
TACTTCGTAAAGTCGACAGCGAAATGGTCAATATTGATAATTGGACCG  
+



FFFFFFFFFFFFFFFFFFFFFFFFFFFFFFFFFFFFFFFFFFFFFFFFFFFFFFFFFFFFFFFFFFFFFFFF  
FFFFFFFFFFFFFFFFFFFFFFFFFFFFFFFFFFFFFFFFFFFFFFFFFFFFFFFFFFFFFFFFFFFFFFFF  
@A00721:190:HGJW7DSXY:4:1128:21992:10958\_1:N:0:TCTGCAAG+GCTGCACT  
AGCTCATGGTGAAGGAAGCTAAGGTAACTTGATGCTTCAGCCTTTTCGAAGCATAACCCCGCA  
CAGAATATCGTTTATCACGCAAATTTATTAATGCAATTTTCGGACCTATCTTTAAGGTTCTTGTGAG  
GAG  
+  
FFFFFFFFFFFFFFFFFFFFFFFFFFFFFFFFFFFFFFFFFFFFFFFFFFFFFFFFFFFFFFFFFFFFFFFF  
FFFFFFFFFFFFFFFFFFFFFFFFFFFFFFFFFFFFFFFFFFFFFFFFFFFFFFFFFFFFFFFFFFFFFFFF  
@A00721:190:HGJW7DSXY:4:2664:16396:14763\_2:N:0:TCTGCAAG+GCTGCACT  
CCAGTGACGATTTCTCCCGAAGCTCTTCTCTCTTAGGAGGTCATGACTACTATAAGGGTGAA  
ATCGATTTTTCGAAGTTTGACAAATCTCAAGATTTCTTTTGTAAGCC  
+  
FFFFFFFFFFFFFFFFFFFFFFFFFFFFFFFFFFFFFFFFFFFFFFFFFFFFFFFFFFFFFFFFFFFFFFFF  
FFFFFFFFFFFFFFFFFFFFFFFFFFFFFFFFFFFFFFFFFFFFFFFFFFFFFFFFFFFFFFFFFFFFFFFF  
@A00721:190:HGJW7DSXY:4:1302:21658:20650\_2:N:0:TCTGCAAG+GCTGCACT  
TTCGATGCTGAATTTCTTGAAGTTTGAGTGCCAGTGAATATTTTGTACGCCAGGAGTATCCATAA  
CGATTTGTCATTTACCACCTTTGCTCAACGACGAAGTGAACGGCCAA  
+  
FFFFFFFFFFFFFFFFFFFFFFFFFFFFFFFFFFFFFFFFFFFFFFFFFFFFFFFFFFFFFFFFFFFFFFFF  
FFFFFFFFFFFFFFFFFFFFFFFFFFFFFFFFFFFFFFFFFFFFFFFFFFFFFFFFFFFFFFFFFFFFFFFF  
@A00721:190:HGJW7DSXY:4:2469:6334:28651\_1:N:0:TCTGCAAG+GCTGCACT  
TAATTGTATGATCACTTTGATGATTTTATCACTTTATTATGACCTTGAAAGTTTTCGGCTGTGGTTG  
TCGCTGGGACGATTCCATTCTGTTTTCAAAGACTCCAATAACTGATCATTCTGATCATATGATTTTG  
GAC  
+  
FFFFFFFFFFFFFFFFFFFFFFFFFFFFFFFFFFFFFFFFFFFFFFFFFFFFFFFFFFFFFFFFFFFFFFFF  
FFFFFFFFFFFFFFFFFFFFFFFFFFFFFFFFFFFFFFFFFFFFFFFFFFFFFFFFFFFFFFFFFFFFFFFF  
@A00721:190:HGJW7DSXY:4:2313:5538:2096\_2:N:0:TCTGCAAG+GCTGCACT  
TGCTCGCGATTTATTCTTTTGTCAATGATTACATCTACTTCGTTCTGATCCTTACAAGATCATCGT  
TAAGTTAGGTAAACCCCTAACCGATGTTACTCTTGTTAGGACTTTGGGA  
+  
FFFFFFFFFFFFFFFFFFFFFFFFFFFFFFFFFFFFFFFFFFFFFFFFFFFFFFFFFFFFFFFFFFFFFFFF  
FFFFFFFFFFFFFFFFFFFFFFFFFFFFFFFFFFFFFFFFFFFFFFFFFFFFFFFFFFFFFFFFFFFFFFFF  
@A00721:190:HGJW7DSXY:4:1328:22218:1986\_2:N:0:TCTGCAAG+GCTGCACT  
AGGTTGTTGTTTGGCGATTAGCTCTTGCAGCTAATATTCGATATTCGATTGAGGGTCGCTATACCTAT  
TCGGCTATCTGTGCTTTGAATTGTATAAGATCAAATTTTAAACGATTC  
+  
FFFFFFFFFFFFFFFFFFFFFFFFFFFFFFFFFFFFFFFFFFFFFFFFFFFFFFFFFFFFFFFFFFFFFFFF  
FFFFFFFFFFFFFFFFFFFFFFFFFFFFFFFFFFFFFFFFFFFFFFFFFFFFFFFFFFFFFFFFFFFFFFFF  
@A00721:190:HGJW7DSXY:4:1322:4869:36886\_1:N:0:TCTGCAAG+GCTGCACT  
TGATGTGGAGGGAGTTCTTGAAGCATCCCGACCTTCTTGTGAAAATTTTGTGCGGTTTCATAAGA  
TTATCAGTAATCCTGATTCTACTACGGATTCATGGACCTCCATCCTGTACCTCTTCTGGAGAGACGT  
ATC  
+  
FFFFFFFFFFFFFFFFFFFFFFFFFFFFFFFFFFFFFFFFFFFFFFFFFFFFFFFFFFFFFFFFFFFFFFFF  
FFFFFFFFFFFFFFFFFFFFFFFFFFFFFFFFFFFFFFFFFFFFFFFFFFFFFFFFFFFFFFFFFFFFFFFF  
@A00721:190:HGJW7DSXY:4:1571:19352:27931\_2:N:0:TCTGCAAG+GCTGCACT  
CTTCGAGACAGGTGATATTGTTGAGCGAGAGCGACCAAGATCTAAATTCGGTAACGGTGCGTGGCGCT  
TTATTTTAAAAAGCTCCCTCCTCTCGCAAGTTTGATCTGATACTTATC  
+

FFFFFFFFFFFFFFFFFFFFFFFFFFFFFFFFFFFFFFFFFFFFFFFFFFFFFFFFFFFFFFFFFFFFFFFF  
FFFFFFFFFFFF:FFFFFFFFFFFFFFFFFFFFFFFFFFFFFFFFFFFFFFFFFFFFFFFF  
@A00721:190:HGJW7DSXY:4:2402:20066:3302\_2:N:0:TCTGCAAG+GCTGCACT  
TGATCAGTCTCTGACTTGACCATCTTTTCAATTTAAATGACGATCATTAAAGACTCTCTTTCTTCTTTGT  
TTCCTTCTTTGCACTGATTTTTCTCATCAGCTTGTGTTTTACCTAAT  
+  
FFFFFFFFFFFFFFFFFFFFFFFFFFFFFFFFFFFFFFFFFFFFFFFFFFFFFFFFFFFFFFFF:FFFFFFFFFFFFFFFF:FFFFF  
FFFFFFFFFFFF:FFFFFFFFFFFFFFFFFFFFFFFFFFFFFFFFFFFFFFFF:FFF:FF:F  
@A00721:190:HGJW7DSXY:4:1465:30011:5744\_2:N:0:TCTGCAAG+GCTGCACT  
GATAACAACATCAGTTGATTAAGACTCTTCCGAAAGGCGAACTTTGGGAATTTGAAGCTCAGGGTGA  
AGCACAACGTTTGACCGTGACGAAGTGTGGTGTCTTGATCTACGTTA  
+  
FFFFFFFFFFFFFFFF:FFFFFFFFFFFFFFFFFFFFFFFFFFFFFFFF:FFFFF:FFFFFFFFFFFFFFFFFFFFFFFFFFFFFFFF  
FFFFFFFFFFFFFFFFFFFFFFFF:FFFFFFFFFFFFFFFFFFFFFFFFFFFFFFFFFFFFFFFF  
@A00721:190:HGJW7DSXY:4:2464:30689:33505\_1:N:0:TCTGCAAG+GCTGCACT  
CACTACCACTTATTACGATATTTCTTTAGTCGATGGGTTTTCGACGCCTTTAAGCGTCTTCTGTTCAT  
CGCAACCAGATGATATCTTCTATTGAACTTATGTTTCGATCAGTGTCTTCTATCAGGAGGAAAAC  
ACT  
+  
FFFFFFFFF:FFFFFFFFFFFFFFFFFFFFFFFFFFFFFFFFFFFFFFFFFFFFFFFFFFFFFFFF:FFFFFFFFFFFF  
FFFFFFFFFFFFFFFFFFFFFFFFFFFFFFFFFFFFFFFFFFFFFFFFFFFFFFFFFFFFFFFFFFFFFFFFFFFFFFFF  
FFF  
@A00721:190:HGJW7DSXY:4:1508:31937:30686\_2:N:0:TCTGCAAG+GCTGCACT  
TCACTTTGTGTGTACTTGTCTCTATTTTAAGTTTTGTCTTCTTGTGTTGCTTATTCTATTAATCACT  
CATTTTAGTGAGATTATTAACAAACGCACTAAACGTCTTCGACAACAG  
+  
FFFFFFFFFFFFFFFF:FFFFFFFFFFFFFFFF:FFFF:FFFFFFFFFFFFFFFFFFFFFFFFFFFFFFFFFFFFFFFF  
FFFFFFFFFFFFFFFFFFFFFFFFFFFF,FFFFFFFFFFFFFFFFFFFFFFFFFFFFFFFF  
@A00721:190:HGJW7DSXY:4:1611:5077:6778\_1:N:0:TCTGCAAG+GCTGCACT  
GCCTTACAGAGGGGCGAGCAGCATGACCATAATTGGTATTGACTTTGGTACCACCTTTTCTACTGTCTG  
TCTCGCCTCTTCGAATGAAGTTTTAATGCTTAACAACAATGATAGTGAATTTATACCTACAATCATTG  
GTT  
+  
FFFFFFFFFFFFFFFFFFFFFFFFFFFFFFFFFFFFFFFFFFFFFFFFFFFFFFFFFFFFFFFFFFFFFFFF  
FFFFFFFFFFFFFFFF:FFFFFFFFFFFFFFFFFFFFFFFFFFFFFFFFFFFFFFFFFFFFFFFFFFFFFFFF  
FFF  
@A00721:190:HGJW7DSXY:4:1252:3378:28134\_2:N:0:TCTGCAAG+GCTGCACT  
TGTTTATGGATATGATGCTATTACTCATGATGGTTACGGTCAGGGAGGATTCTCAGTTTACAAGGACC  
TTAAGCGATGGATCGGGGTTAATTCTAAACATTACCCGAAAGACGTG  
+  
FFFFFFFFFFFFFFFFFFFFFFFFFFFFFFFFFFFFFFFFFFFFFFFFFFFFFFFFFFFFFFFFFFFFFFFF  
FFFFFFFFFFFFFFFFFFFFFFFFFFFFFFFFFFFFFFFFFFFFFFFFFFFFFFFFFFFFFFFF  
@A00721:190:HGJW7DSXY:4:1224:7997:1532\_2:N:0:TCTGCAAG+GCTGCACT  
GTACGATGTCGTCTGTCTCGGCGATCACTTTTCACTAAGAATTGGTCTACTTTTGGACAAGGCCAAC  
TTCGTAATCTTCATGAGATCGTTTCTTTCTTTATCTCTTTGTTGTTA  
+  
FFFFFFFFFFFFFFFFFFFFFFFF:FFFFFFFFFFFFFFFFFFFFFFFFFFFFFFFFFFFFFFFFFFFFFFFF:FFFF  
F,FFFFFFFF:FFFFFFFF:FFFFFFFFFFFFFFFFFFFFFFFF:FFFF  
@A00721:190:HGJW7DSXY:4:1165:25382:13009\_2:N:0:TCTGCAAG+GCTGCACT  
GAGTGAAAGGCTTCAATTGTAGTGGTTTGGTCGTTTCAGTACCCAGTCAGTATACCTCTACGCAAAGA  
TATTTTCATGAAAACACAGAGGAACGTACCGGATTACCTGTCTTTCAT  
+  
FF:F:FFF:FFFFFFFFFFFFFFFFFFFFFFFFFFFFFFFF:FFF,FFFF:F:FFFFFFFFFFFFFFFF,F:F  
FFF:FF:FFFF,FFFF:FFFF:FF:FFFF:FF,FFFF::F:FFF:F

@A00721:190:HGJW7DSXY:4:2172:20681:3959\_1:N:0:TCTGCAAG+GCTGCACT  
CTTCGGCCGCTCTCTTTGCTTCGATGTTGGATGTCAAGAAGGGTTCAGAATGGGATTCTACGTAGTT  
TATGACTTTGGTGGTGGTACTTTGATACTTCTATCGTCTTACGTTACGTAATTACTATAGTGTTAT  
TTA

+

FFFFFFFFFFFFFFFF:FF:FFFFFFFFFFFF:FFFFFFFFFFFFFFFFFFFFFFFFFFFFFFFFFFFFFFFF  
FFFFFFFFFFFFFFFFFFFFFFFFFFFFFFFFFFFFFFFFFFFFFFFFFFFFFFFFFFFFFFFFFFFFFFFF:F:FFFFFFF  
FFF

@A00721:190:HGJW7DSXY:4:2412:21748:1297\_1:N:0:TCTGCAAG+GCTGCACT  
ATAATCTTGGAGGTCGTGACGTTGATGAAGCTATAAGAGCGTTCTTATTACGGCGCACTTCTTTACCC  
GCCACCACACAACCTTTCAGTTTCACAACCTGAAGGAGGAGGTTTCTGTTACTGGAAAACCTCGTCAAT  
ACT

+

FFFFFFFFFFFF,FFFFFFFFFFFF:FFFFFFFFFFFFFFFFFFFFFFFFFFFFFFFFFFFFFFFFFFFFFFFF  
FFFFFFFFFFFFFFFFFFFFFFFFFFFFFFFFFFFFFFFFFFFFFFFFFFFFFFFFFFFFFFFFFFFFFFFFFFF  
FFF

@A00721:190:HGJW7DSXY:4:2550:4426:7968\_2:N:0:TCTGCAAG+GCTGCACT  
GATCTAGTGAAATTAACGCGTCCTTTTCTGGAACGTAGTTTACTATTATGAACAAAGTTATCAAAGA  
TAGTGGCATTCAAGGCAAACCTTACCCTGATTCCGGCCGGTGGTAGCTC

+

FFFFFFFFFFFFFFFFFFFFFFFFFFFF:FFFFFFF:FFFFFFFFFFFFF,FFFFFFFFFFFFFFFF,FFFFFFF  
FFFFFFFFFFFFFFFFFFFFFFFFFFFFFFFFFFFFFFFFFFFFFFFFFFFFFFFFFFFFFFFFFFFFFFFF

@A00721:190:HGJW7DSXY:4:1604:32181:23093\_2:N:0:TCTGCAAG+GCTGCACT  
TGAAACAGCTATTAAAGCTGTTGAGCGGGTAATTACACCTAAACGAGCTCGATCTGCCATCGCTGAAG  
GATGTGCACTCTTTTCTGCTACTTTAAACGGAGCGTAGTGTACTCTTCG

+

FFFFFFFFFFFFFFFFFFFFFFFFFFFFFFFFFFFFFFFFFFFFFFFFFFFFFFFFFFFFFFFFFFFFFFFFFFFF  
FFFFFFFFFFFFFFFFFFFF:FFFFFFFFFFFFFFFFFFFFFFFFFFFFFFFFFFFFFFFFFFFFFFFF

@A00721:190:HGJW7DSXY:4:1241:11849:31093\_2:N:0:TCTGCAAG+GCTGCACT  
AAAGGTCTCTATCAAGCTCGTATTATCGTCGCTGCTGGATCTGCGTTACCGTTGAAGGCTAAACTCCA  
AGGTAATTATGAAGACTGTGATTTATCTTCACTCTGGCCTTGTATGA

+

FFFFFFFFFFFFFFFFFFFFFFFFFFFFFFFFFFFFFFFFFFFFFFFFFFFFFFFFFFFFFFFFFFFFFFFFFFFF  
:FFFFFFFFFFFFFFFFFFFFFFFFFFFFFFFFFFFFFFFFFFFFFFFFFFFFFFFFFFFFFFFFFFFFFFFF  
:FFFFFFFFFFFFFFFFFFFFFFFFFFFFFFFFFFFFFFFFFFFF:FF:FFFFFFFFFFFF

@A00721:190:HGJW7DSXY:4:2145:15510:12665\_1:N:0:TCTGCAAG+GCTGCACT  
CATTAATAATTTCAATCTTCTTAAAAAGAAGATAGAGAGTCATACTTTGGGCTATCGTTTCAAGTGCAT  
GGGGTTGGATAGCCAATATTGAAGTGGACACCTCTGGTAGTATCGAAGTAAAGAGATCGGAAGAGCAC  
ACG

+

FFFFFFFFFFFFFFFFFFFFFFFFFFFFFFFFFFFFFFFFFFFFFFFFFFFFFFFFFFFFFFFFFFFFFFFFFFFF:FFFF:  
FFFFFFFFFFFFFFFFFFFFFFFFFFFFFFFFFFFFFFFFFFFFFFFFFFFFFFFFFFFFFFFFFFFF,FFFFFFFFFFFFFFFF  
FF:

@A00721:190:HGJW7DSXY:4:2610:30228:5932\_2:N:0:TCTGCAAG+GCTGCACT  
AAGCATACTACTTTTGCTTTGATTACTCTACCGCCTTACAAGTCTAAGGTTAAAGAGTCGATTAAACA  
AGTTGTACTTATAAATGATTTTATCGCTGGTTGTTATATCGAAAAGTC

+

FFFFFFFFFFFFFFFFFFFFFFFFFFFFFFFFFFFFFFFFFFFFFFFFFFFFFFFFFFFFFFFFFFFFFFFFFFFF,F  
F,FF,F:,FFF,FF:,FFFFF,F,F,F:F,F,FF,F,F:F,FFF,F,

@A00721:190:HGJW7DSXY:4:2311:8124:15499\_1:N:0:TCTGCAAG+GCTGCACT  
CCCAAAGAGAATATCTAAAATATTTACAAAATCTTACCACTATCTACGAACCTAAAGTTCTGAAGACG  
TTGCTTGTGCTTCTCTCTTAAATGGCACTACCTCGGTACAATCTTACTTGGAACGAAGGCGACCTGT  
TCC

+

:FFFFFF:FFFFFFFFFFFF:FFFFFFFFF:FFF,:FFFFFFFF,FF:FFF:FFF,F,,F::FFFFFFFF

FFFFFFFFFFFFFFFF:FFF:FFF,FFF:F:FFFFFFFF:F:F:FFF,FF:,FF,FFF::FFFF:FFF  
FFF

@A00721:190:HGJW7DSXY:4:2618:30291:9455\_1:N:0:TCTGCAAG+GCTGCACT  
GTTCTGTCTATATTAGGTGAAGCGAAATACGATTTCGAACGTCAACGTTACCGAGTTTCGTTTCGTA  
CCTTGATGCTGACTTTTCGTCAATATGATTTGATCTGGTTGCTCAATTCTAAGCGTGTTCGCTTAGTG  
CGA

+

FFFFFFFFFFFFFFFFFFFFFFFFFFFFFFFFFFFFFFFFFFFFFFFFFFFFFFFFFFFFFFFFFFFFFFFF  
FFFFFFFFFFFFFFFFFFFFFFFFFFFFFFFFFFFFFFFFFFFFFFFFFFFFFFFFFFFFFFFFFFFFFFFF  
FFF

@A00721:190:HGJW7DSXY:4:2110:25482:14372\_1:N:0:TCTGCAAG+GCTGCACT  
CCGAAGTTGCCACGACTCTCCGTGACATACTACATACTAGATATTTGGATGATCTTGATAAAGAACTT  
CATGAATTTTCAGAGGATGAAAAATTTCTTCCTTGATTTTAATATAAAGAATCTTTACCAGGACTC  
CT

+

:F,F,F:,,:F,F,,F,,,F:,,:F:,,:F,,:,,,F,F:F,F,,:FFF,:F,F:F:F,F:F,FFF:,  
FFFFFF,F:FFFFFFFFFFFFFFFFFFFFFFFFFFFFFFFF:F:FFF:FFFFFFFFFFFFFFFFFFFF  
FF

@A00721:190:HGJW7DSXY:4:2401:26313:10802\_1:N:0:TCTGCAAG+GCTGCACT  
GATCGTAAGAAGTTTATAAGGAACATATCCATTTGTTGTAATAGGGTCATCAACTTAGAACTCGAAAC  
TCTAAGTGTAATACTGTCTTCCAAGCTTACCTGTATCTTCAATGAAATTGGACTCTTCGATAGGGG  
ACA

+

FFFFFFFFFFFFFFFFFFFF:FFFFFFFFFF:FFFFFFFFFFFFFFFFFFFFFFFFFFFFFFFFFFFFF  
FFFFFFFFFFFFFFFFFFFFFFFFFFFFFFFFFFFFFFFFFFFF:FFFFFFFFFFFFFFFFFFFFFFFFFFFF  
FFF

@A00721:190:HGJW7DSXY:4:2319:7889:26303\_1:N:0:TCTGCAAG+GCTGCACT  
TAAGAATACTATAAATAGAATAGCTATTACTACTAATGGCGTTGGCCTAGTGGATGTTATTAGTGACA  
TCTGGTCAATTTTCGTTTTAGGTGGTCTTTATTCTATTATTGATTTTTATGAGATTGAGATCGGAAGA  
GCA

+

FFFFFFFFFFFFFFFFFFFFFFFFFFFFFFFFFFFFFFFFFFFFFFFFFFFFFFFFFFFFFFFFFFFF,FFFFFFFFFFFF  
:FFFFFFFFFFFFFFFFFFFFFFFFFFFFFFFFFFFF,FFFFFFFFFFFFFFFFFFFFFFFFFFFFF:,FFFFFFFFF:FFF  
:FF

@A00721:190:HGJW7DSXY:4:1516:14244:3834\_2:N:0:TCTGCAAG+GCTGCACT  
TTCCTGAAGAGTCCTTCCGTAACCAACTTCTTGACAATTTCTTCAATCCTTCGATAATAGTTAAATC  
TACGATTATGTCTGTGTTGAAAGACTTTCTACCGATAAGGGTCACTAG

+

FFFFFFFFFFFFFFFFFFFFFFFFFFFFFFFFFFFFFFFFFFFFFFFFFFFFFFFFFFFFFFFFFFFF:FFFFFFFFFFFF  
FFFFFFFFFFFFFFFFFFFFFFFFFFFFFFFFFFFFFFFFFFFFFFFFFFFFFFFFFFFFFFFFFFFF

@A00721:190:HGJW7DSXY:4:2674:27597:26271\_2:N:0:TCTGCAAG+GCTGCACT  
TAAGAAATAATCCTACATTGACTGATTATCTAAAGATTGAAGGAAAATTTTATCCTCGTTTAACTTAC  
TTAGACTTTCCTACGATACAAATGATAACTTCTAATTTACGTTTGCTA

+

FFFFFFFFFFFFFFFFFFFFFFFFFFFFFFFFFFFFFFFFFFFF:FFFFFFFFFFFFF:FFFFFFFFFFFFFFFFFFFFF  
FFFFFFFFFFFFFFFFFFFF:FFFFFFFFF:FFFFFFFFFFFFFFFFFFFFFFFFFFFF

@A00721:190:HGJW7DSXY:4:1573:25889:27571\_1:N:0:TCTGCAAG+GCTGCACT  
GATGCATGGTGTTATCTCCTCAGGAGTCCCGGCATTTGATAATAATGACGAGACTTTCGTCAATAATCG  
CTGCATATTACGATTACACGGTACCAGCGCATCTCGTGTGAGCCTCGACCCGATTATATGGTATTA  
ACT

+

FFF:FFFFFFFFFFFFFFFFFFFF:FFFFFFF,FFFFFFF:FFFFFF:FFFFFFFFFFFFFFFFFFFFF  
FFFFFFFFFFFF:FFFFFFFFFFFFFFFFFFFFFFFFFFFF:FFFFFFFFFFFFFFFFFFFF,FFFFFFFFFFFFFFFFFFFF:  
FFF

@A00721:190:HGJW7DSXY:4:2675:9254:19085\_1:N:0:TCTGCAAG+GCTGCACT  
TTCTAGAATTCTTAATTATAATATTCAACCTCAAAAGTTACGTGTTTACAGTAACGAGATCACACATT  
TTGAGAACTAACTATGTTATGTTCTCTGATCATTTTGACAATCTCTTCTTATAATAATAATAATA  
ATA

+

FFFFFFFFFFFFFFFFFFFFFFFFFFFFFFFFFFFFFFFFFFFFFFFFFFFFFFFFFFFFFFFFFFFFFFFF  
FFFFFFFFFFFFFFFFFFFFFFFFFFFFFFFFFFFFFFFFFFFFFFFFFFFFFFFFFFFFFFFFFFFFFFFF  
FFF

@A00721:190:HGJW7DSXY:4:2434:15537:31093\_2:N:0:TCTGCAAG+GCTGCACT  
AGTGGAAGGCTCCAGTCAACACTAGTTCGAGTGCTGCTTTGGATTACGATGACGTGAGAATAGGTGA  
AGGGATAGTTTTTACCTCGACCAACATTAAGGCGGCGGCGACTAATCT

+

FFFFFFFFFFFFFFFFFFFFFFFFFFFFFFFFFFFFFFFFFFFFFFFFFFFFFFFFFFFFFFFFFFFFFFFF  
:FFFFFFFF:FFFFFFFF:FFFFFFFFFFFFFFFFFFFFFFFFFFFFFFFFFFFFFFFFFFFFFFFF

@A00721:190:HGJW7DSXY:4:2316:14651:19006\_1:N:0:TCTGCAAG+GCTGCACT  
AGGACACTTCGAAACTGAATAATGATGCACTACAAACAAGTATCGCTAATCATCTGAAAAAGGCTCTA  
AAGGACACTATACAATATCCAGACGACGACGAAGCTTATACTACTTTAATTTTGGGTATTATGTGGAG  
ATA

+

FFFFFFFF:F:FFFFFFFFFFFFFFFFFFFFFFFFFFFFFFFF:F:FFFFFFFF:FFFFFFFFFFFFFFFF  
:FFFFFFFF:FFFFFFFFFFFFFFFFFFFFFFFFFFFFFFFFFFFFFFFFFFFFFFFFFFFFFFFFFFFF  
FFF

@A00721:190:HGJW7DSXY:4:1513:18448:28056\_2:N:0:TCTGCAAG+GCTGCACT  
ACCACATTTTGGTCAAGTCAATCCGTTGAGAAAATTTCTTAGAGGATATTCGCCATTGTGGTACGAAT  
TGGTCCAACATTTACCACCAAATTCTTTTGATACAACCTCTAGCCTTCA

+

FFFFFFFFFFFFFFFFFFFFFFFFFFFFFFFFFFFFFFFFFFFFFFFFFFFFFFFFFFFFFFFFFFFFFFFF  
FFFFFFFFFFFFFFFF:FFFFFFFFFFFFFFFFFFFFFFFFFFFFFFFFFFFFFFFF:

@A00721:190:HGJW7DSXY:4:2370:26142:19899\_2:N:0:TCTGCAAG+GCTGCACT  
TCACCAGATTGGTTCGAACCGTTGATGCTATGTCAGAAGAAGCTATTCAAGCTTGTCGTTTAAAGAC  
TGCAGAGGCTGTCAAACAAGCCCAGACTCAAGGAGTCCAATCAAAGGT

+

FFFFFFFFFFFFFFFFFFFFFFFFFFFFFFFFFFFFFFFFFFFFFFFFFFFFFFFFFFFFFFFF:FFFFFFF  
FFFFFFFFFFFFFFFF:FFFFFFFFFFFFFFFFFFFFFFFFFFFFFFFFFFFFFFFF

@A00721:190:HGJW7DSXY:4:1636:25373:7858\_1:N:0:TCTGCAAG+GCTGCACT  
ATTATTTAGAGATCTTTTCTACTTACAAAGGACAATTAGTTTCATTAATTCTACGAAAAGTCCGGA  
GTATATTGTATGTTAATAGATAGTGGGATAATAGTTCTACCGATACGTAGTGAACGCGTTCGTAGAAC  
CAA

+

FFFFFFFFFFFFFFFFFFFFFFFFFFFFFFFFFFFFFFFFFFFFFFFFFFFFFFFFFFFFFFFFFFFFFFFF  
FFFFFFFFFFFFFFFFFFFFFFFFFFFFFFFFFFFFFFFFFFFFFFFFFFFFFFFFFFFFFFFFFFFFFFFF  
FFF

@A00721:190:HGJW7DSXY:4:2424:2031:36010\_1:N:0:TCTGCAAG+GCTGCACT  
TAACCGATAGGAGTTGTATAGTTGAAGATGTGGCTTTAGACGATAATCCTTTAAGGACTATGTTGACT  
GACGAAGATTTTCCACAGATTTGTCTACGTTGCAGATCGCCACTCCAAACACTATATACATTAAT  
ATA

+

FFFFFFFFFFFFFFFF:FFFFFFFFFFFFFFFFFFFFFFFFFFFFFFFF:FFFFFFFFFFFFFFFF:FF  
FFFFFFFFFFFFFFFFFFFFFFFFFFFFFFFFFFFFFFFF:FFFFFFFFFFFFFFFFFFFFFFFFFFFFFFFF  
FFF

@A00721:190:HGJW7DSXY:4:1617:4164:19852\_1:N:0:TCTGCAAG+GCTGCACT  
CATAACTTTTGTACCAAATTCTTGCTTTCAACGAAGTCTCTGATTTTATTAATCATTACTTTAACG  
ATCTCTCGGTCATTTACTCTGTACTTGATCTACGTCGTTTAACTGTCGGAACAACCTTTACTTAGAAT  
GAC

FFFFFFFFFFFFFFFF:FFFFFFFFFFFFFFFFFFFFFFFFFFFFFFFFFFFFFFFFFFFFFFFF:FFFFFFFF  
 FFFFFFFFFFFFFFFFFFFFFFFFFFFFFFFFFFFFFFFFFFFFFFFFFFFFFFFFFFFFFFFFFFFFFFFFFF  
 FFF

@A00721:190:HGJW7DSXY:4:1618:17246:12383\_2:N:0:TCTGCAAG+GCTGCACT  
 TTCTTATATTATTTACAATAGTTAATATCATATTAGTAATACTCACTATCGTTTTCTGCTTTTTCTTA  
 GCTAATAGATTAATAAAGGATGAGTACGAAAACCAACTCTTCGTACG

+

FFFFFFFFFFFFFFFFFFFFFFFFFFFFFFFFFFFFFFFFFFFFFFFFFFFFFFFFFFFFFFFFFFFFFFF  
 FFFFFFFFFFFFFFFFFFFFFFFFFFFFFFFFFFFFFFFFFFFFFFFFFFFFFFFFFFFFFFFFFFFFFF

@A00721:190:HGJW7DSXY:4:2675:2537:22232\_1:N:0:TCTGCAAG+GCTGCACT  
 GTAGAATAGATTTAGTCTCTACACCCATCTCAACGAGGATAACGCGAGTTTTCCGTCTGAACGTAAT  
 ACACGAAGAGATCATCCGCAAACGACTCGAAACCGAGACGCCGTAGATCAAAGTCCCTTCTA ACTTTA  
 GAT

+

FF,,F:F:, ,FFF,F::F,,FF,FF:, ,:F::, :F,F,: :F:,FF,,FFFF,: :F:FFF,F,,,FF:  
 :F,F:F,,,F,F,,F::,F:FFFFFFFF:FFFFFFFFFFFFFFFFFFFFFFFFFFFFFFFFFFFFF  
 FFF

@A00721:190:HGJW7DSXY:4:2550:12789:16313\_1:N:0:TCTGCAAG+GCTGCACT  
 CTTTACTCATTATATAGCAGTTATTTATGTTGTACTTTTTATAATTTATAACCTTCTTATACTTTTG  
 GTATGTTTTGTGAAAAACATGAGATACCCAAGTCTATCGAAGACATTATCTCTTATGTACTTATTGTA  
 ACG

+

FFFF:FFFFFFFFFFFFFFFFF, :FFFFFFFFFFFFFFFF:FFFFFFFFFFFFFFFFFFFFFFFFFFFFF:F  
 FFFFFF: :FFFFFFFFFFFFFFFFFFFFFFFFFFFFFFFFFFFFFFFFFFFFFFFFFFFFFFFFFFFFF  
 :FF

@A00721:190:HGJW7DSXY:4:1320:28438:36839\_1:N:0:TCTGCAAG+GCTGCACT  
 TTCTTTTATTCCTTTAACTGTGTATGAGGAGGATTTATAATGCTTTTCGATAGTGATTGTTATCAATT  
 TAAATACATTACTGTTTCAAATCATCTTTACTCACAGACTCCGAAAATGGTTTCAAATGAGGTCAAAG  
 CTC

+

FFFFFFFFFFFFFFF:FFFFFFFFFFFFFFFFFFFFFFFFFFFFFFFFFFFFFFFFFFFFFFFFFFFFFFFFF  
 FFFFFFFFFFFFFFFFFFFFFFFFFFFFFFFFFFFFFFFFFFFFFFFFFFFFFFFFFFFFFFFFFFFFFF  
 FFF

@A00721:190:HGJW7DSXY:4:1621:29975:30890\_2:N:0:TCTGCAAG+GCTGCACT  
 AACTATTATCCGATTCTTCGAGGGTATCACTACCACTGATCTGCCGACTTTAGTCAAGGAACCTTCAAT  
 TCCTTCGATGTTTATATTTTTCTATAAGGGAAAATAGCAATAATCAAA

+

FFFF:FFFFFFFFFFFFFFFFFFFFFFF:FFFFFFFFFFFFFFFFFFFFFFFFFFFFFFFFFFFFFFFFF  
 FF:FFFFFFFFFFFFFFFFFFFFFFFFFFFFFFFFFFFFFFFFFFFFFFFFFFFFF:FFFF

@A00721:190:HGJW7DSXY:4:1235:31910:15389\_2:N:0:TCTGCAAG+GCTGCACT  
 AACTTTATTTCAAGAACTCTCTCCGATCACCTTGGTGTGATCTCCCGGAGGATCTTTTCAATAAGATGT  
 ATGATGATAATCTACTATTTTTAAATAGTGATATTACGCGTATACTTG

+

FFFFFFFFFFFFFFFFFFFFFFFFFFFFFFFFFFFFFFFFFFFFFFFFFFFFFFFFFFFFFFFFFFFFFFF  
 FFFFFFFFFFFFFFFFFFFFFF:FFFFFFFFF:FFFF:FFFFFFFFFFFFF

@A00721:190:HGJW7DSXY:4:1513:21730:23500\_1:N:0:TCTGCAAG+GCTGCACT  
 AAAGATTTGGCTTGGTCTATTTACCGCAAAAAGTTGGAAGAGGTCTATGATATTTATTTTACTTATAC  
 TTAAATAGCACCGATTATAACTTGACTGTTGATAATATTACAATAGCTCTTCTCAGAAGATTAGAG  
 AAG

+

FFFFFFFFFFFF:FFFF:FFFFF:FFFFFFFFFFFFFFFFFFFFF:FFFFFFFFFFFFFFFFFFFFFFF  
 FFFFFFFFFFFFFFFFFFFFFFFFFFFFFFFFFFFFFF:FFFFFFFFFFFFFFFFFFFFFFFFFFFFFFFFF  
 FFF

$+$ 

@A00721:190:HGJW7DSXY:4:2126:22652:10755\_2:N:0:TCTGCAAG+GCTGCACT  
TTACATTTTAAATGGTATGGTATAATGTGTCTTACAAATAGAACCTTCACTCTCGGTAATGAGAGTGT  
ATTCCTTAATATTCTAGTAACCGCTATGTGGGCATTACTAGGATTTAT

+

@A00721:190:HGJW7DSXY:4:2510:12780:33238\_2:N:0:TCTGCAAG+GCTGCACT  
TTTAAATGCTAGGAAAATTTAGAAAACTCCATTGTATAGTTCAAGGAGTACTTAATTCAATAGCTT  
TAGTATTATTTACTATCGCCTTTATTGAAAATTGTATAAGAGTTAATT

 $+$ 

@A00721:190:HGJW7DSXY:4:2522:23511:11866\_1:N:0:TCTGCAAG+GCTGCACT  
ACATACCATAACCTACCATGACCAATCATCGCTCCAACTGGCAGCCAGACGTAGGGTCAAACCTACT  
ACCGCCGGTCGGCAGATCGGCACCACTGGTCTCTACGTTAGGGACCCGCTGTGCAGAATAACCTTCC  
CAA

+

@A00721:190:HGJW7DSXY:4:1307:22191:29747\_2:N:0:TCTGCAAG+GCTGCACT  
CACAGAAGAAGGCTGAAGGTCGTTACCGGACGACCACTCAAAGGAAACGGGCTGTTGCCAGAGGAAA  
GCAGCGACCACCGAGGTCGTCGTAACATTGACGGCAGTCCCGTCATC

+

@A00721:190:HGJW7DSXY:4:1304:28330:21245\_1:N:0:TCTGCAAG+GCTGCACT  
CTGAGGCAGTACCTCAGTCAAAAGTCACATTCACCACTCCCATACCAATCAATGATGTGACTATACAG  
TTCGGCCATTTCAAGAGTGGTCAATACGTCGTGGGAGGTACTGAAGCCTTCCCCTCCGCTGGCACGAA  
GAA

+

@A00721:190:HGJW7DSXY:4:1512:9390:16532\_1:N:0:TCTGCAAG+GCTGCACT  
CCAATCAATAGTTCTTCTGACCAGAATGAAAAGGGGTTTACCAGGGTAGTCTCTAAGTCTACCAGGAA  
GAGGGGAAATGTCCCCAAACTGAGAAGAATAAAGGGAAAGGTCCATCAGGACCTAAGAAGGGGAAAT  
TAC

+

@A00721:190:HGJW7DSXY:4:1555:25518:4570\_2:N:0:TCTGCAAG+GCTGCACT  
GGAAGATCTCCCACCATCTGGGGTTGGGAATAAGAAATCTGCACGGGCCAAAGAGGCCGCTGCTACGA  
AGTCGCTGAAGGCGGCTTGGGTCATTAAGGGTAGCTGTAAAGTTGCGC

+

[illegible]

@A00721:190:HGJW7DSXY:4:1268:19407:36730\_1:N:0:TCTGCAAG+GCTGCACT  
ATCTTTGAGACCAAGACTCTCTACAGTAGGTTTCGTGCCTACTATGAGCAAATCTGTTGAATTCGTCAC  
TGAGGACGAAGGTGAGAGGACTTTTGGCTACTGGCGACAACTGAGAGCAGTCGCTGGGGAAAGAGAA  
TTG

+

FFFFFFFFFFFFFFFFFFFFFFFFFFFFFFFFFFFFFFFFFFFFFFFFFFFFFFFFFFFFFFFFFFFFFFFF  
FFFFFFFFFFFFFFFFFFFFFFFFFFFFFFFFFFFFFFFFFFFFFFFFFFFFFFFFFFFFFFFFFFFFFFFF  
:FF

@A00721:190:HGJW7DSXY:4:2406:13711:12587\_2:N:0:TCTGCAAG+GCTGCACT  
ACGCTTCGAGCTTGAGTGTGACGAGGCCGGTGACGTTTTTGTCAACGGCGTTTGGAGGATTTATCCG  
CGCTTAACATATGGGGCGAAGATCCCCTATGGAGTCTTGAAGGACTTAG

+

FFFFFFFFFFFFFFFFFFFFFFFFFFFFFFFFFFFFFFFFFFFFFFFFFFFFFFFFFFFFFFFFFFFFFFFF  
FFFF:FFFFFFFFFFFFFFFFFFFFFFFFFFFFFFFFFFFFFFFFFFFFFFFFFFFFFFFFFFFFFFFF  
:FF

@A00721:190:HGJW7DSXY:4:2452:16929:12336\_1:N:0:TCTGCAAG+GCTGCACT  
GCATGTCACCCTTAAGCACCGAGGTAAGCTCGGGACTTACAAGAGAGAGTGTGAGAGAGTCGCTCTCA  
CTATTTTGGCCAGAATGCGGGCTTTCTGACTGATGAGGTTAAACTCTTGCTCCTTCTGTGGGTGAG  
GGT

+

FFFFFFFFFFFFFFFFFFFFFFFFFFFFFFFFFFFFFFFFFFFFFFFFFFFFFFFFFFFFFFFFFFFFFFFF  
FFF:FFFF:FF,:FFF,FFFFFFFF:FF,:::,F:,FF:FF,FF:FFFF::FFF,F:FF::FF::,F  
FF:

@A00721:190:HGJW7DSXY:4:1433:4372:3959\_2:N:0:TCTGCAAG+GCTGCACT  
GGTTCTGGGAGGCTGCTTTCCTCCATAATTACAACCTCTCTTTAGAGAGCATTAGAAGGAAGTTGGGC  
AAATTCCCACATATGGTAGACGTTGTCACACTTTTCTTGAAAATTTTT

+

FFFFFFFFFFFFFFFFFFFFFFFFFFFFFFFFFFFFFFFFFFFFFFFFFFFFFFFFFFFFFFFFFFFFFFFF  
FFFFFFFFFFFFFFFFFFFFFFFFFFFFFFFFFFFFFFFFFFFFFFFFFFFFFFFFFFFFFFFF

@A00721:190:HGJW7DSXY:4:2652:32877:17942\_1:N:0:TCTGCAAG+GCTGCACT  
TTGGGGATTTCGATGTGAGAAGGTGGAAGGTGTCAAGGGTCTTCTTCATGCTGATCTTTCAGGACCTA  
ATCACATCATGATTGATAGTTACGGCTCGTATCGAGTTGGAGGGAGGAAGTTCTCCGAAATTAAAGAC  
GGG

+

FFF,FFFFFFFF,,F,F:FF:FF:FFFF,:F,FFFF:FFFFFFFFFFFFFFFF:FFFFFFFFFFFF:F:  
FFFFFFFF:FFFFFFFF,:FF:FFFFFFFFFFFFFFFFFFFFFFFF:FFFFFFFFFFFF:FFFFFFFF:FF:  
FFF

@A00721:190:HGJW7DSXY:4:2538:21920:17159\_2:N:0:TCTGCAAG+GCTGCACT  
TCAGAGAGGGGAGCTCTGAAAAGGAACTTCGTCAGAAGATGAGGAAGTCTAAGAGGAGGAGTTTGAG  
GAAGGCTCTAGAGAAGATCTCACCACTGGAGAAGGCAAGTGGAGAGT

+

FFFFFFFFFFFFFFFFFFFFFFFFFFFFFFFFFFFFFFFFFFFFFFFFFFFFFFFFFFFFFFFFFFFFFFFF  
FFFFFFFF:FFFFFFFF:FFFFFFFFFFFFFFFFFFFFFFFF:FFFFFFFFFFFFFFFF

@A00721:190:HGJW7DSXY:4:1537:20401:26929\_2:N:0:TCTGCAAG+GCTGCACT  
AAGAAGGATTATTTGAAGCAGGGGTTACCACTTCCTAAGGTGGATGAGGGAGGTTGTTTCTTTGGAGT  
TTAGATAATCTTTTGAGAAGGGGTATAGAGCCAGCAAGAGAAGCTT

+

FFFFFFFFFFFFFFFFFFFFFFFFFFFFFFFFFFFFFFFFFFFFFFFFFFFFFFFFFFFFFFFFFFFFFFFF  
FFFF::FFFFFFFF:FFFFFFFFFFFFFFFFFFFFFFFF:FFFFFFFF:FFFF

@A00721:190:HGJW7DSXY:4:2159:5972:8108\_2:N:0:TCTGCAAG+GCTGCACT  
TATAATTTAGGTCAACTTGGGGTTTCGAATGTCATTAGTGCCTTACGCTTGAAAGAGGTCCTTTGAG  
TATCGACAGATCTTTCGATCTTGAGGACGTACATTTAACGTGGCAGAA

+

FFFFFFFFFFFFFFFFFFFFFFFFFFFFFFFFFFFFFFFFFFFFFFFFFFFFFFFFFFFFFFFFFFFFFFFF  
FFFFFFFFFFFFFFFFFFFFFFFFFFFFFFFFFFFFFFFFFFFFFFFFFFFFFFFF



@A00721:190:HGJW7DSXY:4:1547:2437:3208\_2:N:0:TCTGCAAG+GCTGCACT  
ATATTGTTCTTCCGGGAAGTTGTGGGATTTAACTTTGACTCAACTACTCCGATCAGATCCGGATGGT  
TTGATTGGTATGGACTACTCGACTTTTGATCTGGAGTTGTCTAGGGTC

+

F,FFFFFFFFFFFFFFFFFFFFFFFFFFFFFFFFFFFFFFFFFFFFFFFFFFFFFFFFFFFFFFFF,FFFFFF:FFF  
FFFF: :FFFFFFFFFFFFFFFFFFFFFFFFFFFFFFFFFFFFFFFFFFFFFFFFFFFFFFFF: :FFFF

@A00721:190:HGJW7DSXY:4:2653:32452:9565\_2:N:0:TCTGCAAG+GCTGCACT  
CGATAAGGTGAAAAATATGCAGGTCAAAGATTCTGTAGCTCTGAGGGCGGTTGAGGGAGCCGTTTTGG  
CCGACTTTAACTATTCTAAGAGTCTTTATGATTCAAACCTATCGTTG

+

FFFFFFFFFFFFFFFFFFFFFFFFFFFFFFFFFFFFFFFFFFFFFFFFFFFFFFFFFFFFFFFFFFFFFFFF  
FFFFFFFFFFFFFFFFFFFFFFFFFFFFFFFFFFFFFFFFFFFFFFFFFFFFFFFFFFFFFFFF:FFFFFFFF,FFFFFFFF

@A00721:190:HGJW7DSXY:4:2237:1380:21793\_2:N:0:TCTGCAAG+GCTGCACT  
GGCTTATTGTGCGCAGTTTCCAGAATTGCGGTTGAAGTTCACCCATTCTATCTTGAATGCTCACGCC  
GTCGCAGCCATATCGAGACTATGTTATAATCACTTGTTAAAGTACAGA

+

FFF,FFFFFFFFFFFFFFFFFFFFFFFFFFFFFFFFFFFFFFFFFFFFFFFFFFFFFFFFFFFFFFFF:FFFFFFFFFFFFFFFFFFFFFFFF:FFFFFFFF  
FFFFFFFF,FFFFFFFFFFFFFFFFFFFFFFFFFFFFFFFFFFFFFFFFFFFFFFFFFFFFFFFFFFFFFFFF

@A00721:190:HGJW7DSXY:4:1368:11731:30389\_2:N:0:TCTGCAAG+GCTGCACT  
ATTATTGATATTGGAGGCGATATTCGTTTTCATATCCAAACTCCTTGAATGGAGTACATATTTGCAA  
CCCTATTCTTGATGTGAAAGATGCATCGAGGTATACGTCTAGGAACAT

+

FFFFFFFFFFFFFFFFFFFFFFFFFFFFFFFFFFFFFFFFFFFFFFFFFFFFFFFFFFFFFFFFFFFFFFFF:FFFFFFFF  
FFFFFFFFFFFFFFFFFFFFFFFFFFFFFFFFFFFFFFFFFFFFFFFFFFFFFFFFFFFFFFFFFFFFFFFF

@A00721:190:HGJW7DSXY:4:1472:12698:26428\_2:N:0:TCTGCAAG+GCTGCACT  
GCTATCGGAGGGAAGCAAAATGTTTCGTTCTGTTACAAGAACGCTTTGGATTGTGACCATAAAGCCTC  
AGTTGCGATAGCTGTAGAGGTATACGATATCTCTCTTGATGATGTAGC

+

FFFFFFFFFFFFFFFFFFFFFFFFFFFFFFFFFFFFFFFFFFFFFFFFFFFFFFFFFFFFFFFFFFFFFFFF  
FF:FFFFFFFFFFFFFFFFFFFFFFFFFFFFFFFFFFFFFFFFFFFFFFFFFFFFFFFFFFFFFFFF

@A00721:190:HGJW7DSXY:4:2103:19840:6042\_1:N:0:TCTGCAAG+GCTGCACT  
TGATGTATGTCATTTTCGTCTTAGTTTGTCCCGCGCAATTATTGGACACGATGAAAAATGACATACCCG  
TTCCTGACCTTGGTATCGTTATCCGTCATGGAGATGATGGCGCATCACTTGATTACTATATGCCCGAA  
GGA

+

FFFFFFFFFFFFFF:FFFFFFFFFFFFFFFFFFFFFFFFFFFFFFFFFFFFFFFFFFFFFFFFFFFFFFFF  
FFFFFFFFFFFFFFFFFFFFFFFFFFFFFFFFFFFFFFFFFFFFFFFFFFFFFFFFFFFFFFFFFFFFFFFF  
FFF

@A00721:190:HGJW7DSXY:4:1641:5267:26240\_2:N:0:TCTGCAAG+GCTGCACT  
AACAAAGATAAGATTTTATCTTTCTTCAAACACCCTGTTTTCCTTAAGGGCGGACAATTGTTCCATTG  
TGAACCTTGGGGACTAGATTGAGCATTAAATGAGTTCCGAATAACTCG

+

FFFFFFFFFFFFFFFFFFFFFFFFFFFFFFFFFFFFFFFFFFFFFFFFFFFFFFFFFFFFFFFFFFFFFFFF  
FFFFFFFFFFFFFFFFFFFFFFFFFFFFFFFFFFFFFFFFFFFFFFFFFFFFFFFFFFFFFFFFFFFFFFFF

@A00721:190:HGJW7DSXY:4:1339:7798:9956\_2:N:0:TCTGCAAG+GCTGCACT  
TATTTCCGTACCAAGAGCCACTGCCAATCTCATCGCTATACGCATACCTGATTGGAAGAAGCGAGGTT  
CGTTCCTCAATAAAAAATTTTCTCAAGAGATTATGGTTGATAAAGTTT

+

FFFFFFFFFFFFFFFFFFFFFFFF:FFFFFFFFFFFFFFFFFFFFFFFFFFFFFFFFFFFFFFFFFFFFFFFF  
FFFFFFFFFFFFFFFFFFFFFFFFFFFFFFFFFFFFFFFFFFFFFFFFFFFFFFFFFFFFFFFFFFFFFFFF

@A00721:190:HGJW7DSXY:4:1131:4878:7748\_1:N:0:TCTGCAAG+GCTGCACT  
TACGTCATGGGGATCACTTCTTCGGTCAATGACAAAACCTTCAATATGTTACGACATGGCTTCGTAA  
CAACAGTGCGAGGATTGTCATCTAGGGTAAAGAGAGAAACAAAGATGTTCTATAGATACGAGATACC  
TAG

+  
FFFFFFFFFFFFFFFF,FFFFFFFF:FFFFFFFFFFFFFFFF,FFFFFFFFFFFFFFFF  
FFFFFFFFFFFFFFFF:FFFFFFFF,F:FF:FF:FFFFFFFFFFFFFFFF:FFFFFFFFFFFFFFFF  
FFF

@A00721:190:HGJW7DSXY:4:1211:5999:11036\_2:N:0:TCTGCAAG+GCTGCACT  
AGCGATCTTACTCGTTATCGGAGCTAAGAAGAAGACTTTGGGTACACGGTATGCTCGCAAACCTTAACG  
TTAGTACCGGAGGTGATCTCTCTGCTTCTGCGTACTGAGAGAAAAGA

+  
FFF:F:FFFF:FFF:FFFFFFFF:FFFF:FFFF:FFFF,FFF:,F,:F,,FFFFFFFFFFFF  
FFFF:F:FFF,FFFFFFFF,:FFFFFF:FF,FFFF:FFFFFFFF

@A00721:190:HGJW7DSXY:4:1258:2474:25191\_1:N:0:TCTGCAAG+GCTGCACT  
CTTTATGGACAAGATGCAAGTTCTTGGGAAATACTTGTTTCCCTTTTGGTTTAGGTAGGTGATCTTG  
ACGTCGATTCTTTGTATAGGGAGTGTGAGAAGACAACGAATCTTGAACTACGGTCCTTATCAAAGAA  
AAT

+  
FFFFFFFFFFFF:FFFFFFFFFFFFFFFFFFFFFFFFFFFFFFFFFFFFFFFFFFFFFFFFFFFFF  
FFFFFFFF:FFFFFFFFFFFFFFFFFFFFFFFFFFFFFFFFFFFFFFFFFFFFFFFFFFFFFFFFF  
FFF

@A00721:190:HGJW7DSXY:4:1178:15275:4554\_2:N:0:TCTGCAAG+GCTGCACT  
AAATCTTTTGAGATTGAGAAGATTGAAGAACACGTCAAGAAGTCGCTCGGCGTTGTTCTTGAAAACCA  
AGTTAAGAAGGAGGCTGATCATGGAGTCTTGTACCTTCTGTCAAAC

+  
FFFFFFFFFFFFFFFFFFFFFFFFFFFFFFFFFFFFFFFFFFFFFFFFFFFFFFFFFFFFFFFFFFFF:FFF  
FFFFFFFFFFFF:FFFFFFFFFFFF:FFFF:FFFFFFFF:FFFFFFFF

@A00721:190:HGJW7DSXY:4:2120:26096:15906\_2:N:0:TCTGCAAG+GCTGCACT  
GCTACGAGAGGTGATCCCGATGTGGATTGAAGGCTGGCTCTAAGGGAGACTCCTTCTTTTGAATGT  
TGTAAGAATTGGGTGAGAAGTGTGCTTACAAGGAGTTAGACTCTT

+  
FFFFFFFFF:F:FFFF:FFF:FFFFFFFF:FFFFFFFFFFFF,FFFFFFFFFFFFFFFFFFFFFFFFF:FFF  
FFF,FFFFFFFFFFFFFFFFFFFFFFFFFFFFFFFFFFFFFFFFFFFF:FFFFF

@A00721:190:HGJW7DSXY:4:2412:26386:30561\_2:N:0:TCTGCAAG+GCTGCACT  
TAAAGAAAAATTTTCGAATAAACTAATGAGAGGTATAGGCTTAGTCAAGTCTGTACTTACATTCTTTA  
CGCCAGATTCTTCATGGGGCGACGCTGTTTCTCTTGGTATTTCTGAAA

+  
FFFFFFFFFFFFFFFFFFFFFFFFFFFFFFFFFFFFFFFFFFFFFFFFFFFF:FF:FFFFFFFFFFFFFFFFFFFFF  
FFFFFFFFFFFFFFFFFFFFFFFFFFFFFFFFFFFFFFFFFFFFFFFFFFFF:FFFFF

@A00721:190:HGJW7DSXY:4:2270:10447:6590\_1:N:0:TCTGCAAG+GCTGCACT  
TTTCTCTGGTAAGGAATTATTAATCATTCTTCTCACTCTTGACGAGAATTATTACTGTTTCTCT  
ACCCATAACTTCTTTTCAAAAATGCGGATGGGTCTACTGATGTTTCTACAGAGTGCAGTCGTTTC  
AAC

+  
FFFFFFFFFFFFFFFFFFFFFFFFFFFFFFFFFFFFFFFFFFFFFFFFFFFFF:  
FFFFFFFFFFFFFFFFFFFFFFFFFFFFFFFFFFFFFFFFFFFFFFFFFFFFFFFFF  
FFF

@A00721:190:HGJW7DSXY:4:1623:14434:32283\_1:N:0:TCTGCAAG+GCTGCACT  
AATAATTGGTGATGTAAATACGTATGTCGGTGGGGTTCTCAAGGCTCTCATCGCCACTGGGATTCTAA  
GGGGTTCCATAAGATATTATCTGACATTGTGGTCAATGATCAGGATTCTTCTTTTGGTCCTTACGTC  
TTA

+  
:FF,,FFF:F,,FF,F:FF::,F,FFFF:FF:FF:FF:FF,,FF,F,FFFF:,F:,,:FF,:F:F,,  
FF,,FFF,FFF,FFF:FFFF,FF:F:FF:F:FFF,FFFF::FF:FFF::F:FFFFFFFF:FFF,F:F  
FFF

@A00721:190:HGJW7DSXY:4:2177:23999:33505\_1:N:0:TCTGCAAG+GCTGCACT  
TCTTGTACGATTCTTAAAAGAAGTTTATTAACCTTCAGAGTCTTGGAAAGTCCAGGTAGCTAATG



FFFFFFFFFFFFFFFFFFFFFFFFFFFFFFFFFFFFFFFFFFFFFFFFFFFFFFFFFFFFFFFF,FFFF  
FFF

@A00721:190:HGJW7DSXY:4:1309:18285:6668\_1:N:0:TCTGCAAG+GCTGCACT  
GATAACGATTTAGTACTGGGAAATGGTGGTAGTCAGTTTACTACTTTTCTTCCCTCCCCTTTTTCGA  
TTGGATTCGACGGGGTCTTCGTCTCACGACTAATTTGATAAGGTTTTCTTTTATGGGACTCTTGTTT  
GTA

+  
FFFFFFFFFFFFFFFFFFFFFFFFFFFFFFFFFFFFFFFFFFFFFFFFFFFFFFFFFFFFFFFF:FFFFFFFFFFFFFFFFFFFFFFFFFFFFFFFF:FFFFF  
FFFFFFFFFFFFFFFFFFFFFFFFFFFFFFFFFFFFFFFFFFFFFFFFFFFFFFFFFFFFFFFFFFFFFFFFFFFFFFFFFFFFFFFFFFFFFFFFFFFFFFFF:FFFF  
FFF

@A00721:190:HGJW7DSXY:4:1146:8269:34820\_2:N:0:TCTGCAAG+GCTGCACT  
AAGTTCTTAATGTAGGTCTCCTAGTACTTAAGGGTTTATGTTTCGGTTTCAGCTGGATGGATCTTTTG  
ATGGTATGTTTCACATTGCGTGATCACTTCCCGTGGACTTGGAAGAG

+  
FFFFFFFFF:FFFFFFFFFFFFFFFFFFFFFFFFFFFFFFFFFFFFFFFFFFFFFFFFFFFFFFFF:FFFFFFFFFFFFFFFFFFFFFFFF:FFF  
:,FFFFFFFFFFFFFFFFFFFFFFFFFFFFFFFFFFFFFFFFFFFFFFFFFFFFFFFFFFFFFFFF,F:F

@A00721:190:HGJW7DSXY:4:1106:25635:2707\_1:N:0:TCTGCAAG+GCTGCACT  
CGATTCTATTATGTCGCTAAAGCCTGTCCAGTTGTCGATGATGTTTCGGGCTGTGGGGATTAAGTTCCC  
TCGTGAAACTTACGACGATGTTCTCGCTCGCATTTACAAGGATTACTAAGCTGAGATCTGCCACTT  
CTA

+  
FFFFFFFFFFFFFFFFFFFFFFFFFFFFFFFFFFFFFFFFFFFFFFFFFFFFFFFFFFFFFFFFFFFFFFFFFFFFFFFFFFFFFFFFFFFFFFFFFFFFFFFF  
FFFFFFFFFFFFFFFFFFFFFFFFFFFFFFFFFFFFFFFFFFFFFFFFFFFFFFFFFFFFFFFFFFFFFFFFFFFFFFFF:FFFFFFFFFFFFFFFFFFFFFFFF  
FFF

@A00721:190:HGJW7DSXY:4:2462:29170:25426\_2:N:0:TCTGCAAG+GCTGCACT  
AGAAAGTTCATGAGGATGTCTTGGTCGAAAAATATCGCCGGGAAGTTCTAATAGAGGATCCTGATGAC  
ATTATTTCAACGGATACCGATCTCAGTTCTACCACAGAAACCGTCTCA

+  
FFFFFFFFFFFFFFFFFFFFFFFFFFFFFFFFFFFFFFFFFFFFFFFFFFFFFFFFFFFFFFFF,FFFFFFFFF:FFFFFFFFFFFF:FFFF  
FFFFFFFFFFFFFFFFFFFFFFFFFFFFFFFFFFFFFFFFFFFFFFFFFFFFFFFFFFFFFFFF,FFFFFFFFFFFFFFFF

@A00721:190:HGJW7DSXY:4:2104:21305:36385\_2:N:0:TCTGCAAG+GCTGCACT  
ACTGATTCGGAATTAGAGAAAGACGACCTTCTTGTTGGGGACTGAGACCTCTGAATTTTCAGGGTGCCC  
TGATGAGGACGTTGAAAGGATAATTTCAACTCTGAGACTTCTAAGAG

+  
FFFFFFFFFFFFFFFFFFFFFFFFFFFFFFFFFFFFFFFFFFFFFFFFFFFFFFFFFFFFFFFFFFFFFFFFFFFFFFFFFFFFFFFFFFFFFFFFFFFFFFFF  
FFFFFFFFFFFFFFFFFFFFFFFFFFFFFFFFFFFFFFFFFFFFFFFFFFFFFFFFFFFFFFFFFFFFFFFFFFFFFFFF

@A00721:190:HGJW7DSXY:4:2127:9851:32518\_2:N:0:TCTGCAAG+GCTGCACT  
ACCAGAAACGTAACAAGAATAAAGGTAGGAAGGGGAGAAAACAGAACAAAGCGAGCGGTTGAAGAG  
AAAAGTATGATTGCGGCTGATCGTACCCCAATTCCTGCTAGAAAG

+  
:FFFFFFFFFFFFFFFFFFFFFFFFFFFFFFFFFFFFFFFFFFFFFFFFFFFFFFFFFFFFFFFFFFFFFFFFFFFFFFFF:FFFFFFFFF  
FFFFFFFFFFFFFFFFFFFFFFFFFFFFFFFFFFFFFFFFFFFFFFFFFFFFFFFFFFFFFFFFFFFFFFFFFFFFFFFF

@A00721:190:HGJW7DSXY:4:2270:11424:16391\_1:N:0:TCTGCAAG+GCTGCACT  
ATACCACTGATCTTCCAGAGTTACGTAGTGGTCGTTCTTTTGGTGATTTTATCAAAGAGAAAGTTTCT  
GCTAGTCGCGACGATAGTATTTATCGGAGTGATATTAACAAGTTAACTTCGAAGTGAAGTACTTAACT  
GAG

+  
FFFFFFFFFFFFFFFFFFFFFFFFFFFFFFFFFFFFFFFFFFFFFFFFFFFFFFFFFFFFFFFFFFFFFFFFFFFFFFFFFFFFFFFFFFFFFFFFFFFFFFFF  
FFFFFFFFFFFFFFFFFFFFFFFFFFFFFFFFFFFFFFFFFFFFFFFFFFFFFFFFFFFFFFFFFFFFFFFFFFFFFFFF:FFFFFFFFFFFFFFFFFFFFFFFF  
FFF

@A00721:190:HGJW7DSXY:4:1630:4996:25488\_2:N:0:TCTGCAAG+GCTGCACT  
TCAGTTTTCCAAAAGCTATTAATAGCAGTTGCGGGGCTATAATACCGCCTCCAGATTACTCTAACT  
GAATCCACTCTCTTGGGATATAAATGAGTACATCTATAATAGAGTTTT

+

FFFFFFFFFFFFFFFFFFFFFFFFFFFFFFFFFFFFFFFFFFFFFFFFFFFFFFFFFFFFFFFFFFFFFFFF  
FFFFFFFFFFFFFFFF:FF:FFFFFFFF:FFFFFFFFFFFFFFFF:FFFFFFFF  
@A00721:190:HGJW7DSXY:4:2332:17345:14465\_1:N:0:TCTGCAAG+GCTGCACT  
AACATGAATTAGTTATTGAAAGTCTTGACCCTCACGTCTCACTTTATCACCTTGGAGATGGTAAAGTC  
ATTAACAAAGGAAATGTTAAGGCTGATGACTTAAATTTTCGATTCTGCTTCGACGGTAATTCCATAAG  
ACC  
+  
FFFFFFFFFFFFFFFFFFFFFFFFFFFFFFFFFFFFFFFFFFFFFFFFFFFFFFFFFFFFFFFFFFFFFFFF  
FFFF:FFFFFFFFFFFFFFFFFFFFFFFFFFFFFFFFFFFFFFFFFFFFFFFFFFFFFFFFFFFFFFFF  
FFF  
@A00721:190:HGJW7DSXY:4:1441:26693:28025\_1:N:0:TCTGCAAG+GCTGCACT  
AACCTTTCCTCGTTCTTCATGAAGATCTTCGAGTGTTTTATAGTGAGTTATTCTTGCGAAGGTTCAAG  
TCGATTGATTTTGTTGACTACGATCTCTTGTAATAAGAAGTTCTTCGCAGTTGAATCTCCACCAGG  
TGG  
+  
FFFFFFFFFFFFFFFF:FFFFFFFFFFFFFFFFFFFFFFFFFFFFFFFFFFFFFFFFFFFFFFFFFFFFFFFF  
FFFFFFFFFFFFFFFFFFFFFFFFFFFFFFFFFFFFFFFFFFFFFFFFFFFFFFFFFFFFFFFFFFFFFFFF  
FFF  
@A00721:190:HGJW7DSXY:4:1308:21414:35164\_2:N:0:TCTGCAAG+GCTGCACT  
GCGACTTTTGTGCAATTTTCGCAAAAGGTCTGAAGTACGTATTGTCACTGCTAATCGTAATTCGCG  
AGAAGAGATAGTGACTAAAGTTTTGGCACTTCTAGTTCATCGCGGTAT  
+  
FFFFFFFFFFFFFFFFFFFFFFFFFFFFFFFFFFFFFFFFFFFFFFFFFFFFFFFFFFFFFFFFFFFFFF,FFFF  
FFFFFFFFFFFFFFFF:FFFFFFFF:FFFFFFFFFFFFFFFFFFFFFFFF,FFFF  
@A00721:190:HGJW7DSXY:4:2272:5493:17832\_2:N:0:TCTGCAAG+GCTGCACT  
CAGACGTGAAAGTTATGATGAGTGATCGTATTAGAACAGCTGATTCTTATTGCATGAACGTCGCTGAG  
GTCAAACCTGTGGACGTTCTTTTCATCGACGAATTATTCATGATTAC  
+  
FFFFF:FFFFFFFFFFFFFFFFFFFFFFFF:FFFFFFFF:FFFF:FFFFFFFFFFFFFFFF:FFF  
FFFFFFFFFFFFFFFFFFFFFFFFFFFFFFFFFFFFFFFFFFFFFFFFFFFFFFFFFFFFFFFF  
@A00721:190:HGJW7DSXY:4:1631:2926:20055\_2:N:0:TCTGCAAG+GCTGCACT  
CATCTACTTAAGCGGCTTATACCATAGGTTACGGTGATTCCAATCAAATCGGATTCATCAATCGTAT  
TGATCTCCAAGTCGCAAACTACTTCAACATCAACGACATCATTCTTGA  
+  
FFFFFFFFFFFFFFFFFFFFFFFFFFFFFFFFFFFFFFFF:F:FFFFFFFFFFFFFFFFFFFFFFFF:FF  
FFFFFF:F::FFFF,FFFFFFFFFFFFFFFF:FFFFFFFF:FFFF  
@A00721:190:HGJW7DSXY:4:2623:14235:31000\_2:N:0:TCTGCAAG+GCTGCACT  
TTATCGAAGTCTCAGTTATCGCTGCCCCGCCGACGTTTGTGCGCAACTCTCAGAGGTTTACGGCAGAA  
AAATTTCTCCTGCTTGAATTCGAGAGAGGACACTATGGAAATTAGAC  
+  
FFFFFFFFF:FFFFFFFFFFFFFFFFFFFFFFFFFFFFFFFFFFFFFFFFFFFFFFFFFFFFFFFFFFFF  
FFFFFFFFFFFFFFFFFFFFFFFFFFFFFFFFFFFFFFFF:FFFFFFFFFFFF  
@A00721:190:HGJW7DSXY:4:2348:15320:26240\_2:N:0:TCTGCAAG+GCTGCACT  
TATTACTTTCCTCAAGGTGAAAAGTTTGAAATTAACAAAGTCCTTGGAAGAGTAAGGTTAAATGTG  
AAGATGCTCAGACTATTATGAAGTTCAAGTAATACTTACCAGCACG  
+  
FFFFFFFFFFFFFFFFFFFFFFFFFFFFFFFFFFFFFFFF:FFF:FFFFFFFF, :FFFFFF:FF:FFFFFF:FFF  
FFFFFF:FF:FFF:FFFFFFFFFFFFFFFF,FFFFFFFFFFFF: :FFF  
@A00721:190:HGJW7DSXY:4:2243:16387:18380\_2:N:0:TCTGCAAG+GCTGCACT  
TTTTGCATCACAACACATATTACCGTTGCTCTATCACGACGTTGAATCTTTACGATACTTTGTTA  
TCAATGTAAAGTTAAACGATGCTACTTGTGAGAGGATCAATCACAGTA  
+  
FFFFFFFFFFFFFFFFFFFFFFFFFFFFFFFFFFFFFFFFFFFFFFFFFFFFFFFFFFFFFFFF:FF:FFFFFFFF  
FFFFFFFF:FFFFFFFF,FF,FFFFFFFFFFFFFFFFFFFFFFFFFFFFFFFF

@A00721:190:HGJW7DSXY:4:1646:31123:34256\_2:N:0:TCTGCAAG+GCTGCACT  
ACGGGAGGTTGCAGATTCAACCCCTTATATCGAGGCTATCGAGGACGATGAGTATCTTGAAGTTGTTG  
ACGACAAGCCTCAAGAGGGTAGAGGACCACCTGGATCTTCTACTGTCT

+

FFFFFFFFFFFFFFFFFFFFFFFFFFFFFFFFFFFFFFFFFFFFFFFFFFFFFFFFFFFFFFFFFFFFFFFF  
FFFFFFFFFFFFFFFFFFFFFFFFFFFFFFFFFFFFFFFFFFFFFFFFFFFFFFFFFFFFFFFF

@A00721:190:HGJW7DSXY:4:2358:3450:24126\_1:N:0:TCTGCAAG+GCTGCACT  
AACCACCTTAACGTCACTCGGTAATCTTTCAGCCGAATTAAGTACTAATGAGTTCAAGTCGGTTGTCTG  
ATCGAATTAAGATCAAGGCTAATACCTTTATAGGTAAGAAGCCCCTTGAGCCGCGTAGTCAGCGCGTT  
TAG

+

FFFFFFFFFFFFFFFFFFFFFFFFFFFFFFFFFFFFFFFFFFFFFFFFFFFFFFFFFFFFFFFFFFFFFFFF  
FFFFFFFFFFFFFFFFFFFFFFFFFFFFFFFFFFFFFFFFFFFFFFFFFFFFFFFFFFFFFFFFFFFFFFFF  
FFF

@A00721:190:HGJW7DSXY:4:1664:31521:28526\_1:N:0:TCTGCAAG+GCTGCACT  
TACCGAGTCTCCAAGAGAATATTTATTCTTATGAGGCTCGAACTTCAACGTTTTACAACGGAAAGA  
CATATCGCACCCGAAATTTTGGGCAGAATGCTCTTAACGCGGTTCTGAACGGTGTGTTTGATCAGTC  
TAA

+

FFFFFFFFFFFFFFFFFFFFFFFFFFFFFFFFFFFFFFFFFFFFFFFFFFFFFFFFFFFFFFFFFFFFFFFF  
FFFFFFFFFFFFFFFFFFFFFFFFFFFFFFFFFFFFFFFFFFFFFFFFFFFFFFFFFFFFFFFFFFFFFFFF  
FFF

@A00721:190:HGJW7DSXY:4:2315:24252:4038\_2:N:0:TCTGCAAG+GCTGCACT  
TATAGGAGACTCAGTTAACCTGAGAGCTCCTCAATTGATGATTGGGTCAACAATAGGGACGCTAGTA  
TACTTCGTAAAGTCGACAGCGAAATGGTCAATATTGATAATTGGACCG

+

FFFFFFFFFFFFFFFFFFFFFFFFFFFFFFFFFFFFFFFFFFFFFFFFFFFFFFFFFFFFFFFFFFFFFFFF  
FFFFFFFFFFFFFFFFFFFFFFFFFFFFFFFFFFFFFFFFFFFFFFFFFFFFFFFFFFFFFFFF

@A00721:190:HGJW7DSXY:4:1140:19072:28855\_1:N:0:TCTGCAAG+GCTGCACT  
AGCTCATGGTGAAAAGGGAAGCTAAGGTTAACTTGATGCTTCAGCCTTTTCGAAGCATAACCCCGCA  
CAGAATATCGTTTATCACGCAAATTTATTAATGCAATTTTCGGACCTATCTTTAAGGTTCTTGAG  
GAG

+

FFFFFFFFFFFFFFFFFFFFFFFFFFFFFFFFFFFFFFFFFFFFFFFFFFFFFFFFFFFFFFFFFFFFFFFF  
FFFFFFFFFFFFFFFFFFFFFFFFFFFFFFFFFFFFFFFFFFFFFFFFFFFFFFFFFFFFFFFFFFFFFFFF  
FFF

@A00721:190:HGJW7DSXY:4:1378:24080:36464\_1:N:0:TCTGCAAG+GCTGCACT  
CAGTGACGATTTCTCCCGGAAGCTCTTCTCTCTTAGGAGTCATGATGACTACTATAAGGGTGAAA  
TCGATTTTTCGAAGTTTGACAAATCTCAAGATTTCTTTGTAAAGCCTATGAGATAAAGATGTATTCT  
TAT

+

FF:FFF:FFFFFFFFFFFFFFFFFFFFFFFFFFFFFFFFFFFFFFFFFFFFFFFFFFFFFFFFFFFFFFFF  
FFFFFFFFFFFFFFFFFFFFFFFFFFFFFFFFFFFFFFFFFFFFFFFFFFFFFFFFFFFFFFFFFFFFFFFF  
FFF

@A00721:190:HGJW7DSXY:4:1348:31675:6621\_2:N:0:TCTGCAAG+GCTGCACT  
AACTTTGGAGTGCCAGTGAATATTTTGTACGCCAGGAGTATCCATAACGATTTGTCAATTTACCACC  
TTTGCTCAACGACGAAGTGGAACGGCCAACACTTTCTTTGGTAATTGT

+

FFFFFFFFFFF:FF:FFFFFFFFFFFFFFFFFFFFFFFFFFFFFFFFFFFFFFFFFFFFFFFFFFFFFFFF  
FFFFFFFFFFFFFFFFFFFFFFFFFFFFFFFFFFFFFFFFFFFFFFFFFFFFFFFFFFFFFFFF

@A00721:190:HGJW7DSXY:4:1142:30816:19539\_1:N:0:TCTGCAAG+GCTGCACT  
GATGATTTTATCACTTTATTATGACCTTGAAAGTTTTTCGGCTGTGGTTGTCGCTGGGGACGATTCCA  
TTCTGTTTTCAAAGACTCCAATAACTGATCATTCTGATCATATGATTTTGGACAATGGTTTCAAGCG  
AAA

```
FFFFFFFFFFFFFFFFFFFFFFFFFFFFFFFFFFFFFFFFFFFFFFFFFFFFFFFFFFFFF  
FFFFF:FFFFFFFFFFFFFFFFFFFFFFFFFFFFFFFFFFFFFFFFFFFFFFFFFFFFFFF  
FFF  
@A00721:190:HGJW7DSXY:4:2622:12454:19335_2:N:0:TCTGCAAG+GCTGCACT  
TGCTCGCGATTTATTCTTTTTGTCAATGATTACATCTACTTCGTTCTGATCCTTACAAGATCATCGT  
TAAGTTAGGTAAACCCCTAACCGATGTTACTCTTGTAGGACTTTGGGA  
+  
FFFFFFFFFFFFFFF:FFFFF:FFFFFFFFFFFFFFFFFFFFFFFFFFFFFFFFFFFFF:FFFFFFFFFFFF:  
FFF:FFFFF:FF:F:FF:F,F,FFFFFFFFFFFFFFFFFFFFF:FFFFFFFFFFFF  
@A00721:190:HGJW7DSXY:4:1442:15510:25535_2:N:0:TCTGCAAG+GCTGCACT  
AGGTTGTTGTTTGGCGATTAGCTCTTGCGACTAATATTCGATATTCGATTGAGGGTCGTTATACCTAT  
TCGGCTATCTGTGCTTTGAATTGTATAAGATCAAATTTTAAACGATTC  
+  
FFFFFFFFFFFFFFFFFFFFFFFFFFFFFFFFFFFFFFFFFFFFFFFFFFFFFFFFFFFFF:FFFFFFFFFFFFF  
FFFFFFFFFFFFFFFFFFFFFFFFFFFFFFFFFFFFFFFFFFFFF:FFFFFFFFFFFFF:  
@A00721:190:HGJW7DSXY:4:1633:22833:30733_1:N:0:TCTGCAAG+GCTGCACT  
TGATGTGGAGGGAGTTCTTGAAGCATCCCGACCTTCTCTGTGAAAATTTTGATGCGGTTTCATAAGA  
TTATCAGTAATCCTGATTCTACTACGGATTCATGGACCTTCCATCCTGTACCTCTTCTGGAGAGACGT  
ATC  
+  
FFFFFFFFFFFFFFFFFFFFF:FFFFFFFFFFFFF:FFFFFFFFFFFFF:FFFFFFFFFFFFF:FFFFF  
FFFFFFFFFFFFFFFFFFFFFFFFFFFFFFFFFFFFFFFFFFFFFFFFFFFFFFFFFFFFF  
FFF  
@A00721:190:HGJW7DSXY:4:2431:26368:7044_2:N:0:TCTGCAAG+GCTGCACT  
CTTCGAGACAGGTGATATTGTTGAGCGAGAGCGACCAAGATCTAAATTCGGTAACGGTGCGTGCGCGCT  
TTATTTTAAAAAGCTCCCTCCTCTCGCAAGTTTGATCTGATACTTATC  
+  
:FFFFFFFFF::FFFFFFFFFFFFF,:FFFF:F:FFFFFFFF:FFFFFFFFF,:::FFFF:FFF:FF:F:F:F  
FFFFFFFFFFFFF:FFF,:FFF:FFFFFFFFFFFFFFFFF:F,FFF,FFFF:  
@A00721:190:HGJW7DSXY:4:2619:30020:23484_2:N:0:TCTGCAAG+GCTGCACT  
TGATCAGTCTCTGACTTGACCATCTTTCATTTTAAATGACGATCATTAAGACTCTCTTTCTTCTTTGT  
TTCCTTCTTTGCACTGATTTTTCCTCATCAGCTTGTGTTTTACCTAAT  
+  
FFFFFFFFFFFFFFFFFFFFFFFFFFFFFFFFFFFFFFFFFFFFF:FFFFFFFFF::F::F:FFFFF:FFFFFFFFF  
FFFFFFFFFFFFFFFFFFFFF,FFFFFFFFF:FFFFFFFFFFFFFFFFFFFFF,:FFFF  
@A00721:190:HGJW7DSXY:4:2107:20283:7874_2:N:0:TCTGCAAG+GCTGCACT  
GATAACAACATATCAGTTGATTAAAGACTCTTCCGAAAGGCCAACTTTGGGAATTTGAAGCTCAGGGTGA  
AGCACAACTTTGACCGTGACGAAGTGTGGTGTCTTGATCTACGTTA  
+  
FFFFFFFFFFFFFFFFFFFFF,FFFFFFFF:FF:FFFFFFFFFFFFFFFFFFFFFFFFFFFFF,FFFFFFFFFFFFF:  
FFFFFFFFFFFFF:FFFFFFFFFFFFFFFFF,FFFFFFFFFFFF:FFFF:FFFFF  
@A00721:190:HGJW7DSXY:4:2554:20799:25958_1:N:0:TCTGCAAG+GCTGCACT  
CACTACCACTTATTACGATATTTCTTTAGTCGATGGGTTTTCGACGCCTTTAAGCGTCTTCTGTTCAT  
CGCAACCAGATGATATCTTCTATTGCAACTTATGTTTCGATCAGTGTTTCTTCTATCAGGAGGAAAAC  
ACT  
+  
FFFFFFFFFFFFFFF:FFFFFFFFFFFFFFFFFFFFFFFFFFFFFFFFFFFFFFFFFFFFF  
FFFFFFFFF:F,FFFFFFFFFFFFFFFFFFFFFFFFFFFFFFFFFFFFFFFFFFFFFFFFFFFFF  
FFF  
@A00721:190:HGJW7DSXY:4:2255:18511:17049_2:N:0:TCTGCAAG+GCTGCACT  
TCACTTTGTGTGTACTTGTCTCTATTTTAAAGTTTTGTCTTCTTGTGTTTGTCTTATTCTATTAATCACT  
CATTTTAGTGAGATTATTA AAAACGCACTAAAACGTCTTCGACAACAG  
+
```

FFFFF:FF:F:FFFFFFFFFFFFFFFF:FFFF:FFFFFFFFFF:FFFFFFFFFFFF:FF:FFFFFFFFF  
FFFFFFFFFFFFFFFFFFFFFFFFFFFFFFFF:FFFFFFFFFFFF,FFF  
@A00721:190:HGJW7DSXY:4:2473:6054:10003\_1:N:0:TCTGCAAG+GCTGCACT  
GCCTTACAGAGGGGAGCAGCATGACCATAATTGGTATTGACTTTGGTACCACCTTTTCTACTGTCTG  
TCTCGCCTCTTCGAATGAAGTTTTAATGCTTAACAACAATGATAGTGAATTTATACCTACAATCATTG  
GTT  
+  
F:FFF:FFFF,F::FFFFFFFFFFFFFFFFFFFF,FFFFFFFFFFFF:FFFFFFFFFFFFFFFFFFFF:FF  
F:F:FF::F:FFFFFFFFFFFFFFFF:FFF:FFFFFFFFFFFFFFFFFFFF:FFFFFFFFFFFFFFFFFFFF  
FFF  
@A00721:190:HGJW7DSXY:4:1419:6614:29919\_2:N:0:TCTGCAAG+GCTGCACT  
TGTTTATGGATATGATGCTATTACTCATGATGGTTACGGTCAGGGAGGATTCTCAGTTTACAAGGACC  
TTAAGCGATGGATCGGGGTTAATTCTAAAACATTACCCGAAAGACGTG  
+  
:FFFFFFFFFFFFFFFFFFFFFFFFFFFFFFFFFFFFFFFFFFFF,FFFFFFFFFFFF:FF  
FFFFFFFFFFFFFFFFFFFFFFFFFFFFFFFFFFFFFFFFFFFF:FFFFF  
@A00721:190:HGJW7DSXY:4:1577:16089:8750\_2:N:0:TCTGCAAG+GCTGCACT  
GTACGATGTCGTCTGTCTCGGCGATCACTTTTCTACTAAGAATTGGTCCTACTTTTGGACAAGGCCAAC  
TTCGTAATCTTCATGAGATCGTTTCTTTCTTTATCTCTTTGGTTGATA  
+  
FFFFFFFFF:::FFFFFFFFFFFFFFFF:FFFFFFFFFFFFFFFF,F:FFFF,FF,FFFF,FFFFFFFF  
,:FFFFFF:FFFF,FFFFFF,FFFFFFFFFFFFFFFF::FFF,:F,,:F  
@A00721:190:HGJW7DSXY:4:1239:9064:18098\_2:N:0:TCTGCAAG+GCTGCACT  
GAGTGAAAGGCTTCAATTGTAGTGGTTTGGTCGTTTTCAGTACCCAGTCAGTATACCTCTACGCAAAGA  
TATTTTCATGAAAACTACAGAGGAACGTACCGGATTACCTGTCTTTCAT  
+  
FFFFFFFFFFFFFFFFFFFFFFFFFFFFFFFFFFFF:FFFFFFFFF:FFFFFFFFFFFFFFFFFFFF:F:FF  
FFFFFFFFFFFFFFFFFFFFFFFFFFFF,FFFFFFFFFFFF:FFFFFFFF:F  
@A00721:190:HGJW7DSXY:4:2254:11134:13479\_1:N:0:TCTGCAAG+GCTGCACT  
CTTCGGCCGCTCTCTTTGCTTCGATGTTGGATGTCAAGAAGGGTTCAGAATGGGATTCTACGTAGTT  
TATGACTTTGGTGGTGGTACTTTCGATACTTCTATCGTCTTACGTTACGTAATTACTATAGTGTTAT  
TTA  
+  
FFFFFFFFFFFFFFFFFFFFFFFFFFFFFFFFFFFFFFFFFFFFFFFFFFFFFFFFFFFFFFFFFFFF  
FFFFFFFFFFFFFFFFFFFFFFFFFFFFFFFFFFFFFFFFFFFFFFFFFFFFFFFFFFFFFFFFFFFF:FFFFFFFF  
FFF  
@A00721:190:HGJW7DSXY:4:2424:8350:29794\_1:N:0:TCTGCAAG+GCTGCACT  
ATAATCTTGGAGGTCGTGACGTTGATGAAGCTATAAGAGCGTTCTTATTACGGCGCACTTCTTTACCC  
GCCACCACACAACCTTTCAGTTTCACAACCTGAAGGAGGAGGTTTCTGTTACTGGAAAACCCTCGTCAAT  
ACT  
+  
FFFFFFFFFFFFFFFFFFFFFFFFFFFFFFFFFFFF:FFFFFFFFF:FFFFFFFFFFFFFFFFFFFF  
FFFFFFFFFFFFFFFFFFFFFFFFFFFFFFFFFFFFFFFFFFFFFFFFFFFFFFFFFFFFFFFFFFFF  
FFF  
@A00721:190:HGJW7DSXY:4:2570:14895:24189\_2:N:0:TCTGCAAG+GCTGCACT  
GATCTAGTGAAATTAACGCGTCCTTTTCTGGAACGTAGTTTACTATTATGAACAAAGTTATCAAAGA  
TAGTGGCATTCAAGGCAAACCTTACCCTGATTCCGGCCGGTGGTAGCTC  
+  
FFFFFFFFFFFFFFFFFFFFFFFFFFFFFFFFFFFFFFFFFFFFFFFFFFFFFFFFFFFFFFFFFFFF  
FFFFFFFFFFFFFFFFFFFFFFFFFFFFFFFFFFFFFFFFFFFFFFFFFFFFFFFFFFFF  
@A00721:190:HGJW7DSXY:4:2523:32877:3443\_2:N:0:TCTGCAAG+GCTGCACT  
TGAAACAGCTATTAAAGCTGTTGAGCGGGTAATTACACCTAAACGAGCTCGATCTGCCATCGCTGAAG  
GATGTGCACTCTTTTCTGCTACTTTAACGGAGCGTAGTGACTCTTCG  
+



FFFFFFFFFFFFFFFF:FFFFFFFFFFFFFFFFFFFFFFFFFFFFFFFFFFFFFFFF  
FFFFFFFFFFFFFFFFFFFFFFFFFFFFFFFF,FFFFFFFFFFFFFF:FFFFFFF  
@A00721:190:HGJW7DSXY:4:1547:29550:9142\_2:N:0:TCTGCAAG+GCTGCACT  
AAAGGTCTCTATCAAGCTCGTATTATCGTCGCTGCTGGATCTGCGTTACCGTTGAAGGCTAAACTCCA  
AGGTAATTATGAAGACGGTGATTTATCTTTCACTCTGGCCTTGTATGA

+  
FF:FFFFFFFFFFFFFFFFFFFFFFFFFFFFFFFFFFFFFFFFFFFFFFFFFFFFFFFF  
FFFFFFFFFFFFFFFFFFFFFFFFFFFFFFFFFFFFFFFFFFFFFFFF:FFF  
@A00721:190:HGJW7DSXY:4:2220:32371:13182\_1:N:0:TCTGCAAG+GCTGCACT  
CATTAATAATTTCAATCTTCTTAAAAAGAAGATAGAGAGTCATACTTTGGGCTATCGTTCAGGTGCAT  
GGGTTGGATAGCCAATATTGAAGTGGACACCTCTGGTAGTATCGAAGTAAAGAGATCGGAAGAGCAC  
ACG

+  
FFFFFFFFFFFFFFFFFFFFFFFFFFFFFFFFFFFFFFFFFFFFFFFFFFFFFFFF  
FFFFFFFFFFFFFFFFFFFFFFFFFFFFFFFFFFFFFFFFFFFFFFFFFFFFFFFF  
FFF  
@A00721:190:HGJW7DSXY:4:2619:12915:33066\_2:N:0:TCTGCAAG+GCTGCACT  
AAGCATACTACTTTTGCTTTGATTACTCTACCGCCTTACAAGTCTAAGGTTAAAGAGTCGATTAAACA  
AGTTGTACTTATCAATGATTTTATCGCTGGTTGTTATCTCGAAAAGTC

+  
FFFFFFFFFFFFFF,FFFFFFFFFFFFFFFFFFFFFFFFFFFFFFFFFFFFFFFF:FFFFFFFFFFFF,FF,F  
F,,FF:,,,FFFFFFFF,FFFFFF:FFFFFFFF,F,F,FFF:F:FF  
@A00721:190:HGJW7DSXY:4:2505:10194:35336\_1:N:0:TCTGCAAG+GCTGCACT  
CCCAAAGAGAATATCTAAAATATTACAAAATCTTACCACTATCTACGAACCTAAAGTTCTGAAGACG  
TTGCTTGTGCTTCCTCCTTTAATGGCACTACCTCGGTACAATCTTACTTGGAACGAAGGCGACCTGT  
TCC

+  
FF:FFFFFF:FFFF:FFFFFFFFFFFFFFFFFFFFFFFF:FFFFFF,FFF:FFFFFFFF:FFFFFFFFFFFF  
FFFFFFFFFFFF:FFFFFFFFFFFFFFFFFFFFFFFFFFFFFFFFFFFFFFFF  
FFF  
@A00721:190:HGJW7DSXY:4:2659:11315:25661\_1:N:0:TCTGCAAG+GCTGCACT  
GTTCTGTCTATATTAGGTGAAGCGAAATACGATTTCAACGTCACGTTACCGAGTTTCGTTTCGTA  
CCTTGATGCTGACTTTTCGTCAATATGATTTGATCTGGTTGCTCAATTCTAAGCGTGTTCCGCTTAGTG  
CGA

+  
FFFFFFFFFFFFFFFFFFFFFFFFFFFFFFFFFFFFFFFFFFFFFFFFFFFFFFFF  
FFFFFFFFFFFFFFFFFFFFFFFFFFFFFFFFFFFFFFFFFFFFFFFFFFFFFFFF  
FFF  
@A00721:190:HGJW7DSXY:4:1255:12346:11350\_2:N:0:TCTGCAAG+GCTGCACT  
AAATACTAGATATTTGGATGATCTTGATAAAGAACTTCATGAATTTTCAGAGGATGAAAAATTTTCTT  
CCTTGATTTTAATATAAAGAATCTTTACCAGGACTCCTACTACAGGA

+  
FFFFFFFFFFFFFFFFFFFFFFFFFFFFFFFFFFFFFFFFFFFFFFFFFFFFFFFF:FFFFFFFF:FFFFFFF  
FFFFFFFFFFFFFFFFFFFFFFFFFFFFFFFFFFFFFFFFFFFFFFFF:FFFFFFF  
@A00721:190:HGJW7DSXY:4:2460:13639:15029\_1:N:0:TCTGCAAG+GCTGCACT  
GATCGTAAGAAGTTTATAAGGAACATATCCATTTGTTGTAATAGGGTCATCAACTTAGAACTCGAAAC  
TCTAAGTGGTAATACTGTCTTTCCAAGCTTACCTGTATCTTCAATGAAATTGGACTCTTCGATAGGGG  
ACA

+  
FFFFFFFFFFFFFFFFFFFFFFFFFFFFFFFFFFFFFFFFFFFFFFFFFFFFFFFF  
FFFFFFFFFFFFFFFFFFFFFFFFFFFFFFFFFFFFFFFF:FFFFFFFF,FFFFFFFFFFFFFFFF  
FFF  
@A00721:190:HGJW7DSXY:4:2414:2600:4178\_1:N:0:TCTGCAAG+GCTGCACT  
TAAGAATACTATAAATAGAATAGCTATTACTACTAATGGCGTTGGCCTAGTGATGTTATTAGTGACA

TCTGGTCAATTTTCGTTTTTAGGTGGTCTTTATTCTATTATTGATTTTTATGAGATTGAGATCGGAAGA  
GCA

+

FFFFFFFFFFFFFF:FFFF:FFFFFFFFFFFFFFFFFFFFFFFFFFFFFFFFFFFFFFFFFFFFFFFF,FFF:FFFFFFFF  
FF:FFFFFFFF:FFF:,::FFF,FFFF:F:F:FF,F::FFFFFFFF:FFFF:F:F:FFFFFFFFFFFFFF  
FFF

@A00721:190:HGJW7DSXY:4:1634:21757:24330\_2:N:0:TCTGCAAG+GCTGCACT  
TTCCTGAAGAGTCCTTCCGTAACCAACTTCTTGACAATTTCTTCAATCCTTCGATAATAGTTAAATC  
TACGATTATGTCTGTGTGAAAGACTTTCTACCGATAAGGGTCACTAG

+

FFFFFFFFFFFFFFFFFFFFFFFFFFFFFFFFFFFFFFFFFFFFFFFFFFFFFFFFFFFFFFFFFFFFFFFF  
FFFFFFFFFFFFFFFFFFFFFFFFFFFFFFFFFFFFFFFFFFFFFFFFFFFFFFFFFFFFFFFF

@A00721:190:HGJW7DSXY:4:2674:8892:2988\_2:N:0:TCTGCAAG+GCTGCACT  
TAAGAAATAATCCTACATTGACTGATTATCTAAAGATTGAAGGAAAATTTTATCCTCGTTTAACTTAC  
TTAGACTTTCTACGATACAAATGATAACTTCTAATTTACGTTTGCTA

+

FFFFFFFFFFFFFFFFFFFFFFFFFFFFFFFFFFFFFFFFFFFFFFFFFFFFFFFFFFFFFFFFFFFFFF:FFFFFFFFFFFFFF  
FFFFFFFFFFFFFFFF:FFFFFFFFFF::FFFFFFFFFFFFFFFFFFFFFFFF

@A00721:190:HGJW7DSXY:4:2103:25861:10394\_1:N:0:TCTGCAAG+GCTGCACT  
GATGCATGGTGTATCTCCTCAGGAGTCCCGGCATTTGATAATAATGACGAGACTTTTCGTCATAATCG  
CTGCATATTACGATTACACGGTACCAGCGCATCTCGTGTGAGCCTCGACCCGATTATATGGTATTA  
ACT

+

FFFFFFFFFFFFFFFFFFFFFFFFFFFFFFFFFFFFFFFFFFFFFFFFFFFFFFFFFFFFFFFFFFFFFFFF  
FFFFFFFFFFFFFFFFFFFFFFFFFFFFFFFFFFFFFFFFFFFFFFFFFFFFFFFFFFFFFFFFFFFFFFFF  
FFF

@A00721:190:HGJW7DSXY:4:1141:22164:24815\_2:N:0:TCTGCAAG+GCTGCACT  
TCTAGAATTCTTAATTATAATATTCAACCTCAAAAGTTACGTGTTTACAGTAACGAGATCACACATTT  
TGAGAACTAACTATGTTATGTTCTCTGATCATTTTGACAATCTCTTCT

+

FFFFFFFFFFFFFFFFFFFFFFFFFFFFFFFFFFFFFFFFFFFFFFFFFFFFFFFFFFFFFFFFFFFFFFFF  
FFFFFFF:FFFFFFFFFFFFFFFFFFFFFFFFFFFFFFFFFFFFFFFF:FFFFFFF

@A00721:190:HGJW7DSXY:4:1429:27841:12164\_2:N:0:TCTGCAAG+GCTGCACT  
AAATAAATAATATTACTAATGGCAAATAGTGGAAGGCTCCAGTCAACACTAGTTCGAGTGCTGCTTT  
GGATTACGATGACGTGAGAATAGGTGAAGGGATAGTTTTTACCTCGAC

+

FFFFFFFFFFFFFFFFFFFFFFFFFFFFFFFFFFFFFFFFFFFFFFFFFFFFFFFFFFFFFFFFFFFFFFFF  
FFFFFFFFFF:FFFFFFFFFFFFFF:FFFFFF:FFFFFFFFFFFFFFFF

@A00721:190:HGJW7DSXY:4:2538:9670:18333\_2:N:0:TCTGCAAG+GCTGCACT  
GCGACTAATCTTAAAGCTTCACCCAAAATGAAGGACACTTCGAAACTGAATAATGATGCACTACAAAC  
AAGTATCGCTAATCATCTGAAAAAGGCTCTAAAGGACACTATACAATA

+

FFFFFFFFFFFFFFFFFFFFFFFFFFFFFFFFFFFFFFFFFFFFFFFFFFFFFFFFFFFFFFFFFFFFFFFF  
FFFFFFFFFFFFFFFFFFFFFFFFFFFFFFFFFFFFFFFFFFFFFFFFFFFFFFFFFFFFFFFF

@A00721:190:HGJW7DSXY:4:1518:23764:35571\_2:N:0:TCTGCAAG+GCTGCACT  
ACCACATTTTGGTCAAGTCAATCCGTTGAGAAAATTTCTTAGAGGATATTCGCCATTGTGGTACGAAT  
TGGTCCAACATTTACCACCAAATTCTTTTGATACAACTCTAGCCTTCA

+

FFFFFFFFFFFFFFFFFFFFFF:FFFFFFF:FFFFFFFFFFFFFFFFFFFFFFFFFFFFFFFFFFFFFFFF  
FFFFFFFFFFFFFFFFFFFFFFFFFFFFFFFFFFFFFFFFFFFFFFFFFFFFFFFF:FF:F,

@A00721:190:HGJW7DSXY:4:1423:15582:35931\_2:N:0:TCTGCAAG+GCTGCACT  
ACCAGATTGGTTCGAACCCGTTGATGCTATGTCAGAAGAAGCTATTCAAGCTTGTCGTTTAAAGACTG  
CAGAGGCTGTCAAACAAGCCCAGACTCAAGGAGTCCAATCAAAGGTTT

+

[illegible]

FFFFFFFFFFFFFFFFFFFFFFFFFFFFFFFFFFFFFFFFFFFFFFFFFFFFFFFFFFFFFFFFFFFFFFFFFFFFFFFF  
FFF

@A00721:190:HGJW7DSXY:4:1631:14235:10770\_2:N:0:TCTGCAAG+GCTGCACT  
AACTATTATCCGATTCTTCGAGGGTATCACTACCACTGATCTGCCGACTTTAGTCAAGGAACCTCAAT  
TCCTTCGATGTTTATATTTTTCTATAAGGGAAAATAGCAATAATCAAA

+

FFF:FFF:F,FFFFFFFFFFFFFFFFFFFFFFFFFFFFFFFFFFFFFFFFFFFFFFFFFFFFFFFFFFFFFFFF:  
F:FFFFFFF,FFFFFFFFFFFFFF,FF:FF  
,FFFFFFFFFFFFFFFFFFFFFFFFFFFFFFFFFFFFFFFFFFFFFFFFFFFFFFFFFFFFFFFF:FFFF:FFFFFFFF

@A00721:190:HGJW7DSXY:4:1402:4725:34976\_2:N:0:TCTGCAAG+GCTGCACT  
AACTTTATTTTCAAGACTCTCTCCGATCACCTTGGTGTGATCTCCCGGAGGATCTTTTCAATAAGATGT  
ATGATGATAATCTACTATTTTTAAATAGTGATATTACGCGTATACTTG

+

FFFFFFFFFFFFFFFFFFFFFFFFFFFFFFFFFFFFFFFFFFFFFFFFFFFFFFFFFFFFFFFFFFFFFFFF:  
FFFFFFFFFFFFFFFFFFFFFFFFFFFFFFFFFFFFFFFFFFFFFFFFFFFFFFFFFFFFFFFF:FFFFFFF

@A00721:190:HGJW7DSXY:4:1434:26576:23531\_2:N:0:TCTGCAAG+GCTGCACT  
TTTGGCTTGGTCTATTTACCGCAAAAAGTTGGAAGAGGTCTATGATATTTATTTTACTTATACTTTAA  
ATAGCACCGATTATAACTTGACTGTTGATAATATTACAATAGCTCTTT

+

FFFFFFFFFFFFFFFFFFFFFFFFFFFFFFFFFFFFFFFFFFFFFFFFFFFFFFFFFFFFFFFFFFFFFFFF  
FFFFFFFFFFFFFFFFFFFFFFFFFFFFFFFFFFFFFFFFFFFFFFFFFFFFFFFFFFFFFFFF

@A00721:190:HGJW7DSXY:4:1232:15908:27101\_2:N:0:TCTGCAAG+GCTGCACT  
AGTAACCGGTGAACACGTCGGTAGCATTGATTTACTTTTACCGTTAGAACTGAAAAAGATTCTTTTCG  
AAAAGAAACCTATAAGTTACAAACGATTCTTCGACTATATTAAAGAAA

+

FFFFFFFFFFFFFFFFFFFFFFFFFFFFFFFFFFFFFFFFFFFFFFFFFFFFFFFFFFFFFFFFFFFFFFFF  
FFFFFFFFFFFFFFFFFFFFFFFFFFFFFFFFFFFFFFFFFFFFFFFFFFFFFFFF:FFFFFFF

@A00721:190:HGJW7DSXY:4:1342:32913:27336\_2:N:0:TCTGCAAG+GCTGCACT  
TCAAGTACCTGAACCTTTACATTTTTAATGGTATGGTATAATGTGTCTTACAAATAGAACCTTCACTCT  
CGGTAATGAGAGTGATTCTTAATATTCTAGTAACCGCTATGTGGGC

+

FFFFFFFFFFFFFFFFFFFFFFFFFFFFFFFFFFFFFFFFFFFFFFFFFFFFFFFFFFFFFFFFFFFFFFFF  
FFFFFFFFFFFFFFFFFFFFFFFFFFFFFFFFFFFFFFFFFFFFFFFFFFFFFFFF:FFF:FFFFFFFFFFFFFFFF

@A00721:190:HGJW7DSXY:4:1304:15438:29136\_2:N:0:TCTGCAAG+GCTGCACT  
TGCTAGGAAAATTTTAGAAAACTCCATTGTATAGTTCAAGGAGTACTTAATTCAATAGCTTTAGTAT  
TATTTACTATCGCCTTTATTGAAAATTGTATAAGAGTTAATTGCTTAC

+

FFFFFFFFFFFFFFFFFFFFFFFFFFFFFFFFFFFFFFFFFFFFFFFFFFFFFFFFFFFFFFFFFFFFFFFF  
FFFFFFFFFFFFF:FFFFFFFFFFFFFFFFFFFFFFFFFFFFFFFFFFFFFFFFFFFFFFFF

@A00721:190:HGJW7DSXY:4:2660:7048:31923\_1:N:0:TCTGCAAG+GCTGCACT  
ACATACCATAACCTACCATGACCAATCATCGCTCCAAGTGGCAGCCAGACGTAGGGTCAAACCTACT  
ACCGCCGGTCGGCAGATCGGCACCACTGGTCTCTACGTTACGGGACCCGCTGTGCAGAATAACCTTCC  
CAA

+

FFFFFFFFFFFFFFFFFFFFFFFFFFFFFFFFFFFFFFFFFFFFFFFFFFFFFFFFFFFFFFFFFFFFFFFF  
FFFFFFFFFFFFFFFFFFFFFFFFFFFFFFFFFFFFFFFFFFFFFFFFFFFFFFFF:FFFFFFFFFFFFFFFF  
FFFFFFFFFFFFFFFFFFFFFFFFFFFFFFFFFFFFFFFFFFFFFFFFFFFFFFFFFFFFFFFF

@A00721:190:HGJW7DSXY:4:1344:6008:2347\_2:N:0:TCTGCAAG+GCTGCACT  
CACAGAAGAAGGCTGAAGGTCGTTACCGGACGACCACTCAAAGGAAACGGGCTGTTGCCAGAGGAAA  
GCAGCGACCACCGAGGTCGCTCGTAACATTGACGGCAGTCCCGTCATC

+

FFFF:FFFFFFFFFFFFFFFFFFFFFFFFFFFFFFFFFFFFFFFFFFFFFFFFFFFFFFFFFFFFFFFF:  
FFFFFFFFFFFF:FFFFFFFFFFFF:FFF:FFF  
:FFFF:FFFFFFFFFFFFFFFFFFFFFFFFFFFFFFFFFFFFFFFFFFFFFFFF:FFFFFF:FFFFFF

@A00721:190:HGJW7DSXY:4:1307:22110:29637\_1:N:0:TCTGCAAG+GCTGCACT  
CTGAGGCAGTACCTCAGTCAAAAGTCACATTACCACTCCCATACCAATCAATGATGTGACTATACAG





FF:FFFF:,,:F:F::F,,FFF:F,FFFFFFF:FFFF,:FFF,F:,,FFFF:FFF:F,FFF,F:FF:,  
:F:

@A00721:190:HGJW7DSXY:4:1676:26937:34616\_2:N:0:TCTGCAAG+GCTGCACT  
AACAAAGATAAGATTTTATCTTTCTTCAAACACCCTGTTTTCCTTAAGGGCGGACAATTGTTCCATTG  
TGAACCTCTGGGGACTAGATTGAGCATTAATGAGTTCCGAATAACTCG

+  
FFFFFFFFFFFFFFFFFFFFFFFFFFFFFFFFFFFFFFFFFFFFFFFFFFFFFFFFFFFFFFFFFFFFFFFF:FFF  
FFFFFFFFFFFFFFFFFFFFFFFFFFFFFFFFFFFFFFFFFFFFFFFFFFFFFFFFFFFFFFFFFFFFFFFF:FFFF

@A00721:190:HGJW7DSXY:4:1404:14805:11913\_2:N:0:TCTGCAAG+GCTGCACT  
TATTTCCGTACCAAGAGCCACTGCCAATCTCATCGCTATACGCATACCTGATTGGAAGAAGCGAGGTT  
CGTTCCTCAATAAAAATTTTCTCAAGAGATTATGGTTGATAAAGTTT

+  
FFFFFFFFFFFFFFFFF,:FFFFFFFFFFFF:FFFFFFFF:FF:FFFFFFFFFFFFFFFF:FFFFFFFFFFFFFFFF:FF  
FFFFFFFFFFFFFFFFFFFFFFFFFFFFFFFFFFFFFFFFFFFFFFFFFFFFFFFFFFFFFFFFFFFFFFFF

@A00721:190:HGJW7DSXY:4:1247:3260:33880\_1:N:0:TCTGCAAG+GCTGCACT  
TACGTCATGGGGATCACTTCTTCGGTCAATGACAAAACCTTCGAATATGTTACGACATGGCTTCGTAA  
CAACAGTGCGAGGATTGTCATCTCGGGGAAAGTGATTACCAAGATGTTCATATAGATACGAGATACC  
TAG

+  
FFFFFFFFFFFFFFFFFFFF:FFFFFFFFFFFFFFFFFFFFFFFFFFFFFFFFFFFFFFFFFFFFFFFFFFFFFFFF  
FFFFFFFFFFFFFFFFFFFFFFFFFFFFFFFFFFFFFFFFFFFFFFFFFFFFFFFFFFFFFFFFFFFFFFFFFFFF  
FFF

@A00721:190:HGJW7DSXY:4:1458:14733:12414\_2:N:0:TCTGCAAG+GCTGCACT  
AGCGATCTTACTCGTTATCGGAGCTAAGAAGAAGACTTTGGGTACACGTTATGCTCGCAAACCTTAACG  
TTAGTACCGGAGGTGATCTCTCTGCTTCTGCGTTACTGAGAGAAAAGA

+  
FFFFFFFFFFFFFFFFFFFFF:FFFFFFFFFFFFFFFFFFFFFFFFFFFFFFFFFFFFFFFFFFFFFFFFFFFFF,FFFFFFFFFFFFFFFFFFFF  
FFFFFFFFFFFFFFFFFFFFFFFFFFFFFFFFFFFFFFFFFFFFFFFFFFFFFFFFFFFFFFFFFFFFFFFFFFFF

@A00721:190:HGJW7DSXY:4:1325:11107:24768\_1:N:0:TCTGCAAG+GCTGCACT  
CTTTATGGACAAGATGCAAGTTCTTGGGAAATACTTGTTTCCCTTTTATAGGTTTAGTAGGTGATCTTG  
ACGTCGATTCTTTGTATAGGAGTGTGAGAAGACAACGAATCTTGAACTACGGTCCTTATCAAAGAA  
AAT

+  
FFFFFFFFFFFFFFF:F:FFFFFFFFFFFF:FFFFFFFFFFFF:FFFFFFFFFFFFFFFFFFFFFFFFFFFFFFF  
FFFFFFFFFFFFFFFFFFFFFFFFFFFF:FFFFFFFFFFFFFFFFFFFFFFFFFFFFFFFFFFFFFFFFFFFFFFF  
FFF

@A00721:190:HGJW7DSXY:4:1218:26386:24236\_2:N:0:TCTGCAAG+GCTGCACT  
AAATCTTTTGAGATTGAGAAGATTGAAGAACACGTCAAGAAGTCGCTCGGCGTTGTTCTTGAAAACCA  
AGTTAAGAAGGAGGCTGATCATGGAGTCTTGTACCTTCTGTCAAAC

+  
FFFFFFFFFFFFFFFFFFFFFFFFFFFFFFFFFFFFFFFFFFFFFFFFFFFFFFFFFFFFFFFFFFFFFFFFFFFF  
FFFFFFFFFFFFFFFFFFFFFFFFFFFFFFFFFFFFFFFFFFFFFFFFFFFFFFFFFFFFFFFFFFFFFFFF:FFFF

@A00721:190:HGJW7DSXY:4:1630:3685:10786\_2:N:0:TCTGCAAG+GCTGCACT  
TACGAGAGGTGATCCCGGATGTGGATTGAAGGCTGGCTCTAAGGGAGACTCCTTCTTTTGAATGTTG  
TAAAGAATTGGGTTGAGAAGTGTGCTTTACAAGGAGTTAGACTCTTCT

+  
FFFFFFFFFFFFF:FFFFFFFFFFFF:FF:FFFFFF:FFFFFFFF:FFFFFFFFFFFFFFFFFFFFFFFFFFFF,FFFF  
,FFFFFFFFFFFFFFFFFFFF:FFFFFFFFFFFFFFFFFFFFFFFFFFFFFFFFFFFFFFFF:FFF

@A00721:190:HGJW7DSXY:4:2527:32226:26334\_2:N:0:TCTGCAAG+GCTGCACT  
TAAAGAAAAATTTTGAATAAACTAATGAGAGGTATAGGCTTAGTCAAGTCTGTACTTACATTCTTTA  
CGCCAGATTCTTCATGGGGCGACGCTGTTTCTTCTTGGTATTTCTGAAA

+  
FFFFFFFFFFFFFFFFFFFFFFFFFFFF:FFFFFFFFFFFFFFFFFFFFFFFFFFFFFFFFFFFFFFFFFFFFFFF:FFFFFFF  
FFFFFFFFFFFFFFFFFFFF:FFFFFFFFFFFFFFFFFFFFFFFFFFFFFFFFFFFFFFFF:FFFF,FFFFF

@A00721:190:HGJW7DSXY:4:2364:4164:25614\_1:N:0:TCTGCAAG+GCTGCACT  
TTTCCTCTGGTAAGGGAATTATTAAATCATTCTTCTCACTCTTGACGAGAATTATTACTGTTTTCTCT  
ACCCATAACTTCTTTTTCAAAAATGCGGATGGGTCTACTGATGTTTTCTACAGAGTGCAGTCGTTTC  
AAC

+

F,FFFFFFFFFFFFFFFFFFFF:FFFFFFFFFFFFFFFFFFFFFFFFFFFFFFFFFFFFFFFFFFFFF  
FFFFFFFFFFFFFFFFFFFFFFFFFFFFFFFFFFFFFFFFFFFFFFFFFFFFFFFFFFFFFFFFFFFFF:FFFFFFFFFFFFFFFFF  
FFF

@A00721:190:HGJW7DSXY:4:1623:15157:32002\_1:N:0:TCTGCAAG+GCTGCACT  
AATAATTGGTGATGAAAATACGTATGTCGGTGGGGTTCTCAAGGCTCTCATCGCCACTGGGATTCTAA  
GGGGTTCATAAGATATTATCTGACATTGTGGTTCATGATCAGGATTCTTCTTTTGGTCCTTACGTC  
TTA

+

FFFFF::FFFFFFFF:FFFFFFFFFFFFFFFFFFFFFFFFFFFFFFFFFFFFFFFFFFFFFFFFFFFFF  
FFFFFFFFFFFFFFFFFFFFFFFFFFFFFFFFFFFF:FFFF::FFFFFFFFFFFFFFFFFFFFFFFFFFFFFFFFFFFFF  
FFF

@A00721:190:HGJW7DSXY:4:2427:4598:11240\_1:N:0:TCTGCAAG+GCTGCACT  
TCTTGTCACGATTCTTAAAAGAAGTTTATTAACCTTCAGAGTCTCTTGGAAGTCCAGGTAGCTAATG  
TTCTTGCAATAGCCACAGACTTTCTGGGAAAAGAGACCTCTGTTGGTAGAGGAGTTGAGAGAATTACT  
CAG

+

F:FFFFFFFFFFFFFFFFFFFFFFFFFFFFFFFFFFFF:FFFFFFFF:FFFFFFFFFFFFFFFFFFFFFFFFFFFFF  
FFFFFFFFFFFFFFFFFFFFFFFFFFFFFFFFFFFFFFFFFFFFFFFFFFFFFFFFFFFFFFFFFFFFF  
FFF

@A00721:190:HGJW7DSXY:4:1214:27651:17848\_1:N:0:TCTGCAAG+GCTGCACT  
AGTTAGGGAGTGGCTAGGTTTTAAAAGATCCTTGCACAAGCAATACCTTCCACTGAGTTCATCACCC  
AGAGTTTCGACGTCGCGGAAAACGATGAAGATTTCCACACTGTTGAGAATCTTCTGATGCTGAATTT  
GAG

+

FFFFFFFFFFFFFFFFFFFFFFFFFFFFFFFFFFFFFFFFFFFFFFFFFFFFFFFFFFFFFFFFFFFFF  
FFFFFFFFFFFFFFFFFFFFFFFFFFFFFFFFFFFFFFFFFFFFFFFFFFFFFFFFFFFFFFFFFFFFF  
FFF

@A00721:190:HGJW7DSXY:4:2660:11134:27696\_1:N:0:TCTGCAAG+GCTGCACT  
TGTGCTCTTCCGATCTCCTGATGGCTCAGTACAGGGAGGAGTAATAGTTATAAACCTTCTTTTATC  
ATTGCAACAGGACTTTGAGAAGACTGTTGAAATGGACAAAATCTGGGATCATAGGTATGTGTCACGCT  
ACA

+

FFF:FF:FF::FFF:F::FF,FF:FFFFFFFFFFFFFFFFF:,FFFFFF:FFFFFFFFFFFFFF:FFFFFFF  
FFFFFFFFFFFF::FFFFFFFFFFFFFFFFFFFFFFFFFFFFF,,:FF:FFFFFFFFFFFFFFFFFFFFFF,,FF  
FFF

@A00721:190:HGJW7DSXY:4:1468:8323:31657\_1:N:0:TCTGCAAG+GCTGCACT  
TGTTTCAGGAAGATCTCTACAGAGATTATCGAGAGTTGTGATCTAGTTCTAAATTTAGGTCGACGGACT  
TTAGCAACTTTAGACAAATTCTTCCGGGCTCAATGACCTTGCTATGTACGTGGATCTAATGCTTGG  
TGA

+

FFFFFFFFFFFFFFF:FFFFFFFFFFFFFFF:FFFFFFFFFFFFFFFFFFFFFFFFFFFFFFFFFFFFF:  
FFFFFFFFFFFFFFF,FFFFFFFFFFFFFFFFFFFFFFFFFFFFFFFFFFFFFFFFFFFFF:FFFFFFFFF  
FFF

@A00721:190:HGJW7DSXY:4:2338:22200:12571\_2:N:0:TCTGCAAG+GCTGCACT  
TATTAGTTCATGAAGTTCTTACACTTCTCGCGACTAATGTCAGCTTCACTACAAAGCGTTACGTAA  
GTAGTTTTTCACGCTTTATCTTAAAGCATTACCACCAATTTAGCACTT

+

FFFFFF:FFFFFF:FFF:FFFF,FFFF:FFFFFF:FFFFFF:FFFFFF:FFFFFF:FFFFFF:FFFFFFF  
FFF:FFFFFFFFFFFFFFFF:FFFFF:F:FF,FFFFFFFFFFFF,F,FF



@A00721:190:HGJW7DSXY:4:2304:21296:7498\_2:N:0:TCTGCAAG+GCTGCACT  
TCGCCATATCAGATTAGAGACATGCCAGTTAGAGTTCTTCTAACCAGGACTGATGGTGAGATTCTTTT  
ACCTTTTGGAGGTCCAGGAACCTTTACTCCTAGTGTCTTTTCTAGAGT

+

FFFFFFFFFFFFFFFFFFFFFFFFFFFFFFFFFFFFFFFFFFFFFFFFFFFFFFFFFFFFFFFFFFFFFFFF  
FFF:FFFFFFFFFFFFFFFFFFFFFFFFFFFFFFFFFFFFFFFFFFFFFFFFFFFFFFFFFFFFFFFF

@A00721:190:HGJW7DSXY:4:1327:3016:16016\_2:N:0:TCTGCAAG+GCTGCACT  
CGGAGGATGACAGGTGGGAGACCGCTCAATAACACTCTATTGAATCCCTTTTCCACGATGAAAGCTCT  
TTATGAGGTGCTCCATGCAAATTTACAGTTCCTCTTTGGTGATATCGC

+

FFFFFFFFFFFF,FFFFFFFFFFFFFFFF,FFFFFFFFFF:FF:FFFFFFFFFFFF,FFFFFFFFFFFFFFFF  
,FFFFFFFFFFFFFFFFFFFFFFFFFFFFFFFFFFFFFFFFFFFFFFFFFFFFFFFFFFFFFFFF,FFFF

@A00721:190:HGJW7DSXY:4:1327:3016:16016\_1:N:0:TCTGCAAG+GCTGCACT  
TTTTGATAAATTTGTTGGAATCGATAATGATACTGACGAAGTTCTATTACCACCCTTGTCATTGATA  
CAAACATTCTAGGTGATGCTTTCTTAGAGGCTCGTCTAGCCGCTGAGATTCTGTTACCTATTTACAA  
TCT

+

:FFFFFF:FFFFFFFFFFFFFFFF:FFFFFFFFFFFFFFFF:FF:FFFF:F:F:FFFFF,:FFFF:FFF::FF  
FFFFFFFFF:FFFFFFFFFFFFFFFF:FF:FFFFFFFFFFFF:FFFFFFFFFFFF:FFFFFFFFFFFFF:F:FFFF  
FF:

@A00721:190:HGJW7DSXY:4:1309:18575:6605\_1:N:0:TCTGCAAG+GCTGCACT  
GATATCGATTTAGTACTGGGAAATGGTGGTAGTCAGTTTACTACTTTTCTTTCCCTCCCTTTTTTCGA  
TTGGATTGACGGGGTCTTCGTCTCACTACTAATTTGATAAGGTTTTTCTTTTATGGGACTCTTGTTT  
GTA

+

F:F,:FFF:FFFFF::FF:FF,:FFFFFF:,F,,FFF,F,FFF,FFFF:FFF:FFF:F:FF,F:F:FF  
FFFFFFFFFFFF,F,F:F:FF:FFFFFF:, ,FFF:FFFF,F,,F,FFFF,,F,FFFF,F,FFFFFFFF  
FFF

@A00721:190:HGJW7DSXY:4:2555:32615:24064\_2:N:0:TCTGCAAG+GCTGCACT  
AAGTTCTTAATGTAGGTCTCCTAGTACTTAAGGGTTTATGTTTCGGTTTCAGCTGGATGGATCTTTTG  
ATGGTATGTTTCACATTGCGTGATCACTTCCCGTGGACTTGGAAGAG

+

FFFFFFFFFFFFFFFFFFFFFFFFFFFFFFFFFFFFFFFFFFFFFFFFFFFFFFFFFFFFFFFFFFFFFFFF  
FFFFFFFFFFFFFFFFFFFFFFFFFFFFFFFFFFFFFFFFFFFFFFFFFFFFFFFFFFFFFFFF

@A00721:190:HGJW7DSXY:4:1162:21495:33959\_1:N:0:TCTGCAAG+GCTGCACT  
CGATTCTATTATGTCGCTAAAGCCTGTCCAGTTGTCGATGATGTTTCGGGCTGTGGGGATTAACCTCCC  
TCGTGAAACTTACGACGATGTTCTCGCTCGCATTTACAAGGATTACTAAGTCTGAGATCTGCCACTT  
CTA

+

FFFFFFFFFFFFFFFFFFFFFFFFFFFFFFFFFFFFFFFFFFFFFFFFFFFFFFFFFFFFFFFFFFFFFFFF  
FFFFFFFFFFFFFFFFFFFFFFFFFFFFFFFFFFFFFFFFFFFFFFFFFFFFFFFFFFFFFFFFFFFFFFFF  
FFF

@A00721:190:HGJW7DSXY:4:1117:16016:11350\_1:N:0:TCTGCAAG+GCTGCACT  
TCTGTTTCATGAGGATGTCTTGTCGAAAAATATCGCCGGGAACCTTCTAATAGAGGATCCTGATGACAT  
TATTTCAACGGATACCGATCTCAGTTCTACCACAGAAACCGTCTCAGGAAGTCTCCACTGATTCGG  
AAT

+

FFFFFFFFFFFFFFFFFFFFFFFFFFFFFFFFFFFFFFFFFFFFFFFFFFFFFFFFFFFFFFFFFFFFFFFF  
FFFFFFFFFFFFFFFFFFFFFFFFFFFFFFFFFFFFFFFFFFFFFFFFFFFFFFFFFFFFFFFFFFFFFFFF  
FFF

@A00721:190:HGJW7DSXY:4:1275:11388:36057\_2:N:0:TCTGCAAG+GCTGCACT  
CGACCTTCTTGTTGGGACTGAGACCTCTGAATTTTCAGGGTGCCCTGATGAGGACGTTGAAAGGGATA  
ATTTCAACTCTGAGACTTCTAAGAGTGTTTCAAAGACCAGAAACGTA

+

FFFFFFFFFFFFFFFFFFFFFFFFFFFFFFFFFFFFFFFFFFFFFFFFFFFFFFFFFFFFFFFFFFFFFFFF  
FFFFFFFFFFFFFFFFFFFFFFFFFFFFFFFFFFFFFFFFFFFFFFFFFFFFFFFFFFFFFFFFFFFFFFFF  
@A00721:190:HGJW7DSXY:4:2225:14136:17425\_1:N:0:TCTGCAAG+GCTGCACT  
TAAAGGTAGGAAGGGGAGAAAACAGAACAAAGCGAGCGGTTGAAGAGAAAAGTATGGTTGCGGCTG  
ATCGTACCCCAATTCTGCTAGAAAGATCACTCTCGGCGATACCACTGATCTTCCAGAGTTACGTAGT  
GGT  
+  
FFF,:,F,F:, ,FF,FF:,FFFF:FFFF,FF:FFFF:FFFFFFFFFFFFFF:FFFFF,FFFFFFFFFFFF  
FF::F,FFF,FFFF:FFF:FFFFFFFFF:::FFFFF:FFFFFFFFFFFFFFFFFFFFFFFFFFFFFFFF:FF  
FFF  
@A00721:190:HGJW7DSXY:4:1508:16278:35540\_1:N:0:TCTGCAAG+GCTGCACT  
TTTTATCAAAGAGAAAGTTTCTGCTAGTCGCGACGATAGTATTTATCGGAGTGATATTAACAAGTTAA  
ACTTCGAAGTACCACCTTACAAGAGTGTTGAAGTACCGCAACATGGATCAGTTTTCCAAAAAGCTATT  
AAT  
+  
FFFFFFFFFFFFFFFFFFFFFFFFFFFFFFFFFFFFFFFFFFFFFFFFFFFFFFFFFFFFFFFFFFFFFFFF  
FFFFFFFFFFFFFFFFFFFFFFFFFFFFFFFFFFFFFFFFFFFFFFFFFFFFFFFFFFFFFFFFFFFFFFFF  
FFF  
@A00721:190:HGJW7DSXY:4:2419:10574:36777\_2:N:0:TCTGCAAG+GCTGCACT  
AAACTGAATCCACTCTCTTGGGATATAAATGAGTACATCTATAATAGAGTTTGGAACTGTGTAATGT  
CCTACGTACTGTTCAAGGTGTTTGGGCTTCTCTAAAGAACAGCAACTT  
+  
FFFFFFFFFFFFFFFFFFFFFFFFFFFFFFFFFFFFFFFFFFFFFFFFFFFFFFFFFFFFFFFFFFFFFFFF  
FFFFFFFFFFFFFFFFFFFFFFFFFFFFFFFFFFFFFFFFFFFFFFFFFFFFFFFFFFFFFFFFFFFFFFFF  
FFF  
@A00721:190:HGJW7DSXY:4:2252:16803:20322\_1:N:0:TCTGCAAG+GCTGCACT  
AACCTTTCCTCGTTCTTCATGAAGATCTTCGAGTGTTTTATAGTGAGTTATTCTTGCGAAGGTTCAAG  
TCGATTGATTTTGTTGACTACGATCTCTTGTAAATAAGAAGTTCTTCGCAGTTGAATCTCCACCAGG  
TGG  
+  
FFFFF:FFFFFFFFFFFFFFFFFFFFFFFFFFFFFFFFFFFFFFFFFFFFFFFFFFFFFFFFFFFFFFFF  
FFFFFFFFF::FFFFFFFFFFFFFFFFFFFFFFFFFFFFFFFFFFFFFFFFFFFFFFFFFFFFFFFFFFFF  
FFF  
@A00721:190:HGJW7DSXY:4:1372:9028:33599\_2:N:0:TCTGCAAG+GCTGCACT  
GCGACTTTTGTGCAATTTTTCGCAAAAGGTCTTGAAGTACGTATTGTCACTGCTAATCGTAATTCGCG  
AGAAGAGATAGTGACTAAAGTTTTGGCACTTCTAGTTCATCGCGGTAT  
+  
FFFFFFFFFFFFFFFFFFFFFFFFFFFFFFFFFFFFFFFFFFFFFFFFFFFFFFFFFFFFFFFFFFFFFFFF  
FFFFFFFFFFFFFFFFFFFFFFFFFFFFFFFFFFFFFFFFFFFFFFFFFFFFFFFFFFFFFFFFFFFFFFFF  
FFF  
@A00721:190:HGJW7DSXY:4:2449:24840:15515\_2:N:0:TCTGCAAG+GCTGCACT  
CAGACGTGAAAGTTATGATGAGTGATCGTATTAGAACAGCTGATTCTTATTGCATGAACGTCGCTGAG  
GTCAAACCTGTGGACGTTCTTTTCATCGACGAATTATTCATGATTCAC  
+  
FFFFF:::FFFFFFFFFFFFFFFFFFFFFFFFFFFFFFFFFFFFFFFFFFFFFFFFFFFFFFFFFFFF  
FF:FFFFFFFF:FFFFF:F:FFFFFFFF:FFFFFFFFFFFFFFFFFFFF:::FF  
@A00721:190:HGJW7DSXY:4:1665:6759:7999\_2:N:0:TCTGCAAG+GCTGCACT  
CATCTACTTAAGGCGGCTTATACCATAGGTTACGGTGATTCCAATCAAATCGGATTCATCAATCGTAT  
TGATCTCCAAGTCGCAAACTACTTCAACATCAACGACATCATTCTTGA  
+  
FFFFFFFFFFFFFFFFFFFFFFFFFFFFFFFFFFFFFFFFFFFFFFFFFFFFFFFFFFFFFFFFFFFFFFFF  
:FFFFFFFFFFFFFFFFFFFFFFFFFFFFFFFFFFFFFFFFFFFFFFFFFFFFFFFFFFFFFFFF  
@A00721:190:HGJW7DSXY:4:2623:15980:31610\_2:N:0:TCTGCAAG+GCTGCACT  
TTATCGAAGTCTCAGTTATCGCTGCCGCGCCGACGTTTGTGCGCAACTCTCAGAGGTTTACGGCAGAA  
AAATTTCTCCTGCTTGTAATTCGAGAGAGGACACTATGGAAATTAGAC  
+

FFFFFFFF:FFFFFFFFFFFFFFFF:FFFFFFFF:FFFFFFFFFFFFFFFFFFFFFFFF:FFF:FFFFFF:F:FF  
FF:FFFF:FFFFFFFFFFFFFFFFFFFFFFFFFFFFFFFFFFFFFFFF,FFFFFFFF  
@A00721:190:HGJW7DSXY:4:2445:8024:34929\_2:N:0:TCTGCAAG+GCTGCACT  
TATTACTTTCACTCAAGGTGAAAAGTTTGAAATTAACAAAGTCCTTGTAAGAGTAAGGTTAAATGTG  
AAGATGCTCAGACTATTCATGAAGTTCAAGTAATACTTACCAGCACG  
+  
FFFFFFFFFFFFFFFF:FFFFFFFFFFFFFFFFFFFFFFFF,FFFFFFFFFFFFFFFFFFFFFFFFFFFF  
FFFFFFFFFFFFFFFFFFFFFFFFFFFFFFFFFFFFFFFFFFFFFFFFFFFFFFFFFFFF  
@A00721:190:HGJW7DSXY:4:1214:29912:33661\_1:N:0:TCTGCAAG+GCTGCACT  
ACAAACACATATTACCGTTGCTCTATCACGACACGTTGAATCTTTACGATACTTTGTTATCAATGTAA  
AGTTAAACGATGCTACTTGTGAGAGGATCAATCACAGTAAGGAAGTGTACGTTTAGCACGGGAGGTT  
GCA  
+  
FFF,FFFFFF,FFFFFFFFFFFFFFFF:F:FFFFFFFFFFFFFFFFFFFFFFFFFFFFFFFF:FFFF  
FFFFFFFFFFFFFFFFFFFFFFFFFFFFFFFFFFFFFFFFFFFFFFFFFFFFFFFFFFFFFFFFFFFF  
FFF  
@A00721:190:HGJW7DSXY:4:1148:15501:13088\_2:N:0:TCTGCAAG+GCTGCACT  
TATATCGAGGCTATCGAGGACGATGAGTATCTTGAAGTTGTTGACGACAAGCCTCAAGAGGGTAGAGG  
ACCACCTGGATCTTCTACTGTCTCTGCCTTCCAAGATTTCTTAGAAGA  
+  
FFFFFFFFFFFFFFFFFFFFFFFF:FFFFFF:FFFFFFFFFFFFFFFFFFFFFFFFFFFFFFFFFFFFFFFF  
FFFFFFFFFFFFFFFFFFFFFFFFFFFFFFFFFFFFFFFFFFFFFFFFFFFFFFFFFFFF  
@A00721:190:HGJW7DSXY:4:2374:1090:10019\_1:N:0:TCTGCAAG+GCTGCACT  
AACCACCTTAACGTCACCTCGGTAATCTTTTCAGCCGAATTAAGTACTAATGAGTTCAAGTCGGTTGTGCG  
ATCGAATTAAGATCAAGGCTAATACCTTTATAGGTAAGAAGCCCCTTGAGCCGCGTAGTCAGCGCGTT  
TAG  
+  
FFFFFFFFFFFFFFFF,FFFF:FFFFFFFFFFFFFFFFFFFFFFFFFFFFFFFFFFFFFFFFFFFFFFFF  
FFFFFFFFFFFFFFFFFFFFFFFFFFFFFFFFFFFFFFFFFFFFFFFFFFFFFFFFFFFFFFFFFFFF  
FFF  
@A00721:190:HGJW7DSXY:4:2306:7446:25379\_1:N:0:TCTGCAAG+GCTGCACT  
TACCGAGTCTCCAAGAGAATATTTATTCTTATGAGGCTCGAACTTCAACGTTTTACAAACGGAAAGA  
CATATCGCACCCGAAATTTTTGGGCAGAATGCTCTTAACGCGGTTCTTGAACGGTGTGTTTGATCAGTC  
TAA  
+  
FFFFFFFFFFFF:F:FFFFFF,F:FFFFFFFFFFFFFFFFFFFF::FFFF:FFFFFFFFFFFFFFFF  
FF:FFFFFFFFFFFFFFFFFFFFFFFFFFFFFFFFFFFFFFFFFFFFFFFFFFFFFFFFFFFFFFFFFFFF  
FFF  
@A00721:190:HGJW7DSXY:4:1213:1280:2174\_1:N:0:TCTGCAAG+GCTGCACT  
ATAGGAGACTCAGTTAACCTGAGAGCTCCTCAATTGATAGATTGGGTCAACAATAGGGACGCTAGTAT  
ACTTCGTAAAGTCGACAGCGAAATGGTCAATATTGATAATTGGACCGACTATATGACCTATTTTAAGC  
TCA  
+  
FFF:FF:FFFFFFFFFFFFFFFFFFFFFFFFFFFFFFFF:FFFFFFFFFFFFFFFFFFFFFFFFFFFF  
FFFFFFFFFFFFFFFFFFFFFFFFFFFF,FF:FFF:FF:FFF:FFFFFFFFFFFFFFFFFFFFFFFF  
FFF  
@A00721:190:HGJW7DSXY:4:1373:3079:1720\_2:N:0:TCTGCAAG+GCTGCACT  
CTAAGGTTAACTTGATGCTTCAGCCTTTTCGAAGCATAACCCCGCACAGAATATCGTTTATCACGCA  
AAATTTATTAATGCAATTTTCGGACCTATCTTTAAGGTTCTTGTGAGG  
+  
FFFFFFFFFFFFFFFFFFFFFFFFFFFFFFFFFFFFFFFFFFFFFFFFFFFFFFFFFFFF:FFFFFFFFFFFFFFFF  
FFFF:FFFF:FFFF:FFFFFFFF:F,FF::FFF,FFFFFFFFFFFF  
@A00721:190:HGJW7DSXY:4:1534:32696:18787\_1:N:0:TCTGCAAG+GCTGCACT  
CAGTGACGATTTCTCCCGGAAGCTCTTCTCTCTTAGGAGTCATGATGACTACTATAAGGGTGAAA

TCGATTTTTCGAAGTTTGACAAATCTCAAGATTTCTTTTGTAAGCCTATGAGATAAAGATGTATTCT  
TAT

+

FFFFFFFFFFFFFFFF:F:FFFF:FFFF:FFFF,F,FFFFFF,,FFFFFF,F:FF:FFFFFFFFFFFFFF  
FFFFFF:FFFFFF:FFFFFFFFFFFFFFFF:FF:F:FFFF:FFFF::FFFFFFFFFFFFFF:FF  
FF:

@A00721:190:HGJW7DSXY:4:2228:10185:24706\_2:N:0:TCTGCAAG+GCTGCACT  
AACTTTGGAGTGCCAGTGAATATTTTTGTACGCCAGGAGTATCCATAACGATTTGTCATTTACCACC  
TTTGCTCAACGACGAAGTGAACGGCCAACACTTTCTTTGGTAATTGT

+

FFFFFFFFFFFFFFFF:FFFFFFFFFFFFFFFFFFFFFFFFFFFFFFFFFFFFFFFF:FFFFFFFF  
FFFFFFFFFFFFFFFFFFFFFFFFFFFFFFFFFFFFFFFF:FFF:FFFFFFFF

@A00721:190:HGJW7DSXY:4:1251:20338:35399\_1:N:0:TCTGCAAG+GCTGCACT  
GATGATTTTATCACTTTATTATGACCTTGGAAGTTTTCGGCTGTGGTTGTCGCTGGGGACGATTCCA  
TTCTGTTTTCAAAGACTCCAATACTGATCATTCTGATCATATGATTTTGGACAATGGTTTCGAAGCG  
AAA

+

FFFFFFFFFFFFFFFFFFFFFFFFFFFFFFFFFFFFFFFF:FFFFFFFF:FFFFFFFFFFFFFFFFFFFFFFFF  
FFFFFFFFFFFFFFFFFFFFFFFFFFFFFFFFFFFFFFFFFFFFFFFFFFFFFFFFFFFFFFFFFFFFFFFF  
FFF

@A00721:190:HGJW7DSXY:4:2638:7518:9377\_2:N:0:TCTGCAAG+GCTGCACT  
TGCTCGCGATTTATTCTTTTTGTCAATGATTACATCTACTTCGTTCTGATCCTTACAAGATCATCGT  
TAAGTTAGGTAAACCCCTAACCGATGTTACTCTTGTAGGACTTTGGGA

+

FFFFFFFFFFFFFFFFFFFFFFFFFFFFFFFFFFFFFFFFFFFFFFFFFFFFFFFFFFFFFFFFFFFFFFFF  
FFFFFFFFFFF:FFF:FFFFF:FFFFFFFFFFFFFFFFFFFFFFFFFFFFFFFF

@A00721:190:HGJW7DSXY:4:1532:12346:36307\_2:N:0:TCTGCAAG+GCTGCACT  
AGGTTGTTGTTTGGCGATTAGCTCTTGCGACTAATATTCGATATTCGATTGAGGGTCGTTATACCTAT  
TCGGCTATCTGTGCTTTGAATTGTATAAGATCAAATTTAAACGATTC

+

FFF:FFFFFFFFFFFFFFFFFFFFFFFFFFFFFFFFFFFFFFFFFFFFFFFFFFFFFFFFFFFFFFFF:FFF  
FF:FFFFFFFFFFFFFFFFFFFFFFFFFFFFFFFFFFFFFFFF,FFFFFFFFFFFFFF

@A00721:190:HGJW7DSXY:4:1645:7129:14873\_1:N:0:TCTGCAAG+GCTGCACT  
TGATGTGGAGGGAGTTCTTGAAGCATCCCGACCTTCTTGTGAAAATTTTGATGCGGTTTCATAAGA  
TTATCAGTAATCCTGATTCTACTACGGATTCATGGACCTTCCATCCTGTACCTCTTCTGGAGAGACGT  
ATC

+

F:FFFFFFFFFFFFFFFFFFFFFFFFFFFFFFFF,FFFF:FFFFFFFFFFFFFFFFFFFFFFFFFFFFFFFF  
FFFFFFFFFFFFFFFFFFFFFFFFFFFFFFFFFFFFFFFFFFFFFFFFFFFFFFFFFFFFFFFFFFFFFFFF  
FFF

@A00721:190:HGJW7DSXY:4:1116:27651:27398\_2:N:0:TCTGCAAG+GCTGCACT  
TCGAGACAGGTGATATTGTTGAGCGAGAGCGACCAAGATCTAAATTCGGTAACGGTGCGTGGCGCTTT  
ATTTTAAAAAGCTCCCTCCTCTCGCAAGTTTGATCTGATAGATCGGAA

+

:FFFFFFFFFFFFF:,FF:FFFFFFFFFFFFFFFFFFFF,FF:F::FF:FFFFFFFFFFFFFFFFFFFF:FF  
FFFF,FFFFFFFFFFFFFFFFFFFFFFFFFFFFFFFF:FFFFFF,FFFFFFFF:

@A00721:190:HGJW7DSXY:4:1168:20112:30655\_2:N:0:TCTGCAAG+GCTGCACT  
GATCAGTCTCTGACTTGACCATCTTTCATTTTAAATGACGATCATTAAGACTCTTTTCTTCTTTGTT  
TCCTTCTTTGCACTGATTTTCTCATCAGCTTGTGTTTACCTAATC

+

FFFFFFFFFFFFFFFFFFFFFFFFFFFFFFFFFFFFFFFFFFFFFFFFFFFFFFFFFFFFFFFFFFFFFF  
FF,FFFFFFFFFFFFFFFFFFFFFFFFFFFFFFFFFFFFFFFFFFFFFFFF

@A00721:190:HGJW7DSXY:4:2171:26992:30107\_2:N:0:TCTGCAAG+GCTGCACT  
GATAACAACATATCAGTTGATTAAGACTCTCCGAAAGGCGAACTTTGGAATTTGAAGCTCAGGGTGA

AGCACAACTTTGACCGTGACGAAGTGTGGTGTCTTGATCTACGTTA

+

FFFF:FFFFFFFFFFFFFFFFFFFFFFFFFFFFFFFF,FFFFFFFF:FFFF:FFFFFFFFFFFF:FFFF  
FFFFFFFFFFFFFFFFFFFFFFFF, F:FFFFFFFFFFFFFFFFFFFF:

@A00721:190:HGJW7DSXY:4:2606:28962:27477\_1:N:0:TCTGCAAG+GCTGCACT  
CACTACCACTTATTACGATATTTCTTTAGTCGATGGGTTTTCGACGCCTTTAAGCGTCTTCTTTTCAT  
CGCAACCAGATGATATCTTCTATTCTGAAGTATGTTTCGATCAGTGTCTTCTATCAGGAGGAAAAC  
ACT

+

:,:FFF::,F:FF,F:FFFFFFFF:F:FFFF:FFFF:FF:F:FFFF:FFFFFFFFFFFF,F,,F:FF  
F:FFFF:FF,FFF::F,FF,FF,FF,:,,,F:FFFFFFFF,FFFF,,:FFFFFF,FFFF:FFFF  
,,F

@A00721:190:HGJW7DSXY:4:2270:3821:16783\_2:N:0:TCTGCAAG+GCTGCACT  
TCACTTTGTGTGTAAGTCTTCTATTTAAGTTTTGTCTTCTTGTGTTGTTGTTTATTCTATTAATCACT  
CATTTTAGTGAGATTATTAACGCACTAAACGTCTTCGACAACAG

+

FFFF:FFFFFFFF:FFFFFFFF:FFFFFFFFFFFFFFFFFFFFFFFFFFFFFFFFFFFFFFFFFFFF  
FFFFFFFFFFFFFFFFFFFF:FFFFFFFFFFFF:FFFFFFFF,FFFF

@A00721:190:HGJW7DSXY:4:2475:17137:29450\_1:N:0:TCTGCAAG+GCTGCACT  
GCCTTACAGAGGGGAGCAGCATGACCATAATTGGTATTGACTTTGGTACCACCTTTTCTACTGTCTG  
TCTCGCCTCTTGAATGAAGTTTAAATGCTTAACAACAATGATAGTGAATTTATACCTACAATCATTG  
GTT

+

FFFFFFFFFFFFFFFFFFFFFFFFFFFFFFFF,FFFFFFFFFFFFFFFFFFFFFFFFFFFFFFFFFFFF  
FFFFFFFFFFFFFFFFFFFFFFFFFFFFFFFFFFFFFFFFFFFFF:, :FFFFFFFFFFFFFFFF  
FFF

@A00721:190:HGJW7DSXY:4:2138:23556:9408\_2:N:0:TCTGCAAG+GCTGCACT  
TGTTTATGGATATGATGCTATTACTCATGATGGTTACGGTCAGGGAGGATTCTCAGTTTACAAGGACC  
TTAAGCGATGGATCGGGGTTAATTCTAAACATTACCCGAAAGACGTG

+

FFFFFFFFFFFFFFFFFFFF:FFFFFFFFFFFFFFFFFFFFFFFFFFFFFFFFFFFFFFFFFFFF  
FFFFFFFFFFFFFFFFFFFF:FFFFFFFFFFFF,F:FFFFFFFF:F

@A00721:190:HGJW7DSXY:4:1577:17146:8265\_2:N:0:TCTGCAAG+GCTGCACT  
GTACGATGTCGTCTGTCTCGGCGATCACTTTTCTACTAAGAATTGGTCCTACTTTTGGACAAGGCCAAC  
TTCGTAATCTTCATGAGATCGTTTCTTTCTTTATCTCTTTGGTTGTTA

+

FFFFFFFFFFFFFFFFFFFFFFFFFFFFFFFF,FFFF,FFFF:F:F,FFFF,FFFF  
:FFFFFFFFFFFFFFFFFFFFFFFF,FFFFFFFF,:FFFF,FFF

@A00721:190:HGJW7DSXY:4:1263:11360:12900\_2:N:0:TCTGCAAG+GCTGCACT  
GAGTGAAAGGCTTCAATTGTAGTGGTTTGGTCGTTTCAGTACCCAGTCAGTATACCTCTACGCAAAGA  
TATTTTCATGAAACTACAGAGGAACGTACCGGATTACCTGTCTTTCAT

+

FFFFFFFFFFFFFFFFFFFFFFFFFFFFFFFFFFFFFFFFFFFFFFFFFFFFFFFFFFFFFFFFFFFF  
FFFFFFFFFFFF,FFFFFFFF:FFFFFFFFFFFFFFFFFFFFFFFF

@A00721:190:HGJW7DSXY:4:2345:16957:31140\_1:N:0:TCTGCAAG+GCTGCACT  
CTTCGGCCGCTCTCTTTGCTTCGATGTTGGATGTCAAGAAGGTTTCAAGATGGGATTCTACGTAGTT  
TATGACTTTGGTGGTGGTACTTTCGATACTTCTATCGTCTTACGTTACGTAATTACTATAGTGTTAT  
TTA

+

FFFFFFF:FFFFFFFF:FFFFFFFFFFFFFFFFFFFFFFFFFFFFFFFFFFFFFFFFFFFFFFFFFFFF  
FFFFFFFFFFFFFFFFFFFFFFFFFFFFFFFFFFFFFFFFFFFFFFFFFFFFFFFFFFFFFFFFFFFF  
FFF

@A00721:190:HGJW7DSXY:4:2526:3857:30154\_1:N:0:TCTGCAAG+GCTGCACT  
ATAATCTTGGAGTCGTGACGTTGATGAAGCTATAAGAGCGTTCTTATTACGGCGCACTTCTTTACCC

GCCACCACACAACCTTTTCAGTTTCACAACCTGAAGGAGGAGGTTTCTGTTACTGGAAAACCCTCGTCAAT  
ACT

+

FFFFFFFFFFFFFFFFFFFFFFFFFFFFFFFFFFFFFFFFFFFFFFFFFFFFFFFFFFFFFFFFFFFFFFFF  
FFFFFFFFFFFFFFFFFFFFFFFFFFFFFFFFFFFFFFFFFFFFFFFFFFFFFFFFFFFFFFFFFFFFFFFF  
FFF

@A00721:190:HGJW7DSXY:4:1248:1561:14403\_2:N:0:TCTGCAAG+GCTGCACT  
TCTAGTGAAATTAACGCGTCCTTTTCTGGAACGTAGTTTACTATTATGAACAAAGTTATCAAAGATA  
GTGGCATTCAAGGCAAACCTTACCCTGATTCCGGCCGGTGGTAGCTCAT

+

FFFFFFFFFFFFFFFFFFFFFFFFFFFFFFFFFFFFFFFFFFFFFFFFFFFFFFFFFFFFFFFFFFFFFFFF  
FFFFFFF:FFFFFFFFF:FFFFFFFFFFFFFFFFFFFFFFFFFFFFFFFFFFFFFFFFFFFFFFFFFFFF

@A00721:190:HGJW7DSXY:4:2636:32353:6324\_2:N:0:TCTGCAAG+GCTGCACT  
TGAAACAGCTATTAAAGCTGTTGAGCGGTAATTACACCTAAACGAGCTCGATCTGCCATCGCTGAAG  
GATGTGCACTCTTTTCTGCTAGTTTAAACGGAGCGTAGTGTACTCTTCG

+

FFFFFFFFF::F,FFFFFFFF,FFFFFFFFF:FFFFFFFFF:FFFFFFFFFFFFFFFFFFFFFFFFFFFF,F  
FFFFFFFFFFFF:FFFFFFFFF,FFFF,FFFF:FF:FFFF,FFFFFF

@A00721:190:HGJW7DSXY:4:1570:8811:35947\_2:N:0:TCTGCAAG+GCTGCACT  
AAAGGTCTCTATCAAGCTCGTATTATCGTCGCTGCTGGATCTGCGTTACCGTTGAAGGCTAAACTCCA  
AGGTAATTATGAAGACTGTGATTTATCTTTCACCTCTGGCCTTGTATGA

+

FFFFFFFFFFFFFFFFFFFFFFFFFFFFFFFFFFFFFFFFFFFFFFFFFFFFFFFFFFFFFFFFFFFFFFFF  
FFF:FFFFFFFFFFFFFFFFFFFFFFFFFFFFFFFFFFFFFFFFFFFFFFFFFFFF:FFF

@A00721:190:HGJW7DSXY:4:2502:10881:3615\_1:N:0:TCTGCAAG+GCTGCACT  
CATTAAATAATTTCAATCTTCTTAAAAAGAAGATAGAGAGTCATACTTTGGGCTATCGTTCAAGTGCAT  
GGGGTTGGATAGCCAATATTGAAGTGGACACCTCTGGTAGTATCGAAGTAAAGAGATCGGAAGAGCAC  
ACG

+

:F,FFFFFF,F,FFFFFFFF:F:FFFFFFFF:FFFFFF:F:FFFFFFFF:FFFF:F,FFFFFF:F,FFF  
FFFFFFFFFFFF::FF,FFFFFFFF:F:FFFFFFFF:FFF:F:FFF::,,:FFF:FFF,FFF:FF,FF  
FFF

@A00721:190:HGJW7DSXY:4:1221:2266:25520\_1:N:0:TCTGCAAG+GCTGCACT  
CTCTACCGCCTTACAAGTCTAAGGTTAAAGAGTCGATTAAACAAGTTGTACTTATCAATGATTTTATC  
GCTGGTTGTTATCTCGAAAAGTCTCTTCTAAAAGGAACGTCAGTTCTAACCCAAAGAGAATATCTAAA  
ATA

+

FFFFFFFFFFFFFFFFFFFFFFFFFFFFFFFFFFFFFFFFFFFFFFFFFFFFFFFFFFFFFFFFFFFFFFFF  
FFFFFFFFFFFFFFFFFFFFFFFFFFFFFFFFFFFFFFFFFFFFFFFFFFFFFFFFFFFFFFFFFFFFFFFF  
FFF

@A00721:190:HGJW7DSXY:4:2307:28782:21402\_1:N:0:TCTGCAAG+GCTGCACT  
TACCACTATCTACGAACCTAAAGTTCTGAAGACGTTGCTTGTGCTTCTCCTTTAATGGCACTACCT  
CGGTACAATCTTACTTGGAACGAAGGCGACCTGTTCCGGAGTTTTTACGGGATCCGGAATGTTCTGTC  
TAT

+

FFFFFFFFFFFFFFFFF:FFFFFFFFFFFFFFFFFFFFFFFFFFFFFFFFFFFFFFFFFFFFFFFFFFFF  
FFFFFFFFFFFFFFFFFFFFFFFFFFFFFFFFFFFFFFFFFFFFFFFFFFFFFFFFFFFFFFFFFFFFFFFF  
FFF

@A00721:190:HGJW7DSXY:4:2102:14190:23563\_1:N:0:TCTGCAAG+GCTGCACT  
AATACGATTTTCAACGTCAACGTTACCGAGTTTCGTTTCGTACCTTGATGCTGACTTTCGTCAATAT  
GATTTGATCTGGTTGCTCAATTCTAAGCGTGTCCGCTTAGTGCGAGGCCTCTCTTCTACGAGTATTG  
CTA

+

FFFFFFFFFFFFFFFFF:FFFFFFFFFFFFFFFFFFFFFFFFFFFFFFFFFFFFFFFFFFFFFFFFFFFF

FFF:FFFFFFFFFFFFFFFFFFFFFFFFFFFFFFFFFFFFFFFFFFFFFFFFFFFFFFFFFFFFFFFFFFFFFFFF  
FFF

@A00721:190:HGJW7DSXY:4:1444:19135:36323\_2:N:0:TCTGCAAG+GCTGCACT  
AAATACTAGATATTTGGATGATCTTGATAAAGAACTTCATGAATTTTCAGAGGATGAAAAATTTTCTT  
CCTTGATTTTAAATATAAAGAATCTTTACCAGGACTCCTACTACAGGA

+

FFFFFFFFFFFFFFFFFFFFFFFFFFFFFFFFFFFFFFFFFFFFFFFFFFFFFFFFFFFFFFFFFFFFFFFF  
FFFFFFFFFFFFFFFFFFFFFFFFFFFFFFFFFFFFFFFFFFFFFFFFFFFFFFFFFFFFFFFF

@A00721:190:HGJW7DSXY:4:2523:20898:28103\_1:N:0:TCTGCAAG+GCTGCACT  
GATCGTAAGAAGTTTATAAGGAACATATCCATTTGTTGTAATAGGGTCATCAACTTAGAACTCGAAAC  
TCTAAGTGTAATACTGTCTTTCCAAGCTTACCTGTATCTTCAATGAAATTGGACTCTTCGATAGGGG  
ACA

+

FFFFFFFFFFFFFFF:FFFFFFFFFFFFFFF:FFFFFFFFFFFFFFFFFFFFFFFFFFFFFFFFFFFFFFF  
FFFFFFFFFFFFFFFFFFFFFFFFFFFFFFFFFFFFFFF:FFFFFFFFFFFFFFFFFFFFFFFFFFFFFFFFFFFFFFF  
FFF

@A00721:190:HGJW7DSXY:4:2452:3314:11115\_1:N:0:TCTGCAAG+GCTGCACT  
TAAGAATACTATAAATAGAATAGCTATTACTACTAATGGCGTTGGCCTAGTGGATGTTATTAGTGACA  
TCTGGTCAATTTGTTTTAGGTGGTCTTTATTCTATTATTGATTTTTATGAGATTGAGATCGGAAGA  
GCA

+

FFFFFFFFFFFFFFFFFFFFFFFFFFFFFFFFFFFFFFFFFFFFFFFFFFFFFFFFFFFFFFFFFFFFFFF:FFFFFFFFFFFFFFFFFFFFFFFF  
FFFFFFFFFFFFFFFFFFFFFFF:FFFFFFFFFFFFFFFFFFFFFFF:FFFFFFFFFFFFFFFFFFFFFFF:,FFFFFFFFFFFFFFF  
FFF

@A00721:190:HGJW7DSXY:4:2533:17173:24596\_2:N:0:TCTGCAAG+GCTGCACT  
TTCCTGAAGAGTCCTTCCGTAACCAACTTCTTGACAATTTTCTTCAATCCTTCGATAATAGTTAAATC  
TACGATTATGTCTGTGTTGAAAGACTTTCTACCGATAAGGGTCACTAG

+

FFFFFFFFFFFFFFFFFFFFFFFFFFFFFFFFFFFFFFFFFFFFFFFFFFFFFFFFFFFFFFFFFFFFFFF  
FFFFFFFFFFFFFFFFFFFFFFFFFFFFFFF:FFFFFFFFFFFFFFFFFFFFFFFFFFFFFFFF

@A00721:190:HGJW7DSXY:4:1146:26476:17409\_2:N:0:TCTGCAAG+GCTGCACT  
ATCCTACATTGACTGATTATCTAAAGATTGAAGGAAAATTTTATCCTCGTTTAACTTACTTAGACTTT  
CCTACGATACAAATGATAACTTCTAATTTACGTTTGCTACTCAGAGCT

+

FFFFFFFFFFFFF:FFFFFFFFFFFFFFFFFFFFFFFFFFFFFFFFFFFFFFF:FFFFFFFFFFFFFFFFFFFFFFFFFFFFFFFFFFFFFFF  
FFFFFFFFFFFFFFF:FFFFFFFFFFFFFFFFFFFFFFFFFFFFFFFFFFFFFFF:F

@A00721:190:HGJW7DSXY:4:2146:6036:26130\_1:N:0:TCTGCAAG+GCTGCACT  
GATGCATGGTGTTATCTCCTCAGGAGTCCCGGCATTTGATAATAATGACGAGACTTTCGTCATAATCG  
CTGCATATTACGATTACACGGTACCAGCGCATCTCGTGTGAGCCTCGACCCGATTATATGGTATTA  
ACT

+

FFFFF:FFFFFFFFFFFFFFFFFFFFFFFFFFFFFFFFFFFFFFF:FFFFFFFFFFFFFFFFFFFFFFFFFFFFFFFFFFFFFFF  
FFFFFFFFFFFFFFFFFFFFFFFFFFFFFFFFFFFFFFFFFFFFFFFFFFFFFFFFFFFFFFFFFFFFFFFF  
FFF

@A00721:190:HGJW7DSXY:4:1152:22318:28307\_2:N:0:TCTGCAAG+GCTGCACT  
TCTAGAATTCTTAATTATAATATTCAACCTCAAAAGTTACGTGTTTACAGTAACGAGATCACACATTT  
TGAGAACTAATATGTTATGTTCTCTGATCATTTTGACAATCTCTCT

+

FFFFFFFFFFFFFFFFFFFFFFFFFFFFFFFFFFFFFFFFFFFFFFFFFFFFFFFFFFFFFFFFFFFFFFF  
FFFFFFFFFFFFFFF:FF,FFFFFFFFFFFFFFFFFFFFFFFFFFFFFFFF

@A00721:190:HGJW7DSXY:4:1475:32696:17347\_2:N:0:TCTGCAAG+GCTGCACT  
AAATAAATAATATTACTAATGGCAAATAGTGGAAGGCTCCAGTCAACACTAGTTCGAGTGCTGCTTT  
GGATTACGATGACGTGAGAATAGGTGAAGGGATAGTTTTTACCTCGAC

+

FFFFFFFFFFFFFFFFFFFFFFFF:FFFFFF:FFFFFFFFFFFFFFFFFFFFFFFF:FFFFFFFFFFFFFFFFFFFFFFFF,F  
FFF:FFFFFFFFFFFFFFFFFFFFFFFFFFFFFFFFFFFFFFFFFFFFFFFFFFFFFFFF

@A00721:190:HGJW7DSXY:4:1115:14344:31219\_1:N:0:TCTGCAAG+GCTGCACT  
TCTTAAAGCTTCACCAAAAATGAAGGACACTTCGAAACTGAATAATGATGCAATACAAAAAGTATCG  
CTAATCTTCTGAAAAAGGCTCTAAAGGACACTATACAATATCCAGACGACGACGAAGCTTATACAATA  
TCC

+

F,FFF:,,:FFF:,FFFF,F:F:F,,,FFF,FF:,FFFFFFFFFFFFFFFF,FFF,F,,F,FFF:F  
,F::FF,FFFFFFFF:FFFF,F:FF:FF,F,FFF:F:FFFFFFFF,,F,,:F,FF,,FF,FFF,:FF  
FF:

@A00721:190:HGJW7DSXY:4:1525:2456:21684\_2:N:0:TCTGCAAG+GCTGCACT  
ACCACATTTTGGTCAAGTCAATCCGTTGAGAAAATTTCTTAGAGGATATTCGCCATTGTGGTACGAAT  
TGGTCCAACATTTACCACCAAATCTTTTGATACAACCTCTAGCCTTCA

+

FFFFFFFFFFFFFFFFFFFFFFFFFFFFFFFFFFFFFFFFFFFFFFFFFFFFFFFFFFFFFFFF  
FFFFFFFFFFFFFFFFFFFFFFFFFFFFFFFFFFFFFFFFFFFFFFFFFFFFFFFF

@A00721:190:HGJW7DSXY:4:1424:13810:15107\_2:N:0:TCTGCAAG+GCTGCACT  
ACCAGATTGGTTCGAACCCGTTGATGCTATGTCAGAAGAAGCTATTCAAGCTTGTCTTTAAAGACTG  
CAGAGGCTGTCAAACAAGCCCAGACTCAAGGAGTCCAATCAAAGGTTT

+

FFFFF,FFFFFFFFFFFFFFFFFFFFFFFF:FFFFFFFFFFFFFFFFFFFFFFFFFFFFFFFF  
FFFFFFFF:FFFFFFFFFFFFFFFFFFFFFFFF,FFFFFFFFFFFFFF,FFFF

@A00721:190:HGJW7DSXY:4:1522:25211:31876\_1:N:0:TCTGCAAG+GCTGCACT  
TTATTTAGAGATCTTTTCTACTTACAAAGGACAATTCAGTTTCATTAATTCTACGAAAAGTCCGGAG  
TATATTGTATGTTAATAGATAGTGGGATAATAGTTCTACCGATACGTAGTGAACGCGTTCGTAGAACC  
AAG

+

FFFFFFFFF:FFFFFFFFFFFFFFFFFFFFFFFFFFFFFFFFFFFFFFFFFFFFFFFFFFFFFF  
FFFFFFFFFFFFFFFFFFFFFFFFFFFFFFFFFFFFFFFFFFFFFFFFFFFFFFFFFFFFFFFF  
FFF

@A00721:190:HGJW7DSXY:4:1145:10203:5071\_1:N:0:TCTGCAAG+GCTGCACT  
ACCGATAGGAGTTGTATAGTTGAAGATGTGGCTTTAGACGATAATCCTTTAAGGACTATGTTGACTGA  
CGAAGATTTTCCAACAGATTTGTCTACGTTGCAGATCGCCACTCCAACACTATATACATTATAAAAT  
ATA

+

FFFFFFFFFFFFFFFFFFFFFFFFFFFFFFFFFFFFFFFFFFFFFFFFFFFFFFFFFFFFFF  
FFFFFFFFFFFFFFFFFFFFFFFFFFFFFFFFFFFFFFFFFFFFFFFFFFFFFFFFFFFFFFFF  
F:F

@A00721:190:HGJW7DSXY:4:2137:11939:11741\_1:N:0:TCTGCAAG+GCTGCACT  
CATAACTTTTGTACCAAATTCCTGGCTTTCAACGAAGTCTCTGATTTTATTAATCATTACTTTAACG  
ATCTCTCGGTCATTTACTCTGTACTTGATCTACGTCGTTTAACTGTCGGAACAACCTTTACTTAGAAT  
GAC

+

FFFFFFFFFFFFFFFFFFFFFFFFFFFFFFFFFFFFFFFFFFFFFFFFFFFFFFFFFFFFFF  
FFFFFFFFFFFFFFFFFFFFFFFFFFFFFFFFFFFFFFFFFFFFFFFFFFFFFFFFFFFFFFFF  
FFF

@A00721:190:HGJW7DSXY:4:2204:8395:24330\_2:N:0:TCTGCAAG+GCTGCACT  
TTCTTATATTATTTACAATAGTTAATATCATATTAGTAATACTCACTATCGTTTTCTGCTTTTCTTA  
GCTAATAGATTAATAAAGGATGAGTACGAAAACCAACTCTTCGTTACG

+

F,,:FFFF:FFFFFFFF:FFFFFFFFFFFFFFFFFFFFFFFF:FFFFFFFFFFFFFFFFFFFFFFFF:FF:FFFF,:  
,FFFFFFFF,FFFFFF:FFFFFFFFFFFF:FFF:FF,FFF:FFFFFF

@A00721:190:HGJW7DSXY:4:1166:13711:3724\_1:N:0:TCTGCAAG+GCTGCACT  
TAGAATAGATTTAGTCTCTACACCCATCTCAACGAGTATAACGCGTGTTTTCCGTCCTGAACGTAATA



CACGAAGAGATCATCCGCAAACGACTCGAAACCGAGACGCCGTAGATCAAAGTCCCTTCTAACTTTAG  
AT

+

:F,FFF::::F:,F,,:FFFF,FF::,,,FF,::,,,F:F:,FF,,,FFF:F:::F:F,F:,,,F,F,  
:,::,,,::,::,FF,,F:FFFFFFFFFFFFFFFFFFFFFFFFFFFFFFFFFFFFFFFFFFFFF  
FF

@A00721:190:HGJW7DSXY:4:1544:19027:24518\_1:N:0:TCTGCAAG+GCTGCACT  
CATTTTATAGCAGTTATTTATGTTGTACTTTTTATAATTTATAACCTTCTTATACTTTTGGGTATGTT  
TTGTGAAAAACATGAGATACCCAAGTCTATCGAAGACATTATCTCTTATGTACTTATTGTAACGATCA  
TTC

+

FFFFFFFFFFFFFFFFFFFFFFFFFFFFFFFFFFFFFFFFFFFFFFFFFFFFFFFFFFFFFFFFFFFFF  
FFFFFFFFFFFFFFFFFFFFFFFFFFFFFFFFFFFFFFFFFFFFFFFFFFFFFFFFFFFFFFFFFFFFF  
FFF

@A00721:190:HGJW7DSXY:4:1556:2320:35884\_1:N:0:TCTGCAAG+GCTGCACT  
TTCTTTTATTCCTTTAACTGTGTATGAGGAGGATTTATAATGCTTTTCGATAGTGATTGTTATCAATT  
TAAATACATTACTGTTTCAAATCATCTTTACTCACAGACTCCGAAAATGTTTCAAATGAGGTCAAAG  
CTC

+

FFF:FFF:FFFFFFFFFFFFFFF,FFFFFFFFFFFFFFFFFFFFFFFFFFFFFFFFFFFFFFFFFFFFF  
FFFFFFFFFF:FFFFFFFFFFFFFFFFFFFFFFFFFFFFFFFFFFFFFFFFFFFFFFFFFFFFFFFFFFFFF  
FFF

@A00721:190:HGJW7DSXY:4:1631:14425:10786\_2:N:0:TCTGCAAG+GCTGCACT  
AACTATTATCCGATTCTTCGAGGGTATCACTACCACTGATCTGCCGACTTTAGTCAAGGAAGTTCAAT  
TCCTTCGATGTTTATATTTTTCTATAAGGGAAAATAGCAATAATCAAA

+

FFFFFFFFFFFFFFFFFFFFFFFFFFFFFFFFFFFFFFFFFFFFFFFFFFFFFFFFFFFFFFFFFFFFF  
FFFFFFFFFFFFFFFFFFFFFFF,FFFFFFFFFFFFFFFFFFFFFFFFFFFFFFFFFFFFFFFFFFFFF

@A00721:190:HGJW7DSXY:4:1435:12057:18458\_2:N:0:TCTGCAAG+GCTGCACT  
AACTTTATTTCAAGACTCTCTCCGATCACCTTGGTGTGATCTCCCGGAGGATCTTTTCAATAAGATGT  
ATGATGATAATCTACTATTTTTAAATAGTGATATTCAGCGTATACTTG

+

FFFFFFFFFFFFFFFFFFFFFFFFFFFFFFFFFFFFFFFFFFFFFFFFFFFFFFFFFFFFFFFFFFFFF  
FFFFFFFFFFFFFFFFFFFFFFFFFFFFFFFFFFFFFFFFFFFFFFFFFFFFFFFFFFFFFFFFFFFFF

@A00721:190:HGJW7DSXY:4:1468:19913:12336\_2:N:0:TCTGCAAG+GCTGCACT  
TTTGGCTTGGTCTATTTACCGCAAAAAGTTGGAAGAGGTCTATGATATTTATTTTACTTATACTTTAA  
ATAGCACCGATTATAACTTGACTGTTGATAATATTACAATAGCTCTTT

+

FFFFFFFFFFFFFFFFFFFFFFFFFFFFFFFFFFFFFFFFFFFFFFFFFFFFFFFFFFFFFFFFFFFFF  
FFFFFFFFFFFFFFFFFFFFFFFFFFFFFFFFFFFFFFFFFFFFFFFFFFFFFFFFFFFFFFFFFFFFF

@A00721:190:HGJW7DSXY:4:1677:11324:17910\_2:N:0:TCTGCAAG+GCTGCACT  
AGTAACCGGTGAACACGTCGGTAGCATTGATTTACTTTTACCGTTAGAAGTAAAAAGATTCTTTTCG  
AAAAGAAACCTATAAGTTACAAACGATTCTTCGACTATATTAAAGAAA

+

FFFFFFFFFFFFFFF:FFFFFFFFFFFFFFFFFFFFFFFFFFFFFFFFFFFFFFFFFFFFFFFFFFFFF  
FFFFFFFFFFFFFFFFFFFFFFFFFFFFFFFFFFFFFFFFFFFFFFFFFFFFFFFFFFFFFFFFFFFFF

@A00721:190:HGJW7DSXY:4:1403:22607:31375\_2:N:0:TCTGCAAG+GCTGCACT  
TCAAGTACCTGAAGTTTACATTTTAAATGGTATGGTATAATGTGTCTTACAAATAGAACCTTCACTCT  
CGGTAATGAGAGTGATTCCTTAATATTCTAGTAACCGCTATGTGGGC

+

:FFFFFFFFFFFFFFFFFFFFFFFFFFFFFFFFFFFFFFFFFFFFFFFFFFFFFFFFFFFFFFFFFFFFF  
F:FFFFFFFFFFFFFFFFFFFFFFF:FFFFFFFFFFFFFFFFFFFFFFFFFFFFFFFFFFFFF

@A00721:190:HGJW7DSXY:4:1317:5466:12649\_2:N:0:TCTGCAAG+GCTGCACT  
TGCTAGGAAAATTTTAGAAAACTCCATTGTATAGTTCAAGGAGTACTTAATTCAATAGCTTTAGTAT

TATTTACTATCGCCTTTATTGAAAATTGTATAAGAGTTAATTGCTTAC  
+  
FFF,FFFFFFFFFFFFFFFFFFFFFFFF:FFFFFF:FFFFFFFFFFFFFFFF:FFFFFF,FFFFFF  
FFFF,FFFF:FFFFFFFF:FFFFFFFFFFFF:,FFFFFFFFFFFF  
@A00721:190:HGJW7DSXY:4:1435:29215:7310\_2:N:0:TCTGCAAG+GCTGCACT  
CATACCATAACCTACCATGACCAATCATCGCTCCAAGTGGCACGCCAGACGTAGGGTCAAACCTACTA  
CCGCCGGTCGGCAGATCGGCACCACTGGTCTCTACGTTACGGGACCCG  
+  
FFFFFFFFFFFFFFFFFFFFFFFF:FFFFFFFFFFFFFFFF:FFFFFFFFFFFFFFFFFFFFFFFF:FF:  
FFFFFFFFFFFFFFFFFFFFFFFFFFFFFFFFFFFFFFFFFFFFFFFFFFFF  
@A00721:190:HGJW7DSXY:4:2242:19705:34867\_2:N:0:TCTGCAAG+GCTGCACT  
TAACCTTCCCAAATCTAGATCTGCACAGAAGAAGGCTGAAGTCGTTACCGGACGACCACTCAAAGGA  
AACGGGCTGTTGCCAGAGGAAAGCAGCGACCACCGAGGTCGCTCGTA  
+  
FFFFFFFFFFFFFFFFFFFFFFFFFFFFFFFFFFFFFFFFFFFFFFFFFFFFFFFFFFFFFFFFFFFF  
FFFFFFFFFFFFFFFFFFFFFFFFFFFFFFFFFFFFFFFFFFFFFFFFFFFF  
@A00721:190:HGJW7DSXY:4:2575:20817:8923\_1:N:0:TCTGCAAG+GCTGCACT  
AGTCCCGTCATCTCTGTGGGAAGTACCTCAGTCAAAAGTCACATTACCACTCCCATGCC  
AATCAATGATGTGACTATACAGTTCGGCCATTTCAAGAGTGGTCAATACGTCGTGGGAGGTACTGAAG  
CCT  
+  
FFFFFFFFFFFFFFFFFFFFFFFFFFFFFFFFFFFFFFFFFFFFFFFFFFFFFFFFFFFFFFFFFFFF:FFFFFFFFFFFFFFFF  
FFFF:FFFFFFFFFFFFFFFFFFFFFFFFFFFFFFFFFFFFFFFFFFFFFFFFFFFFFFFFFFFFFFFFFFFF  
FFF  
@A00721:190:HGJW7DSXY:4:2127:21459:17895\_1:N:0:TCTGCAAG+GCTGCACT  
ATCTAAGAACACTCCCAAGCCAATCAATAGTTCTTCTGACCAGAATGAAAAGGGGTTTACCAGGGTAG  
TCTCTAAGTCTACCAGGAAGAGGGGAAATGTCCCCAAAGTGAAGAATAAAGGGAAAGGTCCATCA  
GGA  
+  
FFFFFF:FFFFFFFF,FF,FFFF:F,FFFF::FFFFFFFF,,:F:FFFF::F:FFFFFFFF  
FFF::FFFFFFFFFFFF:FFFFFF:FFFFFFFFFFFFFFFFFFFFFFFF:F:FFFFFFFF:F::FFFF  
FFF  
@A00721:190:HGJW7DSXY:4:2320:29071:3897\_2:N:0:TCTGCAAG+GCTGCACT  
ATTACCCCTAATTCTGAAGGAAGATCTCCACCATCTGGGGTTGGGAATAAGAAATCTGCACGGGCCA  
AAGAGGCCGCTGCTACGAAGTCGCTGAAGGCGGCTTGGGTCATTAAGG  
+  
FFFFFFFFFFFFFFFFFFFFFFFFFFFFFFFFFFFFFFFFFFFFFFFF:FFFF,FFFFFFFFFFFFFFFFFFFF  
F,FFFFFFFFFFFFFFFFFFFFFFFF:FFFFFFFFFFFF,F,FFF  
@A00721:190:HGJW7DSXY:4:2331:8766:34397\_2:N:0:TCTGCAAG+GCTGCACT  
GTTGCGCCTGCCGACCCCGTCTTTGAGACCAAGACTCTCTACAGTAGGTTCTGTCCTACTATGAGCAA  
ATCTGTTGAATTCGTCACTGAGGACGAAGGTGAGAGGACTTTTGGCTA  
+  
FFFFFFFFFFFFFFFFFFFF,FFFFFFFFFFFFFFFFFFFFFFFFFFFFFFFFFFFFFFFF:FFFFFFFF  
FFFFFFFFFFFF:FFFFFFFFFFFFFFFFFFFFFFFFFFFFFFFFFFFF  
@A00721:190:HGJW7DSXY:4:2213:1796:26021\_1:N:0:TCTGCAAG+GCTGCACT  
CTGAAAGAGAATTGCGTGGGTTGATGGCAGACGCTTCGAGCTTGTGTGTGACGAGGCCGGTGAAGTTT  
TTGTCAACGGCGATTGGAGGATTTTATCCGCGCTTAAGTTGGGGCGAAGATCCCCTATGGAGTCTTG  
AAG  
+  
FFFFFFFF,F::F,,F:,F:FF:,,,F:,,,,,F:FFFF,FFF,,,F,F:,,,,F,,,FF,F,F:FF  
:F,F,:F::,F,,F:,::,,,F,F::F:,,,FFFF,F,F:,,,,F:F,FF,,,F,F::F,F,F::  
:F,  
@A00721:190:HGJW7DSXY:4:1678:6623:4382\_2:N:0:TCTGCAAG+GCTGCACT  
GGCATATTTATGCCGACGATAATAAGCATGTCACCCTTAAGCACCGAGGTAAGCTCGGGACTTACAAG

AGAGAGTGTGAGAGAGTCGCTCTCACTATTTTTGCCCAGAATGCGGGC  
+  
FFFFFFFFFFFFFF,FFFFFFFFFFFFFFFFFFFFFFFFFFFFFFFFFFFFFFFF:F  
FFFFFFFFFFFFFFFFFFFFFFFF:F,FFFFFFFFFFFFFF  
@A00721:190:HGJW7DSXY:4:2553:28727:7153\_2:N:0:TCTGCAAG+GCTGCACT  
GGTTCTGGGAGGCTGCTTTCCTCCATAATTACAACCTCTCTTTAGAGAGCATTAGAAGGAAGTTGGGC  
AAATTCCCACATATGGTAGACGTTGTCACACTTTTCTTGAAAATTTTT  
+  
FFFFFFFFFFFFFFFFFFFFFFFFFFFFFFFFFFFFFFFFFFFFFFFFFFFFFFFF  
FFFFFFFFFFFFFFFFFFFFFFFFFFFFFFFFFFFFFFFFFFFFFFFF  
@A00721:190:HGJW7DSXY:4:2466:5954:33473\_1:N:0:TCTGCAAG+GCTGCACT  
TGGGGATTTGTTGTGAGAATGTGTAAGGTGTCAAGTGTCTTTCATGCTGATATTTCAAGACCTAA  
TCACATCTTGATTGTTAGTTACTGGTCGTATCGAGTTGGAGGGAGGATGTTCTCCGAAATTAAAGACG  
GG  
+  
F,:F,,FFF,F,:F,,FF,,F,,,F,FF,F:,FF,,FFFFFF,FF,FFFF,F,,,FFFF,F,F  
F:,:F,,FFFF,,F::,,,,,:F:F:F:,F:F:FFFF,F,,FF,F:FFF,FFFF:FF,::  
:,  
@A00721:190:HGJW7DSXY:4:2558:14362:29622\_2:N:0:TCTGCAAG+GCTGCACT  
TCAGAGAGGGGAGCTCTGAAAAGGAACTTCGTCAGAAGATGAGGAAGTCTAAGAGGAGGAGTTTGAG  
GAAGGCTCTAGAGAAGATCTCACCACCTGGAGAAGGCAAGTGGAGAGT  
+  
FFFFFFFFFFFFFF:FFFFFFFFFFFFFFFFFFFFFFFFFFFFFFFF:F:FFFFFFFF  
FFFFFFFFFFFFFFFFFFFFFFFFFFFFFFFFFFFFFFFFFFFFFFFF  
@A00721:190:HGJW7DSXY:4:2147:6497:36385\_2:N:0:TCTGCAAG+GCTGCACT  
AAGAAGGATTATTTGAAGCAGGGGTTACCACTTCCTAAGGTGGATGAGGGAGGTTGTTTCTTTGGAGT  
TTTAGATAATCTTTTGAGAAGGGGTCATAGAGCCAGCAAGAGAAGCTT  
+  
FFFFFFFFFFFFFFFFFFFFFFFFFFFFFFFFFFFFFFFFFFFFFFFFFFFFFFFF  
FFFFFFFFFFFFFFFFFFFFFFFFFFFFFFFF,F:FFF::F:F  
@A00721:190:HGJW7DSXY:4:2201:8350:28855\_2:N:0:TCTGCAAG+GCTGCACT  
TATAATTTAGGTCAACTTGGGGTTTCGAATGTCATTAGTGCCTTACGCTTGAAAGAGGTCCTTTTGAG  
TATCGACAGATCTTTCGATCTTGAGGACGTACATTTAACGTGGCAGAA  
+  
FFFFF:FFFFFFFFFFFFFFFFFFFFFFFFFFFFFFFF:F:FFFFFFFF  
FFFFFFFFFFFFFFFFFFFFFFFFFFFFFFFF:F:FFFF:FFFF  
@A00721:190:HGJW7DSXY:4:2228:2663:3035\_2:N:0:TCTGCAAG+GCTGCACT  
ATATTGTTCTTCCGGGAAGTTGTGGGATTTAACTTTGACTCAACTACTCCGATCAGATCCGGATGGT  
TTGATTGGTATGGACTIONCGACTTTTGATCTGGAGTTGTCTAGGGTC  
+  
FFFFFFFFFFFFFFFF:F:FFFFFFFFFFFFFFFFFFFFFFFFFFFFFFFF  
FFFFFFFFFFFFFFFFFFFFFFFFFFFFFFFFFFFFFFFF  
@A00721:190:HGJW7DSXY:4:2216:5602:17707\_2:N:0:TCTGCAAG+GCTGCACT  
AATATGCAGGTCAAAGATTCTGTAGCTCTGAGGGCGGTTGAGGGAGCCGTTTGGCCGACTTTAACTA  
TTCTAAGAGTCTTTATGATTCAAACCTATCGTTGTCGTACCTTACAA  
+  
FFFFFFFFFFFFFFFFFFFFFFFFFFFFFFFF:F:FFFF:F:F  
FFFFFFFFFFFFFFFF:F::FFFFFFFFFFFFFFFFFFFFFFFF  
@A00721:190:HGJW7DSXY:4:2456:22318:7138\_2:N:0:TCTGCAAG+GCTGCACT  
GGCTTATTGTCGCGCAGTTTCCAGAATTGCGGTTGAAGTTCACCCATTCTATCTTGAATGCTCACGCC  
GTCGACCCATATCGAGACTATGTTATAATCACTTGTTAAAGTACAGA  
+  
FFFFFFFFFFFFFFFFFFFFFFFFFFFFFFFFFFFFFFFFFFFFFFFF  
FFFFFFFFFFFFFFFFFFFFFFFFFFFFFFFFFFFFFFFF

@A00721:190:HGJW7DSXY:4:1515:19732:22733\_2:N:0:TCTGCAAG+GCTGCACT  
ATTATTGATATTGGAGGCGATATTCGTTTTCATATCCAAACTCCTTGAATGGAGTACATATTTGCAA  
CCCTATTCTTGATGTGAAAGATGCATCGAGGTATACGTCTAGGAACAT

@A00721:190:HGJW7DSXY:4:1218:26982:24455\_2:N:0:TCTGCAAG+GCTGCACT  
AAATCTTTTGAGATTGAGAAGATTGAAGAACACGTCAAGAAGTCGCTCGGCGTTGTTCTTGAAAACCA  
AGTTAAGAAGGAGGCTGATCATGGAGTCTTGTACCTTCTGTCAAACCT

+

FFFF:FFFFFFFFFFFFFFFF:FFFFFFFFFFFFFFFFFFFFFFFFFFFFFFFFFFFFFFFFFFFF  
FFFFFFFFFFFFFFFFFFFFFFFFFFFFFFFFFFFFFFFFFFFFFFFFFFFFFFFFFFFFFFFF

@A00721:190:HGJW7DSXY:4:2319:5023:31454\_2:N:0:TCTGCAAG+GCTGCACT  
TACGAGAGGTGATCCCGGATGTGGATTGAAGGCTGGCTCTAAGGGAGACTCCTTCTTTTTGAATGTTG  
TAAAGAATTGGGTTGAGAAGTGTGCTTTACAAGGAGTTAGACTCTTCT

+

FFFFFFFFFFFFFFFFFFFFFFFF:FFFFFFFFFFFFFFFFFFFFFFFFFFFFFFFFFFFFFFFFFFFF  
FFFFFFFFFFFFFFFFFFFFFFFFFFFFFFFFFFFFFFFFFFFFFFFFFFFFFFFFFFFFFFFF

@A00721:190:HGJW7DSXY:4:2630:15736:9111\_2:N:0:TCTGCAAG+GCTGCACT  
TAAAGAAAAATTTTCGAATAAACTAATGAGAGGTATAGGCTTAGTCAAGTCTGTACTTACATTCTTTA  
CGCCAGATTCTTCATGGGGCGACGCTGTTTCTTGGTATTTCTGAAA

+

FFFFFFFFFFFFFF:FFFFFFFFFFFFFFFFFFFFFFFFFFFFFFFFFFFFFFFFFFFFFFFFFFFF  
FFFFFFFFFFFFFFFFFFFFFFFFFFFFFFFFFFFFFFFFFFFFFFFFFFFFFFFFFFFFFFFF

@A00721:190:HGJW7DSXY:4:2634:28809:13244\_1:N:0:TCTGCAAG+GCTGCACT  
TTTCTCTGGTAAGGGAATTATTAATCATTCTTCTCACTCTTGACGAGAATTATTACTGTTTTCTCT  
ACCCATAACTTCTTTTTCAAAAATGCGGATGGGTCTACTGATGTTTTCTACAGAGTGCAGTCGTTTC  
AAC

+

F:F:FFFFFFFF:F:FFFFFFFF,,FFFFFFFF:FFFFFFFFFFFFFFFFFFFFFFFFFFFF,FFFF  
FFFFFFFFFFFFFFFF,FFFFFFFFFFFFFFFFFFFFFFFFFFFFFFFFFFFFFFFFFFFFFFFFFFFF  
FFF

@A00721:190:HGJW7DSXY:4:1623:15619:32550\_1:N:0:TCTGCAAG+GCTGCACT  
AATAATTGGTGATGAAAATACGTATGTCGGTGGGTTCTCAAGGCTCTCATCGCCACTGGGATTCTAA  
GGGTTCCATAAGATATTATCTGACATTGTGGTTCAATGATCAGGATTCTTCTTTTGGTCCTTACGTC  
TTA

+

FFFFFFFFFFFFFFFFFFFFFFFFFFFFFFFFFFFFFFFFFFFFFFFFFFFFFFFFFFFFFFFFFFFF  
FFFFFFFFFFFFFFFFFFFFFFFFFFFFFFFFFFFFFFFFFFFFFFFFFFFFFFFFFFFFFFFFFFFF  
FFF

@A00721:190:HGJW7DSXY:4:2470:4408:32769\_1:N:0:TCTGCAAG+GCTGCACT  
TCTTGTACGATTCTTAAAAGAAGTTTATTAACCTTCAGAGTCTCTTGGAAGTCCAGGTAGCTAATG  
TTCTTGCAATAGCCACAGACTTTCTGGGAAAAGAGACCTCTGTTGGTAGAGGAGTTGAGAGAATTACT  
CAG

+

FFFFFFFFFFFFFFFFFFFFFFFFFFFFFFFFFFFFFFFFFFFFFFFFFFFFFFFFFFFFFFFFFFFF  
FFFFFFFFFFFFFFFFFFFFFFFFFFFFFFFFFFFFFFFFFFFFFFFFFFFFFFFFFFFFFFFFFFFF  
FFF

@A00721:190:HGJW7DSXY:4:1669:30535:35243\_1:N:0:TCTGCAAG+GCTGCACT  
AGTTAGGGAGTGGCTAGGTTTTAAAAGATCCTTGCACAAGCAATACCTTCCACTGAGTTCATCACCC  
AGAGTTTCGACGTCGCGGAAAACGATGAAGATTTCCACACTGTTGAGAATCTTCTGATGCTGAATTT  
GAG

+

FFFFFFFFFFFFFFFFFFFFFFFF:FFFFFFFFFFFFFF:FFFFFFFFFFFFFFFFFFFFFFFFFFFF  
FFFFFFFFFFFFFFFFFFFFFFFFFFFFFFFFFFFFFFFFFFFFFFFFFFFFFFFFFFFFFFFFFFFF  
FFF

@A00721:190:HGJW7DSXY:4:1122:3007:30185\_1:N:0:TCTGCAAG+GCTGCACT  
GTTTTTGGTATAAATCCTGATGGCTCAGTACAGGGAGGAGGTAATAGTTATAAACCTTCTTTTATCA  
TTGCAACAGGACTTTGAGAAGACTGTTGAAATGGACAAAATCTGGGATCATAGGTATGTGTCACGCTA  
CAC

```

+
FFFFFFFFFFFFFFFFFFFFFFFFFFFFFFFFFFFFFFFFFFFFFFFFFFFFFFFFFFFFF:FFFFFFFFFFFFFFFFFFFF
FFFFFFF,FFFFFFFFFFFFFFFFFFFFFFFFFFFFFFFFFFFFFFFFFFFFFFFFFFFFF:FFFFFFFFFFFFFFFFFFFF
FFF
@A00721:190:HGJW7DSXY:4:1632:14796:2284_1:N:0:TCTGCAAG+GCTGCACT
TGTTTCAGGAAGATCTCTACAGAGATTATCGAGAGTTGTGATCTAGTTCATAATTTAGGTCGACGGACT
TTAGCAACTTTAGATAAAATTCTTTCCGGGCTCAATGACCTTTGCTATGTACGTGGATCTAATGCTTGG
TGA
+
FFFFFFFFFFFFFFFFFFFFFFFFFFFFFFFFFFFFFFFFFFFFFFFFFFFFF:FFFFFFFFFFFFFFFFFFFF
FFFFFFFFFFFFFFFFFFFFFFFFFFFFFFFFFFFFFFFFFFFFFFFFFFFFF:FFFFFFFFFFFFFFFFFFFF
FFF
@A00721:190:HGJW7DSXY:4:2342:23484:23030_2:N:0:TCTGCAAG+GCTGCACT
TATTAGTTCATGAAGTTCTTACACTTCTCGCGACTAATGTCAGCTTCACTACAAAGGCGTTACGTAAA
GTAGTTTTTCACGCTTTATCTTAAAGCATTACCACCAAATTTAGCACTT
+
FFFFFFFFFFFFFFFFFFFFFFFFFFFFFFFFFFFFFFFFFFFFFFFFFFFFF::FFFFFFFFFFFFF
FFFFFFFFFFFF,FFFFFF,FFFF:F:FFFF,F:FFFF,F:FFFF,:F
@A00721:190:HGJW7DSXY:4:2565:29776:1266_2:N:0:TCTGCAAG+GCTGCACT
TCGCCATATCAGATTAGAGACATGCCAGTTAGAGTTCTTCTAACCCAGGACTGATGGTGAGATTCTTTT
ACCTTTTGAGGTCCAGGAACCTTTACTCCTAGTGTCTTTTCTAGAGT
+
FFFFF:FFFFFFFF:FFFFFFFFFFFFFFFFFFFFFFFFFFFFFFFFFFFFFFFFFFFFF:FFF
FFF,FFFFFFFFFFFFFFFFFFFFFFFFFFFFFFFFFFFFF:FFFFF:FFF,F:FF
@A00721:190:HGJW7DSXY:4:1331:12057:18020_2:N:0:TCTGCAAG+GCTGCACT
CGGAGGATGACAGGTGGGAGACCGCTCAATAACACTCTATTGAATCCCTTTCCACGATGAAAGCTCT
TTATGAGGTGCTCCATGCAAATTTACAGTTCCTCTTTGGTGATATCGC
+
FFFFFFFFFFFFFFFFF:FFFFFFFFFFFFFFFFFFFFFFFFFFFFFFFFFFFFFFFFFFFFF:
FFFFFFFFFFFFFFFFFFFFF:F:FFFFFFFFFFFFF:FFFFFFFFFFFFF
@A00721:190:HGJW7DSXY:4:1331:12057:18020_1:N:0:TCTGCAAG+GCTGCACT
TTTTGATAAATTTGTTGGAATCGATAATGATACTGACGAAGTTCTATTACCACCCTTGTCAATTGATA
CAAACATTCTAGGTGATGCTTTCTTAGAGGCTCGTCTAGCCGCTGAGATTCTGCTTACCTATTTACAA
TCT
+
FFFFFFFFF:FFFFFFFFFFFFFFFFFFFFFFFFFFFFFFFFFFFFFFFFFFFFF:FFFFFFFFFFFF:FFFFFFF
FFFFFFFFFFFFFFFFFFFFFFFFFFFFF:FFFFFFFFFFFFFFFFFFFFFFFFFFFFFFFFFFFFF:
FFF
@A00721:190:HGJW7DSXY:4:1378:23321:13542_1:N:0:TCTGCAAG+GCTGCACT
GATAACGATTTAGTACTGGGAAATGGTGGTAGTCAGTTTACTACTTTTCTTTCCCTCCCCTTTTTTCGA
TTGGATTCGACGGGGTCTTCGTCTCACGACTAATTTGATAAGGTTTTTCTTTTATGGGACTCTTGTTT
GTA
+
FFFFFFFFFFFFFFFFFFFFFFFFFFFFFFFFFFFFFFFFFFFFFFFFFFFFF:FFFFFFFFFFFFF:FFFFFFF
FFFFFFFFFFFFFFFFFFFFFFFFFFFFF:FFFFFFFFFFFFFFFFFFFFFFFFFFFFFFFFFFFFF:
FFF
@A00721:190:HGJW7DSXY:4:2619:27868:7576_2:N:0:TCTGCAAG+GCTGCACT
AAGTTCTTAATGTAGGTCTCCTAGTACTTAAGGGTTTATGTTTCGGTTTCAGCTGGATGGATCTTTTG
ATGGTATGTTTCACATTGCGTGATCACTTCCCGTGGACTTGGAAGAG
+
FFFFFFFFFFFFFFFFFFFFFFFFFFFFFFFFFFFFFFFFFFFFF,FFFFFFFFFFFFFFFFFFFFFFFFFFFFFFFFFFFF
FFFFFFFFFFFFFFFFFFFFFFFFFFFFFFFFFFFFFFFFFFFFFFFFFFFFF
@A00721:190:HGJW7DSXY:4:1327:20980:24893_1:N:0:TCTGCAAG+GCTGCACT
CGATTCTATTATGTCGCTAAAGCCTGTCCAGTTGTGCGATGATGTTTCGGGCTGTGGTGATTAACCTCCC

```

TCGTGAAACTTACGACGATGTTCTCGCTCGCATTTTACAAGGATTACTAAGTCTGAGATCTGCCACTT  
CTA

+

F:,FFFF:FFF:F:,F:FFFF,,,FF:F,FFFF:F,FFFF:FFFF:,F:FFF:FF,FFFFF,,,F:F,  
FFFF,::FFFF:::F:,F:::F,FFF,FFF,:FFFF,:FF:,,:FFFFFFF,FFF::F,:F,FFFF  
,FF

@A00721:190:HGJW7DSXY:4:1362:19940:12790\_1:N:0:TCTGCAAG+GCTGCACT  
TCTGTTCATGAGGATGTCTTGGTCGAAAAATATCGCCGGGAACCTTCTAATAGAGGATCCTGATGACAT  
TATTTCAACGGATACCGATCTCAGTTCTACCACAGAAACCGTCTCAGGAAGTGTCTCCACTGATTTCGG  
AAT

+

FFFFFFFFFFFFFFFFFFFFFFFFFFFFFFFFFFFFFFFFFFFFFFFFFFFFFFFFFFFFFFFFFFFFFFFF  
FFFFFFFFFFFFFFFFFFFFFFFFFFFFFFFFFFFFFFFFFFFFFFFFFFFFFFFFFFFFFFFFFFFFFFFF  
FFF

@A00721:190:HGJW7DSXY:4:1533:16721:21183\_2:N:0:TCTGCAAG+GCTGCACT  
CGACCTTCTTGTGGGGACTGAGACCTCTGAATTTTCAGGGTGCCCTGATGAGGACGTTGAAAGGGATA  
ATTTCAACTCTGAGACTTCTAAGAGTGTTTCAAAGACCAGAAACGTA

+

FFFFFFFFFFFFFFFFFFFFFFFFFFFFFFFFFFFFFFFFFFFFFFFFFFFFFFFFFFFFFFFFFFFFFFFF:FFF:  
FFFFFFFF:FFFFFFFFFFFFFFFF:FFF:FFFFFFFF:FFFFFFFFFFFFFF

@A00721:190:HGJW7DSXY:4:1627:6876:7639\_1:N:0:TCTGCAAG+GCTGCACT  
AAAGGTAGGAAGGGGAGAAAACAGAACAAGCGAGCGGTTGAAGAGAAAAGTATGATGTTGCGGCTGA  
TCGTACCCCAATTCCTGCTAGAAAGATCACTCTCGGCGATACCACTGATCTTCCAGAGTTACGTAGTG  
GTC

+

FFFFFFF:FF:FFFFFFFFFFFFFFFFF,F:FFFFFF:FFFFFFFFFFFFFFFFFFFFFFFFFFFFFFFF  
FFFFFFFFFFFF:FFFFFFFFFFFFFFFFFFFFFFFFFFFFFFFFFFFFFFFFFFFFFFFFFFFFFFFFFFFF  
FFF

@A00721:190:HGJW7DSXY:4:1508:16306:35462\_1:N:0:TCTGCAAG+GCTGCACT  
TTTTATCAAAGAGAAAGTTTCTGCTAGTCGCGACGATAGTATTTATCGGAGTGATATTAACAAGTTAA  
ACTTCGAACTGACCACTTACAAGAGTGTTGAAGTACCGCAACATGGATCAGTTTTCCAAAAGCTATT  
AAT

+

FFFFFFFFFFFFFFFFFFFF:FFF,F,FFFFFF:,FFFFFFFFFFFF:FFFF:FFFFFFFFFFFF:FFFFFFF  
F,FFFFFF:FFFF:FFFF:FFFFFFFFFFFFFFFFFFFF:FFFF:FFFFFFFFFFFF:FFFFFFFFFFFF  
FF:

@A00721:190:HGJW7DSXY:4:2420:11288:1063\_2:N:0:TCTGCAAG+GCTGCACT  
AAACTGAATCCACTCTCTTGGGATATAAATGAGTACATCTATAATAGAGTTTGGAACTGTGTAATGT  
CCTACGTACTGTTCAAGGTGTTTGGGCTTCTCTAAAGAACAGCAACTT

+

FFFFFFFFFFFFFFFFFFFFFFFFFFFFFFFFFFFFFFFFFFFFFFFFFFFFFFFFFFFFFFFFFFFFFFFF  
FFFFFFFFFFFFFFFFFFFFFFF,FFFFFFFFFFFFFFFFFFFFFFFFFFFFFFFF

@A00721:190:HGJW7DSXY:4:2263:3757:10598\_1:N:0:TCTGCAAG+GCTGCACT  
AACCTTTCCTCGTTCTTCATGAAGATCTTCGAGTGTTTTATAGTGAGTTATTCTTGCGAAGGTTCAAG  
TCGATTGATTTTGTTGACTACGATCTCTTGTATAAAGAGTTCTTCGCAGTTGAATCTCCACCAGG  
TGG

+

:FFFFFFFFFFFFFFFFFFFFFFFFFFFFFFFFFFFFFFFFFFFFFFFFFFFFFFFFFFFFFFFFFFFFFF  
FFFFFFFFFFFFFFFFFFFFFFFFFFFFFFFFFFFFFFFFFFFFFFFFFFFFFFFFFFFFFFFFFFFFFFFF  
FFF

@A00721:190:HGJW7DSXY:4:1613:13503:3145\_2:N:0:TCTGCAAG+GCTGCACT  
GCGACTTTTGTGCAATTTTTCGAAAAGGTCTTGAAGTACGTATTGTCACTGCTAATCGTAATTCGCG  
AGAAGAGATAGTGACTAAAGTTTTGGCACTTCTAGTTTCATCGCGGTAT

+

```

FFFFFFFFFFFFFFFFFFFFFFFFFFFFFFFFFFFFFFFFFFFFFFFFFFFFFFFFFFFFFFFF
FFFFFFFFFFFFFFFFFFFFFFFFFFFFFFFFFFFFFFFFFFFFFFFFFFFFFFFFFFFFFFFF
@A00721:190:HGJW7DSXY:4:2452:26078:13056_2:N:0:TCTGCAAG+GCTGCACT
CGTGAAGTTATGATGAGTGATCGTATTAGAACAGCTGATTCTTATTGCATGAACGTCGCTGAGGTCA
AACCTGTGGACGTTCTTTTCATCGACGAATTATTCATGATTACACGCTG
+
FFFFFFFFFFFFFFFFFFFFFFFFFFFFFFFFFFFFFFFFFFFFFFFFFFFFFFFFFFFFFFFF
FFFFFFFFFFFFFFFFFFFFFFFFFFFFFFFFFFFFFFFFFFFFFFFFFFFFFFFFFFFFFFFF
@A00721:190:HGJW7DSXY:4:2159:10321:2801_2:N:0:TCTGCAAG+GCTGCACT
CATCTACTTAAGCGCGCTTATACCATAGGTTACGGTGATTCCAATCAAATCGGATTCATCAATCGTAT
TGATCTCCAAGTCGCAAACTACTTCAACATCAACGACATCATTCTTGA
+
FFFFFFFFFFFFFFFFFFFFFFFFFFFFFFFFFFFFFFFFFFFFFFFFFFFFFFFFFFFFFFFF
FFFFFFFFFFFFFFFFFFFFFFFFFFFFFFFFFFFFFFFFFFFFFFFFFFFFFFFFFFFFFFFF
@A00721:190:HGJW7DSXY:4:2667:22824:17879_2:N:0:TCTGCAAG+GCTGCACT
TTATCGAAGTCTCAGTTATCGCTGCCCCGCCGACGTTTGTGCGCAACTCTCAGAGGTTTACGGCAGAA
AAATTTCTCCTGCTTGTAAATTCGAGAGAGGACACTATGAAATTAGAC
+
FFFFFFFFFFFFFFFFFFFFFFFFFFFFFFFFFFFFFFFFFFFFFFFFFFFFFFFFFFFFFFFF
FFFFFFFFFFFFFFFFFFFFFFFFFFFFFFFFFFFFFFFFFFFFFFFFFFFFFFFFFFFFFFFF
@A00721:190:HGJW7DSXY:4:2455:13449:31735_2:N:0:TCTGCAAG+GCTGCACT
TATTACTTTCACTCAAGGTGAAAAGTTTGAAATTAACAAAGTCCTTGGTAAGAGTAAGGTTAAATGTG
AAGATGCTCAGACTATTATCATGAAGTTCAAGGTAATACTTACCAGCACG
+
FFFFFFFFFFFFFFFFFFFFFFFFFFFFFFFFFFFFFFFFFFFFFFFFFFFFFFFFFFFFFFFF
FFFFF:FFFFFFFFFFFFFFFFFFFFFFFFFFFFFFFFFFFFFFFFFFFFFFFFFFFFFFFF
@A00721:190:HGJW7DSXY:4:1442:20347:22357_1:N:0:TCTGCAAG+GCTGCACT
ACAAACACATATTACCGTTGCTCTATCACGACACGTTGAATCTTTACGATACTTTGTTATCAATGTAA
AGTTAAACGATGCTACTTGTGAGAGGATCAATCACAGTAAGGAAGTGTACGTTTAGCACGGGAGGTT
GCA
+
:FFFFF:FFFFFFFFFFFF,FFFFFFFFFFFF:FFFFFFFFFFFFFFFFFFFFFFFFFFFFFFFF:FFF
FFFFFFFFFFFFFFFFFFFFFFFFFFFFFFFFFFFFFFFFFFFFFFFFFFFFFFFFFFFFFFFF
FFF
@A00721:190:HGJW7DSXY:4:1273:28113:21339_2:N:0:TCTGCAAG+GCTGCACT
TATATCGAGGCTATCGAGGACGATGAGTATCTTGAAGTTGTTGACGACAAGCCTCAAGAGGGTAGAGG
ACCACCTGGATCTTCTACTGTCTCTGCCTTCCAAGATTTCTTAGAAGA
+
FFFFFFFFFFFFFFF:FFFFFFFFFFFFFFFFFFFFFFFFFFFFFFFFFFFFFFFFFFFFFFFF
FFF:FFFFFFFFFFFFFFFFFFFFFFFFFFFFFFFFFFFFFFFFFFFFFFFF:F:FFFFF
@A00721:190:HGJW7DSXY:4:2442:28818:1799_1:N:0:TCTGCAAG+GCTGCACT
AACCACCTTAACGTCACTCGGTAATCTTTACGCCGAATTAAGTACTAATGAGTTCAAGTCGGTTGTGCG
ATCGAATTAAGATCAAGGCTAATACCTTTATAGGTAAGAAGCCCCTTGAGCCGCGTAGTCAGCGCGTT
TAG
+
FFFFFFFFFFFFFFFFFFFFFFFFFFFFFFFFFFFFFFFFFFFFFFFFFFFFFFFFFFFFFFFF
FFFFFFFFFFFFFFFFFFFFFFFFFFFFFFFFFFFFFFFFFFFFFFFFFFFFFFFFFFFFFFFF
FFF
@A00721:190:HGJW7DSXY:4:2306:7726:26303_1:N:0:TCTGCAAG+GCTGCACT
TACCGAGTCTCCAAGAGAATATTTATTCTTATGAGGCTCGAACTTCAACGTTTTTACAAACGGAAAGA
CATATCGCACCCGAAATTTTTGGGCAGAATGCTCTTAACGCGGTTCTTGAACGGTGTTTTGATCAGTC
TAA
+
:FFFFFFFFFFFFFFFF:FFFFFFFFFFFF,FFFFFFFFFFFFFFFFFFFFFFFFFFFFFFFF:FFFFFFF:FFFFFFF

```



FFFF:FFFFFFFF:FFF,FFFFFFFFFFFFFFFFFFFFFFFFFFFFFFFFFFFFFFFF  
FFF

@A00721:190:HGJW7DSXY:4:1347:17363:7169\_1:N:0:TCTGCAAG+GCTGCACT  
ATAGGAGACTCAGTTAACCTGAGAGCTCCTCAATTGATAGATTGGGTCAACAATAGGGACGCTAGTAT  
ACTTCGTAAAGTCGACAGCGAAATGGTCAATATTGATAATTGGACCGACTATATGACCTATTTTAAGC  
TCA

+  
FFFFFFFFFFFFFFFFFFFFFFFFFFFFFFFFFFFFFFFF:FFFFFFFF:FFFFFFFFFFFFFFFFFFFFFFFF  
FFFFFFFFFFFFFFFFFFFFFFFFFFFFFFFF:FFFFFFFF:FFFFFFFFFFFFFFFFFFFFFFFFFFFFFFFF  
FFF

@A00721:190:HGJW7DSXY:4:1544:3540:15013\_2:N:0:TCTGCAAG+GCTGCACT  
CTAAGGTAAACTTGATGCTTCAGCCTTTTCGAAGCATAACCCCGCACAGAATATCGTTTATCACGCA  
AAATTTATTAATGCAATTTTCGGACCTATCTTTAAGGTTCTTGTGAGG

+  
FFFFFFFF:FFFFFFFF:FFFFFFFFFFFFFFFFFFFFFFFF:FFFFFFFFFFFFFFFFFFFFFFFFFFFF  
FFFFFFFF,FFFFFFFFFFFFFFFFFFFFFFFF:F:FFFFFFFFFFFFFFFF

@A00721:190:HGJW7DSXY:4:2402:31602:12759\_1:N:0:TCTGCAAG+GCTGCACT  
CAGTGACGATTTCTCCCGGAAGCTCTTCTCTCTCTTAGGAGGTCATGATGACTACTATAAGGGTGAAA  
TCGATTTTTCGAAGTTTGACAAATCTCAAGATTTCTTTGTAAAGCCTATGAGATAAAGATGTATTCT  
TAT

+  
FFFFFF:FFFFFFFF,FFFFFFFF:F,FFFFFFFF:FFFF:FF:FFFFFFFF:F,FFFFFF  
FF:FFFFFFFFFFFFFFFFFFFFFFFFFFFFFFFFFFFFFFFF:F:FFFF:FFFFFFFFFFFF  
FFF

@A00721:190:HGJW7DSXY:4:2316:10050:12633\_2:N:0:TCTGCAAG+GCTGCACT  
AACTTTGGAGTGCCAGTGAATATTTTGTACGCCAGGAGTATCCATAACGATTTGTCAATTTACCACC  
TTTGCTCAACGACGAAGTGGAACGGCCAACACTTTCTTTGGTAATTGT

+  
FFFFFFFFFFFFFFFFFFFFFFFF:FFFFFFFFFFFFFFFFFFFFFFFFFFFFFFFFFFFFFFFFFFFF  
FFFFFFFFFFFFFFFF:FFFFFFFFFFFFFFFFFFFFFFFF,FFFFFFFF

@A00721:190:HGJW7DSXY:4:1309:21061:14638\_1:N:0:TCTGCAAG+GCTGCACT  
GATGATTTTATCACTTTATTATGACCTTGGAAGTTTTTCGGCTGTGGTTGTCGCTGGGGACGATTCCA  
TTCTGTTTTCAAAGACTCCAATAACTGATCATTCTGATCATATGATTTTGGACAATGGTTTCGAAGCG  
AAA

+  
FFFFFFFFFFFFFFFFFFFFFFFFFFFFFFFFFFFFFFFFFFFFFFFFFFFFFFFFFFFFFFFFFFFF  
FFFFFFFFFFFFFFFFFFFFFFFFFFFFFFFFFFFFFFFFFFFFFFFFFFFFFFFFFFFFFFFFFFFF  
FFF

@A00721:190:HGJW7DSXY:4:2643:4734:21433\_2:N:0:TCTGCAAG+GCTGCACT  
TGCTCGCGATTTATTCTTTTGTCAATGATTACATCTACTTCGTTCTGATCCTTACAAGATCATCGT  
TAAGTTAGGTAAACCCCTAACCGATGTTACTCTTGTAGGACTTTGGGA

+  
FFFFFFFFFFFF:FFFFFFFF:FFFFFFFFFFFFFFFFFFFFFFFFFFFFFFFFFFFFFFFF:FFFFF  
FFFFFFFFFFFFFFFF:FFFFFFFFFFFFFFFFFFFFFFFFFFFFFFFF:FFF

@A00721:190:HGJW7DSXY:4:1643:15944:27759\_2:N:0:TCTGCAAG+GCTGCACT  
AGGTTGTTGTTTGGCGATTAGCTCTTGCAGCTAATATTCGATATTCGATTGAGGGTCGTTATACCTAT  
TCGGCTATCTGTGCTTTGAATTGTATAAGATCAAATTTAAACGATTC

+  
FFF,FFFFFFFFFFFFFFFFFFFFFFFFFFFFFFFFFFFFFFFFFFFFFFFFFFFFFFFFFFFF  
FFFFFFFF:FFFFFFFFFFFFFFFFFFFFFFFFFFFFFFFF:FF:FF:

@A00721:190:HGJW7DSXY:4:2128:20175:7999\_1:N:0:TCTGCAAG+GCTGCACT  
TGATGTGGAGGGAGTTCTTGAAGCATCCCGACCTTCTTGTGAAAATTTTGATGCGGTTTCATAAGA  
TTATCAGTAATCCTGATTCTACTACGATTCATGGACCTCCATCCTGTACCTCTTCTGGAGAGACGT  
ATC

+  
FFFFFFFF:F:FFFFFFFF:FFFFFFFFFFFFFFFF, :FFF, FFFFFFFFFFFFFFFF, :FFFFFFFF  
F:FFFFFF, FFFFFFFFFFFFFFFFFFFFFFFFFFFFFFFFFFFFFFFFFF: FFFFFFFFFFFFFFFFFF:  
FFF  
@A00721:190:HGJW7DSXY:4:1139:10791:15608\_2:N:0:TCTGCAAG+GCTGCACT  
TCGAGACAGGTGATATTGTTGAGCGAGAGCGACCAAGATCTAAATTCGGTAACGGTGCGTGGCGCTTT  
ATTTTAAAAAGCTCCCTCCTCTCGCAAGTTTGATCTGATACTTATCAC  
+  
FFFFFFFF:FFFFFFFFFFFFFFFF, FFFFFFFFF:FFFFFFFF: :FF: FFFFFFFFFFFFFFFF: FFFF  
FFFFFFFFFFFFFFFFFFFFFFFFFFFFFFFFFFFFFFFFFFFFFFFF: FFFF  
@A00721:190:HGJW7DSXY:4:1259:11740:29590\_2:N:0:TCTGCAAG+GCTGCACT  
GATCAGTCTCTGACTTGACCATCTTTCATTTTAAATGACGATCATTAAAGACTCTCTTCTTCTTTGTT  
TCCTTCTTTCGACTGATTTTTCCTCATCAGCTTGTGTTTACCTAATC  
+  
FFFFFFFFFFFFFFFFFFFFFFFF: FFFFFFFFFFFFFFFFFFFFFFFFFFFFFFFFFFFFFFFFFF,  
FFFFFFFFFFFFFFFFFFFFFFFF: FFFFF: FFFFFFFFFFFFFFFFFF  
@A00721:190:HGJW7DSXY:4:2211:8034:11209\_2:N:0:TCTGCAAG+GCTGCACT  
GATAACAACATCAGTTGATTAAGACTCTTCCGAAAGGCGAACTTTGGGAATTTGAAGCTCAGGGTGA  
AGCACAACGTTTGACCGTGACGAAGTGTGGTGTCTTGATCTACGTTA  
+  
FFFFFFFFFFFFFFFFFFFFFFFF:F, : FFFFFFFFFFFFFFFFF: FFFF, FFFFFFF, FFFFFFFFFFFFFFFFFF  
F: FFFFFFFFFFFFFFFFF, FFFFFFFFF: FFFFFFFFFFFFFFFFFF, FF  
@A00721:190:HGJW7DSXY:4:2344:24108:15123\_1:N:0:TCTGCAAG+GCTGCACT  
CACTTATTACGATATTTCTTTAGTCGATGGGTTTTCGACGCCTTTAAGCGTCTTCTGTTTCATCGCAAC  
CAGATGATATCTTCTATTCTGAAGTATGTTTCGATCAGTGTCTTCTATCAGGAGGAAAACACTTGT  
TCT  
+  
FF, FFFFFFF: FFFFFFFFFFFFFFFFFFFFFFFFF: FF: : F: FFFFFFFFF: FFFFFFF: FFFF  
FF: FFFFFFF, FF: FFF: FFFFF, FFFFFFFFFFFFFFFFFFFFFFFFFFFFFFFFFF: FFFFFFF  
FFF  
@A00721:190:HGJW7DSXY:4:1105:19325:24846\_1:N:0:TCTGCAAG+GCTGCACT  
TCTCTATTTTAAAGTTTTGTCTTCTTGTCTTATTCTATTAATCACTCATTTTAGTGAGATTATT  
AAAAACGCACTAAAACGTCTTCGACAACAGCAGGGGTTTTCGAATAGTGATAGCCACCCGCTTACAG  
AGG  
+  
FFF: FFFFFFFFFFFFFFFFF: FFFFFFFFFFFFFFFFF: FFF: FFFFFFFFF: F: FFFFFFFFF  
F, FFFFFFFFFFFFFFFFFFFFFFFFFFFFFFFFFFFFFFFFFFFFFFFFFFFFFFFFFFFFFFFFFF  
F: F  
@A00721:190:HGJW7DSXY:4:1209:14742:4413\_2:N:0:TCTGCAAG+GCTGCACT  
GACTTTGGTACCACCTTTTCTACTGTCTGTCTCGCCTCTTCGAATGAAGTTTAAATGCTTAACAACAA  
TGATAGTGAATTTATACCTACAATCATTGGTTTTTCTAATAATGATGA  
+  
FFFFFFFFFFFFFFFFFFFFFFFFFFFFFFFFFFFFFFFFFFFFFFFFFFFFFFFFFFFFFFFFF  
FFFFFFFFFFFFFFFFFFFFFFFFFFFFFFFFFFFFFFFFFFFFFFFFFFFFFFFFF  
@A00721:190:HGJW7DSXY:4:2478:26350:22482\_1:N:0:TCTGCAAG+GCTGCACT  
CTTGGATATGATGCTATTACTCATGATGGTTACGGTCAGGGAGGATTCTCAGTTTACAAGGACCTTAA  
GCGATGGATCGGGGTTAATTCTAAAACATTACCCGAAAGACGTGCTAAATTAAACATTGTACGATG  
TCG  
+  
FFFFFFFFFFFFFFFFFFFFFFFFFFFFFFFFFFFFFFFFFFFFFFFFFFFFFFFFFFFFFFFFF  
FFFFFFFFFFFFFFFFFFFFFFFFFFFFFFFFFFFFFFFFFFFFFFFFFFFFFFFFF  
FFF  
@A00721:190:HGJW7DSXY:4:1260:1199:35978\_1:N:0:TCTGCAAG+GCTGCACT  
TCACTTTTCACTAAGAATTGGTCCTACTTTTGGACAAGGCCAACTTCGTAATCTTCATGAGATCGTTT



@A00721:190:HGJW7DSXY:4:1117:14425:33520\_1:N:0:TCTGCAAG+GCTGCACT  
GTCTAAGGTTAAAGAGTCGATTAAACAAGTTGTACTTATCAATGATTTTATCGCTGGTTGTTATCTCG  
AAAAGTCTCTTCTAAAAGGAACGTCAGTTCTAACCCAAAGAGAATATCTAAATATTTACAAAATCTT  
ACC

+

FFFFFF,FFFFFFFFF::FFFFFFFFFFFFF:FFFFFFFFFFFFFFFFFFFFFFFFFFFFFFFFFFFFF  
FFFFFFFFFFFFFFFFFFFFFFFFFFFFFFFFFFFFFFFFFFFFFFFFFFFFFFFFFFFFFFFFFFFFFFFFF  
FFF

@A00721:190:HGJW7DSXY:4:1257:7355:33865\_2:N:0:TCTGCAAG+GCTGCACT  
AGACGTTGCTTGTGCTTCCTCCTTTAATGGCACTACCTCGGTACAATCTTACTTGGAACGAAGGCGA  
CCTGTTCCGGAGTTTTTACGGGATCCGGAATGTTCTGTCTATATTAGG

+

FFFFFFFFFFFFFFFFFFFFFFFFFFFFFFFFF:FFFFFFFFFFFFFFFFF::FFFFFFFFFFFFF:FFFF  
FF:FFFFFFFFFFFFFFFFFFFFFFFFFFFFFFFFF:FF,FFFF,:FFFFFFFFF

@A00721:190:HGJW7DSXY:4:1318:28330:6527\_2:N:0:TCTGCAAG+GCTGCACT  
TCGAACGTCAACGTTACCGAGTTTCGTTTCGTACCTTGATGCTGACTTTCGTCAATATGATTTGATC  
TGGTTGCTCAATTCTAAGCGTGTTCCGCTTAGTGCGAGGCCTCTCTTC

+

FFFFFFFFFFFFFFFFFFFFFFFFFFFFFFFFF:FFFFFFFFFFFFFFFFF  
FFFFFFFFFFFFFFFFFFFF,FFFFFFFFFFFF,FFFFFFFFFFFFFFFFF

@A00721:190:HGJW7DSXY:4:1445:26865:23531\_2:N:0:TCTGCAAG+GCTGCACT  
AAATACTAGATATTTGGATGATCTTGATAAAGAACTTCATGAATTTTCAGAGGATGAAAAATTTTCTT  
CCTTGATTTTAATATAAAGAATCTTTACCAGGACTCCTACTACAGGA

+

FFFFFFFFFFFFFFFFFFFFFFFFFFFFFFFFF:FFFFFFFFFFFFFFFFF  
FFFFFFFFFFFFFFFFFFFF::FFFFFFFFF:,FFFFFFFFFFFFFFFFF

@A00721:190:HGJW7DSXY:4:2647:2003:7686\_1:N:0:TCTGCAAG+GCTGCACT  
GATCGTAAGAAGTTTATAAGGAACATATCCATTTGTTGTAATAGGGTCATCAACTTAGAACTCGAAAC  
TCTAAGTGGAATACTGTCTTTCCAAGCTTACCTGTATCTTCAATGAAATTGGACTCTTCGATAGGGG  
ACA

+

FFF:FFFFFFFFFFFFFFFFFFFFFFFFFFFFFFFFF:FFFFFFFFFFFFFFFFF  
FFFFFFFFFFFFFFFFFFFFFFFFFFFFFFFFF:FFFFFFFFFFFFFFFFF:FFFFFFFFFFFFFFFFF  
FFF

@A00721:190:HGJW7DSXY:4:2678:26838:6887\_1:N:0:TCTGCAAG+GCTGCACT  
TAAGAATACTATAAATAGAATAGCTATTACTACTAATGGCGTTGGCCTAGTGATGTTATTAGTGACA  
TCTGGTCAATTTGTTTTAGGTGGTCTTTATTCTATTATTGATTTTTATGAGATTGAGATCGGAAGA  
GCA

+

FFFFFFFFFFFFFFFFFFFFFFFFFFFFFFFFF:FFF:FFFFFFFFFFFFFFFFF:FFFFFFFFF  
FFFFFFFFF:FFFFFFFFFFFFFFFFF:FFFFFFFFFFFFFFFFF:F:FFFFFFFFFFFFF  
FFF

@A00721:190:HGJW7DSXY:4:2552:21169:12320\_2:N:0:TCTGCAAG+GCTGCACT  
TTCCTGAAGAGTCCTTCCGTAACCACTTCTTGACAATTTCTTCAATCCTTCGATAATAGTTAAATC  
TACGATTATGTCTGTGTTGAAAGACTTTCTACCGATAAGGGTCACTAG

+

FFFFFFFFFFFFFFFFFFFFFFFFFFFFFFFFF:FFFFFFFFFFFFFFFFF:FFFFFFFFF:FFFFFFF  
FFFFFFFFFFFFFFFFFFFFFFFFFFFFFFFFF

@A00721:190:HGJW7DSXY:4:1414:3676:18630\_2:N:0:TCTGCAAG+GCTGCACT  
ATCCTACATTGACTGATTATCTAAAGATTGAAGGAAAATTTTATCCTCGTTTAACTTACTTAGACTTT  
CCTACGATACAAATGATAACTTCTAATTTACGTTTGCTACTCAGAGCT

+

FFFFFFFFFFFFFFFFFFFFFFFFFFFFFFFFF:F:FFFFFFFFF:FFFFFFFFFFFFF  
FFFFFFFFFFFFFFFFFFFFFFFFFFFFFFFFF



FFFFFFFFFFFFFFFFFFFFFFFFFFFFFFFFFFFFFFFFFFFFFFFFFFFFFFFFFFFFFFFFFFFFFFFFFFFFFFFF  
FFF

@A00721:190:HGJW7DSXY:4:2315:30445:2425\_1:N:0:TCTGCAAG+GCTGCACT  
CATAACTTTTGTACCAAATTCTTGCTTTCAACGAAGTCTCTGATTTTATTAATCATTACTTTAACG  
ATCTCTCGGTCATTTACTCTGTACTTGATCTACGTCGTTTAACTGTCGGAACAACCTTTACTTAGAAT  
GAC

+

FFFFFFFFFFFFFFFF,FFFFFFFF:F:FFFFFFFFFFFFFFFF:FFFFFFFFFFFFFFFF:FF:FFFFFFFF  
FFFFFFFFFFFFFFFFFFFFFFFFFFFFFFFFFFFFFFFF:FFFFFFFFFFFFFFFFFFFFFFFFFFFFFFFF  
FFF

@A00721:190:HGJW7DSXY:4:2557:29658:8891\_2:N:0:TCTGCAAG+GCTGCACT  
TTCTTATATTATTTACAATAGTTAATATCATATTAGTAATACTCACTATCGTTTTCTGCTTTTCTTA  
GCTAATAGATTAATAAAGGATGAGTACGAAAACCAACTCTTCGTTACG

+

FFFFFFFFF:FFFFFFFFFFFFFFFFFFFFFFFFFFFFFFFFFFFFFFFF:FFFFFFFFFFFFFFFFFFFFFFFF  
FFFFFFFF:FFFFFFFFFFFFFFFFFFFFFFFF:FFFFFFFFFFFFFFFFFFFFFFFF

@A00721:190:HGJW7DSXY:4:1453:15845:5259\_1:N:0:TCTGCAAG+GCTGCACT  
TAGAATATATTTAGTCTCTACACCAATCTAACC GCGTATAACGCGATTTTCCGACCTGACCGTAATA  
CACGAAGATATCATCCGCACACGACTCGAAACCGAGACGCCGTAGATCAAAGTCCCTTCTAACTTTAG  
AT

+

F:,F,F,,:FFF,,,:::,FFF,,,:F,F,F:,F,,:FF,,,:FFF:F,F,F,F,F,:,,FF::  
,F:,::,,,:,,,:FF:FF,FFFFFFFFFFFFFFFFFFFFFFFFFFFFFFFFFFFFFFFFFFFFFFFF  
FF

@A00721:190:HGJW7DSXY:4:1642:1949:8030\_1:N:0:TCTGCAAG+GCTGCACT  
CATTTTATAGCAGTTATTTATGTTGTACTTTTTATAATTTATAACCTTCTTATACTTTTGGGTATGTT  
TTGTGAAAAACATGAGATACCCAAGTCTATCGAAGACATTATCTCTTATGTACTTATTGTAACGATCA  
TTC

+

FFFFFFFFFFFFFFFFFFFF,FFFFFFFFF:FFFFFFFFFFFFFFFFFFFFFFFFFFFFFFFFFFFFFFFFFFFF  
FFFFFF:FFFFFFFFFFFFFFFFFFFFFFFFFFFFFFFFFFFFFFFFFFFFFFFFFFFFFFFFFFFFFFFFFFFF  
FFF

@A00721:190:HGJW7DSXY:4:2210:3170:17503\_1:N:0:TCTGCAAG+GCTGCACT  
TTCTTTTATTCCTTTAACTGTGTATGAGGAGGATTTATAATGCTTTTCGATAGTGATTGTTATCAATT  
TAAATACATTACTGTTTCAAATCATCTTTACTCACAGACTCCGAAAATGGTTTCAAATGAGGTCAAAG  
CTC

+

FFFFFFFFFFFFFFF:FF,FFF:FFFFFFFFFFFFFFFFFFFFFFFFFFFFFFFFFFFFFFFFFFFFFFFFFFFF  
FFFFFFFFFFFFFFFFFFFFFFFFFFFFFFFFFFFFFFFFFFFFFFFFFFFFFFFFFFFFFFFF:FFFFFFFFFFFFFFFF  
FFF

@A00721:190:HGJW7DSXY:4:2218:27914:4961\_2:N:0:TCTGCAAG+GCTGCACT  
AACTATTATCCGATTCTTCGAGGGTATCACTACCACTGATCTGCCGACTTTAGTCAAGGAACCTCAAT  
TCCTTCGATGTTTATATTTTCTATAAGGGAAAATAGCAATAATCAAA

+

FFFFFFFFFFFFFFFFFFFFFFFFFFFFFFFFFFFFFFFFFFFFFFFFFFFFFFFFFFFFFFFFFFFFFFFFFFFF  
FFFFFFFFFFFFFFFFFFFFFFFFFFFFFFFF:FFFFFFFFFFFFFFFFFFFFFFFF

@A00721:190:HGJW7DSXY:4:1540:27859:34178\_2:N:0:TCTGCAAG+GCTGCACT  
AACTTTATTTCAGAACTCTCTCCGATCACCTTGGTGTGATCTCCCGGAGGATCTTTCAATAAGATGT  
ATGATGATAATCTACTATTTTAAATAGTGATATTCAGCGTATACTTG

+

FFFFFFFFFFFFFFFFFFFFFFFFFFFFFFFFFFFFFFFFFFFFFFFFFFFFFFFFFFFFFFFFFFFFFFFFFFFF  
FFFFFFFFFFFFFFFFFFFFFFFFFFFFFFFFFFFFFFFFFFFFFFFFFFFFFFFF

@A00721:190:HGJW7DSXY:4:1610:2266:14810\_1:N:0:TCTGCAAG+GCTGCACT  
GGCTTGCTATTTACCGCAAAAAGTTGAAGAGGTCTATGATATTTATTTACTTATACTTTAAATA







FFFFFFFFFFFFFF, :FFFFFF:FFFFFFFFFFFFFFFF, FFFFFFFFFF:F:FFFFFF:FFFF:FFF  
FFF, FFFFFFFFFFFFFFFFFF:FFFFFF, FFF, FFF:FF:FFFF:FF,,  
@A00721:190:HGJW7DSXY:4:2675:17219:33880\_2:N:0:TCTGCAAG+GCTGCACT  
TATAATTTAGGTCAACTTGGGGTTTCGAATGTCATTAGTGCCTTACGCTTGAAAGAGGTCCTTTTGAG  
TATCGACAGATCTTTCGATCTTGAGGACGTACATTAACTGGCAGAA  
+  
FFFFFFFFF:FFFF:FFFFFFFF, FFFFFFFFFF:FF:FFFFFFFFFFFFFFFFFFFFFF:FFFF:  
FFFF, FFF:FFFFFF:FFFFFFFFFFFFFFFFFFFFFF: :FFFFFF  
@A00721:190:HGJW7DSXY:4:2539:16676:16658\_2:N:0:TCTGCAAG+GCTGCACT  
ATATTGTTCCCTTCCGGGAAGTTGTGGGATTAACTTTGACTCAACTACTCCGATCAGATCCGGATGGT  
TTGATTGGTATGGACTACTCGACTTTTGATCTGGAGTTGTCTAGGGTC  
+  
FFFFFFFFFFFFFFFFFFFFFFFFFFFFFF, FFFFFFFFFFFFFFFFFFFFFFFF:FFFFFFFFFFFFFFF  
, FFFFFFFFFFFFFFFFFFFFFFFFFFFFFFFFFFFFFFFF:FFFFF  
@A00721:190:HGJW7DSXY:4:2522:2130:28322\_2:N:0:TCTGCAAG+GCTGCACT  
AATATGCAGGTCAAAGATTCTGTAGCTCTGAGGGCGGTTGAGGGAGCCGTTTTGGCCGACTTTAACTA  
TTCTAAGAGTCTTTATGATTCAAACCTATCGTTGTCTGACCTTACAA  
+  
FFFFFFFFFFFFFFFFFFFFFFFFFFFFFFFFFFFFFFFFFFFFFFFFFFFFFFFFFFFFF: , FFFFFFFFFFFFFFFF:F  
FFFF:FFFFFFFFFFFFFFFFFFFFFFFFFFFFFFFFFFFFFFFFFFFFFFFFFFFFF  
@A00721:190:HGJW7DSXY:4:1165:8341:12994\_1:N:0:TCTGCAAG+GCTGCACT  
CGCAGTTTCCAGAATTGCGTTGAAGTTCACCCATTCTATCTTGAATGCTCACGCCGTCGAGCCATA  
TCGAGACTATGTTATAATCACTTGTTAAAGTACAGATTTAGTGATTTAGATATTATTGATATTGGAGG  
CGA  
+  
FFFFFFFFFFFFFFFFFFFFFFFFFFFFFF, FFFFFFFFFFFFFFFFFFFFFFFFFFFFFFFFFFFFFFFF  
FFFFFFFFFFFFFFFFFFFFFFFFFFFF: FFFFFFFFFFFFFFFFFFFFFFFFFFFFFFFFFFFFFFFF  
FFF  
@A00721:190:HGJW7DSXY:4:2206:31801:6057\_2:N:0:TCTGCAAG+GCTGCACT  
ATCCAAAACCTCTTGAATGGAGTACATATTTGCAACCCTATTCTTGATGTGAAAGATGCATCGAGGTA  
TACGTCTAGGAACATTGATTGGGAACGTACCTACTCACGAGACGTCAT  
+  
FFFFFFFFFFFFF:FFFF:FFFFFFFFFFFFFFFFFFFFFFFFFFFFFFFFFFFFF, , F:FFF:FF:FFFFFFFFFFFF  
FFFFFFFFFFFFFFFFFFFFFFFFFFFFFFFFFFFFFFFFFFFFFFFFFFFFF:FFFFFFFFF  
@A00721:190:HGJW7DSXY:4:2670:20907:11835\_1:N:0:TCTGCAAG+GCTGCACT  
ATGTTTCGTTCTGTTACAAGAACGCTTTGGATTGTGACCATAAAGCCTCAGTTGCGATAGCTGTAGAG  
GTATACGATATCTCTCTTGATGATGTAGCCACTATAATGCTTAAGAGAGAGATTGATGTATGTCATTT  
CGT  
+  
FFFFFFFFFFFFFFFFFFFFFFFFFFFFFFFFFFFFFFFFFFFFFFFFFFFFFFFFFFFFFFFFFFFFF  
FFFFFFFFF:FFFFFFFFFFFFFFFFFFFFFFFFFFFFFFFFFFFFFFFFFFFFFFFFFFFFFFFFFFFFF  
FFF  
@A00721:190:HGJW7DSXY:4:2367:15456:6277\_1:N:0:TCTGCAAG+GCTGCACT  
GAATTATTGGACACGATGAAAAATGACATACCCGTTCTGACCTTGGTATCGTTATCCGTCATGGAGA  
TGATGGCGCATCACTTGATTACTATATGCCCGAAGGATTGGGTTATTCTCACAACAAAGATAAGATTT  
TAT  
+  
FFFFFFFFFFFFFFFFFFFFFFFFFFFFFFFFFFFFFFFFFFFFFFFFFFFFFFFFFFFFFFFFFFFFF  
FFFFFFFFFFFFFFFFFFFFFFFFFFFFFFFFFFFFFFFFFFFFFFFFFFFFFFFFFFFFF: FFFFFFFF:FFFFF  
FFF  
@A00721:190:HGJW7DSXY:4:2349:31937:15499\_1:N:0:TCTGCAAG+GCTGCACT  
TAAGGGCGGACAATTGTTCCATTGTGAACTCTTGGGGACTAGATTGAGCATTAAATGAGTTCCGAATAA  
CTCGTAATAAATCTTTCTCTAGTGGACAATTCAGAATACCTATTTCCGTACCAAGAGCCACTGCCAAT  
CTC

+  
FFFFFFFFFFFFFFFFFFFFFFFFFFFFFFFFFFFFFFFFFFFFFFFFFFFFFFFFFFFFFFFFFFFFFFFF  
FFFFFFFFFFFFFFFFFFFFFFFFFFFFFFFFFFFFFFFFFFFFFFFFFFFFFFFFFFFFFFFFFFFFFFFF  
FFF  
@A00721:190:HGJW7DSXY:4:1445:15989:22764\_2:N:0:TCTGCAAG+GCTGCACT  
AAATTTTCTCAAGAGATTATGGTTGATAAAGTTTTCTTCATAAGGGCTATTCAGTACGTCATGGGGA  
TCACTTCTTCGGTCAATGACAAAACCTTCGAATATGTTACGACATGGC  
+  
FFFFFFFFFFFFFFFFFFFF, :FFFFFFFFFFFFFF:FFFFFFF, FFFFFFF:FFFFFFFFFFFFFFFF  
FFFFFFFFFFFFFFFFFFFFFFFFFFFFFFFF:FFFFFFFFFFFFFFFFFFFFFFFF  
@A00721:190:HGJW7DSXY:4:2459:31150:5588\_2:N:0:TCTGCAAG+GCTGCACT  
AGGATTGTCATCTCGGGGAAAGTGATTCACCAAGATGTTTCATATAGATACGAGATACCTAGAGAAGGT  
CGCAGCGATCTTACTCGTTATCGGAGCTAAGAAGAAGACTTTGGGTAC  
+  
FFFFFFFFFFFFFFFFFFFF:FFFFFFFFFFFFFF, FFFFFFFFFFFFFFFFFFFFFFFFFF:FFFFFFF  
FFFFFFFFFFFFFF:FFFFFFFFFFFFFFFFFFFF, , FFF::: FFFFFFFF  
@A00721:190:HGJW7DSXY:4:2220:6659:1595\_2:N:0:TCTGCAAG+GCTGCACT  
TAACGTTAGTACCGGAGGTGATCTCTCTGCTTCTGCGTTACTGAGAGAAAAGATTCAGGACGCCTACG  
GTGACTTTATGGACAAGATGCAAGTTCTTGGGAAATACTTGTTCCT  
+  
FFFFFFFFFFFFFFFFFFFFFFFFFFFFFFFFFFFFFFFFFFFFFFFF:FFFFFFFFFFFFFF:FFFFFFFFFF  
FFFFFFF, FFFFFFFFFFFFFFFF, FFFFFFFFFFFFFFFFFFFFFFFFFF  
@A00721:190:HGJW7DSXY:4:1354:5665:33880\_1:N:0:TCTGCAAG+GCTGCACT  
CGTGTGCTCTTCCGATCTAACGAATCTTGAACTACGGTCCTTATCAAAGAAAATGGTGAACCGGTCT  
CTAAATCTTTTGAGATTGAGAAGATTGAAGAACACGTCAAGAAGTCGCTCGGCGTTGTTCTTGAAAAC  
CAA  
+  
FFFFFFFFFFFFFFFFFFFFFFFFFFFFFFFFFFFFFFFFFFFFFFFF:FFFFFFFFFFFFFF:FFFFFFFFFF  
FFFFFFFFFFFFFFFFFFFFFFFFFFFFFFFFFFFFFFFFFFFFFFFFFFFFFFFFFFFFFFFFFFFFFFFF  
FFF  
@A00721:190:HGJW7DSXY:4:1363:29351:10332\_1:N:0:TCTGCAAG+GCTGCACT  
GCTGATCATGGAGTCTTTGTACCTTCTGTCAAACCTTCGAGGTTACGTACGAGAGGTGATCCCGGATG  
TGGATTGAAGGCTGGCTCTAAGGGAGACTCCTTCTTTTTGAATGTTGTAAAGAATTGGGTTGAGAAGT  
GTG  
+  
F:, F:FF, FF, , FFFF:FF, F:FF, FFFF:, F:FFFFFFFFFFFFFFFFFFFFFFFFF:FFFFFFFFFF  
F:F, FFFFFFFFFFFFFFFF:FFFFFFFFFFFFFFF:FFFFFFF, F::FFF:F:FFFFF, FFFFFFFF:FF  
FFF  
@A00721:190:HGJW7DSXY:4:1260:3061:9204\_1:N:0:TCTGCAAG+GCTGCACT  
CTTGGTATTTCTGAAATAGTTTATCAGAGCGTCATTTTCCTTTGGGATCTTTCCTCTGGTAAGGGAAT  
TATTAATCATTCTTCTCACTCTTGACGAGAATTATTACTGTTTTCTCTACCCATAACTTCTTTTTCA  
AAA  
+  
FFFFFFF, F:FFF:FF:FFFF:FFFFFFFFFFFFFFFFFFFFFFFFFFFFFFFFFFFFFFFFFFFFF  
FFFFFFFFFFFFFFFFFFFFFF:FFFFFFFFFFFFFFFFFFFFFFFFFFFFFFFFFFFFFF:FFFFFFF:FFFFF  
F:F  
@A00721:190:HGJW7DSXY:4:2553:4978:11960\_1:N:0:TCTGCAAG+GCTGCACT  
CTGATGTTTTCTACAGAGTGCAGTCGTTTCAACACTTATCACCACCTTTGAAAGGAAAATAATTGGT  
GATGAAAATACGTATGTCGGTGGGGTTCTCAAGGCTCTCATCGCCACTGGGATTCTAAGGGGTTCCAT  
AAG  
+  
FFF:FFFFFFFFFFFFFFFFF:FFFFF, FFFFFFFFFFFFFFFFFFFFFFFFFF:FFFFFFFFFF:FF  
FFFFFFFFFFFFFFFFFFFFFF::FFF:FFF:FFFFFFFFFFFFFFFFFFFFFFFFFFFFFFFFFFFFF  
FFF

@A00721:190:HGJW7DSXY:4:1502:24542:6073\_2:N:0:TCTGCAAG+GCTGCACT  
TTTGGTCCTTACGTCTTAAGTAATTTGGATGTTGTGCGAAAACCTATCAGGTTCTTGTACGATTCTTAA  
AAGAAGTTTATTAATAAACTTCAGAGTCTCTTGGAAGTCCAGGTAGCTAA

+

:FFFFFFFFFFFFFF:FFF,FFFF:FFFFFFFFFFFFFFFFFFFFFFFFFFFFFFFFFFFFFFFFFFFF  
FFF,FFFFFFFFFFFFFF,FFFFFFFFFFFFFFFFFFFFFFFFFFFFFFFFFFFFFFFFFFFF:FFFFFF

@A00721:190:HGJW7DSXY:4:2307:24668:8735\_2:N:0:TCTGCAAG+GCTGCACT  
GGGAAAAGAGACCTCTGTTGGTAGAGGAGTTGAGAGAATTACTCAGATTCAATCTGGCATCACTGAAC  
GTCTACAACGAGTTAGGGAGTGGCTAGGTTTTAAAAGATCCTTTGCAC

+

FFFFFFFFFFFFFFFFFFFFFFFFFFFFFFFFFFFFFFFFFFFFFFFFFFFFFFFFFFFFFFFFFFFF  
FFFF:FFFFFF:FFFFFFFFFFFFFFFFFFFFFFFFFFFFFFFFFFFFFFFFFFFFFFFFFFFF

@A00721:190:HGJW7DSXY:4:2144:23095:19006\_2:N:0:TCTGCAAG+GCTGCACT  
ACGTCGCGGAAAACGATGAAGATTTCCACACTGTTGAGAAATCTTCTGATGCTGAATTTGAGGAAAAT  
TTTTCGGAAGTTTTTGGTATAAATCCTGATGGCTCAGTACAGGGAGGA

+

FFFFFFFFFFFFFFFFFFFFFFFFFFFFFFFFFFFFFFFFFFFFFFFFFFFFFFFFFFFFFFFFFFFF  
FFFF:FFFFFF:FFFFFFFFFFFFFFFFFFFFFFFFFFFFFFFFFFFFFFFFFFFFFFFFFFFF

@A00721:190:HGJW7DSXY:4:2445:1217:11021\_1:N:0:TCTGCAAG+GCTGCACT  
AACCTTCTTTTATCATTGCAACAGGACTTTGAGAAGACTGTTGAAATGGACAAAATCTGGGATCATAG  
GTATGTGTCACGCTACACTCGAAATATGGGCCCTCATAAGGAAGTATAGTTGGCGTCTTGTCTGTTGAC  
GTC

+

FFFFFFFFFFFFFFFFFFFFFFFFFFFFFFFFFFFFFFFFFFFFFFFFFFFFFFFFFFFFFFFFFFFF  
FFFFFFFFFFFFFFFFFFFFFFFFFFFFFFFFFFFFFFFFFFFFFFFFFFFFFFFFFFFFFFFFFFFF  
FFF

@A00721:190:HGJW7DSXY:4:2120:12744:36839\_1:N:0:TCTGCAAG+GCTGCACT  
TGTTTCAGGAAGATCTCTACAGAGATTATCGAGAGTTGTGATCTAGTTCTAAATTTAGGTGACGGACT  
TTAGCAACTTTAGATAAATTTCTTCCGGGCTCAATGACCTTTGCTATGTACGTGGATCTAATGCTTGG  
TGA

+

FFFFFFFFFFFFFFFFFFFF:FFFFFFFFFFFFFFFFFFFFFFFFFFFFFFFFFFFFFFFFFFFFFFFFFFFF  
FFFFFFFFFFFFFFFFFFFFFFFFFFFFFFFFFFFFFFFFFFFFFFFFFFFFFFFFFFFFFFFFFFFF  
FFF

@A00721:190:HGJW7DSXY:4:2514:13838:30060\_2:N:0:TCTGCAAG+GCTGCACT  
TATTAGTTCATGAAGTTCTTACACTTCTCGCGACTAATGTCAGCTTCACTACAAAGGCGTTACGTAAA  
GTAGTTTTTCACGCTTTATCTTAAAGCATTACCACCAAATTTAGCACTT

+

FFFFFFFFFFFFFFFFFFFFFFFFFFFFFFFFFFFFFFFFFFFFFFFFFFFFFFFFFFFFFFFFFFFF  
FFFFFFFFFFFFFF:F:FFFFFFFFFFFFFFFFFFFFFFFFFFFFFFFFFFFFFFFFFFFF:FF  
FFFFFFFFFFFF:F,FFFFFFFFFFFFFF:FFFFFFFFFF,FFFF:FFFF

@A00721:190:HGJW7DSXY:4:2608:14687:3129\_2:N:0:TCTGCAAG+GCTGCACT  
TCGCCATATCAGATTAGAGACATGCCAGTTAGAGTTCTTCTAACCAGGACTGATGGTGAGATTCTTTT  
ACCTTTTGGAGGTCCAGGAACCTTTACTCCTAGTGTCTTTTCTAGAGT

+

FFFFFFFFFFFFFFFFFFFFFFFFFFFFFFFFFFFFFFFFFFFFFFFFFFFFFFFFFFFFFFFFFFFF  
FFFFFFFFFFFFFFFFFFFFFFFFFFFFFFFFFFFFFFFFFFFFFFFFFFFFFFFFFFFFFFFFFFFF

@A00721:190:HGJW7DSXY:4:1605:9507:9345\_2:N:0:TCTGCAAG+GCTGCACT  
CGGAGGATGACAGGTGGGAGACCGCTCAATAACACTCTATTGAATCCCTTTCCACGATGAAAGCTCT  
TTATGAGGTGCTCCATGCAAATTTACAGTTCTCTTTGGTGATATCGC

+

FFFFFFFFFF:FFFFFFFF:FFFFFFFFFFFFFFFFFFFF:FFFFFFFFFFFFFFFFFFFFFFFFFFFF  
F:FFFFFFFFFFFFFFFFFFFFFFFFFFFFFFFFFFFFFFFFFFFF,FFFF:FFFF

@A00721:190:HGJW7DSXY:4:1605:9507:9345\_1:N:0:TCTGCAAG+GCTGCACT  
TTTTGATAAATTTGTTGAATCGATAATGATACTGACGAAGTTCTATTACCACCCTTGTCTTGATA

CAAACATTCTAGGTGATGCTTTCTTAGAGGCTCGTCTAGCCGCTGAGATTCTGCTTACCTATTTACAA  
TCT

+

FFFFFFFFFFFFFFFFFFFFFFFFFFFFFFFFFFFFFFFFFFFFFFFFFFFFFFFFFFFFFFFFFFFFFFFF  
FFFFFFFFF,FFFFFFFFFFFFFFFFFFFFFFFFFFFFFFFFFFFFFFFFFFFFFFFFFFFFFFFFFFFF  
FFF

@A00721:190:HGJW7DSXY:4:1510:10737:5337\_1:N:0:TCTGCAAG+GCTGCACT  
GATAACGATTTAGTACTGGGAAATGGTGGTAGTCAGTTTACTACTTTTCTTCCCTCCCCTTTTTCGA  
TTGGATTCGACGGGGTCTTCGTCTCACGACTAATTTGATAAGGTTTTCTTTTATGGGACTCTTGTTT  
GTA

+

FFFFFFFFFFFFFFFFFFFFFFFFFFFFFFFFFFFFFFFFFFFFFFFFFFFFFFFFFFFFFFFFFFFFFFFF  
FFFFFFFFF,FFFFFFFFFFFFFFFFFFFFFFFFFFFFFFFFFFFFFFFFFFFFFFFFFFFFFFFFFFFF  
FFF

@A00721:190:HGJW7DSXY:4:2666:22453:6308\_2:N:0:TCTGCAAG+GCTGCACT  
AAGTTCTTAATGTAGGTCTCCTAGTACTTAAGGGTTTATGTTTCGGTTTCAGCTGGATGGATCTTTTG  
ATGGTATGTTTACATTGCGTGATCACTTCCCGTGGACTTGGAAGAG

+

FFFFFFFFFFFFFFFFFFFFFFFFFFFFFFFFFFFFFFFFFFFFFFFFFFFFFFFFFFFFFFFFFFFFFFFF  
FFFFFFFFF,FFFFFFFFFFFFFFFFFFFFFFFFFFFFFFFFFFFFFFFFFFFFFFFFFFFFFFFFFFFF

@A00721:190:HGJW7DSXY:4:1330:7184:4100\_1:N:0:TCTGCAAG+GCTGCACT  
CGATTCTATTATGTCGCTAAAGCCTGTCCAGTTGTTCGATGATGTTTCGGGCTGTGGGGATTAACCTCCC  
TCGTGAAACTTACGACGATGTTCTCGCTCGCATTTACAAGGATTACTAAGTCTGAGATCTGCCACTT  
CTA

+

FF,FFFFFFFF:FF:,F:FF,F,,:FFFF:F:FF:FFF,F,:FFFF,FF,FFF,F,,FFFF:FFFF  
FF,F:F,F,FFF:F:F:FFFFFF,FFF:FFFFFF:FF:F,F,FFFFFFFF:F:FFFFFFFFFFFF  
FF:

@A00721:190:HGJW7DSXY:4:2109:28718:36135\_1:N:0:TCTGCAAG+GCTGCACT  
TCTGTTTCATGAGGATGTCTTGGTCGAAAAATATCGCCGGGAACCTCTAATAGAGGATCCTGATGACAT  
TATTTCAACGATACCGATCTCAGTTCTACCACAGAAACCGTCTCAGGAAGTGTCTCCACTGATTCGG  
AAT

+

FFFFFFFFFFFF,FFFFFF:FFF:FFFFFFFFFFFFFFFFFFFFFFFFFFFFFFFFFFFFFFFFFFFF  
FFFFFFFFFFFFFFFFFFFFFFFFFFFFFFFFFFFFFFFFFFFFFFFFFFFFFFFFFFFFFFFFFFFFFFFF  
FFF

@A00721:190:HGJW7DSXY:4:1545:25337:12524\_2:N:0:TCTGCAAG+GCTGCACT  
CGACCTTCTTGTGGGACTGAGACCTCTGAATTTTCAGGGTGCCCTGATGAGGACGTTGAAAGGGATA  
ATTTCAACTCTGAGACTTCTAAGAGTGTTCAAAAGACCAGAAACGTA

+

FFFFFFFFFFFFFFFFFFFFFFFFFFFFFFFFFFFFFFFFFFFFFFFFFFFFFFFFFFFFFFFFFFFF,FFFFFF  
FFFFFFFFFFFFFFFF:FFFFFF:FFFFFFFFFFFFFFFFFFFFFFFFFFFFFFFF

@A00721:190:HGJW7DSXY:4:1676:1398:20666\_1:N:0:TCTGCAAG+GCTGCACT  
AAAGGTAGGAAGGGGAGAAAACAGAACAGCGAGCGTTGAAGAGAAAAGTATGTTTGCAGGCTGA  
TCGTACCCCAATTCTGCTAGAAAGATCACTCTCGGCGATACCACTGATCTTCCAGAGTTACGTAGTG  
GTC

+

F,FFF:FFFFFFFF:FF:F:FFF:FF:FFF:FFFFFFFFFFFF,FFFFFFFFFFFFFFFFFFFF  
FFFFFFFFFFFF:FFFFFFFFFFFF:FFFFFFFFFFFFFFFFFFFFFFFFFFFF,FFFFFFFFFFFFFFFF  
FFF

@A00721:190:HGJW7DSXY:4:1561:30373:22905\_1:N:0:TCTGCAAG+GCTGCACT  
TTTTATCAAAGAGAAAGTTTCTGCTAGTCGCGACGATAGTATTTATCGGAGTGATATTAACAAGTTAA  
ACTTCGAACTGACCACTTACAAGAGTGTGAGTACCGCAACATGGATCAGTTTTCAAAAAGCTATT  
AAT

```

+
FFFFFFFFFFFFFFFFFFFFFFFF:FFFFFFFFFFFFFFFFFFFFFFFF,FFFFFFFFFFFFFFFFFFFFFFFFFFFFFFFFFFFFFFFF
FFFFFFFFFFFFFFFFFFFFFFFFFFFFFFFFFFFFFFFFFFFFFFFFFFFFFFFFFFFFFFFFFFFFFFFFFFFFFFFFFFFFFFFF
FFF
@A00721:190:HGJW7DSXY:4:1654:18936:23516_1:N:0:TCTGCAAG+GCTGCACT
ACTGAATCCACTCTCTTGGGATATAAATGAGTACATCTATAATAGAGTTTTGGAACTGTGTAATGTCC
TACGTACTGTTCAAGGTGTTTGGGCTTCTCTAAAGAACAGCAACTTTCAACATGAATTAGTTATTGAA
AGT
+
FFFFFFFFFFF,FFFFFFF:FFFFFFFFFFFFFFFF:FFFFFFFFF:FFFFFFFFFFFFFFFFFFFFFFFFFFFFFFFF:FF:F
FFFFFFFFFFFFFFFFFFFFFFFFFFFFFFFFFFFFFFFFFFFFFFFFFFFFFFFFFFFFFFFFFFFFFFFFFFFFFFFF
FFF
@A00721:190:HGJW7DSXY:4:2542:25907:1924_1:N:0:TCTGCAAG+GCTGCACT
AACCTTTCTCTCGTTCTTCATGAAGATCTTCGAGTGTTTTATAGTGAGTTATTCTTGCGAAGGTTCAAG
TCGATTGATTTTGTTGACTACGATCTCTCTTGTATAAGAAGTTCTTCGCAGTTGAATCTCCACCAGG
TGG
+
FF:FF,FFFFFFF:FFFFFFFFFFFFFFFFFFFFFFFFFFFFFFFFFFFFFFFF,FFFFFFFFFFFFFFFFFFFFFFFF
F:F:FFFFFFFFFFFFFFFFFFFFFFFFFFFFFFFFFFFFFFFF:FFFFFFFFFFFFFFFFFFFFFFFFFFFFFFFF
FFF
@A00721:190:HGJW7DSXY:4:2226:27181:14121_2:N:0:TCTGCAAG+GCTGCACT
GCGACTTTTGTGCAATTTTCGCAAAAGGTCTTGAAGTACGTATTGTCACTGCTAATCGTAATTCGCG
AGAAGAGATAGTGACTAAAGTTTTGGCACTTCTAGTTCATCGCGGTAT
+
FFFFFFFFFFFFFFFFFFFFFFFFFFFFFFFF:FFFFFFFFFFFFFFFFF:FFFFFFFFFFFFFFFFFFFFFFFF
FFFFFFFFFFFFFFFFFFFFFFFFFFFFFFFF:FFFFFFFFFFFFFFFFFFFFFFFFF:
@A00721:190:HGJW7DSXY:4:2452:26946:12336_2:N:0:TCTGCAAG+GCTGCACT
CGTGAAAGTTATGATGAGTGATCGTATTAGAACAGCTGATTCTTATTGCATGAACGTCGCTGAGGTCA
AACCTGTGGACGTTCTTTTCATCGACGAATTATTCATGATTCACGCTG
+
FFFFFFFFFFFFFFFFFFFFFFFFFFFFFFFFFFFFFFFFFFFFFFFFFFFFFFFFFFFFFFFFFFFFFFFFFFFFFFFF
F:F:FFFFFFFFFFFFFFFFFFFFFFFFFFFFFFFFFFFFFFFFFFFFFFFFFFFFFFFF
@A00721:190:HGJW7DSXY:4:2206:22761:10723_2:N:0:TCTGCAAG+GCTGCACT
CATCTACTTAAGGCGGCTTATACCATAGGTTACGGTGATTCCAATCAAATCGGATTCATCAATCGTAT
TGATCTCCAAGTCGCAAACTACTTCAACATCAACGACATCATTCTTGA
+
FFFFFFFFFFFFFFFFFFFFFFFFFFFFFFFFFFFFFFFFFFFFFFFFFFFFFFFFFFFFFFFFFFFFFFFFFFFFFFFF
FFFFFFFFF:FFFFFFFFFFFFFFFFF
FFFFFFFF:FFFFFFFFFFFFFFFF:FFFFFFF:FF::FFFF:F:FFFFFF
@A00721:190:HGJW7DSXY:4:1112:30644:9283_1:N:0:TCTGCAAG+GCTGCACT
TTATCGAAGTCTCAGTTATCGCTGCCCGGCCGACGTTTGTGCGCAACTCTCAGAGGTTTACGGCAGAA
AAATTTCTCCTGCTTGTAATTCGAGAGAGGACACTATGGAAATTAGACCTATCAGATGTCTTGACGAC
TTC
+
FFFFFFFFFFFFFFFFFFFFFFFFFFFFFFFFFFFFFFFFFFFFFFFFFFFFFFFFFFFFFFFFFFFFFFFFFFFFFFFF
FFFFFFFFFFFFFFFFFFFFFFFFFFFFFFFFFFFFFFFFFFFFFFFFFFFFFFFFFFFFFFFFFFFFFFFFFFFFFFFF
FFF
@A00721:190:HGJW7DSXY:4:2515:4833:17409_2:N:0:TCTGCAAG+GCTGCACT
TATTACTTTCACTCAAGGTGAAAAGTTTGAAATTAACAAAGTCCTTGTTAAGAGTAAGGTTAAATGTG
AAGATGCTCAGACTATTATCATGAAGTTCAAGGTAATACTTACCAGCAGC
+
FFFFFFFFFFFFFFFFFFFFFFFFFFFFFFFFFFFFFFFFFFFFFFFFFFFFFFFFFFFFFFFFFFFFFFFFFFFFFFFF
FFFFFFFFFFFFFFFFFFFFFFFFFFFFFFFFFFFFFFFFFFFFFFFFFFFFFFFFFFFFFFFFFFFFFFFF
@A00721:190:HGJW7DSXY:4:1646:10899:18865_1:N:0:TCTGCAAG+GCTGCACT
ACAAACACATATTACCGTTGCTCTATCACGACACGTTGAATCTTTACGATACTTTGTTATCAATGTAA

```

AGTTAAACGATGCTACTTGTGAGAGGATCAATCACAGTAAGGAACTGTCACGTTTAGCACGGGAGGTT  
GCA

+

FFFF:FFFFFF:FFFFFFFFFFFFFFFFFFFFFFFFFFFFFFFFFFFFFFFFFFFFFFFFFFFFFFFFFFFFFFFF:FFFF  
FFFFFFFFFFFF:FFFFFFFFFFFFFFFFFFFFFFFFFFFFFFFFFFFFFFFFFFFFFFFFFFFFFFFFFFFFFFFF  
FFF

@A00721:190:HGJW7DSXY:4:1358:4354:19993\_2:N:0:TCTGCAAG+GCTGCACT  
TATATCGAGGCTATCGAGGACGATGAGTATCTTGAAGTTGTTGACGACAAGCCTCAAGAGGGTAGAGG  
ACCACCTGGATCTTCTACTGTCTCTGCCTTCCAAGATTTCTTAGAAGA

+

FFFFFFFFFFFFFFFFFFFF::FFFFFFFFFFFFFF:FF:FFFF,FFFFFFFFFFFFFF,FFFFFFFFFFFF,FFF:FFF  
FFFFFFFFFFFF, :FFFF, F::FFFF, FFF, FFFF, FFFF, :FFF:F

@A00721:190:HGJW7DSXY:4:2472:2745:1485\_1:N:0:TCTGCAAG+GCTGCACT  
AACCACCTTAACGTCACTCGGTAATCTTTTCAGCCGAATTAAGTACTAATGAGTTCAAGTCGGTTGTGCG  
ATCGAATTAAGATCAAGGCTAATACCTTTATAGGTAAGAAGCCCCTTGAGCCGCGTAGTCAGCGCGTT  
TAG

+

FFFFFFFF:F,FFFFFFFFFFFFFFFFFFFFFFFFFFFFFFFFFFFFFFFFFFFFFFFFFFFFFFFFFFFFFFFF:F  
FFFFFFFFFFFFFFFFFFFFFFFFFFFF,FFFFFFFFFFFFFFFFFFFFFFFFFFFFFFFFFFFFFFFFFFFFFFFF  
FFF

@A00721:190:HGJW7DSXY:4:2639:16432:3051\_1:N:0:TCTGCAAG+GCTGCACT  
TACCGAGTCTCCAAGAGAATATTTATTCTTATGAGGCTCGAACTTCAACGTTTTTCAACCGGAAAGA  
CATATCGCACCCGAAATTTTTGGGCAGAATGCTCTTAACGCGGTTCTTGAACGGTGTTTTGATCAGTC  
TAA

+

:FFFFFFFFFFFFFFFFFFFFFFFFFFFFFFFFFFFFFFFFFFFFFFFFFFFFFFFFFFFFFFFFFFFFFFFFFFFF  
FFF,FF:FFFFFFFFFFFFFFFFFFFFFFFFFFFFFFFFFFFFFFFFFFFFFFFFFFFFFFFFFFFFFFFFFFFF  
FFF

@A00721:190:HGJW7DSXY:4:1623:2049:36542\_1:N:0:TCTGCAAG+GCTGCACT  
ATAGGAGACTCAGTTAACCTGAGAGCTCCTCAATTGATAGATTGGGTCAACAATAGGGACGCTAGTAT  
ACTTCGTAAAGTCGACAGCGAAATGGTCAATATTGATAATTGGACCGACTATATGACCTATTTTAAGC  
TCA

+

FFFFF:FFFFFFFFFFFFFFFFFFFFFFFFFFFFFFFFFFFFFFFFFFFFFFFFFFFFFFFFFFFFFFFFFFFF  
FFFFFFFFFFFFFFFFFFFFFFFFFFFF:FFFFF:FFFFFFFF:F:FFFFFFFFFFFFFFFFFFFFFFFFFFFF  
FFF

@A00721:190:HGJW7DSXY:4:1577:10719:10066\_2:N:0:TCTGCAAG+GCTGCACT  
CTAAGGTAAACTTGATGCTTCAGCCTTTTCGAAGCATAACCCCGCACAGAATATCGTTTATCACGCA  
AAATTTATTAATGCAATTTTCGGACCTATCTTTAAGGTTCTTGTGAGG

+

FFFFFFFFFFFFFFFFFFFFFFFFFFFFFFFFFFFFFFFFFFFFFFFFFFFFFFFFFFFFFFFFFFFFFFFFFFFF:FFFFFFFFF  
FFFFFFFFFFFFFFFFFFFF,FFFFFFFFFFFFFFF:FFFFFFFFF:FFFFFFF

@A00721:190:HGJW7DSXY:4:2428:10176:18490\_1:N:0:TCTGCAAG+GCTGCACT  
CAGTGACGATTTCTCCCGGAAGCTCTTCTCTCTCTTAGGAGGTCATGATGACTACTATAAGGGTGAAA  
TCGATTTTTCGAAGTTTGACAAATCTCAAGATTTCTTTTGTAAGCCTATGAGATAAAGATGTATTCT  
TAT

+

FFFFFFFFF:FFFFFFFFFFFFFFFFFFFFFFFFFFFFFFFFFFFFFFFFFFFFFFFFFFFFFFFFFFFFFFFFFFFF  
FFFFF:FFF:FFFFFFFFFFFFFFFFFFFFFFFFFFFFFFFFFFFFFFFFFFFFFFFFFFFFFFFFFFFFFFFFFFFF  
FFF

@A00721:190:HGJW7DSXY:4:2505:19895:8202\_2:N:0:TCTGCAAG+GCTGCACT  
AACTTAGGAGTCCAAGTGAATATTTTTGACACGCCATGAGTATCCATAACGATTAGTCAATTACCACC  
ATTGATCAACGACGAAGTGGAACGGCCAACACTTTATTTGGTAATTGT

+

FF,F,,:F,F:,F,,:F,FFFF:F,F,,,FFF,FF,,,::,,F,F:FFFFF,:FF,,,FF,,FFF,FFF  
,F,,,FF,F,FFF,FFFFF,FF,FFF,FF,FFFFF,:FFFFFFFFF,,  
@A00721:190:HGJW7DSXY:4:1441:10556:33677\_1:N:0:TCTGCAAG+GCTGCACT  
GATGATTTTATCACTTTATTATGACCTTGGAAGTTTTTCGGCTGTGGTTGTCGCTGGGGACGATTCCA  
TTCTGTTTTCAAAGACTCCAATAACTGATCATTCTGATCATATGATTTTGGACAATGGTTTCGAAGCG  
AAA

+  
FFFFFFFFFFFFFFFFFFFFFFFFFFFFFFFFFFFFFFFFFFFFFFFFFFFFFFFFFFFFFFFFFFFFFFFF  
:FFFFFFFFFFFFFFFFFFFFFFFFFFFFFFFFFFFFFFFFFFFFFFFFFFFFFFFFFFFFFFFFFFFFFFFF  
FFF

@A00721:190:HGJW7DSXY:4:1369:24144:32315\_1:N:0:TCTGCAAG+GCTGCACT  
CTTTACAAGATCATCGTTAAGTTAGGTAAACCCCTAACCGATGTTACTCTTGTAGGACTTTGGGAGAG  
ATTCGTTAGTTTTAAAGACTATACTAAATATCTCCACTACGAGGTTGTTGTTTGGCGATTAGCTCTTG  
CGA

+  
FFFFF::FFFFFFFFFFFF::FFFFFFFFFFFFF:FFFFFF,FFFFFFFFFFFFFFFFFFFFFFFFFFFF  
F:FFFFFFFFFFFFFFFFFFFFFFFFFFFFFFFFFFFFFFFFFFFFF:FF:FFFFFFFFFFFFFFFFFFFFF  
:FF

@A00721:190:HGJW7DSXY:4:2638:10610:7811\_2:N:0:TCTGCAAG+GCTGCACT  
ATTGAGGGTCGTTATACCTATTCGGCTATCTGTGCTTTGAATTGTATAAGATCAAATTTTAAACGATT  
CCGAGAGGTTTATCCTGATGTGGAGGGAGTTCTTGAAGCATCCCGACC

+  
FFFFFFFFFFFFFFFFFFFFFFFFFFFFFFFFFFFFFFFFFFFFFFFFFFFFFFFFFFFFFFFFFFFFF:FFFFF:F:FFF  
FFFFFFFFFFFFFFFFFFFFFFFFFFFFFFFFFFFFFFFFFFFFFFFFFFFFFFFFFFFFFFFFFFFFF:FFFFF

@A00721:190:HGJW7DSXY:4:2260:25500:16877\_2:N:0:TCTGCAAG+GCTGCACT  
GGTTTCATAAGATTATCAGTAATCCTGATTCTACTACGGATTCATGGACCTCCATCCTGTACCTCTT  
CTGGAGAGACGTATCTCAAAGATCGACTTCGAGACAGGTGATATTGTT

+  
FFFFFFFFFFFFFFFFFFFFFFFFFFFFFFFFFFFFFFFFFFFFFFFFFFFFFFFFFFFFFFFFFFFFF  
FFFFFFFFFFFFFFFFFFFFFFFFFFFFFFFFFFFFFFFFFFFFFFFFFFFFFFFFFFFFFFFFFFFFF

@A00721:190:HGJW7DSXY:4:1449:10004:30373\_1:N:0:TCTGCAAG+GCTGCACT  
ACCAAGATCTAAATTCGGTAACGGTGCGTGCGCTTTATTTTAAAAAGCTCCCTCCTCTCGCAAGTTT  
GATCTGATACTTATCACGAAAGGACTTGAGTCTTTTGATCAGTCTCTGACTTGACCATCTTTTATTTT  
AAA

+  
F,F,FFFFFFFFFFFFFFFFFFFFFFFFF:FFFFF::FFFFFFFFFFFFF:FFFFF:FF,FFFFFF:FFFFF  
FFFFFFF,FFFFFFFFF:FFF:FFF:FFFFFFFFFFFFFFFFFFFFFFFFFFFFFFFFFFFFF:F:FFFFFFFFF  
FF:

@A00721:190:HGJW7DSXY:4:1430:23710:36699\_2:N:0:TCTGCAAG+GCTGCACT  
TTTCTTCTTTGTTTCCTTCTTTGCACTGATTTTCTCATCAGCTTGTTTACCTAATCTGTGTTT  
TTACGATAACAACCTATCAGTTGATTAAGACTCTTCCGAAAGGCGAACT

+  
,FFFFFFFFFFFFFFFFFFFFFFFFFFFFFFFFFFFFFFFFFFFFFFFFFFFFFFFFFFFFFFFFFFFFF  
FFFFFFFFFFFFFFFFFFFFFFFFFFFFFFFFFFFFFFFFFFFFF:FFFF:FFFFFFF

@A00721:190:HGJW7DSXY:4:2336:18240:25254\_2:N:0:TCTGCAAG+GCTGCACT  
GAAGCTCAGGGTGAAGCACAACGTTTGACCGTGACGAAGTGTGGTGTCTTGATCTACGTTACGGATA  
TACTCTCCTTGAGTTCACTCGTAAGGACACTACCACTTATTACGATAT

+  
FFFFFFFFFFFFFFFFFFFFFFFFFFFFFFFFFFFFFFFFFFFFFFFFFFFFFFFFFFFFFFFFFFFFF  
FFFFFFFFFFFFFFFFFFFFFFFFFFFFFFFFFFFFFFFFFFFFFFFFFFFFFFFFFFFFF

@A00721:190:HGJW7DSXY:4:2224:12002:28166\_1:N:0:TCTGCAAG+GCTGCACT  
AGCGTCTTCTGTTTCATCGCAACCAGATGATATCTTCTATTGCACTTATGTTTCGATCAGTGTTTCTT  
CTATCAGGAGGAAAACACTTGTTCTAGTCCTTGTAAGATTAATCCTAACGTAGAAGATTGTTGTTTAC  
CAC

[illegible]



@A00721:190:HGJW7DSXY:4:2470:24569:22905\_1:N:0:TCTGCAAG+GCTGCACT  
CTTGCAAGTACTGGAGTTCAGACGTGTGCTCTTCCGATCTGGCAAACCTTACCCTGATTCCGGCCGG  
TGGTAGCTCATTTCTACCAGGGGCTATTACTCTTGCTGAAACAGCTATTAAAGCTGTTGAGCGGGTAA  
TTA

+

FFFFFFFFFFFFFFFFFFFFFFFFFFFFFFFFFFFFFFFFFFFFFFFFFFFFFFFFFFFFFFFFFFFFFFFF  
FFF:FFFFFFFF:FFFFFFFFFFFFFFFFFFFFFFFFFFFFFFFFFFFFFFFFFFFFFFFFFFFFFFFF  
FFF

@A00721:190:HGJW7DSXY:4:1139:20726:29403\_2:N:0:TCTGCAAG+GCTGCACT  
ATCGCTGAAGGATGTGCACTCTTTTCTGCTACTTTAACGGAGCGTAGTGTACTCTTCGTGATTGTAT  
CAACAGTAACATTACTTCTAATAAAGGTCTCTATCAAGCTCGTATTAT

+

FFFFF:F:FFFFFFFFFFFFFFFFFFFFFFFFFFFFFFFFFFFFFFFFFFFFFFFFFFFFFFFFFFFF  
FFFFFFFFFFFFFFFFFFFFFFFFFFFFFFFFFFFFFFFFFFFFFFFFFFFFFFFFFFFFFFFF

@A00721:190:HGJW7DSXY:4:1101:6587:4758\_1:N:0:TCTGCAAG+GCTGCACT  
TTACCGTTGAAGGCTAAACTCCAAGGTAATTATGAAGACTGTGATTTATCTTTCCTGCTGCTTGT  
TGAGGGTGTCTTAATCGTAACATTAATAATTTCAATCTTCTTAAAAAGAAGATAGAGAGTCATACTT  
TGG

+

F,FFFFFFFFFFFFFFFFFFFFFFFFFFFFFFFFFFFFFFFFFFFFFFFFFFFFFFFFFFFFFFFFFFFF  
FFFFFFFFFFFFFFFFFFFFFFFFFFFFFFFFFFFFFFFFFFFFFFFFFFFFFFFFFFFFFFFFFFFF  
FFF

@A00721:190:HGJW7DSXY:4:2247:29803:17315\_2:N:0:TCTGCAAG+GCTGCACT  
GATAGCCAATATTGAAGTGGACACCTCTGGTAGTATCGAAGTAAAGATAACCAATAAGGAAGGAGCTT  
ATACTATGGTTGAATCAACTAAGCATACTACTTTTGCTTTGATTACTC

+

:FFFFFFFFFFFFFFFFFFFFFFFFFFFFFFFFFFFFFFFFFFFFFFFFFFFFFFFFFFFFFFFFFFFF  
FFFFFFFFFFFFFFFFFFFFFFFFFFFFFFFFFFFFFFFFFFFFFFFFFFFFFFFFFFFFFFFF

@A00721:190:HGJW7DSXY:4:1527:5068:13369\_1:N:0:TCTGCAAG+GCTGCACT  
GTCTAAGGTTAAAGAGTCGATTAAACAAGTTGTACTTATCAATGATTTTATCGCTGGTTGTTATCTCG  
AAAAGTCTCTTCTAAAAGGAACGTCAGTTCTAACCCAAAGAGAATATCTAAAATATTTACAAAATCTT  
ACC

+

FF,FFFFFFFFFFFFFFFFFFFFFFFFFFFFFFFFFFFFFFFFFFFFFFFFFFFFFFFFFFFFFFFFFFFF  
FFFFFFFFFFFFFFFFFFFFFFFFFFFFFFFFFFFFFFFFFFFFFFFFFFFFFFFFFFFFFFFFFFFF  
FFF

@A00721:190:HGJW7DSXY:4:1261:2510:3834\_2:N:0:TCTGCAAG+GCTGCACT  
AGACGTTGCTTGTGCTTCTCTTTAATGGCACTACCTCGGTACAATCTTACTTGAACGAAGGCGA  
CCTGTTCCGGAGTTTTTACGGGATCCGGAATGTTCTGTCTATATTAGG

+

FFFFFFFFFFFFFFFFFFFFFFFFFFFFFFFFFFFFFFFFFFFFFFFFFFFFFFFFFFFFFFFFFFFF  
FFFFFFFFFFFFFFFFFFFFFFFFFFFFFFFFFFFFFFFFFFFFFFFFFFFFFFFFFFFF::FFF:F

@A00721:190:HGJW7DSXY:4:1323:7898:20525\_2:N:0:TCTGCAAG+GCTGCACT  
TCGAACGTCAACGTTACCGAGTTTCGTTTCGTACCTTGATGCTGACTTTCGTCAATATGATTTGATC  
TGGTTGCTCAATTCTAAGCGTGTTCGCTTAGTGCGAGGCCTCTCTTC

+

FFFFFFFFFFFFFFFFFFFFFFFFFFFFFFFFFFFFFFFFFFFFFFFFFFFFFFFFFFFFFFFFFFFF  
:F:FFFFFF:FFFFFFFFFFFFFFFFFFFF,FFFFFFFFFFFFFFFFFFFFFFFF

@A00721:190:HGJW7DSXY:4:1523:16604:32189\_2:N:0:TCTGCAAG+GCTGCACT  
AAATACTAGATATTTGGATGATCTTGATAAAGAACTTCATGAATTTTCAGAGGATGAAAAATTTCTT  
CCTTGGATTTTAAATATAAAGAATCTTTACCAGGACTCTACTACAGGA

+

:FF:F,:FFFFFFFFFFFFFFFF:F:FF::FFFFFFFF,FF,:FFFF,F:FFFF,FFF:F:FFFFFF,FF  
,FF:F:FFFFFFFFFFFF:FFFFFFFFFFFF::F:F,:FFF,F:FF,F



@A00721:190:HGJW7DSXY:4:2124:27001:31125\_2:N:0:TCTGCAAG+GCTGCACT  
ACCACATTTTGGTCAAGTCAATCCGTTGAGAAAATTTCTTAGAGGATATTCGCCATTGTGGTACGAAT  
TGGTCCAACATTTACCACCAAATTCTTTTGATACAACCTCTAGCCTTCA

+

FFFFFF, :FFFFFFFFFFFFF:F:F,FFFFFFFFFFFFF:FFF,F,:F,FFFF:FFF:F,F,FFFF,:FF  
FFFFFF:FF::F:FFF:F,F:FFFF,FFFF:FFFFFFFF,,F:,FF,,F

@A00721:190:HGJW7DSXY:4:1557:11586:11851\_2:N:0:TCTGCAAG+GCTGCACT  
ACCAGATTGGTTCGAACCCGTTGATGCTATGTCAGAAGAAGCTATTCAAGCTTGTCGTTTAAAGACTG  
CAGAGGCTGTCAAACAAGCCCAGACTCAAGGAGTCCAATCAAAGGTTT

+

FFFFFFFFFFFFFFFFFFFFFFFFFFFFFFFFFFFFFFFFFFFFFFFFFFFFFFFFFFFFFFFFFFFFFFFF  
FFFFFFFFFFFFFFFFFFFFFFFFFFFFFFFFFFFFFFFFFFFFFFFFFFFFFFFFFFFFFFFFFFFFFFFF

@A00721:190:HGJW7DSXY:4:2415:3812:11005\_1:N:0:TCTGCAAG+GCTGCACT  
TTATTTAGAGATCTTTTCTACTTACAAAGGACAATTCAGTTTCATTAATTCTACGAAAAGTCCGGAG  
TATATTGTATGTTAATAGATAGTGGGATAATAGTTCTACCGATACGTAGTGAACGCGTTTCGTAGAACC  
AAG

+

FF:FFFFFFFFFFFFFFFFF,FFFFFFFF:,F:FFFFFFFFFFFFFFFFFFFFFFFFFFFFFFFFFFFFFFFF  
FFF:FFFFFFFFFFFF:FFFFFFFFFFFFFFFFFFFFF:FFFF,FFFFFFFFF::FFFFFFFFFFFFFFFFF  
FFF

@A00721:190:HGJW7DSXY:4:1232:16432:30921\_1:N:0:TCTGCAAG+GCTGCACT  
ACCGATAGGAGTTGTATAGTTGAAGATGTGGCTTTAGACGATAATCCTTTAAGGACTATGTTGACTGA  
CGAAGATTTTCCAACAGATTTGTCTACGTTGCAGATCGCCACTCCAAACACTATATACATTATAAAAT  
ATA

+

FFFFFFFFFFFFFFFFFFFFFFFFFFFFFFFFFFFFFFFFFFFFFFFFFFFFFFFFFFFFFFFFFFFFFFFF  
FFFFFFFFFFFFFFFFFFFFF:FFFFFFFFFFFFFFFFFFFFFFFFFFFFFFFFFFFFFFFFFFFFFFFFFFFF  
FFF

@A00721:190:HGJW7DSXY:4:2544:2718:36824\_1:N:0:TCTGCAAG+GCTGCACT  
CATAACTTTTGTTACCAAATTCCTGGCTTCAACGAAGTCTCTGATTTTATTAATCATTACTTTAACG  
ATCTCTCGTCAATTTACTCTGTACTTGATCTACGTCGTTTAACTGTGGAACAACCTTTACTTAGAAT  
GAC

+

FF:FFFFFFFFFFFFFFFFFFFFFFFFFFFFFFFFFFFFFFFFFFFFFFFFFFFFFFFFFFFFFFFFFFFF  
FFFFF,FFFFFFFFFFFFFFFFFFFFFFFFFFFFFFFFFFFFFFFFFFFFFFFFFFFFFFFFFFFFFFFFFFFF  
FFF

@A00721:190:HGJW7DSXY:4:2614:32551:10300\_2:N:0:TCTGCAAG+GCTGCACT  
TTCTTATATTATTTACAATAGTTAATATCATATTAGTAATACTCACTATCGTTTTCTGCTTTTCTTA  
GCTAATAGATTAATAAAGGATGAGTACGAAAACCAACTCTTCGTTACG

+

FFFFFFFFFFFFFFFFFFFFF:FFFFFFFFFFFFFFFFF,FFFFFFFFFFFFFFFFFFFFFFFFFFFFFFFF  
FFFF:FFFFFFFFFFFFF:FFF:FFFFFFFFFFFFF:FFFFFFFFFFFFF

@A00721:190:HGJW7DSXY:4:2153:9679:31720\_1:N:0:TCTGCAAG+GCTGCACT  
TAGAATAGATTTAGTCTATACACCCAAATCAACGTGTATAACGCTATTTTCCGTCCTCAACTTAATA  
CACTAATAGATCATCCGAAAACGACTCGAAACCGAGACGCCGTAGATCAAAGTCCCTTCTAACTTTAG  
AT

+

FF,F,FF,:FFF,,,,:,F::FF:,,,,,:,F:,F:FF:,,,,,FFF,F,,:F:F,F:,,,FF:F  
:::,F,,,F::,FFF,F:FFFFFFFFFFFFFFFFFFFFFFFFFFFFFFFFFFFFFFFFFFFFFFFFFFFF  
FF

@A00721:190:HGJW7DSXY:4:2205:10013:28103\_1:N:0:TCTGCAAG+GCTGCACT  
CATTTTATAGCAGTTATTTATGTTGTAATTTTATAATTTATAACCTTCTTATACTTTTGGGTATGTT  
TTGTGAAAAACATGAGATACCCAAGTCTATCGAAGACATTATCTCTTATGTACTTATTGTAACGATCA  
TTC

[illegible]





@A00721:190:HGJW7DSXY:4:1510:22761:2863\_2:N:0:TCTGCAAG+GCTGCACT  
ACATATTTGCAACCCTATTCTTGATGTGAAAGATGCATCGAGGTATACGTCTAGGAACATTGATTGGG  
AACGTACCTACTCACGAGACGTCATGAAAGCTATCGGAGGGAAGCAAA

@A00721:190:HGJW7DSXY:4:1228:9019:11819\_1:N:0:TCTGCAAG+GCTGCACT  
TTACAAGAACGCTTTGGATTGTGACCATAAAGCCTCAGTTGCGATAGCTGTAGAGGTATACGATATCT  
CTCTTGATGATGTAGCCACTATAATGCTTAAGAGAGAGATTGATGTATGTCATTTGCTCTTAGTTTGT  
CCC

@A00721:190:HGJW7DSXY:4:2252:12500:26365\_2:N:0:TCTGCAAG+GCTGCACT  
GACACGATGAAAAATGACATACCCGTTCTGACCTTGGTATCGTTATCCGTCATGGAGATGATGGCGC  
ATCACTTGATTACTATATGCCCGAAGGATTGGGTTATTCTCACAA

@A00721:190:HGJW7DSXY:4:2636:24153:18239\_1:N:0:TCTGCAAG+GCTGCACT  
TAAGGGCGGACAATTGTTCCATTGTGAACCTTTGGGGACTAGATTGAGCATTAAATGAGTTCCGAATAA  
CTCGTAATAAATCTTTCTCTAGTGGACAATTCAGAATACCTATTTCCGTACCAAGAGCCACTGCCAAT  
CTC

@A00721:190:HGJW7DSXY:4:1458:2121:22294\_2:N:0:TCTGCAAG+GCTGCACT  
AAATTTTCTCAAGAGATTATGGTTGATAAAGTTTCTTCATAAGGGCTATTACGTACGTCATGGGA  
TCACTTCTTCGGTCAATGACAAAACCTTCGAATATGTTACGACATGGC

@A00721:190:HGJW7DSXY:4:2459:32190:5447\_2:N:0:TCTGCAAG+GCTGCACT  
AGGATTGTCATCTCGGGGAAAGTGATTCACCAAGATGTTTCATATAGATACGAGATACCTAGAGAAGGT  
CGCAGCGATCTTACTCGTTATCGGAGCTAAGAAGAAGACTTTGGGTAC

@A00721:190:HGJW7DSXY:4:2448:5936:19820\_2:N:0:TCTGCAAG+GCTGCACT  
TAACGTTAGTACCGGAGGTGATCTCTCTGCTTCTGCGTTACTGAGAGAAAAGATTACGGACGCCTACG  
GTGACTTTATGGACAAGATGCAAGTTCTTGGAATACTTGTTTCCCT

@A00721:190:HGJW7DSXY:4:2345:32805:2942\_1:N:0:TCTGCAAG+GCTGCACT  
CGTGTGCTCTTCCGATCTAACGAATCTTGAACTACGGTCCTTATCAAAGAAAATGGTGAACCGGTCT  
CTAAATCTTTTGAGATTGAGAAGATTGAAGAACACGTCAAGAAGTCGCTCGGCGTTGTTCTTGAAAC  
CAA

```

+
FFFFFFFF,FFFFFF,:F:FFFFFFFF,FFF,FF:FFFF:FFF,FFFFFFFFFFFFFFFFFFFFFFFFFFFF,FF

```

:FFFF,F:FFFFFF:FF::FFFFFFFFFFFFFFFFFFFFFFFFFFFFFFFFFFFFFFFF:FFFFFFFF  
FFF

@A00721:190:HGJW7DSXY:4:1476:14109:31532\_1:N:0:TCTGCAAG+GCTGCACT  
GCTGATCATGGAGTCTTTGTACCTTCTGTCAAACCTTCGAGGTTTCTGCTACGAGAGGTGATCCCGGATG  
TGGATTGAAGGCTGGCTCTAAGGGAGACTCCTTCTTTTGAATGTTGTAAAGAATTGGGTTGAGAAGT  
GTG

+

FFFFFFF:FFFFFFF:FFFFFFFFFFFF,FFFFFFFFFFFF:FFFFFFFFFFFFFFFFFFFFFFFFFFFF  
FFFFFFFFFFFFFFFFFFFFFFFFFFFFFFFFFFFFFFFF:FFFFFFFFFFFFFFFFFFFFFFFFFFFFFFFFFFFF  
FFF

@A00721:190:HGJW7DSXY:4:1446:3640:32847\_1:N:0:TCTGCAAG+GCTGCACT  
CTTGGTATTTCTGAAATAGTTTATCAGAGCGTCATTTTCTTTGGGATCTTTCCTCTGGTAAGGGAAT  
TATTAAATCATTCTTCTCACTCTTGACGAGAATTATTACTGTTTTCTCTACCCATAACTTCTTTTCA  
AAA

+

FFFFFFFFFFFF,FFFFFFFFFFFFFFFFFFFFFFFFFFFFFFFFFFFFFFFFFFFFFFFFFFFFFFFFFFFF  
FFFFFFFFFFFFFFFFFFFFFFFFFFFFFFFFFFFFFFFFFFFFFFFFFFFFFFFFFFFFFFFFFFFFFFFFFFFF  
FFF

@A00721:190:HGJW7DSXY:4:2615:26241:5290\_1:N:0:TCTGCAAG+GCTGCACT  
CTGATGTTTTCTACAGAGTGCAGTCGTTTCAACACTTATCACCACCTTTGAAAGGAAAATAATTGGT  
GATGAAAATACGTATGTCGGTGGGGTTCTCAAGGCTCTCATCGCCACTGGGATTCTAAGGGGTTCCAT  
AAG

+

FFFFFFFFFFFFFFFFFFFFFFFFFFFF,FFFFFFFFFFFFFFFFFFFFFFFFFFFFFFFFFFFFFFFFFFFF  
FFFFFFFFFFFFFFFFFFFFFFFFFFFFFFFFFFFFFFFFFFFFFFFFFFFFFFFFFFFFFFFFFFFFFFFFFFFF  
FFF

@A00721:190:HGJW7DSXY:4:1504:29098:17566\_2:N:0:TCTGCAAG+GCTGCACT  
TTTGGTCCTTACGTCTTAAGTAATTTGGATGTTGTGCAAACTATCAGGTTCTTGTACGATTCTTAA  
AAGAAGTTTATTAACAACTTCAGAGTCTCTTGAAGTCCAGGTAGCTAA

+

FFFFFFFFFFFFFFFFFFFFFFFFFFFF:FFFFFFFFFFFFFFFFFFFFFFFFFFFFFFFFFFFFFFFFFFFF  
FFFFFFFFFFFFFFFFFFFFFFFFFFFFFFFFFFFFFFFFFFFFFFFFFFFFFFFFFFFFFFFFFFFFFFFFFFFF

@A00721:190:HGJW7DSXY:4:2339:14714:20369\_2:N:0:TCTGCAAG+GCTGCACT  
GGGAAAAGAGACCTCTGTTGGTAGAGGAGTTGAGAGAATTACTCAGATTCAATCTGGCATCACTGAAC  
GTCTACAACGAGTTAGGGAGTGGCTAGGTTTTAAAGATCCTTTGCAC

+

FFFFF,FFFFFFFFFFFFFFFFFFFFFFFFFFFFFFFFFFFFFFFFFFFFFFFFFFFFFFFFFFFFFFFFFFFF  
FFFFFFFFFFFFFFFFFFFFFFFFFFFFFFFFFFFFFFFFFFFFFFFFFFFFFFFFFFFFFFFFFFFFFFFFFFFF

@A00721:190:HGJW7DSXY:4:1220:3043:7294\_2:N:0:TCTGCAAG+GCTGCACT  
CGTCGCGGAAAACGATGAAGATTTCCACACTGTTGAGAATCTTCTGATGCTGAATTTGAGGAAAATT  
TTTCGGAAGTTTTTGGTATAAATCCTGATGGCTCAGTACAGGGAGGAG

+

FFFFFFF:FFFFFFFFFFFFFFFFFFFFFFFFFFFF:FFFFFFFFFFFFFFFFFFFF:FFFFFFFFFFFFFFFFFFFF  
FFFF:FFFF,FFFFFFFFFFFFFFFFFFFFFFFFFFFFFFFFFFFFFFFFFFFFFFFFFFFFFFFFFFFF

@A00721:190:HGJW7DSXY:4:2532:7862:13009\_1:N:0:TCTGCAAG+GCTGCACT  
AACCTTCTTTTATCATTGCAACAGGACTTTGAGAAGACTGTTGAAATGGACAAAATCTGGGATCATAG  
GTATGTGTCACGCTACACTCGAAATATGGGCCCTCATAAGGAAGTATAGTTGGCGTCTTGTCTGTTGAC  
GTC

+

FF:FFFFFFFFFFFFFFFFFFFFFFFFFFFFFFFFFFFFFFFFFFFFFFFFFFFFFFFFFFFFFFFFFFFF  
FFFFFFFFFFFFFFFFFFFFFFFFFFFF:FF:FFFFFFFFFFFFFFFFFFFFFFFFFFFFFFFFFFFFFFFFFFFF  
FFF

@A00721:190:HGJW7DSXY:4:2121:13268:1297\_1:N:0:TCTGCAAG+GCTGCACT  
TGTTTCAGGAAGATCTCTACAGAGATTATCGAGAGTTGTGATCTAGTTCTAAATTTAGGTGACGGACT



TTAGCAACTTTAGATAAATTCTTTCCGGGCTCAATGACCTTTGCTATGTACGTGGATCTAATGCTTGG  
TGA

+

FFFFFFFFFFFF,FFFFFFFFFFFF,FFFFFFFFFFFFFFFFFFFFFFFFFFFFFFFFFFFFFFFFFFFF  
FFFFFFFFFFFFFFFFFFFF:FF:FFFFFFFFFFFFFFFFFFFF:FFFFFFFFFFFFFFFFFFFF  
FFF

@A00721:190:HGJW7DSXY:4:2634:9625:14841\_2:N:0:TCTGCAAG+GCTGCACT  
TATTAGTTCATGAAGTTCTTACACTTCTCGCGACTAATGTCAGCTTCACTACAAAGGCGTTACGTAAA  
GTAGTTTTACGCTTTATCTTAAAGCATTACCACCAAATTTAGCACTT

+

FFFFFF:FFFFFFFFFFFFFFFFFFFF:FFFFFFFFFFFFFFFFFFFFFFFFFFFFFFFFFFFF:FFFFFFFFFFFF  
F:FFFFFFFFFFFFFFFFFFFFFFFFFFFF:FFFFFFF:FF,FFFFFFF,  
@A00721:190:HGJW7DSXY:4:2654:21459:14450\_2:N:0:TCTGCAAG+GCTGCACT  
TCGCCATATCAGATTAGAGACATGCCAGTTAGAGTTCTTCTAACCAGGACTGATGGTGAGATTCTTTT  
ACCTTTTGGAGGTCCAGGAACCTTTACTCCTAGTGTCTTTTCTAGAGT

+

FFFFFFFFFFFFFFFFFFFFFFFFFFFFFFFFFFFFFFFFFFFFFFFFFFFFFFFFFFFFFFFFFFFF  
FFFFFFFFFFFFFFFFFFFFFFFFFFFFFFFFFFFFFFFFFFFF:FFFFFFF  
@A00721:190:HGJW7DSXY:4:1663:24062:5963\_2:N:0:TCTGCAAG+GCTGCACT  
CGGAGGATGACAGGTGGGAGACCGCTCAATAACACTCTATTGAATCCCTTTCCACGATGAAAGCTCT  
TTATGAGGTGCTCCATGCAAATTTACAGTTCCTCTTTGGTGATATCGC

+

FFFFFFFFFFFFFFFFFFFFFFFFFFFFFFFFFFFFFFFFFFFFFFFFFFFFFFFFFFFFFFFFFFFF  
FFFFFFFFFFFFF:FFFFF,F:FFFFFFFFF,FFFFFFFFFFFFF:F  
@A00721:190:HGJW7DSXY:4:1663:24062:5963\_1:N:0:TCTGCAAG+GCTGCACT  
TTTTGATAAATTTGTTGGAATCGATAATGATACTGACGAAGGTTCTATTACCACCCTTGTCATTGATA  
CAAACATTCTAGGTGATGCTTTCTTAGAGGCTCGTCTAGCCGCTGAGATTGCTCTTACCTATTTACAA  
TCT

+

FFFFFFFFFFFFFFFFFFFFFFFFFFFFFFFFFFFFFFFFFFFFFFFFFFFFFFFFFFFFFFFFFFFF  
FFFFFFFFFFFFFFFFFFFFFFFFFFFFFFFFFFFFFFFFFFFFFFFFFFFFFFFFFFFFFFFFFFFF,  
FFF  
@A00721:190:HGJW7DSXY:4:2170:10936:2581\_1:N:0:TCTGCAAG+GCTGCACT  
GATAACGATTTAGTACTGGGAAATGGTGGTAGTCAGTTTACTACTTTTCTTTCCCTCCCTTTTTTCGA  
TTGGATTCGACGGGGTCTTCGTCTCACGACTAATTTGATAAGGTTTTCTTTTATGGGACTCTTGTTT  
GTA

+

FFFFFFFFFFFFFFFFFFFF:FFFFFFFFFFFFFFFFFFFFFFFFFFFFFFFFFFFFFFFFFFFF  
FFFFFFFFFFFFFFFFFFFFFFFFFFFFFFFFFFFFFFFFFFFFFFFFFFFFFFFFFFFFFFFFFFFF  
FFF  
@A00721:190:HGJW7DSXY:4:1532:15953:6136\_2:N:0:TCTGCAAG+GCTGCACT  
AGTTCTTAATGTAGGTCTCCTAGTACTTAAGGGTTTATGTTTCGGTTTCAGCTGGATGGATCTTTTGA  
TGGTATGTTTCACATTGCGTGATCACTTCCCGTGGACTTGGAAGAGA

+

FFFFFFFFFFFFFFFFFFFFFFFFFFFFFFFFFFFF:FFFFFFFFFFFFFFFFFFFFFFFFFFFFFFFFFFFF  
FFFFFFFFFFFFF:FFFFFFFFFFFFFFFFFFFF:FFFFFFFFFFFF:FFF  
@A00721:190:HGJW7DSXY:4:1464:2609:29747\_1:N:0:TCTGCAAG+GCTGCACT  
CGATTCTATTATGTCGCTAAAGCCTGTCCAGTTGTCGATGATGTTTCGGGCTGTGGGGATTAACCTCCC  
TCGTGAAACTTACGACGATGTTCTCGCTCGCATTTACAAGGATTACTAAGTCTGAGATCTGCCACTT  
CTA

+

FFFFFFFFFFFFFFFFFFFFF:FFFFFFF:FFFFFFFFFFFFFFFFFFFFFFFFFFFFFFFFFFFF:FFFF  
FFFFFFFFF:FFFFFFFFFFFFFFFFFFFF:FFFFFFFFFFFFFFFFFFFFFFFFFFFFFFFFFFFF  
FF:

$+$ 

+

+

+

+

+

+

+

[illegible]

@A00721:190:HGJW7DSXY:4:1109:24912:13197\_1:N:0:TCTGCAAG+GCTGCACT  
CGTGAAAGTTATGATGAGTGATCGTATTAGAACAGCTGATTCTTATTGCATGAACGTCGCTGAGGTCA  
AACCTGTGGACGTTCTTTTCATCGACGAATTATTCATGATTCACGCTGGTCAGACCCTTTTCTTACA  
CAT

+

FFFFFFFFFFFFFFFFFFFFFFFFFFFFFFFFFFFFFFFFFFFFFFFFFFFFFFFFFFFFFFFFFFFFFFFF  
FFFFFFFFFFFFFFFFFFFFFFFFFFFFFFFFFFFFFFFFFFFFFFFFFFFFFFFFFFFFFFFFFFFFFFFF:FFFF  
FFF

@A00721:190:HGJW7DSXY:4:1574:7636:23140\_2:N:0:TCTGCAAG+GCTGCACT  
GTTACGGTGATTCCAATCAAATCGGATTCATCAATCGTATTGATCTCCAAGTCGAAACTACTTCAAC  
ATCAACGACATCATTCTTGATGAGTGTCGTTCTTATCGAAGTCTCAGT

+

FFFFFFFFFFFFFFFFFFFFFFFFFFFFFFFFFFFFFFFFFFFFFFFFFFFFFFFFFFFFFFFFFFFFFFFF  
FFFFFFFFFFFFFFFFFFFFFFFFFFFFFFFFFFFFFFFFFFFFFFFFFFFFFFFFFFFFFFFFFFFFFFFF:FF

@A00721:190:HGJW7DSXY:4:1502:23041:5791\_2:N:0:TCTGCAAG+GCTGCACT  
CGGCCGACGTTTGTGCGGAACTCTCAGAGGTTTACGGCAGAAAAATTTCTCCTGCTTGTAATTCGAGA  
GAGGACACTATGGAAATTAGACCTATCAGATGTCTTGACGACTTCGAA

+

FFFFFFFFFFFFFFFFFFFFFFFFFFFFFFFFFFFFFFFFFFFFFFFFFFFFFFFFFFFFFFFFFFFFFFFF  
FFFFFFFFFFFFFFFFFFFFFFFFFFFFFFFFFFFFFFFFFFFFFFFFFFFFFFFFFFFFFFFFFFFFFFFF:FF

@A00721:190:HGJW7DSXY:4:2532:22299:8359\_2:N:0:TCTGCAAG+GCTGCACT  
TATTACTTTCACTCAAGGTGAAAAGTTTGAAATTAACAAAGTCCTTGTAAGAGTAAGGTTAAATGTG  
AAGATGCTCAGACTATTCATGAAGTTCAAGTAATACTTACCAGCAGC

+

FFFFFFFFFFFFFFFFFFFFFFFFFFFFFFFFFFFFFFFFFFFFFFFFFFFFFFFFFFFFFFFFFFFFFFFF  
FFFFFFFFFFFFFFFFFFFFFFFFFFFFFFFFFFFFFFFFFFFFFFFFFFFFFFFFFFFFFFFFFFFFFFFF:FFFFF:F:

@A00721:190:HGJW7DSXY:4:2432:31376:3129\_1:N:0:TCTGCAAG+GCTGCACT  
CAAACACATATTACCGTTGCTCTATCACGACACGTTGAATCTTTACGATACTTTGTTATCAATGTAAA  
GTTAAACGATGCTACTTGTGAGAGGATCAATCACAGTAAGGAACTGTCACGTTTAGCACGGGAGGTTG  
CA

+

FF:FFFFFFFFFFFFFFFFFFFFFFFFFFFFFFFFFFFFFFFFFFFFFFFFFFFFFFFFFFFFFFFFFFFF  
FFFFFFFFFFFFFFFFFFFFFFFFFFFFFFFFFFFFFFFFFFFFFFFFFFFFFFFFFFFFFFFFFFFFFFFF  
FF

@A00721:190:HGJW7DSXY:4:2218:5086:7513\_2:N:0:TCTGCAAG+GCTGCACT  
TATATCGAGGCTATCGAGGACGATGAGTATCTTGAAGTTGTTGACGACAAGCCTCAAGAGGGTAGAGG  
ACCACCTGGATCTTCTACTGTCTCTGCCTTCCAAGATTTCTTAGAAGA

+

FF:FFFFFFFFFFFFFFFFFFFFFFFFFFFFFFFFFFFFFFFFFFFFFFFFFFFFFFFFFFFFFFFFFFFF  
FFFFFFFFFFFFFFFFFFFFFFFFFFFFFFFFFFFFFFFFFFFFFFFFFFFFFFFFFFFFFFFFFFFFFFFF

@A00721:190:HGJW7DSXY:4:1120:14760:1501\_2:N:0:TCTGCAAG+GCTGCACT  
ACCACCTTAACGTCAGTCAATCTTTCAGCCGAATTAAGTACTAATGAGTTCAAGTCGGTTGTCGA  
TCGAATTAAGATCAAGGCTAATACCTTTATAGGTAAGAAGCCCCTTGA

+

FFFFFFFFFFFFFFFFFFFFFFFFFFFFFFFFFFFFFFFFFFFFFFFFFFFFFFFFFFFFFFFFFFFFFFFF  
FFFFF:FFFFFFFFFFFFFFFFFFFFFFFFFFFFFFFFFFFFFFFFFFFFFFFFFFFFFFFFFFFFFFFF

@A00721:190:HGJW7DSXY:4:2655:16161:11162\_1:N:0:TCTGCAAG+GCTGCACT  
ACCGAGTCTCCAAGAGAATATTTATTCTTATGAGGCTCGAACTTCAACGTTTTCACAACGGAAAGAC  
ATATCGCACCCGAAATTTTGGGCAGAATGCTCTTAACGCGTTCTTGAACGGTGTTTTGATCAGTCT  
AA

+

FFFF:FFFFF,FFFFFFFFFFFFFFFFFFFFFFFFFFFFF:,FF:FF,FFFF:,:FFFFFFFFF:FFFFF,FF  
FFFFFFFFF:FFFFFFFFFFFFF:FFFFFFFFF:FFFFFFFFFFFFFFFFFFFFFFFFFFFFFFFFFFFFF:,:FFF  
FF

@A00721:190:HGJW7DSXY:4:2375:15130:26725\_1:N:0:TCTGCAAG+GCTGCACT  
ATAGGAGACTCAGTTAACCTGAGAGCTCCTCAATTGATAGATTGGGTCAACAATAGGGACGCTAGTAT  
ACTTCGTAAAGTCGACAGCGAAATGGTCAATATTGATAATTGGACCGACTATATGACCTATTTTAAGC  
TCA

+

F:::F,FFFF:FFFF,FFFFFFFFFFFFFFF:FFF:FFFFFFF,FFFFF,FFF:F,FFFF,F,FFFF  
FFFFFF:FFF:FFFFFFF:FFFFFFFFF:FFFF,FFFF,F,FFF:FFFFFFFFFFFFF::F:, ,FFFFFF  
F:F

@A00721:190:HGJW7DSXY:4:2254:17309:4476\_2:N:0:TCTGCAAG+GCTGCACT  
CTAAGGTAAACTTGATGCTTCAGCCTTTTCGAAGCATAACCCCGCACAGAATATCGTTTATCACGCA  
AAATTTATTAATGCAATTTTCGGACCTATCTTTAAGGTTCTTGTGAGG

+

FFFFFFFFF:F,FFFFFF:FF:FFFFFFFFFFFFFFFFFFFFFFFFFFFFFFFFF,FF:FFFFFFFFFFFFF  
FFF:FFFF::FFF:FF:FFFF:F:FFFFFF:FFFFFFFFFFFFFFFFF

@A00721:190:HGJW7DSXY:4:2555:26928:10050\_1:N:0:TCTGCAAG+GCTGCACT  
CAGTGACGATTTCTCCCGGAAGCTCTTCTCTCTCTTAGGAGGTCATGATGACTACTATAAGGTTGAAA  
TCGATTTTTCGAAGTTGACTAATCTCAAGATTTCTTTGTAAAGCCTATGAGATAAAGATGTATTCT  
TAT

+

FF:F:FF,,FFFFFF:F,,F,:F:FFFF,FF:, ,FFFFFF:FFFF,F,F::F:,FFFF:, ,F:,FF  
F,FFFFFFF:,FF,FFFFFF,:FFFF,, ,F:FFF,FFFFFFFF:FF,: ,F:F:,FFF,FFF:FF:FFF  
FFF

@A00721:190:HGJW7DSXY:4:1119:22544:9032\_2:N:0:TCTGCAAG+GCTGCACT  
TTGGAGTGCCAGTGAATATTTTTGTCACGCCAGGAGTATCCATAACGATTTGTCATTTACCACCTTTG  
CTCAACGACGAAGTGGAACGGCCAACACTTTCTTTGGTAATTGTATGA

+

FFFFFFFFFFFFFFFFFFFFFFFFFFFFFFFFFFFFFFFFFFFFFFFFFFFFFFFFFFFFFFFFF:FF  
FFF:FFFFFFFFFFFFFFFFFFFFFFFFFFFFFFFFF,FFFFF,FFFFFFF

@A00721:190:HGJW7DSXY:4:1135:22200:8187\_2:N:0:TCTGCAAG+GCTGCACT  
ATTTTATCACTTTATTATGACCTTGAAAGTTTTCGGCTGTGGTTGTCGCTGGGGACGATTCCATTCT  
GTTTTCAAAGACTCCAATAACTGATCATTCTGATCATATGATTTTGA

+

FFFFFFFFFFFFFFFFFFFFFFFFFFFFFFFFFFFFFFFFFFFFFFFFFFFFFFFFFFFFFFFFF,FFFFFFFF  
FFFFFFFFFFFFFFF:FFFFFFFFFFFFFFFFFFFFFFFFFFFFFFFFFFFFFFF:F

@A00721:190:HGJW7DSXY:4:2120:10059:32002\_1:N:0:TCTGCAAG+GCTGCACT  
CTTTACAAGATCATCGTTAAGTTAGGTAAACCCCTAACCGATGTTACTCTTGTAGGACTTTGGGAGAG  
ATTCGTTAGTTCTAAAGACTATACTAAATATCTCCACTACGAGTTGTTGTTTGGCGATTAGCTCTTG  
CGA

+

FFFFFFFFFFFFFFFFFFFFFFFFF:FFFFFFFFFFFFFFF:FFFFFFFFFFFFFFFFFFFFFFFFFFFFF  
FFFFFFFFFFFFF,FFFFFFFFFFFFFFFFFFFFFFFFFFFFFFFFFFFFFFFFFFFFFFFFFFFFF  
FFF

@A00721:190:HGJW7DSXY:4:2673:12418:29763\_2:N:0:TCTGCAAG+GCTGCACT  
ATTGAGGGTCGTTATACCTATTCGGCTATCTGTGCTTTGAATTGTATAAGATCAAATTTTAAACGATT  
CCGATAGGTTTATCCTGATGTGGAGGGAGTTCTTGAAGCATCCCGACC

+

FFF,FF,FF:,FFFFFFFFF,:F,F:,FF:F:F::FFF,FFFF,FFFFF,FF:FFFFFFFFFFFFFFFFF  
FF,F,FF,FFFF::FFFF:FFFFFFF,FF:FFF:F,,FF::FFFF

@A00721:190:HGJW7DSXY:4:2421:28230:27712\_2:N:0:TCTGCAAG+GCTGCACT  
GGTTTCATAAGATTATCAGTAATCCTGATTCTACTACGGATTATGGACCTTCCATCCTGTACCTCTT  
CTGGAGAGACGTATCTCAAAGATCGACTTCGAGACAGGTGATATTGTT

+

FFFFFFFFFFFFFFFFFFFFFFFFFFFFFFFFFFFFFFFFFFFFFFFFFFFFFFFFFFFFF:FFFFFFFFFFFFFFFFFFFFF  
FFFFFFFFFFFFFFFFFFFFFFFFF,FFFFFFFFFFFFFFFFFFFFFFFFF,FFFF

@A00721:190:HGJW7DSXY:4:1528:32859:30718\_1:N:0:TCTGCAAG+GCTGCACT  
ACCAAGATCTAAATTCGGTAACGGTGCGTGCGCTTTATTTTAAAAAGCTCCCTCCTCTCGCAAGTTT  
GATCTGATACTTATCACGAAAGGACTTGAGTCTTTTGATCAGTCTCTGACTTGACCATCTTTCATTTT  
AAA

+

FFFF:FF:FFF:FFFFFFFFFFFFFFFFFFFFFFFFFFFFFFFFFFFFFFFFFFFFFFFFFFFFFFFFFFFF  
FFFFFFFFFFFFFFFFFFFFFFFFFFFFFFFFFFFFFFFFFFFFFFFFFFFFFFFFFFFFFFFFFFFFFFFFFFFF  
FFF

@A00721:190:HGJW7DSXY:4:1539:31665:14027\_2:N:0:TCTGCAAG+GCTGCACT  
TTTCTTCTTTGTTTCCTTCTTTGCACTGATTTTTCCTCATCAGCTTGTGTTTACCTAATCTGTGTTT  
TTACGATAACAACATCATGTTGATTAAGACTCTTCCGAAAGGCGAACT

+

FFFFFFFFFFFF,FFFFFFFFFFFFFFFFFFFFFFFFFFFFFFFFFFFFFFFFFFFFFFFFFFFFFFFFFFFF  
FFFF:FFFFFFFF,FFFFFFFFFFFFFFFFFFFFFFFFFFFFFFFFFFFFFFFFFFFFFFFFFFFFFFFFFFFF,FF

@A00721:190:HGJW7DSXY:4:2551:23873:20885\_2:N:0:TCTGCAAG+GCTGCACT  
GAAGCTCAGGGTGAAGCACACGTTTGACCGTGACGAACTGTGGTGTCTTGATCTACGTTACGGATA  
TACTCTCCTTGAGTTCACCTCGTAAGGACACTACCCTTATTACGATAT

+

FFFFFFFFFFFFFFFFFFFFFFFFFFFFFFFFFFFFFFFFFFFFFFFFFFFFFFFFFFFFFFFFFFFFFFFFFFFF  
FFFFFFFFFFFFFFFFFFFFFFFFFFFFFFFFFFFFFFFFFFFFFFFFFFFFFFFFFFFFFFFFFFFFFFFFFFFF

@A00721:190:HGJW7DSXY:4:2371:4300:20462\_1:N:0:TCTGCAAG+GCTGCACT  
AGCGTCTTCTGTTTCATCGCAACCAGATGATATCTTCTATTCTGAACCTTATGTTTCGATCAGTGTCTTCTT  
CTATCAGGAGGAAAACACTTGTTCTAGTCCTTGTAAGATTAATCCTAACGTAGAAGATTGTTGTTTAC  
CAC

+

FFFFFFFFFFFFFFFFFFFFFFFFFFFFFFFFFFFFFFFFFFFFFFFFFFFFFFFFFFFFFFFFFFFFFFFFFFFF  
FFFFFFFFFFFFFFFFFFFFFFFFFFFFFFFFFFFFFFFFFFFFFFFFFFFFFFFFFFFFFFFFFFFFFFFFFFFF  
FFF

@A00721:190:HGJW7DSXY:4:1210:12500:16532\_1:N:0:TCTGCAAG+GCTGCACT  
TCTCTATTTTAAAGTTTTGTCTTCTTGTGTTGTCTTATTCTATTAATCACTCATTTTAGTGAGATTATT  
AAAAACGCACTAAAACGTCTTCGACAACAGCAGGGGTTTTCGAATAGTGATAGCCACCCGCTTACAG  
AGG

+

FFFFFFFFFFFFFFFFFFFFFFFFFFFFFFFFFFFFFFFFFFFFFFFFFFFFFFFFFFFFFFFFFFFFFFFFFFFF  
FFFFFFFFFFFFFFFFFFFFFFFFFFFFFFFFFFFFFFFFFFFFFFFFFFFFFFFFFFFFFFFFFFFFFFFFFFFF  
FFF

@A00721:190:HGJW7DSXY:4:2339:26268:20556\_2:N:0:TCTGCAAG+GCTGCACT  
GACTTTGGTACCACCTTTTCTACTGTCTGTCTCGCCTCTTCTAATGAAGTTTAAATGCTTAACAACAA  
TGATAGTGAATTTATACCTACAATAATTGTTTTTTCTAATAATGATTA

+

FF,F:,F,FFFFFFFF:,,F,FF,F:,:,:FF:F,FFFF,FF,FF,,FF,F,F:FFFF,:FF,FFFF  
F,FFF,,FFF,:,,F:F,,,:F,FFF,F,:F,FFFF:FFFFFF,,FF,F

@A00721:190:HGJW7DSXY:4:1166:11080:3145\_1:N:0:TCTGCAAG+GCTGCACT  
GTGACTGGAGTTCAGACGTGTGCTCTTCCGATCTGTGAGGAGGATTCTCAGTTTACAAGGACCTTAA  
GCGATGGATCGGGGTTAATTCTAAAACATTACCCGAAAGACGTGCTAAATTAACCATTGTACGATG  
TCG

+

FFFFFFFFFFFFFFFFFFFFFFFFFFFFFFFFFFFFFFFFFFFFFFFFFFFFFFFFFFFFFFFFFFFFFFFFFFFF  
FFFFFFFFFFFFFFFFFFFFFFFFFFFFFFFFFFFFFFFFFFFFFFFFFFFFFFFFFFFFFFFFFFFFFFFFFFFF  
FFF

@A00721:190:HGJW7DSXY:4:1271:7780:17002\_1:N:0:TCTGCAAG+GCTGCACT  
TCACTTTTCTAAGAATTGTTCTACTTTTGGACAAGTCCAACCTTCGTAATCTTCATGAGATCGTTT  
CTTTCTTTATCTCTTTGTTGTTAGGGATTTTGAGAGAGTGAAAGGCTTCAATTGTAGTGTTTGGTC  
GTT

+  
:FF,FFFF::FFF,FFFF:F::,,FFFF,F:FFF,,F:FFFFFFFF,FFFFFFFF:FFF  
FFF:FFF:FFFFFFFF:FFFFFFFFFFFFFFFF:FFFFFFFFFFFFFFFF:FFFFFFFF:FFFFFFF  
FFF  
@A00721:190:HGJW7DSXY:4:1571:26124:18897\_2:N:0:TCTGCAAG+GCTGCACT  
ACCTCTACGCAAAGATATTTTCATGAAAACACAGAGGAACGTACCGGATTACCTGTCTTTCATATTAT  
GAATGAACCTTCGGCCGCTCTCTTTGCTTCGATGTTGGATGTCAAGAA  
+  
FFFFFFFFFFFFFFFFFFFFFFFFFFFFFFFFFFFFFFFF,FFFFFFFFFFFFFFFFFFFFFFFFFFFFFFFF  
FFFFFFFFFFFFFFFFFFFFFFFF:FFFFFFFFFFFFFFFFFFFFFFFFFFFFFFFF  
@A00721:190:HGJW7DSXY:4:2276:14000:16939\_1:N:0:TCTGCAAG+GCTGCACT  
ATTCCTACGTAGTTTATGACTTTGGTGGTGGTACTTTTCGATACTTCTATCGTCTTACGTTACGGTAAT  
TACTATAGTGTTATTTATTCTGGTGGTGGTATGATAATCTTGGAGGTCGTGACGTTGATGAAGCTATAAG  
AGC  
+  
FFFFFFFF:FFFFFF,F:FFFF:FFFFFFFFFFFFFFFFFFFFFFFFFFFFFFFFFFFFFFFFFFFFFFFF  
FFFFFFFFFFFFFFFFFFFFFFFF:FFFFFFFFFFFFFFFFFFFFFFFFFFFFFFFFFFFFFFFFFFFFFFFF:FF  
FFF  
@A00721:190:HGJW7DSXY:4:2146:22408:32941\_2:N:0:TCTGCAAG+GCTGCACT  
CACAACCTTTCAGTTTCACAACGAAGGAGGAGTTTCTGTTACTGGAAAACCCTCGTCAATACTTTTC  
AATAATATACGTCTTGAACCTCACTTATGACGATCTAGAGAAATTAACG  
+  
FFFFF:F::F,FF,,FF:FF:,F::,FF:F::F,F:F,FFFF::,F:FF,:,,F:FFFF,FFFF,F  
FFFFFFFF,F,,F,,FFFF,,F,F:FF:FF,FFFF,,,,FFFF,FF  
@A00721:190:HGJW7DSXY:4:2527:7310:8328\_1:N:0:TCTGCAAG+GCTGCACT  
CTTGACAGAGTGACTGGAGTTCAGACGTGTGCTCTTCCGATCTGGCAAACCTTACCCTGATTCCGGCCGG  
TGAGTCTCATTTCTACCAGGGGCTATTACTCTTGCTGAAACAGCTATTAAAGCTGTTGAGCGGGTAA  
TTA  
+  
FFFFFFFFFFFFFFFFFFFFFFFFFFFFFFFFFFFFFFFFFFFFFFFFFFFFFFFFFFFFFFFF,FFFFFFFF  
,FF:FFFFFFFF:FFFFFFFFFFFFFFFF:FFFFFFFFFFFFFFFFFFFFFFFF,FFFFFFFFFFFFFFFF  
FFF  
@A00721:190:HGJW7DSXY:4:1139:20808:27853\_2:N:0:TCTGCAAG+GCTGCACT  
ATCGCTGAAGGATGTGCACTCTTTTCTGCTACTTTAACGGAGCGTAGTGTACTCTTCGTCGATTGTAT  
CAACAGTAACATTACTTCTAATAAAGGTCTCTATCAAGCTCGTATTAT  
+  
FFFFFFFFFFFFFFFFFFFFFFFFFFFFFFFFFFFFFFFFFFFFFFFFFFFFFFFFFFFFFFFFFFFFFFFF  
FFFFFFFFFFFFFFFFFFFFFFFFFFFFFFFFFFFFFFFFFFFFFFFFFFFFFFFFFFFFFFFF  
@A00721:190:HGJW7DSXY:4:1110:24804:35931\_1:N:0:TCTGCAAG+GCTGCACT  
TTACCGGTGAAGGCTAAACTCCAAGGTAATTATGAAGACTGTGAGTTATCTTTCCTGCTGCTGCTGCT  
TGAGGGTGTCTTCTAATCGTAACATTAATAATTTCAATCTTCTTAAAAAGAAGATAGAGAGTCATACTT  
TGG  
+  
F::FFF,,F,FF,F,F,FF,FF,,F:,F:F,FFFF,FF,,,FFFF,,:F,FF,FFFFFFFFFFFFFF  
FFFFFF:F:F,F:F:FFFFFFFFFFFFFFFF,F,FF,FFF:FF,FFF:FFFFFF:FFFFFFFFFFFFFF  
FF:  
@A00721:190:HGJW7DSXY:4:2359:31024:23156\_2:N:0:TCTGCAAG+GCTGCACT  
GATAGCCAATATTGAAGTGGACACCTCTGGTAGTATCGAAGTAAAGATAACCAATAAGGAAGGAGCTT  
ATACTATGGTTGAATCAACTAAGCATACTACTTTTGCTTTGATTACTC  
+  
FFFFFFFFFFFFFFFFFFFFFFFFFFFFFFFFFFFFFFFFFFFFFFFFFFFFFFFFFFFFFFFFFFFFFFFF  
FFFFFFFFFFFFFFFFFFFFFFFF:FFFFFFFFFFFFFFFFFFFFFFFF,FFFFFFFFFFFF  
@A00721:190:HGJW7DSXY:4:1677:9977:17143\_1:N:0:TCTGCAAG+GCTGCACT  
GTCTAAGGTTAAAGAGTCGATTAAACAAGTTGTACTTATCAATGATTTTATCGCTGGTTGTTATCTCG

AAAAGTCTCTTCTAAAAGGAACGTCAGTTCTAACCCAAAGAGAATATCTAAAATATTTACAAAATCTT  
ACC

+

FFFFFFFFFFFFFFFFFFFFFFFFFFFFFFFFFFFFFFFFFFFFFFFFFFFFFFFFFFFFFFFFFFFFFFFF:F  
FFFFFFFFFFFFFFFFFFFFFFFFFFFFFFFFFFFFFFFFFFFFFFFFFFFFFFFFFFFFFFFFFFFFFFFFF  
FFF

@A00721:190:HGJW7DSXY:4:1261:2564:3646\_2:N:0:TCTGCAAG+GCTGCACT  
AGACGTTGCTTGTGCTTCCTCCTTTAATGGCACTACCTCGGTACAATCTTACTTGGAACGAAGGCGA  
CCTGTTCCGGAGTTTTTACGGGATCCGGACTGTTCCGGTCTATATTAGG

+

FFFFFFFFF,FFFFFFFFFFFFFFFFFFFFFFFFFFFFFFFFFFFFFFFFFFFFFFFFFFFFFFFF:F  
FFFFFFFFFFFFFFFFFFFFFFFFFFFFFFFFFFFFFFFFFFFFFFFFFFFFFFFFFFFFFFFFFFFFFFFFF

@A00721:190:HGJW7DSXY:4:1328:21893:21339\_2:N:0:TCTGCAAG+GCTGCACT  
TCGAACGTCAACGTTACCGAGTTTCGTTTCGTACCTTGATGCTGACTTTCGTCAATATGATTTGATC  
TGGTTGCTCAATTCTAAGCGTGTTCCGCTTAGTGCGAGGCCTCTCTTC

+

FFFFFFFFFFFFFFFFFFFFFFFFFFFFFFFFFFFFFFFFFFFFFFFFFFFFFFFFFFFFFFFFFFFFFFFFF  
FFFFFFFFFFFFFFFFFFFFFFFFFFFFFFFFFFFFFFFFFFFFFFFFFFFFFFFFFFFFFFFFFFFFFFFFF

@A00721:190:HGJW7DSXY:4:2110:30987:26036\_2:N:0:TCTGCAAG+GCTGCACT  
AAATACTAGATATTTGGATGATCTTGATAAAGAACTTCATGAATTTTCAGAGGATGAAAAATTTTCTT  
CCTTGGATTTTAATATAAAGAATCTTTACCAGGACTCCTACTACAGGA

+

FFFFFFFFFFFFFFFFFFFFFFFFFFFFFFFFFFFFFFFFFFFFFFFFFFFFFFFFFFFFFFFFFFFFFFFFF  
FFFFFFFFFFFFFFFFFFFFFFFFFFFFFFFFFFFFFFFFFFFFFFFFFFFFFFFFFFFFFFFFFFFFFFFFF

@A00721:190:HGJW7DSXY:4:2221:32750:26083\_1:N:0:TCTGCAAG+GCTGCACT  
ATCGTAAGAAGTTTATAAGGAACATATCCATTTGTTGTAATAGGGTCATCAACTTAGAACTCGAACT  
CTAAGTGGTAATACTGTCTTCCAAGCTTACCTGTATCTTCAATGAAATTGGACTCTTCGATAGGGGA  
CAT

+

FF,FFFF:FF,FFFFFFFFF,FFFFFFFFFFFFFFFFFFFFFFFFFFFFFFFFFFFFFFFFFFFFFFFFF  
FF,FFFFFFFFFFFFFFFFFFFFFFFFFFFFFFFFFFFFFFFFFFFFFFFFFFFFFFFFFFFFFFFFFFFFF  
FFF

@A00721:190:HGJW7DSXY:4:1470:28320:35446\_1:N:0:TCTGCAAG+GCTGCACT  
CTACTAATGGCGTTGGCCTAGTGGATGTTATTAGTGACATCTGGTCAATTTCTTTTTAGGTGGTCTT  
TATTCTATTATTGATTTTATGAGATTGATACGTTAACAGAAGATGATGTTAGAGTAGAATTCCTGAA  
GAG

+

FFFFFFFFFFFFFFFFFFFFFFFFFFFFFFFFFFFFFFFFFFFFFFFFFFFFFFFFFFFFFFFFFFFFFFFFF  
FFFFFFFFFFFFFFFFFFFFFFFFFFFFFFFFFFFFFFFFFFFFFFFFFFFFFFFFFFFFFFFFFFFFFFFFF  
FFF

@A00721:190:HGJW7DSXY:4:1244:26214:2237\_2:N:0:TCTGCAAG+GCTGCACT  
CCAACCTTCTTGACAATTTCTTCAATCCTTCGATAATAGTTAAATCTAGGATTATGTCTGTGTTGAAA  
GACTTTCTACCGATAAGGGTCACTAGTCTTACACAATTAAGAAATAAT

+

FFFFFFFFFFFFFFFFFFFFFFFFFFFFFFFFFFFFFFFFFFFFFFFFFFFFFFFFFFFFFFFFFFFFFFFFF  
FFFFFFFFFFFFFFFFFFFFFFFFFFFFFFFFFFFFFFFFFFFFFFFFFFFFFFFFFFFFFFFFFFFFFFFFF

@A00721:190:HGJW7DSXY:4:1440:7455:36323\_2:N:0:TCTGCAAG+GCTGCACT  
GATTATCTAAAGATTGAAGGAAAATTTATCCTCGTTTAACTTACTTAGACTTTCCTACGATACAAAT  
GATAACTTCTAATTTACGTTTGCTACTCAGAGCTGGTCCTCTCAGCAA

+

FFFFFFFFFFFFFFFFFFFFFFFFFFFFFFFFFFFFFFFFFFFFFFFFFFFFFFFFFFFFFFFFFFFFFFFFF  
FFFFFFFFFFFFFFFFFFFFFFFFFFFFFFFFFFFFFFFFFFFFFFFFFFFFFFFFFFFFFFFFFFFFFFFFF

@A00721:190:HGJW7DSXY:4:1568:21612:21042\_2:N:0:TCTGCAAG+GCTGCACT  
TCCTCAGGAGTCCCGGCATTTGATAATAATGACGACTTTCGTCATAATCGCTGCATATTACGGATTAC

ACGGTACCAGCGCATCTCGTGTCGAGCCTCGACCCGATTATATGGTAT  
+  
FFFFFFFFFFFFFFFFFFFFFFFFFFFFFFFFFFFFFFFFFFFFFFFFFFFFFFFFFFFFFFFFFFFFFFFF  
FFFFFFFFFFFFFFFFFFFFFFFFFFFFFFFFFFFFFFFFFFFFFFFFFFFFFFFFFFFFFFFFFFFFFFFF  
@A00721:190:HGJW7DSXY:4:1348:10592:6872\_2:N:0:TCTGCAAG+GCTGCACT  
TCTAGAATTCTTAATTATAATATTCAACCTCAAAGTTACGTGTTTACAGTAACGAGATCACACATTT  
TGAGAACTAACTATGTTATGTTCTCTGATCATTTTGACAATCTCTTCT  
+  
FFFFFFFFFFFFFFFFFFFFFFFFFFFFFFFFFFFFFFFFFFFFFFFFFFFFFFFFFFFFFFFFFFFFFFFF  
FFFF:FF:FFFFFFFFFFFFFFFF,FFFFFFFFFFFFFFFFFFFFFFFFFFFFFFFF  
@A00721:190:HGJW7DSXY:4:1602:2645:9298\_2:N:0:TCTGCAAG+GCTGCACT  
AAATAAATAATATTACTAATGGCAAATAGTGGAAGGCTCCAGTCAACACTAGTTCGAGTGCTGCTTT  
GGATTACGATGACGTGAGAATAGGTGAAGGGATAGTTTTTACCTCGAC  
+  
FFFFFF:FFFFFFFFFFFFFFFFFFFFFFFFFFFFFFFFFFFFFFFFFFFFFFFFFFFFFFFFFFFFFFFF:FFFFFF  
FFFFFFFFFFFFFFFFFFFFFFFFFFFFFFFFFFFFFFFFFFFFFFFFFFFFFFFFFFFFFFFF:FFFFFF  
@A00721:190:HGJW7DSXY:4:1445:15456:16454\_1:N:0:TCTGCAAG+GCTGCACT  
TCTTAAAGCTTCACCCAAAATGAAGGACACTTCGAAACTGAATAATGATGCACTACAAACAAGTATCG  
CTAATCATCTGAAAAAGGCTCTAAAGGACACTATACAATATCCAGACGACGACGAAGCTTATACAATA  
TCC  
+  
FFFFFFFFFFFFFFFFFFFFFFFFFFFFFFFF:FFFFFFFF:FFFFFFFFFFFFFFFFFFFFFFFF:FFFFFF  
FFFFFFFFFFFFFFFF:FFFFFFFFFFFFFFFFFFFF,FFF,FFFFFFFFFFFFFFFFFFFFFFFFFFFF  
FFF  
@A00721:190:HGJW7DSXY:4:2124:27136:30921\_2:N:0:TCTGCAAG+GCTGCACT  
ACCACATTTTGGTCAAGTCAATCCGTTGAGAAAATTTCTTAGAGGATATTGCGCATTGTGGTACGAAT  
TGGTCCAACATTTACCACCAAATTCTTTTGATACAACCTCTAGCCTTCA  
+  
FFFFFFFFFFFFFFFFFFFFFFFFFFFFFFFFFFFFFFFFFFFFFFFFFFFFFFFFFFFFFFFFFFFFFFFF  
FFFFFFFFFFFFFFFFFFFFFFFFFFFFFFFF,FFFFFFFFFFFFFFFFFFFFFFFF  
@A00721:190:HGJW7DSXY:4:1557:9200:14387\_2:N:0:TCTGCAAG+GCTGCACT  
ACCAGATTGGTTCGAACCCGTTGATGCTATGTCAGAAGAAGCTATTCAAGCTTGTCGTTTAAAGACTG  
CAGAGGCTGTCAAACAAGCCCAGACTCAAGGAGTCCAATCAAAGGTTT  
+  
FF:FFFFFFFFFFFFFFFFFFFFFFFF:FFFFFFFFFFFFFFFFFFFFFFFFFFFFFFFFFFFFFFFF  
FFFFFFFFFFFFFFFF:FFFFFFFFFFFFFFFFFFFFFFFFFFFFFFFFFFFFFFFF  
@A00721:190:HGJW7DSXY:4:2470:5990:10614\_1:N:0:TCTGCAAG+GCTGCACT  
TTATTTAGAGATCTTTTCTACTTACAAAGGACAATTGAGTTTCTACGAAAGTCCGGAG  
TATATTGTATGTTAATAGATAGTGGGATAATAGTTCTACCGATACGTAGTGAACGCGTTCGTAGAACC  
AAG  
+  
FFFF,F:FFFF:FFFFFFFFFFFFFFFFFFFFFFFFFFFFFFFFFFFFFFFFFFFFFFFFFFFFFFFF  
FFFFFFFFFFFFFFFFFFFFFFFFFFFFFFFFFFFFFFFFFFFFFFFFFFFFFFFFFFFFFFFFFFFFFFFF  
FFF  
@A00721:190:HGJW7DSXY:4:1238:23421:16564\_1:N:0:TCTGCAAG+GCTGCACT  
ACCGATAGGAGTTGTATAGTTGAAGATGTGGCTTTAGACGATAATCCTTTAAGGACTATGTTGACTGA  
CGAAGATTTTCCACAGATTTGTCTACGTTGCAGATCGCCACTCCAAACACTATATACATTATAAAAT  
ATA  
+  
FFFFFFFFFFFFFFFFFFFFFFFFFFFFFFFFFFFFFFFFFFFFFFFFFFFFFFFFFFFFFFFFFFFFFFFF  
FFFFFFFFFFFFFFFFFFFFFFFFFFFFFFFFFFFFFFFFFFFFFFFFFFFFFFFFFFFFFFFFFFFFFFFF  
FFF  
@A00721:190:HGJW7DSXY:4:2620:9245:30279\_1:N:0:TCTGCAAG+GCTGCACT  
CATAACTTTTGTTACCAAATTCTTGCTTTCAACGAAGTCTCTGATTTTATTAATCATTACTTTAACG





FFFFFFFFFFFFFFFFFFFFFFFFFFFFFFFFFFFFFFFFFFFFFFFFFFFFFFFFFFFFFFFFFFFFFFFFFFFFFFFF  
FFF

@A00721:190:HGJW7DSXY:4:1552:5846:9831\_1:N:0:TCTGCAAG+GCTGCACT  
GTAGCATTGATTTACTTTTACCGTTAGAACTGAAAAAGATTCTTTTCGAAAAGAAACCTATAAGTTAC  
AAACGATTCTTCGACTATATTAAAGAAATAAAAATACTTCAAGTACCTGAACTTTACATTTTAAATGG  
TAT

+  
FFFF:FFFF:FFF,:FFFFFFFF:FFFFFFFFFFFFFFFFFFFFFFFFFFFFFFFFFFFFFFFFFFFFFFFF:FFF  
FFFFFFFFFFFFFFFFFFFFFFFFFFFFFFFFFFFFFFFFFFFFFFFFFFFFFFFFFFFFFFFFFFFFFFFF:FFFFFFFF  
FFF

@A00721:190:HGJW7DSXY:4:1677:21875:22561\_1:N:0:TCTGCAAG+GCTGCACT  
TTACAAATAGAACCTTCACTCTCGGTAATGAGAGTGTATTCCTTAATATTCTAGTAACCGCTATGTGG  
GCATTACTAGGATTTATCACACTCCTAAATTTGATAGCAATTTATGTTTTAAATGCTAGGAAAATTTT  
AGA

+  
FFFFFFFFFFFFFFFFFFFFFFFFFFFFFFFFFFFFFFFFFFFFFFFFFFFFFFFFFFFFFFFFFFFFFFFFFFFF  
FFFFFFFFFFFFFFFFFFFFFFFFFFFFFFFFFFFFFFFFFFFFFFFFFFFFFFFFFFFFFFFFFFFFFFFFFFFF  
FF:

@A00721:190:HGJW7DSXY:4:2517:4010:32831\_1:N:0:TCTGCAAG+GCTGCACT  
TGTATAGTTCAAGGAGTACTTAATTCAATAGCTTTAGTATTATTTACTATCGCCTTTATTGAAAATTG  
TATAAGAGTTAATTGCTTACACAAAAGTGACGCGCAAGGAATCTTAATTGATTGAAGCTAGGCGTTG  
GGG

+  
FFFFFFFFFFFFFFFFFFFFFFFFFFFFFFFFFFFFFFFFFFFFFFFFFFFFFFFFFFFFFFFFFFFFFFFFFFFF  
FFFFFFFFFFFFFFFFFFFFFFFFFFFFFFFFFFFFFFFFFFFFFFFFFFFFFFFFFFFFFFFFFFFFFFFFFFFF  
FFF

@A00721:190:HGJW7DSXY:4:2565:4562:36041\_2:N:0:TCTGCAAG+GCTGCACT  
CATACCATAACCTACCATGACCAATCATCGTCCAACCTGGCACGCCAGACGTAGGGTCAAACCTACTA  
CCGCCGGTCGGCAGATCGGCACCACTGGTCTCTACGTTCAAGGACCCG

+  
FFFFFFFFFFFFFFFFFFFFFFFFFFFFFFFFFFFFFFFFFFFFFFFFFFFFFFFFFFFFFFFFFFFFFFFFFFFF  
FFFFFFFFFFFFFFFFFFFFFFFFFFFFFFFFFFFFFFFFFFFFFFFFFFFFFFFFFFFFFFFFFFFFFFFFFFFF

@A00721:190:HGJW7DSXY:4:1318:24316:19053\_1:N:0:TCTGCAAG+GCTGCACT  
CCTTCCCAAATCTAGATCTGCACAGAAGAAGGCTGAAGGTCGTTACCGGACGACCACTCAAAGGAAAC  
GGGCTGTTGCCAGAGGAAAGCAGCGACCACCGAGGTCGCTCGTAACATTGACGGCAGTCCCGTCATC  
TCT

+  
FFF:FFFFFFFF:FFFFFFFFFFFFFFFFFFFFFFFFFFFFFFFFFFFFFFFFFFFFFFFFFFFFFFFFFFFF  
FFFFFFF:FFFFFFFFFFFFFFFFFFFFFFFFFFFFFFFFFFFFFFFFFFFFFFFFFFFFFFFFFFFFFFFFFFFF  
FFF

@A00721:190:HGJW7DSXY:4:1329:23366:30154\_2:N:0:TCTGCAAG+GCTGCACT  
GCAGTACCTCAGTCAAAAGTCACATTCACCACTCCCATACCAATCAATGATGTGACTATACAGTTCGG  
CCATTTCAAGAGTGGTCAATACGTCGTGGAGGTACTGAAGCCTTCCC

+  
FFFFF:FF:FFFFF,FFFF:FFFF,FFFFFFFFFFFFFFFFFFFFFFFFFFFFFFFF:FFFFFFFFFFFFF:FFFFF  
FFF::FFF:F,F:FFFFFF:FFFFFFFFFFFFFF:FF:FFFF:FFFFF

@A00721:190:HGJW7DSXY:4:1245:24162:7513\_2:N:0:TCTGCAAG+GCTGCACT  
CCAAGCCAATCAATAGTTCTTCTGACCAGAATGAAAAGGGTTTACCAGGGTAGTCTCTAAGTCTACC  
AGGAAGAGGGGAAATGTCCCCAAAACCTGAGAAGAATAAAGGGAAAGGT

+  
FFFFFFFFFFFFFFFFFFFFFFFFFFFFFFFFFFFFFFFFFFFFFFFFFFFFFFFFFFFFFFFFFFFFFFFFFFFF  
FFFFFFFFFFFFFFFFFFFFFFFFFFFFFFFFFFFFFFFFFFFFFFFFFFFFFFFFFFFFFFFFFFFF,FFFF

@A00721:190:HGJW7DSXY:4:1608:31268:35383\_2:N:0:TCTGCAAG+GCTGCACT  
AGGGGAAATTACCCCTAATTCTGAAGGAAGATCTCCACCATCTGGGGTTGGAATAAGAAATCTGCA

CGGGCCAAAGAGGCCGCTGCTACGAAGTCGCTGAAGGCGGCTTGGGTC  
+  
FFFFFFFFFFFFFFFFFFFFFFFFFFFFFFFFFFFFFFFFFFFFFFFFFFFFFFFFFFFFFFFFFFFFFFFF  
FFFFFFFFFFFFFFFFFFFFFFFFFFFFFFFFFFFFFFFFFFFFFFFFFFFFFFFFFFFFFFFFFFFFFFFF  
@A00721:190:HGJW7DSXY:4:2333:2672:8343\_2:N:0:TCTGCAAG+GCTGCACT  
GTTGCGCCTGCCGACCCCATCTTTGAGACCAAGACTCTCTACAGTAGGTTCTGCTACTATGAGCAA  
ATCTGTTGAATTCGTCACTGAGGACGAAGGTGAGAGGACTTTTGGCTA  
+  
FFFFFFFFFFFFFFFFFFFFFFFFFFFFFFFFFFFFFFFFFFFFFFFFFFFFFFFFFFFFFFFFFFFFFFFF  
FFFFFFFFFFFFFFFFFFFFFFFFFFFFFFFFFFFFFFFFFFFFFFFFFFFFFFFFFFFFFFFFFFFFFFFF  
@A00721:190:HGJW7DSXY:4:1474:26856:31657\_2:N:0:TCTGCAAG+GCTGCACT  
GGAAAGAGAATTGCGTGGGTTGAAGGCCGACGCTTCGAGCTTGAGTGTGACGAGGCCGGTGACGTTTT  
TGTC AACGCGCTTTGGAGGATTTATCCGCGCAAGATCGGAAGAGCGT  
+  
FFFF:FFFFFFFFFFFFFFFFFFFFFFFFFFFFFFFFFFFFFFFFFFFFFFFFFFFFFFFFFFFFFFFFFFFF,FFFFFFFFFFFFFFFF  
FFFFFFFF:FFFFFFFF:FFFFFFFFFFFFFFFFFFFFFFFFFFFFFFFFFFFFFFFFFFFFFFFFFFFF  
@A00721:190:HGJW7DSXY:4:1127:10800:22013\_2:N:0:TCTGCAAG+GCTGCACT  
GAGTCTTGAAGACTTAGGTTGGCATATTTATGCCGACGATAATAAGCATGTCACCCTTAAGCACCGA  
GGTAAGCTCGGGACTTACAAGAGAGAGTGTGAGAGAGTCGCTCTCACT  
+  
F:FFFFFFFFFFFFFFFFFFFFFFFFFFFFFFFFFFFFFFFFFFFFFFFFFFFFFFFFFFFFFFFFFFFF:FFFFFFFFFFFFFFFF  
FFFFFFFFFFFFFFFFFFFFFFFFFFFFFFFFFFFFFFFFFFFFFFFFFFFFFFFFFFFFFFFFFFFF:FFFFFFFF:  
@A00721:190:HGJW7DSXY:4:1501:22905:12007\_2:N:0:TCTGCAAG+GCTGCACT  
TTCTGACTGATGAGGTTAAACTCTTGCTCCTTCTGTGGGTGAGGGTTTTTGTATATTTCACTGGTTC  
TGGGAGGCTGCTTCTCCATAATTACAACCTCTCTTTAGAGAGCATT  
+  
FFF,FFFFFFFFFFFFFFFFFFFFFFFFFFFFFFFFFFFF:FF:F:FFF,FFFFFFFF:FFFFFFFFFFFF,FFFFFFF  
FFFFF:FFFFFF:FFFFFFFFFFFFFFFFFFFFFFFFFFFF:::FF,FFFFFF  
@A00721:190:HGJW7DSXY:4:2262:18846:32409\_2:N:0:TCTGCAAG+GCTGCACT  
AAATTCACATATGGTAGACGTTGTACACTTTTCTTGAAAATTTTCTTCTCCGTCAATTGGGG  
ATTTGATGTGAGAAGGTGAAGGTGTCAAGGGTCTTCTTCATGCTGA  
+  
FFFFFFFFFFFFFFFFFFFFFFFFFFFFFFFFFFFFFFFFFFFFFFFFFFFFFFFFFFFFFFFFFFFFFFFF  
FFFFFFFFFFFFFFFFFFFFFFFFFFFFFFFFFFFFFFFFFFFFFFFFFFFFFFFFFFFFFFFFFFFF:FFFFFFFF  
@A00721:190:HGJW7DSXY:4:1168:28031:34068\_1:N:0:TCTGCAAG+GCTGCACT  
TTCAGACGTGTGCTCTTCCGATCTCGGCTCGTATCGAGTTGGAGGGAGGAAGTTCTCCGAAATTAAAG  
ACGGGGGGGATTAAGAGTCCAGCTGTAAGTGTCAATTCAGAGAGGGGAGCTCTGAAAAGGAACTTCGT  
CAG  
+  
FFFFFFFFFFFFFFFFFFFFFFFFFFFFFFFFFFFFFFFFFFFFFFFFFFFFFFFFFFFFFFFFFFFFFFFF  
FFFFFFFFFFFFFFFFFFFFFFFFFFFFFFFFFFFFFFFFFFFFFFFFFFFFFFFFFFFFFFFFFFFFFFFF  
FFF  
@A00721:190:HGJW7DSXY:4:2141:27850:29778\_2:N:0:TCTGCAAG+GCTGCACT  
AGAGGGGAGGAGTTTGAGGAAGGCTCTAGAGAAGATCTCACCACTGGAGAAGGCAAGTGGAGAGTCC  
AGAAGTTGATGAAGAAGGATTCTTTGAAGCAGGGGTACCACTTCCTA  
+  
F,FFFFFFFFFFFFFFFFFFFFFFFFFFFF,FFFFFF:FFFFFFFFFFFFFFFFFFFFFFFFFFFFFFFF,FFFFFF  
FFF,F,FF:FF,, :FFFFFF:, , FFFFFFF,FFFF:FFFFFFFFF::  
@A00721:190:HGJW7DSXY:4:1135:28583:34867\_2:N:0:TCTGCAAG+GCTGCACT  
TCTTTGGAGTTTTAGATAATCTTTTGAGAAGGGTTCATAGAGCCAGCAAGAGAAGCTTATATGCTGGT  
TTAAGTGATGATTATCACTCCTTGAGAAGACAAGCCACATTAAGATAT  
+  
FFFFFFFFF:FFFFFFFFFFFFFFFFF:FFFFFFFFFFFFFFFFF:FFFFFFFFFFFFFFFFFFFFFFFFFFFF  
FFFFFFFFF,FFFFFFFFFFFFFFFFF:FFFFFFFFFFFFFFFFF,F::F:FFF

@A00721:190:HGJW7DSXY:4:2666:26964:3035\_2:N:0:TCTGCAAG+GCTGCACT  
CTTGGGGTTTCGAATGTCATTAGTGCCTTACGATTGAAAGAGGTCTTTTGAGTATCGACAGATCTTT  
CGATCTTGAGGACGTACATTTAACGTGGCAGAATTCGGTAACTTACCA

@A00721:190:HGJW7DSXY:4:2622:3947:13056\_1:N:0:TCTGCAAG+GCTGCACT  
TCTTGAGAGTGACTGGAGTTCAGACGTGTGCTCTTCCGATCTTTTGATTGGTATGGACTACTCGACT  
TTTGATCTGGAGTTGTCTAGGGTCATGGCAGATACTACCGATAAGGTGAAAAATATGCAGGTCAAAGA  
TTC

@A00721:190:HGJW7DSXY:4:1376:17716:36464\_2:N:0:TCTGCAAG+GCTGCACT  
GGGCGGTTGAGGGAGCCGTTTTGGCCGACTTTAACTATTCTAAGAGTCTTTATGATTCAAACCTATC  
GTTGTCGTACCTTACAAGGTTGAGGAGACTTTACAGCGGCTTATTGTC

@A00721:190:HGJW7DSXY:4:1601:18349:21840\_1:N:0:TCTGCAAG+GCTGCACT  
AGAATTGCGGTTGAAGTTCACCCATTCTATCTTGAATGCTCACGCCGTCGCAGCCATATCGAGACTAT  
GTTATAATCACTTGTTAAAGTACAGATTTAGTGATTTAGATATTATTGATATTGGAGGCGATATTCGT  
TTT

@A00721:190:HGJW7DSXY:4:2326:32479:33129\_2:N:0:TCTGCAAG+GCTGCACT  
ACATATTTGCAACCCTATTCTTGATGTGAAAGATGCATCGAGGTATACGTCTAGGAACATTGATTGGG  
AACGTACCTACTCACGAGACGTCATGAAAGCTATCGGAGGGAAGCAA

@A00721:190:HGJW7DSXY:4:1324:28556:3255\_1:N:0:TCTGCAAG+GCTGCACT  
TTACAAGAACGCTTTGGATTGTGACCATAAAGCCTCAGTTGCGATAGCTGTAGAGGTATACGATATCT  
CTCTTGATGATGTAGCCACTATAATGCTTAAGAGAGAGATTGATGTATGTCATTTCTAGTTTGT  
CCC

@A00721:190:HGJW7DSXY:4:2268:13376:20149\_2:N:0:TCTGCAAG+GCTGCACT  
GACACGATGAAAAATGACATACCCGTTCTGACCTTGGTATCGTTATCCGTCATGGAGATGATGGCGC  
ATCACTTGATTACTATATGCCCCAAGGATTGGGTTATTCTCACAACAA

@A00721:190:HGJW7DSXY:4:1159:9254:23030\_2:N:0:TCTGCAAG+GCTGCACT  
AAGGGCGGACAATTGTTCCATTGTGAACCTCTGGGGACTAGATTGAGCATTAAATGAGTTCCGAATAAC  
TCGTAATAAATCTTCTCTAGTGGACAATTCAGAATACCTATTTCCGT

@A00721:190:HGJW7DSXY:4:1339:7798:9956\_1:N:0:TCTGCAAG+GCTGCACT  
CTGCCAATCTCATCGCTATACGCATACCTGATTGGAAGAAGCGAGGTTCTTCCTCAATAAAAAATTTT  
TCTCAAGAGATTATGGTTGATAAAGTTTTCTTCATAAGGGCTATTACGTACGTCATGGGGATCACTTC  
TTC

+

FFFFFFFFFFFFFFFFFFFFFFFFFFFFFFFFFFFFFFFFFFFFFFFFFFFFFFFFFFFFFFFFFFFFFFFFF:  
FF,FF:FFFFFFFFFFFFFFFFFFFFFFFFFFFFFFFFFFFFFFFFFFFFFFFFFFFFFFFFFFFFFFFFF:  
FFF

@A00721:190:HGJW7DSXY:4:1104:9236:1485\_1:N:0:TCTGCAAG+GCTGCACT  
ACCTTCGAATATGTTACGACATGGCTTCGTAACAACAGTGCAGGATTGTCATCTCGGGGAAAGTGAT  
TCACCAAGATGTTTCATATAGATACGAGATACCTAGAGAAGGTCGCAGCGATCTTACTCGTTATCGGAG  
CTA

+

FFF:FFF:,F:FFFFFFFFFFFFFFFFFFFFFFFFFFFFFFFFFFFFFFFFFFFFFFFFFFFFFFFFFFFFF  
FFFF:FFFFFFFFFFFF,FFFFFFFFFFFFFFFFFFFFFFFFFFFFFFFFFFFFFFFFFFFFFFFFFFFFF  
FFF

@A00721:190:HGJW7DSXY:4:2549:12436:16203\_2:N:0:TCTGCAAG+GCTGCACT  
GTTATGCTCGAAACTTAACGTTAGTACCGGAGGTGATCTCTCTGCTTCTGCGTTACTGAGAGAAAAG  
ATTCAGGACGCCTACGGTGACTTTATGGACAAGATGCAAGAGATCGGA

+

FFF,FFFFFFFFFFFFFFFFFFFFFFFFFFFFFFFFFFFFFFFFFFFFFFFFFFFFFFFFFFFFFFFFFFFF,FF  
FFFFFFFFFFFFFFFFFFFFFFFFFFFFFFFFFFFFFFFFFFFFFFFFFFFFFFFFFFFFFFFFFFFFF

@A00721:190:HGJW7DSXY:4:2622:27371:21778\_1:N:0:TCTGCAAG+GCTGCACT  
CGTGTGCTCTTCCGATCTAACGAATCTTGAACTACGGTCCTTATCAAAGAAAATGGTGAACCGGTCT  
CTAAATCTTTTGAGATTGAGAAGATTGAAGAACACGTCAAGAAGTCGCTCGGCGTTGTTCTTGAAAAC  
CAA

+

FFFFFFFFFFFFFFFFFFFF,FFFFFFFFFFFFFFFFFFFFFFFFFFFFFFFFFFFFFFFFFFFFFFFFFFFFF:FFFF  
:FFFFFFFFFFFFFFFFFFFF,FFFFF:FFFFFFFFFFFFFFFFFFFFFFFFFFFFFFFFFFFFFFFFFFFFF:FFF:FFFFFFFFFFFFF  
FFF

@A00721:190:HGJW7DSXY:4:1538:32949:33285\_1:N:0:TCTGCAAG+GCTGCACT  
GCTGATCATGGAGTCTTTGTACCTTCTGTCAAACCTTCGAGGTTACGTACGAGAGGTGATCCCGGATG  
TGGATTGAAGGCTGGCTCTAAGGGAGACTCCTTCTTTTTGAATGTTGTAAAGAATTGGGTTGAGAAGT  
GTG

+

FFFFFFFFFFFFFFFFFFFFFFFFFFFFFFFFFFFFFFFFFFFFFFFFFFFFFFFFFFFFFFFFFFFFF:FFFFFFFFF  
FFFFFFFFFFFFFFFFFFFFFFFFFFFFFFFFFFFFFFFFFFFFFFFFFFFFFFFFFFFFFFFFFFFFF:FFFFFFFFFFFFFFFFFFFFF  
FFF

@A00721:190:HGJW7DSXY:4:1543:29803:31501\_1:N:0:TCTGCAAG+GCTGCACT  
CTTGGTATTTCTGAAATAGTTTATCAGAGCGTCATTTTCCTTTGGGATCTTTCCTCTGGTAAGGGAAT  
TATTAATCATTCTTCTCACTCTTGACGAGAATTATTACTGTTTTCTCTACCCATAACTTCTTTTTCA  
AAA

+

FFFFFFF:FFFFFFFFFFFFFFFFFFFFFFFFFFFFFFFFFFFFFFFFFFFFFFFFFFFFFFFFFFFFFFFFF:  
FFFFFFFFFFFFFFFFFFFFFFFFFFFFFFFFFFFFFFFFFFFFFFFFFFFFFFFFFFFFFFFFFFFFF:  
FFF

@A00721:190:HGJW7DSXY:4:1534:4788:18521\_2:N:0:TCTGCAAG+GCTGCACT  
TGATGTTTTCTACAGAGTGCAGTCGTTTCAACACTTATCACCCTTTTGAAGGAAAATAATTGGTG  
ATGAAAATACGTATGTCGGTGGGGTTCTCAAGGCTCTCATCGCCACTG

+

FF:FFFFFFFFFFFFFFFFFFFFFFFFFFFFFFFFFFFF,FF:,FFFFF:FFF:FFFFFFFFFFFFFFFFFFFFF  
FFF,FFFFFF,FFF,F,FFFFFFFFFFFFFFFFFFFF:FFFF:FFFFFFF:

@A00721:190:HGJW7DSXY:4:1527:24704:12085\_2:N:0:TCTGCAAG+GCTGCACT  
TTTGGTCCTTACGTCTTAAGTAATTTGGATGTTGTGCAAACTATCAGGTTCTTGTCACGATTCTTAA

AAGAAGTTTATTA AAACTTCAGAGTCTCTTGAAGTCCAGGTAGCTAA  
+  
FFFFFFFFFFFFFFFFFFFF:FFFFF:FFFFFFFFFFFFFFFFFFFFFFFFFFFFFFFFFFFFFFFFFFFF  
FFF:FFFFFFFFFFFFFFFFFFFFFFFFFFFFF:FFFFF:FFFFFFFFFFFF  
@A00721:190:HGJW7DSXY:4:2458:17761:36824\_2:N:0:TCTGCAAG+GCTGCACT  
GGGAAAAGAGACCTCTGTTGGTAGAGGAGTTGAGAGAATTACTCAGATTCAATCTGGCATCACTGAAC  
GTCTACAACGAGTTAGGGAGTGGCTAGGTTTTAAAGATCCTTTGCAC  
+  
FFFF,FFFFFFFFFFFFFFFFFFFF:FFFFFFFFFFFFFFFFFFFFFFFFFFFFFFFFFFFFFFFFFFFF  
FFFFFFFFFFFFF:FFFFFFFFFFFFFFFFFFFFFFFFFFFFFFFFFFFFFFFFFFFF  
@A00721:190:HGJW7DSXY:4:2128:3549:10833\_2:N:0:TCTGCAAG+GCTGCACT  
CGTCGCGGAAAACGATGAAGATTTCCACACTGTTGAGAATCTTCTGATGCTGAATTTGAGGAAAATT  
TTTCGGAAGTTTTTGGTATAAATCCTGATGGCTCAGTACAGGGAGGAG  
+  
FFFFFFFFFFFFFFFFFFFF::FFFFFFFFFFFFFFFFFFFFFFFFFFFFF:F:FFFFFFFFFFFFFFFF:FFFFFFFF:FFFF  
FFFFFFFFFFFF,FFFFF,,FFFFFFFFFFFFFFFFFFFF:FFFFFFFFFFFF  
@A00721:190:HGJW7DSXY:4:1150:2510:36151\_2:N:0:TCTGCAAG+GCTGCACT  
ACCTTCTTTTATCATTGCAACAGGACTTTGAGAAGACTGTTGAAATGGACAAAATCTGGGATCATAGG  
TATGTGTCACGCTACACTCGAAATATGGGCCCTCATAAGGAAGTATAG  
+  
FFFFFFFFFFFFFFFFFFFFFFFFFFFFFFFFFFFFFFFFFFFF:FFFFFFFFFFFFFFFFFFFFFFFFFFFFF:FFF,FFF  
::FFFFFFFFFFFFFFFFFFFFFFFFFFFF,FFFFFFFFFFFF,FFFFFFFF,FFF  
@A00721:190:HGJW7DSXY:4:2526:24695:9533\_1:N:0:TCTGCAAG+GCTGCACT  
TGTTTCAGGAAGATCTCTACAGAGATTATCGAGAGTTGTGATCTAGTTCTAAATTTAGGTGCGACGGACT  
TTAGCAACTTTAGATAAATTCTTTCCGGGCTCAATGACCTTTGCTATGTACGTGGATCTAATGCTTGG  
TGA  
+  
FFFFFFFFFFFFFFFFFFFF,FFFFFFFFFFFFFFFFFFFFFFFFFFFFF:FFFFFFFFFFFFFFFFFFFFFFFFFFFF  
FFFFFFFFFFFFFFFFFFFFFFFFFFFFFFFFFFFFFFFFFFFFFFFFFFFFFFFFFFFFFFFFFFFFFFFFFFFF  
FFF  
@A00721:190:HGJW7DSXY:4:1227:10556:16736\_1:N:0:TCTGCAAG+GCTGCACT  
TTAGTTTCATGAAGTTCTTACACTTCTCGCGACTAATGTCAGTTCACTACAAAGCGTTACGTAAAGT  
AGTTTTTCACGCTTTATCTTAAAGCATTACCACCAATTTAGCACTTTTTGAATATGACAGAAGCTCGC  
CAT  
+  
FFFFFFFFFFFFFFFFFFFFFFFFFFFF:FFFFFFFFFFFFF:FFFFFFFFFFFFFFFFFFFF:FFFFFFFFFFFFFFFFFFFF  
FFFFFFFFFFFFFFFFFFFFFFFFFFFFFFFFFFFFFFFFFFFFFFFFFFFFFFFFFFFFFFFFFFFFFFFFFFFF  
FFF  
@A00721:190:HGJW7DSXY:4:1252:14027:28416\_2:N:0:TCTGCAAG+GCTGCACT  
CCAGTTAGAGTTCTTCTAACCAGGACTGATGGTGAGATTCTTTTACCTTTTGGAGGTCCAGGAACCTT  
TACTCCTAGTGTCTTTTCTAGAGTCCAAGGACGTTTCCGTCGGAGGAT  
+  
FFFFFFF:FFFF:FF:FFFF:FFFFFF,,FFFFFFFFFFFFFFFFFFFF,FFFFFF:FFFF:FFFFFF,FF,  
FFFF,FFFF:F:FFFFFFFFFFFFFFFFFFFF:F:F,FF::FF,F:FFFF  
@A00721:190:HGJW7DSXY:4:1123:6885:18521\_1:N:0:TCTGCAAG+GCTGCACT  
GCTCAATAACACTCTATTGAATCCCTTTTCCACGATGAAAGCTCTTTATGAGGTGCTCCATGCAAATT  
TACAGTTCCTCTTTGGTGATATCGCCTCTGTCTTTCTCTTTAATCGTGAGGTTACGAGAGTTTCGT  
ACT  
+  
FFFFFFFFFFFFF:FFFFFFFFFFFFFFFFFFFFFFFFFFFFFFFFFFFF:FFFFFFFFFFFFFFFFFFFFFFFFFFFF  
FFFFFFFFFFFFFFFFFFFFFFFFFFFFFFFFFFFFFFFFFFFFFFFFFFFFFFFFFFFFFFFFFFFFFFFFFFFF  
FFF  
@A00721:190:HGJW7DSXY:4:2121:5900:28494\_1:N:0:TCTGCAAG+GCTGCACT  
TTTTGATAAATTTGTTGGAATCGATAATGATACTGACGAAGTTCTATTACCACCCTTGTCATTGATA

CAAACATTCTAGGTGATGCTTTCTTAGAGGCTCGTCTAGCCGCTGAGATTCTGCTTACCTATTTACAA  
TCT

+

FFFFFFFF:FFFFFFFFFFFFFFFFFFFFFFFFFFFFFFFFFFFFFFFFFFFFFFFFFFFFFFFFFFFFFFFF:FFFFFFFFFFFFFFFFFFFFFFFF:FFFFF  
FFFFFFFFFFFFFFFFFFFFFFFFFFFFFFFFFFFFFFFFFFFFFFFFFFFFFFFFFFFFFFFFFFFFFFFFFFFFFFFF:FFFFFFFF  
FFF

@A00721:190:HGJW7DSXY:4:2212:13819:32189\_1:N:0:TCTGCAAG+GCTGCACT  
GATAACGATTTAGTACTGGGAAATGGTGGTAGTCAGTTTACTACTTTTCTTCCCTCCCCTTTTTCGA  
TTGGATTCGACGGGGTCTTCGTCTCACGACTAATTTGATAAGGTTTTCTTTATGGGACTCTTGTTT  
GTA

+

:FFFFFFFF,FFFFFFFFFFFFFFFFFFFFFFFFFFFFFFFFFFFFFFFFFFFFFFFFFFFFFFFFFFFFFFFF:F:FFFF  
FFFFFFFFFFFFFFFFFFFFFFFFFFFFFFFFFFFFFFFFFFFFFFFFFFFFFFFFFFFFFFFFFFFFFFFF,FFFFFFFFFFFFFFFFFFFFFFFF  
F:F

@A00721:190:HGJW7DSXY:4:2430:13114:14090\_2:N:0:TCTGCAAG+GCTGCACT  
AGTTCTTAATGTAGGTCTCCTAGTACTTAAGGGTTTATGTTTCGGTTTCAGCTGGATGGATCTTTTGA  
TGGTATGTTTCACATTGCGTGATCACTTCCCGTGGACTTGGGAAGAGA

+

FFFFFFFFFFFFFFFFFFFFFFFFFFFFFFFFFFFFFFFFFFFFFFFFFFFFFFFFFFFFFFFFFFFFFFFFFFFF  
FFFFFFFFFFFFFFFFFFFFFFFFFFFFFFFFFFFFFFFFFFFFFFFFFFFFFFFFFFFFFFFFFFFFFFFF

@A00721:190:HGJW7DSXY:4:1558:13675:2566\_1:N:0:TCTGCAAG+GCTGCACT  
CGATTCTATTATGTCGCTAAAGCCTGTCCAGTTGTGCGATGATGTTTCGGGCTGTGGGGATTAAGTTCCC  
TCGTGAAACTTACGACGATGTTCTCGCTCGCATTTACAAGGATTACTAAGTCTGAGATCTGCCACTT  
CTA

+

FFFFFFFFFFFFFFFFFFFFFFFFFFFFFFFFFFFFFFFFFFFFFFFFFFFFFFFFFFFFFFFFFFFFFFFFFFFF  
FFFFFFFFFFFFFFFFFFFFFFFFFFFFFFFFFFFFFFFFFFFFFFFFFFFFFFFFFFFFFFFFFFFFFFFFFFFF  
FFF

@A00721:190:HGJW7DSXY:4:1239:2474:34240\_2:N:0:TCTGCAAG+GCTGCACT  
AAGTTCATGAGGATGTCTTGGTCGAAAAATATCGCCGGGAACCTCTAATAGAGGATCCTGATGACATT  
ATTTCAACGGATACCGATCTCAGTTCTACCACAGAAACCGTCTCAGGA

+

FFFFFFFF:FFFFFFFFFFFFFFFFFFFFFFFFFFFFFFFFFFFFFFFFFFFFFFFFFFFFFFFFFFFFFFFF  
:FFFFFFFF:F:FFFFFFFFFFFFFFFF:FFFFFFFFFFFF,FFF:FFF

@A00721:190:HGJW7DSXY:4:1262:23637:13495\_2:N:0:TCTGCAAG+GCTGCACT  
CTGATTCGGAATTAGAGAAAGACGACCTTCTTGTGGGACTGAGACCTCTGAATTTTCAGGGTGCCCT  
GATGAGGACGTTGAAAGGATAATTTCAACTCTGAGACTTCTAAGAGT

+

FFF:FFFFFFFFFFFFFFFFFFFFFFFFFFFFFFFFFFFFFFFFFFFFFFFFFFFFFFFFFFFFFFFFFFFF,  
FFFFFFFFFFFFFFFFFFFFFFFFFFFFFFFFFFFFFFFFFFFFFFFFFFFFFFFFFFFFFFFFFFFF,

@A00721:190:HGJW7DSXY:4:2224:5529:3145\_2:N:0:TCTGCAAG+GCTGCACT  
ACCAGAAACGTAACAAGAAGAATAAAGGTAGGAAGGGGAGAAAACAGAACAAGCGAGCGGTTGAAGAG  
AAAACGATATGGTTGCGGCTGATCGTACCCAATTCTGCTAGAAAG

+

FFFFFF:FFFFFF:FFFFFF:FF:FFFF::F:FFFFFFFFFFFFFFFF:FFFFFF:FF:FFF  
FFFF:FFFFFFFF:FFF:FFFF::FFFFFFFFFFFFFFFFFFFF

@A00721:190:HGJW7DSXY:4:2431:13720:28447\_1:N:0:TCTGCAAG+GCTGCACT  
ATACCACTGATCTTCCAGAGTTACGTAGTGGTCGTTCTTTGGTGATTTTATCAAAGAGAAAGTTTCT  
GCTAGTCGCGACGATAGTATTTATCGGAGTGATATTAACAAGTTAACTTCGAAGTACCACTTACAA  
GAG

+

FFFF,F:F,:F,FF,FFF,FFFF,,F,,FF,F,FFF,F:F:F:F,F:FFFF:FFF,F,,FF:,FFFF  
FFFF:FFF:FFF:F:FF,FFF:F:F,F:F:FFFFFFFFFFFFFFFF,FFFFFFFF:FFF:FFFF:F:  
FFF

@A00721:190:HGJW7DSXY:4:2367:3097:35196\_2:N:0:TCTGCAAG+GCTGCACT  
TCAGTTTTCCAAAAAGCTATTAATAGCAGTTGCGGGGCTATAATACCGCCTCCAGATTACTCTAACT  
GAATCCACTCTCTTGGGATATAAATGAGTACATCTATAATAGAGTTTT

+

FFFFFFFFFFFFFFFFFFFFFFFFFFFFFFFFFFFFFFFFFFFFFFFFFFFFFFFFFFFFFFFFFFFFFFFF  
FFFFFFFFFFFFFFFFFFFFFFFFFFFFFFFFFFFFFFFFFFFFFFFFFFFFFFFFFFFFFFFFFFFFFFFF

@A00721:190:HGJW7DSXY:4:2602:27850:32189\_1:N:0:TCTGCAAG+GCTGCACT  
AACATGAATTAGTTATTGAAAGTCTTGACCCTCACGTCTCACTTTATCACCTTGGAGATGGTAAAGTC  
ATTAACAAAGGAAATGTAAAGGCTGATGACTTAAATTTGCATTCTGCTTCGACGGTAATTCCATAAG  
ACC

+

FFFFFFFFFFFFFFFFFFFFFFFFFFFFFFFFFFFFFFFFFFFFFFFFFFFFFFFFFFFFFFFFFFFFFFFF  
FFFFFFFFFFFFFFFFFFFFFFFFFFFFFFFFFFFFFFFFFFFFFFFFFFFFFFFFFFFFFFFFFFFFFFFF  
FFF

@A00721:190:HGJW7DSXY:4:2677:32172:24893\_1:N:0:TCTGCAAG+GCTGCACT  
AACCTTTCCTCGTTCTTCATGAAGATCTTCGAGTGTTTTATAGTGAGTTATTCTTGCGAAGGTTCAAG  
TCGATTGATTTTGTGACTACGATCTCTCTTGTAAATAAGAAAGTTCTTCGCAGTTGAATCTCCACCAGG  
TGG

+

FFFFF:F:FFFFFFFF:FFFFFFFFFFFFFFFFFFFFFFFFFFFFFFFFFFFFFFFFFFFFFFFFFFFFF:FFF  
FFFFFFFFFFFFFFFFFFFFFFFFFFFFFFFFFFFFFFFFFFFFFFFFFFFFFFFFFFFFFFFFFFFFFFFF  
FFF

@A00721:190:HGJW7DSXY:4:1140:19822:14121\_1:N:0:TCTGCAAG+GCTGCACT  
GACTTTTGTGCAATTTTTTCGCAAAAGGTCTTGAAGTACGTATTGTCACTGCTAATCGTAATTCGCGAG  
AAGAGATAGTGACTAAAGTTTTGGCACTTCTAGTTCATCGCGTATTTGTGAAATTAAGACAGACGTG  
AAA

+

FFFFFFFFFFFFFFFFFFFFFFFFFFFFFFFFFFFFFFFFFFFFFFFFFFFFFFFFFFFFFFFFFFFFFFFF:FFFFFFF  
FFFFFFFFFFFFFFFFFFFFFFFFFFFFFFFFFFFFFFFFFFFFFFFFFFFFFFFFFFFFFFFFFFFFFFFF  
FFF

@A00721:190:HGJW7DSXY:4:1226:29668:25661\_1:N:0:TCTGCAAG+GCTGCACT  
TCGTATTAGAACAGCTGATTCTTATTGCATGAACGTCGCTGAGGTCAAACCTGTGGACGTTATTTTCA  
TCGACGAATTATTCATGATTCACGCTGGTCAGACCCTTTTTCTTACACATCTACTTAAGGCGGCTTAT  
ACC

+

F:FF:FFFFF::FFF:FFFFFF,FFFFFFFFFFFFFFFFFFFFFFFFFFFFFFFFFFFFFFFF:FFFFFF:FFFFF:FFFF,FFFFF  
FFFFFFFF:FFFFFFFFFFFFFFFF:FFFFFFFFFFFFFFFFFFFFFFFFFFFFFFFFFFFFFFFF:FFFFFFFFFF  
FFF

@A00721:190:HGJW7DSXY:4:1135:30951:29575\_1:N:0:TCTGCAAG+GCTGCACT  
GTGATTCCAATCAAATCGGATTCATCAATCGTATTGATCTCCAAGTCGAACTACTTCAACATCAAC  
GACATCATTCTTGATGAGTGTCGTTCTTATCGAAGTCTCAGTTATCGCTGCCCGCCGACGTTTGTGCG  
CGA

+

FFFFFFFFFFFFFFFFFFFFFFFFFFFFFFFFFFFFFFFFFFFFFFFFFFFFFFFFFFFFFFFFFFFFFFFF:FFFFFFF  
FFFFFFFF:FFFFFFFFFFFFFFFF:FFFFFFFFFFFFFFFFFFFFFFFFFFFFFFFFFFFFFFFF:FFFFF  
FFF

@A00721:190:HGJW7DSXY:4:1510:25870:31548\_2:N:0:TCTGCAAG+GCTGCACT  
TACGGCAGAAAAATTTCTCCTGCTTGTAATTCGAGAGAGGACACTATGGAAATTAGACCTATCAGATG  
TCTTGACGACTTCGAATTTGAGGACGGAGTTAAATATATTACTTTAC

+

FFFFFFFFFFFFFFFFFFFFFFFFFFFFFFFFFFFFFFFFFFFFFFFFFFFFFFFFFFFFFFFFFFFFFFFF:FFF:FFFFFFFFFFFFFFFF, :FFFFFFFFFFFFFFFF, FFFFFFFF  
FFFFFFFF:FF: :FFFF, FFFFFFFFFFFFFFFFFFFFFFFFFFFFFFFFFFFFFFFFFF

@A00721:190:HGJW7DSXY:4:2665:31864:18662\_2:N:0:TCTGCAAG+GCTGCACT  
AATTAACAAAGTCCTTGTAAGAGTAAGGTTAAATGTGAAGATGCTCAGACTATTCATGAAGTTCAAG



GTAATACTTACCAGCACGTTCGGCTGGTTAGAATTAACCTCAAGATG  
+  
FFFFF:FFFFFFFF:FFFFFF:FFFFFFFFFFFFFF:FFFFFFFFFFFFFFF:FFFFFFFFFFF:FFFFFFFFFFF:FFFFFFFFFFF:  
@A00721:190:HGJW7DSXY:4:1515:7988:12007\_1:N:0:TCTGCAAG+GCTGCACT  
AACACATATTACCGTTGCTCTATCACGACACGTTGAATCTTTACGATACTTTGTTATCAATGTAAAGT  
TAAACGATGCTACTTGTGAGAGGATCAATCACAGTAAGGAACTGTCACGTTTAGCACGGGAGGTTGCA  
+  
FF:F:FF:FF,F:FFFF,F:F:FFFFFF,FF,FFFFFFFF:FF,,:FF,FFFF:FFFF,FFFFFF:FF,  
FFFFFF:FFFF,F:FFFFFFFFFFFF:F:FF::FFFFFF:FF:FFF:FFFFFFFF:F:FFFFFFFFFFFF  
@A00721:190:HGJW7DSXY:4:2243:17336:30389\_2:N:0:TCTGCAAG+GCTGCACT  
TATATCGAGGCTATCGAGGACGATGAGTATCTTGAAGTTGTTGACGACAAGCCTCAAGAGGGTAGAGG  
ACCACCTGGATCTTCTACTGTCTCTGCCTTCCAAGATTTCTTAGAAGA  
+  
FFFFFFFFFFFFFFFFFFFFFF:FFFFFFFFFFFF:FFFFFFFFFFFFFFFFFFFFFFFFFFFFFFFFFFFFF  
FFFFFFFFFFFFFFFFFFFFFFFFFFFFFFFFFFFF::FFFFFFFFFFFFFFFFFFFF  
@A00721:190:HGJW7DSXY:4:1253:13792:29418\_2:N:0:TCTGCAAG+GCTGCACT  
ACCACCTTAACGTCACTCGGTAATCTTTCAGCCGAATTAAGTACTAATGAGTTCAAGTCGGTTGTCGA  
TCGAATTAAGATCAAGGCTAATACCTTTATAGGTAAGAAGCCCCTTGA  
+  
FFFFFFFFFFFFFFFFFFFFFFFFFFFFFFFFFFFFFFFFFFFFFFFFFFFFFFFFFFFFFFFFFFFFFFFFFFFF  
FFFFFFFFFFFFFFFFFFFFFFFFFFFFFFFFFFFFFFFFFFFFFFFFFFFFFFFFFFFFFFFFFFFF  
@A00721:190:HGJW7DSXY:4:1343:27597:7670\_2:N:0:TCTGCAAG+GCTGCACT  
GAGTCTCCAAGAGAATATTTATTCTTATGAGGCTCGAACTTCAACGTTTTTCACAACGGAAAGACATA  
TCGCACCCGAAATTTTGGGGCAGAATGCTCTTAACGCGGTTCTTGAAC  
+  
FFFFF,FFFFFFFF,FFFFFFFFFFFFFFFF:FFFFF,FFFFFFFFFFFFFFFF:FFFFFFFFFFFFFFF  
:FFF:FFFF::FF,,F,FFFFFFFF:FFFFFFFFFFFFFFF,FFFFFFFF  
@A00721:190:HGJW7DSXY:4:2629:26377:26819\_2:N:0:TCTGCAAG+GCTGCACT  
CTAAGTTGGATAAAGTTATAGGAGACTCAGTTAACCTGAGAGCTCCTCAATTGATAGATTGGGTCAAC  
AATAGGGACGCTAGTATACTTCGTAAAGTCGACAGCGAAATGGTCAAT  
+  
FFFFFFFFFFFFFFFFFFFFFFFFFFFFFFFFFFFFFFFFFFFFFFFFFFFFFFFFFFFFFFFFFFFFFFFFFFFF  
FFFFFFFFFFFFFFFFFFFFFFFFFFFFFFFFFFFFFFFFFFFFFFFFFFFFFFFFFFFFFFFFFFFF  
@A00721:190:HGJW7DSXY:4:1468:30653:19351\_1:N:0:TCTGCAAG+GCTGCACT  
TGACCTATTTTAAGCTCATGGTGAAGGGAAGCTAAGGTTAACTTGATGCTTCAGCCTTTTCGAAG  
CATAACCCGCACAGAATATCGTTTATCACGCAAATTTATTAATGCAATTTTCGGACCTATCTTTAA  
GGT  
+  
FFFFFFFFFFFFFFFFFFFFFFFFFFFFFFFFFFFFFFFFFFFFFFFFFFFFFFFFFFFFFFFFFFFFFF:FFFFF  
FFFFFFFFFFFFFFFFFFFFFFFFFFFFFFFFFFFFFFFFFFFFFFFFFFFFFFFFFFFFFFFFFFFFFFF  
FFF  
@A00721:190:HGJW7DSXY:4:1143:31684:10989\_1:N:0:TCTGCAAG+GCTGCACT  
GACGATTTCTCCCGGAAGCTCTTCTCTCTTAGGAGGTCATGATGACTACTATAAGGGTGAAATCGA  
TTTTTCGAAGTTTGACAAATCTCAAGATTTCTTTGTAAAGCCTATGAGATAAAGATGTATTCTTATT  
TAG  
+  
FF,FFFF:F:FFFF:FFFF,F:FFFF:F:FF:FFFFFFFFFFFFFFFF:FFF,:F,FFFFFFFF:FF  
::FFFFFFFF:F,FF,FFFFFFFF:F:FFFFFFFFF,FFFFFFFFFFFFFFFFFFFFFFFFFFFFF  
FFF  
@A00721:190:HGJW7DSXY:4:1161:12599:19742\_2:N:0:TCTGCAAG+GCTGCACT  
TTGGAGTGCCAGTGAATATTTTGTACGCCAGGAGTATCCATAACTATTTGTCATTTACCACCTTGG  
CTCAACGACGAAGTGGAACGGCCAACACTTTCTTTGGTAATTGTATGA  
+

```
F:FFF,FFF,:FFFFFFFF,F,FFFFFFFFF,FFFFFFF,FFFFFFF,:FFFF:F::F,FFFFFF:F:  
FFFFFFFFF:FFFF,FFF,,FFFFFF,FFFFF::FFFF,F:,FFF:  
@A00721:190:HGW7DSXY:4:1545:19877:13056_2:N:0:TCTGCAAG+GCTGCACT  
ATTTTATCACTTTATTATGACCTTGGAAGTTTTTCGGCTGTGGTTGTCTCGTGGGGACGATTCCATTCT  
GTTTTCAAAGACTCCAATAACTGATCATTCTGATCATATGATTTTGA  
  
+  
FFFFFFFF:FFFFFFFFFFFFFF:FFF,FFFFFFFFFFFFFFFFFFFFFFFFFFFFFFF:FFFFFFFFFF,F  
FFFF:FFFFFFFFFFFFFFFFFFFFFFFFFFFFFFF:FFFFFFFFFFFFF:  
@A00721:190:HGW7DSXY:4:2206:5104:15468_1:N:0:TCTGCAAG+GCTGCACT  
CTTTACAAGATCATCGTTAAGTTAGGTAAACCCCTAACCGATGTTACTCTTGTAGGACTTTGGGAGAG  
ATTCGTTAGTTTTAAAGACTATACTAAATATCTCCACTACGAGGTTGTTGTTTGGCGATTAGCTCTTG  
CGA  
  
+  
FFFFFFFF:FFFFFFFFFFFFFFF:FFFFFFFFFFFFFFFFFFFFFFFFFFFFFFFFFFFFFFFFF  
FFFFFFFFFFFFFFFFFFFFFFFFFFFFFFFFFFFFFFFFFFFFFFFFFFFFFFFFFFFFFFFFF  
FFF  
@A00721:190:HGW7DSXY:4:1375:15573:36573_2:N:0:TCTGCAAG+GCTGCACT  
GAGGGTCGTTATACCTATTCGGCTATCTGTGCTTTGAATTGTATAAGATCAAATTTAAACGATTCCG  
AGAGGTTTATCCTGATGTGGAGGGAGTTCTTGAAGCATCCCGACCTTT  
  
+  
FFFFFFFFFFFFFFFFFFFFFFFFFFFFFFFFFFFFFFFFFFFFFFFFFFFFFFFFFFFFFFFFF  
F:FF:FFFFFFFFF,FFFFFFFFFFFFFFFFFFFFFFFFFFFFFFFFFFFFFFFFF  
@A00721:190:HGW7DSXY:4:2421:28257:26850_2:N:0:TCTGCAAG+GCTGCACT  
GGTTTCATAAGATTATCAGTAATCCTGATTCTACTACGGATTATGGACCTTCCATCCTGTACCTCTT  
CTGGAGAGACGTATCTCAAAGATCGACTTCGAGACAGGTGATATTGTT  
  
+  
FFFFFFFFFFFFFFFFFFFFFFFFFFFFFFFFFFFFFFFFFFFFFFFFFFFFFFFFFFFFFFFFF:FFFF  
FFFFFFFFFFFFFFFFFFFFFFFFFFFFFFFFFFFFFFFFFFFFFFFFFFFFFFFFF  
@A00721:190:HGW7DSXY:4:1538:29080:27774_1:N:0:TCTGCAAG+GCTGCACT  
ACCAAGATCTAAATTCGGTAACGGTGC GTGGCGCTTTATTTAAAAAGCTCCCTCCTCTCGCAAGTTT  
GATCTGATACTTATCACGAAAGGACTTGAGTCTTTTGATCAGTCTCTGACTTGACCATCTTTCATTTT  
AAA  
  
+  
FFFFFFFFFFFFFFFFFFFFFFFFFFFFFFFFFFFF:F,FFFFFFFFFFFFFFFFFFFFFFFFFFFFFFFFF  
FFFFFFFFFFFFFFFFFFFFFFFFFFFFFFFFFFFFFFFFFFFFFFFFFFFFFFFFF  
FFF  
@A00721:190:HGW7DSXY:4:1574:30798:16532_2:N:0:TCTGCAAG+GCTGCACT  
TTTCTTCTTTGTTTCTTCTTTCGACTGATTTTCTCATCAGCTTGTTTTACCTAATCTGTGTTT  
TTACGATAACAAC TATCAGTTGATTAAGACTCTTCCGAAAGGCCAACT  
  
+  
FFFFFFFFFFFFFFFFFFFFFFFFFFFFFFFFFFFF:FFFFFFFFFFFFFFFFFFFFFFFFFFFFFFFFF  
FF:FFFFF:FFFFFFFFF:FFFFFFFFFFFFF:FFFF:FFFFF  
@A00721:190:HGW7DSXY:4:2618:31259:35055_2:N:0:TCTGCAAG+GCTGCACT  
GAAGCTCAGGGTGAAGCACACGTTTAACCGTGACGAACTGTGGTGTTCTTGATCTACGTTACGGATA  
TACTCTCCTTGAGTTCACTCGTAAGGACACTACCACTTATTACGATAT  
  
+  
FFFFFFFFFFFFFFFFFFFFFFFFFFFFFFFFFFFFFFFFFFFFFFFFFFFFFFFFFFFFFFFFF  
FFFFFFFFFFFFFFFFFFFFFFFFF:FFFFFFFFFFFFFFFFFFFFFFFFFFFFF  
@A00721:190:HGW7DSXY:4:2572:10691:23923_1:N:0:TCTGCAAG+GCTGCACT  
AGCGTCTTCTGTT CATCGCAACCAGATGATATCTTCTATTGCAACTTATGTTTCGATCAGTGTCTTCT  
CTATCAGGAGGAAAACACTTGTTCTAGTCCTTGTAAGATTAATCCTAACGTAGAAGATTGTTGTTTAC  
CAC  
  
+
```

FFFFFFFFFFFFFFFFFFFFFFFFFFFFFFFFFFFFFFFFFFFFFFFFFFFFFFFFFFFFFFFFFFFFFFFFFFFFFFFF  
FFF

@A00721:190:HGJW7DSXY:4:1228:30436:3756\_1:N:0:TCTGCAAG+GCTGCACT  
TCTCTATTTTAAGTTTTGTCTTCCTTGTGTCTTATTCTATTAATCACTCATTTTAGTGAGATTATT  
AAAAACGCACTAAAACGTCTTCGACAACAGCAGGGGTTTTCTGAATAGTGATAGCCACCCGCTTACAG  
AGG

+  
FFFFFFFFFFFFFFFFFFFFFFFFFFFFFFFFFFFFFFFFFFFFFFFFFFFFFFFFFFFFFFFFFFFFFFFFFFFFFFFF  
FFFFFFFFFFFFFFFFFFFFFFFFFFFFFFFFFFFFFFFFFFFFFFFFFFFFFFFFFFFFFFFFFFFFFFFFFFFFFFFF  
FFF

@A00721:190:HGJW7DSXY:4:2411:28763:4554\_2:N:0:TCTGCAAG+GCTGCACT  
GACTTTGGTACCACCTTTTCTACTGTCTGTCTCGCCTCTTCGAATGAAGTTTAAATGCTTAACAACAA  
TGATAGTGAATTTATACCTACAATCATTGGTTTTTCTAATAATGATGA

+  
FFFFFFFFFFFFFFFFFFFFFFFFFFFFFFFFFFFFFFFFFFFFFFFFFFFFFFFFFFFFFFFFFFFFFFFFFFFFFFFF  
FFFFFFFFFFFFFFFFFFFFFFFFFFFFFFFFFFFFFFFFFFFFFFFFFFFFFFFFFFFFFFFFFFFFFFFFFFFFFFFF  
FFF

@A00721:190:HGJW7DSXY:4:1204:7229:9565\_1:N:0:TCTGCAAG+GCTGCACT  
GTGACTGGAGTTCAGACGTGTGCTCTTCCGATCTGTGAGGAGGATTCTCAGTTTACAAGGACCTTAA  
GCGATGGATCGGGGTTAATTCTAAAACATTACCCGAAAGACGTGCTAAATTAAAACCATTGTACGATG  
TCG

+  
F:::FFFF:FFF:F:F:,FFFF:FF:F,,FFFF:FF,F,FFFFFFFF:F:F,F,:F:F,:F,:  
F:FFFF::FFFFFFFFF:FFFF:FFFFFFFFFFFFFFFF:FF,FFFFFFFF,FF:FFFFFFFFFFFFF  
FFF

@A00721:190:HGJW7DSXY:4:1363:6135:11616\_1:N:0:TCTGCAAG+GCTGCACT  
TCACTTTTCACTAAGAATTGGTCCTACTTTTGGACAAGGCCAACTTCGTAATCTTCATGAGATCGTTT  
CTTTCTTTATCTCTTTGGTTGTTAGGGATTTTGAGAGAGTGAAAGGCTTCAATTGTAGTGGTTTGGTC  
GTT

+  
FFFFFFFFFFFFFFFFFFFFFFFFFFFFFFFFFFFFFFFFFFFFFFFFFFFFFFFFFFFFFFFFFFFFFFFFFFFFFFFF  
FFFFFFFFFFFFFFFFFFFFFFFFFFFFFFFFFFFFFFFFFFFFFFFFFFFFFFFFFFFFFFFFFFFFFFFFFFFFFFFF  
FFF

@A00721:190:HGJW7DSXY:4:2160:4092:31344\_2:N:0:TCTGCAAG+GCTGCACT  
ACCTCTACGCAAAGATATTTTCATGAAAACCTACAGAGGAACGTACCGGATTACCTGTCTTTTCATATTAT  
GAATGAACCTTCGGCCGCTCTCTTTGCTTCGATGTTGGATGTCAAGAA

+  
FFFFFFFFFFFFFFF:FFFFFFFFFFFF:FFFFF,FFFFFFFFFFFFFFFFFFFFFFFFFFFFFFFFFFFF:F  
FFFFF:FFFFFFFFFFFFFFFFFFFFF:FFFFF:FFFFFFFFFFFFFFFFF

@A00721:190:HGJW7DSXY:4:2276:15817:15765\_1:N:0:TCTGCAAG+GCTGCACT  
ATTCTACGTAGTTTATGACTTTGGTGGTGGTACTTTTCGATACTTCTATCGTCTTACGTTACGGTAAT  
TACTATAGTGTTATTTATTCTGGTGGTGGTATGATAATCTTGGAGGTCGTGACGTTGATGAAGCTATAAG  
AGC

+  
FFFFFFFFFFFFFFFFFFFFFFFFFFFFFFFFFFFFFFFFFFFFFFFFFFFFFFFFFFFFFFFFFFFFFFFFFFFFFFFF  
FFFFFFFFFFFFFFFFFFFFFFFFFFFFFFFFFFFFFFFFFFFFFFFFFFFFFFFFFFFFFFFFFFFFFFFFFFFFFFFF  
FFF

@A00721:190:HGJW7DSXY:4:2249:16785:34569\_2:N:0:TCTGCAAG+GCTGCACT  
CACAACCTTTCAGTTTCACAACCTGAAGGAGGAGTTTCTGTTACTGGAAAACCTCGTCAATACTTTTC  
AATAATATACGTCTTGAACCTCACTTATGACGATCTAGTGAAATTAACG

+  
FFFFFFFFFFFFFFFFFFFFFFFFFFFF:,FFFFFFFFFFFFFFFFFFFFFFFFFFFFFFFF,FFFFFF:FF:FFFF:FFF  
FFFFFFFFFFFFFFFFFFFF:FFFFFFF,FFFFFFF:F::FFFF,F::FFFF

@A00721:190:HGJW7DSXY:4:1175:2302:29590\_1:N:0:TCTGCAAG+GCTGCACT  
TACTATTATGAACAAAGTTATCAAAGATAGTGGCATTCAAGGCAAACCTTACCCTGATTCCGGCCGGTG

GTAGCTCATTTCTACCAGGGGCTATTACTCTTGCTGAAACAGCTATTAAAGCTGTTGAGCGGGTAATT  
ACA

+

:FFFFFFFFFFFFFFFFFFFFFFFFFFFFFFFFFFFFFFFFFFFFFFFFFFFFFFFFFFFFFFFFFFFFFFFF  
FFFFFFFFFFFFFFFFFFFFFFFFFFFFFFFFFFFFFFFFFFFFFFFFFFFFFFFFFFFFFFFFFFFFFFFF  
FFF

@A00721:190:HGJW7DSXY:4:1255:8793:36949\_2:N:0:TCTGCAAG+GCTGCACT  
ATCGCTGAAGGATGTGCACTCTTTTCTGCTACTTTAACGGAGCGTAGTGTACTCTTCGTCGATTGTAT  
CAACAGTAACATTACTTCTAATAAAGGTCTCTATCAAGCTCGTATTAT

+

FFFFFFFFFFFFFFFFFFFFFFFFFFFFFFFFFFFFFFFFFFFFFFFFFFFFFFFFFFFFFFFFFFFFFFFF  
FFFFFFFFFFFFFFFFFFFFFFFFFFFFFFFFFFFFFFFFFFFFFFFFFFFFFFFFFFFFFFFFFFFFFFFF

@A00721:190:HGJW7DSXY:4:1113:7979:1720\_1:N:0:TCTGCAAG+GCTGCACT  
TTACCGTTGAAGGCTAAACTCCAAGGTAATTATGAAGACTGTGATTTATCTTTCCTCTGGCCTTGTA  
TGAGGGTGTTTCTAATCGTAACATTAATAATTTCAATCTTCTTAAAAAGAAGATAGAGAGTCATACTT  
TGG

+

FFFFFFFFFFFFFF:FFFFFFFFFF:FFFFFFFFFFFFFFFFFFFFFFFFFFFFFFFFFFFFFFFFFFFF:FF  
FFFFFFFFFFFFFF:FFFFFFFFFFFFFFFFFFFFFFFF:FFFFFFFF:FF:F:FFFFFFFFFFFFFFFF,FFF  
FFF

@A00721:190:HGJW7DSXY:4:2411:19976:10410\_2:N:0:TCTGCAAG+GCTGCACT  
GATAGCCAATATTGAAGTGACACCTCTGGTAGTATCGAAGTAAAGATAACCAATAAGGAAGGAGCTT  
ATACTATGGTTGAATCAACTAAGCATACTACTTTTGCTTTGATTACTC

+

FFFFFFFFFFFFFFFFFFFFFFFFFFFFFFFFFFFFFFFFFFFFFFFFFFFFFFFFFFFFFFFFFFFFFFFF  
FFFFFFFFFFFFFFFFFFFFFFFFFFFFFFFFFFFFFFFFFFFFFFFFFFFFFFFFFFFFFFFFFFFFFFFF

@A00721:190:HGJW7DSXY:4:2164:29487:5055\_1:N:0:TCTGCAAG+GCTGCACT  
GTCTAAGGTTAAAGAGTCGATTAAACAAGTTGTACTTATCAATGATTTTATCGCTGGTTGTTATCTCG  
AAAAGTCTCTTCTAAAAGGAACGTCAGTTCTAACCCAAAGAGAATATCTAAATATTTACAAAATCTT  
ACC

+

FFFFFFFFFFFFFFFFFFFFFFFFFFFFFFFFFFFFFFFFFFFFFFFFFFFFFFFFFFFFFFFFFFFF:FF:FFFFFFFFFFFF  
FFFFFFFF:FFFFFFFFFFFFFFFFFFFFFFFFFFFFFFFFFFFFFFFFFFFFFFFFFFFFFFFFFFFF:FFFF  
FFF

@A00721:190:HGJW7DSXY:4:1261:2582:3646\_2:N:0:TCTGCAAG+GCTGCACT  
AGACGTTGCTTGTGCTTCCTCTTTAATGGCACTACCTCGGTACAATCTTACTTGGAACGAAGGCGA  
CCTGTTCCGGAGTTTTTACGGGATCCGGAATGTTCTGTCTATATTAGG

+

FFFFFFFFFFFFFFFFFFFFFFFFFFFFFFFFFFFFFFFFFFFFFFFFFFFFFFFFFFFFFFFFFFFF:FFFFFFFFFFFFFFFFFFFF  
FFFFFFFFFFFFFF,FFFFFFFF:FFFFF,FFF:F,FFF:F:FFFF

@A00721:190:HGJW7DSXY:4:1343:27227:6809\_2:N:0:TCTGCAAG+GCTGCACT  
TCGAACGTCAACGTTACCGAGTTTCGTTTCGTACCTTGATGCTGACTTTCGTCAATATGATTTGATC  
TGTTGCTCAATTCTAAGCGTGTTCGCTTAGTGCGAGGCCTCTCTTC

+

FFFFFFFFFFFFFFFFFFFFFFFFFFFFFFFFFFFFFFFFFFFFFFFFFFFFFFFFFFFFFFFF:F:FFFFFFFFFFFFFFFFFFFF  
FFF,F:FFFFFFFFFFFF:FFFFFFFFFFFFFFFFFFFFFFFFFFFFFFFFFFFFFFFF

@A00721:190:HGJW7DSXY:4:2259:31919:8328\_2:N:0:TCTGCAAG+GCTGCACT  
AAATACTAGATATTTGGATGATCTTGATAAAGAACTTCATGAATTTTCAGAGGATGAAAAATTTTCTT  
CCTTGATTTTAAATATAAAGAATCTTTACCAGTACTCTACTACAGGA

+

F:FFFFFFFFFFFFFFFFFFFFFFFFFFFFFFFFFFFFFFFFFFFFFFFFFFFFFFFFFFFF:FFFFFFFFFFFFFFFFFFFF  
F:FFFFFFFFFFFF:FFFFF:FFFFFFFFFFFF,FFFF:FFFF:FFFF

@A00721:190:HGJW7DSXY:4:2362:31964:34428\_1:N:0:TCTGCAAG+GCTGCACT  
ATCGTAAGAAGTTTATAAGGAACATATCCATTTGTTGTAATAGGTCATCAACTTAGAACTCGAACT

CTAAGTGGTAATACTGTCTTTCCAAGCTTACCTGTATCTTCAATGAAATTGGACTCTTCGATAGGGGA  
CAT

+

FFF:F:FFFF:FFFFFF:FFFFF:FFF:FFFFFFFF:FFFFFFFFFFFFFFFFFFFFFFFFFFFF  
FFF:FFF:FFFFFFF:FFFFFFFFFFFFFFFFFFFF:FFFFFFFFFFFFFFFFFFFF:FFFFFFFFF  
FFF

@A00721:190:HGJW7DSXY:4:2139:31168:10285\_1:N:0:TCTGCAAG+GCTGCACT  
CTACTAATGGCGTTGGCCTAGTGGATGTTATTAGTGACATCTGGTCAATTCGTTTTTAGGTGGTCTT  
TATTCTATTATTGATTTTATGAGATTGATACGTTAACAGAAGATGATGTTAGAGTAGAATTCCTGAA  
GAG

+

FFFFFFF:FF,FFFFFFFFFFFFFFFFFFFFFFFFFFFFFFFFFFFFFFFFFFFFFFFFFFFF:FFFFF::FF  
FFFFFFFFFFFFFFFFFFFFFFFFFFFFFFFFFFFFFFFFFFFFFFFFFFFFFFFFFFFFFFFFFFFFF  
FFF

@A00721:190:HGJW7DSXY:4:1638:32606:6261\_2:N:0:TCTGCAAG+GCTGCACT  
CCAACCTTCTTGACAATTTCTTCAATCCTTCGATAATAGTTAAATCTAGGATTATGTCTGTGTTGAAA  
GACTTCTACCGATAAGGGTCACTAGTCTTACACAATTAAGAAATAAT

+

FFFFFFFFFFFFFFFFFFFFFFFFFFFFFFFFFFFFFFFFFFFFFFFFFFFF::FFFFFFFFFFFF:FFFFFFFFF  
FFFFFFFFFFFFFFFFFFFFFFFFFFFFFFFFFFFFFFFFFFFFFFFFFFFF:FFFFFFF

@A00721:190:HGJW7DSXY:4:1660:10384:24048\_2:N:0:TCTGCAAG+GCTGCACT  
GATTATCTAAAGATTGAAGGAAAATTTATCCTCGTTTAACTTACTTAGACTTTCCTACGATACAAAT  
GATAACTTCTAATTTACGTTTGCTACTCAGAGCTGGTCCTCTCAGCAA

+

FFFFFFFFFFFFFFFFFFFFFFFFFFFF:FFFFFFFFFFFFFFFFFFFFFFFFFFFFFFFFFFFF:FFFFFFFFFFFF  
FFFFFFFFFFFFFFFFFFFFFFFFFFFFFFFFFFFFFFFFFFFF:FFFFFFFFFFFFF

@A00721:190:HGJW7DSXY:4:1620:23827:21120\_2:N:0:TCTGCAAG+GCTGCACT  
TCCTCAGGAGTCCCGGCATTTGATAATAATGACGACTTTCGTCATAATCGCTGCATATTACGGATTAC  
ACGGTACCAGCGCATCTCGTGTCGAGCCTCGACCCGATTATATGGTAT

+

FFFFFFFFFFFFFFFFFFFFFFFFFFFFFFFFFFFFFFFFFFFFFFFFFFFFFFFFFFF  
FFFFFFFFFFFFFFFFFFFFFFFFFFFF:FFFFFFFFFFFFFFFFFFFFFFFFFFFFF

@A00721:190:HGJW7DSXY:4:1360:8974:22576\_2:N:0:TCTGCAAG+GCTGCACT  
TCTAGAATTCTTAATTATAATATTCAACCTCAAAGTTACGTGTTTACAGTAACGAGATCACACATTT  
TGAGAACTAACTATGTTATGTTCTCTGATCATTTTGACAATCTCTTCT

+

FFFFFFFFFFFFFFFFFFFFFFFFFFFFFFFFFFFFFFFFFFFFFFFFFFFFFFFFFFF  
FFFFFFFFFFFFFFFFFFFFFFFFFFFFFFFFFFFFFFFFFFFFFFFFFFFFF

@A00721:190:HGJW7DSXY:4:1663:11460:32831\_2:N:0:TCTGCAAG+GCTGCACT  
AAATAAATAATATTACTAATGGCAAATAGTGGAAGGCTCCAGTCAACACTAGTTCGAGTGCTGCTTT  
GGATTACGATGACGTGAGAATAGGTGAAGGGATAGTTTTTACCTCGAC

+

FFFFFFFFFFFFFFFFFFFFFFFFFFFFFFFFFFFFFFFFFFFFFFFFFFFFFFFFFFF  
FFFFFFFFFFFFFFFFFFFFFFFFFFFFFFFFFFFFFFFFFFFFFFFFFFFFF

@A00721:190:HGJW7DSXY:4:1461:16495:28714\_1:N:0:TCTGCAAG+GCTGCACT  
TCTTAAAGCTTACCCAAAATGAAGGACACTTCGAAACTGAATAATGATGCACTACAAACAAGTATCG  
CTAATCATCTGAAAAAGGCTCTAAAGGACACTATACAATATCCAGACGACGACGAAGCTTATACAATA  
TCC

+

FFFFFFF:FFFFFFFFFFFFFFFFFFFFFFFFFFFFFFFFFFFFFFFFFFFFFFFFFFFFF  
FFFFFFF,FFFFFFFFFFFFFFFFFFFF:FFFFF:FFFFFFFFFFFFFFFFFFFFFFFFFFFFFFFFFFFF  
FFF

@A00721:190:HGJW7DSXY:4:2130:19180:16736\_2:N:0:TCTGCAAG+GCTGCACT  
ACCACATTTTGGTCAAGTCAATCCGTTGAGAAAATTTCTTAGAGGATATTCGCCATTGTGGTACGAAT

$+$ 

@A00721:190:HGJW7DSXY:4:2269:31675:3082\_2:N:0:TCTGCAAG+GCTGCACT  
ACCAGATTGGTTCGAACCCGTTGATGCTATGTCAGAAGAAGCTATTCAAGCTTGTCGTTTAAAGACTG  
CAGAGGCTGTCAAACAAGCCAGACTCAAGGAGTCCAATCAAAGGTTT

+

@A00721:190:HGJW7DSXY:4:2657:13268:28291\_1:N:0:TCTGCAAG+GCTGCACT  
TTATTTAGAGATCTTTTCTACTTACAAAGGACAATTCTAGTTTCATTAATTCTACGGAAAAGTCCGGAG  
TATATTGTATGTTAATAGATAGTGGGATAATAGTTCTACCGATACGTAGTGAACGCGTTCGTAGAACC  
AAG

+

@A00721:190:HGJW7DSXY:4:1303:9001:16203\_1:N:0:TCTGCAAG+GCTGCACT  
ACCGATAGGAGTTGTATAGTTGAAGATGTGGCTTTAGACGATAATCCTTTAAGGACTATGTTGACTGA  
CGAAGATTTTCCCACAGATTTGTCTACGTTGCAGATCGCCACTCCAAACACTATATACATTATAAAAT  
ATA

+

@A00721:190:HGJW7DSXY:4:2503:7193:4648\_1:N:0:TCTGCAAG+GCTGCACT  
ATAACTTTTGTACCAAATTCTTGGCTTTCAACGAAGTCTCTGATTTTATTAATCATTACTTTAAACGA  
TCTCTCGGTCATTTACTCTGTACTTGATCTACGTCGTTTAACTGTCGGAACAACCTTTACTTAGAATG  
AC

+

@A00721:190:HGJW7DSXY:4:1316:31882:32315\_2:N:0:TCTGCAAG+GCTGCACT  
TCTTATATTATTTACAATAGTTAATATCATATTAGTAATACTCACTATCGTTTTCTGCTTTTTCTTAG  
CTAATAGATTAATAAAGGATGAGTACGAAAACCAACTCTTCGTTACGA

+

@A00721:190:HGJW7DSXY:4:2676:18792:8860\_1:N:0:TCTGCAAG+GCTGCACT  
TATAATAGTTTTAGTCTCTACCCCATCTCAACGAGGATAAAGCGTGTTCCTGCTCCTGAACGTAATA  
CACGAAGAGATCATCCGCAAACGACTCGAAACCGAGACGCCGTAGATCAAAGTCCCTTCTAACTTTAG  
AT

+

@A00721:190:HGJW7DSXY:4:2339:32768:8484\_1:N:0:TCTGCAAG+GCTGCACT  
CATTTTATAGCAGTTATTTATGTTGTACTTTTTATAATTTATAACCTTCTTATACTTTTGGGTATGTT  
TTGTGAAAAACATGAGATACCCAAGTCTATCGAAGACATTATCTCTTATGTACTTATTGTAACGATCA  
TTC

+

FFFFFFFFFFFFFFFFFFFFFFFFFFFFFFFFFFFFFFFFFFFFFFFFFFFFFFFFFFFFFFFFFFFFFFFFFFFFFFFF  
FFF

@A00721:190:HGJW7DSXY:4:2547:5882:6856\_1:N:0:TCTGCAAG+GCTGCACT  
TTCTTTTATTCTTTAACTGTGTATGAGGAGGATTTATAATGCTTTTCGATAGTGATTGTTATCAATT  
TAAATACATTACTGTTTCAAATCATCTTTACTCACAGACTCCGAAAATGGTTTCAAATGAGGTCAAAG  
CTC

+  
FFF::FFF,FFFF:F:FFFFFF:FFFFFFFF:FFFFFFFFFFFF:FFFFFFFFFFFF:FFFFFFFFFFFF, F  
FFFFFFFFFFFFFFFFFFFFFFFF:F:FFFFFFFFFFFFFFFFFFFFFFFFFFFFFFFFFFFFFFFFFFFFFFFF  
F:F

@A00721:190:HGJW7DSXY:4:1551:16179:30796\_2:N:0:TCTGCAAG+GCTGCACT  
TATTATCCGATTCTTCGAGGGTATCACTACCACTGATCTGCCGACTTTAGTCAAGGAACCTCAATTCC  
TTCGATGTTTATATTTTCTATAAGGGAAAATAGCAATAATCAAATTT

+  
FFFFFFFFFFFF:FFFFFFFF,FFFFFFFFFFFFFFFFFFFFFFFF:FFFFFFFF:FFFFFFFF  
,FFFFFFFFFFFFFFFFFFFFFFFFFFFFFFFF:FFFF:FFFFFFFF

@A00721:190:HGJW7DSXY:4:2134:21079:30608\_2:N:0:TCTGCAAG+GCTGCACT  
AACTTTATTTCAGAACTCTCTCCGATCACCTTGGTGTGATCTCCCGGAGGATCTTTCAATAAGATGT  
ATGATGATAATCTACTATTTTAAATAGTGATATTCAGCGTATACTTG

+  
FFFFFFFFFFFFFFFFFFFFFFFFFFFFFFFF:FFFFFF,FFFFFFFFFFFFFFFFFFFFFFFFFFFFFFFF  
FFFF:FF:FF:FFFFFFFFFFFFFFFF:FFFF:FFF::FFFFFFFF

@A00721:190:HGJW7DSXY:4:2572:17300:19210\_1:N:0:TCTGCAAG+GCTGCACT  
GGCTTGCTATTTACCGCAAAAAGTTGAAGAGGTCTATGATATTTATTTTACTTATACTTTAAATA  
GCACCGATTATAACTTGACTGTTGATAATATTACAATAGCTCTTCTCAGAAGATTAGAGAAGTAACC  
GGT

+  
FFFFFFFFFFFFFFFFFFFFFFFFFFFFFFFFFFFFFFFFFFFFFFFFFFFFFFFFFFFFFFFFFFFFFFFFFFFF  
FFFFFFFFFFFFFFFFFFFFFFFFFFFFFFFFFFFFFFFFFFFFFFFFFFFFFFFFFFFFFFFFFFFFFFFFFFFF  
FFF

@A00721:190:HGJW7DSXY:4:1660:7780:35947\_1:N:0:TCTGCAAG+GCTGCACT  
GTAGCATTGATTTACTTTTACCGTTAGAACTGAAAAAGATTCTTTTCGAAAAGAAACCTATAAGTTAC  
AAACGATTCTTCGACTATATTAAAGAAATAAAAATACTTCAAGTACCTGAACTTTACATTTTAAATGG  
TAT

+  
FFF:FFFFFFFFFFFFFFFF,FFFFFFFFFFFFFFFF, ,FFFFFFFFFFFFFFFF:FFFFF  
FFFFFFFFFFFFFFFFFFFFFFFFFFFFFFFF:FF,FFFFFFFFFFFFFFFF:FFFFFFFFFFFFFFFF  
FFF

@A00721:190:HGJW7DSXY:4:2534:17978:2284\_1:N:0:TCTGCAAG+GCTGCACT  
TTACAAATAGAACCTTCACTCTCGTAATGAGAGTGATTCCTTAATATTCTAGTAACCGCTATGTGG  
GCATTACTAGGATTTATCACACTCCTAAATTTGATAGCAATTTATGTTTTAAATGCTAGGAAAATTT  
AGA

+  
FFFF:FFFFFFFFFFFFFFFFFFFFFFFFFFFFFFFF:FFFFFFFFFFFFFFFF,FFFFFFFFFFFF  
FFFFFFFFFFFFFFFFFFFFFFFFFFFFFFFF::FFFFFFFFFFFFFFFFFFFFFFFFFFFFFFFFFFFF  
FFF

@A00721:190:HGJW7DSXY:4:1304:15438:29136\_1:N:0:TCTGCAAG+GCTGCACT  
GTATAGTTCAAGGAGTACTTAATTCAATAGCTTTAGTATTATTTACTATCGCCTTTATTGAAAATTGT  
ATAAGAGTTAATTGCTTACACAAAAGTGACGCGCAAGGAATCTTAATTGATTGAAGCTAGGCGTTGG  
GG

+  
FFFFFFFFFFFFFFFFFFFFFFFFFFFFFFFFFFFFFFFFFFFFFFFFFFFFFFFFFFFFFFFFFFFFFFFFFFFF  
FFFFFFFFFFFFFFFFFFFFFFFFFFFFFFFF:FFFFFF:FFFFFFFFFFFFFFFFFFFFFFFFFFFF  
FF





FFFFFFFFFFFFFFFFFFFFFFFFFFFFFFFFFFFFFFFFFFFFFFFFFFFFFFFFFFFFFFFF  
FFFFFFFFFFFFFFFFFFFFFFFFFFFFFFFFFFFFFFFFFFFFFFFFFFFFFFFFFFFFFFF  
@A00721:190:HGJW7DSXY:4:2262:21206:31328\_2:N:0:TCTGCAAG+GCTGCACT  
AAATTCCCACATATGGTAGACGTGTGCACACTTTTCTTGAAAATTTTTCTTTTCCTCCGTCATTGGGG  
ATTCGATGTGAGAAGGTGGAAGGTGTCAAGGGTCTTCTTCATGCTGA  
+  
FFFFFFFFFFFFFFFFFFFFFFFFFFFFFFFFFFFFFFFFFFFFFFFFFFFFFFFFFFFFFFF,:FFFF  
FFFFFFFFFFFF,FFFFFFFF:FFFFFFFFFFFFFFFFFFFFFFFFFFFFFFFF  
@A00721:190:HGJW7DSXY:4:1561:10529:6480\_1:N:0:TCTGCAAG+GCTGCACT  
TTCAGACGTGTGCTCTTCCGATCTCGGCTCGTATCGAGTTGGAGGGAGGAAGTTCTCCGAAATTAAG  
ACGGGGGGGATTAAGAGTCCAGCTGTAAGTGTCAATTCAGAGAGGGGAGCTCTGAAAAGGAACTTCGT  
CAG  
+  
FFFFFFFFFFFFFFFF,FFFFFFFFFFFFFFFFFFFFFFFFFFFFFFFFFFFFFFFF:FFFFFFFFFFFFFFFF  
FFFFFFFFFFFFFFFFFFFFFFFFFFFFFFFFFFFFFFFFFFFFFFFFFFFFFFFFFFFFFFFFFFFFFFFF  
FFF  
@A00721:190:HGJW7DSXY:4:2313:19425:17378\_2:N:0:TCTGCAAG+GCTGCACT  
AGAGGGGAGGAGTTTGAGGAAGGCTCTAGAGAAGATCTCACCACTGGAGAAGGCAAGTGGAGAGTCC  
AGAAGTTGATGAAGAAGGATTATTTGAAGCAGGGGTTACCACTTCCTA  
+  
F:F:FF:FFFFFFFFFFFFFFFF,FFFF:FFFFFFFF:FF:FFFFFFFFFFFFFFFF::FFFF:FF  
FFFFFFFFFFFFFFFFFFFFFFFF::FFFFF:,::FFF::FF::F:FF  
@A00721:190:HGJW7DSXY:4:2161:27353:19147\_2:N:0:TCTGCAAG+GCTGCACT  
TCTTTGGAGTTTTAGATAATCTTTTGAGAAGGGTTCATAGAGCCAGCAAGAGAAGCTTATATGCTGGT  
TTAAGTGATGATTATCACTCCTTGAGAAGACAAGCCACATTAAGATAT  
+  
FFFFFFFFFFFF,FFFFFFFFFFFFFFFFFFFFFFFFFFFFFFFFFFFFFFFFFFFFFFFFFFFFFFFF  
FFFFFFFFFFFFFFFFFFFFFFFFFFFFFFFFFFFFFFFFFFFFFFFFFFFFFFFF  
@A00721:190:HGJW7DSXY:4:1319:18304:15436\_2:N:0:TCTGCAAG+GCTGCACT  
AATGTCAATTAGTGCCTTACGATTGAAAGAGGTCTTTTTGAGTATCGACAGATCTTTCGATCTTGAGGA  
CGTACATTTAACGTGGCAGAATTCGGTAAGTACCATATTGTTCTCTTC  
+  
FFFFFFFFFFFFFFFFFFFFFFFF:FFFFFFFFFFFFFFFFFFFFFFFF:FFFFFFFFFFFFFFFF:FFFFFFFF  
FFFFFFFFFFFF:FFFFFFFFFFFFFFFFFFFFFFFF:FFFFFFFF:FFFFF  
@A00721:190:HGJW7DSXY:4:1165:1850:5259\_1:N:0:TCTGCAAG+GCTGCACT  
ATTTAACTTTGACTCAACTACTCCGATCAGATCCGATGTTTGATTGGTATGGACTACTCGACTTTT  
GATCTGGAGTTGTCTAGGGTTCATGGCAGATACTACCGATAAGGTGAAAAATATGCAGGTCAAAGATTC  
TGT  
+  
FFFFF:FFFFFFFFFFFFFFFFFFFFFFFFFFFFFFFFFFFFFFFFFFFFFFFFFFFFFFFFFFFFFFFF  
FFFFFFFFFFFFFFFFFFFFFFFFFFFFFFFFFFFFFFFFFFFFFFFFFFFFFFFFFFFFFFFFFFFFFFFF  
FFF  
@A00721:190:HGJW7DSXY:4:1577:17635:7138\_2:N:0:TCTGCAAG+GCTGCACT  
GAGGGAGCCGTTTTGGCCGACTTTAACTATTCTAAGAGTCTTTATGATTCAAACCTATCGTTGTCGT  
ACCTTACAAGTTGAGGAGACTTTACAGCGGCTTATTGTCGCGCAGTT  
+  
FFFFFFFFFFFFFFFFFFFFFFFFFFFFFFFF:FFFFFFFFFFFFFFFFFFFFFFFFFFFFFFFF:FFFFFFFFFFFFFFFF  
FFFFFFFFFFFFFFFFFFFFFFFF:FFFFFFFFFFFFFFFF:FFFFFFFFFFFFF  
@A00721:190:HGJW7DSXY:4:1122:12310:25535\_1:N:0:TCTGCAAG+GCTGCACT  
TATCTTGAATGCTCACGCCGTCGAGCATATCGAGACTATGTTATAATCACTTGTTAAAGTACAGAT  
Ttagtgatttagatattattgatattggaggcgatatcgttttcatatccaaaactccttgaatgga  
gta  
+

@A00721:190:HGJW7DSXY:4:1175:17074:13933\_1:N:0:TCTGCAAG+GCTGCACT  
ACCCTATTCTTGATGTGAAAGATGCATCGAGGTATACGTCTAGGAACATTGATTGGGAACGTACCTAC  
TCACGAGACGTCATGAAAGCTATCGGAGGGAAGCAAAATGTTTCGTTCTGTTACAAGAACGCTTTGGA  
TTG

@A00721:190:HGJW7DSXY:4:1269:20148:13307\_2:N:0:TCTGCAAG+GCTGCACT  
CTCAGTTGCGATAGCTGTAGAGGTATACGATATCTCTTTGATGATGTAGCCACTATAATGCTTAAGA  
GAGAGATTGATGTATGTCATTTCTGTTAGTTTGTCCCGGCGAATTAT

@A00721:190:HGJW7DSXY:4:1209:19877:26772\_2:N:0:TCTGCAAG+GCTGCACT  
AAAAATGACATACCCGTTCTGACCTTGGTATCGTTATCCGTCATGGAGATGATGGCGCATCACTTGA  
TTACTATATGCCCGAAGGATTGGGTTATTCTCACAACAAAGATAAGAT

@A00721:190:HGJW7DSXY:4:1177:20428:27445\_2:N:0:TCTGCAAG+GCTGCACT  
AAGGGCGGACAATTGTTCCATTGTGAACCTTTGGGGACTAGATTGAGCATTAAATGAGTTCCGAATAAC  
TCGTAATAAATCTTTCTCTAGTGGACAATTCAGAATACCTATTTCCGT

@A00721:190:HGJW7DSXY:4:1404:14805:11913\_1:N:0:TCTGCAAG+GCTGCACT  
CTGCCAATCTCATCGCTATACGCATACCTGATTGGAAGAAGCGAGTTTCGTTCTCAATAAAAAATTTT  
TCTCAAGAGATTATGGTTGATAAAGTTTTCTTCATAAGGGCTATTCAGTACGTCATGGGGATCACTTC  
TTC

@A00721:190:HGJW7DSXY:4:1509:6813:32863\_1:N:0:TCTGCAAG+GCTGCACT  
ACCTTCGAATATGTTACGACATGGCTTCGTAACAACAGTGCGAGGATTGTCATCTCGGGGAAAGTGAT  
TCACCAAGATGTTTCATATAGATACGAGATACCTAGAGAAGGTCGCAGCGATCTTACTCGTTATCGGAG  
CTA

@A00721:190:HGJW7DSXY:4:2621:5927:18928\_2:N:0:TCTGCAAG+GCTGCACT  
GTTATGCTCGAACTTAACGTTAGTACCGGAGGTGATCTCTCTGCTTCTGCGTTACTGAGAGAAAAG  
ATTCAGGACGCCTACGGTGACTTTATGGACAAGATGCAAGAGATCGGA

@A00721:190:HGJW7DSXY:4:1109:31421:6214\_1:N:0:TCTGCAAG+GCTGCACT  
GCTCTTCCGATATGACAACGAATATTGAACTACGGTCCTTATCAAAGAAAATGGTGAACCGGTCTCT  
AAATCTTTTGAGATTGAGAAGATTGAAGAACACGTCAAGAAGTCGCTCGGCGTTGTTCTTGAAACCA  
AGT

+  
FFFFF,FF:F,FFFFFF::FF:,FFFFFFFFF:FFF:FFFF,FFFF,FF:FFFF:F:F:F:FF:F  
FFFF:FFFFFFFFFFFF,FF:FFF:FFFF,FFFFFFFFFFFFFFFFFF:FF:FFFFFFFF:FFFF:FF  
F:F  
@A00721:190:HGJW7DSXY:4:1570:3477:12117\_1:N:0:TCTGCAAG+GCTGCACT  
GCTGATCATGGAGTCTTTGTACCTTCTGTCAAACCTTCGAGGTTGAGTACGAGAGGTGATCCCGGATG  
TGGATTGAAGGCTGGCTCTAAGGGAGACTCCTTCTTTTTGAATGTTGTAAAGAATTGGGTTGAGAAGT  
GTG  
+  
FFFFFFFFFFFFFFFFFFFFFFFFFFFFFFFFFFFFFFFFFFFFFFFFFFFFFFFFFFFFFFFFFFFF  
FFFFFFFFFFFFFFFFFFFFFFFFFFFFFFFFFFFFFFFFFFFFFFFFFFFFFFFFFFFFFFFFFFFF,FFFFFFFFFFFFFFFFFFFF  
FFF  
@A00721:190:HGJW7DSXY:4:2101:18927:13886\_1:N:0:TCTGCAAG+GCTGCACT  
CTTGGTATTTCTGAAATAGTTTATCAGAGCGTCATTTTCCTTTGGGATCTTTCCTCTGGTAAGGGAAT  
TATTAAATCATTCTTCTCACTCTTGACGAGAATTATTACTGTTTTCTCTACCCATAACTTCTTTTTCA  
AAA  
+  
FFFFFFFFFFFFFFFFFFFFFFFFFFFFFFFFFFFFFFFFFFFFFFFFFFFFFFFFFFFFFFFFFFFF  
FFFFFFFFFFFFFFFFFFFFFFFFFFFFFFFFFFFFFFFFFFFFFFFFFFFFFFFFFFFFFFFFFFFF  
FFF  
@A00721:190:HGJW7DSXY:4:1308:28384:1924\_2:N:0:TCTGCAAG+GCTGCACT  
TTTCTACAGAGTGCAGTCGTTTCAACACTTATCACCACCTTTTGAAGGAAAATAATTGGTGATGAAA  
ATACGTATGTCGGTGGGGTTCTCAAGGCTCTCATCGCCACTGGGATTC  
+  
FFFFFFFFFFFFFFFFFFFFFF,F,F:FFF:FFF,F:FFFFFF:,FFFF:FFFF:FF:,FF,,F:,FF  
F::,FF:F:F,FF:FFFFFF:F,FFFF:F:F:FF,,FFF:,FFFFFF,  
@A00721:190:HGJW7DSXY:4:1533:29613:29356\_2:N:0:TCTGCAAG+GCTGCACT  
TTTGGTCTTACGTCTTAAGTAATTTGGATGTTGTGCAAACTATCAGGTTCTTGTCACGATTCTTAA  
AAGAAGTTTATTAACAACTTCAGAGTCTCTTGAAGTCCAGGTAGCTAA  
+  
:FFFFFFFF:FFFFFFFFFFFFFFFFFFFFFFFFFFFFFFFFFFFFFFFFFFFFFFFFFFFFFFFFFFFF  
FFFFFFFFFFFFFFFFFFFFFFFFFFFFFFFFFFFFFFFFFFFFFFFFFFFFFFFFFFFF  
@A00721:190:HGJW7DSXY:4:2570:14588:29700\_2:N:0:TCTGCAAG+GCTGCACT  
GGGAAAAGAGACCTCTGTTGGTAGAGGAGTTGAGAGAATTACTCAGATTCAATCTGGCATCACTGAAC  
GTCTACAACGAGTTAGGGGGTGGCTAGGTTTTAAAGATCCTTTGCAC  
+  
FFFF,:FFF:FFFFFFFF:FFFFFFFFFFFFFFFFFFFFFFFF:FFFFFFFFFFFFFFFFFFFF  
FFFFFFFFFFFF:FFFFFFFFFF::FFFF:FFFFFFFF:FFFF  
@A00721:190:HGJW7DSXY:4:2246:9579:2268\_2:N:0:TCTGCAAG+GCTGCACT  
CGTCGCGGAAAACGATGAAGATTTCCACACTGTTGAGAATCTTCTGATGCTGAATTTGAGGAAAATT  
TTTCGGAAGTTTTTGGTATAAATCCTGATGGCTCAGTACAGGGAGGAG  
+  
FFFFFFFFFFFFFFFFFFFFFFFF:FFFFFF:FF:,FFFF:FFFFFFFF,FFFF:::FFFFFFFF,  
F:FF:FFFF,:FFFF:FFFFFF,,FF,FF,FFFF:F,FFFF:F  
@A00721:190:HGJW7DSXY:4:1150:2519:36198\_2:N:0:TCTGCAAG+GCTGCACT  
ACCTTCTTTTATCATTGCAACAGGACTTTGAGAAGACTGTTGAAATGGACAAAATCTGGGATCATAGG  
TATGTGTCACGCTACACTCGAAATATGGGCCCTCATAAGGAAGTATAG  
+  
FFFFFFFFFFFFFFFFFFFFFFFFFFFFFFFFFFFFFFFFFFFFFFFFFFFFFFFFFFFFFFFFFFFF  
FFFFFFFFFFFF:FFFFFFFFFFFFFFFF:FFFF:FFFFFFFFFFFF  
@A00721:190:HGJW7DSXY:4:1211:21151:10316\_2:N:0:TCTGCAAG+GCTGCACT  
GGAAGATCTCTACAGAGATTATCGAGAGTTGTGATCTAGTTCTAAATTTAGGTGACGGAAGTTAGCA  
ACTTTAGATAAATTCTTCCGGGCTCAATGACCTTTGCTATGTACGTG  
+

FFFFFFFF:FFFFFFFFFFFFFFFFFFFFFFFF:FFF:FFFFFFFF:F:F:FF,FFFF:F  
F:FFFFFFFFFFFFFFFFFFFFFFFF:FFF:FFFFFFFF:FFFFF  
@A00721:190:HGJW7DSXY:4:1227:12156:15186\_1:N:0:TCTGCAAG+GCTGCACT  
TTAGTTCATGAAGTTCTTACACTTCTCGCGACTAATGTCAGCTTCACTACAAAGGCGTTACGTAAAGT  
AGTTTTACGCTTTATCTTAAAGCATTACCACCAAATTTAGCACTTTTTGAATATGACAGAAGCTCGC  
CAT  
+  
FFFFFFFFFFFFFFFFFFFFFFFF:FFFFFFFFFFFFFFFFFFFFFFFFFFFFFFFF  
FFFFFFFFFFFFFFFFFFFFFFFFFFFFFFFFFFFFFFFFFFFFFFFFFFFFFFFF  
FFF  
@A00721:190:HGJW7DSXY:4:1516:23240:23390\_2:N:0:TCTGCAAG+GCTGCACT  
CCAGTTAGAGTTCTTCTAACCAGGACTGATGGTGAGATTCTTTACCTTTTGGAGGTCCAGGAACCTT  
TACTCCTAGTGTCTTTCTAGAGTCCAAGGACGTTTCCGTCGGAGGAT  
+  
FFFFFFFFFFFFFFFFFFFFFFFFFFFFFFFF:FFFFFFFFFFFFFFFF:FFFF  
FFFFF:,FFFFF:FFFFFFFFFFFFFFFFFFFFFFFFFFFFFFFF  
@A00721:190:HGJW7DSXY:4:2461:21278:8750\_1:N:0:TCTGCAAG+GCTGCACT  
GCTCAATAACACTCTATTGAATCCCTTTCCACGATGAAAGCTCTTTATGAGGTGCTCCATGCAAATT  
TACAGTTCCTCTTTGGTGATATCGCCTCTGTCCTTTCTCCTTTAATCGTGAGGTTACGAGAGTTTCGT  
ACT  
+  
FFFFFFFFFFFFFFFFFFFFFFFFFFFFFFFFFFFFFFFFFFFFFFFFFFFFFFFF  
FFFFFFFFFFFFFFFFFFFFFFFFFFFFFFFFFFFFFFFFFFFFFFFFFFFFFFFF  
FFF  
@A00721:190:HGJW7DSXY:4:2257:23637:32002\_1:N:0:TCTGCAAG+GCTGCACT  
TTTTGATAAATTTGTTGGAATCGATAATGATACTGACGAAGGTTCTATTACCACCCTTGTCATTGATA  
CAAACATTCTAGGTGATGCTTTCTTAGAGGCTCGTCTAGCCGCTGAGATTGCTCTTACCTATTTACAA  
TCT  
+  
FFFFFFFFFFFFFFFF: :FFFF:FFFFFFFF:FFFFFFFFFFFFFFFFFFFFFFFF  
FFFFFFFFFFFFFFFFFFFFFFFFFFFFFFFFFFFFFFFFFFFFFFFFFFFFFFFF  
FFF  
@A00721:190:HGJW7DSXY:4:2236:31105:9236\_1:N:0:TCTGCAAG+GCTGCACT  
GATAACGATTTAGTACTGGGAAATGGTGGTAGTCAGTTTACTACTTTTCTTTCCCTCCCTTTTTCGA  
TTGGATTGACGGGGTCTTCGTCTCACGACTAATTTGATAAGGTTTTCTTTTATGGGACTCTTGTTT  
GTA  
+  
FFFFF:FFFFFFFFFFFFFFFF:FFFFFFFFFFFFFFFFFFFFFFFFFFFFFFFF  
FF:FFFFFFFFFFFFFFFF:FFFFFFFFFFFFFFFF:FFFFFFFFFFFFFFFF  
FFF  
@A00721:190:HGJW7DSXY:4:1270:18177:15374\_2:N:0:TCTGCAAG+GCTGCACT  
GTTCTTAATGTAGGTCTCCTAGTACTTAAGGGTTTATGTTTCGGTTTCAGCTGGATGGATCTTTGAT  
GGTATGTTTCACATTGCGTGATCACTTCCCGTGGACTTGGAAGAGAT  
+  
FFFFFFFFFFFFFFFFFFFFFFFF,FFFFFFFFFFFFFFFF:FFFF  
FFFFFFFFFFFFFFFFFFFFFFFF:F,FFFFFFFF:  
@A00721:190:HGJW7DSXY:4:2511:22182:25942\_1:N:0:TCTGCAAG+GCTGCACT  
CGATTCTATTATGTCGCTAAAGCCTGTCCAGTTGTCGATGATGTTTCGGGCTGTGGGGATTAACCTCCC  
TCGTGAAACTTACGACGATGTTCTCGCTCGCATTTACAAGGATTACTAAGTCTGAGATCTGCCACTT  
CTA  
+  
F:FFFFFF:::FFFFFFFFFFFFFFFFFFFFFFFFFFFFFFFF:F:FFFFFFFF:F  
FFF,FFFF:FFFFFFFFFFFFFFFFFFFFFFFF:FF:FFFFFFFF,FFFFFFFF  
FFF

$+$ 

@A00721:190:HGJW7DSXY:4:1355:27082:23782\_2:N:0:TCTGCAAG+GCTGCACT  
CTGATTCGGAATTAGAGAAAGACGACCTTCTTGTGGGGACTGAGACCTCTGAATTTTCAGGGTGCCCT  
GATGAGGACGTTGAAAGGGATAATTTCAACTCTGAGACTTCTAAGAGT

 $+$ 

@A00721:190:HGJW7DSXY:4:2237:26847:29387\_2:N:0:TCTGCAAG+GCTGCACT  
ACCAGAAACGTAACAAGAATAAAGGTAGGAAGGGGAGAAAACAGAACAAAGCGAGCGGTTGAAGAG  
AAAACTGATATGGTTGCGGCTGATCGTACCCCAATTCTGCTAGAAAG

+

@A00721:190:HGJW7DSXY:4:2618:3604:5384\_1:N:0:TCTGCAAG+GCTGCACT  
ATACCACTGATCTTCCAGAGTTACGTAGTGTCGTTCTTTGGTGATTTTATCAAAGAGAAAGTTTCT  
GCTAGTCGCGACGATAGTATTTATCGGAGTGATATTAACAAGTTAACTTCGAACTGACCACTTACAA  
GAG

+

@A00721:190:HGJW7DSXY:4:2367:3622:35352\_2:N:0:TCTGCAAG+GCTGCACT  
TCAGTTTTCCAAAAGCTATTAATAGCAGTTGCGGGCTATAATACCGCCTCCAGATTACTCAAACCT  
GAATCAACTCTCTTGGGATATAAATGAGTACATCTATAATAGAGTTTT

+

@A00721:190:HGJW7DSXY:4:2602:28339:32064\_1:N:0:TCTGCAAG+GCTGCACT  
AACATGAATTAGTTATTGAAAGTCTTGACCCTCACGTCTCACTTTATCACCTTGGAGATGGTAAAGTC  
ATTAACAAAGGAAATGTTAAGGCTGATGACTTAAATTTGCACTTCTGCTTCGACGGTAATTCCATAAG  
ACC

+

@A00721:190:HGJW7DSXY:4:1324:29803:28839\_1:N:0:TCTGCAAG+GCTGCACT  
AGAGTGACTGGAGTTCAGACGTGTGCTCTTCCGATCTGTGAGTTATTCTTGCGAAGGTTCAAGTCGAT  
TGATTTTGTGACTACGATCTCTCTTGAATAAGAAGTTCTTCGCAGTTGAATCTCCACCAGGTGGAG  
GGA

+

@A00721:190:HGJW7DSXY:4:1242:13214:3490\_1:N:0:TCTGCAAG+GCTGCACT  
GACTTTTGTGCAATTTTCGCAAAGGTCTTGAAGTACGTATTGTCACTGCTAATCGTAATTCGCGAG  
AAGAGATAGTGACTAAAGTTTGGCACTTCTAGTTCATCGCGGTATTTGTGAAATTAAGACAGACGTG  
AAA

+

.....

@A00721:190:HGJW7DSXY:4:1305:9019:33395\_1:N:0:TCTGCAAG+GCTGCACT  
TCGTATTAGAACAGCTGATTCTTATTGCATGAACGTCGCTGAGGTCAAACCTGTGGACGTTCTTTTCA  
TCGACGAATTATTCATGATTCACGCTGGTCAGACCCTTTTTCTTACACATCTACTTAAGGCGGCTTAT  
ACC

@A00721:190:HGJW7DSXY:4:1470:27263:3552\_1:N:0:TCTGCAAG+GCTGCACT  
GTGATTCCAATCAAATCGGATTCATCAATCGTATTGATCTCCAAGTCGAACTACTTCAACATCAAC  
GACATCATTCTTGATGAGTGTCTTCTTATCGAAGTCTCAGTTATCGCTGCCCGCCGACGTTTGTG  
CGA

@A00721:190:HGJW7DSXY:4:1620:9091:11162\_2:N:0:TCTGCAAG+GCTGCACT  
TACGGCAGAAAAATTTCTCCTGCTTGTAATTCGAGAGAGGACACTATGGAAATTAGACCTATCAGATG  
TCTTGACGACTTCGAATTTGAGGACGGAGTTAAATATATTACTTTTAC

@A00721:190:HGJW7DSXY:4:1220:18511:19648\_2:N:0:TCTGCAAG+GCTGCACT  
CAAAGTCCTTGGTAAGAGTAAGGTTAAATGTGAAGATGCTCAGACTATTTCATGAAGTTCAAGGTAATA  
CTTACCAGCACGTTCGGCTGGTTAGAATTAAACCTCAAGATGACCCCTG

@A00721:190:HGJW7DSXY:4:1270:21278:4053\_1:N:0:TCTGCAAG+GCTGCACT  
CTTCCGATCTCTCTATCACGACACGTTGAATCTTTACGATACTTTGTTATCAATGTAAAGTTAAACGA  
TGCTACTTGTGAGAGGATCAATCACAGTAAGGAAGTGTACGTTTAGCACGGGAGGTTGCAGATTCAA  
CCC

@A00721:190:HGJW7DSXY:4:1344:1434:30373\_1:N:0:TCTGCAAG+GCTGCACT  
AGACGTGTGCTCTTCCGATCTCTTGAAGTTGTTGACGACAAGCCTCAAGAGGGTAGAGGACCACCTGG  
ATCTTCTACTGTCTCTGCCTTCCAAGATTTCTTAGAAGAGGTTATTCTTGAACACCTTAACGTCAC  
TCG

@A00721:190:HGJW7DSXY:4:2163:8974:22514\_2:N:0:TCTGCAAG+GCTGCACT  
TGAGTTCAAGTCGGTTGTCGATCGAATTAAGATCAAGGCTAATACCTTTATAGGTAAGAAGCCCCTTG  
AGCCGCGTAGTCAGCGCGTTTAGCTGTATCATCAGTGAGATCGGAAGA

@A00721:190:HGJW7DSXY:4:2319:1298:23563\_2:N:0:TCTGCAAG+GCTGCACT  
GAGTCTCCAAGAGAATATTTATTCTTATGAGGCTCGAAACTTCAACGTTTTCACACGGAAAGACATA

TCGCACCCGAAATTTTTGGGCAGAATGCTCTTAACGCGGTTCTTGAAC  
+  
FFFFFFFFFFFFFFFFFFFFFFFFFFFFFFFFFFFFFFFFFFFFFFFFFFFFFFFFFFFFFFFFFFFFFFFF  
FFFFFFFFFFFFFFFFFFFFFFFFFFFFFFFFFFFFFFFFFFFFFFFFFFFFFFFFFFFFFFFF  
@A00721:190:HGJW7DSXY:4:2653:31060:12978\_2:N:0:TCTGCAAG+GCTGCACT  
CTAAGTTGGATAAAGTTATAGGAGACTCAGTTAACCTGAGAGCTCCTCAATTGATAGATTGGGTCAAC  
AATAGGGACGCTAGTATACTTCGTAAAGTCGACAGCGAAATGGTCAAT  
+  
FFFFFFF:FFFFFFFFFFFFFFFFFFFFFFFFFFFFFFFFFFFFFFFFFFFFFFFFFFFFFFFFFFFFFFFF:FFFFF  
FFFF:FFFFFFFFFFFFFFFFFFFFFFFFFFFFFFFFFFFFFFFFFFFFFFFFFFFFFFFFFFFFFFFF  
@A00721:190:HGJW7DSXY:4:1570:15420:30326\_1:N:0:TCTGCAAG+GCTGCACT  
TGACCTATTTTAAAGCTCATGGTGAAGGGAAGCTAAGGTTAACTTGATGCTTCAGCCTTTTCGAAG  
CATAACCCCGCACAGAATATCGTTTATCACGCAAATTTATTAATGCAATTTTCGGACCTATCTTTAA  
GGT  
+  
FFFFFFFFFFFFFFFFFFFFFFFFFFFFFFFFFFFFFFFFFFFFFFFFFFFFFFFFFFFFFFFFFFFFFFFF  
FFFFFFFFFFFFFFFFFFFFFFFFFFFFFFFFFFFFFFFFFFFFFFFFFFFFFFFFFFFFFFFFFFFFFFFF  
FFF  
@A00721:190:HGJW7DSXY:4:1143:32117:13338\_1:N:0:TCTGCAAG+GCTGCACT  
GACGATTTCTCCCGAAGCTCTTCTCTCTCTTAGGAGGTCATGATGACTACTATAAGGGTGAAATCGA  
TTTTTCGAAGTTTGACAAATCTCAAGATTTCTTTTGTAAGCCTATGAGATAAAGATGTATTCTTATT  
TAG  
+  
FFFFFFFFFFFFFFF:FFFFFFFFFFFFFFF:FFFFFFFFFFFFFFFFFFFFFFFFFFFFFFFFFFFFFFF  
:FFFFFFFFF::FFFFFFFFFFFFFFFFFFFFFFFFFFFFFFFFFFFFFFFFFFFFFFFFFFFFFFFFFFFF  
FFF  
@A00721:190:HGJW7DSXY:4:1223:11586:12665\_2:N:0:TCTGCAAG+GCTGCACT  
TTGGAGTGCCAGTGAATATTTTGTACGCCAGGAGTATCCATAACGATTTGTCATTTACCACCTTTG  
CTCAACGACGAAGTGGAACGGCCAACACTTTCTTTGGTAATTGTATGA  
+  
:FFFFFFFFF:FFFFFFFFFFFFFFF:FFFFFFFFFFFFFFFFFFFFFFFFFFFFFFFFFFFFFFFFFFFF  
:FFFFFFFFFFFF:FFFFFFFFFFFFFFFFFFFFFFFFFFFFFFFFFFFFFFFF:FFFFFFF:F  
@A00721:190:HGJW7DSXY:4:1549:9173:23171\_2:N:0:TCTGCAAG+GCTGCACT  
ATTTTATCACTTTATTATGACCTTGAAAGTTTTTCGGCTGTGGTTGTCGCTGGGACGATTCCATTCT  
GTTTTCATAGACTCCAATAACTGATCATTCTGATCATATGATTTTGA  
+  
FFFFFFFFFFFFFFFFFFFFFFFFFFFFFFFFFFFFFFFFFFFFFFFFFFFFFFFFFFFFFFFFFFFFFFFF  
FF:FFFF,,:FFFFFFFF:FFFFFFFFFFFF:FFFFFFFFF:FFFFFFFFF  
@A00721:190:HGJW7DSXY:4:1261:15483:19633\_1:N:0:TCTGCAAG+GCTGCACT  
CTTACAAGATCATCGTTAAGTTAGGTAAACCCCTAACCGATGTTACTCTTGTAGGACTTTGGGAGAGA  
TTCGTTAGTTTTAAAGACTATACTAAATATCTCCACTACGAGGTTGTTGTTTGCGATTAGCTCTTGC  
GA  
+  
FFFFFFFFFFFF::F,FFFFFF:FF:FFFFFF:FFFFFF:FFFFFFFFFFFFFFFFFFFF:FFFFF:,FFFFF  
,FFFFFFFFF:FFFF:FFF:FFFFFFFFFFFF:FFF:FFFFFFFFFFFFFFFFFFFFF::FFFFF:  
FF  
@A00721:190:HGJW7DSXY:4:1462:26042:11992\_2:N:0:TCTGCAAG+GCTGCACT  
GAGGGTCGTTATACCTATTCGGCTATCTGTGCTTTGAATTGTATAAGATCAAATTTTAAACGATTCCG  
AGAGGTTTATCCTGATGTGGAGGGAGTTCTTGAAGCATCCCGACCTTT  
+  
FFFFFFFFFFFFFFFFFFFFFFFFFFFFFFFFFFFFFFFFFFFFFFFFFFFFFFFFFFFFFFFFFFFFFFFF  
FFFFFFFFFFFFFFFFFFFFFFFFFFFFFFFFFFFFFFFFFFFFFFFFFFFFFFFFFFFFFFFF  
@A00721:190:HGJW7DSXY:4:2508:19153:35289\_2:N:0:TCTGCAAG+GCTGCACT  
GGTTTCATAAGATTATCAGTAATCCTGATTCTACTACGGATTGATGACCTTCCATCCTGTACCTCTT

$+$ 

@A00721:190:HGJW7DSXY:4:1559:27914:9815\_1:N:0:TCTGCAAG+GCTGCACT  
ACCAAGATCTAAATTCGGTAACGGTGCGTGGCGCTTTATTTTAAAAAGCTCCCTCCTCTCGCAAGTTT  
GATCTGATACTTATCACGAAAGGACTTGAGTCTTTTGATCAGTCTCTGACTTGACCATCTTTCATTTT  
AAA

+

@A00721:190:HGJW7DSXY:4:1611:26883:33144\_2:N:0:TCTGCAAG+GCTGCACT  
TTTCTTCTTTGTTTCCTTCTTGCAGTATTTTCTCATCAGCTTGTTTACCTAATCTGTGTTT  
TTACGATAACAACATCAGTTGATTAAGACTCTTCCGAAAGGCCAACT

+

@A00721:190:HGJW7DSXY:4:1233:7925:7764\_1:N:0:TCTGCAAG+GCTGCACT  
AGCTCAGGGTGAAGCACACGTTTGACCGTGACGAAGTGTGGTGTCTTGATCTACGTTACGGATATA  
CTCTCCTTGAGTTCACCTCGTAAGGACACTACCACCTTATTACGATATTTCTTTAGTCGATGGGTTTTCG  
ACT

+

@A00721:190:HGJW7DSXY:4:1441:27055:31782\_1:N:0:TCTGCAAG+GCTGCACT  
TCTCTATTTTAAGTTTTGTCTTCCTTGTTTGTCTTATTCTATTAATCACTCATTTTAGTGAGATTATT  
AAAAACGCACTAAAACGTCTTCGACAACAGCAGGGGTTTTCGAATAGTGATAGCCACCCGCCTTACAG  
AGG

+

@A00721:190:HGJW7DSXY:4:2603:2510:15421\_2:N:0:TCTGCAAG+GCTGCACT  
GACTTTGGTACCACCTTTTCTACTGTCTGTCTCGCCTCTTCAATGAAGTTTTAATGCTTAACAACAA  
TGATAGTGAATTTATACCTACAATCATTGGTTTTTCTAATAATGATGA

+

@A00721:190:HGJW7DSXY:4:1270:26811:6590\_1:N:0:TCTGCAAG+GCTGCACT  
GTGACTGGAGTTCTAGACGTGTGCTCTTCCGATCTGTCTAGGGAGGATTCTCAGTTTACAAGGACCTTAA  
GCGATGGATCGGGGTTAATTCTAAACATTACCCGAAAGACGTGCTAAATTAAACCATTTGTACGATG  
TCG

+

@A00721:190:HGJW7DSXY:4:1553:5005:17832\_1:N:0:TCTGCAAG+GCTGCACT  
TCACTTTTCACTAAGAATTGGTCCTACTTTTGGACAAGGCCAACTTCGTAATCTTCATGAGATCGTTT  
CTTTCTTTATCTCTTTGGTTGTTAGGGATTTTGAGAGAGTGAAAGGCTTCAATTGTAGTGGTTTGGTC  
GTT

+

[illegible]



FFF:FFFFFFFFFFFFFFFFFFFFFFFFFFFFFFFFFFFFFFFFFFFFFFFFFFFFFFFFFFFFFFFF:FFFF  
FFF  
@A00721:190:HGJW7DSXY:4:2615:25545:8625\_2:N:0:TCTGCAAG+GCTGCACT  
ACCTCTACGCAAAGATATTTTCATGAAACTACAGAGGAACGTACCGGATTACCTGTCTTTCATATTAT  
GAATGAACCTTCGGCCGCTCTCTTTCGCTTCGATGTTGGATGTCAAGAA  
+  
FFFFFFFFFFFFFFFFFFFFFFFFFFFFFFFFFFFFFFFFFFFFFFFFFFFFFFFFFFFFFFFFFFFFF  
FFFFFFFFFFFFFFFFFFFFFFFFFFFFFFFFFFFFFFFFFFFFFFFFFFFFFFFFFFFFFFFFFFFF  
@A00721:190:HGJW7DSXY:4:2313:18493:35556\_1:N:0:TCTGCAAG+GCTGCACT  
ATTCCTACGTAGTTTATGACTTTGGTGGTGGTACTTTCGATACTTCTATCGTCTTACGTTACGGTAAT  
TACTATAGTGTTATTTATTCTGGTGGTGGTATGATAATCTTGGAGGTCGTGACGTTGATGAAGCTATAAG  
AGC  
+  
F,FFFF::FFFF:FFFF:FFFFFFFF:FFFFFFFF:FF:FFF,FFF,FFFFFFFFFFFFFFFF::F  
FFFFFF,F:FFFFFF:FF:FFFFFFFFFFFFFFFFFFFFFFFF:FFFFFF:FFFF:FFFFFFFFFFFF  
FFF  
@A00721:190:HGJW7DSXY:4:2609:3287:11757\_2:N:0:TCTGCAAG+GCTGCACT  
CACAACCTTCAGTTTCACAACGAAGGAGGAGTTTCTGTTACTGGAAAACCTCGTCAATACTTTTC  
AATAATATACGTCTTGAACCTACTTATGACGATCTAGTGAAATTAACG  
+  
FFFFFFFFFFFFFFFFFFFFFFFFFFFFFFFFFFFFFFFF:FFFFFFFFFFFFFFFF:FFF:FF,FFFFFFFFFFFF  
FFFFFFFFFFFFFFFFFFFFFFFFFFFFFFFFFFFFFFFFFFFF,FFFF:FFFFFF  
@A00721:190:HGJW7DSXY:4:1227:16785:16877\_1:N:0:TCTGCAAG+GCTGCACT  
TACTATTATGAACAAAGTTATCAAAGATAGTGGCATTCAAGGCAAACCTTACCCTGATTCCGGCCGGTG  
GTAGCTCATTTCTACCAGGGGCTATTACTCTTGCTGAAACAGCTATTAAAGCTGTTGAGCGGGTAATT  
ACA  
+  
FFFFFFFFFFFFFFFFFFFFFFFFFFFFFFFFFFFFFFFFFFFFFFFFFFFFFFFFFFFFFFFFFFFFF,F  
FFFFFFFFFFFFFFFFFFFFFFFFFFFFFFFFFFFFFFFFFFFFFFFFFFFFFFFFFFFFFFFF:FFFFFFFFFFFFFFFF  
FFF  
@A00721:190:HGJW7DSXY:4:1348:17616:33379\_2:N:0:TCTGCAAG+GCTGCACT  
ATCGCTGAAGGATGTGCACTCTTTTCTGCTACTTTAACGGAGCGTAGTGTACTCTTCGTCGATTGTAT  
CAACAGTAACATTACTTCTAATAAAGGTCTCTATCAAGCTCGTATTAT  
+  
FFFFFFFFF:FFFFFFFFFFFFFFFFFFFFFFFFFFFFFFFFFFFFFFFFFFFFFFFFFFFFFFFFFFFF:FFFFF  
FF,FFFFFFFFFFFFFFFFFFFFFFFFFFFFFFFFFFFFFFFFFFFFFFFFFFFFFFFFFFFF  
@A00721:190:HGJW7DSXY:4:1147:10610:32675\_1:N:0:TCTGCAAG+GCTGCACT  
TTACCGTTGAAGGCTAACTCCAAGGTAATTATGAAGACTGTGATTTATCTTTCCTCTGGCCTTGTA  
TGAGGGTGTCTTAATCGTAACATTAATAATTTCAATCTTCTTAAAAAGAAGATAGAGAGTCATACTT  
TGG  
+  
FFFFFFFFFFFF,FFF:FFF::F,FFFFFFFFFFFFFFFFFFFFFFFFFFFFFFFF:FFFF:FFFF:FFFFFFF  
FFFFFFFFFFFF,F:FFF:FFFFFFFFFFFFFFFF:FFFFFFFFFFFFFFFF:FFFFFFFFFFFF  
FFF  
@A00721:190:HGJW7DSXY:4:2423:29288:19774\_2:N:0:TCTGCAAG+GCTGCACT  
GATAGCCAATATTGAAGTGGACACCTCTGGTAGTATCGAAGTAAAGATAACCAATAAGGAAGGAGCTT  
ATACTATGGTTGAATCAACTAAGCATACTACTTTTGCTTTGATTACTC  
+  
,FFFFFFFFFFFF:FFFF:FFFF:FF:FFFFF,FFFFFFFFF:FFF,F::FFF,FFFF,FFF  
FFFFFFFF:FFFFFFFF:FFFFFFFFFFFF,F:, ,FFFF:FFFF:FF  
@A00721:190:HGJW7DSXY:4:2453:4110:5321\_1:N:0:TCTGCAAG+GCTGCACT  
GTCTAAGGTTAAAGAGTCGATTAAACAAGTTGTACTTATCAATGATTTTATCGCTGGTTGTTATCTCG  
AAAAGTCTCTTCTAAAAGGAACGTCAAGTCTAACCCTAAAGAGAATATCTAAAATATTTACAAAATCTT  
ACC

+  
FF:FFF,F:F,FF:FFF::FFFFFF,FF,FFFF,FFFFFFFFFFFFFFFFFFFFFFFFFFFFFFFF  
FFFFFFFFFFFF:FFFF,FFFFFFFFFFFFFFFFFFFFFFFFFFFFFFFFFFFFFFFFFFFFFFFF  
FFF  
@A00721:190:HGJW7DSXY:4:1350:5810:36229\_2:N:0:TCTGCAAG+GCTGCACT  
AGACGTTGCTTGTGCTTCCTCCTTTAATGGCACTACCTCGGTACAATCTTACTTGGAACGAAGGCGA  
CCTGTTCCGGAGTTTTTACGGGATCCGGAATGTTCTGTCTATATTAGG  
+  
FFF:FFFFFFFFFFFFFFFF:FFFF,FF:F:FFFFFFFFFFFFFF,FFFFFFFFFF,FFF:FFFFFF::FF  
F,FFFFFFFFFFFFFFFF:FFFF::F:FF:FF:FF::F:F:FFFFFFFF:  
@A00721:190:HGJW7DSXY:4:1372:3323:26788\_2:N:0:TCTGCAAG+GCTGCACT  
TCGAACGTCAACGTTACCGAGTTTCGTTTCGTACCTTGATGCTGACTTTCGTCAATATGATTTGATC  
TGGTTGCTCAATTCTAAGCGTGTTCGCTTAGTGCGAGGCCTCTCTTC  
+  
FFFFFFFFFFFFFFFFFFFFFFFFFFFFFFFFFFFFFFFFFFFFFFFF:FFFF:FFFFFFFFFFFFFFFF:  
FFFFFFFFFFFFFFFFFFFFFFFFFFFFFFFFFFFFFFFFFFFFFFFF  
@A00721:190:HGJW7DSXY:4:1147:21088:21856\_2:N:0:TCTGCAAG+GCTGCACT  
ATATTTGGATGATCTTGATAAAGAACTTCATGAATTTTCAGAGGATGAAAAATTTCTTCCTGGATT  
TTAATATAAAGAATCTTTACCAGGACTCTACTACAGGAGGCAGTCTT  
+  
FFFFFFFFFFFFFFFFFFFFFFFFFFFFFFFFFFFFFFFFFFFFFFFFFFFFFFFFFFFFFFFFFFFFFFFF  
FFFFFFFFFFFFFFFFFFFFFFFFFFFFFFFFFFFFFFFFFFFFFFFFFFFFFFFF  
@A00721:190:HGJW7DSXY:4:1243:26060:18474\_1:N:0:TCTGCAAG+GCTGCACT  
ATTTGTTGTAATAGGGTCATCAACTTAGAACTCGAACTCTAAGTGGAATACTGTCTTTCCAAGCTT  
ACCTGTATCTTCAATGAAATTGGACTCTTCGATAGGGGACATTTTATCGTGGGCTTTCGTAAGGAA  
GAT  
+  
FFFFFFFFFFFFFFFFFFFFFFFFFFFFFFFFFFFFFFFFFFFFFFFF,FFFFFFFFFFFFFFFFFFFFFFFF:FFFF:F  
FFFFFFFFFFFF:F:FFFFFFFFFFFF:FFFFFFFFFFFFFFFFFFFFFFFFFFFFFFFFFFFFFFFF  
FFF  
@A00721:190:HGJW7DSXY:4:2233:14588:19961\_1:N:0:TCTGCAAG+GCTGCACT  
CTACTAATGGCGTTGGCCTAGTGGATGTTATTAGTGACATCTGGTCAATTTCTTTTTAGGTGGTCTT  
TATTCTATTATTGATTTTTATGAGATTGATACGTTAACAGAAGATGATGTTAGAGTAGAATTCCTGAA  
GAG  
+  
FFFFFF:FFFFFFFFFFFFFFFFFFFFFFFFFFFFFFFFFFFFFFFFFFFFFFFFFFFFFFFFFFFFFFFF  
FFFFFFFFFFFFFFFFFFFFFFFFFFFFFFFFFFFFFFFFFFFFFFFFFFFFFFFFFFFFFFFFFFFFFFFF  
FFF  
@A00721:190:HGJW7DSXY:4:1658:18530:33144\_2:N:0:TCTGCAAG+GCTGCACT  
CCAACCTTCTTGACAATTTCTTCAATCCTTCGATAATAGTTAAATCTAGGATTATGTCTGTGTTGAAA  
GACTTTCTACCGATAAGGGTCACTAGTCTTACACAATTAAGAAATAAT  
+  
FF:FFFF:FFFFFFFFFFFFFFFFFFFFFFFF:FFFFFFFFFFFFFFFFFFFFFFFF,FFF:FFFFF,:FFFFFFFF  
FF:FFF,FFFF,FFFF:FFFFFFFFFFFFFFFFFFFFFFFFFFFFFFFFFFFFFFFF  
@A00721:190:HGJW7DSXY:4:2348:27100:6151\_2:N:0:TCTGCAAG+GCTGCACT  
GATTATCTAAAGATTGAAGGAAAATTTATCCTCGTTTAACTTACTTAGACTTTCCTACGATACAAAT  
GATAACTTCTAATTTACGTTTGCTACTCAGAGCTGGTCCTCCAGCAA  
+  
FFFFFFFFFFFFFFFFFFFFFFFF::F:FFFFFFFFFFFFFFFFFFFFFFFF:FFFFFF:FFFFFF,FF  
F:FFF:FFFFFFFFFFFFFFFFFFFFFFFFFFFFFFFFFFFFFFFF:FFFFF  
@A00721:190:HGJW7DSXY:4:1651:20654:36479\_2:N:0:TCTGCAAG+GCTGCACT  
TCCTCAGGAGTCCCGCATTTGATAATAATGACGACTTTCGTCATAATCGCTGCATATTACGGATTAC  
ACGGTACCAGCGCATCTCGTGTGAGCCTCGACCCGATTATATGGTAT  
+

```

FFFFF, FFFFFFFF: FFFFFFFFFFFFFFFFFFFFFFFFFFFFFFFFFFFFFFFFFFFFFFFFFFFFFFFFFF
FFFFFFFFFFFFFFFFFFFFFFFFFFFFFFFFFFFFFFFFFFFFFFFFFFFFFFFFFFFFFFFFFFFFFFFFF
@A00721:190:HGJW7DSXY:4:2302:18123:34695_2:N:0:TCTGCAAG+GCTGCACT
TCTAGAATTCTTAATTATAATATTCAACCTCAAAGTTACGTGTTTACAGTAACGAGATCACACATTT
TGAGAACTAACTATGTTATGTTCTCTGATCATTTTTGACAATCTCTTCT
+
FFFFFFFFFFFFFFFFFFFFFFFFFFFFFFFFFFFFFFFFFFFFFFFFFFFFFFFFFFFFFFFFFFFFFFFF: FFFFFFFF: FFFFF: FFFFFF: F
FFFFFFFFFFF, FFF: FFF: FFFFFFFFFFFFFFFFFF: FF: FFFFFFFFF: FF: F
@A00721:190:HGJW7DSXY:4:1663:12029:33066_2:N:0:TCTGCAAG+GCTGCACT
AAATAATAATATTACTAATGGCAAATAGTGGAAGGCTCCAGTCAACACTAGTTTCGAGTGCTGCTTT
GGATTACGATGACGTGAGAAATAGGTGAAGGATAGTTTTTACCTCGAC
+
FFFFFFFFFFFFFFFFFFFFFFFFFFFFFFFFFFFFFFFFFFFFFFFFFFFFFFFFFFFFFFFFFFFFFFFFF
FFFFFFFFFFFFFFFFFFFFFFFFFFFFFFFFFFFFFFFFFFFFFFFFFFFFFFFFFFFFFFFFFFFFFFFFF
@A00721:190:HGJW7DSXY:4:2152:6460:4695_1:N:0:TCTGCAAG+GCTGCACT
TCTTAAAGCTTCACCCAAAATGAAGGACACTTCGAAACTGAATAATGATGCACTACAAACAAGTATCG
CTAATCATCTGAAAAAGGCTCTAAAGGACACTATACAATATCCAGACGACGACGAAGCTTATACAATA
TCC
+
FFF: FFFFFFF: FFF: FFFFFFF: FF: F: : FFFFFFFFFFFFFFFFFFFFFFFFFFFFFFFFFF: FFFFFFFFFFFFFFFF
FFFFFFFFFFFFFFFFFFFFFFFF, FFFFFFFFFFFFFFFFFFFFFFFFFFFFFFFFFFFFFFFFFFFFFFFF
FF:
@A00721:190:HGJW7DSXY:4:2207:4399:18787_2:N:0:TCTGCAAG+GCTGCACT
ACCACATTTTGGTCAAGTCAATCCGTTGAGAAAATTTCTTAGAGGATATTCGCCATTGTGGTACGAAT
TGGTCCAACATTTACCACCAAATTCTTTTGATACAACCTCTAGCCTTCA
+
FFFFFFFFFFFFFFFFFFFFFFFFFFFFFFFFFFFFFFFFFFFFFFFFFFFFFFFFFFFFFFFFFFFFFFFFF
FFFFFFFFFFFFFFF: FFFFFFFFFFFFFFFFFFFFFFFFFFFFFFFFFFFFFFFFFFFFFFFFFF
@A00721:190:HGJW7DSXY:4:2302:25816:18709_2:N:0:TCTGCAAG+GCTGCACT
ACCAGATTGGTTCGAACCCGTTGATGCTATGTCAGAAGAAGCTATTCAAGCTTGTGCTTTAAAGACTG
CAGAGGCTGTCAAACAAGCCCAGACTCAAGGAGTCCAATCAAAGGTTT
+
FFFFF: FFFFFFFFFFFFFFFFFFFFFFFFFFFFFFFFFFFFFFFFFFFFFFFFFFFFFFFFFFFFFFFFFF: FFFFFFFFFF
FFFFFFFFFFFFFFFFFFFFFFFFFFFFFFFFFFFFFFFFFFFFFFFFFFFFFFFFFFFFFFFFFFFFFFFFF
@A00721:190:HGJW7DSXY:4:1143:20971:2707_1:N:0:TCTGCAAG+GCTGCACT
CTTGCAAGTGACTGGAGTTCAGACGTGTGCTCTTCCGATCTGAAAAGTCCGAGTATATTGTATGTT
AATAGATAGTGGGATAATAGTTCTACCGATACGTAGTGAACGCGTTTCGTAGAACCAAGTACTTTCCGT
CTG
+
FFFFFFFFFFFFFFFFFFFFFFFFFFFFFFFFFFFFFFFFFFFFFFFFFFFFFFFFFFFFFFFFFFFFFFFFF
FFFFFFFFFFFFFFFFFFFFFFFFFFFFFFFFFFFFFFFFFFFFFFFFFFFFFFFFFFFFFFFFFFFFFFFFF
FFF
@A00721:190:HGJW7DSXY:4:1374:16884:8469_1:N:0:TCTGCAAG+GCTGCACT
ACCGATAGGAGTTGTATAGTTGAAGATGTGGCTTTAGACGATAATCCTTTAAGGACTATGTTGACTGA
CGAAGATTTTCCAACAGATTTGTCTACGTTGCAGATCGCCACTCCAAACACTATATACATTATAAAAT
ATA
+
FFFFFFFFFFF: FF: FFFFFFFFFFFFFFFFFFFFFFFFFFFFFFFFFFFFFFFFFFFFFFFFFF, FFFFFFFFFFFFFFFFFFFFFFFFFF
: FFFFFFFFFF: FFFFFFFFFFFFFFFFFFFFFFFFFFFFFFFFFFFFFFFFFFFFFFFFFFFFFFFFFF
FFF
@A00721:190:HGJW7DSXY:4:1202:20076:31156_1:N:0:TCTGCAAG+GCTGCACT
ATAACTTTTGTACCAAATTCTTGCTTTCAACGAAGTCTCTGATTTTATTAATCATTACTTTAACGA
TCTCTCGGTCATTTACTCTGTACTTGATCTACGTCGTTTAACTGTGCGGAACAACCTTTACTTAGAATG
ACT

```

[illegible]

@A00721:190:HGJW7DSXY:4:1222:1108:8390\_2:N:0:TCTGCAAG+GCTGCACT  
CATTGATTTACTTTTACCGTTAGAACTGAAAAAGATTCTTTTCGAAAAGAAACCTATAAGTTACAAAC  
GATTCTTCGACTATATTAAAGAAATAAAAAATACTTCAAGTACCTGAAC

+

FFFFFFFFFFFFFF:FFFFFF,FF::FFFFFFFFFFFFFF:FFFFFFFFFFFFFFF:F:FFF:FF  
FFFFFFFFFFFFFF:FFFFFFFFFFFFFFF:FFFFFFFFFFFFFFF

@A00721:190:HGJW7DSXY:4:1427:9634:31673\_1:N:0:TCTGCAAG+GCTGCACT  
ATGGTATAATGTGTCTTACAAATAGAACCTTCACTCTCGGTAATGAGAGTGATTCTTAATATTCTA  
GTAACCGCTATGTGGGCATTACTAGGATTTATCACACTCCTAAATTTGATAGCAATTTATGTTTTAAA  
TGC

+

FFFFFFFF:FFFFFFFFFFFFFFFFFFFFFFFFFFFFFFFFFFFFFFFFFFFFFFFFFFFFFFFF  
FFFFFFFFFFFFFFFFFFFFFFFFFFFFFFFFFFFFFFFF:FFFFFFFFFFFFFFFFFFFFFFFF  
FFF

@A00721:190:HGJW7DSXY:4:1614:20943:27398\_2:N:0:TCTGCAAG+GCTGCACT  
AAAAACTCCATTGTATAGTTCAAGGAGTACTTAATTCAATAGCTTTAGTATTATTTACTATCGCCTTT  
ATTGAAAATTGTATAAGAGTTAATTGCTTACACAAAAGTGACGCGCGA

+

FFFFFFFF:FFFFFFFFFFFFFFFFFFFFFFFFFFFFFFFFFFFFFFFFFFFFFFFFFFFFFFFF  
FFFFFFFFFFFFFFFFFFFFFFFFFFFFFFFF:FFFFFFFF,FFFFFFFF

@A00721:190:HGJW7DSXY:4:2403:32452:2206\_2:N:0:TCTGCAAG+GCTGCACT  
ATACCATAACCTACCATGACCAATCATCGCTCCAAGTGGCACGCCAGACGTAGGGTCAAACCTACTAC  
CGCCGGTCGGCAGATCGGCACCACTGGTCTCTACGTTCAAGGACCCGC

+

FFFFFFFFFFFFFFFFFFFFFFFFFFFFFFFFFFFFFFFFFFFFFFFFFFFFFFFFFFFFFFFF  
FFFFF:FFFFFFFFFFFFFFFFFFFFFFFFFFFFFFFFFFFFFFFFFFFFFFFF

@A00721:190:HGJW7DSXY:4:2132:10104:25034\_1:N:0:TCTGCAAG+GCTGCACT  
CCTTCCCAAATCTAGATCTGCACAGAAGAAGGCTGAAGGTCGTTACCGGACGACCACTCAAAGGAAAC  
GGGCTGTTGCCAGAGGAAAGCAGCGACCACCGAGGTGCTCGTAACATTGACGGCAGTCCCGTCATC  
TCT

+

FFF,FFF,,FFFFFF,F,FFFFFF:FFF,FFFF:FFFFF,,FFFFFFFFFFFFFFFF:FFFF,:F  
FFFFFFFF:FFFFFFFFFF,FFFFFFFFFFFFFFFFFFFFFFFF:FFFFFFFFFFFFFFFF:FFFF  
FFF

@A00721:190:HGJW7DSXY:4:1440:2175:21543\_2:N:0:TCTGCAAG+GCTGCACT  
GCAGTACCTCAGTCAAAAGTCACATTCACTCCCATACCAATCAATGATGTGACTATACAGTTCGG  
CCATTTCAAGAGTGGTCAATACGTCGTGGGAGGTACTGAAGCCTTCCC

+

FFFFFFFFFFFF:FFFFFFFFFFFFFFFFFFFFFFFFFFFFFFFFFFFFFFFFFFFFFFFF  
FFFFFFFFFFFFFFFFFFFFFFFF:FFFFFFFFFFFFFFFF

@A00721:190:HGJW7DSXY:4:2505:25220:3114\_2:N:0:TCTGCAAG+GCTGCACT  
CCAAGCCAATCAATAGTTCTTCTGACCAGAATGAAAAGGGTTTACCAGGGTAGTCTCTAAGTCTACC  
AGGAAGAGGGGAAATGTCCCCAAACTGAGAAGAATAAAGGGAAAGGT

+

FFFFFFFFFFFFFFFFFFFFFFFFFFFFFFFFFFFFFFFFFFFFFFFFFFFFFFFFFFFFFFFF  
FFFFFFFFFFFFFFFFFFFFFFFF,FFFFFFFFFFFFFFFF:FFF

@A00721:190:HGJW7DSXY:4:2258:32334:22232\_2:N:0:TCTGCAAG+GCTGCACT  
AGGGGAAATTACCCCTAATTCTGAAGGAAGATCTCCACCATCTGGGGTTGGGAATAAGAAATCTGCA  
CGGGCCAAAGAGGCCGCTGCTACGAAGTCGCTGAAGCGGCTTGGGTC

+

FFFFFFFFFFFFFFFFFFFFFFFFFFFFFFFFFFFFFFFFFFFFFFFFFFFFFFFFFFFFFFFF  
FFFFFFFFFFFFFFFFFFFFFFFF:FFFFFFFF

@A00721:190:HGJW7DSXY:4:2515:3278:2566\_1:N:0:TCTGCAAG+GCTGCACT  
GTTGCGCCTGCCGACCCCATCTTTGAGACCAAGACTCTCTACAGTAGGTTCTGCTACTATGAGCAA

ATCTGTTGAATTCGTCACTGAGGACGAAGGTGAGAGGACTTTTGGCTACTGGCGACAACTGAGAGCA  
GT

+

FFFFFFFFFFFFFFFFFFFFFFFFFFFFFFFFFFFFFFFFFFFFFFFFFFFFFFFFFFFFFFFFFFFFFFFF  
FFFFFFFFFFFFFFFFFFFFFFFFFFFFFFFFFFFFFFFFFFFFFFFFFFFFFFFFFFFFFFFFFFFFFFFF  
FF

@A00721:190:HGJW7DSXY:4:1165:29017:29105\_2:N:0:TCTGCAAG+GCTGCACT  
CGTGGGTTGAAGGCCGACGCTTCGAGCTTGAGTGTGACGAGGCCGGTGACGTTTTTGTCAACGGCGTT  
TGGAGGATTTTATCCGCGCTTAACATATGGGGCGAAGATCCCTATGGA

+

FFFFFFFFFFFFFFFFFFFFFFFFFFFFFFFFFFFFFFFFFFFFFFFFFFFFFFFFFFFFFFFFFFFFFFFF:  
FFFFFFFFFFFF:FFFFFFFFFFFFFFFFFFFFFFFFFFFFFFFFFFFFFFFFFFFFFFFF:

@A00721:190:HGJW7DSXY:4:1276:31801:32550\_2:N:0:TCTGCAAG+GCTGCACT  
TTGGCATATTTATGCCGACGATAATAAGCATGTACCCCTTAAGCACCGAGGTAAGCTCGGGACTTACA  
AGAGAGAGTGTGAGAGAGTCGCTCTCACTATTTTTGCCAGAATGCGG

+

FFFFFFFFFFFFFFFFFFFFFFFFFFFFFFFFFFFFFFFFFFFFFFFFFFFFFFFFFFFFFFFFFFFFFFFF  
FFFFFFFFFFFFFFFFFFFFFFFFFFFFFFFFFFFFFFFFFFFFFFFFFFFFFFFFFFFFFFFF

@A00721:190:HGJW7DSXY:4:2306:22697:28714\_2:N:0:TCTGCAAG+GCTGCACT  
TCCTCCATAATTACAACCTCTATTTAGAGAGCATTAGAAGGAAGTTGGGCAAATCCCACATATGGTA  
GACGTTGTCACACTTTTCTTGAAAATGTTTCATTTCTCCGTCATTGG

+

FF,FFFFFF:F,F:FF,FF:F,,,,,:FFFF:FFFFFFFF:,,,F,FF:F:::F:FFF,F:F,,:  
FFF,,FF:FFFF:,F:F,,,FFF:,,,FFF,FFF::,FFF,:F::,

@A00721:190:HGJW7DSXY:4:2316:12735:34131\_2:N:0:TCTGCAAG+GCTGCACT  
AAGGTGGAAGGTGTCAAGGGTCTTCTTCATGCTGATCTTTCAGGACCTAATCACATCATGATTGATAG  
TTACGGCTCGTATCGAGTTGGAGGGAGGAAGTTCTCCGAAATTAAGA

+

:FFFFFFFFFFFFFFFFFFFFFFFF,FFFFFFFFFFFF:FFFF:FFFF:FFFFFFFF,FFFFFFFF  
FFFFFFFFFFFFFFFF:FFFFFFFFFFFFFFFFFFFFFFFFFFFFFFFF:FFF

@A00721:190:HGJW7DSXY:4:1345:6126:18051\_1:N:0:TCTGCAAG+GCTGCACT  
TCAGAGAGGGGAGCTCTGAAAAGGAACTTCGTCAGAAGATGAGGAAGTCTAAGAGGAGGAGTTTGA  
GAAGGCTCTAGAGAAGATCTCACACCTGGAGAAGGCAAGTGGAGAGTCCAGAAGTTGATGAAGAAGG  
ATT

+

FFFF::,FFFF:FFFF,:FFFF:FFFF,FFFFFFFFFFFF:FFFFFFFF:FF,FFFFFFFFFFFF:FFF  
FFFFFFFFFFFFFFFFFFFFFFFF,FFFFFFFFFFFFFFFFFFFFFFFFFFFFFFFFFFFFFFFFFFFF  
FFF

@A00721:190:HGJW7DSXY:4:1377:24505:23202\_2:N:0:TCTGCAAG+GCTGCACT  
GTTACCACTTCTAAGGTGGATGAGGGAGGTTGTTTCTTTGGAGTTTTAGATAATCTTTTGAGAAGGG  
GTCATAGAGCCAGCAAGAGAAGCTTATATGCTGGTTTAAGTGATGATT

+

FFFFFFFFFFFF:FFFF:FFF,FFFFFFFF,FFFFFFFFFFFFFFFFFFFFFFFFFFFFFFFFFFFF  
FFFFFF:FFFFFFFFFFFFFFFFFFFF:FFFFFF:FFFFFFFF:FFFF

@A00721:190:HGJW7DSXY:4:1212:4490:27461\_1:N:0:TCTGCAAG+GCTGCACT  
ATTTAGGTCAACTTGGGGTTTCGAATGTCATTAGTGCCTTACGATTGAAAGAGGTCCTTTGAGTATC  
GACAGATCTTTCGATCTTGAGGACGTACATTTAACGTGGCAGAATTCCGTAACCTACCATATTGTTCC  
TTC

+

F:FFFFFFFFFFFFFFFFFFFFFFFFFFFFFFFFFFFFFFFFFFFFFFFFFFFFFFFFFFFFFFFF:  
FFFFFFFFFFFFFFFF:FFFFFFFFFFFFFFFFFFFFFFFFFFFFFFFFFFFFFFFFFFFFFFFFFFFF  
FFF

@A00721:190:HGJW7DSXY:4:1510:8766:9408\_1:N:0:TCTGCAAG+GCTGCACT  
ATTTAACTTTGACTCAACTACTCCGATCAGATCCGATGGTTTGATTGGTATGGACTACTCGACTTTT



@A00721:190:HGJW7DSXY:4:2135:27688:27336\_1:N:0:TCTGCAAG+GCTGCACT  
ACCTTCGAATATGTTACGACATGGCTTCGTAACAACAGTGCGAGGATTGTCATCTCGGGGAAAGTGAT  
TCACCAAGATGTTTCATATAGATACGAGATACCTAGAGAAGGTCGCAGCGATCTTACTCGTTATCGGAG  
CTA

+

FFFFFFFFFFFFFFFFFFFFFFFFFFFFFFFFFFFFFFFFFFFFFFFFFFFFFFFFFFFFFFFFFFFFFFFF  
FFFFFFF,FFFFFFFFFFFFFFF:FFFFFFFFFFFFFFFFFFFFFFFFFFFFFFFFFFFFFFFFFFFFFFFF  
FFF

@A00721:190:HGJW7DSXY:4:1103:24985:34178\_1:N:0:TCTGCAAG+GCTGCACT  
TCGCAAACTTAACGTTAGTACCGGAGGTGATCTCTCTGCTTCTGCGTTACTGAGAGAAAAGATTCAGG  
ACGCCTACGGTGACTTTATGGACAAGATGCAAGTTCTTGGAATACTTGTTTCCCTTTTTAGGTTTA  
GTA

+

FFFFFFFFFFFFFFFFFFFFFFFFFFFFFFFFFFFFFFFFFFFFFFFFFFFFFFFFFFFFFFFFFFFFFFFF  
FFFFFFFFFFFFFFFFFFFFFFFFFFFFFFFFFFFFFFFFFFFFFFFFFFFFFFFFFFFFFFFFFFFFFFFF  
FFF

@A00721:190:HGJW7DSXY:4:1109:31882:6511\_1:N:0:TCTGCAAG+GCTGCACT  
GCTCTTCCGATCTGACAACGAATCTTGAACTACGGTCCTTATCAAAGAAAATGGTGAACCGGTCTCT  
AAATCTTTGAGATTGAGAAGATTGAAGAACACGTCAAGAAGTCGCTCGGCGTTGTTCTTGAAAACCA  
AGT

+

FFFFFFF:FFFFFFFFFFFFFFFFFFFFFFFFFFFFFFFFFFFFFFFFFFFFFFFFFFFFFFFFFFFFFFF  
FFFFFFFFFFFFFFF:FFFFFFFFFFFFFFFFFFFFFFFFFFFFFFFFFFFFFFFFFFFFFFFFFFFFFFFF  
FFF

@A00721:190:HGJW7DSXY:4:1615:8043:4241\_1:N:0:TCTGCAAG+GCTGCACT  
GCTGATCATGGAGTCTTTGTACCTTCTGTCAAACCTTCGAGGTTACAGCTACGAGAGGTGATCCCGGATG  
TGGATTGAAGGCTGGCTCTAAGGGAGACTCCTTCTTTTGAATGTTGTAAAGAATTGGGTTGAGAAGT  
GTG

+

FF:FFFFFFFFFFFFFFFFFFFFFFFFFFFFFFFFFFFFFFFFFFFFFFFFFFFFFFFFFFFFFFFFFFFF  
FFFFFFFFFFFFFFFFFFFFFFFFFFFFFFFFFFFFFFFFFFFFFFFFFFFFFFFFFFFFFFFFFFFFFFFF  
FFF

@A00721:190:HGJW7DSXY:4:2265:26006:24424\_1:N:0:TCTGCAAG+GCTGCACT  
CTTGGTATTTCTGAAATAGTTTATCAGAGCGTCATTTTCTTTGGGATCTTTCCTCTGGTAAGGGAAT  
TATTAAATCATTCTTCTCACTCTTGACGAGAATTATTACTGTTTTCTCTACCCATAACTTCTTTTTCA  
AAA

+

FFFFFFFFF:FFFFFFFFFFFFFFFFFFFFFFFFFFFFFFFFFFFFFFFFFFFFFFFFFFFFFFFFFFFFFFF  
FFFFFFFFFFFFFFFFFFFFFFFFFFFFFFFFFFFFFFFFFFFFFFFFFFFFFFFFFFFFFFFFFFFFFFFF  
FFF

@A00721:190:HGJW7DSXY:4:1443:25355:9549\_2:N:0:TCTGCAAG+GCTGCACT  
TTTCCTACAGAGTGCAGTCGTTTCAACACATATCACCACAATTGAAAGGGAAATAATTGGTGTTGAAA  
ATACGTATGTAGGTGGGGTTATCAAGGCTCTCAACGCCACAGGGATTC

+

:F,FFFFFFFF,FFFFFFF:F,:FFFF,FF,FF,,,FF:F,,,,,:FFF,,, :FFFF:,F,FF,:::F,  
FF,:::F,F,,FF,:::FFF,,F,F,:F:F,:,,,,,:,,:FF,F,

@A00721:190:HGJW7DSXY:4:1674:31747:5744\_2:N:0:TCTGCAAG+GCTGCACT  
TTTGGTCCTTACGTCTTAAGTAATTTGGATGTTGTGCAAACTATCAGGTTCTTGTCACGATTCTTAA  
AAGAAGTTTATTAAACTTCAGAGTCTCTTGGAAGTCCAGGTAGCTAA

+

FFFFFFFFFFFFFFFFFFFFFFFFFFFFFFFFFFFFFFFFFFFFFFFFFFFFFFFFFFFFFFFFFFFFF,FFFFFFFFFFFFFFFFFFFFFFFFFFFFFFFF  
F:FFFFFF,FFFFFFFFFFFFFFFFFFFFFFFFFFFFFFFFFFFFFFFFFFFFFFFFFFFFFFFF:F

@A00721:190:HGJW7DSXY:4:2570:16043:28808\_2:N:0:TCTGCAAG+GCTGCACT  
GGGAAAAGAGACCTCTGTTGGTAGAGGAGTTGAGAGAATTACTCAGATTCAATCTGGCATCACTGAAC



GTCTACAACGAGTTAGGGAGTGGCTAGGTTTTAAAAGATCCTTTGCAC  
+  
FFFFFFFFFFFFFFFFFFFFFFFFFFFFFFFFFFFFFFFFFFFFFFFFFFFFFFFFFFFFFFFFFFFFFFFF  
FFFFFFFFFFFFFF:FFFFFFFFFFFFFFFFFFFFFFFFFFFFFFFF:FFFFFF:FFF  
@A00721:190:HGJW7DSXY:4:2475:5945:36714\_2:N:0:TCTGCAAG+GCTGCACT  
CGTCGCGGAAAACGATGAAGATTTCCACACTGTTGAGAATCTTCTGATGCTGAATTTGAGGAAAATT  
TTTCGGAAGTTTTTGGTATAAATCCTGATGGCTCAGTACAGGGAGGAG  
+  
FFFFFFFFFFFFFFFFFFFFFFFFFFFFFFFFFFFFFFFFFFFFFFFFFFFFFFFFFFFFFFFFFFFFFFFF,FFFFFFFFFFFF:  
FFFFFFFFFFFFFFFFFFFFFFFFFFFFFFFFFFFFFFFFFFFFFFFFFFFFFFFFFFFFFFFF:FFFFFFFF  
@A00721:190:HGJW7DSXY:4:1150:3549:36354\_2:N:0:TCTGCAAG+GCTGCACT  
ACCTTCTTTTATCATTGCAACAGGACTTTGAGAAGACTGTTGAAATGGACAAAATCTGGGATCATAGG  
TATGTGTCACGCTACACTCGAAATATGGGCCCTCATAAGGAAGTATAG  
+  
FFFFFFFFFFFFFFFFFFFFFFFFFFFFFFFFFFFFFFFFFFFFFFFFFFFFFFFFFFFFFFFFFFFFFFFFF:  
FFFFFFFFFFFFFFFFFFFFFFFFFFFFFFFFFFFFFFFFFFFFFFFFFFFFFFFFFFFFFFFF  
@A00721:190:HGJW7DSXY:4:1350:28094:27289\_2:N:0:TCTGCAAG+GCTGCACT  
GGAAGATCTCTACAGAGATTATCGAGAGTTGTGATCTAGTTCTAAATTTAGGTCGACGGACTTTAGCA  
ACTTTAGATAAATTCTTTCCGGGCTCAATGACCTTTGCTATGTACGTG  
+  
FFFFFFFFFFFFFFFFFFFFFFFFFFFFFFFFFFFFFFFFFFFFFFFFFFFFFFFFFFFFFFFFFFFFFFFFF  
FFFFFFFFFFFFFFFFFFFFFFFFFFFFFFFFFFFFFFFFFFFFFFFFFFFFFFFFFFFFFFFF:FFFFFFFF  
@A00721:190:HGJW7DSXY:4:1311:23981:15969\_1:N:0:TCTGCAAG+GCTGCACT  
TTAGTTTCATGAAGTTCTTACACTTCTCGCGACTAATGTCAGCTTCACTACAAAGGCGTTACGTAAAGT  
AGTTTTTCACGCTTTATCTTAAAGCATTACCACCAAATTTAGCACTTTTTGAATATGACAGAAGCTCGC  
CAT  
+  
F,FFFFFFFFFFFFFFFFFFFFFFFFFFFFFFFFFFFFFFFFFFFFFFFFFFFFFFFFFFFFFFFFFFFFFFFFF  
FFFFFFFFFFFFFFFF:F:FFFFFFFFFFFFFFFFFFFFFFFFFFFFFFFFFFFFFFFFFFFFFFFFFFFFFFFF  
FFF  
@A00721:190:HGJW7DSXY:4:1636:22336:3035\_2:N:0:TCTGCAAG+GCTGCACT  
CCAGTTAGAGTTCTTCTAACCAGGACTGATGGTGAGATTCTTTTACCTTTTGGAGGTCCAGGAACCTT  
TACTCCTAGTGTCTTTTCTAGAGTCCAAGGACGTTTCCGTCGGAGGAT  
+  
F,FFFFFFFF:FFFFFFFF:FFF:FF,FFF,:FFF:FFFFFFFF:FF,:F,:FF:F,FF,FFF:FFFF:F  
FF:FF:FFFFFFFF:FF:FFF:FFFFFFFF:FFFF:FFFFFFFFFFFFFFFF  
@A00721:190:HGJW7DSXY:4:2657:15872:19680\_1:N:0:TCTGCAAG+GCTGCACT  
GCTCAATAACACTCTATTGAATCCCTTTTCCACGATGAAAGCTCTTTATGAGGTGCTCCATGCAAATT  
TACAGTTCCTCTTTGGTGATATCGCCTCTGTCTTTCTCCTTTAATCGTGAGGTTACGAGAGTTTCGT  
ACT  
+  
FFFFFFFFFFFFFFFFFFFFFFFFFFFFFFFFFFFFFFFFFFFFFFFFFFFFFFFFFFFFFFFFFFFFFFFFF  
FFFF:FFFFFFFFFFFFFFFFFFFFFFFFFFFFFFFFFFFFFFFFFFFFFFFFFFFFFFFFFFFFFFFF  
FFF  
@A00721:190:HGJW7DSXY:4:2438:3323:32863\_1:N:0:TCTGCAAG+GCTGCACT  
TTTTGATAAATTTGTTGGAATCGATAATGATACTGACGAAGGTTCTATTACCACCCTTGTCAATTGATA  
CAAACATTCTAGGTGATGCTTTCTTAGAGGCTCGTCTAGCCGCTGAGATTCTGCTTACCTATTTACAA  
TCT  
+  
FFFFFFFFFFFFFFFFFFFFFFFFFFFFFFFFFFFFFFFFFFFFFFFFFFFFFFFFFFFFFFFFFFFFFFFF:FFF  
FFFFFFFFFFFFFFFFFFFFFFFFFFFFFFFFFFFFFFFFFFFFFFFFFFFFFFFFFFFFFFFFFFFFFFFFF  
FFF  
@A00721:190:HGJW7DSXY:4:2533:13810:29825\_1:N:0:TCTGCAAG+GCTGCACT  
GATAACGATTTAGTACTGGGAAATGGTGGTAGTCAGTTTACTACTTTTCTTTCCCTCCCCTTTTTCGA

TTGGATTCGACGGGGTCTTCGTCTCACGACTAATTTGATAAGGTTTTTCTTTTATGGGACTCTTGTTT  
GTA

+

FFFFFFFFFFFFFFFFFFFFFFFFFFFFFFFFFFFFFFFFFFFFFFFFFFFFFFFFFFFFFFFFFFFFFFFF  
FFFFFFFFFFFFFFFFFFFFFFFFFFFFFFFFFFFFFFFFFFFFFFFFFFFFFFFFFFFFFFFFFFFFFFFF  
FFF

@A00721:190:HGJW7DSXY:4:1405:5276:27195\_2:N:0:TCTGCAAG+GCTGCACT  
GTTCTTAATGTAGGTCTCCTAGTACTTAAGGGTTTATGTTTCGGTTTCAGCTGGATGGATCTTTTGAT  
GGTATGTTTCACATTGCGTGATCACTTCCCGTGGACTTGGAAGAGAT

+

FFFFFFFFFFFFFFFFFFFFFFFFFFFFFFFFFFFFFFFFFFFFFFFFFFFFFFFFFFFFFFFFFFFFFFFF  
FFFFFFFFFFFFFFFFFFFFFFFFFFFFFFFFFFFFFFFFFFFFFFFFFFFFFFFFFFFFFFFFFFFFFFFF

@A00721:190:HGJW7DSXY:4:2641:4255:29089\_1:N:0:TCTGCAAG+GCTGCACT  
CGATTCTATTATGTCGCTAAAGCCTGTCCAGTTGTGCGATGATGTTTCGGGCTGTGGGGATTAACCTCCC  
TCGTGAACTTACGACGATGTTCTCGCTCGCATTTACAAGGATTACTAAGTCTGAGTTCTGCCACTT  
CTA

+

FFFFFFFFFFFFFFFFFFFFFFFFFFFFFFFFFFFFFFFFFFFFFFFFFFFFFFFFFFFFFFFFFFFFFFFF  
FFFFFFFFFFFFFFFFFFFFFFFFFFFFFFFFFFFFFFFFFFFFFFFFFFFFFFFFFFFFFFFFFFFFFFFF  
FFF

@A00721:190:HGJW7DSXY:4:1309:11442:21057\_2:N:0:TCTGCAAG+GCTGCACT  
AAGTTCATGAGGATGTCTTGGTCGAAAAATATCGCCGGAACCTCTAATAGAGGATCCTGATGACATT  
ATTTCAACGGATACCGATCTCAGTTCTACCACAGAAACCGTCTCAGGA

+

FFFFFFFFFFFFFFFFFFFFFFFFFFFFFFFFFFFFFFFFFFFFFFFFFFFFFFFFFFFFFFFFFFFFFFFF  
FFFFFFFFFFFFFFFFFFFFFFFFFFFFFFFFFFFFFFFFFFFFFFFFFFFFFFFFFFFFFFFFFFFFFFFF

@A00721:190:HGJW7DSXY:4:1443:26386:36323\_2:N:0:TCTGCAAG+GCTGCACT  
CTGATTCGGAATTAGAGAAAGACGACCTTCTTGTGGGACTGAGACCTCTGAATTTTCAGGGTGCCCT  
GATGAGGACGTTGAAAGGGATAATTTCAACTCTGAGACTTCTAAGAGT

+

FFFF:FFFFFFFFFFFFFFFFFFFFFFFFFFFFFFFFFFFFFFFFFFFFFFFFFFFFFFFFFFFFFFFF  
FFFFFFFFFFFFFFFFFFFFFFFFFFFFFFFFFFFFFFFFFFFFFFFFFFFFFFFFFFFFFFFFFFFFFFFF  
FFFF:FFFFFFFFFFFFFFFFFFFFFFFFFFFFFFFFFFFFFFFFFFFFFFFFFFFFFFFFFFFFFFFF

@A00721:190:HGJW7DSXY:4:2508:2808:6668\_2:N:0:TCTGCAAG+GCTGCACT  
ACCAGAAACGTAACAAGAATAAAGGTAGGAAGGGGAGAAAACAGAACAAAGCGAGCGGTTGAAGAG  
AAAACGATATGTTGCGGCTGATCGTACCCCAATTCTGCTAGAAAG

+

FFFFF:FFF:FFFFFFFFFFFFFFFFFFFFFFFFFFFFFFFFFFFFFFFFFFFFFFFFFFFFFFFFFFFF  
FFFFFFFFFFFFFFFFFFFFFFFFFFFFFFFFFFFFFFFFFFFFFFFFFFFFFFFFFFFFFFFFFFFFFFFF  
FFFF:FFFFFFFFFFFFFFFFFFFFFFFFFFFFFFFFFFFFFFFFFFFFFFFFFFFFFFFFFFFFFFFF

@A00721:190:HGJW7DSXY:4:1308:21242:22905\_2:N:0:TCTGCAAG+GCTGCACT  
TACCACTGATCTTCCAGAGTTACGTAGTGGTCGTTCTTTTGGTGATTTTATCAAAGAGAAAGTTTCTG  
CTAGTCGCGACGATAGTATTTATCGGAGTGATATTAACAAGTTAACT

+

FFFFFFFFFFFFFFFFFFFFFFFFFFFFFFFFFFFFFFFFFFFFFFFFFFFFFFFFFFFFFFFFFFFFFFFF  
FFFFFFFFFFFFFFFFFFFFFFFFFFFFFFFFFFFFFFFFFFFFFFFFFFFFFFFFFFFFFFFFFFFFFFFF

@A00721:190:HGJW7DSXY:4:2174:30237:16313\_2:N:0:TCTGCAAG+GCTGCACT  
TGTTGAAGTACCGCAACATGGATCAGTTTTCCAAAAGCTATTAATAGCAGTTGCGGGGCTATAATAC  
CGCCTCCAGATTACTCTAACTGAATCCACTCTCTTGGGATATAAATG

+

FFFFFFFFFFFFFFFFFFFFFFFFFFFFFFFFFFFFFFFFFFFFFFFFFFFFFFFFFFFFFFFFFFFFFFFF  
FFFFFFFFFFFFFFFFFFFFFFFFFFFFFFFFFFFFFFFFFFFFFFFFFFFFFFFFFFFFFFFFFFFFFFFF

@A00721:190:HGJW7DSXY:4:2613:10312:17534\_1:N:0:TCTGCAAG+GCTGCACT  
AACATGAATTAGTTATTGAAAGTCTTGACCCTCACGTCTCACTTTATCACCTTGAGATGGTAAAGTC  
ATTAACAAAGGAAATGTTAAGGCTGATGACTTAAATTTGCAATTCTGCTTCGACGGTAATTCCATAAG  
ACC

+  
FFFFFFFFFFFFFFFFFFFFFFFFFFFFFFFFFFFFFFFFFFFFFFFFFFFFFFFFFFFFFFFFFFFFFFFF  
FFFFFFFFFFFFFFFFFFFFFFFFFFFFFFFFFFFFFFFFFFFFFFFFFFFFFFFFFFFFFFFFFFFFFFFF  
FFF  
@A00721:190:HGJW7DSXY:4:1459:20094:26553\_1:N:0:TCTGCAAG+GCTGCACT  
TTCTTCATGAAGATCTTCGAGTGTTTTATAGTGAGTTATTCTTGCGAAGGTTCAAGTCGATTGATTTT  
GTTGACTACGATCTCTCTTGTAAATAAGAAGTTCTTCGCAGTTGAATCTCCACCAGGTGGAGGGAAGAC  
CAC  
+  
F:FFFFFFFF:FFFFFFFF:F,FF:F,FFFF:FFFF:FFFFFFFFFFFF:FFFF:FFFFFFFF,FFFFFF:  
:FFFFFFFFFFFF:F:F,FFFFFFFF:FFFF:FFFF:FFFFFFFFFFFFFFFF:FFFFFFFFFFFFFFFF  
FFF  
@A00721:190:HGJW7DSXY:4:1308:21414:35164\_1:N:0:TCTGCAAG+GCTGCACT  
GACTTTTGTGCAATTTTCGCAAAAGGTCTTGAAGTACGTATTGTCACTGCTAATCGTAATTCGCGAG  
AAGAGATAGTACTAAAGTTTTGGCACTTCTAGTTCATCGCGGTATTTGTGAAATTAAGACAGACGTG  
AAA  
+  
FFFFFFFFFFFFFFFFFFFFFFFFFFFFFFFFFFFF:FFFFFFFFFFFFFFFFFFFFFFFFFFFF:FFFFFFFF  
FFFFFFFFFFFFFFFFFFFFFFFFFFFF:FFFFFFFFFFFFFFFFFFFFFFFFFFFFFFFFFFFFFFFFFFFF  
FFF  
@A00721:190:HGJW7DSXY:4:1357:3341:20713\_1:N:0:TCTGCAAG+GCTGCACT  
TCGTATTAGAACAGCTGATTCTTATTGCATGAACGTCGCTGAGGTCAAACCTGTGGACGTTCTTTTCA  
TCGACGAATTATTCATGATTCACGCTGGTCAGACCCTTTTCTTACACATCTACTTAAGGCGGCTTAT  
ACC  
+  
FFFFFFFFFFFFFFFFFFFFFFFFFFFF:FFFFFFFFFFFFFFFFFFFFFFFFFFFF:FFFFF:FFFFFFFFFFFFFFFF  
FFFFFFFFFFFFFFFFFFFFFFFFFFFF:FFFFFFFFF:FFFFFFFFF:FFFFFFFFF:FFFFFFFFF  
FFF  
@A00721:190:HGJW7DSXY:4:2136:6307:30389\_1:N:0:TCTGCAAG+GCTGCACT  
GTGATTCCAATCAAATCGGATTCATCAATCGTATTGATCTCCAAGTCGCAAACCTACTTCAACATCAAC  
GACATCATTCTTGATGAGTGTCGTTCTTATCGAAGTCTCAGTTATCGCTGCCCCGCCGACGTTTGTGCG  
CGA  
+  
FFFFFFFFFFFFFFFFFFFFFFFFFFFFFFFFFFFFFFFFFFFFFFFFFFFFFFFFFFFFFFFFFFFFFFFF  
FFFFFFFFFFFFFFFFFFFFFFFFFFFFFFFFFFFFFFFFFFFFFFFFFFFFFFFFFFFFFFFFFFFFFFFF  
FFF  
@A00721:190:HGJW7DSXY:4:2322:30065:31986\_2:N:0:TCTGCAAG+GCTGCACT  
TACGGCAGAAAAATTTCTCCTGCTTGTAATTCGAGAGAGGACACTATGGAAATTAGACCTATCAGATG  
TCTTGACGACTTCGAATTTGAGGACGGAGTTAAATATATTACTTTTAC  
+  
FFFFFFFFFFFFFFFFFFFFFFFFFFFF:FFF,FFFFFFFFFFFF:FF:FFFFFFFFFFFF,FFFFFFF  
FFFFFFFFF:FFFFFFFFFFFFFFFFFFFFFFFFFFFFFFFFFFFFFFFFFFFFFFFFFFFF  
@A00721:190:HGJW7DSXY:4:1241:31620:15640\_2:N:0:TCTGCAAG+GCTGCACT  
CAAAGTCCTTGGAAGAGTAAGGTTAAATGTGAAGATGCTCAGACTATTCATGAAGTTCAAGGTAATA  
CTTACCAGCACGTTGCGCTGGTTAGAATTAAACCTCAAGATGACCCTG  
+  
FFFFFFFFFFFFFFFFFFFFFFFFFFFFFFFFFFFF:FFFFFFFFF:FF:FFFFFFFF:FFFFFF  
FFFF:FF:FFFFFFFF:FFFFFFFFFFFFFFFF,FFFFFFFFF:FFF  
@A00721:190:HGJW7DSXY:4:1375:24804:12759\_1:N:0:TCTGCAAG+GCTGCACT  
CTTCCGATCTCTCTATCACGACACGTTGAATCTTTACGATACTTTGTTATCAATGTAAAGTTAAACGA  
TGCTACTTGTGAGAGGATCAATCACAGTAAGGAAGTGTACGTTTAGCACGGGAGGTTGCAGATTCAA  
CCC  
+  
FFFFFFFFFFFF:FFFFFFFFFFFFFFFFFFFF:FFFFFF:FFFFFFFFFFFFFFFFFFFFFFFFFFFF

@A00721:190:HGJW7DSXY:4:1539:8513:26850\_1:N:0:TCTGCAAG+GCTGCACT  
AGACGTGTGCTCTTCCGATCTCTTGAAGTTGTTGACGACAAGCCTCAAGAGGGTAGAGGACCACCTGG  
ATCTTCTACTGTCTCTGCCTTCCAAGATTTCCTAGAAGAGGTTATTCCTGGAACCACCTTAACGTCAC  
TCG

@A00721:190:HGJW7DSXY:4:2222:5457:28354\_2:N:0:TCTGCAAG+GCTGCACT  
TGAGTTCAAGTCGGTTGTCGATCGAATTAAGATAAAGGCTAATACCTTTATAGGTAAGAAGCCCCTTG  
ATCAGCGTAGTCAGCGCGTTTAGCTGTATCATCAGTGAGATCGGAAGA

@A00721:190:HGJW7DSXY:4:1108:26530:14967\_1:N:0:TCTGCAAG+GCTGCACT  
TCCAAGAGAATATTTATTCTTATGAGGCTCGAACTTCAACGTTTTCACACGGAAAGACATATCGCA  
CCCGAAATTTTTGGGCAGAATGCTCTTAACGCGGTTCTTGAACGGTGTGTTTGATCAGTCTAAGTTGGA  
TAA

@A00721:190:HGJW7DSXY:4:1140:19072:28855\_2:N:0:TCTGCAAG+GCTGCACT  
ACTCAGTTAACCTGAGAGCTCCTCAATTGATAGATTGGGTCAACAATAGGGACGCTAGTATACTTCGT  
AAAGTCGACAGCGAAATGGTCAATATTGATAATTGGACCGACTATATG

@A00721:190:HGJW7DSXY:4:1245:27588:22404\_1:N:0:TCTGCAAG+GCTGCACT  
AGCTCATGGTGAAAAGGGAAGCTAAGGTTAACTTGATGCTTCAGCCTTTTCGAAGCATAACCCCGCA  
CAGAATATCGTTTATCACGCAAATTTATTAATGCAATTTTCGGACCTATCTTTAAGGTTCTTGAG  
GAG

@A00721:190:HGJW7DSXY:4:1640:6741:7654\_1:N:0:TCTGCAAG+GCTGCACT  
GACGATTTCTCCCGGAAGCTCTTCTCTCTCTTAGGAGGTCATGATGACTACTATAAGGGTGAAATCGA  
TTTTTCGAAGTTTGACAAATCTCAAGATTTCTTTGTAAAGCCTATGAGATAAGATGTATTCTTATT  
TAG

@A00721:190:HGJW7DSXY:4:2544:3269:3114\_2:N:0:TCTGCAAG+GCTGCACT  
TTGGAGTGCCAGTGAATATTTTTGTACGCCAGGAGTATCCATAACGATTTGTCATTTACCACCTTG  
CTCAACGACGAAGTGGAACGGCCAACACTTTCTTTGGTAATTGTATGA

@A00721:190:HGJW7DSXY:4:2347:15944:19272\_2:N:0:TCTGCAAG+GCTGCACT  
ATTTTATCACTTTATTATGACCTTGGAAAGTTTTTCGGCTGTGGTTGTCGCTGGGGACGATTCCATTCT

GTTTTCAAAGACTCCAATAACTGATCATTCTGATCATATGATTTTGAG

+

FFFFFF:FFF,FFFF,FFFF,:FFFFFFFFFFFF:FF:FFFFFFFFFFFF:,F:FFFFFFFFFFFF  
FFF:FFFFFFFFFFFF:FFFF:F,FFFF::F:FFFF:FFFF:F:F:

@A00721:190:HGJW7DSXY:4:2324:31684:2691\_1:N:0:TCTGCAAG+GCTGCACT  
TTTACAAGATCATCGTTAAGTTAGGTAAACCCCTAACCGATGTTACTCTTGTAGGACTTTGGGAGAGA  
TTCGTTAGTTTTAAAGACTATACTAAATATCTCCACTACGAGGTTGTTGTTTGGCGATTAGCTCTTGC  
GA

+

FFFFFFFFFFFF:FF,FFFF,FFF::FFFF:F:FFFFFFFFFFFF:FFFFFFFFFFFFFFFFFFFFFFFFFFFF:F  
FF,FFFFFFFFFFFFFFFFFFFFFFFFFFFFFFFFFFFFFFFFFFFFFFFFFFFFFFFFFFFF:FFFFFFFFFFFF  
F:

@A00721:190:HGJW7DSXY:4:1570:31602:8750\_2:N:0:TCTGCAAG+GCTGCACT  
GAGGGTCGTTATACCTATTCGGCTATCTGTGCTTTGAATTGTATAAGATCAAATTTAAACGATTCCG  
AGAGGTTTATCCTGATGTGGAGGGAGTTCTTGAAGCATCCCGACCTTT

+

FFFFFFFFFFFFFFFFFFFFFFFFFFFFFFFFFFFFFFFFFFFFFFFFFFFFFFFFFFFF:FFFFFFFF  
FFF:FFFFFFFFFFFFFFFFFFFFFFFFFFFFFFFFFFFFFFFFFFFF,FFFFFFFFFFFF

@A00721:190:HGJW7DSXY:4:2565:3152:32534\_2:N:0:TCTGCAAG+GCTGCACT  
GGTTTCATAAGATTATCAGTAATCCTGATTCTACTACGGATTCATGGACCTTCCATCCTGTACCTCTT  
CTGGAGAGACGTATCTCAAAGATCGACTTCGAGACAGGTGATATTGTT

+

FFFFFFFFFFFFFFFFFFFFFFFFFFFFFFFFFFFFFFFFFFFFFFFFFFFFFFFFFFFF:FFFFFFFF  
FFFFFFFFFFFFFFFFFFFFFFFFFFFFFFFFFFFFFFFFFFFFFFFFFFFFFFFFFFFF

@A00721:190:HGJW7DSXY:4:1336:28691:6433\_2:N:0:TCTGCAAG+GCTGCACT  
CTAAATTCGGTAACGGTGCGTGGCGCTTTATTTTAAAAAGCTCCCTCCTCTCGCAAGTTTGATCTGAT  
ACTTATCACGAAAGGACTTGAGTCTTTTGATCAGTCTCTGACTTGACC

+

FFF:FFFFFFFFFFFFFFFFFFFFFFFFFFFFFFFFFFFFFFFFFFFFFFFFFFFFFFFFFFFF  
F:FFFFFFFFFFFFFFFFFFFFFFFFFFFFFFFFFFFFFFFFFFFFFFFFFFFF

@A00721:190:HGJW7DSXY:4:1465:10520:4335\_2:N:0:TCTGCAAG+GCTGCACT  
TAAATGACGATCATTAAGACTCTCTTTCTTCTTTGTTTCCTTCTTTGCACTGATTTTCTCATCAGC  
TTGTGTTTTACCTAATCTGTGTTTTTACGATAACAACATCATCAGTTGAT

+

FFFFFFFFFFFFFFFFFFFFFFFFFFFF:FFFFFF:FFFFFFFFFFFFFFFFFFFFFFFFFFFFFFFFFFFF  
FFF:FFFFFFFFFFFF:FFFFFFFFFFFFFFFFFFFFFFFFFFFF:F,FFFF

@A00721:190:HGJW7DSXY:4:1112:30897:9533\_1:N:0:TCTGCAAG+GCTGCACT  
CCGAAAGGCGAACTTTGGGAATTTGAAGCTCAGGGTGAAGCACACGTTTGACCGTGACGAACTGTGG  
TGTTCTTGATCTACGTTACGGATATACTCTCCTTGAGTTCATCGTAAGGACACTACCACTTATTACG  
ATA

+

FFFF,FFF,,FFFFFFFFFFFF,FFF:FFFFFF:F:FFFFFF:F:FFFF,FFF:FFFFFF:F  
FFFFFFFFFFFF,FFF:FFFF,:FFFFFFFFFFFFFFFFFFFF:FFFFFFFFFFFFFFFFFFFF:FFFFFF:  
FFF

@A00721:190:HGJW7DSXY:4:2609:30318:21621\_1:N:0:TCTGCAAG+GCTGCACT  
AGCGTCTTCTGTTTCATCGCAACCAGATGATATCTTCTATTGCACTTATGTTTCGATCAGTGTTTCTT  
CTATCAGGAGGAAAACACTTGTTCTAGTCCTTGTAAGATTAATCCTAACGTAGAAGATTGTTGTTTAC  
CAC

+

FFFFFFFFFFFFFFFFFFFF:FFFFFFFFFFFFFFFFFFFF:FFFFFFFFFFFFFFFFFFFFFFFFFFFF:FFFFFFFFFFFF  
FFFFFFFFFFFFFFFFFFFFFFFFFFFFFFFFFFFFFFFFFFFFFFFFFFFFFFFFFFFF:FFFF  
FFF

@A00721:190:HGJW7DSXY:4:1529:20220:8985\_1:N:0:TCTGCAAG+GCTGCACT  
TCTCTATTTTAAGTTTTGTCTTCCTTGTTGTCTTATTCTATTAATCACTCATTTTAGTGAGATTATT



FFFF,FFF:FFFFFFFFFFFFFFFFFFFFFFFFFFFFFFFFFFFFFFFFFFFFFFFFFFFFFFFFFFFFFFFF:F  
FFF

@A00721:190:HGJW7DSXY:4:1409:27109:36385\_2:N:0:TCTGCAAG+GCTGCACT  
ATCGCTGAAGGATGTGCACTCTTTTCTGCTACTTTAACGGAGCGTAGTGTACTCTTCGTCGATTGTAT  
CAACAGTAACATTACTTCTAATAAAGGTCTCTATCAAGCTCGTATTAT

+

FFFFF:FFFFFFFFFFFFFFFFFFFFFFFFFFFFFFFFFFFFFFFFFFFFFFFFFFFFFFFFFFFFFFFF,F  
FFFFFFFFFFFFFFFFFFFFFFFFFFFFFFFFFFFFFFFFFFFFFFFFFFFFFFFFFFFFFFFF,FFFFF

@A00721:190:HGJW7DSXY:4:1241:11849:31093\_1:N:0:TCTGCAAG+GCTGCACT  
TTACCGTTGAAGGCTAAACTCCAAGGTAATTATGAAGACTGTGATTTATCTTTCCTCTGGCCTTGTA  
TGAGGGTGTCTTAATCGTAACATTAATAATTTCAATCTTCTTAAAAAGAAGATAGAGAGTCATACTT  
TGG

+

F:FFFFF:FFFFFFFFFFFFFFFFFFFFFFFFFFFFFFFFFFFFFFFFFFFFFFFFFFFFFFFFFFFFFFFF  
FFFFFFFFFFFFFFFFFFFFFFFFFFFFFFFFFFFFFFFFFFFFFFFFFFFFFFFFFFFFFFFF:FFFFFFFFFFFFFFFFFFFFFFFF  
FFF

@A00721:190:HGJW7DSXY:4:1247:7446:16016\_2:N:0:TCTGCAAG+GCTGCACT  
CAATATTGAAGTGGACACCTCTGGTAGTATCGAAGTAAAGATAACCAATAAGGAAGGAGCTTATACTA  
TGTTGAATCAACTAAGCATACTACTTTTGCTTTGATTACTCTACCGC

+

FFFFFFFFFFFFFFFFFFFFFFFFFFFFFFFFFFFFFFFFFFFFFFFFFFFFFFFFFFFFFFFF:FFFFFFFFFFFFFFFFFFFFFFFF  
FFFFFFFFFFFFFFFF:FFFFF,:FFFFFFFFFFFFFFFF:FFFFFFFFFFFFFFFF

@A00721:190:HGJW7DSXY:4:2307:28782:21402\_2:N:0:TCTGCAAG+GCTGCACT  
TAAAGAGTCGATTAAACAAGTTGTACTTATCAATTATTTTATCGCTGGTTGTATATCGAAAAGTCTC  
TTCTAAAAGGAACGTCAGTTCTAAACCAAAGAGAATATCTAAAATATT

+

FFFFFFFFFFFF,FFFF:FF,FFFF:,,FF,,,F,,FFFFFFFF:,FF:,F:FFFFF,,,F,F,F,:F:F  
FF,,FFFF,F,F:,F,:F,,FF:FFFFF,F:::,F,,,FFFF,F,F

@A00721:190:HGJW7DSXY:4:2402:14687:8766\_1:N:0:TCTGCAAG+GCTGCACT  
TACCACTATCTACGAACCTAAAGTTCTGAAGACGTTGCTTGTGCTTCCTCCTTTAATGGCACTACCT  
CGGTACAATCTTACTTGAACGAAGGCGACCTGTTCCGGAGTTTTTACGGGATCCGGAATGTTCTGTC  
TAT

+

FFFFFFFFF:FFFFFFFFFFFFFFFFFFFFFFFFFFFFFFFFFFFFFFFFFFFFFFFFFFFFFFFFFFFFFFFF  
FFFFFFFFFFFFFFFF:FFFFFFFFFFFFFFFFFFFFFFFFFFFFFFFFFFFFFFFFFFFFFFFFFFFFFFFFFFFFFFFF  
FFF

@A00721:190:HGJW7DSXY:4:2305:8006:4679\_1:N:0:TCTGCAAG+GCTGCACT  
AATACGATTTCAACGTCACGTTACCGAGTTTCGTTTCGTACCTTGATGCTGACTTTTCGTCAATAT  
GATTTGATCTGGTTGCTCAATTCTAAGCGTGTCCGCTTAGTGCGAGGCCTCTCTTCTACGAGTATTG  
CTA

+

FFFFFFFFFFFFFFFFFFFFFFFFFFFFFFFFFFFFFFFFFFFFFFFFFFFFFFFFFFFFFFFFFFFFFFFF  
FFFFFFFFFFFFFFFF:FFFFFFFFFFFFFFFFFFFFFFFFFFFFFFFFFFFFFFFFFFFFFFFFFFFFFFFFFFFFFFFF  
FFF

@A00721:190:HGJW7DSXY:4:1148:15953:36636\_2:N:0:TCTGCAAG+GCTGCACT  
ATATTTGGATGATCTTGATAAAGAACTTCATGAATTTTCAGAGGATGAAAAATTTTCTTCCTTGATT  
TTAATATAAAGAATCTTTACCAGGACTCCTACTACAGGAGGCAGTCTT

+

FFFFFFFFFFFFFFFFFFFFFFFFFFFFFFFFFFFFFFFFFFFFFFFFFFFFFFFFFFFFFFFFFFFFFFFF  
FFFFFFFFFFFFFFFFFFFFFFFFFFFFFFFFFFFFFFFFFFFFFFFFFFFFFFFFFFFFFFFF

@A00721:190:HGJW7DSXY:4:1533:10149:15843\_1:N:0:TCTGCAAG+GCTGCACT  
ATTTGTTGTAATAGGGTCATCAACTTAGAACTCGAACTCTAAGTGGAATACTGTCTTTCCAAGCTT  
ACCTGTATCTTCAATGAAATTGGACTCTTCGATAGGGGACATTTTATCGTGGGCTTTCCGTAAAGGAA  
GAT

+  
FFFFFFFFFFFF:FFFFFFFFFFFFFFFFFFFFFFFFFFFFFFFFFFFFFFFFFFFFFFFFFFFFFFFFFFFFFFFF  
FFFFFFFFFFFFFFFFFFFFFFFFFFFFFFFFFFFFFFFFFFFFFFFFFFFFFFFFFFFFFFFFFFFFFFFFFFFFFFFF  
FFF  
@A00721:190:HGJW7DSXY:4:2269:24288:2503\_1:N:0:TCTGCAAG+GCTGCACT  
CTACTAATGGCGTTGGCCTAGTGGATGTTATTAGTGACATCTGGTCAATTTCTTTTTAGGTGGTCTT  
TATTCTATTATTGATTTTTATGAGATTGATACGTTAACAGAAGATGATGTTAGAGTAGAATTCCTGAA  
GAG  
+  
FFFFF:FFFFFFFFF:FFF:FFFFFFFFFFFFFFFFF:F,FFFFF:FFFFFFFFFFFFFFFFF,FF  
FFFFFFFFFFFF:FFFFFFFFFFFFFFFFFFFFFFFFFFFFFFFFFFFFFFFFFFFFFFFFFFFFFFFFFFFFF  
FFF  
@A00721:190:HGJW7DSXY:4:2169:24867:10989\_2:N:0:TCTGCAAG+GCTGCACT  
CCAACCTTCTTGACAATTTCTTCAATCCTTCGATAATAGTTAAATCTAGGATTATGTCTGTGTTGAAA  
GACTTTCTACCGATAAGGGTCACTAGTCTTACACAATTAAGAAATAAT  
+  
FFFFFFFFFFFFFFFFFFFF:FFFFFFFFF:FFFFFFFF:FFFFFFFFFFFFFFFFFFFFFFFFFFFFFFFFFFFF  
FFFFFFFFF:FFFFFFFFFFFFFFFFFFFFFFFFFFFFFFFFFFFFFFFFFFFFFFFFFFFFF  
@A00721:190:HGJW7DSXY:4:1124:6506:22373\_2:N:0:TCTGCAAG+GCTGCACT  
ACTATCTAAAGATTGAAGGAAAATTTTATCCTCGTTTAACTTACTTAGACTTTCCTACGATACAAATG  
ATAACTTCTAATTTACGTTTGCTACTCAGAGCTGGTCTCTCAGCAA  
+  
FFFFFFFFF,FFFFFFFFFFFFFFFFFFFFFFFFFFFFFFFFFFFF:FFFFFFFFFFFFFFFFFFFFFFFFFFFF  
FFFFFFFFFFFFFFFFFFFF:FFFFFFFFFFFFFFFFFFFFFFFFFFFFFFFFFFFFF,F  
@A00721:190:HGJW7DSXY:4:2143:9742:15953\_2:N:0:TCTGCAAG+GCTGCACT  
TCCTCAGGAGTCCCGGCATTTGATAATAATGACGACTTTCGTCATAATCGCTGCATATTACGATTAC  
ACGGTACCAGCGCATCTCGTGTCGAGCCTCGACCCGATTATATGGTAT  
+  
FFFFFFFFFFFFFFFFFFFFFFFFFFFFFFFFFFFFF,F,:F:FFF:FFFFFFFFFFFFFFFFFFFFFFFFFFFF:  
FFFFF:FFFFFFFFF:FFFFFFFFFFFFFFFFF:FFFFFFFFFFFFF:FFF  
@A00721:190:HGJW7DSXY:4:2345:6017:29293\_2:N:0:TCTGCAAG+GCTGCACT  
TCTAGAATTCTTAATTATAATATTCAACCTCAAAGTTACGTGTTTACAGTAACGAGATCACACATTT  
TGAGAACTAACTATGTTATGTTCTCTGATCATTTTGACAATCTCTTCT  
+  
FFFFFFFFFFFFFFFFFFFFFFFFFFFFFFFFFFFFFFFFFFFFFFFFFFFFFFFFFFFFFFFFFFFFFFFFFFFF  
FFFFFFFFFFFFFFFFFFFFFFFFFFFFFFFFFFFFFFFFFFFFFFFFFFFFFFFFFFFFF  
@A00721:190:HGJW7DSXY:4:2206:4562:10770\_2:N:0:TCTGCAAG+GCTGCACT  
AAATAAATAATATTACTAATGGCAAATAGTGGAAGGCTCCAGTCAACACTAGTTCGAGTGCTGCTTT  
GGATTACGATGACGTGAGAATAGGTGAAGGGATAGTTTTTACCTCGAC  
+  
FFFFFFFFFFFFFFFFFFFFFFFFFFFFFFFFFFFFFFFFFFFFFFFFFFFFFFFFFFFFFFFFFFFFFFFFFFFF  
FFFFFFFFFFFFFFFFFFFFFFFFFFFFFFFFFFFFFFFFFFFFFFFFFFFFFFFFFFFFF  
@A00721:190:HGJW7DSXY:4:2473:20735:36307\_1:N:0:TCTGCAAG+GCTGCACT  
TCTTAAAGCTTCACCCAAAATGAAGGACACTTCGAAACTGAATAATGATGCACTACAAACAAGTATCG  
CTAATCATCTGAAAAAGGCTCTAAAGGACACTATACAATATCCAGACGACGACGAAGCTTATACAATA  
TCC  
+  
:F:FFFFF:F:FF,F:FFFFFFFF,FF:F,FFF::FFFF:FFFF:FF:FFF:FFFFFFFFFFFF:FF:  
FFFFFFFFFFFFFFFFFFFFFFFFFFFFFFFFFFFFFFFFFFFFFFFFFFFFFFFFFFFFF:FFFFFFF  
FFF  
@A00721:190:HGJW7DSXY:4:2233:14922:12179\_2:N:0:TCTGCAAG+GCTGCACT  
ACCACATTTGGGTCAAGTCAATCCGTTGAGAAAATTTCTTAGAGGATATTGCCATTGTGGTACGAAT  
TGGTCCAACATTTACCACCAAATTCTTTTGATACAACCTCTAGCCTTCA  
+



@A00721:190:HGJW7DSXY:4:2423:1344:36229\_2:N:0:TCTGCAAG+GCTGCACT  
ACCAGATTGGTTCGAACCCGTTGATGCTATGTCAGAAGAAGCTATTCAAGCTTGTGCTTTAAAGACTG  
CAGAGGCTGTCAAACAAGCCCAGACTCAAGGAGTCCAATCAAAGGTTT

@A00721:190:HGJW7DSXY:4:1436:8630:18098\_1:N:0:TCTGCAAG+GCTGCACT  
CTTGCAAGTGACTGGAGTTCAGACGTGTGCTCTTCCGATCTGAAAAGTCCGGAGTATATTGTATGTT  
AATAGATAGTGGGATAATAGTTCTACCGATACGTAGTGAACGCGTTCTAGAACCAAGTACTTTCCGT  
CTG

@A00721:190:HGJW7DSXY:4:1506:18475:24095\_1:N:0:TCTGCAAG+GCTGCACT  
ACCGATAGGAGTTGTATAGTTGAAGATGTGGCTTTAGACGATAATCCTTTAAGGACTATGTTGACTGA  
CGAAGATTTTCCAACAGATTTGTCTACGTTGCAGATCGCCACTCCAAACACTATATACATTATAAAAT  
ATA

@A00721:190:HGJW7DSXY:4:1270:9146:16016\_1:N:0:TCTGCAAG+GCTGCACT  
ATAACTTTTGTACCAAATTCTTGGCTTTCAACGAAGTCTCTGATTTTATTAATCATTACTTTAACTG  
TCTCTCGGTCATTTACTCTGTACTTGATCTACGTCGTTTAACTGTCGGAACAACCTTTACTTAGAATG  
ACT

@A00721:190:HGJW7DSXY:4:1617:28655:24533\_2:N:0:TCTGCAAG+GCTGCACT  
TCTTATATTATTTACAATAGTTAATATCATATTAGTAATACTCACTATCGTTTTCTGCTTTTTCTTAG  
CTAATAGATTAATAAAGGATGAGTACGAAAACCAACTCTTCGTTACGA

@A00721:190:HGJW7DSXY:4:1505:31747:32330\_1:N:0:TCTGCAAG+GCTGCACT  
TTTAATATATTTTTTCTAAAAACCAATATAAACTATTATAATGCTTGTTTTCCGTCGTAAATTTAAAA  
CACTATGATAACATCCCAAACGACTCGAAACCGAGACGCCGTAGATCAAAGTCCCTTCTAACTTTAG  
AT

@A00721:190:HGJW7DSXY:4:2504:4851:15718\_1:N:0:TCTGCAAG+GCTGCACT  
CATTTTATAGCAGTTATTTATGTTGTACTTTTTATAATTTATAACCTTCTTATACTTTTGGGTATGTT  
TTGTGAAAAACATGAGATACCCAAGTCTATCGAAGACATTATCTCTTATGTACTTATTGTAACGATCA  
TTC

[illegible]

@A00721:190:HGJW7DSXY:4:1206:17508:2534\_2:N:0:TCTGCAAG+GCTGCACT  
TATTCCTTTAACTGTGTATGAGGAGGATTTATAATGCTTTTCGATAGTGATTGTTATCAATTTAAATA  
CATTACTGTTTCAAATCATCTTTACTCACAGACTCCGAAAATGGTTTC

+

FFFFFFFFFFFFFFFFFFFFFFFFFFFFFFFFFFFFFFFFFFFFFFFFFFFFFFFFFFFFFFFFFFFFFFFF  
FFFFFFFFFFFFFFFFFFFFFFFFFFFFFFFFFFFFFFFFFFFFFFFFFFFFFFFFFFFFFFFFFFFFFFFF

@A00721:190:HGJW7DSXY:4:1267:10330:34601\_1:N:0:TCTGCAAG+GCTGCACT  
TATTTATTAAACGAACCTATTATCCGATTCTTCGAGGGTATCACTACCACTGATCTGCCGACTTTAGTC  
AAGGAACCTCAATTCCTTCGATGTTTATATTTTTCTATAAGGGAAAATAGCAATAATCAAATTCGAC  
AAA

+

FFFFFFFFFFFFFFFFFFFFFFFFFFFFFFFFFFFFFFFFFFFFFFFFFFFFFFFFFFFFFFFFFFFFFFFF,FFFFFFFF  
FFFFFFFFFFFFFFFFFFFFFFFFFFFFFFFFFFFFFFFFFFFFFFFFFFFFFFFFFFFFFFFFFFFFFFFF,FFFFFFFF  
FFF

@A00721:190:HGJW7DSXY:4:1252:8784:33990\_2:N:0:TCTGCAAG+GCTGCACT  
ATTTCAGAACTCTCTCCGATCACCTTGGTGTGATCTCCCGAGGATCTTTTCAATAAGATGTATGATG  
ATAATCTACTATTTTTAAATAGTGATATTCAGCGTATACTTGAATACT

+

FFFFFFFFFFFFFFFFFFFFFFFFFFFFFFFFFFFFFFFFFFFFFFFFFFFFFFFFFFFFFFFFFFFFFFFF  
FFFFFFFFFFFFFFFFFFFFFFFFFFFFFFFFFFFFFFFFFFFFFFFFFFFFFFFFFFFFFFFFFFFFFFFF:FF:FFF

@A00721:190:HGJW7DSXY:4:1512:8169:3145\_1:N:0:TCTGCAAG+GCTGCACT  
CTTGGTCTATTTACCGCAAAAAGTTGGAAGAGGTCTATGATATTTATTTTACTTATACTTTAAATAGC  
ACCGATTATAACTTGACTGTTGATAATATTACAATAGCTCTTCTCAGAAGATTAGAGAAGTAACCGG  
TGA

+

FFFFFF,F:FFF:FFFFFFFFFFFFFFFFFFFFFFFFFFFFFFFFFFFFFFFFFFFFFFFFFFFFFFFF:FFFFFFFF  
FFFFFFFFFFFFFFFFFFFFFFFFFFFFFFFFFFFFFFFFFFFFFFFFFFFFFFFFFFFFFFFFFFFFFFFF,FFFFFFFF  
FFF

@A00721:190:HGJW7DSXY:4:1318:30490:19194\_2:N:0:TCTGCAAG+GCTGCACT  
CATTGATTTACTTTTACCGTTAGAACTGAAAAAGATTCTTTTCGAAAAGAAACCTATAAGTTACAAAC  
GATTCTTCGACTATATTAAAGAAATAAAAATACTTCAAGTACCTGAAC

+

FFFFFFFFFFFFFFFFFFFFFFFFFFFFFFFFFFFFFFFFFFFFFFFFFFFFFFFFFFFFFFFFFFFFFFFF  
FFFFFFFFFFFFFFFFFFFFFFFFFFFFFFFFFFFFFFFFFFFFFFFFFFFFFFFFFFFFFFFFFFFFFFFF

@A00721:190:HGJW7DSXY:4:1672:17155:23938\_1:N:0:TCTGCAAG+GCTGCACT  
ATGGTATAATGTGTCTTACAAATAGAACCTTCACTCTCGGTAATGAGAGTGATTCTTAAATATTCTA  
GTAACCGCTATGTGGGCATTACTAGGATTTATCACACTCCTAAATTTGATAGCAATTTATGTTTTAA  
TGC

+

FFFFFF,F:FFF:FFFFFFFF:FFF,F:FFFFFFFFFFFFFFFFFFFFFFFF:FFFFFFFF:FFFFFFFF  
FFFFFFFFFFFFFFFFFFFFFFFFFFFFFFFFFFFFFFFFFFFFFFFF:FF:F:FFF,:::FFF:FFF:F,:FFFFFFFF,  
FFF

@A00721:190:HGJW7DSXY:4:1614:21766:27633\_2:N:0:TCTGCAAG+GCTGCACT  
AAAAACTCCATTGTATAGTTCAAGGAGTACTTAATTCAATAGCTTTAGTATTATTTACTATCGCCTTT  
ATTGAAAATTGTATAAGAGTTAATTGCTTACACAAAAGTGACGCGCA

+

FFFFFFFFFFFFFFFFFFFFFFFFFFFFFFFFFFFFFFFFFFFFFFFFFFFFFFFFFFFFFFFFFFFFFFFF,FFFFFFFF  
FFFFFFFFFFFFFFFFFFFFFFFF:FF:FFFFFFFFFFFFFFFFFFFFFFFF

@A00721:190:HGJW7DSXY:4:2522:23511:11866\_2:N:0:TCTGCAAG+GCTGCACT  
ATACCATAACCTACCATGACCAATCATCGCTCCAACCTGGCAGCCAGACGTAGGGTCAAACCTACTAC  
CGCCGGTCGGCAGATCGGCACCACTGGTCTCTACGTTCAAGGACCCGC

+

:FFFFFFFFFFFFFFFFFFFFFFFFFFFFFFFFFFFFFFFFFFFFFFFFFFFFFFFFFFFFFFFFFFFFFFFF  
FFFFFFFFFFFFFFFFFFFFFFFFFFFFFFFFFFFFFFFFFFFFFFFFFFFFFFFF

@A00721:190:HGJW7DSXY:4:2241:23502:35806\_1:N:0:TCTGCAAG+GCTGCACT  
CCTTCCCAAATCTAGATCTGCACAGAAGAAGGCTGAAGGTCGTTACCGGACGACCACTCAAAGGAAAC  
GGGCTGTTGCCAGAGGAAAGCAGCGACCACCGAGGTCGCTCGTAACATTGACGGCAGTCCCGTCATC  
TCT

+

FFFFFFFFFFFFFFFFFFFFFFFFFFFFFFFFFFFFFFFFFFFFFFFFFFFFFFFFFFFFFFFFFFFFFFFF  
FFFFFFFFFFFFFFFFFFFFFFFFFFFFFFFFFFFFFFFFFFFFFFFFFFFFFFFFFFFFFFFFFFFFFFFF  
FFF

@A00721:190:HGJW7DSXY:4:1549:2329:35837\_2:N:0:TCTGCAAG+GCTGCACT  
GCAGTACCTCAGTCAAAAGTCACATTACCACTCCCATAACCAATCAATGATGTGACTATACAGTTCGG  
CCATTTCAAGAGTGGTCAATACGTCGTGGGAGGTACTGAAGCCTTCCC

+

FFFFFFFFFFFFFFFFFFFFFFFFFFFFFFFFFFFFFFFFFFFFFFFFFFFFFFFFFFFFFFFFFFFFFFFF  
FFFFFFFFFFFFFFFFFFFFFFFFFFFFFFFFFFFFFFFFFFFFFFFFFFFFFFFFFFFFFFFFFFFFFFFF  
FFF

@A00721:190:HGJW7DSXY:4:2659:25156:19257\_2:N:0:TCTGCAAG+GCTGCACT  
CCAAGCCAATCAATAGTTCTTCTGACCAGAATGAAAAGGGTTTACCAGGTAGTCTCTAAGTCTACC  
AGGAAGAGGGGAAATGTCCCCAAACTGAGAAGAATAAAGGGAAAGGT

+

FFFFFFFFFFFFFFFFFFFFFFFFFFFFFFFFFFFFFFFFFFFFFFFFFFFFFFFFFFFFFFFFFFFFFFFF  
FFFFFFFFFFFFFFFFFFFFFFFFFFFFFFFFFFFFFFFFFFFFFFFFFFFFFFFFFFFFFFFFFFFFFFFF  
FFF

@A00721:190:HGJW7DSXY:4:2332:21820:27070\_2:N:0:TCTGCAAG+GCTGCACT  
AGGGGAAATTACCCCTAATTCTGAAGGAAGATCTCCACCATCTGGGGTTGGAATAAGAAATCTGCA  
CGGGCCAAAGAGGCCGCTGCTACGAAGTCGCTGAAGGCGGCTTGGGTC

+

FFFFFFFFFFFFFFFFFFFFFFFFFFFFFFFFFFFFFFFFFFFFFFFFFFFFFFFFFFFFFFFFFFFFFFFF  
FFFFFFFFFFFFFFFFFFFFFFFFFFFFFFFFFFFFFFFFFFFFFFFFFFFFFFFFFFFFFFFFFFFFFFFF  
FFF

@A00721:190:HGJW7DSXY:4:2136:26323:5744\_2:N:0:TCTGCAAG+GCTGCACT  
TTGCGCTGCCGACCCCATCTTTGAGACCAAGACTCTCTACAGTAGGTTCTGTCCTACTATGAGCAA  
TCTGTTGAATTCTGCTACTGAGGACGAAGGTGAGAGGACTTTTGGCTAC

+

FFFFFFFFFFFFFFFFFFFFFFFFFFFFFFFFFFFFFFFFFFFFFFFFFFFFFFFFFFFFFFFFFFFFFFFF  
FF:FFFFFFFFFFFFFFFFFFFFFFFFFFFFFFFFFFFFFFFFFFFFFFFFFFFFFFFFFFFFFFFF  
F

@A00721:190:HGJW7DSXY:4:1357:23854:17378\_2:N:0:TCTGCAAG+GCTGCACT  
CGTGGGTTGAAGGCCGACGCTTCGAGCCTGAGTGTGACGAGGCCGGTGACGTTTTTGTCAACGGCGTT  
TGGAGGATTTTATCCGCGCTTAACATATGGGGCGAAGATCCCCTATGGA

+

FF:FFFFFFFFFFFFFFFFFFFFFFFFFFFFFFFFFFFFFFFFFFFFFFFFFFFFFFFFFFFFFFFF  
FFFFFFFFFFFFFFFFFFFFFFFFFFFFFFFFFFFFFFFFFFFFFFFFFFFFFFFFFFFFFFFF  
FFF

@A00721:190:HGJW7DSXY:4:1446:16161:17801\_2:N:0:TCTGCAAG+GCTGCACT  
TTGGCATATTTATGCCGACGATAATAAGCATGTCACCCTTAAGCACCGAGGTAAGCTCGGGACTTACA  
AGAGAGAGTGTGAGAGAGTCGCTCTCACTATTTTTGCCAGAATGCGG

+

FFFF:FF:FFFFFFFFFFFF:FFFFFFFFFFFFFFFFFFFFFFFFFFFFFFFFFFFFFFFFFFFFF,FFFFFFFFFFFF:FF:  
FFFFFFFFFFFFFFFFFFFFFFFFFFFFFFFFFFFFFFFFFFFFFFFFFFFFFFFFFFFFFFFF  
F::F

@A00721:190:HGJW7DSXY:4:2601:12481:18756\_2:N:0:TCTGCAAG+GCTGCACT  
TCCTCCATAATTACAACCTCTCTGTAGAGAGCATTAGAAGGAAGTTGGGCAATTCCCACATATGGTA  
GACGTTGTCACACTTTTCTTGAAAATTTTCTTTTCTCCGTCATTGG

+

FFFFFFFFFFFFFFFFFFFFFFFFFFFFFFFFFFFFFFFFFFFFFFFFFFFFFFFFFFFFFFFFFFFFFFFF  
FFFFFFFFFFFFFFFFFFFFFFFFFFFFFFFFFFFFFFFFFFFFFFFFFFFFFFFFFFFFFFFF  
FFF

@A00721:190:HGJW7DSXY:4:2327:25590:13056\_2:N:0:TCTGCAAG+GCTGCACT  
AAGGTGGAAGGTGTCAAGGGTCTTCTTCATGCTGATCTTTCAGGACCTAATCACATCATGATTGATAG  
TTACGGCTCGTATCGAGTTGGAGGGAGGAAGTTCTCCGAAATTAAAGA

+

@A00721:190:HGJW7DSXY:4:1427:20980:20228\_1:N:0:TCTGCAAG+GCTGCACT  
TCAGAGAGGGGAGCTCTGAAAAGGAACTTCGTCAGAAGATGAGGAAGTCTAAGAGGAGGAGTTTGAG  
GAAGGCTCTAGAGAAGATCTCACCACCTGGAGAAGGCAAGTGGAGAGTCCAGAAGTTGATGAAGAAGG  
ATT

+

```
FF:FFFFFFFFFFFFFFFFFFFFFFFFFFFFFFFFFFFFFFFFFFFFFFFFFFFFFFFFFFFFF
FFFFFFFFFFFFFFFFFFFFFF,FFFFFFFFFFFFFFFFFFFFFFFFFFFFFFFFFFFFFFFFFF
FFF
```

@A00721:190:HGJW7DSXY:4:1532:13584:17221\_2:N:0:TCTGCAAG+GCTGCACT  
GTTACCACTTCCTAAGGTGGATGAGGGAGGTTGTTTCTTTGGAGTTTTAGATAATCTTTTGAGAAGGG  
GTCATAGAGCCAGCAAGAGAAGCTTATATGCTGGTTTAAGTGATGATT

+

```

FFFFFFFFFFFFFFFFFFFFFFFF,FFFFFFFFFFFFFFFFFFFFFFFF:FFFFFFFFFFFFFFFFFFFFFFFF
FFFFFFFFFFFFFFFFFFFFFFFF,FFFFF:FFFFFFFFFFFFFFFF

```

@A00721:190:HGJW7DSXY:4:1319:29568:7576\_1:N:0:TCTGCAAG+GCTGCACT  
ATTTAGGTCAACTTGGGGTTTCGAATGTCATTAGTGCCTTACGATTGAAAGAGGTCCTTTTGAGTATC  
GACAGATCTTTCGATCTTGAGGACGTACATTTAACGTGGCAGAATTGCGTAACTTACCATATTGTTCC  
TTC

+

```

FFFFFFFF:FFFFFFFFFFFFFFFF,FFFFFFFFFFFFFFFFFFFFFFFFFFFFFFFFFFFFFFFF:FFF
FFFFFFFFFFFFFFFF:FFFFFFFFFFFFFFFFFFFFFFFFFFFFFFFFFFFFFFFFFFFFFFFFFFFFF
FFF

```

@A00721:190:HGJW7DSXY:4:2647:2003:4679\_1:N:0:TCTGCAAG+GCTGCACT  
ATTTAACTTTGACTCAACTACTCCGATCAGATCCGGATGTTTTGATTGGTATGGACTACTCGACTTTT  
GATCTGGAGTTGTCTAGGGTCATGGCAGATACTACCGATAAGGTGAAAAATATGCAGGTCAAAGATTC  
TGT

+

[illegible]

@A00721:190:HGJW7DSXY:4:1612:19678:22764\_2:N:0:TCTGCAAG+GCTGCACT  
GAGGGAGCCGTTTTGGCCGACTTTAACTATTCTAAGAGTCTTTATGATTCAAACCTATCGTTGTCGT  
ACCTTACAAGTTGAGGAGACTTTACAGCGGCTTATTGTCGCGCAGTT

+

```

FFFFFFFFFFFFFFFFFFFFFFFFFFFFFFFFFFFFFFFFFFFFFFFFFFFFFFFFFFFFFFFFFFFFFFFF
FF:FFFF:FF:FFFFFFFFFFFFFFFFFFFF:FFF:FFFFFFFFFFFFFFFFFFFF

```

@A00721:190:HGJW7DSXY:4:1132:19768:11960\_1:N:0:TCTGCAAG+GCTGCACT  
TATCTTGAATGCTCACGCCGTCGCAGCCATATCGAGAATATGTTATAATCACTTGTTAAAGTACAGAT  
TtagtgatttagatattattgatattggaggcgatatTCGTTTTCATATCCAAAACCTCTGAATGGA  
GTA

+

```

FFFFFFFF,FFFFFF,:F:FFFFFFFFF,FFFFFFFF,FFF:FFFFFFFFFFFFFF:F:FFFFFFFFF
FFFFFFFFFFFFFFFFFFFFFFFFFFFFFFFF,FFF,FFFFFFFFFFFFFFFFFFFFFF:FFFFFFFFF:FF
FFF

```

@A00721:190:HGJW7DSXY:4:2601:12554:3756\_1:N:0:TCTGCAAG+GCTGCACT  
ACCCTATTCTTGATGTGATAGATGCTGCGAGGTATACGTCTAGGAACATTGATTGGGAACGTACCTAC  
TCACGAGACGTATTGAAAGCTATCGGAGGGAAGCAAAATGTTTCGTTCTGTTACAAGAACGCTTTGGA  
TTG

+

FF,F,F:F,F,FFFFFF,FFF,FFF,,,,,F,FF,,FF,:F,:F,FF,,FFFF:FFF:,F,FF,F,FF:  
FF:FFFF:,FF,,FFFFFFFFFF:F,F,F:F,:FFF,,FFF:FFF,FFFFFFFF:,FFFFFFFF,,:F:FF  
FF,



@A00721:190:HGJW7DSXY:4:2337:25491:16297\_1:N:0:TCTGCAAG+GCTGCACT  
CTTGGTATTTCTGAAATAGTTTATCAGAGCGTCATTTTCTTTGGGATCTTTCCTCTGGTAAGGGAAT  
TATTAAATCATTCTTCTCACTCTTGACGAGAATTATTACTGTTTTCTCTACCCATAACTTCTTTTTCA  
AAA

@A00721:190:HGJW7DSXY:4:1169:6424:6668\_1:N:0:TCTGCAAG+GCTGCACT  
GTGCTCTTCCGATCTGTCGTTTCAACACTTATCACCCTTTTGAAGGAAAATAATTGGTGATGAAAA  
TACGTATGTCGGTGGGGTTCTCAAGGCTCTCATCGCCACTGGGATTCTAAGGGGTTCCATAAGATATT  
ATC

@A00721:190:HGJW7DSXY:4:2233:29586:24768\_2:N:0:TCTGCAAG+GCTGCACT  
TTTGGTCCTTACGTCTTAAGTAATTTGGATGTTGTGCGAAAACATCAGGTTCTTGTCACGATTCTTAA  
AAGAAGTTTATTAAAACTTCAGAGTCTCTTGGAAGTCCAGGTAGCTAA

@A00721:190:HGJW7DSXY:4:2570:16260:28651\_2:N:0:TCTGCAAG+GCTGCACT  
GGGAAAAGAGACCTCTGTTGGTAGAGGAGTTGAGAGAATTACTCAGATTCAATCTGGCATCACTGAAC  
GTCTACAACGAGTTAGGGAGTGGCTAGGTTTTTAAAGATCCTTTGCAC

@A00721:190:HGJW7DSXY:4:2569:25617:11130\_2:N:0:TCTGCAAG+GCTGCACT  
CGTCGCGGAAAACGATGAAGATTTCCACACTGTTGAGAATCTTCTGATGCTGAATTTGAGGAAAATT  
TTTCGGAAGTTTTTGGTATAAATCCTGATGGCTCAGTACAGGGAGGAG

@A00721:190:HGJW7DSXY:4:1276:5231:1658\_2:N:0:TCTGCAAG+GCTGCACT  
ACCTTCTTTTATCATTGCAACAGGACTTTGAGAAGACTGTTGAAATGGACAAAATCTGGGATCATAGG  
TATGTGTCACGCTACACTCGAAATATGGGCCCTCATAAGGAAGTATAG

@A00721:190:HGJW7DSXY:4:1468:8323:31657\_2:N:0:TCTGCAAG+GCTGCACT  
GGAAGATCTCTACAGAGATTATCGAGAGTTGTGATCTAGTTCTAAATTTAGGTGCACGGACTTTAGCA  
ACTTTAGAAAAATCTTTCCGGGCTCAATGACCTTTGCTATGTACGTG

@A00721:190:HGJW7DSXY:4:1508:22182:21966\_1:N:0:TCTGCAAG+GCTGCACT  
T TAGTTTCATGAAGTTCTTACACTTCTCGCGACTAATGTGTCAGCTTCACTACAAAGGCGTTACGTAAAGT  
AGTTTTTACGCTTTATCTTAAAGCATTACCACCAAATTTAGCACTTTTTGAATATGACAGAAGCTCGC  
CAT

FFFFFFFFFFFFFFFFFFFFFFFFFFFFFFFFFFFFFFFFFFFFFFFFFFFFFFFFFFFFFFFFFFFFFFFFFFFFFFFF  
FFF

@A00721:190:HGJW7DSXY:4:2112:25030:6073\_2:N:0:TCTGCAAG+GCTGCACT  
CCAGTTAGAGTTCTTCTAACCAGGACTGATGGTGAGATTCTTTTACCTTTTGGAGGTCCAGGAACCTT  
TACTCCTAGTGTCTTTTCTAGAGTCCAAGGACGTTTCCGTCGGAGGAT

+  
FFFFFFFFFFFFFF:FFFF:FFFFFFFFFFFFFFFFFFFFFFFFFFFFFFFFFFFFFFFFFFFFFFFFFFFFFFFF  
FFFFFFFFFFFFFF:FF:FFFFFFFFFFFFFFFFFFFFFFFFFFFFFFFFFFFFFFFFFFFFFFFFFFFFFFFF

@A00721:190:HGJW7DSXY:4:1261:22281:28369\_1:N:0:TCTGCAAG+GCTGCACT  
TCAATAACACTCTATTGAATCCCTTTTCCACGATGAAAGCTCTTTATGAGGTGCTCCATGCAAATTTA  
CAGTTCTCTTTGGTGATATCGCCTCTGTCCTTTCTCCTTTAATCGTGAGGTTACGAGAGTTTCGTAC  
TTG

+  
FFFFFFFFFFFFFFFFFFFFFFFFFFFFFFFFFFFFFFFFFFFFFFFFFFFFFFFFFFFFFFFFFFFFFFFFFFFF  
FFFFFFFFFFFFFFFFFFFFFFFFFFFFFFFFFFFFFFFFFFFFFFFFFFFFFFFFFFFFFFFFFFFFFFFFFFFF  
FFF

@A00721:190:HGJW7DSXY:4:2530:26313:22482\_1:N:0:TCTGCAAG+GCTGCACT  
TTTTGATAAATTTGTTGGAATCGATAATGATACTGACGAAGGTTCTATTACCACCCTTGTCAATTGATA  
CAAACATTCTAGGTGATGCTTTCTTAGAGGCTCGTCTAGCCGCTGAGATTCGTCTTACCTATTTACAA  
TCT

+  
FFFFFFFFFFFFFFFFFFFFFFFFFFFFFFFFFFFFFFFFFFFFFFFFFFFFFFFFFFFFFFFFFFFFFFFFFFFF  
FFFFFFFFFFFFFFFFFFFFFFFFFFFFFFFFFFFFFFFFFFFFFFFFFFFFFFFFFFFFFFFFFFFFFFFFFFFF  
FFF

@A00721:190:HGJW7DSXY:4:2542:19515:33223\_1:N:0:TCTGCAAG+GCTGCACT  
GATAACGATTTAGTACTGGGAAATGGTGGTAGTCAGTTTACTACTTTTCTTTCCTCCCTTTTTTCGA  
TTGGATTCGACGGGGTCTTCGTCTCACGACTAATTTGATAAGGTTTTTCTTTTATGGGACTCTTGTTT  
GTA

+  
FFFFFFFFFFFFFFFFFFFFFFFFFFFFFFFFFFFFFFFFFFFFFFFFFFFFFFFFFFFFFFFFFFFFFFFFFFFF  
FFFFFFFFFFFFFFFFFFFFFFFFFFFFFFFFFFFFFFFFFFFFFFFFFFFFFFFFFFFFFFFFFFFFFFFFFFFF  
FFF

@A00721:190:HGJW7DSXY:4:1440:3106:29731\_2:N:0:TCTGCAAG+GCTGCACT  
GTTCTTAATGTAGGTCTCCTAGTACTTAAGGGTTTATGTTTCGGTTTCAGCTGGATGGATCTTTTGAT  
GGTATGTTTCACATTGCGTGATCACTTCCCGTGGACTTGGAAGAGAT

+  
FFFFFFFFFFFFFFFFFFFFFFFFFFFFFFFFFFFFFFFFFFFFFFFFFFFFFFFFFFFFFFFFFFFFFFFFFFFF  
FFFFFFFFFFFFFFFFFFFFFFFFFFFFFFFFFFFFFFFFFFFFFFFFFFFFFFFFFFFFFFFFFFFFFFFFFFFF

@A00721:190:HGJW7DSXY:4:1632:32786:20134\_1:N:0:TCTGCAAG+GCTGCACT  
TTCTATTATGTCGCTAAAGCCTGTCCAGTTGTGATGATGTTTCGGGCTGTGGGGATTAAGTTCCCTCG  
TGAAACTTACGACGATGTTCTCGCTCGCATTTCACAAGGATTACTAAGTCTGAGATCTGCCACTTCTA  
ATT

+  
FFFFFFFFFFFFFFFFFFFFFFFFFFFFFFFFFFFFFFFFFFFFFFFFFFFFFFFFFFFFFFFFFFFFFFFFFFFF  
FFFFFFFFFFFFFFFFFFFFFFFFFFFFFFFFFFFFFFFFFFFFFFFFFFFFFFFFFFFFFFFFFFFFFFFFFFFF  
FFF

@A00721:190:HGJW7DSXY:4:1374:29993:21245\_2:N:0:TCTGCAAG+GCTGCACT  
AAGTTCAAGGATGTCTTGGTCGAAAAATATCGCCGGGACCTTCTAATAGAGGATCCTGATGACATT  
ATTTCAACGGATACCGATCTCAGTTCTACCACAGAAACCGTCTCAGGA

+  
FFFFFFFFFFFFFFFFFFFFFFFFFFFFFFFFFFFFFFFFFFFFFFFFFFFFFFFFFFFFFFFFFFFFFFFFFFFF  
FFFFFFFFFFFFFFFFFFFFFFFFFFFFFFFFFFFFFFFFFFFFFFFFFFFFFFFFFFFFFFFFFFFFFFFFFFFF

@A00721:190:HGJW7DSXY:4:1457:26738:23907\_2:N:0:TCTGCAAG+GCTGCACT  
CTGATTCGGAATTAGAGAAAGACGACCTTCTTGTGGGGACTGAGACCTCTGAATTTTTCAGGGTGCCCT

+

@A00721:190:HGJW7DSXY:4:1121:26323:32299\_2:N:0:TCTGCAAG+GCTGCACT  
CAGAAACGTAACAAGAAGATAAAGGTAGGAAGGGGAGAAAACAGAACAAAGCGAGCGGTTGAAGAGAA  
AACTGATATGGTTGCGGCTGATCGTACCCCAATTCTGCTAGAAAGAT

+

@A00721:190:HGJW7DSXY:4:1659:31991:17159\_2:N:0:TCTGCAAG+GCTGCACT  
TACCACTGATCTTCCAGAGTTACGTAGTGGTCGTTCTTTTGGTGATTTTATCAAAGAGAAAGTTTCTG  
CTAGTCGCGACGATAGTATTTATCGGAGTGATATTAACAAGTTAACT

+

@A00721:190:HGJW7DSXY:4:2177:29631:24972\_2:N:0:TCTGCAAG+GCTGCACT  
TGTTGAAGTACCGCAACATGGATCAGTTTTCCAAAAGCTATTAATAGCAGTTGCGGGGCTATAATAC  
CGCCTCCAGATTACTCTAAACTGAATCCACTCTCTTGGGATATAAATG

+

@A00721:190:HGJW7DSXY:4:2639:21594:28244\_1:N:0:TCTGCAAG+GCTGCACT  
AACATGAATTAGTTATTGAAAGTCTTGACCCTCACGTCTCACTTTATCACCTTGGAGATGGTAAAGTC  
ATTAACAAAGGAAATGTAAAGGCTGATGACTTAAATTTGCGATTCTGCTTCGACGGTAATTCCATAAG  
ACC

 $+$ 

@A00721:190:HGJW7DSXY:4:2376:11812:22733\_1:N:0:TCTGCAAG+GCTGCACT  
TTCTTCATGAAGATCTTCGAGTGTTTTATAGTGAGTTATTCTTGCGAAGGTTCAAGTCGATTGATTTT  
GTTGACTACGATCTCTCTTGTAATAAGAAGTTCTTCGCAGTTGAATCTCCACCAGGTGGAGGGAAGAC  
CAC

+

@A00721:190:HGJW7DSXY:4:1372:9028:33599\_1:N:0:TCTGCAAG+GCTGCACT  
GACTTTTGTGCAATTTTCGCAAAGGCTTGAAGTACGTATTGTCACTGCTAATCGTAATTCGCGAG  
AAGAGATAGTGAATAAGTTTTGGCACTTCTAGTTCATCGCGGTATTTGTGAAATTAAGACAGACGTG  
AAA

+

@A00721:190:HGJW7DSXY:4:1417:17806:33927\_1:N:0:TCTGCAAG+GCTGCACT  
TCGTATTAGAACAGCTGATTCTTATTGCATGAACGTCGCTGAGGTCAAACCTGTGGACGTTCTTTTCA  
TCGACGAATTATTCATGATTCACGCTGGTCAGACCCTTTTCTTACACATCTACTTAAGGCGGCTTAT  
ACC

 $+$ [illegible]



@A00721:190:HGJW7DSXY:4:2150:8639:4210\_1:N:0:TCTGCAAG+GCTGCACT  
GTGATTCCAATCAAATCGGATTCATCAATCGTATTGATCTCCAAGTCGAACTACTTCAACATCAAC  
GACATCATTCTTGATGAGTGTCGTTCTTATCGAAGTCTCAGTTATCGCTGCCC GCCGACGTTTGTGCG  
CGA

+

FFFFFFFFFFFFFFFFFFFFFFFFFFFFFFFFFFFFFFFFFFFFFFFFFFFFFFFFFFFFFFFFFFFFFFFF  
FFFFFFFFFFFFFFFFFFFFFFFFFFFFFFFFFFFFFFFFFFFFFFFFFFFFFFFFFFFFFFFFFFFFFFFF  
FFF

@A00721:190:HGJW7DSXY:4:2636:25337:3662\_2:N:0:TCTGCAAG+GCTGCACT  
TACGGCAGAAAAATTTCTCCTGCTTGTAATTCGAGAGAGGACACTATGGAAATTAGACCTATCAGATG  
TCTTGACGACTTCGAATTTGAGGACGGAGTTAAATATATTACTTTTAC

+

FFFFFFFFFFFFFFFFFFFFFFFFFFFFFFFFFFFFFFFFFFFFFFFFFFFFFFFFFFFFFFFFFFFFFFFF  
FFFFFFFFFFFFFFFFFFFFFFFFFFFFFFFFFFFFFFFFFFFFFFFFFFFFFFFFFFFFFFFFFFFFFFFF  
FFF

@A00721:190:HGJW7DSXY:4:1438:4399:27117\_2:N:0:TCTGCAAG+GCTGCACT  
CAAAGTCCTTGTAAGAGTAAGGTTAAATGTGAAGATGCTCAGACTATTCATGAAGTTCAAGGTAATA  
CTTACCAGCACGTTTCGGCTGGTTAGAATTAAACCTCAAGATGACCCTG

+

FFFFFFFFFFFFFFFFFFFFFFFFFFFFFFFFFFFFFFFFFFFFFFFFFFFFFFFFFFFFFFFFFFFFFFFF  
FFFFFFFFFFFFFFFFFFFFFFFFFFFFFFFFFFFFFFFFFFFFFFFFFFFFFFFFFFFFFFFFFFFFFFFF  
FFF

@A00721:190:HGJW7DSXY:4:2220:7826:34616\_1:N:0:TCTGCAAG+GCTGCACT  
CTTCCGATCTCTCTATCACGACACGTTGAATCTTTACGATACTTTGTTATCAATGTAAAGTTAAACGA  
TGCTACTTGTGAGAGGATCAATCACAGTAAGGAAGTGTACGTTTAGCACGGGAGGTTGCAGATTCAA  
CCC

+

FFFFFFFFFFFFFFFFFFFFFFFFFFFFFFFFFFFFFFFFFFFFFFFFFFFFFFFFFFFFFFFFFFFFFFFF  
FFFFFFFFFFFFFFFFFFFFFFFFFFFFFFFFFFFFFFFFFFFFFFFFFFFFFFFFFFFFFFFFFFFFFFFF  
FFF

@A00721:190:HGJW7DSXY:4:2148:28556:2566\_1:N:0:TCTGCAAG+GCTGCACT  
AGACGTGTGCTCTTCCGATCTCTTGAAGTTGTTGACGACAAGCCTCAAGAGGGTAGAGGACCACCTGG  
ATCTTCTACTGTCTCTGCCTTCCAAGATTTCTTAGAAGAGGTTATTCCTGGAACCACCTTAACGTAC  
TCG

+

FFFFFFFFFFFFFFFFFFFFFFFFFFFFFFFFFFFFFFFFFFFFFFFFFFFFFFFFFFFFFFFFFFFFFFFF  
FFFFFFFFFFFFFFFFFFFFFFFFFFFFFFFFFFFFFFFFFFFFFFFFFFFFFFFFFFFFFFFFFFFFFFFF  
FFF

@A00721:190:HGJW7DSXY:4:2236:18096:19554\_2:N:0:TCTGCAAG+GCTGCACT  
TGAGTTCAAGTCGGTTGTCGATCGAATTAAGATCAAGGCTAATACCTTTATAGGTAAGAAGCCCCTTG  
AGCCGCGTAGTCAGCGCGTTTAGCTGTATCATCAGTGAGATCGGAAGA

+

FFFFFFFFFFFFFFFFFFFFFFFFFFFFFFFFFFFFFFFFFFFFFFFFFFFFFFFFFFFFFFFFFFFFFFFF  
FFFFFFFFFFFFFFFFFFFFFFFFFFFFFFFFFFFFFFFFFFFFFFFFFFFFFFFFFFFFFFFFFFFFFFFF  
FFF

@A00721:190:HGJW7DSXY:4:1430:19623:7420\_1:N:0:TCTGCAAG+GCTGCACT  
TCCAAGAGAATATTTATTCTTATGAGGCTCGAACTTCAACGTTTTCACAAACGGAAAGACATATCGCA  
CCCGAAATTTTGGGCAGAATGCTCTTAACGCGGTTCTTGAACGGTGTTTGTATCAGTCTAAGTTGGA  
TAA

+

F,FFFFFFFFFFFFFFFFFFFFFFFFFFFFFFFFFFFFFFFFFFFFFFFFFFFFFFFFFFFFFFFFFFFF  
FFFFFFFFFFFFFFFFFFFFFFFFFFFFFFFFFFFFFFFFFFFFFFFFFFFFFFFFFFFFFFFFFFFFFFFF  
FFF

@A00721:190:HGJW7DSXY:4:1245:27588:22404\_2:N:0:TCTGCAAG+GCTGCACT  
ACTCAGTTAACTGAGAGCTCCTCAATTGATAGATTGGGTCAACAATAGGGACGCTAGTATACTTCGT  
AAAGTCGACAGCGAAATGGTCAATATTGATAATTGGACCGACTATATG

+

```

FFFFFFFF::FFFFFFFFFFFFFFFFFFFFFFFFFFFFFFFF:FFFFFFFFFFFF,FFFFFFFFF:FFF:FFFFFFFF
:FFFFFFFFFFFFFFFF:FFFFFFFFFFFF:FFFF:FFF:FFFFFFFFFFFFFFFFFFFF

```

+

@A00721:190:HGJW7DSXY:4:2431:13060:19413\_1:N:0:TCTGCAAG+GCTGCACT  
GACGATTTCTCCCGGAAGCTCTTCTCTCTCTTAGGAGGTCATGATGACTACTATAAGGGTGAAATCGA  
TTTTTCGAAGTTTGACAAATCTCAAGATTTCTTTGTAAAGCCTATGAGATAAAGATGTATTCTTATT  
TAG

[illegible]

+

@A00721:190:HGJW7DSXY:4:2406:19714:7326\_2:N:0:TCTGCAAG+GCTGCACT  
ATTTTATCACTTTATTATGACCTTGGAAAGTTTTCGGCTGTGGTTGTCGCTGGGGACGATTCCATTCT  
GTTTTCAAAGACTCCAATAACTGATCATTCTGATCATATGATTTTGA

```

FFFFFFFFFFFFFFFFFFFFFFFFFFFFFFFFFFFFFFFFFFFFFFFFFFFFFFFFFFFFFFFF:FFFFFFFFFFFF;FFFFFFF
FFFFFFFF;FFFF;FFFFFFFFFFFFFFFFFFFFFFFFFFFFFFFFFFFFFFFFFFFFFFFF

```

+

@A00721:190:HGJW7DSXY:4:1641:12626:22639\_2:N:0:TCTGCAAG+GCTGCACT  
GAGGGTCGTTATACCTATTCGGCTATCTGTGCTTTGAATTGTATAAGATCAAATTTAAACGATTCCG  
AGAGGTTTATCCTGATGTGGAGGGAGTTCTTGAAGCATCCCACCTTT

[illegible]

+

@A00721:190:HGJW7DSXY:4:2414:15013:34726\_1:N:0:TCTGCAAG+GCTGCACT  
CGTGGCGCTTTATTTTAAAAAGCTCCCTCCTCTCGCAAGTTTGATCTGATACTTATCACGAAAGGACT

TGAGTCTTTTGATCAGTCTCTGACTTGACCATCTTTCATTTTAAATGACGATCATTAAGACTCTCTTT  
CTT

+

FFFFFFFFFFFFFFFFFFFFFFFFFFFFFFFFFFFFFFFFFFFFFFFFFFFFFFFFFFFFFFFFFFFFFFFF  
FFFFFFFFFFFFFFFFFFFFFFFFFFFFFFFFFFFFFFFFFFFFFFFFFFFFFFFFFFFFFFFFFFFFFFFF  
FFF

@A00721:190:HGJW7DSXY:4:2177:5348:25692\_2:N:0:TCTGCAAG+GCTGCACT  
CTTTGCACTGATTTTTCCTCATCAGCTTGTGTTTTACCTAATCTGTGTTTTTACGATAACAACATCA  
GTTGAATAAGACTCATCCGAAAGGCGAACTTTGGGAATTTGAAGCTCA

+

FFFFFFFF:F:F:FFFFFFFFF::,FF:,FFFF,FF,F::FFF:FFF:FF,FFFFF,FFFF  
,,FFF,FFF,FF,,,F:FFFF:F,FFF,,:FFFFFF,F:FF:FFFF

@A00721:190:HGJW7DSXY:4:2166:10755:8187\_2:N:0:TCTGCAAG+GCTGCACT  
ACCGTGACGAAGTGTGGTGTCTTGATCTACGTTACGGATATACTCTCCTTGAGTTCAGTCGTAAGGA  
CACTACCACTTATTACGATATTTCTTTAGTCGATGGGTTTTTCGACGCC

+

FFFFFFFFFFFFFFFFFFFFFFFFFFFFFFFFFFFFFFFFFFFFFFFFFFFFFFFFFFFFFFFFFFFFFFFF  
FFFFFFFFF,FFFFFFFF:FFFFFFFFF:FFFFFFFFFFFFFFFF

@A00721:190:HGJW7DSXY:4:1636:21730:35931\_1:N:0:TCTGCAAG+GCTGCACT  
TCTCTATTTTAAGTTTTGTCTTCCTTGTGTCTTATTCTATTAATCACTCATTTTAGTGAGATTATT  
AAAAACGCACTAAACGTCTTCGACAACAGCAGGGGTTTTCGAATAGTGATAGCCACCCGCCTTACAG  
AGG

+

FFFFFFFFFFFFFFFFFFFFFFFFFFFFFFFFFFFFFFFFFFFFFFFFFFFFFFFFFFFFFFFFFFFFFFFF  
FFFFFFFFFFFFFFFFFFFFFFFFFFFFFFFFFFFFFFFFFFFFFFFFFFFFFFFFFFFFFFFFFFFFFFFF  
FFF

@A00721:190:HGJW7DSXY:4:1209:14742:4413\_1:N:0:TCTGCAAG+GCTGCACT  
GACTTTGGTACCACCTTTCTACTGTCTGTCTCGCCTCTTCGAATGAAGTTTAAATGCTTAACAACAA  
TGATAGTGAATTTATACCTACAATCATTGGTTTTTCTAATAATGATGACACTATTGTTTATGGATATG  
ATG

+

FFFFFFFFF:FFFFFFFF:FFFFFFFFFFFFFFFFFFFFFFFFFFFFFFFFFFFFFFFFFFFFFFFFFFFF  
FFFFFFFFF:FFFFFFFFFFFFFFFFFFFFFFFFFFFFFFFFFFFFFFFFFFFFFFFFFFFFFFFFFFFF  
FFF

@A00721:190:HGJW7DSXY:4:2520:24297:13542\_1:N:0:TCTGCAAG+GCTGCACT  
TGGTTACGGTCAGGGAGGATTCTCAGTTTACAAGGACCTTAAGCGATGGATCGGGGTTAATTCTAAAA  
CATTACCCGAAAGACGTGCTAAATTAACCATTGTACGATGTCGTCTGTCTCGCGATCACTTTTCA  
CTA

+

FFFFFFFFFFFFFFFFFFFFFFFFFFFFFFFFFFFFFFFFFFFFFFFFFFFFFFFFFFFFFFFFFFFFFFFF  
FFFFFFFFFFFFFFFFFFFFFFFFFFFFFFFFFFFFFFFFFFFFFFFFFFFFFFFFFFFFFFFFFFFFFFFF  
FFF

@A00721:190:HGJW7DSXY:4:1202:31259:20431\_1:N:0:TCTGCAAG+GCTGCACT  
AGACGTGTGCTCTTCCGATCTATCGTTTCTTCTTTATCTCTTTGGTTGTTAGGGATTTTGAGAGAGT  
GAAAGGCTTCAATTGTAGTGGTTTGGTCGTTTCAGTACCCAGTCAGTATACCTCTACGCAAAGATATT  
TCA

+

FFFFFFFFFFFFFFFFFFFFFFFFFFFFFFFFFFFFFFFFFFFFFFFFFFFFFFFFFFFFFFFFFFFFFFFF  
FFFFFFFFFFFFFFFFFFFFFFFFFFFFFFFFFFFFFFFFFFFFFFFFFFFFFFFFFFFFFFFFFFFFFFFF  
FFF

@A00721:190:HGJW7DSXY:4:1571:25816:32800\_2:N:0:TCTGCAAG+GCTGCACT  
GAGGAACGTACCGATTACCTGTCTTTCATATTATGAATGAACCTTCGGCCGCTCTCTTTGCTTCGAT  
GTTGGATGTCAAGAAGGGTTCAGAATGGGATTCTACGTAGTTTATGA

+

@A00721:190:HGJW7DSXY:4:1453:25672:36652\_1:N:0:TCTGCAAG+GCTGCACT  
TACTTTTCGATACTTCTATCGTCTTACGTTACGTAATTACTATAGTGTTATTTATTCTGGTGGTGATG  
ATAATCTTGGAGGTCGTGACGTTGATGAAGCTATAAGAGCGTTCCTTATTACGGCGCACTTCTTTACCC  
GCC

+

[illegible]

@A00721:190:HGJW7DSXY:4:1573:2193:7639\_1:N:0:TCTGCAAG+GCTGCACT  
TTTCAGTTTCACTGAAGGAGGAGGTTTCTGTTACTGGAAAACCTCGTCAATACTTTTCAATAAT  
ATACGTCTTGAACCTCACTTATGACGATCTAGTGAAATTAACGCGTCCTTTTCTGGAACGTAGTTTTAC  
TA

+

[illegible]

@A00721:190:HGJW7DSXY:4:1155:11523:32127\_2:N:0:TCTGCAAG+GCTGCACT  
AAAGATAGTGGCATTCAAGGCAAACCTTACCCTGATTCCGGCCGGTGGTAGCTCATTTCTACCAGGGGC  
TATTACTCTTGCTGAAACAGCTATTAAGCTGTTGAGCGGGTAATTAC

+

FFFFFFFFFFFFFFFFFFFFFFFFFFFFFFFFFFFFFFFFFFFFFFFFFFFFFFFFFFFFFFFF  
FFFFFFFFFFFFFFFFFFFFFFFFFFFFFFFFFFFFFFFFFFFFFFFFFFFF

@A00721:190:HGJW7DSXY:4:1530:10059:14559\_2:N:0:TCTGCAAG+GCTGCACT  
ATCGCTGAAGGATGTGCACTCTTTTCTGCTACTTTAACGGAGCGTAGTGTACTCTTCGTCGATTGTAT  
CAACAGTAACATTACTTCTAATAAAGGTCTCTATCAAGCTCGTATTAT

+

```

FFFFFFFFFFFFFFFFFFFFFFFFFFFFFFFF:FFFFFFFFFFFFFFFFFFFFFFFFFFFFFFFF:FFFFFFFFFFFF
FF:FFFFFFFFFFFFFFFF:FFFFFFFFFFFFFFFFFFFFFFFFFFFFFFFFFFFFFFFF:FFFFF

```

@A00721:190:HGJW7DSXY:4:1409:27109:36385\_1:N:0:TCTGCAAG+GCTGCACT  
TTACCGTTGAAGGCTAAACTCCAAGGTAATTATGAAGACTGTGATTTATCTTTCCTCTGGCCTTGTA  
TGAGGGTGTTTCTAATCGTAACATTAATAATTTCAATCTTCTTAAAAAGAAGATAGAGAGTCATACTT  
TGG

+

[illegible]

@A00721:190:HGJW7DSXY:4:2262:19777:36338\_2:N:0:TCTGCAAG+GCTGCACT  
CAATATTGAAGTGGACACCTCTGGTAGTATCGAAGTAAAGATAACCAATAAGGAAGGAGCTTATACTA  
TGGTTGAATCAACTAAGCATACTACTTTTGCTTTGATTACTCTACCGC

+

[illegible]

@A00721:190:HGJW7DSXY:4:2402:14687:8766\_2:N:0:TCTGCAAG+GCTGCACT  
TAAAGAGTCGATTAAACAAGTTGTAATTATCAATGATTTTATCGCTGGGTGTTATCTCGAAAAGTCTA  
TTATAAAAGGAACGGCAGTTCGAAACCAAAGAGAATATATAAAATGTT

+

```
FF:FF,FFFFFF,F,FF,:F,FFFFFF,,F,F:FF,:,:FFF:F,F,:FF,:,,F,F,F,,, :FF,F:,,
:F,FFFFFF,: ,FF,,,,,F: ,F,,FF,,F,,FFFF,:,,F:FF,,,F
```

@A00721:190:HGJW7DSXY:4:2510:25346:36683\_1:N:0:TCTGCAAG+GCTGCACT  
TACCACTATCTACGAACCTAAAGTTCTGAAGACGTTGCTTGTCGCTTCCTCCTTTAATGGCACTACCT  
CGGTACAATCTTACTTGGAACGAAGGCGACCTGTTCCGGAGTTTTTACGGGATCCGGAATGTTCTGTC  
TAT

+  
FF:FFFFFFFF:FFFFFFFF:FFFFFFFFFFFFFFFFFFFFFFFF:FFFFFFFFFFFFFFFF:FFFF  
FFFFFFFFFFFFFFFFFFFFFFFFFFFFFFFFFFFFFFFFFFFFFFFFFFFFFFFFFFFFFFFF  
FFF  
@A00721:190:HGJW7DSXY:4:2528:27245:29951\_1:N:0:TCTGCAAG+GCTGCACT  
AATACGATTTTCAACGTCAACGTTTACCGAGTTTCGTTTCGTACCTTGATGCTGACTTTTCGTCAATAT  
GATTTGATCTGGTTGCTCAATTCTAAGCGTGTTCGCTTAGTGCGAGGCCTCTCTTCTACGAGTATTG  
CTA  
+  
FF,FFFFFFFF:F:FFFFFFFFFFFFFFFFFFFFFFFFFFFFFFFF:FFFFFFFF:FFFFFFFFFFFFFFFF  
FFFFFFFFFFFFFFFFFFFFFFFFFFFFFFFFFFFFFFFFFFFFFFFFFFFFFFFFFFFFFFFF  
FFF  
@A00721:190:HGJW7DSXY:4:1419:24605:28009\_2:N:0:TCTGCAAG+GCTGCACT  
ATATTTGGATGATCTTGATAAAGAACTTCATGAATTTTCAGAGGATGAAAAATTTTCTTCCTTGATT  
TTAATATAAAGAATCTTTAACAGGACTCCTACTACAGGAGGCAGTCTT  
+  
F:FF:FFFFFFFFFFFFFFFFFFFFFFFFFFFFFFFFFFFFFFFF:FFFFFFFF:F,FFFF:FF  
FFFFFFFF:FFFFFFFF,FF::FFFFFFFF:FFFF:FFF:FF  
@A00721:190:HGJW7DSXY:4:2139:24279:33708\_1:N:0:TCTGCAAG+GCTGCACT  
ATTTGTTGTAATAGGGTCATCAACTTAGAACTCGAACTCTAAGTGGAATACTGTCTTTCCAAGCTT  
ACCTGTATCTTCAATGAAATTGGACTCTTCGATAGGGGACATTTTATCGTGGGCTTTCGTAAAGGAA  
GAT  
+  
FFFFFFFFFFFFFFFFFFFFFFFFFFFFFFFFFFFFFFFFFFFFFFFFFFFFFFFFFFFFFFFF  
FFFFFFFFFFFFFFFFFFFFFFFFFFFFFFFFFFFFFFFFFFFFFFFFFFFFFFFFFFFFFFFF  
FFF  
@A00721:190:HGJW7DSXY:4:2303:30436:31876\_1:N:0:TCTGCAAG+GCTGCACT  
CTACTAATGGCGTTGGCCTAGTGGATGTTATTAGTGACATCTGGTCAATTTTCGTTTTTAGGTGGTCTT  
TATTCTATTATTGATTTTTATGAGATTGATACGTTAACAGAAGATGATGTTAGAGTAGAATTCCTGAA  
GAG  
+  
:FFFFFF:FFFFFFFFFFFFFFFFFFFFFFFFFFFFFFFF:FFFFFFFF:FFFFFFFFFFFFFFFF  
FFFFFFFFFFFFFFFFFFFFFFFFFFFFFFFFFFFFFFFFFFFFFFFFFFFFFFFFFFFFFFFF  
FFF  
@A00721:190:HGJW7DSXY:4:2206:9733:36699\_2:N:0:TCTGCAAG+GCTGCACT  
CCAACTTCTTGACAATTTTCTTCAATCCTTCGATAATAGTTAAATCTAGGATTATGTCTGTGTTGAAA  
GACTTTCTACCGATAAGGGTCACTAGTCTTACACAATTAAGAAATAAT  
+  
FFFFFFFFFFFFFFFFFFFFFFFF:FFFFFFFF:FFFFFFFFFFFFFFFFFFFFFFFF:FFFFFFFF  
FFFFFFFFFFFFFFFF,FF:FFFFFFFFFFFFFFFFFFFFFFFF  
@A00721:190:HGJW7DSXY:4:1168:15817:31360\_2:N:0:TCTGCAAG+GCTGCACT  
ACTATCTAAAGATTGAAGGAAAATTTTATCCTCGTTTAACTTACTTAGACTTTCCTACGATACAAATG  
ATAACTTCTAATTTACGTTTGCTACTCAGAGCTGGTCTCTCAGCAA  
+  
FFFFFFF:FFFFF:FFFF:FFFF,FFFF:FF:FFFFFFFFFFFF,FFF:FFFFFFFFFFFFFFFF  
FFFFFFF,F:FFFFFFFFFFFFFFFF:FFFFFFFFFFFF:FFF  
@A00721:190:HGJW7DSXY:4:2215:29984:29152\_2:N:0:TCTGCAAG+GCTGCACT  
TCCTCAGGAGTCCCGGCATTTGATAATAATGACGACTTTCGTGATAATCGCTGCATATTACGGATTAC  
ACGGTACCAGCGCATCTCGTGTGAGCCTCGACCCGATTATATGGTAT  
+  
FFFFFFFFFFFFFFFFFFFFFFFFFFFFFFFFFFFFFFFFFFFFFFFFFFFFFFFFFFFFFFFF  
FFFFFFFFFFFFFFFFFFFFFFFFFFFFFFFFFFFFFFFFFFFFFFFFFFFFFFFF  
@A00721:190:HGJW7DSXY:4:1266:25518:2816\_2:N:0:TCTGCAAG+GCTGCACT  
AGAATTCTTAATTATAATATTCAACCTCAAAAGTTACGTGTTTACAGTAACGAGATCACACATTTTGA

$+$ 

@A00721:190:HGJW7DSXY:4:1145:21522:18161\_1:N:0:TCTGCAAG+GCTGCACT  
TAAATAATATTACTAATGGCAAATAGTGGAAAGGCTCCAGTCAACACTAGTTCGAGTGCTGCTTTGGA  
TTACGATGACGTGAGAATAGGTGAAGGGATAGTTTTTACCTCGACCAACATTAAGGCGGCGGCGACTA  
ATC

+

@A00721:190:HGJW7DSXY:4:2433:18873:10692\_1:N:0:TCTGCAAG+GCTGCACT  
AGGACACTTCGAACTGAATAATGATGCACTACAAACAAGTATCGCTAATCATCTGAAAAAGGCTCTA  
AAGGACACTATACAATATCCAGACGACGACGAAGCTTATACTACTTTAATTTTGGGTATTATGTGGAG  
ATA

+

@A00721:190:HGJW7DSXY:4:2252:26657:4288\_2:N:0:TCTGCAAG+GCTGCACT  
ACCACATTTTGGTCAAGTCAATCCGTTGAGAAAATTTCTTAGAGGATATTCGCCATTGTGGTACGAAT  
TGGTCCAACATTTACCACCAAATTCTTTTGATACAACCTCTAGCCTTCA

+

@A00721:190:HGJW7DSXY:4:1232:31693:29606\_1:N:0:TCTGCAAG+GCTGCACT  
ACCAGATTGGTTCGAACCCGTTGATGCTATGTCAGAAGAAGCTATTCAAGCTTGTGTTTTAAAGACTG  
CAGAGGCTGTCAAACAAGCCCAGACTCAAGGAGTCCAATCAAAGGTTTTGAATTTAGCTCAACTGGGG  
AGA

+

@A00721:190:HGJW7DSXY:4:1514:21947:9972\_1:N:0:TCTGCAAG+GCTGCACT  
CTTGCAGAGTGACTGGAGTTCAGACGTGTGCTCTTCCGATCTGAAAAGTCCGGAGTATATTGTATGTT  
AATAGATAGTGGGATAATAGTTCTACCGATACGTAGTGAACGCGTTTCGTAGAACCAAGTACTTTCCGT  
CTG

+

@A00721:190:HGJW7DSXY:4:1560:30056:13182\_1:N:0:TCTGCAAG+GCTGCACT  
ACCGATAGGAGTTGTATAGTTGAAGATGTGGCTTTAGACGATAATCCTTTAAGGACTATGTTGACTGA  
CGAAGATTTTCCAACAGATTTGTCTACGTTGCAGATCGCCACTCCAAACACTATATACATTATAAAAT  
ATA

+

@A00721:190:HGJW7DSXY:4:1512:14000:8077\_1:N:0:TCTGCAAG+GCTGCACT  
ATAACTTTTGTACCAAATTCTTGGCTTTCAACGAAGTCTCTGATTTTATTAATCATTACTTTAACTG  
TCTCTCGGTCATTTACTCTGTACTTGATCTACGTCGTTTAACTGTCGGAACAACCTTTACTTAGAATG  
ACT

[illegible]

@A00721:190:HGJW7DSXY:4:2147:17580:33129\_2:N:0:TCTGCAAG+GCTGCACT  
CATTGATTTACTTTTACCGTTAGAACTGAAAAAGATTCTTTTCGAAAAGAAACCTATAAGTTACAAAC  
GATTCTTCGACTATATTAAAGAAATAAAAAATACTTCAAGTACCTGAAC

+

FFFFFFFFFFFFFFFF:FFFFFFFFFFFFFFFFFFFFFFFFFFFFFFFFFFFFFFFFFFFFFFFF  
FFFFFFFFFFFFFFFF:F:F:FFFFFFFFFFFFFFFFFFFFFFFFFFFFFFFFFFFFFFFF

@A00721:190:HGJW7DSXY:4:2415:10547:32534\_1:N:0:TCTGCAAG+GCTGCACT  
ATGGTATAATGTGTCTTACAAATAGAACCTTCACTCTCGGTAATGAGAGTGTATTCCTTAATATTCTA  
GTAACCGCTATGTGGGCATTACTAGGATTTATCACACTCCTAAATTTGATAGCAATTTATGTTTTAAA  
TGC

+

:FF:FFFFF:FFF:FFFFFFFFFFFFFFFFFFFFFFFFFFFFFFFFFFFFFFFFFFFFFFFF  
FFFFFFFFFFFFFFFFFFFFFFFFFFFFFFFFFFFFFFFFFFFFFFFFFFFFFFFFFFFFFFFF:FFF:F  
FFF

@A00721:190:HGJW7DSXY:4:2105:3387:27242\_2:N:0:TCTGCAAG+GCTGCACT  
AAAAACTCCATTGTATAGTTCAAGGAGTACTTAATTCAATAGCTTTAGTATTATTTACTATCGCCTTT  
ATTGAAAATTGTATAAGAGTTAATTGCTTACACAAAAGTGACGCGCGA

+

FFFFFFFFFFFFFFFFFFFFFFFFFFFFFFFFFFFFFFFFFFFFFFFFFFFFFFFFFFFFFFFF  
FFFFFFFFFFFFFFFFFFFFFFFFFFFFFFFFFFFFFFFFFFFFFFFFFFFFFFFFFFFFFFFF

@A00721:190:HGJW7DSXY:4:2660:7048:31923\_2:N:0:TCTGCAAG+GCTGCACT  
ATACCATAACCTACCATGACCAATCATCGCTCCAAGTGGCAGCCAGACGTAGGGTCAAACCTACTAC  
CGCCGGTCGGCAGATCGGCACCACTGGTCTCTACGTTCAAGGACCCGC

+

FFFFFFFFFFFFFFFFFFFFFFFFFFFFFFFFFFFFFFFFFFFFFFFFFFFFFFFFFFFFFFFF  
FFFFFFFFFFFFFFFFFFFFFFFFFFFFFFFFFFFFFFFFFFFFFFFFFFFFFFFFFFFFFFFF

@A00721:190:HGJW7DSXY:4:2253:15872:2143\_1:N:0:TCTGCAAG+GCTGCACT  
CCTTCCCAAATCTAGATCTGCACAGAAGAAGGCTGAAGGTCGTTACCGGACGACCACTCAAAGGAAAC  
GGGCTGTTGCCAGAGGAAAGCAGCGACCACCGAGGTGCTCGTAACATTGACGGCAGTCCCGTCATC  
TCT

+

F:FFFFFFFF:FFFFFF:F:FFFFFFFFFFFFFFFFFFFFFFFFFFFFFFFFFFFFFFFF  
FFFFFFFFFFFFFFFFFFFFFFFFFFFFFFFFFFFFFFFFFFFFFFFFFFFFFFFFFFFFFFFF  
FFF

@A00721:190:HGJW7DSXY:4:2324:2428:17378\_2:N:0:TCTGCAAG+GCTGCACT  
GCAGTACCTCAGTCAAAAGTCACATTCACTCCCATACCAATCAATGATGTGACTATACAGTTCGG  
CCATTTCAAGAGTGGTCAATACGTCGTGGGAGGTACTGAAGCCTTCCC

+

FFFFFFFFFFFFFFFFFFFFFFFFFFFFFFFFFFFFFFFFFFFFFFFFFFFFFFFFFFFFFFFF  
FFFFFFFF:FFFFFFFFFFFFFFFFFFFFFFFF:FFF,FFFFFFFFFFFFFF

@A00721:190:HGJW7DSXY:4:1558:27670:14278\_2:N:0:TCTGCAAG+GCTGCACT  
AAGCCAATCAATAGTTCTTCTGACCAGAATGAAAAGGGTTTACCAGGGTAGTCTCTAAGTCTACCAG  
GAAGAGGGGAAATGTCCCCAAACTGAGAAGAATAAAGGGAAAGGTCC

+

FFF:FFFFFFFFFFFFFFFF:FFFF:FFFFFFFF:FFFFFFFF:FFFFFFFF:FFFF,FF:,F  
FFFFFFFF:FFFFFFFFFFFFFFFFFFFFFFFF:FFFFF:FFFFFF

@A00721:190:HGJW7DSXY:4:2571:5330:16141\_2:N:0:TCTGCAAG+GCTGCACT  
AGGGGAAATTACCCCTAATTCTGAAGGAAGATCTCCACCATCTGGGGTTGGGAATAAGAAATCTGCA  
CGGGCCAAAGAGGCCGCTGCTACGAAGTCGCTGAAGGCGGCTTGGGTC

+

:FFFFF:FFFFFFFFFFFFFFFFFFFFFFFFFFFFFFFF:FF:FFFFFFFFFFFFFFFF:FFFFFFFF  
FFFFFFFF:FFFFFFFFFFFFFFFFFFFFFFFFFFFFFFFFFFFFFFFF,FFFFF

@A00721:190:HGJW7DSXY:4:2316:10972:18208\_2:N:0:TCTGCAAG+GCTGCACT  
TTGCGCCTGCCGACCCCATCTTTGAGACCAAGACTCTCTACAGTAGGTTCTGCCTACTATGAGCAAA



TCTGTTGAATTCGACACTGAGGACGAAGGTGAGAGGACTTTTGGCTAC  
+  
::FFF:F:FFFFFFFFFFFFFF,FF:FFFFFFFFFFFFFFF:FFFFFF,FFF:FFFFFF,FFFF  
,FFF:,FFFFFF,F::,F:F:FFFFFFFFFFFFFFF,FFF:FF,F  
@A00721:190:HGJW7DSXY:4:1438:5141:34194\_2:N:0:TCTGCAAG+GCTGCACT  
CGTGGGTTGAAGGCCGACGCTTCGAGCTTGAGTGTGACGAGGCCGGTGACGTTTTTGTCAACGGCGTT  
TGGAGGATTTTATCCGCGCTTAAGTATGGGGCGAAGATCCCCTATGGA  
+  
FFFFFFFFFFFFFFFFFFFFFFFFFFFFFFFFFFFFFFFFFFFFFFFFFFFFFFFFFFFFFFFF:F  
FFFFFFFF,FFF:FFFFFFFFFFFFFF:FFFFFFFFFFFFFFF::FF:  
@A00721:190:HGJW7DSXY:4:2126:14606:4335\_2:N:0:TCTGCAAG+GCTGCACT  
TTGGCATATTTATGCCGACGATAATAAGCATGTCACCCTTAAGCACCAGGTAAGCTCGGGACTTACA  
AGAGAGAGTGTGAGAGAGTCGCTCTCACTATTTTTGCCAGAATGCGG  
+  
FFFFFFFFFFFFFFFFFFFFFFFFFFFFFFFFFFFFFFFFFFFFFFFFFFFFFFFFFFFFFFFF  
FFFFFFFFFFFFFFFFFFFFFFFFFFFFFFFF:FFFFFF,FFFFFFFFFFFFFF  
@A00721:190:HGJW7DSXY:4:2640:16514:32910\_2:N:0:TCTGCAAG+GCTGCACT  
TCCTCCATAATTACAACCTCTCTTTAGAGAGCATTAGAAGGAAGTTGGGCAAATCCCACATATGGTA  
GACGTTGTCACACTTTTCTGAAAATTTTCTTTCTCCTCCGTCATTGG  
+  
FFFFFFFFFFFFFFFFFFFFFFFFFFFFFFFFFFFFFFFFFFFFFFFFFFFFFFFFFFFFFFFF  
FFFFFFFFFFFFFFFF:FF:FFF:FFFFFFFF:F:FF:FF,FFFF,:FF  
@A00721:190:HGJW7DSXY:4:2327:25988:13369\_2:N:0:TCTGCAAG+GCTGCACT  
AAGGTGGAAGGTGTCAAGGGTCTTCTTCATGCTGATCTTTTCAGGACCTAATCACATCATGATTGATAG  
TTACGGCTCGTATCGAGTTGGAGGGAGGAAGTTCTCCGAAATTAAAGA  
+  
FFFFFFFFFFFFFFFFFFFFFFFFFFFFFFFFFFFFFFFFFFFFFFFFFFFFFFFFFFFFFFFF  
FFFFFFFFFFFFFFFF:FFFFFFFFFFFFFFFF:FFFFFFFFFFFFFFF  
@A00721:190:HGJW7DSXY:4:1467:16206:8359\_1:N:0:TCTGCAAG+GCTGCACT  
TCAGAGAGGGGAGCTCTGAAAAGGAACTTCGTCAGAAGATGAGGAAGTCTAAGAGGAGGAGTTTGAG  
GAAGGCTCTAGAGAAGATCTCCCCACCTGGAGAAGGCAAGTGGAGAGTCCAGAAGTTGATGAAGAAGG  
ATT  
+  
FFFFFFFFFFFFFFFFFFFFFFFFFFFFFFFFFFFFFFFFFFFFFFFFFFFFFFFFFFFFFFFF  
FFFFFFFFFFFFFFFFFFFFFFFFFFFFFFFF:FFFFFFFFFFFFFFFFFFFFFFFFFFFFFFFF  
FFF  
@A00721:190:HGJW7DSXY:4:2131:32570:16000\_2:N:0:TCTGCAAG+GCTGCACT  
GTTACCACTTCCTAAGGTGGATGAGGGAGGTTGTTTCTTTGGAGTTTTAGATAATCTTTTGAGAAGGG  
GTCATAGAGCCAGCAAGAGAAGCTTATATGCTGGTTTAAGTGATGATT  
+  
FFFFFFFFFFFFFFFFFFFFFFFFFFFFFFFFFFFFFFFFFFFFFFFFFFFFFFFFFFFFFFFF  
FFFFFFFFFFFFFFFFFFFFFFFFFFFFFFFFFFFFFFFFFFFFFFFFFFFFFFFF  
@A00721:190:HGJW7DSXY:4:1323:32805:3098\_1:N:0:TCTGCAAG+GCTGCACT  
ATTTAGGTCAACTTGGGGTTTCGAATGTCATTAGTGCCTTACGATTGAAAGAGGTCCTTTTGAGTATC  
GACAGATCTTTCGATCTTGAGGACGTACATTTAACGTGGCAGAATTCGGTAACCTACCATATTGTTCC  
TTC  
+  
FFFFFFFF:FFFFFFFF:FFFFFFFFFFFFFFFF:FFFFFFFFFFFFFFFF:FFFFFFFFFFFFFFF  
:FFFFFFFFFFFFFFFFFFFFFFFFFFFFFFFFFFFFFFFFFFFFFFFFFFFFFFFFFFFFFFFF  
FFF  
@A00721:190:HGJW7DSXY:4:1106:7771:5024\_1:N:0:TCTGCAAG+GCTGCACT  
TTTAACTTTGACTCAACTACTCCGATCAGATCCGATGGTTTGATTGGTATGGACTACTCGACTTTTG  
ATCTGGAGTTGTCTAGGGTCATGGCAGATACTACCGATAAGGTGAAAAATATGCAGGTCAAAGATTCT  
GTA

+  
FFFFF:FFFFF,FFFFFFFFFFFFF::FFFFFFFFFFFFFFFFFFFFFFFFFFFFFFFFFFFFFFFF:FFF  
FFFFFFFFFFFFFFFFFFFFFFFFFFFFFFFFFFFFFFFFFFFFFFFFFFFFFFFFFFFFFFFFFFFFFFFF  
FFF  
@A00721:190:HGJW7DSXY:4:2523:22670:34741\_2:N:0:TCTGCAAG+GCTGCACT  
GAGGGAGCCGTTTTGGCCGACTTTAACTATTCTAAGAGTCTTTATGATTCAAAACCTATCGTTGTCGT  
ACCTTACAAGGTTGAGGAGACTTTACAGCGGCTTATTGTCGCGCAGTT  
+  
FFF:FFFFFFFFFFFFFFFFFFFFFFFFFFFFFFFFFFFFFFFFFFFFFFFFFFFFFFFFFFFFFFFF:FFF  
FFFFFFFFFFFFFFFFFFFFFFFFFFFFFFFFFFFFFFFFFFFFFFFFFFFFFFFFFFFFFFFF:FFF:FFF:FFF::F  
FFFFFFFFFFFFFFFFFFFFFFFFFFFFFFFFFFFFFFFFFFFFFFFFFFFFFFFFFFFFFFFF  
@A00721:190:HGJW7DSXY:4:1224:16911:17221\_1:N:0:TCTGCAAG+GCTGCACT  
TATCTTGAATGCTCACGCCGTCGCAGCCATATCGAGACTATGTTATAATCACTTGTTAAAGTACAGAT  
TTAGTGATTAGATATTATTGATATTGGAGGCGATATTCGTTTTTCATATCCAAACTCCTTGAATGGA  
GTA  
+  
FFFFFFFFFFFFFFFFFFFFFFFFFFFFFFFFFFFFFFFFFFFFFFFFFFFFFFFFFFFFFFFFFFFFFFFF:FFFFFFFFFFFFFFFFFFFFFFFF  
FFFFFFFFFFFFFFFFFFFFFFFFFFFFFFFFFFFFFFFFFFFFFFFFFFFFFFFFFFFFFFFFFFFFFFFF:FFFFFFF  
FFF  
@A00721:190:HGJW7DSXY:4:1175:17074:13933\_2:N:0:TCTGCAAG+GCTGCACT  
CCTATTCTTGATGTGAAAGATGCATCGAGGTATACGTCTAGGAACATTGATTGGGAACGTACCTACTC  
ACGAGACGTCATGAAAGCTATCGGAGGGAAGCAAATGTTTCGTTCTG  
+  
FFFFFFFFFFFFFFFFFFFFFFFFFFFFFFFFFFFFFFFFFFFFFFFFFFFFFFFFFFFFFFFFFFFFFFFF:FFFFF:FFFFFFFFFFFFFFFF  
FF::FFFFFFFFFFFFFFFFFFFFFFFFFFFFFFFFFFFFFFFFFFFFFFFFFFFFFFFFFFFFFFFF  
@A00721:190:HGJW7DSXY:4:1544:20220:6981\_2:N:0:TCTGCAAG+GCTGCACT  
AAGCCTCAGTTGCGATAGCTGTAGAGGTATACGATATCTCTTGATGATGTAGCCACTATAATGCTT  
AAGAGAGAGATTGATGTATGTCATTTTCGTCTTAGTTTGTCCCGCGCAA  
+  
FFFFFFFFFFFFFFFFFFFFFFFFFFFFFFFFFFFFFFFFFFFFFFFFFFFFFFFFFFFFFFFFFFFFFFFF:FFFFFFFFFFFFFFFFFFFFFFFF  
:FFFFFFFFFFFFFFFFFFFFFFFFFFFFFFFFFFFFFFFFFFFFFFFFFFFFFFFFFFFFFFFF  
@A00721:190:HGJW7DSXY:4:1149:8793:7106\_2:N:0:TCTGCAAG+GCTGCACT  
CCGTTCTGACCTTGGTATCGTTATCCGTCATGGAGATGATGGCGCATCACTTGATTACTATATGCC  
GAAGGATTGGGTTATTCTCACAAAGATAAGATTTTATCTTTCTTC  
+  
FFFFFFFFFFFFFFFFFFFFFFFFFFFFFFFFFFFFFFFFFFFFFFFFFFFFFFFFFFFFFFFFFFFFFFFF:FFFFFFFFFFFFFFFFFFFFFFFF  
F::FFFFFFFFFFFFFFFFFFFFFFFFFFFFFFFFFFFFFFFFFFFFFFFFFFFFFFFFFFFFFFFF:FFFFFFF  
@A00721:190:HGJW7DSXY:4:1219:23583:29747\_2:N:0:TCTGCAAG+GCTGCACT  
AAGGGCGGACAATTGTTCCATTGTGAACCTTTGGGGACTAGATTGAGCATTAAATGAGTTCCGAATAAC  
TCGTAATAAATCTTTCTCTAGTGGACAATTCAGAATACCTATTTCCGT  
+  
FFFFFFFFFFFFFFFFFFFFFFFFFFFFFFFFFFFFFFFFFFFFFFFFFFFFFFFFFFFFFFFFFFFFFFFF:FFFFFFFFFFFFFFFFFFFFFFFF  
FFFFF,FFFFFFFFFFFFFFFFFFFFFFFFFFFFFFFFFFFFFFFFFFFFFFFFFFFFFFFFFFFFFFFF  
@A00721:190:HGJW7DSXY:4:1502:12545:2707\_1:N:0:TCTGCAAG+GCTGCACT  
CTGCCAATCTCATCGCTATACGCATACCTGATTGGAAGAAGCGAGGTTGTTTCCTCAATAAAAAATTTT  
TCTCAAGAGATTATGGTTGATAAAGTTTCTTCATAAGGGCTATTAGTACGTCATGGGGATCACTTC  
TTC  
+  
FFFFFFFFFFFFFFFFFFFFFFFFFFFFFFFFFFFFFFFFFFFFFFFFFFFFFFFFFFFFFFFFFFFFFFFF:FFFFFFFFFFFFFFFFFFFFFFFF  
FFFFFFFFFFFFFFFFFFFFFFFFFFFFFFFFFFFFFFFFFFFFFFFFFFFFFFFFFFFFFFFF:FFFFFFFFFFFFFFFFFFFFFFFF  
FFF  
@A00721:190:HGJW7DSXY:4:2437:15284:19789\_1:N:0:TCTGCAAG+GCTGCACT  
ACCTTCGAATATGTTACGACATGGCTTCGTAACAACAGTGCGAGGATTGTCATCTCGGGGAAAGTGAT  
TCACCAAGATGTTTCATATAGATACGAGATACCTAGAGAAGGTCGCAGCGATCTTACTCGTTATCGGAG  
CTA

+  
FFFFFFFF:FFFF:FFFFFFFFFFFFFFFFFFFFFFFFFFFFFFFFFFFFFFFF  
FFFFFFFFFFFFFFFFFFFFFFFFFFFFFFFFFFFFFFFFFFFFFFFFFFFFFFFF  
FFF

@A00721:190:HGJW7DSXY:4:1160:6234:25817\_1:N:0:TCTGCAAG+GCTGCACT  
TCGCAAACTTAACGTTAGTACCGGAGGTGATCTCTCTGCTTCTGCGTTACTGAGAGAAAAGATTGAG  
ACGCCTACGGTGAAGTTTATGGACAAGATGCAAGTTCTTGGGAAATACTTGTTCCTTTTATAGTTTA  
GTA

+  
FFFFFFFFFFFFFFFFFFFFFFFFFFFFFFFFFFFFFFFFFFFFFFFFFFFFFFFF  
FFFFFFFFFFFFFFFFFFFFFFFFFFFFFFFFFFFFFFFFFFFFFFFFFFFFFFFF  
FFF

@A00721:190:HGJW7DSXY:4:1403:31204:32737\_1:N:0:TCTGCAAG+GCTGCACT  
CTCTTCCGATCTGACAACGAATCTTGAACTACGGTCCTTATCAAAGAAAATGGTGAACCGGTCTCTA  
AATCTTTTGAAGATTGAGAAGATTGAAGAACACGTCAAGAAGTCGCTCGGCGTTGTTCTTGAAACCAA  
GT

+  
FFFFF:F::F:FFFFFF:FFF::FFFFFFFF,FFFF:FFFFFFFF::FF,FFFF:FFFF,FF:F:FF  
FFFFFFFF:F,:FFFF,FFFFFFFFFFFF:FFFFFFFFFFFFFFFFFFFF,FFFFFFFFFFFF::FFFF  
FF

@A00721:190:HGJW7DSXY:4:1677:8693:19053\_1:N:0:TCTGCAAG+GCTGCACT  
GCTGATCATGGAGTCTTTGTACCTTCTGTCAAACCTTCGAGGTTGAGTACGAGAGGTGATCCCGGATG  
TGGATTGAAGGCTGGCTCTAAGGGAGACTCCTTCTTTTGAATGTTGTAAAGAATTGGGTTGAGAAGT  
GTG

+  
FFFFFFFFFFFFFFFFFFFF:FFFFFFFF:FFFFFFFFFFFFFFFFFFFFFFFFFFFF:FFFFFF  
FFFFFFFFFFFFFFFFFFFFFFFFFFFFFFFFFFFF:FF:FFFFFFFFFFFFFFFFFFFFFFFFFFFF  
FFF

@A00721:190:HGJW7DSXY:4:2614:32497:19695\_1:N:0:TCTGCAAG+GCTGCACT  
CTTGGTATTTCTGAAATAGTTTATCAGAGCGTCATTTTCTTTGGGATCTTTCCTCTGGTAAGGGAAT  
TATTAAATCATTCTTCTCACTCTTGACGAGAATTATTACTGTTTTCTCTACCCATAACTTCTTTTCA  
AAA

+  
FFFF:FFFFFFFFFFFFFFFFFFFFFFFFFFFF::FFFFFFFFFFFFFFFFFFFFFFFFFFFF  
FFFFFFFFFFFFFFFFFFFFFFFFFFFFFFFFFFFFFFFFFFFFFFFFFFFF  
FFF

@A00721:190:HGJW7DSXY:4:1174:10637:18443\_2:N:0:TCTGCAAG+GCTGCACT  
TACAGAGTGCAGTCGTTTCAACACTTATCACCCTTTTGAATGAAAATAATTGGTATGAAAATACG  
TATGTCGGTGGGTTCTCAAGGCTCTCATCGCCCTGGGATTCTAAGG

+  
,FF,FFFFFFFFFFFF,FFF:FFF::FF,FFF::,,:FFF,F,FFF:FFFF::F,F,,,F::FF,:F:  
FF,FFF,F:FFF:,FF,FFF:::,,FF,:FF,,F,F:::FFF:F,,,

@A00721:190:HGJW7DSXY:4:2233:29993:25003\_2:N:0:TCTGCAAG+GCTGCACT  
TTTGGTCCTTACGTCTTAAGTAATTTGGATGTTGTGCGAAAACATCAGGTTCTTGTACGATTCTTAA  
AAGAAGTTTATTAACAACTTCAGAGTCTCTTGAAGTCCAGGTAGCTAA

+  
FFFFFFFFFFFFFFFFFFFFFFFFFFFFFFFFFFFFFFFFFFFFFFFFFFFF  
FFF:F:FFFFFFFFFFFFFFFFFFFFFFFFFFFFFFFFFFFF,FFFF

@A00721:190:HGJW7DSXY:4:1135:6497:26271\_2:N:0:TCTGCAAG+GCTGCACT  
ACCTCTGTTGGTAGAGGAGTTGAGAGAATTACTCAGATTCAATCTGGCATCACTGAACGTCTACAACG  
AGTTAGGAGTGGCTAGGTTTTAAAGATCCTTGCACAAGCAATACC

+  
:FFFFFFFFFFFFFFFFFFFFFFFFFFFFFFFFFFFFFFFFFFFFFFFFFFFF  
FFFFFFFFFFFF:FFFFFFFFFFFFFFFFFFFFFFFFFFFF,FFFFFF

$+$  $+$ 

+

+

+

+

+

+

FFFF:FF:F,F,FFFFFFFF:F:FF::,FF,FFFFFFFF:FFFFFFFF:FFFFFFFF:FF:FFFFFF  
FF:

@A00721:190:HGJW7DSXY:4:2354:4634:32346\_2:N:0:TCTGCAAG+GCTGCACT  
GTTCTTAATGTAGGTCTCCTAGTACTTAAGGGTTTATGTTTCGGTTTCAGCTGGATGGATCTTTTGAT  
GGTATGTTTCACATTGCGTGATCACTTCCCGTGGACTTGGAAGAGAT

+

FFFFFFFF:FFFFFFFFFFFFFFFF:FFFFF,FFFFFFFFFFFFFFFFFFFFFFFF:FFFFFFFF:FF  
FFFFFFFFFFFFFFFFFFFFFFFFFFFFFFFFFFFFFFFF:FF:FF:FFFF

@A00721:190:HGJW7DSXY:4:2159:3305:22247\_1:N:0:TCTGCAAG+GCTGCACT  
TTCTATTATGTCGCTAAAGCCTGTCCAGTTGTCGATGATGTTCCGGCTGTGGGGATTAACCTCCCTCG  
TGAAACTTACGACGATGTTCTCGCTCGCATTCACAAGGATTACTAAGTCTGAGATCTGCCACTTCTA  
ATT

+

FFFFFFFFFFFFFFFFFFFFFFFFFFFFFFFF:FFFFFFFFFFFFFFFFFFFFFFFFFFFFFFFF:FFFFF  
FFFFFFFFFFFFFFFFFFFFFFFFFFFFFFFFFFFFFFFFFFFFFFFFFFFFFFFFFFFFFFFFFFFFFFFF  
FFF

@A00721:190:HGJW7DSXY:4:1462:5122:35697\_2:N:0:TCTGCAAG+GCTGCACT  
AAGTTCATGAGGATGTCTTGGTCGAAAAATATCGCCGGGAACCTCTAATAGAGGATCCTGATGACATT  
ATTTCAACGGATACCGATCTCAGTTCTACCACAGAAACCGTCTCAGGA

+

FFFFFFFFFFFFFFFFFFFFFFFFFFFFFFFF,FFFFFFFFFFFFFFFFFFFFFFFFFFFFFFFF  
:FFFFFFFFFFFFFFFFFFFFFFFFFFFFFFFFFFFFFFFFFFFFFFFFFFFFFFFF

@A00721:190:HGJW7DSXY:4:1627:13648:5619\_2:N:0:TCTGCAAG+GCTGCACT  
CTGATTCGGAATTAGAGAAAGACGACCTTCTTGTGGGACTGAGACCTCTGAATTTTCAGGGTGCCCT  
GATGAGGACGTTGAAAGGGATAATTTCAACTCTGAGACTTCTAAGAGT

+

F:FF,FFFFFFFFFFFFFFFFFFFFFFFFFFFFFFFFFFFFFFFFFFFFFFFFFFFFFFFF  
FFFFFFFFFFFFFFFFFFFFFFFFFFFFFFFFFFFFFFFFFFFFFFFF

@A00721:190:HGJW7DSXY:4:1314:26530:35008\_2:N:0:TCTGCAAG+GCTGCACT  
CAGAAACGTAACAAGAATAAAGGTAGGAAGGGGAGAAACAGAACAAAGCGAGCGGTTGAAGAGAA  
AACTGATATGGTTGCGGCTGATCGTACCCCAATTCTGCTAGAAAGAT

+

FFFFFFFFFFFFFFFFFFFFFFFFFFFFFFFFFFFFFFFFFFFFFFFFFFFFFFFFFFFFFFFF  
F:FFFFFFFFFFFFFFFFFFFFFFFFFFFFFFFF:FFFFFFFFFFFF

@A00721:190:HGJW7DSXY:4:2362:8287:19820\_2:N:0:TCTGCAAG+GCTGCACT  
TACCACTGATCTTCCAGAGTTACGTAGTGGTCGTTCTTTTGGTGATTTTATCAAAGAGAAAGTTTCTG  
CTAGTCGCGACGATAGTATTTATCGGAGTGATATTAACAAGTTAACT

+

FFFFFFFFFFFFFFFFFFFFFFFFFFFFFFFF:FFFFFFFFFFFFFFFFFFFFFFFF:FFFFF  
F,,F:FFFFFFFFFFFFFFFFFFFFFFFFFFFFFFFF:FFFFFFFF:FF

@A00721:190:HGJW7DSXY:4:2246:30138:12414\_2:N:0:TCTGCAAG+GCTGCACT  
TGTTGAAGTACCGCAACATGGATCAGTTTTCCAAAAGCTATTAATAGCAGTTGCGGGGCTATAATAC  
CGCCTCCAGATTACTCTAAACTGAATCCACTCTCTTGGGATATAAATG

+

FFFFFFFFFFFFFFFFFFFFFFFFFFFFFFFF:FFFFFFFFFFFFFFFFFFFFFFFFFFFFFFFF  
FFFFFFFFFFFFFFFFFFFFFFFF:FFFFFFFFFFFF

@A00721:190:HGJW7DSXY:4:2439:23818:10895\_1:N:0:TCTGCAAG+GCTGCACT  
TGAATTAGTTATTGAAAGCTTGACCCTCAATTCTGACTTTATCACCTTGGAGTTGGTAAAGTCATTA  
ACAATGGTAATGTAAAGGCTGATGTCTTAAATTCGCTTTCTGCTTCGCTCGGTAATCCATAAGACC

+

FF:FFFFFFFFF,FFFFFF:F:,FF,,:,F,F,FF:FFF:F:,FFFFFF,FF:FFF,FF:,FF,  
,:,,,FF,FFF,FF,:FF,FFFF,FFFFFFFF:F,,F,FFFF,,F,F,,:FF,F,FFFF,:FFFF

@A00721:190:HGJW7DSXY:4:2417:18584:4773\_1:N:0:TCTGCAAG+GCTGCACT  
TTCTTCATGAAGATCTTCGAGTGTTTTATAGTGAGTTATTCTTGCGAAGGTTCAAGTCGATTGATTTT



@A00721:190:HGJW7DSXY:4:1112:27263:2581\_2:N:0:TCTGCAAG+GCTGCACT  
GACGACAAGCCTCAAGAGGGTAGAGGACCACCTGGATCTTCTACTGTCTCTGCCTTCCAAGATTTCTT  
AGAAGAGGTTATTCCTGGAACCACCTTAACGTCACTCGGTAATCTTTC

+

FFFFFFFFFFFFFFFF:FFFF:FFFFFFFFFFFFFFFFFFFFFFFFFFFFFFFFFFFFFFFF  
FFFFFFFFFFFFFFFFFFFFFFFFFFFFFFFFFFFFFFFFFFFFFFFFFFFFFFFF

@A00721:190:HGJW7DSXY:4:2471:5945:23688\_2:N:0:TCTGCAAG+GCTGCACT  
TGAGTTCAAGTCGGTTGTCGATCGAATTAAGATCAAGGCTAATACCTTTATAGGTAAGAAGCCCCTTG  
AGCCGCGTAGTCAGCGCGTTTAGCTGTATCATCAGTGAGATCGGAAGA

+

FFFFFFFFFFFFFFFF:FFFFFFFFFFFFFFFFFFFFFFFFFFFFFFFF:F:FFFFFFFFFFFFFFFF  
FFFFFFFFFFFFFFFFFFFFFFFFFFFFFFFFFFFFFFFFFFFFFFFFFFFFFFFF

@A00721:190:HGJW7DSXY:4:1529:17002:33724\_1:N:0:TCTGCAAG+GCTGCACT  
TCCAAGAGAATATTTATTCTTATGAGGCTCGAACTTCAACGTTTTACAACGGAAAGACATATCGCA  
CCCGAAATTTTTGGGCAGAAATGCTCTTAACGCGGTTCTTGAACGGTGTTTTGATCAGTCTAAGTTGGA  
TAA

+

FFFFFFFFFFFFFFFFFFFFFFFFFFFFFFFFFFFFFFFFFFFFFFFFFFFFFFFF,FFFFFFFFFFFFFFFF  
F:FFFF:FF:FFFFFFFFFFFFFFFFFFFFFFFFFFFFFFFF:FFFFFFFFFFFFFFFFFFFFFFFF  
FFF

@A00721:190:HGJW7DSXY:4:1306:4001:28087\_2:N:0:TCTGCAAG+GCTGCACT  
ACTCAGTTAACCTGAGAGCTCCTCAATTGATAGATTGGGTCAACAATAGGGACGCTAGTATACTTCGT  
AAAGTCGACAGCGAAATGGTCAATATTGATAATTGGACCGACTATATG

+

FFFFFFFFFFFFFFFFFFFFFFFFFFFFFFFF:FFFFFFFFFFFFFFFFFFFFFFFF:FFFFFFFFFFFF  
FFFFFFFFFFFFFFFFFFFFFFFFFFFFFFFFFFFFFFFFFFFFFFFFFFFFFFFF

@A00721:190:HGJW7DSXY:4:1369:1389:4867\_1:N:0:TCTGCAAG+GCTGCACT  
AGCTCATGGTGAAAAGGGAAGCTAAGGTAAACTTGATGCTTCAGCCTTTTCGAAGCATAACCCGCA  
CAGAATATCGTTTATCACGCAAATTTATTAATGCAATTTTCGGACCTATCTTTAAGGTTCTTGAG  
GAG

+

F,FFFFFFFF:FFFFFFFFFFFF,FFFF,FFFFFF:FFFFFF,FFFFFFFFFFFF:FFFFF  
FFFFFFFFFFFFFFFFFFFF,FFFFFFFFFFFFFFFFFFFFFFFFFFFF:FFF:F:FFF:FFFFFF  
F,F

@A00721:190:HGJW7DSXY:4:1130:19425:12179\_1:N:0:TCTGCAAG+GCTGCACT  
AGCTCTTCTCTCTCTTAGGAGGTCATGATGACTACTATAAGGGTGAAATCGATTTTTCGAAGTTTGAC  
AAATCTCAAGATTTCTTTGTAAAGCCTATGAGATAAAGATGTATTCTTATTAGGCTTCGATGCTGA  
ATT

+

FFFFFFFFFFFFFFFF:FFFFFFFFFFFFFFFFFFFFFFFF:FFFFFFFFFFFF:FFFFFFFFFFFF:FFF  
FFFFFFFFFFFFFFFFFFFFFFFFFFFFFFFFFFFFFFFFFFFFFFFFFFFFFFFFFFFFFFFF  
FFF

@A00721:190:HGJW7DSXY:4:1104:30599:1031\_2:N:0:TCTGCAAG+GCTGCACT  
AGTGCCAGTGAATATTTTTGTCACGCCAGGAGTATCCATAACGATTTGTCATTTACCACCTTGCTCA  
ACGACGAAGTGGAACGGCCAACACTTTCTTTGGTAATTGTATGATCAC

+

FFFFFFFFFFFF,FFFFFFFFFFFFFFFFFFFFFFFFFFFFFFFFFFFFFFFFFFFFFFFFFFFFFFFF  
FFFFFFFFFFFFFFFFFFFFFFFFFFFFFFFF:FFFFFFFF:FFFFFFFFFFFF

@A00721:190:HGJW7DSXY:4:1136:17137:35556\_2:N:0:TCTGCAAG+GCTGCACT  
TATCACTTTATTATGACCTTGGAAGTTTTCGGCTGTGGTTGTCGCTGGGACGATTCCATTCTGTTT  
TCAAAGACTCCAATAACTGATCATTCTGATCATATGATTTTGGACAAT

+

FFFFFFFFFFFFFFFFFFFFFFFFFFFFFFFFFFFFFFFF:FFFFFFFFFFFFFFFFFFFFFFFF  
FFFFF:FFF::FFFFFFFFFFFFFFFFFFFFFFFF:F:FFFFFFFF





FFFFFFFFFFFFFFFFFFFFFFFFFFFFFFFFFFFFFFFFFFFFFFFFFFFFFFFFFFFFFFFFFFFFFFFFFFFFFFFF  
FFF

@A00721:190:HGJW7DSXY:4:2552:7274:33912\_1:N:0:TCTGCAAG+GCTGCACT  
TGGTTACGGTCAGGGAGGATTCTCAGTTTACAAGGACCTTAAGCGATGGATCGGGGTTAATTCTAAAA  
CATTACCCGAAAGACGTGCTAAATTAACCATTGTACGATGTCGTCTGTCTCGGCGATCACTTTTCA  
CTA

+  
FFFFFFFFFFFFFFFF:FFFFFFFFFFFFFFFFFFFFFFFFFFFFFFFFFFFFFFFFFFFFFFFFFFFFFFFF  
FFFFFFFFFFFFFFFFFFFFFFFFFFFFFFFFFFFFFFFFFFFFFFFFFFFFFFFFFFFFFFFFFFFFFFFFFFFF  
FFF

@A00721:190:HGJW7DSXY:4:1325:1325:27305\_1:N:0:TCTGCAAG+GCTGCACT  
AGACGTGTGCTCTTCCGATCTATCGTTTCTTCTTTATCTCTTTGGTTGTTAGGGATTTTGAGAGAGT  
GAAAGGCTTCAATTGTAGTGGTTTGGTCGTTTCAGTACCCAGTCAGTATACCTCTACGCAAAGATATT  
TCA

+  
FFFFFFFFF,:FFFFFFFFFFFFFF:FFFFFFFFFFFFFFFFFFFFFFFFFFFFFFFFFFFFFFFFFFFFFFF:FFFFFFFFFFFF  
FFFFFFFFFFFFFFFFFFFFFFFFFFFFFFFFFFFFFFFFFFFFFFFFFFFFFFFFFFFFFFFFFFFFFFFFFFFF  
FF:

@A00721:190:HGJW7DSXY:4:1669:3522:8844\_2:N:0:TCTGCAAG+GCTGCACT  
GAGGAACGTACCGGATTACCTGTCTTTCATATTATGAATGAACCTTCGGCCGCTCTCTTTGCTTCGAT  
GTTGGATGTCAAGAAGGGTTCAGAATGGGATTCTACGTAGTTTATGA

+  
FFFFF:FFFFFFFFFFFFFFFFFFFFFFFFFFFFFFFFFFFFFFFFFFFFFFFFFFFFFFFFFFFFFFFFFFFF  
FFFFFFFFFFFFFFFFFFFFFFFFFFFFFFFFFFFFFFFFFFFFFFFFFFFFFFFFFFFFFFFFFFFFFFFFFFFF  
FFFFFFFFFFFF:FFF

@A00721:190:HGJW7DSXY:4:2106:9182:33270\_1:N:0:TCTGCAAG+GCTGCACT  
TACTTTCGATACTTCTATCGTCTTACGTTACGGTAATTACTATAGTGTTATTTATTCTGGTGGTGATG  
ATAATCTTGGAGGTCGTGACGTTGATGAAGCTATAAGAGCGTTCCTTATTACGGCGCACTTCTTTACCC  
GCC

+  
FFFFFFFFFFFFFFFFFFFFFF:FFFFFFFFFFFFFFFFFFFFFFFFFFFFFFFFFFFFFFFFFFFFFFFFFFFF  
FFFFFFFFFFFFFFFFFFFFFFFFFFFFFFFFFFFFFFFFFFFFFFFFFFFFFFFFFFFFFFFFFFFFFFFFFFFF  
FFF

@A00721:190:HGJW7DSXY:4:1109:30138:9815\_2:N:0:TCTGCAAG+GCTGCACT  
GTTTCACAACCTGAAGGAGGAGGTTTCTGTACTGGAAAACCCTCGTCAATACTTTTCAATAATATACG  
TCTTGAACCTCACTTATGACGATCTAGTGAAATTAACGCGTCCTTTTCT

+  
FFFFFFFFFFFFFFFFFFFFFFFFFFFFFFFFFFFFFFFFFFFFFFFFFFFFFFFFFFFFFFFFFFFFFFFFFFFF  
FFFFFFFFFFFFFFFFFFFFFFFFFFFFFFFFFFFFFFFFFFFFFFFFFFFFFFFFFFFFFFFFFFFFFFFFFFFF

@A00721:190:HGJW7DSXY:4:1338:14344:35289\_1:N:0:TCTGCAAG+GCTGCACT  
TACTATTATGAACAAAGTTATCAAAGATAGTGGCATTCAAGGCAAACCTTACCCTGATTCCGGCCGGTG  
GTAGCTCATTTCTACCAGGGGCTATTACTCTTGCTGAAACAGCTATTAAAGCTGTTGAGCGGGTAATT  
ACA

+  
FFFFFFFFFFFFFFFFFFFFFFFFFFFFFFFFFFFFFFFFFFFFFFFFFFFFFFFFFFFFFFFFFFFFFFF:FFFFFFFFFFFFFFF:FFFFFFFFFFFF,F  
F:FFFFFFFFFFFFFFFFFFFFFFFFFFFFFFFFFFFFFFFFFFFFFFFFFFFFFFFFFFFFFFFFFFFFFFF,FFFFFF:FFFFFFFFFFFFFFF  
FFF

@A00721:190:HGJW7DSXY:4:1562:18502:15875\_2:N:0:TCTGCAAG+GCTGCACT  
ATCGCTGAAGGATGTGCACTCTTTTCTGCTACTTTAACGGAGCGTAGTGTACTCTTCGTCGATTGTAT  
CAACAGTAACATTACTTCTAATAAAGGTCTCTATCAAGCTCGTATTAT

+  
FFFFF:F:FFFFFFFFFFFFFFFFFFFFFFFFFFFFFFFFFFFFFFFFFFFFFFFFFFFFFFFFFFFFFFFFFFFF  
FFFFFFFFFFFFFFFFFFFFFFFFFFFFFFFFFFFFFFFFFFFFFFFFFFFFFFFFFFFFFFFFFFFFFFF,FFF:FFFFFFFFFFFFFFF

@A00721:190:HGJW7DSXY:4:1530:10059:14559\_1:N:0:TCTGCAAG+GCTGCACT  
TTACCGTTGAAGGCTAAACTCCAAGGTAATTATGAAGACTGTGATTTATCTTTCACTCTGGCCTTGTA



@A00721:190:HGJW7DSXY:4:2246:8350:30671\_2:N:0:TCTGCAAG+GCTGCACT  
CCAACTTCTTGACAATTTCTTCAATCCTTCGATAATAGTTAAATCTAGGATTATGTCTGTGTTGAAA  
GACTTTCTACCGATAAGGGTCACTAGTCTTACACAATTAAGAAATAAT

@A00721:190:HGJW7DSXY:4:1243:28420:14700\_2:N:0:TCTGCAAG+GCTGCACT  
ACTATCTAAAGATTGAAGGAAAATTTATCCTCGTTTAACTTACTTAGACTTTCTACGATACAAATG  
ATAACTTCTAATTTACGTTTGCTACTCAGAGCTGGTCTCTCAGCAA

@A00721:190:HGJW7DSXY:4:2422:11026:17174\_2:N:0:TCTGCAAG+GCTGCACT  
TCCTCAGGAGTCCCGCATTTGATAATAATGACGACTTTCGTCATAATCGCTGCATATTACGGATTAC  
ACGGTACCAGCGCATCTCGTGTCGAGCCTCGACCCGATTATATGGTAT

@A00721:190:HGJW7DSXY:4:2654:9525:30076\_2:N:0:TCTGCAAG+GCTGCACT  
AGAATTCTTAATTATAATATTCAACCTCAAAAGTTACGTGTTTACAGTAACGAGATCACACATTTTGA  
GAACTAACTATGTTATGTTCTCTGATCATTTTGACAATCTCTTCTTAT

@A00721:190:HGJW7DSXY:4:1156:16206:7294\_1:N:0:TCTGCAAG+GCTGCACT  
TAAATAATATTACTAATGGCAAATAGTGGAAAGGCTCCAGTCAACACTAGTTCGAGTGCTGCTTTGGA  
TTACGATGACGTGAGAATAGGTGAAGGGATAGTTTTTACCTCGACCAACATTAAGGCGGCGGCGACTA

```

:FFFFF:FFFFFFFFFFFFFFFFFFFFFFFFFFFFFFFFFFFFFFFFFFFFFFFFFFFFFFFFFFFFFFFF
FFF
@A00721:190:HGJW7DSXY:4:2433:9155:25426 1:N:0:TCTGCAAG+GCTGCACT

```

[illegible][illegible]

ACCGAGTTCGTTTCGATCCCTTTCATTCCTATCTCTGAGAGAGACATTTTCATGCTTTCCTTTTAAAGACATC  
CAGAGGCTGTCAAACAAGCCCAGACTCAAGGAGTCCAATCACAGGTTTTGAATTTAGCTCAACTGGGG  
AGA  
+

FFFFFFFFFFFF:,:FF:FFFFFFFF:FFFFFFFF:FF:F,FF:FFFFFF:FFFFFFFF:,:FFFFF  
FFF

@A00721:190:HGJW7DSXY:4:1608:3405:34882\_1:N:0:TCTGCAAG+GCTGCACT  
CTTGACAGAGTGACTGGAGTTCAGACGTGTGCTCTTCCGATCTGAAAAGTCCGGAGTATATTGTATGTT  
AATAGATAGTGGGATAATAGTTCTACCGATACGTAGTGAACGCGTTCGTAGAACCAAGTACTTTCCGT  
CTG

+

:F:FFFFFFFFFFFFFFFFFFFFFFFFFFFFFFFFFFFFFFFFFFFFFFFFFFFFFFFFFFFFFFFFFFFFFFFF  
FFFFFFFFFFFFFFFFFFFFFFFFFFFFFFFFFFFFFFFFFFFFFFFFFFFFFFFFFFFFFFFFFFFFFFFF  
FFF

@A00721:190:HGJW7DSXY:4:1668:18656:29105\_1:N:0:TCTGCAAG+GCTGCACT  
ACCGATAGGAGTTGTATAGTTGAAGATGTGGCTTTAGACGATAATCCTTTAAGGACTATGTTGACTGA  
CGAAGATTTTCCACAGATTTGTCTACGTTGCAGATCGCCACTCCAAACACTATATACATTATAAAAT  
ATA

+

FFFFFFFFFFFFFFFFFFFFFFFFFFFFFFFFFFFFFFFFFFFFFFFFFFFFFFFFFFFFFFFFFFFFFFFF  
FFFFFFFFFFFF:FFFFFFFFFFFFFFFFFFFFFFFFFFFFFFFFFFFFFFFFFFFFFFFFFFFFFFFFFFFF  
FFF

@A00721:190:HGJW7DSXY:4:1515:25473:14481\_1:N:0:TCTGCAAG+GCTGCACT  
ATAACTTTTGTACCAAATCTTGCTTTCAACGAAGTCTCTGATTTTATTAATCATTACTTTAACGA  
TCTCTCGGTCATTTACTCTGTACTTGATCTACGTCGTTTAACTGTCGAACAACCTTTACTTAGAATG  
ACT

+

FFFFFFFFFFFFFFFFFFFFFFFFFFFFFFFFFFFFFFFFFFFFFFFFFFFFFFFFFFFFFFFFFFFFFFFF  
FFFFFFFFFFFF:FFFFFFFFFFFFFFFFFFFFFFFFFFFFFFFFFFFFFFFFFFFFFFFFFFFFFFFFFFFF  
FFF

@A00721:190:HGJW7DSXY:4:1629:15004:27602\_2:N:0:TCTGCAAG+GCTGCACT  
TCTTATATTATTTACAATAGTTAATATCATATTAGTAATACTCACTATCGTTTTCTGCTTTTTCTTAG  
CTAATAGATTAATAAAGGATGAGTACGAAAACCAACTCTTCGTTACGA

+

FFFFFFFFFFFFFFFFFFFFFFFFFFFFFFFFFFFFFFFFFFFFFFFFFFFFFFFFFFFFFFFFFFFFFFFF  
FFFF,FFFFFFFFFFFF:FFFFFFFFFFFFFFFFFFFFFFFFFFFFFFFFFFFFFFFFFFFFFFFFFFFF

@A00721:190:HGJW7DSXY:4:1371:31656:1892\_1:N:0:TCTGCAAG+GCTGCACT  
TATAATAGATTTAGTCTCTACACCCATCTCACCGAGTATAAAGCGTGTTCCTGACGTAATA  
CACGAAGATATCATCCGAAACGACTCGAAACGAGACGCCGTAGATCAAAGTCCCTTCTAACTTTAG  
ATT

+

FF,F:F,,,:FFF,,FFF,:FFFF,F,F:,F,F:,F,FFFF:,,,:F,:FFF,FFF:F:,,,FF,,  
:,F:FF:F,F:FF,FF,FFFFFFFFFFFFFFFFFFFFFFFFFFFFFFFFFFFFFFFFFFFFFFFFFFFF  
FFF

@A00721:190:HGJW7DSXY:4:1208:26702:21621\_2:N:0:TCTGCAAG+GCTGCACT  
CAGTTATTTATGTTGTACTTTTTATAATTTATAACCTTCTTATACTTTTGGGTATGTTTTGTGAAAAA  
CATGAGATACCAAGTCTATCGAAGACATTATCTCTTATGTACTTATT

+

FFFFFFFFFFFFFFFFFFFFFFFFFFFFFFFFFFFFFFFFFFFFFFFFFFFFFFFFFFFFFFFFFFFFFFFF  
FFFFFFFFFFFF:FFFFFFFFFFFFFFFFFFFFFFFFFFFFFFFFFFFFFFFFFFFFFFFFFFFF

@A00721:190:HGJW7DSXY:4:1513:9878:14528\_2:N:0:TCTGCAAG+GCTGCACT  
TATTCCTTTAACTGTGTATGAGGAGGATTTATAATGCTTTTCGATAGTGATTGTTATCAATTTAAATA  
CATTACTGTTTCAAATCATCTTTACTCACAGACTCCGAAAATGGTTTC

+

FFFFFFFFFFFFFFFFFFFFFFFFFFFFFFFFFFFFFFFFFFFFFFFFFFFFFFFFFFFFFFFFFFFFFFFF  
FFF:FFFFFFFFFFFFFFFFFFFFFFFFFFFFFFFFFFFFFFFFFFFFFFFFFFFF

@A00721:190:HGJW7DSXY:4:1270:25138:10676\_1:N:0:TCTGCAAG+GCTGCACT  
TATTTATTAAACGAACATTATCCGATTCTTCGAGGGTATCACTACCACTGATCTGCCGACTTTAGTC



@A00721:190:HGJW7DSXY:4:1536:30291:33943\_2:N:0:TCTGCAAG+GCTGCACT  
CAGTACCTCAGTCAAAAGTCACATTCACCACTCCCATACCAATCAATGATGTGACTATACAGTTCGGC  
CATTTCAAGAGTGGTCAATACGTCGTGGGAGGTACTGAAGCCTTCCCC

+

FFFFFFFFFFFFFFFFFFFFFFFFFFFFFFFFFFFFFFFFFFFFFFFFFFFFFFFFFFFFFFFFFFFFFFFF  
FFFFFFFFFFFFFFFFFFFFFFFFFFFFFFFFFFFFFFFFFFFFFFFFFFFFFFFFFFFFFFFFFFFFFFFF

@A00721:190:HGJW7DSXY:4:1657:24523:33098\_2:N:0:TCTGCAAG+GCTGCACT  
AAGCCAATCAATAGTTCTTCTGACCAGAATGAAAAGGGGTTTACCAGGGTAGTCTCTAAGTCTACCAG  
GAAGAGGGGAAATGTCCCCAAAACCTGAGAAGAATAAAGGGAAAGGTCC

+

FFFFF:FFFFFFFFFFFFFFFFFFFFFFFFFFFFFFFFFFFFFFFFFFFFFFFFFFFFFFFFFFFFFFFF  
FFFFFFFFFFFFFFFFFFFFFFFFFFFFFFFFFFFFFFFFFFFFFFFFFFFFFFFFFFFFFFFFFFFFFFFF

@A00721:190:HGJW7DSXY:4:1332:10312:14873\_2:N:0:TCTGCAAG+GCTGCACT  
GGGAAATTACCCCTAATTCTGAAGGAAGATCTCCACCATCTGGGGTTGGGAATAAGAAATCTGCACG  
GGCCAAAGAGGCCGCTGCTACGAAGTCGCTGAAGCGGCTTGGGTCAT

+

FFFFFFFFFFFFFFFFFFFFFFFFFFFFFFFFFFFFFFFFFFFFFFFFFFFFFFFFFFFFFFFFFFFFF,FFFFFFFFFFFFFFFF  
FFFF:FFFFFFFFFFFFFFFFFFFFFFFFFFFFFFFFFFFFFFFFFFFFFFFFFFFFFFFFFFFFFFFF:F

@A00721:190:HGJW7DSXY:4:2520:32796:27884\_2:N:0:TCTGCAAG+GCTGCACT  
TTGCGCCTGCCGACCCCATCTTTGAGACCAAGACTCTCTACAGTAGGTTCTGCTACTATGAGCAA  
TCTGTTGAATTCGTCACTGAGGACGAAGGTGAGAGGACTTTTGGCTAC

+

FFFFFFFFFFFFFFFFFFFFFFFFFFFFFFFFFFFFFFFFFFFFFFFFFFFFFFFFFFFFFFFFFFFFF,F  
FFFFF:FFFFFFFFFFFFF:FF:FFFFF:FFFFFFFFFFFFFFFFFFFFFFFFFFFFFFFF

@A00721:190:HGJW7DSXY:4:1470:4264:20337\_2:N:0:TCTGCAAG+GCTGCACT  
CGTGGGTTGAAGGCCGACGCTTCGAGCTTGAGTGTGACGAGGCCGGTGACGTTTTTGTCAACGGCGTT  
TGGAGGATTTTATCCGCGCTTAACATATGGGGCGAAGATCCCTATGGA

+

FFFFFFFFFFFFFFFFFFFFFFFFFFFFFFFFFFFFFFFFFFFFFFFFFFFFFFFFFFFFFFFFFFFFF:FFFFFFFFFFFFFFFF  
FFFFFFFFFFFFFFFFFFFFFFFFFFFFFFFFFFFFFFFFFFFFFFFFFFFFFFFFFFFFFFFFFFFFF,FFFFF

@A00721:190:HGJW7DSXY:4:2168:26241:20478\_2:N:0:TCTGCAAG+GCTGCACT  
TTGGCATATTTATGCCGACGATAATAAGCATGTACCCCTTAAGCACCGAGGTAAGCTCGGGACTTACA  
AGAGAGAGTGTGAGAGAGTCGCTCTCACTATTTTTGCCAGAATGCGG

+

FFFFFFFFFFFFFFFFFFFFFFFFFFFFFFFFFFFFFFFFFFFFFFFFFFFFFFFFFFFFFFFFFFFFF  
FFFFFFFFFFFFFFFFFFFFFFFFFFFFFFFFFFFFFFFFFFFFFFFFFFFFFFFFFFFFFFFFFFFFF

@A00721:190:HGJW7DSXY:4:1122:6912:7545\_2:N:0:TCTGCAAG+GCTGCACT  
ATTACAACCTCTCTTTAGAGAGCATTAGAAGGAAGTTGGGCAAATCCCACATATGGTAGACGTTGTC  
ACACTTTTCTTGAAAATTTTCTTTCTCCGTCATTGGGGATTTCGA

+

FFFFFFFFFFFFF:FFFFFFFFFFFF:FFFFFFFFF,FFFFFFFFFFFFFFFFFFFFF:FFFFF:,FFFFFFFFF  
FFFFFFFFFFFFFFFFFFFFFFFFFFFFF:FFFFF,:::FF:F:,FF:F:FFFF

@A00721:190:HGJW7DSXY:4:1138:24695:8876\_1:N:0:TCTGCAAG+GCTGCACT  
GGAAGGTGTCAAGGGTCTTCTTCATGCTGATCTTTCAGGACCTAATCACATCATGATTGATAGTTACG  
GCTCGTATCGAGTTGGAGGGAGGAAGTTCTCCGAAATTAAGACGGGGGATTAAGAGTCCAGCTGTA  
ACT

+

FFFFFFFFFFFFFFFFFFFFFFFFFFFFFFFFFFFFFFFFFFFFFFFFFFFFFFFFFFFFFFFFFFFFF,FFFF:FFFFFFFF  
FFFFFFFFFFFFFFFFFFFFFFFFFFFFFFFFFFFFFFFFFFFFFFFFFFFFFFFFFFFFFFFFFFFFF  
FFF

@A00721:190:HGJW7DSXY:4:1158:12201:12477\_2:N:0:TCTGCAAG+GCTGCACT  
AGAGGGGAGCTCTGAAAAGGAACTTCGTCAGAAGATGAGGAAGTCTAAGAGGAGGAGTTTGAAGGAAG  
GCTCTAGAGAAGATCTCACCACTGGAGAAGGCAAGTGGAGAGTCCAG

+



GAAGGATTGGGTTATTCTCACAAAGATAAGATTTTATCTTTCTTC

+

FFFFFFFFFFFFFFF:FFFFFFFF,FFFFFF,FFFFFFFFFFFFFFF:FFF:F,FFFFFFFFFFFFFFF  
FFFFF:FFFFFFFF,FFFFFFFFFFFFFFF,F,FF:FFFF:FF

@A00721:190:HGJW7DSXY:4:1565:2320:10269\_2:N:0:TCTGCAAG+GCTGCACT  
AAGGGCGGACAATTGTTCCATTGTGAACCTCTTGGGACTAGATTGAGCATTAAATGAGTTCCGAATAAC  
TCGTAATAAATCTTTCTCTAGTGGACAATTCAGAATACCTATTTCCGT

+

FFFFFFFFFFFFFFF:FFFFFFFF:FFFFFFFFFFFFFFF:FFFFFFFFFFFFFFF  
FFFFFFFFFFFFFFF:FFFFFFFFFFFFFFF:FFFFFFFFFFFFFFF

@A00721:190:HGJW7DSXY:4:1507:14163:25645\_1:N:0:TCTGCAAG+GCTGCACT  
CTGCCAATCTCATCGCTATACGCATACCTGATTGGAAGAAGCGAGGTTTCGTTCCCTCAATAAAATTTT  
TCTCAAGAGATTATGGTTGATAAAGTTTCTTCATAAGGGCTATTAGTACGTCATGGGGATCACTTC  
TTC

+

FFF:FFFFFFFFF:FFFFFFFFFFFFFFF:FFFFFFFFFFFFFFF:FFFFFFFF  
FFFF,FFFFFFFFFFFFFFF:FFFFFFFFFFFFFFF:FFFFFFFFFFFFFFF  
FFF

@A00721:190:HGJW7DSXY:4:1239:5791:14058\_1:N:0:TCTGCAAG+GCTGCACT  
TCGAATATGTTACGACATGGCTTCGTAACAACAGTGCAGGATTGTCATCTCGGGGAAAGTGATTCAC  
CAAGATGTTTCATATAGATACGAGATACCTAGAGAAGGTCGCAGCGATCTTACTCGTTATCGGAGCTAA  
GAA

+

F:FF::FFFFFFFFF:FFFFFFFFFFFFFFF:FFFFFFFFFFFFFFF:FFFFFFFF  
FFFFFFFFFFFFFFF:FFFFFFFFFFFFFFF:FFFFFFFFFFFFFFF:FFFFFFFF  
FFF

@A00721:190:HGJW7DSXY:4:1425:10601:33129\_1:N:0:TCTGCAAG+GCTGCACT  
TCGCAAACTTAACGTTAGTACCGGAGGTGATCTCTCTGCTTCTGCGTTACTGAGAGAAAAGATTCAGG  
ACGCCTACGGTGACTTTATGGACAAGATGCAAGTTCTTGGGAAATACTTGTTTCCCTTTTATAGTTTA  
GTA

+

FFFFFFF:FFFF:FFF:FFF:FFF:FF:FFFFFFFFF:FFFFFFF:FFFFFFFFFFFFFFF  
FFFF:FFFFFFFFFFFFFFF:FFFFFFFFFFFFFFF,FFFF:FFFFFFFFF  
FFF

@A00721:190:HGJW7DSXY:4:1623:5746:33082\_1:N:0:TCTGCAAG+GCTGCACT  
CTCTTCCGATCTGACAACGAATCTTGAACTACGGTCCTTATCAAAGAAAATGGTGAACCGGTCTCTA  
AATCTTTTGAGATTGAGAAGATTGAAGAACACGTCAAGAAGTCGCTCGGCGTTGTTCTTGAAAACCA  
GT

+

FF,FF:F:FFFFFFFFF:FFFFFFFFF:FF,FFFFFFFFF:FFFFFFFFF  
F,FFFFFFFFF:FFFFFFFFF:FFFFFFFFF,,:FF  
FF

@A00721:190:HGJW7DSXY:4:2121:11975:19914\_1:N:0:TCTGCAAG+GCTGCACT  
GCTGATCATGGAGTCTTTGTACCTTCTGTCAAACCTTCGAGGTTTCAGCTACGAGAGGTGATCCCGGATG  
TGGATTGAAGGCTGGCTCTAAGGGAGACTCCTTCTTTTGAATGTTGTAAAGAATTGGGTTGAGAAGT  
GTG

+

FFFFFFFFFFFFFFFFFFFFFFFFFFFFFFFFFFFFFFFFFFFFFFFFFFFFFFFFF  
FFFFFFFFFFFFFFFFFFFFFFFFFFFFFFFFF:FFFFFFFFFFFFFFFFFFFFFFFFF  
FFF

@A00721:190:HGJW7DSXY:4:2636:4065:17519\_1:N:0:TCTGCAAG+GCTGCACT  
CTTGGTATTTCTGAAATAGTTTATCAGAGCGTCATTTTCTTTGGGATCTTTCCTCTGGTAAGGGAAT  
TATTAAATCATTCTTCTCACTCTTGACGAGAATTATTACTGTTTTCTCTACCCATAACTTCTTTTCA  
AAA



```

+
:FFFFF:FFFFFFFFFFFFFFFFF:F,FFFF:FFFFFFFFF:::FFFF:F,FFFFFFFF:FF:F::FF,F
FFFFFFFF:FFFF:FFFFF:FFFFFFFFFFFFFFFFFFFFFFFFF:FFFFFFFFFFFFF:FFFFFFFFFFFFF
FFF
@A00721:190:HGJW7DSXY:4:1310:11876:24001_2:N:0:TCTGCAAG+GCTGCACT
TACAGAGTGCAGTCGTTTTAAACACTTATCACCACCTTTTGAAAGGAAAATAATTTGTGATGAAAATACG
TATGTAGGTGGGGTTCTCAAGGCTCTCATCGCCACTGGGATTCTAAGG
+
FFFFFFFFFFFFFFFFFFFFF,FF,:,,FFFFFFFFF:FFFF,FF:F:FFF,:F,F,F,:FFFFFFFFF,F
F:F,F,FF:FFFF,F:F:FF,F,FFF:F,,,F::F,FFFFFF,FFF,F
@A00721:190:HGJW7DSXY:4:2249:23909:13088_2:N:0:TCTGCAAG+GCTGCACT
TTTGGTCCTTACGTCTTAAGTAATTTGGATGTTGTGCAAACTATCAGGTTCTTGTACAGATTCTTAA
AAGAAGTTTATTAAAACTTCAGAGTCTCTTGGAAGTCCAGGTAGCTAA
+
FFFFFFFFFFFFFFFFFFFFFFFFFFFFFFFFFFFFFFFFFFFFFFFFFFFFFFFFFFFFFFFFFFFFFFFFF
FFF,FFFFFFFFFFFFFFFFFFFFFFFFFFFFFFFFFFFFFFFFFFFFFFFFFFFFFFFFFFFFFFFFF
@A00721:190:HGJW7DSXY:4:1228:10936:36338_2:N:0:TCTGCAAG+GCTGCACT
ACCTCTGTTGGTAGAGGAGTTGAGAGAATTACTCAGATTCAATCTGGCATCACTGAACGTCTACAACG
AGTTAGGGAGTGGCTAGGTTTTAAAAGATCCTTGCACAAGCAATACC
+
FFFFFFFFFFFFF:FFFFFFFFFFFFFFFFF,FFF:FFFFFFFFFFFFF:FFFFFFFFFFFFF:FFFFF::
FFFFFFFFFFFFFFFFFFFFFFFFFFFFFFFFFFFFFFFFF:FFFFFFFFFFFFF:
@A00721:190:HGJW7DSXY:4:1609:14850:14810_2:N:0:TCTGCAAG+GCTGCACT
GTCGCGGAAAACGATGAAGATTTCCACACTGTTGAGAATCTTCTGATGCTGAATTTGAGGAAAATTT
TTCGGAAGTTTTTGGTATAAATCCTGATGGCTCAGTACAGGGAGGAGG
+
FFFFFFFFFFFFFFFFFFFFFFFFFFFFFFFFFFFFFFFFFFFFFFFFFFFFFFFFFFFFFFFFFFFFFFFFF
FFFFF:FFFFFFFFFFFFFFFFFFFFFFFFFFFFFFFFF:FF:FFFF:FF
@A00721:190:HGJW7DSXY:4:2106:21450:5353_2:N:0:TCTGCAAG+GCTGCACT
ACCTTCTTTTATCATTGCAACAGGACTTTGAGAAGACTGTTGAAATGGACAAAATCTGGGATCATAGG
TATGTGTCACGCTACACTCGAAATATGGGCCCTCAGAAGGAAGTATAG
+
FFFFFFFFFFFFFFFFFFFFFFFFFFFFFFFFFFFFFFFFFFFFFFFFFFFFFFFFFFFFFFFFFFFFFFFFF
FFFFFFFFFFFFFFFFF:FFFFFFFFFFFFFFFFFFFFF,FFFFF,FF,FFF
@A00721:190:HGJW7DSXY:4:2120:12744:36839_2:N:0:TCTGCAAG+GCTGCACT
GGAAGATCTCTACAGAGATTATCGAGAGTTGTGATCTAGTTCTAAATTTAGGTCGACGGACTTTAGCA
ACTTTAGATAAATTCTTTCGGGCTCAATGACCTTTGCTATGTACGTG
+
FFFFFFFFFFFFFFFFFFFFFFFFFFFFFFFFFFFFFFFFFFFFFFFFFFFFFFFFFFFFFFFFFFFFFFFFF
FFFFFFFFFFFFF:FFFFFFFFFFFFFFFFFFFFFFFFFFFFFFFFF,FF
@A00721:190:HGJW7DSXY:4:2174:11116:14888_1:N:0:TCTGCAAG+GCTGCACT
TTAGTTCATGAAGTTCTTACACTTCTCGCGACTAATGTCAGCTTCACTACAAAGGCGTTACGTAAAGT
AGTTTTACGCTTTATCTTAAAGCATTACCACCAAATTTAGCACTTTTTGAATATGACAGAAGCTCGC
CAT
+
FFFFFFFFFFFFFFFFFFFFFFFFFFFFFFFFFFFFFFFFFFFFFFFFFFFFFFFFFFFFFFFFFFFFFFFFF
FFFFFFFFFFFFFFFFFFFFFFFFFFFFFFFFFFFFFFFFFFFFFFFFFFFFFFFFFFFFFFFFFFFFFFFFF
FFF
@A00721:190:HGJW7DSXY:4:2363:24153:28948_2:N:0:TCTGCAAG+GCTGCACT
CCAGTTAGAGTTCTTCTAACCAGGACTGATGGTGAGATTCTTTTACCTTTTGGAGGTCCAGGAACCTT
TACTCCTAGTGTCTCTTCTAGAGTCCAAGGACGTTTCCGTCGGAGGAT
+
FFFFFFFFFFFFFFFFFFFFFFFFFFFFFFFFFFFFFFFFFFFFFFFFFFFFFFFFFFFFFFFFFFFFFFFFF
FFFFFFFFFFFFFFFFF:FFFFFFFFFFFFFFFFFFFFFFFFFFFFFFFFF

```

@A00721:190:HGJW7DSXY:4:1623:18376:32878\_1:N:0:TCTGCAAG+GCTGCACT  
TCAATAACACTCTATTGAATCCCTTTTCCACGATGAAAGCTCTTTATGAGGTGCTCCATGCAAATTTA  
CAGTTCCTCTTTGGTGATATCGCCTCTGCTCTTCTCCTTTAATCGTGAGGTTACGAGAGTTTCGTAC  
TTG

+

FFFFFFFFFFFFFFFFFFFFFFFFFFFFFFFFFFFFFFFFFFFFFFFFFFFFFFFFFFFFFFFFFFFFFFFFFFFFFFFF  
FFF:FFF:FFFFFFFFFFFFFFFFFFFFFFFFFFFFFFFFFFFFFFFFFFFFFFFFFFFFFFFFFFFFFFFFFFFFFFFF  
FFF

@A00721:190:HGJW7DSXY:4:2567:29080:2347\_1:N:0:TCTGCAAG+GCTGCACT  
TTTTGATAAATTTGTTGGAATCGATAATGATACTGACGAAGGTTCTATTACCACCCTTGTCAATTGATA  
CAAACATTCTAGGTGATGCTTTCTTAGAGGCTCGTCTAGCCGCTGAGATTCTGCTTACCTATTTACAA  
TCT

+

FFFFFFFFFFFF:FFFFFFFFFFFFFFFFFFFFFFFFFFFFFFFFFFFFFFFFFFFFFFFFFFFFFFFFFFFFFFFF  
FFFFFFFFFFFF:FFFFFFFFFFFFFFFFFFFFFFFFFFFFFFFFFFFFFFFFFFFFFFFFFFFFFFFFFFFFFFFF  
FFF

@A00721:190:HGJW7DSXY:4:2575:4490:1532\_1:N:0:TCTGCAAG+GCTGCACT  
GATAACGATTTAGTACTGGGAAATGGTGGTAGTCAGTTTACTACTTTTCTTCCCTCCCCTTTTTTCGA  
TTGGATTGACGGGGTCTTCGTCTCACGACTAATTTGATAAGGTTTTCTTTTATGGGACTCTTGTTT  
GTA

+

FFFFFFFFFFFFFFFFFFFFFFFFFFFFFFFFFFFFFFFFFFFFFFFFFFFFFFFFFFFFFFFFFFFFFFFFFFFFFFFF  
FFFFFFFFFFFFFFFF:FFFFFFFFFFFFFFFFFFFFFFFFFFFFFFFFFFFFFFFFFFFFFFFFFFFFFFFFFFFF  
FFF

@A00721:190:HGJW7DSXY:4:2376:26286:6558\_2:N:0:TCTGCAAG+GCTGCACT  
GTTCTTAATGTAGGTCTCCTAGTACTTAAGGGTTTATGTTTCGGTTTCAGCTGGATGGATCTTTTGAT  
GGTATGTTTCACATTGCGTGATCACTTCCCGTGGACTTGGAAGAGAT

+

FFFFFFFFFFFFF:FFFF:FFFFFFFFFFFFFFFFFFFFFFFFFFFFFFFFFFFFFFFFFFFFFFFFFFFFFFFF  
FFFFFFFFFFFFFFFFFFFFFFFFFFFFFFFFFFFFFFFFFFFFFFFFFFFFFFFFFFFFFFFFFFFFFFFFFFFF  
FFFFF

@A00721:190:HGJW7DSXY:4:1313:28149:1830\_2:N:0:TCTGCAAG+GCTGCACT  
GCTAAAGCCTGTCCAGTTGTGATGATGTTTCGGGCTGTGGGGATTAAGTCCCTCGTGAACTTACGA  
CGATGTTCTCGCTCGCATTTACAAGGATTACTAAGTCTGAGATCTGC

+

FFFFFFFFFFFFFFFFFFFF:FFFFFFFFFFFFFFFFFFFFFFFFFFFFFFFFFFFFFFFFFFFFFFFFFFFF  
FFFFFFFFFFFFFFFFFFFFFFFFFFFFFFFFFFFFFFFFFFFFFFFFFFFFFFFFFFFFFFFFFFFFFFFFFFFF  
FFFFF

@A00721:190:HGJW7DSXY:4:1514:31684:3944\_2:N:0:TCTGCAAG+GCTGCACT  
AAGTTCATGAGGATGTCTTGGTCGAAAAATATCGCCGGGAACCTTAATAGAGGATCCTGATGACATT  
ATTTCAACGGATACCGATCTCAGTTCTACCACAGAAACCGTCTCAGGA

+

FFFFFFFFFFFFFFFFFFFFFFFFFFFFFFFFFFFFFFFFFFFFFFFFFFFFFFFFFFFFFFFFFFFFFFFFFFFF  
FFFFFFFFFFFFFFFFFFFFFFFFFFFFFFFFFFFFFFFFFFFFFFFFFFFFFFFFFFFFFFFFFFFFFFFFFFFF  
FFFFF

@A00721:190:HGJW7DSXY:4:2201:28519:23641\_2:N:0:TCTGCAAG+GCTGCACT  
CTGATTCGGAATTAGAGAAAGACGACCTTCTTGTGGGGACTGAGACCTCTGAATTTTCAGGGTGCCCT  
GATGAGGACGTTGAAAGGGATAATTTCAACTCTGAGACTTCTAAGAGT

+

FFFF:FFFFFFFFFFFFFFFFFFFFFFFFFFFFFFFFFFFFFFFFFFFFFFFFFFFFFFFFFFFFFFFFFFFF  
FFFFFFFFFFFFFFFFFFFF,FFFFFFFFFFFFFFFFFFFFFFFFFFFFFFFFFFFFFFFFFFFFFFFFFFFF

@A00721:190:HGJW7DSXY:4:1662:21974:20071\_2:N:0:TCTGCAAG+GCTGCACT  
CAGAAACGTAACAAGAATAAAGGTAGGAAGGGGAGAAAACAGAACAAAGCGAGCGGTTGAAGAGAA  
AACTGATATGGTTGCGGCTGATCGTACCCCAATTCTGCTAGAAAGAT

+

:F:FF,FFF:FFFFFFFFFFFF:FFFFF:FFFFFFFFFFFF,FFFF:FFFFFFFF:F,,FFFFFFFFFFFFFFFF  
FFFFF:FFFFFFFFFFFF,FFFFFFFFFFFFFFFFFFFF:FFFFFFFFFFFFFFFF

@A00721:190:HGJW7DSXY:4:2571:20202:8328\_2:N:0:TCTGCAAG+GCTGCACT  
TACCACTGATCTTCCAGAGTTACGTAGTGGTCGTTCTTTTGGTGATTTTATCAAAGAGAAAGTTTCTG  
CTAGTCGCGACGATAGTATTTATCGGAGTGATATTAACAAGTTAACT

+

FFFFFFFFFFFFFFFFFFFFFFFFFFFFFFFFFFFFFFFFFFFFFFFFFFFFFFFFFFFFFFFFFFFFFFFF  
FF:FFFFFFFFFFFFFFFFFFFFFFFFFFFFFFFFFFFFFFFFFFFFFFFFFFFFFFFFFFFFFFFF

@A00721:190:HGJW7DSXY:4:2418:1714:26318\_2:N:0:TCTGCAAG+GCTGCACT  
TGTTGAAGTACCGCAACATGGATCAGTTTTCCAAAAAGCTATTAATAGCAGTTGCGGGGCTATAATAC  
CGCCTCCAGATTACTCTAAACTGAATCCACTCTCTTGGGATATAAATG

+

FFFFFFFFFFFFFFFFFFFFFFFFFFFFFFFFFFFFFFFFFFFFFFFFFFFFFFFFFFFFFFFFFFFFFFFF  
FFFFFFFFFFFFFFFFFFFFFFFFFFFFFFFFFFFFFFFFFFFFFFFFFFFFFFFFFFFFFFFF

@A00721:190:HGJW7DSXY:4:2628:1624:24345\_1:N:0:TCTGCAAG+GCTGCACT  
TTCTTCATGAAGATCTTCGAGTGTTTTATAGTGAGTTATTCTTGCGAAGGTTCAAGTCGATTGATTTT  
GTTGACTACGATCTCTCTTGTAAATAAGAAGTTCTTCGCAGTTGAATCTCCACCAGGTGGAGGGAAGAC  
CAC

+

FFFFFFFFFFFFFFFFFFFFFFFFFFFFFFFFFFFFFFFFFFFFFFFFFFFFFFFFFFFFFFFFFFFFFFFF  
FFFFFFFFFFFFFFFFFFFFFFFFFFFFFFFFFFFFFFFFFFFFFFFFFFFFFFFFFFFFFFFFFFFFFFFF  
FFF

@A00721:190:HGJW7DSXY:4:2226:27181:14121\_1:N:0:TCTGCAAG+GCTGCACT  
GACTTTTGTGCAATTTTTCGCAAAAGGTCTTGAAGTACGTATTGTCACTGCTAATCGTAATTCGCGAG  
AAGAGATAGTGACTAAAGTTTTGGCACTTCTAGTTCATCGCGGTATTTGTGAAATTAAGACAGACGTG  
AAA

+

FFFFFFFFFFFFFFFFFFFFFFFFFFFFFFFFFFFFFFFFFFFFFFFFFFFFFFFFFFFFFFFFFFFFFFFF  
FFFFFFFFFFFFFFFFFFFFFFFFFFFFFFFFFFFFFFFFFFFFFFFFFFFFFFFFFFFFFFFFFFFFFFFF  
FFF

@A00721:190:HGJW7DSXY:4:2174:16821:32503\_1:N:0:TCTGCAAG+GCTGCACT  
TCGTATTAGAACAGCTGATTCTTATTGCATGAACGTCGCTGAGGTCAAACCTGTGGACGTTCTTTTCA  
TCGACGAATTATTCATGATTCACGCTGGTCAGACCCTTTTTCTTACACATCTACTTAAGGCGGCTTAT  
ACC

+

:FFFFFFFFFFFFFFFFFFFFFFFFFFFFFFFFFFFFFFFFFFFFFFFFFFFFFFFFFFFFFFFFFFFFFFFF  
FFFFFFFFFFFFFFFFFFFFFFFFFFFFFFFFFFFFFFFFFFFFFFFFFFFFFFFFFFFFFFFFFFFFFFFF  
FFF

@A00721:190:HGJW7DSXY:4:2373:10149:21605\_1:N:0:TCTGCAAG+GCTGCACT  
GTGATTCCAATCAAATCGGATTCATCAATCGTATTGATCTCCAAGTCGAAACTACTTCAACATCAAC  
GACATCATTCTTGATGAGTGTCGTTCTTATCGAAGTCTCAGTTATCGCTGCCC GCCGACGTTTGTGCG  
CGA

+

FFFFFFFFFFFFFFFFFFFFFFFFFFFFFFFFFFFFFFFFFFFFFFFFFFFFFFFFFFFFFFFFFFFFFFFF  
FFFFFFFFFFFFFFFFFFFFFFFFFFFFFFFFFFFFFFFFFFFFFFFFFFFFFFFFFFFFFFFFFFFFFFFF  
FFF

@A00721:190:HGJW7DSXY:4:1620:9091:11162\_1:N:0:TCTGCAAG+GCTGCACT  
ACGGCAGAAAAATTTCTCCTGCTTGTAATTCGAGAGAGGACACTATGGAAATTAGACCTATCAGATGT  
CTTGACGACTTCGAATTTGAGGACGGAGTTAAATATATTACTTTCACTCAAGGTGAAAAGTTTGAAAT  
TAA

+

FFFFFFFFFFFFFFFFFFFFFFFFFFFFFFFFFFFFFFFFFFFFFFFFFFFFFFFFFFFFFFFFFFFFFFFF  
FFFFFFFFFFFFFFFFFFFFFFFFFFFFFFFFFFFFFFFFFFFFFFFFFFFFFFFFFFFFFFFFFFFFFFFF  
FFF

@A00721:190:HGJW7DSXY:4:1351:30318:14951\_1:N:0:TCTGCAAG+GCTGCACT  
TAAGAGTAAGGTTAAATGTGAAGATGCTCAGACTATTTCATGAAGTTCAAGGTAATACTTACCAGCACG





AAAAACGCACTAAAACGTCTTCGACAACAGCAGGGGTTTTCGAATAGTGATAGCCACCCGCCTTACAG  
AGG

+

FFFFFFFFF:FFFFFFFF:FFFFFFFFFFFFFFFFFFFFFFFFFFFFFFFFFFFFFFFFFFFFFFFF  
FFFFFFFFFFFFFFFFFFFFFFFFFFFFFFFFFFFFFFFFFFFFFFFFFFFFFFFFFFFFFFFFFFFF  
FFF

@A00721:190:HGJW7DSXY:4:2339:26268:20556\_1:N:0:TCTGCAAG+GCTGCACT  
GACTTTGGTACCACCTTTCTACTGTCTGTCTCGCCTCTTGAATGAAGTTTAAATGCTTAACAACAA  
TGATAGTGAATTTATACCTACAATCATTGGTTTTTCTAATAATGATGACACTATTGTTTATGGATATG  
ATG

+

F,FFFF,,FF,F,,:FFF::F,,FFF,FFF:FFFFFF:FF,FF:FF:F:FFFFFFF,FFF:FFFF,,:  
FFFFFFFF,,FFFFFFFF:F:FFFF:FFFFFFFFFFFFFFFFFFFF:FFFFF,:F,FFFFF::FF,F:  
:FF

@A00721:190:HGJW7DSXY:4:1336:6894:19664\_1:N:0:TCTGCAAG+GCTGCACT  
TCTGGATTCTCAGTTTACAAGGACCTTAAGCGATGGATCGGGGTTAATTCTAAAACATTACCCGAAAG  
ACGTGCTAAATTAACCATTGTACGATGTCGTCTGTCTCGCGATCACTTTTCTACTAAGAATTGGTC  
CTA

+

FFFFFFFFFFFFFFFF:FFFFFFFFFFFFFFFFFFFFFFFFFFFFFFFFFFFFFFFFFFFFFFFFFFFF  
FFFFFFFFFFFFFFFFFFFFFFFFFFFFFFFFFFFFFFFFFFFFFFFFFFFFFFFFFFFFFFFFFFFF:FFFFFFFF  
FFF

@A00721:190:HGJW7DSXY:4:1467:23204:23766\_1:N:0:TCTGCAAG+GCTGCACT  
AGACGTGTGCTCTTCCGATCTATCGTTTCTTTCTTTATCTCTTTGGTTGTTAGGGATTTTGAGAGAGT  
GAAAGGCTTCAATTGTAGTGGTTTGGTCGTTTCAGTACCCAGTCAGTATACCTCTACGCAAAGATATT  
TCA

+

FFFFFFFFFFFFFFFFFFFFFFFFFFFFFFFFFFFFFFFFFFFFFFFFFFFFFFFFFFFFFFFFFFFF  
FFFFFFFFFFFFFFFFFFFFFFFFFFFFFFFFFFFFFFFFFFFFFFFFFFFFFFFFFFFFFFFFFFFF  
FFF

@A00721:190:HGJW7DSXY:4:2325:31891:6872\_2:N:0:TCTGCAAG+GCTGCACT  
GAGGAACGTACCGGATTACCTGTCTTTCATATTATGAATGAACCTTCGGCCGCTCTCTTTGCTTCGAT  
GTTGGATGTCAAGAAGGGTTCAGAATGGGATTCCAACGTAGTTTATGA

+

FFFFFFFFFFFFFFFF:FFFFFFFF:FF:FFFF,FFFFFFFFFFFFFFFFFFFFFFFF:FFFFFF:F::  
:FFFFFFFF:,FFFF:FFFFFFFFFFFFFFFF::,F:FFFFFF:FFF

@A00721:190:HGJW7DSXY:4:2224:12084:6230\_1:N:0:TCTGCAAG+GCTGCACT  
TACTTTCGATACTTCTATCGTCTTACGTTACGTAATTACTATAGTGTTATTTATTCTGGTGGTGATG  
ATAATCTTGGAGTCGTGACGTTGATGAAGCTATAAGAGCGTTCTTATTACGGCGCACTTCTTTACCC  
GCC

+

FFFFFFFFFFFFFFFFFFFFFFFFFFFFFFFFFFFFFFFF:FFFF:FFFFFFFFFFFFFFFFFFFFFFFF  
FFFFFFFFFFFFFFFFFFFFFFFFFFFFFFFFFFFFFFFFFFFFFFFFFFFFFFFFFFFFFFFFFFFF  
FFF

@A00721:190:HGJW7DSXY:4:1176:18991:1783\_2:N:0:TCTGCAAG+GCTGCACT  
GTTTCACAACTGAAGGAGGAGTTTCTGTTACTGGAAAACCTCGTCAATACTTTTCAATAATATACG  
TCTTGAACCTACTTATGACGATCTAGTGAAATTAACGCGTCCTTTCT

+

FFFFFFFFFFFF:FFFFFFFFFFFFFFFFFFFFFFFFFFFFFFFFFFFFFFFFFFFFFFFFFFFF  
FFFFFFFFFFFFFFFFFFFFFFFF:FFFFFFFFFFFFFFFF:FFFFFFFF

@A00721:190:HGJW7DSXY:4:1414:6723:15264\_1:N:0:TCTGCAAG+GCTGCACT  
TACTATTATGAACAAAGTTATCAAAGAGAGTGGCATTCAAGGCAAACTTACCCTGATTCCGGCCGGTG  
GTAGCTCATTTCTACCAGGGGCTATTACTCTTGCTGAAACAGCTATTAAAGCTGTTGAGCGGGTAATT  
ACA

+  
FFFFFFF,FFF,F,FFFFFFF:FFFFFF,FFFFF:FFFFFFFFFFFFFFFFFFFF:FFF,FFFFFFF:FFF:F  
FFF,FFFFFFFFFFFF:FFF:FF::FFFFFFF:FFFFFFFFF:FFFF:FFFFFFFFFFFF,FFFFFF  
FFF  
@A00721:190:HGJW7DSXY:4:2122:11722:8923\_2:N:0:TCTGCAAG+GCTGCACT  
ATCGCTGAAGGATGTGCACTCTTTTCTGCTACTTTAACGGAGCGTAGTGTACTCTTCGTCGATTGTAT  
CAACAGTAACATTACTTCTAATAAAGGTCTCTATCAAGCTCGTATTAT  
+  
FFFFFFFFFFFFFFFFFFFFFFFFFFFFFFFFFFFFFFFF:FFFF:FFFFFFFFFFFFFFFF:FFF:F  
FFFFFFFFFFFFFFFFFFFFFFFF: :FFFFFFFFFFFFFFFF  
@A00721:190:HGJW7DSXY:4:1547:29550:9142\_1:N:0:TCTGCAAG+GCTGCACT  
TTACCGTTGAAGGCTAAACTCCAAGGTAATTATGAAGACTGTGATTTATCTTTCACTCTGGCCTTGTA  
TGAGGGTGTCTTAATCGTAACATTAATAATTTCAATCTTCTTAAAAAGAAGATAGAGAGTCATACTT  
TGG  
+  
FFFFFFFFFFFFFFFF:FFFFFFFFFFFFFFFFFFFFFFFFFFFFFFFF:FFFFFFFFFFFFFFFFFFFF  
FFFFFFFFFFFFFFFFFFFFFFFFFFFFFFFFFFFF, :FFFF:FFFFFFFFFFFFFFFFFFFF  
FFF  
@A00721:190:HGJW7DSXY:4:1446:19849:12352\_2:N:0:TCTGCAAG+GCTGCACT  
TGAAGTGGACACCTCTGGTAGTATCGAAGTAAAGATAACCAATAAGGAAGGAGCTTATACTATGGTTG  
AATCAACTAAGCATACTACTTTTGCTTTGATTACTCTACCGCCTTACA  
+  
FFFFFFFFFFFFFFFFFFFFFFFFFFFFFFFFFFFF,FFFFFFFFFFFFFFFFFFFFFFFFFFFF  
FFFFFFFFFFFFFFFFFFFFFFFFFFFFFFFFFFFFFFFFFFFF  
@A00721:190:HGJW7DSXY:4:2655:27670:15718\_2:N:0:TCTGCAAG+GCTGCACT  
TAAAGAGTCGATTAAACAAGTTGTACTTATCAATGATTTTATCGCTGGTTGTTATCTCGAAAAGTCTC  
TTCTAAAAGGAACGTCAAGTTCTAACCCAAAGAGAATATCTAAATATT  
+  
FFFFFFFFFFFF:FFFFFF:,FFFF:,FFF,FF::, :FFFF,FF,:FFF,F:FF:F,:FF,F,FF,:  
FF,FFFFFFFF:FF::,F,:FF,FFF,FF,F,FF:::FFFF,:FF,: ,F  
@A00721:190:HGJW7DSXY:4:1403:14579:23923\_2:N:0:TCTGCAAG+GCTGCACT  
AGACGTTGCTTGTGCTTCCTCTTTAATGGCACTACCTCGGTACAATCTTACTTGAACGAAGGCGA  
CCTGTTCCGGAGTTTTTACGGGATCCGGAATGTTCTGTCTATATTAGG  
+  
FFFFFFFFFFFFFFFFFFFFFFFFFFFFFFFFFFFFFFFFFFFFFFFFFFFFFFFFFFFFFFFFFFFF  
FF:FFFFFFFFFFFFFFFF:FFFFFFFFFFFFFFFFFFFF  
@A00721:190:HGJW7DSXY:4:1639:26838:12085\_2:N:0:TCTGCAAG+GCTGCACT  
TCGAACGTCAACGTTACCGAGTTTCGTTTCGTACCTTGATGCTGACTTTCGTCAATATGATTTGATC  
TGGTTGCTCAATTCTAAGCGTGTCCGCTTAGTGCGAGGCCTCTCTTC  
+  
FFFFFFFFFFFFFFFFFFFFFFFFFFFFFFFFFFFF:FFFF:FFFFFFFFF:FFFFFFFFFF  
FFFFFFFFFFFFFFFFFFFFFFFFFFFFFFFFFFFFFFFFFFFF  
@A00721:190:HGJW7DSXY:4:1506:21404:19523\_2:N:0:TCTGCAAG+GCTGCACT  
ATATTTGGATGATCTTGATAAAGAACTTCATGAATTTTCAGAGGATGAAAAATTTCTTCCTTGATT  
TTAATATAAAGAATCTTTACCAGGACTCCTACTACAGGAGGCAGTCTT  
+  
FFFFFFFFFFFFFFFFFFFFFFFFFFFFFFFFFFFF:FFFFFFFFFFFFFFFF,FF:FFFFFFFFFFFF  
F:FFFFFFFFFFFFFFFFFFFFFFFFFFFFFFFF:FF:FFFFFFF  
@A00721:190:HGJW7DSXY:4:2616:15492:32456\_1:N:0:TCTGCAAG+GCTGCACT  
ATTTGTTGTAATAGGGTCATCAACTTAGAACTCGAACTCTAAGTGGTAATACTGTCTTTCCAAGCTT  
ACCTGTATCTTCAATGAAATTGGACTCTTCGATAGGGGACATTTTATCGTGGGCTTTCGTAAAGGAA  
GAT  
+  
FFFFFFFFFFFF, :FFFF:FFFFFFFFFFFFFFFFFFFFFFFFFFFFFFFFFFFFFFFFFFFF

FFFFFF:FFFFFFFFFFFFFFFFFFFFFFFFFFFFFFFFFFFFFFFFFFFFFFFFFFFFFFFFFFFFFFFF  
FFF

@A00721:190:HGJW7DSXY:4:2362:24379:12618\_1:N:0:TCTGCAAG+GCTGCACT  
CTACTAATGGCGTTGGCCTAGTGGATGTTATTAGTGACATCTGGTCAATTTCTGTTTTTAGGTGGTCTT  
TATTCTATTATTGATTTTTATGAGATTGATACGTTAACAGAAGATGATGTTAGAGTAGAATTCCTGAA  
GAG

+

FFFFFF:FFFFFFFFFFFFFFFFFFFFFFFFFFFFFFFFFFFFFFFFFFFFFFFFFFFFFFFFFFFFFFFF:FFFF:FFFFFFFFFFFFFFFF  
FFFFFFFFFFFFFFFFFFFFFFFFFFFFFFFFFFFFFFFFFFFFFFFFFFFFFFFFFFFFFFFFFFFFFFFF:FFF  
FFF

@A00721:190:HGJW7DSXY:4:2335:9299:18662\_2:N:0:TCTGCAAG+GCTGCACT  
CCAACCTTCTTGACAATTTCTTCAATCCTTCGATAATAGTTAAATCTAGGATTATGTCTGTGTTGAAA  
GACTTTCTACCGATAAGGGTCACTAGTCTTACACAATTAAGAAATAAT

+

F:FFFFFFF,:FFFFFFF:FFFFFFFFFFFFFFFFFFFFFFFFFFFFFFFFFFFFFFFFFFFFFFFFFFFFF  
FFFFFFFFFFFFFFFFFFFFFFFFFFFFFFFFFFFFFFFFFFFFFFFFFFFFFFFFFFFFFFFF

@A00721:190:HGJW7DSXY:4:1243:28519:12399\_2:N:0:TCTGCAAG+GCTGCACT  
ACTATCTAAAGATTGAAGGAAAATTTTATCCTCGTTTAACTTACTTAGACTTTCCTACGATACAAATG  
ATAACTTCTAATTTACGTTTGCTACTCAGAGCTGGTCTCTCAGCAA

+

FFFFFFFFFFFFFFFFFFFFFFFFFFFFFFFFFFFFFFFFFFFFFFFFFFFFFFFFFFFFFFFFFFFFFFFF:FF  
FFFFFFFFFFFF:FFFFFFFFFFFF:FFFFFFFFFFFFFFFFFFFFFFFFFFFFFFFF

@A00721:190:HGJW7DSXY:4:2622:16902:2206\_2:N:0:TCTGCAAG+GCTGCACT  
TCCTCAGGAGTCCCGGCATTTGATAATAATGACGACTTTCGTCATAATCGCTGCATATTACGGATTAC  
ACGGTACCAGCGCATCTCGTGTGCGAGCCTCGACCCGATTATATGGTAT

+

FFFFFFFFFFFFFFFFFFFFFFFFFFFFFFFFFFFFFFFFFFFFFFFFFFFFFFFFFFFFFFFFFFFFFFFF:FFFFF,FFFFFFFFFFFFFFFFFFFFFFFFFFFFFFFFFFFFFFFF:FFFFF  
FFFFFFFFFFFFFFFFFFFFFFFFFFFFFFFFFFFFFFFFFFFFFFFFFFFFFFFFFFFFFFFF

@A00721:190:HGJW7DSXY:4:2658:31711:24627\_2:N:0:TCTGCAAG+GCTGCACT  
AGAATTCTTAATTATAATATTCAACCTCAAAAGTTACGTGTTTACAGTAACGAGATCACACATTTTGA  
GAACTAACTATGTTATGTTCTCTGATCATTTTGACAATCTCTTCTTAT

+

:FFFFFFFFFFFFFFFFFFFFFFFFFFFFFFFFFFFFFFFFFFFFFFFFFFFFFFFFFFFFFFFFFFFFFFFF:FFFFF  
FFFFFFFFFFFF:FFF:FFFFFFFFFFFFFFFF:FFFFFFFFFFFF:FFFF

@A00721:190:HGJW7DSXY:4:1233:17888:1251\_1:N:0:TCTGCAAG+GCTGCACT  
TAAATAATATTACTAATGGCAAATAGTGGAAGGCTCCAGTCAACACTAGTTCGAGTGCTGCTTTGGA  
TTACGATGACGTGAGAATAGGTGAAGGGATAGTTTTTACCTCGACCAACATTAAGGCGGCGGCGACTA  
ATC

+

FFFFFFFFF:FFFFFFFFFFFFFFFFFFFFFFFFFFFFFFFFFFFFFFFFFFFFFFFFFFFFFFFFFFFFFFFF  
FFFFFFFF:FFFFFFFFFFFFFFFFFFFFFFFFFFFFFFFFFFFFFFFFFFFFFFFFFFFFFFFFFFFFFFFF  
FFF

@A00721:190:HGJW7DSXY:4:2440:26883:4147\_1:N:0:TCTGCAAG+GCTGCACT  
AGGACACTTCGAAACTGAATAATGATGCACTACAAACAAGTATCGCTAATCATCTGAAAAAGGCTCTA  
AAGGACACTATACAATATCCAGACGACGACGAAGCTTATACTACTTTAATTTTGGGTATTATGTGGAG  
ATA

+

FFFFFF:FFF:FFFFFFFFFFFFFFFF,FFFFFFFFFFFFFF:FFFFFF,FFFFFFFFF:FFF:FFFFFFF  
FFFFFFFFFFFFFFFFFFFFFFFFFFFFFFFFFFFFFFFFFFFFFFFFFFFFFFFFFFFFFFFFFFFFFFFF  
FFF

@A00721:190:HGJW7DSXY:4:1136:4237:11397\_2:N:0:TCTGCAAG+GCTGCACT  
CCACATTTTGGTCAAGTCAATCCGTTGAGAAAATTTCTTAGAGGATATTCGCCATTGTGGTACGAATT  
GGTCCAACATTTACCACCAAATTTCTTTTGATACAACCTCTAGCCTTCAA

+



FFFFFF:FFFFFFF:FF,FFFF,:FFFF:FFFF,:F:F,FFF:FFFFFF:FFFFFFF:F,FFF:  
F:FF:FF:F:FFFFFFF:FFF,FFFF,F:FF,:FF,:FF:FFF:FFF:

@A00721:190:HGJW7DSXY:4:1674:24153:29262\_1:N:0:TCTGCAAG+GCTGCACT  
ACCAGATTGGTTCGAACCCGTTGATGCTATGTCAGAAGAAGCTATTCAAGCTTGTGTTTTAAAGACTG  
CAGAGGCTGTCAAACAAGCCCAGACTCAAGGAGTCCAATCACAGGTTTTGAATTTAGCTCAACTGGGG  
AGA

+

F,:F:FFFFFFF:FF,:FFF:FFFF:F,:FFFF:FFF,FFFFFFFFFFFFFFFFFFFF  
FFFFFFFFFFFF:FFFFFFFF:FFF,FFFFFFFF:F,,FFF:FFFFFF:F,:FFFFFFFF  
FFF

@A00721:190:HGJW7DSXY:4:2610:3260:6198\_1:N:0:TCTGCAAG+GCTGCACT  
CTTGACAGAGTGACTGGAGTTCAGACGTGTGCTCTTCCGATCTGAAAAGTCCGGAGTATATTGTATGTT  
AATAGATAGTGGGATAATAGTTCTACCGATACGTAGTGAACGCGTTCGTAGAACCAAGTACTTTCCGT  
CTG

+

F:FFFFFFFFFFFFFFFFFFFFFFFFFFFFFFFF:FFFFFFFFFFFFFFFF:FFFFFFFF:F:F  
F:FFFFFFFFFFFFFFFFFFFFFFFF:FFFFFFFFFFFFFFFF:FFFFFFFF:FFFFFFFF  
FFF

@A00721:190:HGJW7DSXY:4:2125:32325:18709\_1:N:0:TCTGCAAG+GCTGCACT  
ACCGATAGGAGTTGTATAGTTGAAGATGTGGCTTTAGACGATAATCCTTTAAGGACTATGTTGACTGA  
CGAAGATTTTCCAACAGATTTGTCTACGTTGCAGATCGCCACTCCAAACACTATATACATTATAAAAT  
ATA

+

F:FFFF:FFFFFFFFFFFFFFFFFFFFFFFF:FFFFFFFFFFFFFFFFFFFFFFFFFFFFFFFF  
FFFFFFFFFFFFFFFFFFFFFFFFFFFFFFFFFFFFFFFFFFFFFFFFFFFFFFFFFFFFFFFF  
FFF

@A00721:190:HGJW7DSXY:4:2321:10764:21731\_1:N:0:TCTGCAAG+GCTGCACT  
ATAACTTTTGTACCAATTCTTGGCTTTCAACGAAGTCTCTGATTTTATTAATCATTACTTTAACGA  
TCTCTCGGTCATTTACTCTGTACTTGATCTACGTCGTTTAACTGTGGAACAACCTTTACTTAGAATG  
ACT

+

FFFF:F:FFFFF:,FFFFFFFFF:FFFFFFFFFFFFFFFF:FFFFFFFFFFFFFFFFFFFF  
FFFFFFFFFFFFFFFFFFFFFFFFFFFFFFFFFFFFFFFFFFFFFFFFFFFFFFFFFFFFFFFF:FFFFFFFFF:F  
FFF

@A00721:190:HGJW7DSXY:4:2212:6234:18020\_2:N:0:TCTGCAAG+GCTGCACT  
TCTTATATTATTTACAATAGTTAATATCATATTAGTAATACTCACTATCGTTTTCTGCTTTTCTTAG  
CTAATAGATTAATAAAGGATGAGTACGAAAACCAACTCTTCGTTACGA

+

FFFFFFFFFFFFFFFFFFFFFFFFFFFFFFFFFFFFFFFFFFFFFFFFFFFFFFFF:FFFFFFFFFFFFF  
:F:FFFFFFFFFFFFFFFF:FFFFFFFFFFFFFFFF:FFFFFFF

@A00721:190:HGJW7DSXY:4:2247:25274:1360\_1:N:0:TCTGCAAG+GCTGCACT  
TATAATATTTTATTCTATACCCATCTCAACGAGGAAAAAGCGATTTTTCGTTCACTTAATA  
CACTAAGAGAAAAGCCGAAAACGACTCGAAACGAGACGCCGTAGATCAAAGTCCCTTCTAACTTTAG  
ATT

+

FF,F:::,FF,,,,:F,FF,,F,:F,,,,F,,,,,F,FF,,,,,FFF,F,,,,:F:F,,F::,,,  
FFF,F,,,,,:,,,,,FFFFFF:FFFFFFF:FFFFFF,FFFFFFFFFFFF,F,:FFFFFFFFF  
FFF

@A00721:190:HGJW7DSXY:4:1674:27651:34945\_2:N:0:TCTGCAAG+GCTGCACT  
CAGTTATTTATGTTGTACTTTTTATAATTTATAACCTTCTTATACTTTTGGGTATGTTTTGTGAAAAA  
CATGAGATACCAAGTCTATCGAAGACATTATCTCTTATGTACTTATT

+

FFFFFFFFFFFFFFFFFFFFFFFF:FFF:FFFFFFFFFFFFFFFFFFFFFFFF:FFFFFFFFFFFFFFFF  
FFFFF:FFFF:FFFFFFFFFFFFFFFFFFFFFFFF,FFFFFF:FF:FF

@A00721:190:HGJW7DSXY:4:2545:28863:27273\_2:N:0:TCTGCAAG+GCTGCACT  
TATTCCTTTAACTGTGTATGAGGAGGATTTATAATGCTTTTCGATAGTGATTGTTATCAATTTAAATA  
CATTACTGTTTCAAATCATCTTTACTCACAGACTCCGAAAATGGTTTC

+

FFFFFFFFFFFFFFFFFFFFFFFFFFFFFFFFFFFFFFFFFFFFFFFFFFFFFFFFFFFFFFFFFFFFFFFF  
FFF,FFFFFFFFFFFFFFFFFFFFFFFFFFFFFFFFFFFFFFFFFFFFFFFFFFFFFFFFFFFFFFFF  
@A00721:190:HGJW7DSXY:4:1270:25165:11287\_1:N:0:TCTGCAAG+GCTGCACT

TATTTATTAAACGAACCTATTATCCGATTCTTCGAGGGTATCACTACCACTGATCTGCCGACTTTAGTC  
AAGGAACCTCAATTCCTTCGATGTTTATATTTTTCTATAAGGGAAAATAGCAATAATCAAATTCGAC  
AAA

+

FFFFFFFFFFFFFFFFFFFFFFFFFFFFFFFFFFFFFFFFFFFFFFFFFFFFFFFFFFFFFFFFFFFFFFFF  
FFFFFFFFFFFFFFFFFFFFFFFFFFFFFFFFFFFFFFFFFFFFFFFFFFFFFFFFFFFFFFFFFFFFFFFF  
FF:

@A00721:190:HGJW7DSXY:4:1540:25789:27586\_2:N:0:TCTGCAAG+GCTGCACT  
ATTTCAGAACTCTCTCCGATCACCTTGGTGTGATCTCCCGAGGATCTTTTCAATAAGATGTATGATG  
ATAATCTACTATTTTTAAATAGTGATATTCAGCGTATACTTGAATACT

+

F:FFFFFFFFFFFFFFFFFFFFFFFFFFFFFFFFFFFFFFFFFFFFFFFFFFFFFFFFFFFFFFFFFFFFFFFF  
FFFFFFFFFFFFFFFFFFFFFFFFFFFFFFFFFFFFFFFFFFFFFFFFFFFFFFFFFFFFFFFFFFFFFFFF  
@A00721:190:HGJW7DSXY:4:2322:1244:10848\_1:N:0:TCTGCAAG+GCTGCACT

CTTGGTCTATTTACCGCAAAAAGTGGGAAGAGGTCTATGATATTTATTTACTTATACTTTAAATAGC  
ACCGATTATAACTTGACTGTTGATAATATTACAATAGCTCTTCTCAGAAGATTAGAGAAGTAACCGG  
TGA

+

FFFFFFFFFFFFFF:FFFFFFFFFFFF:FFFFFFFFFFFFFFFFFFFFFFFFFFFFFFFFFFFFFFFFFFFF  
FFFFFFFFFFFFFFFFFFFFFFFFFFFFFFFFFFFFFFFFFFFFFFFFFFFFFFFFFFFFFFFFFFFFFFFF  
FFF

@A00721:190:HGJW7DSXY:4:2158:15646:9956\_2:N:0:TCTGCAAG+GCTGCACT  
CATTGATTTACTTTTACCGTTAGAACTGAAAAAGATTCTTTTCGAAAAGAAACCTATAAGTTACAAAC  
GATTCTTCGACTATATTAAAGAAATAAAAATACTTCAAGTACCTGAAC

+

FFFFFFFFFFFFFF:FFFFFFFFFFFF:FFFFFFFFFFFFFFFFFFFFFFFFFFFFFFFFFFFFFFFFFFFF  
FFFFFFFFFFFFFFFFFFFFFFFFFFFFFFFFFFFFFFFFFFFFFFFFFFFFFFFFFFFFFFFFFFFFFFFF

@A00721:190:HGJW7DSXY:4:1511:27995:27336\_2:N:0:TCTGCAAG+GCTGCACT  
TGGTATAATGTGTCTTACAAATAGAACCTTCACTCTCGTAATGAGAGTGTATTCCTTAATATTCTAG  
TAACCGCTATGTGGGCATTACTAGGATTTATCACACTCCTAAATTTGA

+

,FFFFFFFFFFFFFFFFFFFFFFFFFFFFFFFFFFFFFFFFFFFFFFFFFFFFFFFFFFFFFFFFFFFFFFFF  
FFFFFFFFFFFF,FFFFFFFFFFFFFFFFFFFFFFFFFFFFFFFFFFFFFFFFFFFFFFFFFFFFFFFF  
@A00721:190:HGJW7DSXY:4:1478:22453:6558\_2:N:0:TCTGCAAG+GCTGCACT

TGCTAGGAAAATTTTAGAAAACTCCATTGTATAGTTCAAGGAGTACTTAATTCAATAGCTTTAGTAT  
TATTTACTATCGCCTTTATTGAAAATTGTATAAGAGTTAATTGCTTAC

+

FFFFFFFFFFFFFFFFFFFFFFFFFFFFFFFFFFFFFFFFFFFFFFFFFFFFFFFFFFFFFFFFFFFFFFFF  
FFFFFFFFFFFFFFFFFFFFFFFFFFFFFFFFFFFFFFFFFFFFFFFFFFFFFFFFFFFFFFFFFFFFFFFF

@A00721:190:HGJW7DSXY:4:1278:25952:27868\_2:N:0:TCTGCAAG+GCTGCACT  
ACCATAACCTACCATGACCAATCATCGCTCCAACCTGGCACGCCAGACGTAGGGTCAAACCTACTACCG  
CCGGTCGGCAGATCGGCACCACTGGTCTCTACGTTACGGGACCCGCTG

+

FFFFFFFFFFFFFFFFFFFFFFFFFFFFFFFFFFFFFFFFFFFFFFFFFFFFFFFFFFFFFFFFFFFFFFFF  
FFFFFFFFFFFFFF:FFFFFFFFFFFFFFFFFFFFFFFFFFFFFFFFFFFFFFFFFFFFFFFFFFFFFFFF

@A00721:190:HGJW7DSXY:4:2559:31638:24095\_1:N:0:TCTGCAAG+GCTGCACT  
CCTTCCCACTCTAGATCTGCACAGAAGAAGGCTGAAGGTCGTTACCGGACGACCACTCAAAGGAAAC



FFFFFFFFFFFFFFFFFFFFFFFFFFFFFFFFFFFFFFFFFFFFFFFFFFFFFFFFFFFFFFFFFFFFFFFF  
FFF

@A00721:190:HGJW7DSXY:4:1219:10456:9768\_2:N:0:TCTGCAAG+GCTGCACT  
AGAGGGGAGCTCTGAAAAGGAACTTCGTCAGAAGATGAGGAAGTCTAAGAGGAGGAGTTTGAGGAAG  
GCTCTAGAGAAGATCTCACCACCTGGAGAAGGCAAGTGGAGAGTCCAG

+  
FFF:FFFF,FFFFFFFFFFFFFFFF:FFF:FFFF:FFF:::,FFFFFFFFFFFFFFFF,FF:FFFF:  
FFFFFFFF:F:FF::FFFFFFFFFFFFFFFF:FFFFFFFF:FFFFFFFF

@A00721:190:HGJW7DSXY:4:1377:24505:23202\_1:N:0:TCTGCAAG+GCTGCACT  
CTTCCGATCTTTTGAAGCAGGGGTTACCACTTCCTAAGGTGGATGAGGGAGGTTGTTTCTTTGGAGTT  
TTAGATAATCTTTTGAAGAAGGGTTCATAGAGCCAGCAAGAGAAGCTTATATGCTGGTTTAAGTGATGA  
TTA

+  
FFFFFFFFFFFFFFFFFFFFFFFFFFFFFFFF:FFFF:FFFFFFFFFFFFFFFFFFFFFFFFFFFFFFFF  
FFFFFFFFFFFFFFFFFFFFFFFFFFFFFFFFFFFFFFFFFFFFFFFFFFFFFFFFFFFFFFFF:FFFFFFFF  
FFF

@A00721:190:HGJW7DSXY:4:1441:12897:1470\_1:N:0:TCTGCAAG+GCTGCACT  
ATTTAGGTCAACTTGGGGTTTCGAATGTCATTAGTGCCTTACGATTGAAAGAGGTCCTTTTGAGTATC  
GACAGATCTTTCGATCTTGAGGACGTACATTTAACGTGGCAGAATTCGGTAACTTACCATATTGTTCC  
TTC

+  
FFFFFFFFF:FFFFFFFFFFFFFFFFFFFFFFFFFFFFFFFFFFFFFFFFFFFFFFFFFFFFFFFFFFFF  
FFFFFFFFFFFFFFFFFFFFFFFFFFFFFFFFFFFFFFFFFFFFFFFFFFFFFFFFFFFFFFFFFFFFFFFF  
FFF

@A00721:190:HGJW7DSXY:4:1169:12933:10582\_1:N:0:TCTGCAAG+GCTGCACT  
TTTAACTTTGACTCAACTACTCCGATCAGATCCGGATGGTTTGATTGGTATGGACTACTCGACTTTTG  
ATCTGGAGTTGTCTAGGGTCATGGCAGATACTACCGATAAGGTGAAAAATATGCAGGTCAAAGATTCT  
GTA

+  
FFFFFFFFFFFFFFFFFFFFFFFFFFFFFFFFFFFFFFFFFFFFFFFFFFFFFFFFFFFFFFFFFFFFFFFF  
FFFFFFFFFFFFFFFFFFFFFFFFFFFFFFFFFFFFFFFFFFFFFFFFFFFFFFFFFFFFFFFFFFFFFFFF  
FFF

@A00721:190:HGJW7DSXY:4:1234:1325:10050\_2:N:0:TCTGCAAG+GCTGCACT  
GTTTTGGCCGACTTTAACTATTCTAAGAGTCTTTATGATTCAAAACCTATCGTTGTCTGACCTTACAA  
GGTTGAGGAGACTTTACAGCGGCTTATTGTCGCGCAGTTTCCAGAATT

+  
FFFFFFFFFFFFFFFFFFFFFFFFFFFFFFFFFFFFFFFFFFFFFFFFFFFFFFFFFFFFFFFFFFFFFFFF  
FFFFFFFFFFFFFFFFFFFFFFFFFFFF:F::FFF:FFFFFFFFFFFFFFFFFFFFFFFF

@A00721:190:HGJW7DSXY:4:1322:11198:22013\_1:N:0:TCTGCAAG+GCTGCACT  
TATCTTGAATGCTCACGCAGTCGCAGCCATATCGAGACTATGTTATAATCACTTGTTAAAGTACAGAT  
TTAGTGATTTAGATATTATTGATATTGGAGCGATATTCGTTTTCATATCCAACACTCCTTGAATGGA  
GTA

+  
F,FFF,,F:FFF,FF:FF,FFFFFFFFF,:FF,FFFFFFFFFFFFFFFFFFFFFFFF:F,FFFF,F:FFF  
FF:FFFF:F,F::FFFFFFFF:FFF:FF,F,,FFFF:FF:FF:FF,FFFF:,FFF,FFFF:F::F  
FF,

@A00721:190:HGJW7DSXY:4:2601:12554:3756\_2:N:0:TCTGCAAG+GCTGCACT  
CCTATTCTTGATGTGAAAGATGCATCGAGGTATACGTCTAGGAACAGTGAGTTGGAACGTACCTACTC  
ACGAGACGTCATGAAAGCTATCGGCGGAAGCAAAATGTGTCGTTCTG

+  
F:,FFFF,FFFF,::F,,F:,F,,FFF,,FF::FF,F,,:FFFF,,:,F,,,FFF:FF:FFF,FF,F  
FF,FFF:F:FFF,FF::F::FFF:,F::F,FFFF:F:::,F:FFFFFF

@A00721:190:HGJW7DSXY:4:2559:30400:2221\_2:N:0:TCTGCAAG+GCTGCACT  
AAGCCTCAGTTGCGATAGCTGTAGAGGTATACGATATCTCTTGATGATGTAGCCACTATAATGCTT

+

@A00721:190:HGJW7DSXY:4:1445:4616:8547\_2:N:0:TCTGCAAG+GCTGCACT

+

@A00721:190:HGJW7DSXY:4:2212:18701:12555\_2:N:0:TCTGCAAG+GCTGCACT

+

@A00721:190:HGJW7DSXY:4:1509:1588:24815 1:N:0:TCTGCAAG+GCTGCACT

 $+$ 

@A00721:190:HGJW7DSXY:4:1466:32633:22968\_1:N:0:TCTGCAAG+GCTGCACT

+

@A00721:190:HGJW7DSXY:4:1452:15881:15280 1:N:0:TCTGCAAG+GCTGCACT

 $+$ 

@A00721:190:HGJW7DSXY:4:2232:18340:7545 1:N:0:TCTGCAAG+GCTGCACT

+

@A00721:190:HGJW7DSXY:4:2121:12084:20134 1:N:0:TCTGCAAG+GCTGCACT

+

[illegible]

@A00721:190:HGJW7DSXY:4:2647:19922:13072\_1:N:0:TCTGCAAG+GCTGCACT  
CTTGGTATTTCTGAAATAGTTTATCAGAGCGTCATTTTCTTTGGGATCTTTCCTCTGGTAAGGGAAT  
TATTAAATCATTCTTCTCACTCTTGACGAGAATTATTACTGTTTTCTCTACCCATAACTTCTTTTTCA  
AAA

@A00721:190:HGJW7DSXY:4:2445:21802:30013\_2:N:0:TCTGCAAG+GCTGCACT  
TACAGAGTGCAGTCGTTTCAACACTTATCACCCTTTTCAAAGGAAAATAATTGGTGATGAAAATACG  
TATGTCGGTGGGGTTCTCAAGGCTCTCATCGCCACTGGGATTCTAAGG

@A00721:190:HGJW7DSXY:4:2323:26946:5008\_2:N:0:TCTGCAAG+GCTGCACT  
TTTGGTCCTTACGTCTTAAGTAATTTGGATGTTGTGCGAAACTATCAGGTTCTTGTCACGATTCTTAA  
AAGAAGTTTATTAATAAACTTCAGAGTCTCTTGGAAGTCCAGGTAGCTAA

@A00721:190:HGJW7DSXY:4:2377:25084:25457\_2:N:0:TCTGCAAG+GCTGCACT  
ACCTCTGTTGGTAGAGGAGTTGAGAGAATTACTCAGATTCAATCTGGCATCACTGAACGTCTACAACG  
AGTTAGGGAGTGGCTAGGTTTTAAAGATCCTTTGCACAAGCAATACC

@A00721:190:HGJW7DSXY:4:1645:2121:28338\_2:N:0:TCTGCAAG+GCTGCACT  
GTCGCGGAAAACGATGAAGATTTCCACACTGTTGAGAATCTTCTGATGCTGAATTTGAGGAAAATTT  
TTCGGAAGTTTTTGGTATAAATCCTGATGGCTCAGTACAGGGAGGAGG

@A00721:190:HGJW7DSXY:4:2514:20410:36652\_2:N:0:TCTGCAAG+GCTGCACT  
ACCTTCTTTTATCATTGCAACAGGACTTTGAGAAGACTGTTGAAATGGACAAAATCTGGGATCATAGG  
TATGTGTCACGCTACACTCGAAATATGGGCCCTCATAAGGAAGTATAG

@A00721:190:HGJW7DSXY:4:2121:13268:1297\_2:N:0:TCTGCAAG+GCTGCACT  
GGAAGATCTCTACAGAGATTATCGAGAGTTGTGATCTAGTTCTAAATTTAGGTCGACGGACTTTAGCA  
ACTTTAGATAAAATCTTTCCGGGCTCAATGACCTTTGCTATGTACGTG

@A00721:190:HGJW7DSXY:4:2323:19343:30295\_1:N:0:TCTGCAAG+GCTGCACT  
TTAGTTCATGAAGTTCTTACACTTCTCGCGACTAATGTCAGCTTCACTACAAAGGCGTTACGTAAAGT  
AGTTTTCACGCTTTATCTTAAAGCATTACCACCAATTTAGCACTTTTTGAATATGACAGAAGCTCGC  
CAT

[illegible]

@A00721:190:HGJW7DSXY:4:2466:7139:23844\_2:N:0:TCTGCAAG+GCTGCACT  
CCAGTTAGAGTTCTTCTAACCAGGACTGATGGTGAGATTCTTTTACCTTTTGGAGGTCCAGGAACCTT  
TACTCCTAGTGTCTTTTCTAGAGTCCAAGGACGTTTCCGTCGGAGGAT

+

FFFFFFFFFFFFFFFFFFFFFFFFFFFFFFFFFFFFFFFFFFFFFFFFFFFFFFFFFFFFFFFFFFFFFFFF  
FFFFFFFFFFFFFFFF:FFFFFFFFFFFFFFFFFFFFFFFFFFFFFFFFFFFFFFFF

@A00721:190:HGJW7DSXY:4:1623:7780:36292\_1:N:0:TCTGCAAG+GCTGCACT  
TCAATAACACTCTATTGAATCCCTTTTCCACGATGAAAGCTCTTTATGAGGTGCTCCATGCAAATTTA  
CAGTTCTCTTTGGTGATATCGCCTCTGTCTTTCTCTTTAATCGTGAGGTTACGAGAGTTTCGTAC  
TTG

+

FFFFFFFFFFFFFFFFFFFFFFFFFFFFFFFFFFFFFFFFFFFFFFFFFFFFFFFFFFFFFFFFFFFFFFFF  
FFFFFFFFFFFFFFFFFFFFFFFFFFFFFFFFFFFFFFFFFFFFFFFFFFFFFFFFFFFFFFFFFFFFFFFF  
FFF

@A00721:190:HGJW7DSXY:4:2606:20735:9846\_1:N:0:TCTGCAAG+GCTGCACT  
TTTTGATAAATTTGTTGGAATCGATAATGATACTGACGAAGTTCTATTACCACCCTTGTCAATTGATA  
CAAACATTCTAGGTGATGCTTTCTTAGAGGCTCGTCTAGCCGCTGAGATTCTGCTTACCTATTTACAA  
TCT

+

FFF:FFFFFFFF:FFFFFFFFFFFFFFFFFFFFFFFFFFFFFFFFFFFFFFFFFFFFFFFFFFFFFFFF  
:FFF,FFFFFFFFFFFFFFFFFFFFFFFFFFFFFFFFFFFFFFFFFFFFFFFFFFFFFFFFFFFFFFFF  
FFF

@A00721:190:HGJW7DSXY:4:1141:10429:20149\_2:N:0:TCTGCAAG+GCTGCACT  
GGGAAATGGTGGTAGTCAGTTTACTACTTTTCTTCCCTCCCCTTTTTCGATTGGATTCGACGGGGTC  
TTCGTCTCACGACTAATTTGATAAGGTTTTTCTTTTATGGGACTCTTG

+

FFF:FFFFFFFFFFFFFFFFFFFFFFFFFFFFFFFFFFFFFFFFFFFFFFFFFFFFFFFFFFFFFFFF  
FFFFFFFFFFFFFFFFFFFFFFFFFFFFFFFFFFFFFFFFFFFFFFFFFFFFFFFFFFFFFFFF

@A00721:190:HGJW7DSXY:4:1270:18177:15374\_1:N:0:TCTGCAAG+GCTGCACT  
ATGTAGGTCTCCTAGTACTTAAGGGTTTATGTTTCGGTTTCAGCTGGATGGATCTTTTGATGGTATGT  
TTCACATTGCGTGATCACTTCCCGTGGACTTGGAAGAGATTAAACATAAAATCCAGCGATTCTATTA  
TGT

+

FFFFFFFFFFFFFFFFFFFFFFFFFFFFFFFFFFFFFFFFFFFFFFFFFFFFFFFFFFFFFFFFFFFFFFFF  
FFFFFFFFFFFFFFFFFFFFFFFFFFFFFFFFFFFFFFFFFFFFFFFFFFFFFFFFFFFFFFFFFFFFFFFF  
FFF

@A00721:190:HGJW7DSXY:4:2633:25373:24111\_2:N:0:TCTGCAAG+GCTGCACT  
TCGATGATGTTGGGGCTGTGGGGATTAACCTCCCTCGTGAAACTTACGACGATGTTCTCGCTCGCATT  
TCACAAGGATTACTAAGTCTGAGATCTGCCACTTCTAATTTTAGGAAA

+

FFFFFFFFFFFFFFFFFFFFFFFFFFFFFFFFFFFFFFFFFFFFFFFFFFFFFFFFFFFFFFFFFFFFFFFF  
FFFFFFFFFFFFFFFFFFFFFFFFFFFFFFFFFFFFFFFFFFFFFFFFFFFFFFFFFFFFFFFF

@A00721:190:HGJW7DSXY:4:1526:5448:36573\_2:N:0:TCTGCAAG+GCTGCACT  
AAGTTCATGAGGATGTCTTGGTCGAAAAATATCGCCGGGAACCTCTAATAGAGGATCCTGATGACATT  
ATTTCAACGGATACCGATCTCAGTTCTACCACAGAAACCGTCTCAGGA

+

FFFFFFFFFFFFFFFFFFFFFFFFFFFFFFFFFFFFFFFFFFFFFFFFFFFFFFFFFFFFFFFFFFFFFFFF  
FFFFFF:FFFFFFFFFFFFFFFFFFFFFFFFFFFFFFFFFFFFFFFF

@A00721:190:HGJW7DSXY:4:2443:27715:30639\_2:N:0:TCTGCAAG+GCTGCACT  
CTGATTCGGAATTAGAGAAAGACGACCTTCTTGTGGGGACTGAGACCTCTGAATTTTACGGGTGCCCT  
GATGAGGACGTTGAAAGGATAATTTCAACTCTGAGACTTCTAAGAGT

+

F:FF:FFFF:FFFFFFFFFFFFFFFFFFFFFFFFFFFFFFFFFFFFFFFFFFFFFFFFFFFFFFFF  
FFFF:FFFFFFFFFFFFFFFFFFFFFFFFFFFFFFFFFFFFFFFFFFFFFFFFFFFFFFFF  
FFFF:FFFFFFFFFFFFFFFFFFFFFFFFFFFFFFFFFFFFFFFFFFFFFFFFFFFFFFFF

@A00721:190:HGJW7DSXY:4:2225:14136:17425\_2:N:0:TCTGCAAG+GCTGCACT  
CAGAAACGTAACAAGAATAAAGGTAGGAAGGGGAGAAAACAGAACAAGCGAGCGGTTGAAGAGAA  
AACTGATATGGTTGCGGCTGATCGTACCCCAATTCTGCTAGAAAGAT

+

FFFFFFFFF,,, :FFFF:FFF,FFF:FF,F:FF,,,FFF:FFFFFFFF,FFF,FFFFFFFF:FFFF  
F:FFFF:F,:FFFFFFFF,F:FFF:FF,FFFFFFFFF:FFF,F:FF

@A00721:190:HGJW7DSXY:4:2628:4472:29403\_2:N:0:TCTGCAAG+GCTGCACT  
TACCACTGATCTTCCAGAGTTACGTAGTGGTCGTTCTTTTGGTGATTTTATCAAAGAGAAAGTTTCTG  
CTAGTCGCGACGATAGTATTTATCGGAGTGATATTAACAAGTTAAACT

+

FFFFFFFFFFFFFFFFFFFFFFFFFFFFFFFFFFFFFFFFFFFFFFFFFFFFFFFFFFFFFFFFFFFFFFFF  
FFFFFFFFFFFFFFFFFFFFFFFFFFFFFFFFFFFFFFFFFFFFFFFFFFFFFFFFFFFFFFFF

@A00721:190:HGJW7DSXY:4:2660:26811:12101\_2:N:0:TCTGCAAG+GCTGCACT  
TGTTGAAGTACCGCAACATGGATCAGTTTTCCAAAAGCTATTAATAGCAGTTGCGGGGCTATAATAC  
CGCCTCCAGATTACTCTAAACTGAATCCACTCTCTTGGGATATAAATG

+

FFFFFFFFF: :FFFFFFFFFFFFFFFFF: :FFFFFFFFFFFFFFFFF: :FF:FF:F: :FFFF:FFFF  
F:FFFFFFFFFFFFFFFFF, :FF:F:FFFFF: :,, :FFFFFFFFF:

@A00721:190:HGJW7DSXY:4:2635:16613:13479\_1:N:0:TCTGCAAG+GCTGCACT  
TTCTTCATGAAGATCTTCGAGTGTTTTATAGTGAGTTATTCTTGCGAAGGTTCAAGTCGATTGATTTT  
GTTGACTACGATCTCTCTTGTAAATAAGAAGTTCTTCGCAGTTGAATCTCCACCAGGTGGAGGGAAGAC  
CAC

+

FFFFFFFFFFFFFFFFFFFFFFFFFFFFFFFFFFFFFFFFFFFFFFFFFFFFFFFFFFFFFFFFFFFFFFFF  
FFFFFFFFFFFFFFFFFFFFFFFFFFFFFFFFFFFFFFFFFFFFFFFFFFFFFFFFFFFFFFFFFFFFFFFF  
FFF

@A00721:190:HGJW7DSXY:4:2646:2844:23829\_1:N:0:TCTGCAAG+GCTGCACT  
GACTTTTGTGCAATTTTCGCAAAAGGTCTTGAAGTACGTATTGTCACTGCTAATCGTAATTCGCGAG  
AAGAGATAGTGACTAAAGTTTGGCACTTCTAGTTCATCGCGGTATTTGTGAAATTAAGACAGACGTG  
AAA

+

FFFFFFFFFFFFFFFFFFFFFFFFFFFFFFFFFFFFFFFFFFFFFFFFFFFFFFFFFFFFFFFFFFFFFFFF  
FFFFFFFFFFFFFFFFFFFFFFFFFFFFFFFFFFFFFFFFFFFFFFFFFFFFFFFFFFFFFFFFFFFFFFFF  
FFF

@A00721:190:HGJW7DSXY:4:2174:16839:32503\_1:N:0:TCTGCAAG+GCTGCACT  
TCGTATTAGAACAGCTGATTCTTATTGCATGAACGTCGCTGAGGTCAAACCTGTGGACGTTCTTTTCA  
TCGACGAATTATTGATGATTACGCTGGTCAGACCCTTTTCTTACACATCTACTTAAGGCGGCTTAT  
ACC

+

FFFFFFFFFFFFFFFFFFFFFFFFFFFFFFFFFFFFFFFFFFFFFFFFFFFFFFFFFFFFFFFFFFFFFFFF  
FFFFFFFFFFFFFFFFFFFFFFFFFFFFFFFFFFFFFFFFFFFFFFFFFFFFFFFFFFFFFFFFFFFFFFFF  
FFF

@A00721:190:HGJW7DSXY:4:2638:5141:7921\_1:N:0:TCTGCAAG+GCTGCACT  
GTGATTCCAATCAAATCGGATTCATCAATCGTATTGATCTCCAAGTCGAAACTACTTCAACATCAAC  
GACATCATTCTTGATGAGTGTCGTTCTTATCGAAGTCTCAGTTATCGCTGCCCGCCGACGTTTGTGCG  
CGA

+

FFFFFFFFF:FFFFFFFFFFFFFFFFFFFFFFFFFFFFFFFFFFFFFFFFFFFFFFFFFFFFFFFFFFFFF  
FFFFFFFFFFFFFFFFFFFFFFFFFFFFFFFFFFFFFFFFFFFFFFFFFFFFFFFFFFFFFFFFFFFFFFFF  
FFF

@A00721:190:HGJW7DSXY:4:2322:30065:31986\_1:N:0:TCTGCAAG+GCTGCACT  
ACGGCAGAAAAATTTCTCCTGCTTGTAATTCGAGAGAGGACACTATGGAAATTAGACCTATCAGATGT  
CTTGACGACTTCGAATTTGAGGACGGAGTTAAATATATTACTTTCACTCAAGGTGAAAAGTTTGAAT  
TAA



+  
FFFFFFFFFFFFFFFFFFFFFFFFFFFFFFFFFFFFFFFFFFFFFFFFFFFFFFFFFFFFFFFFFFFFFFFF  
FFFFFFFFFFFFFFFFFFFFFFFFFFFFFFFFFFFFFFFFFFFFFFFFFFFFFFFFFFFFFFFFFFFFFFFF  
FFF

@A00721:190:HGJW7DSXY:4:1372:16161:30796\_1:N:0:TCTGCAAG+GCTGCACT  
TAAGAGTAAGGTTAAATGTGAAGATGCTCAGACTATTTCATGAAGTTCAAGTAATACTTACCAGCACG  
TTCGGCTGGTTAGAATTAAACCTCAAGATGACCCTGTTTTTGCATCACAACACATATTACCGTTGCT  
CTA

+  
FFFFFFFFFFFFFFFFFFFFFFFFFFFFFFFFFFFFFFFFFFFFFFFFFFFFFFFFFFFFFFFFFFFFFFFF  
FFFFFFFFFFFFFFFFFFFFFFFFFFFFFFFFFFFFFFFFFFFFFFFFFFFFFFFFFFFFFFFFFFFFFFFF  
F:F

@A00721:190:HGJW7DSXY:4:1501:24813:5415\_1:N:0:TCTGCAAG+GCTGCACT  
CTTTACTATACTTTGTTATCAATGTAAAGTTAAACGATGCTACTTGTGAGAGGATCAATCACAGTAAG  
GAACTGTCACGTTTAGCACGGGAGGTTGCAGATTCAACCCCTTATATCGAGGCTATCGAGGACGATGA  
GTA

+  
:FFFFF,:FFFFFFFFFFFF,FFF,FFF,,F:,FF:FFFFFFFFFFFFFFFFFFFF:FF:FFFFFFFFFFFF  
FFFFFFFFFFFF:FFFFFFFFFFFFFFFFFFFF:FFFFFFFFFFFFFFFF:FFFFFF:FFF:FFFFF::FFFF  
FFF

@A00721:190:HGJW7DSXY:4:1340:19425:31469\_2:N:0:TCTGCAAG+GCTGCACT  
GACGACAAGCCTCAAGAGGGTAGAGGACCACCTGGATCTTCTACTGTCTCTGCCTTCCAAGATTTCTT  
AGAAGAGGTTATTCCTGGAACCACCTTAACGTCACCTCGGTAATCTTTC

+  
FFFFFFFFFFFFFFFFFFFFFFFFFFFFFFFFFFFFFFFFFFFFFFFFFFFFFFFFFFFFFFFFFFFFF:FFFFFFFFFFFF  
FFFFFFFFFFFFFFFFFFFFFFFFFFFF:FFFFFFFFFFFFFFFFFFFFFFFFFFFFFFFFFFFF

@A00721:190:HGJW7DSXY:4:1664:31521:28526\_2:N:0:TCTGCAAG+GCTGCACT  
TGTCGATCGAATTAAGATCAAGGCTAATACCTTTATAGGTAAGAAGCCCTTGAGCCGCGTAGTCAGC  
GCGTTTAGCTGTATCATCAGTCAGAGTATACCCGATAGGGTACCGAGT

+  
FFFFFFF:FFFFFFFFFFFFFFFFFFFF:FFFFFFFFFFFFFFFFFFFFFFFFFFFFFFFFFFFFFFFFFFFF  
FFFFFFFFFFFFFFFFFFFFFFFFFFFFFFFFFFFFFFFFFFFFFFFFFFFFFFFFFFFFFFFFFFFF

@A00721:190:HGJW7DSXY:4:1636:8883:32471\_2:N:0:TCTGCAAG+GCTGCACT  
ATATTTATTCTTATGAGGCTCGAACTTCAACGTTTTTCAACGGAAGACATATCGCACCCGAAATT  
TTTGGGCAGAATGCTCTTAACGCGGTTCTTGAACGGTGTTTTGATCAG

+  
FFFFFFFFFFFFFFFFFFFFFFFFFFFFFFFFFFFFFFFFFFFFFFFFFFFFFFFFFFFFFFFFFFFFF  
FFFFFFFFFFFFFFFFFFFFFFFFFFFFFFFFFFFFFFFFFFFFFFFFFFFFFFFFFFFFFFFFFFFF

@A00721:190:HGJW7DSXY:4:2150:1181:33254\_2:N:0:TCTGCAAG+GCTGCACT  
TAAAGTTATAGGAGACTCAGTTAACCTGAGAGCTCCTCAATTGATAGATTGGGTCAACAATAGGGACG  
CTAGTATACTTCGTAAAGTCGACAGCGAAATGGTCAATATTGATAATT

+  
FFFFFFFFFFFFFFF:FFFFFFFFFFFFFFFFFFFF:FFFFFFFFFFFFFFF:FFFFFFFFFFFFF  
FFFFFFFFFFFFFFFFFFFFFFFFFFFFF,FFFFF,FFFFFFFFFFFF:FFFFF

@A00721:190:HGJW7DSXY:4:2647:8712:4492\_1:N:0:TCTGCAAG+GCTGCACT  
TGACCTATTTTAAGCTCATGGTGAAAAGGGAAGCTAAGGTTAACTTGATGCTTCAGCCTTTTCGAAG  
CATAACCCCGCACAGAATATCGTTTATCACGCAAATTTATTAATGCAATTTTCGGACCTATCTTTAA  
GGT

+  
FFFFFFFFFFFFFFFFFFFFFFFFFFFFFFFFFFFF:FFFFFFFFFFFFFFFFFFFFFFFFFFFFFFFFFFFF  
FFFFFFFFFFFFFFFFFFFFFFFFFFFFFFFFFFFFFFFFFFFFFFFFFFFFFFFFFFFFFFFFFFFF  
FFF

@A00721:190:HGJW7DSXY:4:1324:32615:4523\_1:N:0:TCTGCAAG+GCTGCACT  
AGCTCTTCTCTCTTAGGAGGTCATGATGACTACTATAAGGGTGAAATCGATTTTTTCGAAGTTTGAC

AAATCTCAAGATTTCTTTTGTAAGCCTATGAGATAAAGATGTATTCTTATTTAGGCTTCGATGCTGA  
ATT

+

FFF,F::FFFFFFFF,FFFFFFFF:FF:FFFFFFFFFFFFFFFF:FFFFFFFF,FFFFFFFFFFFFFFFF  
FFFFFFFFFFFFFFFFFFFFFFFFFFFFFFFFFFFFFFFFFFFFFFFFFFFFFFFFFFFFFFFF  
FFF

@A00721:190:HGJW7DSXY:4:2152:3495:9236\_2:N:0:TCTGCAAG+GCTGCACT  
AGTGCCAGTGAATATTTTGTACGCCAGGAGTATCCATAACGATTTGTCAATTACCACCTTGCTCA  
ACGACGAAGTGAACGGCCAACACTTTCTTTGGTAATTGTATGATCAC

+

FFFFFFFFFFFFFFFFFFFFFFFFFFFFFFFFFFFFFFFFFFFFFFFFFFFFFFFFFFFFFFFF  
FFFFFFFFFFFFFFFFFFFFFFFFFFFFFFFFFFFFFFFFFFFFFFFFFFFFFFFF

@A00721:190:HGJW7DSXY:4:1173:7084:5995\_2:N:0:TCTGCAAG+GCTGCACT  
TATCACTTTATTATGACCTTGGAAGTTTTCGGCTGTGGTTGTCGCTGGGACGATTCCATTCTGTTT  
TCAAAGACTCCAATAACTGATCATTCTGATCATATGATTTTGGACAAT

+

FFFFFFFFFFFFFFFFFFFFFFFF:FFFFFFFFFFFFFFFFFFFFFFFFFFFFFFFF  
FFFFFFFFFFFFFFFFFFFFFFFF:FFFF:FFFFFFFFFFFFFFFFFFFFFFFF:F

@A00721:190:HGJW7DSXY:4:1274:8097:19085\_2:N:0:TCTGCAAG+GCTGCACT  
ATCGTTAAGTTAGGTAAACCCCTAACCGATGTTACTCTTGTAGGACTTTGGGAGAGATTCTGTTAGTTT  
TAAAGACTATACTAAATATCTCCACTACGAGGTTGTTGTTTGGCGATT

+

FFFFFFFFFFFFFFFFFFFFFFFFFFFFFFFFFFFFFFFFFFFFFFFFFFFFFFFF:FFFFFFFF:FFFFFFFF:F  
FFFFFFFFFFFFFFFFFFFFFFFFFFFFFFFF:FFFFFF:,FFFFFFFFFFFFFF

@A00721:190:HGJW7DSXY:4:1358:27082:27477\_2:N:0:TCTGCAAG+GCTGCACT  
ATATTCGATATTCGATTGAGGGTCGTTATACCTATTCGGCTATCTGTGCTTTGAATTGTATAAGATCA  
AATTTTAAACGATTCCGAGAGGTTTATCCTGATGTGGAGGGAGTTCTT

+

FFFFFFFFFFFFFFFFFFFFFFFFFFFFFFFFFFFFFFFFFFFFFFFFFFFFFFFF  
FFFFFFFF:FFFFFFFFFFFFFFFFFFFFFFFFFFFFFFFFFFFFFFFF

@A00721:190:HGJW7DSXY:4:1645:1461:28354\_1:N:0:TCTGCAAG+GCTGCACT  
ACCTTTCCTTGTGAAAATTTTGATGCGGTTTCATAAGATTATCAGTAATCCTGATTCTACTACGGATT  
CATGGACCTTCCATCCTGTACCTCTTCTGGAGAGACGTATCTCAAAGATCGACTTCGAGACAGGTGAT  
ATT

+

FFFFFFFFFFFFFFFFFFFFFFFF:FFFFFFFFFFFF:FFFFFFFFFFFFFFFF:FFFFFF:FFFF,FFFFF:  
FFFFFFFFFFFFFFFFFFFFFFFFFFFFFFFFFFFFFFFFFFFFFFFF:FFFFFFFFFFFFFFFFFFFF  
FFF

@A00721:190:HGJW7DSXY:4:2202:22616:23938\_2:N:0:TCTGCAAG+GCTGCACT  
CTAAATTCGGTAACGTTGCGTGCGCTTTATTTTAAAAAGCTCCCTCCTCTCGCAAGTTTGATCTGAT  
ACTTATAACGAAAGGACTTGAGTCTTTTATCAGTCTCTGACTTGACC

+

FF:FFFF:FFF:,F,:FFFFFFFFFFFF,:FFFFFFFF:F,FFFFFFFF::F,F:, ,FFF,FFF  
:FFF,F,F,:FFFFFF:FF,F,F:FF,: ,FFFFFFFF,F,: ,:FFFF

@A00721:190:HGJW7DSXY:4:2225:23086:5494\_2:N:0:TCTGCAAG+GCTGCACT  
TAAATGACGATCATTAAGACTCTCTTCTCTTTGTTTCTTCTTTGCACTGATTTTCTCATCAGC  
TTGTGTTTTACCTAATCTGTGTTTTACGATAACAACATCATGTTGAT

+

FFFFFFFFFFFFFFFFFFFF,FFFF::FFFFFF:FFFFFFFFFFFFFFFF:FFFFFFFFFFFFFFFF  
FFFFFFFFFF:FFFFFFFFFFFFFFFF:FFFFFFFF:FFF,FFFFFF

@A00721:190:HGJW7DSXY:4:1274:28483:17315\_1:N:0:TCTGCAAG+GCTGCACT  
CCGAAAGGCGAAGTTTGGGAATTTGAAGCTCAGGGTGAAGCACACGTTTGACCGTGACGAACTGTGG  
TGTTCTTGATCTACGTTACGGATATACTCTCCTTGAGTTCACCTCGTAAGGACACTACCACTTATTACG  
ATA

+  
FFFFF:FFFFFFFFFFFFFFFF:FFFFF:FFFF:FFFFFFFFFFFFFFFFFFFFFFFF:FFFFFFFFFFFFFFFF  
FFF:FFFFFFFFFFFFFFFFFFFFFFFFFFFFFFFFFFFFFFFFFFFFFFFFFFFFFFFFFFFFFFFF  
FFF  
@A00721:190:HGJW7DSXY:4:2203:24804:23782\_1:N:0:TCTGCAAG+GCTGCACT  
TCTCTATTTTAAGTTTTGTCTTCCTTGTGTCTTATTCTATTAATCACTCATTTTAGTGAGATTATT  
AAAAACGCACTAAAACGTCTTCGACAACAGCAGGGGTTTTCGAATAGTGATAGCCACCCGCTTACAG  
AGG  
+  
FF:FFFFFFFFFFFFFFFFFFFFFFFFFFFFFFFFFFFFFFFFFFFFFFFFFFFFFFFFFFFFFFFF  
FFFFFFFFFFFFFFFFFFFFFFFFFFFFFFFFFFFFFFFFFFFFFFFFFFFFFFFFFFFFFFFF  
FFF  
@A00721:190:HGJW7DSXY:4:2411:28763:4554\_1:N:0:TCTGCAAG+GCTGCACT  
GACTTTGGTACCACCTTTTCTACTGTCTGTCTCGCCTCTTCGAATGAAGTTTAAATGCTTAACAACAA  
TGATAGTGAATTTATACCTACAATCATTGGTTTTTCTAATAATGATGACACTATTGTTTATGGATATG  
ATG  
+  
FFFFFFFFFFFFFFF:FFFFFFFFFFFFFFFFFFFFFFFFF:FFFFFFFFFFFFFFFFFFFFFFFFF  
FFFFFFFFFFFFFFFFFFFFFFFFFFFFFFFFFFFFFFFFF:FFFFFFFFFFFFFFFFFFFFFFFFF  
FFF  
@A00721:190:HGJW7DSXY:4:1465:7907:33974\_1:N:0:TCTGCAAG+GCTGCACT  
TCTGGATTCTCAGTTTACAAGGACCTTAAGCGATGGATCGGGTTAATTCTAAAACATTACCCGAAAG  
ACGTGCTAAATTAACCATTGTACGATGTCGTCTGTCTCGCGCATCACTTTTACTAAGAATTGGTC  
CTA  
+  
FF:FFFFFFFFF:FFFFFFFFFFFFFFFFFFFFFFFFFFFFFFFFFFFFFFFFFFFFFFFFFFFFFFFF  
FFFFFFFFFFFFFFFFFFFFFFFFFFFFFFFFFFFFFFFFF:FFFFFFFFFFFFFFFFFFFFFFFFF  
FFF  
@A00721:190:HGJW7DSXY:4:1575:31485:1971\_1:N:0:TCTGCAAG+GCTGCACT  
AGACGTGTGCTCTTCCGATCTATCGTTTCTTCTTTATCTCTTTGGTTGTTAGGGATTTTGAGAGAGT  
GAAAGGCTTCAATTGTAGTGGTTTGGTCGTTTCAGTACCCAGTCAGTATACCTCTACGCAAAGATATT  
TCA  
+  
F:F:FFFFFFFFF,FFFFFFFFFFFFFFFFFFFFFFFFFFFFFFFFF:FFFFFFFFFFFFFFFFF  
FFFFF:FFFFFFFFFFFFF,FFFFFFFFFFFFFFFFF:FFFFFFFFFFFFFFFFF:FFFFF  
FFF  
@A00721:190:HGJW7DSXY:4:2358:2257:9283\_2:N:0:TCTGCAAG+GCTGCACT  
GAGGAACGTACCGGATTACCTGTCTTTCATATTATGAATGAACCTTCGGCCGCTCTCTTGTTCGAT  
GTTGGATGTCAAGAAGGGTTCAGAATGGGATTCCTACGTAGTTTATGA  
+  
FFFFFFFFF:FFFFFFFFFFFFFFFFF:FFFFF:FFFFFFFFFFFFFFFFFFFFFFFFF:FFFFF  
F,FFFFFFFFFFFFFFFFFFFFF,FFFFFFFFF:FFFFFFFFF  
@A00721:190:HGJW7DSXY:4:2364:21793:21574\_1:N:0:TCTGCAAG+GCTGCACT  
TACTTTCGATACTTCTATCGTCTTACGTTACGGTAATTACTATAGTGTTATTTATTCTGGTGGTGATG  
ATAATCTTGGAGGTCGTGACGTTGATGAAGCTATAAGAGCGTTCCTTATTACGGCGCACTTCTTACCC  
GCC  
+  
FFFFFFFFFFFFFFFFFFFFFFFFFFFFFFFFF,FFFFFFFFFFFFFFFFFFFFFFFFF  
FFFFFFFFFFFFFFFFFFFFFFFFFFFFFFFFF:FFFFFFFFFFFFFFFFF  
FFF  
@A00721:190:HGJW7DSXY:4:1408:17553:15107\_2:N:0:TCTGCAAG+GCTGCACT  
GTTTCACAACCTGAAGGAGGAGTTTCTGTACTGGAAAACCTCGTCAATACTTTTCAATAATATACG  
TCTTGAACCTCACTTATGACGATCTAGTGAAATTAACGCGTCCTTTTCT  
+

[illegible]



@A00721:190:HGJW7DSXY:4:1156:18891:36213\_2:N:0:TCTGCAAG+GCTGCACT  
CCACATTTTGGTCAAGTCAATCCGTTGAGAAAATTTCTTAGAGGATATTCGCCATTGTGGTACGAATT  
GGTCCAACATTTACCACCAAATTCCTTTTGATACAACCTCTAGCCTTCAA

@A00721:190:HGJW7DSXY:4:2340:24831:17002\_1:N:0:TCTGCAAG+GCTGCACT  
ACCAGATTGGTTCGAACCCGTTGATGCTATGTCAGAAGAAGCTATTCAAGCTTGTGTTTTAAAGACTG  
CAGAGGCTGTCAAACAAGCCCAGACTCAAGGAGTCCAATCAAAGGTTTTGAATTTAGCTCAACTGGGG  
AGA

@A00721:190:HGJW7DSXY:4:1230:1362:27806\_2:N:0:TCTGCAAG+GCTGCACT  
TTCTACTTACAAAGGACAATTCAGTTTCATTAATTCTACGAAAAGTCCGGAGTATATTGTATGTTAA  
TAGATAGTGGGATAATAGTTCTACCGATACGTAGTGAACGCGTTCGTA

@A00721:190:HGJW7DSXY:4:2171:3504:33270\_1:N:0:TCTGCAAG+GCTGCACT  
ACCGATAGGAGTTGTATAGTTGAAGATGTGGCTTTAGACGATAATCCTTTAAGGACTATGTTGACTGA  
CGAAGATTTTCCACAGATTTGTCTACGTTGCAGATCGCCACTCCAAACACTATATACATTATAAAAT  
ATA

@A00721:190:HGJW7DSXY:4:2353:22914:25081\_1:N:0:TCTGCAAG+GCTGCACT  
ATAACTTTTGTACCAAATTCTTGGCTTTCAACGAAGTCTCTGATTTTATTAATCATTACTTTAACTGA  
TCTCTCGGTCATTTACTCTGTACTTGATCTACGTCGTTTAACTGTCGGAACAACCTTTACTTAGAATG  
ACT

@A00721:190:HGJW7DSXY:4:2502:31367:31140\_2:N:0:TCTGCAAG+GCTGCACT  
TCTTATATTATTTACAATAGTTAATATCATATTAGTAATACTCACTATCGTTTTCTGCTTTTTCTTAG  
CTAATAGATTAATAAAGGATGAGTACGAAAACCAACTCTTCGTTACGA

@A00721:190:HGJW7DSXY:4:2424:29821:22200\_1:N:0:TCTGCAAG+GCTGCACT  
TATAATATTTTTATACTCAACACCCAACACACCGAGTATAACGCTATTTTTCCGACCTTAACTAAATC  
CCCCAAGAGAACACCCCCAAACGACTCGAAACCGAGACGCCGTAGATCAAAGTCCCTTCTAACTTTAG  
ACT

@A00721:190:HGJW7DSXY:4:2534:3115:25488\_2:N:0:TCTGCAAG+GCTGCACT  
CAGTTATTTATGTTGTACTTTTTATAATTTATAACCTTCTTATACTTTTGGGTATGTTTTGTGAAAAA

CATGAGATACCCAAGTCTATCGAAGACATTATCTCTTATGTACTTATT  
+  
FFFFFFFFFFFFFFFF:FFFFFFFFFFFFFFFFFFFFFFFFFFFFFFFF:FFFFFFFFFFFFFFFF  
FFFFF:FFFFF,FFFFFFFF:FFF:FFF:FFFFFFFF:FFFFFFFF  
@A00721:190:HGJW7DSXY:4:1147:21160:3568\_2:N:0:TCTGCAAG+GCTGCACT  
CTGTGTATGAGGAGGATTTATAATGCTTTTCGATAGTGATTGTTATCAATTTAAATACATTACTGTTT  
CAAATCATCTTTACTCACAGACTCCGAAAATGGTTTCAAATGAGGTCA  
+  
FFFFFFFFFFFFFFFFFFFFFFFFFFFFFFFFFFFFFFFF:FFFFFFFFFFFFFFFFFFFFFFFFFFFFFFFF  
FFFFFFFFFFFF:FFFFFFFFFFFFFFFFFFFFFFFFFFFFFFFF:FFFFFFFFFFFF  
@A00721:190:HGJW7DSXY:4:1237:18448:23109\_2:N:0:TCTGCAAG+GCTGCACT  
TTAAACGAACATTATCCGATTCTTCGAGGGTATCACTACCACTGATCTGCCGACTTTAGTCAAGGAA  
CTTCAATTCCTTCGATGTTTATATTTTTCTATAAGGGAAAATAGCAAT  
+  
FFFFFFFFFFFFFFFFFFFFFFFFFFFFFFFFFFFFFFFF:FFFFFFFFFFFFFFFF  
FFFF:FF::FFFFFFFFFFFFFFFFFFFFFFFFFFFFFFFF:FFFFFFFF:FFFF  
@A00721:190:HGJW7DSXY:4:1377:8513:19961\_2:N:0:TCTGCAAG+GCTGCACT  
CGACAAATTTTAGAACTTTATTTAGAACTCTCTCCGATCACCTTGGTGTGATCTCCCGGAGGATCTT  
TTCAATAAGATGTATGATGATAATCTACTATTTTTAAATAGTGATATT  
+  
FFFFF:FFFFFFFF:FFFFFFFFFFFFFFFFFFFFFFFFFFFFFFFF:FFFFFFFFFFFFFFFFFFFFFFFF  
FFFFFFFFF,FFFFFFFF:FFF:FFFFFFFFFFFFFFFFFFFFFFFFFFFFFFFF  
@A00721:190:HGJW7DSXY:4:2537:32777:31266\_1:N:0:TCTGCAAG+GCTGCACT  
CTTTATCAAAGATTTGGCTTGGTCTATTTACCGCAAAAAGTTGGGAGAGGTCTATGATATTTATTTTA  
CTTATACTTTAAATAGCACCGATTATAACTTGACTGTTGATAATATTACAATAGCTCTTTCTCAGAAG  
ATT  
+  
FFFFFFFFFFFFFFFFFFFFFFFF:FF:FFFFFFFF:FFFFFFFFFFFFFFFFFFFFFFFFFFFFFFFF:FFFF  
FFFFFFFFFFFFFFFFFFFFFFFFFFFFFFFFFFFFFFFFFFFFFFFFFFFFFFFFFFFFFFFFFFFFFFFF  
FFF  
@A00721:190:HGJW7DSXY:4:2502:14488:34601\_2:N:0:TCTGCAAG+GCTGCACT  
GGTGAACACGTCGGTAGCATTGATTTACTTTTACCGTTAGAACTGAAAAAGATTCTTTTCGAAAAGAA  
ACCTATAAGTTACAAACGATTCTTCGACTATATTAAGAAATAAAAAT  
+  
FFFFFFFFFFFFFFFFFFFFFFFFFFFFFFFFFFFFFFFF:FFFFFFFFFFFFFFFFFFFFFFFFFFFFFFFF  
FFFFFFFFFFFFFFFFFFFFFFFFFFFFFFFFFFFFFFFFFFFFFFFFFFFFFFFFFFFFFFFF  
@A00721:190:HGJW7DSXY:4:1532:28176:7889\_2:N:0:TCTGCAAG+GCTGCACT  
CTTTACATTTTAAATGGTATGGTATAATGTGTCTTACAAATAGAACCTTCACTCTCGGTAATGAGAGT  
GTATTCCTTAATATTCTAGTAACCGCTATGTGGGCATTACTAGGATTT  
+  
F:FFFFFFFFFFFFFFFFFFFFFFFFFFFFFFFFFFFFFFFFFFFFFFFFFFFFFFFFFFFFFFFF  
FFFFFFFFFFFFFFFFFFFFFFFFFFFFFFFFFFFFFFFF,FFFFFFFFFFFFFFFF  
@A00721:190:HGJW7DSXY:4:1502:32533:25864\_2:N:0:TCTGCAAG+GCTGCACT  
TGCTAGGAAAATTTTAGAAAACTCCATTGTATAGTTCAAGGAGTACTTAATTCAATAGCTTTAGTAT  
TATTTACTATCGCCTTTATTGAAAATTGTATAAGAGTTAATTGCTTAC  
+  
FFFFFFFFF:FFFFFFFFFFFFFFFFFFFFFFFF:FFFFFFFFFFFFFFFFFFFFFFFFFFFFFFFF:FF  
FFFFFFF:FFFFF,FFFFF,FFFFFFFFFFFFFFFFFFFFFFFFFFFFFFFF  
@A00721:190:HGJW7DSXY:4:1351:8495:4867\_2:N:0:TCTGCAAG+GCTGCACT  
ACCATAACCTACCATGACCAATCATCGCTCCAACCTGGCACGCCAGACGTAGGGTCAAACCTACTACCG  
CCGGTCGGCAGATCGGCACCACTGGTCTCTACGTTCAAGGACCCGCTG  
+  
FFFFFFFFFFFFFFFFFFFFFFFFFFFFFFFFFFFFFFFFFFFFFFFFFFFFFFFFFFFFFFFF  
FFFFFFFFFFFFFFFFFFFFFFFFFFFFFFFFFFFFFFFFFFFFFFFFFFFFFFFF

@A00721:190:HGJW7DSXY:4:2608:24053:35196\_1:N:0:TCTGCAAG+GCTGCACT  
CCTTCCCAAATCTAGATCTGCACAGAAGAAGGCTGAAGGTCGTTACCGGACGACCACTCAAAGGAAAC  
GGGCTGTTGCCAGAGGAAAGCAGCGACCACCGAGGTCGCTCGTAACATTGACGGCAGTCCCGTCATC  
TCT

+

FFF,FFFF,FFF::F,FF:FFFFFF,FF:FFFFFF:FFFFFFFFFFFFFFFFFFFFFFFF:FFFF:FFFFFF  
FFFFFFFF:FFFFFFFF,FFFFFFFFFFFFFFFFFFFFFFFFFFFFFFFFFFFFFFFFFFFFFFFF  
FFF

@A00721:190:HGJW7DSXY:4:1574:28655:35587\_2:N:0:TCTGCAAG+GCTGCACT  
CAGTACCTCAGTCAAAAGTCACATTCACCACTCCCATACCAATCAATGATGTGACTATACAGTTCGGC  
CATTTCAAGAGTGGTCAATACGTCGTGGGAGGTACTGAAGCCTTCCCC

+

FFFFFFFFFFFFFFFFFFFFFFFFFFFFFFFFFFFFFFFFFFFFFFFFFFFFFFFFFFFFFFFF  
FFFFFFFFFFFFFFFFFFFFFFFFFFFFFFFFFFFFFFFFFFFFFFFFFFFFFFFF

@A00721:190:HGJW7DSXY:4:2127:21459:17895\_2:N:0:TCTGCAAG+GCTGCACT  
AAGCCAATCAATAGTTCTTCTGACCAGAATGAAAAGGGTTTACCAGGGTAGTCTCTAAGTCTACCAG  
GAAGAGGGGAAATGTCCCCAAACTGAGAAGAATAAAGGGAAAGGTCC

+

FFFFF:FFFFFFFFFFFFFFFFFFFFFFFFFFFFFFFFFFFFFFFFFFFFFFFFFFFFFFFF  
FFFFFFFFFFFFFFFFFFFFFFFFFFFFFFFF,FFFF,F,F,FFFFFFFF

@A00721:190:HGJW7DSXY:4:2355:1985:2644\_2:N:0:TCTGCAAG+GCTGCACT  
ATTACCCCTAATTCTGAAGGAAGATCTCCACCATCTGGGGTTGGGAATAAGAAATCTGCACGGGCCA  
AAGAGGCCGCTGCTACGAAGTCGCTGAAGGCGGCTTGGGTCATTAAGG

+

FFFFFFFFFFFFFFFFFFFFFFFFFFFFFFFFFFFFFFFFFFFFFFFFFFFFFFFFFFFFFFFF  
FFFFFFFFFFFFFFFFFFFFFFFFFFFFFFFFFFFFFFFFFFFFFFFFFFFFFFFF

@A00721:190:HGJW7DSXY:4:1243:28700:5196\_2:N:0:TCTGCAAG+GCTGCACT  
GCCTGCCGACCCATCTTTGAGACCAAGACTCTCTACAGTAGGTTCTGCTACTATGAGCAAATCTG  
TTGAATTCGTCACTGAGGACGAAGGTGAGAGGACTTTTGGCTACTGGC

+

FFFFFFFFFFFFFFFFFFFFFFFFFFFFFFFFFFFFFFFFFFFFFFFFFFFFFFFFFFFFFFFF  
FFFFFFFFFFFFFFFFFFFFFFFF,F:FFFFFFFFFFFFFFFF:FFFFFF

@A00721:190:HGJW7DSXY:4:1668:26702:31266\_2:N:0:TCTGCAAG+GCTGCACT  
CGTGGGTTGAAGGCCGACGCTTCGAGCTTGAGTGTGACGAGCCGGTGACGTTTTTGTCAACGGCGTT  
TGGAGGATTTATCCGCGCTTAACATATGGGGCGAAGATCCCCTATGGA

+

FFFFFFFFFFFFFFFFFFFFFFFFFFFFFFFFFFFFFFFFFFFFFFFFFFFFFFFFFFFFFFFF:F  
FFFFFFFFFFFF:FFFFFFFFFFFFFFFFFFFFFFFFFFFFFFFF

@A00721:190:HGJW7DSXY:4:2508:11107:34663\_2:N:0:TCTGCAAG+GCTGCACT  
TTGGCATATTTATGCCGACGATAATAAGCATGTCACCCTTAAGCACCGAGGTAAGCTCGGGACTTACA  
AGAGAGAGTGTGAGAGAGTCGCTCTCACTATTTTTGCCAGAATGCGG

+

FFFFFFFFFFFFFFFFFFFFFFFFFFFFFFFFFFFFFFFFFFFFFFFFFFFFFFFFFFFFFFFF:  
FFFFFFFFFFFFFF,FFFFFFFFFF:FFFFFF:FFFFFFFF

@A00721:190:HGJW7DSXY:4:1577:28890:14638\_2:N:0:TCTGCAAG+GCTGCACT  
ATTACAACCTCTCTTTAGAGAGCATTAGAAGGAAGTTGGGCAAATCCCACATATGGTAGACGTTGTC  
ACACTTTTCTGAAAATTTTCTTTCTCCGTCATTGGGGATTTCGA

+

FFFFFFFF:FFF:F:FFFFFFFFFFFFFFFFFFFFFFFFFFFFFFFF:.:FFFFFFFF,FFF  
FFFFFFFFFFFFFFFF:FFFFFFFF:FFFFFFFF:FFFFFF:F,

@A00721:190:HGJW7DSXY:4:1473:4544:36542\_1:N:0:TCTGCAAG+GCTGCACT  
GGAAGGTGTCAAGGGTCTTCTTCATGCTGATCTTTCAGGACCTAATCACATCATGATTGATAGTTACG  
GCTCGTATCGAGTTGGAGGGAGGAAGTTCTCCGAAATTAAGACGGGGGGATTAAGAGTCCAGCTGTA  
ACT



+  
FFFFFFFFFFFFFFFFFFFFF:FFFFFFFFFFFFF:FFFFFFFFFFF,FF:FFFFFFFF:FFFFFFFFFFFF  
FFFFFFFFFFFFFFFFFFFFFFFFFFFFFFFFFFFFFFFFFFFFFFFFFFFFFFFFFFFFFFFFFFFFFFFFFFFF  
FFF  
@A00721:190:HGJW7DSXY:4:1532:25292:6308\_2:N:0:TCTGCAAG+GCTGCACT  
AGAGGGGAGCTCTGAAAAGGAAACTTCGTCAGAAGATGAGGAAGTCTAAGAGGAGGAGTTTGAGGAAG  
GCTCTAGAGAAGATCTCACACCTGGAGAAGGCAAGTGGAGAGTCCAG  
+  
FFFFFFFFFFFFFFFFFFFFFFFFFFFFFFFFFFFFFFFFFFFFF:FFFFFFFFFFFFFFFFFFFFFFFFFFFFF  
FFFFFFFFFFFFFFFFFFFFFFFFFFFFFFFFFFFFFFFFFFFFFFFFFFFFF  
@A00721:190:HGJW7DSXY:4:2414:9616:28354\_1:N:0:TCTGCAAG+GCTGCACT  
CTTCCGATCTTTTGAAGCAGGGGTACCCTTCCTAAGGTGGATGAGGGAGGTTGTTTTCTTTGGAGTT  
TTAGATAATCTTTTGAGAAGGGGTCATAGAGCCAGCAAGAGAAGCTTATATGCTGGTTTAAGTGATGA  
TTA  
+  
FF:FFFFFFFF:FFFFFFFFFFFFFFFFFFFFFFFFFFFFFFFFFFFFFFFFFFFFFFFFFFFFFFFFFFFFF  
FFFFFFFFFFFFFFFFFFFFFFFFFFFFFFFFFFFFFFFFFFFFFFFFFFFFFFFFFFFFFFFFFFFFFFFFFFFF  
FFF  
@A00721:190:HGJW7DSXY:4:1522:26060:8390\_1:N:0:TCTGCAAG+GCTGCACT  
ATTTAGGTCAACTTGGGGTTTCGAATGTCATTAGTGCCTTACGATTGAAAGAGGTCCTTTTGGAGTATC  
GACAGATCTTTCGATCTTGAGGACGTACATTAAACGTGGCAGAATTCGGTAACTTACCATATTGTTCC  
TTC  
+  
FFFFF:FF:FFFFFFFFFFFFFFFFFFFFFFFFFFFFFFFFFFFFFFFFFFFFFFFFFFFFFFFFFFFFF:,FFF  
FFFFFFFFFFFFFFFFFFFFFFFFFFFFFFFFFFFFFFFFFFFFFFFFFFFFFFFFFFFFFFFFFFFFFFFFFFFF  
FFF  
@A00721:190:HGJW7DSXY:4:1206:25274:33865\_1:N:0:TCTGCAAG+GCTGCACT  
TTTAACTTTGACTCAACTACTCCGATCAGATCCGATGGTTTGATTGGTATGGACTACTCGACTTTTG  
ATCTGGAGTTGTCTAGGGTCATGGCAGATACTACCGATAAGGTGAAAAATATGCAGGTCAAAGATTCT  
GTA  
+  
FF:FFFFFFFFFFFFFFFFFFFFFFFFFFFFFFFFFFFFFFFFFFFFFFFFFFFFFFFFFFFFFFFFFFFFF:FFF  
FFFFFFFFFFFFFFFFFFFFFFFFFFFFFFFFFFFFFFFFFFFFFFFFFFFFFFFFFFFFFFFFFFFFFFFFFFFF  
FFF  
@A00721:190:HGJW7DSXY:4:1246:13919:35023\_2:N:0:TCTGCAAG+GCTGCACT  
GTTTTGGCCGACTTTAACTATTCTAAGAGTCTTTATGATTCAAACCTATCGTTGTCTGTACCTTACAA  
GGTTGAGGAGACTTTACAGCGGCTTATTGTCGCGCAGTTTCCAGAATT  
+  
FFFFF,FFFFFFFFFFFFFFFFFFFFF:FFFFFFFFFFFF:FFFFFFFFFFFFFFFFFFFFFFFFFFFFF:FFFFF  
FFFF:FFFFFFF:FFFFFFF:FFFFFFFFFFFF:FFFFFFFFF:FFFFFFF  
@A00721:190:HGJW7DSXY:4:1608:5113:36683\_1:N:0:TCTGCAAG+GCTGCACT  
TATCTTGAATGCTCACGCCGTCGCAGCCATATCGAGACTATGTTATAATCACTTGTTAAAGTACAGAT  
TTAGTGATTAGATATTATTGATATTGGAGGCGATATTCGTTTTCATATCCAAAACCTCTTGAATGGA  
GTA  
+  
FFFFFFFFFFFFFFFFFFFFFFFFFFFFFFFFFFFFFFFFFFFFF:FFFFFFF,:FFF:FFFFFFFFFFFFFFFF  
FFFFFFFFFFFFFFFFFFFFFFFFFFFFFFFFFFFFFFFFFFFFFFFFFFFFFFFFFFFFFFFFFFFFF:FFFFF,FFFFFFF  
FFF  
@A00721:190:HGJW7DSXY:4:1108:17445:12727\_1:N:0:TCTGCAAG+GCTGCACT  
CTATTCTTGATGTGAAAGATGCATCGAGGTATACGTCTAGGAACATTGATTGGGAACGTACCTACTCA  
CGAGACGTCATGAAAGCTATCGGAGGGAAGCAAAATGTTTCGTTCTGTTACAAGAACGCTTTGGATTG  
TGA  
+

:FFFF:,F:FFFFFFFFFFFFFFFF:F:F,FFFFFFFFFFFFFFFFFFFFFFFFFFFFFFFFFFFFFFFF  
FF:

@A00721:190:HGJW7DSXY:4:1218:7518:10222\_1:N:0:TCTGCAAG+GCTGCACT  
GTTGCGATAGCTGTAGAGGTATACGATATCTCTCTTGATGATGTAGCCACTATAATGCTTAAGAGAGA  
GATTGATGTATGTCATTTCTGTCTTAGTTTGTCCCGCGAATTATTGGACACGATGAAAAATGACATAC  
CCG

+  
FFFFFFFFFFFFFFFFFFFFFFFFFFFFFFFFFFFFFFFFFFFFFFFFFFFFFFFFFFFFFFFFFFFF  
FFFFFFFFFFFFFFFFFFFFFFFFFFFFFFFFFFFFFFFFFFFFFFFFFFFFFFFFFFFFFFFFFFFF  
FFF

@A00721:190:HGJW7DSXY:4:1524:18258:27070\_2:N:0:TCTGCAAG+GCTGCACT  
TCATGGAGATGATGGCGCATCACTTGATTACTATATGCCCGAAGGATTGGGTATTCTCACAACAAAG  
ATAAGATTTTATCTTTCTTCAAACACCCTGTTTTCTTAAGGGCGGAC

+  
FFFFFFFFFFFFFFFFFFFFFFFFFFFFFFFFFFFFFFFFFFFFFFFFFFFFFFFFFFFFFFFFFFFF  
FFFFFFFFFFFFFFFFFFFFFFFFFFFFFFFFFFFFFFFFFFFFFFFFFFFFFFFFFFFFFFFFFFFF

@A00721:190:HGJW7DSXY:4:1527:11397:1658\_1:N:0:TCTGCAAG+GCTGCACT  
ACTGGAGTTCAGACGTGTGCTCTTCCGATCTATGAGTTCGAATAACTCGTAATAAATCTTTCTCTAG  
TGGACAATTCAGAATACCTATTTCCGTACCAAGAGCCACTGCCAATCTCATCGCTATACGCATACCTG  
ATT

+  
:FFFFFFFFF,,FF:FFFFFFFFF:FFFFF,FFF:,FFFFFFFFFFFFFFFFFFFFFFFF:FFFFF  
FFFFFFFFFFFF,FFFFFFFFF:FFFFFFFFFFFFFFFFFFFFFFFFFFFFFFFF:FFFFF:FFFFFFFF  
FFF

@A00721:190:HGJW7DSXY:4:1608:1561:30405\_2:N:0:TCTGCAAG+GCTGCACT  
AAATTTTCTCAAGAGATTATGGTTGATAAAGTTTTCTTCATAAGGGCTATTAGTACGTATGGGGA  
TCACTTCTTCGGTCAATGACAAAACCTTCGAATATGTTACGACATGGC

+  
FFFFFFFFFFFF:FFFFFFFFFFFFFFFFFFFFFFFFFFFFFFFF,FFFFFFFF,FFFFFFFFFFFFFFFF  
FFFFFFFFFFFFFFFFFFFFFFFF,FFFFFFFFFFFFFFFFFFFFFFFF:FF:F

@A00721:190:HGJW7DSXY:4:1367:1877:11036\_1:N:0:TCTGCAAG+GCTGCACT  
GTATTGTCATCTCGGGGAAAGTGATTACCAAGATGTTATATAGATACGAGATACCTAGAGAAGGTC  
GCAGCGATCTTACTCGTTATCGGAGCTAAGAAGAAGACTTTGGTTACACGTTATGCTCGCAAACCTAA  
CGT

+  
FFFFFFFFFFFFFFFFFFFFFFFFFFFFFFFFFFFFFFFFFFFFFFFFFFFFFFFFFFFFFFFFFFFF  
FFFFFFFFFFFFFFFFFFFFFFFFFFFFFFFFFFFFFFFFFFFFFFFFFFFFFFFFFFFFFFFFFFFF  
FFF

@A00721:190:HGJW7DSXY:4:1159:10004:3975\_2:N:0:TCTGCAAG+GCTGCACT  
CTCTGCTTCTGCGTTACTGAGAGAAAAGATTCAGGACGCTACGGTGACTTTATGGACAAGATGCCAG  
TTCTTGGAATACTTGTTTCCCTTTTGTAGTTTAGTAGGTGATCTTG

+  
FFFFFFFFFFFFFFFFFFFFFFFFFFFFFFFFFFFFFFFFFFFFFFFFFFFFFFFFFFFFFFFFFFFF,FF  
FFFFFFFFF:FFFFF:FFFFF:F,:F:FFFFF,FFFFFFFFFFFFFFFF

@A00721:190:HGJW7DSXY:4:1130:3025:37012\_1:N:0:TCTGCAAG+GCTGCACT  
CCGATCTAGAAGACAACGAATCTTGAACTACGGTCCTTATCAAAGAAAATGGTGAACCGGTCTCTAA  
ATCTTTTGAGATTGAGAAGATTGAAGAACACGTCAAGAAGTCGCTCGNCGTTGTTCTTGAAAACCAAG  
TTA

+  
:FFFFFFFFFFFFFFFFFFFFFFFFFFFFFFFFFFFFFFFFFFFFFFFFFFFFFFFFFFFFFFFFFFFF  
FFFFFFFFFFFFFFFFFFFFFFFFFFFFFFFFFFFFFFFFFFFFFFFFFFFFFFFF#FFFFFFFFFFFFFFFF  
FFF

@A00721:190:HGJW7DSXY:4:1276:32425:26428\_2:N:0:TCTGCAAG+GCTGCACT  
AGTCTTTGTACCTTCTGTCAAACCTTCGAGGTTACGCTACGAGAGGTGATCCCGGATGTGGATTGAAGG

$+$ 

@

+

@

+

@

+

@

+

@

+

@

+

@

+

@

+

[illegible]

@A00721:190:HGJW7DSXY:4:2447:5719:2691\_1:N:0:TCTGCAAG+GCTGCACT  
TTAGTTCATGAAGTTCTTACACTTCTCGCGACTAATGTCAGCTTCACTACAAAGCGTTACGTAAAGT  
AGTTTTCACGCTTTATCTTAAAGCATTACCACCAATTTAGCACTTTTTGAATATGACAGAAGCTCGC  
CAT

+

FFFFFFFFF,FFFFFFFFFFFFFFFFFFFFFFFFFFFFFFFFFFFFFFFFFFFFFFFFFFFFFFFFFFFFFFFFF,FFFFFFFFFFFFFFFFF  
FFFFFFFFFFFFFFFFFFFFFFFFFFFFFFFFFFFFFFFFFFFFFFFFFFFFFFFFFFFFFFFFFFFFFFFFF:FFFFFFFFFFFFFFFFF  
FFF

@A00721:190:HGJW7DSXY:4:2641:11695:20682\_2:N:0:TCTGCAAG+GCTGCACT  
CCAGTTAGAGTTCTTCTAACCAGGACTGATGGTGAGATTCTTTTACCTTTTGGAGGTCCAGGAACCTT  
TACTCCTAGTGTCTTTTCTAGAGTCCAAGGACGTTTCCGTCGGAGGAT

+

FFFFFFFFFFFFFFFFFFFFFFFFFFFFFFFFFFFFFFFFFFFFFFFFFFFFFFFFFFFFFFFFF:F:FFFFFFFFFFFFFFFFF  
FFFFFFF,FFFF:FFFFFFFFFFFFFFFFFFFFFFFFFFFFFFFFFFFFFFFFFFFFFFFFFFFFFFFFF

@A00721:190:HGJW7DSXY:4:2209:5376:20697\_1:N:0:TCTGCAAG+GCTGCACT  
TCAATAACACTCTATTGAATCCCTTTTCCACGATGAAAGCTCTTTATGAGGTGCTCCATGCAAATTTA  
CAGTTCCTCTTTGGTGATATCGCCTCTGTCCTTTCTCCTTTAATCGTGAGGTTACGAGAGTTTCGTAC  
TTG

+

FFFFFFFFFFFFFFFFFFFFFFFFFFFFFFFFFFFFFFFFFFFFFFFFFFFFFFFFFFFFFFFFF:,FFFFFFFFFFFFFFFFF  
F:F:FFFFFFFFFFFFFFFFFFFFFFFFFFFFFFFFFFFFFFFFFFFFFFFFFFFFFFFFFFFFFFFFF  
FFF

@A00721:190:HGJW7DSXY:4:1453:11885:36260\_1:N:0:TCTGCAAG+GCTGCACT  
ACTGGAGTTCAGACGTGTGCTCTTCCGATCTCTGACGAAGTTCTATTACCACCCTTGTCAATTGATAC  
AAACATTCTAGGTGATGCTTTCTTAGAGGCTCGTCTAGCCGCTGAGATTCGTCTTACCTATTTACAAT  
CTG

+

FFFFFFFFFFFFFFFFFFFFFFFFFFFFFFFFFFFFFFFFFFFFFFFFFFFFFFFFFFFFFFFFF  
FF,FFFFFFFFFFFFFFFFFFFFFFFFFFFFFFFFFFFFFFFFFFFFFFFFFFFFFFFFFFFFFFFFF  
FFF

@A00721:190:HGJW7DSXY:4:1156:24008:22874\_2:N:0:TCTGCAAG+GCTGCACT  
GGGAAATGGTGGTAGTCAGTTTACTACTTTTCTTCCCTCCCCTTTTTTCGATTGGATTGACGGGGTC  
TTCGTCTCACGACTAATTTGATAAGGTTTTTCTTTTATGGGACTCTTG

+

FFFFFFFFFFFFFFFFFFFFFFFFFFFFFFFFFFFFFFFFFFFFFFFFFFFFFFFFFFFFFFFFF:F:FF:FFFFFFFFFFFFFFFFF,FF  
FFFFFFFFFFFFFFFFFFFFFFFFFFFFFFFFFFFFFFFFFFFFFFFFFFFFFFFFF:F:FFFFF,FFFFFFFFF

@A00721:190:HGJW7DSXY:4:1405:5276:27195\_1:N:0:TCTGCAAG+GCTGCACT  
ATGTAGGTCTCCTAGTACTTAAGGGTTTATGTTTCGGTTTCAGCTGGATGGATCTTTTGATGGTATGT  
TTCACATTGCGTGATCACTTCCCGTGGACTTGGGAAGAGATTAAACATAAAATCCAGCGATTCTATTA  
TGT

+

FFFFFFFFF:FFFFFFFFFFFF:FFFFFFF:F:FF:FFFFFFFFFFFFFFFF:FFFFFFFFFFFF:FF:F:FFF  
FFFF:FFFFFFFFFFFFFFFF:FFFFFFFFF:FFFF:FFFFFFFFFFFFFFFFFFFFFFFFFFFFFFFFF  
:FF

@A00721:190:HGJW7DSXY:4:2675:29541:3928\_2:N:0:TCTGCAAG+GCTGCACT  
TCGATGATGTTGGGCTGTGGGGATTAACCTCCCTCGTGAACTTACGACGATGTTCTCGCTCGCATT  
TCACAAGGATTACTAAGTCTGAGATCTGCCACTTCTAATTTTAGGAAA

+

FFFFFFFFFFFFFFFFF:FFFFFFFFFFFFFFFFFFFFFFFFFFFFFFFFFFFFFFFFFFFFFFFFF  
FFFFFFFFFFFFFFFFF,FFFFFFFFFFFFFFFFFFFFFFFFF,FFF:FFF

@A00721:190:HGJW7DSXY:4:1571:17906:32064\_2:N:0:TCTGCAAG+GCTGCACT  
AAGTTCATGAGGATGTCTTGGTCGAAAAATATCGCCGGGAACCTCTAATAGAGGATCCAGATGACATT  
ATTTCAACGGATACCGATCTCAGTTCTACCACAGAAACCGTCTCAGGA

+



[illegible]

@A00721:190:HGJW7DSXY:4:1372:12915:12023\_1:N:0:TCTGCAAG+GCTGCACT  
AGCTCATGGTGAAGGGAAGCTAAGGTTAACTTGATGCTTCAGCCTTTTCGAAGCATAACCCCGCA  
CAGAATATCGTTTATCACGCAAATTTATTAATGCAATTTTCGACCTATCTTTAAGGTTCTTGAG  
GAG

+

FFFFFFFFFFFFFFFFFFFFFFFFFFFFFFFFFFFFFFFFFFFFFFFFFFFFFFFFFFFFFFFFFFFFFFFF  
FFFF:FFFFFFFFFFFFFFFFFFFFFFFFFFFFFFFFFFFFFFFFFFFFFFFFFFFFFFFFFFFFFFFF  
FFF

@A00721:190:HGJW7DSXY:4:1516:22625:23390\_1:N:0:TCTGCAAG+GCTGCACT  
AGCTCTTCTCTCTCTTAGGAGGTCATGATGACTACTATAAGGTTGAAATCGATTTTTTCGAAGTTGAC  
AAATCTCAAGATTTCTTTGTAAAGCCTATGAGATAAAGATGTATTCTTATTAGGCTTCGATGCTGA  
ATT

+

FFFF:FFFFFFFF:FFFFFFFFFFFFFFFFFFFFFFFFFFFFFFFFFFFFFFFFFFFFFFFFFFFFFFFF  
FFFFFFFFFFFFFFFF:FFFFFFFFFFFFFFFFFFFFFFFFFFFFFFFFFFFFFFFFFFFFFFFFFFFFFFFF  
FFF

@A00721:190:HGJW7DSXY:4:2218:9399:30076\_2:N:0:TCTGCAAG+GCTGCACT  
AGTGCCAGTGAATATTTTTGTACGCCAGGAGTATCCATAACGATTTGTCAATTACCACCTTGCTCA  
ACGACGAAGTGAACGGCCAACACTTTCTTTGGTAATTGTATGATCAC

+

FFF:FFF,FFFF:,FFFFFFFFFFFF:FFFFFFFFFFFF,FF,FF:FFF:FFFFFFFF,F:FFF  
FFFFFFFF:FFFFF,FFFF:FFFFFFFF:F:FFFFFFFFFFFF:FF

@A00721:190:HGJW7DSXY:4:1523:25744:36933\_2:N:0:TCTGCAAG+GCTGCACT  
TATCACTTTATTATGACCTTGAAAGTTTTTCGGCTGTGGTTGTCGCTGGGACGATTCCATTCTGTTT  
TCAAAGACTCCAATAACTGATCATTCTGATCATATGATTTTGGACAAT

+

FFFFFFFFFFFFFFFFFFFFFFFFFFFFFFFFFFFFFFFFFFFFFFFFFFFFFFFFFFFFFFFF:FFFFFFFFFFFFFFFF  
FFFFFFFFFFFFFFFF:FFFFFFFFFFFFFFFFFFFFFFFF:FFFFFF:FFFFF,

@A00721:190:HGJW7DSXY:4:1536:1380:26772\_2:N:0:TCTGCAAG+GCTGCACT  
ATCGTTAAGTTAGGTAAACCCCTAACCGATGTTACTCTGTAGGACTTTGGGAGAGATTCTGTTAGTTT  
TAAAGACTATACTAAATATCTCCACTACGAGGTTGTTGTTTGGCGATT

+

FFFFFFFFFFFFFFFFFFFFFFFFFFFFFFFFFFFFFFFFFFFFFFFFFFFFFFFFFFFFFFFF:FFFFFFFFFFFFFFFF  
FFFFFFFFFFFFFFFFFFFFFFFFFFFFFFFFFFFFFFFFFFFFFFFFFFFFFFFFFFFFFFFF:FFF

@A00721:190:HGJW7DSXY:4:1427:20726:24768\_2:N:0:TCTGCAAG+GCTGCACT  
ATATTCGATATTCGATTGAGGGTCGTTATACCTATTCGGCTATCTGTGCTTTGAATTGTATAAGATCA  
AATTTTAAACGATTCCGAGAGGTTTATCCTGATGTGGAGGGAGTTCTT

+

FFFFFFFFFFFFFFFFFFFFFFFFFFFFFFFFFFFFFFFFFFFFFFFFFFFFFFFFFFFFFFFFFFFFFFFF  
F:FFFFFFFFFFFFFFFFFFFFFFFFFFFFFFFFFFFFFFFFFFFFFFFFFFFFFFFF:FFFFF

@A00721:190:HGJW7DSXY:4:2253:15049:35509\_1:N:0:TCTGCAAG+GCTGCACT  
ACCTTTCCTTGTGAAAATTTTGATGCGGTTTCATAAGATTATCAGTAATCCTGATTCTACTACGGATT  
CATGGACCTTCCATCCTGTACCTCTTCTGGAGAGACGTATCTCAAAGATCGACTTCGAGACAGGTGAT  
ATT

+

FFFFFFF:FFF:FFFFFFFFFFFFFFFF,FFFFFF:FFFFFFFFFFFFFF:FF:FFFFFFFFFFFFFFFF  
FFFFFFFFFFFFFFFF:FFFFFFFFFF:FFFFFFFFFFFFFFFFFFFFFFFF:F:FFFFFFFFFFFFFFFF  
FFF

@A00721:190:HGJW7DSXY:4:2332:8260:36526\_2:N:0:TCTGCAAG+GCTGCACT  
CTAAATTCGGTAACGGTGCCTGGCGCTTTATTTTAAAAAGCTCCCTCCTCTCGCAAGTTTGATCTGAT  
ACTTATCACGAAAGGACTTGAGTCTTTTGATCAGTCTCTGACTTGACC

+

FFFFFFFFFFFFFFFFFFFFFFFFFFFFFFFFFFFFFFFFFFFFFFFFFFFFFFFFFFFFFFFFFFFFFFFF  
FFFFFFFFFFFFFFFFFFFFFFFFFFFF:F:FFFF:FFFFFFFFFFFFFFFF

@A00721:190:HGJW7DSXY:4:2230:2483:16908\_2:N:0:TCTGCAAG+GCTGCACT  
TAAATGACGATCATTAAGACTCTCTTTCTTTCTTTGTTTCTTTGCACTGATTTTCTCATCAGC  
TTGTGTTTTACCTAATCTGTGTTTTTACGATAACAACATATCAGTTGAT

+

FFFFFFFFFFFFFFFFFFFF:FFFF:FF:FFF,FFFFFFFFFFFFFFFF:FFFFFFFFFFFFFFFFFFFF  
FFFFFFFFFFFFFFFFFFFFFFFFFFFFFFFFFFFF,FFFFFFFFFFFFFFFFFFFF

@A00721:190:HGJW7DSXY:4:1430:10185:20008\_1:N:0:TCTGCAAG+GCTGCACT  
CCGAAAGGCGAACTTTGGGAATTTGAAGCTCAGGGTGAAGCACACGTTTGACCGTGACGAACTGTGG  
TGTCTTGATCTACGTTACGGATATACTCTCCTTGAGTTCACCTCGTAAGGACACTACCACTTATTACG  
ATA

+

F:FFFF:FFFFFFFF:FFFFFFFFFFFFFFFFFFFFFFFFFFFFFFFFFFFFFFFFFFFFFFFFFFFFFFFF:FFFF:  
FFFF:FFFFFFFFFFFFFFFFFFFFFFFFFFFFFFFF:FFFFFFFF:FFFFFFFF:FFFFFFFFFFFFFFFFFFFF  
FF:

@A00721:190:HGJW7DSXY:4:2203:25229:23829\_1:N:0:TCTGCAAG+GCTGCACT  
TCTCTATTTTAAAGTTTTGTCTTCTTGTCTTATTCTATTAATCACTCATTTTAGTGAGATTATT  
AAAAACGCACTAAAACGTCTTCGACAACAGCAGGGGTTTTCGAATAGTGATAGCCACCCGCTTACAG  
AGG

+

FFF:FFFFFFFF:FFFFFFFFFFFFFF:FFFFFFFFFFFFFFFFFFFFFFFFFFFFFFFFFFFFFFFF:FFFFFFFF  
FFFFFFFFFFFFFFFFFFFFFFFFFFFFFFFFFFFFFFFFFFFFFFFFFFFFFFFFFFFFFFFFFFFFFFFFFFFF  
FFF

@A00721:190:HGJW7DSXY:4:2603:2510:15421\_1:N:0:TCTGCAAG+GCTGCACT  
GACTTTGGTACCACCTTTTCTACTGTCTGTCTCGCTCTTCGAATGAAGTTTAAATGCTTAACAACAA  
TGATAGTGAATTTATACCTACAATCATTGGTTTTTCTAATAATGATGACACTATTGTTTATGGATATG  
ATG

+

FFFF:FFFFFFFFFFFFFFFFFFFFFFFFFFFFFFFF:FFFFFF:FFFFFF:FF:FFFFFFFFFFFF  
FFFFFFFFFFFFFFFFFFFFFFFFFFFFFFFFFFFFFFFF:FFFFFF:FFFFFFFFFFFF:FFFFFF  
FFF

@A00721:190:HGJW7DSXY:4:1465:7934:34021\_1:N:0:TCTGCAAG+GCTGCACT  
TCTGGATTCTCAGTTTACAAGGACCTTAAGCGATGGATCGGGTTAATTCTAAAACATTACCCGAAAG  
ACGTGCTAAATTAACCATTGTACGATGTCGTCTGTCTCGCGATCACTTTTCTACTAAGAATTGGTC  
CTA

+

FFFFFFFFFFFFFFFFFFFFFFFFFFFFFFFFFFFFFFFFFFFFFFFFFFFFFFFFFFFFFFFF:FFFFFFFF  
FFFFFFFFFFFFFFFFFFFFFFFFFFFFFFFFFFFFFFFFFFFFFFFFFFFFFFFFFFFFFFFF:FFFFFFFF  
FFF

@A00721:190:HGJW7DSXY:4:1640:24035:16063\_1:N:0:TCTGCAAG+GCTGCACT  
AGACGTGTGCTCTTCCGATCTATCGTTTCTTTCTTTATCTCTTTGGTTGTTAGGGATTTTGAGAGAGT  
GAAAGGCTTCAATTGTAGTGGTTTGGTCGTTTCAGTACCCAGTCAGTATACCTCTACGCAAAGATATT  
TCA

+

FFFFFFFFFFFFFFFFFFFFFFFFFFFFFFFFFFFFFFFFFFFFFFFFFFFFFFFFFFFFFFFF:FFFFFFFF  
FFFFF,FFFFFFFFFFFFFFFFFFFFFFFFFFFFFFFFFFFFFFFFFFFFFFFFFFFFFFFFFFFFFFFF  
FFF

@A00721:190:HGJW7DSXY:4:2517:32045:21010\_2:N:0:TCTGCAAG+GCTGCACT  
GAGGAACGTACCGGATTACCTGTCTTTCATATTATGAATGAACCTTCGGCCGCTCTTTGCTTCGAT  
GTTGGATGTCAAGAAGGTTTCAAGTGGATTCTACGTAGTTTATGA

+

FFFFFFFFFFFFFFFFFFFFFFFFFFFFFFFFFFFFFFFFFFFFFFFFFFFFFFFFFFFFFFFFFFFF  
FFFFFFFFFFFF,FF:FFFF:FFFF:FFFFFFFFFFFFFFFF,F

@A00721:190:HGJW7DSXY:4:2608:31467:16564\_1:N:0:TCTGCAAG+GCTGCACT  
TACTTTCGATACTTCTATCGTCTTACGTTACGGTAATTACTATAGTGTTATTTATTCTGGTGGTGATG



ATAATCTTGGAGGTCGTGACGTTGATGAAGCTATAAGAGCGTTCTTATTACGGCGCACTTCTTTACCC  
GCC

+

FFFFFF:FFFFFFFFFFFFFFFFFFFFFFFFFFFFFFFFFFFFFFFFFFFFFFFFFFFFFFFFFFFFFFFF  
FFFFFFFFFFFFFFFFFFFFFFFFFFFFFFFFFFFFFFFFFFFFFFFFFFFFFFFFFFFFFFFFFFFFFFFF  
FFF

@A00721:190:HGJW7DSXY:4:1535:28257:1673\_2:N:0:TCTGCAAG+GCTGCACT  
GTTTCACAACTGAAGGAGGAGGTTTCTGTACTGGAAAACCTCGTCAATACTTTTCAATAATATACG  
TCTTGAACCTCACTTATGACGATCTAGTGAAATTAACGCGTCCTTTTCT

+

FFFFFFFFFFFFFFFFFFFFFFFFFFFFFFFFFFFFFFFF:FFFFFF:FFFFFFFFFFFFFFFFFFFFFFF  
FFFFFFFFFFFFFFFFFFFFFFFFFFFFFFFFFFFFFFFFFFFFFFFFFFFFFFFFFFFFFFFF:FFFFFF

@A00721:190:HGJW7DSXY:4:1453:31394:20384\_1:N:0:TCTGCAAG+GCTGCACT  
TACTATTATGAACAAAGTTATCAAAGATAGTGGCATTCAAGGCAAACTTACCCTGATTCCGGCCGGTG  
GTAGCTCATTTCTACCAGGGGCTATTACTCTTGCTGAAACAGCTATTAAAGCTGTTGAGCGGTAATT  
ACA

+

FFFFFFFFFFFFFFFFFFFFFFFFFFFFFFFF,FFFFFFFFFFFFFFFFFFFFFFFFFFFFFFFF,FFFFFFFF  
FFFFFFFFFFFFFFFFFFFFFFFFFFFFFFFFFFFFFFFFFFFFFFFFFFFFFFFFFFFFFFFFFFFFFFFF  
FFF

@A00721:190:HGJW7DSXY:4:2146:7166:18255\_2:N:0:TCTGCAAG+GCTGCACT  
ATCGCTGAAGGATGTGCACTCTTTTCTGCTACTTTAACGGAGCGTAGTGACTCTTCGTCGATTGTAT  
CAACAGTAACATTACTTCTAATAAAGGCTCTATCAAGCTCGTATTAT

+

F:FFF:FFFFFF:FFFFFFFFFFFFFFFFFFFFFFFFFFFFFFFFFFFFFFFFFFFFFFFFFFFFFFFF,FFFFF  
FFFFFFFFFFFF:FFFF::FF:F:FFFFFFFFFFFFFFFFFFFFFFFF:FFFF

@A00721:190:HGJW7DSXY:4:1570:8811:35947\_1:N:0:TCTGCAAG+GCTGCACT  
TTACCGTTGAAGGCTAACTCCAAGGTAATTATGAAGACTGTGATTTATCTTCACTCTGGCCTTGTA  
TGAGGGTGTTTCTAATCGTAACATTAATAATTTCAATCTTCTTAAAAAGAAGATAGAGAGTCATACTT  
TGG

+

FFFFFFFFFFFFFFFFFFFFFFFFFFFFFFFFFFFFFFFFFFFFFFFFFFFFFFFFFFFFFFFFFFFFFFF  
FFFFFFFFFFFFFFFFFFFFFFFFFFFFFFFFFFFFFFFF,FFFFFFFFFFFFFFFFFFFFFFFFFFFFFFF  
FFF

@A00721:190:HGJW7DSXY:4:2659:22860:11334\_2:N:0:TCTGCAAG+GCTGCACT  
TGAAGTGGACACCTCTGGTAGTATCGAAGTAAAGATAACCAATAAGGAAGGAGCTTATACTATGGTTG  
AATCAACTAAGCATACTACTTTTGCTTTGATTACTCTACCGCCTTACA

+

FFFFFFFFFFFFFFFFFFFFFFFFFFFFFFFFFFFFFFFF:FFFFFFFFFFFFFFFFFFFFFFFFFFFFFF,FFFFF  
FFFFFFFFFFFFFFFFFFFFFFFFFFFFFFFFFFFFFFFFFFFFFFFFFFFFFFFFFFFFFFFF

@A00721:190:HGJW7DSXY:4:1224:27190:10974\_2:N:0:TCTGCAAG+GCTGCACT  
ATTAAACAAGTTGTACTTATCAATGATTTTATCGCTGGTTGTTATCTCGAAAAGTCTCTTCTAAAAGG  
AACGTCAGTTCTAACCCAAAGAGAATATCTAAAATATTTACAAAATCA

+

F:FFFF,FF,F:,,:F:FFF,FF::FFFFFF:F::,FFFF,FFF:FFFFFFFFF:,,:F:FFFF,F  
FFF::FFF:FF,FF:FF:FFFFFF:,FF:,FFF,FFFF::FFF,,,

@A00721:190:HGJW7DSXY:4:1505:3134:1752\_2:N:0:TCTGCAAG+GCTGCACT  
AGACGTTGCTTGTGCTTCCTCTTTAATGGCACTACCTCGGTACAATCTTACTTGGAACGAAGGCGA  
CCTGTTCCGGAGTTTTTACGGGATCCGGAATGTGCTGTCTATATTAGG

+

FFFFFFFFFFFFFFFFFFFFFFFFFFFFFFFFFFFFFFFFFFFFFFFFFFFFFFFFFFFFFFFFFFFFFF:FFFFF  
FFFFFF,F:FFF::FF:FFFF,FFFFFF,FF,FFFF:FF,FFFF

@A00721:190:HGJW7DSXY:4:2378:31150:36307\_2:N:0:TCTGCAAG+GCTGCACT  
TCGAACGTCAACGTTACCGAGTTTCGTTTCGTACCTTGATGCTGACTTTCGTCAATATGATTTGATC

TGGTTGCTCAATTCTAAGCGTGTTCCGCTTAGTGCGAGGCCTCTCTTC  
+  
FFFFFFFF:FFFF:FFFF:,FFFFFFFFFFFFFFFF:FFFF:FFFFFFFFFFFFFFFFFFFF,F  
FFFFFFFFFFFFFFFF:FFFFFFFF:FFFF:FFFFFF,FFFF:FF:  
@A00721:190:HGJW7DSXY:4:1661:2227:18912\_2:N:0:TCTGCAAG+GCTGCACT  
ATATTTGGATGATCTTGATAAAGAACTTCATGAATTTTCAGAGGATGAAAAATTTCTTCCTTGATT  
TTAATATAAAGAATCTTTACCAGGACTCCTACTACAGGAGGCAGTCTT  
+  
FFFFFFFFFFFFFFFFFFFFFFFFFFFFFFFFFFFFFFFFFFFFFFFFFFFFFFFFFFFFFFFF,FFFFF  
FFFFFFFF:FFFFFFFFFFFFFFFFFFFFFFFFFFFFFFFFFFFFFFFF  
@A00721:190:HGJW7DSXY:4:1532:29035:35336\_2:N:0:TCTGCAAG+GCTGCACT  
TTTGTGTGAATAGGGTCATCAACTTAGAACTCGAACTCTAAGTGTAATACTGTCTTCCAAGCTTA  
CCTGTATCTTCAATGAAATTGGACTCTTCGATAGGGGACATTTTATCG  
+  
FFFFFFFFFFFFFFFFFFFFFFFFFFFFFFFFFFFFFFFFFFFFFFFFFFFFFFFFFFFFFFFF  
FFFFFFFF:FFFFFFFFFFFFFFFF,F,FFFFFFFFFFFFFFFF  
@A00721:190:HGJW7DSXY:4:2240:29432:8750\_1:N:0:TCTGCAAG+GCTGCACT  
TACTAATGGCGTTGGCCTAGTGGATGTTATTAGTGACATCTGGTCAATTCGTTTTTAGGTGGTCTTT  
ATTCTATTATTGATTTTATGAGATTGATACGTTAACAGAAGATGATGTTAGAGTAGAATTCCTGAAG  
AG  
+  
FFFF::F,FFFF:FFFFFFFF, :FFFF:FFFF:FFFF::F:FFFF,FFFFFFFFFFFFFFFF  
FFFFFFFF,FFFFFFFFFFFFFFFF:FFFFFFFFFFFFFFFF,FFFFFFFF,FF  
FF  
@A00721:190:HGJW7DSXY:4:2353:14597:17503\_2:N:0:TCTGCAAG+GCTGCACT  
CCAACTTCTTGACAATTTCTTCAATCCTTCGATAATAGTTAAATCTAGGATTATGTCTGTGTTGAAA  
GACTTTCTACCGATAAGGGTCACTAGTCTTACACAATTAAGAAATAAT  
+  
FFFFFFFFFFFFFFFF:F:FFFFFF:FF,FFFF:FF:FFFFFFFFFFFFFFFFFFFFFFFF  
FFFFFFFFFFFFFFFFFFFFFFFFFFFFFFFFFFFFFFFFFFFFFFFF  
@A00721:190:HGJW7DSXY:4:1255:1814:31626\_2:N:0:TCTGCAAG+GCTGCACT  
ACTATCTAAAGATTGAAGGAAAATTTTATCCTCGTTTAACTTACTTAGACTTTCCTACGATACAAATG  
ATAACTTCTAATTTACGTTTGCTACTCAGAGCTGGTCTCTCAGCAA  
+  
FFF,FFFFFFFFFFFFFFFFFFFFFFFFFFFFFFFFFFFFFFFFFFFFFFFFFFFFFFFF:F  
FFFFFFFFFFFFFFFFFFFFFFFFFFFFFFFFFFFFFFFFFFFFFFFF  
@A00721:190:HGJW7DSXY:4:2630:30626:4304\_2:N:0:TCTGCAAG+GCTGCACT  
TCCTCAGGAGTCCCGGCATTTGATAATAATGACGACTTTCGTCATAATCGCTGCATATTACGGATTAC  
ACGGTACCAGCGCATCTCGTGTGAGCCTCGACCCGATTATATGGTAT  
+  
FFFFFFFFFFFFFFFFFFFFFFFFFFFFFFFF: ,FFFFF,FFFFFFFFFFFFFFFFFFFF  
FFFFFFFF: :FFFFFFFF:F:FFFFFF, ,FFFFFF  
@A00721:190:HGJW7DSXY:4:1152:22318:28307\_1:N:0:TCTGCAAG+GCTGCACT  
TTCTTAATTATAATATTCAACCTCAAAAGTTACGTGTTTACAGTAACGAGATCACACATTTTGAGAAC  
TAACATGTTATGTTCTCTGATCATTTTGACAATCTCTTATAATAATAAATAAATAATATTACT  
AAT  
+  
FFFFFFFFFFFFFFFF:FFFFFFFF:FFFFFFFFFFFFFFFFFFFFFFFFFFFFFFFF  
FFFFFFFFFFFFFFFFFFFFFFFF:FFFFFFFFFFFFFFFFFFFFFFFF  
:FF  
@A00721:190:HGJW7DSXY:4:1262:26666:14606\_1:N:0:TCTGCAAG+GCTGCACT  
AAAGGCTCCAGTCAACACTAGTTCGAGTGCTGTTTGGATTACGATGACGTGAGAATAGGTGAAGGGA  
TAGTTTTTACCTCGACCAACATTAAGGCGGCGGCGACTAATCTTAAAGCTTCACCCAAATGAAGGAC  
ACT

+  
FFFFFFFFFFFFFF:FFFFFFFFFFFFFF:FFFFFFFFFFFFFF:FFFFFFFFFFFFFF:FFFFFFFFFFFFFF  
FFFFFFFFFFFFFF:FFFFFFFFFFFFFF:FFFFFFFFFFFFFF:FFFFFFFFFFFFFF:FFFFFFFFFFFFFF  
FFF  
@A00721:190:HGJW7DSXY:4:2123:3251:21057\_1:N:0:TCTGCAAG+GCTGCACT  
TCTAAAGGACACTATACAATATCCAGACGACGACGAAGCTTATACTACTTTAATTTTGGGTATTATGT  
GGAGATATCGTGATATCAGTACGTCCAGATCCTCTGCTTTTACCGATAACGATAAATTCGTCATCAAA  
TAT  
+  
F:FFFF:FFFFFFFF:FFFFFFFF:FFFFFFFF:FFFFFFFF:FFFFFFFF:FFFFFFFF:FFFFFFFF:FFFF  
FFFFFFFF:FFFFFFFF:FFFFFFFF:FFFFFFFF:FFFFFFFF:FFFFFFFF:FFFFFFFF:FFFFFFFF:FFFF  
FFF  
@A00721:190:HGJW7DSXY:4:1656:29451:32675\_2:N:0:TCTGCAAG+GCTGCACT  
CCACATTTTGGTCAAGTCAATCCGTTGAGAAAATTTCTTAGAGGATATTCGCCATTGTGGTACGAATT  
GGTCCAACATTTACCACCAAATTCCTTTTGATACAACCTCTAGCCTTCAA  
+  
F,,FFF,FFFF:F:FFFFFFFF,,FFFF:F::FFFFF:,FFFF,FFFF,FFF,,F:FFF,FF,,  
:FF,F::FF,FF:F:FFFF,FF:FF,,F:F,F,F:F:FF:FF:FFFF,F,  
@A00721:190:HGJW7DSXY:4:2469:24641:3396\_1:N:0:TCTGCAAG+GCTGCACT  
ACCAGATTGGTTCGAACCCGTTGATGCTATGTCAGAAGAAGCTATTCAAGCTTGTCGTTTAAAGACTG  
CAGAGGCTGTCAAACAAGCCCAGACTCAAGGAGTCCAATCAAAGGTTTTGAATTTAGCTCAACTGGGG  
AGA  
+  
FFFFFFFFFFFFFFFFFFFFFFFFFFFFFFFFFFFFFFFFFFFFFFFFFFFFFFFFFFFFFFFF,FFFFFFFF  
FFFFFFFFFFFFFFFFFFFFFFFFFFFFFFFFFFFFFFFFFFFFFFFFFFFFFFFFFFFFFFFFFFFFFFFF  
FFF  
@A00721:190:HGJW7DSXY:4:1230:1814:28025\_2:N:0:TCTGCAAG+GCTGCACT  
TTCTACTTACAAAGGACAATTCAGTTTCATTAATTCTACGAAAAGTCCGGAGTATATTGTATGTTAA  
TAGATAGTGGGATAATAGTTCTACCGATACGTAGTGAACGCGTTCGTA  
+  
FFFFFFFF:FFFFFFFF:FFFFFFFFFFFFFFFFFFFFFFFFFFFFFFFFFFFFFFFFFFFFFFFF:FF  
FFFF:FFFFFFFFFFFFFFFFFFFFFFFFFFFFFFFF:FFFFFFFFFFFFFFFF  
@A00721:190:HGJW7DSXY:4:2218:22607:27680\_1:N:0:TCTGCAAG+GCTGCACT  
ACCGATAGGAGTTGTATAGTTGAAGATGTGGCTTTAGACGATAATCCTTTAAGGACTATGTTGACTGA  
CGAAGATTTTCCAACAGATTTGTCTACGTTGCAGATCGCCACTCCAAACACTATATACATTATAAAAT  
ATA  
+  
F:FFFF:F::FFFFF,FFFFFFFFFFFFFFFFFFFFFFFFFFFFFFFFFFFFFFFFFFFFFFFF  
FFF:FFFFFFFFFFFFFFFFFFFFFFFFFFFFFFFFFFFFFFFFFFFFFFFFFFFFFFFFFFFFFFFF  
FFF  
@A00721:190:HGJW7DSXY:4:2373:6343:30044\_1:N:0:TCTGCAAG+GCTGCACT  
ATAACTTTTGTACCAAAATCTTGCTTTCAACGAAGTCTCTGATTTTATTAATCATTACTTTAACGA  
TCTCTCGGTCATTTACTCTGTACTTGATCTACGTCGTTTAACTGTCGGAACAACCTTTACTTAGAATG  
ACT  
+  
FFFFFFFFFFFFFFFFFFFFFFFFFFFFFFFFFFFFFFFFFFFFFFFFFFFFFFFFFFFFFFFF  
FFFFFFFFFFFFFFFFFFFFFFFFFFFFFFFFFFFFFFFFFFFFFFFFFFFFFFFFFFFFFFFF  
FFF  
@A00721:190:HGJW7DSXY:4:1311:25635:23907\_2:N:0:TCTGCAAG+GCTGCACT  
TATTTACAATAGTTAATATCATATTAGTAATACTCACTATCGTTTTCTGCTTTTTCTTAGCTAATAGA  
TTAATAAAGGATGAGTACGAAAACCAACTCTTCGTTACGAGACCTGAT  
+  
FFFFFFFFFFFFFFFFFFFFFFFFFFFFFFFFFFFFFFFFFFFFFFFFFFFFFFFFFFFFFFFF  
FFFFFFFFFFFFFFFF,FFFFFFFF:FF:FFFFFFFFFFFF,FFFFFF

@A00721:190:HGJW7DSXY:4:1433:16794:27320\_1:N:0:TCTGCAAG+GCTGCACT  
ATTTCTGCTCTACACCACTCTCAACGAGTATAAAGCGAGTTTTTCGTCTTAACGTAATACACTAAGA  
GATCTTCCGCAAACGACTCGAAACCGAGACGCCGTAGATCAAAGTCCCTTCTAACTTTAGAT

+

FF:F,,F,,,F,FFF,,F:F::,,,F,:F,F::,,,FFFF::,,,F::,,FF,,,,F::,,  
,F,F,,FF,FF,F::FFFFFFFFFFFFFFFFFFFFFFFFFFFFFFFF:F:FFFFFFFFFFFFFFFFFFFF

@A00721:190:HGJW7DSXY:4:2548:8449:26553\_2:N:0:TCTGCAAG+GCTGCACT  
CAGTTATTTATGTTGTACTTTTTATAATTTATAACCTTCTTATACTTTTGGGTATGTTTTGTGAAAAA  
CATGAGATACCCAAGTCTATCGAAGACATTATCTCTTATGTACTTATT

+

FFFFFFFFFFFFFFFFFFFFFFFFFFFFFFFFFFFFFFFFFFFFFFFFFFFFFFFFFFFFFFFFFFFFFFFFF:  
FFFFFFFFFFFFFFFFFFFFFFFFFFFFFFFFFFFFFFFFFFFFFFFFFFFFFFFFFFFFFFFFFFFFFFFFF

@A00721:190:HGJW7DSXY:4:1230:29261:16282\_2:N:0:TCTGCAAG+GCTGCACT  
CTGTGTATGAGGAGGATTTATAATGCTTTTCGATAGTGATTGTTATCAATTTAAATACATTACTGTTT  
CAAATCATCTTTACTCACAGACTCCGAAAATGTTTCAAATGAGGTCA

+

FFFFFFFFFFFFFFFFFFFFFFFFFFFFFFFFFFFFFFFFFFFFFFFFFFFFFFFFFFFFFFFFFFFFFFFFF:  
FFF:FFFFFFFFFFFFFFFFFFFFFFFFFFFFFFFFFFFFFFFFFFFFFFFFFFFFFFFFFFFFFFFFF:F

@A00721:190:HGJW7DSXY:4:2233:8865:3505\_2:N:0:TCTGCAAG+GCTGCACT  
TTAAACGAAGTATTATCCGATTCTTCGAGGGTATCACTACCACTGATCTGCCGACTTTAGTCAAGGAA  
CTTCAATTCCTTCGATGTTTATATTTTTCTATAAGGGAAAATAGCAAT

+

FFFFFFFFFFFFFFFFFFFFFFFFFFFFFFFFFFFFFFFFFFFFFFFFFFFFFFFFFFFFFFFFFFFFFFFFF:  
FFFFF::FFFFFFFFFFFFFFFFFFFFFFFFFFFFFFFFFFFFFFFFFFFFFFFFFFFFFFFFFFFFFFFFF

@A00721:190:HGJW7DSXY:4:1650:15799:31109\_2:N:0:TCTGCAAG+GCTGCACT  
CGACAAATTTTAGAACTTTATTTAGAACTCTCTCCGATCACCTTGGTGTGATCTCCCGGAGGATCTT  
TTCAATAAGATGTATGATGATAATCTACTATTTTTAAATAGTGATATT

+

FFFFFFF:FFFFFFFFFFFFFFFFFFFFFFFFFFFFFFFFFFFFFFFFFFFFFFFFFFFFFFFFFFFFFFFFF:  
FFFFFFFFFFFFFFFFFFFFFFFFFFFFFFFFFFFFFFFFFFFFFFFFFFFFFFFFFFFFFFFFFFFFFFFFF

@A00721:190:HGJW7DSXY:4:2570:4562:20823\_1:N:0:TCTGCAAG+GCTGCACT  
CTTTATCAAAGATTTGGCTTGGTCTATTTACCGCAAAAAGTTGGAAGAGGTCTATGATATTTATTTTA  
CTTATACTTTAAATAGCACCGATTATAACTTGACTGTTGATAATATTACAATAGCTCTTTCTCAGAAG  
ATT

+

:FFF:FFFFFFFFFFFFFFFFFFFFFFFFFFFFFFFFFFFFFFFFFFFFFFFFFFFFFFFFFFFFFFFFF:  
FFFFFFFFFFFFFFFFFFFFFFFFFFFFFFFFFFFFFFFFFFFFFFFFFFFFFFFFFFFFFFFFFFFFFFFFF:  
FFF

@A00721:190:HGJW7DSXY:4:2577:21206:14857\_2:N:0:TCTGCAAG+GCTGCACT  
GGTGAACACGTCGGTAGCATTGATTTACTTTTACCGTTAGAACTGAAAAAGATTCTTTTCGAAAAGAA  
ACCTATAAGTTACAAACGATTCTTCGACTATATTAAAGAAATAAAAAT

+

FFFFFFFFFFFFFFFFFFFFFFFFFFFFFFFFFFFFFFFFFFFFFFFFFFFFFFFFFFFFFFFFFFFFFFFFF:  
FFFFFFFFFFFFFFFFFFFFFFFFFFFFFFFFFFFFFFFFFFFFFFFFFFFFFFFFFFFFFFFFFFFFFFFFF

@A00721:190:HGJW7DSXY:4:1606:17011:3114\_2:N:0:TCTGCAAG+GCTGCACT  
CTTTACATTTTAAATGGTATGGTATAATGTGTCTTACAAATAGAACCTTCACTCTCGGTAATGAGAGT  
GTATTCCTTAATATTCTAGTAACCGCTATGTGGGCATTACTAGGATTT

+

FFFFFFFFFFFFFFFFFFFFFFFFFFFFFFFFFFFFFFFFFFFFFFFFFFFFFFFFFFFFFFFFFFFFFFFFF:  
FFFFFFFFFFFFFFF:FFFFFFFFF:FFFFFFFFFFFFFFFFFFFFFFFFFFFFFFFFF:F:FF

@A00721:190:HGJW7DSXY:4:1610:7717:1673\_2:N:0:TCTGCAAG+GCTGCACT  
TGCTAGGAAAATTTTAGAAAACTCCATTGTATAGTTCAAGGAGTACTTAATTCAATAGCTTTAGTAT  
TATTTACTATCGCCTTTATTGAAAATTGTATAAGAGTTAATTGCTTAC

+

FFF:FFF:FFFFFFFFFFFFFFFFFFFFFFFFFFFFFFFFFFFFFFFFFFFFFFFFFFFFFFFFFFFFFFFF:
FFFFFFFFFFFFFFFFFFFFFFFFFFFFFFFFFFFFFFFFFFFFFFFFFFFFFFFFFFFFFFFFFFFFFFFF
@A00721:190:HGJW7DSXY:4:1527:26612:14011\_2:N:0:TCTGCAAG+GCTGCACT
ACCATAACCTACCATGACCAATCATCGCTCCAAGTGGCAGCCAGACGTAGGGTCAAACCTACTACCG
CCGGTCGGCAGATCGGCACCACTGGTCTCTACGTTACAGGACCCGCTG
+
FFFFFFFFFFFFFFFFFFFFFFFFFFFFFFFFFFFFFFFFFFFFFFFFFFFFFFFFFFFFFFFFFFFFFFFF
FFFFFFFFFFFFFFFFFFFFFFFFFFFFFFFFFFFFFFFFFFFFFFFFFFFFFFFFFFFFFFFFFFFFFFFF
@A00721:190:HGJW7DSXY:4:1354:1814:14278\_1:N:0:TCTGCAAG+GCTGCACT
CTTCCCAAATCTAGATCTGCACAGAAGAAGGCTGAAGGTCGTTACCGGACGACCACTCAAAGGAAACG
GGCTGTTGCCAGAGGAAAGCAGCGACCACCGAGGTCGCTCGTAACATTGACGGCAGTCCCGTCATCT
CT
+
::FFFFFFFFFFFFFFFFFFFFFFFFFFFFFFFFFFFFFFFFFFFFFFFFFFFFFFFFFFFFFFFF:
FFFFFFFFFFFFFFFFFFFFFFFFFFFFFFFFFFFFFFFFFFFFFFFFFFFFFFFFFFFFFFFFFFFFFFFF
FF
@A00721:190:HGJW7DSXY:4:1674:14895:1423\_2:N:0:TCTGCAAG+GCTGCACT
CAGTACCTCAGTCAAAAGTCACATTCACCACTCCCATACCAATCAATGATGTGACTATACAGTTCGGC
CATTTCAAGAGTGGTCAATACGTCGTGGGAGGTACTGAAGCCTTCCCC
+
FFFFFFFFFFFFFFFFFFFFFFFFFFFFFFFFFFFFFFFFFFFFFFFFFFFFFFFFFFFFFFFFFFFFFFFF
FFF:FF,FFFFFFFFFFFFFFFFFFFFFFFFFFFFFFFFFFFFFFFFFFFFFFFFFFFFFFFFFFFFFFFF
@A00721:190:HGJW7DSXY:4:2344:16749:7952\_2:N:0:TCTGCAAG+GCTGCACT
AAGCCAATCAATAGTTCTTCTGACCAGAATGAAAAGGGGTTTACCAGGGTAGTCTCTAAGTCTACCAG
GAAGAGGGGAAATGTCCCCAAAAGTGAAGAATAAAGGGAAAGGTCC
+
FFFFFFFFFFFFFFFFFFFFFFFFFFFFFFFFFFFFFFFFFFFFFFFFFFFFFFFFFFFFFFFFFFFFFFFF
FFFFFFFFFFFFFFFFFFFFFFFFFFFFFFFFFFFFFFFFFFFFFFFFFFFFFFFFFFFFFFFFFFFFFFFF
@A00721:190:HGJW7DSXY:4:2554:14859:8249\_2:N:0:TCTGCAAG+GCTGCACT
ATTACCCCTAATTCTGAAGGAAGATCTCCACCATCTGGGGTTGGGAATAAGAAATCTGCACGGGCCA
AAGAGGCCGCTGCTACGAAGTCGCTGAAGGCGGCTTGGGTCATTAAG
+
FFFFFFFFFFFFFFFFFFFFFFFFFFFFFFFFFFFFFFFFFFFFFFFFFFFFFFFFFFFFFFFFFFFFFFFF
FFFFFFFFFFFFFFFFFFFFFFFFFFFFFFFFFFFFFFFFFFFFFFFFFFFFFFFFFFFFFFFFFFFFFFFF
@A00721:190:HGJW7DSXY:4:1643:27724:12774\_2:N:0:TCTGCAAG+GCTGCACT
GCCTGCCGACCCCATCTTTGAGACCAAGACTCTCTACAGTAGGTTGTCGCTACTATGAGCAAATCGG
GTGAATTCGTCACTGAGGACGAAGGTGAGAGGACTTTTGGCTACTGGC
+
FFF:FFF::FFF:FFFFFFFFFFFFFFFFFFFFFFFFFFFFFFFFFFFFFFFFFFFFFFFFFFFFFFFF:
,FFFFFFFF:F::FFF,FFFFFFFF:F,FFFF,FFFFFFFF,FF:FFFF
@A00721:190:HGJW7DSXY:4:1672:21025:32643\_2:N:0:TCTGCAAG+GCTGCACT
CGTGGGTTGAAGGCCGACGCTTCGAGCTTGAGTGTGACGAGCCGGTGACGTTTTTGTCAACGGCGTT
TGGAGATTTTATCCGCGCTTAAGTATGGGGCGAAGATCCCCTATGGA
+
FFFFF:FFFFFFFFFFFFFFFFFFFFFFFFFFFFFFFFFFFFFFFFFFFFFFFFFFFFFFFFFFFFFFFF
FFFFF,FFFFFFFFFFFFFFFFFFFFFFFFFFFFFFFFFFFFFFFFFFFFFFFFFFFFFFFF
@A00721:190:HGJW7DSXY:4:2405:19280:8202\_2:N:0:TCTGCAAG+GCTGCACT
GGCATATTTATGCCGACGATAATAAGCATGTCACCCTTAAGCACCGAGGTAAGCTCGGGACTTACAAG
AGAGAGTGTGAGAGAGTCGCTCTCACTATTTTTGCCAGAATGCGGC
+
FFFFFFFFFFFFFFFFFFFFFFFFFFFFFFFFFFFFFFFFFFFFFFFFFFFFFFFFFFFFFFFF:FF:
FFFFFFFFFFFFFFFFFFFFFFFFFFFFFFFFFFFFFFFFFFFFFFFFFFFFFFFFFFFFFFFF
@A00721:190:HGJW7DSXY:4:1601:2871:3552\_2:N:0:TCTGCAAG+GCTGCACT
ATTACAACCTCTCTTTAGAGAGCATTAGAAGGAAGTTGGGCAAATTCCCACATATGGTAGACGTTGTC

ACACTTTTCTTGAAAATTTTCTTTCTCCGTCATTGGGGATTTCGA  
+  
FFFFFFFFFFFFFFFFFFFFFFFFFFFFFFFFFFFFFFFFFFFFFFFFFFFFFFFFFFFFFFFF  
FFFFFFFFFFFFFFFFFFFFFFFFFFFFFFFFFFFFFFFFFFFFFFFFFFFFFFFF  
@A00721:190:HGJW7DSXY:4:2124:8006:32612\_1:N:0:TCTGCAAG+GCTGCACT  
GGAAGGTGTCAAGGGTCTTCTTCATGCTGATCTTTCAGGACCTAATCACATCATGATTGATAGTTACG  
GCTCGTATCGAGTTGGAGGGAGGAAGTTCTCCGAAATTAAGACGGGGGGATTAAGAGTCCAGCTGTA  
ACT  
+  
FFFFFFFFFFFFFFFFFFFFFFFFFFFFFFFF::F,FFFFFFFFFFFFFFFF:FFF:FFFFFFFFFFFF  
FFFFFFFFFFFFFFFFFFFFFFFFFFFFFFFFFFFFFFFFFFFFFFFFFFFFFFFFFFFFFFFF  
FFF  
@A00721:190:HGJW7DSXY:4:1561:12762:1799\_2:N:0:TCTGCAAG+GCTGCACT  
AGAGGGGAGCTCTGAAAAGGAACTTCGTCAGAAGATGAGGAAGTCTAAGAGGAGGAGTTTGAGGAAG  
GCTCTAGAGAAGATCTCACCACCTGGAGAAGGCAAGTGGAGAGTCCAG  
+  
FFFFFFFFFFFF:FFFFFFFFFFFFFFFF:FFFFFFFF:FFFFFFFF:FFFF:FFFF:FFFFFFFFFFFF  
FFFFFFFFFFFFFFFFFFFFFFFFFFFFFFFF:FFFFFFFF:FFFFFFFF  
@A00721:190:HGJW7DSXY:4:2446:14172:17206\_1:N:0:TCTGCAAG+GCTGCACT  
CTTCCGATCTTTTGAAGCAGGGGTTACCACTTCCTAAGGTGGATGAGGGAGGTTGTTTCTTTGGAGTT  
TTAGATAATCTTTTGAAGAAGGGTTCATAGAGCCAGCAAGAGAAGCTTATATGCTGGTTTAAGTGATGA  
TTA  
+  
FFFF,F:FFFFFFFFFFFF:FFFFFFFFFFFF::FFFFFFFFFFFFFFFFFFFFFFFFFFFF:FFFFFF:  
F:FF,F:,FFFFFFFFFFFFFFFF:FFFFFFFFFFFFFFFFFFFFFFFFFFFF:FFFFFFFFFFFF  
FFF  
@A00721:190:HGJW7DSXY:4:1537:32054:36558\_1:N:0:TCTGCAAG+GCTGCACT  
ATTTAGGTCAACTTGGGGTTTCGAATGTCATTAGTGCCTTACGATTGAAAGAGGTCCTTTTGAGTATC  
GACAGATCTTTCGATCTTGAGGACGTACATTTAACGTGGCAGAATTTCGGTAACCTACCATATTGTTCC  
TTC  
+  
:FFFFFFFFF,:FFFFFFFF,FF:FFFFFFFFFFFF:FFFF:FF:FFFFFFFFF,F::FFFFFFFFF  
FFFFFFFFFFFFFFFFFFFFFFFFFFFFFFFFFFFFFFFFFFFF:FFFFFFFFFFFF:FFFFFFFFFFFF  
FFF  
@A00721:190:HGJW7DSXY:4:1313:2410:18411\_1:N:0:TCTGCAAG+GCTGCACT  
TTTAACTTTGACTCAACTACTCCGATCAGATCCGATGGTTTGATTGGTATGGACTACTCGACTTTTG  
ATCTGGAGTTGTCTAGGGTCATGGCAGATACTACCGATAAGGTGAAAAATATGCAGGTCAAAGATTCT  
GTA  
+  
FFFFFFFFFFFF:FFFFFFFFFFFFFFFFFFFFFFFFFFFFFFFFFFFFFFFFFFFFFFFFFFFF  
FFFFFFFFFFFFFFFFFFFFFFFFFFFFFFFF:FFFFFFFFFFFFFFFFFFFFFFFFFFFFFFFF:FFF  
FFF  
@A00721:190:HGJW7DSXY:4:1312:1262:2581\_2:N:0:TCTGCAAG+GCTGCACT  
GTTTTTGCCGACTTTAACAATTCTAAGAGTCTTTATGATTCAAAAATATCGTTGTCGTACCTTACAA  
GGTTGAGGAGACTTTACAGCGGCTTATTGTCGCGCAGTTTCCAGAATT  
+  
FFFFF,FF,FFF,FFFF,F,:F:FF:FFFF,FF,,FFFFFFF:,FFF:,F,F,F,,:F,F:FF,FF  
,F:FFFF,F,F,FFFF,F,F::FFFFFF,::FF,FFFFFF:,FFF::  
@A00721:190:HGJW7DSXY:4:2101:15646:17534\_1:N:0:TCTGCAAG+GCTGCACT  
TATCTTGAATGCTCACGCCGTCGCAGCCATATCGAGACTATGTTATAATCACTTGTTAAAGTACAGAT  
TTAGTGATTTAGATATTATTGATATTGGAGGCGATATTCGTTTTCATATCCAAAATCCTTGAATGGA  
GTA  
+  
FFFFFFFF:FFF:FFFFFFFFFFFFFFFFFFFF:FFFFFFFFFFFFFFFFFFFFFFFFFFFF

FFFFFFFFFFFFFFFFFFFFFFFFFFFFFFFFFFFFFFFFFFFFFFFFFFFFFFFFFFFFFFFFFFFFFFFF  
FFF

@A00721:190:HGJW7DSXY:4:1130:1063:10410\_1:N:0:TCTGCAAG+GCTGCACT  
CTATTCTTGATGTGAAAGATGCATCGAGGTATACGTCTAGGAACATTGATTGGGAACGTACCTACTCA  
CGAGACGTCATGAAAGCTATCGGAGGGAAGCAAATGTTTCGTTCTGTTACAAGAACGCTTTGGATTG  
TGA

+  
FFF,FFFFFFFFFFFFFFFFFFFFFFFFFFFFFFFFFFFFFFFFFFFFFFFFFFFFFFFFFFFFFFFF:FFFFF  
FFFFFFFFFFFFFFFFFFFFFFFFFFFFFFFFFFFFFFFFFFFFFFFFFFFFFFFFFFFFFFFF:FFFFFFFF  
FFF

@A00721:190:HGJW7DSXY:4:1558:21685:21919\_1:N:0:TCTGCAAG+GCTGCACT  
GTTGCGATAGCTGTAGAGGTATACGATATCTCTCTTGATGATGTAGCCACTATAATGCTTAAGAGAGA  
GATTGATGTATGTCATTTCTGCTTAGTTTGTCCCGCGCAATTATTGGACACGATGAAAAATGACATAC  
CCG

+  
FFFFFFFFFFFFFFFFFFFFFFFFFFFFFFFFFFFFFFFFFFFFFFFFFFFFFFFFFFFFFFFFFFFFFFFF  
FFFFFFFFFFFFFFFFFFFFFFFFFFFFFFFFFFFFFFFFFFFFFFFFFFFFFFFFFFFFFFFF:FFFFFFFF  
FFF

@A00721:190:HGJW7DSXY:4:1527:18756:15311\_2:N:0:TCTGCAAG+GCTGCACT  
TCATGGAGATGATGGCGCATCACTTGATTACTATATGCCCGAAGGATTGGGTATTCTCACAACAAAG  
ATAAGATTTTATCTTTCTTCAAACACCCTGTTTCTTAAGGGCGGAC

+  
FFFFFFFFFFFFFFFFFFFFFFFFFFFFFFFFFFFFFFFFFFFFFFFFFFFFFFFFFFFFFFFFFFFFFFFF: F  
FFFFFFFFFFFFFFFFFFFFFFFFFFFFFFFFFFFFFFFFFFFFFFFFFFFFFFFFFFFFFFFF

@A00721:190:HGJW7DSXY:4:1637:5086:11303\_1:N:0:TCTGCAAG+GCTGCACT  
ACTGGAGTTCAGACGTGTGCTCTTCCGATCTATGAGTTCGGAATAACTCGTAATAAATCTTTCTCTAG  
TGGACAATTCAGAATACCTATTTCCGTACCAAGAGCCACTGCCAATCTCATCGCTATACGCATACCTG  
ATT

+  
FFFFFFFFFFFFFFFFFFFFFFFFFFFFFFFFFFFFFFFFFFFFFFFFFFFFFFFFFFFFFFFFFFFFFFFF  
FFFFFFFFFFFFFFFF:FFFFFF:FFFFFFFFFFFFFFFFFFFFFFFFFFFFFFFF:FFFFFFFFFFFFFFFF  
FFF

@A00721:190:HGJW7DSXY:4:2144:3821:25708\_2:N:0:TCTGCAAG+GCTGCACT  
AAATTTTCTCAAGAGATTATGGTTGATAAAGTTTTCTTCATAAGGGCTATTAGTACGTCATGGGGA  
TCACTTCTTCGGTCAATGACAAAACCTTCGAATATGTTACGACATGGC

+  
FFFFFFFFFFFFFFFFFFFFFFFFFFFFFFFFFFFFFFFFFFFFFFFFFFFFFFFFFFFFFFFFFFFFFFFF  
FFFFFFFFFFFFFFFFFFFFFFFFFFFFFFFFFFFFFFFFFFFFFFFFFFFFFFFF:FF

@A00721:190:HGJW7DSXY:4:1467:23538:35806\_1:N:0:TCTGCAAG+GCTGCACT  
GTATTGTCATCTCGGGGAAAGTGATTACCAAGATGTTCAATAGATACGAGATACCTAGAGAAGGTC  
GCAGCGATCTTACTCGTTATCGGAGCTAAGAAGAAGACTTTGGTTACACGTTATGCTCGCAAACCTAA  
CGT

+  
FFF:FFFFFFFFFFFFFFFFFFFFFFFFFFFFFFFFFFFFFFFFFFFFFFFFFFFFFFFFFFFFFFFF  
FFFFFFFFFFFFFFFFFFFFFFFFFFFFFFFFFFFFFFFFFFFFFFFFFFFFFFFFFFFFFFFF:FFF  
FFF

@A00721:190:HGJW7DSXY:4:1320:3369:12931\_2:N:0:TCTGCAAG+GCTGCACT  
CTCTGCTTCTGCGTTACTGAGAGAAAAGATTACAGACGCTACGGTGACTTTATGGACAAGATGCAAG  
TTCTTGGGAAATACTTGTTTCCCTTTGTAGTTTAGTAGGTGATCTTG

+  
FFFFFFFFFFFFFFFFFFFF,FFFFFFFFFFFFFFFFFFFFFFFFFFFFFFFF:FFFFFFF,:FFFFFFFF:FFF,F  
FFFFFFFF:FFFF:FFFFFFF:, ,FFFFFFFF:FFFFFFFF

@A00721:190:HGJW7DSXY:4:2455:22652:14794\_1:N:0:TCTGCAAG+GCTGCACT  
CCGATCTAGAAGACAACGAATCTTGAAACTACGGTCCTTATCAAAGAAAATGGTGAACCGGTCTCTAA

ATCTTTTGAGATTGAGAAGATTGAAGAACACGTCAAGAAGTCGCTCGGCGTTGTTCTTGAAAACCAAG  
TTA

+

: : FFF, FFFFFFFFFFFFFFFFFFFFFFFF, FFFFFFFF: FFFFFFFFFFFFFFFFFFFFFFFFFFFFFFFF: F  
FFFFFFFFFFFFFFFFFFFFFFFFFFFFFFFFFFFFFFFFFFFFFFFFFFFFFFFFFFFFFFFFFFFFFFFFFFFF  
FFF

@A00721:190:HGJW7DSXY:4:1666:22914:28682\_2:N:0:TCTGCAAG+GCTGCACT  
AGTCTTTGTACCTTCTGTCAAACCTTCGAGGTTACGCTACGAGAGGTGATCCCGGATGTGGATTGAAGG  
CTGGCTCTAAGGGAGACTCCTTCTTTTTGAATGTTGTAAAGAATTGGG

+

FFFFFFFFFFFFFFFFFFFFFFFFFFFFFFFFFFFFFFFFFFFFFFFFFFFFFFFFFFFFFFFFFFFFFFFFFFFF, F: FFFFFFFFFF  
FFFFFFFF: FFFFFFFFFFFFFFFFFFFFFFFF: FFFFFFFF: FFFFFFFFFF

@A00721:190:HGJW7DSXY:4:1214:14769:16673\_1:N:0:TCTGCAAG+GCTGCACT  
ACAAGGAGTTAGACTCTTCTTCAAGTTTTTAGATCTTCTTGATAATCTTAAAGAAAAATTTTCGAATA  
AACTAATGAGAGGTATAGGCTTAGTCAAGTCTGTACTTACATTCTTTACGCCAGATTCTTCATGGGGC  
GAC

+

F: FFFFFFFF: FFFFFFFF: FFFFFFFF: : FFFFFFFFFFFFFFFFFFFFFFFF: FFFFFFFFFFFFFFFFFF:  
FFFFFFFFFFFFFFFFFFFFFFFFFFFFFFFFFFFFFFFFFFFFFFFFFFFFFFFFFFFFFFFFFFFFFFFFFFFF  
FFF

@A00721:190:HGJW7DSXY:4:1268:16839:9142\_2:N:0:TCTGCAAG+GCTGCACT  
AATTATTAAATCATTCTTCTCACTCTTGACGAGAATTATTACTGTTTTCTCTACCCATAACTTCTTTT  
TCAAAAATGCGGATGGGTCTACTGATGTTTTCTACATAGTGCAGTCG

+

FFFFFFFFFFFFFFFFFF: FF: : FFFFFFFF: FFFFFFFFFFFFFFFF: FFFFFFFFFF: FFF, FFFFFFFFFF  
F: FFFFF: , , F: F, , F, F, FFF: , FFFFFFFF: : FF: F, F, F, FF: F: ,

@A00721:190:HGJW7DSXY:4:1541:31195:3912\_2:N:0:TCTGCAAG+GCTGCACT  
ATCACCACCTTTTGAAAGGAAAATAATTGGTGATGAAAATACGTATGTGCGGTGGGGTTCTCAAGGCTCT  
CATCGCCACTGGGATTCTAAGGGGTTCCATAAGATATTATAGATCGGA

+

FFFFFFFFFFFFFFFFF: FFFFFFFF: FFFFFFFFFFFFFFFF: FFFFFFFFFFFFFFFFFFFFFFFFFFFFFFFF  
FFFFFFFFF: FFFFFFFFFFFFFFFFFFFFFFFFFFFFFFFF, FFFFFFFFFF

@A00721:190:HGJW7DSXY:4:2536:32750:23328\_2:N:0:TCTGCAAG+GCTGCACT  
TTTGGTCCTTACGTCTTAAGTAATTTGGATGTTGTGCAAACTATCAGGTTCTTGTCACGATTCTTAA  
AAGAAGTTTATTA AAAACTTCAGAGTCTCTTGGAAGTCCAGGTAGCTAA

+

F: FFFFFFFF: FFFFFFFFFFFFFFFFFFFFFFFF: FFFFFFFFFFFFFFFF: FFFFF: FFFFFFFFFFFFFFFFFF  
F: FFFFFFFFFFFFFFFFFFFFFFFF: FF, FFFF: F: FFF: FF, FFFFFFFF, ,

@A00721:190:HGJW7DSXY:4:1147:30147:2566\_1:N:0:TCTGCAAG+GCTGCACT  
ACCTCTGTTGGTAGAGGAGTTGAGAGAATTACTCAGATTCAATCTGGCATCACTGAACGTCTACAACG  
AGTTAGGGAGTGCTAGGTTTTAAAAGATCCTTGCACAAGCAATACCTTCCACTGAGTTCATCACC  
AGA

+

FFFFFFFFFFFFFFFFFFFFFFFFFFFF: FFFFFFFFFFFFFFFFFFFFFFFFFFFFFFFFFFFFFFFFFF  
FFFFFFFFFFFFFFFFF: FFFF: FFFF: FFFFFFFFFFFFFFFFFF, FFFFFFFFFFFFFFFFFFFFFFFF  
FFF

@A00721:190:HGJW7DSXY:4:1119:10981:14497\_2:N:0:TCTGCAAG+GCTGCACT  
ATCTTCTGATGCTGAATTTGAGGAAAATTTTCGGAAGTTTTGGTATAAATCCTGATGGCTCAGTAC  
AGGGAGGAGGTAATAGTTATAAAACCTTCTTTTATCATTGCAACAGGA

+

FFFFFFFFFFFFFFFFFFFF, FFFFFFFFFFFFFFFFFFFFFFFFFFFFFFFFFFFFFFFFFF  
FFFFFFFFFFFFFFFFF: FFFFFFFFFFFFFFFFFFFFFFFF, FFFFFFFFFF

@A00721:190:HGJW7DSXY:4:1401:25834:12007\_2:N:0:TCTGCAAG+GCTGCACT  
ATCTGGGATCATAGGTATGTGTCACGCTACACTCGAAATATGGGCCCTCATAAGGAAGTATAGTTGGC



+

@A00721:190:HGJW7DSXY:4:1356:20076:5228\_1:N:0:TCTGCAAG+GCTGCACT  
TTTAGATAAATTCCTTCCGGGCTCAATGACCTTGCTATGTACGTGGATCTAATGCTTGGTGATCTGA  
ATCTGACCATCGCAAAGAAGACTTTATTAGTTCATGAAGTTCCTTACACTTCTCGCGACTAATGTCAGC  
TTC

+

@A00721:190:HGJW7DSXY:4:2265:22598:11694\_2:N:0:TCTGCAAG+GCTGCACT  
CCAAATTTAGCACTTTTGAATATGACAGAAAGCTCGCCATATCAGATTAGAGACATGCCAGTTAGAGT  
TCTTCTAACCAGGACTGATGGTGAGATTCTTTTACCTTTTGGAGGTCC

+

@A00721:190:HGJW7DSXY:4:2619:17065:22748\_2:N:0:TCTGCAAG+GCTGCACT  
CCAAGGACGTTTCCGTCGGAGGATGACAGGTGGGAGACCGCTCAATAACACTCTATTGAATCCCTTTT  
CCACGATGAAAGCTCTTTATGAGGTGCTCCATGCAAATTTACAGTTCC

+

@A00721:190:HGJW7DSXY:4:1508:22670:1391\_1:N:0:TCTGCAAG+GCTGCACT  
ATTGGAGTTCAGACGTGTGCTCTTCCGATCTCTGACGAAGGTTCTATTACCACCCTTGTCATTGATAC  
AAACATTCTAGGTGATGCTTTCTTAGAGGCTCGTCTAGCCGCTGAGATTCGTCTTACCTATTTACAAT  
CTG

+

@A00721:190:HGJW7DSXY:4:1428:27941:30029\_2:N:0:TCTGCAAG+GCTGCACT  
GGGAAATGGTGGTAGTCAGTTTACTACTTTTCTTTCCCTCCCCTTTTTTCGATTGGATTCGACGGGGTC  
TTCGTCTCACGACTAATTTGATAAGGTTTTTCTTTTATGGGACTCTTG

+

@A00721:190:HGJW7DSXY:4:1440:3106:29731\_1:N:0:TCTGCAAG+GCTGCACT  
ATGTAGGTCTCCTAGTACTTAAGGGTTTATGTTTCGGTTTCAGCTGGATGGATCTTTTGATGGTATGT  
TTCACATTGCGTGATCACTTCCCGTGGACTTGGAAGAGATTAAACATAAAATCCAGCGATTCTATTA  
TGT

+

@A00721:190:HGJW7DSXY:4:1532:15953:6136\_1:N:0:TCTGCAAG+GCTGCACT  
CGATGATGTTCTGGGCTGTGGGGATTAACCTCCCTCGTGAACTTACGACGATGTTCTCGCTCGCATTT  
CACAAGGATTACTAAGTCTGAGATCTGCCACTTCTAATTTTAGGAAACGTCGCGAAAAGAAAGTTCAT  
GAG

+

[illegible]

@A00721:190:HGJW7DSXY:4:1144:5936:17628\_2:N:0:TCTGCAAG+GCTGCACT  
GAAAAATATCGCCGGGAACCTCTAATAGAGGATCCTGATGACATTATTTCAACGGATACCGATCTCAG  
TTCTACCACAGAAACCGTCTCAGGAAGTGTCTCCACTGATTCGGAATT

+

FFFFFFFFFFFF:FFFFFFFFFFFFFFFFFFFFFFFFFFFFFFFFFFFFFFFFFFFFFFFFFFFFFFFF  
FFFFFFFFFFFFFFFFFFFFFFFFFFFFFFFFFFFFFFFFFFFFFFFFFFFFFFFFFFFFFFFF:FF

@A00721:190:HGJW7DSXY:4:1421:13132:2910\_2:N:0:TCTGCAAG+GCTGCACT  
CTTCTTGTGGGACTGAGACCTCTGAATTTTCAGGGTGCCCTGATGAGGACGTTGAAAGGGATAATTT  
CAACTCTGAGACTTCTAAGAGTGTTCAAAAGACCAGAAACGTAACAA

+

FFFFFFFFFFFFFFFFFFFFFFFFFFFFFFFFFFFFFFFFFFFFFFFFFFFFFFFFFFFFFFFFFFFF  
FF:F:FFFFFFFFFFFFFFFFFFFFFFFFFFFFFFFFFFFFFFFFFFFFFFFFFFFFFFFF:FFFF

@A00721:190:HGJW7DSXY:4:2202:1479:29481\_2:N:0:TCTGCAAG+GCTGCACT  
GGAAGGGGAGAAAACAGAACAGCGAGCGTTGAAGAGAAAAGTATGTTGCGGCTGATCGTACC  
CCAATTCCTGCTAGAAAGATCACTCTCGGCGATACCACTGATCTTCCA

+

FFFFFFFFFFFFFFFFFFFFFFFFFFFFFFFFFFFFFFFFFFFFFFFFFFFFFFFFFFFFFFFFFFFF  
FFFFFFFFFFFFFFFFFFFFFFFFFFFFFFFFFFFFFFFFFFFFFFFFFFFFFFFFFFFFFFFF

@A00721:190:HGJW7DSXY:4:2571:20202:8328\_1:N:0:TCTGCAAG+GCTGCACT  
GGTCGTTCTTTTGGTGATTTTATCAAAGAGAAAGTTCTGCTAGTCGCGACGATAGTATTTATCGGAG  
TGATATTAACAAGTTAACTTCGAAGTACCACCTTACAAGAGTGTGAAGTACCGCAACATGGATCAG  
TTT

+

FFFFFFF:FFFFFFFFFFFFFFFFFFFFFFFFFFFFFFFFFFFFFFFFFFFFFFFFFFFFFFFFFFFF  
FFFFFFFFFFFFFFFFFFFFFFFFFFFFFFFFFFFFFFFFFFFFFFFFFFFFFFFFFFFFFFFFFFFF  
FFF

@A00721:190:HGJW7DSXY:4:1652:24352:11757\_1:N:0:TCTGCAAG+GCTGCACT  
CTGAATCCACTCTCTTGGGATATAAATGAGTACATCTATAATAGAGTTTTGGAAGTGTGAATGTCCT  
ACGTAAGTGTCAAGGTGTTGGGCTTCTCTAAAGAACAGCAACTTTCAACATGAATTAGTTATTGAAA  
GTC

+

FFFFFFFFFFFFFFFFFFFFFFFFFFFFFFFFFFFFFFFFFFFFFFFFFFFFFFFFFFFFFFFFFFFF  
FFFFFFFFFFFFFFFFFFFFFFFFFFFFFFFFFFFFFFFFFFFFFFFFFFFFFFFFFFFFFFFFFFFF  
FFF

@A00721:190:HGJW7DSXY:4:2635:18738:25238\_1:N:0:TCTGCAAG+GCTGCACT  
TTCTTCATGAAGATCTTCGAGTGTTCATAGTGAGTTATTCTTGCGAAGGTTCAAGTCGATTGATTTT  
GTTGACTACGATCTCTCTTGAATAAGAAGTTCCTCGCAGTTGAATCTCCACCAGGTGGAGGGAAGAC  
CAC

+

FFFFFFFFFFFFFFFFFFFFFFFFFFFFFFFFFFFFFFFFFFFFFFFFFFFFFFFFFFFFFFFFFFFF  
FFFFFFFFFFFFFFFFFFFFFFFFFFFFFFFFFFFFFFFFFFFFFFFFFFFFFFFFFFFFFFFFFFFF  
FFF

@A00721:190:HGJW7DSXY:4:2317:28284:34006\_1:N:0:TCTGCAAG+GCTGCACT  
TTCGCAAAAGGTCTTGAAGTACGTATTGTCAGTCTAATCGTAATTCGCGAGAAGAGATAGTACTAA  
AGTTTTGGCACTTCTAGTTCATCGCGGTATTTGTGAAATTAAGACAGACGTGAAAGTTATGATGAGTG  
ATC

+

FFFFFFFFFFFFFFFFFFFFFFFFFFFFFFFFFFFFFFFFFFFFFFFFFFFFFFFFFFFFFFFFFFFF  
FFFFFFFFFFFFFFFFFFFFFFFFFFFFFFFFFFFFFFFFFFFFFFFFFFFFFFFFFFFFFFFFFFFF  
F,F

@A00721:190:HGJW7DSXY:4:1516:5737:17816\_2:N:0:TCTGCAAG+GCTGCACT  
AGCTGATTCTTATTGCATGAACGTCGCTGAGGTCAAACCTGTGGACGTTCTTTTCATCGACGAATTAT  
TCATGTTTCACGCTGGTCAGACCCTTTTCTTACACATCTACTTAAGG

+

[illegible]

@A00721:190:HGJW7DSXY:4:1372:13105:11976\_1:N:0:TCTGCAAG+GCTGCACT  
AGCTCATGGTGAAGGGAAGCTAAGGTTAACTTGATGCTTCAGCCTTTTCGAAGCATAACCCCGCA  
CAGAATATCGTTTATCACGCAAATTTATTAATGCAATTTTCGACCTATCTTTAAGGTTCTTGAG  
GAG

+

FFFFFF:FFFFFFFFFFFFFFFFFFFFFFFFFFFFFFFFFFFFFFFFFFFFFFFFFFFFFFFFFFFFFFFF  
FFFF:FFFFFFFFFFFFFFFFFFFFFFFFFFFFFFFFFFFFFFFFFFFFFFFFFFFFFFFFFFFFFFFF  
FFF

@A00721:190:HGJW7DSXY:4:2127:25717:2691\_1:N:0:TCTGCAAG+GCTGCACT  
GCTCTTCTCTCTCTTAGGAGGTCATGATGCCTACTATAAGGGTGAAATCGATTTTTCGAAGTTTGACA  
AATCTCAAGATTTCTTTTGTAAGCCTATGAGATAAAGATGTATTCTTATTAGGCTTCGATGCTGAA  
TTT

+

:F:F,FF:FFFFFFFF:FFF:FFF:FF,F,F:FFF:F,F:FF:FFFFFF,FF:FF:FFFFFFFFFFFF  
,FFFFFFFFFFFFFFFFFFFFFFFFFFFFFFFFFFFFFFFF:F::FFFFFFFFFFFFFFFF:FFFFFFF  
FFF

@A00721:190:HGJW7DSXY:4:2218:9408:30123\_2:N:0:TCTGCAAG+GCTGCACT  
AGTGCCAGTGAATATTTTGTACGCCAGGAGTATCCATAACGATTTGTCAATTACCACCTTTGCTCA  
ACGACGAAGTGAACGGCCAACACTTTCTTTGGTAATTGTATGATCAC

+

FFFFFFFFFFFFFFFFFFFFFFFFFFFFFFFFFFFFFFFFFFFFFFFFFFFFFFFFFFFFFFFFFFFF  
FFFFFFFFFFFFFFFFFFFFFFFFFFFFFFFFFFFFFFFFFFFFFFFFFFFFFFFFFFFFFFFF

@A00721:190:HGJW7DSXY:4:2118:17833:26616\_2:N:0:TCTGCAAG+GCTGCACT  
TATCACTTTATTATGACCTTGAAAGTTTTTCGGCTGTGGTTGTGCTGGGACGATTCCATTCTGTTT  
TCAAAGACTCCAATAACTGATCATTCTGATCATATGATTTTGGACAAT

+

FFFFFFFFFFFFFFFF:FF:FFFFFFFFFFFFFFFFFFFFFFFFFFFFFFFFFFFFFFFFFFFFFFFFFFFF  
FFFF:FFFFFF::FFFF::FFFFFFFFFFFFFF:F::FFFFFFFF

@A00721:190:HGJW7DSXY:4:2133:20374:5494\_2:N:0:TCTGCAAG+GCTGCACT  
ATCGTTAAGTTAGGTAAACCCCTAACCGATGTTACTCTGTAGGACTTTGGGAGAGATTCTGTTAGTTT  
TAAAGACTATACTAAATATCTCCACTACGAGGTTGTTGTTTGGCGATT

+

F:FF:FFFFFFFFFFFFFFFFFFFFFFFFFFFFFFFFFFFFFFFFFFFFFFFFFFFFFFFFFFFFF  
FFFFFFFFF, :FFFFFFFF:FFFFFFFF:FFFF:FFFF:FFF,FFF:F

@A00721:190:HGJW7DSXY:4:2465:14190:12821\_2:N:0:TCTGCAAG+GCTGCACT  
ATATTCGATATTCGATTGAGGGTCGTTATACCTATTCGGCTATCTGTGCTTTGAATTGTATAAGATCA  
AATTTTAAACGATTCCGAGAGGTTTATCCTGATGTGGAGGGAGTTCTT

+

FFFFFFFFF:FFFFFFFFFFFFFFFFFFFFFFFFFFFFFFFFFFFFFFFFFFFFFFFFFFFFFFFFFFFF  
FFFFFFFFFFFFFFFFFFFFFFFFFFFFFFFFFFFFFFFFFFFFFFFFFFFFFFFFFFFFFFFF

@A00721:190:HGJW7DSXY:4:2435:12789:19883\_1:N:0:TCTGCAAG+GCTGCACT  
ACCTTTCCTTGTAAGAAATTTTGATGCGGTTTCATAAGATTATCAGTAATCCTGATTCTACTACGGATT  
CATGGACCTTCCATCCTGTACCTCTTCTGGAGAGACGTATCTCAAAGATCGACTTCGAGACAGGTGAT  
ATT

+

FF:FFFF:FFFFFFFF:FFFFFFFFFFFFFFFF::FFFF:FFFF,FFFFFFFF,FFFFFF:FFFF  
FFFFFFFFFFFFFFFF,FFFFFFFFFFFF::FFFFFFFF:F:FF:FF,FFFF::FF:FFFFFFFF:FF  
:FF

@A00721:190:HGJW7DSXY:4:2421:10366:36479\_2:N:0:TCTGCAAG+GCTGCACT  
CTAAATTCGGTAACGGTGCCTGGCGCTTTATTTTAAAAAGCTCCCTCCTCTCGCAAGTTTGATCTGAT  
ACTTATCACGAAAGGACTTGAGTCTTTTGATCAGTCTCTGACTTGACC

+

FFFFFFFFFFFFFFFFFFFFFFFFFFFFFFFFFFFFFFFFFFFFFFFFFFFFFFFFFFFFFFFFFFFF  
F::FFFFFFFFFFFFFFFFFFFFFFFFFFFFFFFFFFFFFFFFFFFFFFFF

@A00721:190:HGJW7DSXY:4:2307:8856:36307\_2:N:0:TCTGCAAG+GCTGCACT  
TAAATGACGATCATTTAGACTCTCTGTCTTCTTTGTTTCCTTCTTTGCACTGATTTTCTCATCAGC  
TTGTGTTTTACCTAATCTGTGTGTTTACGATAACAACATCATGTTGAT

+

FFFFF:FFF,F,F,F,FFF,F:FFF,F,FFFFFF:FFFFFFF:F:FFF:FFFFFFF::FFFFFFF:F:F:  
FFFFF:FFF,F::FF:F,FFF::FFFFFF:,F,FFFFFFFFFFFF:F,,

@A00721:190:HGJW7DSXY:4:1502:20853:16783\_1:N:0:TCTGCAAG+GCTGCACT  
CCGAAAGGCGAACTTTGGGAATTTGAAGCTCAGGGTGAAGCACACGTTTGACCGTGACGAACTGTGG  
TGTTCTTGATCTACGTTACGGATATACTCTCCTTGAGTTCACCTCGTAAGGACACTACCACTTATTACG  
ATA

+

F,FFFFFFFF:FF:FFFFFFFFFFFFFFFFFFFFFFFFFFFFFFFFFFFFFFFFFFFFFFFFFFFFFFFFFFFFFFFF  
FFFF:FFFFFFFF:FFFFFF:FFFFFFFF:FFFFFFFF:FFFF:FFFFFFFF:FFFF:FFFFFFFFFFFF  
FFF

@A00721:190:HGJW7DSXY:4:2258:5683:4601\_1:N:0:TCTGCAAG+GCTGCACT  
TCTCTATTTTAAGTTTTGTCTTCCTTGTTGTCTTATTCTATTAATCACTCATTTTAGTGAGATTATT  
AAAAACGCACTAAAACGTCTTCGACAACAGCAGGGGTTTTCGAATAGTGATAGCCACCCGCTTACAG  
AGG

+

FFF:FFFFFF,FF:FFFFFFFFFFFFFFFFFFFFFFFFFFFFFFFFFFFFFFFFFFFFFFFFFFFFFFFFFFFFFFFF  
FFFFFFFFFFFFFFFFFFFFFFFFFFFFFFFFFFFFFFFFFFFFFFFFFFFFFFFFFFFFFFFFFFFFFFFFFFFFFFFF  
FFF

@A00721:190:HGJW7DSXY:4:2666:25183:13823\_1:N:0:TCTGCAAG+GCTGCACT  
GACTTTGGTACCACCTTTTCTACTGTCTGTCTCGCTCTTCGAATGAAGTTTTAATGCTTAACAACAA  
TGATAGTGAATTTATACCTACAATCATTGGTTTTTCTAATAATGATGACACTATTGTTTATGGATATG  
ATG

+

FFFFFFFFFFFFFFFFFFFFFFFFFFFFFFFFFFFFFFFFFFFFFFFFFFFFFFFFFFFFFFFFFFFFFFFFFFFFF  
FFFFFFFFFFFFFFFFFFFFFFFFFFFFFFFFFFFFFFFFFFFFFFFFFFFFFFFFFFFFFFFFFFFFFFFFFFFFFFFF  
FFF

@A00721:190:HGJW7DSXY:4:1649:4734:12477\_1:N:0:TCTGCAAG+GCTGCACT  
TCTGGATTCTCAGTTTACAAGGACCTTAAGCGATGGATCGGGTTAATTCTAAAACATTACCCGAAAG  
ACGTGCTAAATTAACCATTGTACGATGTCGTCTGTCTCGCGATCACTTTTCTACTAAGAATTGGTC  
CTA

+

FFFFFFFFFFFFFFFFFFFFFFFFFFFFFFFFFFFFFFFFFFFFFFFFFFFFFFFFFFFFFFFFFFFFFFFFFFFFF  
:FFFFFFFFFFFFFFFFFFFFFFFFFFFFFFFFFFFFFFFFFFFFFFFFFFFFFFFFFFFFFFFFFFFFFFFFFFFFF  
FFF

@A00721:190:HGJW7DSXY:4:2201:11478:36182\_1:N:0:TCTGCAAG+GCTGCACT  
AGACGTGTGCTCTTCCGATCTATCGTTTCTTTCTTTATCTCTTTGGTTGTTAGGGATTTTGAGAGAGT  
GAAAGGCTTCAATTGTAGTGGTTTGGTCGTTTCAGTACCCAGTCAGTATACCTCTACGCAAAGATATT  
TCA

+

FFFFFFFF:FFFFFFFFFFFFFFFFFFFFFFFFFFFFFFFFFFFFFFFFFFFFFFFFFFFFFFFFFFFFFFFFFFFFF  
FFFFFFFFFFFFFFFFFFFFFFFFFFFFFFFFFFFFFFFFFFFFFFFFFFFFFFFFFFFFFFFFFFFFFFFFFFFFF  
FFF

@A00721:190:HGJW7DSXY:4:2548:11541:32847\_2:N:0:TCTGCAAG+GCTGCACT  
GAGGAACGTACCGGATTACCTGTCTTTCATATTATGAATGAACCTTCGGCCGCTCTCTTTGCTTCGAT  
GTTGGATGTCAAGAAGGGTTCAGAATGGGATTCTACGTAGTTTATGA

+

FFFFFFFFFFFFFFFFFFFFFFFFFFFFFFFFFFFFFFFFFFFFFFFFFFFFFFFFFFFFFFFFFFFFFFFFFFFFF  
FFFFFFFFFFFFFFFF:FFFFFFFFF:FFFFFFFFF:FFFFFFFFFFFF

@A00721:190:HGJW7DSXY:4:1114:26250:26130\_2:N:0:TCTGCAAG+GCTGCACT  
CTTCTATCGTCTTACGTTACGGTAATTACTATAGTGTTATTATTCTGGTGGTGATGATAATCTTGGGA

GGTCGTGACGTTGATGAAGCTATAAGAGCGTTCTTATTACGGCGCACT  
+  
FFFFFFFFFFFFFF:FFFFFFFFFFFFFF:FFFFFFFFFFFFFF:FFFF  
FFFFFFFFFFFFFF:FFFFFFFFFFFF:FFFFFFF  
@A00721:190:HGJW7DSXY:4:2667:16324:21934\_2:N:0:TCTGCAAG+GCTGCACT  
CACAACTTTCAGTTTCACAACTGAAGGAGGAGGTTTCTGTTACTGGAAAACCCTCGTCAATACTTTTC  
AATAATATACGTCTTGAACCTCACTTATGACGATCTAGTGAAATTAACG  
+  
FFFFFFFFFFFFFF:FFFFFFFFFFFFFF:FFFFFFFFFFFFFF:FFFF  
FFFFFFFFFFFFFF:FFFFFFFFFFFF:FFFFFFF  
@A00721:190:HGJW7DSXY:4:1526:29857:29684\_1:N:0:TCTGCAAG+GCTGCACT  
TACTATTATGAACAAAGTTATCAAAGATAGTGGCATTCAAGGCAAACTTACCCTGATTCCGGCCGGTG  
GTAGCTCATTTCTACCAGGGGCTATTACTCTTGCTGAAACAGCTATTAAAGCTGTTGAGCGGGTAATT  
ACA  
+  
FFFFFFFFFFFFFF:FFFFFFFFFFFF:FFFFFFFFFF,F  
FFFFFFFFFFFFFF:FFFF  
FFF  
@A00721:190:HGJW7DSXY:4:2176:9263:35164\_2:N:0:TCTGCAAG+GCTGCACT  
ATCGCTGAAGGATGTGCACTCTTTTCTGCTACTTTAACGGAGCGTAGTGTACTCTTCGTCGATTGTAT  
CAACAGTAACATTACTTCTAATAAAGGTCTCTATCAAGCTCGTATTAT  
+  
FFFFFFFFFFFFFF:FFFFFFFFFFFFFF:FFFFFFFFFFFF  
FFFFFFFFFFFFFF:FFFF  
@A00721:190:HGJW7DSXY:4:2122:23538:32205\_1:N:0:TCTGCAAG+GCTGCACT  
TTACCGTTGAAGGCTAACTCCAAGGTAATTATGAAGACTGTGATTTATCTTTCACTCTGGCCTTGTA  
TGAGGGTGTTTCTAATCGTAACATTAATAATTTCAATCTTCTTAAAAAGAAGATAGAGAGTCATACTT  
TGG  
+  
F:FFFFFFFFFFFF:FFFFFF:FFFF:FFFFFFFFFFFFFFFFFFFFFFFFFFFFFFFF  
FFFFFFFFFFFFFFFFFFFFFFFFFFFFFFFFFFFFFFFFFFFFFFFFFFFFFFFFFFFF  
FFF  
@A00721:190:HGJW7DSXY:4:1117:14425:33520\_2:N:0:TCTGCAAG+GCTGCACT  
CGAAGTAAAGATAACCAATAAGGAAGGAGCTTATACTATGGTTGAATCAACTAAGCATACTACTTTTG  
CTTTGATTACTCTACCGCCTTACAAGTCTAAGGTTAAAGAGTCGATTA  
+  
FFFFFFFFFFFFFF:FFFFFFFFFFFF,FFFF  
FFFFFFFFFFFFFFFFFFFFFFFFFFFFFFFFFFFFFFFFFFFFFFFFFFFF  
@A00721:190:HGJW7DSXY:4:1140:8305:3881\_2:N:0:TCTGCAAG+GCTGCACT  
TGGTTGTTATCTCGAAAAGTCTCTTCTAAAAGGAACGTCAGTTCTAACCCTAAAGAGAATATCTAAAAT  
ATTTACAAAATCTTACCACTATCTACGAACCTAAAGTTCTGAAGACGT  
+  
FFFFFFFFFFFFFF:FFFFFFFFFFFF,FFFFFFFFFFFF  
FFFFFFFFFFFFFFFFFFFFFFFFFFFFFFFFFFFFFFFFFFFFFFFFFFFF  
@A00721:190:HGJW7DSXY:4:1259:4318:17707\_2:N:0:TCTGCAAG+GCTGCACT  
TTCCTCCTTAATGGCACTACCTCGGTACAATCTTACTTGGAACGAAGGCGACCTGTTCCGGAGTTTT  
TACGGGATCCGGAATGTTCTGTCTATATTAGGTGAAGCGAAATACGAT  
+  
FFFFFFFFFFFFFF:FFFFFFFFFFFF  
FFFFFFFFFFFFFFFFFFFFFFFFFFFFFFFFFFFFFFFFFFFFFFFFFFFF  
@A00721:190:HGJW7DSXY:4:1505:3134:1752\_1:N:0:TCTGCAAG+GCTGCACT  
TCGTACCTTGATGCTGACTTTCGTCAATATGATTTGATCTGTTGCTCAATTCTAAGCGTGTTCCGCT  
TAGTGCGAGGCCTCTCTTCTACGAGTATTGCTATTTATACGGTTACGAGAAGAAGGTTCGAAAGTTTG  
AGA

```

+
FFFFFFFFFFFFFFFFFFFFFFFFFFFFFFFFFFFFFFFFFFFFFFFFFFFFF, FFFFFFFF: FFFFFFFFFFFFFFFFFFFFFFFFFFFFFFFFFFFFFF
: FFFFFFFFFF: FFFFFF: FFFFFFFFFFFFFFFFFFFFFFFFFFFFFFFFFFFFFFFFFFFFFFFFFFFFFFFFFFFFFFFFFFFFFFFFFF: FFF
FFF
@A00721:190:HGJW7DSXY:4:2119:5213:30091_2:N:0:TCTGCAAG+GCTGCACT
ATATTTGGATGATCTTGATAAAGAACCTTCATGAATTTTCAGAGGATGAAAAATTTTCTTCCTTGGATT
TTAATATAAAGAATCTTTACCAGGACTCCTACTACAGGAGGCAGTCTT
+
FFFFFFFFFFFFFFFFFFFFFFFFFFFFFFFFFFFFFFFFFFFFFFFFFFFFF: FFFFFFFFFFFFFFFFFFFFFFFFFFFFFFFFFFFFFFFFFFFFFF
FFFFFFFFFFFFFFFFFFFFFFFFFFFFFFFFFFFFFFFFFFFFFFFFFFFFFFFFFFFFFFFFFFFFFFFFFFFFFFFFFFFFF
@A00721:190:HGJW7DSXY:4:2332:8323:13933_2:N:0:TCTGCAAG+GCTGCACT
TTTGTGTGAATAGGGTCATCAACTTAGAACTCGAAACTCTAAGTGGAATACTGTCTTTCCAAGCTTA
CCTGTATCTTCAATGAAATTGGACTCTTCGATAGGGGACATTTTATCG
+
FFFFFFFFFFFFFFFFFFFFFFFFFFFFFFFFFFFFFFFFFFFFFFFFFFFFF: FFFFFFFFFFFFFFFFFFFFFFFFFFFFFFFFFFFFFF
FFFFFFFFFFFFFFFFFFFFFFFFFFFFFFFFFFFFFFFFFFFFFFFFFFFFFFFFFFFFFFFFFFFFFFFFFFFFFFFFFFFFF,
@A00721:190:HGJW7DSXY:4:2502:28863:7858_1:N:0:TCTGCAAG+GCTGCACT
TACTAATGGCGTTGGCCTAGTGGATGTTATTAGTGACATCTGGTCAATTTTCGTTTTTAGGTGGTCTTT
ATTCTATTATTGATTTTTATGAGATTGATACGTTAACAGAAGATGATGTTAGAGTAGAATTCCTGAAG
AG
+
FFFF, F: FFFFFFFFFF: FFFFFFFFFFFFFFFFFFFFFFFFFFFFFFFFFFFFFFFFFFFFFFFFFFFFFFFFFFFFFFFFFFFFFF: FFFFFFFFFFFFFFFFFF
FFFFFFFFFFFFFFFFFFFFFFFFFFFFFFFFFFFFFFFFFFFFFFFFFFFFF, FFFFFFFFFFFFFFFFFFFFFFFFFFFFFFFFFFFFFFFFFFFFFFFFFFFFFF
FF
@A00721:190:HGJW7DSXY:4:2355:7636:15060_2:N:0:TCTGCAAG+GCTGCACT
CCAACTTCTTGACAATTTTCTTCAATCCTTCGATAATAGTTAAATCTAGGATTATGTCTGTGTTGAAA
GACTTTCTACCGATAAGGGTCACTAGTCTTACACAATTAAGAAATAAT
+
FFFFFFFFFFFFFFFFFFFFFFFFFFFFFFFFFFFFFFFFFFFFFFFFFFFFF: F: FFFFFFFFFFFFFFFFFFFFFFFFFFFFFF
FFFFFFFFF: FFFFFFFFFFFFFFFFFFFFFFFFFFFFFFFFFFFFFFFFFFFFFFFFFFFFFF
@A00721:190:HGJW7DSXY:4:1273:31114:17957_2:N:0:TCTGCAAG+GCTGCACT
ACTATCTAAAGATTGAAGGAAAATTTTATCCTCGTTTAACTTACTTAGACTTTCCTACGATACAAATG
ATAACTTCTAATTTACGTTTGCTACTCAGAGCTGGTCCTCTCAGCAA
+
FFFFFFFFFFFFFFFFFFFFFFFFFFFFFFFFFFFFFFFFFFFFFFFFFFFFF: FFFFFFFFFFFFFFFFFFFFFFFFFFFFFFFFFFFFFFFFFFFFFF
FFFF: FF: FFFFFFFFFFFFFFFFFFFFFFFFFFFFFF: FFFFFFFFFFFFFFFFFFFFFFFFFFFFFF
@A00721:190:HGJW7DSXY:4:1342:22634:26944_2:N:0:TCTGCAAG+GCTGCACT
CTCAGGAGTCCC GCATTTGATAATAATGACGAGACTTTCGTCATAATCGCTGCATATTACGGATTAC
ACGGTACCAGCGCATCTCGTGTGCGAGCCTCGACCCGATTATATGTTAT
+
FFF: F: FFFFFFFFFFFFFFFFFFFFFFFFFFFFFFFFFFFFFFFFFFFFFFFFFFFFFFFFFFFFFFFFFFFFFF: FFFFFFF:: FFFFFFFF
FFF:: F: FFFFFFFFFFFFFFFFFFFFFFFFFFFFFF, FFFFFF, FFF: F, FFFFFFFFFF
@A00721:190:HGJW7DSXY:4:1152:23520:29230_1:N:0:TCTGCAAG+GCTGCACT
TTCTTAATTATAATATTCAACCTCAAAAGTTACGTGTTTACAGTAACGAGATCACACATTTTGAGAAC
TA ACTATGTTATGTTCTCTGATCATTTTGACAATCTCTTCTTATAATAATAATAATAATAATATTACT
AAT
+
FF: FFFF: FFFFFFFFFFFFFFFFFFFFFFFFFFFFFFFFFFFFFFFFFFFFFFFFFFFFFFFFFFFFFFFFFFFFFF
FFFFFFFFFFFFFFFFFFFFFFFFFFFFFFFFFFFFFFFFFFFFFFFFFFFFFFFFFFFFFFFFFFFFFFFFFFFFFFFFFFFFF:
FFF
@A00721:190:HGJW7DSXY:4:1368:32289:7748_1:N:0:TCTGCAAG+GCTGCACT
AAAGGCTCCAGTCAACACTAGTTCGAGTGCTGCTTTGGATTACGATGACGTGAGAATAGGTGAAGGGA
TAGTTTTTACCTCGACCAACATTAAGGCGGCGGCGACTAATCTTAAAGCTTCACCCAAAATGAAGGAC
ACT

```

[illegible]



@A00721:190:HGJW7DSXY:4:1662:22733:6261\_1:N:0:TCTGCAAG+GCTGCACT  
ATTTAGTCTCAACACCCATCTCAACGAGGATAAAGCTATTTTTCCGTCATCAACGTAATACACGAAGA  
GATCATCCGCAAACGACTCGAAACCGAGACGCCGTAGATCAAAGTCCCTTCTAACTTTAGATT

+

:FFF:,:FF,,,FFF,,,,FFF:,:F,FFFF,,,,F,,FFFF,F:F,:FF:,:F:,:::,F,,:  
,:,,,F:FF,,FFFF:FFFFFFFF:FFFFFFFFFFFFFFFF:FFFFFFFFFFFF:FFFFFFFF

@A00721:190:HGJW7DSXY:4:1571:11306:26772\_2:N:0:TCTGCAAG+GCTGCACT  
CAGTTATTTATGTTGTACTTTTTATAATTTATAACCTTCTATAATTTTTGGTAAGTTTTGTGAAAAA  
ATGATATACCCAAGTATATAGAAGACATTATCTCTTATGTACATATTG

+

FFFFFFFFFFFFFFFFFFFFFFFFFFFFFFFFFFFFFFFFFFFFFFFFFFFFFFFFFFFFFFFF,FF:,:FFF,:FFF,,FFFF,F,:FFFF,  
F,,F,:F,FFFF,F,,F:,:FF,,,F,FF,,,,:F:,:FF,,FF,F,

@A00721:190:HGJW7DSXY:4:1310:29107:35587\_2:N:0:TCTGCAAG+GCTGCACT  
CTGTGTATGAGGAGGATTTATAATGCTTTTCGATAGTGATTGTTATCAATTTAAATACATTACTGTTT  
CAAATCATCTTTACTCACAGACTCCGAAAATGTTTCAAATGAGTTCA

+

FFFFF,FFFFF:F:,FFFFFFFFF,FFFFF,FFFF,F,FF:FFFFFFFF:FFFFFFFF:FFFF,FFFFFFFF  
:FF:FFFFFFFFFFFFFFFFFFFFFFFF:FFFFFFFF:FF,:FFFFFFFF,FFF

@A00721:190:HGJW7DSXY:4:2264:2157:21324\_2:N:0:TCTGCAAG+GCTGCACT  
TTAAACGAAGTATTATCCGATTCTTCGAGGGTATCACTACCACTGATCTGCCGACTTTAGTCAAGGAA  
CTTCAATTCCTTCGATGTTTATATTTTTCTATAAGGGAAAATAGCAAT

+

FFFFFFFFFFFFFFFFFFFFFFFFFFFFFFFFFFFFFFFFFFFFFFFFFFFFFFFFFFFFFFFF:FFFFFFFF:FFFFFFFFFFFF  
FFFFFFFFFFFFFFFFFFFFFFFFFFFFFFFFFFFFFFFFFFFFFFFFFFFFFFFFFFFFFFFF

@A00721:190:HGJW7DSXY:4:2109:27706:17973\_2:N:0:TCTGCAAG+GCTGCACT  
CGACAAATTTTAGAACTTTATTTCAGAACTCTCTCCGATCACCTTGGTGTGATCTCCCGGAGGATCTT  
TTCAATAAGATGTATGATGATAATCTACTATTTTTAAATAGTGATATT

+

FFFFFFFFFFFFFFFFFFFFFFFFFFFFFFFFFFFFFFFFFFFFFFFFFFFFFFFFFFFFFFFFFFFFFFFFFFFFFFFF  
FFFFFFFFFFFFFFFFFFFFFFFFFFFFFFFFFFFFFFFFFFFFFFFFFFFFFFFFFFFFFFFF

@A00721:190:HGJW7DSXY:4:2570:5439:21026\_1:N:0:TCTGCAAG+GCTGCACT  
CTTTATCAAAGATTTGGCTTGGTCTATTTACCGCAAAAAGTTGGAAGAGGTCTATGATATTTATTTTA  
CTTATACTTTAAATAGCACCGATTATAACTTGACTGTTGATAATATTACAATAGCTCTTTCTCAGAAG  
ATT

+

F:FFFFFF:FFFFFFFFFFFFFFFFFFFFFFFF:FFFFFFFFFFFFFFFFFFFFFFFFFFFFFFFF:FFFFFFF  
FFFFFFFFFFFFFFFFFFFFFFFFFFFFFFFFFFFFFFFFFFFFFFFFFFFFFFFFFFFFFFFF:FFFFFFFFFFF  
FFF

@A00721:190:HGJW7DSXY:4:2570:15817:35493\_2:N:0:TCTGCAAG+GCTGCACT  
GTTGAACACGTCGGTAGCATTGATTTACTTTTACCGTTAGAACTGAAAAAGATTCTTTTCGAAAAGAA  
ACCTATAAGTTACAAACGATTCTTCGACTATATTAAGAAATAAAAAT

+

F,F:,:FFF,F,: ,FFF,FFFFFFFFFFFFFFFF:F:F,FFF,F,: ,FF,F:FFFF,F:FF:,:FFFF:FF  
,FFFFFF:FFFF,,FFFFFF:,FFFF:FF:F:FFFF,:F:FFF:,F,F

@A00721:190:HGJW7DSXY:4:2148:7157:14137\_2:N:0:TCTGCAAG+GCTGCACT  
CTTTACATTTTTAATGGTATGGTATAATGTGTCTTACAAATAGAACCTTCACTCTCGGTAATGAGAGT  
GTATTCCTTAATATTCTAGTAACCGCTATGTGGGCATTACTAGGATTT

+

FFFFFFFFFFFFFFFFFFFFFFFFFFFFFFFFFFFFFFFFFFFFFFFFFFFFFFFFFFFFFFFFFFFFFFFFFFFF  
FFFFFFFFFFFFFFFFFFFFFFFFFFFFFFFF:FFFFFFFFFFFFFFFF:FFFFF

@A00721:190:HGJW7DSXY:4:2272:13467:8938\_2:N:0:TCTGCAAG+GCTGCACT  
TGCTAGGAAAATTTTAGAAAACTCCATTGTATAGTTCAAGGAGTACTTAATTCAATAGCTTTAGTAT  
TATTTACTATCGCCTTTATTGAAAATTGTATAAGAGTTAATTGCTTAC

+

F,FFF:FFFFFFFFFFFFFFFF::FFF:F:FFFFFFFFFFFF,FFFFFFFFFFFFFFFF,FFFFFFFF  
FFFFFFFFFFFF:FFFFFFFFFFFFFFFF:FFFFFF,,FFFF,FFFFFF  
@A00721:190:HGJW7DSXY:4:1563:6524:11443\_2:N:0:TCTGCAAG+GCTGCACT  
ACCATAACCTACCATGACCAATCATCGCTCCAAGTGGCAGCCAGACGTAGGGTCAAACCTACTACCG  
CCGGTCGGCAGATCGGCACCACTGGTCTCTACGTTACAGGACCCGCTG  
+  
FFFFFFFFFFFFFFFFFFFFFFFFFFFFFFFFFFFFFFFFFFFFFFFFFFFFFFFFFFFFFFFF  
FFFFFFFFFFFFFFFFFFFFFFFFFFFFFFFFFFFFFFFFFFFFFFFFFFFFFFFFFFFFFFFF  
@A00721:190:HGJW7DSXY:4:1619:7319:3145\_1:N:0:TCTGCAAG+GCTGCACT  
TTCCCAAATCTAGATCTGCACAGAAGAAGGCTGAAGGTCGTTACCGGACGACCACTCAAAGGAAACGG  
GCTGTTGCCAGAGGAAAGCAGCGACCACCGAGGTCGCTCGTAACATTGACGGCAGTCCCGTCATCTC  
TGT  
+  
:,FFF:F:FFF:F,:FF:FFFFFFFF,FFFFFFFFFFFFFFFFFFFFFFFFFFFFFFFFFFFF  
FFFFFFFFFFFFFFFFFFFFFFFFFFFFFFFFFFFFFFFFFFFFFFFFFFFFFFFFFFFFFFFFFFFF  
FFF  
@A00721:190:HGJW7DSXY:4:2148:23439:9893\_2:N:0:TCTGCAAG+GCTGCACT  
CAGTACCTCAGTCAAAAGTCACATTCACCACTCCCATACCAATCAATGATGTGACTATACAGTTCGGC  
CATTTCAAGAGTGGTCAATACGTCGTGGGAGGTACTGAAGCCTTCCCC  
+  
FFFFFFFFF:FFFFFFFFFFFFFFFFFFFFFFFFFFFFFFFFFFFFFFFFFFFFFFFFFFFFFFFF  
FFFFFFFFFFFFFFFFFFFFFFFFFFFFFFFFFFFFFFFFFFFFFFFFFFFFFFFFFFFFFFFF  
@A00721:190:HGJW7DSXY:4:2430:27832:25300\_2:N:0:TCTGCAAG+GCTGCACT  
AAGCCAATCAATAGTTCTTCTGACCAGAATGAAAAGGGTTTACCAGGGTAGTCTCTAAGTCTACCAG  
GAAGAGGGGAAATGTCCCCAAAAGTGAAGAATAAAGGGAAGGTCC  
+  
FFFFFFFFFFFFFFFFFFFFFFFFFFFFFFFFFFFFFFFFFFFFFFFFFFFFFFFFFFFFFFFFFFFF  
FFFFFFFFFFFFFFFFFFFFFFFFFFFFFFFFFFFFFFFFFFFFFFFFFFFFFFFFFFFFFFFF  
@A00721:190:HGJW7DSXY:4:1410:18132:17018\_1:N:0:TCTGCAAG+GCTGCACT  
ATCTCTAATTCTGAAGGAAGATCTCCCACCATCTGGGGTTGGGAATAAGAAATCTGCACGGGCCAAAG  
AGGCCGCTGCTACGAAGTCGCTGAAGGCGGCTTGGGTCATTAAGGGTAGCTGTAAAGTTGCGCCTGCC  
GAC  
+  
FFFF:FFF:F,F,F,:,,FFFFFFFF::F,,FFFFFFFF:FFFF::F::F:F:FFFF:F:FF,:F,:F  
FFF,F,:FF:FF:F,FFF:F:FFFF:F:F:,FFFFFFFFFFFF,FFFF:FFFFFFFF,FFFF::FFFF  
F,F  
@A00721:190:HGJW7DSXY:4:1654:23882:30514\_2:N:0:TCTGCAAG+GCTGCACT  
GACTCTCTACAGTAGGTTCTGCCTACTATGAGCAAATCTGTTGAATTCGTCAGTGAAGGACGAAGGTG  
AGAGGACTTTTGGCTACTGGCGACAAACAGATCGGAAGAGCGTCGTGT  
+  
FFFFFFFFFFFFFFFFFFFFFFFFFFFFFFFFFFFFFFFFFFFFFFFFFFFFFFFFFFFFFFFFFFFF  
:FFFFFFFFFFFFFFFFFFFFFFFFFFFFFFFFFFFFFFFFFFFFFFFFFFFFFFFF  
@A00721:190:HGJW7DSXY:4:1473:14344:1125\_1:N:0:TCTGCAAG+GCTGCACT  
CTTGAGTGTGACGAGGCCGGTGACGTTTTGTCAACGGCGTTTGGAGGATTTTATCCGCGCTTAACTA  
TGGGGCGAAGATCCCCTATGGAGTCTTGAAGGACTTAGGTTGGCATATTTATGCCGACGATAATAAGC  
ATG  
+  
:FFFFFFFFFFFFFFFFFFFFFFFFFFFF::FFFFFFFF:FFFFFFFFFFFFFFFFFFFFFFFFFFFF  
FFFFFF,FFFF:FFFFFFFF::,FFFFFFFF:FFFFFFFFF:,FFFFFFFF:FFFFFF:FFFFFFFF  
F::  
@A00721:190:HGJW7DSXY:4:1655:26106:32581\_2:N:0:TCTGCAAG+GCTGCACT  
CGGGACTTACAAGAGAGAGTGTGAGAGAGTCGCTCTCACTATTTTTGCCAGAATGCGGGCTTTCTGA  
CTGATGAGGTTAAAGTCTTGCTCCTTCTGTGGGTGAGGGTTTTTGT  
+

F,FFFF,:F:FF,FFFF::F:FFF:,F:FFFFFF:F,FFFFFFFFF:  
@A00721:190:HGJW7DSXY:4:1624:27552:13479\_2:N:0:TCTGCAAG+GCTGCACT  
ATTACAACCTCTCTTTAGAGAGCATTAGAAGGAAGTTGGGCAAATTCACATATGGTAGACGTTGTC  
ACACTTTTCTTGAAAATTTTTCCTTTCCTCCGTCATTGGGGATTTCGA  
+  
FFFFFFFFFFFFFFFF:FFF:FFFF:FFFFFFFF,FFFFFFFF:FFFFFFFF,FF,FFFF:FFFFFF  
FFFFFFFF,FF:,FFFFFFFF:FFFFFF:FF,,FFFFF,:FFF  
@A00721:190:HGJW7DSXY:4:2142:4960:7138\_1:N:0:TCTGCAAG+GCTGCACT  
GGAAGGTGTCAAGGGTCTTCTTCATGCTGATCTTTCAGGACCTAATCACATCATGATTGATAGTTACG  
GCTCGTATCGAGTTGGAGGGAGGAAGTTCTCCGAAATTAAAGACGGGGGGATTAAAGAGTCCAGCTGTA  
ACT  
+  
FFFFFFFFFFFFFFFFFFFFFFFFFFFFFFFFFFFFFFFFFFFFFFFFFFFFFFFFFFFFFFFFFFFFFFFF  
FFFFFFFFFFFFFFFFFFFFFFFF:FFFFFFFFFFFFFFFFFFFFFFFFFFFFFFFFFFFFFFFFFFFFFFFF  
FFF  
@A00721:190:HGJW7DSXY:4:2158:31250:11678\_2:N:0:TCTGCAAG+GCTGCACT  
AGAGGGGAGCTCTGAAAAGGAACTTCGTCAGAAGATGAGGAAGTCTAAGAGGAGGAGTTTGAGGAAG  
GCTCTAGAGAAGATCTCACCACCTGGAGAAGGCAAGTGGAGAGTCCAG  
+  
FFFFFFFFF:FFFF:F:FFFFFFFFFFFFFFFFFFFFFFFFFFFFFFFFFFFFFFFFFFFFFFFF:FFFFFFFF  
F:F:FFFFFFFF:FFF:FFFF,FFFFFFFF:FFFFFFFFFFFF:FF  
@A00721:190:HGJW7DSXY:4:2649:21468:23735\_1:N:0:TCTGCAAG+GCTGCACT  
CTTCCGATCTTTGAAGCAGGGGTACCACCTTCCTAAGGTGGATGAGGGAGGTTGTTTCTTTGGAGTT  
TTAGATAATCTTTTGAGAAGGGGTCATAGAGCCAGCAAGAGAAGCTTATATGCTGGTTAAGTGATGA  
TTA  
+  
FFFFFFFFFFFFFFFFFFFFFFFFFFFFFFFFFFFFFFFFFFFFFFFFFFFFFFFFFFFFFFFF:FFFFFFFF  
FFFFFFFFFFFFFFFFFFFFFFFFFFFFFFFFFFFFFFFFFFFFFFFFFFFFFFFFFFFFFFFFFFFFFFFF  
FFF  
@A00721:190:HGJW7DSXY:4:1635:3378:3583\_1:N:0:TCTGCAAG+GCTGCACT  
ATTTAGGTCAACTTGGGGTTTCGAATGTCATTAGTGCCTTACGATTGAAAGAGGTCCTTTTGAGTATC  
GACAGATCTTTCGATCTTGAGGACGTACATTTAACGTGGCAGAATTTCGTAACCTACCATATTGTTCC  
TTC  
+  
FFFFFFFFFFFFFFFFFFFFFFFFFFFFFFFFFFFFFFFFFFFFFFFFFFFFFFFFFFFFFFFFFFFFFFFF  
FFFFFFFFFFFFFFFFFFFFFFFFFFFFFFFFFFFFFFFFFFFFFFFFFFFFFFFFFFFFFFFFFFFFFFFF  
FFF  
@A00721:190:HGJW7DSXY:4:1322:22164:1078\_1:N:0:TCTGCAAG+GCTGCACT  
TTTAACTTTGACTCAACTACTCCGATCAGATCCGGATGGTTTGATTGGTATGGACTACTCGACTTTTG  
ATCTGGAGTTGTCTAGGGTCATGGCAGATACTACCGATAAGGTGAAAAATATGCAGGTCAAAGATTCT  
GTA  
+  
FFFFFFFFFFFFFFFFFFFFFFFFFFFFFFFFFFFFFFFFFFFFFFFFFFFFFFFFFFFFFFFFFFFFFFFF  
FFFFFFFFF:FFFFFFFFFFFFFFFF:FFFFFFFFFFFFFFFFFFFFFFFFFFFFFFFFFFFFFFFF  
FFF  
@A00721:190:HGJW7DSXY:4:1514:10393:36432\_2:N:0:TCTGCAAG+GCTGCACT  
GTTTTGCCGACTTTAACTATTCTAAGAGTCTTTATGATTCAAACCTATCGTTGTCTGACCTTACAA  
GGTTGAGGAGACTGTACAGCGGCTTATTGTCGCGCAGTTTCCAGAATT  
+  
FFF:FF,FFFFF,FFFF:F:FFFFFFFFFFFFFFFF,FFFFFFFFFFFF::FFF:FFFF,F:,FF  
:FFFFFFFFFFFF:,FFFFFFFFFF,FFFF:,FFFFFFFFFFFFFFFF,F  
@A00721:190:HGJW7DSXY:4:2305:9073:8844\_1:N:0:TCTGCAAG+GCTGCACT  
TATCTTGAATGCTCACGCCGTCGAGCCATATCGAGACTATGTTATAATCACTTGTTAAAGTACAGAT



FFFFFFFFFFFFFFFF,F:,FFFFFFFFFFFFFFFF,FF:FFF:FFFF,FFFF,,:,FFFF,FF:,FF,:F  
,,FF:FFFFFFFF,F:FFFFFF,:F,FF,FFF:FF,F:,FFFFFFFF  
@A00721:190:HGJW7DSXY:4:2604:29740:14418\_1:N:0:TCTGCAAG+GCTGCACT  
CCGATCTAGAAGACAACGAATCTTGAACTACGGTCCTTATCAAATAAAATGGTGAACCGGTCTCTAA  
ATCTTTTGAGATTGAGAAGATTGAAGAACACGTCAAGAAGTCGCTCGGCGTTGTTCTTGAACCAAG  
TTA

+  
:,F:F,FFF,F:F,,F,FF,F:FFFF,FFFF:FFF:FFFF,FFF,:F:FFF,FFFF::FFF,F:FF:  
FFFFFFFFFFFF,:FFFF,F:FFFFFFFF:FFFFFFFFFFFF:FFFFFFFFFFFF:FFFFFFFF:F,:FF  
FFF

@A00721:190:HGJW7DSXY:4:1108:17354:13291\_2:N:0:TCTGCAAG+GCTGCACT  
CTTTGTACCTTCTGTCAAACCTCGAGGTTACGCTACGAGAGGTGATCCCGGATGTGGATTGAAGGCTG  
GCTCTAAGGGAGACTCCTTCTTTTGAATGTTGTAAAGAATTGGGTTG

+  
FFFFFFFFFFFFFFFFFFFFFFFFFFFF:FFFFFFFF:F:FFF:F:FFFFFFFF:FFFFFFFF:FFFFFFFFFFFF  
FFFFFFFF,FFFFFFFFFFFFF::FFF,,FFFFFF,:FFF:FFFF:FF

@A00721:190:HGJW7DSXY:4:1261:8151:2143\_1:N:0:TCTGCAAG+GCTGCACT  
ACAAGGAGTTAGACTCTTCTTCAAGTTTTAGATCTTCTTGATAATCTTAAAGAAAAATTTTGAATA  
AACTAATGAGAGGTATAGGCTTAGTCAAGTCTGTACTTACATTCTTTACGCCAGATTCTTCATGGGGC  
GAC

+  
FFFFFFFFFFFFFFFFFFFFFFFFFFFF:FFFFFFFF,FF:FFFFFFFFFFFF:FFFFFFFFFFFFFFFFFFFF  
FFFFFFFFFFFFFFFFFFFFFFFFFFFFFFFFFFFFFFFFFFFFFFFFFFFFFFFFFFFFFFFFFFFFFFFFFFFF  
FFF

@A00721:190:HGJW7DSXY:4:1249:5421:27508\_2:N:0:TCTGCAAG+GCTGCACT  
CGAGAATTATTACTGTTTTCTTACCCATAACTTCTTTTTCAAAAATGCGGATGGGTCTACTGATGTT  
TTCTACAGAGTGCAGTCGTTTCAACACTTATCACCCTTTTGAAGG

+  
FFFFFFFFFFFFFFFFFFFFFFFFFFFFFFFFFFFF:FFFFFFFFFFFFFFFFFFFFFFFFFFFFFFFFFFFF  
FFFFFFFFFFFF:FFFFFFFFFFFF,FFFFFFFFFF:FF:FF,FFF,FF:,F

@A00721:190:HGJW7DSXY:4:2343:9670:30608\_2:N:0:TCTGCAAG+GCTGCACT  
AATACGTATGTCGGTGGGTTCTCAAGGCTCTCATGCCACTGGGATTCTAAGGGGTTCCATAAGATA  
TTATCTGACATTGTGGTTCAATGATCAGGATTCTTCTTTTGGTCCTTA

+  
FFFFFFFFFFFFFFFFFFFFFFFFFFFFFFFFFFFF,FFFFFFFFFFFFFFFFFFFF:FFFFFFFFFFFF  
FFFFFFFFFFFFF:FFFFFFFFFFFFFFFFFFFFFFFF:FFFFFFFFFFFFF

@A00721:190:HGJW7DSXY:4:2574:3323:22686\_1:N:0:TCTGCAAG+GCTGCACT  
ATTTGGATGTTGTGAAAACATCAGGTTCTTGTCACGATTCTTAAAGAAGTTTATTAAACTTCAG  
AGTCTCTTGAAGTCCAGGTAGCTAATGTTCTTGCAATAGCCACAGACTTTCTGGGAAAAGAGACCTC  
TGT

+  
FFFFFFFFFFFFFFFFFFFFFFFFFFFFFFFFFFFF:FFFFFFFFFFFFFFFFFFFFFFFFFFFFFFFFFFFF  
FFFFFFFFFFFFFFFFFFFFF:FFFFFFFFFFFFFFFFFFFFFFFFFFFFFFFFFFFFFFFFFFFFFFFFFFFF  
FFF

@A00721:190:HGJW7DSXY:4:2233:29586:24768\_1:N:0:TCTGCAAG+GCTGCACT  
GAGAATTACTCAGATTCAATCTGGCATCACTGAACGTCTACAACGAGTTAGGGAGTGGCTAGGTTTTA  
AAAGATCCTTTGCACAAGCAATACCTTCCACTGAGTTCATCACCAGAGTTTCGACGTGCGGAAAAC  
GAT

+  
FFFFFFFFFFFFFFFFFFFFFFFFFFFFFFFFFFFF:FFFF  
FFFFFFFFFFFFFFFFFFFFFFFFFFFFFFFFFFFFFFFFFFFFFFFFFFFFFFFFFFFFFFFFFFFFFFFFFFFF  
FFF

@A00721:190:HGJW7DSXY:4:1121:27073:7952\_2:N:0:TCTGCAAG+GCTGCACT  
ATCTTCTGATGCTGAATTTGAGGAAAATTTTTCGGAAGTTTTTGGTATAAATCCTGATGGCTCAGTAC

AGGGAGGAGGTAATAGTTATAAAACCTTCTTTTATCATTGCAACAGGA  
+  
FFFFFFFFFFFFFFFFFFFFFFFFFFFFFFFFFFFFFFFFFFFFFFFFFFFFFFFFFFFFFFFF  
FFFFFFFFFFFFFFFFFFFFFFFFFFFFFFFFFFFFFFFFFFFFFFFFFFFFFFFF  
@A00721:190:HGJW7DSXY:4:2141:26078:13338\_2:N:0:TCTGCAAG+GCTGCACT  
ATCTGGGATCATAGGTATGTGTACGCTACACTCGAAATATGGGCCCTCATAAGGAAGTATAGTTGGC  
GTCTTGTCTTGACGTCATTACAGTCTGGAAGTTAGATCATTTGTTCA  
+  
FF:FF:FFFFFFFFFFFFFFFFFFFFFFFFFFFFFFFFFFFFFFFFFFFFFFFFFFFFFFFF  
FFFFFFFFFFFF:FFFFFFFFFFFFFFFFFFFF,FF:FFF:FF:FFFFFFFF:  
@A00721:190:HGJW7DSXY:4:2452:8594:33880\_1:N:0:TCTGCAAG+GCTGCACT  
TTTAGATAAATTCTTTCCGGGCTCAATGACCTTTGCTATGTACGTGGATCTAATGCTTGGTGATCTGA  
ATCTGACCATCGCAAAGAAGACTTTATTAGTTTCATGAAGTTCTTACACTTCTCGCGACTAATGTCAGC  
TTC  
+  
FFFFFFFFFFFFFFFFFFFF:FFFFFFFFFFFFFFFFFFFFFFFFFFFFFFFFFFFFFFFF  
FFFFFFFFFFFFFFFFFFFFFFFFFFFFFFFFFFFFFFFFFFFFFFFFFFFFFFFF  
FFF  
@A00721:190:HGJW7DSXY:4:2434:4643:2707\_2:N:0:TCTGCAAG+GCTGCACT  
CCAAATTTAGCACTTTTGAATATGACAGAAGCTCGCCATATCAGATTAGAGACATGCCAGTTAGAGT  
TCTTCTAACCAGGACTGATGGTGAGATTCTTTTACCTTTTGGAGGTCC  
+  
FFFFFFFFFFFFFFFFFFFFFFFFFFFFFFFFFFFFFFFFFFFFFFFFFFFFFFFFFFFF:FFFFFFFFFFFFFFFF  
FFFFFFFFFFFFFFFFFFFFFFFFFFFFFFFFFFFFFFFFFFFFFFFFFFFFFFFF  
@A00721:190:HGJW7DSXY:4:1257:32841:1376\_2:N:0:TCTGCAAG+GCTGCACT  
GACGTTTCCGTCGGAGGATGACAGGTGGGAGACCGCTCAATAAACTCTATTGAATCCCTTTTCCACG  
ATGAAAGCTCTTTATGAGGTGCTCCAGATCGGAAGAGCGTCGTGTAGG  
+  
FFFFFFFFFFFFFFFFFFFFFFFFFFFFFFFFFFFFFFFFFFFFFFFFFFFFFFFFFFFF,FFFFFFFFFFFFFFFF  
FFF:FFFFFFFFFFFFFFFFFFFFFFFFFFFFFFFFFFFFFFFFFFFF:FFFFF  
@A00721:190:HGJW7DSXY:4:2360:6298:33191\_1:N:0:TCTGCAAG+GCTGCACT  
ACTGGAGTTCAGACGTGTGCTCTTCCGATCTCTGACGAAGGTTCTATTACCACCCTTGTCATTGATAC  
AAACATTCTAGGTGATGCTTTCTTAGAGGCTCGTCTAGCCGCTGAGATTCGTCTTACCTATTTACAAT  
CTG  
+  
FFFFFFFFFFFFFFFFFFFFFFFFFFFFFFFFFFFFFFFFFFFFFFFFFFFFFFFFFFFF:FFFFF:FFFFFFF  
FFFFFFFFFFFFFFFFFFFFFFFFFFFFFFFFFFFFFFFFFFFFFFFFFFFFFFFF  
FFF  
@A00721:190:HGJW7DSXY:4:2265:14922:11522\_2:N:0:TCTGCAAG+GCTGCACT  
GGGAAATGGTGGTAGTCAGTTTACTACTTTTCTTCCCTCCCTTTTTTCGATTGGATTCGACGGGGTC  
TTCGTCTCACGACTAATTTGATAAGGTTTTCTTTTATGGGACTCTTG  
+  
FFFFFFFFFFFFFFFFFFFF:FFFFFFFFFFFFFFFFFFFFFFFFFFFFFFFFFFFFFFFF  
FFFFFFFFFFFFFFFFFFFFFFFFFFFFFFFFFFFFFFFFFFFFFFFFFFFF,:FFFFFF  
@A00721:190:HGJW7DSXY:4:2354:4634:32346\_1:N:0:TCTGCAAG+GCTGCACT  
ATGTAGGTCTCCTAGTACTTAAGGGTTTATGTTTCGGTTTCAGCTGGATGGATCTTTTGATGGTATGT  
TTCACATTGCGTGATCACTTCCCGTGGACTTGGAAGAGATTAAACATAAAATCCAGCGATTCTATTA  
TGT  
+  
FFFF,F:F,F:FFFFFFFFFFFF:FFFFF,FFFFFF,FFFFFF:FFFFF:FF::F,FFFFFFFFFFFF  
FFFFFFFFFFFF,FFFFFFF:FFF:FFFFFF:FFFFFF,FFFFFFFFF:FFFFFFFFF:FFFFFF:FFFFF  
FFF  
@A00721:190:HGJW7DSXY:4:2430:13114:14090\_1:N:0:TCTGCAAG+GCTGCACT  
CGATGATGTTCCGGGCTGTGGGGATTAACCTCCCTCGTGAAACTTACGACGATGTTCTCGCTCGCATTT







$+$ 

@A00721:190:HGJW7DSXY:4:1678:7193:14074\_1:N:0:TCTGCAAG+GCTGCACT  
AGCTCATGGTGAAAAGGGAAGCTAAGGTTAACTTGATGCTTCAGCCTTTTCGAAGCATAACCCCGCA  
CAGAATATCGTTTATCACGCAAATTTATTAATGCAATTTTCGGACCTATCTTTAAGGTTCTTGTGAG  
GAG

 $+$ 

@A00721:190:HGJW7DSXY:4:1670:26268:18740\_1:N:0:TCTGCAAG+GCTGCACT  
TCTCTCTCTTAGGAGGTCATGATGACTACTATAAGGGTGAAATCGATTTTTCGAAGTTTGACAAATCT  
CAAGATTTCTTTTGTAAGCCTATGAGATAAAGATGTATTCTTATTTAGGCTTCGATGCTGAATTTCT  
TGA

 $+$ 

@A00721:190:HGJW7DSXY:4:2341:18701:16470\_2:N:0:TCTGCAAG+GCTGCACT  
TGTCACGCCAGGAGTATCCATAACGATTTGTCATTTACCACTTTGCTCAACGACGAAGTGGAAACGGC  
CAACACTTTCTTTGGTAATTGTATGATCACTTTGATGATTTTATCACT

$$+$$

@A00721:190:HGJW7DSXY:4:1173:7084:5995\_1:N:0:TCTGCAAG+GCTGCACT  
CTTGGAAGTTTTCGGCTGTGGTTGTCGCTGGGACGATTCCATTCTGTTTTCAAAGACTCCAATAAC  
TGATCATTCTGATCATATGATTTTGGACAATGGTTTCGAAGCGAATTTTTGAGGGATAAACACGCGT  
ACT

$$+$$

@A00721:190:HGJW7DSXY:4:2153:22950:32597\_2:N:0:TCTGCAAG+GCTGCACT  
ATCGTTAAGTTAGGTAAACCCCTAACCGATGTTACTCTTGTAGGACTTTGGGAGAGATTTCGTTAGTTT  
TAAAGACTATACTAAATATCTCCACTACGAGGTTGTTGTTTGGCGATT

+

@A00721:190:HGJW7DSXY:4:1250:4878:7122\_1:N:0:TCTGCAAG+GCTGCACT  
CTATTCGATATTCGATTGAGGGTCGTTATACCTATTCGGCTATCTGTGCTTTGAATTGTATAAGATCA  
AATTTTAAACGATTCCGAGAGGTTTATCCTGATGTGGAGGGAGTTCTTGAAGCATCCCGACCTTTCCT  
TGT

+

@A00721:190:HGJW7DSXY:4:2414:8133:21433\_1:N:0:TCTGCAAG+GCTGCACT  
TTTCATAAGATTATCAGTAATCCTGATTCTACTACGGATTCATGGACCTTCCATCCTGTACCTCTTCT  
GGAGAGACGTATCTCAAAGATCGACTTCGAGACAGGTGATATTGTTGAGCGAGAGCGACCAAGATCTA  
AAT

[illegible]

@A00721:190:HGJW7DSXY:4:2661:19162:25567\_1:N:0:TCTGCAAG+GCTGCACT  
ACCTGTCTTTTCATATTATGAATGAACCTTCGGCCGCTCTCTTTGCTTCGATGTTGGATGTCAAGAAGG  
GTTCAGAATGGGATTCTACGTAGTTTATGACTTTGGTGGTGGTACTTTCGATACTTCTATCGTCTTA  
CGT

@A00721:190:HGJW7DSXY:4:1524:32479:13526\_2:N:0:TCTGCAAG+GCTGCACT  
AGTGTATTATTCTGGTGGTGATGATAATCTTGGAGGTCGTGACGTTGATGAAGCTATAAGAGCGTT  
CTTATTACGGCGCACTTCTTTACCCGCCACCACACAACCTTTCAGTTTC

@A00721:190:HGJW7DSXY:4:1537:14769:25598\_1:N:0:TCTGCAAG+GCTGCACT  
ACTGGAACCCTCGTAAATACTTTTCAATAATATACGTCTTGAACCTCACTTATGACGATCTAGTGAA  
ATTAACGCGTCCTTTTCTGGAACGTAGTTTACTATTATGAACAAAGTTATCAAAGATAGTGGCATT  
AAG

@A00721:190:HGJW7DSXY:4:2655:5041:11819\_1:N:0:TCTGCAAG+GCTGCACT  
AGATCTTGAGAGTGACTGGAGTTCAGACGTGTGCTCTTCCGATCTCTTGCTGAAACAGCTATTTAAAG  
CTGTTGAGCGGGTAATTACACCTAAACGAGCTCGATCTGCCATCGCTGAAGGATGTGCACTCTTTTCT  
GCT

@A00721:190:HGJW7DSXY:4:2331:2826:21480\_2:N:0:TCTGCAAG+GCTGCACT  
TCGATTGTATCAACAGTAACATTACTTCTAATAAAGGTCTCTATCAAGCTCGTATTATCGTCGCTGCT  
GGATCTGCGTTACCGTTGAAGGCTAAACTCCAAGGTAATTATGAAGAC

@A00721:190:HGJW7DSXY:4:1601:21061:31829\_1:N:0:TCTGCAAG+GCTGCACT  
ACGTGTGCTCTTCCGATCTATAATTTCAATCTTCTTAAAAAGAAGATAGAGAGTCATACTTTGGGCTA  
TCGTTCAAGTGCATGGGGTTGGATAGCCAATATTGAAGTGGACACCTCTGGTAGTATCGAAGTAAAGA  
TAA

@A00721:190:HGJW7DSXY:4:1242:1280:28948\_1:N:0:TCTGCAAG+GCTGCACT  
CTCTACCGCCTTACAAGTCTAAGGTTAAAGAGTCGATTAAACAAGTTGTACTTATCAATGATTTTATC  
GCTGGTTGTTATCTCGAAAAGTCTCTTCTAAAAGGAACGTCAGTTCTAACCCAAAGAGAATATCTAAA  
ATA

[illegible]

+

+

+

+

+

+

+

+

[illegible]



@A00721:190:HGJW7DSXY:4:2408:26729:26897\_1:N:0:TCTGCAAG+GCTGCACT  
ACTTTTGTACCAAATTCTTGGCTTTCAACGAAGTCTCTGATTTTATTAATCATTACTTTAACGATCT  
CTCGGTCATTTACTCTGTACTTGATCTACGTCGTTTAACTGTCGGAACAACTTTACTTAGAA

TCGACTATATTAAGAAATAAAAATACTTCAAGTACCTGAACTTTACA  
+  
FFFFFFFFFFFFFFFFFFFFFFFFFFFFFFFFFFFFFFFFFFFFFFFFFFFFFFFFFFFFFFFFFFFFFFFF  
FFFFFFFFFFFFFFFFFFFFFFFFFFFFFFFFFFFFFFFFFFFFFFFFFFFFFFFFFFFFFFFFFFFFFFFF  
@A00721:190:HGJW7DSXY:4:1651:1362:29309\_2:N:0:TCTGCAAG+GCTGCACT  
TGGTATAATGTGTCTTACAAATAGAACCTTCACTCTCGGTAATGAGAGTGTATTCCTTAATATTCTAG  
TAACCGCTATGTGGGCATTACTAGGATTTATCACACTCCTAAATTTGA  
+  
FFFFFFFFFFFFFFFFFFFFFFFFFFFFFFFFFFFFFFFFFFFFFFFFFFFFFFFFFFFFFFFFFFFFFFFF  
FFFFFFFFFFFFFFFFFFFFFFFFFFFFFFFFFFFFFFFFFFFFFFFFFFFFFFFFFFFFFFFFFFFFFFFF  
@A00721:190:HGJW7DSXY:4:2364:16197:14700\_2:N:0:TCTGCAAG+GCTGCACT  
TGCTAGGAAAATTTAGAAAACTCCATTGTATAGTTCAAGGAGTACTTAATTCAATAGCTTTAGTAT  
TATTTACTATCGCCTTTATTGAAAATTGTATAAGAGTTAATTGCTTAC  
+  
FFF,FFFFFFFFFFFFFFFFFFFFFFFFFFFFFFFFFFFFFFFFFFFFFFFFFFFFFFFFFFFFFFFFFFFF  
FFFFFFFFFFFFFFFFFFFFFFFFFFFFFFFFFFFFFFFFFFFFFFFFFFFFFFFFFFFFFFFFFFFFFFFF  
@A00721:190:HGJW7DSXY:4:1573:27299:31140\_2:N:0:TCTGCAAG+GCTGCACT  
ACCATAACCTACCATGACCAATCATCGCTCCAAGTGGCAGCCAGACGTAGGGTCAAACCTACTACCG  
CCGGTCGGCAGATCGGCACCACTGGTCTCTACGTTCAAGGACCCGCTG  
+  
FFFFFFFFFFFFFFFFFFFFFFFFFFFFFFFFFFFFFFFFFFFFFFFFFFFFFFFFFFFFFFFFFFFFFFFF  
FFFFFFFFFFFF,FFFF:FFFFFFFFFFFFFFFFFFFFFFFFFFFFFFFFFFFFFFFFFFFFFFFFFFFF  
@A00721:190:HGJW7DSXY:4:2102:29523:35775\_1:N:0:TCTGCAAG+GCTGCACT  
TTCCCAAATCTAGATCTGCACAGAAGAAGGCTGAAGGTCGTTACCGGACGACCACTCAAAGGAAACGG  
GCTGTTGCCAGAGGAAAGCAGCGACCACCGAGGTCGCTCGTAACATTGACGGCAGTCCCGTCATCTC  
TGT  
+  
F:FF:FF:FFF:FF,F:F:FFFFFFFF,FFFFFF:FFFFFFFFFFFFFFFFFFFFFFFFFFFFFFFFFFFF  
FFFFFFFFFFFFFFFFFFFFFFFFFFFFFFFFFFFFFFFFFFFFFFFFFFFFFFFFFFFFFFFFFFFFFFFF  
FFF  
@A00721:190:HGJW7DSXY:4:2209:4535:19523\_2:N:0:TCTGCAAG+GCTGCACT  
CAGTACCTCAGTCAAAAGTCACATTCACCACTCCCATACCAATCAATGATGTGACTATACAGTTCGGC  
CATTTCAAGAGTGGTCAATACGTCGTGGGAGGTACTGAAGCCTTCCCC  
+  
FFFFFFFFFFFFFFFFFFFFFFFFFFFFFFFFFFFFFFFFFFFFFFFFFFFFFFFFFFFFFFFFFFFFFFFF  
FFFFFFFFFFFF:FF:FFFFFFFFFFFFFFFFFFFFFFFFFFFFFFFFFFFFFFFFFFFFFFFFFFFF  
@A00721:190:HGJW7DSXY:4:2576:30002:8234\_2:N:0:TCTGCAAG+GCTGCACT  
AAGCCAATCAATAGTTCTTCTGACCAGAATGAAAAGGGTTTACCAGGGTAGTCTCTAAGTCTACCAG  
GAAGAGGGGAAATGTCCCCAAACTGAGAAGAATAAAGGGAAAGGTCC  
+  
FF:FFFFFFFF, ,F:FFFFFFFFFFFF, :FFF,FFFFFFFF:F: :FFFFFFFF:FFF: :FFF  
FF: :F:F, ,FFFF:FF: ,FFF:FFF:FFFF,FFFFFFFF: :FFF: :F,F  
@A00721:190:HGJW7DSXY:4:1448:1985:33082\_1:N:0:TCTGCAAG+GCTGCACT  
ATCTCTAATTCTGAAGGAAGATCTCCACCATCTGGGGTTGGGAATAAGAAATCTGCACGGGCCAAAG  
AGGCCGCTGCTACGAAGTCGCTGAAGGCGCTTGGGTCATTAAGGGTAGCTGTAAAGTTGCGCCTGCC  
GAC  
+  
FFFF, ,FFFF:FFFFFFFFFFFFFFFFFFFFFFFFFFFFFFFFFFFFFFFFFFFFFFFFFFFF:FFFF  
FFFFFFFFFFFFFFFFFFFFFFFFFFFFFFFFFFFFFFFFFFFFFFFFFFFFFFFFFFFFFFFFFFFFFFFF  
FFF  
@A00721:190:HGJW7DSXY:4:2274:28754:30185\_2:N:0:TCTGCAAG+GCTGCACT  
GACTCTCTACAGTAGGTTCTGCCTACTATGAGCAAATCTGTTGAATTCGTCACTGAGGACGAAGGTG  
AGAGGACTTTTGGCTACTGGCGACAAACAGATCGGAAGAGCGTCGTGT  
+

FFFFFFFFFFFFFFFFFFFFFFFFFFFFFFFFFFFFFFFFFFFFFFFFFFFFFFFFFFFFFFFF:FFFFF  
FFFFFFFFFFFFFFFFFFFFFFFFFFFFFFFFFFFFFFFFFFFFFFFFFFFFFFFFFFFFF  
@A00721:190:HGJW7DSXY:4:1552:1208:1705\_1:N:0:TCTGCAAG+GCTGCACT  
CTTGAGTGTGACGAGGCCGGTGACGTTTTGTCAACGGCGTTTGGAGGATTTTATCCGCGCTTAAC  
TGGGGCGAAGATCCCCTATGGAGTCTTGAAGGACTTAGGTTGGCATATTTATGCCGACGATAATAAGC  
ATG  
+  
:FFFFFFFFF::F:FFFFFFFF,F,F:FFFFFFFF:FFFFFF:FFFFFFFFFFFFFFFF,FF:FFF,  
FFFFFF:FFFFFF:F,F::FFFFFF:FFFFFFFFFFFFFFFFFFFFFFFFFFFFFFFFFFFF,FFF  
FFF  
@A00721:190:HGJW7DSXY:4:2305:9715:26584\_2:N:0:TCTGCAAG+GCTGCACT  
CGGGACTTACAAGAGAGAGTGTGAGAGAGTCGCTCTCACTATTTTTGCCAGAATGCGGGCTTCTGA  
CTGATGAGGTTAAACTCTTGCTCCTTCTGTGGGTGAGGGTTTTTGT  
+  
FFFFFFFFFFFFFFFFFFFFFFFFFFFFFFFFFFFF:FF:,FFFFFF::FFF::FF:,FFF,:FF,F,:  
F,F,F,F:F:FFFFF,,:FFF,F,,::,,:FF:F,F:FFFFFFFF,:F  
@A00721:190:HGJW7DSXY:4:2164:28339:24706\_2:N:0:TCTGCAAG+GCTGCACT  
ATTACAACCTCTCTTTAGAGAGCATTAGAAGGAAGTTGGGCAAATTCCCACATATGGTAGACGTTGTC  
ACACTTTTCTTGAAAATTTTCTTTCTCCGTCATTGGGGATTTCGA  
+  
:FFFFFFFFFFFFFF:FFFFFFFFF:FFFFFFFFFFFFFFFFFFFFFFFFFFFFFFFFFFFF:FFFFFFFFF  
FFFFFFFFFFFFFFFFFFFFFFFFFFFFFFFFFFFFFFFFFFFF,FFFFFF,FFFF  
@A00721:190:HGJW7DSXY:4:2155:17969:24972\_1:N:0:TCTGCAAG+GCTGCACT  
GGAAGGTGTCAAGGGTCTTCTTCATGCTGATCTTTCAGGACCTAATCACATCATGATTGATAGTTACG  
GCTCGTATCGAGTTGGAGGGAGGAAGTTCTCCGAAATTAAAGACGGGGGGATTAAGAGTCCAGCTGTA  
ACT  
+  
FF:FFFFFFFFF,F,FFFFFFFFFFFFFFFF:FFFF:FFFFFF:FFFFFFFF:FFF,FFFFFFFFF  
FFFFFFFFF:FFFFFFFFF:FFFF:FFFFFFFFFFFFFFFFFFFFFFFFFFFFFFFFFFFFF  
FFF  
@A00721:190:HGJW7DSXY:4:2418:11505:28463\_2:N:0:TCTGCAAG+GCTGCACT  
AGAGGGGAGCTCTGAAAAGGAACTTCGTCAGAAGATGAGGAAGTCTAAGAGGAGGAGTTTGAGGAAG  
GCTCTAGAGAAGATCTCACCACCTGGAGAAGGCAAGTGGAGAGTCCAG  
+  
FFFFFFFFFFFF:FFFFFFFFFFFFFFFFFFFFF:F:FFFFFF:FFF:FFF:FF:FFFF:FFFF:  
FFFFFFFF:FFFFF:FF:FFFF:FFFFF,:FFF:FF:FFFFFF:FF  
@A00721:190:HGJW7DSXY:4:2505:2374:15311\_2:N:0:TCTGCAAG+GCTGCACT  
GGATTATTTGAAGCAGGGTTACCACTTCCTAAGGTGGATGAGGGAGGTTGTTTCTTTGGAGTTTATG  
ATAATCTTTTGAAGGGTTCATAGAGCCAGCAAGAGAAGCTTATATG  
+  
FFFFFFFFFFFFFFFFFFFFFFFFFFFFFFFFFFFFFFFFFFFFFFFFFFFFFFFFFFFFFFFFF  
FFFFFFFFFFFFFFFFFFFFFFFFFFFFFFFFFFFFFFFFFFFFFFFFFFFFFFFFFFFFF  
@A00721:190:HGJW7DSXY:4:1671:23005:3317\_1:N:0:TCTGCAAG+GCTGCACT  
ATTTAGGTCAACTTGGGGTTTGAATGTCATTAGTGCCTTACGATTGAAAGAGGTCCTTTTGAGTATC  
GACAGATCTTTCGATCTTGAGGACGTACATTTAACGTGGCAGAATTCGGTAACCTACCATATTGTTCC  
TTC  
+  
FFFFFFFFFFFFFFFFFFFFFFFFFFFFFFFFFFFFFFFFFFFFFFFFFFFFFFFFFFFFFFFFF  
FFFFFFFFFFFFFFFFFFFFFFFFFFFFFFFFFFFFFFFFFFFFFFFFFFFFFFFFFFFFFFFFF  
FFF  
@A00721:190:HGJW7DSXY:4:1501:20799:24612\_1:N:0:TCTGCAAG+GCTGCACT  
TTTAACTTTGACTCAACTACTCCGATCAGATCCGATGGTTTGATTGGTATGGACTACTCGACTTTTG  
ATCTGGAGTTGTCTAGGGTCATGGCAGATACTACCGATAAGGTGAAAAATATGCAGGTCAAAGATTCT  
GTA



F:FFFFFFFFFFFF:FFFF:FF,FFFFFFFFFFFFFFFFFFFFFFFFFFFFFFFFFFFFFFFF  
FFFFFFFFFFFFFFFFFFFFFFFFFFFFFFFFFFFFFFFFFFFFFFFFFFFFFFFFFFFFFFFFF,  
FFF  
@A00721:190:HGJW7DSXY:4:2102:13331:24361\_2:N:0:TCTGCAAG+GCTGCACT  
TTTTGGCCGACTTTAACTATTCTAAGAGTCTTTATGATTCAAAACCTATCGTTGTCTACCTTACAA  
GTTTGAGGAGACTCTACAGCGGCTTATTGTCGCGCAGTTTCCAGAATT  
+  
FFFFFFFFFFFF:FFFF:FFFFFFFFF:FFFFFFFFFFFFFFFFFFFFFFFF:FF:FFFFFFFFFFFFFF:FF  
FFFFFFFFF:FFF,FF:F:FFFFFFFFF:FFFFFFFFF,FFFF:F  
@A00721:190:HGJW7DSXY:4:2511:16712:28682\_1:N:0:TCTGCAAG+GCTGCACT  
TATCTTGAATGCTCACGCCGTCGCAGCCATATCGAGACTATGTTATAATCACTTGTTAAAGTACAGAT  
TAGTGATTTAGATATTATTGATATTGGAGGCGATATTCGTTTTCATATCCAAAACCTCCTTGAATGGA  
GTA  
+  
FFFFFFFFFFFFFFFFFFFFFFFFFFFFFFFFFFFFFFFFFFFFFFFFFFFFFFFFFFFFFFFFF  
FFFFFFFFFFFFFFFFFFFFFFFFFFFFFFFFFFFFFFFFFFFFFFFFFFFFFFFFFFFFFFFFF  
FFF  
@A00721:190:HGJW7DSXY:4:1226:28935:2503\_1:N:0:TCTGCAAG+GCTGCACT  
CTATTCTTGATGTGAAAGATGCATCGAGGTATACGTCTAGGAACATTGATTGGGAACGTACCTACTCA  
CGAGACGTCATGAAAGCTATCGGAGGGAAGCAAATGTTTCGTTCTGTTACAAGAACGCTTTGGATTG  
TGA  
+  
FFFFFFFFFFFFFFFFFFFFFFFFFFFFFFFFFFFFFFFFFFFFFFFFFFFFFFFFFFFFFFFFF  
FFFFFFFFFFFFFFFFFFFFFFFFFFFFFFFFFFFFFFFFFFFFFFFFFFFFFFFFFFFFFFFFF  
FFF  
@A00721:190:HGJW7DSXY:4:2510:3369:3443\_1:N:0:TCTGCAAG+GCTGCACT  
GTTGCGATAGCTGTAGAGGTATACGATATCTCTCTTGATGATGTAGCCACTATAATGCTTAAGAGAGA  
GATTGATGTATGTCATTTCTGCTTAGTTTGTCCC GGCGAATTATTGGACACGATGAAAAATGACATAC  
CCG  
+  
FFFFFFFFF:FFFFFFFFFFFFFFFFF:F:F:FFFFFFF:FFFF::F::FFFF,FF:FFFFFFFFF  
FFFFFFFFFFFFFFFFFFFFFFFFFFFFFFFFF:FFFF:FFFF:FFFFFFFFFFFFFFFFFFFFFFFFF  
FFF  
@A00721:190:HGJW7DSXY:4:1546:20039:27899\_2:N:0:TCTGCAAG+GCTGCACT  
TCATGGAGATGATGGCGCATCACTTGATTACTATATGCCCGAAGGATTGGGTTATTCTCACAACAAAG  
ATAAGATTTTATCTTTCTTCAAACACCCTGTTTTCTTAAGGGCGGAC  
+  
FFFFFFFFFFFFFFFFFFFFFFFFFFFFFFFFF:FFFFFFFFFFFFFFFFFFFFFFFFFFFFFFFFF:F  
FFFFFFFFFFFFFFFFFFFFFFFFFFFFFFFFFFFFFFFFFFFFFFFFFFFFFFFFF  
@A00721:190:HGJW7DSXY:4:2508:22064:16939\_1:N:0:TCTGCAAG+GCTGCACT  
ACTGGAGTTCAGACGTGTGCTCTTCCGATCTATGAGTTC CGAATAACTCGTAATAAATCTTTCTCTAG  
TGGACAATTCAGAATACCTATTTCCGTACCAAGAGCCACTGCCAATCTCATCGCTATACGCATACCTG  
ATT  
+  
FFFFFFFFFFFFFFFFFFFFFFFFFFFFFFFFF:FFFFFFFFFFFFFFFFFFFFFFFFFFFFFFFFF  
FFFFFFFFFFFFFFFFFFFFFFFFFFFFFFFFFFFFFFFFFFFFFFFFFFFFFFFFF  
FFF  
@A00721:190:HGJW7DSXY:4:1161:17544:34162\_2:N:0:TCTGCAAG+GCTGCACT  
AGATTATGGTTGATAAAGTTTTCTTCATAAGGGCTATTCAGTACGT CATGGGGATCACTTCTTCGGTC  
AATGACAAAACCTTCGAATATGTTACGACATGGCTTCGTAACAACAGT  
+  
FFFFFFFFF:FFFFFFFFFFFFFFFFFFFFFFFFFFFFFFFFFFFFFFFFFFFFFFFFF  
FFFFFFFFFFFFFFFFF:FFFFFFFFFFFFFFFFFFFFFFFFF:FFFFFFF

@A00721:190:HGJW7DSXY:4:1258:5773:21010\_2:N:0:TCTGCAAG+GCTGCACT  
GATTCACCAAGATGTTCATATAGATACGAGATACCTAGAGAAGGTCGCAGCGATCTTACTCGTTATCG  
GAGCTAAGAAGAAGACTTTGGGTACACGTTATGCTCGCAAACCTTAACG

FFFFFFFFFFFFFFFFFFFFFFFFFFFFFFFFFFFFFFFFFFFFFFFFFFFFFFFFFFFFFFFFFFFFFFFFFFFFFFFF  
FFF

@A00721:190:HGJW7DSXY:4:1119:31430:21574\_1:N:0:TCTGCAAG+GCTGCACT  
GGAGTGGCTAGGTTTTAAAAGATCCTTTGCACAAGCAATACCTTCCACTGAGTTCATCACCCAGAGTT  
TCGACGTCGCGGAAAACGATGAAGATTTCCACACTGTTCGAGAATCTTCTGATGCTGAATTTGAGGAA  
AAT

+

FFFFFF:FFFF::FFFFFFFFFFFF:FFFFFFFFFFFF:FFFFFFFFFFFFFFFFFFFFFFFFFFFFFFFFFFFF  
FFFFFFFFFFFFFFFFFFFFFFFFFFFFFFFFFFFFFFFFFFFFFFFFFFFFFFFFFFFFFFFFFFFFFFFFFFFF  
FFF

@A00721:190:HGJW7DSXY:4:1275:31295:32362\_1:N:0:TCTGCAAG+GCTGCACT  
TTTTTGGTATAAATCCTGATGGCTCAGTACAGGGAGGAGGTAATTGTTATAAAACCTTCTTTTATCAT  
TGCAACAGGACTTTGAGATGACTGTTGAAATGGACAAAATCTGGGATCATAGGTATGTGTACGCTAC  
AC

+

FFFFFF:FFFFFFFFFFFF:FF,FFF,,FF::,FF,FFFF,F,:FF:FF:FFF:FF,FFFFFFFF,  
,:F::,,FFFFFFFFF,F:FFFF:,FFFF:,,:FFFFFFFFFFFFFFFFFFFFFFFFFFFFFFFFFFFF  
FF

@A00721:190:HGJW7DSXY:4:1168:19804:2534\_2:N:0:TCTGCAAG+GCTGCACT  
AAGATCTCTACAGAGATTATCGAGAGTTGTGATCTAGTTCTAAATTTAGGTCGACGGACTTTAGCAAC  
TTTAGATAAATTCTTCCGGGCTCAATGACCTTTGCTATGTACGTGGA

+

FFFFFFFFFFFFFFFFFFFF:FF::FFFFFFFFFFFFFFFFFFFFFFFFFFFFFFFFFFFF:FFFFFFFFFFFFFFFFFFFF  
F,FFFFFFFFFFFFFFFF:FFFFFFFFFFFFFFFF:FFFFFFFFFFFFFFFF

@A00721:190:HGJW7DSXY:4:2459:11632:18349\_1:N:0:TCTGCAAG+GCTGCACT  
TTTGTTTCATGAAGTTCTTACACTTCTCGCGACTTATGTGAGCTTCACTTCATAGGCGTTACGTAAAGT  
AGTTTTACGCTTTATCTTAAAGCATTACCACCAAATTTAGCACTTTTTGAATATGACAGAAGCTCGC  
CAT

+

FF,F:F:,FFFFFF:FFFFFFFFFFFF:FF:F,FF,F:FF,:F,F,F,:,,F,,,FFFF,,F,,FFF  
:FFFFFF,:FFFFFFFFF,F::FFF,:F,:FFFFFFFFF:FFFFFFFFF,:FFF:FFFF,FFF  
FFF

@A00721:190:HGJW7DSXY:4:1365:13747:1157\_1:N:0:TCTGCAAG+GCTGCACT  
AGTTAGAGTTCTTCTAACCAGGACTGATGGTGAGATTCTTTTACCTTTTGGAGGTCCAGGAACCTTTA  
CTCCTAGTGTCTTTCTAGAGTCCAAGGACGTTTCCGTCGGAGGATGACAGGTGGGAGACCGCTCAAT  
AAC

+

FFFFFFFFFFFFFFFFFFFFFFFFFFFFFFFFFFFFFFFFFFFF:FFFFFFFF:FFFFFFFFFFFFFFFF:FFFFFFF  
FFFFFFFFFFFFFFFFFFFFFFFFFFFFFFFFFFFFFFFFFFFFFFFFFFFFFFFFFFFFFFFFFFFFFFFFFFFF  
FFF

@A00721:190:HGJW7DSXY:4:2678:31919:10175\_1:N:0:TCTGCAAG+GCTGCACT  
GATATCGCCTCTGTCTTTCTCCTTTAATCGTGAGGTTACGAGAGTTTCGTACTTGGGTTTATCGGTT  
GTATTTTGATAAATTTGTTGGAATCGATAATGATACTGACGAAGGTTCTATTACCACCCTTGTCATTG  
ATA

+

:FFFF,F::F:FFFF,,FFFF,F:FFFF:FF,FFFF:FFF::F,FFFF,F,,FFFF,FFFF,F,FF  
,FFFFFF,:F,,,FFFFFF,,F:F,,FFFFFFFFFFFFFFFF:FFFFFFFF:FFFF,FF,:FF:FFFFF  
:FF

@A00721:190:HGJW7DSXY:4:1510:10737:5337\_2:N:0:TCTGCAAG+GCTGCACT  
TACAATCTGTAGAGAGAGAGGTTAATCAGAATTTGAGTGATAACGATTTAGTACTGGGAAATGGTGGT  
AGTCAGTTTACTACTTTTCTTCCCTCCCCTTTTTCGATTGATTCTGA

+

FFFFFF:FFFFFFFFFFFFFFFFFFFFFFFFFFFFFFFFFFFF:FFFFFFFFFFFFFFFFFFFFFFFFFFFF  
:FFFFFFFFFFFFFFFFFFFFFFFFFFFFFFFFFFFF:,FFFFFFFFFFFFFFFF

@A00721:190:HGJW7DSXY:4:2376:26286:6558\_1:N:0:TCTGCAAG+GCTGCACT  
ATGTAGGTCTCCTAGTACTTAAGGGTTTATGTTTCGGTTTCAGCTGGATGGATCTTTTGATGGTATGT  
TTCACATTGCGTGATCACTTCCCGTGGACTTGGGAAGAGATTAAACATAAAATCCAGCGATTCTATTA  
TGT

+

FFFFFFFFFFFF,F,FFF,FF:FFFFFFFF,FFFFFFFFFFFFFFFF:FFFFFFFFFFFFFF,:,FFFFFFFF  
FFF:FFFFFFFFFFFFFFFF,FFFFFFFFFFFFFFFF:,FFFFFFFFFFFFFFFF:FFFFFFFFFFFFFF  
FFF

@A00721:190:HGJW7DSXY:4:2110:18475:11443\_1:N:0:TCTGCAAG+GCTGCACT  
TCTTGATGTTCCGGGCTGTGGGGATTAACTTCCCTCGTGAACTTACGACGATGTTCTCGCTCGCATTT  
CACAAGGATTACTAAGTCTGAGATCTGCCACTTCTAATTTTAGGAAACGTCGCGAAAAGAAAGTTTCAT  
GAG

+

FFFFFFFFFFFFFFFFFFFFFFFFFFFFFFFFFFFFFFFFFFFFFFFFFFFFFFFFFFFFFFFF:FFFFFFFFFFFFFFFF  
FFFFFFFFFFFFFFFFFFFFFFFFFFFFFFFFFFFFFFFFFFFFFFFFFFFFFFFFFFFFFFFFFFFFFFFF  
FFF

@A00721:190:HGJW7DSXY:4:2413:20537:22780\_2:N:0:TCTGCAAG+GCTGCACT  
GAAAAATATCGCCGGGAACCTCTAATAGAGGATCCTGATGACATTATTTCAACGGATACCGATCTCAG  
TTCTACCACAGAAACCGTCTCAGGAAGTGTCTCCACTGATTCGGAATT

+

:FFFFFFFFFFFF:F,:F::FFFF:FFFFFFFFFFFF,F::FFFFFFFF:FFFFFFFF:FF:FFFFFF  
F:FFFFFF:FFFF,FFFF:F,,FF:F:FFFFFF,FFF,FF:F,:F

@A00721:190:HGJW7DSXY:4:1648:18258:31923\_2:N:0:TCTGCAAG+GCTGCACT  
CTTCTTGTGGGACTGAGACCTCTGAATTTTCAGGGTCCCTGATGAGGACGTTGAAAGGGATAATTT  
CAACTCTGAGACTTCTAAGAGTGTTTCAAAAGACCAGAAACGTAACAA

+

FFFFFFFFFFFFFFFFFFFFFFFFFFFFFFFFFFFFFFFFFFFFFFFFFFFFFFFFFFFFFFFF  
FFFFFFFFFFFFFFFFFFFFFFFFFFFFFFFFFFFFFFFF:FFFFFFFFFFFFFFFF

@A00721:190:HGJW7DSXY:4:2618:3604:5384\_2:N:0:TCTGCAAG+GCTGCACT  
GGAAGGGGAGAAAACAGAACAAGCGAGCGGTTGAAGAGAAACTGATATGGTTGCGGCTGATCGTACC  
CCAATTCCTGCTAGAAAGATCACTCTCGGCGATACCACTGATCTTCCA

+

FFFFFFFFFFFFFFFFFFFFFFFFFFFFFFFFFFFFFFFFFFFFFFFFFFFFFFFFFFFFFFFF  
FFFFFFFFFFFFFFFFFFFFFFFFFFFFFFFF:FFFFFFFFFFFFFFFF

@A00721:190:HGJW7DSXY:4:2134:16297:29089\_1:N:0:TCTGCAAG+GCTGCACT  
TTTTATCAAAGAGAAAGTTTCTGCTAGTCGCGACGATAGTATTTATCGGAGTGATATTAACAAGTTAA  
ACTTCGAACTGACCACTTACAAGAGTGTTGAAGTACCGCAACATGGATCAGTTTTCAAAAAGCTATT  
AAT

+

FFFFFFFFFFFFFFF::FFFFFFFF:FFFFFFFFFFFFFFFFFFFFFFFF:FFFFFFFFFFFF:FFFFFFFF  
FFFFFFFFFFFFFFFF:FFFFFFFFFFFFFFFFFFFFFFFF:FFFFFFFFFFFFFFFFFFFFFFFF  
FF,

@A00721:190:HGJW7DSXY:4:2165:14281:25160\_1:N:0:TCTGCAAG+GCTGCACT  
CTGAATCCACTCTCTTGGGATATAAATGAGTACATCTATAATAGAGTTTTGGAAGTGTGTAATGTCCT  
ACGTACTGTTCAAGGTGTTTGGGCTTCTCTAAAGAACAGCAACTTTCAACATGAATTAGTTATTGAAA  
GTC

+

FFFFFFFFFFFFFFFFFFFFFFFFFFFFFFFFFFFFFFFFFFFFFFFFFFFFFFFFFFFFFFFF  
FFFFFFFFFFFFFFFFFFFFFFFFFFFFFFFFFFFFFFFFFFFFFFFFFFFFFFFFFFFFFFFF  
FFF

@A00721:190:HGJW7DSXY:4:1305:23312:20478\_1:N:0:TCTGCAAG+GCTGCACT  
TCTTCATGAAGATCTTCGAGTGTTTTATAGTGAGTTATTCTTGCGAAGGTTCAAGTCGATTGATTTTG  
TTGACTACGATCTCTCTTGAATAAGAAGTTCTTCGCAGTTGAATCTCCACCAGGTGGAGGGAAGACC  
ACT



FFFFFFFFFFFFFFFFFFFFFFFFFFFFFFFFFFFFFFFFFFFFFFFFFFFFFFFFFFFFFFFFFFFFFFFFFFFFFFFF  
FFF

@A00721:190:HGJW7DSXY:4:1547:2383:3646\_1:N:0:TCTGCAAG+GCTGCACT  
TCCAAGAGAATATTTATTCTTATGAGGCTCGAACTTCAACGTTTTTCAACGGAAGACATATCGCA  
CCCGAAATTTTTGGGCAGAATGCTCTTAACGCGGTTCTTGAACGGTGTGTTTGATCAGTCTAAGTTGGA  
TAA

+  
FFFFFFFFFFFFFFFF:FFFFFFFFFFFFFFFFFFFFFFFFFFFFFFFFFFFFFFFFFFFFFFFFFFFFFFFF  
FFFFFFFFFFFFFFFFFFFFFFFFFFFFFFFFFFFFFFFFFFFFFFFFFFFFFFFFFFFFFFFFFFFFFFFFFFFF  
FFF

@A00721:190:HGJW7DSXY:4:1372:13105:11976\_2:N:0:TCTGCAAG+GCTGCACT  
ACTCAGTTAACCTGAGAGCTCCTCAATTGATAGATTGGGTCAACAATAGGGACGCTAGTATACTTCGT  
AAAGTCGACAGCGAAATGGTCAATATTGATAATTGGACCGACTATATG

+  
FFFFFF:FFFFFFFFFFFFFFFFFFFFFFFFFFFFFFFFFFFFFFFFFFFFFFFFFFFFFFFFFFFFFFFF  
FFFFFFFFFFFFFFFFFFFFFFFFFFFFFFFFFFFFFFFFFFFFFFFFFFFFFFFFFFFFFFFFFFFFFFFFFFFF

@A00721:190:HGJW7DSXY:4:2115:15600:35336\_1:N:0:TCTGCAAG+GCTGCACT  
AGCTCATGGTGAAAAGGGAAGCTAAGGTAAACTTGATGCTTCAGCCTTTTCGAAGCATAACCCCGCA  
CAGAATATCGTTTATCACGCAAATTTATTAATGCAATTTTCGACCTATCTTTAAGGTTCTTGAG  
GAG

+  
FFFFFFFFFFFFFFFFFFFFFFFFFFFFFFFFFFFFFFFFFFFFFFFFFFFFFFFFFFFFFFFFFFFFFFFFFFFF  
FFFFFFFFFFFFFFFFFFFFFFFFFFFFFFFFFFFFFFFFFFFFFFFFFFFFFFFFFFFFFFFFFFFFFFFFFFFF  
FFF

@A00721:190:HGJW7DSXY:4:2144:6343:34115\_1:N:0:TCTGCAAG+GCTGCACT  
TCTCTCTCTTAGGAGGTCATGATGACTACTATAAGGGTGAAATCGATTTTTTCGAAGTTTGACAAATCT  
CAAGATTTCTTTTGTAAGCCTATGAGATAAAGATGTATTCTTATTTAGGCTTCGATGCTGAATTTCT  
TGA

+  
FFFFFFFFFFFFFFFFFFFFFFFFFFFFFFFFFFFFFFFFFFFFFFFFFFFFFFFFFFFFFFFFFFFFFFFFFFFF  
FFFFFFFFFFFF:FFFFFFFFFFFFFFFFFFFFFFFFFFFFFFFFFFFFFFFFFFFFFFFFFFFFFFFFFFFF  
FFF

@A00721:190:HGJW7DSXY:4:2634:26494:33035\_2:N:0:TCTGCAAG+GCTGCACT  
TGTCACGCCAGGAGTATCCATAACGATTTGTCATTTACCACCTTTGCTCAACGACGAAGTGGAACGGC  
CAACACTTTCTTTGGTAATTGTATGATCACTTTGATGATTTTATCACT

+  
FFFFFFFFFFFFFFFFFFFFFFFFFFFFFFFFFFFFFFFFFFFFFFFFFFFFFFFFFFFFFFFFFFFFFFFFFFFF  
FFFFFFFFFFFFFFFFFFFFFFFFFFFFFFFFFFFFFFFFFFFFFFFFFFFFFFFFFFFFFFFFFFFFFFFFFFFF

@A00721:190:HGJW7DSXY:4:1523:25744:36933\_1:N:0:TCTGCAAG+GCTGCACT  
CTTGGAAGTTTTCGGCTGTGGTTGTCGCTGGGACGATTCCATTCTGTTTTCAAAGACTCCAATAAC  
TGATCATTCTGATCATATGATTTTGACAATGGTTTCGAAGCGAAATTTTTGAGGGATAAACCAGCGT  
ACT

+  
FFFFFF:FFFFFF,FFFFFFFFFFFFFFFFFFFFFFFFFFFFFFFFFFFFFFFFFFFFFFFFFFFFFFFF  
FFFFF,,FFFFFFFFFFFF:FFFFF:FFFFFFFFFFFFFFFFFFFFFFFFFFFFFFFFFFFFFFFFFFFF  
FFF

@A00721:190:HGJW7DSXY:4:2315:13187:32252\_2:N:0:TCTGCAAG+GCTGCACT  
ATCGTTAAGTTAGGTAAACCCCTAACCGATGTTACTCTTGTAGGACTTTGGGAGAGATTGTTAGTTT  
TAAAGACTATACTAAATATCTCCACTACGAGGTTGTTGTTTGCGGATT

+  
FFFFFFFFFFFF,FFFFFFFFFFFFFFFFFFFFFFFFFFFFFFFFFFFFFFFFFFFFFFFFFFFFFFFFFFFF  
FFFFFFFFFFFFFFFFFFFFFFFFFFFFFFFFFFFFFFFFFFFFFFFFFFFFFFFFFFFFFFFFFFFFFFFFFFFF  
FFFFFFFFFFFF:FFFF

@A00721:190:HGJW7DSXY:4:1449:8974:11960\_1:N:0:TCTGCAAG+GCTGCACT  
CTATTCGATATTCGATTGAGGGTCGTTATACCTATTCGGCTATCTGTGCTTTGAATTGTATAAGATCA

AATTTTAAACGATTCCGAGAGGTTTATCCTGATGTGGAGGGAGTTCTTGAAGCATCCCGACCTTTCCT  
TGT

+

FFFFFF:FFFFFFFFFFFFFFFFFFFFFFFFFFFFFFFFFFFFFFFFFFFFFFFFFFFFFFFFFFFFFFFF  
FFFFF:FFFFFFFFFFFFFFFFFFFFFFFFFFFFFFFFFFFFFFFFFFFFFFFFFFFFFFFFFFFFFFFF  
FFF

@A00721:190:HGJW7DSXY:4:2414:8684:21762\_1:N:0:TCTGCAAG+GCTGCACT  
TTTAATAAGATTATCAGTAATCCTGATTCTACTACGGATTCATGGACCTTCCATCCTGTACCTCTTCT  
GGAGAGACGTATCTCAAAGATCGACTTCGAGACAGGTGATATTGTTGAGCGAGAGCGACCAAGATCTA  
AAT

+

FFF,:F,F,:FF:FFF,FFFFF:FF,FF,F,:,:FFFF:FFFFFF,F,,FFFFFF,FFFFFF,F,FF,F  
FFFF,F,:,:FFFF,:FFFFFFFFF:FFFF,FF,FFFFFFFFFFFFFFFFFFFFFFFFFFFFFFFFF,FFFF  
FFF

@A00721:190:HGJW7DSXY:4:2506:10773:11193\_1:N:0:TCTGCAAG+GCTGCACT  
CGTGGCGCTTTATTTTAAAAAGCTCCCTCCTCTCGCAAGTTTGATCTGATACTTATCACGAAAGGACT  
TGAGTCTTTTGATCAGTCTCTGACTTGACCATCTTTCATTTTAAATGACGATCATTAAGACTCTCTTT  
CTT

+

FFFFFFFFF:FFFFFFFFFFFFFFFFFFFFFFFFFFFFFFFFFFFFFFFFFFFFFFFFFFFFFFFFFFFF  
FFFFFFFFFFFFFFFFFFFFFFFFFFFFFFFFFFFFFFFFFFFFFFFFFFFFFFFFFFFFFFFFFFFFFFFFF  
FFF

@A00721:190:HGJW7DSXY:4:2663:10592:1579\_2:N:0:TCTGCAAG+GCTGCACT  
CTTTGCACTGATTTTTCCTCATCAGCTTGTTGTTTTACCTAATCTGTGTTTTTACGATAACAACATCA  
GTTGATTAAGACTCTTCCGAAAGGCGAACTTTGGGAATTTGAAGCTCA

+

FFFFFFFFFFFFFFFFFFFFFFFFFFFF:::FFFFFF:FFFF:FFFFFFFFFFFFFF:::FFFFFFF,FFF  
FFFFFFFFFFFFFFFFFFFFFFFFFFFFFFFFFFFF:FF,FFFFFF:FFFFFF

@A00721:190:HGJW7DSXY:4:2636:27398:11428\_2:N:0:TCTGCAAG+GCTGCACT  
ACCGTGACGAAGTGTGGTGTCTTGATCTACGTTACGGATATACTCTCCTTGAGTTCACTCGTAAGGA  
CACTACCACTTATTACGATATTTCTTTAGTCGATGGGTTTTTCGACGCC

+

FFFFFFFFFFFFF,FFFF:FFFFFFFFFFFFFFFFFFFFFFFFFFFFFFFFFFFFFFFFFFFFFFFFFFFF  
FFFFFFFFFFFFF:FFFFF,FFFFFFFFF:F:::FFFFFFFFFFFF

@A00721:190:HGJW7DSXY:4:2566:11541:6918\_1:N:0:TCTGCAAG+GCTGCACT  
TCTCTATTTTAAAGTTTGTCTTCCTTGTTGTCTTATTCTATTAATCACTCATTTTAGTGAGATTATT  
AAAAACGCACTAAAACGTCTTCGACAACAGCAGGGGTTTTCGAATAGTGATAGCCACCCGCTTACAG  
AGG

+

F::,F,FFFFFFFFF:FFF:FFFFF:FFFF,,FFF::FFFFFF:F,,FF,,FFFFFFFF,:FFFFF  
FFFFF,FFFFFFFFFFFFFFFFF,F::,F::FF,F,:FFFFFF:FFFFFFFFFFFFFFFFFFFFF:FFFF  
FF:

@A00721:190:HGJW7DSXY:4:1638:6849:32518\_1:N:0:TCTGCAAG+GCTGCACT  
TCTTCCGATCTCACCTTTTCTACTGTCTGTCTCGCCTCTTCGAATGAAGTTTAAATGCTTAACAACAA  
TGATAGTGAATTTATACCTACAATCATTGGTTTTTCTAATAATGATGACACTATTGTTTATGGATATG  
ATG

+

FFFFFFFFFFFFF,FFFFFFFFFFFFFFFFFFFFFFFFFFFFFFFFFFFFFFFFFFFFFFFFFFFFFFFF  
FFFFFFFFFFFFFFFFFFFFFFFFFFFFFFFFFFFF,FFFFFFFFFFFFFFFFFFFFFFFFFFFFFFFFFFFF  
FFF

@A00721:190:HGJW7DSXY:4:2376:23845:1611\_1:N:0:TCTGCAAG+GCTGCACT  
TCTGGATTCTCAGTTTACAAGGACCTTAAGCGATGGATCGGGGTTAATTCTAAAACATTACCCGAAAG  
ACGTGCTAAATTAACCATTTGTACGATGTCGTCTGTCTCGCGCATCACTTTTCTACTAAGAATTGGTC  
CTA







@A00721:190:HGJW7DSXY:4:2412:5394:26177\_1:N:0:TCTGCAAG+GCTGCACT  
ACTTTCCTACGATACAAATGATACTTCTAATTTACGTTTGCTACTCAGAGCTGGTCCTATCAGCAA  
GGGATGCATGGTGTATCTCCTCAGGAGTCCCGGCATTTGATAATAATGACGAGACTTTTCGTCATAAT  
CG

+  
:FFFF:FF,F,FFF:,:::FF:,,F::F,F,FFF,,FF:,,FF,F,F,F,FFFFFFFF,F:F,FF,F  
F,FFFF,: ,FFFFFFFF,FFFFFF,,F,F,,,F:FFFF,FF:FFF:F:,,FFFFFFFF,FFFFFF  
:F

@A00721:190:HGJW7DSXY:4:2301:6334:31062\_1:N:0:TCTGCAAG+GCTGCACT  
GATTACACGGTACCAGCGCATCTCGTGTGAGCCTCGACCCGATTATATGGTATTAACCTATAAAGGT  
GAGGAGACCATTTTCTTGCTGAAATTTATAGAAGATTATTTTGACAGAATCAATAAGAATCATCGATT  
CTC

+  
FFFFFFFFFFFFFFFFFFFFFFFFFFFFFFFFFFFFFFFFFFFFFFFFFFFFFFFFFFFFFFFFFFFFFFFFF,FFFFFFFFFFFFFFFFFFFFFFFFFFFFFFFFF:  
FFFFFFFFFFFFFFFFFFFFFFFF:F:FF:FF:FFFFFFFFFFFFFFFF:F: ,FF:FFFFFFFFFFFFFFFF:FFFF  
:F:

@A00721:190:HGJW7DSXY:4:1251:18096:15295\_1:N:0:TCTGCAAG+GCTGCACT  
TTCTTAATTATAATATTCAACCTCAAAAGTTACGTGTTTACAGTAACGAGATCACACATTTTGAGAAC  
TAATAATGTTATGTTCTCTGATCATTTTGACAATCTCTTCTTATAATAATAATAATAATAATATTACT  
AAT

+  
FF:FFFFFFFFFFFFFFFFFFFFFFFFFFFFFFFFFFFFFFFFFFFFFFFFFFFFFFFFFFFFFFFFFFFFFFFFF  
FFFF:FFFF:FFFFFFFFFFFFFFFFFFFFFFFFFFFFFFFFFFFFFFFFFFFFFFFFFFFFFFFFFFFFFFFFF  
FFF

@A00721:190:HGJW7DSXY:4:2154:22064:14841\_1:N:0:TCTGCAAG+GCTGCACT  
AAAGGCTCCAGTCAACACTAGTTCGAGTGCTGCTTTGGATTACGATGACGTGAGAATAGGTGAAGGGA  
TAGTTTTTACCTCGACCAACATTAAGGCGGCGGCGACTAATCTTAAAGCTTCACCCAAAATGAAGGAC  
ACT

+  
:FFFFFFFFFFFF:FFFFFFFFFFFFFFFFFFFFFFFFFFFFFFFFFFFFFFFFFFFFFFFFFFFFFFFFFFFFF  
FFFFFF,FFFFFFFFFFFFFFFFFFFFFFFFFFFFFFFFFFFFFFFFFFFFFFFFFFFFFFFFFFFFFFFFFFFFF:FFFFFFFF  
FFF

@A00721:190:HGJW7DSXY:4:1426:22887:16047\_1:N:0:TCTGCAAG+GCTGCACT  
TCCAGACGACGACGAAGCTTATACTAATTTTATTTTGGGTATTATGTGGAGATTTTCGTGATATCAGTA  
CGTCCAGATCCTCTGCTTTTACCGATAACGATAATTTTCGTAATCAAATATAAAGAAAAGGACTATGAA  
ATA

+  
FFF,:FF:F,FF:F:F:FFFFFFFF:F,FFF,:FF::F,FF:FFFFFFFF:,FFF,:FFFF:F:FFFF  
FFF,:FFFF,FFFFFFFFF,,,FFFF:FFFF,FF:FF,F,,,FF,F,F,FFF,FFFF:FFFF:  
FF,

@A00721:190:HGJW7DSXY:4:2118:32922:11162\_2:N:0:TCTGCAAG+GCTGCACT  
CCACATTTTGGTCAAGTCAATCCGTTGAGAAAATTTCTTAGAGGATATTCGCCATTGTGGTACGAATT  
GGTCCAACATTTACCACCAAATTTCTTTTGATACAACCTCTAGCCTTCAA

+  
FFFFFFFFFFFFFFFFFFFFFFFFFFFFFFFFFFFFFFFFFFFFFFFFFFFFFFFFFFFFFFFFFFFFFFFFF  
FFFFFFFFFFFFFFFFFFFFFFFFFFFFFFFFFFFFFFFFFFFFFFFFFFFFFFFFFFFFFFFFFFFFF

@A00721:190:HGJW7DSXY:4:1213:10095:34381\_2:N:0:TCTGCAAG+GCTGCACT  
CCAGATTGGTTCGAACCCGTTGATGCTATGTCAGAAGAAGCTATTCAAGCTTGTCGTTTAAAGACTGC  
AGAGGCTGTCAAACAAGCCCAGACTCAAGGAGTCCAATCAAAGGTTTT

+  
F:FFFFFFFFFFFFFFFF,FFFFFF:F:FF:FFFFFFFF:FFFFFFFFF:FFFF:F:FFFF,FFFF  
F:FFFF,FFF:F,:FFFFFFFFF,FFF:F::FFFFFFFFF:F,FFF

@A00721:190:HGJW7DSXY:4:1534:8106:3129\_2:N:0:TCTGCAAG+GCTGCACT  
TTCTACTTACAAAGGACAATTCAGTTTCATTAATTCTACGAAAAGTCCGGAGTATATTGTATGTAA

+

@A00721:190:HGJW7DSXY:4:2305:7491:17284\_1:N:0:TCTGCAAG+GCTGCACT  
ACCGATAGGAGTTGTATAGTTGAAGATGTGGCTTTAGACGATAATCCTTTAAGGACTATGTTGACTGA  
CGAAGATTTTCCACAGATTTGTCTACGTTGCAGATCGCCACTCCAAACACTATATACATTATAAAAT  
ATA

+

@A00721:190:HGJW7DSXY:4:1250:21468:20384\_1:N:0:TCTGCAAG+GCTGCACT  
ACTTTTGTACCAAATTCCTGGCTTCAACGAAGTCTCTGATTTTATTAATCATTACTTTAACGATCT  
CTCGGTCATTTACTCTGTACTTGATCTACGTCGTTTAACTGTCGGAACAACCTTTACTTAGAATGACT  
CTA

+

@A00721:190:HGJW7DSXY:4:1160:16396:11005\_2:N:0:TCTGCAAG+GCTGCACT  
CAATAGTTAATATCATATTAGTAATACTCACTATCGTTTTCTGCTTTTCTTAGCTAATAGATTAATA  
AAGGATGAGTACGAAAACCAACTCTTCGTTACGAGACCTGATGGTAGA

+

@A00721:190:HGJW7DSXY:4:1347:2998:15922\_1:N:0:TCTGCAAG+GCTGCACT  
TCTCTACCCCATCTCACC GTGTATAAAGCGTTTTTCCGTCCTTA ACTTAATACACGAAGATATCAT  
CCGCACACGACTCGAAACCGAGACGCCGTAGATCAAAGTCCCTTCTAACTTTAGATTATGAATCCTGC  
CTT

+

@A00721:190:HGJW7DSXY:4:2157:24704:25175\_2:N:0:TCTGCAAG+GCTGCACT  
TTTTTATAATTTATAACCTTCTTATACTTTTGGGTATGTTTGTGAAAAACATGAGATACCCAAGTCT  
ATCGAAGACATTATCTCTTATGTACTTATTGTAACGATCATTCTTTTCG

+

@A00721:190:HGJW7DSXY:4:2304:18394:4946\_2:N:0:TCTGCAAG+GCTGCACT  
CTGTGTATGAGGAGGATTTATAATGCTTTTCGATAGTGATTGTTATCAATTTAAATACATTACTGTTT  
CAAATCATCTTTACTCACAGACTCCGAAAATGGTTTCAAATGAGGTCA

+

@A00721:190:HGJW7DSXY:4:1621:29975:30890\_1:N:0:TCTGCAAG+GCTGCACT  
TAAACGAAC TATTATCCGATTCTTCGAGGGTATCACTACCACTGATCTGCCGACTTTAGTCAAGGAAC  
TTCAATTCTTCGATGTTTATATTTTCTATAAGGGAAAATAGCAATAATCAAATTTTCGACAAATTTT  
AGA

+

[illegible]

@A00721:190:HGJW7DSXY:4:1152:14651:13714\_1:N:0:TCTGCAAG+GCTGCACT  
GAACTCTCTCCGATCACCTTGGTGTGATCTCCCGGAGGATCTTTTCAATAAGATGTATGATGATAATC  
TACTATTTTAAATAGTGATATTCAGCGTATACTTGAATACTTTATCAAAGATTTGGCTTGGTCTATT  
TAC

+

FFFF:FFFFFFFF:FFFFFFFFFFFFFFFFFFFFFFFF:FFF:FFFFFFFFFFFFFFFFFFFFFFFF  
FFFFFFFFFFFFFFFFFFFFFFFFFFFFFFFFFFFFFFFFFFFFFFFFFFFFFFFFFFFFFFFFFFFFFFFF  
FFF

@A00721:190:HGJW7DSXY:4:1159:22968:32409\_2:N:0:TCTGCAAG+GCTGCACT  
GGTCTATGATATTTATTTTACTTATACTTTAAATAGCACCGATTATAACTTGACTGTTGATAATATTA  
CAATAGCTCTTTCTCAGAAGATTAGAGAAGTAACCGGTGAACACGTCG

+

FFFFFF:F:FFFFFFFFFFFFFFFFFFFFFFFF:FFFFFF:FFFF,FFF:FFFFFF,:FFFFFFFF  
FFFFFFFFFFFFFFFF:FFFF:F,FFF,,FFFF,F::FFFF,:F,

@A00721:190:HGJW7DSXY:4:1152:4924:1939\_2:N:0:TCTGCAAG+GCTGCACT  
TTTACTTTTACCGTTAGAACTGAAAAAGATTCTTTTCGAAAAGAAACCTATAAGTTACAAACGATTCT  
TCGACTATATTAAAGAAATAAAAATACTTCAAGTACCTGAACTTTACA

+

FFFFFF:FFFFFFFFFFFFFFFFFFFFFFFFFFFFFFFFFFFFFFFFFFFFFFFFFFFFFFFFFFFFFFFF  
FFFFFF:FFFF:F:FFFFFFFFFFFFFFFFFFFFFFFF:FFFFFFFFFFFFFF

@A00721:190:HGJW7DSXY:4:2401:7726:21574\_2:N:0:TCTGCAAG+GCTGCACT  
TGGTATAATGTGTCTTACAAATAGAACCTTCACTCTCGGTAATGAGAGTGATTTCCTTAATATTCTAG  
TAACCGCTATGTGGCATTACTAGGATTTATCACACTCCTAAATTTGA

+

FFFFFFFFFFFFFFFFFFFFFFFFFFFFFFFFFFFFFFFF:FFFFFFFFFFFFFFFFFFFFFFFF:FF  
FFFFFFFFFFFFFFFFFFFFFFFFFFFFFFFFFFFFFFFF:FFFF

@A00721:190:HGJW7DSXY:4:2365:7907:24173\_2:N:0:TCTGCAAG+GCTGCACT  
TGCTAGGAAAATTTAGAAAACTCCATTGTATAGTTCAAGGAGTACTTAATTCAATAGCTTTAGTAT  
TATTTACTATCGCCTTTATTGAAAATTGTATAAGAGTTAATTGCTTAC

+

FFFFFFFFFFFFFFFFFFFFFFFFFFFFFFFF:FFFFFFFFFFFFFFFFFFFFFFFFFFFFFFFF:FF  
FFFFFFFFFFFFFFFFFFFFFFFFFFFFFFFF,FFFFFFFFFFFFFF

@A00721:190:HGJW7DSXY:4:1604:6831:29575\_2:N:0:TCTGCAAG+GCTGCACT  
ACCATAACCTACCATGACCAATCATCGCTCCAAGTGGCACGCCAGACGTAGGGTCAAACCTACTACCG  
CCGGTCGGCAGATCGGCACCACTGGTCTCTACGTTACGGGACCCGCTG

+

FFFFFFFFFFFFFFFFFFFFF:,FFFFFFFF:FFFFFFFFFFFFFFFFFFFFFFFF:F:FFF,FFFFFF  
FFFFFFFFFFFFFFFFFFFFFFFFFFFFFFFFFFFFFFFFFFFFFFFFFFFFFFFF

@A00721:190:HGJW7DSXY:4:2249:24153:5869\_1:N:0:TCTGCAAG+GCTGCACT  
TTCCCAAATCTAGATCTGCACAGAAGAAGGCTGAAGGTCGTTACCGGACGACCACTCAAAGGAAACGG  
GCTGTTGCCAGAGGAAAGCAGCGACCACCGAGGTCGCTCGTAACATTGACGGCAGTCCCGTCATCTC  
TGT

+

FFFFFF:FF:FFFF:FFFFFFFFFFFFFFFFFFFFFFFF:FFFFFFFFFFFFFFFFFFFFFFFF  
FFFFFFFFFFFFFFFFFFFFFFFFFFFFFFFFFFFFFFFF:FFFFFFFFFFFFFFFFFFFFFFFF  
FFF

@A00721:190:HGJW7DSXY:4:2357:28800:2644\_2:N:0:TCTGCAAG+GCTGCACT  
CAGTACCTCAGTCAAAAGTCACATTCACCACTCCCATACCAATCAATGATGTGACTATACAGTTCGGC  
CATTTCAAGAGTGGTCAATACGTCGTGGGAGGTACTGAAGCCTTCCCC

+

F:FFFFFFFFFFFFFFFFFFFFFFFFFFFFFFFFFFFFFFFFFFFFFFFFFFFFFFFF  
F:FFFFFFFFFFFFFFFFFFFFFFFFFFFFFFFF:FFFFFFFFFFFFFF

@A00721:190:HGJW7DSXY:4:2618:1172:4836\_2:N:0:TCTGCAAG+GCTGCACT  
AAGCCAATCAATAGTTCTTCTGACCAGAATGAAAAGGGTTTACCAGGGTAGTCTCTAAGTCTACCAG

+

@A00721:190:HGJW7DSXY:4:1469:22507:36025\_1:N:0:TCTGCAAG+GCTGCACT

+

@A00721:190:HGJW7DSXY:4:1243:28700:5196\_1:N:0:TCTGCAAG+GCTGCACT

+

@A00721:190:HGJW7DSXY:4:1631:27570:23469 1:N:0:TCTGCAAG+GCTGCACT

+

@A00721:190:HGJW7DSXY:4:2332:4246:2801 2:N:0:TCTGCAAG+GCTGCACT

+

@A00721:190:HGJW7DSXY:4:2225:20455:28839 2:N:0:TCTGCAAG+GCTGCACT

+

@A00721:190:HGJW7DSXY:4:2371:5394:18349 1:N:0:TCTGCAAG+GCTGCACT

+

@A00721:190:HGJW7DSXY:4:1233:5258:16579 1:N:0:TCTGCAAG+GCTGCACT

 $+$ 

1, 2, 3, 4, 5, 6, 7, 8, 9, 10, 11, 12, 13, 14, 15, 16, 17, 18, 19, 20, 21, 22, 23, 24, 25, 26, 27, 28, 29, 30, 31, 32, 33, 34, 35, 36, 37, 38, 39, 40, 41, 42, 43, 44, 45, 46, 47, 48, 49, 50, 51, 52, 53, 54, 55, 56, 57, 58, 59, 60, 61, 62, 63, 64, 65, 66, 67, 68, 69, 70, 71, 72, 73, 74, 75, 76, 77, 78, 79, 80, 81, 82, 83, 84, 85, 86, 87, 88, 89, 90, 91, 92, 93, 94, 95, 96, 97, 98, 99, 100, 101, 102, 103, 104, 105, 106, 107, 108, 109, 110, 111, 112, 113, 114, 115, 116, 117, 118, 119, 120, 121, 122, 123, 124, 125, 126, 127, 128, 129, 130, 131, 132, 133, 134, 135, 136, 137, 138, 139, 140, 141, 142, 143, 144, 145, 146, 147, 148, 149, 150, 151, 152, 153, 154, 155, 156, 157, 158, 159, 160, 161, 162, 163, 164, 165, 166, 167, 168, 169, 170, 171, 172, 173, 174, 175, 176, 177, 178, 179, 180, 181, 182, 183, 184, 185, 186, 187, 188, 189, 190, 191, 192, 193, 194, 195, 196, 197, 198, 199, 200, 201, 202, 203, 204, 205, 206, 207, 208, 209, 210, 211, 212, 213, 214, 215, 216, 217, 218, 219, 220, 221, 222, 223, 224, 225, 226, 227, 228, 229, 230, 231, 232, 233, 234, 235, 236, 237, 238, 239, 240, 241, 242, 243, 244, 245, 246, 247, 248, 249, 250, 251, 252, 253, 254, 255, 256, 257, 258, 259, 260, 261, 262, 263, 264, 265, 266, 267, 268, 269, 270, 271, 272, 273, 274, 275, 276, 277, 278, 279, 280, 281, 282, 283, 284, 285, 286, 287, 288, 289, 290, 291, 292, 293, 294, 295, 296, 297, 298, 299, 300, 301, 302, 303, 304, 305, 306, 307, 308, 309, 310, 311, 312, 313, 314, 315, 316, 317, 318, 319, 320, 321, 322, 323, 324, 325, 326, 327, 328, 329, 330, 331, 332, 333, 334, 335, 336, 337, 338, 339, 340, 341, 342, 343, 344, 345, 346, 347, 348, 349, 350, 351, 352, 353, 354, 355, 356, 357, 358, 359, 360, 361, 362, 363, 364, 365, 366, 367, 368, 369, 370, 371, 372, 373, 374, 375, 376, 377, 378, 379, 380, 381, 382, 383, 384, 385, 386, 387, 388, 389, 390, 391, 392, 393, 394, 395, 396, 397, 398, 399, 400, 401, 402, 403, 404, 405, 406, 407, 408, 409, 410, 411, 412, 413, 414, 415, 416, 417, 418, 419, 420, 421, 422, 423, 424, 425, 426, 427, 428, 429, 430, 431, 432, 433, 434, 435, 436, 437, 438, 439, 440, 441, 442, 443, 444, 445, 446, 447, 448, 449, 450, 451, 452, 453, 454, 455, 456, 457, 458, 459, 460, 461, 462, 463, 464, 465, 466, 467, 468, 469, 470, 471, 472, 473, 474, 475, 476, 477, 478, 479, 480, 481, 482, 483, 484, 485, 486, 487, 488, 489, 490, 491, 492, 493, 494, 495, 496, 497, 498, 499, 500, 501, 502, 503, 504, 505, 506, 507, 508, 509, 510, 511, 512, 513, 514, 515, 516, 517, 518, 519, 520, 521, 522, 523, 524, 525, 526, 527, 528, 529, 530, 531, 532, 533, 534, 535, 536, 537, 538, 539, 540, 541, 542, 543, 544, 545, 546, 547, 548, 549, 550, 551, 552, 553, 554, 555, 556, 557, 558, 559, 560, 561, 562, 563, 564, 565, 566, 567, 568, 569, 570, 571, 572, 573, 574, 575, 576, 577, 578, 579, 580, 581, 582, 583, 584, 585, 586, 587, 588, 589, 590, 591, 592, 593, 594, 595, 596, 597, 598, 599, 600, 601, 602, 603, 604, 605, 606, 607, 608, 609, 610, 611, 612, 613, 614, 615, 616, 617, 618, 619, 620, 621, 622, 623, 624, 625, 626, 627, 628, 629, 630, 631, 632, 633, 634, 635, 636, 637, 638, 639, 640, 641, 642, 643, 644, 645, 646, 647, 648, 649, 650, 651, 652, 653, 654, 655, 656, 657, 658, 659, 660, 661, 662, 663, 664, 665, 666, 667, 668, 669, 670, 671, 672, 673, 674, 675, 676, 677, 678, 679, 680, 681, 682, 683, 684, 685, 686, 687, 688, 689, 690, 691, 692, 693, 694, 695, 696, 697, 698, 699, 700, 701, 702, 703, 704, 705, 706, 707, 708, 709, 710, 711, 712, 713, 714, 715, 716, 717, 718, 719, 720, 721, 722, 723, 724, 725, 726, 727, 728, 729, 730, 731, 732, 733, 734, 735, 736, 737, 738, 739, 740, 741, 742, 743, 744, 745, 746, 747, 748, 749, 750, 751, 752, 753, 754, 755, 756, 757, 758, 759, 760, 761, 762, 763, 764, 765, 766, 767, 768, 769, 770, 771, 772, 773, 774, 775, 776, 777, 778, 779, 780, 781, 782, 783, 784, 785, 786, 787, 788, 789, 790, 791, 792, 793, 794, 795, 796, 797, 798, 799, 800, 801, 802, 803, 804, 805, 806, 807, 808, 809, 810, 811, 812, 813, 814, 815, 816, 817, 818, 819, 820, 821, 822, 823, 824, 825, 826, 827, 828, 829, 830, 831, 832, 833, 834, 835, 836, 837, 838, 839, 840, 84

@A00721:190:HGJW7DSXY:4:2407:3965:32816\_2:N:0:TCTGCAAG+GCTGCACT  
GTTACCACTTCTAAGGTGGATGAGGGAGGTTGTTTCTTTGGAGTTTTAGATAATCTTTTGAGAAGGG  
GTCATAGAGCCAGCAAGAGAAGCTTATATGCTGGTTTAAGTGATGATT

+

FFFFFFFFFFFFFFFFFFFFFFFFFFFFFFFFFFFFFFFFFFFFFFFFFFFFFFFFFFFFFFFFFFFFFFFF  
FFFFFFFFFFFFFFFFFFFFFFFFFFFFFFFFFFFFFFFFFFFFFFFFFFFFFFFFFFFFFFFF

@A00721:190:HGJW7DSXY:4:2112:16062:33630\_1:N:0:TCTGCAAG+GCTGCACT  
ATTTAGGTCAACTTGGGGTTTCGAATGTCATTAGTGCCTTACGATTGAAAGAGGTCCTTTTGAGTATC  
GACGATCTTTCGATCTTGAGGACGTACATTTAACGTGGCAGAATTCGGTAACCTACCATATTGTTCC  
TTC

+

FFF::FFFFFFFFFFFFFFFFFFFFFFFFFFFFFFFFFFFFFFFFFFFFFFFFFFFFFFFFFFFFFFFF  
FFFFFFFFFFFFFFFFFFFFFFFFFFFFFFFFFFFFFFFFFFFFFFFFFFFFFFFFFFFFFFFFFFFFFFFF  
FFF

@A00721:190:HGJW7DSXY:4:1526:20401:34882\_1:N:0:TCTGCAAG+GCTGCACT  
TTTAACTTTGACTCATCTACTCCGATCAGATCCGATGGTTTGATTGGTATGGACTACTCGACTTTTG  
ATCTGGAGTTGTCTAGGGTCATGGCAGATACTACCGATAAGGTGAAAAATATGCAGGTCAAAGATTCT  
GTA

+

FFFF,FFFF::FF,,:FF,F,FFF:FFFFF:FFFFF::FFFF:FFFFFFFFFFFFFFFFFFFF:F:FFF  
FFFFFFFF:FFF:FF:,FFFFF,FFF::FF,,FF:F::FFFFF:FF:FFF:F,FFF:,FFF,FFFFFF:F  
FFF

@A00721:190:HGJW7DSXY:4:2211:8142:13714\_2:N:0:TCTGCAAG+GCTGCACT  
GTTTTGGCCGACTTTAACTATTCTAAGAGTCTTTATGATTCAAACCTATCGTTGTCGTACCTTACAA  
GGTTGAGGAGACTTTACAGCGGCGTATTGTCGCGCAGTTTCCAGAATT

+

FFFFFFFFFFF:,FFFFFFFF:FFFFFFFFFFFFFFFFFFFF:FFFFFFFF,FFFFFFFFFFFFFFFFFFFF:FF:FF  
:F:FFFFFF,FFFFFFFF:F:FF,FFFFFFFFFFFF:FFF:F,FF:FFFF

@A00721:190:HGJW7DSXY:4:2608:31747:20400\_1:N:0:TCTGCAAG+GCTGCACT  
TATCTTGAATGCTCACGCCGTCGCAGCCATATCGAGACTATGTTATAATCACTTGATAAAGTACAGAT  
TTAGTGATTTAGATATTATTGATATTGGAGGCGATATTCGTTTTCATATCCAAACTCCTTGATGGA  
GTA

+

FFFFFFFFFFFFFFFFFFFFF:FFFFFFFFFFFFFFFFFFFFFFFFFFFFFFFFFFFFFFFFFFFF,FFFFFFFFFFFF  
F:FFF:F:FFF:FFFFFFFFFFFFFFFFFFFFFFFFFFFFFFFFFFFF:FFFFFFFFFFFF:FFFF:FFFFFF  
FFF

@A00721:190:HGJW7DSXY:4:1672:23276:26804\_1:N:0:TCTGCAAG+GCTGCACT  
CTATTCTTGATGTGAAAGATGCATCGAGGTATACGTCTAGGAACATTGATTGGGAACGTACCTACTCA  
CGAGACGTCATGAAAGCTATCGGAGGGAAGCAAATGTTTCGTTCTGTTACAAGAACGCTTTGGATTG  
TGA

+

FFFFFFFFFFFFFFFFFFFFFFFFFFFFFFFFFFFFFFFFFFFFFFFFFFFFFFFFFFFFFFFFFFFF,FFFFFFFFFFFF  
FFFFFFFFFFFFFFFFFFFFFFFFFFFFFFFFFFFFFFFFFFFF::FFFFFFFFFFFFFFFFFFFFFFFFFFFFFFFFFFFF  
FFF

@A00721:190:HGJW7DSXY:4:2524:19786:33317\_1:N:0:TCTGCAAG+GCTGCACT  
GTTGCGATAGCTGTAGAGGTATACGATATCTCTTTGATGATGTAGCCACTATAATGCTTAAGAGAGA  
GATTGATGTATGTCATTTCTGCTTAGTTTGTCCCGGCGAATTATTGGACACGATGAAAAATGACATAC  
CCG

+

FFFFFFFFFFFFFFFFFFFFFFFFFFFF:FFFFFFFFFFFFFFFFFFFFFFFFFFFFFFFFFFFFFFFFFFFF  
FFFFFFFFFFFFFFFFFFFFFFFFFFFFFFFFFFFFFFFFFFFFFFFFFFFFFFFFFFFFFFFFFFFFFFFFFFFF  
FFF

@A00721:190:HGJW7DSXY:4:1671:31557:21073\_2:N:0:TCTGCAAG+GCTGCACT  
TCATGGAGATGATGGCGCATCACTTGATTACTATATGCCCGAAGGATTGGGTTATTCTCACAACAAAG

ATAAGATTTTATCTTTCTTCAAACACCCTGTTTTCTTAAGGGCGGAC  
+  
FFFFFFFFFFFFFFFFFFFFFFFFFFFFFFFFFFFFFFFFFFFFFFFFFFFFFFFFFFFFFFFF  
:FFFFFFFFFFFFFFFFFFFFFFFFFFFFFFFFFFFFFFFFFFFFFFFFFFFFFFFF  
@A00721:190:HGJW7DSXY:4:2544:25961:34835\_1:N:0:TCTGCAAG+GCTGCACT  
ACTGGAGTTCAGACGTGTGCTCTTCCGATCTATGAGTTCCGAATAACTCGTAATAAATCTTTCTCTAG  
TGGACAATTCAGAATACCTATTTCCGTACCAAGAGCCACTGCCAATCTCATCGCTATACGCATACCTG  
ATT  
+  
FFFFFFFFFFFFFFFFFFFFFFFFFFFFFFFFFFFFFFFFFFFFFFFFFFFFFFFFFFFFFFFF  
FFFFFFFFFFFFFFFFFFFFFFFFFFFFFFFFFFFFFFFFFFFFFFFFFFFFFFFFFFFFFFFF  
FFF  
@A00721:190:HGJW7DSXY:4:1167:32461:22827\_2:N:0:TCTGCAAG+GCTGCACT  
AGATTATGGTTGATAAAGTTTTCTTCATAAGGGCTATTCAGTACGTCATGGGGATCACTTCTTCGGTC  
AATGACAAAACCTTCGAATATGTTACGACATGGCTTCGTAACAACAGT  
+  
FFFF:FFFFFFFF:FFFFFFFFFFFFFFFFFFFFFFFFFFFFFFFFFFFFFFFFFFFFFFFF:  
F:FFFF::FFFF:FFFFFFFFFFFFFFFFFFFFFFFFFFFFFFFFFFFFFFFFFFFFFFFF  
@A00721:190:HGJW7DSXY:4:1355:11342:24455\_2:N:0:TCTGCAAG+GCTGCACT  
GATTCACCAAGATGTTTCATATAGATACGAGATACCTAGAGAAGGTCGAGCGATCTTACTCGTTATCG  
GAGCTAAGAAGAAGACTTTGGGTACACGTTATGCTCGCAAACCTTAACG  
+  
FFFFFFFFFFFFFFFFFFFFFFFFFFFFFFFFFFFFFFFFFFFFFFFFFFFFFFFFFFFFFFFF  
FFFFFFFFFFFFFFFFFFFFFFFFFFFFFFFFFFFFFFFFFFFFFFFFFFFFFFFFFFFFFFFF  
@A00721:190:HGJW7DSXY:4:1470:25301:1501\_2:N:0:TCTGCAAG+GCTGCACT  
AGGTGATCTCTCTGCTTCTGCGTTACTGAGAGAAAAGATTCAGGACGCCTACGGTGACTTTATGGACA  
AGATGCAAGTTCTTGGGAAATACTTGTTTCCCTTTTTAGGTTTAGTAG  
+  
FFFFFFFFFF:F:F,FF::,:FFFFFFFF:FF:FFFF:FFFFFFFF,FFFFFFFFF:,,::,FFF::FFFF  
FFFFFFFFFFFFFF:FF,FFFFFF:FFFFFF,FF:FFFF::F,FFF:FF  
@A00721:190:HGJW7DSXY:4:2275:1425:33896\_1:N:0:TCTGCAAG+GCTGCACT  
TGTGAGAAGACAACGAATCTTGAAACTACGGTCCTTATCAAAGAAAATGGTGAACCGGTCTCTAAATC  
TTTTGAGATTGAGAAGATTGAAGAACACGTCAAGAAGTCGCTCGGCGTTGTTCTTGAAAACCAAGTTA  
AGA  
+  
FFFFFFFFFFFF:FF:FFFFFFFFFF:F:FFFF:FFFFFF:FF:FF:FFFFFFFFFFFFFFFFFFFFFF  
FFFFFFFFFFFF:FFFFFFFFFFFFFFFFFFFFFFFFFFFFFFFFFFFF:FFFF:FFFFFF:FFFFFFFFFFFFFF  
FFF  
@A00721:190:HGJW7DSXY:4:2406:7238:17002\_2:N:0:TCTGCAAG+GCTGCACT  
CTTTGTACCTTCTGTCAAACCTCGAGGTTACGCTACGAGAGGTGATCCCGGATGTGGATTGAAGGCTG  
GCTCTAAGGGAGACTCCTTCTTTTTGAATGTTGTAAAGAATTGGGTTG  
+  
FFFFFFFFFFFFFFFFFFFFFFFFFFFFFFFFFFFFFFFFFFFFFFFFFFFFFFFFFFFFFFFF  
FFFFFFFFFFFFFFFFFFFFFFFFFFFFFFFFFFFFFFFFFFFFFFFFFFFFFFFFFFFFFFFF  
@A00721:190:HGJW7DSXY:4:1349:21368:3928\_1:N:0:TCTGCAAG+GCTGCACT  
ACAAGGAGTTAGACTCTTCTTCAAGTTTTTAGATCTTCTTGATAATCTTAAAGAAAAATTTTCGAATA  
AACTAATGAGAGGTATAGGCTTAGTCAAGTCTGTACTTACATTCTTTACGCCAGATTCTTCATGGGGC  
GAC  
+  
FFFFFFFFFFFFFFFFFFFFFFFFFFFFFFFFFFFFFFFFFFFFFFFFFFFFFFFFFFFFFFFF  
:FFFFFFFFFFFFFFFFFFFFFFFFFFFFFFFFFFFFFFFFFFFFFFFFFFFFFFFF:FFFFFFFFFF:FFFFFFFFFFFF  
FFF  
@A00721:190:HGJW7DSXY:4:1539:5240:19523\_2:N:0:TCTGCAAG+GCTGCACT  
CGAGAATTATTACTGTTTTCTCTACCCATAACTTCTTTTTCAAAAATGCGGATGGGTCTACTGATGTT

TTCCTACAGAGTGCAGTCGTTTCAACACTTATCACCACCTTTTGAAAGG

+

FF:FFFFFFFFFFFFFFFFFFFFFFFFFFFFFFFFFFFFFFFFFFFFFFFFFFFFFFFFFFFFFFFF  
FFFFFFFFFFFFFFFFFFFFFFFF:F:FFFFFFFF,F,FFF::FFFFFFFF

@A00721:190:HGJW7DSXY:4:1410:24731:28510\_1:N:0:TCTGCAAG+GCTGCACT  
ATACGTATGTCGGTGGGGTTCTCAAGGCTCTCATCGCCACTGGGATTCTAAGGGTTCCATAAGATAT  
TATCTGACATTGTGGTTCAATGATCAGGATTCTTCTTTTGGTCCTTACGTCTTAAGTAATTTGGATGT  
TGT

+

:F:F,,FFF,FFFFFFFF,FFF,F:FFFFFFFF::FFF,FF:FF:FFFF:F,FFF::FFFFFFFF  
FFFFFFFF:F:FFFF,FFFFFFFFFFFFFFFFFFFFFFFFFFFFFFFF,FF,F,FFFFFFFF  
FFF

@A00721:190:HGJW7DSXY:4:2660:26350:15436\_1:N:0:TCTGCAAG+GCTGCACT  
TCTTGTACGATTCTTAAAAGAAGTTTATTAAACTTCAGAGTCTCTTGGAAAGTCCAGGTAGCTAATG  
TTCTTGAATAGCCACAGACTTTCTGGGAAAAGAGACCTCTGTTGGTAGAGGAGTTGAGAGAATTACT  
CAG

+

FFFFFFFF::FFFFFFFFFFFFFFFF:FFF,FFFFFFFFFFFFFFFF:FFFFFFFFFFFFFFFF  
FFFFFFFFFFFFFFFFFFFFFFFF:FFFFFFFFFFFFFFFFFFFFFFFFFFFFFFFFFFFFFFFF  
FFF

@A00721:190:HGJW7DSXY:4:1245:30581:13808\_1:N:0:TCTGCAAG+GCTGCACT  
GGAGTGGCTAGGTTTTAAAAGATCCTTGCACAAGCAATACCTTCCACTGAGTTCATCACCAGAGTT  
TCGACGTCGCGGAAAACGATGAAGATTTCCACACTGTTGAGAATCTTCTGATGCTGAATTTGAGGAA  
AAT

+

FFFFFFFFFFFFFFFFFFFFFFFFFFFFFFFFFFFFFFFFFFFFFFFFFFFFFFFFFFFFFFFF  
FFFFFFFFFFFFFFFFFFFFFFFF:FFFFFFFFFFFFFFFFFFFFFFFFFFFFFFFFFFFFFFFF  
FFF

@A00721:190:HGJW7DSXY:4:1226:31593:2065\_1:N:0:TCTGCAAG+GCTGCACT  
TTTTTGGTATAAATCCTGATGGCTCAGTACAGGGAGGAGGTAATAGTTATAAACCTTCTTTTATCAT  
TGCAACAGGACTTTGAGAAGACTGTTGAAATGGACAAAATCTGGGATCATAGGTATGTGTACGCTAC  
ACT

+

FFFFF:FFFFFFFF:FFFFFFFFFFFFFFFFFFFFFFFFFFFFFFFFFFFFFFFF:FFFF:FFFFF  
FFFFFF,FFFFFFFFFFFFFFFFFFFFFFFFFFFFFFFFFFFFFFFFFFFFFFFFFFFFFFFF  
FFF

@A00721:190:HGJW7DSXY:4:1273:11939:27524\_2:N:0:TCTGCAAG+GCTGCACT  
AAGATCTCTACAGAGATTATCGAGAGTTGTGATCTAGTTCTAAATTTAGGTCGACGGACTTTAGCAAC  
TTAGATAAATCTTTCCGGGCTCAATGACCTTTGCTATGTACGTGGA

+

FFFFFFFF:FFFFFFFFFFFFFFFFFFFFFFFFFFFFFFFFFFFFFFFFFFFFFFFF:FF:FFFFFFFF  
FFFFFFFF:FF,FFFFFFFF:FFF:FF:FFFFFFFF:F,FF

@A00721:190:HGJW7DSXY:4:2532:28510:30076\_1:N:0:TCTGCAAG+GCTGCACT  
Ttagttcatgaagttcttaccttctcgcgactaatgtcagcttctactacaaaggcgttacgtaaagt  
agttttcacgctttatcttaaagcattaccaccaaatttagcactttttgaatatgacagaagctcgc  
cat

+

FFFFFFFFFFFFFFFFFFFFFFFFFFFFFFFFFFFFFFFFFFFFFFFF: ,FFFFFFFF  
FFFFFFFF:FFFFFFFFFFFFFFFFFFFFFFFFFFFFFFFFFFFFFFFFFFFFFFFF  
FFF

@A00721:190:HGJW7DSXY:4:1616:10691:4319\_1:N:0:TCTGCAAG+GCTGCACT  
AGTTAGAGTTCTTCTAACCAGGACTGATGGTGAGATTCTTTTACCTTTTGGAGGTCCAGGAACCTTTA  
CTCCTAGTGTCTTTCTAGAGTCCAAGGACGTTTCCGTCGGAGGATGACAGGTGGGAGACCGCTCAAT  
AAC



+  
FFFFFFFF::FFFFFFFFFFFFFFFF::FFFFFFFF:FFFFFFFFFFFFFFFFFFFFFFFF:FFFFFF  
FFFF:FFFFFFFFFFFFFFFFFFFFFFFFFFFFFFFF:FFFFFFFFFFFFFFFFFFFFFFFF  
FFF  
@A00721:190:HGJW7DSXY:4:1104:26476:14027\_2:N:0:TCTGCAAG+GCTGCACT  
TTGATAAATTTGTTGGAATCGATAATGATACTGACGAAGGTTCTATTACCACCTTGTCATTGATACA  
AACATTCTAGGTGATGCTTTCTTAGAGGCTCGTCTAGCCGCTGAGATT  
+  
FFFFFFFFFFFFFFFFFFFFFFFF:FFFFFFFFFFFFFFFFFFFFFFFF:FF:FFFFFFFFFFFFFFF  
FFFFFFFFFFFFFFFFFFFFFFFF:F:FFFFFFFFFFFFFFFFFFFFFFF  
@A00721:190:HGJW7DSXY:4:2236:31105:9236\_2:N:0:TCTGCAAG+GCTGCACT  
TACAATCTGTAGAGAGAGAGGTTAATCAGAATTTGAGTGATAACGATTTAGTACTGGGAAATGGTGGT  
AGTCAGTTTACTACTTTTCTTCCCTCCCCTTTTTCGATTGGATTCTGA  
+  
FFFFFFFFFFFFFFFFFFFFFFFFFFFFFFFFFFFFFFFF:FFFFFFFFFFFFFFFFFFFFFFF  
FFFFFFFFFFFFFFFFFFFFFFFF:FFFF:FFFFF:FFFF, :FFFFF  
@A00721:190:HGJW7DSXY:4:1107:29152:9893\_1:N:0:TCTGCAAG+GCTGCACT  
GTAGGTCTCCTAGTACTTAAGGGTTTATGTTTCGGTTTCAGCTGGATGGATCTTTTGATGGTATGTTT  
CACATTGCGTGATCACTTCCCGTGGACTTGGAAGAGATTAAACATAAAATCCAGCGATTCTATTATG  
TCG  
+  
FFFFFFFFFFFF:FFFFFFFFFFFFFFFFFFFFFFFFFFFFFFFFFFFFFFFFFFFFFFFFFFFF:F  
FFFFFFFFFFFFFFFFFFFF:FFFFFFFFFFFFFFFFFFFFFFFFFFFFFFFFFFFFFFFFFFFF:FF  
FFF  
@A00721:190:HGJW7DSXY:4:2110:18701:12273\_1:N:0:TCTGCAAG+GCTGCACT  
TCTTGATGTTGCGGCTGTGGGGATTAACTTCCCTCGTGAACTTACGACGATGTTCTCGCTCGCATTT  
CACAAGGATTACTAAGTCTGAGATCTGCCACTTCTAATTTTAGGAAACGTCGCGAAAAGAAAGTTCAT  
GAG  
+  
FFFFFFFFFFFFFFFFFFFFFFFFFFFFFFFFFFFFFFFFFFFFFFFFFFFFFFFFFFFFFFFFFFFF  
FFFFFFFFFFFFFFFFFFFFFFFFFFFFFFFFFFFFFFFFFFFFFFFFFFFFFFFFFFFFFFFFFFFF  
FFF  
@A00721:190:HGJW7DSXY:4:2641:32805:13495\_2:N:0:TCTGCAAG+GCTGCACT  
GAAAAATATCGCCGGAAGTCTAATAGAGGATCCTGATGACATTATTTCAACGGATACCGATCTCAG  
TTCTACCACAGAAACCGTCTCAGGAAGTCTCCACTGATTCGGAATT  
+  
FFFFFFFFFFFFFFFFFFFFFFFFFFFFFFFFFFFFFFFFFFFFFFFFFFFFFFFFFFFFFFFFFFFF  
FFFFFFF:FFF:F:FFFFFFFFFFFFFFFFFFFF:FFFFFFFFFFFFFFF  
@A00721:190:HGJW7DSXY:4:2637:14253:20979\_2:N:0:TCTGCAAG+GCTGCACT  
CTTCTTGTTGGGACTGAGACCTCTGAATTTTCAGGGTGCCCTGATGAGGACGTTGAAAGGGATAATTT  
CAACTCTGAGACTTCTAAGAGTGTTCAAAAGACCAGAAACGTAACAA  
+  
FFFFFFFFFFFF,FFFFFFFFFFFFFFFFFFFFFFFFFFFFFFFF:FF,FFFFFFFFFFFFFFFFFFFF  
FFFFFFFFFFFFFFFFFFFFFFFFFFFFFFFF:FFFFFFFFF,FFFFFFFFF  
@A00721:190:HGJW7DSXY:4:2270:11424:16391\_2:N:0:TCTGCAAG+GCTGCACT  
AGCGAGCGGTTGAAGAGAAAAGTATGTTGCGGCTGATCGTACCCCAATTCCTGCTAGAAAGATC  
ACTCTCGGCGATACCACTGATCTCCAGAGTTACGTAGTGGTCTTCT  
+  
FFFFFFFFFFFFFFFFFFFFFFFFFFFFFFFFFFFFFFFFFFFFFFFFFFFFFFFFFFFFFFFFFFFF  
FFFFFFFFFFFFFFFFFFFFFFFFFFFFFFFFFFFFFFFFFFFFFFFFFFFFFFFFFFFFF  
@A00721:190:HGJW7DSXY:4:2464:17942:35446\_2:N:0:TCTGCAAG+GCTGCACT  
TCAGTTTTCCAAAAGCTATTAATAGCAGTTGCGGGCTATAATACCGCCTCCAGATTACTCTAACT  
GAATCCACTCTCTTGGGATATAAATGAGTACATCTATAATAGAGTTTT  
+

[illegible]

@A00721:190:HGJW7DSXY:4:2639:16432:3051\_2:N:0:TCTGCAAG+GCTGCACT  
TGTCGATCGAATTAAGATCAAGGCTAATACCTTTATAGGTAAGAAGCCCCTTGAGCCGCGTAGTCAGC  
GCGTTTAGCTGTATCATCAGTCAGAGTATACCCGATAGGGTACCGAGT

@A00721:190:HGJW7DSXY:4:2450:27579:31187\_2:N:0:TCTGCAAG+GCTGCACT  
GTTTTCAACGGAAGACATATCGCACCCGAAATTTTGGGCAGAATGCTCTTAACGCGGTTCTTGA  
ACGGTGTTTTGATCAGTCTAAGTTGGATAAAGTTATAGGAGACTCAGT

@A00721:190:HGJW7DSXY:4:2174:32389:24706\_2:N:0:TCTGCAAG+GCTGCACT  
GCTCCTCAATTGATAGATTGGGTCAACAATAGGGACGCTAGTATACTTCGTAAAGTCGACAGCGAAAT  
GGTCAATATTGATAATTGGACCGACTATATGACCTATTTTAAGCTCAT

@A00721:190:HGJW7DSXY:4:2366:13340:28886\_2:N:0:TCTGCAAG+GCTGCACT  
CTAAGGTTAACTTGATGCTTCAGCCTTTTCGAAGCATAACCCCGCACAGAATATCGTTTATCACGCA  
AAATTTATTAATGCAATTTTCGGACCTATCTTTAAGGTTCTTGTGAGG

@A00721:190:HGJW7DSXY:4:2268:1832:14559\_1:N:0:TCTGCAAG+GCTGCACT  
TCTCTCTCTTAGGAGGTCATGATGACTACTATAAGGGTGAAATCGATTTTTCGAAGTTTGACAAATCT  
CAAGATTTCTTTTGTAAGCCTATGAGATAAAGATGTATTCTTATTTAGGCTTCGATGCTGAATTTCT  
TGA

@A00721:190:HGJW7DSXY:4:2650:32551:1783\_2:N:0:TCTGCAAG+GCTGCACT  
TGTCACGCCAGGAGTATCCATAACGATTTGTCATTTACCACCTTTGCTCAACGACGAAGTGGAAACGC  
CAACACTTTCTTTGGTAATTGTATGATCACTTTGATGATTTTATCACT

@A00721:190:HGJW7DSXY:4:2118:17833:26616\_1:N:0:TCTGCAAG+GCTGCACT  
CTTGGAAGTTTTCGGCTGTGGTTGTCGCTGGGACGATTCCATTCTGTTTTCAAAGACTCCAATAAC  
TGATCATTCTGATCATATGATTTTGACAATGGTTTCGAAGCGAATTTTTGAGGGATAAACACGCGT  
ACT

@A00721:190:HGJW7DSXY:4:2556:29234:18646\_2:N:0:TCTGCAAG+GCTGCACT  
ATCGTTAAGTTAGGTAAACCCCTAACCGATGTTACTCTTGTAGGACTTTGGGAGAGATTTCGTTAGTTT  
TAAAGACTATACTAAATATCTCCACTACGAGGTTGTTGTTTGGCGATT

[illegible]





+  
FFFFFFFFFFFFFFFF:FFFFFFFF:FFFFFFFFFFFFFFFFFFFFFFFFFFFFFFFFFFFFFFFFFFFFFFFF,FFFF  
FFFFFFFFFFFFFFFFFFFFFFFFFFFFFFFFFFFFFFFFFFFFFFFFFFFFFFFFFFFFFFFF:FFFFFFFFFFFFFFFF  
FFF  
@A00721:190:HGJW7DSXY:4:1677:9977:17143\_2:N:0:TCTGCAAG+GCTGCACT  
CGAAGTAAAGATAACCAATAAGGAAGGAGCTTATACTATGGTTGAATCAACTAAGCATACTACTTTTG  
CTTTGATTACTCTACCGCCTTACAAGTCTAAGGTTAAAGAGTCGATTA  
+  
FFFFFFFFFFFFFFFFFFFFFFFFFFFFFFFFFFFFFFFF,FFFFFFFFFFFFFFFFFFFFFFFFFFFFFFFF:FFF  
FFFFFFFFFFFFFFFFFFFFFFFFFFFFFFFFFFFFFFFFFFFFFFFFFFFFFFFFFFFFFFFF  
@A00721:190:HGJW7DSXY:4:1172:18900:12837\_2:N:0:TCTGCAAG+GCTGCACT  
TGGTTGTTATCTCGAAAAGTCTCTTCTAAAAGGAACGTCAGTTCTAACCCAAAGAGAATATCTAAAAT  
ATTTACAAAATCTTACCACTATCTACGAACCTAAAGTTCTGAAGACGT  
+  
FFF:FFFFFFFFFFFFFFFFFFFFFFFFFFFFFFFFFFFFFFFFFFFFFFFFFFFFFFFFFFFFFFFFFFFFFFFF  
FFFFFFFFFFFFFFFFFFFFFFFF,FFFFFFFF:FFFF:FFFFFFFF:FFF  
@A00721:190:HGJW7DSXY:4:1553:5421:20024\_2:N:0:TCTGCAAG+GCTGCACT  
TTCCTCCTTTAATGGCACTACCTCGGTACAATCTTACTTGGAACGAAGGCGACCTGTTCCGGAGTTTT  
TACGGGATCCGGAATGTTCTGTCTATATTAGGTGAAGCGAAATACGAT  
+  
FFFFFFFFFFFFFFFFFFFFFFFFFFFFFFFFFFFFFFFFFFFFFFFFFFFFFFFFFFFFFFFFFFFFFFFF:FF:FFFFFFFF  
FFFFFF:FFFFFFFFFFFFFFFF,FF:FFFFFFFF:FFFFFFFF  
@A00721:190:HGJW7DSXY:4:1639:20247:32643\_1:N:0:TCTGCAAG+GCTGCACT  
TCGTACCTTGATGCTGACTTTTCGTCAATATGATTTGATCTGTTGCTCAATTCTAAGCGTGTTCCGCT  
TAGTGCGAGGCCTCTCTTATACGAGTATTGCTATTTAAACGTTACGAGAAGAAGGTTCGAAAGTTTG  
AGA  
+  
FFFFF:FFFF:FF:FF,FFF::FFFF:FFFFFFFF,F::FFFFFFFF:FFFFF:F::FF::FFF,FF,F  
FFF::F:FFFF:FF,,F,FFFF::FFF::FF:FFF,,FFFFFFFF:F,FF::FFFFFFFF:F:FF  
F::  
@A00721:190:HGJW7DSXY:4:2366:8332:27602\_2:N:0:TCTGCAAG+GCTGCACT  
ATATTTGGATGATCTTGATAAAGAACTTCATGAATTTTCAGAGGATGAAAAATTTTCTTCCTTGATT  
TTAATATAAAGAATCTTTACCAGGACTCCTACTACAGGAGGCAGTCTT  
+  
FFFFFFFFFFFFFFFFFFFFFFFFFFFFFFFFFFFFFFFFFFFFFFFFFFFFFFFFFFFFFFFFFFFFFFFF  
FFFFFFFFFFFFFFFFFFFFFFFFFFFFFFFFFFFFFFFFFFFFFFFFFFFFFFFFFFFFFFFF  
@A00721:190:HGJW7DSXY:4:2263:1597:24643\_2:N:0:TCTGCAAG+GCTGCACT  
CGAAACTCTAAGTGGAATACTGTCTTTCCAAGCTTACCTGTATCTTCAATGAAATTGGACTCTTCGA  
TAGGGGACATTTTATCGTGGGCTTCCGTAAAGGAAGATCTGTTATCG  
+  
FFFFFFFFFFFFFFFFFFFFFFFFFFFFFFFFFFFFFFFFFFFFFFFFFFFFFFFFFFFFFFFFFFFFFFFF  
FFFFFFFFFFFFFFFFFFFFFFFFFFFFFFFFFFFFFFFFFFFFFFFFFFFFFFFFFFFFFFFF  
@A00721:190:HGJW7DSXY:4:2109:4010:14011\_1:N:0:TCTGCAAG+GCTGCACT  
AATGGCGTTGGCCTAGTGGATGTTATTAGTGACATCTGGTCAATTTGTTTTAGGTGGTCTTTATTC  
TATTATTGATTTTATGAGATTGATACGTTAACAGAAGATCTGTTATCGACGTTTATCGTTTACGAA  
GTA  
+  
::,FFFFFFFFFFFFFFFF:FFFFFFFFFFFFFFFF:FFFFFFFFFFFFFFFF:FFFFFFFFFFFFFFFF  
FFFFFFFF:FFFFFFFF:FFF:FFFFFFFFFFFFFFFFFFFFFFFFFFFFFFFFFFFFFFFF  
FFF  
@A00721:190:HGJW7DSXY:4:1419:14787:4523\_2:N:0:TCTGCAAG+GCTGCACT  
AGGATTATGTCTGTGTTGAAAGACTTTCTACCGATAAGGGTCACTAGTCTTACACAATTAAGAAATAA  
TCCTACATTGACTGATTATCTAAAGATTGAAGGAAAATTTTATCCTCG  
+

FFFFFFFFFFFFFFFFFFFFFFFFFFFFFFFFFFFFFFFFFFFFFFFFFFFFFFFFFFFFFFFFFFFFFFFF  
FFFFFFFFFFFFFFFFFFFFFFFFFFFFFFFFFFFFFFFFFFFFFFFFFFFFFFFFFFFFFFFF  
@A00721:190:HGJW7DSXY:4:1169:1588:9909\_1:N:0:TCTGCAAG+GCTGCACT  
ACTTTCTACGATACAAATGATACTTCTAATTTACGTTTGCTACTCAGAGCTGGTCCTCTCAGCAA  
GGGATGCATGGTGTATCTCCTCAGGAGTCCCGCATTTGATAATAATGACGAGACTTTCGTCATAAT  
CGC  
+  
FFFFFFFFFFFFFFFFFFFFFFFFFFFFFFFFFFFFFFFFFFFFFFFFFFFFFFFFFFFFFFFFFFFFFFFF  
FFFFFFFFFFFFFFFFFFFFFFFFFFFFFFFFFFFFFFFFFFFFFFFFFFFFFFFFFFFFFFFF:FFFFFFFF  
FFF  
@A00721:190:HGJW7DSXY:4:2432:25192:22200\_1:N:0:TCTGCAAG+GCTGCACT  
GATTACACGGTACCAGCGCATCTCGTGTGAGCCTCGACCCGATTATATGGTATTAACCTATAAAGGT  
GAGGAGACCATTTTCTTGCTGAAATTTATAGAAGATTATTTTGACAGAATCAATAAGAATCATCGATT  
CTC  
+  
FF:FFF:FFFFFFFFFFFFFFFFFFFFFFFF:FFFFFFFFFFFFFFFFFFFFFFFF:FFFFFFFFFFFFFFF,:FF  
FFFFFFFFFFFFFFFF:FFF:FFFFFFFFFFFF:FFFFFFFFFFFF,FF:FFFFFFFF:FF::FF,FF,:  
,FF  
@A00721:190:HGJW7DSXY:4:1348:10592:6872\_1:N:0:TCTGCAAG+GCTGCACT  
TTCTTAATTATAATATTCAACCTCAAAAGTTACGTGTTTACAGTAACGAGATCACACATTTTGAGAAC  
TAATATGTTATGTTCTCTGATCATTTTGACAATCTCTTCTTATAATAAATAAATAAATAATATTACT  
AAT  
+  
FFFFFFFFFFFFFFFFFFFFFFFFFFFFFFFFFFFFFFFFFFFFFFFFFFFFFFFFFFFFFFFFFFFFFFFF  
FFFFFFFFFFFFFFFFFFFFFFFFFFFFFFFFFFFFFFFFFFFFFFFFFFFFFFFFFFFFFFFFFFFFFFFF  
:FF  
@A00721:190:HGJW7DSXY:4:2173:22073:12352\_1:N:0:TCTGCAAG+GCTGCACT  
AAAGGCTCCAGTCAACACTAGTTCGAGTGCTGCTTTGGATTACGATGACGTGAGAATAGGTGAAGGGA  
TAGTTTTTACCTCGACCAACATTAAGGCGGCGGCGACTAATCTTAAAGCTTCACCCAAATGAAGGAC  
ACT  
+  
FFFFFFFFFFFFFFFFFFFFFFFFFFFFFFFF:FFFFFFFFFFFFFFFF:FFFFFFFFFFFFFFFF:FFFFFFF  
FFF:FFF:FFFFFFFFFFFFFFFF:F:FFFFFFFFFFFFFFFFFFFFFFFFFFFFFFFF,FFFFFFFF  
FFF  
@A00721:190:HGJW7DSXY:4:1428:28763:1110\_1:N:0:TCTGCAAG+GCTGCACT  
TCCAGACGACGACGAAGCTTATACTACTTTAATTTTGGGTATTATGTGGAGATATCGTGATATCAGTA  
CGTCCAGATCCTCTGCTTTTACCGATAACGATAAATTCGTCATCAAATATAAAGAAAAGGACTATGAA  
ATA  
+  
FFFF:F:FF:FFFFFFFFFFFFFFFFFFFFFFFF,F,FFFFFFFFFFFFFFFFFFFFFFFFFFFFFFFF  
FFF,FFFFFFFFFFFF:FFFFFFFFFFFFFFFFFFFFFFFF:FFFFFFFFFFFFFFFFFFFFFFFFFFFF  
FFF  
@A00721:190:HGJW7DSXY:4:2167:25554:2848\_2:N:0:TCTGCAAG+GCTGCACT  
CCACATTTTGGTCAAGTCAATCCGTTGAGAAAATTTCTTAGAGGATATTGCCATTGTGGTACGAATT  
GGTCCAACATTTACCACCAAATCTTTTGATACAACTCTAGCCTTCAA  
+  
FFFFFFFFFFFFFFFFFFFFFFFFFFFFFFFF:FFFFFFFFFFFFFFFFFFFFFFFFFFFFFFFFFFFFFFFF  
FFFFFF:FFFFFFFFFFFFFFFFFFFFFFFFFFFFFFFFFFFFFFFFFFFFFFFF  
@A00721:190:HGJW7DSXY:4:1302:22887:33426\_2:N:0:TCTGCAAG+GCTGCACT  
CCAGATTGTTTGAACCCGTTGATGCTATGTCAGAAGAAGCTATTCAAGCTTGTCGTTTAAAGACTGC  
AGAGGCTGTCAAACAAGCCAGACTCAAGGAGTCCAATCAAAGGTTTT  
+  
FFFFFFFFFFFFFFFFFFFFFFFFFFFFFFFFFFFFFFFFFFFFFFFFFFFFFFFFFFFFFFFF:FFFFFFF  
F:FFFFFFFFFFFFFFFFFFFFFFFFFFFFFFFF:FFFFF:FFFFFF:FF

@A00721:190:HGJW7DSXY:4:1617:32081:28620\_2:N:0:TCTGCAAG+GCTGCACT  
TTCTACTTACAAAGGACAATTCAGTTTCATTAATTCTACGAAAAGTCCGGAGTATATTGTATGTTAA  
TAGATAGTGGGATAATAGTTCTACCGATACGTAGTGAACGCGTTCGTA

+

F,FFFFFFFFFFFFFFFF:FFFFFFFFFFFFFFFFFFFFFFFFFFFFFFFFFFFFFFFF:FFFFFFFFFFFF  
FFFFFFFFFFFFFFFF:F:FFFFFFFF:FFF:FFFFFFFFFFFFFFFFFFFFFFFF

@A00721:190:HGJW7DSXY:4:2508:29939:21277\_1:N:0:TCTGCAAG+GCTGCACT  
ACCGATAGGAGTTGTATAGTTGAAGATGTGGCTTTAGACGATAATCCTTTAAGGACTATGTTGACTGA  
CGAAGATTTTCCAACAGATTTGTCTACGTTGCAGATCGCCACTCCAAACACTATATACATTATAAAAT  
ATA

+

FFFFFFF:FFFFFFFFFFFFFFFFFFFFFFFFF:,FFFFFFF:FFFFFFF:FFFFFFFFFFFFFFFFFFFFF  
FFFFFFFFFFFFFFFFFFFFFFFFFFFFFFFFFFFFFFFFFFFFFFFFFFFFFFFFFFFFFFFFFFFFFFFF  
FFF

@A00721:190:HGJW7DSXY:4:1257:30752:35399\_1:N:0:TCTGCAAG+GCTGCACT  
ACTTTTGTACCAAATTCCTGGCTTTCAACGAAGTCTCTGATTTTATTAATCATTACTTTAACGATCT  
CTCGGTCATTTACTCTGTACTTGATCTACGTCGTTTAACTGTCGGAACAACCTTTACTTAGAATGACT  
CTA

+

FFFFFFFFFFFFFFFFFFFFFFFFFFFFFFFFFFFFFFFFFFFFFFFFFFFFFFFFFFFFFFFFFFFF,FFFFFFFFFFFF  
FFFFFFFFFFFFFFFFFFFFFFFFFFFFFFFFFFFFFFFFFFFFFFFFFFFFFFFFFFFFFFFFFFFFFFFFFFFF  
FFF

@A00721:190:HGJW7DSXY:4:1215:3803:35352\_2:N:0:TCTGCAAG+GCTGCACT  
AGTTAATATCATATTAGTAATACTCACTATCGTTTTCTGCTTTTTCTTAGCTAATAGATTAATAAAGG  
ATGAGTACGAAAACCAACTCTTCGTTACGAGACCTGATGGTAGAATAG

+

FFFFFFFFFFFFFFFFF:FFFFF:FFFFFFFFF:F:FFFFFFFFFFFFFFFFFFFFFFFFFFFFFFFF:FFFFF  
FFFFFFFFFFFFFFFFFFFFFFFFFFFFFFFFFFFFFFFFFFFFFFFFFFFFFFFFFFFFFFFF

@A00721:190:HGJW7DSXY:4:1676:10746:3129\_1:N:0:TCTGCAAG+GCTGCACT  
TCTTGCAAGTGAAGTTCAGACGTGTGCTCTTCCGATCTCGTAATACACGAAGAGATCATCCGC  
AAACGACTCGAAACCGAGACGCCGTAGATCAAAGTCCCTTCTAACTTTAGATT

+

::F:::,,F::F::F,,,F:::,F,,,::F:FF,F,F:::,::,FF:FFF::,F::,,::,,F,FF:,  
F,FFFFFFFFFFFFFFFFFFFFFFFFFFFFFFFFFFFFFFFFFFFFFFFFFFFFFFFF

@A00721:190:HGJW7DSXY:4:2643:1805:21966\_2:N:0:TCTGCAAG+GCTGCACT  
TTTTTATAATTTATAACCTTCTTATACTTTTGGGTATGTTTGTGAAAAACATGAGATACCCAAGTCT  
ATCGAAGACATTATCTCTTATGTACTTATTGTAACGATCATTCTTTG

+

FFFFFFFFFFFFFFFFFFFFFFFFFFFFFFFFFFFFFFFF:FFFFFFFFFFFFFFFFFFFFFFFFFFFF,:FF  
FFFFFFFFFFFFFFFFFFFFFFFFFFFFFFFFFFFFFFFFFFFFFFFFFFFFFFFF

@A00721:190:HGJW7DSXY:4:2421:21829:36417\_2:N:0:TCTGCAAG+GCTGCACT  
CTGTGTATGAGGAGGATTTATAATGCTTTTCGATAGTGATTGTTATCAATTTAAATACATTACTGTTT  
CAAATCATCTTTACTCACAGACTCCGAAAATGGTTTCAAATGAGGTCA

+

FFFFFFF:FFFFFFFFFFFFFFF,FFFFFFF:FFFFFFFFFFFFFFFFF:FFFFFFFFFFFF,:::FF,,FFF  
,FFFF:FFFFFFFFF:FFFFFFF:::FFFFFF:FFF,FF::FF:,FF

@A00721:190:HGJW7DSXY:4:1631:14235:10770\_1:N:0:TCTGCAAG+GCTGCACT  
TAAACGTACTATTATCCGATTCTTCGAGTGTATCACTACCACTGTTCTGCCGACTTTAGTCAAGGAAC  
TTCAATTCCTTCGATGTTTATATTTTCTATAAGGGAAAATAGCAATAATCAAATTTGACAAATTTT  
AGA

+

:F,F:F,F::F:FF:F,:FFFFFFFF:F,FFFFF,FFF,F,FFF,FFFF:FFFFFFFFFFFF,:::FFF  
F,FFF:F:FFFFFFFFFFFFFFFF:FFFFFFF,FF:FFF:FFFFFFFF:FF:FFF:FFFFFFFFFFFF:FFFF  
:FF



@A00721:190:HGJW7DSXY:4:1232:31277:14043\_1:N:0:TCTGCAAG+GCTGCACT  
GAACTCTCTCCGATCACCTTGGTGTGATCTCCCGGAGGATCTTTTCAATAAGATGTATGATGATAATC  
TACTATTTTAAATAGTGTTATTTCAGCGTATACTTGAATACTTTATCAAAGATTTGGCTTGGTCTATT  
TAC

+

FFFFFFFFFFFFFFFFFFFFFFFFFFFFFFFFFFFFFFFFFFFFFFFFFFFFFFFFFFFFFFFFFFFFFFFF  
FFFFFFFFFFFFFFFFFFFFFFFFFFFFFFFFFFFFFFFFFFFFFFFFFFFFFFFFFFFFFFFFFFFFFFFF  
FFF

@A00721:190:HGJW7DSXY:4:1307:18701:15562\_2:N:0:TCTGCAAG+GCTGCACT  
GGTCTATGATATTTATTTTACTTATACTTTAAATAGCACCGATTATAACTTGACTGTTGATAATATTA  
CAATAGCTCTTTCTCAGAAGATTAGAGAAGTAACCGGTGAACACGTCG

+

FFFFF:FFFFFFFFFFFFFFFFFFFFFFFFFFFFFFFFFFFFFFFFFFFFFFFFFFFFFFFFFFFFFFFF:  
FFF:FFFFF:FFFFFFFFFFFFFFFFFFFFFFFFFFFFFFFFFFFFFFFFFFFFFFFFFFFFFFFF:  
FFF:FFFFF:FFFFF:FF,F

@A00721:190:HGJW7DSXY:4:1340:29243:5071\_2:N:0:TCTGCAAG+GCTGCACT  
TTTACTTTTACCGTTAGAACTGAAAAAGATTCTTTTCGAAAAGAAACCTATAAGTTACAAACGATTCT  
TCGACTATATTAAAGAAATAAAAATACTTCAAGTACCTGAACTTTACA

+

FFFFFFFFFFFFFFFFFFFFFFFFFFFFFFFFFFFFFFFFFFFFFFFFFFFFFFFFFFFFFFFF:  
FFFF,FFFFFFFFFFFFFFFFFFFFFFFFFFFFFFFFFFFFFFFFFFFFFFFFFFFFFFFF:  
FFF:FFFFF:FFFFF:FF,FF::F:FFFF::,FFFF:

@A00721:190:HGJW7DSXY:4:2462:2347:27038\_2:N:0:TCTGCAAG+GCTGCACT  
ATGTGTCTTACAAATAGAACCTTCACTCTCGGTAATGAGAGTGTATTCTTAATATTCTAGTAACCGC  
TATGTGGGCATTACTAGGATTTATCACACTCCTAAATTTGATAGCAAT

+

FFFFFFFFFFFFFFFFFFFFFFFFFFFFFFFFFFFFFFFFFFFFFFFFFFFFFFFFFFFFFFFF:  
F:FFFFFFFFFFFFFFFFFFFFFFFFFFFFFFFFFFFFFFFFFFFFFFFFFFFFFFFF:  
FFFFFFFFFFFFFFFFFFFFFFFFFFFFFFFFFFFFFFFFFFFFFFFFFFFFFFFF:F

@A00721:190:HGJW7DSXY:4:2517:4010:32831\_2:N:0:TCTGCAAG+GCTGCACT  
TGCTAGGAAAATTTAGAAAACTCCATTGTATAGTTCAAGGAGTACTTAATTCAATAGCTTTAGTAT  
TATTTACTATCGCCTTTATTGAAAATTGTATAAGAGTTAATTGCTTAC

+

FFFF:FFF:FFFFFFFFFFFFFFFFFFFFFFFFFFFFFFFFFFFFFFFFFFFFFFFFFFFFFFFF,  
FFFFFFFFFFFFFFFFFFFFFFFFFFFFFFFFFFFFFFFFFFFFFFFFFFFFFFFF:  
::FF:FFFFF:FFFF:FFFFF:FFFFF

@A00721:190:HGJW7DSXY:4:1604:7202:27806\_2:N:0:TCTGCAAG+GCTGCACT  
ACCATAACCTACCATGACCAATCATCGCTCCAAGTGGCAGCCAGACGTAGGGTCAAACCTACTACCG  
CCGGTCGGCAGATCGGCACCACTGGTCTCTACGTTACGGGACCCGCTG

+

FFFFFFFFF:FFFFFFFFFFFFFFFFFFFFFFFFFFFFFFFFFFFFFFFFFFFFFFFFFFFFFFFF  
FFFF:FFFFFFFFFFFFFFFFFFFFFFFFFFFFFFFFFFFFFFFFFFFFFFFFFFFFFFFF:  
FFFFFFFFFFFFFFFFFFFFFFFFFFFFFFFFFFFFFFFFFFFFFFFFFFFFFFFF

@A00721:190:HGJW7DSXY:4:2251:16034:30984\_1:N:0:TCTGCAAG+GCTGCACT  
TTCCCAAATCTAGATCTGCACAGAAGAAGGCTGAAGGTCGTTACCGGACGACCACTCAAAGGAAACGG  
GCTGTTGCCAGAGGAAAGCAGCGACCACCGAGGTCGCTCGTAACATTGACGGCAGTCCCGTCATCTC  
TGT

+

F,FFFF:FFFFFFFFFFFFFFFFFFFFFFFFFFFFFFFFFFFFFFFFFFFFFFFFFFFFFFFF  
FFFFFFFFFFFFFFFFFFFFFFFFFFFFFFFFFFFFFFFFFFFFFFFFFFFFFFFF:  
FFF

@A00721:190:HGJW7DSXY:4:2357:30201:3724\_2:N:0:TCTGCAAG+GCTGCACT  
CAGTACCTCAGTCAAAAGTCACATTCACCACTCCCATACCAATCAATGATGTGACTATACAGTTCCGGC  
CATTTCAAGAGTGGTCAATACGTCGTGGGAGGTACTGAAGCCTTCCCC

+

FFFFFFFFFFFFFFFFFFFFFFFFFFFFFFFFFFFFFFFFFFFFFFFFFFFFFFFFFFFFFFFF:  
FFFFFFFFF:F:FFFFFFFFFFFFFFFFFFFFFFFFFFFFFFFFFFFFFFFFFFFFFFFF:  
FFFF

@A00721:190:HGJW7DSXY:4:1334:15664:23891\_2:N:0:TCTGCAAG+GCTGCACT  
GCCAATCAATAGTTCTTCTGACCAGAATGAAAAGGGTTTACCAGGTTAGTCTCTAAGTCTACCAGGA

AGAGGGGAAATGTCCCCAAACTGAGAAGAATAAAGGGAAAGGTCCAT

+

FFFFFFFFFFFFFFFFFFFFFFFFFFFFFFFFFFFFFFFFFFFFFFFFFFFFFFFFFFFFFFFFFFFFFFFF  
FFFFFFFFFFFFFFFFFFFFFFFFFFFFFFFFFFFFFFFFFFFFFFFFFFFFFFFFFFFFFFFFFFFFFFFF

@A00721:190:HGJW7DSXY:4:2642:31792:9048\_1:N:0:TCTGCAAG+GCTGCACT  
ATCTCTAATTCTGAAGGAAGATCTCCCACCATCTGGGGTTGGAATAAGAAATCTGCACGGGCCAAAG  
AGGCCGCTGCTACGAAGTCGCTGAAGGCGGCTTGGGTCATTAAGGGTAGCTGTAAAGTTGCGCCTGCC  
GAC

+

:FFFFFFFF:FFFFF:FFFFFFFFFFFF,FFFFFFFFFFFFFFFF:FFFFFFFFFFFFFFFFFFFFFFFF, F  
FFFFFFFFFFFFFFFFFFFFFFFFFFFFFFFFFFFFFFFFFFFFFFFFFFFFFFFFFFFFFFFFFFFFFFFF  
FFF

@A00721:190:HGJW7DSXY:4:2502:5647:34820\_1:N:0:TCTGCAAG+GCTGCACT  
ACTCTCTACAGTAGGTTTCGTGCCTACTATGAGCAAATCTGTTGAATTCGTCACTGAGGACGAAGGTGA  
GAGGACTTTTGGCTACTGGCGACAACTGAGAGCAGTCGCTGGGGAAGAGAATTGCGTGGGTTGAAG  
GCC

+

FFFFFFFF,F:FFFFFFFFFFFF:FFFFFFFFFFFF,FFFFFFFFFFFFFFFFFFFFFFFFFFFFFFFF  
FFFFFFFFFFFFFFFFFFFFFFFFFFFFFFFFFFFFFFFFFFFFFFFFFFFFFFFFFFFFFFFFFFFFFFFF  
FFF

@A00721:190:HGJW7DSXY:4:1643:24243:14951\_1:N:0:TCTGCAAG+GCTGCACT  
CTTGAGTGTGACGAGGCCGGTGACGTTTTGTCAACGGCGTTTGGAGGATTTTATCCGCGCTTAACTA  
TGGGGCGAAGATCCCCTATGGAGTCTTGAAGGACTTAGGTTGGCATATTTATGCCGACGATAATAAGC  
ATG

+

FFFFFFFFFFFFFFFFFFFFFFFFFFFFFFFF:FFFFFFFFFFFFFFFFFFFFFFFFFFFFFFFF:F:FFFFFFFF  
FFFFFFFFFFFFFFFFFFFFFFFFFFFFFFFFFFFFFFFFFFFFFFFFFFFFFFFFFFFFFFFFFFFFFFFF  
FFF

@A00721:190:HGJW7DSXY:4:2447:24053:3724\_2:N:0:TCTGCAAG+GCTGCACT  
CGGGACTTACAAGAGAGAGTGTGAGAGAGTCGCTCTCACTATTTTTGCCAGAATGCGGGCTTTCTGA  
CTGATGAGGTTAAACTCTTGCTCCTTCTGTGGGTGAGGGTTTTTGT

+

FFFFFFFFFFFFFFFFFFFFFFFF:FFFFFFFFFFFFFFFF:FFF:FFFFFF,FFFFFFFF,FFFFFFFF:F  
FF:FFFF,FFFFFFFF:F:FFFF: :FFFFFFFF:F:FFFFFFFF

@A00721:190:HGJW7DSXY:4:2266:9444:34976\_2:N:0:TCTGCAAG+GCTGCACT  
ATTACAACCTCTCTTTAGAGAGCATTAGAAGGAAGTTGGGCAAATCCCACATATGGTAGACGTTGTC  
ACACTTTTCTTGAAAATTTTCCTTTCCTCCGTCATTGGGGATTTCGA

+

FFFFFFFFFFFF:FFFFFFFFFFFFFFFFFFFFFFFFFFFFFFFFFFFFFFFF:FF,FFFFFFFFFFFF  
FFFFF:FFFF:FFFFFFFFFFFFFFFFFFFF:FFFF:FFFFFFFFFFFF

@A00721:190:HGJW7DSXY:4:2472:12156:2503\_1:N:0:TCTGCAAG+GCTGCACT  
GGAAGGTGTCAAGGGTCTTCTTCATGCTGATCTTTCAGGACCTAATCACATCATGATTGATAGTTACG  
GCTCGTATCGAGTTGAGGGAGGAAGTTCTCCGAAATTAAAGACGGGGGGATTAAGAGTCCAGCTGTA  
ACT

+

FFFFFFFFFFFFFFFFFFFFFFFFFFFFFFFFFFFFFFFFFFFFFFFFFFFFFFFFFFFFFFFFFFFFFFFF  
FFFFFFFFFFFFFFFFFFFFFFFFFFFFFFFFFFFFFFFFFFFFFFFFFFFFFFFFFFFFFFFFFFFFFFFF  
FFF

@A00721:190:HGJW7DSXY:4:1629:25762:18145\_2:N:0:TCTGCAAG+GCTGCACT  
AAGAAAACCTTCGTGAGAAGATGAGGAAGTCTAAGAGGAGGAGTTTGAGGAAGGCTCTAGAGAAGATCT  
CACCACCTGGAGAAGGCAAGTGGAGAGTCCAGAAGTTGATGAAGAAGG

+

FFFFFFFFFFFFFFFFFFFFFFFFFFFFFFFFFFFFFFFFFFFFFFFFFFFFFFFFFFFFFFFFFFFFFFFF  
F:FFFFFFFFFFFF:FFFFFFFFFFFFFFFFFFFF:F:FFFFFFFFFFFF

@A00721:190:HGJW7DSXY:4:2414:9616:28354\_2:N:0:TCTGCAAG+GCTGCACT  
GTTACCACTTCCTAAGGTGGATGAGGGAGGTTGTTTCTTTGGAGTTTTAGATAATCTTTTGAGAAGGG  
GTCATAGAGCCAGCAAGAGAAGCTTATATGCTGGTTTAAGTGATGATT

@A00721:190:HGJW7DSXY:4:2121:31222:35963\_1:N:0:TCTGCAAG+GCTGCACT  
ATTTAGGTCAACTTGGGGTTTCGAATGTCATTAGTGCCTTACGATTGAAAGAGGTCCTTTTGAGTATC  
GACAGATCTTTCGATCTTGAGGACGTACATTTAACGTGGCAGAATTTCGTAACCTTACCATATTGTTCC  
TTC

@A00721:190:HGJW7DSXY:4:1548:29830:15922\_1:N:0:TCTGCAAG+GCTGCACT  
TTTAACTTTGACTCAACTACTCCGATCAGATCCGGATGGTTTGATTGGTATGGACTACTCGACTTTTG  
ATCTGGAGTTGTCTAGGGTCATGGCAGATACTACCGATAAGGTGAAAAATATGCAGGTCAAAGATTCT  
GTA

@A00721:190:HGJW7DSXY:4:2234:4797:3004\_2:N:0:TCTGCAAG+GCTGCACT  
GTTTTGGCCGACTTTAACTATTCTAAGAGTCATTATGATTCAAATCCTATCGTTGTCGTACCTTACAA  
GGTGGAGGAGACTTTACAGCGGCGTATTGTCGCGCAGTTTCCAGAATT

@A00721:190:HGJW7DSXY:4:1214:16215:19899\_1:N:0:TCTGCAAG+GCTGCACT  
TTGAATGCTCACGCCGTCGCAGCCATATCGAGACTATGTTATAATCACTTGTTAAAGTACAGATTTAG  
TGATTTAGATATTATTGATATTGGAGGCGATATTCGTTTTTCATATCCAAAACTCCTTGAATGGAGTAC  
ATA

@A00721:190:HGJW7DSXY:4:2505:15709:21652\_1:N:0:TCTGCAAG+GCTGCACT  
TATTCTTGATGTGAAAGATGCATCGAGGTATACGTCTAGGAACATTGATTGGGAACGTACCTACTCAC  
GAGACGTCATGAAAGCTATCGGAGGGAAGCAAATGTTTCGTTCTGTTACAAGAACGCTTTGGATTGT  
GA

@A00721:190:HGJW7DSXY:4:2524:19976:33458\_1:N:0:TCTGCAAG+GCTGCACT  
GTTGCGATAGCTGTAGAGGTATACGATATCTCTCTTGATGATGTAGCCACTATAATGCTTAAGAGAGA  
GATTGATGTATGTCATTTCTGCTTAGTTTGTCCCGCGAATTATTGGACACGATGAAAAATGACATAC  
CCG

@A00721:190:HGJW7DSXY:4:2647:2130:23688\_2:N:0:TCTGCAAG+GCTGCACT  
TCATGGAGATGATGGCGCATCACTTGATTACTATATGCCCCAAGGATTGGGTTATTCTCACAACAAAG

ATAAGATTTTATCTTTCTTCAAACACCCTGTTTTCTTAAGGGCGGAC  
+  
FFFF:FF,FFFFFF:FFFFFFFF,FFFFFFFF,F:FFFFFFFF:FF,FFF,FFFFFFFFFFFFFFFF  
FFFFFFFF,FFFF:F,:FFFFFFFFF:,FF,:FFFF:FFF,:FFFF  
@A00721:190:HGJW7DSXY:4:1137:5104:19351\_2:N:0:TCTGCAAG+GCTGCACT  
GTGAACTCTTGGGGACTAGATTGAGCATTAAATGAGTTCCGAATAACTCGTAATAAATCTTTCTCTAGT  
GGACAATTCAGAATACCTATTTCCGTACCAAGAGCCACTGCCAATCTC  
+  
FFFFFFFFFFFFFFFFFFFFFFFFFFFFFFFFFFFFFFFFFFFFFFFFFFFFFFFFFFFFFFFFFFFFFFFF  
FFFFFFFFFFFFFFFFFFFFFFFFFFFFFFFFFFFFFFFFFFFFFFFFFFFFFFFFFFFFFFFFFFFFFFFF  
@A00721:190:HGJW7DSXY:4:1245:20699:17206\_2:N:0:TCTGCAAG+GCTGCACT  
AGATTATGGTTGATAAAGTTTTCTTCATAAGGGCTATTCAGTACGTCATGGGGATCACTTCTTCGGTC  
AATGACAAAACCTTCGAATATGTTACGACATGGCTTCGTAACAACAGT  
+  
FFFFFFFFF:FFFFFFFFFFFFFFFFFFFFFFFFFFFFFFFFFFFFFFFFFFFFFFFFFFFFFFFFFFFFFFFF  
FFFFFFFFFFFFFFFFFFFFFFFFFFFFFFFFFFFFFFFFFFFFFFFFFFFFFFFFFFFFFFFFFFFFFFFF  
@A00721:190:HGJW7DSXY:4:1430:2130:18396\_2:N:0:TCTGCAAG+GCTGCACT  
GATTCACCAAGATGTTTCATATAGATACGAGATACCTAGAGAAGGTCGACGCGATCTTACTCGTTATCG  
GAGCTAAGAAGAAGACTTTGGGTACACGTTATGCTCGCAAACCTTAACG  
+  
FFFFFFFFFFFFFFF:FFFFFFFFFFFFFFF:FFFFFFFFFFFFFFF:FFFFFFFFFFFFFFFFFFFFFFFF  
FFFFFFFFFFFFFFFFFFFFFFFFFFFFFFFFFFFFFFFFFFFFFFFFFFFFFFFFFFFFFFFFFFFFFFFF  
@A00721:190:HGJW7DSXY:4:1539:30228:7780\_2:N:0:TCTGCAAG+GCTGCACT  
AGGTGATCTCTCTGCTTCTGCGTTACTGAGAGAAAAGATTCAGGACGCCTACGGTGACTIONTATGGACA  
AGATGCAAGTTCTTGGGAAATACTTGTTTCCCTTTTTAGGTTTAGTAG  
+  
FFFFFFFFFFFFFFFFFFFFFFFFFFFFFFFFFFFFFFFFFFFFFFFFFFFFFFFFFFFFFFFFFFFFFFFF  
FFFFFFFFFFFFFFFFFFFFFFFFFFFFFFFFFFFFFFFFFFFFFFFFFFFFFFFFFFFFFFFFFFFFFFFF  
@A00721:190:HGJW7DSXY:4:2331:31159:29152\_1:N:0:TCTGCAAG+GCTGCACT  
TGTGAGAAGACAACGAATCTTGAAACTACGGTCCTTATCAAAGAAAATGGTGAACCGGTCTCTAAATC  
TTTTGAGATTGAGAAGATTGAAGAACACGTCAAGAAGTCGCTCGGCGTTGTTCTTGAAAACCAAGTTA  
AGA  
+  
F,FFFFFFFFFFFFFFFFFFFFFFFFFFFFFFFFFFFFFFFFFFFFFFFFFFFFFFFFFFFFFFFFFFFFFFFF  
FFFFFFFFFFFFFFFFFFFFFFFFFFFFFFFFFFFFFFFFFFFFFFFFFFFFFFFFFFFFFFFFFFFFFFFF  
:FF  
@A00721:190:HGJW7DSXY:4:2416:18394:25207\_2:N:0:TCTGCAAG+GCTGCACT  
CTTTGTACCTTCTGTCAAACCTCGAGGTTACGCTACGAGAGGTGATCCCGGATGTGGATTGAAGGCTG  
GCTCTAAGGGAGACTCCTTCTTTTGAATGTTGTAAAGAATTGGGTTG  
+  
FFFFFFFFFFFFFFFFFFFFFFFFFFFFFFFFFFFFFFFFFFFFFFFFFFFFFFFFFFFFFFFFFFFFFFFF  
FFFFFFFFFFFFFFFFFFFFFFFFFFFFFFFFFFFFFFFFFFFFFFFFFFFFFFFFFFFFFFFFFFFFFFFF  
@A00721:190:HGJW7DSXY:4:1362:17047:29825\_1:N:0:TCTGCAAG+GCTGCACT  
ACAAGGAGTTAGACTCTTCTTCAAGTTTTTAGATCTTCTTGATAATCTTAAAGAAAAATTTTCAATA  
AACTAATGAGAGGTATAGGCTTAGTCAAGTCTGTACTTACATTCTTTACGCCAGATTCTTCATGGGGC  
GAC  
+  
:FFFF:FFFFFFFFF:FFFFFFFFF:FFFF: :FFFF:FFFF:FFFFFFFFFFFFFFFFFFFFFFFF:FF: :F  
FFFFFFFFFFFFFFFFFFFFFFFFFFFFFFFFFFFFFFFFFFFFFFFFFFFFFFFFFFFFFFFFFFFFFFFF,FFFFFFFF:FFFF  
FFF  
@A00721:190:HGJW7DSXY:4:1544:29044:7576\_2:N:0:TCTGCAAG+GCTGCACT  
CGAGAATTATTACTGTTTTCTCTACCCATAACTTCTTTTTCAAAAATGCGGATGGGTCTACTGATGTT  
TTCTACAGAGTGCAGTCGTTTCAACACTTATCACCCTTTTGTAAAG  
+

[illegible]

@A00721:190:HGJW7DSXY:4:1332:2483:28714\_2:N:0:TCTGCAAG+GCTGCACT  
TTGATAAATTTGTTGGAATCGATAATGATACTGACGAAGGTTCTATTACCACCCTTGTCAATTGATACA  
AACATTCTAGGTGATGCTTTCTTAGAGGCTCGTCTAGCCGCTGAGATT

+

FFFFFFFFFFFFFFFFF:F:FFFFFFFFFFFFFFFFFFFFFFFFFFFFFFFFFFFFFFFFFFFFFFFFFFFFFFFFFFFFFFFF  
FFFFFFFFFFFFFFFFFFFFFFFFFFFFFFFFFFFFFFFFFFFFFFFFFFFFFFFFFFFFFFFFFFFFFFFF

@A00721:190:HGJW7DSXY:4:2533:13810:29825\_2:N:0:TCTGCAAG+GCTGCACT  
TACAATCTGTAGAGAGAGAGGTTAATCAGAATTTGAGTGATAACGATTTAGTACTGGGAAATGGTGGT  
AGTCAGTTTACTACTTTTCTTCCCTCCCCTTTTTTCGATTGGATTCTGA

+

FFFFF:FFFFFFFFFFFFFFFFFFFFFFFFFFFFFFFFFFFFFFFFFFFFFFFFFFFFFFFFFFFFFFFFFFFFFFFFFFFF  
FFFFFFFFFFFFFFFFFFFFFFFFFFFFFFFFFFFFFFFFFFFFFFFFFFFFFFFFFFFFFFFFFFFFFFFF

@A00721:190:HGJW7DSXY:4:1121:28049:33254\_1:N:0:TCTGCAAG+GCTGCACT  
GTAGGTCTCCTAGTACTTAAGGGTTTATGTTTCGGTTTCAGCTGGATGGATCTTTTGATGGTATGTTT  
CACATTGCGTGATCACTTCCCGTGGACTTGGAAGAGATTAAACATAAAATCCAGCGATTCTATTATG  
TCG

+

FFFFF,F,FFFFF,,FFFFFFFFFFFFFFFFFFFFFFFFFFFFFFFFFFFFFFFFFFFFFFFFFFFFFFFFFFFFFFFF  
FFFFFFFFFFFFF:FFFFFFFFFFFFFFFFFFFFFFFFFFFFFFFFFFFFFFFFFFFFFFFFFFFFFFFFFFFFFFFF  
FFF

@A00721:190:HGJW7DSXY:4:2213:16703:16799\_1:N:0:TCTGCAAG+GCTGCACT  
TCTTGATGTTCTGGGCTGTGGGGATTAACTTCCCTCGTGAACTTACGACGATGTTCTCGCTCGCATTT  
CACAAGGATTACTAAGTCTGAGATCTGCCACTTCTAATTTTAGGAAACGTCGCGAAAAGAAAGTTCAT  
GAG

+

FFFFF:FFFFFFFFFFFFFFFFFFFFFFFFFFFFFFFFFFFFFFFFFFFFFFFFFFFFFFFFFFFFFFFFFFFFFFFFFFFF  
FFFFFFFFFFFFFFFFFFFFFFFFFFFFFFFFFFFFFFFFFFFFFFFFFFFFFFFFFFFFFFFFFFFFFFFFFFFFFFFF  
FFF

@A00721:190:HGJW7DSXY:4:1105:3088:22561\_1:N:0:TCTGCAAG+GCTGCACT  
CTTCTAATAGAGGATCCTGATGACATTATTTCAACGGATACCGATCTCAGTTCTACCACAGAAACCGT  
CTCAGGAAGTGTCTCCACTGATTCGGAATTAGAGAAAGACGACCTTCTTGTGGGGACTGAGACCTCTG  
AAT

+

FFFFFFFFFFFFFFFFFFFFFFFFFFFFFFFFFFFFFFFFFFFFFFFFFFFFFFFFFFFFFFFFFFFFFFFFFFFFF,FFFFFFFFFFFFFFFFFFFFFFFF  
FFFFFFFFFFFFFFFFFFFFFFFFFFFFFFFFFFFFFFFFFFFFFFFFFFFFFFFFFFFFFFFFFFFFFFFFFFFFFFFF  
FFF

@A00721:190:HGJW7DSXY:4:2224:28800:20306\_1:N:0:TCTGCAAG+GCTGCACT  
CTCTGATGAGGACGTTGAAAGGGATAATTTCAACTCTGAGACTTCTAAGAGTGTTCAAAAGACCAGA  
AACGTAACAAGAAGAATAAAGGTAGGAAGGGGAGAAAACAGAACAAGCGAGCGGTTGAAGAGAAAAC  
GA

+

FF:FFFF:FF,,,FFFFFFFFF,F,:FFFF:FFFF:FF,:FFFF,FFFFFFFFFFFF,FFF,,FFF  
FF:FFFFFFFFFFFFFFFFFFFFFFFFFFFFFFFFFFFFFFFFFFFFFFFFFFFFFFFFFFFFFFFFFFFFFFFF  
FF

@A00721:190:HGJW7DSXY:4:1108:30029:20400\_2:N:0:TCTGCAAG+GCTGCACT  
GCTGATCGTACCCCAATTCCTGCTAGAAAGATCACTCTCGGCGATACCACTGATCTTCAGAGTTACG  
TAGTGGTCGTTCTTTTGGTGATTTTATCAAAGAGAAAGTTTCTGCTAG

+

FFFFFFFFFFFFFFFFFFFFFFFFFFFFFFFFFFFFFFFFFFFFFFFFFFFFFFFFFFFFFFFFFFFFFFFFFFFFF  
FFFFFFFFFFFFFFFFFFFFFFFFFFFFFFFFFFFFFFFFFFFFFFFFFFFFFFFFFFFFFFFFFFFFFFFF

@A00721:190:HGJW7DSXY:4:1317:11496:11224\_1:N:0:TCTGCAAG+GCTGCACT  
TCAGTTTTCCAAAAGCTATTAATAGCAGTTGCGGGGCTATAATACCGCCTCCAGATTACTCTAACT  
GAATCCACTCTCTTGGGATATAAATGAGTACATCTATAATAGAGTTTTGGAAGTGTGTAATGTCCTAC  
GTA

+  
FFFFFFFFFFFFFFFFFFFFFFFF,FFFFFFFFFFFFFFFFFFFFFFFFFFFFFFFFFFFFFFFF  
FFFFFFFFFFFFFFFFFFFFFFFF:FFFFFFFFFFFFFF:F,FFFFFFFFFFFFFFFFFFFFFFFF  
FFF  
@A00721:190:HGJW7DSXY:4:1522:17689:4633\_1:N:0:TCTGCAAG+GCTGCACT  
TCTTCATGAAGATCTTCGAGTGTTTTATAGTGAGTTATTCTTGCGAAGGTTCAAGTCGATTGATTTTG  
TTGACTACGATCTCTCTTGTAATAAGAAGTTCTTCGCAGTTGAATCTCCACCAGGTGGAGGGAAGACC  
ACT  
+  
FFFFF:FFFFFFFFF:FFFFFFFF:FFFFFFFFFFFFFFFFFFFFFFFFFFFFFFFFFFFFFFFF  
FFFFFFFFFFFFFFFFF::FFFFFFFFF:F:FFFFFFFFFFFFFFFFFFFFFFFFFFFFFFFF  
FFF  
@A00721:190:HGJW7DSXY:4:2350:26386:33818\_1:N:0:TCTGCAAG+GCTGCACT  
TCGCAAAAGGTCTTGAAGTACGTATTGTCACTGCTAATCGTAATTCGCGAGAAGAGATAGTGAATAAA  
GTTTTGGCACTTCTAGTTCATCGCGGTATTTGTGAAATTAAGACAGACGTGAAAGTTATGATGAGTGA  
TCG  
+  
FF:FFFFF,FFFFF:FFF:FFFFFFFFFFFFFFFFFFFFFFFFFFFFFFFF:FFFFFFFFFFFFFFFF  
FFFFFFFFF:FFFFF,FFFFFFFFFFFFFFFFFFFFFFFFFFFFFFFFFFFFFFFFFFFFFFFF  
FFF  
@A00721:190:HGJW7DSXY:4:1253:5104:24017\_2:N:0:TCTGCAAG+GCTGCACT  
CAAACCTGTGGACGTTCTTTTCATCGACGAATTATTCATGATTCACGCTGGTCAGACCCTTTTCTTA  
CACATCTACTTAAGGCGGCTTATACCATAGGTTACGGTGATTCCAATC  
+  
FFFFFFFFFFFFFFFFF:FFFFFFFFFFFFFFFFFFFFFFFFF:F:FFFFFFF:FFFFFFFFF:FFFFF,  
FF:F,FFFFFFFFFFFFF:FFFFFFFFFFFFFFFFFFFFFFFFF:FFF:F  
@A00721:190:HGJW7DSXY:4:1617:1877:17989\_1:N:0:TCTGCAAG+GCTGCACT  
GTTTCAGACGTGTGCTCTTCCGATCTAACTACTTCAACATCAACGACATCATTCTTGATGAGTGTGCTT  
CTTATCGAAGTCTCAGTTATCGCTGCCCGGCCGACGTTTGTGCGAACTCTCAGAGTTTACGGCAGA  
AAA  
+  
FFFFF,FFFFFFFFFFFFFFFFFFFFFFFF:FFFFF:FFFFFFFFFFFFFFFF:FFFFFFFFFFFFFFFF  
FFFFFFFFF:FFFFFFFFFFFFFFFFFFFFFFFFFFFFFFFFFFFFFFFFFFFFFFFFFFFFFFFF  
FFF  
@A00721:190:HGJW7DSXY:4:1217:27136:4648\_1:N:0:TCTGCAAG+GCTGCACT  
ATTAGACCTATCAGATGTCTTGACGACTTCGAATTTGAGGACGGAGTTAAATATATTACTTTCACTCA  
AGGTGAAAAGTTTGAAATTAACAAAGTCCTTGTAAGAGTAAGGTTAAATGTGAAGATGCTCAGACTA  
TTC  
+  
FFFFFFFFFFFFFFFFFFFFFFFFFFFFFFFFFFFFFFFFFFFFFFFF:FFFFFFFFFFFFFFFFFFFFFFFF  
FFFF:FFFFF:FFFFFFFFFFFFFFFFFFFFFFFFFFFFFFFFFFFFFFFFFFFFFFFF:FFFFFFFFFFFFF  
FFF  
@A00721:190:HGJW7DSXY:4:1676:22001:31673\_1:N:0:TCTGCAAG+GCTGCACT  
TCTATCACGACACGTTGAATCTTTACGATACTTTGTTATCAATGTAAAGTTAAACGATGCTACTTGTG  
AGAGGATCAATCACAGTAAGGAAGTGTACGTTTAGCACGGGAGGTTGCAGATTCAACCCCTTATATC  
GAG  
+  
FFFF:FFFFFFFFFFFFFFFFFFFFFFFFFFFFFFFFFFFFFFFFFFFFFFFFFFFFFFFFFFFFFFFF  
FFFFFFFFFFFFFFFFFFFFFFFFFFFFFFFFFFFFFFFFFFFFFFFFFFFFFFFFFFFFFFFFFFFFFFFF  
FFF  
@A00721:190:HGJW7DSXY:4:2137:18548:24784\_1:N:0:TCTGCAAG+GCTGCACT  
ACGATGAGTATCTTGAAGTTGTTGACGACAAGCCTCAAGAGGGTAGAGGACCACCTGGATCTTCTACT  
GTCTCTGCCTTCCAAGATTTCTTAGAAGAGGTTATTCTGGAACCACTTAACGTCACTCGGTAATCT  
TTC

```
+
:FFFFFFFFFFFFFFFFFFFFFFFFFFFFFFFFFFFFFFFFFFFFFFFFFFFFFFFFFFFFF
FFFFFFFFFFFFFFFFFFFFFFFFFFFFFFFFFFFFFFFFFFFFFFFFFFFFFFFFFFFFF
FFF
@A00721:190:HGJW7DSXY:4:2655:16161:11162_2:N:0:TCTGCAAG+GCTGCACT
TGTCGATCGAATTAAGATCAAGGCTAATACCTTTATAGGTAAGAAGCCCCTTGAGCCGCGTAGTCAGC
GCGTTTAGCTGTATCATCAGTCAGAGTATAACCCGATAGGGTACCGAGT
+
F:FFFFFFFFFFFFFF,FFFFF:Ffff,FFFFFFFFFFFFFFFF:FFFF::FFF,:FFF:FFFFFFFF:
FFF,FFF:FFFFFF:FFFF::FFFFFFFFFF:FFFF,:FF:FFFF
@A00721:190:HGJW7DSXY:4:2563:21703:25770_2:N:0:TCTGCAAG+GCTGCACT
GTTTTACAACGGAAGACATATCGCACCCGAAATTTTGGGCAGAATGCTCTTAACGCGGTTCTTGA
ACGGTGTTTTGATCAGTCTAAGTTGGATAAAGTTATAGGAGACTCAGT
+
FFFFFFFFF:FFFFFFFFFFFFFFFF:FFFFFFFFFFFFFFFFFFFFFFFFFFFFFFFFF,FFFFFF
FFFFFF:FFFF:Ffffff,FFFFFFFFF:FFFFF::FFFFFFFFF
@A00721:190:HGJW7DSXY:4:2204:27877:23625_2:N:0:TCTGCAAG+GCTGCACT
GCTCCTCAATTGATAGATTGGGTCAACAATAGGGACGCTAGTATACTGCGTAAAGTCGACAGCGAAAT
GGTCAATATTGATAATTGGACCGACTATATGACCTATTTTAAGCTCAT
+
FFF,FF,FFF,FF,F:FF::F,F,FFFF,F,, :FFF:,F,FFFFFF,,FFFF,FF:F,FF:,FFFF
:FFFF,F,FFFFFF,,,,FFF::F:F,F:,F,F,FF,,FFF:FFFF
@A00721:190:HGJW7DSXY:4:1210:28727:9533_1:N:0:TCTGCAAG+GCTGCACT
CTTGATGCTTCAGCATTTTCGAAGCATAACCCCGCACAGAATATCGTTTATCACGCAAATTTATTAA
TGCAATTTTCGGACCTATCTTTAAGGTTCTTGTGAGGAGAGTCAAACAGTGTCTTTTACCCAACATTT
TTA
+
FFFFFF:F:FFFF,:FFF,FFFFFF,FF:F:FF::F::F,FF:F,FFFFFFFF::,FFFFFFFFF
FFF:FFFFFFFFFFFFFFFFFFFFFFFFFFFFFFFFFFFFFFFFFFFFFFFFFFFFFFFFF:
FFF
@A00721:190:HGJW7DSXY:4:2564:18159:36855_1:N:0:TCTGCAAG+GCTGCACT
TCTCCCTCTTAGGAGGTCATGATGACTACTATAAGGGTGAAATCGATTTTTCGAAGTTTGACAAATCT
CGAGATTTCTTTTGTAAGCCTATGAGATAAAGATGTATTCTTATTTAGGCTTCGATGCTGAATTTCT
TGA
+
FFFFFFFFFFFFFFFFFFFFFFFFFFFFFFFFFFFFFFFFFFFFFFFFFFFFFFFFFFFFF
F,FFFFFFFFFFFFFFFFFFFFFFFFFFFFFFFFFFFFFFFFFFFFFFFFFFFFFFFFFFFFF
FFF
@A00721:190:HGJW7DSXY:4:1143:17128:18975_2:N:0:TCTGCAAG+GCTGCACT
ACGCCAGGAGTATCCATAACGATTTGTCATTTACCACCTTTGCTCAACGACGAAGTGGAACGGCCAAC
ACTTTCTTTGGTAATTGTATGATCACTTTGATGATTTTATCACTTTAT
+
FFFFFFFFFFFFFFFFFFFFFFFFFFFFFFFFFFFFFFFFFFFFFFFFFFFFFFFFFFFFF:FFF
FFFFFFFFFFFFFFFFFFFFFFFFFFFFFFFFFFFFFFFFFFFFFFFFFFFFFFFFFFFFF
@A00721:190:HGJW7DSXY:4:1135:22200:8187_1:N:0:TCTGCAAG+GCTGCACT
TTGTCGCTGGGGACGATTCCATTCTGTTTTCAAAGACTCCAATAACTGATCATTCTGATCATATGATT
TTGGACAATGTTTTGAAGCGAAATTTTGGAGGATAAACAGCGTACTTCTGCTCGCGATTTATTCT
TTT
+
FFFFFF:FFFFFFFFF:FFFFFFFFFFFFFFFFFFFFFFFFFFFFFFFFFFFFFFFFFFFFF
FFFFFFFFFFFFFFFFFFFFFFFFFFFFFFFFFFFFFFFFFFFFFFFFFFFFFFFFFFFFF
FFF
@A00721:190:HGJW7DSXY:4:1369:24144:32315_2:N:0:TCTGCAAG+GCTGCACT
CGTTAAGTTAGGTAAACCCCTAACCGATGTTACTCTTGAGGACTTTGGGAGAGATTCGTTAGTTTAA
```



AAGACTATACTAAATATCTCCACTACGAGGTTGTTGTTTGGCGATTAG

+

FFFFFFFFFFFFFFFFFFFFFFFFFFFFFFFFFFFFFFFFFFFFFFFFFFFFFFFFFFFFFFFFFFFFFFFF  
F:FFFFFFFFFFFFFFFFFFFFFFFFFFFFFFFFFFFFFFFFFFFFFFFFFFFFFFFFFFFFFFFF:FFF

@A00721:190:HGJW7DSXY:4:2619:30174:32957\_1:N:0:TCTGCAAG+GCTGCACT  
CTATTCGATATTCGATTGAGGGTCGTTATACCTATTCGGATATCTGTGCTTTGAATTGTATAAGATCA  
AATTTTAAACGATTCCGAGAGGTTTATCCTGATGTGGAGGGAGTTCTTGAAGCATCCCGACCTTTCCT  
TGT

+

FFFF:F,FFFFFF:FFFFFF,FF,FFFF:F,FFFFFF,FFFFFFFFFFFFFFFF:FFFF:FFF,FF:F  
FFFFFFFF:FFFFFFFFFFFFFFFFFFFFFFFFFFFFFFFFFFFFFFFFFFFFFFFFFFFFFFFFFFFFFFFF  
FFF

@A00721:190:HGJW7DSXY:4:2209:29062:29246\_1:N:0:TCTGCAAG+GCTGCACT  
AAGATTATCAGTAATCCTGATTCTACTACGATTTCATGGACCTTCCATCCTGTACCTCTTCTGGAGAG  
ACGTATCTCAAAGATCGACTTCGAGACAGGTGATATTGTTGAGCGAGAGCGACCAAGATCTAAATTCG  
GTA

+

FFFFFFFFFFFFFFFFFFFFFFFFFFFFFFFFFFFFFFFFFFFFFFFFFFFFFFFFFFFFFFFF:FF,FFFFF  
FFFFFFFFFFFFFFFFFFFFFFFFFFFFFFFFFFFFFFFFFFFFFFFFFFFFFFFFFFFFFFFFFFFFFFFF  
FFF

@A00721:190:HGJW7DSXY:4:1624:5755:25614\_1:N:0:TCTGCAAG+GCTGCACT  
AAAAGCTCCCTCCTCTCGCAAGTTTGATCTGATACTTATCACGAAAGGACTTGAGTCTTTTGATCAGT  
CTCTGACTTGACCATCTTTCATTTTAAATGACGATCATTAAGACTCTCTTTCTTCTTTGTTTCCTTCT  
TTG

+

FFFFFFFFFFFFFFFFFFFFFFFFFFFFFFFFFFFFFFFFFFFFFFFFFFFFFFFFFFFFFFFFFFFFFFFF  
FFFFFFFFFFFFFFFFFFFFFFFFFFFFFFFFFFFFFFFFFFFFFFFFFFFFFFFFFFFFFFFFFFFFFFFF  
FFF

@A00721:190:HGJW7DSXY:4:1547:15402:14982\_1:N:0:TCTGCAAG+GCTGCACT  
TCCTCATCAGCTTGTGTTTTACCTAATCTGTGTTTTACGATAACAACATCAGTTGATTAAGACTCT  
TCCGAAAGGCGAACTTTGGGAATTTGAAGCTCAGGCTGAAGCACACGTTTGACCGTGACGAACTGTG  
GTG

+

FFFFFFFFFFF,:FFFF:FF,FFFFFFFFFFFFFFFFF:,FFFFFFFFFFF,FFFFFFFFFFFFFFFF  
FFFFF:FFFFFFFFFFFFFFFFFFFFFFFFFFFFFFFFFFFFFFFFFFFFFFFFFFFFFFFF:FFFFFFFF  
FFF

@A00721:190:HGJW7DSXY:4:1627:17870:11428\_1:N:0:TCTGCAAG+GCTGCACT  
GTTACGGATATACTCTCCTTGAGTTCACTCGTAAGGACACTACCACTTATTACGATATTTCTTTAGTC  
GATGGGTTTTCGACGCCTTTAAGCGTCTTCTGTTTCATCGCAACCAGATGATATCTTCTATTGAACTT  
ATG

+

FFFF:FFFFFFFFFFFFFFFFFFFFFFFFFFFFFFFFFFFFFFFFFFFFFFFFFFFFFFFFFFFFFFFF  
FFFFFFFFFFFFFFFFFFFFFFFFFFFFFFFFFFFFFFFFFFFFFFFFFFFFFFFFFFFFFFFFFFFFFFFF  
F:F

@A00721:190:HGJW7DSXY:4:2639:5611:32440\_1:N:0:TCTGCAAG+GCTGCACT  
TCTCTATTTTAAAGTTTTGTCTTCCTTGTCTTATTCTATTAATCACTCATTTTAGTGAGATTATT  
AAAAACGCACTAAAACGTCTTCGACAACAGCAGGGGTTTTCGAATAGTGATAGCCACCCGCTTACAG  
AGG

+

FFFFFFFFFFFFFFFFFFFFFFFFFFFFFFFFFFFFFFFF:FFF:FFFFFFFFFFFFFFFF:FFFFFFFF  
FFFFFFFFFFFFFFFFFFFFFFFFFFFFFFFFFFFFFFFFFFFFFFFFFFFFFFFFFFFFFFFFFFFFFFFF  
FFF

@A00721:190:HGJW7DSXY:4:1478:8531:13166\_1:N:0:TCTGCAAG+GCTGCACT  
CTTTGGTACCACCTTTTCTACTGTCTGTCTCGCCTCTTGAATGAAGTTTAAATGCTTAACAACAATG





@A00721:190:HGJW7DSXY:4:1457:6750:27774\_2:N:0:TCTGCAAG+GCTGCACT  
AGGATTATGTCTGTGTGAAAGACTTTCTACCGATAAGGGTCACTAGTCTTACACAATTAAGAAATAA  
TCCTACATTGACTGATTATCTAAAGATTGAAGGAAAATTTATCCTCG

+

F,FFFFFFFFFFFFFF:FFFFFFFFFFFFFF:FFFFFFFFFFFFFF:FFFFFFFFFFFFFF:F:FFFFFF  
FFFFF,FFFFFFFFFFFFFF:FFFFFFFFFFFFFF:FFFFFFFFFFFFFF:

@A00721:190:HGJW7DSXY:4:1440:7455:36323\_1:N:0:TCTGCAAG+GCTGCACT  
ACTTTCCTACGATACAAATGATAACTTCTAATTTACGTTTGCTACTCAGAGCTGGTCTCTCAGCAAA  
GGGATGCATGGTGTTATCTCCTCAGGAGTCCCGGCATTTGATAATAATGACGAGACTTTCGTCAATAAT  
CGC

+

FFF:FFFFFFFFFFFFFF:FFFFFFFFFFFFFF:FFFFFFFFFFFFFF:FFFFFFFFFFFFFF:FFFFFFFF  
FFFFFFFFFFFFFFFFFFFFFFFFFFFFFFFFFFFFFFFFFFFFFFFFFFFFFFFFFFFFFFFFFFFFFFFF  
FFF

@A00721:190:HGJW7DSXY:4:1330:24370:20964\_1:N:0:TCTGCAAG+GCTGCACT  
GGTACCAGCGCATCTCGTGTGAGCCTCGACCCGATTATATGGTATTAACCTTATAAAGGTGAGGAGAC  
CATTTTCTTGCTGAAATTTATAGAAGATTATTTTGACAGAATCAATAAGAATCATCGATTCTCGATTCT  
GTA

+

FFFFFFFFFFFFFFFFFFFFFFFFFFFFFFFFFFFFFFFFFFFFFFFFFFFFFFFFFFFFFFFFFFFFFFFF  
FFFFF:FFFFFFFFFFFFFF:FFF,FFFFF:,FFFFFFFFFF:FFFF:FFFFFFFFFF:FF  
FFF

@A00721:190:HGJW7DSXY:4:1360:8974:22576\_1:N:0:TCTGCAAG+GCTGCACT  
TTCTTAATTATAATATTCAACCTCAAAAGTTACGTGTTTACAGTAACGAGATCACACATTTTGAGAAC  
TAAGTATGTTATGTTCTCTGATCATTTTGACAATCTCTTCTTATAATAAATAAATAAATAATATTACT  
AAT

+

FFFFFFFFFFFFFFFFFFFFFFFFFFFFFFFFFFFFFFFFFFFFFFFFFFFFFFFFFFFFFFFFFFFFFFFF  
FFFFFFFFFFFFFFFFFFFFFFFFFFFFFFFFFFFFFFFFFFFFFFFFFFFFFFFFFFFFFFFFFFFFFFFF  
FFF

@A00721:190:HGJW7DSXY:4:2472:23330:11021\_1:N:0:TCTGCAAG+GCTGCACT  
AAAGGCTCCAGTCAACACTAGTTCGAGTGCTGCTTTGGATTACGATGACGTGAGAATAGGTGAAGGGA  
TAGTTTTTACCTCGACCAACATTAAGGCGGCGGCGACTAATCTTAAAGCTTCACCCAAATGAAGGAC  
ACT

+

FFFFFFFFFFFFFFFFFFFFFFFFFFFFFFFFFFFFFFFFFFFFFFFFFFFFFFFFFFFFFFFFFFFFFFFF  
FFFFF,FFFFFFFFFFFFFFFFFFFFFFFFFFFFFFFFFFFFFFFFFFFFFFFFFFFFFFFFFFFFFFFF  
FFF

@A00721:190:HGJW7DSXY:4:1455:2112:17487\_1:N:0:TCTGCAAG+GCTGCACT  
TCCAGACGACGACGAAGCTTATACTACTTTAATTTTGGGTATTATGTGGAGATATCGTGATATCAGTA  
CGTCCAGATCCTCTGCTTTTACCGATAACGATAAATTCGTCATCAAATATAAAGAAAAGGACTATGAA  
ATA

+

FFFFFFFFFFFFFFFFFFFFFFFFFFFFFFFFFFFFFFFFFFFFFFFFFFFFFFFFFFFFFFFFFFFFFFFF:  
:FFFFFFFFFFFFFFFFFFFFFFFFFFFFFFFFFFFFFFFFFFFFFFFFFFFFFFFFFFFFFFFFFFFFFF:  
FFF

@A00721:190:HGJW7DSXY:4:2167:25717:2597\_2:N:0:TCTGCAAG+GCTGCACT  
CCACATTTTGGTCAAGTCAATCCGTTGAGAAAATTTCTTAGAGGATATTCGCCATTGTGGTACGAATT  
GGTCCAACATTTACCACCAAATCTTTTGATACAACCTCTAGCCTTCAA

+

FFFFFFFFFFFFFFFFFFFFFFFFFFFFFFFFFFFFFFFFFFFFFFFFFFFFFFFFFFFFFFFFFFFFFFFF  
FFFFFF:FFFFFFFFFFFFFF:FFFFFFFFFFFFFF:FFFFFFFFFFFFFF:

@A00721:190:HGJW7DSXY:4:2113:19877:30843\_2:N:0:TCTGCAAG+GCTGCACT  
CCAGATTGTTTCAACCCGTTGATGCTATGTCAGAAGAAGCTATTCAAGCTTGTCGTTTAAAGACTGC

AGAGGCTGTCAAACAAGCCCAGACTCAAGGAGTCCAATCAAAGGTTTT  
+  
FFFF,FFFFFFFFFFFFFFFFFFFFFFFFFFFFFFFFFFFFFFFFFFFFFFFFFFFFFFFFFFFFFFFF  
FFFFFFFFFFFFFFFFFFFFFFFFFFFFFFFFFFFFFFFFFFFFFFFFFFFFFFFFFFFFFFFF:FFF  
@A00721:190:HGJW7DSXY:4:2125:10908:25708\_2:N:0:TCTGCAAG+GCTGCACT  
TTCTACTTACAAAGGACAATTCAGTTTCATTAATTCTACGAAAAGTCCGGAGTATATTGTATGTTAA  
TAGATAGTGGGATAATAGTTCTACCGATACGTAGTGAACGCGTTCGTA  
+  
F,F:FFFFFFFF:,FFFFFFFFFFFFFFFFFFFFFFFF, :FFFF,FFFF:,F:FF,:FF,:,:FF:FFFF  
:FF:,FFFF:,,:FFFFFFFF,FFFFFF, :FFFF:FFFF,FFFF  
@A00721:190:HGJW7DSXY:4:2547:19226:31845\_1:N:0:TCTGCAAG+GCTGCACT  
ACCGATAGGAGTTGTATAGTTGAAGATGTGGCTTTAGACGATAATCCTTTAAGGACTATGTTGACTGA  
CGAAGATTTTCCACAGATTTGTCTACGTTGCAGATCGCCACTCCAAACACTATATACATTATAAAAT  
ATA  
+  
F,FFFFFFFF,FFFFFF,FFFFF:FFF:,F:FFFFFFFF,FFFF:FFFFFFFF,FFFFFFFFFFFF  
FFFF:FFF:FFFFFFFFFFFFFFFFFFFFFFFFFFFFFFFFFFFFFFFFFFFFFFFFFFFFFFFFFFFF  
FFF  
@A00721:190:HGJW7DSXY:4:1263:15049:33755\_1:N:0:TCTGCAAG+GCTGCACT  
ACTTTTGTACCAAATCTTGCTTTCAACGAAGTCTCTGATTTTATTAATCATTACTTTAACGATCT  
CTCGGTCATTTACTCTGTACTTGATCTACGTCGTTTAACTGTGGAACAACCTTTACTTAGAATGACT  
CTA  
+  
FFFFFFFFFFFFFFFFFFFFFFFFFFFFFFFFFFFFFFFFFFFFFFFFFFFFFFFFFFFFFFFFFFFF  
FFFFFFFFFFFFFFFFFFFFFFFFFFFFFFFFFFFFFFFFFFFFFFFFFFFFFFFFFFFFFFFF:FFFFFFFFFF:FFFFFFFFFFFFFFFFFFFF  
FFF  
@A00721:190:HGJW7DSXY:4:2233:26178:12258\_2:N:0:TCTGCAAG+GCTGCACT  
AGTTAATATCATATTAGTAATACTCACTATCGTTTTCTGCTTTTTCTTAGCTAATAGATTAATAAAGG  
ATGAGTACGAAAACCAACTCTTCGTTACGAGACCTGATGGTAGAATAG  
+  
FFFFFFFFFFFFFFFFFFFFFFFFFFFFFFFFFFFFFFFFFFFFFFFFFFFFFFFFFFFFFFFFFFFF:FFF:F:FFFFFFFFFFFF  
FFFFFFFFFFFF:F:FFFFFFFFFFFF: :FFFFFFFF,FFFFFFFFFFFF  
@A00721:190:HGJW7DSXY:4:1519:32533:20384\_1:N:0:TCTGCAAG+GCTGCACT  
ACACCCATCTAAACGAGTATAAAGCGAGTTCCCGTCCTTAACGTAATACACCAAGAGATAACCCGCA  
CACGACTCGAAACCGAGACGCCGTAGATCAAAGTCCCTTCTAACTTTAGATTATGAATCCT  
+  
:::FF,:,,,,:F,:,:F,F,:,,,FFF,F,:,:F,F:,,,FF,,,F,F,,,F,,,FF,:F  
:FFFF:FFFFFFFFFFFFFFFFFFFFFFFFFFFFFFFFFFFFFFFFFFFFFFFFFFFFFFFFFFFF  
@A00721:190:HGJW7DSXY:4:1320:28438:36839\_2:N:0:TCTGCAAG+GCTGCACT  
ATAACCTTCTTATACTTTTGGGTATGTTTTGTGAAAAACATGAGATACCCAAGTCTATCGAAGACATT  
ATCTCTTATGTACTTATTGTAACGATCATTCTTTGAGTTTTGTGATT  
+  
FFFFFFFFFFFFFFFFFFFFFFFFFFFF:FFF:FFFFFFFF:FF:FFFFFFFFFFFF:FFFFFFFFFFFFFFFFFFFF  
FFFFFFFFFFFFFFFFFFFFFFFFFFFFFFFFFFFFFFFFFFFFFFFFFFFFFFFFFFFF,F,FFF  
@A00721:190:HGJW7DSXY:4:1102:13892:14278\_2:N:0:TCTGCAAG+GCTGCACT  
ATGAGGAGGATTTATAATGCTTTTCGATAGTGATTGTTATCAATTTAAATACATTACTGTTTCAAATC  
ATCTTTACTCACAGACTCCGAAAATGGTTTCAAATGAGGTCAAAGCTC  
+  
FFFFF:FFFFFFFFFFFFFFFFFFFFFFFFFFFFFFFFFFFFFFFFFFFFFFFFFFFFFFFFFFFFF  
FFFFFFFFFFFFFFFFF: :FFFFFFFF:F:FF:FFFF:FFFFFFFFFFFFF  
@A00721:190:HGJW7DSXY:4:2461:18502:23202\_2:N:0:TCTGCAAG+GCTGCACT  
TATTATCCGATTCCTCGAGGTATCACTACCACTGATCTGCCGACTTTAGTCAAGGAACCTTCAATTCC  
TTCGATGTTTATATTTTCTATAAGGGAAAATAGCAATAATCAAATTT  
+

[illegible]

$+$ 

@

 $+$ 

@

+

©

+

④

+

9

+

©

+

6

+

6

+

```
FFFFFFFFFFFFFFFFFFFFFFFFFFFFFFFFFFFFF:FFFFFFFFFFFFFFFFFFFFFFF:FFFFFFFFFFFFFFFFFFFFFFF  
:FFFFFFFFFFFFFFFFFFFFFFFFFFFFFFFFF,FFFF:F FFF:F FFFF,F FFFF  
@A00721:190:HGIW7DSXY:4:2227:18159:8265_1:N:0:TCTGCAAG+GCTGCACT  
ATTTAGGTCAACTTGGGGTTTTGAATGTCATTAGTGCCCTACGATTGAAAGAGGTCCTTTTGAGTATC  
GACAGATCTTTCGATCTTGAGGACGTACATTTAACGTGGCAGAATT CGGTAACCTACCATATTGTTCC  
TTC  
+  
FF:FFFFFFFFFFFFFFFFFFFFFFFFFFFFFFFFFFFFF:FFFFFFFFFFFFFFFFFFFFFFF  
FFFFFFFFFFFFFFFFFFFFFFFFFFFFFFFFFFFFF:FFFFFFF:FFFFFFFFFFFFFFFFF  
FFF  
@A00721:190:HGIW7DSXY:4:1556:12671:10786_1:N:0:TCTGCAAG+GCTGCACT  
TTTTACTTTGACTCAACTACTCCGATCAGATCCGGATGGTTTGATTGGTATTGACTACTCGACTTTTG  
ATCTGGAGTTGTCTAGGGTCATGGCAGTTAATAACGATAAGGTGAAAAATATGCAGGTAAAAGATTCT  
GTA  
+  
FFF,F:F FFF:F,,FF,FFFF:,,,,F:FF:F,,FFFF:FFFF:FFFF,FFF,,FFF,,FF:F:FFFF,  
,F:F,:F,:F,FFF,F,F:F,FFFF,,FF,F,,F,FFF:FF:,,FF,,FFF,,FFF,F:FFFFFFFF  
FFF  
@A00721:190:HGIW7DSXY:4:2555:4517:3114_2:N:0:TCTGCAAG+GCTGCACT  
GTTTTGGCCGACTTTAACTATTCTAAGAGTCTTTATGATTCAAACCTATCGTTGTCGTACCTTACAA  
GGTTGAGGAGACTTTACAGCGGCTTATTGTGCGCGAGTTTCCAGAATT  
+  
FFFFFFFFFFFFFFFFFFFFFFFFFFFFF:FFFFFFFFFFFFFFFFFFFFFFF:FFF:FFFFFFFF:F:  
:FF:F FF:F,FFFFFFFFFFFFFFFF,F:F:FFF:FFFFFFFF:FFFF::  
@A00721:190:HGIW7DSXY:4:1320:8757:29966_1:N:0:TCTGCAAG+GCTGCACT  
TTGAATGCTCACGCCGTCGCAGCCATATCGAGACTATGTTATAATCACTTGTTAAAGTACAGATTTAG  
TGATTTAGATATTATTGATATTGGAGGCGATATTCGTTTTCATATCCAAACTCCTTGAATGGAGTAG  
ATA  
+  
FFFFFFFFFFF:F::FFF:,FFF:FF,FFFFFFFFFFFFFFFF,,,,FFFFFFFFF:F,FF:F::FFFF  
FFF,FFF:FF:FFFF:FFFF:FFFF,FFFFFFFFFFFF:FF,F::F,:,F,:FFFFFFFFFFFFF:  
FFF  
@A00721:190:HGIW7DSXY:4:1517:12156:31407_2:N:0:TCTGCAAG+GCTGCACT  
TGTGAAAGATGCATCGAGGTATACGTCTAGGAACATTGATTGGGAACGTACCTACTCACGAGACGTCA  
TGAAAGCTATCGGAGGGAAGCAAATGTTTCGTTCTGTTACAAGAACG  
+  
FFFF:FFFFFFFFFFFFFFFFFFFFFFFFFFFFF,FFFFFFFFFFFFF:FFFFFFFFFFFFF:FFFFFFFFF  
FFF,FFFF:FFFFFFFFF:FFF:FFFFFFFFFFFFFFFFFFFFFFFFFFFFF:  
@A00721:190:HGIW7DSXY:4:1176:25418:20901_1:N:0:TCTGCAAG+GCTGCACT  
CTCAGTTGCGATAGCTGTAGAGGTATACGATATCTCTCTTGATGATGTAGCCACTATAATGCTTAAGA  
GAGAGATTGATGTATGTCATTTCTGCTTAGTTTGTC GCGCAATTATTGGACACGATGAAAAATGAC  
ATA  
+  
FFFFFFFFFFFFFFFFFFFFFFFFFFFFFFFFFFFFFFFFFFFFFFFFFFFFFFFFFFFFFFFFFFFFFFFFF  
FFFFFFFFFFFFFFFFFFFFFFFFFFFFFFFFFFFFF:FFFFFFFFFFFFFFFFFFFFFFF:FFF:  
FFF  
@A00721:190:HGIW7DSXY:4:2166:2835:10473_1:N:0:TCTGCAAG+GCTGCACT  
TCATGGAGATGATGGCGCATCACTTGATTACTATATGCCCGAAGGATTGGGTTATTCTCACAAAGATA  
AGATTTTATCTTTCTTCAAACACCCTGTTTTCTTAAGGGCGGACAATTGTTCCATTGTGA ACTCTTG  
GGG  
+  
FFFFFFFFFFFFF:FFFFFF:FFFFFFFFFFFFFFFF,F::FFFFFFFFFFFFFFFFF:FFFFFFFFF:F:F:FF  
FFFFFFFFFFFFFFFFFFFFF:F,FFFFFFFF:FFFFFFFFFFFFFFFFFFFFF:FFFFFFFFFFFFFFFFF  
FFF
```





TATCTGACATTGTGGTTCAATGATCAGGATTCTTCTTTTGGTCCTTACGTCTTAAGTAATTTGGATGT  
TGT

+

FFFFFFFFFFFFFFFFFFFFFFFFFFFFFFFFFFFFFFFFFFFFFFFFFFFFFFFFFFFFFFFFFFFFFFFFFFFFFFFF  
FFFFFFFFFFFFFFFFFFFFFFFFFFFFFFFFFFFFFFFFFFFFFFFFFFFFFFFFFFFFFFFFFFFFFFFFFFFFFFFF  
FFF

@A00721:190:HGJW7DSXY:4:1228:5801:7341\_2:N:0:TCTGCAAG+GCTGCACT  
ACGATTCTTAAAAGAAGTTTATTA AAACTTCAGAGTCTCTTGGAAGTCCAGGTAGCTAATGTTCTTGC  
AATAGCCACAGACTTTCTGGGAAAAGAGACCTCTGTTGGTAGAGGAGT

+

FFFFFFFFFFFFFFFFFFFFFFFFFFFFFFFFFFFFFFFFFFFFFFFFFFFFFFFFFFFFFFFFFFFFFFFFFFFFFFFF  
FFFFFFFFFFFFFFFFFFFFFFFFFFFFFFFFFFFFFFFFFFFFFFFFFFFFFFFFFFFFFFFFFFFFFFFFFFFFFFFF

@A00721:190:HGJW7DSXY:4:1226:31593:2065\_2:N:0:TCTGCAAG+GCTGCACT  
ACTCAGATTCAATCTGGCATCACTGAACGTCTACAACGAGTTAGGGAGTGGCTAGGTTTTAAAAGATC  
CTTTGCACAAGCAATACCTTCCACTGAGTTCATCACCCAGAGTTTCGA

+

FFFFFFFFFFFFFFFFFFFFFFFFFFFFFFFFFFFFFFFFFFFFFFFFFFFFFFFFFFFFFFFFFFFFFFFFFFFFFFFF  
:FFFFFFFF:FFFF:FFFFFFFFFFFFFFFFFFFFFFFFFFFFFFFFFFFFFFFFFFFFFFFFFFFFFFFF:FFF  
:FFFFFFFF:FFFF:FFFFFFFFFFFFFFFFFFFFFFFFFFFFFFFFFFFFFFFFFFFFFFFFFFFFFFFF:FF

@A00721:190:HGJW7DSXY:4:2408:9372:17628\_2:N:0:TCTGCAAG+GCTGCACT  
ATCTTCTGATGCTGAATTTGAGGAAAATTTTTCGGAAGTTTTTGGTATAAATCCTGATGGCTCAGTAC  
AGGGAGGAGGTAATAGTTATAAAACCTTCTTTTATCATTGCAACAGGA

+

FFFF:FFF:FFFFFFFFFFFF:FFFF:FFFFFFFF:FFF::FFFFFFFFFFFF:FFFFFF,FF,FF:F  
FFFF:FFFF,FFF,FFFFFFFFFFFFFFFFFFFF:FFFFFFFFFFFFFFFFFFFF

@A00721:190:HGJW7DSXY:4:1511:18258:15389\_2:N:0:TCTGCAAG+GCTGCACT  
TCATAGGTATGTGTACGCTACACTCGAAATATGGGCCCTCATAAGGAAGTATAGTTGGCGTCTTGTC  
GTTGACGTCATTACAGTCTGGAAGTTAGATCATTTGTTGAGGAAGATC

+

FFF,:FFFFFFFFFFFFFFFFFFFF:FF:FFFFFFFFFFFFFFFFFFFFFFFFFFFFFFFFFFFFFFFFFFFFF  
FFFFFFFFFFFF:FFFFF::FFFFFFFF:FFFFFFFFFFFFFFFFFFFFFFFF

@A00721:190:HGJW7DSXY:4:2560:15826:3975\_1:N:0:TCTGCAAG+GCTGCACT  
TTTAGATAAATTCTTTCCGGGCTCAATGACCTTTGCTATGTACGTGGATCTAATGCTTGGTGATCTGA  
ATCTGACCATCGCAAAGAAGACTTTATTAGTTCATGAAGTTCTTACACTTCTCGCGACTAATGTCAGC  
TTC

+

FFFFFFFFFFFFFFFFFFFFFFFFFFFFFFFFFFFFFFFFFFFFFFFFFFFFFFFFFFFFFFFFFFFFFFFFFFFFF:  
FFFFFFFFFFFFFFFFFFFFFFFFFFFFFFFFFFFFFFFFFFFFFFFFFFFFFFFFFFFFFFFFFFFFFFFFFFFFF  
FFF

@A00721:190:HGJW7DSXY:4:2553:8531:19523\_2:N:0:TCTGCAAG+GCTGCACT  
CCAAATTTAGCACTTTTGAATATGACAGAAGCTCGCCATATCAGATTAGAGACATGCCAGTTAGAGT  
TCTTCTAACCAGGACTGATGGTGAGATTCTTTTACCTTTTGGAGGTCC

+

FF:FFFFFFFFFFFFFFFFFFFFFFFFFFFFFFFFFFFFFFFFFFFFFFFFFFFFFFFFFFFFFFFFFFFFFFFFF  
FFFFFFFFFFFFFFFFFFFFFFFFFFFFFFFFFFFFFFFFFFFFFFFFFFFFFFFFFFFFFFFFFFFF:F

@A00721:190:HGJW7DSXY:4:2116:8495:28667\_2:N:0:TCTGCAAG+GCTGCACT  
GACGTTTCCGTCGGAGGATGACAGGTGGGAGACCGCTCAATAACACTCTATTGAATCCCTTTCCACG  
ATGAAAGCTCTTTATGAGGTGCTCCAGATCGGAAGAGCGTCGTGTAGG

+

FFFFFFFFFFFFFFFFFFFFFFFFFFFFFFFFFFFFFFFFFFFFFFFFFFFFFFFFFFFFFFFFFFFFFFFFFFFFF  
FFFFFFFFFFFFFFFFFFFFFFFFFFFFFFFFFFFFFFFFFFFFFFFFFFFFFFFFFFFFFFFFFFFF

@A00721:190:HGJW7DSXY:4:2211:24722:5071\_2:N:0:TCTGCAAG+GCTGCACT  
TTGATAAATTTGTTGGAATCGATAATGATACTGACGAAGGTTCTATTACCACCCTTGTCATTGATACA  
AACATTCTAGGTGATGCTTTCTTAGAGGCTCGTCTAGCCGCTGAGATT

+

FFFFFFFFFFFFFFFFFFFFFFFF:FFFFFFFF::FFFFFFFFFFFFFFFFFFFFFFFFFFFFFFFFFFFFFFFF  
FFFFFFFF:FFFFFFFFFFFFFFFFFFFFFFFF:FFFFFFFF:FFFFFFF  
@A00721:190:HGJW7DSXY:4:2542:19515:33223\_2:N:0:TCTGCAAG+GCTGCACT  
TACAATCTGTAGAGAGAGAGGTTAATCAGAATTTGAGTGATAACGATTTAGTACTGGGAAATGGTGGT  
AGTCAGTTTACTACTTTTCTTTCCCTCCCCTTTTTTCGATTGGATTCTGA  
+  
FFFFFF:F,FFFFFFFFFFFFFFFFFFFFFFFFFFFFFFFF:FFFFFFFF:FFFFFFFFFFFFFFFF:FFF  
FFFFFFFFFFFFFFFFFFFFFFFFFFFFFFFFFFFFFFFF:FFFFFFF  
@A00721:190:HGJW7DSXY:4:1403:30861:33489\_1:N:0:TCTGCAAG+GCTGCACT  
GTAGGTCTCCTAGTACTTAAGGGTTTATGTTTCGGTTTCAGCTGGATGGATCTTTTGATGGTATGTTT  
CACATTGCGTGATCACTTCCCGTGGACTTGGAAGAGATTAAACATAAAATCCAGCGATTCTATTATG  
TCG  
+  
:FF:FFFFFFFF:FFFFFFFFFFFFFFFF:FFF:FFFFFF:FFFFFFFF:FFFFFF,FFFFFFFF  
FFFFFFFFFFFFFFFF:FFFFFFFF:FFFFFF:FFFFFFFFFFFFFFFFFFFFFFFFFFFFFFFF  
FFF  
@A00721:190:HGJW7DSXY:4:1460:1533:28823\_2:N:0:TCTGCAAG+GCTGCACT  
GTTTCGGGCTGTGGGGATTAACCTCCCTCGTGAACTTACGACGATGTTCTCGCTCGCATTTACAAGG  
ATTACTAAGTCTGAGATCTGCCACTTCTAATTTTAGGAAACGTCGCGA  
+  
F:FFFFFF:FFFFFFFFFFFFFFFF:FFFFFF,FFFFFF:FFF,FFFFFFFF,FFFF:FFFFFF  
FFF:FFF:FFFF:FFFFFFFFFFFFFFFF,FFFF,FF,F,F  
@A00721:190:HGJW7DSXY:4:1476:22164:16203\_1:N:0:TCTGCAAG+GCTGCACT  
TCTTGGTCGAAAAATATCGCCGGGAACCTCTAATAGAGGATCCTGATGACATTATTTCAACGGATACC  
GATCTCAGTTCTACCACAGAAACCGTCTCAGGAACTGTCTCCACTGATTCGGAATTAGAGAAAGACGA  
CCT  
+  
FFFFFFF:,FFFFFFFF,F:,F,F:FFFFFFFF:F::,FF:FFFFFFFF,F,FFFF,FFFFFF:F  
FFF:FF:F:FFF:FFFFFFFF:FF:FFFFFFFFFFFFFFFFFFFFFFFF:FFFFFFFF  
F:F  
@A00721:190:HGJW7DSXY:4:1250:10782:6574\_2:N:0:TCTGCAAG+GCTGCACT  
AATTTTCAGGGTGCCCTGATGAGGACGTTGAAAGGGATAATTTCAACTCTGAGACTTCTAAGAGTGTT  
TCAAAAGACCAGAAACGTAACAAGAAGAATAAAGGTAGGAAGGGGAGA  
+  
FFFFFFFFFFFFFFFFFFFFFFFF:FFFFFFFFFFFFFFFFFFFFFFFFFFFFFFFFFFFFFFFF  
FFFFFFFF:FFFFFFFFFFFFFFFFFFFFFFFF:FFF,FFFFFF  
@A00721:190:HGJW7DSXY:4:2421:4517:34084\_2:N:0:TCTGCAAG+GCTGCACT  
AGCGAGCGGTTGAAGAGAAAACCTGATATGGTTGCGGCTGATCGTACCCCAATTCCTGCTAGAAAGATC  
ACTCTCGGCGATACCACTGATCTTCAGAGTTACGTAGTGGTCGTTCT  
+  
FFFFFFFFFFFFFFFFFFFFFFFFFFFFFFFFFFFFFFFFFFFFFFFFFFFFFFFFFFFFFFFF  
FFFFFFFFFFFFFFFFFFFFFFFFFFFFFFFF:FFFFFFF  
@A00721:190:HGJW7DSXY:4:2170:3106:24408\_1:N:0:TCTGCAAG+GCTGCACT  
TCAGTTTTCCAAAAGCTATTAATAGCAGTTGCGGGGCTATAATACCGCCTCCAGATTACTCTAACT  
GAATCCACTCTCTTGGGATATAAATGAGTACATCTATAATAGAGTTTTGGAAGTGTGAATGTCCTAC  
GTA  
+  
FFFFFFFF:FFFFFFFFFFFFFFFFFFFFFFFFFFFFFFFFFFFFFFFFFFFFFFFFFFFFFFFF  
FFFFFFFFFFFF,FFFFFFFF:FFFFFFFFFFFFFFFFFFFFFFFFFFFFFFFF:FFFFFFF  
FFF  
@A00721:190:HGJW7DSXY:4:2272:28085:16501\_1:N:0:TCTGCAAG+GCTGCACT  
TCTTCATGAAGATCTTCGAGTGTTTTATAGTGAGTTATTCTTGCGAAGGTTCAAGTCGATTGATTTTG  
TTGACTACGATCTCTTGTAAATAAGAAGTTCTTCGCGAGTTGAATCTCCACCAGGTGGAGGGAAGACC  
ACT

+  
FFFFFFFFFFFFFFFFFFFFFFFFFFFFFFFFFFFFFFFFFFFFFFFFFFFFFFFFFFFFFFFFFFFFFFFF  
FFFFFFFFFFFFFFFFFFFFFFFFFFFFFFFFFFFFFFFFFFFFFFFFFFFFFFFFFFFFFFFFFFFFFFFF  
FFF  
@A00721:190:HGJW7DSXY:4:1433:27498:22842\_1:N:0:TCTGCAAG+GCTGCACT  
GCAAAAGGTCTTGAAGTACGTATTGTCACGTGCTAATCGTAATTCGCGAGAAGAGATAGTGAATAAGT  
TTTGGCACTTCTAGTTCATCGCGGTATTTGTGAAATTAAGACAGACGTGAAAGTTATGATGAGTGATC  
GTA  
+  
FF:FFFFFF:FFFFFFFFFFFFFF,FFFFFFFF:FFFFFFFF:FFFFFFFFFFFFFF,FFFFFF:FFFF  
FFFFFFFFFFFFFF:FFFFFFFF:FFFFFFFFFFFFFFFFFFFFFFFFFFFFFFFFFFFFFFFFFFFFFF:FFFF  
FFF  
@A00721:190:HGJW7DSXY:4:1303:6135:21512\_2:N:0:TCTGCAAG+GCTGCACT  
CAAACCTGTGGACGTTCTTTTCATCGACGAATTATTCATGATTCACGCTGGTCAGACCCTTTTCTTA  
CACATCTACTTAAGGCGGCTTATACCATAGGTTACGGTGATTCCAATC  
+  
FFFFFFFFFFFFFFFF:FFFFFFFF,FFFFFFFFFFFFFFFFFFFFFFFFFFFFFFFFFFFFFFFFFFFFFF  
FFFFFFFFFFFFFFFFFFFFFFFFFFFFFFFF:FFFFFFFFFFFFFFFFFFFFFFFFFFFFFF  
@A00721:190:HGJW7DSXY:4:2139:19054:31892\_1:N:0:TCTGCAAG+GCTGCACT  
GTTGACGAGTGTCTCTTCCGATCTAACTACTTCAACATCAACGACATCATTCTTGATGAGTGTCTGTT  
CTTATCGAAGTCTCAGTTATCGCTGCCCGGCCGACGTTTGTGCGCAACTCTCAGAGTTTACGGCAGA  
AAA  
+  
FFFFFFFFFFFFFFFFFFFFFFFFFFFFFFFFFFFFFFFFFFFFFFFFFFFFFFFFFFFFFFFFFFFFFFFF  
FFFFFFFFFFFFFFFFFFFFFFFFFFFFFFFFFFFFFFFFFFFFFFFFFFFFFFFFFFFFFFFFFFFFFFFF  
FFF  
@A00721:190:HGJW7DSXY:4:1233:22697:18255\_1:N:0:TCTGCAAG+GCTGCACT  
ATTAGACCTATCAGATGTCTTGACGACTTCGAATTTGAGGACGGAGTTAAATATATTACTTTCACTCA  
AGGTGAAAAGTTTGAATTAACAAAGTCCTTGGAAGAGTAAGGTTAAATGTGAAGATGCTCAGACTA  
TTC  
+  
FFFFFFFFFFFFFFFFFFFFFFFFFFFFFFFFFFFFFFFFFFFFFFFFFFFFFFFFFFFFFFFF:FFFF:FFFF  
FFFFFFFFFFFFFFFFFFFFFFFFFFFFFFFFFFFFFFFFFFFFFFFFFFFFFFFFFFFFFFFF:FFFF  
FFF  
@A00721:190:HGJW7DSXY:4:1677:27064:29136\_1:N:0:TCTGCAAG+GCTGCACT  
TCTATCACGACACGTTGAATCTTTACGATACTTTGTTATCAATGTAAAGTTAAACGATGCTACTTGTG  
AGAGGATCAATCACAGTAAGGAAGTGTACGTTTAGCACGGGAGGTTGCAGATTCAACCCCTTATATC  
GAG  
+  
F::FFFFFFFFFFFFFFFFFFFFFFFFFFFFFFFFFFFFFFFFFFFFFFFFFFFFFFFFFFFFFFFF  
FFFFFFFF:FFFFFFFFFFFFFFFFFFFFFFFFFFFFFFFFFFFFFFFFFFFFFFFFFFFFFFFF  
FFF  
@A00721:190:HGJW7DSXY:4:2307:1154:3020\_1:N:0:TCTGCAAG+GCTGCACT  
ACGATGAGTATCTTGAAGTTGTTGACGACAAGCCTCAAGAGGGTAGAGGACCACCTGGATCTTCTACT  
GTCTCTGCCTTCCAAGATTTCTTAGAAGAGGTTATTCCTGGAACACCTAACGTCACGCGTAATCT  
TTC  
+  
FFFFFFFFFFFFFFFFFFFFFFFFFFFFFFFFFFFFFFFFFFFFFFFFFFFFFFFFFFFFFFFFFFFFFFFF  
FFFFFFFFFFFFFFFFFFFFFFFFFFFFFFFFFFFFFFFFFFFFFFFFFFFFFFFFFFFFFFFFFFFFFFFF  
FFF  
@A00721:190:HGJW7DSXY:4:1147:26323:11068\_2:N:0:TCTGCAAG+GCTGCACT  
TCGAATTAAGATCAAGGCTAATACCTTTATAGGTAAGAAGCCCCTTGAGCAGCGTAGTCAGCGCGTTT  
AGCTGTATCATCAGTCAGAGTATACCCGATAGGTTACCGAGTCTCCAA  
+

F,F:F,:FFFF::FF,F,FFF:FF,,FFF,FF,FFF:F::FFFFFF,F:,,,FFFFF,:,,FFFFFFF  
FFF:FF,FFFFFF:FF:FFFF,:FF,F,FFF,:FFFFFFFFFFFF,FFF  
@A00721:190:HGJW7DSXY:4:2604:25753:31125\_2:N:0:TCTGCAAG+GCTGCACT  
GTTTTCACAAACGAAAGACATATCGCACCCGAAATTTTGGGCAGAATGCTCTTAACGCGGTTCTTGA  
ACGGTGTTTTGATCAGTCTAAGTTGGATAAAGTTATAGGAGACTCAGT  
+  
FFFFFFFFFFFFFFFFFFFFFFFFFFFFFFFFFFFFFFFFFFFFFFFFFFFFFFFFFFFFFFFFFFFFFFFF:FFF  
F:FFFFFFFFFFFF:FFFFFFFFFFFFFFFFFFFFFFFFFFFFFFFFFFFFFFFFFFFFFFFF:FFF  
@A00721:190:HGJW7DSXY:4:2273:22788:11522\_2:N:0:TCTGCAAG+GCTGCACT  
GCTCCTCAATTGATAGATTGGGTCAACAATAGGGACGCTAGTATACTTCGTAAAGTCGACAGCGAAAT  
GGTCAATATTGATAATTGGACCGACTATATGACCTATTTTAAGCTCAT  
+  
FFFFFFFFFFFFFFFFFFFFFFFFFFFFFFFFFFFFFFFFFFFFFFFFFFFFFFFFFFFFFFFFFFFFFFFF  
FFFFFFFFFFFFFFFF:FFFFFFFFFFFFFFFFFFFFFFFFFFFFFFFFFFFFFFFFFFFFFFFF:F  
@A00721:190:HGJW7DSXY:4:1506:32796:3333\_1:N:0:TCTGCAAG+GCTGCACT  
CTTGATGCTTCAGCCTTTTCGAAGCATAACCCCGCACAGAATATCGTTTATCACGCAAATTTATTAA  
TGCAATTTTCGGACCTATCTTTAAGGTTCTTGTGAGGAGAGTCAAACAGTGTCTTTTACCCAACATTT  
TTA  
+  
F:FFFFF:FFFFF:F::FFFFFFFFFFFFFFFFFFFFFFFFFFFFFFFFFFFFFFFFFFFFFFFF:FFFFFFFFFFFFFFFFFFFFFFFF  
FFFFFFFFFFFFFFFFFFFFFFFFFFFFFFFFFFFFFFFFFFFFFFFFFFFFFFFFFFFFFFFFFFFFFFFF  
FFF  
@A00721:190:HGJW7DSXY:4:2613:8522:1720\_1:N:0:TCTGCAAG+GCTGCACT  
TCTCTCTCTTAGGAGGTCATGATGACTACTATAAGGGTGAAATCGATTTTTTCGAAGTTTGACAAATCT  
CAAGATTTCTTTTGTAAGCCTATGAGATAAAGATGTATTCTTATTTAGGCTTCGATGCTGAATTTCT  
TGA  
+  
FFFF:FFFFFF,FF,FFFFFFFFFFFF,FFFFFFFFFFFFFFFFFFFFFFFFFFFFFFFFFFFF:,FFFFFF:F::FFF,F  
FFFFFFFFFFFFFFFFFFFFFFFFFFFFFFFFFFFFFFFFFFFFFFFFFFFFFFFFFFFFFFFFFFFF,FFFF,FFFF:F:FFFFFFFF:FFFFFFFF  
FFF  
@A00721:190:HGJW7DSXY:4:1225:8802:34366\_2:N:0:TCTGCAAG+GCTGCACT  
ACGCCAGGAGTATCCATAACGATTTGTCATTTACCACCTTTGCTCAACGACGAAGTGGAACGGCCAAC  
ACTTTCTTTGGTAATTGTATGATCACTTTGATGATTTTATCACTTTAT  
+  
FFFFFFFFFFFFFFFFFFFFFFFFFFFFFFFFFFFFFFFFFFFFFFFFFFFFFFFFFFFFFFFFFFFFFFFF:FFFFFFFFFFFFFFFF  
FF:FFFFFFFFFFFFFFFFFFFFFFFFFFFFFFFF:FFFFFFFFFFFFFFFFFFFFFFFF  
@A00721:190:HGJW7DSXY:4:1545:19877:13056\_1:N:0:TCTGCAAG+GCTGCACT  
TTGTCGCTGGGACGATTCCATTCTGTTTTCAAAGACTCCAATAACTGATCATTCTGATCATATGATT  
TTGGACAATGTTTCGAAGCGAAATTTTGAGGGATAAACCAGCGTACTTCTGCTCGCGATTTATTCT  
TTT  
+  
:FFFFFFFFFFFFFFFF:F:FFFFFFFF:FFFFFFFFFFFFFFFFFFFFFFFFFFFFFFFFFFFFFFFF  
FFFFFFFFFFFFFFFFFFFFFFFFFFFFFFFF:FFFFFFFFFFFFFFFFFFFFFFFFFFFFFFFF:FFFFFFFFFFFFFFFF  
FFF  
@A00721:190:HGJW7DSXY:4:2120:10059:32002\_2:N:0:TCTGCAAG+GCTGCACT  
CGTTAAGTTAGGTAAACCCCTAACCGATGTTACTCTTGAGGACTTTGGGAGAGATTGTTAGTTCTA  
AAGACTATACTAAATATCTCCACTACGAGGTTGTTGTTTGGCGATTAG  
+  
FFFFFFFFFFFFFFFFFFFFFFFFFFFFFFFFFFFFFFFFFFFFFFFFFFFFFFFFFFFFFFFFFFFF,FF  
FFFFFFFFFFFFFFFFFFFFFFFFFFFFFFFFFFFF,FFFFFFFFFFFFFFFFFFFF  
@A00721:190:HGJW7DSXY:4:2673:12418:29763\_1:N:0:TCTGCAAG+GCTGCACT  
CTATTCGATATTCGATTGAGGGTCGTTATACCTATTCGGCTATCTGTGCTTTGAATTGTATAAGATCA  
AATTTTAAACGATTCCGAGAGGTTTATCCTGATGTGGAGGGAGTTCTTGAAGCATCCCACCTTTCCT  
TGT

+  
FF:FF,FFF,FFF:FFFFFF:,F:,FFFF::,F:FFF,F,FFF,FF:F,,FF:::FF::F,F,FFF,  
,FFFFFFFFF::FFF,FFF,,F:FF:FF:FFFFFF::F:,F:F,F,FF:FF:FFFFFF:FFF:FF:FFF:  
FFF

@A00721:190:HGJW7DSXY:4:2244:31132:36808\_1:N:0:TCTGCAAG+GCTGCACT  
AAGATTATCAGTAATCCTGATTCTACTACGGATTCATGGACCTTCATCCTGTACCTCTTCTGGAGAG  
ACGTATCTCAAAGATCGACTTCGAGACAGGTGATATTGTTGAGCGAGAGCGACCAAGATCTAAATTCG  
GTA

+  
FFFFFFFFF:FFFFFFFFF:FF:FF:F:FF,:FFFFFFFFFFFFFFFFF,FF::F:FFFFFFFFF,  
FFF:FFF:FF:FFFFFF,FFF,FFF:FFFFFFFFFFFFFFFFFFFFFFFFFFFFFFFFF:FFFFFFF  
:FF

@A00721:190:HGJW7DSXY:4:1626:24713:10723\_1:N:0:TCTGCAAG+GCTGCACT  
AAAAGCTCCCTCCTCTCGCAAGTTTGATCTGATACTTATCACGAAAGGACTTGAGTCTTTTGATCAGT  
CTCTGACTTGACCATCTTTCATTTTAAATGACGATCATTAAGACTCTCTTTCTTCTTTGTTTCCTTCT  
TTG

+  
FFFFFFF:FFFFFFFFFFFFFFFFFFFFFFFFF:F:FFFFFFFFFFFFFFFFFFFFFFFFFFFFFFFFF  
FFFFFFFFFFFFFFFFFFFFFFFFF:FFFFFFFFFFFFFFFFFFFFFFFFFFFFFFFFFFFFFFFFF  
FFF

@A00721:190:HGJW7DSXY:4:2145:3577:10974\_1:N:0:TCTGCAAG+GCTGCACT  
TCCTCATCAGCTTGTGTTTTACCTAATCTGTGTTTTACGATAACAACACTATCAGTTGATTAAGACTCT  
TCCGAAAGGCGAACTTTGGGAATTTGAAGCTCAGGGTGAAGCACAACGTTTGACCGTGACGAACTGTG  
GTG

+  
FFFFF,FF::FFFFFFFFF:FFFFFFFFFFFFFFFFFFFFFFFFF:F:FFFFFFFFF:FFFFFFF  
FFFFF,FFFFFFFFFFFFFFFFFFFFFFFFFFFFFFFFFFFFFFFFFFFFFFFFFFFFFFFFF  
FFF

@A00721:190:HGJW7DSXY:4:2166:10755:8187\_1:N:0:TCTGCAAG+GCTGCACT  
GTTACGGATATACTCTCCTTGAGTTCACCTCGTAAGGACACTACCACTTATTACGATATTTCTTTAGTC  
GATGGGTTTTCGACGCCTTTAAGCGTCTTCTGTTCATCGCAACCAGATGATATCTTCTATTTCGAACCT  
ATG

+  
FFFFFFFFFFFFFFFFFFFFFFFFFFFFFFFFF:FFFFFFFFFFFFFFFFF  
FFFFFFFFFFFFFFFFFFFFFFFFFFFFFFFFF:FFFFFFFFFFFFFFFFF  
FFF

@A00721:190:HGJW7DSXY:4:2653:23113:36511\_1:N:0:TCTGCAAG+GCTGCACT  
TCTCTATTTTAAGTTTTGTCTTCCTTGTGTCTTATTCTATTAATCACTCATTTTAGTGAGATTATT  
AAAAACGCACTAAAACGTCTTCGACAACAGCAGGGGTTTTCGAATAGTGATAGCCACCCGCTTACAG  
AGG

+  
FFFFFFFFFFFFFFFFF:FFFFFFFFFFFFFFFFF:FFFFFFFFF  
FFFFFFFFFFFFFFFFF:FFFFFFFFF,FFFFFFFFF  
FFF

@A00721:190:HGJW7DSXY:4:1518:32253:9220\_1:N:0:TCTGCAAG+GCTGCACT  
CTTTGGTACCACCTTTTCTACTGTCTGTCTCGCCTCTTCGAATGAAGTTTAAATGCTTAACAACAATG  
ATAGTGAATTTATACCTACAATCATTGGTTTTCTAATAATGATGACACTATTGTTTATGGATATGAT  
GCT

+  
FFFFFFFFFFFFFFFFFFFFFFFFF:FFFFFFFFF  
FFFFFFFFFFFFFFFFF:FFFFFFF,FFFFFFFFF  
FFF

@A00721:190:HGJW7DSXY:4:1510:18114:8437\_1:N:0:TCTGCAAG+GCTGCACT  
GAGGATTCTCAGTTTACAAGGACCTTAAGCGATGGATCGGGTTAATTCTAAAACATTACCCGAAAGA



,:,:FFF,:FFFF,F,,F,,FFFFFF:FFFF,F,,FF::FFF,,FFF:F,FFF:FFFF,,,:FFFFFF  
FFF

@A00721:190:HGJW7DSXY:4:2453:4110:5321\_2:N:0:TCTGCAAG+GCTGCACT  
CGAAGTAAAGATAACCAATAAGGAAGGAGCTTATACTATGGTTGAATCAACTAAGCATACTACTTTTG  
CTTTGATTACTCTACCGCCTTACAAGTCTAAGGTTAAAGAGTCGATTA

+

FFFFFFFFFFFFFFFFFFFFFFFFFFFFFFFFFFFFFFFFFFFFFFFFFFFFFFFFFFFFFFFFFFFFFFFF  
FFFFFFFF:FFFFFFFF, :FFFFFFFFFFFFFFFFFFFFFFFFFFFFFFFFFFFFFFFFFFFFFFFF  
FFFFFFFF:FFFF

@A00721:190:HGJW7DSXY:4:2248:27154:3082\_2:N:0:TCTGCAAG+GCTGCACT  
TGGTTGTTATCTCGAAAAGTCTCTTCTAAAAGGAACGTCAAGTTCTAACCCTAAAGAGAATATCTAAAAT  
ATTTACAAAATCTTACCACTATCTACGAACCTAAAGTTCTGAAGACGT

+

FFF,FFFFFFFFFFFFFFFFFFFFFFFFFFFFFFFFFFFFFFFFFFFFFFFFFFFFFFFFFFFFFFFF  
FFFFFFFFFFFFFFFFFFFFFFFFFFFFFFFFFFFFFFFFFFFFFFFFFFFFFFFFFFFFFFFF:  
@A00721:190:HGJW7DSXY:4:1624:24894:32612\_2:N:0:TCTGCAAG+GCTGCACT

TTCTCTCTTAATGGCACTACCTCGGTACAATCTTACTTGGAACGAAGGCGACCTGTTCCGGAGTTTT  
TACGGGATCCGGAATGTTCTGTCTATATTAGGTGAAGCGAAATACGAT

+

FFFFFFFFFFFFFFFFFFFFFFFFFFFFFFFFFFFFFFFFFFFFFFFFFFFFFFFFFFFFFFFFFFFFFFFF  
FFFFFFFFFFFFFFFF:FFFFFFFFFFFFFFFFFFFFFFFFFFFFFFFFFFFFFFFFFFFFFFFF

@A00721:190:HGJW7DSXY:4:1659:4309:15687\_1:N:0:TCTGCAAG+GCTGCACT  
TCGTACCTTGATGCTGACTTTCGTCAATATGATTTGATCTGGTTGCTCAATTCTAAGCGTGTTCCGCT  
TAGTGCGAGGCCTCTCTTCTACGAGTATTGCTATTTATACGGTTACGAGAAGAAGGTTGAAAGTTTG  
AGA

+

FFFFFFFFFFFFFFFFFFFFFFFFFFFFFFFFFFFFFFFFFFFFFFFFFFFFFFFFFFFFFFFFFFFFFFFF  
FFFFFFFFFFFFFFFFFFFFFFFFFFFFFFFFFFFFFFFFFFFFFFFFFFFFFFFFFFFFFFFFFFFFFFFF  
FFF

@A00721:190:HGJW7DSXY:4:2621:11930:30044\_2:N:0:TCTGCAAG+GCTGCACT  
ATATTTGGATGATCTTGATAAAGAACTTCATGAATTTTCAGAGGATGAAAAATTTCTTCTTGGATT  
TTAATATAAAGAATCTTTACCAGGACTCTACTACAGGAGGCAGTCTT

+

FFFFFFFFFFFFFFFFFFFFFFFFFFFFFFFFFFFFFFFFFFFFFFFFFFFFFFFFFFFFFFFFFFFFFFFF  
FFFFFFFFFFFFFFFFFFFFFFFFFFFFFFFFFFFFFFFFFFFFFFFFFFFFFFFFFFFFFFFF

@A00721:190:HGJW7DSXY:4:1119:21016:27273\_1:N:0:TCTGCAAG+GCTGCACT  
GAAACTCTAAGTGGAATACTGTCTTTCCAAGCTTACCTGTATCTTCAATGAAATTGGACTCTTCGAT  
AGGGGACATTTTATCGTGGGCTTTCCGTAAAGGAAGATCTGTTATCGACGGTTTATCGTTTACGAAGT  
ATC

+

FFFFFFFFFFFFFFFFFFFFFFFFFFFFFFFFFFFFFFFFFFFFFFFFFFFFFFFFFFFFFFFFFFFFFFFF  
:FFFFFFFFFFFFFFFFFFFFFFFFFFFFFFFFFFFFFFFFFFFFFFFFFFFFFFFFFFFFFFFF  
FFF

@A00721:190:HGJW7DSXY:4:2325:27543:28181\_1:N:0:TCTGCAAG+GCTGCACT  
ATGGCGTTGGCCTAGTGGATGTTATTATTGACATCTGGTCAATTTCTGTTTTAGGTGGTCTTTATTCT  
ATTATTGATTTTTATGAGATTGATACGTAAACAGAAGATCTGTTATCGACGGTTTATCGTTTACGAAG  
TA

+

FFF:FFFF,F,F,FF:FFFFFFFF,,FFFF,FFFF,F,:FFF,FF:FFF,,FF,FF,FFFFFF:F  
:FFFF,:FFFFFFFF:FF,,,:,,:FFFF:FFFF,F,FF:F,FF::F:FFFFFFFFF,:FFF  
FF

@A00721:190:HGJW7DSXY:4:1550:12879:32440\_2:N:0:TCTGCAAG+GCTGCACT  
AGGATTATGTCTGTGTTGAAAGACTTTCTACCGATAAGGGTCACTAGTCTTACACAATTAAGAAATAA  
TCCTACATTGACTGATTATCTAAAGATTGAAGGAAAATTTATCCTCG

+



FFFF:F::FFFFFFFFFFFFFFFFFFFFFFFFFFFFFFFFFFFFFFFFFFFFFFFFFFFFFFFFFFFFFFFF:FF  
FFFFFFFFFFFFFFFFFFFFFFFFFFFFFFFFFFFFFFFFFFFFFFFFFFFFFFFFFFFFFFFF

@A00721:190:HGJW7DSXY:4:1660:10384:24048\_1:N:0:TCTGCAAG+GCTGCACT  
ACTTTCTACGATACAAATGATACTTCTAATTTACGTTTGCTACTCAGAGCTGGTCTCTCAGCAA  
GGGATGCATGGTGTATCTCCTCAGGAGTCCCGCATTTGATAATAATGACGAGACTTTCGTCATAAT  
CGC

+

FFFFFFFFFFFFFFFFFFFFFFFFFFFFFFFFFFFFFFFFFFFFFFFFFFFFFFFFFFFFFFFF:FFFF:FFFFFFFF  
FFFFFFFFFFFFFFFFFFFFFFFFFFFFFFFFFFFFFFFFFFFFFFFFFFFFFFFFFFFFFFFF:FFFFFFFF  
FFF

@A00721:190:HGJW7DSXY:4:2302:27100:26224\_1:N:0:TCTGCAAG+GCTGCACT  
GGTACCAGCGCATCTCGTGTGAGCCTCGACCCGATTATATGGTATTAACCTATAAAGGTGAGGAGAC  
CATTTTCTTGCTGAAATTTATAGAAGATTATTTTGACAGAATCAATAAGAATCATCGATTCTCGATT  
GTA

+

FFFFFFFFFFFFFFFFFFFFFFFFFFFFFFFFFFFFFFFFFFFFFFFFFFFFFFFFFFFFFFFF:FFFFFFFF  
FFFFFFFFFFFFFFFFFFFFFFFF:FFFFFFFFFFFFFFFFFFFFFFFFFFFFFFFFFFFFFFFFFFFFFFFF  
FFF

@A00721:190:HGJW7DSXY:4:1404:26332:27962\_1:N:0:TCTGCAAG+GCTGCACT  
TTCTTAATTATAATATTCAACCTCAAAAGTTACGTGTTTACAGTAACGAGATCACACATTTTGAGAAC  
TAATATGTTATGTTCTCTGATCATTTTGACAATCTCTTCTTATAATAAATAAATAAATAATATTACT  
AAT

+

FF:FF,FFFFFF,FFFFFFF:FF,FFFF:FFFFFFFF:FFFF,F:FFFFFFFF:FFFF:FFFFFF  
FFFFFFFFFFFF:FF::F:FFFFFFFF:FF::FFFF:FFFF::F,FFFF:FFFF,FFF,FFFFFF  
FFF

@A00721:190:HGJW7DSXY:4:2506:11686:10895\_1:N:0:TCTGCAAG+GCTGCACT  
AAAGGCTCCAGTCAACACTAGTTGAGTGCTGCTTTGGATTACGATGACGTGAGAATAGGTGAAGGGA  
TAGTTTTTACCTCGACCAACATTAAGGCGGCGGCGACTAATCTTAAAGCTTCACCCAAATGAAGGAC  
ACT

+

FFFFFFFF:FFFFFF:FFF:FFFFFFFF:F,:FFFF:FFF:FFF:FFFFFFFF:FFFFFF:FFFF  
F:FFFFFFFFFFFF:FFFFFFFFFFFFFFFFFFFFFFFFFFFFFFFFFFFFFFFFFFFFFFFFFFFF  
FFF

@A00721:190:HGJW7DSXY:4:1458:18096:13667\_1:N:0:TCTGCAAG+GCTGCACT  
TCCAGACGACGACGAAGCTTATACTACTTTAATTTTGGGTATTATGTGGAGATATCGTGATATCAGTA  
CGTCCAGATCCTCTGCTTTTACCGATAACGATAAATTCGTCATAAAATATAAAGAAAAGGACTATGAA  
ATA

+

FF,,F,:FFFF,:FFFFFFFFFFFF,FFF:FFFFFF,FFF::FF::FFFFFFFF,FFFFFFFF  
FFF:FFFF,:F,FFFFFFFF,,FFFF:F,FFFFFF:,FFF,FFFF:F:FFFFFF::FFFFFFFF,  
FFF

@A00721:190:HGJW7DSXY:4:2445:9579:28228\_2:N:0:TCTGCAAG+GCTGCACT  
CCACATTTTGGTCAAGTCAATCCGTTGAGAAAATTTCTTAGAGGATATTCGCCATTGTGGTACGAATT  
GGTCCAACATTTACCACCAAATCTTTTGATACAACTCTAGCCTTCAA

+

F,FFFF,F:FFFF::FFFFFFFF:FFFF:FFFFFFFFFFFFFFFFFFFFFFFFFFFFFFFFFFFF  
FFF:F::FFFFFFFF,FFFFFF:FFFFFFFFFFFF:FFFFFF

@A00721:190:HGJW7DSXY:4:2148:22453:4742\_2:N:0:TCTGCAAG+GCTGCACT  
CCAGATTGTTTCAACCCGTTGATGCTATGTCAGAAGAAGCTATTCAAGCTTGTCGTTTAAAGACTGC  
AGAGGCTGTCAAACAAGCCCAGACTCAAGGAGTCCAATCAAAGTTTT

+

FFFFFFFFFFFFFFFFFFFFFFFFFFFFFFFFFFFFFFFFFFFFFFFFFFFFFFFFFFFFFFFFFFFF  
FFFFFFFFFFFF:FF:FFFFFF:FF::FFFFFFFF:FFFF

$+$ 

+

 $+$ 
$$+$$

+

+

+

+

@A00721:190:HGJW7DSXY:4:1635:29993:33896\_2:N:0:TCTGCAAG+GCTGCACT  
CTTTATTTT CAGAACTCTCTCCGATCACCTTGGTGTGATCTCCCGGAGGATCTTTTCAATAAGATGTAT





@A00721:190:HGJW7DSXY:4:2649:21468:23735\_2:N:0:TCTGCAAG+GCTGCACT  
GTTACCACTTCCTAAGGTGGATGAGGGAGGTTGTTTCTTTGGAGTTTTAGATAATCTTTTGAGAAGGG  
GTCATAGAGCCAGCAAGAGAAGCTTATATGCTGGTTTAAGTGATGATT

+

FFFFFFFFFFFFFFFF:FFFFFFFFFFFFFFFFFFFFFFFFFFFFFFFFFFFFFFFFFFFFFFFFFFFFFFFF  
FFFFFFFFFFFFFFFF:FFFFFFFF:FFFFFFFFFFFFFFFFFFFFFFFFFFFFFFFF

@A00721:190:HGJW7DSXY:4:2269:22191:24643\_1:N:0:TCTGCAAG+GCTGCACT  
ATTTAGGTCAACTTGGGGTTTCGAATGTCATTAGTGCCTTACGATTGAAAGAGGTCCTTTTGAGTATC  
GACGATCTTTCGATCTTGAGGACGTACATTTAACGTGGCAGAATTCGGTAACCTACCATATTGTTCC  
TTC

+

FFFFFFFFFFFFFFFFFFFFFFFFFFFFFFFFFFFFFFFFFFFFFFFFFFFFFFFFFFFFFFFFFFFFFFFF  
FFFFFFFFFFFFFFFFFFFFFFFFFFFFFFFFFFFFFFFFFFFFFFFFFFFFFFFFFFFFFFFFFFFFFFFF  
FFF

@A00721:190:HGJW7DSXY:4:1658:8784:9940\_1:N:0:TCTGCAAG+GCTGCACT  
TTTAACTTTGACTCAACTACTCCGATCAGATCCGGATGGTTTGATTGGTATGGACTACTCGACTTTTG  
ATCTGGAGTTGTCTAGGGTCATGGCAGATACTACCGATAAGGTGAAAAATATGCAGGTCAAAGATTCT  
GTA

+

FFFFFFFFFFFFFFFFFFFFFFFFFFFFFFFFFFFFFFFFFFFFFFFFFFFFFFFFFFFFFFFFFFFFFFFF  
FFFFFFFFFFFFFFFFFFFFFFFFFFFFFFFFFFFFFFFFFFFFFFFFFFFFFFFFFFFFFFFFFFFFFFFF  
FFF

@A00721:190:HGJW7DSXY:4:1614:13340:8970\_1:N:0:TCTGCAAG+GCTGCACT  
TTCTAAGAGTCTTTATGATTCAAAACCTATCGTTGTCTGTACCTTACAAGTTGAGGAGACTTTACAGC  
GGCTTATTGTCGCGCAGTTTCCAGAATTGCGGTTGAAGTTCACCCATTCTATCTTGAATGCTCACGCC  
GTC

+

FFFFFFFFFFFFFFFFFFFFFFFFFFFFFFFFFFFFFFFFFFFFFFFFFFFFFFFFFFFFFFFFFFFFFFFF  
FFFFFFFFFFFFFFFFFFFFFFFFFFFFFFFFFFFFFFFFFFFFFFFFFFFFFFFFFFFFFFFFFFFFFFFF  
FFF

@A00721:190:HGJW7DSXY:4:2207:6135:17942\_1:N:0:TCTGCAAG+GCTGCACT  
ATCACTTGTTAAAGTACAGATTTAGTGATTTAGATATTATTGATATTGGAGGCGATATTCGTTTTTCAT  
ATCCAAAACCTCTTGAATGGAGTACATATTTGCAACCCTATTCTTGATGTGAAAGATGCATCGAGGTA  
TAC

+

FFFF:FFF:FFFF,FFFFFFFFFFFFFFFFFFFFFFFFFFFFFFFFFFFFFFFFFFFFFFFFFFFFFFFF  
FF:FFFFFFFFFFFFFFFFFFFFFFFFFFFFFFFFFFFFFFFFFFFFFFFFFFFFFFFFFFFFFFFFFFFF  
FFF

@A00721:190:HGJW7DSXY:4:2456:7175:33865\_2:N:0:TCTGCAAG+GCTGCACT  
TTGATTGGGAACGTACCTACTCACGAGACGTATGAAAGCTATCGAGGGAAGCAAATGTTTCGTTT  
TGTTACAAGAACGCTTTGGATTGTGACCATAAAGCCTCAGTTGCGATA

+

FFFFFFFFFFF:FFFFFFFFFFFFFFFFFFFFFFFFFFFFFFFFFFFFFFFFFFFFFFFFFFFFFFFFFFFF  
FFFFFFFFFFFFFFFFFFF:FFFFFFFFFFFFFFFFFFFFFFFFFFFFFFFFFFFFFFFFFFFFFFFFFFFF

@A00721:190:HGJW7DSXY:4:2540:5222:23938\_1:N:0:TCTGCAAG+GCTGCACT  
CTCTCTTGATGATGTAGCCACTATAATGCTTAAGAGAGAGATTGATGTATGTCATTTTCGTCTTAGTTT  
GTCCCGGCGAATTATTGGACACGATGAAAAATGACATACCCGTTCTGACCTTGGTATCGTTATCCGT  
CAT

+

FFFFFFFFFFFFFFFFFFFFFFFFFFFFFFFFFFFFFFFFFFFFFFFFFFFFFFFFFFFFFFFFFFFFFFFF  
FFFFFFFFFFFFF:FFFFFFFFFFFFFFFFFFFFFFFFFFFFFFFFFFFFFFFFFFFFFFFFFFFFFFFFFFFF  
FFF

@A00721:190:HGJW7DSXY:4:2647:6424:12148\_2:N:0:TCTGCAAG+GCTGCACT  
AACAAAGATAAGATTTTATCTTTCTTCAAACACCCTGTTTTCCTTAAGGGCGGACAATTGTTCCATTG

$+$ 

@A00721:190:HGJW7DSXY:4:1501:25238:25379\_2:N:0:TCTGCAAG+GCTGCACT  
TATTTCCGTACCAAGAGCCACTGCCAATCTCATCGCTATACGCATACCTGATTGGAAGAAGCGAGGTT  
CGTTCTCAATAAAAAATTTTCTCAAGAGATTATGGAGATCGGAAGAG

+

@A00721:190:HGJW7DSXY:4:2378:19443:11459\_1:N:0:TCTGCAAG+GCTGCACT  
TACGTCATGGGGATCACTTCTTCGGTCAATGACAAAACCTTCGAATATGTTACGACATGGCTTCGTAA  
CAACAGTGCGAGGATTGTCATCTCGGGGAAAGTGATTACCAAGATGTTCATATAGATACGAGATACC  
TAG

+

@A00721:190:HGJW7DSXY:4:1459:9435:32456\_2:N:0:TCTGCAAG+GCTGCACT  
AGCGATCTTACTCGTTATCGGAGCTAAGAAGAAGACTTTGGGTACACGTTATGCTCGCAAACCTTAACG  
TTAGTACCGGAGGTGATCTCTCTGCTTCTGCGTTACTGAGAGAAAAGA

+

@A00721:190:HGJW7DSXY:4:1431:16812:26099\_1:N:0:TCTGCAAG+GCTGCACT  
CTTTATGGACAAGATGCAAGTTCTTGGGAAATACTTGTTTCCCTTTTTAGGTTTAGTAGGTGATCTTG  
ACGTCGATTCTTTGTATAGGGAGTGTGAGAAGACAACGAATCTTGAAACTACGGTCCTTATCAAAGAA  
AAT

+

@A00721:190:HGJW7DSXY:4:1341:8983:9596\_2:N:0:TCTGCAAG+GCTGCACT  
AAATCTTTTGAGATTGAGAAGATTGAAGAACACGTCAAGAAGTCGCTCGGCGTTGTTCTTGAAACCA  
AGTTAAGAAGGAGGCTGATCATGGAGTCTTTGTACCTTCTGTCAAAC

+

@A00721:190:HGJW7DSXY:4:2356:17671:24205\_2:N:0:TCTGCAAG+GCTGCACT  
TACGAGAGGTGATCCCGGATGTGGATTGAAGGCTGGCTCTAAGGGAGACTCCTTCTTTTGAATGTTG  
TAAAGAATTGGGTTGAGAAGTGTGCTTTACAAGGAGTTAGACTCTTCT

+

@A00721:190:HGJW7DSXY:4:2448:14597:4507\_2:N:0:TCTGCAAG+GCTGCACT  
CGAGAATTATTACTGTTTTCTCTACCCATAACTTCTTTTTCAAAAATGCGGATGGGTCTACTGATGTT  
TTCCTACAGAGTGCAGTCGTTTCAACACTTATCACCACCTTTTGAAAGG

+

@A00721:190:HGJW7DSXY:4:2663:27697:11224\_1:N:0:TCTGCAAG+GCTGCACT  
GTCGGTGGGGTTCTCAAGGCTCTCATCGCCACTGGGATTCTAAGGGGTTCCATAAGATATTATCTGAC  
ATTGTGGTTCAATGATCAGGATTCTTCTTTTGGTCCTTACGTCTTAAGTAATTTGGATGTTGTCGAAA  
ACT

```

FFFFFFFFFFFFFFFFFFFFFFFFFFFFFFFFFFFFFFFFFFFFFFFFFFFFFFFFFFFFF,FFFFFFFFFFFFFFFFFFFFFFF
FFFFFFFFFFFFFFFFFFFFFFFFFFFFFFFFFFFFFFFFFFFFFFFFFFFFFFFFFFFFFFFFFFFFFFFFFFFFFFFFFFFFF
FFF
@A00721:190:HGJW7DSXY:4:1248:16658:34820_2:N:0:TCTGCAAG+GCTGCACT
ACGATTCTTAAAAGAAGTTTATTA AAAACTTCAGAGTCTCTTGGAAGTCCAGGTAGCTAATGTTCTTGC
AATAGCCACAGACTTTCTGGGAAAAGAGACCTCTGTTGGTAGAGGAGT
+
FFFFFFFFFFFFFFFFFFFFFF:FFFFFF:FFFFFFFFFFFFFFFFFFFFFFFFFFFFFFFFFFFFFFFFFFFFFFFFFFFFF
FFFF:FFFFFFFF:FF:FFFFFFFFFFFFFFFFFFFFFF:FFFFFFFFFFFFFFFF
@A00721:190:HGJW7DSXY:4:1241:2437:6151_2:N:0:TCTGCAAG+GCTGCACT
ACTCAGATTCAATCTGGCATCACTGAACGTCTACAACGAGTTAGGGAGTGGCTAGGTTTTAAAGATC
CTTTCACAAGCAATACCTTCCACTGAGTTCATCACCCAGAGTTTCGA
+
FFFFFFFFFFFFFFFFFFFFFFFFFFFFFFFFFFFFFFFFFFFFFFFFFFFFFFFFFFFFF:FFFFFFFFFFFFFFFFFFFFFFF
FFFFFFFFFFFFFFFFFFFFFFFFFFFFFFFFFFFFFFFFFFFFFFFFFFFFFFFFFFFFF,FFFFF
@A00721:190:HGJW7DSXY:4:1220:3043:7294_1:N:0:TCTGCAAG+GCTGCACT
CTTCTGATGCTGAATTTGAGGAAAATTTTTCGGAAGTTTGTGATAAATCCTGATGGCTCAGTACAG
GGAGGAGGTAATAGTTATAAACCTTCTTTTATCATTGCAACAGGACTTTGAGAAGACTGTTGAAATG
GAC
+
FFFFFF:FFFF:FFF:FFFFFFFFFFFFFFFFFFFFFFFFFFFFFFFFFFFFF:FFFFFF:FFFFFF:FFF:FFFFFFF
F:FFFF,FFFFFFFFFFFFFFFF:FFFFFFFFFFFFFFFFFFFFFFFFFFFFF,,FFFFFFFFFFFFFFFFFFFFFFFFFFFFF
FFF
@A00721:190:HGJW7DSXY:4:1554:22715:30874_2:N:0:TCTGCAAG+GCTGCACT
TCATAGGTATGTGTACGCTACACTCGAAATATGGGCCCTCATAAGGAAGTATAGTTGGCGTCTTGTC
GTTGACGTCATTACAGTCTGGAAGTTAGATCATTTGTT CAGGAAGATC
+
FFFFFFFFFFFFFFFFFFFFFFFFFFFFFFFFFFFFFFFFFFFFFFFFFFFFFFFFFFFFF:FFFFFFFFFFFFFFFFFFFFFFF
FFFF:FFFFFFFFFFFFFFFFFFFFFFFFFFFFFFFFFFFFFFFFFFFFFFFFFFFFFFFFFFFFF
@A00721:190:HGJW7DSXY:4:1152:32850:36213_1:N:0:TCTGCAAG+GCTGCACT
TTAGATAAATTCTTTCCGGGCTCAATGACCTTTGCTATGTACGTGGATCTAATGCTTGGTGATCTGAA
TCTGACCATCGCAAAGAAGACTTTATTAGTTCATGAAGTTCTTACACTTCTCGCGACTAATGTCAGCT
TCA
+
FFFFFFFFFFFFFFFFFFFFFFFFFFFFFFFFFFFFFFFFFFFFFFFFFFFFFFFFFFFFF:FFFFFFFFFFFFFFFFFFFF:F:FFFF:
FFFFFFFFFFFFFFFFFFFFFFFFFFFFFFFFFFFFFFFFFFFFFFFFFFFFFFFFFFFFFFFFFFFFFFFFFFFFFFFFFFFFF
FFF
@A00721:190:HGJW7DSXY:4:2553:9046:17816_2:N:0:TCTGCAAG+GCTGCACT
CCAAATTTAGCACTTTTTGAATATGACAGAAGCTCGCCATATCAGATTAGAGACATGCCAGTTAGAGT
TCTTCTAACCAGGACTGATGGTGAGATTCTTTTACCTTTTGGAGGTCC
+
FFFFFFFFFFFFFFFFFFFFFFFFFFFFFFFFFFFFFFFFFFFFFFFFFFFFFFFFFFFFF:FFFFFFFFFFFFFFFFFFFFFFF
FFFFFFFFFFFFFFFFFFFFFFFFFFFFFFFFFFFFFFFFFFFFFFFFFFFFFFFFFFFFFFFFFFFFFFFFFFFFFFFFFFFFF
@A00721:190:HGJW7DSXY:4:2122:2917:23735_2:N:0:TCTGCAAG+GCTGCACT
GACGTTTCCGTCGGAGGATGACAGGTGGGAGACCGCTCAATAACACTCTATTGAATCCCTTTTCCACG
ATGAAAGCTCTTTATGAGGTGCTCCAGATCGGAAGAGCGTCGTGTAGG
+
:FFF,FF,:F,F:FF,FFF:FFFFFFFFFFFFFFF::F:FFFFFFFFFFFFFFFF:FFFF,F,F,,F,,FFFF
FF:FFFF,FFFF,FF,FFF,,FFFF:::,FF,F,:,FF:FFFFF
@A00721:190:HGJW7DSXY:4:2516:25545:30358_2:N:0:TCTGCAAG+GCTGCACT
TTGATAAATTTGTTGGAATCGATAATGATACTGACGAAGGTTCTATTACCACCCTTGTCATTGATACA
AACATTCTAGGTGATGCTTTCTTAGAGGCTCGTCTAGCCGCTGAGATT
+

```

FFFFFFFFFFFFFFFFFFFFFFFFFFFFFFFFFFFFFFFFFFFFFFFFFFFFFFFFFFFFFFFF  
FFFFFFFFFFFFFFFFFFFFFFFFFFFFFFFFFFFFFFFFFFFFFFFFFFFFFFFFFFFFFFF  
@A00721:190:HGJW7DSXY:4:2575:4490:1532\_2:N:0:TCTGCAAG+GCTGCACT  
TACAATCTGTAGAGAGAGAGGTTAATCAGAATTTGAGTGATAACGATTTAGTACTGGGAAATGGTGGT  
AGTCAGTTTACTACTTTTCTTCCCTCCCCTTTTTCGATTGGATTCTGA  
+  
FFFFFFFFFFFFFFFFFFFFFFFFFFFFFFFFFFFFFFFFFFFFFFFFFFFFFFFFFFFF, FFFFFFFFFFFFFFFFFFFFFFFF:F  
FFFFFFFFFFFFFFFFFFFFFFFFFFFFFFFFFFFFFFFFFFFFFFFFFFFFFFFFFFFFFFF  
@A00721:190:HGJW7DSXY:4:1677:13232:5368\_1:N:0:TCTGCAAG+GCTGCACT  
GTAGGTCTCCTAGTACTTAAGGGTTTATGTTTCGGTTTCAGCTGGATGGATCTTTTGATGGTATGTTT  
CACATTGCGTGATCACTTCCCGTGGACTTGGAAGAGATTAAACATAAAATCCAGCGATTCTATTATG  
TCG  
+  
FFFFFFFFFFFFFFFFFFFFFFFFFFFFFFFFFFFFFFFFFFFFFFFFFFFFFFFFFFFFFFFFFFFFFFFFFFFFFFFFFFFFFFFF  
FFFFFFFFFFFFFFFFFFFFFFFFFFFFFFFFFFFFFFFFFFFFFFFFFFFFFFFFFFFFFFFFFFFFFFFFFFFFFFFFFFFFFFFF  
FFF  
@A00721:190:HGJW7DSXY:4:1562:14778:22795\_2:N:0:TCTGCAAG+GCTGCACT  
GTTCTGGGCTGTGGGGATTAACCTCCCTCGTGAAACTTACGACGATGTTCTCGCTCGCATTTTACAAGG  
ATTACTAAGTCTGAGATCTGCCACTTCTAATTTTAGGAAACGTCGCGA  
+  
FFFFFFFFFFFFFFFFFFFFFFFFFFFFFFFFFFFFFFFFFFFFFFFFFFFFFFFFFFFFFFFFFFFFFFFFFFFFFFFFFFFFFFFF  
FFFFFFFFFFFFFFFFFFFFFFFFFFFFFFFFFFFFFFFFFFFFFFFFFFFFFFFFFFFFFFFFFFFFFFFFFFFFFFFFFFFFFFFF  
FFF  
@A00721:190:HGJW7DSXY:4:1507:8061:8656\_1:N:0:TCTGCAAG+GCTGCACT  
TCTTGGTCGAAAAATATCGCCGGGAACCTCTAATAGAGGATCCTGATGACATTATTTCAACGGATACC  
GATCTCAGTTCTACCACAGAAACCGTCTCAGGAACGTCTCCA CTGATT CGGAATTAGAGAAAGACGA  
CCT  
+  
FFF, FFFFFFFFFFFFFFFFFFFFFFFFFFFFFFFFFFFFFFFFFFFFFFFFFFFFFFFFFFFFFFFFFFFFFFFFFFFFFFFFF  
:FFFFFFFFFFFFFFFFFFFFFFFFFFFFFFFFFFFFFFFFFFFFFFFFFFFFFFFFFFFFFFFFFFFFFFFFFFFFFFFF  
FFF  
@A00721:190:HGJW7DSXY:4:2614:13223:14152\_2:N:0:TCTGCAAG+GCTGCACT  
AATTTTCAGGGTGCCCTGATGAGGACGTTGAAAGGGATAATTTCAACTCTGAGACTTCTAAGAGTGTT  
TCAAAGACCAGAAACGTAACAAGAAGAATAAAGGTAGGAAGGGGAGA  
+  
FFFFFFFFFFFFFFFFFFFFFFFFFFFFFFFFFFFFFFFFFFFFFFFFFFFFFFFFFFFFFFFFFFFFFFFFFFFFFFFFFFFFFFFF  
FFFFFFFFFFFFFFFFFFFFFFFFFFFFFFFFFFFFFFFFFFFFFFFFFFFFFFFFFFFFFFFFFFFFFFFFFFFFFFFFFFFFFFFF  
@A00721:190:HGJW7DSXY:4:1217:30011:12289\_1:N:0:TCTGCAAG+GCTGCACT  
GGTTGAAGAGAAA ACTGATATGGTTGCGGCTGATCGTACCCCAATTCCTGCTAGAAAGATCACTCTCG  
GCGATACCACTGATCTTCCAGAGTTACGTAGTGGTCTGTTCTTTTGGTGATTTTATCAAAGAGAAAGTT  
TCT  
+  
FF: FFFFFFFFFFFFFFFFFFFFFFFFFFFFFFFFFFFFFFFFFFFFFFFFFFFFFFFFFFFFFFFFFFFFFFFFFFFFFFFFF  
FFFFFFFFFFFFFFFFFFFFFFFFFFFFFFFFFFFFFFFFFFFFFFFFFFFFFFFFFFFFFFFFFFFFFFFFFFFFFFFF  
FFF  
@A00721:190:HGJW7DSXY:4:2217:26024:19288\_1:N:0:TCTGCAAG+GCTGCACT  
TCAGTTTTTCAAAAAGCTATTAATAGCAGTTGCGGGGATATAATACCGCCTCCAGATTACTCTAAACT  
GAATCCACTCTCTTGGGATATAAATGAGTACATCTATAATAGAGTTTTGGA ACTGTGTAATGTCTCTAC  
GTA  
+  
FFF:F: FFFFFFFFFF: FFFFF: FFFFFFFFFFFFFFFFFF, FFFFFFFFFFFF:F,F,, FFFFFFFFFFFFFFFF  
FFFFFFFFFFFFFFFFFFFF, FFFFFFFFFFFF: FFFFFFFFFFFFFFFFFF: FFFFFFFFFFFFFFFFFFFFFFFF  
FFF  
@A00721:190:HGJW7DSXY:4:1126:25274:35775\_1:N:0:TCTGCAAG+GCTGCACT  
TTCATGAAGATCTTCGAGTGTTTTATAGTGAGTTATTCTTGCGAAGGTTCAAGTCGATTGATTTTGT





FFFFFFFFFFFFFFFFFFFFFFFFFFFFFFFFFFFFFFFFFFFFFFFFFFFFFFFFFFFFFFFFFFFFFFFFFFFFFFFF  
FFF

@A00721:190:HGJW7DSXY:4:2155:17400:34851\_1:N:0:TCTGCAAG+GCTGCACT  
TCCAAGAGAATATTTATTCTTATGAGGCTCGAAACTTCAACGTTTTTCAACGGAAGACATATCGCA  
CCCGAAATTTTTGGGCAGAATGCTCTTAACGCGGTTCTTGAACGGTGTGTTTGATCAGTCTAAGTTGGA  
TAA

+

FFF:FFF:FFFFFFFFFFFFFFFFFFFFFFFFFFFFFFFFFFFFFFFFFFFFFFFFFFFFFFFFFFFFFFFFFFFF  
FFFFFFFFFFFFFFFFFFFFFFFFFFFFFFFFFFFFFFFFFFFFFFFFFFFFFFFFFFFFFFFFFFFFFFFFFFFF  
FFF

@A00721:190:HGJW7DSXY:4:1678:7193:14074\_2:N:0:TCTGCAAG+GCTGCACT  
ACTCAGTTAACCTGAGAGCTCCTCAATTGATAGATTGGGTCAACAATAGGGACGCTAGTATACTTCGT  
AAAGTCGACAGCGAAATGGTCAATATTGATAATTGGACCGACTATATG

+

FFFFFFFFFFFFFFFFFFFFFFFFFFFFFFFFFFFFFFFFFFFFFFFFFFFFFFFFFFFFFFFFFFFFFFFFFFFF:FFFFFFFFFFFFFFFFFFFF  
FFFFFFFFFFFFFFFFFFFFFFFFFFFFFFFFFFFFFFFFFFFFFFFFFFFFFFFFFFFFFFFFFFFFFFFFFFFF

@A00721:190:HGJW7DSXY:4:2116:16450:1673\_1:N:0:TCTGCAAG+GCTGCACT  
AGCTCATGGTGAAAAGGGAAGCTAAGGTAAACTTGATGCTTCAGCCTTTTCGAAGCATAACCCCGCA  
CAGAATATCGTTTATCACGCAAATTTATTAATGCAATTTTCGGACCTATCTTTAAGGTTCTGTGAG  
GAG

+

FFFFFFFFFFFFFFFFFFFFFFFFFFFFFFFFFFFFFFFFFFFFFFFFFFFFFFFFFFFFFFFFFFFFFFFFFFFF,FFFFFFFFFFFFFFFFFFFF  
FFFFF,FFFFFFFFFFFFFFFFFFFFFFFFFFFFFFFFFFFFFFFFFFFFFFFFFFFFFFFFFFFFFFFFFFFF  
FFF

@A00721:190:HGJW7DSXY:4:1322:10303:34992\_1:N:0:TCTGCAAG+GCTGCACT  
TCTCTCTTAGGAGGTCATGACTACTATAAGGGTGAAATCGATTTTTTCGAAGTTTGACAAATCTCA  
AGATTTCTTTGTAAAGCCTATGAGATAAAGATGTATTCTTATTTAGGCTTCGATGCTGAATTTCTTG  
AAC

+

FFFFF:FFFFFFFFFFFFFFFFFFFFFFFFFFFFFFFFFFFFFFFFFFFFFFFFFFFFFFFFFFFFFFFFFFFF  
FFFFFFFFFFFFFFFFFFFFFFFFFFFFFFFFFFFFFFFFFFFFFFFFFFFFFFFFFFFFFFFFFFFFFFFFFFFF  
FFF

@A00721:190:HGJW7DSXY:4:1275:13865:28385\_2:N:0:TCTGCAAG+GCTGCACT  
ACGCCAGGAGTATCCATAACGATTTGTCAATTTACCACCTTTGCTCAACGACGAAGTGGAACGGCCAAC  
ACTTTCTTTGGTAATTGTATGATCACTTTGATGATTTTATCACTTTAT

+

FFFFFFFFFFFFFFFFFFFFFFFFFFFFFFFFFFFFFFFFFFFFFFFFFFFFFFFFFFFFFFFFFFFFFFFFFFFF  
FFF:FFFFFFFFFFFFFFFFFFFFFFFFFFFFFFFFFFFFFFFFFFFFFFFFFFFFFFFFFFFFFFFFFFFF

@A00721:190:HGJW7DSXY:4:1549:9173:23171\_1:N:0:TCTGCAAG+GCTGCACT  
TTGTCGCTGGGACGATTCCATTCTGTTTTCAAAGACTCCAATAACTGATCATTCTGATCATATGATT  
TTGGACAATGGTTTCGAAGCGAAATTTTTGAGGGATAAACCAGCGTACTTCTGCTCGCGATTTATTCT  
TTT

+

FFFFF:FFFFFFFFFFFFFFFFFFFFFFFFFFFFFFFFFFFFFFFFFFFFFFFFFFFFFFFFFFFFFFFFFFFF:FFFFF,FFFFFFFF  
FFFFFFFF:FFFFFFFFFFFFFFFFFFFFFFFFFFFFFFFFFFFFFFFFFFFFFFFFFFFFFFFFFFFFFFFFFFFF  
FFF

@A00721:190:HGJW7DSXY:4:2206:5104:15468\_2:N:0:TCTGCAAG+GCTGCACT  
CGTTAAGTTAGGTAAACCCCTAACCGATGTTACTCTTGAGGACTTTGGGAGAGATTGTTAGTTTTTA  
AAGACTATACTAAATATCTCCACTACGAGGTTGTTGTTTGGCGATTAG

+

FFFFFFFFFFFFFFFFFFFFFFFFFFFFFFFFFFFFFFFFFFFFFFFFFFFFFFFFFFFFFFFFFFFFFFFFFFFF  
FF:FF:FFFFFFFFFFFFFFFFFFFFFFFFFFFFFFFFFFFFFFFFFFFFFFFFFFFFFFFFFFFFFFFFFFFF:FFFFF:FFFFFFFFFFFF:

@A00721:190:HGJW7DSXY:4:1644:31448:3411\_1:N:0:TCTGCAAG+GCTGCACT  
TATTCTATATTCGATTGAGGTTCTTTATAACTATTGGCTATCTGTGATTTTAATTGTATAATATCAA



@A00721:190:HGJW7DSXY:4:2145:1488:23109\_1:N:0:TCTGCAAG+GCTGCACT  
GAGGATTCTCAGTTTACAAGGACCTTAAGCGATGGATCGGGTTAATTCTAAAACATTACCCGAAAGA  
CGTGCTAAATTAAAACCATTTGTACGATGTCGTCTGTCTCGGCGATCACTTTTCACTAAGAATTGGTCC  
TAC

+

FFFFFFFFFFFFFFFFFFFFFFFFFFFFFFFFFFFFFFFFFFFFFFFFFFFFFFFFFFFFFFFFFFFFFFFF  
FFFFFFFFFFFFFFFFFFFFFFFFFFFFFFFFFFFFFFFFFFFFFFFFFFFFFFFFFFFFFFFFFFFFFFFF  
FFF

@A00721:190:HGJW7DSXY:4:2615:18349:29543\_1:N:0:TCTGCAAG+GCTGCACT  
AGACGTGTGCTCTTCCGATCTATCGTTTCTTTCTTTATCTCTTTGGTTGTTAGGGATTTTGAGAGAGT  
GAAAGGCTTCAATTGTAGTGGTTTGGTCGTTTCAGTACCCAGTCAGTATACCTCTACGCAAAGATATT  
TCA

+

FFFFFFFF:FFFFFF::FF,FFFFFFFF:FFFFFFFFFFFFFFFFFFFFFFFFFFFFFFFFFFFFFFFF:FFFFFF  
FFFFFFFFFF:FFF::FFFFFFFF,FFFFF:FFFFFFFFFFFFFFFFFFFFFFFFFFFFFFFFFFFFFFFF:FFFF:FFFFF  
FFF

@A00721:190:HGJW7DSXY:4:1145:14199:14497\_1:N:0:TCTGCAAG+GCTGCACT  
TGTCTTTCATATTATGAATGAACCTTCGGCCGCTCTCTTTGCTTCGATGTTGGATGTCAAGAAGGGTT  
CAGAATGGGATTCTACGTAGTTTATGACTTTGGTGGTGGTACTTTCGATACTTCTATCGTCTTACGT  
TAC

+

FFFFFFFFFFFFFFFFFFFFFFFFFFFFFFFFFFFFFFFFFFFFFFFFFFFFFFFFFFFFFFFFFFFFFFFF  
FFFFFFFFFFFFFFFFFFFFFFFFFFFFFFFFFFFFFFFFFFFFFFFFFFFFFFFFFFFFFFFFFFFFFFFF  
FFF

@A00721:190:HGJW7DSXY:4:1573:2193:7639\_2:N:0:TCTGCAAG+GCTGCACT  
AGTGTTATTTATTCTGGTGGTGATGATAATCTTGAGGTCGTGACGTTGATGAAGCTATAAGAGCGTT  
CTTATTACGGCGCACTTCTTTACCCGCCACCACACAACCTTTCAGTTTC

+

FF:F:FFFFFFFF:FFFFFFFFFFFFFFFFFFFFFFFFFFFFFFFFFFFFFFFFFFFFFFFFFFFFFFFF  
FFFFFFFFFFFFFFFFFFFFFFFFFFFFFFFFFFFFFFFF,FFFFFFFFFFFFFFFFFFFFFFFFFFFFFFFF

@A00721:190:HGJW7DSXY:4:2123:20690:8516\_1:N:0:TCTGCAAG+GCTGCACT  
ACTGGAAAACCCTCGTCAATACTTTTCAATAATATACGTCTTGAACCTCACTTATGACGATCTAGTGAA  
ATTAACGCGTCCTTTTCTGGAACGTAGTTTACTATTATGAACAAAGTTATCAAAGATAGTGGCATTCAAG

+

FFFFFFFFFFFFFFFFFFFF:F:FFFFFFFFFFFF,FFFFFFFFFFFFFFFFFFFFFFFFFFFFFFFFFFFF  
FFFFFFFFFFFFFFFFFFFFFFFFFFFFFFFFFFFFFFFFFFFFFFFFFFFFFFFFFFFFFFFFFFFFFFFF  
FFF

@A00721:190:HGJW7DSXY:4:2527:7310:8328\_2:N:0:TCTGCAAG+GCTGCACT  
CTGATTCCGGCCGGTGGTAGCTCATTTCTACCAGGGCTATTACTCTTGCTGAAACAGCTATTAAAGC  
TGTTGAGCGGGTAATTACACCTAAACGAGAGATCGGACGAGCGTCGTG

+

FFFFFFFFFFFFFFFFFFFFFFFFFFFFFFFFFFFFFFFFFFFFFFFFFFFFFFFFFFFFFFFFFFFFFFFF  
FFF,FF,FFFFFFFFFFFFFFFFFFFFFFFFFFFFFFFFFFFFFFFF,FFFFFFFFFFFF

@A00721:190:HGJW7DSXY:4:1513:3414:30608\_1:N:0:TCTGCAAG+GCTGCACT  
GCTACTTTAACGGAGCGTAGTGTACTCTTCGTCGATTGTATCAACAGTAACATTACTTCTAATAAAGG  
TCTCTATCAAGCTCGTATTATCGTCGCTGCTGGATCTGCGTTACCGTTGAAGGCTAACTCCAAGGTA  
ATT

+

FFFF::FFFFFFFFFFFFFFFFFFFFFFFFFFFFFFFFFFFFFFFFFFFFFFFFFFFFFFFF:FFFFFFFF  
FFF:FFFFFFFFFFFFFFFFFFFFFFFFFFFFFFFFFFFFFFFF:FFFFFFFFFFFFFFFFFFFFFFFFFFFF  
FFF

@A00721:190:HGJW7DSXY:4:1310:20690:18724\_1:N:0:TCTGCAAG+GCTGCACT  
TTTATCTTTCCTCTGGCCTTGTATGAGGGTGTCTTAATCGTAACATTAATAATTTCAATCTTCTTA

AAAAGAAGATAGAGAGTCATACTTTGGGCTATCGTTCAGGTGCATGGGGTTGGATAGCCAATATTGAA  
GTG

+

:FFFFFFFFFFFFFFFFFFFFFFFFFFFFFFFFFFFFFFFFFFFFFFFFFFFFFFFFFFFFFFFFFFFFFFFFFFFFFFFF  
FFFFFFFFFFFFFFFFFFFFFFFFFFFFFFFFFFFFFFFFFFFFFFFFFFFFFFFFFFFFFFFFFFFFFFFFFFFFFFFF  
FFF

@A00721:190:HGJW7DSXY:4:1247:7446:16016\_1:N:0:TCTGCAAG+GCTGCACT  
AAGTAAAGATAACCAATAAGGAAGGAGCTTATACTATGGTTGAATCAACTAAGCATACTACTTTTGCT  
TTGATTACTCTACCGCCTTACAAGTCTAAGGTTAAAGAGTCGATTAACAAGTTGTACTTATCAATGA  
TTT

+

FFFFFF:FFFFFFFFFFFF:F:FFFFFFFFFFFFFFFFFFFFFFFFFFFFFFFFFFFFFFFFFFFFFFFFFFFFFFFF  
FFFFFFFFFFFFF,FFFFFFFFFFFFFFFFFFFFFFFFFFFFFFFFFFFFFFFFFFFFFFFFFFFFFFFFFFFFFFFF  
FFF

@A00721:190:HGJW7DSXY:4:1474:18493:13135\_2:N:0:TCTGCAAG+GCTGCACT  
CCAAAGAGAATATCTAAAATATTTACAAAATCTTACCACCTATCTACGAACCTAAAGTTCTGAAGACGT  
TGCTTGTGCTTCCTCCTTAATGGCACTACCTCGGTACAATCTTACT

+

FFFFFFFFFFFFFFFFFFFFFFFFFFFFFFFFFFFFFFFFFFFFFFFFFFFFFFFFFFFFFFFFFFFFFFFFFFFFFFFF  
FFF:FFFFFFFFF:FFFFFFFFFFFFFFFFFFFFFFFFFFFFFFFFFFFFFFFFFFFFFFFFFFFFFFFFFFFFFFFF

@A00721:190:HGJW7DSXY:4:2102:14190:23563\_2:N:0:TCTGCAAG+GCTGCACT  
GCGACCTGTTCCGGAGTTTTACGGGATCCGGAATGTTCTGTCTATATTAGGTGAAGCGAAATACGAT  
TTCGAACGTCAACGTTACCGAGTTTCGTTTCGTACCTTGATGCTGAC

+

FFFFFFFFFFFFFFFFFFFFFFFFFFFFFFFFFFFFFFFFFFFFFFFFFFFFFFFFFFFFFFFFFFFFFFFFFFFFFFFF  
FFF:FFFFFFFFF:FFFFFFFFFFFFFFFFFFFFFFFFFFFFFFFFFFFFFFFFFFFFFFFFFFFFFFFFFFFFFFFF

@A00721:190:HGJW7DSXY:4:1318:28330:6527\_1:N:0:TCTGCAAG+GCTGCACT  
TAGTGCGAGGCCTCTCTTCTACGAGTATTGCTATTTATACGTTACGAGAAGAAGGTTGAAAGTTTG  
AGAACTTAGTTTACGAACCTGACTCTACTATACGTGACATACTAAATACTAGATATTTGGATGATCTT  
GAT

+

FFFFFFFFFFFFFFFFFFFF:FFFFFFFFFFFFFFFFFFFFFFFFFFFFFFFFFFFFFFFFFFFFFFFFFFFFFFFF  
FFFFFFFFFFFF:FFFFFFFFFFFFFFFFFFFFFFFFFFFFFFFFFFFFFFFFFFFFFFFFFFFFFFFFFFFFFFFF  
FFF

@A00721:190:HGJW7DSXY:4:2146:25798:29857\_2:N:0:TCTGCAAG+GCTGCACT  
AAAATTTTCTTCCTTGGAATTTAATATAAAGAATCTTTACCAGGACTCCTACTACAGGAGGCAGTCTT  
CTGATCGTAAGAAGTTTATAAGGAACATATCCATTTGTTGTAATAGGG

+

FFFFFFFFFFFFFFFFFFFFFFFFFFFFFFFFFFFFFFFFFFFFFFFFFFFFFFFFFFFFFFFFFFFFFFFFFFFFFFFF  
FFFFFFFFFFFFFFFFFFFFFFFFFFFFFFFFFFFFFFFFFFFFFFFFFFFFFFFFFFFFFFFFFFFFFFFFFFFFFFFF

@A00721:190:HGJW7DSXY:4:1158:26042:31156\_1:N:0:TCTGCAAG+GCTGCACT  
GAAACTCTAAGTGGAATACTGTCTTTCCAAGCTTACCTGTATCTTCAATGAAATTGGACTCTTCGAT  
AGGGGACATTTTATCGTGGGCTTTCCGTAAAGGAAGATCTGTTATCGACGGTTTATCGTTTACGAAGT  
ATC

+

FFFF,F,FFFF:FFFFFFFFFFFF:FF:F:F,FFFF:FFFFFFFFFFFF:FFFF:FFFFFFFFFFFFFFFF  
F:FF:FFFFFFFFFFFFFFFFFFFFFFFFFFFFFFFFFFFFFFFFFFFFFFFFFFFFFFFFFFFFFFFFFFFFFFFF  
FFF

@A00721:190:HGJW7DSXY:4:2676:24478:27164\_1:N:0:TCTGCAAG+GCTGCACT  
GGCGTTGGCCTAGTGGATGTTATTAGTGACATCTGGTCAATTTCTGTTTTAGGTGGTCTTTATTCTAT  
TATTGATTTTTATGAGATTGATACGTTAACAGAAGATCTGTTATCGACGGTTTATCGTTTACGAAGTA

+

:FFFFFFFFFFFFFFFFFFFFFFFFFFFFFFFFFFFFFFFFFFFFFFFFFFFFFFFFFFFFFFFFFFFFFFFFFFFF  
FFFFFFFFFFFFFFFFFFFF:FF:FFFF:FFFFFFFFFFFFFFFFFFFFFFFFFFFFFFFFFFFFFFFFFFFFFFFF

$+$ 

@A00721:190:HGJW7DSXY:4:2348:27100:6151\_1:N:0:TCTGCAAG+GCTGCACT  
ACTTTCTACGATACAAATGATACTTCTAATTTACGTTTGCTACTCAGAGCTGGTCTCCCAGCAA  
GGGATGCATGGTGTTATCTCCTCAGGAGTCCCGGCATTTGATAATAATGACGAGACTTTCGTCATAAT  
CGC

 $+$ 

@A00721:190:HGJW7DSXY:4:2459:9218:27539\_1:N:0:TCTGCAAG+GCTGCACT  
GGTACCAGCGCATCTCGTGTGAGCCTCGACCCGATTATATGGTATTAAC TTATAAAGGTGAGGAGAC  
CATTTTCTTGCTGAAATTTATAGAAGATTATTTTGACAGAATCAATAAGAATCATCGATTCTCGATTCT  
GTA

 $+$ 

@A00721:190:HGJW7DSXY:4:2302:18123:34695\_1:N:0:TCTGCAAG+GCTGCACT  
TTCTTAATTATAATATTCAACCTCAAAAGTTACGTGTTTACAGTAACGAGATCACACATTTTGAGAAC  
TAACATGTTATGTTCTCTGATCATTTTGACAATCTCTTCTTATAATAAATAAATAAATAATATTACT  
AAT

+

@A00721:190:HGJW7DSXY:4:1102:31114:29418\_1:N:0:TCTGCAAG+GCTGCACT  
CTCCAGTCAACACTAGTTCGAGTGCTGCTTTGGATTACGATGACGTGAGAATAGGTGAAGGGATAGTT  
TTTACCTCGACCAACATTAAGGCGGCGGCGACTAATCTTAAAGCTTCACCCAAAATGAAGGACACTTC  
GAA

+

@A00721:190:HGJW7DSXY:4:1466:29677:29434\_1:N:0:TCTGCAAG+GCTGCACT  
TCCAGACGACGACGAAGCTTATACTACTTTAATTTTGGGTATTATGTGGAGATATCGTGATATCAGTA  
CGTCCAGATCCTCTGCTTTTACCGATAACGATAAATTCGTCATCAAATATAAAGAAAAGGACTATGAA  
ATA

+

@A00721:190:HGJW7DSXY:4:1223:12744:25473\_1:N:0:TCTGCAAG+GCTGCACT  
GTCAATCCGTTGAGAAAATTTCTTAGAGGATATTCGCCATTGTGGTACGAATTGGTCCAACATTTACC  
ACCAAATTCTTTTGATACAACCTCTAGCCTTCAAGTGGGGTATGCCTGCGGAATACGCTTGCTATTAC  
CAG

+

[illegible]

@A00721:190:HGJW7DSXY:4:1131:28637:16705\_1:N:0:TCTGCAAG+GCTGCACT  
CCCGTTGATGCTATGTCAGAAGAAGCTATTCAAGCTTGTCTTTAAAGACTGCAGAGGCTGTCAAACA  
AGCCCAGCCTCAAGGAGTCCAATAAAATGGTTAGACAGGAGCTCAACGGGTGAGACGTGCTTACATGG  
GTG

+

FFFFFFFFF:FFFFFFFFFFFFFFFFFFFFFFFFFFFFFFFFFFFFFFFFFFFFFFFFFFFFFFFFFFFFF  
FFFFFFF:FFFFFFFFFFFFFFFFFFFFF,:FFFFFFFFFFFFFFFFFFFFFFFFFFFFFFFFFFFFF:FFFFFFF  
FFF

@A00721:190:HGJW7DSXY:4:1550:28492:5149\_1:N:0:TCTGCAAG+GCTGCACT  
TACTTACAAAGGACAATTCAGTTTCATTAATTCTACGGAAGTCCGGAGTATATTGTATGTTAATAG  
ATAGTGGGATAATAGTTCTACCGATACGTAGTGAACGCGTTCGTAGAACCAAGTACTTTCGTCTGAA  
GAG

+

FFFFFFFFFFFFFFFFFFFFFFFFFFFFFFFFFFFFFFFFFFFFFFFFFFFFFFFFFFFFFFFFFFFFF  
FFFFFFFFFFFFFFFFFFFFFFFFFFFFFFFFFFFFFFFFFFFFFFFFFFFFFFFFFFFFFFFFFFFFF  
FFF

@A00721:190:HGJW7DSXY:4:2669:31828:29215\_1:N:0:TCTGCAAG+GCTGCACT  
ACCGATAGGAGTTGTATAGTTGAAGATGTGGCTTTAGACGATAATCCTTTAAGGACTATGTTGACTGA  
CGAAGATTTTCCACAGATTTGTCTACGTTGCAGATCGCCACTCCAAACACTATATACATTATAAAAT  
ATA

+

FFFFFFFFFFFFFFFFFFFFF:FFFFFFFFFFFFFFFFFFFFFFFFFFFFFFFFFFFFFFFFFFFFFFFFFFFFF  
FFFFFFFFFFFFFFFFFFFFFFFFFFFFFFFFFFFFFFFFFFFFFFFFFFFFFFFFFFFFFFFFFFFFF  
FFF

@A00721:190:HGJW7DSXY:4:1318:9914:1031\_1:N:0:TCTGCAAG+GCTGCACT  
ACTTTTGTACCAAATCTTGGCTTTCAACGAAGTCTCTGATTTTATTAATCATTACTTTAACGATCT  
CTCGGTCATTTACTCTGTACTTGATCTACGTCGTTTAACTGTGCGAACAACCTTTACTTAGAATGACT  
CTA

+

FFFFFFFFFFFFFFFFFFFFFFFFFFFFFFFFFFFFFFFFFFFFFFFFFFFFFFFFFFFFFFFFFFFFF  
FFFFFFFFFFFFFFFFFFFFF:FFFFFFFFFFFFFFFFF:FFFFFFF:FF::FFFFF,FF:F:FF:FFFF,F  
FFF

@A00721:190:HGJW7DSXY:4:2278:29496:27461\_2:N:0:TCTGCAAG+GCTGCACT  
AGTTAATATCATATTAGTAATACTCACTATCGTTTTCTGCTTTTCTTAGCTAATAGATTAATAAAGG  
ATGAGTACGAAAACCAACTCTTCGTTACGAGACCTGATGGTAGAATAG

+

FFFFFFFFFFFFFFFFF:FFFFFFFFFFFFFFFFFFFFFFFFFFFFFFFFFFFFF:FFFFFFFFFFFFFFFFFFFFF  
FFFFFFFFFFFFFFFFFFFFFFFFFFFFFFFFFFFFFFFFFFFFFFFFFFFFFFFFFFFFF,

@A00721:190:HGJW7DSXY:4:1243:6072:17300\_1:N:0:TCTGCAAG+GCTGCACT  
ACACCCATCTCAACGTGTATAAAGCGATTTTTCCGTCCTGACCTTAATACACGAAGAGATCATCCGCA  
CACGACTCGAAACCGAGACGCCGTAGATCAAAGTCCCTTCTAACTTTAGATTATGAATCCTGCCTTTA  
CTC

+

F:FFF,FF:F,:::F,:F,F:,F::,,FFF:F::,F,F,F,:FFF,:FFF,F,F:,F,,::F:::,  
,FFFFFFFFF:FFFFFFFFFFFFF:FFFFFFFFFFFFFFFFFFFFFFFFFFFFFFFFFFFFF  
FFF

@A00721:190:HGJW7DSXY:4:1556:2320:35884\_2:N:0:TCTGCAAG+GCTGCACT  
ATAACCTTCTTATACTTTTGGGTATGTTTTGTGAAAAACATGAGATACCCAAGTCTATCGAAGACATT  
ATCTCTTATGTACTTATTGTAACGATCATTCTTTCGAGTTTGTGATT

+

FFFFFFFFFFFFFFFFFFFFFFFFFFFFFFFFFFFFFFFFFFFFFFFFFFFFFFFFFFFFFFFFFFFFF  
FFFFFFFFFFFFFFFFFFFFF:FFFFFFFFFFFFFFFFFFFFFFFFFFFFF

@A00721:190:HGJW7DSXY:4:1449:2564:34898\_2:N:0:TCTGCAAG+GCTGCACT  
ATGAGGAGGATTTATAATGCTTTTCGATAGTGATTGTTATCAATTTAAATACATTACTGTTTCAAATC

ATCTTTACTCACAGACTCCGAAAATGGTTTCAAATGAGGTCAAAGCTC

+

:FFFFFFFFFFFFFFFF:FFFFFFFFFFFFFFFF:FFF:FFFFFFFFFFFFFFFF:FFFFFFFFFF  
FFFFF:FFFFFFFFFFFFFFFF:FFFFFFFFF:FFF:FFFFFFFF:FFFF

@A00721:190:HGJW7DSXY:4:1143:18195:15875\_1:N:0:TCTGCAAG+GCTGCACT  
TATTATCCGATTCTTCGAGGTATCACTACCACTGATCTGCCGACTTTAGTCAAGGAACCTTCAATTCC  
TTCGATGTTTATATTTTTCTATAAGGGAAAATAGCAATAATCAAATTTGACAAATTTTAGAACTTTA  
TTT

+

FFFFFFFFF:FFFFFFFFFFFFFFFFFFFFFFFFFFFFFFFFFFFFFFFFFFFFFFFFFFFFFFFFF  
FFFFFFFFFFFFFFFFFFFFFFFFFFFFFFFFFFFFFFFFFFFFFFFFFFFFFFFFFFFFFFFFFFFF  
FFF

@A00721:190:HGJW7DSXY:4:1204:19696:10081\_1:N:0:TCTGCAAG+GCTGCACT  
TCCGATCACCTTGGTGTGATCTCCCGAGGATCTTTTCAATAAGATGTATGATGATAATCTACTATTT  
TTAAATAGTGATATTCAGCGTATACTTGAATACTTTATCAAAGATTTGGCTTGGTCTATTTACCGCAA  
AAA

+

FFFFFFFFF:FFFFF:FFFFFFF,FFFF::F,FFFFFF:F:FFFFFFFFFFFFFFFFFFFFFFFFF:F  
FFFFFFFFFFFFFFFFF:F:FFFFFF:FFFFFFF:FFFFFFFFF:FFFFFF:FF,FFFFFF,FFFFFF  
FFF

@A00721:190:HGJW7DSXY:4:1425:19958:25003\_2:N:0:TCTGCAAG+GCTGCACT  
TATGATATTTATTTTACTTATACTTTAAATAGCACCGATTATAACTTGACTGTTGATAATATTACAAT  
AGCTCTTTCTCAGAAGATTAGAGAAGTAACCGGTGAACACGTCGGTAG

+

FFF:FFFFFFFFFFFFFFFFFFFFFFFFFFFFFFFFFFFFFFFFFFFFFFFFFFFFFFFF:FFF:FFFFFFFFFFFFF:  
F:FFFFFFFFFFFFF:FFFF::FFFFFFFFFFFFFFFFFFFFF:FFFFFFF

@A00721:190:HGJW7DSXY:4:1677:11324:17910\_1:N:0:TCTGCAAG+GCTGCACT  
CTTTTACCGTTAGAAGTGAAGAAAGATTCTTTTCGAAAAGAAACCTATAAGTTACAAACGATTCTTCGA  
CTATATTAAAGAAATAAAAATACTTCAAGTACCTGAACCTTACATTTTAAATGGTATGGTATAATGTG  
TCT

+

FFFFFFFFFFFFFFFFFFFFFFFFFFFFFFFFFFFFFFFFFFFFFFFFFFFFFFFFFFFFFFFFFFFF  
FFFFFFFFFFFFFFFFFFFFFFFFFFFFFFFFFFFFFFFFFFFFFFFFFFFFFFFFFFFFFFFF:FFFFFFFFFFFFFFFFFFFF  
FFF

@A00721:190:HGJW7DSXY:4:2437:18765:30389\_1:N:0:TCTGCAAG+GCTGCACT  
TTCCTCTCGGTAATGAGAGTGTATTCCTTAATATTCTAGTAACCGCTATGTGGGCATTACTAGGATT  
TATCACACTCCTAAATTTGATAGCAATTTATGTTTTAAATGCTAGGAAAATTTTAGAAAACTCCATT  
GTA

+

FFFFFFFFFFFFFFFFFFFFFFFFFFFFFFFFFFFFFFFFFFFFFFFFFFFFFFFFFFFFFFFFFFFF  
FFFFFFFFFFFFFFFFFFFF:FFFFFFFFFFFFFFFFFFFFFFFFFFFFFFFFFFFFFFFFFFFFFFFFFFFF  
FFF

@A00721:190:HGJW7DSXY:4:2366:21151:6370\_2:N:0:TCTGCAAG+GCTGCACT  
GTACTTAATTCAATAGCTTTAGTATTATTTACTATCGCCTTTATTGAAAATTGTATAAGAGTTAATTG  
CTTACACAAAAGTGACGCGCAAGGAATCTTAATTGATTGAAGCTAGG

+

FFFFFFFFFFFFFFFFFFFFFFFFFFFFFFFFFFFFFFFFFFFFFFFFFFFFFFFFFFFFFFFFFFFF  
FFFFFFF,FFFFFFFFFFFFF:FFFFFFFFFFFFF,FFFFFFFFF

@A00721:190:HGJW7DSXY:4:1132:17436:26835\_2:N:0:TCTGCAAG+GCTGCACT  
CCTACCATGACCAATCATCGCTCCAACCTGGCAGCCAGACGTAGGGTCAAACCTACTACCGCCGGTCG  
GCAGATCGGCACCACTGGTCTCTACGTTCAAGGACCCGCTGTGCAGAA

+

FFFFF,:FFFFFFF,F:FFFFFFFF,FFF:F:FFFF,FFFFFFFF,,FFFFFFF,:FFFFFFFFFF:FF  
FFF:FFFFFFFFFFFFFFFF:FFFF,,FFFFFFFFFFFFFFFF:FF:



$+$  $+$ 

+

+

+

 $+$  $+$ 

+

FFFFFFFFFFFFFFFFFFFFF:F:FFFFFFFFFFFFFFFFFFFFFFFFFFFFFFFFFFFFFFFFFFFFF  
FF:  
@A00721:190:HGJW7DSXY:4:1166:32199:32612\_1:N:0:TCTGCAAG+GCTGCACT  
TCTTTTCAGGACCTAATCACATCATGATTGATAGTTACGGCTCGTATCGAGTTGGAGGGAGGAAGTTCT  
CCGAAATTAAAGACGGGGGATTAAGAGTCCAGCTGTAAGTGTCAATTCAGAGAGGGGAGCTCTGAAA  
AGG  
+  
FFFFFFFFFFFFFFFFFFFFFFFFFFFFFFFFFFFFF:F,FFFFFFFFFFFFFFFFFFFFFFFFFFFFFFFFFFFF,FF  
FFFFFFFFFFFFFFFFFFFFFFFFFFFFFFFFFFFFFFFFFFFFF:FFFFFFFFFFFFFFFFFFFFFFFFFFFFF  
FFF  
@A00721:190:HGJW7DSXY:4:1201:18728:2487\_2:N:0:TCTGCAAG+GCTGCACT  
AGAAGATGAGGAAGTCTAAGAGGAGGAGTTTGAGGAAGGCTCTAGAGAAGATCTCACCACCTGGAGAA  
GGCAAGTGGAGAGTCCAGAAGTTGATGAAGAAGGATTATTTGAAGCAG  
+  
:FFFFFFFFFFFFFFFFFFFFFFFFFFFFFFFFFFFFFFFFFFFFFFFFFFFFFFFFFFFFFFFFFFFFF  
FFFFFFFFFFFFFFFFFFFFFFFFFFFFFFFFFFFFF,F:FFFFFFFFFFFFF:FFFFFFFFF  
@A00721:190:HGJW7DSXY:4:2352:10221:10802\_1:N:0:TCTGCAAG+GCTGCACT  
TTCCTAAGGTGGATGAGGGAGGTTGTTTCTTTGGAGTTTGTAGATAATCTTTTGAGAAGGGGTCATAGA  
GCCAGCAAGAGAAGCTTATATGCTGGTTTAAGTGATGATTATCACTCCTTGAGAAGACAAGCCACATT  
AA  
+  
F:FFFFFFFFFFFFFFFFFFFFF:FFFFF:FFFFFFFFFFFFFFFFFFFFFFFFFFFFFFFFFFFFF::FFFFF  
FFFFFFFFFFFFFFFFFFFFFFFFFFFFFFFFFFFFFFFFFFFFFFFFFFFFFFFFFFFFFFFFFFFFF  
FF  
@A00721:190:HGJW7DSXY:4:2424:2410:24987\_2:N:0:TCTGCAAG+GCTGCACT  
AATGTCATTAGTGCCTTACGATTGAAAGAGGTCCTTTTGAGTATCGACAGATCTTCGATCTTGAGGA  
CGTACATTTAACGTGGCAGAATTCGGTAACTTACCATATTGTTTCCTTC  
+  
FFFFFFFFFFFFFFFFFFFFF:FFF:FFFF:FFFFFFFFFFFFF:F:FFFFFFFFFFFFFFFFFFFFFFFFFFFFF::FFFF  
FFFFF,,FFFF:,F:FFFFF:FFFFFFFFF::FFFFFFFF:FFFFF,FF  
@A00721:190:HGJW7DSXY:4:2125:22119:34006\_1:N:0:TCTGCAAG+GCTGCACT  
TTTAACTTTGACTCAACTACTCCGATCAGATCCGATGGTTTGATTGGTATGGACTACTCGACTTTTG  
ATCTGGAGTTGTCTAGGGTCATGGCAGATACTACCGATAAGGTGAAAAATATGCAGGTCAAAGATTCT  
GTA  
+  
FFFFFFFFFFFFFFFFFFFFFFFFFFFFFFFFFFFFFFFFFFFFF:FFFFFFFFF:FFFFFFFFFFFFFFFFFFFFF  
FFFFFFFFFFFFFFFFFFFFFFFFFFFFFFFFFFFFFFFFFFFFFFFFFFFFFFFFFFFFFFFFFFFFF  
FFF  
@A00721:190:HGJW7DSXY:4:2106:11143:35383\_1:N:0:TCTGCAAG+GCTGCACT  
TTCTAAGAGTCTTTATGATTCAAAACCTATCGTTGTCGTACCTTACAAGGTTGAGGAGACTTTACAGC  
GGCTTATTGTCGCGCAGTTTCCAGAATTGCGGTTGAAGTTCACCCATTCTATCTTGAATGCTCACGCC  
GTC  
+  
FFFFFFFFFFFFF:FFFFFFFFFFFFFFFFFFFFFFFFFFFFFFFFFFFFFFFFFFFFFFFFFFFFFFFFFFFFF  
FF:FFFFFFFFFFFFFFFFFFFFFFFFFFFFFFFFFFFFFFFFFFFFFFFFFFFFFFFFFFFFFFFFFFFFF  
FFF  
@A00721:190:HGJW7DSXY:4:2211:16857:27430\_1:N:0:TCTGCAAG+GCTGCACT  
ATCACTTGTTAAAGTACAGATTTAGTGATTTAGATATTATTGATATTGGAGGCGATATTGGTTTTTCAT  
ATCCAAAACCTCTTGAATGGAGTACATATTTGCAACCCTATTCTTGATGTGAAAGATGCATCGAGGTA  
TAC  
+  
FF:, ,FF,FF:, ,FF,FFFFFFFFFFFFFFFFFFFFFFFFFFFFFFFFFFFFF:FFFF:FFFFFFFFFFFF,FF  
:FF,FFFFFFFFFFFFF,:FFFFFFFF,FF:FFF:FFF:F:F::,FFFFFFFFFFFFFFFFFFFFFFFFFFFFF,  
FFF

@A00721:190:HGJW7DSXY:4:2632:18756:32878\_2:N:0:TCTGCAAG+GCTGCACT  
TTGATTGGGAACGTACCTACTCACGAGACGTCATGAAAGCTATCGAGGGAAGCAAATGTTTCGTTCT  
TGTTACAAGAACGCTTTGGATTGTGACCATAAAGCCTCAGTTGCGATA

@A00721:190:HGJW7DSXY:4:1551:5972:31187\_1:N:0:TCTGCAAG+GCTGCACT  
TCCCGGATGTGGATTGAAGGCTGGCTCTAAGGGAGACTCCTTCTTTTTGAATGTTGTAAAGAATTGGG  
TTGAGAAGTGTGCTTTACAAGGAGTTAGACTCTTCTTCAAGTTTTTAGATCTTCTTGATAATCTTAA  
GAA

[illegible]

@A00721:190:HGJW7DSXY:4:2553:4978:11960\_2:N:0:TCTGCAAG+GCTGCACT  
CGAGAATTATTACTGTTTTCTCTACCCATAACTTCTTTTCAAAAATGCGGATGGGTCTACTGATGTT  
TTCCTACAGAGTGCAGTCGTTTCAACACTTATCACCACTTTTGAAAGG

```
FFFFFFFFFFFFFFFFFFFFFFFFFFFFFFFFFFFFFFFFFFFFFFFFFFFFFFFFFFFFFFFFFFFFFFFFFFFFF
FFFFFFFFFFFFFFFFFFFFFFFFFFFFFFF:FF:FFFFFF,FF:FFFF:::F:F
```

@A00721:190:HGJW7DSXY:4:2663:28483:11898\_1:N:0:TCTGCAAG+GCTGCACT  
GTCGGTGGGGTTCTCAAGGCTCTCATCGCCACTGGGATTCTAAGGGGTTCCATAAGATATTATCTGAC  
ATTGTGGTTCAATGATCAGGATTCTTCTTTTGGTCCTTACGTCTTAAGTAATTTGGATGTTGTCGAAA  
ACT

[illegible]

@A00721:190:HGJW7DSXY:4:1410:4725:25363\_2:N:0:TCTGCAAG+GCTGCACT  
ACGATTCTTAAAAGAAGTTTATTA AAACTTCAGAGTCTCTTGAAGTCCAGGTAGCTAATGTTCTTGC  
AATAGCCACAGACTTTCTGGGAAAAGAGACCTCTGTTGGTAGAGGAGT

[illegible]

@A00721:190:HGJW7DSXY:4:1305:18927:6402\_2:N:0:TCTGCAAG+GCTGCACT  
ACTCAGATTCAATCTGGCATCACTGAACGCTACAACGAGTTAGGGAGTGGCTAGGTTTTAAAGATC  
CTTTGCACAAGCAATACCTTCCACTGAGTTCATACCCAGAGTTTCGA

```
FFFFFFFFFFFFFFFFFFFFFFFFFFFFFFFFFFFFFFFFFFFFFFFFFFFFFFFFFFFFF:FFFFFFFFFFFFFFFFFFFFFFF
F,FFFFFFFFFFFFFFFFFFFFFFFFFFFFFFFFFFFFFFFFFFFFFFFFFFFFFFFFFFFF
```

@A00721:190:HGJW7DSXY:4:2128:3549:10833\_1:N:0:TCTGCAAG+GCTGCACT  
CTTCTGATGCTGAATTTGAGGAAAATTTTTCGGAAGTTTTTGGTATAAATCCTGATGGCTCAGTACAG  
GGAGGAGGTAATAGTTATAAAACCTTCTTTTATCATTGCAACAGGACTTTGAGAAGACTGTTGAAATG  
GAC

[illegible]

@A00721:190:HGJW7DSXY:4:2268:4056:33285\_2:N:0:TCTGCAAG+GCTGCACT  
TCATAGGTATGTGTACGCTACACTCGAAATATGGGCCCTCATAAGGAAGTATAGTTGGCGTCTTGTC  
GTTGACGTCATTACAGTCTGGAAGTTAGATCATTTGTTGAGGAAGATC

```

FFFFFFFFFFFFFFFFFFFFFFFFFFFFFFFFFFFFFFFFFFFFFFFFFFFFFFFFFFFFFFFFFFFFFFFFFFFFFFFF
FFFFFFFF:FFF,FFFFFFFFFFFFFFFFFFFFFF,FFFFFFFFFFFF,FF

```

@A00721:190:HGJW7DSXY:4:1211:11107:32377\_1:N:0:TCTGCAAG+GCTGCACT  
TTAGATAAATTTCTTTCCGGGCTCAATGACCTTTGCTATGTACGTGGATCTAATGCTTGGTGATCTGAA  
TCTGACCATCGCAAAGAAGACTTTATTAGTTCATGAAGTTCTTACACTTCTCGCGACTAATGTCAGCT  
TCA

[illegible]

FFFFFFFFFFFFFFFFFFFFFFFFFFFFFFFFFFFFFFFFFFFFFFFFFFFFFFFFFFFFFFFFFFFFFFFFFFFFFFFF  
FFF

@A00721:190:HGJW7DSXY:4:1130:26187:34068\_1:N:0:TCTGCAAG+GCTGCACT  
CCAAATTTAGCACTTTTTGAATATGACAGAAGCTCGCCATATCAGATTAGAGACATGCCAGTTAGAGT  
TCTTCTAACCAGGACTGATGGTGAGATTCTTTTACCTTTTGGAGGTCCAGGAACCTTTACTCCTAGTG  
TCT

+

FFFFFFFFFFFFFFFFFFFFFFFFFFFFFFFFFFFFFFFFFFFFFFFFFFFFFFFFFFFFFFFFFFFFFFFFFFFFFFFF  
FFFFFFFFFFFFFFFFFFFFFFFFFFFFFFFFFFFFFFFFFFFFFFFFFFFFFFFFFFFFFFFFFFFFFFFFFFFFFFFF  
FFF

@A00721:190:HGJW7DSXY:4:2142:21314:2237\_2:N:0:TCTGCAAG+GCTGCACT  
GACGTTTCCGTCGGAGGATGACAGGTGGGAGACCGCTCAATAACACTCTATTGAATCCCTTTCCGCG  
ATGAAAGCTCTTTATGAGGTGCTCCAGATCGGAAGAGCGTCGTGTAGG

+

FFFFFFFFFF,FF:FF:FFFFFFFF:FFFFFFFFFFFFFFFFFFFFFFFFFFFFFFFFFFFFFFFFFFFFFFFF  
FFFFFFFFFFFFFFFFFFFFFFFFFFFFFFFFFFFFFFFFFFFFFFFFFFFFFFFFFFFFFFFFFFFFFFFFFFFF  
FFF

@A00721:190:HGJW7DSXY:4:1105:27055:32033\_1:N:0:TCTGCAAG+GCTGCACT  
TAATGATACTGACGAAGGTTCTATTACCACCCTTGTCATTGATACAAACATTCTAGGTGATGCTTTCT  
TAGAGGCTCGTCTAGCCGCTGAGATTCTGCTTACCTATTTACAATCTGTAGAGAGAGAGGTTAATCAG  
AAT

+

FFFFFFFFFFFFFFFFFFFFFFFFFFFFFFFFFFFFFFFFFFFFFFFFFFFFFFFFFFFFFFFFFFFFFFFFFFFFFFFF  
FFFFFFFFFFFFFFFFFFFFFFFFFFFFFFFFFFFFFFFFFFFFFFFFFFFFFFFFFFFFFFFFFFFFFFFFFFFFFFFF  
FFF

@A00721:190:HGJW7DSXY:4:2664:28122:2534\_1:N:0:TCTGCAAG+GCTGCACT  
GTAGGTCTCCTAGTTCTTAAGGGTTTATGTTTCGGTTTCAGCTGGATGGATCTTTTGATGGTATGTTT  
CACATTGCGTGATCACGTCCCGTGGACTTGGAAGAGATTAAACATAAAATCCAGCGATTCTATTATG  
TCG

+

FFFFFFFFF:F,FF,FFFF,FFFFFF:F:FFFFFFFFF,F::FFFF,FFF,FFFFFFFF:FFF,,FF  
F:F,:FFF,FFFFFF:,F:FFFFFFFFF::FFFFFFFF:FFFFFF:FFFFFFFF:FF::FFFFF  
FFF

@A00721:190:HGJW7DSXY:4:2337:9688:29919\_2:N:0:TCTGCAAG+GCTGCACT  
GTTTCGGGCTGTGGGGATTAACCTCCCTCGTGAAACTTACGACGATGTTCTCGCTCGCATTTCAAGG  
ATTACTAAGTCTGAGATCTGCCACTTCTAATTTTAGGAAACGTCGCGA

+

FFFFFFFFFFFFFFFFF:FFFFFFFFFFFFFFFFFFFFFFFFFFFFFFFFFFFFFFFFFFFFFFFFFFFFFFFF  
FFFF:FFFFFFFFFFFFFFFFFFFFFFFFFFFFFFFFFFFFFFFFFFFFFFFFFFFFFFFFFFFFFFFF

@A00721:190:HGJW7DSXY:4:2462:29170:25426\_1:N:0:TCTGCAAG+GCTGCACT  
TCTTGGTCGAAAAATATCGCCGGAACTTCTAATAGAGGATCCTGATGACATTATTTCAACGGATACC  
GATCTCAGTTCTACCACAGAAACGCTCAGGAACTGTCTCCACTGATTCGGAATTAGAGAAAGACGA  
CCT

+

FF:FFFFFFFFFFFFFFFFFFFFFFFFFFFFFFFFFFFFFFFFFFFFFFFFFFFFFFFFFFFFFFFFFFFFFFFF  
FFFFFFFFFFFFFFFFFFFFFFFFFFFFFFFFFFFFFFFFFFFFFFFFFFFFFFFFFFFFFFFFFFFFFFFFFFFF  
FFF

@A00721:190:HGJW7DSXY:4:2465:28818:34460\_2:N:0:TCTGCAAG+GCTGCACT  
TTTTCAGGGTGCCCTGATGAGGACGTTGAAAGGGATAATTTCAACTCTGAGACTTCTAAGAGTGTTTC  
AAAAGACCAGAAACGTAACAAGAAGAATAAAGGTAGGAAGGGGAGAAA

+

FFFFFFFFFFFFFFFFF,FFFFFFFFFFFFFFFFFFFFFFFFFFFFFFFFFFFFFFFFFFFFFFFFFFFFFFFF  
FFFFFFFFFFFFFFFFFFFFFFFFFFFFFFFFFFFFFFFF:F:FFFFFFFFFFFFFFFFF

@A00721:190:HGJW7DSXY:4:1511:3414:1266\_1:N:0:TCTGCAAG+GCTGCACT  
GGTTGAAGAGAAAACGATATGGTTGCGGCTGATCGTACCCCAATTCTGCTAGAAAGATCACTCTCG

GCGATACCACTGATCTTCCAGAGTTACGTAGTGGTCGTTCTTTTGGTGATTTTATCAAAGAGAAAGTT  
TCT

+

FFF:FFFFFFFFFFFFFF,F,FFFFFFFFFFFFFFFFFFFFFFFF:FFFFFFFFFFFFFFFFFFFFFFFF  
FFFFFFFFFFFFFFFFFFFFFFFFFFFFFFFFFFFFFFFFFFFFFFFFFFFFFFFFFFFFFFFFFFFFFFFF  
FFF

@A00721:190:HGJW7DSXY:4:2404:17933:5368\_1:N:0:TCTGCAAG+GCTGCACT  
TCAGTTTTCCAAAAAGCTATTAATAGCAGTTGCGGGGCTATAATACCGCCTCCAGATTACTCTAACT  
GAATCCACTCTCTTGGGATATAAATGAGTACATCTATAATAGAGTTTTGGAAGTGTGTAATGTCCTAC  
GTA

+

FFFFFFFFFFFFFFFF:FFFF,FFFFFFFFF:FFFFFFFFFFFFFFFFFFFFFFFF:FFFFFFF:FFFFFFFFF  
FFFFFFFFFFFFFFFFFFFFFFFFFFFFFFFFFFFFFFFFFFFFFFFFFFFFFFFFFFFFFFFFFFFFFFFF:FFFFFFF  
FFF

@A00721:190:HGJW7DSXY:4:1614:5990:23766\_1:N:0:TCTGCAAG+GCTGCACT  
TTCATGAAGATCTTCGAGTGTTTTATAGTGAGTTATTCTTGCGAAGGTTCAAGTCGATTGATTTTGT  
GACTACGATCTCTCTTGAATAAGAAGTTCTTCGAGTTGAATCTCCACCAGGTGGAGGGAAGACCAC  
TGA

+

FFFFF,FFFFFFFFF,FFFFFFF,FFF:F,,F:FFFFFF,FFF,FFFF:F:FFFF:FF,,FFFFFFF  
FFFF,FFFFFFFFF,,FF,FFFFFFF:FFF:,FFFFFFFFFFFF,FFFFF:FF:FFFFFF:FFFFFFF  
FF,

@A00721:190:HGJW7DSXY:4:1334:30861:26162\_2:N:0:TCTGCAAG+GCTGCACT  
ATTGTCACTGCTAATCGTAATTCGCGAGAAGAGATAGTGACTAAAGTTTTGGCACTTCTAGTTCATCG  
CGGTATTTGTGAAATTAAGACAGACGTGAAAGTTATGATGAGTGATCG

+

FFFFFFFFFFFFFFFFFFFFFFFFFFFFFFFFFFFFFFFF:FFFFFFFFFFFFFFFFFFFFFFFFFFFFFFFF  
FF,FFFFFFFFFFFFFFFF:FFFFFFFFFF,,FFFFFFFFFFFF,FFFF

@A00721:190:HGJW7DSXY:4:2260:16405:6887\_2:N:0:TCTGCAAG+GCTGCACT  
CAAACCTGTGGACGTTCTTTTCATCGACGAATTATTCATGATTCACGCTGGTCAGACCCTTTTCTTA  
CACATCTACTTAAGGCGGCTTATACCATAGGTTACGGTGATTCCAATC

+

FFFFFFFFFFFFFFFFFFFFFFFFFFFFFFFFFFFFFFFFFFFFFFFFFFFFFFFFFFFFFFFFFFFFFFFF  
FFFFFFFFFFFFFFFFFFFFFFFFFFFFFFFFFFFFFFFF:FFFFFFFFFFFFFFFFFFFFFFFF

@A00721:190:HGJW7DSXY:4:2433:10285:15295\_1:N:0:TCTGCAAG+GCTGCACT  
GTTCAGACGTGTGCTCTTCCGATCTAACTACTTCAACATCAACGACATCATTCTTGATGAGTGTGCTT  
CTTATCGAAGTCTCAGTTATCGCTGCCCGGCCGACGTTTGTGCGAACTCTCAGAGTTTACGGCAGA  
AAA

+

FFFFFFFFFFFFFFFFFFFFFFFFFFFFFFFFFFFFFFFF:FFFFFFFFFFFFFFFFFFFFFFFFFFFFFFFF  
FFF:FFFFFFFFFFFFFFFFFFFFFFFFFFFFFFFFFFFFFFFFFFFFFFFFFFFFFFFFFFFFFFFFFFFF  
FFF

@A00721:190:HGJW7DSXY:4:1519:11026:15577\_1:N:0:TCTGCAAG+GCTGCACT  
ATTAGACCTATCAGATGTCTTGACGACTTCGAATTTGAGGACGGAGTTAAATATATTACTTTCACTCA  
AGGTGAAAAGTTTGAAATTAACAAAGTCCTTGTAAGAGTAAGGTTAAATGTGAAGATGCTCAGACTA  
TTC

+

FFFFFFFFFFFFFFFFFFFFFFFFFFFFFFFFFFFFFFFFFFFFFFFFFFFFFFFFFFFFFFFFFFFFFFFF  
FFFFFFFFFFFFFFFFFFFFFFFFFFFFFFFFFFFFFFFFFFFFFFFFFFFFFFFFFFFFFFFF:FFFFFFF:FF::FFFFFFFFF  
FFF

@A00721:190:HGJW7DSXY:4:1460:15121:15937\_2:N:0:TCTGCAAG+GCTGCACT  
ACGACACGTTGAATCTTTACGATACTTTGTTATCAATGTAAAGTTAAACGATGCTACTTGTGAGAGGA  
TCAATCACAGTAAGGAACTGTCACGTTTAGCACGGGAGGTTGCAGATT

+

F:FFFF:F,FFFF,F:FFFFFFFFFFFFFF:FFF:FFF:FFFFFFFFFFFF,F:FFF,FFFF:FFFF:FFF  
:FFFFFFFFFFFF,FFFFF,:FFFFFF:F:FFFFFFFFFFFFFF:FFFF:F  
@A00721:190:HGJW7DSXY:4:1502:22851:10942\_2:N:0:TCTGCAAG+GCTGCACT  
CTATCGAGGACGATGAGTATCTTGAAGTTGTTGACGACAAGCCTCAAGAGGGTAGAGGACCACCTGGA  
TCTTCTACTGTCTCTGCCTTCCAAGATTTCTTAGAAGAGGTTATTCCT  
+  
FFFFFFFFFFFFFFFFFFFFFFFFFFFFFFFFFFFFFFFFFFFFFFFFFFFFFFFFFFFFFFFFFFFF  
FFFFFFFFFFFFFFFFFFFFFFFFFFFFFFFFFFFFFFFFFFFFFFFFFFFFFFFFFFFF  
@A00721:190:HGJW7DSXY:4:1539:24994:34194\_1:N:0:TCTGCAAG+GCTGCACT  
GTCACGCGTAATCTTTCAGCCGAATTAAGTACTAATGAGTTCAAGTCGGTTGTCGATCGAATTAAGA  
TCAAGGCTAATACCTTTATAGGTAAGAAGCCCTTGAGCCGCGTAGTCAGCGCGTTTAGCTGTATCAT  
CAG  
+  
FFFFFFFFFFFFFFFFFFFFFFFFFFFFFFFFFFFFFFFFFFFFFFFFFFFFFFFFFFFFFFFFFFFF  
FFFFFFFFFFFFFFFFFFFFFFFFFFFFFFFFFFFFFFFFFFFFFFFFFFFFFFFFFFFF  
FFF  
@A00721:190:HGJW7DSXY:4:2166:28167:4742\_1:N:0:TCTGCAAG+GCTGCACT  
TCCAAGAGAATATTTATTCTTATGAGGCTCGAACTTCAACGTTTTTCAACGGAAGACATATCGCA  
CCCGAAATTTTTGGGCAGAATGCTCTTAACGCGGTTCTTGAACGGTGTTTTGATCAGTCTAAGTTGGA  
TAA  
+  
FFFFFFFFFFFFFFFFFFFF:FFFFFFFFFFFFFFFFFFFFFFFFFFFFFFFFFFFFFFFFFFFF:FFFFFFFFFFFFFFFFFFFF  
FFFFFFFFFFFFFFFFFFFFFFFFFFFFFFFFFFFFFFFFFFFFFFFFFFFFFFFFFFFF  
FFF  
@A00721:190:HGJW7DSXY:4:2115:15600:35336\_2:N:0:TCTGCAAG+GCTGCACT  
ACTCAGTTAACCTGAGAGCTCCTCAATTGATAGATTGGGTCAACAATAGGGACGCTAGTATACTTCGT  
AAAGTCGACAGCGAAGTGGTCAATATTGATAATTGGACCGACTATATG  
+  
FFFFFFFFFFFFFFFFFFFF:FFFFFFFFFFFFFFFFFFFFFFFFFFFFFFFFFFFF:FFFFFFF:FFFF,FFFFFFFFFFFFFFFFFFFF  
FF:FFFFFFFFFFFFFF,FFFFFFFFFFFFFFFFFFFFFFFFFFFFFFFFFFFF  
@A00721:190:HGJW7DSXY:4:2568:4318:22498\_1:N:0:TCTGCAAG+GCTGCACT  
AGCTCATGGTGAAAAGGGAAGCTAAGGTTAACTTGATGCTTCAGCCTTTTCGAAGCATAACCCCGCA  
CAGAATATCGTTTATCACGCAAATTTATTAATGCAATTTTCGACCTATCTTTAAGGTTCTTGTGAG  
GAG  
+  
F:FFFFFFFFFFFFFFFFFFFFFFFFFFFFFFFFFFFFFFFFFFFFFFFFFFFFFFFFFFFFFFFFFFFF  
FFFFFFFFFFFFFFFFFFFFFFFFFFFFFFFFFFFFFFFFFFFFFFFFFFFFFFFFFFFF  
FFF  
@A00721:190:HGJW7DSXY:4:1514:15989:4476\_1:N:0:TCTGCAAG+GCTGCACT  
TCTCTCTTAGGAGGTCATGATGACTACTATAAGGGTGAAATCGATTTTTTCGAAGTTTGACAAATCTCA  
AGATTTCTTTTGTAAGCCTATGAGATAAAGATGTATTCTTATTTAGGCTTCGATGCTGAATTTCTTG  
AAC  
+  
FFFFFFFFFFFF:FFFFFFFFFFFFFFFFFFFFFFFFFFFFFFFFFFFF:FFFFFFFFFFFFFFFFFFFFFFFFFFFF  
FFFFFFFFFFFFFFFFFFFFFFFFFFFFFFFFFFFFFFFFFFFFFFFFFFFFFFFFFFFF:FFFFFFFFFFFF  
FFF  
@A00721:190:HGJW7DSXY:4:1330:15609:22169\_2:N:0:TCTGCAAG+GCTGCACT  
ACGCCAGGAGTATCCATAACGATTTGTCAATTTACCACCTTTGCTCAACGACGAAGTGGAACGGCCAAC  
ACTTTCTTTGGTAATTGTATGATCACTTTGATGATTTTATCACTTTAT  
+  
FFFFFFFFFFFFFFFFFFFFFFFFFFFFFFFFFFFFFFFFFFFFFFFFFFFFFFFFFFFF:FFFFFFF  
FFFFFFFFFFFFFFFFFFFFFFFFFFFFFFFFFFFFFFFFFFFFFFFFFFFF  
@A00721:190:HGJW7DSXY:4:2406:19714:7326\_1:N:0:TCTGCAAG+GCTGCACT  
TTGTCGCTGGGGACGATTCCATTCTGTTTTCAAAGACTCCAATAACTGATCATTCTGATCATATGATT

TTGGACAATGGTTTTGAAGCGAAATTTTTGAGGGATAAACCAGCGTACTTCTGCTCGCGATTTATTCT  
TTT

+

:FFFFFFFFFFFFFFFFFFFFFFFF:FF:FFF:FFFFFFFF:FFFFFFFFFFFFFFFFFFFFFFFF  
FFFFFFFFFFFFFFFFFFFFFFFFFFFFFFFF:FFFFFFFFFFFFFFFFFFFFFFFFFFFFFFFF  
FFF

@A00721:190:HGJW7DSXY:4:2324:31684:2691\_2:N:0:TCTGCAAG+GCTGCACT  
CGTTAAGTTAGGTAAACCCCTAACCGATGTTACTCTTGTAGGACTTTGGGAGAGATTCGTTAGTTTAA  
AAGACTATACTAAATATCTCCACTACGAGGTTGTTGTTTGCGGATTAG

+

FFFFFFFFFFFFFFFFFFFFFFFFFFFFFFFF:FFFFFFFFFFFFFFFFFFFFFFFFFFFFFFFF  
FFFFFFFFFFFFFFFFFFFFFFFF:FF,FFF::F,F,FFFFFFFF::FFFFF,

@A00721:190:HGJW7DSXY:4:1224:11225:15045\_2:N:0:TCTGCAAG+GCTGCACT  
ATTCGATATTCGATTGAGGGTCGTTATACCTATTCGGCTAACTGTGCTATGAATTGTATAAGATCAAA  
TTTTAAACGAATCCGATAGGTTTATCCTTATGTGGAGGTAGTTCTTAA

+

FFF,,FFF:FFFFFFFFF,FFFF:FF:FF,:FFF,:FF,F:F,:FF,F,F,FF,,FFFF,F,,FFF  
F,F:FFF:,F,,:F,:,:,FFF,FF,FF,:F:,,:FFF,:,,F,FF,,

@A00721:190:HGJW7DSXY:4:2577:4191:32518\_1:N:0:TCTGCAAG+GCTGCACT  
AAGATTATCAGTAATCCTGATTCTACTACGGATTCATGGACCTCCATCCTGTACCTCTTCTGGAGAG  
ACGTATCTCAAAGATCGACTTCGAGACAGGTGATATTGTTGAGCGAGAGCGACCAAGATCTAAATTCG  
GTA

+

FFFFFFFFFFFFFFFFFFFFFFFFFFFFFFFFFFFFFFFFFFFFFFFFFFFFFFFFFFFFFFFF:FFFFFFFFF  
:FFFFFFFFFFFFFFFFFFFFFFFFFFFFFFFFFFFFFFFFFFFFFFFFFFFFFFFFFFFFFFFF  
FFF

@A00721:190:HGJW7DSXY:4:2550:32579:5149\_1:N:0:TCTGCAAG+GCTGCACT  
CCTCCTCTCGCAAGTTTGATCTGATACTTATCACGAAAGGACTTGAGTCTTTTGATCAGTCTCTGACT  
TGACCATCTTTCATTTTAAATGACGATCATTAAAGACTCTCTTCTTCTTTGTTTCCTTCTTTGCACTG  
ATT

+

FFFFFFFFF:FFFFFFFFFFFFFFFFFFFFFFFFFFFFFFFFFFFFFFFFFFFFFFFFFFFFFFFF:FFFFFFFFF  
FFFFFFFFF:FFFFFFFFFFFFFFFFFFFFFFFFFFFFFFFFFFFFFFFFFFFFFFFFFFFFFFFF:FFFFFFFFF  
FFF

@A00721:190:HGJW7DSXY:4:2656:15139:32722\_1:N:0:TCTGCAAG+GCTGCACT  
CTCTTCCGATCTCTAATCTGTGTTTTTACGATAACAACATCAGTTGATTAAGACTCTTCCGAAAGGC  
GAACCTTGGGAATTTGAAGCTCAGGGTGAAGCACACGTTTGACCGTGACGAACTGTGGTGTCTTGA  
TCT

+

FFFFFFFFFFFFFFFFFFFFFFFFFFFFFFFFFFFFFFFFFFFFFFFFFFFFFFFFFFFFFFFF  
FFFF:FFFFFFFFFFFFFFFFFFFFFFFFFFFFFFFFFFFFFFFFFFFFFFFFFFFFFFFF:FFFFFFFFF  
FFF

@A00721:190:HGJW7DSXY:4:2461:31403:8312\_1:N:0:TCTGCAAG+GCTGCACT  
CACTTATTACGATATTTCTTTAGTCGATGGGTTTTCGACGCCTTTAAGCGTCTTCTGTTTCATCGCAAC  
CAGATGATATCTTCTATTCGAACCTATGTTTCGATCAGTGTTTCTTCTATCAGGAGGAAAACACTTGT  
TCT

+

FFFFFFFFFFFFFFFFFFFFFFFFFFFFFFFF,FFFFFFFFFFFFFFFFFFFFFFFFFFFFFFFF:FF  
FFFFFFFFFFFFFFFFFFFFFFFFFFFFFFFFFFFFFFFFFFFFFFFFFFFFFFFFFFFFFFFF  
FFF

@A00721:190:HGJW7DSXY:4:1550:24216:3286\_1:N:0:TCTGCAAG+GCTGCACT  
TCTATTTTAAGTTTTGTCTTCCTTGTTTGCTTATTCTATTAATCACTCATTTTGTGAGATTATTAA  
AAACGCACTAAAACGTCTTCGACAACCGCAGGGGTTTTGAATAGTGATAGCCACCCGCTTACAGAG  
GGG



+  
F:F:FF:F::FFFFFF:,FF:F:FFFF,FFFFFFFFFFFF:FFFFFFFFFFFF,FFFFFFFFFFFF  
FFFF:,FFFFFFFFFFFF:FFFFFFFFFFFF,,F:FFF:FFFF:FFFFFFFFFFFFFFFFFF:FFFFFFFFF::FF  
:FF  
@A00721:190:HGJW7DSXY:4:2170:18638:1297\_1:N:0:TCTGCAAG+GCTGCACT  
CTTTGGTACCACCTTTTCTACTGTCTGTCTCGCCTCTTCGAATGAAGTTTAAATGCTTAACAACAATG  
ATAGTGAATTTATACCTACAATCATTGGTTTTTCTAATAATGATGACACTATTGTTTATGGATATGAT  
GCT  
+  
FFFFFFFFFFFFFFFFFFFFFFFFFFFFFFFFFFFFFFFFFFFFFFFFFFFFFFFFFFFFFFFFFFFFF::FFFFF  
FFFFFFFFFFFFFFFFFFFFFFFFFFFFFFFFFFFFFFFFFFFFFFFFFFFFFFFFFFFFFFFFFFFFFFFFF  
FFF  
@A00721:190:HGJW7DSXY:4:2318:19153:22294\_1:N:0:TCTGCAAG+GCTGCACT  
GAGGATTCTCAGTTTACAAGGACCTTAAGCGATGGATCGGGGTTAATTCTAAAACATTACCCGAAAGA  
CGTGCTAAATTAAAACCATTTGTACGATGTCTGTCTCGGCGATCACTTTTCTACTAAGAATTGGTCC  
TAC  
+  
FFFFFFFFFFFFFFFFFFFFFFFFFFFFFFFFFFFFFFFFFFFFFFFFFFFFFFFFFFFFFFFFFFFFF:FFFFFFFFFFFFFFFFFFFFF  
FFFFFFFFFFFFFFFFF:FFFFFFFFFFFFFFFFFFFFFFFFFFFFFFFFFFFFFFFFFFFFFFFFFFFFFFFFFFFFF  
FFF  
@A00721:190:HGJW7DSXY:4:2675:6822:25520\_1:N:0:TCTGCAAG+GCTGCACT  
AGACGTGTGCTCTTCCGATCTATCGTTTCTTTCTTTATCTCTTTGGTTGTTAGGGATTTTGAGAGAGT  
GAAAGGCTTCAATTGTAGTGGTTTGGTCGTTTCAGTACCCAGTCAGTATACCTCTACGCAAAGATATT  
TCA  
+  
FFFFFFFFFFFFFFFFFFFFFFFFFFFFFFFFFFFFFFFFFFFFFFFFFFFFFFFFFFFFFFFFFFFFF  
FFFFFFFFFFFFFFFFFFFFFFFFFFFFFFFFFFFFFFFFFFFFFFFFFFFFFFFFFFFFFFFFFFFFFFFFF  
FFF  
@A00721:190:HGJW7DSXY:4:1429:9236:8469\_1:N:0:TCTGCAAG+GCTGCACT  
TGTCTTTTCATATTATGAATGAACCTTCGCCGCTCTCTTTGCTTCGATGTTGGATGTCAAGAAGGGTT  
CAGAATGGGATTCTACGTAGTTTATGACTTTGGTGGTGGTACTTTCGATACTTCTATCGTCTTACGT  
TAC  
+  
FFFFFFFFFFFFFFFFFFFFFFFFFFFFFFFFFFFFFFFFFFFFFFFFFFFFFFFFFFFFFFFFFFFFF  
FFFFFFFFFFFFF:FFFFFFFFFFFFFFFFFFFFFFFFFFFFFFFFFFFFFFFFFFFFFFFFFFFFFFFFFFFFF  
FFF  
@A00721:190:HGJW7DSXY:4:1604:26476:36229\_2:N:0:TCTGCAAG+GCTGCACT  
AGTGTATTATTTATCTGGTGGTGGTATGATAATCTTGAGGTCGTGACGTTGATGAAGCTATAAGAGCGTT  
CTTATTACGGCGCACTTCTTTACCCGCCACCACACAACCTTTCAGTTTC  
+  
FFFFF:FFFFFFFFFFFFFFFFFFFFFFFFFFFFFFFFFFFFFFFFFFFFFFFFFFFFFFFFFFFFF:F:FF:FFFFFFFFFFFFF  
FFFFFFFFFFFFFFFFFFFFFFFFFFFF,FFFF:FFFFFFFFFFFFF:FFFFF:  
@A00721:190:HGJW7DSXY:4:2129:25066:29716\_1:N:0:TCTGCAAG+GCTGCACT  
ACTGGAAAACCCTCGTCAATACTTTTCAATAATATACGTCTTGAACCTCACTTATGACGATCTAGTGAA  
ATTAACGCGTCCTTTTCTGGAACGTAGTTTACTATTATGAACAAAGTTATCAAAGATAGTGGCATTCAAG  
AAG  
+  
FFFF:FFFFFFFFFFFFFFFFFFFFFFFFFFFFFFFFFFFFFFFFFFFFFFFFFFFFFFFFFFFFFFFFF  
FFFFFFFFFFFFFFFFFFFFFFFFFFFFFFFFFFFFFFFFFFFFFFFFFFFFFFFFFFFFFFFFFFFFFFFFF  
FFF  
@A00721:190:HGJW7DSXY:4:1649:10276:18286\_1:N:0:TCTGCAAG+GCTGCACT  
CTGATTCCGGGCGGTGGTAGCTCATTTCTACCTGGGGCTATTACTCTTGCTGAAACAGCTATTTAAGC  
TGTTGAGCGGGTAATTACACCTAAACGAGCTAGATCTGCCATCGCTGAAGGATGTGCACTCTTTTCTG  
C

+  
:FF,,F,F::,,F,,F:,F:,F:FFFFFF:,F,,FFFFFF:FFFF,FF,F:F::F,F,,F,FF,,:FF  
F:F:F:,:,FFFF,FFFF,F,:FF,FF,:,:F,FFF,,,F,,F,,,FF,,FF,F:::,FFFFFF,FFF,

,  
@A00721:190:HGJW7DSXY:4:2375:31882:7388\_2:N:0:TCTGCAAG+GCTGCACT  
TCGATTGTATCAACAGTAACATTACTTCTAATAAAGGTCTCTATCAAGCTCGTATTATCGTCGCTGCT  
GGATCTGCGTTACCGTTGAAGGCTAAACTCCAAGGTAATTATGAAGAC

+  
FFFFFFFFFFFFFFFFFFFFFFFFFFFFFFFFFFFFFFFFFFFFFFFFFFFFFFFFFFFFFFFFFFFFFFFF  
FFFFFFFFF:FFFFFFFF,FFFFFF:FFFFFFFFFFFFFFFF,FFFF

@A00721:190:HGJW7DSXY:4:1604:9444:36605\_1:N:0:TCTGCAAG+GCTGCACT  
ACGTGTGCTCTTCCGATCTATAATTTCAATCTTCTTAAAAAGAAGATAGAGAGTCATACTTTGGGCTA  
TCGTTCAAGTGCATGGGGTTGGATAGCCAATATTGAAGTGGACACCTCTGGTAGTATCGAAGTAAAGA  
TAA

+  
F:FFFFFFFF:FF,FFFF,FFFF,FFFFFF:F:FF:FFFFFF,FFFF:FFFFFFFF,FFFFFFFF:FF:FF  
FFFFFFFF:FFF,F,FFFFFFFFFFFFFFFF:FFFFFFFFFFFFFFFF:FFFFFFFFFFFFFFFF:F:FF  
FFF

@A00721:190:HGJW7DSXY:4:1401:20654:28150\_1:N:0:TCTGCAAG+GCTGCACT  
CTCTACCGCCTTACAAGTCTAAGGTTAAAGAGTCGATTAAACAAGTTGTACTTATCAATGATTTTATC  
GCTGGTTGTTATCTCGAAAAGTCTCTTCTAAAAGGAACGTCAGTTCTAACCCAAAGAGAATATCTAAA  
ATA

+  
FFFFFFFFFFFFFFFFFFFFFFFFFFFFFFFFFFFFFFFFFFFFFFFFFFFFFFFFFFFFFFFFFFFFFFFF  
FFFFFFFFFFFFFFFFFFFFFFFFFFFFFFFF:FFFFFFFFFFFFFFFFFFFFFFFFFFFFFFFFFFFFFFFF  
FFF

@A00721:190:HGJW7DSXY:4:1610:19831:27853\_2:N:0:TCTGCAAG+GCTGCACT  
AGACGTTGCTTGTGCTTCCTCTTTAATGGCACTACCTCGGTACAATCTTACTTGAACGAAGGCGA  
CCTGTTCCGGAGTTTTTACGGGATCCGGAATGTTCTGTCTATATTAGG

+  
FFFFFFFFFFFFFFFFFFFFFFFFFFFFFFFFFFFFFFFFFFFFFFFFFFFFFFFFFFFFFFFFFFFFFFFF  
FFFFFFFFFFFFFFFFFFFF:FFFF,FFFFFFFFFFFFFFFF:F,FFFF

@A00721:190:HGJW7DSXY:4:2444:23610:11945\_2:N:0:TCTGCAAG+GCTGCACT  
TCGAACGTCAACGTTACCGAGTTTCGTTTCGTACCTTGATGCTGACTTTCGTCAATATGATTTGATC  
TGTTGCTCAATTCTAAGCGTGTTCGCTTAGTGCGAGGCCTCTCTTC

+  
FFFFFFFFFFFFFFFFFFFFFFFFFFFFFFFFFFFFFFFFFFFFFFFFFFFFFFFFFFFFFFFFFFFFFFFF  
FFFFFFFFFFFFFFFFFFFF,FFFF:FFF:FFFFFFFFFFFFFFFF

@A00721:190:HGJW7DSXY:4:1126:29243:7326\_2:N:0:TCTGCAAG+GCTGCACT  
TATTTGGATGATCTTGATAAAGAACTTCATGAATTTTACAGAGGATGAAAAATTTCTTCTTGATTT  
TAATATAAAGAATCTTTACCAGGACTCCTACTACAGGAGGCAGTCTTC

+  
FFFFFFFFFFFFFFFFFFFFFFFFFFFFFFFFFFFFFFFFFFFFFFFFFFFFFFFFFFFFFFFFFFFFFFFF  
FF:FFFFFFFFFFFFFFFF:FFFFFFFFFFFFFFFFFFFFFFFF

@A00721:190:HGJW7DSXY:4:1170:16016:36307\_1:N:0:TCTGCAAG+GCTGCACT  
GAAACTCTAAGTGGTAATACTGTCTTTCCAAGCTTACCTGTATCTTCAATGAAATTGGACTCTTCGAT  
AGGGGACATTTTATCGTGGGCTTCCGTAAAGGAAGATCTGTTATCGACGTTTATCGTTTACGAAGT  
ATC

+  
FFFFFFFF:FFFFFFFFFFFFFFFFFFFFFFFFFFFFFFFFFFFFFFFFFFFFFFFFFFFFFFFFFFFF  
FFFFFFFFFFFFFFFFFFFFFFFFFFFFFFFFFFFFFFFFFFFFFFFFFFFFFFFFFFFFFFFFFFFFFFFF  
FFF

@A00721:190:HGJW7DSXY:4:1136:30156:32362\_1:N:0:TCTGCAAG+GCTGCACT  
TTGGCCTAGTGGATGTTATTAGTGACATCTGGTCAATTTTCGTTTTTAGGTGGTCTTTATTCTATTATT

GATTTTTATGAGATTGATACGTTAACAGAAGATGATGTTAGAGTAGAATTCCTGAAGAGTCCTTCCGT  
AAC

+

FFFFFFFFFFFFFFFFFFFFFFFFFFFFFFFFFFFFFFFFFFFFFFFFFFFFFFFFFFFFFFFFFFFFFFFF:F:FF  
FFFFFFFF:FFFFFFFFFFFFFFFFFFFFFFFFFFFFFFFFFFFFFFFFFFFFFFFF:FFFFFFFF:FFFFFFFFFFFF  
FFF

@A00721:190:HGJW7DSXY:4:2371:21097:7091\_2:N:0:TCTGCAAG+GCTGCACT  
AGGATTATGTCTGTGTTGAAAGACTTTCTACCGATAAGGGTCACTAGTCTTACACAATTAAGAAATAA  
TCCTACATTGACTGATTATCTAAAGATTGAAGGAAAATTTATCCTCG

+

FFFFFFFFFFFFFFFFFFFFFFFFFFFFFFFFFFFFFFFFFFFFFFFFFFFFFFFFFFFFFFFFFFFFFFFF:FF  
FFFFF,FFF:FFFFFFFF:FFFFFFFFFFFFFFFFFFFFFFFFFFFFFFFFFFFFFFFF

@A00721:190:HGJW7DSXY:4:1457:15845:29027\_1:N:0:TCTGCAAG+GCTGCACT  
AAGACGGCATACGAGATCTTGAGAGTGAAGGAGTTGAGACGTGTGCTCTCCGATCTCTCAGCAA  
GGGATGCATGGTGTATCTCCTCAGGAGTCCCGGCATTTGATAATAATGACGAGACTTTCGTCATAAT  
CGC

+

FFF:FFFFFFFF:,FFFFFFFFFFFFFFFFFFFFFFFFFFFFFFFFFFFFFFFFFFFFFFFFFFFFFFFF:FFFFF  
FFFFFFFFFFFFFFFFFFFFFFFFFFFFFFFFFFFFFFFFFFFFFFFFFFFFFFFF:FFFFFFFFFFFFFFFFFFFF  
FFF

@A00721:190:HGJW7DSXY:4:1314:6207:14904\_2:N:0:TCTGCAAG+GCTGCACT  
GTACCAGCGCATCTCGTGTGAGCCTCGACCCGATTATATGGTATTAAGGTGAGGAGACC  
ATTTTCTTGCTGAAATTTATAGAAGATTATTTTGACAGAATCAATAAG

+

FFFFFFFFFFFFFFFFFFFFFFFFFFFFFFFFFFFFFFFFFFFFFFFFFFFFFFFFFFFFFFFFFFFFFFFF:FFFFF  
FFFFF:FFFFFFFFFFFFFFFFFFFFFFFFFFFFFFFFFFFFFFFFFFFFFFFFFFFFFFFF

@A00721:190:HGJW7DSXY:4:2345:6017:29293\_1:N:0:TCTGCAAG+GCTGCACT  
TTCTTAATTATAATATTCAACCTCAAAAGTTACGTGTTTACAGTAACGAGATCACACATTTTGAGAAC  
TAATATGTTATGTTCTCTGATCATTTTGACAATCTCTTATAATAATAATAATAATAATATTACT  
AAT

+

FFFFFFFFFFFFFFFFFFFFFFFFFFFFFFFFFFFFFFFFFFFFFFFFFFFFFFFFFFFFFFFFFFFFFFFF:FFFF  
FFFF:FFFFFFFF:FFFF:FFFFFFFF:FFFFFFFFFFFFFFFFFFFFFFFFFFFFFFFFFFFFFFFFFFFF  
:FF

@A00721:190:HGJW7DSXY:4:1175:32805:31062\_1:N:0:TCTGCAAG+GCTGCACT  
CTCCAGTCAACACTAGTTCGAGTGTGCTTTGGATTACGATGACGTGAGAATAGGTGAAGGGATAGTT  
TTTACCTCGACCAACATTAAGGCGGCGGCGACTAATCTTAAAGCTTACCCAAAATGAAGGACACTTC  
GAA

+

FFFFF:FFF:FFFFFFFFFFFF,FFFFFFFFFFFFFFFF:FFFFF:FFFFFFFFFFFFFFFFFFFFFFFF  
F:F,FFFFFFFFFFFFFFFFFFFFFFFFFFFFFFFFFFFFFFFF:FFFFFFFFFFFFFFFFFFFFFFFF:FFFFF  
FFF

@A00721:190:HGJW7DSXY:4:2137:32398:4492\_1:N:0:TCTGCAAG+GCTGCACT  
TCCAGACGACGACGAAGCTTATACTACTTTAATTTTGGGTATTATGTGGAGATATCGTGATATCAGTA  
CGTCCAGATCCTCTGCTTTTACCGATAACGATAAATTCGTCATCAAATATAAAGAAAAGGACTATGAA  
ATA

+

FFFFFFFFFFFF,FFFFFFFFFFFFFF:FF,FFFFFFFF:FFFFFFFFFFFFFFFF:FFFFFFFFFFFF  
FFFFFFFFFFFF:FFFFFFFFFFFFFFFF:FFFFFFFFFFFFFFFFFFFFFFFFFFFFFFFFFFFFFFFFFFFF  
FFF

@A00721:190:HGJW7DSXY:4:1512:16875:5415\_1:N:0:TCTGCAAG+GCTGCACT  
GTCAATCCGTTGAGAAAATTTCTTAGAGGATATTCGCCATTGTGGTACGAATTGGTCCAACATTTACC  
ACCAAATCTTTTGATACAACCTCTAGCCTTCAAGTGGGGTATGCCTGCGGAATACGCTTGCTATTAC  
CAG

+  
FFFFFFFFFFFFFFFFFFFFFFFFFFFFFFFFFFFFFFFFFFFFFFFFFFFFFFFFFFFFFFFFFFFFFFFF  
FFFFFFFFF,FFFFFFFFFFFFFFFFFFFFFFFFFFFFFFFFFFFFFFFFFFFFFFFFFFFFFFFFFFFF  
FFF  
@A00721:190:HGJW7DSXY:4:1177:29306:5462\_1:N:0:TCTGCAAG+GCTGCACT  
CCCGTTGATGCTATGTCAGAAGAAGCTATTCAAGCTTGTCTTTAAAGACTGCAGAGGCTGTCAAACA  
AGCCCAGACTCAAGGAGTCCAATCAAAGGTTTTGAATTTAGCTCAACTGGGGAGACGTGCTTAAATGG  
GTG  
+  
FF::F:F::,F:,FF:, :FF,FFF:F,FFF:F:F,FFF:FFFFFF:F,FFFF,F:,FFFFFFFFFFFF,  
F:FFF,FF:FFFF:FF,FFFFFFFFF:FFFFFFFFFFFFFFFFFFFFFFFFFFFFFFFFFFFFFFFF  
FFF  
@A00721:190:HGJW7DSXY:4:2328:13702:21120\_1:N:0:TCTGCAAG+GCTGCACT  
TACTTACAAAGGACAATTCAGTTTCATTAATTCTACGAAAAGTCCGGAGTATATTGTATGTTAATAG  
ATAGTGGGATAATAGTTCTACCGATACGTAGTGAACGCGTTCGTAGAACCAAGTACTTTCGCTCTGAA  
GAG  
+  
FFFFFFFFFFF:FFFFFF:FFFFFFFFFFFFFFFFFFFFFFFFFFFFFFFFFFFFFFFFFFFFFFFFFFFF:FFFFFF  
FFFFFFFFFFFFFFFFFFFFFFFFFFFFFFFFFFFFFFFFFFFFFFFFFFFFFFFFFFFFFFFFFFFFFFFF  
FFF  
@A00721:190:HGJW7DSXY:4:1303:7247:15577\_1:N:0:TCTGCAAG+GCTGCACT  
CGATAGGAGTTTTATAGTTGAAGATGTGGATTTAGACGATAATCCTTTAAGGACTATGTTGACTGACG  
AAGATTTTCCACAGATTTGTCTACGTTGCAGTTCGCCACTCCAAACACTATATACATTATAAAATAT  
A  
+  
F,FFFFFFFFF,FFFFFFF,FF:,F:F:, ,FFFF,FF:,FFFF:,FFFFFF, :FFFF,FF,F,F:FFF  
FFFFFFFF::, : ,FFF:FFFFFFFFF,FF,FFF,FF:F:FFF:FFFFFFFFF,FFFFFFFFF,F::FFFF  
F  
@A00721:190:HGJW7DSXY:4:1343:11360:1031\_1:N:0:TCTGCAAG+GCTGCACT  
ACTTTTGTACCAAATTCCTGGCTTTCAACGAAGTCTCTGATTTTATTAATCATTACTTTAACGATCT  
CTCGGTCATTTACTCTGTACTTGATCTACGTCGTTTAACTGTGGAACAACCTTTACTTAGAATGACT  
CTA  
+  
FFFFFFFFFFFFFFFFFFFFFFFFFFFFFFFFFFFFFFFFFFFFFFFFFFFFFFFFFFFFFFFFFFFFFFFF  
FFFFFFFFFFFFFFFFFFFFFFFFFFFFFFFFFFFFFFFFFFFFFFFFFFFFFFFFFFFFFFFFFFFFFFFF  
FFF  
@A00721:190:HGJW7DSXY:4:2424:29821:22200\_2:N:0:TCTGCAAG+GCTGCACT  
AGTTAATATCATATTAGTAATACTCACTATCGTTTTCTGCTTTTTCTTAGCTAATAGATTAATAAAG  
ATGAGTACGAAAACCAACTCTTCGTTACGAGACCTGATGGTAGAATAG  
+  
FFFFFFFFFFFFFFFFFFFFFFFFFFFFFFFFFFFFFFFFFFFFFFFFFFFFFFFFFFFFFFFF:FFF,FFFFFFFFFFFFFFFF  
FFFFFFFFFFFFFFFFFFFFFFFFFFFFFFFFFFFFFFFFFFFFFFFFFFFFFFFFFFFFFFFF  
@A00721:190:HGJW7DSXY:4:1345:18738:31125\_1:N:0:TCTGCAAG+GCTGCACT  
ACACCCATCTCAACGCGTAAAAAGCTATTTTTCCGTCCTGACCTTAATACACTAATAGAACATCCGCA  
AACGACTCGAAACCGAGACGCCGTAGATCAAAGTCCCTTCTAACTTTAGATTATGAATCCTGCCTTTA  
CTC  
+  
F,FFFFF::,F,F,,,F,FF,,::,FFF:F::,F,F,F::,F:::F:,FF,,,F,,,F:::F  
,,FFFFFFFF:F:FFFFFFFFF:FFFFFFFFFFFFFFFFFFFFFFFFFFFFFFFFFFFFFFFFFFFF  
FFF  
@A00721:190:HGJW7DSXY:4:2210:3170:17503\_2:N:0:TCTGCAAG+GCTGCACT  
ATAACCTTCTTATACTTTTGGGTATGTTTTGTGAAAAACATGAGATACCCAAGTCTATCGAAGACATT  
ATCTCTTATGTACTTATTGTAACGATCATTCTTTGAGTTTTGTCATT  
+



+

@A00721:190:HGJW7DSXY:4:2103:7527:35571\_2:N:0:TCTGCAAG+GCTGCACT  
TCTGCACAGAAGAAGGCTGAAGGTCGTTACCGGACGACCACTCAAAGGAAACGGGCTGTTGCCCAGAG  
GAAAGCAGCGACCACCGAGGTCGCTCGTAACATTGACGGCAGTCCCGT

+

@A00721:190:HGJW7DSXY:4:1673:5701:14873\_1:N:0:TCTGCAAG+GCTGCACT  
AACTGAGGCAGTACCTCAGTCAAAAGTCACATTCACCACTCCCATACCAATCAATGATGTGACTATAC  
AGTTCGGCCATTTCAAGAGTGGTCAATACGTCGTGGGAGGTACTGAAGCCTTCCCCTCCGCTGGCACG  
AAG

+

@A00721:190:HGJW7DSXY:4:2204:32768:15843\_2:N:0:TCTGCAAG+GCTGCACT  
GCCAATCAATAGTTCTTCTGACCAGAATGAAAAGGGGTTTACCAGGGTAGTCTCTAAGTCTACCAGGA  
AGAGGGGAAATGTCCCCAAACTGAGAAGAATAAAGGGAAAGGTCCAT

+

@A00721:190:HGJW7DSXY:4:2603:23601:31469\_2:N:0:TCTGCAAG+GCTGCACT  
CCTAATTCTGAAGGAAGATCTCCACCATCTGGGGTTGGGAATAAGAAATCTGCACGGGCCAAAGAGG  
CCGCTGCTACGAAGTCGCTGAAGGCGGCTTGGGTCATTAAGGGTAGCT

+

@A00721:190:HGJW7DSXY:4:1426:8522:10520\_1:N:0:TCTGCAAG+GCTGCACT  
CCGACCCCATCTTTGAGACCAAGACTCTCTACAGTAGGTTCTGTCCTACTATGAGCAAATCTGTTGAA  
TTCGTCACTGAGGACGAAGGTGAGAGGACTTTTGCTACTGGCGACAACTGAGAGCAGTCGCTGGGG  
AAA

+

@A00721:190:HGJW7DSXY:4:2277:32479:12649\_1:N:0:TCTGCAAG+GCTGCACT  
CTTGAGTGTGACGAGGCCGGTGACGTTTTTGTCAACGGCGTTTGGAGGATTTTATCCGCGCTTAACCTA  
TGGGGCGAAGATCCCCTATGGAGTCTTGAAGGACTTAGGTTGGCATATTTATGCCGACGATAATAAGC  
ATG

+

@A00721:190:HGJW7DSXY:4:2642:10158:32675\_2:N:0:TCTGCAAG+GCTGCACT  
CGGGACTTACAAGAGAGAGTGTGAGAGAGTCGCTCTCACTATTTTTGCCAGAATGCGGGCTTTCTGA  
CTGATGAGGTTAAAACTCTTGCTCCTTCTGTGGGTGAGGGTTTTTGT

+

@A00721:190:HGJW7DSXY:4:1428:19687:29857\_1:N:0:TCTGCAAG+GCTGCACT  
CAACCTCTCTTTAGAGAGCATTAGAAGGAAGTTGGGCAAATCCCACATATGGTAGACGTTGTACAC



FFFFFFFFFFFFFFFFFFFFFFFFFFFFFFFFFFFFFFFFFFFFFFFFFFFFFFFFFFFFFFFFFFFFFFFF  
FFF

@A00721:190:HGJW7DSXY:4:1268:24840:13698\_2:N:0:TCTGCAAG+GCTGCACT  
TGATTGGAACGTACCTACTCACGAGACGTCATGAAAGCTATCGGAGGGAAGCAAATGTTTCGTTCT  
GTTACAAGAACGCTTTGGATTGTGACCATAAAGCCTCAGTTGCGATAG

+  
FFFFFFFFFFFFFFFFFFFFFFFFFFFFFFFFFFFFFFFFFFFFFFFFFFFFFFFFFFFFFFFFFFFFFFFF:  
FFFFFFFFFFFFFFFFFFFFFFFFFFFFFFFFFFFFFFFFFFFFFFFFFFFFFFFFFFFFFFFFFFFFFFFF

@A00721:190:HGJW7DSXY:4:2631:8359:34538\_1:N:0:TCTGCAAG+GCTGCACT  
CTCTCTTGATGATGTAGCCACTATAATGCTTAAGAGAGAGATTGATGTATGTCATTTTCGTCTTAGTTT  
GTCCCGGCGAATTATTGGACACGATGAAAAATGACATACCCGTTCTGACCTTGGTATCGTTATCCGT  
CAT

+  
FFFFFFFFFFFFFFFFFFFFFFFFFFFFFFFFFFFFFFFFFFFFFFFFFFFFFFFFFFFFFFFFFFFFFFFF  
FFFFFFFFFFFFFFFFFFFFFFFFFFFFFFFFFFFFFFFFFFFFFFFFFFFFFFFFFFFFFFFFFFFFFFFF  
FFF

@A00721:190:HGJW7DSXY:4:1304:16188:18223\_2:N:0:TCTGCAAG+GCTGCACT  
AAAGATAAGATTTTATCTTTCTTCAAACACCCTGTTTTCTTAAGGGCGGACAATTGTTCCATTGTGA  
ACTCTTGGGGACTAGATTGAGCATTAATGAGTTCCGAATAACTCGTAA

+  
FFFFFFFFFFFFFFFFFFFFFFFFFFFFFFFFFFFFFFFFFFFFFFFFFFFFFFFFFFFFFFFFFFFFFFFF  
FFFFFFFFFFFFFFFFFFFFFFFFFFFFFFFFFFFFFFFFFFFFFFFFFFFFFFFFFFFFFFFFFFFFFFFF  
FFF

@A00721:190:HGJW7DSXY:4:1507:14163:25645\_2:N:0:TCTGCAAG+GCTGCACT  
TATTTCCGTACCAAGAGCCACTGCCAATCTCATCGCTATACGCATACCTGATTGGAAGAAGCGAGGTT  
CGTTCTCAATAAAAATTTTCTCAAGAGATTATGGTTGATAAAGTTT

+  
FFFFFFFFFFFFFFFFFFFFFFFFFFFFFFFFFFFFFFFFFFFFFFFFFFFFFFFFFFFFFFFFFFFFFFFF  
FFFFFFFFFFFFFFFFFFFFFFFFFFFFFFFFFFFFFFFFFFFFFFFFFFFFFFFFFFFFFFFFFFFFFFFF

@A00721:190:HGJW7DSXY:4:2508:23204:18349\_1:N:0:TCTGCAAG+GCTGCACT  
TACGTCATGGGGATCACTTCTCGGTCAATGACAAAACCTTCGAATATGTTACGACATGGCTTCGTAA  
CAACAGTGCGAGGATTGTCATCTCGGGGAAAGTGATTACCAAGATGTTCATATAGATACGAGATACC  
TAG

+  
FFFFFFFFFFFF:FFFFFFFFFFFFFFFFFFFFFFFFFFFFFFFFFFFFFFFFFFFFFFFFFFFF,FFF:FFFFFFFFFFFFFFFFFFFF  
FFFFFFFFFFFFFFFFFFFF:FFFFFFFFFFFFFFFFFFFFFFFFFFFF:FFFFFFFFFFFFFFFFFFFFFFFFFFFFFFFFFFFFFFFFFFFF  
FFF

@A00721:190:HGJW7DSXY:4:2259:10682:22122\_2:N:0:TCTGCAAG+GCTGCACT  
AGCGATCTTACTCGTTATCGGAGCTAAGAAGAAGACTTTGGGTACACGTTATGCTCGCAAACCTTAACG  
TTAGTACCGGAGGTGATCTCTGCTTCTGCGTTACTGAGAGAAAAGA

+  
FFFFFFFFFFFFFFFFFFFFFFFFFFFFFFFFFFFFFFFFFFFFFFFFFFFF:F,FFFFFFFFFFFFFFFFFFFF:FFFFFFFFFFFF  
FFFFFFFFFFFFFFFFFFFFFFFFFFFFFFFFFFFFFFFFFFFFFFFFFFFF,FFFFFFFFFFFF

@A00721:190:HGJW7DSXY:4:1607:11360:9549\_1:N:0:TCTGCAAG+GCTGCACT  
CTTTATGGACAAGATGCAAGTTCTTGGGAAATACTTGTTTCCCTTTTtaggTTtagTAGGTGATCTTG  
ACGTCGATTCTTTGTATAGGGAGTGTGAGAAGACAACGAATCTTGAAACTACGGTCCTTATCAAAGAA  
AAT

+  
FFFF:FFFFF:FFFFFFFFFFFF,FFFFFFFFFFFFFFFFFFFF:FFFFFFFFFFFF:FFFFF:FFFFFFFFFFFF  
FFFFFFFFFFFFFFFFFFFFFFFFFFFFFFFFFFFFFFFFFFFFFFFFFFFFFFFFFFFFFFFFFFFFFFFFFFFF  
FFF

@A00721:190:HGJW7DSXY:4:1413:21323:20666\_2:N:0:TCTGCAAG+GCTGCACT  
AAATCTTTTGAGATTGAGAAGATTGAAGAACACGTCAAGAAGTCGCTCGGCGTTGTTCTTGAAAACCA  
AGTTAAGAAGGAGGCTGATCATGGAGTCTTTGTACCTTCTGTCAAAC

+



FFFFFFFFFFFFFFFF:FF:FFF:FF:FFFFFFFFFFFFFFFFFFFFFFFFFFFFFFFF  
FFFFFFFFFFFF:FFFFFFFFFFFFFFFFFFFFFFFFFFFFFFFFFFFF  
@A00721:190:HGJW7DSXY:4:1557:6894:7827\_1:N:0:TCTGCAAG+GCTGCACT  
TCCCGGATGTGGATTGAAGGCTGGCTCTAAGGGAGACTCCTTCTTTTGAATGTTGTAAAGAATTGGG  
TTGAGAAGTGTGCTTTACAAGGAGTTAGACTCTTCTTCAAGTTTTTAGATCTTCTTGATAATCTTAA  
GAA  
+  
FFFFFFFFFFFFFFFFFFFFFFFF:FFFFFFFFFFFFFFFFFFFFFFFF:FFFFFFFFFFFF  
FFFFFFFFFFFFFFFFFFFFFFFFFFFFFFFFFFFFFFFFFFFFFFFFFFFFFFFFFFFF  
FFF  
@A00721:190:HGJW7DSXY:4:2615:26241:5290\_2:N:0:TCTGCAAG+GCTGCACT  
CGAGAATTATTACTGTTTTCTCTACCCATAACTTCTTTTTCAAAAATGCGGATGGGTCTACTGATGTT  
TTCCTACAGAGTGCAGTCGTTTCAACACTTATCACCCTTTTGAAGG  
+  
FFFFFFFFFFFFFFFFFFFFFFFFFFFFFFFFFFFFFFFFFFFFFFFFFFFFFFFFFFFF  
FFFFFF:FFFFFFFFFFFFFF,FF,F,,FFF,FFFF,FFF,:FF,F  
@A00721:190:HGJW7DSXY:4:2427:4598:11240\_2:N:0:TCTGCAAG+GCTGCACT  
GGGTTCTCAAGGCTCTCATCGCCACTGGGATTCTAAGGGGTTCCATAAGATATTATCTGACATTGTGG  
TTCAATGATCAGGATTCTTCTTTGGTCTTACGTCTTAAGTAATTTG  
+  
FFFFFFFFFFFFFFFFFFFFFFFFFFFFFFFFFFFFFFFFFFFFFFFFFFFFFFFFFFFF  
:FFFFFFFFFFFFFFFFFFFFFFFF:FFFFFFFFFFFFFFFFFFFFFFFF  
@A00721:190:HGJW7DSXY:4:2136:17598:12023\_2:N:0:TCTGCAAG+GCTGCACT  
ACGATTCTTAAAAGAAGTTTATTA AAACTTCAGAGTCTCTTGGAAGTCCAGGTAGCTAATGTTCTTGC  
AATAGCCACAGACTTTCTGGGAAAAGAGACCTCTGTTGGTAGAGGAGT  
+  
FFFFFFFFFFFFFFFF:FFFFFFFFFFFFFFFFFFFFFFFFFFFFFFFF:FFFFFFFFFFFF:FFFFFFFF  
FFFFFFFFFFFFFFFFFFFFFFFFFFFFFFFFFFFFFFFFFFFFFFFFFFFF:FFFF  
@A00721:190:HGJW7DSXY:4:1358:24099:2331\_2:N:0:TCTGCAAG+GCTGCACT  
ACTCAGATTCAATCTGGCATCACTGAACGTCTACAACGAGTTAGGGAGTGGCTAGGTTTTAAAGATC  
CTTTGCACAAGCAATACCTTCCACTGAGTTCATCACCCAGAGTTTCGA  
+  
FFFFFFFFFFFFFFFFFFFFFFFFFFFFFFFFFFFFFFFFFFFFFFFFFFFFFFFFFFFF  
FFFFFFFFFFFFFFFFFFFFFFFFFFFFFFFFFFFFFFFFFFFFFFFFFFFF  
@A00721:190:HGJW7DSXY:4:2475:5945:36714\_1:N:0:TCTGCAAG+GCTGCACT  
CTTCTGATGCTGAATTTGAGGAAAATTTTTCGGAAGTTTTTGGTATAAATCCTGATGGCTCAGTACAG  
GGAGGAGGTAATAGTTATAAAACCTTCTTTTATCATTGCAACAGGACTTTGAGAAGACTGTTGAAATG  
GAC  
+  
:FFFFFFFF:FFFFFFFFFFFF:FFFFFFFFFFFF:FFFFFFFFFFFFFFFFFFFFFFFFFFFFFFFFFFFF  
FFFFFFFFFFFFFFFFFFFFFFFFFFFFFFFFFFFFFFFFFFFFFFFFFFFFFFFFFFFF  
FFF  
@A00721:190:HGJW7DSXY:4:2401:20980:25050\_2:N:0:TCTGCAAG+GCTGCACT  
TCATAGGTATGTGTACGCTACACTCGAAATATGGGCCCTCATAAGGAAGTATAGTTGGCGTCTTGTC  
GTTGACGTCATTACAGTCTGGAAGTTAGATCATTTGTTTCAGGAAGATC  
+  
FFFFFFFFFFFFFFFFFFFFFFFFFFFFFFFFFFFFFFFFFFFFFFFFFFFFFFFFFFFF  
FFFFFFFFFFFFFFFFFFFFFFFFFFFFFFFFFFFFFFFFFFFFFFFFFFFF:  
@A00721:190:HGJW7DSXY:4:1501:1380:10363\_1:N:0:TCTGCAAG+GCTGCACT  
TTAGATAAATTCTTTCCGGGCTCAATGACCTTTGCTATGTACGTGGATCTAATGCTTGGTGATCTGAA  
TCTGACCATCGCAAAGAAGACTTTATTAGTTCATGAAGTTCTTACACTTCTCGGACTAATGTCAGCT  
TCA  
+  
FFFFFFFFFFFFFF,FFFFFFFF:FFFFFF:FFFFFFFFFFFFFFFF:FFFFFFFFFFFFFFFFFFFF



```
F:FFFFFFFFFFFFFFFFFFFFFFFFFFFFFFFF,FFFFFFFF,FFFFFFFFFFFFFFFF,FFFFFFFFF:FFF
FFFF:FFF:,FFFFFFFFF:FFF:FFFFFFFFFFFFFFFFFFFFFFFF,::FFFFFFFF:FFFFFFFFFFFFFFF
FF
```

[illegible][illegible][illegible]

```
FFFFFFFFFFFFFFFFFFFFFFFFFFFFFFFFFFFFFFFFFFFFFFFFFFFFFFFFFFFFFFFFFFFFFFFFF  
FFFFFFFFFFFFFFFFFFFFFFFFFFFFFFFFFFFF;FFFFFFFFFFFFFFFFFFFFFF
```

```

FFFFFFFFFFFFFFFF,FFFFFFFFFFFFFFFF:FFFF:F:FFFFFFFFFFFFFF,FFFF
FFFF,FF:FFFFFFFFFFFFFFFF:FFFFFFFFFFFFFFFF

```

```

FFFFFFFFFFFFFFFFFFFFFFFFFFFFFFFFFFFFFFFFFFFFFFFFFFFFFFFFFFFFFFFFFFFFFFFF:FFFFF
F:FFFFFFFFFFFFFFFFFFFF:FFFFFFFFF:FFFFFFFFFFFFFFFFFFFFFFFFFFFF

```

[illegible]

@A00721:190:HGJW7DSXY:4:1534:17300:2394\_2:N:0:TCTGCAAG+GCTGCACT  
ACGACACGTTGAATCTTTACGATACTTTGTTATCAATGTAAAGTTAAACGATGCTACTTGTGAGAGGA  
TCAATCACAGTAAGGAAGTGTACGTTTAGCACGGGAGGTTGCAGATT

+

FFFFFFFFFFFFFF:FFFFFFFFFFFFFF:FFFFFFFFFFFFFF:FFFFFFFFFFFFFF:FFFFFFFFFFFFFF  
FFFFFFFFFFFFFF:FFFFFFFFFFFFFF:FFFFFFFFFFFFFF:FFFFFFFFFFFFFF

@A00721:190:HGJW7DSXY:4:1508:31295:4272\_2:N:0:TCTGCAAG+GCTGCACT  
CTATCGAGGACGATGAGTATCTTGAAGTTGTTGACGACAAGCCTCAAGAGGGTAGAGGACCACCTGGA  
TCTTCTACTGTCTCTGCCTTCCAAGATTTCTTAGAAGAGGTTATTCT

+

FFFFFFFFFFFFFF:FFFFFFFFFFFFFF:FFFFFFFFFFFFFF:FFFFFFFFFFFFFF:FFFFFFFFFFFFFF  
FFFFFFFFFFFFFF:FFFFFFFFFFFFFF:FFFFFFFFFFFFFF:FFFFFFFFFFFFFF

@A00721:190:HGJW7DSXY:4:1646:24189:18584\_1:N:0:TCTGCAAG+GCTGCACT  
GTCACTCGGTAATCTTTCAGCCGAATTAAGTACTAATGAGTTCAAGTCGGTTGTCGATCGAATTAAGA  
TCAAGGCTAATACCTTTATAGGTAAGAAGCCCCTTGAGCCGCGTAGTCAGCGCGTTTAGCTGTATCAT  
CAG

+

FFFFFFFFFFFFFF:FFFFFFFFFFFFFF:FFFFFFFFFFFFFF:FFFFFFFFFFFFFF:FFFFFFFFFFFFFF  
FF:FFFF:FFFFFFFFFFFFFF:FFFFFFFFFFFFFF:FFFFFFFFFFFFFF:FFFFFFFFFFFFFF  
FFF

@A00721:190:HGJW7DSXY:4:2245:25373:3035\_1:N:0:TCTGCAAG+GCTGCACT  
TCCAAGAGAATATTTATTCTTATGAGGCTCGAACTTCAACGTTTTACAAACGGAAAGACATATCGCA  
CCCGAAATTTTGGGCAGAATGCTCTTAACGCGGTTCTTGAACGGTGTTTTGATCAGTCTAAGTTGGA  
TAA

+

FFFFFFFFFFFFFF:FFFFFFFFFFFFFF:FFFFFFFFFFFFFF:FFFFFFFFFFFFFF:FFFFFFFFFFFFFF  
FFFFFFFFFFFFFF:FFFFFFFFFFFFFF:FFFFFFFFFFFFFF:FFFFFFFFFFFFFF:FFFFFFFFFFFFFF  
FFF

@A00721:190:HGJW7DSXY:4:2116:16450:1673\_2:N:0:TCTGCAAG+GCTGCACT  
ACTCAGTTAACCTGAGAGCTCCTCAATTGATAGATTGGGTCAACAATAGGGACGCTAGTATACTTCGT  
AAAGTCGACAGCGAAATGGTCAATATTGATAATTGGACCGACTATATG

+

FFFFFFFFFFFFFF:FFFFFFFFFFFFFF:FFFFFFFFFFFFFF,FFFFFFFFFFFFFF:FFFFFFFFFFFFFF  
FFFFFFFFFFFFFF,FFFFFFFFFFFFFF:FFFFFFFFFFFFFF

@A00721:190:HGJW7DSXY:4:2645:1063:23281\_1:N:0:TCTGCAAG+GCTGCACT  
AGCTCATGGTGAAAAGGAAGCTAAGGTAAACTTGATGCTTCAGCCTTTTCGAAGCATAACCCCGCA  
CAGAATATCGTTTATCACGCAAATTTATTAATGCAATTTTCGACCTATCTTTAAGGTTCTTGTGAG  
GAG

+

FFFFFFFFFFFFFF:FF:FFFFFFFFFFFFFF:FF:FFFFFFFFFFFFFF:FFFFFFFFFFFFFF  
FFFFFFFF:FFFFFFFF:FFFFFFFFFFFFFF:FFFFFFFFFFFFFF:FFFFFFFFFFFFFF:FFFFFFFF  
FFF

@A00721:190:HGJW7DSXY:4:1618:24713:7999\_1:N:0:TCTGCAAG+GCTGCACT  
TCTCTCTTAGGAGGTCATGATGACTACTATAAGGGTGAAATCGATTTTTCGAAGTTTGACAAATCTCA  
AGATTTCTTTGTAAAGCCTATGAGATAAAGATGTATTCTTATTTAGGCTTCGATGCTGAATTTCTTG  
AAC

+

FFFFFFFFFF:FFFFFFFFFFFFFF:FFFFFFFFFF:FFFFFFFFFFFFFF:FFFFFFFFFFFFFF  
FFFFFFFFFFFFFF:FFFFFFFFFF:FFFFFFFFFFFFFF:FFFFFFFFFFFFFF:FFFFFFFFFFFFFF  
FFF

@A00721:190:HGJW7DSXY:4:2220:29604:13307\_2:N:0:TCTGCAAG+GCTGCACT  
ACGCCAGGAGTATCCATAACGATTTGTCAATTTACCACCTTTGCTCAACGACGAAGTGGAACGGCCAAC  
ACTTTCTTTGGTAATTGTATGATCACTTTGATGATTTTATCACTTTAT

+

[illegible]

@A00721:190:HGJW7DSXY:4:2111:18231:27586\_1:N:0:TCTGCAAG+GCTGCACT  
TCTATTTTAAGTTTTGTCTTCCTTGTCTTATTCTATTAATCACTCATTTTGTAGGATTATTAA  
AAACGCACTAAAACGTCTTCGACAACAGCAGGGGTTTTCGAATAGTGATAGCCACCCGCCTTACAGAG  
GGG

+

FFFFFFFFFFFFFFFFFFFFFFFFFFFFFFFFFFFFFFFF:FFFFF:F:FFFF:FFFFFFFFFFFFFFFF  
FFFFFFFFFFFFFFFFFFFFFFFFFFFFFFFFFFFFFFFFFFFFFFFFFFFFFFFFFFFFFFFFFFFFFFFF  
FFF

@A00721:190:HGJW7DSXY:4:2344:20220:26584\_1:N:0:TCTGCAAG+GCTGCACT  
CTTTGGTACCACCTTTTCTACTGTCTGTCTCGCCTCTTCGAATGAAGTTTAAATGCTTAACAACAATG  
ATAGTGAATTTATACCTACAATCATTGGTTTTTCTAATAATGATGACACTATTGTTTATGGATATGAT  
GCT

+

FFFFFFFFFFFFFFFFFFFFFFFFFFFFFFFFFFFFFFFF:FFFFFFFF:FFFFFFFFFFFFFFFFFFFF  
FFFFFFFFFFFFFFFFFFFFFFFFFFFFFFFFFFFFFFFFFFFFFFFFFFFFFFFFFFFFFFFFFFFFFFFF  
FFF

@A00721:190:HGJW7DSXY:4:2321:25870:25786\_1:N:0:TCTGCAAG+GCTGCACT  
GAGGATTCTCAGTTTACAAGGACCTTAAGCGATGGATCGGGTTAATTCTAAAACATTACCCGAAAGA  
CGTGCTAAATTAAAACCATTTGTACGATGTCGTCTGTCTCGGCGATCACTTTTCTACTAAGAATTGGTCC  
TAC

+

FF:FFFFFFFFFFFFFFFFFFFFFFFFFFFFFFFFFFFFFFFFFFFFFFFFFFFFFFFFFFFFFFFFFFFF  
FFFFFFFFFFFFFFFFFFFFFFFFFFFFFFFFFFFFFFFFFFFFFFFFFFFFFFFFFFFFFFFFFFFFFFFF:FFFFFFFF  
FFF

@A00721:190:HGJW7DSXY:4:1127:13358:2581\_2:N:0:TCTGCAAG+GCTGCACT  
AATCTTCATGAGATCGTTTCTTTCTTTATCTCTTTGGTTGTTAGGGATTTTGAGAGAGTGAAAGGCTT  
CAATTGTAGTGGTTTGGTCGTTTCAGTACCCAGTCAGTATACCTCTAC

+

FFFFFFFFFFFFFFFFFFFFFFFFFFFFFFFFFFFFFFFF:FFFFFFFFFFFFFFF,FFFFFFFFFFFFFFF  
FFFFFFFFFFFFFFFFFFFFFFFFFFFFFFFFFFFFFFFF:FFFFFFFFFFFFFFF:

@A00721:190:HGJW7DSXY:4:1367:14959:15342\_1:N:0:TCTGCAAG+GCTGCACT  
GACGTGTGCTCTTCCGATCTGTACCGGATTACCTGTCTTTCATATTATGAATGAACCTTCGGCCGCTC  
TCTTTGCTTCGATGTTGGATGTCAAGAAGGGTTCAGAATGGGATTCCTACGTAGTTTATGACTTTGGT  
GGT

+

FFFFFFFFFFFFFFFFFFFFFFFFFFFFFFFFFFFFFFFF:FFFFFFFFFFFFFFF:F  
FFFFFFFFFFFFFFFFFFFFFFFFFFFFFFFFFFFFFFFF:FFFFFFFFFFFFFFF:FFF,FF,FFF,FFFF:FF  
FFF

@A00721:190:HGJW7DSXY:4:1209:10818:17534\_2:N:0:TCTGCAAG+GCTGCACT  
CTTCTATCGTCTTACGTTACGTAATTACTATAGTGTTATTTATTCTGGTGGTGATGATAATCTTGGA  
GGTCGTGACGTTGATGAAGCTATAAGAGCGTTCCTATTACGGCGCACT

+

FFFFF:FFFFFFFFFFFFFFF,FFFFFFFFFFF,F,FF:FF:FFFF:FFF,FF,FFF,FFFF:FF  
FFFFFFFF:F:FFFFFFFF:FF:FFF,FFFFFFFFFFF,,FFFFF

@A00721:190:HGJW7DSXY:4:1109:30138:9815\_1:N:0:TCTGCAAG+GCTGCACT  
CTTTCAGTTTCACAACTGAAGGAGGAGTTTCTGTTACTGGAAAACCCTCGTCAATACTTTTCAATAA  
TATACGTCTTGAACCTCACTTATGACGATCTAGTGAAATTAACGCGTCCTTTTCTGGAACGTAGTTTAA  
CTA

+

FFFFFFFFFFFFFFFFFFFFFFFFFFFFFFFFFFFFFFFFFFFFFFFFFFFFFFFFFFFFFFFFFFFF  
FFFFFFFFFFFFFFFFFFFFFFFFFFFFFFFFFFFFFFFFFFFFFFFFFFFFFFFFFFFFFFFFFFFFFFFF  
FFF

@A00721:190:HGJW7DSXY:4:1326:25427:20635\_2:N:0:TCTGCAAG+GCTGCACT  
AAAGATAGTGGCATTCAAGGCAAACCTTACCCTGATTCCGGCCGGTGGTAGCTCATTTCTACCAGGGGC

TATTACTCTTGCTGAAACAGCTATTAAGCTGTTGAGCGGGTAATTAC

+

FFFF:FFFFFFFFFFFFFFFF:FFFFFFFFFFFFFFFFFFFFFFFFFFFFFFFFFFFFFFFF  
FFFFFFFFFFFFFFFFFFFFFFFF:FFFFFFFFFFFFFFFFFFFFFFFF

@A00721:190:HGJW7DSXY:4:2274:19081:6104\_2:N:0:TCTGCAAG+GCTGCACT  
ATCGCTGAAGGATGTGCACTCTTTTCTGCTACTTTAACGGAGCGTAGTGTACTCTTCGTCGATTGTAT  
CAACAGTAACATTACTTCTAATAAAGGTCTCTATCAAGCTCGTATTAT

+

F:FFFFFFFF:FFFFFFFFFFFFFFFFFFFFFFFFFFFFFFFFFFFFFFFFFFFFFFFF,FFFF  
FFFFFFFFFFFFFFFFFFFFFFFF:FFFFFFFFFFFF:FFFFFFFF

@A00721:190:HGJW7DSXY:4:2239:23746:21198\_1:N:0:TCTGCAAG+GCTGCACT  
TTACCGTTGAAGGCTAACTCCAAGGTAATTATGAAGACTGTGATTTATCTTCACTCTGGCCTTGTA  
TGAGGGTGTCTTAATCGTAACATTAATAATTTCAATCTTCTTAAAAAGAAGATAGAGAGTCATACTT  
TGG

+

FFFF:FFFF:,FFFFFFFFFFFFFFFFFFFFFFFFFFFFFFFFFFFFFFFFFFFFFFFFFFFF  
FFFFFFFFFFFFFFFFFFFFFFFFFFFFFFFFFFFFFFFFFFFFFFFFFFFFFFFFFFFFFFFF  
FFF

@A00721:190:HGJW7DSXY:4:2262:19777:36338\_1:N:0:TCTGCAAG+GCTGCACT  
AAGTAAAGATAACCAATAAGGAAGGAGCTTATACTATGGTTGAATCACTAAGCATACTACTTTTGCT  
TTGATTACTCTACCGCCTTACAAGTCTAAGGTTAAAGAGTCGATTAAACAAGTTGTACTTATCAATGA  
TTT

+

FFFFFFFFFFFFFFFF:FFFFFFFFFFFFFFFFFFFFFFFFFFFFFFFFFFFFFFFFFFFFFFFF  
FFFFFFFFFF:FFFFFFFFFFFFFFFFFFFFFFFFFFFFFFFFFFFFFFFFFFFFFFFFFFFF  
FFF

@A00721:190:HGJW7DSXY:4:2107:10384:8609\_2:N:0:TCTGCAAG+GCTGCACT  
CCAAAGAGAATATCTAAAATATTTACAAAATCTTACCCTATCTACGAACCTAAAGTTCTGAAGACGT  
TGCTTGTGCTTCTCCTTTAATGGCACTACCTCGGTACAATCTTACT

+

FFFFFFFFFFFFFFFFFFFFFFFFFFFFFFFFFFFFFFFFFFFFFFFFFFFFFFFFFFFFFFFF  
FFFFF:FFFFFFFFFFFFFFFFFFFFFFFFFFFFFFFFFFFFFFFFFFFFFFFF

@A00721:190:HGJW7DSXY:4:2305:8006:4679\_2:N:0:TCTGCAAG+GCTGCACT  
GCGACCTGTTCCGGAGTTTTACGGGATCCGGAATGTTCTGTCTATATTAGGTGAAGCGAAATACGAT  
TTCGAACGTCAACGTTACCGAGTTTCGTTTCGTACCTTGATGCTGAC

+

FFFFFFFFFFFFFFFFFFFFFFFFFFFF, :FFFF, FF, FFFFF:FFFFFFFFFFFFFFFFFFFF:  
FFFF:FFFFFFFFFFFFFFFFFFFFFFFFFFFFFFFFFFFFFFFFFFFFFFFF

@A00721:190:HGJW7DSXY:4:1323:7898:20525\_1:N:0:TCTGCAAG+GCTGCACT  
TAGTGCGAGGCCTCTCTTCTACGAGTATTGCTATTTATACGGTTACGAGAAGAAGGTTGAAAGTTTG  
AGAACTTAGTTTACGAACCTGACTCTACTATACGTGACATACTAAATACTAGATATTTGGATGATCTT  
GAT

+

FFFFFFFFFFFFFFFFFFFFFFFFFFFF:FF, FFFFF, :FFFFFFFF:FFFFFFFF:FFF:FFFF  
FFFFFFFFFFFFFFFFFFFFFFFFFFFFFFFFFFFFFFFFFFFFFFFFFFFFFFFFFFFFFFFF  
FFF

@A00721:190:HGJW7DSXY:4:2177:16152:19006\_2:N:0:TCTGCAAG+GCTGCACT  
AAAATTTCTTCTTGATTATAATAAAGATCTTTACCAGGACTCCTACTACAGGAGGCAGTCTT  
CTGATCGTAAGAAGTTTATAAGGAACATATCCATTTGTTGTAATAGGG

+

FF:FFFFFFFFFFFFFFFFFFFFFFFFFFFFFFFFFFFFFFFFFFFFFFFFFFFFFFFF:FFFFFFF  
FFFFFFFFFFFFFFFFFFFFFFFF:FFFFFFF:FFFFFFFF

@A00721:190:HGJW7DSXY:4:1215:11388:28354\_1:N:0:TCTGCAAG+GCTGCACT  
GAAACTCTAAGTGGAATACTGTCTTCCAAGCTTACCTTTATCTTCAATGAAATTGGACTCTTCGAT

AGGGGACATTTTATCGTGGGCTTTCCGTAAAGGAAGATCTGTTATCGACGGTTTATCGTTTACGAAGT  
ATC

+

FFFFFFFFFFFFFFFFFFFFFFFF::F:FFFFFFFFFFFFFFFFFFFFFFFFFFFFFFFFFFFFFFFF:FFFF  
FFFFFFFFFFFFFFFFFFFFFFFFFFFFFFFFFFFFFFFFFFFFFFFFFFFFFFFFFFFFFFFFFFFFFFFF  
FFF

@A00721:190:HGJW7DSXY:4:1152:24722:13651\_1:N:0:TCTGCAAG+GCTGCACT  
TTGGCCTAGTGGATGTTATTAGTGACATCTGGTCAATTTTCGTTTTTAGGTGGTCTTTATTCTATTATT  
GATTTTATGAGATTGATACGTAAACAGAAGATGATGTTAGAGTAGAATTCCTGAAGAGTCCTTCCGT  
AAC

+

:FF::FFF:F:,FFFF,F,,FFFFFFF,:,F:,FF:,,,FFF::F::FFFF:FF:,FFFFF,:,FFFF:  
FF:FFFFFF:FFFF:F:F,FFFFFFF,FF,FF:FFFFFF,F,FF,FFFF:,,:FFFF,F,FFF:FF:  
FFF

@A00721:190:HGJW7DSXY:4:2413:7500:35368\_2:N:0:TCTGCAAG+GCTGCACT  
AGGATTATGTCTGTGTTGAAAGACTTTCTACCGATAAGGGTCACTAGTCTTACACAATTAAGAAATAA  
TCCTACATTGACTGATTATCTAAAGATTGAAGGAAAATTTATCCTCG

+

FFFFFFFFFFFFFFFFFFFFFFFFFFFFFFFF:FFFFFFFFFFFFFFFFFFFFFFFFFFFFFFFFFFFFFFFF  
FFFFFFFFFFFFFFFFFFFFFFFF:FFFFFFFFF:FFFFFFFFFFFFFFFFFFFFFFFF

@A00721:190:HGJW7DSXY:4:2274:5195:10708\_1:N:0:TCTGCAAG+GCTGCACT  
AAGACGGCATACGAGATCTTGACAGAGTACTGGAGTTCAGACGTGTGCTCTTCCGATCTCTCAGCAAA  
GGGATGCATGGTGTATCTCCTCAGGAGTCCCGGCATTTGATAATAATGACGAGACTTTCGTCATAAT  
CGC

+

:FF:FFFFFFFF:,F:FF,FFFFFFFFFFFFFFFFFFFFFFFFFFFFFFFFFFFFFFFF:FFFFFFF  
FFFFFFFFFFFFFFFFFFFFFFFFFFFFFFFFFFFFFFFFFFFFFFFFFFFFFFFFFFFFFFFFFFFFFFFF  
FFF

@A00721:190:HGJW7DSXY:4:1648:19895:4288\_2:N:0:TCTGCAAG+GCTGCACT  
GTACCAGCGCATCTCGTGTCGAGCCTCGACCCGATTATATGGTATTAACCTATAAAGGTGAGGAGACC  
ATTTTCTTGCTGAAATTTATAGAAGATTATTTTGACAGAATCAATAAG

+

FFFFFFFFFFFFFFFFFFFFFFFFFFFFFFFF:FFFFFFFFFFFFFFFFFFFFFFFFFFFFFFFF  
FFFFFFFFFFFFFFFFFFFFFFFFFFFFFFFFFFFFFFFFFFFFFFFFFFFFFFFFFFFFFFFF

@A00721:190:HGJW7DSXY:4:2413:4065:32550\_1:N:0:TCTGCAAG+GCTGCACT  
TTCTTAATTATAATATTCAACCTCAAAAGTTACGTGTTTACAGTAACGAGATCACACATTTTGAGAAC  
TAATAATGTTATGTTCTCTGATCATTTTGACAATCTCTTCTTATAATAATAATAATAATAATATTACT  
AAT

+

FF:FFFFFFFFFFFFFFFFFFFFFFFF:F:FFF,FFFFFFFF:FFFFFFFFFFFFFFFFFFFFFFFF  
FFFFFFFFFFFFFFFFFFFFFFFFFFFFFFFF:FFFFFFFFFFFFFFFFFFFFFFFFFFFFFFFF  
FFF

@A00721:190:HGJW7DSXY:4:1367:25979:31516\_1:N:0:TCTGCAAG+GCTGCACT  
CTCCAGTCAACACTAGTTCGAGTGCTGCTTTGGATTACGATGACGTGAGAATAGGTGAAGGGATAGTT  
TTTACCTCGACCAACATTAAGGCGGCGGCGACTAATCTTAAAGCTTACCCAAAATGAAGGACACTTC  
GAA

+

FFFFFFFFFFFFFFFFFFFFFFFFFFFFFFFF:FFFFF  
FFFFFFFFFFFFFFFFFFFFFFFFFFFFFFFF:FFFFFFFFFFFFFFFFFFFFFFFFFFFFFFFF:FF  
F:F

@A00721:190:HGJW7DSXY:4:2330:13150:7889\_1:N:0:TCTGCAAG+GCTGCACT  
TCAAGACGACGACGAAGCTTATACTACTTTAATTTTGGTTATTATGTGGAGATATCGTGATATCAGTA  
CGTCCAGATCCTCTGCTTTTACCGATAACGATAAATTCGTCATCAAATATAAAGAAAAGGACTATGAA  
ATA



+  
FF,FFF:F,F,FFF,FFFF,FF,FFFFFFFFFFFF,FFFFFFFFFFFF:FFFF:FFFF,F:F,FF  
,FF:, :FFFFFFFF:FFFFFFFF:F:FFF:FFFFFFFFFFFFFFFF,FFFFFFFFFFFFFFFF  
,F:  
@A00721:190:HGJW7DSXY:4:2430:32940:16235\_1:N:0:TCTGCAAG+GCTGCACT  
GTCAATCCGTTGAGAAAATTTCTTAGAGGATATTCGCCATTGTGGTACGAATTGGTCCAACATNTACC  
ACCAAATTCTTTTGATACAACCTCTAGCCTTCAAGTGGGGTATGCCTGCGGAATACGCTTGCTATTAC  
CAG  
+  
FFFFFFFF:FFFFFFFF:FFFF:FFFFFFFFFFFFFFFFFFFFFFFFFFFFFFFF#FFFF  
FFFFFFFFFFFFFFFFFFFFFFFFFFFFFFFFFFFFFFFFFFFFFFFFFFFFFFFFFFFFFFFF  
FFF  
@A00721:190:HGJW7DSXY:4:1368:29134:25551\_1:N:0:TCTGCAAG+GCTGCACT  
CCCGTTGATGCTATGTCAGAAGAAGCTATTCAAGCTTGTCTTTAAAGACTGCAGAGGCTGTCAAACA  
AGCCCAGACTCAAGGAGTCCAATCAAAGGTTTTGAATTTAGCTCAACTGGGAGACGTGCTTAAATGG  
GTG  
+  
FFFFFFFFFFFFFFFFFFFFFFFFFFFFFFFFFFFFFFFF:FFFFFFFF:FFFFFFFF  
FFFFFFFFFFFFFFFFFFFFFFFFFFFFFFFFFFFFFFFFFFFFFFFFFFFFFFFFFFFFFFFF  
FFF  
@A00721:190:HGJW7DSXY:4:2626:4101:19460\_1:N:0:TCTGCAAG+GCTGCACT  
TACTTACAAAGGACAATTCAGTTTCATTAATTCTACGAAAAGTCCGAGTATATTGTATGTTAATAG  
ATAGTGGGATAATAGTTCTACCGATACGTAGTGAACGCGTTCGTAGAACCAAGTACTTTCCGTCTGAA  
GAG  
+  
:FFFFFFFF, :FFFF:FFFFFFFFFFFFFFFFFFFFFFFFFFFFFFFFFFFFFFFFFFFFFFFF  
FFFFFFFFFFFFFFFFFFFFFFFFFFFFFFFFFFFFFFFFFFFFFFFFFFFFFFFFFFFFFFFF:F:FFFFFFFF  
FFF  
@A00721:190:HGJW7DSXY:4:2305:9344:1423\_1:N:0:TCTGCAAG+GCTGCACT  
TAGTAGTTGTATAGTTGAAGATGTGGCTTTAGACGATAATCCTTTTAGGACTATGTTGACTGACGAAG  
ATTTTCCAACAGATTTGTCTACGTTGCAGATCGCCACTCCAAACACTATATACATTATAAAATATA  
+  
F,F,F:FFFF:F,FFF,FF:,FFFF,,FFFF, :FFFFF,,FFF,:F,,,FF:FFF,:FFFF:FFFF  
FFFF,FFF:FFFFFFFF,FFF,FFFF,FFFFFFFF,FF:FF:FFF:FFF:, :FF:F:FFFFFFFF  
@A00721:190:HGJW7DSXY:4:1345:11912:36620\_1:N:0:TCTGCAAG+GCTGCACT  
ACTTTTGTTACCAAATCTTGCTTTCAACGAAGTCTCTGATTTTATTAATCATTACTTTAACGATCT  
CTCGGTCATTTACTCTGTACTTGATCTACGTCGTTTAACTGTGGAACAACCTTTACTTAGAATGACT  
CTA  
+  
FFFFFFFFFFFFFF:,FFFFFFFFFFFFFFFFFFFFFFFFFFFFFFFFFFFFFFFFFFFFFFFF  
FFFFFFFF:FFFFFFFFFFFFFFFF,FFFFFFFF:FFFFFFFF:FF:FFFF:FFFFFFFF  
,FF  
@A00721:190:HGJW7DSXY:4:2463:15510:6339\_2:N:0:TCTGCAAG+GCTGCACT  
AGTTAATATCATATTAGTAATACTCACTATCGTTTTCTGCTTTTTCTTAGCTAATAGATTAATAAAGG  
ATGAGTACGAAAACCAACTCTTCGTTACGAGACCTGATGGTAGAATAG  
+  
FFFFFFFFFFFFFFFFFFFFFFFFFFFFFFFFFFFFFFFFFFFFFFFFFFFFFFFFFFFFFFFF,FFFF,FFFF  
FFFFFFFFFFFFFFFFFFFFFFFFFFFFFFFFFFFFFFFFFFFFFFFFFFFFFFFF  
@A00721:190:HGJW7DSXY:4:1457:32027:3286\_1:N:0:TCTGCAAG+GCTGCACT  
ACACCCATCACAACGCGTATAAAGCGAGTTTTCCGTCTGAACGTAATACACGAAGAGATCATCCGCA  
AACGACTCGAAACCGAGACGCCGTAGATCAAAGTCCCTTCTAACTTTAGATTATGAATCCTGCCTTTA  
CTC  
+  
F:FFF,,,,,:F:F,,,,F,FF,,:,,,FFFF:F,F,F,F,:,,FF,F,,F,F,,F,F,,:,,FFF,::

@A00721:190:HGJW7DSXY:4:2319:8097:9721\_2:N:0:TCTGCAAG+GCTGCACT  
ATAACCTTCTTATACTTTGGGTATGTTTTGTGAAAAACATGAGATACCCAAGTCTATCGAAGACATT  
ATCTCTTATGTACTTATTGTAACGATCATTCTTCGAGTTTTGTCATT

@A00721:190:HGJW7DSXY:4:2601:19461:23735\_2:N:0:TCTGCAAG+GCTGCACT  
ATGAGGAGGATTTATAATGCTTTTCGATAGTGATTGTTATCAATTTAAATACATTACTGTTTCAAATC  
ATCTTTACTCACAGACTCCGAAAATGGTTTCAAATGAGGTCAAAGCTC

@A00721:190:HGJW7DSXY:4:1165:26332:6637\_1:N:0:TCTGCAAG+GCTGCACT  
TATTATCCGATTCTTCGAGGGTATCACTACCACTGATCTGCCGACTTTAGTCAAGGAAGTTCAATTCC  
TTCGATGTTTATATTTTCTATAAGGGAAAATAGCAATAATCAAATTTTCGACAAATTTTAGAAGTTTA  
TTT

@A00721:190:HGJW7DSXY:4:1237:18448:23109\_1:N:0:TCTGCAAG+GCTGCACT  
TCCGATCACCTTGGTGTGATCTCCCGGAGGATCTTTTCAATAAGATGTATGATGATAATCTACTATTT  
TTAAATAGTGATATTCAGCGTATACTTGAATACTTTATCAAAGATTTGGCTTGGTCTATTTACCGCAA  
AAA

@A00721:190:HGJW7DSXY:4:1563:22218:13416\_2:N:0:TCTGCAAG+GCTGCACT  
TATGATATTTATTTACTTATACTTTAAATAGCACCGATTATACTTGACTGTTGATAATATTACAAT  
AGCTCTTTCTCAGAAGATTAGAGAAGTAACCGGTGAACACGTCGGTAG

@A00721:190:HGJW7DSXY:4:1553:1723:30091\_1:N:0:TCTGCAAG+GCTGCACT  
AGAAGTGAAGAAAGATTCTTTTCGAAAAGAAACCTATAAGTTACAAACGATTCTTCGACTATATTTAAAG  
AAATAAAAAATACTTCAAGTACCTGAAGTTTACATTTTTTAATGGTATGGTATAATGTGTCTTACAAATA  
GAA

@A00721:190:HGJW7DSXY:4:1617:8856:9909\_2:N:0:TCTGCAAG+GCTGCACT  
TAATGAGAGTGTATTCCTTAATATTCTAGTAACCGCTATGTGGGCATTACTAGGATTTATCACACTCC  
TAAATTTGATAGCAATTTATGTTTTAAATGCTAGGAAAATTTTAGAAA

@A00721:190:HGJW7DSXY:4:1150:9064:28056\_1:N:0:TCTGCAAG+GCTGCACT  
GGAGTACTTAATTCAATAGCTTTAGTATTATTTACTATCGCCTTTATTGGAAATTGTATAAGAGTTAA  
TTGCTTACACAAAAGTGACGCGCGAAGGAATCTTAATTGATTGAAGCTAGGCGTTGGGGAGAATGAAC  
TGC

+  
FFFFFFFFFFFFFFFF,F,FFFFFFFFFFFFFFFFFFFFFFFFFFFFFFFFFFFFFFFFFFFFFFFF  
FFFFFFFFFFFFFFFFFFFFFFFF:FFFFFFFFFFFFFFFFFFFFFFFFFFFFFFFFFFFFFFFF  
FFF  
@A00721:190:HGJW7DSXY:4:1662:19723:25316\_2:N:0:TCTGCAAG+GCTGCACT  
CCTACCATGACCAATCATCGCTCCAACCTGGCACGCCAGACGTAGGGTCAAACCTACTACCGCCGGTCG  
GCAGATCGGCACCACTGGTCTCTACGTTCAAGGACCCGCTGTGCAGAA  
+  
FFFFFFFFFFFFFFFFFFFFFFFFFFFFFFFFFFFFFFFFFFFFFFFFFFFFFFFFFFFFFFFF  
FFFFFFFFFFFF:FFFFFF:FFFFFFFFFFFFFFFF:FFFFFFFFFFFFFFFF  
@A00721:190:HGJW7DSXY:4:2133:32560:11788\_2:N:0:TCTGCAAG+GCTGCACT  
TCTGCACAGAAGAAGGCTGAAGGTCGTTACCGACGACCACTCAAAGGAAACGGGCTGTTGCCAGAG  
GAAAGCAGCGACCAACCGAGGTCGCTCGTAACATTGACGGCAGTCCCGT  
+  
FFFFFFFFFFFFFFFFFFFFFFFFFFFFFFFFFFFFFFFFFFFFFFFFFFFFFFFFFFFFFFFF  
FFFFFFFFFFFFFFFFFFFFFFFFFFFFFFFFFFFFFFFFFFFFFFFFFFFFFFFF  
@A00721:190:HGJW7DSXY:4:2107:31412:20290\_1:N:0:TCTGCAAG+GCTGCACT  
AACTGAGGCAGTACCTCAGTCAAAAGTCACATTACCACTCCCATACCAATCAATGATGTGACTATAC  
AGTTCGGCCATTTCAAGAGTGGTCAATACGTCGTGGGAGGTACTGAAGCCTTCCCCTCCGCTGGCAGC  
AAG  
+  
FFFFFFFFFFFFFFFFFFFFFFFFFFFFFFFFFFFFFFFFFFFFFFFFFFFFFFFFFFFFFFFF  
FFFFFFFFFFFFFFFFFFFFFFFFFFFFFFFFFFFFFFFFFFFFFFFFFFFFFFFFFFFFFFFF  
FFF  
@A00721:190:HGJW7DSXY:4:2228:24587:35587\_2:N:0:TCTGCAAG+GCTGCACT  
GCCAATCAATAGTTCTTCTGACCAGAATGAAAAGGGGTTTACCAGGGTAGTCTCTAAGTCTACCAGGA  
AGAGGGGAAATGTCCCCAAAACCTGAGAAGAATAAAGGGAAAGGTCCAT  
+  
FFFFFFFFFFFFFFFFFFFFFFFFFFFFFFFFFFFFFFFFFFFFFFFFFFFFFFFFFFFFFFFF  
FFFFFFFFFFFFFFFFFFFFFFFFFFFFFFFFFFFFFFFFFFFFFFFFFFFFFFFF  
@A00721:190:HGJW7DSXY:4:2634:29342:12477\_2:N:0:TCTGCAAG+GCTGCACT  
CCTAATTCTGAAGGAAGATCTCCACCATCTGGGGTTGGAATAAGAAATCTGCACGGGCCAAAGAGG  
CCGCTGCTACGAAGTCGCTGAAGGCGGCTTGGGTCATTAAGGGTAGCT  
+  
FFFFFFFFFFFFFFFFFFFFFFFFFFFFFFFFFFFFFFFFFFFFFFFFFFFFFFFFFFFFFFFF  
FFFFFFFFFFFFFFFFFFFFFFFFFFFFFFFFFFFFFFFFFFFFFFFFFFFFFFFF,FFF:  
@A00721:190:HGJW7DSXY:4:1432:27914:9189\_1:N:0:TCTGCAAG+GCTGCACT  
CCGACCCCATCTTTGAGACCAAGACTCTCTACAGTAGGTCGTGCCTACTATGAGCAAATCTGTTGAA  
TTCGTCAGTACGAGACGAAGGTGAGAGGACTTTTGGCTACTGGCGACAACTGAGAGCAGTCGCTGGGG  
AAA  
+  
FFFFFFFFFFFFFFFFFFFFFFFFFFFFFFFFFFFFFFFFFFFFFFFFFFFFFFFFFFFFFFFF  
FFFFFFFFFFFFFFFFFFFFFFFFFFFFFFFFFFFFFFFFFFFFFFFFFFFFFFFFFFFFFFFF  
FFF  
@A00721:190:HGJW7DSXY:4:2551:3694:6950\_1:N:0:TCTGCAAG+GCTGCACT  
CTTGAGTGTGACGAGGCCGGTGACGTTTTTGTCAACGGCGTTTGGAGGATTTTATCCGCGCTTAAC  
TGGGGCGAAGATCCCCTATGGAGTCTTGAAGGACTTAGGTTGGCATATTTATGCCGACGATAATAAGC  
ATG  
+  
FFFFFFFFFFFFFFFFFFFFFFFFFFFFFFFFFFFFFFFFFFFFFFFFFFFFFFFFFFFFFFFF  
FFFFFFFFFFFFFFFFFFFFFFFFFFFFFFFFFFFFFFFFFFFFFFFFFFFFFFFFFFFFFFFF:FF  
FFF  
@A00721:190:HGJW7DSXY:4:1261:4996:23453\_2:N:0:TCTGCAAG+GCTGCACT  
GACTTACAAGAGAGAGTGTGAGAGAGTCGCTCTCACTATTTTTGCCAGAAATCGGGCTTTCTGACTG

$+$ 

@A00721:190:HGJW7DSXY:4:1601:2871:3552\_1:N:0:TCTGCAAG+GCTGCACT  
CAACCTCTCTTTAGAGAGCATTAGAAGGAAGTTGGGCAAAATCCCACATATGGTAGACGTTGTACAC  
TTTTCTTGAAAATTTTTCTTTCTCCGTCATTGGGGATTTCGATGTGAGAAGGTGGAAGGTGTCAAG  
GGT

+

@A00721:190:HGJW7DSXY:4:2456:14009:1454\_1:N:0:TCTGCAAG+GCTGCACT  
TCTTTCAGGACCTAATCACATCATGATTGATAGTTACGGCTCGTATCGAGTTGGAGGGAGGAAGTTCT  
CCGAAATTAAGACGGGGGATTAAGAGTCCAGCTGTAACGTGCATTTAGAGAGGGGAGCTCTGAAA  
AGG

+

@A00721:190:HGJW7DSXY:4:2144:25554:9173\_2:N:0:TCTGCAAG+GCTGCACT  
AGAAGATGAGGAAGTCTAAGAGGAGGAGTTTGAGGAAGGCTCTAGAGAAGATCTCACCACCTGGAGAA  
GGCAAGTGGAGAGTCCAGAAGTTGATGAAGAAGGATTATTTGAAGCAG

+

@A00721:190:HGJW7DSXY:4:1578:3929:14591\_1:N:0:TCTGCAAG+GCTGCACT  
CCTAAGGTGGATGAGGGAGGTTGTTTCTTTGGAGTTTTAGATAATCTTTTGAGAAGGGGTCATAGAGC  
CAGCAAGAGAAGCTTATATGCTGGTTTAAGTGATGATTATCACTCCTTGAGAAGACAAGCCACATTAA  
GAT

+

@A00721:190:HGJW7DSXY:4:2363:11659:13416\_2:N:0:TCTGCAAG+GCTGCACT  
AGGTCCTTTT GAGTATCGACAGATCTTTCGATCTTGAGGACGTGCATTTAACGTGGCAGAATTCGGTA  
ACTTACCATATTGTTCTTCCGGGAAGTTGTGGGATTTAACTTTGACT

+

@A00721:190:HGJW7DSXY:4:1126:4381:2096\_2:N:0:TCTGCAAG+GCTGCACT  
TGGACTACTCGACTTTTGATCTGGAGTTGTCTAGGGTCATGGCAGATACTACCGATAAGGTGAAAAAT  
ATGCAGGTCAAAGATTCTGTAGCTCTGAGGGCGGTTGAGGGAGCCGTT

+

@A00721:190:HGJW7DSXY:4:2535:21685:13275\_1:N:0:TCTGCAAG+GCTGCACT  
TTCTAAGAGTCTTTATGATTCAAAACCTATCGTTGTCGTACCTTACAAGGTTGAGGAGACTTTACAGC  
GGCTTATTGTCGCGCAGTTTCCAGAATTGCGGTTGAAGTTCACCCATTCTATCTTGAATGCTCACGCC  
GTC

+

[illegible]

$+$ 

@A00721:190:HGJW7DSXY:4:2365:6578:10316\_2:N:0:TCTGCAAG+GCTGCACT  
TGATTGGGAACGTACCTACTCACGAGACGTCATGAAAGCTATCGGAGGGAAGCAAATGTTTCGTTCT  
GTTACAAGAACGCTTTGGATTGTGACCATAAAGCCTCAGTTGCGATAG

 $+$ 

@A00721:190:HGJW7DSXY:4:1335:9417:18145\_1:N:0:TCTGCAAG+GCTGCACT  
CTCTTGATGATGTAGCCACTATAATGCTTAAGAGAGAGATTGATGTATGTCATTTCTGCTTAGTTTGT  
CCCGCGGAATTATTGGACACGATGAAAAATGACATACCCGTTCTGACCTTGGTATCGTTATCCGTCATGG

+

@A00721:190:HGJW7DSXY:4:1307:22417:18114\_2:N:0:TCTGCAAG+GCTGCACT  
AAAGATAAGATTTTATCTTTCTTCAAACACCCTGTTTCTTAAGGGCGGACAATTGTTCCATTGTGA  
ACTCTTGGGGACTAGATTGAGCATTAAATGAGTTCCGAATAACTCGTAA

+

@A00721:190:HGJW7DSXY:4:1509:1588:24815\_2:N:0:TCTGCAAG+GCTGCACT  
TATTTCCGTACCAAGAGCCACTGCCAATCTCATCGCTATACGCATACCTGATTGGAAGAAGCGAGGTT  
CGTTCTCAATAAAAAATTTTCTCAAGAGATTAGGGGTGATAAAGTTT

+

@A00721:190:HGJW7DSXY:4:1562:15411:35790\_2:N:0:TCTGCAAG+GCTGCACT  
ACGTCATGGGGATCACTTCTTCGGTCAATGACAAAACCTTCGAATATGTTACGACATGGCTTCGTAAC  
AACAGTGCGAGGATTGTCATCTCGGGGAAAGTGATTACCAAGATGTT

+

@A00721:190:HGJW7DSXY:4:2377:31448:11741\_1:N:0:TCTGCAAG+GCTGCACT  
GAGATACCTAGAGAAGGTCGCAGCGATCTTACTCGTTATCGGAGCTAAGAAGAAGACTTTGGGTACAC  
GTTATGCTCGAAACTTAACGTTAGTACCGGAGGTGATCTCTCTGCTTCTGCGTTACTGAGAGAAAAG  
ATT

+

@A00721:190:HGJW7DSXY:4:1607:11514:8531\_1:N:0:TCTGCAAG+GCTGCACT  
CTTTATGGACAAGATGCAAGTTCTTGGGAAATACTTGTTTCCCTTTTTAGGTTTAGTAGGTGATCTTG  
ACGTCGATTCTTTGTATAGGGAGTGTGAGAAGACAACGAATCTTGAAACTACGGTCCTTATCAAAGAA  
AAT

+

[illegible]

$+$  $+$  $+$  $+$  $+$  $+$ 

+

+

```

FFFFFFFFFFFFFFFFFFFFFFFF:FFFFFF:F:F:FFFFFFFFFFFFFFFFFFFFFFFF:FFFFFF:FFFFFFFFFFFFFFFF
FFFFFFFFF:FFFFFFFFFFFFFF:FFFFFFFFFFFFFFFFFFFFFFFFFFFFFFFFFFFF

```

@A00721:190:HGJW7DSXY:4:1501:1425:10441\_1:N:0:TCTGCAAG+GCTGCACT  
TTAGATAAATTCTTTCCGGGCTCAATGACCTTTGCTATGTACGTGGATCTAATGCTTGGTGATCTGAA  
TCTGACCATCGCAAAGAAGACTTTATTAGTTCATGAAGTTCTTACACTTCTCGCGACTAATGTCAGCT  
TCA

+

FFFFFFFFFFFFFFFFFFFFFFFFFFFFFFFFFFFFFFFFFFFFFFFFFFFFFFFFFFFFFFFFFFFFFFFF  
FFFFFFFFFFFFFFFFFFFFFFFFFFFFFFFFFFFFFFFFFFFFFFFFFFFFFFFFFFFFFFFFFFFFFFFF  
FFF

@A00721:190:HGJW7DSXY:4:1647:12500:29152\_1:N:0:TCTGCAAG+GCTGCACT  
CCAAATTTAGCACTTTTTGAATATGACAGAAAGCTCGCCATATCAGATTAGAGACATGCCAGTTAGAGT  
TCTTCTAACCAGGACTGATGGTGAGATTCTTTTACCTTTTGGAGGTCCAGGAACCTTTACTCCTAGTG  
TCT

+

FFFFFFFFFFFFFFFFFFFFFFFFFFFFFFFFFFFFFFFFFFFFFFFFFFFFFFFFFFFFFFFFFFFFFFFF  
FFFFFFFFFFFFFFFFFFFFFFFFFFFFFFFFFFFFFFFFFFFFFFFFFFFFFFFFFFFFFFFFFFFFFFFF  
FFF

@A00721:190:HGJW7DSXY:4:1520:17671:25770\_1:N:0:TCTGCAAG+GCTGCACT  
ACGTTTCCGTCGGAGGATGACAGGTGGGAGACCGCTCAATAACACTCTATTGAATCCCTTTTCCACGA  
TGAAAGCTCTTTATGAGGTGCTCCATGCAAATTTACAGTTCCTCTTTGGTGATATCGCCTCTGTCCTT  
TCT

+

FFFFFFFFFFFFFFFFFFFFFFFFFFFFFFFFFFFFFFFFFFFFFFFFFFFFFFFFFFFFFFFFFFFFFFFF  
FFFFFFFFFFFFFFFFFFFFFFFFFFFFFFFFFFFFFFFFFFFFFFFFFFFFFFFFFFFFFFFFFFFFFFFF  
FFF

@A00721:190:HGJW7DSXY:4:1432:23610:22686\_1:N:0:TCTGCAAG+GCTGCACT  
TAATGATACTGACGAAGGTTCTATTACCACCCTTGTCATTGATACAAACATTCTAGGTGATGCTTTCT  
TAGAGGCTCGTCTAGCCGCTGAGATTCTGCTTACCTATTTACAATCTGTAGAGAGAGAGGTTAATCAG  
AAT

+

FFFFFFFFFFFFFFFFFFFFFFFFFFFFFFFFFFFFFFFFFFFFFFFFFFFFFFFFFFFFFFFFFFFFFFFF  
FFFFFFFFFFFFFFFFFFFFFFFFFFFFFFFFFFFFFFFFFFFFFFFFFFFFFFFFFFFFFFFFFFFFFFFF  
FFF

@A00721:190:HGJW7DSXY:4:1421:32054:2644\_1:N:0:TCTGCAAG+GCTGCACT  
TAGGTCTACTAGTACTTAAGGGTTTATGTTTCGTTTTAGCTGGATGGATCTTTTGATGGTATGTTTC  
ACATTGCGTGATCACTTCCCGTGGACTTGGGAAGAGATTAAACATAAAATCCAGCGATTCTATTATGT  
CGC

+

FFF,,,,:,,F,FF:FFFFFFFF:FFFF,FFFF,,FFFF:F,FFFFFF:FF:FFFFFFFFFFFFFF,F:,F  
FFFFFF::FFFF:FF,,:FFF:,F:FFF,F:FFFF,:FF,FF,FF::FFF:,:::FFFFFFFFF::F  
:F:

@A00721:190:HGJW7DSXY:4:2432:11225:35430\_2:N:0:TCTGCAAG+GCTGCACT  
GGCTGTGGGGATTAACCTCCCTCGTGAAACTTACGACGATGTTCTCGCTCGCATTTCACAAGGATTAC  
TAAGTCTGAGATCTGCCACTTCTAATTTTAGGAAACGTCGCGAAAAGA

+

FFFFFFFFFFFFFFFFFFFFFFFFFFFFFFFFFFFFFFFFFFFFFFFFFFFFFFFFFFFFFFFFFFFFFFFF  
FFFFFFFFFFFFFFFFFFFFFFFFFFFFFFFFFFFFFFFFFFFFFFFFFFFFFFFFFFFFFFFFFFFFFFFF

@A00721:190:HGJW7DSXY:4:1250:17400:1877\_2:N:0:TCTGCAAG+GCTGCACT  
TTGGTCGAAAAATATCGCCGGGAAGCTTCTAATAGAGGATCCTGATGACATTATTTCAACGGATACCGA  
TCTCAGTTCTACCACAGAAACCGTCTCAGGAAGTGTCTCCACTGATTC

+

FFFFFFFFFFFFFFFFFFFFFFFFFFFFFFFFFFFFFFFFFFFFFFFFFFFFFFFFFFFFFFFFFFFFFFFF  
FFFFFFFFFFFFFFFFFFFFFFFFFFFFFFFFFFFFFFFFFFFFFFFFFFFFFFFFFFFFFFFFFFFFFFFF

@A00721:190:HGJW7DSXY:4:1508:25681:1783\_2:N:0:TCTGCAAG+GCTGCACT  
AAAGACGACCTTCTTGTGGGACTGAGACCTCTGAATTTTCAGGTGCCCTGATGAGGACGTTGAAAG

GGATAATTTCAACTCTGAGACTTCTAAGAGTGTTTCAAAAGACCAGAA

+

FFFFFFFFFFFFFF:FFFFFFFFFFFFFFFFFFFFFFFFFFFFFFFFFFFFFFFFFFFFFFFF  
FFFFFFFFFF,FFFFFFFFFFFFFFFFFFFFFFFFFFFFFFFFFFFFFFFF

@A00721:190:HGJW7DSXY:4:1558:26313:14528\_1:N:0:TCTGCAAG+GCTGCACT  
GGTTGAAGAGAAAAGCTGATATGGTTGCGGCTGATCGTACCCCAATTCCTGCTAGAAAGATCACTCTCG  
GCGATAACCACTGATCTTCCAGAGTTACGTAGTGGTCGTTCTTTTGGTGATTTTATCGAAGAGAAAGTT  
TCT

+

FFFFFFFFFFFFFF:FFFFFFFFFFFFFFFFFFFFFFFFFFFFFFFFFFFFFFFFFFFFFFFF  
FFFF:FFFFFFFF:FFFFFFFFFFFFFFFFFFFFFFFFFFFFFFFFFFFFFFFFFFFFFFFF  
FFF

@A00721:190:HGJW7DSXY:4:2448:23547:28494\_1:N:0:TCTGCAAG+GCTGCACT  
TCAGTTTTCCAAAAGCTATTAATAGCAGTTGCGGGCTATAATACCGCCTCCAGATTACTCTAACT  
GAATCCACTCTCTTGGGATATAAATGAGTACATCTATAATAGAGTTTTGGAAGTGTGAATGTCCTAC  
GTA

+

FFFFF:FFFFFFFFFFFFFFFFFFFFFFFFFFFFFFFFFFFFFFFFFFFFFFFF:FFFFFFFF  
FFFFFFFFFFFFFFFFFFFFFFFFFFFFFFFFFFFFFFFFFFFFFFFFFFFFFFFFFFFFFFFF  
FFF

@A00721:190:HGJW7DSXY:4:2164:7491:25207\_1:N:0:TCTGCAAG+GCTGCACT  
TTCATGAAGATCTTCGAGTGTTTTATAGTGAGTTATTCTTGCGAAGGTTCAAGTCGATTGATTTTGT  
GACTACGATCTCTCTTGTAAATAAGAAGTTCTTCGCAGTTGAATCTCCACCAGGTGGAGGGAAGACCAC  
TGA

+

FFFFFFFFFFFFFFFFFFFFFFFFFFFFFFFFFFFFFFFFFFFFFFFF:FFFFFFFF  
FFFFFFFFFFFFFFFFFFFFFFFFFFFFFFFFFFFFFFFFFFFFFFFFFFFFFFFFFFFFFFFF  
FFF

@A00721:190:HGJW7DSXY:4:1344:5475:16016\_2:N:0:TCTGCAAG+GCTGCACT  
ATTGTCAGTGAATCGTAATTCGCGAGAAGAGATAGTGACTAAAGTTTTGGCACTTCTAGTTCATCG  
CGGTATTTGTGAAATTAAGACAGACGTGAAAGTTATGATGAGTGATCG

+

FFFFFFFFFFFFFFFFFFFFFFFFFFFFFFFFFFFFFFFFFFFFFFFF:FFFFFFFF  
FFFFFFFFFFFFFFFFFFFFFFFFFFFFFFFF:FFFFFFFF

@A00721:190:HGJW7DSXY:4:1470:27263:3552\_2:N:0:TCTGCAAG+GCTGCACT  
GGACGTTCTTTTCATCGACGAATTATTCATGATTCACGCTGGTCAGACCCTTTTCTTACACATCTAC  
TTAAGGCGGCTTATACCATAGGTTACGGTGATTCCAATCAAATCGGAT

+

FFFFFFFFFFFFFFFFFFFFFFFFFFFFFFFFFFFFFFFFFFFFFFFF:FFFFFFFF  
FFFFFFFFFFFFFFFFFFFFFFFFFFFFFFFF:FFFFFFFF

@A00721:190:HGJW7DSXY:4:1313:16206:2253\_2:N:0:TCTGCAAG+GCTGCACT  
TATTGATCTCCAAGTCGCAAAGTCAACATCAACGACATCATTCTTGATGAGTGTGTTCTTATC  
GAAGTCTCAGTTATCGCTGCCCCGCCGACGTTTGTGCGGAACTCTCAG

+

FFFFFFFFFFFFFFFFFFFFFFFFFFFFFFFFFFFFFFFFFFFFFFFF:FFFFFFFF  
FFFFFFFFFFFFFFFFFFFFFFFFFFFFFFFF:FFFFFFFF

@A00721:190:HGJW7DSXY:4:2545:16080:28150\_1:N:0:TCTGCAAG+GCTGCACT  
AATTTCTCCTGCTTGTAATTCGAGAGAGGACACTATGGAAATTAGACCTATCAGATGTCTTGACGACT  
TCGAATTTGAGGACGGAGTTAAATATATTACTTTCACTCAAGGTGAAAAGTTTGAATTAACAAAGTC  
CTT

+

FFFFFFFFFFFFFFFFFFFFFFFFFFFFFFFFFFFFFFFFFFFFFFFF:FFFFFFFF  
FFFFFFFFFFFFFFFFFFFFFFFFFFFFFFFF:FFFFFFFF  
FFF



@A00721:190:HGJW7DSXY:4:1562:13937:30984\_2:N:0:TCTGCAAG+GCTGCACT  
ACGACACGTTGAATCTTTACGATACTTTGTTATCAATGTAAAGTTAAACGATGCTACTTGTGAGAGGA  
TCAATCACAGTAAGGAAGTGTACGTTTAGCACGGGAGGTTGCAGATT

+

FFFFFFFFFFFFFFFFFFFFFFFFF:F,FFF:FFFFFFFFFFFF:FFFFFFFFFFFFFFFFFFFFFFFFF  
FFFFFFFFFFFF,FFFFFFFFFFFFFFFFFFFFFFFFF:FFFFFFFFF

@A00721:190:HGJW7DSXY:4:2206:14055:10050\_2:N:0:TCTGCAAG+GCTGCACT  
CTATCGAGGACGATGAGTATCTTGAAGTTGTTGACGACAAGCCTCAAGAGGGTAGAGGACCACCTGGA  
TCTTCTACTGTCTCTGCCTTCCAAGATTTCTTAGAAGAGGTTATTCCT

+

FFFFFFFFFFFFFFFFFFFFFFFFFFFFFFFFFFFFFFFFFFFFFFFFFFFFFFFFFFFFFFFFF:FFFFFFFFFFFFFFFFF  
FFFFFFFFFFFFFFFFFFFFFFFFFFFFFFFFFFFFFFFFFFFFFFFFFFFFFFFFFFFFFFFFF

@A00721:190:HGJW7DSXY:4:2229:15130:6997\_1:N:0:TCTGCAAG+GCTGCACT  
GTCACTCGTAATCTTTCAGCCGAATTAAGTACTAATGAGTTCAAGTCGGTTGTCGATCGAATTAAGA  
TCAAGGCTAATACCTTTATAGGTAAGAAGCCCCTTGAGCCGCGTAGTCAGCGCGTTTAGCTGTATCAT  
CAG

+

FFFFFFFFFFFFFFFFFFFF:FFFFFFFFFFFFFFFFFFFFFFFFFFFFFFFFFFFFFFFFFFFFFFFFF  
FFFFFFFFFFFFFFFFFFFFFFFFFFFFFFFFFFFFFFFFFFFFFFFFFFFFFFFFFFFFFFFFF  
FFF

@A00721:190:HGJW7DSXY:4:2267:6949:20447\_1:N:0:TCTGCAAG+GCTGCACT  
TCCAAGAGAATATTTATTCTTATGAGGCTCGAACTTCAACGTTTTCAACAGGAAAGACATATCGCA  
CCCGAAATTTTTGGGCAGAATGCTCTTAACGCGGTTCTTGAACGGTGTTTTGATCAGTCTAAGTTGGA  
TAA

+

FFFFFFFFFFFFFFFFFFFFFFFFF:FFFFF:FFFFFFFFFFFFFFFFFFFFFFFFFFFFFFFFFFFFF  
FFFFFFFFFFFFFFFFFFFFFFFFFFFFFFFFFFFFFFFFFFFFFFFFFFFFFFFFFFFFFFFFF  
FFF

@A00721:190:HGJW7DSXY:4:2568:4318:22498\_2:N:0:TCTGCAAG+GCTGCACT  
ACTCAGTTAACCTGAGAGCTCCTCAATTGATAGATTGGGTCAACAATAGGGACGCTAGTATACTTCGT  
AAAGTCGACAGCGAAATGGTCAATATTGATAATTGGACCGACTATATG

+

FFFFFFFFFFFFFFFFFFFFFFFFFFFFFFFFFFFFFFFFFFFFFFFFF:FFFFFFFFFFFFFFFFFFFFFFFFF  
FFFF,FFFFFFFFFFFFFFFFFFFFFFFFF:FFFFFFFFFFFFFFFFF

@A00721:190:HGJW7DSXY:4:2672:11496:6370\_1:N:0:TCTGCAAG+GCTGCACT  
AGCTCATGGTGAAAAGGAAGCTAAGGTAAACTTGATGCTTCAGCCTTTTCGAAGCATAACCCGCA  
CAGAATATCGTTTATCACGCAAATTTATTAATGCAATTTTCGACCTATCTTTAAGGTTCTTGTGAG  
GAG

+

FFFFFFFFFFFFFFFFFFFFFFFFF:FFFFFFFFFFFFFFFFFFFFFFFFFFFFFFFFFFFFFFFFF  
FFFFFFFFFFFFFFFFFFFFFFFFFFFFFFFFFFFFFFFFFFFFFFFFFFFFFFFFFFFFFFFFF  
FFF

@A00721:190:HGJW7DSXY:4:2212:17436:7044\_1:N:0:TCTGCAAG+GCTGCACT  
TCTCTCTTAGGAGGTCATGATGACTACTATAAGGGTGAAATCGATTTTTCGAAGTTTGACAAATCTCA  
AGATTTCTTTGTAAAGCCTATGAGATAAAGATGTATTCTTATTTAGGCTTCGATGCTGAATTTCTTG  
AAC

+

FFFFFFFFFFFFFFFFFFFFFFFFFFFFFFFFFFFFFFFFF:FFFFFFFFFFFFFFFFFFFFFFFFFFFFFFFFF  
FFFFFFFFFFFFFFFFFFFFFFFFFFFFFFFFFFFFFFFFFFFFFFFFFFFFFFFFFFFFFFFFF  
FFF

@A00721:190:HGJW7DSXY:4:2220:29948:16783\_2:N:0:TCTGCAAG+GCTGCACT  
ACGCCAGGAGTATCCATAACGATTTGTCAATTTACCACCTTTGCTCAACGACGAAGTGGAACGCCAAC  
ACTTTCTTTGGTAATTGTATGATCACTTTGATGATTTTATCACTTTAT

+

FFFFFFFFFFFFFFFFFFFFFFFFFFFFFFFFFFFFFFFFFFFFFFFFFFFFFFFFFFFFFFFFFFFFFFFF  
FFFFFFFFFFFFFFFFFFFFFFFFFFFFFFFFFFFFFFFFFFFFFFFFFFFFFFFFFFFFFFFF  
@A00721:190:HGJW7DSXY:4:2634:28158:22263\_1:N:0:TCTGCAAG+GCTGCACT  
TTGTCGCTGGGGACGATTCCATTCTGTTTTCAAAGACTCCAATAACTGATCATTCTGATCATATGATT  
TTGGACAATGGTTTCGAAGCGAAATTTTTGAGGGATAAACCAGCGTACTTCTGCTCGCGATTTATTCT  
TTT  
+  
FFFFFF:FFFFFF:FFFFFFFFFFFFFFFFFFFFFFFFFFFFFFFFFFFFFFFFFFFFFFFFFFFFFFFF  
FFFFFFFFFFFFFFFFFFFFFFFFFFFFFFFFFFFFFFFFFFFFFFFFFFFFFFFFFFFFFFFFFFFFFFFF  
FFF  
@A00721:190:HGJW7DSXY:4:1378:26910:1063\_1:N:0:TCTGCAAG+GCTGCACT  
ATGTTACTCTTGTAGGACTTTGGGAGAGATTCTGTTAGTTTTAAAGACTATACTAAATATCTCCACTAC  
GAGGTTGTTGTTTGGCGATTAGCTCTTGCGACTAATATTCGATATTCGATTGAGGGTCGTTATACCTA  
TTC  
+  
FFFFFFFFFFFFFFFFFFFF:FFFFFFFFFFFFFFFFFFFFFFFFFFFFFFFFFFFFFFFFFFFFFFFFFFFF  
FFFFFFFFFFFFFFFFFFFFFFFFFFFFFFFFFFFFFFFFFFFFFFFFFFFFFFFFFFFFFFFFFFFFFFFF  
FFF  
@A00721:190:HGJW7DSXY:4:1462:26042:11992\_1:N:0:TCTGCAAG+GCTGCACT  
GCTTTGAATTGTATAAGATCAAATTTTAAACGATTCCGAGAGGTTTATCCTGATGTGGAGGGAGTTCT  
TGAAGCATCCCGACCTTTCCTTGTGAAAATTTGATGCGGTTTCATAAGATTATCAGTAATCCTGATT  
CTA  
+  
FFFFFFFFFFFFFFFFFFFFFFFFFFFFFFFFFFFFFFFFFFFFFFFFFFFFFFFFFFFFFFFFFFFFFFFF  
FFFFFFFFFFFFFFFFFFFFFFFFFFFFFFFFFFFFFFFFFFFFFFFFFFFFFFFFFFFFFFFFFFFFFFFF  
FFF  
@A00721:190:HGJW7DSXY:4:2337:26133:24580\_1:N:0:TCTGCAAG+GCTGCACT  
ACCTCTTCTGGAGAGACGTATCTCAAAGATCGACTTCGAGACAGGTGATATTGTTGAGCGAGAGCGAC  
CAAGATCTAAATTCGGTAACGGTGCGTGCGCTTTATTTTAAAAGCTCCCTCCTCTCGCAAGTTTGA  
TCT  
+  
FFFFFFFFFFFFFFFFFFFFFFFFFFFFFFFFFFFFFFFFFFFFFFFFFFFFFFFFFFFFFFFFFFFFFFFF  
FFFFFFFFFFFFFFFFFFFFFFFFFFFFFFFFFFFFFFFFFFFFFFFFFFFFFFFFFFFFFFFFFFFFFFFF  
FFF  
@A00721:190:HGJW7DSXY:4:1534:32081:23578\_2:N:0:TCTGCAAG+GCTGCACT  
GATCAGTCTCTGACTTGACCATCTTTCATTTTAAATGACGATCATTAAGACTCTCTGTCTTCTTTGTT  
TCCTTCTTTGCACTGATTTTTCCTCATCAGCTTGTGTTTTACCTAATC  
+  
FFFFFFFFFFFFFFFFFFFFFFFFFFFF,FFFFFFFFFFFFFF:FFFFFFFFFFFF:FF:FFFF:F,FFFF:FFFFFF  
FFFFFFFFFFFFFFFFFFFFFFFFFFFF:FFF:FF,FFFFFFFFFFFF,,FFFF:  
@A00721:190:HGJW7DSXY:4:2331:7102:15796\_2:N:0:TCTGCAAG+GCTGCACT  
GATAACAACATATCAGTTGATTAAGACTCTTCCGAAAGGCGAACTTTGGGAATTTGAAGCTCAGGGTGA  
AGCACAACGTTTGACCGTGACGAACGTGTTGTTCTTGATCTACGTTA  
+  
FFFFFFFFFFFFFFFFFFFFFFFFFFFFFFFFFFFFFFFFFFFFFFFFFFFF:FFF:FFFF:FFFFFFFFFFFFFFFF  
FFFFFFFFFFFFFFFFFFFFFFFFFFFFFFFFFFFFFFFFFFFFFFFFFFFFFFFFFFFFFFFF  
@A00721:190:HGJW7DSXY:4:2571:26115:2816\_1:N:0:TCTGCAAG+GCTGCACT  
CACTTATTACGATATTTCTTTAGTCGATGGGTTTTGACGCTTTAAGCGTCTTCTGTTTCATCGCAAC  
CAGATGATATCTTCTATTCTGAACCTATGTTTCGATCAGTGTTTCTTCTATCAGGAGGAAAACACTTGT  
TCT  
+  
FFFFFFFFF,FFFFFFFFFFFFFFFFFFFFFFFFFFFFFFFFFFFFFFFFFFFF:FFFFFFFFFFFFFFFFFFFFFFFF  
FFFFFFFFFFFF:FFFFFFFFFF:FFFFFFFFFFFFFFFFFFFFFFFFFFFFFFFFFFFFFFFFFFFFF:  
FFF

@A00721:190:HGJW7DSXY:4:2250:23131:20666\_1:N:0:TCTGCAAG+GCTGCACT  
TCTATTTTAAGTTTTGTCTTCCTTGTGTCTTATTCTATTAATCACTCATTTTAGTGAGATTATTAA  
AAACGCACTAAAACGTCTTCGACAACAGCAGGGGTTTTCGAATAGTGATAGCCACCCGCCTTACAGAG  
GGG

+

FFFFFFFFFFFFFFFFFFFFFFFFFFFFFFFFFFFFFFFFFFFFFFFFFFFFFFFFFFFFFFFFFFFFFFFF,FFFFFFFFFFFFFFFF  
FFFFFFFFFFFFFFFFFFFFFFFFFFFFFFFFFFFFFFFFFFFFFFFFFFFFFFFFFFFFFFFFFFFFFFFFFFFFFFFFFFFFFFFF  
FFF

@A00721:190:HGJW7DSXY:4:2502:26332:36918\_1:N:0:TCTGCAAG+GCTGCACT  
CTTTGGTACCACCTTTTCTACTGTCTGTCTCGCCTCTTCGAATGAAGTTTAAATGCTTAACAACAATG  
ATAGTGAATTTATACCTACAATCATTGGTTTTTCTAATAATGATGACACTATTGTTTATGGATATGAT  
GCT

+

:FFFFFFFFFFFFFFFFFFFFFFFFFFFFFFFFFFFFFFFFFFFFFFFFFFFFFFFFFFFFFFFFFFFFFFFFFFFFFFFF  
FFFFFFFFFFFFFFFFFFFFFFFFFFFFFFFFFFFFFFFFFFFFFFFFFFFFFFFFFFFFFFFFFFFFFFFFFFFFFFFF  
FFF

@A00721:190:HGJW7DSXY:4:2423:25201:24502\_1:N:0:TCTGCAAG+GCTGCACT  
GAGGATTCTCAGTTTACAAGGACCTTAAGCGATGGATCGGGTTAATTCTAAAACATTACCCGAAAGA  
CGTGCTAAATTAAAACCATTTGTACGATGTCGTCTGTCTCGGCGATCACTTTTCTACTAAGAATTGGTCC  
TAC

+

FFFFFFFFFFFFFFFFFFFFFFFFFFFFFFFFFFFFFFFFFFFFFFFFFFFFFFFFFFFFFFFFFFFFFFFFFFFFFFFF  
FFFFFFFFFFFFFFFFFFFFFFFFFFFFFFFFFFFFFFFFFFFFFFFFFFFFFFFFFFFFFFFFFFFFFFFFFFFFFFFF  
FFF

@A00721:190:HGJW7DSXY:4:1235:6460:27868\_2:N:0:TCTGCAAG+GCTGCACT  
AATCTTCATGAGATCGTTTCTTTCTTTATCTCTTTGGGTGTTAGGGATTTTGAGAGAGTGAAAGGCTT  
CAAGTGTAGTGGTTTGGTCGTTTCAGTACCCAGTCAGTATACCTCTAC

+

FFFFFFFFFFFFFFFFFFFFFFFFFFFFFFFFFFFFFFFFFFFFFFFFFFFFFFFFFFFFFFFFFFFFFFFFFFFFFFFF  
FF:,FFFFFFFF,FFF:FFFFFFFFFFFFFFFF,FF,FF,FFFFFFFF,FFFFFFFFFFFFFFFF:FFFFF  
FF:,:FFFFFFFF,FF,FF,FFFFFF,:F

@A00721:190:HGJW7DSXY:4:2257:15257:21465\_1:N:0:TCTGCAAG+GCTGCACT  
GACGTGTGCTCTTCCGATCTGTACCGGATTACCTGTCTTTCATATTATGAATGAACCTTCGGCCGCTC  
TCTTTGCTTCGATGTTGGATGTCAAGAAGGGTTCAGAATGGGATTCCTACGTAGTTTATGACTTTGGT  
GGT

+

FFFFFFFFFFFFFFFFFFFFFFFFFFFFFFFFFFFFFFFFFFFFFFFFFFFFFFFFFFFFFFFFFFFFFFFFFFFFFFFF  
FFF:FFFFFFFFFFFFFFFFFFFFFFFFFFFFFFFFFFFFFFFFFFFFFFFFFFFFFFFFFFFFFFFFFFFFFFFF  
FFF

@A00721:190:HGJW7DSXY:4:1250:24207:29136\_2:N:0:TCTGCAAG+GCTGCACT  
CTTCTATCGTCTTACGTTACGTAATTACTATAGTGTTATTTATTCTGGTGGTGATGATAATCTTGGA  
GGTCGTGACGTTGATGAAGCTATAAGAGCGTTCTTATTACGGCGCACT

+

FFFFFFFFFFFFFFFFFFFFFFFFFFFFFFFFFFFFFFFFFFFFFFFFFFFFFFFFFFFFFFFFFFFFFFFFFFFFFFFF  
FFFFFFFFFFFFFFFFFFFFFFFFFFFFFFFFFFFFFFFFFFFFFFFFFFFFFFFFFFFFFFFFFFFFFFFF:  
:

@A00721:190:HGJW7DSXY:4:1176:18991:1783\_1:N:0:TCTGCAAG+GCTGCACT  
CTTTCAGTTTCACAACTGAAGGAGGAGTTTCTGTTACTGGAAAACCCTCGTCAATACTTTTCAATAA  
TATACGTCTTGAACCTCACTTATGACGATCTAGTGAAATTAACGCGTCCTTTTCTGGAACGTAGTTT  
CTA

+

FFFFFFFFFFFFFFFFFFFFFFFFFFFFFFFFFFFFFFFFFFFFFFFFFFFFFFFFFFFFFFFFFFFFFFFFFFFFFFFF  
FFFFFFFFFFFFFFFFFFFFFFFFFFFFFFFFFFFFFFFFFFFFFFFFFFFFFFFFFFFFFFFFFFFFFFFF:FFFFF  
FFF

@A00721:190:HGJW7DSXY:4:2216:6424:23954\_2:N:0:TCTGCAAG+GCTGCACT  
AAAGATAGTGGCATTCAAGGCAAACTTACCCTGATTCCGGCCGGTGGTAGCTCATTTCTACCAGGGGC

TATTACTCTTGCTGAAACAGCTATTAAGCTGTTGAGCGGGTAATTAC

+

FFFF:FFFFFFFFFFFFFFFF,FFFFFFFFFFFFFFFFFFFFFFFFFFFFFFFF:FFFFFFFFFFFFFFFFFFFF  
F:FFFFFFFFFFFFFFFFFFFFFFFFFFFFFFFFFFFFFFFFFFFFFFFF:F:FFF

@A00721:190:HGJW7DSXY:4:2402:32570:15468\_2:N:0:TCTGCAAG+GCTGCACT  
ATCGCTGAAGGATGTGCACTCTTTTCTGCTACTTTAACGGAGCGTAGTGTACTCTTCGTCGATTGAAT  
CAACAGTAACATTACTTCTGAATACAGGTCTCTATCAAGCGCGTATTAT

+

FFF:FFF:,FF,,F,FFF:FFFFF,:FFFFFFFFF:,FF,:FFF::FFFFFFFFF,F:F:FF,,F,FF  
,:FF::FF,F,:F,FFF,,F,F,,FFF,F:FFFFF,,F,FF,FF:F,

@A00721:190:HGJW7DSXY:4:2274:19081:6104\_1:N:0:TCTGCAAG+GCTGCACT  
TTACCGTTGAAGGCTAAACTCCAAGGTAATTATGAAGACTGTGATTTATCTTCTACTCTGGCCTTGTA  
TGAGGGTGTCTTAATCGTAACATTAATAATTTCAATCTTCTTAAAAAGAAGATAGAGAGTCATACTT  
TGG

+

F,FFFFFFFFFFFFFFFFFFFFFFFF:FFFFFFFFFFFFFFFFFFFFFFFFFFFFFFFFFFFFFFFFFFFFFFFF  
FFFFFFFFFFFFFFFFFFFFFFFFFFFFFFFFFFFFFFFFFFFFFFFFFFFFFFFF:FFFFFFFFFFFFFFFFFFFF  
FFF

@A00721:190:HGJW7DSXY:4:1460:10022:34131\_1:N:0:TCTGCAAG+GCTGCACT  
CTCTACCGCCTTACAAGTCTAAGGTTAAAGAGTCGATTAAACAAGTTGTACTTATCAATGATTTTATC  
GCTGGTTGTTATCTCGAAAAGTCTCTTCTAAAAGGAACGTCAGTTCTAACCCAAAGAGAATATCTAAA  
ATA

+

FFFF:FFFFFFFFFFFFFFFFFFFFFFFFFFFFFFFFFFFFFFFF:FFFFFFFFFFFFFFFFFFFFFFFFFFFF  
FFFFFFFFFFFFFFFFFFFFFFFFFFFFFFFFFFFFFFFFFFFFFFFFFFFFFFFF:FFFFFFFFFFFFFFFFFFFF  
FFF

@A00721:190:HGJW7DSXY:4:1620:22815:15170\_2:N:0:TCTGCAAG+GCTGCACT  
AGACGTTGCTTGTGCTTCTCTCTTTAATGGCACTACCTCGGTACAATCTTACTTGAACGAAGGCGA  
CCTGTTCCGGAGTTTTTACGGGATCCGGAATGTTCTGTCTATATTAGG

+

FFFFFFFFF:FFFFFFFFFFFFFFFFFFFFFFFFFFFFFFFFFFFFFFFF,FFFFFFFFF:F:FFFFFFFFFFFF  
FFFF,FFFFFFFFFFFFF:F:,,:FF:F:,F:FFFF,FFFF,FFFF

@A00721:190:HGJW7DSXY:4:2572:24858:36526\_2:N:0:TCTGCAAG+GCTGCACT  
TCGAACGTCAACGTTACCGAGTTTCGTTTCGTACCTTGATGCTGACTTTCGTCAATATGATTTGATC  
TGTTGCTCAATTCTAAGCGTGTTCCGCTTAGTGCGAGGCCTCTCTTC

+

FFFFFFFFFFFFFFFFFFFFFFFFFFFFFFFFFFFFFFFFFFFFFFFFFFFFFFFFFFFFFFFFFFFFFFFFFFFF  
FFFFFFFFF:FFFFFFFFFFFFFFFFFFFFFFFFFFFFFFFFFFFFFFFFFFFFFFFF

@A00721:190:HGJW7DSXY:4:1260:2410:8328\_2:N:0:TCTGCAAG+GCTGCACT  
TATTTGGATGATCTTGATAAAGAACTTCATGAATTTTACAGAGGATGAAAAATTTCTTCTTGATTT  
TAATATAAAGAATCTTTACCAGGACTCCTACTACAGGAGGCAGTCTTC

+

FFFFFFFFFFFFFFFFFFFFFFFFFFFFFFFFFFFFFFFFFFFFFFFFFFFFFFFFFFFFFFFFFFFFFFFFFFFF  
FFFFFFFFFFFFFFFFFFFFFFFFFFFFFFFFFFFFFFFFFFFFFFFFFFFFFFFF

@A00721:190:HGJW7DSXY:4:1313:31114:3396\_1:N:0:TCTGCAAG+GCTGCACT  
GAAACTCTAAGTGTTAATACTTTCTTTCCAAGATTACCATTTATTTCAATTAAATTGGACTATTTCGAT  
AGGGGACATTTTATCGTGGGCTTCCGTAAAGTAAGATCTGTTATCGACGGTTTATCGTTTACGAAGT  
ATC

+

FF,F,F,F,,:FF,F:FFF,F,F:,FF,,F,,,FFFF:,FFFF,FF,FFF,F:,F:F:F,,,FF::,,  
FFF,,,,,FFFF:F,FFF,F,FF:FF,FFFF,,FF,FF,FFF:FFF::,F:FFFF::F,FFF,FFFF  
F::

@A00721:190:HGJW7DSXY:4:1171:21721:9330\_1:N:0:TCTGCAAG+GCTGCACT  
TTGGCCTAGTGGATGTTATTAGTGACATCTGGTCAATTTCTTTTTAGGTGGTCTTTATTCTATTATT

GATTTTTATGAGATTGATACGTAAACAGAAGATGATGTTAGAGTAGAATTCCTGAAGAGTCCTTCCGT  
AAC

+

:FFFFFFFFFFFFFFFFFFFFFFFFFFFFFFFFFFFFFFFFFFFFFFFFFFFFFFFFFFFFFFFFFFFFFFFF  
FFFFFFFFFFFFFFFFFFFFFFFFFFFFFFFFFFFFFFFFFFFFFFFFFFFFFFFFFFFFFFFFFFFFFFFF  
FFF

@A00721:190:HGJW7DSXY:4:2561:20464:25034\_2:N:0:TCTGCAAG+GCTGCACT  
AGGATTATGTCTGTGTTGAAAGACTTTCTACCGATAAGGGTCACTAGTCTTACACAATTAAGAAATAA  
TCCTACATTGACTGATTATCTAAAGATTGAAGGAAAATTTATCCTCG

+

FFFFFFFFFFFFFFFFFFFFFFFFFFFFFFFFFFFFFFFFFFFFFFFFFFFFFFFFFFFFFFFFFFFFFFFF  
FFFFFFFFFFFFFFFF:F:FFFFFFFFFFFFFFFFFFFFFFFFFFFFFFFFFFFFFFFFFFFFFFFF

@A00721:190:HGJW7DSXY:4:2665:4282:30796\_1:N:0:TCTGCAAG+GCTGCACT  
AGACGGCATACGAGATCTTGCAGAGTGACTGGAGTTCAGACGTGTGCTCTTCCGATCTCTCAGCAAAG  
GGATGCATGGTGTATCTCCTCAGGAGTCCCGCATTTGATAATAATGACGAGACTTTCGTCATAATC  
GC

+

FFFFFFFF:FF:,FFFFFFFFFFFFFFFFFFFFFFFFFFFFFFFFFFFFFFFFFFFFFFFFFFFFFFFF  
FFFFFFFFFFFFFFFFFFFFFFFFFFFFFFFFFFFFFFFFFFFFFFFFFFFFFFFFFFFFFFFFFFFFFFFF  
FF

@A00721:190:HGJW7DSXY:4:1103:19226:7169\_1:N:0:TCTGCAAG+GCTGCACT  
GTACCAGCGCATCTCGTGTGAGCCTCGACCCGATTATATGGTATTAAGGTGAGGAGACC  
ATTTTCTTGCTGAAATTTATAGAAGATTATTTTGACAGAATCAATAAGAATCATCGATTCTCGATTCTG  
TAG

+

FFFFFFFFFFFFFFFFFFFFFFFFFFFFFFFFFFFFFFFFFFFFFFFFFFFFFFFFFFFFFFFFFFFFFFFF  
FFFFF:FFFFFFFFFFFFFFFFFFFFFFFFFFFFFFFFFFFFFFFFFFFFFFFFFFFFFFFFFFFFFFFF  
FFF

@A00721:190:HGJW7DSXY:4:2473:15167:24533\_1:N:0:TCTGCAAG+GCTGCACT  
TTCTTAATTATAATATTCAACCTCAAAAGTTACGTGTTTACAGTAACGAGATCACACATTTTGAGAAC  
TAATAATGTTATGTTCTCTGATCATTTTGACAATCTCTTCTTATAATAATAATAATAATAATAATATTACT  
AAT

+

FFFFFFFFFFFFFFFFFFFFFFFFFFFFFFFFFFFFFFFFFFFFFFFFFFFFFFFFFFFFFFFFFFFFFFFF  
FFFFFFFFFFFFFFFFFFFFFFFFFFFFFFFFFFFFFFFFFFFFFFFFFFFFFFFFFFFFFFFFFFFFFFFF  
FFF

@A00721:190:HGJW7DSXY:4:1375:26386:27179\_1:N:0:TCTGCAAG+GCTGCACT  
CTCCAGTCAACACTAGTTCGAGTGCTGCTTTGGATTACGATGACGTGAGAATAGGTGAAGGGATAGTT  
TTTACCTCGACCAACATTAAGGCGGCGGCGACTAATCTTAAAGCTTCACCCAAAATGAAGGACACTTC  
GAA

+

FFFFFFFFFFFF:FFFFF:FFFFFFFFFFFFFFFFFFFFFFFFFFFFFFFFFFFFFFFFFFFFFFFF  
FFFFFFFFFFFFFFFFFFFFFFFFFFFFFFFFFFFFFFFFFFFFFFFFFFFFFFFFFFFFFFFFFFFFFFFF  
FFF

@A00721:190:HGJW7DSXY:4:1634:13150:18787\_1:N:0:TCTGCAAG+GCTGCACT  
TGCAGACGACGACGAAGCTTATACTACTTTAATTTTGGGTATTATGTGGAGATATCGTGATATCAGTA  
CGTCCAGATCCTCTGCTTTTACCGATAACGATAAATTCGTCATCAAATATAAAGAAAAGGACTATGAA  
ATA

+

FFFFFFFFFFFF:FF:F,::FFFFFFFF:F,FF:FFFFF:FFFFFFFF:FFFF:F:FFFFFFFFFFFFFFFF  
FFFF:FF:FFFFFFFFFFFFFFFFFFFFFFFFFFFFFFFFFFFFFFFFFFFFFFFFFFFFFFFFFFFFFFFF  
FFF

@A00721:190:HGJW7DSXY:4:2505:10185:11835\_1:N:0:TCTGCAAG+GCTGCACT  
GTCAATCCGTTGAGAAAATTTCTTAGAGGATATTCGCCATTGTGGTACGAATTGGTCCAACATTTACC

ACCAAATTCTTTTGATACAACCTCTAGCCTTCAAGTGGGGTATGCCTGCGGAATACGCTTGCTATTACAC  
CAG

+

FF:FFFFFFFFFFFFFFFFFFFFFFFFFFFFFFFFFFFFFFFFFFFFFFFFFFFFFFFFFFFFFFFFFFFFFFFF  
FFFFFFFFFFFFFFFFFFFFFFFFFFFFFFFFFFFFFFFFFFFFFFFFFFFFFFFFFFFFFFFFFFFFFFFF  
FFF

@A00721:190:HGJW7DSXY:4:1459:7591:14763\_1:N:0:TCTGCAAG+GCTGCACT  
CCCGTTGATGCTATGTCAGAAGAAGCTATTCAAGCTTGTCTTTAAAGACTGCAGAGGCTGTCAAACA  
AGCCCAGACTCAAGGAGTCCAATCAAAGGTTTTGAATTTAGCTCAACTGGGGAGACGTGCTTAAATGG  
GTG

+

FFFF,FFFFFFFFFFFFFFFF:FFFFFFFF:FFFFFFFFFFFFFF,F:FFFFFFFFFFFFFFFFFFFFFFF  
FFFFFFFFFFFFFFFFFFFFFFFF:FFFFFFFFFFFFFFFFFFFFFFFFFFFFFFFFFFFFFFFFFFFFFFF  
FFF

@A00721:190:HGJW7DSXY:4:2245:11487:4288\_2:N:0:TCTGCAAG+GCTGCACT  
CTACGGAAGTCCGGAGTATATTGTATGTTAATAGATAGTGGGATAATAGTTCTACCGATACGTAGT  
GAACGCGTTCTGTAGAACCAAGTACTTTCCGTCTGAAGAGTTTAGAGCT

+

FFFFFFFFFFFFFFFFFFFFFFFFFFFFFFFFFFFFFFFFFFFFFFFFFFFFFFFFFFFFFFFF:FFFFFFF:FFFFFFF:F  
FFFFFFFFFFFFFFFF:FFFF:FFFFFFFF,FFFFFF:FFFF,FFFFFF

@A00721:190:HGJW7DSXY:4:1458:29161:3646\_2:N:0:TCTGCAAG+GCTGCACT  
AGTTGTATAGTTGAAGATGTGGCTTTAGACGATAATCCTTTAAGGACTATGTTGACTGACGAAGATTT  
TCCCACAGATTTGTCTACGTTGCAGATCGCCACTCCAAACACTATATA

+

FFFFFFFFFFFFFFFFFFFFFFFFFFFFFFFFFFFFFFFFFFFFFFFFFFFFFFFFFFFFFFFF:FFFFFFFFFFFFFFF  
FFFFFFFFFFFFFFFFFFFFFFFFFFFFFFFF:FFFFFFFFFFFFFF,F:FFFFFF

@A00721:190:HGJW7DSXY:4:1350:1777:5353\_1:N:0:TCTGCAAG+GCTGCACT  
ACTTTTGTACCAAATCTTGGCTTTCAACGAAGTCTCTGATTTTATTAATCATTACTTTAACGATCT  
CTCGGTCATTTACTCTGTACTTGATCTACGTCGTTTAACTGTGCGAACAACCTTTACTTAGAATGACT  
CTA

+

FFFFFFFFFFFFFFFFFFFFFFFFFFFFFFFFFFFFFFFFFFFFFFFFFFFFFFFFFFFFFFFF:FFFFFFFFFFFFFFF  
FFFFFFFFFFFFFFFFFFFFFFFFFFFFFFFFFFFFFFFFFFFFFFFFFFFFFFFF:FFFF,FFFFFFFFF:F:F  
:FF

@A00721:190:HGJW7DSXY:4:1126:21368:27665\_2:N:0:TCTGCAAG+GCTGCACT  
ATATCATATTAGTAATACTCACTATCGTTTTCTGCTTTTTCTTAGCTAATAGATTAATAAAGGATGAG  
TACGAAAACCAACTCTTCGTTACGAGACCTGATGGTAGAATAGATTTA

+

FFFFFFFFFFFFFFFFFFFFFFFFFFFFFFFFFFFFFFFFFFFFFFFFFFFFFFFFFFFFFFFFFFFFFFFF  
FFFFFFFFFFFFFFFFFFFFFFFFFFFFFFFFFFFFFFFFFFFFFFFFFFFFFFFFFFFFFFFF

@A00721:190:HGJW7DSXY:4:2267:26847:36088\_1:N:0:TCTGCAAG+GCTGCACT  
TGTTGAAGTGTGATTTGTGTTAATACGTGTTATTTTCATTTTTTAACCGATTTTATCATCCGAAAACG  
ACTCGAAACCGAGAAGCCGTAGATCAAAGTCCCTTCTAACTTTAGATTATTAATCCTGCCTTTACTC

+

F,FF::,::,::,F,F,,F,,,,,F:,,,:::F,,F,F,F:,,,FF,,,,,F,F,F,,FF:F,F  
F:FF:FFF:F,F,F,F,:FF:FFFF,FFF,,FFF,F:F,FFFF:FFFF,FFF:FFF,F:FFF,F:

@A00721:190:HGJW7DSXY:4:2547:4661:8375\_2:N:0:TCTGCAAG+GCTGCACT  
ATAACCTTCTTATACTTTTGGGTATGTTTTGTGAAAAACATGAGATACCCAAGTCTATCGAAGACATT  
ATCTCTTATGTACTTATTGTAACGATCATTCTTTGAGTTTTGTGATT

+

FFFFFFFFFFFFFFFFFFFFFFFFFFFFFFFFFFFFFFFFFFFFFFFFFFFFFFFFFFFFFFFF:F  
FFFFFFFFFFFFFFFFFFFFFFFF:FF:FFFFFFFFFFFFFFFF::

@A00721:190:HGJW7DSXY:4:2638:2654:15671\_2:N:0:TCTGCAAG+GCTGCACT  
ATGAGGAGGATTTATAATGCTTTTCGATAGTGATTGTTATCAATTTAAATACATTACTGTTTCAAATC



$+$ 

@A00721:190:HGJW7DSXY:4:2155:8513:28134\_1:N:0:TCTGCAAG+GCTGCACT  
AACTGAGGCAGTACCTCAGTCAAAAGTCACATTCACCACTCCCATACCAATCAATGATGTGACTATAC  
AGTTTCGGCCATTTCAAGAGTGGTCAATACGTCGTGGGAGGTACTGAAGCCTTCCCCTCCGCTGGCAGC  
AAG

 $+$ 

@A00721:190:HGJW7DSXY:4:2257:17626:26976\_2:N:0:TCTGCAAG+GCTGCACT  
GCCAATCAATAGTTCTTCTGACCAGAATGAAAAGGGGTTTACCAGGGTAGTCTCTAAGTCTACCAGGA  
AGAGGGGAAATGTCCCCAAACTGAGAAGAATAAAGGGAAAGGTCCAT

+

@A00721:190:HGJW7DSXY:4:1374:17987:1047\_2:N:0:TCTGCAAG+GCTGCACT  
AATTCTGAAGGAAGATCTCCCACCATCTGGGGTTGGGAATAAGAAATCTGCACGGGCCAAAGAGGCCG  
CTGCTACGAAGTCGCTGAAGGCGGCTTGGGTCATTAAGGGTAGCTGTA

+

@A00721:190:HGJW7DSXY:4:1445:31015:26459\_1:N:0:TCTGCAAG+GCTGCACT  
CCGACCCCATCTTTGAGACCAAGACTCTCTACAGTAGGTTCTGTCCTACTATGAGCAAATCTGTTGAA  
TTCGTCCTACTGAGGACGAAGGTGAGAGGACTTTTGCTACTGGCGACAACTGAGAGCAGTCGCTGGGG  
AAA

+

@A00721:190:HGJW7DSXY:4:2263:29306:3458\_1:N:0:TCTGCAAG+GCTGCACT  
TTGATTGTGACGAGGCCGGTGACGTTTTTTGTCAAGGGCGTTTGGAGGATTTTATCCGCGCTTATCTAT  
GGGGCGAAGATCCCCTATGGAGTCTTGATGGACTTAGGTTGGCATATTTATTCCGACGATAATAAGCA  
TG

+

@A00721:190:HGJW7DSXY:4:2515:5367:1141\_2:N:0:TCTGCAAG+GCTGCACT  
GACTTACAAGAGAGAGTGTGAGAGAGTCGCTCTCACTATTTTTGCCAGAAAGCGGGCTTTCTGACTG  
ATGAGGTTAAACTCTTGCTCCTTCTGTGGGTGAGGGTTTTTGTATA

+

@A00721:190:HGJW7DSXY:4:1624:27552:13479\_1:N:0:TC T G C A A G + G C T G C A C T  
C A A C C T C T C T T T A G A G A G C A T T A G A A G G A A G T T G G G C A A A T T C C C A C A T A T G G T A G A C G T T G T C A C A C  
T T T T C T T G A A A T T T T T C C T T T C C T C C G T C A T T G G G G A T T T C G A T G T G A G A A G G T G G A A G G T G T C A A G  
G G T

+



@A00721:190:HGJW7DSXY:4:2671:11496:25097\_1:N:0:TCTGCAAG+GCTGCACT  
TCTTTTCAGGACCTAATCACATCATGATTGATAGTTACGGCTCGTATCGAGTTGGAGGGAGGAAGTTCT  
CCGAAATTAAGACGGGGGGATTAAGAGTCCAGCTGTAAGTGTCAATTCAGAGAGGGGAGCTCTGAAA  
AGG

@A00721:190:HGJW7DSXY:4:2459:24713:18928\_2:N:0:TCTGCAAG+GCTGCACT  
AGAAGATGAGGAAGTCTAAGAGGAGGAGTTTGAGGAAGGCTCTAGAGAAGATCTCACCACCTGGAGAA  
GGCAAGTGAGAGTCCAGAAGTTGATGAAGAAGGATTATTTGAAGCAG

@A00721:190:HGJW7DSXY:4:2141:19388:26741\_1:N:0:TCTGCAAG+GCTGCACT  
CCTAAGGTGGATGAGGGAGGTTGTTTCTTTGGAGTTTTAGATAATCTTTTGAGAAGGGGTCATAGAGC  
CAGCAAGAGAAGCTTATATGCTGGTTTAAGTGATGATTATCACTCCTTGAGAAGACAAGCCACATTAA  
GAT

@A00721:190:HGJW7DSXY:4:2427:3513:16720\_2:N:0:TCTGCAAG+GCTGCACT  
AGGTCCTTTTGAGTATCGACAGATCTTTCGATCTTGAGGACGTACATTTAACGTGGCAGAATTCTGTA  
ACTTACCATATTGTTCCCTCCGGGAAGTTGTGGGATTTAACTTTGACT

@A00721:190:HGJW7DSXY:4:1126:4634:2973\_2:N:0:TCTGCAAG+GCTGCACT  
TGGACTACTCGACTTTTGATCTGGAGTTGTCTAGGGTCATGGCAGATACTACCGATAAGGTGAAAAAT  
ATGCAGGTCAAAGATTCTGTAGCTCTGAGGGCGGTTGAGGGAGCCGTT

@A00721:190:HGJW7DSXY:4:1111:32045:22451\_1:N:0:TCTGCAAG+GCTGCACT  
CTAAGAGTCTTTATGATTCAAAACCTATCGTTGTCGTACCTTACAAGTTGAGGAGACTTTACAGCGG  
CTTATTGTCGCGCAGTTTCCAGAATTGCGGTTGAAGTTCACCCATTCTATCTTGAATGCTCACGCCGT  
CGC

@A00721:190:HGJW7DSXY:4:2403:15221:27038\_2:N:0:TCTGCAAG+GCTGCACT  
AAAGTACAGATTTAGTGATTTAGATATTATTGATATTGGAGGCGATATTCGTTTTCATATCCAAACT  
CCTTGAATGGAGTACATATTTGCAACCTATTCTTGATGTGAAAGATG

@A00721:190:HGJW7DSXY:4:2365:7509:10770\_2:N:0:TCTGCAAG+GCTGCACT  
TGATTGGGAACGTACCTACTCACGAGACGTCATGAAAGCTATCGGAGGGAAGCAAATGTTTCGTTCT  
GTTACAAGAACGCTTTGGATTGTGACCATAAAGCCTCAGTTGCGATAG

+

FFFFFFFFFFFFFFFFFFFFFFFFFFFFFFFFFFFFFFFFFFFFFFFFFFFFFFFFFFFFFFFF  
FFFFFFFF:FFFFFFFFFFFFFFFFFFFFFFFFFFFFFFFFFFFFFFFFFFFFFFFFFFFFF  
@A00721:190:HGJW7DSXY:4:1472:12698:26428\_1:N:0:TCTGCAAG+GCTGCACT  
CTCTTGATGATGTAGCCACTATAATGCTTAAGAGAGAGATTGATGTATGTCATTTCTGCTTAGTTTGT  
CCCCGCCGAATTATTGGACACGATGAAAAATGACATACCCGTTCTGACCTTGGTATCGTTATCCGTCA  
TGG  
+  
FFFFFFFFFFFFFFFFFFFFFFFFFFFFFFFFFFFFFFFFFFFFFFFFFFFFFFFFFFFFFFFF  
FFFFFFFFFFFFFFFFFFFFFFFF:FFFFFFFFFFFFFFFFFFFFFFFFFFFFFFFFFFFFFFFF  
FFF  
@A00721:190:HGJW7DSXY:4:1414:21784:15671\_2:N:0:TCTGCAAG+GCTGCACT  
AAAGATAAGATTTTTATCTTTCTTCAAACACCCTGTTTTCTTAAGGGCGGACAATTGTTCCATTGTGA  
ACTCTTGGGACTAGATTGAGCATTAAATGAGTTCGAATAACTCGTAA  
+  
FFFFFFFFFFFFFFFFFFFFFFFFFFFFFFFFFFFFFFFF:F,FF:FFFFFFFFFFFFFFFFFFFFFFFF:FFFFFF  
FFFFFFFFFFFFFFFFFFFFFFFF:FFFFFFFFFFFF:FFFFF:FFFFF:FFFFF  
@A00721:190:HGJW7DSXY:4:2449:4399:14246\_2:N:0:TCTGCAAG+GCTGCACT  
TATTTCCGTACCAAGAGCCACTGCCAATCTCATCGCTATACGCATACCTGATTGGAAGAAGCGAGGTT  
CGTTCCTCAATAAAAATTTTTCTCAAGAGATTATGGAGATCGGAAGAG  
+  
FFF,FFFF:FFFF,F::FFFF:F::FFFFFFFF:FFFF:,FFF:FFF:FFFFFFFFFFFFFFFF  
F:FF:FFFFFFFF:FFFF,FFF:FFFFFFFFFFFF,FF:F::F,FF:F:  
@A00721:190:HGJW7DSXY:4:1675:8097:20337\_2:N:0:TCTGCAAG+GCTGCACT  
ACGTCATGGGGATCACTTCTTCGGTCAATGACAAAACCTTCGAATATGTTACGACATGGCTTCGTAAC  
AACAGTGCGAGGATTGTCATCTCGGGGAAAGTGATTACCAAGATGTT  
+  
FFFFFFFFFFFFFFFFFFFFFFFF:FFFFFF:FFFFFFFFFFFFFFFFFFFFFFFFFFFFFFFFFFFFFFFF  
FFFFFFFFFFFFFFFFFFFFFFFFFFFFFFFF:FFFFFFFFFFFFFFFF:F:FF  
@A00721:190:HGJW7DSXY:4:1206:6723:22435\_1:N:0:TCTGCAAG+GCTGCACT  
AGATACCTAGAGAAGGTCGCAGCGATCTTACTCGTTATCGGAGCTAAGAAGAAGACTTTGGGTACACG  
TTATGCTCGCAAACCTTAACGTTAGTACCGGAGGTGATCTCTCTGCTTCTGCGTTACTGAGAGAAAAGA  
TTC  
+  
FFF:FFFFFFFFFFFFFFFFFFFFFFFFFFFFFFFFFFFFFFFFFFFFFFFFFFFFFFFFFFFFFFFF  
FFFFFFFFFFFFFFFFFFFFFFFFFFFFFFFFFFFFFFFFFFFFFFFFFFFFFFFFFFFFFFFF  
FFF  
@A00721:190:HGJW7DSXY:4:1615:6298:21731\_1:N:0:TCTGCAAG+GCTGCACT  
CTTTATGGACAAGATGCAAGTTCTTGGGAAATACTTGTTTCCCTTTCTAGTTTGTAGGTGATCTTG  
ACGTCGATTCTTTGTATAGGGAGTGTGAGAAGACAACGAATCTTGAAACTACGGTCCTTATCAAAGAA  
AAT  
+  
FFFFFFFFFFFFFFFFFFFFFFFFFFFFFFFFFFFFFFFFFFFFFFFFFFFFFFFFFFFFFFFF  
FFFFFFFFFFFFFFFFFFFFFFFFFFFFFFFFFFFFFFFFFFFFFFFFFFFFFFFFFFFFFFFF  
FFF  
@A00721:190:HGJW7DSXY:4:1550:19036:22185\_2:N:0:TCTGCAAG+GCTGCACT  
AAATCTTTTGAGATTGAGAAGATTGAAGAACACGTCAAGAAGTCGCTCGGCGTTGTTCTTGAAAACCA  
AGTTAAGAAGGAGGCTGATCATGGAGTCTTTGTACCTTCTGTCAAAC  
+  
FFFFFFFFFFFFFFFFFFFFFFFFFFFFFFFFFFFFFFFFFFFFFFFFFFFFFFFFFFFFFFFF:FFFFFFFF  
FFFFFFFFFFFFFFFFFFFFFFFFFFFFFFFFFFFFFFFFFFFFFFFFFFFFFFFF  
@A00721:190:HGJW7DSXY:4:1650:7853:11522\_1:N:0:TCTGCAAG+GCTGCACT  
TCCCGGATGTGGATTGAAGGCTGGCTCTAAGGGAGACTCCTTCTTTTGAATGTTGTAAAGAATTGGG  
TTGAGAAGTGTGCTTTACAAGGAGTTAGACTCTTCTCAAGTTTTTAGATCTTCTTGATAATCTTAA  
GAA

+  
FFFFFFFFFFFFFFFFFFFFFFFFFFFFFFFFFFFFFFFFFFFFFFFFFFFFFFFFFFFFF,FFFFFFFF  
FFFFFFFFFFFFFFFFFFFFFFFFFFFFFFFFFFFFFFFFFFFFFFFFFFFFFFFFFFFFF  
FFF  
@A00721:190:HGJW7DSXY:4:1336:19316:5666\_1:N:0:TCTGCAAG+GCTGCACT  
TCTGAATTACTGTCTTTCTCTACCCATAACTTCTTTTTCAAAAATGCGGATGGGTCTACTGATGTT  
TTCCTACAGAGTGCAGTCGTTTCAACACTTATCACCACCTTTTGAAAGGAAAATAATTGGTGATGAAAA  
TAC  
+  
FFF:FFFFFFFFFFFFFFFFFFFFFFFFFFFFFFFFFFFFFFFFFFFFFFFFFFFFFFF:FFFFFFF  
FFF,FFFFFFFFFFFFFFFFFFFFFFFFFFFFFFFFFFFFFFFFFFFFFFFFFFFFFFFFFFFFF  
FFF  
@A00721:190:HGJW7DSXY:4:2660:26350:15436\_2:N:0:TCTGCAAG+GCTGCACT  
GGGTTCTCAAGGCTCTCATCGCCACTGGGATTCTAAGGGGTTCCATAAGATATTATCTGACATTGTGG  
TTCAATGATCAGGATTCTTCTTTTGGTCCTTACGTCTTAAGTAATTTG  
+  
FFFFFFFFFFFFFFFFFFFFFFFFFFFFFFFFFFFFFFFFFFFFFFFFFFFFFFFFFFFFF  
FFFFFFFFFFFFFFFFFFFFFFFFFFFFFFFFFFFFFFFFFFFFFFFFFFFFF  
@A00721:190:HGJW7DSXY:4:1110:21603:35618\_1:N:0:TCTGCAAG+GCTGCACT  
GATTCTTAAAAGAAGTTTATTAAACTTCAGAGTCTCTTGGAAGTCCAGGTAGCTAATGTTCTTGCAA  
TAGCCACAGACTTTCTGGGAAAAGAGACCTCTGTTGGTAGAGGAGTTGAGAGAATTACTCAGATTCAA  
TCT  
+  
FFFFFFFFFFFFFFFFFFFFFFFFFFFF:F:FFFFFFFFFFFFFFFFFFFFFFFFFFFFFFFFFFFFF  
FFFFFFFFFFFFFFFFFFFFFFFFFFFFFFFFFFFFFFFFFFFFFFFFFFFFFFFFFFFFF  
FFF  
@A00721:190:HGJW7DSXY:4:1517:25201:12633\_1:N:0:TCTGCAAG+GCTGCACT  
GGAGTGGCTAGGTTTTAAAAGATCCTTTGCACAAGCAATACCTTCCACTGAGTTCATCACCCAGAGTT  
TCGACGTCGCGGAAAACGATGAAGATTTCCACACTGTTGAGAATCTTCTGATGCTGAATTTGAGGAA  
AAT  
+  
FF:FFFFFFFFF:FFFFFFFFFFFFF:FFFFFFFFF:FFFFFFFFF::FFFF,FFFFFFFFF:FFFFFFF  
FFFF:FF,FF::FFFFFFFFFFFFF,:FFFFFFFFFFFFF:FFFFFFFFFFFFFFFFFFF:::  
FFF  
@A00721:190:HGJW7DSXY:4:2139:16052:28291\_1:N:0:TCTGCAAG+GCTGCACT  
TTTTTGGTATAAATCCTGATGGCTCAGTACAGGGAGGAGGTAATAGTTATAAACCTTCTTTTATCAT  
TGCAACAGGACTTTGAGAAGACTGTTGAAATGGACAAAATCTGGGATCATAGGTATGTGTCACGCTAC  
ACT  
+  
FFFFFFFFFFFFFFFFFFFFFFFFFFFFFFFFFFFFFFFFFFFFFFFFFFFFF:FFFFFFFFFFFFF:FFF  
FFFFFFFFFFFFFFFFFFFFFFFFFFFFFFFFFFFFFFFFFFFFFFFFFFFFF:FFFFFFFFFFFFF  
FFF  
@A00721:190:HGJW7DSXY:4:1273:12120:29590\_2:N:0:TCTGCAAG+GCTGCACT  
AAGATCTCTACAGAGATTATCGAGAGTTGTGATCTAGTTCTAAATTTAGGTGACGGACTTTAGCAAC  
TTAGATAAATCTTTCCGGGCTCAATGACCTTTGCTATGTACGTGGA  
+  
FFFFFFFFFFFFFFFFFFFFFFFFFFFFFFFFFFFFFFFFFFFFFFFFFFFFF:F,FFFFFFF  
:FFFFFFF:FFFFF:FFFFFFFFFFFFFFFFFFFFFFFFFFFFF,FFFFFFFFF  
@A00721:190:HGJW7DSXY:4:1435:10276:35133\_2:N:0:TCTGCAAG+GCTGCACT  
TCACTACAAAGGCGTTACGTAAAGTAGTTTTACGCTTTATCTTAAAGCATTACCACCAAATTTAGCA  
CTTTTTGAATATGACAGAAGCTCGCCATATCAGATTAGAGACATGCCA  
+  
FFFFFFFFF:FFFFFFFFFFFFF:FFFFFFFFFFFFFFFFFFFFFFFFFFFFFFFFFFFFF  
FFFFFFFFFFFFFFFFFFFFFFFFFFFFFFFFFFFFF:FFFFFFFFFFFFF

@A00721:190:HGJW7DSXY:4:1252:14027:28416\_1:N:0:TCTGCAAG+GCTGCACT  
TTCTAACCAGGACTGATGGTGAGATTATTTTACCTTTTGGAGGTCCAGGAACCTTTACTCCTAGTGTC  
TTTTCTAGAGTCCAAGGACGTTTCCGTCGGAGGATGACAGGTGGGTGACCGCTCAATAACACTCTATT  
GAA

+

FF,FFF,FFF:FFFFFFF:FFF,FFF,F:FFFFFFFFF:FFFFFFFFFFFFFFF:FFFF:FFFFFFFFF:  
FFFF:F:FFFFF:FFFFF:FFFFFFFFFFFFFFF,FFFFFFFFFFF,,F,FFFFF:FFFFFFFFF,FF,FFFF  
FFF

@A00721:190:HGJW7DSXY:4:1432:24388:24314\_1:N:0:TCTGCAAG+GCTGCACT  
TAATGATACTGACGAAGGTTCTATTACCACCCTTGTCAATTGATACAAACATTCTAGGTGATGCTTTCT  
TAGAGGCTCGTCTAGCCGCTGAGATTCTGCTTACCTATTTACAATCTGTAGAGAGAGAGGTTAATCAG  
AAT

+

FFFFFFFFFFFFFFFFFFFFFFFFFFFFFFFFFFFFFFFFFFFFFFFFFFFFFFFFFFFFFFFFFFFFFFFFF  
FFFFFFFFFFFFFFFFFFFFFFFFFFFFFFFFFFFFFFFFFFFFFFFFFFFFFFFFFFFFFFFFFFFFFFFFF  
FFF

@A00721:190:HGJW7DSXY:4:1459:2908:21997\_1:N:0:TCTGCAAG+GCTGCACT  
TAGGTCTCCTAGTACTTAAGGGTTTATGTTTCGGTTTCAGCTGGATGGATCTTTTGATGGTATGTTTC  
ACATTGCGTGATCACTTCCCGTGGACTTGGGAAGAGATTAAACATAAAATCCAGCGATTCTATTATGT  
CGC

+

FFFFFFFFFFFFFFFFFFFF:FFFFFFFFFFFFFFFFFFFFFFFFFFFFFFFFFFFFFFFFFFFFFFFFFFFFF  
FFF:FFFFFFFFFFFFFFFFFFFFFFFFFFFFFFFFFFFFFFFFFFFFFFFFFFFFFFFFFFFFFFFFFFFFF  
FFF

@A00721:190:HGJW7DSXY:4:2110:18475:11443\_2:N:0:TCTGCAAG+GCTGCACT  
TGTGGGGATTAACCTCCCTCGTGAACTTACGACGATGTTCTCGCTCGCATTTACAAGGATTACTAA  
GTCTGAGATCTGCCACTTCTAATTTTAGGAAACGTCGCGAAAAGAAAG

+

FF:FFFFFFFFFFFFFFFFF:FFFFFFFFFFFFFFFFF:FFFFFFFFFFFFFFFFFFFFFFFFFFFFFFFFF  
FFFFFFFFFFFFFFFFFFFF:FFFFFFFFFFF,FFFFFFFFF::FFFFFFFFFFF

@A00721:190:HGJW7DSXY:4:1618:21811:32033\_2:N:0:TCTGCAAG+GCTGCACT  
TTGGTCGAAAAATATCGCCGGGAACCTTCTAATAGAGGATCCTGATGACATTATTTCAACGGATACCGA  
TCTCAGTTCTACCACAGAAACCGTCTCAGGAACCTGTCTCCACTGATTC

+

FFFFFFFFFFFFFFF:FFFFFFFFFFFFFFFFFFFF::FFFFFFFFFFFFFFFFFFFFFFFFFFFFFFFFFFFF  
FFFFFFFFFFFFFFF:FFFFF:F:FFFFFFFFF:FFFFFFFFFFFFFFF:F:

@A00721:190:HGJW7DSXY:4:1558:10456:30968\_2:N:0:TCTGCAAG+GCTGCACT  
AAAGACGACCTTCTTGTGGGGACTGAGACCTCTGAATTTTCAGGGTGCCTGATGAGGACGTTGAAAG  
GGATAATTTCAACTCTGAGACTTCTAAGAGTGTTTCAAAGACCAGAA

+

FFFFFFFFFFFFFFF,FFFFFFFFFFFFFFFFFFFFFFFFFFFFFFFFFFFFFFFFFFFFFFFFFFFFFFFFF  
FFFFFFFFFFFFFFFFFFFFFFFFFFFFFFFFFFFFFFFFFFFFFFFFFFFFFFFFFFFFFFFFFFFFF

@A00721:190:HGJW7DSXY:4:1558:27941:15499\_1:N:0:TCTGCAAG+GCTGCACT  
GGTTGAAGAGAAAACCTGATATGGTTGCGGCTGATCGTACCCCAATTCTGCTAGAAAGATCACTCTCG  
GCGATACCACTGATCTTCCAGAGTTACGTAGTGGTCGTTCTTTTGGTGATTTTATCAAAGAGAAAGTT  
TCT

+

FFFFFFFFFFFFFFF:FFFFFFFFFFFFFFFFFFFFFFFFFFFFFFFFFFFFFFFFFFFFFFFFFFFFFFFFF  
FFFFFFFFFFFFFFFFFFFFFFFFFFFFFFFFFFFFFFFFFFFFFFFFFFFFFFFFFFFFFFFFFFFFF:FFFFF  
FFF

@A00721:190:HGJW7DSXY:4:2549:23592:25254\_1:N:0:TCTGCAAG+GCTGCACT  
TCAGTTTTCCAAAAGCTATTAATAGCAGTTGCGGGGCTATAATACCGCCTCCAGATTACTCTAAACT  
GAATCCACTCTCTTGGGATATAAATGAGTACATCTATAATAGAGTTTTGGAACCTGTGTAATGTCCTAC  
GTA

```

+
FFFFFFFFFFFFFFFFFFFFFFFFFFFFFFFFFFFFFFFFFFFFF:FFFFFF:FFFFFFFFFFFFFFFFFFFFFFFFFFFF
FFFF:FFFFFFFFFFFFFFFFFFFFFFFFFFFFFFFFFFFFFFFFFFFFFFFFFFFFFFFFFFFFFFFFFFFFFFFFFFFFF
FFF
@A00721:190:HGJW7DSXY:4:2513:6623:33223_1:N:0:TCTGCAAG+GCTGCACT
TTCATGAAGATCTTCGAGTGTTTTATAGTGAGTTATTCTTGCGAAGGTTCAAGTCGATTGATTTTGTT
GACTACGATCTCTCTTGTAATAAGAAGTTCTTCGCAGTTGAATCTCCACCAGGTGGAGGGAAGACCAC
TGA
+
FFFFFFFFFFFFFFFFFFFFF,FFFFFFFFFFFFFFFFF:FFFFFFFFFFFFFFFFFFFFFFFF:FFFFFFFFFFFFF
FFFFFFFFFFFFFFFFFFFFFFFFFFFFFFFFFFFFFFFFFFFFFFFFFFFFFFFFFFFFFFFFFFFFFFFFFFFFFFFFF
FFF
@A00721:190:HGJW7DSXY:4:1357:15863:1438_2:N:0:TCTGCAAG+GCTGCACT
ATTGTCACTGCTAATCGTAATTTCGCGAGAAGAGATAGTGACTAAAGTTTTGGCACTTCTAGTTCATCG
CGGTATTTGTGAAATTAAGACAGACGTGAAAAGTTATGATGAGTGATCG
+
FFFFFFFFFFFFFFFFF:FFFFFFFFFFFFFFFFFFFFFFFFFFFFFFFFFFFFFFFF:FFFFFFFFFFFFFFFFFFFF:F
FFFFFF:FFFFFFFFFFFFFFFFF:FFFFFFFFFFFFFFFFFFFFFFFFFFFFF,FF
@A00721:190:HGJW7DSXY:4:2136:6307:30389_2:N:0:TCTGCAAG+GCTGCACT
GGACGTTCTTTTCATCGACGAATTATTCATGATTCACGCTGGTCAGACCCTTTTTCTTACACATCTAC
TTAAGGCGGCTTATACCATAGGTTACGGTGATTCCAATCAAATCGGAT
+
FFFFFFFFFFFFFFFFFFFFFFFFFFFFFFFFFFFFFFFFFFFFFFFFFFFFFFFFFFFFFFFFFFFFFFFFFFFFFFFFF
FFFFFFFFFFFFFFFFFFFFFFFFFFFFFFFFF:FFFFFFFFFFFFFFFFFFFF::FFF
@A00721:190:HGJW7DSXY:4:1459:23782:26741_2:N:0:TCTGCAAG+GCTGCACT
TATTGATCTCCAAGTCGAAACTACTTCAACATCAACGACATCATTCTTGATGAGTGTCGTTCTTATC
GAAGTCTCAGTTATCGCTGCCCGCCGACGTTTGTGCGGAACTCTCAG
+
FFFFFFFFFFFFFFFFFFFFFFFFFFFFFFFFFFFFFFFFFFFFFFFFFFFFFFFFFFFFFFFFFFFFFFFFFFFFFFFFF
FFFFFFFFFFFFFFFFFFFFFFFFFFFFFFFFF:FFFFFFFFFFFFFFFFFFFFF
@A00721:190:HGJW7DSXY:4:2573:22571:17190_1:N:0:TCTGCAAG+GCTGCACT
AATTTCTCCTGCTTGTAATTCGAGAGAGGACACTATGGAAATTAGACCTATCAGATGTCTTGACGACT
TCGAATTTGAGGACGGAGTTAAATATATTACTTTCACTCAAGGTGAAAAGTTTGAAATTAACAAAGTC
CTT
+
FFFFFFFFFFFFF:FFFFFFFFFFFFFFFFFFFFFFFFFFFFFFFFFFFFFFFFFFFFFFFFFFFFFFFFFFFFFFFFFFFF
FFFFFFFFFFFFFFFFFFFFFFFFFFFFFFFFF:FFFFFFFFFFFFFFFFFFFFF
@A00721:190:HGJW7DSXY:4:2402:25491:36432_2:N:0:TCTGCAAG+GCTGCACT
ACGACACGTTGAATCTTTACGATACTTTGTTATCAATGTAAAGTTAAACGATGCTACTTGTGAGAGGA
TCAATCACAGTAAGGAAGTGCACGTTTAGCACGGGAGGTTGCAGATT
+
FFFFF:FFFFFF:FFFFFFFFFFFF::,FFFFFF:,FF,FFFFFFFFFFFFFFFFFFFFFFFFFFFFFFFFFFFFF,
FFFFFFFFFFFF,FFFFFFFFFFFFF,FFFFFFFFFFFFFFFFFFFFFFFFFFFFF
@A00721:190:HGJW7DSXY:4:2240:8088:13244_2:N:0:TCTGCAAG+GCTGCACT
CTATCGAGGACGATGAGTATCTTGAAGTTGTTGACGACAAGCCTCAAGAGGGTAGAGGACCACCTGGA
TCTTCTACTGTCTCTGCCTTCCAAGATTTCTTAGAAGAGGTTATTCTT
+
FFFFFFFFFFFFFFFFFFFFFFFFF:F:FFFFFFFFFFFFFFFFFFFFFFFF:FFFFFF,FF,FFFFF,:FFFF:,FFFF
FFF:FFFFFF:FFFF:FFFFFFFFF:FFF,FFFF,F:FFFFFFFFF
@A00721:190:HGJW7DSXY:4:2426:7355:30921_1:N:0:TCTGCAAG+GCTGCACT
GTCACGCGTAATCTTTCAGCCGAATTAAGTACTAATGAGTTCAAGTCGGTTGTCGATCGAATTAAGA
TCAAGGCTAATACCTTTATAGGTAAGAAGCCCCTTGAGCCGCGTAGTCAGCGCGTTTAGCTGTATCAT
CAG

```

[illegible][illegible][illegible]

```
FF,FF::F,FFF,FFFF::FFF:FFF:FFFFFF:FFFFFFFF:FFFFFF,FFFFFFFFFFFFFF:FFF
FFF,FFF:FFFFFFFFFFFF:FF,,FFFFFFFFF,,,FF:F:FF:FFFF
```

[illegible]

```
FFFFFFFFFFFFFFFFFFFFFFFFFFFFFFFFFFFFFFFFFFFFFFFFFFFFFFFFFFFFFFF
FFFFFFFFFFFFFFFFFFFFFFFFFFFFFFFFFFFFFFFFFFFF
```

[illegible][illegible]

@A00721:190:HGJW7DSXY:4:1570:31602:8750\_1:N:0:TCTGCAAG+GCTGCACT  
GCTTTGAATTGTATAAGATCAAATTTTAAACGATTCCGAGAGGTTTATCCTGATGTGGAGGGAGTTCT  
TGAAGCATCCCGACCTTTCCTTGTGAAAATTTTGATGCGGTTTCATAAGATTATCAGTAATCCTGATT  
CTA

+

FFFFFFFFFFFFFFFFFFFFFFFFFFFFFFFFFFFFFFFFFFFFFFFFFFFFFFFFFFFFFFFFFFFFFFFFFFFFFFFF  
FFFFFFFFFFFFFFFFFFFFFFFFFFFFFFFFFFFFFFFFFFFFFFFFFFFFFFFFFFFFFFFFFFFFFFFFFFFFFFFF  
FFF

@A00721:190:HGJW7DSXY:4:2428:4246:13009\_1:N:0:TCTGCAAG+GCTGCACT  
ACCTCTTCTGGAGAGACGTATCTCAAAGATCGACTTCGAGACAGGTGATATTGTTGAGCGAGAGCGAC  
CAAGATCTAAATTCGGTAACGGTGCGTGCGCTTTATTTTAAAAAGCTCCCTCCTCTCGCAAGTTTGA  
TCT

+

FFFFFFFFFFFFFFFFFFFFFFFFFFFFFFFFFFFFFFFFFFFFFFFFFFFFFFFFFFFFFFFFFFFFFFFFFFFFFFFF  
FFFFFFFFFFFFFFFFFFFFFFFFFFFFFFFFFFFFFFFFFFFFFFFFFFFFFFFFFFFFFFFFFFFFFFFFFFFFFFFF  
FFF

@A00721:190:HGJW7DSXY:4:2133:29197:1611\_2:N:0:TCTGCAAG+GCTGCACT  
GATCAGTCTCTGACTTGACCATCTTTCATTTTAAATGACGATCATTAAAGACTCTCTTCTTCTTTGTT  
TCCTTCTTTCGACTGATTTTTCCTCATCAGCTTGTGTTTACCTAATC

+

FFFFFFFFFFFFFFFFFFFFFFFFFFFFFFFFFFFFFFFFFFFFFFFFFFFFFFFFFFFFFFFFFFFFFFFFFFFFFFFF  
FFFFFFFFFFFFFFFFFFFFFFFFFFFFFFFFFFFFFFFFFFFFFFFFFFFFFFFFFFFFFFFFFFFFFFFFFFFFFFFF  
FFF

@A00721:190:HGJW7DSXY:4:2446:19235:23531\_2:N:0:TCTGCAAG+GCTGCACT  
GATAACAACATCAGTTGATTAAGACTCTTCCGAAAGGCGAACTTTGGGAATTTGAAGCTCAGGGTGA  
AGCACAACGTTTGACCGTGACGAAGTGTGGTGTCTTGATCTACGTTA

+

FFFFFFFFFFFFFFFFFFFFFFFFFFFFFFFFFFFFFFFFFFFFFFFFFFFFFFFFFFFFFFFFFFFFFFFFFFFFFFFF  
FFFFFFFFFFFFFFFFFFFFFFFFFFFFFFFFFFFFFFFFFFFFFFFFFFFFFFFFFFFFFFFFFFFFFFFFFFFFFFFF

@A00721:190:HGJW7DSXY:4:1272:6578:19680\_1:N:0:TCTGCAAG+GCTGCACT  
TATTTTAAAGTTTGTCTTCTTGTGTTGTTCTATTCTAATCACTCATTTTAGTGAGATTATTA  
ACGCACTAAACGTCTTCGACAACAGCAGGGGTTTTCGAATAGTGATAGCCACCCGCTTACAGAGGG  
GCA

+

FFFFFF:FFFFFFFFFFFFFFFFFFFFFFFFFFFFFFFFFFFFFFFFFFFFFFFFFFFFFFFFFFFFFFFFFFFFFFFF  
FFFFFFFFFFFFFFFFFFFFFFFFFFFFFFFFFFFFFFFFFFFFFFFFFFFFFFFFFFFFFFFFFFFFFFFFFFFFFFFF  
:FF

@A00721:190:HGJW7DSXY:4:2563:9200:30326\_1:N:0:TCTGCAAG+GCTGCACT  
CTTTGGTACCACCTTTTCTACTGTCTGTCTCGCTCTTCGAATGAAGTTTAAATGCTTAACAACAATG  
ATAGTGAATTTATACCTACAATCATTGGTTTTTCTAATAATGATGACACTATTGTTTATGGATATGAT  
GCT

+

:FFFFFFFFFFFFFFFFFFFFFFFFFFFFFFFFFFFFFFFFFFFFFFFFFFFFFFFFFFFFFFFFFFFFFFFFFFFF  
FFFFFFFFFFFFFFFFFFFFFFFFFFFFFFFFFFFFFFFFFFFFFFFFFFFFFFFFFFFFFFFFFFFFFFFFFFFF  
FFF

@A00721:190:HGJW7DSXY:4:2571:30219:31125\_1:N:0:TCTGCAAG+GCTGCACT  
GAGGATTCTCAGTTTACAAGGACCTTAAGCGATGGATCGGGGTTAATTCTAAAACATTACCCGAAAGA  
CGTGCTAAATTAAACCATTTGTACGATGTCGTCTGTCTCGGCGATCACTTTTACTAAGAATTGGTCC  
TAC

+

FFFFFFFFFFFFFFFFFFFFFFFFFFFFFFFFFFFFFFFFFFFFFFFFFFFFFFFFFFFFFFFFFFFFFFFFFFFF  
FFFFFFFFFFFFFFFFFFFFFFFFFFFFFFFFFFFFFFFFFFFFFFFFFFFFFFFFFFFFFFFFFFFFFFFFFFFF  
FFF

@A00721:190:HGJW7DSXY:4:1538:6650:27602\_2:N:0:TCTGCAAG+GCTGCACT  
AATCTTCATGAGATCGTTTCTTCTTTATCTCTTTGTTGTTAGGGATTTTGAGAGAGTGAAAGGCTT

$+$ 

@A00721:190:HGJW7DSXY:4:2428:32226:9893\_1:N:0:TCTGCAAG+GCTGCACT  
GACGTGTGCTCTTCCGATCTGTACCGGATTACCTGTCTTTCATATTATGAATGAACCTTCGGCCGCTC  
TCTTTGCTTCGATGTTGGATGTCAAGAAGGGTTCAGAATGGGATTCTACGTAGTTTATGACTTTGGT  
GGT

+

@A00721:190:HGJW7DSXY:4:1519:14136:24972\_2:N:0:TCTGCAAG+GCTGCACT  
CTTCTATCGTCTTACGTTACGGTAATTACTATAGTGTTATTTATTCTGGTGGTGATGATAATCTTGA  
GGTCGTGACGTTGATGAAGCTATAAGAGCGTTCCTTATTACGGCGCACT

+

@A00721:190:HGJW7DSXY:4:1408:17553:15107\_1:N:0:TCTGCAAG+GCTGCACT  
CTTTCAGTTTCACAACCTGAAGGAGGAGGTTTCTGTTACTGGAAAACCTCGTCAATACTTTTCAATAA  
TATACGTCTTGAACCTCACTTATGACGATCTAGTGAAATTAACGCGTCCTTTTCTGGAACGTAGTTTAA  
CTA

+

@A00721:190:HGJW7DSXY:4:2224:30101:9220\_2:N:0:TCTGCAAG+GCTGCACT  
AAAGATAGTGGCATTCAAGGCAAACCTTACCTGATTCCGGCCGGTGGTAGCTCATTTCTACCAGGGGC  
TATTACTCTTGCTGAAACAGCTATTAAGCTGTTGAGCGGGTAATTAC

+

@A00721:190:HGJW7DSXY:4:2522:29342:11506\_2:N:0:TCTGCAAG+GCTGCACT  
ATCGCTGAAGGATGTGCACTCTTTCTGCTACTTTAACGGAGCGTAGTGTACTCTTCGTCGATTGTAT  
CAACAGTAACATTACTTCTAATAAAGGCTCTATCAAGCTCGTATTAT

+

@A00721:190:HGJW7DSXY:4:2402:32570:15468\_1:N:0:TCTGCAAG+GCTGCACT  
TTACCTTTGAAGGCTAACTCCAAGGTAATTATGAAGTCTGTGATTTATCTTTCCTCTGGCCTTGTT  
TGAGGGTGTTTCTAATCGTAACATTTATAATTTCAATCTTCTTAAAAAGAAGATAGAGAGTCATACTT  
TGG

+

@A00721:190:HGJW7DSXY:4:1558:10655:18662\_1:N:0:TCTGCAAG+GCTGCACT  
CTCTACCGCCTTACAAGTCTAAGGTTAAAGAGTCGATTAAACAAGTTGTACTTATCAATGATTTTATC  
GCTGGTTGTTATCTCGAAAAGTCTCTTCTAAAAGGAACGTCAGTTCTAACCCAAAGAGAATATCTAAA  
ATA

+

```

FFFFFFFFFFFFFFFFFFFFFFFF:FFFFFFFF:FFFFFFFF:FFFFFFFFFFFFFFFFFFFFFFFF:
F:FFFFFFFFFFFFFFFF:FFFFFFFFFFFF,FFFFFFFFFFFFFFFFFFFFFFFFFFFFFFFF:FFFFFFFFFFFF
FFF

```





FFFFFFFFF:FFFFFFFFF:FFFFFFFFFFFFFFFFFFFFFFFFFFFFFFFFF  
FFF

@A00721:190:HGJW7DSXY:4:1220:1307:14027\_2:N:0:TCTGCAAG+GCTGCACT  
TAATATTCAACCTCAAAAAGTTACGTGTTTACAGTAACGAGATCACACATTTTGAGAACTAACTATGTT  
ATGTTCTCTGATCATTTTGACAATCTCTTCTTATAATAAATAAATAA

+

FFFFFFFFFFFFFFFFF:FFFFFF:FFFFFFFFF:FFFFFFFFFFFFFFFFFFFFFFFFF  
FFFFFFFFFFFFFFFFFFFFFFFFFFFFFFFFFFFFFFFFFFFFFFFFF

@A00721:190:HGJW7DSXY:4:1211:24243:13886\_1:N:0:TCTGCAAG+GCTGCACT  
AATGGCAAATAGTGGAAGGCTCCAGTCAACACTAGTTCGAGTGCTGCTTTGGATTACGATGACGTGA  
GAATAGGTGAAGGGATAGTTTTTACCTCGACCAACATTAAGGCGGCGGCGACTAATCTTAAAGCTTCA  
CCC

+

F:FF:FFFFFFFFF:FFFFFFF:FFFFFFFFFFFFFFFFFFFFFFFFFFFFFFFFF  
FFFFFFFFFFFFFFFFFFFFFFFFFFFFFFFFFFFFFFFFFFFFFFFFF  
FFF

@A00721:190:HGJW7DSXY:4:1269:29478:31814\_1:N:0:TCTGCAAG+GCTGCACT  
ACACTTCGAACTGAATAATGATGCACTACAAACAAGTATCGCTAATCATCTGAAAAAGGCTCTAAAG  
GACACTATACAATATCCAGACGACGACGAAGCTTATACTACTTTAATTTGGGTATTATGTGGAGATA  
TCG

+

FFFFFFFFFFFFFFFFF:FFFFFF:FFFFFFFFF:FFFFFFFFFFFFFFFFFFFFFFFFF  
FFFFFFFFFFFFFFFFFFFFFFFFFFFFFFFFFFFFFFFFFFFFFFFFF:FFFF:FFFFFFFFFFFFFFFFF  
FFF

@A00721:190:HGJW7DSXY:4:1169:23538:10316\_1:N:0:TCTGCAAG+GCTGCACT  
CCGTTGAGAAAATTTCTTAGAGGATATTGCCATTGTGGTACGAATTGGTCCAACATTTACCACCAA  
TTCTTTTGATACAACCTTAGCCTTCAAGTGGGGTATGCCTGCGGAATACGCTTGCTATTACACGATT  
GGT

+

FFFFFFFFF:FFFFFFFFFFFFFFFFFFFFFFFFFFFFFFFFFFFFFFFFF  
FFFFFFFFFFFFFFFFFFFFFFFFFFFFFFFFFFFFFFFFF:FFFFFFFFFFFFFFFFF  
FFF

@A00721:190:HGJW7DSXY:4:1346:32371:29904\_2:N:0:TCTGCAAG+GCTGCACT  
TGATGCTATGTCAGAAGAAGCTATTCAAGCTTGTCGTTTAAAGACTGCAGAGGCTGTCAAACAAGCCC  
AGACTCAAGGAGTCCAATCAAAGTTTTGAATTTAGCTCAACTGGGGA

+

FFFFFFFFFFFFFFFFF:FFFFFFFFFFFFFF,FFFF:FFFFFFFF:FFFFFFFFFFFF:FFF  
FFFFFF:F:FFFFFFFFF:FFFFF::FFFF:F:FFFFFF:FFF

@A00721:190:HGJW7DSXY:4:2547:19226:31845\_2:N:0:TCTGCAAG+GCTGCACT  
CTACGGAAGTCCGGAGTATATTGTATGTTAATAGATAGTGGGATAATAGTTCTACCGATACGTAGT  
GAACGCGTTCGTAGAACCAAGTACTTTCGCTCTGAAGAGTTTAGAGCT

+

FFFFFFFFFFFFFFFFFFFFFFFFFFFFFFFFFFFFFFFFF:F:FFFFFFFF:FFF,FFF:FF:FF:F  
FFFFFFFFFFFFFFFFF:FF,FFFFFFFF:F,FFFFF,FFFF,F:,F

@A00721:190:HGJW7DSXY:4:1255:28103:13275\_2:N:0:TCTGCAAG+GCTGCACT  
AGTTGAAGATGTGGCTTTAGACGATAATCCTTTAAGGACTATGTTGACTGACGAAGATTTCCACAG  
ATTTGTCTACGTTGCAGATCGCCACTCCAAACACTATATACATTATAA

+

FFFFFFFFFFFFFFFFFFFFFFFFFFFFFFFFFFFFFFFFF  
FFFFFFFFF:FFFFFFFFF:FFF:FFFFFFFFF:F:F

@A00721:190:HGJW7DSXY:4:1433:23637:15969\_1:N:0:TCTGCAAG+GCTGCACT  
ACTTTTGTTACCAAATCTTGCTTTCAACGAAGTCTCTGATTTTATTAATCATTACTTTAACGATCT  
CTCGGTCATTTACTCTGTACTTGATCTACGTCGTTTAACTGTGGAACAACCTTTACTTAGAATGACT  
CTA

FFFFFFFFFFFFFFFFFFFFFFFFFFFFFFFFFFFFFFFFFFF:FFFFFFFFFFFFFFFFFFFFFFFFFFFFFFFFFFFFFFFFFF  
FFFFFFFFFFFFFFFFFFFFFFFFFFFFFFFFFFFFFFFFFFFFFFFFFFFFFFFFFFFFFFFFFFFFFFFFFFFFFFFFFFFF:F  
FFF  
@A00721:190:HGJW7DSXY:4:1273:9977:34303\_2:N:0:TCTGCAAG+GCTGCACT  
ATATCATATTAGTAATACTCACTATCGTTTTCTGCTTTTCTTAGCTAATAGATTAATAAAGGATGAG  
TACGAAAACCAACTCTTCGTACGAGACCTGATGGTAGAATAGATTTA  
+  
FFFFFFFFF:FFFFFFFFFFFFFFFFFFFFFFFFF:FFFFFFFFFFFFFFFFFFFFFFFFFFFFFFFFFFFF,FFFFFFFFFF  
FFFFFFFFF:FFFFFFFFFFFFFFFFF:FFFFFFFFF::FFF:FFFF,F:F  
@A00721:190:HGJW7DSXY:4:1271:5484:35728\_1:N:0:TCTGCAAG+GCTGCACT  
CATCTCAACTAGGATAAAGCTAGTTTTCCGTCCTGAACGTAATACACGAAGAGATCATCCGCACACGA  
CTCGAAACCGAGACGCCGTAGATCAAAGTCCCTTCTAACTTTAGATTATGAATCCTGCCTTTACTCAT  
TTT  
+  
:,F:FF:,,F,F:FF,FF,,,FFFFFF:FFF:F,FF:F:FFFFFFFF,F,,,,F:,F,FFF,F,FFFF  
FFFFFFFFFFFFFFFFFFFFFFFFFFFFFFFFFFFFFFFFFFFFFFFFFFFFFFFFFFFFFFFFFFFFFFFFFFFFFFFFFFFF  
FFF  
@A00721:190:HGJW7DSXY:4:2547:5882:6856\_2:N:0:TCTGCAAG+GCTGCACT  
ATAACCTTCTTATACTTTTGGGTATGTTTTGTGAAAAACATGAGATACCCAAGTCTATCGAAGACATT  
ATCTCTTATGTACTTATTGTAACGATCATTCTTTCGAGTTTTGTCATT  
+  
FFFFFFFFFFFFFFFFFFFFFFFFFFFFFFFFFFFFFFFFFFFF:FFFFFFFFFFFFFFFFFFFFFFFFFFFFFFFFFFFF  
FF:FFFFFFFFFFFFFFFFFFFFFFFFF:FFFFFFFFFFFFFFFFFFFFFFFFFFFF:FF  
@A00721:190:HGJW7DSXY:4:1340:16848:25786\_2:N:0:TCTGCAAG+GCTGCACT  
ATGCTTTTCGATAGTGATTGTTATCAATTTAAATACATTACTGTTTCAAATCATCTTTACTCACAGAC  
TCCGAAAATGGTTTCAAATGAGGTCAAAGCTCTATTTATTAAACGAAC  
+  
FFFFFFFFFFFFFFFFFFFFFFFFFFFFFFFFFFFFFFFFFFFFFFFFFFFFFFFFFFFFFFFFFFFFFFFFFFFFFFFFFFFF  
FFFFFFFFFFFFFFFFFFFFFFFFFFFFFFFFFFFF,FFFFFFFFFFFFFFFFFFFFFF  
@A00721:190:HGJW7DSXY:4:2372:4842:29763\_1:N:0:TCTGCAAG+GCTGCACT  
CACTACCACTGATCTGCCGACTTTAGTCAAGGACTTCAATTCCTTCGATGTTTATATTTTTCTATAA  
GGGAAAATATCAATAATCAAATTTGACAAATTTAGAACTTTATTTCAGAACTCTCTCCGATCACCT  
TGG  
+  
FFFFFFFFFFFFFFFFFFFFFFFFFFFFFFFFFFFFFFFFFFFFFFFFFFFFFFFFFFFFFFFFFFFFFFFFFFFFFFFFFFFF  
FFFFFFFFFFFFFFFFFFFFFFFFFFFFFFFFFFFF:FFFFFFFFFFFFFFFFFFFFF  
FFFFFFFFFFFFFFFFFFFFFFFFFFFFFFFFFFFFFFFFFFFF:FFFFFFFFFFFFFFFFFFFFFFFFFFFFFFFFFFFF  
FFF  
@A00721:190:HGJW7DSXY:4:2308:9643:30843\_2:N:0:TCTGCAAG+GCTGCACT  
TCAATAAGATGTATGATGATAATCTACTATTTTTAAATAGTGATATTCAGCGTATACTTGAATACTTT  
ATCAAAGATTTGGCTTGGTCTATTTACCGCAAAAAGTTGGAAGAGGTC  
+  
FFFFFFFFFFFFFFFFFFFFFFFFFFFFFFFFFFFFFFFFFFFFFFFFFFFFFFFFFFFFFFFFFFFFFFFFFFFFFFFFFFFF  
FFFFFFFFFFFFFFF:FFFF,FFFFFFFFFF:FFFFFFF:FFF:FFFF:FFF  
@A00721:190:HGJW7DSXY:4:1603:22779:5619\_2:N:0:TCTGCAAG+GCTGCACT  
TTTTACTTATACTTTAAATAGCACCGATTATAACTTGACTGTTGATAATATTACAATAGCTCTTCTC  
AGAAGATTAGAGAAGTAACCGGTGAACACGTCGGTAGCATTGATTAC  
+  
FFFFF:FFFFF:FFFFFFFFFFFFF:FFFFFFFFFFFFF:F,FFFFFFFFFFFFF:FFFFF:FFF:FFFFF  
FFFFFFFFFFFFFFFFFFFFFFFFFFFF:,FFF:FFFFFFFFFFFFFFFFFFFFF:FFF  
@A00721:190:HGJW7DSXY:4:2351:7193:14450\_1:N:0:TCTGCAAG+GCTGCACT  
AGAACTGAAAAAGATTCTTTTCGAAAAGAAACCTATAAGTTACAAACGATTCTTCGACTATATTAAG  
AAATAAAAATACTTCAAGTACCTGAACTTTACATTTTTAATGGTATGGTATAATGTGTCTTACAAATA  
GAA

+  
FFFFFFFFFFFFFFFFFFFFFFFFFFFFFFFFFFFFFFFFFFFFFFFFFFFFFFFFFFFFFFFFFFFFFFFFFFFFFFFF  
FFFFFFFFFFFFFFFFFFFFFFFFFFFFFFFFFFFFFFFFFFFFFFFFFFFFFFFFFFFFFFFFFFFFFFFFFFFFFFFF  
FFF  
@A00721:190:HGJW7DSXY:4:2122:18304:24580\_2:N:0:TCTGCAAG+GCTGCACT  
TAATGAGAGTGTATTCTTAATATTCTAGTAACCGCTATGTGGGCATTACTAGGATTTATCACACTCC  
TAAATTTGATAGCAATTTATGTTTTAAATGCTAGGAAAATTTAGAAA  
+  
FFFFFFFFFFFFFFFFFFFFFFFFFFFFFFFFFFFFFFFFFFFFFFFFFFFFFFFFFFFFFFFFFFFFFFFFFFFFFFFF  
FFFFFFFFFFFFFFFFFFFFFFFFFFFFFFFFFFFFFFFFFFFFFFFFFFFFFFFFFFFFFFFFFFFFFFFFFFFFFFFF  
FFFFFFFFFFFFFFFFFFFFFFFFFFFFFFFFFFFFFFFFFFFFFFFFFFFFFFFFFFFFFFFFFFFFFFFFFFFFFFFF  
@A00721:190:HGJW7DSXY:4:1445:23601:32972\_1:N:0:TCTGCAAG+GCTGCACT  
GGAGTACTTAATTCAATAGCTTTAGTATTATTTACTATCGCCTTTATTGGAAATTGTATAAGAGTTAA  
TTGCTTACACAAAAGTGACGCGCAAGGAATCTTAATTGATTGAAGCTAGGCGTTGGGGAGAATGAAC  
TGC  
+  
FFFFFFFFFFFFFFFFFFFFFFFFFFFFFFFFFFFFFFFFFFFFFFFFFFFFFFFFFFFFFFFFFFFFFFFFFFFFFFFF  
FFFFFFFFFFFFFFFFFFFFFFFFFFFFFFFFFFFFFFFFFFFFFFFFFFFFFFFFFFFFFFFFFFFFFFFFFFFFFFFF  
FFF  
@A00721:190:HGJW7DSXY:4:2638:30770:29951\_2:N:0:TCTGCAAG+GCTGCACT  
CCTACCATGACCAATCATCGCTCCAAGTGGCAGCCAGACGTAGGGTCAAACCTACTACCGCCGGTCCG  
GCAGATCGGCACCACTGGTCTCTACGTTCAAGGACCCGCTGTGCAGAA  
+  
FFFFFFFFFFFF,FFFFFFFFFFFF:FFFFFFFFFFFF,FFFFFFFF:F:FFFFFFFFFFFF,FFFFFFFFFFFF  
FFFFFFFFFFFFFFFFFFFFFFFFFFFFFFFFFFFFFFFFFFFFFFFFFFFFFFFFFFFFFFFFFFFFFFFFFFFFFFFF  
FFFFFFFFFFFFFFFFFFFFFFFFFFFFFFFFFFFFFFFFFFFFFFFFFFFFFFFFFFFFFFFFFFFFFFFFFFFFFFFF  
@A00721:190:HGJW7DSXY:4:2553:12825:34976\_2:N:0:TCTGCAAG+GCTGCACT  
TCTGCACAGAAGAAGGCTGAAGGTCGTTACCGGACGACCACTCAAAGGAAACGGGCTGTTGCCAGAG  
GAAAGCAGCGACCAACCGAGGTCGCTCGTAACATTGACGGCAGTCCCGT  
+  
FFFFFFFFFFFFFFF:FFFFFFFFF:FFFFFFFFFFFFFFFFFFFFFFFFFFFFFFFFFFFFFFFFFFFFFFFFFFFFF:FF:FFFF  
FFFFFFFFF::FF:FFFF:F:FFFFFFFF:FFFFFFFFFFFF,FFFF,F:FF,  
@A00721:190:HGJW7DSXY:4:2268:18304:30091\_1:N:0:TCTGCAAG+GCTGCACT  
AACTGAGGCAGTACCTCAGTCAAAAGTCACATTCACCACTCCCATACCAATCAATGATGTGACTATAC  
AGTTTCGGCCATTTCAAGAGTGGTCAATACGTCGTGGGAGGTACTGAAGCCTTCCCCTCCGCTGGCAGC  
AAG  
+  
FFFFFFFFFFFFFFFFFFFFFFFFFFFFFFFFFFFFFFFFFFFFFFFFFFFFFFFFFFFFFFFFFFFFFFFFFFFFFFFF  
FFFFFFFFFFFFFFFFFFFFFFFFFFFFFFFFFFFFFFFFFFFFFFFFFFFFFFFFFFFFFFFFFFFFFFFFFFFFFFFF  
FFF  
@A00721:190:HGJW7DSXY:4:2257:17644:28447\_2:N:0:TCTGCAAG+GCTGCACT  
GCCAATCAATAGTTCTTCTGACCAGAATGAAAAGGGTTTACCAGGGTAGTCTCTAAGTCTACCAGGA  
AGAGGGGAAATGTCCCCAAAAGTGAAGAATAAAGGGAAAGGTCCAT  
+  
FFFFFFFFFFFFFFFFFFFFFFFFFFFFFFFFFFFFFFFFFFFFFFFFFFFFFFFFFFFFFFFFFFFFFFFFFFFFFFFF  
FFFFFFFFFFFFFFFFFFFFFFFFFFFFFFFFFFFFFFFFFFFFFFFFFFFFFFFFFFFFFFFFFFFFFFFFFFFFFFFF  
@A00721:190:HGJW7DSXY:4:1418:4209:4899\_2:N:0:TCTGCAAG+GCTGCACT  
AATTCTGAAGGAAGATCTCCACCATCTGGGGTTGGGAATAAGAAATCTGCACGGGCCAAAGAGGCCG  
CTGCTACGAAGTCGCTGAAGGCGGCTTGGGTACCTAAGGGTAGCTGTA  
+  
FFFFFFFFFFFFFFFFFFFFFFFFFFFFFFFFFFFFFFFFFFFFFFFFFFFFFFFFFFFFFFFFFFFFFFFFFFFFFFFF  
FFFFFFFFFFFFFFFFFFFFFFFFFFFFFFFFFFFFFFFFFFFFFFFFFFFFFFFFFFFFFFFFFFFFFFFFFFFFFFFF  
@A00721:190:HGJW7DSXY:4:1452:3323:34554\_1:N:0:TCTGCAAG+GCTGCACT  
CCGACCCCATCTTTGAGACCAAGACTCTCTACAGTAGGTTCTGTCCTACTATGAGCAAATCTGTTGAA  
TTCGTCACTGAGGACGAAGGTGAGAGGACTTTTGGCTACTGGCGACAAAGTGAAGAGCAGTCGCTGGG  
AAA

[illegible]



@A00721:190:HGJW7DSXY:4:1272:15745:2362\_1:N:0:TCTGCAAG+GCTGCACT  
AGATACCTAGAGAAGGTCGCAGCGATCTTACTCGTTATCGGAGCTAAGAAGAAGACTTTGGGTACACG  
TTATGCTCGCAAACCTTAACGTTAGTACCGGAGGTGATCTCTGCTTCTGCGTTACTGAGAGAAAAGA  
TTC

+

FFFFFFFFFFFFFFFFFFFFFFFFFFFFFFFFFFFFFFFFFFFFFFFFFFFFFFFFFFFFFFFFFFFFFFFF  
FFFFFFFFFFFFFFFFFFFFFFFFFFFFFFFFFFFFFFFFFFFFFFFFFFFFFFFFFFFFFFFFFFFFFFFF:  
FFF

@A00721:190:HGJW7DSXY:4:1628:19958:17957\_1:N:0:TCTGCAAG+GCTGCACT  
CTTTATGGACAAGATGCAAGTTCTTGGGAAATACTTGTTTCCCTTTTGGTTTAGGTAGGTGATCTTG  
ACGTCGATTCTTTGTATAGGGAGTGTGAGAAGACAACGAATCTTGAACTACGGTCCTTATCAAAGAA  
AAT

+

:FFFFFFFFFFFF,FFFFFFFFFFFFFFFFFFFFFFFFFFFFFFFFFFFFFFFFFFFFFFFFFFFFFFFF:  
FFFFFFFFFFFFFFFFFFFFFFFFFFFFFFFFFFFFFFFFFFFFFFFFFFFFFFFFFFFFFFFFFFFFFFFF:  
:FF

@A00721:190:HGJW7DSXY:4:1551:29957:7373\_2:N:0:TCTGCAAG+GCTGCACT  
AAATCTTTTGAGATTGAGAAGATTGAAGAACACGTCAAGAAGTCGCTCGGCGTTGTTCTTGAAAACCA  
AGTTAAGAAGGAGGCTGATCATGGAGTCTTGTACCTTCTGTCAAAC

+

FFFFFFFFF:F:FFF,FFFF:FFF:FFFFFFFFFFFFFFFFFFFFFFFFFFFFFFFFFFFFFFFFFFFF  
FFFFFFFFFFFFFFFFFFFFFFFFFFFFFFFFFFFFFFFFFFFFFFFFFFFFFFFFFFFFFFFFFFFFFFFF:  
:FF

@A00721:190:HGJW7DSXY:4:2226:27254:35697\_1:N:0:TCTGCAAG+GCTGCACT  
TCCCGGATGTGGATTGAAGGCTGGCTCTAAGGGAGACTCCTTCTTTTGAATGTTGTAAAGAATTGGG  
TTGAGAAGTGTGCTTTACAAGGAGTTAGACTCTTCTTCAAGTTTTTAGATCTTCTTGATAATCTTAA  
GAA

+

F:FFFFF:FFF::FFF:FFFFFFFFFFFF,FFFFFFFFF:,FFFFFFFF:FFFFFFFFFFFFFFFF,FFFF:  
FFFFFFFFFFFFFFFFFFFFFFFFFFFFFFFFFFFFFFFFFFFFFFFFFFFFFFFFFFFFFFFFFFFFFFFF:  
FFF

@A00721:190:HGJW7DSXY:4:1463:7609:17581\_1:N:0:TCTGCAAG+GCTGCACT  
TCTGAATTATTACTGTTTTCTCTACCCATAACTTCTTTTTCAAAAATGCGGATGGGTCTACTGATGTT  
TTCCTACAGAGTGCAGTCGTTTCAACACTTATCACCCTTTTGAAGGAAAATAATTGGTGATGAAAA  
TAC

+

FFFFFFFFFFFFFFFFF:FFFFFFFFFFFF:FFFFFFFFFFFFFFFFFFFFFFFFFFFFFFFFFFFFFFFF  
FFFFFFFFFFFFFFFFFFFFFFFFFFFFFFFFFFFFFFFFFFFFFFFFFFFFFFFFFFFFFFFFFFFFFFFF  
FFF

@A00721:190:HGJW7DSXY:4:1230:29695:4100\_2:N:0:TCTGCAAG+GCTGCACT  
TCTCAAGGCTCTCATCGCCACTGGGATTCTAAGGGGTTCCATAAGATATTATCTGACATTGTGGTTCA  
ATGATCAGGATTCTTCTTTTGGTCCTTACGTCTTAAGTAATTTGGATG

+

FFFFFFFFFFFFFFFFFFFFFFFFFFFFFFFFFFFFFFFFFFFFFFFFFFFFFFFFFFFFFFFFFFFFFFFF  
FFFFFFFFFFFFFFFFFFFFFFFFFFFFFFFFFFFFFFFFFFFFFFFFFFFFFFFFFFFFFFFFFFFFFFFF:  
FFFFFFFFF

@A00721:190:HGJW7DSXY:4:1272:26919:14575\_1:N:0:TCTGCAAG+GCTGCACT  
GATTCTTAAAAGAAGTTTATTAACCTTCAAGTCTCTTGAAGTCCAGGTAGCTAATGTTCTTGCAA  
TAGCCACAGACTTTCTGGGAAAAGAGACCTCTGTTGGTAGAGGAGTTGAGAGAATTACTCAGATTCAA  
TCT

+

FFFFFFFFFFFFFFFFFFFFFFFFFFFFFFFFFFFFFFFFFFFFFFFFFFFFFFFFFFFFFFFFFFFFFFFF  
FFFFFFFFFFFFFFFFFFFFFFFFFFFFFFFFFFFFFFFFFFFFFFFFFFFFFFFFFFFFFFFFFFFFFFFF:  
FFF

@A00721:190:HGJW7DSXY:4:1537:18991:10520\_1:N:0:TCTGCAAG+GCTGCACT  
GGAGTGGCTAGGTTTTAAAAGATCCTTTGCACAAGCAATACCTTCCACTGAGTTCATCACCCAGAGTT

TCGACGTCGCGGAAAACGATGAAGATTTCCACACTGTTGAGAATCTTCTGATGCTGAATTTGAGGAA  
AAT

+

FFFFFF:FFFFFFFFFFFFFFFFFFFFFFFFFFFFFFFFFFFFFFFFFFFFFFFFFFFFFFFFFFFFFFFF  
FFFFFFFFFFFFFFFFFFFFFFFFFFFFFFFFFFFFFFFFFFFFFFFFFFFFFFFFFFFFFFFFFFFFFFFF  
FFF

@A00721:190:HGJW7DSXY:4:2353:18873:18145\_1:N:0:TCTGCAAG+GCTGCACT  
TTTTTGGTATAAATCCTGATGGCTCAGTACAGGGAGGAGGTAATAGTTATAAAACCTTCTTTTATCAT  
TGCAACAGGACTTTGAGAAGACTGTTGAAATGGACAAAATCTGGGATCATAGGTATGTGTACGCTAC  
ACT

+

FFFFFFFFFFFFFFFFFFFFFFFFFFFFFFFFFFFFFFFFFFFFFFFFFFFFFFFFFFFFFFFFFFFFFFFF  
FFFFFFFFFFFFFFFFFFFFFFFFFFFFFFFFFFFFFFFFFFFFFFFFFFFFFFFFFFFFFFFFFFFFFFFF  
FFF

@A00721:190:HGJW7DSXY:4:1308:29225:4977\_2:N:0:TCTGCAAG+GCTGCACT  
AAGATCTCTACAGAGATTATCGAGAGTTGTGATCTAGTTCTAAATTTAGGTCGACGACTTTAGCAAC  
TTTAGATAAATCTTTCCGGGCTCAATGACCTTTGCTATGTACGTGGA

+

FFFFFFFFFFFFFFFF:FFFFFFFFFFFFFFFFFFFFFFFFFFFFFFFFFFFFFFFFFFFFFFFFFFFFFFFF  
FFFFFFFFFFFFFFFF:FFFFFFFFFFFFFFFFFFFFFFFFFFFFFFFFFFFFFFFFFFFFFFFFFFFFFFFF  
FFF:F

@A00721:190:HGJW7DSXY:4:2208:22245:26271\_2:N:0:TCTGCAAG+GCTGCACT  
TCACTACAAAGGCGTTACGTAAAGTAGTTTTACGCTTTATCTTAAAGCATTACCACCAAATTTAGCA  
CTTTTGAATATGACAGAAGCTCGCCATATCAGATTAGAGACATGCCA

+

FFFFFFFFFFFFFFFFFFFFFFFFFFFFFFFFFFFFFFFFFFFFFFFFFFFFFFFFFFFFFFFFFFFFFFFF  
FFFFFFFFFFFFFFFFFFFFFFFFFFFFFFFFFFFFFFFFFFFFFFFFFFFFFFFFFFFFFFFFFFFFFFFF

@A00721:190:HGJW7DSXY:4:1516:23240:23390\_1:N:0:TCTGCAAG+GCTGCACT  
TTCTAACCAGGACTGATGGTGAGATTCTTTTACCTTTTGGAGGTCCAGGAACCTTTACTCCTAGTGTC  
TTTTCTAGAGTCCAAGGACGTTTCCGTCGGAGGATGACAGGTGGGAGACCGCTCAATAACACTCTATT  
GAA

+

FFFFFFFFFFFFFFFFFFFFFFFFFFFFFFFFFFFFFFFFFFFFFFFFFFFFFFFFFFFFFFFFFFFFFFFF  
FFFFFFFFFFFFFFFFFFFFFFFFFFFFFFFFFFFFFFFFFFFFFFFFFFFFFFFFFFFFFFFFFFFFFFFF  
FFF

@A00721:190:HGJW7DSXY:4:1471:2736:28307\_1:N:0:TCTGCAAG+GCTGCACT  
TAATGATACTGACGAAGGTTCTATTACCACCCTTGTCAATTGATACAAACATTCTAGGTGATGCTTTCT  
TAGAGGCTCGTCTAGCCGCTGAGATTCTGCTTACCTATTTACAATCTGTAGAGAGAGAGGTTAATCAG  
AAT

+

FFFFFF:FFFFFFFFFFFFFFFFFFFFFFFFFFFFFFFFFFFFFFFFFFFFFFFFFFFFFFFFFFFFFFFF  
FFFFFFFFFFFFFFFFFFFFFFFFFFFFFFFFFFFFFFFFFFFFFFFFFFFFFFFFFFFFFFFFFFFFFFFF  
F,F

@A00721:190:HGJW7DSXY:4:2124:3260:2284\_1:N:0:TCTGCAAG+GCTGCACT  
TAGGTCTCCTAGTACTTAAGGGTTTATGTTTCGGTTTCAGCTGGATGGATCTTTTGATGGTATGTTTC  
ACATTGCGTGATCACTTCCCGTGGACTTGGAAGAGATTAAACATAAAATCCAGCGATTCTATTATGT  
CGC

+

F,F:FFFF:FFFF:FFF,FF,FFF,F:FFFFFFFFFFFFFFFFFFFFFFFFFFFFFFFFFFFFFFFF  
F,F,FFFF:F:FFFFFFFFFFFFFFFF:FFFFFFFFFFFFFFFFFFFFFFFFFFFFFFFFFFFFFFFF  
FFF

@A00721:190:HGJW7DSXY:4:2110:18701:12273\_2:N:0:TCTGCAAG+GCTGCACT  
TGTGGGGATTAACTTCCCTCGTGAACTTACGACGATGTTCTCGCTCGCATTTACAAGGATTACTAA  
GTCTGAGATCTGCCACTTCTAATTTTAGGAAACGTCGCGAAAAGAAAG

+



FFFFFFFFFFFFFFFFFFFFFFFFFFFFFFFFFFFFFFFFFFFFFFFFFFFFFFFFFFFFFFFF:F  
FFFFFFFFFFFFFFFFFFFFFFFFFFFFFFFFFFFFFFFFFFFFFFFFFFFFFFFFFFFFF  
@A00721:190:HGJW7DSXY:4:2477:25165:23907\_2:N:0:TCTGCAAG+GCTGCACT  
TTGGTCGAAAAATATCGCCGGGAACCTCTAATAGAGGATCCTGATGACATTATTTCAACGGATACCGA  
TCTCAGTTCTACCACAGAAACCGTCTCAGGAAGTGTCTCCACTGATTC  
+  
FFFFFFFFFFFFFFFFFFFFFFFFFFFFFFFFFFFFFFFFFFFFFFFFFFFFFFFFFFFFFFFFF  
FFFFFF:FFFFFFFFFFFFFFFFFFFFFFFFFFFFFFFFFFFFFFFFFFFFFFFFFFFFF  
@A00721:190:HGJW7DSXY:4:2243:27091:13244\_2:N:0:TCTGCAAG+GCTGCACT  
AAAGACGACCTTCTTGTGGGACTGAGACCTCTGAATTTTCAGGGTGCCCTGATGAGGACGTTGAAAG  
GGATAATTTCAACTCTGAGACTTCTAAGAGTGTTCAAAAGACCAGAA  
+  
F:FFFFFFFFFFFFFFFFFFFFFFFFFFFFFFFFFFFFFFFFFFFFFFFFFFFFFFFFFFFFF  
FFFFF:FFFFFFFFFFFFFFFFFFFFFFFFFFFFFFFFFFFFFFFFFFFFFFFFFFFFF  
@A00721:190:HGJW7DSXY:4:2112:28483:8672\_1:N:0:TCTGCAAG+GCTGCACT  
GGTTGAAGAGAAAAGCTGATATGGTTGCGGCTGATCGTACCCCAATTCCTGCTAGAAAGATCACTCTCG  
GCGATACCACTGATCTTCCAGAGTTACGTAGTGGTCGTTCTTTTGGTGATTTTATCAAAGAGAAAGTT  
TCT  
+  
:F:,FFF:FF:,F,F:,FF:FFFFFF::FFFFFFFF:FF,F,,FFF:FFF,F::FFF,FFFF,F:FF,  
,FFFFFF:F,,FF:FFF:FFF,FFF:FFF:FF:FF,FFFF,:FFF:FFFFFFFF:F,FF,FFF  
F,F  
@A00721:190:HGJW7DSXY:4:1307:30020:22733\_1:N:0:TCTGCAAG+GCTGCACT  
GTTTTCCAAAAGCTATTAATAGCAGTTGCGGGGCTATAATACCGCCTCCAGATTACTCTAAAGTAA  
TCCACTCTCTTGGGATATAAATGAGTACATCTATAATAGAGTTTTGGAAGTGTGTAATGTCTTACGTA  
CTG  
+  
F:FFFFFFFF:FFFFFFFFFFFFFFFFFFFFFFFFFFFFFFFFFFFFFFFFFFFFFFFFFFFFF:  
:FF:FF:FFFFFFFF:FFFFFFFFFFFFFFFF:,:FFFFFFFFFFFFFFFFFFFFFFFFFFFFF  
FFF  
@A00721:190:HGJW7DSXY:4:1133:10773:7059\_2:N:0:TCTGCAAG+GCTGCACT  
GAAGATCTTCGAGTGTTTTATAGTGAGTTATTCTTGCGAAGGTTCAAGTCGATTGATTTTGTGACTA  
CGATCTCTCTTGTAAATAAGAAGTTCTTCGCAGTTGAATCTCCACCAGG  
+  
FFFF:FFFFFFFFFFFFFFFFFFFFFFFFFFFFFFFFFFFFFFFFFFFFFFFFFFFFF,FFFFFF:FFFFFF  
FFFFFFFF:FFF:FFFFFFFFFFFFFFFFFFFF:FF:FFF:FFFFFFFF  
@A00721:190:HGJW7DSXY:4:1237:18276:1078\_2:N:0:TCTGCAAG+GCTGCACT  
ACCACTGAAGTTATAGCGACTTTTGTGCAATTTTTCGAAAAGTCTTGAAGTACGTATTGTCACTGC  
TAATCGTAATTCGCGAGAAGAGATAGTACTAAAGTTTTGGCACTTCT  
+  
FF,FFFFFFFFFFFFFFFF:F::FFFFFFFF:FFFFFFFFFFFFFFFF:F:FFFFFF:F:FFFF  
FFFFFFFF:FFF,:FFFFFFFF:FF:FFFFFF,,F:, ,FF:::FF  
@A00721:190:HGJW7DSXY:4:1112:26585:2566\_1:N:0:TCTGCAAG+GCTGCACT  
TTGTGAAATTAAGACAGACGTGAAAGTTATGATGAGTGATCGTATTAGAACAGCTGATTCTTATTGCA  
TGAACGTCGCTGAGGTCAAACCTGTGGACGTTCTTTTCATCGACGAATTATTCATGATTCACGCTGGT  
CAG  
+  
FFFFFFFFFFFFFFFFFFFFFFFFFFFFFFFFFFFFFFFFFFFFFFFFFFFFFFFFFFFFFFFFF  
FFFFFFFFFFFFFFFFFFFFFFFFFFFFFFFFFFFFFFFFFFFFFFFFFFFFFFFFFFFFFFFFF  
FFF  
@A00721:190:HGJW7DSXY:4:2206:23493:7482\_2:N:0:TCTGCAAG+GCTGCACT  
CATCTACTTAAGGCGGCTTATACCATAGGTTACGGTGATTCCAATCAAATCGGATTCATCAATCGTAT  
TGATCTCCAAGTCGAAACTACTTCAACATCAACGACATCATTCTTGA  
+

FFFFFFFFFFFFFFFFFFFFFFFFFFFFFFFFFFFFFFFFFFFFFFFFFFFFFFFFFFFFFFFFFFFFFFFF  
FFFFFFFFFFFFFFFFFFFFFFFFFFFFFFFFFFFFFFFFFFFFFFFFFFFFFFFFFFFFFFFFFFFFFFFF  
@A00721:190:HGJW7DSXY:4:2158:23249:26005\_1:N:0:TCTGCAAG+GCTGCACT  
TTATCGAAGTCTCAGTTATCGCTGCCCCGCCGACGTTTGTGCGCAACTCTCAGAGGTTTACGGCAGAA  
AAATTTCTCCTGCTTGTAATTCGAGAGAGGACACTATGGAAATTAGACCTATCAGATGTCTTGACGAC  
TTC  
+  
FFFFFFFFFFFFFFFFFFFFFFFFFFFFFFFFFFFFFFFFFFFFFFFFFFFFFFFFFFFFFFFFFFFFFFFF  
FFFFFFFFFFFFFFFFFFFFFFFFFFFFFFFFFFFFFFFFFFFFFFFFFFFFFFFFFFFFFFFFFFFFFFFF  
FFF  
@A00721:190:HGJW7DSXY:4:2261:29631:32957\_2:N:0:TCTGCAAG+GCTGCACT  
CAAAGTCCTTGGTAAGAGTAAGGTTAAATGTGAAGATGCTCAGACTATTCATGAAGTTCAAGGTAATA  
CTTACCAGCACGTTCTGGCTGGTTAGAATTAAACCTCAAGATGACCCTG  
+  
FFFFFFFFF:FFFFFFFFFFFFFFFFFFFFFFFFFFFFFFFFFFFFFFFFFFFFFFFFFFFFFFFFFFFFF  
FFFFFFFFFFFFFFFFFFFFFFFFFFFFFFFFFFFFFFFFFFFFFFFFFFFFFFFFFFFFFFFFFFFF:FFFF  
@A00721:190:HGJW7DSXY:4:1177:11116:18333\_2:N:0:TCTGCAAG+GCTGCACT  
ACGTTGAATCTTTACGATACTTTGTTATCAATGTAAAGTTAAACGATGCTACTTGTGAGAGGATCAAT  
CACAGTAAGGAAGTGTACGTTTAGCACGGGAGGTTGCAGATTCAACC  
+  
FFFFFFFFFFFFFFFFFFFFFFFFFFFFFFFFFFFFFFFFFFFFFFFFFFFFFFFFFFFFFFFFFFFFFFFF  
FFFFFFFFFFFF:FF:FFFFFFFFFFFFFFFFFFFFFFFFFFFFFFFFFFFFFFFFFFFFFFFFFFFF:FFF  
@A00721:190:HGJW7DSXY:4:2253:7184:8077\_2:N:0:TCTGCAAG+GCTGCACT  
CTATCGAGGACGATGAGTATCTTGAAGTTGTTGACGACAAGCCTCAAGAGGGTAGAGGACCACCTGGA  
TCTTCTACTGTCTCTGCCTTCCAAGATTTCTTAGAAGAGGTTATTCT  
+  
FFFFFFFFFFFFFFFFFFFFFFFFFFFFFFFFFFFFFFFFFFFFFFFFFFFFFFFFFFFFFFFFFFFFFFFF  
FFFFFFFFFFFFFFFFFFFFFFFFFFFFFFFFFFFFFFFFFFFFFFFFFFFFFFFFFFFFFFFFFFFF  
@A00721:190:HGJW7DSXY:4:2520:15148:13385\_1:N:0:TCTGCAAG+GCTGCACT  
GTCACTCGGTAATCTTTCAGCCGAATTAAGTACTAATGAGTTCAAGTCGGTTGTCGATCGAATTAAGA  
TCAAGGCTAATACCTTTATAGGTAAGAAGCCCCTTGAGCCGCGTAGTCAGCGCGTTTAGCTGTATCAT  
CAG  
+  
FFFFFFFFFFFFFFFFFFFFFFFFFFFFFFFFFFFFFFFFFFFFFFFFFFFFFFFFFFFFFFFFFFFFFFFF  
FFFFFFFFFFFFFFFFFFFFFFFFFFFFFFFFFFFFFFFFFFFFFFFFFFFFFFFFFFFFFFFFFFFFFFFF  
FFF  
@A00721:190:HGJW7DSXY:4:2357:23131:6511\_1:N:0:TCTGCAAG+GCTGCACT  
TCCAAGAGAATATTTATTCTTATGAGGCTCGAACTTCAACGTTTTTACAACGGAAAGACATATCGCA  
CCCGAAATTTTGGGCAGAATGCTCTTAACGCGGTTCTTGAACGGTGTTTTGATCAGTCTAAGTTGGA  
TAA  
+  
FFFFFFFFFFFFF:F:FFFFFFFFFFFFFFFFFF:FF:FFFFFFFFFFFFFFFFFF:FFFFFFFFFFFFFFFFFF  
FFFFFFFFFFFFFFFFFFFFFFFFFFFFFFFFFFFFFFFFFFFFFFFFFFFFFFFFFFFFFFFFFFFFFFFF  
FFF  
@A00721:190:HGJW7DSXY:4:2672:11496:6370\_2:N:0:TCTGCAAG+GCTGCACT  
ACTCAGTTAACCTGAGAGCTCCTCAATTGATAGATTGGGTCAACAATAGGGACGCTAGTATACTTCGT  
AAAGTCGACAGCGAAATGGTCAATATTGATAATTGGACCGACTATATG  
+  
FFFFFFFFFFFFFFFFFFFFFFFFFFFFFFFFFFFFFFFFFFFFFFFFFFFFFFFFFFFFFFFFFFFFFFFF  
FFFFFFFFFFFFFFFFFFFFFFFFFFFFFFFFFFFFFFFFFFFFFFFFFFFFFFFFFFFFFFFFFFFF  
@A00721:190:HGJW7DSXY:4:2324:4634:6010\_1:N:0:TCTGCAAG+GCTGCACT  
CTTGATGCTTCAGCCTTTTGAAGCATAACCCCGCACAGAATATCGTTTATCACGCAAAATTTATTAA  
TGCAATTTTCGGACCTATCTTTAAGGTTCTTGTGAGGAGAGTCAAACAGTGTCTTTTACCCAACATTT  
TTA

+  
FFFFFFFFFFFFFFFFFFFFFFFFFFFFFFFFFFFFFFFFFFFFFFFFFFFFFFFFFFFFFFFFFFFFFFFF  
FFFFFFFFFFFFFFFFFFFFFFFFFFFFFFFFFFFFFFFFFFFFFFFFFFFFFFFFFFFFFFFFFFFFFFFF  
FFF  
@A00721:190:HGJW7DSXY:4:2214:20148:4852\_1:N:0:TCTGCAAG+GCTGCACT  
TCTCTCTTAGGAGGTCATGATGACTACTATAAGGGTGAAATCGATTTTTCGAAGTTTGACAAATCTCA  
AGATTTCTTTTGTAAGCCTATGAGATAAAGATGTATTCTTATTTAGGCTTCGATGCTGAATTTCTTG  
AAC  
+  
FFFFFFFF,FF::F:FFFFFF,:FFFFFFFFFFFFFFFF:F,FFFFFFFFFFFFFFFFFFFFFFFFF:  
FFFFFFFFFFFFFFFF:FFFFFF:FF:FFFF:FFFFFFFFFFFFFFFFFFFFFFFF:FFFFFFFFFFFF  
FFF  
@A00721:190:HGJW7DSXY:4:1143:17128:18975\_1:N:0:TCTGCAAG+GCTGCACT  
ACGCCAGGAGTATCCATAACGATTTGTCAATTTACCACCTTTGCTCAACGACGAAGTGGAACGGCCAAC  
ACTTTCTTTGGTAATTGTATGATCACTTTGATGATTTTATCACTTTATTATGACCTTGAAAGTTTTTC  
GGC  
+  
FFFFFFFFFFFFFFFFFFFFFFFFFFFFFFFFFFFFFFFFFFFFFFFFFFFFFFFFFFFFFFFFFFFFFFFF  
FFF:FFFFFFFFFFFFFFFFFFFFFFFFFFFFFFFFFFFFFFFFFFFFFFFFFFFFFFFFFFFFFFFFFFFF  
FFF  
@A00721:190:HGJW7DSXY:4:1564:22625:22388\_1:N:0:TCTGCAAG+GCTGCACT  
GCTGGGGACGATTCCATTCTGTTTTCAAAGACTCCAATAACTGATCATTCTGATCATATGATTTTGGA  
CAATGGTTTCGAAGCGAAATTTTTGAGGGATAAACCAGCGTACTTCTGCTCGCGATTTATTCTTTTTG  
TCA  
+  
FFF::FFFFFFFF:FFFFFFFF:FFFFFF:F:FFFFFFFF:FFFFFFFFFFFF:FFFFFFFFFFFFF  
FFFFFFFFFFFFFFFFFFFFFFFFFFFFFFFFFFFFFFFFFFFFFFFFFFFFFFFFFFFFFFFFFFFF:FFFF  
FFF  
@A00721:190:HGJW7DSXY:4:1553:21450:14810\_1:N:0:TCTGCAAG+GCTGCACT  
ATGTTACTCTGTAGGACTTTGGGAGAGATTCTGTAGTTTTAAAGACTATACTAAATATCTCCACTAC  
GAGGTTGTTGTTTGGCGATTAGCTCTTGCGACTAATATTCGATATTCGATTGAGGGTCGTTATACCTA  
TTC  
+  
FFFFFFFFFFFFFFFFFFFFFFFFFFFFFFFFFFFFFFFFFFFFFFFFFFFFFFFFFFFFFFFFFFFFFFFF  
FFFFFFFFFFFFFFFFFFFFFFFFFFFFFFFFFFFFFFFFFFFFFFFFFFFFFFFFFFFFFFFFFFFF:FFFF  
FFF  
@A00721:190:HGJW7DSXY:4:1641:12626:22639\_1:N:0:TCTGCAAG+GCTGCACT  
GCTTTGAATTGTATAAGATCAAATTTTAAACGATTCCGAGAGGTTTATCCTGATGTGGAGGGAGTTCT  
TGAAGCATCCCGACCTTCTTGTGAAAATTTGATGCGGTTTCATAAGATTATCAGTAATCCTGATT  
CTA  
+  
F:FFFFFFFFFFFFFFFF:FF:FFFFFFFFFFFFFFFFFFFFFFFFFFFFFFFFFFFFFFFFFFFFFFFF  
FFFFFFFFFFFFFFFFFFFFFFFFFFFFFFFFFFFFFFFFFFFFFFFFFFFFFFFFFFFFFFFFFFFF  
FFF  
@A00721:190:HGJW7DSXY:4:2458:25211:33943\_1:N:0:TCTGCAAG+GCTGCACT  
ACCTCTTCTGGAGAGACGTATCTCAAAGATCGACTTCGAGACAGGTGATATTGTTGAGCGAGAGCGAC  
CAAGATCTAAATTCGGTAACGGTGCGTGGCGCTTTATTTTAAAAGCTCCCTCCTCTCGCAAGTTTGA  
TCT  
+  
FFFFFFFFFFFFFFFFFFFFFFFFFFFFFFFFFFFFFFFFFFFFFFFFFFFFFFFFFFFFFFFFFFFFFFFF  
FFFFFFFFFFFFFFFFFFFFFFFFFFFFFFFFFFFFFFFFFFFFFFFFFFFFFFFFFFFFFFFFFFFF  
FFF  
@A00721:190:HGJW7DSXY:4:2155:30391:12727\_2:N:0:TCTGCAAG+GCTGCACT  
GATCAGTCTCTGACTTGACCATCTTTCATTTTAAATGACGATCATTAAGACTCTTTTCTTCTTTGTT

TCCTTCTTTGCACTGATTTTTCTCATCAGCTTGTGTTTTACCTAATC

+

FFFFFFFFFFFFFF:FFFFFFFFFFFFFF:FFFFFFFFFFFFFF:FFFFFFFF,FFFF:  
F:FFFFFFFFFFFFFF,FFFFFFFFFFFFFF,FF:FF:

@A00721:190:HGJW7DSXY:4:2450:6198:19022\_2:N:0:TCTGCAAG+GCTGCACT  
GATAACAACATCAGTTGATTAAGACTCTTCCGAAAGGCGAACTTTGGGAATTTGAAGCTCAGGGTGA  
AGCACACGTTTGACCGTGACGAAGTGTGGTGTCTTGATCTACGTTA

+

FFFFFFFFFFFFFF:FFFFFFFFFFFFFF:F,FFFFFFFF:FFFFFFFFFFFFFF  
FFFFFFFFFFFFFF:FFFFFFFFFFFFFF

@A00721:190:HGJW7DSXY:4:1305:14127:27680\_1:N:0:TCTGCAAG+GCTGCACT  
TATTTTAAGTTTGTCTTCTTGTGTCTTATTCTATTAATCACTCATTTTAGTGAGATTATTA  
ACGCACTAAACGTCTTCGACAACAGCAGGGGTTTTCGAATAGTGATAGCCACCCGCTTACAGAGGG  
GCA

+

FFFFFFFFFFFFFF,FFFFFFFF:FFFFFFFFFFFFFFFFFFFFFFFF  
FFFFFFFFFFFFFFFFFFFFFFFFFFFFFFFFFFFFFFFFFFFFFFFF  
FFF

@A00721:190:HGJW7DSXY:4:2669:29116:22388\_1:N:0:TCTGCAAG+GCTGCACT  
CTTTGGTACCACCTTTCTACTGTCTGTCTCGCTCTTCGAATGAAGTTTAAATGCTTAACAACAATG  
CTAGTGAATTTATACCTACAATCATTGGTTTTCTAATAATGATGACACTATTGTTTATGGATATGAT  
GCT

+

:FFFFFFFFFFFFFFFF,FFFFFFFFFFFFFFFFFFFFFFFFFFFFFFFF:FFF  
,FFFFFFFFFFFFFFFF:FFFFFFFFFFFFFFFFFFFFFFFFFFFFFFFF  
FFF

@A00721:190:HGJW7DSXY:4:1355:16306:32142\_1:N:0:TCTGCAAG+GCTGCACT  
AGGATTCTCAGTTTACAAGGACCTTAAGCGATGGATCGGGGTTAATTCTAAACATTACCCGAAAGAC  
GTGCTAAATTAACCATTTGTACGATGTCGTCTGTCTCGCGCATCACTTTTCTACTAAGAATTGGTCCT  
ACT

+

FFFF,FFFFFFFFFFFFFFFFFFFFFFFFFFFFFFFF:FFFFFFFFFFFFFF  
FFFFFFFFFFFFFFFF,FFFFFFFF:FFFFFFFF,FFFF:FFFFFFFF  
FFF

@A00721:190:HGJW7DSXY:4:2241:6587:5259\_2:N:0:TCTGCAAG+GCTGCACT  
AATCTTCATGAGATCGTTTCTTCTTTATCTTTGGGTGTTAGGGATTTTGAGAGAGTGAAAGGCTT  
CAATTGTAGTGGTTTGGTCGTTTCAGTACCCAGTCAGTATACCTCTAC

+

FFFFFFFFFFFFFF:FFFFFFFFFFFFFF,:FFFFFFFF,FFFFFFFF,FFFF  
FFF:FFFFFFFFFFFFFF:FFFFFFFF:FF:F:FFFFFFFF

@A00721:190:HGJW7DSXY:4:1145:14199:14497\_2:N:0:TCTGCAAG+GCTGCACT  
GAAAACTACAGAGGAACGTACCGGATTACCTGTCTTTCATATTATGAATGAACCTTCGGCCGCTCTCT  
TTGCTTCGATGTTGGATGTCAAGAAGGGTTCAGAATGGGATTCTACG

+

FFFFFFFFFFFFFFFFFFFFFFFFFFFFFFFF,FFFFFFFF:FFFFFFFFFFFFFFFF  
FFFFFFFF:FFFFFFFFFFFFFFFF:FFFFFFFF

@A00721:190:HGJW7DSXY:4:1420:4083:10786\_1:N:0:TCTGCAAG+GCTGCACT  
CTTTGGTGGTGGTACTTTCGATACTTCTATCGTCTTACGTTACGGTAATTACTATAGTGTTATTTATT  
CTGGTGGTGATGATAATCTTGAGGTCGTGACGTTGATGAAGCTATAAGAGCGTTCTTATTACGGCGC  
ACT

+

F:FFFFFFFFFFFFFF:FFFFFFFFFFFFFFFFFFFFFFFF,FFFFFFFF  
FFFFFFFF:FF:F:FFFFFFFFFFFFFFFFFFFFFFFF:FFFFFFFF:FFFF  
FFF

@A00721:190:HGJW7DSXY:4:1435:20835:28244\_1:N:0:TCTGCAAG+GCTGCACT  
CTTTCAGTTTCACTGAAGGAGGAGGTTTCTGTTACTGGAAAACCCTCGTCAATACTTTTCAATAA  
TATACGTCTTGAACCTACTTATGACGATCTAGTGAAATTAACGCGTCCTTTTCTGGAACGTAGTTTAA  
CTA

+

FF:FF:,FFFFFFFFFFFFFFFF,FFFFFFFFFFFFFFFFFFFFFFFFFFFFFFFFFFFFFFFF:FFFF,FFFFFF  
FFF:F:FFFFFFFFFFFF,F,FFFFFFFFFFFFFFFFFFFFFFFFFFFFFFFFFFFFFFFF:FFFFFFFFFFFF:FFFF  
FFF

@A00721:190:HGJW7DSXY:4:2652:23836:13056\_2:N:0:TCTGCAAG+GCTGCACT  
AAAGATAGTGGCATTCAAGGCAAACCTTACCCTGATTCCGGCCGGTGGTAGCTCATTTCTACCAGGGGC  
TATTACTCTTGCTGAAACAGCTATTAAAGCTGTTGAGCGGGTAATTAC

+

FFFFFFFFFFFFFFFFFFFFFFFFFFFFFFFFFFFFFFFFFFFFFFFFFFFFFFFFFFFFFFFFFFFFFFFF  
FFFFFFFFFFFFFFFFFFFFFFFFFFFFFFFFFFFFFFFFFFFFFFFFFFFFFFFFFFFFFFFF:FFFF

@A00721:190:HGJW7DSXY:4:2527:12689:4241\_2:N:0:TCTGCAAG+GCTGCACT  
ATCGCTGAAGGATGTGCACTCTTTTCTGCTACTTTAACGGAGCGTAGTGTACTCTTCGTCGATTGTAT  
CAACAGTAACATTACTTCTAATAAAGGTCTCTATCAAGCTCGTATTAT

+

FFFFFFF:FFFFFFFFFFFFFFFF:FFFFFFFFFFFFFFFFFFFFFFFF:FFFFFFFFFFFFFFFFFFFFFFFF  
FFFFFFFFF:FFFFFFFFFFFFFFFFFFFFFFFFFFFFFFFFFFFFFFFFFFFFFFFFFFFFFFFF

@A00721:190:HGJW7DSXY:4:2527:12689:4241\_1:N:0:TCTGCAAG+GCTGCACT  
TTACCGTTGAAGGCTAAACTCCAAGGTAATTATGAAGACTGTGATTTATCTTTCCTCTGGCCTTGTA  
TGAGGGTGTCTTAATCGTAACATTAATAATTTCAATCTTCTTAAAAAGAAGATAGAGAGTCATACTT  
TGG

+

FFFFFFFFFFFFF:FFFFFFFFFFFFF:FFFFFFFFFFFFFFFFFFFFFFFF:FFFFFFFFFFFFFFFFFFFFFFFF  
FFFFFFFFFFFFF:FFFFFFFFFFFFFFFFFFFFFFFFFFFFFFFFFFFFFFFFFFFFFFFF:FFFFFFFFFFFFFFFFFFFFFFFF  
FFF

@A00721:190:HGJW7DSXY:4:1578:17815:3192\_1:N:0:TCTGCAAG+GCTGCACT  
CTCTACCGCCTTACAAGTCTAAGGTTAAAGAGTCGATTAAACAAGTTGTACTTATCAATGATTTTATC  
GCTGGTTGTTATCTCGAAAAGTCTCTTCTAAAAGGAACGTCAGTTCTAACCCAAAGAGAATATCTAAA  
ATA

+

FFFFFFFFF:FFFFFFFFFFFFFFFFFFFFFFFFFFFFFFFFFFFFFFFFFFFFFFFF:FFFFFFFFFFFF:FFFFF  
:FFFFFFFFFFFFFFFFFFFFFFFFFFFFFFFFFFFFFFFFFFFFFFFFFFFFFFFFFFFFFFFFFFFFFFFF  
FFF

@A00721:190:HGJW7DSXY:4:1639:20247:32643\_2:N:0:TCTGCAAG+GCTGCACT  
AGACGTTGCTTGTGCTTCTCTTTAATGGCACTACCTCGGTACAATCTTACTTGGAACGAAGGCGA  
CCTGTTCCGGAGTTTTTACGGGATCCGGACTGTTCTGTCTATATTAGG

+

FF,FFFFFF::FFF:F::FF:F,F::FFF:FFF,FFFFFFFF:FFFFF,F:F:F,FFFFFFFF,FFF  
F:,FFFFFFF:FFF,FFFFFF:FFFFF,,FF:::,F:,FFF,FF:F

@A00721:190:HGJW7DSXY:4:1168:29704:19335\_1:N:0:TCTGCAAG+GCTGCACT  
CGAACGTCAACGTTACCGAGTTTCGTTTCGTACCTTGATGCTGACTTTTCGTCAATATGATTTGATCT  
GGTTGCTCAATTCTAAGCGTGTTCCGCTTAGTGCGAGGCCTCTTCTACGAGTATTGCTATTTATAC  
GGT

+

FFFFFFFFFFFFF:FFFFFFFFFFFFFFFFFFFFFFFFFFFFFFFFFFFFFFFFFFFFFFFF:FFFFFFF  
FFFFFFFFFFFFFFFFFFFFFFFFFFFFFFFFFFFFFFFFFFFFFFFFFFFFFFFFFFFFFFFFFFFFFFFF  
FFF

@A00721:190:HGJW7DSXY:4:1424:4481:25911\_2:N:0:TCTGCAAG+GCTGCACT  
TATTTGGATGATCTTGATAAAGAACTTCATGAATTTTCAGAGGATGAAAAATTTCTTCCTTGATTT  
TAATATAAAGAATCTTTACCAGGACTCCTACTACAGGAGGCAGTCTTC

+

[illegible]

@A00721:190:HGJW7DSXY:4:1542:12210:15217\_1:N:0:TCTGCAAG+GCTGCACT  
ACACTTCGAACTGAATAATGATGCACTACAAACAAGTATCGCTAATCATCTGAAAAAGGCTCTAAAG  
GACACTATACAATATCCAGACGACGACGAAGCTTATACTACTTTAATTTTGGGTATTATGTGGAGATA  
TCG

+

FFFF:FFFFFFFFFFFFFFFFFFFFFFFFFFFFFFFFFFFFFFFFFFFFFFFFFFFFFFFFFFFFFFFFFFFFF,  
FFFFFFFFFFFFFFFFFFFFFFFFFFFFFFFFFFFFFFFFFFFFFFFFFFFFFFFFFFFFFFFFFFFFFFFFFFFF  
FFF

@A00721:190:HGJW7DSXY:4:1255:23176:18646\_1:N:0:TCTGCAAG+GCTGCACT  
CCGTTGAGAAAATTTCTTAGAGGATATTCGCCATTGTGGTACGAATTGGTCCAACATTTACCACCAA  
TTCTTTTGATACAACCTCTAGCCTTCAAGTGGGGTATGCCTGCGGAATACGCTTGCTATTACCAGATT  
GGT

+

FFFFFFFFFFFFFFFFFFFFFFFFFFFFFFFFFFFFFFFFFFFFFFFFFFFFFFFFFFFFFFFFFFFFFFFFFFFF  
:FFFFFFFFFFFFFFFFFFFFFFFFFFFFFFFFFFFFFFFFFFFFFFFFFFFFFFFFFFFFFFFFFFFFFFFFFFFF  
FFF

@A00721:190:HGJW7DSXY:4:1405:30707:36417\_2:N:0:TCTGCAAG+GCTGCACT  
TGATGCTATGTCAGAAGAAGCTATTCAAGCTTGTCGTTTAAAGACTGCAGAGGCTGTCAAACAAGCCC  
AGACTCAAGGAGTCCAATCAAAGTTTTGAATTTAGCTCAACTGGGGA

+

FFFFFFFFFFFFFFFFFFFFFFFFFFFFFFFFFFFFFFFFFFFFFFFFFFFFFFFFFFFFFFFFFFFFFFFFFFFF  
FFFFFFFFF,FFFFFFFFF:FF::FFFFFFFFF:, :F:FF:F:FFFF

@A00721:190:HGJW7DSXY:4:2554:2392:32315\_2:N:0:TCTGCAAG+GCTGCACT  
CTACGGAAAAGTCCGGAGTATATTGTATGTTAATAGATAGTGGGATAATAGTTCTACCGATACGTAGT  
GAACGCGTTCTGTAACCAAGTACTTTCCGTCTGAAGAGTTTAGAGCT

+

FFFFFFFFFFFFFFFFFFFF:FFFFFFFFFFFF:FFFFFFFFF:FFFFFFFFFFFF:FFFFF:FFFFFFFFFFFF  
FFFFFFFFF:FFFFFFFFFFFF:FFFFFFFFFFFFFFFFFFFFFFFFF,FF,FFFF

@A00721:190:HGJW7DSXY:4:1401:19262:36198\_2:N:0:TCTGCAAG+GCTGCACT  
AGTTGAAGATGTGGCTTTAGACGATAATCCTTTAAGGACTATGTTGACTGACGAAGATTTTCCCACAG  
ATTTGTCTACGTTGCAGATCGCCACTCCAAACACTATATACATTATAA

+

FFFFFFFFFFFFFFFFFFFFFFFFFFFFFFFFFFFFFFFFFFFFFFFFFFFFFFFFFFFFFFFFFFFFFFFFFFFF  
FFFFFFFFFFFFFFFFFFFFFFFFFFFFFFFFFFFFFFFFFFFFFFFFFFFFFFFFFFFFFFFFFFFFFFFFFFFF

@A00721:190:HGJW7DSXY:4:1574:24216:5165\_1:N:0:TCTGCAAG+GCTGCACT  
ACTTTTGTTACCAAATCTTGCTTTCAACGAAGTCTCTGATTTTATTAATCATTACTTTAACGATCT  
CTCGGTCATTTACTCTGTACTTGATCTACGTCGTTTAACTGTGGAACAACCTTTACTTAGAATGACT  
CTA

+

FFFFFFFFFFFFFFFFFFFFFFFFFFFFFFFFFFFFFFFFFFFFFFFFFFFFFFFFFFFFFFFFFFFFFFFFFFFF  
FFFFFFFFF:FFFFFFFFFFFF:FFFFFFFFFFFFFFFFFFFFFFFFF,FFFFFFFFFFFFFFFFFFFFF,FFF  
FFF

@A00721:190:HGJW7DSXY:4:1412:3830:20306\_2:N:0:TCTGCAAG+GCTGCACT  
ATATCATATTAGTAATACTCACTATCGTTTTCTGCTTTTTCTTAGCTAATAGATTAATAAAGGATGAG  
TACGAAAACCAACTCTTCGTTACGAGACCTGATGGTAGAATAGATTTA

+

FFFFFFFFFFFFFFFFFFFFFFFFFFFF:FFFFF:FFFFFFFFFFFFFFFFFFFF,F,FFFFFFFFFFFFFFFFFFFF  
FFFFF,FFFFFFFFFFFFFFFFFFFF:FFFFFFFFFFFFFFFFFFFF:FFFFF

@A00721:190:HGJW7DSXY:4:1354:24216:6386\_1:N:0:TCTGCAAG+GCTGCACT  
CATATCAACGAGTATAAAGCGTGTTCCTTCTGAAGTAAATACACGAAGATATCATCCGCAAACGA  
CTCGAAACCGAGACGCCGTAGATCAAAGTCCCTTCTAACTTTAGATTATGAATCCTGCCTTTACTCAT  
TTT

+

F:F,,,F,:,FF,,,FF,F,,,,FFF,F:,,,::F,F:::, :F:F,,,::,F,FF,:F,F,FF:,F:FFFF

@A00721:190:HGJW7DSXY:4:1257:13458:30185\_1:N:0:TCTGCAAG+GCTGCACT  
ATAACCTTCTTATACTTTTGGGTATGTTTTGTGAAAAACATGAGATACCCAAGTCTATCGAAGACATT  
ATCTCTTATGTACTTATTGTAACGATCATTCTTTCGAGTTTGTCACTTCTTATTCTTTTATTCCTTTA  
ACT

@A00721:190:HGJW7DSXY:4:1403:6244:16564\_2:N:0:TCTGCAAG+GCTGCACT  
ATGCTTTTCGATAGTGATTGTTATCAATTTAAATACATTACTGTTTCAAATCATCTTTACTCACAGAC  
TCCGAAAATGTTTTCAAATGAGGTCAAAGCTCTATTTATTAAACGAAC

@A00721:190:HGJW7DSXY:4:2530:19162:29230\_1:N:0:TCTGCAAG+GCTGCACT  
CACTACCACTGATCTGCCGACTTTAGTCAAGGAAGTTCAATTCCTTCGATGTTTATATTTTTCTATAA  
GGGAAATATCAATAATCAAATTTGACAAATTTAGAACTTTATTTCAGAACTCTCTCCGATCACCT  
TGG

@A00721:190:HGJW7DSXY:4:2367:14461:15734\_2:N:0:TCTGCAAG+GCTGCACT  
TCAATAAGATGTATGATGATAATCTACTATTTTTAAATAGTGATATTCAGCGTATACTTGAATACTTT  
ATCAAAGATTTGGCTTGGTCTATTTACCGCAAAAAGTTGGAAGAGGTC

@A00721:190:HGJW7DSXY:4:2274:16568:22294\_2:N:0:TCTGCAAG+GCTGCACT  
TTTACTTATACTTTAAATAGCACCGATTATAACTTGACTGTTGATAATATTACAATAGCTCTTTCTC  
AGAAGATTAGAGAAGTAACCGGTGAACACGTCGGTAGCATTGATTTAC

@A00721:190:HGJW7DSXY:4:2522:6253:14606\_1:N:0:TCTGCAAG+GCTGCACT  
AGAAGTGAAGAAAGATTCTTTTCGAAAAGAAACCTATAAGTTACAAACGATTCTTCGACTATATTAAAG  
AAATAAAAATACTTCAAGTACCTGAAGTTTACATTTTAAATGGTATGGTATAATGTGTCTTACAAATA  
GAA

@A00721:190:HGJW7DSXY:4:2169:14507:33004\_2:N:0:TCTGCAAG+GCTGCACT  
TAATGAGAGTGTATTCTTAATATTCTAGTAACCGCTATGTGGGCATTACTAGGATTTATCACACTCC  
TAAATTTGATAGCAATTTATGTTTTAAATGCTAGGAAAAATTTTAGAAA

@A00721:190:HGJW7DSXY:4:1539:25283:31125\_1:N:0:TCTGCAAG+GCTGCACT  
GGAGTACTTAATTCAATAGCTTTAGTATTATTTACTATCGCCTTTATTGGAATTGTATAAGAGTTAA  
TTGCTTACACAAAAGTGACGCGCGAAGGAATCTTAATTGATTGAAGCTAGGCGTTGGGGAGAATGAAC  
TGC



[illegible]

@A00721:190:HGJW7DSXY:4:2234:17472:18067\_2:N:0:TCTGCAAG+GCTGCACT  
CTTACAAGAGAGAGTGTGAGAGAGTCGCTCTCACTATTTTTGCCAGAATGCGGGCTTTCTGACTGAT  
GAGGTTAAAACTCTTGCTCCTTCTGTGGGTGAGGGTTTTTGTATATT

F:FFFFFFFFFFFFFFFFFFFFFFFF:FFFF:FFF::FFFFFFFFFFFFFFFF:FFFFFFFFFFFFFFFFFFFFFFFFFFFFFFFF  
FFFFFFFFFFFFFFFFFFFFFFFF:FFFFFFFFFFFFFFFFFFFFFFFFFFFFFFFFFFFFFFFFFFFFFFFFFFFFFFFFFFFFFFFF  
FFF  
@A00721:190:HGJW7DSXY:4:1250:16947:4852\_2:N:0:TCTGCAAG+GCTGCACT  
GATTTAGATATTATTGATATTGGAGGCGATATTCGTTTTTCATATCCAAAACCTCCTTGAATGGAGTACA  
TATTTGCAACCCTATTCTTGATGTGAAAGATGCATCGAGGTATACGTC  
+  
FFFFFFFFFFFFFFFFFFFFFFFF:,FFFFFFFFFFFFFFFFFFFFFFFFFFFFFFFFFFFFFFFF:FFFF:FFFFFFFF  
FFFFFF:FFFFFFFFFFFFFF,FFFFFFFFFFFFFF:FFFFFFFFFFFFFF  
@A00721:190:HGJW7DSXY:4:1211:28899:23265\_1:N:0:TCTGCAAG+GCTGCACT  
GATTGGGAACGTACCTACTCACGAGACGTCATGAAAGCTATCGGAGGGAAGCAAAATGTTTCGTTCTG  
TTACAAGAACGCTTTGGATTGTGACCATAAAGCCTCAGTTGCGATAGCTGTAGAGGTATACGATATCT  
CTC  
+  
FFFFFFFFFFFF:FFFF:FFFF:FFFFFFFFFFFFFFFFFFFFFFFFFFFFFFFFFFFFFFFF,FF:FFFFFFFF  
:FFFFFFFF::FFFFFFFFFFFFFFFFFFFFFFFFFFFFFFFF:FFFFFFFFFFFFFFFFFFFFFFFF:::FFFF  
FFF  
@A00721:190:HGJW7DSXY:4:2166:2835:10473\_2:N:0:TCTGCAAG+GCTGCACT  
TATGTCATTTTCGTCTTAGTTTGTCCCGGCGAATTATTGGACACGATGAAAAATGACATACCCGTTCTC  
GACCTTGGTATCGTTATCCGTCATGGAGATGATGGCGCATCACTTGAT  
+  
FFFFFFFFFFFFFFFFFFFFFFFFFFFFFFFFFFFFFFFFFFFFFFFFFFFFFFFFFFFFFFFFFFFFFFFF:FFFF  
FFFFFFFFFFFFFFFFFFFFFFFFFFFFFFFFFFFFFFFFFFFFFFFF:FFFFFFFF  
@A00721:190:HGJW7DSXY:4:2210:23122:22185\_2:N:0:TCTGCAAG+GCTGCACT  
AAAGATAAGATTTTATCTTTCTTCAAACACCCTGTTTTCTTAAGGGCGGACAATTGTTCCATTGTGA  
ACTCTTGGGACTAGATTGAGCATTAAATGAGTTCGAATAACTCGTAA  
+  
FFFFFFFFFFFF,FFFFFFFFFFFFFFFF:FFFFFFFFFFFFFFFF,FFFFFFFFFFFFFFFFFFFFFFFF  
FFFFFFFFFFFFFFFFFFFFFFFF:FFFFFFFFFFFFFFFFFFFFFFFF:FFFF  
@A00721:190:HGJW7DSXY:4:1105:16848:32831\_2:N:0:TCTGCAAG+GCTGCACT  
AAGAGCCACTGCCAATCTCATCGCTATACGCATACCTGATTGGAAGAAGCGAGGTTCTGTTCTCAATA  
AAAATTTTCTCAAGAGATTATGGTTGATAAAGTTTTCTTCATAAGGG  
+  
FFFFFFFFFFFF:FFFFFFFFFFFFFFFFFFFFFFFFFFFFFFFFFFFFFFFF:FFFFFFFFFFFFFFFF  
FFFFFFFFFFFFFFFF:FFFFF:FF:FFF:FFFFFFFF:FFF:FFFF  
@A00721:190:HGJW7DSXY:4:1131:4878:7748\_2:N:0:TCTGCAAG+GCTGCACT  
GTCATGGGGATCACTTCTTCGGTCAATGACAAAACCTTCGAATATGTTACGACATGGCTTCGTAACAA  
CAGTGCAGGATTGTCATCTCGGGGAAAGTGATTCACCAAGATGTTCA  
+  
FFFFFFFFFFFFFFFFFFFFFFFFFFFFFFFFFFFFFFFFFFFFFFFFFFFFFFFFFFFFFFFFFFFFFFFF  
FFFFFFFFFFFFFFFFFFFFFFFFFFFFFFFF,FFFFFFFFFFFF:FFFFFFFF  
@A00721:190:HGJW7DSXY:4:1402:21079:20776\_1:N:0:TCTGCAAG+GCTGCACT  
AGATACCTAGAGAAGGTCGAGCGATCTTACTCGTTATCGGAGCTAAGAAGAAGACTTTGGGTACACG  
TTATGCTCGCAAACCTTAACGTTAGTACCGGAGGTGATCTCTGCTTCTGCGTTACTGAGAGAAAAGA  
TTC  
+  
FFFFFFFF:FFFFFFFFFFFFFFFFFFFFFFFFFFFFFFFFFFFFFFFF:FFFFFFFFFFFFFFFF  
FFFFFFFFFFFFFFFFFFFFFFFFFFFFFFFFFFFFFFFFFFFFFFFFFFFFFFFFFFFFFFFFFFFFFFFF  
FFF  
@A00721:190:HGJW7DSXY:4:1664:27859:33927\_1:N:0:TCTGCAAG+GCTGCACT  
CTTTATGGACAAGATGCAAGTTCTTGGGAAATACTTGTTTCCCTTTTTAGGTTTAGTAGGTGATCTTG  
ACGTCGATTCTTTGTATAGGGAGTGTGAGAAGACAACGAATCTTGAAACTACGGTCCTTATCAAAGAA  
AAT

+  
FFFFFFFFFFFFFF,F,:FFFFFFFFF:FFFFFFFFFFFFFF:FFFFFFFFFFFFFFFFFFFFFFFF  
FFFFFFFFFFFFFFF,FFFFFFFFFFFFFFF,FFFFFFFFFFFFFFF:FFFFFFFFFFFFFFF  
:FF  
@A00721:190:HGW7DSXY:4:1606:7545:11397\_2:N:0:TCTGCAAG+GCTGCACT  
AAATCTTTTGAGATTGAGAAGATTGAAGAACACGTCAAGAAGTCGCTCGGCGTTGTTCTTGAAAACCA  
AGTTAAGAAGGAGGCTGATCATGGAGTCTTTGTACCTTCTGTCAAACCT  
+  
FFFF:FF,FFFFFFFFFFFFFFFFFFFFFFFFFFFFFFFFFFFFFFFFFFFFFFFFFFFFFFFF  
FFFFFFFFFFFFFFF:FFFFFFFFFFF:FFFFFFFFF:FFFFFFFFFFFF:FF  
@A00721:190:HGW7DSXY:4:2319:5023:31454\_1:N:0:TCTGCAAG+GCTGCACT  
TCCCGGATGTGGATTGAAGGCTGGCTCTAAGGGAGACTCCTTCTTTTTGAATGTTGTAAAGAATTGGG  
TTGAGAAGTGTGCTTTACAAGGAGTTAGACTCTTCTTCAAGTTTTTAGATCTTCTTGATAATCTTAA  
GAA  
+  
FFFFFFFFFFFFFFFFFFFFFFFFFFFFFFF,FFFFFFFFF:FFFFFFFFFFFFFFFFFFFFFFFF  
FFFFFFFFFFFFFFFFFFFFFFFFFFFFFFFFFFFFFFFFFFFFFFFFFFFFFFFFFFFFFFFF  
FFF  
@A00721:190:HGW7DSXY:4:1623:28113:13103\_1:N:0:TCTGCAAG+GCTGCACT  
TCTGAATTATTACTGTTTTCTCTACCCATAACTTCTTTTTCAAAAATGCGGATGGGTCTACTGATGTT  
TTCCTACAGAGTGCAGTCGTTTCAACACTTATCACCACTTTTGAAAGGAAAATAATTGGTGATGAAAA  
TAC  
+  
FFFFFFFFFFFFFFFFF:F:FFFF:FFFF:F:FFFFFFFFFFFFFFFFF:FFFFFFFFFFFFFFFF  
FFFFFFFFFFFFFFFFFFFFFFFFFFFFFFF,FFFFFFFFFFFFFFFFFFFFFFFFFFFFFFFF  
FFF  
@A00721:190:HGW7DSXY:4:1325:30635:3881\_2:N:0:TCTGCAAG+GCTGCACT  
TCTCAAGGCTCTCATCGCCACTGGGATTCTAAGGGGTTCCATAAGATATTATCTGACATTGTGGTTCA  
ATGATCAGGATTCTTCTTTTGTCCTTACGTCTTAAGTAATTTGGATG  
+  
FFFFFFFFFFFFFFFFF:FFFFFFFFFFFFFFFFFFFFFFFFFFFFFFF:FFFFFFFFFFFFFFFF  
FFFFFFFFFFFFFFFFF:F,FFFFFFFFFFF:FFFFFFFFFFFFFFFFF  
@A00721:190:HGW7DSXY:4:1468:29306:31391\_1:N:0:TCTGCAAG+GCTGCACT  
GATTCTTAAAGAAGTTTATTTAAACTTCAGAGTCTCTTGGAAGTCCAGGTAGCTAATGTTCTTGCAA  
TAGCCACAGACTTTCTGGGAAAAGAGACCTCTGTTGGTAGAGGAGTTGAGAGAATTACTCAGATTCAA  
TCT  
+  
FFFFFFFFFFFFFFFFFFFFFFFFFFFFFFF:FFFFFFFFFFFFFFFFFFFFFFFFFFFFFFFF  
FFFFFFFFFFFFFFF:FFFFFFFFFFFFFFFFFFFFFFFFFFFFFFFFFFFFFFFFFFFFFFFF  
FF,  
@A00721:190:HGW7DSXY:4:2161:7446:26694\_1:N:0:TCTGCAAG+GCTGCACT  
GGAGTGGCTAGGTTTTAAAGATCCTTTGCACAAGCAATACCTTCCACTGAGTTCATCACCCAGAGTT  
TCGACGTCGCGGAAAACGATGAAGATTTCCACACTGTTGAGAATCTTCTGATGCTGAATTTGAGGAA  
AAT  
+  
FF:FFFFFFFFFFFF:FFFFFFFFFFFFFFFFFFFFFFFFFFFFFFF,:FFFFFFFFFFFFFFFF  
FFFFFFFFFFFFFFFFFFFFFFFFF:FFFFFFF:FFFFFFFFFFFFFFFFFFFFFFFFF:FFFFFFFF  
FFF  
@A00721:190:HGW7DSXY:4:1541:16206:6198\_1:N:0:TCTGCAAG+GCTGCACT  
GAGTGACTGGAGTTCAGACGTGTGCTCTTCCGATCTGTTATAAACCTTCTTTTTATCATTGCAACAGG  
ACTTTGAGAAGACTGTTGAAATGGACAAAATCTGGGATCATAGGTATGTGTCACGCTACACTCGAAAT  
ATG  
+

FFFFFFFFFFFFFFFFFFFFFFFFFFFFFFFFFFFFFFFFFFFFFFFFFFFFFFFFFFFFFFFFFFFFFFFF  
FFF

@A00721:190:HGJW7DSXY:4:2105:13530:3161\_2:N:0:TCTGCAAG+GCTGCACT  
AAGATCTCTACAGAGATTATCGAGAGTTGTGATCTAGTTCTAAATTTAGGTCGACGGACTTTAGCAAC  
TTTAGATAAATTCTTTCCGGTCTCAATGACCTTTGCTATGTACGTGGA

+

FFFFFFF:F:FFFFFFFFFFFFFFFF,F,,F,FFFFFFFFF::FFFFFFFFFFF::,FFF:FFFFFF,F:FFF  
FFFFFFFFFFFFFFFFFFFFFFFFF:,FFFFFFFFF:FFFFFFFFFFFFFFFFFFFF:FF

@A00721:190:HGJW7DSXY:4:2470:15980:19617\_2:N:0:TCTGCAAG+GCTGCACT  
TCACTACAAAGGCGTTACGTAAAGTAGTTTTACGCTTTATCTTAAAGCATTACCACCAAATTTAGCA  
CTTTTTGAATATGACAGAAGCTCGCCATATCAGATTAGAGACATGCCA

+

FFFFFFFFFFFFFFFFFFFFFFFFFFFFFFFFFFFFFFFFFFFFFFFFFFFFFFFFFFFFFFFFFFFFFFFF  
FFFFFFFFFFFFFFFFFFFFFFFFFFFFFFFFFFFFFFFFFFFFFFFFFFFFFFFFFFFFFFFF

@A00721:190:HGJW7DSXY:4:1636:22336:3035\_1:N:0:TCTGCAAG+GCTGCACT  
TTCTAACCAGGACTGATGGTGAGATTCTTTTACCTTTTGGAGGTCCAGGAACCTTTACTCCTAGTGTC  
TTTTCTAGAGTCCAAGGACGTTTCCGTCGGAGGATGACAGGTGGGAGACCGCTCAATAACACTCTATT  
GAA

+

FFFFFFFFFFFFFFFFFFFFF:,FFFFFFF:FFFFFFF,FFFFFFFFFFFFFFFFF:FFFFF:FFFFFFFFFFFFF  
FFFFF,FFFFFFFFF:F:FFFFFFFFFFFFFFFFFFFFFFFFFFFFF:FF::FFFFFFFFFFFFF:FFF:FFFFFFF  
FFF

@A00721:190:HGJW7DSXY:4:2257:11803:19304\_1:N:0:TCTGCAAG+GCTGCACT  
TAATGATACTGACGAAGGTTCTATTACCACCCTTGTCATTGATACAAACATTCTAGGTGATGCTTTCT  
TAGAGGCTCGTCTAGCCGCTGAGATTCTGCTTACCTATTTACAATCTGTAGAGAGAGAGGTTAATCAG  
AAT

+

FFFFFFF:FFFFFFFFFFFFFFFFFFFFFFFFFFFFFFFFFFFFFFFFFFFFFFFFFFFFFFFFFFFFFFFF  
FFFFFFFFFFFFFFFFFFFFFFFFFFFFFFFFFFFFFFFFFFFFFFFFFFFFFFFFFFFFFFFFFFFFFFFF  
FFF

@A00721:190:HGJW7DSXY:4:1339:28908:24752\_1:N:0:TCTGCAAG+GCTGCACT  
AGGTCTCCTAGTACTTAAGGTTTATGTTTCGTTTCAGCTGGATGGATCTTTTGATGGTATGTTTCA  
CATTGCGTGATCACTTCCCGTGGACTTGGAAGAGATTAAACATAAAATCCAGCGATTCTATTATGTC  
GC

+

FFFFFFFFFFF:FFFFFFFFFFFFF:FFFFFFFFFFFFF,FFFFFFF:FFFFFFFFFFFFFFFFFFFFF  
FFFFFFFFFFFFFFFFF,FFFFFFFFFFFFF,F:FFFFFFFFFFFFFFFFFFFFFFFFFFFFFFFFFFFFF  
FF

@A00721:190:HGJW7DSXY:4:2213:16703:16799\_2:N:0:TCTGCAAG+GCTGCACT  
TGTGGGGATTAACTTCCCTCGTGAACTTACGACGATGTTCTCGCTCGCATTTACAAGGATTACTAA  
GTCTGAGATCTGCCACTTCTAATTTTAGGAAACGTCGCGAAAAGAAAG

+

FFFFFFFFFFFFFFFFFFFFFFFFFFFFFFFFFFFFFFFFFFFFFFFFFFFFFFFFFFFFFFFFFFFFFFFF  
FFFFFFFFFFFFFFFFFFFFFFFFFFFFFFFFFFFFFFFFFFFFF:FFFF:FFFF::FF

@A00721:190:HGJW7DSXY:4:2505:22589:5603\_2:N:0:TCTGCAAG+GCTGCACT  
TTGGTCGAAAAATATCGCCGGGAACCTTCTAATAGAGGATCCTGATGACATTATTTCAACGGATACCGA  
TCTCAGTTCTACCACAGAAACCGTCTCAGGAACGTCTCCACTGATTC

+

FFFFFFFFFFFFFFFFFFFFFFFFFFFFFFFFFFFFFFFFFFFFFFFFFFFFFFFFFFFFFFFFFFFFFFFF  
FFFFFFFFFFFFFFFFFFFFFFFFFFFFFFFFFFFFFFFFFFFFFFFFFFFFFFFFFFFFFFFF

@A00721:190:HGJW7DSXY:4:2458:20654:32565\_2:N:0:TCTGCAAG+GCTGCACT  
AAAGACGACCTTCTTGTGGGACTGAGACCTCTGAATTTTCAGGGTGCCTGATGAGGACGTTGAAAG  
GGATAATTTCAACTCTGAGACTTCTAAGAGTGTTTCAAAGACCAGAA

+

:FFFFFFFFFFFFFFFFFFFFFFFFFFFFFFFFFFFFFFFFFFFFFFFFFFFFFFFFFFFFFFFFFFFFFFFFFFFFFFFF  
FFFFFFFFFFFFFFFFFFFFFFFFFFFFFFFFFFFFFFFFFFFFFFFFFFFFFFFFFFFFFFFFFFFFFFFFFFFFFFFF  
@A00721:190:HGJW7DSXY:4:2158:9480:29027\_1:N:0:TCTGCAAG+GCTGCACT  
GGTTGAAGAGAAAAGCTGATATGGTTGCGGCTGATCGTACCCCAATTCCTGCTAGAAAGATCACTCTCG  
GCGATACCACTGATCTTCCAGAGTTACGTAGTGGTCGTTCTTTTGGTGATTTTATCAAAGAGAAAGTT  
TCT  
+  
FFFFF:FFFFFFFFFFFF:FFFFFFFFFFFFFFFFFFFFFFFFFFFFFFFFFFFFFFFFFFFFFFFFFFFFFFFF  
FFFF:FFFFFFFFFFFFFFFFFFFFFFFFFFFFFFFFFFFFFFFFFFFFFFFFFFFFFFFFFFFFFFFFFFFFFFF  
FFF  
@A00721:190:HGJW7DSXY:4:1448:21766:25911\_1:N:0:TCTGCAAG+GCTGCACT  
GTTTTCCAAAAGCTATTAATAGCAGTTGCGGGGCTATAATACCGCCTCCAGATTACTCTAAAGTGAA  
TCCACTCTCTTGGGATATAAATGAGTACATCTATAATAGAGTTTTGGAAGTGTGTAATGTCCTACGTA  
CTG  
+  
FFFFFFFFFFFFFFFFFFFFFFFFFFFFFFFFFFFFFFFFFFFFFFFFFFFFFFFFFFFFFFFFFFFFFFFFFFFF:FFFFFFFFFFFFFFFF  
FFFFFFFFFFFFFFFFFFFFFFFFFFFFFFFFFFFFFFFFFFFFFFFFFFFFFFFFFFFFFFFFFFFFFFFFFFFF:FFFFFFFFFFFFFFFF  
FFF  
@A00721:190:HGJW7DSXY:4:1266:32633:34084\_2:N:0:TCTGCAAG+GCTGCACT  
GAAGATCTTCGAGTGTTTTATAGTGAGTTATTCTTGCGAAGTTCAAGTCGATTGATTTTGTGACTA  
CGATCTCTCTTGTAAATAAGAAGTTCTTCGCAGTTGAATCTCCACCAGG  
+  
FFFFFFFFFFFFFFFFFFFFFFFFFFFFFFFFFFFFFFFFFFFFFFFFFFFFFFFFFFFFFFFFFFFFFFFFFFFF:FFFFFFFFFFFFFFFF  
FFFFFFFFFFFFFF,FFFFFF:FFFF:FFFF:FFFFFFFFFFFFFF,FFFF  
@A00721:190:HGJW7DSXY:4:1239:12879:1564\_2:N:0:TCTGCAAG+GCTGCACT  
ACCACTGAACTTATAGCGACTTTTGTGCAATTTTTCGCAAAAGTCTTGAAGTACGTATTGTCACTGC  
TAATCGTAATTCGCGAGAAGAGATAGTGAATAAAGTTTTGGCACTTCT  
+  
FFFFFFFFFFFFFFFFFFFFFFFFFFFFFFFFFFFFFFFFFFFFFFFFFFFFFFFFFFFFFFFFFFFFFFFFFFFF:FFFFFFFFFFFFFFFF  
FFFFFFFFFFFFFFFFFFFFFFFFFFFFFFFFFFFFFFFFFFFFFFFFFFFFFFFFFFFFFFFFFFFF:FFFF  
@A00721:190:HGJW7DSXY:4:1278:23511:23109\_1:N:0:TCTGCAAG+GCTGCACT  
TTGTGAAATTAAGACAGACGTGAAAGTTATGATGAGTGATCGTATTAGAACAGCTGATTCTTATTGCA  
TGAACGTCGCTGAGGTCAAACCTGTGGACGTTCTTTTCATCGACGAATTATTCATGATTCACGCTGGT  
CAG  
+  
FFFFFFFFFFFFFFFFFFFFFFFFFFFFFFFFFFFFFFFFFFFFFFFFFFFFFFFFFFFFFFFFFFFFFFFFFFFF  
FFFFFFFFFFFFFFFFFFFF:FFFFFFFFFFFFFFFFFFFFFFFFFFFFFFFFFFFFFFFFFFFFFFFFFFFFFFFF  
FFF  
@A00721:190:HGJW7DSXY:4:2229:1551:23218\_2:N:0:TCTGCAAG+GCTGCACT  
CATCTACTTAAGCGGCTTATACCATAGGTTACGGTGATTCCAATCAAATCGGATTCATCAATCGTAT  
TGATCTCCAAGTCGAAACTACTTCAACATCAACGACATCATTCTTGA  
+  
FFFFFFFFFFFFFFFFFFFFFFFFFFFFFFFFFFFFFFFFFFFFFFFFFFFFFFFFFFFFFFFFFFFFFFFFFFFF  
F:FFFFFFFFFFFFFFFFFFFFFFFFFFFFFFFFFFFFFFFFFFFFFFFFFFFFFFFFFFFFFFFFFFFF  
@A00721:190:HGJW7DSXY:4:2225:24469:36354\_1:N:0:TCTGCAAG+GCTGCACT  
TTATCGAAGTCTCAGTTATCGCTGCCGCGCCGACGTTTGTGCGAACTCTCAGAGGTTTACGGCAGAA  
AAATTTCTCCTGCTTGTAAATTCGAGAGAGGACACTATGGAAATTAGACCTATCAGATGTCTTGACGAC  
TTC  
+  
FF:FFFF:FFFFFFFFFFFFFFFFFFFFFFFFFFFFFFFFFFFFFFFFFFFFFFFFFFFFFFFFFFFFFFFFFFFF:FFFFFFFF  
FFFFFFFFFFFFFFFFFFFFFFFFFFFFFFFFFFFFFFFFFFFFFFFFFFFFFFFFFFFFFFFFFFFF,FFFFFFFFFFFFFFFF  
FFF  
@A00721:190:HGJW7DSXY:4:2336:23032:29888\_2:N:0:TCTGCAAG+GCTGCACT  
CAAAGTCCTTGGTAAGAGTAAGGTTAAATGTGAAGATGCTCAGACTATTCATGAAGTTCAAGGTAATA

+

@A00721:190:HGJW7DSXY:4:1270:21278:4053\_2:N:0:TCTGCAAG+GCTGCACT  
ACGTTGAATCTTTACGATACTTTGTTATCAATGTAAAGTTAAACGATGCTACTTGTGAGAGGATCAAT  
CACAGTAAGGAAGTGTACGTTTAGCACGGGAGGTTGCAGATTCAACC

+

@A00721:190:HGJW7DSXY:4:2256:11731:23281\_2:N:0:TCTGCAAG+GCTGCACT  
CTATCGAGGACGATGAGTATCTTGAAGTTGTTGACGACAAGCCTCAAGAGGGTAGAGGACCACCTGGA  
TCTTCTACTGTCTCTGCCTTCCAAGATTTCTTAGAAGAGGTTATTCT

+

@A00721:190:HGJW7DSXY:4:1332:12707:25254\_2:N:0:TCTGCAAG+GCTGCACT  
TCACTCGGTAATCTTTAGCCGAATTAAGTACTAATGAGTTCAAGTCGGTTGTCGATCGAATTAAGAT  
CAAGGCTAATACCTTTATAGGTAAGAAGCCCCCTTGAGCCGCGTAGTCA

+

@A00721:190:HGJW7DSXY:4:2521:9625:14810\_1:N:0:TCTGCAAG+GCTGCACT  
TCCAAGAGAATATTTATTCTTATGAGGCTCGAACTTCAACGTTTTCAACGGAAGACATATCGCA  
CCCGAAATTTTGGGCAGAATGCTCTTAACGCGGTTCTTGAACGGTGTGTTTGATCAGTCTAAGTTGGA  
TAA

+

@A00721:190:HGJW7DSXY:4:1262:25545:27164\_2:N:0:TCTGCAAG+GCTGCACT  
GAGCTCCTCAATTGATAGATTGGGTCAACAATAGGGACGCTAGTATACTTCGTAAAGTCGACAGCGAA  
ATGGTCAATATTGATAATTGGACCGACTATATGACCTATTTTAAGCTC

+

@A00721:190:HGJW7DSXY:4:2525:6045:33254\_1:N:0:TCTGCAAG+GCTGCACT  
CTTGATGCTTCAGCCTTTTCGAAGCATAACCCCGCACAGAATATCGTTTATCACGCAAAATTTATTAA  
TGCAATTTTCGGACCTATCTTTAAGGTTCTTGTGAGGAGAGTCAAACAGTGTCTTTACCCAACATTT  
TTA

+

@A00721:190:HGJW7DSXY:4:2331:21866:28432\_1:N:0:TCTGCAAG+GCTGCACT  
TCTCTCTTATGAGGTCATGATGACTACTATAAGGGTGAAATCGATTTTTCGAAGTTTGACAAATCTCA  
AGATTTCTTTTGTAAGCCTATGAGATAAAGATGTATTCTTATTTAGGCTTCGATGCTGAATTTCTTG  
AAC

+

@A00721:190:HGJW7DSXY:4:1225:8802:34366\_1:N:0:TCTGCAAG+GCTGCACT  
ACGCCAGGAGTATCCATAACGATTTGTCATTTACCACCTTTGCTCAACGACGAAGTGGAACGGCCAAC

ACTTTCTTTGGTAATTGTATGATCACTTTGATGATTTTATCACTTTATTATGACCTTGAAAGTTTTC  
GGC

+

FFFFFFFFFFFFFFFFFFFFFFFFFFFFFFFFFFFFFFFFFFFFFFFFFFFFFFFFFFFFFFFFFFFFFFFF  
FFFFFFFFFFFFFFFFFFFFFFFFFFFFFFFFFFFFFFFFFFFFFFFFFFFFFFFFFFFFFFFFFFFFFFFF  
FFF

@A00721:190:HGJW7DSXY:4:1630:1099:6339\_1:N:0:TCTGCAAG+GCTGCACT  
GCTGGGACGATTCCATTCTGTTTTCAAAGACTCCAATAACTGATCATTCTGATCATATGATTTTGG  
CAATGGTTTCGAAGCGAAATTTTTGAGGGATAAACAGCGTACTTCTGCTCGCGATTTATTCTTTT  
TCA

+

FFFFFFFFFFFF:FFFFFFFF,FFFFFFFFFFFFFFFFFFFFFFFFFFFFFFFFFFFFFFFFFFFFFFFF  
FFFFFFFFFFFFFFFFFFFFFFFFFFFFFFFFFFFFFFFFFFFFFFFFFFFFFFFFFFFFFFFFFFFFFFFF  
FFF

@A00721:190:HGJW7DSXY:4:1577:32172:24361\_1:N:0:TCTGCAAG+GCTGCACT  
ATGTTACTCTTGATGACTTTGGGAGAGATTCTGTTAGTTTTAAAGACTATACTAAATATCTCCACT  
GAGGTTGTTGTTTGGCGATTAGCTCTTGCGACTAATATTGATATTGATTGAGGGTCGTTATACCT  
TTC

+

:FFFF:FF:FFFF,FFFFFFFF:FFFF,FFFFFFFF,FFFF:FFFF:FF,FFFF,F::F:FF:  
FFFFFFFFFFFF:FF,FFF:FF:FF,FFFF:FFFFFFFFFFFFFFFF:FFFFFFFF, :FFFFFFFF  
:FF

@A00721:190:HGJW7DSXY:4:2158:7943:10739\_1:N:0:TCTGCAAG+GCTGCACT  
GCTTTGAATTGTATAAGATCAAATTTTAAACGATTCCGAGAGGTTTATCCTGATGTGGAGGGAGTT  
TGAAGCATCCCGACCTTTCCTTGTAATAATTTGATGCGGTTTCATAAGATTATCAGTAATCCTGAT  
CTA

+

FFFF:FFFFFFFFFFFFFFFF:FFFFF:FFFF:FFFFFFFFFFFFFFFFFFFFFFFFFFFFFFFFFFFF  
FFFFFFFFFFFFFFFFFFFFFFFFFFFFFFFFFFFFFFFFFFFFFFFFFFFFFFFFFFFFFFFFFFFFFFFF  
FFF

@A00721:190:HGJW7DSXY:4:2458:26539:34428\_1:N:0:TCTGCAAG+GCTGCACT  
ACCTCTTCTGGAGAGACGTATCTCAAAGATCGACTTCGAGACAGGTGATATTGTTGAGCGAGAGCG  
CAAGATCTAAATTCGGTAACGGTGCGTGCGCTTTATTTTAAAAAGCTCCCTCCTCTCGCAAGTTT  
TCT

+

FFFFFFFFFFFFFFFFFFFFFFFFFFFFFFFFFFFFFFFFFFFFFFFFFFFFFFFFFFFFFFFFFFFFFFFF  
FFFFFFFFFFFFFFFFFFFFFFFFFFFFFFFFFFFFFFFFFFFFFFFFFFFFFFFFFFFFFFFFFFFFFFFF  
FFF

@A00721:190:HGJW7DSXY:4:2221:22634:17801\_2:N:0:TCTGCAAG+GCTGCACT  
GATCAGTCTCTGACTTGACCATCTTTCATTTTAAATGACGATCATTAAGACTCTCTTCTTCTTTG  
TCCTTCTTTCGACTGATTTTCTCATCAGCTTGTTTACCTAATC

+

FFFFFFFFFFFFFFFFFFFFFFFFFFFFFFFFFFFFFFFFFFFFFFFFFFFFFFFFFFFFFFFFFFFFFFFF  
FF:FFFF:FFFFFFFFFFFFFFFFFFFFFFFFFFFFFFFFFFFFFFFF:FFF:FFFF:

@A00721:190:HGJW7DSXY:4:2464:30689:33505\_2:N:0:TCTGCAAG+GCTGCACT  
GATAACAACATCAGTTGATTAAGACTCTCCGAAAGGCGAACTTTGGGAATTTGAAGCTCAGGGTGA  
AGCACAACGTTTGACCGTGACGAAGTGTGGTGTCTTGATCTACGTTA

+

FFFFFFFFFFFFFFFFFFFFFFFFFFFFFFFFFFFFFFFFFFFFFFFFFFFFFFFFFFFFFFFFFFFFFFFF  
FF::FF, :FFFFFFFFFFFFFFFF:FFFFFFFFFFFFFFFF:FF:FFFFFF

@A00721:190:HGJW7DSXY:4:1358:28348:18584\_1:N:0:TCTGCAAG+GCTGCACT  
TATTTTAAAGTTTGTCTTCTTGTGTTGTTTATTCTATTAATCACTCATTTTAGTGAGATTATTA  
ACGCACTAAACGTCTTCGACAACAGCAGGGGTTTTCGAATAGTGATAGCCACCCGCTTACAGAGG  
GCA



[illegible]

FFFFFFFFFFFFFFFFFFFFFFFFFFFFFFFFFFFFFFFFFFFFFFFFFFFFFFFFFFFFFFFFFFFFFFFF  
FFF

@A00721:190:HGJW7DSXY:4:1663:29749:28338\_2:N:0:TCTGCAAG+GCTGCACT  
CACTCTTTTCTGCTACTTTAACGGAGCGTAGTGTACTCTTCGTCGATTGTATCAACAGTAACATTACT  
TCTAATAAAGGTCTCTATCAAGCTCGTATTATCGTCGCTGCTGGATCT

+

FFFFFFF:FFFFFFFFFFFFFFFFFFFFFFFFFFFFFFFFFFFFFFFFFFFFFFFFFFFFFFFFFFFFFFF  
FFFFFFFFFFFFFFFFFFFFFFFFFFFFFFFFFFFFFFFFFFFFFFFFFFFFFFFFFFFFFFFFFFFFFFFF

@A00721:190:HGJW7DSXY:4:2331:2826:21480\_1:N:0:TCTGCAAG+GCTGCACT  
AAGGCTAAACTCCAAGGTAATTATGAAGACTGTGATTTATCTTTCACTCTGGCCTTGTATGAGGGTGT  
TTCTAATCGTAACATTAATAATTTCAATCTTCTTAAAAAGAAGATAGAGAGTCATACTTTGGGCTATC  
GTT

+

FFFFFFFFFFFFFFF,FFFFFFFF:FFFFFFFFFFFF:FFFFFFFFFFFFFFFFFFFFFFFFFFFFFFF,FFFFFFFF  
FFFFF:FFFFFFFFFFFFFFFFFFFFFFFFFFFFFFFFFFFFFFFFFFFFFFFFFFFFFFFFFFFFFFFFFFFF  
FFF

@A00721:190:HGJW7DSXY:4:2113:1334:22780\_1:N:0:TCTGCAAG+GCTGCACT  
CTCTACCGCCTTACAAGTCTAAGGTTAAAGAGTCGATTAAACAAGTTGTACTTATCAATGATTTTATC  
GCTGGTTGTTATCTCGAAAAGTCTCTTCTAAAAGGAACGTCAGTTCTAACCCAAAGAGAATATCTAAA  
ATA

+

FFFFFFF,F,FFFF:FFFF:FF,FF:FFFFFFFF,FFFF:F:FFFFFFFF:FFFFFFFF:FFFF:FF  
:FFF:FFFFFFFF:FFFFFFFFFFFF:FFFFFFFFFFFFFFFFFFFFFFFF:FFFFFFFFFFFFFFFFFFFF  
FFF

@A00721:190:HGJW7DSXY:4:1639:20781:31814\_2:N:0:TCTGCAAG+GCTGCACT  
AGACGTTGCTTGTGCTTCCTCTTTAATGGCACTACCTCGGTACAATCTTACTTGGAACGAAGGCCGA  
CCTGTTCCGGAGTTTTTACGGGATCCGGAATGTTCTGTCTATATTAGG

+

FFFFFFFFF:FFFFFFFFFFFF:FFFFFFFFFFFF:FFFFFFFFFFFFFFFFFFFFFFFF:FFFFFFFFFFFF  
FF:FFFFFFFFFFFFFFFFFFFF,:FF,FF:F::FF,FF,FFFFFFFF

@A00721:190:HGJW7DSXY:4:1633:30644:34491\_1:N:0:TCTGCAAG+GCTGCACT  
CGAACGTCAACGTTACCGAGTTTCGTTTCGTACCTTGATGCTGACTTTCGTCAATATGATTTGATCT  
GGTTGCTCAATTCTAAGCGTGTTCCGCTTAGTGCGAGGCCCTCTTCTACGAGTATTGCTATTTATAC  
GGT

+

:FFFFFF:FFFFFFFFFFFFFFFFFFFFFFFFFFFFFFFFFFFFFFFFFFFFFFFFFFFFFFFFFFFFFFF  
FFFFFFFFFFFFFFFFFFFFFFFFFFFFFFFFFFFFFFFFFFFFFFFFFFFFFFFFFFFFFFFFFFFFFFFF  
FFF

@A00721:190:HGJW7DSXY:4:1424:5276:26913\_2:N:0:TCTGCAAG+GCTGCACT  
TATTTGGATGATCTTGATAAAGAACTTCATGAATTTTCAGAGGATGAAAAATTTCTTCCTTGATTT  
TAATATAAAGAATCTTTACCAGGACTCCTACTACAGGAGGCAGTCTTC

+

FFFFFFFFFFFFFFFFFFFFFFFFFFFFFFFFFFFFFFFFFFFFFFFFFFFFFFFFFFFFFFFFFFFFFFF  
FFFFFFFFFFFFFFFFFFFFFFFFFFFFFFFFFFFFFFFFFFFFFFFFFFFFFFFFFFFFFFFFFFFFFF

@A00721:190:HGJW7DSXY:4:1510:1262:18959\_1:N:0:TCTGCAAG+GCTGCACT  
GAAACTCTAAGTGGAATACTGTCTTTCCAAGCTTACCTGTATCTTCAATGAAATTGGACTCTTCGAT  
AGGGGACATTTTATCGTGGGCTTTCCGTAAAGGAAGATCTGTTATCGACGGTTTATCGTTTACGAAGT  
ATC

+

FFFFFFFFFFFFFFFFFFFFFFFFFFFFFFFFFFFFFFFFFFFFFFFFFFFFFFFFFFFFFFFFFFFFFFF  
FFFFFFFFF,FFFFFFFFFFFFFFFFFFFFFFFFFFFFFFFFFFFFFFFFFFFFFFFFFFFFFFFFFFFFF:FFFFFFFFF  
FFF

@A00721:190:HGJW7DSXY:4:1224:16758:2112\_1:N:0:TCTGCAAG+GCTGCACT  
TTGGCCTAGTGGATGTTATTAGTGACATCTGGTCAATTTTCGTTTTTAGGTGGTCTTTATTCTATTATT

GATTTTTATGAGATTGATACGTTAACAGAAGATGATGTTAGAGTAGAATTCCTGAAGAGTCCTTCCGT  
AAC

+

FFFFFFFFFFFFFFFFFFFFFFFFFFFFFFFFFFFFFFFF,FF::FFFFFFFFFFFFFFFFFFFFFFFF  
FFFFFFFFF:FFFFF:FFFFFFFFFFFFFFFFFFFFFFFFFFFFFFFFFFFFFFFFFFFFFFFF  
FFF

@A00721:190:HGJW7DSXY:4:2134:22643:9298\_2:N:0:TCTGCAAG+GCTGCACT  
ATTATGTCTGTGTTGAAAGACTTTCTACCGATAAGGGTCACTAGTCTTACACAATTAAGAAATAATCC  
TACATTGACTGATTATCTAAAGATTGAAGGAAAATTTTATCCTCGTTT

+

FFF:FFFFFFFFFFFFFFFF:FFFFFFFFFFFFFFFFFFFFFFFFFFFFFFFFFFFFFFFF  
FFFFFFFFFFFFFFFFFFFFFFFFFFFFFFFFFFFFFFFFFFFFFFFF

@A00721:190:HGJW7DSXY:4:1243:28420:14700\_1:N:0:TCTGCAAG+GCTGCACT  
TTTCTACGATACAAATGATAACTTCTAATTTACGTTTGTACTCAGAGCTGGTCTCTCAGCAAAGG  
GATGCATGGTGTTATCTCCTCAGGAGTCCCGGCATTTGATAATAATGACGAGACTTTCGTCATAATCG  
CTG

+

FFFFFFFFFFFFFFFFFFFFFFFFFFFFFFFFFFFFFFFFFFFFFFFFFFFFFFFFFFFFFFFF  
FFFFFFFFFFFFFFFFFFFFFFFFFFFFFFFFFFFFFFFFFFFFFFFF:FFFFFFFFFFFFFFFF  
FFF

@A00721:190:HGJW7DSXY:4:2133:3034:30639\_1:N:0:TCTGCAAG+GCTGCACT  
GTACCAGCGCATCTCGTGTGAGCCTCGACCCGATTATATGGTATTAAGGTGAGGAGACC  
ATTTTCTTGCTGAAATTTATAGAAGATTATTTTGACAGAATCAATAAGAATCATCGATTCTCGATTCTG  
TAG

+

FFFFFFFFFFFFFFFFFFFFFFFFFFFFFFFFFFFFFFFFFFFFFFFFFFFFFFFFFFFFFFFF  
FFFFFFFFFFFFFFFFFFFFFFFFFFFFFFFFFFFFFFFFFFFFFFFF:FFFFFFFFFFFFFFFF  
FFF

@A00721:190:HGJW7DSXY:4:1336:22968:5603\_2:N:0:TCTGCAAG+GCTGCACT  
TAATATTCAACCTCAAAAGTTACGTGTTTACAGTAACGAGATCACACATTTTGAGAACTAACTATGTT  
ATGTTCTCTGATCATTTTGACAATCTCTTCTTATAATAATAATAAA

+

FFFFF:FFFFFFFFFFFFFFFFFFFFFFFFFFFFFFFF:FFFFFFFFFFFFFFFFFFFFFFFF  
FFFFFFFFFFFFFFFFFFFFFFFFFFFFFFFFFFFFFFFFFFFFFFFF:F:FFFFF

@A00721:190:HGJW7DSXY:4:1516:18728:9377\_1:N:0:TCTGCAAG+GCTGCACT  
AATGGCAAATAGTGAAAGGCTCCAGTCAACACTAGTTCGAGTGCTGCTTTGGATTACGATGACGTGA  
GAATAGGTGAAGGGATAGTTTTTACCTCGACCAACATTAAGCGGCGGCGACTAATCTTAAAGCTTCA  
CCC

+

FFFFFFFFFFFFFFFFFFFFFFFFFFFFFFFFFFFFFFFFFFFFFFFFFFFFFFFFFFFFFFFF  
FFFFFFFFFFFFFFFFF:FFF:FFFFFFFFFFFFFFFFFFFFFFFFFFFFFFFFFFFFFFFF  
FFF

@A00721:190:HGJW7DSXY:4:2115:15763:28635\_1:N:0:TCTGCAAG+GCTGCACT  
ACACTTCGAACTTAATAATGATGCACTACAAACAAGTATCGCTAATCATCTGAAAAAGGCTCTAAAG  
GACACTATAAATATCCAGACGACGACGAAGCTTATACTACTTTAATTTTGGGTATTATGTGGAGATA  
TCG

+

FFF:FF:,FF,FF,:F,F,:F:FF,,F:F,,,:FF:F,:FFFFFF:F,FFFF,F:,,:F,FFFF,  
:FFFFFF:FF,,F,FFF,,,FFFFFFFF:FFFF:F:F:FFFFFF,FFFF,FFFFFFFF:F:FFFF:  
FFF

@A00721:190:HGJW7DSXY:4:1255:24849:19163\_1:N:0:TCTGCAAG+GCTGCACT  
CCGTTGAGAAAATTTCTTAGAGGATATTCGCCATTGTGGTACGAATTGGTCCAACATTTACCACCAA  
TTCTTTTGATACAACCTCTAGCCTTCAAGTGGGGTATGCCTGCGGAATACGCTTGCTATTACCAGATT  
GGT

+  
FFFFFFFFF:FF,FFF,FFFFFFFFFFFFFFFFFFFFFFFFFFFFFFFFFFFFFFFF  
:FFFFFFFFFFFFFFFFFFFFFFFFFFFFFFFFFFFFFFFFFFFFFFFFFFFFFFFF  
FFF  
@A00721:190:HGJW7DSXY:4:1430:8901:4257\_2:N:0:TCTGCAAG+GCTGCACT  
TGATGCTATGTCAGAAGAAGCTATTCAAGCTTGTCTTTAAAGACTGCAGAGGCTGTCAAACAAGCCC  
AGACTCAAGGAGTCCAATCAAAGTTTTGAATTTAGCTCAACTGGGGA  
+  
FFFFFFFFFFFFFFFFFFFFFFFFFFFFFFFFFFFFFFFF:FFFFFF:FFFFFF:FFFFFFFFFFFFFFFF  
FFFFFFFFFFFFFFFFFFFFFFFF:FFFFFFFF:FFFFFFFFFFFFFF,,FF:F  
@A00721:190:HGJW7DSXY:4:2669:31828:29215\_2:N:0:TCTGCAAG+GCTGCACT  
CTACGGAAGTCCGGAGTATATTGTATGTTAATAGATAGTGGGATAATAGTTCTACCGATACGTAGT  
GAACGCGTTCGTAGAACCAAGTACTTTCGTCTGAAGAGTTTAGAGCT  
+  
FFFFFFFFFFFFFFFFFFFFFFFF:FFFFFFFFFFFFFFFFFFFFFFFFFFFFFFFFFFFFFFFF  
FFFFFFF:FFFFFF:FFFFFFFFFFFFFFFFFFFFFFFF:FFFFF,FFFF:F  
@A00721:190:HGJW7DSXY:4:1420:25057:9815\_2:N:0:TCTGCAAG+GCTGCACT  
AGTTGAAGATGTGGCTTTAGACGATAATCCTTTAAGGACTATGTTGACTGACGAAGATTTTCCCACAG  
ATTTGTCTACGTTGCAGATCGCCACTCCAAACACTATATACATTATAA  
+  
FFFFFFFFFFFFFFFFFFFFFFFFFFFFFFFFFFFFFFFF:FFFFFFFFFFFFFFFFFFFFFFFF  
FFFFFFFFFFFFFFFFFFFFFFFFFFFFFFFFFFFFFFFFFFFFFFFFFFFFFFFF  
@A00721:190:HGJW7DSXY:4:2107:32154:26553\_1:N:0:TCTGCAAG+GCTGCACT  
ACTTTTGTACCAAATCTTGCTTTCAACGAAGTCTCTGATTTTATTAATCATTACTTTAACGATCT  
CTCGGTCATTTACTCTGTACTTGATCTACGTCGTTTAACTGTGGAACAACCTTTACTTATAATGACT  
CTA  
+  
FFFFFFFFFFFFFFFFFFFFFFFFFFFFFFFFFFFFFFFFFFFFFFFFFFFFFFFFFFFFFFFF  
FFFFFFFFFFFFFFFFFFFFFFFFFFFFFFFFFFFFFFFF:FFFFF,FFFFFFFFF:FFF:FF,FFF,,F  
FFF  
@A00721:190:HGJW7DSXY:4:2205:16604:2942\_2:N:0:TCTGCAAG+GCTGCACT  
ATATCATATTAGTAATACTCACTATCGTTTTCTGCTTTTTCTTAGCTAATAGATTAATAAAGGATGAG  
TACGAAAACCAACTCTTCGTTACGAGACCTGATGGTAGAATAGATTTA  
+  
FFFFFFFFFFFFFFFFFFFFFFFFFFFFFFFFFFFFFFFFFFFFFFFFFFFFFFFFFFFFFFFF  
FFFFFFFFFFFFFFFFFFFFFFFFFFFFFFFFFFFFFFFFFFFFFFFF,FFF  
@A00721:190:HGJW7DSXY:4:1453:5421:4993\_1:N:0:TCTGCAAG+GCTGCACT  
CATCTCAACGAGTATAAAGCGAGTTTTCCGTCCTTAACGTAATACACGAAGAGAACATCCGCAAACGA  
CTCGAAACCGAGACGCCGTAGATCAAAGTCCCTTCTAACTTTAGATTATGAATCCTGCCTTTACTCAT  
TTT  
+  
:FFF,::,:F:F,F:FF,:,,,FFF,F::FF,F,::,:F:,FFFF:F,::,F,,::FF:,FFFFFF  
FFFFFFFFFFFFFFFFFFFFFFFFFFFFFFFFFFFFFFFFFFFFFFFFFFFFFFFFFFFFFFFF  
FFF  
@A00721:190:HGJW7DSXY:4:1611:8223:17769\_1:N:0:TCTGCAAG+GCTGCACT  
ATAACCTTCTTATACTTTTGGGTATGTTTTGTGAAAAACATGAGATACCCAAGTCTATCGAAGACATT  
ATCTCTTATGTACTTATTGTAACGATCATTTCTTCGAGTTTTGTCATTCTTATTCTTTTATTCTTTA  
ACT  
+  
FFFFF,FF:FF:FFFFFFFFFFFFFFFF:FFFFF:FFFF:FFFFFFFFFFFFFFFFFFFFFFFF:FFF  
FFFFFFFFFFFFFFFFFFFFFFFFFFFFFFFFFFFFFFFF:FFFFFFFFFFFFFFFFFFFFFFFF  
FFF  
@A00721:190:HGJW7DSXY:4:1470:21621:5400\_2:N:0:TCTGCAAG+GCTGCACT  
ATGCTTTTCGATAGTGATTGTATCAATTAAATACATTACTGTTTCAAATCATCTTTACTCACAGAC

$+$ 

@A00721:190:HGJW7DSXY:4:2614:13955:26788\_1:N:0:TCTGCAAG+GCTGCACT  
CACTACCACTGATCTGCCGACCTTTAGTCAAGGAACCTTCAATTCCTTCGATGTTTATATTTTTCTATAA  
GGGAAATATCAATAATCAAATTTGACAAATTTAGAACTTTATTTCAGAACTCTCTCCGATCACCT  
TGG

+

@A00721:190:HGJW7DSXY:4:2441:11577:23265\_2:N:0:TCTGCAAG+GCTGCACT  
TCAATAAGATGTATGATGATAATCTACTATTTTTAAATAGTGATATTCAGCGTATACTTGAATACTTT  
ATCAAAGATTTGGCTTGGTCTATTTACCGCAAAAAGTTGGAAGAGGTC

+

@A00721:190:HGJW7DSXY:4:2362:1823:1172\_2:N:0:TCTGCAAG+GCTGCACT  
TTTTACTTATACTTTAAATAGCACCGATTATACTTGACTGTTGATAATATTACAATAGCTCTTCTC  
AGAAGATTAGAGAAGTAACCGGTGAACACGTCGGTAGCATTGATTAC

+

@A00721:190:HGJW7DSXY:4:1137:3721:25128\_1:N:0:TCTGCAAG+GCTGCACT  
GAAGTGAAGAAAGATTCTTTTCGAAAAGAAACCTATAAGTTACAAACGATTCTTCGACTATATTAAGA  
AATAAAAATACTTCAAGTACCTGAACCTTACATTTTAAATGGTATGGTATAATGTGTCTTACAAATAG  
AAC

+

@A00721:190:HGJW7DSXY:4:2278:29740:36432\_2:N:0:TCTGCAAG+GCTGCACT  
TAATGAGAGTGTATTCTTAATATTCTAGTAACCGCTATGTGGGCATTACTAGGATTTATCACACTCC  
TAAATTTGATAGCAATTTATGTTTTAAATGCTAGGAAAAATTTTAGAAA

+

@A00721:190:HGJW7DSXY:4:2366:13810:32675\_1:N:0:TCTGCAAG+GCTGCACT  
GGAGTACTTAATTCAATAGCTTTAGTATTATTTACTATCGCCTTTATTGAAAATTGTATAAGAGTTAA  
TTGCTTACACAAAAGTGACGCGCGAAGGAATCTTAATTGATTGAAGCTAGGCGTTGGGGAGAATGAAC  
TGC

+

@A00721:190:HGJW7DSXY:4:2274:26485:27571\_1:N:0:TCTGCAAG+GCTGCACT  
CTACCATGACCAATCATCGCTCCAACCTGGCAGGCCAGACGTAGGGTCAAACCTACTACCGCCGGTCGG  
CAGATCGGCACCACTGGTCTCTACGTTCAGGGACCCGCTGTGCAGAATAACCTTCCCAAATCTAGATC  
TGC

+

[illegible]

@A00721:190:HGJW7DSXY:4:1176:32253:28948\_1:N:0:TCTGCAAG+GCTGCACT  
CTGAAGGTCGTTACCGGACGACCACTCAAAGGAAACGGGCTGTTGCCAGAGGAAAGCAGCGACCACC  
GAGGTCGCTCGTAACATTGACGGCAGTCCCGTCATCTCTGTGGGAAGTACCTCAGTCAAA  
AGT

+

FFFFFFFFFFFFFFFFFFFFFFFFFFFFFFFFFFFFFFFFFFFFFFFFFFFFFFFFFFFFFFFFFFFF  
FFFFFFFFFFFFFFFFFFFFFFFFFFFFFFFFFFFFFFFFFFFFFFFFFFFFFFFFFFFFFFFFFFFF  
FFF

@A00721:190:HGJW7DSXY:4:1265:1389:11506\_2:N:0:TCTGCAAG+GCTGCACT  
ACTCCCATGCCAATCAATGATGTGACTATACAGTTCGGCCATTTCAAGAGTGGTCAATACGTCGTGGG  
AGGTACTGAAGCCTTCCCCTCCGCTGGCACGAAGAACAACCTCCCAAGCC

+

FFFFFFFFFFFFFFFFFFFFFFFFFFFFFFFFFFFFFFFFFFFFFFFFFFFFFFFFFFFFFFFFFFFF  
FFFFFFFFFFFFFFFFFFFFFFFFFFFFFFFFFFFFFFFFFFFFFFFFFFFFFFFFFFFFFFFFFFFF

@A00721:190:HGJW7DSXY:4:1130:8549:4210\_1:N:0:TCTGCAAG+GCTGCACT  
CTTCTGACCAGAATGAAAAGGGGTTTACCAGGGTAGTCTCTAAGTCTACCAGGAAGAGGGGAAATGTC  
CCCAAACTGAGAAGAATAAAGGGAAAGGTCCATCAGGACCTAAGAAGGGGAAATTACCCCTAATTCT  
GAA

+

FFFFFFF:FFFFFFFFFFFFFFFFFFFFFFFFFFFFFFFFFFFFFFFFFFFFFFFFFFFFFFFFFFFF  
FFFFFFFFFFFFFFFFFFFFFFFFFFFFFFFFFFFFFFFFFFFFFFFFFFFFFFFFFFFFFFFFFFFF  
FFF

@A00721:190:HGJW7DSXY:4:1362:8956:7044\_2:N:0:TCTGCAAG+GCTGCACT  
CCACCATCTGGGGTTGGGAATAAGAAATCTGCACGGGCCAAAGAGGCCGCTGCTACGAAGTCGCTGAA  
GGCGGCTTGGGTCATTAAGGGTAGCTGTAAAGTTGCGCCTGCCGACCC

+

FFFFFFFFFFFFFFFFFFFFFFFFFFFFFFFFFFFFFFFFFFFFFFFFFFFFFFFFFFFFFFFFFFFF  
FFFFFFFFFFFFFFFFFFFFFFFFFFFFFFFFFFFFFFFFFFFFFFFFFFFFFFFFFFFFFFFFFFFF

@A00721:190:HGJW7DSXY:4:1643:27724:12774\_1:N:0:TCTGCAAG+GCTGCACT  
CTCTCTACAGTAGGTTCTGCTACTATGAGCAAATCTGTTGAATTCTGCTACTGAGGACGAAGGTGAG  
AGGACTTTTGGCTACTGGCGACAACTGAGAGCAGTCGCTGGGGAAAGAGAATTGCGTGGGTTGAAGG  
CC

+

FF:FFFF,FFFFF:FFFFFFFFF::FF:FF:FFF:FFFF:FF,FF:FF:FFFFF:F:FF,FFFFF  
FFFFFFFFFFFF:FFFF:,FF::F::FFF:FF:FFFF,FFFF:F::FFFFFFFFFFFF:FFFFF  
FF

@A00721:190:HGJW7DSXY:4:1369:23800:30436\_1:N:0:TCTGCAAG+GCTGCACT  
TCTTGCAAGTACTGGAGTTCAGACGTGTGCTCTTCCGATCTTTTATCCGCGCTTAATATGGGGC  
GAAGATCCCCTATGGAGTCTTGAAGGACTTAGGTTGGCATATTTATGCCGACGATAATAAGCATGTCA  
CCC

+

FFFFFFFFFFFFFFFFFFFFFFFFFFFFFFFFFFFFFFFFFFFFFFFFFFFFFFFFFFFFFFFFFFFF  
FFFFFFFFFFFFF:FFFFFFFFFFFFFFFFFFFFFFFFFFFFFFFFFFFFFFFFFFFFFFFFFFFFFFFFFFFF  
FFF

@A00721:190:HGJW7DSXY:4:2419:8477:30702\_2:N:0:TCTGCAAG+GCTGCACT  
CTTACAAGAGAGAGTGTGAGAGAGTCGCTCTCACTATTTTGGCCAGAATGCGGGCTTTCTGACTGAT  
GAGGTTAAACTCTTGCTCCTTCTGTGGGTGAGGGTTTTTGTATATT

+

FFFFFFF:FF:FFF:FFFFFFFFFFFFFFFFF:FF::F,FFFF,F:F:FF:,F,FFFFF,F:FFF:  
,F:FFFFFFFF,F,,F,F,,,:F:,F,,FF:,F,FF:FFFF,FFFFF

@A00721:190:HGJW7DSXY:4:2266:9444:34976\_1:N:0:TCTGCAAG+GCTGCACT  
CAACCTCTCTTTAGAGAGCATTAGAAGGAAGTTGGGCAAATTCCCACATATGGTAGACGTTGTACAC  
TTTTCTTGAAAATTTTCTTTCTCCGTCATTGGGGATTTCGATGTGAGAAGGTGGAAGGTGTCAAG  
GGT

+  
 F::FFFFFFFF:FFFFFFFFFFFFFFFFFFFFFFFFFFFFFFFFFFFFFFFFFFFFFFFF  
 FFFFFFFFFFFFFFFFFFFFFFFFFFFFFFFFFFFFFFFFFFFFFFFFFFFFFFFFFFFFFFFF  
 FFF  
 @A00721:190:HGJW7DSXY:4:2552:9218:27915\_1:N:0:TCTGCAAG+GCTGCACT  
 CTTCCGATCTCCTAATCACATCATGATTGATAGTTACGGCTCGTATCGAGTTGGAGGGAGGAAGTTCT  
 CCGAAATTAAGACGGGGGATTAAGAGTCCAGCTGTAAGTGTCAATTCAGAGAGGGGAGCTCTGAAA  
 AGG  
 +  
 FFF,FFFFFFFF,,:FFFFF,,FF::FFFF:FFFF,:FFFFFFFFFFFFFFFFFFFFFFFFFFFFFFFF  
 F,FFFF,FFFFFFFFFFFFFFFF:FFFFFFFFFFFFFFFFFFFFFFFFFFFFFFFFFFFFFFFF::F  
 FFF  
 @A00721:190:HGJW7DSXY:4:2471:4237:28745\_2:N:0:TCTGCAAG+GCTGCACT  
 ATGAGGAAGTCTAAGAGGAGGAGTTTGAGGAAGGCTCTAGAGAAGATCTCACCACCTGGAGAAGGCAA  
 GTGGAGAGTCCAGAAGTTGATGAAGAAGGATTATTTGAAGCAGGAGAT  
 +  
 FFFFFFFFFF:FFFFFFFFFFFFFFFFFFFFFFFFFFFFFFFFFFFFFFFFFFFFFFFFFFFFFFFF  
 FFFFFFFFFFFFFFFFFF:FFFFFFFFFFFFFFFF:FFFFFFFFFFFFFFFF  
 @A00721:190:HGJW7DSXY:4:1410:29206:8985\_2:N:0:TCTGCAAG+GCTGCACT  
 AAGGTGGATGAGGGAGGTTGTTTCTTTGGAGTTTTAGATAATCTTTTGAGAAGGGGTCATAGAGCCAG  
 CAAGAGAAGCTTATATGCTGGTTTAAGTGATGATTATCACTCCTTGAG  
 +  
 FFFFFFFF:FFFFFFFFFFFFFFFFFFFFFFFFFFFFFFFFFFFFFFFFFFFFFFFFFFFFFFFF  
 FFFFFFFFFFFFFFFFFF:FFFFFFFFFFFFFFFFFFFFFFFFFFFFFFFFFFFF,F  
 @A00721:190:HGJW7DSXY:4:2477:20546:10676\_1:N:0:TCTGCAAG+GCTGCACT  
 ATTTAGGTCAACTTGGGGTTTCAATGTCATTAGTGCCTTACGATTGAAAGAGGTCCTTTTGAGTATC  
 GACAGATCTTTCGATCTTGAGGACGTACATTTAACGTGGCAGAATTCGGTAACTTACCATATTGTTCC  
 TTC  
 +  
 FFFFFFFFFF:FFFFFFFFFFFFFFFFFFFFFFFFFFFFFFFFFFFFFFFFFFFFFFFFFFFFFFFF  
 FFF:FFFFFFFFFFFFFFFFFFFFFFFFFFFFFFFFFFFFFFFFFFFFFFFFFFFFFFFFFFFF  
 FFF  
 @A00721:190:HGJW7DSXY:4:2363:11659:13416\_1:N:0:TCTGCAAG+GCTGCACT  
 TTTAACTTTGACTCAACTACTCCGATCAGATCCGATGGTTTGATTGGTATGGACTACTCGACTTTTG  
 ATCTGGAGTTGTCTAGGGTCATGGCAGATACTACCGATAAGGTGAAAAATATGCAGGTCAAAGATTCT  
 GTA  
 +  
 FFFFFFFFFF:FFFFFFFFFFFFFFFFFFFFFFFFFFFFFFFFFFFFFFFFFFFFFFFFFFFFFFFF  
 FFFFFFFFFFFFFFFFFF:FFFFFFFFFFFFFFFFFFFFFFFFFFFFFFFFFFFFFFFFFFFFFFFF  
 FFF  
 @A00721:190:HGJW7DSXY:4:1304:18629:19194\_1:N:0:TCTGCAAG+GCTGCACT  
 CTAAGAGTCTTTATGATTCAAAACCTATCGTTGTCTGACCTTACAAGGTTGAGGAGACTTTACAGCGG  
 CTTATTGTCGCGCAGTTTCCAGAATTGCGGTTGAAGTTCACCCATTCTATCTTGAATGCTCACGCCGT  
 CGC  
 +  
 FFFFFFFFFF:FFFFFFFFFFFFFFFFFFFFFFFFFFFFFFFFFFFFFFFFFFFFFFFFFFFFFFFF  
 FFFFFFFFFFFFFFFFFF:FFFFFFFFFFFFFFFFFFFFFFFFFFFFFFFFFFFFFFFFFFFFFFFF  
 FFF  
 @A00721:190:HGJW7DSXY:4:1314:27480:18490\_2:N:0:TCTGCAAG+GCTGCACT  
 GATTTAGATATTATTGATATTGGAGGCGATATTGTTTTTCATATCCAAAACCTCTTGAATGGAGTACA  
 TATTTGCAACCCTATTCTTGATGTGAAAGATGCATCGAGGTATACGTC  
 +  
 FFFFFFFFFF:FFFFFFFFFFFFFFFFFFFFFFFFFFFFFFFFFFFFFFFFFFFFFFFFFFFFFFFF  
 FFFFFFFFFFFFFFFFFF:FFFFFFFFFFFFFFFFFFFFFFFFFFFFFFFFFFFF,FFFF:FFFFF

@A00721:190:HGJW7DSXY:4:1269:9534:33755\_1:N:0:TCTGCAAG+GCTGCACT  
GATTGGGAACGTACCTACTCACGAGACGTCATGAAAGCTATCGGAGGGAAGCAAAATGTTTCGTTCTG  
TTACAAGAACGCTTTGGATTGTGACCATAAAGCCTCAGTTGCGATAGCTGTAGAGGTATACGATATCT  
CTC

+

FFFFFFFFFFFFFFFFFFFFFFFFFFFFFFFFFFFFFFFFFFFFFFFFFFFFFFFFFFFFFFFFFFFFFFFF  
FFFFFFFFFFFFFFFFFFFFFFFFFFFFFFFFFFFFFFFFFFFFFFFFFFFFFFFFFFFFFFFFFFFFFFFF  
FFF

@A00721:190:HGJW7DSXY:4:2173:22010:10614\_2:N:0:TCTGCAAG+GCTGCACT  
TATGTCATTTTCGTCTTAGTTTGTCCCGCGAATTATTGGACACGATGAAAAATGACATACCCGTTCCCT  
GACCTTGGTATCGTTATCCGTCATGGAGATGATGGCGCATCACTTGAT

+

FFFFFFFFFFFFFFFFFFFFFFFFFFFFFFFFFFFFFFFFFFFFFFFFFFFFFFFFFFFFFFFFFFFFFFFF  
FFFFFFFFFFFFFFFFFFFFFFFFFFFFFFFFFFFFFFFFFFFFFFFFFFFFFFFFFFFFFFFFFFFFFFFF

@A00721:190:HGJW7DSXY:4:2258:7916:3145\_2:N:0:TCTGCAAG+GCTGCACT  
AAAGATAAGATTTTATCTTTCTTCAAACACCCTGTTTTCTTAAGGGCGGACAATTGTTCCATTGTGA  
ACTCTTGGGACTAGATTGAGCATTAAATGAGTTCCGAATAACTCGTAA

+

FF,F:FF,FFFFFFFFFFFFFFFFFFFFFFFFFFFFFFFFFFFFFFFFFFFFFFFFFFFFFFFFFFFFFFFF  
FFFFFFFFFFFFFFFFFFFFFFFFFFFFFFFFFFFFFFFFFFFFFFFFFFFFFFFFFFFFFFFFFFFFFFFF  
FFFFFFFFFFFFFFFFFFFFFFFFFFFFFFFF,F,FF:FFF:FFFFFF,FFFFFF

@A00721:190:HGJW7DSXY:4:1418:27462:13917\_2:N:0:TCTGCAAG+GCTGCACT  
AAGAGCCACTGCCAATCTCATCGCTATACGCATACCTGATTGGAAGAAGCGAGGTTCTGTTCTCAATA  
AAAATTTTCTCAAGAGATTATGGTTGATAAAGTTTTCTTCATAAGGG

+

FFFFFFFFFFFFFFFFFFFFFFFFFFFFFFFFFFFFFFFFFFFFFFFFFFFFFFFFFFFFFFFFFFFFFFFF  
FFFFFFFFFFFFFFFFFFFFFFFFFFFFFFFFFFFFFFFFFFFFFFFFFFFFFFFFFFFFFFFFFFFFFFFF  
FFFFFFFFFFFFFFFFFFFFFFFFFFFFFFFF,F,FF:FFFFFF

@A00721:190:HGJW7DSXY:4:1149:19958:36839\_2:N:0:TCTGCAAG+GCTGCACT  
GTCATGGGGATCACTTCTTCGGTCAATGACAAAACCTTCGAATATGTTACGACATGGCTTCGTAACAA  
CAGTGCGAGTATTGTCATCTCGGGGAAAGTGATTCACCAAGATGTTCA

+

FFFFFFFFFFFFFFFFFFFFFFFFFFFFFFFFFFFFFFFFFFFFFFFFFFFFFFFFFFFFFFFFFFFFFFFF  
FFFFFFFFFFFFFFFFFFFFFFFFFFFFFFFFFFFFFFFFFFFFFFFFFFFFFFFFFFFFFFFFFFFFFFFF

@A00721:190:HGJW7DSXY:4:1458:28944:35180\_1:N:0:TCTGCAAG+GCTGCACT  
AGATACCTAGAGAAGGTCGCAGCGATCTTACTCGTTATCGGAGCTAAGAAGAAGACTTTGGGTACACG  
TTATGCTCGCAAACCTTAACGTTAGTACCGGAGGTGATCTCTCTGCTTCTGCGTTACTGAGAGAAAAGA  
TTC

+

FFFFFFFFFFFFFFFFFFFFFFFFFFFFFFFFFFFFFFFFFFFFFFFFFFFFFFFFFFFFFFFFFFFFFFFF  
FFFFFFFFFFFFFFFFFFFFFFFFFFFFFFFFFFFFFFFFFFFFFFFFFFFFFFFFFFFFFFFFFFFFFFFF  
FFF

@A00721:190:HGJW7DSXY:4:1672:25021:11663\_1:N:0:TCTGCAAG+GCTGCACT  
CTTTATGGACAAGATGCAAGTTCTTGGGAAATACTTGTTTCCCTTTTTAGGTTTAGTAGGTGATCTTG  
ACGTCGATTCTTTGTATAGGGAGTGTGAGAAGACAACGAATCTTGAACTACGGTCCTTATCAAAGAA  
AAT

+

FFFFFFFFFFFFFFFFFFFFFFFFFFFFFFFFFFFFFFFFFFFFFFFFFFFFFFFFFFFFFFFFFFFFFFFF  
FFF:FFF:FFFFFFFFFFFFFFFFFFFFFFFFFFFFFFFFFFFFFFFFFFFFFFFFFFFFFFFFFFFFFFFF  
FFF

@A00721:190:HGJW7DSXY:4:1606:8133:11130\_2:N:0:TCTGCAAG+GCTGCACT  
AAATCTTTTGAGATTGAGAAGATTGAAGAACACGTCAAGAAGTCGCTCGGCGTTGTTCTTGAAAACCA  
AGTTAAGAAGGAGGCTGATCATGGAGTCTTTGTACCTTCTGTCAAAC

+

FFF::FFFFFFFF:F,FFFFFFFFFFFFFFFFFFFFFFFFFFFFFFFFFFFFFFFFFFFFFFFFFFFFFFFF  
FFFF,FFFF,,FFFFFFFFFFFFFFFFFFFFFFFFFFFFFFFFFFFFFFFFFFFFFFFF:FF:FFFF



@A00721:190:HGJW7DSXY:4:2356:17671:24205\_1:N:0:TCTGCAAG+GCTGCACT  
TCCCGGATGTGGATTGAAGGCTGGCTCTAAGGGAGACTACTTCTTTTTGAATGTTGTAAAGAATTGGG  
TTGAGAAGTGTGCTTTACAAGGAGTTAGACTCTTCTTCAAGTTTTTAGATCTTCTTGATAATCTTAA  
GAA

+

FFFFFFFF:FFFFFFFF,FF,F:FF,:FFFF:F,FFFFFFFFFFFFFFFF:FFF,,FFFFFFFF  
FFFFFF,FFFF:FFFFFFFF:FFFF:FFFFFFFFFFFFFFFFFFFFFFFFFFFFFFFF:F:FF  
FFF

@A00721:190:HGJW7DSXY:4:2212:10294:18850\_1:N:0:TCTGCAAG+GCTGCACT  
TCTGAATTATTACTGTTTTCTCTACCCATAACTTCTTTTTCAAAAATGCGGATGGGTCTACTGATGTT  
TTCCTACAGAGTGCAGTCGTTTCAACACTTATCACCCTTTTCAAAGGAAAATAATTGGTGATGAAAA  
TAC

+

FFFFFFFFFFFFFFFF:FFFFFFFFFFFFFFFF,F:F:FF:FFFFFFFFFFFFFFFFFFFFFFFF:FF  
FFFFFFFFFFFFFFFFFFFFFFFFFFFFFFFFFFFFFFFFFFFFFFFFFFFFFFFFFFFFFFFF:FFFFFFFF  
FFF

@A00721:190:HGJW7DSXY:4:2450:12292:8249\_2:N:0:TCTGCAAG+GCTGCACT  
TCTCAAGGCTCTCATCGCCACTGGGATTCTAAGGGGTTCCATAAGATATTATCTGACATTGTGGTTCA  
ATGATCAGGATTCTTCTTTTGGTCCTTACGTCTTAAGTAATTTGGATG

+

FFFFFFFFFFFFFFFFFFFFFFFFFFFFFFFFFFFFFFFFFFFFFFFFFFFFFFFFFFFFFFFF:FFFFFFFFFF  
FFFFFFFFFFFFFFFFFFFFFFFFFFFFFFFFFFFFFFFFFFFFFFFFFFFFFFFFFFFFFFFF

@A00721:190:HGJW7DSXY:4:1505:19804:27931\_1:N:0:TCTGCAAG+GCTGCACT  
GATTCTTAAAAGAAGTTTATTA AAAACTTCAGAGTCTCTTGGAAGTCCAGGTAGCTAATGTTCTTGCAA  
TAGCCACAGACTTTCTGGGAAAAGAGACCTCTGTTGGTAGAGGAGTTGAGAGAATTACTCAGATTCAA  
TCT

+

FFFFFFFFFFFFFFFFFFFFFFFFFFFFFFFFFFFFFFFFFFFFFFFFFFFFFFFFFFFFFFFF  
FFFFFFFFFFFFFFFFFFFFFFFFFFFFFFFFFFFFFFFFFFFFFFFFFFFFFFFFFFFFFFFF  
FFF

@A00721:190:HGJW7DSXY:4:2357:15402:7811\_1:N:0:TCTGCAAG+GCTGCACT  
GGAGTGGCTAGGTTTTAAAAGATCCTTTGCACAAGCAATACCTTCCACTGAGTTCATCACCCAGAGTT  
TCGACGTCGCGGAAAACGATGAAGATTTCCACACTGTTGAGAATCTTCTGATGCTGAATTTGAGGAA  
AAT

+

FFFFFF:FFFF,FFFFFFFF:FFFFFFFFFFFFFFFFFFFFFFFFFFFFFFFFFFFFFFFF  
FFFFFFFFFFFFFFFFFFFFFFFF:FFFFFFFFFFFFFFFFFFFFFFFFFFFFFFFFFFFFFFFF  
FFF

@A00721:190:HGJW7DSXY:4:1562:32398:33896\_1:N:0:TCTGCAAG+GCTGCACT  
GAGTGACTGGAGTTCAGACGTGTGCTCTTCCGATCTGTTATAAACCTTCTTTTATCATTGCAACAGG  
ACTTTGAGAAGACTGTTGAAATGGACAAAATCTGGGATCATAGGTATGTGTCACGCTACACTCGAAAT  
ATG

+

FFFFFFFFFFFFFFFFFFFFFFFFFFFFFFFFFFFFFFFFFFFFFFFF,FFFFFF:FFFFFFFF  
FFFFFFFFFFFFFFFFFFFFFFFFFFFFFFFFFFFFFFFFFFFFFFFFFFFFFFFFFFFFFFFF  
FFF

@A00721:190:HGJW7DSXY:4:2327:29351:25238\_2:N:0:TCTGCAAG+GCTGCACT  
AAGATCTCTACAGAGATTATCGAGAGTTGTGATCTAGTTCTAAATTTAGGTCGACGACTTTAGCAAC  
TTTAGATAAATCTTTCCGGGCTCAATGACCTTGCTATGTACGTGGA

+

FFFFFFFFFFFFFFFFFFFFFFFFFFFFFFFFFFFFFFFFFFFFFFFFFFFFFFFFFFFFFFFF  
FFFFFFFFFFFFFFFFFFFFFFFFFFFFFFFF:FFFFFFFF

@A00721:190:HGJW7DSXY:4:2614:30581:10394\_2:N:0:TCTGCAAG+GCTGCACT  
TCACTACAAAGGCGTTACGTAAAGTAGTTTTACGCTTTATCTTAAAGCATTACCACCAAATTTAGCA

+

@A00721:190:HGJW7DSXY:4:2112:25030:6073\_1:N:0:TCTGCAAG+GCTGCACT  
TTCTAACCAGGACTGATGGTGAGATTCTTTTACCTTTTGGAGGTCCAGGAACCTTTACTCCTAGTGTC  
TTTTCTAGAGTCCAAGGACGTTTCCGTCGGAGGATGACAGGTGGGAGACCGCTCAATAACACTCTATT  
GAA

+

@A00721:190:HGJW7DSXY:4:2465:9109:34867\_1:N:0:TCTGCAAG+GCTGCACT  
TAATGATACTGACGAAGGTTCTATTACCACCTTGTCAATTGATACAAACATTCTAGGTGATGCTTTCT  
TAGAGGCTCGTCTAGCCGCTGAGATTCTCTTACCTATTTACAATCTGTAGAGAGAGAGGTTAATCAG  
AAT

+

@A00721:190:HGJW7DSXY:4:1107:29152:9893\_2:N:0:TCTGCAAG+GCTGCACT  
TCTCCTAGTACTTAAGGGTTTATGTTTCGGTTTCAGCTGGATGGATCTTTTGATGGTATGTTTCACAT  
TGC GTGATCACTTCCCGTGGACTTGGGAAGAGATTAAACATAAAATCC

+

@A00721:190:HGJW7DSXY:4:1313:30789:3803\_2:N:0:TCTGCAAG+GCTGCACT  
GCTAAAGCCTGTCCAGTTGTCGATGATGTTCCGGGCTGTGGGGATTAACCTCCCTCGTGAACTTACGA  
CGATGTTCTCGCTCGCATTTACAAGGATTACTAAGTCTGAGATCTGC

 $+$ 

@A00721:190:HGJW7DSXY:4:2115:18421:6308\_2:N:0:TCTGCAAG+GCTGCACT  
AAGTTCATGAGGATGTCTTGGTCGAAAAATATCGCCGGAACCTTAATAGAGGATCCTGATGACATT  
ATTTCAACGGATACCGATCTCAGTTCTACCACAGAAACCGTCTCAGGA

+

@A00721:190:HGJW7DSXY:4:1345:19605:14904\_2:N:0:TCTGCAAG+GCTGCACT  
GATTCCGAATTAGAGAAAGACGACCTTCTTGTGGGGACTGAGACCTCTGAATTTTCAGGGTGCCCTGA  
TGAGGACGTTGAAAGGGATAATTTCAACTCTGAGACAGATCGGAAGAG

 $+$ 

@A00721:190:HGJW7DSXY:4:1130:9037:28667\_1:N:0:TCTGCAAG+GCTGCACT  
GTAACAAGAAGAATAAAGGTAGGAAGGGGAGAAAACAGAACAGCGAGCGGTTGAAGAGAAAACCTGAT  
ATGGTTGCGGCTGATCGTACCCCAATTCTGCTAGAAAGATCACTCTCGGCGATACCACTGATCTTCC  
AGA

+

@A00721:190:HGJW7DSXY:4:2437:8513:2675\_1:N:0:TCTGCAAG+GCTGCACT  
TTTTATCAAAGAGAAAGTTTCTGCTAGTCGCGACGATAGTATTTATCGGAGTGATATTAACAAGTTAA



+

+

+

+

+

+

+

+

[illegible]

[illegible]

@A00721:190:HGJW7DSXY:4:2523:31006:13041\_1:N:0:TCTGCAAG+GCTGCACT  
AGGATTCTCAGTTTACAAGGACCTTAAGCGATGGATCGGGGTTAATTCTAAAACATTACCCGAAAGAC  
GTGCTAAATTAACCATTGTACGATGTCGTCTGTCTCGGCGATCACTTTTCTACTAAGAATTGGTCCT  
ACT

+

FF:FFFFFFFFFFFFFFFFFFFFFFFFFFFFFFFFFFFFFFFFFFFFFFFFFFFFFFFFFFFFFFFFFFFFFFFF  
FFFFFFFFFFFFFFFFFFFFFFFFFFFFFFFFFFFFFFFFFFFFFFFFFFFFFFFFFFFFFFFFFFFFFFFFFFFF  
FFF

@A00721:190:HGJW7DSXY:4:2536:2790:6417\_2:N:0:TCTGCAAG+GCTGCACT  
AATCTTCATGAGATCGTTTCTTTCTTTATCTCTTTGGTTGTTAGGGATTTTGAGAGAGTGAAAGGCTT  
CAATTGTAGTGGTTTGGTCGTTTCAGTACCCAGTCAGTATACCTCTAC

+

FFFFFFFFFFFFFFFFFFFFFFFFFFFFFFFFFFFFFFFFFFFFFFFFFFFFFFFFFFFFFFFFFFFFFFFF  
FFFFFFFFFFFFFFFFFFFFFFFFFFFFFFFFFFFFFFFFFFFFFFFFFFFFFFFFFFFFFFFFFFFFFFFFFFFF  
FFF,FFFF,FF:FFFFFFFF,FFFFFFFF:FFFF:FF  
FFFFFFFF:FFF:FFFF,FF::F::FFFF:FFFFFFFF:FF:FFFF,

@A00721:190:HGJW7DSXY:4:1515:26467:2988\_2:N:0:TCTGCAAG+GCTGCACT  
GAAAACTACAGAGGAACGTACCGGATTACCTGTCTTTCATATTATGAATGAACCTTCGGCCGCTCTCT  
TTGCTTCGATGTTGGATGTCAAGAAGGGTTCAGAATGGGATTCCTACG

+

FF:FFFFF:F:FFFFFFFFFFFFFFFFFFFFFFFFFFFFFFFFFFFFFFFFFFFFFFFFFFFFFFFFFFFF  
FFFFF:FFF:FFFF,FF::F::FFFF:FFFFFFFF:FF:FFFF,  
FFFF,FFFFFFFFFFFFFFFFFFFFFFFFFFFFFFFFFFFFFFFFFFFFFFFFFFFFFFFFFFFFFFFFFFFF

@A00721:190:HGJW7DSXY:4:1524:9091:32518\_1:N:0:TCTGCAAG+GCTGCACT  
CTTTGGTGGTGGTACTTTTCGATACTTCTATCGTCTTACGTTACGGTAATTACTATAGTGTTATTTATT  
CTGGTGGTGATGATAATCTTGAGGTCGTGACGTTGATGAAGCTATAAGAGCGTTCTTATTACGGCGC  
ACT

+

FFFFFFFFFFFFFFFFFFFFFFFFFFFFFFFFFFFFFFFFFFFFFFFFFFFFFFFFFFFFFFFFFFFFFFFF  
FFFFFFFFFFFFFFFFFFFFFFFFFFFFFFFFFFFFFFFFFFFFFFFFFFFFFFFFFFFFFFFFFFFFFFFFFFFF  
FFF

@A00721:190:HGJW7DSXY:4:1532:28330:22435\_1:N:0:TCTGCAAG+GCTGCACT  
CTTTCAGTTTCACTGAAGGAGGAGTTTCTGTTACTGGAAAACCCTCGTCAATACTTTTCAATAA  
TATACGTCTTGAACCTCACTTATGACGATCTAGTGAAATTAACGCGTCCTTTTCTGGAACGTAGTTT  
CTA

+

FFFFF,FFFFFFFFFFFFFFFFFFFFFFFFFFFFFFFFFFFFFFFFFFFFFFFFFFFFFFFFFFFFFFFF  
FFFFFFFFFFFFFFFFFFFFFFFFFFFFFFFFFFFFFFFFFFFFFFFFFFFFFFFFFFFFFFFFFFFFFFFFFFFF  
FFF

@A00721:190:HGJW7DSXY:4:2250:5267:4820\_1:N:0:TCTGCAAG+GCTGCACT  
ACGTGTGCTCTTCCGATCTAATTACCCTGATTCCGGCCGGTGGTAGCTCATTTCTACCAGGGGCTAT  
TACTCTTGCTGAAACAGCTATTAAAGCTGTTGAGCGGGTAATTACACCTAAACGAGCTCGATCTGCCA  
TCG

+

FFFFFFFFFFFFFFFFFFFFFFFFFFFFFFFFFFFFFFFFFFFFFFFFFFFFFFFFFFFFFFFFFFFFFFFF  
FFFFFFFFFFFFFFFFFFFFFFFFFFFFFFFFFFFFFFFFFFFFFFFFFFFFFFFFFFFFFFFFFFFFFFFFFFFF  
FFF

@A00721:190:HGJW7DSXY:4:2358:24108:3098\_2:N:0:TCTGCAAG+GCTGCACT  
CACTCTTTTCTGCTACTTTAACGGAGCGTAGTGTACTCTTCGTCGATTGTATCAACAGTAACATTACT  
TCTAATAAAGTCTCTATCAAGCTCGTATTATCGTCGCTGCTGGATCT

+

FFFFFFFFFFFFFFFFFFFFFFFFFFFFFFFFFFFFFFFFFFFFFFFFFFFFFFFFFFFFFFFFFFFFFFFF  
FFFFFFFFFFFFFFFFFFFFFFFFFFFFFFFFFFFFFFFFFFFFFFFFFFFFFFFFFFFFFFFFFFFFFFFFFFFF  
FF:F:FFFFFFFF

@A00721:190:HGJW7DSXY:4:1261:31611:16908\_2:N:0:TCTGCAAG+GCTGCACT  
AGGCTAACTCCAAGGTAATTATGAAGACTGTGATTTATCTTTCCTCTGGCCTTGATGAGGGTGT  
TCTAATCGTAACATTAATAATTTCAATCTTCTTAAAAAGAAGATAGAG

+

FFFFFFFFFFFFFFFF:FFFFFFFF:FFFFFFFFFFFFFFFFFFFFFFFFFFFFFFFFFFFFFFFFFFFFFFFF  
FFFFFFFFFFFFFFFFFFFFFFFFFFFFFFFFFFFFFFFFFFFFFFFF:FFFFFFFF:FF  
@A00721:190:HGJW7DSXY:4:1325:12834:1642\_2:N:0:TCTGCAAG+GCTGCACT  
GCTATCGTTCAGGTGCATGGGGTTGGATAGCCAATATTGAAGTGGACACCTCTGGTAGTATCGAAGTA  
AAGATAACCAATAAGGAAGGAGCTTATACTATGGTTGAATCAACTAAG  
+  
FFFFFFFFFFFFFFFF:FFFFFF:FFFFFFFFFFFFFFFFFFFFFFFFFFFFFFFFFFFFFFFFFFFFFFFF:FFFFFFFF  
FFFFFFFFFFFFFFFFFFFFFFFF:FFFFFFFFFFFFFFFFFFFFFFFFFFFFFFFF  
@A00721:190:HGJW7DSXY:4:2136:22959:19460\_1:N:0:TCTGCAAG+GCTGCACT  
CTCTACCGCCTTACAAGTCTAAGGTTAAAGAGTCGATTAAACAAGTTGTACTTATCAATGATTTTATC  
GCTGGTTGTTATCTCGAAAAGTCTCTTCTAAAAGGAACGTCAGTTCTAACCCAAAGAGAATATCTAAA  
ATA  
+  
FFFFFFFF:FFFFFF:FFFFFFFFFFFFFFFFFFFFFFFFFFFFFFFFFFFFFFFFFFFFFFFFFFFFFFFF  
FFFFFFFFFFFFFFFFFFFFFFFFFFFFFFFFFFFFFFFFFFFFFFFFFFFFFFFFFFFFFFFFFFFFFFFF  
FFF  
@A00721:190:HGJW7DSXY:4:1659:4309:15687\_2:N:0:TCTGCAAG+GCTGCACT  
AGACGTTGCTTGTGCTTCCTCCTTTAATGGCACTACCTCGGTACAATCTTACTTGAACGAAGGCGA  
CCTGTTCCGGAGTTTTTACGGGATCCGGAATGTTCTGTCTATATTAGG  
+  
FFFFFFFFFFFFFFFFFFFFFFFFFFFFFFFFFFFFFFFFFFFFFFFFFFFFFFFFFFFFFFFFFFFFFFFF:FFFF  
FFFFFFFFFFFFFFFF:FFFFFFF,FFFFFF,FF,FF,FFFF::FFF:F  
@A00721:190:HGJW7DSXY:4:2327:5312:24878\_1:N:0:TCTGCAAG+GCTGCACT  
CGAACGTCAACGTTACCGAGTTTCGTTTCGTACCTTGATGCTGACTTTCGTCAATATGATTTGATCT  
GGTTGCTCAATTCTAAGCGTGTTCCGCTTAGTGCGAGGCCTCTTCTACGAGTATTGCTATTTATAC  
GGT  
+  
:FFF:FFFFFFFF:FFFFFFFFFFFFFFFF,FFFFFFFF:FFFF:,FFF:FFFFFFFFFFFFFFFF  
FFFFFFFF:F:FF:,F,:FFFFFF:FF:F,FFFFFF,FFFFFF::F:FFF,FFF:FFFFFFFF,F  
FFF  
@A00721:190:HGJW7DSXY:4:1457:16595:3333\_2:N:0:TCTGCAAG+GCTGCACT  
TATTTGGATGATCTTGATAAAGAACTTCATGAATTTTACAGAGGATGAAAAATTTCTTCTTGATTT  
TAATATAAAGAATCTTTACCAGGACTCCTACTACAGGAGGCAGTCTTC  
+  
FFFFFFFFFFFFFFFFFFFFFFFFFFFFFFFFFFFFFFFFFFFFFFFF:FFFFFFFF:FFFF::F:FFFFFFFF  
FFFFFFFF:FFFFFFFFFFFFFFFFFFFFFFFFFFFFFFFF:FFFFFFFF  
@A00721:190:HGJW7DSXY:4:1532:29035:35336\_1:N:0:TCTGCAAG+GCTGCACT  
GAAACTCTAAGTGGTAATACTGTCTTTCCAAGCTTACCTGTATCTTCAATGAAATTGGACTCTTCGAT  
AGGGGACATTTTATCGTGGGCTTCCGTAAAGGAAGATCTGTTATCGACGGTTTATCGTTTACGAAGT  
ATC  
+  
FFFFFFFFFFFFFFFF:FFFFFFFF:FFFF:FFFF:FFFFFFFF:,FFFFFFFFFFFFFFFF  
FFFFFFFFFFFFFFFFFFFFFFFFFFFFFFFFFFFFFFFFFFFFFFFFFFFFFFFFFFFFFFFF  
FFF  
@A00721:190:HGJW7DSXY:4:1374:21956:2033\_1:N:0:TCTGCAAG+GCTGCACT  
TTGGCCTAGTGGATGTTATTAGTGACATCTGGTCAATTTCTTTTTAGGTGGTCTTTATTCTATTATT  
GATTTTTATGAGATTGATACGTTAACAGAAGATGATGTTAGAGTAGAATTCCTGAAGAGTCCTTCCGT  
AAC  
+  
:FFF:FFFFFFFFFFFFFFFFFFFFFFFFFFFFFFFFFFFFFFFF:FFFFFFFFFFFFFFFF,F,FFFF  
FFFFFFFFFFFFFFFFFFFFFFFFFFFFFFFFFFFFFFFFFFFFFFFFFFFFFFFFFFFFFFFF  
FFF  
@A00721:190:HGJW7DSXY:4:2226:4010:1517\_2:N:0:TCTGCAAG+GCTGCACT  
ATTATGTCTGTGTTGAAAGACTTTCTACCGATAAGGGTCACTAGTCTTACACAATTAAGAAATAATCC

TACATTGACTGATTATCTAAAGATTGAAGGAAAATTTTATCCTCGTTT  
+  
F,FFFFFFFFFFFFFFFFFFFFFFFFFFFFFFFFFFFFFFFFFFFFFFFFFFFFFFFFFFFFFFFF  
FFFF:FFFFFFFFFFFFFFFFFFFFFFFF::FFFFFFFFFFFFFFFF  
@A00721:190:HGJW7DSXY:4:1243:28519:12399\_1:N:0:TCTGCAAG+GCTGCACT  
TTTCTACGATACAAATGATAACTTCTAATTTACGTTTGCTACTCAGAGCTGGTCCTCTCAGCAAAGG  
GATGCATGGTGTATCTCCTCAGGAGTCCCGGCATTTGATAATAATGACGAGACTTTCGTCATAATCG  
CTG  
+  
FF:FFFFFFFFFFFFFFFFFFFFFFFF:FFFFFFFFFF,FFFFFFFFFFFFFFFFFFFFFFFFFFFF  
FFFFFFFFFFFFFFFFFFFFFFFFFFFFFFFFFFFFFFFFFFFFFFFFFFFFFFFFFFFFFFFFFFFF  
FFF  
@A00721:190:HGJW7DSXY:4:2151:7374:33833\_1:N:0:TCTGCAAG+GCTGCACT  
GTACCAGCGCATCTCGTGTGAGCCTCGACCCGATTATATGGTATTAAGGTGAGGAGACC  
ATTTTCTTGCTGAAATTTATAGAAGATTATTTTGACAGAATCAATAAGAATCATCGATTCTCGATTCTG  
TAG  
+  
F:FFFFFFFFFFFFFFFFFFFFFFFFFFFF,FFFFFFFFFF:FFFFFFFF:FFFFFFFFFFFFFFFFFFFF  
FFFFFFFFFFFFFFFFFFFFFFFFFFFFFFFFFFFF:F:FFFF:FFFFFFFFFFFFFFFFFFFFFFFFFFFF  
FFF  
@A00721:190:HGJW7DSXY:4:2133:31602:34835\_2:N:0:TCTGCAAG+GCTGCACT  
TAATATTCAACCTCAAAAAGTTACGTGTTTACAGTAACGAGATCACACATTTTGAGAACTAACTATGTT  
ATGTTCTCTGATCATTTTGACAATCTCTTCTTATAATAAAATAAA  
+  
FFFF:FFFF:FFFFFFFFFFFFFFFFFFFFFFFFFFFFFFFF:FFFFFFFFFF,FF:FFFFFFFFFFFFFFFFFFFF  
FFFFFFFFFFFF:FFFFFF:FFFFFFFFFF,FFFFFFFFFFFF:FFFFFFFFFF  
@A00721:190:HGJW7DSXY:4:1552:17951:25034\_1:N:0:TCTGCAAG+GCTGCACT  
AATGGCAAATAGTGGAAGGCTCCAGTCAACACTAGTTCGAGTGCTGCTTTGGATTACGATGACGTGA  
GAATAGGTGAAGGGATAGTTTTTACCTCGACCAACATTAAGGCGGCGGCGACTAATCTTAAAGCTTCA  
CCC  
+  
:FF,,F:::FF:FFFFFFFF:FFFFFFFFFFFF:FFFFFFFF:FFF:F::F:FFF:FFF:FFFFFFFFFFFF  
F:FF:FFFFFFFFFFFF,FFFFFF,FFFFFFFF:FFFFFFFF:F:FF,:FF,:FFFF:FFFFFFFF  
FF:  
@A00721:190:HGJW7DSXY:4:2303:4264:31516\_1:N:0:TCTGCAAG+GCTGCACT  
ACACTTCGAACTGAATAATGATGCACTACAAACAAGTATCGCTAATCATCTGAAAAAGGCTCTAAAG  
GACACTATACAATATCCAGACGACGACGAAGCTTATACTACTTTAATTTTGGGTATTATGTGGAGATA  
TCG  
+  
FFFFFFFFF:F:FFFFFFFFFFFFFFFF:FFF,:FF,FFFFFFFF:FFFFFFFFFFFFFFFFFFFF  
FFFFFFFFF:FF:FFFFFFFFFF:FFFFFFFFFFFFFFFFFFFF,FFFFF:F:FFFFFFFFFFFFFFFFFFFF  
FFF  
@A00721:190:HGJW7DSXY:4:1662:7591:10911\_1:N:0:TCTGCAAG+GCTGCACT  
CCGTTGAGAAAATTTCTTAGAGGATATTCGCCATTGTGGTACGAATTGGTCCAACATTTACCACCAA  
TTCTTTTGATACAACTCTAGCCTTCAAGTGGGGTATGCCTGCGGAATACGCTTGCTATTACAGATT  
GGT  
+  
FFF:FFFFFFFFFFFFFFFFFFFFFFFFFFFFFFFFFFFFFFFFFFFFFFFFFFFFFFFFFFFF  
FFFFFFFFFFFFFFFFFFFFFFFFFFFFFFFFFFFFFFFFFFFFFFFFFFFFFFFFFFFFFFFFFFFF  
FFF  
@A00721:190:HGJW7DSXY:4:2314:3468:6621\_2:N:0:TCTGCAAG+GCTGCACT  
TGATGCTATGTCAGAAGAAGCTATTCAAGCTTGTCGTTTAAAGACTGCAGAGGCTGTCAAACAAGCCC  
AGACTCAAGGAGTCCAATCAAAGTTTTGAATTTAGCTCAACTGGGGA  
+



FFFFF:FFFFFFFFFFFFFFFF:FFFFFFFFFFFFFFFF:FFFFFFFFF:,FFF:FFFF,FFFFFF,FF,FFF  
FFFFFF,FF,FF,FF:FFFFFFF,,F::F,FFFFFF:,::FFF,,:::F  
@A00721:190:HGJW7DSXY:4:1263:7102:8625\_2:N:0:TCTGCAAG+GCTGCACT  
AAAAGTCCGGAGTATATTGTATGTTAATAGATAGTGGGATAATAGTTCTACCGATACGTAGTGAACGC  
GTTCTAGTAACCAAGTACTTTCCGTCTGAAGAGTTTAGAGCTGCTATT

+  
FFFFFFFFFFFFFFFF:FFFF,FFFFFFFFFFFFFFFFFFFFFFFFFFFFFFFFFFFFFFFFFFFFFFFF:F  
FFFFFFFFFFFFFFFFFFFFFFFFFFFFFFFFFFFFFFFFFFFFFFFFFFFFFFFFFFFFFFFF  
@A00721:190:HGJW7DSXY:4:1506:7283:23062\_2:N:0:TCTGCAAG+GCTGCACT  
AGTTGAAGATGTGGCTTTAGACGATAATCCTTTAAGGACTATGTTGACTGACGAAGATTTTCCCACAG  
ATTTGTCTACGTTGCAGATCGCCACTCCAAACACTATATACATTATAA

+  
FFFFFFFFFFFFFFFFFFFFFFFFFFFFFFFFFFFFFFFFFFFFFFFFFFFFFFFFFFFFFFFFFFFFFFFF  
FFFFFFFFFFFFFFFF:FFFF:FFFFFFFFFFFFFFFF:FFFFFF:FFF  
@A00721:190:HGJW7DSXY:4:2125:19678:34256\_1:N:0:TCTGCAAG+GCTGCACT  
ACTTTTGTACCAAATCTTGGCTTTCAACGAAGTCTCTGATTTTATTAATCATTGCTTTAACGATCT  
CTCGGTCATTTACTCTGTACTTGATCTACGTCGTTTAACTGTCGGAACAACCTTTACTTAGAATGACT  
CTA

+  
FFFFFFF:FFFFFFFFFFFFFFFFFFFFFFFFFFFFFFFFFFFFFFFFFFFFFFFFFFFFFFFFFFFFFFF,FFFFFFFFF:F  
FFFFFFFFFFFFFFFFFFFFFFFFFFFFFFFFFFFFFFFFFFFFFFFFFFFFFFFFFFFFFFFF:F:FFF:FFFF,FFFF::  
:FF  
@A00721:190:HGJW7DSXY:4:2510:2474:23156\_2:N:0:TCTGCAAG+GCTGCACT  
ATATCATATTAGTAATACTCACTATCGTTTTCTGCTTTTTCTTAGCTAATAGATTAATAAAGGATGAG  
TACGAAAACCAACTCTTCGTTACGAGACCTGATGGTAGAATAGATTTA

+  
FFFFFFFFF,FFFFFFF,F,FFFFFFFFF:FFFFFFF:FFFFFF:FFFFFFF,FFFFFFF,FFFFFFFFF  
FFFFFFFFFFFFFFFFFFFFFFFFFFFFFFFFFFFFFFFFFFFFFFFFFFFFFFFF:F:FFFFFFF,FF:  
@A00721:190:HGJW7DSXY:4:2433:4670:13683\_1:N:0:TCTGCAAG+GCTGCACT  
ATCTCAACGTGTATAAAGCTTGTTCCTTCTGAACCTAATACACGATGATATAATCCGCAACGAC  
TCGAAACCGAGACGCCGTAGATCAAAGTCCCTTCTAACTTTAGATTATGAATCCTGCCTTTACTC

+  
FF,,F,::,,::,FFF,F,,,FFF,F,F,F,::F,:::FF,FF::,,F:,F,,,FF,:F::FFFF  
FFFFFFFFF,FFFFFFFFFFFFFFFFFFFFFFFFFFFFFFFFFFFFFFFFFFFFFFFFFFFFFFFF  
@A00721:190:HGJW7DSXY:4:1662:22652:14105\_1:N:0:TCTGCAAG+GCTGCACT  
ATAACCTTCTTATACTTTTGGGTATGTTTTGTGAAAAACATGAGATACCCAAGTCTATCGAAGACATT  
ATCTCTTATGTACTTATTGTAACGATCATTCTTCGAGTTTGTGATTCTTATTCTTTATTCCTTTA  
ACT

+  
FFF,,FFF,FFFF,FFFFFFFFFFFFFFFF:FFFFFFFFFFFFFFFFFFFFFFFFFFFFFFFF:FFFF  
FFFFFFFF,FFFFFFFFFFFFFFFFFFFFFFFFFFFFFFFFFFFFFFFFFFFFFFFF:FFFFFFFFFFFFFFFFFFFFF,  
FFF  
@A00721:190:HGJW7DSXY:4:1578:2157:25958\_2:N:0:TCTGCAAG+GCTGCACT  
ATGCTTTTCGATAGTGATTGTTATCAATTTAAATACATTACTGTTTCAAATCATCTTTACTCACAGAC  
TCCGAAAATGTTTCAAATGAGGTCAAAGCTCTATTTATTAAACGAAC

+  
FFFFFFFFFFFFFFFFFFFFFFFFFFFFFFFFFFFFFFFFFFFFFFFFFFFFFFFFFFFFFFFFFFFFFFFF  
FFFFFFFFFFFFFFFFFFFFFFFFFFFFFFFFFFFFFFFFFFFFFFFFFFFFFFFFFFFFFFFF  
@A00721:190:HGJW7DSXY:4:1318:5448:26897\_1:N:0:TCTGCAAG+GCTGCACT  
ACTACCACTGATCTGCCGACTTTAGTCAAGGAACCTTCAATTCCTTCGATGTTTATATTTTCTATAAG  
GGAATAATCAATAATCAAATTTGACAAATTTTGAACCTTATTTCAGAACTCTCTCCGATCACCTT  
GG

+  
FFFF,:F::F,FFF:F:,FFFFFFFFFFFFFFFF,FFFF:FF,FFF,F:F::FF:F:F:FFFFFFFFF

FFFF:FFFF:FFFFFFFFFFFF,FF:F,,FFFFFFFFFFFFFFFF:FFFFF::FFFF:FFFF  
FF

@A00721:190:HGJW7DSXY:4:2560:19171:25739\_2:N:0:TCTGCAAG+GCTGCACT  
TCAATAAGATGTATGATGATAATCTACTATTTTTAAATAGTGATATTCAGCGTATACTTGAATACTTT  
ATCAAAGATTTGGCTTGGTCTATTTACCGCAAAAAGTTGGAAGAGGTC

+

FFFFFFFFFFFFFFFFFFFFFFFFFFFFFFFFFFFFFFFFFFFFFFFFFFFFFFFFFFFFFFFFFFFF  
FFFFFFFFFFFFFFFFFFFFFFFF:FFFFFFFF:::FFF:FFFFFFFF

@A00721:190:HGJW7DSXY:4:2572:8269:29089\_2:N:0:TCTGCAAG+GCTGCACT  
TTTTACTTATACTTTAAATAGCACCGATTATAACTTGACTGTTGATAATATTACAATAGCTCTTTCTC  
AGAAGATTAGAGAAGTAACCGGTGAACACGTCGGTAGCATTGATTTAC

+

FFFFFFFFFFFFFFFFFFFFFFFFFFFFFFFFFFFFFFFFFFFFFFFFFFFFFFFFFFFFFFFFFFFF  
FFFFFFFFFFFFFFFFFFFFFFFFFFFFFFFFFFFFFFFFFFFFFFFFFFFFFFFF

@A00721:190:HGJW7DSXY:4:2415:23285:14732\_1:N:0:TCTGCAAG+GCTGCACT  
GAACTGAAAAAGATTCTTTTCGAAAAGAAACCTATAAGTTACACACGATTCTTCGACTATATTAAAGA  
AATAAAAATACTTCAAGTACCTGAACCTTACATTTTTAATGGTATGGTATAATGTGTCTTACAAATAG  
AAC

+

FFF:FFFFF:FFFF:FF,FFFFFFFFF:F:FFFFFFFFFFFF,, ,FFFFFF:FFFFFFFFFFFFF  
FFFFFFFFFFFF:FFFFFFFFFFFFFFFFFFFFFFFFFFFF:FFFFFFFFFFFFFFFFFFFFFFFFFFFF  
F:F

@A00721:190:HGJW7DSXY:4:2349:25681:36166\_2:N:0:TCTGCAAG+GCTGCACT  
TAATGAGAGTGATTCTTAATATTCTAGTAACCGCTATGTGGGCATTACTAGGATTTATCACACTCC  
TAAATTTGATAGCAATTTATGTTTTAAATGCTAGGAAAATTTAGAAA

+

FFFFFFFFFFFFFFFFFFFFFFFFFFFFFFFFFFFFFFFFFFFFFFFFFFFFFFFFFFFFFFFFFFFF:  
FFFFFFFFFFFF:FFFFFFFFFFFFFFFF:FF:FFFFFFFFFFFFFFFF

@A00721:190:HGJW7DSXY:4:2550:1235:25144\_1:N:0:TCTGCAAG+GCTGCACT  
GGAGTACTTAATTCAATAGCTTTAGTATTATTTACTATCGCCTTTATTGGAAATTGTATAAGAGTTAA  
TTGCTTACACAAAAGTGACGCGCAAGGAATCTTAATTGATTGAAGCTAGGCGTTGGGGAGAATGAAC  
TGC

+

FFFFFFFFFFFFFFFFFFFFFFFFFFFFFFFFFFFFFFFFFFFFFFFFFFFFFFFFFFFFFFFFFFFF  
:FFFFFFFFFFFFFFFFFFFFFFFFFFFF,FFFFFFFFFFFFFFFFFFFFFFFFFFFFFFFFFFFFFFFF  
FFF

@A00721:190:HGJW7DSXY:4:2542:29152:33254\_1:N:0:TCTGCAAG+GCTGCACT  
CTACCATGACCAATCATCGCTCCAACCTGGCACGCCAGACGTTGGGTCAAACCTACTACCGCCGGTCGG  
CAGATCGGCACCACTGGTCTCTACGTTCAGGGACCGCTGTGCAGAATAACCTTCCCAATCTAGATC  
TGC

+

FFF:FFF:FF,:FF,:FFFFFFFF:FFFFFF:FFFF:, ,F:,FFFF,FFFFFF,F:F:FFFFFF,FF  
, ,F,FFF,FFFFFFFFFFFFFFFFFFFF,FFFFFFFFFFFFFFFF,F,FFFF:FFFFF:,F,FF:F:FF  
FF:

@A00721:190:HGJW7DSXY:4:2103:7527:35571\_1:N:0:TCTGCAAG+GCTGCACT  
CTGAAGGTCGTTACCGGACGACCACTCAAAGGAAACGGGCTGTTGCCAGAGGAAAGCAGCGACCACC  
GAGGTCGCTCGTAACATTGACGGCAGTCCCGTCATCTCTGTGGGAAGTACCTCAGTCAAA  
AGT

+

FFFFFFFF:FFFFFFFF:FFFFFFFFFFFFFFFF:FFFFFFFFFFFFFFFFFFFFFFFFFFFF  
FFFFFFFFFFFFFFFFFFFFFFFFFFFFFFFFFFFFFFFFFFFFFFFFFFFFFFFFFFFFFFFFFFFF  
FFF

@A00721:190:HGJW7DSXY:4:1378:25310:24220\_2:N:0:TCTGCAAG+GCTGCACT  
ACTCCCATGCCAATCAATGATGTGACTATACAGTTCGGCCATTTCAAGAGTGGTCAATACGTCGTGGG

AGGTACTGAAGCCTTCCCCTCCGCTGGCACGAAGAACAACACTCCCAAGCC

+

FFFFFFFFFFFFFFFFFFFFFFFF:FFFFFFFFFFFFFF,FFFFFFFFFFFFFFFFFFFFFFFF:FFF:FFFFFF  
FFFFFFFFFFFFFFFFFFFFFFFFFFFFFFFFFFFFFFFFFFFFFFFFFFFFFFFF

@A00721:190:HGJW7DSXY:4:2437:4490:31313\_1:N:0:TCTGCAAG+GCTGCACT  
CTTCTGACCAGAATGAAAAGGGGTTTACCAGGGTAGTCTCTAAGTCTACCAGGAAGAGGGGAAATGTC  
CCCAAACTGAGAAGAATAAAGGGAAAGTCCATCAGGACCTAAGAAGGGGAAATTACCCCTAATTCT  
GAA

+

FFFFFFFFFFFFFFFFFFFFFFFF,FFFFFFFFFFFFFFFF:FFFFFFFFFFFFFFFF:FFFFFFF  
FFFFFFFFFFFF::FF,F,F,FFFFFFFFFFFFFFFFFFFFFFFFFFFFFFFF:FFFFFFFFFFFFFF  
FFF

@A00721:190:HGJW7DSXY:4:1425:1850:15092\_2:N:0:TCTGCAAG+GCTGCACT  
CCACCATCTGGGGTTGGAATAAGAAATCTGCACGGCCAATGAGGCCGCTGCTACGAAGTCGCTGAA  
GGCGGCTTGGGTCATTAAGGGTAGCGGTAAAGTTGCGCCTGCCGACCC

+

FFFFF,FFFFFFFFFFFFFFFFFFFFFFFF,F,FFFFFFFFFFFFFFFFFFFFFFFF  
FFFFF:FFFFFFFF:FFFFFFFF,FF,FFFFFFFFFFFFFFFF

@A00721:190:HGJW7DSXY:4:1112:28212:14935\_1:N:0:TCTGCAAG+GCTGCACT  
CTTGACAGAGTACTGGAGTTCAGACGTGCGCTCTTCCGATCTCGTCACTGAGGACGAAGGTGAGAGGA  
CTTTTGGCTACTGGCGACAACTGAGAGCAGTCGCTGGGGAAAGAGAATTGCGTGGGTTGAAGGCCGA  
CGC

+

FF:FFFFFFFFFFFFFFFFFFFFFFFF,F,FFFFFFFFFFFF::FFFFFFFFFFFFFFFFFFFFFFFF:  
FFFF:FFFFFFFFFFFFFFFF:FF,FFFFF,FFFFFFFFFFFF:FFFFFFFFFFFFFFFF  
FFF

@A00721:190:HGJW7DSXY:4:1374:9435:11256\_1:N:0:TCTGCAAG+GCTGCACT  
TCTTGACAGAGTACTGGAGTTCAGACGTGCTCTTCCGATCTTTTATCCGCGCTTAATATGGGGC  
GAAGATCCCCTATGGAGTCTTGAAGGACTTAGGTTGGCATATTTATGCCGACGATAATAAGCATGTCA  
CCC

+

FFF:FFFFFFFFFFFFFFFFFFFFFFFF:FFFFFFFFFFFFFFFFFFFFFFFF  
FFFFFFFFFFFFFFFFFFFFFFFFFFFFFFFFFFFFFFFFFFFFFFFFFFFFFFFF  
FFF

@A00721:190:HGJW7DSXY:4:1514:32841:2722\_2:N:0:TCTGCAAG+GCTGCACT  
TTACAAGAGAGAGTGTGAGAGAGTCGCTCTCACTATTTTGGCCAGAATGCGGGCTTTCTGACTGATG  
AGGTTAAACTCTTGCTCCTTCTGTGGGTGAGGGTTTTGTTATATTC

+

FFFFF,FFFFFFFFFFFFFFFF:FFFFFFFFFFFFFFFFFFFFFFFF  
FFFFFFFFFFFFFFFFFFFFFFFFFFFFF:F:FFF:FFFFFF

@A00721:190:HGJW7DSXY:4:2318:30761:14372\_1:N:0:TCTGCAAG+GCTGCACT  
CAACCTCTCTTTAGAGAGCATTAGAAGGAAGTTGGGCAAATCCCACATATGGTAGACGTTGTCACAC  
TTTTCTTGAAAATTTTCTTTCTCCGTCATTGGGGATTTCGATGTGAGAAGGTGGAAGGTGTCAAG  
GGT

+

FFFFFFF:FFFFFFFFFFFFFFFFFFFFFFFF,FFFFFFFFFFFFFFFF  
FFF:FFFFFFFFFFFF:FFFFFFFFFFFFFFFFFFFFFFFFFFFFFFFF  
FFF

@A00721:190:HGJW7DSXY:4:2408:13413:8030\_1:N:0:TCTGCAAG+GCTGCACT  
CTTTCAGGACCTAATCACATCATGATTGATAGTTACGGCTCGTATCGAGTTGGAGGGAGGAAGTTCTC  
CGAAATTAAGACGGGGGATTAAGAGTCCAGCTGTAAGTGTCAATTCAGAGAGGGGAGCTCTGAAAA  
GG

+

FF::FFFFFF:FFFFFF:,FF:FFFFFF:F:FFFF:FF,:FFF:FFFFFF::FFFFFFFF

F:FFFFFFFFFFFFFFFFFFFFFFFFFFFFFFFFFFFFFFFFFFFFFFFFFFFFFFFFFFFFFFFF  
FF

@A00721:190:HGJW7DSXY:4:1370:25102:24549\_1:N:0:TCTGCAAG+GCTGCACT  
TGGAAGTCTAAGAGGAGGAGTTTGAGGAAGGCTCTAGAGAAGATCTCCCCACCTGGAGAAGGCAAGTG  
GAGAGTCCAGAAGTTGATGAAGAAGGATTATTTGAAGCAGGGGTTACCACTTCCTAAGGTGGATGAGG  
GAG

+  
FFFFFFFFFFFFFFFFFFFFFFFFFFFFFFFFFFFFFFFFFFFFFFFFFFFFFFFFFFFFFFFF,FFFFFFFFFFFFFFFFFFFFFFFF  
FFFFFFFFFFFFFFFFFFFFFFFFFFFFFFFFFFFFFFFFFFFFFFFFFFFFFFFF:F:FFFFFFFFFFFFFFFFFFFFFFFF  
FFF

@A00721:190:HGJW7DSXY:4:1426:4001:1219\_1:N:0:TCTGCAAG+GCTGCACT  
TTTTGAGAAGGGGTATAGAGCCAGCAAGAGAAGCTTATATGCTGGTTTAAGTGATGATTATCACTCC  
TTGAGAAGACAAGCCACATTAAGATATAATTTAGGTCAACTTGGGGTTTCGAATGTCATTAGTGCCTT  
ACG

+  
FFFFFFFFFFFFFFFFFFFFFFFFFFFFFFFFFFFFFFFFFFFFFFFFFFFFFFFF:FFF:FFFFFFFFFFFFFFFFFFFFFFFF  
FFFFFFFFFFFFFFFFFFFFFFFFFFFFFFFFFFFFFFFFFFFFFFFF,FF:FFFFFFFFFFFFFFFFFFFFFFFF:FFFFF  
FFF

@A00721:190:HGJW7DSXY:4:1365:8992:26490\_2:N:0:TCTGCAAG+GCTGCACT  
TCCTTTTGAGTATCGACAGATCTTTCGATCTTGAGGACGTACATTTAACGTGGCAGAATTCGGTAACT  
TACCATATTGTTCTTCCGGGAAGTTGTGGGATTTAACTTTGACTCAA

+  
F,FF,FFFFFFFF:FFF:FFF,F,FFFFFF:,F:FFF,,FFF:FFFF,FF:FFFF,FFF,F:FFFF  
FFF,F::F,FFFFFFFF,FF:FFFF:FF,FF,FFFF:F,F::F::F

@A00721:190:HGJW7DSXY:4:1210:9968:10269\_2:N:0:TCTGCAAG+GCTGCACT  
TGGACTACTCGACTTTTGATCTGGAGTTGTCTAGGGTCATGGCAGATACTACCGATAAGGTGAAAAAT  
ATGCAGGTCAAAGATTCTGTAGCTCTGAGGGCGGTTGAGGGAGCCGTT

+  
FFFFFFFFFFFFFFFFFFFFFFFFFFFFFFFFFFFFFFFFFFFFFFFFFFFFFFFF:FFFFFFFFFFFFFFFFFFFFFFFF:F  
FFFFFFFFFFFFFFFFFFFFFFFFFFFFFFFFFFFFFFFFFFFFFFFF:FFFFFF:F:FFF

@A00721:190:HGJW7DSXY:4:1312:1262:2581\_1:N:0:TCTGCAAG+GCTGCACT  
CTAAGAGTCTTTATGATTCAAAACCTATCGTTGTCTGACCTTACAATGTTGAGGAGACTTTACAGCGG  
CTTATTGTGCGCAGTTTCCAGAATTGCGGTTGAAGTTCACCCATTCTATCTTGAATGCTCACGCCGT  
CGC

+  
:F,FFFFFFFFFFFFFFFFFFFFFFFFFFFFFFFFFFFFFFFFFFFFFFFF:FFF,FFF,F:FFFFFFFFFFFFFFFFFFFFF,:  
,FFFFFFFF,FFFFFFFF::FFFFFFFF:,,,FFFFFFFF:F::FFFFFFFFFFFFF:,FFFFFFFF:FFFFF  
FFF

@A00721:190:HGJW7DSXY:4:1329:18448:18223\_2:N:0:TCTGCAAG+GCTGCACT  
GATTTAGATATTATTGATATTGGAGGCGATATTCGTTTTCATATCCAAAACCTTGAATGGAGTACA  
TATTTGCAACCCTATTCTTGATGTGAAAGATGCATCGAGGTATACGTC

+  
:FFFFFFFFFFFFFFFFFFFFFFFFFFFFFFFFFFFFFFFFFFFFFFFFFFFFFFFFFFFFFFFFFFFFFFFFFFFFFFFF  
FFFFF,FFF:FFFFFFFF,F:FFFFFFFFFFFFFFFFFFFFFFFFFFFFFFFF

@A00721:190:HGJW7DSXY:4:2128:32452:6120\_1:N:0:TCTGCAAG+GCTGCACT  
GATTGGGAACGTACCTACTCACGAGACGTATGAAAGCTATCGGAGGGAAGCAAAATGTTTCGTTCTG  
TTACAAGAACGCTTTGGATTGTGACCATAAAGCCTCAGTTGCGATAGCTGTAGAGGTATACGATATCT  
CTC

+  
FFFFFFFFFFFFFFFFFFFFFFFFFFFFFFFFFFFFFFFFFFFFFFFFFFFFFFFFFFFFFFFFFFFFFFFFFFFFFFFF  
FFFFFFFFFFFFFFFFFFFFFFFFFFFFFFFFFFFFFFFFFFFFFFFFFFFFFFFFFFFFFFFFFFFFFFFFFFFFFFFF  
FFF

@A00721:190:HGJW7DSXY:4:2246:15872:18239\_2:N:0:TCTGCAAG+GCTGCACT  
TATGTCATTTCTGCTTAGTTTGTCCCGCGAATTATTGGACACGATGAAAAATGACATACCCGTTCTT

GACCTTGGTATCGTTATCCGTCATGGAGATGATGGCGCATCACTTGAT  
+  
FFFFFFFFFFFFFFFFFFFFFFFFFFFFFFFFFFFFFFFFFFFFFFFFFFFFFFFFFFFFFFFFFFFFFFFF  
FFFFFFFFFFFFFFFFFFFFFFFFFFFFFFFFFFFFFFFFFFFFFFFFFFFFFFFFFFFFFFFFFFFFFFFF  
@A00721:190:HGJW7DSXY:4:2439:16550:4257\_2:N:0:TCTGCAAG+GCTGCACT  
AAAGATAAGATTTTATCTTTCTTCAAACACCCTGTTTTCTTAAGGGCGGACAATTGTTCCATTGTGA  
ACTCTTGGGGACTAGATTGAGCATTAAATGAGTTCCGAATAACTCGTAA  
+  
FFFFFFFFFFFF:FFFFFFFFFFFFFFFFFFFFFFFFFFFFFFFFFFFFFFFFFFFFFFFFFFFFFFFFFFFF  
FFFFFFFFFFFFFFFFFFFFFFFFFFFFFFFFFFFFFFFFFFFFFFFFFFFFFFFFFFFFFFFF,FF:FFFFFF  
@A00721:190:HGJW7DSXY:4:1507:14290:18004\_2:N:0:TCTGCAAG+GCTGCACT  
AAGAGCCACTGCCAATCTCATCGCTATACGCATACCTGATTGGAAGAAGCGAGGTTCTGTTCTCAATA  
AAAATTTTCTCAAGAGATTATGTTGATAAAGTTTTCTTCATAAGGG  
+  
FFFFFFFFFFFFFFFFFFFFFFFFFFFFFFFFFFFFFFFFFFFFFFFFFFFFFFFFFFFFFFFFFFFFFFFF  
FFFFFFFFFFFFFFFFFFFFFFFFFFFFFFFFFFFFFFFFFFFFFFFFFFFFFFFFFFFFFFFF,FFFFF  
@A00721:190:HGJW7DSXY:4:1201:21513:35274\_2:N:0:TCTGCAAG+GCTGCACT  
GTCATGGGGATCACTTCTTCGGTCAATGACAAAACCTTCGAATATGTTACGACATGGCTTCGTAACAA  
CAGTGCGAGGATTGTCATCTCGGGGAAAGTGATTCACCAAGATGTTCA  
+  
FFFFFFFFFFFFFFFFFFFFFFFFFFFFFFFFFFFFFFFFFFFFFFFFFFFFFFFFFFFFFFFFFFFFFFFF  
FFFFFFFFFFFFFFFFFFFFFFFFFFFFFFFFFFFFFFFFFFFFFFFFFFFFFFFFFFFFFFFF,FFFFF  
@A00721:190:HGJW7DSXY:4:2328:10077:9204\_1:N:0:TCTGCAAG+GCTGCACT  
AGATACCTAGAGAAGGTCGCAGCGATCTTACTCGTTATCGGAGCTAAGAAGAAGACTTTGGGTACACG  
TTATGCTCGCAAACCTTAACGTTAGTACCGAGGTGATCTCTGCTTCTGCGTTACTGAGAGAAAAGA  
TTC  
+  
FFFFF:FFFFFFFFFFFF:FFFFFFFFFFFFFFFFFFFFFFFFFFFFFFFFFFFFFFFFFFFFFFFFFFFF  
FFFFF,FFFFFFFFFFFFFFFFFFFFFFFFFFFFFFFFFFFFFFFFFFFFFFFFFFFFFFFFFFFFFFFF  
FFF  
@A00721:190:HGJW7DSXY:4:2218:8630:10927\_1:N:0:TCTGCAAG+GCTGCACT  
CTTTATGGACAAGATGCAAGTTCTTGGGAAATACTTGTTTCCCTTTTTAGGTTTAGTAGGTGATCTTG  
ACGTCGATTCTTTGTATAGGGAGTGTGAGAAGACAACGAATCTTGAAACTACGGTCCTTATCAAAGAA  
AAT  
+  
:FFF:FF,FFFF,FF:FFFFFFFFFFFFFFFFFFFF,F,FFF:FFFFFFFFFFFF:,FFFFFFFF,FFFF:FFFF  
F:FFFFFFFF,FFFFFFFFFFFFFFFFFFFF:FFFF,FFF:FFF,FFFFFFFF:,FFFFFFFFFFFFFFFFFFFF  
,:F  
@A00721:190:HGJW7DSXY:4:1621:18240:17550\_2:N:0:TCTGCAAG+GCTGCACT  
AAATCTTTTGAGATTGAGAAGATTGAAGAACACGTCAAGAAGTCGCTCGGCGTTGTTCTTGAAAACCA  
AGTTAAGAAGGAGGCTGATCATGGAGTCTTTGTACCTTCTGTCAAAC  
+  
FFFFFFFFFFFF:FFFFFFFFFFFFFFFFFFFFFFFFFFFFFFFFFFFFFFFFFFFFFFFFFFFFFFFFFFFF  
FFFFFFFFFFFFFFFFFFFFFFFFFFFFFFFFFFFFFFFFFFFFFFFFFFFFFFFFFFFFFFFF,F,FF  
@A00721:190:HGJW7DSXY:4:2373:4227:30358\_1:N:0:TCTGCAAG+GCTGCACT  
TCCCGGATGTGGATTGAAGGCTGGCTCTAAGGGAGACTCCTTCTTTTGAATGTTGTAAAGAATTGGG  
TTGAGAAGTGTGCTTTACAAGGAGTTAGACTCTTCTTCAAGTTTTTAGATCTTCTTGATAATCTTAA  
GAA  
+  
FFFFFFFFFFFFFFFFFFFFFFFFFFFFFFFFFFFFFFFFFFFFFFFFFFFFFFFFFFFFFFFFFFFFFFFF  
FFFFFFFFFFFFFFFFFFFFFFFFFFFFFFFFFFFFFFFFFFFFFFFFFFFFFFFFFFFFFFFFFFFFFFFF  
FFF  
@A00721:190:HGJW7DSXY:4:2463:6334:12649\_1:N:0:TCTGCAAG+GCTGCACT  
TCTGAATTATTACTGTTTTCTCTACCCATAACTTCTTTTTCAAAAATGCGGATGGGTCTACTGATGTT

TTCCTACAGAGTGCAGTCGTTTCAACACTTATCACCACCTTTTGAAAGGAAAATAATTGGTGATGAAAA  
TAC

+

FFF,FFFFFFFFFFFFFF:FFFFFFFFFF,FFF::FF:FFF:F,F:FFFFFFFFFFFFFF:FFFFFFF  
FFFFFF:FFFFFF::F,FFFF,FFFFFF:FFFFFFFF:FFFFFFFF::FFFFFF:FFFFFF:F:  
FF:

@A00721:190:HGJW7DSXY:4:1230:29695:4100\_1:N:0:TCTGCAAG+GCTGCACT  
GGGGTTCCATAAGATATTATCTGACATTGTGGTTCAATGATCAGGATTCTTCTTTTGGTCCTTACGTC  
TTAAGTAATTTGGATGTTGTGCGAAACTATCAGGTTCTTGTACGATTCTTAAAAGAAGTTTATTTAA  
ACT

+

FFFFFFFFFFFF,FF:FFFF:FFFFFF,FFFFFFFFFFFFFFFFFFFFFFFFFFFFFFFFFFFFFFFF:FFFF:F  
FFFF,FFFFFFFFFFFFFF:FFFFFFFFFFFFFFFF:FFFFFFFFFFFFFFFFFFFFFFFFFFFFFFFFFFFF  
FFF

@A00721:190:HGJW7DSXY:4:2433:31403:26162\_1:N:0:TCTGCAAG+GCTGCACT  
GGTAGCTAATGTTCTTGCAATAGCCACAGACTTTCTGGGAAAAGAGACCTCTGTTGTAGAGGAGTTGA  
GAGAATTACTCAGATTCAATCTGGCATCACTGAACGTCTACAACGAGTTAGGGAGTGGCTAGGTTTTA  
AAA

+

FFFFF:FFFFFFFFFFFFFFFFFFFFFFFFFFFFFFFFFFFFFFFFFFFFFFFFFFFFFFFFFFFFFFFFFFFF  
FFFFFFFFFFFFFFFFFFFFFFFFFFFFFFFFFFFFFFFFFFFFFFFFFFFFFFFFFFFFFFFFFFFFFFFF:FFFF  
FFF

@A00721:190:HGJW7DSXY:4:1257:15908:18145\_1:N:0:TCTGCAAG+GCTGCACT  
CATACGAGATCTTGCAAGTACTGGAGTTCAGACGTGTGCTCTTCCGATCTTGAAGATTTCCACACT  
GTTTCGAGAATCTTCTGATGCTGAATTTGAGGAAAATTTTCGGAAGTTTTTGGTATAAATCCTGATGG  
CTC

+

FFFFF::FFFFFFFFFFFFFFFFFFFFFFFFFFFFFFFFFFFFFFFFFFFFFFFFFFFFFFFFFFFFFFFFFFFF  
FFFFFFFFFFFFFFFFFFFFFFFFFFFFFFFFFFFFFFFFFFFFFFFFFFFFFFFFFFFFFFFFFFFFFFFFFFFF  
FFF

@A00721:190:HGJW7DSXY:4:1564:8811:22420\_1:N:0:TCTGCAAG+GCTGCACT  
ACCTTCTTTTATCATTGCAACAGGACTTTGAGAAGACTGTTGAAATGGACAAAATCTGGGATCATAGG  
TATGTGTCACGCTACACTCGAAATATGGGCCCTCATAAGGAAGTATAGTTGGCGTCTTGTCTGTTGACG  
TC

+

FFF,FFFFFFFFFFFF:F,FFFFFFFFFFFFFFFF:FFFFFF:FFFFFF:F,FFFFFFFFFFFFFF:F  
FFFF:FF,:FFFFFFFF:FFFFFFFF:FFFFFFFFFFFFFFFFFFFFFFFFFFFFFFFFFFFF,FFFFFFFF:F  
FF

@A00721:190:HGJW7DSXY:4:2468:20419:26710\_2:N:0:TCTGCAAG+GCTGCACT  
AAGATCTCTACAGAGATTATCGAGAGTTGTGATCTAGTTCTAAATTTAGGTCGACGGACTTTAGCAAC  
TTTAGATAAATTCTTTACGGGCTCAATGACCTTTGCTATGTACGTGGA

+

FFFFFFFFFFFFFF:FFFFFFF:F,FF,,:FF:,FFFFFF:FFFFFFFFFFFF::F:FFFFFFFFF  
FFFF::FFFFFFFFF,,F,:FFFF,FFFFFFFF,FFF::FFF,,:F

@A00721:190:HGJW7DSXY:4:2664:18484:27336\_2:N:0:TCTGCAAG+GCTGCACT  
TCACTACAAAGGCGTTACGTAAAGTAGTTTTACGCTTTATCTTAAAGCATTACCACCAAATTTAGCA  
CTTTTTGAATATGACAGAAGCTCGCCATATCAGATTAGAGACATGCCA

+

FFFF,FFFFFFF:F:FFFF,FFFFFF:FFFFFFFF,FFFFFFFFFFFFFFFFFFFFFFFFFFFFFFFF  
FFF:FFFFFFFFFFFF,FFFF:FFFFFFFFFFFFFFFF,F:F,FF

@A00721:190:HGJW7DSXY:4:2301:5204:26381\_1:N:0:TCTGCAAG+GCTGCACT  
TTCTAACCAGGACTGATGGTGAGATTCTTTTACCTTTTGGAGGTCCAGGAACCTTTACTCCTAGTGTC  
TTTTCTAGAGTCCAAGGACGTTTCCGTCGGAGGATGACAGGTGGGAGACCGCTCAATAACACTCTATT  
GAA

+  
FF,FFFF,, ,FFFFFFFFFFFFFFFFFFFFFFFF:FFFFFFFF: ,FF:F:FF,, :F:F:FF:,FF,FFF,  
FFFF,FFFFFFFF:FFF::FFFFFFFF:FFF:,FFFF:FFFF:FFFF,FF:FFFFFFFF:F:FFFF  
FFF  
@A00721:190:HGJW7DSXY:4:1135:24198:9643\_2:N:0:TCTGCAAG+GCTGCACT  
AATGATACTGACGAAGGTTCTATTACCACCCTTGTCAATTGATACAAACATTCTAGGTGATGCTTTCTT  
AGAGGCTCGTCTAGCCGCTGAGATTCGTCTTACCTATTTACAATCTGT  
+  
FFFF:FFFFFFFF:FFFFFFFFFFFFFFFFFFFFFFFFFFFFFFFF,FFFFFFFFFFFFFFFFFFFFFFFF  
FFFFFFFFFFFFFFFFFFFFFFFF:FFFFFFFFFFFFFFFFFFFFFFFFFFFFFFFF:  
@A00721:190:HGJW7DSXY:4:1121:28049:33254\_2:N:0:TCTGCAAG+GCTGCACT  
TCTCCTAGTACTTAAGGGTTTATGTTTCGGTTTCAGCTGGATGGATCTTTTGATGGTATGTTTCACAT  
TGCGTGATCACTTCCCGTGGACTTGGGAAGAGATTAAACATAAAATCC  
+  
FFFFF:FFFFFFFFFFFFFFFFFFFFFFFFFFFFFFFFFFFFFFFFFFFFFFFFFFFFFFFFFFFFFFFF  
FFFFFFFFFFFFFFFFFFFFFFFFFFFFFFFF,FFFFF:FFF:FFFFF:FFFF  
@A00721:190:HGJW7DSXY:4:1521:17996:12806\_2:N:0:TCTGCAAG+GCTGCACT  
GCTAAAGCCTGTCCAGTTGTTCGATGATGTTTCGGGCTGTGGGGATTAACCTCCCTCGTGAAACTTACGA  
CGATGTTCTCTCTCGCATTTACAAGGATTACTAAGTCTGAGATCTGC  
+  
FFFFF,::,FF:FFF,F,F,:F,,FF:FF:FF,FF,,,FF,FFFF:FFF,FFF:FFFFF,:FF:F  
FFFF,:FF:F,:FFFF,,FFF:FFF:FFFFF:,FFFFF:F:,F,:F  
@A00721:190:HGJW7DSXY:4:2170:20274:10207\_2:N:0:TCTGCAAG+GCTGCACT  
AAGTTTCATGAGGATGTCTTGGTCGAAAAATATCGCCGGGAACCTCTAATAGAGGATCCTGATGACATT  
ATTTCAACGGATACCGATCTCAGTTCTACCACAGAAACCGTCTCAGGA  
+  
FFFFFFFFFFFFFFFFFFFFFFFFFFFFFFFFFFFFFFFF,FFFF:FFFFFFFFFFFFFFFFFFFFFFFF  
FFFFFFFFFFFFFFFFFFFFFFFFFFFFFFFFFFFFFFFFFFFFFFFFFFFFFFFF  
@A00721:190:HGJW7DSXY:4:1514:6352:1877\_2:N:0:TCTGCAAG+GCTGCACT  
GATTCCGAATTAGAGAAAGACGACCTTCTTGTGGGACTGAGACCTCTGAATTTTCAGGGTGCCCTGA  
TGAGGACGTTGAAAGGGATAATTTCAACTCTGAGACAGATCGGAAGAG  
+  
FFFFFFFFF:FFFFFFFFFFFFFF:FFFFFFFFFFFFFFFFFFFFFFFFFFFFFFFF:FFFFFFFFFFFFFFFF  
FFFFFFFFFFFFFF:FFFFFFFFFFFFFFFFFFFFFFFFFFFFFFFFFFFFFFFF  
@A00721:190:HGJW7DSXY:4:1321:23647:5932\_1:N:0:TCTGCAAG+GCTGCACT  
GTAACAAGAAGAATAAAGGTAGGAAGGGGAGAAAACAGAACAAGCGAGCGGTTGAAGAGAAAACCTGAT  
ATGTTGCGGCTGATCGTACCCCAATTCTGCTAGAAAGATCACTCTCGGCGATACCACTGATCTTCC  
AGA  
+  
FFFFFFFFFFFFFFFF,FFFFFFFFFFFFFFFF,FFFFFFFFF:FFFFFFFFFFFFFFFFFFFFFFFF  
FFFFFFFFFFFFFFFFFFFFFFFF,FFFFFFFFFFFFFFFF:FFFFFFFFFFFFFFFFFFFFFFFF  
FFF  
@A00721:190:HGJW7DSXY:4:2555:22661:15217\_1:N:0:TCTGCAAG+GCTGCACT  
TTTTATCAAAGAGAAAGTTTCTGCTAGTCGCGACGATAGTATTTATCGGAGTGATATTAACAAGTTAA  
ACTTCGAACTGACCACTTACAAGAGTGTTGAAGTACCGCAACATGGATCAGTTTTCCAAAAGCTATT  
AAT  
+  
FFFFFFFFFFFFFFFFFFFFFFFFFFFFFFFFFFFFFFFFFFFFFFFFFFFFFFFFFFFFFFFF:FFFFF  
FFFFFFFF:FFFFFFFFFFFFFFFFFFFFFFFFFFFFFFFFFFFFFFFFFFFFFFFFFFFFFFFF:  
FFF  
@A00721:190:HGJW7DSXY:4:2150:29677:16000\_2:N:0:TCTGCAAG+GCTGCACT  
GAAGATCTTCGAGTGTTTTATAGTGAGTTATTCTTGCAGAGTTCAAGTCGATTGATTTTGTGACTA  
CGATCTCTTGTGAATAAGAAGTTCTTCGCAGTTGAATCTCCACCAGG  
+

[illegible]



@A00721:190:HGJW7DSXY:4:2211:16929:32690\_1:N:0:TCTGCAAG+GCTGCACT  
CAACGGAAAGACATATCGCACCCGAAATTTTTGGGCAGAA TGCTCTTAACGCGGTTCTTGAACGGTGT  
TTTGATCAGTCTAAGTTGGATAAAGTTATAGGAGACTCAGTTAACCTGAGAGCTCCTCAATTGATAGA  
TTG

+

[illegible]

@A00721:190:HGJW7DSXY:4:2469:4218:21010\_2:N:0:TCTGCAAG+GCTGCACT  
CTAGTATACTTCGTAAAGTCGACAGCGAAATGGTCAATATTGATAATAGGACCGACTATATGACCTAT  
TTTAAGCTCATGGTGAAAAGGGAAGCTAAGGTTAACTTGATGCTTCA

+

F,FF,FFF:F:FFFFFFFFFFFFFFFF:FFFFFFFF:FF:FFF,FFFF:,,:FFFFFFFF:FFFFF:FF:  
:,FFFFFFFFFFFFFFFFFFFFFFFF:FFF,,FF:FF:FFFFFFFFFFFFFFFF:,FF:

@A00721:190:HGJW7DSXY:4:2361:19226:7106\_2:N:0:TCTGCAAG+GCTGCACT  
CCTATCTTTAAGTTCTTGTGAGGAGAGTCAAACAGTGTCTTTACCCAACATTATTATGTATACAGA  
GATGACCAGTGACGATTTCTCCCGGAAGCTCTTCTCTCTTAGGAGG

+

F::FFFF,FF::,FFFFFFF,FFFFFFF:FFFFFF,FFFFFF,FFFF,F:FFFF,,F:FF,FFFFFFF  
 ,FF,F,FF:FFFF,FF::F:,F,FF,F:FF::FFFF:FF,F,FF:F

@A00721:190:HGJW7DSXY:4:2263:3839:18161\_1:N:0:TCTGCAAG+GCTGCACT  
GATAAAGATGTATTCTTATTTAGGCTTCGATGCTGAATTTCTTGAACCTTTGGAGTGCCAGTGAATATT  
TTTGTACGCCAGGAGTATCCATAACGATTTGTCATTTACCACCTTTGCTCAACGACGAAGTGGAACG  
GCC

+

[illegible]

@A00721:190:HGJW7DSXY:4:2278:26666:18114\_1:N:0:TCTGCAAG+GCTGCACT  
AATTGTATGATCACTTTGATGATTTTATCACTTTATTATGACCTTGGAAAGTTTTCGGCTGTGGTTGT  
CGCTGGGGACGATTCCATTCTGTTTTCAAAGACTCCAATAACTGATCATTCTGATCATATGATTTTGG  
ACA

+

```

FFFFFFFFFFFFFF:FFFFFFFFFFFFFFFFFFFFFFFFFFFFFFFFFFFFFFFF
FFFFFFFFFFFFFFFFFFFFFFFFFFFFFFFFFFFFFFFF:FFFFFFFFFFFFFF
FFF

```

@A00721:190:HGJW7DSXY:4:1630:8666:16689\_1:N:0:TCTGCAAG+GCTGCACT  
ATGTTACTCTTTTAGGACTTTGGGAGAGATTCTTGGTTTAAATACTATACTAAATATCTCCACTAC  
GAGGTTGTTGTTTGGCGATTAGCTCTTGCGACTAATATTCGATATTCGATTGAGGGTCGTTATACCTA  
TTC

+

```

FFFFFF,::FF,FF:F::FFFFFF:FFFFFFFFFFFFFFFFFFFF:F,,FFF,F,FFFF:FFF:FFFF,:FF
FF,FFF,FFF:FFFFFF,FF:FFFFFFFFFF,:FFFF:FF,FFFFFFFFF,F:F,FFFFFF:FFFF::,:
FFF

```

@A00721:190:HGJW7DSXY:4:2378:18141:36385\_1:N:0:TCTGCAAG+GCTGCACT  
GCTTTGAATTGTATAAGATCAAATTTTAAACGATTCCGAGAGGTTTATCCTGATGTGGAGGGAGTTCT  
TGAAGCATCCCGACCTTTCCTTGTAATAATTTTGATGCGGTTTCATAAGATTATCAGTAATCCTGATT  
CTA

+

```

FFFFFFFFFFFFFFFFFFFFFFFF:F,FFFFFFFFFFFFFFFFFFFFFFFFFFFFFFFFFFFFFFFF
FFFFFFFFFFFFFFFF:FFFFFFFFFFFF:FFFFFFFFFFFFFFFFFFFFFFFFFFFFFFFFFFFFFF
FFF

```

@A00721:190:HGJW7DSXY:4:2672:20048:30577\_1:N:0:TCTGCAAG+GCTGCACT  
TCTTCTGGAGAGACGTATCTCAAAGATCGACTTCGAGACAGGTGATATTGTTGAGCGAGAGCGACCAA  
GATCTAAATTCGGAACGGTGCCTGGCGCTTTATTTTAAAAAGCTCCCTCCTCTCGCAAGTTTGATCT  
GAT

+

FFFFFFFFFFFFFFFFFFFFFFFFFFFFFFFFFFFFFFFFFFFFFFFFFFFFFFFFFFFFFFFFFFFFFFFF  
FFFFFFF:,FFFFFFFFFFFFFFFFFFFFFFFFFFFFFFFFFFFFFFFFFFFFFFFFFFFFFFFFFFFFFFFF  
FFF

@A00721:190:HGJW7DSXY:4:2314:28510:16360\_2:N:0:TCTGCAAG+GCTGCACT  
GATCAGTCTCTGACTTGACCATCTTTTATTTTAAATGACGATCATTAAAGACTCTCTTTCTTCTTTGTT  
TCCTTCTTTGCACTGATTTTTCCTCATCAGCTTGTGTTTTACCTAATC

+

FFFFFFFFFFFFFFFFFFFFFFFFFFFFFFFFFFFFFFFFFFFFFFFFFFFFFFFFFFFFFFFFFFFFFFFF  
FF::FFFFFFFFFFFFFFFFFFFFFFFFFFFFFFFFFFFFFFFFFFFFFFFFFFFFFFFFFFFFFFFF  
FFF

@A00721:190:HGJW7DSXY:4:2606:28962:27477\_2:N:0:TCTGCAAG+GCTGCACT  
GATAACAACATCAGTTGATTAAGACTCTTCCGAAAGTCGAACCTTGGGACTTTGAAGCTCAGGGTGA  
AGCACAACCTTTTGACCGTGACGAACGAGGTGTTCTTGATCTACGTTA

+

,::FF,FFF:FFFFFFFFFFFFFFFFFFFFFFFFFFFFFFFFFFFFFFFFFFFFFFFFFFFFFFFF  
F,F:FFF:, ,FFFFFF,FFF:, ,FFFFFF,F,FF,FFF,::F,::F,FFF:FFFFF,FF:  
F,F:FFF:, ,FFFFFF,FFF:, ,FFFFFF,F:, ,FFFFFF,FF,FF:FFFF

@A00721:190:HGJW7DSXY:4:1449:31711:25786\_1:N:0:TCTGCAAG+GCTGCACT  
TATTTTAAAGTTTGTCTTCTTGTGTTGTCTTATTCTATTAATCACTCATTTTAGTGAGATTATTA  
ACGCACTAAAACGTCTTCGACAACAGCAGGGGTTTTCGAATAGTGATAGCCACCCGCCTTACAGAGGG  
GCA

+

FFFFFFF:FFFFFFFFFFFFFFFFFFFFFFFFFFFFFFFFFFFFFFFFFFFFFFFFFFFFFFFFFFFFFFFF  
FFFFFFFFFFFFFFFFFFFFFFFFFFFFFFFFFFFFFFFFFFFFFFFFFFFFFFFFFFFFFFFFFFFFFFFF  
FFF

@A00721:190:HGJW7DSXY:4:2278:18521:25864\_1:N:0:TCTGCAAG+GCTGCACT  
TGGTACCACCTTTTCTACTGTCTGTCTCGCCTCTTGAATGAAGTTTTAATGCTTAACAACAATGATA  
GTGAATTTATACCTACAATCATTGGTTTTTCTAATAATGATGACACTATTGTTTATGGATATGATGCT  
ATT

+

FFFFFFFFFFFFFFFFFFFFFFFFFFFFFFFFFFFFFFFFFFFFFFFFFFFFFFFFFFFFFFFFFFFFFFFF  
FFFFFFFFFFFFFFFFFFFFFFFFFFFFFFFFFFFFFFFFFFFFFFFFFFFFFFFFFFFFFFFFFFFFFFFF  
FFF

@A00721:190:HGJW7DSXY:4:1401:8892:7467\_1:N:0:TCTGCAAG+GCTGCACT  
GGATTCTCAGTTTACAAGGACCTTAAGCGATGGATCGGGGTTAATTCTAAAACATTACCCGAAAGACG  
TGCTAAATTAAAACCATTTGTACGATGTCGTCTGTCTCGGCGATCACTTTTCACTAAGAATTGGTCCTA  
CTT

+

FFFFF:FFFFF:FFFF:FFFFFFFFFFFFFFFFFFFFFFFFFFFFFFFFFFFFFFFFFFFFFFFFFFFF  
FFFFFFFFFFFFFFFFFFFFFFFFFFFFFFFFFFFFFFFFFFFFFFFFFFFFFFFFFFFFFFFFFFFFFFFF  
FFF

@A00721:190:HGJW7DSXY:4:2536:2889:6151\_2:N:0:TCTGCAAG+GCTGCACT  
AATCTTCATGAGATCGTTTCTTTCTTTATCTCTTTGGTTGTTAGGGATTTTGAGAGAGTGAAAGGCTT  
CAATTGTAGTGGTTTGGTCGTTTCAGTACCCAGTCAGTATACCTCTAC

+

FFFFFFFFFFFFFFFFFFFFFFFFFFFFFFFFFFFFFFFFFFFFFFFFFFFFFFFFFFFFFFFFFFFFFFFF  
FFFF:FFFFFFFFFFFFFFFFFFFFFFFFFFFFFFFFFFFFFFFFFFFFFFFFFFFFFFFFFFFFFFFF  
F

@A00721:190:HGJW7DSXY:4:1515:27145:2785\_2:N:0:TCTGCAAG+GCTGCACT  
GAAACTACAGAGGAACGTACCGGATTACCTGTCTTTCATATTATGAATGAACCTTCGGCCGCTCTCT  
TTGCTTCGATGTTGGATGTCAAGAAGGGTTCAGAATGGGATTCCTACG

+

FFFFFFFFFFFFFFFFFFFFFFFFFFFFFFFFFFFFFFFFFFFFFFFFFFFFFFFFFFFFFFFFFFFFFFFF  
FFFFFFFF,FFFFFFFFFFFFFFFFFFFFFFFFFFFFFFFFFFFFFFFFFFFFFFFFFFFFFFFF  
@A00721:190:HGJW7DSXY:4:2329:1814:12461\_1:N:0:TCTGCAAG+GCTGCACT  
CTTTGGTGGTGGTACTTTTCGATACTTCTATCGTCTTACGTTACGGTAATTACTAGAGTGTTATTTATT  
CTGGTGGTGATGATAATCTTGGAGGTCGTGACGTTGATGAAGCTATAAGAGCGTTCTTATTACGGCGC  
ACT  
+  
FFFFFFFFFFFFFF:FFFFFFFFFFFFFFFFFFFFFFFFFFFFFFFFFFFFFFFFFFFFFFFFFFFFFFFF,FFFFFFFFFFFFFF  
FFFFFFFFFFFFFFFFFFFFFFFFFFFFFFFFFFFFFFFFFFFFFFFFFFFFFFFFFFFFFFFFFFFFFFFF  
FFF  
@A00721:190:HGJW7DSXY:4:1535:28257:1673\_1:N:0:TCTGCAAG+GCTGCACT  
CTTTCAGTTTCACAACTGAAGGAGGAGGTTTCTGTTACTGGAAAACCCTCGTCAATACTTTTCAATAA  
TATACGTCTTGAACCTCACTTATGACGATCTAGTGAAATTAACGCGTCCTTTTCTGGAACGTAGTTTCTA  
CTA  
+  
FFF:FFFFFFFFFFFFFFFFFFFFFFFFFFFFFFFFFFFFFFFFFFFFFFFFFFFFFFFF:FFFFFFFFFFFFFF  
FF:FFFFFFFFFFFFFFFFFFFFFFFFFFFFFFFFFFFFFFFFFFFFFFFFFFFFFFFF:FFFFFFFFFFFFFF  
FFF  
@A00721:190:HGJW7DSXY:4:2622:24144:11678\_1:N:0:TCTGCAAG+GCTGCACT  
ACGTGTGCTCTTCCGATCTAACTTACCCTGATTCCGGCCGGTGGTAGCTCATTTCTACCAGGGGCTAT  
TACTCTTGCTGAAACAGCTATTAAAGCTGTTGAGCGGGTAATTACACCTAAACGAGCTCGATCTGCCA  
TCG  
+  
FFFFFFFFFFFFFF:FFFFFFFFFFFFFFFFFFFFFFFFFFFFFFFFFFFFFFFFFFFFFFFF,FFFFFFFFFFFFFFFF  
FFFFFFFFFFFFFFFFFFFFFFFFFFFFFFFFFFFFFFFFFFFFFFFFFFFFFFFFFFFFFFFFFFFFFFFF  
FFF  
@A00721:190:HGJW7DSXY:4:2521:21377:14685\_2:N:0:TCTGCAAG+GCTGCACT  
CACTCTTTTCTGCTACTTTAACGGAGCGTAGTGTACTCTTCGTCGATTGTATCAACAGTAACATTACT  
TCTAATAAAGGTCTCTATCAAGCTCGTATTATCGTCGCTGCTGGATCT  
+  
FFFFFFFFFFFFFFFFFFFFFF:FFFFFFFFFFFFFFFFFFFFFFFFFFFFFFFFFFFFFFFF:FFFFFFFFFFFFFF  
FFFFFF,FFFFFFFFFFFFFFFFFFFFFF:,F:FFFFFFFFFFFFFFFFFFFFFF  
@A00721:190:HGJW7DSXY:4:1347:1859:19335\_2:N:0:TCTGCAAG+GCTGCACT  
AGGCTAAACTCCAAGGTAATTATGAAGACTGTGATTTATCTTCCACTCTGGCCTTGTATGAGGGTGT  
TCTAATCGTAACATTAATAATTTCAATCTTCTTAAAAAGAAGATAGAG  
+  
FFFFFFFFFFFFFFFFFFFFFFFFFFFFFFFFFFFFFFFFFFFFFFFFFFFFFFFFFFFFFFFFFFFFFFFF  
FFF:FFFFFFFF:FFFFFFFFFFFFFFFFFFFFFFFFFFFFFFFFFFFFFFFFFFFFFFFF  
@A00721:190:HGJW7DSXY:4:1325:2121:26146\_2:N:0:TCTGCAAG+GCTGCACT  
GCTATCGTTCAGGTGCATGGGGTTGGATAGCCAATATTGAAGTGGACACCTCTGGTAGTATCGAAGTA  
AAGATAACCAATAAGGAAGGAGCTTATACTATGGTTGAATCAACTAAG  
+  
FFFFFFFFFFFFFFFFFFFFFFFFFFFFFFFFFFFFFFFFFFFFFFFFFFFFFFFFFFFFFFFFFFFFFFFF  
FFFFFFFFFFFFFFFFFFFFFFFFFFFFFFFFFFFFFFFFFFFFFFFFFFFFFFFFFFFFFFFF  
@A00721:190:HGJW7DSXY:4:2359:31024:23156\_1:N:0:TCTGCAAG+GCTGCACT  
CTCTACCGCATTACAAGTCTAAGGTTAAAGAGTCGATTAAACAAGTTGTACTTATCAATGATTTTATC  
GCTGGTTGTTATCTCGAAAAGTCTCTTCTAAAAGGAACGTCAGTTCTAACCCAAAGAGAATATCTAAA  
ATA  
+  
FFFFF::FF,FFFFF:,FFFFF,FFF:FFFFF,FFFFF,FFFFFFFFFFFF:FFF:FFFFF  
::FFFFF:FFFF,FFFFFFFFF:FFF:FF,FFFFFFFFFFFFFFFF,FFF,FFFFF,FF:F  
FF:  
@A00721:190:HGJW7DSXY:4:2204:29378:9815\_2:N:0:TCTGCAAG+GCTGCACT  
AGACGTTGCTTGTGCTTCCTCCTTTAATGGCACTACCTCGGTACAATCTTACTTGGAACGAAGCGA

CCTGTTCCGGAGTTTTTACGGGATCCGGAATGTTCTGTCTATATTAGG

```
FFFFFFFFFFFFFFFFFFFFFFFFFFFFFFFFFFFFFFFFFFFFFFFFFFFFFFFFFFFFFFFFFFFFFFFFFFFFF
FFFFFFFFFFFFFFFFFFFFFFFFFFFFFFFFFFFFFF:F000:F00000000000
```

+

```

FFFFFFFFFFFFFFFFFFFFFFFFFFFFFFFFFFFFFFFFFFFFFFFFFFFFFFFFFFFFFFFFFFFFFFFFFFFFFFFF
FFFFFFFFFFFFFFFF:FFFFFFFFFFFFFFFFFFFFFFFFFFFFFFFFFFFFFFFFFFFFFFFFFFFFFFFF

```

+

```
FFFFFFFFFFFFFFFFFFFFF:FFFFFFFFFFFFFF:FFFFFFFFFFFFFFFFFFFFFFFFFFFFFFFFFFFFFFFF
FFFFFFFFFFFFFFFFFFFFFFFFFFFFFFFFFFFFFFFFFFFFFFFFFFFFFFFF
```

 $+$ 

```
FFFFFFFFFFFFFFFF:FFFFFFFFFFFFFFFF,FFFFFFFFFFFF:FFFFFFFF:FFF:FFFFFFF
FFFFFFFFFFFFFFFF,FFFFFFFFFFFFFFFFFFFFFFFFFFFFFFFF:FFFFFFFFFFFFFFF
:FF
```

+

[illegible]

+

```
F,FFFFFFFFFFFF:FFFFFFFFFFFFFFFFFFFFFFFFFFFFFFFFFFFFFFFFFFFFFFFFFFFFFFFFF,F:FFFF  
E:FF..FFFFFFFFFFFFFFFFFFFFFFFFFFFFFFFFFFFFFFFFFFFFFFFFFFFFFFFF
```

+

```
FFFF,FF,FFFF:FFF,:FF:FF:F,F,FFFFF,F:F:,FFF:F:FFF,FF:FFFFFFFF::FFFF,F:
FFF:F:FFFF:FFFFFFFFFFFF,FFFFFFFFFFFFFFFFFFFFFFFFFFFF:FF,F:FFFFF:F:,FFFFFF
:F:
```

+

[illegible]

@A00721:190:HGJW7DSXY:4:2603:28429:25989\_2:N:0:TCTGCAAG+GCTGCACT  
TAATATTCAACCTCAAAAAGTTACGTGTTTACAGTAACGAGATCACACATTTTGAGAACTAACTATGTT  
ATGTTCTCTGATCATTTTGACAATCTCTTCTTATAATAAATAAATAA

+

FFFFFFFFF,FFFFFFFFF:FFFFFFFFF,FFFFFFFFF,FFFFF,F,F,FF,FFFFFFFF:FF  
FFFFFFFF:FFFFFFFF::FFFF:FF::FFFFFFFFFFFFFFFFFFFF:FFFF

@A00721:190:HGJW7DSXY:4:1602:2645:9298\_1:N:0:TCTGCAAG+GCTGCACT  
AATGGCAAATAGTGGAAGGCTCCAGTCAACACTAGTTCGAGTGCTTTGGATTACGATGACGTGA  
GAATAGGTGAAGGGATAGTTTTTACCTCGACCAACATTAAGGCGGCGGCGACTAATCTTAAAGCTTCA  
CCC

+

F:FFFFFFFF:FFFFFFFFFFFFFFFFFFFF:FFFFFFFFFFFF:FFFFFFFFFFFFFFFFFFFF:FFFFFFFFFFFF  
FFFFFFFFFFFFFFFFFFFFFFFFFFFFFFFFFFFFFFFFFFFFFFFFFFFFFFFFFFFFFFFFFFFFFFFF:FFF  
FFF

@A00721:190:HGJW7DSXY:4:2521:4779:23923\_1:N:0:TCTGCAAG+GCTGCACT  
ACACTTCGAAACTGAATAATGATGCACTACAAACAAGTATCGCTAATCATCTGAAAAAGGCTCTAAAG  
GACACTATACAATATCCAGACGACGACGAAGCTTATACTACTTTAATTTTGGGTATTATGTGGAGATA  
TCG

+

FFFFFFFFF:FFFF:F:FF:F,FFFFFFFF::F:FFFFFFFFFFFFFFFFFFFFFFFFFFFFFFFFFFFF  
FFFFFFFFFFFF:FFFFFFFFFFFFFFFFFFFFFFFFFFFFFFFFFFFFFFFFFFFFFFFFFFFFFFFFFFFF  
FFF

@A00721:190:HGJW7DSXY:4:2117:5692:30420\_1:N:0:TCTGCAAG+GCTGCACT  
CCGTTGAGAAAATTTCTTAGAGGATATTCGCCATTGTGGTACGAATTGGTCCAACATTTACCACCAA  
TTCTTTTGATACAACCTCTAGCCTTCAAGTGGGGTATGCCTGCGGAATACGCTTGCTATTACCAGATT  
GGT

+

FFFFFFFFFFFFFFFFFFFF:FFFFFFFF:F:FFFFFFFF:FFFFFFFFFFFFFFFFFFFF:FFFFFFFF  
FFFFFFFFFFFFFFFFFFFFFFFFFFFFFFFFFFFFFFFFFFFFFFFFFFFFFFFFFFFFFFFFFFFFFFFF  
FFF

@A00721:190:HGJW7DSXY:4:2327:17409:20682\_2:N:0:TCTGCAAG+GCTGCACT  
TGATGCTATGTCAGAAGAAGCTATTCAAGCTTGTCGTTTAAAGACTGCAGAGGCTGTCAAACAAGCCC  
AGACTCAAGGAGTCCAATCAAAGTTTTGAATTTAGCTCAACTGGGGA

+

FFFFFFFFF:FFFFFFFFFFFFFFFFFFFF:FFF:FF:FFFFF,FF,FFFFFFFF,FF,FF:FFF,FFF  
FFF,FFFFFFFF:FFFF:,FFF::FFFFFFFFFFFFFFFF,FFF:,F,FF

@A00721:190:HGJW7DSXY:4:1276:2944:17143\_2:N:0:TCTGCAAG+GCTGCACT  
AAAAGTCCGGAGTATATTGTATGTTAATAGATAGTGGGATAATAGTTCTACCGATACGTAGTGAACGC  
GTTCTGAGAACCAAGTACTTTCGTCTGAAGAGTTTAGAGCTGCTATT

+

FFFFFFFFF::FFFFFFFFFFFFFFFFFFFFFFFFFFFFFFFFFFFFFFFFFFFFFFFFFFFFFFFFFFFF  
FFFFFFFFF:FFFFFFFFFFFFFFFFFFFF:FFFFFFFF:FFFFFF:FFF

@A00721:190:HGJW7DSXY:4:1125:15049:22200\_2:N:0:TCTGCAAG+GCTGCACT  
TGTGGCTTTAGACGATAATCCTTTAAGGACTATGTTGACTGACGAAGATTTCCACAGATTTGTCTA  
CGTTGCAGATCGCCACTCCAAACACTATATACATTATAAAATATAAAA

+

FFFFFFFFFFFFFFFFFFFFFFFFFFFFFFFFFFFFFFFFFFFFFFFFFFFFFFFFFFFFFFFFFFFFFFFF  
FFFFFFFFFFFFFFFFFFFFFFFFFFFFFFFFFFFFFFFF:FFFFFFFFFFFF

@A00721:190:HGJW7DSXY:4:2138:14841:25661\_1:N:0:TCTGCAAG+GCTGCACT  
ACTTTTGTACCAAATCTTGCTTTCAACGAAGTCTCTGATTTTATTAATCATTACTTTAACGATCT  
CTCGGTCATTTACTCTGTACTTGATCTACGTCGTTTAACTGTCGGAACAACCTTTACTTAGAATGACT  
CTA

+

FFFFFFFFF:FFFF:F:FF::FFFFFFFF,FFFF:FFFFF:FFFFFFFFFFFF,FFFFFFFF,FF,FF

```

:FF
:FF
@A00721:190:HGJW7DSXY:4:1131:8730:13761_2:N:0:TCTGCAAG+GCTGCACT
ATCATATTAGTAATACTCACTATCGTTTTCTGCTTTTTCTTAGCTAATAGATTAATAAAGGATGAGTA
CGAAAACCAACTCTTCGTTACGAGACCTGATGGTAGAATAGATTTAGT
+
FFFFFFFFFFFFFFFFFFFFFFFFFFFFFFFFFFFFFFFFFFFFFFFFFFFFFFFFFFFFFFFFFFFFFFFF
FFFFFFFFFFFFFFFFFFFFFFFFFFFFFFFFFFFFFFFFFFFFFFFFFFFFFFFFFFFFFFFFFFFFFFFF
@A00721:190:HGJW7DSXY:4:2151:1127:17910_1:N:0:TCTGCAAG+GCTGCACT
ATCTCAACTTGTATAACGTTTTTTTTCTTACCTTAACCTAATACACTTCGATAACATCCGCACACGAC
TCGAAACCGAGACGCCGTAGATCAAAGTCCCTTCTAACTTTAGATTATGAATCCTGCCTTTACTC
+
FF:F,F,,,,F,FFF,,,,,,,,:F,,FF,,F,,,,F,F,F,:F,,,,,,F,F,,F,:,,,::FFFFF
FFFF:FFFFFFFF:FFFFFFFFFFFFFFFFFFFFFFFF:FFFFF:F:FFFFFFFFFFFFFFFF:FFFFFFFF
@A00721:190:HGJW7DSXY:4:2570:8305:16407_1:N:0:TCTGCAAG+GCTGCACT
TAACCTTCTTATACTTTTGGGTATGTTTTGTGAAAAACATGAGATACCCAAGTCTATCGAAGACATTA
TCTCTTATGTACTTATTGTAACGATCATTCTTTCGAGTTTGTCTATTCTTATTCTTTTATTCTTTAA
CTG
+
FFFFFFFFFFFFFF:FFFFFF:FFFFFFFFFFFFFFFFFFFFFFFFFFFFFFFFFFFFFFFFFFFFFFFF
FFFFFFFFFFFFFFFF:FFFFFFFFFFFFFFFFFFFFFFFFFFFFFFFF:FFFFFFFFFFFFFFFFFFFFFFFF,F
FFF
@A00721:190:HGJW7DSXY:4:1612:22372:1031_2:N:0:TCTGCAAG+GCTGCACT
ATGCTTTTCGATAGTGATTGTTATCAATTTAAATACATTACTGTTTCAAATCATCTTTACTCACAGAC
TCCGAAAATGTTTCAAATGAGGTCAAAGCTCTATTTATTAAACGAAC
+
FFFFF:FFFFFFFFFFFFFFFFFFFFFFFFFFFFFFFFFFFFFFFFFFFFFFFFFFFFFFFFFFFFFFFF
FFFFFFFFFFFFFFFFFFFFFFFFFFFFFFFFFFFFFFFFFFFFFFFFFFFFFFFF:FFF
@A00721:190:HGJW7DSXY:4:1102:13892:14278_1:N:0:TCTGCAAG+GCTGCACT
TACCACTGATCTGCCGACTTTAGTCAAGGAACCTTCAATTCCTTCGATGTTTATATTTTCTATAAGGG
AAAATAGCAATAATCAAATTTGACAAATTTTAGAACTTTATTTCAGAACTCTCTCCGATCACCTTGG
TGT
+
FFFFFFFFF:FFFFFFFFFFFFFFFFFFFFFFFFFFFF:FFF:FFFFFFFFFFFFFFFF:FFFFFFFFFFFFF
FFFFFFFFFFFFF:FFF:FFFFFFFFF::FFFFFFFFFFFFF::FFFFFFFFFFFFFFFFFFFFFFFFFFFF
FFF
@A00721:190:HGJW7DSXY:4:1105:1199:6511_1:N:0:TCTGCAAG+GCTGCACT
TCAATAAGATGTATGATGATAATCTACTATTTTTAAATAGTGATATTCAGCGTATACTTGAATACTTT
ATCAAAGATTTGGCTTGGTCTATTTACCGCAAAAAGTTGAAGAGGTCTATGATATTTATTTTACTTA
TAC
+
F:FFFFFFFFFFFFFFFFFFFFFFFFFFFFFFFF,FFFFFFFFFFFFFFFFFFFFFFFF:FFFFFFFFFFFF
FFFFFFFFFFFFFFFFFFFFFFFFFFFFFFFFFFFFFFFFFFFFFFFFFFFFFFFFFFFFFFFFFFFFFFFF
:FF
@A00721:190:HGJW7DSXY:4:1627:17445:22968_2:N:0:TCTGCAAG+GCTGCACT
CCGATTATAACTTGACTGTTGATAATATTACAATAGCTCTTCTCAGAAGATTAGAGAAGTAACCGGT
GAACACGTCGGTAGCATTGATTTACTTTTACCGTTAGAACTGAAAAAG
+
FFFFFFFFFFFFFFFFFFFFFFFFFFFFFFFFFFFFFFFFFFFFFFFFFFFFFFFFFFFFFFFFFFFFFFFF
FFFFFFFFFFFFFFFFFFFFFFFFFFFFFFFF:FFF:FFFFFFFFFFFFFFFF
@A00721:190:HGJW7DSXY:4:2404:12753:4977_1:N:0:TCTGCAAG+GCTGCACT
ACCTATAAGTTACAAACGATTCTTCGACTATATTAAGAAATAAAAAACTTCAAGTACCTGAACCTTT
ACATTTTAAATGGTATGGTATAATGTGTCTTACAAATAGAACCTTCACTCTCGGTAATGAGAGTGTAT
TCC

```

```

+
::FFFFFFFFFFFFFFFFFFFFFFFF:FFFFF:FFFFFFFFFFFFFFFFFFFFFFFFFFFFFFFFFFFFFFFF
FFF:FFFFFFFFFFFFFFFFFFFFFFFFFFFFFFFFFFFFFFFFFFFFFFFFFFFFFFFFFFFFFFFFFFFF
FFF
@A00721:190:HGJW7DSXY:4:2248:19361:10692_1:N:0:TCTGCAAG+GCTGCACT
GGCATTACTAGGATTTATCACACTCCTAAATTTGATAGCAATTTATGTTTTAAATGCTAGGAAATTT
TAGAAAACTCCATTGTATAGTTCAAGGAGTACTTAATTCAATAGCTTTAGTATTATTTACTATCGCC
TTT
+
FFFF:FFFFFFFFFFFFFFFFFFFFFFFFFFFFFFFF:FFFFFFFFF::FFFFF:FFFFFFFFFFFFFFFF
FFFFFFFFFFFFFFFFFFFFFFFF:FFFFFFFFFFFFFFFFFFFFFFFFFFFFFFFF:FFFFFFFFFFFFFFFF
FFF
@A00721:190:HGJW7DSXY:4:2333:2311:6308_2:N:0:TCTGCAAG+GCTGCACT
AGTTAATTGCTTACACAAAAGTGACGCGCAAGGACTCTTAATTGATTGAAGCTAGGCGTTGGGGAGA
ATGAACTGCCGCTTCCCGGAAGAAACGATCTATTTACAGAGTATTTAG
+
FFFFFFFFFFFFFFFFFFFFFFFFFFFFFFFFFFFFFFFF,FFFF:FFFFFFFFFFFFFFFFFFFFFFFF
,FFFFFFFF:FFFFFFFFFFFFFFFFFFFFFFFFFFFFFFFF:FFF:F
@A00721:190:HGJW7DSXY:4:2565:4562:36041_1:N:0:TCTGCAAG+GCTGCACT
CTACCATGACCAATCATCGCTCCAAGTGGCAGCCAGACGTAGGGTCAAACCTACTACCGCCGGTCGG
CAGATCGGCACCACTGGTCTCTACGTTCAAGGACCCGCTGTGCAGAATAACCTTCCCAAATCTAGATC
TGC
+
FFFFFFFFFFFFFFFFFFFFFFFFFFFFFFFFFFFFFFFFFFFFFFFFFFFFFFFFFFFFFFFFFFFFFFFF
FFFFFFFFFFFFFFFFFFFFFFFFFFFFFFFFFFFFFFFFFFFFFFFFFFFFFFFFFFFFFFFFFFFFFFFF
,FF
@A00721:190:HGJW7DSXY:4:2553:12825:34976_1:N:0:TCTGCAAG+GCTGCACT
CTGAAGGTCGTTACCGGACGACCACTCAAAGGAAACGGGCTGTTGCCAGAGGAAAGCAGCGACCACC
GAGGTCGCTCGTAACATTGACGGCAGTCCCGTCATCTCTGTGGGAAGTGAAGCAGTACCTCAGTCAAA
AGT
+
FFFFFFFFF:F:FFFFFFFF:FFFF,FF,FFFFFFFF,FFFFFF:,F,FFF,FFF:, ,FF,FFFFFF
F,FFFF,:F:FFFF,FFFF::FFF:FFFFFFFFFFFFFFFFFFFFFFFF:FF:F:FFFFFFF:,FFF
FFF
@A00721:190:HGJW7DSXY:4:1451:30255:25394_2:N:0:TCTGCAAG+GCTGCACT
ACTCCCATGCCAATCAATGATGTGACTATACAGTTCGGCCATTTCAAGAGTGGTCAATACGTCGTGGG
AGGTAAGCCTTCCCCTCCGCTGGCACGAAGAACTCCCAAGCC
+
FFFFFFFFFFFFFFFFFFFFFFFFFFFFFFFFFFFFFFFFFFFFFFFFFFFFFFFFFFFFFFFFFFFFFFFF
FFFFFFFFFFFFFFFFFFFFFFFFFFFFFFFFFFFFFFFFFFFFFFFFFFFFFFFFFFFFFFFF
@A00721:190:HGJW7DSXY:4:2605:27615:16313_1:N:0:TCTGCAAG+GCTGCACT
CTTCTGACCAGAATGAAAAGGGGTTTCCCAGGGTAGTCTCTAAGTCTACCAGGAAGAGGGGAAATGTC
CCCAAACTGAGAAGAATAAAGGGAAAGGTCCATCAGGACCTAAGAAGGGGAAATTACCCCTAATTCT
GAA
+
FF:FFFFFFFFFFFFFFFFFFFFFFFF:FF:FFF,:FFFFFFFF:FFFFFFFF:FFFF:FFF:FFFF
F,:F,FF:F::F,FFF:F,FF:,FFFF:FFFFFFFFFFFFFFFFFFFFFFFF:F:F,FFFFFFFF
FFF
@A00721:190:HGJW7DSXY:4:1431:12617:10848_2:N:0:TCTGCAAG+GCTGCACT
CCACCATCTGGGGTTGGGAATAAGAAATCTGCACGGGCCAAAGAGGCCGCTGCTACGAAGTCGCTGAA
GGCGGCTTGGGTCATTAAGGGTAGCTGTAAAGTTGCGCCTGCCGACCC
+
FFFFFFFFFFFFFFFFFFFFFFFF,FFFFFFFFFFFFFFFFFFFFFFFFFFFFFFFFFFFFFFFF
FFFFFFFF,FFFF:FFFFFFFFFFFFFFFFFFFFFFFFFFFFFFFF

```





@A00721:190:HGJW7DSXY:4:2104:17734:4398\_2:N:0:TCTGCAAG+GCTGCACT  
TCCTTTTGTAGTATCGACAGATCTTTCGATCTTGAGGACGTACATTTAACGTGGCAGAATTCGGTAACT  
TACCATATTGTTCTTCCGGAAGTTGTGGGATTTAACTTTGACTCAA

+

FFFFFFFFFFFFFFFFFFFFFFFFFFFFFFFFFFFFFFFFFFFFFFFFFFFFFFFFFFFFFFFFFFFFFFFF  
FFFFFFFFFFFFFFFFFFFFFFFFFFFFFFFFFFFFFFFFFFFFFFFFFFFFFFFFFFFFFFFFFFFFFFFF

@A00721:190:HGJW7DSXY:4:1452:5195:36949\_2:N:0:TCTGCAAG+GCTGCACT  
TGGACTACTCGACTTTTGATCTGGAGTTGTCTAGGGTCATGGCAGATACTACCGATAAGGTGAAAAAT  
ATGCAGGTCAAAGATTCTGTAGCTCTGAGGGCGGTTGAGGGAGCCGTT

+

FFFFFFFFFFFFFFFFFFFFFFFFFFFFFFFFFFFFFFFFFFFFFFFFFFFFFFFFFFFFFFFFFFFFFFFF  
FFFFFFFFFFFFFFFFFFFFFFFFFFFFFFFFFFFFFFFFFFFFFFFFFFFFFFFFFFFFFFFFFFFFFFFF

@A00721:190:HGJW7DSXY:4:1375:7157:22028\_1:N:0:TCTGCAAG+GCTGCACT  
CTAAGAGTCTTTATGATTCAAACCTATCGTTGTCTGACCTTACAAGTTGAGGAGACTTTACAGCGG  
CTTATTGTGCGCAGTTTCCAGAATTGCGGTTGAAGTTCACCCATTCTATCTTGAATGCTCACGCCGT  
CGC

+

FFFFFFFFFFFFFFFFFFFFFFFFFFFFFFFFFFFFFFFFFFFFFFFFFFFFFFFFFFFFFFFFFFFFFFFF  
FFFFFFFFFFFFFFFFFFFFFFFFFFFFFFFFFFFFFFFFFFFFFFFFFFFFFFFFFFFFFFFFFFFFFFFF  
FFF

@A00721:190:HGJW7DSXY:4:1366:14190:20306\_2:N:0:TCTGCAAG+GCTGCACT  
GATTTAGATATTATTGATATTGGAGGCGATATTCGTTTTCATATCCAAAACCTTGAATGGAGTACA  
TATTTGCAACCCTATTCTTGATGTGAAAGATGCATCGAGGTATACGTC

+

FFFFFFFFFFFFFFFFFFFFFFFFFFFFFFFFFFFFFFFFFFFFFFFFFFFFFFFFFFFFFFFFFFFFFFFF  
FFFFFFFFFFFFFFFFFFFFFFFFFFFFFFFFFFFFFFFFFFFFFFFFFFFFFFFFFFFFFFFFFFFFFFFF

@A00721:190:HGJW7DSXY:4:2211:28836:17425\_1:N:0:TCTGCAAG+GCTGCACT  
GATTGGGAACGTACCTACTCACGAGACGTATGAAAGCTATCGGAGGGAAGCAAAATGTTTCGTTCTG  
TTACAAGAACGCTTTGGATTGTGACCATAAAGCCTCAGTTGCGATAGCTGTAGAGGTATACGATATCT  
CTC

+

FFFFFFFFFFFFFFFFFFFFFFFFFFFFFFFFFFFFFFFFFFFFFFFFFFFFFFFFFFFFFFFFFFFFFFFF  
FFFFFFFFFFFFFFFFFFFFFFFFFFFFFFFFFFFFFFFFFFFFFFFFFFFFFFFFFFFFFFFFFFFFFFFF  
FFF

@A00721:190:HGJW7DSXY:4:2253:31620:6057\_2:N:0:TCTGCAAG+GCTGCACT  
TATGTCATTTCTGCTTAGTTTGTCCCGCGAATTATTGGACACGATGAAAAATGACATACCCGTTCTT  
GACCTTGGTATCGTTATCCGTCATGGAGATGATGGCGCATCACTTGAT

+

FFFFFFFFF:FFFFFFFFFFFFFFFFFFFFFFFFFFFFFFFFFFFFFFFFFFFFFFFFFFFFFFFFFFFFF,FFFFFFFFFFFFFFFFF  
FFFFF:FFFFFFFFFFFFFFFFFFFFFFFFFFFFFFFFFFFFFFFFFFFFFFFFFFFFFFFFFFFFFFFFF:

@A00721:190:HGJW7DSXY:4:1125:16459:8265\_2:N:0:TCTGCAAG+GCTGCACT  
GATTTTATCTTTCTTCAAACACCCTGTTTTCCTTAAGGGCGGACAATTGTTCCATTGTGAACCTTGG  
GGACTAGATTGAGCATTAATGAGTTCCGAATAACTCGTAATAAATCTT

+

FF,FFFFFFFFFFFFFFFFF:FFFFFFFFFFFFFFFFFFFFFFFFFFFFFFFFFFFFFFFFFFFFFFFFFFFFF:FFFFFFFFFFFFFFFFF  
FFFFFFFFFFFFFFFFFFFFFFFFFFFFFFFFFFFFFFFFFFFFFFFFFFFFFFFFFFFFFFFFFFFFFFFF

@A00721:190:HGJW7DSXY:4:1547:21721:8766\_2:N:0:TCTGCAAG+GCTGCACT  
AAGAGCCACTGCCAATCTCATCGCTATACGCATACCTGATTGGAAGAAGCGAGGTTCTGTTCTCAATA  
AAAATTTTCTCAAGAGATTATGTTGATAAAGTTTTCTTCATAAGGG

+

F:FFFFFFFFFFFFFFFFFFFFFFFFFFFFFFFFFFFFFFFFFFFFFFFFFFFFFFFFFFFFFFFFFFFFF:FFFFFFFFFFFFFFFFF  
FFFFFFFFFFFFFFFFFFFFFFFFFFFFFFFFFFFFFFFFFFFFFFFFFFFFFFFFFFFFFFFFFFFFF,FFFFFFFFF

@A00721:190:HGJW7DSXY:4:1247:3260:33880\_2:N:0:TCTGCAAG+GCTGCACT  
GTCATGGGGATCACTTCTTCGGTCAATGACAAAACCTTCGAATATGTTACGACATGGCTTCGTAACAA

CAGTGCAGGATTGTCATCTCGGGGAAAGTGATTACCAAGATGTTCA  
+  
FFFFFFFFFFFFFFFFFFFFFFFFFFFFFFFFFFFFFFFFFFFFFFFFFFFFFFFFFFFFFFFFFFFFFFFF  
FFFFFFFFFFFFFFFFFFFFFFFFFFFFFFFFFFFFFFFFFFFFFFFFFFFFFFFFFFFFFFFFFFFFFFFF  
@A00721:190:HGJW7DSXY:4:2444:8793:30279\_1:N:0:TCTGCAAG+GCTGCACT  
AGATACCTAGAGAAGGTCGCAGCGATCTTACTCGTTATCGGAGCTAAGAAGAAGACTTTGGGTACACG  
TTATGCTCGCAAACCTTAACGTTAGTACCGGAGGTGATCTCTCTGCTTCTGCGTTACTGAGAGAAAAGA  
TTC  
+  
FFFFFFFFFFFFFFFFFFFFFFFFFFFFFFFFFFFFFFFFFFFFFFFFFFFFFFFFFFFFFFFFFFFFFFFF  
FFFFFFFFFFFFFFFFFFFFFFFFFFFFFFFFFFFFFFFFFFFFFFFFFFFFFFFFFFFFFFFFFFFFFFFF  
FFF  
@A00721:190:HGJW7DSXY:4:2326:14796:28494\_1:N:0:TCTGCAAG+GCTGCACT  
CTTTATGGACAAGATGCAAGTTCTTGGGAAATACTTGTTTCCCTTTTATAGGTTTAGTAGGTGATCTTG  
ACGTCGATTCTTTGTATAGGGAGTGTGAGAAGACAACGAATCTTGAACTACGGTCCTTATCAAAGAA  
AAT  
+  
FFFFFFFFFFFFFFFFFFFF:FFFFFFFF:FFFFFFFFFFFFFFFF,FFFFFFFFFFFFFFFFFFFFFFFF  
FFFFF:FFFFFFFFFFFFFFFFFFFFFFFFFFFFFFFFFFFFFFFFFFFFFFFFFFFFFFFFFFFFFFFF  
:FF  
@A00721:190:HGJW7DSXY:4:2109:23330:16595\_2:N:0:TCTGCAAG+GCTGCACT  
AAATCTTTTGAGATTGAGAAGATTGAAGAACACGTCAAGAAGTCGCTCGGCGTTGTTCTTGAAAACCA  
AGTTAAGAAGGAGGCTGATCATGGAGTCTTGTACCTTCTGTCAAAC  
+  
FFFFFFFFFFFFFFFFFFFF:FFFFFFFF:FFFFFFFFFFFFFFFFFFFF:FFFFFFFFFFFFFFFFFFFF  
FFFFFFFFFFFFFFFFFFFFFFFFFFFFFFFFFFFFFFFFFFFFFFFFFFFFFFFFFFFFFFFFFFFF:  
@A00721:190:HGJW7DSXY:4:2431:15284:22701\_1:N:0:TCTGCAAG+GCTGCACT  
TCCCGGATGTGGATTGAAGGCTGGCTCTAAGGGAGACTCCTTCTTTTGAATGTTGTAAAGAATTGGG  
TTGAGAAGTGTGCTTTACAAGGAGTTAGACTCTTCTTCAAGTTTTTAGATCTTCTTGATAATCTTAA  
GAA  
+  
FFFFFFFFFFFFFFFFFFFFF:FFFFFFFFFFFFFFFFFFFF:FFFFFFFFFFFFFFFFFFFF:FFFF  
FFFFFFFFFFFFFFFFFFFFFFFFFFFFFFFFFFFFFFFFFFFFFFFFFFFFFFFFFFFFFFFFFFFF  
FFF  
@A00721:190:HGJW7DSXY:4:1463:7609:17581\_2:N:0:TCTGCAAG+GCTGCACT  
TTTTCTCTACCCATAACTTCTTTTCAAAAATGCGGATGGGTCTACTGATGTTTTCTACAGAGTGCA  
GTCGTTTCAACACTTATCACCCTTTTCAAAGGAAAATAATTGGTGAT  
+  
FFFFFFFFFFFFFFFFFFFFFFFFFFFFFFFFFFFFFFFFFFFFFFFFFFFFFFFFFFFFFFFFFFFF  
FFFFFFFFF:FFFFFFFFFFFFFFFF,FFF,FF:FFFFFF:FFF:F  
@A00721:190:HGJW7DSXY:4:1325:30635:3881\_1:N:0:TCTGCAAG+GCTGCACT  
GGGGTTCCATAAGATATTATCTGACATTGTGGTTCAATGATCAGGATTCTTCTTTTGGTCCTTACGTC  
TTAAGTAATTTGGATGTTGTCGAAAACCTATCAGGTTCTTGTACGATTCTTAAAAGAAGTTTATTAAA  
ACT  
+  
:FFFFFFFFFFFFFFFFFFFFFFFFFFFFFFFFFFFFFFFFFFFFFFFFFFFFFFFFFFFFFFFFFFFF  
FFFFFFFFFFFFFFFFFFFFFFFFFFFFFFFFFFFFFFFFFFFFFFFFFFFFFFFFFFFFFFFFFFFF  
FFF  
@A00721:190:HGJW7DSXY:4:2546:26928:24893\_1:N:0:TCTGCAAG+GCTGCACT  
GGTAGCTAATGTTCTTGCAATAGCCACAGACTTTCTGGGAAAAGAGACCTCTGTTGTAGAGGAGTTGA  
GAGAATTACTCAGATTCAATCTGGCATCACTGAACGTCTACAACGAGTTAGGAGTGGCTAGGTTTTA  
AAA  
+  
FFFFFFFFFFFFFFFFF:FFFFFFFF:FFFFFFFFFFFFFFFFFFFFFFFFFFFFFFFFFFFFFFFFFFFF

FFFFFFFFFFFFFFFFFFFFFFFFFFFFFFFFFFFFFFFFFFFFFFFFFFFFFFFFFFFFFFFF  
F:F

@A00721:190:HGJW7DSXY:4:1314:3685:14920\_1:N:0:TCTGCAAG+GCTGCACT  
CATACGAGATCTTGACAGAGTGGAGTTTCAGACGTGTGCTCTTCCGATCTTGAAGATTTCCACACT  
GTTTCGAGAATCTTCTGATGCTGAATTTGAGGAAAATTTTCGGAAGTTTTTGGTATAAATCCTGATGG  
CTC

+  
FFFFFF,FFFFFFFFFFFFFFFFFFFFFFFFFFFFFFFFFFFFFFFFFFFFFFFFFFFFFFFF,FF  
FFFFFFFF:FFFFFFFFFFFFFFFFFFFFFFFFFFFFFFFFFFFFFFFFFFFFFFFFFFFFFFFF  
FFF

@A00721:190:HGJW7DSXY:4:1646:18882:12931\_1:N:0:TCTGCAAG+GCTGCACT  
ACCTTCTTTTATCATTGCAACAGGACTTTGAGAAGACTGTTGAAATGGACAAAATCTGGGATCATAGG  
TATGTGTCACCTCTACACTCGAAATATGGGCCCTCATAAGGAAGTATAGTTGGCGTATTGTCGTTGACG  
TC

+  
F:FFFFF,FFFF,FFFF:FF:F:F:FFF:FFF:FFFFF:FFFF,FFFFFFFF,F,,FFF,: ,FF:FF  
FFFFF,FF,: ,F:FFFFFFFFFFFFFFFFF,: :FFFF,FFFFF:FFF:FF:FF,FF,FF:F,FFFFFF  
FF

@A00721:190:HGJW7DSXY:4:2476:12744:33144\_2:N:0:TCTGCAAG+GCTGCACT  
AAGATCTCTACAGAGATTATCGAGAGTTGTGATCTAGTTCTAAATTTAGGTCGACGGACTTTAGCAAC  
TTAGATAAATTCTTCCGGGCTCAATGACCTTTGCTATGTACGTGGA

+  
FFFFFFFFFFFFF:F::FFFFFFFF:FFFFFFFFFFFFFFFFFFFFFFFFFFFFFFFFFFFFFFFF  
FFFFFFFFFFFFFFFF:FFFFFF:FFFFFFFFFFFFFFFFFFFFFFFF:FF:FF:FF

@A00721:190:HGJW7DSXY:4:1677:13702:2832\_1:N:0:TCTGCAAG+GCTGCACT  
CCAAATTTAGCACTTTTTGAATATGGCAGAGCTCGCCATATCAGATTAGAGACATGCCAGTTAGAGT  
TCTTCTAACCAGGACTGATGGTGAGATTCTTTACCTTTTGAGGTCCAGGAACCTTTACTCCTAGTG  
TCT

+  
FFFFFFFFFFFFFFFFFFFFFFFFFFFFFFFFFFFFFFFFFFFFFFFFFFFFFFFFFFFFFFFF  
FFFFFFFFFFFFFFFFFFFFFFFFFFFFFFFFFFFFFFFFFFFFFFFFFFFFFFFFFFFFFFFF  
FFF

@A00721:190:HGJW7DSXY:4:1546:8748:8375\_1:N:0:TCTGCAAG+GCTGCACT  
ACGTTTCCGTCGGAGGATGACAGGTGGGAGACCGCTCAATAACACTCTATTGAATCCCTTTTCCACGA  
TGAAAGCTCTTTATGAGGTGCTCCATGCAAATTTACAGTTCCTCTTTGGTGATATCGCCTCTGTCCTT  
TCT

+  
FFFFFFFFFFFFFFFFFFFFFFFFFFFFFFFFFFFFFFFFFFFFFFFFFFFFFFFFFFFFFFFF,FFFFFF  
FFFFFFFFFFFFFFFFFFFFFFFFFFFFFFFFFFFFFFFFFFFFFFFFFFFFFFFFFFFFFFFF  
FFF

@A00721:190:HGJW7DSXY:4:1253:7916:18364\_2:N:0:TCTGCAAG+GCTGCACT  
AATGATACTGACGAAGGTTCTATTACCACCCTTGTCAATTGATACAAACATTCTAGGTGATGCTTTCTT  
AGAGGCTCGTCTAGCCGCTGAGATTCGTCTTACCTATTTACAATCTGT

+  
FFFFFFFFFFF,FFFFFFFFFFFFFFFFFFFFFFFFFFFFFFFFFFFFFFFF:FFFFFFFFFFFFFFFF  
FFFFFFFFFFFFFFFFFFFFFFFFFFFFFFFFFFFFFFFFFFFFFFFFFFFFFFFF:FFF

@A00721:190:HGJW7DSXY:4:1403:30861:33489\_2:N:0:TCTGCAAG+GCTGCACT  
TCTCCTAGTACTTAAGGGTTTATGTTTCGGTTTCAGCTGGATGGATCTTTTGATGGTATGTTTCACAT  
TGCGTGATCACTTCCCGTGGACTTGGAAGAGATTAAACATAAAATCC

+  
FFFFFFFFFFFFFFFFFFFFFFFFFFFFFFFFFFFFFFFFFFFFFFFFFFFFFFFFFFFFFFFF  
FFFFFFFFFFFFFFFFFFFFFFFFFFFFFFFFFFFFFFFFFFFFFFFFFFFFFFFF:F

@A00721:190:HGJW7DSXY:4:1522:11406:32737\_2:N:0:TCTGCAAG+GCTGCACT  
GCTAAAGCCTGTCCAGTTGTGATGATGTTTCGGGCTGTGGGGATTAACTCCCTCGTGAAACTTACGA

CGATGTTCTCGCTCGCATTTTACAAGGATTACTAAGTCTGAGATCTGC  
+  
FFFFFFFFFFFFFFFF:FFFFFFFFFFFFFFFFFFFFFFFFFFFFFFFF:FFFFFFFFFFFFFFFF  
FFFFFFFFFFFFFFFF:FFF:FFFFFFFFFFFFFFFFFFFFFFFF:F:  
@A00721:190:HGJW7DSXY:4:2311:15899:4131\_2:N:0:TCTGCAAG+GCTGCACT  
AAGTTCATGAGGATGTCTTGGTCGAAAAATATCGCCGGGAACCTCTAATAGAGGATCCTGATGACATT  
ATTTCAACGGATACCGATCTCAGTTCTACCACAGAAACCGTCTCAGGA  
+  
FFFFFFF:FFF:FFFFFFFFFFFFFFFF:FF:FFFFFFFFFFFFFFFF:FFFFFFFFFFFFFFFF:FFF  
FFFFFF,:FFFFFFFFFFFFFFFF:FFFFFFFFFFFFFFFF  
@A00721:190:HGJW7DSXY:4:2275:19985:17503\_2:N:0:TCTGCAAG+GCTGCACT  
GATTCCGAATTAGAGAAAGACGACCTTCTGTGGGACTGAGACCTCTGAATTTTCAGGGTGCCTGA  
TGAGGACGTTGAAAGGGATAATTTCAACTCTGAGACAGATCGGAAGAG  
+  
FFFFFFFFFFFFFFFF:FFFFFFFFFFFFFFFFFFFFFFFFFFFFFFFFFFFFFFFFFFFFFFFF  
FFFFFFFFFFFFFFFFFFFFFFFFFFFFFFFFFFFFFFFFFFFFFFFF:FFF  
@A00721:190:HGJW7DSXY:4:1462:12102:35321\_1:N:0:TCTGCAAG+GCTGCACT  
GTAACAAGAAGAATAAAGGTAGGAAGGGGAGAAAACAGAACAAGCGAGCGGTTGAAGAGAAAAGTAT  
ATGTTGCGGCTGATCGTACCCCAATTCTGCTAGAAAGATCACTCTCGGCGATACCACTGATCTTCC  
AGA  
+  
FFFFFFFFFFFFFFFF:FFFFFFFFFFFFFFFFFFFFFFFFFFFFFFFFFFFFFFFFFFFFFFFF:F:FFFF  
FFFFFFFFFFFFFFFFFFFFFFFF:FFFFFFFFFFFFFFFFFFFFFFFFFFFFFFFFFFFFFFFF  
FFF  
@A00721:190:HGJW7DSXY:4:2577:5773:4664\_1:N:0:TCTGCAAG+GCTGCACT  
TTTTATCAAAGAGAAAGTTTCTGCTAGTCGCGACGATAGTATTTATCGGAGTGATATTAACAAGTTAA  
ACTTCGAACTGACCACTTACAAGAGTGTTGAAGTACCGCAACATGGATCAGTTTCCAAAAGCTATT  
AAT  
+  
FFFFFFFFFFFFFFFFFFFFFFFFFFFFFFFFFFFFFFFFFFFFFFFF:FFFFFFFFFFFFFFFF:FFFFF  
FFFFFFFFFFFFFFFFFFFFFFFF:FFFFFFFFFFFFFFFFFFFFFFFFFFFFFFFFFFFFFFFF  
:F:  
@A00721:190:HGJW7DSXY:4:2447:20799:24017\_2:N:0:TCTGCAAG+GCTGCACT  
GAAGATCTTCGAGTGTTTTATAGTGAGTTATTCTTGCGAAGGTTCAAGTCGATTGATTTTGTGACTA  
CGATCTCTCTTGAATAAGAAGTTCTTCGCAGTTGAATCTCCACCAGG  
+  
FFFFFFFFFFFFFFFFFFFFFFFFFFFFFFFFFFFFFFFFFFFFFFFF:FFFFFFFFFFFFFFFF  
FFFFFFFFFFFFFFFFFFFFFFFF:FFFFFFFFFFFFFFFF  
@A00721:190:HGJW7DSXY:4:2239:29396:6402\_2:N:0:TCTGCAAG+GCTGCACT  
ACCACTGAACCTATAGCGACTTTTGTGCAATTTTTCGAAAAGGTCTTGAAGTACGTATTGTCACTGC  
TAATCGTAATTCGCGAGAAGAGATAGTGAATAAGTTTTGGCACTTCT  
+  
FFFFFFFFFFFFFFFFFFFFFFFFFFFFFFFFFFFFFFFFFFFFFFFF:FFFFFFFFFFFFFFFF  
FFFFFFFFFFFFFFFFFFFFFFFF:FFFFFFFFFFFFFFFF  
@A00721:190:HGJW7DSXY:4:2513:5819:36245\_1:N:0:TCTGCAAG+GCTGCACT  
TTGTGAAATTAAGACAGACGTGAAAGTTATGATGAGTGATCGTATTAGAACAGCTGATTCTTATTGCA  
TGAACGTCGCTGAGGTCAAACCTGTGGACGTTCTTTTCATCGACGAATTATTCATGATTCACGCTGGT  
CAG  
+  
FFFFFFFFFFFFFFFFFFFFFFFFFFFFFFFFFFFFFFFFFFFFFFFF:FFFFFFFFFFFFFFFF  
FFFFFFFFFFFFFFFFFFFFFFFF:FFFFFFFFFFFFFFFF  
@A00721:190:HGJW7DSXY:4:2363:14823:36338\_2:N:0:TCTGCAAG+GCTGCACT  
CATCTACTTAAGGCGGCTTATACCATAGGTTACGGTGATTCCAATCAAATCGGATTCATCAATCGTAT

TGATCTCCAAGTCGCAAACACTACTTCAACATCAACGACATCATTCTTGA  
+  
FFFFFFFFFFFFFFFFFFFFFFFFFFFFFFFFFFFFFFFFFFFFFFFFFFFFFFFFFFFFFFFFFFFFFFFF  
FFFFFFFFFFFFFFFF:FFFFFFFFFFFFFFFF:FFFFFFFFFFFFFFFF  
@A00721:190:HGJW7DSXY:4:2657:7283:23218\_1:N:0:TCTGCAAG+GCTGCACT  
TTATCGAAGTCTCAGTTATCGCTGCCCGCCGACGTTTGTGCGCAACTCTCAGAGGTTTACGGCAGAA  
AAATTTCTCCTGCTTGTAATTCGAGAGAGGACACTATGGAAATTAGACCTATCAGATGTCTTGACGAC  
TTC  
+  
FFFFFFF:FFFFFFFFFFFFFFFFFFFFFFFFFFFFFFFFFFFFFFFFFFFFFFFFFFFFFFFFFFFFFFFF  
FFFFFFFFFFFFFFFFFFFFFFFFFFFFFFFFFFFFFFFFFFFFFFFFFFFFFFFFFFFFFFFFFFFFFFFF  
FFF  
@A00721:190:HGJW7DSXY:4:2417:6153:20290\_2:N:0:TCTGCAAG+GCTGCACT  
CAAAGTCCTTGGTAAGAGTAAGGTTAAATGTGAAGATGCTCAGACTATTCATGAAGTTCAAGGTAATA  
CTTACCAGCACGTTGCGCTGGTTAGAATTAACCTCAAGATGACCTG  
+  
FFFFFFFFFFFFFFFFFFFFFFFFFFFFFFFFFFFFFFFFFFFFFFFFFFFFFFFFFFFFFFFFFFFFFFFF  
FFFFFFFFFFFFFFFFFFFFFFFFFFFFFFFFFFFFFFFF:FFFFFFFFFFFFFFFF  
@A00721:190:HGJW7DSXY:4:2577:11017:24330\_2:N:0:TCTGCAAG+GCTGCACT  
ACGTTGAATCTTTACGATACTTTGTTATCAATGTAAAGTTAAACGATGCTACTTGTGAGAGGATCAAT  
CACAGTAAGGAAGTGTACGTTTAGCACGGGAGGTTGCAGATTCAACC  
+  
FFFFFFFFFFFFFFFFFFFFFFFFFFFFFFFFFFFFFFFFFFFFFFFFFFFFFFFFFFFFFFFFFFFFFFFF  
FFFFFFFFFFFFFFFFFFFFFFFFFFFFFFFFFFFFFFFFFFFFFFFFFFFFFFFFFFFFFFFFFFFFFFFF  
@A00721:190:HGJW7DSXY:4:2560:24695:4930\_1:N:0:TCTGCAAG+GCTGCACT  
TATCGAGGACGATGAGTATCTTGAAGTTGTTGACGACAAGCCTCAAGAGGGTAGAGGACCACCTGGAT  
CTTCTACTGTCTCTGCCTTCCAAGATTTCTTAGAAGAGGTTATTCCTGGAACCACCTTAACGTCATC  
GGT  
+  
FFFFFFFFFFFFFFFFFFFFFFFFFFFFFFFFFFFFFFFFFFFFFFFFFFFFFFFFFFFFFFFFFFFFFFFF:  
FFFFFFFFFFFFFFFFFFFFFFFFFFFFFFFF:FFFFFFFFFFFFFFFFFFFFFFFFFFFFFFFFFFFFFFFF  
FFF  
@A00721:190:HGJW7DSXY:4:1529:4101:30765\_2:N:0:TCTGCAAG+GCTGCACT  
TCGAATTAAGATCAAGGCTAATACCTTTATAGGTAAGAAGCCCCTTGAGCCGCGTAGTCAGCGCGTTT  
AGCTGTATCATCAGTCAGAGTATACCCGATAGGTTACCGAGTCTCCAA  
+  
FFFFFFFFFFFFFFFFFFFFFFFFFFFFFFFFFFFFFFFFFFFFFFFFFFFFFFFFFFFFFFFFFFFFFFFF:  
FFFFFFFFF:FFF:FFFFFFFFF:FFFFFFFFF:FFFF:FFFFFFFFF  
@A00721:190:HGJW7DSXY:4:2319:1298:23563\_1:N:0:TCTGCAAG+GCTGCACT  
CAACGGAAGACATATCGCACCCGAAATTTTGGGCAGAATGCTCTTAACGCGGTTCTTGAACGGTGT  
TTTGATCAGTCTAAGTTGGATAAAGTTATAGGAGACTCAGTTAACCTGAGAGCTCCTCAATTGATAGA  
TTG  
+  
FFFFFFFFFFFFFFFFFFFFFFFFFFFFFFFFFFFFFFFFFFFFFFFFFFFFFFFFFFFFFFFFFFFFFFFF  
FFFFFFFFFFFFFFFFFFFFFFFFFFFFFFFFFFFFFFFFFFFFFFFFFFFFFFFFFFFFFFFFFFFFFFFF  
FFF  
@A00721:190:HGJW7DSXY:4:2529:27968:20525\_2:N:0:TCTGCAAG+GCTGCACT  
CTAGTATACTTCGTAAAGTCGACAGCGAAATGGTCAATATTGATAATTGGACCGACTATATGACCTAT  
TTTAAGCTCATGGTGAAAAGGGAAGCTAAGGTTAAACTTGATGCTTCA  
+  
FFFFFFFFFFFFFFFFFFFFFFFFFFFFFFFFFFFFFFFFFFFFFFFFFFFFFFFFFFFFFFFFFFFFFFFF  
FFFFFFFFFFFFFF:FFFFFFFFF:FFFFFFFFF:FFFFFFFFF  
@A00721:190:HGJW7DSXY:4:2434:8829:12712\_2:N:0:TCTGCAAG+GCTGCACT  
CCTATCTTTAAGGTTCTTGTGAGGAGAGTCAAACAGTGTCTTTTACCCAACATTTTTATGTATACAGA

+

@A00721:190:HGJW7DSXY:4:2443:9082:33880\_1:N:0:TCTGCAAG+GCTGCACT

+

@A00721:190:HGJW7DSXY:4:1106:19642:35415\_1:N:0:TCTGCAAG+GCTGCACT

+

@A00721:190:HGJW7DSXY:4:2261:3233:28917\_1:N:0:TCTGCAAG+GCTGCACT

+

@A00721:190:HGJW7DSXY:4:2443:17372:35618 1:N:0:TCTGCAAG+GCTGCACT

+

@A00721:190:HGJW7DSXY:4:2422:23430:16297 2:N:0:TCTGCAAG+GCTGCACT

+

@A00721:190:HGJW7DSXY:4:2343:14922:27868 2:N:0:TCTGCAAG+GCTGCACT

+

@A00721:190:HGJW7DSXY:4:1144:23375:20713\_2:N:0:TCTGCAAG+GCTGCACT

+

[illegible]

@A00721:190:HGJW7DSXY:4:1610:27154:26788\_1:N:0:TCTGCAAG+GCTGCACT  
TATTTTAAGTTTTGTCTTCCTTGTGTTGTCTTATTCTATTAATCACTCATTTTAGTGAGATTATTA  
ACGCACTAAACGTCTTCGACAACAGCAGGGGTTTTCGAATAGTGATAGCCACCCGCCTTACAGAGGG  
GCA

+

FFFFFF,FFF,FFFFFFFFFFFFFFFFFFFFFFFFFFFFFFFFFFFFFFFFFFFFFFFFFFFFFFFFFFFFFFFF  
FFFF:FFFFFFFFFFFFFFFFFFFFFFFFFFFFFFFFFFFFFFFFFFFFFFFFFFFFFFFFFFFFFFFFFFFFF  
FFF

@A00721:190:HGJW7DSXY:4:2641:18005:16329\_1:N:0:TCTGCAAG+GCTGCACT  
TGGTACCACCTTTTCTACTGTCTGTCTCGCCTCTTCGAATGAAGTTTTAATGCTTAACAACAATGATA  
GTGAATTTATACCTACAATCATTGGTTTTTCTAATAATGATGACACTATTGTTTATGGATATGATGCT  
ATT

+

FFFFFFFFFFFFFFFFFFFFFFFFFFFFFFFFFFFFFFFFFFFFFFFFFFFFFFFFFFFFFFFFFFFFFFFFFFFF  
FFFFFF,FFFFFFFFFFFFFFFFFFFFFFFFFFFFFFFFFFFFFFFFFFFFFFFFFFFFFFFFFFFFFFFFFFFF  
FFF

@A00721:190:HGJW7DSXY:4:2327:28375:8453\_1:N:0:TCTGCAAG+GCTGCACT  
GGATTCTCAGTTTACAAGGACCTTAAGCGATGGATCGGGGTTAATTCTAAAACATTACCCGAAAGACG  
TGCTAAATTAAAACCATTTGTACGATGTCGTCTGTCTCGGCGATCACTTTTCACTAAGAATTGGTCCTA  
CTT

+

:FFFFFFFFFFFFFFFFFFFFFFFFFFFFFFFFFFFFFFFFFFFFFFFFFFFFFFFFFFFFFFFFFFFFFFFFFFFF  
:FFFFFFFFFFFFFFFFFFFFFFFFFFFFFFFFFFFFFFFFFFFFFFFFFFFFFFFFFFFFFFFFFFFFFFFFFFFF  
FFF

@A00721:190:HGJW7DSXY:4:1339:5520:36354\_2:N:0:TCTGCAAG+GCTGCACT  
ATCTTCATGAGATCGTTTCTTTCTTTATCTCTTTGGTTGTTAGGGATTTTGAGAGAGTGAAAGGCTTC  
AATTGTAGTGGTTTGGTCGTTTCAGTACCCAGTCAGTATACCTCTACG

+

FFF:F:FFFFFFFFFFFFFFFF,FF:FFFFFF,:FFFF:FF:FFFFFFFFFFFFFF:FFFFFFFFFFFFF:,FF  
FFFFFFFFFFFFFFFFFFFFFFFFFFFFFFFFFFFFFFFFFFFFFFFFFFFFFFFFFFFFFFFFFFFFFFFFFFFF

@A00721:190:HGJW7DSXY:4:1569:3558:3803\_2:N:0:TCTGCAAG+GCTGCACT  
GAAAACTACAGAGGAACGTACCGGATTACCTGTCTTTCATATTATGAATGAACCTTCGGCCGCTCTCT  
TTGCTTCGATGTTGGATGTCAAGAAGGGTTCAGAATGGGATTCCTACG

+

FFFFFFFFFFFFFFFF,FFFFFFFFFFFFFFFFFFFFFFFFFFFFFFFFFFFFFFFFFFFFFFFFFFFFFFFFFFFF  
FFFFFFFFFFFFFFFFFFFFFFFFFFFFFFFFFFFFFFFFFFFFFFFFFFFFFFFFFFFFFFFFFFFFFFFFFFFF  
FFFF:FFFFFFFF

@A00721:190:HGJW7DSXY:4:2529:21395:22044\_1:N:0:TCTGCAAG+GCTGCACT  
CTTTGGTGGTGGTACTTTGATACTTCTATCGTCTTACGTTACGGTAATTACTATAGTGTTATTTATT  
CTGGTGGTGATGATAATCTTGAGGTCGTGACGTTGATGAAGCTATAAGAGCGTTCTTATTACGGCGC  
ACT

+

FFF:FFFFFFFF,FFFFFFFFFFFFFFFFFFFFFFFFFFFFFFFFFFFFFFFFFFFFFFFFFFFFFFFFFFFFF  
FFFFFFFFFFFF:FFFFFFFFFFFFFFFFFFFFFFFFFFFFFFFFFFFFFFFFFFFFFFFFFFFFFFFFFFFFF  
FFF

@A00721:190:HGJW7DSXY:4:1536:8513:2394\_1:N:0:TCTGCAAG+GCTGCACT  
CTTTCAGTTTCACAACTGAAGGAGGAGGTTTCTGTTACTGGAAAACCTCGTCAATACTTTTCAATAA  
TATACGTCTTGAACCTCACTTATGACGATCTAGTGAAATTAACGCGTCCTTTTCTGGAACGTAGTTTTA  
CTA

+

FFFFFFFFFFFFFFFFFFFFFFFFFFFFFFFFFFFFFFFFFFFFFFFFFFFFFFFFFFFFFFFFFFFFFFFFFFFF  
FFFFFFFFFFFFFFFFFFFFFFFFFFFFFFFFFFFFFFFFFFFFFFFFFFFFFFFFFFFFFFFFFFFFFFFFFFFF  
FFF

@A00721:190:HGJW7DSXY:4:2511:6569:19476\_1:N:0:TCTGCAAG+GCTGCACT  
CGTGTGCTCTCCGATCTAACTTACCCTGATTCCGGCCGGTGGTAGCTCATTTCTACCAGGGGCTATT





FFF:FFFF,FFFFFFFFFF:FF:FF,FFF:FFFFFFFF:FF:FFFFFFFFFFFFFFFFFFFFFFFFFFFF  
FFF

@A00721:190:HGJW7DSXY:4:2152:25319:22075\_1:N:0:TCTGCAAG+GCTGCACT  
TTGGCCTAGTGGATGTTATTAGTGACATCTGGTCAATTTCTGATTTAGGTGGTCTTTATTATATTATT  
GATTTTTATTATATTGATACGTTAACAGAAGATGATGTTAGAGTAGAATTCCTGAAGATTCATTCCGT  
AAC

+

FF:FFFF:,F,FF,,FFFF,FFFF:,FFFF:FFFF:FFF::F,,,FF,,,,FFFF:FF,F,F::FFF:  
,:FFFF,F,,F,:FF:FFF,FFFFFFFFFF,FFFFFF,F:,,:FF,FFFF:FFFF,,,,FF,F,,,F,  
:::

@A00721:190:HGJW7DSXY:4:2517:10004:25708\_2:N:0:TCTGCAAG+GCTGCACT  
ATTATGTCTGTGTTGAAAGACTTTCTACCGATAAGGGTCACTAGTCTTACACAATTAAGAAATAATCC  
TACATTGACTGATTATCTAAAGATTGAAGGAAAATTTTATCCTCGTTT

+

FFFFFFFFFFFFFFFFFFFFFFFFFFFFFFFFFFFFFFFFFFFFFFFFFFFFFFFFFFFFFFFFFFFF  
F:FF:FFFFFFFFFFFFFFFFFFFF:F:FFFF::FFFFFFFF:FF:FFF

@A00721:190:HGJW7DSXY:4:1255:1814:31626\_1:N:0:TCTGCAAG+GCTGCACT  
TTTCTACGATACAAATGATAACTTCTAATTTACGTTTGCTACTCAGAGCTGGTCTCTCAGCAAAGG  
GATGCATGGTGTATCTCCTCAGGAGTCCCGGCATTTGATAATAATGACGAGACTTTCGTCATAATCG  
CTG

+

FFFFFFFFFFFFFFFFFFFFFFFFFFFFFFFFFFFFFFFFFFFFFFFFFFFFFFFFFFFFFFFFFFFF  
FFFFFFFFFFFFFFFFFFFFFFFFFFFFFFFFFFFFFFFFFFFFFFFFFFFFFFFFFFFFFFFFFFFF  
FFF

@A00721:190:HGJW7DSXY:4:2325:19180:22091\_1:N:0:TCTGCAAG+GCTGCACT  
GTACCAGCGCATCTCGTGTCGAGCCTCGACCCGATTATATGGTATTAAGGTGAGGAGACC  
ATTTTCTTGCTGAAATTTATAGAAGATTATTTTGACAGAATCAATAAGAATCATCGATTCTCGATTCTG  
TAG

+

FFFFFFFFF,:FF,F:FF:FFFFFFFF:F:FF,F:FFFFFFFF:FFFFFF:F,FFFF,FFFFFFFFFFFFF  
FFFFF,FF:FFFF,FFFFFF:FFFFFFFF:FFF:F:FFF:FFFFFFFF:FFFFFF,FFFF:FFFFF  
FFF

@A00721:190:HGJW7DSXY:4:2528:16947:33536\_2:N:0:TCTGCAAG+GCTGCACT  
GAGATCACACATTTTGAGAACTAACTATGTTATGTTCTCTGATCATTTTGACAATCTCTTCTTATAAT  
AAATAAATAAATAATATTACTAATGGCAAATAGTGGAAGGCTCCAGT

+

FFFFFFF:FFF:FFFFFFFFFFFFFFFFFFFFFFFFFFFF:FFFFFFFFFFFFFFFFFFFF:FFFFFFFFF  
FFFFFFFFFFFFFFFFFFFFFFFFFFFF:FFFFFF::FFFFFFFFFFFFFFFFFFFF

@A00721:190:HGJW7DSXY:4:2676:15808:11522\_2:N:0:TCTGCAAG+GCTGCACT  
TACGATGACGTGAGAATAGGTGAAGGGATAGTTTTTACCTCGACCAACATTAAGGCGGCGGCGACTAA  
TCTTAAAGCTTCACCCAAAATGAAGGACACTTCGAAACTGAATAATGA

+

FFFFFFFFFFFFFFFFFFFFF,FFFFFFFFFFFFFFFFFFFFFFFFFFFFFFFFFFFFFFFFFFFFF  
FFFFFFFFFFFFFFFFFFFFFFFFFFFFFFFFFFFFFFFFFFFFFFFFFFFFFFFFFFFF

@A00721:190:HGJW7DSXY:4:2212:13693:13933\_1:N:0:TCTGCAAG+GCTGCACT  
CCGTTGAGAAAATTTCTTAGAGGATATTCGCCATTGTGGTACGAATTGGTCCAACATTTACCACCAA  
TTCTTTTGATACAACTCTAGCCTTCAAGTGGGGTATGCCTGCGGAATACGCTTGCTATTACAGATT  
GGT

+

FFFFFFFFFFFFFFFFFFFFFFFFFFFFFFFFFFFFFFFFFFFFFFFFFFFFFFFFFFFFFFFFFFFF:F  
FFFFFFFFFFFFFFFFFFFFFFFFFFFFFFFFFFFFFFFFFFFFFFFFFFFFFFFFFFFFFFFFFFFF  
FFF

@A00721:190:HGJW7DSXY:4:2665:9742:6652\_2:N:0:TCTGCAAG+GCTGCACT  
TGATGCTATGTCAGAAGAAGCTATTCAAGCTTGTCGTTTAAAGACTGCAGAGGCTGTCAAACAAGCCC

$+$ 

+

+

+

+

+

+

 $+$  $+$ 

.....



+  
FFFFF:FFFFFFFFFFFFFFFFFFFFFFFFFFFFFFFFFFFFFFFFFFFFFFFFFFFFFFFFFFFFFFFF  
FFFFFFFFFFFFFFFFFFFFFFFFFFFFFFFFFFFFFFFFFFFFFFFFFFFFFFFFFFFFFFFF:FFFFFFFFFFFFFFFF  
FFF  
@A00721:190:HGJW7DSXY:4:2344:17553:28761\_2:N:0:TCTGCAAG+GCTGCACT  
GCCAATCAATAGTTCTTCTGACCAGAATGAAAAGGGTTTACCAGGGTAGTCTCTAAGTCTACCAGGA  
AGAGGGGAAATGTCCCCAAAAGTGAAGAATAAAGGGAAAGGTCCAT  
+  
FFFFFFFFFFFFFFFFFFFFFFFFFFFFFFFFFFFFFFFFFFFFFFFFFFFFFFFFFFFFFFFFFFFFFFFF  
FFFFFFFFFFFFFFFFFFFFFFFFFFFFFFFFFFFFFFFFFFFFFFFFFFFFFFFFFFFFFFFF  
@A00721:190:HGJW7DSXY:4:1570:6795:13917\_2:N:0:TCTGCAAG+GCTGCACT  
AATTCTGAAGGAAGATCTCCACCATCTGGGGTTGGGAATAAGAAATCTGCACGGGCCAAAGAGGCCG  
CTGCTACGAAGTCGCTGAAGGCGGCTTGGGTCAATTAAGGGTAGCTGTA  
+  
FFFFFFFFFFFFFFFFFFFFFFFFFFFF:FF:FFFFFFFFFF,FFFFFFFFFFFFFFFFFFFFFFFFFFFF  
FFFFFFFFFFFFFFFFFFFFFFFFFFFFFFFF,FFFFFF,FFFFFFF:FFFFFF  
@A00721:190:HGJW7DSXY:4:1623:31051:34006\_1:N:0:TCTGCAAG+GCTGCACT  
CCGACCCCATCTTTGAGACCAAGACTCTCTACAGTAGGTTCTGTCCTACTATGAGCAAATCTGTTGAA  
TTCGTCACAGGACGAAGGTGAGAGGACTTTTGGCTACTGGCGACAACTGAGAGCAGTCGCTGGGG  
AAA  
+  
FFFFFFFFFFFF:FFFFFFFFFFFFFFFFFFFF:FFFFFFFFFFFFFFFFFFFFFFFFFFFFFFFFFFFF  
FFFFFFFFFFFFFFFFFFFFFFFFFFFFFFFFFFFFFFFFFFFFFFFFFFFFFFFFFFFFFFFFFFFF  
FFF  
@A00721:190:HGJW7DSXY:4:1657:25889:33489\_1:N:0:TCTGCAAG+GCTGCACT  
TCTTGACAGAGTACTGGAGTTCAGACGTGTGCTCTTCCGATCTTTTATCCGCGCTTAAGTATGGGGC  
GAAGATCCCCTATGGAGTCTTGAAGGACTTAGGTTGGCATATTTATGCCGACGATAATAAGCATGTCA  
CCC  
+  
FFFFFFFFFFFFFFFFFFFFFFFFFFFFFFFFFFFFFFFFFFFFFFFFFFFF:FFFFFFFFF:FFFFFFFF  
FFFFFFFFFFFFFFFFFFFFFFFFFFFFFFFFFFFFFFFFFFFFFFFFFFFFFFFFFFFFFFFFFFFF  
FFF  
@A00721:190:HGJW7DSXY:4:2174:32416:6151\_2:N:0:TCTGCAAG+GCTGCACT  
TTACAAGAGAGAGTGTGAGAGAGTCGCTCTCACTATTTTTGCCAGAATGCGGGCTTTCTGACTGATG  
AGGTTAAACTCTTGCTCCTTCTGTGGGTGAGGGTTTTGTATATTC  
+  
FFFFFFFFFFFFFFFFFFFFFFFFFFFFFFFFFFFFFFFFFFFF,FFFFFFFFFFFFFFFFFFFFFFFFFFFF  
FFFFFFFFFFFFFFFFFFFFFFFFFFFFFFFFFFFFFFFFFFFF:FFFFFFFFFFFF  
@A00721:190:HGJW7DSXY:4:1577:28890:14638\_1:N:0:TCTGCAAG+GCTGCACT  
AACCTCTCTTTAGAGAGCATTAGAAGGAAGTTGGGCAAATTCACATATGGTAGACGTTGTCACACT  
TTTCTTGAAAATTTTCTTCTCCGTCATTGGGGATTTGATGTGAGAAGGTGGAAGGTGTCAAGG  
GT  
+  
FF:FF,:FFFFFFFFFFFFFFFFFFFF:FF:FFFFFFFF:FFFFFFFFFFFF:FFFFFFFF:FFFFFFFF:  
FFFFFFFFFFFFFFFFFFFFFFFFFFFFFFFFFFFFFFFF:FFFF:FFFFF:FFFFFFFFFFFFFFFF:FFFF  
FF  
@A00721:190:HGJW7DSXY:4:2251:4797:18662\_2:N:0:TCTGCAAG+GCTGCACT  
TTTCAGGACCTAATCACATCATGATTGATAGTTACGGCTCGTATCGAGTTGGAGGGAGGAAGTTCTCC  
GAAATTAAGACGGGGGGATTAAGAGTCCAGCTGTAAGTGTCAATTCA  
+  
FFFFFFFFFFFFFFFFFFFFFFFFFFFF:FFFFFF:FFFFFFFFFFFF:FFFFFFFFFFFFFFFFFFFF  
FFFFFFFFF:FFFFFFFFFFFF:FFFFFFFFFFFFFFFFFFFFFFFF:FFFFFFF  
@A00721:190:HGJW7DSXY:4:2342:26802:27555\_2:N:0:TCTGCAAG+GCTGCACT  
AAGGAAACTTCGTCAGAAGATGAGGAAGTCTAAGAGGAGGAGTTTGAGGAAGGCTCTAGAGAAGATCT

CACCACCTGGAGAAGGCAAGTGGAGAGTCCAGAAGTTGATGAAGAAGG  
+  
FFFFFFFFFFFFFFFFFFFFFFFFFFFFFFFFFFFFFFFFFFFFFFFFFFFFFFFFFFFFFFFF  
FFFFFFFFFFFFFFFFFFFFFFFFFFFFFFFFFFFFFFFFFFFFFFFFFFFFFFFF:F  
@A00721:190:HGJW7DSXY:4:1623:18539:23015\_1:N:0:TCTGCAAG+GCTGCACT  
CTTCCTAAGGTGGATGAGGGAGGTTGTTTCTTTGGAGTTTTAGATAATCTTTTGAGAAGGGGTCATAG  
AGCCAGCAAGAGAAGCTTATATGCTGGTTAAGTGATGATTATCACTCCTTGAGAAGACAAGCCACAT  
TAA  
+  
FFFFFFFFFFF:F:FFFFFFFFF:F::FF,FFFF:FFFFFFFFFFFFFFFFFFFFFFFFFFFFFFFF  
FFFFFFFFFFFFFFFFF:FFFFFFFFFFFFFFFFFFFFFFFFFFFFFFFFF:FFFFFFFFFFFFFFFF  
FFF  
@A00721:190:HGJW7DSXY:4:2446:1561:32659\_2:N:0:TCTGCAAG+GCTGCACT  
AGGTCCTTTTGAGTATCGACAGATCTTTCGATCTTGAGGACGTACATTTAACGTGGCAGAATTCGGTA  
ACTTACCATATTGTTCTTCCGGAAGTTGTGGGATTTAACTTTGACT  
+  
FFF:FFFFFFFFFFFFFFFFFFFFFFFFF:FFFFFFFFFFFFFFFFFFFFFFFFFFFFFFFF  
FFFFFFFFFFFFFFFFF:FFF,FFFF:FFFFFFFFFFFFFFFFF,FFFF  
@A00721:190:HGJW7DSXY:4:1504:31593:25332\_2:N:0:TCTGCAAG+GCTGCACT  
TGGACTACTCGACTTTTGATCTGGAGTTGTCTAGGGTCATGGCAGATACTACCGATAAGGTGAAAAAT  
ATGCAGGTCAAAGATTCTGTAGCTCTGAGGGCGGTTGAGGGAGATCGG  
+  
FFFFFFFFFFFFFFFFFFFFFFFFFFFFFFFFFFFFFFFFFFFFFFFFF:FFFFFFFFFFFFFFFF  
FF,FFFFFFFFF,FF:FFFF:FFFFFFFFFFFFFFFFF:F:FF  
@A00721:190:HGJW7DSXY:4:1514:10393:36432\_1:N:0:TCTGCAAG+GCTGCACT  
CTAAGAGTCTTTATGATTCAAAACCTATCGTTGTCTGACCTTACAAGGTTGAGGAGACTTTACAGCGG  
CTTATTGTCGCGCAGTTTCCAGAATTGCGGTTGAAGTTCACCCATTCTATCTTGAATGCTCACGCCGT  
CGC  
+  
FFFFFFFFFFFFFFFFF:FFFFFFFFFFFFFFFFF:FFFF::FFFF:FFFFFFFFFFFFFFFF  
FFFFFFFFFFFFFFFFF,FF:FFFFFFFFFFFFFFFFF:FFFFF,FFFF:FFFF:FFFFF:FF:FFF  
FFF  
@A00721:190:HGJW7DSXY:4:1446:2401:26819\_2:N:0:TCTGCAAG+GCTGCACT  
GATTTAGATATTATTGATATTGGAGGCGATATTCGTTTTCATATCCAAAACCTTGAATGGAGTACA  
TATTTGCAACCCTATTCTTGATGTGAAAGATGCATCGAGGTATACGTC  
+  
FFFFFFFFFFFFFFFFFFFFFFFFFFFFFFFFFFFFFFFFFFFFFFFFFFFFFFFFFFFFFFFF  
FFFFFFFFFFFFFFFFFFFFFFFFFFFFFFFFFFFFFFFFFFFFFFFFF  
@A00721:190:HGJW7DSXY:4:2616:19289:23594\_1:N:0:TCTGCAAG+GCTGCACT  
GATTGGGAACGTACCTACTCACGAGACGTACGAAAGCTATCGGAGGGAAGCAAAATGTTTCGTTCTG  
TTACAAGAACGCTTTGATTGTGACCATAAAGCCTCAGTTGCGATAGCTGTAGAGGTATACGATATCT  
CTC  
+  
FFFFFFFFFFF:FFFF,FFF:FFFFFFFFFFFFFFFFFFFFFFFFFFFFFFFFFFFFFFFF  
FFFFFFFFFFF:FFFFFFFFFFFFFFFFFFFFFFFFFFFFFFFFFFFFFFFFFFFFFFFFF:  
FFF  
@A00721:190:HGJW7DSXY:4:2348:19334:15969\_2:N:0:TCTGCAAG+GCTGCACT  
TATGTCATGTCGTCTTAGTTTGTCCCGGCGAATTATTGGACACGATGAAAAATGACATACCCGTTCT  
GACCTTGGTATCGTTATCCGTCATGGAGATGATGGCGCATCACTTGAT  
+  
FFFFFFF,FFFFFFFFFFFFFFFFFFFFFFFFF:FFFFFFFFFFFFFFFFFFFFFFFFF  
FFFF:FFFFFFFFFFFFFFFFFFFFFFFFFFFFFFFFFFFFFFFFF:  
@A00721:190:HGJW7DSXY:4:1166:20555:19930\_2:N:0:TCTGCAAG+GCTGCACT  
GATTTTATCTTTCTTCAAACACCCTGTTTCTTAAGGGCGGACAATTGTTCCATTGTGAACCTTGG

GGACTAGATTGAGCATTAATGAGTTCCGAATAACTCGTAATAAATCTT  
+  
FFFFFFFFFFFFFFFFFFFFFFFFFFFFFFFFFFFFFFFFFFFFFFFFFFFFFFFFFFFFFFFF  
FFFFFFFFFFFFFFFFFFFFFFFFFFFFFFFFFFFFFFFFFFFFFFFFFFFFFFFF  
@A00721:190:HGJW7DSXY:4:1626:3323:6308\_2:N:0:TCTGCAAG+GCTGCACT  
AAGAGCCACTGCCAATCTCATCGCTATACGCATACCTGATTGGAAGAAGCGAGGTTCTTCCTCAATA  
AAAATTTTCTCAAGAGATTATGGTTGATAAAGTTTTCTTCATAAGGG  
+  
FFFFFFF:FFFFFFFFFFFFFFFFFFFFFFFFFFFFFFFFFFFFFFFFFFFFFFFFFFFFFFFF  
FFFFFFFFFFFFFFFFFFFFFFFFFFFFFFFFFFFFFFFFFFFFFFFFFFFFFFFF  
@A00721:190:HGJW7DSXY:4:1367:1877:11036\_2:N:0:TCTGCAAG+GCTGCACT  
GTCATGGGGATCACTTCTTCGGTCAATGACAAAACCTTCGAATATGTTACGACATGGCTTCGTAACAA  
CAGTGCGAGTATTGTCATCTCGGGGAAAGTGATTCACCAAGATGTTCA  
+  
FFFFFFFFFFFFFFFFFFFFFFFFFFFFFFFFFFFFFFFFFFFFFFFFFFFFFFFFFFFFFFFF,FFFFFFFFFFFFFFFF:  
FFFFFFFFFFFFFFFFFFFFFFFFFFFFFFFFFFFFFFFFFFFFFFFFFFFFFFFF:FF  
@A00721:190:HGJW7DSXY:4:2469:17119:28886\_1:N:0:TCTGCAAG+GCTGCACT  
AGATACCTAGAGAAGGTCGCAGCGATCTTACTCGTTATCGGAGCTAAGAAGAAGACTTTGGGTACACG  
TTATGCTCGCAAACCTTAACGTTAGTACCGGAGGTGATCTCTGCTTCTGCGTTACTGAGAGAAAAGA  
TTC  
+  
FFF,FFFFFFFFFFFFFFFFFFFFFFFFFFFFFFFFFFFFFFFFFFFFFFFFFFFFFFFFFFFFFFFF  
FFFFFFFF:FFFFFFFFFFFFFFFFFFFFFFFFFFFFFFFFFFFFFFFFFFFFFFFFFFFFFFFF  
FFF  
@A00721:190:HGJW7DSXY:4:2425:7581:30530\_1:N:0:TCTGCAAG+GCTGCACT  
CTTTATGGACAAGATGCAAGTTCTTGGGAAATACTTGTTTCCCTTTTGGTTTAGTGGTGATCTTG  
ACGTCGATTCTTTGTATAGGGAGTGTGAGAAGACAACGAATCTTGAACTACGGTCCTTATCAAAGAA  
AAT  
+  
FFFF,FFFFF,:F:FFFFFFFFFFFFFFFFFFFFFFFFFFFFFFFFFFFFFFFFFFFFFFFFFFFFFFFF  
FFFFFFFFFFFFFFFFFFFFFFFFFFFFFFFFFFFFFFFFFFFFFFFFFFFFFFFF:FFFFFFFFFFFFFFFF  
FFF  
@A00721:190:HGJW7DSXY:4:2176:13838:34444\_2:N:0:TCTGCAAG+GCTGCACT  
AAATCTTTTGAGATTGAGAAGATTGAAGAACACGTCAAGAAGTCGCTCGGCGTTGTTCTTGAAAACCA  
AGTTAAGAAGGAGGCTGATCATGGAGTCTTGTACCTTCTGTCAAAC  
+  
FFFFFFFFFFFFFFFFFFFFFFFFFFFFFFFFFFFFFFFFFFFFFFFFFFFFFFFFFFFFFFFF:FFFFFFFFFFFFF  
FFFFFFFFFFFFFFFFFFFFFFFFFFFFFFFFFFFFFFFFFFFFFFFFFFFFFFFF:FFFFFFFFFFFFFFFF  
@A00721:190:HGJW7DSXY:4:1208:2220:12759\_2:N:0:TCTGCAAG+GCTGCACT  
CCCGGATGTGGATTGAAGGCTGGCTCTAAGGAGACTCCTTCTTTTGAATGTTGTAAAGAATTGGGT  
TGAGAAGTGTGCTTTACAAGGAGTTAGACTCTTCTTCAAGTTTTTAGA  
+  
FFFFFF:FFFFFFFFFFFFFFFFFFFFFFFFFFFFFFFFFFFFFFFFFFFFFFFFFFFFFFFF:FFFFF:FFFFFFFFFFFFFFFF  
FFFFFFFFFFFFFFFFFFFFFFFFFFFFFFFFFFFFFFFFFFFFFFFFFFFFFFFF:FFFFFFFFFFFFFFFF  
@A00721:190:HGJW7DSXY:4:1623:28113:13103\_2:N:0:TCTGCAAG+GCTGCACT  
TTTTCTCTACCCATAACTTCTTTTCAAAAATGCGGATGGGTCTACTGATGTTTTCTACAGAGTGCA  
GTCGTTTCAACACTTATCACCCTTTTGAAGGAAAATAATTGGTGAT  
+  
FFFFFFFFFFFFFFFFFFFFFFFFFFFFFFFFFFFFFFFFFFFFFFFFFFFFFFFFFFFFFFFF  
FFFFFFFFFFFFF:F:, :FF::FFF,FFFFFFFF:F:FFF:FF,FFFF::F  
@A00721:190:HGJW7DSXY:4:1326:16821:10989\_1:N:0:TCTGCAAG+GCTGCACT  
GGGGTTCCATAAGATATTATCTGACATTGTGGTTCAATGATCAGGATTCTTCTTTTGGTCCTTACGTC  
TTAAGTAATTTGGATGTTGTGCGAAAACATCAGGTTCTTGTACGATTCTTAAAAGAAGTTTATTTAA  
ACT

+  
FFFFFFFFFFFFFFFFFFFFFFFFFFFFFFFFFFFFFFFFFFFFFFFFFFFFFFFFFFFFFFFF  
FFFFFFFFFFFFFFFFFFFFFFFFFFFFFFFFFFFFFFFFFFFFFFFFFFFFFFFFFFFFFFFF  
FFF  
@A00721:190:HGJW7DSXY:4:2602:31629:13213\_1:N:0:TCTGCAAG+GCTGCACT  
GGTAGCTAATGTTCTTGCAATAGCCACAGACTTTCTGGGAAAAGAGACCTCTGTTGTAGAGGAGTTGA  
GAGAATTACTCAGATTCAATCTGGCATCACTGAACGTCTACAACGAGTTAGGGAGTGGCTAGGTTTTA  
AAA  
+  
FFF,F,FFFFFFFFFFFFFFFFFFFFFFFFFFFFFFFFFFFFFFFFFFFFFFFFFFFFFFFF  
FFFFFFFFFFFFFFFFFFFFFFFFFFFFFFFFFFFFFFFFFFFFFFFFFFFFFFFFFFFFFFFF  
FFF  
@A00721:190:HGJW7DSXY:4:1649:10393:6903\_1:N:0:TCTGCAAG+GCTGCACT  
CATACGAGATCTTGCAAGTACTGGAGTTCAGACGTGTGCTCTTCCGATCTTGAAGATTTCCACACT  
GTTTCGAGAATCTTCTGATGCTGAATTTGAGGAAAATTTTTCGGAAGTTTTTGGTATAAATCCTGATGG  
CTC  
+  
FF:,F,,FFFFFFFFFFFFFFFFFFFFFFFFFFFFFFFFFFFFFFFFFFFFFFFFFFFFFFFF  
FFFFFFFFFFFFFFFFFFFFFFFFFFFFFFFFFFFFFFFFFFFFFFFFFFFFFFFFFFFFFFFF  
FFF  
@A00721:190:HGJW7DSXY:4:1411:30463:10848\_2:N:0:TCTGCAAG+GCTGCACT  
TTCTTTTATCATTGCAACAGGACTTTGAGAAGACTGTTGAAATGGACAAAATCTGGGATCATAGGTAT  
GTGTCACGCTACACTCGAAATATGGGCCCTCATAAGGAAGTATAGTTG  
+  
FFFFFFFFFFFFFFFFFFFFFFFFFFFFFFFFFFFFFFFFFFFFFFFFFFFFFFFFFFFFFFFF  
FFFFFFFF:FFF::FF:FFFFFFFFFFFF:FFF:FF,FFFFFFFFFFFFFFFF  
@A00721:190:HGJW7DSXY:4:1617:6451:11130\_1:N:0:TCTGCAAG+GCTGCACT  
TTAGATAAATCTTTCCGGGCTCAATGACCTTTGCTATGTACGTGGATCTAATGCTTGGTGATCTGAA  
TCTGACCATCGCAAAGAAGACTTTATTAGTTCATGAAGTTCTTACACTTCTCGCGACTAATGTCAGCT  
TCA  
+  
FFFFFFFFFFFFFFFFFFFFFFFFFFFFFFFFFFFFFFFFFFFFFFFFFFFFFFFFFFFFFFFF  
FFFFFFFFFFFFFFFFFFFFFFFFFFFFFFFFFFFFFFFFFFFFFFFFFFFFFFFFFFFFFFFF  
FFF  
@A00721:190:HGJW7DSXY:4:2126:30653:22514\_1:N:0:TCTGCAAG+GCTGCACT  
CCAAATTTAGCACTTTTGAATATGACAGAAGCTCGCCATATCAGATTAGCGACATGCCAGTTAGAGT  
TCTTCTAACCAGGACTGATGGTGAGATTCTTTTACCTTTTGGAGGTCCAGGAACCTTTACTCCTAGTG  
TCT  
+  
FFFFFFFFF,FFFF:FFFFFFFFFFFFFFFFFFFFFFFFFFFFFFFFFFFFFFFFFFFFFFFF,FFF::FFFFFFFFF  
FFFFFFFFFFFFFFFFFFFFFFFFFFFFFFFFFFFFFFFFFFFFFFFFFFFFFFFFFFFFFFFF  
FFF  
@A00721:190:HGJW7DSXY:4:1578:30138:26537\_1:N:0:TCTGCAAG+GCTGCACT  
ACGTTTCCGTCGGAGGATGACAGGTGGGAGACCGCTCAATAACACTCTATTGAATCCCTTTTCCACGA  
TGAAAGCTCTTTATGAGGTGCTCCATGCAAATTTACAGTTCCTCTTTGGTGATATCGCCTCTGTCCTT  
TCT  
+  
:FFFFFFFFFFFFFFFFFFFFFFFFFFFFFFFFFFFFFFFFFFFFFFFFFFFFFFFFFFFFFFFF  
FFFFFFFFFFFFFFFFFFFFFFFFFFFFFFFFFFFFFFFFFFFFFFFFFFFFFFFFFFFFFFFF  
FFF  
@A00721:190:HGJW7DSXY:4:1448:32334:8829\_2:N:0:TCTGCAAG+GCTGCACT  
AATGATACTGACGAAGGTTCTATTACCACCTTGTGATTGATACAAACATTCTAGGTGATGCTTTCTT  
AGAGGCTCGTCTAGCCGCTGAGATTCGTCTTACCTATTTACAATCTGT  
+

FFFFFFFFF:FFFFFFFFF:FFFFFFFFFFFFFFFF:FFFFFFFFFFFFFFFFFFFFFFFFF  
FFFFFFFFFFFFFFFFFFFFFFFFFFFFFFFFFFFFFFFFFFFFFFFFFFFFFFFFF  
@A00721:190:HGJW7DSXY:4:1677:13232:5368\_2:N:0:TCTGCAAG+GCTGCACT  
TCTCCTAGTACTTAAGGGTTTATGTTTCGGTTTCAGCTGGATGGATCTTTTGATGGTATGTTTCACAT  
TGCGTGATCACTTCCCGTGGACTTGGAAGAGATTAAACATAAAATCC  
+  
FFFFFFFFFFFFFFFFFFFFFFFFFFFFFFFFFFFFFFFFFFFFFFFFFFFFFFFFF  
FFFFFFFFFFFFFFFFFFFFFFFFFFFFFFFFFFFFFFFFFFFFFFFFFFFFFFFFF  
@A00721:190:HGJW7DSXY:4:1533:27923:3161\_2:N:0:TCTGCAAG+GCTGCACT  
GCTAAAGCCTGTCCAGTTGTTCGATGATGTTTCGGGCTGTGGGGATTAACCTCCCTCGTGAAACTTACGA  
CGATGTTCTCGCTCGCATTTACAAGGATTACTAAGTCTGAGATCTGC  
+  
FFFFF:FFFFFFFFF:FFFFFFFFFFFFFFFF,FFFFFFFFFFFFFFFFFFFFFFFFF  
FFFFFFFFFFFFFFFFFFFFFFFF:FFFFFFFFFFFFFFFFFFFFFFFFF  
@A00721:190:HGJW7DSXY:4:2644:11234:22733\_2:N:0:TCTGCAAG+GCTGCACT  
AAGTTCATGAGGATGTCTTGGTCGAAAAATATCGCCGGGAACCTCTAATAGAGGATCCTGATGACATT  
ATTTCAACGGATACCGATCTCAGTTCTACCACAGAAACCGTCTCAGGA  
+  
:FFFFFFFFFFFFFFFFFFFFFFFFFFFFFFFFF,:FFF,FF:FFFFFFFFFFFFFFFFF  
FFFFFFFFFFFFFFFFFFFFFFFFFFFFFFFFFFFFFFFFFFFFFFFFFFFFFFFFF  
@A00721:190:HGJW7DSXY:4:2324:4788:36213\_2:N:0:TCTGCAAG+GCTGCACT  
GATTCGGAATTAGAGAAAGACGACCTTCTTGTGGGGACTGAGACCTCTGAATTTTCAGGGTGCCCTGA  
TGAGGACGTTGAAAGGGATAATTTCAACTCTGAGACAGATCGGAAGAG  
+  
FFFFFFFFFFFFFFFFFFFFFFFFF:FFFFFFFFFFFFFFFFFFFFFFFFFFFFFFFFF  
FFFFFFFFFFFFFFFF:FFFFFFFFFFFFFFFFF:FFFFFFFFFFFFFFFFF  
@A00721:190:HGJW7DSXY:4:1463:10095:3317\_1:N:0:TCTGCAAG+GCTGCACT  
GTAACAAGAAGAATAAAGGTAGGAAGGGGAGAAAACAGAACAAAGCGAGCGGTTGAAGAGAAAAGTAT  
ATGGTTGCGGCTGATCGTACCCCAATTCTGCTAGAAAGATCACTCTCGGCGATACCACTGATCTTCC  
AGA  
+  
FFFFFFFFFFFFFFFFFFFFFFFFFFFFFFFFFFFFFFFFFFFFFFFFFFFFFFFFF  
FFFFFFFFFFFFFFFFFFFFFFFFF:FFFFFFFFFFFFFFFFFFFFFFFFFFFFFFFFF  
FFF  
@A00721:190:HGJW7DSXY:4:2171:25771:25582\_1:N:0:TCTGCAAG+GCTGCACT  
GTTTTCCAAAAGCTATTAATAGCAGTTGCGGGGCTATAATACCGCCTCCAGATTACTCTAAAGTAA  
TCCACTCTCTTGGGATATAAATGAGTACATCTATAATAGAGTTTTGGAAGTGTGTAATGTCTACGTA  
CTG  
+  
FFFFFFFFFFFFFFFFFFFFFFFFFFFFFFFFFFFFFFFFFFFFFFFFFFFFFFFFF  
FFFFFFFFFFFFFFFFFFFFFFFFF:FFFFFFFFFFFFFFFFFFFFFFFFFFFFFFFFF  
FFF  
@A00721:190:HGJW7DSXY:4:2635:31693:3709\_2:N:0:TCTGCAAG+GCTGCACT  
GAAGATCTTCGAGTGTTTTATAGTGAGTTATTCTTGCAGAGTTCAAGTCGATTGATTTTGTTGACTA  
CGATCTCTTGTGTAATAAGAAGTTCTTCGAGTTGAATCTCCACCAGG  
+  
FFF:FFFFFF:FFFFFFFFFFFFFFFFFFFFFFFFF:FFF:FFFFFFFFF:F::FFFFFFFFF,:FF  
:FFF,F:F,FFFFFFFFF::FFFF,FFFFFFFFFFFFFFFFF:F:F,FF  
@A00721:190:HGJW7DSXY:4:2317:28284:34006\_2:N:0:TCTGCAAG+GCTGCACT  
ACCACTGAAGTATAGCGACTTTTGTGCAATTTTTCGAAAAGGTCTTGAAGTACGTATTGTCACTGC  
TAATCGTAATTTCGCGAGAAGAGATAGTGACTAAAGTTTTGGCACTTCT  
+  
FFFFFFFFFFF,FFFFFFFFFFFFFFFFFFFFFFFFFFFFFFFFF:FFFFFFFFFFFFFFFFFFFFFFFFF  
F:FFFFFFFFFFFFFFFFFFFFFFFFFFFFFFFFF,:FFFFFFFF:F:FFF







```
F::F:FFFFFFFF:FF:FFFFFFFFFFFFFFFFFFFFFFFFFFFFFFFFFFFFFFFF:F::F,FFFFFF
@A00721:190:HGJW7DSXY:4:1161:16685:15264_2:N:0:TCTGCAAG+GCTGCACT
TCAGTTGATTAAGACTCTTCCGAAAGGCCGAACCTTTGGGAATTTGAAGCTCAGGGTGAAGCACAAACGTT
TGACCGTGACGAACTGTGGTGTCTTGTATCTACGTTACGGATATACTC
+
FFFF,FFFFFFFFFFFFFFFFFFFFFFFFFFFFFFFFFFFFFFFFFFFFFFFFFFFFFFFFFFFFFFFF: :FFFFFFFF
FFFFF:FFFFF:FF:FFF:FFFFFFFFF:FFFFFFFFFFFFFFFFFFFFF
@A00721:190:HGJW7DSXY:4:1642:10764:2534_1:N:0:TCTGCAAG+GCTGCACT
TATTTTAAGTTTTGTCTTCTTGTGTTGCTTATTCTATTAATCACTCATTTTAGTGAGATTATTA AAA
ACGCACTAAAACGTCTTCGACAACAGCAGGGGTTTTCGAATAGTGATAGCCACCCGCCTTACAGAGGG
GCA
+
FF:FFFFFFFFFFFFFFFFFFFFFFFFFFFFFFFFFFFFFFFFFFFFFFFFFFFFFFFFFFFFFFFFFFFFFFFF
FFFFFFFFFFFFFFFFFFFFFFFFFFFFFFFFFFFFFFFFFFFFFFFFFFFFFFFFFFFFFFFFFFFFFFFFFFFF
FFF
@A00721:190:HGJW7DSXY:4:2653:26702:35681_1:N:0:TCTGCAAG+GCTGCACT
TGGTACCACCTTTTCTACTGTCTGTCTCGCCTCTTCGAATGAAGTTTTAATGCTTAACAACAATGATA
GTGAATTTATACCTACAATCATTTGGTTTTTCTAATAATGATGACACTATTGTTTATGGATATGATGCT
ATT
+
FFFFFFFFFFFFFFFFFFFFFFFFFFFFFFFFFFFFFFFFFFFFFFFFFFFFFFFFFFFFFFFFFFFFFFFFFFFF
FFFFFFFFFFFFFFFFFFFFFFFFFFFFFFFFFFFFFFFFFFFFFFFFFFFFFFFFFFFFFFFFFFFFFFFFFFFF
FFF
@A00721:190:HGJW7DSXY:4:2571:10104:36025_1:N:0:TCTGCAAG+GCTGCACT
GGATTCTCAGTTTACAAGGACCTTAAGCGATGGATCGGGGTTAATTCTAAAACATTACCCGAAAGACG
TGCTAAATTAAACCATTTGTACGATGTCGTCTGTCTCGGCGATCACTTTTCTAAGAATTGGTCCTA
CTT
+
FFFFF:FFFFFFFFFFFFFFFF:FFFFFFFFFFFFFFFFFFFFFFFFFFFFFFFFFFFFFFFFFFFFFFFFFFFF
FFFFFFFFFFFFFFFFFFFFFFFFFFFFFFFFFFFFFFFFFFFFFFFFFFFFFFFFFFFFFFFFFFFFFFFFFFFF
FFF
@A00721:190:HGJW7DSXY:4:1408:17517:31641_2:N:0:TCTGCAAG+GCTGCACT
ATCTTCATGAGATCGTTTCTTTCTTTATCTCTTTGGTTGTTAGGGATTTTGAGAGAGTGAAAGGCTTC
AATTGTAGTGGTTTGGTCGTTTCAGTACCCAGTCAGTATACCTCTACG
+
FF,:F:FFFF:F:FFF,FFFFFFFF:FFFFFFFF:F,,FFF:FFFF:F,FFFFF,FFFF:FF:F,FF,,
FFFFFF:,FFF:FFFFFF,FFFFFFFF,F,F:FFF:,FFFF: :FFFF,
@A00721:190:HGJW7DSXY:4:2150:29713:19382_2:N:0:TCTGCAAG+GCTGCACT
GAAAACTACAGAGGAACGTACCGGATTACCTGTCTTTCATATTATGAATGAACCTTCGGCCGCTCTCT
TTGCTTCGATGTTGGATGTCAAGAAGGGTTCAGAATGGGATTCTCCTACG
+
FFFFFFFFFFFFFFFFFFFFFFFFFFFFFFFFFFFFFFFFFFFFFFFFFFFFFFFFFFFFFFFFFFFFFFFFFFFF
FFFF:FFFF:FFFFFFFFFFFFFF:FFFFFFFFFFFFFFFFFFFFFFFFFFFFF
@A00721:190:HGJW7DSXY:4:1319:20356:28322_1:N:0:TCTGCAAG+GCTGCACT
TTTGGTGGTGGTACTTTCGATACTTCTATCGTCTTACGTTACGTAATTACTATAGTGTTATTTATTC
TGGTGGTGGTATGATAATCTTGGAGGTCGTGACGTTGATGAAGCTATAAGAGCGTTCTTATTACGGCGCA
CTT
+
FFFFFFFFFFFFFFFFFFFFFFFFFFFFFFFFFFFFFFFFFFFFFFFFFFFFFFFFFFFFFFFFFFFFFFFFFFFF
::FFFFF:FF:FFF:FFFFFFFFF:FFFFFFFFFFFFFFFFFFFFFFFFFFFF:FFFFFFFFFFFFFF:FFFFFF
FFF
@A00721:190:HGJW7DSXY:4:2107:27778:20760_1:N:0:TCTGCAAG+GCTGCACT
CTTTCAGTTTCACAACCTGAAGGAGGAGGTTTCTGTACTGGAAAACCCCTCGTCAATACTTTTCAATAA
```



@A00721:190:HGJW7DSXY:4:1676:24433:18474\_2:N:0:TCTGCAAG+GCTGCACT  
TATTTGGATGATCTTGATAAAGAACTTCATGAATTTTCAGAGGATGAAAAATTTCTTCCTTGATT  
TAATATAAAGAATCTTTACCAGGACTCCTACTACAGGAGGCAGTCTTC

+

,FFF,FFFFFFFF:FF:FFFF:F:FFFFFF:FFFFFFFFFFFF::FFF:FFFFFFFF:F,FFFF  
FFFFFFFFFFFFFFFF:FF:FFFFFFFF::FF:FFF,:FF:FFFFFFFF

@A00721:190:HGJW7DSXY:4:1671:29017:17206\_1:N:0:TCTGCAAG+GCTGCACT  
GAAACTCTAAGTGGTAATACTGTCTTTCCAAGCTTACCTTTATCTTCAATGAAATTGGACTCTTCGAT  
AGGGGACATTTTATCGTGGGCTTTCCGTAAAGGAAGATCTGTTATCGACGGTTTATCGTTTACGAAGT  
ATC

+

FFFFFFFFFFFFFFFFFFFFFFFFFFFFFFFFFFFFFFFF:FF:FFFFFF:FF:FFFFFF:F::FFFF  
FFFFFFFFFFFFFFFFFFFFFFFFFFFFFFFFFFFFFFFFFFFFFFFFFFFFFFFFFFFFFFFFFFFF  
FFF

@A00721:190:HGJW7DSXY:4:2209:13657:29904\_1:N:0:TCTGCAAG+GCTGCACT  
TTGGCCTAGTGGATGTTATTAGTGACATCTGGTCAATTTTCGTTTTTAGGTGGTCTTTATTCTATTATT  
GATTTTTATGAGATTGATACGTTAACAGAAGATGATGTTAGAGTAGAATTCCTGAAGAGTCTTCCGT  
AAC

+

FFFFFFFFFFFFFFFFFFFFFFFFFFFFFFFFFFFFFFFF:FFFFFFFF:FFFF::FFFF,FF,FFF:F  
FFFFFFFFFFFFFFFFFFFFFFFFFFFFFFFFFFFFFFFF:FFFFFFFFFFFFFFFFFFFFFFFFFFFFFFFF  
FFF

@A00721:190:HGJW7DSXY:4:1535:15754:19445\_2:N:0:TCTGCAAG+GCTGCACT  
TACACAATTAAGAAATAATCCTACATTGACTGATTATCTAAAGATTGAAGGAAAATTTATCCTCGTT  
TAACTTACTTAGACTTTCCTACGATACAAATGATAACTTCTAATTTAC

+

FFFFFFFFFFFFFFFFFFFFFFFFFFFFFFFFFFFFFFFFFFFFFFFFFFFFFFFFFFFFFFFFFFFF,FFF:F  
:FFFFFFFFFFFFFFFF:FF,FFFFFFFFFFFFFFFFFFFFFFFFFFFFFFFF

@A00721:190:HGJW7DSXY:4:2311:19325:36746\_1:N:0:TCTGCAAG+GCTGCACT  
GATGCATGGTGTATCTCCTCAGGAGTCCCGGCATTTGATAATAATGACGAGACTTTCGTCAATAATCG  
CTGCATATTACGATTACACGGTACCAGCGCATCTCGTGTGCGAGCCTCGACCCGATTATATGGTATTA  
ACT

+

FFFFFFF:FFFF:FFFF,FFFFFF:F:FFF,FF,FFFFFFFF:FFFFFFFFFFFFFFFFFFFF,FFFFFF  
FFFFFFFFFFFFFFFF:FFFFFF::FFF,FFFFFFFFFFFF:FFFFFFFFFFFF:FFFFFF,F:FFF  
FFF

@A00721:190:HGJW7DSXY:4:1227:13847:10473\_2:N:0:TCTGCAAG+GCTGCACT  
TCACACATTTTGAGAACTAACTATGTTATGTTCTCTGATCATTTTGACAATCTCTTCTTATAATAAAT  
AAATAAATAATATTACTAATGGCAAATAGTGGAAGGCTCCAGTCAAC

+

FFFFFFFFFFFFFFFFFFFFFFFFFFFFFFFFFFFFFFFFFFFFFFFFFFFFFFFFFFFFFFFFFFFF:FFFFFFFFFFFFFFFFFFFF  
FFFFFFFFFFFFFFFFFFFFFFFFFFFFFFFFFFFFFFFF:FFFFFFFFFFFFFFFF

@A00721:190:HGJW7DSXY:4:2137:3974:3051\_1:N:0:TCTGCAAG+GCTGCACT  
CGATGACGTGAGAATAGGTGAAGGGATAGTTTTACCTCGACCAACATTAAGGCGGCGGCGACTAATC  
TTAAAGCTTCACCCAAATGAAGGACACTTCGAAACTGAATAATGATGCACTACAAACAAGTATCGCT  
AAT

+

FFFFFFFFFFFFFFFFFFFFFFFFFFFFFFFFFFFFFFFFFFFFFFFFFFFFFFFFFFFFFFFFFFFF  
FFFFFFFFFFFFFFFFFFFFFFFFFFFFFFFFFFFFFFFF:FFFFFFFFFFFFFFFF:FF:FFFFFFF  
FFF

@A00721:190:HGJW7DSXY:4:2431:32759:5682\_1:N:0:TCTGCAAG+GCTGCACT  
CCGTTGAGAAAATTTCTTAGAGGATATTCGCCATTGTGGTACGAATTGGTCCAACATTTACCACCAA  
TTCTTTTGATACAACCTCTAGCCTTCAAGTGGGGTATGCCTGCGGAATACGCTTGCTATTACCAGATT  
GGT

+  
FFFFFFFFFFFFFFFFFFFFFFFFFFFFFFFFFFFFFFFFFFFFFFFFFFFFFFFFFFFFFFFFFFFFFFFF  
FFFF:FFFFFFFFFFFFFFFFFFFFFFFFFFFFFFFFFFFFFFFFFFFFFFFFFFFFFFFFFFFFFFFF  
FFF  
@A00721:190:HGJW7DSXY:4:1120:25843:19100\_1:N:0:TCTGCAAG+GCTGCACT  
TGATGCTATGTCAGAAGAAGCTATTCAAGCTTGTCTTTAAAGACTGCAGAGGCTGTCAAACAAGCCC  
AGACTCAAGGAGTCCAATCAAAGTTTTGAATTTAGCTCAACTGGGGAGACGTGCTTAAATGGGTGAT  
AAA  
+  
FFFFFFFFFFFFFFFF:FFFFFFFFFFFFFFFFFFFFFFFFFFFFFFFFFFFFFFFFFFFFFFFFFFFFFFFF  
FFFFFFFFFFFFFFFF:FFFFFFFFFFFFFFFFFFFFFFFFFFFFFFFFFFFFFFFFFFFFFFFFFFFFFFFF  
FFF  
@A00721:190:HGJW7DSXY:4:1409:8187:15765\_2:N:0:TCTGCAAG+GCTGCACT  
AAAAGTCCGGAGTATATTGTATGTTAATAGATAGTGGGATAATAGTTCTACCGATACGTAGTGAACGC  
GTTCGTAGAACCAAGTACTTTCCGTCTGAAGAGTTTAGAGCTGCTATT  
+  
FFFFFFFFFFFFFFFFFFFFFFFF:FFFFFFFFFFFFFFFFFFFFFFFFFFFFFFFFFFFFFFFFFFFFFFFF  
FFFFFFFFFFFFFFFFFFFFFFFFFFFFFFFFFFFFFFFFFFFFFFFFFFFFFFFFFFFFFFFF:F  
@A00721:190:HGJW7DSXY:4:1356:2175:23234\_2:N:0:TCTGCAAG+GCTGCACT  
TGTGGCTTTAGACGATAATCCTTTAAGGACTATGTTGACTGACGAAGATTTTCCACAGATTTGTCTA  
CGTTGCAGATCGCCACTCCAAACACTATATACATTATAAAATATAAAA  
+  
F:FFFFFFFF:FFFFFF:FFFFFF:FFFF:F::FF:FFF,FFFFFFFFFFFFFFFF:FFFFFF  
FFFF,:FFFFFFFFFFFFFFFFFFFFFFFF,FFFFFFFF:FFFF:F:FFF  
@A00721:190:HGJW7DSXY:4:2320:15691:8218\_1:N:0:TCTGCAAG+GCTGCACT  
ACTTTTGTACCAAATCTTGGCTTTCAACGAAGTCTCTGATTTTATTAATCATTACTTTAACGATCT  
CTCGGTCATTTACTCTGTACTTGATCTACGTCGTTTAACTGTGGAACAACCTTTACTTAGAATGACT  
CTA  
+  
FFFFFFFFFFFFFFFFFFFFFFFFFFFFFFFFFFFFFFFFFFFFFFFFFFFFFFFFFFFFFFFFFFFFFFFF:FFFF  
FFFFFFFFFFFFFFFFFFFFFFFFFFFFFFFFFFFFFFFFFFFFFFFF:FF:FFFF,F,FFF,:FF,FFFFFF  
FFF  
@A00721:190:HGJW7DSXY:4:1372:3061:14998\_2:N:0:TCTGCAAG+GCTGCACT  
ATCATATTAGTAATACTCACTATCGTTTTCTGCTTTTTCTTAGCTAATAGATTAATAAAGGATGAGTA  
CGAAAACCAACTCTTCGTTACGAGACCTGATGGTAGAATAGATTTAGT  
+  
FFFFFFFFFFFFFFFFFFFFFFFFFFFFFFFFFFFFFFFFFFFFFFFFFFFFFFFFFFFFFFFFFFFFFFFF  
FFFFFFFFFFFFFFFFFFFFFFFFFFFFFFFFFFFFFFFFFFFFFFFFFFFFFFFFFFFFFFFF  
@A00721:190:HGJW7DSXY:4:2675:10818:32440\_1:N:0:TCTGCAAG+GCTGCACT  
GTGACTGGAGTTCAGACGTGTGCTCTTCCGATCTCGTAATACACTAAGAGATCATCCGCAAACGACTC  
GAAACCGAGACGCCGTAGATCAAAGTCCCTTCTAACTTTAGATT  
+  
:F,F:,FF,,FF::,,FF,FF,,,F,F,,F::,,,F,::F,F,F,,,::,,F,F:::F:FFFFFF  
FFFFFFFFFFFFFFFFFFFFFFFFFFFFFFFFFFFFFFFFFFFFFFFFFFFFFFFFFFFFFFFF  
@A00721:190:HGJW7DSXY:4:1660:6225:13683\_2:N:0:TCTGCAAG+GCTGCACT  
CTTATACTTTTGGGTATGTTTTGTGAAAAACATGAGATACCCAAGTCTATCGAAGACATTATCTCTTA  
TGTAATTATTGTAACGATCATTCTTTCGAGTTTTGTCAATTCTTATTCT  
+  
FFFFFFFFFFFFFFFF:FFFFFFFFFFFFFFFFFFFFFFFFFFFFFFFFFFFFFFFFFFFFFFFFFFFFFFFF  
FFFFFFFFFFFFFFFFFFFFFFFFFFFFFFFF:FFFFFFFFFFFFFFFF:FFFFFF  
@A00721:190:HGJW7DSXY:4:2107:15013:3380\_2:N:0:TCTGCAAG+GCTGCACT  
ATGCTTTTCGATAGTGATTGTTATCAATTTAAATACATTACTGTTTCAAATCATCTTTACTCACAGAC  
TCCGAAAATGGTTTCAAATGAGGTCAAAGCTCTATTTATTAAACGAAC  
+

@A00721:190:HGJW7DSXY:4:1517:14154:11600\_1:N:0:TCTGCAAG+GCTGCACT  
TACCACTGATCTGCCGACTTTAGTCAAGGATCTTCAATTCCTTCGATGTTTATATTTTTCTATAAGGG  
AAAATAGCAATAATCAAATTTGACAAATTTTAGAACTTTATTTCAGAACTCTCTCCGATCACCTTGG  
TGT

+

```
FFF,FFFF,FFFF,FFFFFFFF:,FF,,,F:,FFFF:F,F,FFF,F,FFFFFFFFF::,FFFF:FFFF,F
F:FFFF,:FFF,FF,: ,FFFFFFFFF::FFFF,FFFFFFFF:FFF:F:FFFF:F,F:,FFFFFFFF:FFF
:FF
```

@A00721:190:HGJW7DSXY:4:1249:16631:25222\_1:N:0:TCTGCAAG+GCTGCACT  
TCAATAAGATGTATGATGATAATCTACTATTTTTAAATAGTGATATTCAGCGTATACTTGAATACTTT  
ATCAAAGATTTGGCTTGGTCTATTTACCGCAAAAAGTTGGAAGAGGTCTATGATATTTATTTTACTTA  
TAC

+

[illegible]

@A00721:190:HGJW7DSXY:4:2145:25012:35415\_2:N:0:TCTGCAAG+GCTGCACT  
CCGATTATAACTTGACTGTTGATAATATTACAATAGCTCTTTCTCAGAAGATTAGAGAAGTAACCGGT  
GAACACGTCGGTAGCATTGATTTACTTTTACCGTTAGAAGTAAAAAG

+

```

FFFFFFFFFFFFFFFF,FFFFFFFFFFFFFFFFFFFFFFFFFFFFFFFFFFFFFFFF
FFFFFFFFFFFFFFFFFFFFFFFFFFFFFFFFFFFFFFFFFFFFFFFF:F

```

@A00721:190:HGJW7DSXY:4:2623:29649:9064\_1:N:0:TCTGCAAG+GCTGCACT  
ACCTATAAGTTACAAACGATTCTTCGACTATATTAAGAAATAAAAACTTCAAGTACCTGAACTTT  
ACATTTTTTAATGGTATGGTATAATGTGTCTTACAAATAGAACCTTCACTCTCGGTAATGAGAGTGTAT  
TCC

+

[illegible]

@A00721:190:HGJW7DSXY:4:2603:3314:12430\_1:N:0:TCTGCAAG+GCTGCACT  
GGCATTACTAGGATTTATCACACTCCTAAATTTGATAGCAATTTATGTTTTAAATGCTAGGAAATTT  
TAGAAAACTCCATTGTATAGTTCAAGGAGTACTTAATTCATAGCTTTAGTATTATTTACTATCGCC  
TTT

+

```
F,FFFFFFFFFFFFFFFFFFFFFFFFFFFFFFFF:FFFFFFFFFFFFFF:FFFFFFFFFFFFFF
FFFFFFFFFFFFFF:FFFFFFFFFFFFFFFFFFFFFFFFFFFFFFFF:FFF:FFFFFFFFFFFFFF
FFF
```

@A00721:190:HGJW7DSXY:4:2573:6994:6120\_2:N:0:TCTGCAAG+GCTGCACT  
AGTTAATTGCTTACACAAAAGTGACGCGGAAGGAATCTTAATTGATTGAAGCTAGGCGTTGGGGAGA  
ATGAACTGCCGCTTCCCGGAAGAAACGATCTATTTACAGAGTATTTAG

+

```

FFFFFFFFFFFFFFFF:FFFFFFFFFFFFFFFFFFFFFFFFFFFFFFFFFFFFFFFFFFFFFFFF
FFFFFFFFFFFFFFFF:FFFFFFFFFFFFFFFFFFFFFFFFFFFFFFFF:FF

```

@A00721:190:HGJW7DSXY:4:2203:7057:16063\_2:N:0:TCTGCAAG+GCTGCACT  
TACCATGACCAATCATCGCTCCAAGTGGCAGCCAGACGTAGGGTCAAACCTACTACCGCCGGTGGC  
AGATCGGCACCACTGGTCTCTACGTTCAAGGACCCGCTGTGCAGAATA

+

[illegible]

@A00721:190:HGJW7DSXY:4:2651:17490:33849\_2:N:0:TCTGCAAG+GCTGCACT  
TCTGCACAGAAGAAGGCTGAAGGTCGTTACCGGACGACCACTCAAAGGAAACGGGCTGTTGCCAGAG

$+$ 

@A00721:190:HGJW7DSXY:4:2337:32389:32722\_1:N:0:TCTGCAAG+GCTGCACT  
AACTGAGGCAGTACCTCAGTCAAAAGTCACATTCACCACTCCCATACCAATCAATGATGTGACTATAC  
AGTTTCGGCCATTTCAAGAGTGGTCAATACGTCGTGGGAGGTACTGAAGCCTTCCCCTCCGCTGGCACG  
AAG

+

@A00721:190:HGJW7DSXY:4:2374:20211:26850\_2:N:0:TCTGCAAG+GCTGCACT  
GCCAATCAATAGTTCTTCTGACCAGAATGAAAAGGGGTTTACCAGGGTAGTCTCTAAGTCTACCAGGA  
AGAGGGGAAATGTCCCCAAAACCTGAGAAGAATAAAGGGAAAGGTCCAT

+

@A00721:190:HGJW7DSXY:4:1666:13241:18662\_2:N:0:TCTGCAAG+GCTGCACT  
AATTCTGAAGGAAGATCTCCACCATCTGGGGTTGGGAATAAGAAATCTGCACGGGCCAAAGAGGCCG  
CTGCTACGAAGTCGCTGAAGGCGGCTTGGGTCATTAAGGGTAGCTGTA

+

@A00721:190:HGJW7DSXY:4:2169:15365:7404\_1:N:0:TCTGCAAG+GCTGCACT  
CCGACCCCATCTTTGAGACCAAGACTCTCTACAGTAGGTTCTGTCCTACTATGAGCAAATCTGTTGAA  
TTCGTCACTGAGGACGAAGGTGAGAGGACTTTTGCTACTGGCGACAACTGAGAGCAGTCGCTGGGG  
AAA

+

@A00721:190:HGJW7DSXY:4:1678:1262:33395\_1:N:0:TCTGCAAG+GCTGCACT  
TCTTGAGAGTGACTGGAGTTGAGACGTGTGCTCTTCCGATCTTTTATCCGCGCTTAAGTATGGGGC  
GAAGATCCCCATGGAGTCTTGAAGGACTTAGGTTGGCATATTTATGCCGACGATAATAAGCATGTCA  
CCC

+

@A00721:190:HGJW7DSXY:4:2206:22761:30514\_2:N:0:TCTGCAAG+GCTGCACT  
TTACAAGAGAGAGTGTGAGAGAGTCGCTCTCACTATTTTTGCCAGAATGCGGGCTTTCTGACTGATG  
AGGTTAAACTCTTGCTCCTTCTGTGGGTGAGGGTTTTTGTTATATTC

+

@A00721:190:HGJW7DSXY:4:1273:1416:36323\_2:N:0:TCTGCAAG+GCTGCACT  
TTTAGAGAGCATTAGAAGGAAGTTGGGCAAATTCCCACATATGGTAGACGTTGTCACACTTTTCTTGA  
AAATTTTTCCTTTCCTCCGTCATTGGGGATTTTCGATGTGAGAAGGTGG

+

@A00721:190:HGJW7DSXY:4:1616:19153:36980\_2:N:0:TCTGCAAG+GCTGCACT  
GGGTCTTCTTCATGCTGATCTTTCAGGACCTAATCACATCATGATTGATAGTTACGGCTCGTATCGAG



TTGGAGGGAGGAAGTTCTCCGAAATTAAGACGGGGGGATTAAGAGTC  
+  
FFFFFFFFFFFFFFFFFFFFFFFFFFFFFFFFFFFFFFFFFFFFFFFFFFFFFFFFFFFFFFFF:FFFFFFFFFFFF  
FFFFFFFFFFFFFFFFFFFFFFFFFFFFFFFFFFFFFFFFFFFFFFFFFFFFFFFFFFFFFFFF  
@A00721:190:HGJW7DSXY:4:1507:27742:27680\_1:N:0:TCTGCAAG+GCTGCACT  
TCAGAGAGGGGAGCTCTGAAAAGGAACTTCGTCAGAAGATGAGGAAGTCTAAGAGGAGGAGTTTGAG  
GAAGGCTCTAGAGAAGATCTCCCCACCTGGAGAAGGCAAGTGGAGAGTCCAGAAGTTGATGAAGAAGG  
ATT  
+  
FFFFFFFFFFFFFFFFFFFFFFFFFFFFFFFFFFFFFFFFFFFFFFFFFFFFFFFFFFFFFFFF:FFFFFFFFFFFFFFFFFFFFFFFFFFFFFFFF  
FFFFFFFFFFFFFFFFFFFFFFFFFFFFFFFFFFFFFFFFFFFFFFFFFFFFFFFFFFFFFFFFFFFFFFFF  
FFF  
@A00721:190:HGJW7DSXY:4:1642:7762:33035\_1:N:0:TCTGCAAG+GCTGCACT  
CTTCCTAAGGTGGATGAGGGAGGTTGTTTCTTTGGAGTTTGTAGATAATCTTTTGAGAAGGGGTCATAG  
AGCCAGCAAGAGAAGCTTATATGCTGGTTAAGTGATGATTATCACTCCTTGAGAAGACAAGCCACAT  
TAA  
+  
F,FFFFFFFFFFFFFFFFFFFFFFFFFFFFFFFFFFFFFFFFFFFFFFFFFFFFFFFFFFFFFFFF:FFFFFFFFFFFFFFFF:FFFFFFFFFFFFFFFF:FFFFF  
FFFFFFFFFFFFFFFFFFFFFFFFFFFFFFFFFFFFFFFFFFFFFFFFFFFFFFFFFFFFFFFFFFFFFFFFFFFFFFFFFFFFFFFFFFFFFFFF  
FFF  
@A00721:190:HGJW7DSXY:4:2621:5448:28714\_2:N:0:TCTGCAAG+GCTGCACT  
AGGTCCTTTTGAGTATCGACAGATCTTTCGATCTTGAGGACGTACATTTAACGTGGCAGAATTCGGTA  
ACTTACCATATTGTTCTTCCGGAAGTTGTGGGATTAACTTTGACT  
+  
FFFFFFFFFFFFFFFFFFFFFFFFFFFFFFFFFFFFFFFFFFFFFFFFFFFFFFFFFFFFFFFFFFFFFFFFFFFFFFFFFFFFFFFF  
FFFFFFFFFFFFFFFFFFFFFFFFFFFFFFFFFFFFFFFFFFFFFFFFFFFFFFFFFFFFFFFF  
@A00721:190:HGJW7DSXY:4:1550:18168:29199\_2:N:0:TCTGCAAG+GCTGCACT  
TGGACTACTCGACTTTTGATCTGGAGTTGTCTAGGGTCATGGCAGATACTACCGATAAGGTGAAAAAT  
ATGCAGGTCAAAGATTCTGTAGCTCTGAGGGCGGTTGAGGGAGCCGTT  
+  
FFFFFFFFFFFFFFFFFFFFFFFFFFFFFFFFFFFFFFFFFFFFFFFFFFFFFFFFFFFFFFFFFFFFFFFFFFFFFFFFFFFFFFFF  
FFFFFFFFFFFFFFFFFFFFFFFFFFFFFFFFFFFFFFFFFFFFFFFFFFFFFFFFFFFFFFFF  
@A00721:190:HGJW7DSXY:4:1534:10050:27352\_1:N:0:TCTGCAAG+GCTGCACT  
CTAAGAGTCTTTATGATTCAAACCTATCGTTGTGCGTACCTTACAAGTTGAGGAGACTTTACAGCGG  
CTTATTGTCGCGCAGTTTCCAGAATTGCGGTTGAAGTTCACCCATTCTATCTTGAATGCTCACGCCGT  
CGC  
+  
FFF:FFFFFFFFFFFFFFFFFFFFFFFFFFFFFFFFFFFFFFFFFFFFFFFFFFFFFFFFFFFFFFFFFFFFFFFFFFFFFFFF  
FFFFFFFFFFFFFFFFFFFFFFFFFFFFFFFFFFFFFFFFFFFFFFFFFFFFFFFFFFFFFFFFFFFFFFFFFFFFFFFF  
FFF  
@A00721:190:HGJW7DSXY:4:1621:4001:6449\_2:N:0:TCTGCAAG+GCTGCACT  
GATTTAGATATTATTGATATTGGAGGCGATATTCGTTTTTCATATCCAAAACCTCTTGAATGGAGTACA  
TATTTGCAACCCTATTCTTGATGTGAAAGATGCATCGAGGTATACGTC  
+  
FFFFF:FFFFFFFFFFFFFFFFFFFFFFFFFFFFFFFFFFFFFFFFFFFFFFFFFFFFFFFFFFFFFFFFFFFFFFFFFFFFFFFF  
FF:FFFFFFFFFFFFFFFFFFFFFFFFFFFFFFFFFFFFFFFFFFFFFFFFFFFFFFFFFFFFFFFFFFFFFFFF  
@A00721:190:HGJW7DSXY:4:1678:31593:20666\_2:N:0:TCTGCAAG+GCTGCACT  
GCTATCGGAGGGAAGCAAAATGTTTCGTTCTGTTACAAGAACGCTTTGGATTGTGACCATAAAGCCTC  
AGTTGCGATAGCTGTAGAGGTATACGATATCTCTCTTGATGATGTAGC  
+  
FFFFFFFFFFFFFFFFFFFFFFFFFFFFFFFFFFFFFFFFFFFFFFFFFFFFFFFFFFFFFFFF:FFFFFFFFFFFFFFFFFFFFFFFF  
:FFFFFFFFFFFFFFFFFFFFFFFFFFFFFFFFFFFFFFFF:FFFFF:FFFFFFFFF:FFFFFFF  
@A00721:190:HGJW7DSXY:4:2449:11948:15076\_2:N:0:TCTGCAAG+GCTGCACT  
TATGTCATTTCTGCTTAGTTTGTCCCGCGAATTATTGGACACGATGAAAAATGACATACCCGTTCTCT

GACCTTGGTATCGTTATCCGTCATGGAGATGATGGCGCATCACTTGAT  
+  
FFFFFFFFFFFFFFFFFFFFFFFFFFFFFFFFFFFFFFFFFFFFFFFFFFFFFFFFFFFFFFFFFFFFFFFF  
FFFFFFFF:FFFFFFFFFFFFFFFF:FFFFFFFFFFFFFFFFFFFFFFFF  
@A00721:190:HGJW7DSXY:4:1169:2392:3380\_2:N:0:TCTGCAAG+GCTGCACT  
GATTTTATCTTTCTTCAAACACCCTGTTTTCTTAAGGGCGGACAATTGTTCCATTGTGAACCTTGG  
GGACTAGATTGAGCATTAAATGAGTTCCGAATAACTCGTAATAAATCTT  
+  
FF:FFFFFFFFFFFFFFFF:FFFFFFFFFFFFFFFFFFFFFFFFFFFFFFFFFFFFFFFFFFFFFFFF  
FFFFFFFFFFFFFFFFFFFFFFFFFFFFFFFF:FFFFFFFFFFFFFFFF  
@A00721:190:HGJW7DSXY:4:2374:14027:18239\_2:N:0:TCTGCAAG+GCTGCACT  
AAGAGCCACTGCCAATCTCATCGCTATACGCATACCTGATTGGAAGAAGCGAGGTTCTGTTCTCAATA  
AAAATTTTCTCAAGAGATTATGGTTGATAAAGTTTTCTTCATAAGGG  
+  
FFFFFFFFFFFFFFFFFFFFFFFFFFFFFFFFFFFFFFFFFFFFFFFFFFFFFFFFFFFFFFFFFFFFFFFF  
FFFFFFFFFFFFFFFFFFFFFFFFFFFFFFFF:FFFFFFFFFFFFFFFF:FFF  
FFFFFFFFFFFFFFFFFFFFFFFF,FF:FFF::,FFFF:FFFFFFFF  
@A00721:190:HGJW7DSXY:4:1445:19578:16266\_2:N:0:TCTGCAAG+GCTGCACT  
GTCATGGGGATCACTTCTTCGGTCAATGACAAAACCTTCGAATATGTTACGACATGGCTTCGTAACAA  
CAGTGCGAGGATTGTCATCTCGGGGAAAGTGATTCACCAAGATGTTCA  
+  
FFFFFFFFFFFFFFFFFFFFFFFFFFFFFFFFFFFFFFFFFFFFFFFFFFFFFFFFFFFFFFFFFFFFFFFF  
FFFFFFF,FFFFFFFFFFFFFFFFFFFFFFFFFFFFFFFFFFFFFFFF  
@A00721:190:HGJW7DSXY:4:1201:17517:34710\_1:N:0:TCTGCAAG+GCTGCACT  
CCTAGAGAAGGTCGACGATCTTACTCGTTATCGGAGCTAAGAAGAAGACTTTGGGTACACGTTATG  
CTCGCAAACCTTAACGTTAGTACCGGAGGTGATCTCTCTGCTTCTGCGTTACTGAGAGAAAAGATTGAG  
GAC  
+  
FFFFFFFFFFFFFFFFFFFFFFFFFFFFFFFFFFFFFFFFFFFFFFFFFFFFFFFFFFFFFFFFFFFFFFFF  
FFFFFFFFFFFFFFFFFFFFFFFFFFFFFFFFFFFFFFFFFFFFFFFFFFFFFFFFFFFFFFFFFFFFFFFF  
FFF  
@A00721:190:HGJW7DSXY:4:2425:7925:30780\_1:N:0:TCTGCAAG+GCTGCACT  
CTTTATGGACAAGATGCAAGTTCTTGGGAAATACTTGTTTCCCTTTTATAGTTTAGTAGGTGATCTTG  
ACGTCGATTCTTTGTATAGGGAGTGTGAGAAGACAACGAATCTTGAAACTACGGTCCTTATCAAAGAA  
AAT  
+  
FFF:FF,:::,FF::FF::FFFFFFFFFFFFFFFF:FFFFFFFFFFFFFFFFFFFFFFFFFFFFFFFF:FFFF  
FFFFFFFFFFFFFFFFFFFFFFFFFFFFFFFFFFFFFFFFFFFFFFFFFFFFFFFFFFFFFFFFFFFFFFFF:FFFFFFFFFFFFFFFFFFFFFFFF  
FFF  
@A00721:190:HGJW7DSXY:4:2323:26323:25222\_2:N:0:TCTGCAAG+GCTGCACT  
AAATCTTTTGAGATTGAGAAGATTGAAGAACACGTCAAGAAGTCGCTCGGCGTTGTTCTTGAAAACCA  
AGTTAAGAAGGAGGCTGATCATGGAGTCTTTGTACCTTCTGTCAAACCT  
+  
FFFFFFFFFFFFFFFFFFFFFFFFFFFFFFFFFFFFFFFFFFFFFFFFFFFFFFFFFFFFFFFFFFFFFFFF  
FFFFFFFFFFFFFFFFFFFFFFFFFFFFFFFF:FFFFFFFFFFFFFFFF  
@A00721:190:HGJW7DSXY:4:1272:9652:7968\_2:N:0:TCTGCAAG+GCTGCACT  
CCCGGATGTGGATTGAAGGCTGGCTCTAAGGGAGACTCCTTCTTTTGAATGTTGTAAAGAATTGGGT  
TGAGAAGTGTGCTTTACAAGGAGTTAGACTCTTCTTCAAGTTTTTAGA  
+  
FFFFF:FFFFFFFFFFFFFFFFFFFFFFFFFFFFFFFFFFFFFFFFFFFFFFFFFFFFFFFFFFFFFFFF:FFF:FF  
FFFF:FFFFFFFFFFFFFFFF,FFFF:F:FFFFFFFFFFFFFFFF  
@A00721:190:HGJW7DSXY:4:2212:10294:18850\_2:N:0:TCTGCAAG+GCTGCACT  
TTTTCTCTACCATAACTTCTTTTTCAAAAATGCGGATGGGTCTACTGATGTTTTCTACAGAGTGCA  
GTCGTTTCAACACTTATCACCCTTTTGAAGGAAAATAATTGGTGAT  
+





@A00721:190:HGJW7DSXY:4:1221:1768:12696\_2:N:0:TCTGCAAG+GCTGCACT  
CCACTGAAC TTATAGCGACTTTTGT CGAATTTTCGCAAAGGTCTTGAAGTACGTATTGCTACTGCT  
AATCGTAATTCGCGAGAAGAGCAGATCGGAAGAGCGTCGTGTAGGGAA

@A00721:190:HGJW7DSXY:4:2647:14036:27242\_1:N:0:TCTGCAAG+GCTGCACT  
CAACGGAAGACATATCGCACCCGAAATTTTGGGCAGAATGCTCTTAACGCGGTTCTTGAACGGTGT  
TTTGATCAGTCTAAGTTGGATAAAGTTATAGGAGACTCAGTTAACCTGAGAGCTCCTCAATTGATAGA  
TTG

+

FFFFFFFFFFFFFFFFFFFFFFFFFFFFFFFFFFFFFFFFFFFFFFFFFFFFFFFFFFFFFFFFFFFFFFFF  
FFFFFFFFFFFFFFFFFFFFFFFFFFFFFFFFFFFFFFFFFFFFFFFFFFFFFFFFFFFFFFFFFFFFFFFF  
FFF

@A00721:190:HGJW7DSXY:4:1506:32796:3333\_2:N:0:TCTGCAAG+GCTGCACT  
TAGTATACTTCGTAAAGTCGACAGCGAAATGGTCAATATTGATAATTGGACCGACTATATGACCTATT  
TTAAGCTCATGGTGAAGGAAGCTAAGGTTAACTTGATGCTTCAG

+

FFFFFFFFFFFFFFFFFFFFFFFFFFFFFFFFFFFFFFFFFFFFFFFFFFFFFFFFFFFFFFFFFFFF:FFFFFFF  
FFFFFFFFFFFFFFFFFFFFFFFFFFFFFFFFFFFFFFFFFFFFFFFFFFFFFFFFFFFFFFFFFFFF

@A00721:190:HGJW7DSXY:4:2660:4372:4773\_2:N:0:TCTGCAAG+GCTGCACT  
CCTATCTTTAAGGTTCTTGTGAGGAGAGTCAAACAGTGTCTTTTACCCAACATTTTTATGTATACAGA  
GATGACCAGTGACGATTTCTCCCGAAGCTCTTCTCTCTCTTAGGAGG

+

FFFFFFFFFFFFFFFFFFFFFFFFFFFFFFFFFFFFFFFFFFFFFFFFFFFFFFFFFFFFFFFFFFFF  
:FFFFFFFFFFFFFFFFFFFFFFFFFFFFFFFFFFFFFFFFFFFFFFFFFFFFFFFFFFFFFFFF

@A00721:190:HGJW7DSXY:4:1510:12364:13448\_2:N:0:TCTGCAAG+GCTGCACT  
TTCGATGCTGAATTTCTTGAACCTTGGAGTGCCAGTGAATATTTTTGTCACGCCAGGAGTATCCATAA  
CGATTTGTCATTTACCACCTTTGCTCAACGACGAAGTGAACGGCCAA

+

FFFFF:FFFFFFFFFFFFFFFFFFFFFFFFFFFFFFFFFFFFFFFFFFFFFFFFFFFFFFFFFFFFFFFF  
FFFFFFFFFFFFFFFFFFFFFFFFFFFFFFFFFFFFFFFFFFFFFFFFFFFFFFFFFFFFFFFFFFFF

@A00721:190:HGJW7DSXY:4:1564:11677:26537\_1:N:0:TCTGCAAG+GCTGCACT  
TCTTGATGATCACTTTGATGATTTTATCACTTTATTATGACCTTGGAAGTTTTCGGCTGTGGTTGT  
CGCTGGGACGATTCCATTCTGTTTTCAAAGACTCCAATAACTGATCATTCTGATCATATGATTTTGG  
ACA

+

FFFFFFFFFFFFFF,FFFFFFFFFFFFFFFFFFFFFFFFFFFFFFFFFFFFFFFFFFFFFFFFFFFFFFFF  
FFFFFFFFFFFFFFFFFFFFFFFFFFFFFFFFFFFFFFFFFFFFFFFFFFFFFFFFFFFFFFFFFFFF  
FFF

@A00721:190:HGJW7DSXY:4:2369:3369:2566\_1:N:0:TCTGCAAG+GCTGCACT  
ATGTTACTCTTGTAGGACTTTGGGAGAGATTCTGTTAGTTTTAAAGACTATACTAAATATCTCCACTAC  
GAGGTTGTTGTTTGGCGATTAGCTCTTGCGACTAATATTCGATATTCGATTGAGGGTCGTTATACCTA  
TTC

+

FFFFFFFFFFFFFFFFFFFFFFFFFFFFFFFFFFFFFFFFFFFFFFFFFFFFFFFFFFFFFFFFFFFF  
FFFFFFFFFFFFFFFFFFFFFFFFFFFFFFFFFFFFFFFFFFFFFFFFFFFFFFFFFFFFFFFFFFFF  
FFF

@A00721:190:HGJW7DSXY:4:2104:31593:34882\_1:N:0:TCTGCAAG+GCTGCACT  
CTTTGAATTGTATAAGATCAAATTTTAAACGATTCCGAGAGGTTTATCCTGATGTGGAGGGAGTTCTT  
GAAGCATCCCACCTTTCCTTGTGAAAATTTGATGCGGTTTCATAAGATTATCAGTAATCCTGATTC  
TA

+

:FFF,FFFFF:FF:F,FF:FFFFFFFFFFFFFF,FFFFFFFFFFFFFFFFFFFFFFFFFFFFFFFFFFFF:F  
FFFFFFFFFFFFFFFFFFFFFFFFFFFFFFFFFFFFFFFFFFFFFFFFFFFFFFFFFFFFFFFFFFFF  
FF

@A00721:190:HGJW7DSXY:4:1139:28212:3129\_2:N:0:TCTGCAAG+GCTGCACT  
CGTATCTCAAAGATCGACTTCGAGACAGGTGATATTGTTGAGCGAGAGCGACCAAGATCTAAATTCGG  
TAACGGTGCGTGGCGCTTTATTTTAAAAAGCTCCCTCCTCTCGCAAGT

+

FFFFFFFFFFFFFFFF,FFFFFFFFFFFFFFFFFFFFFFFFFFFFFFFFFFFFFFFFFFFFFFFFFFFFFFFF:FFFF  
FFFFFFFF:FFFF:FFFFFFFFFFFF,FFFF,FFFFFFFFFFFFFFFF  
@A00721:190:HGJW7DSXY:4:2535:20781:24737\_2:N:0:TCTGCAAG+GCTGCACT  
GATCAGTCTCTGACTTGACCATCTTTCATTTTAAATGACGATCATTAAGACTCTCTTCTTCTTTGTT  
TCCTTCTTTGCACTGATTTTCTCATCAGCTTGTGTTTTACCTAATC  
+  
FFFFFFFFFFFFFFFFFFFFFFFFFFFFFFFFFFFFFFFFFFFFFFFFFFFFFFFFFFFFFFFF:FFFF  
FFFFFFFFFFFFFFFFFFFFFFFF:FFFFFFFF:FFFFFFFF:F,FF:FFF  
@A00721:190:HGJW7DSXY:4:1202:14552:20118\_2:N:0:TCTGCAAG+GCTGCACT  
TCAGTTGATTAAGACTCTTCCGAAAGGCGAACTTTGGGAATTTGAAGCTCAGGGTGAAGCACAACTGTT  
TGACCGTGACGAAGTGTGGTGTCTTGATCTACGTTACGGATATACTC  
+  
FFFFFFFFFFFFFFFFFFFFFFFFFFFFFFFF:FFFFF:FFFFFFFFFFFFFFFF:FFFF:FFFFFFFF:FFFFFFF  
FFFFFFFFFFFFFFFFFFFFFFFF:FFFFFFFFFFFF:FFFFFFFFFFFFFFFFFFFFFFFF  
@A00721:190:HGJW7DSXY:4:1673:28999:19304\_1:N:0:TCTGCAAG+GCTGCACT  
TATTTTAAGTTTTGTCTTCTTGTGTTGTCTTATTCTATTAATCACTCATTTTAGTGAGATTATTA  
ACGCACTAAACGTCTTCGACAACAGCAGGGGTTTTCGAATAGTGATAGCCACCCGCCTTACAGAGGG  
GCA  
+  
FFFF:FFFF,FFFFFFFFFFFFFFFFFFFFFFFFFFFFFFFFFFFFFFFFFFFFFFFFFFFFFFFFFFFFFFFF:FFFF  
FFFFFFFFFFFFFFFFFFFFFFFFFFFFFFFFFFFFFFFFFFFFFFFFFFFFFFFFFFFFFFFFFFFFFFFFFFFFFFFF  
FFF  
@A00721:190:HGJW7DSXY:4:2654:18059:35806\_1:N:0:TCTGCAAG+GCTGCACT  
TGGTACCACCTTTTCTACTGTCTGTCTCGCCTCTTGAATGAAGTTTTAATGCTTAACAACAATGATA  
GTGAATTTATACCTACAATCATTGGTTTTTCTAATAATGATGACACTATTGTTTATGGATATGATGCT  
ATT  
+  
FFFFFFFFFFFFFFFFFFFFFFFFFFFFFFFFFFFFFFFFFFFFFFFFFFFFFFFFFFFFFFFFFFFFFFFF:FFFF  
FFFFFFFFFFFFFFFFFFFFFFFFFFFFFFFFFFFFFFFFFFFFFFFFFFFFFFFFFFFFFFFFFFFFFFFFFFFFFFFF  
FFF  
@A00721:190:HGJW7DSXY:4:2407:24080:21402\_1:N:0:TCTGCAAG+GCTGCACT  
GATTCTCAGTTTACAAGGACCTTAAGCGATGGATCGGGTTAATTCTAAACATTACCCGAAAGACGT  
GCTAAATTAACCATTTGTACGATGTCGTCTGTCTCGGCGATCACTTTTCACTAAGAATTGGTCCTAC  
TT  
+  
FFFFFFFFFFFFFFFFFFFFFFFF:FFFF:FF:FFFF:FFFFFFFFFFFFFFFF:FFFFFF:FFFFFFFFFFFFFFFF  
FFFFFFFFFFFFFFFFFFFFFFFFFFFFFFFFFFFFFFFFFFFFFFFFFFFFFFFFFFFFFFFFFFFFFFFFFFFFFFFF  
FF  
@A00721:190:HGJW7DSXY:4:1440:21016:36824\_2:N:0:TCTGCAAG+GCTGCACT  
ATCTTCATGAGATCGTTTCTTTCTTTATCTCTTTGGTTGTTAGGGATTTTGAGAGAGTGAAAGGCTTC  
AATTGTAGTGGTTTGGTCGTTTCAGTACCCAGTCAGTATACCTCTACG  
+  
FFFFFFFFFFFFFFFFFFFFFFFFFFFFFFFFFFFFFFFFFFFFFFFFFFFFFFFFFFFFFFFF:FFFF:FFFFFFFFFFFFFFFFFFFFFFFF:FF  
FFFFFFFFFFFF:FFFF:FFFFFFFFFFFFFFFFFFFFFFFFFFFFFFFFFFFFFFFF  
@A00721:190:HGJW7DSXY:4:2343:23746:10081\_2:N:0:TCTGCAAG+GCTGCACT  
GAAACTACAGAGGAACGTACCGGATTACCTGTCTTTCATATTATGAATGAACCTTCGGCCGCTCTCT  
TTGCTTCGATGTTGGATGTCAAGAAGGGTTCAGAATGGGATTCTACG  
+  
FFFFFFFFFFFFFFFFFFFFFFFFFFFFFFFFFFFFFFFFFFFFFFFFFFFFFFFFFFFFFFFFFFFFFFFF  
FFFFFFFFFFFFFFFFFFFFFFFFFFFFFFFFFFFFFFFFFFFFFFFFFFFFFFFF  
@A00721:190:HGJW7DSXY:4:1654:22661:24298\_1:N:0:TCTGCAAG+GCTGCACT  
TTTGGTGGTGGTACTTTCGATACTTCTATCGTCTTACGTTACGGTAATTACTATAGTGTTATTTATTC  
TGGTGGTGTGATAATCTTGGAGGTCGTGACGTTGATGAAGCTATAAGAGCGTTCTTATTACGGCGCA  
CTT





+

@A00721:190:HGJW7DSXY:4:2125:15835:9126\_2:N:0:TCTGCAAG+GCTGCACT  
TATTTGGATGATCTTGATAAAGAACTTCATGAATTTTCAGAGGATGAAAAATTTCTTCCTTGATTT  
TAATATAAAGAATCTTTACCAGGACTCCTACTACAGGAGGCAGTCTTC

+

@A00721:190:HGJW7DSXY:4:2102:3974:15421\_1:N:0:TCTGCAAG+GCTGCACT  
GAAACTCTAAGTGGTAATACTGTCTTTCCAAGCTTACCTGTATCTTCAATGAAATTGGACTCTTCGAT  
AGGGGACATTTTATCGTGGGCTTTCCGTAAAGGAAGATCTGTTATCGACGGTTTATCGTTTACGAAGT  
ATC

+

@A00721:190:HGJW7DSXY:4:2421:2257:27164\_1:N:0:TCTGCAAG+GCTGCACT  
TTGGCCTAGTGGATGTTATTAGTGACATCTGGTCAATTTCTTTTTAGGTGGTCTTTATTCTATTATT  
GATTTTTATGAGATTGATACGTTAACAGAAGATGATGTTAGAGTAGAATTCCTGAAGAGTCCTTCCGT  
AAC

+

@A00721:190:HGJW7DSXY:4:1622:28664:15718\_2:N:0:TCTGCAAG+GCTGCACT  
TACACAATTAAGAAATAATCCTACATTGACTGATTATCTAAAGATTGAAGGAAAATTTTATCCTCGTT  
TAACCTACTTAGACTTTTCTACGATACAAATGATAACTTCTAATTTAC

+

@A00721:190:HGJW7DSXY:4:2425:6641:13933\_1:N:0:TCTGCAAG+GCTGCACT  
GATGCATGGTGTTATCTCCTCAGGAGTCCCGGCATTTGATAATAATGACGAGACTTTTCGTCATAATCG  
CTGCATATTACGGATTACACGGTACCAGCGCATCTCGTGTCTGAGCCTCGACCCGATTATATGGTATTA  
ACT

+

@A00721:190:HGJW7DSXY:4:1562:27624:23375\_2:N:0:TCTGCAAG+GCTGCACT  
TCACACATTTTGAGAACTAACTATGTTATGTTCTCTGATCATTTTGACAATCTCTTCTTATAATAAAT  
AAATAAATAATATTACTAATGGCAAATAGTGGAAAGGCTCCAGTCAAC

+

@A00721:190:HGJW7DSXY:4:2319:13241:10739\_1:N:0:TCTGCAAG+GCTGCACT  
CGATGACGTGAGAATAGGTGAAGGGATAGTTTTTACCTCGACCAACATTAAGGCGGCGGCGACTAATC  
TTAAAGCTTCACCCAAATGAAGGACACTTCGAAACTGAATAATGATGCACTACAAACAAGTATCGCT  
AAT

+

[illegible]



@A00721:190:HGJW7DSXY:4:2135:24433:21104\_2:N:0:TCTGCAAG+GCTGCACT  
ATGCTTTTCGATAGTGATTGTTATCAATTTAAATACATTACTGTTTCAAATCATCTTTACTCACAGAC  
TCCGAAAATGGTTTCAAATGAGGTCAAAGCTCTATTTATTAAACGAAC

+

FFFFFFFFFFFFFFFFFFFFFFFFFFFFFFFFFFFFFFFFFFFFFFFFFFFFFFFFFFFFFFFFFFFFFFFF  
FFFFFFFF:FFFFFFFFFFFFFFFFFFFFFFFFFFFFFFFFFFFFFFFFFFFFFFFFFFFFFFFF:

@A00721:190:HGJW7DSXY:4:2601:19461:23735\_1:N:0:TCTGCAAG+GCTGCACT  
TACCACTGATCTGCCGACTTTAGTCAAGGAAC TTCAATTCCTTCGATGTTTATATTTTCTATAAGGG  
AAAATAGCAATAATCAAATTTGACAAATTTAGAACTTTATTTCAGAACTCTCTCCGATCACCTTGG  
TGT

+

FFFFFFFFFFFFFFFFFFFFFFFFFFFFFFFFFFFFFFFFFFFFFFFFFFFFFFFFFFFFFFFFFFFFFFFF  
FFFFFFFFFFFFFFFFFFFFFFFFFFFFFFFFFFFFFFFFFFFFFFFFFFFFFFFFFFFFFFFFFFFFFFFF  
FFF

@A00721:190:HGJW7DSXY:4:1252:8784:33990\_1:N:0:TCTGCAAG+GCTGCACT  
TCAATAAGATGTATGATGATAATCTACTATTTTTAAATAGTGATATTCAGCGTATACTTGAATACTTT  
ATCAAAGATTTGGCTTGCTATTTACCGCAAAAAGTTGGAAGAGGTCTATGATATTTATTTACTTA  
TAC

+

FFF:FF:,FF,F:FFFFFFFFF,FF:FFFFFFF,FF:FFFFFFF,FFFFFF:FFFFFFFFF:  
FFFFF,FFFFFFFFFFFFFFFFFFFFFFFFFFFFFFFFFFFFFFFFFFFFFFFFFFFFFFFFFFFFFFFF  
FFF

@A00721:190:HGJW7DSXY:4:2145:8721:17597\_2:N:0:TCTGCAAG+GCTGCACT  
CCGATTATAACTTGACTGTTGATAATATTACAATAGCTCTTCTCAGAAGATTAGAGAAGTAACCGGT  
GAACACGTCGGTAGCATTGATTTACTTTTACCGTTAGAACTGAAAAAG

+

FFFFFFFFFFFFFFFFFFFFFFFFFFFFFFFFFFFFFFFFFFFFFFFFFFFFFFFFFFFFFFFFFFFFFFFF  
FFFFFFFFFFFFFFFF:FFFFFFFFFFFFFFFFFFFFFFFFFFFFFFFFFFFFFFFFFFFFFFFF

@A00721:190:HGJW7DSXY:4:2650:31340:27806\_1:N:0:TCTGCAAG+GCTGCACT  
ACCTATAAGTTACAAACGATTCTTCGACTATATTAAAGAAATAAAAATACTTCAAGTACCTGAAC TTT  
ACATTTTAAATGGTATGGTATAATGTGTCTTACAAATAGAACCTTCACTCTCGGTAATGAGAGTGTAT  
TCC

+

FFFFFFF::FFFFFFFFFFFF:FFFFFFFFFFFFFFFFFFFFFFFFFFFFFFFFFFFFFFFFFFFFFFFF  
FFFFFFFFFFFFFFFFFFFFFFFFFFFFFFFFFFFFFFFFFFFFFFFFFFFFFFFFFFFFFFFFFFFFFFFF  
FFF

@A00721:190:HGJW7DSXY:4:2632:9109:5118\_1:N:0:TCTGCAAG+GCTGCACT  
GGCATTACTAGGATTTATCACACTCCTAAATTTGATAGCAATTTATGTTTTAAATGCTAGGAAAATTT  
TAGAAAACTCCATTGTATAGTTCAAGGAGTACTTAATTCAATAGCTTTAGTATTATTACTATCGCC  
TTT

+

F,FFFFFFFFFFFFFFFFFFFFFFFFFFFFFFFFFFFFFFFFFFFFFFFFFFFFFFFFFFFFFFFFFFFF  
FFFFFFFFFFFFFFFFFFFFFFFFFFFFFFFFFFFFFFFFFFFFFFFFFFFFFFFFFFFFFFFFFFFFFFFF  
FFF

@A00721:190:HGJW7DSXY:4:2605:1551:7216\_2:N:0:TCTGCAAG+GCTGCACT  
AGTTAATTGCTTACACAAAAGTGACGCGCAAGGAATCTTAATTGATTGAAGCTAGGCGTTGGGGAGA  
ATGAACTGCCGCTTCCCGGAAGAAACGATCTATTTACAGAGTATTTAG

+

FFFFFFFFFFFFFFFFFFFFFFFFFFFFFFFFFFFFFFFFFFFFFFFFFFFFFFFFFFFFFFFFFFFFFFFF  
FFFFFFFFFFFFFFFFFFFFFFFFFFFFFFFFFFFFFFFFFFFFFFFFFFFFFFFFFFFFFFFF

@A00721:190:HGJW7DSXY:4:2245:25256:34021\_2:N:0:TCTGCAAG+GCTGCACT  
TACCATGACCAATCATCGCTCCAAC TGGCACGCCAGACGTAGGGTCAAACCTACTACCGCCGGTCGGC  
AGATCGGCACCACTGGTCTCTACGTT CAGGGACCCGCTGTGCAGAATA

+

FFFFFFFFFFFFFFFFFFFFFFFFFFFFFFFFFFFFFFFFFFFFF:FFFFFFFFFFFFFFFFFFFFFFFFFF  
FFFFFFFFFFFFFFFFFFFFFFFFFFFFFFFFFFFFFFFFFFFFFFFFFFFFFFFFFFFFFFFF  
@A00721:190:HGJW7DSXY:4:1435:31855:3740\_2:N:0:TCTGCAAG+GCTGCACT  
CACAGAAGAAGGCTGAAGGTCGTACCGGACGACCCTCAAAGGAAACGGGCTGTTGCCCAGAGGAAA  
GCAGCGACCACCGAGGTCGCTCGTAACATTGACGGCAGTCCCGTCATC  
+  
FFFFFFFFFFFFFFFFFFFFFFFFFFFFFFFFFFFFFFFFFFFFF:FFFFFFFFFFFFFFFFFFFFFFFFFF  
FFFFFFFFFFFFFFFFFFFF,FFFFFFFFFF:FF,FFFFFFFFFFFFFFFF,FFFF  
@A00721:190:HGJW7DSXY:4:1307:22191:29747\_1:N:0:TCTGCAAG+GCTGCACT  
CTGAGGCACTACCTCAGTCAAAAGTCACATTCACCACTCCCATAACCAATCAATGATGTGACTATACAG  
TTCCGCCATTTCAAGAGTGGTCAATACGTCGTGGGAGGTACTGAAGCCTTCCCCCTCCGCTGGCACGAA  
GAA  
+  
FFFFFFFFFFFFFFFFFFFFFFFFFFFFFFFFFFFFFFFFFFFFF:FFFFFFFFFFFFFFFFFFFFFFFFFF  
FFFFFFFFFFFFFFFFFFFFFFFFFFFFFFFFFFFFFFFFFFFFFFFFFFFFFFFFFFFFFFFFFFFFFFFFFF  
FFF  
@A00721:190:HGJW7DSXY:4:2131:13169:2033\_1:N:0:TCTGCAAG+GCTGCACT  
CCAATCAATAGTTCTTCTGACCAGAATGAAAAGGGGTTTTACCAGGGTAGTCTCTAAGTCTACCAGGAA  
GAGGGGAAATGTCCCCAAAACTGAGAAGAATAAAGGGAAAGGTCCATCAGGACCTAAGAAGGGGAAAT  
TAC  
+  
FFFFFFF,FFFFFFFFFFFFFFFFFFFFFFFFFFFFFFFFFFFFF:FFFFFFFFFFFFFFFFFFFFFFFFFF,  
FFFFFFFFFFFFFFFFFFFFFFFFFFFFFFFFFFFFFFFFFFFFFFFFFFFFFFFFFFFFFFFFFFFFFFFFFF:  
FFFF  
@A00721:190:HGJW7DSXY:4:2276:1705:34601\_2:N:0:TCTGCAAG+GCTGCACT  
GGAAGATCTCCACCATCTGGGGTTGGGAATAAGAAATCTGCACGGGCCAAAGAGGCCGCTGCTACGA  
AGTCGCTGAAGGCGGCTTGGGTCATTAAGGGTAGCTGTAAAGTTGCGC  
+  
FFFFFFFFFFFFFFFFFFFFFFFFFFFFFFFFFFFFFFFFFFFFF:FFFFFFFFFFFFFFFFFFFFFFFFFF  
FFFFFFFFFFFFFFFFFFFFFFFFFFFFFFFFFFFFFFFFFFFFFFFFFFFFFFFFFFFFFFFFFFFFFFFFFF  
@A00721:190:HGJW7DSXY:4:1562:9453:20494\_1:N:0:TCTGCAAG+GCTGCACT  
ATCTTTGAGACCAAGACTCTCTACAGTAGGTTCTGTCCTACTATGAGCAAATCTGTTGAATTCGTCAC  
TGAGGACGAAGGTGAGAGGACTTTTGGCTACTGGCGACAACTGAGAGCAGTCGCTGGGGAAAGAGAA  
TTG  
+  
FFFFF:FFFFFFFFFFFFFFFFFFFFF:FFFFFFFFFFFFFFFFFFFFFFFFFFFFFFFFFFFFFFFFFF,FFFFFFF  
FFFFFFFFFFFFFFFFFFFFFFFFFFFFFFFFFFFFFFFFFFFFFFFFFFFFFFFFFFFFFFFFFFFFFFFFFF  
FFF  
@A00721:190:HGJW7DSXY:4:2153:24008:9126\_1:N:0:TCTGCAAG+GCTGCACT  
TCTTGCAAGTGAAGTTCAGACGTCGTCTTCCGATCTTTTTATCCGCGCTTAACCTATGGGGC  
GAAGATCCCCCTATGGAGTCTTGAAGGACTTAGGTTGGCATATTTATGCCGACGATAATAAGCATGTCA  
CCC  
+  
FFFF:FFFFFFFFFFFFFFFFFFFFFFFFFFFFFFFFFFFFF::FFFFFFFFFFFFFF:FFF:FFFFFFFFFFFFF:  
FFFFFFFFFFFFFFFFFFFFFFFFFFFFFFFFFFFFFFFFFFFFFFFFFFFFFFFFFFFFFFFFFFFFFFFFFF:  
FFFFF:FFFFFFF:FFFF  
FFF  
@A00721:190:HGJW7DSXY:4:2309:2013:15499\_2:N:0:TCTGCAAG+GCTGCACT  
TTACAAGAGAGAGTGTGAGAGAGTCGCTCTCACTATTTTTGCCAGAATGCGGGCTTTCTGACTGATG  
AGGTTAAAACTCTTGCTCCTTCTGTGGGTGAGGGTTTTTGTATATTC  
+  
FFF:FFFFFF:,FFFF:F,FFFFFFFFFFFF::FF:F:FFFFFFF:,F,FFFFFFFFFFFFFFFF,,:FF  
:F:FFFFFF:FFF,FF:FFFFFFFFFFFFFFFFFFFFF:FFFFFFFFF:, :FFFF  
@A00721:190:HGJW7DSXY:4:1421:23312:6449\_2:N:0:TCTGCAAG+GCTGCACT  
TTAGAGAGCATTAGAAGGAAGTTGGGCAAATTCACATATGGGTAGACGTTGTCACACTTTTCTTGA

+

@A00721:190:HGJW7DSXY:4:1136:31629:35258\_2:N:0:TCTGCAAG+GCTGCACT  
CTTCATGCTGATCTTTCAGGACCTAATCACATCATGATTGATAGTTACGGCTCGTATCGAGTTGGAGG  
GAGGAAGTTCTCCGAAATTAAGACGGGGGGATTAAGAGTCCAGCTGT

+

@A00721:190:HGJW7DSXY:4:1601:18258:15671\_1:N:0:TCTGCAAG+GCTGCACT  
TCAGAGAGGGGAGCTCTGAAAAGGAACTTCGTCTAGAAGATGAGGAAGTCTAAGAGGAGGAGTTTGAG  
GAAGGCTCTAGAGAAGATCTCACCACCTGGAGAAGGCAAGTGGAGAGTCCAGAAGTTGATGAAGAAGG  
ATT

+

@A00721:190:HGJW7DSXY:4:2141:30011:7310\_1:N:0:TCTGCAAG+GCTGCACT  
CTTCCTAAGGTGGATGAGGGAGGTTGTTTCTTTGGAGTTTATAGATAATCTTTTGAGAAGGGGTCTAG  
AGCCAGCAAGAGAAGCTTATATGCTGGTTTAAGTGATGATTATCACTCCTTGAGAAGACAAGCCACAT  
TAA

+

@A00721:190:HGJW7DSXY:4:2357:25635:17801\_2:N:0:TCTGCAAG+GCTGCACT  
TCCTTTTGAGTATCGACAGATCTTCGATCTTGAGGACGTACATTTAACGTGGCAGAATTCGGTAACT  
TACCATATTGTTCCCTTCCGGAAGTTGTGGGATTTAACTTTGACTCAA

+

@A00721:190:HGJW7DSXY:4:1568:7030:20118\_2:N:0:TCTGCAAG+GCTGCACT  
TGGACTACTCGACTTTTGATCTGGAGTTGTCTAGGGTCATGGCAGATACTACCGATAAGGTGAAAAAT  
ATGCAGGTCAAAGATTCTGTAGCTCTGAGGGCGGTTGAGGGAGATCGG

+

@A00721:190:HGJW7DSXY:4:1534:11930:27007\_1:N:0:TCTGCAAG+GCTGCACT  
CTAAGAGTCTTTATGATTCAAAACCTATCGTTGTCGTACCTTACAAGGTTGAGGAGACTTTACAGCGG  
CTTATTGTCGCGCAGTTTCCAGAATTGCGGTTGAAGTTCACCCATTCTATCTTGAATGCTCACGCCGT  
CGC

+

@A00721:190:HGJW7DSXY:4:2119:32642:3317\_2:N:0:TCTGCAAG+GCTGCACT  
GATTTAGATATTATTGATATTGGAGGCGATATTCGTTTTCATATCCAAACTCCTTGAATGGAGTACA  
TATTTGCAACCCTATTCTTGATGTGAAAGATGCATCGAGGTATACGTC

+

@A00721:190:HGJW7DSXY:4:2502:5891:27445\_2:N:0:TCTGCAAG+GCTGCACT  
GCTATCGGAGGGAAGCAAAATGTTTCGTTCTGTTACAAGAACGCTTTGGATTGTGACCATAAAGCCTC

AGTTGCGATAGCTGTAGAGGTATACGATATCTCTCATGATGATGTAGC  
+  
FFFFFFFFFFFFFFFF:FFFF:FFFFFFFFFFFFFFFFFFFFFFFFFFFFFFFF:FFFFF,FFFFFFFFFFFFFFFF:F  
:FFFFFF:FFFF,FFFF:FFFFFFFFF:FFF:,,,FFFFFFFF:F  
@A00721:190:HGJW7DSXY:4:2449:24641:18270\_2:N:0:TCTGCAAG+GCTGCACT  
TATGTCATTTCTGCTTAGTTTGTCCCGCGCAATTATTGGACACGATGAAAAATGACATAACCGTTCCT  
GACCTTGGTATCGTTATCCGTCATGGAGATGATGGCGCATCACTTGAT  
+  
FFFFFFFFFFFFFFFFFFFFFFFFFFFFFFFFFFFFFFFFFFFFFFFFFFFFFFFFFFFFFFFF  
FFFFFFFFFFFFFFFFFFFFFFFFFFFFFFFFFFFFFFFF:FFFFFFFFFFFF  
@A00721:190:HGJW7DSXY:4:1670:32560:36620\_2:N:0:TCTGCAAG+GCTGCACT  
GATTTTATCTTTCTTCAAACACCCTGTTTTCCTTAAGGGCGGACAATTGTTCCATTGTGAACCTTGG  
GGACTAGATTGAGCATTAATGAGTTCGAATAACTCGTAATAAATCTT  
+  
FFF:FFFFFFFFFFFFFFFFFFFFFFFFFFFFFFFF,FFFFFFFFF:FFFFFFFFF:FFFFFFFFF:FFF  
FFFFFFFFFFFFFFFF:FFFFFFFFF:FFF:FFFFFFFFFFFFFFFFFFFF  
@A00721:190:HGJW7DSXY:4:2529:10095:35978\_2:N:0:TCTGCAAG+GCTGCACT  
AAGAGCCACTGCCAATCTCATCGCTATACGCATACCTGATTGGAAGAAGCGAGGTCGTTCTCAATA  
AAAATTTTCTCAAGAGATTATGGTTGATAAAGTTTTCTTCATAAGGG  
+  
:FFFFFFFFFFFFFFFFFFFFFFFFFFFFFFFF:FFFFFFFF:FF:FFFFFFFFFFFFFFFFFFFFFFFF:FFF  
FFFFFFFFFFFFFFFFFFFFFFFF:FFFFFFFF:FFFFFFFFFFFFFFFFFFFF  
@A00721:190:HGJW7DSXY:4:1467:23538:35806\_2:N:0:TCTGCAAG+GCTGCACT  
GTCATGGGGATCACTTCTTCGGTCAATGACAAAACCTTCGAATATGTTACGACATGGCTTCGTAACAA  
CAGTGCGAGTATTGTCATCTCGGGGAAAGTGATTCACCAAGATGTTCA  
+  
FFFFFFFFFFFFFFFFFFFFFFFFFFFFFFFF:FFFFFFFFFFFFFFFFFFFFFFFFFFFFFFFFFFFF  
FFFFFFFFFFFFFFFFFFFFFFFFFFFFFFFFFFFFFFFF:FFFFFFFFFFFF  
@A00721:190:HGJW7DSXY:4:1343:24758:24079\_1:N:0:TCTGCAAG+GCTGCACT  
CCTAGAGAAGGTCGAGCGATCTTACTCGTTATCGGAGCTAAGAAGAAGACTTTGGGTACACGTTATG  
CTCGCAAACCTTAACGTTAGTACCGGAGGTGATCTCTCTGCTTCTGCGTTACTGAGAGAAAAGATTGAG  
GAC  
+  
F:FFFFFFFFFFFFFFFFFFFFFFFFFFFFFFFFFFFFFFFFFFFFFFFFFFFFFFFFFFFFFFFF  
FFFFFFFFFFFFFFFFFFFFFFFF:FFFFFFFFFFFFFFFFFFFFFFFFFFFFFFFFFFFFFFFFFFFF  
FFF  
@A00721:190:HGJW7DSXY:4:2459:31150:5588\_1:N:0:TCTGCAAG+GCTGCACT  
CTTTATGGACAAGATGCAAGTTCTTGGGAAATACTTGTTTCCCTTTTtaggTTTAGGTGATCTTG  
ACGTCGATTCTTTGTATAGGGAGTGTGAGAAGACAACGAATCTTGAACTACGGTCCTTATCAAAGAA  
AAT  
+  
:FFFFF,FFFFFF:,FFFFFFFFFFFFFFFFFFFFFFFFFFFFFFFF,FFFFFFFFFFFFFFFF:FFFFFF  
FFFFFFFFFFFFFFFFFFFFFFFF:F:FFFFFFFFFFFFFFFFFFFFFFFFFFFFFFFFFFFFFFFF  
:FF  
@A00721:190:HGJW7DSXY:4:2459:27407:14920\_2:N:0:TCTGCAAG+GCTGCACT  
AAATCTTTTGAGATTGAGAAGATTGAAGAACACGTCAAGAAGTCGCTCGGCGTTGTTCTTGAAAACCA  
AGTTAAGAAGGAGGCTGATCATGGAGTCTTGTACCTTCTGTCAAAT  
+  
FFFFF:FFFFFF:FFFFFFFFFFFFFFFFFFFFFFFF:FFFFFFFFFFFFFFFF:FFFFFFFFFFFF  
FF:FFFFFFFFFFFFFFFFFFFFFFFFFFFFFFFFFFFFFFFFFFFFFFFF  
@A00721:190:HGJW7DSXY:4:1139:15347:34334\_2:N:0:TCTGCAAG+GCTGCACT  
CCGGATGTGGATTGAAGGCTGGCTCTAAGGGAGACTCCTTCTTTTGAATGTTGTAAAGAATTGGGTT  
GAGAAGTGTGCTTTACAAGGAGTTAGACTCTTCTTCAAGTTTTTAGAT  
+

FFFFFFFFFFFFFFFFFFFFFFFFFFFFFFFFFFFFFFFFFFFFFFFFFFFFFFFFFFFFFFFF:F::FFF  
FFFFFFFFFFFFFFFFFFFFFFFFFFFFFFFFFFFFFFFFFFFFFFFFFFFFFFFFFFFFFFFF  
@A00721:190:HGJW7DSXY:4:2463:6334:12649\_2:N:0:TCTGCAAG+GCTGCACT  
TTTTCTCTACCCATAACTTCTTTTTCAAAAATGCGGATGGGTCTACTGATGTTTTCTACAGAGTGCA  
GTCGTTTCAACACTTATCACCACCTTTTGAAAGGAAAATAATTGGTGAT  
+  
FFFFFFFFFFFFFF:FFFFFF,::FFF:FFF:FFF:FFFFFFFFFFFFFFFFFFFFFFFF:FFFFFFFF:FFFFFF  
FFFFFFFFFFFFFF:FFFFFFFFFFFFFF,,F:FFFFFFFFFFFFFF,F,FFF:  
@A00721:190:HGJW7DSXY:4:1565:5159:36041\_1:N:0:TCTGCAAG+GCTGCACT  
GGGGTTCCATAAGATATTATCTGACATTGTGGTTCAATGATCAGGATTCTTCTTTTGGTCCTTACGTC  
TTAAGTAATTTGGATGTTGTGCGAAACTATCAGGTTCTTGTACGATTCTTAAAAGAAGTTTATTAAA  
ACT  
+  
FFFFFFFFFFFF:FFFF:FFFF,FF:FFFFFFFFFFFFFF,FFFFFFFF:FF:FFFFFFFF:FFFFFFFF  
FFFFFFFFFFFFFFFFFFFFFFFF:FFFFFFFFFFFFFF:FFFFFFFFFFFFFFFFFFFFFFFFFFFFFFFF  
,FF  
@A00721:190:HGJW7DSXY:4:2264:15899:28369\_1:N:0:TCTGCAAG+GCTGCACT  
GTAGCTAATGTTCTTGCAATAGCCACAGACTTTCTGGGAAAAGAGACCTCTGTTGTAGAGGAGTTGAG  
AGAATTACTCAGATTCAATCTGGCATCACTGAACGTCTACAACGAGTTAGGGAGTGGCTAGGTTTTAA  
AA  
+  
FFF:FF:FFFF,FFFF:FFFF,FF:FFF,FFFFFF,FFFF,FFFFFFFF:FF:FF:FF,F,FFFF  
FF::FFFFFFFFFFFFFFFF:FF::FFF,FFFFFFFFFFFFFFFFFFFFFFFFFFFFFFFF:FFFFFFFF:FFFF  
FF  
@A00721:190:HGJW7DSXY:4:1334:5186:36996\_2:N:0:TCTGCAAG+GCTGCACT  
AATACCTTCCACTGAGTTCATCACCAGAGTTTCGACGTCGCGGAAAACGATGAAGATTTCCACACTG  
TTCGAGAATCTTCTGATGCTGAATTTGAGGAAAATTTTTCGGAAGTTT  
+  
FFFFFFFFFFFFFFFFFFFFFFFFFFFFFFFFFFFFFFFFFFFFFFFFFFFFFFFFFFFFFFFF  
FFFFFFFFFFFFFFFFFFFFFFFF,FFFFFFFFFFFFFFFFFFFFFFFF  
@A00721:190:HGJW7DSXY:4:2270:27010:25191\_1:N:0:TCTGCAAG+GCTGCACT  
ACGTGTGCTCTTCCGATCTGGAGGAGGTAATAGTTATAAAACCTTCTTTTATCATTGCAACAGGACTT  
TGAGAAGACTGTTGAAATGGACAAAATCTGGGATCATAGGTATGTGTACGCTACACTCGAAATATGG  
GCC  
+  
FFFFFFFFFF:FFFFFFFFFFFFFFFFFFFFFF,FFFFFFFFFFFFFFFFFFFFFF:FFF:FFFFFFFF:FF:FFFF  
FFFF:FFFFFFFFFFFFFFFFFFFFFFFFFFFFFFFFFFFFFFFFFFFFFFFFFFFFFFFFFFFFFFFF  
:FF  
@A00721:190:HGJW7DSXY:4:1635:5421:36307\_1:N:0:TCTGCAAG+GCTGCACT  
TTAGATAAATTCTTCCGGGCTCAATGACCTTTGCTATGTACGTGGATCTAATGCTTGGTGATCTGAA  
TCTGACCATCGCAAAGAAGACTTTATTAGTTCATGAAGTTCTTACACTTCTCGCGACTAATGTCAGCT  
TCA  
+  
FFFFFFFFFFFFFFFFFFFFFFFFFFFFFFFFFFFFFFFFFFFFFFFFFFFFFFFFFFFFFFFF  
FFFFFFFFFFFFFFFFFFFFFFFFFFFFFFFFFFFFFFFFFFFFFFFFFFFFFFFFFFFFFFFF:FFFFFF  
FFF  
@A00721:190:HGJW7DSXY:4:2338:22200:12571\_1:N:0:TCTGCAAG+GCTGCACT  
CCATATTTATCACTTTTTGAATATGACAGAAGCTCGCCATATCAGATTAGAGACATGCCAGTTAGAGT  
TCTTCTAACCAGGACTGATGGTGAGATTCTTTTACCTTTTGGAGGTCCAGGAACCTTTACTCCTATTG  
TCT  
+  
::,,,FF:F,F,,, :FFFFFFFF:,, :FFF:F:FFF,FFFFFFFF:F,:F,::FF:F,,,F,FF,F  
F:FFFF,F::,F,, :FFFF:FF:F,FF:F:FF,FFF,FFFF::F:::F,FFF,FFF,FF,,FF,:F  
F:F







FFFFFFFFFFFFFFFFFFFFFFFFFFFFFFFFFFFFFFFFFFFFFFFFFFFFFFFFFFFFFFFFFFFFFFFF  
FFFFF:FFFFFFFFFFFFFFFFFFFFFFFFFFFFFFFFFFFFFFFFFFFFFFFFFFFFFFFFFFFF  
@A00721:190:HGJW7DSXY:4:2648:23710:1438\_1:N:0:TCTGCAAG+GCTGCACT  
CAACGGAAAGACATATCGCACCCGAAATTTTGGGCAGAATGCTCTTAACGCGGTTCTTGAACGGTGT  
TTTGATCAGTCTAAGTTGGATAAAGTTATAGGAGACTCAGTTAACCTGAGAGCTCCTCAATTGATAGA  
TTG  
+  
:FFFFFFFFFFFFFFFFFFFF,FFFF:FFFFFFFFFFFFFFFFFFFFFFFFFFFFFFFFFFFFFFFFFFFF  
FFFFFFFFFFFF,FFFFF:FFFFFFFFFFFFFFFFFFFFFFFFFFFFFFFFFFFFFFFFFFFFFFFFFFFF  
FFF  
@A00721:190:HGJW7DSXY:4:2324:4634:6010\_2:N:0:TCTGCAAG+GCTGCACT  
TAGTATACTTCGTAAAGTCGACAGCGAAATGGTCAATATTGATAATTGGACCGACTATATGACCTATT  
TTAAGCTCATGGTGAAGGAAGCTAAGGTTAACTTGATGCTTCAG  
+  
FFFFFFFFFFFFFFFFFFFFFFFFFFFFFFFFFFFFFFFFFFFFFFFFFFFFFFFFFFFFFFFFFFFF  
FFFFFFFFFFFFFFFFFFFFFFFFFFFF:FFF:FFFFFFFFFFFFFFFFFFFFFFFFFFFF  
@A00721:190:HGJW7DSXY:4:1320:16288:5838\_1:N:0:TCTGCAAG+GCTGCACT  
CTATCTTTAAGGTTCTTGTGAGGAGAGTCAAACAGTGTCTTTTACCAACATTTTTATGTATACAGAG  
ATGACCAGTGACGATTTCTCCCGAAGCTCTTCTCTCTCTTAGGAGGTCATGATGACTACTATAAGGG  
TGA  
+  
FFFFF:FFFFFFFFFFFFFFFFFFFFFFFFFFFFFFFFFFFFFFFFFFFFFFFFFFFFFFFFFFFF  
:FFFFFFFF:FFFFFFFFFFFFFFFFFFFFFFFFFFFFFFFFFFFFFFFFFFFFFFFFFFFFFFFFFFFF  
FFF  
@A00721:190:HGJW7DSXY:4:1662:31828:32189\_2:N:0:TCTGCAAG+GCTGCACT  
TTCGATGCTGAATTTCTTGAACCTTTGGAGTGCCAGTGAATATTTTGTACGCCAGGAGTATCCATAA  
CGATTTGTCATTTACCACCTTTGCTCAACGACGAAGTGAACGGCCAA  
+  
FFFFFFFFFFFFFFFFFFFFFFFFFFFFFFFFFFFFFFFFFFFFFFFFFFFFFFFFFFFFFFFFFFFF  
FFFFFFFFFFFFFFFFFFFFFFFFFFFFFFFFFFFFFFFFFFFFFFFFFFFFFFFFFFFF  
@A00721:190:HGJW7DSXY:4:1666:17354:36370\_1:N:0:TCTGCAAG+GCTGCACT  
TCTTGTATGATCACTTTGATGATTTTATCACTTTATTATGACCTTGAAAGTTTTCGGCTGTGGTTGT  
CGCTGGGACGATTCCATTCTGTTTTCAAAGACTCCAATAACTGATCATTCTGATCATATGATTTTGG  
ACA  
+  
FFFFFFFFFFFFFFFFFFFFFFFFFFFFFFFFFFFFFFFFFFFF:FFFFFFFFFFFFFFFFFFFFFFFFFFFF  
FFFFFFFFFFFFFFFFFFFFFFFFFFFFFFFFFFFFFFFFFFFFFFFFFFFFFFFFFFFFFFFFFFFF  
FFF  
@A00721:190:HGJW7DSXY:4:2577:2166:33865\_1:N:0:TCTGCAAG+GCTGCACT  
ATGTTACTCTTGTAGGACTTTGGGAGAGATTTCGTTAGTTTTAAAGACTATACTAAATATCTCCACTAC  
GAGGTTGTTGTTTGGCGATTAGCTCTTGCGACTAATATTCGATATTCGATTGAGGTCGTTATACCTA  
TTC  
+  
FFFFF:F,FFFFF:,F,FFFFFFFFFFFF,F:F:FFFFF,FFFFF:FFFF,FFFFFFFF,,FFFF  
FFF,FFFFFFFFFFFF:FFFFFFFFFFFFFFFFFFFFFFFFFFFFFFFFFFFFFFFFFFFFF::FF  
,FF  
@A00721:190:HGJW7DSXY:4:2532:14208:12978\_1:N:0:TCTGCAAG+GCTGCACT  
TTTGAATTGTATAAGATCAAATTTTAAACGATTCCGAGAGGTTTATCCTGATGTGGAGGGAGTTCTTG  
AAGCATCCCGACCTTTCCTTGTGAAAATTTTGATGCGGTTTCATAAGATTATCAGTAATCCTGATTCT  
A  
+  
:FF:F:FFFFFFFF,F:FFFFFFFF:F:FFFFFFFFFFFFFFFFFFFFFFFFFFFFFFFFFFFF  
FFFFFFFFFFFFFFFF:FFFFFFFFFFFFF:FFFFFFFFFFFFFFFFFFFFFFFFFFFFFFFFFFFF  
F

@A00721:190:HGJW7DSXY:4:1310:18973:5979\_2:N:0:TCTGCAAG+GCTGCACT  
CGTATCTCAAAGATCGACTTCGAGACAGGTGATATTGTTGAGCGAGAGCGACCAAGATCTAAATTCGG  
TAACGGTGCGTGGCGCTTTATTTTAAAAAGCTCCCTCCTCTCGCAAGT

+

FFFFFFFFFFFFFFFFFFFFFFFFFFFFFFFFFFFFFFFFFFFFFFFFFFFFFFFFFFFFFFFFFFFFFFFF  
FFFFFFFFFFFFFFFFFFFFFFFFFFFFFFFFFFFFFFFFFFFFFFFFFFFFFFFFFFFFFFFFFFFFFFFF

@A00721:190:HGJW7DSXY:4:1539:30038:25238\_2:N:0:TCTGCAAG+GCTGCACT  
AGTCTCTGACTTGACCATCTTTCATTTTAAATGACGATCATTAAGACTCTCTTCTTCTTTGTTTCCT  
TCTTTCGACTGATTTTTCCTCATCAGCTTGTGTTTTACCTAATCTGTG

+

FFFFFFFFFFFFFFFFFFFFFFFFFFFFFFFFFFFFFFFFFFFFFFFFFFFFFFFFFFFFFFFFFFFFFFFF  
FFFFFFFFFFFFFFFFFFFFFFFFFFFFFFFFFFFFFFFFFFFFFFFFFFFFFFFFFFFFFFFFFFFFFFFF

@A00721:190:HGJW7DSXY:4:1473:15664:26741\_2:N:0:TCTGCAAG+GCTGCACT  
TCAGTTGATTAAGACTCTTCCGAAAGGCGAACTTTGGGAATTTGAAGCTCAGGGTGAAGCACAACTG  
TGACCGTGACGAAGTGTGGTGTCTTGATCTACGTTACGGATATACTC

+

FFFFFFFFFFFFFFFFFFFFFFFFFFFFFFFFFFFFFFFFFFFFFFFFFFFFFFFFFFFFFFFFFFFFFFFF  
FFFFFFFFFFFFFFFFFFFFFFFFFFFFFFFFFFFFFFFFFFFFFFFFFFFFFFFFFFFFFFFFFFFFFFFF

@A00721:190:HGJW7DSXY:4:2248:14931:26068\_1:N:0:TCTGCAAG+GCTGCACT  
TATTTTAAGTTTTGTCTTCTTGTGTTGTCTTATTCTATTAATCACTCATTTTAGTGAGATTATTA  
ACGCACTAAAACGTCTTCGACAACAGCAGGGGTTTTCGAATAGTGATAGCCACCCGCCTTACAGAGG  
GCA

+

FFFFFFFFFFFF:FFFFFFFFFFFFFFFFFFFFFFFFFFFFFFFFFFFFFFFFFFFFFFFFFFFFFFFF  
FFFFFFFFFFFFFFFF:FFFFFFFFFFFFFFFFFFFFFFFFFFFFFFFFFFFFFFFFFFFFFFFFFFFF  
FFF

@A00721:190:HGJW7DSXY:4:1378:5647:4163\_1:N:0:TCTGCAAG+GCTGCACT  
CCACCTTTTCTACTGTCTGTCTCGCCTCTTGAATGAAGTTTTAATGCTTAACAACAATGATAGTGAA  
TTTATACCTACAATCATTGGTTTTTCTAATAATGATGACACTATTGTTTATGGATATGATGCTATTAC  
TCA

+

FFFFFFFFFFFFFFFFFFFFFFFFFFFFFFFFFFFFFFFFFFFFFFFFFFFFFFFFFFFFFFFFFFFFFFFF  
FFFFFFFFFFFFFFFFFFFFFFFFFFFFFFFFFFFFFFFFFFFFFFFFFFFFFFFFFFFFFFFFFFFFFFFF  
FFF

@A00721:190:HGJW7DSXY:4:2407:24080:21433\_1:N:0:TCTGCAAG+GCTGCACT  
GATTCTCAGTTTACAAGGACCTTAAGCGATGGATCGGGGTTAATTCTAAACATTACCCGAAAGACGT  
TCTAAATTAACCATTTGTACGATGTCGTCTGTCTCGGCGATCACTTTTCACTAAGAATTGGTCCTAC  
TT

+

F,:FFF:F:FFF:FFF:F,:::FFF:FFFFFFFF:F:F,FF:FFFFFFFFFFFFFFFF:FFFFFFFF  
,FFFFFFFFF,:::FFF:::FFF,:FFFFFFFFF,:::FFFF,:F,:::FFFFFF:FFFFFFFF:F  
FF

@A00721:190:HGJW7DSXY:4:1544:1877:29074\_2:N:0:TCTGCAAG+GCTGCACT  
ATCTTCATGAGATCGTTTCTTCTTTATCTCTTTGGTTGTTAGGGATTTTGAGAGAGTGAAAGGCTTC  
AATTGTAGTGGTTTGGTCGTTTCAGTACCCAGTCAGTATACCTCTACG

+

FFFFFFFFFFFFFFFFFFFFFFFFFFFFFFFFFFFFFFFFFFFFFFFFFFFFFFFFFFFFFFFFFFFFFFFF  
FFFFF,FF:FF:FFFFFFFFFFFFFFFFFFFFFFFFFFFFFFFFFFFFFFFFFFFFFFFF:FFF

@A00721:190:HGJW7DSXY:4:2404:7157:25097\_2:N:0:TCTGCAAG+GCTGCACT  
GAAACTACAGAGGAACGTACCGGATTACCTGTCTTTCATATTATGAATGAACCTTCGGCCGCTCTCT  
TTGCTTCGATGTTGGATGTCAAGAAGGGTTCAGAATGGGATTCCTACG

+

FFFFFFF:FFFFFFF,FFFFFFFFFFFFFFFFFFFFFFFFFFFFFFFFFFFFFFFFFFFFFFFFFFFF  
FFFF:FFFF:F:FFFFFFF,FFFFFFFF:FFFF,FFFFFFFFFFFFFF

[illegible][illegible]

+

[illegible] $+$ [illegible]

+

[illegible]

+

```

FFFFFFFFFFFFFF:FFFFFFFFFFFFFFFFFFFFFFFFFFFFFFFFFFFFF:,F,FFFFFFFFFFFFFFFFFFFFFF
FFFFFFFFFFFFFF:FFFFFFFFFFFFFFFFFFFFFFFFFFFFFFFFFFFFFF

```

+

[illegible]

+

[illegible]

$+$ 

@A00721:190:HGJW7DSXY:4:2310:5819:35086\_2:N:0:TCTGCAAG+GCTGCACT  
TATTTGGATGATCTTGATAAAGAACTTCATGAATTTT CAGAGGATGAAAAATTTTCTTCTTGATT  
TAATATAAAGAATCTTTACCAGGACTCCTACTACAGGAGGCAGTCTTC

 $+$ 

@A00721:190:HGJW7DSXY:4:2166:6117:14090\_1:N:0:TCTGCAAG+GCTGCACT  
GAAACTCTAAGTGGTAATACTGTCTTTCCAAGCTTACCTTTATCTTCAATGAAATTGGACTCTTCGAT  
AGGGGACATTTTATCGTGGGCTTTCCGTAAAGGAAGATCTGTTATCGACGGTTTATCGTTTACGAAGT  
ATC

+

@A00721:190:HGJW7DSXY:4:2441:24587:27665\_1:N:0:TCTGCAAG+GCTGCACT  
TTGGCCTAGTGGATGTTATTAGTGACATCTGGTCAATTTCTTTTTAGGTGGTCTTTATTCTATTATT  
GATTTTTATGAGATTGATACGTAAACAGAAGATGATGTTATAGTAGAATACCTGAAGAGTCCTTCCGT  
AAC

+

@A00721:190:HGJW7DSXY:4:1658:4544:5321\_2:N:0:TCTGCAAG+GCTGCACT  
TACACAATTAAGAAATAATCCTACATTGACTGATTATCTAAAGATTGAAGAAAATTTTATCCTCGTT  
TAACCTACTTAGACTTTTCTACGATACAAATGATACTTCTAATTTAC

+

@A00721:190:HGJW7DSXY:4:2464:24370:35086\_1:N:0:TCTGCAAG+GCTGCACT  
GATGCATGGTGTTATCTCCTCAGGAGTCCCGGCATTTGATAATAATGACGAGACTTTCGTCATAATCG  
CTGCATATTACGGATTACACGGTACCAGCGCATCTCGTGTGCGAGCCTCGACCCGATTATATGGTATTA  
ACT

+

@A00721:190:HGJW7DSXY:4:1626:1325:8578\_2:N:0:TCTGCAAG+GCTGCACT  
TCACACATTTTGAGAACTAACTATGTTATGTTCTCTGATCATTTTGACAATCTCTTCTTATAATAAAT  
AAATAAATAATATTACTAATGGCAAATAGTGGAAAGGCTCCAGTCAAC

+

@A00721:190:HGJW7DSXY:4:1446:18430:1877\_1:N:0:TCTGCAAG+GCTGCACT  
GATGACGTGAGAATAGGTGAAGGGATAGTTTTTACCTCGACCAACATTAAGGCGGCGGCGACTAATCT  
TAAAGCTTCACCCAAAATGAAGGACACTTCGAAACTGAATAATGATGCACTACAAACAAGTATCGCTA  
AT

 $+$ 

FFFFFFFFFFFFFFFF:FFFFFFFFFFFFFFFF,FFFFFF,FFFF:FFFFFFFFFFFFFFFFFFFFFFFFFFFFFFFFFFFFFFFF

FFFFFFFFFFFFFFFFFFFFFFFFFFFFFFFFFFFFFFFFFFFFFFFFFFFFFFFFFFFFFFFF:FF,:FFFFFFFF  
FF

@A00721:190:HGJW7DSXY:4:1506:17354:36871\_2:N:0:TCTGCAAG+GCTGCACT  
CGTTGAGAAAATTTCTTAGAGGATATTCGCCATTGTGGTACGAATTGGTCCAACATTTACCACCAAAT  
TCTTTTGATACAACTCTAGCCTTCAAGTGGGGTATGCCTGCGGAATAC

+  
FFFFFFFFFFFFFFFFFFFFFFFFFFFFFFFFFFFFFFFFFFFFFFFFFFFFFFFFFFFFFFFF,FFFFFF  
FFFFFFFF:FFFFFFFFFFFFFFFFFFFFFFFFFFFFFFFFFFFFFFFFFFFFFFFF

@A00721:190:HGJW7DSXY:4:2412:2220:13166\_2:N:0:TCTGCAAG+GCTGCACT  
CCAGATTGGTTCGAACCCGTTGATGCTATGTCAGAAGAAGCTATTCAAGCTGTCGTTTAAAGACTGC  
AGAGGCTGTCAAACAAGCCCAGACTCAAGGAGTCCAATCAAAGTTTT

+  
FFFFFFFFFFFFFFFFFFFFFFFFFFFFFFFFFFFFFFFFFFFFFFFFFFFFFFFFFFFFFFFF:FFFFFFFFFFFF  
FFFFFFFFFFFFFFFFFFFFFFFFFFFFFFFFFFFFFFFFFFFFFFFFFFFFFFFF:FF:FFFFFFFF

@A00721:190:HGJW7DSXY:4:1519:12906:5337\_2:N:0:TCTGCAAG+GCTGCACT  
AAAAGTCCGGAGTATATTGTATGTTAATAGATAGTGGGATAATAGTTCTACCGATACGTAGTGAACGC  
GTTCTGTAACAAGTACTTTCCGTCTGAAGAGTTTAGAGCTGCTATT

+  
FFFFFFFFFFFFFFFFFFFFFFFFFFFFFFFFFFFFFFFFFFFFFFFFFFFFFFFFFFFFFFFF:FFFFFF:F  
FFFFFFFFFFFFFFFFFFFFFFFFFFFFFFFFFFFFFFFFFFFFFFFFFFFFFFFF

@A00721:190:HGJW7DSXY:4:1478:2003:19398\_2:N:0:TCTGCAAG+GCTGCACT  
TGTGGCTTTAGACGATAATCCTTTAAGGACTATGTTGACTGACGAAGATTTTCCACAGATTTGTCTA  
CGTTGCAGATCGCCACTCCAAACACTATATACATTATAAAATATAAAA

+  
FFFFFFFFFFFFFFFFFFFFFFFFFFFFFFFFFFFFFFFFFFFFFFFFFFFFFFFFFFFFFFFF:FFFFFF:FFF:FFFFF  
FFFFFFFFFFFFFFFFFFFFFFFFFFFFFFFFFFFFFFFF,FFFFF:FFFFFFFFFFFFFFFF

@A00721:190:HGJW7DSXY:4:2367:30147:12023\_1:N:0:TCTGCAAG+GCTGCACT  
ACTTTTGTACCAAATCTTGGCTTTCAACGAAGTCTCTGATTTTATTAATCATTACTTTAACGATCT  
CTCGGTCATTTACTCTGTACTTGATCTACGTCGTTTAACTGTGGAACAACCTTTACTTAGAATGACT  
CTA

+  
FFFFFFFFFFFFFFFFFFFFFFFFFFFFFFFFFFFFFFFFFFFFFFFFFFFFFFFFFFFFFFFF,FFFFFFFFFFFFFFFF  
FFFFFFFF:FFFFFFFFFFFFFFFFFFFFFFFFFFFFFFFFFFFFFFFFFFFFFFFFFFFFFFFF:FFFFF:F  
FFF

@A00721:190:HGJW7DSXY:4:2172:1615:30718\_2:N:0:TCTGCAAG+GCTGCACT  
ATCATATTAGTAATACTCACTATCGTTTTCTGCTTTTTCTTAGCTAATAGATTAATAAAGGATGAGTA  
CGAAAACCAACTCTTCGTTACGAGACCTGATGGTAGAATAGATTTAGT

+  
FFFFFFFFFFFFFFFFFFFFFFFFFFFFFFFFFFFFFFFFFFFFFFFFFFFFFFFFFFFFFFFF:FFFFFFFFFFFFFFFF  
FFFFFFFFFFFFFFFFFFFFFFFFFFFFFFFFFFFFFFFFFFFFFFFFFFFFFFFF:FFFFF

@A00721:190:HGJW7DSXY:4:2261:3314:34100\_2:N:0:TCTGCAAG+GCTGCACT  
CTCAACGAGGATAAAGCGAGTTTTCCGTCCTGAACGTAATACACGAAGAGATCATCCGCAAACGACTC  
GAAACCGAGACGCCGTAGATCAAAGTCCCTTCTAACTTTAGATTATGA

+  
FFFFFFFFFFFFFFFFFFFFFFFFFFFFFFFFFFFFFFFFFFFFFFFFFFFFFFFFFFFFFFFF:FFFFFFFFFFFFFFFF  
FFFFFFFFFFFFFFFFFFFFFFFFFFFFFFFFFFFFFFFFFFFFFFFFFFFFFFFF:FFFFFFFF

@A00721:190:HGJW7DSXY:4:2357:8368:30295\_2:N:0:TCTGCAAG+GCTGCACT  
CTTATACTTTTGGGTATGTTTTGTGAAAAACATGAGATAACCAAGTCTATCGAAGACATTATCTCTTA  
TGTAATTATTGTAACGATCATTCTTTCGAGTTTTGTCATTCTTATTCT

+  
FFFFFFFFFFFFFFFFFFFFFFFFFFFFFFFFFFFFFFFF:FFFFFFFF,FFFFFFFFFFFFFFFF:FFFFFFFFFFFF  
FFFFFFFF,FFFFFF:FFFFFFFFFFFFFFFF:FFFFFFFFFFFF:FFF:FFF

@A00721:190:HGJW7DSXY:4:2206:21341:3286\_2:N:0:TCTGCAAG+GCTGCACT  
ATGCTTTTCGATAGTGATTGTTATCAATTTAAATACATTACTGTTTCAAATCATCTTTACTCACAGAC

TCCGAAAATGGTTTCAAATGAGGTCAAAGCTCTATTTATTAACGAAC

+

FFFFFFFFFFFFFFFFFFFFFFFFFFFFFFFFFFFFFFFFFFFFFFFFFFFFFFFFFFFFFFFFFFFFFFFF  
FFFFFFFFFFFFFFFFFFFFFFFFFFFFFFFFFFFFFFFFFFFFFFFFFFFFFFFFFFFFFFFF

@A00721:190:HGJW7DSXY:4:2638:2654:15671\_1:N:0:TCTGCAAG+GCTGCACT  
TACCACTGATCTGCCGACTTTAGTCAAGGAAGTTCAATTCCTTCGATGTTTATATTTTCTATAAGGG  
AAAATAGCAATAATCAAATTTGACAAATTTAGAACTTTATTTTCTCAGAACTCTCTCCGATCACCTTGG  
TGT

+

FFFFFFFFFFFFFFFFFFFFFFFFFFFFFFFFFFFFFFFFFFFFFFFFFFFFFFFFFFFFFFFFFFFFFFFF  
FFFFFFFFFFFFFFFFFFFFFFFFFFFFFFFFFFFFFFFFFFFFFFFFFFFFFFFFFFFFFFFFFFFFFFFF  
FFF

@A00721:190:HGJW7DSXY:4:1254:17987:33865\_1:N:0:TCTGCAAG+GCTGCACT  
TCAATAAGATGTATGATGATAATCTACTATTTTTAAATAGTGATATTCAGCGTATACTTGAATACTTT  
ATCAAAGATTTGGCTTGGTCTATTTACCGCAAAAAGTTGGAAGAGGTCTATGATATTTATTTTACTTA  
TAC

+

FFFFFFFFFFFFFFFFFFFFFFFFFFFFFFFFFFFFFFFFFFFFFFFFFFFFFFFFFFFFFFFFFFFFFFFF  
FFFFFFFFFFFFFFFFFFFFFFFFFFFFFFFFFFFFFFFFFFFFFFFFFFFFFFFFFFFFFFFFFFFFFFFF  
FFF

@A00721:190:HGJW7DSXY:4:2222:25708:32737\_2:N:0:TCTGCAAG+GCTGCACT  
CCGATTATAACTTGACTGTTGATAATATTACAATAGCTCTTCTCAGAAGATTAGAGAAGTAACCGGT  
GAACACGTCGGTAGCATTGATTTACTTTTACCGTTAGAACTGAAAAAG

+

FFFF:FFFFFFFFFFFFFFFFFFFFFFFFFFFFFFFFFFFFFFFFFFFFFFFFFFFFFFFFFFFFFFFF  
FFFFFFFFFFFFFFFFFFFFFFFF:FF,FFFFFFFFFFFFFFFFFFFFFFFFFFFFFFFFFFFFFFFF

@A00721:190:HGJW7DSXY:4:2205:14669:5729\_2:N:0:TCTGCAAG+GCTGCACT  
TATAAGTTACAAACGATTCTTCGACTATATTAAAGAAATAAAAATACTTCAAGTACCTGAACCTTACA  
TTTTTAATGGTATGGTATAATGTGTCTTACAAATAGAACCTTCACTCT

+

F:FFF,F:FFFFFFFFFFFFFFFFFFFFFFFFFFFFFFFFFFFFFFFFFFFFFFFFFFFFFFFFFFFF  
FFFFFFFFFFFFFFFFFFFFFFFFFFFFFFFFFFFFFFFFFFFFFFFFFFFFFFFFFFFFFFFF,FFFFFFFF

@A00721:190:HGJW7DSXY:4:1144:27254:19257\_2:N:0:TCTGCAAG+GCTGCACT  
TCCTTAATATTCTAGTAACCGCTATGTGGGCATTACTAGGATTTATCACACTCCTAAATTTGATAGCA  
ATTTATGTTTTAAATGCTAGGAAAATTTTAGAAAACTCCATTGTATA

+

FFF:FFFFFFFFFFFFFFFFFFFFFFFFFFFFFFFFFFFFFFFFFFFFFFFFFFFFFFFFFFFFFFFF  
FFFFFFFFFFFFFFFFFFFFFFFFFFFFFFFFFFFFFFFFFFFFFFFFFFFFFFFF:F:FFFFFFF

@A00721:190:HGJW7DSXY:4:2142:24587:12508\_1:N:0:TCTGCAAG+GCTGCACT  
ACTTAATTCATAGCTTTAGTATTATTTACTATCGCCTTTATTGAAAATTGTATAAGAGTTAATTGCT  
TACACAAAAGTGACGCGGAAGGAATCTTAATTGATTGAAGCTAGGCGTTGGGAGAATGAACTGCCG  
CTT

+

FFFFFFFFFFFF:FFFFFFFFFFFFFFFFFFFFFFFFFFFFFFFFFFFFFFFFFFFFFFFFFFFFFFFF  
FFFFFFFFFFFFFFFFFFFFFFFFFFFFFFFFFFFFFFFFFFFFFFFFFFFFFFFFFFFFFFFFFFFFFFFF  
FFF

@A00721:190:HGJW7DSXY:4:2263:18367:19335\_2:N:0:TCTGCAAG+GCTGCACT  
TACCATGACCAATCATCGCTCCAAGTGGCAGCGCAGACGTAGGGTCAAACCTACTACCGCCGGTCGGC  
AGATCGGCACCACTGGTCTCTACGTTACGGGACCCGCTGTGCAGAATA

+

FFFFFFFFFFFFFFFFFFFFFFFFFFFFFFFFFFFFFFFFFFFFFFFFFFFFFFFFFFFFFFFFFFFF  
FFFFFFFFFFFFFFFFFFFFFFFFFFFFFFFFFFFFFFFFFFFFFFFFFFFFFFFFFFFFFFFF

@A00721:190:HGJW7DSXY:4:1450:29957:9972\_2:N:0:TCTGCAAG+GCTGCACT  
CACAGAAGAAGGCTGAAGGTCGTTACCGGACGACCACTCAAAGGAAACGGGCTGTTGCCAGAGGAAA

GCAGCGACCACCGAGGTCGCTCGTAACATTGACGGCAGTCCCGTCATC

+

FFFFFFFFFFFFFFFFFFFFFFFFFFFFFFFFFFFFFFFFFFFFFFFFFFFFFFFFFFFFFFFFFFFFFFFF  
FFFFFFFFFFFFFFFFFFFFFFFFFFFFFFFFFFFFFFFFFFFFFFFFFFFFFFFFFFFFFFFF

@A00721:190:HGJW7DSXY:4:1344:6008:2347\_1:N:0:TCTGCAAG+GCTGCACT  
CTGAGGCAGTACCTCAGTCAAAAGTCACATTCACCACTCCCATACCAATCAATGATGTGACTATACAG  
TTCGGCCATTTCAAGAGTGGTCAATACGTCGTGGGAGGTACTGAAGCCTTCCCCTCCGCTGGCAGGAA  
GAA

+

FFF:FF,:FFF,:F,FFFFFFF,:F:FFFFFFFFF:,,FFFFF,F:FFF,FF,FFFF,F,FFFFFF:  
FFFFFFFFFFFF:,,FFFFFFFFFFFF,:FFFFFF:FF:FFFF:FFFF:FFF:FFFFFFFF,F,FFFF  
FFF

@A00721:190:HGJW7DSXY:4:2329:2049:36292\_1:N:0:TCTGCAAG+GCTGCACT  
CCAATCAATAGTTCTTCTGAACAGATTGAATTGGGGTTTACCAGGGTAGTCTCTAAGTCTACGAGGAA  
GAGGGGAAATGTGCCCAAACTGAGAAGAATAAAGGGAAAGGTCCATCAGGACCTAAGAAGGGGAAAT  
TAC

+

F,:FF:F,FFFFFFFF:FF:F,FFFF:,FFF,,FF,FF,FFFF:FFFF,FFFFFFFF,:FFF:F,F,FFF  
:,:FF,FFFFFF,FFFFFFFF,,FFFFFF:FF,,::FF,:FFFFFFFFFFFFFF:FF:FFFFFF:FFFF:  
::F

@A00721:190:HGJW7DSXY:4:1659:27091:10363\_1:N:0:TCTGCAAG+GCTGCACT  
GGAAGATCTCCCACCATCTGGGGTTGGGAATAAGAAATCTGCACGGGCCAAAGAGGCCGCTGCTACGA  
AGTCGCTGAAGGCGGCTTGGGTCATTAAGGGTAGCTGTAAAGTTGCGCCTGCCGACCCCATCTTTGAG  
ACC

+

FFFFFFFFFFFFFFFFFFFFFFFFFFFFFFFFFFFFFFFFFFFFFFFFFFFFFFFFFFFFFFFFFFFFFFFF  
FFFFFFFFFFFFFFFFFFFFFFFFFFFFFFFFFFFFFFFFFFFFFFFFFFFFFFFFFFFFFFFFFFFFFFFF  
FFF

@A00721:190:HGJW7DSXY:4:1608:14488:24330\_2:N:0:TCTGCAAG+GCTGCACT  
ACAGTAGGTTCTGTGCTACTATGAGCAAACTGTTGAATTCGTCACTGAGGACGAAGGTGAGAGGACT  
TTTGGCTACTGGCGACAACTGAGAGCAGTCGCTGGGGAAGAGAATT

+

FFFFFFFFFFFFFFFFFFFFFFFFFFFFFFFFFFFFFFFFFFFFFFFFFFFFFFFFFFFFFFFFFFFFFFFF  
FFFFFFFFFFFFFF:FFFF:F:FFFFFFFFFFFFFFFFFFFF,FFFFFFFF

@A00721:190:HGJW7DSXY:4:2153:24252:9486\_1:N:0:TCTGCAAG+GCTGCACT  
TCTTGCAAGTACTGGAGTTCAGACGTGTGCTCTTCCGATCTTTTATCCGCGCTTAAGTATGGGGC  
GAAGATCCCCTATGGAGTCTTGAAGGACTTAGGTTGGCATATTTATGCCGACGATAATAAGCATGTCA  
CCC

+

FF:FFFFFFFFFFFFFFFF:FFFFFFFFFFFFFFFFFFFFFFFF:FFFFFFFFFFFFFFFF:FFFFFFFF  
FFFFFFFFFFFFFFFF:FFFFFFFFFFFFFFFFFFFFFFFFFFFFFFFFFFFFFFFFFFFFFFFF  
FFF

@A00721:190:HGJW7DSXY:4:2424:29324:18145\_2:N:0:TCTGCAAG+GCTGCACT  
TTACAAGAGAGAGTGTGAGAGAGTCGCTCTCACTATTTTGGCCAGAATGCGGGCTTTCTGACTGATG  
AGGTTAAACTCTTGCTCCTTCTGTGGGTGAGGGTTTTTGTATATTC

+

FFFFFFFFF,FFFFFFFFFFFFFFFF:FFFF,FFFFFFFFF,FFFFFF:FFFFFFFFFFFFFFFF  
FFFFFFFF:FFFFFFFFFFFFFFFFFFFFFFFFFFFFFFFFFFFFFFFF

@A00721:190:HGJW7DSXY:4:1619:12735:17440\_2:N:0:TCTGCAAG+GCTGCACT  
TTTAGAGAGCATTAGAAGGAAGTTGGGCAAATCCACATATGGTAGACGTTGTACACTTTTCTTGA  
AAATTTTCTCTTCTCCGTCATTGGGGATTTCGATGTGAGAAGGTGG

+

FFFFFFFFFFFFFFFFFFFFFFFFFFFFFFFFFFFFFFFFFFFFFFFFFFFFFFFFFFFFFFFFFFFFFFFF  
FFFFFFFFFFFFFFFFFFFFFFFFFFFFFFFFFFFFFFFFFFFFFFFF



@A00721:190:HGJW7DSXY:4:1652:5032:31187\_2:N:0:TCTGCAAG+GCTGCACT  
CTTCATGCTGATCTTTCAGGACCTAATCACATCATGATTGATAGTTACGGCTCGTATCGAGTTGGAGG  
GAGGAAGTTCTCCGAAATTAAGACGGGGGATTAAGAGTCCAGCTGT

+

FFFFFFFFFFFFFFFFFFFFFFFFFFFFFFFFFFFFFFFFFFFFFFFFFFFFFFFFFFFFFFFFFFFFFFFF  
FFFFFFFFFFFFFFFFFFFFFFFFFFFFFFFFFFFFFFFFFFFFFFFFFFFFFFFFFFFFFFFF

@A00721:190:HGJW7DSXY:4:1670:25220:3646\_1:N:0:TCTGCAAG+GCTGCACT  
TCAGAGAGGGGAGCTCTGAAAAGGAACTTCGTCAGAAGATGAGGAAGTCTAAGAGGAGGAGTTTGAG  
GAAGGCTCTAGAGAAGATCTCACCACCTGGAGAAGGCAAGTGGAGAGTCCAGAAGTTGATGAAGAAGG  
ATT

+

FFFF:FFFFFFFF:FFFFFFFF:FFFFFFFF:FFFFFFFFFFFFFFFFFFFFFFFF:FFFFFFFFFFFFFFFF  
FFFFFFFF:FFFFFFFFFFFFFFFFFFFFFFFF:FFFFFFFFFFFFFFFFFFFFFFFFFFFFFFFF  
FFF

@A00721:190:HGJW7DSXY:4:2352:10230:10817\_1:N:0:TCTGCAAG+GCTGCACT  
CTTCCTAAGGTGGATGAGGGAGGTTGTTTCTTTGGAGTTTTAGATAATCTTTTGAGAAGGGGTCATAG  
AGCCAGCAAGAGAAGCTTATATGCTGGTTAAGTGATGATTATCACTCCTTGAGAAGACAAGCCACAT  
TAA

+

FFFF:F:FFFFFFFF:FFF,:FFF:FFFFFFFFFFFFFFFF:FFFFFFFFFFFFFFFFFFFFFFFF  
FFFFFFFFFFFFFFFFFFFFFFFFFFFFFFFFFFFFFFFFFFFFFFFFFFFFFFFFFFFFFFFF  
FFF

@A00721:190:HGJW7DSXY:4:1306:6831:34835\_1:N:0:TCTGCAAG+GCTGCACT  
TTTGAGTATCGACAGATCTTTCGATCTTGAGGACGTACATTTAACGTGGCAGAATTCGGTAACCTTACC  
ATATTGTTCTTCCGGGAAGTTGTGGGATTTAACTTTGACTCACTACTCCGATCAGATCCGGATGGT  
TTG

+

FFFFF:FF:FFFFFFFFFFFFFFFFFFFFFFFFFFFFFFFF:FFFFFFFFFFFFFFFFFFFFFFFF  
FFFFFFFFF:FFFFFFFF,FFFF:FFFFFFFFFFFFFFFFFFFFFFFFFFFFFFFFFFFFFFFF  
FF:

@A00721:190:HGJW7DSXY:4:1474:17852:18724\_1:N:0:TCTGCAAG+GCTGCACT  
AGAAGACGGCATACGCGATCTTGAGAGTGACTGGAGTTCAGACGTGTGCTCTTCCGATCTTGAGGT  
CAAAGATTCTGTAGCTCTGAGGGCGGTTGAGGGAGCCGTTTGGCCGACTTTAACTATTCTAAGAGTC  
TTT

+

F,:F::FFF,FF:F,,FFF::FF,FF:FFFFFFFF:FFFFFFFFFFFFFFFFFFFFFFFF:FFFFFFF  
FF:F,FFFFFFFF:FFFFFFFF:FFFFFFF,F:FF,FFFFF:FF:FFFFFFFFFFFFFFFF,FF  
FFF

@A00721:190:HGJW7DSXY:4:2305:9073:8844\_2:N:0:TCTGCAAG+GCTGCACT  
CGTTGTCGTACCTTACAAGTTGAGGAGACTTTACAGCGGCTTATTGTCGCGAGTTTCCAGAATTGC  
GGTTGAAGTTCACCCATTCTATCTTGAATGCTCACGCCGTCGCAGCCA

+

FFFFFFFFFFFFFFFFFFFFFFFFFFFFFFFFFFFFFFFFFFFFFFFFFFFFFFFFFFFFFFFF:FFFFFFF  
FF,FFFFFFFF:FFFFFFFFFFFFFFFF:FFFFFFFF:FFFFF,

@A00721:190:HGJW7DSXY:4:2417:5710:30639\_2:N:0:TCTGCAAG+GCTGCACT  
GATTTAGATATTATTGATATTGGAGGCGATATTCGTTTTCATATCCAAAACCTTGAATGGAGTACA  
TATTTGCAACCCTATTCTTGATGTGAAAGATGCATCGAGGTATACGTC

+

FFFFFFFFFFFFFFFFFFFFFFFFFFFFFFFFFFFFFFFFFFFFFFFFFFFFFFFFFFFFFFFF  
FFFFFFFFFFFFFFFFFFFFFFFFFFFFFFFFFFFFFFFF:FFFFF

@A00721:190:HGJW7DSXY:4:1218:7518:10222\_2:N:0:TCTGCAAG+GCTGCACT  
CGGAGGGAAGCAAAATGTTTCTGTTACAAGAACGCTTTGGATTGTGACCATAAAGCCTCAGTTG  
CGATAGCTGTAGAGGTATACGATATCTCTCTTGATGATGTAGCCACTA

+

FFFFFFFF: ,FFFFFFFFFFFFFFFFFFFFFFFFFFFFFFFFFFFFFFFFFFFFFFFFFFFFFFFFFFFFFFFF  
FFFFFFFFFFFFFFFFFFFFFFFFFFFFFFFFFFFFFFFFFFFFFFFFFFFFFFFFFFFFFFFF:FFFFF  
@A00721:190:HGJW7DSXY:4:2577:16206:11710\_2:N:0:TCTGCAAG+GCTGCACT  
TATGTCATTTCTGCTTAGTTTGTCCCGGCGAATTATTGGACACGATGAAAAATGACATACCCGTTCCCT  
GACCTTGGTATCGTTATCCGTCATGGAGATGATGGCGCATCACTTGAT  
+  
FFFFFFFFF:FFFFF:FFFFFFFFF:FF:FFFFFFFFFFFFFFFFFFFFFFFFFFFFFFFF:FFFFFFFF:FFFFF  
FFFF:FFFFFFFFFFFFFFFFFFFFFFFFFFFFFFFF:FFFFFFFF:FFFFF,FFFFF  
@A00721:190:HGJW7DSXY:4:2401:8151:21778\_2:N:0:TCTGCAAG+GCTGCACT  
GATTTTATCTTTCTTCAAACACCCTGTTTTCCTTAAGGGCGGACAATTGTTCCATTGTGAACCTTG  
GGACTAGATTGAGCATTAATGAGTTCGGAATAACTCGTAATAAATCTT  
+  
FFF,FFFFFFFFFFFFFFFFFFFFFFFFFFFFFFFF:FFFFFFFFFFFFFFFFFFFFFFFF,FFFFFFFF:FFFFFFFFFFFFF:  
FFFFFFFFF:FFFFFFFFF,FFFFFFFFFFFFFFFFFFFFFFFFFFFFFFFFFFFFFFFF  
@A00721:190:HGJW7DSXY:4:2538:32805:14685\_2:N:0:TCTGCAAG+GCTGCACT  
AAGAGCCACTGCCAATCTCATCGCTATACGCATACCTGATTGGAAGAAGCGAGGTTCTGTTCTCAATA  
AAAATTTTTCTCAAGAGATTATGGTTGATAAAGTTTTCTTCATAAGGG  
+  
FFFFFFFFFFFFFFFFFFFFFFFFFFFFFFFFFFFFFFFFFFFFFFFFFFFFFFFFFFFFFFFFFFFFFFFFFFFF  
FFFF:FFFFFFFFFFFFFFFFFFFFFFFFFFFFFFFF:FFFFFFFF:FFFF:FF:FF:F::F  
@A00721:190:HGJW7DSXY:4:1561:31738:16532\_2:N:0:TCTGCAAG+GCTGCACT  
GTCATGGGGATCACTTCTTCGGTCAATGACAAAACCTTCGAATATGTTACGACATGGCTTCGTAACAA  
CAGTGCGAGTATTGTCATCTCGGGGAAAGTGATTCACCAAGATGTTCA  
+  
FFFFFFFFFFFFFFFFFFFFFFFFFFFFFFFFFFFFFFFFFFFFFFFFFFFFFFFFFFFFFFFFFFFFFFFFFFFF  
FFFFFFFFFFFFFFFFFFFFFFFFFFFFFFFFFFFFFFFFFFFFFFFFFFFFFFFFFFFFFFFF:FFFFF  
@A00721:190:HGJW7DSXY:4:1435:3495:11710\_1:N:0:TCTGCAAG+GCTGCACT  
CCTAGAGAAGGTCGAGCGATCTTACTCGTTATCGGAGCTAAGAAGAAGACTTTGGGTACACGTTATG  
CTCGCAAACCTTAACGTTAGTACCGGAGGTGATCTCTCTGCTTCTGCGTTACTGAGAGAAAAGATTGAG  
GAC  
+  
FFFFFFFFFFF:FFFFFFFFF::FF,FFF,FFFFFFFFF:FFFFFFFFFFFFFFFF:FFFFFFFFFFFFFFFF  
FFFFFFFFFFFFFFFFFFFFFFFFFFFFFFFFFFFFFFFF:FFFFFFFFFFFFFFFF:FFFFFFFFFFFFFFFF  
FFF  
@A00721:190:HGJW7DSXY:4:2459:32190:5447\_1:N:0:TCTGCAAG+GCTGCACT  
CTTTATGGACAAGATGCAAGTTCTTGGGAAATACTTGTTTCCCTTTTTAGGTTTAGTAGGTGATCTTG  
ACGTCGATTCTTTGTATAGGGAGTGTGAGAAGACAACGAATCTTGAACTACGGTCCTTATCAAAGAA  
AAT  
+  
:FFFFF:FFFFF:F::FFFFFFFFFFFFFFFFFFFFFFFFFFFFFFFF:FFFFFFFFF:F:FFFFFFFFFFFFFFFF  
FFFFFFFFFFFFFFFFFFFFFFFFFFFFFFFFFFFFFFFFFFFFFFFFFFFFFFFFFFFFFFFFFFFFFFFFFFFF  
FFF  
@A00721:190:HGJW7DSXY:4:1232:1280:14732\_1:N:0:TCTGCAAG+GCTGCACT  
ATCTTTTGAGATTGAGAAGATTGAAGAACACGTCAAGAAGTCGCCCGGCGTTGTTCTTGAAAACCAAG  
TTAAGAAGGAGGCTGATCATGGAGTCTTTGTACCTTCTGTCAAACCTTCGAGGTTGAGCTACGAGAGGT  
GAT  
+  
::FF:FFFFFFFFFFFFFFFFFFFFFFFFFFFFFFFF,FFFFFFFF:FFFFFFFFFFFFFFFFFFFFFFFFFFFFFFFF  
FFFFF,FF:FFFF:FF:FFFFFFFFFFFFFFFF:FFFFFFFFFFFFFFFFFFFFFFFFFFFFFFFFFFFFFFFF  
FFF  
@A00721:190:HGJW7DSXY:4:1236:26992:36902\_2:N:0:TCTGCAAG+GCTGCACT  
TTGAAGGCTGGCTCTAAGGGAGACTCCTTCTTTTTGAATGTTGTAAAGAATTGGGTTGAGAAGTGTGC  
TTTACAAGGAGTTAGACTCTTCTTCAAGTTTTTAGATCTTCTTGATAA  
+

FFFFFFFFFFFFFFFFFFFFFFFFFFFFFFFFFFFFFFFFFFFFFFFFFFFFFFFFFFFFFFFFFFFFFFFF  
FFFFFFFFFFFFFFFFFFFFFFFFFFFFFFFFFFFFFFFFFFFFFFFFFFFFFFFFFFFFFFFF  
@A00721:190:HGJW7DSXY:4:1523:20654:1532\_2:N:0:TCTGCAAG+GCTGCACT  
TTCTCTACCCATAACTTCTTTTTCAAAAATGCGGATGGGTCTACTGATGTTTTCTACAGAGTGCAGT  
CGTTTCAACACTTATCACCACCTTTTGAAGGAAAATAATTGGTGATGA  
+  
FFFFFFFFFFFFFFFFFFFFFFFFFFFFFFFFFFFFFFFFFFFFFFFFFFFFFFFFFFFFFFFFFFFFFFFF  
FFFFF:FF:FFFFFF:F,FFF:FFFF:FFFF:FFFFFFFFF:FF:FFF  
@A00721:190:HGJW7DSXY:4:2343:9670:30608\_1:N:0:TCTGCAAG+GCTGCACT  
GGGGTTCCATAAGATATTATCTGACATTGTGGTTCAATGATCAGGATTCTTCTTTTGGTCCTTACGTC  
TTAAGTAATTTGGATGTTGTGCGAAACTATCAGGTTCTTGTACGATTCTTAAAAGAAGTTTATTTAA  
ACT  
+  
FF:FFF:FFFFFFFFFFFFFFFFFFFFFFFFFFFFFFFFFFFFFFFFFFFFFFFFFFFFFFFFFFFFFFFF  
FFFFFFFFFFFFFFFFFFFFFFFFFFFFFFFFFFFFFFFFFFFFFFFFFFFFFFFFFFFFFFFFFFFFFFFF  
:FF  
@A00721:190:HGJW7DSXY:4:1138:5791:25770\_1:N:0:TCTGCAAG+GCTGCACT  
CTAATGTTCTTGCAATAGCCACAGACTTTCTGGGAAAAGAGACCTCTGTTGGTAGAGGAGTTGAGAGA  
ATTACTCAGATTCAATCTGGCATCACTGAACGTCTACAACGAGTTAGGGAGTGGCTAGGTTTAAAAG  
ATC  
+  
FFF:FFFFFFFFF:FFFFFFFFFFFFFFFFFFFFFFFFFFFFFFFFFFFFFFFFFFFFFFFFFFFFFFFF  
F:FFFFFFFFFFFFFFFFFFFFFFFFFFFFFFFFFFFFFFFFFFFFFFFFFFFFFFFFFFFFFFFFFFFF  
FFF  
@A00721:190:HGJW7DSXY:4:1455:13693:6198\_2:N:0:TCTGCAAG+GCTGCACT  
AATACCTTCCACTGAGTTCATCACCCAGAGTTTCGACGTCGCGGAAAACGATGAAGATTTCCACACTG  
TTCGAGAATCTTCTGATGCTGAATTTGAGGAAAATTTTTCGGAAGTTT  
+  
FFFFFFFFFFFFFF:FFFFFFFFFFFFFFFFFFFFFFFFFFFFFFFFFFFFFFFFFFFFFFFFFFFFFFFF  
FFFFFFFFFFFFFFFFFFFFFFFFFFFF:FFFFFFFF,FFFFFFFFFFFF:FFFF  
@A00721:190:HGJW7DSXY:4:2462:9715:16564\_1:N:0:TCTGCAAG+GCTGCACT  
ACGTGTGCTCTTCCGATCTGGAGGAGGTAATAGTTATAAAACCTTCTTTTATCATTGCAACAGGACTT  
TGAGAAGACTGTTGAAATGGACAAAATCTGGGATCATAGGTATGTGTACGCTACACTCGAAATATGG  
GCC  
+  
:FFFFFF:FFFFFF:,FFFFFFFFFFFF,FFFFFF:FFFFFFFF:FF:FFFFFFFFFFFF:FFF:FFFFFF  
FFFFFFFFFFFFFFFFFFFF:FFFFFFFFFFFFFFFFFFFFFFFFFFFFFFFFFFFF:FFFFFFFF:FFFFFF  
FFF  
@A00721:190:HGJW7DSXY:4:1677:17598:1501\_1:N:0:TCTGCAAG+GCTGCACT  
TTAGATAAATTCTTTCCGGGCTCAATGACCTTTGCTATGTACGTGGATCTAATGCTTGGTGATCTGAA  
TCTGACCATCGCAAAGAAGACTTTATTAGTTCATGAAGTTCTTACACTTCTCGCGACTAATGTCAGCT  
TCA  
+  
FFFFFFFFFFFFFFFFFFFFFFFFFFFFFFFFFFFFFFFFFFFFFFFFFFFFFFFFFFFFFFFFFFFFFFFF  
FFFFFFFFFFFFFFFFFFFFFFFFFFFFFFFFFFFF:FFFFFFFFFFFFFFFFFFFFFFFFFFFFFFFFFFFF  
FFF  
@A00721:190:HGJW7DSXY:4:2514:13838:30060\_1:N:0:TCTGCAAG+GCTGCACT  
CCAAATTTAGCACTTTTTGAATATGACAGAAGCTCGCCATATCAGATTAGAGACATGCCAGTTAGAGT  
TCTTCTAACCAGGACTGATGGTGAGATTCTTTTACCTTTTGGAGGTCCAGGAACCTTTACTCCTAGTG  
TCT  
+  
:FFFFFF:FFFFFF:FFFFFFFFFFFFFFFFFFFFFFFFFFFFFFFFFFFFFFFFFFFFFFFFFFFFFFFF  
FFFFFFFFFFFFFFFFFFFFFFFFFFFFFFFFFFFF:FFFFFFFFFFFFFFFFFFFFFFFFFFFFFFFFFFFF  
FFF



FFFFFFFFFFFFFFFFFFFFFFFFFFFFFFFFFFFFFFFFFFFFFFFFFFFFFFFFFFFFFFFFFFFFFFFF  
FFF  
@A00721:190:HGJW7DSXY:4:2209:4887:29653\_1:N:0:TCTGCAAG+GCTGCACT  
TCTTGCGAAGGTTCAAGTCGATTGATTTTGTGACTACGATCTCTCTTGTAAATAAGAAGTTCTTCGCA  
GTTGAATCTCCACCAGGTGGAGGGAAGACCACTGAACTTATAGCGACTTTTGTGCAATTTTCGCAAA  
AGG  
+  
FFFFFFFFFFFFFFFFFFFFFFFFFFFFFFFFFFFFFFFFFFFFFFFFFFFFFFFFFFFFFFFFFFFFFFFF  
FFFFF:FFFFFFFFFFFFFFFFFFFFFFFFFFFFFFFFFFFFFFFFFFFFFFFFFFFFFFFFFFFFFFFF  
FFF  
@A00721:190:HGJW7DSXY:4:1424:25003:5368\_2:N:0:TCTGCAAG+GCTGCACT  
ATTGTCACTGCTAATCGTAATTCGCGAGAAGAGATAGTGACTAAAGTTTTGGCACTTCTAGTTCATCG  
CGGTATTTGTGAAATTAAGACAGACGTGAAAGTTATGATGAGTGATCG  
+  
FFFFFFFFFFFFFFFFFFFFFFFFFFFFFFFFFFFFFFFFFFFFFFFFFFFFFFFFFFFFFFFFFFFFFFFF  
FF:FFFFFFFFFFFFFFFFFFFFFFFFFFFFFFFFFFFFFFFFFFFFFFFFFFFFFFFFFFFFFFFFFFFF  
@A00721:190:HGJW7DSXY:4:2318:16550:30874\_2:N:0:TCTGCAAG+GCTGCACT  
GGACGTTCTTTTCATCGACGAATTATTCATGATTCACGCTGGTCAGACCCTTTTCTTACACATCTAC  
TTAAGGCGGCTTATACCATAGGTTACGGTGATTCCAATCAAATCGGAT  
+  
FFFFFFFFFFFFFFF,FFF,FF:FFFF:FFFFFFFFFFFFFFFFFFFFFFFFFFFFFFFFFFFFFFFF  
F:F:FFFFFFFFFFFFFFFFFFFFFFFFFFFFFFFFFFFFFFFFFFFFFFFFFFFFFFFFFFFFFFFF  
@A00721:190:HGJW7DSXY:4:1548:8938:30467\_2:N:0:TCTGCAAG+GCTGCACT  
TATTGATCTCCAAGTCGCAAACTACTTCAACATCAACGACATCATTCTTGATGAGTGTGTTCTTATC  
GAAGTCTCAGTTATCGCTGCCCGGCCGACGTTTGTGCGGAACTCTCAG  
+  
FFFFFFFFFFFFFFFFFFFFFFFFFFFFFFFFFFFFFFFFFFFFFFFFFFFFFFFFFFFFFFFFFFFFFFFF  
FFFFFFFFFFFFFFFFFFFFFFFFFFFFFFFFFFFFFFFFFFFFFFFFFFFFFFFFFFFFFFFFFFFFFFFF  
@A00721:190:HGJW7DSXY:4:1519:11306:15906\_1:N:0:TCTGCAAG+GCTGCACT  
ATTAGACCTATCAGATGTCTTGACGACTTCGAATTTGAGGACGGAGTTAAATATATTACTTTCACTCA  
AGGTGAAAAGTTTGAATTAACAAAGTCCTTGTAAGAGTAAGGTTAAATGTGAAGATGCTCAGACTA  
TTC  
+  
FFFFFFF,FFFFFFFFFFFF:FFFF,FF,FF:FFFFFFFFFFFFFFFFFFFFFFFFFFFFFFFFFFFF  
FFFFFFFFF:FF:FFFFFFFFFFFFFFFFFFFFFFFFFFFFFFFFFFFFFFFFFFFFFFFFFFFFFFFF  
FFF  
@A00721:190:HGJW7DSXY:4:2106:18728:10160\_1:N:0:TCTGCAAG+GCTGCACT  
CTTTACGATACTTTGTTATCAATGTAAAGTTAAACGATGCTACTTGTGAGAGGATCAATCACAGTAAG  
GAACTGTCACGTTTAGCACGGGAGGTTGCAGATTCAACCCCTTATATCGAGGCTATCGAGGACGATGA  
GTA  
+  
FFFFF::FFF,FFFFF:FF:FFFFFFFFFFFFFFFFFFFFFFFFFFFFFFFFFFFFFFFFFFFFFFFF  
FFF:FFFFFFFFF:FFF:FFFFFFFFFFFFFFFFFFFFFFFFFFFFFFFFFFFFFFFFFFFFFFFFFFFF  
FFF  
@A00721:190:HGJW7DSXY:4:1450:28140:1908\_2:N:0:TCTGCAAG+GCTGCACT  
GACGACAAGCCTCAAGAGGGTAGAGGACCACCTGGATCTTCTACTGTCTCTGCCTTCCAAGATTTCTT  
AGAAGAGGTTATTCTCTGGAACCACTTAACGTCACTCGGTAATCTTTC  
+  
FFFFFFFFFFFFFFFFFFFFFFFFFFFFFFFFFFFFFFFFFFFFFFFFFFFFFFFFFFFFFFFFFFFFFFFF  
FFFFFFFFFFFFFFFFFFFFFFFFFFFFFFFFFFFFFFFFFFFFFFFFFFFFFFFFFFFFFFFFFFFFFFFF  
@A00721:190:HGJW7DSXY:4:2211:16929:32690\_2:N:0:TCTGCAAG+GCTGCACT  
TCGAATTAAGATCAAGGCTAATACCTTTATAGGTAAGAAGCCCCTTGAGCCGCGTAGTCAGCGCGTTT  
AGCTGTATCATCAGTCAGAGTATACCCGATAGGTTACCGAGTCTCCAA  
+

F:FFFFFFFF, :FFFFFFFF:FFFFFFFF:FFFFFFFFFFFFFFFFFFFFFFFF:FFFFFFFFFFFFFFFF:FFFF  
FFFFFFFF:FFFFFFFFFFFFFFFF::FF::FF:FF, F::F:FFFF:::FF  
@A00721:190:HGJW7DSXY:4:2654:15157:13401\_1:N:0:TCTGCAAG+GCTGCACT  
CAACGGAAGACATATCGCACCCGAAATTTTGGGCAGAAATGCTCTTAACGCGGTTCTTGAACGGTGT  
TTTGATCAGTCTAAGTTGGATAAAGTTATAGGAGACTCAGTTAACCTGAGAGCTCCTCAATTGATAGA  
TTG  
+  
FFFFFFFFFFFFFFFFFFFFFFFFFFFFFFFFFFFFFFFFFFFFFFFFFFFFFFFFFFFFFFFF:FFFFFFFFFFFF  
FFFFFFFFFFFFFFFFFFFFFFFFFFFFFFFFFFFFFFFFFFFFFFFFFFFFFFFFFFFFFFFFFFFFFFFF  
FFF  
@A00721:190:HGJW7DSXY:4:2525:6045:33254\_2:N:0:TCTGCAAG+GCTGCACT  
TAGTATACTTCGTAAAGTCGACAGCGAAATGGTCAATATTGATAATTGGACCGACTATATGACCTATT  
TTAAGCTCATGGTGAAGGAAGCTAAGGTTAACTTGATGCTTCAG  
+  
FFFFFFFFFFFFFFFFFFFFFFFFFFFFFFFFFFFFFFFFFFFFFFFFFFFFFFFFFFFFFFFF:FFFFFFFFFFFF  
FFFFFFFFFFFFFFFF:FFFFFFFFFFFF:FFFFFFFFFFFFFFFFFFFFFFFF:FFFFF  
@A00721:190:HGJW7DSXY:4:1535:18891:12101\_1:N:0:TCTGCAAG+GCTGCACT  
CTATCTTTAAGGTTCTTGTGAGGAGAGTCAAACAGTGTCTTTTACCCAACATTTTTATGTATACAGAG  
ATGACCAGTGACGATTTCTCCCGAAGCTCTTCTCTCTCTTAGGAGGTCATGATGACTACTATAAGGG  
TGA  
+  
FFFFFFFFFFFFFFFF:FFFFFFFFFFFFFFFFFFFFFFFFFFFFFFFFFFFFFFFFFFFFFFFF, FFFFFFFFFFFFF  
FFFFFFFF:FFFFFFFFFFFFFFFFFFFFFFFFFFFFFFFFFFFFFFFFFFFFFFFFFFFFFFFFFFFFFFFF  
FFF  
@A00721:190:HGJW7DSXY:4:2326:1127:6793\_2:N:0:TCTGCAAG+GCTGCACT  
TTCGATGCTGAATTTCTTGAACCTTTGGAGTGCCAGTGAATATTTTGTACGCCAGGAGTATCCATAA  
CGATTTGTCATTTACCACCTTTGCTCAACGACGAAGTGAACGGCCAA  
+  
FFFFFFFFFFFFFFFFFFFFFFFF:FFFFFFF:FFFFFFFFFFFFFF:FFFFFFFFFFFFFFFFFFFFFFFF:FFFF  
F:FFFFFFFFFFFF:FFFFFFFF:FFFFFFFFFFFFFFFFFFFFFFFFFFFFFFFF:FF  
@A00721:190:HGJW7DSXY:4:2305:14281:8876\_1:N:0:TCTGCAAG+GCTGCACT  
TCTTGTATGATCACTTTGATGATTTTATCACTTTATTATGACCTTGGAAGTTTTCGGCTGTGGTTGT  
CGCTGGGACGATTCCATTCTGTTTTCAAAGACTCCAATAACTGATCATTCTGATCATATGATTTTGG  
ACA  
+  
F:FF:FFF, FFF, FFFFFFFFF:FFFFFFF::FFFFFFFFFFFF:, FFFF:FFFFFFFF::FFFFFFFF  
FF, FF:FFFFFFFFFFFFFFFFFFFFFFFF:FFFFFFF:FFFFFFFF:FFFF:FFFFFFFFFFFFFFFF  
FFF  
@A00721:190:HGJW7DSXY:4:2615:16495:9987\_1:N:0:TCTGCAAG+GCTGCACT  
ATGTTACTCTTGTAGGACTTTGGGAGAGATTCTGTTAGTTTAAAGACTATACTAAATATCTCCACTAC  
GAGGTTGTTGTTTGGCGATTAGCTCTTGCGACTAATATTCGATATTCGATTGAGGTCGTTATACCTA  
TTC  
+  
FFFFFFFFFFFFFFFFFFFFFFFFFFFFFFFFFFFFFFFFFFFFFFFFFFFFFFFFFFFFFFFFFFFFFFFF  
FFFFFFFFFFFFFFFFFFFFFFFF:FFFFFFFFFFFFFFFFFFFFFFFFFFFFFFFFFFFFFFFF  
FFF  
@A00721:190:HGJW7DSXY:4:1106:31530:2644\_2:N:0:TCTGCAAG+GCTGCACT  
TTGTATAAGATCAAATTTTAAACGATTCCGAGAGGTTTATCCTGATGTGGAGGGAGTTCTTGAAGCAT  
CCCGACCTTTCCTTGTGAAAATTTTGATGCGGTTTCATAAGATTATCA  
+  
FFFFFFFFFFFFFFFFFFFFFFFF:FFFFFFFFFFFFFFFFFFFFFFFFFFFFFFFFFFFFFFFF  
FFFFFFFFFFFFFFFFFFFFFFFFFFFFFFFFFFFFFFFFFFFFFFFF:FFFFFFF  
@A00721:190:HGJW7DSXY:4:1101:13702:2675\_2:N:0:TCTGCAAG+GCTGCACT  
TTCTACTACGGATTCATGGACCTTCCATCCTGTACCTCTTCTGGAGAGACGTATCTCAAAGATCGACT

$+$ 

@A00721:190:HGJW7DSXY:4:2608:4969:35994\_1:N:0:TCTGCAAG+GCTGCACT  
CCTCCTCTCGCAAGTTTGATCTGATACTTATCACGAAAGGACTTGAGTCTTTTGATCAGTCTCTGACT  
TGACCATCTTTCATTTTAAATGACGATCATTAAGACTCTCTTCTTCTTTGTTTCCTTCTTTGCACTG  
ATT

+

@A00721:190:HGJW7DSXY:4:1642:1090:5666\_2:N:0:TCTGCAAG+GCTGCACT  
TTTACGATAACAACATATCAGTTGATTAAGACTCTTCCGAAAGGCCGAACCTTTGGGAATTTGAAGCTCAG  
GGTGAAGCACAAACGTTTGACCGTGACGAACCTGTGGTGTCTTGATCTA

+

@A00721:190:HGJW7DSXY:4:2624:19750:32409\_1:N:0:TCTGCAAG+GCTGCACT  
TATTTTAAGTTTGTCTTCCTTGTTTGTCTTATTCTATTAATCACTCATTTTAGTGAGATTATTA  
ACGCACTAAACGTCTTCGACAACAGCAGGGGTTTTCGAATAGTGATAGCCACCCGCTTACAGAGGG  
GCA

+

@A00721:190:HGJW7DSXY:4:2234:5819:7842\_1:N:0:TCTGCAAG+GCTGCACT  
CCACCTTTTCTACTGTCTGTCTCGCCTCTTCGAATGAAGTTTTAATGCTTAACAACAATGATAGTGAA  
TTTATACCTACAATCATTGTTTTTCTAATAATGATGACACTATTGTTTATGGATATGATGCTATTAC  
TCA

+

@A00721:190:HGJW7DSXY:4:1166:11080:3145\_2:N:0:TCTGCAAG+GCTGCACT  
TCTCAGTTTACAAGGACCTTAAGCGATGGATCGGGGTTAATTCTAAAACATTACCCGAAAGACGTGCT  
AAATTA AAAACCATTTGTACGATGTCGTCTGTCTCGGCGAGATCGGAAGA

+

@A00721:190:HGJW7DSXY:4:2615:31548:23343\_2:N:0:TCTGCAAG+GCTGCACT  
ATCTTCATGAGATCGTTTCTTTCTTTATCTCTTTGGTTGTTAGGGATTTTGAAGAGTGAAGGCTTC  
AATTGTAGTGGTTTGGTCGTTTCAGTACCCAGTCAGTATACCTCTACG

+

@A00721:190:HGJW7DSXY:4:1111:15013:34569\_2:N:0:TCTGCAAG+GCTGCACT  
AAACTACAGAGGAACGTACCGGATTACCTGTCTTTCATATTATGAATGAACCTTCGCCGCTCTCTT  
TGCTTCGATGTTGGATGTCAAGAAGGGTTCAGAATGGGATTCCCTACGT

+

@A00721:190:HGJW7DSXY:4:2223:29053:33865\_1:N:0:TCTGCAAG+GCTGCACT  
TTTGGTGGTGGTACTTTTCGATACTTCTATCGTCTTACGTTACGGTAATTACTATAGTGTTATTTATTC

TGGTGGTGATGATAATCTTGGAGGTCGTGACGTTGATGAAGCTATAAGAGCGTTCTTATTACGGCGCA  
CTT

+

FFFFFFFF:FFFFFFFFFFFFFFFF,FFFFFFFFFFFFFFFFFFFFFFFFFFFFFFFFFFFFFFFF:FF  
FFFFFFFFFFFFFFFFFFFFFFFFFFFFFFFFFFFFFFFFFFFFFFFFFFFFFFFFFFFFFFFFFFFF  
FFF

@A00721:190:HGJW7DSXY:4:2535:32253:32769\_1:N:0:TCTGCAAG+GCTGCACT  
CTTTCAGTTTCACAACCTGAAGGAGGAGGTTTCTGTTACTGAAAACCTCGTCAATACTTTTCAATAA  
TATACGTCTTGAACCTCACTTATGACGATCTAGTGAAATTAACGCGTCCTTTTCTGGAACGTAGTTT  
CTA

+

FFFFFFFF:FFFFFFFFFFFFFFFFFFFFFFFFFFFFFFFFFFFFFFFFFFFFFFFFFFFFFFFFFFFF  
FFFFFFFFFFFFFFFFFFFFFFFFFFFFFFFFFFFFFFFFFFFFFFFFFFFFFFFFFFFFFFFFFFFF:FF  
FFFFFFFFFFFFFFFFFFFFFFFF

@A00721:190:HGJW7DSXY:4:2610:28818:31454\_1:N:0:TCTGCAAG+GCTGCACT  
ATAGTGGCATTCAAGGCAAACCTTACCCTGATTCCGGCCGGTGGTAGCTCATTTCTACCAGGGGCTATT  
ACTCTTGCTGAAACAGCTATTAAAGCTGTTGAGCGGGTAATTACACCTAAACGAGCTCGATCTGCCAT  
CGC

+

F,FFFFFFFFFFFFFFFFFFFFFFFFFFFFFFFFFFFFFFFFFFFFFFFFFFFFFFFFFFFFFFFFFFFF  
FFFFFFFFFFFFFFFFFFFFFFFFFFFFFFFFFFFFFFFFFFFFFFFFFFFFFFFFFFFFFFFFFFFF:FF  
FFFFFFFFFFFFFFFF

@A00721:190:HGJW7DSXY:4:1208:10411:7623\_2:N:0:TCTGCAAG+GCTGCACT  
ACTTTATCTGAGAGTAGCGTTCTTTTTGTGCGATTGTATCAATAGTAACATAACGACAAATAAAGGTCT  
CTATCAGGTGGGTATAATAGTTGCCGCCGATCCGCCTTACCATTGAA

+

FFFFFFFFFFFFFFFFFFFFFFFFFFFFFFFFFFFFFFFFFFFFFFFFFFFFFFFFFFFFFFFFFFFF  
FFFFFFFFFFFFFFFFFFFFFFFFFFFFFFFFFFFFFFFFFFFFFFFFFFFFFFFFFFFFFFFFFFFF

@A00721:190:HGJW7DSXY:4:2203:28872:6308\_2:N:0:TCTGCAAG+GCTGCACT  
AGGTAATTATGAAGACTGTGATTTATCTTTCACCTCTGGCCTTGTATGAGGGTGTCTAATCGTAACA  
TTAATAATTTCAATCTTCTTAAAAAGAAGATAGAGAGTCATACTTTGG

+

FFFFFFFFFFFFFFFFFFFFFFFFFFFFFFFFFFFFFFFFFFFFFFFFFFFFFFFFFFFFFFFFFFFF  
FFFFFFFFFFFFFFFFFFFFFFFFFFFFFFFFFFFFFFFFFFFFFFFFFFFFFFFFFFFFFFFFFFFF

@A00721:190:HGJW7DSXY:4:1325:2121:26146\_1:N:0:TCTGCAAG+GCTGCACT  
TACCGCCTTACAAGTCTAAGGTTAAAGAGTCGATTAAACAAGTTGTACTTATCAATGATTTTATCGCT  
GGTTGTTATCTCGAAAAGTCTCTTCTAAAAGGAACGTCAGTTCTAACCCAAAGAGAATATCTAAAATA  
TTT

+

FFF:, :FFFFFFFFFFFFFFFFFFFFFFFFFFFFFFFFFFFFFFFFFFFFFFFFFFFFFFFFFFFF  
FFFFFFFFFFFFFFFFFFFFFFFFFFFFFFFFFFFFFFFFFFFFFFFFFFFFFFFFFFFFFFFFFFFF:FF  
FFFFFFFF

@A00721:190:HGJW7DSXY:4:2107:10384:8609\_1:N:0:TCTGCAAG+GCTGCACT  
TTGCTTGTGCTTCTCCTTTAATGGCACTACCTCGGTACAATCTTACTTGGAACGAAGGCGACCTGT  
TCCGGAGTTTTTACGGGATCCGGAATGTTCTGTCTATATTAGGTGAAGCGAAATACGATTTGCAACGT  
CAA

+

FFFFFFFFFFFFFFFFFFFFFFFFFFFFFFFFFFFFFFFFFFFFFFFFFFFFFFFFFFFFFFFFFFFF  
FFFFFFFFFFFFFFFFFFFFFFFFFFFFFFFFFFFFFFFFFFFFFFFFFFFFFFFFFFFFFFFFFFFF:FF  
FFFFFFFF

@A00721:190:HGJW7DSXY:4:1546:21088:22294\_2:N:0:TCTGCAAG+GCTGCACT  
GCTGACTTTCGTCAATATGATTTGATCTGGTTGCTCAATTCTAAGCGTGTTCCGCTTAGTGCGAGGCC  
TCTCTTCTACGAGTATTGCTATTTATACGGTTACGAGAAGAAGTTTCG

+



FF:FFFFFFFFFFFFFFFFFFFFFFFFFFFFFFFFFFFFFFFFFFFFFFFFFFFFFFFFFFFFFFFF  
FFFFFFFFFFFFFFFFFFFFFFFF,FFFFFFFFFFFFFFFF:FFFFFFFF  
@A00721:190:HGJW7DSXY:4:2326:16902:8155\_2:N:0:TCTGCAAG+GCTGCACT  
TATTTGGATGATCTTGATAAAGAACTTCATGAATTTTCAGAGGATGAAAAATTTCTTCTTGATT  
TAATATAAAGAATCTTTACCAGGACTCCTACTACAGGAGGCAGTCTTC  
+  
F:FFFFFFFFFFFFFFFFFFFFFFFFFFFFFFFFFFFFFFFFFFFFFFFFFFFFFFFFFFFFFFFF:  
FFFFFFFFFFFFFFFFFFFFFFFF:FFFFFFFFFFFFFFFFFFFFFFFFFFFFFFFF  
@A00721:190:HGJW7DSXY:4:2230:24578:4507\_1:N:0:TCTGCAAG+GCTGCACT  
GAAACTCTAAGTGGTAATACTGTCTTTCCAAGCTTACCTTTATCTTCAATGAAATTGGACTCTTCGAT  
AGGGGACATTTTATCGTGGGCTTTCGTAAAGGAAGATCTGTTATCGACGGTTTATCGTTTACGAAGT  
ATC  
+  
FFFFFFFFFFFFFF:FFF:FFFFFFFFFFFFFFFFFFFFFFFFFFFFFFFFFFFFFFFFFFFFFFFF:  
FFFFFFFFFFFFFFFFFFFFFFFF:FFFFFFFFFFFFFFFFFFFFFFFFFFFFFFFFFFFFFFFFFFFF  
FFF  
@A00721:190:HGJW7DSXY:4:2510:22616:16830\_1:N:0:TCTGCAAG+GCTGCACT  
TTGGCCTAGTGGATGTTATTAGTGACATCTGGTCAATTTTCGTTTTTAGGTGGTCTTTATTCTATTATT  
GATTTTTATGAGATTGATACGTTAACAGAAGATGATGTTAGAGTAGAATTCCTGAAGAGTCTTCCGT  
AAC  
+  
,FFFFFFFFFFFFFFFFFFFFFFFFFFFFFFFF:FFFFFFFFFFFFFFFF:FFFFFFFFFFFFFFFF:FFFFF  
FFFFFFFFFFFFFFFFFFFFFFFFFFFFFFFF:FFFF:FFFF:FFFFFFFFFFFFFFFF:FF:FF,FFFFFFFF  
FFF  
@A00721:190:HGJW7DSXY:4:2130:21558:7075\_2:N:0:TCTGCAAG+GCTGCACT  
TACACAATTAAGAAATAATCCTACATTGACTGATTATCTAAAGATTGAAGGAAAATTTATCCTCGTT  
TAACTTACTTAGACTTTCCTACGATACAAATGATAACTTCTAATTTAC  
+  
FFFFFFFFFFFFFF:FFFFFFFFFFFFFFFFFFFFFFFFFFFFFFFFFFFFFFFFFFFFFFFFFFFFFFFF:  
FFFFFFFFFFFFFF:FFFFFFFFFFFFFFFFFFFFFFFF:FFFFFFFFFFFFFFFFFFFFFFFF  
@A00721:190:HGJW7DSXY:4:1457:15845:29027\_2:N:0:TCTGCAAG+GCTGCACT  
ATGCATGGTGTATCTCCTCAGGAGTCCCGGCATTTGATAATAATGACGAGACTTTCGTCATAATCGC  
TGCATATTACGGAGATCGGAAGAGCGTCGTGTAGGGAAGAGTGTAGT  
+  
FFFFFFFFFFFFFFFFFFFFFFFFFFFFFFFFFFFFFFFFFFFFFFFFFFFFFFFFFFFFFFFF:FFFFF  
FFFFFFFFFFFFFFFF:FFFFFFFFFFFFFFFFFFFFFFFFFFFFFFFFFFFFFFFF  
@A00721:190:HGJW7DSXY:4:2111:15438:15734\_2:N:0:TCTGCAAG+GCTGCACT  
TCACACATTTTGAGAACTAACTATGTTATGTTCTCTGATCATTTTGACAATCTCTTCTTATAATAAAT  
AAATAAATAATATTACTAATGGCAAATAGTGGAAGGCTCCAGTCAAC  
+  
FFFFFFFFFFFFFFFFFFFFFFFFFFFFFFFFFFFFFFFFFFFFFFFFFFFFFFFFFFFFFFFF:FFFFF  
FFFFFFFFFFFFFFFFFFFFFFFFFFFFFFFFFFFFFFFFFFFFFFFFFFFFFFFF  
@A00721:190:HGJW7DSXY:4:1108:1750:24439\_2:N:0:TCTGCAAG+GCTGCACT  
AATAGGTGAAGGATAGTTTTTACCTCGACCAACATTAAGGCGGCGGCGACTAATCTTAAAGCTTCAC  
CCAAAATGAAGGACACTTCGAAACTGAATAATGATGCACTACAAACAA  
+  
FFFFF:FFFFFFFFFFFFFFFFFFFFFFFFFFFFFFFF:FFFFFFFFFFFFFF,FFFFFFFFFFFFFF  
FFFFFFFFFFFFFFFF:FFFFFFFFFFFFFFFFFFFFFFFFFFFFFFFF,FFF  
@A00721:190:HGJW7DSXY:4:1523:12590:32847\_2:N:0:TCTGCAAG+GCTGCACT  
CGTTGAGAAAATTTCTTAGAGGATATTCGCCATTGTGGTACGAATTGGTCCAACATTTACCACCAAAT  
TCTTTTGATACAACTCTAGCCTTCAAGTGGGGTATGCCTGCGGAATAC  
+  
FFFFFFFFFFFFFFFF:FFFFFFFFFFFFFFFFFFFFFFFFFFFFFFFF:FFFFFFFFFFFFFFFF:FFFFF  
FFF:FFFFFFFFFFFFFFFF:FFFFFFFFFFFF,FFFFFFFF:FF:FFFF

@A00721:190:HGJW7DSXY:4:2567:16450:9095\_2:N:0:TCTGCAAG+GCTGCACT  
CCAGATTGGTTTGAACCCGTTGATGCTATGTCAGAAGAAGCTATTCAAGCTTGTCGTTTAAAGACTGC  
AGAGGCTGTCAAACAAGCCCAGACTCAAGGAGTCCAATCAAAGTTTT

+

FFFFFFFFFFFFFFFFFFFFFFFFFFFFFFFFFFFFFFFFFFFFFFFFFFFFFFFFFFFFFFFFFFFFFFFF  
FFFFFFFFFFFFFF:FFFFFFFFFFFFFFFFFFFFFFFFFFFFFFFFFFFFFFFFFFFFFFFF

@A00721:190:HGJW7DSXY:4:1553:18032:16125\_2:N:0:TCTGCAAG+GCTGCACT  
AAAAGTCCGGAGTATATTGTATGTTAATAGATAGTGGGATAATAGTTCTACCGATACGTAGTGAACGC  
GTTTCGTAGAACCAAGTACTTTCGGTCTGAAGAGTTTAGAGCTGCTATT

+

FFFFFFFFFFFFFFFFFFFFFFFFFFFFFFFFFFFFFFFFFFFFFFFFFFFFFFFFFFFFFFFFFFFFFFFF  
FFFFFFFFFFFFFFFFFFFFFFFFFFFFFFFFFFFFFFFFFFFFFFFFFFFFFFFFFFFFFFFF

@A00721:190:HGJW7DSXY:4:1516:18882:22545\_2:N:0:TCTGCAAG+GCTGCACT  
TGTGGCTTTAGACGATAATCCTTTAAGGACTATGTTGACTGACGAAGATTTTCCACAGATTTGTCTA  
CGTTGCAGATCGCCACTCCAAACACTATATACATTATAAAATATAAAA

+

FFFFF:FFFFFFFFFFFFFFFFFFFFFFFFFFFFFFFFFFFFFFFFFFFFFFFFFFFFFFFFFFFFFFFF  
FFFF,FFFFFFFFFFFFFF:FFFF:F:FFFFFFFFFFFFFFFFFFFFFFFF

@A00721:190:HGJW7DSXY:4:2367:30210:12007\_1:N:0:TCTGCAAG+GCTGCACT  
ACTTTTGTACCAAATCTTGGCTTTCAACGAAGTCTCTGATTTTATTAATCATTACTTTAACGATCT  
CTCGGTCATTTACTCTGTACTTGATCTACGTCGTTTAACTGTCGGAACAACCTTTACTTAGAATGACT  
CTA

+

FFFFFFFFFFFFFFFFFFFFFFFFFFFFFFFFFFFFFFFFFFFFFFFFFFFFFFFFFFFFFFFFFFFFFFFF  
FFFFFFFFFFFFFF:F:FFFFFFFF:F:FFFFFFFF:F:FFFFFFFF:F:FFFFFFFF:F:FFFFFFFF,  
FFFFF,FFF:F:F  
FF:

@A00721:190:HGJW7DSXY:4:2221:30427:7686\_2:N:0:TCTGCAAG+GCTGCACT  
ATCATATTAGTAATACTCACTATCGTTTTCTGCTTTTTCTTAGCTAATAGATTAATAAAGGATGAGTA  
CGAAAACCAACTCTTCGTTACGAGACCTGATGGTAGAATAGATTTAGT

+

FFFFFFFFFFFFFFFFFFFFFFFFFFFFFFFFFFFFFFFFFFFFFFFFFFFFFFFFFFFFFFFFFFFFFFFF  
FFFFFFFFFFFFFFFFFFFFFFFFFFFFFFFFFFFFFFFFFFFFFFFFFFFFFFFFFFFFFFFF

@A00721:190:HGJW7DSXY:4:2271:3305:30639\_2:N:0:TCTGCAAG+GCTGCACT  
CTCAACGAGGATAAAGCGAGTTTTCCGTCCTGAACGTAATACACGAAGAGATCATCCGCAAACGACTC  
GAAACCGAGACGCCGTAGATCAAAGTCCCTTCTAACTTTAGATTATGA

+

FFFFFFFFFFFFFFFFFFFFFFFFFFFFFFFFFFFFFFFFFFFFFFFFFFFFFFFFFFFFFFFFFFFFFFFF  
FFFFFFFFFFFFFFFFFFFFFFFFFFFFFFFFFFFFFFFFFFFFFFFFFFFFFFFFFFFFFFFF

@A00721:190:HGJW7DSXY:4:2435:7392:14732\_2:N:0:TCTGCAAG+GCTGCACT  
CTTATACTTTTGGGTATGTTTTGTGAAAAACATGAGATACCCAAGTCTATCGAAGACATTATCTCTTA  
TGTACTTATTGTAACGATCATTCTTTCGAGTTTTGTCATTCTTATTCT

+

FFFFFFFFFFFFFFFFFFFFFFFFFFFFFFFFFFFFFFFFFFFFFFFFFFFFFFFFFFFFFFFFFFFFFFFF  
FFFFFFFFFFFFFFFFFFFFFFFFFFFFFFFFFFFFFFFFFFFFFFFFFFFFFFFFFFFFFFFF

@A00721:190:HGJW7DSXY:4:2253:21947:11287\_2:N:0:TCTGCAAG+GCTGCACT  
ATGCTTTTCGATAGTGATTGTTATCAATTTAAATACATTACTGTTTCAAATCATCTTTACTCACAGAC  
TCCGAAAATGGTTTCAAATGAGGTCAAAGCTCTATTTATTAAACGAAC

+

FFFFFFFFFFFFFFFFFFFFFFFFFFFFFFFFFFFFFFFFFFFFFFFFFFFFFFFFFFFFFFFFFFFFFFFF  
FFFFFFFFFFFFFFFFFFFFFFFFFFFFFFFFFFFFFFFFFFFFFFFFFFFFFFFF

@A00721:190:HGJW7DSXY:4:1152:6307:16642\_1:N:0:TCTGCAAG+GCTGCACT  
ACCACTGATCTGCCGACTTTAGTCAAGGAACCTCAATTCCTTCGATGTTTATATTTTTCTATAAGGGA  
AAATAGCAATAATCAAATTTGACAAATTTTAGAACTTTATTTCAGAACTCTCTCCGATCACCTGGT  
GT

FFFFFFFFFFFFFFFFFFFFFFFFFFFFFFFFFFFFF::FFFFFFFFFFF:FFFF,FFFF,FFFFFFF  
 FFFF:FFFFFFF,FFFFFFFFFFFF:, :FFFFFFFFF:FFFF:FFFFFFFFFFFFFFFFFFFF,FFF,FFF  
 FF  
 @A00721:190:HGJW7DSXY:4:1342:20844:29105\_1:N:0:TCTGCAAG+GCTGCACT  
 TCAATAAGATGTATGATGATAATCTACTATTTTTAAATAGTGATATTCAGCGTATACTTTGAATACTTT  
 ATCAAAGATTGGCTTGGTCTATTTACCGCAAAAAGTTGGAAGAGGTCTATGATATTTATTTACTTA  
 TAC  
 +  
 FFFFFFFFFFFFFFFFFFFFFFFFFFFFFFFFFF:FFFFFFFFFFFFFFFFFFFFFFFFFFFFFFFFFFFFF  
 FFFFFFFFFFFFFFFFFFFFFFFFFFFFFFFFFF:FFFFFFFFFFFFFFFFFFFFFFFFFFFFFFFFFFFFF  
 FFF  
 @A00721:190:HGJW7DSXY:4:2324:25183:9471\_2:N:0:TCTGCAAG+GCTGCACT  
 CCGATTATAACTTGACTGTTGATAATATTACAATAGCTCTTCTCAGAAGATTAGAGAAGTAACCGGT  
 GAACACGTCGGTAGCATTGATTTACTTTTACCGTTAGAACTGAAAAAG  
 +  
 FFFFFFFFFFFFFFFFFFFFFFFFFFFFFFFFFF:FFFFFFFFFFFFFFFFFFFFFFFFFFFFFFFFFFFFF  
 FFFFFFFFFFFFFFFFFFFFFFFFFFFFFFFFFF:FFFFFFFFFFFFFFFFFFFFFFFFFFFFFFFFFFFFF  
 @A00721:190:HGJW7DSXY:4:2210:23285:13949\_2:N:0:TCTGCAAG+GCTGCACT  
 TATAAGTTACAAACGATTCTTCGACTATATTAAAGAAATAAAAATACTTCAAGTACCTGAACCTTACA  
 TTTTAAATGGTATGGTATAATGTGTCTTACAAATAGAACCTTCACTCT  
 +  
 FFFFF,FFFFFFF,FFFFFFFF:FFFFFFFFF:FFFFFFFFFFFFF:FFFFFFFFFFFFFFFFFFFFF  
 :FFFFFFFFFFFFFFFFFFFFFFFFFFFFFFFFFFFFF:FFFFFFFFF  
 @A00721:190:HGJW7DSXY:4:1144:28492:19022\_2:N:0:TCTGCAAG+GCTGCACT  
 TCCTTAATATTCTAGTAACCGCTATGTGGGCATTACTAGGATTTATCACACTCCTAAATTTGATAGCA  
 ATTTATGTTTTAAATGCTAGGAAAATTTTAGAAAACTCCATTGTATA  
 +  
 FFFFFFFFFFFFFFFFFFFFFFFFFFFFFFFFFF:FFFFFFFFFFFFFFFFFFFFFFFFFFFFFFFFFFFFF  
 FFFF:FFF,FFF:FFF,FFFFFFFF:FFFFFFFFFFFFFFFFFFFFF  
 @A00721:190:HGJW7DSXY:4:2425:8386:27821\_1:N:0:TCTGCAAG+GCTGCACT  
 ACTTAATTCAATAGCTTTAGTATTATTTACTATCGCCTTTATTGAAAATTGTATAAGAGTTAATTGCT  
 TACACAAAAGTGACGCGCAAGGAATCTTAATTGATTGAAGCTAGGCGTTGGGGAGAATGAAGTCCG  
 CTT  
 +  
 F,FFFFFFFFFFFF,FFFFFFFFFFFFFFFFFFFFF:FFFFFFFFFFFFF:FFFFFFFFF  
 FFFFFFFFFFFFFFFFFFFFFFFFFFFFFFFFFF:FFFFFFFFF  
 FFF  
 @A00721:190:HGJW7DSXY:4:2263:18927:19836\_2:N:0:TCTGCAAG+GCTGCACT  
 TACCATGACCAATCATCGCTCCAAGTGGCACGCCAGACGTAGGGTCAAACCTACTACCGCCGGTCGGC  
 AGATCGGCACCACTGGTCTCTACGTTACGGGACCCGCTGTGCAGAATA  
 +  
 FFFFFFFFFFFFF:FFFFFFFFFFFFFFFFFFFFFFFFFFFFFFFFFFFFF:FFFFFFFFFFFFFFFFFFFFF  
 FFFFFFFFFFFFFFFFFFFFFFFFFFFFFFFFFF:FFFFFFFFF  
 @A00721:190:HGJW7DSXY:4:1557:16043:20415\_2:N:0:TCTGCAAG+GCTGCACT  
 CACAGAAGAAGGCTGAAGGTCGTTACCGGACGACCACTCAAAGGAAACGGGCTGTTGCCAGAGGAAA  
 GCAGCGACCAACCGAGGTCGCTCGTAACATTGACGGCAGTCCCGTCATC  
 +  
 FFFFFFFFFFFFFFFFFFFFFFFFFFFFFFFFFF:FFFFFFFFFFFFFFFFFFFFFFFFFFFFFFFFFFFFF  
 FFFFFFFFFF:FFFFFFFFF,FFFFFFFFF:FFFFFFFFFFFFFFFFFFFFF  
 @A00721:190:HGJW7DSXY:4:1435:31855:3740\_1:N:0:TCTGCAAG+GCTGCACT  
 CTGAGGCAGTACCTCAGTCAAAGTCAATTACCACTCCCATACCAATCAATGATGTGACTGTACAG  
 TTCGGCCATTTCAAGAGTGGTCAATACGTCGTGGGAGGTACTGAAGCCTTCCCCTCCGCTGGCACGAA  
 GAA

```
+  
FFFFFFFFFFFFFFFFFFFFFFFFFFFFFFFFFFFFF:FFFFFFFFFFFFFFFFFFFFF  
FFFFFFFFFFFFFFFFFFFFFFFFFFFFFFFFFFFFF:FFFFFFFFFFFFFFFFFFFFF  
FFF  
@A00721:190:HGJW7DSXY:4:2468:21386:8782_1:N:0:TCTGCAAG+GCTGCACT  
CCAATCAATAGTTCTTCTGACCAGAATGAAAAGGGGTTTTACCGGGTAGTCTCTAAGTCTACCAGGAA  
GAGGGGAATGTCCCCAAAACTGAGAAGAATAAAGGGAAAGGTCCATCAGGACCTAAGAAGGGGAAT  
TAC  
+  
FFFFFFFFFFFFFFFFFFFFFFFFFFFFFFFFFFFFF  
FFFFFFFFFFFFFFFFFFFF,FFFFFFFFFFFFFFFFFFFFFFFFFFFFFFFFFFFFFF  
FFF  
@A00721:190:HGJW7DSXY:4:2350:26756:21778_1:N:0:TCTGCAAG+GCTGCACT  
GGAAGATCTCCCACCATCTGGGGTTGGGAATAAGAAATCTGCACGGGCCAAAGAGGCCGCTGCTACGA  
AGTCGCTGAAGGCGGCTTGCGTCATTAAAGGGTAGCTGTAAAGTTGCGCCTGCCGACCCCATCTTTGAG  
ACC  
+  
FFFFFFFFFFFFFF:FFFFFFFFFFFFFFFFFFFFFFFFFFFFFFFFFFFFF,FFFFFFFFFFFFFFFFFFFF  
FFFFFFFFFFFFFFFFFFFFFFFFFFFFFFFFFFFFF,FFFFFFFFFFFFFFFFFFFFF  
FFF  
@A00721:190:HGJW7DSXY:4:2363:17119:30389_2:N:0:TCTGCAAG+GCTGCACT  
ACAGTAGGTTCTGTCCTACTATGAGCAAATCTGTTGAATTCGTCACTGAGGACGAAGGTGAGAGGACT  
TTTGGCTACTGGCGACAACTGAGAGCAGTCGCTGGGGAAAGAGAATT  
+  
:FFFFFFFFFFFFFFFFFFFFFFFFFFFF:F,FFFFFFFFFFFFFFFFFFFFFFFFFF:FF,FFFFFFFFFF  
FFFFFFFFFFFFFFFFFFFFFFFFFFFFFFFFFFFFF:FFFFFFFFF  
@A00721:190:HGJW7DSXY:4:2354:30635:10833_1:N:0:TCTGCAAG+GCTGCACT  
CTTG CAGAGT GACT GGAG TT CAGAC GTG CTCT TCCG ATCT TTTT ATCC GC GTTA ACTAT GGGG C  
GAAGATCCCCTATGGAGTCTTGAAGGACTTAGGTTGGCATATTTATGCCGACGATAATAAGCATGTCA  
CCC  
+  
FFFFFFFFFFFFFFFFFFFFFFFFFFFFFFFFFFFFF,FFFFFFFFFFFFFFFFFFFFF,FFFFFFFFFFFF  
FFFFFFFFFFFFFFFFFFFFFFFFFFFFFFFFFFFFF,FFFFFFFFFFFFFFFFFFFFF  
FFF  
@A00721:190:HGJW7DSXY:4:2452:16929:12336_2:N:0:TCTGCAAG+GCTGCACT  
TTACAAGAGAGAGTGTGAGAGAGTCGCTCTCACTATTTTTGCCAGAATGCGGGCTTTCTGACGGATG  
AGGTTAAACTCTTGCTCCTTCTGTGGGTGAGGGTTTTTGTtatattc  
+  
FFFFFFFFFFFFFFFFFFFFFFFFFFFFFFFFFFFFF,FFFFFFFFFFFFFFFFF:,FFFFF  
FFFF:FF,FFFFFFFFFFFF,FFFF,FFFF,FFFFFFFFFFFF:FFFF  
@A00721:190:HGJW7DSXY:4:2258:5439:17769_2:N:0:TCTGCAAG+GCTGCACT  
TTTAGAGAGCATTAGAAGGAAGTTGGGCAAATCCCACATATGGTAGACGTTGTCACACTTTTCTTGA  
AAATTTTCTTTTCTCCGTCATTGGGGATTTCGATGTGAGAAGGTGG  
+  
FFFFFFFFFFFFFFFFFFFFFFFFFFFFFFFFFFFFF  
FFFFFFFFFFFFFF:FFFFFFF,,FFFFFFFFFFFFFFFFFFFF:  
@A00721:190:HGJW7DSXY:4:2306:21133:5588_2:N:0:TCTGCAAG+GCTGCACT  
CTTCATGCTGATCTTTCAGGACCTAATCACATCATGATTGATAGTTACGGCTCGTATCGAGTTGGAGG  
GAGGAAGTTCTCCGAAATTAAGACGGGGGATTAAGAGTCCAGCTGT  
+  
FFFFFFFFFFFFFFFFFFFFFFFFFFFFFFFFFFFFF:FFFFFFFFFFFFFFFFFFFF:FFFFFFFFF  
FFFFFFFFF:FFFFFF:FFFFFFFFFFFFFFFFFFFFFFFFFFFFF  
@A00721:190:HGJW7DSXY:4:2115:11053:10551_1:N:0:TCTGCAAG+GCTGCACT  
TCAGAGAGGGGAGCTCTGAAAAGGAAACTTCGTCAGAATATGAGGAAGTCTAAGAGGAGGAGTTTgag
```

GAAGGCTCTAGAGAAGATCTCCCCACCTGGAGAAGGCAAGTGGAGAGTCCAGAAGTTGATGAAGAAGG  
ATT

+

FFFFFF:F:F,:F:FF:FFFF,:FF,:FF,F::F:FF,FFF:, ,FFFF,FFFFFFFF:FFFFFFFFF  
,FFFF,F,FF:F:F:FFFF:, :F:FFFFFF,FFF,FF:F:FF,FFFF:F,FFFFFFFF:FFF,FFF  
FFF

@A00721:190:HGJW7DSXY:4:2363:21811:14873\_1:N:0:TCTGCAAG+GCTGCACT  
CTTCCTAAGGTGGATGAGGGAGGTTGTTTCTTTGGAGTTTATAGATAATCTTTTGAGAAGGGGTCATAG  
AGCCAGCAAGAGAAGCTTATATGCTGGTTAAGTGATGATTATCACTCCTTGAGAAGACAAGCCACAT  
TAA

+

FFFFFFFFFFFFFFFFFFFFFFFF:FF:FFFFFFFFFFFFFFFFFFFFFFFF:FFFFFFFFFFFFFFFF  
FFFFFFFFFFFFFFFFFFFFFFFF:FFFFFFFFFFFFFFFFFFFFFFFFFFFFFFFFFFFFFFFF  
FFF

@A00721:190:HGJW7DSXY:4:1414:25834:25254\_1:N:0:TCTGCAAG+GCTGCACT  
TTTGAGTATCGACAGATCTTCGATCTTGAGGACGTACATTTAACGTGGCAGAATTCGGTAACCTACC  
ATATTGTTCTTCCGGGAAGTTGTGGGATTTAACTTTGACTCAACTACTCCGATCAGATCCGGATGGT  
TTG

+

FFFFFFFFFFFFFFFF:FFFFFFFFFFFFFFFFFFFFFFFFFFFFFFFFFFFFFFFFFFFFFFFF  
FFFFFFFFFFFFFFFFFFFFFFFFFFFFFFFFFFFFFFFFFFFFFFFFFFFFFFFFFFFFFFFF,FFFFFFFF  
FFF

@A00721:190:HGJW7DSXY:4:1274:31711:36025\_1:N:0:TCTGCAAG+GCTGCACT  
GAAGACGGCATACGAGATCTTGACAGAGTGACTGGAGTTCAGACGTGTGCTCTTCCGATCTTGACAGTC  
AAAGATTCTGTAGCTCTGAGGGCGGTTGAGGGAGCCGTTTGGCCGACTTTAACTATTCTAAGAGTCT  
TT

+

:FFFFFFFFFFFF,FFFFFFFF:FFFFFFFFFFFFFFFF:FFFFFFFFFFFFFFFFFFFFFFFF  
FFFFFFFFFFFFFFFFFFFFFFFFFFFFFFFFFFFFFFFFFFFFFFFFFFFFFFFFFFFFFFFF  
FF

@A00721:190:HGJW7DSXY:4:2511:16712:28682\_2:N:0:TCTGCAAG+GCTGCACT  
CGTTGTCGTACCTTACAAGTTGAGGAGACTTTACAGCGGCTTATTGTCGCGCAGTTTCCAGAATTGC  
GGTTGAAGTTCACCCATTCTATCTTGAATGCTCACGCCGTCGCAGCCA

+

FFFFFFFFFFFFFFFFFFFFFFFFFFFFFFFFFFFFFFFFFFFFFFFFFFFFFFFFFFFFFFFF  
FFFFFFFFFFFFFFFFFFFFFFFFFFFFFFFFFFFFFFFFFFFFFFFFFFFFFFFF

@A00721:190:HGJW7DSXY:4:2468:16703:5713\_2:N:0:TCTGCAAG+GCTGCACT  
GATTTAGATATTATTGATATTGGAGGCGATATTCGTTTTCATATCCAAACTCCTTGAATGGAGTACA  
TATTTGCAACCCTATTCTTGATGTGAAAGATGCATCGAGGTATACGTC

+

FFFFFFFFFFFFFFFFFFFFFFFFFFFFFFFFFFFFFFFFFFFFFFFFFFFFFFFFFFFFFFFF  
FFFFFFFFFFFFFFFFFFFFFFFFFFFFFFFFFFFFFFFF:FFFFFFF

@A00721:190:HGJW7DSXY:4:1558:21685:21919\_2:N:0:TCTGCAAG+GCTGCACT  
CGGAGGGAAGCAAAATGTTTCGTTCTGTTACAAGAACGCTTTGGATTGTGACCATAAAGCCTCAGTTG  
CGATAGCTGTAGAGGTATACGATATCTCTCTTGATGATGTAGCCACTA

+

FFFFFFFFFFFFFFFFFFFFFFFFFFFFFFFFFFFFFFFFFFFFFFFFFFFFFFFFFFFFFFFF  
FFFFFFFFFFFFFFFFFFFFFFFFFFFFFFFFFFFFFFFF:FFFFFFF

@A00721:190:HGJW7DSXY:4:1160:5819:6558\_2:N:0:TCTGCAAG+GCTGCACT  
TCATTTCTGTTAGTTTGTCCGCGCAATTATTGGACACGATGAAAAATGACATACCGTTCTGACC  
TTGGTATCGTTATCCGTCATGGAGATGATGGCGCATCAGATCGGAAGA

+

FFFFF:FFFFFFFFFFFFFFFF:FF:FFFFFFFFFFFFFFFFFFFFFFFFFFFFFFFF  
FFFFFFFFFFFFFFFFFFFFFFFFFFFFFFFFFFFFFFFFFFFFFFFF

@A00721:190:HGJW7DSXY:4:2656:14751:21559\_2:N:0:TCTGCAAG+GCTGCACT  
AAGGGCGGACAATTGTTCCATTGTGAACTCTTGGGGACTAGATTGAGCATTAATGAGTTCCGAATAAC  
TCGTAATAAATCTTTCTCTAGTGGACAATTCAGAATACCTATTTCCGT

+

FFFFFFFFFFFFFFFFFFFFFFFFFFFFFFFFFFFFFFFFFFFFFFFFFFFFFFFFFFFFFFFF  
FFFFFFFFFFFFFFFFFFFFFFFFFFFFFFFFFFFFFFFFFFFFFFFFFFFFFFFFFFFFFFFF

@A00721:190:HGJW7DSXY:4:1164:22426:13777\_1:N:0:TCTGCAAG+GCTGCACT  
TGCCAATCTCATCGCTATACGCATACCTGATTGGAAGAAGCGAGGTTCTGTTCTCAATAAAAAATTTT  
CTCAAGAGATTATGGTTGATAAAGTTTTCTTCATAAGGGCTATTACGTACGTCATGGGGATCACTTCT  
TC

+

F,F,F,FFF,FF:FFFFFFFFFFFF:,FFFFF,FFF:FF:FFF:FFF,FFFFFFFFFFFFFFFFFFFF  
FFFFF:F:FFFFFFFFF:FFFFF:FF:FFFF:FFF,:F:F:FFF:FFFFF:FFFF,:FFFF:FFF  
,F

@A00721:190:HGJW7DSXY:4:2158:17752:22623\_1:N:0:TCTGCAAG+GCTGCACT  
TCGAATATGTTACGACATGGCTTCGTAACAACAGTGCAGGATTGTCATCTCGGGGAAAGTGATTCAC  
CAAGATGTTTCATATAGATACGAGATACCTAGAGAAGGTCGCAGCGATCTTACTCGTTATCGGAGCTAA  
GAA

+

FF:F:FFF:FF,F:F::F,FFFF,FFFF:FFF,FFFFFFFFF:FFFFFF:FFFF,FFFFFFFFFFFF  
:FF,FFFFFF,FFFFFFFFF:F:F:FFFF:FF,FFFFFFFFFFFFFFFFFFFF:FFFFFF:FFFFFFFF  
FFF

@A00721:190:HGJW7DSXY:4:1457:15628:2597\_1:N:0:TCTGCAAG+GCTGCACT  
TCGCAAACTTAACGTTAGTACCGGAGGTGATCTCTCTGCTTCTGCGTTACTGAGAGAAAAGATTGAG  
ACGCCCTACGGTGACTTTATGGACAAGATGCAAGTTCTTGGGAAATACTTGTTTCCCTTTTTAGGTTTA  
GTA

+

FFFFFFFFFFFFFFFFFFFF,FFFFFFFFFFFFFFFFF:FFFFFFFFFFFFFFFFF:FFFFFFFFFFFFF  
FFFFFFFFFFFFFFFFFFFFFFFFFFFFFFFFFFFFFFFFFFFFFFFFFFFFFFFFFFFFFFFF:FFFF:FFFFFFFF  
FFF

@A00721:190:HGJW7DSXY:4:2531:20292:29622\_1:N:0:TCTGCAAG+GCTGCACT  
TGTGAGAAGACAACGAATCTTGAAACTACGGTCCTTATCAAAGAAAATGGTGAACCGGTCTCTAAATC  
TTTTGAGATTGAGAAGATTGAAGAACACGTCAAGAAGTCGCTCGGCGTTGTTCTTGAAAACCAAGTTA  
AGA

+

FFF,FFFFFFFFF:FF,FF,FFFFFF:FFF:FFFFFFFFF:F,FF:FFFFFFFFFFFFFFFFFFFF  
FFFFFFFFFFFFFFFFFFFF:FFFFFFFFF:FFFFFFFFFFFFFFFFFFFF:FFFFFFFFFFFFF  
FFF

@A00721:190:HGJW7DSXY:4:2624:18936:27524\_2:N:0:TCTGCAAG+GCTGCACT  
CTTTGTACCTTCTGTCAAACCTCGAGGTTGAGCTACGAGAGGTGATCCCGGATGTGGATTGAAGGCTG  
GCTCTAAGGGAGACTCCTTCTTTTTGAATGTTGTAAAGAATTGGGTTG

+

FFFFFFFFFFFFFFFFFFFFFFFFFFFFFFFFFFFFFFFFFFFFFFFFFFFFFFFFFFFFFFFF,FFFFFFFFFFFFF  
FFFFF,FFFFFFFFFFFFFFFFF:FF:F:FFFF:FFFF,F:FF,FF

@A00721:190:HGJW7DSXY:4:2130:7292:22294\_1:N:0:TCTGCAAG+GCTGCACT  
ACAAGGAGTTAGACTCTTCTTCAAGTTTTTAGATCTTCTTGATAATCTTAAAGAAAAATTTTCGAATA  
AACTAATGAGAGGTATAGGCTTAGTCAAGTCTGTACTTACATTCTTTACGCCAGATTCTTCATGGGGC  
GAC

+

FF:FFFFFFFFFFFFFFFFF:FFFFFFFFFFFFFFFFFFFFFFFFFFFFFFFFFFFFFFFFF:  
FFFFFFFFFFFFFFFFFFFFFFFFFFFFFFFFFFFFFFFFFFFFFFFFFFFFFFFFFFFFFFFF  
FFF

@A00721:190:HGJW7DSXY:4:1673:28890:34648\_2:N:0:TCTGCAAG+GCTGCACT  
TTCTCTACCCATAACTTCTTTTTCAAAAATGCGGATGGGTCTACTGATGTTTTCTACAGAGTGCAGT

$+$ 

@A00721:190:HGJW7DSXY:4:2450:12292:8249\_1:N:0:TCTGCAAG+GCTGCACT  
GGGGTTCCATAAGATATTATCTGACATTGTGGTTCAATGATCAGGATTCTTCTTTTGGTCCTTACGTC  
TTAAGTAATTTGGATGTTGTCGAAAACATCAGGTTCTTGTCCAGATTCTTAAAAGAAGTTTATTAA  
ACT

+

@A00721:190:HGJW7DSXY:4:1267:19000:36777\_1:N:0:TCTGCAAG+GCTGCACT  
CTAATGTTCTTGCAATAGCCACAGACTTTCTGGGAAAAGAGACCTCTGTTGGTAGAGGAGTTGAGAGA  
ATTACTCAGATTCAATCTGGCATCACTGAACGTCTACAACGAGTTAGGGAGTGGCTAGGTTTTAAAG  
ATC

+

@A00721:190:HGJW7DSXY:4:1455:14163:5791\_2:N:0:TCTGCAAG+GCTGCACT  
AATACCTTCCACTGAGTTCATCACCCAGAGTTTCGACGTCGCGAAAACGATGAAGATTTCCACACTG  
TTTGAGAATCTTCTGATGCTGAATTTGAGGAAAATTTTTCGGAAGTTT

+

@A00721:190:HGJW7DSXY:4:1345:12527:17143\_1:N:0:TCTGCAAG+GCTGCACT  
CCTGATGGCTCAGTACAGGGAGGAGGTAATAGTTATAAAACCTTCTTTTATCATTGCAACAGGACTTT  
GAGAAGACTGTTGAAATGGACAAATCTGGGATCATAGGTATGTGTACGCTACACTCGAAATATGGG  
CCC

+

@A00721:190:HGJW7DSXY:4:2634:9625:14841\_1:N:0:TCTGCAAG+GCTGCACT  
CCAACCTTTAGCACTTTTTGAATATGACAGAAGCTCGCCATATCAGATTAGAGACATGCCAGTTAGAGT  
TCTTCTAACCAGGACTGATGGTGAGATTCTTTACCTTTTGAGGTCCAGGAACCTTTACTCCTAGTG  
TCT

+

@A00721:190:HGJW7DSXY:4:2360:9860:26929\_1:N:0:TCTGCAAG+GCTGCACT  
ACGTTTCCGTCGGAGGATGACAGGTGGGAGACCGCTCAATAACACTCTATTGAATCCCTTTTCCACGA  
TGAAAGCTCTTTATGAGGTGCTCCATGCAAATTTACAGTTCCTCTTTGGTGATATCGCCTCTGTCCTT  
TCT

+

@A00721:190:HGJW7DSXY:4:1104:26476:14027\_1:N:0:TCTGCAAG+GCTGCACT  
AAGGTTCTATTACCACCCTTGTCATTGATACAAACATTCTAGGTGATGCTTTCTTAGAGGCTCGTCTA  
GCCGCTGAGATTCTGCTTACCTATTTACAATCTGTAGAGAGAGAGGTTAATCAGAATTTGAGTGATAA  
CGA

```
+
FFFFFFFFFFFFFFFFFFFFFFFFFFFFFFFFFFFFFFFFFFFFFFFFFFFFFFFFFFFFFFFFFFFFF
FFFFFFFFFFFFFFFFFFFFFFFFFFFFFFFFFFFFFFFFFFFFFFFFFFFFFFFFFFFFFFFFFFFFF:FFFFFFFFFFF
FFF
@A00721:190:HGJW7DSXY:4:1327:20980:24893_2:N:0:TCTGCAAG+GCTGCACT
CTCCTAGTACTTAAGGGTTTATGTTTCGGTTTCAGCTGGATGGATCTTTTGATGGTATGTTTCACATT
GCGTGATCACTTCCCGTGGACTTGGAAGAGATTAAACATAAAATCCA
+
:F,FFF,F,:FFFFFFFFFFFFFF:FFFFFFFFFFFFFFFFFFFFFFFFFFFFFFFFFFFFF,FFFFFFF,:FF
F:FFF,FFFFFFFF:FFFF:FF:FFF,:F:F,FFFF,FFFF,FFFF
@A00721:190:HGJW7DSXY:4:2278:17933:35462_2:N:0:TCTGCAAG+GCTGCACT
GCTAAAGCCTGTCCAGTTGTCGATGATGTTTCGGGCTGTGGGGATTAACTTCCCTCGTGAACTTACGA
CGATGTTCTCGCTCGCATTTTACAAGGATTACTAAGTCTGAGATCTGC
+
FFFFFFFFFFFFFFFFFFFFFFFFFFFFFFFFFFFFFFFFFFFFFFFFFFFFFFFFFFFFFFFFFFFFF:FFFFFFFFFFFF
FFFFFFFFFFFFFFFFFFFFFFFFFFFFFFFFFFFFFFFFFFFFFFFFFFFFFFFFFFFFFFFFFFFFF
@A00721:190:HGJW7DSXY:4:2262:4191:31735_2:N:0:TCTGCAAG+GCTGCACT
GTTTCATGAGGATGTCTTGGTCGAAAAATATCGCCGGGAACCTCTAATAGAGGATCTGATGACATTAT
TTCAACGGATACCGATCTCAGTTCTACCACAGAAACCGTCTCAGGAAC
+
F,FFFFFFFFFFFFFFFFFFFFFFFFFFFFFFFFFFFF:FFFFFF:,FFFF,FFFFFFFFFFFFFFFFFFFFFFFFFFFF
FFFFFFFFFFFFFF:FFFFFFFFFFFFFFFFFFFFFFFFFFFFFFFFFFFFFFFFFFFFFFFFFFFFF
@A00721:190:HGJW7DSXY:4:2447:32542:17018_1:N:0:TCTGCAAG+GCTGCACT
GGAATTAGAGAAAGACGACCTTCTTGTGGGACTGAGACCTCTGAATTTTCAGGGTGCCCTGATGAGG
ACGTTGAAACGGATAATTTCAACTCTGAGACTTCTAAGAGTGTTTTCAAAGACCAGAAACGTAACAAG
AAG
+
F:FFFFFFFFFFFFFFFFFFFFFF:FFFFFF:FFFFFFFFFFFFFFFF:FFFFFFFFFFFFFFFFFFFFFFFFFFFFF
FFFFFFFFFFFFFFFFFFFFFFFFFFFFFFFFFFFFFFFFFFFFFFFFFFFFFFFFFFFFFFFFFFFFF
FFF
@A00721:190:HGJW7DSXY:4:1401:7057:17440_1:N:0:TCTGCAAG+GCTGCACT
TGTGCTCTTCCGATCTGATATGGTTGCGGCTGATCGTACCCCAATTCTGCTAGAAAGATCACTCTCG
GCGATACCACTGATCTTCCAGAGTTTCGTAGTGGTCTTCTTTTGGTGATTTTATCAAAGAGAAAGTT
TCT
+
F:FFF:FFF:F,FFFF,FFFF::FFF::FFFFFFFFF:,F,F::F:FFFFFFFFF,FFFFFFF:FFF:
:FFF:F::,FF,FFFF,FFFFF,,FFF,FF,FFFFFFFFF::FFFFFFFFF:FF:FF:FFF:FF
FFF
@A00721:190:HGJW7DSXY:4:1355:8061:9815_1:N:0:TCTGCAAG+GCTGCACT
TTCTAAAAGCTATTAATAGCAGTTGCGGGGCTATAATACCGCCTCCAGATTACTCTAAACTGAATCC
ACTCTCTTGGGATATAAATGAGTACATCTATAATAGAGTTTGGAACTGTGTAATGTCCTACGTACTG
TTC
+
FFFFFFF:FFFFFFFFFFFFFFFFFFFFFFFFFFFFFFFFFFFFFFFFFFFFFFFFFFFF:FFF:FFFFFFFFFFFFFFFFFFFF
FFFFFFFFFFFFFFFFFFFFFFFFFFFF:FFFFFF:FFFFFFFFFFFFFFFFFFFFFFFFFFFFFFFFFFFFF
FFF
@A00721:190:HGJW7DSXY:4:2209:4960:28870_1:N:0:TCTGCAAG+GCTGCACT
TCTTGCGAAGGTTCAAGTCGATTGATTTTGTGACTACGATCTCTCTTGTAATAAGAAGTTCTTCGCA
GTTGAATCTCCACCAGGTGGAGGGAAGACCACTGAACCTTATAGCGACTTTTGTGCAATTTTTCGCAAA
AGG
+
FFFFFFF:FFFFFFFFFFFFFFFFFFFFFFFFFFFFFFFFFFFFFFFFFFFFFFFFFFFF:FFFFFFFFFFFFFF
FFFFFFFFFFFFFFFFFFFFFFFFFFFF:FFFFFF:FFFFFFFFFFFFFFFFFFFFFFFFFFFFFFFFFFFFF
FFF
```



@A00721:190:HGJW7DSXY:4:1636:23610:7122\_2:N:0:TCTGCAAG+GCTGCACT  
ATTGTCAGTCTAATCGTAATTCGCGAGAAGAGATAGTGAATAAGTTTTGGCACTTCTAGTTCATCG  
CGGTATTTGTGAAATTAAGACAGACGTGAAAGTTATGATGAGTGATCG

+

FFFFFFFFFFFFFFFFFFFFFFFFFFFFFFFFFFFFFFFFFFFFFFFFFFFFFFFFFFFFFFFFFFFFFFFF  
FFFFFFFFFFFFFFFFFFFFFFFFFFFFFFFFFFFFFFFFFFFFFFFFFFFFFFFFFFFFFFFFFFFFFFFF

@A00721:190:HGJW7DSXY:4:2373:10149:21605\_2:N:0:TCTGCAAG+GCTGCACT  
GGACGTTCTTTTCATCGACGAATTATTCATGATTCACGCTGGTCAGACCCTTTTCTTACACATCTAC  
TTAAGGCGGCTTATACCATAGGTTACGGTGATTCCAATCAAATCGGAT

+

FFFFFFFFFFFFFFFFFFFFFFFFFFFFFFFFFFFFFFFFFFFFFFFFFFFFFFFFFFFFFFFFFFFFFFFF:FFFF  
FFFFFFFFFFFFFFFFFFFFFFFFFFFFFFFFFFFFFFFFFFFFFFFFFFFFFFFFFFFFFFFFFFFFFFFF:FFF

@A00721:190:HGJW7DSXY:4:2124:27462:28072\_2:N:0:TCTGCAAG+GCTGCACT  
TATTGATCTCCAAGTCGAACTACTTCAACATCAACGACATCATTCTTGATGAGTGTCGTTCTTATC  
GAAGTCTCAGTTATCGCTGCCCGCCGACGTTTGTGCGGAACTCTCAG

+

FFFFFFFFFFFFFFFFFFFFFFFFFFFFFFFFFFFFFFFFFFFFFFFFFFFFFFFFFFFFFFFFFFFFFFFF  
FFFFFFFFFFFFFFFFFFFFFFFFFFFFFFFFFFFFFFFFFFFFFFFFFFFFFFFFFFFFFFFFFFFFFFFF

@A00721:190:HGJW7DSXY:4:1569:11903:3756\_1:N:0:TCTGCAAG+GCTGCACT  
ATTAGACCTATCAGATGTCTTGACGACTTCGAATTTGAGGACGGAGTTAAATATATTACTTTCACTCA  
AGGTGAAAAGTTTGAAATTAACAAAGTCCTTGTAAGAGTAAGGTTAAATGTGAAGATGCTCAGACTA  
TTC

+

FFFFFFFFFFFFFFFFFFFFFFFFFFFFFFFFFFFFFFFFFFFFFFFFFFFFFFFFFFFFFFFFFFFFFFFF  
FFFFFFFFFFFFFFFFFFFFFFFFFFFFFFFFFFFFFFFFFFFFFFFFFFFFFFFFFFFFFFFFFFFFFFFF  
FFF

@A00721:190:HGJW7DSXY:4:2135:1090:18067\_1:N:0:TCTGCAAG+GCTGCACT  
CTTTACGATACTTTGTTATCAATGTAAAGTTAAACGATGCTACTTGTGAGAGGATCAATCACAGTAAG  
GAACTGTCACGTTTAGCACGGGAGGTTGCAGATTCAACCCCTTATATCGAGGCTATCGAGGACGATGA  
GTA

+

FFFFFFFFFFFFFFFFFFFFFFFFFFFFFFFFFFFFFFFFFFFFFFFFFFFFFFFFFFFFFFFFFFFFFFFF  
FFFFFFFFFFFFFFFFFFFFFFFFFFFFFFFFFFFFFFFFFFFFFFFFFFFFFFFFFFFFFFFFFFFFFFFF  
FFF

@A00721:190:HGJW7DSXY:4:1468:23375:2863\_2:N:0:TCTGCAAG+GCTGCACT  
GACGACAAGCCTCAAGAGGGTAGAGGACCACCTGGATCTTCTACTGTCTCTGCCTTCAAGATTTCTT  
AGAAGAGGTTATTCCTGGAACACCTTAACGTCACCTCGGTAATCTTTC

+

FFFFFFFFFFFFFFFFFFFFFFFFFFFFFFFFFFFFFFFFFFFFFFFFFFFFFFFFFFFFFFFFFFFFFFFF  
FFFFFFFFFFFFFFFFFFFFFFFFFFFFFFFFFFFFFFFFFFFFFFFFFFFFFFFFFFFFFFFFFFFFFFFF

@A00721:190:HGJW7DSXY:4:2357:23131:6511\_2:N:0:TCTGCAAG+GCTGCACT  
TCGAATTAAGATCAAGGCTAATACCTTTATAGGTAAGAAGCCCCTTGAGCCGCGTAGTCAGCGCGTTT  
AGCTGTATCATCAGTCAGAGTATACCCGATAGGGTACCGAGTCTCCAA

+

FFFFFFFFFFFFFF:FFFF:F:FFFFFF:FFFFFFFF,FFFFFFFFFFFFFFFFFFFFFFFF,FFFFFFFFFFFFFF  
FFFFFF,F:FFFFFFFFFFFFFF,F,FFF:FFFFFF:F:F:FFFFFFFF

@A00721:190:HGJW7DSXY:4:1147:26323:11068\_1:N:0:TCTGCAAG+GCTGCACT  
AACGGAAAGACATATCGCACCCGAAATTTTGGGCAGTATGCTCTTAACCTCGGTTATTTAACGGTGTT  
TTGATCAGTCTAAGTTGTATAAAGTTATAGGAGACTCAGTTAACCTGAGAGCTCCTAAATTGATAGAT  
TG

+

FF:,F,,,,:F:F:FF,FF,F:F,FF:FFFF,FF,FF,FFFF,FFFF,F,,FF,FF,F,:FFFF:F  
FF,F:F:FFFF,:FFF:,FF,FF:FFFFFF:FF,FFFFFF:FF,FFFFFF:F:F,FFFFFF:FF  
FF

@A00721:190:HGJW7DSXY:4:1267:11677:15765\_1:N:0:TCTGCAAG+GCTGCACT  
TTCGTAAAGTCGACAGCGAAATGGTCAATATTGATAATTGGACCGACTATATGACCTATTTTAAGCTC  
ATGGTGAAAAGGGAAGCTAAGGTTAACTTGATGCTTCAGCCTTTTCGAAGCATAACCCCGCACAGAA  
TAT

+

FFFFFFFFFFFFFFFFFFFFFFFFFFFFFFFFFFFFFFFFFFFFFFFFFFFFFFFFFFFFFFFFFFFFFFFF  
FFFFFFFFFFFFFFFFFFFFFFFFFFFFFFFFFFFFFFFFFFFFFFFFFFFFFFFFFFFFFFFFFFFFFFFF  
FFF

@A00721:190:HGJW7DSXY:4:1629:9914:25488\_1:N:0:TCTGCAAG+GCTGCACT  
CTATCTTTAAGGTTCTTGTGAGGAGAGTCAAACAGTGTCTTTTACCCAACATTTTTATGTATACAGAG  
ATGACCAGTGACGATTTCTCCCGAAGCTCTTCTCTCTCTTAGGAGGTCATGATGACTACTATAAGGG  
TGA

+

FFFFFFFFFFFFFFFFFFFFFFFFFFFFFFFFFFFFFFFFFFFFFFFFFFFFFFFFFFFFFFFFFFFFFFFF  
FFFFFFFFFFFFFFFFFFFFFFFFFFFFFFFFFFFFFFFFFFFFFFFFFFFFFFFFFFFFFFFFFFFFFFFF  
FFF

@A00721:190:HGJW7DSXY:4:2412:9408:33379\_2:N:0:TCTGCAAG+GCTGCACT  
TTGATGCTGAATTTCTTGAACCTTTGGAGTGCCAGTGAATATTTTTGTACGCCAGGAGTATCCATAA  
CGATTTGTCATTTACCACCTTTGCTCAACGACGAAGTGAACGGCCAA

+

FFFFFFF:F:FFFFFFFFFFFFFFFFFFFFFFFFFFFFFFFFFFFFFFFFFFFFFFFFFFFFFFFFFFFFF  
FFFFFFFFFFFFFFFFFFFFFFFFFFFFFFFFFFFFFFFFFFFFFFFFFFFFFFFFFFFFFFFFFFFFFFFF  
FFF

@A00721:190:HGJW7DSXY:4:2557:23113:35352\_1:N:0:TCTGCAAG+GCTGCACT  
TCTTGTATGATCACTTTGATGATTTTATCACTTTATTATGACCTTGGAAGTTTTCGGCTGTGGTTGT  
CGCTGGGACGATTCCATTCTGTTTTCAAAGACTCCAATAACTGATCATTCTGATCATATGATTTTGG  
ACA

+

::FFFFFFFFFFFFFFFFFFFFFFFFFFFFFFFFFFFFFFFFFFFFFFFFFFFFFFFFFFFFFFFFFFFFF,FFFFFFFFFFFFFFFFFFFFF  
FFFFFFFFFFFFF:FFFFFFFFFFFFFFFFFFFFFFFFFFFFFFFFFFFFFFFFFFFFFFFFFFFFFFFFFFFFF  
FFF

@A00721:190:HGJW7DSXY:4:2210:28646:35383\_1:N:0:TCTGCAAG+GCTGCACT  
TAGGACTTTGGGAGAGATTTCGTTAGTTTTAAAGACTATACTAAATATCTCCACTACGAGGTTGTTGTT  
TGGCGATTAGCTCTTGGGACTAATATTCGATATTCGATTGAGGGTCGTTATACCTATTCGGCTATCTG  
TGC

+

FFFFFFF:FFFFFFFFFFFFFFFFFFFFFFFFFFFFFFFFFFFFFFFFFFFFFFFFFFFFFFFFFFFFFFFF  
FFFFFFFFFFFFFFFFFFFFFFFFFFFFFFFFFFFFFFFFFFFFFFFFFFFFFFFFFFFFFFFFFFFFFFFF  
FFF

@A00721:190:HGJW7DSXY:4:1134:4065:32299\_2:N:0:TCTGCAAG+GCTGCACT  
AAGATCAAATTTTAAACGATTCCGAGAGGTTTATCCTGATGTGGAGGGAGTTCTTGAAGCATCCCGAC  
CTTTCCTTGTGAAAATTTTGATGCGGTTTCATAAGATTATCAGTAATC

+

FFFFFFFFFFFFFFFFFFFF:FFFFFFFFFFFFFFFFFFFFFFFFFFFFFFFFFFFFFFFFFFFFFFFFFFFFF  
FFFFF:FFFFFFFFFFFFFFFFFFFFFFFFFFFFFFFFFFFFFFFFFFFFFFFFFFFFFFFFFFFFFFFFF,FFF

@A00721:190:HGJW7DSXY:4:2332:15420:26882\_1:N:0:TCTGCAAG+GCTGCACT  
ATTCATGGACCTTCCATCCTGTACCTCTTCTGGAGAGACGTATCTCAAAGATCGACTTCGAGACAGGT  
GATATTGTTGAGCGAGAGCGACCAAGATCTAAATTGCGTAACGGTGCGTGGCGCTTTATTTTAAAAAG  
CTC

+

FFFFFFFFFFFFFFF:FFFFFFFFFFFFFFF:FFFFFFFFFFFFFFFFFFFFFFFFFFFFFFFFFFFFFFFF  
FFFFFFFFFFFFFFFFFFFFFFFFFFFFFFFFFFFFFFFFFFFFFFFFFFFFFFFFFFFFFFFFFFFFFFFF  
FFF

@A00721:190:HGJW7DSXY:4:2177:21938:22983\_1:N:0:TCTGCAAG+GCTGCACT  
GATACTTATCACGAAAGGACTTGAGTCTTTTGATCAGTCTCTGACTTGACCATCTTTCATTTTAAATG

ACGATCATTAAGACTCTCTTTCTTCTTTGTTTCCTTCTTTGCACTGATTTTCTCATCAGCTTGTGT  
TTT

+

FFFFFFFFFFFFFFFFFFFFFFFFFFFFFFFFFFFFFFFFFFFFFFFFFFFFFFFFFFFFFFFF  
FFFFFFFFFFFFFFFFFFFFFFFFFFFFFFFFFFFFFFFFFFFFFFFFFFFFFFFFFFFFFFFF  
FFF

@A00721:190:HGJW7DSXY:4:2139:32570:13777\_2:N:0:TCTGCAAG+GCTGCACT  
TTTACGATAACAACATCAGTTGATTAAGACTCTTCCGAAAGGCGAACTTTGGAATTTGAAGCTCAG  
GGTGAAGCACAACTTTGACCGTGACGAACTGTGGTGTCTTGATCTA

+

FFFFFFFFFFFFFFFFFFFFFFFFFFFFFFFFFFFFFFFFFFFFFFFFFFFFFFFFFFFFFFFF  
:FFF:FFF:FFFFFFFFFFFFFFFFFFFFFFFFFFFFFFFFFFFFFFFFFFFFFFFF:F:FFFFFFFF

@A00721:190:HGJW7DSXY:4:1447:1307:27430\_2:N:0:TCTGCAAG+GCTGCACT  
TTAAGTTTGTCTTCTTGTGTTGTTGTTATTCTATTAATCACTCATTTTAGTGAGATTATTAACGCG  
ACTAAACGTCTTCGACAACAGCAGGGGTTTTCGAATAGTGATAGCCA

+

FFFF,,FFFFFFFF:::F:FFFFFFFF:FFFFFFFFFFFFFFFFFFFFFFFF:FFFF:F:FFFFFF::FFFF  
FFFFFFFF:FF:F:,FFFF:FF,FFF,FF,:F,FFFF:FFFFFFFF

@A00721:190:HGJW7DSXY:4:1116:25048:20729\_1:N:0:TCTGCAAG+GCTGCACT  
AGAGGGGCAGCAGCATGACCATAATTGGTATTGACTTTGGTACCACCTTTTCTACTGTCTGTCTCGCC  
TCTTCGAATGAAGTTTTAATGCTTAACAACAATGATAGTGAATTTATACCTACAATCATTGGTTTTTC  
TAA

+

FFFFFFFFFFFFFFFFFFFFFFFFFFFFFFFFFFFFFFFFFFFFFFFFFFFFFFFFFFFFFFFF  
FFFFFFFFFFFFFFFFFFFFFFFFFFFFFFFFFFFFFFFFFFFFFFFFFFFFFFFF:FFF,FFFFFFFFFFFFFFFF  
FFF

@A00721:190:HGJW7DSXY:4:2153:23149:15843\_2:N:0:TCTGCAAG+GCTGCACT  
TGTTTATGGATATGATGCTATTACTCATGATGGTTACGGTCAGGGAGGATTCTCAGTTTACAAGGACC  
TTAAGCGATGGATCGGGGTTAATTCTAAACATTACCCGAAAGACGTG

+

FFFFFFFFFFFFFFFFFFFFFFFFFFFFFFFFFFFFFFFFFFFFFFFFFFFFFFFFFFFFFFFF  
FFFFFFFFFFFFFFFFFFFFFFFFFFFFFFFFFFFFFFFFFFFFFFFFFFFFFFFF

@A00721:190:HGJW7DSXY:4:2229:6840:4789\_2:N:0:TCTGCAAG+GCTGCACT  
GTACGATGTCGTCTGTCTCGGCGATCACTTTTCTACTAAGAATTGGTCCTACTTTTGGACAAGGCCAAC  
TTCGTAATCTTCATGAGATCGTTTCTTTCTTTATCTCTTTGGTTGTTA

+

FFFFFFFFFFFFFFFFFFFFFFFFFFFFFFFFFFFFFFFFFFFFFFFFFFFFFFFFFFFFFFFF  
FFFFFFFFFFFFFFFF:FFFF,FFFFFFFF,FFFFFFFFFFFFFFFF:F

@A00721:190:HGJW7DSXY:4:1267:24930:7185\_2:N:0:TCTGCAAG+GCTGCACT  
GAGTGAAAGGCTTCAATTGTAGTGGTTTGGTCGTTTCAGTACCCAGTCAGTATACCTCTACGCAAAGA  
TATTTTCATGAAACTACAGAGGAACGTACCGGATTACCTGTCTTTCAT

+

FFFFFFFFFFFFFFFF,FFFFFF:FFFFFFFF:FFFFFFFFFFFFFFFFFFFFFFFFFFFFFFFF,FFF  
FFFFFFFFFFFFFF:FFFFFFFF,FFFFFFFFFFFFFFFFFFFFFF:FF

@A00721:190:HGJW7DSXY:4:2618:30427:12853\_1:N:0:TCTGCAAG+GCTGCACT  
CTTCGGCCGCTCTCTTTGCTTCGATGTTGGATGTCAAGAAGGTTTCAAGATGGGATTCTACGTAGTT  
TATGACTTTGGTGGTGGTACTTTCGATACTTCTATCGTCTTACGTTACGTAATTACTATAGTGTTAT  
TTA

+

FFFFFFFFFFFFFFFFFFFFFFFFFFFFFFFFFFFFFFFF:::FFFFFF,FFFFFFFFFFFFFFFF  
FFFFFFFFFFFFFFFFFFFFFFFFFFFFFFFFFFFFFFFFFFFFFFFFFFFFFFFFFFFFFFFF  
FFF

@A00721:190:HGJW7DSXY:4:2632:17318:26068\_1:N:0:TCTGCAAG+GCTGCACT  
ATAATCTTGGAGGTCGTGACGTTGATGAAGCTATAAGAGCGTTCTTATTACGGCGCACTTCTTTACCC

GCCACCACACAACCTTTTCAGTTTCACAACCTGAAGGAGGAGGTTTCTGTTACTGGAAAACCCTCGTCAAT  
ACT

+

FFFFF:FFFFFFFFFFFFFF:FFFFFFFFFFFFFF:FFFFFFFFFFFFFF:FFFFFFFFFFFFFF  
FFFFFFFFFFFFFFFFFFFFFFFFFFFFFFFFFFFFFFFFFFFFFFFFFFFFFFFFFFFFFFFF  
FFF

@A00721:190:HGJW7DSXY:4:2236:16405:15812\_2:N:0:TCTGCAAG+GCTGCACT  
TCTAGTGAAATTAACGCGTCCTTTTCTGGAACGTAGTTTACTATTATGAACAAAGTTATCAAAGATA  
GTGGCATTCAAGGCAAACCTTACCCTGATTCCGGCCGGTGGTAGCTCAT

+

FFFFFFFFFFFFFFFFFFFFFFFFFFFFFFFFFFFFFFFFFFFFFFFFFFFFFFFFFFFFFFFF  
FFFFFFFFFFFFFFFF:FFFFFFFFFFFFFFFFFFFFFFFFFFFFFFFF

@A00721:190:HGJW7DSXY:4:2666:16993:32863\_2:N:0:TCTGCAAG+GCTGCACT  
TGAAACAGCTATTAAAGCTGTTGAGCGGTAATTACACCTAAACGAGCTCGATCTGCCATCGCTGAAG  
GATGTGCACTCTTTTCTGCTACTTTAACGGAGCGTAGTGTACTCTTCG

+

FFFFFFFFFFFFFFFFFFFFFFFFFFFFFFFFFFFFFFFFFFFFFFFFFFFFFFFFFFFFFFFF  
FFFFFFFFFFFFFFFFFFFFFFFFFFFFFFFF,FFFFFFFFFFFFFFFFFFFFFFFF

@A00721:190:HGJW7DSXY:4:2122:23538:32205\_2:N:0:TCTGCAAG+GCTGCACT  
AAAGGTCTCTATCAAGCTCGTATTATCGTCGCTGCTGGATCTGCGTTACCGTTGAAGGCTAAACTCCA  
AGGTAATTATGAAGACTGTGATTTATCTTTCACCTCTGGCCTTGTATGA

+

FFFFFFFFFFFFFFFFFFFFFFFFFFFFFFFFFFFFFFFFFFFFFFFFFFFFFFFFFFFFFFFF  
FFFFFFFFFFFFFFFFFFFFFFFFFFFFFFFFFFFFFFFFFFFFFFFFFFFFFFFF

@A00721:190:HGJW7DSXY:4:1276:24162:6355\_1:N:0:TCTGCAAG+GCTGCACT  
TTCCGATCTTTTCAATCTTCTTAAAAAGAAGATAGAGAGTCATACTTTGGGCTATCGTTTCAAGTGCAT  
GGGGTTGGATAGCCAATATTGAAGTGGACACCTCTGGTAGTATCGAAGTAAAGATAACCAATAAGGAA  
GGA

+

FFFF:FFFFFFFF:F:,FFFFFFFF:FFFF:FF:, :FFFFFFFF:FFFFFFF::FFF:FFF  
FFFFFFFFFFFFFFFF:FFFFFFFFFF:FF:FFFFFFFFFFFFFFFFFFFFFFFF:FFFFFFFFF  
:FF

@A00721:190:HGJW7DSXY:4:1428:15275:22435\_1:N:0:TCTGCAAG+GCTGCACT  
TACCGCCTTACAAGTCTAAGGTTAAAGAGTCGATTAAACAAGTTGTACTTATCAATGATTTTATCGCT  
GGTTGTTATCTCGAAAAGTCTCTTCTAAAAGGAACGTCAGTTCTAACCCAAAGAGAATATCTAAAATA  
TTT

+

FFFFFFFFFFFFFFFFFFFFFFFFFFFFFFFFFFFFFFFFFFFFFFFFFFFFFFFFFFFFFFFF  
FFFFFFFFFFFFFFFFFFFFFFFFFFFFFFFFFFFFFFFFFFFFFFFFFFFFFFFFFFFFFFFF  
F:F

@A00721:190:HGJW7DSXY:4:2362:2663:26522\_1:N:0:TCTGCAAG+GCTGCACT  
TTGCTTGTGCTTCTCCTTTAATGGCACTACCTCGGTACAATCTTACTTGGAACGAAGGCGACCTGT  
TCCGGAGTTTTTACGGGATCCGGAATGTTCTGTCTATATTAGGTGAAGCGAAATACGATTTTCAACGT  
CAA

+

FFFFFFFFFFFFFFFFFFFFFFFFFFFFFFFFFFFFFFFFFFFFFFFFFFFFFFFFFFFFFFFF  
FFFFFFFFFFFFFFFFFFFFFFFFFFFFFFFFFFFFFFFFFFFFFFFFFFFFFFFFFFFFFFFF  
FFF

@A00721:190:HGJW7DSXY:4:2110:25482:14372\_2:N:0:TCTGCAAG+GCTGCACT  
GCTGACTTTCGTCAATATGATTTGATCTGGTTGCTCAATTCTCAGCGTGTTCGCTTAGTGCGAGGCC  
TCTCTTCTACGAGGATTGCGATTTCTAGGGTTACGCGATGACGGGTCG

+

FFFFF:,F:FFFFF,FFFFFFFF,,FFFFF:FFFFF,FFFF,F,FFFF:FFFF::FF,FFFFFFF  
FFFF,FF::F::F,F,:FF,FF:F,FF,,FF,:F:,F,:F,,F:FF:F

@A00721:190:HGJW7DSXY:4:2329:11089:16376\_2:N:0:TCTGCAAG+GCTGCACT  
TATTTGGATGATCTTGATAAAGAACTTCATGAATTTTCAGAGGATGAAAAATTTCTTCCTTGATT  
TAATATAAAGAATCTTTACCAGGACTCCTACTACAGGAGGCAGTCTTC

GGCTGTCAAACAAGCCCAGACTCAAGGAGTCCAATCAAAGGTTTTGAATTTAGCTCAACTGGGGAGAC  
GTG

+

:FFFFFFFF:FFFFFFFFFFFFFFFFFFFFFFFFFFFFFFFFFFFFFFFFFFFFFFFFFFFFFFFFFFFFFFFF  
FFFFF:FFFFFFFFFFFFFFFFFFFFFFFFFFFFFFFFFFFFFFFFFFFFFFFFFFFFFFFFFFFFFFFF  
FFF

@A00721:190:HGJW7DSXY:4:2244:30798:14465\_2:N:0:TCTGCAAG+GCTGCACT  
AAAAGTCCGGAGTATATTGTATGTTAATAGATAGTGGGATAATAGTTCTACCGATACGTAGTGAACGC  
GTTTCGTAGAACCAAGTACTTTCCGTCTGAAGAGTTTAGAGCTGCTATT

+

FFFFFFFFFFFFFFFFFFFFFFFFFFFFFFFFFFFFFFFFFFFFFFFFFFFFFFFFFFFFFFFFFFFFFFFF  
FFFFFFFFFFFFFFFFFFFFFFFFFFFFFFFFFFFFFFFFFFFFFFFFFFFFFFFFFFFFFFFFFFFFFFFF

@A00721:190:HGJW7DSXY:4:2306:29993:8970\_2:N:0:TCTGCAAG+GCTGCACT  
TGTGGCTTTAGACGATAATCCTTTAAGGACTATGTTGACTGACGAAGATTTTCCACAGATTTGTCTA  
CGTTGCAGATCGCCACTCCAAACACTATATACATTATAAAATATAAAA

+

FFFFF,FFFFFFFFFFFFFFFFFFFFFFFFFFFFFFFFFFFFFFFFFFFFFFFFFFFFFFFFFFFFFFFF  
FFFFFFFFFFFFFFFFFFFFFFFFFFFFFFFFFFFFFFFFFFFFFFFFFFFFFFFFFFFFFFFFFFFFFFFF

@A00721:190:HGJW7DSXY:4:2369:25265:20259\_1:N:0:TCTGCAAG+GCTGCACT  
ACTTTTGTACCAAATCTTGGCTTTCAACGAAGTCTCTGATTTTATTAATCATTACTTTAACGATCT  
CTCGGTCATTTACTCTGTACTTGATCTACGTCGTTTAACTGTCGGAACAACCTTTACTTAGAATGACT  
CTA

+

FFFFFFFFFFFFFFFFFFFFFFFFFFFFFFFFFFFFFFFFFFFFFFFFFFFFFFFFFFFFFFFFFFFFFFFF  
FFFFFFFFFFFFFFFFFFFFFFFFFFFFFFFFFFFFFFFFFFFFFFFFFFFFFFFFFFFFFFFFFFFFFFFF:FF:FFFFFFFFFFFFFFFFFFFFFFFF:FFF:,FF  
FFF

@A00721:190:HGJW7DSXY:4:2520:17092:27336\_2:N:0:TCTGCAAG+GCTGCACT  
ATCATATTAGTAATACTCACTATCGTTTTCTGCTTTTTCTTAGCTAATAGATTAATAAAGGATGAGTA  
CGAAAACCAACTCTTCGTTACGAGACCTGATGGTAGAATAGATTTAGT

+

FFFFFFFFFFFFFFFFFFFFFFFFFFFFFFFFFFFFFFFFFFFFFFFFFFFFFFFFFFFFFFFFFFFFFFFF  
FFFFFFFFFFFFFFFFFFFFFFFFFFFFFFFFFFFFFFFFFFFFFFFFFFFFFFFFFFFFFFFFFFFFFFFF,FFFF

@A00721:190:HGJW7DSXY:4:2307:25789:28463\_2:N:0:TCTGCAAG+GCTGCACT  
CTCAACGAGGATAAAGCGAGTTTTCCGTCCTGAACGTAATACACGAAGAGATCATCCGCAAACGACTC  
GAAACCGAGACGCCGTAGATCAAAGTCCCTTCTAACTTTAGATTATGA

+

FFFFFFFFFFFFFFFFFFFFFFFFFFFFFFFFFFFFFFFFFFFFFFFFFFFFFFFFFFFFFFFFFFFFFFFF  
FFFFFFFFFFFFFFFFFFFFFFFFFFFFFFFFFFFFFFFFFFFFFFFFFFFFFFFFFFFFFFFFFFFFFFFF

@A00721:190:HGJW7DSXY:4:2662:21088:34381\_2:N:0:TCTGCAAG+GCTGCACT  
CTTATACTTTTGGGTATGTTTTGTGAAAAACATGAGATACCCAAGTCTATCGAAGACATTATCTCTTA  
TGTACTTATTGTAACGATCATTCTTTCGAGTTTTGTCATTCTTATTCT

+

FFFFFFFFFFFFFFFFFFFFFFFFFFFFFFFFFFFFFFFFFFFFFFFFFFFFFFFFFFFFFFFFFFFFFFFF  
FFFF:FFFFFFFFFFFFFFFFFFFFFFFFFFFFFFFFFFFFFFFFFFFFFFFFFFFFFFFFFFFFFFFF:F

@A00721:190:HGJW7DSXY:4:2269:8124:18317\_2:N:0:TCTGCAAG+GCTGCACT  
ATGCTTTTCGATAGTGATTGTTATCAATTTAAATACATTACTGTTTCAAATCATCTTTACTCACAGAC  
TCCGAAAATGTTTTCAAATGAGGTCAAAGCTCTATTTATTAAACGAAC

+

FFFFFFFFFFFFFFFFFFFFFFFFFFFFFFFFFFFFFFFFFFFFFFFFFFFFFFFFFFFFFFFFFFFFFFFF  
FFFFFFFFFFFFFFFFFFFFFFFFFFFFFFFFFFFFFFFFFFFFFFFFFFFFFFFFFFFFFFFFFFFFFFFF

@A00721:190:HGJW7DSXY:4:1109:3920:1861\_1:N:0:TCTGCAAG+GCTGCACT  
ACCACTGATCTGCCGACTTTAGTCAAGGAACCTCAATTCCTTCGATGTTTATATTTTTCTATAAGGGA  
AAATAGCAATAATCAAATTTGACAAATTTTAGAACTTTATTTCAGAACTCTCTCCGATCACCTTGGT  
GTG

+  
FFFFFFFFFFFFFFFF:FFFF:FFFFFFFFFFFFFFFF:FFFFFFFFFFFFFFFFFFFFFFFFFFFFFFFF  
FFFFFFFFFFFFFFFFFFFFFFFFFFFFFFFFFFFFFFFFFFFFFFFFFFFFFFFFFFFFFFFF:FFFF  
FFF  
@A00721:190:HGJW7DSXY:4:1423:28863:25426\_1:N:0:TCTGCAAG+GCTGCACT  
TCAATAAGATGTATGATGATAATCTACTATTTTTAAATAGTGATATTCAGCGTATACTTGAATACTTT  
ATCAAAGATTTGGCTTGGTCTATTTACCGCAAAAAGTTGGAAGAGGTCTATGATATTTATTTACTTA  
TAC  
+  
FFFFFFFFFFFFFFFFFFFFFFFF,FFFFFFFFFFFFFFFFFFFFFFFFFFFFFFFFFFFFFFFF  
FFFFFFFFFFFFFFFFFFFFFFFFFFFFFFFFFFFFFFFFFFFFFFFFFFFFFFFFFFFFFFFF  
FFF  
@A00721:190:HGJW7DSXY:4:2412:3079:23797\_2:N:0:TCTGCAAG+GCTGCACT  
CCGATTATAACTTGACTGTTGATAATATTACAATAGCTCTTCTCAGAAGATTAGAGAAGTAACCGGT  
GAACACGTCGGTAGCATTGATTTACTTTTACCGTTAGAACTGAAAAAG  
+  
FFFF:FFFFFFFFFFFF:FFF:FFFFFFFFFFFFFFFFFFFFFFFFFFFFFFFFFFFFFFFF:FFFFFFFF  
FFFFFFFFFFFFFFFF:FFFFFFFFFFFFFFFFFFFFFFFFFFFFFFFF:FFFF  
@A00721:190:HGJW7DSXY:4:2349:23475:10895\_2:N:0:TCTGCAAG+GCTGCACT  
TATAAGTTACAAACGATTCTTCGACTATATTAAAGAAATAAAAATACTTCAAGTACCTGAACTTTACA  
TTTTAATGGTATGGTATAATGTGTCTTACAAATAGAACCTTCACTCT  
+  
FFFFF:FFFF,FFFFFFFF:FFFFFFFFFFFFFFFFFFFFFFFFFFFFFFFFFFFFFFFF:FFFF  
:FF:FFFFFFFF:FFFFFFFFFFFFFFFFFFFFFFFFFFFFFFFFFFFFFFFF  
@A00721:190:HGJW7DSXY:4:1418:15402:33520\_2:N:0:TCTGCAAG+GCTGCACT  
TCCTTAATATTCTAGTAACCGCTATGTGGCATTACTAGGATTTATCACACTCCTAAATTTGATAGCA  
ATTTATGTTTTAAATGCTAGGAAAATTTAGAAAACTCCATTGTATA  
+  
,FF:FFFFFFFFFFFFFFFFFFFFFFFFFFFFFFFFFFFFFFFFFFFFFFFF:FFFF:FFFFFFFF  
FF:F:FF:FFF:F:FFFFFFFFFFFFFFFFFFFFFFFF:FFFFFFFFFFFF  
@A00721:190:HGJW7DSXY:4:1236:24650:21793\_1:N:0:TCTGCAAG+GCTGCACT  
CTTAATTCAATAGCTTTAGTATTATTTACTATCGCTTTATTGAAAATTGTATAAGAGTTAATTGCTT  
ACACAAAAGTGACGCGCGAAGGAATCTTAATTGATTGAAGCTAGGCGTTGGGAGAATGAACTGCCGC  
TTC  
+  
FFFFFF:FFFFFFFFFFFFFFFFFFFFFFFFFFFFFFFFFFFFFFFFFFFFFFFFFFFFFFFF  
FFFFFFFFFFFFFFFFFFFFFFFFFFFFFFFFFFFFFFFFFFFFFFFFFFFFFFFF  
,FF  
@A00721:190:HGJW7DSXY:4:2358:19813:9627\_2:N:0:TCTGCAAG+GCTGCACT  
TACCATGACCAATCATCGCTCCAAGTGGCACGCCAGACGTAGGGTCAAACCTACTACCGCCGGTCGGC  
AGATCGGCACCACTGGTCTCTACGTTCAAGGACCCGCTGTGCAGAATA  
+  
FFFFFFFFFFFFFFFFFFFFFFFFFFFFFFFFFFFFFFFFFFFFFFFFFFFFFFFF  
FFFFFFFFFFFFFFFFFFFFFFFFFFFFFFFFFFFFFFFFFFFFFFFF  
@A00721:190:HGJW7DSXY:4:2165:30807:30013\_2:N:0:TCTGCAAG+GCTGCACT  
CACAGAAGAAGGCTGAAGGTCGTTACCGGACGACCACTCAAAGGAAACGGGCTGTTGCCAGAGGAAA  
GCAGCGACCACCGAGGTCGCTCGTAACATTGACGGCAGTCCCGTCATC  
+  
FFFFFFFFFFFFFFFFFFFFFFFF:FFFFFFFFFFFFFFFFFFFFFFFFFFFFFFFF:FFFF  
FFFFFFFFFFFFFFFFFFFFFFFFFFFFFFFFFFFFFFFFFFFFFFFF  
@A00721:190:HGJW7DSXY:4:1450:29957:9972\_1:N:0:TCTGCAAG+GCTGCACT  
CTGAGGCAGTACCTCAGTCAAAAGTCACATTCACTACTCCATACCAATCAATGATGTGACTATACAG  
TTCGGCCATTTCAAGAGTGGTCAATACGTCGTGGGAGGTACTGAAGCCTTCCCCTCCGCTGGCACGAA  
GAA

+  
FFFFFFFFFFFFFFFFFFFFFFFFFFFFFFFFFFFFFFFFFFFFFFFFFFFFF:FFFFFF:FFFFFFFFFFFFFFFFFFFF  
FFFFFFFFFFFFFFFFFFFFFFFFFFFFFFFFFFFFFFFFFFFFFFFFFFFFFFFFFFFFFFFFFFFFFFFFFFFFFFFFFFFF  
FFF  
@A00721:190:HGJW7DSXY:4:2566:19036:15702\_1:N:0:TCTGCAAG+GCTGCACT  
CCAATCAATAGTTCTTCTGACCAGAATGAAAAGGGGTTTACCAGGGTAGTCTCTAAGTCTACCAGGAA  
GAGGGGAAATGTCCCCAAAAC TGAGAAGAATAAAGGGAAAGGTCCATCAGGACCTAAGAAGGGGAAAT  
TAC  
+  
FFFFFFFFFFFFFFFFFFFFFFFFFFFFFFFFFFFFFFFFFFFFFFFFFFFFF:FFFFFFFFFFFFFFFFFFFFFFFFFFFF  
FFFFFFFFFFFFFFFFFFFFFFFFFFFFFFFFFFFFFFFFFFFFFFFFFFFFFFFFFFFFFFFFFFFFFFFFFFFFFFFFFFFF  
:FF  
@A00721:190:HGJW7DSXY:4:2508:22073:17989\_1:N:0:TCTGCAAG+GCTGCACT  
GGAAGATCTCCCACCATCTGGGGTTGGGAATAAGAAATCTGCACGGGCCAAAGAGGCCGCTGCTACGA  
AGTCGCTGAAGGCGGCTTGGGTCATTAAAGGGTAGCTGTAAAGTTGCGCCTGCCGACCCCATCTTTGAG  
ACC  
+  
FFFFFFFFFFFFFFFFFFFF:FF:FFFFFFFF:FFFFFFFFFFFFFFFFFFFFFFFFFFFF:FFFFFFFFFFFFFFFFFFFF  
FFFFFFFFFFFFFFFFFFFFFFFFFFFFFFFFFFFFFFFFFFFFFFFFFFFFFFFFFFFFFFFFFFFFFFFFFFFFFFFFFFFF  
FFF  
@A00721:190:HGJW7DSXY:4:1105:10257:6637\_1:N:0:TCTGCAAG+GCTGCACT  
CTCTTCCGATCTCCTACTATGAGCAAATCTGTTGAATTCGTCACTGAGGACGAAGGTGAGAGGACTTT  
TGGCTACTGGCGACAAAC TGAGAGCAGTCGCTGGGGAAAGAGAATTGCGTGGGTTGAAGGCCGACGCT  
TCG  
+  
FF,FF,,FFFF,,F,FFFF:F,F:FFF:FFFFFFFF:FFFF:FFFF:F,FFF:FFFFFFFF::,FFF  
F:::FF:F,F,FF:F:,FFFF:,F,,FFFF,FFFF,:FFFFFF:FFF:FFF:FFFFFFFFFFFFFFFF:FF  
FFF  
@A00721:190:HGJW7DSXY:4:1240:26223:3850\_2:N:0:TCTGCAAG+GCTGCACT  
ACGAGGCCGGTGACGTTTTTGTCAACGGCGTTTGGAGGATTTTATCCGCGCTTA ACTATGGGGCGAAG  
ATCCCCTATTGAGTCTTGAAGGACTTAGGTTGGCATATTTATGCCGAC  
+  
FFFFFFFFFFFFFFFFFFFFFFFFFFFFFFFFFFFFFFFFFFFFFFFFFFFFFFFFFFFFFFFFFFFFFFFFFFFFFFFFFFFF  
FFFFFF:FFFFFFFFFFFFFFFFFFFFFFFFFFFFFFFFFFFFFFFFFFFFFFFFFFFFF  
@A00721:190:HGJW7DSXY:4:1367:8052:13589\_1:N:0:TCTGCAAG+GCTGCACT  
TGTCACCCTTAAGCACCGAGGTAAGCTCGGGACTTACAAGAGAGAGTGTGAGAGAGTCGCTCTCACTA  
TTTTTGCCGAGAATGCGGGCTTTCTGACTGATGAGGTTAAACTCTTGCTCCTTCTGTGGGTGAGGGT  
TTT  
+  
FFFFFFFFFFFFFFFFFFFFFFFFFFFF:FFFFFFFFFFFFFFFFFFFFFFFFFFFFFFFFFFFFFFFFFFFFFFFFFFFF  
:::FFFFFFF::FFFFFFFFFFFFFFFFFFFFFFFFFFFF,FFF:FF,FFFFFFFFFFFFFFFFFFFFFFFFFFFF:  
FFF  
@A00721:190:HGJW7DSXY:4:2355:4056:30937\_2:N:0:TCTGCAAG+GCTGCACT  
TTTAGAGAGCATTAGAAGGAAGTTGGGCAAATTCACACATATGGTAGACGTTGTACACTTTTCTTGA  
AAATTTTTCTTTCTCCGTCATTGGGGATTTCGATGTGAGAAGGTGG  
+  
FFFFFFFFFFFFFFFFFFFFFFFFFFFFFFFFFFFFFFFFFFFFFFFFFFFFFFFFFFFFFFFFFFFFFFFFFFFF:FFFF  
FFFFFFFFFFFFFFFFFFFFFFFF:FF,FFFFFFFFFFFFFFFFFFFFFFFFFFFFF  
@A00721:190:HGJW7DSXY:4:2669:5330:35430\_2:N:0:TCTGCAAG+GCTGCACT  
CTTCATGCTGATCTTTCAGGACCTAATCACATCATGATTGATAGTTACGGCTCGTATCGAGTTGGAGG  
GAGGAAGTTCTCCGAAATTAAGACGGGGGATTAAGAGTCCAGCTGT  
+  
FFFFFFFFFFFFFFF:FFFFFFFFFFFFFFFFFFFFFFFFFFFFFFFFFFFFFFFFFFFF:FFFFFF:FFFFFFF  
F:FFFFFFFFFFFFFFFFFFFFFFFFFFFFFFFFFFFFF, :FFFFFFFFFFFF:FF



+

@

+

@A

 $+$ 

6

+

94

+

©

+

©

+

©

+

FFFFFFFFFFFFFFFFFFFFFFFFFFFFFFFFFFFFFFFFFFFFFFFFFFFFFFFFFFFFFFFFFFFFFFFF  
FFFFFFFFFFFFFFFFFFFFFFFFFFFFFFFFFFFFFFFFFFFFFFFFFFFFFFFFFFFFFFFFFFFFFFFF  
@A00721:190:HGJW7DSXY:4:1119:4716:32706\_1:N:0:TCTGCAAG+GCTGCACT  
ACAATTGTTCCATTGTGAACCTTTGGGGACTAGATTGAGCATTAAATGAGTTCCGAATAACTCGTAATA  
AATCTTTCTCTAGTGGACAATTCAGAATACCTATTTCCGTACCAAGAGCCACTGCCAATCTCATCGCT  
ATA  
+  
FFF:FFF:F:FFFFFFFFFFFFFFFFFFFFFFFFFFFFFFFFFFFFFFFFFFFFFFFFFFFFFFFFFFFF  
F:FFFFFFFFFFFFFFFFFFFFFFFFFFFFFFFFFFFFFFFFFFFFFFFFFFFFFFFFFFFFFFFFFFFFF:FFFFFFFF  
FFF  
@A00721:190:HGJW7DSXY:4:1350:10176:6965\_2:N:0:TCTGCAAG+GCTGCACT  
AGATTATGGTTGATAAAGTTTTCTTCATAAGGGCTATTCAGTACGTCATGGGGATCACTTCTTCGGTC  
AATGACAAAACCTTCGAATATGTTACGACATGGCTTCGTAACAACAGT  
+  
FFFFFFFFFFFFFFFFFFFFFFFFFFFFFFFFFFFFFFFFFFFFFFFFFFFFFFFFFFFFFFFFFFFFFFFF  
FFFFF:FFFFF,FFFFFFFFFFFFFFFFFFFFFFFFFFFFFFFFFFFFFFFFFFFFFFFFFFFFFFFFFFFF  
@A00721:190:HGJW7DSXY:4:2119:1615:8077\_2:N:0:TCTGCAAG+GCTGCACT  
GATTCACCAAGATGTTTCATATAGATACGAGATACCTAGAGAAGGTCGCAGCGATCTTACTCGTTATCG  
GAGCTAAGAAGAAGACTTTGGGTACACGTTATGCTCGCAAACCTTAACG  
+  
FFFFFFFFFFFFFFFFFFFFFFFFFFFFFFFFFFFFFFFFFFFFFFFFFFFFFFFFFFFFFFFFFFFFFFFF  
FFFFFFFFFFFFFFFFFFFFFFFFFFFFFFFFFFFFFFFFFFFFFFFFFFFFFFFFFFFFFFFFFFFFFFFF  
@A00721:190:HGJW7DSXY:4:2356:32235:4398\_2:N:0:TCTGCAAG+GCTGCACT  
AGGTGATCTCTCTGCTTCTGCGTTACTGAGAGAAAAGATTTCAGGACGCCTACGGTGACTTTATGGACA  
AGATGCAAGTTCTTGGGAAATACTTGTTTCCCTTTTTAGGTTTAGTAG  
+  
FFFFFFFFFFFFFFFFFFFFFFFFFFFFFFFFFFFFFFFFFFFFFFFFFFFFFFFFFFFFFFFFFFFFFFFF  
FFFFFFFFFFFFFFFFFFFFFFFFFFFFFFFFFFFFFFFFFFFFFFFFFFFFFFFFFFFFFFFFFFFFFFFF  
@A00721:190:HGJW7DSXY:4:2506:29496:27179\_1:N:0:TCTGCAAG+GCTGCACT  
GTGAGAAGACAACGAATCTTGAACTACGGTCCTTATCAAAGAAAATGGTGAACCGGTCTCTAAATCT  
TTTGAGATTGAGAAGATTGAAGAACACGTCAAGAAGTCGCTCGGCGTTGTTCTTGAAAACCAAGTTAA  
GA  
+  
FFFFFFFFF:FFFFFFFFFFFFFFFFFFFFFFFFFFFFFFFFFFFFFFFFFFFFFFFFFFFFFFFFFFFFF  
FFFFFFFFFFFF:FFFFFFFFFFFFFFFFFFFFFFFFFFFFFFFFFFFFFFFFFFFFFFFFFFFFFFFFFFFF  
FF  
@A00721:190:HGJW7DSXY:4:2303:9281:20447\_2:N:0:TCTGCAAG+GCTGCACT  
GTACCTTCTGTCAAACCTTCGAGGTTACGCTACGAGAGGTGATCCCGGATGTGGATTGAAGGCTGGCTC  
TAAGGGAGACTCCTTCTTTTTGAATGTTGTAAAGAATTGGGAGATCGG  
+  
FFFFFFFFFFFFFFFFFFFFFFFFFFFFFFFFFFFFFFFFFFFFFFFFFFFFFFFFFFFFFFFFFFFFFFFF  
FFFFFFFFFFFFFFFFF:FFFFFFFFFF,FF:FFFFFFFFFFFFFFFFFFFFFFFFFFFFFFFFFFFFF  
@A00721:190:HGJW7DSXY:4:2203:7102:14074\_2:N:0:TCTGCAAG+GCTGCACT  
TTCTCTACCCATAACTTCTTTTTCAAAAATGCGGATGGGTCTACTGATGTTTTCTACAGAGTGCAGT  
CGTGTCAAAACATATCACCACAATTGAAATGAAAATAATTGGTGATGA  
+  
,FFF:FFFFFFFFFFFFF:F:FFFFFFFFF:FFFFFFFFFFFFFFFFFFFFFFFFFFFFFFFFFFFFF,  
FFF,FFFF,FF,:F,,,F,,,F,,,FFF,FF,F,F:F,F,,,F,,,FF  
@A00721:190:HGJW7DSXY:4:2536:32859:23484\_2:N:0:TCTGCAAG+GCTGCACT  
TTTGGTCCTTACGTCTTAAGTAATTTGGATGTTGTGCGAAAACCTATCAGGTTCTTGTACGATTCTTAA  
AAGAAGTTTATTAAACTTCAGAGTCTCTTGGAAGTCCAGGTAGCTAA  
+  
FFFFFFFFFFFFF,FFFFFFFFFFFFF:FFFFFFFFFFFFFFFFFFFFF:FFFFFFFFFFFFFFFFFFFFF,FFFF,FFFF  
,FF,F:FFFFFFFFF:FFF:FFF::FFFFFFFFF::FFFFFFFFFFFF:FFFFF

@A00721:190:HGJW7DSXY:4:1454:32913:29465\_1:N:0:TCTGCAAG+GCTGCACT  
ACCTCTGTTGGTAGAGGAGTTGAGAGAATTACTCAGATTCAATCTGGCATCACTGAACGTCTACAACG  
AGTTAGGGAGTGGCTAGGTTTTAAAGATCCTTTGCACAAGCAATACCTTCCACTGAGTTCATCACCC  
AGA

+

FFFFFFF,FFFFFFFFFFFFFFFFFFFFFFFFFFFFFFFFFFFFFFFFFFFFFFFFFFFFFFFFFFFFFFFF  
FFFFFFFFFFFFFFFFFFFFFFFFFFFFFFFFFFFFFFFFFFFFFFFFFFFFFFFFFFFFFFFFFFFFFFFF  
FFF

@A00721:190:HGJW7DSXY:4:2669:31286:1219\_1:N:0:TCTGCAAG+GCTGCACT  
CTTCTGATGCTGAATTTGAGGAAAATTTTCGGAAGTTTTTGGTATAAATCCTGATGGCTCAGTACAG  
GGAGGAGGTAATAGTTATAAAACCTTCTTTTATCATTGCAACAGGACTTTGAGAAGACTGTTGAAATG  
GAC

+

FFFFFFFFFFFF:FFFFFFFF:FFFFFFFFFFFFFFFFFFFFFFFFFFFFFFFFFFFFFFFFFFFFFFFF  
FFFFFFFFFFFFFFFFFFFFFFFFFFFFFFFFFFFFFFFFFFFFFFFFFFFFFFFFFFFFFFFFFFFFFFFF  
FFF

@A00721:190:HGJW7DSXY:4:2511:20654:18944\_2:N:0:TCTGCAAG+GCTGCACT  
TCATAGGTATGTGTACGCTACACTCGAAATATGGGCCCTCATAAGGAAGTATAGTTGGCGTCTTGTC  
GTTGACGTCATTACAGTCTGGAAGTTAGATCATTTGTTGAGGAAGATC

+

FFFFFFFFFFFFFFFFFFFFFFFFFFFFFFFFFFFFFFFFFFFFFFFFFFFFFFFFFFFFFFFFFFFFFFFF  
FFFFFFFFFFFFFFFFFFFFFFFFFFFFFFFFFFFFFFFFFFFFFFFFFFFFFFFFFFFFFFFFFFFFFFFF

@A00721:190:HGJW7DSXY:4:2342:23484:23030\_1:N:0:TCTGCAAG+GCTGCACT  
CAAATTTAGCACTTTTTGAATATGACAGAAGCTCGCCATATCAGATTAGAGACATGCCAGTTAGAGTT  
CTTCTAACCAGGACTGATGGTGAGATTCTTTTACCTTTTGGAGGTCCAGGAACCTTTACTCCTAGTGT  
CT

+

FFFFFFFFFFFF:FFFFFFFFFFFFFFFFFFFFFFFFFFFFFFFFFFFFFFFFFFFFFFFFFFFFFFFFFFFF  
FFFFFFFFFFFFFFFFFFFFFFFFFFFFFFFFFFFFFFFFFFFFFFFFFFFFFFFFFFFFFFFFFFFFFFFF  
FF

@A00721:190:HGJW7DSXY:4:1207:9209:15969\_1:N:0:TCTGCAAG+GCTGCACT  
GTTTCCGTCGGAGGATGACAGGTGGGAGACCGCTCAATAACACTCTATTGAATCCCTTTTCCACGATG  
AAAGCTCTTTATGAGGTGCTCCATGCAAATTTACAGTTCCTCTTTGGTGATATCGCCTCTGTCCTTTC  
TCC

+

FF:FFFFFFFFFFFFFFFFFFFFFFFFFFFFFFFFFFFFFFFFFFFFFFFFFFFFFFFFFFFFFFFFFFFF  
FFFFFFFFFFFFFFFFFFFFFFFFFFFFFFFFFFFFFFFFFFFFFFFFFFFFFFFFFFFFFFFFFFFFFFFF  
FFF

@A00721:190:HGJW7DSXY:4:1221:13349:17065\_1:N:0:TCTGCAAG+GCTGCACT  
AAGGTTCTATTACCACCTTGTGATTGATACAAACATTCTAGGTGATGCTTTCTTAGAGGCTCGTCTA  
GCCGCTGAGATTGCTCTTACCTATTTACAATCTGTAGAGAGAGAGTTAATCAGAATTTGAGTGATAA  
CGA

+

FFFFFFFFFFFFFFFFFFFFFFFFFFFFFFFFFFFFFFFFFFFFFFFFFFFFFFFFFFFFFFFFFFFFFFFF  
FFFFFFFFFFFFFFFFFFFFFFFFFFFFFFFFFFFFFFFFFFFFFFFFFFFFFFFFFFFFFFFFFFFFFFFF  
FFF

@A00721:190:HGJW7DSXY:4:1330:7184:4100\_2:N:0:TCTGCAAG+GCTGCACT  
CTCCTAGTACTTAATGGTTTATGTTTCGGTTTCAGCTGGATGGATCTTTTGATGGAATGTTTCACAAA  
GAGTGATCACTTCACGTGGAATTGGGAAGAGATTAAACATAAAAACCA

+

,F,,,F:FFFFFFF,FFFFFFF,,,FF,F,F::FF,F,,F:F,FF,,,FF:::,F,FF,F,F::,,  
F,F,,FFFF,,,,,,,,,FF,F,,F,FF:FF:F,FFF,F,FFF:,F,F

@A00721:190:HGJW7DSXY:4:2539:7808:36839\_2:N:0:TCTGCAAG+GCTGCACT  
GCTAAAGCCTGTCCAGTTGTGATGATGTTTCGGGCTGTGGGGATTAACCTCCCTCGTGAACTTACGA

CGATGTTCTCGCTCGCATTTACACAAGGATTACTAAGTCTGAGATCTGC  
+  
FFFFFFFFFFFFFFFFFFFFFFFFFFFFFFFFFFFFFFFFFFFFFFFFFFFFFFFFFFFFFFFFFFFFFFFF  
FFFFFFFFFFFFFFFFFFFFFFFFFFFFFFFFFFFFFFFFFFFFFFFFFFFFFFFFFFFFFFFFFFFFFFFF  
@A00721:190:HGJW7DSXY:4:2605:11089:35102\_2:N:0:TCTGCAAG+GCTGCACT  
GTTTCATGAGGATGTCTTGGTCGAAAAATATCGCCGGGAACCTTAATAGAGGATCCTGATGACATTAT  
TTCAACGGATACCGATCTCAGTTCTACCACAGAAACCGTCTCAGGAAC  
+  
FFFFFFFFFFFFFFFFFFFFFFFFFFFFFFFFFFFFFFFFFFFFFFFFFFFFFFFFFFFFFFFFFFFFFFFF  
FFFFFFFFFFFFFFFFFFFFFFFFFFFFFFFFFFFFFFFFFFFFFFFFFFFFFFFFFFFFFFFFFFFFFFFF  
@A00721:190:HGJW7DSXY:4:2564:8965:2707\_1:N:0:TCTGCAAG+GCTGCACT  
GGAATTAGAGAAAGACGACCTTCTTGTGGGACTGAGACCTCTGAATTTTCAGGGTGCCCTGATGAGG  
ACGTTGAAACGGATAATTTCAACTCTGAGACTTCTAAGAGTGTTTCAAAGACCAGAAACGTAACAAG  
AAG  
+  
FFFFFFFFFFFFFFFFFFFFFFFFFFFFFFFFFFFFFFFFFFFFFFFFFFFFFFFFFFFFFFFFFFFFFFFF  
FFFFFFFFFFFFFFFFFFFFFFFFFFFFFFFFFFFFFFFFFFFFFFFFFFFFFFFFFFFFFFFFFFFFFFFF  
FFF  
@A00721:190:HGJW7DSXY:4:1622:15682:10332\_1:N:0:TCTGCAAG+GCTGCACT  
TGTGCTCTTCCGATCTGATATGGTTGCGGCTGATCGTACCCCAATTCCTGCTAGAAAGATCACTCTCG  
GCGAGACCACTGATCTTCCAGAGTTACGTAGTGGTCGTTCTTTTGGTGATTTTATCAAAGAGAAAGTT  
TCT  
+  
FFFFFFFFFFFFFFFFFFFFFFFFFFFFFFFFFFFFFFFFFFFFFFFFFFFFFFFFFFFFFFFFFFFFFFFF  
FFFFF,,::F:FF:F:,F:,FF:FFFF:F::F:FFFFFFFFFFFFFFFFFFFFFFFF:F:F,F:FFFF:FF,,FFF  
FFF  
@A00721:190:HGJW7DSXY:4:2516:1515:34522\_1:N:0:TCTGCAAG+GCTGCACT  
TTCTAAAAAGCTATTAATAGCAGTTGCGGGGCTATAATACCGCCTCCAGATTACTCTAAACTGAATCC  
ACTCTCTTGGGATATAAATGAGTACATCTATAATAGAGTTTTGGAACTGTGTAATGTCTACGTACTG  
TTC  
+  
FF,FF,FF:F,F,FFFFFFFFFFFFFFFF:FF:,FFFFFFFFFFFFFFFFFFFFFFFFFFFFFFFF:F:F:FFF  
FFFFFFFFFFFFFFFF:FFFFFFFFFFFFFFFF:FFFFFFFFFFFFFFFFFFFFFFFFFFFFFFFF:FFFF:FFF  
FFF  
@A00721:190:HGJW7DSXY:4:1324:29803:28839\_2:N:0:TCTGCAAG+GCTGCACT  
TGCGAAGGTTCAAGTCGATTGATTTTGTGACTACGATCTCTTGTAAATAAGAAGTTCTTCGCAGTT  
GAATCTCCACCAGGTGGAGGAAGACCACTGAACAGATCGGAAGAGCG  
+  
FFFFF:FF,FFFFFFFF:FFF:F:FFFFF,F,FFFF:F:F,FF:FFFFFFFF,F:FF:FFFFFFFF  
:FFFFFFFFFFFFFFFF:FFFFFFFF::FFFFFFFF:FFFF:F:F  
@A00721:190:HGJW7DSXY:4:2145:2935:14184\_2:N:0:TCTGCAAG+GCTGCACT  
ATTGTCACTGCTAATCGTAATTCGCGAGAAGAGATAGTGACTAAAGTTTTGGCACTTCTAGTTCATCG  
CGGTATTTGTGAAATTAAGACAGACGTGAAAGTTATGATGAGTGATCG  
+  
FFFFFFFFFFFFFFFFFFFFFFFFFFFFFFFFFFFFFFFFFFFFFFFFFFFFFFFFFFFFFFFFFFFFFFFF  
FFFFF,FFFFFFFF:FFFFFFFFFFFFFFFFFFFFFFFFFFFFFFFF:FF  
@A00721:190:HGJW7DSXY:4:2638:5141:7921\_2:N:0:TCTGCAAG+GCTGCACT  
GGACGTTCTTTTCATCGACGAATTATTCATGATTCACGCTGGTCAGACCCTTTTCTTACACATCTAC  
TTAAGGCGGCTTATACCATAGGTTACGGTGATTCCAATCAAATCGGAT  
+  
FFFFFFFFFFFFFFFFFFFFFFFFFFFFFFFFFFFFFFFFFFFFFFFFFFFFFFFFFFFFFFFFFFFFFFFF  
FFFFFFFFFFFFFFFFFFFFFFFFFFFFFFFFFFFFFFFFFFFFFFFFFFFFFFFFFFFFFFFFFFFFFFFF  
@A00721:190:HGJW7DSXY:4:2124:28709:27070\_2:N:0:TCTGCAAG+GCTGCACT  
TATTGATCTCCAAGTCGAACTACTTCAACATCAACGACATCATTCTTGATGAGTGTGTTCTTATC

+

@A00721:190:HGJW7DSXY:4:2118:14317:15107\_1:N:0:TCTGCAAG+GCTGCACT

+

@A00721:190:HGJW7DSXY:4:2137:16658:7827\_1:N:0:TCTGCAAG+GCTGCACT

+

@A00721:190:HGJW7DSXY:4:1468:5692:32988 2:N:0:TCTGCAAG+GCTGCACT

+

@A00721:190:HGJW7DSXY:4:2476:28302:10332 2:N:0:TCTGCAAG+GCTGCACT

+

@A00721:190:HGJW7DSXY:4:1529:2844:9768 1:N:0:TCTGCAAG+GCTGCACT

+

@A00721:190:HGJW7DSXY:4:2315:24252:4038 1:N:0:TCTGCAAG+GCTGCACT

+

@A00721:190:HGJW7DSXY:4:1629:9968:25488 1:N:0:TCTGCAAG+GCTGCACT

 $+$

FFFFFFFFFFFFFFFFFFFFFFFFFFFFFFFFFFFFFFFFFFFFFFFFFFFFFFFFFFFFFFFFFFFFFFFF  
FFF

@A00721:190:HGJW7DSXY:4:2504:25464:34194\_2:N:0:TCTGCAAG+GCTGCACT  
TTCGATGCTGAATTTCTTGAACCTTTGGAGTGCCAGTGAATATTTTTGTCACGCCAGGAGTATCCATAA  
CGATTTGTCATTTACCACCTTTGCTCAACGACGAAGTGAACGGCCAA

+

FFFFFFFFFFFFFFFFFFFFFFFFFFFFFFFFFFFFFFFFFFFFFFFFFFFFFFFFFFFFFFFFFFFFFFFF  
FFFFFFFFFFFFFFFFFFFFFFFFFFFFFFFFFFFFFFFFFFFFFFFFFFFFFFFFFFFFFFFFFFFFFFFF

@A00721:190:HGJW7DSXY:4:2651:12852:2487\_1:N:0:TCTGCAAG+GCTGCACT  
TCTTGTATGATCACTTTGATGATTTTATCACTTTATTATGACCTTGGAAGTTTTCGGCTGTGGTTGT  
CGCTGGGACGATTCCATTCTGTTTTCAAAGACTCCAATAACTGATCATTCTGATCATATGATTTTGG  
ACA

+

F:FF,FFFF::F,FFFFFFFF:FFFF:FFFFFFFFFFFFFFFFFFFFFFFFFFFFFFFFFFFFFFFF  
FFFFFFFFFF:FF,FFFFFFFFFFFFFFFF:FFFFFFFF:F:FFFF:FFFFFFFFFFFF:FFFFFFFFFFFF  
FFF

@A00721:190:HGJW7DSXY:4:2375:22028:27085\_1:N:0:TCTGCAAG+GCTGCACT  
TAGGACTTTGGGAGAGATTCGTTAGTTTTAAAGACTATACTAAATATCTCCACTACGAGGTTGTTGTT  
TGCGGATTAGCTCTTGCGACTAATATTCGATATTCGATTGAGGGTCGTTATACCTATTCGGCTATCTG  
TGC

+

FFFFF,FFFF,FFF:FFFFFF:F:F:FFFFFFFFFFFFFFFF:FFFFFFFF:F:FFF,:F,FFFFFF:F  
FFFFFFFFF,:F,FFFF,,FFFF:FFFFFF:FFF:FFFFFFFFFFFFFFFFFFFFFFFFFFFFFFFF  
FFF

@A00721:190:HGJW7DSXY:4:1155:23068:15013\_2:N:0:TCTGCAAG+GCTGCACT  
AAGATCAAATTTTAAACGATTCCGAGAGGTTTATCCTGATGTGGAGGGAGTTCTTGAAGCATCCCGAC  
CTTTCCTTGTGAAAATTTTGATGCGGTTTCATAAGATTATCAGTAATC

+

FFFFFFFFFFFFFFFFFFFFFFFFFFFFFFFFFFFFFFFFFFFFFFFFFFFFFFFFFFFFFFFFFFFFFFFF  
FFFFF,F,FFFFFFFFF:FFFF,FFFFFFFFFFFFFFFFFFFFFFFFFFFFFFFF

@A00721:190:HGJW7DSXY:4:2366:22715:15280\_1:N:0:TCTGCAAG+GCTGCACT  
ATTCATGGACCTTCCATCCTGTACCTCTTCTGGAGAGACGTATCTCAAAGATCGACTTCGAGACAGGT  
GATATTGTTGAGCGAGAGCGACCAAGATCTAAATTCGGTAACGGTGCGTGCGCTTTATTTTAAAAAG  
CTC

+

FFFFFFFFFFFF:FFFFFFFFFFFFFFFFFFFFFFFFFFFFFFFFFFFFFFFFFFFFFFFFFFFFFFFF  
FFFFFFFFFFFFFFFFFFFFFFFFFFFFFFFFFFFFFFFFFFFFFFFFFFFFFFFFFFFFFFFFFFFFFFFF  
FFF

@A00721:190:HGJW7DSXY:4:2332:8260:36526\_1:N:0:TCTGCAAG+GCTGCACT  
GATACTTATCACGAAAGGACTTGAGTCTTTTGATCAGTCTCTGACTTGACCATCTTTCATTTTAAATG  
ACGATCATTAAGACTCTCTTCTCTTTGTTTCCTTCTTTGCACTGATTTTTCCTCATCAGCTTGTGT  
TTT

+

FFFFFFFFFFFFFFFFFFFFFFFFFFFFFFFFFFFFFFFFFFFFFFFFFFFFFFFFFFFFFFFFFFFFFFFF  
FFFFFFFFFFFFFFFFFFFFFFFFFFFFFFFFFFFFFFFFFFFFFFFFFFFFFFFFFFFFFFFFFFFFFFFF  
FFF

@A00721:190:HGJW7DSXY:4:2368:13286:8563\_2:N:0:TCTGCAAG+GCTGCACT  
TTTACGATAACAACATATCAGTTGATTAAGACTCTTCCGAAAGGCGAACTTTGGGAATTTGAAGCTCAG  
GGTGAAGCACACGTTTGACCGTGACGAACTGTGGTGTCTTGATCTA

+

FFFFFFFFFFFFFFFFFFFFFFFFFFFFFFFFFFFFFFFFFFFFFFFFFFFFFFFFFFFFFFFFFFFFFFFF  
FFFFF:FFFFFFFFFFFFFFFF:FFFFFFFFFFFFFFFFFFFFFFFFFFFFFFFF

@A00721:190:HGJW7DSXY:4:2331:32741:36182\_2:N:0:TCTGCAAG+GCTGCACT  
TTAAGTTTTGTCTTCTTGTGTTGTTATTCTATTAATCACTCATTTTAGTGAGATTATTAACGA

ACTAAAACGTCTTCGACAACAGCAGGGGTTTTTCGAATAGTGATAGCCA

+

FFFFFFFF,FFF::FFFF:FFFF:FFFFFFFFFFFFFF:FFFFFFFFFFFFFF:FFFFFFFF:FFFF,F:,  
FFFFFFFF,,F:FFF,F:FFF,FFFF,FFF,FFF:FFFF:FFFFFF:F

@A00721:190:HGJW7DSXY:4:1134:31331:23500\_1:N:0:TCTGCAAG+GCTGCACT  
AGAGGGGCAGCAGCATGACCATAATTGGTATTGACTTTGGTACCACCTTTTCTACTGTCTGTCTCGCC  
TCTTCGAATGAAGTTTTAATGCTTAACAACAATGATAGTGGATTTATACCTACAATCATTGGTTTTTC  
TAA

+

:FFFFFFFF:FFFFFFFFFFFFFFFFFFFFFFFFFFFFFFFFFFFFFFFFFFFFFFFFFFFFFFFFFFFFF  
FFFFFFFFFFFFFFFFFFFFFFFFFFFFFFFFFFFFFFFFFFFFFFFFFFFFFFFFFFFFFFFFFFFFFFFFF  
FFF

@A00721:190:HGJW7DSXY:4:1158:20726:21198\_1:N:0:TCTGCAAG+GCTGCACT  
TTTATGGATATGATGCTATTACTCATGATGGTTACGGTCAGGAGGATTCTCAGTTTACAAGGACCTT  
AAGCGATTGATCGGGGTTAATTCTAAAACATTACCCGAAAGACGTGCTAAATTAAAACCATTGTACGA  
TGT

+

FFFFFFFFFFFFFFFFFFFFFFFFFFFFFF:FFFFFFFFFFFFFFFFFFFFFFFFFFFFFFFFFFFFFFFFF  
FFFFFFFFFFFFFFFFFFFFFFFFFFFFFFFFFFFFFF,FFFFFFFFFFFFFFFFFFFFFFFFFFFFFFFFF  
FFF

@A00721:190:HGJW7DSXY:4:2366:9019:29606\_1:N:0:TCTGCAAG+GCTGCACT  
TCACTTTTCACTAAGAATTGGTCCTACTTTTGGACAAGGCCAACTTCGTAATCTTCATGAGATCGTTT  
CTTTCTTTATCTCTTTGGTTGTTAGGGATTTTGAGAGAGTGAAAGGCTTCAATTGTAGTGGTTTGTC  
GTT

+

:FFF:FFFFFFFFFFFF:FFFFFFFFFFFFFFFFFFFFFFFFFFFFFFFFFFFFFFFFFFFFFFFFFFFFF  
FFFFFFFFFFFFFFFFFFFFFFFFFFFFFFFFFFFFFFFFFFFFFFFFFFFFFFFFFFFFFFFFFFFFFFFFF  
FFF

@A00721:190:HGJW7DSXY:4:2620:26657:23672\_2:N:0:TCTGCAAG+GCTGCACT  
ACCTCTACGCAAAGATATTTTCATGAAAACCTACAGAGGAACGTACCGGATTACCTGTCTTTCATATTAT  
GAATGAACCTTCGCCGCTCTCTTTGCTTCGATGTTGGATGTCAAGAA

+

FFFFFFF:FFFFFFFFF:FF,FF:FFFF:FFFFFFFF:F::FFF:FF:FFFFFFFFFFFFFFFFFFFFF  
FFFFFFFFF,FFFFFFFF:FFFFFFFFF::FFFFFFFF:F::FFFFFFFF,FF

@A00721:190:HGJW7DSXY:4:2541:29930:25050\_1:N:0:TCTGCAAG+GCTGCACT  
ATTCCTACGTAGTTTATGACTTTGGTGGTGGTACTTTGATACTTCTATCGTCTTACGTTACGGTAAT  
TACTATAGTGTTATTTATTCTGGTGGTGGTATGATAATCTTGGAGTCGTGACGTTGATGAAGCTATAAG  
AGC

+

F,FFFFFFFFF:FFFFFFFFF:FFFFFFFFFFFFFFFFFFFFFFFFFFFFFFFFFFFFFFFFFFFFFFFFF  
FFF:F:FFFF,FFFFFFFFFFFFFFFFFFFFFFFFFFFFFFFFFFFFFFFFFFFFFFFFFFFFFFFFFFFFF  
FFF

@A00721:190:HGJW7DSXY:4:2543:8929:9596\_1:N:0:TCTGCAAG+GCTGCACT  
CTTTCAGTTTCACAACTGAAGGAGGAGTTTCTGTTACTGGAAAACCCTCGTCAATACTTTTCAATAA  
TATACGTCTTGAACCTCACTTATGACGATCTAGTGAAATTAACGCGTCCTTTCTGGAACGTAGTTTTC  
CTA

+

FFF:FFFFFFFFF:FFFFFFFFFFFFFFFFFFFFFFFFFFFFFFFFFFFFFFFFFFFFFFFFFFFFFFFFF  
FFFFFFFFFFFFFFFFFFFFFFFFFFFFFFFFFFFFFFFFFFFFFFFFFFFFFFFFFFFFFFFFFFFFFFFFF  
FFF

@A00721:190:HGJW7DSXY:4:1326:25427:20635\_1:N:0:TCTGCAAG+GCTGCACT  
TTGTGGCATTCAAGGCAAACCTTACCCTGAGTCCGGCCGGTTGTAGCTCATTTCTACCAGGGGCTATTA  
CTCTTGCTGAAACAGCTATTAAAGCTGTTGAGCGGGTAATTACACCTAAACGAGCTCGATCTGCCATC  
GC

+  
F,FFFF,,F,F,F,,,F:FFF,F,:FF,F,FFFFFF,,FFFFFF:FF:::,F,F:FFFF:FFFF:  
FFFFFF:FFFF:F:,FFFFFF,FF:FFFFFF:FF,FFFF,F,FF,:F:FF:F:FFFFFFFF:F:::  
F:  
@A00721:190:HGJW7DSXY:4:1514:32796:24815\_2:N:0:TCTGCAAG+GCTGCACT  
ACTTTATCTGAGAGTAGCGTTCTTTTGTTCGATTGTATCAATAGTAACATAACGACAAATAAAGGTCT  
CTATCAGGTGGGTATAATAGTTGCCGCCGATCCGCCTTACCATTGAA  
+  
FFFFFFFFFFFFFFFFFFFFFFFFFFFFFFFFFFFFFFFFFFFFFFFFFFFFFFFFFFFFFFFFFFFFFFFF:FFFF  
FFFFFFFFFFFFFFFFFFFFFFFFFFFFFFFFFFFFFFFFFFFFFFFFFFFFFFFFFFFFFFFFFFFFFFFF  
@A00721:190:HGJW7DSXY:4:2330:6144:27289\_2:N:0:TCTGCAAG+GCTGCACT  
AGGTAATTATGAAGACTGTGATTTATCTTCACTCTGGCCTTGTATGAGGGTGTTCCTAATCGTAACA  
TTAATAATTTCAATCTTCTTAAAAAGAAGATAGAGAGTCATACTTTGG  
+  
FFFFFFFFFFFFFFFFFFFFFFFFFFFFFFFFFFFFFFFFFFFFFFFFFFFFFFFFFFFFFFFFFFFFFFFF  
:FFFFFFFFFFFFFFFFFFFFFFFFFFFFFFFFFFFFFFFFFFFFFFFFFFFFFFFFFFFFFFFFFFFFFFFF  
@A00721:190:HGJW7DSXY:4:1625:22869:31986\_1:N:0:TCTGCAAG+GCTGCACT  
TACCGCCTTACAAGTCTAAGGTTAAAGAGTCGATTAAACAAGTTGTACTTATCAATGATTTTATCGCT  
GGTTGTTATCTCGAAAAGTCTCTTCTAAAAGGAACGTCAGTTCTAACCCAAAGAGAATATCTAAAATA  
TTT  
+  
F,FFFFFFFFFFFFFFFFFFFFFFFFFFFFFFFFFFFFFFFFFFFFFFFFFFFFFFFFFFFFFFFFFFFFFFFF  
FFFFFFFFFFFFFFFFFFFFFFFFFFFFFFFFFFFFFFFFFFFFFFFFFFFFFFFFFFFFFFFFFFFFFFFF:FFFFFFFFFFFFFFFF  
FFF  
@A00721:190:HGJW7DSXY:4:2411:8919:7326\_1:N:0:TCTGCAAG+GCTGCACT  
TTGCTTGTGCTTCCTCCTTTAATGGCACTACCTCGGTACAATCTTACTTGGAACGAAGGCGACCTGT  
TCCGGAGTTTTTACGGGATCCGGAATGTTCTGTCTATATTAGGTGAAGCGAAATACGATTTCAACGT  
CAA  
+  
:FFFFFFFFFFFFFFFFFFFFFFFFFFFFFFFFFFFFFFFFFFFFFFFFFFFFFFFFFFFFFFFFFFFFFFFF  
FFFFFFFFFFFFFFFFFFFFFFFFFFFFFFFFFFFFFFFFFFFFFFFFFFFFFFFFFFFFFFFFFFFFFFFF  
FFF  
@A00721:190:HGJW7DSXY:4:2140:32750:3787\_2:N:0:TCTGCAAG+GCTGCACT  
GCTGACTTTCGTCAATATGATTTGATCTGGTTGCTCAATTCTAAGCGTGTTCCGCTTAGTGCGAGGCC  
TCTCTTCTACGAGTATTGCTATTTATACGGTTACGAGAAGAAGTTTCG  
+  
FFFFFFFFF:FFFFFFFFFFFFFFFFFFFFFFFFFFFFFFFFFFFFFFFFFFFFFFFFFFFFFFFFFFFFFFFF  
FFFFFFFFFFFFFFFFFFFFFFFFFFFFFFFFFFFFFFFFFFFFFFFFFFFFFFFFFFFFFFFFFFFFFFFF  
FFF  
@A00721:190:HGJW7DSXY:4:2448:23276:2691\_2:N:0:TCTGCAAG+GCTGCACT  
TATTTGGATGATCTTGATAAAGAACTTCATGAATTTTACAGAGGATGAAAAATTTCTTCTTGGATTT  
TAATATAAAGAATCTTTACCAGGACTCCTACTACAGGAGGCAGTCTTC  
+  
FFFFFFFFFFFFFFFFFFFFFFFFFFFFFFFFFFFFFFFFFFFFFFFFFFFFFFFFFFFFFFFFFFFFFFFF,F:FFFFFF:F  
FFFFFFFFFFFFFFFFFFFFFFFFFFFFFFFFFFFFFFFFFFFFFFFFFFFFFFFFFFFFFFFFFFFFFFFF  
@A00721:190:HGJW7DSXY:4:2246:10755:35305\_1:N:0:TCTGCAAG+GCTGCACT  
GAAACTCTAAGTGGTAATACTGTCTTTCCAAGCTTACCTGTATCTTCAATGAAATTGGACTCTTCGAT  
AGGGGACATTTTATCGTGGGCTTCCGTAAAGGAAGATCTGTTATCGACGGTTTATCGTTTACGAAGT  
ATC  
+  
FFFFFFFFFFFFFFFFFFFFF:FFFFFFFFFFFFFFFFFFFF:FFFFFFFFFFFFFFFFFFFF:FFFFFFFFFFFFFFFFFFFF  
FFFFFFFFFFFFFFFFFFFFFFFFFFFFFFFFFFFFFFFFFFFFFFFFFFFFFFFFFFFFFFFFFFFFFFFF:FFFFFFF  
FFF  
@A00721:190:HGJW7DSXY:4:2578:20871:25457\_1:N:0:TCTGCAAG+GCTGCACT  
TTGGCCTAGTGGATGTTATTAGTGACATCTGGTCAATTTTCGTTTTTAGGTGGTCTTTATTCTATTATT





FFFFFFFFFFFFFFFFFFFFFFFFFFFFFFFFFFFFFFFFFFFFFFFFFFFFFFFFFFFFFFFFFFFFFFFF  
FFFFFFFFFFFFFFFFFFFFFFFFFFFFFFFFFFFFFFFFFFFFFFFFFFFFFFFFFFFFFFFFFFFFFFFF  
@A00721:190:HGJW7DSXY:4:2411:19759:26757\_1:N:0:TCTGCAAG+GCTGCACT  
ACTTTTGTACCAAATTCTTGGCTTTCAACGAAGTCTCTGATTTTATTAATCATTACTTTAACGATCT  
CTCGGTCATTTACTCTGTACTTGATCTACGTCGTTTAACTGTCGGAACAACCTTTACTTAGAATGACT  
CTA  
+  
FFFFFFFFFFFFFFFFFFFFFFFFFFFFFFFFFFFFFFFFFFFFFFFFFFFFFFFFFFFFFFFFFFFFFFFF  
FFFFFFFFFFFFFFFFFFFFFFFFFFFFFFFFFFFFFFFFFFFFFFFFFFFFFFFFFFFFFFFFFFFFFFFF  
:,FF,FFFF::FFF,F:F,:FF:::F  
,FF  
@A00721:190:HGJW7DSXY:4:2629:28140:18787\_2:N:0:TCTGCAAG+GCTGCACT  
ATCATATTAGTAATACTCACTATCGTTTTCTGCTTTTTCTTAGCTAATAGATTAATAAAGGATGAGTA  
CGAAAACCAACTCTTCGTTACGAGACCTGATGGTAGAATAGATTAGT  
+  
FFFFFFFFFFFFFFFFFFFFFFFFFFFFFFFFFFFFFFFFFFFFFFFFFFFFFFFFFFFFFFFFFFFFFFFF  
FFFFFFFFFFFFFFFFFFFFFFFFFFFFFFFFFFFFFFFFFFFFFFFFFFFFFFFFFFFFFFFFFFFFFFFF  
@A00721:190:HGJW7DSXY:4:2414:4616:5572\_2:N:0:TCTGCAAG+GCTGCACT  
CTCAACGAGGATAAAGCGAGTTTTCCGTCCTGAACGTAATACACGAAGAGATCATCCGCAAACGACTC  
GAAACCGAGACGCCGTAGATCAAAGTCCCTTCTAACTTTAGATTATGA  
+  
FFFFFFFFFFFFFFFFFFFFFFFFFFFFFFFFFFFFFFFFFFFFFFFFFFFFFFFFFFFFFFFFFFFFFFFF  
FFFFFFFFFFFFFFFFFFFFFFFFFFFFFFFFFFFFFFFFFFFFFFFFFFFFFFFFFFFFFFFFFFFFFFFF  
:,FFFF,FFFF  
@A00721:190:HGJW7DSXY:4:2112:1154:11099\_1:N:0:TCTGCAAG+GCTGCACT  
TTTGGGTATGTTTTGTGAAAAACATGAGATACCCAAGTCTATCGAAGACATTATCTCTTATGTACTTA  
TTGTAACGATCATTCTTTCGAGTTTTGTCATTCTTATTCTTTATTCTTTAACTGTGTATGAGGAGG  
ATT  
+  
FFFFFFFFFFFFFFFFFFFFFFFFFFFFFFFFFFFFFFFFFFFFFFFFFFFFFFFFFFFFFFFFFFFFFFFF  
FFFFFFFFFFFFFFFFFFFFFFFFFFFFFFFFFFFFFFFFFFFFFFFFFFFFFFFFFFFFFFFFFFFFFFFF  
FFF  
@A00721:190:HGJW7DSXY:4:1507:21847:5196\_1:N:0:TCTGCAAG+GCTGCACT  
TCGATAGTGATTGTTATCAATTTAAATACATTACTGTTTCAAATCATCTTTACTCACAGACTCCGAAA  
ATGGTTTCAAATGAGGTCAAAGCTCTATTTATTAACGAACCTATTATCCGATTCTTCGAGGGTATCAC  
TAC  
+  
FFFF:FFFFFFFFFFFFFFFFFFFFFFFFFFFFFFFFFFFFFFFFFFFFFFFFFFFFFFFFFFFFFFFF  
FFFFFFFFFFFFFFFFFFFFFFFFFFFFFFFFFFFFFFFFFFFFFFFFFFFFFFFFFFFFFFFFFFFFFFFF  
FFF  
@A00721:190:HGJW7DSXY:4:1412:2401:25817\_1:N:0:TCTGCAAG+GCTGCACT  
GACTTTAGTCAAGGAACTTCAATTCCTTCGATGTTTATATTTTCTATAAGGGAAAATAGCAATAATC  
AAATTTGACAAATTTTAGAACTTTATTTCAGAACTCTCTCCGATCACCTTGGTGTGATCTCCCGGAG  
GAT  
+  
FFFFFFFFFFFFFFFFFFFFFFFFFFFFFFFFFFFFFFFFFFFFFFFFFFFFFFFFFFFFFFFFFFFFFFFF  
FFFFFFFFFFFFFFFFFFFFFFFFFFFFFFFFFFFFFFFFFFFFFFFFFFFFFFFFFFFFFFFFFFFFFFFF  
FFF  
@A00721:190:HGJW7DSXY:4:1631:23402:1219\_2:N:0:TCTGCAAG+GCTGCACT  
ATGTATGATGATAATCTACTATTTTTAAATAGTGATATTCAGCGTATACTTGAATACTTTATCAAAGA  
TTTGGCTTGGTCTATTTACCGCAAAAAGTTGGAAGAGGTCTATGATAT  
+  
FFFFF:FFFFFFFFFFFF:FFFFFFFFFFFFFFFF:FF:F:FFFF,FF:FFFFFFFFFFFFFFFFFFFF  
FF:FFFF:F:FFF:FFFF:FFFFFFFFFF:FF,FFFFFFFF:FFFF  
@A00721:190:HGJW7DSXY:4:1378:26612:22060\_2:N:0:TCTGCAAG+GCTGCACT  
TTTAAATAGCACCGATTATAACTTGACTGTTGATAATATTACAATAGCTCTTCTCAGAAGATTAGTG

AAGTAACCGGTGAACACGTCGGTAGCATTGATTTACTTTTACCGTTAG  
+  
F:FF,FF,FFFF:FFFFFFFFFFFF,FFFFFFFF,F::FFFFFFFF:FFFFFFFF::FFFFFFFF:FF:F,,  
F:F,FF:FFFF:FFFF,:F,FFFF:FFFFFFFF:FFFF,FF,:F:  
@A00721:190:HGJW7DSXY:4:2444:26910:36260\_2:N:0:TCTGCAAG+GCTGCACT  
TTTCGAAAAGAAACCTATAAGTTACAAACGATTCTTCGACTATATTAAAGAAATAAAAATACTTCAAG  
TACCTGAACTTTACATTTTAAATGGTATGGTATAATGTGTCTTACAAA  
+  
FFFFFFFFFFFFFFFFFFFFFFFFFFFFFFFFFFFFFFFFFFFFFFFFFFFFFFFFFFFFFFFFFFFFFFFF  
:FFFFFFFFFFFFFFFFFFFFFFFFFFFF,FFFF:FFFFFFFFFFFFFFFFFFFF  
@A00721:190:HGJW7DSXY:4:1212:8983:25880\_2:N:0:TCTGCAAG+GCTGCACT  
TCTCGGTAATGAGAGTGTATTCCTTAATATTCTAGTAACCGCTATGTGGGCATTACTAGGATTTATCA  
CACTCCTAAATTTGATAGCAATTTATGTTTTAAATGCTAGGAAAATTT  
+  
FFFFFFFFF:FFFFFFFFFFFFF:FFFFFFFF:FFFFFFFFFFFFFFFFFFFFF:FFFFFFFFFFFFFFFFFFFF  
F,FFFFFFFFF:FFFFFFFFFFFFF:FFFFFFFFFFFFFFFFFFFFFFFFFFFFF:  
@A00721:190:HGJW7DSXY:4:1470:31123:7952\_1:N:0:TCTGCAAG+GCTGCACT  
GTATAGTTCAAGGAGTACTTAATTCAATAGCTTTAGTATTATTTACTATCGCCTTTATTGAAAATTGT  
ATAAGAGTTAATTGCTTACACAAAAGTGACGCGCAAGGAATCTTAATTGATTGAAGCTAGGCGTTGG  
GGA  
+  
FFFFFFFFFFFFFFFFFFFFFFFFFFFFFFFFFFFFFFFFFFFFFFFFFFFFFFFFFFFFFFFFFFFFFFFF  
FFFFFFFFFFFFFFFFFFFFFFFFFFFFFFFFFFFFFFFFFFFFFFFFFFFFFFFFFFFFFFFFFFFFFFFF  
FFF  
@A00721:190:HGJW7DSXY:4:1103:16712:20885\_1:N:0:TCTGCAAG+GCTGCACT  
ACCATGACCAATCATCGCTCCAACCTGGCACGCCAGACGTAGGGTCAAACCTACTACCGCCGGTCGGCA  
GATCGGCACCACTGGTCTCTACGTTCAAGGACCCGCTGTGCAGAATAACCTTCCCAAATCTAGATCTG  
CAC  
+  
FFF,F,FF,:FF:FFFF,F:F,,,F:F,FFF:F:F::FFFF::,FFFFFF:,FFF::FFF:FFFF:F  
,FFFFFFFFF:FFFFFFF:FFFFFFFFFFFFF:FFFFFFFFFFFFFFFFFFFFFFFFFFFFFFFFFFFF  
FFF  
@A00721:190:HGJW7DSXY:4:1633:10529:30311\_1:N:0:TCTGCAAG+GCTGCACT  
AAGGTCGTTACCGGACGACCACTCAAAGGAAACGGGCTGTTGCCAGAGGAAAGCAGCGACCACCGAG  
GTCGCTCGTAACATTGACGGCAGTCCCGTCATCTCTGTGGAACTGAGGCAGTACCTCAGTCAAAAGT  
CAC  
+  
F:FFFFFFFFFFFFFFFFFFFFFFFFFFFFF:FFFFFFFFFFFFFFFFFFFFFFFFFFFFFFFFFFFFF  
FFFFFFFFFFFFFFFFFFFFFFFFFFFFFFFFFFFFFFFFFFFFFFFFFFFFFFFFFFFFFFFFFFFFFFFF  
FFF  
@A00721:190:HGJW7DSXY:4:1107:27489:25864\_2:N:0:TCTGCAAG+GCTGCACT  
CATACCAATCAATGATGTGACTATACAGTTCGGCCATTTCAAGAGTGGTCAATACGTCGTGGGAGGTA  
CTGAAGCCTTCCCCTCCGCTGGCACGAAGAACTCCCAAGCCAATCA  
+  
FFFFFFFFFFFFFFFFFFFFFFFFFFFFFFFFFFFFFFFFFFFFFFFFFFFFFFFFFFFFFFFFFFFFFFFF  
FFFFFFFFFFFFFFFFFFFFFFFFFFFFFFFFFFFFFFFFFFFFFFFFFFFFFFFFFFFFFFFFFFFFF  
@A00721:190:HGJW7DSXY:4:1503:16658:1407\_2:N:0:TCTGCAAG+GCTGCACT  
TGACCAGAAATGAAAAGGGGTTTACCAGGGTAGTCTCTAAGTCTACCAGGAAGAGGGGAAATGTCCCCA  
AACTGAGAAGAATAAAGGGAAAGGTCCATCAGGACCTAAGAAGGGGA  
+  
FFFFFFFFFFFFFFFFFFFFFFFFFFFFFFFFFFFFF:FFFFFFFFFFFFFFFFFFFFFFFFFFFFFFFFFFFF  
,FFFFFFFFFFFFF:FFFFFFFFFFFFFFFFFFFFFFFFFFFFFFFFFFFFFFFFFFFFF  
@A00721:190:HGJW7DSXY:4:1410:18132:17018\_2:N:0:TCTGCAAG+GCTGCACT  
GAAGATCTCCCAACCATCTGGGGTTGGGAATAAGAAATCTGCACGGGCCAAAGAGGCCGCTGCTACGAA

GTCGCTGAAGGCGGCTTGGGTCATTAAGGGTAGCTGTAAAGTTGCGCC

+

FFFFFFFFFFFFFFFF:FFFF,FF:FFFF:FF:FFFFFFFFFFFFFFFF,FFF:F::FF:FFFFFFFF,FF  
,FFFFFFFF,FFFFF::FFFF:F:F,F,FF:F,:FFF,FFFF,FFF

@A00721:190:HGJW7DSXY:4:2210:14660:21872\_1:N:0:TCTGCAAG+GCTGCACT  
ATCTTTGAGACCAAGACTCTCTACAGTAGGTTCTGCTACTATGAGCAAATCTGTTGAATTCGTCAC  
TGAGGACGAAGGTGAGAGGACTTTTGGCTACTGGCGACAACTGAGAGCAGTCGCTGGGGAAAGAGAA  
TTG

+

FFFFFFFFFFFFFFFFFFFFFFFF:FFFF:FFFFFFFFFFFFFFFFFFFFFFFFFFFFFFFFFFFFFFFF  
FFFFFFFFFFFFFFFFFFFFFFFFFFFFFFFFFFFFFFFFFFFFFFFFFFFFFFFFFFFFFFFFFFFFFFFF  
FFF

@A00721:190:HGJW7DSXY:4:2567:29939:10598\_1:N:0:TCTGCAAG+GCTGCACT  
TCTTGCAGAGTGAAGTTCAGACGTGTGCTCTTCCGATCTTTTATCCGCGCTTAAGTATGGGGC  
GAAGATCCCCTATGGAGTCTTGAAGGACTTAGGTTGGCATATTTATGCCGACGATAATAAGCATGTCA  
CCC

+

FFFFFFFFFFFFFFFFFFFFFFFFFFFFFFFFFFFFFFFFFFFFFFFFFFFFFFFFFFFFFFFFFFFFFFFF  
FFFFFFFFFFFFFFFFFFFFFFFFFFFFFFFFFFFFFFFFFFFFFFFFFFFFFFFFFFFFFFFFFFFFFFFF  
FFF

@A00721:190:HGJW7DSXY:4:2561:10619:19570\_2:N:0:TCTGCAAG+GCTGCACT  
TTACAAGAGAGAGTGTGAGAGAGTCGCTCTCACTATTTTGGCCAGAATGCGGGCTTCTGACTGATG  
AGGTTAAACTCTTGCTCCTTCTGTGGGTGAGGGTTTTTGTATATTC

+

FF:FFFFFFFFFFFFFFFFFFFFFFFFFFFFFFFFFFFFFFFFFFFFFFFFFFFFFFFFFFFFFFFFFFFF  
FFFFFFFFFFFFFF:FFFFFFFFFFFFFFFFFFFFFF:FFFFFFFFFFFFFF

@A00721:190:HGJW7DSXY:4:2360:32036:14481\_2:N:0:TCTGCAAG+GCTGCACT  
TTTAGAGAGCATTAGAAGGAAGTTGGGCAAATCCCACATATGGTAGACGTTGTCACACTTTTCTTGA  
AAATTTTTCCTTTCCTCCGTCATTGGGGATTTCGATGTGAGAAGGTGG

+

FFFFFFFFFFFFFFFFFFFFFFFFFFFFFFFFFFFFFFFFFFFFFFFFFFFFFFFFFFFFFFFFFFFFFFFF  
FFFFFFFFF:FFFFFFFFFFFFFFFFFFFFFFFFFFFFFFFFFFFFFFFFFFFFFFFF

@A00721:190:HGJW7DSXY:4:2414:20654:7388\_2:N:0:TCTGCAAG+GCTGCACT  
TTTCAGGACCTAATCACATCATGATTGATAGTTACGGCTCGTATCGAGTTGGAGGGAGGAAGTTCTCC  
GAAATTAAGACGGGGGATTAAGAGTCCAGCTGTAAGTGTCAATTTCA

+

FFFFFFFFFFF:FFFFFF:FFFFFFFFFFFFFFFFFFFFFFFFFFFFFFFFFFFFFFFFFFFFFFFF:FF:F::FFFF  
FFFFFFFFFFFFFFFFFFFFFFFFFFFFFFFFFFFFFFFFFFFFFFFFFFFFFFFFFFFFFFFF:

@A00721:190:HGJW7DSXY:4:2374:18222:36025\_2:N:0:TCTGCAAG+GCTGCACT  
AAGGAACTTCGTCAGAAGATGAGGAAGTCTAAGAGGAGGAGTTTGAGGAAGGCTCTAGAGAAGATCT  
CACCACCTGGAGAAGGCAAGTGGAGAGTCCAGAAGTTGATGAAGAAGG

+

F:FFFFFFFFFFFFFFFFFFFF,FF:FF:FFFF,FFF:FFFFFFFFFFFFFFFF:FFFF:FFFF,FFFFF  
FFFFFFFFFFFFFFFFFFFFFFFFFFFFFFFFFFFFFFFFFFFFFFFFFFFFFFFF:FFFF

@A00721:190:HGJW7DSXY:4:2671:26847:8093\_1:N:0:TCTGCAAG+GCTGCACT  
CTTCCTAAGGTGGATGAGGGAGGTTGTTTCTTTGGAGTTTGTAGATAATCTTTTGAGAAGGGGTCATAG  
AGCCAGCAAGAGAAGCTTATATGCTGGTTAAGTGATGATTATCACTCCTTGAGAAGACAAGCCACAT  
TAA

+

FFFFFFF,FFFFFFFFF:FFF:FFFFFFFFFFFFFFFFFFFFFFFFFFFFFFFF,FFFFFFFFFFFFFFFF  
FFFFFFFFFFFFFFFFFFFFFFFFFFFFFFFFFFFFFFFFFFFFFFFFFFFFFFFFFFFFFFFFFFFFFFFF  
FFF

@A00721:190:HGJW7DSXY:4:1429:21097:11569\_1:N:0:TCTGCAAG+GCTGCACT  
TTTGAGTATCGACAGATCTTTCGATCTTGAGGACGTACATTTAACGTGGCAGAATTCGGTAAGTACC



GAGCTAAGAAGAAGACTTTGGGTACACGTTATGCTCGCAAACCTTAACG  
+  
FFFFFFFFFFFFFFFFFFFFFFFFFFFFFFFFFFFFFFFFFFFFFFFFFFFFFFFFFFFFFFFF  
FFFFFFFFFFFFFFFFFFFFFFFFFFFFFFFFFFFFFFFFFFFFFFFFFFFFFFFF  
@A00721:190:HGJW7DSXY:4:2405:14100:20744\_2:N:0:TCTGCAAG+GCTGCACT  
AGGTGATCTCTCTGCTTCTGCGTTACTGAGAGAAAAGATTGAGACGCCTACGGTGAAGTTTATGGACA  
AGATGCAAGTTCTTGGGAAATACTTGTTTCCCTTTTATAGTTTAGTAG  
+  
FFFFFFFFFFFFFFFFFFFFFFFFFFFFFFFFFFFFFFFFFFFFFFFFFFFFFFFFFFFFFFFF  
FFFFFFFFFFFFFFFFFFFFFFFFFFFFFFFFFFFFFFFFFFFFFFFFFFFFFFFF  
@A00721:190:HGJW7DSXY:4:1232:1280:14732\_2:N:0:TCTGCAAG+GCTGCACT  
GAGAAGACAACGAATCTTGAACTACGGTCCTTATCAAAGAAAATGGTGAACCGGTCTCTAAATCTTT  
TGAGATTGAGAAGATTGAAGAACACGTCAAGAAGTCGCCCCGGCGTTGT  
+  
FFFFFFFFFFFFFFFFFFFFFFFFFFFFFFFFFFFFFFFFFFFFFFFFFFFFFFFFFFFFFFFF  
FFFFFFFFFFFFFFFFFFFFFFFFFFFFFFFFFFFFFFFFFFFFFFFFFFFFFFFF  
@A00721:190:HGJW7DSXY:4:1236:27769:35430\_2:N:0:TCTGCAAG+GCTGCACT  
CAAGTTAAGAAGGAGGCTGATCATGGAGTCTTTGTACCTTCTGTCAAACCTTCGAGGTTGAGTACGAG  
AGGTGATCCCGGATGTGGATTGAAGGCTGGCTCTAAGGGAGACTCCTT  
+  
FFFFFFFFFFFFFFFFFFFFFFFFFFFFFFFFFFFFFFFFFFFFFFFFFFFFFFFFFFFFFFFF  
FFFFFFFFFFFFFFFFFFFFFFFFFFFFFFFFFFFFFFFFFFFFFFFFFFFFFFFF  
@A00721:190:HGJW7DSXY:4:1111:12536:32221\_2:N:0:TCTGCAAG+GCTGCACT  
TGTAAGAATTGGGTTGAGAAGTGTGCTTTACAAGGAGTTAGACTCTTCTTCAAGTTTTTAGATCTTC  
TTGATAATCTTAAAGAAAAATTTTGAATAAACTAATGAGAGGTATAG  
+  
F:FFFF:FFFFFFFFFFFFFFFF:FFFFFFFFFFFFFFFFFFFFFFFF:FFFFFFFFFFFFFFFF:FFFFFFFF  
FFFFFFFF:FFFFFFFFFFFFFFFF:FFFFFFFF:FFFF:FFFFFFFF  
@A00721:190:HGJW7DSXY:4:2452:20934:17675\_2:N:0:TCTGCAAG+GCTGCACT  
TTCTCTACCCATAACTTCTTTTCAAAAATGCGGATGGGTCTACTGATGTTTTCTACAGAGTGCAGT  
CGTTTCAACACTTATCACCCTTTTGAAGGAAAATAATTGGTGATGA  
+  
FFFFFFFFFFFFFFFFFFFFFFFFFFFFFFFFFFFFFFFFFFFFFFFFFFFFFFFFFFFFFFFF  
FFFFFFFFF,F:,FFFF:FFF:FFF:,FF,F:FFF:FFFF:FFFFFFFF  
@A00721:190:HGJW7DSXY:4:2657:13196:4241\_2:N:0:TCTGCAAG+GCTGCACT  
TGGTCCTTACGTCTTAAGTAATTTGGATGTTGTCGAAAACATCAGGTTCTTGTCACGATTCTTAAAA  
GAAGTTTATTAAACTTCAGAGTCTCTTGAAGTCCAGGTAGCTAATG  
+  
FFFFFFFFFFFFFFFFFFFFFFFFFFFFFFFFFFFFFFFFFFFFFFFFFFFFFFFFFFFFFFFF  
FF:F:FFFFFFFF:FFF:FFFFFFFF:FFFFFFFFFFFFFFFFFFFF:F  
@A00721:190:HGJW7DSXY:4:2365:22815:22404\_1:N:0:TCTGCAAG+GCTGCACT  
ACCTCTGTTGGTAGAGGAGTTGAGAGAATTACTCAGATTCAATCTGGCATCACTGAACGTCTACAACG  
AGTTAGGGAGTGGCTAGGTTTTAAAGATCCTTGCACAAGCAATACCTTCCACTGAGTTCATCACCC  
AGA  
+  
FFFFF,FFFFFFFFFFFF,F:FFF:F:FFFFFFFF:F:FFFFFFFFFFFFFFFF:FF:FFFFFF  
FF:FFFFFF:F::FFFF:FFFFFFFFFFFFFFFFFFFF:FFFF,FFFF:FFFFFFFFFFFFFFFF  
FFF  
@A00721:190:HGJW7DSXY:4:2372:16785:35697\_2:N:0:TCTGCAAG+GCTGCACT  
TCTGATGCTGACTTTGAGGAAAATTTTTCGGAAGTTTTTGGTATAAATCCTGATGGCTCAGTACAGGG  
AGGAGGTAATAGTTATAAAACCTTCTATTATCATTGCAACAGGACTTT  
+  
FF:FF:F:FF:,FF,FFF:FFF::FF,F,F:FFFF,:FFF,:FF:F,FF:,FF,FFFFFF,::,:F::  
FF,FFFF,FFF:F:FFFFFF:FF:FF,,FFFFFF:::FFF:FFFF,F



@A00721:190:HGJW7DSXY:4:2170:9191:30749\_1:N:0:TCTGCAAG+GCTGCACT  
TGTGCTCTTCCGATCTGATATGGTTGCGGCTGATCGTACCCCAATTCCTGCTAGAAAGATCACTCTCG  
GCGATACCACTGATCTTCCAGAGTTACGTAGTGGTCGTTCTTTTGGTGATTTTATCAAAGAGAAAGTT  
TCT

+

FFFFFFFFFFFFFFFFFFFFFFFFFFFFFFFFFFFFFFFFFFFFFFFFFFFFFFFFFFFFFFFFFFFFFFFFFFFFFFFF  
FFFF,FFFFFFFFFFFFFFFFFFFFFFFFFFFFFFFFFFFFFFFFFFFFFFFFFFFFFFFFFFFFFFFFFFFFFFFF  
FFFF,FFFFFFFFFFFFFFFFFFFFFFFFFFFFFFFFFFFFFFFFFFFFFFFFFFFFFFFFFFFFFFFFFFFFFFFF  
FFF

@A00721:190:HGJW7DSXY:4:2628:10673:9330\_1:N:0:TCTGCAAG+GCTGCACT  
TTCTAAAAAGCTATTAATAGCAGTTGCGGGGCTATAATACCGCCTCCAGATTACTCTAACTGAATCC  
ACTCTCTTGGGATATAAATGAGTACATCTATAATAGAGTTTGGAACTGTGTAATGTCTACGTACTG  
TTC

+

FFFFFFFFFFFFFFFFFFFFFFFFFFFFFFFFFFFFFFFFFFFFFFFFFFFFFFFFFFFFFFFFFFFFFFFFFFFFFFFF  
FFFFFF:FFFFFFFFFFFFFFFFFFFFFFFFFFFFFFFFFFFFFFFFFFFFFFFFFFFFFFFFFFFFFFFFFFFFFFFF  
FFF

@A00721:190:HGJW7DSXY:4:1236:21748:32268\_1:N:0:TCTGCAAG+GCTGCACT  
GGTTCAAGTCGATTGATTTTGTGACTACGATCTCTTGTAAATAAGAAGTTCTTCGCAGTTGAATCT  
CCACCAGGTGGAGGGAAGACCACTGAACTTATAGCGACTTTTGTCAATTTTTCGAAAAGGTCTTGA  
AGT

+

FFFFFF:FFFFFFFFFFFFFFFFFFFFFFFFFFFFFFFFFFFFFFFFFFFFFFFFFFFFFFFFFFFFFFFFFFFFFFFF  
FFFFFFFFFFFFFFFFFFFFFFFFFFFFFFFFFFFFFFFFFFFFFFFFFFFFFFFFFFFFFFFFFFFFFFFFFFFFFFFF  
FFF

@A00721:190:HGJW7DSXY:4:1112:26585:2566\_2:N:0:TCTGCAAG+GCTGCACT  
ACTGCTAATCGTAATTCGCGAGAAGAGATAGTACTAAAGTTTGGCACTTCTAGTTCATCGCGGTAT  
TTGTGAAATTAAGACAGACGTGAAAGTTATGATGAGTGATCGTATTAG

+

FFFFFFFFFFFFFFFFFFFFFFFFFFFFFFFFFFFFFFFFFFFFFFFFFFFFFFFFFFFFFFFFFFFFFFFFFFFFFFFF  
FFFF:FFFFFFFFFFFFFFFFFFFFFFFFFFFFFFFFFFFFFFFFFFFFFFFFFFFFFFFFFFFFFFFFFFFFFFFF

@A00721:190:HGJW7DSXY:4:2178:24994:11083\_1:N:0:TCTGCAAG+GCTGCACT  
CGTTCTTTTCATCGACGAATTATTCATGATTCACGCTGGTCAGACCCTTTTCTTACACATCTACTTA  
AGGCGGCTTATACCATAGGTTACGGTGATTCCAAATCGGATTCATCAATCGTATTGATCTCCAAGTCG  
CAA

+

FFF:FFFFFFFFFFFFFFFFFFFFFFFFFFFFFFFFFFFFFFFFFFFFFFFFFFFFFFFFFFFFFFFFFFFFFFFF  
FFFFFFFFFFFFFFFFFFFFFFFFFFFFFFFFFFFFFFFFFFFFFFFFFFFFFFFFFFFFFFFFFFFFFFFFFFFFFFFF  
FFF

@A00721:190:HGJW7DSXY:4:1443:17716:20087\_2:N:0:TCTGCAAG+GCTGCACT  
ATCAACGACATCATTCTTGATGAGTGTCGTTCTTATCGAAGTCTCAGTTATCGCTGCCCGGCCGACGT  
TTGTCGCGAACTCTCAGAGTTTACGGCAGAAAATTTCTCCTGCTAG

+

FFFFFFFFFFFFFFFFFFFFFFFFFFFFFFFFFFFFFFFFFFFFFFFFFFFFFFFFFFFFFFFFFFFFFFFFFFFFFFFF  
F:FFFFFFFFFFFF:F:F,FFFFFFFFFFFFFFFFFFFFFFFF:FF,  
F:FFFFFFFFFFFF:FFFFFFFFFFFFFFFFFFFF,:FFFFFFFFFFFF,F

@A00721:190:HGJW7DSXY:4:2133:30490:7451\_1:N:0:TCTGCAAG+GCTGCACT  
ATTAGACCTATCAGATGTCTTGACGACTTCGAATTTGAGGACGGAGTTAAATATATTACTTTCACTCA  
AGGTGAAAAGTTTGAATTAACAAAGTCCTTGTAAGAGTAAGTTAAATGTGAAGATGCTCAGACTA  
TTC

+

FFFFF:F::F:FFFFFFFFFFFFFFFFFFFFFFFFFFFFFFFFFFFFFFFF:F:FF,FFFFFFFFFFFFFF:FFFFF:FF  
FFFF:F:FF:FFFFFFFFFFFFFFFFFFFF:FFFFFFFFFFFF:FF::FFFF:FFFFFFFFFFFFFFFFFFFF  
FFF

@A00721:190:HGJW7DSXY:4:1133:9191:26490\_2:N:0:TCTGCAAG+GCTGCACT  
ACGATACTTTGTTATCAATGTAAAGTTAAACGATGCTACTTGTGAGAGGATCAATCACAGTAAGGAAC



TGTCACGTTTACGACGGGAGGTTGCAGATTCAACCCCTTATATCGAGG  
+  
FFFFFFFFFFFFFFFFFFFF,FFFFF,FFFFFFFFFFFFFFFFFFFFFFFFFFFFFFFFFFFFFFFFFFFF  
FFFFFFFFFFFFFFFFFFFFFFFF:FFFFFFFFFFFFFFFFFFFF,FFFFF  
@A00721:190:HGJW7DSXY:4:1469:13404:14246\_2:N:0:TCTGCAAG+GCTGCACT  
AGTATCTTGAAGTTGTTGACGACAAGCCTCAAGAGGGTAGAGGACCACCTGGATCTTCTACTGTCTCT  
GCCTTCCAAGATTTCTTAGAAGAGGTTATTCCTGGAACCACCTTAACG  
+  
FFFFFFFFFFFFFFFFFFFFFFFFFFFFFFFFFFFFFFFFFFFFFFFFFFFFFFFFFFFFFFFFFFFF  
FFFFFFF:FFFFFFFFFFFFFFFFFFFFFFFFFFFFFFFFFFFFFFFFFFFF  
@A00721:190:HGJW7DSXY:4:1333:32642:14184\_1:N:0:TCTGCAAG+GCTGCACT  
TCAGCCGAATTAAGTACTAATGAGTTCAAGTCGGTTGTCGATCGAATTAAGATCAAGGCTAATACCTT  
TATAGGTAAGAAGCCCCTTGAGCCGCGTAGTCAGCGCGTTTAGCTGTATCATCAGTCAGAGTATACCC  
GAT  
+  
:FFFF,FFFFFFFFFFFFFFFFFFFFFFFF:FFFFFFFFFFFFFFFFFFFFFFFFFFFFFFFFFFFF  
FFFFFFFFFFFFFFFFFFFFFFFFFFFFFFFFFFFFFFFFFFFFFFFFFFFFFFFFFFFFFFFFFFFF:FFFFFFFFFFFF  
FFF  
@A00721:190:HGJW7DSXY:4:2626:6008:11365\_1:N:0:TCTGCAAG+GCTGCACT  
TCCAAGAGAATATTTATTCTTATGAGGCTCGAACTTCAACGTTTTTACAACGGAAAGACATATCGCA  
CCCGAAATTTTGGGCAGAATGCTCTTAACGCGGTTCTTGAACGGTGTTTTGATCAGTCTAAGTTGGA  
TAA  
+  
FFFFFFFFFFFFFFFFFFFF:FFFFFFFFFFFFFFFFFFFFFFFFFFFFFFFFFFFFFFFFFFFFFFFFFFFF  
FFFFF:FFFFFFFFFFFFFFFFFFFFFFFFFFFFFFFFFFFFFFFFFFFFFFFFFFFFFFFFFFFFFFFFFFFF  
FF:  
@A00721:190:HGJW7DSXY:4:1338:7789:11537\_2:N:0:TCTGCAAG+GCTGCACT  
GAGCTCCTCAATTGATAGATTGGGTCAACAATAGGGACGCTAGTATACTTCGTAAAGTCGACAGCGAA  
ATGGTCAATATTGATAATTGGACCGACTATATGACCTATTTTAAGCTC  
+  
FFFFFFFFFFFFFFFFFFFFFFFFFFFFFFFFFFFFFFFFFFFFFFFFFFFFFFFFFFFFFFFFFFFF  
FFFFFFF:FFFFFFFFFFFFFFF:FFFFFFFFFFFFFFFFFFFF:FFFFFFF  
@A00721:190:HGJW7DSXY:4:1215:9697:15374\_1:N:0:TCTGCAAG+GCTGCACT  
ATGCTTCAGCCTTTTCGAAGCATAACCCCGCACAGAATATCGTTTATCACGCAAAATTTATTAATGCA  
ATTTTCGACCTATCTTTAAGGTTCTTGTGAGGAGAGTCAAACAGTGTCTTTTACCCAACATTTTAT  
GTA  
+  
FFF:FFF:FFFFFFF:FFFFFFFFF:FFFFFFFFFFFFFFFF,FFFFFFFFF::FFFFFFFFFFFFFFFF  
FFFFFFFFFFFFFFFFFFFFFFFFFFFFFFFFFFFFFFFFFFFFFFFFFFFFFFFFFFFFFFFFFFFF  
FFF  
@A00721:190:HGJW7DSXY:4:2544:4417:14184\_1:N:0:TCTGCAAG+GCTGCACT  
TCTCTCTTAGGAGGTCATGATGACTACTATAAGGGTGAAATCGATTTTTTCGAAGTTTGACAAATCTCA  
AGATTTCTTTTGTAAGCCTATGAGATAAAGATGTATTCTTATTTAGGCTTCGATGCTGAATTTCTTG  
AAC  
+  
FFFFFFFFFFFFFFFFFFFFFFFFFFFFFFFFFFFFFFFFFFFFFFFFFFFFFFFFFFFFFFFFFFFF  
FFFFFFFFFFFFFFFFFFFF:FFFFFFFFFFFFFFFFFFFFFFFFFFFFFFFFFFFFFFFFFFFFFFFFFFFF  
FFF  
@A00721:190:HGJW7DSXY:4:1275:13865:28385\_1:N:0:TCTGCAAG+GCTGCACT  
ACGCCAGGAGTATCCATAACGATTTGTCAATTTACCACCTTTGCTCAACGACGAAGTGGAACGGCCAAC  
ACTTTCTTTGGTAATTGTATGATCACTTTGATGATTTTATCACTTTATTATGACCTTGAAAGTTTTC  
GGC  
+  
FFFFFFFFFFFFFFFFFFFF:FFF:F,FFFFFFFFFFFFF,:FFF:FFFF:FFFFFFFFFFFFFFFFFFFF

@A00721:190:HGJW7DSXY:4:1671:31548:1110\_1:N:0:TCTGCAAG+GCTGCACT  
GCTGGGGACGATTCCATTCTGTTTTCAAAGACTCCAATACTGATCATTCTGATCATATGATTTTGA  
CAATGTTTCGAAGCGAAATTTTTGAGGGATAAACAGCGTACTTCTGCTCGCGATTTATTCTTTTG  
TCA

@A00721:190:HGJW7DSXY:4:2375:22110:27070\_1:N:0:TCTGCAAG+GCTGCACT  
TAGGACTTTGGGAGAGATTCTGTTAGTTTTAAAGACTATACTAAATATCTCCACTACGAGGTTGTTGTT  
TGGCGATTAGCTCTTGCGACTAATATTCGATATTCGATTGAGGGTCGTTATACCTATTCGGCTATCTG  
TGC

@A00721:190:HGJW7DSXY:4:2163:9914:5415\_2:N:0:TCTGCAAG+GCTGCACT  
AAGATCAAATTTTAAACGATTCCGAGAGGTTTATCCTGATGTGGAGGGAGTTCTTGAAGCATCCCGAC  
CTTTCCTTGTGAAAATTTTGATGCGGTTTCATAAGATTATCAGTAATC

@A00721:190:HGJW7DSXY:4:2510:16215:8594\_1:N:0:TCTGCAAG+GCTGCACT  
ATTCATGGACCTTCCATCCTGTACCTCTTCTGGAGAGACGTATCTCAAAGATCGACTTCGAGACAGGT  
GATATTGTTGAGCGAGAGCGACCAAGATCTAAATTCGGTAACGGTGCGTGCGCTTTATTTTAAAAAG  
CTC

@A00721:190:HGJW7DSXY:4:2421:10366:36479\_1:N:0:TCTGCAAG+GCTGCACT  
GATACTTATCACGAAAGGACTTGAGTCTTTTGATCAGTCTCTGACTTGACCATCTTTCATTTTAAATG  
ACGATCATTAAGACTCTCTTCTTTGTTTCCTTCTTTGCACTGATTTTTCCTCATCAGCTTGTGT  
TTT

@A00721:190:HGJW7DSXY:4:2549:27561:10770\_2:N:0:TCTGCAAG+GCTGCACT  
TTTACGATAACAACATATCAGTTGATTAAGACTCTTCCGAAAGGCGAACTTTGGGAATTTGAAGCTCAG  
GGTGAAGCACAAACGTTTGACCGTGACGAAGTGTGGTGTCTTGATCTA

@A00721:190:HGJW7DSXY:4:2667:6488:7373\_2:N:0:TCTGCAAG+GCTGCACT  
TTAAGTTTTGTCTTCCTTGTTTGTCTTATTCTATTAATCACTCATTTTGTAGTGAGATTATTA AAAACGC  
ACTAAAACGCTCTTCGACAACAGCAGGGGTTTTCGAATAGTGATAGCCA

@A00721:190:HGJW7DSXY:4:1151:16929:32690\_1:N:0:TCTGCAAG+GCTGCACT  
AGAGGGGGCAGCAGCATGACCATAATTGGTATTGACTTTGGTACCACCTTTTCTACTGTCTGTCTCGCC

TCTTCGAATGAAGTTTTAATGCTTAACAACAATGATAGTGAATTTATACCTACAATCATTGGTTTTTC  
TAA

+

:FFFFFFFFFFFFFFFFFFFFFFFFFFFFFFFFFFFFFFFFFFFFFFFFFFFFFFFFFFFFFFFF  
FFFFFFFFFFFFFFFFFFFFFFFFFFFFFFFFFFFFFFFFFFFFFFFFFFFFFFFFFFFFFFFF  
FFF

@A00721:190:HGJW7DSXY:4:1172:22426:23578\_1:N:0:TCTGCAAG+GCTGCACT  
TTTATGGATATGATGCTATTACTCATGATGGTTACGGTCAGGGAGGATTCTCAGTTTACAAGGACCTT  
AAGCGATTGATCGGGGTTAATTCTAAAACATTACCCGAAAGACGTGCTAAATTAACCATTGTACGA  
TGT

+

FFFFFFFFFFFFFFFFFFFFFFFFFFFFFFFFFFFFFFFFFFFFFFFFFFFFFFFFFFFFFFFF  
FFFFFFFFFFFFFFFFFFFFFFFFFFFFFFFFFFFFFFFFFFFFFFFFFFFFFFFFFFFFFFFF  
FFF

@A00721:190:HGJW7DSXY:4:2368:12997:21527\_1:N:0:TCTGCAAG+GCTGCACT  
TCACTTTTCTACTAAGAATTGGTCCTACTTTTGGACAAGGCCAATTTCGTAATCTTCATGAGATCGTTT  
CTTTCTTTATCTCTTTGGTTGTTAGGGATTTTGAGAGAGTGAAAGGCTTCAATTGTAGTGGTTTGGTC  
GTT

+

:FFF:FFFFFFFFFFFFFFFFFFFFFFFFFFFFFFFFFFFFFFFFFFFFFFFFFFFFFFFFFFFF  
FFFFFFFFFFFFFFFFFFFFFFFFFFFFFFFFFFFFFFFFFFFFFFFFFFFFFFFFFFFFFFFF  
FFF

@A00721:190:HGJW7DSXY:4:1134:10845:33771\_2:N:0:TCTGCAAG+GCTGCACT  
TCTACGCAAAGATATTTTCATGAAAACCTACAGAGGAACGTACCGGATTACCTGTCTTTCATATTATGAA  
TGAACCTTCGGCCGCTCTCTTTGCTTCGATGTTGGATGTCAAGAAGGG

+

FFFFFFFFFFFFFFFFFFFFFFFFFFFFFFFFFFFFFFFFFFFFFFFFFFFFFFFFFFFFFFFF  
FFFFFFFFFFFFFFFFFFFFFFFFFFFFFFFFFFFFFFFFFFFFFFFFFFFFFFFFFFFFFFFF  
F:,FFFFFFFFFFFFFFF

@A00721:190:HGJW7DSXY:4:2552:1868:1846\_1:N:0:TCTGCAAG+GCTGCACT  
TTCCTACGTAGTTTATGACTTTGGTGGTGGTACTTTCGATACTTCTATCGTCTTACGTTACGGTAATT  
ACTATAGTGTTATTTATTCTGGTGGTGATGATAATCTTGAGGTCGTGACGTTGATGAAGCTATAAGA  
GC

+

FFFFF,FFF,FFF,FFF:FFF:FF:FFF:F,,FFF:FFF,,FFFF:FFFFFFF,F,FFF:FFFFFF,  
FF,:F,F,FFFFFFFFFFFFFFFFFFFFF,:FFFF:FFF,FF:,:FFFF:,FFFFFFFFF:FF:FFF  
,F

@A00721:190:HGJW7DSXY:4:2610:6397:22654\_1:N:0:TCTGCAAG+GCTGCACT  
CTTTCAGTTTCACACTGAAGGAGGAGGTTTCTGTTACTGAAAACCTCGTCAATACTTTTCAATAA  
TATACGTCTTGAACCTCACTTATGACGATCTAGTGAAATTAACGCGTCCTTTCTGGAACGTAGTTT  
CTA

+

FFFFFFFFFFFFFFFFFFFFFFFFFFFFFFFFFFFFFFFFFFFFFFFFFFFFFFFFFFFFFFFF  
FFFFFFFFFFFFFFFFFFFFFFFFFFFFFFFFFFFFFFFFFFFFFFFFFFFFFFFFFFFFFFFF  
FFF

@A00721:190:HGJW7DSXY:4:1169:3974:36025\_1:N:0:TCTGCAAG+GCTGCACT  
AGTGGCATTCAAGGCAAACCTTACCCTGATTCCGGCCGGTAGCTCATTTCTACCAGGGGCTATTAC  
TCTTGCTGAAACAGCTATTAAAGCTGTTGAGCGGGTAATTACACCTAAACGAGCTCGATCTGCCATCG  
CTG

+

FFFFFFFFFFFFFFFFFFFFFF:FFFFFF,FFFFFFFFFFFF,FFFFFFFFFFFF:FFFFFF:FFFFFF  
FFFFFF:FFFFFFFFFFFFFFFFFFFFFFFFFFFFFFFFFFFFFFFFFFFFFFFFFFFFFFFF  
FFF

@A00721:190:HGJW7DSXY:4:2135:11171:10066\_2:N:0:TCTGCAAG+GCTGCACT  
ACTTTATCTGAGAGTAGCGTTCTTTTGTGCGATTGTATCAATAGTAACATAACGACAAATAAAGGTCT

$+$ 

@A00721:190:HGJW7DSXY:4:2607:7536:20901\_2:N:0:TCTGCAAG+GCTGCACT  
AGGTAATTATGAAGACTGTGATTTATCTTTCACCTCTGGCCTTGTATGAGGGTGTTTCTAATCGTAACA  
TTAATAATTTCAATCTTCTTAAAAAGAAGATAGAGAGTCATACTTTGG

+

@A00721:190:HGJW7DSXY:4:1660:27995:15969\_1:N:0:TCTGCAAG+GCTGCACT  
TACCGCCTTACAAGTCTAAGGTTAAAGAGTCGATTAACAAGTTGTACTTATCAATGATTTTATCGCT  
GGTTGTTATCTCGAAAAGTCTCTTCTAAAAGGAACGTCAGTTCTAACCCAAAGAGAATATCTAAAATA  
TTT

+

@A00721:190:HGJW7DSXY:4:2412:24641:1454\_1:N:0:TCTGCAAG+GCTGCACT  
TTGCTTGTGCGTTCTCTCTTTAATGGCACTACCTCGGTACAATCTTACTTGGAAACGAAGGCGACCTGT  
TCCGGAGTTTTTACGGGATCCGGAATGTTCTGTCTATATTAGGTGAAGCGAAATACGATTTCGAACGT  
CAA

+

@A00721:190:HGJW7DSXY:4:2227:22227:8547\_2:N:0:TCTGCAAG+GCTGCACT  
GCTGACTTTCGTCAATATGATTTGATCTGGTTGCTCAATTCTAAGCGTGTTCCGCTTAGTGCGAGGCC  
TCTCTTCTACGAGTATTGCTATTTATACGGTTACGAGAAGAAGGTTCCG

+

@A00721:190:HGJW7DSXY:4:2568:21630:29371\_2:N:0:TCTGCAAG+GCTGCACT  
TATTTGGATGATCTTGATAAAGAACTTCATGAATTTTCAGAGGATGAAAAATTTCTTCCTTGATT  
TAATATAAAGAATCTTACCAGGACTCCTACTACAGGAGGCAGTCTTC

+

@A00721:190:HGJW7DSXY:4:2314:1895:23375\_1:N:0:TCTGCAAG+GCTGCACT  
GAAACTCTAAGTGGTAATACTGTCTTTCCAAGCTTACCTTTATCTTCAATGAAATTGGACTCTTCGAT  
AGGGGACATTTTATCGTGGGCTTTCCGTAAAGGAAGATCTGTTATCGACGGTTTATCGTTTACGAAGT  
ATC

+

@A00721:190:HGJW7DSXY:4:2674:3125:23594\_1:N:0:TCTGCAAG+GCTGCACT  
TTGGCCTAGTGGATGTTATTAGTGACATCTGGTCAATTTCTTTTTAGGTGGTCTTTATTCTATTATT  
GATTTTTATGAGATTGATACGTTAACAGAAGATGATGTTAGAGTAGAATTCCTGAAGAGTCCTTCCGT  
AAC

+

```

:FFFFFFFFFFFFFFFFFFFFFFFFFFFFFFFF:FFFFFF,FFFFFFFF:FFFFFFFFFFFFFFFF
FFFFFFFFFFFFFFFF:FFFFFFFFFFFFFFFFFFFFFFFFFFFFFFFFFFFFFFFFFFFFFFFF
FFF

```

@A00721:190:HGJW7DSXY:4:2358:4978:2503\_2:N:0:TCTGCAAG+GCTGCACT  
TACACAATTAAGAAATAATCCTACATTGACTGATTATCTAAAGATTGAAGGAAAATTTATCCTCGTT  
TAACCTACTTAGACTTTTCTACGATACAAATGATAACTTCTAATTTAC

+

FFFFFFFFFFFFFFFFFFFFFFFFFFFFFFFFFFFFFFFFFFFFFFFFFFFFFFFFFFFFFFFFFFFFFFFF  
FFFFFFFFFFFFFFFFFFFFFFFFFFFFFFFFFFFFFFFFFFFFFFFFFFFFFFFFFFFFFFFFFFFFFFFF

@A00721:190:HGJW7DSXY:4:2448:14163:34757\_1:N:0:TCTGCAAG+GCTGCACT  
GGAGTTCAGACGTGTGCTCTTCCGATCTCGGCATTTGATAATAATGACGAGACTTTCGTCATAATCGC  
TGCATATTACGGATTACACGGTACCAGCGCATCTCGTGTGAGCCTCGACCCGATTATATGGTATTAA  
CTT

+

FFFFFFFFFFFFFFFFFFFFFFFFFFFFFFFFFFFFFFFFFFFFFFFFFFFFFFFFFFFFFFFFFFFFFFFF  
FFFFF:FFFFFFFFFFFFFFFFFFFFFFFFFFFFFFFFFFFFFFFFFFFFFFFFFFFFFFFFFFFFFFFF  
FFF

@A00721:190:HGJW7DSXY:4:2528:16694:35571\_2:N:0:TCTGCAAG+GCTGCACT  
TCACACATTTTGAGAACTAACTATGTTATGTTCTCTGATCATTTTGACAATCTCTTCTTATAATAAAT  
AAATAAATAATATTACTAATGGCAAATAGTGGAAGGCTCCAGTCAAC

+

FFFFFFFFFFFFFFFFFFFFFFFFFFFFFFFFFFFFFFFFFFFFFFFFFFFFFFFFFFFFFFFFFFFFFFFF  
FFFFFFFFFFFFFFFFFFFFFFFFFFFFFFFFFFFFFFFFFFFFFFFFFFFFFFFFFFFFFFFFFFFFFFFF

@A00721:190:HGJW7DSXY:4:2204:4020:30279\_2:N:0:TCTGCAAG+GCTGCACT  
AATAGGTGAAGGGATAGTTTTTACCTCGACCAACATTAAGCGGCGGCGACTAATCTTAAAGCTTCAC  
CCAAAATGAAGGACACTTCGAAACTGAATAATGATGCACTACAAACAA

+

FFFFFFFFFFFFFFF:FFFFFFFFFFFFFFFFFFFFFFFFFFFFFFFFFFFFFFFFFFFFFFFFFFFFFFF:F:F:FFFFFFFFFFFFFFFFFFFFFFFF  
FFFFFFFFF:FFF:FFFFFFFFFFFFF:FFFFFFFFFFFFF:FFFFFFFFFFFFF

@A00721:190:HGJW7DSXY:4:2151:13792:8719\_2:N:0:TCTGCAAG+GCTGCACT  
CGTTGAGAAAATTTCTTAGAGGATATTCGCCATTGTGGTACGAATTGGTCCAACATTTACCACCAAAT  
TCTTTTGATACAACCTAGCCTTCAAGTGGGTATGCCTGCGGAATAC

+

FFFFFFFFFFFFFFFFFFFFFFFFFFFFFFFFFFFFFFFFFFFFFFFFFFFFFFFFFFFFFFFFFFFFFFFF  
FFFFFFFFFFFFFFFFFFFFFFFFFFFFFFFFFFFFFFFFFFFFFFFFFFFFFFFFFFFFFFFFFFFFFFFF

@A00721:190:HGJW7DSXY:4:1350:16486:5713\_1:N:0:TCTGCAAG+GCTGCACT  
TTGCAGAGTGACTGGAGTTCAGACGTGTGCTCTTCCGATCTTCAAGCTTGTCGTTAAAGACTGCAGA  
GGCTGTCAAACAAGCCAGACTCAAGGAGTCCAATCAAAGGTTTTGAATTTAGCTCAACTGGGGAGAC  
GTG

+

: ,FFFFFFFFFFFFFFFFFFFFFFFFFFFFFFFFFFFFFFFFFFFFFFFFFFFFFFFFFFFFFFFFFFFF  
FFFFFFFFFFFFFFFFFFFFFFFFFFFFFFFFFFFFFFFFFFFFFFFFFFFFF,FFFF:FFFFFFFFFFFFFFFFFFFFFFFFFFFFFFFF  
FFF

@A00721:190:HGJW7DSXY:4:2368:7536:23093\_2:N:0:TCTGCAAG+GCTGCACT  
AAAAGTCCGAGTATATTGTATGTTAATAGATAGTGGGATAATAGTTCTACCGATACGTAGTGAACGC  
GTTTCGTAGAACCAAGTACTTTCGCTCTGAAGAGTTTAGAGCTGCTATT

+

FFFFFFFFFFFFFFFFF:FFFFFFFFFFFFFFFFFFFFFFFFFFFFFFFFFFFFFFFFFFFFFFFFFFFFF  
FFFFFFFFFFFFFFFFFFFFFFFFFFFFFFFFFFFFFFFFFFFFFFFFFFFFFFFFFFFFFFFFFFFFFFFF

@A00721:190:HGJW7DSXY:4:2661:26512:11772\_2:N:0:TCTGCAAG+GCTGCACT  
TGTGGCTTTAGACGATAATCCTTTAAGGACTATGTTGACTGACGAAGATTTCCACAGATTTGTCTA  
CGTTGCAGATCGCCACTCCAAACACTATATACATTATAAAATATAAAA

+

FFFFFFFFFFFFFFFFFFFFFFFFFFFFFFFFFFFFFFFFFFFFFFFFFFFFFFFFFFFFFFFFFFFFFFFF  
FFFFFFFFFFFFFFFFFFFFFFFFFFFFFFFFFFFFFFFFFFFFFFFFFFFFFFFFFFFFFFFFFFFFFFFF

@A00721:190:HGJW7DSXY:4:2436:2193:1877\_1:N:0:TCTGCAAG+GCTGCACT  
ACTTTTGTTACCAAATCTTGCTTTCAACGAAGTCTCTGATTTTATTAATCATTACTTTAACGATCT



@A00721:190:HGJW7DSXY:4:2215:27516:2550\_1:N:0:TCTGCAAG+GCTGCACT  
TATATTAAAGAAATAAAAATACTTCAAGTACCTGAACCTTTACATTTTTAATGGTATGGTATAATGTGT  
CTTACAAATAGAACCTTCACTCTCGGTAATGAGAGTGTATTCCTTAATATTCTAGTAACCGCTATGTG  
GGC

+

FFFFFFFFFFFFFFFFFFFFFFFFFFFFFFFFFFFFFFFFFFFFFFFFFFFFFFFFFFFFFFFFFFFFFFFF  
FFFFFFFFFFFFFFFFFFFFFFFFFFFFFFFFFFFFFFFFFFFFFFFFFFFFFFFFFFFFFFFFFFFFFFFF  
FFF

@A00721:190:HGJW7DSXY:4:1321:7157:10535\_2:N:0:TCTGCAAG+GCTGCACT  
GAAAATTTTAGAAAACTCCATTGTATAGTTCAAGGAGTACTTAATTCAATAGCTTTAGTATTATTTA  
CTATCGCCTTTATTGAAAATTGTATAAGAGTTAATTGCTTACACAAAA

+

FFFFFFFFFFFFFFF:,FFF,F:FFFFFFFFFFFFFFFFFFFFFFFFFFFFFFFFFFFFFFFFFFFFFFF  
FFFFF:F:FFFFFF:FFFFFFFFFFFFFFF:FFF::FF:FFFFFFFFFFFF

@A00721:190:HGJW7DSXY:4:1320:23683:15421\_1:N:0:TCTGCAAG+GCTGCACT  
ACCATGACCAATCATCGCTCCAAGTGGCAGCCAGACGTAGGGTCAAACCTACTACCGCCGGTCGGCA  
GATCGGCACCACTGGTCTCTACGTTCAAGGACCCGCTGTGCAGAATAACCTCCCAAATCTAGATCTG  
CAC

+

FFFF:FFFFFFFFFFFFFFFFFFFF,FFFFFFFFFFFFFFFFFFFFFFFFFFFFFFFFFFFFFFFFFFFFF  
FFFFFFFFFFFFFFFFFFFFFFFFFFFFFFFFFFFFFFFFFFFFFFFFFFFFFFFFFFFFFFFFFFFFFFFF  
FFF

@A00721:190:HGJW7DSXY:4:2242:19705:34867\_1:N:0:TCTGCAAG+GCTGCACT  
AAGGTCGTTACCGGACGACCACTCAAAGGAAACGGGCTGTTGCCAGAGGAAAGCAGCGACCACCGAG  
GTCGCTCGTAACATTGACGGCAGTCCCGTCATCTCTGTGGAACTGAGGCAGTACCTCAGTCAAAAGT  
CAC

+

:FFFFFFFFFFFFFFFFFFFFFFFFFFFFFFFFFFFFFFFFFFFFFFFFFFFFFFFFFFFFFFFFFFFFF  
FFFFFFFFFFFFFFFFFFFFFFFFFFFFFFFFFFFFFFFFFFFFFFFFFFFFFFFFFFFFFFFFFFFFFFFF  
FFF

@A00721:190:HGJW7DSXY:4:1126:21893:25567\_2:N:0:TCTGCAAG+GCTGCACT  
CATACCAATCAATGATGTGACTATACAGTTTCGGCCATTTCAAGAGTGGTCAATACGTCGTGGGAGGTA  
CTGAAGCCTTCCCCTCCGCTGGCACGAAGAACTCCCAAGCCAATCA

+

FFFFFFFFFFFFFFF:FF,FFFF:FFFFFFFFFFFF,FFFFFFFFFFFFFFFFFFFFFFFFFFFFFFFFF  
FFFFFFFFFFFFFFFFFFFFFFFFFFFFFFFFFFFFFFFFFFFFFFFFFFFFFFFFFFFFFFFFFFFFFFFF  
FF:FFFF:FF:F:F,FF

@A00721:190:HGJW7DSXY:4:1543:27073:13745\_2:N:0:TCTGCAAG+GCTGCACT  
TGACCAGAATGAAAAGGGGTTTACCAGGGTAGTCTCTAAGTCTACCAGGAAGAGGGGAAATGTCCCCA  
AACTGAGAAGAATAAAGGGAAAGGTCCATCAGGACCTAAGAAGGGGA

+

FFFFF:FF:FFFF:FFFFFFFFFFFFFFFFFFFFFFFFFFFFFFFFFFFFFFFFFFFFFFFFFFFFFFF  
FFFFFFFFFFFFFFFFFFFFFFFFFFFFFFFFFFFFFFFFFFFFFFFFFFFFFFFFFFFFFFFFFFFFFFFF  
FFFFFFFFFFFF

@A00721:190:HGJW7DSXY:4:1448:1985:33082\_2:N:0:TCTGCAAG+GCTGCACT  
GAAGATCTCCACCATCTGGGGTTGGGAATAAGAAATCTGCACGGGCCAAAGAGGCCGCTGCTACGAA  
GTCGCTGAAGCGGCTTGGGTCATTAAGGGTAGCTGTAAAGTTGCGCC

+

FFFFFFFFFFFFFFFFF:F:FFFF:FFFF:,FFFFFFFFFFFFFFFFFFFFFFFFFFFFFFFFFFFFFFF:FFFF  
FFFFFFFFFFFFFFFFF,:FFFFFF,,F:FFFFFFFFFFFF,FFFFFFFFFFFF

@A00721:190:HGJW7DSXY:4:2561:17038:15186\_1:N:0:TCTGCAAG+GCTGCACT  
ATCTTTGAGACCAAGACTCTCTACAGTAGGTTTCGTGCCTACTATGAGCAATCTGTTGAATTCGTAC  
TGAGGACGAAGGTGAGAGGACTTTTGGCTACTGGCGACAACTGAGAGCAGTCGCTGGGGAAAGAGAA  
TTG

+

FFFFFFFFFFFFFFFFFFFFFFF:FFFFFFFFFFFFFFFFFFFFFFFFFFFFFFFFFFFFFFFFFFFFFFF

FFFFFFFFFFFFFFFFFFFFFFFFFFFFFFFFFFFFFFFFFFFFFFFFFFFFFFFFFFFFFFFFFFFFFFFFFFFFFFFF  
FFF

@A00721:190:HGJW7DSXY:4:1617:3242:15060\_2:N:0:TCTGCAAG+GCTGCACT  
ACGAGGCCGGTGACGTTTTGTCAACGGCGTTTGGAGGATTTTATCCGCGCTTAACTATGGGGCGAAG  
ATCCCCTATTGAGTCTTGAAGGACTTAGGTTGGCATATTTATGCCGAC

+  
FFFFFFFFFFFFFFFFFFFFFFFFFFFFFFFFFFFFFFFFFFFFFFFFFFFFFFFFFFFFFFFFFFFFFFFFFFFF:FFFFFF:  
FFFFFFFFFFFFFFFFFFFFFFFFFFFFFFFFFFFFFFFFFFFFFFFFFFFFFFFFFFFFFFFFFFFFFFFFFFFF:FFF:FF

@A00721:190:HGJW7DSXY:4:1657:26702:14732\_1:N:0:TCTGCAAG+GCTGCACT  
TGTCACCCTTAAGCACCGAGGTAAGCTCGGGACTTACAAGAGAGAGTGTGAGAGAGTCGCTCTCACTA  
TTTTTGCCAGAATGCGGGCTTTCTGACTGATGAGGTTAAACTCTTGCTCCTTCTGTGGGTGAGGGT  
TTT

+  
FFFFFFFF,FFF:,FFF,FFFFFFFF:F,F:FFFF,FFFFFFFFFFFFFFFF:FFFF:FFFFFFFF,  
,::FF,F:FFFFFFFF:FFF:F:FFFF:,FFFFFFFF,FF:FFFFFFFF:F:FFFFFFFFFFFF:FF:F  
FFF

@A00721:190:HGJW7DSXY:4:2527:20817:21919\_2:N:0:TCTGCAAG+GCTGCACT  
TTTAGAGAGCATTAGAAGGAAGTTGGGCAAATCCCACATATGGTAGACGTTGCACACTTTTCTTGA  
AAATTTTCTCTTCTCCGTCATTGGGGATTTGATGTGAGAAGGTGG

+  
FFFFFFFFF:FFFFFFFFFFFFFFFFFFFFFFFFFFFFFFFFFFFFFFFFFFFFFFFFFFFFFFFFFFFFFFFFFFFF:FFF  
FFFFFFFFFFFFFFFFFFFFFFFFFFFFFFFFFFFFFFFFFFFFFFFFFFFFFFFFFFFFFFFFFFFFFFFFFFFF:FFFFFFFFFFFF

@A00721:190:HGJW7DSXY:4:2418:21052:8296\_2:N:0:TCTGCAAG+GCTGCACT  
TTTCAGGACCTAATCACATCATGATTGATAGTTACGGCTCGTATCGAGTTGGAGGGAGGAAGTTCTCC  
GAAATTAAAGACGGGGGATTAAGAGTCCAGCTGTAAGTGTCAATTTCA

+  
FFFFFFFFF:FFFFFFFFFFFFFFFFFFFFFFFFFFFFFFFFFFFFFFFFFFFFFFFFFFFFFFFFFFFFFFFFFFFF  
FFFFFFFFFFFFFFFFFFFFFFFFFFFFFFFFFFFFFFFFFFFFFFFFFFFFFFFFFFFFFFFFFFFFFFFFFFFF:FFFFFFFFFFFF

@A00721:190:HGJW7DSXY:4:2525:22453:18615\_2:N:0:TCTGCAAG+GCTGCACT  
AAGGAACTTCGTCAGAAGATGAGGAAGTCTAAGAGGAGGAGTTTGAGGAAGGCTCTAGAGAAGATCT  
CACCACCTGGAGAAGGCAAGTGGAGAGTCCAGAAGTTGATGAAGAAGG

+  
FFFFFFFFFFFFFFFFFFFFFFFFFFFFFFFFFFFFFFFFFFFFFFFFFFFFFFFFFFFFFFFFFFFFFFFFFFFF  
FFFFFFFFFFFFFFFFFFFFFFFFFFFFFFFFFFFFFFFFFFFFFFFFFFFFFFFFFFFFFFFFFFFFFFFFFFFF

@A00721:190:HGJW7DSXY:4:2141:27850:29778\_1:N:0:TCTGCAAG+GCTGCACT  
CCTAAGGTGGATGAGGGAGGTTGTTTCTTTGGAGTTTATGATACTCTTTGAGAAGGGGTCATAGAGC  
CAGCAAGAGAAGCTTATATGCTGGTTTAAGTATGATTATCACTCCTTGAGAAGACAAGCCACATTAA  
GAT

+  
FF,:FFF:FFFF,FFFF,,:F,F:FFFFFFFF:FF:F:F,,F:FFFFFFFFF::F:FFFFF  
FFFFFFFFFFFFFFFFFFFFFFFFFFFFFFFFFFFFFFFFFFFFFFFFFFFFFFFFFFFFFFFFFFFFFFFFFFFF  
FFF

@A00721:190:HGJW7DSXY:4:1519:10484:12665\_1:N:0:TCTGCAAG+GCTGCACT  
TTTGAGTATCGACAGATCTTTCGATCTTGAGGACGTACATTTAACGTGGCAGAATTCGGTAACCTACC  
ATATTGTTCTTCCGGGAAGTTGTGGGATTTAACTTTGACTCACTACTCCGATCAGATCCGGATGGT  
TTG

+  
FFFFFFFFFFFFFFFFFFFFFFFFFFFFFFFFFFFFFFFFFFFFFFFFFFFFFFFFFFFFFFFFFFFFFFFFFFFF  
FFFFFFFFFFFFFFFFFFFFFFFFFFFFFFFFFFFFFFFFFFFFFFFFFFFFFFFFFFFFFFFFFFFFFFFFFFFF:  
FFF

@A00721:190:HGJW7DSXY:4:2341:4146:16250\_1:N:0:TCTGCAAG+GCTGCACT  
GATCTGGAGTTGTCTAGGGTCATGGCAGATACTACCGATAAGGTGAAAAATATGCAGGTCAAAGATTT  
TGTAAGCTCTGAGGGCGGTTGAGGGAGCCGTTTTGGCCGACTTTAACTATTCTAAGAGTCTTTATGATT  
CAA



+  
FFFFFFFFFFFFFFFFFFFFFFFFFFFFFFFFFFFFFFFFFFFFFFFFFFFFFFFFFFFFFFFFFFFFFFFF  
FFFFFFFFFFFFFFFFFFFFFFFFFFFFFFFFFFFFFFFFFFFFFFFFFFFFFFFFFFFFFFFFFFFFFFFF  
FFF  
@A00721:190:HGJW7DSXY:4:1563:20618:27023\_1:N:0:TCTGCAAG+GCTGCACT  
TGTCGTACCTTACAAGGTTGAGGAGACTTTACAGCGCTTATTGTCGCGCAGTTTCCAGAATTGCGGT  
TGAAGTTCACCCATTCTATCTTGAATGCTCACGCCGTCGCAGCCATATCGAGACTATGTTATAATCAC  
TT  
+  
FFFFFFFFFFFFFFFFFFFFFFFFFFFFFFFFFFFFFFFFFFFFFFFFFFFFFFFFFFFFFFFFFFFFFFFF  
FFFFFFFFFFFFFFFFFFFFFFFFFFFFFFFFFFFFFFFFFFFFFFFFFFFFFFFFFFFFFFFFFFFFFFFF  
FF  
@A00721:190:HGJW7DSXY:4:1515:3495:27680\_2:N:0:TCTGCAAG+GCTGCACT  
ATTATTGATATTGGAGGCGATATTCGTTTTTCATATCCAAACTCCTTGAATGGAGTACATATTTGCAA  
CCCTATTCTTGATGTGAAAGATGCATCGAGGTATACGTCTAGGAACAT  
+  
FFFFFFFFFFFFFFFFFFFFFFFFFFFFFFFFFFFFFFFFFFFFFFFFFFFFFFFFFFFFFFFFFFFFFFFF  
FFF:FFFFFFFFFFFFFFFFFFFFFFFFFFFFFFFFFFFFFFFFFFFFFFFFFFFFFFFFFFFFFFFF:  
@A00721:190:HGJW7DSXY:4:2524:19786:33317\_2:N:0:TCTGCAAG+GCTGCACT  
CGGAGGGAAGCAAATGTTTCTGTTACAAGAACGCTTTGGATTGTGACCATAAAGCCTCAGTTG  
CGATAGCTGTAGAGGTATACGATATCTCTCTTGATGATGTAGCCACTA  
+  
FFFFFFFF:FFFF:FFFFFFFF:FFFFFFFFFFFFFFFFFFFFFFFFFFFFFFFFFFFFFFFFFFFFFFF  
FFFFFFFFFFFF,FFFF:FFFFFFFFFFFFFFFFFFFFFFFFFFFFFFFFFFFFFFFFFFFFFFFF  
@A00721:190:HGJW7DSXY:4:1445:12825:7420\_2:N:0:TCTGCAAG+GCTGCACT  
TCATTTCTGCTTAGTTTGTCCCGCGCAATTATTGGACACGATGAAAAATGACATACCCGTTCTGACC  
TTGGTATCGTTATCCGTCATGGAGATGATGCCGCATCACTTGATTACT  
+  
FFFFFFFFFFFFFFFFFFFFFFFFFFFFFFFF:FFFFFFFFFFFFFFFFFFFFFFFFFFFFFFFFFFFFFFF  
F,FFFFFFFFFFFFFFFFFFFFFFFFFFFFFFFFFFFFFFFFFFFFFFFFFFFFFFFFFFFFFFFF  
@A00721:190:HGJW7DSXY:4:1265:4282:21120\_2:N:0:TCTGCAAG+GCTGCACT  
GTGAACTCTTGGGGACTAGATTGAGCATTAATGAGTTCCGAATAACTCGTAATAAATCTTTCTCTAGT  
GGACAATTCAGAATACCTATTTCCGTACCAAGAGCCACTGCCAATCTC  
+  
FFFFFFFFF:FFFFFFF:FFFFFFFFFFFFFFFFFFFFFFFFFFFFFFFFFFFFFFFFFFFFFFFFFFFFF,FFFFFFFFFFFF:FF,FF  
FFFFFFFFFFFF:FFFFFFFFFFFFFFFFFFFFFFFFFFFFFFFFFFFFFFFFFFFFFFFFFFFFFFFF:  
@A00721:190:HGJW7DSXY:4:1407:24334:30358\_2:N:0:TCTGCAAG+GCTGCACT  
AGATTATGTTGATAAAGTTTTCTTCATAAGGGCTATTCAGTACGTCATGGGGATCACTTCTTCGGTC  
AATGACAAAACCTTCGAATATGTTACGACATGGCTTCGTAACAACAGT  
+  
FFFFFFFFFFFFFFFFFFFFFFFFFFFFF:FFFFFFFFFFFFFFFFFFFFFFFFFFFFFFFFFFFFFFFFFFFFF::FF  
FFFFFFFFFFFFFFFFFFFFFFFFFFFFF:FFFFFFFFFF,FFFFF:FFFFFFFFFFFF  
@A00721:190:HGJW7DSXY:4:1621:24704:27054\_1:N:0:TCTGCAAG+GCTGCACT  
TTCACCAAGATGTTTCATATAGATACGAGATACCTAGAGAGGTCGCAGCGATCTTACTCGTTATCGGAG  
CTAAGAAGAAGACTTTGGGTACACGTTATGCTCGAACTTAACGTTAGTACCGGAGGTGATCTCTCT  
GCT  
+  
FFFFFFFFFFFFFFFFFFFFFFFFFFFFFFFFFFFFFFFFFFFFFFFFFFFFFFFFFFFFFFFFFFFFFFFF  
FFFFFFF:FFFFFFFFFFFFFFFFFFFFFFFFFFFFFFFFFFFFFFFFFFFFFFFFFFFFFFFFFFFFFFF  
FFF  
@A00721:190:HGJW7DSXY:4:1659:27335:14418\_1:N:0:TCTGCAAG+GCTGCACT  
GAGAGAAAAGATTACAGGACGCCTACGGTGACTTTATGGACAAGATGCAAGTTCTTGGGAAATACTTGT  
TTCCCTTTTTAGGTTTAGTAGGTGATCTTGACGTCGATTCTTTGTATAGGGAGTGTGAGAAGACAACG  
AAT

```

+
FFFFFFFFFFFFFF:FFFFFFFFFFFFFFFFFFFFFFFFFFFFFFFFFFFF,FFFFFFFFFFFFFFFFFFFFFFFFFFFFFFFFFFFF
FFFFFFFFFFFFFFFFFFFFFFFFFFFFFFFFFFFFFFFFFFFFFFFFFFFFFFFFFFFFFFFFFFFFFFFFFFFFFFFFFFFFF
FFF
@A00721:190:HGJW7DSXY:4:2203:10447:5494_2:N:0:TCTGCAAG+GCTGCACT
ACCGGTCTCTAAATCTTTTGAATTGAGAAGATTGAAGAACACGTCAAGAAGTCGCTCGGC GTTGTTCT
TTGAAAACCAAGTTAAGAAGGAGGCTGATCATGGAGTCTTTGTACCTT
+
FFFFFFFFFFFFFFFFFFFFFF,FFF:F,FFFFFFFFFFFFFFFFFFFFFFFFFFFFFFFFFFFFFFFFFFFFFFFFFFFFF
FFFFF:FFFFFFFFFFFFFFFFFFFFFFFFFFFFFFFFFFFFFFFFFFFF:FFFFF:FFF
@A00721:190:HGJW7DSXY:4:1634:29396:28855_2:N:0:TCTGCAAG+GCTGCACT
GGTTCAGCTACGAGAGGTGATCCCGGATGTGGATTGAAGGCTGGCTCTAAGGGAGACTCCTTCTTTTT
GAATGTTGTAAAGAATTGGGTTGAGAAGTGTGCTTTACAAGGAGTTAG
+
FFFFFFFFFFFFFFFFFFFFFFFFFFFFFFFFFFFFFFFFFFFFFFFFFFFFFFFFFFFFFFFFFFFFFFFFFFFFFFFFFFFF,
FFFFFFFFFFFFFF:F:FFFFFFFFFFFFFFFFFFFFFFFFFFFFFFFFFFFF:FFFFFFFFF
@A00721:190:HGJW7DSXY:4:2659:6008:7670_2:N:0:TCTGCAAG+GCTGCACT
TTCTCTACCCATAACTTCTTTTTCAAAAATGCGGATGGGTCTACTGATGTTTTCTACAGAGTGCAGT
CGTTTCAACACTTATCACCACTTTTGAAAGGAAAATAATTGGTGATGA
+
FFFFFFFFFFFFFFFFFFFFFFFFFFFFFFFFFFFFFFFFFFFFFFFFFFFFFFFFFFFFFFFFFFFFFFFFFFFFFFFFFFFF
FFFFF:FF,FF,FFFFFFFFFFFF:FFFFF:FFFF:F:F:FFFFFFFFF:
@A00721:190:HGJW7DSXY:4:1214:11930:10003_2:N:0:TCTGCAAG+GCTGCACT
ACGTCTTAAGTAATTTGGATGTTGTGAAAACTATCAGGTTCTTGTACGATTCTTAAAAGAAGTTTA
TTAAAACTTCAGAGTCTCTTGGAAGTCCAGGTAGCTAATGTTATTGCA
+
F,FFFFFFFF:FFFFFFFFFFFFFFFFFFFF::FFFFFFFFFFFFFFFFFFFFFFFFFFFFFFFFFFFF:FF:
FFFFF:FFFFFFFFFFFF:FFFFFFFFFFFF,F,:FFFFFFFF,FFF,F
@A00721:190:HGJW7DSXY:4:1609:24777:19288_1:N:0:TCTGCAAG+GCTGCACT
CCTCTGTTGGTAGAGGAGTTGAGAGAATTACTCAGATTCAATCTGGCATCACTGAACGTCTACAACGA
GTTAGGGAGTGGCTAGGTTTTAAAAGATCCTTTGCACAAGCAATACCTTCCACTGAGTTCATCACCCA
GA
+
FFFFFFFFFFFF:FFFFFFFFFFFFFFFFF:,F:,FFF:FF:FFFFF::FFFFFFFF,F,:FF:FFFFF:F:
F:F,FFF,FFFFFFFFF:,FF,FFFFFF:FF,,FF:F,,FFF,:FF:FFFFFFFF:FF:F,FFFFFF:
FF
@A00721:190:HGJW7DSXY:4:1235:19162:29387_1:N:0:TCTGCAAG+GCTGCACT
CTGATGCTGAATTTGAGGAAAATTTTTCGGAAGTTTTTGGTATAAATCCTGATGGCTCAGTACAGGGA
GGAGGTAATAGTTATAAAACCTTCTTTTATCATTGCAACAGGACTTTGAGAAGACTGTTGAAATGGAC
AAA
+
FFFFFFFFFFFFFFFFFFFFFFFFFFFFFFFFFFFFFFFFFFFF,FFFFFFFFFFFFFFFFFFFFFFFFFFFFFFFFFFFF
FFFFFFFFFFFFFFFFFFFFFFFFFFFFFFFFFFFFFFFFFFFFFFFFFFFFFFFFFFFFFFFFFFFFFFFFFFFFFFFFFFFF
FFF
@A00721:190:HGJW7DSXY:4:1306:22309:26569_1:N:0:TCTGCAAG+GCTGCACT
AGGTATGTGTCACGCTACACTCGAAATATGGGCCCTCATAAGGAAGTATAGTTGGCGTCTTGTCTGTTG
ACGTCATTACAGTCTGGAAGTTAGATCATTTGTTGAGGAAGATCTCTACAGAGATTATCGAGAGTTGT
GAT
+
FFFFFFFFFFFFFFFFFFFFFFFFFFFFFFFFFFFFFFFFFFFF:F:FFFFFFFF,F:FFFFFFFF:FFFFFFFFFFFF
FFFFF::FFFFFFFFFFFFFFFFFFFFFFFFFFFFFFFFFFFFFFFFFFFFFFFFFFFFFFFFFFFFFFFFFFFFFFFFFFFF
FFF
@A00721:190:HGJW7DSXY:4:1519:18421:9220_2:N:0:TCTGCAAG+GCTGCACT
AATTTAGCACTTTTTGAATATGACAGAAGCTCGCCATATCAGATTAGAGACATGCCAGTTAGAGTTCT

```

TCTAACCAGGACTGATGGTGAGATTCTTTTACCTTTTGGAGGTCCAGG

+

FFFFFF:FF:FFFFFFFFFFFFFFFFFFFFFFFF:FFF:FFFFFFFFFFFFFFFFFFFFFFFF:FFFFFFFFFFFFFFFFFFFF  
:FFFFFFFFFFFF:FFFFFFFFFFFFFFFFFFFFFFFF:,FFFFF:FF:FFF,FF

@A00721:190:HGJW7DSXY:4:1640:17192:3897\_1:N:0:TCTGCAAG+GCTGCACT  
GTTTCCGTCGGAGGATGACAGGTGGGAGACCGCTCAATAACACTCTATTGAATCCCTTTTCCACGATG  
AAAGCTCTTTATGAGGTGCTCCATGCAAATTTACAGTTCTCTTTGGTGATATCGCCTCTGTCCTTTC  
TCC

+

FFFFFFFFFFFFFFFFFFFFFFFF:FFFFFFFFFFFFFFFFFFFFFFFFFFFFFFFF:FFFFFF:FFFFFFFFFFFFFFFFFFFF  
FFFFFFFF,FFFFFFFFFFFFFFFFFFFFFFFFFFFFFFFFFFFFFFFFFFFFFFFFFFFFFFFF,FFFFFFFF,FFFFFFFF  
FFF

@A00721:190:HGJW7DSXY:4:1339:12906:6057\_1:N:0:TCTGCAAG+GCTGCACT  
AAGGTTCTATTACCACCTTGTGATTGATACAAACATTCTAGGTGATGCTTTCTTAGAGGCTCGTCTA  
GCCGCTGAGATTCTGCTTACCTATTTACAATCTGTAGAGAGAGAGGTTAATCAGAATTTGAGTGATAA  
CGA

+

FFFF:FFFFFF,FFFFFFFF:FFFFFFFFFFFFFFFFFFFFFFFFFFFFFFFFFFFFFFFFFFFFFFFFFFFFFFFFFFFF  
FFFFFFFFFFFFFFFFFFFFFFFFFFFFFFFFFFFFFFFFFFFFFFFFFFFFFFFFFFFFFFFFFFFFFFFFFFFFFFFFFFFF  
FFF

@A00721:190:HGJW7DSXY:4:1558:13675:2566\_2:N:0:TCTGCAAG+GCTGCACT  
CTCCTAGTACTTAAGGGTTTATGTTTCGGTTTCAGCTGGATGGATCTTTTGATGGTATGTTTCACATT  
GCGTGATCACTTCCCGTGGACTTGGAAGAGATTAAACATAAAATCCA

+

FFFFFFFFFFFFFFFFFFFFFFFFFFFFFFFFFFFFFFFFFFFFFFFFFFFFFFFFFFFFFFFFFFFFFFFFFFFFFFFFFFFF  
FFFFFFFFFFFFFFFF:FFFFFFFFFFFFFFFFFFFFFFFFFFFFFFFFFFFFFFFFFFFFFFFFFFFF

@A00721:190:HGJW7DSXY:4:2630:8585:21903\_2:N:0:TCTGCAAG+GCTGCACT  
GCTAAAGCCTGTCCAGTTGTGCGATGATGTTTCGGGCTGTGGGGATTAACCTCCCTCGTGAACTTACGA  
CGATGTTCTCGCTCGCATTTACAAGGATTACTAAGTCTGAGATCTGC

+

FFFFFFFFFFFFFFFFFFFF:FFFFFFFFFFFFFFFFFFFFFFFFFFFFFFFFFFFFFFFFFFFFFFFFFFFFFFFFFFFF  
FFFFFFFFFFFFFFFFFFFFFFFFFFFFFFFFFFFFFFFFFFFFFFFFFFFF:FFFFFFFFFFFF

@A00721:190:HGJW7DSXY:4:2603:16269:17581\_2:N:0:TCTGCAAG+GCTGCACT  
TTGGTCGAAAAATATCGCCGGGAACCTCTAATAGAGGATCCTGATGACATTATTTCAACGGATACCGA  
TCTCAGTTCTACCACAGAAACCGTCTCAGGAAGTGTCTCCACTGATTC

+

FFFFFFFFFFFFFFFFFFFFFFFFFFFF:FFFFFFFFFFFFFFFFFFFFFFFFFFFFFFFFFFFFFFFFFFFFFFFFFFFF  
FFFFFFFFFFFFFFFFFFFFFFFFFFFFFFFFFFFFFFFFFFFFFFFFFFFF:FF

@A00721:190:HGJW7DSXY:4:2519:13078:33943\_2:N:0:TCTGCAAG+GCTGCACT  
AAAGACGACCTTCTTGTGGGACTGAGACCTCTGAATTTTCAGGGTGCCTGATGAGGACGTTGAAAG  
GGATAATTTCAACTCTGAGACTTCTAAGAGTGTTCAAAAGACCAGAA

+

FFFFFFFFFFFFFFFFFFFFFFFFFFFFFFFFFFFFFFFFFFFFFFFF:FFFFFFFFFFFFFFFFFFFF:FFFFFFFFFFFFF:,FF  
FF:FFFFFFFFFFFFFFFFFFFFFFFFFFFFFFFFFFFFFFFFFFFFFFFFFFFFFFFFFFFFFFFF

@A00721:190:HGJW7DSXY:4:2446:21178:5509\_1:N:0:TCTGCAAG+GCTGCACT  
TGTGCTCTTCCGATCTGATATGGTTGCGGCTGATCGTACCCCAATTCTGCTAGAAAGATCACTCTCG  
GCGATACCACTGATCTTCCAGAGTTACGTAGTGGTCTTTTGGTGATTTTATCAAAGAGAAAGTT  
TCT

+

FFFFFFFFFFFF:FFFFFFFFFFFFFFFFFFFFFFFFFFFFFFFFFFFFFFFF:FFFF,FFFFFFFFFFFFFFFFFFFF  
FFFFFFFFFFFFFFFFFFFFFFFFFFFFFFFFFFFFFFFF:FFFFFFFFFFFFFFFFFFFFFFFFFFFFFFFFFFFFFFFF  
FFF

@A00721:190:HGJW7DSXY:4:1628:7102:20588\_1:N:0:TCTGCAAG+GCTGCACT  
TTATAAAAAGCTATTAATAGCAGTTGCGGGCTATAATACCGCCTCCAGATTACTCTAACTGAATCC







$+$ 

@A00721:190:HGJW7DSXY:4:1272:7572:30733\_2:N:0:TCTGCAAG+GCTGCACT  
GAGTGAAAGGCTTCAATTGTAGTGGTTTGGTCGTTTCAGTACCCAGTCAGTATACCTCTACGCAAAGA  
TATTTTCATGAAAACACAGAGGAACGTACCGGATTACCTGTCTTTTCAT

 $+$ 

@A00721:190:HGJW7DSXY:4:1319:20356:28322\_2:N:0:TCTGCAAG+GCTGCACT  
TCGCCGCTCTCTTTGCTTCGATGTTGGATGTCAAGAAGGGTTCAGAATGGGATTCCTACGTAGTTTA  
TGACTTTGGTGGTGGTACTTTCGATACTTCTATCGTCTTACGTTACGG

+

@A00721:190:HGJW7DSXY:4:1633:26350:12555\_2:N:0:TCTGCAAG+GCTGCACT  
AGTGTATTATTCTGGTGGTGATGATAATCTTGGAGGTCGTGACGTTGATGAAGCTATAAGAGCGTT  
CTTATTACGGCGCACTTCTTTACCCGCCACCACACAACCTTTCAGTTTC

+

@A00721:190:HGJW7DSXY:4:2146:22408:32941\_1:N:0:TCTGCAAG+GCTGCACT  
ACTGGAACCCTCGACAATACTTTTCAATAATCTACGTCTTGAACCTCACTTATGACGATCTAGTGAA  
ATTAACGCGTCCTTTTCTGGAACGTAGTTTACTATTATGAACAAAGTTATCAAAGATAGTGGCATT  
AAG

+

@A00721:190:HGJW7DSXY:4:1270:17824:28479\_1:N:0:TCTGCAAG+GCTGCACT  
GATCTTGCAAGTGACTGGAGTTCAGACGTGTGCTCTTCCGATCTCTTGCTGAAACAGCTATTAAAGC  
TGTTGAGCGGGTAATTACACCTAAACGAGCTCGATCTGCCATCGCTGAAGGATGTGCACTCTTTTCTG  
CT

+

@A00721:190:HGJW7DSXY:4:2158:25509:4742\_2:N:0:TCTGCAAG+GCTGCACT  
AAAGGTCTCTATCAAGCTCGTATTATCGTCGCTGCTGGATCTGCGTTACCGTTGAAGGCTAAACTCCA  
AGGTAATTATGAAGACTGTGATTTATCTTTCACTCTGGCCTTGTATGA

+

@A00721:190:HGJW7DSXY:4:1561:29035:36965\_1:N:0:TCTGCAAG+GCTGCACT  
TTCCGATCTTTTCAATCTTCTTAAAAAGAAGATAGAGAGTCATACTTTGGGCTATCGTTTCAGGTGCAT  
GGGGTTGGATAGCCAATATTGAAGTGGACACCTCTGGTAGTATCGAAGTAAAGATAACCAATAAGGAA  
GGA

 $+$ [illegible]





@A00721:190:HGJW7DSXY:4:1311:3857:2033\_2:N:0:TCTGCAAG+GCTGCACT  
ACACATTTTGAGAACTAACTATGTTATGTTCTCTGATCATTTTGACAATCTCTTCTTATAATAAATAA  
ATAAATAATATTACTAATGGCAAATAGTGGAAGGCTCCAGTCAACAC

@A00721:190:HGJW7DSXY:4:2330:11071:14309\_2:N:0:TCTGCAAG+GCTGCACT  
AATAGGTGAAGGGATAGTTTTTACCTCGACCAACATTAAGGCGGCGGCGACTAATCTTAAAGCTTCAC  
CCAAAATGAAGGACACTTCGAAACTGAATAATGATGCACTACAAACAA

@A00721:190:HGJW7DSXY:4:2156:29071:25598\_2:N:0:TCTGCAAG+GCTGCACT  
CGTTGAGAAAATTTCTTAGAGGATATTCGCCATTGTGGTACGAATTGGTCCAACATTTACCACCAAT  
TCTTTTGATACAACTCTAGCCTTCAAGTGGGGTATGCCTGCGGAATAC

@A00721:190:HGJW7DSXY:4:2132:8919:24205\_1:N:0:TCTGCAAG+GCTGCACT  
TTGCAGAGTGACTGGAGTTCAGACGTGTGCTCTTCCGATCTTTCAAGCTTGTGTTAAAGACTGCAGA  
GGCTGTCAAACAAGCCAGACTCAAGGAGTCCAATCAAAGGTTTTGAATTTAGCTCAACTGGGGAGAC  
GTG

@A00721:190:HGJW7DSXY:4:2532:26449:4304\_2:N:0:TCTGCAAG+GCTGCACT  
AAAAGTCCGGAGTATATTGTATGTTAATAGATAGTGGGATAATAGTTCTACCGATACGTAGTGAACGC  
GTTCTGAGAACCAAGTACTTTCCGTCTGAAGAGTTTAGAGCTGCTATT

@A00721:190:HGJW7DSXY:4:1106:13612:29262\_1:N:0:TCTGCAAG+GCTGCACT  
TGGCTTTAGACGATAATCCTTTAAGGACTATGTTGACTGACGAAGATTTTCCACAGATTTGTCTACG  
TTGCAGATCGCCACTCCAAACACTATATACATTATAAAATATAAAAATAAGGGAGTCATAACTTTTGT  
TAC

@A00721:190:HGJW7DSXY:4:1114:5755:7075\_2:N:0:TCTGCAAG+GCTGCACT  
CGAAGTCTCTTATTTTATTAATCATTACTTTAACGATCTCTCGGTCATTTACTCTGTACTTGATCTAC  
GTCGTTTAACTGTCGGAACAACCTTTACTTAGAATGACTCTATCTTTT

@A00721:190:HGJW7DSXY:4:1610:30165:5541\_1:N:0:TCTGCAAG+GCTGCACT  
AATACTCACTATCGTTTTCTGCTTTTTCTTAGCTAATAGATTAATAAAGGATGAGTACGAAAACCAAC  
TCTTCGTTACGAGACCTGATGGTAGAATAGATTTAGTCTCTACACCCATCTCAACGAGGATAAAGCGA  
GTT

[illegible]

FFFFFFFFFFFFFFFFFFFFFFFFFFFFFFFFFFFFFFFFFFFFFFFFFFFFFFFFFFFFFFFF  
F:F

@A00721:190:HGJW7DSXY:4:1428:8124:16438\_1:N:0:TCTGCAAG+GCTGCACT  
ACTAAGATATCATCCGCAAACGACTCGAAACCGAGACGCCGTAGATCAAAGTCCCTTCTAACTTTAGA  
TTATGAATCCTGCCTTTACTCATTTTATAGCAGTTATTTATGTTGTACTTTTTATAATTTATAACCTT  
CTT

+

:F,F,,F,F,,F,FF:,F,FFFFFFFFFFFFFFFFFFFFFFFFFFFFFFFFFFFFFFFFFFFFFFFF:FFFFFF  
FFFFFFFFFFFFFFFFFFFFFFFFFFFFFFFFFFFFFFFFFFFFFFFFFFFFFFFFFFFFFFFF:FFFF  
FFF

@A00721:190:HGJW7DSXY:4:2536:31087:3944\_2:N:0:TCTGCAAG+GCTGCACT  
TTGTAACGATCATTCTTTCGAGTTTTGTCATTCTTATTCTTTTATTCTTTAACTGTGTATGAGGAGG  
ATTTATAATGATTTTCGATAGTGATTGTTATCAATTTAAATACATTAC

+

FFFFFFFFFFFFFFFFFFFFFFFFFFFFFFFFFFFFFFFFFFFFFFFFFFFFFFFFFFFFFFFF:FF:FF,FFFFFFFF,FFFF:FFFF:FFF:FFFF  
FFFFFFFFFFFF,FFFF,FFFF,FFFFFFFFFFFFFFFFFFFFFFFFFFFFFFFF:FFFFF

@A00721:190:HGJW7DSXY:4:1108:26747:5478\_1:N:0:TCTGCAAG+GCTGCACT  
TCACAGACTCCGAAAATGGTTTCAAATGAGGTCAAAGCTCTATTTATTAAACGAACTATTATCCGATT  
CTTCGAGGGTATCACTACCACTGATCTGCCGACTTTAGTCAAGGAAGTCAATTCCTTCGATGTTTAT  
ATT

+

FFFFFFF:FF:F:FFFFFFFFFFFFFFFFFFFFFFFFFFFFFFFFFFFFFFFFFFFFFFFFFFFFFFFF  
FFFFFFFFFFFFFFFFFFFFFFFFFFFFFFFFFFFFFFFFFFFFFFFFFFFFFFFFFFFFFFFFFFFFFFFF  
FFF

@A00721:190:HGJW7DSXY:4:1508:25075:16892\_2:N:0:TCTGCAAG+GCTGCACT  
GGAAAATAGCAATAATCAAATTTGACAAATTTTAGAACTTTATTTAGAACTCTCTCCGATCACCTT  
GGTGTGATCTCCCGAGGATCTTTTCAATAAGATGTATGATGATAATC

+

FFFFFFFFFFFFFFFFFFFFFFFFFFFFFFFFFFFFFFFFFFFFFFFFFFFFFFFFFFFFFFFFFFFFFFFF  
FFFFFFFFFFFFFFFFFFFFFFFFFFFFFFFFFFFFFFFFFFFFFFFFFFFFFFFFFFFFFFFF:FFFFFFF

@A00721:190:HGJW7DSXY:4:2242:30138:16297\_2:N:0:TCTGCAAG+GCTGCACT  
AGTGATATTCAGCGTATACTTGAATACTTTATCAAAGATTGGCTTGGTCTATTTACCGCAAAAAGTT  
GGAAGAGGTCTATGATATTTATTTTACTTATACTTTAAATAGCACCGA

+

FFFFFFFFFFFFFFFFFFFFFFFFFFFFFFFFFFFFFFFFFFFFFFFFFFFFFFFFFFFFFFFFFFFFFFFF,FFF  
FFFFFFFFFFFFFFFFFFFFFFFFFFFFFFFFFFFFFFFFFFFFFFFFFFFFFFFFFFFFFFFF:F:FFFF

@A00721:190:HGJW7DSXY:4:2441:9950:15029\_2:N:0:TCTGCAAG+GCTGCACT  
TGTTGATAATATTACAATAGCTCTTCTCAGAAGATTAGAGAAGTAACCGGTGAACACGTCGGTAGCA  
TTGATTTACTTTTACCGTTAGAACTGAAAAAGATTCTTTTCGAAAAGA

+

FFFFFFFFFFFFFFFFFFFFFFFFFFFFFFFFFFFFFFFFFFFFFFFFFFFFFFFFFFFFFFFFFFFFFFFF  
FFFFFFFFFFFFFFFFFFFFFFFFFFFFFFFFFFFFFFFFFFFFFFFFFFFFFFFFFFFFFFFF

@A00721:190:HGJW7DSXY:4:1147:30183:11835\_1:N:0:TCTGCAAG+GCTGCACT  
AAACGATTCTTCGACTATATTAAGAAATAAAAATACTTCAAGTACCTGAACTTTACATTTTAAATGG  
TATGGTATAATGTGTCTTACAAATAGAACCTTCACTCTCGGTAATGAGAGTGTATTCCTTAATATTCT  
AGT

+

:FFFFF,FFFFFFFFFFFFFFFFFFFFFFFFFFFFFFFFFFFFFFFFFFFFFFFFFFFFFFFFFFFFFFFF  
FFFFFFFFFFFFFFFFFFFFFFFFFFFFFFFFFFFFFFFFFFFFFFFFFFFFFFFFFFFFFFFFFFFFFFFF  
FFF

@A00721:190:HGJW7DSXY:4:2666:22489:27665\_1:N:0:TCTGCAAG+GCTGCACT  
GGCATTACTAGGATTTATCACACTCCTAAATTTGATAGCAATTTATGTTTTAAATGCTAGGAAAATTT  
TAGAAAACTCCATTGTATAGTTCAAGGAGTACTTAATTCAATAGCTTTAGTATTATTTACTATCGCC  
TTT

```
FFFFFFFFFFFFFFFFFFFFFFFFFFFFFFFFFFFFFFFFFFFFF:FFFFFFFFFFFFFFFFFFFFFFFFFFFFFFF  
FFFFFFFFFFFFFFFFFFFFFFFFFFFFFFFFFFFFFFFFFFFFFFFFFFFFFFFFFFFFFFFFFFFFFFFFFFFFFFF  
FFF  
@A00721:190:HGJW7DSXY:4:2611:26666:28980_2:N:0:TCTGCAAG+GCTGCACT  
AGTTAATTGCTTACACAAAAGTGACGC GCGAAGGAATCTTAATTGATTGAAGCTAGGCGTTGGGGAGA  
ATGAACTGCCGCTTCCCGGAAGAAACGATCTATTTACAGAGTATTTAG  
  
+  
FFFFFFFFFFFFFFFFFFFFF:FFFFF:FFFFFFFFFFFFF:FFFFFFFFFFFFFFFFFFFFFFFFFFFFFFF:FFFFFFFFF  
FFFFFFFFFFFFFFFFFFFFFFFFFFFFFFFFFFFFFFFFFFFFFFFFFFFFFFFFFFFFFFFFFFFFFFFFFF  
@A00721:190:HGJW7DSXY:4:1612:5240:11694_1:N:0:TCTGCAAG+GCTGCACT  
ACCATGACCAATCATCGCTCCA ACTGGCACGCCAGACGTAGGGTCAA ACCTACTACCGCCGTCGGCA  
GATCGGCACCACTGGTCTCTAC GTTCAGGGACCCGCTGTGCAGAATAACCTTCCC AAATCTAGATCTG  
CAC  
  
+  
FFF:FFFFF:FFF:FFFFFFFFF,:FFFFFFFFFFFFFFFFFFFFFFFFFFFFFFFFFFFFF:, FFFFFFFFFFFFFF  
FFFFFFFFFFFFFFFFFFFFFFFFFFFFFFFFFFFFFFFFFFFFFFFFFFFFFFFFFFFFFFFFFFFFFFFFFFFFF  
FFF  
@A00721:190:HGJW7DSXY:4:2613:32434:2769_1:N:0:TCTGCAAG+GCTGCACT  
AAGGTCGTTACCGGACGACCA CTCAAAGGAAACGGGCTGTTGCC CAGAGGAAAGCAGCGACCACCGAG  
GTCGCTCGTAACATTGACGGCAGTCC CGTCATCTCTGTGG GA ACTGAGGCAGTACCTCAGTCAA AAGT  
CAC  
  
+  
FFFFFFFFFFFFFFF::FFFFFFFFF:, FF:FFFF,FFFF:FFFFFFFFFFFFFFF, FFFFFFFFFFFFFFFF:FFF  
:FFF:FFFFFFFFFFFFFFF:FFFFFFFFFFFFFFFFFFFF, FF:FFFFFFFFFFFFF:FFFFFFFFF: FFFFFFFF  
FFF  
@A00721:190:HGJW7DSXY:4:1167:31430:24048_2:N:0:TCTGCAAG+GCTGCACT  
CATACCAATCAATGATGTGACT ATACAGTTTCGGCCATTT CAAGAGTGGTCAATACGTCGTGGGAGGTA  
CTGAAGCCTTCCCC TCCGCTGGCACGA AGAACACTCCCAAGCCAATCA  
  
+  
FFFFFFFFFFFFFFFFFFFFFFFFFFFFFFFFFFFFFFFFFFFFFFFFFFFFFFFFFFFFFFFFFFFFFFFFFFFFFFF  
FFFFFFFFFFFFFFFFFFFFFFFFFFFFFFFFFFFFFFFFFFFFFFFFFFFFFFFFFFFFFFFFFFFFFFFFFF  
@A00721:190:HGJW7DSXY:4:2122:19144:33489_2:N:0:TCTGCAAG+GCTGCACT  
TGACCAGAATGAAAAGGGGTTT ACCAGGTAGTCTCTAAGTCTACCAGGAAGAGGGGAAATGTCCCCA  
AAACTGAGAAGAATAAAG GGAAAGGTCCATCAGGACCTAAGAAGGGGA  
  
+  
FFFFFFFFFFFFFFFFFFFFFFFFFFFFFFFFFFFFFFFFFFFFFFFFFFFFFFFFFFFFFFFFFFFFFFFFFFFFF:FFFFFFFFF  
FFFFFFFFFFFFFFF:FFFFFFFFFFFFFFFFFFFFFFFFFFFFFFFFFFFFFFFFFFFFFFFFFFFFFFFFF  
@A00721:190:HGJW7DSXY:4:1469:22507:36025_2:N:0:TCTGCAAG+GCTGCACT  
GAAGATCTCCCACCATCTGGGG TTGGGAATAAGAAATCTGCACGGGCCAAAGAGGCCGCTGCTACGAA  
GTCGCTGAAGGCGGCTTG GGTCATTAAGGGTAGCTGTAAAGTTGCGCC  
  
+  
FFFFFFFFFFFFFFFFFFFFF, FFFFFFFFFFFFFFFF:FFFFFFFFFFFFFFFFFFFFF:FFFFFFFFFFFFFFFFFFFFF  
FFFFFFFFFFFF:F:FFFFFFFFFFFFFFFFFFFFFFFFFFFFFFFFFFFFFFFFFFFFF:FFF  
@A00721:190:HGJW7DSXY:4:1151:12292:21684_2:N:0:TCTGCAAG+GCTGCACT  
TCTTTGAGACCAAGACTCTCTACAGTAGG TTCGTGCCTACTATGAGCAAATCTGTTGAATTCGTCACT  
GAGGACGAAGGTGAGAGGACTTTTTGGCTACTGGCGACA AACTGAGAGC  
  
+  
FFFFFFFFFFFFFFFFFFFFFFFFFFFFF.:FFFFFFFFFFFFFFFFFFFFFFFFFFFFFFFFFFFFFFFFFFFFFFF  
FFFFFFFFFFFFFFFFFFFFFFFFFFFFF, FFFFFFFFFFFFFFFFFFFFFFFFFFFFFFFFFFFFFF  
@A00721:190:HGJW7DSXY:4:2213:1796:26021_2:N:0:TCTGCAAG+GCTGCACT  
CGTGGGTTGAAGGCCGACGCTTCGAGCTTGAGTGTGACGAGGCCG GTGACGTTTTTTGTCAACTGCGTT  
TGGAGGATTTTATCCGCGCTTAACTATGGGGCGAAGATCC CATATGGA
```

F:FF:FFFFFF:FFFFFF:FFF,:F,F,FF,FFF:::FFF:F:,FFFFFF:FFFFFF::FFFF,:F,,,  
F,:FFF,:,,F:F,F::FFFF:,,,FF:,FFFFFF,FF,,,F:F,F  
@A00721:190:HGJW7DSXY:4:2555:15962:36746\_2:N:0:TCTGCAAG+GCTGCACT  
GGCATATTTATGCCGACGATAATAAGCATGTACCCTTAAGCACCGAGGTAAGCTCGGGACTTACAAG  
AGAGAGTGTGAGAGAGTCGCTCTCACTATTTTTGCCAGAATGCGGGC  
+  
FFFF:FFFFFFFFFFFFFFFFFFFFFFFFFFFFFFFFFFFFFFFFFFFFFFFFFFFFFFFFFFFFFFFFFFFFFFFF  
FFFFFFFFFFFFFFFFFFFFFFFFFFFFFFFFFFFFFFFFFFFFFFFFFFFFFFFFFFFFFFFFFFFFFFFF  
@A00721:190:HGJW7DSXY:4:2602:30092:35321\_2:N:0:TCTGCAAG+GCTGCACT  
TTTAGAGAGCATTAGAAGGAAGTTGGGCAAATTCACACATATGGTAGACGTTGTCACACTTTTCTTGA  
AAATTTTTCCTTCTCCGTCATTGGGGATTTCGATGTGAGAAGGTGG  
+  
FFFFFFFFFFFFFFFFFFFFFFFFFFFFFFFFFFFFFFFFFFFFFFFFFFFFFFFFFFFFFFFFFFFFFFFF  
FFFFFFFFFFFFFFFFFFFFFFFFFFFFFFFFFFFFFFFFFFFFFFFFFFFFFFFFFFFFFFFFFFFFFFFF  
@A00721:190:HGJW7DSXY:4:1136:23158:9157\_1:N:0:TCTGCAAG+GCTGCACT  
GACCTAATCACATCATGATTGATAGTTACGGCTCGTATCGAGTTGGAGGGAGGAAGTTCTCCGAAATT  
AAAGACGGGGGGATTAAGAGTCCAGCTGTAAGTGTCAATTCAGAGAGGGGAGCTCTGAAAAGGAACT  
TCG  
+  
FFFF:F:FFFFFFFFFFFFFFFFFFFFFFFFFFFFFFFFFFFFFFFFFFFFFFFFFFFFFFFFFFFFFFFF  
FFFFFFFFFFFFFFFFFFFFFFFFFFFFFFFFFFFFFFFFFFFFFFFFFFFFFFFFFFFFFFFFFFFFFFFF  
FFF  
@A00721:190:HGJW7DSXY:4:1228:19388:27054\_1:N:0:TCTGCAAG+GCTGCACT  
CTGTCTAAGAGGAGGAGTTTGAGGAAGGCTCTAGAGAAGATCTCCCCACCTGGAGAAGGCAAGTGGAG  
AGTCCAGAAGTTGATGAAGAAGGATTATTTGAAGCAGGGGTTACCACTTCCTAAGGTGGATGAGGGAG  
GTT  
+  
FFFFFFFFFFFFFFFFFFFFFFFFFFFFFFFFFFFFFFFFFFFFFFFFFFFFFFFFFFFFFFFFFFFFFFFF  
FFFFFFFFFFFFFFFFFFFFFFFFFFFFFFFFFFFFFFFFFFFFFFFFFFFFFFFFFFFFFFFFFFFFFFFF  
FFF  
@A00721:190:HGJW7DSXY:4:2161:27353:19147\_1:N:0:TCTGCAAG+GCTGCACT  
TTTTGAGAAGGGGTCATAGAGCCAGCAAGAGAAGCTTATATGCTGGTTTAAGTGATGATTATCACTCC  
TTGAGAAGACAAGCCACATTAAGATATAATTTAGGTCAACTTGGGGTTTTGAATGTCATTAGTGCCTT  
ACG  
+  
FFFFFFFFFFFFFFFFFFFFFFFFFFFFFFFFFFFFFFFFFFFFFFFFFFFFFFFFFFFFFFFFFFFFFFFF  
FFFFFFFFFFFFFFFFFFFFFFFFFFFFFFFFFFFFFFFFFFFFFFFFFFFFFFFFFFFFFFFFFFFFFFFF  
FFF  
@A00721:190:HGJW7DSXY:4:1554:31828:6386\_1:N:0:TCTGCAAG+GCTGCACT  
TTTGAGTATCGACAGATCTTTCGATCTTGAGGACGTACATTTAACGTGGCAGAATTCGGTAACCTTACC  
ATATTGTTCTTCCGGGAAGTTGTGGGATTTAACTTTGACTCAACTACTCCGATCAGATCCGGATGGT  
TTG  
+  
FFFFFFFFFFFFFFFFFFFFFFFFFFFFFFFFFFFFFFFFFFFFFFFFFFFFFFFFFFFFFFFFFFFFFFFF  
FFFFFFFFFFFFFFFFFFFFFFFFFFFFFFFFFFFFFFFFFFFFFFFFFFFFFFFFFFFFFFFFFFFFFFFF  
FFF  
@A00721:190:HGJW7DSXY:4:1223:16550:4288\_1:N:0:TCTGCAAG+GCTGCACT  
ATGGCAGATACTACCGATAAGGTGAAAAATATGCAGGTCAAAGATTCTGTAGCTCTGAGGGCGGTTGA  
GGGAGCCGTTTTGGCCGACTTTAACTATTCTAAGAGTCTTTATGATTCAAACCTATCGTTGTCGTAC  
CT  
+  
FFF:FF:F,F::F:FF,F:FF:FFF:,:F,,F,FF,FFFF,,FFFF:FFF,FFFF,,FFFF,:FFF  
F,FFF,F:FFFFFFFFF,: ,FFFFFFFFF:FFF,F,F:FFFF:FFF:FF,FFFFFFFFFFFFFFFF  
FF

@A00721:190:HGJW7DSXY:4:1503:10041:27555\_1:N:0:TCTGCAAG+GCTGCACT  
CGCAGTTTCCAGAATTGCGGTTGAAGTTCACCCATTCTATCTTGAATGCTCACGCCGTCGCAGCCATA  
TCGAGACTATGTTATAATCACTTGTTAAAGTACAGATTTAGTGATTTAGATATTATTGATATTGGAGG  
CGA

+

FFFFFFFFFFFFFF:FFFFFFFF:FFFFFFFFFFFFFF:FFFFFFFFFFFFFFF, F,  
FFFFFFFFFFFFFF:FFFFFFFFFFFFFF:FFFFFFFFFFFFFFF  
FFF

@A00721:190:HGJW7DSXY:4:2215:4300:18333\_2:N:0:TCTGCAAG+GCTGCACT  
ATCCAAACTCCTTGAATGGAGTACATATTTGCAACCCTATTCTTGATGTGAAAGATGCATCGAGGTA  
TACGTCTAGGAACATTGATTGGGAACGTACCTACTCACGAGACGTCAT

+

FFFFFFFFFFFFFFF  
FFFFFFFFFFFFFFF

@A00721:190:HGJW7DSXY:4:1120:4942:19727\_1:N:0:TCTGCAAG+GCTGCACT  
TTCGTTCTGTTACAAGAACGCTTTGGATTGTGACCATAAAGCCTCAGTTGCGATAGCTGTAGAGGTAT  
ACGATATCTCTCTTGATGATGTAGCCACTATAATGCTTAAGAGAGAGATTGATGTATGTCATTTCGTC  
TTA

+

FFFFFFFFF:FFFFFFFFFFFFFF:FFFFFFFFFFFFFFF  
FFFFFFFFFFFFFFF  
FFF

@A00721:190:HGJW7DSXY:4:2367:9968:18098\_1:N:0:TCTGCAAG+GCTGCACT  
GAATTATTGGACACGATGAAAAATGACATACCCGTTCTGACCTTGGTATCGTTATCCGTCATGGAGA  
TGATGCCGCATCACTTGATTACTATATGCCCGAAGGATTGGGTTATTCTCACAACAAAGATAAGATTT  
TAT

+

FFFFFFFFFFFFFFF:FFFFFFFFFFFFFFF:FFFFFFFFFFFFFFF  
FFFFF:FFFFFFFFFFFFFFF  
FFF

@A00721:190:HGJW7DSXY:4:1274:31295:6151\_2:N:0:TCTGCAAG+GCTGCACT  
GTGAACTCTTGGGGACTAGATTGAGCATTAATGAGTTCCGAATAACTCGTAATAAATCTTTCTCTAGT  
GGACAATTCAGAATACCTATTTCCGTACCAAGAGCCACTGCCAATCTC

+

FFFFFFF:FFFFFFFFFFFFFFF, :FF:FFFFFFFFFFFFFFF:FF, FFF  
FFFFFFFFFFFFFFF

@A00721:190:HGJW7DSXY:4:1572:25780:15295\_2:N:0:TCTGCAAG+GCTGCACT  
AGATTATGGTTGATAAAGTTTTCTTCATAAGGGCTATTCAGTACGTCATGGGGATCACTTCTTCGGTC  
AATGACAAAACCTTCGAATATGTTACGACATGGCTTCGTAACAACAGT

+

FFFFFFFFFFFFFFF:FFFFFFFFFFFFFFF  
FFFFFFFFFFFFFFF

@A00721:190:HGJW7DSXY:4:1406:29143:18051\_1:N:0:TCTGCAAG+GCTGCACT  
TCACCAAGATGTTTCATATAGATACGAGATACCTAGAGAAGGTCGCAGCGATCTTACTCGTTATCGGAG  
CTAAGAAGAAGACTTTGGGTACACGTTATGCTCGAACTTAACGTTAGTACCGGAGGTGATCTCTCT  
GCT

+

FFFFFFFFFFFFFFF  
FFFFFFFFFFFFFFF  
FFF

@A00721:190:HGJW7DSXY:4:2304:14525:30749\_1:N:0:TCTGCAAG+GCTGCACT  
GAGAGAAAAGATTGAGGACGCCTACGGTGACTTTATGGACAAGATGCAAGTTCTTGGGAAATACTTGT  
TTCCCTTTTAGGTTTAGTAGGTGATCTTGACGTCGATTCTTGTATAGGGAGTGTGAGAAGACAACG  
AAT

+  
 FFFFFFFFFFFFFFFFFF:FFF:FFFFFFFFFFFFFFFFFFFFFFFFFFFFFFFF:FFFF:FFFFFFFF  
 FFFFFFFFFFFFFFFFFFFFFFFFFFFFFFFFFFFFFFFFFFFFFFFFFFFFFFFFFFFFFFFFFF  
 FFF  
 @A00721:190:HGJW7DSXY:4:1173:4942:26177\_1:N:0:TCTGCAAG+GCTGCACT  
 ACCGGTCTCTAAATCTTTTGAAGATTGAGAAGATTGAAGAACACGTCAAGAAGTCGCTCGGCGTTGTTC  
 TTGAAAACCAAGTTAAGAAGGAGGCTGATCATGGAGTCTTTGTACCTTCTGTCAAACCTCGAGGTTCA  
 GCT  
 +  
 :FF,FFFFFFFF:FF:FFFF,FFFFFFFF,:FFFFFFFF:FFFFFFFF:FFFFFFFF:FFFFFF:  
 FFFFFFF,F:F,:FFFF:F,FFF::F:F:F,F:FF:,FFFF:FFFF,FFF,FFFFFFFFFFFF,F  
 FFF  
 @A00721:190:HGJW7DSXY:4:1644:5204:11099\_2:N:0:TCTGCAAG+GCTGCACT  
 CCGGATGTGGATTGAAGGCTGGCTCTAAGGGAGACTCCTTCTTTTTGAATGTTGTAAAGAATTGGGT  
 GAGAAGTGTGCTTTACAAGGAGTTAGACTCTTCTTCAAGTTTTTAGAT  
 +  
 FFFFFFFFFFFFFFFFFFFFFFFFFFFFFFFFFFFFFFFFFFFFFFFFFFFFFFFFFFFFFFFFFF  
 FFFFFFFFFFFFFFFFFFFFFFFFFFFFFFFFFFFFFFFFFFFFFFFFFFFFFF  
 @A00721:190:HGJW7DSXY:4:2659:6587:8140\_2:N:0:TCTGCAAG+GCTGCACT  
 TTCTCTACCCATAACTTCTTTTCAAAAATGCGGATGGGTCTACTGATGTTTTCTACAGAGTGCAGT  
 CGTTTCAACACTTATCACCACCTTTTGAAGGAAAATAATTGGTGATGA  
 +  
 FFFFFFFFFFFFFFFFFFFFFFFFFFFFFFFFFFFFFFFFFFFFFFFFFFFFFFFFFFFFFFFFF:FFF  
 FFFFFFFF:FF:FFFF:FFFFFFFFFFFF::FF:FFFF:FFFF:FFF  
 @A00721:190:HGJW7DSXY:4:1269:25437:19680\_2:N:0:TCTGCAAG+GCTGCACT  
 ACGTCTTAAGTAATTTGGATGTTGTGCAAACTATCAGGTTCTTGTACGATTCTTAAAGAAGTTTA  
 TAAAACTTCAGAGTCTCTTGAAGTCCAGGTAGCTAATGTTCTTGCA  
 +  
 FFFFFFFFFFFFFFFFFFFFFFFFFFFFFFFFFFFFFFFFFFFFFFFFFFFFFFFFFFFFF:FF::FFFFFFF  
 FFFFFFFFFFFFFF:FFFFFFFFFFFFFFFFFFFFFFFFFFFFFFFFFFFFF  
 @A00721:190:HGJW7DSXY:4:1440:6705:29919\_1:N:0:TCTGCAAG+GCTGCACT  
 CTCTGTTGGTAGAGGAGTTGAGAGAATTACTCAGATTCAATCTGGCATCACTGAACGTCTACAACGAG  
 TTAGGGAGTGGCTAGGTTTTAAAGATCCTTTGCACAAGCAATACCTTCCACTGAGTTCATCACCAG  
 AGT  
 +  
 FFFFFFFFFFFFFFFFFFFFFFFFFFFFFFFFFFFFFFFFFFFFFFFFFFFFFFFFFFFFFFFFFF  
 FFFFFFFF:FFFFFFFFFFFFFFFFFFFFFFFFFFFFFFFFFFFFFFFFFFFFFFFFFFFFFFFFF  
 FFF  
 @A00721:190:HGJW7DSXY:4:1552:15176:33129\_1:N:0:TCTGCAAG+GCTGCACT  
 CTGATGCTGAATTTGAGGAAAATTTTCGGAAGTTTTTGGTATAAATCCTGATGGCTCAGTACAGGGA  
 GGAGGTAATAGTTATAAAACCTTCTTTTATCATTGCAACAGGACTTTGAGAAGACTGTTGAAATGGAC  
 AAA  
 +  
 FFFFFFFFFFFFFFFFFFFFFFFFFFFFFFFFFFFFFFFFFFFFFFFFFFFFF:FFFFFFFFFFFFFFFFFFFFF  
 FFFFFFFFFFFFFFFFFFFFFFFFFFFFFFFFFFFFF:FFFFFF:FFFFFFFFFFFF:FFFFFFFFFFFFF  
 FFF  
 @A00721:190:HGJW7DSXY:4:1317:30698:28260\_1:N:0:TCTGCAAG+GCTGCACT  
 AGGTATGTGTCACGCTACACTCGAAATATGGGCCCTCATAAGGAAGTATAGTTGGCGTCTTGTGTTG  
 ACGTCATTACAGTCTGGAAGTTAGATCATTTGTTGAGGAAGATCTCTACAGAGATTATCGAGAGTTGT  
 GAT  
 +  
 FFFFFFFFFFFFFFFFFFFFFFFFFFFFFFFFFFFFFFFFFFFFF:FFFFFFFFFFFFFFFFFFFFFFFFF  
 FFFFFFFFFFFFFFFFFFFFFFFFFFFFFFFFFFFFF:FFFFFFFF:FFFFFFFFFFFF:FFFFFFFFFFFFF  
 FFF

@A00721:190:HGJW7DSXY:4:1638:4987:1924\_1:N:0:TCTGCAAG+GCTGCACT  
ACTTTTGAATATGACAGAAGCTCGCCATATCAGATTAGAGACATGCCAGTTAGAGTTCTTCTAACCA  
GGACTGATGGTGAGATTCTTTTACCTTTTGGAGGTCCAGGAACCTTTACTCCTAGTGTCTTTTCTAGA  
GTC

+

FFFFFFFFFFFFFFFFFFFFFFFFFFFFFFFFFFFFFFFFFFFFFFFFFFFFFFFFFFFFFFFFFFFFFFFF  
FFFFFFFFFFFF,FFFFFFFFFFFFFFFFFFFFFFFFFFFFFFFFFFFFFFFFFFFFFFFFFFFFFFFFFFFFF:  
FFFFFFFFFFFF:F  
FFF

@A00721:190:HGJW7DSXY:4:2121:5900:28494\_2:N:0:TCTGCAAG+GCTGCACT  
CGGAGGATGACAGGTGGGAGACCGCTCAATAACACTCTATTGAATCCCTTTCCACGATGAAAGCTCT  
TTATGAGGTGCTCCATGCAAATTTACAGTTCCTCTTTGGTGATATCGC

+

FFFFFFFFFFFFFFFFFFFF:FFFFFFFFFFFFFFFFFFFF:FFFFFFFFFFFFF,:FFFFFFFFFFFFFFFFFFFF  
,:F:FFFFFFFFFFFFFFFFF:FFFFFFFFFFFFFFFFFFFF,F,FFFFFFFFFFFFF

@A00721:190:HGJW7DSXY:4:1649:30490:24267\_1:N:0:TCTGCAAG+GCTGCACT  
AAGGTTCTATTACCACCTTGTGATTGATACAAACATTCTAGGTGATGCTTTCTTAGAGGCTCGTCTA  
GCCGCTGAGATTCTGCTTACCTATTTACAATCTGTAGAGAGAGAGGTTAATCAGAATTTGAGTGATAA  
CGA

+

FFFFF:FFFFFFFFFFFF:FFFFFFFFFFFFFFFFFFFFFFFFFFFFFFFFFFFFFFFFFFFFFFFFFFFFF  
FFFFFFFFFFFFFFFFFFFFF:FFFFFFFFFFFF:F,FFFFFFFFFFFFFFFFFFFFFFFFFFFFFFFFFFFFF  
FFF

@A00721:190:HGJW7DSXY:4:2511:22182:25942\_2:N:0:TCTGCAAG+GCTGCACT  
CTCCTAGTACTTAAGGGTTTATGTTTCGTTTCAGCTGGATGGATCTTTTGATGGTATGTTTCACATT  
GCGTGATCACTTCCCGTGGACTTGGAAGAGATTAAACATAAAATCCA

+

FFFFFFFFFFFFFFFFFFFFFFFFFFFFF,:F:FFFFF:FFFFF:FFFFF:FFFFF:FFFFF:FFFFF:  
::FFFFFFFFFFFF:FFF:FFFF:FFFFFFFFFFFF,FFFFFFFFFFFFF:F

@A00721:190:HGJW7DSXY:4:2630:8757:21699\_2:N:0:TCTGCAAG+GCTGCACT  
GCTAAAGCCTGTCCAGTTGTGCGATGATGTTTCGGGCTGTGGGGATTAACCTCCCTCGTGAAACTTACGA  
CGATGTTCTCGCTCGCATTTACAAGGATTACTAAGTCTGAGATCTGC

+

FFFFFFFFFFFFF,FFFFFFFFFFFFFFFFFFFFFFFFFFFFF:F:FFFFFFFFFFFFF:FFFFF,FF  
F:F:FFFFFFFFFFFF:F:FFFFFFFFF:FFFFFFFFFFFFF:FFFFF

@A00721:190:HGJW7DSXY:4:1178:22535:17347\_1:N:0:TCTGCAAG+GCTGCACT  
CTTCTAATAGAGGATCCTGATGACATTATTTCAACGGATACCGATCTCAGTTCTACCACAGAAACCGT  
CTCAGGAAGTGTCTCCACTGATTCGGAATTAGAGAAAGACGACCTTCTTGTGGGGACTGAGACCTCTG  
AAT

+

FFFFF:FFFFF:FFFFFFFFFFFFFFFFF:FFFFFFFFFFFFFFFFFFFFF:FFFFF,F:FFFFF  
FFFFFFFFFFFFFFFFFFFFFFFFFFFFFFFFFFFFFFFFFFFFFFFFFFFFFFFFFFFFFFFFFFFFF  
FFF

@A00721:190:HGJW7DSXY:4:1317:29912:27993\_1:N:0:TCTGCAAG+GCTGCACT  
AGGACGTTGAAAGGGATAATTTCAACTCTGAGACTTCTAAGAGTGTTTCAAAAGACCAGAAACGTAAC  
AAGAAGAATAAAGGTAGGAAGGGGAGAAAACAGAACAGCGAGCGTTGAAGAGAAAACCTGATATGGT  
TGC

+

FF,FFFFFFFFFFFF,FFFFFFFFFFFFFFFFFFFFFFFFFFFFFFFFFFFFFFFFFFFFFFFFFFFFF  
FFFFFFFFFFFFFFFFFFFFFFFFFFFFFFFFFFFFFFFFFFFFFFFFFFFFF:FFFFFFFFFFFFFFFFFFFFF  
FFF

@A00721:190:HGJW7DSXY:4:2139:19190:1407\_2:N:0:TCTGCAAG+GCTGCACT  
CTCGCGGATACCACTGATCTTCCAGAGTTACGTAGTGGTCGTTCTTTTGGTGATTTTATCAAAGAGAA  
AGTTTCTGCTAGTCGCGACGATAGTATTTATCGGAGTGATATTAACAA

+

FFFFFFFFFFFFFFFFFFFFFFFF:F:FFFFFFFFFFFFFFFFFFFFFFFFFFFFFFFFFFFFFFFF:FFFFFFFFF,,FFFFFFFFFFFFFFFFFFFFFFFFFFFFFFFFFFFFFFFF:FFF  
@A00721:190:HGJW7DSXY:4:1354:20166:19163\_1:N:0:TCTGCAAG+GCTGCACT  
TCCAAAAAGCTATTAATAGCAGTTGCGGGGCTATAATACCGCCTCCAGATTACTCTAAACTGAATCCA  
CTCTCTTGGGATATAAATGAGTACATCTATAATAGAGTTTTGGAAGTGTGTAATGTCCTACGTACTGT  
TCA  
+  
FFFFF:FFFFFFFFFFFFFFFF:FFFFFFFFFFFFFFFFFFFFFFFFFFFFFFFF:FFFFFFFFFFFFFFFF  
FFFFFFFFFFFFFFFFFFFFFFFF,FFFFFFFFFFFFFFFFFFFFFFFFFFFFFFFFFFFFFFFFFFFFFFFF  
FFF  
@A00721:190:HGJW7DSXY:4:1423:14009:14638\_1:N:0:TCTGCAAG+GCTGCACT  
GGTTCAAGTCGATTGATTTTGTGACTACGATCTCTCTTGTAAATAAGAAGTTCTTCGCAGTTGAATCT  
CCACCAGGTGGAGGGAAGACCACTGAACTTATAGCGACTTTTGTGAATTTTCGCAAAGGTCTTGA  
AGT  
+  
FFFFFFFFFFFFFFFFFFFFFFFFFFFFFFFFFFFFFFFF:FFFFFFFFFFFFFFFFFFFFFFFFFFFFFFFF  
FFFFFFFFFFFFFFFFFFFFFFFFFFFFFFFFFFFFFFFFFFFFFFFFFFFFFFFFFFFFFFFFFFFFFFFF  
FFF  
@A00721:190:HGJW7DSXY:4:1625:12906:12352\_2:N:0:TCTGCAAG+GCTGCACT  
ACTGCTAATCGTAATTCGCGAGAAGAGATAGTACTAAAGTTTTGGCACTTCTAGTTCATCGCGGTAT  
TTGTGAAATTAAGACAGACGTGAAAGTTATGATGAGTGATCGTATTAG  
+  
FFFFFFFFFFFFFFFFFFFFFFFFFFFFFFFFFFFFFFFFFFFFFFFFFFFFFFFFFFFFFFFFFFFFFFFF:FFFFFFFF  
FFF:FFFFFFFFFFFFFFFF:FFFFFFFFFFFFFFFFFFFFFFFFFFFFFFFF  
@A00721:190:HGJW7DSXY:4:2422:5068:6668\_1:N:0:TCTGCAAG+GCTGCACT  
CGTTCTTTTCATCGACGAATTATTCATGATTCACGCTGGTCAGACCCTTTTCTTACACATCTACTTA  
AGGCGGCTTATACCATAGGTTACGGTGATTCCAAATCGGATTCATCAATCGTATTGATCTCCAAGTCG  
CAA  
+  
FFF:FFFFFFFF:FFFFFFFFFFFFFFFFFFFFFFFFFFFFFFFFFFFFFFFFFFFFFFFF:FFFFFFF  
FFFFFFFFFFFFFFFFFFFFFFFFFFFFFFFFFFFFFFFFFFFFFFFFFFFFFFFFFFFFFFFFFFFFFFFF  
FFF  
@A00721:190:HGJW7DSXY:4:2139:18945:32174\_2:N:0:TCTGCAAG+GCTGCACT  
ATCAACGACATCATTCTTGATGAGTGTCGTTCTTATCGAAGTCTCAGTTATCGCTGCCCGGCCGACGT  
TTGTGCGCAACTCTCAGAGGTTTACGGCAGAAAAATTTCTCCTGCTAG  
+  
FFFFFFFFFFFFFFFFFFFFFFFFFFFFFFFFFFFFFFFFFFFFFFFFFFFFFFFFFFFFFFFF:FF::FFFFFFFF  
,,FFFFFFFFFFFFFFFF:FFFFFFFFFFFF,FFFF:FFFFFF  
@A00721:190:HGJW7DSXY:4:1201:9010:16219\_1:N:0:TCTGCAAG+GCTGCACT  
CTTGGAAGAGTAAGGTTAAATGTGAAGATGCTCAGACTATTATGAAGTTCAAGGTAATACTTACCA  
GCACGTTGCGCTGGTTAGAATTAACCTCAAGATGACCCTGTTTTTGCATCACAAACACATATTACCG  
TTG  
+  
FFFFFFFFFFFFFFFFFFFFFFFFFFFFFFFFFFFFFFFFFFFFFFFFFFFFFFFFFFFFFFFF:FFFFFFFF  
FF,FFFFFFFFFFFFFFFFFFFFFFFFFFFFFFFFFFFFFFFF:FFFFFFFFFFFFFFFFFFFFFFFF  
FFF  
@A00721:190:HGJW7DSXY:4:1501:24813:5415\_2:N:0:TCTGCAAG+GCTGCACT  
ACGATACTTTGTTATCAATGTAAAGTTAAACGATGCTACTTGTGAGAGGATCAATCACAGTAAGGAAC  
TGTCACGTTTAGCACGGGAGGTTGCAGATTCAACCCCTTATATCGAGG  
+  
FFFFFF:FFFF:FFFF:F:FFFF:FFFFFFFFFFFFFFFF:FFFFFFFFFFFFFFFFFFFFFFFF,F  
FFFFFFFFFFFF:FFFF,FFFFFFFFFFFF:FFFFFFFFFFFFFFFF:  
@A00721:190:HGJW7DSXY:4:2307:1154:3020\_2:N:0:TCTGCAAG+GCTGCACT  
AGTATCTTGAAGTTGTTGACGACAAGCCTCAAGAGGGTAGAGGACCACCTGGATCTTCTACTGTCTCT



GCCTTCCAAGATTTCTTAGAAGAGGTTATTCCTGGAACCACCTTAACG

+

FFFFFFFFFFFFFFFFFFFFFFFFFFFFFFFFFFFFFFFFFFFFFFFFFFFFFFFFFFFFFFFFFFFFFFFF  
FFFFFFFFFFFFFFFFFFFFFFFFFFFFFFFFFFFFFFFFFFFFFFFFFFFFFFFFFFFFFFFFFFFFFFFF

@A00721:190:HGJW7DSXY:4:2314:8196:6230\_1:N:0:TCTGCAAG+GCTGCACT  
TCAGCCGAATTAAGTACTAATGAGTTCAAGTCGGTTGTCGATCGAATTAAGATCAAGGCTAATACCTT  
TATAGGTAAGAAGCCCCTTGAGCCGCGTAGTCAGCGCGTTTAGCTGTATCATCAGTCAGAGTATACCC  
GAT

+

FFFFFFFFFFFFFFFFFFFFFFFFFFFFFFFFFFFFFFFFFFFFFFFFFFFFFFFFFFFFFFFFFFFFFFFF  
FFFFFFFFFFFFFFFFFFFFFFFFFFFFFFFFFFFFFFFFFFFFFFFFFFFFFFFFFFFFFFFFFFFFFFFF  
FFF

@A00721:190:HGJW7DSXY:4:2172:22101:25426\_1:N:0:TCTGCAAG+GCTGCACT  
CCAAGAGAATATTTATTCTTATGAGGCTCGAACTTCAACGTTTTTCAACGAAAGACATATCGCAC  
CCGAAATTTTTGGGCAGAATGCTCTTAACGCGTTCTTGAACGGTGTTTTGATCAGTCTAAGTTGGAT  
AAA

+

FFFFFFFFFFFFFFFFFFFFFFFFFFFFFFFFFFFFFFFFFFFFFFFFFFFFFFFFFFFFFFFFFFFFFFFF  
FFFFFFFFFFFFFFFFFFFFFFFFFFFFFFFFFFFFFFFFFFFFFFFFFFFFFFFFFFFFFFFFFFFFFFFF  
FFF

@A00721:190:HGJW7DSXY:4:1570:15420:30326\_2:N:0:TCTGCAAG+GCTGCACT  
GAGCTCCTCAATTGATAGATTGGGTCAACAATAGGGACGCTAGTATACTTCGTAAAGTCGACAGCGAA  
ATGGTCAATATTGATAATTGGACCGACTATATGACCTATTTTAAGCTC

+

FFFFFFFFFFFFFFFFFFFFFFFFFFFFFFFFFFFFFFFFFFFFFFFFFFFFFFFFFFFFFFFFFFFFFFFF  
FFFFFFFFFFFFFFFFFFFFFFFFFFFFFFFFFFFFFFFFFFFFFFFFFFFFFFFFFFFFFFFFFFFFFFFF

@A00721:190:HGJW7DSXY:4:1459:7509:11804\_1:N:0:TCTGCAAG+GCTGCACT  
ATGCTTCAGCCTTTTCGAAGCATAACCCCGCACAGAATATCGTTTATCACGCAAATTTATTAATGCA  
ATTTTCGGACCTATCTTTAAGTTCTTGTGAGGAGAGTCAACAGTGTCTTTTACCCAACATTTTAT  
GTA

+

FFFFFFFFFFFF:FFF:FFFFFFFFFFFFFFFFFFFFFFFFFFFFFFFFFFFFFFFFFFFFFFFFFFFFF  
FFFFFFFFFFFF:FF:FFFFFFFFFFFFFFFFFFFFFFFFFFFFFFFFFFFFFFFFFFFFFFFFFFFFF:FFFFFFFF  
FFF

@A00721:190:HGJW7DSXY:4:2417:19162:24408\_1:N:0:TCTGCAAG+GCTGCACT  
CGAGATCTTGAGAGTGACTGGAGTTCAGACGTGTGCTCTTCCGATCTTTTCTTTTGTAAGCCTATG  
AGATAAAGATGTATTCTTATTTAGGCTTCGATGCTGAATTTCTTGAACCTTGGAGTGCCAGTGAATAT  
TTT

+

:::FFFFFFFF::FFFFF:FFFF:FFFF,,FFF:,FFFF,FFFFF,FFFF:FF:FFFF::FFFF  
F,FFFFFFFFFFFFF,FFFFFFFFF:FFF:FF:FFFFF,FFFFF,FFFFFFFFFFFFFFFFFFFFF  
FF,

@A00721:190:HGJW7DSXY:4:2165:24542:13463\_1:N:0:TCTGCAAG+GCTGCACT  
GAGTATCCATAACGATTTGTCATTTACCACCTTTGCTCAACGACGAAGTGGAACGGCCAACACTTTCT  
TTGGTAATTGTATGATCACTTTGATGATTTTATCACTTTATTATGACCTTGAAAGTTTTCGGCTGTG  
GTT

+

FFFFFFFFFFFFFFFFFFFFFFFFFFFFFFFFFFFFFFFFFFFFFFFFFFFFFFFFFFFFFFFFFFFFFFFF  
FFFFFFFFFFFFFFFFFFFFFFFFFFFFFFFFFFFFFFFFFFFFFFFFFFFFFFFFFFFFFFFFFFFFFFFF  
FFF

@A00721:190:HGJW7DSXY:4:2330:23158:17550\_2:N:0:TCTGCAAG+GCTGCACT  
CTGTTTTCAAAGACTCCAATAACTGATCATTCTGATCATATGATTTTGGACAATGGTTTCAAGCGAA  
ATTTTGTAGGGATAAACCAGCGTACTTCTGCTCGCGATTTATTCTTTT

+

FFFFFFFFFFFFFFFFFFFFFFFFFFFFFFFFFFFFFFFFFFFFFFFFFFFFFFFFFFFFFFFFFF  
 FFFFFFFFFFFFFFFFFFFFFFFFFFFFFFFFFFFFFFFFFFFFFFFFFFFFFFFFFFFFFFFFFF  
 @A00721:190:HGJW7DSXY:4:2257:13819:32753\_2:N:0:TCTGCAAG+GCTGCACT  
 AGGTTGTTGTTTGGCGATTAGCTCTTGCGACTAATATTCGATATTCGATTGAGGGTCGTATACCTAT  
 TCGGCTATCTGTGCTTTGAATTGTATAAGATCAAATTTAAACGATTC  
 +  
 FFF:FFFFFFFFFFFFFF:FFFFFFFFFFFFFFFFFFFFFFFFFFFFFFFFFFFF:FFFFFFFFFFFFFFFFFFFFFFFFFFFFF  
 FFFFFFFFFFFFFFFFFFFFFFFFFFFFFFFFFFFFFFFFFFFFFFFFFFFFFFFFFFFFFF  
 @A00721:190:HGJW7DSXY:4:2153:14778:29309\_1:N:0:TCTGCAAG+GCTGCACT  
 TGATGTGGAGGGAGTTCTTGAAGCATCCCGACCTTCTTGTGAAAATTTTGATGCGGTTTCATAAGA  
 TTATCAGTAATCCTGATTCTACTACGGATTCATGGACCTTCCATCCTGTACCTCTTCTGGAGAGACGT  
 ATC  
 +  
 FFFFFFFFFFFFFFFFFFFFFFFFFFFFFFFFFFFFFFFFFFFFFFFFFFFFFFFFFFFFFFFFFF  
 F:FFFFFFFFFFFFFFFFFFFFFFFFFFFFFFFFFFFFFFFFFFFFFFFFFFFFFFFFFFFFFFFFF  
 FFF  
 @A00721:190:HGJW7DSXY:4:1624:5755:25614\_2:N:0:TCTGCAAG+GCTGCACT  
 TCGAGACAGGTGATATTGTTGAGCGAGAGCGACCAAGATCTAAATTCGGTAACGGTGCGTGGCGCTTT  
 ATTTTAAAAAGCTCCCTCCTCTCGCAAGTTTGATCTGATACTTATCAC  
 +  
 FFFFFFFFFFFFFFFFFFFFFFFFFFFFFFFFFFFFFFFFFFFFFFFFFFFFFFFFFFFFFF:FFFFFFFFFFFFFFFFFFFFF  
 FFFFFFFFFFFFFFFFFFFFFFFFFFFFFFFFFFFFFFFFFFFFFFFFFFFFFFFFFFFFFF  
 @A00721:190:HGJW7DSXY:4:2264:13657:12242\_2:N:0:TCTGCAAG+GCTGCACT  
 AGTCTCTGACTTGACCATCTTTCATTTTAAATGACGATCATTAAGACTCTTTTCTTCTTTGTTTCCT  
 TCTTGCCTGATTTTTCTCATCAGCTTGTGTTTTACCTAATCTGTG  
 +  
 ,FFFFFFFFFFFFFFFFFFFFFFFFFFFFFFFFFFFFFFFFFFFFFFFFFFFFFFFFFFFFF:FFFFFFFFFFFF::F:FF:FFF::FFFFFFFFFFFFF  
 FFFFFFFFFF::FFFFFFFFFFFFFFFFFFFFFFFFFFFF:FFFF:FFFFFFFFF:  
 @A00721:190:HGJW7DSXY:4:1504:29098:13714\_2:N:0:TCTGCAAG+GCTGCACT  
 TCAGTTGATTAAGACTCTTCCGAAAGGCGAACTTTGGGAATTTGAAGCTCAGGGTGAAGCACAACGTT  
 TGACCGTGACGAAGTGTGGTGTCTTGATCTACGTTACGGATATACTC  
 +  
 FFFFFFFFFFFFFFFFFFFFFFFFFFFFFFFFFFFFFFFFFFFFFFFFFFFFFFFFFFFFFF:F:FFFFFFFFFFFFFFFFFFFFFFFFFFFFFFFFFFFFFFFFFFFFF  
 FFFFFFFFFFFFFF:FFFFFFFFF:FFFFFFFFFF:FFFFFFFFFFFFFFFFFFFFF  
 @A00721:190:HGJW7DSXY:4:2277:12084:24893\_2:N:0:TCTGCAAG+GCTGCACT  
 TTTTGTCTTCTTGTGTTGCTTATTCTATTAATCACTCATTTTAGTGAGATTATTAACGCACTAA  
 AACGTCTTCGACAACAGCAGGGGTTTTCGAATAGTGATAGCCACCCGC  
 +  
 FFFFFFFFFFFFFFFFFFFFFFFFFFFFFFFFFFFFFFFFFFFFFFFFFFFFFFFFFFFFFF:F:F::FFFF:FFFFFFFFFFFFFFFFFFFF:FFFFFFFFFFFF:FFFF:FF  
 @A00721:190:HGJW7DSXY:4:1673:6415:15890\_2:N:0:TCTGCAAG+GCTGCACT  
 GGCAGCAGCATGACCATAATTGGTATTGACTTTGGTACCACCTTTCTACTGTCTGTCTGCGCTCTTC  
 GAATGAAGTTTTAATGCTTAACAACAATGATAGTGAATTTATACCTAC  
 +  
 FFFFFFFFFFFFFFFFFFFFFFFFFFFFFFFFFFFFFFFFFFFFFFFFFFFFFFFFFFFFFF:FFFFFFFFFFFFFFFFFFFFFFFFFFFFFFFFFFFFF:FFFFFFF  
 FFFFFFFFFFFFFF:FFFFFFFFFFFFF:FFFFFFFFFFFFFFFFFFFFFFFFFFFFF  
 @A00721:190:HGJW7DSXY:4:1353:1045:26663\_1:N:0:TCTGCAAG+GCTGCACT  
 TTTTCTAATAATGATGACACTATTGTTTATGGATATGATGCTATTACTCATGATGGTTACGGTCAGGG  
 AGGATTCTCAGTTTACAAGGACCTTAAGCGATGGATCGGGGTTAATTCTAAAACATTACCCGAAAGAG  
 GTG  
 +  
 FFFFFFFFFFFFFFFFFFFFFFFFFFFFFFFFFFFFFFFFFFFFFFFFFFFFFFFFFFFFFF  
 FFFFFFFFFFFFFF:FFFFFFFFFFFFF:FFFFFFFFFFFFFFFFFFFFFFFFFFFFF  
 FFFFFFFFFFFFFF:FFFFFFFFFFFFF:FFFFFFFFFFFFFFFFFFFFFFFFFFFFF  
 FFF

@A00721:190:HGJW7DSXY:4:2452:18954:6668\_2:N:0:TCTGCAAG+GCTGCACT  
GTACGATGTCGTCTGTCTCGGCGATCACTTTTCACTAAGAATTGGTCCTACTTTTGGACAAGGCCAAC  
TTCGTAATCTTCATGAGATCGTTTCTTTCTTTATCTCTTTGGTTGTTA

+

```
FFFFFFFFFFFFFFFF:FFFFFFFFFFFFFFFFFFFFFFFF:FF::FFFFF
```

GAGTGAAAGGCTTCAATTGTAGTGGTTTGGTCGTTTCAGTACCCAGTCAGTATACCTCTACGCAAAGA  
TATTTTCATGAAAACCTACAGAGGAACGTACCGGATTACCTGTCTTTTCAT

+

```
FFF,FFFF:FFFF:FFFFFF:FFFFFFFF::FFFFF,FFFFFFFFFF,F
```

TCGGCCGCTCTCTTTGCTTCGATGTTGGATGTCAAGAAGGGTTCAGAATGGGATTCTACGTAGTTTA  
TGACTTTGGTGGTGGTACTTTCGATACTTCTATCGTCTTACGTTACGG

+

```

FFF:F:FFFFFFFFFFFFFFFFFFFFFFFFFFFFFFFFFFFFFFFF,FFFFFF

```

AGTGTATTATTCTGGTGGTGATGATAATCTTGGAGGTCGTGACGTTGATGAAGCTATAAGAGCGTT  
CTTATTACGGCGCACTTCTTTACCCGCCACCACACAACTTTTCAGTTTC

+

[illegible]

ACTGGAACCGTCTTTTCTGGAACGTAGTTTTACTATTATGAACAAAGTTATCAAAGATAGTGGCATTCAAG

+

[illegible]

GATCTTGCAGAGTGACTGGAGTTCCAGACGTGTGCTCTTCCGATCTCTTGCTGAAACAGCTATTAAAGC  
 TGTTGAGCGGGTAATTACACCTAAACGAGCTCGATCTGCCATCGCTGAAGGATGTGCACTCTTTTCTG  
 CT

+

[illegible]

CAAGCTCGTATTATCGTCGCTGCTGGATCTGCGTTACCGTTGAAGGCTAAACTCCAAGGTAATTATGA  
AGACTGTGATTTATCTTTCACCTCTGGCCTTGTATGAGGGTGTTTCTAA

+

```

FFFFFFFF,FFFFFFFFFFFFFFFFFFFFFFFFFFFFFFFF:FFFFFFFFFFFFFFFFFFFFFF

```

AATAATTTCAATCTTCTTAAAAAGAAGATAGAGAGTCATACTTTGGGCTATCGTTCAGGTGCANGGGG  
 TTGGATAGCCAATATTGAAGTGGACACCTCTGGTAGTATCGAAGTAAAGATAACCAATAAGGAAGGAG  
 CTT

+

[illegible]

@A00721:190:HGJW7DSXY:4:2314:28854:10473\_1:N:0:TCTGCAAG+GCTGCACT  
TACCGCCTTACAAGTCTAAGGTTAAAGAGTCGATTAAACAAGTTGTACTTATCAATGATTTTATCGCT  
GGTTGTTATCTCGAAAAGTCTCTTCTAAAAGGAACGTCAGTTCTAACCCAAAGAGAATATCTAAAATA  
TTT

+

F:F,:FFFFFFF:F,FFF:FFFFFFFFF,FFFFFFFFFFFFFFFFF,F,FFFFFFFFF,:F  
FFFFFFFFFFFF:FFF,FFFFFF:FFF:FF:FFFFFFFFFFFFFFFFFFFFFFFFFFFFFFFFF::FFF  
FFF

@A00721:190:HGJW7DSXY:4:1563:13286:25567\_1:N:0:TCTGCAAG+GCTGCACT  
TTCAGACGTGTGCTCTTCCGATCTCTTACTTGGAACGAAGGCGACCTGTTCCGGAGTTTTTACGGGAT  
CCGGAATGTTCTGTCTATATTAGGTGAAGCGAAATACGATTTCAACGTCAACGTTACCGAGTTTCG  
TTT

+

FFFFFFFFFFFFFFFFFFFFFFFFF,:FFFFFFFFFFFFFFFFFFFFFFFFFFFFFFFFF  
FFFFFFFFFFFFFFFFFFFFFFFFFFFFF:FFF:FFFFF,FFFFFFFFFFFFFFFFFFFFFFFFF:FFFF  
FFF

@A00721:190:HGJW7DSXY:4:2370:4101:2738\_2:N:0:TCTGCAAG+GCTGCACT  
GCTGACTTTCGTC AATATGATTTGATCTGGTTGCTCAATTCTAAGCGTGTTCGCTTAGTGCGAGGCC  
TCTCTTCTACGAGTATTGCTATTTATACGGTTACGAGAAGAAGTTTCG

+

FF:FFFF:FFFFFFFFF:FFFFF:FFFFFFFFFFFFFFFFFFFFFFFFFFFFFFFFF:FFFFF:FFF  
FFFFFFFFFFFFFFFFFFFFFFFFFFFFFFFFF:FFFFF

@A00721:190:HGJW7DSXY:4:1422:28366:33489\_1:N:0:TCTGCAAG+GCTGCACT  
ATCTTGATAAAGAACTTCATGAATTTTCAGAGGATGAAAAATTTTCTTCCTTGGATTTTAATATAAAG  
AATCTTTACCAGGACTCCTACTACAGGAGGCAGTCTTCTGATCGTAAGAAGTTTATAAGGAACATATC  
CAT

+

F:FF,,F:FFFFFFFFF:FFF:FFFFF:FF:FFFFFFFFF,FFFFFFFFF:FFFF:  
FFFFFFFFFFFFFFFFFFFFFFFFFFFFF::FFFFFFFFFFFFFFFFFFFFFFFFF::FFFFFFF  
FFF

@A00721:190:HGJW7DSXY:4:2361:19036:28510\_1:N:0:TCTGCAAG+GCTGCACT  
GAAACTCTAAGTGGTAATACTGTCTTTCCAAGCTTACCTTTATCTTCAATGAAATTGGACTCTTCGAT  
AGGGGACATTTTATCGTGGGCTTTCGTAAGGAAGATCTGTTATCGACGGTTTATCGTTTACGAAGT  
ATC

+

FFFFFFFFFFFFFFFFFFFFFFFFFFFFFFFFF:FFFFF  
FFFFFFFF:FFFFFFFFFFFFFFFFFFFFFFFFFFFFFFFFF:FFFFFFFFF  
FFF

@A00721:190:HGJW7DSXY:4:1107:7916:1924\_2:N:0:TCTGCAAG+GCTGCACT  
TAGTGGATGTTATTAGTGACATCTGGTCAATTTCTGTTTTAGGTGGTCTTTATTCTATTATTGATTTT  
TATGAGATTGATACGTTAACAGAAGATGATGTTAGAGTAGAATTCCTG

+

FFFFFFFFFFFFFFFFFFFFFFFFFFFFFFFFF:FFFFFFFFF  
FFFFFFFFFFFFFFFFFFFFFFFFFFFFFFFFF

@A00721:190:HGJW7DSXY:4:2115:11261:5963\_2:N:0:TCTGCAAG+GCTGCACT  
CTTCTTCTTGACAATTTTATTCAATCCTTCTATAATAGTTAAATATAGGATTATGTCTGTGTGAAAG  
ACTTTATACCTATAAGGGTCAATAGTCTTACACAATT

+

F,,,FF,FF:,,,FFFF,FF,:F,,:F,,:F,,F::FFF:FF,FF,,:FF,F,F,F,F,FF,FF,,  
F:F,F,FF,:,:FF,:F,F:::,F,,FF:::,FFFF

@A00721:190:HGJW7DSXY:4:2105:21160:16031\_2:N:0:TCTGCAAG+GCTGCACT  
ATTGACTGATTATCTAAAGATTGAAGGAAAATTTATCCTCGTTTAACTTACTTAGACTTTCATACGA  
TACAAATGATAACTTCTAATTTACGTTTGCTACTCAGAGCTGGTCCTC

+

F,FFF:F:FFFFFFFFF:FFFFFFFFF,FFFFFFFF:FFFFFFFFFFFF:FFFFFF,FFF:F  
FFFFFFFFFFFFFFFFFFFFFFFF,FFF,:FF:F,FFF::FFFF,F,  
@A00721:190:HGJW7DSXY:4:1342:22634:26944\_1:N:0:TCTGCAAG+GCTGCACT  
TTGGTGTATCTCCTCAGGAGTCCCGGCATTGTGATAATAATGACGAGACTTTCGTCATAATCGCTGCA  
TATTACGGATTACACGGTACCAGCGCATCTCGTGTGAGCCTCGACCCGATTATATGGTATTA ACTTA  
TAA

+  
FFFFFF,FFF:F,FFFFFFFF:,FF::FFFF:::F:FFFFFFFFFFFF:FFFFFFFFFFFFF  
FFFFFFFFFFFF:FFF:FFFFFFFF:FFFFFF:FFFFFF,FFFFFF,FFFFFFFF:FFFFFF:FFF,  
FFF

@A00721:190:HGJW7DSXY:4:2451:13295:6449\_2:N:0:TCTGCAAG+GCTGCACT  
ACACATTTTGAGAACTA ACTATGTTATGTTCTCTGATCATTTTGACAATCTCTTCTTATAATAAATAA  
ATAATAATATTACTAATGGCAAATAGTGGAAGGCTCCAGTCAACAC

+  
FFFF:FFFFFFFFFFFFFFFFFFFFFFFFFFFFFFFFFFFFFFFFFFFFFFFFFFFF:FFFFFFFF:F:FFFFFF:FFF  
FFF:FFFFFFFFFFFFFFFFFFFFFFFFFFFFFFFFFFFF,FFF:,FFFF:FFFFFF

@A00721:190:HGJW7DSXY:4:2360:17689:7764\_2:N:0:TCTGCAAG+GCTGCACT  
AATAGGTGAAGGGATAGTTTTTACCTCGACCAACATTAAGGCGGCGGCGACTAATCTTAAAGCTTCAC  
CCAAAATGAAGGACACTTCGAAACTGAATAATGATGCACTACAAACAA

+  
FFFFFFFFFFFFFFFFFFFFFFFFFFFFFFFFFFFFFFFFFFFFFFFFFFFFFFFFFFFFFFFFFFFFFFFF  
FFFFFFFFFFFFFFFFFFFFFFFFFFFFFFFFFFFFFFFFFFFFFFFFFFFFFFFFFFFFFFFF

@A00721:190:HGJW7DSXY:4:1210:23909:14215\_1:N:0:TCTGCAAG+GCTGCACT  
GAGAAAATTTCTTAGAGGATATTCGCCATTGTGGTACGAATTGGTCCAACATTTACCACCAAATTTCTT  
TTGATACA ACTCTAGCCTTCAAGTGGGGTATGCCTGCGGAATACGCTTGCTATTACCAGATTGGTTC  
GAA

+  
FFFFFFFFFFFFFFFFFFFFFFFFFFFFFFFFFFFFFFFFFFFFFFFFFFFFFFFFFFFFFFFFFFFFFFFF:FFFF  
FFFFFFFFFFFF:FFFFFFFFFFFFFFFFFFFFFFFFFFFFFFFFFFFFFFFFFFFFFFFFFFFFFFFFFFFF  
FFF

@A00721:190:HGJW7DSXY:4:1202:18032:27492\_2:N:0:TCTGCAAG+GCTGCACT  
ATGTCAGAAGAAGCTATTCAAGCTTGTCGTTTAAAGACTGCAGAGGCTGTCAAACAAGCCAGACTCA  
AGGAGTCCAATCAAAGGTTTTGAATTTAGCTCAACTGGGGAGACGTGC

+  
FFFFFFFFFFFFFFFFFFFFFFFFFFFFFFFFFFFFFFFFFFFFFFFFFFFFFFFFFFFFFFFFFFFFFFFF:FFF,FFFFFFFF:F  
F:F,:FFFFFF:FFF,FF:FF::FFFF,FFFF,,:FFFF:F::F:F

@A00721:190:HGJW7DSXY:4:1225:11143:15655\_1:N:0:TCTGCAAG+GCTGCACT  
GTCCGGAGTATATTGTATGTTAATAGATAGTGGGATAATAGTTCTACCGATACGTAGTGAACGCGTTC  
GTAGAACCAAGTACTTTCCGTCTGAAGAGTTTAGAGCTGCTATTGATTATGTAACCGATAGGAGTTGT  
ATA

+  
FFFFFFFFFFFFFFFFFFFFFFFFFFFFFFFFFFFFFFFFFFFFFFFFFFFFFFFFFFFFFFFFFFFFFFFF  
FFFFFFFFFFFFFFFF:FFFFFFFFFFFFFFFFFFFFFFFFFFFFFFFFFFFFFFFFFFFFFFFFFFFF:FFFFFF  
FFF

@A00721:190:HGJW7DSXY:4:1171:14335:26757\_1:N:0:TCTGCAAG+GCTGCACT  
TGGCTTTAGACGATAATCCTTTAAGGACTATGTTGACTGACGAAGATTTTCCACAGATTTGTCTACG  
TTGCAGATCGCCACTCCAAACACTATATACATTATAAAATATAAAAATAAGGGAGTCATAACTTTTGT  
TAC

+  
FFFF:FFFFFFFFFFFF:FFFFFFFFFFFFFFFFFFFFFFFFFFFFFFFFFFFFFFFFFFFFFFFFFFFF  
FFFFFFFFFFFFFFFFFFFF,FFFFFFFFFFFFFFFFFFFFFFFFFFFFFFFFFFFFFFFFFFFF:FFFFFFFFFFFF  
FFF

@A00721:190:HGJW7DSXY:4:1129:27579:25833\_2:N:0:TCTGCAAG+GCTGCACT  
CGAAGTCTCTGATTTTATTAATCATTACTTTAACGATCTCTCGGTCATTTACTCTGTACTTGATCTAC

$+$ 

FFFFFFFF:FFFFFFFF:FFFF,FF:FFFFFFFF

TCT

+

FFF

TTA

+

FFF

TTG

 $+$ [illegible]

CTT

+

FFF

GGA

+

FFFFFFFFFFFFFFFFFFFFFFFFFFFFFFFFFFFFFFFF

AGT

+

```
FFF,F:FFFFFFFF:FFFFFFFFFFFFFFFFFFFFFFFFFFFFFFFF:
```

TTG

+

```
FFFFF,FFFFFFFF:FFFFFFFFFFFFFFFF,FFFFFFFFF,FFF,:FFF::
```

AAA



@A00721:190:HGJW7DSXY:4:1255:30327:18192\_1:N:0:TCTGCAAG+GCTGCACT  
CTTGACAGAGTGAAGTTCAGACGTGTGCTCTTCCGATCTCGTCACTGAGGACGAAGGTGAGAGGA  
CTTTTGGCTACTGGCGACAACTGAGAGCAGTCGCTGGGGAAAGAGAATTGCGTGGGTGAAGGCCGA  
CGC

+

FFFFFFFFFFFFFFFFFFFFFFFFFFFFFFFFFFFFFFFFFFFFFFFFFFFFFFFFFFFFFFFFFFFFFFFF  
FFFFFFFFFFFF:FFFFFFFFFFFFFFFF:FFFFFFFFFFFFFFFFFFFFFFFFFFFFFFFFFFFFFFFF  
FFF

@A00721:190:HGJW7DSXY:4:1666:7726:25113\_2:N:0:TCTGCAAG+GCTGCACT  
ACGAGGCCGGTGACGTTTTGTCAACGGCGTTTGGAGGATTTATCCGCGCTTAAGTATGGGGCGAAG  
ATCCCCTATTGAGTCTTGAAGGACTTAGGTTGGCATATTTATGCCGAC

+

FFFFF:FFFFFFFFFFFFFFFF:FFFFFFFFFFFFFFFFFFFFFFFFFFFFFFFFFFFFFFFFFFFFFFFF  
FFFFF,F:FFFFFFFFFFFFFFFF:FFFFFFFFFFFFFFFFFFFFFFFFFFFFFFFFFFFFFFFF

@A00721:190:HGJW7DSXY:4:2253:28239:19930\_1:N:0:TCTGCAAG+GCTGCACT  
TGTCACCCTTAAGCACCGAGGTAAGCTCGGGACTTACAAGAGAGAGTGTGAGAGAGTCGCTCTACTA  
TTTTTGCCAGAATGCGGGCTTTCTGACTGATGAGGTTAAACTCTTGCTCCTTCTGTGGGTGAGGGT  
TTT

+

FFFFFFFF,F,FFFFFFFFFFFFFFFFFFFFFFFFFFFFFFFFFFFFFFFFFFFFFFFFFFFFFFFF:FF  
F:F:FFFFFFFFFFFFFFFF:FFFFFFFFFFFFFFFF,FFFFFFFFFFFFFFFFFFFFFFFF  
FFF

@A00721:190:HGJW7DSXY:4:2602:30110:35321\_2:N:0:TCTGCAAG+GCTGCACT  
TGTAGAGAGCATTAGAAGGAAGTTGGGCAAATTCCCACATATGGTAGACGTTGTACACTTTTCTTGA  
AAATTTTTCCTTTCCTCCGTCATTGGGGATTCGATGTGAGAAGGTGG

+

:,FFFFFFFF,F,:FFFF,FFFFFFFF:F,:FFFFFFFFF,:::FF,FF,F,:,,F,FF:F,:FFF,F  
FFFF,FF,F:FF,FF:FFF,:,,FF,,FFF,,F:FF::FFF:::F,

@A00721:190:HGJW7DSXY:4:1269:18005:1360\_1:N:0:TCTGCAAG+GCTGCACT  
GACCTAATCACATCATGATTGATAGTTACGGCTCGTATCGAGTTGGAGGGAGGAAGTTCTCCGAAATT  
AAAGACGGGGGGATTAAGAGTCCAGCTGTAAGTGTCAATTCAGAGAGGGGAGCTCTGAAAAGGAACT  
TCG

+

FFFFFFFFFFFFFFFFFFFFFFFFFFFFFFFFFFFFFFFFFFFFFFFFFFFFFFFFFFFFFFFFFFFFFFFF  
FFFFFFFFFFFFFFFFFFFFFFFFFFFFFFFFFFFFFFFFFFFFFFFFFFFFFFFFFFFFFFFFFFFFFFFF  
FFF

@A00721:190:HGJW7DSXY:4:2251:29369:11397\_1:N:0:TCTGCAAG+GCTGCACT  
CTGTCTAAGAGGAGGAGTTTGAAGGAAGGCTCTAGAGAAGATCTCACCACCTGGAGAAGGCAAGTGGAG  
AGTCCAGAAGTTGATGAAGAAGGATTATTTGAAGCAGGGGTTACCACTTCCTAAGGTGGATGAGGGAG  
GTT

+

FFFFFFFFFFFFFFFFFFFFFFFFFFFFFFFFFFFFFFFFFFFFFFFFFFFFFFFFFFFFFFFFFFFFFFFF  
FFFFFFFFF:FFFFFFFFFFFFFFFFFFFFFFFFFFFFFFFFFFFFFFFFFFFFFFFFFFFFFFFF  
F:F

@A00721:190:HGJW7DSXY:4:2230:8549:1141\_1:N:0:TCTGCAAG+GCTGCACT  
TTTTGAGAAGGGGTATAGAGCCAGCAAGAGAAGCTTATATGCTGGTTTAAGTGATGATTATCACTCC  
TTGAGAAGACAAGCCACATTAAGATATAATTTAGGTCAACTTGGGGTTTCGAATGTCATTAGTGCCTT  
ACG

+

FFFFFFF:FFFFFFFFFFFFFFFFFFFFFFFFFFFFFFFFFFFFFFFFFFFFFFFFFFFFFFFFFFFFFFFF  
FFFFFFFFFFFFFFFFFFFFFFFFFFFFFFFFFFFFFFFF:FFFFFFFFFFFFFFFFFFFFFFFF  
FFF

@A00721:190:HGJW7DSXY:4:1609:12301:15217\_1:N:0:TCTGCAAG+GCTGCACT  
TTTGAGTATCGACAGATCTTTCGATCTTGAGGACGTACATTTAACGTGGCAGAATTCGGTAAGTACC



ATATTGTTCTTCCGGGAAGTTGTGGGATTAACTTTGACTCAACTACTCCGATCAGATCCGGATGGT  
TTG

+

FFFFFFFFFFFFFFFFFFFFFFFFFFFFFFFFFFFFFFFFFFFFFFFFFFFFFFFFFFFFFFFFFFFFFFFF:FFFFFFFFFFFFFFFF  
FFFFFFFF:FFFFFFFFFFFFFFFFFFFFFFFFFFFFFFFFFFFFFFFFFFFFFFFFFFFFFFFFFFFFFFFFFFFFFFFF:FFF  
FFF

@A00721:190:HGJW7DSXY:4:2250:14000:9768\_1:N:0:TCTGCAAG+GCTGCACT  
ATGGCAGATACTACCGATAAGGTGAAAAATATGCAGGTCATAGATTCTGTAGCTCTGAGGGCGGTTGA  
GGGAGCCGTTTTGGCCGACTTTAACTATTCTAAGAGTCTTTATGATTCAAAACCTATCGTTGTCGTAC  
CT

+

FFFFF:FFFF,F,F,FFF:,FFFFF:,FFFFF:FF,FFFF,FFFFF,FFF:FFF,FFFF,FFFFF::F  
F,FFFFFFFFFFFF,,F,:FFF:FFFF:FFFFFFFF:FFFFF,FFFF,,F:FFFFFFFFFFFFFFFF  
FF

@A00721:190:HGJW7DSXY:4:1643:28709:31266\_1:N:0:TCTGCAAG+GCTGCACT  
CGCAGTTTCCAGAATTGCGGTTGAAGTTCACCCATTCTATCTTGAATGCTCACGCCGTCGAGCCATA  
TCGAGACTATGTTATAATCACTTGTTAAAGTACAGATTTAGTGATTTAGATATTATTGATATTGGAGG  
CGA

+

FFFFF,FFFFF:F,FFFF,F:FFFFFFFF:FFFFFFFFFFFFFFFFFFFFFFFFFFFFFFFF:FF:F,FFFF  
FFFF,F:FFFFFFFF:FFFF:FFFFFFFF:FFFFFFFFFFFF:F:FFFFFFFFFF:FFFFFFFFFFFFFFFF  
FFF

@A00721:190:HGJW7DSXY:4:2225:11505:18411\_2:N:0:TCTGCAAG+GCTGCACT  
ATCCAAAACCTCTTGAATGGAGTACATATTTGCAACCCTATTCTTGATGTGAAAGATGCATCGAGGTA  
TACGTCTAGGAACATTGATTGGGAACGTACCTACTCACGAGACGTCAT

+

FFFFFFFFFFFFFFFFFFFFFFFFFFFFFFFFFFFFFFFFFFFFFFFFFFFFFFFFFFFFFFFFFFFFFFFF  
FFFFFFFFFFFFFFFFFFFFFFFFFFFFFFFFFFFFFFFFFFFFFFFFFFFFFFFFFFFFFFFF

@A00721:190:HGJW7DSXY:4:1149:17571:7185\_1:N:0:TCTGCAAG+GCTGCACT  
TTCGTTCTGTTACAAGAACGCTTTGGATTGTGACCATAAAGCCTCAGTTGCGATAGCTGTAGAGGTAT  
ACGATATCTCTCTTGATGATGTAGCCACTATAATGCTTAAGAGAGAGATTGATGTATGTCATTTCTC  
TTA

+

FFFFFFFFFF:FF:F::FFFFFFFFFFFFFFFFFFFFFFFFFFFFFFFF:FFFFFFFFFFFFFFFFFFFFFFFF  
FFFFFFFFFFFFFFFFFFFFFFFFFFFFFFFF:FFFFFFFFFFFFFFFF:FFFFFFFFFFFFFFFFFFFFFFFF  
FFF

@A00721:190:HGJW7DSXY:4:2377:30156:2456\_1:N:0:TCTGCAAG+GCTGCACT  
GAATTATTGGACACGATGAAAAATGACATACCCGTTCTGACCTTGGTATCGTTATCCGTCATGGAGA  
TGATGGCGCATCACTTGATTACTATATGCCCGAAGGATTGGGTTATTCTCACAACAAAGATAAGATTT  
TAT

+

FFFFFFFFFFFFFFFFFFFFFFFFFFFFFFFFFFFFFFFF:FFFFFFFFFFFFFFFFFFFFFFFFFFFFFFFF  
FFFFFFFFFFFFFFFFFFFFFFFFFFFFFFFFFFFFFFFFFFFFFFFFFFFFFFFFFFFFFFFFFFFFFFFF:FFFF  
FFF

@A00721:190:HGJW7DSXY:4:1316:1515:31673\_2:N:0:TCTGCAAG+GCTGCACT  
GTGAACTCTTGGGGACTAGATTGAGCATTAATGAGTTCCGAATAACTCGTAATAAATCTTTCTCTAGT  
GGACAATTGAGAATACCTATTTCCGTACCAAGAGCCACTGCCAATCTC

+

FFFFFFFFF,FFFFFFFF:FFFFFFFFFFFFF,FFFFFFFF,FFFFFFFFFFFFFFFF:FFFF:FFFF  
F:F:F:FFFFFFFFFFFFF,F:F:FF:FFFF:FF:FFFFFF,FFF

@A00721:190:HGJW7DSXY:4:1641:28266:27242\_2:N:0:TCTGCAAG+GCTGCACT  
AGATTATGGTTGATAAAGTTTTCTTCATAAGGGCTATTAGTACGTCATGGGGATCACTTCTTCGGTC  
AATGACAAAACCTTCGAATATGTTACGACATGGCTTCGTAACAACAGT

+

FFFFFFFFFFFFFFFFFFFFFFFFFFFFFFFFFFFFFFFFFFFFFFFFFFFFFFFFFFFFFFFFFFFFFFFF  
FFFFFFFFFFFFFFFFFFFFFFFFFFFFFFFFFFFFFFFFFFFFFFFFFFFFFFFFFFFFFFFF

@A00721:190:HGJW7DSXY:4:1406:30599:18129\_1:N:0:TCTGCAAG+GCTGCACT  
TCACCAAGATGTTTCATATAGATACGAGATACCTAGAGAAGGTCGCAGCGATCTTACTCGTTATCGGAG  
CTAAGAAGAAGACTTTGGGTACACGTTATGCTCGCAAACCTAACGTTAGTACCGGAGGTGATCTCTCT  
GCT

+  
FFFFFFFFFFFFFFFFFFFFFFFFFFFFFFFFFFFFFFFFFFFFFFFFFFFFFFFFFFFFFFFFFFFFFFFF  
FFFFFFFFFFFFFFFFFFFFFFFFFFFFFFFFFFFFFFFFFFFFFFFFFFFFFFFFFFFFFFFFFFFFFFFF  
FFF

@A00721:190:HGJW7DSXY:4:2358:7419:14998\_1:N:0:TCTGCAAG+GCTGCACT  
GAGAGAAAAGATTACAGGACGCCTACGGTGACTTTATGGACAAGATGCAAGTTCTTGGGAAATACTTGT  
TTCCCTTTTATAGTTTAGTAGGTGATCTTGACGTCGATTCTTTGTATAGGGAGTGTGAGAAGACAACG  
AAT

+  
:FFFFFFFFFFFFFFFFFFFFFFFFFFFFFFFFFFFFFFFFFFFFFFFFFFFFFFFFFFFFFFFFFFFFFFFF  
FFFFFFFFFFFFFFFFFFFFFFFFFFFFFFFFFFFFFFFFFFFFFFFFFFFFFFFFFFFFFFFFFFFFFFFF  
FFF

@A00721:190:HGJW7DSXY:4:1344:21522:23171\_1:N:0:TCTGCAAG+GCTGCACT  
ACCGGTCTCTAAATCTTTTGAGATTGAGAAGATTGAAGAACACGTCAAGAAGTCGCTCGGCGTTGTTC  
TTGAAAACCAAGTTAAGAAGGAGGCTGATCATGGAGTCTTTGTACCTTCTGTCAAACCTTCGAGGTTCA  
GCT

+  
FFFFFFFFFFFFFF:F:FFFFFFFF:FFFFFFFFFFFFFFFFFFFFFFFFFFFFFFFFFFFFFFFFFFFFF  
FFFFFFFFFFFFFFFFFFFFFFFF:FFFF:F:FF,FFFFFFFFFFFFFFFFFFFFFFFFFFFFFFFFFFFF  
FFF

@A00721:190:HGJW7DSXY:4:2164:10429:27258\_2:N:0:TCTGCAAG+GCTGCACT  
CCGGATGTGGATTGAAGGCTGGCTCTAAGGGAGACTCCTTCTTTTGAATGTTGTAAAGAATTGGGTT  
GAGAAGTGTGCTTTACAAGGAGTTAGACTCTTCTTCAAGTTTTTAGAT

+  
FFFFFFFFFFFFFFFFFFFFFFFFFFFFFFFFFFFFFFFFFFFFFFFFFFFFFFFFFFFFFFFFFFFFFFFF  
FFFFFFFFFFFFFFFFFFFFFFFFFFFFFFFFFFFFFFFFFFFFFFFFFFFFFFFFFFFFFFFF

@A00721:190:HGJW7DSXY:4:1303:14633:1532\_2:N:0:TCTGCAAG+GCTGCACT  
CTCTACCCATAACTTCTTTTTCAAAAATGCGGATGGGTCTACTGATGTTTTCTACAGAGTGCAGTCG  
TTTCAACACTTATCACCACCTTTTGAAAGGAAAATAATTGGTGATGAAA

+  
FFFFFFFFFFFFFFFFFFFFFFFFFFFFFFFFFFFFFFFFFFFFFFFFFFFFFFFFFFFFFFFFFFFFFFFF  
FFF,FF:FF,FFF,F,FFF,FFF:FFF,FFFFFF:F:F,,FFFF,FF

@A00721:190:HGJW7DSXY:4:1478:30544:25864\_2:N:0:TCTGCAAG+GCTGCACT  
ACGTCTTAAGTAATTTGGATGTTGTCGAAAACATCAGGTTCTTGTACGATTCTTAAAGAAGTTTA  
TAAAACTTCAGAGTCTCTTGAAGTCCAGGTAGCTAATGTTCTTGCA

+  
FFFFFFFFFFFFFFFFFFFFFFFFFFFFFFFFFFFFFFFFFFFFFFFFFFFFFFFFFFFFFFFFFFFFFFFF  
FFFFFFFFFFFFFFFFFFFFFFFFFFFFFFFFFFFFFFFFFFFFFFFFFFFFFFFF

@A00721:190:HGJW7DSXY:4:1562:27181:23641\_1:N:0:TCTGCAAG+GCTGCACT  
CTCTGTTGGTAGAGGAGTTGAGAGAATTACTCAGATTCAATCTGGCATCACTGAACGTCTACAACGAG  
TTAGGGAGTGGCTAGGTTTTAAAGATCCTTTGCACAAGCAATACCTTCCACTGAGTTCATCACCAG  
AGT

+  
FFFFFFFFFFFFFFFFFFFFFFFFFFFFFFFF:FFFFFFFFFFFFFFFF:FFFFFFFFFFFF:FFFFFFFFFFFF  
FFFFFFFF:FFFFFFFFFFFFFFFFFFFFFFFFFFFFFFFFFFFFFFFFFFFFFFFFFFFFFFFFFFFFF  
FFF

@A00721:190:HGJW7DSXY:4:1635:4725:2002\_1:N:0:TCTGCAAG+GCTGCACT  
CTGATGCTGAATTTGAGGAAAATTTTCGGAAGTTTTTGGTATAAATCCTGATGGCTCAGTACAGGGA



FFFFFFFF:FFFFF:FFFFFFFFFFFFFFFFFFFFFFFFFFFFFFFFFFFFFFFFFFFFFFFF  
FFF

@A00721:190:HGJW7DSXY:4:1466:21929:12665\_1:N:0:TCTGCAAG+GCTGCACT  
AGGACGTTGAAAGGGATAATTTCAACTCTGAGACTTCTAAGAGTGTTCAAAAGACCAGAAACGTAAC  
AAGAAGAATAAAGGTAGGAAGGGGAGAAAACAGAACAAGCGAGCGGTTGAAGAGAAAACCTGATATGGT  
TGC

+  
:FFFFFFFFFFFFFFFFFFFFFFFF,FFFFFFFFF:FFFFF:FFFFFFFFFFFFFFFFFFFFFFFF:FFFFF  
F:FFFFFFFFFFFFFFFFFFFFFFFFFFFFFFFFFFFFFFFFFFFFFFFFFFFFFFFFFFFFFFFF  
FFF

@A00721:190:HGJW7DSXY:4:2220:1850:4633\_2:N:0:TCTGCAAG+GCTGCACT  
CTCGGCGATACCACTGATCTTCCAGAGTTACGTAGTGGTCGTTCTTTTGGTGATTTTATCAAAGAGAA  
AGTTTCTGCTAGTCGCGACGATAGTATTTATCGGAGTGATATTAACAA

+  
FFFFFFFFFFFFFFFFFFFFFFFFFFFFFFFFFFFFFFFFFFFFFFFFFFFFFFFFFFFFFFFF:FFFFFFFFF  
FFFFFFFFF::FFFFFFFFFFFFFFFFFFFFFFFFFFFFFFFFFFFFFFFFFFFFFFFF

@A00721:190:HGJW7DSXY:4:1455:24306:35571\_1:N:0:TCTGCAAG+GCTGCACT  
TCCAAAAGCTATTAATAGCAGTTGCGGGCTATAATACCGCCTCCAGATTACTCTAACTGAATCCA  
CTCTCTGGGATATAAATGAGTACATCTATAATAGAGTTTTGGAAGTGTGTAATGTCCTACGTACTGT  
TCA

+  
FFFFFFFFFFFFFFFFFFFFFFFFFFFFFFFFFFFFFFFFFFFFFFFFFFFFFFFFFFFFFFFF  
FFFFFFFFFFFFFFFFFFFFFFFFFFFFFFFFFFFFFFFFFFFFFFFFFFFFFFFFFFFFFFFF  
FFF

@A00721:190:HGJW7DSXY:4:1611:18059:7341\_1:N:0:TCTGCAAG+GCTGCACT  
GGTTCAAGTCGATTGATTTTGTGACTACGATCTCTCTTGTAAATAAGAAGTTCTTCGCAGTTGAATCT  
CCACCAGGTGGAGGGAAGACCACTGAACTTATAGCGACTTTTGTGCAATTTTCGCAAAAGGTCTTGA  
AGT

+  
FFFFFFFFFFFFFFFFFFFFFFFFFFFFFFFFFFFFFFFFFFFFFFFFFFFFFFFFFFFFFFFF  
FFFFFFFFFFFFFFFFFFFFFFFFFFFFFFFFFFFFFFFFFFFFFFFFFFFFFFFFFFFFFFFF  
FFF

@A00721:190:HGJW7DSXY:4:2142:23592:15828\_2:N:0:TCTGCAAG+GCTGCACT  
ACTGCTAATCGTAATTCGCGAGAAGAGATAGTACTAAAGTTTTGGCACTTCTAGTTCATCGCGGTAT  
TTGTGAAATTAAGACAGACGTGAAAGTTATGATGAGTGATCGTATTAG

+  
FFFFFFFFFFFFFFFFFFFFFFFFFFFFFFFFFFFFFFFFFFFFFFFFFFFFFFFFFFFFFFFF  
FFFFFFFFFFFFFFFFFFFFFFFFFFFFFFFFFFFFFFFFFFFFFFFFFFFFFFFF

@A00721:190:HGJW7DSXY:4:2427:15185:31861\_1:N:0:TCTGCAAG+GCTGCACT  
CGTTCTTTTCATCGACGAATTATTCATGATTCACGCTGGTCAGACCCTTTTCTTACACATCTACTTA  
AGGCGGCTTATACCATAGGTTACGGTGATTCCAAATCGGATTCATCAATCGTATTGATCTCCAAGTCG  
CAA

+  
FFFFFFFFFFFFFFFFFFFFFFFFFFFFFFFFFFFFFFFFFFFFFFFFFFFFFFFFFFFFFFFF:FFFFFFFFF  
FFFFFFFFFFFFFFFFFFFFFFFFFFFFFFFFFFFFFFFFFFFFFFFFFFFFFFFFFFFFFFFF  
FFF

@A00721:190:HGJW7DSXY:4:2139:19054:31892\_2:N:0:TCTGCAAG+GCTGCACT  
ATCAACGACATCATTCTTGATGAGTGTCGTTCTTATCGAAGTCTCAGTTATCGCTGCCCGGCCGACGT  
TTGTCGCGAACTCTCAGAGGTTTACGGCAGAAAAATTTCTCCTGCTAG

+  
FFFFFFFFFFFFFFFFFFFFFFFFFFFFFFFFFFFFFFFFFFFFFFFFFFFFFFFFFFFFFFFF:FFFFFFFFF  
FFFFFFFFFFFFFFFFFFFFFFFFFFFFFFFFFFFFFFFFFFFFFFFFFFFFFFFF

@A00721:190:HGJW7DSXY:4:1458:5285:9518\_1:N:0:TCTGCAAG+GCTGCACT  
CTTGTAAGAGTAAGGTTAAATGTGAAGATGCTCAGACTATTTCATGAAGTTCAAGGTAATACTTACCA

GCACGTTGCGCTGGTTAGAATTAAACCTCAAGATGACCCTGTTTTTGCATCACAAACACATATTACCG  
TTG

+

:F:FFFFFFFFFFFFFFFFFFFF,FFFF,FF,F,FFFFFFFFFFFFFFFFFFFF:FFF:F:FFF::FFFF::F  
:F,FFF::FFFF:FFFFFF:FFF:FFFF,FF,FFFFFF,FFFFFF:FFFFFFFFF:FFF::F:FF  
FFF

@A00721:190:HGJW7DSXY:4:1546:2031:35383\_2:N:0:TCTGCAAG+GCTGCACT  
ACGATACTTTGTTATCAATGTAAAGTTAAACGATGCTACTTGTGAGAGGATCAATCACAGTAAGGAAC  
TGTCACGTTTAGCACGGGAGGTTGCAGATTCAACCCCTTATATCGAGG

+

FFFFFFFF:FFFFFFFFFFFFFFFFFFFF:FFFFFFFFFFFFFFFFFFFFFFFFFFFFFFFFFFFF,F  
FFFFFFFFFFFFFFFFFFFFFFFFFFFFFFFFFFFF,FFF:FFFFFF

@A00721:190:HGJW7DSXY:4:2326:20283:13792\_2:N:0:TCTGCAAG+GCTGCACT  
AGTATCTTGAAGTTGTTGACGACAAGCCTCAAGAGGGTAGAGGACCACCTGGATCTTCTACTGTCTCT  
GCCTTCCAAGATTTCTTAGAAGAGGTTATTCCTGGAACCACCTTAACG

+

FFFFFFFFFFFFFFFFFFFFFFFFFFFFFFFFFFFFFFFFFFFFFFFFFFFFFFFFFFFFFFFFFFFF  
FFFFFFFFFFFFFFFFFFFFFFFFFFFFFFFFFFFF:FFFFFFFFFFFFFFFFFFFF

@A00721:190:HGJW7DSXY:4:2321:12210:4288\_1:N:0:TCTGCAAG+GCTGCACT  
TCAGCCGAATTAAGTACTAATGAGTTCAAGTCGGTTGTCGATCGAATTAAGATCAAGGCTAATACCTT  
TATAGGTAAGAAGCCCCTTGAGCCGCGTAGTCAGCGCGTTAGCTGTATCATCAGTCAGAGTATACCC  
GAT

+

FFFFFFFFFFFFFFFFFFFFFFFFFFFFFFFFFFFFFFFFFFFFFFFFFFFFFFFFFFFFFFFFFFFF  
FFFFFFFFFFFFFFFFFFFFFFFFFFFFFFFFFFFFFFFFFFFFFFFFFFFFFFFFFFFFFFFFFFFF  
FFF

@A00721:190:HGJW7DSXY:4:2524:9778:27195\_1:N:0:TCTGCAAG+GCTGCACT  
CCAAGAGAATATTTATTTCTTATGAGGCTCGAACTTCAACGTTTTTCACAACGGAAAGACATATCGCAC  
CCGAAATTTTTGGGCAGAATGCTCTTAACGCGTTCTTGAACGGTGTTTTGATCAGTCTAAGTTGGAT  
AAA

+

:FFFFFFFF:FFFFFFFFFFFFFFFFFFFFFFFFFFFFFFFFFFFFFFFFFFFFFFFFFFFF:FFFF  
FFFFFFFFFFFFFFFFFFFFFFFFFFFFFFFFFFFFFFFFFFFFFFFFFFFFFFFFFFFFFFFFFFFF  
FFF

@A00721:190:HGJW7DSXY:4:2124:16504:9909\_2:N:0:TCTGCAAG+GCTGCACT  
GAGCTCCTCAATTGATAGATTGGGTCAACAATAGGGACGCTAGTATACTTCGTAAAGTCGACAGCGAA  
ATGGTCAATATTGATAATTGGACCGACTATATGACCTATTTTAAGCTC

+

FFFFFFFFFFFFFFF,FFFF:FFFFFFFFFFFFFFFFFFFF:FFFF:FFFFFFFFFFFFFFFFFFFF  
:FFFFFFFFFFFFFFFFFFFFFFFFFFFF,FFFFFFFFFF:FFFFFFF

@A00721:190:HGJW7DSXY:4:2158:18521:12680\_1:N:0:TCTGCAAG+GCTGCACT  
ATGCTTCAGCCTTTTCGAAGCATAACCCCGCACAGAATATCGTTTATCACGCAAAATTTATTAATGCA  
ATTTTCGACCTATCTTTAAGGTTCTTGTGAGGAGAGTCAAACAGTGTCTTTTACCCAACATTTTAT  
GTA

+

FFFFF:FF:F:FFFFFFFFFFFFFFFF:FFFFFFFFFFFFFFFFFFFFFFFFFFFFFFFFFFFF  
FFFFF:FFF:FFFFFFFFFFFFFFFF:FFFFFFFFFFFFFFFFFFFF:FF:FFFFFFFF:F:FFFFFFFF:F  
FFF

@A00721:190:HGJW7DSXY:4:2508:22471:18709\_2:N:0:TCTGCAAG+GCTGCACT  
TTGATGCTGAATTTCTTGAACCTTTGGAGTGCCAGTGAATATTTTTGTCACGCCAGGAGTATCCATAA  
CGATTTGTCATTTACCACCTTTGCTCAACGACGAAGTGAACGGCCAA

+

FFFFFFFFFFFFFFFFFFFFFFFFFFFFFFFFFFFFFFFFFFFFFFFFFFFFFFFFFFFFFFFFFFFF  
FFFFFFFFFFFFFFFFFFFFFFFFFFFF:FFFFFFFFFFFFFFFFFFFF:FFFF



AGGATTCTCAGTTTACAAGGACCTTAAGCGATGGATCGGGGTTAATTCTAAAACATTACCCGAAAGAC  
GTG

+

FFFFFFFFFFFFFFFFFFFFFFFFFFFFFFFFFFFFFFFFFFFFFFFFFFFFFFFFFFFFFFFFFFFFFFFF  
FFFFFFFFFFFFFFFFFFFFFFFFFFFFFFFFFFFFFFFFFFFFFFFFFFFFFFFFFFFFFFFFFFFFFFFF  
FFF

@A00721:190:HGJW7DSXY:4:1116:9362:21684\_2:N:0:TCTGCAAG+GCTGCACT  
TACGATGTCGTCTGTCTCGGCGATCACTTTTCACTAAGAATTGGTCCTACTTTTGGACAAGGCCAACT  
TCGTAATCTTCATGAGATCGTTTCTTTCTTTATCTCTTTGGTTGTTAG

+

FFFFFFFFFFFFFFFFFFFFFFFFFFFFFFFFFFFFFFFFFFFFFFFFFFFFFFFFFFFFFFFFFFFFFFFF  
FFFFFFFFFFFFFFFFFFFFFFFFFFFFFFFFFFFFFFFFFFFFFFFFFFFFFFFFFFFFFFFFFFFFFFFF  
FFF,FFFFFFFF

@A00721:190:HGJW7DSXY:4:1371:2844:13839\_2:N:0:TCTGCAAG+GCTGCACT  
GAGTGAAAGGCTTCAATTGTAGTGGTTTGGTCGTTTCAGTACCCAGTCAGTATACCTCTACGCAAAGA  
TATTTTCATGAAAACCTACAGAGGAACGTACCGGATTACCTGTCTTTCAT

+

FFFFFF:FFFFFFFFFFFF:FFFFFFFFFFFFFFFFFFFFFFFFFFFFFFFFFFFFFFFFFFFFFFFF:FFFF  
FFFFFFFFFFFFFFFFFFFFFFFFFFFFFFFFFFFFFFFFFFFFFFFFFFFFFFFFFFFFFFFFFFFFFFFF

@A00721:190:HGJW7DSXY:4:2117:24722:35665\_2:N:0:TCTGCAAG+GCTGCACT  
TCGGCCGCTCTCTTTGCTTCGATGTTGGATGTCAAGAAGGGTTCAGAATGGGATTCCTACGTAGTTTA  
TGACTTTGGTGGTGGTACTTTCGATACTTCTATCGTCTTACGTTACGG

+

FFFFFFFFFFFFFFFFFFFFFFFFFFFFFFFFFFFFFFFFFFFFFFFFFFFFFFFFFFFFFFFFFFFFFFFF  
FFFFFFFFFFFFFFFFFFFFFFFFFFFFFFFFFFFFFFFFFFFFFFFFFFFFFFFFFFFFFFFFFFFFFFFF

@A00721:190:HGJW7DSXY:4:2107:27778:20760\_2:N:0:TCTGCAAG+GCTGCACT  
AGTGTTATTTATTCTGGTGGTGATGATAATCTTGGAGGTCGTGACGTTGATGAAGCTATAAGAGCGTT  
CTTATTACGGCGCACTTCTTTACCCGCCACCACACAACCTTTCAGTTTC

+

FFFFFFF:FFFFFFFFFFFFFFFFFFFFFFFFFFFFFFFFFFFFFFFFFFFFFFFFFFFFFFFFFFFFFFFF  
FFFFFFF:FFFFFFFFFFFF:F:F,FFFFFFFFFFFF:FFFFF,FFF

@A00721:190:HGJW7DSXY:4:2325:16839:10113\_1:N:0:TCTGCAAG+GCTGCACT  
ACTGGAAAACCCTCGTCAATACTTTTCAATAATATACGTCTTGAACCTCACTTATGACGATCTAGTGAA  
ATTAACGCGTCCTTTTCTGGAACGTAGTTTACTATTATGAACAAAGTTATCAAAGATAGTGGCATTCAAG

+

FFFFFFFFFFFFFFFFFFFFFFFFFFFFFFFFFFFFFFFFFFFFFFFFFFFFFFFFFFFFFFFFFFFFFFFF  
FFF:FFFF:FFFFFFFFFFFFFFFFFFFFFFFFFFFFFFFFFFFFFFFFFFFFFFFFFFFFFFFF:FFF,FFFFFFFF:FF:FF  
FFF

@A00721:190:HGJW7DSXY:4:2404:26241:26804\_1:N:0:TCTGCAAG+GCTGCACT  
GATCTTGCAGAGTGACTGGAGTTCAGACGTGTGCTCTTCCGATCTCTTGCTGAAACAGCTATTAAAGC  
TGTTGAGCGGGTAATTACACCTAAACGAGCTCGATCTGCCATCGCTGAAGGATGTGCACTCTTTTCTGCT

+

FFFFFFFFFFFFFFFFFFFFFFFFFFFFFFFFFFFFFFFFFFFFFFFFFFFFFFFFFFFFFFFFFFFFFFFF  
FFFFFFFFFFFFFFFFFFFFFFFFFFFFFFFFFFFFFFFFFFFFFFFFFFFFFFFFFFFFFFFFFFFFFFFF  
FF

@A00721:190:HGJW7DSXY:4:1520:13286:25441\_2:N:0:TCTGCAAG+GCTGCACT  
CAAGCTCGTATTATCGTCGCTGCTGGATCTGCGTTACCGTTGAAGGCTAAACTCCAAGGTAATTATGA  
AGACTGTGATTATCTTTCACTCTGGCCTTGATGAGGGTGTCTTCTAA

+

FFFFFFFFFFFFFFFFFFFFFFFFFFFFFFFFFFFFFFFFFFFFFFFFFFFFFFFFFFFFFFFFFFFFFFFF  
FF:FFFFFFFFFFFFFFFFFFFFFFFFFFFFFFFFFFFFFFFFFFFFFFFFFFFFFFFFFFFFFFFF

@A00721:190:HGJW7DSXY:4:1360:18276:33771\_2:N:0:TCTGCAAG+GCTGCACT  
AATTTCAATCTTCTTAAAAAGAAGATAGAGAGTCATACTTTGGGCTATCGTTCAGGTGCATGGGGTTG

$+$ 

FFFFFFFFFFFFFFFFFFFFFFFFFFFFFFFF,FF:FFFFFFFFFFFFFFFF

1

FF

+

FFF

+

FFFFF:FFFFFFFFFFFFFFFFFFFFFFFF:FFFFFFFFFFFFFFFFFFFFFFFF

+

FFF

+

FFF

+

FFFFFFFFFFFFFFFFFFFFFFFFFFFFFFFFFFFFFFFF:FFFFFFFFFFFFFFFF

+

FFFFFFFF:FFFFFFFFFFFFFFFFFFFFFFFFFFFFFFFFFFFFFFFFFFFFFFFF



@A00721:190:HGJW7DSXY:4:1574:17219:2503\_2:N:0:TCTGCAAG+GCTGCACT  
ACTATCTAAAGATTGAAGGAAAATTTTATCCTCGTTTAACTTACTTAGACTTTCCTACGATACAAATG  
ATAACTTCTAATTTACGTTTGCTACTCAGAGCTGGTCTCTCAGCAA

+

:FFFFFFFFFFFFFFFFFFFFFFFFFFFFFFFFFFFFFFFFFFFFFFFFFFFFFFFFFFFFFFFFFFFFFFFF  
FFFF:FFFFFFFFFFFF,FFFFFFFFFFFF:FFFFFFFFFFFFFFFFFFFFFFFF

@A00721:190:HGJW7DSXY:4:1430:9426:24424\_2:N:0:TCTGCAAG+GCTGCACT  
CTCAGGAGTCCCGGCATTTGATAATAATGACGAGACTTTCGTCATAATCGCTGCATATTACGGATTAC  
ACGGTACCAGCGCATCTCGTGTGCGAGCCTCGACCCGATTATATGGTAT

+

FFFFFFFFFFFFFFFFFFFFFFFFFFFFFFFFFFFFFFFFFFFFFFFFFFFFFFFFFFFFFFFFFFFFFFFF  
FFFFF,FFFFFFFFFFFFFFFFFFFFFFFFFFFFFFFFFFFFFFFFFFFFFFFFFFFFFFFF:FFFFFFF

@A00721:190:HGJW7DSXY:4:1350:28519:25739\_2:N:0:TCTGCAAG+GCTGCACT  
CATTTTGAGAACTAACTATGTTATGTTCTCTGATCATTTTGACAATCTCTTCTTATAATAATAAATA  
AATAATATTACTAATGGCAAATAGTGGAAGGCTCCAGTCAACACTAG

+

FF,FFFFFFFFFFFFFFFFFFFFFFFFFFFFFFFFFFFFFFFFFFFFFFFFFFFFFFFFFFFFFFFFFFFF  
FFFFFFFFFFFFFFFFFFFFFFFF:FF:FFFFFFFFFFFFFFFFFFFFFFFFFFFFFFFF

@A00721:190:HGJW7DSXY:4:2628:11162:36730\_2:N:0:TCTGCAAG+GCTGCACT  
AATAGGTGAAGGATAGTTTTTACCTCGACCAACATTAAGGCGGCGGCGACTAATCTTAAAGCTTCAC  
CCAAAATGAAGGACACTTCGAAACTGAATAATGATGCACTACAAACAA

+

FFFFFFFFFFFFFFFFFFFFFFFFFFFFFFFFFFFFFFFFFFFFFFFFFFFFFFFFFFFFFFFFFFFFFFFF  
FFFFFFFFFFFFFFFFFFFFFFFFFFFFFFFFFFFFFFFFFFFFFFFFFFFFFFFFFFFFFFFF

@A00721:190:HGJW7DSXY:4:1320:25925:29857\_1:N:0:TCTGCAAG+GCTGCACT  
GAGAAAATTTCTTAGAGGATATTCGCCATTGTGGTACGAATTGGTCCAACATTTACCACCAAATTCCT  
TTGATACAACCTCTAGCCTTCAAGTGGGGTATGCCTGCGGAATACGCTTGCTATTACCAGATTGGTTC  
GAA

+

FFFFFFFFFFFFFFFFFFFFFFFFFFFFFFFFFFFFFFFFFFFFFFFFFFFFFFFFFFFFFFFFFFFFFFFF  
FFFFFFFFFFFFFFFFFFFFFFFFFFFFFFFFFFFFFFFFFFFFFFFFFFFFFFFFFFFFFFFFFFFFFFFF  
FFF

@A00721:190:HGJW7DSXY:4:1212:10664:14920\_2:N:0:TCTGCAAG+GCTGCACT  
ATGTCAGAAGAAGCTATTCAAGCTTGTCGTTTAAAGACTGCAGAGGCTGTCAAACAAGCCAGACTCA  
AGGAGTCCAATCAAAGGTTTTGAATTTAGCTCAACTGGGGAGACGTGC

+

FFFFFFFFFFFFFFFFFFFFFFFFFFFFFFFFFFFFFFFFFFFFFFFFFFFFFFFFFFFFFFFFFFFFFFFF  
F:FFFFFFFFFFFFFFFF,FFFFFFFF,FF,FFFFFFFFFFFFFFFF

@A00721:190:HGJW7DSXY:4:1408:24985:21214\_1:N:0:TCTGCAAG+GCTGCACT  
GTCCGGAGTATATTGTATGTTAATAGATAGTGGGATAATAGTTCTACCGATACGTAGTGAACGCGTTC  
GTAGAACCAAGTACTTTCCGTCTGAAGAGTTTAGAGCTGCTATTGATTATGTAACCGATAGGAGTTGT  
ATA

+

FFFFFFFFFFFF:FFFFFFFFFFFFFFFFFFFFFFFFFFFFFFFFFFFFFFFFFFFFFFFFFFFFFFFF  
FFFFFFFFFFFF:F:F:FFFFFFFFFFFFFFFFFFFFFFFFFFFFFFFFFFFFFFFFFFFFFFFF

@A00721:190:HGJW7DSXY:4:1305:22290:17143\_1:N:0:TCTGCAAG+GCTGCACT  
TGTCTTTAGACGATAATACTTTAATGACTATGTTGACTGACGAAGATTTCCACAGATTTGTCTACG  
TTGCAGATCGCCACTCCAAACACTATATACATTATAAAATATAAAAATAAGGGAGTCATAACTTTTGT  
TAC

+

FF,::FFF,F,FFF:,F,::FFFF,F,,F:F,FF,F:FFF:F:F:FFFF::FF:::FFF,F:F,FF  
FFF,F,FF:FFF:FF,FF,F,,FFFFFFFFFFFFFFFF,FFF:F:FF,FFFF,::,FFFFFF,::FFFF  
F:F

@A00721:190:HGJW7DSXY:4:1163:15031:22608\_2:N:0:TCTGCAAG+GCTGCACT  
CGAAGTCTCTGATTTTATTAATCATTACTTTAACGATCTCTCGGTCACTTACTCTGTACTTGATCTAC  
GTCGTTAACTGTCGGAACAACCTTTACTTAGAATGACTCTATCTTTT

+

FFFFFFFFFFFFFF:FFFFFFFFFFFFFFFFFFFFFFFFFFFFFFFFFFFFFFFFFFFFFFFFFFFF  
FFFFFFFFFFFFFFFFFFFFFFFFFFFFFFFFFFFFFFFFFFFFFFFFFFFFFFFFFFFF

@A00721:190:HGJW7DSXY:4:1676:27868:10770\_1:N:0:TCTGCAAG+GCTGCACT  
AATACTCACTATCGTTTTCTGCTTTTTCTTAGCTAATAGATTAATAAAGGATGAGTACGAAAACCAAC  
TCTTCGTTACGAGACCTGATGGTAGAATAGATTTAGTCTCTACACCCATCTCAACGAGGATAAAGCGA  
GTT

+

FFFFFFFFFFFFFFFFFFFFFFFFFFFFFFFFFFFFFFFFFFFFFFFFFFFFFFFFFFFF:FFFFFF:FFFFFFF,FFFFFFFFFFFFFF,FFFFFFF  
FFFFFFFFFFFFFFFFFFFFFFFFFFFFFFFFFFFFFFFFFFFFFFFFFFFFFFFFFFFF:FFFFFFFFFFFFFFFFFFFFFFF  
FFF

@A00721:190:HGJW7DSXY:4:2231:13847:5838\_1:N:0:TCTGCAAG+GCTGCACT  
ACTAAGAGATCATCCGCACACGACTCGAAACCGAGACGCCGTAGATCAAAGTCCCTTCTAACTTTAGA  
TTATGAATCCTGCCTTTACTCATTTTATAGCAGTTATTTATGTTGTACTTTTTATAATTTATAACCTT  
CTT

+

::,F,,F,F,:F:FF::F:FFFFFFFFFFFFFFFFFFFFFFFFFFFFFFFFFFFFFFFFFFFF:FFFFFFFFFFFFFFF  
FFFFFFFFFFFFFFFFFFFFFFFFFFFFFFFFFFFFFFFFFFFFFFFFFFFFFFFFFFFF:FFFFFFFFFFFFFFFFFFFFFFF  
FFF

@A00721:190:HGJW7DSXY:4:2270:28420:1329\_2:N:0:TCTGCAAG+GCTGCACT  
ATGCTTTTCGATAGTGATTGTTATCAATTTAAATACATTACTGTTCAAATCATCTTTACTCACAGAC  
TCCGAAAATGGTTTCAAATGAGGTCAAAGCTCTATTTATTAAACGAAC

+

FFFFFFFFFFFFFFFFFFFFFFFFFFFFFFFFFFFFFFFFFFFFFFFFFFFF:FFFFFFFFFFFFFFFFFFFFFFFFFFFFFFFFFFFF  
FFFFFFFFFFFFFFFFFFFF:FFFFFFFFFFFF:FFFFFFFFFFFFFFFFFFFF:FFF

@A00721:190:HGJW7DSXY:4:1551:16179:30796\_1:N:0:TCTGCAAG+GCTGCACT  
ACCACTGATCTGCCGACTTTAGTCAAGGAAC TTCAATTCCTTCGATGTTTATATTTTTCTATAAGGGA  
AAATAGCAATAATCAAATTTGACAAATTTTAGAACTTTATTTCAGAACTCTCTCCGATCACCTTGGT  
GTG

+

FFFFFFFFFFFFFFFFFFFFFFFFFFFFFFFFFFFFFFFFFFFF,FFFFFFFFFFFFFFFFFFFFFFFFFFFF:FFFFFFFFF  
FFFFFFFFFFFFFFFFFFFFFFFFFFFF:FFFFFFFFFFFFFFFFFFFFFFFFFFFFFFFFFFFFFFFFFFFFFFFFFFFF  
FFF

@A00721:190:HGJW7DSXY:4:1427:31114:34773\_1:N:0:TCTGCAAG+GCTGCACT  
TCAATAAGATGTATGATGATAATCTACTATTTTTAAATAGTGATATTCAGCGTATACTTGAATACTTT  
ATCAAAGATTTGGCTTGGTCTATTTACCGCAAAAAGTTGAAGAGGTCTATGATATTTATTTTACTTA  
TAC

+

F:FFFFFFFF,FFFFFF,FFFFFFFFFFFFFFFFFFFFFFFFFFFFFFFFFFFFFFFFFFFFFFFFFFFF  
FFFFFFFFFFFFFFFFFFFFFFFFFFFF:FFFFFFFFFFFFFFFFFFFFFFFFFFFFFFFFFFFFFFFFFFFF  
FFF

@A00721:190:HGJW7DSXY:4:2675:17580:35164\_2:N:0:TCTGCAAG+GCTGCACT  
CCGATTATAACTTGACTGTTGATAATATTACAATAGCTCTTCTCAGAAGATTAGAGAAGTAACCGGT  
GAACACGTCGGTAGCATTGATTTACTTTTACCGTTAGAACTGAAAAAG

+

FFFFFFFFFFFFFFFFFFFFFFFFFFFFFFFFFFFFFFFFFFFFFFFFFFFFFFFFFFFF:FFFFFFFFFFFFFFFFFFFF  
FFFFFFFFFFFFFFFFFFFFFFFFFFFFFFFFFFFFFFFFFFFFFFFFFFFFFFFFFFFF

@A00721:190:HGJW7DSXY:4:2377:20835:13056\_2:N:0:TCTGCAAG+GCTGCACT  
TATAAGTTACAAACGATTCTTCGACTATATTAAAGAAATAAAAATACTTCAAGTACCTGAACCTTACA  
TTTTTAATGGTATGGTATAATGTGTCTTACAAATAGAACCTTCACTCT

+

FFFFF:FFFFFF,FFFFFFF:FFFFFF:FFFFFFFFFFFFFFFFFFFFFFFFFFFFFFFFFFFF  
FFFFFFFFFFFFFFFFFFFFFFFFFFFFFFFFFFFFFFFFFFFFFFFFFFFFFFFFFFFF  
@A00721:190:HGJW7DSXY:4:1560:11577:20823\_2:N:0:TCTGCAAG+GCTGCACT  
TCCTTAATATTCTAGTAACCGCTATGTGGGCATTACTAGGATTTATCACACTCCTAAATTTGATAGCA  
ATTTATGTTTTAAATGCTAGGAAAATTTTAGAAAACTCCATTGTATA  
+  
F:FFFFFF:FFFFFFF,FFF:FFFFF:FFF:FFF:FFFFFFFFFFFFFFFFFFFFFFF,,:FFFFFFF  
FFFFFFFFFFFFFFF:FFFFFFFFFFFFFFFFFFFFFFFFF:FFFFFFFFFFFFFFF  
@A00721:190:HGJW7DSXY:4:1354:10565:35102\_1:N:0:TCTGCAAG+GCTGCACT  
CTTAATTCAATAGCTTTAGTATTATTTACTATCGCCTTTATTGAAAATTGTATAAGAGTTAATTGCTT  
ACACAAAAGTGACGCGCGAAGGAATCTTAATTGATTGAAGCTAGGCGTTGGGAGAATGAAGTCCGC  
TTC  
+  
:FFF:,FFFFFFFFFFFFFFFFFFFFFFFFFFFFFFFFFFFFFFFFFFFFFFFFF,FFFFFFFFFFFFFFFFF  
FFFFFFFFFFFFFFFFF:,FFFF:F:FFFFFF:FFFFFFFFFFFFFFFFFFFFFFFFFFFFFFFFF:FFF  
:F:  
@A00721:190:HGJW7DSXY:4:2676:27507:17190\_1:N:0:TCTGCAAG+GCTGCACT  
ACCATGACCAATCATCGCTCCAAGTGGCAGCCAGACGTAGGGTCAAACCTACTACCGCCGGTCGGCA  
GATCGGCACCACTGGTCTCTACGTTCAAGGACCCGCTGTGCAGAATAACCTTCCCAATCTAGATCTG  
CAC  
+  
:FFF:FFFFFFFF:FFFFFFFF:FFFFFFFFFFFFFFFFFFFFFFFFFFFFFFFFFFFFFFFFF  
FFFFFFFFFFFFFFF:FFFFFFFFFFFFFFFFFFFFFFFFFFFFFFFFFFFFFFFFFFFFFFFFF:FFFFFFFFF  
FFF  
@A00721:190:HGJW7DSXY:4:1159:28673:21652\_1:N:0:TCTGCAAG+GCTGCACT  
GGACGACCACTCAAAGGAAACGGGCTGTTGCCAGAGGAAAGCAGCGACCAACCGAGGTCGCTCGTAAC  
ATTGACGGCAGTCCCGTCATCTCTGTGGGAAGTGAAGGACGTACCTCAGTCAAAAGTCACATTCACCAC  
TCC  
+  
FFFFFFFFFFFFFFFFFFFFFFFFFFFFFFFFFFFFFFFFFFFFFFFFFFFFFFFFFFFFFFFFF  
FFFFFFFFFFFFFFF:FFFFFFFFF:FFFFFFFFFFFFFFFFFFFFFFFFFFFFFFFFF:FFFF  
FFF  
@A00721:190:HGJW7DSXY:4:1241:16893:23516\_2:N:0:TCTGCAAG+GCTGCACT  
TGTGACTATACAGTTCGCCATTTCAAGAGTGGTCAATACGTCTGGGAGGTACTGAAGCCTTCCCCT  
CCGCTGGCACGAAGAACAACCTCCCAAGCCAATCAATAGTTCTTCTGACC  
+  
FFFFFFFFFFFFFFFFFFFFFFFFFFFFFFFFFFFFFFFFFFFFFFFFFFFFFFFFFFFFFFFFF  
FFFFFFFFFFFFFFFFFFFFFFFFFFFFFFFFF:FFFFFFF,FFFFFFFFFFFFFFF  
@A00721:190:HGJW7DSXY:4:2222:32344:18677\_2:N:0:TCTGCAAG+GCTGCACT  
AGGGTAGTCTCTAAGTCTACCAGGAAGAGGGGAAATGTCCCAAACCTGAGAAGAATAAAGGGAAAGG  
TCCATCAGGACCTAAGAAGGGGAAATTACCCCTAATTCTGAAGGAAGA  
+  
FFFFFFFFFFF:FFFFFFFFFFFFFFFFFFFFFFFFFFFFFFFFFFFFFFFFFFFFFFFFF  
FFFFFFFFFFFFFFFFFFFFFFFFFFFFFFF,FFFFFFFFF:FFFFFFFFFFFFFFF  
@A00721:190:HGJW7DSXY:4:1263:10411:22999\_2:N:0:TCTGCAAG+GCTGCACT  
GGGGTTGGGAATAAGAAATCTGCACGGGCCAAAGAGGCCGCTGCTACGAAGTCGCTGAAGGCGGCTTG  
GGTCATTAAGGGTAGCTGTAAAGTTGCGCCTGCCGACCCCATCTTTGA  
+  
FFFFFFFFFFF,FFFFF:FFFFFFFFFFFFFFFFFFFFFFFFFFFFFFFFFFFFFFFFF  
FFFFFFFFFFFFFFF:FFFFF:FFFFFFFFFFFFFFFFFFFFFFFFFFFFFFFFF  
@A00721:190:HGJW7DSXY:4:1441:30563:16157\_1:N:0:TCTGCAAG+GCTGCACT  
CTTGACAGAGTGAAGTTCAGACGTGTGCTCTTCCGATCTCGTCACTGAGGACGAAGGTGAGAGGA  
CTTTTGGCTACTGGCGACAACTGAGAGCAGTCGCTGGGGAAAGAGAATTGCGTGGGTTGAAGGCCGA  
CGC



+  
FFFFFFFFFFFFFFFFFFFFFFFFFFFFFFFFFFFFFFFFFFFFFFFFFFFFFFFFFFFFFFFFFFFFFFFF  
FFFFFF,FFFFFFFFFFFFFFFFFFFFFFFF:FFFF,FFFFFFFFFFFFFFFFFFFFFFFFFFFFFFFF  
FFF  
@A00721:190:HGJW7DSXY:4:1112:31937:8296\_1:N:0:TCTGCAAG+GCTGCACT  
ATGGCAGATACTACCGATAAGGTGAAAAATATGCAGGTCAAAGATTCTGTAGCTCTGAGGGCGGTTGA  
GGGAGCCGTTTTGGCCGACTTTAACTATTCTAAGAGTCTTTATGATTCAAAACCTATCGTTGTCGTAC  
CTT  
+  
FF,FFFFFFFFFFFFFFFFFFFFFFFFFFFFFFFFFFFFFFFFFFFFFFFFFFFFFFFFFFFFFFFFFFFF  
FFFFFFFFFFFFFFFFFFFFFFFFFFFFFFFFFFFFFFFFFFFFFFFFFFFFFFFFFFFFFFFFFFFFFFFF  
FFF  
@A00721:190:HGJW7DSXY:4:2154:30237:1407\_1:N:0:TCTGCAAG+GCTGCACT  
CGCAGTTTCCAGAATTGCGGTTGAAGTTCACCCATTCTATCTTGAATGCTCACGCCGTCGAGCCATA  
TCGAGACTATGTTATAATCACTTGTTAAAGTACAGATTTAGTGATTAGATATTATTGATATTGGAGG  
CGA  
+  
FF:FFFFFFFF:FFFFFFFFFFFFFFFFFFFFFFFFFFFFFFFFFFFFFFFFFFFFFFFF:FFFFFFFF  
FFFFFFFFFFFFFFFFFFFFFFFF,FFFFFFFFFFFFFFFFFFFFFFFFFFFFFFFFFFFFFFFFFFFFF  
FFF  
@A00721:190:HGJW7DSXY:4:2225:12002:18959\_2:N:0:TCTGCAAG+GCTGCACT  
ATCCAAAACCTCTTGAATGGAGTACATATTTGCAACCCTATTCTTGATGTGAAAGATGCATCGAGGTA  
TACGTCTAGGAACATTGATTGGGAACGTACCTACTCACGAGACGTCAT  
+  
FFFFFFFFFFFFFFFF:F:FFFFFFFFFFFFFFFFFFFFFFFFFFFFFFFFFFFFFFFFFFFFFFFFFFFF  
FFFFFFFFFFFFFFFFFFFFFFFF:F,FFFFFFFFFFFFFFFFFFFFFFFFFFFF  
@A00721:190:HGJW7DSXY:4:1155:17680:8406\_1:N:0:TCTGCAAG+GCTGCACT  
TTCGTTCTGTTACAAGAACGCTTTGGATTGTGACCATAAAGCCTCAGTTGCGATAGCTGTAGAGGTAT  
ACGATATCTCTCTTGATGATGTAGCCACTATAATGCTTAAGAGAGAGATTGATGTATGTCATTTCTGC  
TTA  
+  
FFFFFFFFFFFFFF,FFFFFFFFFFFFFFFFFFFFFFFF:FF:FFFFFFFFFFFFFFFFFFFFFFFFFFFF  
FFFFFFFFFFFFFFFFFFFFFFFFFFFFFFFFFFFFFFFFFFFFFFFFFFFFFFFFFFFFFFFFFFFFFFFF  
FFF  
@A00721:190:HGJW7DSXY:4:2434:21341:29872\_1:N:0:TCTGCAAG+GCTGCACT  
GAATTATTGGACACGATGAAAAATGACATACCCGTTCTGACCTTGGTATCGTTATCCGTCATGGAGA  
TGATGGCGCATCACTTGATTACTATATGCCCGAAGGATTGGGTTATTCTCACAACAAAGATAAGATTT  
TAT  
+  
FFFFFFFFFFFFFF:FF:FFFFFF:FFF:FF,FFFFFFFFFFFFFFFFFFFFFFFFFFFFFFFFFFFF  
FFFFFFFFFFFFFFFFFFFFFFFF:FFFFFFFFFFFFFFFFFFFFFFFFFFFFFFFFFFFFFFFFFFFFF  
FFF  
@A00721:190:HGJW7DSXY:4:1316:1741:31657\_2:N:0:TCTGCAAG+GCTGCACT  
GTGAACCTTGGGGACTAGATTGAGCATTAATGAGTTCCGAATAACTCGTAATAAATCTTTCTCTAGT  
GGACAATTCAGAATACCTATATCCGTACCAAGAGCCACTGCCAATCTC  
+  
FF:F,F,F:,FF,FFFFFFFFFFFFFFFF:FFFFFFFFFFFF:F:FFFF:F:FFFFFFFFFFFFFFFF  
F:FFFF:FFFFFFFF:F,FFFF:FFFFFFFF,FFFFFF,:F:  
@A00721:190:HGJW7DSXY:4:2136:9815:34334\_2:N:0:TCTGCAAG+GCTGCACT  
AGATTATGGTTGATAAAGTTTTCTTCATAAGGGCTATTCAGTACGTCATGGGGATCACTTCTTCGGTC  
AATGACAAAACCTTCGAATATGTTACGACATGGCTTCGTAACAACAGT  
+  
FFFF,F:FF,,FFFFFFFF:F,F,FFFF:FFFFFFFF,FFFF,:FF:FFFFFFFF,FFF  
F:FFFFFFFF:F,FFFF:FFF,FFFFFFFFFFFFFFFF:::

@A00721:190:HGJW7DSXY:4:2132:29478:28933\_1:N:0:TCTGCAAG+GCTGCACT  
TCACCAAGATGTTTCATATAGATACGAGATACCTAGAGAAGGTCGAGCGATCTTACTCGTTATCGGAG  
CTAAGAAGAAGACTTTGGGTACACGTTATGCTCGAACTTAACGTTAGTACCGAGGTGATCTCTCT  
GCT

+

FFFFFFFFFFFFFFFFFFFFFFFFFFFFFFFFFFFFFFFFFFFFFFFFFFFFFFFFFFFFFFFFFFFFFFFF  
FFFFFFFFFFFFFFFFFFFFFFFFFFFFFFFFFFFFFFFFFFFFFFFFFFFFFFFFFFFFFFFFFFFFFFFF  
FFF

@A00721:190:HGJW7DSXY:4:1250:9896:9204\_1:N:0:TCTGCAAG+GCTGCACT  
AGAGAAAAGATTGAGGACGCCTACGGTGACTTTATGGACAAGATGCAAGTTCTTGGGAAATACTTGTT  
TCCCTTTTATAGGTTTAGTAGGTGATCTTGACGTCGATTCTTTGTATAGGGAGTGTGAGAAGACAACGA  
ATC

+

FFFF:FFFFFFFFFFFFFFFFFFFFFFFFFFFFFFFF:FFF:FFFFFFFF:FFFFFF:FF:FFFF:  
FFFFFF: :FFFFFFFFFFFFFFFFFFFFFFFFFFFFFFFFFFFFFFFFFFFFFFFFFFFFFFFFFFFFF  
FFF

@A00721:190:HGJW7DSXY:4:2109:11080:25034\_1:N:0:TCTGCAAG+GCTGCACT  
ACCGGTCTCTAAATCTTTGAGATTGAGAAGATTGAAGAACACGTCAAGAAGTCGCTCGGCGTTGTTC  
TTGAAAACCAAGTTAAGAAGGAGGCTGATCATGGAGTCTTTGTACCTTCTGTCAAACCTTCGAGGTTCA  
GCT

+

FFFFFFFFFFFFFFFFFFFFFFFFFFFFFFFFFFFFFFFFFFFFFFFFFFFFFFFFFFFFFFFFFFFFFFFF  
FFFFFFFFFFFFFFFFFFFFFFFF:FFFF:FF,FFFFFFFFFFFFFFFFFFFFFFFFFFFFFFFF,FFFFFFFFFFFF  
FFF

@A00721:190:HGJW7DSXY:4:2209:4065:26349\_2:N:0:TCTGCAAG+GCTGCACT  
CCGGATGTGGATTGAAGGCTGGCTCTAAGGGAGACTCCTTCTTTTGAATGTTGTAAAGAATTGGGTT  
GAGAAGTGTGCTTTACAAGGAGTTAGACTCTTCTTCAAGTTTTTAGAT

+

FFFFFFFFFFFFFFFFFFFFFFFFFFFFFFFFFFFFFFFFFFFFFFFFFFFFFFFFFFFFFFFFFFFFFFFF  
FFFFFFFFFFFFFFFFFFFFFFFF:FFFFFFFFFFFFFFFF,FFFFFFFFFFFF

@A00721:190:HGJW7DSXY:4:1453:2284:27774\_2:N:0:TCTGCAAG+GCTGCACT  
CTCTACCCATAACTTCTTTTTCAAAAATGCGGATGGGTCTACTGATGTTTTCTACAGAGTGCAGTCG  
TTTCAACACTTATCACCACCTTTTGAAAGGAAAATAATTTGTGATGAAA

+

FFFFFFFFFFF:FFFFFFFFFFFFFFFFFFFFFFFFFFFFFFFFFFFFFFFFFFFFFFFFFFFFFFFFFFFF  
F:FFFF:FF:FF,FFFF:FF:FFFF,FFFFFFFFF:,FF:FFFF

@A00721:190:HGJW7DSXY:4:2134:1298:20306\_2:N:0:TCTGCAAG+GCTGCACT  
ACGTCTTAAGTAATTTGGATGTTGTGAAAACATCAGGTTCTTGTACGATTCTTAAAGAAGTTTA  
TAAAACTTCAGAGTCTCTTGAAGTCCAGGTAGCTAATGTTCTTGCA

+

FFFFFFFFFFFFFFFFFFFFFFFFFFFFFFFFFFFFFFFFFFFFFFFFFFFFFFFFFFFFFFFFFFFFFFFF  
FFFFFFFFFFFFFFFFFFFFFFFFFFFFFFFFFFFFFFFFFFFFFFFFFFFFFFFFFFFFFFFF

@A00721:190:HGJW7DSXY:4:1622:18819:25128\_1:N:0:TCTGCAAG+GCTGCACT  
CTCTGTTGGTAGAGGAGTTGAGAGAATTACTCAGATTCAATCTGGCATCACTGAACGTCTACAACGAG  
TTAGGGAGTGGCTAGGTTTTAAAGATCCTTGCACAAGCAATACCTTCCACTGAGTTCATCACCAG  
AGT

+

FFFFFFFFFFFFFF:FFFFFFFFFFFFFFFFFFFFFFFFFFFFFFFFFFFFFFFFFFFFFFFFFFFFFFFF  
FFFFFFFFFFFFFFFFFFFFFFFFFFFFFFFFFFFFFFFFFFFFFFFFFFFFFFFFFFFFFFFF:FFFFFFFFFFFFFFFFFFFFFFFF  
FFF

@A00721:190:HGJW7DSXY:4:2140:13612:35055\_1:N:0:TCTGCAAG+GCTGCACT  
CTGATGCTGAATTTGAGGAAAATTTTCGGAAGTTTTTGGTATAAATCCTGATGGCTCAGTACAGGGA  
GGAGGTAATAGTTATAAAACCTTCTTTTATCATTGCAACAGGACTTTGAGAAGACTGTTGAAATGGAC  
AAA

+  
FFFFFFFFF:FFFFFFFFFFFFFFFFFFFF,,FFFFFFFFFFFFFFFFFFFFFFFF:FFFFFF  
FFFFFFFFFFFFFFFFFFFFFFFFFFFFFFFFFFFFFFFFFFFFFFFFFFFFFFFFFFFFFFFF  
FFF  
@A00721:190:HGJW7DSXY:4:2141:26078:13338\_1:N:0:TCTGCAAG+GCTGCACT  
AGGTATGTGTACGCTACACTCGAAATATGGGCCCTCATAAGGAAGTATAGTTGGCGTCTTGTCGTTG  
ACGTCATTACAGTCTGGAAGTTAGATCATTTGTT CAGGAAGATCTCTACAGAGATTATCGAGAGTTGT  
GAT  
+  
FFFFFFFFFFFFFFFFFFFFFFFFFFFFFFFFFFFFFFFFFFFFFFFF:FFFFFFFFFFFFFFFF  
FFFFFFF,FFFFFFFFFFFFFFFFFFFFFFFFFFFFFFFFFFFFFFFFFFFFFFFFFFFFFFFF  
FFF  
@A00721:190:HGJW7DSXY:4:2519:19190:24173\_1:N:0:TCTGCAAG+GCTGCACT  
ACTTTTTGAATATGACAGAAGCTCGCCATATCAGATTAGAGACATGCCAGTTAGAGTTCTTCTAACCA  
GGACTGATGGTGAGATTCTTTTACCTTTTGGAGGTCCAGGAACCTTTACTCCTAGTGTCTTTTCTAGA  
GTC  
+  
FFFFFFFFFFFFFFFFFFFFFFFFFFFFFFFFFFFFFFFFFFFFFFFF:F:FFFFFF:  
FFFFFFFFF,FFFFFFFF:FFFFFFFFFFFFFFFFFFFFFFFFFFFFFFFF:FFFFFFFF  
FFF  
@A00721:190:HGJW7DSXY:4:2438:3323:32863\_2:N:0:TCTGCAAG+GCTGCACT  
CGGAGGATGACAGGTGGGAGACCGCTCAATAACACTCTATTGAATCCCTTTTCCACGATGAAAGCTCT  
TTATGAGGTGCTCCATGCAAATTTACAGTTCCTCTTTGGTGATATCGC  
+  
FFFFFFFFFFFFFFFFFFFFFFFFFFFFFFFFFFFFFFFFFFFFFFFFFFFFFFFFFFFFFFFF  
FFFFFFFFF:FFF:FFFFFFFFFFFFFFFFFFFFFFFF:FFFFFFFFFF:F  
@A00721:190:HGJW7DSXY:4:2516:25545:30358\_1:N:0:TCTGCAAG+GCTGCACT  
AAGGTTCTATTACCACCCTTGTCATTGATACAAACATTCTAGGTGATGCTTTCTTAGAGGCTCGTCTA  
GCCGCTGAGATTGCTCTTACCTATTTACAATCTGTAGAGAGAGAGGTTAATCAGAATTTGAGTGATAA  
CGA  
+  
FFFFFFFFFFFFFFFFF:FFFF:FFFFFFFFFFFFFFFFFFFFFFFFFFFFFFFFFFFFFFFF  
FFFFFFFFFFFFFFFFFFFFFFFFF:FFFFFFFFFFFFFFFFFFFFFFFFFFFFFFFFFFFFFFFF  
FFF  
@A00721:190:HGJW7DSXY:4:2346:12943:2049\_1:N:0:TCTGCAAG+GCTGCACT  
GGTTTATGTTTCGGTTTCAGCTGGATGGATCTTTTGATGGTATGTTTCACATTGCGTGATCACTTCCC  
GTGGACTTGGGAAGAGATTAAACATAAAAATCCAGCGATTCTATTATGTCGCTAAAGCCTGTCCAGTTG  
TCG  
+  
FF:FFFFFFFFF:FFFFFFFFFFFFFFFFFFFF,F:FFFF:FFFF:FFFFFFFFF,FFFF  
FFFFFFFFFFFFFFFFFFFFFFFFFFFFFFFFFFFFFFFFFFFFF:FF:FFFFFFFFFFFFFFFF  
FFF  
@A00721:190:HGJW7DSXY:4:1208:7075:12242\_2:N:0:TCTGCAAG+GCTGCACT  
TTCTCGCTCGCATTTACAAAGGATTACTAAGTCTGAGATCTGCCACTTCTAATTTTAGGAAACGTGCG  
GAAAAGAAAGTTCATGAGGATGTCTTGGTCGAAAAATATCGCCGGGAA  
+  
FFFFFFFFFFFFFFFFFFFFFFFFFFFFFFFFFFFFFFFFFFFFFFFFFFFFFFFFFFFFFFFF  
FFFFFFFFFFFFFFFFFFFFFFFFFFFFFFFFFFFFFFFF:FFFFFF:  
@A00721:190:HGJW7DSXY:4:1144:5936:17628\_1:N:0:TCTGCAAG+GCTGCACT  
GGATCCTGATGACATTATTTCAACGGATACCGATCTCAGTTCTACCACAGAAACCGTCTCAGGAAGTG  
TCTCCACTGATTGGAATTAGAGAAAGACGACCTTCTTGTTGGGGACTGAGACCTCTGAATTTTCAGGG  
TGC  
+

FFFFFFFFFFFFFFFFFFFFFFFFFFFFFFFFFFFFFFFFFFFFFFFFFFFFFFFFFFFFFFFFFFFFFFFFFFFFFFFF  
FFF

@A00721:190:HGJW7DSXY:4:2313:22589:4288\_1:N:0:TCTGCAAG+GCTGCACT  
ACGTTGAAAGGGATAATTTCAACTCTGAGACTTCTAAGAGTGTTCAAAAGACCAGAAACGTAACAAG  
AAGAATAAAGGTAGGAAGGGGAGAAAACAGAACAAGCGAGCGGTTGAAGAGAAAACCTGATATGGTTGC  
+

F,::F,F,F:F,FFF:FFF,FFFFFFFF:F,F::FFFF,FF:FFFF,FFFFF:FFFFFFFF,FFF,FFF  
FFF,,FFFF::FFFF:FFFF,F:,FF,F:,F:FFF::FFFFFFFFFFFF::F:F:FF:FFFF:F

@A00721:190:HGJW7DSXY:4:2415:29179:3333\_2:N:0:TCTGCAAG+GCTGCACT  
CTCGGCGATACCACTGATCTTCCAGAGTTACGTAGTGGTCGTTCTTTTGGTGATTTTATCAAAGAGAA  
AGTTTCTGCTAGTCGCGACGATAGTATTTATCGGAGTGATATTAACAA

+  
FFFFFFFFFFFFFFFFFFFFFFFFFFFFFFFFFFFFFFFFFFFFFFFFFFFFFFFFFFFFFFFFFFFFFFFF:FFFFFFFF  
FFFFFFFFFFFFFFFFFFFFFFFFFFFFFFFFFFFFFFFFFFFFFFFFFFFFFFFFFFFFFFFFFFFFFFFF

@A00721:190:HGJW7DSXY:4:1578:15736:9392\_1:N:0:TCTGCAAG+GCTGCACT  
TCCAAAAAGCTATTAATAGCAGTTGCGGGGCTATAATACCGCCTCCAGATTACTCTAACTGAATCCA  
CTCTCTTGGGATATAAATGAGTACATCTATAATAGAGTTTTGGAAGTGTGTAATGTCTACGTACTGT  
TCA

+  
FFFFFFFFFFFFF:FFFFFFFFFFFFFFFFFFFFFFFFFFFFFFFFFFFFFFFFFFFFFFFFFFFFFFFFFFFF  
FFFFFFFFFFFFFFFFFFFFFFFFFFFFFFFFFFFFFFFFFFFFFFFFFFFFFFFFFFFFFFFFFFFFFFFFFFFF  
FFF

@A00721:190:HGJW7DSXY:4:1112:6714:26616\_1:N:0:TCTGCAAG+GCTGCACT  
CGATCTAGTCGATTGATTTTGTGACTACGATCTCTTTGTAATAAGAAGTTCTTCGCAGTTGAATCT  
CCACCAGGTGGAGGGAAGACCACTGAACTTATAGCGACTTTTGTCAATTTTTCGCAAAGGTCTTGA  
AGT

+  
FFFFFFFFFFFFFFFFFFFFFFFFFFFFFFFFFFFFFFFFFFFFFFFFFFFFFFFFFFFFFFFFFFFFFFFFFFFF  
FFFFFFFFF,FFFFFFFF:F:FF:FFFFFFFFFFFFFFFFFFFFFFFFFFFFFFFFFFFFFFFFFFFFFFFFFFFF  
FFF

@A00721:190:HGJW7DSXY:4:2513:5819:36245\_2:N:0:TCTGCAAG+GCTGCACT  
ACTGCTAATCGTAATTCGCGAGAAGAGATAGTACTAAAGTTTTGGCACTTCTAGTTCATCGCGGTAT  
TTGTGAAATTAAGACAGACGTGAAAGTTATGATGAGTGATCGTATTAG

+  
FFFFFFF:FFFFFFFFFFFFFFFFFFFFFFFFFFFFFFFFFFFFFFFFFFFFFFFFFFFFFFFFFFFFFFFF:FFFFFFF:  
FFFFFFFFFFFFFFFFFFFFFFFFFFFFFFFFFFFFFFFFFFFFFFFFFFFFFFFFFFFFFFFFFFFFFFFF

@A00721:190:HGJW7DSXY:4:1262:9155:28087\_1:N:0:TCTGCAAG+GCTGCACT  
GTTCTTTTCATCGACGAATTATTCATGATTCACGCTGGTCAGACCCTTTTCTTACACATCTACTTAA  
GGCGGCTTATACCATAGGTTACGGTGATTCCAAATCGGATTCATCAATCGTATTGATCTCCAAGTCGC  
AA

+  
FFFFFFFFFFFFF:FF,:FFF:FFFFFF,FFFFF:,FFFFFFF:FF:FFFF:FFF:FFFF,FFFFFFFF  
FFFF:FFF:FFFFFFFFFFFF,F:FFFFFFF,,:FFFFFFFFFFFF:FFFFFFFFFFFF,FF,FF:FFF,  
F:

@A00721:190:HGJW7DSXY:4:2209:16857:13870\_2:N:0:TCTGCAAG+GCTGCACT  
ATCAACGACATCATTCTTGATGAGTGTCGTTCTTATCGAAGTCTCAGTTATCGCTGCCCGGCCGACGT  
TTGTCGCGAACTCTCAGAGGTTTACGGCAGAAAAATTTCTCCTGCTAG

+  
FFFFFFFFFFFFFFFFFFFFFFFFFFFFFFFFFFFFFFFFFFFFFFFFFFFFFFFFFFFFFFFFFFFFFFFF:FFF  
FFFFFFFFFFFFFFFFFFFFFFFFFFFFFFFFFFFFFFFFFFFFFFFFFFFFFFFFFFFFFFFFFFFFFFFF

@A00721:190:HGJW7DSXY:4:1627:10818:11678\_1:N:0:TCTGCAAG+GCTGCACT  
CTTGGTAAGAGTAAGGTTAAATGTGAAGATGCTCAGACTATTATGAAGTTCAAGGTAATACTTACCA  
GCACGTTGCGCTGGTTAGAATTAACCTCAAGATGACCCTGTTTTTGCATCACAAACACATATTACCG  
TTG



+  
FFFFFFFFFFFFFF:FFFFFFFFFFFFFF  
FFFFFFFFFFFFFF  
FFF  
@A00721:190:HGJW7DSXY:4:2106:18728:10160\_2:N:0:TCTGCAAG+GCTGCACT  
ACGATACTTTGTTATCAATGTAAAGTTAAACGATGCTACTTGTGAGAGGATCAATCACAGTAAGGAAC  
TGTCACGTTTAGCACGGGAGGTTGCAGATTCAACCCCTTATATCGAGG  
+  
FFFFFFF,FF:FFFFFFFFF,FFF:FF:FFFFF:FFFFFFFFFFFFFFF:FFFFFFF:FFF  
FFFFFFFF:FFFFFFFFF:FFFFFFFFF  
@A00721:190:HGJW7DSXY:4:2364:30156:33833\_2:N:0:TCTGCAAG+GCTGCACT  
AGTATCTTGAAGTTGTTGACGACAAGCCTCAAGAGGGTAGAGGACCACCTGGATCTTCTACTGTCTCT  
GCCTTCCAAGATTTCTTAGAAGAGGTTATTCCTGGAACCACTTAACG  
+  
FFFFFFFFFFFFFFFFFFFFFFFFFFFFFFFFFFFFFFFFFFFFFFFFFFFFFFFF  
FFFFFFFFFFFFFFFFFFFFFFFFFFFFFFFF,FFFFFFFFF  
@A00721:190:HGJW7DSXY:4:2321:13150:5760\_1:N:0:TCTGCAAG+GCTGCACT  
TCCGCCGAATTAAGTACTAATGAGTTCAAGTCGGTTGTCGATCGAATTAAGATCAAGGCTAATACCTT  
TATAGGTAAGAAGCCCCTTGAGCCGCGTAGTCAGCGCGTTTAGCTGTATCATCAGTCAGAGTATACCC  
GAT  
+  
FF,F,:FFFF,F:::FF,:F:FF:FFFF,F,FFFFFFFFFFFFFFFFFFFFF:F:FFF,F:F  
FFFF:,F,F:,FF::FFF:FFFF:FF:FFFFFFF,F,F:FF:FFFFFFFFFFFF:FF:FF:F:F::  
F::  
@A00721:190:HGJW7DSXY:4:2569:18792:1313\_1:N:0:TCTGCAAG+GCTGCACT  
CCAAGAGAATATTTATTCTTATGAGGCTCGAACTTCAACGTTTTCAACGAAAGACATATCGCAC  
CCGAAATTTTTGGGCAGAATGCTCTTAACGCGTTCTTGAACGGTGTTTTGATCAGTCTAAGTTGGAT  
AAA  
+  
FF:FFFFFFFFF:FFFFFFFFF:FFFFFFFFFFFFFFFFFFFFFFFFFFFFFFFF  
FFFFFFFFFFFFFFFFFFFFFFFFFFFFFFFFFFFFFFFFFFFFFFFFFFFFFFFF  
FFF  
@A00721:190:HGJW7DSXY:4:2647:8712:4492\_2:N:0:TCTGCAAG+GCTGCACT  
GAGCTCCTCAATTGATAGATTGGGTCAACAATAGGGACGCTAGTATACTTCGTAAAGTCGACAGCGAA  
ATGGTCAATATTGATAATTGGACCGACTATATGACCTATTTTAAGCTC  
+  
FFFFFFFFFFFFFFFFFFFFFFFFFFFFFFFFFFFFFFFFFFFFFFFFFFFFF:FFFFFFFFFFFF  
FFFFFFFFFFFFFFFFFFFFFFFFFFFFFFFFFFFFFFFFFFFFFFFFFFFFFFFF  
FFF  
@A00721:190:HGJW7DSXY:4:2272:14127:16219\_1:N:0:TCTGCAAG+GCTGCACT  
ATGCTTCAGCCTTTTCGAAGCATAACCCCGCACAGAATATCGTTTATCACGCAAAATTTATTAATGCA  
ATTTTCGGACCTATCTTTAAGGTTCTTGTGAGGAGAGTCAAACAGTGTCTTTTACCCAACATTTTAT  
GTA  
+  
FFFFF:FFFFFFFFFFFFFFFFFFFFFFFFFFFFFFFFFFFFFFFFFFFFFFFF  
FFFFFFFFFFFFFFFFFFFFFFFFFFFFFFFFFFFFFFFFFFFFFFFFFFFFFFFF  
FFF  
@A00721:190:HGJW7DSXY:4:2637:3197:26099\_2:N:0:TCTGCAAG+GCTGCACT  
TTCGATGCTGAATTTCTTGAACCTTGGAGTGCCAGTGAATATTTTGTACGCGCAGGAGTATCCATAA  
CGATTTGTCAATTAACACCTTTGCTCAACGACGAAGTGAACGGCAA  
+  
FFFFFFFFFFFFFFFFFFFFFFFFFFFFFFFFFFFFFFFFFFFFFFFFFFFFF  
FFFFFFFFF:FFFFFFFFFFFFFFFFFFFFFFFFFFFFFFFFF,FFFFF  
@A00721:190:HGJW7DSXY:4:1261:30698:2581\_1:N:0:TCTGCAAG+GCTGCACT  
GTGTGCTCTCCGATCTATTTATCACTTTATTATGACCTTGGAAGTTTTCGGCTGTGGTTGTCGCT

GGGGACGATTCCATTCTGTTTTCAAAGACTCCAATAACTGATCATTCTGATCATATGATTTTGGACAA  
TGG

+

FFFFFFFFFFFFFFFF:FFF:FFFFFFFFFFFFFFFF,FFFFFFFFFFFFFFFF:FFFFFFFFFFFFFFFF  
FFFFFFFFFFFFFFFFFFFFFFFFFFFFFFFFFFFFFFFFFFFFFFFFFFFFFFFFFFFFFFFF  
FFF

@A00721:190:HGJW7DSXY:4:2426:12861:26271\_2:N:0:TCTGCAAG+GCTGCACT  
AGGTTGTTGTTTGGCGATTAGCTCTTGCGACTAATATTCGATATTCGATTGAGGGTCGTTATACCTAT  
TCGGCTATCTGTGCTTTGAATTGTATAAGATCAAATTTTAAACGATTC

+

FFFFFFFFFFFFFFFFFFFFFFFFFFFFFFFFFFFFFFFFFFFFFFFFFFFFFFFFFFFFFFFF:FFFFFFFFFFFFFFFFFFFFFFFF  
FFFFFFFFFFFFFFFFFFFFFFFF:FFFFFFFFFFFFFFFFFFFFFFFFFFFFFFFFFFFFFFFF

@A00721:190:HGJW7DSXY:4:2366:16712:20478\_1:N:0:TCTGCAAG+GCTGCACT  
TGATGTGGAGGGAGTTCTTGAAGCATCCCGACCTTCTCTGTGAAAATTTTGATGCGGTTTCATAAGA  
TTATCAGTAATCCTGATTCTACTACGGATTCATGGACCTTCCATCCTGTACCTCTTCTGGAGAGACGT  
ATC

+

FFFFFFFFFFFFFFFFFFFFFFFFFFFFFFFFFFFFFFFFFFFFFFFFFFFFFFFFFFFFFFFF  
FFFFFFFFFFFFFFFFFFFFFFFFFFFFFFFFFFFFFFFFFFFFFFFFFFFFFFFFFFFFFFFF  
FFF

@A00721:190:HGJW7DSXY:4:2268:5005:27571\_2:N:0:TCTGCAAG+GCTGCACT  
TCGAGACAGGTGATATTGTTGAGCGAGAGCGACCAAGATCTAAATTCGGTAACGGTGCGTGGCGCTTT  
ATTTTAAAAAGCTCCCTCCTCTCGCAAGTTTGATCTGATAGATCGGAA

+

FFFFFFFFFFFFFFFFFFFFFFFFFFFFFFFFFFFFFFFFFFFFFFFFFFFFFFFFFFFFFFFF  
FFFFFFFFFFFFFFFFFFFFFFFFFFFFFFFFFFFFFFFFFFFFFFFFFFFFFFFF

@A00721:190:HGJW7DSXY:4:2310:13684:18897\_2:N:0:TCTGCAAG+GCTGCACT  
AGTCTCTGACTTGACCATCTTTCATTTTAAATGACGATCATTAAGACTCTCTTCTTGTGTTTCTTCT  
TCGTTGCACTGATTTTTCTCATCAGCTTGTGTTTTACCTAAGCTGTG

+

F:FFFFFF:,,FFFFFF,,FFFFFF:FFF::FF,FFFF,FFFFFF,,F:FF:F,,::,F:FFF:F  
FF,:F,FFFFFF,FFFF:F:FFFF:FFFF:FFFFFF,FFF,,:F,F

@A00721:190:HGJW7DSXY:4:2260:3387:34068\_2:N:0:TCTGCAAG+GCTGCACT  
TCAGTTGATTAAGACTCTTCCGAAAGGCGAACTTTGGGAATTTGAAGCTCAGGGTGAAGCACAACTT  
TGACCGTGACGAACTGTGGTGTCTTGATCTACGTTACGGATATACTC

+

FFFF:FFFFFFFFFFFFFFFFFFFFFFFFFFFFFFFFFFFFFFFF,FFFFFFFFFFFFFFFFFFFFFFFF  
FFFFFFFFFFFFFFFF:F:FFFF:FFFFFFFFFFFFFFFFFFFFFFFF

@A00721:190:HGJW7DSXY:4:2630:22064:16282\_2:N:0:TCTGCAAG+GCTGCACT  
TTTTGTCTTCTTGTGTTGTCTTATTCTATTAATCACTCATTTTAGTGAGATTATTAACGCACTAA  
AACGTCTTCGACAACAGCAGGGGTTTTCGAATAGTGATAGCCACCCGC

+

FFF:FFFFFFFFFFFFFFFFFFFFFFFFFFFFFFFFFFFFFFFF::FFFFFFFFFFFFFFFFFFFFFFFF  
FFFF::F:F:FFF:FFFFFFFF:FFFFFFFFFFFFFFFF:,F:F:FF

@A00721:190:HGJW7DSXY:4:2341:24487:28244\_2:N:0:TCTGCAAG+GCTGCACT  
GGCAGCAGCATGACCATAATTGGTATTGACTTTGGTACCACCTTTCTACTGTCTGTCTCGCCTCTTC  
GAATGAAGTTTAAATGCTTAACAACAATGATAGTGAATTTATACCTAC

+

FFFFFFFF:FFFFFFFFFFFFFFFFFFFFFFFFFFFFFFFFFFFFFFFF:FFFF:FFFFFFFFFFF:F,FFFF  
FFFFFFFFFFFFFFFF:FFFFF:FFFFFFFFFFFFFFFFFFFFFFFF:F::F

@A00721:190:HGJW7DSXY:4:1540:23167:30342\_1:N:0:TCTGCAAG+GCTGCACT  
TTTTCTAATAATGATGACACTATTGTTTATGGATATGATGCTATTACTCATGATGGTTACGGTCAGGG  
AGGATTCTCAGTTTACAAGGACCTTAAGCGATGGATCGGGGTTAATTCTAAACATTACCCGAAAGAC  
GTG

+  
FFFFFFFFFFFFFFFFFFFFFFFFFFFFFFFFFFFFFFFFFFFFFFFFFFFFFFFFFFFFFFFFFFFFFFFF  
FFFFFFFFFFFFFFFFFFFFFFFFFFFFFFFFFFFFFFFFFFFFFFFFFFFFFFFFFFFFFFFFFFFFFFFF  
FFF  
@A00721:190:HGJW7DSXY:4:1127:12264:18662\_2:N:0:TCTGCAAG+GCTGCACT  
TACGATGTCGTCTGTCTCGGCGATCACTTTTCTACTAAGAATTGGTCCTACTTTTGGACAAGGCCAACT  
TCGTAATCTTCATGAGATCGTTTCTTTCTTTATCTCTTTGGTTGTTAG  
+  
FFFFFFFFFFFFFFFFFFFFFFFFFFFFFFFFFFFFFFFFFFFFFFFFFFFFFFFFFFFFFFFFFFFFFFFF  
FFFFFFFFFFFFFFFFFFFFFFFFFFFFFFFFFFFFFFFFFFFFFFFFFFFFFFFFFFFFFFFFFFFFFFFF  
@A00721:190:HGJW7DSXY:4:1417:13105:21840\_2:N:0:TCTGCAAG+GCTGCACT  
GAGTGAAAGGCTTCAATTGTAGTGGTTTGGTCGTTTCAGTACCCAGTCAGTATACCTCTACGCAAAGA  
TATTTTCATGAAAACCTACAGAGGAACGTACCGGATTACCTGTCTTTCAT  
+  
FFFFFFFFFFFFFFFFFFFFFFFFFFFFFFFFFFFFFFFFFFFFFFFFFFFFFFFFFFFFFFFFFFFFFFFF  
FFFFFFFFFFFFFFFFFFFFFFFFFFFFFFFFFFFFFFFFFFFFFFFFFFFFFFFFFFFFFFFFFFFFFFFF  
@A00721:190:HGJW7DSXY:4:2223:29053:33865\_2:N:0:TCTGCAAG+GCTGCACT  
TCGGCCGCTCTCTTTGCTTCGATGTTGGATGTCAAGAAGGGTTCAGAATGGGATTCCTACGTAGTTTA  
TGACTTTGGTGGTGGTACTTTCGATACTTCTATCGTCTTACGTTACGG  
+  
FFFFFFFFFFFFFFFFFFFFFFFFFFFFFFFFFFFFFFFFFFFFFFFFFFFFFFFFFFFFFFFFFFFFFFFF  
FFFFFFFFFFFFFFFFFFFFFFFFFFFFFFFFFFFFFFFFFFFFFFFFFFFFFFFFFFFFFFFFFFFFFFFF  
@A00721:190:HGJW7DSXY:4:2165:5945:36871\_2:N:0:TCTGCAAG+GCTGCACT  
AGTGTTATTTATTCTGGTGGTGTATGATAATCTTGAGGTCGTGACGTTGATGAAGCTATAAGAGCGTT  
CTTATTACGGCGCACTTCTTTACCCGCCACCACACAACCTTTCAGTTTC  
+  
FFFFF:FFFFFFFFFFFFFFFFFFFFFFFFFFFFFFFFFFFFFFFFFFFFFFFFFFFFFFFFFFFFFFFF  
FFFFFFFFF::FFFFFFFFFFFFFFFFF::FFF:FFFFFFFFFFFFFFFFFFFFFFFFF  
@A00721:190:HGJW7DSXY:4:2325:17255:9549\_1:N:0:TCTGCAAG+GCTGCACT  
ACTGGAAAACCCTCGTCAATACTTTTCAATAATATACGTCTTGAACCTCACTTATGACGATCTAGTGAA  
ATTAACGCGTCCTTTTCTGGAACGTAGTTTACTATTATGAACAAAGTTATCAAAGATAGTGGCATTCAAG  
+  
FFFFFFFFF:FFFF:FFFFFFFFF:F,FF:FFFF::FFFFFFFFFFFFFFFFFFFFFFFFF:F:FFFFFFFF  
FFFFFFFFFFFFFFFFFFFFFFFFFFFFFFFFFFFFFFFFFFFFFFFFFFFFFFFFFFFFFFFFFFFFFFFF  
FFF  
@A00721:190:HGJW7DSXY:4:2540:16839:6950\_1:N:0:TCTGCAAG+GCTGCACT  
GATCTTGCAGAGTGACTGGAGTTCAGACGTGTCTCTTCCGATCTCTTGCTGAAACAGCTATTAAAGC  
TGTTGAGCGTGTAATTACACCTAAACGAGCTCGATCTGCCATCGCTGAAGGATGTGCACTCTTTTCTGCT  
+  
F,FFF,FFFF,FF:FFFFFFFF:F:FFF,FFFF:FF,FFFFFFFFF,:FFFFFFFF:FFFFFFFFFFFF  
FFFFFFFFF:F,F:F,FFF:FF:FF,:FFFF:FFFF:FF:,FF:FFF:F:F:FFFF:FFFFFFFFFFFF  
F,  
@A00721:190:HGJW7DSXY:4:1575:2383:35806\_2:N:0:TCTGCAAG+GCTGCACT  
CAAGCTCGTATTATCGTCGCTGCTGGATCTGCGTTACCGTTGAAGGCTAACTCCAAGGTAATTATGA  
AGACTGTGATTTATCTTTCACTCTGGCCTTGATGAGGGTGTCTTCTAA  
+  
FFFFFFFFFFFFFFFFFFFFFFFFFFFFFFFFFFFFFFFFFFFFFFFFFFFFFFFFFFFFFFFFFFFFFFFF  
FFFFFFFFFFFFFFFFFFFFFFFFFFFFFFFFFFFFFFFFFFFFFFFFFFFFFFFFFFFFFFFFFFFFFFFF  
@A00721:190:HGJW7DSXY:4:1370:27796:35947\_2:N:0:TCTGCAAG+GCTGCACT  
AATTTCAATCTTCTTAAAAAGAAGATAGAGAGTCATACTTTGGGCTATCGTTCAGGTGCATGGGGTTG  
GATAGCCAATATTGAAGTGGACACCTCTGGTAGTATCGAAGTAAAGAT  
+

```
FFFFFFFFFFFFFFFFFFFFFFFFFFFFFFFFFFFFFFFFFFFFF,FFFFFFFFFFFFFFFFFFFFFFFFFFFFF,FFFFFFF
FFFFFFFF:FFFFFFFFFFFFFFFFFFFFFFFFFFFFFFFF:F:FFFFFFFF:FFFFFFFF
```

 $+$  $+$ 

+

+

+

+

+

TATTACGGATTACACGGTACCAGCGCATCTCGTGTCGAGCCTCGACCCGATTATATGGTATTAACCTTA  
TAA

+

FFFFFFFF:FFFFFFFFFFFFFFFFFFFFFFFFFFFFFFFFFFFFFFFFFFFFFFFFFFFFFFFFFFFFFFFF  
FFFFFFFFFFFFFFFFFFFFFFFFFFFFFFFFFFFFFFFFFFFFFFFFFFFFFFFFFFFFFFFFFFFFFFFF  
FFF

@A00721:190:HGJW7DSXY:4:2357:24695:9439\_2:N:0:TCTGCAAG+GCTGCACT  
CATTTTGAGAACTAACTATGTTATGTTCTCTGATCATTTTGACAATCTCTTCTTATAATAAAATAAATA  
AATAATATTACTAATGGCAAATAGTGGAAGGCTCCAGTCAACACTAG

+

FFFFFFFFFFFFFFFFFFFFFFFFFFFFFFFFFFFFFFFFFFFFFFFFFFFFFFFFFFFFFFFFFFFFFFFF  
FFFFFFFFFFFFFFFFFFFFFFFFFFFFFFFFFFFFFFFFFFFFFFFFFFFFFFFFFFFFFFFF,FFFFFFF

@A00721:190:HGJW7DSXY:4:1226:22670:7780\_1:N:0:TCTGCAAG+GCTGCACT  
AATAGGTGAAGGATAGTTTTTACCTCGACCAACATTAAGGCGGCGGCGACTAATCTTAAAGCTTCAC  
CCAAAATGAAGGACACTTCGAAACTGAATAATGATGCACTACAAACAAGTATCGCTAATCATCTGAAA  
AAG

+

FFFFFFFFFFFFFFF:FFFF:FFFFFFFFFFFFFFFF:FFFFFFFFFFFFFFFFFFFFFFFF:FFFFFFFFFFFFFF  
FFFFFFFFFFFFFFFFFFFF,FFFFFFFFFFFFFFFFFFFFFFFFFFFFFFFFFFFFFFFFFFFFFFFFFFFFFF  
F:F

@A00721:190:HGJW7DSXY:4:1323:10917:30232\_1:N:0:TCTGCAAG+GCTGCACT  
GAGAAAATTTCTTAGAGGATATTCGCCATTGTGGTACGAATTGGTCCAACATTTACCACCAAATTCTT  
TTGATACAACCTCTAGCCTTCAAGTGGGGTATGCCTGCGGAATACGCTTGCTATTACCAGATTGGTTC  
GAA

+

FFFFFFF:FFFFFFFFFFFFFFF:FFFFFFFFFFFFFFFFFFFFFFFFFFFFFFFF:FFFFFFFFFFFFFFFF  
FFFFFFFFFFFFFFF,FFFFFFFFFFFFFFFFFFFFFFFFFFFFFFFFFFFFFFFFFFFFFFFFFFFFFFFF  
FFF

@A00721:190:HGJW7DSXY:4:1344:7699:20838\_2:N:0:TCTGCAAG+GCTGCACT  
ATGTCAGAAGAAGCTATTCAAGCTTGTCGTTTAAAGACTGCAGAGGCTGTCAAACAAGCCCAGACTCA  
AGGAGTCCAATCAAAGGTTTTGAATTTAGCTCAACTGGGGAGACGTGC

+

FFFFFFFFFFFFFFFFFFFFFFFFFFFFFFFF:FFFFFFFFFFFFFFFFFFFFFFFFFFFFFFFF:FFFFFFFF  
FFFFFFFFFFFFFFFFFFFFFFF,F:FFFFFFFFFFFFFFFFFFFFFFFFFFFFFFFF:FF

@A00721:190:HGJW7DSXY:4:2122:29026:25739\_1:N:0:TCTGCAAG+GCTGCACT  
GTCCGGAGTATATTGTATGTTAATAGATAGTGGGATAATAGTTCTACCGATACGTAGTGAACGCGTTC  
GTAGAACCAAGTACTTTCCGTCTGAAGAGTTTAGAGCTGCTATTGATTATGTAACCGATAGGAGTTGT  
ATA

+

FFFFFFFFFFFFFFFFFFFFFFFFFFFFFFFFFFFFFFFFFFFFFFFFFFFFFFFFFFFFFFFFFFFFFFFF  
FFFFFFFFFFFFFFFFFFFF,FFFFFFFFFFFFFFFFFFFFFFFFFFFFFFFFFFFFFFFFFFFFFFFFFFFF  
FFF

@A00721:190:HGJW7DSXY:4:1605:19497:34444\_1:N:0:TCTGCAAG+GCTGCACT  
TGGCTTTAGACGATAATCCTTTAAGGACTATGTTGACTGACGAAGATTTTCCCACAGATTTGTCTACG  
TTGCAGATCGCCACTCCAAACACTATATACATTATAAAATATAAAAATAAGGGAGTCATAACTTTTGT  
TAC

+

FFFFFFFFFFFFFFFFFFFFFFFFFFFFFFFFFFFFFFFFFFFFFFFFFFFFFFFFFFFFFFFFFFFFFFFF  
FFFFFFFFFFFFFFFFFFFFFFFFFFFFFFFFFFFFFFFFFFFFFFFFFFFFFFFF:FFFFFFFFFFFFFFFF  
FFF

@A00721:190:HGJW7DSXY:4:1365:10673:3537\_2:N:0:TCTGCAAG+GCTGCACT  
CGAAGTCTCTGATTTTATTAATCATTACTTTAACGATCTCTCGGTCATTTACTCTGTACTTGATCTAC  
GTCGTTTAACTGTCGGAACAACCTTTACTTAGAATGACTCTATCTTTT

+

FFFFFFFFFFFFFFFFFFFFFFFFFFFFFFFFFFFFFFFFFFFFFFFFFFFFFFFFFFFFFFFFFFFFFFFFFFFFFFFF  
FFFFFFFFFFFFFFFFFFFFFFFFFFFFFFFFFFFFFFFFFFFFFFFFFFFFFFFFFFFFFFFFFFFFFFFFFFFFFFFF  
@A00721:190:HGJW7DSXY:4:2103:1181:6136\_1:N:0:TCTGCAAG+GCTGCACT  
AATACTCACTATCGTTTTCTGATTTTTCTTAGCTAATAGATTAATAATGGATGAGTACGAAAACCAAC  
TCTTCGTTACGAGACCTGATGGTAGAATAGATTTAGTCTCTACACCCATCTCAACGAGGATAAAGCGA  
GTT  
+  
FFFFF:,FFFFFF, :FFFFFF, :FFF:,FFF:FFF:FF,FFF, :FFF,F,FFFF:FFF,FFFF:FFF  
:FFF,FFFF,FFFFFFFF:FFFFFFFF,FFFF:FFFFFFFFFFFF:FFFFFFFFFFFF:FFF:FF,FFF  
FFF  
@A00721:190:HGJW7DSXY:4:1254:21287:28526\_2:N:0:TCTGCAAG+GCTGCACT  
CGAAGAGATCATCCGCAAACGACTCGAAACCGAGACGCCGTAGATCAAAGTCCCTTCTAACTTTAGAT  
TATGAATCCTGCCTTTACTCATTTTATAGCAGTTATTTATGTTGTACT  
+  
FFFFFFFFFFFFFFFFFFFFFFFFFFFFFFFFFFFFFFFFFFFFFFFFFFFFFFFFFFFFFFFFFFFFFFFFFFFFF  
FFFFFFFFFFFFFFFFFFFFFFFFFFFFFFFFFFFFFFFFFFFFFFFFFFFFFFFFFFFFFFFFFFFFFFFFFFFF:  
@A00721:190:HGJW7DSXY:4:2137:24126:18223\_1:N:0:TCTGCAAG+GCTGCACT  
TTTGGGTATGTTTTGTGAAAAACATGAGATACCCAAGTCTATCGAAGACATTATCTCTTATGTACTTA  
TTGTAACGATCATTCTTTCGAGTTTTGTCATTCTTATTCTTTTATTCCTTAACTGTGTATGAGGAGG  
ATT  
+  
FFFFFFFFFFFFFFFFFFFFFFFFFFFFFFFFFFFFFFFFFFFFFFFFFFFFFFFFFFFFFFFFFFFFFFFFFFFFF  
FFFFFFFFF:FFFFFFFFFFFF:FFFFFFFFFFFF,FFFFFFFFFFFFF::FFFF, :FFFF:FFFFFFFFF  
FFF  
@A00721:190:HGJW7DSXY:4:1537:28366:30921\_1:N:0:TCTGCAAG+GCTGCACT  
TCGATAGTGATTGTTATCAATTTAAATACATTACTGTTTCAAATCATCTTTACTCACAGACTCCGAAA  
ATGTTTCAAATGAGGTCAAAGCTCTATTTATTAACGAACCTATTATCCGATTCTTCGAGGGTATCAC  
TAC  
+  
FFFFFFFFFFFFFFFFFFFFFFFFFFFF:FFFFFFFFFFFFFFFFFFFFFFFFFFFFFFFFFFFF,FFFFFFFFFFFFFFFFFFFF  
FFFFFFFFFFFFFFFFFFFFFFFFFFFFFFFFFFFFFFFFFFFFFFFFFFFFFFFFFFFFFFFFFFFFFFFFFFFFF  
FFF  
@A00721:190:HGJW7DSXY:4:1427:26178:14450\_1:N:0:TCTGCAAG+GCTGCACT  
GACTTTAGTCAAGGAACCTTCAATTCCTTCGATGTTTATATTTTTCTATAAGGGAAAATAGCAATAATC  
AAATTTGACAAATTTTAGAAGCTTTATTTAGAACTCTCTCCGATCACCTTGGTGTGATCTCCCGGAG  
GAT  
+  
FF,FFFFFFFF:FFFFFFFF,FFFFFFFFFFFF:FFFFFFFF:FFF,FFFFFFFFFFFFFFFF:F:FFFFFF  
:FFFFFFFFF,FFFFFFFFFFFF:FFFFFFFFFFFFFFFFFFFFFFFFFFFF,FFFFFFFFFFFFFFFFFFFF  
FF:  
@A00721:190:HGJW7DSXY:4:2305:30888:28714\_2:N:0:TCTGCAAG+GCTGCACT  
ATGTATGATGATAATCTACTATTTTTAAATAGTGATATTCAGCGTATACTTGAATACTTTATCAAAGA  
TTTGCTTGGTCTATTTACCGCAAAAAGTTGGAAGAGGTCTATGATAT  
+  
FFFFFFFFFFFFFFFFFFFFFFFFFFFF:FFFFFFFFFFFF:FFFFFFFFFFFFFFFFFFFFFFFFFFFFF  
FFFFFFFFF:FFFFFFFFFFFFFFFFFFFF:FFFFFFFF,FFFFFFFFFFFF  
@A00721:190:HGJW7DSXY:4:1672:31042:15953\_2:N:0:TCTGCAAG+GCTGCACT  
TTTAAATAGCACCGATTATAACTTGACTGTTGATAATATTACAATAGCTCTTCTCAGAAGATTAGAG  
AAGTAACCGGTGAACACGTCGGTAGCATTGATTTACTTTTACCGTTAG  
+  
FFFFF:FFFFFFFFFFFF:FFFF,FFFF::FFFFFFFF:FFFFFFFF,FFFFFFFFFFFFFFFFFFFFF  
FFFF:FFFFFFFFFFFF:FFFF:F:FF,FFF:FFFF:FFFF:FF:FF  
@A00721:190:HGJW7DSXY:4:2412:18493:34710\_2:N:0:TCTGCAAG+GCTGCACT  
TATAAGTTACACACGATTCTTCGACTATATTAAAGAAATAAAAATACTTCAAGTACCTGAACCTTACA

TTTTTAATGGTATGGTATAATGTGTCTTACAAATAGAACCTTCACTCT  
+  
FFFFF:FFFFF,FFFFFFFF:FFFFFFF:,FFFFFFFFFFFFFFFFFFFFFFFFFFFFFFFFFFFFF  
:FFFFFFFFFFFFFFFFFFFFFFFFFFFFFFFFFFFFFFFFFFFFFFFFFFFFF  
@A00721:190:HGJW7DSXY:4:2111:4562:14246\_2:N:0:TCTGCAAG+GCTGCACT  
TCCTTAATATTCTAGTAACCGCTATGTGGGCATTACTAGGATTTATCACACTCCTAAATTTGATAGCA  
ATTTATGTTTTAAATGCTAGGAAAATTTTAGAAAACTCCATTGTATA  
+  
FFFFFFFFFFFFFFFFFFFFFFFFFFFFFFFFFFFFFFFFFFFFFFFFFFFFFFFFFFFFFFFFFFFFF  
FFFFFFFFFFFFFFFFFFFFFFFFFFFFFFFFFFFFFFFFFFFFFFFFFFFFFFFFFFFFF  
@A00721:190:HGJW7DSXY:4:1377:25129:3865\_1:N:0:TCTGCAAG+GCTGCACT  
CTTAATTCAATAGCTTTAGTATTATTTACTATCGCCTTTATTGAAAATTGTATAAGAGTTAATTGCTT  
ACACAAAAGTGACGCGCGAAGGAATCTTAATTGATTGAAGCTAGGCGTTGGGGAGAATGAACTGCCGC  
TTC  
+  
FFFFFFFFFFFFF:FFFFFFFFFFFFFFFFF:FFFF:FFFFFFFFFFFFFFFFFFFFF:F:FFFFF,FFFFF  
FFFFFFFFFFFFFFFFFFFFFFFFFFFFF:FFFF,FFFF:FFFFFFFFFFFFFFFFFFFFFFFFFFFFF  
FFF  
@A00721:190:HGJW7DSXY:4:1551:32741:26287\_1:N:0:TCTGCAAG+GCTGCACT  
CCATGACCAATCATCGCTCCAAGTGGCACGCCAGACGTAGGGTCAAACCTACTACCGCCGGTCGGCAG  
ATCGGCACCACTGGTCTCTACGTTACAGGACCCGCTGTGCAGAATAACCTTCCCAAATCTAGATCTGC  
AC  
+  
FFFFFFFFF,,FFFFFFFFFFFFFFFFFFFFFFFFFFFFFFFFFFFFFFFFFFFFFFFFFFFFF:FFFFFFFFFFFFFFFFFFFFF  
FFFFFFFFFFFFF:FFFFFFFFFFFFFFFFFFFFFFFFFFFFFFFFFFFFFFFFFFFFF,FFFFFFFFFFFFF,:FFFFFFFFFFFFF  
FF  
@A00721:190:HGJW7DSXY:4:1326:7129:29434\_1:N:0:TCTGCAAG+GCTGCACT  
GGACGACCACTCAAAGGAAACGGGCTGTTGCCAGAGGAAAGCAGCGACCAACCGAGGTGCTCGTAAC  
ATTGACGGCAGTCCCGTCATCTCTGTGGGAACTGAGGCAGTACCTCAGTCAAAGTCACATTCACCAC  
TCC  
+  
FFFFFFFFF:FFFFF:::FF,,FFFFFFFF:FFFFFFFFFFFFFFFFFFFF,FF:FFFFFFFFFFFF:FFFFFFFFFFFF:  
FFFF,FFFF,FFFFFFFFFFFFF:FFFFFFFFFFFF:FFFFFFFFFFFFFFFFFFFFFFFFFFFFF,FFFFFFFFFFFFFFFFFFFFF  
FFF  
@A00721:190:HGJW7DSXY:4:1326:22824:8735\_2:N:0:TCTGCAAG+GCTGCACT  
TGTGACTATACAGTTTCGGCCATTTCAAGAGTGGTCAATACGTCGTGGGAGGTACTGAAGCCTTCCCCT  
CCGCTGGCACGAAGAACAACCTCCCAAGCCAATCAATAGTTCTTCTGACC  
+  
FFFFFFFFFFFFFFFFFFFFFFFFFFFFFFFFFFFFFFFFFFFFFFFFFFFFFFFFFFFFFFFFFFFFF  
FFFFFFFFFFFFFFFFFFFFFFFFFFFFFFFFFFFFFFFFFFFFFFFFFFFFFFFFFFFFF  
@A00721:190:HGJW7DSXY:4:2307:15727:15389\_2:N:0:TCTGCAAG+GCTGCACT  
AGGGTAGTCTCTAAGTCTACCAGGAAGAGGGGAAATGTCCCCAAAACCTGAGAAGAATAAAGGGAAAGG  
TCCATCAGGACCTAAGAAGGGGAAATTACCCCTAATTCTGAAGGAAGA  
+  
FFFFFFFFFFFFFFFFFFFFFFFFFFFFFFFFFFFFFFFFFFFFFFFFFFFFFFFFFFFFFFFFFFFFF,FFFFF:FFF  
FFFFFFFFFFFFFFFFFFFFFFFFFFFFFFFFFFFFFFFFFFFFFFFFFFFFFFFFFFFFF  
@A00721:190:HGJW7DSXY:4:1268:19407:36730\_2:N:0:TCTGCAAG+GCTGCACT  
GGGGTTGGGAATAAGAAATCTGCACGGGCCAAAGAGGCCGCTGCTACGAAGTCGCTGAAGGCGGCTTG  
GGTCATTAAGGGTAGCTGTAAAGTTGCGCCTGCCGACCCCATCTTTGA  
+  
FFFFFFFFFFFFF:FFFFFFFFFFFFFFFFFFFFF:FF:FFFFFFFFFFFFFFFFFFFFFFFFFFFFFFFFFFFFF  
FFFFFFFFFFFFFFFFFFFF,FF,FFFFFFFFFFFFFFFFFFFFFFFFFFFFFFFFFFFFF  
@A00721:190:HGJW7DSXY:4:2225:3748:2785\_1:N:0:TCTGCAAG+GCTGCACT  
CTTGCAGAGTGACTGGAGTTCAGACGTGTGCTCTTCCGATCTCGTCACTGAGGACGAAGGTGAGAGGA









FFFFFFFFFFFFFFFF:FFFFFFFFFFFFFFFFFFFFFFFFFFFFFFFF:FFFFFFFFFFFFFFFFFFFFFFFFFFFFFFFF  
FFF

@A00721:190:HGJW7DSXY:4:2673:14696:24815\_1:N:0:TCTGCAAG+GCTGCACT  
AGGTATGTGTACGCTACACTCGAAATATGGGCCCTCATAAGGAAGTATAGTTGGCGTCTTGTCTGTTG  
ACGTCATTACAGTCTGGAAGTTAGATCATTTGTTGAGGAAGATCTCTACAGAGATTATCGAGAGTTGT  
GAT

+

FFFFFFFFFFFF:F:FFFFFFFFFFFF,FFFFFFFFFFFF:FFFFF:FFFFF:FF,FFFFFFFFFFFFFFFFFFFF  
FFFFFFFFFFFFFFFFFFFFFFFFFFFFFFFFFFFFFFFF:FFFFFFFFFFFFFFFFFFFFFFFFFFFFFFFFFFFFFFFF  
FFF

@A00721:190:HGJW7DSXY:4:2577:12373:32315\_1:N:0:TCTGCAAG+GCTGCACT  
ACTTTTGAATATGACAGAAAGCTCGCCATATCAGATTAGAGACATGCCAGTTAGAGTTCTTCTAACCA  
GGACTGATGGTGAGATTCTTTTACCTTTTGGAGGTCCAGGAACCTTTACTCCTAGTGTCTTTTCTAGA  
GTC

+

FFF:FFFFFFFFFFFFFFFFFFFFFFFFFFFFFFFFFFFFFFFFFFFFFFFFFFFFFFFFFFFFFFFF:FFFFF  
FFFFFFFFFFFF,FFFFFFFFFFFFFFFFFFFFFFFFFFFFFFFFFFFFFFFFFFFFFFFFFFFFFFFFFFFFFFFF  
FFF

@A00721:190:HGJW7DSXY:4:2530:26313:22482\_2:N:0:TCTGCAAG+GCTGCACT  
CGGAGGATGACAGGTGGGAGACCGCTCAATAACACTCTATTGAATCCCTTTCCACGATGAAAGCTCT  
TTATGAGGTGCTCCATGCAAATTTACAGTTCCTCTTTGGTGATATCGC

+

FFFFFFFFFFFFFFFFFFFFFFFFFFFFFFFFFFFFFFFFFFFFFFFFFFFFFFFFFFFFFFFFFFFFFFFF  
FFFFFFFFFFFFFFFFFFFFFFFFFFFFFFFFFFFFFFFFFFFFFFFFFFFFFFFFFFFFFFFFFFFFFFFF  
@A00721:190:HGJW7DSXY:4:1453:11885:36260\_2:N:0:TCTGCAAG+GCTGCACT

CTATTACCACCCTTGTCTATTGATACAAACATTCTAGGTGATGCTTTCTTAGAGGCTCGTCTAGCCGCT  
GAGATTCGTCTTACCTATTTACAATCTGTAGAGAGAGAGGAGATCGGA

+

FFFFFFFFFFFFFFFFFFFFFFFFFFFFFFFFFFFFFFFFFFFFFFFFFFFFFFFFFFFFFFFFFFFFFFFF  
FFFF:FFFFFFFFFFFFFFFFFFFFFFFFFFFFFFFFFFFFFFFFFFFFFFFFFFFFFFFFFFFFFFFF  
FFFF:FFFFFFFFFFFFFFFFFFFFFFFFFFFFFFFF:F:FFFFFFFFFFFFFFFFFFFF

@A00721:190:HGJW7DSXY:4:1349:18150:15922\_1:N:0:TCTGCAAG+GCTGCACT  
GTTTATGTTTCGGTTTCAGCTGGATGGATCTTTTGATGGTATGTTTACATTGCGTGATCACTTCCCG  
TGGACTTGGAAGAGATTAAACATAAAATCCAGCGATTCTATTATGTCGCTAAAGCCTGTCCAGTTGT  
CG

+

FFFF,FFFFFF,FFFFFFFFFFFFFFFF:, :FFFFFF,FF:FFF,FFFFFF,FFFFFF, :F:, F:FF:FF  
FFFFFFFFFFFF:FFFFFFFF:FFFFFFFFFFFF,FFFFFFFFF:FFFFFFFFFFFF,F:FFFF:FFFFFF  
FF

@A00721:190:HGJW7DSXY:4:1272:13078:4820\_2:N:0:TCTGCAAG+GCTGCACT  
TTCTCGCTCGCATTTCAAGGATTACTAAGTCTGAGATCTGCCACTTCTAATTTTAGGAAACGTCGC  
GAAAAGAAAGTTCATGAGGATGTCTTGGTCGAAAAATATCGCCGGGAA

+

FFFFFFFFFFFFFFFFFFFFFFFFFFFFFFFFFFFFFFFFFFFFFFFFFFFFFFFFFFFFFFFFFFFFFFFF  
FFFFFFFFFFFFFFFFFFFFFFFFFFFFFFFFFFFFFFFFFFFFFFFFFFFFFFFFFFFFFFFFFFFFFFFF

@A00721:190:HGJW7DSXY:4:1259:27245:10598\_1:N:0:TCTGCAAG+GCTGCACT  
GGATCCTGATGACATTATTTCAACGGATACCGATCTCAGTTCTACCACAGAAACCGTCTCAGGAACGTG  
TCTCCACTGATTCGGAATTAGAGAAAGACGACCTTCTTGTGGGACTGAGACCTCTGAATTTTCAGGG  
TGC

+

FF:FFFFFFFFFFFFFFFFFFFFFFFFFFFFFFFFFFFFFFFFFFFFFFFFFFFFFFFFFFFFFFFFFFFF  
FFFFFFFFFFFFFFFFFFFFFFFFFFFFFFFFFFFFFFFFFFFFFFFFFFFFFFFFFFFFFFFFFFFFFFFF:FFFFF  
FFF

@A00721:190:HGJW7DSXY:4:1243:31403:27884\_2:N:0:TCTGCAAG+GCTGCACT  
TTGAAAGGGATAATTTCAACTCTGAGACTTCTAAGAGTGTTTCAAAGACCAGAAACGTAACAAGAAG

$+$ 

@A00721:190:HGJW7DSXY:4:1373:13819:2033\_2:N:0:TCTGCAAG+GCTGCACT  
TGGTTGCGGCTGATCGTACCCCAATTCCTGCTAGAAAGATCACTCTCGGCGATACCACTGATCTTCCA  
GAGTTACGTAGTGGTCGTTCTTTTGGTGATTTTATCAAAGAGAAAGTT

+

@A00721:190:HGJW7DSXY:4:2174:30237:16313\_1:N:0:TCTGCAAG+GCTGCACT  
TCCAAAAAGCTATTAATAGCAGTTGCGGGGCTATAATACCGCCTCCAGATTACTCTAAACTGAATCCA  
CTCTCTTGGGATATAAATGAGTACATCTATAATAGAGTTTTGGAAGTGTGTAATGTCCTACGTACTGT  
TCA

+

@A00721:190:HGJW7DSXY:4:2551:26928:33160\_1:N:0:TCTGCAAG+GCTGCACT  
CGATCTAGTCGATTGATTTTGTGACTACGATCTCTCTTGTAAATAAGAAGTTCTTCGCAGTTGAATCT  
CCACCAGGTGGAGGGAAGACCACTGAACCTTATAGCGACTTTTGTCAATTTTTCGCAAAGGTCTTGA  
AGT

+

@A00721:190:HGJW7DSXY:4:2669:7111:3380\_2:N:0:TCTGCAAG+GCTGCACT  
ACTGCTAATCGTAATTCGCGAGAAGAGATAGTGACTAAAGTTTTGGCACTTCTAGTTCATCGCGGTAT  
TTGTGAAATTAAGACAGACGTGAAAGTTATGATGAGTGATCGTATTAG

+

@A00721:190:HGJW7DSXY:4:1233:24478:1235\_1:N:0:TCTGCAAG+GCTGCACT  
TCTTTTCATCGACGAATTATTCATGATTCACGCTGGTCAGACCCTTTTTCTTACACATCTACTTAAGG  
CGGCTTATACCATAGGTTACGGTGATTCCAATCAAATCGGATTCATCAATCGTATTGATCTCCAAGTC  
GCA

+

@A00721:190:HGJW7DSXY:4:1315:13313:32941\_1:N:0:TCTGCAAG+GCTGCACT  
ACATCAACGACCTCATTCTTGATGAGTGTCGTTCTTATCGAAGTCTCAGTTATCGCTGCCCGGCCGAC  
GTTTGTGCGCAACTCTCAGAGTTTACGGCAGAAAAATTTCTCCTGCTTGTAATTCGAGAGAGGACAC  
TAT

+

@A00721:190:HGJW7DSXY:4:1635:30282:12540\_1:N:0:TCTGCAAG+GCTGCACT  
CTTGTAAGAGTAAGGTTAAATGTGAAGATGCTCAGACTATTTCATGAAGTTCAAGGTAATACTTACCA  
GCACGTTCTGGCTGGTTAGAAATTAACCTCAAGATGACCCTGTTTTTGCATCACAACACATATTACCG  
TTG

+

FFFFFFFFFFFFFF.F::FF:FFF:FFFFFFFFFFFFFF:FFFFFFFFFFFFFF:FFFFFFFF

FFFFF:FFFFFFFFFFFFFFFFFFFFFFFFFFFFFFFFFFFFFFFFFFFFFFFFFFFFFFFFFFFFFFFF  
FFF  
@A00721:190:HGJW7DSXY:4:2135:1090:18067\_2:N:0:TCTGCAAG+GCTGCACT  
ACGATACTTTGTTATCAATGTAAAGTTAAACGATGCTACTTGTGAGAGGATCAATCACAGTAAGGAAC  
TGTCACGTTTAGCACGGGAGGTTGCAGATTCAACCCCTTATATCGAGG  
+  
:FFFFFFFFFFFFFFFFFFFFFFFFFFFFFFFFFFFFFFFFFFFFFFFFFFFFFFFFFFFFFFFF  
FFFFFFFFFFFFFFFFFFFFFFFFFFFFFFFFFFFFFFFFFFFFFFFFFFFFFFFFFFFFFFFF  
@A00721:190:HGJW7DSXY:4:2605:21784:36276\_2:N:0:TCTGCAAG+GCTGCACT  
AGTATCTTGAAGTTGTTGACGACAAGCCTCAAGAGGGTAGAGGACCACCTGGATCTTCTACTGTCTCT  
GCCTTCCAAGATTTCTTAGAAGAGGTTATTCCTGGAACCACCTTAACG  
+  
FFFFFFFFFFFFFFFFFFFFFFFFFFFFFFFFFFFFFFFFFFFFFFFFFFFFFFFFFFFFFFFF  
FFFFFFFFFFFFFFFFFFFFFFFFFFFFFFFFFFFFFFFFFFFFFFFFFFFFFFFFFFFFFFFF  
@A00721:190:HGJW7DSXY:4:2622:2266:22106\_1:N:0:TCTGCAAG+GCTGCACT  
TCAGCCGAATTAAGTACTAATGAGTTCAAGTCGGTTGTCGATCGAATTAAGATCAAGGCTAATACCTT  
TATAGGTAAGAAGCCCCTTGAGCCGCGTAGTCAGCGCGTTAGCTGTATCATCAGTCAGAGTATACCC  
GAT  
+  
FFFFF,FFFFFFFFFFFF::FFFF:FFFFFFFFFFFFFFFFFFFFFFFFFFFFFFFFFFFFFFFF  
FF,FFFFFFFFFFFFFFFFFFFFFFFFFFFFFFFFFFFFFFFFFFFFFFFFFFFFFFFFFFFFFFFF:FFFF  
F:F  
@A00721:190:HGJW7DSXY:4:2172:22336:27367\_1:N:0:TCTGCAAG+GCTGCACT  
CAAGAGAATATTTATTCTTATGAGGCTCGAACTTCAACGTTTTTCACAACGGAAAGACATATCGCACC  
CGAAATTTTTGGGCAGAATGCTCTTAACGCGGTTCTTGAACGGTGTTTTGATCAGTCTAAGTTGGATA  
AA  
+  
F::FFFFFFFFFFFFFFFFFFFFFFFFFFFFF,FFFF::F,:FFF:F,FFFF:FFFFFFFFFFFF:FFFF  
FFFFFFFFFFFFFFFF:FFF,FFFF:FFFFFFFF:FFFF:FFFFFFFFFFFFFFFFFFFFFFFF:FFFF::FF  
:F  
@A00721:190:HGJW7DSXY:4:1237:23448:21371\_2:N:0:TCTGCAAG+GCTGCACT  
TCAATTGATAGATTGGGTCAACAATAGGGACGCTAGTATACTTCGTAAAGTCGACAGCGAAATGGTCA  
ATATTGATAATTGGACCGACTATATGACCTATTTTAAGCTCATGGTGA  
+  
FFFFFFFFFFFFFFFFFFFFFFFFFFFFFFFFFFFFFFFFFFFFFFFFFFFFFFFFFFFFFFFF  
FFFFFFFFFFFFFFFFFFFFFFFFFFFFFFFFFFFFFFFFFFFFFFFFFFFFFFFF::,FFFF  
@A00721:190:HGJW7DSXY:4:2556:23086:10160\_1:N:0:TCTGCAAG+GCTGCACT  
ATGCTTCAGCCTTTTCGAAGCATAACCCCGCACAGAATATCGTTTATCACGCAAAATTTATTAATGCA  
ATTTTCGGACCTATCTTTAAGTTCTTGTGAGGAGAGTCAAACAGTGTCTTTTACCCAACATTTTAT  
GTA  
+  
FFFFFFFFF:FFFFFFFFFFFFFFFFFFFFFFFFFFFFFFFFFFFFFFFFFFFFFFFFFFFFFFFF  
FFFFFFFFFFFFFFFFFFFFFFFFFFFFFFFFFFFFFFFFFFFFFFFFFFFFFFFFFFFFFFFF  
FFF  
@A00721:190:HGJW7DSXY:4:2647:20112:7733\_2:N:0:TCTGCAAG+GCTGCACT  
TTCGATGCTGAATTTCTTGAACCTTGGAGTGCCAGTGAATATTTTTGTCACGCCAGGAGTATCCATAA  
CGATTTGTCATTTACCACCTTTGCTCAACGACGAAGTGAACGGCCAA  
+  
FFFFFFFFFFFFFFFFFFFFFFFFFFFFFFFFFFFFFFFFFFFFFFFFFFFFFFFFFFFFFFFF  
:FFFFFFFFFFFF:FFF:FFFF:FFFFFFFF,FFFFFF:FFFF  
@A00721:190:HGJW7DSXY:4:1271:17418:33505\_1:N:0:TCTGCAAG+GCTGCACT  
GTGTGCTCTTCCGATCTATTTTATCACTTTATTATGACCTTGGAAGTTTTTCGGCTGTGGTTGTCGCT  
GGGGACGATTCCATTCTGTTTTCAAAGACTCCAATAACTGATCATTCTGATCATATGATTTTGGACAA  
TGG

+  
FFFFFFFFFFFFFFFFFFFFFFFFFFFFFFFFFFFFFFFFFFFFFFFFFFFFFFFFFFFFFFFFFFFFFFFF  
FFFFFFFFFFFFFFFFFFFFFFFFFFFFFFFFFFFFFFFFFFFFFFFFFFFFFFFFFFFFFFFFFFFFFFFF  
FFF  
@A00721:190:HGJW7DSXY:4:1652:15004:27414\_2:N:0:TCTGCAAG+GCTGCACT  
GCGACTAATATTCGATATTCGATTGAGGGTCGTTATACCTATTCGGCTATCTGTGCTTTGAATTGTAT  
AAGATCAAATTTTAAACGATTCCGAGAGGTTTATCCTGATGTGGAGGG  
+  
FFFFFFFFFFFFFFFFFFFFFFFFFFFFFFFFFFFFFFFFFFFFFFFFFFFFFFFFFFFFFFFFFFFFFFFF:FFFFFFFFFFFFFFFF:FFFFF  
FFFFFFFF:FFFFFFFF:FFF,FF:F:FFFFFFFFFFFFFFFFFFFFFFFFFFFFFFFF  
@A00721:190:HGJW7DSXY:4:1503:12943:31829\_1:N:0:TCTGCAAG+GCTGCACT  
CCCAGACCTTTCCTTGTGAAAATTTTGATGCGGTTTCATAAGATTATCAGTAATCCTGATTCTACTACG  
GATTCATGGACCTTCCATCCTGTACCTCTTCTGGAGAGACGTATCTCAAAGATCGACTTCGAGACAGG  
TGA  
+  
FFFFFFFFFFFFFFFFFFFFFFFFFFFFFFFFFFFFFFFFFFFFFFFFFFFFFFFFFFFFFFFFFFFFFFFF  
FFFFFFFFFFFFFFFFFFFFFFFFFFFFFFFFFFFFFFFFFFFFFFFFFFFFFFFFFFFFFFFFFFFFFFFF  
FFF  
@A00721:190:HGJW7DSXY:4:1362:29731:1752\_1:N:0:TCTGCAAG+GCTGCACT  
CGAGAGCGACCAAGATCTAAATTCGGTAACGGTGCCTGGCGCTTTATTTTAAAAAGCTCCCTCCTCTC  
CCAAGTTTGATCTGATACTTATCACGAAAGGACTTGAGTCTTTTGATCAGTCTCTGACTTGACCATCT  
TTC  
+  
FFFFFFFFFFFFFFFFFFFFFFFFFFFFFFFFFFFFFFFFFFFFFFFFFFFFFFFFFFFFFFFFFFFFFFFF:FF:FFFFFFFFFFFFFFFF:FFFFFFFF:FF  
FFFFF:FFFFFFFFFFFFFFFF:FFFFFFFFFFFFFFFFFFFFFFFFFFFFFFFFFFFFFFFFFFFFFFFF  
FFF  
@A00721:190:HGJW7DSXY:4:2227:8820:34209\_2:N:0:TCTGCAAG+GCTGCACT  
TTTCTTCTTTGTTTCCTTCTTTGCACTGATTTTCTCATCAGCTTGTGTTTACCTAATCTGTGTTT  
TTACGATAACAACATCATGTTGATTAAGACTCTTCCGAAAGGCGAACT  
+  
FFFFFFFFFFFFFFFF:FFFFFFFFFFFFFFFFFFFFFFFFFFFFFFFFFFFFFFFF:FFFFFFFFFFFFFFFFFFFFFFFF  
FFFF,FFFF,FFFFFFFFFFFFFFFF:FF:FF:FFFF:FFFF  
@A00721:190:HGJW7DSXY:4:1609:20374:31046\_1:N:0:TCTGCAAG+GCTGCACT  
AGCTCAGGGTGAAGCACAACGTTTGACCGTGACGAAGTGTGGTGTCTTGATCTACGTTACGGATATA  
CTCTCCTTGAGTTCACTCGTAAGGACACTACCACTTATTACGATATTTCTTTAGTCGATGGGTTTTCG  
ACT  
+  
FFFF:::FFFFFFFFFFFF,FFFFFF:FFFFFF,FFFFFFFF:F:FFFFF,FFF:F,FFFFF  
FFFF:FFFFFF:FFFFFF::F:F:FFFFFFFFFFFF:FFFFFF:FFF:FFFFFFFFFFFF  
FFF  
@A00721:190:HGJW7DSXY:4:2639:5611:32440\_2:N:0:TCTGCAAG+GCTGCACT  
TTTTGTCTTCCTTGTGTTTGTCTTATTCTATTAATCACTCATTTTAGTGAGATTATTAACGCACTAA  
AACGTCTTCGACAACAGCAGGGGTTTTCGAATAGTGATAGCCACCCGC  
+  
FFFFFFFFFFFFFFFFFFFFFFFFFFFFFFFFFFFFFFFFFFFFFFFFFFFFFFFFFFFFFFFFFFFFFFFF  
FFFFFFFF:FFFFFFFFFFFFFFFF,FFFFFFFF:FFFFFF:  
@A00721:190:HGJW7DSXY:4:2603:2546:27258\_2:N:0:TCTGCAAG+GCTGCACT  
GGCAGCAGCATGACCATAATTGGTATTGACTTTGGTACCACCTTTCTACTGTCTGTCTCGCCTCTTC  
GAATGAAGTTTAAATGCTTAACAACAATGATAGTGAATTTATACCTAC  
+  
FFFFFFFFFFFFFFFF,FFFFFFFF:FFFF,FFFFFFFFFFFFFFFFFFFFFFFFFFFFFFFFFFFFFFFF  
FFFFFFFF:FFFFFFFF:FFFFFF:FFFFFFFFFFFFFFFF:F  
@A00721:190:HGJW7DSXY:4:1544:18566:2425\_1:N:0:TCTGCAAG+GCTGCACT  
TTTTCTAATAATGATGACACTATTGTTTATGGATATGATGCTATTACTCATGATGGTTACGGTCAGGG

AGGATTCTCAGTTTACAAGGACCTTAAGCGATGGATCGGGGTTAATTCTAAAACATTACCCGAAAGAC  
GTG

+

FFFFFFFFFFFFFFFFFFFFFFFFFFFFFFFFFFFFFFFFFFFFFFFFFFFFFFFFFFFFFFFFFFFFFFFF  
FFFFFFFFFFFFFFFFFFFFFFFFFFFFFFFFFFFFFFFFFFFFFFFFFFFFFFFFFFFFFFFFFFFFFFFF  
FFF

@A00721:190:HGJW7DSXY:4:1162:19081:19570\_2:N:0:TCTGCAAG+GCTGCACT  
TACGATGTCGTCTGTCTCGGCGATCACTTTTCACTAAGAATTGGTCCTACTTTTGGACAAGGCCAACT  
TCGTAATCTTCATGAGATCGTTTCTTTCTTTATCTCTTTGGTTGTTAG

+

FFFFFFFFFFFFFFFFFFFFFFFFFFFFFFFFFFFFFFFFFFFFFFFFFFFFFFFFFFFFFFFFFFFFFF:  
FFFFFFFFFFFFFFFF: ,FFFFFFFFFFFFFF:FFFFF:FFFFFFFFFF:FF

@A00721:190:HGJW7DSXY:4:1433:32515:5478\_2:N:0:TCTGCAAG+GCTGCACT  
GAGTGAAAGGCTTCAATTGTAGTGGTTTGGTCGTTTCAGTACCCAGTCAGTATACCTCTACGCAAAGA  
TATTTTCATGAAAACCTACAGAGGAACGTACCGGATTACCTGTCTTTCAT

+

FFFFF, :FFFFFFFFFFFFFFFFFFFFFFFFFFFFFFFFFFFFFFFFFFFFFFFF:F:FFFFFFFFF::F:  
FFFFFFFF:FFFFFFFFFFFFFFFF:F:FFFF:FFFFFFFF:FFFFFFFF

@A00721:190:HGJW7DSXY:4:2548:4580:12054\_1:N:0:TCTGCAAG+GCTGCACT  
TTTGCTTCGATGTTGGATGTCAAGAAGGGTTCAGAATGGGATTCTACGTAGTTTATGACTTTGGTGG  
TGGTACTTTCGATACTTCTATCGTCTTACGTTACGGTAATTACTATAGTGTTATTTATTCTGGTGGTG  
ATG

+

FFFFFFFFFFFFFFFFFFFFFFFFFFFFFFFFFFFFFFFFFFFFFFFFFFFFFFFFFFFFFFFFFFFFFF  
FFFFFFFFFFFFFFFFFFFFFFFFFFFFFFFFFFFFFFFFFFFFFFFFFFFFFFFFFFFFFFFFFFFFFF,  
FFF

@A00721:190:HGJW7DSXY:4:1669:16911:27023\_1:N:0:TCTGCAAG+GCTGCACT  
GGTCGTGACGTTGATGAAGCTATAAGAGCGTTCTTATTACGGCGCACTTCTTTACCCGCCACCACACA  
ACTTTCAGTTTCACAACTGAAGGAGGAGGTTTCTGTTACTGGAAAACCCTCGTCAATACTTTTCAATA  
ATA

+

FFFFFFFFFFFFFFFFFFFFFFFFFFFFFFFFFFFFFFFFFFFFFFFFFFFFFFFFFFFFFFFFFFFFFF  
FFFFFFFFFFFFFFFFFFFFFFFFFFFFFFFFFFFFFFFFFFFFFFFFFFFFFFFFFFFFFFFFFFFFFF  
FFF

@A00721:190:HGJW7DSXY:4:2437:2130:32550\_2:N:0:TCTGCAAG+GCTGCACT  
TCTAGTGAAATTAACGCGTCCTTTTCTGGAACGTAGTTTACTATTATGAACAAAGTTATCAAAGATA  
GTGGCATTCAAGGCAAACCTTACCCTGATTCCGGCCGGTGGTAGCTCAT

+

FFFFFFFFFFFFFFFFFFFFFF,FFFFFFFF:FFFFF:FFFFFFFFFFFFFFFFFFFFFFFFFFFFFF  
FFFFFFFFFFFFFF,FF::FFFFFFFF:F,FFFFFFFFFFFFFFFF

@A00721:190:HGJW7DSXY:4:2143:32805:30812\_2:N:0:TCTGCAAG+GCTGCACT  
GAAACAGCTATTAAAGCTGTTGAGCGGGTAATTACACCTAAACGAGCTCGATCTGCCATCGCTGAAGG  
ATGTGCACTCTTTTCTGCTACTTTAACGGAGCGTAGTGACTCTTCGT

+

FFFFFFFFFFFFFFFFFFFFFFFFFFFFFFFFFFFFFFFFFFFFFFFFFFFFFFFFFFFFFFFFFFFFFF  
:FFFFFFFFFFFFFFFFFFFFFFFFFFFFFFFFFFFFFFFFFFFFFFFF

@A00721:190:HGJW7DSXY:4:1575:4978:31876\_2:N:0:TCTGCAAG+GCTGCACT  
CAAGCTCGTATTATCGTCGCTGCTGGATCTGCGTTACCGTTGAAGGCTAACTCCAAGGTAATTATGA  
AGACTGTGATTATCTTTCACTCTGGCCTTGATGAGGGTGTTTCTAA

+

FFFFFFFFFFFFFFFFFFFFFFFFFFFFFFFFFFFFFFFFFFFFFFFFFFFFFFFFFFFFFFFFFFFFFF  
FFFFFFFFFFFFFFFFFFFFFFFFFFFFFFFFFFFFFFFFFFFFFFFF

@A00721:190:HGJW7DSXY:4:1371:14335:19272\_2:N:0:TCTGCAAG+GCTGCACT  
AATTTCAATCTTCTTAAAAAGAAGATAGAGAGTCATACTTCGGGCTATCGTTCAGGTGCATGGGGTTG

$+$ 

@A00721:190:HGJW7DSXY:4:1633:30644:34491\_2:N:0:TCTGCAAG+GCTGCACT  
TCTAAGGTTAAAGAGTCGATTAACAAGTTGTACTTATCAATTATTTATAGCTGGTTTTTATCTCGA  
AAAGTCTATTCTAAAAGGAACGTCAGTTCTAACCCAAAGAGAATATAT

+

@A00721:190:HGJW7DSXY:4:1610:24325:7889\_2:N:0:TCTGCAAG+GCTGCACT  
 CAAAATCTTACCACTATCTACGAACCTAAAGTTCTGAAGACGTTGCTTGTGCTTCTCTTTAATGG  
 CACTACCTCGGTACAATCTTACTTGGAACGAAGGCGACCTGTTCCGGA

+

@A00721:190:HGJW7DSXY:4:1257:7102:32456\_1:N:0:TCTGCAAG+GCTGCACT  
TCTGTCTATATTAGGTGAAGCGAAATACGATTTTCAACGTTCAACGTTACCGAGTTTTGTTTCGTACC  
TTGATGCTGACTTTTCGTCAATATGATTTGATCTGGTTGCTCAATTCTAAGCGTGTTCGCTTAGTGCG  
AGG

+

@A00721:190:HGJW7DSXY:4:2568:21630:29371\_1:N:0:TCTGCAAG+GCTGCACT  
ATCTTGATAAAGAACTTCATGAATTTTCAGAGGATGAAAAATTTTCTTCCTTGGATTTTAATATAAAG  
AATCTTTACCAGGACTCCTACTACAGGAGGCAGTCTTCTGATCGTAAGAAGTTTATAAGGAACATATC  
CAT

+

@A00721:190:HGJW7DSXY:4:2565:32163:36933\_1:N:0:TCTGCAAG+GCTGCACT  
GAAACTCTAAGTGGTAATACTGTCTTTCCAAGCTTACCTTTATCTTCAATGAAATTGGACTCTTCGAT  
AGGGGACATTTTATCGTGGGCTTTCGTAAAGGAAGATCTGTTATCGACGGTTTATCGTTTACGAAGT  
ATC

+

@A00721:190:HGJW7DSXY:4:2304:28709:2550\_1:N:0:TCTGCAAG+GCTGCACT  
TAGTGACATCTGGTCAATTTCTTTTTAGGTGGTCTTTATTCTATTATTGATTTTTATGAGATTGATA  
CGTTAACAGAAGATGATGTTAGAGTAGAATTCCTGAAGAGTCCTTCCGTAACCACTTCTTGACAATT  
TTC

+

@A00721:190:HGJW7DSXY:4:2469:5104:28307\_2:N:0:TCTGCAAG+GCTGCACT  
TACACAATTAAGAAATAATCCTACATTGACTGATTATCTAAAGATTGAAGGAAAATTTTATCCTCGTT  
TAACCTACTTAGACTTTTCTACGATACAAATGATAACTTCTAATTTAC

+

```

FFFFFFFFFFFFFFFFFFFFFFFF:FFFFFFFFFFFFFFFFFFFFFFFF:FF::FFFFFFFFFFFF,FFFFFFFFFFFFFF
FF:FFFFFFFFFFFFFF:FFFF,FFFFFFFFFFFFFFFFFFFFFFFF:FFF,FFFFF

```



@A00721:190:HGJW7DSXY:4:1430:9588:24674\_1:N:0:TCTGCAAG+GCTGCACT  
TTGGTGTATCTCCTCAGGAGTCCCGGCATTTGATAATAATGACGAGACTTTCGTCATAATCGCTGCA  
TATTACGGATTACACGGTACCAGCGCATCTCGTGTGAGCCTCGACCCGATTATATGGTATTAACCTTA  
TAA

+

FFFFFFFF:FFFFFFFFFFFFFFFFFFFFFFFFFFFFFFFFFFFFFFFFFFFFFFFFFFFFFFFFFFFFFFFF  
FFFFFFFF,FFFFFFFFFFFFFFFFFFFFFFFFFFFFFFFFFFFFFFFFFFFFFFFFFFFFFFFFFFFFFFFF:FFFF:FFFF  
FFF

@A00721:190:HGJW7DSXY:4:2420:21160:2910\_2:N:0:TCTGCAAG+GCTGCACT  
CATTTTGAGAACTAACTATGTTATGTTCTCTGATCATTTTGACAATCTCTTCTTATAATAATAAATA  
AATAATATTACTAATGGCAAATAGTGGAAGGCTCCAGTCAACACTAG

+

FFFFFFFFFFFFFFFFFFFFFFFF,FFFFFFFFFFFFFFFF:FFFFFFFFFFFFFFFFFFFFFFFFFFFFFFFF  
FFFFFFFFFFFFFFFFFFFFFFFFFFFFFFFF:FFFFFFFFFFFFFFFFFFFFFFFFFFFFFFFF

@A00721:190:HGJW7DSXY:4:1253:14714:28980\_1:N:0:TCTGCAAG+GCTGCACT  
AATAGGTGAAGGGATAGTTTTTACCTCGACCAACATTAAGGCGGCGGCGACTAATCTTAAAGCTTCAC  
CCAAAATGAAGGACACTTCGAACTGAATAATGATGCACTACAAACAAGTATCGCTAATCATCTGAAA  
AAG

+

FFFFFFFFFFF:FFF:F:FF,FFFF:FFFFFFFFFFF:FFFFFFFFF,FFFFFFF:FFF:FFFFFFFF  
FFFFFFFFF:FFFF:FFFFFFFFFFFFFFFFFFFFFFFFFFFFFFFFFFFFFFFFFFFFFFFFFFFFFFFF  
F:F

@A00721:190:HGJW7DSXY:4:1518:23764:35571\_1:N:0:TCTGCAAG+GCTGCACT  
GAGAAAATTTCTTAGAGGATATTCGCCATTGTGGTACGAATTGGTCCAACATTTACCACCAAATTCTT  
TTGATACAACCTCTAGCCTTCAAGTGGGGTATGCCTGCGGAATACGCTTGCTATTCACCAGATTGGTTC  
GAA

+

FFFFFFFFFFFFFFFFFFFFFFFFFFFFFFFFFFFFFFFFFFFFFFFFFFFFFFFFFFFFFFFFFFFFFFFF  
FFFFFFFFFFFFFFFFFFFFFFFFFFFFFFFF:FFFFFFFFFFFFFFFFFFFFFFFFFFFFFFFFFFFFFFFF  
FFF

@A00721:190:HGJW7DSXY:4:1471:14561:10864\_2:N:0:TCTGCAAG+GCTGCACT  
ATGTCAGAAGAAGCTATTCAAGCTTGTCGTTTAAAGACTGCAGAGGCTGTCAAACAAGCCAGACTCA  
AGGAGTCCAATCAAAGGTTTTGAATTTAGCTCAACTGGGGAGACGTGC

+

FFFFFFFFFFFFFFFFFFFFFFFFFFFFFFFFFFFFFFFFFFFFFFFFFFFFFFFFFFFFFFFFFFFFFFFF  
FFFFFFFFFFFFFFFFFFFFFFFFFFFFFFFFFFFFFFFFFFFF:FFFFFFFFFFFF

@A00721:190:HGJW7DSXY:4:2651:27181:24173\_1:N:0:TCTGCAAG+GCTGCACT  
GTCCGGAGTATATTGTATGTTAATAGATAGTGGGATAATAGTTCTACCGATACGTAGTGAACGCGTTC  
GTAGAACCAAGTACTTTCCGTCTGAAGAGTTTAGAGCTGCTATTGATTATGTAACCGATAGGAGTTGT  
ATA

+

FFFFFFFFFFFFFFFFFFFFFFFFFFFFFFFFFFFFFFFFFFFFFFFFFFFFFFFFFFFFFFFFFFFFFFFF  
FFFFFFFFFFFFFFFFFFFFFFFFFFFFFFFFFFFFFFFFFFFFFFFFFFFFFFFFFFFFFFFFFFFFFFFF  
FFF

@A00721:190:HGJW7DSXY:4:2256:30861:31829\_1:N:0:TCTGCAAG+GCTGCACT  
TGGCTTTAGACGATAATCCTTTAAGGACTATGTTGACTGACGAAGATTTTCCCACAGATTTGTCTACG  
TTGCAGATCGCCACTCCAAACACTATATACATTATAAAAATATAAAAATAAGGGAGTCATAACTTTTGT  
TAC

+

FFFFFFFFFFF:FFFFFFF,FFFF::FFFF:FFFFFFFFFFFFFFFFFFFFFFFF:FFFFFFFF:FFFFF  
FFFFFFFFFFFFFFFFFFFFFFFFFFFFFFFFFFFFFFFFFFFFFFFFFFFFFFFFFFFFFFFFFFFFFFFF  
FFF

@A00721:190:HGJW7DSXY:4:1577:10013:24940\_2:N:0:TCTGCAAG+GCTGCACT  
CGAAGTCTCTGATTTTATTAATCATTACTTTAACGATCTCTCGGTCATTTACTCTGTACTTGATCTAC

$+$ 

@A00721:190:HGJW7DSXY:4:2112:17047:33739\_1:N:0:TCTGCAAG+GCTGCACT  
AATACTCACTATCGTTTTCTGCTTTTTCTTAGCTAATAGATTAATAAAGGATGAGTACGAAAACCAAC  
TCTTCGTTACGAGACCTGATGGTAGAATAGATTTAGTCTCTACACCCATCTCAACGAGGATAAAGCGA  
GTT

+

@A00721:190:HGJW7DSXY:4:1270:3260:8516\_2:N:0:TCTGCAAG+GCTGCACT  
CGAAGAGATCATCCGCAAACGACTCGAAACCGAGACGCCGTAGATCAAAGTCCCTTCTAACTTTAGAT  
TATGAATCCTGCCTTTACTCATTTTATAGCAGTTATTTATGTTGTACT

+

@A00721:190:HGJW7DSXY:4:2340:10375:9690\_1:N:0:TCTGCAAG+GCTGCACT  
TTTGGGTATGTTTTGTAAAAACATGAGATACCCAAGTCTATCGAAGACATTATCTCTTATGTACTTA  
TTGTAACGATCATTCTTTGAGTTTTGTCATTCTTATTCTTTTATTCTTTAACTGTGTATGAGGAGG  
ATT

+

@A00721:190:HGJW7DSXY:4:1641:18394:11209\_1:N:0:TCTGCAAG+GCTGCACT  
TCGATAGTGATTGTTATCAATTTAAATACATTACTGTTTCAAATCATCTTTACTCACAGACTCCGAAA  
ATGGTTTCAAATGAGGTCAAAGCTCTATTTATTAACGAACTATTATCCGATTCTTCGAGGGTATCAC  
TAC

+

@A00721:190:HGJW7DSXY:4:1540:29758:29230\_1:N:0:TCTGCAAG+GCTGCACT  
GACTTTAGTCAAGGAAGTTCAATTCCTTCGATGTTTATATTTTTCTATAAGGGAAAATAGCAATAATC  
AAATTTGACAAATTTAGAACTTTATTTCAGAACTCTCTCCGATCACCTTGGTGTGATCTCCCGGAG  
GAT

+

@A00721:190:HGJW7DSXY:4:2364:19081:34569\_2:N:0:TCTGCAAG+GCTGCACT  
ATGTATGATGATAATCTACTATTTTTAAATAGTGATATTCAGCGTATACTTGAATACTTTATCAAAGA  
TTTGGCTTGGTCTATTTACCGCAAAAAGTTGGAAGAGGTCTATGATAT

+

@A00721:190:HGJW7DSXY:4:2246:11053:23985\_2:N:0:TCTGCAAG+GCTGCACT  
TTTAAATAGCACCGATTATAACTTGACTGTTGATAATATTACAATAGCTCTTCTCAGAAGATTAGAG  
AAGTAACCGGTGAACACGTCGGTAGCATTGATTTACTTTTACCGTTAG

+

```

FFFFFFFF:FFFFFFFF:FFFFFFFF:F:FFFFFFFFFFFFFFFFFFFFFFFFFFFFFFFFFFFFFFFF,FFF
FFFFFFFF:FFFFFFFF:,FFFFFFFF,F:FFFFFFFF:FFF:,FFFF:

```

@A00721:190:HGJW7DSXY:4:2471:29071:11443\_2:N:0:TCTGCAAG+GCTGCACT  
TATAAGTTACAAACGATTCTTCGACTATATTAAAGAAATAAAAATACTTCAAGTACCTGAACTTTACA  
TTTTTAATGGTATGGTATAATGTGTCTTACAAATAGAACCTTCACTCT

+

F:FF,FFFFFFFFFFFFFFFFFFFFFFFFF:,FFFFFFFFFFFFFFFFFFFFFFFFF:FFFFFFFFF  
FFFFFF:FFFFFFFFFFFFFFFFFFFFFFFFF,FFFFFF

@A00721:190:HGJW7DSXY:4:2560:11632:25739\_2:N:0:TCTGCAAG+GCTGCACT  
TCCTTAATATTCTAGTAACCGCTATGTGGCATTACTAGGATTTATCACACTCCTAAATTTGATAGCA  
ATTTATGTTTTAAATGCTAGGAAAATTTAGAAAACTCCATTGTATA

+

FFFFFFFFFFFFFFFFFFFFFFFFFFFFFFFFFFFFFFFFFFFFFFFFFFFFFFFFF:FFFFFFF  
FF:FFFFFFFFFFFFFFFFF:FFFFFFFFFFFFFFFFF:FFFFF

@A00721:190:HGJW7DSXY:4:1502:13386:2190\_1:N:0:TCTGCAAG+GCTGCACT  
CTTAATTCAATAGCTTTAGTATTATTTACTATCGCTTTATTGAAAATTGTATAAGAGTTAATTGCTT  
ACACAAAAGTGACGCGCGAAGGAATCTTAATTGATTGAAGCTAGGCGTTGGGAGAATGAAGTCCGC  
TTC

+

FFFF,FFFFF,FFFFFFFFFFFFFFFFFFFFFFFF:FFFFFFFFFFFFFFFFF,:FFFF:FF:FFFF  
FFFFFFFFFFFFFFFFF::FFF,,FFFF,FFFFFFFFFFFFFFFFFFFFFFFFFFFFFFFFF  
:FF

@A00721:190:HGJW7DSXY:4:2335:2582:20212\_1:N:0:TCTGCAAG+GCTGCACT  
CCATGACCAATCATCGCTCCAAGTGGCAGCCAGACGTAGGGTCAAACCTACTACCGCCGGTCGGCAG  
ATCGGCACCACTGGTCTCTACGTTCAAGGACCCGCTGTGCAGAATAACCTTCCCAAATCTAGATCTGC  
AC

+

FF:FFFF,:FF,FFFF:FF:F,FF,:F::FF:FFF,FF,F,FF:F:FFFF,F,FFFFFFFFF::  
FFFFFFFF:FFFF:FFFFFF::FFFFFFFFFFFFFFFFF:FFF:FFFF,FF,FFFF,FFFFFFFFF  
FF

@A00721:190:HGJW7DSXY:4:1459:21160:9799\_1:N:0:TCTGCAAG+GCTGCACT  
GGACGACCACTCAAAGGAAACGGGCTGTTGCCAGAGGAAAGCAGCGACCAACCGAGGTGCTCGTAAC  
ATTGACGGCAGTCCCGTCATCTCTGTGGGAACTGAGGCAGTACCTCAGTCAAAGTCACATTCACCAC  
TCC

+

FFFFFFFFFFFFFFFFF:FFFFFFFFFFFFFFFFFFFFFFFFFFFFFFFFF  
FFFFFFFFFFFFFFFFFFFFFFFFF:FFFFFFFFFFFFFFFFFFFFFFFFF  
FFF

@A00721:190:HGJW7DSXY:4:2374:15609:35258\_2:N:0:TCTGCAAG+GCTGCACT  
TGTGACTATACAGTTCGGCCATTTCAAGAGTGGTCAATACGTCGTGGGAGGTACTGAAGCCTTCCCCT  
CCGCTGGCACGAAGAACACTCCCAAGCCAATCAATAGTTCTTCTGACC

+

FFFFFFFFFFFFFFFFF:FFFFFFFFFFFFFFFFFFFFFFFFF:FFFFFFFFFFFFF  
FFFFFFFFFFFFFFFFFFFFFFFFF

@A00721:190:HGJW7DSXY:4:2369:28492:15890\_2:N:0:TCTGCAAG+GCTGCACT  
AGGGTAGTCTCTAAGTCTACCAGGAAGAGGGGAAATGTCCCCAAACGGAGAAGAATAAAGGGAAAGG  
TCCATCAGGACCTAAGAAGGGGACATTACCCCTAATTCTGAAGGAAGA

+

FFFFF,FFFFF,FFFFFFFFFFFFFFFFFFFFFFFFF:F:F,FFFFFFFF:FFFFFFFFF  
FFFFFFFFFFFFFFFFF,FFFFFFFFFFFFFFFFF,,F:

@A00721:190:HGJW7DSXY:4:1517:30680:16736\_2:N:0:TCTGCAAG+GCTGCACT  
GGGGTTGGGAATAAGAAATCTGCACGGCCAAAGAGGCCGCTGCTACGAAGTCGCTGAAGCGGCTTG  
GGTCATTAAGGGTAGCTGTAAAGTTGCGCCTGCCGACCCCATCTTTGA

+

FF:FFFFFF:FFFFFFFFFFFFFFFFFFFFFFFFF:FFFFFF:FFFFFFFFF  
FFFFFFFF:FFFFFFFFFFFFFFFFF:FFFFFFFFFFFFFFFFF

@A00721:190:HGJW7DSXY:4:2319:21902:3537\_1:N:0:TCTGCAAG+GCTGCACT  
CTTGACAGAGTACTGGAGTTCAGACGTGTGCTCTTCCGATCTCGTCACTGAGGACGAAGGTGAGAGGA  
CTTTTGGCTACTGGCGACAACTGAGAGCAGTCGCTGGGGAAAGAGAATTGCGTGGGTGAAGGCCGA  
CGC

+

F:,FFFFFFFFFFFFFFFFFFFFFFFFFFFFFFFFFFFFFFFFFFFFFFFFFFFFFFFFFFFFFFFFFFFFFFFF  
F:F:FFFFFFFF:FFFFFFFF,FFFFFFFFFFFFFFFFFFFFFFFFFFFFFFFFFFFFFFFFFFFFFFFFFFFF  
FFF

@A00721:190:HGJW7DSXY:4:2560:31349:33833\_2:N:0:TCTGCAAG+GCTGCACT  
ACGAGGCCGGTGACGTTTTGTCAACGGCGTTTGGAGGATTTATCCGCGCTTAAGTATGGGGCGAAG  
ATCCCCTATTGAGTCTTGAAGGACTTAGGTTGGCATATTTATGCCGAC

+

:FFFFFFFFFFFFFFFFFFFFFFFFFFFFFFFFFFFFFFFFFFFFFFFFFFFFFFFFFFFFFFFFFFFFFFFF  
FFFFFFFFFFFFFFFFFFFFFFFFFFFFFFFFFFFFFFFFFFFFFFFFFFFFFFFFFFFFFFFFFFFFFFFF  
F:F:FFF

@A00721:190:HGJW7DSXY:4:2234:17472:18067\_1:N:0:TCTGCAAG+GCTGCACT  
GACGTGTGCTCTTCCGATCTGTAAGCTCGGGACTTACAAGAGAGAGTGTGAGAGAGTCTGCTCTACTA  
TTTTTGGCCAGAATGCGGGCTTTCTGACTGATGAGGTTAAACTCTTGCTCCTTCTGTGGGTGAGGGT  
TTT

+

FFFFFFFFFFFFFFFFFFFFFFFFFFFFFFFFFFFFFFFFFFFFFFFFFFFFFFFFFFFFFFFFFFFFFFFF  
FFF:FFFFFFFFFFFFFFFFFFFFFFFFFFFFFFFFFFFFFFFFFFFFFFFFFFFFFFFFFFFFFFFFFFFF  
FFF

@A00721:190:HGJW7DSXY:4:1569:3197:2550\_1:N:0:TCTGCAAG+GCTGCACT  
TTAGAGAGCATTAGAAGGAAGTTGGGCAAATTCACACATATGGTAGACGTTGTACACTTTTCTTGAA  
AATTTTTCCTTCTCCGTCATTGGGGATTCGATGTGAGAAGGTGGAAGGTGTCAAGGGTCTTCTTC  
ATG

+

FF,FFFFFFFFFFFFFFFFFFFFFFFFFFFFFFFFFFFFFFFFFFFFFFFFFFFFFFFFFFFFFFFFFFFF  
FFFFFFFFFFFFFFFFFFFFFFFFFFFFFFFFFFFFFFFFFFFFFFFFFFFFFFFFFFFFFFFFFFFFFFFF  
:FF

@A00721:190:HGJW7DSXY:4:2414:20654:7388\_1:N:0:TCTGCAAG+GCTGCACT  
GACCTAATCACATCATGATTGATAGTTACGGCTCGTATCGAGTTGGAGGGAGGAAGTTCTCCGAAATT  
AAAGACGGGGGGATTAAGAGTCCAGCTGTAAGTGTCAATTCAGAGAGGGGAGCTCTGAAAAGGAACT  
TCG

+

:FF:F,F:FFFFFF,F:FFFF:FFFF:FFF:FFFFFFFF::FFFF:FFFFFF:FFFFFFF:,FFFF  
FFFF,FFFFFFFF:FFFFFFFFFFFFFFFFFFFFFFFFFFFFFFFFFFFFFFFFFFFFFFFFFFFFFFFF  
FFF

@A00721:190:HGJW7DSXY:4:2550:22073:31923\_2:N:0:TCTGCAAG+GCTGCACT  
AGAGGGGAGGAGTTTGAGGAAGGCTCTAGAGAAGATCTCACACCTGGAGAAGGCAAGTGGAGAGTCC  
AGAAGTTGATGAAGAAGGATTATTTGAAGCAGGGGTTACCACTTCCTA

+

FFFFFFFFFFFFFF:FFFF:FFFFFFFFFFFFFFFFFFFFFFFFFFFFFFFFFFFFFFFFFFFFFFFFFFFF  
FFFFFFFFFFFFFFFFFFFFFFFFFFFFFFFFFFFFFFFFFFFFFFFFFFFFFFFFFFFFFFFFFFFFFFFF  
F:FFFF

@A00721:190:HGJW7DSXY:4:2304:1244:5274\_2:N:0:TCTGCAAG+GCTGCACT  
CTTTGGAGTTTAGATAATCTTTTGAGAAGGGGTCATAGAGCCAGCAAGAGAAGCTTATATGCTGGTTT  
AAGTGATGATTATCACTCCTTGAGAAGACAAGCCACATTAAGATATAA

+

FFFFFFFFFFFFFFFFFFFFFFFFFFFFFFFFFFFFFFFFFFFFFFFFFFFFFFFFFFFFFFFFFFFFFFFF  
FFFFFFFFFFFFFFFFFFFFFFFFFFFFFFFFFFFFFFFFFFFFFFFFFFFFFFFFFFFFFFFFFFFFFFFF  
F:FFFF

@A00721:190:HGJW7DSXY:4:2441:10610:23594\_1:N:0:TCTGCAAG+GCTGCACT  
TTTGAGTATCGACAGATCTTCGATCTTGAGGACGTACATTTAACGTGGCAGAATTCGGTAAGTACC  
ATATTGTTCTTCCGGGAAGTTGTGGGATTTAACTTTGACTCACTACTCCGATCAGATCCGGATGGT  
TTG

[illegible]

@A00721:190:HGJW7DSXY:4:2169:26286:2331\_1:N:0:TCTGCAAG+GCTGCACT  
TCACCAAGATGTTTCATATAGATACGAGATACCTAGAGAAGGTCGACGATCTTACTCGTTATCGGAG  
CTAAGAAGAAGACTTTGGGTACACGTTATGCTCGAACTTAACGTTAGTACCGAGGTGATCTCTCT  
GCT

+

FFFFFFFFFFFFFFFFFFFFFFFFFFFFFFFFFFFFFFFFFFFFFFFFFFFFFFFFFFFFFFFFFFFFFFFFFFFFFFFF  
FFFFFFFFFFFFFFFFFFFFFFFFFFFFFFFFFFFFFFFFFFFFFFFFFFFFFFFFFFFFFFFFFFFFFFFFFFFFFFFF  
FFF

@A00721:190:HGJW7DSXY:4:2335:24162:4445\_1:N:0:TCTGCAAG+GCTGCACT  
AGAGAAAAGATTGAGGACGCCTACGGTGACTTTATGGACAAGATGCAAGTTCTTGGGAAATACTTGTT  
TCCCTTTTATAGGTTTAGTAGGTGATCTTGACGTCGATTCTTTGTATAGGGAGTGTGAGAAGACAACGA  
ATC

+

FFFFFFFFFFFFFFFFFFFFFFFFFFFFFFFFFFFFFFFFFFFFFFFFFFFFFFFFFFFFFFFFFFFFFFFFFFFFFFFF  
FFFFFFFFFFFFFFFFFFFFFFFFFFFFFFFFFFFFFFFFFFFFFFFFFFFFFFFFFFFFFFFFFFFFFFFFFFFFFFFF  
FFF

@A00721:190:HGJW7DSXY:4:2152:15076:30733\_1:N:0:TCTGCAAG+GCTGCACT  
ACCGGTCTCTAAATCTTTTGAAGATTGAGAAGATTGAAGAACACGTCAAGAAGTCGCTCGGCGTTGTTC  
TTGAAAACCAAGTTAAGAAGGAGGCTGATCATGGAGTCTTTGTACCTTCTGTCAAACCTTCGAGGTTCA  
GCT

+

:FFFFFFFFFFFFFFFFFFFFFFFFFFFFFFFFFFFFFFFFFFFFFFFFFFFFFFFFFFFFFFFFFFFFFFFFFFFFFFFF  
FFFFFFFFFFFFFFF:FFFFF:FFF:FF:FF:FFFFFFFFFFFFFFFFFFFFFFFFFFFFFFFFFFFFFFFFFFFFF  
FFF

@A00721:190:HGJW7DSXY:4:2262:7093:22733\_2:N:0:TCTGCAAG+GCTGCACT  
CCGGATGTGGATTGAAGGCTGGCTCTAAGGGAGACTCCTTCTTTTGAATGTTGTAAAGAATTGGGTT  
GAGAAGTGTGCTTTACAAGGAGTTAGACTCTTCTTCAAGTTTTTAGAT

+

FFFF:FFFFFFFFFFFFFFFFFFFFFFFFFFFFFFFFFFFFFFFFFFFFFFFFFFFFFFFFFFFFFFFFFFFFFFFF  
FFFFFFFF:FFFFFFFFFFFFFFFFFFFFFFFFFFFFFFFFFFFFFFFFFFFFFFFFFFFFFFFFFFFFFFFFFFFFF

@A00721:190:HGJW7DSXY:4:2259:16532:36730\_2:N:0:TCTGCAAG+GCTGCACT  
CTCTACCCATAACTTCTTTTTCAAAAATGCGGATGGGTCTACTGATGTTTTCTACAGAGTGCAGTCG  
TTTCAACACTTATCACCACCTTTTGAAAGGAAAATAATTGGTGATGAAA

+

FFFFFFFFFFFFFFFFF:FFFFFFFFFFFFFFFFFFFFFFFFFFFFFFFFFFFFFFFFFFFFFFFFFFFFFFFFFFFF  
F:FFFF:FF:FFFFFFFF:F::FF:FFF:FFFF:FF,F,FFFF::FF

@A00721:190:HGJW7DSXY:4:2447:5611:35916\_2:N:0:TCTGCAAG+GCTGCACT  
ACGTCTTAAGTAATTTGGATGTTGTGCAAACTATCAGGTTCTTGTACGATTCTTAAAGAAGTTTA  
TAAAACTTCAGAGTCTCTTGAAGTCCAGGTAGCTAATGTTCTTGCA

+

FFFFFFFFFFFFFFF:FFFFFFFFFFFFFFFFFFFFFFFFFFFFFFFFFFFFFFFFFFFFFFFFFFFFFFFFFFFF  
FFFFFFFFFFFFFFFFFFFFFFFFFFFFF:FFFFFFFFFFFFFFFFFFFFFFFFFFFFFFFFFFFFF

@A00721:190:HGJW7DSXY:4:1637:26549:12712\_1:N:0:TCTGCAAG+GCTGCACT  
CTCTGTTGGTAGAGGAGTTGAGAGAATTACTCAGATTCAATCTGGCATCACTGAACGTCTACAACGAG  
TTAGGGAGTGGCTAGGTTTTAAAGATCCTTTGCACAAGCAATACCTTCCACTGAGTTCATCACCCAG  
AGT

+

FFFFFFFFFFFFFFF,FFFF:FFFFFFFFFFFFFFFFFFFFFFFFFFFFFFFFFFFFFFFFFFFFFFFFFFFFF:FFFFFFF  
FFFFFFFFFFFFFFFFFFFFFFFFFFFFFFFFFFFFFFFFFFFFFFFFFFFFFFFFFFFFFFFFFFFFFFFFFFFFF  
FFF

@A00721:190:HGJW7DSXY:4:1159:29803:19132\_1:N:0:TCTGCAAG+GCTGCACT  
GTTTTTGGTATAAATCCTGATGGCTCAGTACAGGGAGGAGGTAATAGTTATAAAACCTTCTTTTATCA  
TTGCAACAGGACTTTGAGAAGACTGTTGAAATGGACAAAATCTGGGATCATAGGTATGTGTCACGCTA  
CAC

+  
FFFFFFFFFFFF,FFF:FFFFFF,FF,FFFFFF,FFFFFFFFFFFFFFFFFFFFFFFFFFFFFFFF:FFF  
F:FFFFFFFFFFFFFFFF,FFFFFFFF,FFFFFFFFFFFFFFFF:FFFFFFFFFFFFFFFF:FFFF  
FFF  
@A00721:190:HGJW7DSXY:4:1220:25482:3630\_2:N:0:TCTGCAAG+GCTGCACT  
CTTTTGAATATGACAGAAGCTCGCCATATCAGATTAGAGACATGCCAGTTAGAGTTCTTCTAACCAG  
GACTGATGGTGAGATTCTTTTACCTTTTGGAGGTCCAGGAACCTTTAC  
+  
FFFFFFFFFFFFFFFFFFFFFFFFFFFFFFFFFFFFFFFFFFFFFFFFFFFFFFFFFFFFFFFF  
FFFFFFFFFFFFFFFFFFFFFFFFFFFFFFFFFFFFFFFFFFFFFFFFFFFFFFFF  
@A00721:190:HGJW7DSXY:4:1658:13602:19445\_1:N:0:TCTGCAAG+GCTGCACT  
GTTTCCGTCGGAGGATGACAGGTGGGAGACCGCTCAATAACACTCTATTGAATCCCTTTCCACGATG  
AAAGCTCTTTATGAGGTGCTCCATGCAATTTACAGTTCCTCTTGGTGATATCGCCTCTGTCCTTTC  
TCC  
+  
FFFFFFFFFFFFFFFF:FFFFFFFF::F:F:FFFF:FFFF:FFFFFFFF:FFFF:FF:FFF,FF  
FFFFFFFF:FFFFFFFFFFFFFFFF:F:FFFF:F::FFFFFFFFFFFFFFFF:FFFFFFFF:FFFF,  
F:F  
@A00721:190:HGJW7DSXY:4:1508:22670:1391\_2:N:0:TCTGCAAG+GCTGCACT  
CTATTACCACCCTTGTCAATTGATACAAACATTCTAGGTGATGCTTTCTTAGAGGCTCGTCTAGCCGCT  
GAGATTCGTCTTACCTATTTACAATCTGTAGAGAGAGAGGAGATCGGA  
+  
FFFFFFFFFFFFFFFFFFFFFFFFFFFFFFFFFFFFFFFFFFFFFFFFFFFFFFFFFFFFFFFF  
FFFFFFFFFFFFFFFFFFFFFFFFFFFFFFFFFFFFFFFF:FFFF:FF  
@A00721:190:HGJW7DSXY:4:1228:21115:16235\_1:N:0:TCTGCAAG+GCTGCACT  
GTTTATGTTTCGGTTTCAGCTGGATGGATCTTTTGATGGTATGTTTCACATTGCGTGATCACTTCCCG  
TGGACTTGGGAAGAGATTAAACATAAAATCCAGCGATTCTATTATGTCGCTAAAGCCTGTCCAGTTGT  
CGA  
+  
FF:FFFFFFFFFFFFFFFFFFFFFFFFFFFFFFFFFFFFFFFF:FFFFFFFFFFFFFFFF:FFFF  
FFFFFFFFFFFFFFFFFFFFFFFF:F,F,FFFFFFFFFFFFFFFF:FFFFFFFFFFFF  
FFF  
@A00721:190:HGJW7DSXY:4:2274:8142:22232\_2:N:0:TCTGCAAG+GCTGCACT  
TTCTCGCTCGCATTTCAACAAGGATTACTAAGTCTGAGATCTGCCACTTCTAATTTTAGGAAACGTGCG  
GAAAAGAAAGTTCATGAGGATGTCTTGGTCGAAAAATATCGCCGGGAA  
+  
FFFFFFFFFFFFFFFFFFFFFFFFFFFFFFFFFFFFFFFFFFFFFFFFFFFFFFFFFFFFFFFF  
FFFFFFFFFFFFFFFFFFFFFFFFFFFFFFFFFFFFFFFF: ,  
@A00721:190:HGJW7DSXY:4:1375:3351:12712\_1:N:0:TCTGCAAG+GCTGCACT  
GGATCCTGATGACATTATTTCAACGATACCGATCTCAGTTCTACCACAGAAACGCTCAGGAAGT  
TCTCCACTGATTCGGAATTAGAGAAAGACGACCTTCTTGTGGGACTGAGACCTCTGAATTTTCAGGG  
TGC  
+  
FFFFFFFFFFFFFFFFFFFFFFFFFFFFFFFFFFFFFFFFFFFFFFFFFFFFFFFF:FFFFFFFF  
FFFFFFFF:FFFF:FFFFFFFFFFFFFFFFFFFFFFFFFFFFFFFFFFFFFFFF  
FFF  
@A00721:190:HGJW7DSXY:4:1262:9561:11475\_2:N:0:TCTGCAAG+GCTGCACT  
TTGAAAGGGATAATTTCAACTCTGAGACTTCTAAGAGTGTTTCAAAGACCAGAAACGTAACAAGAAG  
AATAAAGGTAGGAAGGGGAGAAAACAGAACAAAGCGAGCGGTTGAAGAG  
+  
F:FFFFFFFFFFFFFFFFFFFFFFFFFFFFFFFFFFFFFFFFFFFFFFFFFFFFFFFF  
FFFFFFF,FFF:F::FFFFFFFFFFFFFFFFFFFFFFFFFFFFFFFF:FF  
@A00721:190:HGJW7DSXY:4:1508:16278:35540\_2:N:0:TCTGCAAG+GCTGCACT  
TGTTGCGGCTGATCGTACCCAATTCCTGCTAGAAAGATCACTCTCGGCGATACCACTGATCTTCCA

GAGTTACGTAGTGGTCGTTCTTTTGGTGATTTTATCAAAGAGAAAGTT  
+  
FFFFFFFFFFFFFFFFFFFFFFFFFFFFFFFFFFFFFFFFFFFFFFFFFFFFFFFFFFFFFFFFFFFFFFFFFFFFFFFF  
FFFFFFFFFFFFFFFFFFFFFFFFFFFFFFFFFFFFFFFFFFFFFFFFFFFFFFFFFFFFFFFFFFFFFFFFFFFFFFFF,  
@A00721:190:HGJW7DSXY:4:2177:29631:24972\_1:N:0:TCTGCAAG+GCTGCACT  
TCCAAAAAGCTATTAATAGCAGTTGCGGGGCTATAATACCGCCTCCAGATTACTCTAAACTGAATCCA  
CTCTCTTGGGATATAAATGAGTACATCTATAATAGAGTTTTGGAAGTGTGTAATGTCCTACGTACTGT  
TCA  
+  
FFFFFFFFFFFFFFFFFFFFFFFFFFFFFFFFFFFFFFFFFFFFFFFFFFFFFFFFFFFFFFFFFFFFFFFFFFFFFFFF  
FFFFFFFFFFFFFFFFFFFFFFFFFFFFFFFFFFFFFFFFFFFFFFFFFFFFFFFFFFFFFFFFFFFFFFFFFFFFFFFF  
FFF  
@A00721:190:HGJW7DSXY:4:2615:32045:33442\_1:N:0:TCTGCAAG+GCTGCACT  
CGATCTAGTCGATTGATTTTGTGACTACGATCTCTCTTGTAAATAAGAAGTTCTTCGCAGTTGAATCT  
CCACCAGGTGGAGGGAAGACCACTGAACTTATAGCGACTTTTGTGAATTTTTCGCAAAGGTCTTGA  
AGT  
+  
FFFFFFF:FFFFFFFFFFFFFFFFFFFFFFFFFFFFFFFFFFFFFFFFFFFFFFFFFFFFFFFFFFFFFFFFFFFFFFF  
FFFFFFF:FFFFFFFFFFFFFFFFFFFFFFFFFFFFFFFFFFFFFFFFFFFFFFFFFFFFFFFFFFFFFFFFFFFFFFF  
FFF  
@A00721:190:HGJW7DSXY:4:1226:29668:25661\_2:N:0:TCTGCAAG+GCTGCACT  
CTGCTAATCGTAATTCGCGAGAAGAGATAGTACTAAAGTTTGGCACTTCTAGTTCATCGCGGTATT  
TGTGAAATTAAGACAGACGTGAAAGTTCTGATGAGTGATCGTATTAGA  
+  
FFFFFFFFFFFF:FFFFFFFFFFFFF,FFFFFFFFFFFFFFFFFFFFFFFFFFFFFFFFFFFFFFFFFFFFFFFFFFFFF  
FFFFFFFF,FF,FFFFFFFFFFFFFFFFFFFF,FFFFFFFFFFFF,FFFFFFFFFFFF  
@A00721:190:HGJW7DSXY:4:1666:21820:1861\_1:N:0:TCTGCAAG+GCTGCACT  
TCTTTTCATCGACGAATTATTCATGATTCACGCTGGTCAGACCCTTTTCTTACACATCTACTTAAGG  
CGGCTTATACCATAGGTTACGGTGATTCCAATCAAATCGGATTCATCAATCGTATTGATCTCCAAGTC  
GCA  
+  
::FFFFFFFFFFFF:FFFFFFFFFFFFFFFFFFFFFFFFFFFFFFFFFFFFFFFFFFFFFFFFFFFFFFFFFFFFF  
FFFFFFFFFFFFFFFFFFFFFFFFFFFFFFFFFFFFFFFFFFFFFFFFFFFFFFFFFFFFFFFFFFFFFFFFFFFFF  
FFF  
@A00721:190:HGJW7DSXY:4:1370:2935:31000\_1:N:0:TCTGCAAG+GCTGCACT  
ACATCAACGACATCATTCTTGATGAGTGTCGTTCTTATCGAAGTCTCAGTTATCGCTGCCCGGCCGAC  
GTTTGTGCGAACTCTCAGAGTTTACGGCAGAAAAATTTCTCCTGCTTGTAAATTCGAGAGAGGACAC  
TAT  
+  
FFFFFFFFFFFF:FFFFFFFFFFFFFFFFFFFFFFFFFFFFFFFFFFFFFFFFFFFFFFFFFFFFFFFFFFFFF  
FFFFFFFFFFFF:FFFFFFFFFFFFFFFFFFFFFFFFFFFFFFFFFFFFFFFFFFFFFFFFFFFFFFFFFFFFF  
FFF  
@A00721:190:HGJW7DSXY:4:1635:30960:10770\_1:N:0:TCTGCAAG+GCTGCACT  
CTTGGTAAGAGTAAGGTAAATGTGAAGATGCTCAGACTATTCATGAAGTTCAAGGTAATACTTACCA  
GCACGTTGCGCTGGTTAGAAATTAACCTCAAGATGACCCTGTTTTTGCATCACAAACACATATTACCG  
TTG  
+  
:FF,FFFF,F,FFFF:,FFFFF:FFFF,FF:FFFF,FFFFFF:F,FFFFFF:FFF,FFF,FF,FFFF  
FFFF:FF:FFFFFFFFFFFFFFFFFFFFFFFFFFFFFFFFFFFFFFFFFFFFFFFFFFFFFFFFFFFFF  
FFF  
@A00721:190:HGJW7DSXY:4:2137:16658:7827\_2:N:0:TCTGCAAG+GCTGCACT  
ACGATACTTTGTTATCAATGTAAAGTTAAACGATGCTACTTGTGAGAGGATCAATCACAGTAAGGAAC  
TGTCACGTTTAGCACGGGAGGTTGCAGATTCAACCCCTTATATCGAGG  
+



FFFFFFFFFFFFFFFFFFFFFFFFFFFFFFFFFFFFFFFFFFFFFFFFFFFFFFFFFFFFFFFFFFFFFFFF  
FFFFFFFFFFFFFFFFFFFFFFFFFFFFFFFFFFFFFFFFFFFFFFFFFFFFFFFFFFFFFFFFFFFFFFFF  
@A00721:190:HGJW7DSXY:4:1402:22589:16501\_1:N:0:TCTGCAAG+GCTGCACT  
AGTTGTTGACGACAAGCCTCAAGAGGGTAGAGGACCACCTGGATCTTCTACTGTCTCTGCCTTCCAAG  
ATTTCTTAGAAGAGGTTATTCCTGGAACCACCTTAACGTCACTCGTAATCTTTCAGCCGAATTAAGT  
ACT  
+  
FF:FFFFFFFFFFFFFFFFFFFFFFFFFFFFFFFFFFFFFFFFFFFFFFFFFFFFFFFFFFFFFFFFFFFF  
FFFFFF:FFFFFFFFFFFFFFFFFFFFFFFFFFFFFFFFFFFFFFFFFFFFFFFFFFFFFFFFFFFFFFFF  
FFF  
@A00721:190:HGJW7DSXY:4:2626:6008:11365\_2:N:0:TCTGCAAG+GCTGCACT  
TCGAATTAAGATCAAGGCTAATACCTTTATAGGTAAGAAGCCCCTTGAGCCGCGTAGTCAGCGCGTTT  
AGCTGTATCATCAGTCAGAGTATACCCGATAGGGTACCGAGTCTCCAA  
+  
FFFFFFFFFF:FFFFFFFFFFFFFFFFFFFFFFFFFFFFFFFFFFFFFFFFFFFFFFFFFFFFFFFFFFFF  
FFFFFFFFFFFFFFFFFFFFFFFFFFFFFFFFFFFFFFFFFFFFFFFFFFFFFFFFFFFFFFFFFFFFFFFF  
FFF  
@A00721:190:HGJW7DSXY:4:1636:8883:32471\_1:N:0:TCTGCAAG+GCTGCACT  
GAAAGACATATCGCACCCGAAATTTTGGGCAGAATGCTCTTAACGCGGTTCTTGAACGGTGTTTTGA  
TCAGTCTAAGTTGGATAAAGTTATAGGAGACTCAGTTAACCTGAGAGCTCCTCAATTGATAGATTGGG  
TCA  
+  
FFFFFFFFFFFFFFFFFFFFFFFFFFFFFFFFFFFFFFFFFFFFFFFFFFFFFFFFFFFFFFFFFFFFFFFF  
FFFFFFFFFFFFFFFFFFFFFFFFFFFFFFFFFFFFFFFFFFFFFFFFFFFFFFFFFFFFFFFFFFFFFFFF  
FFF  
@A00721:190:HGJW7DSXY:4:1128:21992:10958\_2:N:0:TCTGCAAG+GCTGCACT  
AGTCGACAGCGAAATGGTCAATATTGATAATTGGACCGACTATATGACCTATTTTAAGCTCATGGTGA  
AAAGGGAAGCTAAGGTTAACTTGATGCTTCAGCCTTTTCGAAGCATA  
+  
FFFFFFF:FFFFFFFFFFFFFFFFFFFFFFFFFFFFFFFFFFFFFFFFFFFFFFFFFFFFFFFFFFFFFFFF  
FFFFFFFFF:FFFFFFFFF:FFFFFFFFFFFFFFFF:FFFFFFFFFFFFFFF,FFFF  
@A00721:190:HGJW7DSXY:4:2125:17137:6089\_1:N:0:TCTGCAAG+GCTGCACT  
CTATCTTTAAGGTTCTTGTGAGGAGAGTCAAACAGTGTCTTTTACCCAACATTTTTATGTATACAGAG  
ATGACCAGTGACGATTTCTCCCGAAGCTCTTCTCTCTCTTAGGAGGTCATGATGACTACTATAAGGG  
TGA  
+  
FFFFFFFFF,FFFFFFFFFFFFFFFFFFFFFFFFFFFFFFFFFFFFFFFFFFFFFFFFFFFFFFFFFFFFFF  
FFFFFFFFFFFFFFFFFFFFFFFFFFFFFFFFFFFFFFFFFFFFFFFFFFFFFFFFFFFFFFFFFFFFFFFF  
FFF  
@A00721:190:HGJW7DSXY:4:1220:13602:33786\_2:N:0:TCTGCAAG+GCTGCACT  
TCGATGCTGAATTTCTTGAACCTTTGGAGTGCCAGTGAATATTTTGTACGCCAGGAGTATCCATAAC  
GATTTGTCATTTACCACCTTTGCTCAACGACGAAGTGAACGGCCAAC  
+  
FFFFFFFFFFFFFFFFFFFFFFFFFFFFFFFFFFFFFFFFFFFFFFFFFFFFFFFFFFFFFFFFFFFFFFFF  
FF:FFFFFFFFFFFFFFFFFFFFFFFFFFFFFFFFFFFFFFFFFFFFFFFFFFFFFFFFFFFFFFFFFFFF  
@A00721:190:HGJW7DSXY:4:1463:23375:8750\_1:N:0:TCTGCAAG+GCTGCACT  
GTGTGCTCTTCCGATCTATTTTATCACTTTATTATGACCTTGAAAGTTTTCGGCTGTGGTTGTGCGT  
GGGACGATTCCATTCTGTTTTCAAAGACTCCAATAACTGATCATTCTGATCATATGATTTTGGACAA  
TGG  
+  
FFFFFFFFFFF,FFFFFFFFFFFFFFFFFFFFFFFFFFFF::FFF:FFF,F::FFFFFF,FFFFFFFFF:F:FFF  
FFFFFF,FFFFFFFFF,F:FFFFFFFFFFFFFFFFFFFFFFFFFFFF:FFFFFFFFFFFFFFFFF:FFFFFFF,FF  
FFF  
@A00721:190:HGJW7DSXY:4:2214:32325:27226\_2:N:0:TCTGCAAG+GCTGCACT  
GCGACTAATATTCGATATTCGATTGAGGGTCGTTATACCTATTCGGCTATCTGTGCTTTGAATTGTAT

+

@A00721:190:HGJW7DSXY:4:1528:16613:14763\_1:N:0:TCTGCAAG+GCTGCACT  
CCCGACCTTTCCTTGTGAAAAATTTTGATGCGGTTTCATAAGATTATCAGTAATCCTGATTCTACTACG  
GATTTCATGGACCTTCCATCCTGTACCTCTTCTGGAGAGACGTATCTCAAAGATCGACTTCGAGACAGG  
TGA

+

@A00721:190:HGJW7DSXY:4:1655:7600:33974\_1:N:0:TCTGCAAG+GCTGCACT  
CGAGAGCGACCAAGATCTAAATTCGGTAACGGTGCGTGGCGCTTTATTTTAAAAAGCTCCCTCCTCTC  
CCAAGTTTGATCTGATACTTATCACGAAAGGACTTGAGTCTTTTGATCAGTCTCTGACTTGACCATCT  
TTC

+

@A00721:190:HGJW7DSXY:4:2614:25427:11647\_2:N:0:TCTGCAAG+GCTGCACT  
TTTCTTCTTTGTTTCCTTCTTTGCACTGATTTTCCTCATCAGCTTGTTTACCTAATCTGTGTTT  
TTACGATAACAACATATCAGTTGATTAAGACTCTTCCGAAAGGCCAACT

+

@A00721:190:HGJW7DSXY:4:2219:7102:16548\_1:N:0:TCTGCAAG+GCTGCACT  
AGCTCAGGGTGAAGCACACGTTTGACCGTGACGAAGTGTGGTGTTCCTTGATCTACGTTACGGATATA  
CTCTCCTTGAGTTCACCTCGTAAGGACACTACCACCTTATTACGATATTTCTTTAGTCGATGGGTTTTTCG  
ACT

+

@A00721:190:HGJW7DSXY:4:2653:23113:36511\_2:N:0:TCTGCAAG+GCTGCACT  
TTTTGTCTTCCTTGTGGTCTTATTCTATTAATCACTCATTTTAGTGAGATTATTAACGCACTAA  
AACGTCTTCGACAACAGCAGGGGTTTTCGAATAGTGATAGCCACCCGC

+

@A00721:190:HGJW7DSXY:4:2604:6262:25801\_2:N:0:TCTGCAAG+GCTGCACT  
GGCAGCAGCATGACCATAATTGGTATTGACTTTGGTACCACCTTTTCTACTGTCTGTCTCGCCTCTTC  
GAATGAAGTTTTTAATGCTTAACAACAATGATAGTGAATTTATACCTAC

+

@A00721:190:HGJW7DSXY:4:2108:23854:25895\_1:N:0:TCTGCAAG+GCTGCACT  
TTTTCTAATAATGATGACACTATTGTTTATGGATATGATGCTATTACTCATGATGGTTACGGTCAGGG  
AGGATTCTCAGTTTACAAGGACCTTAAGCGATGGATCGGGGTTAATTCTAAACATTACCCGAAAGAC  
GTG

+

[illegible]

@A00721:190:HGJW7DSXY:4:1563:5249:14121\_2:N:0:TCTGCAAG+GCTGCACT  
TACGATGTCGTCTGTCTCGGCGATCACTTTTCTACTAAGAATTGGTCCTACTTTTGGACAAGGCCAACT  
TCGTAATCTTCATGAGATCGTTTCTTTCTTTATCTCTTTGGTTGTTAG

+

FFFFFFFFFFFFFFFFFFFFFFFFFFFFFFFFFFFFFFFFFFFFFFFFFFFFFFFFFFFFFFFFFFFFFFFF:FFFFFFFFFFFFFFFF  
FFFFFFFFFFFFFFFFFFFFFFFFFFFFFFFFFFFFFFFFFFFFFFFFFFFFFFFFFFFFFFFFFFFFFFFF,FFFFFFFF

@A00721:190:HGJW7DSXY:4:1449:24749:19460\_2:N:0:TCTGCAAG+GCTGCACT  
GAGTGAAAGGCTTCAATTGTAGTGGTTTGGTCGTTTCAGTACCCAGTCAGTATACCTCTACGCAAAGA  
TATTTTCATGAAACTACAGAGGAACGTACCGGATTACCTGTCTTTTCAT

+

FFFFFFFFFFFFFFFFFFFFFFFFFFFFFFFFFFFFFFFFFFFFFFFFFFFFFFFFFFFFFFFFFFFFFFFF:FFFFFFFFFFFFFFFF:FFFFFFFF:  
FFFFFFFFFFFFFFFF,FFFFFFFF:FF:FFFFFFFFFFFFFFFFFFFFFFFFFFFFFFFFFFFFFFFF

@A00721:190:HGJW7DSXY:4:2615:25545:8625\_1:N:0:TCTGCAAG+GCTGCACT  
TTTGCTTCGATGTTGGATGTCAAGAAGGGTTCAGAATGGGATTCTACGTAGTTTATGACTTTGGTGG  
TGGTACTTTCGATACTTCTATCGTCTTACGTTACGGTAATTACTATAGTGTTATTTATTCTGGTGGTG  
ATG

+

FFFFFFFFFFFFFFFFFFFFFFFFFFFFFFFFFFFFFFFFFFFFFFFFFFFFFFFFFFFFFFFFFFFFFFFF:FFFFFFFFFFFFFFFFFFFFFFFF  
FFFFFFFFFFFFFFFFFFFFFFFFFFFFFFFFFFFFFFFFFFFFFFFFFFFFFFFFFFFFFFFFFFFFFFFF:FFFFFFFFFFFFFFFFFFFFFFFF  
FFF

@A00721:190:HGJW7DSXY:4:2160:27462:20713\_1:N:0:TCTGCAAG+GCTGCACT  
GGTCGTGACGTTGATGAAGCTATAAGAGCGTTCTTATTACGGCGCACTTCTTTACCCGCCACCACACA  
ACTTTCAGTTTCACAACTGAAGGAGGAGTTTCTGTTACTGGAAAACCCTCGTCAATACTTTTCAATA  
ATA

+

FFFFFFFFFFFFFFFFFFFFFFFFFFFFFFFFFFFFFFFFFFFFFFFFFFFFFFFFFFFFFFFFFFFFFFFF:FFFFFFFFFFFFFFFFFFFFFFFF  
FFFFFFFFFFFFFFFFFFFFFFFFFFFFFFFFFFFFFFFFFFFFFFFFFFFFFFFFFFFFFFFFFFFFFFFF:FFFFFFFFFFFFFFFFFFFFFFFF  
FFF

@A00721:190:HGJW7DSXY:4:2610:28818:31454\_2:N:0:TCTGCAAG+GCTGCACT  
TCTAGTGAAATTAACGCGTCCTTTTCTGGAACGTAGTTTACTATTATGAACAAAGTTATCAAAGATA  
GTGGCATTCAAGGCAAACCTTACCCTGATTCCGGCCGGTGGTAGCTCAT

+

FFFFFFFFFFFFFF:FFFFFFFFFFFFFFFFFFFFFFFFFFFFFFFFFFFFFFFFFFFFFFFFFFFFFFFFFFFFFFFF:FFFFFFFF  
FFFFFFFFFFFFFFFF:FF:FFFFFFFF,FFFFFFFFFFFFFFFFFFFFFFFF:

@A00721:190:HGJW7DSXY:4:2346:18177:1282\_2:N:0:TCTGCAAG+GCTGCACT  
GAAACAGCTATTAAAGCTGTTGAGCGGGTAATTACACCTAAACGAGCTCGATCTGCCATCGCTGAAGG  
ATGTGCACTCTTTTCTGCTACTTTAACGGAGCGTAGTGACTCTTCGT

+

FFFFFFFFFFFFFFFFFFFFFFFFFFFFFFFFFFFFFFFFFFFFFFFFFFFFFFFFFFFFFFFFFFFFFFFF:FFFFFFFFFFFFFF:FFFFFFF  
F:FFFFFFFF:FFFFFFFF:FFFFFFFF:FFFFFFFF:FFFFFFFF

@A00721:190:HGJW7DSXY:4:2344:28501:29716\_2:N:0:TCTGCAAG+GCTGCACT  
CAAGCTCGTATTATCGTCGCTGCTGGATCTGCGTTACCGTTGAAGGCTAACTCCAAGGTAATTATGA  
AGACTGTGATTTATCTTTCACTCTGGCCTTGATGAGGGTGTTTCTAA

+

FFFFFFFFFFFFFFFFFFFFFFFFFFFFFFFFFFFFFFFFFFFFFFFFFFFFFFFFFFFFFFFFFFFFFFFF,FFFFFFFFFFFFFF  
FFFFF:F:FFFFFFFFFFFFFF,FFFFFFFFFFFFFFFFFFFFFFFFFFFFFFFF

@A00721:190:HGJW7DSXY:4:1475:17047:34554\_2:N:0:TCTGCAAG+GCTGCACT  
AATTTCAATCTTCTTAAAAAGAAGATAGAGAGTCATACTTTGGGCTATCGTTCAGGTGCATGGGGTTG  
GATAGCCAATATTGAAGTGACACCTCTGGTAGTATCGAAGTAAAGAT

+

FFFFFFFFFFFFFFFFFFFFFFFFFFFFFFFFFFFFFFFFFFFFFFFFFFFFFFFFFFFFFFFFFFFFFFFF  
FFFFFFFFFFFFFFFFFFFFFFFFFFFFFFFFFFFFFFFFFFFFFFFFFFFFFFFFFFFFFFFF

@A00721:190:HGJW7DSXY:4:2327:5312:24878\_2:N:0:TCTGCAAG+GCTGCACT  
TCTAAGGTTAAAGAGTCGAGTAAACAAGTTGGACTTATCAATTATTTTAAACGCAGGGTGTTATAACGA

+

+

+

 $+$  $+$ 

+

+

+

FFFFFFFFF,FFFFFFFFFFFFFFFFFFFFFFFFFFFFFFFFFFFFFFFFFFFFFFFFFFFFFFFFFFFFFFFF  
FFF

@A00721:190:HGJW7DSXY:4:1315:32199:31172\_2:N:0:TCTGCAAG+GCTGCACT  
AATTTTGAGAACTAACTATGTTATGATCTATGATCATTTTGACAATCTCTTCTAATAATAATAAATA  
AATAATATTACTAATTGAAAATAGTGGAAGGCTCCAGTCAAACTAG

+

,F::,,FFFF:F,FFF:F,:FFFF:,,,F,FFF::FFFFF,,:F:::,F,,,,:FFF:FFFF:FFF  
F:FFF,FF,FF,F::,F,FFF,FF,,,,F,,,,F,:F:,FFF,FF,FF

@A00721:190:HGJW7DSXY:4:1266:26196:36777\_1:N:0:TCTGCAAG+GCTGCACT  
AATAGGTGAAGGGATAGTTTTTACCTCGACCAACATTAAGGCGGCGGCGACTAATCTTAAAGCTTCAC  
CCAAAATGAAGGACACTTCGAAACTGAATAATGATGCACTACAAACAAGTATCGCTAATCATCTGAAA  
AAG

+

FFFFFF:FFFFFFFFFFFF:FFFFFFFFFFFFFFFFFFFFFFFFFFFFFFFFFFFFFFFF:FFFFFFFFFFFFFFFFFFFF  
FFFFFFFFFFFFFFFFFFFF:FFFFFFFFFFFFFFFFFFFFFFFFFFFFFFFFFFFFFFFF:FFFFFFFFFFFFFFFFFFFF  
FFF

@A00721:190:HGJW7DSXY:4:2130:19180:16736\_1:N:0:TCTGCAAG+GCTGCACT  
GAGAAAATTTCTTAGAGGATATTCGCCATTGTGGTACGAATTGGTCCAACATTTACCACCAAATTCTT  
TTGATACAACCTCTAGCCTTCAAGTGGGGTATGCCTGCGGAATACGCTTGCTATTACCAGATTGGTTC  
GAA

+

FFFFFFFFFFFFFFFFFFFFF:FFFFFFFFFFFFFFFFFFFF:FFFFFFFFFFFFFFFFFFFF:FFFFF  
FFFFFFFFFFFFFFFFFFFFF:FFFFFFFFFFFFFFFFFFFFF:FFFFFFFFFFFFFFFFFFFFF:FFFFF  
FFF

@A00721:190:HGJW7DSXY:4:1556:15935:33661\_2:N:0:TCTGCAAG+GCTGCACT  
ATGTCAGAAGAAGCTATTCAAGCTTGTCGTTTAAAGACTGCAGAGGCTGTCAAACAAGCCCAGACTCA  
AGGAGTCCAATCAAAGGTTTTGAATTTAGCTCAACTGGGGAGACGTGC

+

FFFFFFFFFFFFFFFFFFFFFFFFFFFFFFFFFFFFFFFFFFFFFFFFFFFFFFFFFFFFFFFFFFFF  
FFFFFFFFFFFFFFFFFFFFFFFFFFFFFFFFFFFFFFFFFFFFF:FFFFFFFFF:F

@A00721:190:HGJW7DSXY:4:1143:20971:2707\_2:N:0:TCTGCAAG+GCTGCACT  
GTATATTGTATGTTAATAGATAGTGGGATAATAGTTCTACCGATACGTAGTGAACGCGTTCTAGAAC  
CAAGTACTTTCCGTCTGAAGAGTTTAGAGAGATCGGAAGAGCGTCGTG

+

FFFFFFFFFFFFFFFFFFFFFFFFFFFFFFFFFFFFFFFFFFFFFFFFFFFFFFFFFFFFFFFFFFFF  
FFFFFFFFFFFFFFFFFFFFF:FFFFF:FFFFFFFFFFFFFFFFFFFFF

@A00721:190:HGJW7DSXY:4:1202:20076:31156\_2:N:0:TCTGCAAG+GCTGCACT  
GCTTTAGACGATAATCCTTTAAGGACTATGTTGACTGACGAAGATTTTCCACAGATTTGTCTACGTT  
GCAGATCGCCACTCCAAACACTATATACATTATAAAATATAAAAATAA

+

FFFFFFFFFFFFFFFFFFFFFFFFFFFFFFFFFFFFFFFFFFFFFFFFFFFFFFFFFFFFFFFFFFFF  
FFFFFFFFFFFFFFFFFFFFF:FFFFFFFFFFFFF

@A00721:190:HGJW7DSXY:4:2511:32497:36229\_1:N:0:TCTGCAAG+GCTGCACT  
ACTTTTGTTACCAAATCTTGGCTTTCAACGAAGTCTCTGATTTTATTAATCATTACTTTAACGATCT  
CTCGGTCATTTACTCTGTACTTGATCTACGTCGTTTAACTGTGGAACAACCTTTACTTAGAATGACT  
CTA

+

FFFFFFFFFFFFFFFFFFFFFFFFFFFFFFFFFFFFFFFFFFFFFFFFFFFFFFFFFFFFFFFFFFFF  
FFFFFFFFFFFFFFFFFFFFF:FFFFFFFFFFFFF,F:F:FFF:FF,FFFFFF,:FFFFFFFFF:F:F  
FFF

@A00721:190:HGJW7DSXY:4:2115:16269:18584\_1:N:0:TCTGCAAG+GCTGCACT  
AATACTCACTATCGTTTTCTGCTTTTTCTTAGCTAATAGATTAATAAAGGATGAGTACGAAAACCAAC  
TCTTCGTTACGAGACCTGATGGTAGAATAGATTTAGTCTCTACACCCATCTCAACGAGGATAAAGCGA  
GTT

```
+
FFFFFFFFFFFFFFFFFFFFFFFFFFFFF:FFFFFFFFFFFFFFF,FFFFFFFF,FFFFFFFFFFFF
FF:FFFFFFFFFFFFFFFFFFFFFFFFFFFFFFFFFFFFFFFFFFFFFFFFFFFFFFFFFFFFF
FFF
@A00721:190:HGJW7DSXY:4:1419:6424:7639_2:N:0:TCTGCAAG+GCTGCACT
CGAAGAGATCATCCGCAAACGACTCGAAACCGAGACGCCGTAGATCAAAGTCCCTTCTAACTTTAGAT
TATGAATCCTGCCTTTACTCATTTTTATAGCAGTTATTTATGTTGTACT
+
FFFFFFF:FF:FFFFFFFFFFFFFFFFFFFFFFFFFFFFFFFFFFFFFFFFFFFFFFFFFFFFF
FFFFFFFF:FFFFFFFFFFFFFFFFFFFF:FFFFFFFFFFFFFFFFFFFF
@A00721:190:HGJW7DSXY:4:2464:4896:15922_1:N:0:TCTGCAAG+GCTGCACT
TTTGGGTATGTTTTGTGAAAAACATGAGATAACCCAAGTCTATCGAAGACATTATCTCTTATGTACTTA
TTGTAACGATCATTCTTCGAGTTTTGTCATTCTTATTCTTTTATTCTTTAACTGTGTATGAGGAGG
ATT
+
FFFFFFFFFFFFFFFFFFFFFFFFFFFFFFFFFFFFFFFFFFFFFFFFFFFFFFFFFFFFFFFFF
FFFFFFFFFFFFFFFFFFFFFFFFFFFFFFFF:F:FFF:FFFFFFFFFFFFFFF,FFF:F:F,FFFFFFF
FFF
@A00721:190:HGJW7DSXY:4:2157:24704:25175_1:N:0:TCTGCAAG+GCTGCACT
TCGATAGTGATTGTTATCAATTTAAATACATTACTGTTTCAAATCATCTTTACTCACAGACTCCGAAA
ATGTTTTCAAATGAGGTCAAAGCTCTATTTATTAACGAACTATTATCCGATTCTTCGAGGGTATCAC
TAC
+
FFFFFFFFFFFFFFFFFFFFFFFFFFFFFFFFFFFFFFFFFFFFF:FFFFFFFFFFFFFFFFFFFFFFFFF
FFFFFFFFFFFFFFFFFFFF:FFFFFFFFFFFFFFFFFFFFFFFFFFFFFFFFFFFFFFFFFFFFF
FFF
@A00721:190:HGJW7DSXY:4:2134:24008:7968_1:N:0:TCTGCAAG+GCTGCACT
GACTTTTAGTCAAGGAAC TTCAATTCCTTCGATGTTTATATTTTTCTATAAGGGAAAATAGCAATAATC
AAATTTTCGACAAATTTTAGAAC TTTATTT CAGA ACTCTCTCCGATCACCTTG GTGTGATCTCCC GGAG
GAT
+
FFFF,FFF,FFFF:FFF:FFFFFFFFFFFFFFFFFFFFFFFFFFFFFFFFFFFFF:FFFFFFFFFFFFFFFFF
FFFFF:FFFFFFFFFFFFFFFFFFFFFFFFFFFFFFFFFFFFFFFFFFFFFFFFFFFFFFFFFFFFF
FFF
@A00721:190:HGJW7DSXY:4:2461:5204:25034_2:N:0:TCTGCAAG+GCTGCACT
ATTTTTAAATAGTGATATT CAGCGTATA CT TGAATACTTTATCAAAGATT TGCTTGGTCTATTTACC
GCAAAAAGTTGGAAGAGGTCTATGATATTTATTTACTTATACTTTAA
+
FFFFFFFFFFFFFFFFFFFFFFFFFFFF,FFFFFFFFFFFFFFFFFFFFFFFFFFFFFFFFFFFFF
FFFFFFFFFFFF:FFFFFFFFFFFFFFF,FF:FFFFFFFFFFFFFFFFFFFF:F
@A00721:190:HGJW7DSXY:4:2375:17797:25175_1:N:0:TCTGCAAG+GCTGCACT
AACTTGACTGTTGATAATATTACAATAGCTCTTTCTCAGAAGATTAGAGAAGTAACCGGTGAACACGT
CGGTAGCATTGATTTACTTTTACCGTTAGAACTGAAAAAGATTCTTTTCGAAAAGAAACCTATAAGTT
ACA
+
F,FFFFFFFFFFFFFFFFFFFFF:FFFF:FFFFFFFFFFFFFFF:FFFFFFFFFFFFFFFFFFFF,FFFFFF:FF
FFFF:F:FFFFFFFFF FFFFF:FFFF:FFFF:FFFF:FFFF:FFFFFFFFFFFF:FFFF:FFFFFFFFF
F:F
@A00721:190:HGJW7DSXY:4:1251:32072:32142_2:N:0:TCTGCAAG+GCTGCACT
TAAAGAAATAAAAATACTTCAAGTACCTGAACTTTACATTTTTTAATGGTATGGTATAATGTGTCTTAC
AAATAGAACATTCACTCTCGGTAATGAGAGTGTATTCCTTAATATTCT
+
FFF:FFF:FF:,FFFF:FFFFFF:FFFF::F:FFFFFFFF:F,FFFF:FFFFFF,F:FFFFFFF
FFFFFFFFF,FFF:FF,:FFFFFFFFF:E::FE,F:F:FFFF:FFFF
```

@A00721:190:HGJW7DSXY:4:2167:1524:12461\_1:N:0:TCTGCAAG+GCTGCACT  
GCATTACTAGGATTTATCACACTCCTAAATTTGATAGCAATTTATGTTTTAAATGCTAGGAAAATTTT  
AGAAAACTCCATTGTATAGTTCAAGGAGTACTTAATTCAATAGCTTTAGTATTATTTACTATCGCCT  
TT

+

FFFFFFFF:FFFFFFFFFFFFFFFF:FFFF,FFFFFFFFFFFFFFFFFFFFFFFFFFFFFFFFFFFFFFFF  
FFFFFFFFFFFFFFFFFFFFFFFFFFFFFFFFFFFFFFFFFFFFFFFFFFFFFFFFFFFFFFFFFFFFFFFF  
FF

@A00721:190:HGJW7DSXY:4:1160:14271:33379\_1:N:0:TCTGCAAG+GCTGCACT  
TTAATTGCTTACACAAAAGTGACGCGCGAAGGAATCTTAATTGATTGAAGCTAGGCGTTGGGGAGAAT  
GAAC TGCCGCTTCCCGGAAGAAACGATCTATTTACAGAGTATTTAGAGTAGTCCAAAGTTTGATAAA  
TTT

+

FFFFFFFFFFFFFFFFFFFFFFFFFFFFFFFFFFFFFFFFFFFFFFFFFFFFFFFFFFFFFFFFFFFFFFFF  
FFFFFFFFFFFFFFFFFFFFFFFFFFFFFFFFFFFFFFFFFFFFFFFFFFFFFFFFFFFFFFFFFFFFFFFF  
FFF

@A00721:190:HGJW7DSXY:4:1101:14959:14497\_2:N:0:TCTGCAAG+GCTGCACT  
ATGACCAATCATCGCTCCAAGTGGCAGCGCAGACGTAGGGTCAAACCTACTACCGCCGGTCGGCAGAT  
CGGCACCACTGGTCTCTACGTTCAAGGACCCGCTGTGCAGAATAACCT

+

FFFFFFFFFFFFFFFFFFFFFFFFFFFFFFFFFFFFFFFFFFFFFFFFFFFFFFFFFFFFFFFFFFFFFFFF  
FFFFFFFFFFFFFFFFFFFFFFFFFFFFFFFFFFFFFFFFFFFFFFFFFFFFFFFFFFFFFFFFFFFFFFFF  
FFFFF

@A00721:190:HGJW7DSXY:4:2267:10547:6042\_2:N:0:TCTGCAAG+GCTGCACT  
CACAGAAGAAGGCTGAAGGTCGTTACCGGACGACCACTCAAAGGAAACGGGCTGTTGCCAGAGGAAA  
GCAGCGACCACCGAGGTCGCTCGTAACATTGACGGCAGTCCCGTCATC

+

FFFFF:FFFFFFFFFFFFFFFFFFFFFFFFFFFFFFFFFFFFFFFFFFFFFFFFFFFFFFFFFFFFFFFF  
FFFFFFFFFFFFFFFFFFFFFFFFFFFFFFFFFFFFFFFFFFFFFFFFFFFFFFFFFFFFFFFFFFFFFFFF  
@A00721:190:HGJW7DSXY:4:1531:6903:18991\_1:N:0:TCTGCAAG+GCTGCACT

CTGAGGCAGTACCTCAGTCAAAAGTCACATTCACCACTCCCATACCAATCAATGATGTGACTATACAG  
TTCGGCCATTTCAAGAGTGGTCAATACGTCGTGGGAGGTACTGAAGCCTTCCCCTCCGCTGGCAGAA  
GAA

+

FFFFFFFFFFFFFFFFFFFFFFFFFFFFFFFFFFFFFFFFFFFFFFFFFFFFFFFFFFFFFFFFFFFFFFFF  
FFFFFFFFFFFFFFFFFFFFFFFFFFFFFFFFFFFFFFFFFFFFFFFFFFFFFFFFFFFFFFFFFFFFFFFF  
FFF

@A00721:190:HGJW7DSXY:4:2446:3947:9706\_1:N:0:TCTGCAAG+GCTGCACT  
CAATCAATAGTTCTTCTGACCAGAATGAAAAGGGTTTACCAGGCTAGTCTCTAAGTCTACCAGGAAG  
AGGGGAAATGTCCCCAAACTGAGAAGAATAAAGGGAAGGTCCATCAGGACCTAAGAAGGGGAAATT  
AC

+

FFFF:FFF,FFFFFFFFFFFF:FFFFF,FFFFFFFFFFFFFFFFFFFFFFFFFFFFFFFFFFFFFFFF  
FFFFFFFFFFFFFFFFFFFFFFFFFFFFFFFFFFFFFFFFFFFFFFFFFFFFFFFFFFFFFFFFFFFFFFFF  
FFF

@A00721:190:HGJW7DSXY:4:2642:31792:9048\_2:N:0:TCTGCAAG+GCTGCACT  
GAAGATCTCCACCATCTGGGGTTGGGAATAAGAAATCTGCACGGGCCAAAGAGGCCGCTGCTACGAA  
GTGCTGAAGCGGCTTGGGTCATTAAGGGTAGCTGTAAAGTTGCGCC

+

FFFFFFFFFFFF,FFFFFFFFFFFF:FFFF, :FF:FFFFFFFFFFFFFFFF:FFFFFF:FFFFFFFFFFFF  
FFFFFFFF:FFFFFFFF:FFFF, :FF, FFFFFFFF, :FFF, :FFFFFF:F

@A00721:190:HGJW7DSXY:4:1434:8006:11631\_2:N:0:TCTGCAAG+GCTGCACT  
TCTTTGAGACCAAGACTCTCTACAGTAGGTTTCGTGCCTACTATGAGCAAATCTGTTGAATTCGTCACT  
GAGGACGAAGGTGAGAGGACTTTTGGCTACTGGCGACAACTGAGAGC

+

FFFFFFFFFFFFFFFFFFFFFFFFFFFFFFFFFFFFFFFFFFFFFFFFFFFFFFFFFFFFFFFFFFFFFFFF  
FFFFFFFFFFFFFFFFFFFFFFFFFFFFFFFFFFFFFFFFFFFFFFFFFFFFFFFFFFFFFFFF  
@A00721:190:HGJW7DSXY:4:2217:3848:29825\_2:N:0:TCTGCAAG+GCTGCACT  
CGTGGGTTGAAGGCCGACGCTTCGAGCTTGAGTGTGACGAGGCCGGTGACGTTTTTGTCAACGGCGTT  
TGGAGGATTTTATCCGCGCTTAACCTATGGGGCGAAGATCCCCTATGGA

+  
FFFFFFFFFFFFFFFFFFFFFFFFFFFFFFFFFFFFFFFFFFFFFFFFFFFFFFFFFFFFFFFFFFFFFFFF  
FFFFFFFFFFFFFFFFFFFFFFFFFFFFFFFFFFFFFFFFFFFFFFFFFFFFFFFFFFFFFFFF  
@A00721:190:HGJW7DSXY:4:1124:11324:13620\_2:N:0:TCTGCAAG+GCTGCACT  
TATTTATGCCGACGATAATAAGCATCACACCATAAGCACCGAGGTAAGCTCGGGACTTACAAGAGAG  
AGTGAGAGAGAGTCGCTCAAATAATAATGCACACAAATAGGGCCTTC

+  
,FFFFFF,FF,FF,F:FFFFFF,FFF,,,::,F,,FF,FFFF,FF,FF::,FF::,FFFFFF:F,F:F:  
F,,F,,F,F,F,F,,FFF:,F:,F::,,F,,,F,FF::,F,,,F,F,  
@A00721:190:HGJW7DSXY:4:2115:16369:36699\_1:N:0:TCTGCAAG+GCTGCACT  
TTAGAGAGCATTAGTAGGAAGTTGGGCAAATCCCACATATGTTAGTCGTTGTCTCTCTTTTCTTGAA  
AATTTTCTCTTCTCCGTCATTGGGGATTAGATGTGTGAAGGTGGAAGGTGTCAAGGTCTTCTTC  
ATG

+  
FFF:F:,FFF:F,F::,,:FF,F:FFF,FF,:FF,FF,FF,F:F,,FFF:,,,,F:,F,:FFFF,  
FF,FFFFFF,FFF,,F,F,FFFFFF,FFF:FF,F:FFFF,FFF:FF,FFFF:FFFFFF,,FF,FF:FFF  
FF:  
@A00721:190:HGJW7DSXY:4:2418:21052:8296\_1:N:0:TCTGCAAG+GCTGCACT  
GACCTAATCACATCATGATTGATAGTTACGGCTCGTATCGAGTTGGAGGGAGGAAGTTCTCCGAAATT  
AAAGACGGGGGATTAAGAGTCCAGCTGTAAGTGTCAATTCAGAGAGGGGAGCTCTGAAAAGGAACT  
TCG

+  
FFF:FFFFFFFFFFFFFFFFFFFFFFFFFFFFFFFFFFFFFFFFFFFFFFFFFFFFFFFFFFFFFFFF  
FFFFFFFFFFFFFFFFFFFFFFFFFFFFFFFFFFFFFFFFFFFFFFFFFFFFFFFFFFFFFFFF  
FFF  
@A00721:190:HGJW7DSXY:4:2662:7808:22717\_2:N:0:TCTGCAAG+GCTGCACT  
AGAGGGGAGGAGTTTGAGGAAGGCTCTAGAGAAGATCTCACCACTGGAGAAGGCAAGTGGAGAGTCC  
AGAAGTTGATGAAGAAGGATTATTTGAAGCAGGGTTACCACTTCCTA

+  
FFFFFFFFFFFFFFFFFFFFFFFFFFFFFFFFFFFFFFFFFFFFFFFFFFFFFFFFFFFFFFFFFFFFFFFF  
FFFFFFFFFFFFFFFFFFFFFFFFFFFFFFFFFFFFFFFFFFFFFFFFFFFFFFFFFFFFFFFF  
@A00721:190:HGJW7DSXY:4:1227:15682:16626\_1:N:0:TCTGCAAG+GCTGCACT  
TTGGAGTTTTAGATAATCTTTTGAGAAGGGGTCATAGAGCCAGCAAGAGAAGCTTATATGCTGGTTTA  
AGTGATGATTATCACTCCTTGAGAAGACAAGCCACATTAAGATATAATTTAGGTCAACTTGGGGTTTC  
GAA

+  
FF:FFF,FFFF:FF:FFFF:FFFFFFFF:FFFF,FFFFFFFF:FFF,FF:F:FFFFFFFF,F::F:FFFF  
FFFFFFFF:FFFF:FF,FFFFFFFF:FF:FF:FF:FFFFFFFF:FFFF:FFFFFFFFFFFFFFFF  
F:F  
@A00721:190:HGJW7DSXY:4:2515:31675:22592\_1:N:0:TCTGCAAG+GCTGCACT  
TTTGAGTATCGACAGATCTTCGATCTTGAGGACGTACATTTAACGTGGCAGAATTCGGTAACCTACC  
ATATTGTTCTTCCGGGAAGTTGTGGGATTTAACTTTGACTCAACTACTCCGATCAGATCCGGATGGT  
TTG

+  
FFFFFFFFFFFFFFFF:FFFFFFFFFFFFFFFFFFFFFFFFFFFFFFFFFFFFFFFFFFFFFFFF  
FFFFFFFFFFFFFFFFFFFFFFFFFFFFFFFFFFFFFFFFFFFFFFFFFFFFFFFFFFFFFFFF:  
FFF  
@A00721:190:HGJW7DSXY:4:1518:10700:10692\_1:N:0:TCTGCAAG+GCTGCACT  
ATGGCAGATACTACCGATAAGGTGAAAAATATGCAGGTCAAAGATTCTGTAGCTCTGAGGGCGGTTGA





FFFFFFFFFFFFFFFFFFFFFFFFFFFFFFFFFFFFFFFFFFFFFFFFFFFFFFFFFFFFFFFFFFFFFFFFFFFFFFFF  
FFF

@A00721:190:HGJW7DSXY:4:2356:32235:4398\_1:N:0:TCTGCAAG+GCTGCACT  
AGAGAAAAGATTACAGGACGCCTACGGTGACTTTATGGACAAGATGCAAGTTCTTGGGAAATACTTGTT  
TCCCTTTTATAGTTTAGTAGGTGATCTTGACGTGATTCTTTGTATAGGGAGTGTGAGAAGACAACGA  
ATC

+  
:FFFFFFFFFFFFFFFFFFFFFFFFFFFFFFFFFFFFFFFFFFFFFFFFFFFFFFFFFFFFFFFFFFFFFFFFFFFF:  
FFFFFFFFFFFFFFFFFFFFFFFFFFFFFFFFFFFFFFFFFFFFFFFFFFFFFFFFFFFFFFFFFFFFFFFFFFFF  
FFF

@A00721:190:HGJW7DSXY:4:1318:4788:19648\_1:N:0:TCTGCAAG+GCTGCACT  
ATCTTTTGAGATTGAGAAGATTGAAGAACACGTCAAGAAGTCGCTCGGCGTTGTTCTTGAAAACCAAG  
TTAAGAAGGAGGCTGATCATGGAGTCTTTGTACCTTCTGTCAAACCTTCGAGGTTTCAGCTACGAGAGGT  
GAT

+  
FFFFFFFFFFFFFFFFFFFFFFFFFFFFFFFFFFFFFFFFFFFFFFFFFFFFFFFFFFFFFFFFFFFFFFFFFFFF  
FF,FFF,F:FFFF,FFFF:FFFFF:FFF:FFFFFFFFFFFFFFFFFFFFFFFFFFFFFFFFFFFFFFFFFFFF  
FFF

@A00721:190:HGJW7DSXY:4:1253:8513:21120\_2:N:0:TCTGCAAG+GCTGCACT  
TTGAAGGCTGGCTCTAAGGGAGACTCCTTCTTTTTGAATGTTGTAAAGAATTGGGTTGAGAAGTGTGC  
TTTACAAGGAGTTAGACTCTTCTTCAAGTTTTTAGATCTTCTTGATAA

+  
FFFFFFFFFFFFFFFFFFFFFFFFFFFFFFFFFFFFFFFFFFFFFFFFFFFFFFFFFFFFFFFFFFFFFFFFFFFF  
FFFFFFFFFFFFFFFFFFFFFFFFFFFFFFFFFFFFFFFFFFFFFFFFFFFFFFFFFFFFFFFFFFFFFFFFFFFF  
FF:FF:FF,FFFF

@A00721:190:HGJW7DSXY:4:2339:31846:4507\_2:N:0:TCTGCAAG+GCTGCACT  
CTCTACCCATAACTTCTTTTTCAAAAATGCGGATGGGTCTACTGATGTTTTCTACAGAGTGCAGTCG  
TTTCAACACTTATCACCACCTTTTGAAAGGAAAATAATTGGGGATGAAA

+  
FFFFFFF:FFFFFF:FFFFFFFFFFFFFFFFFFFFFFFFFFFFFFFFFFFFFFFFFFFFFFFFFFFFFFFFFFFF  
F:FF:FFFF:FFF::FFFF,,FFF,:F:FFF:FFF,:FF,,,F:F:,,F

@A00721:190:HGJW7DSXY:4:2456:23873:11898\_2:N:0:TCTGCAAG+GCTGCACT  
ACGTCTTAAGTAATTTGGATGTTGTGCGAAACTATCAGGTTCTTGTACGATTCTTAAAAGAAGTTTA  
TAAAACCTTCAGAGTCTCTTGAAGTCCAGGTAGCTAATGTTCTTGCA

+  
FFFFFFFFFFFFFFFFFFFFFFFFFFFFFFFFFFFFFFFFFFFFFFFFFFFFFFFFFFFFFFFFFFFFFFFFFFFF  
FFFFFFFFFFFFFF:FFFFFFFFFFFFFF:FFFFFFFFFFFFFFFFFFFFFFFFFFFFFFFFFFFFFFFFFFFF

@A00721:190:HGJW7DSXY:4:2112:31810:23171\_1:N:0:TCTGCAAG+GCTGCACT  
CTCTGTTGGTAGAGGAGTTGAGAGAATTACTCAGATTCAATCTGGCATCACTGAACGTCTACAACGAG  
TTAGGGAGTGGCTAGGTTTTAAAGATCCTTGCACAAGCAATACCTTCCACTGAGTTCATCACCCAG  
AGT

+  
FFFFFFFFFFFFFFFFFFFFFFFFFFFFFFFFFFFFFFFFFFFFFFFFFFFFFFFFFFFFFFFFFFFFFFFFFFFF  
FFFFFFFFFFFFFFFFFFFFFFFFFFFFFFFFFFFFFFFFFFFFFFFFFFFFFFFFFFFFFFFFFFFFFFFFFFFF  
FFF

@A00721:190:HGJW7DSXY:4:1204:22670:18803\_1:N:0:TCTGCAAG+GCTGCACT  
GTTTTTGGTATAAATCCTGATGGCTCAGTACAGGGATGAGGTAATAGTTATAAACCTTCTTTTATCA  
TTGCAACAGGACTTTGAGAAGACTGTTTGAATGGACAAAATCTGGGATCATAGGTATGTGTACGCTA  
CAC

+  
FFFFFF,FF,FF,FF,FFFFF:F:F,FFFFFF,F:F,FF::FFFF,FFFF:,,:FF:FFFFFFFF  
FF,,,FFFF::,FFF:FFF:FFFFFFFF,,FF:FFF,FFFFFF:F,FF:,FF,FFFFFFFFFFFFFFF  
::F

@A00721:190:HGJW7DSXY:4:1250:22218:8093\_2:N:0:TCTGCAAG+GCTGCACT  
CTTTTTGAATATGACAGAAGCTCGCCATATCAGATTAGAGACATGCCAGTTAGAGTTCTTCTAACCAG

GACTGATGGTGAGATTCTTTTACCTTTTGGAGGTCCAGGAACCTTTAC  
+  
FFFFFFFFFFFFFFFFFFFFFFFFFFFFFFFFFFFFFFFFFFFFFFFFFFFFFFFFFFFFFFFF  
FFFFFFFFFFFFFFFFFFFFFFFFFFFFFFFFFFFFFFFFFFFFFFFFFFFFFFFF  
@A00721:190:HGJW7DSXY:4:2269:29803:16595\_1:N:0:TCTGCAAG+GCTGCACT  
GTTTCCGTCGGAGGATGACAGGTGGGAGACCGCTCAATAACACTCTATTGAATCCCTTTTCCACGATG  
AAAGCTCTTTATGAGGTGCTCCATGCAAATTTACAGTTCTTCTTTGGTGATATCGCCTCTGTCCTTTC  
TCC  
+  
FFFFFFFFFFFFFFFFFFFFFFFFFFFFFFFFFFFFFFFFFFFFFFFFFFFFFFFFFFFFFFFF  
FFFFFFFFFFFFFFFFFFFFFFFFFFFFFFFFFFFFFFFFFFFFFFFFFFFFFFFF,FFFFFFFFFFFFFFFF  
FFF  
@A00721:190:HGJW7DSXY:4:2360:6298:33191\_2:N:0:TCTGCAAG+GCTGCACT  
CTATTACCACCCTTGTCATTGATACAAACATTCTAGGTGATGCTTTCTTAGAGGCTCGTCTAGCCGCT  
GAGATTCTGCTTACCTATTTACAATCTGTAGAGAGAGAGGAGATCGGA  
+  
FFFFFFFFFFFFFFFFFFFFFFFFFFFFFFFFFFFFFFFFFFFFFFFFFFFFFFFFFFFFFFFF  
FFFFFFFFFFFFFFFFFFFFFFFFFFFFFFFFFFFFFFFFFFFFFFFF,FFFFFFFFFFFFFFFF  
@A00721:190:HGJW7DSXY:4:1408:29297:2691\_1:N:0:TCTGCAAG+GCTGCACT  
GTTTATGTTTCGGTTTCAGCTGGATGGATCTTTTGATGGTATGTTTCACATTGCGTGATCACTTCCCG  
TGGACTTGGAAGAGATTAAACATAAAATCCAGCGATTCTATTATGTCGCTAAAGCCTGTCCAGTTGT  
CGA  
+  
FFFFFFFFFFFFFFFFFFFFFFFFFFFFFFFFFFFFFFFFFFFFFFFFFFFFFFFFFFFFFFFF  
FFFFFFFFFFFFFFFFFFFFFFFFFFFFFFFFFFFFFFFFFFFFFFFFFFFFFFFF,FFFFFFFFFFFFFFFF  
FFF  
@A00721:190:HGJW7DSXY:4:2347:21079:7122\_2:N:0:TCTGCAAG+GCTGCACT  
TTCTCGCTCGCATTTTACAAGGATTACTAAGTCTGAGATCTGCCACTTCTAATTTTAGGAAACGTGCG  
GAAAAGAAAGTTCATGAGGATGTCTTGGTCGAAAAATATCGCCGGGAA  
+  
,FFFFFFFFFFFFFFFFFFFFFFFFFFFFFFFFFFFFFFFFFFFFFFFFFFFFFFFFFFFFFFFF  
FFFFFFFFFFFFFFFFFFFFFFFFFFFFFFFFFFFFFFFFFFFFFFFFFFFFFFFF,FFFFFFFF  
@A00721:190:HGJW7DSXY:4:2101:26268:29543\_1:N:0:TCTGCAAG+GCTGCACT  
GGATCCTGATGACATTATTTCAACGGATACCGATCTCAGTTCTACCACAGAAACCGTCTCAGGAACTG  
TCTCCACTGATTCGGAATTATAGAAAGACGACCTTCTTGTGGGACTGAGACCTCTGAATTTTCAGGG  
TGC  
+  
:FFFF,F,FFFF,FFFFFFFF:FF,F:FFF:,FF,FF:FFFFFFFF:F,FFF,:FFFFFFFF,F:  
FFF,FFF:,FFF:,,:FF,,F,FF,FFFF:,FFFF:FFFFFF,FFF:FFFFFFFF:FFFFFF  
FF:  
@A00721:190:HGJW7DSXY:4:1262:9959:9283\_2:N:0:TCTGCAAG+GCTGCACT  
TTGAAAGGGATAATTTCAACTCTGAGACTTCTAAGAGTGTTTCAAAGACCAGAAACGTAACAAGAAG  
AATAAAGGTAGGAAGGGGAGAAAACAGAACAAAGCGAGCGGTTGAAGAG  
+  
FFFFFFFFFFFFFFFFFFFFFFFFFFFFFFFFFFFFFFFFFFFFFFFFFFFFFFFFFFFFFFFF  
FFFFFFFFFFFFFFFFFFFFFFFFFFFFFFFFFFFFFFFFFFFFFFFFFFFFFFFF  
@A00721:190:HGJW7DSXY:4:1508:16306:35462\_2:N:0:TCTGCAAG+GCTGCACT  
TGGTTGCGGCTGATCGTACCCCAATTCCTGCTAGAAAGATCACTCTCGGCGATACCACTGATCTTCCA  
GAGTTACGTAGTGGTCGTTCTTTTGGTGATTTTATCAAAGAGAAAGTT  
+  
F:FFFFFF:FFFFFF:FFF:FFFFFFFFFFFFFFFF:FFFFFF:FFFFFF:FFFFFFFFFFFFFFFF  
FFFFFF,F:F:FFFFFF,FFFFFFFF:,,FFF:F:FFF  
@A00721:190:HGJW7DSXY:4:2246:30138:12414\_1:N:0:TCTGCAAG+GCTGCACT  
TCCAAAAGCTATTAATAGCAGTTGCGGGGCTATAATACGCCTCCAGATTACTCTAAACTGAATCCA

CTCTCTTGGGATATAAATGAGTACATCTATAATAGAGTTTTGGAAGTGTGTAATGTCCTACGTACTGT  
TCA

+

FFFFFFFFFFFFFFFFFFFFFFFFFFFFFFFFFFFFFFFFFFFFFFFFFFFFFFFFFFFFFFFFFFFFFFFF  
F:FFFFFFFFFFFFFFFF:FFFFFFFFFFFFFFFF:FFFFFFFFFFFFFFFFFFFFFFFFFFFFFFFF  
FFF

@A00721:190:HGJW7DSXY:4:2635:31693:3709\_1:N:0:TCTGCAAG+GCTGCACT  
CAAGTCGATTGATTTTGTGACTACGATCTCTCTTGTAAATAAGAAGTTCTTCGCAGTTGAATCTCCAC  
CAGGTGGAGGGAAGACCACTGAACTTATAGCGACTTTTGTGCAATTTTCGCAAAAGGTCTTGAAGTA  
CGT

+

FFFFFFFFFFFFFFFFFFFFFFFFFFFFFFFFFFFFFFFFFFFFFFFFFFFFFFFFFFFFFFFFFFFFFFFF  
FFFFFFFFFFFFFFFFFFFFFFFFFFFFFFFFFFFFFFFFFFFFFFFFFFFFFFFFFFFFFFFFFFFFFFFF  
FFF

@A00721:190:HGJW7DSXY:4:2614:31729:28948\_2:N:0:TCTGCAAG+GCTGCACT  
TCGTAATTCGCGAGAAGAGATAGTACTAAAGTTTTGGCACTTCTAGTTTCATCGCGGTATTTGTGAAA  
TTAAGACAGACGTGAAAGTTATGATGAGTGATCGTATTAGAACAGCTG

+

FFFFFFFFFFFF:FFFFFFFFFFFFFFFFFFFFFFFFFFFFFFFFFFFFFFFFFFFFFFFFFFFFFFFF  
FFFFFFFFF,F:FF:,FFFFFFFFFFFFFFFF:FFFFFFFFF,,,FFFF

@A00721:190:HGJW7DSXY:4:2261:1741:15749\_1:N:0:TCTGCAAG+GCTGCACT  
TCTTTTCATCGACGAATTATTAATGATTCACGCTGGTCAGACCCTTTTCTTACACATCTACTTAAGG  
CGGATTATACCATAGGTTACGGTGATTCCAATCAAATCGGATTCATCAATCGTATTGATCTCCAAGTC  
GCA

+

F,FFFFF,F::FF,FFFFFFFF,,FFFF::FFF:FFFFFFFF,:FFFFFF,:F:F:FFF,FF:FF:FFF  
FFF,FFFFFFFFFFFFFFFFFFFFFFFF::FFF,:FFFF,FFFFFFFFF,,F:F:,FFFF,FFFF:  
,FF

@A00721:190:HGJW7DSXY:4:2265:12038:14356\_1:N:0:TCTGCAAG+GCTGCACT  
ACATCAACGACATCATTCTTGATGAGTGCTGTTCTTATCGAAGTCTCAGTTATCGCTGCCCCGCCGAC  
GTTTGTGCGCAACTCTCAGAGTTTACGGCAGAAAAATTTCTCCTGCTTGTAAATTCGAGAGAGGACAC  
TAT

+

FF,FFFFF:F,,FFFFFFFF:FFFFFFFFFFFFFFFFFFFFFFFFFFFFFFFFFFFFFFFFFFFFFFFF  
FF:FFFFFFFFFFFFFFFF:FFFFFFFFFFFFFFFFFFFFFFFFFFFFFFFFFFFFFFFFFFFFFFFF  
FFF

@A00721:190:HGJW7DSXY:4:2324:1515:20181\_1:N:0:TCTGCAAG+GCTGCACT  
CTTGTAAGAGTAAGGTAAATGTGAAGATGCTCAGACTATTTCATGAAGTTCAAGGTAATACTTACCA  
GCACGTTGCGCTGGTTAGAATTAAACCTCAAGATGACCCTGTTTTTGCATCACAAACACATATTACCG  
TTG

+

FFFFFF:FFF:FFF:FFFF:F:FFFFFFFF:FFFFFFFFFFFFFFFFFFFFFFFFFFFFFFFFFFFF  
FFFFFFFFFFFFFFFFFFFFFFFFFFFFFFFFFFFFFFFFFFFFFFFFFFFFFFFFFFFFFFFFFFFFFFFF  
FFF

@A00721:190:HGJW7DSXY:4:1474:1597:18912\_1:N:0:TCTGCAAG+GCTGCACT  
GTTATCAATGTAAAGTTAAACGATGCTACTTGTGAGAGGATCAATCACAGTAAGGAAGTGCACGTTT  
AGCACGGGAGGTTGCAGATTCAACCCCTTATATCGAGGCTATCGAGGACGATGAGTATCTTGAAGTTG  
TTG

+

FF:FFFFFFFFFFFFFFFFFFFFFFFFFFFFFFFFFFFFFFFFFFFFFFFFFFFFFFFFFFFFFFFFFFFF  
FFFFFFFFFFFFFFFFFFFFFFFFFFFFFFFFFFFFFFFFFFFFFFFFFFFFFFFFFFFFFFFFFFFFFFFF  
FFF

@A00721:190:HGJW7DSXY:4:2231:19777:8343\_1:N:0:TCTGCAAG+GCTGCACT  
TAGAGGACCACCTGGATCTTCTACTGTCTCTGCCTTCCAAGATTTCTTAGAAGAGGTTATTCCTGGAA

CCACCTTAACGTCACTCGGTAATCTTTCAGCCGAATTAAGTACTAATGAGTTCAAGTCGGTTGTCGAT  
CGA

+

FFFFFFFFFFFFFFFFFFFFFFFFFFFFFFFFFFFFFFFFFFFFFFFFFFFFFFFFFFFFFFFFFFFFFFFF  
FFF:FFFFFFFFFFFFFFFFFFFFFFFFFFFFFFFFFFFFFFFFFFFFFFFFFFFFFFFFFFFFFFFFFFFF  
FFF

@A00721:190:HGJW7DSXY:4:2521:1904:22326\_2:N:0:TCTGCAAG+GCTGCACT  
GGCTAATACCTTTATAGGTAAGAAGCCCCTTGAGCCGCGTAGTCAGCGCGTTTAGCTGTATCATCAGT  
CAGAGTATACCCGATAGGGTACCGAGTCTCCAAGAGAATATTTATTCT

+

:FFF,FFFF:FF:FFFFFFFFFFFFFFFFFFFFFFFFFFFFFFFFFFFFFFFF:FFFFF:,F:F,:FF,F:F:FF:F,, :FFFFFFFF:  
FFFFFFFFFFFFFFFFFFFF,FF:::FFFFFFFFFFFF:FFFFFFFFFFFF:FFF

@A00721:190:HGJW7DSXY:4:2535:1289:23359\_1:N:0:TCTGCAAG+GCTGCACT  
GAAAGACATATCGCACCCGAAATTTTTGGGCAGAATGCTCTTAACGCGGTTCTTGAACGGTGTTTTGA  
TCAGTCTAAGTTGGATAAAGTTATAGGAGACTCAGTTAACCTGAGAGCTCCTCAATTGATAGATTGGG  
TCA

+

FFFFFFFFFFFFFFFFFFFFFFFFFFFFFFFFFFFFFFFFFFFFFFFFFFFFFFFFFFFFFFFFFFFFFFFF  
FFFFFFFFFFFFFFFFFFFFFFFFFFFFFFFFFFFFFFFFFFFFFFFFFFFFFFFFFFFFFFFFFFFFFFFF  
FFF

@A00721:190:HGJW7DSXY:4:1369:1389:4867\_2:N:0:TCTGCAAG+GCTGCACT  
AGTCGACAGCGAAATGGTCAATATTGATAATTGGACCGACTATATGACCTATTTTAAGCTCATGGTGA  
AAAGGGAAGCTAAGGTTAACTTGATGCTTCAGCCTTTTCGAAGCATA

+

FFFFFFFFFFFFFFFFFFFFFFFFFFFFFFFFFFFFFFFFFFFFFFFFFFFFFFFFFFFFFFFFFFFFFFFF  
FF:FFFF,F:FFFFF::FFFFFFFFFFFFFFFFFFFFFFFFFFFFFFFF,FFFFFFFF

@A00721:190:HGJW7DSXY:4:2361:19226:7106\_1:N:0:TCTGCAAG+GCTGCACT  
CTATCTTTAAGGTTATTGTGAGGAGAGTCAAACAGTGTCTTTTACCCAACATTTTTATGTATACAGAG  
ATGACCAGTGACGATTTCTCCCGAAGCTCTTCTCTCTCTTAGGAGGTCATGATGACTACTATAAGGG  
TGA

+

FF:FFFF, :FFFF,FFFFFFFFFFFFFFFF,FFF,FFF,FFFFFFFFFF:FF::FFFFFFFFFFFFFFFF:,F:  
FFFF,FF:F::F:FFFFFFFFF,FFFFFFFF:FFFF,F:F,FFFF:,FF:,FFFF,F,FF::FF::FF  
FF:

@A00721:190:HGJW7DSXY:4:1220:14344:34569\_2:N:0:TCTGCAAG+GCTGCACT  
TCGATGCTGAATTTCTTGAACCTTGAGTGCCAGTGAATATTTTTGTACGCCAGGAGTATCCATAAC  
GATTTGTCATTTACCACCTTGCTCAACGACGAAGTGAACGCCAAC

+

FFFFFFFFFFFFFFFFFFFFFFFFFFFFFFFFFFFFFFFFFFFFFFFFFFFFFFFFFFFFFFFFFFFFFFFF  
FFFFFFFFFFFFFFFFFFFFFFFFFFFFFFFFFFFFFFFFFFFFFFFFFFFFFFFFFFFFFFFFFFFFFFFF

@A00721:190:HGJW7DSXY:4:2174:24352:27289\_1:N:0:TCTGCAAG+GCTGCACT  
GTGTGCTCTTCCGATCTATTTATCACTTTATTATGACCTTGGAAGTTTTTCGGCTGTGGTTGTGCGT  
GGGGACGATTCCATTCTGTTTTCAAAGACTCCAATAACTGATCATTCTGATCATATGATTTTGGACAA  
TGG

+

FFFFFFFFFFFFFFFFFFFF:FFFFF:FFFFFFFFFFFFFFFFFFFFFFFFFFFFFFFFFFFFFFFFFFFF  
FFFFFFFFFFFFFFFFFFFFFFFF,FFFFFFFFFFFFFFFFFFFFFFFFFFFFFFFFFFFFFFFFFFFFFFFF  
FFF

@A00721:190:HGJW7DSXY:4:2222:26585:21887\_2:N:0:TCTGCAAG+GCTGCACT  
GCGACTAATATTCGATATTCGATTGAGGGTCGTTATACCTATTCGGCTATCTGTGCTTTGAATTGTAT  
AAGATCAAATTTTAAACGATTCCGAGAGGTTTATCCTGATGTGGAGGG

+

FFFFFFFFFFFFFFFFFFFFFFFFFFFFFFFFFFFFFFFFFFFFFFFFFFFFFFFFFFFFFFFFFFFFFFFF  
FFFFFFFFFFFF:FFFFFFFFFFFFFFFFFFFFFFFFFFFFFFFF:FFFFFFFFFFFFFFFFFFFF

@A00721:190:HGJW7DSXY:4:1628:16080:18787\_1:N:0:TCTGCAAG+GCTGCACT  
CCCCACCTTTCCCTTGTGAAAATTTTGATGCGGTTTCATAAGATTATCAGTAATCCTGATTCTACTACG  
GATTCATGGACCTTCCATCCTGTACCTCTTCTGGAGAGACGTATCTCAAAGATCGACTTCGAGACAGG  
TGA

+

FFFFFFFFFFFFFFFFFFFFFFFFFFFFFFFFFFFFFFFFFFFFFFFFFFFFFFFFFFFFFFFFFFFFFFFF  
FFFFFFFFFFFFFFFFFFFFFFFFFFFFFFFFFFFFFFFFFFFFFFFFFFFFFFFFFFFFFFFFFFFFFFFF  
FFF

@A00721:190:HGJW7DSXY:4:1669:12093:20556\_1:N:0:TCTGCAAG+GCTGCACT  
CGAGAGCGACCAAGATCTAAATTCGGTAACGGTGCGTGGCGCTTTATTTTAAAAAGCTCCCTCCTCTC  
CCAAGTTTGATCTGATACTTATCACGAAAGGACTTGAGTCTTTTGATCAGTCTCTGACTTGACCATCT  
TTC

+

FFFFFFFFFFFFFFFFFFFFFFFFFFFFFFFFFFFFFFFFFFFFFFFFFFFFFFFFFFFFFFFFFFFFFFFF  
FFFFFFFFFFFFFFFFFFFFFFFFFFFFFFFFFFFFFFFFFFFFFFFFFFFFFFFFFFFFFFFFFFFFFFFF  
FFF

@A00721:190:HGJW7DSXY:4:2624:12653:11036\_2:N:0:TCTGCAAG+GCTGCACT  
TTTCTTCTTTGTTTCTTCTTTGCACTGATTTTCTCATCAGCTTGTGTTTACCTAATCTGTGTTT  
TTACGATAACAACATCAGTTGATTAAGACTCTTCCGAAAGCGAACT

+

F:FFFFFFFFFFFFFFFFFFFFFFFFFFFFFFFFFFFFFFFFFFFFFFFFFFFFFFFFFFFFFFFFFFFF  
FFFFFFFFFFFFFFFFFFFFFFFFFFFFFFFFFFFFFFFFFFFFFFFFFFFFFFFFFFFFFFFFFFFFFFFF  
FFF

@A00721:190:HGJW7DSXY:4:2439:1515:1736\_1:N:0:TCTGCAAG+GCTGCACT  
AGCTCAGGGTGAAGCACAAACGTTTGACCGTGACGAACTGTGGTGTCTTGATCTACGTTACGGATATA  
CTCTCCTTGAGTTCACTCGTAAGGACACTACCACTTATTACGATATTTCTTTAGTCGATGGGTTTTCG  
ACT

+

FFFFFFFFFFFFFFFFFFFFFFFFFFFFFFFFFFFFFFFFFFFFFFFFFFFFFFFFFFFFFFFFFFFFFFFF  
FFFFFFFFFFFFFFFFFFFFFFFFFFFFFFFFFFFFFFFFFFFFFFFFFFFFFFFFFFFFFFFFFFFFFFFF  
FFF

@A00721:190:HGJW7DSXY:4:1232:27254:25426\_1:N:0:TCTGCAAG+GCTGCACT  
TGTGCTCTTCCGATCTATTAATCACTCATTTGAGTGAGATTATTAACACGCACTAAACGCTCTTCGA  
CAACAGCAGGGGTTTTCGAATAGTGATAGCCACCCGCTTACAGAGGGGCAGCAGCATGACCATAATT  
GGT

+

FF,FFFFFFFF:FF:F,FFF,,FFFFFFFF,F,FFFF:F,FFFFFFFF,FFFFFFFFFFFFFFFFFFFF  
FFFFF:F,FFFFFFFFFFFF:FF,FFFFFFFFFFFFFFFF,FF,FFFFFFFFFFFFFFFF:FFFFFFF  
FFF

@A00721:190:HGJW7DSXY:4:2566:4119:22654\_1:N:0:TCTGCAAG+GCTGCACT  
CCACCTTTTCTACTGTCTGTCTCGCCTCTTGAATGAAGTTTAAATGCTTAACAACAATGATAGTGAA  
TTTATACCTACAATCATTGTTTTTCTAATAATGATGACACTATTGTTTATGGATATGATGCTATTAC  
TCA

+

F:FFFFFFFF,FFFFFFFFFFFFFFFFFFFFFFFFFFFFFFFFFFFFFFFFFFFFFFFFFFFFFFFFFFFF  
F:FFFFFFFFFFFFFFFFFFFFFFFFFFFFFFFFFFFFFFFFFFFFFFFFFFFFFFFFFFFFFFFFFFFF  
FFF

@A00721:190:HGJW7DSXY:4:1204:7229:9565\_2:N:0:TCTGCAAG+GCTGCACT  
TCTCAGTTTACAAGGACCTTAAGCGATGGATCGGGGTTAATTCTAAAACATTACCCGAAAGACGTGCT  
AAATTAACCATTTGTACGATGTCGTCTGTCTCGGCGAGATCGGAAGA

+

FF:FFF::FFFFFFFFF:FFFFFFFFFFFFFFFF:FFFFFFFFFFFFFF,F:FFFF,FFFFFFFF::F  
FFFFFFFFFFFF:FFFFFF:FFFFFF:FFFFFFFFFFFFFFFF:FF

@A00721:190:HGJW7DSXY:4:1436:23466:24001\_1:N:0:TCTGCAAG+GCTGCACT  
TCGTTTCTTTCTTTATCTCTTTGTTGTTAGGGATTTTGAGAGAGTGAAAGGCTTCAATTGTAGTGGT

TTGGTCGTTTTAGTACCCAGTCAGTATACCTCTACGCAAAGATATTTTCATGAAAACCTACAGAGGAACG  
TAC

+

FFFFFFFFFFFF:FFFFFFFFFFFF:FFFFFFFFFFFF:FFFFFFFFFFFF:FFFFFFFFFFFF:FFFFFFFFFFFF  
::FFFFFFFFFFFF:FFFFFFFFFFFF:FFFFFFFFFFFF:FFFFFFFFFFFF:FFFFFFFFFFFF:FFFFFFFFFFFF  
FFF

@A00721:190:HGJW7DSXY:4:1472:18367:29293\_2:N:0:TCTGCAAG+GCTGCACT  
TCTTTTCATATTATGAATGAACCTTCGGCCGCTCTCTTTGCTTCGATGTTGGATGTCAAGAAGGGTTCA  
GAATGGGATTCTACGTAGTTTATGACTTTGGTGGTGGTACTTTTCGAT

+

FFFFFFFFFFFF:FFFFFFFFFFFF:FFFFFFFFFFFF:FFFFFFFFFFFF:FFFFFFFFFFFF:FFFFFFFFFFFF  
FFFFFFFFFFFF:F,,FFFFFFFFFFFF

@A00721:190:HGJW7DSXY:4:1531:18846:12994\_2:N:0:TCTGCAAG+GCTGCACT  
GTTACGGTAATTACTATAGTGTATTATTCTGGTGGTGTGATAATCTTGGAGGTCGTGACGTTGAT  
GAAGCTATAAGAGCGTTCTTATTACGGCGCACTTCTTTACCCGCCACC

+

FFFFFFF,FFFFFFFFFFFF:FFFFFFFFFFFF:FFFFF:FFFFFFFFFFFF:FFFFFFFFFFFF:FFFFFFFFFFFF  
FFFFFFFFFFFF:FFF:FF

@A00721:190:HGJW7DSXY:4:2543:8929:9596\_2:N:0:TCTGCAAG+GCTGCACT  
GTTTCACAACTGAAGGAGGAGTTTCTGTTACTGGAAAACCCTCGTCAATACTTTTCAATAATATACG  
TCTTGAACCTCACTTATGACGATCTAGTGAAATTAACGCGTCCTTTTCT

+

FFFFFFFFFFFF:FFFFFFFFFFFF:FFFFFFFFFFFF:FFFFFFFFFFFF:FFFFFFFFFFFF:FFFFFFFFFFFF  
FFFFFFFFFFFF:FFFFFFFFFFFF:FFFFFFFFFFFF:FFFFFFFFFFFF:FFFFFFFFFFFF:FFFFFFFFFFFF

@A00721:190:HGJW7DSXY:4:2511:3902:32988\_1:N:0:TCTGCAAG+GCTGCACT  
TACTATTATGAACAAAGTTATCAAAGATAGTGGCATTCAAGGCAAACCTTACCCTGATTCCGGCCGGTG  
GTAGCTCATTTCTACCAGGGGCTATTACTCTTGCTGAAACAGCTATTAAAGCTGTTGAGCGGGTAATT  
ACA

+

FF:FFFFFFFF:FFFFFFFF:FFFFFF:FFFFFFFF:FFFFFFFF:FFFFFFFF:FFFFFFFF, F  
FFFFFF::FFFFFFFF,FFFFFFFF:FF:FFFF:FF:FFFFFFFF

+

@A00721:190:HGJW7DSXY:4:2532:20428:27352\_2:N:0:TCTGCAAG+GCTGCACT  
ATCGCTGAAGGATGTGCACTCTTTTCTGCTACTTTAACGGAGCGTAGTGTACTCTTCGTGATTGTAT  
CAACAGTAACATTACTTCTAATAAAGGTCTCTATCAAGCTCGTATTAT

+

FFFFFFFF:FFFFFFFF:FFFFFFFF:FFFFFFFF:FFFFFFFF:FFFFFFFF:FFFFFFFF:FFFFFFFF  
FFFFFFFF:FFFFFFFF:FFFFFFFF:FFFFFFFF:FFFFFFFF:FFFFFFFF:FFFFFFFF:FFFFFFFF

@A00721:190:HGJW7DSXY:4:2532:20428:27352\_1:N:0:TCTGCAAG+GCTGCACT  
TTACCGTTGAAGGCTAACTCCAAGGTAATTATGAAGACTGTGATTTATCTTTCACTCTGGCCTTGTA  
TGAGGGTGTCTAATCGTAACATTAATAATTTCAATCTTCTTAAAAAGAAGATAGAGAGTCATACTT  
TGG

+

:FFFFFFFF:FFFFFFFF:FFFFFFFF:FFFFFFFF:FFFFFFFF:FFFFFFFF:FFFFFFFF:FFFFFFFF  
FFFFFFFF:FFFFFFFF:FFFFFFFF:FFFFFFFF:FFFFFFFF:FFFFFFFF:FFFFFFFF:FFFFFFFF  
FFF

@A00721:190:HGJW7DSXY:4:1240:20211:33959\_2:N:0:TCTGCAAG+GCTGCACT  
ATTAAACAAGTTGTACTTATCAATGATTTATCGCTGGTTGTTATCTCGAAAAGTCTCTTCTAAAAGG  
AACGTCAGTTCTAACCCAAAGAGAATATCTAAAATATTTACAAAATCT

+

FFFFFFFF:FFFFF:,FFFFFF,FF:FFFF,FF,FFFFFFFF,F,:FFFF,F:FF:F:FFFFFFF  
FFFFF,FFFF,:FF,FF,FF:,FFFF:F,:FFFFFF:FF,FFFF,F

@A00721:190:HGJW7DSXY:4:2518:29378:7592\_1:N:0:TCTGCAAG+GCTGCACT  
TTCAGACGTGTGCTCTCCGATCTCGTACTTGGAACGAAGGCGACCTGTTCCGGAGTTTTTACGGGAT

CCGGAATGTTCTGTCTATATTAGGTGAAGCGAAATACGATTTCTGAACGTCAACGTTACCGAGTTTCG  
TTT

+

FFFFFFFFFFFFFFFFFFFFFFFF, :FFFFFFFFFFFF:FFFFFFFFFFFFFFFFFFFFFFFF  
FFFF:FFFFFFFFFFFFFFFFFFFF:FFFFFFFFFFFFFFFFFFFFFFFFFFFFFFFF  
:FF

@A00721:190:HGJW7DSXY:4:2403:8223:20838\_2:N:0:TCTGCAAG+GCTGCACT  
GCTGACTTTCGTCAATATGATTTGATCTGGTTGCTCAATTCTAAGCGTGTTCCGCTTAGTGCGAGGCC  
TCTCTTCTACGAGTATTGCTATTTATACGGTTACGAGAAGAAGGTTTCG

+

FFFFFFFFFFFFFFFFFFFFFFFFFFFFFFFF:FFFFFFFFFFFF:FFFFFFFFFFFFFFFFFFFFFFFF,  
FFFFFFFFFFFFFFFFFFFFFFFFFFFF:FFFFF:FF:FFF:F,FFFF

@A00721:190:HGJW7DSXY:4:1218:31331:11663\_1:N:0:TCTGCAAG+GCTGCACT  
CTTGATAAAGAACTTCATGAATTTTCAGAGGATGAAAAATTTCTTCCTTGGAATTTAATATAAAGAA  
TCTTTACCAGGACTCCTACTACAGGAGGCAGTCTTCTGATCGTAAGAAGTTTATAAGGAACATATCCA  
TTT

+

FF:FFFFFFFFFFFFFFFFFFFFFFFFFFFFFFFF,FFFFFFFFFFFFFFFFFFFFFFFF:FFF  
FFFFFFFFFFFFFFFFFFFFFFFFFFFFFFFFFFFFFFFFFFFFFFFFFFFFFFFFFFFFFFFF  
FFF

@A00721:190:HGJW7DSXY:4:2610:23484:1736\_1:N:0:TCTGCAAG+GCTGCACT  
GAAACTCTAAGTGGTAATACTGTCTTTCCAAGCTTACCTTTATCTTCAATGAAATTGGACTCTTCGAT  
AGGGGACATTTTATCGTGGGCTTTCCGTAAAGGAAGATCTGTTCTCGACGGTTTATCGTTTACGAAGT  
ATC

+

F::FF:FFFFF:F::F::F:F:FFF,:FF,F,FFF:::FF:F,F:,FFF:,FF::FF:::F,FF:  
FF:F::FFFFF:FF:FFFF:FF:FF,FF,FF:FFFF,FFFF,,FFFF,FFFF::F:FFF:FFFF  
FFF

@A00721:190:HGJW7DSXY:4:2430:14841:28416\_1:N:0:TCTGCAAG+GCTGCACT  
TAGTGACATCTGGTCAATTTCTTTTTAGGTGGTCTTTATTCTATTATTGATTTTTATGAGATTGATA  
CGTTAACAGAAGATGATGTTAGAGTAGAATTCCTGAAGAGTCCTTCCGTAACCAACTTCTTGACAATT  
TTC

+

FFFFFFFFFFFFFFF:FFFFFF:,FFFFFFFFFFFFFFFFFFFFFFFFFFFFFFFFFFFFFFFF  
FFFFFFFFFFFFFFFFFFFFFFFFFFFFFFFF:FFFFFFFFFFFFFFFFFFFFFFFFFFFFFFFF  
FFF

@A00721:190:HGJW7DSXY:4:1363:7148:16125\_2:N:0:TCTGCAAG+GCTGCACT  
ACAATTAAGAAATAATCCTACATTGACTGATTATCTAAAGATTGAAGGAAAATTTTATCCTCGTTTAA  
CTAACTTAGACTTTCCTACGATACAAATGATAACTTCTAATTTACGTT

+

FFFF::FF,FFFFFFFFFFFF:FFF:F,F,FF,FF:FFFF:FFFFFFFF:FFFF,FFFF:FFFFFFFF  
FF,FFFFFFFF:FFF:FFFF,:FFFFFF,FFFFFF:FFFF:FFFFFF

@A00721:190:HGJW7DSXY:4:2159:9109:19085\_1:N:0:TCTGCAAG+GCTGCACT  
TTGGTGTTATCTCCTCAGGAGTCCCGGCATTTGATAATAATGACGAGACTTTCGTCATAATCGCTGCA  
TATTACGGATTACACGGTACCAGCGCATCTCGTGTGAGCCTCGACCCGATTATATGGTATTAACCTTA  
TAA

+

FFFFFFFFFFFFFFFFFFFFFFFFFFFFFFFF:FFFFFFFFFFFFFFFFFFFFFFFFFFFF:FF:FFFFFFFF  
FFF:FFFFFFFFFFFFFFFFFFFFFFFFFFFF:FFFFFFFFF:FFFFFFFFFFFFFFFFFFFF  
FFF

@A00721:190:HGJW7DSXY:4:1102:19542:27602\_2:N:0:TCTGCAAG+GCTGCACT  
TTTTGAGAACTAACTATGTTATGTTCTCTGATCATTTTGACAATCTCTTCTTATAATAAATAAATAA  
TAATATTACTAATGGCAAATAGTGGAAGGCTCCAGTCAACACTAGTT

+



```

FFFFFFFFFFFFFFFFFFFFFFFFFFFFFFFFFFFFFFFFFFFFFFFFFFFFFFFFFFFFFFFFFFFFF
FFFFFFFFFFFFFFFFFFFFFFFFFFFFFFFFFFFFFFFFFFFFFFFFFFFFFFFFFFFFFFFFFFFFF
@A00721:190:HGJW7DSXY:4:1325:11207:5525_1:N:0:TCTGCAAG+GCTGCACT
AATAGGTGAAGGGATAGTTTTTACCTCGACCAACATTAAGGCCGGCGGCGACTAATCTTAAAGCTTCAC
CCAAAATGAAGGACACTTCGAAACTGAATAATGATGCACTACAAACACGTATCGCTAATCATCTGAAA
AAG
+
:FFFF:F,,FF:,FFFFFFF:,FF:FF:F:FFFFFFF,FF::F:FF::F:F:FF:FF::FFFFFFF
:FF,: ,FFFFFFFF:F:FFF:F,F,,FFF:FF,FFF:,F,FFF:,,,FFFFFFFF:F:FFF:FFFFF
::F
@A00721:190:HGJW7DSXY:4:1431:5095:10222_2:N:0:TCTGCAAG+GCTGCACT
AAATTTCTTAGAGGATATTGCCATTGTGGTACGAATTGGTCCAACATTTACCACCAAATTCTTTTGA
TACAACCTCTAGCCTTCAAGTGCGGTATGCCTGCGGAATACGCTTGCTA
+
FFFFFFFFFFFFFFFFFFFFFFFFFFFFFFFFFFFFFFFFFFFFFFFFFFFFFFFFFFFFFFFFFFFFF
FFFFFFFFFFFFFFFFFFFFFFFFFFFFFFFFFFFFFFFFFFFFFFFFFFFFFFFFFFFFFFFFFFFFF
@A00721:190:HGJW7DSXY:4:1248:30526:27837_2:N:0:TCTGCAAG+GCTGCACT
CGAACCCGTTGATGCTATGTCAGAAGAAGCTATTCAAGCTTGTCGTTTAAAGACTGCAGAGGCTGTCA
AACAAGCCCAGACTCAAGGAGTCCAATCAAAGTTTTGAATTTAGCTC
+
FFFFFFFFFFFFFFFFFFFFFFFFFFFFFFFFFFFFFFFFFFFFFFFFFFFFFFFFFFFFFFFFFFFFF
FFFFFFFFFFFFFFFFFFFFFFFFFFFFFFFFFFFFFFFFFFFFFFFFFFFFFFFFFFFFFFFFFFFFF
@A00721:190:HGJW7DSXY:4:1436:8630:18098_2:N:0:TCTGCAAG+GCTGCACT
GTATATTGTATGTTAATAGATAGTGGGATAATAGTTCTACCGATACGTAGTGAACGCGTTCGTAGAAC
CAAGTACTTTCGCTCTGAAGAGTTTAGAGAGATCGGAAGAGCGTCGTG
+
FFFFFFFFFFFFFFFFFFFFFFFFFFFFFFFFFFFFFFFFFFFFFFFFFFFFFFFFFFFFFFFFFFFFF
FFFFFFFFFFFFFFFFFFFFFFFFFFFFFFFFFFFFFFFFFFFFFFFFFFFFFFFFFFFFFFFFFFFFF
@A00721:190:HGJW7DSXY:4:1270:9146:16016_2:N:0:TCTGCAAG+GCTGCACT
GCTTTAGACGATAATCCTTTAAGGACTATGTTGACTGACGAAGATTTTCCCACAGATTTGTCTACGTT
GCAGATCGCCACTCCAAACACTATATACATTATAAAAATATAAAAAATAA
+
FFFFFFFFFFFFFFFFFFFFFFFFFFFFFFFFFFFFFFFFFFFFFFFFFFFFFFFFFFFFFFFFFFFFF
FFFF:FFFFFFFFFFFFFFFFFFFFFFFFFFFFFFFFFFFFFFFFFFFFFFFFFFFFFFFFFFFFF
@A00721:190:HGJW7DSXY:4:2563:32741:4867_1:N:0:TCTGCAAG+GCTGCACT
ACTTTTGTTACCAAATTCTTGCTTTCAACGAAGTCTCTGATTTTATTAATCATTACTTTAACGATCT
CTCGGTCATTTACTCTGTACTTGATCTACGTCGTTTAACTGTGGAACAACCTTTACTTAGAATGACT
CTA
+
FFFFFFFFFFFFFFFFFFFFFFFFFFFFFFFFFFFFFFFFFFFFFFFFFFFFFFFFFFFFFFFFFFFFF
FFFFFFFFFFFFFFFFFFFFFFFFFFFFFFFFFFFFFFFFFFFFFFFFFFFFFFFFFFFFFFFFFFFFF
@A00721:190:HGJW7DSXY:4:2206:13295:1720_1:N:0:TCTGCAAG+GCTGCACT
AATACTCACTATCGTTTTCTGCTTTTTCTTAGCTAATAGATTAATAAAGGATGAGTACGAAAACCAAC
TCTTCGTTACGAGACCTGATGGTAGAATAGATTTAGTCTCTACACCCATCTCAACGAGGATAAAGCGA
GTT
+
FFFFFFFFFFFFFFFFFFFFFFFFFFFFFFFFFFFFFFFFFFFFFFFFFFFFFFFFFFFFFFFFFFFFF
FFFFFFFFFFFFFFFFFFFFFFFFFFFFFFFFFFFFFFFFFFFFFFFFFFFFFFFFFFFFFFFFFFFFF
@A00721:190:HGJW7DSXY:4:1617:18674:4429_2:N:0:TCTGCAAG+GCTGCACT
CGAAGAGATCATCCGAAACGACTCGAAACCGAGACGCCGTAGATCAAAGTCCCTTCTAACTTTAGAT
TATGAATCCTGCCTTTACTCATTTTATAGCAGTTATTTATGTTGTACT
+

```

FFFFFFFFFFFFFFFFFFFFFFFFFFFFFFFFFFFFFFFFFFFFFFFFFFFFFFFFFFFFFFFF  
F:FFFFFFFFFFFFFFFFFFFFFFFFFFFFFFFFFFFFFFFFFFFFFFFFFFFFFFFF  
@A00721:190:HGJW7DSXY:4:2331:26530:4225\_2:N:0:TCTGCAAG+GCTGCACT  
ATGCTTTTCGATAGAGATTGTTATCAATTAAATACATTACTGTTTCAAATCATCTTTACTCACAGAA  
TCCGAAAATCGTTTCAAATGAGGTCAAAGCTCTATTTATTAAACGAAC  
+  
FF:,,,FF:FFF:,FF,F,,FFF,FFF,FFFF:FFFFFFFF:,FF:FF::,F:,FFFFFFFF,FFF,  
FF::FFFF:,,,FFFFF::FFFFFFFFF,,F:F,,F::FFF:,FFF  
@A00721:190:HGJW7DSXY:4:2236:10041:22294\_1:N:0:TCTGCAAG+GCTGCACT  
ACCACTGATCTGCCGACTTTAGTCAAGGAAC TTCAATTCCTTCGATGTTTATATTTTTCTATAAGGGA  
AAATAGCAATAATCAAATTCGACAAATTTAGAACTTTATTTCAGAACTCTCTCCGATCACCTTGGT  
GTG  
+  
FFFFF:FF:F,:FFFFFFFF:F:F,FF:,FFFFF:FF,FFFFFFFF:FFFF:FF:F:,FFFFFFFF:F:F:F:  
FFFFF:FFFFFFFFFFFFFFFFFFFFF:FFFFFFFFF:FFFFFFFFFFFFFFFFFFFFFFFFF:FFFFF  
FFF  
@A00721:190:HGJW7DSXY:4:1461:25156:4758\_1:N:0:TCTGCAAG+GCTGCACT  
TCAATAAGATGTATGATGATAATCTACTATTTTTAAATAGTGATATTCAGCGTATACTTGAATACTTT  
ATCAAAGATTTGGCTTGGTCTATTTACCGCAAAAAGTTGAAGAGGTCTATGATATTTATTTTACTTA  
TAC  
+  
FFFFFFFFFFFF:FFFFFFFFFFFF,F:FFFFFFFFFFFFFFFFFFFFFFFFFFFFFFFFFFFFFFFFF  
FFFFFFFFFFFFFFFFFFFFFFFFFFFFF:FFFFFFFFFFFFFFFFFFFFFFFFFFFFFFFFFFFFFFFFF  
FFF  
@A00721:190:HGJW7DSXY:4:2274:16568:22294\_1:N:0:TCTGCAAG+GCTGCACT  
CGATTATAACTTGACTGTTGATAATATTACAATAGCTCTTCTCAGAAGATTAGAGAAGTAACCGGTG  
AACACGTCGGTAGCATTGATTTACTTTTACCGTTAGAACTGAAAAAGATTCTTTTCGAAAAGAAACCT  
ATA  
+  
FFFFFFFFFFFFFFFFFFFFFFFFFFFFFFFFFFFFFFFFFFFFFFFFFFFFFFFFFFFFFFFFF  
FFFFFFFFFFFFF:FFFFFFFFFFFFFFFFFFFFFFFFFFFFFFFFFFFFFFFFFFFFFFFFFFFFF:FFF  
FFF  
@A00721:190:HGJW7DSXY:4:1370:7916:24721\_2:N:0:TCTGCAAG+GCTGCACT  
TAAAGAAATAAAAATACTTCAAGTACCTGAAC TTTACATTTTTAATGGTATGGTATAATGTGTCTTAC  
AAATAGAACCTTCACTCTCGGTAATGAGAGTGTATTCTTAATATTCT  
+  
FFFFFFFFFFFFFFFFFFFFFFFFFFFFFFFFFFFFFFFFFFFFFFFFFFFFFFFFFFFFFFFFF  
FFFFFFFFFFFFFFFFFFFFFFFFFFFFFFFFFFFFF:FFFFFFFFFFFFFFFFF  
@A00721:190:HGJW7DSXY:4:1221:18204:8907\_1:N:0:TCTGCAAG+GCTGCACT  
GCATTACTAGGATTTATCACACTCCTAAATTTGATAGCAATTTATGTTTTAAATGCTAGGAAAATTTT  
AGAAAAACTCCATTGTATAGTTCAAGGAGTACTTAATTCAATAGCTTTAGTATTATTTACTATCGCCT  
TTA  
+  
FFFFFFFFFFFFFFFFFFFFFFFFFFFFFFFFFFFFFFFFFFFFFFFFFFFFF:FFFFFFFFFFFF:FFFFFFFFF  
FFFFFFFFFFFFFFFFFFFFFFFFFFFFFFFFFFFFFFFFFFFFFFFFFFFFFFFFFFFFFFFFF:  
FFF  
@A00721:190:HGJW7DSXY:4:1304:21612:28557\_1:N:0:TCTGCAAG+GCTGCACT  
TTAATTGCTTACACAAAAGTGACGCGCAAGGAATCTTAATTGATTGAAGCTAGGCGTTGGGGAGAAT  
GAACTGCCGCTTCCCGGAAGAAACGATCTATTTACAGAGTATTTAGAGTAGTCCAAAGTTTGATAAA  
TTT  
+  
FFFFFFFFFFFFFFFFFFFFFFFFFFFFFFFFFFFFF:FFF,:FFFFFFFFFFFFFFFFFFFFFFFFFFFFFFFFF  
FFFFFFFFFFFFFFFFFFFFFFFFFFFFF:FFFFFFFFFFFFFFFFFFFFFFFFFFFFFFFFFFFFFFFFF  
FFF





```
+
FFFFFFFFFFFFFFFFFFFFFFFFFFFFFFFFFFFFFFFFFFFFFFFFFFFFFFFFFFFFF:FFF
FFFFFFFFFFFFFFFFFFFFFFFFFFFFFFFFFFFFFFFFFFFFFFFFFFFFFFFFFFFFF
FFF
@A00721:190:HGJW7DSXY:4:1343:8223:12320_2:N:0:TCTGCAAG+GCTGCACT
AAACTCCTTGAATGGAGTACATATTTGCAACCCTATTCTTGATGTGAAAGATGCATCGAGGTATACGT
CTAGGAACATTGATTGGGAACGTACCTACTCACGAGACGTCATGAAAG
+
FFFFFFFFFFFFFFFFFFFFFFFFFFFFFFFFFFFFFFFFFFFFFFFFFFFFFFFFFFFFF
FFFFFFFFFFFFFFFFFFFFFFFFFFFFFFFFFFFFFFFFFFFFFFFFFFFFFFFFFFFFF
@A00721:190:HGJW7DSXY:4:1531:15628:16031_1:N:0:TCTGCAAG+GCTGCACT
TTCGTTCTGTTACAAGAACGCTTTGGATTGTGACCATAAAGCCTCAGTTGCGATAGCTGTAGAGGTAT
ACGATATCTCTCTTGATGATGTAGCCACTATAATGCTTAAGAGAGAGATTGATGTATGTCATTTCTGTC
TTA
+
FFFFFFFFFFFFFFFFF:FFFFFFFFFFFFFFFFFFFFFFFFFFFFFFFFFFFFFFFFFFFFF
FFFFFFFFFFFFFFFFFFFFFFFFFFFFFFFFFFFFFFFFFFFFFFFFFFFFFFFFFFFFF
FFF
@A00721:190:HGJW7DSXY:4:1166:19669:28604_1:N:0:TCTGCAAG+GCTGCACT
TATTGGACACGATGAAAAATGACATACCCGTTCTGACCTTGGTATCGTTATCCGTCATGGAGATGAT
GGCGCATCACTTGATTACTATATGCCCGAAGGATTGGGTATTCTCACAACAAAGATAAGATTTTATC
TTT
+
FFFFFFFFFFFFFFFFFFFFFFFFFFFFFFFFFFFFFFFFFFFFFFFFFFFFFFFFFFFFF
FFFFFFFFFFFFFFFFFFFFFFFFFFFFFFFFFFFFFFFFFFFFFFFFFFFFFFFFFFFFF:FFFFFFFFF
FFF
@A00721:190:HGJW7DSXY:4:2610:21965:5901_2:N:0:TCTGCAAG+GCTGCACT
GCATTAATGAGTTCCGAATAACTCGTAATAAATCTTTCTTAGTGGAACAATTCAGAATACCTATTTCC
GTACCAAGAGCCACTGCCAATCTCATCGCTATACGCATACCTGATTGG
+
FF,:FFFFFFFFFFFFFFFFFFFFFFFFFFFFFFFFFFFFFFFFFFFFFFFFFFFFFFFFFFFFF
F:FFFF:FFFFFFFFFFFFFFFFFFFFFFFFFFFFFFFFFFFFFFFFFFFFF:FFFFFFFFF
@A00721:190:HGJW7DSXY:4:2420:19271:15107_2:N:0:TCTGCAAG+GCTGCACT
AGATTATGGTTGATAAAGTTTTCTTCATAAGGGCTATTCAGTACGTCATGGGGATCACCTCTTCGGTC
AATGACAAAACCTTCGAATATGTTACGACATGGCTTCGTAACAACAGT
+
FFFFFFFFFFFFFFFFFFFFFFFFFFFFFFFFFFFFFFFFFFFFFFFFFFFFFFFFFFFFF:FFFFFFFFF
FFFFFFFFFFFFFFFFFFFFFFFFFFFFFFFFFFFFFFFFFFFFFFFFFFFFF:FFF:
@A00721:190:HGJW7DSXY:4:2415:9290:6183_1:N:0:TCTGCAAG+GCTGCACT
TCACCAAGATGTTCATATAGATACGAGATACCTAGAGAAGGTCGCAGCGATCTTACTCGTTATCGGAG
CTAAGAAGAAGACTTTGGGTACACGTTATGCTCGCAAACCTAACGTTAGTACCGGAGGTGATCTCTCT
GCT
+
FFFF:FFF:FFFFFFFFFFFFFFFFFFFFFFFFFFFFFFFFFFFFFFFFFFFFF:FFFFFFFFFFFFFFFFFFFFF
FFFFFFFFFFFFFFFFFFFFFFFFFFFFFFFFFFFFFFFFFFFFFFFFFFFFF:FFF
FFF
@A00721:190:HGJW7DSXY:4:2405:14100:20744_1:N:0:TCTGCAAG+GCTGCACT
AGAGAAAAGATTTCAGGACGCCTACGGTGACTTTATGGACAAGATGCAAGTTCTTGGGAAATACTTGTT
TCCCTTTTTAGGTTTAGTAGGTGATCTTGACGTCGATTCTTTGTATAGGGAGTGTGAGAAGACAACGA
ATC
+
FFFFFFFFFFFFFFF,:FFFFFFFFFFFFFFFFFFFFFFFFFFFFFFFFFFFFF:FFF:FFFFFFFFFFFFFFFFFFFFF
FFFFFFFF:FFFFFFFFFFFFFFFFFFFFFFFFFFFFFFFFFFFFFFFFFFFFF:FFF
FFF
```

@A00721:190:HGJW7DSXY:4:1560:31982:29105\_1:N:0:TCTGCAAG+GCTGCACT  
ATCTTTTGAAGATTGAGAAGATTGAAGAACACGTCAAGAAGTCGCTCGGCGTTGTTCTTGAAAACCAAG  
TTAAGAAGGAGGCTGATCATGGAGTCTTTGTACCTTCTGTCAAACCTTCGAGGTTGAGCTACGAGAGGT  
GAT

+

FFFFFFFF:FFFFFFFFFFFFFFFFFFFFFFFFFFFFFFFFFFFFFFFFFFFFFFFFFFFFFFFFFFFFFFFF  
FFFFFFFF:FF:FFFF:FFFFFFFFFFFFFFFFFFFFFFFFFFFFFFFFFFFFFFFFFFFFFFFFFFFFFFFF  
FFF

@A00721:190:HGJW7DSXY:4:1262:25473:1423\_2:N:0:TCTGCAAG+GCTGCACT  
TTGAAGGCTGGCTCTAAGGGAGACTCCTTCTTTTTGAATGTTGTAAAGAATTGGGTTGAGAAGTGTGC  
TTTACAAGGAGTTAGACTCTTCTTCAAGTTTTTAGATCTTCTTGATAA

+

F:FFFFFFFFFFFFFFFFFFFFFFFFFFFFFFFFFFFFFFFFFFFFFFFFFFFFFFFFFFFFFFFF:FFF  
FFFFFFFFFFFFFFFF:FF:FFFFFFFFFFFFFFFFFFFFFFFFFFFFFFFFFFFFFFFFFFFFFFFFFFFF

@A00721:190:HGJW7DSXY:4:1107:18900:5478\_1:N:0:TCTGCAAG+GCTGCACT  
CTACCCATAACTTCTTTTTTCAAAAATGCGGATGGGTCTACTGATGTTTTCTACAGAGTGCAGTCGTT  
TCAACACTTATCACCACCTTTTGAAGGAAAATAATTGGTGATGAAAATACGTATGTCGGTGGGGTTCT  
CAA

+

FFFFFFFFFFFFFFFFFFFFFFFFFFFFFFFFFFFFFFFFFFFFFFFFFFFFFFFFFFFFFFFFFFFFFFFF  
FFFFFFFFFFFFFFFFFFFFFFFFFFFFFFFFFFFFFFFFFFFFFFFFFFFFFFFFFFFFFFFFFFFFFFFF  
FFF

@A00721:190:HGJW7DSXY:4:2502:29125:4053\_2:N:0:TCTGCAAG+GCTGCACT  
ACGTCTTAAGTAATTTGGATGTTGTGCGAAACTATCAGGTTCTTGTACGATTCTTAAAGAATTTTA  
TTAAAACTTCAGAGTCTCTTGAAGTCCAGGTAGCTAAAGTTCTTGCA

+

FF,:F:FFF,FFFF:,F,F,:F,F,F,F:FF:FFFF,F,:FFFF,FF,FFF,F:,FFFF,FF,FFFF  
F,FFFF:,,FFF,FF,FFF,,FF,FFFF:,,FF:FFF,F,F::,F,F

@A00721:190:HGJW7DSXY:4:2137:6262:28964\_1:N:0:TCTGCAAG+GCTGCACT  
CTCTGTTGGTAGAGGAGTTGAGAGAATTACTCAGATTCAATCTGGCATCACTGAACGTCTACAACGAG  
TTAGGGAGTGGCTAGGTTTTAAAGATCCTTTGCACAAGCAATACCTTCCACTGAGTTCATCACCCAG  
AGT

+

FFFFFFFFFFFFFFFFFFFFFFFFFFFFFFFFFFFFFFFFFFFFFFFFFFFFFFFFFFFFFFFFFFFFFFFF  
FFFFFFFFFFFFFFFFFFFFFFFFFFFFFFFFFFFFFFFFFFFFFFFFFFFFFFFFFFFFFFFFFFFFFFFF  
FFF

@A00721:190:HGJW7DSXY:4:1243:31810:13088\_1:N:0:TCTGCAAG+GCTGCACT  
GTTTTTGGTATAAATCCTGATGGCTCAGTACAGGGAGGAGGTAATAGTTATAAAACCTTCTTTTATCA  
TTGCAACAGGACTTTGAGAAGACTGTTGAAATGGACAAAATCTGGGATCATAGGTATGTGTCACGCTA  
CAC

+

FFFFFFFFFFFFFFFFFFFFFFFFFFFFFFFFFFFFFFFFFFFFFFFFFFFFFFFFFFFFFFFFFFFFFFFF  
FFFFFFFFFFFFFFFFFFFFFFFFFFFFFFFFFFFFFFFFFFFFFFFFFFFFFFFFFFFFFFFFFFFFFFFF  
FFF

@A00721:190:HGJW7DSXY:4:1341:14208:34272\_2:N:0:TCTGCAAG+GCTGCACT  
CTTTTTGAATATGACAGAAGCTCGCCATATCAGATTAGAGACATGCCAGTTAGAGTTCTTCTAACCAG  
GACTGATGGTGAGATTCTTTTACCTTTTGGAGGTCCAGGAACCTTTAC

+

FFFFFFFFFFFFFFFFFFFFFFFFFFFFFFFFFFFFFFFFFFFFFFFFFFFFFFFFFFFFFFFFFFFFFFFF  
FFFFFFFFFFFFFFFFFFFFFFFFFFFFFFFFFFFFFFFFFFFFFFFFFFFFFFFFFFFFFFFFFFFFFFFF

@A00721:190:HGJW7DSXY:4:2269:30120:16078\_1:N:0:TCTGCAAG+GCTGCACT  
GTTTCCGTCGGAGGATGACAGGTGGGAGACCGCTCAATAACACTCTATTGAATCCCTTTTCCACGATG  
AAAGCTCTTTATGAGGTGCTCCATGCAAATTTACAGTTCCTCTTTGGTGATATCGCCTCTGTCCTTTC  
TCC

[illegible]





@A00721:190:HGJW7DSXY:4:1117:31919:13839\_1:N:0:TCTGCAAG+GCTGCACT  
TAATACCTTTATAGGTAAGAAGCCCCTTGAGCCGCGTAGTCAGCGCGTTTAGCTGTATCATCAGTCAG  
AGTATACCCGATAGGGTACCGAGTCTCCAAGAGAATATTTATTCTTATGAGGCTCGAACTTCAACGT  
TTT

+

FFFFFFFF:FFFFFF:FFFFFFFFFFFFFFFFFFFFFFFFFFFFFFFFFFFFFFFFFFFFFFFFFFFF  
FFFFFFFFFFFFFFFFFFFFFFFFFFFFFFFFFFFFFFFFFFFFFFFFFFFFFFFFFFFFFFFF:FFFFFF:FFFFFFFF  
FFF

@A00721:190:HGJW7DSXY:4:2648:15519:20415\_2:N:0:TCTGCAAG+GCTGCACT  
TCGCACCCGAAATTTTGGGCAGAATGCTCTTAACGCGGTTCTAGAACGGTGTTTGTATCAGTCTAAG  
TTGGATAAAGTTATAGGAGACTCAGTTAACCTGAGAGCTCCTCAATTG

+

FFFFFF,F,FF,FF,:FF:FFF,FFF:FFFF:F,FF:,,FF:F,FFFFFFFFFFFFFFFF,,FFFFFF  
F,,FFFFFFFFFFFF:FFFF:FFFFFFFF,FF:FFF::F:FFFF,FF

@A00721:190:HGJW7DSXY:4:2469:4218:21010\_1:N:0:TCTGCAAG+GCTGCACT  
AATAGGGTCGCTAGTATACTTCGTAAAGTCGACAGCTAAATGGTCAATATTGATAATTGGACCGACTA  
TATGACCTATTTTAAGCTCATGGTGAAATGGGAAGCTAAGGTTAACTTGATGCTTCAGCCTTTTCGA  
AG

+

F,F,F,F,:FF::F:FFFFFF:FFF:FFFFFF,FF,:FFFFFFFF,,F,FFFFFF,FFF:,FF,:F,  
::FFF:FFFFFFFF,::,FFFF:F,:FF,,FF,F,,FFFF,F:FFFF,FFF:FF:FFFFFFFF:  
,F

@A00721:190:HGJW7DSXY:4:2660:4372:4773\_1:N:0:TCTGCAAG+GCTGCACT  
CTATCTTTAAGGTTCTTGTGAGGAGAGTCAAACAGTGTCTTTTACCCAACATTTTTATGTATACAGAG  
ATGACCAGTGACGATTTCTCCCGAAGCTCTTCTCTCTCTTAGGAGGTCATGATGACTACTATAAGGG  
TGA

+

FFFFFFFFFFFFFFFFFFFFFFFFFFFFFFFFFFFFFFFFFFFFFFFFFFFFFFFFFFFFFFFFFFFF  
FFFFFFFFFFFFFFFFFFFFFFFFFFFFFFFFFFFFFFFFFFFFFFFFFFFFFFFFFFFFFFFFFFFF  
FFF

@A00721:190:HGJW7DSXY:4:2108:18448:3004\_2:N:0:TCTGCAAG+GCTGCACT  
TCGATGCTGAATTTCTTGAACCTTGAGGTGCCAGTGAATATTTTGTACGCCAGGAGTATCCATAAC  
GATTTGTCAATTTACCACCTTTGCTCAACGACGAAGTGGAACGGCCAAC

+

FF::FF,FFFFFF,FFFF:FFFF:FFF,FFFFFFFF:FFFFFFFFFFFF,FFF:FFFFFF,FFFF  
FFFFFFFFFFFF:FFFFFF,F,FFFFFFFFFFFFFFFF, :FFF,FFFF

@A00721:190:HGJW7DSXY:4:2250:19651:5055\_1:N:0:TCTGCAAG+GCTGCACT  
GTGTGCTCTTCCGATCTATTTTATCACTTTATTATGACCTTGGAAGTTTTCGGCTGTGGTTGTGCGT  
GGGGACGATTCCATTCTGTTTTCAAAGACTCCAATAACTGATCATTCTGATCATATGATTTTGGACAA  
TGG

+

FFFFFFFFFFFFFFFFFFFFFFFFFFFF:FFFFFF:FFFFFFFFFFFFFFFFFFFFFFFFFFFFFFFFFFFF  
FFFFFFFFFFFFFFFFFFFFFFFFFFFFFFFFFFFFFFFFFFFFFFFFFFFFFFFFFFFFFFFFFFFF  
:FF

@A00721:190:HGJW7DSXY:4:2332:15420:26882\_2:N:0:TCTGCAAG+GCTGCACT  
GCGACTAATATTCGATATTCGATTGAGGTCGTTATACCTATTCGGCTATCTGTGCTTTGAATTGTAT  
AAGATCAAATTTTAAACGATTCCGAGAGGTTTATCCTGATGTGGAGGG

+

FFFFFFFFFFFFFFFFFFFFFFFFFFFFFFFFFFFFFFFFFFFFFFFFFFFF:FFFFFFFFFFFFFFFFFFFF  
FFFFFFFFFFFFFFFFFFFFFFFFFFFFFFFFFFFFFFFFFFFFFFFFFFFF:FFFFFF

@A00721:190:HGJW7DSXY:4:1648:15492:31610\_1:N:0:TCTGCAAG+GCTGCACT  
CCCGACCTTCTTGTGAAAATTTTGTATGCGGTTTCATAAGATTATCAGTAATCCTGATTCTACTACG  
GATTCATGGACCTTCCATCCTGTACCTCTTCTGGAGAGACGTATCTCAAAGATCGACTTCGAGACAGG  
TGA

+  
FFFFFFFFF:FFFFFFFFFFFFFFFFFFFFFFFFFFFFFFFFFFFFFFFFFFFFFFFFFFF:FFFFFFFFFFFFFFFFFFFFFFFFFFFFFFFFFFFFFFFFFFFF  
FFFFFFFFFFFFFFFFF:FFFFFFFFFFFFFFFFFFFFFFFFFFFFFFFFFFFFFFFFFFFFFFFFFFFFFFFFFFFFFFFFFFFFFFFFFFFFFFFFFFFF  
FFF  
@A00721:190:HGJW7DSXY:4:2105:8938:24330\_1:N:0:TCTGCAAG+GCTGCACT  
CGAGAGCGACCAAGATCTAAATTCGGTAACGGTGC GTGGCGCTTTATTTTTAAAAAGCTCCCTCCTCTC  
CCAAGTTTGATCTGATACTTATCACGAAAGGACTTGAGTCTTTTGATCAGTCTCTGACTTGACCATCT  
TTC  
+  
FFFFFFFFFFFFFFFFF:FFFFFFFFFFFFFFFFFFFFFFFFFFFFFFFFFFFFFFFFFFFFFFFFFFFFFFFFFFFFFFFFFFFFFFFFFFFFFFFFFFFF  
FFFFFFFFFFFFFFFFFFFFFFFFFFFFFFFFFFFFFFFFFFFFFFFFFFFFFFFFFFFFFFFFFFFFFFFFFFFFFFFFFFFFFFFFFFFFFFFFFFFF  
FFF  
@A00721:190:HGJW7DSXY:4:1341:29288:15702\_2:N:0:TCTGCAAG+GCTGCACT  
TGTTTCCTTCTTTGCACTGATTTTTCTCATCAGCTTGTTTACCTAATCTGTGTTTTTACGATAA  
CAACTATCAGTTGATTAAGACTCTTCCGAAAGGCCGAAC TTTGGGAATT  
+  
FFFFFFFFFFFFFFFFFFFFFFFFFFFFFFFFFFFFFFFFFFFFFFFFFFFFFFFFFFFFFFFFFFFFFFFFFFFFFFFFFFFFFFFFFFFFFFFFFFFF  
FFFFFFFFFFFFFFFFFFFFFFFFFFFFFFFFFFFFFFFFFFFFFFFFFFFFFFFFFFFFFFFFFFFFFFFFFFFFFFFFFFFFFFFFFFFFFFFFFFFF  
FFF  
@A00721:190:HGJW7DSXY:4:1357:2835:4679\_1:N:0:TCTGCAAG+GCTGCACT  
AGCACAACGTTTGACCGTGACGAAGTGTGGTGTCTTGATCTACGTTACGGATATACTCTCCTTGAGT  
TCACTCGTAAGGACACTACCACTTATTACGATATTTCTTTAGTCGATGGGTTTTCGACTCCTTTAAGC  
GTC  
+  
FFFFFFFFFFFFFFFFFFFFFFFFFFFFFFFFFFFFFFFFFFFFFFFFFFFFFFFFFFFFFFFFFFFFFFFFFFFFFFFFFFFFFFFFFFFFFFFFFFFF  
FFFFFFFFFFFFFFFFFFFFFFFFFFFFFFFFFFFFFFFFFFFFFFFFFFFFFFFFFFFFFFFFFFFFFFFFFFFFFFFFFFFFFFFFFFFFFFFFFFFF  
FFF  
@A00721:190:HGJW7DSXY:4:1562:15438:8437\_1:N:0:TCTGCAAG+GCTGCACT  
GTGCTCTTCCGATCTATTAATCACTCATTTTTAGTGAGATTATTA AAAACGCACTAAAACGTCTTCGA  
CAACAGCAGGGGTTTTCGAATAGTGATAGCCACCCGCTTACAGAGGGGCAGCAGCATGACCATAATT  
GGT  
+  
FFFFFFFFFFFFFFFFFFFFFFFFFFFFFFFFFFFFFFFFFFFFFFFFFFFFFFFFFFFFFFFFFFFFFFFFFFFFFFFFFFFFFFFFFFFFFFFFFFFF  
FFFFFFFFFFFFFFFFFFFFFFFFFFFFFFFFFFFFFFFFFFFFFFFFFFFFFFFFFFFFFFFFFFFFFFFFFFFFFFFFFFFFFFFFFFFFFFFFFFFF  
FFF  
@A00721:190:HGJW7DSXY:4:2133:18150:20964\_1:N:0:TCTGCAAG+GCTGCACT  
CACTTTTCTACTGTCTGTCTCGCTCTTCGAATGAAGTTTTAATGCTTAACAACAATGATAGTGAAT  
TTATACCTACAATCATTGGTTTTTTCTAATAATGATGACACTATTGTTTATGGATATGATGCTATTACT  
CA  
+  
:FF:FFFF,FFFFFFFF:FFFFFFFFF:FFFFFFFFF,FFF:FFFFFFFFF:FFFFFFFFFFFFFFFFFFFFFFFFF  
:FFFFFF:FFFFFF,F FF:FFFF:FFFFFFFFFFFFFFFFFFFFFFFFF:FFFFFFFFFFFF,FFFFFFFF:F  
:,  
@A00721:190:HGJW7DSXY:4:1270:26811:6590\_2:N:0:TCTGCAAG+GCTGCACT  
TCTCAGTTTACAAGGACCTTAAGCGATGGATCGGGGTTAATTCTAAAACATTACCCGAAAGACGTGCT  
AAATTA AAACATTGTACGATGTCGTCTGTCTCGGCGAGATCGGAAGA  
+  
FFFFFFFFFFFFFFFFFFFFFFFFFFFFFFFFFFFFFFFFFFFFFFFFFFFFFFFFFFFFFFFFFFFFFFFFFFFFFFFFFFFFFFFFFFFFFFFFFFFF  
FFFFFFFFFFFFFFFFFFFFFFFFFFFFFFFFFFFFFFFFFFFFFFFFFFFFFFFFFFFFFFFFFFFFFFFFFFFFFFFFFFFFFFFFFFFFFFFFFFFF  
@A00721:190:HGJW7DSXY:4:1516:15157:21136\_1:N:0:TCTGCAAG+GCTGCACT  
TCGTTTCTTTCTTTATCTCTTTGGTTGTTAGGGATTTTGAGAGAGTGAAAGGCTTCAATTGTAGTGGT  
TTGGTCGTTTCAGTACCCAGTCAGTATACCTCTACGCAAAGATATTT CATGAAA ACTACAGAGGAACG  
TAC  
+  
F:FFFFFFFFFFFFFFFFF::FFFFFFFFFFFF,FFFF:F:FFFFFFFFFFFFFFFFFFFFFFFFFFFFFFFFFFFFF,



@A00721:190:HGJW7DSXY:4:2409:9959:19680\_2:N:0:TCTGCAAG+GCTGCACT  
GCTGACTTTCGTCAATATGATTTGATCTGGTTGCTCAATTCTAAGCGTGTTCCGCTTAGTGCGAGGCC  
TCTCTTCTACGAGTATTGCTATTTATACGGTTACGAGAAGAAGGTTTCG

@A00721:190:HGJW7DSXY:4:1638:28953:18850\_1:N:0:TCTGCAAG+GCTGCACT  
CTTGATAAAGAACTTCATGAATTTTCAGAGGATGAAAAATTTTCTTCCTTGGATTTTAATATAAAGAA  
TCTTTACCAGGACTCCTACTACAGGAGGCAGTCTTCTGATCGTAAGAAGTTTATAAGGAACATATCCA  
TTT

@A00721:190:HGJW7DSXY:4:2623:12825:13777\_1:N:0:TCTGCAAG+GCTGCACT  
GAAACTCTAAGTGGTAATACTGTCTTTCCAAGCTTACCTTTATCTTCAATGAAATTGGACTCTTCGAT  
AGGGGACATTTTATCGTGGGCTTTCCGTAAAGGAAGATCTGTTATCGACGGTTTATCGTTTACGAAGT  
ATC

@A00721:190:HGJW7DSXY:4:2621:20772:9345\_1:N:0:TCTGCAAG+GCTGCACT  
TAGTGACATCTGGTCAATTTCTTTTTAGGTGGTCTTTATTCTATTATTGATTTTTATGAGATTGATA  
CGTTAACAGAAGATGATGTTAGAGTAGAATTCCTGAAGAGTCCTTCCGTAACCAACTTCTTGACAATT  
TTC

@A00721:190:HGJW7DSXY:4:1406:4155:18521\_2:N:0:TCTGCAAG+GCTGCACT  
ACAATTAAGAAATAATCCTACATTGACTGATTATCTAAAGATTGAAGGAAAATTTTATCCTCGTTAA  
CTTACTTAGACTTTTCCTACGATACAAATGATAACTTCTAATTTACGTT

@A00721:190:HGJW7DSXY:4:2354:26196:17018\_1:N:0:TCTGCAAG+GCTGCACT  
TTGGTGTTATCTCCTCAGGAGTCCCGGCATTTGATAATAATGACGAGACTTTCGTCATAATCGCTGCA  
TATTACGGATTACACGGTACCAGCGCATCTCGTGTCGAGCCTCGACCCGATTATATGGTATTAACCTTA  
TAA

@A00721:190:HGJW7DSXY:4:1148:27290:24455\_2:N:0:TCTGCAAG+GCTGCACT  
TTTTGAGAACTAACTATGTTATGTTCTCTGATCATTTTGACAATCTCTTCTTATAATAAATAAATAA  
TAATATTACTAATGGCAAATAGTGGAAAGGCTCCAGTCAACACTAGTT

@A00721:190:HGJW7DSXY:4:1343:20518:18396\_1:N:0:TCTGCAAG+GCTGCACT  
AATAGGTGAAGGGATAGTTTTTACCTCGACCAACATTAAGGCGGCGGCGACTAATCTTAAAGCTTCAC

CCAAAATGAAGGACACTTCGAAACTGAATAATGATGCACTACAAACAAGTATCGCTAATCATCTGAAA  
AAG

+

FFFFFFFFFFFFFFFF:FFFFFFFFFFFFFFFFFFFFFFFFFFFFFFFFFFFFFFFFFFFFFFFF  
FFFFFFFFFFFFFFFFFFFFFFFFFFFFFFFFFFFFFFFFFFFFFFFFFFFFFFFF,FFFFFFFFFFFFFFFF  
FFF

@A00721:190:HGJW7DSXY:4:2314:3161:7717\_2:N:0:TCTGCAAG+GCTGCACT  
AAATTTCTTAGAGGATATTCGCCATTGTGGTACGAATTGGTCCAACATTTACCACCAAATTCTTTGA  
TAACTCTAGCCTTCAAGTGGGGTATGCCTGCGGAATACGCTTGCTA

+

FFFFFFFFFFFFFFFFFFFFFFFFFFFFFFFFFFFFFFFFFFFFFFFFFFFFFFFFFFFFFFFF  
FFFFFFFFFFFFFFFFFFFFFFFFFFFFFFFFFFFFFFFFFFFFFFFFFFFFFFFF

@A00721:190:HGJW7DSXY:4:1402:13982:7764\_2:N:0:TCTGCAAG+GCTGCACT  
CGAACCCGTTGATGCTATGTCAGAAGAAGCTATTCAAGCTTGTCGTTTAAAGACTGCAGAGGCTGTCA  
AACAAGCCCAGACTCAAGGAGTCCAATCAAAGTTTTGAATTTAGCTC

+

FFFFFFFFFFFFFFFFFFFFFFFFFFFFFFFFFFFFFFFFFFFFFFFFFFFFFFFFFFFFFFFF  
FFFFF:FFFF::F:FFF:FFFFFFFFFFFF:FFFFFFFFFFFF,FFF

@A00721:190:HGJW7DSXY:4:1514:21947:9972\_2:N:0:TCTGCAAG+GCTGCACT  
GTATATTGTATGTTAATAGATAGTGGGATAATAGTTCTACCGATACGTAGTGAACGCGTTCGTAGAAC  
CAAGTACTTTCGCTCTGAAGAGTTTAGAGAGATCGGAAGAGCGTCGTG

+

FFFFFFFFFFFFFFFFFFFFFFFFFFFFFFFFFFFFFFFFFFFFFFFFFFFFFFFFFFFFFFFF  
FFFFFFFFFFFFFFFFFFFF:FFFF:FFFFFFFFFFFFFFFFFFFFFFFFFFFF:F

@A00721:190:HGJW7DSXY:4:1512:14000:8077\_2:N:0:TCTGCAAG+GCTGCACT  
GCTTTAGACGATAATCCTTTAAGGACTATGTTGACTGACGAAGATTTTCCCACAGATTTGTCTACGTT  
GCAGATCGCCACTCCAAACACTATATACATTATAAAATATAAAAATAA

+

FFFFFFFFFFFFFFFFFFFFFFFFFFFFFFFFFFFFFFFFFFFFFFFFFFFFFFFFFFFFFFFF  
FFFFFFFFFFFFFFFFFFFFFFFFFFFFFFFFFFFFFFFFFFFFFFFFFFFFFFFF

@A00721:190:HGJW7DSXY:4:2638:8793:1094\_1:N:0:TCTGCAAG+GCTGCACT  
ACTTTTGTACCAAATCTTGCTTTCAACGAAGTCTCTGATTTTATTAATCATTACTTTAACGATCT  
CTCGGTCATTTACTCTGTACTTGATCTACGTCGTTTAACTGTGCGAACAACCTTTACTTAGAATGACT  
CTA

+

FFFFFFFFFFFFFFFFFFFFFFFFFFFFFFFFFFFFFFFFFFFFFFFFFFFFFFFFFFFFFFFF  
FFFFFFFFFFFFFFFFFFFFFFFFFFFFFFFFFFFFFFFFFFFFFFFFFFFFFFFF:FFFFF  
FFFFFFFFFFFFFFFFFFFFFFFFFFFFFFFFFFFFFFFFFFFFFFFFFFFFFFFF:FFFFF:FF:FFFFF:FFFFFFFF  
FFF

@A00721:190:HGJW7DSXY:4:2249:24388:25316\_1:N:0:TCTGCAAG+GCTGCACT  
AATACTCACTATCGTTTTCTGCTTTTTCTTAGCTAAGAGATTAATAAAGGATGAGTACGAAAACCAAC  
TCTTCGTTACGAGACCTGATGGTAGAATAGATTTAGTCTCTACACCCATCTCAACGAGGATAAAGCGA  
GTT

+

FFFFF,F,:FFFFFFFFF,FFFFFFFFFFFFFFFF,FFFFFFFFF,F,FFFFFFFF:FFFFFFFFFFFF  
FFFFFFFFFFFFFFFFFFFFFFFFFFFFFFFFFFFFFFFFFFFFFFFFFFFFFFFF:FFFFF:FFF::FFFFFFFF  
FFF

@A00721:190:HGJW7DSXY:4:2547:29071:22905\_2:N:0:TCTGCAAG+GCTGCACT  
CGAAGAGATCATCCGAAACGACTCGAAACCGAGACGCCGTAGATCAAAGTCCCTTCTAACTTTAGAT  
TATGAATCCTGCCTTTACTCATTTTATAGCAGTTATTTATGTTGTACT

+

FFFFFFFFFFFFFFFFFFFFFFFFFFFFFFFFFFFFFFFFFFFFFFFFFFFFFFFFFFFFFFFF  
FFFFFFFFFFFFFFFFFFFFFFFFFFFF,FFFFFFFFFFFFFFFFFFFFFFFF

@A00721:190:HGJW7DSXY:4:2371:27245:17613\_2:N:0:TCTGCAAG+GCTGCACT  
ATGCTTTTCGATAGTGATTGTTATCAATTTAAATACATTACTGTTTCAAATCATCTTTACTCACAGAC

$+$ 

@A00721:190:HGJW7DSXY:4:2461:18502:23202\_1:N:0:TCTGCAAG+GCTGCACT  
ACCACTGATCTGCCGACTTTAGTCAAGGAAC TTCAATTCTTCGATGTTTATATTTTTCTATAAGGGA  
AAATAGCAATAATCAAATTTGACAAATTTTAGAACTTTATTTCAGAACTCTCTCCGATCACCTTGGT  
GTG

+

@A00721:190:HGJW7DSXY:4:1540:25789:27586\_1:N:0:TCTGCAAG+GCTGCACT  
TCAATAAGATGTATGATGATAATCTACTATTTTTAAATAGTGATATTCAGCGTATACTTGAATACTTT  
ATCAAAGATTTGGCTTGGTCTATTTACCGCAAAAAGTTGGAAGAGGTCTATGATATTTATTTTACTTA  
TAC

+

@A00721:190:HGJW7DSXY:4:2362:1823:1172\_1:N:0:TCTGCAAG+GCTGCACT  
CGATTATAACTTGACTGTTGATAATATTACAATAGCTCTTTCTCAGAAGATTAGAGAAGTAACCGGTG  
AACACGTCGGTAGCATTGATTTACTTTTACCGTTAGAACTGAAAAAGATTCTTTTCGAAAAGAAACCT  
ATA

+

@A00721:190:HGJW7DSXY:4:1372:30526:27774\_2:N:0:TCTGCAAG+GCTGCACT  
TAAAGAAATAAAAATACTTCAAGTACCTGAACCTTTACATTTTAAATGGTATGGTATAATGTGTCTTAC  
AAATAGAACCTTCACTCTCGGTAATGAGAGTGTATTCCTTAATATTCT

 $+$ 

@A00721:190:HGJW7DSXY:4:1332:29948:36855\_2:N:0:TCTGCAAG+GCTGCACT  
TTACTAGGATTTATCACACTCCTAAATTTGATAGCAATTTATGTTTTAAATGCTAGGAAAATTTTAGA  
AAAACCTCCATTGTATAGTTCAAGGAGTACTTAATTCAATAGCTTTAGT

+

@A00721:190:HGJW7DSXY:4:2515:27887:23046\_2:N:0:TCTGCAAG+GCTGCACT  
CTTTATTGAAAATTGTATAAGAGTTAATTGCTTACACAAAAGTGACGCGCGAAGGAATCTTAATTGAT  
TGAAGCTAGGCGTTGGGGAGAATGAACTGCCGCTTCCCGGAAGAGATC

+

@A00721:190:HGJW7DSXY:4:1263:24343:32409\_2:N:0:TCTGCAAG+GCTGCACT  
ATGACCAATCATCGCTCCAACCTGGCACGCCAGACGTAGGGTCAAACCTACTACCGCCGGTCGGCAGAT  
CGGCACCACTGGTCTCTACGTTACAGGGACCCGCTGTGCAGAATAACCT

+

@A00721:190:HGJW7DSXY:4:2553:13087:35931\_1:N:0:TCTGCAAG+GCTGCACT  
CTGAAGGTCGTTACCGGACGACCACTCAAAGGAAACGGGCTGTTGCCAGAGGAAAGCAGCGACCACC

GAGGTCGCTCGTAACATTGACGGCAGTCCCGTCATCTCTGTGGGAAGTCTGAGGCAGTACCTCAGTCAAA  
AGT

+

FFFFFFFF:FFFFFFFFFFFFFFFFFFFFFFFFFFFFFFFFFFFFFFFFFFFFFFFFFFFFFFFFFFFFFFFF  
FFFFFFFFFFFFFFFFFFFFFFFFFFFFFFFFFFFFFFFFFFFFFFFFFFFFFFFFFFFFFFFFFFFFFFFF  
FFF

@A00721:190:HGJW7DSXY:4:2148:4146:4163\_2:N:0:TCTGCAAG+GCTGCACT  
ACTCCCATGCCAATCAATGATGTGACTATACAGTTCGGCCATTTCAAGAGTGGTCAATACGTCGTGGG  
AGGTACTGAAGCCTTCCCCTCCGCTGGCACGAAGAACAACCTCCCAAGCC

+

FFFFF:FFFFFFFFFFFFFFFFFFFFFFFFFFFFFFFFFFFFFFFFFFFFFFFFFFFFFFFFFFFFFFFF  
FFFFFFFFFFFFFFFFFFFFFFFFFFFFFFFFFFFFFFFFFFFFFFFFFFFFFFFFFFFFFFFF

@A00721:190:HGJW7DSXY:4:2437:4490:31313\_2:N:0:TCTGCAAG+GCTGCACT  
TTCTGACCAGAATGAAAAGGGTTTACCAGGGTAGTCTCTAAGTCTACCAGGAAGAGGGGAAATGTCC  
CCAAAAGTGAAGAATAAAGGGAAAGGTCCATCAGGACCTAAGAAGG

+

FFFFFFFFFFFFFFFFFFFFFFFFFFFFFFFFFFFFFFFFFFFFFFFFFFFFFFFFFFFFFFFF, FFFFFFF:FFFFFFFFFFFFFFFFFFFFFFFF:F:FFFF  
FFF:FFFFFFFF:FFFF, F:FFFFFFFFFFFFFFFFFFFFFFFFFFFFFFFFFFFFFFFF

@A00721:190:HGJW7DSXY:4:1101:28438:17080\_1:N:0:TCTGCAAG+GCTGCACT  
CTCCCACCATCTGGGGTTGGGAATAAGAAATCTGCACGGGCCAAAGAGGCCGCTGCTACGAAGTCGCT  
GAAGGCGGCTTGGGTCATTAAGGGTAGCTGTAAAGTTGCGCCTGCCGACCCCATCTTTGAGACCAAGA  
CTC

+

FFFFFFFFFFFFFFFFFFFFFFFFFFFFFFFFFFFFFFFFFFFFFFFFFFFFFFFFFFFFFFFFFFFFFFFF  
FFFFFFFFFFFFFFFFFFFFFFFFFFFFFFFFFFFFFFFFFFFFFFFFFFFFFFFFFFFFFFFFFFFFFFFF, FFFFFFFFF  
FFF

@A00721:190:HGJW7DSXY:4:1127:13259:15749\_2:N:0:TCTGCAAG+GCTGCACT  
CAAATCTGTTGAATTCGTCAGTACTGAGGACGAAGGTGAGAGGACTTTTGGCTACTGGCGACAACTGAGA  
GCAGTCGCTGGGGAAAGAGAATTGCGTGGGTTGAAGGCCGACGCTTCG

+

FFFFFFFF:FFFFFFFFFFFFFFFFFFFFFFFFFFFFFFFFFFFFFFFFFFFFFFFF:FFFFFF:FFFFFFFFFFFFFFFF  
FFFFFFFFFFFFFFFF:FFFFFFFFFFFFFFFFFFFFFFFF:FFFFFFFF:FFF

@A00721:190:HGJW7DSXY:4:2660:27471:33223\_2:N:0:TCTGCAAG+GCTGCACT  
ACGAGGCCGGTGACGTTTTTGTCAACGGCGTTTGGAGGATTTTATCCGCGCTTAAGTATGGGGCGAAG  
ATCCCCTATTGAGTCTTGAAGGACTTAGGTTGGCATATTTATGCCGAC

+

FFFFFFFFFFFFFFFF:FFFFFFFFFFFF, FFFFFFFFF:FFFFFFFFFFFF, FFFFFFF:F  
FFFFFFFF:FFFFFFFFFFFFFFFFFFFFFFFF:FFFF:FF, FFFF:FFFF

@A00721:190:HGJW7DSXY:4:1657:26702:14732\_2:N:0:TCTGCAAG+GCTGCACT  
CACCCCTAAGCACCGAGGTAAGCTCGGGACTTACAAGAGAGAGTGTGAGAGAGTCGCTCTCACTATTT  
TTGCCCAGAATGCGGGCTTTCTGACTGATGAGGTTAAACTCTTGCTC

+

FFFFFFFFFFFF:FFFFFFFFFFFFFFFFFFFFFFFFFFFFFFFFFFFFFFFFFFFFFFFFFFFFFFFF  
FF, FFFFFFFFFFFFFFFFFFFFFFFFF:FFFFFF, FFFFF, F:::FF:

@A00721:190:HGJW7DSXY:4:2163:1280:19523\_1:N:0:TCTGCAAG+GCTGCACT  
TTAGAGAGCATTAGAAGGAAGTTGGGCAAATCCCACATATGGTAGACGTTGTCACACTTTTCTTGAA  
AATTTTCTTTCTCCGTCATTGGGGATTTGATGTGAGAAGGTGGAAGGTGTCAAGGTCTTCTTC  
ATG

+

FFFFFFFFFFFFFFFFFFFFFFFFFFFFFFFFFFFFFFFFFFFFFFFFFFFFFFFFFFFFFFFFFFFF  
FFFFFFFFFFFFFFFFFFFFFFFFFFFFFFFFFFFFFFFFFFFFFFFFFFFFFFFFFFFFFFFFFFFF  
FFF

@A00721:190:HGJW7DSXY:4:2216:6343:17801\_1:N:0:TCTGCAAG+GCTGCACT  
TTCAGACGTGTGCTCTCCGATCTCGGCTCGTATCGAGTTGGAGGGAGGAAGTTCTCCGAAATTAAG

ACGGGGGGGATTAAGAGTCCAGCTGTAAGTGTCAATTCAGAGAGGGGAGCTCTGAAAAGGAACTTCGT  
CAG

+

FFFFFFFFFFFFFFFF:FFFFFFFFFFFFFFFFFFFFFFFFFFFFFFFFFFFFFFFFFFFFFFFFFFFFFFFF  
FFFFFFFFFFFFFFFFFFFFFFFFFFFFFFFFFFFFFFFFFFFFFFFFFFFFFFFFFFFFFFFFFFFFFFFF  
FFF

@A00721:190:HGJW7DSXY:4:1407:6949:32722\_2:N:0:TCTGCAAG+GCTGCACT  
GAGGAGGAGTTTGAGGAAGGCTCTAGAGAAGATCTCACCACCTGGAGAAGGCAAGTGGAGAGTCCAGA  
AGTTGATGAAGAAGGATTATTTGAAGCAGGGGTTACCACTTCCTAAGG

+

FFFFFFFFFFFFFFFFFFFFFFFFFFFFFFFFFFFFFFFFFFFFFFFFFFFFFFFFFFFFFFFFFFFFFFFF  
FFFFFFFF:FFFFFFFFFFFFFFFFFFFFFFFFFFFFFFFFFFFFFFFFFFFFFFFF:FFFF

@A00721:190:HGJW7DSXY:4:1348:21621:18740\_1:N:0:TCTGCAAG+GCTGCACT  
TTGGAGTTTTAGATAATCTTTTGAGAAGGGGTCATAGAGCCAGCAAGAGAAGCTTATATGCTGGTTTA  
AGTGATGATTATCACTCCTTGAGAAGACAAGCCACATTAAGATATAATTTAGGTCAACTTGGGGTTTC  
GAA

+

FFFFFFFFFF:FFFF:FF:FFFFFFFFFFFFFFFFFFFFFFFFFFFFFFFFFFFFFFFFFFFFFFFFFFFF  
FFFFFFFF:FFFFFFFFFFFFFFFFFFFFFFFFFFFFFFFFFFFFFFFFFFFFFFFFFFFFFFFFFFFFFFFF  
FFF

@A00721:190:HGJW7DSXY:4:1272:7925:29496\_1:N:0:TCTGCAAG+GCTGCACT  
GACTGGAGTTCAGACGTGTGCTCTTCCGATCTATTTAAGTGGCAGAATTCGGTAACCTACCATATTG  
TTCCTTCCGGGAAGTTGTGGGATTTAACTTTGACTCAACTACTCCGATCAGATCCGGATGGTTTGATT  
GGT

+

FFFFFFFFFFFFFFFFFFFFFFFFFFFFFFFFFFFFFFFFFFFFFFFFFFFFFFFFFFFFFFFFFFFFFFFF  
:FFFFFFFFFFFFFFFFFFFFFFFFFFFFFFFFFFFFFFFFFFFFFFFFFFFFFFFFFFFFFFFFFFFFFFFF  
FFF

@A00721:190:HGJW7DSXY:4:2112:29405:14622\_1:N:0:TCTGCAAG+GCTGCACT  
ATGGCAGATACTACCGATAAGGTGAAAAATATGCAGGTCAAAGATTCTGTAGCTCTGAGGGCGGTTGA  
GGGAGCCGTTTTGGCCGACTTTAACTATTCTAAGAGTCTTTATGATTCAAACCTATCGTTGTCGTAC  
CTT

+

F::FFFFFFFFFFFFFFFFFFFFFFFFFFFFFFFFFFFFFFFFFFFFFFFFFFFFFFFFFFFFFFFFFFFF  
FFFFFFFFFFFFFFFFFFFFFFFFFFFFFFFFFFFFFFFFFFFFFFFFFFFFFFFFFFFFFFFFFFFFFFFF  
FFF

@A00721:190:HGJW7DSXY:4:1241:27064:10504\_1:N:0:TCTGCAAG+GCTGCACT  
GTTTCCAGAATTGCGGTTGAAGTTCACCCATTCTATCTTGAATGCTCACGCCGTCGCAGCCATATCGA  
GACTATGTTATAATCACTTGTTAAAGTACAGATTTAGTGATTAGATATTATTGATATTGGAGGCGAT  
ATT

+

FFFFFFFFFFFFFFFFFFFFFFFFFFFFFFFFFFFFFFFFFFFFFFFFFFFFFFFFFFFFFFFFFFFFFFFF  
FFFFFFFFFFFF:FFFFFFFFFFFFFFFFFFFFFFFFFFFFFFFFFFFFFFFFFFFFFFFFFFFFFFFFFFFF  
FFF

@A00721:190:HGJW7DSXY:4:2456:9968:13714\_2:N:0:TCTGCAAG+GCTGCACT  
AAACTCCTTGAATGGAGTACATATTTGCAACCCTATTCTTGATGTGAAAGATGCATCGAGGTATACGT  
CTAGGAACATTGATTGGGAACGTACCTACTCACGAGACGTCATGAAAG

+

FFFFFFFFFFFF:FFFFFFFFFFFFFFFFFFFFFFFFFFFFFFFFFFFFFFFFFFFFFFFFFFFFFFFFFFFF  
FFFFFFFFFFFFFFFFFFFFFFFFFFFFFFFFFFFFFFFFFFFFFFFFFFFFFFFFFFFFFFFFFFFFFFFF

@A00721:190:HGJW7DSXY:4:1670:32172:29528\_1:N:0:TCTGCAAG+GCTGCACT  
TTCGTTCTGTTACAATAACGCTTTGGATTGTGACCATAAAGCCTCATTTGCGATAGCTGTAGTGGTAT  
AAGATATCTCTCTTGATGATGTAGCCACTATAATGCTTAAGAGAGAGATTGATGTATGTCATTTCTGC  
TTA



@A00721:190:HGJW7DSXY:4:1311:21748:9032\_1:N:0:TCTGCAAG+GCTGCACT  
TATTGGACACGATGAAAAATGACATACCCGTTCTGACCTTGGTATCGTTATCCGTCATGGAGATGAT  
GGCGCATCACTTGATTACTATATGCCCGAAGGATTGGGTATTCTCACAACAAAGATAAGATTTTATC  
TTT

@A00721:190:HGJW7DSXY:4:1141:14660:10222\_2:N:0:TCTGCAAG+GCTGCACT  
ATTAATGAGTTCCGAATAACTCGTAATAAATCTTTCTAGTGGACAATTGAGAATACCTATTTCCGT  
ACCAAGAGCCACTGCCAATCTCATCGCTATACGCATACCTGATTGGAA

@A00721:190:HGJW7DSXY:4:2620:25301:14591\_2:N:0:TCTGCAAG+GCTGCACT  
AGATTATGGTTGATAAAGTTTTCTTCATAAGGGCTATTCAGTACGTCATGGGGATCACTTCTTCGGTC  
AATGACAAAACCTTCGAATATGTTACGACATGGCTTCGTAACAACAGT

@A00721:190:HGJW7DSXY:4:2432:1777:13275\_1:N:0:TCTGCAAG+GCTGCACT  
TCACCAAGATGTTTCATATAGATACGAGATACCTAGAGAAGGTCGCAGCGATCTTACTCGTTATCGGAG  
CTAAGAAGAAGACTTTGGGTACACGTTATGCTCGCAAACCTTAACGTTAGTACCGGAGGTGATCTCTCT  
GCT

@A00721:190:HGJW7DSXY:4:2617:13060:30248\_1:N:0:TCTGCAAG+GCTGCACT  
AGAGAAAAGATT CAGGACGCCTACGGTGACTTTATGGACAAGATGCAAGTTCTTGGGAAATACTTGTT  
TCCCTTTTTAGGTTTAGTAGGTGATCTTGACGTCGATTCTTTGTATAGGGAGTGTGAGAAGACAACGA  
ATC

@A00721:190:HGJW7DSXY:4:2220:25907:26600\_1:N:0:TCTGCAAG+GCTGCACT  
ATCTTTTGAGATTGAGAAGATTGAAGAACACGTCAAGAAGTCGCTCGGCGTTGTTCTTGAAAACCAAG  
TTAAGAAGGAGGCTGATCATGGAGTCTTTGTACCTTCTGTCAAACCTTCGAGGTTACGCTACGAGAGGT  
GAT

@A00721:190:HGJW7DSXY:4:1272:4417:2628\_2:N:0:TCTGCAAG+GCTGCACT  
TTGAAGGCTGGCTCTAAGGGAGACTCCTTCTTTTTGAATGTTGTAAAGAATTGGGTTGAGAAGTGTGC  
TTTACAAGGAGTTAGACTCTTCTTCAAGTTTTTAGATCTTCTTGATAA

```
+
FFFFFFFFFFFFFFFFFFFFFFFFFFFFFFFFFFFFF:FFFFFFFFFFFFFFFFFFFFFFFFFFFFFFF
FFFFFFFFFFFFFFFFFFFF,E:FFFFFFFFFFFFFFFFFFFFFFFFFFFFFFFFFFFF
```



FFFFFFFFFFFFFFFFFFFFFFFFFFFFFFFFFFFFFFFFFFFFFFFFFFFFFFFFFFFFFFFFFFFFFFFFFFFFFFFF  
FFF

@A00721:190:HGJW7DSXY:4:2161:5891:1360\_1:N:0:TCTGCAAG+GCTGCACT  
GTTTATGTTTCGGTTTCAGCTGGATGGATCTTTTGATGGTATGTTTCACATTGCGTGATCACTTCCCG  
TGGACTTGGAAGAGATTAAACATAAAATCCAGCGATTCTATTATGTCGCTAAAGCCTGTCCAGTTGT  
CGA

+

F:FFFFFFFF:FFFFF:FFFFFFFFFFFFFFFFFFFFFFFFFFFFFFFFFFFFFFFFFFFFFFFFFFFFFFFF  
FFFFFFFFFFFFFFFFFFFFFFFFFFFFFFFFFFFFFFFFFFFFFFFFFFFFFFFFFFFFFFFFFFFFFFFFFFFF  
FFF

@A00721:190:HGJW7DSXY:4:2529:25048:13870\_2:N:0:TCTGCAAG+GCTGCACT  
TTCTCGCTCGCATTTCAAGGATTACTAAGTCTGAGATCTGCCACTTCTAATTTTAGGAAACGTGCG  
GAAAAGAAAGTTCATGAGGATGTCTTGGTCGAAAAATATCGCCGGGAA

+

FFFFFFFFFFFFFFFFFFFFFFFFFFFFFFFFFFFFFFFFFFFFFFFFFFFFFFFFFFFFFFFFFFFFFFFFFFFF  
FFFFFFFFFFFFFFFFFFFFFFFFFFFFFFFFFFFFFFFFFFFFFFFFFFFFFFFFFFFFFFFFFFFFFFFFFFFF

@A00721:190:HGJW7DSXY:4:2262:4191:31735\_1:N:0:TCTGCAAG+GCTGCACT  
GGATCCTGATGACATTATTTCAACGGATACCGATCTCAGTTCTACCACAGAAACCGTCTCAGGAAGT  
TCTCCACTGATTCGGAATTAGAGAAAGACGACCTTCTTGTTGGGGACTGAGACCTCTGAATTTTCAGGG  
TGC

+

FFFFFFFFFFFFFFFFFFFF:F:FFFFFFFFFFFFFFFFFFFFFFFFFFFFFFFFFFFFFFFFFFFFFFFFFFFF  
FFFFFFFFFFFFFFFFFFFFFFFFFFFFFFFFFFFFFFFFFFFFFFFFFFFFFFFFFFFFFFFFFFFFFFFFFFFF  
FFF

@A00721:190:HGJW7DSXY:4:1630:20518:30765\_2:N:0:TCTGCAAG+GCTGCACT  
TTGAAAGGGATAATTTCAACTCTGAGACTTCTAAGAGTGTTTCAAAGACCAGAAACGTAACAAGAAG  
AATAAAGGTAGGAAGGGGAGAAAACAGAACAAAGCGAGCGGTTGAAGAG

+

FFFFFFFFFFFFFFFFFFFFFFFFFFFFFFFFFFFFFFFFFFFFFFFFFFFFFFFFFFFFFFFFFFFFFFFFFFFF  
FFFFFFFFFFFFFFFFFFFFFFFFFFFFFFFFFFFFFFFFFFFFFFFFFFFFFFFFFFFFFFFFFFFF,FFFFF

@A00721:190:HGJW7DSXY:4:1571:32678:28025\_2:N:0:TCTGCAAG+GCTGCACT  
TGGTTGCGGCTGATCGTACCCCAATTCCTGCTAGAAAGATCACTCTCGGCGATACCACTGATCTTCCA  
GAGTTACGTAGTGGTCGTTCTTTTGGTGATTTTATCAAAGAGAAAGTT

+

FFFFFFFFFFFF:FFFFFFFFFFFFFFFFFFFFFFFFFFFFFFFFFFFFFFFFFFFFFFFFFFFFFFFFFFFF  
FFFFFFFFFFFFFFFFFFFFFFFFFFFFFFFFFFFFFFFFFFFFFFFFFFFFFFFFFFFFFFFFFFFF,FFFFF

@A00721:190:HGJW7DSXY:4:2660:26811:12101\_1:N:0:TCTGCAAG+GCTGCACT  
TCCAAAAGCTATTAATAGCAGTTGCGGGGCTATAATACCGCCTCCAGATTACTCTAACTGAATCCA  
CTCTCTTGGGATATAAATGAGTACATCTATAATAGAGTTTGGAACTGTGTAATGTCCTACGTACTGT  
TCA

+

F,FFFFFFFF:FFFFF:FFF,:F:F,,FFFFFFFFFFFF,FFFFFF,FF,FFFFFFFFFFFFFFFFFFFF::F,  
::FF:FFFF:FFFFFFFFFFFFFFFFFFFF:FFFFFFFF:F,FFFFFF::FFFFFFFFFFFF,F:FFFFFF  
FFF

@A00721:190:HGJW7DSXY:4:1247:6460:25332\_2:N:0:TCTGCAAG+GCTGCACT  
TCGATTGATTTTGTTGACTACGATCTCTTGTAAATAAGAAGTTCTTCGCAGTTGAATCTCCACCAGG  
TGGAGGAAGACTACTGAACTTATAGCGACTTTTGTGCAATTTTTCGC

+

FFFF:FFFF:FFFF,FFFFFFFFFFFFFFFFFFFFFFFFFFFFFFFFFFFFFFFFFFFFFFFFFFFF:FFFFF:FFFFF  
FFFFFFFF,FFFFFFFFFFFFFFFFFFFF:FFFFF,FFFFFFFFFFFF

@A00721:190:HGJW7DSXY:4:2242:30282:13416\_2:N:0:TCTGCAAG+GCTGCACT  
ATTGTCACTGCTAATCGTAATTCGCGAGAAGAGATAGTGAATAAGTTTTGGCACTTCTAGTTCATCG  
CGGTATTTGTGAAATTAAGACAGACGTGAAAGTTATGATGAGTGATCG

+



CTAAGGTAACTTGATGCTTCAGCCTTTTCGAAGCATAACCCCGCACAGAATATCGTTTATCACGCA  
AAA

+

FFFFFFFFFFFFFFFFFFFFFFFFFFFFFFFFFFFFFFFFFFFFFFFFFFFFFFFFFFFFFFFFFFFFFFFF  
FFFFFFFFFFFFFFFFFFFFFFFFFFFFFFFFFFFFFFFFFFFFFFFFFFFFFFFFFFFFFFFFFFFFFFFF  
FFF

@A00721:190:HGJW7DSXY:4:1103:1768:6809\_1:N:0:TCTGCAAG+GCTGCACT  
GGTTCTTGAGGAGAGTCAAACAGTGTCTTTACCCAACATTTTATGTATACAGAGATGACCAAGTG  
ACGATTTCTCCCGGAAGCTCTTCTCTCTTAGGAGGTCATGATGACTACTATAAGGGTGAAATCGAT  
TTT

+

FFFFFFFFFFFFFFFFFFFFFFFFFFFFFFFFFFFFFFFFFFFFFFFFFFFFFFFFFFFFFFFFFFFFFFFF  
FFFFFFFFFFFFFFFFFFFFFFFFFFFFFFFFFFFFFFFFFFFFFFFFFFFFFFFFFFFFFFFFFFFFFFFF  
FFF

@A00721:190:HGJW7DSXY:4:2131:19000:36777\_2:N:0:TCTGCAAG+GCTGCACT  
TCGATGCTGAATTTCTTGAACCTTGAGGTGCCAGTGAATATTTTGTACGCCAGGAGTATCCATAAC  
GATTTGTCATTTACCACCTTGCTCAACGACGAAGTGGAACGGCCAAC

+

:FFFFFFFFFFFFFFFFFFFFFFFFFFFFFFFFFFFFFFFFFFFFFFFFFFFFFFFFFFFFFFFFFFFFFFFF  
FFFFFFFFFFFF:FFFFFFFFFFFFFFFFFFFFFFFFFFFFFFFFFFFFFFFFFFFFFFFFFFFFFFFFFFFF  
FFF

@A00721:190:HGJW7DSXY:4:2438:16134:4069\_1:N:0:TCTGCAAG+GCTGCACT  
GTGTGCTCTCCGATCTATTTTATCACTTTATTATGACCTTGGAAGTTTTCGGCTGTGGTTGTGCGT  
GGGACGATTCCATTCTGTTTTCAAAGACTCCAATAACTGATCATTCTGATCATATGATTTTGGACAA  
TGG

+

FFFFFFFFFFFFFFFFFFFF,FFFFFF,FFFFFFFFFFFF:FFFFFFFFFFFFFFFFFFFF:FFFFFFFFFFFFFFFFFFFF  
FFFFFFFFFFFFFFFFFFFFFFFFFFFFFFFFFFFFFFFFFFFFFFFFFFFFFFFFFFFFFFFFFFFFFFFF  
FFF

@A00721:190:HGJW7DSXY:4:2366:22715:15280\_2:N:0:TCTGCAAG+GCTGCACT  
GCGACTAATATTCGATATTCGATTGAGGGTCGTTATACCTATTCGGCTATCTGTGCTTTGAATTGTAT  
AAGATCAAATTTTAAACGATTCCGAGAGGTTTATCCTGATGTGGAGGG

+

FFFFFFFFFFFFFFFFFFFFFFFFFFFFFFFFFFFFFFFFFFFFFFFFFFFFFFFFFFFFFFFFFFFF,FFFFFFFFFFFFFFFFFFFF:F  
FFFFFFFFF:FFFFFFFFFFFFFFFFFFFFFFFFFFFFFFFFFFFFFFFFFFFFFFFFFFFFFFFFFFFF:

@A00721:190:HGJW7DSXY:4:2227:6081:34882\_1:N:0:TCTGCAAG+GCTGCACT  
CCCGACCTTCTTGTAATTTTATGATGCGGTTTCATAAGATTATCAGTAATCCTGATTCTACTACG  
GATTCATGGACCTTCCATCCTGTACCTCTTCTGGAGAGACGTATCTCAAAGATCGACTTCGAGACAGG  
TGA

+

FFFFFFFFFFFF:FFFFFFFFFFFFFFFFFFFFFFFFFFFFFFFFFFFFFFFFFFFFFFFFFFFFFFFFFFFF  
FFFFFFFFFFFFFFFFFFFFFFFFFFFFFFFFFFFFFFFFFFFFFFFFFFFFFFFFFFFFFFFFFFFFFFFF  
FFF

@A00721:190:HGJW7DSXY:4:2256:4345:8923\_1:N:0:TCTGCAAG+GCTGCACT  
CGAGAGCGACCAAGATCTTAATTGGGTATCGGTGCGTGCGCTTTATTTTAAAAAGCTCCCTCCTCTC  
CCAAGTTTGATCTGATACTTATCACGATAGGACTTGAGTCTTTTGATCAGTCTCTGACTTGACCATCT  
TTC

+

FFFFF,F,:F,F,FFF:F:F,:F,F,F,,,F,FF,FFFF:FFFFFFFFFFFF:F,FFF,F,F:,FFFF  
,:FF,FFFFFFFF,FF:FF,FFFFFF,:F:F,FFF,:F:FFFFFFFF:FFFFF,:FFF,FFF,FFF  
FF:

@A00721:190:HGJW7DSXY:4:2218:9661:32784\_2:N:0:TCTGCAAG+GCTGCACT  
TGTTTCCTTCTTTGCACTGATTTTCTCATCAGCTTGTTTACCTAATCTGTGTTTTACGATAA  
CAACTATCAGTTGATTAAGACTCTTCCGAAAGGCGAACTTTGGGAATT

+

FFFFFFFFFFFFFFFFFFFFFFFFFFFFFFFFFFFFFFFFFFFFFFFFFFFFFFFFFFFFFFFFFFFFFFFF  
FFFFFFFFFFFFFF:FFFFFFFFFFFFFF:FFFFF:FFFFFFFFF,FFFFFF  
@A00721:190:HGJW7DSXY:4:1550:5358:14403\_1:N:0:TCTGCAAG+GCTGCACT  
AGCACAACTTTGACCGTGACGAAGTGTGGTGTCTTGTATCTACGTTACGGATATACTCTCCTTGAGT  
TCACTCGTAAGGACACTACCACTTATTACGATATTTCTTTAGTCGATGGGTTTTCGACTCCTTTAAGC  
GTC  
+  
FFFFF:FFFFFFFFFFFFFFFFFFFFFFFFFFFFFFFFFFFFFFFFFFFFFFFFFFFFFFFFFFFFFFFF  
FFFFFFFFFFFFFFFFFFFFFFFFFFFFFFFFFFFFFFFFFFFFFFFFFFFFFFFFFFFFFFFFFFFFFFFF  
FFF  
@A00721:190:HGJW7DSXY:4:1665:28962:14137\_1:N:0:TCTGCAAG+GCTGCACT  
TGTGCTCTTACGATCTATTAATCACTCATTTTAGTGAGATTATTAACGCACTAAACGTCTTCGA  
CAACAGCAGGGGTTTTCGAATAGTGATAGCCACCCGCTTACAGAGGGGCAGCAGCATGACCATAATT  
GGT  
+  
F:FF:::F:,::FF,FFFFFFFF:F:,F,:FF:FF,:FF::FFFFFFFF:FF:FFFFFFFF::FFFF,FF,  
FFFFFFFF:FF,,:::,FFF:F,FFFFFFFFFFF:FFF:FF,FFF,:FFFF:FFFFFFFF,FFFFFF:F:FFFF  
FF:  
@A00721:190:HGJW7DSXY:4:1231:9381:15107\_1:N:0:TCTGCAAG+GCTGCACT  
CACCTTTTCTACTGTCTGTCTCGCCTCTTCGAATGAAGTTTAAATGCTTAACAACAATGATAGTGAAT  
TTATACCTACAATCATTGGTTTTTCTAATAATGATGACACTATTGTTTATGGATATGATGCTATTACT  
CAT  
+  
FFFFFFFFFFFFFFFFFFFFFFFFFFFFFFFFFFFFFFFFFFFFFFFFFFFFFFFFFFFFFFFFFFFFFFFF:  
FFFFFFFFFFFFFFFFFFFFFFFFFFFFFFFFFFFFFFFFFFFFFFFFFFFFFFFFFFFFFFFFFFFFFFFF  
FFF  
@A00721:190:HGJW7DSXY:4:1469:6488:32049\_2:N:0:TCTGCAAG+GCTGCACT  
TCTCAGTTTACAAGGACCTTAAGCGATGGATCGGGGTAAATTCTAAACATTACCCGAAAGACGTGCT  
AAATTAACCATTTGTACGATGTCGTCTGTCTCGCGAGATCGGAAGA  
+  
FFFFFFFFFFFFFFFFFFFFFFFFFFFFFFFFFFFFFFFFFFFFFFFFFFFFFFFFFFFFFFFFFFFFFFFF  
FFFFFFFFFFFFFFFFFFFFFFFFFFFFFFFFFFFFFFFFFFFFFFFFFFFFFFFFFFFFFFFFFFFFFFFF  
@A00721:190:HGJW7DSXY:4:1671:20898:2926\_1:N:0:TCTGCAAG+GCTGCACT  
TCGTTTCTTTCTTTATCTCTTTGGTTGTTAGGGATTTTGAGAGAGTGAAAGGCTTCAATTGTAGTGGT  
TTGGTCGTTTCAGTACCCAGTCAGTATACCTCTACGCAAAGATATTTTCATGAAACTACAGAGGAACG  
TAC  
+  
FFFFFFFFFFFFFFFFFFFFFFFFFFFFFFFFFFFFFFFFFFFFFFFFFFFFFFFFFFFFFFFFFFFFFFFF  
FFFFFFFFFFFFFFFFFFFFFFFFFFFFFFFFFFFFFFFFFFFFFFFFFFFFFFFFFFFFFFFFFFFFFFFF  
FFF  
@A00721:190:HGJW7DSXY:4:1516:8775:36636\_2:N:0:TCTGCAAG+GCTGCACT  
TCTTTTCATATTATGAATGAACCTTCGGCCGCTCTCTTTGCTTCGATGTTGGATGTCAAGAAGGGTTCA  
GAATGGGATTCTACGTAGTTTATGACTTTGGTGGTGGTACTTTTCGAT  
+  
FFFFF:FFFFFFFFFFFFFFFFFFFFFFFFFFFFFFFFFFFFFFFFFFFFFFFFFFFFFFFFFFFFFFFF  
FFFFFFFFFFFFFFFFFFFFFFFF:FFFFF:F:F:F,F:FF:FFFFF:FFF  
@A00721:190:HGJW7DSXY:4:2214:16622:30686\_2:N:0:TCTGCAAG+GCTGCACT  
GTTACGGTAATTACTATAGTGTATTATTCTGGTGGTGATGATAATCTTGGAGGTCGTGACGTTGAT  
GAAGCTATAAGAGCGTTCTTATTACGGCGCACTTCTTTACCCGCCACC  
+  
FFFFFFFFF,FFFFFFFFFFFFFFFFFFFFFFFFFFFFFFFFFFFFFFFFFFFFFFFFFFFFFFFFFFFF  
FFFFFFFFFFFFFFFFFFFFFFFF:FFFFFFFFFFFFFFFF:FFFFFFFFF  
@A00721:190:HGJW7DSXY:4:2665:16206:14278\_2:N:0:TCTGCAAG+GCTGCACT  
GTTTCACAACTGAAGGAGGAGTTTCTGTACTGGAAAACCTCGTCAATACTTTTCAATAATATACG

$+$ 

@A00721:190:HGJW7DSXY:4:2605:21902:34914\_1:N:0:TCTGCAAG+GCTGCACT  
TACTATTATGAACAAAGTTATCAAAGATAGTGGCATTCAAGGCCAACTTACCCTGATTCCGGCCGGTG  
GTAGCTCATTTCTACCAGGGGCTATTACTCTTGCTGAAACAGCTATTAAGCTGTTGAGCGGGTAATT  
ACA

+

@A00721:190:HGJW7DSXY:4:1604:32181:23093\_1:N:0:TCTGCAAG+GCTGCACT  
ATCGCTGAAGGATGTGCACTCTTTTCTGCTACTTTAACGGAGCGTAGTGTACTCTTCGTCGATTGTAT  
CAACAGTAACATTACTTCTAATAAAGGTCTCTATCAAGCTCGTATTATCGTCGCTGCTGGATCTGCGT  
TAC

+

@A00721:190:HGJW7DSXY:4:1257:7193:4272\_2:N:0:TCTGCAAG+GCTGCACT  
GTAATTATGAAGACTGTGATTTATCTTTCACCTCTGGCCTTGATGAGGGTGTTTCTAATCGTAACATT  
AATAATTTCAATCTTCTTAAAAAGAAGATAGAGAGTCATACTTTGGGC

 $+$ 

@A00721:190:HGJW7DSXY:4:1344:10719:7874\_2:N:0:TCTGCAAG+GCTGCACT  
ATTAACAAGTTGTA CTATCAATGATTTATCGCTGGTTGTTATCTCGAAAAGTCTCTTATAAAAGG  
AACGTCAGTTATAACCCAAAGAGAAAATCTAAAATATTTACAAAATCT

+

@A00721:190:HGJW7DSXY:4:2676:9362:19398\_1:N:0:TCTGCAAG+GCTGCACT  
TTCAGACGTGTGCTCTTCCGATCTCTTACTTGGAACGAAGGCGACCTGTTCCGGGGTTTTTACGGGAT  
CCGGAATGTTCTGTCTATATTAGGTGAAGCGAAATACGATTTCAACGTCAACGTTACCGAGTTTCG  
TTT

+

@A00721:190:HGJW7DSXY:4:2477:20690:31031\_2:N:0:TCTGCAAG+GCTGCACT  
GCTGACTTTCGTCAATATGATTTGATCTGGTTGCTCAATTCTAAGCGTGTTCCGCTTAGTGCGAGGCC  
TCTCTTCTACGAGTATTGCTATTTATACGGTTACGAGAAGAAGGTTTCG

+

@A00721:190:HGJW7DSXY:4:1660:26829:4679\_1:N:0:TCTGCAAG+GCTGCACT  
CTTGATAAAGAACTTCATGAATTTTCAGAGGATGAAAAATTTTCTTCCTTGGATTTTAATATAAAGAA  
TCTTTACCAGGACTCCTACTACAGGAGGCAGTCTTCTGATCGTAAGAAGTTTATAAGGAACATATCCA  
TTT

+

[illegible]





+

@

+

@

+

@

+

@

+

@

+

@

+

@

+



@A00721:190:HGJW7DSXY:4:2273:17183:27743\_2:N:0:TCTGCAAG+GCTGCACT  
TGACCAGAATGAAAAGGGGTTTACCAGGGTAGTCTCTAAGTCTACCAGGAAGAGGGGAAATGTCCCA  
AAACTGAGAAGAATAAAGGGAAAGGTCCATCAGGACCTAAGAAGGGGA

+

FFFFFFFFFFFFFFFFFFFFFFFFFFFFFFFFFFFFFFFFFFFFFFFFFFFFFFFFFFFFFFFFFFFFFFFF  
FFFFFFFFFFFFFF:FFFFFFFFFFFFFFFFFFFFFFFFFFFFFFFFFFFFFFFFFFFFFFFF

@A00721:190:HGJW7DSXY:4:1326:20537:2675\_1:N:0:TCTGCAAG+GCTGCACT  
CTCCCACCATCTGGGGTTGGGAATAAGAAATCTGCACGGGCCAAAGAGGCCGCTGCTACGAAGTCGCT  
GAAGCGGCTTGGGTCAATTAAGGGTAGCTGTAAAGTTGCGCTGCCGACCCCATCTTTGAGACCAAGA  
CTC

+

FFFFF:FFFFFFFFFFFF,FFFFFFFF:F:FFFFFFFFFFFFFFFFFFFFFFFF:FFFFFFFFFFFFFFFFFFFF  
FFFFFFFFFFFFFFFFFFFFFFFFFFFFFFFFFFFFFFFFFFFFFFFFFFFFFFFFFFFFFFFFFFFFFFFF  
FFF

@A00721:190:HGJW7DSXY:4:1530:3007:16031\_2:N:0:TCTGCAAG+GCTGCACT  
CAAATCTGTTGAATTCGTCACTGAGGACGAAGGTGAGAGGACTTTTGGCTACTGGCGACAACTGAGA  
GCAGTCGCTGGGGAAAGAGAAATGCGTGGGTGAAGGCCGACGCTTCG

+

,FFF,FF,,,,FF:F,FF:F:FFF,FF,,FF,F::F,F,FFFFFFFF::,FF,F,,:FF,FFFF,FFF  
:,F,,F,FF,:FF,F:,F:::,F:FF,FFF,FF,FF::FF,F,

@A00721:190:HGJW7DSXY:4:1434:9842:16564\_2:N:0:TCTGCAAG+GCTGCACT  
GACGTTTTTGTCAACGGCGTTTGGAGGATTTATCCGCGCTTAAGTATGGGGCGAAGATCCCCTATGG  
AGTCTTGAAGGACTTAGGTTGGCATATTTATGCCGACGATAATAAGCA

+

FFFFFFF:FFFFFFFFFFFFFFFFFFFFFFFFFFFFFFFFFFFFFFFFFFFFFFFFFFFFFFFFFFFFFFFF  
FFFFFFFFFFFF:FFFFFF:FFFFFFFFFFFFFFFF:FF:FFFFF,FFF,F

@A00721:190:HGJW7DSXY:4:1354:29017:10097\_1:N:0:TCTGCAAG+GCTGCACT  
AAGCACCGAGGTAAGCTCGGGACTTACAAGAGAGAGTGTGAGAGAGTCGCTCTCACTATTTTTGCCCA  
GAATGCGGGCTTTCTGACTGATGAGGTTAAACTCTTGCTCCTTCTGTGGGTGAGGGTTTTTGTATA  
TTC

+

FFFFFFFFFFFFFFFFFFFFFFFFFFFFFFFFFFFFFFFFFFFFFFFFFFFFFFFFFFFFFFFF:FFFFFFF  
FFFFFFFFFFFFFFFFFFFFFFFFFFFFFFFFFFFFFFFFFFFFFFFFFFFFFFFFFFFFFFFFFFFF,F  
FFF

@A00721:190:HGJW7DSXY:4:2615:27679:35336\_1:N:0:TCTGCAAG+GCTGCACT  
TTAGAGAGCATTAGAAGGAAGTTGGGCAAATCCACATATGGTAGACGTTGTCACACTTTTCTTGAA  
AATTTTCTTTCTCCGTCATTGGGGATTCGATGTGAGAAGGTGGAAGGTGTCAAGGGCTTCTTC  
ATG

+

F::FFFF::FFFFFFFF:FFFFFFFFF::F,F,F:,FF::FFFFF:FFFF::,FFFFFF:F:F  
,FF::FFFFFFFF:FFFFFFFF:F:FFFFFFFFFFFF::FFFFFFFFFFFFFFFFFFFF:FFFF:  
FFF

@A00721:190:HGJW7DSXY:4:2240:19922:28948\_1:N:0:TCTGCAAG+GCTGCACT  
TTCAGACGTGTGCTCTTCCGATCTCGGCTCGTATCGAGTTGGAGGGAGGAAGTTCTCCGAAATTAAAG  
ACGGGGGGATTAAGAGTCCAGCTGTAAGTGTCAATTCAGAGAGGGGAGCTCTGAAAAGGAACTTCGT  
CAG

+

FF:FFFFFFFFFFFFFFFF:FFFFFFFFFFFFFFFFFFFFFFFF:FFFFFFFFFFFFFFFFFFFF:F  
FFFF:FFFFFFFFF::FFFFFFFFFFFFFFFFFFFFFFFF:FFFFFFFFFFFFFFFFFFFFF:  
FFF

@A00721:190:HGJW7DSXY:4:1477:27624:17487\_2:N:0:TCTGCAAG+GCTGCACT  
GAGGAGGAGTTTGAAGGAGGCTCTAGAGAAGATCTCACCACTGGAGAAGGCAAGTGGAGAGTCCAGA  
AGTTGATGAAGAAGGATTATTTGAAGCAGGGGTTACCACTTCCTAAGG

+

@A00721:190:HGJW7DSXY:4:1135:28583:34867\_1:N:0:TCTGCAAG+GCTGCACT  
TTTGAGAAGGGGTCATAGAGCCAGCAAGAGAAGCTTATATGCTGGTTTAAGTGATGATTATCACTCCT  
TGAGAAGACAAGCCACATTAAGATATAATTTAGGTCAACTTGGGGTTTCGAATGTCATTAGTGCCTTA  
CG

@A00721:190:HGJW7DSXY:4:1335:6271:8093\_1:N:0:TCTGCAAG+GCTGCACT  
GACTGGAGTTCAGACGTGTGCTCTTCCGATCTATTTAACTGGGCAGAATTCGGTAACTTACCATATTG  
TTCCTTCCGGGAAGTTGTGGGATTTAACTTTGACTCAACTACTCCGATCAGATCCGGATGGTTTGATT  
GGT

@A00721:190:HGJW7DSXY:4:2511:20817:28808\_1:N:0:TCTGCAAG+GCTGCACT  
ATGGCAGATACTACCGATAAGGTGAAAAATATGCAGGTCAAAGATTCTGTAGCTCTGAGGGCGGTTGA  
GGGAGCCGTTTTGGCCGACTTTAACTATTCTAAGAGTCTTTATGATTCAAAACCTATCGTTGTCGTAC  
CTT

@A00721:190:HGJW7DSXY:4:1312:27163:2065\_1:N:0:TCTGCAAG+GCTGCACT  
GTTTCCAGAATTGCGGTTGAAGTTCACCCATTCTATCTTGAATGCTCACGCCGTCGCAGCCATATCGA  
GACTATGTTATAATCACTTGTTAAAGTACAGATTTAGTGATTTAGATATTATTGATATTGGAGGCGAT  
ATT

@A00721:190:HGJW7DSXY:4:2460:10755:35994\_2:N:0:TCTGCAAG+GCTGCACT  
AAACTCCTTGAATGGAGTACATATTTGCAACCCTATTCTTGATGTGAAAGATGCATCGAGGTATACGT  
CTAGGAACATTGATTGGGAACGTACCTACTCACGAGACGTCATGAAAG

@A00721:190:HGJW7DSXY:4:2138:11586:6057\_1:N:0:TCTGCAAG+GCTGCACT  
TTCGTTCTGTTACAAGAACGCTTTGGATTGTGACCATAAAGCCTCAGTTGCGATAGCTGTAGAGGTAT  
ACGATATCTCTCTTGATGATGTAGCCACTATAATGCTTAAGAGAGAGATTGATGTATGTCATTTGCTC  
TTA

@A00721:190:HGJW7DSXY:4:2338:11171:12258\_1:N:0:TCTGCAAG+GCTGCACT  
TATTGGACACGATGAAAAATGACATACCCGTTCTGACCTTGGTATCGTTATCCGTCATGGAGATGAT  
GGCGCATCACTTGATTACTATATGCCCAGGATTGGGTATTCTCACAACAAAGATAAGATTTTATC  
TTT

.....





GAAAAGAAAGTTCATGAGGATGTCTTGGTCGAAAAATATCGCCGGGAA  
+  
FFFFFFFFFFFFFFFFFFFFFFFFFFFFFFFFFFFFFFFFFFFFFFFFFFFFFFFFFFFFFFFFFFFFFFFF  
FFFFFFFF:FFFFFFFFFFFFFFFFFFFFFFFFFFFFFFFFFFFFFFFFFFFFFFFFFFFFFFFF  
@A00721:190:HGJW7DSXY:4:2413:20537:22780\_1:N:0:TCTGCAAG+GCTGCACT  
GGATCCTGATGACATTATTTCAACGGATACCGATCTCAGTTCTACCACAGAAACCGTCTCAGGAAGT  
TCTCCACTGATTCGGAATTAGAGAAAGACGACCTTCTTGTGGGGACTGAGACCTCTGAATTTTCAGGG  
TGC  
+  
FFFFF::FFFF:FFFFFFFFFFFFFFFF,FFFF:FFFF,FFFFFFFF:FFFFFFFF:,::FFFF,FFFF:  
FFFF:FFFF:F:FFFFFFFFFFFFFFFFFFFFFFFFFFFFFFFFFFFFFFFFFFFFFFFFFFFFFFFF  
F:,  
@A00721:190:HGJW7DSXY:4:2224:28800:20306\_2:N:0:TCTGCAAG+GCTGCACT  
TTGAAAGGGATAATTTCAACTCTGAGACTTCTAAGAGTGTTCAAAAGACCAGAAACGTAACAAGAAG  
AATAAAGGTAGGAAGGGGAGAAAACAGAACAAAGCGAGCGGTTGAAGAG  
+  
,FFFFFFFF:FFF:FFFFFFFFFFFFFFFF,FF:FFF:FFFFFFFF,FFFFFF:FFFFFF:  
FF,F:FFFF:F,FFFFFFFF,FFF::FFF,:F,FFFF,FFF:FF  
@A00721:190:HGJW7DSXY:4:2134:16297:29089\_2:N:0:TCTGCAAG+GCTGCACT  
TGGTTGCGGCTGATCGTACCCAATTCCTGCTAGAAAGATCACTCTCGGCGATACCACTGATCTTCCA  
GAGTTACGTAGTGGTCGTTCTTTGGTGATTTTATCAAAGAGAAAGTT  
+  
FFFFFFFFFFFFFFFFFFFFFFFFFFFFFFFFFFFFFFFFFFFFFFFFFFFFFFFFFFFFFFFFFFFFFFFF:  
FFFFFFFFFFFFFFFFFFFFFFFFFFFFFFFFFFFFFFFFFFFFFFFFFFFFFFFFFFFFFFFF  
@A00721:190:HGJW7DSXY:4:1409:14705:34381\_2:N:0:TCTGCAAG+GCTGCACT  
AAAAGCTATTAATAGCAGTTGCGGGGCTATAATACCGCCTCCAGATTACTCTAAACTGAATCCACTCT  
CTTGGGATATAAATGAGTACATCTATAATAGAGTTTTGGAAGTGTGTA  
+  
FFFFFFFFFFFFFFFFFFFFFFFFFFFFFFFFFFFFFFFFFFFFFFFFFFFFFFFFFFFFFFFFFFFFFFFF  
F::FFFFFFFFFFFFFFFFFFFFFFFFFFFFFFFFFFFFFFFFFFFFFFFFFFFFFFFF  
@A00721:190:HGJW7DSXY:4:1371:26178:15076\_2:N:0:TCTGCAAG+GCTGCACT  
TCGATTGATTTTGTGACTACGATCTCTTGTATAAGAAGTTCTTCGAGTTGAATCTCCACCAGG  
TGGAGGGAAGACTACTGAACTTATAGCGACTTTTGTGCAATTTTTCGC  
+  
FFFFFFF:FFFFFFFFFFFFFFFFFFFFFFFFFFFFFFFF:FF:FFFF:FFFFFFFF:F,F:FFFF  
,FFFFFF:FFF:FFFFFFFF:FFFFFFFFFFFFFFFFFFFFFFFF:  
@A00721:190:HGJW7DSXY:4:2312:32344:1924\_2:N:0:TCTGCAAG+GCTGCACT  
ATTGTCAGTAAATCGTAATTCGCGAGAAGAGATAGTGAAGTTTGGCACTTCTAGTTCATCG  
CGGTATTTGTGAATTAAGACAGACGTGAAAGTTATGATGAGTGATCG  
+  
FFFFFFFFFFFFFFFFFFFFFFFF:FFFFFFFFFFFFFFFF:FFFFFFFF:FFFFFFFFFFFFFFFF  
FFFFFFFFFFFFFFFF:FFFFFFFFFFFF:,FFFFFFFFF,FFFFFF  
@A00721:190:HGJW7DSXY:4:2502:19623:33724\_1:N:0:TCTGCAAG+GCTGCACT  
TATTTTCATCGACTAATTATTCATGATTCACGCTGGTCAGACCCTTTTCTTACACATCTACTTAAGG  
CGGCTTATAACAATAGGTTACGGTTATTCCAATCAAATCGTTTTCATCAATCGTATTGATCTCCAAGTC  
GCA  
+  
F,FFFF,FF::,,FFF:FF,,F,,F:FF:F::,FF,FFFF,,FFFF,FFF,F,FF,FF,FFF:FF  
FFF,FFFF,,:F,F,FF::,F,:F,:FFF,FFFF:F,,FF,FFFF:F,,F,FF:FF::,F,,F:  
F:F  
@A00721:190:HGJW7DSXY:4:1224:14145:27398\_1:N:0:TCTGCAAG+GCTGCACT  
ATCAACGACATCATTCTTGATGAGTGTCGTTCTTATCGAAGTCTCAGTTATCGCTGCCCGGCCGACGT  
TTGTGCGGAAGTCTCAGAGGTTTACGGCAGAAAAATTTCTCCTGCTTGTAAATTCGAGAGAGGACACTA  
TGG

```
+
:FF:FFFFFFFFFFFFFFFFFFFFFFFFFFFFFFFFFFFFFFFFFFFFFFFFFFFFFFFFFFFFF
FFFFFFFFFFFFFFFFFFFFFFFFFFFFFFFFFFFFFFFFFFFFFFFFFFFFFFFFFFFFFFFFF
FFF
@A00721:190:HGJW7DSXY:4:1631:4761:14184_1:N:0:TCTGCAAG+GCTGCACT
TAAGAGTAAAGTTAAATGTGAAGATGCTCAGACTATTTCATGAAGTTCAAGGTAATACTTACCAGCACG
TTCGGCTGGTTAGAATTAACCTCAAGATGACCCTGTTTTTGCATCACAAACACATATTACCGTTGCT
CTA
+
FFFFFFFFFFFF:FF:FFFFFFFFFFFFFFFFFFFFFFFFFFFFFFFFFFFFFFFFFFFFFFFFFFFFF
FFFFFFFFFFFFFFFFFFFFFFFFFFFFFFFFFFFFFFFFFFFFFFFFFFFFFFFFFFFFFFFFFFFFF
FFF
@A00721:190:HGJW7DSXY:4:1305:29396:9251_1:N:0:TCTGCAAG+GCTGCACT
TTATCAATGTAAAGTTAAACGATGCTACTTGTGAGAGGATCAATCACAGTAAGGAAGTGTACGTTTA
GCACGGGAGGTTGCAGATTCAACCCCTTATATCGAGGCTATCGAGGACGATGAGTATCTTGAAGTTGT
TG
+
FFFFFFFFFFFFFFFFFFFFFFFFFFFFFFFFFFFFFFFFFFFFFFFFFFFFFFFFFFFFFFFFFFFFF
FFFFFFFFFFFFFFFFFFFFFFFFFFFFFFFFFFFFFFFFFFFFFFFFFFFFFFFFFFFFFFFFFFFFF
FF
@A00721:190:HGJW7DSXY:4:1454:32334:32189_2:N:0:TCTGCAAG+GCTGCACT
AGAGGACCACCTGGATCTTCTACTGTCTCTGCCTCCAAGATTTCTTAGAAGAGGTTATTCCTGGAAC
CACCTTAACGTCACCTCGGTAATCTTTCAGCCGAATTAAGTACTAATGA
+
FFFFFFFFFFFFFFFFFFFFFFFFFFFFFFFFFFFFFFFFFFFFFFFFFFFFFFFFFFFFFFFFFFFFF
FFFFF:FFF:FFFFFFFFFFFFFFFFFFFFFFF:FF:FFFFFFF:FFFFF
@A00721:190:HGJW7DSXY:4:2648:23710:1438_2:N:0:TCTGCAAG+GCTGCACT
TCGAATTAAGATCAAGGCTAATACCTTTATAGGTAAGAAGCCCCTTGAGCCGCGTAGTCAGCGCGTTT
AGCTGTATCATCAGTCAGAGTATACCCGATAGGGTACCGAGTCTCCAA
+
FFFFFFFFFFFF:FFFFFF:FFFF:FFFFFFFFFFFFFFFFFFFFF:FF:FFFFFF:FFFFFFFFFFFF:FFFF:FF
F:FFFFFF,FFF,:FF:FFFFFFFFFFFF:FFFFFFF,FFFFF:FFFFFFF
@A00721:190:HGJW7DSXY:4:1338:8467:20259_1:N:0:TCTGCAAG+GCTGCACT
TTCCGATCTGTTTTGATCAGTCTAAGTTGGATAAAGTTATAGGAGACTCAGTTAACCTGAGAGCTCCT
CAATTGATAGATTGGGTCAACAATAGGGACGCTAGTATACTTCGTAAAGTCGACAGCGAAATGGTCAA
TAT
+
:FFFFFFFFFFFFFFFFF:FFFFFFFFFFFFFFFFFFFFFFFFFFFFF:FFFFFFFFFFFFFFFFFFFFF
FFFFFFFFFFFFFFFFFFFFFFFFFFFFFFFFFFFFF:FFFFFFFFFFFFFFFFFFFFFFFFFFFFF
FFF
@A00721:190:HGJW7DSXY:4:2333:14832:10081_2:N:0:TCTGCAAG+GCTGCACT
AGCCTTTTCGAAGCATAACCCCGCACAGAATATCGTTTATCACGCAAAATTTATTAATGCAATTTTCG
GACCTATCTTTAAGGTTCTTGTGAGGAGAGTCAAACAGTGTCTTTTAC
+
FFFFFFFFFF,FFFFFFFFFFFFFFFFFFFFFFFFFFFFF,:FFFFFF,FFFFFFFFFFFFFFFFF,F:FFFFFF
FFFFFFFFFFFF,FFFFFFFFFFFF:FF:FFFFFF,FFFFFF,FFF:FF
@A00721:190:HGJW7DSXY:4:2143:31250:15248_2:N:0:TCTGCAAG+GCTGCACT
TCGATGCTGAATTTCTTGAAGTTTGGAGTGCCAGTGAATATTTTGTACGCCAGGAGTATCCATAAC
GATTTGTCAATTAACACCTTTGCTCAACGACGAAGTGGAACGGCCAAC
+
FFFFFFFFFFFFFFFFFFFFFFFFFFFFFFFFFFFFFFFFFFFFFFFFFFFFFFFFFFFFFFFFFFFFF
FFFFFFFFFFFFFFFFFFFF,:FF:FFFFFFFFFFFFFFFFFFFFF:F
@A00721:190:HGJW7DSXY:4:1138:27661:2206_2:N:0:TCTGCAAG+GCTGCACT
TATGATCACTTTGATGATTTTATCACTTTATTATGACCTTGGAAGTTTTCGGCTGTGGTTGTCGCTG
```



GGGACGATTCCATTCTGTTTTCAAAGACTCCAATAACTGATAGATCGG



[illegible]

```

FFFFFFFFFFFFFFFFFFFFFFFFFFFFFFFFFFFFFFFFFFFFFFFFFFFFFFFFFFFFFFFFFFFFFFFF:
FFF
@A00721:190:HGJW7DSXY:4:1661:4679:27195_2:N:0:TCTGCAAG+GCTGCACT
TTTTGAGAACTAACTATGTTATGTTCTCTGATCATTTTGACAATCTCTTCTTATAATAATAATAA
TAATATTACTAATGGCAAATAGTGGAAAGGCTCCAGTCAACACTAGTT
+
FFFFFFFFFFFFFFFFFFFFFFFFFFFFFFFFFFFFFFFFFFFFFFFFFFFFFFFFFFFFFFFFFFFFFFFF
FFFFFFFFFFFFFF:FFFF,F:FFFFFFFFFFFFFFFFFFFFFFFFFFFFFFFFFFFFFFFF
@A00721:190:HGJW7DSXY:4:1444:10664:29700_1:N:0:TCTGCAAG+GCTGCACT
AATAGGTGAAGGGATAGTTTTTACCTCGACCAACATTAAGGCGGCGGCGACTAATCTTAAAGCTTCAC
CCAAAATGAAGGACACTTCGAAACTGAATAATGATGCACTACAAACAAGTATCGCTAATCATCTGAAA
AAG
+
FFFF:FFFFFFFFFFFFFF:F,FFFFFFFFFFFFFFFFFFFFFFFFFFFFFFFFFFFFFFFFFFFFFFFF
FFF:FFFFFFFFFFFFFFFFFFFFFFFFFFFFFFFFFFFFFFFFFFFFFFFFFFFFFFFFFFFFFFFF
F:F
@A00721:190:HGJW7DSXY:4:2365:12472:28291_1:N:0:TCTGCAAG+GCTGCACT
TCTTAGAGGATATTCGCCATTGTGGTACGAATTGGTCCAACATTTACCACCAAATTCTTTTGATACAA
CTCTAGCCTTCAAGTGGGGTATGCCTGCGGAATACGCTTGCTATTCACCAGATTGGTTCGAACCCGTT
GAT
+
FFFFFFFFFFFFFF:FFFFFFFFFFFFFFFFFFFFFFFFFFFFFFFFFFFFFFFFFFFFFFFFFFFFFFFF
FFFFFFFFFFFFFFFFFFFFFFFFFFFFFFFFFFFFFFFFFFFFFFFFFFFFFFFFFFFFFFFFFFFFFFFF
FFF
@A00721:190:HGJW7DSXY:4:1128:1570:21183_1:N:0:TCTGCAAG+GCTGCACT
TGCTATTCAAGCTTGTCGTTTAAAGACTGCAGAGGCTGTCAAACAAGCCAGACTCAAGGAGTCCAAT
CAAAGGTTTTGAATTTAGCTCAACTGGGGAGACGTGCTTAAATGGGTGATAAAAATTATTAGAGATC
TTT
+
FFFFFFFFFF:FF:FFFFFFFFFFFFFFFFFFFFFFFFFFFFFFFFFFFFFFFFFFFFFFFFFFFFFFFF
FFF:FFFFFFFFFFFFFFFFFFFFFFFFFFFFFFFFFFFFFFFFFFFFFFFFFFFFFFFFFFFFFFFF
FFF
@A00721:190:HGJW7DSXY:4:2610:3260:6198_2:N:0:TCTGCAAG+GCTGCACT
GTATATTGTATGTTAATAGATAGTGGGATAATAGTTCTACCGATACGTAGTGAACGCGTTCGTAGAAC
CAAGTACTTTCGCTCTGAAGAGTTTAGAGAGATCGGAAGAGCGTCGTG
+
FFFFFFFFFFFFFFFFFFFFFFFFFFFFFFFFFFFFFFFFFFFFFFFFFFFFFFFFFFFFFFFFFFFFFF:FFFFFFFF
FFFFFFFFFFFFFFFFFFFFFFFFFFFFFFFFFFFFFFFFFFFFFFFFFFFFFFFFFFFFFFFF
@A00721:190:HGJW7DSXY:4:2321:10764:21731_2:N:0:TCTGCAAG+GCTGCACT
GCTTTAGACGATAATCCTTTAAGGACTATGTTGACTGACGAAGATTTTCCACAGATTTGTCTACGTT
GCAGATCGCCACTCCAAACACTATATACATTATAAAAATATAAAAATAA
+
FFFFFFFFFFFFFF:FFFFFFFFFFFFFFFFFFFFFFFFFFFFFFFFFFFFFFFFFFFFFFFFFFFFFFFF
FFFFFFFFF:FFFFFFFFFFFFFFFFFFFFFFFFFFFFFFFFFFFFFFFFFFFFFFFF
@A00721:190:HGJW7DSXY:4:1422:4906:30311_1:N:0:TCTGCAAG+GCTGCACT
CTTTTGTTACCAAATTCTTGGCTTCAACGAAGTCTCTGATTTTATTAATCATTACTTTAACGATCTC
TCGGTCATTTACTCTGTACTTGATCTACGTCGTTTAACTGTCGGAACAACCTTTACTTAGAATGACTC
TAT
+
FFFFFFFFFFFFFFFFFFFFFF:FFFFFFFFFFFFFFFFFFFFFFFFFFFFFFFFFFFFFFFFFFFFFFFF
FFFFFFFFFFFFFFFFFFFFFFFFFFFFFFFFFFFFFFFFFFFFFFFFFFFFFFFFFFFFFFFF:FFFFFFFF
FFF
@A00721:190:HGJW7DSXY:4:2562:26250:4085_1:N:0:TCTGCAAG+GCTGCACT
AATACTCACTATCGTTTTCTGCTTTTTCTTAGCTAATAGATTAATAAAGGATGAGTACGAAAACCAAC

```

TCTTCGTTACGAGACCTGATGGTAGAATAGATTTAGTCTCTACACCCATCTCAACGAGGATAAAGCGA  
GTT

+

FFFFFFFFFFFFFFFFFFFFFFFFFFFFFFFFFFFFFFFFFFFFFFFFFFFFFFFFFFFFFFFFFFFFFFFF  
FFFFFFFFFFFFFFFFFFFFFFFFFFFFFFFFFFFFFFFFFFFFFFFFFFFFFFFFFFFFFFFFFFFFFFFF  
FFF

@A00721:190:HGJW7DSXY:4:2265:13648:3583\_1:N:0:TCTGCAAG+GCTGCACT  
CGAAGAGATCATCCGCAAACGACTCGAAACCGAGACGCCGTAGATCAAAGTCCCTTCTAACTTTAGAT  
TATGAATCCTGCCTTTACTCATTTTATAGCAGTTATTTATGTTGTACTTTTATAATTTATAACCTT

+

: , F , , : , FF , F , F , , FF , FFFFFFFFFFFFFFFFFFFFFFFFFFFFFFFFFFFFFFFF  
FFFFFFFFFFFFFFFFFFFFFFFFFFFFFFFFFFFFFFFFFFFFFFFFFFFFFFFFFFFFFFFFFFFFFFFF

@A00721:190:HGJW7DSXY:4:2650:1588:14011\_2:N:0:TCTGCAAG+GCTGCACT  
ATGCTTTTCGATAGTGATTGTTATCAATTTAAATACATTACTGTTTCAAATCATCTTTACTCACAGAC  
TCCGAAAATGTTTCAAATGAGGTCAAAGCTCTATTTATTAAACGAAC

+

FF , F : : FFFFFFFF : F : : FFFF : FFFFFFFF : FFFFFFFF : FFFFFFFF , FFF : : FFF , FFF , FF : FFFF  
 , F : : FFFF : : , FF , FFFFFFFF : : FFFF , , FFFFFFFF , FF : FFFF

@A00721:190:HGJW7DSXY:4:2371:1669:34569\_1:N:0:TCTGCAAG+GCTGCACT  
GACTTTAGTCAAGGAACTTCAATTCCTTCGATGTTTATATTTTCTATAAGGGAAAATAGCAATAATC  
AAATTTGACAAATTTTAGAACTTTATTTGAGAACTCTCTCCGATCACCTTGGTGTGATCTCCCGGAG  
GAT

+

FFFFFFFF : FFFFFFFFFFFFFFFFFFFFFFFFFF : FFFF : FFFFFFFFFFFFFFFFFFFFFFFFFF  
FFFFFFFFFFFFFFFFFFFFFFFFFFFFFFFF : FFFFFFFFFFFFFFFFFFFFFFFFFFFFFFFFFF  
FFF

@A00721:190:HGJW7DSXY:4:2512:19208:11553\_2:N:0:TCTGCAAG+GCTGCACT  
ATTTTTAAATAGTGATATTCAGCGTATACTTGAATACTTTATCAAAGATTTGGCTTGGTCTATTTACC  
GCAAAAAGTTGGAAGAGGTCTATGATATTTATTTTACTTATACTTTAA

+

FFF : FFFFFFFFFFFFFFFFFF , FFFFFFFFFFFFFFFFFFFFFFFFFFFFFFFFFF  
FFFFFFFFFFFFFFFF : FFFFFFFFFFFFFFFFFFFFFFFFFF :

@A00721:190:HGJW7DSXY:4:2434:15628:32597\_1:N:0:TCTGCAAG+GCTGCACT  
AACTTGACTGTTGATAATATTACAATAGCTCTTTCTCAGAAGATTAGAGAAGTAACCGGTGAACACGT  
CGGTAGCATTGATTTACTTTTACCGTTAGAACTGAAAAAGATTCTTTTCGAAAAGAAACCTATAAGTT  
ACA

+

F : : FF , FFF , FF , FFFFFFFF : F , FF , FF , FFFF : F : FF , FFFFF , FFFFFFF : F : FFFF , FFFF  
 FFFF : : , FF : : FFFF : FFFFFFFF : FFFFFFFF , FFFFFFFF : FFFF , FFFFFFFFFFFFFFFFFF  
 FFF

@A00721:190:HGJW7DSXY:4:1547:24623:25911\_2:N:0:TCTGCAAG+GCTGCACT  
TAAAGAAATAAAAATACTTCAAGTACCTGAACCTTACATTTTAAATGGTATGGTATAATGTGTCTTAC  
AAATAGAACCTTCACTCTCGGTAATGAGAGTGTATTCTTAATATTCT

+

FFFFFFFFFFFFFFFFFFFFFFFFFFFFFFFFFFFFFFFFFFFFFFFFFFFFFFFFFFFFFFFFFFFF  
FF : FFFFFFFFFFFFFFFFFFFFFFFFFFFFFFFFFF

@A00721:190:HGJW7DSXY:4:1534:6497:18850\_2:N:0:TCTGCAAG+GCTGCACT  
TTACTAGGATTTATCACACTCCTAAATTTGATAGCAATTTATGTTTTAAATGCTAGGAAAATTTTAGA  
AAAACCTCATTGTATAGTTCAAGGAGTACTTAATTCAATAGCTTTAGT

+

FFFFFFFFFFFFFFFFFFFFFFFF : FFFFFFFFFFFFFFFFFF : FFFFFFFFFFFFFFFFFF  
 FFFFFFFF : FFFFFFFFFFFFFFFFFF

@A00721:190:HGJW7DSXY:4:1255:27308:22670\_2:N:0:TCTGCAAG+GCTGCACT  
TTTATTGAAAATTGTATAAGAGTTAATTGCTTACACAAAAGTGACGCGGAAGGAATCTTAATTGATT

+

@A00721:190:HGJW7DSXY:4:2371:1416:35571\_2:N:0:TCTGCAAG+GCTGCACT  
ATGACCAATCATCGCTCCAACTGGCACGCCAGACGTAGGGTCAAACCTACTACCGCCGGTCGGCAGAT  
CGGCACCACTGGTCTCTACGTTACAGGGACCCGCTGTGCAGAATAACCT

+

@A00721:190:HGJW7DSXY:4:1543:8223:30201\_1:N:0:TCTGCAAG+GCTGCACT  
GGACGACCACTCAAAGGAAACGGGCTGTTGCCAGAGGAAAGCAGCGACCACCGAGGTCGCTCGTAAC  
ATTGACGGCAGTCCCGTCATCTCTGTGGGAACTGAGGCAGTACCTCAGTCAAAGTCACATTACCAC  
TCC

+

@A00721:190:HGJW7DSXY:4:2468:16278:32847\_2:N:0:TCTGCAAG+GCTGCACT  
TGTGACTATACAGTTTCGCCATTTCAAGAGTGGTCAATACGTCGTGGGAGGTACTGAAGCCTTCCCT  
CCGCTGGCACGAAGAACACTCCCAAGCCAATCAATAGTTCTTCTGACC

+

@A00721:190:HGJW7DSXY:4:2476:17002:3129\_2:N:0:TCTGCAAG+GCTGCACT  
AGGGTAGTCTCTAAGTCTACCAGGAAGAGGGGAAATGTCCCCAAACTGAGAAGAATAAAGGGAAAGG  
TCCATCAGGACCTAAGAAGGGGAAATTACCCCTAATTCTGAAGGAAGA

+

@A00721:190:HGJW7DSXY:4:1562:9453:20494\_2:N:0:TCTGCAAG+GCTGCACT  
GGGGTTGGGAATAAGAAATCTGCACGGGCCAAAGAGGCCGCTGCTACGAAGTCGCTGAAGGCGGCTTG  
GGTCATTAAGGGTAGCTGTAAAGTTGCGCCTGCCGACCCCATCTTTGA

 $+$ 

@A00721:190:HGJW7DSXY:4:2330:30734:11162\_1:N:0:TCTGCAAG+GCTGCACT  
CTTGCAGAGTGACTGGAGTTCAGACGTGTGCTCTTCCGATCTCGTCACTGAGGACGAAGGTGAGAGGA  
CTTTTGGCTACTGGCGACAACTGAGAGCAGTCGCTGGGGAAAGAGAATTGCGTGGGTTGAAGGCCGA  
CGC

+

@A00721:190:HGJW7DSXY:4:2605:8052:34350\_2:N:0:TCTGCAAG+GCTGCACT  
GACGTTTTTGTCAACGGCGTTTGGAGGATTTTATCCGCGCTTA ACTATGGGGCGAAGATCCCCTATGG  
AGTCTTGAAGGACTTAGGTTGGCATATTTATGCCGACGATAATAAGCA

+

@A00721:190:HGJW7DSXY:4:1546:18114:14137\_1:N:0:TCTGCAAG+GCTGCACT  
AAGCACCGAGGTAAGCTCGGGACTTACAAGAGAGAGTGTGAGAGAGTCGCTCTCACTATTTTTGCCCCA  
GAATGCGGGCTTTCTGACTGATGAGGTTAAACTCTTGCTCCTTCTGTGGGTGAGGGTTTTTGTTATA  
TTC

+  
FFFFFFFFFFFF:FFFFFFFFFFFF:FFFFFFFFFFFFFFFFFFFFFFFFFFFFFFFFFFFFFFFFFFFFFFFF  
FFFFFFFFFFFFFFFFFFFFFFFFFFFFFFFFFFFFFFFFFFFFFFFFFFFFFFFFFFFFFFFFFFFFFFFFFFFF:FFFFFFFFFFFFFFFFFFFFFFFF  
FFF  
@A00721:190:HGJW7DSXY:4:2618:8630:33285\_1:N:0:TCTGCAAG+GCTGCACT  
TTAGAGAGCATTAGAAGGAAGTTGGGCAAATTCACATATGGTAGACGTTGTCACACTTTTCTTGAA  
AATTTTTCCTTCTCCGTCATTGGGGATTTCGATGTGAGAAGGTGGAAGGTGTCAAGGGTCTTCTTC  
ATG  
+  
FFFFFFF:FFFFF:FF:FFF::FFF,FFFFFFFF:FFFFFFFF:FFFFFFFFFFFFFFFFFFFFFFFFFFFF  
FFFFFFFF:FFFFFFFFFFFF:FFFFFFFFFFFFFFFFFFFFFFFFFFFFFFFFFFFFFFFFFFFFFFFFFFFF  
FFF  
@A00721:190:HGJW7DSXY:4:2240:21142:29089\_1:N:0:TCTGCAAG+GCTGCACT  
TTCAGACGTGTGCTCTTCCGATCTCGGCTCGTATCGAGTTGGAGGGAGGAAGTTCTCCGAAATTAAAG  
ACGGGGGGATTAAAGAGTCCAGCTGTAAGTGTCACTTTCAGAGAGGGGAGCTCTGAAAAGGAACTTCGT  
CAG  
+  
FFFFFFF:FFFFFFFFFFFFFFFFFFFFFFFFFFFFFFFFFFFFFFFFFFFFFFFFFFFFFFFFFFFFFFFFFFFF  
FFFFFFFFFFFFFFFF:FFFFFFFFFFFFFFFFFFFFFFFFFFFFFFFFFFFFFFFFFFFFFFFFFFFFFFFFFFFF  
FFF  
@A00721:190:HGJW7DSXY:4:1514:5647:18129\_2:N:0:TCTGCAAG+GCTGCACT  
GAGGAGGAGTTTGAGGAAGGCTCTAGAGAAGATCTCACCACTGGAGAAGGCAAGTGGAGAGTCCAGA  
AGTTGATGAAGAAGGATTATTTGAAGCAGGGGTTACCACTTCCTAAGG  
+  
FFFFFFFFFFFFFFFFFFFFFFFFFFFFFFFFFFFFFFFFFFFFFFFFFFFFFFFFFFFFFFFFFFFFFFFFFFFF  
FFFFFFFFFFFFFFFFFFFFFFFFFFFFFFFFFFFFFFFFFFFFFFFFFFFFFFFFFFFFFFFFFFFF  
@A00721:190:HGJW7DSXY:4:2216:28510:28134\_1:N:0:TCTGCAAG+GCTGCACT  
TTTGAGAAGGGGTCATAGAGCCAGCAAGAGAAGCTTATATGCTGGTTTAAGTGATGATTATCACTCCT  
TGAGAAGACAAGCCACATTAAGATATAATTTAGGTCAACTTGGGGTTTGAATGTCATTAGTGCCTTA  
CG  
+  
FFFFFFFFFFFFFFFFFFFFFFFFFFFF,FFFFFFFFFFFFFFFFFFFFFFFFFFFFFFFFFFFFFFFFFFFF  
FFFFFFFFFFFFFFFFFFFFFFFFFFFFFFFFFFFFFFFFFFFFFFFFFFFFFFFFFFFFFFFFFFFFFFFFFFFF  
FF  
@A00721:190:HGJW7DSXY:4:1507:13883:27132\_1:N:0:TCTGCAAG+GCTGCACT  
GACTGGAGTTTCAGACGTGTGCTCTTCCGATCTATTTAACGTGGCAGAATTCGGTAACCTACCATATTG  
TTCCTTCCGGGAAGTTGTGGGATTAACTTTGACTCAACTACTCCGATCAGATCCGGATGGTTTGATT  
GGT  
+  
FFFFFFFFFFFFFFFFFFFFFFFFFFFFFFFFFFFFFFFFFFFF::,FFF,FFFFFFFFFFFFFFFFFFFFFFFFFFFF:FFF  
:FFFFFFFFFFFFFFFFFFFFFFFFFFFFFFFFFFFFFFFFFFFFFFFFFFFFFFFFFFFFFFFFFFFFFFFFFFFF  
FFF  
@A00721:190:HGJW7DSXY:4:2555:23963:1595\_1:N:0:TCTGCAAG+GCTGCACT  
ATGGCAGATACTACCGATAAGGTGAAAAATATGCAGGTCAAAGATTCTGTAGCTCTGAGGGCGGTTGA  
GGGAGCCGTTTTGGCCGACTTTAACTATTCTAAGAGTCTTTATGATTCAAAACCTATCGTTGTCGTAC  
CTT  
+  
FFF:,FFFF,FFFFFFF:F:FFFFFFFFFFFF:FFFF,FFFFFFFFFFFFFFFFFFFF:FF:FFF:FFFFFF  
F:FFFFFFFFF:FF:FFFFFFFFFFFFFFFFFFFF:FFF:FFFFFFF:FF:FFFFFFFFFFFFFFFFFFFF  
FFF  
@A00721:190:HGJW7DSXY:4:1606:20835:27586\_1:N:0:TCTGCAAG+GCTGCACT  
GTTTCCAGAATTGCGGTTGAAGTTCACCCATTCTATCTTGAATGCTCACGCCGTGCGAGCCATATCGA  
GACTATGTTATAATCACTTGTTAAAGTACAGATTTAGTGATTAGATATTATTGATATTGGAGGCGAT  
ATT

F:FFFFFFFFFFFFFFFFFFFFFFFFFFFFFFFFFFFFFFFFFFFFFFFFFFFFFFFFFFFF  
FFFFFFFFFFFFFFFFFFFFFFFFFFFFFFFFFFFFFFFFFFFFFFFFFFFFFFFFFFFF  
FFF  
@A00721:190:HGJW7DSXY:4:2460:9697:36730\_2:N:0:TCTGCAAG+GCTGCACT  
AAACTCCTTGAATGGAGTACATATTTGCAACCCTATTCTTGATGTGAAAGATGCATCGAGGTATACGT  
CTAGGAACATTGATTGGGAACGTACCTACTCACGAGACGTCATGAAAG  
+  
FFFFFFFFFFFFFFFFFFFFFFFFFFFFFFFFFFFFFFFFFFFFFFFFFFFFFFFFFFFF  
FFFFFF,FFFFFFFFFFFFFFFFFFFFFFFFFFFFFFFFFFFFFFFFFFFFFFFFFFFF  
@A00721:190:HGJW7DSXY:4:2176:20419:2190\_1:N:0:TCTGCAAG+GCTGCACT  
TTCGTTCTGTACAAGAACGCTTTGGATTGTGACCATAAAGCCTCAGTTGCGATAGCTGTAGAGGTAT  
ACGATATCTCTCTTGATGATGTAGCCACTATAATGCTTAAGAGAGAGATTGATGTATGTCATTTCTGTC  
TTA  
+  
FFFFFFFFFFFFFFFFFFFFFFFFFFFFFFFFFFFFFFFFFFFFFFFFFFFFFFFFFFFF  
FFFFFFFFFFFFFFFFFFFFFFFFFFFFFFFFFFFFFFFFFFFFFFFFFFFFFFFFFFFF  
FFF  
@A00721:190:HGJW7DSXY:4:2438:22182:21778\_1:N:0:TCTGCAAG+GCTGCACT  
TATTGGACACGATGAAAAATGACATACCCGTTCTGACCTTGGTATCGTTATCCGTCATGGAGATGAT  
GGCGCATCACTTGATTACTATATGCCCGAAGGATTGGGTATTCTCACAACAAAGATAAGATTTTATC  
TTT  
+  
FFFFFFFFFFFFFFFFFFFFFFFFFFFFFFFFFFFFFFFFFFFFFFFFFFFFFFFFFFFF  
FFFFFFFFFFFFFFFFFFFFFFFFFFFFFFFFFFFFFFFFFFFFFFFFFFFFFFFFFFFF  
FFF  
@A00721:190:HGJW7DSXY:4:1643:7970:13479\_2:N:0:TCTGCAAG+GCTGCACT  
ATTAATGAGTTCCGAATAACTCGTAATAAATCTTTCTCTAGTGGACAATTCAGAATACCTATTTCCGT  
ACCAAGAGCCACTGCCAATCTCATCGCTATACGCATACCTGATTGGAA  
+  
FFFFFFFFFFFFFFFFFFFFFFFFFFFFFFFFFFFFFFFFFFFFFFFFFFFFFFFFFFFF  
FFFFFFFFFFFFFFFFFFFFFFFFFFFFFFFFFFFFFFFFFFFFFFFFFFFF,FF  
@A00721:190:HGJW7DSXY:4:1228:1208:17550\_2:N:0:TCTGCAAG+GCTGCACT  
TTTCTTCATAAGGGCTATTACGTACGTCATGGGGATCACTTCTTCGGTCAATGACAAAACCTTCGAAT  
ATGTTACGACATGGCTTCGTAACAACAGTGCGAGGATTGTCATCTCGG  
+  
:FFFFFFFFFFFFFFFFFFFFFFFFFFFFFFFFFFFFFFFFFFFFFFFFFFFFFFFFFFFF  
FFFFFFFF,FFFFFF:FFFFFF:F,FFFF:FF:FFFFFFFFFFFFFF:F  
@A00721:190:HGJW7DSXY:4:1324:13964:2816\_2:N:0:TCTGCAAG+GCTGCACT  
TTCATATAGATACGAGATACCTAGAGAAGGTCGCAGCGATCTTACTCGTTATCGGAGCTAAGAAGAAG  
ACTTTGGGTACACGTTATGCTCGCAAACCTAACGTTAGTACCGGAGGT  
+  
FFFFFFFFFFFFFFFFFFFFFFFFFFFFFFFFFFFFFFFFFFFFFFFFFFFFFFFFFFFF  
FFFFFFFFFFFFFFFFFFFFFFFFFFFFFFFFFFFFFFFFFFFF:FFFFFF:FFFFFFFFFFFF  
@A00721:190:HGJW7DSXY:4:1406:6659:4883\_2:N:0:TCTGCAAG+GCTGCACT  
CTTCTGCGTTACTGAGAGAAAAGATTACAGGACGCCTACGGTGACTTTATGACAAGATGCAAGTTCTT  
GGGAAATACTTGTTTTCCCTTTTTAGGTTTAGTAGGTGATCTTGACGTC  
+  
FFFFFFFFFFFFFFFFFFFFFFFFFFFFFFFFFFFFFFFFFFFFFFFFFFFFFFFFFFFF  
FFFF:FFFFFFFFFFFFFF,F:FFFFFFFFF,:FFFF:FFFFFFFFFFFF  
@A00721:190:HGJW7DSXY:4:1560:31982:29105\_2:N:0:TCTGCAAG+GCTGCACT  
GAGAAGACAACGAATCTTGAACTACGGTCCTTATCAAAGAAAATGGTGAACCGGTCTCTAAATCTTT  
TGAGATTGAGAAGATTGAAGAACACGTCAAGAAGTCGCTCGGCGTTGT  
+



```

FFFFFFFFFFFFFFFFFFFFFFFFFFFFFFFFFFFFFFFFFFFFFFFFFFFFFFFFFFFFFFFF
FFFFFFFFFFFFFFFFFFFFFFFFFFFFFFFFFFFFFFFFFFFFFFFFFFFFFFFFFFFFFFFF
@A00721:190:HGJW7DSXY:4:2121:12084:20134_2:N:0:TCTGCAAG+GCTGCACT
CAAGTTAAGAAGGAGGCTGATCATGGAGTCTTTGTACCTTCTGTCAAACCTTCGAGGTTTACGCTACGAG
AGGTGATCCCGGATGTGGATTGAAGGCTGGCTCTAAGGGAGACTCCTT
+
FFFFFFFFFFFFFFFFFFFFFFFFFFFFFFFFFFFFFFFFFFFFFFFFFFFFFFFFFFFFFFFF
FFFFFFFF:FFFFFFFFFFFFFFFF:FFFFFFFFFFFF:FFFFFFFFFFFFFF
@A00721:190:HGJW7DSXY:4:2270:10447:6590_2:N:0:TCTGCAAG+GCTGCACT
TGTAAGAATTGGGTTGAGAAGTGTGCTTTACAAGGAGTTAGACTCTTCTTCAAGTTTTTAGATCTTC
TTGATAATCTTAAAGAAAAATTTTCAATAAACTAATGAGAGGTATAG
+
FFFFFFFFFFFFFFFFFFFFFFFFFFFFFFFFFFFFFFFFFFFFFFFFFFFFFFFFFFFFFFFF,F:FFF:FFFFF:FFFFFFFFFFFFFF,F
:FFFFFFFFFFFFFFFF,FFFFFFFFFFFF:FFFFFFFF:FFFFFFFFFFFFFF
@A00721:190:HGJW7DSXY:4:2107:16577:10786_1:N:0:TCTGCAAG+GCTGCACT
CTACCCATAACTTCTTTTTCAAAAATGCGGATGGGTCTACTGATGTTTTCTACAGAGTGCAGTCGTT
TCAACACTTATCACCACCTTTGAAAGGAAAATAATTGGTGATGAAAATACGTATGTCGGTGGGGTTCT
CAA
+
FFFFFFFF:FFFF::,FFFFFFFFFFFFFFFFFFFFFFFFFFFFFFFFFFFFFFFFFFFFFFFFFFFFFFFF
FFFFFFFFFFFFFFFFFFFFFFFFFFFFFFFFFFFFFFFF:FFFFFFFFFFFFFFFFFFFFFFFFFFFFFFFF
FFF
@A00721:190:HGJW7DSXY:4:2648:29080:32440_1:N:0:TCTGCAAG+GCTGCACT
TCAGACGTGTGCTCTTCCGATCTCTATCAGGTTCTTGTACGATTCTTAAAAGAAGTTTATTAAAGCT
TCAGAGTCTCTTGAAGTCCAGGTAGCTAATGTTCTTGCAATAGCCACAGACTTTCTGGGAAAAGAGA
CCT
+
FFFFFFFFFFFFFFFFFFFFFFFFFFFFFFFFFFFFFFFFFFFFFFFFFFFFFFFFFFFFFFFF:FFFF
FFFFFFFFFFFFFFFFFFFFFFFFFFFFFFFFFFFFFFFFFFFFFFFFFFFFFFFFFFFFFFFF
FFF
@A00721:190:HGJW7DSXY:4:1267:6858:8046_2:N:0:TCTGCAAG+GCTGCACT
AGGAGTTGAGAGAATTACTCAGATTCAATCTGGCATCACTGAACGTCTACAACGAGTTAGGGAGTGGC
TAGGTTTTAAAAGATCCTTTCACAAGCAATACCTTCCACTGAGTTCA
+
:FFFFFF:FFFFFFFFFFFF,FFFFFFFFFFFFFFFFFFFFFFFFFFFFFFFFFFFFFFFFFFFFFFFF
,FFFFFFFFFFFFFFFFFFFF,FFFFFFFFFFFFFFFFFFFFFFFFFFFF,FFF
@A00721:190:HGJW7DSXY:4:2334:2835:20243_2:N:0:TCTGCAAG+GCTGCACT
GTGCGGAAAACGATGAAGATTTCCACACTGTTTCGAGAATCTTCTGATGCTGAATTTGAGGAAAATTT
TTCGGAAGTTTTTGGTATAAATCCTGATGGCTCAGTACAGGGAGGAGG
+
FFFFFFFFFFFF:FFFFFFFF,FFFFFFF:FFF,FFFFFF:FFFFFFFF:FFFF:FFFFFFFF:FFFF::
FFFFFFFFF:F:FFFFFFFFFFFFFFFFFFFFFFFFFFFF:FFFFFF:FFFF
@A00721:190:HGJW7DSXY:4:2364:5086:4539_2:N:0:TCTGCAAG+GCTGCACT
TTCTTTTATCATTGCAACAGGACTTTGAGAAGACTGTTGAAATGGACAAAATCTGGGATCATAGGTAT
GTGTCACGCTACACTCGAAATATGGGCCCTCATAAGGAAGTATAGTTG
+
FFFFFFFFFFFFFFFFFFFFFFFFFFFFFFFFFFFFFFFFFFFFFFFFFFFFFFFFFFFFFFFF:F
FFFFFFFFFFFFFFFFF:FFFFFFFFFFFFFFFFFFFFFFFFFFFF,FFFFFFF
@A00721:190:HGJW7DSXY:4:2407:12626:5071_2:N:0:TCTGCAAG+GCTGCACT
CTTTTTGAATATGACAGAAGCTCGCCATATCAGATTAGAGACATGCCAGTTAGAGTTCTTCTAACCAG
GACTGATGGTGAGATTCTTTTACCTTTTGGAGGTCCAGGAACCTTTAC
+
FFFFFFFFFFFFFFFFFFFFFFFFFFFFFFFFFFFFFFFFFFFFFFFFFFFFFFFFFFFFFFFF
FFFFFFFFFFFF:FFFFFFFFFFFFFFFFFFFFFFFFFFFFFFFFFFFFFFFF

```

@A00721:190:HGJW7DSXY:4:2567:29080:2347\_2:N:0:TCTGCAAG+GCTGCACT  
CGGAGGATGACAGGTGGGAGACCGCTCAATAACACTCTATTGAATCCCTTTCCACGATGAAAGCTCT  
TTATGAGGTGCTCCATGCAAATTTACAGTTCCTCTTTGGTGATATCGC

+

FFFFFFFFFFFFFFFFFFFFFFFFFFFFFFFFFFFFFFFFFFFFFFFFFFFFFFFFFFFFFFFFFFFFFFFF  
FF:FFFFFFFFFFFFFFFFFFFFFFFFFFFFFFFFFFFFFFFFFFFFFFFFFFFFFFFFFFFFFFFF:F

@A00721:190:HGJW7DSXY:4:2150:8549:2613\_1:N:0:TCTGCAAG+GCTGCACT  
TTACCACCCTTGTCAATTGATACAAACATTCTAGGTGATGCTTTCTTAGAGGCTCGTCTAGCCGCTGAG  
ATTCGTCTTACCTATTTACAATCTGTAGAGAGAGAGGTTAATCAGAATTTGAGTGATAACGATTAGT  
ACT

+

FFFFFFFFFFFFFFFFFFFFFFFFFFFFFFFFFFFFFFFFFFFFFFFFFFFFFFFFFFFFFFFFFFFFFFFF  
FFFFFFFFFFFFFFFFFFFFFFFFFFFFFFFFFFFFFFFFFFFFFFFFFFFFFFFFFFFFFFFFFFFFFFFF  
FFF

@A00721:190:HGJW7DSXY:4:2357:28845:31814\_1:N:0:TCTGCAAG+GCTGCACT  
GTTTATGTTTCGGTTTTGAGCTGGATGGATCTTTTGATGGTATGTTTCACATTGCGTGATCACTTCCCG  
TGGACTTGGAAGAGATTAAACATAAAATCCAGCGATTCTATTATGTCGCTAAAGCCTGTCCAGTTGT  
CGA

+

FFFFFFFFFFFFFFFFFFFFFFFFFFFFFFFFFFFFFFFFFFFFFFFFFFFFFFFFFFFFFFFFFFFFFFFF  
FFFFFFFFFFFFFFFFFFFFFFFFFFFFFFFFFFFFFFFFFFFFFFFFFFFFFFFFFFFFFFFFFFFFFFFF  
FFF

@A00721:190:HGJW7DSXY:4:1150:16821:35102\_1:N:0:TCTGCAAG+GCTGCACT  
TTCTCGCTCGCATTTTACAAGGATTACTAAGTCTGAGATCTGCCACTTCTAATTTTAGGAAACGTGCG  
GAAAAGAAAGTTCATGAGGATGTCTTGGTCGAAAAATATCGCCGGAAGTCTAATAGAGGATCCTGA  
TGA

+

:FFFFFFFFFFFFFF:FFFFFFFFFFFFFF,FFFFFFFFFFFFFFFFFFFFFFFFFFFFFFFFFFFFFFFF  
FFFFFFFFFFFFFFFFFFFFFFFFFFFFFFFFFFFFFFFFFFFFFFFFFFFFFFFFFFFFFFFFFFFFFFFF  
FFF

@A00721:190:HGJW7DSXY:4:1343:25690:22842\_2:N:0:TCTGCAAG+GCTGCACT  
ACGGATACCGATCTCAGTTCTACCACAGAAACCGTCTCAGGAAGTGTCTCCACTGATTCGGAATTAGA  
GAAAGACGACCTTCTTGTGGGGACTGAGACCTCTGAATTTTCAGGGTG

+

FFFFFFFFFFFFFFFFFFFFFFFFFFFFFFFFFFFFFFFFFFFFFFFFFFFFFFFFFFFFFFFFFFFFFFFF  
FFFFFFFFFFFFFFFFFFFFFFFFFFFFFFFFFFFFFFFFFFFFFFFFFFFFFFFFFFFFFFFFFFFFFFFF

@A00721:190:HGJW7DSXY:4:2372:17924:8641\_2:N:0:TCTGCAAG+GCTGCACT  
TTGAAAGGGATAATTTCAACTCTGAGACTTCTAAGAGTGTTCAAAAGACCAGAAACGTAACAAGAAG  
AATAAAGGTAGGAAGGGGAGAAAACAGAACAAGCGAGCGGTTGAAGAG

+

FFFFFFFFFFFFFFFFFFFFFFFFFFFFFFFFFFFFFFFFFFFFFFFFFFFFFFFFFFFFFFFFFFFFFFFF  
FFFFFFFFFFFFFFFFFFFFFFFFFFFFFFFFFFFFFFFFFFFFFFFFFFFFFFFFFFFFFFFFFFFFFFFF

@A00721:190:HGJW7DSXY:4:2310:24071:24486\_2:N:0:TCTGCAAG+GCTGCACT  
TGGTTGCGGCTGATCGTACCCCAATTCCTGCTAGAAAGATCACTCTCGGCGATACCACTGATCTTCCA  
GAGTTACGTAGTGGTCGTTCTTTTGGTGATTTTATCAAAGAGAAAGTT

+

FFFFFFFFFFFFFFFFFFFFFFFFFFFFFFFFFFFFFFFFFFFFFFFFFFFFFFFFFFFFFFFFFFFFFFFF  
FFFFFFFFFFFFFFFFFFFFFFFFFFFFFFFFFFFFFFFFFFFFFFFFFFFFFFFFFFFFFFFFFFFFFFFF

@A00721:190:HGJW7DSXY:4:1652:24352:11757\_2:N:0:TCTGCAAG+GCTGCACT  
AAAAGCTATTAATAGCAGTTGCGGGCTATAATACCGCCTCCAGATTACTCTAAACTGAATCCACTCT  
CTTGGGATATAAATGAGTACATCTATAATAGAGTTTTGGAAGTGTGTA

+

FFFFFFFFFFFFFFFFFFFFFFFFFFFFFFFFFFFFFFFFFFFFFFFFFFFFFFFFFFFFFFFFFFFFFFFF  
F:FFFFFFFFFFFF,FFFFFFFFFFFFFFFFFFFFFFFFFFFFFFFFFFFFFFFFFFFFFFFFFFFFFFFF

@A00721:190:HGJW7DSXY:4:1463:11957:9612\_2:N:0:TCTGCAAG+GCTGCACT  
TCGATTGATTTTGTGACTACGATCTCTCTTGTAAATAAGAAGTTCTTCGCAAGTTGAATCTCCACCAGG  
TGGAGGGAAGACTACTGAACTTATAGCGACTTTTGTGAATTTTTCGC

+

FFFFFFFF:FFFFFF:FFFFFFFF,FFFFFFFFFFFFFFFFF:F:FFFF:FFFFFFFFFFFF:FFFF:FF  
,FFF:FFFFFFFFFFFFFFFF:FFF:FFFFFFFFFFFF:FFFF:FFFF:F

@A00721:190:HGJW7DSXY:4:2547:18358:22138\_2:N:0:TCTGCAAG+GCTGCACT  
ATTGTCACTGCTAATCGTAATTCGCGAGAAGAGATAGTGAATAAGTTTTGGCACTTCTAGTTCATCG  
CGGTATTTGTGAAATTAAGACAGACGTGAAAGTTATGATGAGTGATCG

+

FFFFFFFFFFFF:FF,FFFFFFFFFFFF:FFFF:FFF:FFF:FFFFFFFF:FFFFFFFFFFFFFFFFFFFFFFFFFFFF:FFFF  
FF:FFF:FFFFFFFFFFFFFFFF,FFFFFFFF,FFFFFF:FFFFFFFFFFFF

@A00721:190:HGJW7DSXY:4:1621:14714:32017\_2:N:0:TCTGCAAG+GCTGCACT  
TTCATCGACGAATTATTCATGATTCACGCTGGTCAGACCCTTTTTCTTACACATCTACTTAAGGCGGC  
TTATACCATAGGTTACGGTGATTCCAATCAAATCGGATTCATCAATCG

+

FFFFF:FFFFFFFFFFFFFFFFFFFFFFFFFFFFFFFFFFFFFFFFFFFFFFFFFFFFFFFFFFFFFFFFFFFF  
FFF:FFFFFFFF,FFFFFFFFFFFFFFFFFFFF:FFFF:FF:FFFF

@A00721:190:HGJW7DSXY:4:1167:7880:22592\_1:N:0:TCTGCAAG+GCTGCACT  
CGCAAACACTTCAACATCAACGACATCATTCTTGATGAGTGTCGTTCTTATCGAAGTCTCAGTTATC  
GCTGCCCGGCCGACGTTTGTGCGCAACTCTCAGAGGTTACGGCAGGAAAATTTCTCTGCTTGTAAT  
TCG

+

FFFFFFFFFFFFFFFFFFFFFFFFFFFFFFFFFFFFFFFFFFFFFFFFFFFFFFFFFFFFFFFFFFFFFFFFFFFF  
FFFFFFFFFFFFFFFFFFFFFFFFFFFFFFFFFFFFFFFFFFFFFFFFFFFFFFFFFFFFFFFFFFFFFFFFFFFF  
FFF

@A00721:190:HGJW7DSXY:4:2215:8006:19805\_1:N:0:TCTGCAAG+GCTGCACT  
TAAGAGTAAGGTTAAATGTGAAGATGCTCAGACTATTATGAAGTTCAAGGTAATACTTACCAGCACG  
TTCGGCTGGTTAGAATTAACCTCAAGATGACCCTGTTTTTGCATCACAAACACATATTACCGTTGCT  
CTA

+

FFFFFFFFFFFFFFFFFFFFFFFFFFFFFFFFFFFFFFFFFFFFFFFFFFFFFFFFFFFFFFFFFFFF:FFFFFFFFFFFFF  
FFFFFFFFFFFFFFFFFFFFFFFFFFFFFFFFFFFFFFFFFFFFFFFFFFFFFFFFFFFFFFFFFFFFFFFFFFFF:FFFFFFFFF  
FFF

@A00721:190:HGJW7DSXY:4:1165:22281:4445\_2:N:0:TCTGCAAG+GCTGCACT  
TCAATGTAAAGTTAAACGATGCTACTTGTGAGAGGATCAATCACAGTAAGGAACTGTCAGTTTAGCA  
CGGGAGGTTGCAGATTCAACCCCTTATATCGAGGCTATCGAGGACGAT

+

FFFFFFFFFFFF:FFFF:FFF:FFFF:F,FFF:F,FFFF:FFFFFFFFFFFF,,FF,F,,:FFF:F  
FFFF,FFFFFF:FF:FFF:FFFFFFFF,FF:FFFFFF:FFF:FF

@A00721:190:HGJW7DSXY:4:1530:19497:32315\_1:N:0:TCTGCAAG+GCTGCACT  
AGTTGTTGACGACAAGCCTCAAGAGGGTAGAGGACCCTGGATCTTCTACTGTCTCTGCCTTCCAAG  
ATTTCTTAGAAGAGGTTATTCCTGGAACACCTTAACGTCACTCGGTAATCTTTCAGCCGAATTAAGT  
ACT

+

FFFFFFFFFFFFFFFFFFFF:FFF:FFFF:FFFFFFFFFFFF:FFFF:FFFFFFFFFFFFFFFFFFFF:FFFFF  
FF:FFFFFFFFFFFFFFFFFFFFFFFFFFFF:FFFFFFFFFFFFFFFFFFFF:F:FFFFFFFFFFFFFFFF:F  
:FF

@A00721:190:HGJW7DSXY:4:2654:15157:13401\_2:N:0:TCTGCAAG+GCTGCACT  
TCGAATTAAGATCAAGGCTAATACCTTTATAGGTAAGAAGCCCCTTGAGCCGCGTAGTCAGCGCGTTT  
AGCTGTATCATCAGTCAGAGTATACCCGATAGGATACCGAGTCTCAA

+

FFFFFFFFFFFFFFFFFFFFFFFFFFFF:FFFFFFFFFFFFFFFFFFFFFFFFFFFF:FFFFFFFFFFFFFFFFFFFF  
FFFFFFFFFFFFFFFFFFFFFFFFFFFF:FFFFF:FFFFFFFFFFFFFFFFFFFF

@A00721:190:HGJW7DSXY:4:1533:12283:15468\_1:N:0:TCTGCAAG+GCTGCACT  
TTCCGATCTGTTTTGATCAGTCTAAGTTGGATAAAGTTATAGGAGACTCAGTTAACCTGAGAGCTCCT  
CAATTGATAGATTGGGTCAACAATAGGGACGCTAGTATACTTCGTAAAGTCGACAGCGAAATGGTCAA  
TAT

+

FFFFFFFFFFFFFFFFFFFFFFFFFFFFFFFFFFFFFFFFFFFFFFFFFFFFFFFFFFFFFFFFFFFFFFFF  
FFFFFFFFFFFFFFFFFFFFFFFFFFFFFFFFFFFFFFFFFFFFFFFFFFFFFFFFFFFFFFFFFFFFFFFF  
FFF

@A00721:190:HGJW7DSXY:4:2363:18340:35728\_2:N:0:TCTGCAAG+GCTGCACT  
AGCCTTTTCGAAGCATAACCCCGCACAGAATATCGTTTATCACGCAAAATTTATTAATGCAATTTTCG  
GACCTATCTTTAAGGTTCTTGTGAGGAGAGTCAAACAGTGTCTTTTAC

+

:FFFFFFFFFFFFFFFFFFFFFFFFFFFFFFFFFFFFFFFFFFFFFFFFFFFFFFFFFFFFFFFFFFFFFFFF  
FFFFFFFF:FFFFFFFFFFFFFFFF:FFFFFFFFFFFFFFFFFFFFFFFFFFFFFFFF:

@A00721:190:HGJW7DSXY:4:2352:18358:24079\_2:N:0:TCTGCAAG+GCTGCACT  
TCGATGCTGAATTTCTTGAACCTTTGGAGTGCCAGTGAATATTTTTGTACGCCAGGAGTATCCATAAC  
GATTTGTCATTTACCACCTTTGCTCAACGACGAAGTGGAACGGCCAAC

+

FFFFFFFFFFFFFFFFFFFFFFFFFFFFFFFFFFFFFFFFFFFFFFFFFFFFFFFFFFFFFFFFFFFFFFFF  
:FFFFFFFFFFFFFFF:FFFFFFF:FFFFFFFFFFFFFFFFFFFFFFF:::FFFFF

@A00721:190:HGJW7DSXY:4:1449:17354:36119\_2:N:0:TCTGCAAG+GCTGCACT  
TATGATCACTTTGATGATTTTATCACTTTATTATGACCTTGAAAGTTTTCTGCTGTGGTTGTCGCTG  
GGGACGATTCCATTCTGTTTTCAAAGACTCCAATAACTGATAGATCGG

+

F:FFFFFFFF,FFFFFFFFFFFFFFFFFFFF,FFFFFFFFFFFFFFFFFFFF:FFF:F,::FFFFF:FFFFF:FF  
,,FFFFFFFFFFFFFFF:FFF:FFFF,FF:FFFFFF,FF:FF,FFFFF

@A00721:190:HGJW7DSXY:4:2561:23900:27101\_2:N:0:TCTGCAAG+GCTGCACT  
GCGACTAATATTCGATATTCGATTGAGGGTCGTTATACCTATTCGGCTATCTGTGCTTTGAATTGTAT  
AAGATCAAATTTTAAACGATTCCGAGAGGTTTATCCTGATGTGGAGGG

+

FFFFFFFFFFFFFFFFFFFF:FFF:FFFFFFFFFFFFFFFFFFFFFFFFFFFF:FFF,:FFFFFFFFFFFFFFFF  
FFFF:FFFF:FFFF:FF:FFFFFFFFF:FFFFFFFFFFFFFFFFFFFF

@A00721:190:HGJW7DSXY:4:2455:1515:25974\_1:N:0:TCTGCAAG+GCTGCACT  
CCCGACCTTCTTGTGAAAATTTTGATGCGGTTTCATAAGATTATCAGTAATCCTGATTCTACTACG  
GATTCATGGACCTTCCATCCTGTACCTCTTCTGGAGAGACGTATCTCAAAGATCGACTTCGAGACAGG  
TGA

+

FFFFFFFFFFFFFFFFFFFFFFFFFFFFFFFFFFFFFFFFFFFFFFFFFFFFFFFFFFFFFFFFFFFFFFFF  
FFFFFFFFFFFFFFFFFFFFFFFFFFFFFFFFFFFFFFFFFFFFFFFFFFFFFFFFFFFFFFFFFFFFFFFF  
FFF

@A00721:190:HGJW7DSXY:4:2502:25599:7153\_1:N:0:TCTGCAAG+GCTGCACT  
CGAGAGCGACCAAGATCTAAATTCGGTAACGGTGCCTGGCGCTTTATTTTAAAAAGCTCCCTCCTCTC  
CCAAGTTTGATCTGATACTTATCACGAAAGGACTTGAGTCTTTTGATCAGTCTCTGACTTGACCATCT  
TTC

+

:FFFFFFFF:FFFFF:F,FFFFFFFFFFFFFFFFFFFF,FF,FFF:FFFF:,FFFFFFFFF,FFFF,  
:,FFFFFFFFFFFFFFFFFFFF:FF:FF:FF::FF,FF:FFFFFFFF,FF:FFFFFFFFFFFFFFFF  
FFF

@A00721:190:HGJW7DSXY:4:2340:13431:27038\_2:N:0:TCTGCAAG+GCTGCACT  
TGTTTTCTTCTTTGCACTGATTTTCTCATCAGCTTGTTTACCTAATCTGTGTTTTACGATAA  
CAACTATCAGTTGATTAAGACTCTTCCGAAAGGCGAACTTTGGGAATT

+

FFFFFFFFFFFFFFFFFFFFFFFFFFFFFFFFFFFFFFFFFFFFFFFFFFFFFFFFFFFFFFFFFFFF:FFFFFFFFFFFFFFFF  
FFF:FFFFFFFFFFFFFFFFFFFFFFFF:FFFFFFFFF:FFFFF:FFFFF

@A00721:190:HGJW7DSXY:4:2334:2076:1297\_1:N:0:TCTGCAAG+GCTGCACT  
AGCACAACTTTGACCGTGACGAAGTGTGGTGTCTTGATCTACGTTACGGATATACTCTCCTTGAGT  
TCACTCGTAAGGACACTACCACTTATTACGATATTTCTTTAGTCGATGGGTTTTCGACTCCTTTAAGC  
GTC

+

FFFFFFFFFFFFFFFFFFFFFFFFFFFFFFFFFFFFFFFFFFFFFFFFFFFFFFFFFFFFFFFFFFFFFFFF  
FFFFFFFFFFFFFFFFFFFFFFFFFFFFFFFFFFFFFFFFFFFFFFFFFFFFFFFFFFFFFFFFFFFFFFFF:FFF  
FFF

@A00721:190:HGJW7DSXY:4:2501:3378:3677\_1:N:0:TCTGCAAG+GCTGCACT  
TGTGCTCTTCCGATCTATTAATCACTCATTTTAGTGAGATTATTAACGCACTAAACGTCTTCGA  
CAACAGCAGGGGTTTTCGAATAGTGATAGCCACCCGCCTTACAGAGGGGCAGCAGCATGACCATAATT  
GGT

+

FFFFFFFFFFFF:FFFFFFFFFFFFFFFFFFFFFFFFFFFFFFFFFFFFFFFFFFFFFFFFFFFFFFFF  
FFFFFFFFFFFFFFFFFFFFFFFFFFFFFFFFFFFFFFFFFFFFFFFFFFFFFFFFFFFFFFFFFFFFFFFF:FFFFFFFF  
FFF

@A00721:190:HGJW7DSXY:4:1401:10836:15812\_1:N:0:TCTGCAAG+GCTGCACT  
CACCTTTTCTACTGTCTGTCTCGCCTCTTCGAATGAAGTTTAAATGCTTAACAACAATGATAGTGAAT  
TTATACCTACAATCATTGGTTTTTCTAATAATGATGACACTATTGTTTATGGATATGATGCTATTACT  
CAT

+

FFFFFFFFFFFFFFFFFFFFFFFFFFFFFFFFFFFFFFFFFFFFFFFFFFFFFFFFFFFFFFFFFFFFFFFF  
FFFFFFFFFFFFFFFFFFFFFFFFFFFFFFFFFFFFFFFFFFFFFFFFFFFFFFFFFFFFFFFFFFFFFFFF:FFFFFFFF  
FFF

@A00721:190:HGJW7DSXY:4:1615:1904:32377\_2:N:0:TCTGCAAG+GCTGCACT  
TCTCAGTTTACAAGGACCTTAAGCGATGGATCGGGGTAAATTCTAAACATTACCCGAAAGACGTGCT  
AAATTAACCATTTGTACGATGTCGTCTGTCTCGGCGAGATCGGAAGA

+

FFFFFFFFFFFFFFFFFFFFFFFFFFFFFFFFFFFFFFFFFFFFFFFFFFFFFFFFFFFFFFFFFFFFFFFF  
,FFFFFFFF:FFFFFFFF:FFFFFFFF:FFFFFFFF:FFFFFFFF:FFFFFFFF:FFFFFFFF:FFFFFFFF:  
,FFFFFFFF:FFFFFFFFFFFFFFFFFFFFFFFFFFFFFFFFFFFFFFFFFFFFFFFF:FF,FF

@A00721:190:HGJW7DSXY:4:2302:31195:28307\_1:N:0:TCTGCAAG+GCTGCACT  
TCGTTTCTTTCTTTATCTCTTTGGTTGTTAGGGATTTTGAGAGAGTGAAAGGCTTCAATTGTAGTGGT  
TTGGTCGTTTCAGTACCCAGTCAGTATACCTCTACGCAAAGATATTTTCATGAAACTACAGAGGAACG  
TAC

+

FFFFFFFFFFFFFFFFFFFFFFFFFFFFFFFFFFFFFFFFFFFFFFFFFFFFFFFFFFFFFFFFFFFFFFFF  
FFFFFFFFFFFFFFFFFFFFFFFFFFFFFFFFFFFFFFFFFFFFFFFFFFFFFFFFFFFFFFFFFFFFFFFF  
FFF

@A00721:190:HGJW7DSXY:4:2224:4797:26490\_2:N:0:TCTGCAAG+GCTGCACT  
TCTTTCATATTATGAATGAACCTTCGGCCGCTCTCTTTGCTTCGATGTTGGATGTCAAGAAGGGTTCA  
GAATGGGATTCTACGTAGTTTATGACTTTGGTGGTGGTACTTTTCGAT

+

FFFFFFFFFFFFFFFFFFFFFFFFFFFFFFFFFFFFFFFFFFFFFFFFFFFFFFFFFFFFFFFFFFFFFFFF  
FFFFFFFFFFFFFFFFFFFFFFFFFFFFFFFFFFFFFFFFFFFFFFFFFFFFFFFFFFFFFFFFFFFFFFFF

@A00721:190:HGJW7DSXY:4:2376:3712:16344\_2:N:0:TCTGCAAG+GCTGCACT  
AGTGTTATTTATTCTGGTGGTGATGATAATCTTGAGGTCGTGACGTTGATGAAGCTATAAGAGCGTT  
CTTATTACGGCGCACTTCTTACCCGCCACCACAACTTTCAGTTTC

+

FFFFFFFFFFFFFFFFFFFFFFFFFFFFFFFFFFFFFFFFFFFFFFFFFFFFFFFFFFFFFFFFFFFFFFFF  
FFFFF:FFFFFFFFFFFFFFFFFFFFFFFFFFFFFFFFFFFFFFFFFFFFFFFFFFFFFFFF,FFF  
FFFFF:FFFFFFFFFFFFFFFFFFFFFFFFFFFFFFFFFFFFFFFFFFFFFFFFFFFFFFFF,FFF

@A00721:190:HGJW7DSXY:4:2368:27218:34945\_1:N:0:TCTGCAAG+GCTGCACT  
ACTTGAAAACCTCGTCAATACTTTTCAATAATATACGTCTTGAACCTCACTTATGACGATCTAGTGAA  
ATTAACGCGTCCTTTTCTGGAACGTAGTTTACTATTATGAACAAAGTTATCAAAGATAGTGGCATT  
AAG

+  
FFF,,::,,:,F,FF,:::F,F::F:,FFF,FFF:,FFF:F,,,FF:FFFFFF,FF:FFF:,FF,:  
,FFFF,FFFF:,FFFFFFFFF,FFFFFFFFFFFF,FF,FFFF,::F:FFFF,F:,,,FF,FFF,FFFF  
,::  
@A00721:190:HGJW7DSXY:4:2102:20148:25801\_1:N:0:TCTGCAAG+GCTGCACT  
CTGATTCCGGCCGGTGGTAGCTCATTTCTACCAGGGCTATTACTCTTGCTGAAACAGCTATTAAAGC  
TGTTGAGCGGGTAATTACACCTAAACGAGCTCGATCTGCCATCGCTGAAGGATGTGCACTCTTTTCTG  
CTA  
+  
FFFFFFFFFFFFFFFFFFFFFFFFFFFFFFFFFFFFFFFFFFFFFFFFFFFFFFFFFFFFFFFFFFFFFFFF  
FFFFFFFFFFFFFFFFFFFFFFFFFFFFFFFFFFFFFFFFFFFFFFFFFFFFFFFFFFFFFFFFFFFFFFFF  
FFF  
@A00721:190:HGJW7DSXY:4:2676:16016:14418\_2:N:0:TCTGCAAG+GCTGCACT  
CAAGCTCGTATTATCGTCGCTGCTGGATCTGCGTTACCGTTGAAGGCTAAACTCCAAGTAATTATGA  
AGACTGTGATTATCTTTCACTCTGGCCTTGATGAGGGTGTTCCTAA  
+  
FFFFFFFFFFFFFFFFFFFFFFFFFFFFFFFFFFFFFFFFFFFFFFFFFFFFFFFFFFFFFFFFFFFFFFFF  
F:FFFFFFFFFFFFFFFFFFFFFFFFFFFFFFFFFFFFFFFFFFFFFFFFFFFFFFFFFFFFFFFF  
@A00721:190:HGJW7DSXY:4:1666:10230:33865\_2:N:0:TCTGCAAG+GCTGCACT  
AATTTCAATCTTCTTAAAAAGAAGATAGAGAGTCATACTTTGGGCTATCGTTCAGGTGCATGGGGTTG  
GATAGCCAATATTGAAGTGGACACCTCTGGTAGTATCGAAGTAAAGAT  
+  
FFFFFFFFFFFFFFFFFFFFFFFFFFFFFFFFFFFFFFFFFFFFFFFFFFFFFFFFFFFFFFFFFFFFFFFF  
FFFFFFFFFFFFFFFFFFFFFFFFFFFFFFFFFFFFFFFFFFFFFFFFFFFFFFFFFFFFFFFFFFFFFFFF  
@A00721:190:HGJW7DSXY:4:1344:9932:9486\_2:N:0:TCTGCAAG+GCTGCACT  
ATTAAACAAGTTGTACTTATCAATGATTTTATCGCGGGTGTATCTCGAAAAGTCTCTTCTAAAAGG  
AACGTCAGTTCTAACCCAAAGAGAATATCTAAAATATTTACAAAATCT  
+  
F:FFFF,FFFFFF,FF,FFFF:F,FFFFFFFF,FFF,FF,FFFF:,FFFFFFFF:,FFFFFFFF  
FFF,F,::F,FFF::FF:F:FFFFFFFF:FFFFFF,FF,,FFFF,F:  
@A00721:190:HGJW7DSXY:4:1160:23158:13135\_1:N:0:TCTGCAAG+GCTGCACT  
ATGGCACTACCTCGGTACAATCTTACTTGGAACGAAGGCGACCTGTTCCGGAGTTTTTACGGGATCCG  
GAATGTTCTGTCTATATTAGGTGAAGCGAAATACGATTTTGAACGTCAACGTTACCGAGTTTCGTTT  
CGT  
+  
FFFFFF:FFFFFFFFF,FF:F:,FFFFFFFF,F:FFF:FFF::F,F,,FF:FFFFFF:::FFFFFF  
FFFFFFFFFFFFFF::FFF:FFF:F,FFFFFFFF:FFFF:FFF,FF:FFFF:FF,FFFFFFFF,FF:F  
FFF  
@A00721:190:HGJW7DSXY:4:1343:27227:6809\_1:N:0:TCTGCAAG+GCTGCACT  
TAGTGCGAGGCCTCTCTTCTACGAGTATTGCTATTTATACGGTTACGAGAAGAAGGTTGAAAGTTTG  
AGAACTTAGTTTACGAACCTGACTCTACTATACGTGACATACTAAATACTAGATATTTGGATGATCTT  
GAT  
+  
:FFFFFFFFFFFFFFFFFFFFFFFFFFFFFFFFFFFFFFFFFFFFFFFFFFFFFFFFFFFFFFFFFFFFFFFF  
FFFFFFFFFFFFFFFFFFFFFFFFFFFFFFFFFFFFFFFFFFFFFFFFFFFFFFFFFFFFFFFFFFFFFFFF  
FFF  
@A00721:190:HGJW7DSXY:4:2344:31340:13495\_2:N:0:TCTGCAAG+GCTGCACT  
AAAATTTTCTTCTTGGAATTTAATATAAAGAATCTTTACCAGGACTCCTACTACAGGAGGCAGTCTT  
CTGATCGTAAGAAGTTTATAAGGAACATATCCATTTGTTGTAATAGGG  
+  
FFFF:FFFFFFFFFFFFFFFFFFFFFFFFFFFFFFFFFFFFFFFFFFFFFFFFFFFFFFFFFFFFFFFF  
FFF:FFFFFFFFFFFFFFFFFFFFFFFFFFFFFFFFFFFFFFFFFFFFFFFFFFFFFFFFFFFFFFFF  
@A00721:190:HGJW7DSXY:4:1458:31638:1611\_2:N:0:TCTGCAAG+GCTGCACT  
AACTCTAAGTGGTAATACTGTCTTCCAAGCTTACCTGTATCTTCAATGAAATTGGACTCTTCGATAG

$+$ 

@A00721:190:HGJW7DSXY:4:2565:3992:12853\_2:N:0:TCTGCAAG+GCTGCACT  
GGTGGTCTTTATTCTATTATTGATTTTATGAGATTGATACGTTAACAGAAGATGATGTTAGAGTAGA  
ATTCCTGAAGAGTCCTTCCGTAACCAACTTCTTGACAATTTCTTCAA

+

@A00721:190:HGJW7DSXY:4:1515:31069:3443\_2:N:0:TCTGCAAG+GCTGCACT  
AATTAAGAAATAATCCTACATTGACTGATTATCTAAAGATTGAAGGAAAATTTTATCCTCGTTTAACT  
TACTTAGACTTTCCTACGATACAAATGATAACTTCTAATTTACGTTTG

+

@A00721:190:HGJW7DSXY:4:2649:9281:12587\_1:N:0:TCTGCAAG+GCTGCACT  
TTGGTGTTATCTCCTCAGGAGTCCCGGCATTTGATAATAATGACGAGACTTTCTGCATAATCGCTGCA  
TATTACGGATTACACGGTACCAGCGCATCTCGTGTCGAGCCTCGACCCGATTATATGGTATTAACCTTA  
TAA

+

@A00721:190:HGJW7DSXY:4:1140:21160:4006\_2:N:0:TCTGCAAG+GCTGCACT  
GACTAACTATGTTATGTTCTCTGATCATTTTGACAATCTCTTCTTATAATAAATAAATAATAT  
TACTAATGGCAAATAGTGGAAAGGCTCCAGTCAACACTAGTTCGAGTG

+

@A00721:190:HGJW7DSXY:4:1449:8901:25676\_1:N:0:TCTGCAAG+GCTGCACT  
AATAGGTGAAGGGATAGATTTTACCTCGACCAACATTAAGGCGGCGGCGACTAATCTTAAAGCTTCAC  
CCAAAATGAAGGACACTTCGAAACTGAATAATGATGCACTACAAACAAGTATCGCTAATCATCTGAAA  
AAG

+

@A00721:190:HGJW7DSXY:4:2472:25328:27946\_1:N:0:TCTGCAAG+GCTGCACT  
TCTTAGAGGATATTCGCCATTGTGGTACGAATTGGTCCAACATTTACCACCAAATTCTTTTGATACAA  
CTCTAGCCTTCAAGTGGGGTATGCCTGCGGAATACGCTTGCTATTACCAGATTGGTTCGAACCCGTT  
GAT

+

@A00721:190:HGJW7DSXY:4:1313:12861:14434\_1:N:0:TCTGCAAG+GCTGCACT  
TGCTATTCAAGCTTGTCGTTTAAAGACTGCAGAGGCTGTCAAACAAGCCCAGACTCAAGGAGTCCAAT  
CAAAGGTTTTGAATTTAGCTCAACTGGGGAGACGTGCTTAAATGGGTGATAAAAATTATTTAGAGATC  
TTT

+

[illegible]





@A00721:190:HGJW7DSXY:4:1603:22779:5619\_1:N:0:TCTGCAAG+GCTGCACT  
GATTATAACTTGACTTTTGATAATATTACAATAGCTCTTTCTCAGAAGATTAGAGAAGTAACCGGTGA  
ACACGTCGGTAGCATTGATTTACTTTTACCGTTAGAAGTAAAAAGATTCTTTTCGAAAAGAAACCTA  
TA

@A00721:190:HGJW7DSXY:4:1575:11243:29450\_2:N:0:TCTGCAAG+GCTGCACT  
TAAAGAAATAAAAATACTTCAAGTACCTGAACCTTTACATTTTAAATGGTATGGTATAATGTGTCTTAC  
AAATAGAACCTTCACTCTCGGTAATGAGAGTGTATTCCTTAATATTCT

@A00721:190:HGJW7DSXY:4:2138:5990:36479\_2:N:0:TCTGCAAG+GCTGCACT  
TTACTAGGATTTATCACACTCCTAAATTTGAAAGCAATTTATGTTTTAAATGCTAGGAAAATTTTAGA  
AAAACCTCCATTGTATAGTTCAAGGAGTACTTAATTCAATAGCTTTAGT

@A00721:190:HGJW7DSXY:4:1272:16604:6574\_2:N:0:TCTGCAAG+GCTGCACT  
TTTATTGAAAATTGTATAAGAGTTAATTGCTTACACAAAAGTGACGCGGAAGGAATCTTAATTGATT  
GAAGCTAGGCGTTGGGGAGAATGAACTGCCGCTTCCCGGAAGAAACGA

@A00721:190:HGJW7DSXY:4:2425:31864:10269\_2:N:0:TCTGCAAG+GCTGCACT  
ATGACCAATCATCGCTCCAACCTGGCACGCCAGACGTAGGGTCAAACCTACTACCGCCGGTCGGCAGAT  
CGGCACCACTGGTCTCTACGTTACAGGGACCCGCTGTGCAGAATAACCT

@A00721:190:HGJW7DSXY:4:1562:11803:10817\_1:N:0:TCTGCAAG+GCTGCACT  
GGACGACCACTCAAAGGAAACGGGCTGTTGCCAGAGGAAAGCAGCGACCACCGAGGTCGCTCGTAAC  
ATTGACGGCAGTCCCGTCATCTCTGTGGGAACTGAGGCAGTACCTCAGTCAAAGTCACATTCACCAC  
TCC

@A00721:190:HGJW7DSXY:4:1573:23854:35603\_2:N:0:TCTGCAAG+GCTGCACT  
TGTGACTATACAGTTCGGCCATTTCAAGAGTGGTCAATACGTCGTGGGAGGTACTGAAGCCTTCCCT  
CCGCTGGCACGAAGAACACTCCCAAGCCAATCAATAGTTCTTCTGACC

@A00721:190:HGJW7DSXY:4:2612:3992:20838\_2:N:0:TCTGCAAG+GCTGCACT  
AGGGTAGTCTCTAAGTCTACCAGGAAGAGGGGAAATGTCCCCAAACTGAGAAGAATAAAGGGAAAGG  
TCCATCAGGACCTAAGAAGGGGAAATTACCCCTAATTCTGAAGGAAGA

```
FFFFFFFFFFFFFFFFFFFFFFFFFFFFF:FFFFFFFFFFFFFFFFFFFFFFFFFFFFFFF:FFF  
FFFFFFFFFFFFFFFFFFFFFFFFFFFFF:FFFFFFFFFFFFFFFFFFFFFFFF
```

@A00721:190:HGJW7DSXY:4:2210:14660:21872\_2:N:0:TCTGCAAG+GCTGCACT  
GGGGTTGGGAATAAGAAATCTGCACGGGCCAAAGAGGCCGCTGCTACGAAGTCGCTGAAGGCGGCTTG  
GGTCATTAAGGGTAGCTGTAAAGTTGCGCCTGCCGACCCCATCTTTGA

+

FFFF:FFFFFFFFFFFFFFFFFFFFFFFFFFFFFFFFFFFFFFFFFFFFFFFFFFFFFFFFFFFFFFFF  
FFFFFFFFFFFFFF,FFFFFFFF:FFFFFFFFFFFFFFFFFFFFFFFFFFFFFFFF

@A00721:190:HGJW7DSXY:4:2521:19958:28228\_1:N:0:TCTGCAAG+GCTGCACT  
CTTGACAGAGTGGAGTTCAGACGTGTGCTCTTCCGATCTCGTCACTGAGGACGAAGGTGAGAGGA  
CTTTTGGCTACTGGCGACAACTGAGAGCAGTCGCTGGGGAAGAGAATTGCGTGGGTGAAGGCCGA  
CGC

+

FFFFFFFFFFFFFFFFFFFFFFFFFFFFFFFFFFFFFFFFFFFFFFFFFFFFFFFFFFFFFFFFFFFF  
FFFFFFFFFFFFFFFFFFFFFFFFFFFFFFFFFFFFFFFFFFFFFFFFFFFFFFFFFFFFFFFFFFFF  
FFF

@A00721:190:HGJW7DSXY:4:2648:8350:4178\_2:N:0:TCTGCAAG+GCTGCACT  
GACGTTTTTTGTCAACGGCGTTTGGAGGATTTTATCCGCGCTTAAGTATGGGGCGAAGATCCCCTATGG  
AGTCTTGAAGGACTTAGGTTGGCATATTTATGCCGACGATAATAAGCA

+

FFFFFFFFFFFFFFFFFFFFFF,FFFFFFFFFFFFFFFFFFFFFFFFFFFFFFFFFFFFFFFF:FFFFFFFF  
FFFFFFFFFFFFFFFFFFFFFFFFFFFFFFFFFFFFFFFFFFFFFFFFFFFFFFFFFFFF:F

@A00721:190:HGJW7DSXY:4:1678:6623:4382\_1:N:0:TCTGCAAG+GCTGCACT  
AAGCACCGAGGTAAGCTCGGGACTTACAAGAGAGAGTGTGAGAGAGTCGCTCTCACTATTTTGTCCCA  
GAATGCGGGCTTTCTGACTGATGAGGTTAAACTCTTGCTCCTTCTGTGGGTGAGGGTTTTTGTATA  
TTC

+

FFFF:FFFFFFFFFFFFFFFFFFFFFFFFFFFFFFFFFFFFFFFF:FFFF:FFFFFFFFFFFFFF  
FFFF:FF,FFFFFFFFFF:FF:FF:FFFFFFFFFFFFFFFFFFFFFFFFFFFFFFFF:FFFFFFFFFFFF  
FFF

@A00721:190:HGJW7DSXY:4:1174:5511:2394\_1:N:0:TCTGCAAG+GCTGCACT  
GAGAGCATTAGAAGGAAGTTGGGCAAATCCACATATGGTAGACGTTGTCACTTTTCTTGAAAAT  
TTTTCTTTCTCCGTCATTGGGGATTTTCGATGTGAGAAGGTGGAAGGTGTCAAGGGTCTTCTTCATG  
CTG

+

FFFFFFFFFFFFFF:FFFFFFFFFFFFFFFFFFFFFFFF:FFFFFFFFFFFFFFFFFFFFFFFFFFFF  
FF:FFFFFFFFFFFFFF:F:FFFFFFFFFFFFFFFFFFFFFFFFFFFFFFFFFFFFFFFFFFFF  
FFF

@A00721:190:HGJW7DSXY:4:2561:11487:11616\_1:N:0:TCTGCAAG+GCTGCACT  
TTCAGACGTGTGCTCTTCCGATCTCGGCTCGTATCGAGTTGGAGGGAGGAAGTTCTCCGAAATTAAG  
ACGGGGGGGATTAAGAGTCCAGCTGTAAGTGTCAATTCAGAGAGGGGAGCTCTGAAAAGGAACTTCGT  
CAG

+

:FFFFFFFFFFFFFFFFFFFFFFFFFFFFFFFFFFFFFFFFFFFFFFFFFFFFFFFFFFFFFFFFFFFF  
FFFFFFFFFFFFFFFF:FFFFFFFFFFFFFFFFFFFFFFFFFFFFFFFFFFFFFFFFFFFFFFFFFFFF  
FFF

@A00721:190:HGJW7DSXY:4:1523:17011:22404\_2:N:0:TCTGCAAG+GCTGCACT  
GAGGAGGAGTTTGAGGAAGGCTCTAGAGAAGATCTCACCACCTGGAGAAGGCAAGTGGAGAGTCCAGA  
AGTTGATGAAGAAGGATTATTTGAAGCAGGGGTTACCACTTCCTAAGG

+

FFFFFFFFFFFFFFFFFFFFFFFFFFFFFFFFFFFFFFFF:FFFFFFFFFFFF:FFFFFF  
FFFFFFFFFFFFFFFFFFFFFFFF:FFFFFFF:FFFFFFFFFFFFFFFFFFFF

@A00721:190:HGJW7DSXY:4:2477:2908:9314\_1:N:0:TCTGCAAG+GCTGCACT  
ATTTAGGTCAACTTGGGGTTTCGAATGTCATTAGTGCCTTACGATTGAAAGAGGTCCTTTTGTAGTATC  
GACAGATCTTTCGATCTTGAGGACGTACATTTAACGTGGCAGAATTTCGGTAACCTACCATATTGTTCC  
TTC

+  
FFFFFFFFFFFFFF::FFFFFFFFFFFFFFFFFFFFFFFFFFFFFFFFFFFFFFFFFFFFFFFF  
FFFFFFFFFFFFFFFFFFFFFFFFFFFFFFFFFFFF,FF:FFFFFFFF:FFFFFFFFFFFFFFFFFFFFF  
FFF  
@A00721:190:HGJW7DSXY:4:2426:21911:17143\_1:N:0:TCTGCAAG+GCTGCACT  
TTTAACCTTTTACTCACTACTCCGATCAGATCCGGATGGTTTGATTGGTATGGACTACTCGACTTTTG  
ATCTGGAGTTGTCTAGGGTCATGGCAGATACTACCGATAAGGTGAAAAATATGCAGGTCAAAGATTCT  
GTA  
+  
FFFFFFFFFFFFFFFFFFFFFFFFFFFFFFFFFFFF:FFFFFFFFFFFFFFFFFFFFFFFFFFFFFFFF  
FFFFFFFFFFFFFFFFFFFFFFFFFFFFFFFFFFFFFFFFFFFFFFFFFFFFFFFFFFFFFFFFFFFF  
FFF  
@A00721:190:HGJW7DSXY:4:1551:15031:7200\_1:N:0:TCTGCAAG+GCTGCACT  
CTAAGAGTCTTTATGATTCAAACCTATCGTTGTCTGACCTTACAAGGTTGAGGAGACTTTACAGCGG  
CTTATTGTCGCGCAGTTTTCCAGAATTGCGGTTGAAGTTCACCCATTCTATCTTGAATGCTCACGCCGT  
CGC  
+  
FFFFFFFFFF,FFFFFFFFFFFFFFFFFFFF,FFFFFFFFFFFFFFFFFFFFFFFFFFFFFFFFFFFF,  
FFFFFFFFFFFFFFFFFFFFFFFFFFFF:FFFFFFFFFFFFF:FFFFFFFFFFFFFFFFFFFFFFFFFFFF  
FFF  
@A00721:190:HGJW7DSXY:4:1539:8395:27461\_2:N:0:TCTGCAAG+GCTGCACT  
ATTATTGATATTGGAGGCGATATTCTTTTTTCATATCCAAAACCTCTTGAATGGAGTACATATTTGCAA  
CCCTATTCTTGATGTGAAAGATGCATCGAGGTATACGTCTAGGAACAT  
+  
FFFFFFF:FF,FFFFFFFFFFFFFFFFFFFFFFFFFFFFFFFFFFFFFFFFFFFFFFFFFFFF:FFFFFFF  
FFFFFFFFFFFFFFFFFFFF:FFFFFFFFFFFFFFFFFFFFFFFFFFFFFFFFFFFF  
@A00721:190:HGJW7DSXY:4:2524:19976:33458\_2:N:0:TCTGCAAG+GCTGCACT  
CGGAGGGAAGCAAATGTTTCGTTCTGTTACAAGAACGCTTTGGATTGTGACCATAAAGCCTCAGTTG  
CGATAGCTGTAGAGGTATACGATATCTCTCTTGATGATGTAGCCACTA  
+  
FFFFFFFFFFFFFFFFFFFF:FFFFFFFFFFFFF:FFFFFFFFFFFFFFFFFFFFFFFFFFFFFFFFFFFF  
FFFFFFFFFFFFFFFFFFFF:FFFFFFFFFFFFFFFFFFFFFFFFFFFFFFFFFFFF  
@A00721:190:HGJW7DSXY:4:1522:7401:4100\_2:N:0:TCTGCAAG+GCTGCACT  
TCATTTCTGCTTAGTTTGTCCCGCGCAATTATTGGACACGATGAAAAATGACATACCCGTTCTGACC  
TTGGTATCGTTATCCGTCATGGAGATGATGCCGCATCACTTGATTACT  
+  
FFFFFFFFFFFFFFFFFFFFFFFFFFFFFFFFFFFF:FFFFFFFFFFFF:FFFFFFFFFFFFFFFFFFFF  
FFFFFFFFFFFFFFFFFFFF:FFFF,FFFFFFFFFFFFFFFFFFFFF  
@A00721:190:HGJW7DSXY:4:2450:3821:28839\_2:N:0:TCTGCAAG+GCTGCACT  
ATTAATGAGTTCCGAATAACTCGTAATAAATCTTTCTCTAGTGGACAATTCAGAATACCTATTTCCGT  
ACCAAGAGCCACTGCCAATCTCATCGCTATACGCATACCTGATTGGAA  
+  
FFFFFFFFFFFFFFFFFFFFFFFFFFFFFFFFFFFF:FFFFFFFFFFFF:FFFFFFFFFFFFFFFFFFFF  
FFFFFFFFFFFFFFFFFFFF:FFFF,FFFFFFFFFFFFFFFFFFFFF  
@A00721:190:HGJW7DSXY:4:1236:17626:4617\_2:N:0:TCTGCAAG+GCTGCACT  
TTTCTTCATAAGGGCTATTACGTACGTATGGGGATCACTTCTTCGGTCAATGACAAAACCTTCGAAT  
ATGTTACGACATGGCTTCGTAACAACAGTGCGAGGATTGTATCTCGG  
+  
FFFFFFFFFFFFFFFFFFFFFFFFFFFFFFFFFFFF:FFFFFFFFFFFF,FFFFFFFFFFFFF  
FFFFFFFFFFFFFFFFFFFF:FFFFFFFFFFFFFFFFFFFFFFFFFFFFF,  
@A00721:190:HGJW7DSXY:4:1365:6750:25739\_2:N:0:TCTGCAAG+GCTGCACT  
TTCATATAGATACGAGATACCTAGAGAAGGTCGCAGCGATCTTACTCGTTATCGGAGCTAAGAAGAAG  
ACTTTGGGTACACGTTATGCTCGCAAACCTTAACGTTAGTACCGGAGGT  
+

FFFFFFFFFFFFFFFFFFFFFFFFFFFFFFFFFFFFFFFFFFFFFFFFFFFFFFFFFFFFFFFF:FFFFFFFF  
FFFFFFFFFFFFFFFFFFFFFFFFFFFFFFFFFFFFFFFFFFFFFFFFFFFFFFFF:  
@A00721:190:HGJW7DSXY:4:1659:27335:14418\_2:N:0:TCTGCAAG+GCTGCACT  
CTTCTGCGTTACTGAGAGAAAAGATTACAGGACGCCTACGGTGACTTTATGGACAAGATGCAAGTTCTT  
GGGAAATACTTGTTCCTTTTTAGGTTTAGTAGGTGATCTTGACGTC  
+  
FFFFFFFF:F:FFF,FFFFFF:FFFFFFFFFFFFFFFFFFFFFFFF:F:FFFFFFFFFFFFFFFF:FFFFFF  
FFFFFFFF:FFFFFFFFFFFF,:FFFF,:FF:FFFFFFFFFFFFFFFF  
@A00721:190:HGJW7DSXY:4:2220:25907:26600\_2:N:0:TCTGCAAG+GCTGCACT  
GAGAAGACAACGAATCTTGAAACTACGGTCCTTATCAAAGAAAATGGTGAACCGGTCTCTAAATCTTT  
TGAGATTGAGAAGATTGAAGAACACGTCAAGAAGTCGCTCGGCGTTGT  
+  
FFFFFFFF:FFFFFFFFFFFFFFFFFFFFFFFFFFFFFFFF:FFFFFFFFFFFFFFFF:FFFFFFFFFFFFFFFF  
FF:FF:FF:FFFFFFFF:F:FFFFFFFFFFFFFFFFFFFFFFFFFFFFFFFF  
@A00721:190:HGJW7DSXY:4:2229:26024:2002\_2:N:0:TCTGCAAG+GCTGCACT  
CAAGTTAAGAAGGAGGCTGATCATGGAGTCTTTGTACCTTCTGTCAAACCTTCGAGGTTCAGCTACGAG  
AGGTGATCCCGGATGTGGATTGAAGGCTGGCTCTAAGGGAGACTCCTT  
+  
FF:FFFFFFFFFFFFFFFFFFFFFFFFFFFFFFFFFFFFFFFFFFFFFFFFFFFFFFFFFFFFFFFF  
FFFFFFFFFFFFFFFF:FFFFFFFFFFFFFFFFFFFFFFFF:FFFFFFFFFFFF  
@A00721:190:HGJW7DSXY:4:2364:4164:25614\_2:N:0:TCTGCAAG+GCTGCACT  
TGTAAGAATTGGGTTGAGAAGTGTGCTTTACAAGGAGTTAGACTCTTCTTCAAGTTTTTAGATCTTC  
TTGATAATCTTAAAGAAAAATTTTCAATAAACTAATGAGAGGTATAG  
+  
FFFFFFFF:F:FFF:FFFFFFFFFFFFFFFFFFFFFFFFFFFFFFFFFFFFFFFFFFFFFFFFFFFFFFFF:FFFF  
F,FFFFFFFF:FFFFFFFF,FFFFFF:F:FFF:FFFFFFFF:  
@A00721:190:HGJW7DSXY:4:2213:4074:13275\_1:N:0:TCTGCAAG+GCTGCACT  
CTACCCATAACTTCTTTTTCAAAAATGCGGATGGGTCTACTGATGTTTTCTACAGAGTGAGTCGTT  
TCAACACTTATCACCACCTTTTGAAGGAAAATAATTGGTGATGAAAATACGTATGTCGGTGGGGTTCT  
CAA  
+  
FFFF:F:FFF,,FFFF,FFFF:FF:FFF:F:FF,FFFFFFFF:FFFF:FFFF,FFFFFF:FFF  
FF:F:FFFFFFFF,:FF:F:F:FFFFFFFF:FFF:FFFFFFFF,FFFFFFFF:FFF:F  
FFF  
@A00721:190:HGJW7DSXY:4:2641:18240:14450\_1:N:0:TCTGCAAG+GCTGCACT  
ATTTGGATGTTGTCGAAAATATCAGGTTCTTGTCACGATTCTTAAAAGAAGTTTATTAACCTTCAG  
AGTCTCTTGAAGTCCAGGTAGCTAATGTTCTTGCAATAGCCACAGACTTTCTGGGAAAAGAGACCTC  
TGT  
+  
FFFFFFFFFFFFFFFF:FFFFFFFFFFFFFFFFFFFFFFFFFFFFFFFFFFFFFFFF:FFFFFF:FFF  
FFFFFFFFFFFFFFFFFFFFFFFFFFFFFFFF:FFFFFFFFFFFFFFFFFFFFFFFFFFFFFFFF  
FFF  
@A00721:190:HGJW7DSXY:4:2233:29993:25003\_1:N:0:TCTGCAAG+GCTGCACT  
GAGAATTACTCAGATTCAATCTGGCATCACTGAACGTCTACAACGAGTTAGGGAGTGGCTAGGTTTTA  
AAAGATCCTTGCACAAGCAATACCTTCCACTGAGTTCATCACCAGAGTTTCGACGTGCGGAAAAC  
GAT  
+  
FFFFFFFFFFFFFFFFFFFFFFFFFFFFFFFFFFFFFFFFFFFFFFFFFFFFFFFFFFFFFFFF,FFF  
FF:FFFFFFFFFFFFFFFFFFFFFFFFFFFFFFFFFFFFFFFFFFFFFFFFFFFFFFFFFFFFFFFF  
FFF  
@A00721:190:HGJW7DSXY:4:1246:7545:3223\_1:N:0:TCTGCAAG+GCTGCACT  
GTTTTTGGTATAAATCCTGATGGCTCAGTACAGGGAGGAGTAATAGTTATAAACCTTCTTTTATCA  
TTGCAACAGGACTTTGAGAAGACTGTTGAAATGGACAAAATCTGGGATCATAGGTATGTGTCACGCTA  
CAC

F:FFFFFFFFFFFFFFFFFFFFFFFFFFFFFFFFFFFFFFFFFFFFFFFFFFFFFFFFFFFFFFFF  
FFFFFFFFFFFFFFFFFFFFFFFFFFFFFFFFFFFFFFFFFFFFFFFFFFFFFFFFFFFFFFFF  
FFF

@A00721:190:HGJW7DSXY:4:2436:22254:5462\_2:N:0:TCTGCAAG+GCTGCACT  
CTTTTTGAATATGACAGAAGCTCGCCATATCAGATTAGAGACATGCCAGTTAGAGTTCCTTAACCAG  
GACTGATGGTGAGATTCTTTTACCTTTTGGAGGTCCAGGAACCTTTAC

+

FFFFFFFFFFFFFFFFFFFFFFFFFFFFFFFFFFFFFFFFFFFFFFFFFFFFFFFFFFFFFFFF  
FFFFFFFFFFFFFFFFFFFFFFFFFFFFFFFFFFFFFFFFFFFFFFFFFFFFFFFFFFFFF

@A00721:190:HGJW7DSXY:4:2606:20735:9846\_2:N:0:TCTGCAAG+GCTGCACT  
CGGAGGATGACAGGTGGGAGACCGCTCAATAACACTCTATTGAATCCCTTTCCACGATGAAAGCGCT  
TTATGAGGTGCTCCATGCAAATTTACAGTTCCTCTTTGGTGATATCGC

+

:FFFFFFFF:FFFFFFFFFFFFFFFFFFFFFFFFFFFFFFFFFFFFFFFFFFFFFFFFFFFFFF:  
FF,F:FFFFFFFFFFFFFF,FFFFFFFFFF,FF:::F,FFFFFFFF:F

@A00721:190:HGJW7DSXY:4:2262:24551:16924\_1:N:0:TCTGCAAG+GCTGCACT  
TTACCACCCTTGTCATTGATACAAACATTCTAGGTGATGCTTTCTTAGAGGCTCGTCTAGCCGCTGAG  
ATTCGTCTTACCTATTTACAATCTGTAGAGAGAGAGGTTAATCAGAATTTGAGTGATAACGATTTAGT  
ACT

+

FFFFFFFFFFFFFFFFFFFFFFFFFFFFFFFFFFFFFFFFFFFFFFFFFFFFFFFFFFFFFF:  
FFFFFFFFFFFFFFFFFFFFFFFFFFFFFFFFFFFFFFFFFFFFFFFFFFFFFFFFFFFFFF,  
FFF

@A00721:190:HGJW7DSXY:4:2662:31656:32017\_1:N:0:TCTGCAAG+GCTGCACT  
GTTTATGTTTCGTTTCAGCTGGATGGATCTTTTGATGGTATGTTTCACATTGCGTGATCACTTCCCG  
TGGACTTGGAAGAGATTAAACATAAAATCCAGCGATTCTATTATGTCGCTAAAGCCTGTCCAGTTGT  
CGA

+

FFFFFFFFFFFFFFFFFFFFFFFFFFFFFFFFFFFFFFFFFFFFFFFFFFFFFFFFFFFFFF:  
FFFFFFFFFFFFFFFFFFFFFFFFFFFFFFFFFFFFFFFFFFFFFFFFFFFFFFFFFFFFFF:  
FFF

@A00721:190:HGJW7DSXY:4:2168:23701:7373\_1:N:0:TCTGCAAG+GCTGCACT  
TTCTCGCTCGCATTTCAAGGATTACTAAGTCTGAGATCTGCCACTTCTAATTTTAGGAAACGTGCG  
GAAAAGAAAGTTCATGAGGATGTCTTGGTCGAAAAATATCGCCGGAACTTCTAATAGAGGATCCTGA  
TGA

+

FFFFFFFFFFFFFFFFFFFFFFFFFFFFFFFFFFFFFFFFFFFFFFFFFFFFFFFFFFFFFF:  
FFFFFFFFFFFFFFFFFFFFFFFFFFFFFFFFFFFFFFFFFFFFFFFFFFFFFFFFFFFFFF:  
FFF

@A00721:190:HGJW7DSXY:4:1343:26494:22232\_2:N:0:TCTGCAAG+GCTGCACT  
ACGGATACCGATCTCAGTTCTACCACAGAAACCGTCTCAGGAAGTGTCTCCACTGATTCGGAATTAGA  
GAAAGACGACCTTCTTGTGGGGACTGAGACCTCTGAATTTTCAGGGTG

+

FFFFFFFFFFFFFFFFFFFFFFFFFFFFFFFFFFFFFFFFFFFFFFFFFFFFFFFFFFFFFF:  
FFFFFFFFFFFFFFFFFFFFFFFFFFFFFFFFFFFFFFFFFFFFFFFFFFFFFFFFFFFFF

@A00721:190:HGJW7DSXY:4:2538:18050:32283\_2:N:0:TCTGCAAG+GCTGCACT  
TTGAAAGGGATAATTTCAACTCTGAGACTTCTAAGAGTGTTTCAAAGACCAGAAACGTAACAAGAAG  
AATAAAGGTAGGAAGGGGAGAAAACAGAACAAGCGAGCGGTTGAAGAG

+

FFFFFFFFFFFFFFFFFFFFFFFFFFFFFFFFFFFFFFFFFFFFFFFFFFFFFFFFFFFFFF:  
FFFFFFFFFFFFFF,FFFFFFFFFFFFFFFFFFFFFFFFFFFFFFFFFFFFF:FFFF

@A00721:190:HGJW7DSXY:4:2437:8513:2675\_2:N:0:TCTGCAAG+GCTGCACT  
TGGTTGCGGCTGATCGTACCCCAATTCCTGCTAGAAAGATCACTCTCGGCATACCACTGATCTTCCA

GAGTTACGTAGTGGTCGTTCTTTTGGTGATTTTATCAAAGAGAAAGTT  
+  
FFFFFFFFFFFFFFFFFFFFFFFFFFFFFFFFFFFFFFFFFFFFFFFFFFFFFFFFFFFFFFFF  
FFFFFFFFFFFFFFFFFFFFFFFFFFFFFFFFFFFFFFFFFFFFFFFFFFFFFFFF  
@A00721:190:HGJW7DSXY:4:2141:21215:27117\_2:N:0:TCTGCAAG+GCTGCACT  
AAAAGCTATTAATAGCAGTTGTGGGGCTATAATACCGCCTCCAGATTACTCTAAACTGAATCCACTCT  
CTTGGGATATAAATGAGTACATCTATAATAGAGTTTTGGAAGTGTGTA  
+  
FFFFFFFFFFFFFFFFFFFFFFFFFFFFFFFFFFFFFFFFFFFFFFFFFFFFFFFFFFFFFFFF  
FFFFFFFFFFFFFF:FFFFFFFFFFFF:FFFFFFFFFFFF:FFFFFF  
@A00721:190:HGJW7DSXY:4:2456:12237:21652\_2:N:0:TCTGCAAG+GCTGCACT  
TCGATTGATTTTGTGACTACGATCTCTTGTATAAAGAAGTTCTTCGCAGTTGAATCTCCACCAGG  
TGGAGGAAGACTACTGAACTTATAGCGACTTTTGTGCAATTTTTCGC  
+  
FFFFFFFFFFFFFFFFFFFFFFFFFFFF:FFFFFFFFF:FFFFFFFFFFFFFFFFFFFFFFFF  
FFFFFFFFF:FFFFFFFFFFFF:FFFFFFFFF:FFFFFFFFF,FFFF,FF  
@A00721:190:HGJW7DSXY:4:2611:28420:28197\_2:N:0:TCTGCAAG+GCTGCACT  
ATTGTCACTGCTAATCGTAATTCGCGAGAAGAGATAGTGAATAAGTTTTGGCACTTCTAGTTCATCG  
CGGTATTTGTGAAATTAAGACAGACGTGAAAGTTATGATGAGTGATCG  
+  
FFFFFFFFFFFF,FFFFFF,FFFFFFFFFFFFFFFFFFFFFFFFFFFF:FFFFFFFFFFFFFFFFFFFF:FF  
FFFF:FFF,FF:F:FFFFFFFFFFFFFFFFFFFFFFFFFFFF:FFFFFF  
@A00721:190:HGJW7DSXY:4:2472:16595:27070\_2:N:0:TCTGCAAG+GCTGCACT  
TTCATCGACGAATTATTCATGATTCACGCTGGTCAGACCTTTTTCTTACACATCTACTTAAGGCGGC  
TTATACCATAGGTTACGGTGAATCCAATCAAATCGGATTCATCAATCG  
+  
FFFF:FFFFFFFFFFFFFFFFFFFFFFFFFFFFFFFFFFFFFFFFFFFFFFFFFFFFFFFFFFFF  
F,FFFFFFFFFFFF:FFFF,FFFFFFFFFFFF:FFF:FFFFFFFF  
@A00721:190:HGJW7DSXY:4:1167:8323:22357\_1:N:0:TCTGCAAG+GCTGCACT  
CGCAAACACTTCAACATCAACGACATCATTCTTGATGAGTGTCGTTCTTATCGAAGTCTCAGTTATC  
GCTGCCCGGCCGACGTTTGTGCGCAACTCTCAGAGGTTACGGCAGAAAAATTTCTCTGCTTGAAT  
TCG  
+  
FFFFFFFFFFFFFFFFFFFF:FFFFFFFFFFFF:FFFFFFFFFFFFFFFFFFFFFFFFFFFFFFFFFFFF:FFFF  
FFFFFFFFFFFF:FFFFFFFFFFFFFFFFFFFFFFFFFFFFFFFFFFFFFFFFFFFFFFFFFFFF  
FFF  
@A00721:190:HGJW7DSXY:4:2333:9787:21104\_1:N:0:TCTGCAAG+GCTGCACT  
TAAGAGTAAGGTTAAATGTGAAGATGCTCAGACTATTCAATGAAGTTCAAGGTAATACTTACCAGCACG  
TTCGGCTGGTTAGAATTAAACCTCAAGATGACCCTGTTTTGCATCACAACACATATTACCGTTGCT  
CTA  
+  
FFFFFFFFF:F,FFFFFFFFFFFFFFFFFFFFFFFFFFFFFFFFFFFFFFFFFFFFFFFFFFFF  
FFFFFFFFF:FFFFFFFFFFFFFFFFFFFFFFFFFFFFFFFFFFFFFFFFFFFFFFFFFFFF  
FFF  
@A00721:190:HGJW7DSXY:4:1215:30526:21136\_2:N:0:TCTGCAAG+GCTGCACT  
TCAATGTAAAGTTAAACGATGCTACTTGTGAGAGGATCAATCACAGTAAGGAAGTGTACGTTTAGCA  
CGGGAGGTTGCAGATTCAACCCCTTATATCGAGGCTATCGAGGACGAT  
+  
FFFFFFFFFFFF:FF:FFFFFFFFFFFFFFFFF,F:FFFFFFFFFFFF,FFFFFFFFFFFF:F:  
FFFFFF:FFFFFFF:FFFF:FFF:FFF:FFFFFFFFF,FFFFF  
@A00721:190:HGJW7DSXY:4:2305:3215:24846\_1:N:0:TCTGCAAG+GCTGCACT  
AGTTGTTGACGACAAGCCTCAAGAGGGTAGAGGACCACCTGGATCTTCTACTGTCTCTGCCTTCCAAG  
ATTTCTTAGAAGAGGTTATTCCTGGAACCACCTTAACGTCACTCGGTAATCTTTCAGCCGAATTAAGT  
ACT

[illegible]

@A00721:190:HGJW7DSXY:4:2664:2040:18333\_1:N:0:TCTGCAAG+GCTGCACT  
GATACTTATCACGAAAGGACTTGAGTCTTTTGATCAGTCTCTGACTTGACCATCTTTCATTTTAAATG  
ACGATCATTAAGACTCTCTTTCTTTGTTTCCTTCTTTGCACTGATTTTTCCTCATCAGCTTGTGT  
TTT

+

FFFFFFFFFFFFFFFFFFFFFFFFFFFFFFFFFFFFFFFFFFFFFFFFFFFFFFFFFFFFFFFFFFFFFFFF  
FFFFFFFFFFFFFFFFFFFFFFFFFFFFFFFFFFFFFFFFFFFFFFFFFFFFFFFFFFFFFFFFFFFFFFFF  
FFF

@A00721:190:HGJW7DSXY:4:2177:1506:34726\_1:N:0:TCTGCAAG+GCTGCACT  
TTTACGATAACAACCTATCAGTTGATTAAGACTCTTCCGAAAGGCGAACTTTGGGAATTTGAAGCTCAG  
GGTGAAGCACAACTTTGACCGTGACGAACTGTGGTGTCTTGATCTACGTTACGGATATACTCTCCT  
TGA

+

FFFFFFFFFFFFFFFFFFFFFFFF:FFFFFFFF:FFFFFFFFFFFFFFFFFFFFFFFFFFFFFFFFFFFF  
FFFFFFFFFFFFFFFF:FFFFFFFFFFFFFFFFFFFFFFFFFFFFFFFFFFFFFFFFFFFFFFFFFFFFF,  
FFF

@A00721:190:HGJW7DSXY:4:2633:27868:22388\_1:N:0:TCTGCAAG+GCTGCACT  
TGTGCTCTTCCGATCTATTAATCACTCATTTTAGTGAGATTATTAACACGCACTAAACGTCTTCGA  
CAACAGCAGGGGTTTTCGAATAGTGATAGCCACCCGCCTTACAGAGGGGCAGCAGCATGACCATAATT  
GGT

+

FF:FFFFFFFFFFFFFFFF,FFFFFFFFFFFFFFFFFFFFFFFFFFFFFFFFFFFFFFFFFFFFFFFF  
FFFFFFFFFFFFFFFFFFFFFFFFFFFFFFFFFFFFFFFFFFFFFFFFFFFFFFFFFFFFFFFFFFFFFFFF  
FFF

@A00721:190:HGJW7DSXY:4:1577:22236:20682\_1:N:0:TCTGCAAG+GCTGCACT  
CACCTTTTCTACTGTCTGTCTCGCCTCTTCGAATGAAGTTTAAATGCTTAACAACAATGATAGTGAAT  
TTATACCTACAATCATTGGTTTTCTAATAATGATGACACTATTGTTTATGGATATGATGCTATTACT  
CAT

+

FFFFFFFF:FFFFFFFFFFFF:F,FFFFFFFFFFFF:FFFFFFFFFFFFFFFFFFFFFFFFFFFFFFFF  
FFF:F:FFFFFFFF,FFFFFFFFFFFFFFFF:FFFFF,:FFFFFFFFFFFFFFFF,FFF,FF:FFFF  
FFF

@A00721:190:HGJW7DSXY:4:2351:27850:1752\_2:N:0:TCTGCAAG+GCTGCACT  
TCTCAGTTTACAAGGACCTTAAGCGATGGATCGGGGTTAATTCTAAACATTACCCGAAAGACGTGCT  
AAATTAACCATTTGTACGATGTCGTCTGTCTCGGCGAGATCGGAAGA

+

FFFFFFFFFFFFFFFFFFFFFFFFFFFFFFFFFFFFFFFFFFFFFFFFFFFFFFFFFFFFFFFFFFFFFFFF  
FFFFFFFF,FFFFFFFFFFFFFFFFFFFFFFFFFFFFFFFFFFFFFFFFFFFFFFFF

@A00721:190:HGJW7DSXY:4:2348:23538:3646\_1:N:0:TCTGCAAG+GCTGCACT  
TCGTTTCTTTCTTTATCTCTTTGGTTGTTAGGGATTTTGAGAGAGTGAAAGGCTTCAATTGTAGTGGT  
TTGGTCGTTTCAGTACCCAGTCAGTATACCTCTACGCAAAGATATTTTCATGAAACTACAGAGGAACG  
TAC

+

FFFFFFFFFFFFFFFFFFFFFFFFFFFFFFFFFFFFFFFFFFFFFFFFFFFFFFFFFFFFFFFFFFFFFFFF  
FFFFFFFFFFFFFFFFFFFFFFFFFFFFFFFFFFFFFFFFFFFFFFFFFFFFFFFFFFFFFFFF:FFFFFFF  
FFF

@A00721:190:HGJW7DSXY:4:2343:25455:21026\_2:N:0:TCTGCAAG+GCTGCACT  
TCTTTTCATATTATGAATGAACCTTCGGCCGCTCTTTTGCTTCGATGTTGGATGTCAAGAAGGGTTCA  
GAATGGGATTCTACGTAGTTTATGACTTTGGTGGTGGTACTTTTCGAT

+

FFFFFFFFFFFFFFFFFFFFFFFFFFFFFFFFFFFFFFFFFFFFFFFF:FFFFFFFFFFFFFFFFFFFF  
FFFFFFFFFFFFFFFFFFFFFFFF:FFFFFFF:,FFFFFFFFFFFFFFFF,FFF

@A00721:190:HGJW7DSXY:4:2412:21748:1297\_2:N:0:TCTGCAAG+GCTGCACT  
AGTGTTATTTATTCTGGTGGTGTGATAATCTTGGAGGTCGTGACGTTGATGAAGCTATAAGAGCGTT



CTTATTACGGCGCACTTCTTTACCCGCCACCACACAACCTTTCAGTTTC

+

FF:FFFFFFFFFFFFFFFFFFFFFFFFFFFFFFFFFFFFFFFFFFFFFFFFFFFFFFFFFFFFFFFF:FF:FFFFFFFFFFFFFF  
FFFFFFFF,FFF,FFFF:FFF::,FFFFFFFFFFFFFF,FFFFFFFF

@A00721:190:HGJW7DSXY:4:2468:16468:28886\_1:N:0:TCTGCAAG+GCTGCACT  
ACTGGAAAACCCTCGTCAATACTTTTCAATAATATACGCTTGAACCTCACTTATGACGATCTAGTGAA  
ATTAACGCGTCCTTTTCTGGAACGTAGTTTACTATTATGAACAAAGTTATCAAAGATAGTGGCATTCAAG

+

FFFFFFFFFFFFFFFFFFFFFFFFFFFFFFFFFFFFFFFFFFFFFFFFFFFFFFFFFFFFFFFF:FFFFFFF  
FFFFFFFFFFFFFFFFFFFFFFFFFFFFFFFFFFFFFFFFFFFFFFFFFFFFFFFFFFFFFFFFFFFFFFF  
FFF

@A00721:190:HGJW7DSXY:4:2134:14398:29747\_1:N:0:TCTGCAAG+GCTGCACT  
CTGATTCCGGCCGGTGGTAGCTCATTTCTACCAGGGGCTATTACTCTTGCTGAAACAGCTATTAAAGC  
TGTTGAGCGGGTAATTACACCTAAACGAGCTCGATCTGCCATCGCTGAAGGATGTGCACTCTTTTCTGCTA

+

FFFFFFFFFFFFFFFFFFFFFFFFFFFFFFFFFFFFFFFFFFFFFFFFFFFFFFFFFFFFFFFF:FFF  
FFFFFFFFFFFFFFFFFFFFFFFFFFFFFFFFFFFFFFFFFFFFFFFFFFFFFFFFFFFFFFFFFFFFFFF  
FFF

@A00721:190:HGJW7DSXY:4:1268:6234:29919\_2:N:0:TCTGCAAG+GCTGCACT  
GCTCGTATTATCGTCGCTGCTGGATCTGCGTTACCGTTGAAGGCTAACTCCAAGGTAATTATGAAGA  
CTGTGATTTATCTTTCACTCTGGCCTTGTATGAGGGTGTTCATCG

+

FFFFFFFFFFFFFFFFFFFFFFFFFFFFFFFFFFFFFFFFFFFFFFFFFFFFFFFFFFFFFFFF:FFF  
F:FFFFFFFFFFFFFFFFFFFFFFFFFFFFFFFFFFFFFFFFFFFFFFFFFFFFFFFFFFFFFFF

@A00721:190:HGJW7DSXY:4:2173:12057:13322\_2:N:0:TCTGCAAG+GCTGCACT  
AATTTCAATCTTCTTAAAAAGAAGATAGAGAGTCATACTTTGGGCTATCGTTCAGGTGCATGGGGTTG  
GATAGCCAATATTGAAGTGGACACCTCTGGTAGTATCGAAGTAAAGAT

+

FFFFFFFFFFFFFFFFFFFFFFFFFFFFFFFFFFFFFFFFFFFFFFFFFFFFFFFFFFFFFFFF:FFFFFFF  
FFFFFFFFFFFFFFFFFFFFFFFFFFFFFFFFFFFFFFFFFFFFFFFFFFFFFFFFFFFFFFF:FFF

@A00721:190:HGJW7DSXY:4:1508:18548:1391\_2:N:0:TCTGCAAG+GCTGCACT  
ATTAAGGTTGTACTTATCAATGATTTTATCGCTGGTTGTTATATCGAAAAGTCTCTTCTAAAAGG  
AACGTCAGTTCTAACCCAAAGAGAATATCTAAAATATTTACAAAATAA

+

F,FF:F,FF,:FFF:F:F::,FF,FFFFFF:F,:,,FF,FF:F,:F,FFFF,F,FF:F,FFFF:F  
FF,FF,F,FF,FF:F:F:FF,,,FF,FFFFFF,F,FF:,FFFF,:,

@A00721:190:HGJW7DSXY:4:1412:30002:5102\_1:N:0:TCTGCAAG+GCTGCACT  
ATGGCACTACCTCGGTACAATCTTACTTGAACGAAGGCGACCTGTTCCGGAGTTTTTACGGGATCCG  
GAATGTTCTGTCTATATTAGGTGAAGCGAAATACGATTTTGAACGTCAACGTTACCGAGTTTCGTTT  
CGT

+

FFFFFFFFFFFFFFFF,FFFFFFFFFFFFFFFFFFFFFFFFFFFFFFFFFFFFFFFFFFFFFFFF  
FFFFFFFFFFFFFFFFFFFFFFFFFFFFFFFFFFFFFFFFFFFFFFFFFFFFFFFFFFFFFFFFFFFFF  
FFF

@A00721:190:HGJW7DSXY:4:1372:3323:26788\_1:N:0:TCTGCAAG+GCTGCACT  
TAGTGCGAGGCCTCTCTTCTACGAGTATTGCTATTTATACGTTACGAGAAGAAGGTTGAAAGTTTG  
AGAACTTAGTTTACGAACCTGACTCTACTATACGTGACATACTAAATACTAGATATTTGGATGATCTTGAT

+

FFFFFFFFFFFFFF:F:FF,FFFF:FFFFFFFFFFFFFFFFFFFFFFFF,FFFFFFFF:FFF:FFFFFF:  
FFFFFFFFFFFFFFFF:FFFFFFFFFFFFFFFFFFFFFFFF:FFFFFFFFFFFFFFFF,FFFFFFFF:FFFFFF  
FFF

@A00721:190:HGJW7DSXY:4:2359:10077:17284\_2:N:0:TCTGCAAG+GCTGCACT  
AAAATTTTCTTCCTTGGATTTTAATATAAAGAATCTTTACCAGGACTCCTACTACAGGAGGCAGTCTT  
CTGATCGTAAGAAGTTTATAAGGAACATATCCATTTGTTGTAATAGGG

+

FFFFFFFFFFFFFFFFFFFFFFFFFFFFFFFFFFFFFFFFFFFFFFFFFFFFFFFFFFFFFFFFFFFFFFFF  
FFFF:FFFFFFFFFFFFFFFFFFFFFFFFFFFFFFFFFFFFFFFFFFFFFFFFFFFFFFFFFFFFFFFF

@A00721:190:HGJW7DSXY:4:1478:6298:32315\_2:N:0:TCTGCAAG+GCTGCACT  
AACTCTAAGTGGTAATACTGTCTTTCCAAGCTTACCTGTATCTTCAATGAAATTGGACTCTTCGATAG  
GGGACATTTTATCGTGGGCTTTCCGTAAAGGAAGATCTGTTATCGACG

+

FFFFFFFFFFFFFFFFFFFFFFFFFFFFFFFFFFFFFFFFFFFFFFFFFFFFFFFFFFFFFFFFFFFFFFFF  
FFFFFFFFFFFF:FFFFFFFFFFFFFFFFFFFFFFFFFFFFFFFFFFFFFFFFFFFFFFFFFFFFFFFF

@A00721:190:HGJW7DSXY:4:2565:4110:12649\_2:N:0:TCTGCAAG+GCTGCACT  
GGTGGTCTTTATTCTATTATTGATTTTTATGAGATTGATACGTTAACAGAAGATGATGTTAGAGTAGA  
ATTCCTGAAGAGTCCTTCCGTAACCAACTTCTTGACAATTTTCTTCAA

+

FFFFFFFFFFFFFFFFFFFFFFFFFFFFFFFFFFFFFFFFFFFFFFFFFFFFFFFFFFFFFFFFFFFFFFFF  
FFFFFFFFFFFF:FFFFFFFFFFFFFFFFFFFFFFFFFFFFFFFFFFFFFFFFFFFFFFFFFFFFFFFF

@A00721:190:HGJW7DSXY:4:1529:16297:6292\_2:N:0:TCTGCAAG+GCTGCACT  
AATTAAGAAATAATCCTACATTGACTGATTATCTAAAGATTGAAGGAAAATTTTATCCTCGTTTAACT  
TACTTAGACTTTCTACGATACAAATGATAACTTCTAATTTACGTTTG

+

FFFFFFFFFFFFFFFFFFFFFFFFFFFFFFFFFFFFFFFFFFFFFFFFFFFFFFFFFFFFFFFFFFFFFFFF  
FFFFFFFFFFFF:FFFFFFFFFFFFFFFFFFFFFFFFFFFFFFFFFFFFFFFFFFFFFFFFFFFFFFFF

@A00721:190:HGJW7DSXY:4:1430:9588:24674\_2:N:0:TCTGCAAG+GCTGCACT  
CTCAGGAGTCCCGGCATTTGATAATAATGACGAGACTTTTCGTCATAATCGCTGCATATTACGGATTAC  
ACGGTACCAGCGCATCTCGTGTGCGAGCCTCGACCCGATTATATGGTAT

+

FFFFFFFFFFFFFFFFFFFFFFFFFFFFFFFFFFFFFFFFFFFFFFFFFFFFFFFFFFFFFFFFFFFFFFFF  
FFFFFFFFFFFF:FFFFFFFFFFFFFFFFFFFFFFFFFFFFFFFFFFFFFFFFFFFFFFFFFFFFFFFF

@A00721:190:HGJW7DSXY:4:2310:14290:20384\_2:N:0:TCTGCAAG+GCTGCACT  
GAACTAACTATGTTATGTTCTCTGATCATTTTGACAATCTCTTCTTATAATAATAATAATAATAT  
TACTAATGGCAAATAGTGGAAGGCTCCAGTCAACACTAGTTCGAGTG

+

FFFFFFFFFFFFFFFFFFFFFFFFFFFFFFFFFFFFFFFFFFFFFFFFFFFFFFFFFFFFFFFFFFFFFFFF  
FFFFFFFFFFFF:FFFFFFFFFFFFFFFFFFFFFFFFFFFFFFFFFFFFFFFFFFFFFFFFFFFFFFFF

@A00721:190:HGJW7DSXY:4:1451:17345:10394\_1:N:0:TCTGCAAG+GCTGCACT  
AATAGGTGAAGGGATAGTTTTTACCTCGACCAACATTAAGGCGGCGGCGACTAATCTTAAAGCTTCAC  
CCAAAATGAAGGACACTTCGAAACTGAATAATGATGCACTACAAACAAGTATCGCTAATCATCTGAAA  
AAG

+

F:FFFFFFFFFFFFFFFFFFFF:FF,F,FFFFFFFFFFFFFFFFFFFFFFFFFFFFFFFFFFFFFFFFFFFF  
FFFFFF,FFFFFFFFFFFFFFFFFFFFFFFFFFFFFFFFFFFFFFFFFFFFFFFFFFFFFFFFFFFFFFFF  
FFF

@A00721:190:HGJW7DSXY:4:2641:32244:29309\_1:N:0:TCTGCAAG+GCTGCACT  
TCTTAGAGGATATTCGCCATTGTGGTACGAATTGGTCCAACATTTACCACCAAATCTTTTGATACAA  
CTCTAGCCTTCAAGTGGGGTATGCCTGCGGAATACGCTTGCTATTACCAGATTGGTTCGAACCCGTT  
GAT

+

FFFFFFFFFFFFFFFFFFFFFFFFFFFFFFFFFFFFFFFFFFFFFFFFFFFFFFFFFFFFFFFFFFFFFFFF  
FFFFFFFFFFFF:FFFFFFFFFFFFFFFFFFFFFFFFFFFFFFFFFFFFFFFFFFFFFFFFFFFFFFFF  
FFF

@A00721:190:HGJW7DSXY:4:2575:7862:32268\_1:N:0:TCTGCAAG+GCTGCACT  
TGCTATTCAAGCTTGTCGTTTAAAGACTGCAGAGGCTGTCAAACAAGCCAGACTCAAGGAGTCCAAT

+

@

+

@

+

@

+

@

+

@

+

@

+

@

+

```
FFFFFFFF:FFFFFFFFFFFFFFFFFFFFFFFFFFFFF:,FFFFFFFF:FFFFFFFFFFFFFFFFFFFFFFFFFFFF
FF,FFFFFFFFFFFFFFFFFFFFFFFFFFFFFFFFFFFFF:FFFFF
```



@A00721:190:HGJW7DSXY:4:1163:20066:25347\_1:N:0:TCTGCAAG+GCTGCACT  
GGAGTTTCAGACGTGTGCTCTTCCGATCTGGGAAATGTCCCCAAACTGATAAGAATAAAGGGAAAGGT  
CCATCAGGACCTAAGAAGGGGAAATTACCCCTAATTCTGAAGGAAGATCTCCCACCATCTGGGGTTGG  
GAA

+

FFFFFFFFFFFFFFFFFFFFFFFFFFFFFFFFFFFFFFFFFFFFFFFFFFFFFFFFFFFFFFFFFFFFFFFF  
FFFFFFFFFFFFFFFFFFFFFFFFFFFFFFFFFFFFFFFFFFFFFFFFFFFFFFFFFFFFFFFFFFFFFFFF  
FFF

@A00721:190:HGJW7DSXY:4:2361:22824:25488\_1:N:0:TCTGCAAG+GCTGCACT  
GCACGGGCCAAAGAGGCCGCTGCTACGAAGTCGCTGAAGGCGGCTTGGGTCATTAAGGGTAGCTGTAA  
AGTTGCGCCTGCCGACCCCATCTTTGAGACCAAGACTCTCTACAGTAGGTTCTGCTACTATGAGCA  
AAT

+

FFFFFFFFFFFFFFFFFFFFFFFFFFFFFFFFFFFFFFFFFFFFFFFFFFFFFFFFFFFFFFFFFFFFFFFF  
FFFFFFFFFFFFFFFFFFFFFFFFFFFFFFFFFFFFFFFFFFFFFFFFFFFFFFFFFFFFFFFFFFFFFFFF  
FFF

@A00721:190:HGJW7DSXY:4:1530:3007:16031\_1:N:0:TCTGCAAG+GCTGCACT  
TCACTGAGGACGAAGGTGAGAGGACTTTTGGCTACTGGCGACAACTGAGAGCAGTCGCTGGGGAAAG  
AGAATTGCGTGGGTTGAAGGCCGACGCTTCGAGCTTGAGTGTGACGTGGCCGGTGACGTTTTTGTCAA

+

FF:,FFFF,FFF,,:FFFF:FFFFFFFFF:,FFFF::,,,,,,,,,F,F,FF,FFF,F,FFF,:FF:  
,F,FFF::FFFF:FF,,FFFF,:F:FFF:F,F:FFFF:FFFFF,F,:FFFFFF,FFFFFFFFFFFFF

@A00721:190:HGJW7DSXY:4:1617:3242:15060\_1:N:0:TCTGCAAG+GCTGCACT  
TTTATCCGCGCTTAAGTATGGGGCGAAGATCCCCTATTGAGTCTTGAAGGACTTAGGTTGGCATATTT  
ATGCCGACGATAATAAGCATGTCACCCTTAAGCACCGAGGTAAGCTCGGGACTTACAAGAGAGAGTGT  
GAG

+

FFFFF:,F:FFFFFFFF,FFFFFFFFFFFFFFFF:FFFFFFFFFFFFFFFF:FFFFFFFFFFFFFFFF  
FFFFFFFFFFFFFFFF,FFFFFFFFFFFFFFFFFFFFFFFFFFFFFFFF:FFFFFFFFFFFFFFFFFFFFF  
FFF

@A00721:190:HGJW7DSXY:4:2305:9715:26584\_1:N:0:TCTGCAAG+GCTGCACT  
CACTATTTTTGCCAGAAATGCGGGCTTTCTGACTGATGAGGTTAAACTCTTGCTCCTTCTGTGGGTG  
AGGGTTTTTTGTTATATTCAGTGGTTCTGGGAGGCTGCTTTCCTCCATAATTACAACCTCTCTTTAGAG  
AGC

+

FFFFFFFFFFFFFFFFFFFFFFFFFFFFFFFFFFFFFFFFFFFFFFFFFFFFFFFFFFFFFFFFFFFFFFFF  
FFFFFFFFFFFFFFFF:FFFFFFFFFFFFFFFFFFFFFFFFFFFFFFFFFFFFFFFFFFFFFFFFFFFFF  
FFF

@A00721:190:HGJW7DSXY:4:1556:28049:34507\_2:N:0:TCTGCAAG+GCTGCACT  
AGTTGGGCAAATCCCACATATGGTAGACGTTGTACACTTTTCTTGAAAATTTTCTTTCTCCGT  
CATTGGGGATTTGATGTGAGAAGGTGAAGGTGTCAAGGTCTTCTT

+

:FFFFFFFF:FFFFF:FFFFFFFFFFFFFFFFFFFFFFFFFFFFFFFFFFFFFFFFFFFFFFFFFFFFF  
FFF,FFFFFFFFFFFF,FFFFFFF:FFFFFFFFFFFFFFFFFFFFFFFFFFFF

@A00721:190:HGJW7DSXY:4:2672:23963:30812\_1:N:0:TCTGCAAG+GCTGCACT  
TTCAGACGTGTGCTCTTCCGATCTCGGCTCGTATCGAGTTGGAGGGAGGAAGTTCTCCGAAATTAAAG  
ACGGGGGGATTAAGAGTCCAGCTGTAAGTGTCAATTCAGAGAGGGGAGCTCTGAAAAGGAACTTCGT  
CAG

+

FFFFFFF:FFFFFFFFFFFFFFFFFFFFFFFF:FFFFFFFFFFFFFFFFFFFFFFFFFFFFFFFFFFFFF  
FFFFFFFFFFFFFFFF:F:FFFFFFFFFFFFFFFFFFFFFFFFFFFFFFFF:FFFFFFFFFFFFFFFF::FFF  
FFF

@A00721:190:HGJW7DSXY:4:2251:29369:11397\_2:N:0:TCTGCAAG+GCTGCACT  
GAGTTTGAGGAAGGCTCTAGAGAAGATCTCACCACTGGAGAAGGCAAGTGAGAGTCCAGAAGTTGA

TGAAGAAGGATTATTTGAAGCAGGGGTACCACTTCCTAAGGTGGATG

[illegible]

+

[illegible]

+

```
FFFF:FFF:FFFFFF,FFFF:,FFFF:FFFFFFFF,FFFFFFFFFFFFFF:FFFFFFFFFFFFFFF
FFFFFFFFFFFF,F:FFFFFFFFFFFFFFFFFFFFFFFFFFFFFFFF:FFFFFFFFFFFFFFFFFFFFF
FFF
```

+

```

FFFFFFFFF:FFFFFFFFFFFFFFFFFFFFFFFFFFFFFFFFFFFFFFFFFFFFFFFFFFFFFFFFFFFF
FFFFFFFFFFFFFFFFFFFF:FFFFFFFFFFFFFFFFFFFFFFFFFFFFFFFFFFFFFFFFFFFFFFFFFFFF
FFF

```

+

```

FFFFFFFFFFFFFF:FFFFFFFFFFFFFF,FFFFFFFFFF,FFFFFFFFF:,FFFFFFF,FFFFF::FFFFFF:F:
F,,:FFFFF,,F,FFFFF:FF:FFFFF,FFF:FFFFF,,:F,F:FFFFF

```

+

```
FFFFFFFF:FFFFFFFFFFFFFFFFFFFFFFFFFFFFFFFFFFFFFFFFFFFFFFFFFFFFF  
FFFFFFFFFFFFFFFFFFFFFFFFFFFFFFFFFFFFFFFFFFFFFFFFFFFFFF
```

 $+$ [illegible]

+

[illegible]

@A00721:190:HGJW7DSXY:4:1535:17951:27821\_2:N:0:TCTGCAAG+GCTGCACT  
TTTCTTCATAAGGGCTATTAGTACGTATGGGGATCACTTCTCGGTCAATGACAAAACCTTCGAAT  
ATGTTACGACATGGCTTCGTAACAACAGTGCGAGGATTGTCATCTCGG

+

FFFFFFFFFFFFFFFFFFFFFFFFFFFFFFFFFFFFFFFFFFFFFFFFFFFFFFFFFFFFFFFFFFFFFFFFF:  
FFFFFFFFFFFFFFFFFFFFFFFFFFFFFFFFFFFFFFFFFFFFFFFFFFFFFFFFFFFFFFFFFFFFFFFFF

@A00721:190:HGJW7DSXY:4:2210:15203:2863\_2:N:0:TCTGCAAG+GCTGCACT  
TTCATATAGATACGAGATACCTAGAGAAGGTCGCAGCGATCTTACTCGTTATCGGAGCTAAGAAGAAG  
ACTTTGGGTACACGTTATGCTCGCAAACCTAACGTTAGTACCGGAGGT

+

FFFFFFFFFFFFFFFFFFFFFFFFFFFFFFFFFFFFFFFFFFFFFFFFFFFFFFFFFFFFFFFFFFFFFFFFF:  
FFFFFFFFFFFFFFFFFFFFFFFFFFFFFFFFFFFFFFFFFFFFFFFFFFFFFFFFFFFFFFFFFFFFFFFFF

@A00721:190:HGJW7DSXY:4:2304:14525:30749\_2:N:0:TCTGCAAG+GCTGCACT  
CTTCTGCGTTACTGAGAGAAAAGATTACAGGACGCCTACGGTGACTTTATGGACAAGATGCAAGTTCTT  
GGGAAATACTTGTTCCTTTTCTAGGTTTAGTAGGTGATCTTGACGTC

+

FFFFFFFFFFFFFFFFFFFFFFFFFFFFFFFFFFFFFFFFFFFFFFFFFFFFFFFFFFFFFFFFFFFFFFFFF:  
FFFFFFFFFFFFFFFFFFFFFFFFFFFFFFFFFFFFFFFFFFFFFFFFFFFFFFFFFFFFFFFFFFFFFFFFF

@A00721:190:HGJW7DSXY:4:2320:12066:35289\_2:N:0:TCTGCAAG+GCTGCACT  
GAGAAGACAACGAATCTTGAACTACGGTCCTTATCAAAGAAAATGGTGAACCGGTCTCTAAATCTTT  
TGAGATTGAGAAGATTGAAGAACACGTCAAGAAGTCGCTCGGCGTTGT

+

FFFFFFFFFFFFFFFFFFFFFFFFFFFFFFFFFFFFFFFFFFFFFFFFFFFFFFFFFFFFFFFFFFFFFFFFF:  
FFFFFFFFFFFFFFFFFFFFFFFFFFFFFFFFFFFFFFFFFFFFFFFFFFFFFFFFFFFFFFFFFFFFFFFFF

@A00721:190:HGJW7DSXY:4:2233:5086:33066\_2:N:0:TCTGCAAG+GCTGCACT  
CAAGTTAAGAAGGAGGCTGATCATGGAGTCTTTGTACCTTCTGTCAAACCTTCGAGGTTACGCTACGAG  
AGGTGATCCCGGATGTGGATTGAAGGCTGGCTCTAAGGGAGACTCCTT

+

FFFFFFFFFFFFFFFFFFFFFFFFFFFFFFFFFFFFFFFFFFFFFFFFFFFFFFFFFFFFFFFFFFFFFFFFF:  
FFFFFFFFFFFFFFFFFFFFFFFFFFFFFFFFFFFFFFFFFFFFFFFFFFFFFFFFFFFFFFFFFFFFFFFFF

@A00721:190:HGJW7DSXY:4:2634:28809:13244\_2:N:0:TCTGCAAG+GCTGCACT  
TGTAAGAATTGGGTTGAGAAGTGTGCTTTACAAGGAGTTAGACTCTTCTTCAAGTTTTTAGATCTTC  
TTGATAATCTTAAAGAAAAATTTTCAATAAACTAATGAGAGGTATAG

+

FFFFF,FFFF:FFFFFFFF:FFFFFF:FFFFFFFFFFFFFFFFFFFFFFFFFFFFFFFFFFFFFFFFF:  
FFFFF,FFFF,FFF,FFFFFFFFFFFFFFFF:FFFF:FF:FFFFFFFF

@A00721:190:HGJW7DSXY:4:1176:4616:37012\_2:N:0:TCTGCAAG+GCTGCACT  
CATAACTCTTTTTCAAAAATGCGGATGGGTCTACTGATGTTTTCTACAGAGTGCAGTCGTTTCAAC  
ACTTATCACCCTTTTGAAGGAAAATAATTGGTGATGAAAATACGTA

+

FFFFFFFFFFFFFFFFFFFFFFFFFFFFFFFFFFFFFFFFFFFFFFFFFFFFFFFFFFFFFFFFFFFFFFFFF:  
FF,FFFFFFFFF,FFF:FFFF,FFFFFFFFF:FF,,,:FFFF:F::

@A00721:190:HGJW7DSXY:4:2662:30327:29904\_1:N:0:TCTGCAAG+GCTGCACT  
ATTTGGATGTTGTCGAAAACATCAGGTTCTTGTACGATTCTTAAAAGAAGTTTATTAACCTTCAG  
AGTCTCTTGAAGTCCAGGTAGCTAATGTTCTTGCAATAGCCACAGACTTTCTGGGAAAAGAGACCTC  
TGT

+

FFFFFFFFFFFFFFFFFFFFFFFFFFFFFFFFFFFFFFFFFFFFFFFFFFFFFFFFFFFFFFFFFFFFFFFFF:  
FFFFFFFFFFFFFFFFFFFFFFFFFFFFFFFFFFFFFFFFFFFFFFFFFFFFFFFFFFFFFFFFFFFFFFFFF  
FFF

@A00721:190:HGJW7DSXY:4:2249:23909:13088\_1:N:0:TCTGCAAG+GCTGCACT  
GAGAATTACTCAGATTCAATCTGGCATCACTGAACGTCTACAACGAGTTAGGGAGTGGCTAGGTTTTA  
AAAGATCCTTTGCACAAGCAATACCTTCCACTGAGTTCATACCCAGAGTTTCGACGTCGCGGAAAAC  
GAT

+  
FFFFFFFFFFFFFFFFFFFFFFFFFFFFFFFFFFFFFFFFFFFFFFFFFFFFFFFFFFFFFFFF:FFFF  
FFFFFFFFFFFFFFFFFFFFFFFFFFFFFFFFFFFFFFFFFFFFFFFFFFFFFFFFFFFFFFFFFFFF  
FFF  
@A00721:190:HGJW7DSXY:4:1262:6705:1454\_1:N:0:TCTGCAAG+GCTGCACT  
GTTTTTGGTATAAATCCTGATGGCTCAGTACAGGGAGGAGGTAATAGTTATAAAACCTTCTTTTATCA  
TTGCAACAGGACTTTGAGAAGACTGTTGAAATGGACAAAATCTGGGATCATAGGTATGTGTCACGCTA  
CAC  
+  
FF:FFFFFFFFFFFFFFFFFFFFFFFFFFFFFFFFFFFFFFFFFFFFFFFFFFFFFFFFFFFF,FFFF  
FFFFFFFFFFFFFFFFFFFFFFFFFFFFFFFFFFFFFFFFFFFFFFFFFFFFFFFFFFFFFFFFFFFF  
FFF  
@A00721:190:HGJW7DSXY:4:2515:18123:5478\_2:N:0:TCTGCAAG+GCTGCACT  
CTTTTGAATATGACAGAAGCTCGCCATATCAGATTAGAGACATGCCAGTTAGAGTTCTTCTAACCAG  
GACTGATGGTGAGATTCTTTTACCTTTTGGAGGTCCAGGAACCTTTAC  
+  
FFFFFFFFFFFFFFFFFFFFFFFFFFFFFFFFFFFFFFFFFFFFFFFFFFFFFFFFFFFFFFFFFFFF  
FFFFFFFFFFFFFFFFFFFFFFFFFFFFFFFFFFFFFFFFFFFFFFFFFFFFFFFFFFFF  
@A00721:190:HGJW7DSXY:4:2576:4887:3067\_1:N:0:TCTGCAAG+GCTGCACT  
GTGGGAGACCGCTCAATAACACTCTATTGAATCCCTTTCCACGATGAAAGCTCTTTATGAGGTGCTC  
CATGCAAATTTACAGTTCCTCTTTGGTGATATCGCCTCTGTCCTTTCTCCTTAATCGTGAGGTTACG  
AGA  
+  
FFFFFFFFFFFFFFFFFFFFFFFFFFFFFFFFFFFFFFFFFFFFFFFFFFFFFFFFFFFF,FFFFFFFFFFFF  
FFFFFFFFFFFFFFFF,FFFFFFFFFFFFFFFFFFFFFFFFFFFFFFFFFFFFFFFFFFFFFFFFFFFF  
FFF  
@A00721:190:HGJW7DSXY:4:2561:10664:6997\_1:N:0:TCTGCAAG+GCTGCACT  
TTACCACCCTTGTCATTGATACAAACATTCTAGGTGATGCTTCTTAGAGGCTCGTCTAGCCGCTGAG  
ATTCGTCTTACCTATTTACAATCTGTAGAGAGAGAGGTTAATCAGAATTTGAGTGATAACGATTTAGT  
ACT  
+  
FF::F:F,FFF,F,FFFFFFFF:FFF,FFFFFF::F,FFFFFFFF,FFFF,:FFFFFFFF,F,:F:FFFF  
FFFFFFFFFF,FF:FFF:F:FF:FFFF::,FFFFFFFFFFFFFFFFFFFFFFFF:FF::FF::F:FFFFF  
FFF  
@A00721:190:HGJW7DSXY:4:1146:8269:34820\_1:N:0:TCTGCAAG+GCTGCACT  
TTTATGTTTCGGTTTCAGCTGGATGGATCTTTTGATGGTATGTTTCACATTGCGTGATCACTTCCCGT  
GGACTTGGGAAGAGATTAAACATAAATTCCAGCGATTCTATTATGTCGCTAAAGCCTGTCCAGTTGTC  
GAT  
+  
FFFFFFFFFFFFFFFFFFFFFFFFFFFFFFFFFFFFFFFFFFFFFFFFFFFF:FFFFFFFF:FFFFF,FFFFF  
FFFFFFFFFFFFFFFFFFFFFFFFFFFF,FFFFFFFFFFFFFFFFFFFFFFFFFFFFFFFFFFFFFFFFFFFF  
FFF  
@A00721:190:HGJW7DSXY:4:2417:32407:6292\_1:N:0:TCTGCAAG+GCTGCACT  
TTCTCGCTCGCATTTACAAAGGATTACTAAGTCTGAGATCTGCCACTTCTAATTTTAGGAAACGTCGC  
GAAAAGAAAGTTCATGAGGATGTCTTGGTCGAAAAATATCGCCGGGAACCTCTAATAGAGGATCCTGA  
TGA  
+  
FFFFFFFF:F:FFFFFFFFFFFFFFFFFFFFFFFFFFFFFFFFFFFFFFFFFFFF:FFFFFFFFFFFFFFFFFFFF  
FFFFFFFFFFFFFFFFFFFFFFFFFFFFFFFFFFFFFFFFFFFFFFFFFFFFFFFFFFFFFFFFFFFFFFFFFFFF  
FFF  
@A00721:190:HGJW7DSXY:4:1369:8015:10426\_2:N:0:TCTGCAAG+GCTGCACT  
ACGGATACCGATCTCAGTTCTACCACAGAAACCGTCTCAGGAAGTGTCTCCACTGATTGGAATTAGA  
GAAAGACGACCTTCTTGTTGGGGACTGAGACCTCTGAATTTTCAGGGTG  
+



[illegible]

@A00721:190:HGJW7DSXY:4:1260:15447:16000\_2:N:0:TCTGCAAG+GCTGCACT  
TCAATGTAAAGTTAAACGATGCTACTTGTGAGAGGATCAATCACAGTAAGGAACTGTCACGTTTAGCA  
CGGGAGGTTGCAGATTCAACCCCTTATATCGAGGCTATCGAGGACGAT

+

FFFFFF:FFFFFF,FFFFFFFFFFFFFFFFFFFFFFFFFFFFFFFF:FF:FF:FFFFFF  
FFFFFFFF:FFFFF:FFFFFFFFFFFFFFFFFFFFFFFFFFFF:FFF

@A00721:190:HGJW7DSXY:4:1477:7744:25488\_2:N:0:TCTGCAAG+GCTGCACT  
GACGACAAGCCTCAAGAGGGTAGAGGACCACCTGGATCTTCTACTGTCTCTGCCTTCCAAGATTCTT  
AGAAGAGGTTATTCTCTGGAACCACCTTAACGTCACCTCGGTAATCTTTC

+

FFFFFFFFFFFFFFFFFFFFFFFFFFFFFFFFFFFFFFFFFFFFFFFFFFFFFFFFFFFFFFFF  
FFFFFFFF:FFFFFFFFFFFFFFFFFFFFFFFFFFFFFFFFFFFFFFFF

@A00721:190:HGJW7DSXY:4:2314:8549:28823\_1:N:0:TCTGCAAG+GCTGCACT  
CGAATTAAGATCAAGGCTAATACCTTTATAGGTAAGAAGCCCCTTGAGCCGCGTAGTCAGCGGTTTA  
GCTGTATCATCAGTCAGAGTATACCCGATAGGGTACCGAGTCTCCAAGAGAATATTTATTCTTATGAG  
GCT

+

FFFFFFFFFFFFFFFFFFFFFFFFFFFFFFFFFFFFFFFFFFFFFFFFFFFFFFFFFFFFFFFF  
FFFFFFFFFFFFFFFFFFFFFFFFFFFFFFFFFFFFFFFFFFFFFFFFFFFFFFFFFFFFFFFF  
FFF

@A00721:190:HGJW7DSXY:4:1654:28248:11334\_1:N:0:TCTGCAAG+GCTGCACT  
TTCCGATCTGTTTTGATCAGTCTAAGTTGGATAAAGTTATAGGAGACTCAGTTAACCTGAGAGCTCCT  
CAATTGATAGATTGGGTCAACAATAGGGACGCTAGTATACTTCGTAAAGTCGACAGCGAAATGGTCAA  
TAT

+

FFFFF:FFF:FFFF:FF,FFFF::F:FFF:, :FFFF,FFFF::FFFF,F:FFFFFF:FFFFFF,FFFFF,  
FFFFFFFF:F,FFFFFFFF:FFF::FF,FFFFF:,FFFF:FFF:FFF,:FFF:FFFFFFFFFFFF, :  
:FF

@A00721:190:HGJW7DSXY:4:1236:14724:16125\_1:N:0:TCTGCAAG+GCTGCACT  
GGTTCTTGTGAGGAGAGTCAAACAGTGTCTTTTACCCAACATTTTATGTATACAGAGATGACCAGTG  
ACGATTTCTCCCGGAAGCTCTTCTCTCTTAGGAGGTCATGATGACTACTATAAGGGTGAAATCGAT  
TTT

+

FFFFF:FFFFFFFFFFFFFF,FFFFFFFF:FFFF:FFFFFFFFFFFFFFFFFFFFFFFF:F,FFFFF  
F:FFFFFFFFFFFFFFFF,FFFFFF:FFFFFFFFFFFFFFFFFFFFFFFF:FFFFFFFFFFFF:F:  
FFF

@A00721:190:HGJW7DSXY:4:2634:9453:24471\_2:N:0:TCTGCAAG+GCTGCACT  
TTGGAGTGCCAGTGAATATTTTGTACGCCAGGAGTATCCATAACGATTTGTCATTTACCACCTTGG  
CTCAACGACGAAGTGGAACGGCCAACACTTTCTTTGGTAATTGTATGA

+

FFFFFFFFFFFFFFFFFFFFFFFFFFFFFFFFFFFFFFFF:FFFFFFFFFFFFFFFFFFFFFFFF  
FFFFFFFF:FFFFFFFFFFFFFFFFFFFF:FFFF:F,FF:FFFFFF

@A00721:190:HGJW7DSXY:4:2427:14561:21637\_2:N:0:TCTGCAAG+GCTGCACT  
ATTTTATCACTTTATTATGACCTTGGAAAGTTTCGGCTGTGGTTGTCGCTGGGACGATTCCATTCT  
GTTTTCAAAGACTCCAATAACTGATCATTCTGATCATATGATTTTGGA

+

FFFFFFFFFFFFFF,FFFFFFFFFFFFFFFFFFFFFFFFFFFFFFFFFFFFFFFFFFFFFFFF  
FFFFFFFF:FFFF:FFF:FFFFFFFF,F:FFFFFFFF:FFFFF

@A00721:190:HGJW7DSXY:4:2359:13196:22936\_2:N:0:TCTGCAAG+GCTGCACT  
ATTCGATATTCGATTGAGGGTCGTTATACCTATTCGGCTATCTGTGCTTTGAATTGTATAAGATCAAA  
TTTTAAACGATTCCGAGAGGTTTATCCTGATGTGGAGGGAGTTCTTGA

+

FFFFFFFFFFFFFFFFFFFFFFFFFFFFFFFFFFFFFFFFFFFFFFFFFFFFFFFFFFFFFFFF  
FFFFFFFFFFFFFFFFFFFFFFFFFFFFFFFFFFFFFFFFFFFFFFFF

@A00721:190:HGJW7DSXY:4:1276:32425:18004\_1:N:0:TCTGCAAG+GCTGCACT  
TCCGATCTCAGTAATCCTGATTATACTACGGATTTCATGGACATTCCATCCTGTACCTCTTCTGGAGAG  
ACGTATCTCAAAGATCGACTTCGAGACAGGTGATATTGTTGAGCGAGAGCGACCAAGATCTAAATTCG  
GTA

+

FFFFFFFFF,::FFFFFFFFF,FF:FF,:FFF,FFFF:F:,FF:FFFF,FFF,,FFFFFFFFFFFFF  
FF,F:F::FFFFFFFFF,FFFFFFFFFFFFFFFFFFFF:FFFFFFF,:FF:FFFFFFFFFFFFFFFFFFFF  
FFF

@A00721:190:HGJW7DSXY:4:2319:3305:6997\_2:N:0:TCTGCAAG+GCTGCACT  
AGTCTCAGACGTGACCAGCTTTCATTTTAAATGACGATCATTAAAGACTCTTTCTTCGTTGTTTCCT  
TCTTTCGACTGATTTTTTCATCATCAGCTTGTGTTTTACCTAATCTGTG

+

,,FF,F,,F:,,,FFFF,F,FF:FF,F:FFFF,FFF::FF:FFFF::,,:F:F:F,,,FFF,F:FF  
FFF,,:FFFF,FFFF,FF,FFFF:F,F,,FFFFFF:F:,F:F,FF,,F

@A00721:190:HGJW7DSXY:4:2344:24108:15123\_2:N:0:TCTGCAAG+GCTGCACT  
TCAGTTGATTAAGACTCTTCCGAAAGGCGAACTTTGGGAATTTGAAGCTCAGGGTGAAGCACAACTT  
TGACCGTGACGAACTGTGGTGTCTTGATCTACGTTACGGATATACTC

+

FFFF,FFFFFFFFFFFFFFFFF:,FFF,FF:FFFFFFFFFFFFFFFFF:FFFF:FFFFFFFF:FF:FFFFF  
FFFFFFFFFFFFFFFFF:F:F,,FFFFFFFFFFFFFFFFFFFFFFFFFFFF:FF

@A00721:190:HGJW7DSXY:4:1232:17725:19727\_1:N:0:TCTGCAAG+GCTGCACT  
TGACTGGAGTTCAGACGTGTGCTCTTCCGATCTATTATTAACGCACTAAAACGTCTTCGACAACA  
GCAGGGGTTTTCGAATAGTGATAGCCACCCGCCTTACAGAGGGGCAGCAGGGGTTTTCGAATAGTGAT  
AGC

+

FFFFFFFFFFFFFFFFFFFFFFFFFFFFFFFFFFFFFFFFFFFFFFFFFFFFFFFFFFFFFFFFFFFFFFFFF  
FFFFFFFFFFFFFFFFFFFFFFFFFFFFFFFFFFFFFFFFFFFFFFFFFFFFFFFFFFFFFFFFFFFFFFFFF  
FFF

@A00721:190:HGJW7DSXY:4:1223:1750:20055\_1:N:0:TCTGCAAG+GCTGCACT  
ACCTTTTCTACTGTCTGTCTCGCCTCTTTCGAATGAAGTTTAAATGCTTAACAACAATGATAGTGAATT  
TATACCTACAATCATTGGTTTTTCTAATAATGATGACACTATTGTTTATGGATATGATGCTATTACTC  
AT

+

FF,FFFFFFFFFFFFFFFFFFFF,FF:FF:FFFFFFFFFFFFFFFFF:FFF::FFFFFFFFFFFFFFFF:FF,  
F,FFFFFF:FFF:FFFFFFFFFFFFFFFFF::FFFFF:F,FF:FFFFFFFF:FFFFFFFF:FFFF:FFF  
FF

@A00721:190:HGJW7DSXY:4:2466:23321:29356\_2:N:0:TCTGCAAG+GCTGCACT  
TCTCAGTTTACAAGGACCTTAAGCGATGGATCGGGGTTAATTCTAAAACATTACCCGAAAGACGTGCT  
AAATTAACCATTTGTACGATGTCGTCTGTCTCGCGAGATCGGAAGA

+

FFFFFFFFFFFFFFFFFFFFFFFFFFFFFFFFFFFFFFFFFFFFFFFFFFFFFFFFFFFFFFFFFFFFFFFFF  
FFFFFFFFFFFFFFFFFFFFFFFFFFFFFFFFFFFFFFFFFFFFFFFFFFFFFFFFFFFFFFFFFFFFFFFFF  
FFF

@A00721:190:HGJW7DSXY:4:2546:13096:32315\_1:N:0:TCTGCAAG+GCTGCACT  
TCGTTTCTTTCTTTATCTCTTTGGTTGTTAGGGATTTTGAGAGAGTGAAAGGCTTCAATTGTAGTGGT  
TTGGTCGTTTCAGTACCCAGTCAGTATACCTCTACGCAAAGATATTTTCATGAAAACCTACAGAGGAACG  
TAC

+

F:FFFFFFFFFFFFFFFFFFFFFFFFFFFFFFFFFFFFFFFFFFFFFFFFFFFFFFFFFFFFFFFFFFFFFFFFF  
FFFFFFFFFFFFFFFFFFFFFFFFFFFFFFFFFFFFFFFFFFFFFFFFFFFFFFFFFFFFFFFFFFFFFFFFF  
FFF

@A00721:190:HGJW7DSXY:4:1134:27136:18082\_1:N:0:TCTGCAAG+GCTGCACT  
TTTCATATTATGAATGAACCTTCGGCCGCTCTCTTTGCTTCGATGTTGGATGTCAAGAAGGGTTCAGA  
ATGGGATTCCTACGTAGTTTATGACTTTGGTGGTGGTACTTTCGATACTTCTATCGTCTTACGTTACG  
GTA

+  
FF:FFFFFFFFFFFFFFFFFFFFFFFFFFFFFFFFFFFFFFFFFFFFFFFFFFF:FFFFFFFFFFFFFFFF  
FFFFFFFFFFFFFFFFFFFFFFFFFFFFFFFFFFFFFFFFFFFFFFFFFFFFFFFFFFFFFFFFFFFFFFFF  
FFF

@A00721:190:HGJW7DSXY:4:1164:20600:32064\_2:N:0:TCTGCAAG+GCTGCACT  
TATTCTGGTGATGATAATCTTTGGAGGTCGTGACGTTGATGAAGCTATAAGAGCGTTCTTATTACG  
GCGCACTTCTTTACCCGCCACCACACAACCTTTCAGTTTTCACAACTGAA

+  
FFFFFFFFFFFFFFFFFFFFFFFFFFFFFFFFFFFFFFFFFFFFFFFFFFFFFFFFFFFFFFFFFFFFFFFF  
:FFFFFFFFFFFFFFFFFFFFFFFFFFFFFFFFFFFFFFFFFFFFFFFFFFFFFFFFFFFFFFFFFFFFFFFF  
@A00721:190:HGJW7DSXY:4:2475:3866:18584\_1:N:0:TCTGCAAG+GCTGCACT  
ACTGAAAAACCCTCGTCAATACTTTTCAATAATATACGCTTGAAGCTCACTTATGACGATCTAGTGAA  
ATTAACGCGTCCTTTCTGGAACGTAGTTTTACTATTATGAACAAAGTTATCAAAGATAGTGGCATTC  
AAG

+  
FFFFFFFFFFFFFFFFFFFFFFFFFFFFFFFFFFFFFFFFFFFFFFFFFFFFFFFFFFFFFFFFFFFFFFFF  
FFFFFFFFFFFFFFFFFFFFFFFFFFFFFFFFFFFFFFFFFFFFFFFFFFFFFFFFFFFFFFFFFFFFFFFF  
FFF

@A00721:190:HGJW7DSXY:4:2223:15962:9565\_1:N:0:TCTGCAAG+GCTGCACT  
CTGATTCCGGCCGGTAGCTCATTCTACCAGGGGCTATTACTCTTGCTGAAACAGCTATTAAAGC  
TGTTGAGCGGGTAATTACACCTAACGAGCTCGATCTGCCATCGCTGAAGGATGTGCACTCTTTCTG  
CTA

+  
FFFF:FF,FF,, :FF,FF::FFFFFFFFFFFF,FFFF,FF:FF::FFFFFFFFFFFF:FFFF:FF:FFF,  
FFFFFFFFFFFFFFFFFFFFFFFFFFFFFFFFFFFFFFFF:FF:FFFFFFFF,FFFFFFFFFFFF:FFF:FFFFFF  
:FF

@A00721:190:HGJW7DSXY:4:1377:8549:17707\_2:N:0:TCTGCAAG+GCTGCACT  
GCTCGTATTATCGTCGCTGCTGGATCTGCGTTACCGTTGAAGGCTAACTCCAAGGTAATTATGAAGA  
CTGTGATTTATCTTTCACTCTGGCCTTGTATGAGGGTGTTCCTAATCG

+  
FFFFFFFFFFFFFFFFFFFFFFFFFFFFFFFFFFFFFFFFFFFFFFFFFFFFFFFFFFFFFFFFFFFFFFFF  
:FFFFFFFFFFFFFFFFFFFFFFFFFFFFFFFFFFFFFFFFFFFFFFFFFFFFFFFFFFFFFFFFFFFFFFFF  
@A00721:190:HGJW7DSXY:4:2321:7148:26428\_2:N:0:TCTGCAAG+GCTGCACT  
AATTTCAATCTTCTTAAAAAGAAGATAGAGAGTCATACTTTGGGCTATCGTTCAGGTGCATGGGGTTG  
GATAGCCAATATTGAAGTGGACACCTCTGGTAGTATCGAAGTAAAGAT

+  
FFFFFFFFFFFFFFFFFFFFFFFFFFFFFFFFFFFFFFFFFFFFFFFFFFFFFFFFFFFFFFFFFFFFFFFF  
FFFFFFFFFFFFFFFFFFFFFFFFFFFFFFFFFFFFFFFF:FFFFFFFFFFFF:FFF

@A00721:190:HGJW7DSXY:4:1553:27371:32049\_2:N:0:TCTGCAAG+GCTGCACT  
ATTAACAAGTTGTACTTATCAATGATTTTATCGCTGGTTGTTATCTCGAAAAGTCTCTTCTAAAAGG  
AACGTCAGTTCTAACCCAAAGAGAATATCTAAAATATTTACAAAATCA

+  
FFFFFFFFFF,FF:FF,:FF:, , FFFFFFFFFF:F:FFFF::FFFF,FFFF:FFFF:,F,FFFF:F  
FFFF:F:FF:F:F:FFFF:F,FF,FF,, FFFFFFFFFF,FFFF,,,  
@A00721:190:HGJW7DSXY:4:1610:19831:27853\_1:N:0:TCTGCAAG+GCTGCACT  
ATGGCACTACCTCGGTACAATCTTACTTGGAACGAAGGCGACCTGTTCCGGAGTTTTTACGGGATCCG  
GAATGTTCTGTCTATATTAGGTGAAGCGAAATACGATTTTCAACGTCAACGTTACCGAGTTTCGTTT  
CGT

+  
FFFFFFFFFFFFFFFFFFFFFFFFFFFFFFFFFFFFFFFFFFFFFFFFFFFFFFFFFFFFFFFFFFFFFFFF  
FFFFFFFFFFFF:FFFFFFFFFFFFFFFFFFFFFFFFFFFFFFFFFFFFFFFFFFFFFFFFFFFFFFFFFFFF  
FFF

@A00721:190:HGJW7DSXY:4:1639:26838:12085\_1:N:0:TCTGCAAG+GCTGCACT  
TAGTGCAGGCCTCTCTTCTACGAGTATTGCTATTTATACGGTTACGAGAAGAAGGTTCTGAAAGTTTG

AGAACTTAGTTTACGAACTTGACTCTACTATACGTGACATACTAAATACTAGATATTTGGATGATCTT  
GAT

+

FFFFFFFFFFFFFF:FFFFFFFFFFFFFF:FFFFFFFFFFFFFF  
FFFFFFFFFFFFFF:FFFFFFFFFFFFFF:FFFFFF:FFFFFFFFFFFFFF:FFFFFFFFFFFF  
FFF

@A00721:190:HGJW7DSXY:4:2502:17499:7686\_2:N:0:TCTGCAAG+GCTGCACT  
AAAATTTTCTTCCTTGATTTTAATATAAAGAATCTTTACCAGGACTCCTACTACAGGAGGCAGTCTT  
CTGATCGTAAGAAGTTTATAAGGAACATATCCATTTGTTGTAATAGGG

+

FFFFFFFFFFFFFF:FFFFFFFFFFFFFF:FFFFFFFFFFFFFF  
FFFFFFFFFFFFFF:FFFFFFFFFFFFFF:FFFFFFFFFFFFFF:F

@A00721:190:HGJW7DSXY:4:2167:17273:20353\_2:N:0:TCTGCAAG+GCTGCACT  
AACTCTAAGTGGTAATACTGTCTTCCAAGCTTACCTGTATCTTCAATGAAATTGGACTCTTCGATAG  
GGGACATTTTATCGTGGGCTTTCGTAAGGAAGATCTGTTATCGACG

+

FFFFFFFFFFFFFF:FFFFFFFFFFFFFF:FFFFFFFFFFFFFF  
FFFFFFFFFFFFFF:FFFFFFFFFFFFFF:FFFFFFFFFFFFFF:FFF

@A00721:190:HGJW7DSXY:4:2141:9842:26365\_1:N:0:TCTGCAAG+GCTGCACT  
TGGTCTTTATTCTATTATTGATTTTATGAGATTGATACGTTAACAGAAGATGATGTTAGAGTAGAAT  
TCCTGAAGAGTCCTTCGTAACCAACTTCTTGACAATTTCTTCAATCCTTCGATAATAGTTAAATCT  
AGG

+

F,FFFFFFFFFFFFFFFF:FFFFFFFFFFFFFF:FFFFFFFFFFFFFF  
FFFFFFFFFFFFFF:FFFFFFFFFFFFFF:FFFFFFFFFFFFFF:FFF

@A00721:190:HGJW7DSXY:4:2157:28926:2206\_2:N:0:TCTGCAAG+GCTGCACT  
AATTAAGAAATAATCCTACATTGACTGATTATCTAAAGATTGAAGGAAAATTTATCCTCGTTTAACT  
TACTTAGACTTTCCTACGATACAAATGATAACTTCTAATTTACGTTTG

+

FFFFFFFFFFFFFF:FFFFF:FFFFFFFFF:FFFFFFFFF:F,FFFFF,FFFFFFFFFFFF  
FFFFF,FFFFFFFFFFFFFFFF:FFFFFFFFFFFFFF:FFFFFFFFFFFFFF

@A00721:190:HGJW7DSXY:4:1552:8205:20369\_2:N:0:TCTGCAAG+GCTGCACT  
CTCAGGAGTCCCGGCATTTGATAATAATGACGAGACTTTCGTCATAATCGCTGCATATTACGGATTAC  
ACGGTACCAGCGCATCTCGTGTGAGCCTCGACCCGATTATATGGTAT

+

FFFFFFFFFFFFFF:FFFFFFFFFFFFFF:FFFFFFFFFFFFFF  
FFFFFFFFFFFFFF:FFFFFFFFFFFFFF:FFFFFFFFFFFFFF

@A00721:190:HGJW7DSXY:4:2557:6361:15201\_2:N:0:TCTGCAAG+GCTGCACT  
GAACTAACTATGTTATGTTCTCTGATCATTTTGACAATCTCTTCTTATAATAATAATAATAATAT  
TACTAATGGCAAATAGTGGAAGGCTCCAGTCAACACTAGTTCGAGTG

+

FFFFFFFFFFFFFFFF:FFFFFFFFFFFFFF:FFFFFFFFFFFFFF  
:FFFFFFFFFFFFFF:F:F:FFFFFFFFF:FFFFFFFFF

@A00721:190:HGJW7DSXY:4:1551:2067:25269\_1:N:0:TCTGCAAG+GCTGCACT  
AATAGGTGAAGGATAGTTTTTACCTCGACCAACATTAAGGCGGCGGCGACTAATCTTAAAGCTTCAC  
CCAAAATGAAGGACACTTCGAAACTGAATAATGATGCACTACAAACAAGTATCGCTAATCATCTGAAA  
AAG

+

FFFFFFFFFFFFFFFF:FFFFF:FFFFF:F:FFFFFFFFF:FFFFFFFFF  
FFFFFFFFFFFFFFFF:FFFFFFFFFFFFFF:F:FFFFF:FFFFFFFFF  
FFF

@A00721:190:HGJW7DSXY:4:1352:7256:21731\_2:N:0:TCTGCAAG+GCTGCACT  
AGAGGATATTCGCCATTGTGGTACGAATTGGTCCAACATTTACCACCAAATTTTGGATACAACCTCT

AGCCTTCAAGTGGGGTATGCCTGCGGAATACGCTTGCTATTCACCAGA  
+  
FFFFFFFFFFFFFFFF:FFFFFFFFFFFFFFFFFFFFFFFFFFFFFFFFFFFFFFFF  
FFFFFFFFFFFFFFFFFFFFFFFFFFFFFFFFFFFFFFFF, :FFFFFFF  
@A00721:190:HGJW7DSXY:4:1540:27290:4194\_1:N:0:TCTGCAAG+GCTGCACT  
CCCGTTGATGCTATGTCAGAAGAAGCTATTCAAGCTTGTCGTTTAAAGACTGCAGAGGCTGTCAAACA  
AGCCCAGACTCAAGGAGTCCAATCAAAGGTTTTGAATTTAGCTCAACTGGGAGACGTGCTTAAATGG  
GTG  
+  
FFFFF,FF:FFFFFFFFFFFFFFFFFFFFFFFF:FFFFFFFFFFFFFFFF:FF:FFFFFFFFF,FFFF:FF  
FFFFFFFFFFFFFFFFFFFFFFFF:FFFFFFFFFFFFFFFFFFFFFFFFFFFFFFFFFFFFFFFF  
FFF  
@A00721:190:HGJW7DSXY:4:1643:9263:12430\_2:N:0:TCTGCAAG+GCTGCACT  
GTATGTTAATAGATAGTGGGATAATAGTTCTACCGATACGTAGTGAACGCGTTCGTAGAACCAAGTAC  
TTTCCGTCTGAAGAGTTTAGAGCTGCTATTGATTATGTAACCGATAGG  
+  
:FFFFFFFFFFFF::FFFFFFFFF,FFF:F:F:FFFFFFFFFFFFFFFFFFFFFFFF:FF,FFFFFF,FFF  
FFFFFF:FFFFFFFF,F:FF,FFFF:F,F:FFFF:FFFF,FFFFF  
@A00721:190:HGJW7DSXY:4:2632:12382:26569\_2:N:0:TCTGCAAG+GCTGCACT  
GCTTTAGACGATAATCCTTTAAGGACTATGTTGACTGACGAAGATTTTCCACAGATTTGTCTACGTT  
GCAGATCGCCACTCCAAACACTATATACATTATAAAATATAAAAATAA  
+  
FFFFFFFFFFFFFFFFFFFFFFFF:FFFFFFFFFFFFFFFFFFFFFFFFFFFFFFFFFFFFFFFF  
FFFFFFFFFFFFFFFFFFFFFFFFFFFFFFFF:FFFFFFFFFFFFFFFF  
@A00721:190:HGJW7DSXY:4:1114:5755:7075\_1:N:0:TCTGCAAG+GCTGCACT  
TTTTGTTACCAAATTCTTGGCTTTCAACGAAGTCTCTGAATTTATTAATCATTACTTTAACGATCTCT  
CGGTCAATTTACTCTGTACTTGATCTACGTCGTTTAACTGTCGGAACAACATTTACTAATAATGACTCT  
A  
+  
FFFF,, :FFFFFFFF:F,,FFFF,FFFFFFFF,, :F,: ,FFFFFFFF,FFFF,FF:FF,FF,FFFF  
,,FF:FFFF,F,F,FF,:FFFFFFFF,:F,:F,FFFF,FFF:FF,:F:, ,F,F,, ,F,FF,:F,,FF  
F  
@A00721:190:HGJW7DSXY:4:1425:1081:29293\_2:N:0:TCTGCAAG+GCTGCACT  
ACTCACTATCGTTTTCTGCTTTTTCTTAGCTAATAGATTAATAAAGGATGAGTACGAAAACCAACTCT  
TCGTTACGAGACCTGATGGTAGAATAGATTTAGTCTCTACACCCATCT  
+  
FFFF:FFFFFFFFFFFFFFFFFFFFFFFFFFFFFFFF,FFFFFFFF:FFFFFFFF:FFFFFFFF:FFFF  
FFFFFFFF,FFFFFFFFFFFFFFFF,FFFFFFFFFFFFFFFF,FFFFF  
@A00721:190:HGJW7DSXY:4:1325:4408:23750\_1:N:0:TCTGCAAG+GCTGCACT  
AATGCTTTTTTCTCCCTTAACCTTAATACTAAGAGAACACCCGCAAACGACTCGAAACCGAGACG  
CCGTAGATCAAAGTCCCTTCTAACTTTAGAT  
+  
F:,,,::,FFF:F,,,,,F,F,,,:,,,::,F,,,,,F:,FF,,F,FFFFFFFFFFFFFFFF  
FFFFFFFFFFFFFFFFFFFFFFFFFFFFFFFF  
@A00721:190:HGJW7DSXY:4:1165:26332:6637\_2:N:0:TCTGCAAG+GCTGCACT  
TGCTTTTCGATAGTGATTGTTATCAATTTAAATACATTACTGTTTCAAATCATCTTTACTCACAGACT  
CCGAAATGGTTTCAAATGAGGTCAAAGCTCTATTTATTAAACGAAC  
+  
FFFFFFFFFFFFFFFFFFFFFFFFFFFFFFFF,FFFFFFFF,FFFFFFFF:FFFFFFFFFFFFFFFF  
FFFFFFFFFFFFFFFF,FF:FFFF,FFFFFFFFFFFFFFFF::FFFFF  
@A00721:190:HGJW7DSXY:4:2371:1669:34569\_2:N:0:TCTGCAAG+GCTGCACT  
CAAGGAACTTCAATTCCTTCGATGTTTATATTTTTCTATAAGGGAAAATAGCAATAATCAAATTCGA  
CAAATTTTAGAATTTATTTTCAAGACTCTCTCCGATCACCTTGGTGTG  
+

FFFFFFFFFFFFFFFFFFFFFFFFFFFFFFFFFFFFFFFFFFFFFFFFFFFFFFFFFFFFFFFFFFFFFFFF  
F:FFFFFFFFFFFFFFFFFFFFFFFFFFFFFFFFFFFFFFFFFFFFFFFFFFFFFFFFFFFFFFFF:F  
@A00721:190:HGJW7DSXY:4:2254:32000:11913\_1:N:0:TCTGCAAG+GCTGCACT  
TCAATAAGATGTATGATGATAATCTACTATTTTTAAATAGTGATATTCAGCGTATACTTGAATACTTT  
ATCAAAGATTTGGCTTGGTCTATTTACCGCAAAAAGTTGGAAGAGGTCTATGATATTTATTTTACTTA  
TAC  
+  
:,FFFFF,FF:FFF:FFFFFFFFFFFFFFFFFFFFFFFFFFFFFFFFFFFFFFFFFFFFFFFFFFFFFFFF  
FFFFFFFFFFFFFFFFFFFFFFFFFFFFFFFFFFFFFFFFFFFFFFFFFFFFFFFFFFFFFFFFFFFFFFFF  
FFF  
@A00721:190:HGJW7DSXY:4:2565:12970:26772\_1:N:0:TCTGCAAG+GCTGCACT  
AACTTGACTGTTGATAATATTACAATAGCTCTTTCTCAGAAGATTAGAGAAGTAACCGGTGAACACGT  
CGGTAGCATTGATTTACTTTTACCGTTAGAACTGAAAAAGATTCTTTTCGAAAAGAAACCTATAAGTT  
ACA  
+  
FFFFF:FFFFFFFF:FFFFFFFFFFFFFFFFFFFFFFFFFFFFFFFFFFFFFFFFFFFFFFFFFFFFFFFF  
FF:FFF:FFF:FFFFF:FFFFFFFFFFFFFFFFFFFFFFFFFFFFFFFFFFFFFFFFFFFFFFFFFFFF  
FFF  
@A00721:190:HGJW7DSXY:4:2167:1524:12461\_2:N:0:TCTGCAAG+GCTGCACT  
TAAAGAAATAAAAATACTTCAAGTACCTGAACCTTTACATTTTTAATGGTATGGTATAATGTGTCTTAC  
AAATAGAACCTTCACTCTCGGTAATGAGAGTGTATTCCTTAATATTCT  
+  
FFFFFFFFFFFFFFFFFFFFFFFFFFFFFFFFFFFFFFFFFFFFFFFFFFFFFFFFFFFFFFFFFFFFFFFF  
FFFFFFFFF::FFFFFFFFF:FFFFFFFFFFFFFFFFFFFFFFFFFFFFFFFFFFFFFFFFFFFFFFFF  
@A00721:190:HGJW7DSXY:4:2162:12491:1548\_2:N:0:TCTGCAAG+GCTGCACT  
TTACTAGGATTTATCACACTCCTAAATTTGATAGCAATTTATGTTTTAAATGCTAGGAAAATTTTGA  
AAAACCTCATTGTATAGTTCAAGGAGTACTTAATTCAATAGCTTTAGT  
+  
FFFFFFFFFFFFFFFFFFFFFFFFFFFFFFFFFFFFFFFFFFFFFFFFFFFFFFFFFFFFFFFFFFFFFFFF  
FFFFFFFFF:FFFFFFFFFFFFFFFFFFFFFFFFFFFFFFFFFFFFFFFFFFFFFFFFFFFFFFFF  
@A00721:190:HGJW7DSXY:4:1665:24921:28244\_2:N:0:TCTGCAAG+GCTGCACT  
TTTATTGAAAATTGTATAAGAGTTAATTGCTTACACAAAAGTGACGCGCAAGGAATCTTAATTGATT  
GAAGCTAGGCGTTGGGGAGAATGAACTGCCGCTTCCCGGAAGAAACGA  
+  
FFFFFFFFFFFFFFFFFFFFFFFFFFFFFFFFFFFFFFFFFFFFFFFFFFFFFFFFFFFFFFFFFFFFFFFF  
FFFFFFFFF:FFFFFFFFFFFFFFFFFFFFFFFFFFFFFFFFFFFFFFFFFFFFFFFFFFFFFFFF  
@A00721:190:HGJW7DSXY:4:1125:12337:27085\_2:N:0:TCTGCAAG+GCTGCACT  
TGACCAATCATCGCTCCAACCTGGCACGCCAGACGTAGGGTCAAACCTACTACCGCCGGTCGGCAGATC  
GGCACCCTGGTCTCTACGTTCAAGGACCCGCTGTGCAGAATAACCTT  
+  
FFFFFFFFFFFFFFFFFFFFFFFFFFFFFFFFFFFFFFFFFFFFFFFFFFFFFFFFFFFFFFFFFFFFFFFF  
FFFFFFFFF:FFFFFFFFFFFFFFFFFFFFFFFFFFFFFFFFFFFFFFFFFFFFFFFFFFFFFFFF  
@A00721:190:HGJW7DSXY:4:1642:30300:26757\_1:N:0:TCTGCAAG+GCTGCACT  
GGACGACCACTCAAAGGAAACGGGCTGTTGCCAGAGGAAAGCAGCGACCAACCGAGGTGCTCGTAAC  
ATTGACGGCAGTCCCGTCATCTCTGTGGGAACTGAGGCAGTACCTCAGTCAAAGTCACATTCACCAC  
TCC  
+  
FFFFFFFFF:FFFFF:FFFFFFFFFFFFFFFFFFFFFFFFFFFFFFFFFFFFFFFFFFFFFFFFFFFFFFFF  
FFFFFFFFF:FFFFFFFFFFFFFFFFFFFFFFFFFFFFFFFFFFFFFFFFFFFFFFFFFFFFFFFFFFFFFFFF  
FFF  
@A00721:190:HGJW7DSXY:4:2371:32551:10708\_2:N:0:TCTGCAAG+GCTGCACT  
TGTGACTATACAGTTTCGCCATTTCAAGAGTGGTCAATACGTCGTGGGAGGTACTGAAGCCTTCCCCT  
CCGCTGGCACGAAGAACACTCCCAAGCCAATCAATAGTTCTTCTGACC  
+





AGAAGGCAAGTGGAGAGTCCAGAAGTTGATGAAGAAGGATTATTTGAAGCAGGGGTTACCACTTCCTA  
AGG

+

FF:FFFFFFFFFFFFFFFFFFFFFFFFFFFFFFFFFFFFFFFFFFFFFFFFFFFFFFFFFFFFFFFF,FFFFFFFF  
FFFFFFFFFFFFFFFF:FFFFFFFFFFFFFFFFFFFFFFFFFFFFFFFFFFFFFFFF:FFFFFFFFFFFFFFFF  
FFF

@A00721:190:HGJW7DSXY:4:2626:8865:28369\_1:N:0:TCTGCAAG+GCTGCACT  
ATTTAGGTCATCTTGGTGTTCGAATGTCATTAGTGCCTTACGATTGAAAGAGTTACTTTTGAGTATC  
GACGATCTTTCGATCTTGAGGACGTACATTTAACGTGGCAGAATTAGGTAACCTACCATATTGTTCC  
TTC

+

:FFF,F::FF,,FF:, ,FFFF,FFFFFF,F,:F:F,,:F:,,,FF::,FFFF,,,F:F:,F,FFF:  
:F,FFFF:FFF::FF:FFFF:,F,F:F,:FFF,,,F:, ,FFFF,,:F:F,F::,,F:FFF:F:, ,  
FFF

@A00721:190:HGJW7DSXY:4:2446:1561:32659\_1:N:0:TCTGCAAG+GCTGCACT  
TTTAACTTTGACTCAACTACTCCGATCAGATCCGGATGGTTTGATTGGTATGGACTACTCGACTTTTG  
ATCTGGAGTTGTCTAGGGTCATGGCAGATACTACCGATAAGGTGAAAAATATGCAGGTCAAAGATTCT  
GTA

+

FFFFFFFFFFFFFFFFFFFFFFFFFFFFFFFFFFFFFFFFFFFFFFFFFFFFFFFFFFFFFFFFFFFF  
FFFFFFFFFFFFFFFFFFFFFFFFFFFFFFFFFFFFFFFFFFFFFFFFFFFFFFFFFFFFFFFFFFFF  
FFF

@A00721:190:HGJW7DSXY:4:1643:1362:28275\_1:N:0:TCTGCAAG+GCTGCACT  
CTAAGAGTCTTTATGATTCAAAACCTATCGTTGTCTGACCTTACAAGTTGAGGAGACTTTACAGCGG  
CTTATTGTCGCGCAGTTTCCAGAATTGCGGTTGAAGTTCACCCATTCTATCTTGAATGCTCACGCCGT  
CGC

+

FFFFFFFFFFFFFFFFFFFFFFFFFFFFFFFFFFFFFFFFFFFFFFFFFFFFFFFFFFFFFFFFFFFF  
FFFFFFFFFFFFFFFFFFFFFFFFFFFFFFFFFFFFFFFFFFFFFFFFFFFFFFFFFFFFFFFFFFFF  
FFF

@A00721:190:HGJW7DSXY:4:1314:27480:18490\_1:N:0:TCTGCAAG+GCTGCACT  
GAGGCGATATTCGTTTTCATATCCAAAACCTCTTGAATGGAGTACATATTTGCAACCCTATTCTTGAT  
GTGAAAGATGCATCGAGGTATACGTCTAGGAACATTGATTGGGAACGTACCTACTCACGAGACGTCAT  
GAA

+

FFFFFFFFFFFFFFFFFFFFFFFFFFFFFFFFFFFFFFFFFFFFFFFFFFFFFFFFFFFFFFFFFFFF  
FFFFFFFFFFFFFFFFFFFFFFFFFFFFFFFFFFFFFFFFFFFFFFFFFFFFFFFFFFFFFFFFFFFF  
FFF

@A00721:190:HGJW7DSXY:4:2176:22299:2065\_1:N:0:TCTGCAAG+GCTGCACT  
TTCGTTCTGTACAAGAACGCTTTGGATTGTGACCATAAAGCCTCAGTTGCGATAGCTGTAGAGGTAT  
ACGATATCTCTCTTGATGATGTAGCCACTATAATGCTTAAGAGAGAGATTGATGTATGTCATTTGTC  
TTA

+

FFFFFFFFFFFFFFFFFFFFFFFFFFFFFFFFFFFFFFFFFFFFFFFFFFFFFFFFFFFFFFFFFFFF  
FFFFFFFFFFFFFFFFFFFFFFFFFFFFFFFFFFFFFFFFFFFFFFFFFFFFFFFFFFFFFFFFFFFF  
FFF

@A00721:190:HGJW7DSXY:4:2367:15456:6277\_2:N:0:TCTGCAAG+GCTGCACT  
GACACGATGAAAAATGACATACCCGTTCTGACCTTGGTATCGTTATCCGTCATGGAGATGATGGCGC  
ATCACTTGATTACTATATGCCGAAGGATTGGGTTATTCTCACAACAA

+

FFFFFFFFFFFFFFFFFFFFFFFFFFFFFFFFFFFFFFFFFFFFFFFFFFFFFFFFFFFFFFFFFFFF  
FFFFFFFFF:FFFFFFFFFFFFFFFFFFFFFFFFFFFFFFFFFFFFFFFFFFFFFFFF

@A00721:190:HGJW7DSXY:4:1554:23204:5321\_1:N:0:TCTGCAAG+GCTGCACT  
AATGAGTTCGAATAACTCGTAATAAATCTTCTCTAGTGGACAATTAGAATACCTATTTCCGTACC

AAGAGCCACTGCCAATCTCATCGCTATACGCATACCTGATTGGAAGAAGCGAGGTTCTGTTCTCAATA  
AAA

+

FFFFFFFF:FFFFFFFFFFFFFFFFFFFFFFFFFFFFFFFFFFFFFFFFFFFFFFFFFFFFFFFF  
FFFFFFFFFFFFFFFFFFFFFFFFFFFFFFFFFFFFFFFFFFFFFFFFFFFFFFFFFFFFFFFF  
FFF

@A00721:190:HGJW7DSXY:4:1537:1958:9330\_2:N:0:TCTGCAAG+GCTGCACT  
TTTCTTCATAAGGGCTATTCAGTACGTCATGGGGATCACTTCTTCGGTCAATGACAAAACCTTCGAAT  
ATGTTACGACATGGCTTCGTAACAACAGTGCGAGGATTGTCATCTCGG

+

:FFFFFFFF,FFFF,FFFFFFFFFFFFFFFFFFFFFFFFFFFFFFFFFFFFFFFFFFFFFFFF  
FFFFFFFFFFFF:FFFFFFFFFFFFFFFFFFFFFFFFFFFFFFFFFFFFFFFFFFFFFFFF

@A00721:190:HGJW7DSXY:4:2368:30083:26694\_2:N:0:TCTGCAAG+GCTGCACT  
TTCATATAGATACGAGATACCTAGAGAAGTTCGACGATCTTACTCGTTATCGGAGCTAAGAAGAAG  
ACTTTGGGTACACGTTATGCTCGAACTTAACGTTAGTACCGGAGGT

+

FFFFFFFFFFFFFFFFFFFFFFFFFFFFFFFF:FFFFFFFFFFFFFFFFFFFFFFFF:FFFFFFFFFFFFFF:FF  
FFFFFFFFFFFFFFFFFFFFFFFFFFFFFFFFFFFFFFFFFFFFFFFFFFFFFFFFFFFFFFFF

@A00721:190:HGJW7DSXY:4:2358:7419:14998\_2:N:0:TCTGCAAG+GCTGCACT  
CTTCTGCGTTACTGAGAGAAAAGATTACAGACGCCTACGGTGACTTTATGGACAAGATGCAAGTTCTT  
GGGAAATACTTGTTTCCCTTTTAGGTTTAGTAGGTGATCTTGACGTC

+

FFFFFFFFFFFF:FFFFFFFF:FFFFFFFFFFFFFFFFFFFFFFFFFFFFFFFFFFFFFFFF:FFFF,FFFFF  
FFFFFFFFFFFFFFFFFFFF:FFF:FFFFFFFFFFFFFFFFFFFFFFFF:FFFF

@A00721:190:HGJW7DSXY:4:2352:10303:4429\_2:N:0:TCTGCAAG+GCTGCACT  
GAGAAGACAACGAATCTTGAACTACGGTCCTTATCAAAGAAAATGGTGAACCGGTCTCTAAATCTTT  
TGAGATTGAGAAGATTGAAGAACACGTCAAGAAGTCGCTCGGCGTTGT

+

FFFF:FFFFFFFFFFFFFFFFFFFFFFFFFFFFFFFF:FFFFFFFFFFFFFFFFFFFFFFFFFFFFFFFF  
FFFFFFFFFFFFFFFFFFFFFFFFFFFFFFFFFFFFFFFFFFFFFFFFFFFFFFFFFFFFFFFF

@A00721:190:HGJW7DSXY:4:2427:20021:15217\_2:N:0:TCTGCAAG+GCTGCACT  
CAAGTTAAGAAGGAGGCTGATCATGGAGTCTTTGTACCTTCTGTCAAACCTTCGAGGTTACGCTACGAG  
AGGTGATCCCGGATGTGGATTGAAGGCTGGCTCTAAGGGAGACTCCTT

+

FFFFFFFFFFFFFFFFFFFFFFFFFFFFFFFFFFFFFFFFFFFFFFFFFFFFFFFFFFFFFFFF  
FFFFFFFFFFFFFFFFFFFFFFFFFFFFFFFFFFFFFFFFFFFFFFFFFFFFFFFFFFFFFFFF

@A00721:190:HGJW7DSXY:4:1253:8513:21120\_1:N:0:TCTGCAAG+GCTGCACT  
GTAAAGAATTGGGTTGAGAAGTGTGCTTTACAAGGAGTTAGACTCTTCTTCAAGTTTTTAGATCTTCT  
TGATAATCTTAAAGAAAAATTTTGAATAAACTAATGAGAGGTATAGGCTTAGTCAAGTCTGTACTTA  
CAT

+

FFFFFFFFFFFF:FFFFFFFFFFFF:FFFFFFFFFFFF:FFFFFFFFFFFFFFFFFFFFFFFFFFFF  
FFFFFFFFFFFFFFFFFFFFFFFFFFFFFFFFFFFFFFFFFFFFFFFFFFFFFFFFFFFFFFFF  
FFF

@A00721:190:HGJW7DSXY:4:1653:26955:14481\_2:N:0:TCTGCAAG+GCTGCACT  
CATAACTTCTTTTCAAAAATGCGGATGGGTCTACTGATGTTTTCTACAGAGTGCAGTCGTTTCAAC  
ACTTATCACCCTTTTGAAGGAAAATAATTGGTGATGAAAATACGTA

+

FFFFFFFFFFFFFF:FFF,FFFFFFFFFFFFFFFFFFFFFFFFFFFFFFFF:FFFFFFFFFFFF,FFFF:F,FFF  
FF:F:F,FFFF,,FFFFFFFFF::FFF:FF:FF,FFF:FFF:F:F,

@A00721:190:HGJW7DSXY:4:1110:21603:35618\_2:N:0:TCTGCAAG+GCTGCACT  
TTGGATGTTGTGCAAACTATCAGGTTCTTGTCACGATTCTTAAAAGAAGTTTATTAAACTTCAGAG  
TCTCTTGAAGTCCAGGTAGCTAATGTTCTTGCAATAGCCACAGACTT

+



FFFFFFFFFFFFFFFFFFFFFFFFFFFFFFFFFFFFFFFFFFFFFFFFFFFFFFFFFFFFFFFFFFFFFFFF  
FFF

@A00721:190:HGJW7DSXY:4:1641:24686:35039\_2:N:0:TCTGCAAG+GCTGCACT  
ACGGATACCGATCTCAGTTCTACCACAGAAACCGTCTCAGGAAGTGTCTCCACTGATTCGGAATTAGA  
GAAAGACGACCTTCTTGTGGGGACTGAGACCTCTGAATTTTCAGGGTG

+  
FFFFFFFFFFFFFFFFFFFFFFFFFFFFFFFFFFFFFFFFFFFFFFFFFFFFFFFFFFFFFFFFFFFFFFFF:FFFFFFFFFFFF  
FFFFFFFFFFFFFFFFFFFFFFFFFFFFFFFFFFFFFFFFFFFFFFFFFFFFFFFFFFFFFFFFFFFFFFFF

@A00721:190:HGJW7DSXY:4:1340:11487:31688\_2:N:0:TCTGCAAG+GCTGCACT  
GGATAATTTCAACTCTGAGACTTCTAAGAGTGTTCAAAAGACCAGAAACGTAACAAGAATAAAG  
GTAGGAAGGGGAGAAAACAGAACAGCGAGCGGTTGAAGAGAAAAC TG

+  
FFFFFFFFFFFF:FFFFFFFFFFFFFFFF:FFFFFFFFFFFFFFFFFFFFFFFF,FFFFFFFF,FF,FFFFFFFF  
FF:FF::FFFFFFFFFFFFFFFFFFFFFFFFFFFFFFFFFFFFFFFFFFFFFFFFFFFFFFFF

@A00721:190:HGJW7DSXY:4:1622:15682:10332\_2:N:0:TCTGCAAG+GCTGCACT  
GCTGATCGTACCCCAATTCCTGCTAGAAAGATCACTCTCGGCGATACCACTGATCTTCAGAGTTACG  
TAGTGGTCGTTCTTTTGGTGATTTTATCAAAGAGAAAGTTTCTGCTAG

+  
FFFFFFFFFFFF:FFFFFFFFFFFFFFFF:FFFFFFFFFFFFFFFFFFFFFFFF:FFFFFFFF:FFFF:F,FFFF  
,FFFFFFFFFFFFFFFF,FFFF:FFFF:FFFF,F,F,FFF,FFF:FFFF

@A00721:190:HGJW7DSXY:4:2326:2935:17910\_2:N:0:TCTGCAAG+GCTGCACT  
AAAAGCTATTAATAGCAGTTGCGGGGCTATAATACCGCCTCCAGATTACTCTAAACTGAATCCACTCT  
CTTGGGATATAAATGAGTACATCTATAATAGAGTTTTGGAAGTGTGTA

+  
FFFFFFFFFFFFFFFFFFFFFFFFFFFFFFFFFFFFFFFFFFFFFFFFFFFFFFFFFFFFFFFFFFFFFFFF  
FFFFFFFFFFFFFFFF,FFFFFFFFFFFFFFFFFFFFFFFF:FFFF:FFFFFFFF:

@A00721:190:HGJW7DSXY:4:1112:6714:26616\_2:N:0:TCTGCAAG+GCTGCACT  
TTGTTGACTACGATCTCTCTTGTAAATAAGAGTTCTTCGCAGTTGAATCTCCACCAGGTGGAGGGAAG  
ACCACTGAAGTTATAGCGACTTTTGTGCAATTTTTCGCAAAAGTCTT

+  
FFFFFFFFFFFFFFFFFFFFFFFFFFFFFFFFFFFFFFFFFFFFFFFFFFFFFFFFFFFFFFFFFFFFFFFF:FFFFFFFFFFFF  
FFFFFFFFFFFF,FFFF:FFFFFFFF,FFFFFFFFFFFFFFFFFFFFFFFF

@A00721:190:HGJW7DSXY:4:1305:9019:33395\_2:N:0:TCTGCAAG+GCTGCACT  
CTGCTAATCGTAATTCGCGAGAAGAGATAGTGAAGTTTGGCACTTCTAGTTCATCGCGGTATT  
TGTGAAATTAAGACAGACGTGAAAGTTATGATGAGTGATCGTATTAGA

+  
FFFFFFFFFFFFFFFFFFFFFFFFFFFFFFFFFFFFFFFFFFFFFFFFFFFFFFFFFFFFFFFFFFFFFFFF  
FFFFFFFFFFFFFFFFFFFFFFFFFFFFFFFFFFFFFFFFFFFFFFFFFFFFFFFFFFFFFFFF

@A00721:190:HGJW7DSXY:4:2560:18439:13573\_2:N:0:TCTGCAAG+GCTGCACT  
TTCATCGACGAATTATTCATGATTCACGCTGGTCAGACCTTTTTCTTACACATCTACTTAAGGCGGC  
TTATACCATAGGTTACGGTGATTCCAATCAAATCGGATTCATCAATCG

+  
FFFFFFFFFFFF,FFFFFFFFFFFF:FFFF:FFFFFFFFFFFFFFFF,FFFFFFFFFFFFFFFF:FFFFFFFFFFFF  
:FFFFFFFF,::FFFFFFFFFFFF:FF:FFFFFFFFFFFFFFFF:FF:FFF

@A00721:190:HGJW7DSXY:4:1477:1615:20290\_1:N:0:TCTGCAAG+GCTGCACT  
CGCAAAGTACTTCAACATCAACGACATCATTCTTGATGAGTGTGCTTCTTATCGAAGTCTCAGTTATC  
GCTGCCCCGCCGACGTTTGTGCGCAACTCTCAGAGGTTACGGCAGAAAAATTTCTCTGCTTGAAT  
TCG

+  
FFFFFFFFFFFFFFFFFFFFFFFFFFFFFFFFFFFFFFFFFFFFFFFFFFFFFFFFFFFFFFFFFFFFFFFF  
FFFFFFFFFFFFFFFFFFFFFFFFFFFFFFFFFFFFFFFF:FFFFFFFFFFFFFFFFFFFFFFFFFFFFFFFF  
FFF

@A00721:190:HGJW7DSXY:4:2445:8024:34929\_1:N:0:TCTGCAAG+GCTGCACT  
TAAGAGTAAGGTTAAATGTGAAGATGCTCAGACTATTATGAAGTTCAAGGTAATACTTACCAGCACG



:FFFFFFFFFFFFFFFF:FFFFFFFFFFFFFFFF,FFFFFFFFFFFF:FFFF:FFFFFFFF:FFFFFFFFFFFFFFFF,  
FFFFFFFFFFFFFFFFFFFFFFFFFFFFFFFFFFFFFFFFFFFFFFFF:FFF,FFFFFFFF  
@A00721:190:HGJW7DSXY:4:2411:5023:7216\_2:N:0:TCTGCAAG+GCTGCACT  
ATTCGATATTCGATTGAGGGTCGTTATACCTATTCGGCTATCTGTGCTTTGAATTGTATAAGATCAAA  
TTTTAAACGATTCCGAGAGGTTTATCCTGATGTGGAGGGAGTTCTTGA  
+  
FFFFFFFF:FFFFFFFFFFFFFFFFFFFFFFFFFFFFFFFFFFFFFFFFFFFFFFFFFFFFFFFFFFFFFFFF  
FFFFFFFFFFFFFFFFFFFFFFFFFFFFFFFFFFFFFFFFFFFFFFFF:FFFFFFFFFFFF  
@A00721:190:HGJW7DSXY:4:1438:24496:10567\_1:N:0:TCTGCAAG+GCTGCACT  
TCCGATCTCAGTAATCCTGATTCTACTACGGATTCATGGACCTTCCATCCTGTACCTCTTCTGGAGAG  
ACGTATCTCAAAGATCGACTTCGAGACAGGTGATATTGTTGAGCGAGAGCGACCAAGATCTAAATTCTG  
GTA  
+  
FFFFFFFFFF:FFFFFFFFFFFFFFFFFFFFFFFFFFFFFFFFFFFFFFFFFFFFFFFFFFFFFFFFFFFFFFF  
FFFFFFFFFFFFFFFFFFFFFFFFFFFFFFFFFFFFFFFFFFFFFFFFFFFFFFFFFFFFFFFFFFFFFFFF  
FFF  
@A00721:190:HGJW7DSXY:4:2378:10474:27555\_2:N:0:TCTGCAAG+GCTGCACT  
AGTCTCTGACTTGACCATCTTTCATTTTAAATGACGATCATTAAGACTCTCTTCTTCTTTGTTTCCT  
TCTTTCGACTGATTTTTCCTCATCAGCTTGTGTTTTACCTAATCTGTG  
+  
FFFFFFFFFFFFFFFFFFFFFFFFFFFFFFFFFFFFFFFFFFFFFFFFFFFFFFFFFFFFFFFF,FF:FFFFFFFF,FF::FFFF  
FFFFFFFFFFFFFFFF:FFFFFFFFFFFFFFFFFFFFFFFFFFFFFFFFFFFFFFFF:FFF  
@A00721:190:HGJW7DSXY:4:2367:22272:31610\_2:N:0:TCTGCAAG+GCTGCACT  
TCAGTTGATTAAGACTCTTCCGAAAGGCGAACTTTGGAATTTGAAGCTCAGGGTGAAGCACAAACGTT  
TGACCGTGACGAACTGTGGTGTCTTGATCTACGTTACGGATATACTC  
+  
F:FFFFFFFF:FFFFFFFFFFFFFFFF:FFFFFFFFF,FFFFFFFFFFFFFFFF:FFFFFFFFFFFFFFFF  
FFFFFFFFFFFFFFFFFFFFFFFF:F:FFFFFFFFFFFFFFFFFFFFFFFF  
@A00721:190:HGJW7DSXY:4:1265:7310:23954\_1:N:0:TCTGCAAG+GCTGCACT  
TGACTGGAGTTCAGACGTGTGCTCTTCCGATCTATTATTAACGCACTAAAACGTCTTCGACAACA  
GCAGGGGTTTTCGAATAGTGATAGCCACCCGCCTTACAGAGGGGCAGCAGGGGTTTTCGAATAGTGAT  
AGC  
+  
FFFFFFFFFFFFFFFFFFFFFFFFFFFFFFFFFFFFFFFFFFFFFFFFFFFFFFFFFFFFFFFF:FFFFFFFFFFFFFFFF  
FFFFFFFFFFFFFFFFFFFFFFFFFFFFFFFFFFFFFFFFFFFFFFFFFFFFFFFFFFFFFFFFFFFFFFFF  
FFF  
@A00721:190:HGJW7DSXY:4:1569:24532:1548\_1:N:0:TCTGCAAG+GCTGCACT  
TACTGTCTGTCTCGCTCTTCGAATGAAGTTTTAATGCTTAACAACAATGATAGTGAATTTATACCTA  
CAATCATTGGTTTTTCTAATAATGATGACACTATTGTTTATGGATATGATGCTATTACTCATGATGGT  
TAC  
+  
FFFFFFFFFFFFFFFFFFFFFFFFFFFFFFFFFFFFFFFFFFFFFFFF:F,FFFFFFFFFFFFFFFFFFFFFFFF,FFFF  
FFFFFFFFFFFFFFFFFFFFFFFFFFFFFFFFFFFFFFFFFFFFFFFFFFFFFFFFFFFFFFFFFFFFFFFF  
FFF  
@A00721:190:HGJW7DSXY:4:2624:26259:16971\_2:N:0:TCTGCAAG+GCTGCACT  
TCTCAGTTTACAAGGACCTTAAGCGATGGATCGGGGTTAATTCTAAACATTACCCGAAAGACGTGCT  
AAATTAACCATTTGTACGATGTCGTCTGTCTCGGCGAGATCGGAAGA  
+  
FFFFFFFFFFFFFFFFFFFFFFFFFFFFFFFFFFFFFFFFFFFFFFFFFFFFFFFFFFFFFFFF  
FFFFFFFFFFFFFFFFFFFFFFFFFFFFFFFFFFFFFFFFFFFFFFFF  
@A00721:190:HGJW7DSXY:4:2512:4878:17300\_2:N:0:TCTGCAAG+GCTGCACT  
TTTATCTCTTTGGTTGTTAGGGATTTTGAGAGAGTGAAAGGCTTCAATTGTAGTGGTTTGGTCGTTTC  
AGTACCCAGTCAGTATACCTCTACGCAAAGATATTTTCATGAAAACCTAC  
+

FFFFFFFF,FFFF:FFFFFFFF:FFFFFFFFFFFFFFFFFFFFFFFFFFFFFFFFFFFFFFFF  
FFFFFFFFFFFFFFFFFFFFFFFFFFFFFFFFFFFFFFFFFFFFFFFFFFFFFFFF

@A00721:190:HGJW7DSXY:4:1515:26467:2988\_1:N:0:TCTGCAAG+GCTGCACT  
TGTCTTTCATATTATGAATGAACCTTCGCCGCTCTCTTTGCTTCGATGTTGGATGTCAAGAAGGGTT  
CAGAATGGGATTCTACGTAGTTTATGACTTTGGTGGTGGTACTTTCGATACTTCTATCGTCTTACGT  
TAC

+  
FFFFFFFF:FFFFFFFFFFFFFFFFFFFFFFFFFFFFFFFF:FFFFFFFF:FFFFFFFFFFFFFFFF  
F::FFFFFFFFFFFFFFFFFFFFFFFFFFFFFFFFFFFFFFFFFFFFFFFFFFFFFFFF  
FFF

@A00721:190:HGJW7DSXY:4:2424:8350:29794\_2:N:0:TCTGCAAG+GCTGCACT  
AGTGTTATTTATTCTGGTGGTGATGATAATCTTGGAGGTCGTGACGTTGATGAAGCTATAAGAGCGTT  
CTTATTACGGCGCACTTCTTTACCCGCCACCACACAACCTTTCAGTTTC

+  
FFFFFFFFFFFFFFFFFFFFFFFFFFFFFFFFFFFFFFFFFFFFFFFFFFFFFFFF:FFFFFFFF  
FFFFFFFFFFFFFFFFFFFFFFFFFFFFFFFF:FFFFFFFF:FFFFF

@A00721:190:HGJW7DSXY:4:2609:28528:12195\_1:N:0:TCTGCAAG+GCTGCACT  
ACTGGAAAACCCTCGTCAATACTTTTCAATAATATACGTCTTGAACCTCACTTATGACGATCTAGTGAA  
ATTAACGCGTCCTTTTCTGGAACGTAGTTTACTATTATGAACAAAGTTATCAAAGATAGTGGCATT  
AAG

+  
FFFFFFFFFFFFFFFFFFFFFFFFFFFFFFFFFFFFFFFFFFFFFFFFFFFFFFFF:FFFFFFFF  
FFFFFFFFFFFFFFFFFFFFFFFFFFFFFFFF:FFFFFFFFFFFFFFFFFFFFFFFF  
FFF

@A00721:190:HGJW7DSXY:4:2550:4426:7968\_1:N:0:TCTGCAAG+GCTGCACT  
CTGATTCCGGCCGGTGGTAGCTCATTTCTACCAGGGGCTATTACTCTTGCTGAAACAGCTATTAAAGC  
TGTTGAGCGGGTAATTACACCTAAACGAGCTCGATCTGCCATCGCTGAAGGATGTGCACTCTTTCTG  
CTA

+  
FFFFFFFFFFFFFF,FFFFFFFFFFFFFFFFFFFFFFFFFFFFFFFFFFFFFFFF  
FFFFFFFFFFFFFFFFFFFFFFFFFFFFFFFFFFFFFFFFFFFFFFFFFFFFFFFF  
FFF

@A00721:190:HGJW7DSXY:4:2271:32696:23641\_2:N:0:TCTGCAAG+GCTGCACT  
GCTCGTATTATCGTCGCTGCTGGATCTGCGTTACCGTTGAAGGCTAACTCCAAGGTAATTATGAAGA  
CTGTGATTTATCTTTCACCTCTGGCCTTGTATGAGGGTGTTCCTAATCG

+  
FFFFFFFFFFFFFFFFFFFFFFFFFFFFFFFFFFFFFFFFFFFFFFFFFFFFFFFF:FFF  
FFFFF,FFFFFF:FF:FFFFFFFFFFFFFFFFFFFFFFFFFFFFFFFF

@A00721:190:HGJW7DSXY:4:2118:19768:31657\_1:N:0:TCTGCAAG+GCTGCACT  
ATTTCAATATTCTTAAAAAGAAGATAGAGAGTCATACTTTGGGCTATCGTTCAGGTGCATGGGGTTTG  
ATAGCCAATATTGAAGTGGACACATCTGGTAGTATCGAAGTAAAGATAACCAATAAGGAAGGAGCTTA  
TAC

+  
FFFFF,FF,FF:FF,,,:FF:F,FFFF:FFF:FFFF:FFFF,F,F,FFFF,,F,:FF,,F,FF,F  
FFFFF,FFF:FF,:FFFF,FF:,F,FFFFFFFF:F,F,F,:FFFF,FFFFFFFF,,F:FFF::FF,  
FF:

@A00721:190:HGJW7DSXY:4:1562:28664:36980\_2:N:0:TCTGCAAG+GCTGCACT  
ATTAAACAAGTTGTACTTATCAATGATTTTATCGCTGGTTGTTATCTCGAAAAGTCTCTTCTAAAAGG  
AACGTCAGTTCTAACCCAAAGAGAATATCTAAAATATTTACAAAATCT

+  
FFFFFFFFF,FFFF:FFFFFFFF:FFFFFFFF,FFFF:FFFFFFFF,FFF:FFF:FFFFFFFF:F  
F:FF,:F,FFFF:FFFFFFFF::FFF,FFF:FFF:FFFFFFFF,F

@A00721:190:HGJW7DSXY:4:1620:22815:15170\_1:N:0:TCTGCAAG+GCTGCACT  
ATGGCACTACCTCGGTACAATCTTACTTGGAACGAAGGCGACCTGTTCCGGAGTTTTTACGGGATCCG

GAATGTTCTGTCTATATTAGGTGAAGCGAAATACGATTTTGAACGTCAACGTTACCGAGTTTCGTTT  
CGT

+

F: ,FFFFFFFFFFFFFFFF,FFFF:FFFFFFFFFFFFFFFFFFFFFFFFFFFFFFFFFFFFFFFFFFFFFFFF  
FFFFFFFFFFFFFFFFFFFFFFFFFFFFFFFFFFFFFFFFFFFFFFFFFFFFFFFFFFFFFFFFFFFFFFFF,FFF:FFF  
FFF

@A00721:190:HGJW7DSXY:4:2258:8133:8061\_1:N:0:TCTGCAAG+GCTGCACT  
TAGTGCGAGGCCTCTCTTCTACGAGTATTGCTATTTATACGTTACGAGAAGAAGGTTGAAAGTTTG  
AGAAGCTAGTTTACGAAGTCTACTATACGTGACATACTAAATACTAGATATTTGGATGATCTT  
GAT

+

FFFFFFFFFFFFFFFFFFFFFFFFFFFFFFFF,FFFFFFFFFFFFFF:FFFFFFFFFFFFFFFFFFFFFFFFFFFF  
FFFFFFFFFFFFFFFF:FFFFFFFFFFFFFFFF:FFFFFFFF:FFFFFFFF,FFFFFFFFFFFFFFFFFFFF  
FFF

@A00721:190:HGJW7DSXY:4:1147:21088:21856\_1:N:0:TCTGCAAG+GCTGCACT  
TTCTTCCTTGATTTTAAATATAAAGAATCTTTACCAGGACTCCTACTACAGGAGGCAGTCTTCTGATC  
GTAAGAAGTTTATAAGGAACATATCCATTTGTTGTAATAGGGTCATCAACTAGAACTCGAAACTCTA  
AGT

+

FFFFFFFFFFFFFFFFFFFFFFFFFFFF:F:FFFFFFFFFFFFFFFFFFFFFFFFFFFFFFFFFFFFFFFFFFFF  
FFFFFFFFFFFFFFFF:FFFFFFFFFFFFFFFFFFFFFFFFFFFFFFFFFFFFFFFFFFFFFFFFFFFFFFFFFFFF  
FFF

@A00721:190:HGJW7DSXY:4:1336:30273:6762\_2:N:0:TCTGCAAG+GCTGCACT  
CCAAGCTTACCTGTATCTTCAATGAAATTGACTCTTCGATAGGGGACATTTTATCGTGGGCTTTCCG  
TAAAGGAAGATCTGTTATCGACGTTTATCGTTTACGAAGTATCACTC

+

FFFFFFFFFFFFFFFFFFFFFFFFFFFFFFFFFFFFFFFFFFFFFFFFFFFFFFFFFFFFFFFFFFFFFFFFFFFF  
F:FFFFFFFFFFFFFFFFFFFFFFFFFFFFFFFF:FFF:FFFFFFFFFFFFFF

@A00721:190:HGJW7DSXY:4:2254:20509:28119\_1:N:0:TCTGCAAG+GCTGCACT  
TGGTCTTTATTCTATTATTGATTTTATGAGATTGATACGTTAACAGAAGATGATGTTAGAGTAGAAT  
TCCTGAAGAGTCCTTCCGTAACCAACTTCTTGACAATTTTCTTCAATCCTTCGATAATAGTTAAATCT  
AGG

+

FFFFFFFFFFFFFFFFFFFFFFFFFFFFFFFFFFFFFFFFFFFFFFFFFFFFFFFFFFFFFFFFFFFFFFFFFFFF  
FFFFFFFFFFFFFFFFFFFFFFFFFFFFFFFFFFFFFFFFFFFFFFFFFFFFFFFFFFFFFFFFFFFFFFFFFFFF  
FFF

@A00721:190:HGJW7DSXY:4:2160:6677:3912\_2:N:0:TCTGCAAG+GCTGCACT  
AATTAAGAAATAATCCTACATTGACTGATTATCTAAAGATTGAAGGAAAATTTTATCCTCGTTTAACT  
TACTTAGACTTTCCTACGATACAAATGATAACTTCTAATTTACGTTTG

+

FF:FFFFFFFFFFFFFFFFFFFFFFFFFFFFFFFFFFFFFFFFFFFFFFFFFFFFFFFFFFFFFFFFFFFF:FFFF  
FFFFFFFFFFFFFFFFFFFFFFFFFFFFFFFF:FFFFFFFFFFFFFFFFFFFF

@A00721:190:HGJW7DSXY:4:2159:9109:19085\_2:N:0:TCTGCAAG+GCTGCACT  
CTCAGGAGTCCCGGCATTTGATAATAATGACGAGACTTTCGTCATAATCGCTGCATATTACGGATTAC  
ACGGTACCAGCGCATCTCGTGTGAGCCTCGACCCGATTATATGGTAT

+

FFFFFFFFFFFFFFFFFFFF:FFFFFFFFFFFFFFFFFFFFFFFF,FFFFFFFF,F:F:FFFFFFFFFFFF,FFFFF  
FFFFFFFF:FFFFFFFFFFFFFFFFFFFFFFFF:FFFFFFFF:FF:FF

@A00721:190:HGJW7DSXY:4:2645:4300:1642\_2:N:0:TCTGCAAG+GCTGCACT  
GAACTAACTATGTTATGTTCTCTGATCATTTTGACAATCTCTTCTTATAATAATAATAATAATAT  
TACTAATGGCAAATAGTGAAAGGCTCCAGTCAACACTAGTTCGAGTG

+

FFFFFFFFFFFF:FFFFFFFFFFFFFFFFFFFFFFFFFFFFFFFFFFFFFFFFFFFFFFFFFFFFFFFFFFFF:F  
FFFF:FF:FFF:FFFFFFFFFFFFFFFFFFFF::FFFFFF, :F,FFFFFF



@A00721:190:HGJW7DSXY:4:1652:13015:27414\_1:N:0:TCTGCAAG+GCTGCACT  
AATAGGTGAAGGGATAGTTTTTACCTCGACCAACATTAAGGCGGCGGCGACTAATCTTAAAGCTTCAC  
CCAAAATGAAGGACACTTCGAAACTGAATAATGATGCACTACAAACAAGTATCGCTAATCATCTGAAA  
AAG

+

:FFFFFF:FFFFFFFFFFFFFF:FF:FFF::FFFFFFFF:FFFFFFFFFFFFFF,FFFFFF  
FFFFFFFFFFFFFF:FFFFF:FFFFFFFFFFFFFF:FFFFFF:FFFFFFFF:FFFFFFFFFFFFFF  
F:F

@A00721:190:HGJW7DSXY:4:1361:3577:3928\_2:N:0:TCTGCAAG+GCTGCACT  
AGAGGATATTCGCCATTGTGGTACGAATTGGTCCAACATTTACCACCAAATTCTTTTGATACAACTCT  
AGCCTTCAAGTGGGGTATGCCTGCGGAATACGCTTGCTATTCACCAGA

+

FFFFFFFFFFFFFFFFFFFFFFFFFFFFFFFFFFFFFFFFFFFFFFFFFFFFFFFFFFFFFFFF  
FFFFFFFFFFFFFFFFFFFFFFFFFFFFFFFFFFFFFFFFFFFFFFFFFFFFFFFF

@A00721:190:HGJW7DSXY:4:1602:23647:27007\_1:N:0:TCTGCAAG+GCTGCACT  
CCCGTTGATGCTATGTCAGAAGAAGCTATTCAAGCTTGTCGTTTAAAGACTGCAGAGGCTGTCAAACA  
AGCCCAGACTCAAGGAGTCCAATCAAAGGTTTTGAATTTAGCTCAACTGGGAGACGTGCTTAAATGG  
GTG

+

FFFFFF:FFFFFFFFFFFFFF:FFFFFFFFFFFFFFFFFFFFFFFFFFFFFFFFFFFFFFFF  
FFF:FFFFFFFFFFFFFFFFFFFFFFFFFFFFFFFFFFFFFFFFFFFFFFFFFFFFFFFF  
FFF

@A00721:190:HGJW7DSXY:4:2538:29143:22185\_2:N:0:TCTGCAAG+GCTGCACT  
GTATGTTAATAGATAGTGGGATAATAGTTCTACCGATACGTAGTGAACGCGTTCGTAGAACCAAGTAC  
TTTCCGTCTGAAGAGTTTAGAGCTGCTATTGATTATGTAACCGATAGG

+

:FF:FF,.,FF:FF,FFFF,FF:F,FF,,FFFF:F:,FF,F,F:FF:FF:F:F:F,FFF:F,FFFF:  
F,,:FF,F,,FFFF::FF:FF,.:F:FFFFFFFF,FF::F:FFF

@A00721:190:HGJW7DSXY:4:1629:4761:6511\_2:N:0:TCTGCAAG+GCTGCACT  
GATAATCCTTTAAGGACTATGTTGACTGACGAAGATTTCCACAGATTTGTCTACGTTGCAGATCGC  
CACTCCAAACACTATATACATTATAAAAATATAAAAATAAGGGAGTCAT

+

FFFFFFFFFFFFFFFFFFFFFFFFFFFFFFFFFFFFFFFF:FFFFFFFF:FFFFFFFF  
FFFFFFFFFFFFFFFFFFFFFFFFFFFFFFFFFFFFFFFF:FFFFFFFF

@A00721:190:HGJW7DSXY:4:1225:29866:10723\_1:N:0:TCTGCAAG+GCTGCACT  
ACCAAATCTTGCTTTCAACGAAGTCTCTGATTTTATTAATCATTACTTTAACGATCTCTCGGTCAT  
TACTCTGTACTTGATCTACGTCGTTTAAATGTCGAACAACCTTACTTAGAATGACTCTATCTTT  
CA

+

FFFFFFFFFFFFFFFFFFFFFFFFFFFFFFFFFFFFFFFFFFFFFFFFFFFFFFFFFFFFFFFF  
FFFFFFFFFFFFFFFFFFFFFFFF,FFFFFFFF,FFF:FFF:FFF::FFF,FFFFFFFF::F:FFF:FFF  
FF

@A00721:190:HGJW7DSXY:4:1428:10601:23703\_2:N:0:TCTGCAAG+GCTGCACT  
ACTCACTATCGTTTTCTGCTTTTTCTTAGCTAATAGATTAATAAAGGATGAGTACGAAAACCAACTCT  
TCGTTACGAGACCTGATGGTAGAATAGATTTAGTCTCTACACCCATCT

+

FFFFFFFFFFFFFFFFFFFFFFFFFFFFFFFFFFFFFFFF:FFFFFFFFFFFFFFFFFFFFFFFF  
FFFFFFFFFFFFFFFFFFFFFFFFFFFFFFFFFFFFFFFF:FFF

@A00721:190:HGJW7DSXY:4:1417:31937:9142\_1:N:0:TCTGCAAG+GCTGCACT  
AAAGCGTTTTTACCGTCCTGAACCTTAATACACGAAGATAACAACCGCAAACGACTCGAAACCGAGACG  
CCGTAGATCAAAGTCCCTTCTAACTTTAGATTATGAATCCTGCCTTTACTCATTTT

+

F:,,,:.,FFF,F,,,,:.,F,,,,,:.,FFF:,F,,,,:F,::,FF,,F,FFFFFFFFFFFFFFFF  
FFFFFFFFFFFFFFFFFFFFFFFFFFFFFFFFFFFFFFFFFFFFFFFFFFFFFFFF

@A00721:190:HGJW7DSXY:4:1221:4246:19429\_2:N:0:TCTGCAAG+GCTGCACT  
TGCTTTTCGATAGTGATTGTTATCAATTTAAATACATTACTGTTTCAAATCATCTTTACTCACAGACT  
CCGAAATGGTTTCAAATGAGGTCAAAGCTCTATTTATTAACGAAC

ATTGACGGCAGTCCCGTCATCTCTGTGGGAACTGAGGCAGTACCTCAGTCAAAAGTCACATTCACCAC  
TCC

+

FFFFFF,FFFFFF::FFFF:FFF:F:FFFFFF:F:FFFFFFFFFFFFFFFFFFFFFFFFFFFFFFFF:FFFF  
FFFFFFFFFFFFFFFFFFFFFFFF:FFFFFFFF:FFFFFFFFFFFFFFFFFFFFFFFFFFFFFFFFFFFFFFFF  
:FF

@A00721:190:HGJW7DSXY:4:1152:32570:29841\_2:N:0:TCTGCAAG+GCTGCACT  
GACTATACAGTTCGGCCATTTCAAGAGTGGTCAATACGTCGTGGGAGGTACTGAAGCCTTCCCCTCCG  
CTGGCACGAAGAACTCCCAAGCCAATCAATAGTTCTTCTGACCAGA

+

FFFFFFFFFFFFFFFFFFFFFFFFFFFFFFFFFFFFFFFFFFFFFFFFFFFFFFFF:F:FFFFFFFFFFFFFFFF  
FFFFFF:FFFFFFFFFFFFFFFFFFFFFFFFFFFFFFFF:FFFFFFFF

@A00721:190:HGJW7DSXY:4:2443:22101:15405\_1:N:0:TCTGCAAG+GCTGCACT  
GGAGTTCAGACGTGTGCTCTTCCGATCTGGGAAATGTCCCCAAACTGATAAGAATAAAGGGAAAGGT  
CCATCAGGACCTAAGAAGGGGAAATTACCCCTAATTCTGAAGGAAGATCTCCCACCATCTGGGGTTGG  
GAA

+

:FFFFFFFFFFFFFFFFFFFFFFFFFFFFFFFFFFFFFFFFFFFFFFFFFFFFFFFF:FFFFFFF  
FFFFFFFFFFFFFFFFFFFFFFFF:FFFFFFFFFFFFFFFFFFFFFFFFFFFFFFFFFFFFFFFFFFFFFFFF  
FFF

@A00721:190:HGJW7DSXY:4:2547:19660:6292\_1:N:0:TCTGCAAG+GCTGCACT  
GCACGGGCCAAAGAGGCCGCTGCTACGAAGTCGCTGAAGGCGGCTTGGGTCATTAAAGGGTAGCTGTAA  
AGTTGCGCCTGCCGACCCCATCTTTGAGACCAAGACTCTCTACAGTAGGTCGTGCCTACTATGAGCA  
AAT

+

FFFFFFFFFFFFFFFFFFFFFFFFFFFFFFFFFFFFFFFFFFFFFFFFFFFFFFFF,FFFFFFF  
FFFFFFFFFFFFFFFFFFFFFFFF:FFFFFFFFFFFFFFFFFFFFFFFFFFFFFFFFFFFFFFFFFFFFFFFF  
FFF

@A00721:190:HGJW7DSXY:4:2263:32732:2973\_1:N:0:TCTGCAAG+GCTGCACT  
GGACGAAGGTGAGAGGACTTTTGGCTACTGGCGACAACTGAGAGCAGTCGCTGGGGAAAGAGAATTG  
CGTGGGTTGAAGGCCGACGCTTCGAGCTTGAGTGTGACGAGGCCGGTGACGTTTTTGTCAACGGCGTT  
TGG

+

FFFFFFFFFFFFFF,F::FFFFFFFFFFFFFFFFFFFFFFFFFFFFFFFF:FFFFFFFFFFFFFFFF:FFFF  
FFFFFFFFFFFFFFFFFFFFFFFFFFFFFFFFFFFFFFFFFFFFFFFFFFFFFFFF:FFFFFFFFFFFFFF,F  
FFF

@A00721:190:HGJW7DSXY:4:1535:29550:32346\_2:N:0:TCTGCAAG+GCTGCACT  
CTTAAGTATGGGGCGAAGATCCCCTATGGAGTCTTGAAGGACTTAGGTTGGCATATTTATGCCGACGA  
TAATAAGCATGTACCCCTAAGCACCGAGGTAAGCTCGGGACTTACAA

+

FFFFFFFFFFFFFFFFFFFFFFFF:F:FFFFFFFFFFFFFFFFFFFFFFFFFFFFFFFFFFFFFFFF  
FFFFFFFFFFFFFFFFFFFFFFFF:FFFFFFFFFFFFFFFFFFFFFFFF

@A00721:190:HGJW7DSXY:4:2124:32506:25661\_1:N:0:TCTGCAAG+GCTGCACT  
GATCTTGCAGAGTGACTGGAGTTCAGACGTGTGCTCTTCCGATCTGTTAAACTCTTGCTCCTTCTGT  
GGGTGAGGGTTTTTGTATATTCACTGGTCTGGGAGGCTGCTTCTCCATAATTACAACCTCTCTT  
TAG

+

FFFFFFFFFFFFFFFFFFFFFFFFFFFFFFFFFFFFFFFFFFFFFFFFFFFFFFFF:FFFFFFFFFFFF  
FFFFFFFF:FFFFFFFF:FFFFFFFFFFFFFFFFFFFFFFFFFFFFFFFFFFFFFFFFFFFFFFFF  
FFF

@A00721:190:HGJW7DSXY:4:1626:31394:6136\_2:N:0:TCTGCAAG+GCTGCACT  
AGTTGGGCAAATTCACATATGGTAGACGTTGTACACTTTTCTTGAAAATTTTCTTTCTCCGT  
CATTGGGGATTTGATGTGAGAAGGTGGAAGGTGTCAAGGGTCTTCTT

+

@A00721:190:HGJW7DSXY:4:2306:5267:19006\_2:N:0:TCTGCAAG+GCTGCACT  
TCACATCATGATTGATAGTTACGGCTCGTATCGAGGTGGAGGGAGGAAGTTCTCCGAAATTAAGACG  
GGGGGATTAAGAGTCCAGCTGTACCTGTCATTTAGAGAGGGGAGCTC

@A00721:190:HGJW7DSXY:4:2122:11225:7341\_1:N:0:TCTGCAAG+GCTGCACT  
CGTCAGAAGATGAGGAAGTCTAAGAGGAGGAGTTTGAGGAAGGCTCTAGAGAAGATCTCCCCACCTGG  
AGAAGGCAAGTGAGAGTCCAGAAGTTGATGAAGAAGGATTATTTGAAGCAGGGGTTACCACTTCCTA  
AGG

@A00721:190:HGJW7DSXY:4:1160:14778:14998\_1:N:0:TCTGCAAG+GCTGCACT  
TTTAGGTCAACTTGGGGTTTCGAATGTCATTAGTGCCTTACGATTGAAAGAGGTCCTTTTGAGTATCG  
ACAGATCTTTCGATCTTGAGGACGTACATTTAACGTGGCAGAATTCGGTAACTTACCATATTGTTCT  
TC

@A00721:190:HGJW7DSXY:4:2621:5448:28714\_1:N:0:TCTGCAAG+GCTGCACT  
TTTAACTTTGACTCAACTACTCCGATCAGATCCGATGGTTTGATTGGTATGGACTACTCGACTTTTG  
ATCTGGAGTTGTCTAGGGTCATGGCAGATACTACCGATAAGGTGAAAAATATGCAGGTCAAAGATTCT  
GTA

@A00721:190:HGJW7DSXY:4:2102:13331:24361\_1:N:0:TCTGCAAG+GCTGCACT  
CTAAGAGTCTTTATGATTCAAAACCTATCGTTGTCGTACCTTACAAGTTGAGGAGACTCTACAGCGG  
CTTATTGTCGCGCAGTTTCCAGAATTGCGGTTGAAGTTCACCCATTCTATCTTGAATGCTCACGCCGT  
CGC

@A00721:190:HGJW7DSXY:4:1329:18448:18223\_1:N:0:TCTGCAAG+GCTGCACT  
GAGGCGATATTCGTTTTCATATCCAAAACTCCTTGAATGGAGTACATATTTGCAACCCTATTCTTGAT  
GTGAAAGATGCATCGAGGTATACGTCTAGGAACATTGATTGGGAACGTACCTACTCACGAGACGTCAT  
GAA

@A00721:190:HGJW7DSXY:4:2403:32316:19257\_1:N:0:TCTGCAAG+GCTGCACT  
TTCGTTCTGTTACAAGACGCTTTGGATTGTGACCATAAAGCCTCAGTTGCGATAGCTGTAGAGGTAT  
ACGATATCTCTCTTGATGATGTAGCCACTATAATGCTTAAGAGAGAGATTGATGTATGTCATTTGCTC  
TTA

```
FF,FFF:F::FF,,FFFFFF,FF,FFFFFFFFFFFF:,FFF:F,FFF:FFFFFF,FFF:FFFFFF:FFFFFF
```

F:FFFFFFFFFFFFFFFFFFFFF, :FFFFFFFFFFFF:FFFF:FFF:F:FFFFFFFFFFFFFFFF:FF, F  
FFF

@A00721:190:HGJW7DSXY:4:2377:30156:2456\_2:N:0:TCTGCAAG+GCTGCACT  
GACACGATGAAAAATGACATACCCGTTCTGACCTTGGTATCGTTATCCGTCATGGAGATGATGGCGC  
ATCACTTGATTACTATATGCCCGAAGGATTGGGTTATTCTCACAACAA

+

FFFFFFFFFFFFFFFFFFFFFFFFFFFFFFFFFFFFFFFFFFFFFFFFFFFFFFFFFFFFFFFFFFFFFFFF:FFF  
FFFFFFFFFFFFFFFFFFFFFFFF, FFFFFFFFFFFFFFFFFFFFFFFFFFFFFFFFFF

@A00721:190:HGJW7DSXY:4:1641:5267:26240\_1:N:0:TCTGCAAG+GCTGCACT  
AATGAGTTCCGAATAACTCGTAATAAATCTTCTCTAGTGACAATTGAGAATACCTATTTCCGTACC  
AAGAGCCACTGCCAATCTCATCGCTATACGCATACCTGATTGGAAGAAGCGAGGTTTCGTTCTCAATA  
AAA

+

F:FFFFFFFFFFFFFFFFFFFFFFFFFFFFFFFFFFFFFFFFFFFFFFFFFFFFFFFFFFFFFFFFFFFFFFFF:FFF  
FFFFFFFFFFFFFFFFFFFFFFFFFFFFFFFFFFFFFFFFFFFFFFFFFFFFFFFFFFFFFFFFFFFFFFFF  
FFF

@A00721:190:HGJW7DSXY:4:2223:25201:33332\_2:N:0:TCTGCAAG+GCTGCACT  
TTTCTTCATAAGGGCTATTCAGTACGTATGGGGATCACTTCTCGGTCAATGACAAAACCTTCGAAT  
ATGTTACGACATGGCTTCGTAACAACAGTGCGAGGATTGTCATCTCGG

+

FFFFFFFFFFFFFFFFFFFFFFFFFFFFFFFFFFFFFFFFFFFFFFFFFFFFFFFFFFFFFFFFFFFFFFFF:FFF  
FFFFFFFFFFFFFFFFFFFFFFFFFFFFFFFFFFFFFFFFFFFFFFFFFFFFFFFFFFFFFFFFFFFFFFFF

@A00721:190:HGJW7DSXY:4:2377:30535:11350\_2:N:0:TCTGCAAG+GCTGCACT  
TTCATATAGATACGAGATACCTAGAGAAGGTGCGAGCGATCTTACTCGTTATCGGAGCTAAGAAGAAG  
ACTTTGGGTACACGTTATGCTCGCAAACCTTAACGTTAGTACCGGAGGT

+

FFF:FFFFFFFFFFFFFFFFFFFFFFFFFFFFFFFFFFFFFFFFFFFFFFFFFFFFFFFFFFFFFFFFFFFFFFFF, FF:FF  
FFFFFFFFFFFF:FFFFFFFFFFFFFFFFFFFFFFFF:FFFFFFFFFFFFFFFF

@A00721:190:HGJW7DSXY:4:1470:25301:1501\_1:N:0:TCTGCAAG+GCTGCACT  
GAGAAAAGATTGAGGACGCCTACGGTGACTTTATGGACAAGATGCAAGTTCTTGGGAAATACTTGTTT  
CCCTTTTATAGTTTAGTAGGTGATCTTGACGTGATTCTTTGTATAGGGAGTGTGAGAAGACAACGAA  
TC

+

F::,F,F:,FF,F:FF:F:FFFF,FFF::FFFFFFFFFFFF,FFF:, ,F:FF:FF,FFFFFFFFFFFF:F  
,:FFFF:F:FFFFFFFFFFFF:FF:FF,,,:F:FFFFFFFFFFFF:F::FFF,FFF:FFF,:F,FF:,  
FF

@A00721:190:HGJW7DSXY:4:2320:12066:35289\_1:N:0:TCTGCAAG+GCTGCACT  
ATCTTTTGAGATTGAGAAGATTGAAGAACACGTCAAGAAGTCGCTCGGCGTTGTTCTTGAAAACCAAG  
TTAAGAAGGAGGCTGATCATGGAGTCTTTGTACCTTCTGTCAAACCTTCGAGGTTGAGCTACGAGAGGT  
GAT

+

FFFF:FFFFFFFFFFFFFFFFFFFFFFFFFFFFFFFFFFFFFFFFFFFFFFFFFFFFFFFFFFFFFFFFFFFFFFFF  
FFFFFFFF:FFFFFFFF:FFFFFFFFFFFFFFFFFFFFFFFFFFFFFFFFFFFFFFFFFFFFFFFFFFFFFFFF  
FFF

@A00721:190:HGJW7DSXY:4:1272:4544:4476\_2:N:0:TCTGCAAG+GCTGCACT  
TTGAAGGCTGGCTCTAAGGGAGACTCCTTCTTTTGAATGTTGTAAAGAATTGGGTTGAGAAGTGTGC  
TTTACAAGGAGTTAGACTCTTCTTCAAGTTTTTAGATCTTCTTGATAA

+

FFFFFFFFFFFFFFFFFFFFFFFFFFFFFFFFFFFFFFFFFFFFFFFFFFFFFFFFFFFFFFFFFFFFFFFF, FFFFFFFFFFFFFFFFFFFFFF  
FFFFFFFFFFFFFFFFFFFFFFFFFFFFFFFFFFFFFFFFFFFFFFFFFFFFFFFFFFFFFFFF:FFFFFF:FFFF

@A00721:190:HGJW7DSXY:4:2222:30996:33912\_2:N:0:TCTGCAAG+GCTGCACT  
CATAACTTCTTTTTCAAAAATGCGGATGGGTCTACTGATGTTTTCTACAGAGTGCAGTCGTGTAAAC  
ACTTATCACCCTTTTTGAAAGGAAAATAATTGGTGATGTAAATACGTA

+

[illegible]

@A00721:190:HGJW7DSXY:4:2633:25373:24111\_1:N:0:TCTGCAAG+GCTGCACT  
TTCTCGCTCGCATTTTACAAGGATTACTAAGTCTGAGATCTGCCACTTCTAATTTTAGGAAACGTCGC  
GAAAGAAAGTTCATGAGGATGTCTTGGTCGAAAAATATCGCCGGAACTTCTAATAGAGGATCCTGA  
TGA

+

:FFFFFFFF:FFFFFF:FFFFFFFF:FFFFFFFFFFFF,FFFF:FFFF:FFFFFFFFFFFFFFFFFFFF  
FFFFFFFFFFFFFFFFFFFFFFFFFFFFFFFFFFFFFFFFFFFFFFFFFFFFFFFFFFFFFFFFFFFFFFFF  
FFF

@A00721:190:HGJW7DSXY:4:2417:4327:12148\_2:N:0:TCTGCAAG+GCTGCACT  
ACGATACCGATCTCAGTTCTACCACAGAAACCGTCTCAGGAAGTGTCTCCACTGATTCGGAATTAGA  
GAAAGACGACCTTCTTGTGGGACTGAGACCTCTGAATTTTCAGGGTG

+

FFFFFFFFFFFFFFFFFFFFFFFFFFFFFFFFFFFFFFFF:FFFF:FFFFFFFFFFFF:FF,FFFFFFFF:FFF  
FFFF:FFFFFFFF,FFFFFFFFFFFFFFFFFFFFFFFFFFFFFFFFFFFFFFFF

@A00721:190:HGJW7DSXY:4:1549:25771:1846\_2:N:0:TCTGCAAG+GCTGCACT  
GGATAATTTCAACTCTGAGACTTCTAAGAGTGTTCAAAAGACCAGAAACGTAACAAGAAGATAAAG  
GTAGGAAGGGGAGAAAACAGAACAGCGAGCGGTTGAAGAGAAAACCTG

+

FFFFFFFFFFFFFFFFFFFFFFFFFFFFFFFFFFFFFFFFFFFFFFFFFFFFFFFFFFFFFFFFFFFFFFFF  
FFFFFFFFFFFFFFFFFFFFFFFFFFFFFFFFFFFFFFFFFFFFFFFFFFFFFFFFFFFFFFFF

@A00721:190:HGJW7DSXY:4:2170:9191:30749\_2:N:0:TCTGCAAG+GCTGCACT  
GCTGATCGTACCCCAATTCCTGCTAGAAAGATCACTCTCGGCGATACCACTGATCTTCAGAGTTACG  
TAGTGGTCGTTCTTTTGGTGATTTTATCAAAGAGAAAGTTTCTGCTAG

+

FFFFFFFFFFFFFFFFFFFFFFFFFFFFFFFFFFFFFFFFFFFFFFFFFFFFFFFFFFFFFFFFFFFFFFFF  
FFFFFFFFFFFFFFFFFFFF:FFFFFFFFFFFFFFFFFFFFFFFFFFFFFFFFFFFFFFFF

@A00721:190:HGJW7DSXY:4:2326:3251:18145\_2:N:0:TCTGCAAG+GCTGCACT  
AAAAGCTATTAATAGCAGTTGCGGGGCTATAATACCGCCTCCAGATTACTCTAAACTGAATCCACTCT  
CTTGGGATATAAATGAGTACATCTATAATAGAGTTTTGGAAGTGTGTA

+

FFFFFFFFFFFFFFFFFFFFFFFFFFFFFFFFFFFFFFFFFFFFFFFFFFFFFFFFFFFFFFFFFFFFFFFF  
FFFFFFFFFFFFFFFFFFFFFFFFFFFF:FFF,FFFFFFFFFFFFFFFFFFFFFFFF

@A00721:190:HGJW7DSXY:4:1433:27498:22842\_2:N:0:TCTGCAAG+GCTGCACT  
TTGTTGACTACGATCTCTCTTGTAAATAAGAAAGTTCTTCGAGTTGAATCTCCACCAGGTGGAGGGAAG  
ACCACTGAAGTTATAGCGACTTTTGTGCAATTTTTCGCAAAAGGTCTT

+

FFFFFFFFFFFFFFFFFFFFFFFFFFFFFFFFFFFFFFFFFFFFFFFFFFFFFFFFFFFFFFFFFFFFFFFF  
F:FF:FFFF,FFFF:FFFFFFFF:F:FFFF:FFFFFFFF:F,FFFF

@A00721:190:HGJW7DSXY:4:1357:3341:20713\_2:N:0:TCTGCAAG+GCTGCACT  
CTGCTAATCGTAATTCGCGAGAAGAGATAGTACTAAAGTTTTGGCACTTCTAGTTCATCGCGGTATT  
TGTGAAATTAAGACAGACGTGAAAGTTATGATGAGTGATCGTATTAGA

+

FFFFFFFFFFFFFFFFFFFFFFFFFFFFFFFFFFFFFFFFFFFFFFFFFFFFFFFFFFFFFFFFFFFFFFFF  
FFFFFFFFFFFFFFFFFFFFFFFFFFFFFFFFFFFF:FFF:FFFFFFFFFFFFFFFF

@A00721:190:HGJW7DSXY:4:1544:24008:35399\_1:N:0:TCTGCAAG+GCTGCACT  
CGACGAATTATTCATGATTCACGCTGGTCAGACCCTTTTCTTACACATCTACTTAAGGCGGCTTATA  
CCATAGGTTACGGTGATTCCAATCAAATCGGATTCATCAATCGTATTGATCTCCAAGTCGAAACTAC  
TTC

+

FFFFFFFFFFFFFFFFFFFFFFFFFFFFFFFFFFFF:F:FFFFFFFFFFFFFFFFFFFFFFFFFFFFFFFF:FFF:F  
FFFFFFFFFFFFFFFFFFFFFFFFFFFFFFFFFFFFFFFFFFFFFFFFFFFFFFFFFFFFFFFF:FFFFFFFFF:F  
FFF

@A00721:190:HGJW7DSXY:4:1601:6406:2221\_2:N:0:TCTGCAAG+GCTGCACT  
TGAGTGTGTTCTTATCGAAGTCTCAGTTATCGCTGCCCGCCGACGTTTGTGCGCAACTCTCAGAGG

TTTACGGCAGAAAAATTTCTCCTGCTTGTAATTCGAGAGAGGACACTA  
+  
FFF:,FF:FFFFFFFFFFFF:,F,,:F:FFFF:FF,:FF,FFF:F:FF,,,FFFF:FFF,F,,FFFF:  
,:FF:FFFFFFFFFFFF:FF,,,F,F,:FFFF:FFFF:F::FFFF,:  
@A00721:190:HGJW7DSXY:4:2455:13449:31735\_1:N:0:TCTGCAAG+GCTGCACT  
TAAGAGTAAGGTTAAATGTGAAGATGCTCAGACTATTCATGAAGTTCAAGTAATACTTACCAGCAGC  
TTCGGCTGGTTAGAATTAAACCTCAAGATGACCCTGTTTTTGCATCACAACACATATTACCGTTGCT  
CTA  
+  
FFFFFFFFFFFFFFFF:FFFF:FFFFFFFFFFFFFFFFFFFFFFFFFFFFFFFF:FFFFFFFFFFFFFFFFFFFF  
FFFFFFFFFFFFFFFFFFFFFFFFFFFF,FFFFFFFFFFFFFFFFFFFFFFFFFFFFFFFFFFFFFFFFFFFFF  
FFF  
@A00721:190:HGJW7DSXY:4:1367:11360:23516\_2:N:0:TCTGCAAG+GCTGCACT  
TCAATGTAAAGTTAAACGATGCTACTTGTGAGAGGATCAATCACAGTAAGGAACAGTCACGTTTAGCA  
CGGGAGGTTGCAGATTCAACCCCTTATATCGAGGCTATCGAGGACGAG  
+  
:FF:FF,F,FFFFFFFF,:FFFFFFF:, :FFFFFFFFFFFF,FFFF:FFF:FFFF,FFFFFFFF:,F:,F  
FFF:F,FFFFFF:FFFFFF:FF,:FFFF: :FFFF:FFFF:,FFF,  
@A00721:190:HGJW7DSXY:4:1623:1145:9017\_2:N:0:TCTGCAAG+GCTGCACT  
GACGACAAGCCTCAAGAGGGTAGAGGACCACCTGGATCTTCTACTGTCTCTGCCTTCCAAGATTTCTT  
AGAAGAGGTTATTCCTGGAACCACCTTAACGTCACCTCGGTAATCTTTC  
+  
FFFFFFFFFFFFFFFFFFFFFFFFFFFFFFFFFFFFFFFF:FFFFFFFFFFFFFFFFFFFFFFFFFFFF,FF:FFFF  
:FFFFFFFFF:FFFFFF,FFFFFFFFFFFFFFFF:FFFFFFFFFF,FF  
@A00721:190:HGJW7DSXY:4:1508:15474:3928\_1:N:0:TCTGCAAG+GCTGCACT  
GATCAAGGCTAATACCTTTATAGGTAAGAAGCCCCTTGAGCCGCGTAGTCAGCGCGTTTAGCTGTATC  
ATCAGTCAGAGTATACCCGATAGGGTACCGAGTCTCCAAGAGAATATTTATTCTTATGAGGCTCGAAA  
CTT  
+  
:FFFF:::FFFFFFFFF::FFF:F:FFFFFFFF:FFFFFFFFF,FFFFFFFFF,FFFFFFFFFFFFF,  
FF::FFFFFFFFFFFF:FFFFFFFFF:FFFFFFFFFFFF,FFFFFFFFFFFFF:FFFFFFFFFFFF  
:FF  
@A00721:190:HGJW7DSXY:4:2270:13322:29857\_1:N:0:TCTGCAAG+GCTGCACT  
TTCCGATCTGTTTTGATCAGTCTAAGTTGGATAAAGTTATAGGAGACTCAGTTAACCTGAGAGCTCCT  
CAATTGATAGATTGGGTCAACAATAGGGACGCTAGTATACTTCGTAAAGTCGACAGCGAAATGGTCAA  
TAT  
+  
FFFFFFFFFFFFFFFFFFFFFFFFFFFFFFFFFFFFFFFFFFFFFFFFFFFFFFFFFFFFFFFF:FFFFFFFFFFFFFFFF  
FFFFFFFFFFFFFFFFFFFFFFFFFFFFFFFFFFFFFFFFFFFFFFFFFFFFFFFFFFFFFFFFFFFFFFFFFFFF  
FFF  
@A00721:190:HGJW7DSXY:4:1567:5647:4570\_1:N:0:TCTGCAAG+GCTGCACT  
GGTTCTTGAGGAGAGTCAAACAGTGTCTTTTACCCAACATTTTTATGTATACAGAGATGACCAGTG  
ACGATTTCTCCCGGAAGCTTCTCTCTCTTAGGAGGTCATGATGACTACTATAAGGGTGAAATCGAT  
TTT  
+  
FFFF,FFFFFFFFFFFFFFFFFFFFFFFFFFFFFFFF:FFFFFFFFFFFFFFFFFFFFFFFF:FFFFFFFFFFFFFFFF  
FFFFFFFFFFFFFFFFFFFFFFFFFFFFFFFFFFFFFFFFFFFFFFFFFFFFFFFFFFFFFFFFFFFFFFFFFFFF  
FFF  
@A00721:190:HGJW7DSXY:4:2220:29948:16783\_1:N:0:TCTGCAAG+GCTGCACT  
ACGCCAGGAGTATCCATAACGATTTGTCAATTTACCACCTTTGCTCAACGACGAAGTGGAACGGCCAAC  
ACTTTCTTTGGTAATTGTATGATCACTTTGATGATTTTATCACTTTATTATGACCTTGAAAGTTTTTC  
GGC  
+  
FFF,FFFFFFFFFFFFFFFFFFFFFFFF:FFFFF,F:FFFFFFFF,FFFFFFFFFFFFFFFFFFFFFFFFFFFF



@A00721:190:HGJW7DSXY:4:2461:4444:11287\_2:N:0:TCTGCAAG+GCTGCACT  
CTGTTTTCAAAGACTCCAATACTGATCATTCTGATCATATGATTTTGGACAATGGTTTCGAAGCGAA  
ATTTTTGAGGGATAAACCGCGTACTTCTGCTCGCGATTTATTCTTTT

@A00721:190:HGJW7DSXY:4:1107:24985:1830\_1:N:0:TCTGCAAG+GCTGCACT  
CGATATTCGATTGAGGGTCGTTATACCTATTCGGCTATCTGTGCTTTGAATTGTATAAGATCAAATTT  
TAAACGATTCCGAGAGGTTTATCCTGATGTGGAGGGAGTTCTTGAAGCATCCCGACCTTTCCTTGTGA  
AAA

@A00721:190:HGJW7DSXY:4:2140:11975:11835\_1:N:0:TCTGCAAG+GCTGCACT  
TCCGATCTCAGTAATCCTGATTCTACTACGGATTCATGGA<sup>C</sup>CTTCCATCCTGTACCTCTTCTGGAGAG  
ACGTATCTCAAAGATCGACTTCGAGACAGGTGATATTGTTGAGCGAGAGCGACCAAGATCTAAATTCTG  
GTA

@A00721:190:HGJW7DSXY:4:2665:27046:21872\_2:N:0:TCTGCAAG+GCTGCACT  
AGTCTCTGACTTGACCATCTTTCATTTTAAATGACGATCATTAAGACTCTCTTCTCTTGTTCCT  
TCTTTCGCACTGATTTTTCCTCATCAGCTTGTGTTTTACCTAATCTGTG

@A00721:190:HGJW7DSXY:4:2442:1479:8970\_2:N:0:TCTGCAAG+GCTGCACT  
TCAGTTGATTAAGACTCTTCCGAAAGGCGAACTTTGGGAATTTGAAGCTCAGGTGAAGCACAACTT  
TGACCGTGACGAACTGTGGTGTCTTGTATCTACGTTACGGATATACTC

@A00721:190:HGJW7DSXY:4:1203:16794:18490\_2:N:0:TCTGCAAG+GCTGCACT  
AATCACTCATTTTAGTGAGATTATTAACGCACTAAACGTCTTCGACAACAGCAGGGGTTTTCGA  
ATAGTGATAGCCACCCGCCTTACAGAGGGGAGCAGCATGACCATAAT

@A00721:190:HGJW7DSXY:4:1674:26964:13557\_1:N:0:TCTGCAAG+GCTGCACT  
CACCTTTTCTACTGTCTGTCTCGCCTCTTCGAATGAAGTTTAAATGCTTAACAACAATGATAGTGAAT  
TTATACCTACAATCATTGGTTTTTCTAATAATGATGACACTATTGTTTATGGATATGATGCTATTACT  
CAT

@A00721:190:HGJW7DSXY:4:2205:10185:15280\_2:N:0:TCTGCAAG+GCTGCACT  
GTTTACAAGGACCTTAAGCGATGGATCGGGGTTAATTCTAAAACATTACCCGAAAGACGTGCTAAATT  
AAAACCATTTGTACGATGTCGTCTGTCTCGGCGATCACTTTTCACAGAT

+

```

FFFFFFFFFFF:FFFFFFFFFFF:FFFFFFFFFFF:FFFFFFFFFFF:FFFFFFFFFFF:FFFFFFFFFFF:FFFFFFFFFFF:FFFFFFFFFFF
FFFFF:FFFFF:FF,:FFFFF:FFFFF:FF:F,FFFF::,F,FF
@A00721:190:HGJW7DSXY:4:2606:1425:14888_2:N:0:TCTGCAAG+GCTGCACT
TTTATCTCTTTGGTTGTTAGGGATTTTGAGAGAGTGAAAGGCTTCAATTGTAGTGGTTTGTTCGTTTC
AGTACCCAGTCAGTATACCTCTACGCAAAGATAATTATGAAAACCTAC
+
FFFF::FFFF,:FFF:::FFFFF:FFFFFFFFFFF:FF:FFFFFFFFFF,:FFF,,F:FF:FF
F,FF,FFFF,FFFFFFFFFF:F,,FFFFF:,FFFF:FFFFFFFFFF:
@A00721:190:HGJW7DSXY:4:1515:27145:2785_1:N:0:TCTGCAAG+GCTGCACT
TGTCTTTTCATATTATGAATGAACCTTCGCCGCTCTCTTTGCTTCGATGTTGGATGTCAAGAAGGGTT
CAGAATGGGATTCTACGTAGTTTATGACTTTGGTGGTGGTACTTTTCGATACTTCTATCGTCTTACGT
TAC
+
FFFFFFFFFFFFFFFFFFFFFFFFFFFFFFFFFFFFFFFFFFFFFFFFFFFFFFFFFFFFFFFFFFFFFFFFFFFFFFFFFFFFFFFFFFFFFFFFFFFFFFFF
FFFFFFFFFFFFFFFFFFFFFFFFFFFFFFFFFFFFFFFFFFFFFFFFFFFFFFFFFFFFFFFFFFFFFFFFFFFFFFFFFFFFFFFFFFFFFFFFFFFFFFFF
FFF
@A00721:190:HGJW7DSXY:4:2460:12762:15139_2:N:0:TCTGCAAG+GCTGCACT
AGTGTTATTTATTCTGGTGGTGATGATAATCTTGAGGTCGTGACGTTGATGAAGCTATAAGAGCGTT
CTTATTACGGCGCACTTCTTTACCCGCCACCACACAACCTTTCAGTTTC
+
FFFFFFFF:F:FFFFFFFFFFFFFFFFFFFFFFFFFFFFFFFFFFFFFFFFFFFFFFFFFFFFFFFFFFFFFFFFFFFFFFFFFFFFFFFFFFFFFFFFFFFFF
FFFFFFFFFFFFFFFFFFFFFFFFFFFFFFFFFFFFFFFFFFFFFFFFFFFFFFFFFFFFFFFFFFFFFFFFFFFFFFFFFFFFFFFFFFFFFFFFFFFFFFFF
FFF
@A00721:190:HGJW7DSXY:4:2609:3287:11757_1:N:0:TCTGCAAG+GCTGCACT
ACTGGAACCCCTCGTCAATACTTTTCAATAATATACGCTTGAACCTCACTTATGACGATCTAGTGAA
ATTAACGCGTCCTTTTCTGGAACGTAGTTTACTATTATGAACAAAGTTATCAAAGATAGTGGCATTCAAG
AAG
+
:FFFFFFFFFFFFFFFFFFFFFFFFFFFFFFFFFFFFFFFFFFFFFFFFFFFFFFFFFFFFFFFFFFFFFFFFFFFFFFFFFFFFFFFFFFFFFFFFFFFFFFFF
FFFFFFFFFFFFFFFFFFFFFFFFFFFFFFFFFFFFFFFFFFFFFFFFFFFFFFFFFFFFFFFFFFFFFFFFFFFFFFFFFFFFFFFFFFFFFFFFFFFFFFFF
FFF
@A00721:190:HGJW7DSXY:4:2652:23836:13056_1:N:0:TCTGCAAG+GCTGCACT
TGATTCCGCCGGTGGTAGCTCATTTCTACCAGGGGCTATTACTCTTGCTGAAACAGCTATTAAAGCT
GTTGAGCGGTAATTACACCTAAACGAGCTCGATCTGCCATCGCTGAAGGATGTGCACTCTTTTCTGC
TAC
+
FFFFFFFFFFFFFFFFFFFFFFFFFFFFFFFFFFFFFFFFFFFFFFFFFFFFFFFFFFFFFFFFFFFFFFFFFFFFFFFFFFFFFFFFFFFFFFFFFFFFFFFF
FFFFFFFFFFFFFFFFFFFFFFFFFFFFFFFFFFFFFFFFFFFFFFFFFFFFFFFFFFFFFFFFFFFFFFFFFFFFFFFFFFFFFFFFFFFFFFFFFFFFFFFF
FFF
@A00721:190:HGJW7DSXY:4:2649:9769:7326_2:N:0:TCTGCAAG+GCTGCACT
GCTCGTATTATCGTCGCTGCTGGATCTGCGTTACCGTTGAAGGCTAAAGCTCAAGGTAATTATGAAGA
CTGTGATTTATCTTTCACTCTGGCCTTGTATGAGGGTGTTCCTAATCG
+
FF:FFFFFFFFFFFFFFFFFFFFFFFFFFFFFFFFFFFFFFFFFFFFFFFFFFFFFFFFFFFFFFFFFFFFFFFFFFFFFFFFFFFFFFFFFFFFFFFFFFFFF
FFFF:F:FFFFFFFFFFFFFFFFFFFFFFFFFFFFFFFFFFFFFFFFFFFFFFFFFFFFFFFFFFFFFFFFFFFFFFFFFFFFFFFFFFFFFFFFFFFFF
@A00721:190:HGJW7DSXY:4:1252:30689:37012_2:N:0:TCTGCAAG+GCTGCACT
TTCTTAAAAAGAAGATAGAGAGTCATACTTTGGGCTATCGTTCAGGTGCATGGGGTTGGATAGCCAAT
ATTGAAGTGGACACCTCTGGTAGTATCGAAGTAAAGATAACCAATAAG
+
FFFFFFFF:FFFFF,FFFFFFFFFFFFFFFFFFFFFFFF,F:FFFFFFFFFFFFFFFF,FF:F:FFFFFFFFFFFFFFFF
FFFFFFFFFFFFFFFFFFFFFFFFFFFFFFFFFFFFFFFFFFFFFFFFFFFFFFFFFFFFFFFFFFFFFFFFFFFFFFFFFFFFFFFFFFFFFFFFFFFFF
@A00721:190:HGJW7DSXY:4:2177:5032:4758_2:N:0:TCTGCAAG+GCTGCACT
ATTAAACAAGTTGTACTTATCAATGATTTTATCGCTGGTTGTTATCTCGAAAAGTCTCTTCTAAAAGG
AACGTCAGTTCTAACCCAAAGAGAATATCTAAAATATTTACAAAATCT
+

```

FFFFFFFF:FFFF:FFFF:FF:F:FFFFFFFF:FFFFFFFFFFFF::FFFF:FFF,FF,FFFF:F  
FF,FFFF:FF,FFF,FFFF,F:FFFF:FFFFFFFFFFFF:FFFF,,  
@A00721:190:HGJW7DSXY:4:1620:23185:16031\_1:N:0:TCTGCAAG+GCTGCACT  
ATGGCACTACCTCGGTACAATCTTACTTGGAACGAAGGCGACCTGTTCCGGAGTTTTTACGGGATCCG  
GAATGTTCTGTCTATATTAGGTGAAGCGAAATACGATTTTGAACGTCAACGTTACCGAGTTTCGTTT  
CGT

+

FFFFFFFFFFFFFFFFFFFFFFFFFFFF:FF:FFFFFFFFFFFFFFFFFFFFFFFFFFFF:FFFFFFFFFFFF  
FFFFFFFFFFFFFFFFFFFFFFFFFFFFFFFFFFFFFFFFFFFFFFFFFFFFFFFFFFFFFFFFFFFF  
FFF

@A00721:190:HGJW7DSXY:4:2378:31150:36307\_1:N:0:TCTGCAAG+GCTGCACT  
TAGTGCGAGGCCTCTATTCTACGAGTATTGCTATTTATACGGTTACGAGAAGAAGGTTTCAAAGTTTG  
AGAACTTAGTTTACGAACCTGACTCTACTATACGTGACATACTAAATACTAGATATTTGGATGATCTT  
GAT

+

FFFFFFFFFFFF,F,F,FF,FF,:F:FFFF:FFFFFFFF:FFFFFFFFFFFFFFFFFFFFFFFFFFFF:FFFF  
:FFFFFF,FFFF,,FFFFFFFFFFFF:FFFFFFFF:F:FFFF:FFFF:FFFFFF:FFFF:FFFFFFFF  
FFF

@A00721:190:HGJW7DSXY:4:1148:15953:36636\_1:N:0:TCTGCAAG+GCTGCACT  
TTCTTCCTTGATTTTAAATATAAAGAATCTTTACCAGGACTCCTACTACAGGAGGCAGTCTTCTGATC  
GTAAGAAGTTTATAAGGAACATATCCATTTGTTGTAATAGGGTCATCAACTTAGAACTCGAACTCTA  
AGT

+

FF:FFFFFFFFFFFFFFFFFFFFFFFFFFFFFFFFFFFFFFFFFFFFFFFFFFFFFFFFFFFFFFFFFFFF  
FFFFFFFFFFFFFFFFFFFFFFFFFFFFFFFFFFFFFFFFFFFFFFFFFFFF:FFFFFFFFFFFFFFFFFFFF  
FFF

@A00721:190:HGJW7DSXY:4:1470:23393:24032\_2:N:0:TCTGCAAG+GCTGCACT  
CCAAGCTTACCTGTATCTTCAATGAAATTGGACTCTTCGATAGGGGACATTTTATCGTGGGCTTTCCG  
TAAAGGAAGATCTGTTATCGACGTTTATCGTTTACGAAGTATCACTC

+

FFFFFFFFFFFFFFFFFFFFFFFFFFFF,FFFFFFFFFFFFFFFFFFFF,FFFFFFFF:F:FFFFFFFFFFFFFFFF  
:FF,FFFFFFFFFFFFFFFFFFFFF::FFFFFFFFFFFFFFFFFFFF

@A00721:190:HGJW7DSXY:4:2319:11550:33426\_1:N:0:TCTGCAAG+GCTGCACT  
TGGTCTTTATTCTATTATTGATTTTTATGAGATTGATACGTTAACAGAAGATGATGTTAGAGTAGAAT  
TCCTGAAGAGTCCTTCGTAACCAACTTCTTGACAATTTTCTTCAATCCTTCGATAATAGTTAAATCT  
AGG

+

FFFFFFFFFFFFFFFFFFFFFFFFFFFF:FFFFFFFFFFFFFFFFFFFFFFFFFFFFFFFFFFFFFFFFFFFF  
FFF:FFFFFFFFFFFFFFFFFFFFFFFFFFFFFFFFFFFFFFFFFFFFFFFFFFFFFFFFFFFFFFFFFFFF  
FFF

@A00721:190:HGJW7DSXY:4:2333:20148:31469\_2:N:0:TCTGCAAG+GCTGCACT  
AATTAAGAAATAATCCTACATTGACTGATTATCTAAAGATTGAAGGAAAATTTTATCCTCGTTTAACT  
TACTTAGACTTTCTACGATACAAATGATAACTTCTAATTTACGTTTG

+

FFFFFFFFFFFFFFFFFFFFFFFFFFFF:FF:FFFFFFFFFFFFFFFFFFFFFFFFFFFFFFFFFFFF  
FFFFF:FFFFFFFFFFFFFFFFFFFFFFFFFFFF:FFFFFFFFFFFF

@A00721:190:HGJW7DSXY:4:2354:26196:17018\_2:N:0:TCTGCAAG+GCTGCACT  
CTCAGGAGTCCCGGCATTTGATAATAATGACGAGACTTTTCGTCATAATCGCTGCATATTACGGATTAC  
ACGGTACCAGCGCATCTCGTGTGAGCCTCGACCCGATTATATGGTAT

+

FFFFFFFFFFFFFFFFFFFFFFFFFFFFFFFFFFFFFFFFFFFFFFFFFFFFFFFFFFFFFFFFFFFF  
FFFFFFFFFFFFFFFFFFFFFFFFFFFFFFFFFFFFFFFFFFFFFFFFFFFF

@A00721:190:HGJW7DSXY:4:1269:29478:31814\_2:N:0:TCTGCAAG+GCTGCACT  
AACTAACTATGTTATGTTCTCTGATCATTTTGACAATCTCTTCTTATAATAAATAAATAAATAATATT

ACTAATGGCAAATAGTGGAAGGCTCCAGTCAACACTAGTTCGAGTGC  
+  
FFFFFFFFFFFFFFFF:FFFFFFFFFFFFFFFF:FFFFFFFFFFFFFFFF:FFFF  
FFFF:,FF:FFFFFFFF,FFFFFFFFFFFFFFFF:,,F  
@A00721:190:HGJW7DSXY:4:1665:27145:20415\_1:N:0:TCTGCAAG+GCTGCACT  
AATAGGTGAAGGGATAGTTTTACCTCGACCAACATTAAGGCGGCGGCGACTAATCTTAAAGCTTCAC  
CCAAAATGAAGGACACTTCGAAACTGAATAATGATGCACTACAAACAAGTATCGCTAATCATCTGAAA  
AAG  
+  
FFFFFFFFFFFFFF,FFFFFF,FFFFFFFFFFFFFFFFFFFFFFFFFFFFFFFFFFFFFFFF  
FFFFFFFFFFFFFFFFFFFFFFFFFFFFFFFFFFFFFFFFFFFFFFFFFFFFFFFFFFFFFFFF  
F:F  
@A00721:190:HGJW7DSXY:4:1625:3152:9612\_2:N:0:TCTGCAAG+GCTGCACT  
AGAGGATATTCGCCATTGTGGTACGAATTGGTCCAACATTTACCACCAAATTTCTTTGATACAACTCT  
AGCCTTCAAGTGGGGTATGCCTGCGGAATACGCTTGCTATTCACCAGA  
+  
FFFFFFFFFFFFFFFFFFFFFFFFFFFFFFFFFFFFFFFFFFFFFFFFFFFFFFFFFFFFFFFF  
FFFFFFFFF:FFFFFFFFFFFFFFFFFFFFFFFFFFFFFFFFFFFFFFFF  
@A00721:190:HGJW7DSXY:4:1639:16288:18396\_1:N:0:TCTGCAAG+GCTGCACT  
CCCGTTGATGCTATGTCAGAAGAAGCTATTCAAGCTTGTCTTTAAAGACTGCAGAGGCTGTCAAACA  
AGCCCAGACTCAAGGAGTCCAATCAAAGGTTTTGAATTTAGCTCAACTGGGGAGACGTGCTTAAATGG  
GTG  
+  
FFFFF:F:FFFFF:FFFFF:FFFFFFFFFFFFFFFFFFFFF:F:FF:FFFFFFFFFFFFFFFF  
:FFFFFFFFFFFFFFFFFFFFFFFFFFFFFFFFFFFFFFFFFFFFFFFFFFFFFFFFFFFFFFFF  
FFF  
@A00721:190:HGJW7DSXY:4:1145:10203:5071\_2:N:0:TCTGCAAG+GCTGCACT  
TAGATAGTGGGATAATAGTTCTACCGATACGTAGTGAACGCGTTTCGTAGAACCAAGTACTTTCCGTCT  
GAAGAGTTTAGAGCTGCTATTGATTATGTAACCGATAGGAGTTGTATA  
+  
FFFFFFFFFFFFFFFFFFFFFFFFFFFFFFFFFFFFFFFF:FFFFFFFF:FFFFFFFFFFFFFFFF:FFFF  
FF:FFFF:FFFF:FFFFFFFFFFFFFFFFFFFFFFFFFFFFFFFFFFFFFFFF  
@A00721:190:HGJW7DSXY:4:2109:3992:3333\_2:N:0:TCTGCAAG+GCTGCACT  
GATAATCCTTTAAGGACTATGTTGACTGACGAAGATTTTCCCACAGATTTGTCTACGTTGCAGATCGC  
CACTCCAAACACTATATACATTATAAAAATATAAAAATAAGGGAGTCAT  
+  
:FFFFFFFF:FFFFFFFFFFFFFFFF:F:FFFFFFFF:FFFF:FFFFFFFF:FFFF,FFFF  
FFFFFFFF:FFFFFFFFFFFF:FFFFFFFFFFFFF:::FFFFF  
@A00721:190:HGJW7DSXY:4:1507:19533:24079\_1:N:0:TCTGCAAG+GCTGCACT  
ACCAAATCTTGCTTTCAACGAAGTCTCTGATTTTATTAATCATTACTTTAACGATCTCTCGGTCAT  
TACTCTGTACTTGATCTACGTCGTTTAACTGTCGGAACAACCTTACTTAGAATGAATCTATCTTTT  
AA  
+  
FFFFFFFF::FFFFFFFFFFFFFFFFFFFFFFFF:FFFFFFFF:FFFFFFFFFFFF:FFFFFFFFFFFF:  
FFFFFFFF:FFFFFFFFFFFFFFFFFFFFF::FF::FFF,FFFF,FFFFFFFF,FF::F,:FFF:, ,FFF  
,F  
@A00721:190:HGJW7DSXY:4:1678:15989:15718\_2:N:0:TCTGCAAG+GCTGCACT  
ACTCACTATCGTTTTCTGCTTTTTCTTAGCTAATAGATTAATAAAGGATGAGTACGAAAACCAACTCT  
TCGTTACGAGACCTGATGGTAGAATAGATTTAGTCTCTACACCCATCT  
+  
FFFFFFFFFFFFFFFFFFFFFFFFFFFFFFFFFFFFFFFFFFFFFFFFFFFFFFFFFFFFFFFF  
F:FFFFFFFFFFFFFFFFFFFFFFFFFFFFFFFF:FFFFFFFFFFFFFFFF  
@A00721:190:HGJW7DSXY:4:1221:1443:20901\_1:N:0:TCTGCAAG+GCTGCACT  
TGTGCTCTTCCTATCTCCTTAACGTAATACACGAAGAGATCATCCGCAAACGACTCGAAACCGAGACG

CCGTAGATCAAAGTCCCTTCTAACTTTAGATTATGAATCCTGCCTTTACTCATTTTCATAGCAGTTA  
+  
:F:F:,,, :F:,FF,,F::,F,,,FF:,F::,,,,,F,F,:F,FF,,, :FFFFFFFFFFFFFFFF:F  
FFFFFFFF:FFFFFFFFFFFFFFFFFFFFFFFFFFFFFFFF:FFFFFFFF:FFFFF:FFFFFFFFF  
@A00721:190:HGJW7DSXY:4:1269:25247:31469\_2:N:0:TCTGCAAG+GCTGCACT  
TGCTTTTCGATAGTGATTGTTATCAATTTAAATACATTACTGTTTCAAATCATCTTTACTCACAGACT  
CCGAAAATGGTTTCAAATGAGGTCAAAGCTCTATTTATTAAACGAAC  
+  
F,FFFFFFFFFFFFFFFF:FFFFFFFFFFFFFFFFFFFFFFFF:FFFFFFFFFFFFFFFF  
FFFFFFFFFFFFFFFFFFFFFFFF, :FFFFFFFF, FFFFFFFFF  
@A00721:190:HGJW7DSXY:4:1602:1090:4131\_1:N:0:TCTGCAAG+GCTGCACT  
GGAACCTCAATTCCTTCGATGTTTATATTTTCTATAAGGAAAATAGCAATAATCAAATTCGACAA  
ATTTTAGAACTTTATTTCAAGACTCTCTCCGATCACCTTGGTGTGATCTCCCGAGGATCTTTTCAAT  
AAG  
+  
F:FF,FFFFFFFF,FFFFFFFF, :FFFFFF:FFFFFFFF: ,FFFFFFFFFFFFFFFFFFFFFFFFF:  
FFFFFFFFFFFFFFFF,FF:FFFFFFFFFFFFFFFF:FFFFFFFFFFFFFFFF: :FFFFFFFFFFF:FFF  
FFF  
@A00721:190:HGJW7DSXY:4:2572:17300:19210\_2:N:0:TCTGCAAG+GCTGCACT  
ATTTTAAATAGTGATATTCAGCGTATACTTGAATACTTTATCAAAGATTTGGCTTGGTCTATTTACC  
GCAAAAAGTTGAAGAGGTCTATGATATTTATTTACTTATACTTTAA  
+  
FFFFFFFFFFFFFFFFFFFFFFFFFFFFFFFFFFFFFFFFFFFFFFFFFFFFFFFFFFFFFFFF  
FFFFFFFFFFFFFFFFFFFFFFFFFFFFFFFFFFFFFFFFFFFFFFFFFFFFFFFF  
@A00721:190:HGJW7DSXY:4:2636:19208:3912\_1:N:0:TCTGCAAG+GCTGCACT  
CTCTTGACTGTTGATAATATTACAATAGCTCTTCTCAGAAGATTAGAGAAGTAACCGGTGAACACGT  
CGGTAGCATTGATTTACTTTTACCGTTAGAACTGAAAAAGATTCTTTTCGAAAAGAAACCTATAAGTT  
ACA  
+  
:FFF:FF:F:FF:FF:FFFFFF, :FF,F,::FFF,FF:,FFFFFF, ,FFFFFF:F:FFFFFFFF:FF  
::FFFF:FFFFFFFF,FFFFFFFF:FFFFFFFF, : :FFFFFFFFFFF,FFFF:FFFF::FF  
FFF  
@A00721:190:HGJW7DSXY:4:2603:3314:12430\_2:N:0:TCTGCAAG+GCTGCACT  
TAAAGAAATAAAAATACTTCAAGTACCTGAACCTTACATTTTAAATGGTATGGTATAATGTGTCTTAC  
AAATAGAACCTTCACTCTCGGTAATGAGAGTGTATTCCTTAATATTCT  
+  
F:FFFFFFFFFFFFFFFFFFFFFFFF:FFFFFFFFFFFF:FFFFFF:FFFFFFFFFFFFFFFF  
FFFFFFFFFFFFFFFFFFFFFFFF:FFFFFFFFFFFFFFFFFFFFFFFF  
@A00721:190:HGJW7DSXY:4:1113:27805:23531\_1:N:0:TCTGCAAG+GCTGCACT  
TTACTAGGATTTATCACACTCCTAAATTTGATAGCAATTTATGTTTTAAATGCTAGGAAAATTTAGA  
AAAACCTCATTGTATAGTTCAAGGAGTACTTAATTCAATAGCTTTAGTATTATTTACTATCGCCTTTA  
TTG  
+  
FFFF, :FFFFFFFFFFFFFFFFFFFFFFFF:FFFFFFFFFFFF:FFFF, FFFFFFF:FFFFFFFFFFFF  
FFFFFFFFFFFFFFFFFFFFFFFFFFFFFFFFFFFFFFFF, FFFFFFFFFFFFFFFFFFFFFFFFFF  
FFF  
@A00721:190:HGJW7DSXY:4:1402:22019:3239\_1:N:0:TCTGCAAG+GCTGCACT  
TTAATTGCTTACACAAAAGTGACGCGCAAGGAATCTTAATTGATTGAAGCTAGCGGTTGGGGAGAAT  
GAACTGCCGCTTCCCGGAAGAAACGATCTATTTACAGAGTATTTAGAGTAGTCCAAAGTTGTATAAA  
TTT  
+  
FFFFFFFFFFF:FFFFFFFFFFFFFFFFFFFFFFFF: :FFFFFFFF:F:FFFFFFFFFFFFFFFF:FFF  
FFFFFFFFFFFF:FFFFFFFFFFFFFFFF:FFFFFFFFFFFFFFFFFFFFFFFFFFFFFFFF  
FFF



@A00721:190:HGJW7DSXY:4:1273:1416:36323\_1:N:0:TCTGCAAG+GCTGCACT  
GAGAGCATTAGAAGGAAGTTGGGCAAATTCACATATGGTAGACGTTGCACACTTTTCTTGAAAT  
TTTTCTTTCTCCGTCATTGGGGATTTGATGTGAGAAGGTGGAAGGTGTCAAGGGTCTTCTTCATG  
CTG

[illegible]

@A00721:190:HGJW7DSXY:4:2422:14045:36495\_2:N:0:TCTGCAAG+GCTGCACT  
TCACATCATGATTGATAGTTACGGCTCGTATCGAGTTGGAGGGAGGAAGTTCTCCGAAATTAAGACG  
GGGGGATTAAGAGTCCAGCTGTAAGTGTCAATTCAGAGAGGGGAGCTC

[illegible]

@A00721:190:HGJW7DSXY:4:2306:4309:8359\_1:N:0:TCTGCAAG+GCTGCACT  
CGTCAGAAGATGAGGAAGTCTAAGAGGAGGAGTTTGAGGAAGGCTCTAGAGAAGATCTCACCACCTGG  
AGAAGGCAAGTGGAGAGTCCAGAAGTTGATGAAGAAGGATTATTTGAAGCAGGGGTTACCACTTCCTA  
AGG

[illegible]

@A00721:190:HGJW7DSXY:4:1361:27208:7905\_1:N:0:TCTGCAAG+GCTGCACT  
TTAGGTCAACTTGGGGTTTCGAATGTCATTAGTGCCTTACGATTGAAAGAGGTCCTTTTGAGTATCGA  
CAGATCTTTCGATCTTGAGGACGTACATTTAACGTGGCAGAATTTCGGTAACTTACCATATTGTTTCCTT  
CCG

[illegible]

@A00721:190:HGJW7DSXY:4:1241:32099:31876\_1:N:0:TCTGCAAG+GCTGCACT  
TTAACTTTGACTCAACTACTCCGATCAGATCCGGATGGTTTGATTGGTATGGACTACTCGACTTTTGA  
TCTGGAGTTGTCTAGGGTCATGGCAGATACTACCGATAAGGTGAAAAATATGCAGGTCAAAGATTCTG  
TA

```
FFFF:,FFFF:FFFFFF::FFFFFF:FF:FFF:FFFFFFFFFFFFFFF,FFFF:FFFF,F::FFFFFFFFF
FFFFFFFFFFFF:FFFFFFFFFFFFFFFFFFFF::FFFFFF:FFFFFFFFFFFFFFFFFFFFF:,FFFF,:FFFFFF
FF
```

@A00721:190:HGJW7DSXY:4:2161:4752:4648\_1:N:0:TCTGCAAG+GCTGCACT  
CTAAGAGTCTTTATGATTCAAAACCTATCGTTGTGCTACCTTACAAGTTGAGGAGACTTTACAGCGG  
CTTATTGTCGCGCAGTTTCCAGAATTGCGGTTGAAGTTCACCCATTCTATCTTGAATGCTCACGCCGT  
CGC

[illegible]

@A00721:190:HGJW7DSXY:4:1366:14190:20306\_1:N:0:TCTGCAAG+GCTGCACT  
GAGGCGATATTCGTTTTCATATCCAAACTCCTTGAATGGAGTACATATTTGCAACCCTATTCTTGAT  
GTGAAAGATGCATCGAGGTATACGTCTAGGAACATTGATTGGGAACGTACCTACTCACGAGACGTCAT  
GAA

[illegible]

@A00721:190:HGJW7DSXY:4:2514:14208:20494\_1:N:0:TCTGCAAG+GCTGCACT  
TTCGTTCTGTTACAAGAACGCTTTGGATTGTGACCATAAAGCCTCAGTTGCGATAGCTGTAGAGGTAT  
ACGATATCTCTCTTGATGATGTAGCCACTATAATGCTTAAGAGAGAGATTGATGTATGTCATTTCTGTC  
TTA

+

FFFFFFFFFFFFFFFFFFFFFFFFFFFFFFFFFFFFFFFFFFFFFFFFFFFFFFFFFFFFFFFFFFFFFFFF  
FFFFFFFFFFFFFFFFFFFFFFFFFFFFFFFFFFFFFFFFFFFFFFFFFFFFFFFFFFFFFFFFFFFFFFFF  
FFF

@A00721:190:HGJW7DSXY:4:2434:21341:29872\_2:N:0:TCTGCAAG+GCTGCACT  
GACACGATGAAAAATGACATACCCGTTCTGACCTTGGTATCGTTATCCGTCATGGAGATGATGGCGC  
ATCACTTGATTACTATATGCCCGAAGGATTGGGTTATTCTCACAAACA

+

FFFFFFFFFFFFFFFFFFFFFFFFFFFFFFFFFFFFFFFFFFFFFFFFFFFFFFFFFFFFFFFFFFFFFFFF  
FFFFFFFFFFFFFFFFFFFFFFFFFFFFFFFFFFFFFFFFFFFFFFFFFFFFFFFFFFFFFFFFFFFFFFFF  
FFF

@A00721:190:HGJW7DSXY:4:1676:26937:34616\_1:N:0:TCTGCAAG+GCTGCACT  
AATGAGTTCCGAATAACTCGTAATAAATCTTTCTCTAGTGGACAATTGAGAATACCTATTTCCGTACC  
AAGAGCCACTGCCAATCTCATCGCTATACGCATACCTGATTGGAAGAAGCGAGGTTCTGTTCTCAATA  
AAA

+

FFFFFFFFFFFFFFFFFFFFFFFFFFFFFFFFFFFFFFFFFFFFFFFFFFFFFFFFFFFFFFFFFFFFFFFF  
FFFFFFFFFFFFFFFFFFFFFFFFFFFFFFFFFFFFFFFFFFFFFFFFFFFFFFFFFFFFFFFFFFFFFFFF  
FFF

@A00721:190:HGJW7DSXY:4:2255:29306:28228\_2:N:0:TCTGCAAG+GCTGCACT  
TTTCTTCATAAGGGCTATTCAGTACGTCATGGGGATCACTTCTTCGGTCAATGACAAAACCTTCGAAT  
ATGTTACGACATGGCTTCGTAACAACAGTGCGAGGATTGTCATCTCGG

+

FFFFFFFFFFFFFFFFFFFFFFFFFFFFFFFFFFFFFFFFFFFFFFFFFFFFFFFFFFFFFFFFFFFFFFFF  
FFFFFFFFFFFFFFFFFFFFFFFFFFFFFFFFFFFFFFFFFFFFFFFFFFFFFFFFFFFFFFFFFFFFFFFF  
FFF

@A00721:190:HGJW7DSXY:4:2377:31448:11741\_2:N:0:TCTGCAAG+GCTGCACT  
TTCATATAGATACGAGATACCTAGAGAAGGTCGCAGCGATCTTACTCGTTATCGGAGCTAAGAAGAAG  
ACTTTGGGTACACGTTATGCTCGAACTTAACGTTAGTACCGGAGGT

+

FFFFFFFFFFFFFFFFFFFFFFFFFFFFFFFFFFFFFFFFFFFFFFFFFFFFFFFFFFFFFFFFFFFFFFFF  
FFFFFFFFFFFFFFFFFFFFFFFFFFFFFFFFFFFFFFFFFFFFFFFFFFFFFFFFFFFFFFFFFFFFFFFF  
FFF

@A00721:190:HGJW7DSXY:4:1458:14733:12414\_1:N:0:TCTGCAAG+GCTGCACT  
AAAAGATTGAGGACGCCTACGGTGACTTTATGGACAAGATGCAAGTTCTTGGGAAATACTTGTTCCTCC  
TTTTTAGGTTTAGTAGGTGATCTTGACGTCGATTCTTTGTATAGGGAGTGTGAGAAGACAACGAATCT  
TGA

+

F:FFFFFFFFFFFFFFFFFFFFFFFFFFFFFFFFFFFFFFFFFFFFFFFFFFFFFFFFFFFFFFFFFFFF  
FFFFFFFFFFFFFFFFFFFFFFFFFFFFFFFFFFFFFFFFFFFFFFFFFFFFFFFFFFFFFFFFFFFFFFFF  
FFF

@A00721:190:HGJW7DSXY:4:2352:10303:4429\_1:N:0:TCTGCAAG+GCTGCACT  
ATCTTTTGAGATTGAGAAGATTGAAGAACACGTCAAGAAGTCGCTCGGCGTTGTTCTTGAAAACCAAG  
TTAAGAAGGAGGCTGATCATGGAGTCTTTGTACCTTCTGTCAAACCTTCGAGGTTGAGCTACGAGAGGT  
GAT

+

FF:FFFFFFFFFFFFFFFFFFFFFFFFFFFFFFFFFFFFFFFFFFFFFFFFFFFFFFFFFFFFFFFFFFFF  
FF:FFF:FFFFFFFFFFFF:FFFFFFFFFFFFFFFFFFFFFFFF:FFFFFFFFFFFFFFFFFFFFFFFF  
F:F

@A00721:190:HGJW7DSXY:4:1273:19180:10097\_2:N:0:TCTGCAAG+GCTGCACT  
TTGAAGGCTGGCTCTAAGGGAGACTCCTTCTTTTTGAATGTTGTAAAGAATTGGGTTGAGAAGTGTGC  
TTTACAAGGAGTTAGACTCTTCTTCAAGTTTTTAGATCTTCTTGATAA

+



FFFFFFFFFFFFFFFF:FFFFFFFFFFFFFFFF:FFF:FF:FFFFFFFFFFFFFFFFFFFFFFFFFFFFFFFF  
FFFFFFFFFFFFFFFFFFFFFFFFFFFFFFFFFFFFFFFFFFFFFFFFFFFFFFFF:FFFF:  
@A00721:190:HGJW7DSXY:4:2373:28700:22482\_2:N:0:TCTGCAAG+GCTGCACT  
CATAACTTCTTTTTCAAAAATGCGGATGGGTCTACTGATGTTTTCTACAGAGTGCAGTCGTTTCAAC  
ACTTATCACCCTTTTGAAAGGAAAATAATTGGTGATGAAAATACGTA  
+  
FFFFFFFFFFFFFFFFFFFFFFFFFFFFFFFFFFFFFFFFFFFFFFFFFFFFFFFFFFFFFFFF, F:FFF  
FFFFFFFFFFFFFFFF:FF:::FF, FFFFFFFF::FF:F, FF, F, FFFFF, F  
@A00721:190:HGJW7DSXY:4:1468:29306:31391\_2:N:0:TCTGCAAG+GCTGCACT  
TTGGATGTTGTGCAAACTATCAGGTTCTTGTCACGATTCTTAAAAGAAGTTTATTAACACTTCAGAG  
TCTCTTGGAAGTCCAGGTAGCTAATGTTCTTGCAATAGCCACAGACTT  
+  
FFFFFFFFFFFFFFFFFFFFFFFFFFFFFFFFFFFFFFFFFFFFFFFFFFFFFFFFFFFFFFFF:FFFFFF:F  
FFFFFFFFFFFFFFFFFFFFFFFF, FFFFFFFF:FFFF:FFFFFF  
@A00721:190:HGJW7DSXY:4:2513:6126:32142\_1:N:0:TCTGCAAG+GCTGCACT  
CTCTGTTGGTAGAGGAGTTGAGAGAATTACTCAGATTCAATCTGGCATCACTGAACGTCTACAACGAG  
TTAGGGAGTGGCTAGGTTTTAAAAGATCCTTTGCACAAGCAATACCTTCCACTGAGTTCATCACCCAG  
AGT  
+  
FFFFFFFFFFFFFFFFFFFFFFFFFFFFFFFFFFFFFFFFFFFFFFFFFFFFFFFFFFFFFFFF  
FFFFFFFFFFFFFFFF, FFFFFFFF:FFFFFFFFFFFFFFFFFFFFFFFFFFFFFFFF  
FFF  
@A00721:190:HGJW7DSXY:4:1304:13774:20337\_1:N:0:TCTGCAAG+GCTGCACT  
GTTTTTGGTATAAATCCTGATGGCTCAGTACAGGGAGGAGGTAATAGTTATAAACCTTCTTTTATCA  
TTGCAACAGGACTTTGAGAAGACTGTTGAAATGGACAAAATCTGGGATCATAGGTATGTGTCACGCTA  
CAC  
+  
FFFFFFFFFFFFFFFFFFFFFFFFFFFFFFFFFFFFFFFF:FFFFFF:FFFFFFFFFFFFFFFFFFFFFFFF  
FFFFFFFFFFFFFFFFFFFFFFFFFFFFFFFFFFFFFFFFFFFFFFFFFFFFFFFFFFFFFFFF  
FFF  
@A00721:190:HGJW7DSXY:4:1372:5837:7874\_2:N:0:TCTGCAAG+GCTGCACT  
TCGCCATATCAGATTAGAGACATGCCAGTTAGAGTTCTTCTAACCAGGACTGATGGTGAGATTCTTT  
ACCTTTTGAGGTCCAGGAACCTTTACTCCTAGTGTCTTTTCTAGAGT  
+  
FFFFFFFFF:FFFF:FFFF::FFFFFFFFFFFFFFFF:FFFFFFFFFFFFFFFFFFFFFFFFFFFFFFFF:F::FF  
FFFFF:FFFFFFFFFFFFFFFF:FF:FFFFFFFFFFFFFFFFFFFFFFFF  
@A00721:190:HGJW7DSXY:4:2337:14036:13025\_1:N:0:TCTGCAAG+GCTGCACT  
TCAATAACACTCTATTGAATCCCTTTTCCACGATGAAAGCTCTTTATGAGGTGCTCCATGCAAATTTA  
CAGTTCCTCTTTGGTGATATCGCCTCTGTCCTTTCTCCTTTAATCGTGAGGTACGAGAGTTTCGTAC  
TTG  
+  
:FFFFFFFFFFFFFFFFFFFFFFFFFFFFFFFFFFFFFFFFFFFFFFFFFFFFFFFFFFFFFFFF  
FFF:FFFFFFFFFFFFFFFFFFFFFFFFFFFFFFFFFFFFFFFFFFFFFFFFFFFFFFFF  
FFF  
@A00721:190:HGJW7DSXY:4:1235:10013:3364\_1:N:0:TCTGCAAG+GCTGCACT  
AGAGAGAGAGGTTAATCAGAATTTGAGTGATAACGATTTAGTACTGGGAAATGGTGGTAGTCAGTTTA  
CTACTTTTCTTCCCTCCCCTTTTTCGATTGGATTGACGGGTCTTCGTCTCACGACTAATTTGATA  
AGG  
+  
FFFFFFFFFFF:FFF:FFFFFFFFFFFFFFFFFFFFFFFFFFFFFFFFFFFFFFFF:FFFFFFFFFFFFFFFF  
FFFFFFFFFFF:FFFFFFFFFFF:FFFFFFFFFFFFFFFFFFFFFFFFFFFFFFFFFFFFFFFF  
FFF  
@A00721:190:HGJW7DSXY:4:2666:22453:6308\_1:N:0:TCTGCAAG+GCTGCACT  
TTTATGTTTCGGTTTCAGCTGGATGGATCTTTTGATGGTATGTTTCACATTGCGTGATCACTTCCCGT

GGACTTGGAAGAGATTAAACATAAAATCCAGCGATTCTATTATGTCGCTAAAGCCTGTCCAGTTGTC  
GAT

+

FFFFFFFFFFFFFFFFFFFFFFFFFFFFFFFFFFFFFFFFFFFFFFFFFFFFFFFFFFFFFFFFFFFFFFFFFFFFFFFF  
FFFFFFFFFFFFFFFFFFFFFFFFFFFFFFFFFFFFFFFFFFFFFFFFFFFFFFFFFFFFFFFFFFFFFFFFFFFFFFFF  
FFF

@A00721:190:HGJW7DSXY:4:2675:29541:3928\_1:N:0:TCTGCAAG+GCTGCACT  
TCTCGCTCGCATTTTACAAGGATTACTAAGTCTGAGATCTGCCACTTCTAATTTTAGGAAACGTCGCG  
AAAAGAAAGTTCATGAGGATGTCTTGGTCGAAAAATATCGCCGGAACCTCTAATAGAGGATCCTGAT  
GA

+

FFFFFFFFFFFFFFFFFFFFFFFFFFFFFFFFFFFFFFFFFFFFFFFFFFFFFFFFFFFFFFFFFFFFFFFFFFFFFFFF  
FFFFFFFFFFFFFFFFFFFFFFFFFFFFFFFFFFFFFFFFFFFFFFFFFFFFFFFFFFFFFFFFFFFFFFFFFFFFFFFF  
FF

@A00721:190:HGJW7DSXY:4:2447:32542:17018\_2:N:0:TCTGCAAG+GCTGCACT  
ACGGATACCGATCTCAGTTCTACCACAGAAACCGTCTCAGGAAGTGTCTCCACTGATTCGGAATTAGA  
GAAAGACGACCTTCTTGTGGGACTGAGACCTCTGAATTTTCAGGGTG

+

FFFFFFFFFFFFFFFFFFFFFFFFFFFFFFFFFFFFFFFFFFFFFFFFFFFFFFFFFFFFFFFFFFFFFFFFFFFFFFFF  
FFFFFFFFFFFFFFFFFFFFFFFFFFFFFFFFFFFFFFFFFFFFFFFFFFFFFFFFFFFFFFFFFFFFFFFFFFFFFFFF

@A00721:190:HGJW7DSXY:4:2104:8576:25958\_2:N:0:TCTGCAAG+GCTGCACT  
GGATAATTTCAACTCTGAGACTTCTAAGAGTGTTCAAAAGACCAGAAACGTAACAAGAAGAATAAAG  
GTAGGAAGGGGAGAAAACAGAACAAGCGAGCGGTTGAAGAGAAAAC TG

+

FFFFFFFFFFFFFFFFFFFFFFFFFFFFFFFFFFFFFFFFFFFFFFFFFFFFFFFFFFFFFFFFFFFFFFFFFFFFFFFF  
FFFFFFFFFFFFFFFFFFFFFFFFFFFFFFFFFFFFFFFFFFFFFFFFFFFFFFFFFFFFFFFFFFFFFFFFFFFFFFFF

@A00721:190:HGJW7DSXY:4:2446:21178:5509\_2:N:0:TCTGCAAG+GCTGCACT  
GCTGATCGTACCCCAATTCCTGCTAGAAAGATCACTCTCGGCGATACCACTGATCTTCAGAGTTACG  
TAGTGGTCGTTCTTTTGGTGATTTTATCAAAGAGAAAGTTTCTGCTAG

+

FFFFFFFFFFFFFFFFFFFFFFFFFFFFFFFFFFFFFFFFFFFFFFFFFFFFFFFFFFFFFFFFFFFFFFFFFFFFFFFF  
FFFFFFFFFFFFFFFFFFFFFFFFFFFFFFFFFFFFFFFFFFFFFFFFFFFFFFFFFFFFFFFFFFFFFFFFFFFFFFFF

@A00721:190:HGJW7DSXY:4:2257:2980:5306\_2:N:0:TCTGCAAG+GCTGCACT  
TTGTTGACTACGATCTCTCTTGTAAATAAGAAGTTCTTCGCAGTTGAATCTCCACCAGGTGGAGGGAAG  
ACCACTGAACCTTATAGCGACCTTTGTGCAATTTTTCGCAAAAGGTCTT

+

FFFFFFFFFFFFFFFFFFFFFFFFFFFFFFFFFFFFFFFFFFFFFFFFFFFFFFFFFFFFFFFFFFFFFFFFFFFFFFFF  
FFFFFFFFFFFFFFFFFFFFFFFFFFFFFFFFFFFFFFFFFFFFFFFFFFFFFFFFFFFFFFFFFFFFFFFFFFFFFFFF

@A00721:190:HGJW7DSXY:4:1417:17806:33927\_2:N:0:TCTGCAAG+GCTGCACT  
CTGCTAATCGTAATTCGCGAGAAGAGATAGTACTAAAGTTTGGCACTTCTAGTTCATCGCGGTATT  
TGTGAAATTAAGACAGACGTGAAAGTTATGATGAGTGATCGTATTAGA

+

FFFFFFFFFFFFFFFFFFFFFFFFFFFFFFFFFFFFFFFFFFFFFFFFFFFFFFFFFFFFFFFFFFFFFFFFFFFFFFFF  
FFFFFFFFFFFFFFFFFFFFFFFFFFFFFFFFFFFFFFFFFFFFFFFFFFFFFFFFFFFFFFFFFFFFFFFFFFFFFFFF

@A00721:190:HGJW7DSXY:4:1666:10122:2300\_1:N:0:TCTGCAAG+GCTGCACT  
CGACGAATTATTCATGATTCACGCTGGTCAGACCCTTTTCTTACACATCTACTTAAGGCGGCTTATA  
CCATAGGTTACGGTGATTCCAATCAAATCGGATTCATCAATCGTATTGATCTCCAAGTCGCAAACTAC  
TTC

+

FFFFFFFFFFFFFFFFFFFFFFFFFFFFFFFFFFFFFFFFFFFFFFFFFFFFFFFFFFFFFFFFFFFFFFFFFFFFFFFF  
FFFFFFFFFFFFFFFFFFFFFFFFFFFFFFFFFFFFFFFFFFFFFFFFFFFFFFFFFFFFFFFFFFFFFFFFFFFFFFFF  
FFF

@A00721:190:HGJW7DSXY:4:2468:32624:28119\_2:N:0:TCTGCAAG+GCTGCACT  
TGAGTGTCGTTCTTATCGAAGTCTCAGTTATCGCTGCCCGGCCGACGTTTGTGCGCAACTCTCAGAGG

TTTACGGCAGAAAAATTTCTCCTGCTTGTAATTCGAGAGAGGACACTA  
+  
FFFFFFFFFFFFFFFFFFFFFFFFFFFFFFFFFFFFFFFFFFFFFFFFFFFFFFFFFFFFFFFFFFFFFFFF  
FFFFFFFFFFFFFFFFFFFFFFFFFFFFFFFFFFFFFFFFFFFFFFFFFFFFFFFFFFFFFFFFFFFFFFFF  
@A00721:190:HGJW7DSXY:4:2515:4833:17409\_1:N:0:TCTGCAAG+GCTGCACT  
TAAGAGTAAGGTTAAATGTGAAGATGCTCAGACTATTCATGAAGTTCAAGTAATACTTACCAGCACG  
TTCGGCTGGTTAGAATTAACCTCAAGATGACCCTGTTTTTGCATCACAACACATATTACCGTTGCT  
CTA  
+  
FFFFFFF:F:FFFF:FFFFFFFFFFFFFFFFFFFFFFFFFFFFFFFFFFFFFFFFFFFFFFFFFFFFFFFF  
FFFFFFFFFFFFFFFFFFFFFFFFFFFFFFFFFFFFFFFFFFFFFFFFFFFFFFFFFFFFFFFFFFFFFFFF  
FFF  
@A00721:190:HGJW7DSXY:4:1454:31729:19993\_2:N:0:TCTGCAAG+GCTGCACT  
TCAATGTAAAGTTAAACGATGCTACTTGTGAGAGGATCAATCACAGTAAGGAACTGTCACGTTTAGCA  
CGGGAGGTTGCAGATTCAACCCCTTATATCGAGGCTATCGAGGACGAT  
+  
FFFFFFFFFFFFFFFFFFFFFFFFFFFFFFFFFFFFFFFFFFFFFFFFFFFFFFFFFFFFFFFFFFFFFFFF  
FFFFFFFFFFFFFFFFFFFFFFFFFFFFFFFFFFFFFFFFFFFFFFFFFFFFFFFFFFFFFFFFFFFFFFFF  
@A00721:190:HGJW7DSXY:4:1663:22571:12085\_2:N:0:TCTGCAAG+GCTGCACT  
GACGACAAGCCTCAAGAGGGTAGAGGACCACCTGGATCTTCTACTGTCTCTGCCTTCCAAGATTCTT  
AGAAGAGGTTATTCCTGGAACCACCTTAACGTCACCTCGGTAATCTTTC  
+  
FFFFFFFFFFFFFFFFFFFFFFFFFFFFFFFFFFFFFFFFFFFFFFFFFFFFFFFFFFFFFFFFFFFFFFFF  
FFFFFFFFFFFFFFFFFFFFFFFFFFFFFFFFFFFFFFFFFFFFFFFFFFFFFFFFFFFFFFFFFFFFFFFF  
@A00721:190:HGJW7DSXY:4:1675:26720:22216\_1:N:0:TCTGCAAG+GCTGCACT  
GATCAAGGCTAATACCTTTATAGGTAAGAAGCCCCTTGAGCCGCGTAGTCAGCGCGTTTAGCTGTATC  
ATCAGTCAGAGTATACCCGATAGGGTACCGAGTCTCCAAGAGAATATTTATTCTTATGAGGCTCGAAA  
CTT  
+  
:FFFFF:F,FFF:F,FFFFFF::FF:FFFFFF:FFFFFFF,FFFFFF:FFFFFFFFFFFFFF:FFF,  
FFFFF:FFFFFFFF::FF:FFF:F:F:FFFFFFFFFFFFFFFFFFFFFFFF:FFFFFF:FFFFFFF:  
FFF  
@A00721:190:HGJW7DSXY:4:2603:28230:18380\_1:N:0:TCTGCAAG+GCTGCACT  
TTCCGATCTGTTTTGATAAGTCTAAGTTGGATAAATTTATAGGAGACTCAGTTAACCTGAGAGCTCCT  
CAATTGATAGATTGGGTCAACAATAGGGACGCTAGTATACTTCGTAAAGTCGACAGCGAAATGGTCAA  
TAT  
+  
FF,F,FF,FF:FFF:,F,FFF:F,F:FFF:FF,,F,FFFF,FF:F:FFFF:F:,F:FFFF:FFF,:F  
FFFFF,:F,:,:FFF:FFF::,FFFFFF,FFFFFFF,:F,FFF,FF,FFFFF,F,FFF:F,FFFF,,  
F:F  
@A00721:190:HGJW7DSXY:4:1567:6298:4633\_1:N:0:TCTGCAAG+GCTGCACT  
GGTTCTTGAGGAGAGTCAAACAGTGTCTTTTACCCAACATTTTATGTATACAGAGATGACCAGTG  
ACGATTTCTCCCGGAAGCTTCTCTCTCTTAGGAGGTCATGATGACTACTATAAGGGTGAAATCGAT  
TTT  
+  
:FFFFFFFFFFFFFFFFFFFFFFFFFFFFFFFFFFFFFFFFFFFFFFFFFFFFFFFFFFFFFFFFFFFFFF  
FFFFFFFFFFFFFFFFFFFFFFFFFFFFFFFFFFFFFFFFFFFFFFFFFFFFFFFFFFFFFFFFFFFFFFFF  
FFF  
@A00721:190:HGJW7DSXY:4:2228:28601:21559\_1:N:0:TCTGCAAG+GCTGCACT  
ACGCCAGGAGTATCCATAACGATTTGTCAATTTACCACCTTTGCTCAACGACGAAGTGGAACGGCCAAC  
ACTTTCTTTGGTAATTGTATGATCACTTTGATGATTTTATCACTTTATTATGACCTTGAAAGTTTTTC  
GGC  
+  
FFFFFFFFFFFFFFFFFFFF::FFFF:FFFFFFFFFFFFFFF,FFFF:FFFFFFFFFFFFFFFFFFFFFFF

FFF:FFFFFFFFFFFFFFFFFFFFFFFFFFFFFFFFFFFFFFFFFFFFFFFFFFFFFFFFFFFFFFFF  
FFF

@A00721:190:HGJW7DSXY:4:2517:32108:33176\_2:N:0:TCTGCAAG+GCTGCACT  
CTGTTTTCAAAGACTCCAATAACTGATCATTCTGATCATATGATTTTGGACAATGGTTTCGAAGCGAA  
ATTTTGTAGGGATAAACCAGCGTACTTCTGCTCGCGATTTATTCTTTT

+  
FFFFFFFFFFFFFFFFFFFFFFFFFFFFFFFFFFFFFFFFFFFFFFFFFFFFFFFFFFFFFFFF:FFFFFFFFFFFFFFFF: :FFFFFFF  
FFFFFFFFFFFFFFFFFFFFFFFFFFFFFFFFFFFFFFFFFFFFFFFFFFFFFFFFFFFFFFFF,FFFFFFFFFFFF

@A00721:190:HGJW7DSXY:4:1118:18611:21637\_1:N:0:TCTGCAAG+GCTGCACT  
CGATATTCGATTGAGGGTCGTTATACCTATTCGGCTATCTGTGCTTTGAATTGTATAAGATCAAATTT  
TAAACGATTCCGAGAGGTTTATCCTGATGTGGAGGGAGTTCTTGAAGCATCCCGACCTTTCTTGTGA  
AAA

+  
FFF,:FFFF:FFFF:,::FFFFFFFF: :FFFFFFFF:FFFFFFFFFFFF:FF:FFFF: :F:FFFFFF  
FF,FFFF:FFFFFFFFFFFFFFFFFFFFFFFFFFFFFFFFFFFFFFFFFFFFFFFFFFFFFFFFFFFFFFFF,FFFFFFFFFFFF  
FFF

@A00721:190:HGJW7DSXY:4:2474:30382:14591\_1:N:0:TCTGCAAG+GCTGCACT  
TCCGATCTCAGTAATCCTGATTCTACTACGGATTCATGGACCTTCCATCCTGTACCTCTTCTGGAGAG  
ACGTATCTCAAAGATCGACTTCGAGACAGGTGATATTGTTGAGCGAGAGCGACCAAGATCTAAATTCG  
GTA

+  
FFFFFFFFFFFFFFFFFFFFFFFFFFFFFFFFFFFFFFFFFFFFFFFFFFFFFFFFFFFFFFFFFFFFFFFF  
FFFFFFFFFFFFFFFFFFFFFFFFFFFFFFFFFFFFFFFFFFFFFFFFFFFFFFFFFFFFFFFFFFFFFFFF  
FFF

@A00721:190:HGJW7DSXY:4:2349:20112:9768\_2:N:0:TCTGCAAG+GCTGCACT  
TCTTTCATTTTAAATGACGATCATTAAAGACTCTCTTCTTCTTGTTCCTTCTTGCATGATTTTT  
TCCTCATCAGCTTGTGTTTTACCTAATCTGTGTTTTTACGATAACAAC

+  
FFFFFFFFFFFF:FFFFFFFF:FFFFFFFFFFFFFFFFFFFF,FFFFFFFFFFFFFFFFFFFFFFFFFFFF:FFFFF  
FFFFFFFFFFFFFFFFFFFFFFFFFFFFFFFFFFFF, :FFFFFFFFFFFFFFFFFFFFFFFFFFFF

@A00721:190:HGJW7DSXY:4:1275:28935:34131\_2:N:0:TCTGCAAG+GCTGCACT  
TCTTCCGAAAGGCGAACTTTGGGAATTTGAAGCTCAGGGTGAAGCACAAACGTTTGACCGTGACGAAC  
GTGGTGTTCTTGATCTACGTTACGGATATACTCTCCTTGAGTTCATC

+  
FFFFFFFFFFFF:FFFFFFFFFFFFFFFFFFFFFFFFFFFFFFFFFFFFFFFFFFFFFFFFFFFF:FFFFFFFFFFFF:F  
FFFF:FFFFFFFFFFFFFFFFFFFFFFFFFFFFFFFFFFFFFFFFFFFFFFFFFFFFFFFFFFFF

@A00721:190:HGJW7DSXY:4:1478:8531:13166\_2:N:0:TCTGCAAG+GCTGCACT  
AATCACTCATTTTAGTGAGATTATTAACAAACGCACTAAACGTCTTCGACAACAGCAGGGGTTTTCGA  
ATAGTGATAGCCACCCGCCTTACAGAGGGGCAGCAGCATGACCATAAT

+  
:FFFFFFFFFFFFFFFFFFFFFFFFFFFFFFFFFFFFFFFFFFFFFFFFFFFFFFFFFFFFFFFFFFFFF  
FFFFFFF:FFFFFFFFFFFFFFFFFFFFFFFFFFFFFFFFFFFFFFFFFFFFFFFFFFFF: :

@A00721:190:HGJW7DSXY:4:2138:27362:5008\_1:N:0:TCTGCAAG+GCTGCACT  
CACCTTTTCTACTGTCTGTCTCGCCTCTTCGAATGAAGTTTAAATGCTTAACAACAATGATAGTGAAT  
TTATACCTACAATCATTGGTTTTTCTAATAATGATGACACTATTGTTTATGGATATGATGCTATTACT  
CAT

+  
FF:FFFFFFFFFFFFFFFFFFFFFFFFFFFFFFFFFFFFFFFFFFFFFFFFFFFFFFFFFFFFFFFFFFFF  
FFFFFFFFFFFFFFFFFFFFFFFFFFFFFFFFFFFF,FFFFFF:F:FFFFFFFFFFFFFFFFFFFFFFFFFFFFF  
FFF

@A00721:190:HGJW7DSXY:4:2214:16812:31360\_2:N:0:TCTGCAAG+GCTGCACT  
GTTTACAAGGACCTTAAGCGATGGATCGGGGTTAATTCTAAAACATTACCCGAAAGACGTGCTAAATT  
AAAACCATTTGTACGATGTCGTCTGTCTCGGCGATCACTTTTCACAGAT

+

FFFFFFFFFFFFFFFFFFFFFFFFFFFFFFFFFFFFFFFFFFFFFFFFFFFFFFFFFFFFFFFFFFFFFFFF  
FFFFFFFFFFFFFFFFFFFFFFFFFFFFFFFFFFFFFFFFFFFFFFFFFFFFFFFFFFFFFFFFFFFFFFFF  
@A00721:190:HGJW7DSXY:4:2606:1642:15201\_2:N:0:TCTGCAAG+GCTGCACT  
TTTATCTCTTTGGTTGTTAGGGATTTTGAGAGAGTGAAAGGCTTCAATTGTAGTGGTTTGGTCGTTTC  
AGTACCCAGTCAGTATACCTCTACGCAAAGATATTTTCATGAAACTAC  
+  
FFFFFFFFFFFFFFFFFFFFFFFFFFFFFFFFFFFFFFFFFFFFFFFFFFFFFFFFFFFFFFFFFFFFFFFF  
FFFFFFFFFFFFFFFFFFFFFFFFFFFFFFFFFFFFFFFFFFFFFFFFFFFFFFFFFFFFFFFFFFFFFFFF  
@A00721:190:HGJW7DSXY:4:1569:3558:3803\_1:N:0:TCTGCAAG+GCTGCACT  
TGTCTTTTCATATTATGAATGAACCTTCGGCCGCTCTCTTTGCTTCGATGTTGGATGTCAAGAAGGGTT  
CAGAATGGGATTCTACGTAGTTTATGACTTTGGTGGTGGTACTTTCGATACTTCTATCGTCTTACGT  
TAC  
+  
FFFFF:FFFFFFFFFFFFFFFFFFFFFFFFFFFFFFFFFFFFFFFFFFFFFFFFFFFFFFFFFFFFFFFF  
FFFFFFFFFFFFFFFFFFFFFFFFFFFFFFFFFFFFFFFFFFFFFFFFFFFFFFFFFFFFFFFFFFFFFFFF  
FFF  
@A00721:190:HGJW7DSXY:4:2526:3857:30154\_2:N:0:TCTGCAAG+GCTGCACT  
AGTGTTATTTATTCTGGTGGTGTATGATAATCTTGAGGTCGTGACGTTGATGAAGCTATAAGAGCGTT  
CTTATTACGGCGCACTTCTTTACCCGCCACCACACAACCTTTCAGTTTC  
+  
FFFFFFFFFFFFFFFFFFFFFFFFFFFFFFFFFFFFFFFFFFFFFFFFFFFFFFFFFFFFFFFFFFFFFFFF  
FFFFFFFFF:FFF:FFFF:FFFF:FFFFFFFFF:FFFFFFFFF:FFFFF  
@A00721:190:HGJW7DSXY:4:2648:1787:4085\_1:N:0:TCTGCAAG+GCTGCACT  
ACTGGAAAACCCTCGTCAATACTTTTCAATAATATACGTCCTTGAACCTCACTTATGACGATCTAGTGAA  
ATTAACGCGTCCTTTTCTGGAACGTAGTTTACTATTATGAACAAAGTTATCAAAGATAGTGGCATT  
AAG  
+  
FFFFFFFFFFFFFFFFFFFFFFFFFFFFFFFFFFFFFFFFFFFFFFFFFFFFFFFFFFFFFFFFFFFFFFFF  
FFFFFFFFFFFFF:FFFFFFFFFFFFFFFFFFFFFFFFFFFFFFFFFFFFFFFFFFFFFFFFFFFFFFFF  
FFF  
@A00721:190:HGJW7DSXY:4:1252:16776:12258\_2:N:0:TCTGCAAG+GCTGCACT  
TTCCGGCCGGTGGTAGCTCATTTCTACCAGGGGCTATTACTCTTGCTGAAACAGCTATTAAAGCTGTT  
GAGCGGGTAATTACACCTAAACGAGCTCGATCTGCCATCGCTGAAGGA  
+  
FFFFFFFFFFFFFFFFFFFFFFFFF,FFFFFFFFFFFFFFFFFFFFFFFFFFFFFFFFFFFFFFFFF:FF:FF:  
FFFFFFFFFFFFFFFFFFFFFFFFFFFFFFFFFFFFFFFFFFFFFFFFFFFFFFFFFFFFFFFFFFFF  
@A00721:190:HGJW7DSXY:4:2241:1759:14904\_2:N:0:TCTGCAAG+GCTGCACT  
ACTTTATCTGAGAGTAGCGTTCTTTTGTGCGATTGTATCAATAGTAACATAACGACAAATAAAGGTCT  
CTATCAGGTGGGTATAATAGTTGCCGCCGGATCCGCCTTACCATTGAA  
+  
FFFFFFFFFFFFFFFFFFFFFFFFFFFFFFFFFFFFFFFFFFFFFFFFFFFFFFFFFFFFFFFFFFFFFFFF  
FFFFFFFFFFFFFFFFFFFFFFFFFFFFFFFFFFFFFFFFFFFFFFFFFFFFFFFFFFFFFFFFFFFF  
@A00721:190:HGJW7DSXY:4:1270:3676:3443\_2:N:0:TCTGCAAG+GCTGCACT  
GTAATTATGAAGACTGTGATTTATCTTTCACCTCTGGCCTTGATGAGGGTGTTTCTAATCGTAACATT  
AATAATTTCAATCTTCTTAAAAAGAAGATAGAGAGTCATACTTTGGGC  
+  
F:F,FFFFFFFFFFFFFFFFFFFFFFFFFFFFFFFFFFFFFFFFFFFFFFFFFFFFFFFFFFFFFFFFF:FFFF:FFF:F  
FFFFFFFFFFFFFFFFFFFFFFFFFFFFFFFFFFFFFFFFFFFFFFFFFFFFFFFFFFFFFFFFFFFF,FFFFFFFFF:FFFF  
@A00721:190:HGJW7DSXY:4:2264:8829:16814\_2:N:0:TCTGCAAG+GCTGCACT  
ATTAAACAAGTTGTACTTATCAATGATTTTATCGCTGGGTGTTATCTCGAAAAGTCTCTTCTAAAAGG  
AACGTCAGTTCTAACCCAAAGAGAATATCTAAAATATTTACAAAATCT  
+  
F:FFFFFF:FFFFF,FFFF:,FF,FFFFFFFF:FFFFF,FFFFFF,FFF,FF:,FFFFFF,FFFFF,F  
:FF:FFFF,FFFFFF:FFFF:FFFFFFFF:FFFFFFFFFFFF,F,FF,:F

@A00721:190:HGJW7DSXY:4:2204:29378:9815\_1:N:0:TCTGCAAG+GCTGCACT  
ATGGCACTACCTCGGTACAATCTTACTTGGAACGAAGGCGACCTGTTCCGGAGTTTTTACGGGATCCG  
GAATGTTCTGTCTATATTAGGTGAAGCGAAATACGATTTTGAACGTCAACGTTACCGAGTTTCGTTT  
CGT

+

FFFFFFFFFFFFFFFFFFFFFFFFFFFFFFFFFFFFFFFFFFFFFFFFFFFFFFFFFFFFFFFFFFFFFFFFF:FFFFFFFFF  
FFFFFFFFFFFFFFFFFFFFFFFFFFFFFFFFFFFFFFFFFFFFFFFFFFFFFFFFFFFFFFFFFFFFFFFFF  
FFF

@A00721:190:HGJW7DSXY:4:2422:7365:6699\_1:N:0:TCTGCAAG+GCTGCACT  
TAGTGCGAGGCCTCTCTTCTACGAGTATTGCTATTTATACGGTTACGAGAAGAAGGTTTCAAAGTTTG  
AGAAGTTAGTTTACGAAGTTGACTCTACTATACGTGACATACTAAATACTAGATATTTGGATGATCTT  
GAT

+

FFFFFFFFFFFFFFFFF:FFFFFFFFFFFFFFFFFFFFFFFFFFFFFFFFFFFFFFFFFFFFFFFFFFFFFFF  
FFFFFFFFFFFFFFFFFFFFFFFFFFFFFFFFFFFFFFFFFFFFFFFFFFFFFFFFFFFFFFFFFFFFFFFFF:FFFFFFFFF  
FFF

@A00721:190:HGJW7DSXY:4:1419:24605:28009\_1:N:0:TCTGCAAG+GCTGCACT  
TTCTTCCTTGGAATTTTAAATAAAGAATCTTTACCAGGACTCCTACTACAGGAGGCAGTCTTCTGATC  
GTAAGAAGTTTATAAGGAACATATCCATTTGTTGTAATAGGGTCATCAACTTAGAACTCGAACTCTA  
AGT

+

F:,,FFFFF:FFFFFFFFF,FFFFFFFFFFFFFFFFF:FF:,FFFFFFFFF::FFFFFFFFFFFFFFFFFFFFF:  
FFFF,,:FF:FFF,,F,FFFFFFFFF,F,FFFFFFFFFFFFFFFFFFFFF::FFFFFFFFF::F:FF,FFF:F,  
FF:

@A00721:190:HGJW7DSXY:4:1663:2157:34851\_2:N:0:TCTGCAAG+GCTGCACT  
CCAAGCTTACCTGTATCTTCAATGAAATTGGACTCTTCGATAGGGGACATTTTATCGTGGGCTTTCCG  
TAAAGGAAGATCTGTTATCGACGGTTTATCGTTTACGAAGTATCACTC

+

FFFFFFFFFFFFFFFFF:FFFF:F:FFFFFFFFFFFFFFFFFFFFFFFFFFFFFFFFFFFFFFFFFFFFF,FFFFFFFFF  
F,,FFFFFFFFF:FFFFFFFFFFFFFFFFF:FFFFFFFFFFFFFFFFF

@A00721:190:HGJW7DSXY:4:2319:12301:33849\_1:N:0:TCTGCAAG+GCTGCACT  
TGGTCTTTATTCTATTATTGATTTTTATGAGATTGATACGTTAACAGAAGATGATGTTAGAGTAGAAT  
TCCTGAAGAGTCCTTCCGTAACCAACTTCTTGACAATTTTCTTCAATCCTTCGATAATAGTTAAATCT  
AGG

+

FFFFFFFFFFFFFFFFFFFFFFFFFFFFFFFFF:FFFFFFFFFFFFFFFFF:FFFFFFFFFFFFFFFFFFFFF  
FFF:FFFFFFFFFFFFFFFFFFFFFFFFFFFFFFFFFFFFFFFFFFFFFFFFFFFFFFFFFFFFFFFFFFFFF  
FFF

@A00721:190:HGJW7DSXY:4:2343:10086:11569\_2:N:0:TCTGCAAG+GCTGCACT  
AATTAAGAAATAATCCTACATTGACTGATTATCTAAAGATTGAAGGAAAATTTTATCCTCGTTTAACT  
TACTTAGACTTTCCTACGATACAAATGATAACTTCTAATTTACGTTTG

+

FFFFFFFFFFFFFFFFFFFFFFFFF:FFFFFFFFFFFFFFFFF,FFFFFFFFFFFFFFFFF:FF  
FFFFFFFFFFFFFFFFFFFFF,FFFFFFFFF:FFFFFFFFFFFFFFFFF,

@A00721:190:HGJW7DSXY:4:2406:3070:29011\_2:N:0:TCTGCAAG+GCTGCACT  
CTCAGGAGTCCCGGCATTTGATAATAATGACGAGACTTTCGTCATAATCGCTGCATATTACGGATTAC  
ACGGTACCAGCGCATCTCGTGTGCGAGCCTCGACCCGATTATATGGTAT

+

FFFFFFFFFFFFFFFFFFFFFFFFFFFFFFFFFFFFFFFFFFFFFFFFFFFFFFFFFFFFFFFFFFFFF  
FFFFF:FFFFFFFFFFFFFFFFFFFFFFFFFFFFFFFFF:FFFFF

@A00721:190:HGJW7DSXY:4:1542:12210:15217\_2:N:0:TCTGCAAG+GCTGCACT  
AACTAACTATGTTATGTTCTCTGATCATTTTGACAATCTCTTCTTATAATAAATAAATAAATAATATT  
ACTAATGGCAAATAGTGGAAGGCTCCAGTCAACACTAGTTCGAGTGC

+

@A00721:190:HGJW7DSXY:4:2149:18521:14497\_1:N:0:TCTGCAAG+GCTGCACT  
AATAGGTGAAGGGATAGTTTTTACCTCGACCAACATTAAGGCGGCGGCGACTAATCTTAAAGCTTCAC  
CCAAAATGAAGGACACTTCGAAACTGAATAATGATGCACTACAAACAAGTATCGCTAATCATCTGAAA  
AAG

+

[illegible]

@A00721:190:HGJW7DSXY:4:2105:31467:19758\_2:N:0:TCTGCAAG+GCTGCACT  
AGAGGATATTCGCCATTGTGGTACGAATTGGTCCAACATTTACCACCAAATTCCTTTGATACAACTCT  
AGCCTTCAAGTGGGGTATGCCTGCGGAATACGCTTGCTATTCACCAGA

+

[illegible]

@A00721:190:HGJW7DSXY:4:2467:27308:2534\_1:N:0:TCTGCAAG+GCTGCACT  
CCCGTTGATGCTATGTCAGAAGAAGCTATTCAAGCTTGTCTTTAAAGACTGCAGAGGCTGTCAAACA  
AGCCCAGACTCAAGGAGTCCAATCAAAGGTTTTGAATTTAGCTCAACTGGGGAGACGTGCTTAAATGG  
GTG

+

```

FFFFF,F:,FFFFFFFFFFFF,FFFFFFFF:FFFFFFFFFFFFFFFFFFFF::F:FFFF:FFFFFFFF:FF
FFFF::FFFFFF:FFFFF,F:FFFFF,FFFFFFFFFFFFFFFFFFFF:F:FFFFF:FFFFF::FFFFF:,FFF
FFF

```

@A00721:190:HGJW7DSXY:4:1232:16432:30921\_2:N:0:TCTGCAAG+GCTGCACT  
TAGATAGTGGGATAATAGTTCTACCGATACGTAGTGAACGCGTTTCGTAGAACCAAGTACTTTCCGTCT  
GAAGAGTTTtagagctgctattgattatgtaaccgataggagttgtata

+

```

FFFFFFFFFFFFFFFFFFFFFFFF:FFFFFFFFFFFFFFFFFFFFFFFF:FFFFFFFFFFFFFFFFFFFFFFFF:FFFF
FFFFFFFFFFFF:FFFFFFFFFFFFFFFFFFFFFFFFFFFFFFFFFFFFFFFFFFFFFFFF

```

@A00721:190:HGJW7DSXY:4:1255:28103:13275\_1:N:0:TCTGCAAG+GCTGCACT  
GATAATCCTTTAAGGACTATGTTGACTGACGAAGATTTTCCACAGATTTGTCTACGTTGCAGATCGC  
CACTCCAAACACTATATACATTATAAAATATAAAAATAAGGGAGTCATAACTTTTGTTACCAAATTCT  
TGG

+

[illegible]

@A00721:190:HGJW7DSXY:4:1269:22480:2033\_2:N:0:TCTGCAAG+GCTGCACT  
ATTTTATTAATCATTACTTTAACGATCTCTCGGTCATTTACTCTGTACTTGATCTACGTCGTTAACT  
GTCGGAACAACCTTTACTTAGAATGACTCTATCTTTTCAGACACTTCT

+

```

FFFFFFFFFFFFFFFFFFFFFFFFFFFFFFFFFFFFFFFF:FFFFFFFFFFFFFFFFFFFFFFFFFFFFFFFFFFFF
FFFF:FFFFFFFFFFFFFFFFFFFFFFFF:FFFFFFF.FFF:FFFFFFFFFFFF

```

@A00721:190:HGJW7DSXY:4:2129:18096:1830\_2:N:0:TCTGCAAG+GCTGCACT  
ACTCACTATCGTTTTCTGCTTTTTCTTAGCTAATAGATTAATAAAGGATGAGTACGAAAACCAACTCT  
TCGTTACGAGACCTGATGGTAGAATAGATTTAGTCTCTACACCCATCT

+

```

FFFFFFFFFFFFFFFFFFFFFFFF,FF,FFFFFFFFFFFFFF:FFFFFFFFFFFFFFFFFFFFFFFF,FFFFFFF
F:FFFFFFFFFFFFFFFFFFFFFF:FFFFFFFFFFFFFFFFFFFFFF:FFFFF

```

@A00721:190:HGJW7DSXY:4:1517:28501:22952\_1:N:0:TCTGCAAG+GCTGCACT  
TGTGCTCTTCCGATCTCCTGAACCTTAATACACGAAGATAACATCCGCAAACGACTCGAAACCGAGACG  
CCGTAGATCAAAGTCCCTTCTAACTTTAGATTATGAATCCTGCCTTTACTCATTTTATAGCAGTTA

+

F:F,F,,F,F:,FFF,F::,F:,,,FF,FF,,,::,F,F,,F,FF,,F:FFFFFFFFFFFFFFFFFFFF  
FFFFFFFFFFFFFFFFFFFFFFFFFFFFFFFFFFFFFFFFFFFFFFFFFFFFFFFFFFFFFFFFFFFF  
@A00721:190:HGJW7DSXY:4:1639:7771:6965\_2:N:0:TCTGCAAG+GCTGCACT  
TGCTTTTCGATAGTGATTGTTATCAATTTAAATACATTACTGTTTCAAATCATCTTTACTCACAGACT  
CCGAAAATGGTTTCAAATGAGGTCAAAGCTCTATTTATTAAACGAAC

+  
FFFFFFFFFFFFFFFFFFFFFFFFFFFFFFFFFFFFFFFFFFFFFFFFFFFFFFFFFFFFFFFFFFFF  
FFFFFFFFFFFFFFFFFFFFFFFFFFFFFFFFFFFFFFFFFFFFFFFFFFFFFFFFFFFF  
@A00721:190:HGJW7DSXY:4:2251:18177:23234\_1:N:0:TCTGCAAG+GCTGCACT  
GGAACCTCAATTCCTTCGATGTTTATATTTTCTATAAGGGAAAATAGCAATAATCAAATTCGACAA  
ATTTTAGAACTTTATTTAGAACTCTCTCCGATCACCTTGGTGTGATCTCCCGAGGATCTTTTCAAT  
AAG

+  
:FFFF:FFF,FFFFFFFFFFFFFFFF:F:FFFFFFFFFFFFFFFFFFFFFFFF:FFFF:F,FFFFFF  
FFFFFFFFFFFF:FF:FFFFFFFF:FFFFFFFFFFFFFFFFFFFFFFFFFFFFFFFFFFFFFFFFFFFF  
FFF  
@A00721:190:HGJW7DSXY:4:1360:5231:7012\_2:N:0:TCTGCAAG+GCTGCACT  
TAAATAGTGATATTCAGCGTATACTTGAATACTTTATCAAAGATTTGGCTTGGTCTATTTACCGCAA  
AAGTTGAAGAGGTCTATGATATTTATTTTACTTATACTTTAAATAGC

+  
FFFFFFFFFFFFFFFF:FFFF,FFFFFFFFFFFFFFFFFFFFFFFFFFFFFFFFFFFFFFFFFFFFFFFF:F  
F:FF:FFFFFFFFFFFFFFFFFFFFFFFFFFFFFFFFFFFFFFFF:FF:FFFF  
@A00721:190:HGJW7DSXY:4:1646:15899:10457\_1:N:0:TCTGCAAG+GCTGCACT  
ACTTGACTGTTGATAATATTACAATAGCTCTTCTCAGAAGATTAGAGAAGTAACCGGTTAACACGTC  
GGTATCTTTGATTTACTTTTACCGTTAGAACTGAAAAAGATTCTTTTCGAAAAGAAACCTATAAGTTA  
CA

+  
FF:FFF,F:FF:FFFF,FFF:FFF:F,F,FF:F::F,FF,,FFF:F,F,FFF,: ,FFF,FF,FFFF  
,FF,,F,FF,:FFFF,FFFFFF,F:FF,F,FF,FFFF,FFF,FFFF:FFFF,F,FF,FFF:F:FFF  
FF  
@A00721:190:HGJW7DSXY:4:2632:9109:5118\_2:N:0:TCTGCAAG+GCTGCACT  
TAAAGAAATAAAAATACTTCAAGTACCTGAACCTTTACATTTTAAATGGTATGGTATAATGTGTCTTAC  
AAATAGAACCTTCACTCTCGGTAATGAGAGTGATTCTCTTAATATTCT

+  
FFFFFFFFFFFFFFFFFFFFFFFFFFFFFFFFFFFFFFFFFFFFFFFF:FFFFFFFF:FFFFFFFFFFFFFFF  
FFFFFFFFFFFFFFFFFFFFFFFFFFFFFFFFFFFFFFFFFFFFFFFF:FFFFFFFF  
@A00721:190:HGJW7DSXY:4:1160:21893:14982\_1:N:0:TCTGCAAG+GCTGCACT  
TTACTAGGATTTATCACACTCCTAAATTTGATAGCAATTTATGTTTTAAATGCTAGGAAAATTTTAGA  
AAAACCTCATTGTATAGTTCAAGGAGTACTTAATTCAATAGCTTTAGTATTATTTACTATCGCCTTTA  
TTG

+  
FFFFFFFFFFFFFFFFFFFFFFFFFFFFFFFF:FFF:FFFFFFFFFFFFFFFFFFFFFFFFFFFFFFFFFFFF  
FF:FFFFFFFFFFFFFFFFFFFFFFFFFFFFFFFF:FF:FFFF:FFFFFFFFFFFFFFFFFFFFFFFFFFFF  
FFF  
@A00721:190:HGJW7DSXY:4:1552:1777:4069\_1:N:0:TCTGCAAG+GCTGCACT  
TTAATTGCTTACACAAAAGTGACGCGCAAGGAATCTTAATTGATTGAAGCTAGGCGTTGGGGAGAAT  
GAACTGCCGCTTCCCGGAAGAAACGATCTATTTACAGAGTATTTAGAGTAGTCCAAAGTTGTATAAA  
TTT

+  
FFFFFFFFFFFFFFFFFFFFFFFFFFFFFFFF:FFFFFFFFFFFFFFFFFFFFFFFFFFFFFFFFFFFF  
FFFFFFFFFFFFFFFFFFFFFFFFFFFFFFFF:FFFFFFFFFFFFFFFFFFFFFFFFFFFFFFFFFFFF  
FFF  
@A00721:190:HGJW7DSXY:4:1203:32253:25379\_2:N:0:TCTGCAAG+GCTGCACT  
TGACCAATCATCGCTCCAACCTGGCACGCCAGACGTAGGGTCAAACCTACTACCGCCGGTCGGCAGATC



$+$ 

@A00721:190:HGJW7DSXY:4:2545:1967:12696\_1:N:0:TCTGCAAG+GCTGCACT  
GGACGACCACTCAAAGGAAACGGGCTGTTGCCAGAGGAAAGCAGCGACCACCGAGGTCGCTCGTAAC  
ATTGACGGCAGTCCCGTCATCTCTGTGGGAAGTGAAGGAGTACCTCAGTCAAAGTCACATTACCAC  
TCC

+

@A00721:190:HGJW7DSXY:4:1453:21838:8500\_2:N:0:TCTGCAAG+GCTGCACT  
GACTATACAGTTCGCCATTTCAAGAGTGGTCAATACGTCGTGGGAGGTACTGAAGCCTTCCCCTCCG  
CTGGCACGAAGAACTCCCAAGCCAATCAATAGTTCTTCTGACCAGA

+

@A00721:190:HGJW7DSXY:4:2574:13277:35916\_1:N:0:TCTGCAAG+GCTGCACT  
GGAGTTTCAGACGTGTGCTCTTCCGATCTGGGAAATGTCCCCAAACTGATAAGAATAAAGGGAAAGGT  
CCATCAGGACCTAAGAAGGGGAAATTACCCCTAATTCTGAAGGAAGATCTCCCACCATCTGGGGTTGG  
GAA

+

@A00721:190:HGJW7DSXY:4:2148:16938:23657\_2:N:0:TCTGCAAG+GCTGCACT  
CACGGGCCAAAGAGGCCGCTGCTACGAAGTCGCTGAAGGCGGCTTGGGTCATTAAGGGTAGCTGTAA  
GTTGCGCCTGCCGACCCCATCTTTGAGACCAAGACTCTCTACAGTAGG

+

@A00721:190:HGJW7DSXY:4:1659:27073:5259\_2:N:0:TCTGCAAG+GCTGCACT  
CAAATCTGTTGAATTCTGCTACTGAGGACGAAGGTGAGAGGACTTTTGGCTACTGGCGACAACTGAGA  
GCAGTCGCTGGGGAAAGAGAATTGCGTGGGTTGAAGGCCGACGCTTCG

+

@A00721:190:HGJW7DSXY:4:1115:20925:36667\_2:N:0:TCTGCAAG+GCTGCACT  
TTTTGTCAACGGCGTTTGGAGGATTTTATCCGCGCTTAACATGCGGGCGAAGATCCCTATGGAGTCT  
TGAAGGACTTAGGTTGGCATATTTATGCCGACGATAATAAGCATGTCA

+

@A00721:190:HGJW7DSXY:4:1165:3152:32784\_1:N:0:TCTGCAAG+GCTGCAC  
CAAGAGAGAGTGTGAGAGAGTCGCTCTCACTATTTTTGCCAGAATGCGGGCTTTCTGACTGATGAGG  
TTAAAACTCTTGCTCCTTCTGTGGGTGAGGGTTTTTGTATATTCAC TGTTCTGGGAGGCTGCTTTC  
CTC

+

@A00721:190:HGJW7DSXY:4:1421:23312:6449\_1:N:0:TCTGCAAG+GCTGCACT  
GAGAGCATTAGAAGGAAGTTGGGCAAATTCACACATATGGTAGACGTTGTACACACTTTTCTTGAAAT

TTTTCTTTCTCCGTCATTGGGGATTTTCGATGTGAGAAGGTGGAAGGTGTCAAGGGTCTTCTTCATG  
CTG

+

FFFFFFFFFFFFFFFFFFFFFFFFFFFFFFFFFFFFFFFFFFFFFFFFFFFFFFFFFFFFFFFFFFFFFFFF  
FFFFFFF:FFFFFFFFFFFFFFFFFFFFFFFFFFFFFFFFFFFFFFFFFFFFFFFFFFFFFFFFFFFFFFFF  
FFF

@A00721:190:HGJW7DSXY:4:2623:4191:1360\_2:N:0:TCTGCAAG+GCTGCACT  
TCACATCATGATTGATAGTTACGGCTCGTATCGAGTTGGAGGGAGGAAGTTCTCCGAAATTAAAGACG  
GGGGGATTAAGAGTCCAGCTGTAAGTGTCAATTCAGAGAGGGGAGCTC

+

FFFFFFFFFFFFFFFFFFFFFFFFFFFFFFFFFFFFFFFFFFFFFFFFFFFFFFFFFFFFFFFFFFFFFFFF  
FFFFF:F:FFFFFFFFFFFFFFFFFFFFFFFFFFFFFFFFFFFFFFFFFFFFFFFFFFFFFFFFFFFFFFFF

@A00721:190:HGJW7DSXY:4:2341:6741:19899\_1:N:0:TCTGCAAG+GCTGCACT  
CGTCAGAAGATGAGGAAGTCTAAGAGGAGGAGTTTGAGGAAGGCTCTAGAGAAGATCTCACCACCTGG  
AGAAGGCAAGTGGAGAGTCCAGAAGTTGATGAAGAAGGATTATTTGAAGCAGGGGTTACCACTTCCTA  
AGG

+

FF:FFFFFFFFFFFFFFFFFFFFFFFFFFFFFFFFFFFFFFFFFFFFFFFFFFFFFFFFFFFFFFFFFFFF  
FFFFFFFFFFFFFFFFFFFFFFFFFFFFFFFFFFFFFFFFFFFFFFFFFFFFFFFFFFFFFFFFFFFFF:  
FFF

@A00721:190:HGJW7DSXY:4:1376:25373:23265\_1:N:0:TCTGCAAG+GCTGCACT  
TTAGGTCAACTTGGGGTTTCAATGTCAATAGTGCCTTACGATTGAAAGAGGTCCTTTTGAGTATCGA  
CAGATCTTTCGATCTTGAGGACGTACATTTAACGTGGCAGAATTCGGTAACTTACCATATTGTTCTT  
CCG

+

FFFFFFFFFFFFFFFFFFFFFFFFFFFFFFFFFFFFFFFFFFFFFFFFFFFFFFFFFFFFFFFFFFFFFFFF  
FFFFFFFFFFFFFFFFFFFFFFFFFFFFFFFFFFFFFFFFFFFFFFFFFFFFFFFFFFFFFFFFFFFFFFFF  
FFF

@A00721:190:HGJW7DSXY:4:2142:28637:20243\_1:N:0:TCTGCAAG+GCTGCACT  
TTAACTTTGACTCAACTACTCCGATCAGATCCGGATGGTTTGATTGGTATGGACTACTCGACTTTTGA  
TCTGGAGTTGTATAGGGTCATGGCAGATACTACCGATAAGGTGAAAAATATGCAGGTCAAAGATTCTG  
TA

+

FFFF:F:FFFFF,FFFFFFFF:FFFFF::FF:FF:FFFFFFFFFFFFFFFFFFFFF,:FFFFF:,FFF:F  
FFFFF:FF:FF,FFFFFFFFF,FFFFFFFFFFFFF,:F::FFFFFFFFFFFFFFFFFFFF:FFFFFFFFFFFF  
:F

@A00721:190:HGJW7DSXY:4:2211:8142:13714\_1:N:0:TCTGCAAG+GCTGCACT  
CTAAGAGTCTTTATGATTCAAAACCTATCGTTGTCTGACCTTACAAGTTGAGGAGACTTTACAGCGG  
CTTATTGTCGCGCAGTTTCCAGAATTGCGGTTGAAGTTCACCCATTCTATCTTGAATGCTCACGCCGT  
CGC

+

FFFFFFFFFFFFFFFFFFFFFFFFFFFFFFFFFFFFFFFFFFFFFFFFFFFFFFFFFFFFFFFFFFFFFFFF  
FFFFFFFFFFFFFFFFFFFFFFFFFFFFFFFFFFFFFFFFFFFFFFFFFFFFFFFFFFFFFFFFFFFFFFFF  
FFF

@A00721:190:HGJW7DSXY:4:1446:2401:26819\_1:N:0:TCTGCAAG+GCTGCACT  
GAGGCGATATTCGTTTTCATATCCAAACTCCTTGAATGGAGTACATATTTGCAACCCTATTCTTGAT  
GTGAAAGATGCATCGAGGTATACGTCTAGGAACATTGATTGGGAACGTACCTACTCACGAGACGTCAT  
GAA

+

FFFFFFFFFFFFFFFFFFFFFFFFFFFFFFFFFFFFFFFFFFFFFFFFFFFFFFFFFFFFFFFFFFFFFFFF  
FFFFFFFFFFFFFFFFFFFFFFFFFFFFFFFFFFFFFFFFFFFFFFFFFFFFFFFFFFFFFFFFFFFFFFFF  
FFF

@A00721:190:HGJW7DSXY:4:1204:14859:25222\_2:N:0:TCTGCAAG+GCTGCACT  
TCGTTCTGTTACAAGAACGCTTTGGATTGTGACCATAAAGCCTCAGTTGCGATAGCTGTAGAGGTATA

CGATATCTCTCTTGATGATGTAGCCACTATAATGCTTAAGAGAGAGAT  
+  
FFFF:FFFF:FFFF:FFFFFFFFFFFFFFFFFFFFFFFFFFFFFFFF:F:FFFFFFFFFFFF:FF:FFFF  
:FFFFFFFFFFFFFFFF:FFFFFFFF:FFFFFFFFFFFF,FFFFFFFFFFFFFFFF  
@A00721:190:HGJW7DSXY:4:1416:8558:13839\_2:N:0:TCTGCAAG+GCTGCACT  
CATTTTCGTCTTAGTTTGTCCCGGCGAATTATTGGACACGATGAAAAATGACATACCCGTTCTGACCT  
TGGTATCGTTATCCGTCATGGAGATGATGGCGCATCACTTGATTACTA  
+  
FFFFFFFFFFFFFFFFFFFF:FFF:FF:FFFFFFFF:FFFFFFFFFFFFFFFF:FFFFFFFFFFFF:FFFFFFFF  
FFFFFFFF:FFFFFFFFFFFFFFFF:FFFFFFFFFFFFFFFF:F:FFFFFFFF  
@A00721:190:HGJW7DSXY:4:2516:8703:28087\_1:N:0:TCTGCAAG+GCTGCACT  
AATGAGTTCCGAATAACTCGTAATAAATCTTCTCTAGTGGACAATTCAGAATACCTATTTCCGTACC  
AAGAGCCACTGCCAATCTCATCGCTATACGCATACCTGATTGGAAGAAGCGAGGTTCTGTTCTCAATA  
AAA  
+  
FFFFFFFFFFFFFFFFFFFF:FFFFFFFFFFFFFFFFFFFFFFFFFFFFFFFFFFFFFFFFFFFFFFFFFFFFF  
FFFFFFFFFFFFFFFFFFFFFFFFFFFFFFFFFFFFFFFFFFFFFFFFFFFFFFFFFFFFFFFF:FFFFFFFFFF  
FFF  
@A00721:190:HGJW7DSXY:4:2519:10574:36025\_2:N:0:TCTGCAAG+GCTGCACT  
TTTCTTCATAAGGGCTATTAGTACGTCATGGGGATCACTTCTCGGTCAATGACAAAACCTTCGAAT  
ATGTTACGACATGGCTTCGTAACAACAGTGCGAGGATTGTCATCTCGG  
+  
FFFFFFFFFFFFFFFFFFFFFFFFFFFFFFFFFFFFFFFFFFFFFFFFFFFFFFFFFFFFFFFFFFFFFFFFFFFF  
FFFFFFFFFFFFFFFFFFFFFFFFFFFFFFFFFFFFFFFF:FFFFFFFFFFFFFFFF:F  
@A00721:190:HGJW7DSXY:4:1206:6723:22435\_2:N:0:TCTGCAAG+GCTGCACT  
ATAGATACGAGATACCTAGAGAAGGTCGCAGCGATCTTACTCGTTATCGGAGCTAAGAAGAAGACTTT  
GGGTACACGTTATGCTCGCAAACCTTAACGTTAGTACCGGAGGTGATCT  
+  
FFFFFFFFFFFFFFFFFFFFFFFFFFFFFFFFFFFFFFFFFFFFFFFFFFFFFFFFFFFFFFFFFFFFFFFFFFFF  
FFFF,FFFFFFFFFFFFFFFF:FFFFFFFF:FFFF:FFFFFFFFFFFF  
@A00721:190:HGJW7DSXY:4:1459:8992:30843\_1:N:0:TCTGCAAG+GCTGCACT  
AAAAGATTACAGGACGCCTACGGTGACTTTATGGACAAGATGCAAGTTCTTGGGAAATACTTGTTTCCC  
TTTTTAGGTTTAGTAGGTGATCTTGACGTCGATTCTTTGTATAGGGAGTGAGAGAAGACAACGAATCT  
TGA  
+  
FFFFFFFFFFFFFFFF,FFFFFFFF,F:FFFFFFFFFFFFFFFF:F:,FFFFFF:FFFFFFFFFFFFFF:,F  
F:FFFF:FFFFFFFFFFFFFFFF:FFFF:FFFF:FFFFFFFFFFFF:FFFF:F:F:FF:FFFFFFFF:  
F:F  
@A00721:190:HGJW7DSXY:4:2410:28772:30185\_1:N:0:TCTGCAAG+GCTGCACT  
ATCTTTTGAGATTGAGAAGATTGAAGAACACGTCAAGAAGTCGCTCGGCGTTGTTCTTGAAAACCAAG  
TTAAGAAGGAGGCTGATCATGGAGTCTTTGTACCTTCTGTCAAACCTTCGAGGTTACGCTACGAGAGGT  
GAT  
+  
FFFFFFFFFFFFFFFFFFFFFFFFFFFFFFFFFFFFFFFFFFFFFFFFFFFFFFFFFFFFFFFFFFFFFFFFFFFF  
FFFFFFFF:FFFFFFFFFFFFFFFFFFFFFFFFFFFF,FFFFFFFFFFFFFFFF:FFFFFFFFFFFFFFFF  
FFF  
@A00721:190:HGJW7DSXY:4:1273:21224:9345\_2:N:0:TCTGCAAG+GCTGCACT  
TTGAAGGCTGGCTCTAAGGGAGACTCCTTCTTTTGAATGTTGTAAAGAATTGGGTTGAGAAGTGTGC  
TTTACAAGGAGTTAGACTCTTCTCAAGTTTTTAGATCTTCTTGATAA  
+  
FFFFFFFFFFFFFFFFFFFFFFFFFFFFFFFFFFFF:FFFFFFFFFFFFFFFFFFFFFFFFFFFFFFFFFFFF  
FFFFFFFFFFFFFFFFFFFFFFFFFFFFFFFFFFFFFFFFFFFFFFFFFFFFFFFFFFFF  
@A00721:190:HGJW7DSXY:4:2440:7003:8171\_2:N:0:TCTGCAAG+GCTGCACT  
CATAACTCTTTTTCAAAAATGCGGATGGGTCTACTGATGTTTTCTACAGAGTGCAGTCGTTTCAAC

ACTTATCACCACCTTTTGAAGGAAAATAATTGGTGATGAAAATACGTA  
+  
FFFFFFFFFFFFFFFFFFFFFFFFFFFFFFFFFFFFFFFFFFFFFFFFFFFFFFFFFFFFFFFFFFFFFFFF:FF:  
FF,:FF:FFF,,FFF,FFF:FFFFFFFFFFFF:FFFF:FFFFFF,,FF  
@A00721:190:HGJW7DSXY:4:1505:19804:27931\_2:N:0:TCTGCAAG+GCTGCACT  
TTGGATGTTGTGCAAACTATCAGGTTCTTGTCACGATTCTTAAAAGAAGTTTATTAAACTTCAGAG  
TCTCTTGGAAGTCCAGGTAGCTAATGTTCTTGCAATAGCCACAGACTT  
+  
FFFFFFFFFFFFFFFFFFFFFFFFFFFFFFFFFFFFFFFFFFFFFFFFFFFFFFFFFFFFFFFFFFFFFFFF  
FFFFFFFF:FFFF:FFFFFFFFFFFFFFFFFFFFFFFFFFFFFFFFFFFFFFFFFFFFFFFF:  
@A00721:190:HGJW7DSXY:4:1118:24026:12915\_1:N:0:TCTGCAAG+GCTGCACT  
TCTGTTGGTAGAGGAGTTGAGAGAATTACTCAGATTCAATCTGGCATCACTGAACGTCTACAACGAGT  
TAGGGAGTGGCTAGGTTTTAAAAGATCCTTGCACAAGCAATACCTTCCACTGAGTTCATCACCCAGA  
GTT  
+  
FFFFFFFFFFFFFFFFFFFFFFFFFFFFFFFFFFFFFFFFFFFFFFFFFFFFFFFFFFFFFFFFFFFFFFFF  
FFFFFFFFFFFFFFFFFFFFFFFFFFFFFFFFFFFFFFFFFFFFFFFFFFFFFFFFFFFFFFFFFFFFFFFF  
FFF  
@A00721:190:HGJW7DSXY:4:1363:6668:25942\_1:N:0:TCTGCAAG+GCTGCACT  
GTTTTTGGTATAAATCCTGATGGCTCAGTACAGGGAGGAGGTAATAGTTATAAACCTTCTTTTATCA  
TTGCAACAGGACTTTGAGAAGACTGTTGAAATGGACAAAATCTGGGATCATAGGTATGTGTCACGCTA  
CAC  
+  
FFFFFFFFFFFFFFFFFFFFFFFFFFFFFFFFFFFFFFFFFFFFFFFFFFFFFFFFFFFFFFFFFFFFFFFF  
FFFFFFFFFFFF:FFFFFFFFFFFFFFFFFFFFFFFFFFFFFFFFFFFFFFFFFFFFFFFFFFFFFFFF  
FFFFFFFFFFFF:FFFFFFFFFFFFFFFFFFFFFFFFFFFFFFFFFFFFFFFFFFFFFFFFFFFFFFFF  
FFF  
@A00721:190:HGJW7DSXY:4:1421:1768:8281\_2:N:0:TCTGCAAG+GCTGCACT  
TCGCCATATCAGATTAGAGACATGCCAGTTAGAGTTCTTCTAACCAGGACTGATGGTGAGATTCTTTT  
ACCTTTTGAGGTCCAGGAACCTTTACTCCTAGTGTCTTTTCTAGAGT  
+  
FFFFFFFFFFFFFFF:FFFFFFFFFFFFFFFFFFFFFFFFFFFFFFFFFFFFFFFFFFFFFFFFFFFFFFFF  
FFFFFFFFFFFFFFFFFFFFFFFFFFFFFFFFFFFF:FFFFFFFFFFFFFFFFFFFFFFFFFFFFFFFF  
@A00721:190:HGJW7DSXY:4:2418:19352:34287\_1:N:0:TCTGCAAG+GCTGCACT  
TCAATAACACTCTATTGAATCCCTTTTCCACGATGAAAGCTCTGTATGAGGTGCTCCATGCAAATTTA  
CAGTTCCTCTTTGGTGATATCGCCTCTGTCTTTCTCCTTTAATCGTGAGGTACGAGAGTTTCGTAC  
TTG  
+  
FFFFFFFFFFFFF:FFFFFFFFFFFFFFFFFFFFFFFFFFFFFFFFFFFFFFFFFFFFFFFFFFFFFFFF  
FFFFFFFFFFFFFFFFFFFFFFFFFFFFFFFFFFFF,F,FFFFFFFFFFFFFFFFFFFFFFFFFFFF  
FFFFFFFFFFFFFFFFFFFFFFFFFFFFFFFFFFFFFFFFFFFFFFFFFFFFFFFFFFFFFFFFFFFFFFFF  
FFF  
@A00721:190:HGJW7DSXY:4:2130:15356:8954\_1:N:0:TCTGCAAG+GCTGCACT  
AGAGAGAGAGGTTAATCAGAATTTGAGTGATAACGATTTAGTACTGGGAAATGGTGGTAGTCAGTTTA  
CTACTTTTCTTTCCCTCCCCTTTTTCGATTGGATTGACGGGTCTTCGTCTCACGACTAATTTGATA  
AGG  
+  
FFFFFFFFFFFF,F,FFFFFFF:FFFFFFFFFFFF:::FFFF,:F:FFFFFFFFFFFFFFFFFFFFFFFF  
FFFFFFFF:F:,FFFFFFFFF::FFFFFFFFFFFFFFFFFFFFFFFFFFFFFFFFFFFFFFFFFFFF  
FFF  
@A00721:190:HGJW7DSXY:4:1478:11930:28197\_1:N:0:TCTGCAAG+GCTGCACT  
ATGTTTTCGTTTTCAGCTGGATGGATCTTTTGATGGTATGTTTCACATTGCGTGATCACTTCCCGTGA  
CTTGGAAGAGATTAAACATAAAATCCAGCGATTCTATTATGTCGCTAAAGCCTGTCCAGTTGTGAT  
GAT  
+  
FFFFFFFFFFFFFFFFFFFFFFFFFFFFF:FFF:FFFFFFFF:FFFFFFFFFFFFFFFFFFFFFFFF:FFFFFFFF



@A00721:190:HGJW7DSXY:4:2532:22299:8359\_1:N:0:TCTGCAAG+GCTGCACT  
TAAGAGTAAGGTTAAATGTGAAGATGCTCAGACTATTTCATGAAGTTCAAGGTAATACTTACCAGCACG  
TTCGGCTGGTTAGAATTAACCTCAAGATGACCCTGTTTTTGCATCACAAACACATATTACCGTTGCT  
CTA

+

FFFFFFFF:F:FFFF:FFFFFFFFFFFFFFFFFFFFFFFFFFFFFFFFFFFFFFFFFFFFFFFFFFFFFFFF  
FFFFFFFFFFFFFFFFFFFFFFFFFFFFFFFFFFFFFFFFFFFFFFFFFFFFFFFFFFFFFFFFFFFFFFFF  
FFF

@A00721:190:HGJW7DSXY:4:1505:12500:14685\_2:N:0:TCTGCAAG+GCTGCACT  
TCAATGTAAAGTTAAACGATGCTACTTGTGAGAGGATCAATCACAGTAAGGAACTGTCACGTTTAGCA  
CGGGAGGTTGCAGATTCAACCCCTTATATCGAGGCTATCGAGGACGAT

+

FFFFFFFFFFFFFFFFFFFFFFFFFFFFFFFFFFFFFFFFFFFFFFFFFFFFFFFFFFFFFFFFFFFFFFFF  
FFFF:FFFF:FFFFFFFFFFFFFF,FFFFFFFFFFFFFFFFFFFFFFFFFFFFFFFF

@A00721:190:HGJW7DSXY:4:1675:13729:27649\_2:N:0:TCTGCAAG+GCTGCACT  
GACGACAAGCCTCAAGAGGGTAGAGGACCACCTGGATCTTCTACTGTCTCTGCCTTCCAAGATTTCTT  
AGAAGAGGTTATTCCTGGAACCACCTTAACGTCACCTCGGTAATCTTTC

+

FFFFFFFFFFFFFFFF:FFFFFFFFFFFFFFFFFFFFFFFFFFFFFFFFFFFFFFFFFFFFFFFFFFFFFFFF  
FFFFFFFF:FFFFFFFFFFFFFFFFFFFFFFFFFFFFFFFFFFFFFFFFFFFFFFFFFFFFFFFF

@A00721:190:HGJW7DSXY:4:2219:9778:32737\_1:N:0:TCTGCAAG+GCTGCACT  
GATCAAGGCTAATACCTTTATAGGTAAGAAGCCCCTTGAGCCGCGTAGTCAGCGCGTTTAGCTGTATC  
ATCAGTCAGAGTATACCCGATAGGGTACCGAGTCTCCAAGAGAATATTTATTCTTATGAGGCTCGAAA  
CTT

+

FFFFFFFFFFFFFFFFFFFFFFFFFFFFFFFFFFFFFFFFFFFFFFFFFFFFFFFFFFFFFFFFFFFFFFFF  
FFFFFFFFFFFFFFFFFFFFFFFFFFFFFFFFFFFFFFFFFFFFFFFFFFFFFFFFFFFFFFFFFFFFFFFF  
FFF

@A00721:190:HGJW7DSXY:4:2629:26377:26819\_1:N:0:TCTGCAAG+GCTGCACT  
TTCCGATCTGTTTTGATCAGTCTAAGTTGGATAAAGTTATAGGAGACTCAGTTAACCTGAGAGCTCCT  
CAATTGATAGATTGGGTCAACAATAGGGACGCTAGTATACTTCGTAAAGTCGACAGCGAAATGGTCAA  
TAT

+

FFFFFFF:FFFFFFFFF:FF:F:F:FFFFFFFFFFFFFFFF:.:FFFFFFFFFFFFFFFFFFFFFFFF  
FFFFFFFFF,FFFFFFFFFFFFFFFFFFFFFFFFFFFFFFFFFFFFFFFFFFFFFFFFFFFFFFFF  
FFF

@A00721:190:HGJW7DSXY:4:2271:9055:33959\_1:N:0:TCTGCAAG+GCTGCACT  
GGTTCTTGTGAGGAGAGTCAAACAGTGTCTTTTACCCAACATTTTTATGTATACAGAGATGACCAGTG  
ACGATTTCTCCCGAAGCTCTTCTCTCTTAGGAGGTCATGATGACTACTATAAGGGTGAAATCGAT  
TTT

+

FFFFFFFFFFFFFFFFFFFFFFFFFFFFFFFFFFFFFFFFFFFFFFFFFFFFFFFFFFFFFFFFFFFFFFFF  
FFFFFFFFFFFFFFFFFFFFFFFFFFFFFFFFFFFFFFFFFFFFFFFFFFFFFFFFFFFFFFFFFFFFFFFF  
FFF

@A00721:190:HGJW7DSXY:4:1139:11116:13228\_2:N:0:TCTGCAAG+GCTGCACT  
CCAGGAGTATCCATAACGATTTGTCAATTTACCACCTTTGCTCAACGACGAAGTGGAACGGCCAACACT  
TTCTTTGGTAATTGTATGATCACTTTGATGATTTTATCACTTTATTAT

+

FFFFFFFFFFFFFFFFFFFFFFFFFFFFFFFFFFFFFFFFFFFFFFFFFFFFFFFFFFFFFFFFFFFFFFF:FFFFFFFFFFFF  
,FFFFFFFFFFFFFFFFFFFFFFFFFFFFFFFFFFFFFFFFFFFFFFFF

@A00721:190:HGJW7DSXY:4:2526:6587:30968\_2:N:0:TCTGCAAG+GCTGCACT  
CTGTTTTCAAAGACTCCAATAACTGATCATTCTGATCATATGATTTTGGACAATGGTTTCGAAGCGAA  
ATTTTTGAGGGATAAACCAGCGTACTTCTGCTCGCGATTTATTCTTTT

+

FFFFFFFFFFFFFFFFFFFFFFFFFFFFFFFFFFFFFFFFFFFFFFFFFFFFFFFFFFFFFFFFFFFFFFFF  
FFFFFFFFFFFFFFFFFFFFFFFFFFFFFFFFFFFFFFFFFFFFFFFFFFFFFFFFFFFFFFFF  
@A00721:190:HGJW7DSXY:4:1177:28302:11898\_1:N:0:TCTGCAAG+GCTGCACT  
CGATATTCGATTGAGGGTCGTTATACCTATTCGGCTATCTGTGCTTTGAATTGTATAAGATCAAATTT  
TAAACGATTCCGAGAGGTTTATCCTGATGTGGAGGGAGTTCTTGAAGCATCCCGACCTTTCCTTGTGA  
AAA  
+  
FFFFFFFFFFFFFFFFFFFFFFFFFFFFFFFFFFFFFFFFFFFFFFFFFFFFFFFFFFFFFFFFFFFFFFFF  
FFF:FFF:FFFFFFFFFFFFFFFFFFFFFFFFFFFFFFFFFFFFFFFFFFFFFFFFFFFFFFFFFFFFFFFF  
FFF  
@A00721:190:HGJW7DSXY:4:2564:17345:5572\_1:N:0:TCTGCAAG+GCTGCACT  
TCCGATCTCAGTAATCCTGATTCTACTACGGATTCATGGACCTTCCATCCTGTACCTCTTCTGGAGAG  
ACGTATCTCAAAGATCGACTTCGAGACAGGTGATATTGTTGAGCGAGAGCGACCAAGATCTAAATTCG  
GTA  
+  
FFFFFFFFFF:FFFFFFFFFFFFFFFFFFFFFFFFFFFFFFFFFFFFFFFFFFFFFFFFFFFFFFFFFFFFF:FFFFFF  
FFFFFFFFFFFFFFFFFFFFFFFFFFFFFFFFFFFFFFFFFFFFFFFFFFFFFFFFFFFFFFFFFFFFFFFF  
FFF  
@A00721:190:HGJW7DSXY:4:2447:16080:28056\_2:N:0:TCTGCAAG+GCTGCACT  
TCTTTCATTTTAAATGACGATCATTAAAGACTCTCTTCTTCTTTGTTTCCTTCTTGGCACTGATTTTT  
TCCTCATCAGCTTGTGTTTTACCTAATCTGTGTTTTTACGATAACAAC  
+  
,FFFFFFFF,FFF:FFFFFF,FF,F,FFFFFFFF,FFFFFF:FFFFFFFFFFFF,,:FFF:FFF,FF  
FFFFFFFF,FFFF:FFF,FFF:FFFF,FF,,FFFFFF,FFFF:FFF  
@A00721:190:HGJW7DSXY:4:1315:1597:21104\_2:N:0:TCTGCAAG+GCTGCACT  
TCTTCCGAAAGGCGAACTTTGGGAATTTGAAGCTCAGGGTGAAGCACAACGTTTGACCGTGACGAACT  
GTGGTGTCTTGATCTACGTTACGGATATACTCTCCTTGAGTTCACCT  
+  
FFFFFFFFFFFFFF:F,FFFF:F::FFF:FFFFFFFFFFFF:FFFFFFFFFFFFFFFFFFFFFFFFFFFF  
FF:F:F:FF:FFFFFFFFFFFFFFFF,F:FFFFFFFF:FFFFFFFF  
@A00721:190:HGJW7DSXY:4:1518:32253:9220\_2:N:0:TCTGCAAG+GCTGCACT  
AATCACTCATTTTAGTGAGATTATTA AAAACGCACTAAACGTCTTCGACAACAGCAGGGGTTTTCGA  
ATAGTGATAGCCACCCGCCTTACAGAGGGGCAGCAGCATGACCATAAT  
+  
FFFFFFFFFFFFFFFFFFFFFFFFFFFFFFFFFFFFFFFFFFFFFFFFFFFFFFFFFFFFFFFFFFFFFFFF  
FFFFFFFFFFFF:FFFFFFFFFFFFFFFFFFFFFFFFFFFFFFFFFFFF:FFFFFF  
@A00721:190:HGJW7DSXY:4:2147:4010:25441\_1:N:0:TCTGCAAG+GCTGCACT  
CACCTTTTCTACTGTCTGTCTCGCCTCTTCGAATGAAGTTTAAATGCTTAACAACAATGATAGTGAAT  
TTATACCTACAATCATTGGTTTTTCTAATAATGATGACACTATTGTTTATGGATATGATGCTATTACT  
CAT  
+  
FFFFFFFFFFFF:FFFFFFFFFFFF:FFFFFFFFFFFFFFFFFFFFFFFFFFFFFFFFFFFFFFFFFFFF,FFFFFFFFFFFF  
FFFFFFFFFFFFFFFFFFFFFFFFFFFFFFFFFFFF:FFFFFFFFFFFF:FFFFFFFFFFFFFFFFFFFF  
F:F  
@A00721:190:HGJW7DSXY:4:1336:6894:19664\_2:N:0:TCTGCAAG+GCTGCACT  
TACAAGGACCTTAAGCGATGGATCGGGTTAATTCTAAACATTACCCGAAAGACGTGCTAAATTTAA  
ACCATTGTACGATGTCGTCTGTCTCGGCGATCACTTTTCACTAAGAAT  
+  
FFFFFFFFFFFFFFFFFFFFFFFFFFFFFFFFFFFFFFFFFFFFFFFFFFFFFFFFFFFFFFFFFFFFFFFF  
FFFFFFFFFFFFFFFFFFFFFFFFFFFFFFFFFFFFFFFFFFFFFFFFFFFFFFFFFFFFFFFF  
@A00721:190:HGJW7DSXY:4:2615:18349:29543\_2:N:0:TCTGCAAG+GCTGCACT  
TTTATCTCTTTGGTTGTTAGGGATTTTGAGAGAGTGAAAGGCTTCAATTGTAGTGGTTTGGTCGTTTC  
AGTACCCAGTCAGTATACCTCTACGCAAAGATATTTTCATGAAAACCTAC  
+

+

©

+

9

+

④

+

④

+

Q

+

①

+

④

+

[illegible]



@A00721:190:HGJW7DSXY:4:2646:12201:4053\_2:N:0:TCTGCAAG+GCTGCACT  
GCTGACTTTCGTCAATATGATTTGATCTGGTTGCTCAATTCTAAGCGTGTTCCGCTTAGTGCGAGGCC  
TCTCTTCTACGAGTATTGCTATTTATACGGTTACGAGAAGAAGGTTTCG

@A00721:190:HGJW7DSXY:4:2204:12463:27305\_1:N:0:TCTGCAAG+GCTGCACT  
CTTGATAAAGAACTTCATGAATTTTCAGAGGATGAAAAATTTTCTTCCTTGGATTTTAATATAAAGAA  
TCTTTACCAGGACTCCTACTACAGGAGGCAGTCTTCTGATCGTAAGAAGTTTATAAGGAACATATCCA  
TTT

@A00721:190:HGJW7DSXY:4:2236:7491:30561\_2:N:0:TCTGCAAG+GCTGCACT  
AACTCTAAGTGGTAATACTGTCTCTCCAAGCTTACCTGTATCTTCAATGAAATTGGACTCTTCGATAG  
GGGACATTTTATCGTGGGCTTTCCGTAAAGGAAGATCTGTTATCGACG

@A00721:190:HGJW7DSXY:4:1653:24740:6042\_1:N:0:TCTGCAAG+GCTGCACT  
GTCTTTATTCTATTATTGATTTTTATGAGATTGATACGTTAACAGAAGATGATGTTAGAGTAGAATTC  
CTGAAGAGTCCTTCCGTAACCAACTTCTTGACAATTTTCTTCAATCCTTCGATAATAGTTAAATCTAG  
G

@A00721:190:HGJW7DSXY:4:2528:1859:2644\_2:N:0:TCTGCAAG+GCTGCACT  
AATTAAGAAATAATCCTACATTGACTGATTATCTAAAGATTGAAGGAAAATTTTATCCTCGTTTAACT  
TACTTAGACTTTTCCTACGATACAAATGATACCTGCTAATTTACGTTTG

@A00721:190:HGJW7DSXY:4:2549:25400:25191\_2:N:0:TCTGCAAG+GCTGCACT  
CTCAGGAGTCCCGGCATTTGATAATAATGACGAGACTTTCGTCATAATCGCTGCATATTACGGATTAC  
ACGGTACCAGCGCATCTCGTGTCGAGCCTCGACCCGATTATATGGTAT

@A00721:190:HGJW7DSXY:4:2115:15763:28635\_2:N:0:TCTGCAAG+GCTGCACT  
AACTAACTATGTTATGTTCTCTGATCATTTTGACAATCTCTTCTTATAATAAAATAAATAAATATT  
ACTAATTGCAAATAGTGGAAAGGCTCCAGTCAACACTAGTTCGAGTGC

@A00721:190:HGJW7DSXY:4:2149:18539:14465\_1:N:0:TCTGCAAG+GCTGCACT  
AATAGGTGAAGGGATAGTTTTTACCTCGACCAACATTAAGGCGGCGGCGACTAATCTTAAAGCTTCAC  
CCAAAATGAAGGACACTTCGAAACTGAATAATGATGCACTACAAACAAGTATCGCTAATCATCTGAAA  
AAG

@A00721:190:HGJW7DSXY:4:2158:20961:23985\_2:N:0:TCTGCAAG+GCTGCACT  
AGAGGATATTCGCCATTGTGGTACGAATTGGTCCAACATTTACCACCAAATTCTTTTGATACAACTCT  
AGCCTTCAAGTGGGGTATGCCTGCGGAATACGCTTGCTATTCACCAGA

+

FFFFFFFFFFFFFFFFFFFFFFFFFFFFFFFFFFFFFFFFFFFFFFFFFFFFFFFFFFFFFFFFFFFFFFFF  
FFFFFFFFFFFFFFFFFFFFFFFFFFFFFFFFFFFFFFFFFFFFFFFFFFFFFFFFFFFFFFFF

@A00721:190:HGJW7DSXY:4:2505:1145:30499\_1:N:0:TCTGCAAG+GCTGCACT  
CCCGTTGATGCTATGTCAGAAGAAGCTATTCAAGCTTGTCTTTAAAGACTGCAGAGGCTGTCAAACA  
AGCCCAGACTCAAGGAGTCCAATCAAAGGTTTTGAATTTAGCTCAACTGGGGAGACGTGCTTAAATGG  
GTG

+

FFFF:FFFFFFFFFFFFFFFFFFFFFFFFFFFFFFFFFFFFFFFFFFFFFFFFFFFFFFFFFFFFFFFF  
FFFFFFFFFFFFFFFFFFFFFFFFFFFFFFFFFFFFFFFFFFFFFFFFFFFFFFFFFFFFFFFFFFFFFFFF  
FFF

@A00721:190:HGJW7DSXY:4:1374:16884:8469\_2:N:0:TCTGCAAG+GCTGCACT  
TAGATAGTGGGATAATAGTTCTACCGATACGTAGTGAACGCGTTTCGTAGAACCAAGTACTTTCCGTCT  
GAAGAGTTTAGAGCTGCTATTGATTATGTAACCGATAGGAGTTGTATA

+

FFFFF,FFFFFFFF:FFFFFFFFFFFFFFFFFFFFFFFFFFFFFFFFFFFFFFFFFFFFFFFFFFFFF  
FFFFFFFFFFFF,FFFFFFFFFFFF:FF:FF,FFFFFF:FFFFFF:FF

@A00721:190:HGJW7DSXY:4:1401:19262:36198\_1:N:0:TCTGCAAG+GCTGCACT  
GATAATCCTTTAAGGACTATGTTGACTGACGAAGATTTCCACAGATTTGTCTACGTTGCAGATCGC  
CACTCCAAACACTATATACATTATAAAAATATAAAAATAAGGGAGTCATAACTTTTGTTACCAAATTCT  
TGG

+

FFFFFFFFFFFFFFFFFFFFFFFFFFFFFFFFFFFFFFFFFFFFFFFFFFFF:FF:FFFFFFFFFFFFFFFFFFFFF  
FFFFFFFFF:FFFFFFF:FFFFFFFFFFFFFFFFFFFFFFFFFFFFFFFFFFFFFFFFFFFFFFFFFFFF  
FFF

@A00721:190:HGJW7DSXY:4:1453:15845:5259\_2:N:0:TCTGCAAG+GCTGCACT  
ATTTTATTAATCATTACTTTAACGATCTCTCGTCAATTAAGTCTGTACTTGATCTACGTCGTTTAACT  
GTCGGAACAACCTTTACTTAGAATGACTCTATCTTTTCAGACACTTCT

+

FFFFFFFFFFFFFFFFFFFF:FFFFFFF:FFFFFFFFFFFFFFFFFFFFFFFFFFFFFFFFFFFFFFFFFFFF,FFFFF  
FFFFFFFFFFFFFFFFFFFF:FFFFFFF:FFFFFFFFFFFFFFFFFFFF,FFFFF:FFF

@A00721:190:HGJW7DSXY:4:2330:28185:36808\_2:N:0:TCTGCAAG+GCTGCACT  
ACTCACTATCGTTTTCTGCTTTTTCTTAGCTAATAGATTAATAAAGGATGAGTACGAAAACCAACTCT  
TCGTTACGAGACCTGATGGTAGAATAGATTTAGTCTCTACACCCATCT

+

FFFFFFFFFFFFFFFFFFFFFFFFFFFFFFFFFFFFFFFFFFFF:FFFFFFFFF:FFFFFFFFFFFFFFFFFFFFF  
FFFFFFFFFFFFFFFFFFFF:FFFFFFFFFFFFFFFFFFFFFFFFFFFFFFFFFFFFFFFFFFFF

@A00721:190:HGJW7DSXY:4:2569:30779:4570\_1:N:0:TCTGCAAG+GCTGCACT  
TGTGCTATTCCGATCTCCTGAACCTTAATACACGAATAGATCATCCGAAAACGACTCGAAACCGAGACG  
CCGTAGATCAAAGTCCCTTCTAACTTTAGATTATGAATCCTGCCTTTACTCATTTTATAGCAGTTA

+

F:,::,F:F,::,F:,F,::F:,F:F:,F,::F:,F,F:F,F,FFFFFFFFFFFFFFFFFFFFF  
FFFFFFFFF:FFFFFFFFFFFFFFFFFFFFFFFFFFFFFFFFFFFFFFFFFFFFFFFFFFFFFFFFFFFFF

@A00721:190:HGJW7DSXY:4:2204:16034:31391\_2:N:0:TCTGCAAG+GCTGCACT  
TGCTTTTCGATAGTGATTGTTATCAATTTAAATACATTACTGTTTCAAATCATCTTTACTCACAGACT  
CCGAAAATGGTTTCAAATGAGGTCAAAGCTCTATTTATTAAACGAACT

+

FFFFFFFFFFFFFFFFFFFF:FFFFFFFFFFFFFFFFFFFFFFFFFFFFFFFFFFFFFFFFFFFF:FFFFFFFFFFFFFFFFFFFFF  
FFFFFFFFFFFFFFFFFFFFFFFFFFFFFFFFFFFFFFFFFFFFFFFFFFFFFFFFFFFFF:FFFFF

@A00721:190:HGJW7DSXY:4:2324:5674:34679\_1:N:0:TCTGCAAG+GCTGCACT  
GGAACCTCAATTCCTTCGATGTTTATATTTTCTATAAGGGAAAATAGCAATAATCAAATTCGACAA

ATTTTAGAACTTTATTTTCAGAACTCTCTCCGATCACCTTGGTGTGATCTCCCGGAGGATCTTTTCAAT  
AAG

+

FFFFFFFFF,FFFFFFFFFFFFFFFFFFFFFFFFFFFFFFFFFFFFFFFFFFFFFFFFFFFFFFFF  
FFFFFFFFFFFFFFFFFFFFFFFFFFFFFFFFFFFFFFFFFFFFFFFFFFFFFFFFFFFFFFFFFFFF  
FFF

@A00721:190:HGJW7DSXY:4:2236:15691:34554\_2:N:0:TCTGCAAG+GCTGCACT  
TAAATAGTGATATTCAGCGTATACTTGAATACTTTATCAAAGATTTGGCTTGGTCTATTTACGCAAA  
AAGTTGGAAGAGGTCTATGATATTTATTTTACTTATACTTTAAATAGC

+

FFFFFFFFFFFFFFFFFFFFFFFFFFFFFFFFFFFFFFFFFFFFFFFFFFFFFFFFFFFFFFFFFFFF  
FFFFFFFFFFFFFFFFFFFFFFFFFFFFFFFFFFFFFFFFFFFFFFFFFFFFFFFFFFFFFFFFFFFF  
FFFF:FFFF:

@A00721:190:HGJW7DSXY:4:1241:12753:32534\_1:N:0:TCTGCAAG+GCTGCACT  
TCTTGACTGTTGATAATATTACAATAGCTCTTCTCAGAAGATTAGAGAAGTAACCGGTGAACACGTC  
GGTAGCATTGATTTACTTTTACCGTTAGAACTGAAAAAGATTCTTTTCGAAAAGAAACCTATAAGTTA  
CA

+

F,FFFFFFFF:FFFFFFFFFFFFFFFFFFFFFFFFFFFFFFFFFFFFFFFFFFFFFFFFFFFFFFFF  
F:FFFFF:F:FFFFFFFFFFFFFFFFFFFFFFFFFFFFFFFFFFFFFFFFFFFFFFFFFFFFFFFFFFFF  
FF

@A00721:190:HGJW7DSXY:4:2666:22489:27665\_2:N:0:TCTGCAAG+GCTGCACT  
TAAAGAAATAAAAATACTTCAAGTACCTGAACCTTACATTTTAAATGGTATGGTATAATGTGTCTTAC  
AAATAGAACCTTCACTCTCGGTAATGAGAGTGTATTCCTTAATATTCT

+

FFFFFFFFFFFFFFFFFFFFFFFFFFFFFFFFFFFFFFFFFFFFFFFFFFFFFFFFFFFFFFFFFFFF  
,FFFFFFFFFFFFFFFFFFFFFFFFFFFFFFFFFFFFFFFFFFFFFFFFFFFFFFFFFFFFFFFFFFFF  
,FFFFFFFF,FFFFFFF

@A00721:190:HGJW7DSXY:4:1330:18530:10097\_1:N:0:TCTGCAAG+GCTGCACT  
TTACTAGGATTTATCACACTCCTAAATTTGATAGCAATTTATGTTTTAAATGCTAGGAAAATTTTAGA  
AAAACCTCATTGTATAGTTCAAGGAGTACTTAATTCAATAGCTTTAGTATTATTTACTATCGCCTTTA  
TTG

+

FFFFFFF:FFFFFFFFFFFF:FFFFFFFFFFFFFFFFFFFFFFFFFFFFFFFFFFFFFFFFFFFFF  
FFFFFFFFFFFFFFFFFFFFFFFFFFFFFFFFFFFFFFFFFFFFFFFFFFFFFFFFFFFFFFFFFFFFF  
FFF

@A00721:190:HGJW7DSXY:4:2121:19036:19774\_1:N:0:TCTGCAAG+GCTGCACT  
TTAATTGCTTACACAAAAGTGACGCGCAAGGAATCTTAATTGATTGAAGCTAGGCGTTGGGGAGAAT  
GAACTGCCGCTTCCCGGAAGAAACGATCTATTTACAGAGTATTTAGAGTAGTCCAAAGTTTGTATAAA  
TTT

+

FFFFFFFFFFFFFFFFFFFFFFFFFFFFFFFFFFFFFFFFFFFFFFFFFFFFFFFFFFFFFFFFFFFF  
FFFFFFFFFFFFFFFFFFFFFFFFFFFFFFFFFFFFFFFFFFFFFFFFFFFFFFFFFFFFFFFFFFFFF  
FFF

@A00721:190:HGJW7DSXY:4:1347:7093:23109\_2:N:0:TCTGCAAG+GCTGCACT  
TGACCAATCATCGCTCCAACCTGGCACGCCAGACGTAGGGTCAAACCTACTACCGCCGGTCGGCAGATC  
GGCACCCTGGTCTCTACGTTCCAGGGACCCGCTGTGCAGAATAACCTT

+

FFFFFFFFFFFFFFFFFFFFFFFFFFFFFFFFFFFFFFFFFFFFFFFFFFFFFFFFFFFFFFFFFFFF  
FFFFFFFFFFFFFFFFFFFFFFFFFFFFFFFFFFFFFFFFFFFFFFFFFFFFFFFFFFFFFFFFFFFF

@A00721:190:HGJW7DSXY:4:2545:2736:14967\_1:N:0:TCTGCAAG+GCTGCACT  
GGACGACCACTCAAAGGAAACGGGCTGTTGCCAGAGGAAAGCAGCGACCACCGAGGTGCTCGTAAC  
ATTGACGGCAGTCCCGTCATCTCTGTGGAACTGAGGCAGTACCTCAGTCAAAAGTCACATTCACCAC  
TCC

+

FFFFFFFFFFFFFFFF:FFFFFFF:FF::F,:FFFFFFFF:F:FFFFF:FFFFFF:F:FFFFFF:FFFF

FFFFFFFFFFFF:FFFFFFFF:F:F:F:F:FFFF::FFFFFF,FFFFFFFFFFFFFFFFFFFFFFFFFFFF  
:FF

@A00721:190:HGJW7DSXY:4:1541:28031:6417\_2:N:0:TCTGCAAG+GCTGCACT  
GACTATACAGTTCGGCCATTTCAAGAGTGGTCAATACGTCGTGGGAGGTACTGAAGCCTTCCCCTCCG  
CTGGCACGAAGAACAACCTCCCAAGCCAATCAATAGTTCTTCTGACCAGA

+

FFFFFFFFFFFFFFFFFFFFFFFFFFFFFFFF:FFFFFFFFFFFFFFFFFFFFFFFF:FFFFFFFFFFFFFFFF:F  
FFFFFFFFFFFFFFFFFFFFFFFFFFFFFFFFFFFFFFFFFFFFFFFFFFFFFFFFFFFFFFFF

@A00721:190:HGJW7DSXY:4:2612:30581:25989\_1:N:0:TCTGCAAG+GCTGCACT  
GAGTTCAGACGTGTGCTCTTCCGATCTGGGAAATGTCCCCAAAAGTATAAGAATAAAGGGAAAGGTC  
CATCAGGACCTAAGAAGGGGAAATTACCCCTAATTCTGAAGGAAGATCTCCACCATCTGGGGTTGGG  
AA

+

FF,FF::F::FFF::F,FF,,FFFF:FFFFFFFF,F:FFFF,F:FFF,FFF:FFFFFFFF,  
FFFFFFFFFFFFFFFF,FF,FF,FFFFFFFF:FFFFFFFFFFFFFFFFFFFFFFFF:FFFFFFFF  
FF

@A00721:190:HGJW7DSXY:4:2321:31015:7952\_2:N:0:TCTGCAAG+GCTGCACT  
CACGGGCCAAAGAGGCCGCTGCTACGAAGTCGCTGAAGGCGCTTGGGTCTTAAGGGTAGCTGTAAA  
GTTGCGCCTGCCGACCCCATCTTTGAGACCAAGACTCTCTACAGTAGG

+

FFFFFFFFFFFFFFFFFFFFFFFFFFFFFFFFFFFFFFFFFFFFFFFFFFFFFFFF:FFF:F:FFFF,FFFF  
FFFFFFFFFFFFFFFFFFFFFFFF,FFFFFFFFFFFFFFFFFFFFFFFF

@A00721:190:HGJW7DSXY:4:1659:28022:7185\_2:N:0:TCTGCAAG+GCTGCACT  
CAAATCTGTTGAATTCGTCAGTACGAGGAGGAGGAGGACTTTTGGCTACTGGCGACAAAGTGA  
GCAGTCGCTGGGGAAAGAGAATTGCGTGGGTGAAGGCCGACGCTTCG

+

F,:F,F:FF:F:FFFFFFFFFFFFFFFF:FFFFFFFFFFFFFFFF:FFF:FFF:F,FF:FFFFFF  
FFFFFFFF:FFF:,FFFF,FFFF,FFF:F:FFFFFF:FFF:FF

@A00721:190:HGJW7DSXY:4:1206:18087:14121\_2:N:0:TCTGCAAG+GCTGCACT  
TTTTGTCAACGGCGTTTGGAGATTTTATCCGCGCTTAATATGGGGCGAAGATCCCCTATGGAGTCT  
TGAAGGACTTAGGTTGGCATATTTATGCCGACGATAATAAGCATGTCA

+

F:FFFFFFFF,FFFFFFFFFFFFFFFFFFFFFFFFFFFFFFFFFFFFFFFF:FFFFFFFF  
FFFFFFFFFFFFFFFFFFFFFFFFFFFFFFFFFFFFFFFFFFFFFFFF

@A00721:190:HGJW7DSXY:4:1227:8648:1814\_1:N:0:TCTGCAAG+GCTGCACT  
CAAGAGAGAGTGTGAGAGAGTCGCTCTCACTATTTTGGCCAGAATGCGGGCTTCTGACTGATGAGG  
TTAAAGTCTTGCTCCTTCTGTGGGTGAGGGTTTTGTTATATTCACTGGTTCTGGGAGGCTGCTTC  
CTC

+

FFFFFFFFFFFFFFFFFFFFFFFF:FFFFFF:F:FFFFFFFFFFFFFFFFFFFFFFFFFFFFFFFF  
FFFFFFFFFFFFFFFFFFFFFFFFFFFFFFFFFFFFFFFFFFFFFFFF:FFFFFFFFFFFFFFFF  
FFF

@A00721:190:HGJW7DSXY:4:1619:12735:17440\_1:N:0:TCTGCAAG+GCTGCACT  
GAGAGCATTAGAAGGAAGTTGGGCAAATCCCACATATGGTAGACGTTGTCACACTTTTCTTGAAAAT  
TTTTCTTTCTCCGTCATTGGGGATTTGATGTGAGAAGGTGGAAGGTGTCAAGGGTCTTCTTCATG  
CTG

+

FFFFFFF,FFFFFFFFFFFFFFFFFFFFFFFFFFFFFFFFFFFFFFFFFFFFFFFF  
:FFFFFF,FFFFFFFFFFFFFFFFFFFFFFFFFFFFFFFFFFFFFFFFFFFFFFFF  
FFF

@A00721:190:HGJW7DSXY:4:2673:22860:3067\_2:N:0:TCTGCAAG+GCTGCACT  
TCACATCATGATTGATAGTTACGGCTCGTATCGAGTTGGAGGGAGGAAGTTCTCCGAAATTAAGACG  
GGGGGAGTAAGAGTCCAGCTGTAAGTGTCAATTCAGAGAGGGGAGCTC

+



@A00721:190:HGJW7DSXY:4:2647:6424:12148\_1:N:0:TCTGCAAG+GCTGCACT  
AATGAGTTCCGAATAACTCGTAATAAATCTTTCTCTAGTGGACAATTGAGAATACCTATTTCCGTACC  
AAGAGCCACTGCCAATCTCATCGCTATACGCATACCTGATTGGAAGAAGCGAGGTTCTGTTCTCAATA  
AAA

+

FFFFFFFFF,FFFFFFFFFFFFFFFFFFFFFFFFFFFFFFFFFFFFFFFFFFFFFFFFFFFFFFFFFFFFFFFF  
FFFFFFFFFFFFFFFFFFFFFFFFFFFFFFFFFFFFFFFFFFFFFFFFFFFFFFFFFFFFFFFFFFFFFFFFFFFF  
FFF

@A00721:190:HGJW7DSXY:4:1438:5755:11459\_1:N:0:TCTGCAAG+GCTGCACT  
TCTTCATAAGGGCTATTGAGTACGTGATGGGGATCACTTCTTCGGTCAATGACAAAACCTTCGAATAT  
GTTACGACATGGCTTCGTAACAACAGTGCAGGATTGTCATCTCGGGGAAAGTGATTACCAAGATGT  
TCA

+

FFFFFFFFFFFFFFFFFFFFFFFFFFFFFFFFFFFFFFFFFFFFFFFFFFFFFFFFFFFFFFFFFFFFFFFFFFFF  
FFFFFFFFFFFFFFFFFFFFFFFFFFFFFFFFFFFFFFFFFFFFFFFFFFFFFFFFFFFFFFFFFFFFFFFFFFFF  
FFF

@A00721:190:HGJW7DSXY:4:1435:3531:12305\_1:N:0:TCTGCAAG+GCTGCACT  
CCTAGAGAAGGTCGAGCGATCTTACTCGTTATCGGAGCTAAGAAGAAGACTTTGGGTACACGTTATG  
CTCGAAACTTAACGTTAGTACCGGAGGTGATCTCTCTGCTTCTGCGTTACTGAGAGAAAAGATTGAG  
GAC

+

FFFFFFFFFFFFFFFFFFFFFFFFFFFFFFFFFFFFFFFFFFFFFFFFFFFFFFFFFFFFFFFFFFFFFFFFFFFF  
FFFFFFFFFFFFFFFFFFFFFFFFFFFFFFFFFFFFFFFFFFFFFFFFFFFFFFFFFFFFFFFFFFFFFFFFFFFF  
FFF

@A00721:190:HGJW7DSXY:4:1519:23032:23343\_1:N:0:TCTGCAAG+GCTGCACT  
TTTATGGACAAGATGCAAGTCCTTGGGAAATACTTGTTTCCCTTTTATAGTTTAGTAGGTGATCTTGA  
CGTCGATTCTTTGTATAGGGAGTGTGAGAAGACAACGAATCTTGAAACTACGGTCCTTATCAAAGAAA  
AT

+

FFFFFFFFFFFFFFFFFFFFFFFFFFFFFFFFFFFFFFFFFFFFFFFFFFFFFFFFFFFFFFFFFFFFFFFFFFFF  
FFFFFFFFF:FFFFFFFFFFFFFFFFFFFFFFFFFFFFFFFFFFFFFFFFFFFFFFFFFFFFFFFFFFFFFFFF  
FF

@A00721:190:HGJW7DSXY:4:2542:1633:15311\_1:N:0:TCTGCAAG+GCTGCACT  
ATCTTTTGAGATTGAGAAGATTGAAGAACACGTCAAGAAGTCGCTCGGCGTTGTTCTTGAAAACCAAG  
TTAAGAAGGAGGCTGATCATGGAGTCTTTGTACCTTCTGTCAAACCTTCGAGGTTGAGCTACGAGAGGT  
GAT

+

:FFFFFFFFFFFFFFFFFFFFFFFFFFFFFFFFFFFFFFFFFFFFFFFFFFFFFFFFFFFFFFFFFFFFFFFFFFFF  
FFFFFFFFF:F,F,FFFF,FFFFFFFFFFFFFFFFFFFFFFFFFFFFFFFFFFFFFFFFFFFFFFFFFFFFFFFF  
FFF

@A00721:190:HGJW7DSXY:4:1351:2474:25441\_2:N:0:TCTGCAAG+GCTGCACT  
TTGAAGGCTGGCTCTAAGGGAGACTCCTTCTTTTGAATGTTGTAAAGAATTGGGTTGAGAAGTGTGC  
TTTACAAGGAGTTAGACTCTTCTTCAAGTTTTTAGATCTTCTTGATAA

+

FFFFFFFFFFFFFFFFF:FFFFFFFFFFFFFFFFFFFFFFFFFFFFFFFFFFFFFFFFFFFFFFFFFFFFFFFFFFFF,FFFFFFFFFFFFFFFFFFFF  
FFFFFFFFFFFFFFFFFFFFFFFFFFFFFFFFFFFFFFFFFFFFFFFFFFFFFFFFFFFFFFFFFFFFFFFFFFFF,F

@A00721:190:HGJW7DSXY:4:2463:11758:36886\_2:N:0:TCTGCAAG+GCTGCACT  
CATAACTTCTTTTCAAAAATGCGGATGGGTCTACTGATGTTTTCTACAGAGTGCAGTCGTTTCAAC  
ACTTATCACCCTTGTGAAAGGAAAATAATTGGTGATGAAAATACGTA

+

FFFFFFF,FFFF,FFFFFFFFFFFFFFFFFFFF,FFFFFFFFFFFFFFFFFFFFFFFF,FFFFFFF:::FFFF:F:  
FFFF:F:FFFF:F,FF,FFFF:FF,,FF:F,FFFFFF,F:F:F:,F

@A00721:190:HGJW7DSXY:4:1539:22064:1658\_2:N:0:TCTGCAAG+GCTGCACT  
TTGGATGTTGTGAAAACATCAGGTTCTTGTCACGATTCTTAAAAGAAGTTTATTAATAACTTCAGAG

TCTCTTGGAAGTCCAGGTAGCTAATGTTCTTGCAATAGCCACAGACTT  
+  
FFFFFFFFFFFFFFFFFFFFFFFFFFFFFFFFFFFFFFFFFFFFFFFFFFFFFFFFFFFFFFFF  
:FFFFFFFF:FFFFFFFFFFFFFFFFFFFFFFFFFFFFFFFFFFFFFFFFFFFFFFFF  
@A00721:190:HGJW7DSXY:4:1262:20916:34867\_1:N:0:TCTGCAAG+GCTGCACT  
TCTGTTGGTAGAGGAGTTGAGAGAATTACTCAGATTCAATCTGGCATCACTGAACGTCTACAACGAGT  
TAGGGAGTGGCTAGGTTTTTAAAAGATCCTTTGCACAAGCAATACCTTCCACTGAGTTCATCACCCAGA  
GTT  
+  
FFFFFFFFFFFFFFFFFFFFFFFFFFFFFFFFFFFFFFFFFFFFFFFFFFFFFFFFFFFFFFFF  
FFFFFFFFFFFFFFFFFFFFFFFFFFFFFFFFFFFFFFFFFFFFFFFFFFFFFFFFFFFFFFFF  
FFF  
@A00721:190:HGJW7DSXY:4:1402:24894:18333\_1:N:0:TCTGCAAG+GCTGCACT  
GTTTTTGGTATAAATCCTGATGGCTCAGTACAGGGAGGAGGTAATAGTTATAAAACCTTCTTTTATCA  
TTGCAACAGGACTTTGAGAAGACTGTTGAAATGGACAAAATCTGGGATCATAGGTATGTGTCACGCTA  
CAC  
+  
FFFFFFFFFFFFFFFFFFFFFFFFFFFFFFFFFFFFFFFFFFFFFFFFFFFFFFFFFFFFFF:F:FFFFFFFF:FFFFF  
FFFFFFFFFFFFFFFFFFFFFFFFFFFFFFFFFFFFFFFFFFFFFFFFFFFFFFFFFFFFFFFF  
FFF  
@A00721:190:HGJW7DSXY:4:1638:4987:1924\_2:N:0:TCTGCAAG+GCTGCACT  
TCGCCATATCAGATTAGAGACATGCCAGTTAGAGTTCTTCTAACCAGGACTGATGGTGAGATTCTTTT  
ACCTTTTGGAGGTCCAGGAACCTTTACTCCTAGTGTCTTTTCTAGAGT  
+  
FFFFF::FFFFFFFFFFFFFFFFFFFFFFFFFFFFFFFFFFFFFFFFFFFFFFFFFFFFFFFF  
FFF:FFFFFFFFFFFFFFFFF::FFFFFFFFFFFFFFFFFFFF:FFFF  
@A00721:190:HGJW7DSXY:4:2665:25825:33880\_1:N:0:TCTGCAAG+GCTGCACT  
TCAATAACACTCTATTGAATCCCTTTTCCACGATGAAAGCTCTTTATGAGGTGCTCCATGCAAATTTA  
CAGTTCCTCTTTGGTGATATCGCCTCTGTCCTTTCTCCTTTAATCGTGAGGTTACGAGAGTTTCGTAC  
TTG  
+  
FFFFFFFFFFFFFFFFFFFFFFFFFFFFFFFFFFFFFFFFFFFFFF:FFFFFFFFFFFFFFFFFFFF  
FFFFFFFFFFFFFFFFFFFFFFFFFFFFFFFFFFFFFFFFFFFFFFFFFFFFFFFFFFFFFFFF  
FFF  
@A00721:190:HGJW7DSXY:4:2451:32289:36495\_1:N:0:TCTGCAAG+GCTGCACT  
AGAGAGAGAGGTTAATCAGAATTTGAGTGATAACGATTTAGTACTGGGAAATGGTGGTAGTCAGTTTA  
CTACTTTTCTTCCCTCCCCTTTTTCGATTGGATTGACGGGTCTTCGTCTCACGACTAATTTGATA  
AGG  
+  
FFFFFFFFFFFFFFFFFFFFFFFFFFFFFFFFFFFFFFFFFFFFFF:F:FFFFFFFFFFFFFFFF  
FFFFFFFFFFFFFFFFFFFF:FFFFFFFFFFFFFFFFFFFFFFFFFFFFFFFFFFFFFFFF  
FFF  
@A00721:190:HGJW7DSXY:4:2153:27588:33708\_1:N:0:TCTGCAAG+GCTGCACT  
ATGTTTCGTTTTAGCTGGATGGATCTTTTGATGGTATGTTTCACATTGCGTGATCACTTCCCGTGGA  
CTTGGAAGAGATTAAACATAAAATCCAGCGATTCTATTATGTCGCTAAAGCCTGTCCAGTTGTCGAT  
GAT  
+  
FFFFFFFFFFFFFFFFFFFFFFFFFFFFFFFFFFFFFFFFFFFFFFFFFFFFFFFFFFFF,FFFFFFFF  
FFFFFFFFFFFFFFFFFFFFFFFFFFFFFFFFFFFFFFFFFFFF:FFFFFFFFFFFFFFFFFFFF  
FFF  
@A00721:190:HGJW7DSXY:4:1552:23610:15045\_1:N:0:TCTGCAAG+GCTGCACT  
CACAAGGATTACTAAGTCTGAGATCTGCCACTTCTAATTTTAGGAAACGTGCGGAAAAGAAAGTTTCAT  
GAGGATGTCTTGGTCGAAAAATATCGCCGGGAACCTTCTAATAGAGGATCCTGATGACATTATTTCAAC  
GGA

+  
FFFFFFFFFFFFFF:F:FFFFFFFFFFFFFFFFFFFFFFFFFFFFFFFFFFFFFFFFFFFFFFFF  
FFFFFFFFFFFFFFFFFFFFFFFFFFFFFFFFFFFFFFFFFFFFFFFFFFFFFFFFFFFFFFFF  
FFF  
@A00721:190:HGJW7DSXY:4:1650:31991:23422\_2:N:0:TCTGCAAG+GCTGCACT  
CTACCACAGAAACCGTCTCAGGAAGTGTCTCCACTGATTCGGAATTAGAGAAAGACGACCTTCTTG  
GGGACTGAGACCTCTGAATTTTCAGGGTGCCCTGATGAGGACGTTGAA  
+  
FFFFFFFFFFFFFFFFFFFFFFFF:FFFFFFFFFFFFFF:FFFFFF:FFFFFFFFFFFFFFFF  
FFFFFFFFFFFFFFFFFFFFFFFFFFFFFFFFFFFFFFFF:FFFFFFFFFFFF:F  
@A00721:190:HGJW7DSXY:4:1558:27941:15499\_2:N:0:TCTGCAAG+GCTGCACT  
CTTCTAAGAGTGTTCAAAAGACCAGAAACGTAACAAGAATAAAGGTAGGAAGGGGAGAAAACAG  
AACAAGCGAGCGGTTGAAGAGAAAACCTGATATGGTTGCGGCTGATCGT  
+  
FFFFFFF:FFFFFFFFFFFFFFFF:FFFFFFFFFFFFFFFF:FFF:FFFFFFFFFFFF,FFFF  
FFFFFFFFFFFFFFFF:FF,FFFFFFFFFFFFFFFFFFFFFFFFFFFFFFFF  
@A00721:190:HGJW7DSXY:4:1513:10267:3959\_1:N:0:TCTGCAAG+GCTGCACT  
GGCGATACCACTGATCTTCCAGAGTTACGTAGTGGTCGTTCTTTTGGTGATTTTATCAAAGAGAAAGT  
TTCTGCTAGTCGCGACGATAGTATTTATCGGAGTGATATTAACAAGTTAACTTCGAAGTACCCTT  
ACA  
+  
FFF:FFFFFF:FFFF,FFFFFFFFFFFFFFFFFFFFFFFF:FFFFFFFFFFFFFFFF  
FF:FFFFFFFFFFFFFFFFFFFFFFFF,FFFFFFFFFFFFFFFFFFFFFFFF  
FFF  
@A00721:190:HGJW7DSXY:4:2615:32045:33442\_2:N:0:TCTGCAAG+GCTGCACT  
TTGTTGACTACGATCTCTTGTAAATAAGAGTTCTTCGCAGTTGAATCTCCACCAGGTGGAGGGAAG  
ACCACTGAAGTTATAGCGACTTTTGTGCAATTTTTCGCAAAAGGTCTT  
+  
FFFFFFFFFFFFFFFFFFFF::FFFFFFFF:FFFFFFFFFFFFFFFFFFFFFFFF  
:FFFFFFFF:FFFFFF:F,FFFFFFFFFFFFFFFF:F:FFF,FFF::F  
@A00721:190:HGJW7DSXY:4:2174:16821:32503\_2:N:0:TCTGCAAG+GCTGCACT  
CTGCTAATCGTAATTCGCGAGAAGAGATAGTACTAAAGTTTGGCACTTCTAGTTCATCGCGGTATT  
TGTGAAATTAAGACAGACGTGAAAGTTATGATGAGTGATCGTATTAGA  
+  
FFFFFFFFFFFFFFFFFFFFFFFFFFFFFFFF,FFFFFFFFFFFFFFFF  
FF,FFFFFFFFFFFFFFFF:FFFFFFFFFFFF,FFFFFFFF  
@A00721:190:HGJW7DSXY:4:2165:16423:20854\_1:N:0:TCTGCAAG+GCTGCACT  
CGACGAATTATTCATGATTCACGCTGGTCAGACCCTTTTCTTACACATCTACTTAAGGCGGCTTATA  
CCATAGGTTACGGTGATTCCAATCAAATCGGATTCATCAATCGTATTGATCTCCAAGTCGAAACTAC  
TTC  
+  
FFFFFFFFFFFFFFFFFFFF,FFFF:FF:FFFF:FFFFFFFFFFFFFFFF:FFFFFFFFFFFF:F  
FFFFFFFFFFFFFFFFFFFFFFFF:FFFFFFFFFFFFFFFF:FFFFFFFF  
FFF  
@A00721:190:HGJW7DSXY:4:1233:22697:18255\_2:N:0:TCTGCAAG+GCTGCACT  
GAGTGTGCTTCTTATCGAAGTCTCAGTTATCGCTGCCGCGCCGACGTTTGTGCGCAACTCTCAGAGGT  
TTACGGCAGAAAAATTTCTCCTGCTTGAATTCGAGAGAGGACACTAT  
+  
FFFFFFFFFFFFFFFFFFFFFFFF,FFFFFFFFFFFFFFFFFFFFFFFF,FFFFF  
FFFFFFFFFFFF,FFFFFFFFFF:FF:F,FFF:FFFFFFFFFF:FF  
@A00721:190:HGJW7DSXY:4:2561:20627:5337\_1:N:0:TCTGCAAG+GCTGCACT  
TAAGAGTAAGGTTAAATGTGAAGATGCTCAGACTATTATGAAGTTCAAGGTAATACTTACCAGCACG  
TTCGGCTGGTTAGAATTAACCTCAAGATGACCCTGTTTTTGCATCACAAACACATATTACCGTTGCT  
CTA



+  
FFFFFFFFFFFF:FFFFFFFFFFFFFFFFFFFFFFFFFFFFFFFFFFFFFFFFFFFFFFFFFFFFFFFFFFFFFFFF  
FFFFFFFFFFFFFFFFFFFFFFFFFFFFFFFFFFFFFFFFFFFFFFFF:FF:FFFFFFFFFFFFFFFF:FFFFFFFFFFFF  
FFF  
@A00721:190:HGJW7DSXY:4:1613:14516:29230\_2:N:0:TCTGCAAG+GCTGCACT  
TCAATGTAAAGTTAAACGATGCTACTTGTGAGAGGATCAATCACAGTAAGGAACTGTCACGTTTAGCA  
CGGGAGGTTGCAGATTCAACCCCTTATATCGAGGCTATCGAGGACGAT  
+  
FFFFFFFFFFFFFFFFFFFFFFFFFFFFFFFFFFFFFFFFFFFFFFFFFFFFFFFFFFFFFFFFFFFFFFFFFFFF  
FFFFFFFFFFFFFFFFFFFFFFFF:FFFFFFFF:FFFFFFFFFFFFFFFFFFFF  
@A00721:190:HGJW7DSXY:4:2104:25744:32174\_2:N:0:TCTGCAAG+GCTGCACT  
GACGACAAGCCTCAAGAGGGTAGAGGACCACCTGGATCTTCTACTGTCTCTGCCTTCCAAGATTCTT  
AGAAGAGGTTATTCTCTGGAACCACCTTAACGTCACTCGGTAATCTTTC  
+  
FFFFFFFF:FFFFFFFFFFFFFFFFFFFFFFFFFFFFFFFFFFFFFFFF:FF:FFFFFFFFFFFFFFFF:F:FFFFFF  
,FFFFFFFF:FFFFFFFFFFFF,FFFFFFFFFFFFFFFFFFFF:,FFF  
@A00721:190:HGJW7DSXY:4:2273:26377:14544\_1:N:0:TCTGCAAG+GCTGCACT  
GATCAAGGATAATACCTTTATAGGTAAGAAGCCCCTTGAGCCGCGTAGTCAGCGGTTTAGCTGTATC  
ATCAGTCAGTGTATACCCGATAGGGTACCGAGTCTCCAAGAGAATATTTCTTCTTATGAGGCTCGAAA  
CTT  
+  
FFF,,,FF,FF:F,,,FF,FF:F:F:FFF:,,,FFFFFF,F,,FFFFFF,F,,F,FF:,F:,:F:F:  
,F,,,FF,F,:FFFF,FFFF,FFF:,,FFFF:FF::F,FFFFFF:F,,F,FF:F:,,,FF,FF:  
:FF  
@A00721:190:HGJW7DSXY:4:2653:31060:12978\_1:N:0:TCTGCAAG+GCTGCACT  
TTCCGATCTGTTTTGATCAGTCTAAGTTGGATAAAGTTATAGGAGACTCAGTTAACCTGAGAGCTCCT  
CAATTGATAGATTGGGTCAACAATAGGGACGCTAGTATACTTCGTAAAGTCGACAGCGAAATGGTCAA  
TAT  
+  
FFFF:FFFF,FFFFFFFFFFFFFFFFFFFFFFFFFFFFFFFFFFFFFFFF:FF:FFFFFFFFFFFFFFFFFFFF  
FFFFFFFFFFFFFFFFFFFFFFFFFFFFFFFFFFFFFFFFFFFFFFFFFFFFFFFFFFFFFFFFFFFFFFFFFFFF  
FFF  
@A00721:190:HGJW7DSXY:4:2277:28971:11772\_1:N:0:TCTGCAAG+GCTGCACT  
GGTTCTTGTGAGGAGAGTCAAACAGTGTCTTTTACCCAACATTTTATGTATACAGAGATGACCAGTG  
ACGATTTCTCCCGAAGCTCTTCTCTCTCTTAGGAGGTCATGATGACTACTATAAGGGTGAAATCGAT  
TTT  
+  
FFFFFFFFFFFFFFFFFFFFFFFF:FFFFFFFFFFFFFFFFFFFFFFFFFFFFFFFFFFFFFFFFFFFFFFFFFFFF  
FFFFFFFFFFFFFFFFFFFFFFFFFFFFFFFFFFFFFFFFFFFFFFFFFFFFFFFFFFFFFFFFFFFFFFFFFFFF  
FFF  
@A00721:190:HGJW7DSXY:4:1139:11342:13526\_2:N:0:TCTGCAAG+GCTGCACT  
CCAGGAGTATCCATAACGATTTGTCATTTACCACCTTTGCTCAACGACGAAGTGAACGGCCAACACT  
TTCTTTGGTAATTGTATGATCACTTTGATGATTTTATCACTTTATTAT  
+  
FFFFFFFFFFFFFFFFFFFF::F:FFFFFFFFFFFFFFFFFFFFFFFFFFFFFFFFFFFFFFFF:FFFFFFFFFFFF  
FFFF,FFFF,FFFFFFFF:FFFFFFFFFFFFFFFFFFFFFFFF:FFFFFFF  
@A00721:190:HGJW7DSXY:4:2546:17707:4163\_2:N:0:TCTGCAAG+GCTGCACT  
CTGTTTTCAAAGACTCCAATAACTGATCATTCTGATCATATGATTTTGGACAATGGTTTGAAGCGAA  
ATTTTTGAGGGATAAACCAGCGTACTTCTGCTCGGATTTATTCTTTT  
+  
FFFFFFFFFFFFFFFFFFFF:FFFFFFFFFFFFFFFFFFFFFFFFFFFFFFFFFFFFFFFFFFFFFFFFFFFFFFFF  
FFFFFFFFFFFFFFFFFFFFFFFFFFFFFFFFFFFFFFFF:FFFFF,FFFFFFFFFFFF  
@A00721:190:HGJW7DSXY:4:1177:30047:13917\_1:N:0:TCTGCAAG+GCTGCACT  
CGATATTCGATTGAGGGTCGTTATACCTATTGGGCTATCTGTGCTTTGAATTGTATAAGATCAAATTT

TAAACGATTCCGAGAGGTTTATCCTGATGTGGAGGGAGTTCTTGAAGCATCCCGACCTTTCCTTGTGA  
AAA

+

FFFFFFFFFFFFFFFFFFFFFFFFFFFFFFFFFFFFFFFFFFFFFFFFFFFFFFFFFFFFFFFFFFFFFFFF  
FFFFFFFFFFFFFFFFFFFFFFFFFFFFFFFFFFFFFFFFFFFFFFFFFFFFFFFFFFFFFFFFFFFFFFFF  
FFF

@A00721:190:HGJW7DSXY:4:2672:20048:30577\_2:N:0:TCTGCAAG+GCTGCACT  
CCTGATTCTACTACGGATTCATGGACCTTCCATCCTGTACCTCTTCTGGAGAGACGTATCTCAAAGAT  
CGACTTCGAGACAGGTGATATTGTTGAGCGAGAGCGACCAAGATCTAA

+

FFFFFFFFFFFFFFFFFFFFFFFFFFFFFFFFFFFFFFFFFFFFFFFFFFFFFFFFFFFFFFFFFFFFFFFF  
FFFFFFFFFFFFFF:FFFFFFFFFFFFFFFFFFFFFFFFFFFFFFFFFFFFFFFFFFFFFFFF

@A00721:190:HGJW7DSXY:4:2522:26395:10786\_2:N:0:TCTGCAAG+GCTGCACT  
TCTTTTCATTTTAAATGACGATCATTAAGACTCTCTTTCTTTGTTTCCTTCTTTGCACTGATTTTT  
TCCTCATCAGCTTGTGTTTTACCTAATCTGTGTTTTTACGATAACAAC

+

FFFFFFFFFFFFFFFFFFFFFFFFFFFFFFFFFFFFFFFFFFFFFFFFFFFFFFFFFFFFFFFFFFFFFFFF  
FFFFFFFFFFFF,:FFFFFFFFFFFF:FF:F:FFF:FFFFFF,FFFFFFFF

@A00721:190:HGJW7DSXY:4:1452:3378:11162\_2:N:0:TCTGCAAG+GCTGCACT  
TCTTCCGAAAGGCGAACTTTGGGAATTTGAAGCTCAGGGTGAAGCACAAACGTTTGACCGTGACGAAC  
GTGGTGTCTTGATCTACGTTACGGATATACTCTCCTTGAGTTCATC

+

FFFFFFFFFFFFFFFFFFFF:FFFFFFFFFFFFFFFFFFFFFFFFFFFFFFFFFFFFFFFFFFFFFFFF:FF  
FFFFFFFFFFFFFFFFFFFFFFFFFFFFFFFFFFFFFFFFFFFFFFFFFFFFFFFFFFFF,FFFFFFFF

@A00721:190:HGJW7DSXY:4:1646:22390:26334\_2:N:0:TCTGCAAG+GCTGCACT  
AATCACTCATTTTAGTGAGATTATTAACGCACTAAACGTCTTCGACAACAGCAGGGGTTTTCGA  
ATAGTGATAGCCACCCGCCTTACAGAGGGCAGCAGCATGACCATAAT

+

FFFFFFFFFFFF:FFFFFFFFFFFFFFFFFFFF,FFFFFFFF:F:FFFFFFFFFFFFFFFFFFFFFFFF  
FFFFFFFFFFFFFFFFFFFFFFFF:FFFFFFFFFFFF:FFFFFFFFFFFF

@A00721:190:HGJW7DSXY:4:2473:31729:28291\_1:N:0:TCTGCAAG+GCTGCACT  
CACCTTTTCTACTGTCTGTCTCGCCTCTTCGAATGAAGTTTAATGCTTAACAACAATGATAGTGAAT  
TTATACCTACAATCATTGGTTTTTCTAATAATGATGACACTATTGTTTATGGATATGATGCTATTACT  
CAT

+

FFFFFFFFFFFFFFFF:FFFFFFF,F:FFFFFFFFFFFF,FFFFFF:FFFFFFFFFFFFFFFFFFFF  
:FFFFFFFFFFFFFFFFFFFFFFFFFFFFFFFFFFFFFFFFFFFFFFFFFFFFFFFFFFFFFFFFFFFF  
FFF

@A00721:190:HGJW7DSXY:4:1465:7907:33974\_2:N:0:TCTGCAAG+GCTGCACT  
TACAAGGACCTTAAGCGATGGATCGGGTTAATTCTAAACATTACCCGAAAGACGTGCTAAATTAAA  
ACCATTGTACGATGTCGTCTGTCTCGGCGATCACTTTTCACTAAGAAT

+

FFFFFFFFFFFFFFFFFFFFFFFFFFFFFFFFFFFFFFFFFFFFFFFFFFFFFFFFFFFFFFFFFFFF  
FFFFFFFFFFFFFFFFFFFFFFFFFFFFFFFFFFFFFFFFFFFFFFFFFFFFFFFFFFFF

@A00721:190:HGJW7DSXY:4:2675:6822:25520\_2:N:0:TCTGCAAG+GCTGCACT  
TTTATCTCTTTGGTTGTTAGGGATTTTGAGAGAGTGAAAGGCTTCAATTGTAGTGGTTTGGTCGTTTC  
AGTACCCAGTCAGTATACCTCTACGCAAAGATATTCATGAAAACCTAC

+

FFFFFFF::FF,FF:FFFFFFFFFFFFFFFFFFFFFFFFFFFFFFFF:FFFFFF:FFFFFFFFFFFFFFFF  
FFFFFFFFFFFFFFFFFFFFFFFFFFFFFFFFFFFFFFFFFFFFFFFFFFFFFFFF

@A00721:190:HGJW7DSXY:4:2343:23746:10081\_1:N:0:TCTGCAAG+GCTGCACT  
TGTCTTTCATATTATGAATGAACCTTCGCCGCTCTCTTTGCTTCGATGTTGGATGTCAAGAAGGGTT  
CAGAATGGGATTCTACGTAGTTTATGACTTTGGTGGTGGTACTTTCGATACTTCTATCGTCTTACGT  
TAC

+  
FFFFFFFFFFFFFFFFFFFFFFFFFFFFFFFFFFFFFFFFFFFFFFFFFFFFFFFFFFFFFFFFFFFFFFFF  
FFFFFFFFFFFFFFFFFFFFFFFFFFFFFFFFFFFFFFFFFFFFFFFFFFFFFFFFFFFFFFFFFFFFFFFF  
FFF  
@A00721:190:HGJW7DSXY:4:2632:17318:26068\_2:N:0:TCTGCAAG+GCTGCACT  
AGTGTATTATTCTGGTGGTGATGATAATCTTGAGGTCGTGACGTTGATGAAGCTATAAGAGCGTT  
CTTATTACGGCGCACTTCTTTACCCGCCACCACACAACCTTTCAGTTTC  
+  
FFFF,FFFFFFFFFFFFFFFFFFFFFFFFFFFFFFFFFFFFFFFFFFFFFFFFFFFFFFFFFFFFFFFF  
FFFFFFFF:FFFFFFFFFFFFFFFF:FFFFFFFFFFFFFFFFFFFFFFFF:F:FFFFFFFF  
@A00721:190:HGJW7DSXY:4:2667:16324:21934\_1:N:0:TCTGCAAG+GCTGCACT  
ACTGGAACCTCGTCAATACTTTTCAATAATATACGTCTTGAACCTCACTTATGACGATCTAGTGAA  
ATTAACGCGTCCTTTTCTGGAACGTAGTTTACTATTATGAACAAAGTTATCAAAGATAGTGGCATT  
AAG  
+  
FFFFFFFFFFFFFFFFFFFFFFFFFFFFFFFFFFFFFFFFFFFFFFFFFFFFFFFFFFFFFFFFFFFFFFFF  
FFFFFFFFFFFFFFFFFFFFFFFFFFFFFFFFFFFFFFFFFFFFFFFFFFFFFFFFFFFFFFFFFFFFFFFF  
FFF  
@A00721:190:HGJW7DSXY:4:1619:31882:33692\_2:N:0:TCTGCAAG+GCTGCACT  
TTCCGGCCGGTGGTAGCTCATTTCTACCAGGGGCTATTACTCTTGCTGAAACAGCTATTAAAGCTGT  
GAGCGGGTAATTACACCTAAACGAGCTCGATCTGCCATCGCTGAAGGA  
+  
FFFFFFFFFFFFFFFFFFFFFFFFFFFFFFFFFFFFFFFFFFFFFFFFFFFFFFFFFFFFFFFFFFFFFFFF  
FFFFFFFFFFFFFFFFFFFFFFFFFFFFFFFFFFFFFFFFFFFFFFFFFFFFFFFFFFFFFFFFFFFFFFFF  
@A00721:190:HGJW7DSXY:4:2628:4634:31908\_2:N:0:TCTGCAAG+GCTGCACT  
ACTTTATCTGAGAGTAGCGTTCTTTTGTGCGATTGTATCAATAGTAACATAACGACAAATAAAGGTCT  
CTATCAGGTGGGTATAATAGTTGCCGCCGGATCCGCCTTACCATTGAA  
+  
FFFFFFFFFFFFFFFFFFFFFFFFFFFFFFFFFFFFFFFFFFFFFFFFFFFFFFFFFFFFFFFFFFFFFFFF  
FFFFFFFF:FFFFFFFFFFFFFFFFFFFFFFFFFFFFFFFFFFFFFFFFFFFFFFFF:  
@A00721:190:HGJW7DSXY:4:1346:3613:1955\_2:N:0:TCTGCAAG+GCTGCACT  
GTAATTATGAAGACTGTGATTTATCTTTCCTCTGGCCTTGTATGAGGGTGTCTAATCGTAACATT  
AATAATTTCAATCTTCTTAAAAAGAAGATAGAGAGTCATACTTTGGGC  
+  
FFFF:FFFF:F:FFFFFFFF:FFFF,FFF,,FFF,F,FFFFFFFFFFFFFFFF:FFFF,FFFF:  
FFFF:FFFFFFFF:FFFFFFFFFFFFFFFF:FFFF:FFFFFFFF  
@A00721:190:HGJW7DSXY:4:2342:1624:36808\_2:N:0:TCTGCAAG+GCTGCACT  
ATTAAACAAGTTGTACTTATCAATGATTTTATCGCTGGTTGTTATCTCGAAAAGTCTCTTCTAAAAG  
AACGTCAGTTCTAACCCAAAGAGAATATCTAAAATATTTACAAAATAT  
+  
FFF:FF,FF,:F:FFFFFFFF:FFFF:FFF:,,:F:FFFF:FFFF,FFFFF,F,:F,FFFF,F  
,F,FF:F,FF,FFF,FFFF,F,FF:FF,,FFF:F:FFF:FFFF,,  
@A00721:190:HGJW7DSXY:4:2125:28076:3302\_2:N:0:TCTGCAAG+GCTGCACT  
TGGCACTACCTCGGTACAATCTTACTTGGAACGAAGGCGACCTGTTCCGGAGTTTTTACGGGATCCGG  
AATGTTCTGTCTATATTAGGTGAAGCGAAATACGATTTCGAACGTCAA  
+  
FFFFFFFFFFFFFFFFFFFFFFFFFFFFFFFFFFFFFFFFFFFFFFFFFFFFFFFFFFFFFFFFFFFFFFFF  
FFFFFFFFFFFFFFFFFFFFFFFFFFFFFFFFFFFFFFFFFFFFFFFFFFFFFFFFFFFFFFFF  
@A00721:190:HGJW7DSXY:4:2444:23610:11945\_1:N:0:TCTGCAAG+GCTGCACT  
TAGTGCGAGGCCTCTCTTCTACGAGTATTGCTATTTATACGTTACGAGAAGAAGGTTGAAAGTTTG  
AGAACTTAGTTTACGAACCTGACTCTACTATACGTGACATACTAAATACTAGATATTTGGATGATCT  
GAT  
+  
FFFFF:FFFFFFFFFFFFFFFF:FF,FF:FFFFFFFFFFFFFFFF:FFFFFFFFFFFFFFFF

@A00721:190:HGJW7DSXY:4:1440:29017:23062\_1:N:0:TCTGCAAG+GCTGCACT  
TTCTTCCTTGGAATTTAATATAAAGAATCTTTACCAGGACTCCTACTACAGGAGGCAGTCTTCTGATC  
GTAAGAAGTTTATAAGGAACATATCCATTGTGTGAATAGGGTCATCAACTTAGAACTCGAACTCTA  
AGT

@A00721:190:HGJW7DSXY:4:2563:31494:9721\_2:N:0:TCTGCAAG+GCTGCACT  
CCAAGCTTACCTGTATCTTCAATGAAATTGGACTCTTCGATAGGGGACATTTTATCGTGGGCTTTCCG  
TAATGGAAGATCTGTTATCGACGGTTTATCGTTTACGAAGTATCACTC

@A00721:190:HGJW7DSXY:4:1244:26214:2237\_1:N:0:TCTGCAAG+GCTGCACT  
TCTATTATTGATTTTTATGAGATTGATACGTTAACAGAAATGATGTTAGAGTAGAATTCCTGAAGAG  
TCCTTCCGTAACCAACTTCTTGACAATTTCTTCAATCCTTCGATAATAGTTAAATCTAGGATTATGT  
CTG

@A00721:190:HGJW7DSXY:4:2666:17535:5274\_2:N:0:TCTGCAAG+GCTGCACT  
AATTAAGAAATAATCCTACATTGACTGATTATCTAAAGATTGAAGGAAAATTTTATCCTCGTTTAACT  
TACTTAGACTTTTCCTACGATACAAATGATAACTTCTAATTTACGTTTG

@A00721:190:HGJW7DSXY:4:2649:9281:12587\_2:N:0:TCTGCAAG+GCTGCACT  
CTCAGGAGTCCCGGCATTTGATAATAATGACGAGACTTTTCGTCATAATCGCTGCATATTACGGATTAC  
ACGGTACCAGCGCATCTCGTGTCGAGCCTCGACCCGATTATATGGTAT

@A00721:190:HGJW7DSXY:4:2303:4264:31516\_2:N:0:TCTGCAAG+GCTGCACT  
AACTAACTATGTTATGTTCTCTGATCATTTTGACAATCTCTTCTTATAATAAAATAAATAAATAATATT  
ACTAATGGCAAATAGTGGAAAGGCTCCAGTCAACACTAGTTCGAGTGC

@A00721:190:HGJW7DSXY:4:2161:20491:17065\_1:N:0:TCTGCAAG+GCTGCACT  
AATAGGTGAAGGGATAGTTTTTACCTCGACCAACATTAAGGCGGCGGCGACTAATCTTAAAGCTTCAC  
CCAAAATGAAGGACACTTCGAAACTGAATAATGATGCACTACAAACAAGTATCGCTAATCATCTGAAA  
AAG

@A00721:190:HGJW7DSXY:4:2448:9869:1391\_2:N:0:TCTGCAAG+GCTGCACT  
AGAGGATATTCGCCATTGTGGTACGAATTGGTCCAACATTTACCACCAAATTCTTTTGATACAACCTCT  
AGCCTTCAAGTGGGGTATGCCTGCGGAATACGCTTGCTATTCACCAGA

+

FFFFFFFFFFFFFFFF:FFFFFFFFFFFFFFFF:FFFFFFFFFFFFFFFFFFFFFFFFFFFFFFFFFFFFFFFF  
FFFFFFFFFFFFFFFFFFFFFFFFFFFFFFFFFFFFFFFFFFFFFFFFFFFFFFFFFFFFFFFF

@A00721:190:HGJW7DSXY:4:2630:18511:30639\_1:N:0:TCTGCAAG+GCTGCACT  
CCCGTTGATGCTATGTCAGAAGAAGCTATTCAAGCTTGTCTTTAAAGACTGCAGAGGCTGTCAAACA  
AGCCCAGACTCAAGGAGTCCAATCAAAGGTTTTGAATTTAGCTCAACTGGGGAGACGTGCTTAAATGG  
GTG

+

FFFFFFFFFFFFFFFFFFFFFFFFFFFFFFFF:FFFFFFFFFFFFFFFF:FF:FFFFFFFFFFFFFFFF  
FFFFFFFFFFFFFFFFFFFFFFFFFFFFFFFFFFFFFFFFFFFFFFFFFFFFFFFFFFFFFFFF  
FFF

@A00721:190:HGJW7DSXY:4:1506:18475:24095\_2:N:0:TCTGCAAG+GCTGCACT  
TAGATAGTGGGATAATAGTTCTACCGATACGTAGTGAACGCGTTCGTAGAACCAAGTACTTTCCGTCT  
GAAGAGTTTAGAGCTGCTATTGATTATGTAACCGATAGGAGTTGTATA

+

FFFFFFFFFFFFFFFFFFFFFFFFFFFFFFFFFFFFFFFFFFFFFFFFFFFFFFFFFFFFFFFF  
FFFFFFFFFFFFFFFFFFFFFFFFFFFFFFFFFFFFFFFFFFFFFFFFFFFFFFFF:F

@A00721:190:HGJW7DSXY:4:1420:25057:9815\_1:N:0:TCTGCAAG+GCTGCACT  
GATAATCCTTTAAGGACTATGTTGACTGACGAAGATTTTCCACAGATTTGTCTACGTTGCAGATCGC  
CACTCCAAACACTATATACATTATAAAATATAAAAATAAGGGAGTCATAACTTTTGTTACCAAATTCT  
TGG

+

FFFFFFFFFFFFFFFFFFFFFFFFFFFFFFFFFFFFFFFFFFFFFFFFFFFFFFFFFFFFFFFF  
FFFFFFFFFFFFFFFFFFFFFFFFFFFFFFFFFFFFFFFFFFFFFFFFFFFFFFFFFFFFFFFF  
FFF

@A00721:190:HGJW7DSXY:4:1455:13232:20087\_2:N:0:TCTGCAAG+GCTGCACT  
ATTTTATTAATCATTACTTTAACGATCTCTCGGTAATTTACTCTGTAATTTATCTACGTATTTAACT  
GTCGGA AAAACATTTACTTAGAATGACTCTATCTTTAAGACACTTAT

+

F:FFFF,FFF,FFF,FF,:FFF,:FF,FF,,F,F,FFF,F,:,,F,F,,FFF:FFF,,,FFFF,F  
FF:::FF,FF,,F,F::,FF,:FF,:FFF,F,FFF,FF,,FFF,::

@A00721:190:HGJW7DSXY:4:2517:21224:26757\_2:N:0:TCTGCAAG+GCTGCACT  
ACTCACTATCGTTTTCTGCTTTTTCTTAGCTAATAGATTAATAAAGGATGAGTACGAAAACCAACTCT  
TCGTTACGAGACCTGATGGTAGAATAGATTTAGTCTCTACACCCATCT

+

FFFFFFFFFFFFFFFFFFFFFFFFFFFFFFFFFFFFFFFFFFFFFFFFFFFFFFFF:FFFFFFFFFFFF  
FFFFFFFFFFFFFFFFFFFFFFFF,FFFFFFFFFFFFFFFFFFFFFFFF:FFFFF

@A00721:190:HGJW7DSXY:4:1118:7048:7310\_1:N:0:TCTGCAAG+GCTGCACT  
AAAGCTTGTTTTCCGTCCTGAACCTTAATACTAATAGATCACCCGCAAACGACTCGAAACCGAGACG  
CCGTAGATCAAAGTCCCTTCTAACTTTAGATTATGAATCCTGCCTTTACTCATTTTATAGCAGTTATT  
TA

+

F:,,,,:FFF,F:,,,F,F,,,FF,:,,,F:,F:F,,F,FF,,,FFFFFFFFFFFFFFFF  
FFFFFFFFFFFF:FFFFFFFFFFFFFFFFFFFFFFFFFFFFFFFFFFFFFFFFFFFFFFFF  
FF

@A00721:190:HGJW7DSXY:4:2367:2727:18834\_2:N:0:TCTGCAAG+GCTGCACT  
TGCTTTTCGATAGTGATTGTTATCAATTTAAATACATTACTGTTTCAAATCATCTTTACTCACAGACT  
CCGAAAATGGTTTCAAATGAGGTCAAAGCTCTATTTATTAAACGAAC

+

FFFFFFFFFFFFFFFFFFFFFFFFFFFFFFFFFFFFFFFFFFFFFFFFFFFFFFFF  
FFFFFFFFFFFFFFFFFFFFFFFFFFFFFFFF:FFFFFFFFFFFFF

@A00721:190:HGJW7DSXY:4:2351:10203:19351\_1:N:0:TCTGCAAG+GCTGCACT  
GGAACCTCAATTCCTTCGATGTTTATATTTTCTATAAGGGAAAATAGCAATAATCAAATTCGACAA  
ATTTTAGAACTTTATTTCAAGACTCTCTCCGATCACCTGGTGTGATCTCCCGGAGGATCTTTTCAAT  
AAG

+  
FFFFF:FFFF,FFFFFFFFFFFFFFFFFFFFFFFFFFFFFFFFFFFFFFFFFFFFFFFFFFFFFFFFFFFFFFFF  
F,FFFFFFFFFFFFFFFFFFFFFFFFFFFFFFFFFFFFFFFFFFFFFFFFFFFFFFFFFFFFFFFFFFFFFFFF:FF  
FFF  
@A00721:190:HGJW7DSXY:4:2462:2320:2159\_2:N:0:TCTGCAAG+GCTGCACT  
TAAATAGTGATATTCAGCGTATACGTGAATACTTTATCAAAGATTGGCTTGGTCTATTTACCGCAA  
AAGTTGGAAGAGGTCTATGATATTTATTTACTTATACTTTAAATAGC  
+  
FFFF:FFFFFFFF:FF::FFFFFF,F:FF:F,:F:FFFFFF:FFF,F:FFFF,FF:FF,FFFF:FFF  
,F:FFFFFFFF:FFFF:FFFFFF,FFFFFFFFFFFFFFFF:F,FFF:F,,  
@A00721:190:HGJW7DSXY:4:1229:20229:18427\_1:N:0:TCTGCAAG+GCTGCACT  
ACTTGACTGTTGATAATATTACAATAGCTCTTCTCAGAAGATTAGAGAAGTAACTGGTGAACACGTC  
GGTAGCATTGATTTACTTTTACCGTTAGAACTGAAAAAGATTCTTTTCGAAAAGAAACCTATAAGTTA  
CAA  
+  
FFFFFFFFFFFFFFFFFFFFFFFFFFFFFFFFFFFFFFFFFFFFFFFFFFFFFFFFFFFFFFFF:FFFFFFFFFFFFFFFF  
FFFFFFFFFFFFFFFFFFFFFFFFFFFFFFFFFFFFFFFFFFFFFFFFFFFFFFFFFFFFFFFFFFFFFFFF,FFF  
FFF  
@A00721:190:HGJW7DSXY:4:2672:19633:14450\_2:N:0:TCTGCAAG+GCTGCACT  
TAAAGAAATAAAAATACTTCAAGTACCTGAACCTTACATTTTAAATGGTATGGTATAATGTGTCTTAC  
AAATAGAACCTTCACTCTCGGTAATGAGAGTGTATTCCTTAATATTCT  
+  
FFF:FFFFFFFFFFFFFFFFFFFFFFFFFFFFFFFFFFFFFFFFFFFFFFFFFFFFFFFF:FFFFFFFFFFFFFFFF  
FFFFFFFFFFFFFFFFFFFFFFFFFFFFFFFFFFFFFFFFFFFFFFFFFFFFFFFFFFFFFFFF  
@A00721:190:HGJW7DSXY:4:1478:10583:20729\_1:N:0:TCTGCAAG+GCTGCACT  
TTACTAGGATTTATCACACTCCTAAATTTGATAGCAATTTATGTTTTAAATGCTAGGAAAATTTAGA  
AAAACCTCATTGTATAGTTCAAGGAGTACTTAATTCAATAGCTTTAGTATTATTTACTATCGCCTTTA  
TTG  
+  
FFFFFFFFFFFFFFFFFFFFFFFFFFFFFFFFFFFFFFFFFFFFFFFFFFFFFFFF:FFFFFFFFFFFF:FFFF  
FFFFFFFFFFFFFFFFFFFFFFFFFFFFFFFFFFFFFFFFFFFFFFFF:F:FFFFFFFFFFFFFFFFFFFFFFFF  
:FF  
@A00721:190:HGJW7DSXY:4:2172:17616:34726\_1:N:0:TCTGCAAG+GCTGCACT  
TTAATTGCTTACACAAAAGTGACGCGCGAAGGAATCTTAATTGATTGAAGCTAGGCGTTGGGAGAAT  
GAACTGCCGCTTCCCGGAAGAAACGATCTATTTACAGAGTATTTAGAGTAGTCCAAAGTTTGTATAAA  
TTT  
+  
FFFFFFFFFFFFFFFFFFFFFFFFFFFFFFFFFFFFFFFFFFFFFFFFFFFFFFFFFFFFFFFFFFFFFFFF  
FFFFFFFFFFFFFFFFFFFFFFFFFFFFFFFFFFFFFFFFFFFFFFFFFFFFFFFFFFFFFFFF:FF:FFFFFFF  
FFF  
@A00721:190:HGJW7DSXY:4:1567:6352:14434\_2:N:0:TCTGCAAG+GCTGCACT  
TGACCAATCATCGCTCCAACCTGGCACGCCAGACGTAGGGTCAAACCTACTACCGCCGGTCGGCAGATC  
GGCACCCTGGTCTCTACGTTCAAGGACCCGCTGTGCAGAATAACCTT  
+  
FFFFF:FFFFFFFFFFFFFFFFFFFFFFFFFFFFFFFFFFFFFFFFFFFFFFFFFFFFFFFFFFFFFFFF  
FFFFFFFFFFFFFFFFFFFFFFFFFFFFFFFFFFFFFFFFFFFFFFFFFFFFFFFF  
@A00721:190:HGJW7DSXY:4:2562:13602:17065\_1:N:0:TCTGCAAG+GCTGCACT  
GGACGACCACTCAAAGGAAACGGGCTGTTGCCAGAGGAAAGCAGCGACCACCGAGGTCGCTCGTAAC  
ATTGACGGCAGTCCCGTCATCTCTGTGGGAACTGAGGCAGTACCTCAGTCAAAGTCACATTCACCAC  
TCC  
+  
FFFFFFFFFFFFFFFFFFFFFFFFFFFFFFFFFFFFFFFFFFFFFFFFFFFFFFFFFFFFFFFF  
FFFFFFFFFFFFFFFFFFFFFFFF:F:FFFFFFFFF::FFFFFFFFFFFFFFFFFFFFFFFF  
FFF

@A00721:190:HGJW7DSXY:4:1554:1823:14199\_2:N:0:TCTGCAAG+GCTGCACT  
GACTATACAGTTCGCCATTTCAAGAGTGGTCAATACGTCGTGGGAGGTACTGAAGCCTTCCCCTCCG  
CTGGCACGAAGAACACTCCCAAGCCAATCAATAGTTCTTCTGACCAGA

@A00721:190:HGJW7DSXY:4:1630:28357:9173\_1:N:0:TCTGCAAG+GCTGCACT  
GGTAGTCTCTAAGTCTACCAGGAAGAGGGGAAATGTCCCCAAACTGAGAAGAATAAAGGGAAAGGTC  
CATCAGGACCTAAGAAGGGGAAATTACCCCTAATTCTGAAGGAAGATCTCCCACCATCTGGGGTTGGG  
AAT

@A00721:190:HGJW7DSXY:4:2413:22227:34068\_2:N:0:TCTGCAAG+GCTGCACT  
CACGGGCCAAAGAGGCCGCTGCTACGAAGTCGCTGAAGGCGGCTTGGGTCATTAAGGGTAGCTGTAA  
GTTGCGCCTGCCGACCCCATCTTTGAGACCAAGACTCTCTACAGTAGG

@A00721:190:HGJW7DSXY:4:1662:13386:8923\_2:N:0:TCTGCAAG+GCTGCACT  
CAAATCTGTTGAATTCGTCCTGAGGACGAAGGTGAGAGGACTTTTGGCTACTGGCGACAACTGAGA  
GCAGTCGCTGGGGAAAGAGAATTGCGTGGGTTGAAGGCCGACGCTTCG

@A00721:190:HGJW7DSXY:4:1454:32940:21057\_2:N:0:TCTGCAAG+GCTGCACT  
TTTTGTCAACGGCGTTTGGAGGATTTTATCCGCGCTTAACATGCGGGCGAAGATCCCTATGGAGTCT  
TGAAGGACTTAGGTTGGCATATTTATGCCGACGATAATAAGCATGTCA

@A00721:190:HGJW7DSXY:4:1255:3188:20322\_1:N:0:TCTGCAAG+GCTGCACT  
CAAGAGAGAGTGTGAGAGAGTCGCTCTCACTATTTTTGCCAGAATGCGGGCTTTCTGACTGATGAGG  
TAAAACTCTTGCTCCTTCTGTGGGTGAGGGTTTTTGTTATATTCAGTGGTCTGGGAGGCTGCTTTC  
CTC

FFF  
@A00721:190:HGJW7DSXY:4:2258:5439:17769\_1:N:0:TCTGCAAG+GCTGCACT  
GAGAGCATTAGAAGGAAGTTGGGCAAATTCACACATATGGTAGACGTTGTACACTTTTCTTGAAAAT  
TTTTCTTTCTCCGTCATTGGGGATTTGATGTGAGAAGGTGGAAGGTGTCAAGGGTCTTCTTCATG  
CTG

FFF  
@A00721:190:HGJW7DSXY:4:1127:24704:6793\_1:N:0:TCTGCAAG+GCTGCACT  
GCAGAGTGACTGGAGTTCAGACGTGTGCTCTTCCGATCTGAGGAAGTTCTCCGAAATTAAAGACGGGG  
GGATTAAGAGTCCAGCTGTAAGTGTCAATTCAGAGAGGGGAGCTCTGAAAAGGAACTTCGTCAGAAG  
ATG

FFFFFFFFFFFFFFFFFFFFFFFFFFFFFFFFFFFFFFFFFFFFFFFFFFFFFFFFFFFFFFFFFFFFFFFFFFFFFFFF  
FFF

@A00721:190:HGJW7DSXY:4:2527:20998:33317\_2:N:0:TCTGCAAG+GCTGCACT  
GAGTTTGAGGAAGGCTCTAGAGAAGATCTCACCACCTGGAGGAGGCAAGTGGAGAGTCCAGAAGTTGA  
TGAAGAAGGATTATTTGAAGCAGGGGTTACCACTTCCTAAGGTGGATG

+  
FFFFFFFFFFFFFFFFFFFFFFFFFFFFFFFFFFFFFFFFFFFFFFFFFFFFFFFFFFFFFFFFFFFFFFFFFFFFFFFF  
FFFFFFFF:FFFFF:F:FFFFFFFF:FFFFFFFFFFFFFFFFFFFFFFFF,FFFFFFFF

@A00721:190:HGJW7DSXY:4:2208:16116:13683\_1:N:0:TCTGCAAG+GCTGCACT  
TTAGGTCAACTTGGGGTTTCAATGTCATTAGTGCCTTACGATTGAAAGAGGTCCTTTTGAGTATCGA  
CAGATCTTTCGATCTTGAGGACGTACATTTAACGTGGCAGAATTCGGTAACCTACCATATTGTTCTT  
CCG

+  
FFFFFFFFFFFFFFFFFFFFFFFFFFFFFFFFFFFFFFFFFFFFFFFFFFFFFFFFFFFFFFFFFFFFFFFFFFFFFFFF  
FFFFFFFFFFFFFFFFFFFFFFFFFFFFFFFFFFFFFFFFFFFFFFFFFFFFFFFFFFFFFFFFFFFFFFFFFFFFFFFF  
FFF

@A00721:190:HGJW7DSXY:4:1112:13087:6402\_1:N:0:TCTGCAAG+GCTGCACT  
TAACCTTTGACTCAACTACTCCGATCAGATCCGATGGTTTGATTGGTATGGACTACTCGACTTTTGAT  
CTGGAGTTGTCTAGGGTCATGGCAGATACTACCGATAAGGTGAAAAATATGCAGGTCAAAGATTCTGT  
AGC

+  
FFF:FFFFFFFFFFFFFFFFFFFFFFFFFFFFFFFFFFFFFFFFFFFFFFFFFFFFFFFFFFFFFFFFFFFFFFFF  
FFFFFFFFFFFFFFFFFFFFFFFFFFFFFFFFFFFFFFFFFFFFFFFFFFFFFFFFFFFFFFFFFFFFFFFFFFFFFFFF  
FFF

@A00721:190:HGJW7DSXY:4:2372:20437:20353\_1:N:0:TCTGCAAG+GCTGCACT  
CTAAGAGTCTTTATGATTCAAAACCTATCGTTGTCGTACCTTACAAGGTTGAGGAGACTTTACAGCGG  
CTTATTGTCGCGCAGTTTCCAGAATTGCGGTTGAAGTTCACCCATTCTATCTTGAATGCTCACGCCGT  
CGC

+  
FFFFFFFFFFFFFFFFFFFFFFFFFFFFFFFFFFFFFFFFFFFFFFFFFFFFFFFFFFFFFFFFFFFFFFFFFFFFFFFF  
FFFFFFFFFFFFFFFFFFFFFFFFFFFFFFFFFFFFFFFFFFFFFFFFFFFFFFFFFFFFFFFFFFFFFFFFFFFFFFFF  
FFF

@A00721:190:HGJW7DSXY:4:1612:18367:36933\_1:N:0:TCTGCAAG+GCTGCACT  
GAGGCGATATTCGTTTTTCATATCCAAAACCTCTTGAATGGAGTACATATTTGCAACCCTATTCTTGAT  
GTGAAAGATGCATCGAGGTATACGTCTAGGAACATTGATTGGGAACGTACCTACTCACGAGACGTCAT  
GAA

+  
FF:FFFFFFFFFFFFFFFFFFFFFFFFFFFFFFFFFFFFFFFFFFFFFFFFFFFFFFFFFFFFFFFFFFFFFFFF  
FFFFFFFFFFFFFFFFFFFFFFFFFFFFFFFFFFFFFFFFFFFFFFFFFFFFFFFFFFFFFFFFFFFFFFFF  
FFF

@A00721:190:HGJW7DSXY:4:2462:28456:28447\_2:N:0:TCTGCAAG+GCTGCACT  
TCGTTCTGTTACAAGAACGCTTTGGATTGTGACCATAAAGCCTCAGTTGCGATAGCTGTAGAGGTATA  
CGATATCTCTCTTGATGATGTAGCCACTATAATGCTTAAGAGAGAGAT

+  
FFFFFFFFFFFFFFFFFFFFFFFFFFFFFFFFFFFFFFFFFFFFFFFFFFFFFFFFFFFFFFFFFFFFFFFFFFFFFFFF  
FFFF:FFFFFFFFFFFFFFFFFFFFFFFFFFFFFFFFFFFFFFFFFFFFFFFFFFFFFFFFFFFFFFFF  
FFFFFFFF

@A00721:190:HGJW7DSXY:4:1564:17291:36605\_2:N:0:TCTGCAAG+GCTGCACT  
CATTTTCGTCTTAGTTTGTCCCGGCGAATTATTGGACACGATGAAAAATGACATACCCGTTCTGACCT  
TGGTATCGTTATCCGTCATGGAGATGATGGCGCATCACTTGATTACTA

+  
FFFFFFFFFF:FFFFFFFFFFFFFFFFFFFFFFFFFFFFFFFFFFFFFFFFFFFFFFFFFFFFFFFFFFFFFFFF  
FFFFFFFFFFFFFFFFFFFFFFFFFFFFFFFFFFFFFFFFFFFFFFFFFFFFFFFFFFFFFFFFFFFFFFFF

@A00721:190:HGJW7DSXY:4:1467:26666:28980\_1:N:0:TCTGCAAG+GCTGCACT  
ATGAGTTCGAATAACTCGTAATAAATCTTCTCTAGTGGACAATTCAGAATACCTATTTCCGTACCA







GGGACTGAGACCTCTGAATTTTCAGGGTGCCTGATGAGGACGTTGAA

+

FFFFF:,FFF,FFFF:FFF:FFFFFFFF:FFF:FFF:FF:FFF:FFFFFFFFFFFF,FFF:FF,FFF  
F:FFFFFFFFFFFF,FFF:FFFFFFFFFFFF:FFFFFF:FFFFFF

@A00721:190:HGJW7DSXY:4:2112:28483:8672\_2:N:0:TCTGCAAG+GCTGCACT  
CTTATAAGAGAGTTTCAAAAGACAAGAAAAGTAACAAGAAGATAAAGGTACGAAGGGGAGAAAACAG  
AACAAGCGAGCGGTTGAAGAGAAAACCTTATATGGTTGCGGCTGATCGT

+

FF,,,FFFF,,,F:FFFFFF,FF,FFFF:,,FF::FFFF,,,FFFF::F:,,:F,FF,F,FFFF:,,  
FFFF:,,,,,,FFF,:F,F:FFFF,F,,,F:,,F:F,:F,,FFF,F,

@A00721:190:HGJW7DSXY:4:1553:28393:18693\_1:N:0:TCTGCAAG+GCTGCACT  
GGCGATACCACTGATCTTCCAGAGTTACGTAGTGGTCGTTCTTTTGGTGATTTTATCAAAGAGAAAAGT  
TTCTGCTAGTCGCGACGATAGTATTTATCGGAGTGATATTAACAAGTTAACTTCGAAGTACCCTT  
ACA

+

FFFFFFFFF:FFFFFFFFFFFFFFFFFFFFFFFFFFFFFFFFFFFFFFFFFFFFFFFFFFFFFFFFFFFFFFFF  
FFFFFFFFFFFFFFFFFFFFFFFFFFFFFFFFFFFFFFFFFFFFFFFFFFFFFFFFFFFFFFFF:F:FFFFFFFFFFFFFFFFFFFF  
FFF

@A00721:190:HGJW7DSXY:4:2436:21866:27398\_1:N:0:TCTGCAAG+GCTGCACT  
AGAAGTTCTTCGCAGTTGAATCTCCACCAGGTGGAGGGAAGACCACTGAAGTTATAGCGACTTTTGTG  
GAATTTTTCGCAAAGGTCTTGAAGTACGTATTGTCACTGCTAATCGTAATTCGCGAGAAGAGATAGT  
GAC

+

FFFFFFFFFFFFFFFFFFFFFFFFFFFFFFFFFFFFFFFFFFFFFFFFFFFFFFFFFFFFFFFFFFFFFFFFFFFF  
FFFFFFFFFFFFFFFFFFFFFFFFFFFFFFFFFFFFFFFFFFFFFFFFFFFFFFFFFFFFFFFFFFFFFFFFFFFF  
FFF

@A00721:190:HGJW7DSXY:4:1221:8675:36965\_2:N:0:TCTGCAAG+GCTGCACT  
CTAGTTCATCGCGGTATTTGTGAAATTAAGACAGACGTGAAAGTTATGATGAGTGATCGTATTAGAAC  
AGCTGATTCTTATTGCATGAACGTCGCTGAGGTCAAACCTGTGGACGT

+

FFFFFFF:FFFFFF:FFFFF:FFFFFFFFFFFF:FFFFFFFFFFFFFFFFFFFFFFFFFFFFFFFFFFFF  
FFFFFFFFFFFFFFFFFFFFFFFFFFFFFFFFFFFF:FFFF:FFFFFFFFFFFFFFFFFFFF

@A00721:190:HGJW7DSXY:4:1634:6253:1767\_1:N:0:TCTGCAAG+GCTGCACT  
ACGAATTATTCATGATTCACGCTGGTCAGACCCTTTTTCTTACACATCTACTTAAGGCGGCTTATACC  
ATAGGTTACGGTGATTCCAATCAAATCGGATTCATCAATCGTATTGATCTCCAAGTCGAAACTACTT  
CAA

+

:F:FFFFFFFFF:FFFFFFFFFFFF:FFF::FFFFF:FFFFFFFFFFFFFFFFFFFFFFFFFFFF:FF::FFF  
FFFFFF:FFFFFFFFFFFFFFFFFFFF:FF:FFFFFFFFFFFFF:FFFFFFFFFFFFF:FFFFFFFFF  
FFF

@A00721:190:HGJW7DSXY:4:1356:32099:10989\_2:N:0:TCTGCAAG+GCTGCACT  
GAGTGTCGTTCTTATCGAAGTCTCAGTTATCGCTGCCCGCCGACGTTTGTGCGGAAGTCTCAGAGGT  
TTACGGCAGAAAAATTTCTCCTGCTTGTAATTCGAGAGAGGACACTAT

+

FFFFFFFFFFFFFFFFFFFFFFFFFFFFFFFFFFFFFFFFFFFFFFFFFFFFFFFFFFFFFFFFFFFFFFFFFFFF  
FFFFFFFFFFFFFFFFFFFFFFFFFFFFFFFFFFFFFFFFFFFFFFFFFFFFFFFFFFFFFFFFFFFF,F:FF

@A00721:190:HGJW7DSXY:4:1264:5728:17049\_1:N:0:TCTGCAAG+GCTGCACT  
AAGAGTAAGGTTAAATGTGAAGATGCTCAGACTATTCATGAAGTTCAAGGTAATACTTACCAGCACGT  
TCGGCTGGTTAGAATTAACCTCAAGATGACCCTGTTTTTGCATCACAAACACATATTACCGTTGCTC  
TA

+

FF:F,,F,FFF:F:FF:FFFF,FFFFFFFFF,FFFFF,FFF:FFF::FFFF:FFFFFF:FFFF,FF  
:F:::FFFFFFF::FFFFFFFFF:FF:FFFFFFFFF:FFFFF:FF:FFFF:,F,FFFFFFFFFFFF:FF  
FF

+

+

+

+

+

+

+

+

• • •

@A00721:190:HGJW7DSXY:4:1276:32425:18004\_2:N:0:TCTGCAAG+GCTGCACT  
TTCTACTACGGATTCATGGACCTTCATCCTGTACCTCTTCTGGAGAGACGTATCTCAAAGATCGACT  
TCGAGACAGGTGATATTGTTGAGCGAGAGCGACCAAGATCTAAATTCTG

[illegible]

FFFFFFFFFFFFFFFFFFFFFFFFFFFFFFFFFFFFFFFFFFFFFFFFFFFFFFFFFFFFFFFFFFFFFFFF  
FFF

@A00721:190:HGJW7DSXY:4:2576:9444:34225\_2:N:0:TCTGCAAG+GCTGCACT  
CCAAGCTTACCTGTATCTTCAATGAAATTGGACTCTTCGATAGGGGACATTTTATCGTGGGCTTTCCG  
TAAAGGAAGATCTGTTATCGACGTTTATCGTTTACGAAGTATCACTC

+

FFFFFFFFFFFFFFFFFFFFFFFFFFFFFFFFFFFFFFFFFFFFFFFFFFFFFFFFFFFFFFFFFFFFFFFF  
FFFFFFFFFFFFFFFFFFFFFFFFFFFFFFFFFFFFFFFFFFFFFFFFFFFFFFFFFFFFFFFF

@A00721:190:HGJW7DSXY:4:1658:18530:33144\_1:N:0:TCTGCAAG+GCTGCACT  
TCTATTATTGATTTTTATGAGATTGATACGTTAACAGAAGATGATGTTAGAGTAGAATTCCTGAAGAG  
TCCTTCCGTAACCAACTTCTTTACAATTTCTTCAATCCTTCGATAATAGTTAAATCTAGGATTATGT  
CTG

+

::FFFFFFFF::FFFFFFFFFFFFFFFFFFFFFFFF,FFFFF:,FFFFF::F:FFFF,FF,FFFFF,F::F:FF  
FF,FFF,FFFFF,FFFFF,F:,F,FF::FF::FFFFF,FFF:,FFFF:F:F:FFF::FF,FFFF:FFF  
F:F

@A00721:190:HGJW7DSXY:4:2666:18475:6089\_2:N:0:TCTGCAAG+GCTGCACT  
AATTAAGAAATAATCCTACATTGACTGATTATCTAAAGATTGAAGGAAAATTTTATCCTCGTTTAACT  
TACTTAGACTTTCTACGATACAAATGATAACTTCTAATTTACGTTTG

+

FFFFFFFFFFFFFFFFFFFFFFFFFFFFFFFFFFFFFFFFFFFFFFFF:FFF,FFFFF,FFFFFFFFFFFFFFFF  
FFFFFFFFFFFFFFFFFFFFFFFF,FFFFFFFF:FFFFFFFFFFFFFFFF,::

@A00721:190:HGJW7DSXY:4:1375:21323:35352\_1:N:0:TCTGCAAG+GCTGCACT  
CTCAGGAGTCCCGGCATTTGATAATAATGACGAGACTTTTCGTCATAATCGCTGCATATTACGGATTAC  
ACGGTACCAGCGCATCTCGTGTGCGACCTCGACCCGATTATATGGTATTAACCTTATAAAGGTGAGGAG  
ACC

+

FFF,FFFFFFFFFFFFFFFFFFFFFFFF:FFF:FFFFFFFFFFFFFFFFFFFFFFFFFFFFFFFFFFFFFFFF  
FFFF:FFFFFFFFFFFFFFFFFFFFFFFF:FFFFFFFFFFFFFFFFFFFFFFFF,FFFFF:FFFFFFFF  
FFF

@A00721:190:HGJW7DSXY:4:2521:4779:23923\_2:N:0:TCTGCAAG+GCTGCACT  
AACTAACTATGTTATGTTCTCTGATCATTTTGACAATCTCTTCTTATAATAAATAAATAAATATT  
ACTAATGGCAAATAGTGGAAGGCTCCAGTCAACACTAGTTCGAGTGC

+

FFFFFFFFFFFFFFFFFFFFFFFFFFFFFFFFFFFFFFFFFFFFFFFFFFFFFFFFFFFFFFFFFFFFFFFF  
FFFFFFFFFFFFFFFFFFFFFFFFFFFFFFFFFFFFFFFFFFFFFFFFFFFFFFFFFFFFFFFF

@A00721:190:HGJW7DSXY:4:2407:8052:17910\_1:N:0:TCTGCAAG+GCTGCACT  
AATAGGTGAAGGGATAGTTTTTACCTCGACCAACATTAAGGCGGCGGCGACTAATCTTAAAGCTTCAC  
CCAAAATGAAGGACACTTCGAAACTGAATAATGATGCACTACAAACAAGTATCGCTAATCATCTGAAA  
AAG

+

FFFFFFFFFFFFFFFFFFFFFFFFFFFFFFFFFFFFFFFF:FF:FFFFFFFFFFFFFFFF:FFFFFFFFFFFFFFFF  
FFFFFFFFFFFFFFFFFFFFFFFFFFFFFFFFFFFFFFFFFFFFFFFFFFFFFFFF:FFFFFFFFFFFFFFFF  
FFF

@A00721:190:HGJW7DSXY:4:2545:27868:8359\_2:N:0:TCTGCAAG+GCTGCACT  
AGAGGATATTCGCCATTGTGGTACGAATTGGTCCAACATTTACCACCAAATTTCTTTGATACAACTCT  
AGCCTTCAAGTGGGGTATGCCTGCGGAATACGCTTGCTATTCACCAGA

+

FFFFFFFFFFFFFFFFFFFFFFFFFFFFFFFFFFFFFFFF:FFFFFFFFFFFFFFFF:FF:FFF  
FFF:FFFF,FFFFFFFF:FFF:FFFFFFFF:FFFFFFFF:FFFF

@A00721:190:HGJW7DSXY:4:1409:23032:29230\_1:N:0:TCTGCAAG+GCTGCACT  
GTTTCAGACGTGTGCTCTTCCGATCTTTCAAGCTTGTCGTTTAAAGACTGCAGAGGCTGTCAAACAAGC  
CCAGACTCAAGGAGTCCAATCAAAGTTTTGAATTTAGCTCAACTGGGGAGACGTGCTTAAATGGGTG  
ATA

FFFFFFFFFFFFFFFFFFFFFFFFFFFFFFFFFFFFF:FFFFFFFFFFFFFFFFFFFFFFFFFFFF  
FFFFFFFFFFFFFFFFFFFFFFFFFFFFFFFFFFFFFFFFFFFFFFFFFFFFFFFFFFFFFFFFFFFF  
FFF  
@A00721:190:HGJW7DSXY:4:1560:30056:13182\_2:N:0:TCTGCAAG+GCTGCACT  
TAGATAGTGGGATAATAGTTCTACCGATACGTAGTGAACGCGTTTCGTAGAACCAAGTACTTTCCGTCT  
GAAGAGTTTtagagctgctatttgattatgtaaccgataggagttgtata  
+  
FFFFFFFFFFFFFFFFFFFFFFFFFFFFFFFFFFFFFFFFFFFFFFFFFFFFFFFFFFFFFFFFFFFF  
FFFFFFFFFFFF:FFFFFFFFFFFFFFFFFFFFFFFFFFFFFFFFFFFFFFFFFFFF  
@A00721:190:HGJW7DSXY:4:1506:7283:23062\_1:N:0:TCTGCAAG+GCTGCACT  
GATAATCCTTTAAGGACTATGTTGACTGACGAAGATTTCCCACAGATTTGTCTACGTTGCAGATCGC  
CACTCCAAACACTATATACATTATAAAAATATAAAAATAAGGGAGTCATAACTTTTGTTACCAAATTCT  
TGG  
+  
FFFFFFF,FFFFFFFFFFFFFFFFFFFFFFFFFFFFFFFFFFFFFFFFFFFFFFFFFFFFFFFFFFFF:FFFFFFFFFFFFFFFFFFFF  
FFFFFFFFFFFFFFFFFFFFFFFFFFFFFFFFFFFFFFFFFFFFFFFFFFFFFFFFFFFFFFFFFFFF  
FFF  
@A00721:190:HGJW7DSXY:4:1540:4634:25676\_2:N:0:TCTGCAAG+GCTGCACT  
ATTTTATTAATCATTACTTTAACGATCTCTCGTcatttactctgtacttgatctacgtcgtttaact  
GTCGGAACAACCTTTACTTAGAATGACTCTATCTTTTCAGACACTTCT  
+  
,FFFFFFFFFFFFFFFF:F::F:F:F:F,FFFF,FFFF:FFF:FF,FFF:F:FFFFFFFFFFFFFFFFFFFF  
F::F:F,FFFFFFFF,FFFFFFFFFFFF:FFFFFFF,FFFF:FFF:F:F  
@A00721:190:HGJW7DSXY:4:1139:30436:20854\_2:N:0:TCTGCAAG+GCTGCACT  
CTCACTATCGTTTTCTGCTTTTTCTTAGCTAATAGATTAATAAAGGATGAGTACGAAAACCAACTCTT  
CGTTACGAGACCTGATGGTAGAATAGATTTAGTCTCTACACCCATCTC  
+  
FFFFFFFFFFFFFFFFFFFFFFFFFFFFFFFFFFFFFFFFFFFFFFFFFFFFFFFFFFFFFFFFFFFF  
FFFFFFFFFFFFFFFFFFFFFFFFFFFFFFFFFFFFFFFFFFFFFFFFFFFFFFFFFFFF  
@A00721:190:HGJW7DSXY:4:1118:6903:7310\_2:N:0:TCTGCAAG+GCTGCACT  
AGCGAGTTTTCCGTCTGAACGTAATACACGAAGAGATCATCCGCAAACGACTCGAAACCGAGACGCC  
GTAGATCAAAGTCCCTTCTAACTTTAGATTATGAATCCTGCCTTTACT  
+  
FFFFFFFFFFFFFFFFFFFFFFFFFFFF:FFFFFFFFFFFFFFFFFFFFFFFFFFFFFFFFFFFFFFFFFFFF  
FFFFFFFFFFFFFFFFFFFF:FFFFFFFFFFFFFFFFFFFF:FFFF:FFFFFFFFFFFFF  
@A00721:190:HGJW7DSXY:4:2465:23131:6637\_2:N:0:TCTGCAAG+GCTGCACT  
TGCTTTTCGATAGTGATTGTTATCAATTTAAATACATTACTGTTTCAAATCATCTTTACTCACAGACT  
CCGAAAATGGTTTCAAATGAGGTCAAAGCTCTATTTATTAACGAAC  
+  
FFFFFFFFFFFFFFFFFFFFFFFFFFFFFFFFFFFFFFFFFFFFFFFFFFFFFFFFFFFFFFFFFFFF:FFF:FFF  
FF:FFFF,FFFF:FFFFFFFFFFFFFFFF:FFFF:FFFFFFFF:FFFFF  
@A00721:190:HGJW7DSXY:4:2360:30662:21715\_1:N:0:TCTGCAAG+GCTGCACT  
GTAAC TTCAATTCCTTCGATGTTTATATTTTCTATAAGGGAAAATAGCAATAATCAAATTCGACAA  
ATTTTAGAACTTTATTTcagaactctctccgatcaccttggtgtgatctcccggaggatcttttcaat  
AAG  
+  
:,FFFFFFFFFFFF,FFFF:FFFF,FFFF,FFFF,FFF,FFFF,FFFF,FFFFFFFF::F:FFF,FFFF  
,:FFFFFFFFFFFFFFFFFFFF:FFFFFFFFFFFFFFFFFFFF,FFFFFFFFFFFFFFFFFFFFFFFFFFFF  
FFF  
@A00721:190:HGJW7DSXY:4:2473:21368:19961\_2:N:0:TCTGCAAG+GCTGCACT  
TAAATAGTGATATTCAGCGTATACTTGAATACTTTATCAAAGATTTGGCTTGCTATTTACCGCAAA  
AAGTTGGAAGAGGTCTATGATATTTATTTTACTTATACTTTAAATAGC





FFFFFFFF:FFFFFFFFFFFFFFFFFFFFFFFFFFFFFFFFFFFFFFFFFFFFFFFFFFFFFFFF  
FFF

@A00721:190:HGJW7DSXY:4:2127:13729:23923\_2:N:0:TCTGCAAG+GCTGCACT  
CAAATCTGTTGAATTCGTCAGGACGAAGGTGAGAGGACTTTTGGCTACTGGCGACAACTGAGA  
GCAGTCGCTGGGGAAAGAGAATTGCGTGCGTGAAGGCCGACGCTTCG

+

FFFFFFFFFFFFFFFFFFFFFFFFFFFFFFFFFFFFFFFFFFFFFFFFFFFFFFFFFFFFFFFF  
FFFFFFFFFFFFFFFFFFFFFFFFFFFFFFFFFFFFFFFFFFFFFFFFFFFFFFFF

@A00721:190:HGJW7DSXY:4:2525:2374:11866\_2:N:0:TCTGCAAG+GCTGCACT  
TTTTGTCAACGGCGTTTGGAGGATTTTATCCGCGCTTAACATATGGGGCGAAGATCCCCTATGGAGTCT  
TGAAGGACTTAGGTTGGCATATTTATGCCGACGATAATAAGCATGTCA

+

:FFFFFFFFFFFFFF:FFFFFFFFFFFFFFFFFFFFFFFFFFFFFFFFFFFFFFFFFFFFFFFF  
FFFFFFFFFFFFFFFFFFFFFFFFFFFFFFFFFFFFFFFFFFFFFFFFFFFFFFFF,FFFFFFFFFFFFFF

@A00721:190:HGJW7DSXY:4:1360:29288:11631\_1:N:0:TCTGCAAG+GCTGCACT  
CAAGAGAGAGTGTGAGAGAGTCGCTCTCACTATTTTTGCCAGAAATGCGGGCTTTCTGACTGATGAGG  
TAAAACTCTTGCTCCTTCTGTGGGTGAGGGTTTTTGTATATTCACTGGTTCTGGGAGGCTGCTTTC  
CTC

+

FFFFFFFF:FFFFFFFFFFFFFFFFFFFFFFFFFFFFFFFFFFFFFFFFFFFFFFFFFFFFFFFF  
FFF,FFFFFFFFFFFFFFFFFFFFFFFFFFFFFFFFFFFFFFFFFFFFFFFFFFFFFFFF:FFFFFFFFFFFFFF  
FFF

@A00721:190:HGJW7DSXY:4:2355:4056:30937\_1:N:0:TCTGCAAG+GCTGCACT  
GAGAGCATTAGAAGGAAGTTGGGCAAATCCACATATGGTAGACGTTGTCACACTTTTCTTGAAGAAAT  
TTTTCTTTCTCCGTCATTGGGGATTTGATGTGAGAAGGTGGAAGGTGTCAAGGGTCTTCTTCATG  
CTG

+

FFFFFFFFFFFFFF:FFFFFFFFFFFFFF,FFFFFFFF:FFFFFFFFFFFFFFFFFFFFFFFF:FFFFFFFF  
FFFFFFFFFFFFFFFFFFFFFFFFFFFFFFFFFFFFFFFFFFFFFFFFFFFFFFFFFFFFFFFFFFFFFFFF  
FFF

@A00721:190:HGJW7DSXY:4:1416:1280:8594\_1:N:0:TCTGCAAG+GCTGCACT  
GCAGAGTGAAGGAGTTGAGAGTGTGCTCTTCCGATCTGAGGAAGTTCTCCGAAATTAAAGACGGGG  
GGATTAAGAGTCCAGCTGTAAGTGTCAATTCAGAGAGGGGAGCTCTGAAAAGGAACTTCGTCAGAAG  
ATG

+

FFFFFFFFFFFFFFFFFFFFFFFFFFFFFFFFFFFFFFFFFFFFFFFF:FFFFFFFFFFFFFFFF:FFF  
FFFFFFFFFFFFFFFFFFFFFFFFFFFFFFFFFFFFFFFFFFFFFFFFFFFFFFFFFFFFFFFFFFFFFFFF  
FFF

@A00721:190:HGJW7DSXY:4:1217:29243:28682\_2:N:0:TCTGCAAG+GCTGCACT  
AGTTTGAGGAAGGCTCTAGAGAAGATCTCACCACCTGGAGAAGGCAAGTGGAGAGTCCAGAAGTTGAT  
GAAGAAGGATTATTTGAAGCAGGGGTACCCTCCTCAGGTGGATGA

+

FF:FFFFFFFF,FFFFFFFF:FFFFF:FFF:FFFFFFFF:FFFFF,:FFFF:FFFFFFFF:FFF  
FFFFFFFFFFFF:FFFFFFFF:FFFF:FFF,FFFF,FF,FFFFFF

@A00721:190:HGJW7DSXY:4:2516:20302:16078\_1:N:0:TCTGCAAG+GCTGCACT  
TTAGGTCAACTTGGGGTTTGAATGTCATTAGTGCCTTACGATTGAAAGAGGTCCTTTGAGTATCGA  
CAGATCTTTCGATCTTGAGGACGTACATTTAACGTGGCAGAATTCGGTAACTTACCATATTGTTCTT  
CCG

+

FF::F:,F,FF:FFFFFFFF,FFFFFFFFFFFFFFFFFFFFFFFF,FFFFFFFFFFFFFFFF  
:FFFFFFFF:FFFFFFFF:FFFFFFFFFFFFFFFFFFFFFFFF:FFFFFFFFFFFFFFFF  
FFF

@A00721:190:HGJW7DSXY:4:1165:19533:16157\_1:N:0:TCTGCAAG+GCTGCACT  
TAACTTTGACTCAACTACTCCGATCAGATCCGGATGGTTTGATTGGTATGGACTACTCGACTTTTGAT

CTGGAGTTGTCTAGGGTCATGGCAGATACTACCGATAAGGTGAAAAATATGCAGGTCAAAGATTCTGT  
AGC

+

FFFFFFFFFFFFFFFFFFFFFFFFFFFFFFFFFFFFFFFFFFFFFFFFFFFFFFFFFFFFFFFFFFFFFFFF  
FFFFFFFFFFFFFFFFFFFFFFFFFFFFFFFFFFFFFFFFFFFFFFFFFFFFFFFFFFFFFFFFFFFFFFFF  
FFF

@A00721:190:HGJW7DSXY:4:2421:27624:35775\_1:N:0:TCTGCAAG+GCTGCACT  
CTAAGAGTCTTTATGATTCAAAACCTATCGTTGTCTGTACCTTACAAGGTTGAGGAGACTTTACAGCGG  
CTTATTGTCGCGCAGTTTCCAGAATTGCGGTTGAAGTTCACCCATTCTATCTTGAATGCTCACGCCGT  
CGC

+

FF:FFFFFFFFFFFFFFFFFFFFFFFFFFFFFFFFFFFFFFFFFFFFFFFFFFFFFFFFFFFFFFFFFFFF:FF  
FFFFFFFFFFFFFFFFFFFFFFFFFFFFFFFFFFFFFFFFFFFFFFFFFFFFFFFFFFFFFFFFFFFFFFFF  
FFF

@A00721:190:HGJW7DSXY:4:1612:19678:22764\_1:N:0:TCTGCAAG+GCTGCACT  
GAGGCGATATTCTTTTTTCATATCCAAAACCTCTTGAATGGAGTACATATTTGCAACCCTATTCTTGAT  
GTGAAAGATGCATCGAGGTATACGTCTAGGAACATTGATTGGGAACGTACCTACTCACGAGACGTCAT  
GAA

+

FFFFFFFFFFFFFFFFFFFFFFFFFFFFFFFFFFFFFFFFFFFFFFFFFFFFFFFFFFFFFFFFFFFFFFFF  
FFFFFFFFFFFFFFFFFFFFFFFFFFFFFFFFFFFFFFFFFFFFFFFFFFFFFFFFFFFFFFFFFFFFFFFF  
FFF

@A00721:190:HGJW7DSXY:4:1114:7310:8766\_2:N:0:TCTGCAAG+GCTGCACT  
GTTCTGTTACAAGAACGCTTTGGATTGTGACCATAAAGCCTCAGTTGCGATAGCTGTAGAGGTATACG  
ATATCTCTCTTGATGATGTAGCCACTATAATGCTTAAGAGAGAGATTG

+

FFFFFFFFFFFFFFFFFFFFFFFFFFFFFFFFFFFFFFFFFFFFFFFFFFFFFFFFFFFFFFFFFFFF:FFFFFFFFFFFFFFFFFFFF  
FFFFFFFFFFFFFFFFFFFFFFFFFFFFFFFFFFFFFFFFFFFFFFFFFFFFFFFFFFFFFFFFFFFF

@A00721:190:HGJW7DSXY:4:2477:7609:31391\_2:N:0:TCTGCAAG+GCTGCACT  
GACACGATGAAAAATGACATACCCGTTCTGACCTTGGTATCGTTATCCGTCATGGAGATGATGGCGC  
ATCACTTGATTACTATATGCCCGAAGGATTGGGTTATTCTCACAACAA

+

FFFFFFFFFFFFFFFFFFFFFFFFFFFFFFFFFFFFFFFFFFFFFFFFFFFFFFFFFFFFFFFFFFFFFFFF  
FFFFFFFFFFFFFFFFFFFFFFFFFFFFFFFFFFFFFFFFFFFFFFFFFFFFFFFFFFFFFFFFFFFF

@A00721:190:HGJW7DSXY:4:2225:31439:28948\_1:N:0:TCTGCAAG+GCTGCACT  
ATGAGTTCCGAATAACTCGTAATAAATCTTCTCTAGTGGACAATTGAGAATACCTATTTCCGTACCA  
AGAGCCACTGCCAATCTCATCGCTATACGCATACCTGATTGGAAGAAGCGAGGTTTCGTTCTCAATAA  
AAA

+

FFFFFFF:FFFFFF:FFFFFFFFFFFFFFFFFFFFFFFFFFFFFFFFFFFFFFFFFFFFFFFFFFFF:FFFFFFF:FFFFFFF  
FFFFFFFFF:FFFF:FFFFFFFFFFFFFFFFFFFFFFFFFFFFFFFFFFFFFFFFFFFFFFFFFFFFFFFF  
FFF

@A00721:190:HGJW7DSXY:4:1548:10890:8359\_1:N:0:TCTGCAAG+GCTGCACT  
TCTTCATAAGGGCTATTACGTACGTATGGGGATCACTTCTTCGGTCAATGACAAAACCTTCGAATAT  
GTTACGACATGGCTTCGTAACAACAGTGCAGGATTGTCTCTCGGGGAAAGTATTACCAAGATGT  
TCA

+

FFFFFFFFFFFFFFF:FFFFFFFFFFFFFFFFFFFFFFFFFFFFFFFFFFFFFFFFFFFF:FFFFFF:FFFFFFFFFFFFFFFFFFFF  
FFFFFFFFFFFFFFFFFFFFFFFFFFFFFFFFFFFFFFFFFFFFFFFFFFFFFFFFFFFFFFFFFFFFFFFF  
FFF

@A00721:190:HGJW7DSXY:4:1550:17915:30953\_1:N:0:TCTGCAAG+GCTGCACT  
CCTAGAGAAGGTCGACGATCTTACTCGTTATCGGAGCTAAGAAGAAGACTTTGGGTACACGTTATG  
CTCGCAAACCTTAACGTTAGTACCGGAGGTGATCTCTCTGCTTCTGCGTTACTGAGAGAAAAGATTGAG  
GAC

[illegible]



@A00721:190:HGJW7DSXY:4:1329:18918:24236\_2:N:0:TCTGCAAG+GCTGCACT  
CTAGTTCATCGCGGTATTTGTGAAATTAAGACAGACGTGAAAGTTATGATGAGTGATCGTATTAGAAC  
AGCTGATTCTTATTGCATGAACGTCGCTGAGGTCAAACCTGTGGACGT

@A00721:190:HGJW7DSXY:4:2339:18756:23046\_1:N:0:TCTGCAAG+GCTGCACT  
ACGAATTATTCATGATTCACGCTGGTCAGACCCCTTTTCTTACACATCTACTTAAAGGCGGCTTATACC  
ATAGGTTACGGTGATTCCAATCAAATCGGATTCATCAATCGTATTGATCTCCAAGTCGAAACTACTT  
CAA

@A00721:190:HGJW7DSXY:4:1519:11026:15577\_2:N:0:TCTGCAAG+GCTGCACT  
GAGTGTCTGTTCTTATCGAAGTCTCAGTTATCGCTGCCCGCCGACGTTTGTGCGCAACTCTCAGAGGT  
TTACGGCAGAAAAATTTCTCCTGCTTGTAATTCGAGAGAGGACACTAT

@A00721:190:HGJW7DSXY:4:2242:24505:8860\_2:N:0:TCTGCAAG+GCTGCACT  
TCAATGTAAAGTTAAACGATGCTACTTGTGAGAGGATCAATCACAGTAAGGAAGTGTACGTTTAGCA  
CGGGAGGTTGCAGATTC AACCCCTTATATCGAGGCTATCGAGGACGAT

@A00721:190:HGJW7DSXY:4:2148:28556:2566\_2:N:0:TCTGCAAG+GCTGCACT  
GACGACAAGCCTCAAGAGGGTAGAGGACCACCTGGATCTTCTACTGTCTCTGCCTTCCAAGATTTCTT  
AGAAGAGGTTATTCTGGAACCACCTTAACGTCACTCGGTAATCTTTC

@A00721:190:HGJW7DSXY:4:2314:8549:28823\_2:N:0:TCTGCAAG+GCTGCACT  
TCAAGGCTAATACCTTTATAGGTAAGAAGCCCCTTGAGCCGCGTAGTCAGCGCGTTTAGCTGTATCAT  
CAGTCAGAGTATACCCGATAGGGTACCGAGTCTCCAAGAGAATATTTA

@A00721:190:HGJW7DSXY:4:2648:15519:20415\_1:N:0:TCTGCAAG+GCTGCACT  
GATAAATTTATAGGAGACTCAGTTAACCTGAGAGCTCCTCAATTGATAGATTGGGTCAACAATAGGGA  
CGCTAGTATACTTCGTAAAGTCGTCAGCGAAATTGTCAATATTGATAATTGGACCTACTATATGACCT  
ATT

@A00721:190:HGJW7DSXY:4:2434:9462:11835\_1:N:0:TCTGCAAG+GCTGCACT  
GTTTCTTGAGGAGAGTCAAACAGTGTCTTTTACCCAACATTTTTATGTATACAGAGATGACCACTG  
ACGATTTCTCCCGAAGCTCTTCTCTCTTAGGAGGTCATGATGACTACTATAAGGGTGAAATCGAT  
TTT

FFFFFFFFFFFFFFFFFFFFFFFFFFFFFFFFFFFFFFFFFFFFFFFFFFFFFFFFFFFFFFFFFFFFFFFF  
FFF

@A00721:190:HGJW7DSXY:4:1336:16251:8782\_2:N:0:TCTGCAAG+GCTGCACT  
CCAGGAGTATCCATAACGATTTGTCATTTACCACCTTTGCTCAACGACGAAGTGGAAACGGCCAACACT  
TTCTTTGGTAATTGTATGATCACTTTGATGATTTTATCACTTTATTAT

+  
FFFFFFFFFFFFFFFFFFFFFFFFFFFFFFFFFFFFFFFFFFFFFFFFFFFFFFFFFFFFFFFFFFFFFFFF:FFFFFFFFFFFFFFFFFFFF  
FFFF,FFFF,FFFFFFFF,FFFFF:FFFFFFF:,FFFFFFFFFFFFFFFF

@A00721:190:HGJW7DSXY:4:2253:7808:2080\_1:N:0:TCTGCAAG+GCTGCACT  
TTTTCAAAGACTCCAATAACTGATCATTCTGATCATATGATTTTGGACAATGGTTTCGAAGCGAAATT  
TTTGAGGGATAAACCAGCGTACTTCTGCTCGCGATTTATTCTTTTTGTCAATGATTACATCTATCTTC  
GTT

+  
FFFFFFFFFFFFFFFFFFFFFFFFFFFFFFFFFFFFFFFFFFFFFFFFFFFFFFFFFFFFFFFFFFFFFFFF:FFFFFFFFFFFFFFFFFFFF  
FFFFFFFFFFFFFFFFFFFFFFFFFFFFFFFFFFFFFFFFFFFFFFFFFFFFFFFFFFFFFFFFFFFFFFFF:FFFFFFFFFFFFFFFFFFFF  
FFF

@A00721:190:HGJW7DSXY:4:1439:16532:23109\_1:N:0:TCTGCAAG+GCTGCACT  
CGATATTCGATTGAGGGTCGTTATACCTATTCGGCTATCTGTGCTTTGAATTGTATAAGATCAAATTT  
TAAACGATTCCGAGAGGTTTATCCTGATGTGGAGGGAGTTCTTGAAGCATCCCGACCTTCTTGTGA  
AAA

+  
FFFFFFFFFFFFFFFFFFFFFFFFFFFFFFFFFFFFFFFFFFFFFFFFFFFFFFFFFFFFFFFFFFFFFFFF:FFFFFFFFFFFFFFFFFFFF  
FF:FFFFFFFFFFFFFFFFFFFFFFFFFFFFFFFFFFFFFFFFFFFFFFFFFFFFFFFFFFFFFFFFFFFFFFFF:FFFFFFFFFFFFFFFFFFFF  
FFF

@A00721:190:HGJW7DSXY:4:1413:30544:3537\_2:N:0:TCTGCAAG+GCTGCACT  
TTCTACTACGGATTCATGGACCTTCCATCCTGTACCTCTTCTGGAGAGACGTATCTCAAAGATCGACT  
TCGAGACAGGTGATATTGTTGAGCGAGAGCGACCAAGATCTAAATTCG

+  
FFFFFFFFFFFFFFFFFFFFFFFFFFFFFFFFFFFFFFFFFFFFFFFFFFFFFFFFFFFFFFFFFFFFFFFF:FFFFFFFFFFFFFFFFFFFF  
FFFFFFFFFFFFFFFF:FF,FFFFFF:FFFFFFFFFFFFFFFFFFFFFFFF:FFFFFF

@A00721:190:HGJW7DSXY:4:2330:29731:28275\_2:N:0:TCTGCAAG+GCTGCACT  
TAAATGACGATCATTAAGACTCTCTTTCTTCTTTGTTTCCTTCTTTGCACTGATTTTCTCATCAGC  
TTGTGTTTTACCTAATCTGTGTTTTTACGATAACAACATATCAGTTGAT

+  
FFFFFFFFFFFFFFFFFFFFFFFFFFFFFFFFFFFFFFFFFFFFFFFFFFFFFFFFFFFFFFFFFFFFFFFF:FFFFFFFFFFFFFFFFFFFF  
:FFFFFFFFF:F:FFFFFFFFFFFFFFFFFFFFFFFF:FFFFFFFFFFFFFFFF

@A00721:190:HGJW7DSXY:4:2335:7500:7028\_1:N:0:TCTGCAAG+GCTGCACT  
CCGAAAGCGAACTTTGGGAATTTGAAGCTCAGGGTGAAGCACACGTTTGACCGTGACGAACTGTGG  
TGTTCTTGATCTACGTTACGGATATACTCTCCTTGAGTTCACCTCGTAAGGACACTACCACTTATTACG  
ATA

+  
F:FFFFFFFFFFFF,FFFFFFFFFFFFFFFFFFFFFFFFFFFFFFFFFFFFFFFFFFFFFFFFFFFFFFFFFFFFFFFFFFFFFFFF  
FFFFFFFFFFFFFFFFFFFFFFFFFFFFFFFFFFFFFFFFFFFFFFFFFFFFFFFFFFFFFFFFFFFFFFFFFFFFFFFFFFFFFFFF  
FFF

@A00721:190:HGJW7DSXY:4:2344:20220:26584\_2:N:0:TCTGCAAG+GCTGCACT  
AATCACTCATTTTAGTGAGATTATTAACGCACTAAACGCTTCGACAACAGCAGGGGTTTTCGA  
ATAGTGATAGCCACCCGCCTTACAGAGGGGCAGCAGCATGACCATAAT

+  
FFFFFFFFFFFFFFFFFFFFFFFFFFFFFFFFFFFFFFFFFFFFFFFFFFFFFFFFFFFFFFFFFFFFFFFF:FFFFFFFFFFFF  
FFFFFFFFFFFFFFFFFFFFFFFFFFFFFFFFFFFFFFFFFFFFFFFFFFFFFFFFFFFFFFFFFFFFFFFF

@A00721:190:HGJW7DSXY:4:2176:27516:7811\_1:N:0:TCTGCAAG+GCTGCACT  
TACTGTCTGTCTCGCTCTTCGAATGAAGTTTTAATGCTTAACAACAATGATAGTGAATTTATACCTA  
CAATCATTTGGTTTTTCTAATAATGATGACACTATTGTTTATGGATATGATGCTATTACTCATGATGGT  
TAC





@A00721:190:HGJW7DSXY:4:2360:8730:27289\_2:N:0:TCTGCAAG+GCTGCACT  
ATTAAACAAGTTGTACTTATCAATGATTTTATCGCTGGTTGTTATCTCGAAAAGTCTCTTCTAAAAGG  
AACGTCAGTTCTAACCCAAAGAGAATATCTAAAATATTTACAAAATCT

+

FFFFFF,FFFFFF:,FFFF,FF:,FFFF:FFFFFFFFF:FFFF,F::FFFF,FFF::FFFFFFFF:F  
FF:FF,F,FF,,F:FFFFFFFF,FFFF,:FFFFFFFFF,FFFFFF

@A00721:190:HGJW7DSXY:4:1206:2962:27352\_1:N:0:TCTGCAAG+GCTGCACT  
TGGCACTACCTCGGTACAATCTTACTTGGAACGAAGGCGACCTGTTCCGGAGTTTTTACGGGATCCGG  
AATGTTCTGTCTATATTAGGTGAAGCGAAATACGATTTCGAACGTCAACGTTACCGAGTTTCGTTTC  
GTA

+

FFFFFFFFFFFFFFFFFFFF:FFFFFF:FFFFFFFFFFFFFFFFFFFF,FFFFFFFFFFFF:F:FFFFFFFFFFFF  
FFFFFFFFFFFFFFFFFFFFFFFFFFFFFFFFFFFFFFFFFFFFFFFFFFFFFFFFFFFFFFFFFFFFFFFFFFFF  
FFF

@A00721:190:HGJW7DSXY:4:2578:6840:23766\_1:N:0:TCTGCAAG+GCTGCACT  
TAGTGCGAGGCCTCTCTTCTACGAGTATTGCTATTTATACGTTACGAGAAGAAGGTTCGAAAGTTTG  
AGAACTTAGTTTACGAACCTGACTCTACTATACGTGACATACTAAATACTAGATATTTGGATGATCTT  
GAT

+

FFFFFFFFFFFFFFFFFFFFFFFFFFFFFFFFFFFFFFFFFFFFFFFFFFFFFFFFFFFFFFFFFFFFFFFFFFFF  
FFFFFFFFFFFFFFFFFFFFFFFFFFFFFFFFFFFFFFFFFFFFFFFFFFFFFFFFFFFFFFFFFFFFFFFFFFFF  
FFF

@A00721:190:HGJW7DSXY:4:1617:13051:18646\_1:N:0:TCTGCAAG+GCTGCACT  
TTCTTCTTGATTTTAAATAAAGAATCTTTACCAGGACTCCTACTACAGGAGGCAGTCTTCTGATC  
GTAAGAAGTTTATAAGGAACATATCCATTTGTTGTAATAGGGTCATCAACTTAGAACTCGAAACTCTA  
AGT

+

FFFFFFFFFFFFFFF:FFFFFFFFFFFFFFFFFFFFFFFFFFFFFFFFFFFFFFFFFFFFFFFFFFFFFFFFFFFF  
FFFFFFFFFFFFFFFFFFFFFFFFFFFFFFFFFFFFFFFFFFFFFFFFFFFFFFFFFFFFFFFFFFFFFFFFFFFF  
FFF

@A00721:190:HGJW7DSXY:4:1336:30273:6762\_1:N:0:TCTGCAAG+GCTGCACT  
CAAGCTTACCTGTATCTTCAATGAAATTGGACTCTTCGATAGGGGACATTTTATCGTGGGCTTTCCGT  
AAAGGAAGATCTGTTATCGACGGTTTATCGTTTACGAAGTATCACTCCACCGGTGAATGGTTTAAGAA  
TAC

+

FFFFFFFFFFFFFFFFFFFFFFFFFFFFFFFFFFFFFFFFFFFFFFFFFFFFFFFFFFFFFFFFFFFFFFFFFFFF  
FFFFFFFFFFFFFFFFFFFFFFFFFFFFFFFFFFFFFFFFFFFFFFFFFFFFFFFFFFFFFFFFFFFFFFFFFFFF  
FFF

@A00721:190:HGJW7DSXY:4:2169:24867:10989\_1:N:0:TCTGCAAG+GCTGCACT  
TCTATTATTGATTTTATGAGATTGATACGTTAACAGAAGATGATGTTAGAGTAGAATTCCTGAAGAG  
TCCTTCCGTAACCAACTTCTTGACAATTTTCTTCAATCCTTCGATAATAGTTAAATCTAGGATTATGT  
CTG

+

FFFFFFFFFFFFFFFFFFFFFFFFFFFFFFFFFFFFFFFFFFFFFFFFFFFFFFFFFFFFFFFFFFFF:FFFF:FFFFFFF  
FFFFFFFFFFFFFFFFFFFFFFFFFFFFFFFFFFFFFFFFFFFFFFFFFFFF:,FFFFFFFFFFFF:FFFFFF:F,:FFFFFFF  
FFF

@A00721:190:HGJW7DSXY:4:1523:30987:25254\_2:N:0:TCTGCAAG+GCTGCACT  
ATCCTACATTGACTGATTATCTAAAGATTGAAGGAAAATTTATCCTCGTTTAACTTACTTAGACTTT  
CCTACGATACAAATGATAACTTCTAATTTACGTTTGCTACTCAGAGCT

+

FFFFFFF,FFFFFFFFFFFFFFFFFFFFFFFFFFFFFFFFFFFFFFFFFFFFFFFFFFFFFFFFFFFFFFFFFFFF  
FFFFFFFFFFFFFFFFFFFFFFFFFFFFFFFFFFFFFFFFFFFFFFFFFFFFFFFFFFFFFFFFFFFF

@A00721:190:HGJW7DSXY:4:1504:24017:2722\_1:N:0:TCTGCAAG+GCTGCACT  
CTCAGGAGTCCCGGCATTTGATAATAATGACGAGACTTTCGTCATAATCGCTGCATATTACGGATTAC



CGTTACGAGACCTGATGGTAGAATAGATTTAGTCTCTACACCCATCTC  
+  
FFFFFFFFFFFFFFFFFFFFFFFF:FFFF:FFFFFFFFFFFFFFFFFFFFFFFFFFFFFFFF:FFFFFFFF  
FFFFFFFF:FFFFFFFFFFFFFFFF:FFFFFFFFFFFFFFFFFFFFFFFFFFFFFFFF  
@A00721:190:HGJW7DSXY:4:1118:7048:7310\_2:N:0:TCTGCAAG+GCTGCACT  
AGCGAGTTTTCCGTCCTGAACGTAATACACGAAGAGATCATCCGCAAACGACTCGAAACCGAGACGCC  
GTAGATCAAAGTCCCTTCTAACTTTAGATTATGAATCCTGCCTTTACT  
+  
FFFFFFFFFFFFFFFFFFFFFFFFFFFFFFFFFFFFFFFFFFFFFFFFFFFFFFFFFFFFFFFFFFFFFFFF  
FFFFFFFFFFFFFFFFFFFFFFFFFFFFFFFFFFFFFFFFFFFFFFFFFFFFFFFFFFFFFFFF  
@A00721:190:HGJW7DSXY:4:2552:16568:29058\_2:N:0:TCTGCAAG+GCTGCACT  
TGCTTTTCGATAGTGATTGTTATCAATTTAAATACATTACTGTTTCAAATCATCTTTACTCACAGACT  
CCGAAAATGGTTTCAAATGAGGTCAAAGCTCTATTTATTAAACGAAC  
+  
FF,:F,FF:FFFFF:, ,FF,FFFFFFFFFFFFFFFF,FFFFFF:FFFFFFFF:FFFFFFFF:FFF  
FFFFFFFF,FFFFFF,FFFF, ,FF: :FFFF:FFFFFFFF,FFF,  
@A00721:190:HGJW7DSXY:4:1568:23113:6856\_2:N:0:TCTGCAAG+GCTGCACT  
AACTTCAATTCCTTCGATGTTTATATTTTCTATAAGGGAAAATAGCAATAATCAAATTCGACAAAT  
TTTAGAACTTTATTTAGAACTCTCTCCGATCACCTTGGTGTGATCTC  
+  
FFFFFFF,FFFFFFFFFFFFFFFFFFFFFFFFFFFFFFFFFFFFFFFFFFFFFFFFFFFFFFFFFFFF:F  
FFFFFFFFFFFFFFFFFFFFFFFFFFFFFFFFFFFFFFFF:F:FFFFFFFFFFFF  
@A00721:190:HGJW7DSXY:4:2308:11053:36855\_1:N:0:TCTGCAAG+GCTGCACT  
TCAATAAGATGTATGATGATAATCTACTATTTTTAAATAGTGATATTCAGCGTATACTTGAATACTTT  
ATCAAAGATTTGGCTTGGTCTATTTACCGCAAAAAGTTGGAAGAGGTCTATGATATTTATTTACTTA  
TAC  
+  
:FFFFFFFFFFFFFFFFFFFFF::FFFFF,F:FFFFFFFFFFFFFFFFFFFFFFFFFFFFFFFFFFFFF  
FFFFF:FFFFFFFFFFFFFFFF:FFFFFFFFFFFFFFFFFFFFFFFFFFFFFFFFFFFFFFFFFFFFF  
FFF  
@A00721:190:HGJW7DSXY:4:1459:5511:24408\_1:N:0:TCTGCAAG+GCTGCACT  
ACTTGACTGTTGATAATATTACAATAGCTCTTCTCAGAAGATTAGAGAAGTAACTGGTGAACACGTC  
GGTAGCATTGATTTACTTTTACCGTTAGAACTGAAAAAGATTCTTTTCGAAAAGAAACCTATAAGTTA  
CAA  
+  
FFFFFFFFFFFFFFFFFFFFFFFFFFFFFFFFFFFFFFFFFFFFFFFFFFFFFFFFFFFFFFFFFFFFFFFF  
FFFFFFFFFFFFFFFFFFFFFFFFFFFFFFFFFFFFFFFFFFFFFFFFFFFFFFFFFFFFFFFFFFFF:FFFFFFFF  
FFF  
@A00721:190:HGJW7DSXY:4:1359:28049:7075\_1:N:0:TCTGCAAG+GCTGCACT  
AAAGAAATAAAAATACTTCAAGTACCTGAACCTTACATTTTAAATGGTATGGTATAATGTGTCTTACA  
AATAGAACCTTCACTCTCGTAATGAGAGTGATTCTTAATATTCTAGTAACCGCTATGTGGGCATT  
ACT  
+  
FFFFFFFFFFFFFFFFFFFFFFFFFFFFFFFFFFFFFFFFFFFFFFFFFFFFFFFFFFFFFFFFFFFF:FFFFFFFF  
F:FFFFFFFFFFFFFFFFFFFFFFFFFFFFFFFFFFFFFFFFFFFFFFFFFFFFFFFFFFFFFFFFFFFFF  
FFF  
@A00721:190:HGJW7DSXY:4:1377:25129:3865\_2:N:0:TCTGCAAG+GCTGCACT  
GAAAATTTTAGAAAACTCCATTGTATAGTTCAAGGAGTACTTAATTCAATAGCTTTAGTATTATTTA  
CTATCGCCTTTATTGAAAATTGTATAAGAGTTAATTGCTTACACAAAA  
+  
FFFFFFFFFFFF:FFFF:FFFF, :FFFFFFFFFFFF:FFFFFFFFFFFFFFFFFFFF:FFFFFFFFFFFF  
FFFFFFFFFFFF:FFFFFFFFFFFF,FFFFFFFFFFFFFFFFFFFF:FF  
@A00721:190:HGJW7DSXY:4:2167:4056:19476\_2:N:0:TCTGCAAG+GCTGCACT  
TGACCAATCATCGCTCCAACCTGGCACGCCAGACGTAGGGTCAAACCTACTACCGCCGGTCGGCAGATC

GGCACCCTGGTCTCTACGTTGAGGGACCCGCTGTGCAGACTAACCTT  
+  
FFFFFFFFFFFF:FFFFFFFFFFFFFFFFFFFFFFFF, :FFFFFFFFFFFF, FFFFFFFFFFFFFFFFFF  
FFFFFFFFFFFF:FFFFFFFFFFFFFFFFFFFFFFFF:FFFFF, :F:FFFF  
@A00721:190:HGJW7DSXY:4:2518:7419:20823\_2:N:0:TCTGCAAG+GCTGCACT  
ACGACCCTCAAAGGAAACGGGCTGTTGCCAGAGGAAAGCAGCGACCACCGAGGTCGCTCGTAACAT  
TGACGGCAGTCCCGTCATCTCTGTGGGAACTGAGGCAGTACCTCAGTC  
+  
FFFFFFFFFFFFFFFFFFFFFFFFFFFFFFFFFFFFFFFF:FFFFFFFFFF:FF:FFFFFF, FFFFF:FFFFFFFF:FFFF  
F:FFF:F:F:F:FFFFFFFFFFFF::FFF, FFFFFFFFFFFFF, FFFFFF  
@A00721:190:HGJW7DSXY:4:1168:7880:16360\_2:N:0:TCTGCAAG+GCTGCACT  
CACTCCCATGCCAATCAATGATGTGACTATACAGTTCGGCCATTTCAAGAGTGGTCAATACGTCGTGG  
GAGGTACTGAAGCCTTCCCCTCCGCTGGCACGAAGAACTCCCAAGC  
+  
FFFFFFFFFFFFFFFFFFFFFFFFFFFFFFFFFFFFFFFFFFFFFFFFFFFFFFFFFFFFFFFFFFFFFFFF:FFFFFFFFFFFFFFFFFFFFFFFF  
FFFFFF:FFFFFFFFFFFFFFFFFFFFFFFFFFFFFFFFFFFFFFFFFFFFFFFFFFFFFFFFFFFFFFFF  
@A00721:190:HGJW7DSXY:4:2420:24035:26772\_2:N:0:TCTGCAAG+GCTGCACT  
TGACCAGAATGAAAAGGGGTTTACCAGGGTAGTCTCTAAGTCTACCAGGAAGAGGGGAAATGTCCCA  
AACTGAGAAGAATAAAGGGAAAGGTCCATCAGGACCTAAGAAGGGGA  
+  
FFFFFFFFFFFFFFFFFFFFFFFFFFFFFFFFFFFFFFFFFFFFFFFFFFFFFFFFFFFFFFFFFFFFFFFF  
FFFFFFFFFFFFFFFFFFFFFFFFFFFFFFFFFFFFFFFFFFFFFFFFFFFFFFFFFFFFFFFF  
@A00721:190:HGJW7DSXY:4:1459:18530:19836\_1:N:0:TCTGCAAG+GCTGCACT  
CTCCCACCATCTGGGGTTGGGAATAAGAAATCTGCACGGGCCAAAGAGGCCGCTGCTACGAAGTCGCT  
GAAGGCGGCTTGGGTCATTAAGGGTAGCTGTAAAGTTGCGCTGCCGACCCCATCTTTGAGACCAAGA  
CTC  
+  
FFFFFF:FFFFFFFF, FFFFFFFFF, FFFFFFFFFFFFFFFFFFFFFFFFFFFFFFFFFFFFFFFFFF  
FFFFFFFF:FFFFF:FFFFFFFFFFFFFFFFFFFFFFFF:FFFFFFFFFFFFFFFFFFFFFFFF:FFF  
FFF  
@A00721:190:HGJW7DSXY:4:2131:26539:36933\_2:N:0:TCTGCAAG+GCTGCACT  
CAAATCTGTTGAATTCGTCCTGAGGACGAAGGTGAGAGGACTTTTGCTACTGGCGACAACTGAGA  
GCAGTCGCTGGGGAAAGAGAATTGCGTGGGTGAAGGCCGACGCTTCG  
+  
:FFFFFFFF:FFFFFFFFFFFFFFFFFFFFFFFFFFFFFFFFFFFFFFFFFFFFFFFFFFFFFFFF  
FFFFFFFFFFFFFFFFFFFFFFFF:FFFFFFFF, FFFFFFFFF  
@A00721:190:HGJW7DSXY:4:2526:26693:13432\_2:N:0:TCTGCAAG+GCTGCACT  
TTTTGTCAACGGCGTTTGGAGATTTTATCCGCGCTTAACATATGGGGCGAAGATCCCCTATGGAGTCT  
TGAAGGACTTAGGTTGGCATATTTATGCCGACGATAATAAGCATGTCA  
+  
FFFFFF:FFFFFF, FFFFFFFFFFFFFFFFFFFFFFFFFFFFFFFFFFFFFFFFFF, F:FFFFFF  
FFFFFFFFFFFFFFFFFFFFFFFFFFFFFFFFFFFFFFFFFFFFFFFF:FFFF  
@A00721:190:HGJW7DSXY:4:1515:16938:15295\_1:N:0:TCTGCAAG+GCTGCACT  
CAAGAGAGAGTGTGAGAGAGTCGCTCTCACTATTTTTGCCAGAATGCGGGCTTTCTGACTGATGAGG  
TTAAACTCTTGCTCCTTCTGTGGGTGAGGGTTTTGTTATATTCACTGGTTCTGGGAGGCTGCTTTC  
CTC  
+  
FFFFFFFFFFFFFFFFFFFFFFFFFFFFFFFFFFFFFFFF:F::FFFFFFFFFFFFFFFF:FFFFFFFFFFFFFFFF  
:FFFFFFFFFFFFFFFFFFFFFFFF:FFFFFFFFFFFFFFFFFFFFFFFFFFFFFFFF  
FFF  
@A00721:190:HGJW7DSXY:4:2360:32036:14481\_1:N:0:TCTGCAAG+GCTGCACT  
GAGAGCATTAGAAGGAAGTTGGGCAAATCCCACATATGGTAGACGTTGTACACTTTTCTTGA  
TTTTCTTTCTCCGTCATTGGGGATTTTCGATGTGAGAAGGTGGAAGGTGTCAAGGGTCTTCTTCATG  
CTG

+  
FFFF:FFFFFFFFFFFFFFFFFFFFFFFFFFFFFFFFFFFFFFFFFFFFFFFFFFFFFFFFFFFFFFFF  
FFFFFFFFFFFFFFFFFFFFFFFFFFFFFFFFFFFFFFFFFFFFFFFFFFFFFFFFFFFFFFFFFFFFFFFF  
FFF  
@A00721:190:HGJW7DSXY:4:1632:10899:9596\_1:N:0:TCTGCAAG+GCTGCACT  
GCAGAGTGACTGGAGTTCAGACGTGTGCTCTTCCGATCTGAGGAAGTTCTCCGAAATTAAAGACGGGG  
GGATTAAGAGTCCAGCTGTAACGTGCATTTAGAGAGGGGAGCTCTGAAAAGGAACTTCGTCAGAAG  
ATG  
+  
FFFFFFFF:FFFFFFFF:FFFFFFFFFFFFFFFF:FFFFFFFFFFFFFFFF:FFFFFF:FFFF  
FFFFFFFFFFFFFFFFFFFFFFFFFFFFFFFF:FFFFFFFFFFFFFFFFFFFFFFFFFFFFFFFF:FF  
FFF  
@A00721:190:HGJW7DSXY:4:1217:30382:28087\_2:N:0:TCTGCAAG+GCTGCACT  
AGTTTGAGGAAGGCTCTAGAGAAGATCTCACCACCTGGAGAAGGCAAGTGGAGAGTCCAGAAGTTGAT  
GAAGAAGGATTATTTGAAGCAGGGGTTACCACTTCCTAAGGTGGATGA  
+  
FFFFFFFFFFFFFFFFFFFFFFFFFFFFFFFFFFFFFFFFFFFFFFFFFFFFFFFFFFFFFFFFFFFF  
FFFFFFFFFFFFFFFFFFFFFFFFFFFFFFFFFFFFFFFFFFFFFFFFFFFFFFFFFFFF  
@A00721:190:HGJW7DSXY:4:2666:26964:3035\_1:N:0:TCTGCAAG+GCTGCACT  
TTAGGTCAACTTGGGGTTTGAATGTCTAGTGCCTTACGATTGAAAGAGGTCCTTTGAGTATCGA  
CAGATCTTTCGATCTTGAGGACGTACATTTAACGTGGCAGAATTCGGTAACTTACCATATTGTTCTT  
CCG  
+  
F:FFFFFFFFFFFFFFFFFFFFFFFFFFFFFFFFFFFFFFFFFFFFFFFFFFFFFFFFFFFFFFFFFFFF  
FFFFFFFFFFFFFFFFFFFFFFFFFFFFFFFFFFFFFFFFFFFFFFFFFFFFFFFFFFFF:FFFFFFFFFFFF  
FFF  
@A00721:190:HGJW7DSXY:4:1376:21160:34632\_1:N:0:TCTGCAAG+GCTGCACT  
TAACCTTGACTCAACTACTCCGATCAGATCCGATGGTTTGATTGGTATGGACTACTCGACTTTTGAT  
CTGGAGTTGTCTAGGGTCATGGCAGATACTACCGATAAGGTGAAAAATATGCAGGTCAAAGATTCTGT  
AGC  
+  
FFFFFFFFFFFFFFFFFFFFFFFFFFFFFFFFFFFFFFFFFFFFFFFFFFFFFFFFFFFFFFFFFFFF  
FFFFFFFFFFFFFFFFFFFFFFFFFFFFFFFFFFFFFFFFFFFFFFFFFFFF:FFFFFFFFFFFFFFFFFFFF  
FFF  
@A00721:190:HGJW7DSXY:4:2555:4517:3114\_1:N:0:TCTGCAAG+GCTGCACT  
CTAAGAGTCTTTATGATTCAAAACCTATCGTTGTGCTACCTTACAAGGTTGAGGAGACTTTACAGCGG  
CTTATTGTCGCGCAGTTTCCAGAATTGCGGTTGAAGTTCACCCATTCTATCTTGAATGCTCACGCCGT  
CGC  
+  
FFFFFFFFFFFFFFFFFFFFFFFFFFFFFFFFFFFFFFFFFFFFFFFFFFFFFFFFFFFFFFFFFFFF  
FFFFFFFFFFFFFFFFFFFFFFFFFFFFFFFFFFFFFFFFFFFFFFFFFFFF:FFFFFFFFFFFFFFFFFFFF  
FFF  
@A00721:190:HGJW7DSXY:4:1621:4001:6449\_1:N:0:TCTGCAAG+GCTGCACT  
GAGGCGATATTCGTTTTATATCCAAACCTCCTTGAATGGAGTACATATTTGCAACCCTATTCTTGAT  
GTGAAAGATGCATCGAGGTATACGTCTAGGAACATTGATTGGGAACGTACCTACTCACGAGACGTCAT  
GAA  
+  
FFFFFFFFFFFFFFFF:FFFFFFFFFFFFFFFFFFFFFFFFFFFFFFFFFFFFFFFFFFFFFFFFFFFF  
F:FFFFFFFFFFFFFFFF,FFFF:FFFFFFFFFFFFFFFFFFFFFFFFFFFFFFFFFFFFFFFFFFFF  
FFF  
@A00721:190:HGJW7DSXY:4:1376:27163:6042\_2:N:0:TCTGCAAG+GCTGCACT  
GTTCTGTTACAAGAAGCGCTTTGGATTGTGACCATAAAGCCTCAGTTGCGATAGCTGTAGAGGTATACG  
ATATCTCTCTTGATGATGTAGCCACTATAATGCTTAAGAGAGAGATTG  
+

[illegible]

$+$ 

@A00721:190:HGJW7DSXY:4:2246:20247:18552\_2:N:0:TCTGCAAG+GCTGCACT  
TTGGATGTTGTCGAAACTATCAGGTTCTTGTCACGATTCTTAAAAGAAGTTTATTAAAACTTCAGAG  
TCTCTTGAAGTCCAGGTAGCTAATGTTCTTGCAATAGCCACAGACTT

+

@A00721:190:HGJW7DSXY:4:1646:1452:16971\_1:N:0:TCTGCAAG+GCTGCACT  
TCTGTTGGTAGAGGAGTTGAGAGAATTACTCAGATTCAATCTGGCATCACTGAACGTCTACAACGAGT  
TAGGGAGTGGCTAGGTTTTAAAGATCCTTGCACAAGCAATACCTTCCACTGAGTTCATTACCCAGA  
GTT

+

@A00721:190:HGJW7DSXY:4:2149:7383:4131\_1:N:0:TCTGCAAG+GCTGCACT  
GTTTTTGGTATAAATCCTGATGGCTCAGTACAGGGAGGAGGTAATAGTTATAAAACCTTCTTTTATCA  
TTGCAACAGGACTTTGAGAAGACTGTTGAAATGGACAAAATCTGGGATCATAGGTATGTGTCACGCTA  
CAC

+

@A00721:190:HGJW7DSXY:4:2577:12373:32315\_2:N:0:TCTGCAAG+GCTGCACT  
TCGCCATATCAGATTAGAGACATGCCAGTTAGAGTTCTTCTAACCAGGACTGATGGTGAGATTCTTTT  
ACCTTTTGGAGGTCCAGGAACCTTTACTCCTAGTGTCTTTTCTAGAGT

 $+$ 

@A00721:190:HGJW7DSXY:4:2430:22290:4523\_2:N:0:TCTGCAAG+GCTGCACT  
CAATAACACTCTATTGAATCCCTTTCCACGATGAAAGCTCTTTATGAGGTGCTCCATGCAAATTTAC  
AGTTCTCTTTGGTGATATCGCCTCTGTCCTTTCTCCTTTAATCGTGA

+

@A00721:190:HGJW7DSXY:4:1101:19289:36213\_1:N:0:TCTGCAAG+GCTGCACT  
GCTCTTCCGATCTGCTGGATGGATCTTTTGATGGTATGTTTCACATTGCGTGATCACTTCCCGTGGAC  
TTGGGAAGAGATTAAACATAAAATCCAGCGATTCTATTATGTCGCTAAAGCCTGTCCAGTTGTCGATG  
ATG

+

@A00721:190:HGJW7DSXY:4:2278:17933:35462\_1:N:0:TCTGCAAG+GCTGCACT  
CACAAGGATTACTAAGTCTGAGATCTGCCACTTCTAATTTTAGGAAACGTCGCGAAAAGAAAGTTCAT  
GAGGATGTCTTGTCGAAAAATATCGCCGGGAACCTCTAATAGAGGATCCTGATGACATTATTTCAAC  
GGA

 $+$

@A00721:190:HGJW7DSXY:4:2520:23023:13777\_2:N:0:TCTGCAAG+GCTGCACT  
CTACCACAGAAACCGTCTCAGGAAGTGTCTCCACTGATTCGGAATTAGAGAAAGACGACCTTCTTG  
GGGACTGAGACCTCTGAATTTTCAGGGTGCCCTGATGAGGACGTTGAA

@A00721:190:HGJW7DSXY:4:2216:22987:34820\_2:N:0:TCTGCAAG+GCTGCACT  
CTTCTAAGAGTGTTC AAAAGACCAGAAACGTAACAAGAAGAATAAAGGTAGGAAGGGGAGAAAACAG  
AACAAGCGAGCGGTTGAAGAGAAAACCTGATATGGTTGCGGCTGATCGT

@A00721:190:HGJW7DSXY:4:2126:6144:2769\_1:N:0:TCTGCAAG+GCTGCACT  
GGCGATACCACTGATCTTCCAGAGTTACGTAGTGGTCGTTCTTTTGGTGATTTTATCAAAGAGAAAGT  
TTCTGCTAGTCGCGACGATAGTATTTATCGGAGTGATATTAACAAGTTAACTTCGAACTGACCACTT  
ACA

@A00721:190:HGJW7DSXY:4:1205:9010:29559\_2:N:0:TCTGCAAG+GCTGCACT  
AGTTCTTCGCAGTTGAATCTCCACCAGGTGGAGGGAAGACCACTGAACCTTATAGCGACTTTTGTGCAA  
TTTTTCGCAAAAGGTCTTGAAGTACGTATTGTCACCTGCTAATCGTAAT

@A00721:190:HGJW7DSXY:4:1354:5104:10582\_2:N:0:TCTGCAAG+GCTGCACT  
CTAGTTCATCGCGGTATTTGTGAAATTAAGACAGACGTGAAAGTTATGATGAGTGATCGTATTAGAAC  
AGCTGATTCTTATTGCATGAACGTCGCTGAGGTCAAACCTGTGGACGT

@A00721:190:HGJW7DSXY:4:2543:6144:28917\_1:N:0:TCTGCAAG+GCTGCACT  
ACGAATTATTCATGATTCACGCTGGTCAGACCCTTTTTCTTACACATCTACTTAAAGGCGGCTTATACC  
ATAGGTTACGGTGATTCCAATCAAATCGGATTCATCAATCGTATTGATCTCCAAGTCGAAACTACTT  
CAA

@A00721:190:HGJW7DSXY:4:1519:11306:15906\_2:N:0:TCTGCAAG+GCTGCACT  
GAGTGTCTGTTCTTATCGAAGTCTCAGTTATCGCTGCCCGGCCGACGTTTGTGCGCAACTCTCAGAGGT  
TTACGGCAGAAAAATTTCTCCTGCTTGTAATTCGAGAGAGGACACTAT

@A00721:190:HGJW7DSXY:4:2509:10782:33943\_2:N:0:TCTGCAAG+GCTGCACT  
TCAATGTAAAGTTAAACGATGCTACTTGTGAGAGGATCAATCACAGTAAGGAAGTGTACGTTTAGCA  
CGGGAGGTTGCAGATTCAACCCCTTATATCGAGGCTATCGAGGACGAT

[illegible]



@A00721:190:HGJW7DSXY:4:2222:3622:26209\_2:N:0:TCTGCAAG+GCTGCACT  
GACGACAAGCCTCAAGAGGGTAGAGGACCACCTGGATCTTCTACTGTCTCTGCCTTCCAAGATATCTT  
AGAAGAGGTTATTCCTGGAACCACCTTAACGTCACTCGGTAATCTTTC

+

,:F:FFFFFF:FFFFFF,FFFFFF,FFFF,FF,F,FFF:FF,FFFF,: ,FFF,F,: :FFF,FF::  
FFFF:FF,,,: ,FF: ,FFFF:FFFF,FFFF:FFFFFF,FFFFFF,,FF,

@A00721:190:HGJW7DSXY:4:2451:18313:19492\_2:N:0:TCTGCAAG+GCTGCACT  
TCAAGGCTAATACCTTTATAGGTAAGAAGCCCCTTGAGCCGCTAGTCAGCGCGTTTAGCTGTATCAT  
CAGTCAGAGTATACCCGATAGGGTACCGAGTCTCCAAGAGAATATTTA

+

FFFFFFFFFFFFFFFFFFFFFFFFFFFFFFFFFFFFFFFFFFFFFFFFFFFFFFFFFFFFFFFFFFFFFFFF  
FFFFFFFFFFFFFFFFFFFFFFFFFFFFFFFFFFFFFFFFFFFFFFFFFFFFFFFFFFFFFFFFFFFFFFFF

@A00721:190:HGJW7DSXY:4:2413:2428:29309\_1:N:0:TCTGCAAG+GCTGCACT  
ATAGGAGACTCAGTTAACCTGAGAGCTCCTCAATTGATAGATTGGGTCAACAATAGGGACGCTAGTAT  
ACTTCGTAAAGTCGACAGCGAAATGGTCAATATTGATAATTGGACCGACTATATGACCTATTTTAAGC  
TCA

+

FFFFFFFFFFFFFFFF:FFFFFFFFFFFFFFFFFFFFFFFFFFFFFFFFFFFFFFFFFFFFFFFFFFFFFFFF  
FFFFFFFFFFFFFFFFFFFFFFFFFFFFFFFFFFFFFFFF:F:FFFFFFFFFFFFFFFFFFFFFFFFFFFFFFF  
FFF

@A00721:190:HGJW7DSXY:4:1150:26612:13385\_2:N:0:TCTGCAAG+GCTGCACT  
GTTCTTGTGAGGAGAGTCAAACAGTGTCTTTTACCCAACATTTTTATGTATACAGAGATGACCAGTGA  
CGATTTCTCCCGAAGCTCTTCTCTCTCTTAGGAGGTCATGATGACTA

+

FFFFFFFFFFFFFFFFFFFFFFFFFFFFFFFFFFFFFFFFFFFFFFFFFFFFFFFFFFFFFFFFFFFFFFFF  
F:FFFFFFFFFFFFFFFFFFFFFFFFFFFFFFFFFFFFFFFFFFFFFFFFFFFFFFFFFFFFFFFF

@A00721:190:HGJW7DSXY:4:1444:12057:8249\_2:N:0:TCTGCAAG+GCTGCACT  
CCAGGAGTATCCATAACGATTTGTCAATTTACCACCTTTGCTCAACGACGAAGTGGAAACGGCCAACACT  
TTCTTTGGTAATTGTATGATCACTTTGATGATTTTATCACTTTATTAT

+

FFFFFFFFFFFFFFFFFFFFFFFFFFFFFFFFFFFFFFFFFFFFFFFFFFFFFFFFFFFFFFFFFFFFFFFF  
FFFFFFFFFFFFFFFFFFFFFFFFFFFFFFFFFFFFFFFFFFFFFFFFFFFFFFFFFFFFFFFF

@A00721:190:HGJW7DSXY:4:2373:7726:36417\_1:N:0:TCTGCAAG+GCTGCACT  
TTTTCAAAGACTCCAATAACTGATCATTCTGATCATATGATTTTGGACAATGGTTTGAAGCGAAATT  
TTTGAGGATAAACCAGCGTACTTCTGCTCGCGATTTATTCTTTTTGTCAATGATTACATCTATCTTC  
GTT

+

FFFFFFFFFFFFFFFF:FFFFFFFFFFFFFFFFFFFFFFFFFFFFFFFFFFFFFFFFFFFFFFFFFFFFFFF  
FFFFFFFFFFFFFFFFFFFFFFFFFFFFFFFFFFFFFFFFFFFFFFFFFFFFFFFFFFFFFFFFFFFFFFFF  
FFF

@A00721:190:HGJW7DSXY:4:1446:18466:3599\_1:N:0:TCTGCAAG+GCTGCACT  
CGATATTGATTGAGGGTCGTTATACCTATTTCGGCTATCTGTGCTTTGAATTGTATAAGATCAAATTT  
TAAACGATTCCGAGAGGTTTATCCTGATGTGGAGGGAGTTCTTGAAGCATCCCGACCTTTCCTTGTGA  
AAA

+

FFFFFFFFFFFFFFFFFFFFFFFFFFFFFFFFFFFFFFFFFFFFFFFFFFFFFFFFFFFFFFFFFFFFFFF  
FFFFFFFFFFFFFFFFFFFFFFFFFFFFFFFFFFFFFFFFFFFFFFFFFFFFFFFFFFFFFFFFFFFFFFFF  
FFF

@A00721:190:HGJW7DSXY:4:1438:24496:10567\_2:N:0:TCTGCAAG+GCTGCACT  
TTCTACTACGATTGATGACCTTCCATCCTGTACCTCTTCTGGAGAGACGTATCTCAAAGATCGACT  
TCGAGACAGGTGATATTGTTGAGCGAGAGCGACCAAGATCTAAATTCTG

+

FFFFFFFFFFFFFFFFFFFFFFFFFFFFFFFFFFFFFFFFFFFFFFFFFFFFFFFFFFFFFFFFFFFFFFF  
FFFFFFFFFFFFFFFF:FFFFFFFFFFFFFFFFFFFFFFFFFFFFFFFFFFFFFFFF

+

@A00721:190:HGJW7DSXY:4:2610:26973:9095\_1:N:0:TCTGCAAG+GCTGCACT  
CCGAAAGGCGAACTTTGGGAATTTGAAGCTCAGGGTGAAGCACACGTTTGACCGTGACGAACTGTGG  
TGTTCTTGATCTACGTTACGGATATACTCTCCTTGAGTTCACCTCGTAAGGACACTACCACTTATTACG  
ATA

 $+$ 

@A00721:190:HGJW7DSXY:4:2502:26332:36918\_2:N:0:TCTGCAAG+GCTGCACT  
AATCACTCATTTTAGTGAGATTATTAACGCACTAAACGTCTTCGACAACAGCAGGGGTTTTCGA  
ATAGTGATAGCCACCCGCCTTACAGAGGGGCGAGCAGCATGACCATAAT

+

@A00721:190:HGJW7DSXY:4:2540:19859:14215\_1:N:0:TCTGCAAG+GCTGCACT  
TACTGTCTGTCTCGCCTCTTCGAATGAAGTTTTAATGCTTAACAACAATGATAGTGAATTTATACCTA  
CAATCATTGGTTTTTCTAATAATGATGACACTATTGTTTATGGATATGATGCTATTACTCATGATGGT  
TAC

+

@A00721:190:HGJW7DSXY:4:2225:29279:36949\_2:N:0:TCTGCAAG+GCTGCACT  
TACAAGGACCTTAAGCGATGGATCGGGTTAATTCTAAACATTACCCGAAAGACGTGCTAAATTA  
ACCATTGTACGATGTCGTCTGTCTCGGCGATCACTTTTCACTAAGAAT

+

@A00721:190:HGJW7DSXY:4:1533:8449:21699\_2:N:0:TCTGCAAG+GCTGCACT  
GAGTGAAAGGCTTCAATTGTAGTGGTTTGGTCGTTTCAGTAACCAGTCAGTATACCTCTACGCAAAGA  
TATTTTCATGAAAACCTACAGAGGAACGTACCGGATTACCTGTCTTTTCAT

+

@A00721:190:HGJW7DSXY:4:1672:10176:10379\_2:N:0:TCTGCAAG+GCTGCACT  
CGATGTTGGATGTCAAGAAGGGTTCAGAATGGGATTCTACGTAGTTTATGACTTTGGTGGTGGTACT  
TTCGATACTTCTATCGTCTTACGTTACGGTAATTACTATAGTGTTATT

+

@A00721:190:HGJW7DSXY:4:1214:26630:27884\_1:N:0:TCTGCAAG+GCTGCACT  
TTGGAGGTCGTGACGTTGATGAAGCTATAAGAGCGTTCTTATTACGGCGCACTTCTTTACCCGCCACC  
ACACAACCTTTCAGTTTCACAACCTGAAGGAGGAGGTTTCTGTTACTGGAAAACCTCGTCAATACTTTT  
CAA

+

[illegible]

$+$  $+$ 

+

+

+

+

+

+

@A00721:190:HGJW7DSXY:4:2206:9733:36699\_1:N:0:TCTGCAAG+GCTGCACT  
TCTATTATTGATTTTTATGAGATTGATACGTTAACAGAAGATGATGTTAGAGTAGAATTCCTGAAGAG

TCCTTCCGTAACCAACTTCTTGACAATTTTCTTCAATCCTTCGATAATAGTTAAATCTAGGATTATGT  
CTG

+

FFFFFFFFFFFFFFFF:FFFFFFF,FFF:F:F:FF,F,FFFFFFFF:FFFF:FF,FFF:FFFFFF:FF  
FFFFFFFFFFFFFFFF:FFFFFF,FF,:FFF:FFFF:F,FF,FFFFFF,FFFFFF,:F,,F:FFF:F  
FF:

@A00721:190:HGJW7DSXY:4:1570:29170:10207\_2:N:0:TCTGCAAG+GCTGCACT  
ATCCTACATTGACTGATTATCTAAAGATTGAAGGAAAATTTTATCCTCGTTTAACTTACTTAGACTTT  
CCTACGATACAAATGATAACTTCTAATTTACGTTTGCTACTCAGAGCT

+

FFFFFFFFFFFFFFFFFFFFFFFFFFFFFFFFFFFFFFFFFFFFFFFFFFFFFFFFFFFFFFFF  
FFFFFFFFFFFFFFFFFFFFFFFF,FFFFFFFFFFFFFFFFFFFFFFFF

@A00721:190:HGJW7DSXY:4:2205:10239:10645\_1:N:0:TCTGCAAG+GCTGCACT  
CTCAGGAGTCCCGGCATTTGATAATAATGACGAGACTTTTCGTCATAATCGCTGCATATTACGGATTAC  
ACGGTACCAGCGCATCTCGTGTGAGCCTCGACCCGATTATATGGTATTAAGGTGAGGAG  
ACC

+

FFFFFFFFFFFFFFFF:FFFFFFFFFFFFFFFFFFFFFFFFFFFFFFFFFFFFFFFFFFFFFFFF  
FFFFFFFFFFFFFFFFFFFFFFFFFFFFFFFFFFFFFFFFFFFFFFFFFFFFFFFFFFFFFFFF  
FFF

@A00721:190:HGJW7DSXY:4:1102:19542:27602\_1:N:0:TCTGCAAG+GCTGCACT  
ACTAACTATGTTATGTTCTCTGATCATTTTGACAATCTCTTCTTATAATAAATAAATAAATAATATTA  
CTAATGGCAAATAGTGGAAGGCTCCAGTCAACACTAGTTCGAGTGCTGCTTTGGATTACGATGACGT  
GAG

+

FFFF:FFFFFFFFFFFF:FFFFFFFFFFFF:FFFFFFFFFFFFFFFFFFFFFFFFFFFF:FFFFFFF  
FFFFFFFF:FFFFFFFFFFFFFFFFFFFFFFFFFFFFFFFFFFFFFFFFFFFFFFFFFFFFFFFF  
FFF

@A00721:190:HGJW7DSXY:4:1406:22146:13667\_2:N:0:TCTGCAAG+GCTGCACT  
ATAGTTTTTACCTCGACCAACATTAAGGCGGCGGCGACTAATCTTAAAGCTTCACCCAAAATGAAGGA  
CACTTCGAAACTGAATAATGATGCACTACAAACAAGTATCGCTAATCA

+

FFFFFF:FFFFFFFFFFFFFFFFFFFFFFFFFFFFFFFFFFFF:F:FFFFFFFFFFFFFFFFFFFF,:FF  
FFFFFFFFFFFFFFFFFFFFFFFFFFFFFFFFFFFFFFFFFFFFFFFFFFFFFFFF

@A00721:190:HGJW7DSXY:4:1457:14470:3630\_2:N:0:TCTGCAAG+GCTGCACT  
GAGGATATTCGCCATTGTGGTACGAATTGGTCCAACATTTACCACCAAATCTTTTGATACAACCTA  
GCCTTCAAGTGGGGTATGCCTGCGGAATACGCTTGCTATTCACCAGAT

+

FFFFFFFFFFFFFFFFFFFFFFFFFFFF:FFFFFFFFFFFF:FFFFFFFFFFFFFFFFFFFFFFFF  
:FFFFFFFFFFFFFFFFFFFFFFFFFFFFFFFFFFFFFFFFFFFFFFFF

@A00721:190:HGJW7DSXY:4:1649:10954:1423\_1:N:0:TCTGCAAG+GCTGCACT  
GTTGAGACGTGTGCTCTTCCGATCTTTCAAGCTTGTGCTTTAAAGACTGCAGAGGCTGTCAAACAAGC  
CCAGACTCAAGGAGTCCAATCAAAGTTTTGAATTTAGCTCAACTGGGGAGACGTGCTTAAATGGGTG  
ATA

+

FFFFFFFFFFFF:FFFFFFFFFFFFFFFFFFFFFFFFFFFF:FFFF:FFFFFFFFFFFFFFFFFFFF:  
FFF,FFFFFFFFFFFFFFFF:FFFFFFFFFFFFFFFFFFFFFFFFFFFFFFFFFFFFFFFF  
FFF

@A00721:190:HGJW7DSXY:4:2218:22607:27680\_2:N:0:TCTGCAAG+GCTGCACT  
TAGATAGTGGGATAATAGTTCTACCGATACGTAGTGAACGCGTTTCGTAGAACCAAGTACTTTCCGTCT  
GAAGAGTTTAGAGCTGCTATTGATTATGTAACCGATAGGAGTTGTATA

+

FFFFFFFFFFFFFFFFFFFFFFFFFFFFFFFFFFFFFFFFFFFF:FFFFFFFFFFFFFFFFFFFF  
FFFFFFFFFFFFFFFFFFFFFFFFFFFFFFFFFFFFFFFF:FFFFFFFFF:

@A00721:190:HGJW7DSXY:4:1118:14895:10598\_2:N:0:TCTGCAAG+GCTGCACT  
ATCCTTTAAGGACTATGTTGACTGACGAAGATTTTCCCACAGATTTGTCTACGTTGCAGATCGCCACT  
CCAAACACTATATACATTATAAAATATAAAAATAAGGGAGTCATAACT

+

FFFFFFFFFFFFFFFFFFFFFFFFFFFFFFFFFFFFFFFFFFFFFFFFFFFFFFFFFFFFFFFFFFFFFFFF,FFF:FFFF:FFFFF  
FFFFFFFFFFFFFFFFFFFF:FFFFFFFFFFFFFFFFFFFF:FF:FFFF:F

@A00721:190:HGJW7DSXY:4:1208:27896:26757\_2:N:0:TCTGCAAG+GCTGCACT  
AATTCTTGCTTTCAACGAAGTCTCTGATTTTATTAATCATTACTTTAACGATCTCTCGGTCATTTAC  
TCTGTACTTGATCTACGTCGTTTAACTGTCGGAACAACCTTTACTTAG

+

FFFFFFFFFFFFFFFFFFFFFFFFFFFFFFFFFFFFFFFFFFFFFFFFFFFFFFFFFFFFFFFFFFFFFFFF,:FF  
FFFFFFFFFFFFFFFFFFFF:FFFFFFFF:FFFFF,FFFFFFFF:F::FFFF

@A00721:190:HGJW7DSXY:4:1337:23411:10911\_2:N:0:TCTGCAAG+GCTGCACT  
CTCACTATCGTTTTCTGCTTTTTCTTAGCTAATAGATTAATAAAGGATGAGTACGAAAACCAACTCTT  
CGTTACGAGACCTGATGGTAGAATAGATTTAGTCTCTACACCCATCTC

+

FFFFFFFFFFFFFFFFFFFFFFFFFFFFFFFFFFFFFFFFFFFFFFFFFFFFFFFFFFFFFFFFFFFFFFFF,FFFF  
FFFFFFFFFFFFFFFFFFFF:FFFFF:FFFFFFFFFFFFFFFFFFFFFFFFFFFF

@A00721:190:HGJW7DSXY:4:1367:18575:24298\_2:N:0:TCTGCAAG+GCTGCACT  
AGCGAGTTTTCCGTCCTGAACGTAATACACGAAGAGATCATCCGCAAACGACTCGAAACCGAGACGCC  
GTAGATCAAAGTCCCTTCTAACTTTAGATTATGAATCCTGCCTTTACT

+

FFFFFFFFFFFFFFFFFFFFFFFFFFFFFFFFFFFFFFFFFFFFFFFFFFFFFFFFFFFFFFFFFFFFFFFF:FFFF  
FFFFFFFFFFFFFFFFFFFFFFFFFFFF:FFFFF:FFFFFFFFFFFFFFFFFFFFFFFFFFFF

@A00721:190:HGJW7DSXY:4:1108:26747:5478\_2:N:0:TCTGCAAG+GCTGCACT  
CTTTTCGATAGTGATTGTTATCAATTTAAATACATTACTGTTTCAAATCATCTTTACTCACAGACTCC  
GAAAATGGTTTCAAATGAGGTCAAAGCTCTATTTATTAACGAAGTAT

+

FFFFFFFFFFFFFFFFFFFFFFFFFFFFFFFFFFFFFFFFFFFFFFFFFFFFFFFFFFFFFFFFFFFFFFFFFFFF  
FFFF:FFFFFFFFFFFFFFFFFFFFFFFF,FFFFFFFFFFFFFFFFFFFF:FF::FFF

@A00721:190:HGJW7DSXY:4:2159:13557:36714\_2:N:0:TCTGCAAG+GCTGCACT  
AACTTCAATTCCTTCGATGTTTATATTTTTCTATAAGGGAAAATAGCAATAATCAAATTTGACAAAT  
TTTAGAACTTTATTTTCAAGACTCTCTCCGATCACCTTGGTGTGATCTC

+

FFFFFFFFFFFFFFFFFFFFFFFFFFFFFFFFFFFFFFFFFFFFFFFFFFFFFFFFFFFFFFFFFFFFFFFFFFFF,  
:FFFFFFFFFFFFFFFFFFFFFFFFFFFFFFFFFFFFFFFFFFFFFFFFFFFF,::F::FFFFF

@A00721:190:HGJW7DSXY:4:2357:17237:14653\_1:N:0:TCTGCAAG+GCTGCACT  
TCAATCAGATGTATGATGATAATCTACTATTTTTAAATAGTGATATTCAGCGTATACTTGAATACTTT  
ATCAAAGATTTGGCTTGGTCTATTTACCGCAAAAAGTTGAAGATGTCTATGATATTTATTTTACTTA  
TAC

+

FFFFF,F,FFFFF,FF:FF:FFFFF:F:FFFFF:FF:,F,FFFF:FF,FFFF,:FFF:FFFFF  
F,F:F::FFF:F,FFFFFFFF:FFFF:F,:F::,FFFFFF::FF,FFFFFFFF:F,FFFFFFFF  
FFF

@A00721:190:HGJW7DSXY:4:1627:27832:14779\_1:N:0:TCTGCAAG+GCTGCACT  
ACTTGACTGTTGATAATATTACAATAGCTCTTCTCAGAAGATTAGAGAAGTAACTGGTGAACACGTC  
GGTAGCATTGATTTACTTTTACCGTTAGAACTGAAAAAGATTCTTTTCGAAAAGAACTATAAGTTA  
CAA

+

FFFFFFFFFFFFFFFFFFFF:FFFFFFFFFFFFFFFFFFFFFFFFFFFFFFFFFFFFFFFFFFFFFFFFFFFF  
FFFFFFFFFFFFFFFFFFFFFFFFFFFFFFFFFFFFFFFFFFFFFFFFFFFF:FFFFFFFFFFFFFFFFFFFF:FFFF  
FFF

@A00721:190:HGJW7DSXY:4:1528:29649:35305\_1:N:0:TCTGCAAG+GCTGCACT  
AAAGAAATAAAAATACTTCAAGTACCTGAACCTTTACATTTTAAATGGTATGGTATAATGTGTCTTACA



$+$ 

@A00721:190:HGJW7DSXY:4:1628:27977:16282\_1:N:0:TCTGCAAG+GCTGCACT  
CAAGAGAGAGTGTGAGAGAGTCGCTCTCACTATTTTTGCCAGAATGCGGGCTTTCTGACTGATGAGG  
TTAAAACTCTTGCTCCTTCTGTGGGTGAGGGTTTTTGTTATATTCCTGTTCTGGGAGGCTGCTTTC  
CTC

+

@A00721:190:HGJW7DSXY:4:2527:20817:21919\_1:N:0:TCTGCAAG+GCTGCACT  
GAGAGCATTAGAAGGAAGTTGGGCAAATTCACATATGGTAGACGTTGTACACTTTTCTTGAAAT  
TTTTCTTTCTCCGTCATTGGGGATTTGATGTGAGAAGGTGGAAGGTGTCAAGGGTCTTCTTCATG  
CTG

+

@A00721:190:HGJW7DSXY:4:1650:16893:26710\_1:N:0:TCTGCAAG+GCTGCACT  
GCAGAGTGA CTGGAGTTCAGACGTGTGCTCTTCCGATCTGAGGAAGTTCTCCGAAATTAAAGACGGGG  
GGATTAAGAGTCCAGCTGTA ACTGTCA TTTCA GAGAGGGGAGCTCTGAAAAGGAACTTCGTCAGAAG  
ATG

+

@A00721:190:HGJW7DSXY:4:1253:17616:17879\_2:N:0:TCTGCAAG+GCTGCACT  
AGTTTGAGGAAGGCTCTAGAGAAGATCTCACCACCTGGAGAAGGCAAGTGGAGAGTCCAGAAGTTGAT  
GAAGAAGGATTATTTGAAGCAGGGGTTACCACTTCCTAAGGTGGATGA

 $+$ 

@A00721:190:HGJW7DSXY:4:2336:32560:35524\_1:N:0:TCTGCAAG+GCTGCACT  
GACTGGAGTTTCAGACGTGTGCTCTTCCGATCTATTTAACGTGGCAGAATTCGGTAACTTACCATATTG  
TTCCTTCCGGGAAGTTGTGGGATTTAACTTTGACTCAACTACTCCGATCAGATCCGGATGGTTTGATT  
GGT

+

@A00721:190:HGJW7DSXY:4:1535:8929:22654\_1:N:0:TCTGCAAG+GCTGCACT  
TCTTCCGATCTCCGATAAGGTGAAAAATATGCAGGTCAAAGATTCTGTAGCTCTGAGGGCGGTTGAGG  
GAGCCGTTTTGGCCGACTTTAACTATTCTAAGAGTCTTTATGATTCAAACCTATCGTTGTCGTACCT  
TAC

+

@A00721:190:HGJW7DSXY:4:2107:27778:22576\_1:N:0:TCTGCAAG+GCTGCACT  
GTTTCCAGAATTGCGGTTGAAGTTCACCCATTCTATCTTGAATGCTCACGCCGTCGCAGCCATATCGA  
GACTATGTTATAATCACTTGTTAAAGTACAGATTTAGTGATTTAGATATTATTGATATTGGAGGCGAT  
ATT

```

+
FFFFFFFFFFFFFFFFFFFFFFFFFFFFFFFFFFFFFFFFFFFFFFFFFFFFFFFFFFFFFFFFFFFFFFFFFFFFF
FFFFFFFFFFFFFFFFFFFFFFFFFFFFFFFFFFFFFFFFFFFFFFFFFFFFFFFFFFFFFFFFFFFFFFFFFFFFFFFFF
FFF
@A00721:190:HGJW7DSXY:4:2604:22978:30545_2:N:0:TCTGCAAG+GCTGCACT
AAACTCCTTGAATGGAGTACATATTTGCAACCCTATTCTTGATGTGAAAGATGCATCGAGGTATACGT
CTAGGAACATTGATTGGGAACGTACCTACTCACGAGACGTCATGAAAG
+
FFFFFFFFFFFFFFFFFFFFFFFFFFFFFFFFFFFFFFFFFFFFFFFFFFFFFFFFFFFFFFFFFFFFFFFFFFFFF
FFFFFFFFFFFFFFFFFFFFFFFFFFFFFFFFFFFFFFFFFFFFFFFFFFFFFFFFFFFFFFFFFFFFFFFFFFFFFFFFF
@A00721:190:HGJW7DSXY:4:1422:20238:21981_2:N:0:TCTGCAAG+GCTGCACT
GTTCTGTTACAAGAACGCTTTGGATTGTGACCATAAAGCCTCAGTTGCGATAGCTGTAGAGGTATACG
ATATCTCTCTTGATGATGTAGCCACTATAATGCTTAAGAGAGAGATTG
+
F:FFFFFFFFFFFFFFFFFFFFFFFFFFFFFFFFFFFFFFFFFFFFFFFFFFFFFFFFFFFFFFFFFFFFFFFFFFFFF
FFF:FFFFFFFF:FFFFFFFFFFFFFFFFFFFF,FFFFFFFF:FFFFFFF
@A00721:190:HGJW7DSXY:4:1524:26765:29778_2:N:0:TCTGCAAG+GCTGCACT
TGACCTTGGTATCGTTATCCGTCATGGAGATGATGGCGCATCGCTTGATTACTATATGCCCGAAGGAT
TGGGTTATTCTCACAACAAAGATAAGATTTTATCTTTCTTCAAACACC
+
FFFF:,FFFFFFFFFFFFFFFFFFFFFFFFFFFFFFFFFFFFFFFFFFFFFFFFFFFFFFFFFFFFFFFFFFFFF
FFFFFFFFFFFFFFFF:FFF:FFFFFFFF:FFFFF:FFFFFFFFFFFF
@A00721:190:HGJW7DSXY:4:1125:16459:8265_1:N:0:TCTGCAAG+GCTGCACT
TGAGTTCCGAATAACTCGTAATAAATCTTCTCTAGTGGACAATTCAGAATACCTATTTCCGTACCAA
GAGCCACTGCCAATCTCATCGCTATACGCATACCTGATTGGAAGAAGCGAGGTTCTGTTCTCAATAAA
AAT
+
FFFFFFF:FFFFFFFFFFFFFFFFFFFFFFFFFFFFFFFFFFFFFFFFFFFFFFFFFFFFFFFFFFFFFFFFFFFFF
FFFFFFFFFFFFFFFFFFFFFFFFFFFFFFFFFFFFFFFFFFFFFFFFFFFFFFFFFFFFFFFFFFFFFFFFFFFFF
FFF
@A00721:190:HGJW7DSXY:4:2102:4887:13557_1:N:0:TCTGCAAG+GCTGCACT
TCTTCATAAGGGCTATTACGTACGTATGGGGATCACTTCTTCGGTCAATGACAAAACCTTCGAATAT
GTTACGACATGGCTTCGTAACAACAGTGCGAGGATTGTCATCTCGGGGAAAGTGATTACCAAGATGT
TCA
+
FFFFFFFFFFFFFFFFFFFF,FFFFFF:FFFFFFFFFFFFFFFFFFFFFFFFFFFFFFFFFFFFFFFFFFFFFFFFFFFFF
FFFFFFFFFFFFFFFFFFFFFFFFFFFFFFFFFFFFFFFFFFFFFFFFFFFFFFFFFFFFFFFFFFFFFFFFFFFFF
FFF
@A00721:190:HGJW7DSXY:4:2108:25464:26835_1:N:0:TCTGCAAG+GCTGCACT
CCTAGAGAAGGTCGCAGCGATCTTACTCGTTATCGGAGCTAAGAAGAAGACTTTGGGTACACGTTATG
CTCGCAAACCTAACGTTAGTACCGGAGGTGATCTCTCTGCTTCTGCGTTACTGAGAGAAAAGATTGAG
GAC
+
FFFFFFFFFF:FFFFFFFFFFFFFFFFFFFFFFFFFFFFFFFFFFFFFFFFFFFFFFFFFFFFFFFFFFFFFFFFFFFFF
FFFFFFFFFFFFFFFFFFFFFFFFFFFFFFFFFFFFFFFFFFFFFFFFFFFFFFFFFFFFFFFFFFFFFFFFFFFFF
FFF
@A00721:190:HGJW7DSXY:4:2675:4209:31203_2:N:0:TCTGCAAG+GCTGCACT
GAGAAGACAACGAATCTTGAACTACGGTCCTTATCAAAGAAAATGGTGAACCGGTCTCTAAATCTTT
TGAGATTGAGAAGATTGAAGAACACGTCAAGAAGTCGCTCGGCGTTGT
+
FFFFF:FFF:FF:FFF::,FFFFFF:FFFFFF:FFFFFFFFFFFF:FFFFFFFFFFFFFFFFFFFFFFFFFFFF,F
FFF:FFFFFF:FFF::FFF:FFF:FFFFFFF:,F::FF,,FF::FF
@A00721:190:HGJW7DSXY:4:1673:25075:1861_1:N:0:TCTGCAAG+GCTGCACT
AAGTTAAGAAGGAGGCTGATCATGGAGTCTTTGTACCTTCTGTCAAACCTTCGAGGTTTCAGCTACGAGA

```



GGTGATCCCGGATGTGGATTGAAGGCTGGCTCTAAGGGAGACTCCTTCTTTTTGAATGTTGTAAAGAA  
TTG

+

FFFFFFFFFFFFFFFFFFFFFFFFFFFFFFFFFFFFFFFFFFFFFFFFFFFFFFFFFFFFFFFFFFFFFFFFFFFFFFFF  
FFFFFFFFFFFFFFFFFFFFFFFFFFFFFFFFFFFFFFFFFFFFFFFFFFFFFFFFFFFFFFFFFFFFFFFFFFFFFFFF  
FFF

@A00721:190:HGJW7DSXY:4:2410:6732:24424\_1:N:0:TCTGCAAG+GCTGCACT  
ACAAGGAGTTAGACTCTTCTTCAAGTTTTTAGATCTTCTTGATAATCTTAAAGAAAAATTTTCGAATA  
AACTAATGAGAGGTATAGGCTTAGTCAAGTCTGTACTTACATTCTTTACGCCAGATTCTTCATGGGGC  
GAC

+

F:FF:FFF,F:FFF:FFF,FFFFFFFFFFFFFFFFFFFFFFFFFFFFFFFFFFFFFFFFFFFFFFFFFFFFFFFF  
FFFFFFFFFFFFFFFFFFFFFFFFFFFFFFFFFFFFFFFFFFFFFFFFFFFFFFFFFFFFFFFFFFFFFFFFFFFFFFFF  
FFF

@A00721:190:HGJW7DSXY:4:2637:25355:11804\_2:N:0:TCTGCAAG+GCTGCACT  
CATAACTTCTTTTTCAAAAATGCGGATGGGTCTACTGATGTTTTCTACAGAGTGCAGTCGTTTCAAC  
ACATATCACCCTTTTTGAAAGGAAAATAATTGGTGATGAAAATACGTA

+

FFFFFFFFFFFFFFFFFFFFFFFFFFFFFFFFFFFFFFFFFFFFFFFFFFFFFFFFFFFFFFFFFFFFFFFFFFFFFFFF  
FF,FFFFFFFFF::FF,,FF:F:FFF,:F::FFF,F,:FFF,,,::,

@A00721:190:HGJW7DSXY:4:2274:14525:16752\_2:N:0:TCTGCAAG+GCTGCACT  
TTGGATGTTGTGCAAACTATCAGGTTCTTGTACGATTCTTAAAAGAAGTTTATTAAACTTCAGAG  
TCTCTTGGAAGTCCAGGTAGCTAATGTTCTTGCAATAGCCACAGACTT

+

FFFFFFFFFFFFFFFFFFFFFFFFFFFFFFFFFFFFFFFFFFFFFFFFFFFFFFFFFFFFFFFFFFFFFFFFFFFFFFFF  
FFFFFFFFFFFFFFFFFFFFFFFFFFFFFFFFFFFFFFFFFFFFFFFFFFFFFFFFFFFFFFFFFFFFFFFFFFFFFFFF  
:FFFFFFFFFFFF:FFFFFFFFFFFF

@A00721:190:HGJW7DSXY:4:1661:1154:19742\_1:N:0:TCTGCAAG+GCTGCACT  
TCTGTTGGTAGAGGAGTTGAGAGAATTACTCAGATTCAATCTGGCATCACTGAACGTCTACAACGAGT  
TAGGGAGTGGCTAGGTTTTAAAAGATCCTTGCACAAGCAATACCTTCCACTGAGTTCATTACCCAGA  
GTT

+

FFFFFFFFFFFFFFFFFFFFFFFFFFFFFFFFFFFFFFFFFFFFFFFFFFFFFFFFFFFFFFFFFFFFFFFFFFFFFFFF  
FFFFFFFFFFFFFFFFFFFFFFFFFFFFFFFFFFFFFFFFFFFFFFFFFFFFFFFFFFFFFFFFFFFFFFFFFFFFFFFF  
FFF

@A00721:190:HGJW7DSXY:4:2149:7780:3599\_1:N:0:TCTGCAAG+GCTGCACT  
GTTTTTGGTATAAATCCTGATGGCTCAGTACAGGGAGGAGGTAATAGTTATAAAACCTTCTTTTATCA  
TTGCAACAGGACTTTGAGAAGACTGTTGAAATGGACAAAATCTGGGATCATAGGTATGTGTCACGCTA  
CAC

+

:FFFFFFFFFFFFFFFFFFFFFFFFFFFFFFFFFFFFFFFFFFFFFFFFFFFFFFFFFFFFFFFFFFFFFFFFFFFF  
FFFF:FFFFFFFFFFFFFFFFFFFFFFFFFFFFFFFFFFFFFFFFFFFFFFFFFFFFFFFFFFFFFFFFFFFFFFFF  
FFF

@A00721:190:HGJW7DSXY:4:1157:14678:13385\_1:N:0:TCTGCAAG+GCTGCACT  
CGCCATATCAGATTAGAGACATGCCAGTTAGAGTTCTTCTAACCAGGACTGATGGTGAGATTCTTTTA  
CCTTTTGGAGGTCCAGGAACCTTTACTCCTAGTGTCTTTTCTAGAGTCCAAGGACGTTTCCGTCGGAG  
GAT

+

FFFFF:FFFFFFFFFFFFFFFFFFFFFFFFFFFFFFFFFFFFFFFFFFFFFFFFFFFFFFFFFFFFFFFFFFFF  
FF:FFFFFFFFFFFFFFFFFFFFFFFFFFFFFFFFFFFFFFFFFFFFFFFFFFFFFFFFFFFFFFFFFFFFFFFF  
FFF

@A00721:190:HGJW7DSXY:4:1127:27751:26694\_1:N:0:TCTGCAAG+GCTGCACT  
CAATAACACTCTATTGAATCCCTTTCCACGATGAAAGCTCTTTATGAGGTGCTCCATGCAAATTTAC  
AGTTCCTCTTTGGTGATATCGCCTCTGTCCTTTCTCCTTAATCGTGAGGTTACGAGAGTTTCGTACT  
TGG

+  
FFFF,FFFFFFFF:FFFFFF,FFFFFFFFFFFFFFFFFFFFFFFF,FFFFFFFFFFFFFFFFFFFFFFFF  
:F,FFFFFFFFFFFFFFFFFFFFFFFF:FFFF,,FFFFFF:FF,FFFFFFFFFFFFFFFFFFFFFFFF  
FFF  
@A00721:190:HGJW7DSXY:4:1127:19271:31109\_1:N:0:TCTGCAAG+GCTGCACT  
GCTCTTCCGATCTGCTGGATGGATCTTTTGTATGTTTCACATTGCGTGATCACTTCCCGTGGAC  
TTGGGAAGAGATTAAACATAAAATCCAGCGATTCTATTATGTCGCTAAAGCCTGTCCAGTTGTCGATG  
ATG  
+  
F,FFFFFFFFFFFFFFFF:F:FFFFFFFFFFFFFFFFFFFFFFFF,FFFFFFFFFFFFFFFF,FFFFFFFF:  
F:FFFFFFFFFFFFFFFFFFFFFFFF:FFFFFFFFFFFFFFFFFFFFFFFF:FFFFFFFFFFFFFFFF  
FFF  
@A00721:190:HGJW7DSXY:4:2347:21079:7122\_1:N:0:TCTGCAAG+GCTGCACT  
CACAAGGATTACTAAGTCTGAGATCTGCCACTTCTAATTTAGGAAACGTCGCGAAAAGAAAGTTTCAT  
GAGGATGTCTTGGTCGAAAAATATCGCCGGGAACCTCTAATAGAGGATCCTGATGACATTATTTCAAC  
GGA  
+  
FFFFFFFF,F:F:FFFFFFFFFFFFFFFFFFFFFFFFFFFFFFFFFFFFFFFFFFFFFFFFFFFFFFFF  
FFFFFFFFFFFFFFFF:FFFFFFFFFFFFFFFFFFFFFFFFFFFFFFFFFFFFFFFFFFFFFFFF  
FFF  
@A00721:190:HGJW7DSXY:4:2530:24713:35399\_2:N:0:TCTGCAAG+GCTGCACT  
CTACCACAGAAACCGTCTCAGGAACGTCTCCACTGATTCGGAATTAGAGAAAGACGACCTTCTTGTG  
GGGACTGAGACCTCTGAATTTTCAGGGTGCCTGATGAGGACGTTGAA  
+  
FFFFFFFF:FFFFFFFFFFFFFFFFFFFFFFFFFFFFFFFF:FFFF:FFFFFFFFFFFFFFFF,FFFFF  
FFFFFFFFFFFFFFFFFFFFFFFF:FFFFFFFFFFFFFFFFFFFFFFFF  
@A00721:190:HGJW7DSXY:4:1124:25717:14747\_1:N:0:TCTGCAAG+GCTGCACT  
TTCTAAGAGTGTTTCAAAAGACCAGAAACGTAACAAGAAGAATAAAGGTAGGAAGGGGAGAAAACAGA  
ACAAGCGAGCGGTTGAAGAGAAACTGATATGGTTGCGGCTGATCGTACCCCAATTCTGCTAGAAAG  
ATC  
+  
FFFFFFFFFFFFFFFFFFFFFFFF:FFFFFFFFFFFFFFFFFFFFFFFFFFFFFFFFFFFFFFFF  
FFFFFFFFFFFFFFFFFFFFFFFFFFFFFFFF:FFFF:FFFFFFFFFFFFFFFFFFFFFFFF  
FFF  
@A00721:190:HGJW7DSXY:4:1329:17291:23202\_1:N:0:TCTGCAAG+GCTGCACT  
ACCACTGATCTTCCAGAGTTACGTAGTGGTCGTTCTTTTGGTGATTTTATCAAAGAGAAAGTTTCTGC  
TAGTCGCGACGATAGTATTTATCGGAGTGATATTAACAAGTTAACTTCGAACTGACCACTTACAAGA  
GTG  
+  
FFF,FFF:F:FFFFFFFFFFFFFFFF:F:FFFFFFFFFFFFFFFF,FFFFFF:FFFF:FFFFFFFF:FF  
FF::,FF,,FFFFFFFFFFFFFFFF:FFFFFFFFFFFF::FF,:FFFF,FFFFFF:FF::FFFFFFFF  
FFF  
@A00721:190:HGJW7DSXY:4:1242:9308:30921\_2:N:0:TCTGCAAG+GCTGCACT  
AGTTCTTCGCAGTTGAATCTCCACCAGGTGGAGGAAGACCACTGAACTTATAGCGACTTTTGTGCGAA  
TTTTTCGCAAAGGTCTTGAAGTACGTATTGTCACCTGCTAATCGTAAT  
+  
F:FFFFFFFFFFFFFFFFFFFFFFFFFFFFFFFFFFFFFFFFFFFFFFFFFFFFFFFF  
FFFFFFFF,FFFFFFFFFFFFFFFFFFFFFFFFFFFFFFFF:  
@A00721:190:HGJW7DSXY:4:2116:18819:25222\_2:N:0:TCTGCAAG+GCTGCACT  
CTAGTTCATCGCGGTATTTGTGAAATTAAGACAGACGTGAAAGTTATGATGAGTGATCGTATTAGAAC  
AGCTGATTCTTATTGCATGAACGTCGCTGAGGTCAAACCTGTGGACGT  
+  
FFFFFFFFFFFFFFFFFFFFFFFFFFFFFFFFFFFFFFFFFFFFFFFFFFFFFFFF  
FFFFFFFFFFFFFFFFFFFFFFFF:FFFFFFFFFFFFFFFF

@A00721:190:HGJW7DSXY:4:2167:14470:32534\_2:N:0:TCTGCAAG+GCTGCACT  
CTGGTCAGACCCTTTTTCTTACACATCTACTTAAGGCGGCTTATACCATAGGTTACGGTGATTCCAAT  
CAAATCGGATTCATCAATCGTATTGATCTCCAAGTCGAAACTACTTC

+

FFFFFFFFFFFFFFFFFFFFFFFFFFFFFFFFFFFFFFFFFFFFFFFFFFFFFFFFFFFFFFFFFFFFFFFF  
FFFFFFFFFFFFFFFFFFFFFFFFFFFFFFFFFFFFFFFFFFFFFFFFFFFFFFFFFFFFFFFF

@A00721:190:HGJW7DSXY:4:1569:11903:3756\_2:N:0:TCTGCAAG+GCTGCACT  
GAGTGTCGTTCTTATCGAAGTCTCAGTTATCGCTGCCCGCCGACGTTTGTGCGGAACTCTCAGAGGT  
TTACGGCAGAAAAATTTCTCCTGCTTGTAATTCGAGAGAGGACACTAT

+

FFFFFFFFFFFFFF:FFFFFFFFFFFFFFFFFFFFFFFFFFFFFFFFFFFFFFFFFFFFFFFFFFFFFFFF  
FFFFFFFFFFFFFF:FFFFFFFFFFFFFF:FFFFFFFFFFFFFFFFFFFFFF:FFFF

@A00721:190:HGJW7DSXY:4:2509:10827:33990\_2:N:0:TCTGCAAG+GCTGCACT  
TCAATGTAAAGTTAAACGATGCTACTTGTGAGAGGATCAATCACAGTAAGGAACTGTCACGTTTAGCA  
CGGGAGGTTGCAGATTCAACCCCTTATATCGAGGCTATCGAGGACGAT

+

FFFFFFFFFFFFFFFFFFFFFFFFFFFFFFFFFFFFFFFFFFFFFFFFFFFFFFFFFFFFFFFFFFFFFFFF  
FFFFFFFFFFFFFFFFFFFFFFFFFFFFFFFFFFFFFFFFFFFFFFFFFFFFFFFF:FFFFFFFFFFFF

@A00721:190:HGJW7DSXY:4:2232:7012:32268\_2:N:0:TCTGCAAG+GCTGCACT  
GACGACAAGCCTCAAGAGGGTAGAGGACCACCTGGATCTTCTACTGTCTCTGCCTTCCAAGATTTCTT  
AGAAGAGGTTATTCCTGGAACCACCTTAACGTCACCTCGGTAATCTTTC

+

FFFFFFFFFFFFFFFFFFFFFF,FFFFFFFF:FFFFFFFFFFFFFFFFFFFFFFFFFFFFFFFFFFFFFFFF  
FFFFFFFFFF::FFF:FFFFFFFFFFFFFFFFFFFFFFFFFFFFFFFFFFFFFFFF:FFFF

@A00721:190:HGJW7DSXY:4:1119:9986:29684\_2:N:0:TCTGCAAG+GCTGCACT  
AAGGCTAATACCTTTATAGGTAAGAAGCCCTTGAGCCGCGTAGTCAGCGCGTTTAGCTGTATCATCA  
GTCAGAGTATACCCGATAGGGTACCGAGTCTCCAAGAGAATATTTATT

+

FFFFFFFFFFFFFFFFFFFFFFFFFFFFFFFFFFFFFFFFFFFFFFFFFFFFFFFFFFFFFFFFFFFFFF:FFFFFFFFFFFFFFFF  
FFFFFFFFFFFF:FFFFFFFFFFFFFFFFFFFFFFFFFFFFFFFFFFFFFFFFFFFFFFFF

@A00721:190:HGJW7DSXY:4:2540:1118:14575\_1:N:0:TCTGCAAG+GCTGCACT  
ATAGGAGACTCAGTTAACCTGAGAGCTCCTCAATTGATAGATTGGGTCAACAATAGGGACGCTAGTAT  
ACTTCGTAAAGTCGACAGCGAAATGGTCAATATTGATAATTGGACCGACTATATGACCTATTTTAAGC  
TCA

+

FFFFFFFFFFFF,FFFFFFFF:F:FFFFFFFF:FFFFFFFFFFFF:FFFFFFFFFFFFFFFFFFFFFFFF  
FFFFFFFFFFFFFFFFFFFFFFFFFFFFFFFFFFFFFFFFFFFFFFFFFFFFFFFFFFFFFFFFFFFFFFFF  
FFF

@A00721:190:HGJW7DSXY:4:1150:27561:14559\_2:N:0:TCTGCAAG+GCTGCACT  
GTTCTTGTGAGGAGAGTCAAACAGTGTCTTTTACCCAACATTTTATGTATACAGAGATGACCAGTGA  
CGATTTCTCCCGGAAGCTCTTCTCTCTCTTAGGAGGTCATGATGACTA

+

FFFFFFFFFFFFFFFFFFFFFFFFFFFFFFFFFFFFFFFFFFFFFFFFFFFFFFFFFFFFFFFFFFFFFF:FFFFFFFFFFFF,FFFF  
FFFFFFFF:FFFFF,FFF:FFFFFFFFFFFFFFFFFFFFFFFFFFFFFFFFFFFFFFFF

@A00721:190:HGJW7DSXY:4:1445:14335:21934\_2:N:0:TCTGCAAG+GCTGCACT  
CCAGGAGTATCCATAACGATTTGTCAATTTACCACCTTTGCTCAACGACGAAGTGGAACGGCCAACACT  
TTCTTTGGTAATTGTATGATCACTTTGATGATTTTATCACTTTATTAT

+

:FFFFFFFFFFFFFFFFFFFFFF:FFFFFFFFFFFFFFFFFFFFFF:FFFFFFFFFFFFFFFFFFFFFF  
:F,F,F,FFFF:FFFFFFFF:FFF:FFFFFFFFFFFFFFFF:FFFFFFFF

@A00721:190:HGJW7DSXY:4:2375:22028:27085\_2:N:0:TCTGCAAG+GCTGCACT  
AGACTCCAATAACTGATCATTCTGATCATATGATTTTGACAATGGTTTCGAAGCGAAATTTTGAGG  
GATAAACAGCGTACTTCTGCTCGCGATTTATTCTTTTTGTCAATGAT

+

FFFFF,FFFFFFFFFFFFFF:FFFFFF::FFFF,FFFFFFFFFFFFFF:FFFFFF:F::FF:FFF:FFFFFF  
FFFFF::FFFFFF:FF,:FF,FFFFF,FFF:FFF:FFFFFFFF:FFF  
@A00721:190:HGJW7DSXY:4:1469:3974:8155\_1:N:0:TCTGCAAG+GCTGCACT  
CGATATTCGATTGAGGGTCGTTATACCTATTCGGCTATCTGTGCTTTGAATTGTATAAGATCAAATTT  
TAAACGATTCCGAGAGGTTTATCCTGATGTGGAGGGAGTTCTTGAAGCATCCCGACCTTTCCTTGTGA  
AAA  
+  
FFFFFFFFFFFFFFFFFFFFFFFFFFFFFFFFFFFFFFFFFFFFFFFFFFFFFFFFFFFFFFFF:FFFFFFF  
FF:FFFFFFFFFFFFFFFFFFFFFFFFFFFFFFFFFFFFFFFFFFFFFFFFFFFFFFFFFFFFFFFF  
FFF  
@A00721:190:HGJW7DSXY:4:2140:11975:11835\_2:N:0:TCTGCAAG+GCTGCACT  
TTCTACTACGGATTCATGGACCTTCCATCCTGTACCTCTTCTGGAGAGACGTATCTCAAAGATCGACT  
TCGAGACAGGTGATATTGTTGAGCGAGAGCGACCAAGATCTAAATTCTG  
+  
FFFFFFFFFFFFFFFFFFFFFFFFFFFFFFFFFFFFFFFFFFFFFFFFFFFFFFFFFFFFFFFF  
FFFFFFFFFFFFFFFFFFFFFFFFFFFFFFFFFFFFFFFFFFFFFFFFFFFFFFFF  
@A00721:190:HGJW7DSXY:4:1207:12129:3709\_1:N:0:TCTGCAAG+GCTGCACT  
TGACGATCATTAAGACTCTCTTCTTCTTTGTTTCCTTCTTTCGACTGATTTTCTCATCAGCTTGT  
GTTTTACCTAATCTGTGTTTTTACGATAACAACATCAGTTGATTAAGACTCTTCCGAAAGGCGAACT  
TTG  
+  
FFFFFFFFFFFFFFFFFFFFFFFFFFFFFF,FFFFFFFFFFFFFFFFFFFFFFFFFFFFFF,FF:FFFFFF  
FFFFFFFFFFFFFFFFFFFFFFFFFFFFFFFFFFFFFFFFFFFFFFFFFFFFFFFFFFFFFFFF  
FFF  
@A00721:190:HGJW7DSXY:4:1550:5358:14403\_2:N:0:TCTGCAAG+GCTGCACT  
GGGTGAAGCACAACGTTTGACCGTGACGAACTGTGGTGTCTTGATCTACGTTACGGATATACTCTCC  
TTGAGTTCACCTCGTAAGGACACTACCACTATTACGATATTTCTTTAG  
+  
FFFFFFFFFFFFFFFFFFFFFFFFFFFFFFFFFFFFFFFFFFFFFFFFFFFFFFFFFFFFFF:FFFFFFF  
FFFFFFFFFFFFFFFF:FFFFFFFFFFFFFFFFFFFFFFFF  
@A00721:190:HGJW7DSXY:4:2563:9200:30326\_2:N:0:TCTGCAAG+GCTGCACT  
AATCACTCATTTTAGTGAGATTATTAACAAACGCACTAAACGTCTTCGACAACAGCAGGGGTTTTCGA  
ATAGTGATAGCCACCCGCCTTACAGAGGGGAGCAGCATGACCATAAT  
+  
FFFFFFFFFFFFFFFFFFFFFFFFFFFFFF:FFFFFFFFFFFFFFFFFFFFFFFF:FFFFFFFFFFFFFFFF  
FFFFFFFFFFFFFFFFFFFFFFFFFFFFFFFF:FFFFFF:FFFFFFFF  
@A00721:190:HGJW7DSXY:4:2549:2808:1532\_1:N:0:TCTGCAAG+GCTGCACT  
TACTGTCTGTCTCGCCTCTTCGAATGAAGTCTTAATGCTTAACAACAATGATAGTGAATTTATACCTA  
CAATCATTGGTTTTTCTAATAATGATGACACTATTGTTTATGGATATGATGCTATTACTCATGATGGT  
TAC  
+  
FFFFFFFFFFFFFFFFFFFFFFFFFFFFFF,FFF:FFFFFF:FFFFFFF,:FFFFF,FFFFFFFF  
FFFFFFFFFFFFFFFFFFFFFFFFFFFFFFFFFFFFFFFFFFFFFFFFFFFFFFFFFFFFFFFF  
FFF  
@A00721:190:HGJW7DSXY:4:2376:23845:1611\_2:N:0:TCTGCAAG+GCTGCACT  
TACAAGGACCTTAAGCGATGGATCGGGGTTAATTCTAAACATTACCCGAAAGACGTGCTAAATTTAA  
ACCATTGTACGATGTCGTCTGTCTCGGCGATCACTTTTCACTAAGAAT  
+  
FFFFFFFFFFFFFFFFFFFFFFFFFFFFFFFFFFFFFFFFFFFFFFFFFFFFFFFFFFFFFFFF  
FFFFFFFFFFFFFFFFFFFFFFFFFFFFFFFFFFFFFFFFFFFFFFFF  
@A00721:190:HGJW7DSXY:4:1537:15275:21559\_2:N:0:TCTGCAAG+GCTGCACT  
GAGTGAAAGGCTTCAATTGTAGTGGTTTGGTCGTTTCAGTACCCAGTCAGTATACCTCTACGCAAAGA  
TATTTTCATGAAACTACAGAGGAACGTACCGGATTACCTGTCTTTTCAT  
+

[illegible]

@A00721:190:HGJW7DSXY:4:2351:30951:2143\_1:N:0:TCTGCAAG+GCTGCACT  
CTTGATAAAGAACTTCATGAATTTTCAGAGGATGAAAAATTTCTTCCTTGGATTTTAATATAAAGAA  
TCTTTACCAGGACTCCTACTACAGGAGGCAGTCTTCTGATCGTAAGAAGTTTATAAGGAACATATCCA  
TTT

+

FFFFFFFFFFFF,FFFF:FF:FFFFFFFFFFFFFFFFFFFFFFFFFFFFFFFFFFFFFFFFFFFFFFFF,FFF:  
FFFFFFFFFFFFFFFFFFFFFFFFFFFFFFFFFFFFFFFFFFFFFFFFFFFFFFFFFFFFFFFF:FFFFFFFFFFFF  
FFF

@A00721:190:HGJW7DSXY:4:2501:5168:4554\_2:N:0:TCTGCAAG+GCTGCACT  
AACTCTAAGTGGTAATACTGTCTTTCCAAGCTTACCTGTATCTTCAATGAAATTGGACTCTTCGATAG  
GGGACATTTTATCGTGGGCTTTCGTAAGGAAGATCTGTTATCGACG

+

FFFFF:FFFFFFFFFFFFFFFFFFFFFFFF:FFFF,FFFFFFFFFFFFFFFF:FFFFFFFFFFFFFFFFFFFFF:,F  
FFFFFFFF:FFFFFFFF:FFF:F,FFFF:FFFFFFFFFFFFFFFF,FFF

@A00721:190:HGJW7DSXY:4:2335:9299:18662\_1:N:0:TCTGCAAG+GCTGCACT  
TCTATTATTGATTTTTATGAGATTGATACGTAAACAGAAGATGATGTTAGAGTAGAATTCCTGAAGAG  
TCCTTCCGTAACCAACTTCTTGACAATTTCTTCAATCCTTCGATAATAGTTAAATCTAGGATTATGT  
CTG

+

FFFFFFFFFFFFFFFFFFFFFFFFFFFFFFFFFFFFFFFFFFFFFFFFFFFFFFFFFFFFFFFF:FFFFFFFF:  
FFFFFFFFFFFFFFFFFFFFFFFFFFFFFFFF:FFFFFF:F:FFFFFFFFF:FFFFFF:FF:FFFFFFF  
FFF

@A00721:190:HGJW7DSXY:4:2155:21603:25473\_2:N:0:TCTGCAAG+GCTGCACT  
ATCCTACATTGACTGATTATCTAAAGATTGAAGGAAAATTTATCCTCGTTTAACTTACTTAGACTTT  
CCTACGATACAAATGATAACTTCTAATTTACGTTTGCTACTCAGAGCT

+

FFFFFFFFFFFFFFFFFFFFFFFFFFFFFFFFFFFFFFFFFFFFFFFFFFFFFFFFFFFFFFFF:FF,FFFFFFFFFFFFFFFFFFFFFFFFFFFFFFFF  
FFFFFFFFFFFFFFFFFFFFFFFFFFFFFFFF:FFFFFFFFFFFFFFFFFFFFFFFF

@A00721:190:HGJW7DSXY:4:2215:31015:21261\_1:N:0:TCTGCAAG+GCTGCACT  
CTCAGGAGTCCCGGCATTTGATAATAATGACGAGACTTTCGTCATAATCGCTGCATATTACGGATTAC  
ACGGTACCAGCGCATCTCGTGTGCGAGCCTCGACCCGATTATATGGTATTAATAAAGGTGAGGAG  
ACC

+

FFF,:FFFFFFFFFFFFFFFFFFFFFFFFFFFFFFFFFFFFFFFFFFFFFFFFFFFFFFFF:FFFFFFFFFFFFFFFF  
FFFFFFFFFFFFFFFF:FFFFFFFFFFFFFFFFFFFFFFFFFFFFFFFFFFFFFFFF:FFFFFFFFFFFFFFFF  
FFF

@A00721:190:HGJW7DSXY:4:1148:27290:24455\_1:N:0:TCTGCAAG+GCTGCACT  
ACTAACTATGTTATGTTCTCTGATCATTTTGACAATCTCTTCTTATAATAAATAAATAAATATTA  
CTAATGGCAAATAGTGGAAGGCTCCAGTCAACACTAGTTCGAGTGCTGCTTTGGATTACGATGACGT  
GAG

+

FFFFFFFFFFFFFFFFFFFFFFFFFFFFFFFFFFFFFFFFFFFFFFFFFFFFFFFFFFFFFFFF:FFFFFFFFFFFFFFFFFFFFFFFFFFFFFFFF  
FFF:FFFFFFFFFFFFFFFFFFFFFFFFFFFFFFFFFFFFFFFF:FFFFFFFFFFFFFFFFFFFFFFFFFFFFFFFF  
FFF

@A00721:190:HGJW7DSXY:4:2219:16288:6402\_2:N:0:TCTGCAAG+GCTGCACT  
ATAGTTTTTACCTCGACCAACATTAAGGCGGCGGCGACTAATCTTAAAGCTTCACCCAAAATGAAGGA  
CACTTCGAAACTGAATAATGATGCACTACAAACAAGTATCGCTAATCA

+

FFFFF:FFFFFFFFFFFFFFFFFFFFFFFFFFFFFFFFFFFFFFFFFFFFFFFFFFFFFFFF:FFFFFFFFF:FFFFF  
FFFFFFFFFFFFFFFFFFFFFFFF,FFFFFFFFFFFFF:FFFFFFFFFFFFF

@A00721:190:HGJW7DSXY:4:1525:17038:14904\_2:N:0:TCTGCAAG+GCTGCACT  
GAGGATATTCGCCATTGTGGTACGAATTGGTCCAACATTTACCACCAAATCTTTTGATACAACTCTA  
GCCTTCAAGTGGGGTATGCCTGCGGAATACGCTTGCTATTACCAGAT

+

```
FFFFFFFFFFFFFFFFFFFFFFFFFFFFFFFFFFFFFFFFFFFFFFFFFFFFFFFFFFFFFFFFFFFFFFF  
FFFFFFFFFFFF,FFFFFFFFFFFFFFFFFFFFFFFFFFFFFFFFFFFFFFFFFFFFFFFFFFFFFF,FFF:FFFFF  
@A00721:190:HGJW7DSXY:4:2655:8440:34961_1:N:0:TCTGCAAG+GCTGCACT  
GTTCAGACGTGTGCTCTTCCGATCTTTCAAGCTTGTCGTTAAAGACTGCAGAGGCTGTCAAACAAGC  
CCAGACTCAAGGAGTCCAATCAAAGTTTTGAATTTAGCTCAACTGGGGAGACGTGCTTAAATGGGTG  
ATA  
+  
FFFFFFFFFFFFFFFFFFFFFFFFFFFFFFFFFFFFFFFFFFFFFFFFFFFFFFFFFFFFFFFFFFFFFFF  
FFFFFFFFFFFFFFFFFFFFFFFFFFFFFFFFFFFFFFFFFFFFFFFFFFFFFFFFFFFFFFFFFFFFFFF  
FFF  
@A00721:190:HGJW7DSXY:4:2238:30364:36135_2:N:0:TCTGCAAG+GCTGCACT  
TAGATAGTGGGATAATAGTTCTACCGATACGTAGTGAACGCGTTCGTAGAACCAAGTACTTTCCGTCT  
GAAGAGTTTAGAGCTGCTATTGATTATGTAACCGATAGGAGTTGTATA  
+  
FFFFFFFFFFFFFFFFFFFFFFFFFFFFFFFFFFFFFFFFFFFFFFFFFFFFFFFFFFFFFFFFFFFFFFF  
FFFFFFFFFFFFFFFF:F:FFFFFFFFFFFFFFFFFFFFFFFFFFFFFFFF:FFFFFFFFFFFF  
@A00721:190:HGJW7DSXY:4:1251:25889:34867_2:N:0:TCTGCAAG+GCTGCACT  
ATCCTTTAAGGACTATGTTGACTGACGAAGATTTCCCACAGATTTGTCTACGTTGCAGATCGCCACT  
CCAAACACTATATACATTATAAAAATATAAAAAATAAGGGAGTCATAACT  
+  
FFFFFFFFFFFFFFFFFFFFFFFFFFFFFFFFFFFFFFFFFFFFFFFFFFFFFFFFFFFFFFFFFFFFFFF  
FFFFFFFFFFFFFFFF:FFFFFFFFFF:FFFFFFFFFFFFFFFFFFFFFFFF:FFFFF  
@A00721:190:HGJW7DSXY:4:2157:25409:14685_2:N:0:TCTGCAAG+GCTGCACT  
AATTCTTGGCTTTCAACGAAGTCTCTGATTTTATTAATCATTTACTTTAACGATCTCTCGGTCATTTAC  
TCTGTACTTGATCTACGTCGTTTAACTGTCGGAACAACCTTTACTTAG  
+  
FFFFFFFFFFFFFFFFFFFFFFFFFFFFFFFFFFFFFFFFFFFFFFFFFFFFFFFFFFFFFFFFFFFFFFF  
FFFFFFFFFFFFFFFF:FFFFFFFFF:FFFFFFFFFFFFFFFF:FFFFF:F,  
@A00721:190:HGJW7DSXY:4:1623:22498:19038_2:N:0:TCTGCAAG+GCTGCACT  
CTCACTATCGTTTTCTGCTTTTTCTTAGCTAATAGATTAATAAAGGATGAGTACGAAAACCAACTCTT  
CGTTACGAGACCTGATGGTAGAATAGATTTAGTCTCTACACCCATCTC  
+  
FFFFFFFFFFFF:FFFFFFFFF,FFF:FFFFFFFFFFFFFFFFFFFFFFFF:FFFFFFFFFFFFFFFFFFFFF  
FFFFFFFFFFFFFFFFFFFFFFFF:FFFFFFFFFFFFFFFFFFFFFFFF:FFFF  
@A00721:190:HGJW7DSXY:4:1445:12038:33144_2:N:0:TCTGCAAG+GCTGCACT  
AGCGAGTTTTCTTCTGAACGTAATACACGAAGAGATCATCCGCAAACGACTCGAAACCGAGACGCC  
GTAGATCAAAGTCCCTTCTAACTTTAGATTATGAATCCTGCCTTTACT  
+  
FFFFFFFFFFFFFFFFFFFFFFFFFFFFFFFFFFFFFFFFFFFFFFFFFFFFFFFFFFFFFFFFFFFFFFF  
F:FFFFFFF,:FFFFFFFF:F:FFFFFFFFFFFFFFFFFFFFFFFF,FF:FFFF  
@A00721:190:HGJW7DSXY:4:1108:28302:4852_2:N:0:TCTGCAAG+GCTGCACT  
CTTTTCGATAGTGATTGTTATCAATTTAAATACATTACTGTTTCAAATCATCTTTACTCACAGACTCC  
GAAAATGGTTTCAAATGAGGTCAAAGCTCTATTTATTAAACGA ACTAT  
+  
FFFFFFFFFFFFFFFFFFFFFFFFFFFFFFFFFFFFFFFFFFFFFFFFFFFFFFFFFFFFFFFFFFFFFFF  
FFFFFFFFFFFFFFFF:F:FFFFFFF:FFFFFFFFFFFFFFFFFFFFFFFF  
@A00721:190:HGJW7DSXY:4:2159:14100:36589_2:N:0:TCTGCAAG+GCTGCACT  
AACTTCAATTCCTTCGATGTTTATATTTTCTATAAGGGAAAATAGCAATAATCAAATTCGACAAAT  
TTTAGAACTTTATTT CAGA ACTCTCTCCGATCACCTTGGTGTGATCTC  
+  
FFFFFFFFFFFFFFFFFFFFFFFFFFFFFFFFFFFFFFFFFFFFFFFFFFFFFFFFFFFFFFFFFFFFFFF  
FFFFFFFFFFFFFFFF:F:FFFFFFF:FFFFFFFFFFFFFFFFFFFFFFFF  
@A00721:190:HGJW7DSXY:4:2378:1868:34569_1:N:0:TCTGCAAG+GCTGCACT  
TCAATAAGATGTATGATGATAATCTACTATTTTTAAATAGTGATATTCAGCGTATACTTGAATACTTT
```

ATCAAAGATTTGGCTTGGTCTATTTACCGCAAAAAGTTGGAAGAGGTCTATGATATTTATTTTACTTA  
TAC

+

FFFFFFFFFFFFFFFFFFFFFFFFFFFFFFFFFFFFFFFFFFFFFFFFFFFFFFFFFFFFFFFFFFFFFFFF  
FFFFFFFFFFFFFFFFFFFFFFFFFFFFFFFFFFFFFFFFFFFFFFFFFFFFFFFFFFFFFFFFFFFFFFFF  
FFF

@A00721:190:HGJW7DSXY:4:2345:11849:31187\_1:N:0:TCTGCAAG+GCTGCACT  
ACTTGACTGTTGATAATATTACAATAGCTCTTTCTCAGAAGATTAGAGAAGTAAGTGGTGAACACGTC  
GGTAGCATTGATTTACTTTTACCGTTAGAACTGAAAAAGATTCTTTTCGAAAAGAAACCTATAAGTTA  
CAA

+

FFFFFFFFFFFFFFFFFFFFFFFFFFFFFFFFFFFFFFFFFFFFFFFFFFFFFFFFFFFFFFFFFFFFFFFF  
FFFFFFFFFFFFFFFFFFFFFFFFFFFFFFFFFFFFFFFFFFFFFFFFFFFFFFFFFFFFFFFFFFFFFFFF  
FFF

@A00721:190:HGJW7DSXY:4:2327:26603:29215\_1:N:0:TCTGCAAG+GCTGCACT  
AAAGAAATAAAAATACTTCAAGTACCTGAACTTTACATTTTAAATGGTATGGTATAATGTGTCTTACA  
AATAGAACCTTCACTCTCGTAATGAGAGTGTATTCCTTAATATTCTAGTAACCGCTATGTGGGCATT  
ACT

+

FFFFFFFFFFFFFFFFFFFFFFFFFFFFFFFFFFFFFFFFFFFFFFFFFFFFFFFFFFFFFFFFFFFFFFFF  
FFFFFFFFFFFFFFFFFFFFFFFFFFFFFFFFFFFFFFFFFFFFFFFFFFFFFFFFFFFFFFFFFFFFFFFF  
FFF

@A00721:190:HGJW7DSXY:4:1511:32145:12070\_2:N:0:TCTGCAAG+GCTGCACT  
GAAAATTTTAGAAAAACTCCATTGTATAGTTCAAGGAGTACTTAATTCAATAGCTTTAGTATTATTTA  
CTATCGCCTTTATTGAAAATTGTATAAGAGTTAATTGCTTACACAAAA

+

FFFFFFFFFFFFFFFFFFFFFFFFFFFFFFFFFFFFFFFFFFFFFFFFFFFFFFFFFFFFFFFFFFFFFFFF  
FFFFFFFF:FFF:FFFFFFFFF,FFFFFFFFFFFFFFFF:FFFFFF:FFF

@A00721:190:HGJW7DSXY:4:2351:23050:36902\_2:N:0:TCTGCAAG+GCTGCACT  
TGACCAATCATCGCTCCAAGTGGCACGCCAGACGTAGGGTCAAACCTACTACCGCCGGTCGGCAGATC  
GGCACCCTGGTCTCTACGTTCAAGGACCCGCTGTGCAGAATAACCTT

+

:F:FFFFFF:F:F:FFFFFFF,FFF:FFF:FFFFFF:,FFFFFFFFF:F,FFF:F,:,FF:FFFF  
FFFFF:FF::FFFF,FF:F:FFFF,F,FF:FFFF:FFFFFFFF:FFF

@A00721:190:HGJW7DSXY:4:2143:4535:23093\_1:N:0:TCTGCAAG+GCTGCACT  
GACCACTCAAAGGAAACGGGCTGTTGCCAGAGGAAAGCAGCGACCACCGAGGTCGCTCGTAACATTG  
ACGGCAGTCCCGTCATCTCTGTGGGAAGTGAAGGAGTACCTCAGTCAAAGTCACATTCACCACTCCC  
ATA

+

FFFFFFFFFFFFFF:FFF::FFFF::FFFFFFFFFFFFFFFFFFFFFFFFFFFFFFFFFFFFFFFF  
FFFFFFFFFFFFFFFFFFFFFFFFFFFFFFFFFFFFFFFFFFFFFFFFFFFFFFFFFFFFFFFFFFFFFFFF  
FFF

@A00721:190:HGJW7DSXY:4:1574:27742:35446\_2:N:0:TCTGCAAG+GCTGCACT  
GACTATACAGTTCGGCCATTTCAAGAGTGGTCAATACGTCGTGGGAGGTACTGAAGCCTTCCCCTCCG  
CTGGCACGAAGAACTCCCAAGCCAATCAATAGTTCTTCTGACCAGA

+

FFFF:FFFFFFFFFFFFFFFFFFFFFFFFFFFFFFFFFFFFFFFFFFFFFFFFFFFFFFFFFFFFFFFF  
FFFFFFFFFFFFFFFFFFFFFFFFFFFFFFFFFFFFFFFF,F:FFFFFFFFFFFFFFFFFFFFFFFF

@A00721:190:HGJW7DSXY:4:2544:1732:9784\_1:N:0:TCTGCAAG+GCTGCACT  
GGTAGTCTCTAAGTCTACCAGGAAGAGGGGAAATGTCCCCAAACTGAGAAGAATAAAGGGAAAGGTC  
CATCAGGACCTAAGAAGGGGAAATTACCCCTAATTCTGAAGGAAGATCTCCACCATCTGGGGTTGGG  
AAT

+

FFF::FFFFFFF,:FF:FFF:FFFFFF:F:F:FFFFFFFF:FF::FFF:FFF,F:FF:F:F:FFFF:::



F:FF:FFFF:FFFF:,F:FFFF,FFFFFFFFFFFFFFFFFFFFFFFFF::F:FFFF:F:FFFFFFFF:  
FFF  
@A00721:190:HGJW7DSXY:4:2564:1145:2159\_2:N:0:TCTGCAAG+GCTGCACT  
CACGGGCCAAAGAGGCCGCTGCTACGAAGTCGCTGAAGGCGGCTTGGGTCATTAAGGGTAGCTGTAAAG  
GTTGCGCCTGCCGACCCCATCTTTGAGACCAAGACTCTCTACAGTAGG  
+  
FFFFFFFFFFFFFFFFFFFFFFFFFFFFFFFFF:FFFFFFFF:F:FFFFFFFF,FFFFFFFFFFFF:FF:  
FFFFFFFFFFFFFFFFFFFFFFFFFFFFFFFFFFFFFFFFFFFFFFFFFFFFFFFFF  
@A00721:190:HGJW7DSXY:4:1105:10257:6637\_2:N:0:TCTGCAAG+GCTGCACT  
AAATCTGTTGAATTCGTCACTGAGGACGAAGGTGAGAGGACTTTTGGCTACTGGCGACAACTGAGAG  
CAGTCGCTGGGGAAGAGAATTGCGTGGGTGAAGGCCGACGCTTCGA  
+  
:FFF:FFFFFFFF:FFFF:,FFF:FFFF,FFFFFF:F:FFFF:FFFF,,:FFFFFFFF,,FFF  
:F,:FFF:F:FFFFFFFF::,F,:FF:F,FF,FFF,FFF:FF,FF  
@A00721:190:HGJW7DSXY:4:1123:18385:2300\_1:N:0:TCTGCAAG+GCTGCACT  
GTCAACGGCGTTTGGAGGATTTTATCCGCGCTTAAGTATGGGGCGAAGATCCCCTATGGAGTCTTGAA  
GGACTTAGGTTGGCATATTTATGCCGACGATAATAAGCATGTCACCCTTAAGCACCGAGGTAAGCTCG  
GGA  
+  
FFFFFFFFFFFFFFFFFFFFFFFFFFFFFFFFFFFFFFFFFFFFFFFFFFFFFFFFFFFFFFFFF  
FFFFFFFFFFFFFFFFFFFFFFFFFFFFFFFFFFFFFFFFFFFFFFFFFFFFFFFFFFFFFFFFF  
FFF  
@A00721:190:HGJW7DSXY:4:2124:32759:25911\_1:N:0:TCTGCAAG+GCTGCACT  
GATCTTGCAGAGTGACTGGAGTTCAGACGTGTGCTCTTCCGATCTGTTAAACTCTTGCTCCTTCTGT  
GGGTGAGGGTTTTTGTATATTCACTGGTTCTGGGAGGCTGCTTCTCCATAATTACAACCTCTCTT  
TAG  
+  
FFFFFFFFFFFFFFFFFFFFFFFFFFFFFFFFFFFFFFFFF:FFFFFFFFFFFFFFFFFFFFFFFFF  
FFFFFFFF:F,FFFFFFFFFFFFFFFFFFFFFFFFFFFFFFFFFFFFFFFFFFFFFFFFF  
FFF  
@A00721:190:HGJW7DSXY:4:2153:29794:35305\_2:N:0:TCTGCAAG+GCTGCACT  
AGTTGGGCAAATTCACATATGGTAGACGTTGTCACTTTTCTTGAAAATTTTCTTTTCTCCGT  
CATTGGGGATTTCGATGTGAGAAGGTGGAAGGTGTCAAGGTCTTCTT  
+  
FFFFFFFFFFFFFFFFFFFFFFFFFFFFFFFFFFFFFFFFFFFFFFFFFFFFFFFFFFFFFFFFF:FFFFFFFFF  
FFFFFFFFFFFFFFFFF:FFFFFFFFF:FFFFFFFFFFFFFFFFF  
@A00721:190:HGJW7DSXY:4:1661:4182:20322\_1:N:0:TCTGCAAG+GCTGCACT  
GCAGAGTGACTGGAGTTCAGACGTGTGCTCTTCCGATCTGAGGAAGTTCTCCGAAATTAAAGACGGGG  
GGATTAAGAGTCCAGCTGTAAGTGTCAATTCAGAGAGGGGAGCTCTGAAAAGGAACTTCGTCAGAAG  
ATG  
+  
F,:F:FFF:F:FFFFFFFF,:FF,F:FFFF,FFFF,:FFFFFFFF:F:,FF:FFF:F::FFF  
FFFFFFFFFFFF:FF:FFFF,FFFF::FFFFFFFFFFFFFFFF:FFFFFFFF:FFFFFFFF,F:,FF  
FFF  
@A00721:190:HGJW7DSXY:4:1452:17381:33536\_2:N:0:TCTGCAAG+GCTGCACT  
AGTTTGAGGAAGGCTCTAGAGAAGATCTCACCACCTGGAGAAGGCAAGTGAGAGTCCAGAAGTTGAT  
GAAGAAGGATTATTTGAAGCAGGGGTTACCACTTCTAAGGTGGATGA  
+  
FFFFFFFFFFFFFFFFFFFFFFFFFFFFFFFFF:FFF:F,FFFFFFFF:FFFFFFFFFFFF:FFFF:FF  
FFFFFFFFFFFF:FFFFFFFFFFFFFFFFF:F:FFFF,FFFFFFFF:FF  
@A00721:190:HGJW7DSXY:4:2404:2763:23719\_1:N:0:TCTGCAAG+GCTGCACT  
GACTGGAGTTCAGACGTGTGCTCTTCCGATCTATTTAACGTGGCAGAATTCGTAACCTACCATATTG  
TTCTTCCGGGAAGTTGTGGGATTTAACTTTGACTCAACTACTCCGATCAGATCCGGATGGTTTGATT  
GGT

[illegible]



TTGCAACAGGACTTTGAGAAGACTGTTGAAATGGACAAAATCTGGGATCATAGGTATGTGTCACGCTA  
CAC

+

:FFFFFFFFFFFFFFFF,FFFFFFFF:FFFFFFFF:FFFFFFFFFFFFFFFF:FFFFFFFF  
FFFFF:FFFFFFFFFFFFFFFFFFFFFFFFFFFFFFFF:FFFFFFF:FFFFFFFFFFFFFFFFFFFFF  
FFF

@A00721:190:HGJW7DSXY:4:1169:22987:5290\_1:N:0:TCTGCAAG+GCTGCACT  
CGCCATATCAGATTAGAGACATGCCAGTTAGAGTTCTTCTAACCAGGACTGATGGTGAGATTCTTTTA  
CCTTTTGGAGGTCCAGGAACCTTTACTCCTAGTGTCTTTTCTAGAGTCCAAGGACGTTTCCGTCGGAG  
GAT

+

FFFFFFFFFFFFFFFFFFFFFFFFFFFFFFFFFFFFFFFF:F,FFFFFFFFFFFFFFFFFFFFFFFFFFFF  
FFFFFFFFFFFFFFFFFFFFFFFF:FFFFFFFFFFFFFFFFFFFFFFFFFFFFFFFFFFFFFFFFFFFFF  
FFF

@A00721:190:HGJW7DSXY:4:2430:22290:4523\_1:N:0:TCTGCAAG+GCTGCACT  
CAATAACACTCTATTGAATCCCTTTCCACGATGAAAGCTCTTTATGAGGTGCTCCATGCAAATTTAC  
AGTTCCTCTTTGGTGATATCGCCTCTGTCCTTTCTCCTTAATCGTGAGGTTACGAGAGTTTCGTACT  
TGG

+

FFFFFFFFFFFFFFFFFFFFFFFFFFFFFFFFFFFFFFFF,FFFFFFFFFFFFFFFFFFFFFFFFFFFF  
FFFFFFFFFFFFFFFFFFFFFFFFFFFFFFFF:FFFFFFFFFFFFFFFFFFFFFFFFFFFFFFFFFFFFF  
FFF

@A00721:190:HGJW7DSXY:4:1259:3097:10895\_1:N:0:TCTGCAAG+GCTGCACT  
GCTCTTCCGATCTGCTGGATGGATCTTTTGATGGTATGTTTCACATTGCGTGATCACTTCCCGTGGAC  
TTGGGAAGAGATTAAACATAAAATCCAGCGATTCTATTATGTCGCTAAAGCCTGTCCAGTTGTCGATG  
ATG

+

FFFFFFFFFFFFFFFFFFFFFFFFFFFFFFFFFFFFFFFFFFFFFFFFFFFFFFFFFFFFFFFFFFFFF:FFFFFFFF  
FFFFFFFFFFFFFFFFFFFFFFFFFFFFFFFFFFFFFFFF, :FFFFFFF:FFFFFFFFFFFFFFFFFFFF  
FFF

@A00721:190:HGJW7DSXY:4:2466:14479:12665\_1:N:0:TCTGCAAG+GCTGCACT  
CACAAGGATTACTAAGTCTGAGATCTGCCACTTCTAATTTTAGGAAACGTCGCGAAAAGAAAGTTTCAT  
GAGGATGTCTTGGTCGAAAAATATCGCCGGGAACCTCTAATAGAGGATCCTGATGACATTATTTCAAC  
GGA

+

FFFFFFFFFFFFFFFFFFFFFFFFFFFFFFFFFFFFFFFFFFFFFFFFFFFFFFFFFFFFFFFFFFFFF  
FFFFFFFFFFFFFFFFFFFFFFFFFFFFFFFFFFFFFFFFFFFFFFFFFFFFFFFFFFFFFFFFFFFFF  
FFF

@A00721:190:HGJW7DSXY:4:2562:17644:28009\_2:N:0:TCTGCAAG+GCTGCACT  
CTACCACAGAAACCGTCTCAGGAAGTCTCCACTGATTCGGAATTAGAGAAAGACGACCTTCTTGTCG  
GGGACTGAGACCTCTGAATTTTCAGGGTGCCCTGATGAGGACGTTGAA

+

FFFFFFFFFFFFFFFFFFFFFFFFFFFFFFFFFFFFFFFF:FFFFFFF:FFFFFFFFFFFFFFFFFFFF:FFFF  
FFFFFFFFFFFFFFFFFFFFFFFFFFFFFFFFFFFFFFFFFFFFFFFFFFFFFFFFFFFFFFFF: :

@A00721:190:HGJW7DSXY:4:1340:11487:31688\_1:N:0:TCTGCAAG+GCTGCACT  
TTCTAAGAGTGTTTCAAAAGACCAGAAACGTAACAAGAAGAATAAAGGTAGGAAGGGGAGAAAACAGA  
ACAAGCGAGCGGTTGAAGAGAAAACCTGATATGGTTGCGGCTGATCGTACCCCAATTCTGCTAGAAAG  
ATC

+

FFFFFFFFFFFFFFFFFFFF:FFFFFFFFFFFFFFFFFFFFFFFFFFFFFFFFFFFFFFFFFFFFFFFFFFFF  
FFFFFFFFFFFFFFFFFFFFFFFFFFFFFFFFFFFFFFFFFFFFFFFFFFFFFFFFFFFFFFFFFFFFF  
FFF

@A00721:190:HGJW7DSXY:4:2628:1154:34679\_1:N:0:TCTGCAAG+GCTGCACT  
ACCACTGATCTTCCAGAGTTACGTAGTGGTCGTTCTTTTGGTGATTTTATCAAAGAGAAAGTTTCTGC





@A00721:190:HGJW7DSXY:4:1177:24876:13823\_2:N:0:TCTGCAAG+GCTGCACT  
TGTCTGTCTCGCCTCTTCGAATGAAGTTTAAATGCTTAACAACAATGATAGTGAATTTATACCTACAA  
TCATTGTTTTTCTAATAATGATGACACTATTGTTTATGGATATGATG

+

:FFFFFFFFFFFFFFFFFFFFFFFFFFFFFFFFFFFFFFFFFFFFFFFFFFFFFFFFFFFFFFFFFFFFFFFF:F  
FFFFFFFFFFFFFFFFFFFFFFFFFFFFFFFFFFFFFFFFFFFFFFFFFFFFFFFFFFFFFFFFFFFFFFFF

@A00721:190:HGJW7DSXY:4:1114:21522:12430\_2:N:0:TCTGCAAG+GCTGCACT  
GGACCTTAAGCGATGGATCGGGGTTAATTCTAAAACATTACCCGAAAGACGTGCTAAATTAACCAT  
TGTACGATGTCGTCTGTCTCGGCGATCACTTTTCTACTAAGAATTGGTC

+

FFFFFFFFFFFFFFFFFFFFFFFFFFFFFFFFFFFFFFFFFFFFFFFFFFFFFFFFFFFFFFFFFFFFFFFF,F  
FFFFFFFFFFFFFFFFFFFFFFFFFFFFFFFFFFFFFFFFFFFFFFFFFFFFFFFFFFFFFFFFFFFFFFFF

@A00721:190:HGJW7DSXY:4:1554:24939:34757\_2:N:0:TCTGCAAG+GCTGCACT  
GAGTGAAAGGCTTCAATTGTAGTGGTTTGGTCGTTTCAGTACCCAGTCAGTATACCTCTACGCAAAGA  
TATTTTCATGAAAACTACAGAGGAACGTACCGGATTACCTGTCTTTCAT

+

FFFFFFFFFFFFFFFFFFFFFFFFFFFFFFFFFFFFFFFFFFFFFFFFFFFFFFFFFFFFFFFFFFFFFFFF  
FFFFFFFFFFFFFFFFFFFFFFFFFFFFFFFFFFFFFFFFFFFFFFFFFFFFFFFFFFFFFFFFFFFFFFFF:F

@A00721:190:HGJW7DSXY:4:1260:15167:21715\_2:N:0:TCTGCAAG+GCTGCACT  
GTTGGATGTCAAGAAGGGTTCAGAATGGGATTCTACGTAGTTTATGACTTTGGTGGTGGTACTTTTCG  
ATACTTCTATCGTCTTACGTTACGGTAATTACTATAGTGTTATTTATT

+

FFFFFFFFFFFFFFFFFFFFFFFFFFFFFFFFFFFFFFFFFFFFFFFFFFFFFFFFFFFFFFFFFFFFFFFF,F  
FFFFFFFFFFFFFFFFFFFFFFFFFFFFFFFFFFFFFFFFFFFFFFFFFFFFFFFFFFFFFFFFFFFFFFFF

@A00721:190:HGJW7DSXY:4:1339:19813:36839\_1:N:0:TCTGCAAG+GCTGCACT  
TTGGAGGTCGTGACGTTGATGAAGCTATAAGAGCGTTCTTATTACGGCGCACTTCTTTACCCGCCACC  
ACACAACTTTCAGTTTCACTGAAGGAGGAGGTTTCTGTTACTGGAACCCCTCGTCAATACTTTT  
CAA

+

FFFFFFFFFFFFFFFFFFFFFFFFFFFFFFFFFFFFFFFFFFFFFFFFFFFFFFFFFFFFFFFFFFFFFFFF,FF  
FFFFFFFFFFFFFFFFFFFFFFFFFFFFFFFFFFFFFFFFFFFFFFFFFFFFFFFFFFFFFFFFFFFFFFFF  
FFF

@A00721:190:HGJW7DSXY:4:2256:6768:19914\_2:N:0:TCTGCAAG+GCTGCACT  
CGTCCTTTTCTGGAACGTAGTTTTACTATTATGAACAAAGTTATCAAAGATAGTGGCATTCAAGGCAA  
ACTTACCCTGATTCCGGCCGGTGGTAGCTCATTTCTACCAGAGATCGG

+

FFFFFFFFFFFFFFFFFFFFFFFFFFFFFFFFFFFFFFFFFFFFFFFFFFFFFFFFFFFFFFFFFFFFFFFF  
FFFFFFFFFFFFFFFFFFFFFFFFFFFFFFFFFFFFFFFFFFFFFFFFFFFFFFFFFFFFFFFFFFFFFFFF

@A00721:190:HGJW7DSXY:4:2626:2889:8406\_2:N:0:TCTGCAAG+GCTGCACT  
GAAACAGCTATTAAAGCTGTTGAGCGGTAATTACACCTAAACGAGCTCGATCTGCCATCGCTGAAGG  
ATGTGCACTCTTTTCTGCTACTTTAACGGAGCGTAGTGACTCTTCGT

+

FFFFFFFFFFFFFFFFFFFFFFFFFFFFFFFFFFFFFFFFFFFFFFFFFFFFFFFFFFFFFFFFFFFFFFFF  
FFFFFFFFFFFFFFFFFFFFFFFFFFFFFFFFFFFFFFFFFFFFFFFFFFFFFFFFFFFFFFFFFFFFFFFF

@A00721:190:HGJW7DSXY:4:2146:7166:18255\_1:N:0:TCTGCAAG+GCTGCACT  
TACCGTTGAAGGCTAACTCCAAGGTAATTATGAAGACTGTGATTTATCTTTCCTCTGGCCTTGTAT  
GAGGGTGTCTTCTAATCGTAACATTAATAATTTCAATCTTCTTAAAAAGAAGATAGAGAGTCATACTTT  
GG

+

F:FFFFFFFFFFFFFFFFFFFFFFFFFFFFFFFFFFFFFFFFFFFFFFFFFFFFFFFFFFFFFFFFFFFFFFFF  
FFFFFFFFFFFFFFFFFFFFFFFFFFFFFFFFFFFFFFFFFFFFFFFFFFFFFFFFFFFFFFFFFFFFFFFF  
FF

@A00721:190:HGJW7DSXY:4:2638:21730:14356\_2:N:0:TCTGCAAG+GCTGCACT  
ATTAAACAAGTTGTACTTATCAATGATTTTATCGCTGGTTGTTATCTCGAAAAGTCTCTTCTAAAAGG

AACGTCAGTTCTAACCCAAAGAGAATATCTAAAATATTTACAAAATCT

+

FFFFFFFF:FFFFFF::FF,FFFFFFFFFFFFFFFF:FFFF:FFFF:F:FFFF:F::,,FFFFFFFF:F  
FF,:FFF::F:FFFF:F:FF:FFFFFFFF,FFFFFFFFFFFFFFFF,F

@A00721:190:HGJW7DSXY:4:1619:2085:7232\_1:N:0:TCTGCAAG+GCTGCACT  
TGGCACTACCTCGGTACAATCTTACTTGGAACGAAGGCGACCTGTTCCGGAGTTTTTACGGGATCCGG  
AATGTTCTGTCTATATTAGGTGAAGCGAAATACGATTTTCAACGTCAACGTTACCGAGTTTCGTTTC  
GTA

+

FFFFFFFFFFFFFFFF:FF:FFFFFFFFFFFFFFFFFFFFFFFFFFFFFFFFFFFFFFFFFFFFFFFF  
FFFFFFFFFFFFFFFFFFFFFFFFFFFFFFFFFFFFFFFFFFFFFFFFFFFFFFFFFFFFFFFF:FF  
F:F

@A00721:190:HGJW7DSXY:4:2415:4155:4805\_1:N:0:TCTGCAAG+GCTGCACT  
CTTGATAAAGAACTTCATGAATTTTCAGAGGATGAAAAATTTCTTCCTTGATTATTAATATAAAGAA  
TCTTTACCAGGACTCCTACTACAGGAGGCAGTCTTCTGATCGTAAGAAGTTTATAAGGAACATATCCA  
TTT

+

FFFFFFFFFFFFFFFFFFFFFFFFFFFFFFFFFFFFFFFFFFFFFFFFFFFFFFFFFFFFFFFF:FFFF  
FFFFFFFFFFFFFFFFFFFFFFFFFFFFFFFFFFFFFFFFFFFFFFFFFFFFFFFFFFFFFFFF:FFFF  
FFF

@A00721:190:HGJW7DSXY:4:2567:10068:26663\_2:N:0:TCTGCAAG+GCTGCACT  
AACTCTAAGTGGTAATACTGTCTTTCCAAGCTTACCTGTATCTTCAATGAAATTGGACTCTTCGATAG  
GGGACATTTTATCGTGGGCTTTCCGTAAAGGAAGATCTGTTATCGACG

+

FFFFFFFFFFFFFFFFFFFFFFFFFFFFFFFFFFFFFFFFFFFFFFFFFFFFFFFFFFFFFFFF:FF  
FFFFFFFFFFFFFFFF:FFFFFFFFFFFFFF:FFFFFFFFFFFFFFFF

@A00721:190:HGJW7DSXY:4:2353:14091:17597\_1:N:0:TCTGCAAG+GCTGCACT  
TCTATTATTGATTTTTATGAGATTGATACGTTAACAGAAGATGATGTTAGAGTAGAATTCCTGAAGAG  
TCCTTCCGTAACCAACTTCTTGACAATTTCTTCAATCCTTCGATAATAGTTAAATCTAGGATTATGT  
CTG

+

FFFFFFFF:FFFF:FFFF:FFFFFFFF,FF:FFFFFFFFFFFF:F:FFF:FFFF,F,F,:FF:F,  
F:FF,,F:FFFFFFFF,FFFFFFFFFFFF,FF::FFF,FFF,F:FF:FF,FFFF,:FF,FFFF,F  
,FF

@A00721:190:HGJW7DSXY:4:2229:28501:1157\_2:N:0:TCTGCAAG+GCTGCACT  
ATCCTACATTGACTGATTATCTAAAGATTGAAGGAAAATTTATCCTCGTTTAACTTACTTAGACTTT  
CCTACGATACAAATGATAACTTCTAATTTACGTTTGCTACTCAGAGCT

+

FFFFFFFF:FFFFFFFFFFFFFFFF:FFFFFF:FFFFFFFFFFFFFFFFFFFFFFFFFFFFFFFF  
FFFFFFFFFFFFFFFFFFFFFFFF:FFFFFFFFFFFFFFFF

@A00721:190:HGJW7DSXY:4:2317:22462:19038\_1:N:0:TCTGCAAG+GCTGCACT  
CTCAGGAGTCCCGCATTTGATAATAATGACGAGACTTTTCGTCATAATCGCTGCATATTACGGATTAC  
ACGGTACCAGCGCATCTCGTGTGAGCCTCGACCCGATTATATGGTATTAACCTATAAAGGTGAGGAG  
ACC

+

FFFFFFFFFFFF:FFFFFFFFFFFFFFFFFFFFFFFFFFFFFFFFFFFFFFFFFFFFFFFF:FFFFFFFF  
FFFFFFFFFFFFFFFFFFFFFFFFFFFFFFFFFFFFFFFFFFFFFFFFFFFFFFFFFFFFFFFF  
FFF

@A00721:190:HGJW7DSXY:4:1342:1705:8046\_1:N:0:TCTGCAAG+GCTGCACT  
ACTAACTATGTTATGTTCTCTGATCATTTTGACAATCTCTTCTATAATAATAATAATAATATTA  
CTAATGGCAAATAGTGAAAGGCTCCAGTCAACACTAGTTCGAGTGCTGCTTTGATTACGATGACGT  
GAG

+

FFFFFFFF,F:FFFF,FFFFFFFFFFFFFFFF:FFFFFFFFFFFFFFFFFFFFFFFF:FFFFFF:F



FFFFFFFFFFFFFFFFFFFFFFFFFFFFFFFFFFFFFFFFFFFFFFFFFFFFFFFFFFFFFFFFFFFFFFFFFFFFFFFF  
FFF

@A00721:190:HGJW7DSXY:4:2343:3070:10285\_2:N:0:TCTGCAAG+GCTGCACT  
ATAGTTTTTACCTCGACCAACATTAAGGCGGCGGCGACTAATCTTAAAGCTTCACCCAAAATGAAGGA  
CACTTCGAAACTGAATAATGATGCACTACAAACAAGTATCGCTAATCA

+  
FFFFFF:FFFFFF:FFFF,FF:FFFFFFFFFFFFFFFFFFFFFFFFFFFFFFFFFFFFFFFFFFFFFFFF,FFFFFFFF  
FFFFFFFFFFFFFFFFFFFFFFFFFFFFFFFFFFFFFFFFFFFFFFFF:FFFFFFFFFFFFFF

@A00721:190:HGJW7DSXY:4:1531:32371:33098\_2:N:0:TCTGCAAG+GCTGCACT  
GAGGATATTCGCCATTGTGGTACGAATTGGTCCAACATTTACCACCAAATTCTTTTGATACAACTCTA  
GCCTTCAAGTGGGGTATGCCTGCGGAATACGCTTGCTATTCACCAGAT

+  
FFFFFFFFFFFFFFFFFFFFFFFFFFFFFFFFFFFFFFFFFFFFFFFFFFFFFFFFFFFFFFFFFFFFFFFFFFFF  
FFFFFF,FFFFFFFFFFFFFFFFFFFFFFFFFFFFFFFF:F,FFFFFFFF

@A00721:190:HGJW7DSXY:4:1507:28510:17080\_1:N:0:TCTGCAAG+GCTGCACT  
TGATGCTATGTCAGAAGAAGCTATTCAAGCTTGTCGTTTAAAGACTGCAGAGGCTGTCAAACAAGCCC  
AGACTCAAGGAGTCCAATCAAAGTTTTGAATTTAGCTCAACTGGGGAGACGTGCTTAAATGGGTGAT  
AAA

+  
FFFFF,FFFF:FFFFFFFF:FF,FFFF:FFFF::FF:FFFFFFFFFFFFFFFFFFFFFFFFFFFFFFFF  
FFFFFFFFFFFFFFFFFFFF,F:FFFFFFFFFFFFFFFFFFFFFFFFFFFFFFFFFFFFFFFFFFFFFFFF  
FFF

@A00721:190:HGJW7DSXY:4:2305:9344:1423\_2:N:0:TCTGCAAG+GCTGCACT  
TAGATAGTGGGATAATAGTTCTACCGATACGTAGTGAAAGCGTTTGAAGAACCAAGTACTATCCGTCT  
GAAGAGTTTAGAGCTGCTATTGATTATGTAACCGATAGGAGTTGTATA

+  
,F:F:F::F::FFFF:F,,FFF:FFFFFF,FFF:FF,F:FFFF,,F:FFFFFF:FFF,,FF:,FF  
:FFFF:FFFFFF,FFF:FF:FF:F:FF,F:,F,FFF:::,F,FFFF

@A00721:190:HGJW7DSXY:4:1268:26422:32941\_2:N:0:TCTGCAAG+GCTGCACT  
ATCCTTTAAGGACTATGTTGACTGACGAAGATTTCCACAGATTTGTCTACGTTGCAGATCGCCACT  
CCAAACACTATATACATTATAAAATATAAAAATAAGGGAGTCATACT

+  
FFFFFFFFF:FFFFFFFFFFFFFFFFFFFF:FFFFFFFFFFFFFFFFFFFFFFFFFFFFFFFFFFFFFFFF  
FFFFFFFFFFFFFFFFFFFFFFFFFFFFFFFFFFFFFFFF:FFFFFFFFFFFFFF

@A00721:190:HGJW7DSXY:4:2226:21052:23015\_2:N:0:TCTGCAAG+GCTGCACT  
AATTCTTGCTTTCAACGAAGTCTCTGATTTTATTAATCATTACTTTAACGATCTCTCGGTCATTTAC  
TCTGTACTTGATCTACGTCGTTTAAATGTCTGAACAACCTAACTTAG

+  
FFFFFF:F::FF,:FF,:FFFF:, :FF:FF,FFFF::FFFF:F::FF:FFF,,,FF:,,FF,F:F,  
FFFF:FFFF,FFFFFF:,F,F:FFF,F:FF,FFFF::,,,F:, :F,

@A00721:190:HGJW7DSXY:4:2309:10257:28995\_2:N:0:TCTGCAAG+GCTGCACT  
CTCACTATCGTTTTCTGCTTTTTCTTAGCTAATAGATTAATAAAGGATGAGTACGAAAACCAACTCTT  
CGTTACGAGACCTGATGGTAGAATAGATTTAGTCTCTACACCCATCTC

+  
FFFFFFFFFFFFFFFFFFFFFFFFFFFFFFFFFFFF:FFFFFFFFFFFFFFFFFFFFFFFFFFFFFFFFFFFF  
FFFFFFFFFFFFFFFFFFFFFFFFFFFFFFFFFFFFFFFFFFFFFFFFFFFFFFFFFFFFFFFF

@A00721:190:HGJW7DSXY:4:1557:1398:19445\_2:N:0:TCTGCAAG+GCTGCACT  
AGCGAGTTTTCCGTCTGAACGTAATACACGAAGAGATCATCCGCAAACGACTCGAAACCGAGACGCC  
GTAGATCAAAGTCCCTTCTAACTTTAGATTATGAATCCTGCCTTTACT

+  
FFFFFFFFFFFFFFFFFFFFFFFFFFFFFFFFFFFFFFFFFFFF:FFFFFFFFFFFFFFFFFFFFFFFFFFFF  
FFFFFFFFFFFFFFFFFFFFFFFFFFFF:FFFFF:FFFFFFFFFFFFFFFFFFFFFF

@A00721:190:HGJW7DSXY:4:1141:17852:30279\_2:N:0:TCTGCAAG+GCTGCACT  
CTTTTCGATAGTGATTGTTATCAATTTAAATACATTACTGTTTCAAATCATCTTTACTCACAGACTCC

GAAAATGGTTTCAAATGAGGTCAAAGCTCTATTTATTAAACGAACTAT

[illegible]

AACTTCAATTCCTTCGATGTTTATATTTTTCTATAAGGGAAAATAGCAATAATCAAATTTGACAAAT  
TTTAGAACTTTATTTAGAACTCTCTCCGATCACCTTGGTGTGATCTC

```

FFFFFFFFFFFFFFFF:FFFFFFFFFFFFFFFFFFFFFFFF:FFF:FFFFFFFFFFFFFFFFFFFFFFFF
FFFFFFFFF,FFF:FFFFFFFFFFFFFFFFFFFFFFFF,FFFFFFFFFFFF

```

TCAATAAGATGTATGATGATAATCTACTATTTTTAAATAGTGATATTCAGCGTATACTTGAATACTTT  
ATCAAAGATTTGGCTTGGTCTATTTACCGCAAAAAGTTGGAAGAGGTCTATGATATTTATTTTACTTA  
TAC

[illegible]

CTTGA CTGTTGATAATA TACAATAGCTCTTTCTCAGAAGATTAGAGAAGTAACCGGTGAACACGTCG  
GTAGCATTGATTTACTTTTACCGTTAGAACTGAAAAAGATTCTTTTCG

[illegible]

AAACGATTCTTCGACTATATTAAGAAATAAAAATACTTCAGTACCTGAACTTTACATTTTTAATGG  
TATGGTATAATGTGTCTTACAAATAGAACCTTCACTCTCGGTAATGAGAGTGTATTCTTAATATTCT  
AGT

```
F:FFFFF,FFFFFFFFFFFFFFFFFFFFFFFFFFFFFFFFFFFFFFFFFFFFFFFFFFFFFF:FFF:FFF  
FFFFFFFFFFFFFFFF:FFFFFFFFFFFFFFFFFFFFFFFFFFFFFFFFFFFFFFFFFFFFFFFFFF  
FFF
```

TTACTAGGATTATCACACTCCTAAAATTGATAGCAATTTATGTTTTAAATGCTAGGAAAATTTTAGA  
AAAACCTCCATTGTATAGTTCAAGGAGTACTTAATTCAATAGCTTTAGTATTATTTACTATCGCCTTTA  
TTG

```
FFFFFFFFFFFFFFFFFFFFFFF:FFF,F:FFFF,FFF:FFF,FFFFFFFFFFFFFFFFFFFFFF:FFF
FFFFFFFFF:FFFFFF:FFFFFFFFFFFFFFFFFFFFFFFFFFFFF:FFFFFFFFFFFFFFFFFFFFFFF
FFF
```

TTAATTGCTTACACAAAGTGACGCGCGAAGGAATCTTAATTGATTGAAGCTAGGCGTTGGGGAGAAT  
GAACTGCCGCTTCCCGGAAGAAACGATCTATTTACAGAGTATTTAGAGTAGTCCAAAGTTTGTATAAA  
TTT

[illegible]

TGACCAATCATCGTCCAACTGGCAGCCAGACGTAGGCCTCAAACCTACTACCGCCGGTCGGCAGATC  
GGCACCACTGGTCTCTCACTTCAGGGACCGCTGTGCAGAATAAACCCT

[illegible]

@A00721:190:HGJW7DSXY:4:2272:19090:27289\_1:N:0:TCTGCAAG+GCTGCACT  
GACCACTCAAAGGAAACGGGCTGTTGCCAGAGGAAAGCAGCGACCACCGAGGTCGCTCGTAACATTG  
ACGGCAGTCCCGTCATCTCTGTGGAACTGAGGCAGTACCTCAGTCAAAGTCACATTCACCACTCCC  
ATA

+

FFFF:FF,,F:FF:,F:FF:FFFF:FF,F:F:FFFFFFFFFFFFFFFF:F,F:FFF,FFFFFF:FF,FF:  
FFFFFF:FF,F:FF,FFFFFFFF,::FFFFFFFF:FF:F:F:FFFFFFFF,FF:FFF,FFF:FF:  
:FF

@A00721:190:HGJW7DSXY:4:2117:3314:14904\_2:N:0:TCTGCAAG+GCTGCACT  
GACTATACAGTTCGGCCATTTCAAGAGTGGTCAATACGTCGTGGGAGGTACTGAAGCCTTCCCCTCCG  
CTGGCACGAAGAACTCCCAAGCCAATCAATAGTTCTTCTGACCAGA

+

FFF:FFFFFFFFFFFFFFFFFFFFFFFF:FFFFFFFFFFFFFFFF:FFFFFFFF:FFFFFFFFFFFFFFF  
FFFFFFFFFFFFFFFFFFFFFFFFFFFFFFFF:FFFF:FFFFFFFFFFFFFFFF

@A00721:190:HGJW7DSXY:4:2545:11731:31955\_1:N:0:TCTGCAAG+GCTGCACT  
GGTAGTCTCTAAGTCTACCAGGAAGAGGGGAAATGTCCCCAAAAGTGAAGAATAAAGGGAAAGGTC  
CATCAGGACCTAAGAAGGGGAAATTACCCCTAATTCTGAAGGAAGATCTCCACCATCTGGGGTTGGG  
AAT

+

FFFFFFF,FFFFFFFFFFFFFFFFFFFFFFFF:FFFFFFFFFFFFFFFFFFFFFFFF:FFFF:FFFFFF,F::FF  
FFFFFFFFF:FFFFFFFFFFFFFFFFFFFFFFFFFFFFFFFFFFFFFFFFFFFFFFFFFFFFFFFFFFFFFFFF  
FFF

@A00721:190:HGJW7DSXY:4:2605:29595:8719\_2:N:0:TCTGCAAG+GCTGCACT  
CACGGGCCAAAGAGGCCGCTGCTACGAAGTCGCTGAAGGCGGCTTGGGTCATTAAGGGTAGCTGTAAA  
GTTGCGCCTGCCGACCCCATCTTTGAGACCAAGACTCTCTACAGTAGG

+

FFFFFFFFF:FFFFFFFFFFFFFFFFFFFFFFFFFFFFFFFFFFFFFFFFFFFFFFFFFFFFFFFFFFFFFFF  
FFFFFFFFFFFFFFFFFFFFFFFFFFFFFFFFFFFFFFFFFFFFFFFFFFFFFFFF

@A00721:190:HGJW7DSXY:4:1105:11035:7670\_2:N:0:TCTGCAAG+GCTGCACT  
AAATCTGTTGAATTCGTCACTGAGGACGAAGGTGAGAGGACTTTTGGCTACTGGCGACAACTGAGAG  
CAGTCGCTGGGGAAGAGAATTGAGTGGGTTGAAGGCCGACGCTTCGA

+

FFFFFFF,:FFFFFFF,FF:FFFFFFFFFFFFFFFF,FFFFFFFFFFFFFFFF,F,FFFFFFFFFFFFFFFF  
FFF:FFFFFFFFF:FFF,F::FF,F,FFF:F::FFFFFFFF:FF:FFF

@A00721:190:HGJW7DSXY:4:1137:22092:4398\_1:N:0:TCTGCAAG+GCTGCACT  
GTCAACGGCGTTTGGAGGATTTTATCCGCGCTTAAGTATGGGGCGAAGATCCCCTATGGAGTCTTGAA  
GGACTTAGGTTGGCATATTTATGCCGACGATAATAAGCATGTCACCCTTAAGCACCGAGGTAAGCTCG  
GGA

+

FFFFFFFFFFFFFFFFFFFFFFFFF,FFFFFFFFFFFF:FFFFFFFFFFFFFFFFFFFFFFFF:FFFFFFFFFFFFFFF  
FFFFFFFFFFFFFFFFFFFFFFFFFFFFFFFFFFFFFFFFFFFFFFFF:FFFFFFFFFFFFFFFFFFFFFFFF  
FFF

@A00721:190:HGJW7DSXY:4:2303:12048:17190\_1:N:0:TCTGCAAG+GCTGCACT  
GATCTTGACAGAGTGACTGGAGTTCAGACGTGTGCTCTTCCGATCTGTTAAAGTCTTGCTCCTTCTGT  
GGGTGAGGGTTTTGTTATATTCAGTGGTCTGGGAGGCTGCTTCTCCATAATTACAACCTCTCTT  
TAG

+

FFF,FFFFFFFFFFFFFFFF:FFFFFFFFFFFFFFFF:FFFFF,FFFFFFFFFFFFFFFF:FFFFFFFF  
F:FFFFFFFFF:FFFFFFFFFFFFFFFFFFFFFFFFFFFFFFFFFFFFFFFF:FFFFFFFFFFFFFFFF  
FFF

@A00721:190:HGJW7DSXY:4:2407:1389:19241\_2:N:0:TCTGCAAG+GCTGCACT  
AGTTGGGCAAATTCACATATGGTAGACGTTGTCAACTTTTCTTGAAAATTTTCTTTCTCCGT  
CATTGGGATTTTCGATGTGAGAAGGTGGAAGGTGTCAAGGCTCTTCTT

+

FF:FFFFFFFF:FFFFFFFFFFFFFFFFFFFFFFFFFFFFFFFFFFFFFFFFFFFFFFFFFFFFFFFF  
FFFFFFFFFFFFFFFF:FFFFFFFFFFFFFFFFFFFFFFFFFFFFFFFFFFFFFFFF  
@A00721:190:HGJW7DSXY:4:2273:29767:20322\_1:N:0:TCTGCAAG+GCTGCACT  
GCAGAGTGACTGGAGTTCAGACGTGTGCTCTTCCGATCTGAGGAAGTTCTCCGAAATTAAAGACGGGG  
GGATTAAGAGTCCAGCTGTAAGTGTCAATTCAGAGAGGGGAGCTCTGAAAAGGAACTTCGTCAGAAG  
ATG  
+  
FFFFFFFFFFFFFFFFFFFFFFFFFFFFFFFF:FFFFFFFFFFFFFFFFFFFFFFFFFFFFFFFFFFFFFFFF  
FFFFFFFFFFFFFFFFFFFFFFFFFFFFFFFFFFFFFFFFFFFFFFFFFFFFFFFFFFFFFFFFFFFFFFFF  
FFF  
@A00721:190:HGJW7DSXY:4:1543:24804:18803\_2:N:0:TCTGCAAG+GCTGCACT  
AGTTTGAGGAAGGCTCTAGAGAAGATCTCACCACCTGGAGAAGGCAAGTGGAGAGTCCAGAAGTTGAT  
GAAGAAGGATTATTTGAAGCAGGGGTTACCACTTCCTAAGGTGGATGA  
+  
FFFFFFFFFFFFFFFFFFFFFFFFFFFFFFFFFFFFFFFFFFFFFFFFFFFFFFFFFFFFFFFFFFFFFFFF  
FFFFFFFFFFFFFFFF:FFFFFFFFFFFFFFFFFFFFFFFFFFFFFFFFFFFFFFFF  
@A00721:190:HGJW7DSXY:4:2663:22932:2347\_1:N:0:TCTGCAAG+GCTGCACT  
GACTGGAGTTCAGACGTGTGCTCTTCCGATCTATTTAACGTGGCAGAATTCGGTAACCTACCATATTG  
TTCCTTCCGGGAAGTTGTGGGATTTAACTTTGACTCAACTACTCCGATCAGATCCGGATGGTTTGATT  
GGT  
+  
FFFFFFFFFFFFFF:FFFFFFFFFFFF:FFFFFFFFFFFFFF:FFFFF:FFFFFFFFFFFF:FFFFFFFFFFFF  
,FFFFFFFFFFFFFFFFFFFFFFFF:FFFFFFFFFFFFFFFFFFFFFFFFFFFFFFFFFFFFFFFF:FFFFF  
FFF  
@A00721:190:HGJW7DSXY:4:2675:10719:26631\_1:N:0:TCTGCAAG+GCTGCACT  
TCTTCCGATCTCCGATAAGGTGAAAAATATGCAGGTCAAAGATTCTGTAGCTCTGAGGGCGGTTGAGG  
GAGCCGTTTTGGCCGACTTTAACTATTCTAAGAGTCTTTATGATTCAAACCTATCGTTGTGCTACCT  
TAC  
+  
FFFFFFFFFFFFFFFFFFFFFFFFFFFFFFFF:FFFFFFFFFFFFFFFFFFFFFFFFFFFFFFFFFFFFFFFF  
FFFFFFFFFFFFFFFFFFFFFFFFFFFFFFFFFFFFFFFFFFFFFFFFFFFFFFFFFFFFFFFFFFFFFFFF  
FFF  
@A00721:190:HGJW7DSXY:4:2237:1380:21793\_1:N:0:TCTGCAAG+GCTGCACT  
GTTTCCAGAATTGCGGTTGAAGTTCACCCATTCTATCTTGAATGCTCACGCCGTGCGAGCCATATCGA  
GACTATGTTATAATCACTTGTTAAAGTACAGATTTAGTGATTAGATATTATTGATATTGGAGGCGAT  
ATT  
+  
FFFFFFFFFFFFFFFFFFFFFFFFFFFFFFFFFFFFFFFFFFFFFFFFFFFFFFFFFFFFFFFF:FFFFFFFFFFFFFFFFFFFF  
FFFFFFFFFFFFFFFFFFFFFFFFFFFFFFFFFFFFFFFF,FFFFFFFFFFFFFFFFFFFFFFFFFFFFFFFFFFFF  
FFF  
@A00721:190:HGJW7DSXY:4:2614:22507:5556\_2:N:0:TCTGCAAG+GCTGCACT  
AAACTCCTTGAATGGAGTACATATTTGCAACCCTATTCTTGATGTGAAAGATGCATCGAGGTATACGT  
CTAGGAACATTGATTGGGAACGTACCTACTCACGAGACGTCATGAAAG  
+  
FF:::FFFF:FFFFFFFFFFFFFF:,F,,FFF:,FFFFFFFFFFFFFFFF:FFFF:F:,FFF:FF:F:,F  
:FFFFFFFF,FFFF:F,FFFFFF,FFFF:F,,FFFF,FFFFFFFF  
@A00721:190:HGJW7DSXY:4:2206:1696:16642\_2:N:0:TCTGCAAG+GCTGCACT  
GTTCTGTTACAAGAACGCTTTGGATTGTGACCATAAAGCCTCAGTTGCGATAGCTGTAGAGGTATACG  
ATATCTCTCTTGATGATGTAGCCACTATAATGCTTAAGAGAGAGATTG  
+  
FFFFFFFFFFFFFFFFFFFFFFFF:FFFFFFFFFFFFFFFFFFFFFFFFFFFFFFFFFFFFFFFFFFFFFFFF  
FFFFF:FFFFFFFFFFFFFFFF,FFFFFFFFFFFFFFFF:FFFFF  
@A00721:190:HGJW7DSXY:4:1610:3712:25551\_2:N:0:TCTGCAAG+GCTGCACT  
TGACCTTGGTATCGTTATCCGTCATGGAGATGATGGCGCATCACTTGATTACTATATGCCCGAAGGAT

$+$ 

@

+

@

+

@

+

@

+

@

+

@

+

©

@A00721:190:HGJW7DSXY:4:1314:6479:2722\_1:N:0:TCTGCAAG+GCTGCACT  
ATAACTTCTTTTTCAAAAATGCGGATGGGTCTACTGATTTTTCTACAGAGTGAGTCGTTTCAACA  
CTTATCACCACCTTTGAAAGGAAATAATTGGTGATGAAAATACGTATGTCGGTGGGGTTCTCAAGGC  
TCT

+  
FFFF,FF:FFFFFF:FFFFFF:, :FFFF:FFFFFFFF:FFFFFFFFFFFFFFF:F:FFFFFF,FF  
FFFFFFFFFFFF,FFFFFFFFFFFFFFFFFFFFFFFF:F:FFFF:FFFFFFFFFFFFFF:FFFF  
FFF  
@A00721:190:HGJW7DSXY:4:2560:21160:24330\_2:N:0:TCTGCAAG+GCTGCACT  
TTGGATGTTGTGCAAACTATCAGGTTCTTGTCACGATTCTTAAAAGAAGTTTATTAAACTTCAGAG  
TCTCTTGGAAGTCCAGGTAGCTAATGTTCTTGCAATAGCCACAGACTT  
+  
FFFFFFFFFFFFFFFFFFFFFFFFFFFFFFFFFFFFFFFFFFFFFFFFFFFFFFFF:FFFFFFFFFFFFFFFF  
FFFFFFFFFFFFFFFFFFFFFFFFFFFFFFFFFFFFFFFFFFFFFFFFFFFFFFFF  
@A00721:190:HGJW7DSXY:4:2238:7726:25708\_1:N:0:TCTGCAAG+GCTGCACT  
TCTGTTGGTAGAGGAGTTGAGAGAATTACTCAGATTCAATCTGGCATCACTGAACGTCTACAACGAGT  
TAGGGAGTGGCTAGGTTTTAAAAGATCCTTGCACAAGCAATACCTTCCACTGAGTTCATCACCCAGA  
GTT  
+  
FFFFFFFFFFFFFFFFFFFFFFFFFFFFFFFFFFFFFFFFFFFFFFFFFFFFFFFFFFFFFFFFFFFFFFFF  
FFFFFFFFFFFFFFFFFFFFFFFF:FFFFFFFFF:FFFFFFFFFFFFFFFFFFFFFFFFFFFFFFFF  
F:F  
@A00721:190:HGJW7DSXY:4:2350:11442:3239\_1:N:0:TCTGCAAG+GCTGCACT  
GTTTTTGGTATAAATCCTGATGGCTCAGTACAGGGAGGAGGTAATAGTTATAAACCTTCTTTTATCA  
TTGCAACAGGACTTTGAGAAGACTGTTGAAATGGACAAAATCTGGGATCATAGGTATGTGTCACGCTA  
CAC  
+  
FFFFFFFFFFF,F:FFFFFFFFFFFFFFFFFFFFFFFFFFFFFFFFFFFFFFFFFFFFFFFF:FFFFFFFFFFF  
FFFF:FFFFFFFFFFFFFFFF:FFFFFFFFFFFFFFFF:FFFFFFFFF:FFFFFFFFFFFFFFFF  
FFF  
@A00721:190:HGJW7DSXY:4:1217:7392:2926\_1:N:0:TCTGCAAG+GCTGCACT  
CGCCATATCAGATTAGAGACATGCCAGTTAGAGTTCTTCTAACCAGGACTGATGGTGAGATTCTTTTA  
CCTTTTGGAGGTCCAGGAACCTTTACTCCTAGTGTCTTTTCTAGAGTCCAAGGACGTTTCCGTCGGAG  
GAT  
+  
FF:FFFF:FFFFFFFFFFFFFFFFFFFFFFFFFFFFFFFFFFFFFFFFFFFFFFFFFFFFFFFF:FFF  
FF:FFFFFFFFFFFFFFFF:FFFFFFFFFFFFFFFFFFFFFFFFFFFFFFFFFFFFFFFFFFFFFFFF  
FF:  
@A00721:190:HGJW7DSXY:4:2417:30436:2409\_1:N:0:TCTGCAAG+GCTGCACT  
AATAACACTCTATTGAATCCCTTTTCCCGATGAAAGCTCTTTATGAGGTGCTCAATTAATAATTTACT  
GTTCTCTTTGGTGATATCGCCTCTGTCTTTCTCCTTTAATCGTGAGGTACGAGAGTTTCGTACTT  
GG  
+  
:FFFFF,F,FF,F,,,F,FFF:F:,,,F:FF,FF,,F,F:F,FF,FFF,,:F,F:,,F,FFFF,,,  
,,F,,:FF:F,FFFFFFFF,F,FF:F,F,,F:FFF,,, :FF,FF,F:F:FFFF:,FFFF,FFF:FF,F  
FF  
@A00721:190:HGJW7DSXY:4:1313:23746:32002\_1:N:0:TCTGCAAG+GCTGCACT  
GCTCTTCCGATCTGCTGGATGGATCTTTTGATGGTATGTTTCACATTGCGTGATCACTTCCCGTGGAC  
TTGGGAAGAGATTAAACATAAAATCCAGCGATTCTATTATGTCGCTAAAGCCTGTCCAGTTGTCGATG  
ATG  
+  
FFFFFFFFFFFFFFFFFFFFFFFFFFFFFFFFFFFFFFFFFFFFFFFFFFFFFFFF::FFFFFFFFF  
FFFFFFFFFFFFFFFFFFFFFFFFFFFFFFFFFFFFFFFFFFFFFFFFFFFFFFFFFFFFFFFFFFFFFFFF  
FFF  
@A00721:190:HGJW7DSXY:4:2529:25048:13870\_1:N:0:TCTGCAAG+GCTGCACT  
CACAAGGATTACTAAGTCTGAGATCTGCCACTTCTAATTTTAGGAAACGTGCGGAAAAGAAAGTTCAT  
GAGGATGTCTTGGTCGAAAAATATCGCCGGGAACCTTCTAATAGAGGATCCTGATGACATTATTTCAAC  
GGA

+  
FFFFFFFFFFFFFFFFFFFFFFFFFFFFFFFFFFFFFFFFFFFFFFFFFFFFFFFFFFFFFFFFFFFFFFFF  
FFFFFFFFFFFFFFFFFFFFFFFFFFFFFFFFFFFFFFFFFFFFFFFFFFFFFFFFFFFFFFFFFFFFFFFF  
FFF  
@A00721:190:HGJW7DSXY:4:1348:5294:30639\_2:N:0:TCTGCAAG+GCTGCACT  
TACCACAGAAACCGTCTCAGGAAGTGTCTCCACTGATTCGGAATTAGAGAAAGACGACCTTCTTGTGG  
GGAAGTGAACCTCTGAATTTTCAGGGTGCCTGATGAGGACGTTGAAA  
+  
FFFFFFFFFFFF:FFFF:FFFFFFFF:FFFFF:FFFFFFFF:FFFFFFF,FFFFFFFFFFFFFFFFFFFF:F:  
FFFF:FFFFFFFF:,FFFFFFFF:FFFF,FFFFFFFFFFFFFFFF:FFFF  
@A00721:190:HGJW7DSXY:4:1549:25771:1846\_1:N:0:TCTGCAAG+GCTGCACT  
TTCTAAGAGTGTTCAAAAGACCAGAAACGTAACAAGAAGATAAAGGTAGGAAGGGGAGAAAACAGA  
ACAAGCGAGCGGTTGAAGAGAAAAGTATGATATGGTTGCGGCTGATCGTACCCCAATTCCTGCTAGAAAG  
ATC  
+  
FFFFFFFFFFFFFFFFFFFFFFFFFFFFFFFFFFFFFFFFFFFFFFFFFFFFFFFFFFFFFFFFFFFFFFFF  
FF::FFFFFFFFFFFFFFFFFFFFFFFFFFFFFFFFFFFFFFFFFFFFFFFFFFFFFFFFFFFFFFFFFFFF  
FFF  
@A00721:190:HGJW7DSXY:4:2403:28330:1548\_1:N:0:TCTGCAAG+GCTGCACT  
CACTGATCTTCCAGAGTTACGTAGTGGTCGTTCTTTTGGTGATTTTATCAAAGAGAAAGTTTCTGCTA  
GTCGCGACGATAGTATTTATCGGAGTGATATTAACAAGTTAACTTCGAACTGACCACTTACAAGAGT  
G  
+  
:F,F:FF:FFFFFFFFFFFF,FFFFFFFF:FFFFFFFFFFFF:FFFF:FF:FFFF:FF::F,FFFFFFF  
FF,:F:FFFF,FF,FFFFFFFF:FFFFFF:FFFFFFF,FFFF,:FFFFFFFF:F::FFFFF,F:FFFFF  
F  
@A00721:190:HGJW7DSXY:4:2350:26386:33818\_2:N:0:TCTGCAAG+GCTGCACT  
AGTTCTTCGCAGTTGAATCTCCACCAGGTGGAGGGAAGACCACTGAACCTATAGCGACTTTTGTGCGAA  
TTTTTCGCAAAAGGTCTTGAAGTACGTATTGTCAGTCTAATCGTAAT  
+  
FFFFFFFFFFFFFFFFFFFFFFFFFFFFFFFFFFFFFFFFFFFFFFFFFFFFFFFFFFFFFFFFFFFFFFFF  
FFFFFFFFFFFFFFFFFFFFFFFFFFFFFFFFFFFFFFFFFFFFFFFFFFFFFFFFFFFFFFFFFFFFFFFF  
@A00721:190:HGJW7DSXY:4:2303:5222:34679\_2:N:0:TCTGCAAG+GCTGCACT  
CTAGTTCATCGCGGTATTTGTGAAATTAAGACAGACGTGAAAGTTATGATGAGTGATCGTATTAGAAC  
AGCTGATTCTTATTGCATGAACGTCGCTGAGGTCAAACCTGTGGACGT  
+  
FFFFFFFFFFFFFFFFFFFFFFFFFFFFFFFFFFFFFFFFFFFFFFFFFFFFFFFFFFFFFFFFFFFFFFFF  
FFFFFFFFFFFFFFFFFFFFFFFFFFFFFFFFFFFFFFFFFFFFFFFFFFFFFFFFFFFFFFFFFFFFFFFF  
@A00721:190:HGJW7DSXY:4:2263:27335:7216\_2:N:0:TCTGCAAG+GCTGCACT  
CTGGTCAGACCCTTTTCTTACACATCTACTTAAGGCGGCTTATACCATAGGTTACGGTGATTCCAAT  
CAAATCGGATTCATCAATCGTATTGATCTCCAAGTCGAACTACTTC  
+  
FFFFFFFFFFFFFFFFFFFFFFFFFFFFFFFFFFFFFFFFFFFFFFFFFFFFFFFFFFFFFFFFFFFFFFFF  
FFFFFFFFFFFFFFFFFFFFFFFFFFFFFFFFFFFFFFFFFFFFFFFFFFFFFFFFFFFFFFFFFFFFFFFF  
@A00721:190:HGJW7DSXY:4:2133:30490:7451\_2:N:0:TCTGCAAG+GCTGCACT  
GAGTGTGCTTCTTATCGAAGTCTCAGTTATCGCTGCCGCGCCGACGTTTGTGCGCAACTCTCAGAGGT  
TTACGGCAGAAAAATTTCTCCTGCTTGTAATTCGAGAGAGGACACTAT  
+  
FFFFFFFFFFFFFFFFFFFF,FFF,F:FFFFFFFFFFFF:FFFF:FFFFFFFFFFFFFFFFFFFF:FFFFFFF  
FF:::FFFFFFFFFFFFFFFF:FFF:FF,FF:FFF::FFFFF,FF:FFF  
@A00721:190:HGJW7DSXY:4:1507:8079:36182\_2:N:0:TCTGCAAG+GCTGCACT  
TGTAAGTTAAACGATGCTACTTGTGAGAGGATCAATCACAGTAAGTAAGTGTACGTTTAGCACGGG  
AGGTTGCAGATTCAACCCCTTATATCGAGGCTATCGAGGACGATGAGT  
+

FFFFFFFFFFFF:FFFFFFFFFFFFFFFFFFFFFFFFFFFFFFFFFFFFFFFFFFFFFFFFFFFF  
FFFFFFFFFFFFFFFFFFFFFFFFFFFFFFFFFFFFFFFFFFFFFFFFFFFF:FFFFFFFF  
@A00721:190:HGJW7DSXY:4:2474:5900:14372\_2:N:0:TCTGCAAG+GCTGCACT  
GACGACAAGCCTCAAGAGGGTAGAGGACCACCTGGATCTTCTACTGTCTCTGCCTTCCAAGATTTCTT  
AGAAGAGGTTATTCCTGGAACCACCTTAACGTCACTCGGTAATCTTTC  
+  
FFFFFFFF,FFFFFFFFFFFFFFFF:FFFFFF:FFFFFF:FFFFFFFFFFFFFFFFFFFF:FF:F:FFFFF  
F:FF:FFFFFFFF:FFF,FFFFFFFFFFFFFFFF:FFFF,FFF::FF,F  
@A00721:190:HGJW7DSXY:4:1344:32407:27837\_2:N:0:TCTGCAAG+GCTGCACT  
AAGGCTAATACCTTTATAGGTAAGAAGCCCTTGAGCCGCGTAGTCAGCGCGTTTAGCTGTATCATCA  
GTCAGAGTATACCCGATAGGGTACCGAGTCTCCAAGAGAATATTTATT  
+  
FFFFFFFFFFFFFFFFFFFFFFFFFFFFFFFFFFFFFFFFFFFFFFFFFFFFFFFFFFFF  
FFFFFFFFFFFFFFFFFFFFFFFFFFFFFFFFFFFFFFFFFFFFFFFFFFFF  
@A00721:190:HGJW7DSXY:4:2623:3197:29982\_1:N:0:TCTGCAAG+GCTGCACT  
ATAGGAGACTCAGTTAACCTGAGAGCTCCTCAATTGATAGATTGGGTCAACAATAGGGACGCTAGTAT  
ACTTCGTAAAGTCGACAGCGAAATGGTCAATATTGATAATTGGACCGACTATATGACCTATTTTAAGC  
TCA  
+  
FFFFFF:F:F:FFF:FFFFFFFFFFFFFFFFFFFFFFFFFFFFFFFFFFFFFFFFFFFFFFFFFFFF  
FFFFFFFFFFFFFFFFFFFFFFFFFFFFFFFFFFFFFFFFFFFFFFFFFFFFFFFFFFFFFFFFFFFF  
FFF  
@A00721:190:HGJW7DSXY:4:1322:10303:34992\_2:N:0:TCTGCAAG+GCTGCACT  
GTTCTTGTGAGGAGAGTCAAACAGTGTCTTTTACCCAACATTTTTATGTATACAGAGATGACCAGTGA  
CGATTTCTCCCGAAGCTCTTCTCTCTCTTAGGAGGTCATGATGACTA  
+  
FFFFFFFFFFFFFFFFFFFFFFFFFFFFFFFFFFFFFFFFFFFFFFFFFFFFFFFFFFFF:FFFFFFFFFFFF  
FFFFFFFFFFFFFFFFFFFFFFFFFFFFFFFFFFFF:FFFFFFFFFFFFFFFFFFFF  
@A00721:190:HGJW7DSXY:4:2165:24542:13463\_2:N:0:TCTGCAAG+GCTGCACT  
CCAGGAGTATCCATAACGATTTGTCAATTTACCACCTTTGCTCAACGACGAAGTGGAAACGGCCAACACT  
TTCTTTGGTAATTGTATGATCACTTTGATGATTTTATCACTTTATTAT  
+  
FFFFFFFFFFFFFFFFFFFFFFFFFFFFFFFFFFFFFFFFFFFFFFFFFFFFFFFFFFFF  
FFFFFFFFFFFFFFFFFFFFFFFFFFFFFFFFFFFFFFFFFFFFFFFFFFFF  
@A00721:190:HGJW7DSXY:4:2555:22562:18991\_2:N:0:TCTGCAAG+GCTGCACT  
AGACTCCAATAACTGATCATTCTGATCATATGATTTTGACAATGGTTTCGAAGCGAAATTTTGAGG  
GATAAACAGCGTACTTCTGCTCGCGATTTATTCTTTTGTCAATGAT  
+  
FFFFFFFFFFFFFFFFFFFFFFFFFFFFFFFFFFFF:FFFFFFFFFFFFFFFFFFFFFFFFFFFF,FFFFFFFF  
FFFFFFFFFFFF:FFFFFFFF,FFF:FFFF:FFFFFFFFFFFFFFFF  
@A00721:190:HGJW7DSXY:4:1641:32136:5697\_1:N:0:TCTGCAAG+GCTGCACT  
CGATATTCGATTGAGGGTCGTTATACCTATTTCGGCTATCTGTGCTTTGAATTGTATAAGATCAAATTT  
TAAACGATTCCGAGAGGTTTATCCTGATGTGGAGGGAGTTCTTGAAGCATCCCGACCTTTCCTTGTGA  
AAA  
+  
F:FFFFFF:FFFFFF:F:FFFFFFFFFFFFFFFF:FFFF:F,F:FFFF,FFFFFFFFFFFF:FFFF:  
FFFFFFFFFFFFFFFFFFFFFFFFFFFFFFFFFFFF:FFFF:FFFFFFFFFFFFFFFFFFFFFFFFFFFF  
FFF  
@A00721:190:HGJW7DSXY:4:2550:32579:5149\_2:N:0:TCTGCAAG+GCTGCACT  
TTCTACTACGATTTCATGGACCTTCCATCCTGTACCTCTTCTGGAGAGACGTATCTCAAAGATCGACT  
TCGAGACAGGTGATATTGTTGAGCGAGAGCGACCAAGATCTAAATTCG  
+  
FFFFFFFFFFFFFFFFFFFFFFFFFFFFFFFFFFFF:FFFFFFFFFFFFFFFFFFFFFFFFFFFF  
FFFFF:FFF:FFF:FFFFFFFFFFFFFFFFFFFFFFFFFFFFFFFFFFFF:FFFFF



@A00721:190:HGJW7DSXY:4:1257:3730:12555\_1:N:0:TCTGCAAG+GCTGCACT  
TGACGATCATTAAGACTCTCTTTCTTCTTTGTTTCCTTCTTTGCACTGATTTTTCCTCATCAGCTTGT  
GTTTTACCTAATCTGTGTTTTTACGATAACAACATCAGTTGATTAAGACTCTTCCGAAAGGCGAACT  
TTG

+

FFFFFFFFFFFFFFFFFFFFFFFFFFFFFFFFFFFFFFFFFFFFFFFFFFFFFFFFFFFFFFFFFFFFFFFF  
FFFFFFFFFFFFFFFFFFFFFFFFFFFFFFFFFFFFFFFFFFFFFFFFFFFFFFFFFFFFFFFFFFFFFFFF:  
FFF

@A00721:190:HGJW7DSXY:4:2334:2076:1297\_2:N:0:TCTGCAAG+GCTGCACT  
GGGTGAAGCACAACTTTGACCGTGACGAACGTGGTGTCTTGATCTACGTTACGGATATACTCTCC  
TTGAGTTCACTCGTAAGGACACTACCACTTATTACGATATTTCTTTAG

+

FFFFFFFFFFFFFFFFFFFFFFFFFFFFFFFFFFFFFFFFFFFFFFFFFFFFFFFFFFFFFFFFFFFFFFFF  
FFFFFFFFFFFFFFFFFFFFFFFFFFFFFFFFFFFFFFFFFFFFFFFFFFFFFFFFFFFFFFFFFFFFFFFF,

@A00721:190:HGJW7DSXY:4:1160:7012:3646\_2:N:0:TCTGCAAG+GCTGCACT  
ATCACTCATTTTAGTGAGATTATTAACAAACGCACTAAACGTCTTCGACAACAGCAGGGGTTTTCGAA  
TAGTGATAGCCACCCGCTTACAGAGGGGCAGCAGCATGACCATAATT

+

FFFFFFFFFFFFFFFFFFFFFFFFFFFFFFFFFFFFFFFFFFFFFFFFFFFFFFFFFFFFFFFFFFFFFFFF:  
FFFFFFFFFFFFFFFFFFFFFFFFFFFFFFFFFFFFFFFFFFFFFFFFFFFFFFFFFFFFFFFFFFFFFFFF

@A00721:190:HGJW7DSXY:4:1431:5963:23156\_2:N:0:TCTGCAAG+GCTGCACT  
TGTCTGTCTCGCCTCTTCGAATGAAGTTTTAATGCTTAACAACAATGATAGTGAATTTATACCTACAA  
TCATTGGTTTTCTAATAATGATGACACTATTGTTTATGGATATGATG

+

FFFFFF:FFFFFFFFFFFFFFFFFFFFFFFFFFFFFFFFFFFFFFFFFFFFFFFFFFFFFFFFFFFFFFFF:  
,FF,FFFF:FFFFFFFFFFFF:FFFFFF:FF:,FF:FFF,FFFF,FFF

@A00721:190:HGJW7DSXY:4:1178:30689:19727\_2:N:0:TCTGCAAG+GCTGCACT  
GGACCTTAAGCGATGGATCGGGGTTAATTCTAAACATTACCCGAAAGACGTGCTAAATTAACCAT  
TGTACGATGTCGTCTGTCTCGCGATCACTTTTCACTAAGAATTGGTC

+

FFFFFFFFFFFFFFFFFFFFFFFFFFFFFFFFFFFFFFFFFFFFFFFFFFFFFFFFFFFFFFFFFFFFFFFF:  
FFFFFFFFFFFFFFFFFFFFFFFFFFFFFFFFFFFFFFFFFFFFFFFFFFFFFFFFFFFFFFFFFFFFFFFF

@A00721:190:HGJW7DSXY:4:1611:26567:29152\_2:N:0:TCTGCAAG+GCTGCACT  
GAGTGAAAGGCTTCAATTGTAGTGGTTTGGTCGTTTCAGTACCCAGTAAGTATACCTCTACGCAAAGA  
TATTTTCATGAAAACCTACAGAGGAACGTACCGGATTACATGTCTTTTCAT

+

FFFF:F,F,FFFF,FFFFFFFF,FFFF:F,FF:,F,F::,FFF,F::,FFFF:FFFF,FF,FFFFFF  
FF,FFFF,FFFFFF,FFF,F:,FFF::FF,F,F:FFF,F:,F,,,:F,

@A00721:190:HGJW7DSXY:4:2160:27462:20713\_2:N:0:TCTGCAAG+GCTGCACT  
GTTGGATGTCAAGAAGGGTTCAGAATGGGATTCTACGTAGTTTATGACTTTGGTGGTGGTACTTTTCG  
ATACTTCTATCGTCTTACGTTACGGTAATTACTATAGTGTTATTTATT

+

FFFFFFFFFFFFFFFFFFFFFFFFFFFFFFFFFFFFFFFFFFFFFFFFFFFFFFFFFFFFFFFFFFFFFFFF:  
FFFFFFFFFFFFFFFFFFFFFFFFFFFFFFFFFFFFFFFFFFFFFFFFFFFFFFFFFFFFFFFFFFFFFFFF

@A00721:190:HGJW7DSXY:4:2267:2175:20666\_1:N:0:TCTGCAAG+GCTGCACT  
TTGGAGGTCGTGACGTTGATGAAGCTATAAGAGCGTTCTTATTACGGCGCACTTCTTTACCCGCCACC  
ACACAACTTTCAGTTTCACAACTGAAGGAGGAGGTTTCTGTTACTGGAACCCCTCGTCAATACTTTT  
CAA

+

FFFFFFFFFFFFFFFFFFFFFFFFFFFFFFFFFFFFFFFFFFFFFFFFFFFFFFFFFFFFFFFFFFFFFFFF  
FFFFFFFFFFFFFFFFFFFFFFFFFFFFFFFFFFFFFFFFFFFFFFFFFFFFFFFFFFFFFFFFFFFFFFFF:  
FF:

@A00721:190:HGJW7DSXY:4:2315:28330:22968\_2:N:0:TCTGCAAG+GCTGCACT  
CGTACTTTTCTGGAACGTAGTTTTACTATTATGAACCAAGTTATCAAAGATAGTGGCATTCAAGGCAA

ACTTACCCTGATTCCGGCCGGTGGTAGCTCATTTCTACCAGAGATCGG  
+  
FF,,,,FFF,:F,FF,FFFF,FF,,FF,:F:FF,,FFF,FFFF:FF,:FF,FF,FF,:F:,,,FFF  
FF,FFFFFF,FFF:,F:FF:F:FFFF:FF:F,,FFF,:F,,:F,FF,  
@A00721:190:HGJW7DSXY:4:2639:32434:7780\_2:N:0:TCTGCAAG+GCTGCACT  
GAAACAGCTATTAAAGCTGTTGAGCGGGTAATTACACCTAAACGAGCTCGATCTGCCATCGCTGAAGG  
ATGTGCACTCTTTTCTGCTACTTTAACGGAGCGTAGTGTACTCTTCGT  
+  
FFFFFFFFFFFFFFFF:F:FFFFFFFFFFFFFFFFFFFFFFFFFFFFFFFF:FF,F,FFFF:FFFFFFFFFFFFFFFF  
FFFFFFFFFFFFFF,FFFFFFFFFFFFFF:FFFF::FFFFFFFFFFFF:FFFF  
@A00721:190:HGJW7DSXY:4:2158:25509:4742\_1:N:0:TCTGCAAG+GCTGCACT  
TACCGTTGAAGGCTAACTCCAAGGTAATTATGAAGACTGTGATTTATCTTTCACCTCTGGCCTTGTAT  
GAGGGTGTTCCTAATCGTAACATTAATAATTTCAATCTTCTTAAAAAGAAGATAGAGAGTCATACTTT  
GG  
+  
FFF:,FFFFFFFFFFFFFFFFFFFFFFFF:FFFF:FFFFFF,FFFFFFFFFFFFFFFF,FFFFFFFFFFFFFFFF  
FFFFFFFFFFFFFF::FF,FF:FFFFFFFFFFFFFF:FFFF,FFF:FFFFFFFFFFFFFFFFFFFFFFFFFFFF  
FF  
@A00721:190:HGJW7DSXY:4:2276:13404:1689\_2:N:0:TCTGCAAG+GCTGCACT  
TGGTTGTTATCTCGAAAAGTCTCTTCTAAAAGGAACGTCAGTTCTAACCCAAAGAGAATATCTAAAAT  
ATTTACAAAATCTTACCACTATCTACGAACCTAAAGTTCTGAAGACGT  
+  
FFFFFFFF:FFFFFFFFFFFFFFFFFFFFFFFFFFFFFFFFFFFFFFFFFFFFFFFFFFFFFFFFFFFFFFFFFFFF  
FFFFFFFFFFFFFFFFFFFFFFFFFFFFFFFFFFFFFFFFFFFFFFFFFFFFFFFFFFFFFFFFFFFF  
@A00721:190:HGJW7DSXY:4:2227:13286:31641\_1:N:0:TCTGCAAG+GCTGCACT  
TGGCACTACCTCGGTACAATCTTACTTGGAACGAAGGCGACCTGTTCCGGAGTTTTTACGGGATCCGG  
AATGTTCTGTCTATATTAGGTGAAGCGAAATACGATTTCGAACGTCAACGTTACCGAGTTTCGTTTC  
GTA  
+  
FFFFFFFFFFFFFFFFFFFFFFFF:FFFFFFFFFFFFFFFFFFFFFFFFFFFFFFFFFFFFFFFFFFFFFFFFFFFF  
FFFFFFFFFFFFFFFFFFFFFFFFFFFFFFFFFFFFFFFFFFFFFFFFFFFFFFFFFFFFFFFFFFFFFFFFFFFF  
FFF  
@A00721:190:HGJW7DSXY:4:2636:23023:31501\_1:N:0:TCTGCAAG+GCTGCACT  
CTTGATAAAGAACTTCATGAATTTTCAGAGGATGAAAAATTTCTTCTTGGATTTTAATATAAAGAA  
TCTTTACCAGGACTCCTACTACAGGAGGCAGTCTTCTGATCGTAAGAAGTTTATAAGGAACATATCCA  
TTT  
+  
FFFFF:F,FFFFFFFFFFFFFFFFFFFFFFFFFFFFFFFFFFFFFFFFFFFFFFFFFFFFFFFFFFFFFFFFFFFF,FFF  
FFFFFFFFFFFFFFFFFFFFFFFFFFFFFFFFFFFFFFFFFFFFFFFFFFFFFFFFFFFFFFFFFFFFFFFFFFFF  
FFF  
@A00721:190:HGJW7DSXY:4:2567:10520:26130\_2:N:0:TCTGCAAG+GCTGCACT  
AACTCTAAGTGGTAATACTGTCTTTCCAAGCTTACCTGTATCTTCAATGAAATTGGACTCTTCGATAG  
GGGACATTTTATCGTGGGCTTTCCGTAAAGGAAGATCTGTTATCGACG  
+  
FFFFF,FF:FF:FFFFFFFFFFFFFFFFFFFFFFFFFFFFFFFFFFFFFFFFFFFFFFFFFFFFFFFFFFFFF:  
FFFFFFFFFFFFFFFFFFFF,FFFFFFFFFFFF,F:FFFFFFFFFFFFFFFFFFFF  
@A00721:190:HGJW7DSXY:4:2353:14597:17503\_1:N:0:TCTGCAAG+GCTGCACT  
TCTATTATTGATTTTTATGAGATTGATACGTTAACAGAAGATGATGTTAGAGTAGAATTCCTGAAGAG  
TCCTTCCGTAACCAACTTCTTGACAATTTCTTCAATCCTTCGATAATAGTTAAATCTAGGATTATGT  
CTG  
+  
FFFF,FFFFFFFFFFFFFFFFFFFFFFFFFFFFFFFFFFFFFFFF:FFFFFFFFFFFFFFFFFFFFFFFFFFFFF  
FFFFFFFFFFFFFF:FFFFFFFFFFFFFFFF:FFFFFFFFFFFFFFFFFFFFFFFFFFFF:FFFF:FF:FFFFFFF  
FFF

@A00721:190:HGJW7DSXY:4:2258:4010:31172\_2:N:0:TCTGCAAG+GCTGCACT  
ATTGACTGATTATCTAAAGATTGAAGGAAAATTTATCCTCGTTTAACTTACTTAGACTTTCCTACGA  
TACAAATGATAACTTCTAATTTACGTTTGCTACTCAGAGCTGGTCCTC

+

F,FFFFFFFFFFFFFFFF:FFFFFFFFFFFF:FFFFFFFFFFFFFFFFFFFFFFFFFFFFFFFF:FFFFFFFF  
FFFFFFFFFFFFFFFFFFFFFFFFFFFFFFFFFFFFFFFFFFFFFFFFFFFFFFFFFFFFFFFF:FFFFFFF

@A00721:190:HGJW7DSXY:4:2516:8901:28651\_1:N:0:TCTGCAAG+GCTGCACT  
CTCAGGAGTCCCGGCATTTGATAATAATGACGAGACTTTCGTCATAATCGCTGCATATTACGGATTAC  
ACGGTACCAGCGCATCTCGTGTGCGAGCCTCGACCCGATTATATGGTATTAACCTATAAAGGTGAGGAG  
ACC

+

FFFFFFFFFFFFFFFFFFFFFFFFFFFFFFFFFFFFFFFFFFFFFFFFFFFFFFFFFFFFFFFFFFFFFFFF  
FFFFFFFFFFFFFFFFFFFFFFFFFFFFFFFFFFFFFFFFFFFFFFFFFFFFFFFFFFFFFFFFFFFFFFFF  
FFF

@A00721:190:HGJW7DSXY:4:1661:4679:27195\_1:N:0:TCTGCAAG+GCTGCACT  
ACTAACTATGTTATGTTCTCTGATCATTTTGACAATCTCTTCTTATAATAAATAAATAAATAATATTA  
CTAATGGCAAATAGTGGAAGGCTCCAGTCAACACTAGTTCGAGTGCTGCTTTGGATTACGATGACGT  
GAG

+

FFFFF,FFFFFFFFFFFFFFFFFFFFFFFFFFFFFFFFFFFFFFFFFFFFFFFFFFFFFFFFFFFFFFFF  
FFF:FFFFFFFFFFFFFFFFFFFFFFFFFFFFFFFFFFFFFFFFFFFFFFFFFFFFFFFFFFFFFFFFFFFF  
FFF

@A00721:190:HGJW7DSXY:4:2248:20898:25285\_1:N:0:TCTGCAAG+GCTGCACT  
TAGTTTTTACCTCGACCAACATTAAGGCGGCGGCGACTAATCTTAAAGCTTCACCCAAATGAAGGAC  
ACTTCGAAACTGAATAATGATGCACTACAAACAAGTATCGCTAATCATCTGAAAAAGGCTCTAAAGGA  
CAC

+

FFFFFFFFFFFFFFFFFFFFFFFFFFFFFFFFFFFFFFFFFFFFFFFFFFFFFFFFFFFFFFFFFFFFFFFF  
FFFFFFFFFFFFFFFFFFFFFFFFFFFFFFFFFFFFFFFFFFFFFFFFFFFFFFFFFFFFFFFFFFFFFFFF  
FFF

@A00721:190:HGJW7DSXY:4:2473:23493:8797\_2:N:0:TCTGCAAG+GCTGCACT  
GAGGATATTCGCCATTGTGGTACGAATTGGTCCAACATTTACCACCAAATTCTTTTGATACAACTCTA  
GCCTTCAAGTGGGGTATGCCTGCGGAATACGCTTGCTATTACCAGAT

+

FFFF:FFFFFFFFFFFFFFFFFFFFFFFFFFFFFFFFFFFFFFFFFFFFFFFFFFFFFFFFFFFFFFFF  
FFFFFFFFFFFFFFFFFFFFFFFFFFFFFFFF:F,FFFFFFFFFFFFFFFFFFFFFFFF

@A00721:190:HGJW7DSXY:4:2356:31693:20901\_1:N:0:TCTGCAAG+GCTGCACT  
TGATGCTATGTCAGAAGAAGCTATTCAAGCTTGTCGTTTAAAGACTGCAGAGGCTGTCAAACAATCCC  
AGACTCAAGGAGTCCAATCAAAGTTTTGAATTTAGCTCAACTGGGGAGACGTGCTTAAATGGGTGAT  
AAA

+

:FFF,FFFF:F:F::F:FFF:FFF,FF::,:FF:F:F,FFFF:FFFF,:F:F:FF,:FFFFFF,F:,  
F,F:F:FFF,:FF:::F:FFF:F:F,FF,FFFFFFFF,FF,F:FFF:FFFF:FFFFFF::FFFFFF  
F:F

@A00721:190:HGJW7DSXY:4:2508:29939:21277\_2:N:0:TCTGCAAG+GCTGCACT  
TAGATAGTGGGATAATAGTTCTACCGATACGTAGTGAACGCGTTCGTAGAACCAAGTACTTCCGTCT  
GAAGAGTTTAGAGCTGCTATTGATTATGTAACCGATAGGAGTTGTATA

+

FFFFFFFFFFFFFFFFFFFFFFFFFFFFFFFFFFFFFFFFFFFFFFFFFFFFFFFFFFFFFFFFFFFF:FFFF  
FFFFFFFFFFFFFFFFFFFFFFFF:FFFFFFFFFFFFFFFF:FFFFFFFFFFFFFF

@A00721:190:HGJW7DSXY:4:1453:25084:1251\_2:N:0:TCTGCAAG+GCTGCACT  
ATCCTTTAAGGACTATGTTGACTGACGAAGATTTCCACAGATTTGTCTACGTTGCAGATCGCCACT  
CCAAACACTATATACATTATAAAATATAAAAATAAGGGAGTCATAACT

+

[illegible]

@A00721:190:HGJW7DSXY:4:1643:9914:22952\_1:N:0:TCTGCAAG+GCTGCACT  
TTACTAGGATTTATCACACTCCTAAATTTGATAGCAATTTATGTTTTAAATGCTAGGAAAATTTTAGA  
AAACTCCATTGTATAGTTCAAGGAGTACTTAATTCAATAGCTTTAGTATTATTTACTATCGCCTTTA  
TTG

+

FF:FFFFFFFFFFFFFFFFFFFFFFFFFFFFFFFFFFFFFFFFFFFFFFFFFFFFFFFFFFFFFFFFFFFFFFFF  
FFFFFFFFFFFFFFFFFFFFFFFFFFFFFFFFFFFFFFFFFFFFFFFFFFFFFFFFFFFFFFFFFFFFFFFFFFFF  
FFF

@A00721:190:HGJW7DSXY:4:1438:11975:11929\_1:N:0:TCTGCAAG+GCTGCACT  
CTTACACAAAAGTGACGCGGAAGGAATCTTAATTGATTGAAGCTAGGCGTTGGGGAGAATGAACTGC  
CGCTTCCCGGAAGAAACGATCTATTTACAGAGTATTTAGAGTAGTCCAAAGTTTGTATAAATTTATAT  
GAT

+

FFFFFFFFFFFFFFFFFFFFFFFF:FFFF:FF,FFFFFFFF,FFFFFFFFFFFFFFFFFFFFFFFFFFFFFFFF:FFFF:FFFF  
FFFFFFFF:FFFFFFFF:FFF:FFFFFFFFFFFFFFFFFFFFFFFFFFFFFFFFFFFFFFFFFFFFFFFFFFFFF  
FFF

@A00721:190:HGJW7DSXY:4:2611:32334:20948\_2:N:0:TCTGCAAG+GCTGCACT  
TGACCAATCATCGATCCAAGTGGCAGCGGACGCTAGGGTCAAACCTACTACCGCCGGACGGCAGATC  
GGCACCCTGGTCTCTACGTTCAAGGACCCGCTGTGCAGAATAACCTA

+

:FFFFFFFF:FF,,FFFFFF:F,F,F,FFF:F,,FF:FFFFFFFF,FFFFFFFF,FFFFFF:,F  
FFF,F,:FFF,:FF:FFFFFF:FFF:FFFFFFFF,F:FFFFFFFF,

@A00721:190:HGJW7DSXY:4:2356:31593:31501\_1:N:0:TCTGCAAG+GCTGCACT  
GACCACTCAAAGGAAACGGGCTGTTGCCAGAGGAAAGCAGCGACCACCGAGGTCGCTCGTAACATTG  
ACGGCAGTCCCGTCATCTCTGTGGGAAGTGAAGCAGTACCTCAGTCAAAGTCACATTCACCACTCCC  
ATA

+

FFFFFFFFFFFFFFFFFFFFFFFFFFFFFFFFFFFFFFFFFFFFFFFFFFFFFFFFFFFFFFFFFFFFFFFFFFFF  
FFFFFFFFFFFFFFFFFFFFFFFFFFFFFFFFFFFFFFFFFFFFFFFFFFFFFFFFFFFFFFFFFFFFFFFFFFFF  
FFF

@A00721:190:HGJW7DSXY:4:2175:32542:5243\_2:N:0:TCTGCAAG+GCTGCACT  
GACTATACAGTTCGGCCATTTCAAGAGTGGTCAATACGTCGTGGGAGGTACTGAAGCCTTCCCTCCG  
CTGGCAGCAAGAACTCCCAAGCCAATCAATAGTTCTTCTGACCAGA

+

FFFFFFFFFFFFFFFFFFFFFFFF:FF:FFFF:FFFF:FFFF,FFF:FFFFFFFFFFFFFFFFFFFFFFFFFFFF:  
F,FFFF:FFF,FFFF:FFFF:FFFFFFFF:FFFF:FFFFFFFF

@A00721:190:HGJW7DSXY:4:2656:28537:27336\_1:N:0:TCTGCAAG+GCTGCACT  
GGTAGTCTCTAAGTCTACCAGGAAGAGGGGAAATGTCCCCAAACTGAGAAGAATAAAGGGAAAGGTC  
CATCAGGACCTAAGAAGGGGAAATTACCCCTAATTCTGAAGGAAGATCTCCACCATCTGGGGTTGGG  
AAT

+

FFFFFFFFFFFFFFFFFFFFFFFFFFFFFFFFFFFFFFFFFFFFFFFFFFFFFFFFFFFFFFFFFFFFFFFFFFFF  
FFFFFFFFFFFFFFFFFFFFFFFFFFFFFFFFFFFFFFFFFFFFFFFFFFFFFFFFFFFFFFFFFFFFFFFFFFFF  
FFF

@A00721:190:HGJW7DSXY:4:1130:7808:27633\_2:N:0:TCTGCAAG+GCTGCACT  
ACGGGCCAAAGAGGCCGCTGCTACGAAGTCGCTGAAGGCGGCTTGGGTCATTAAGGGTAGCTGTAAAG  
TTGCGCTGCCGACCCATCTTTGAGACCAAGACTCTCTACAGTAGGT

+

FFFFFFFF:FFFFFFFFFFFFFFFF:FFF:FFFF:FFFF:FF,F:FFF,FFF:FFFFFFFF:F  
FFFFFFFFFFFFFFFF:FF:FFFF:FFFF:FFFFFFFF

@A00721:190:HGJW7DSXY:4:1223:19144:18239\_2:N:0:TCTGCAAG+GCTGCACT  
AAATCTGTTGAATTCGTCACTGAGGACGAAGGTGAGAGGACTTTTCGCTACTGGCGACAACTGAGAG  
CACTCGCTGGGGAAAGAGAATTGCGTGGGTGAAGGCCGACGCTTCGA

+

```

FFFFFFFFFFF:FFFFFFFFFFF:FFFFFFFFFFF:FFFFFFFFFFF:FFFFFFFFFFF:FFFFFFFFFFF:FFFFFFFFFFF:FFFFFFFFFFF:FFFFFFFFFFF:FFFFFFFFFFF
@A00721:190:HGJW7DSXY:4:1165:29017:29105_1:N:0:TCTGCAAG+GCTGCACT
GTCAACGGCGTTTGGAGGATTTTATCCGCGCTTAAGTATGGGGCGAAGATCCCCTATGGAGTCTTGAA
GGACTTAGGTTGGCATATTTATGCCGACGATAATAAGCATGTACCCTTAAGCACCGAGGTAAGCTCG
GGA
+
FFFFFFFFFFF:FFFFFFFFFFF:FFFFFFFFFFF:FFFFFFFFFFF:FFFFFFFFFFF:FFFFFFFFFFF:FFFFFFFFFFF:FFFFFFFFFFF:FFFFFFFFFFF:FFFFFFFFFFF
FFFFFFFFFFF:FFFFFFFFFFF:FFFFFFFFFFF:FFFFFFFFFFF:FFFFFFFFFFF:FFFFFFFFFFF:FFFFFFFFFFF:FFFFFFFFFFF:FFFFFFFFFFF:FFFFFFFFFFF
FFF
@A00721:190:HGJW7DSXY:4:2369:3351:35884_1:N:0:TCTGCAAG+GCTGCACT
GATCTTGCAAGTGAAGTTCAGACGTGTGCTCTTCCGATCTGTTAAACTCTTGCTCCTTCTGT
GGGTGAGGGTTTTTGTATATTCACTGGTCTGGGAGGCTGCTTCTCCTCATAATTACAACCTCTCTT
TAG
+
FFFFFFFFFFF:FFFFFFFFFFF:FFFFFFFFFFF:FFFFFFFFFFF:FFFFFFFFFFF:FFFFFFFFFFF:FFFFFFFFFFF:FFFFFFFFFFF:FFFFFFFFFFF:FFFFFFFFFFF
FFFFFFFFFFF:FFFFFFFFFFF:FFFFFFFFFFF:FFFFFFFFFFF:FFFFFFFFFFF:FFFFFFFFFFF:FFFFFFFFFFF:FFFFFFFFFFF:FFFFFFFFFFF:FFFFFFFFFFF
FFF
@A00721:190:HGJW7DSXY:4:2438:28447:20259_2:N:0:TCTGCAAG+GCTGCACT
AGTTGGGCAAATTCACATATGGTAGACGTTGTACACTTTTCTTGAAAATTTTCTTTCCTCCGT
CATTGGGGATTTCGATGTGAGAAGGTGGAAGGTGTCAAGGTCTTCTT
+
FFFFFFFFFFF:FFFFFFFFFFF:FFFFFFFFFFF:FFFFFFFFFFF:FFFFFFFFFFF:FFFFFFFFFFF:FFFFFFFFFFF:FFFFFFFFFFF:FFFFFFFFFFF:FFFFFFFFFFF
FFFFFFFFFFF:FFFFFFFFFFF:FFFFFFFFFFF:FFFFFFFFFFF:FFFFFFFFFFF:FFFFFFFFFFF:FFFFFFFFFFF:FFFFFFFFFFF:FFFFFFFFFFF:FFFFFFFFFFF
FFF
@A00721:190:HGJW7DSXY:4:2510:19416:16047_1:N:0:TCTGCAAG+GCTGCACT
GCAGAGTGAAGTTCAGACGTGTGCTCTTCCGATCTGAGGAAGTTCTCCGAAATTAAAGACGGGG
GGATTAAGAGTCCAGCTGTAAGTGTCAATTTCAGAGAGGGGAGCTCTGAAAAGGAACTTCGTCAGAAG
ATG
+
FFFFFFFFFFF:FFFFFFFFFFF:FFFFFFFFFFF:FFFFFFFFFFF:FFFFFFFFFFF:FFFFFFFFFFF:FFFFFFFFFFF:FFFFFFFFFFF:FFFFFFFFFFF:FFFFFFFFFFF
FFFFFFFFFFF:FFFFFFFFFFF:FFFFFFFFFFF:FFFFFFFFFFF:FFFFFFFFFFF:FFFFFFFFFFF:FFFFFFFFFFF:FFFFFFFFFFF:FFFFFFFFFFF:FFFFFFFFFFF
FFF
@A00721:190:HGJW7DSXY:4:2142:11153:23124_2:N:0:TCTGCAAG+GCTGCACT
AGTTTGAGGAAGGCTCTAGAGAAGATCTCACCACCTGGAGAAGGCAAGTGGAGAGTCCAGAAGTTGAT
GAAGAAGGATTATTTGAAGCAGGGGTTACCACTTCCTAAGGTGGATGA
+
FFFFFFFFFFF:FFFFFFFFFFF:FFFFFFFFFFF:FFFFFFFFFFF:FFFFFFFFFFF:FFFFFFFFFFF:FFFFFFFFFFF:FFFFFFFFFFF:FFFFFFFFFFF:FFFFFFFFFFF
FFFFFFFFFFF:FFF,FFFFFFFFFFF,FFFFFFFFFFF,FFFFFFFFFFF,FFFFFFFFFFF,FFFFFFFFFFF,FFFFFFFFFFF,FFFFFFFFFFF,FFFFFFFFFFF,FFFFFFFFFFF
FFF
@A00721:190:HGJW7DSXY:4:1134:7591:8656_2:N:0:TCTGCAAG+GCTGCACT
GATCTTGAGGACGTACATTTAACGTGGCAGAATTCGGTAACCTACCATATTGTTCTTCCGGGAAGTT
GTGGGATTTAACTTTGACTCAACTACTCCGATCAGATCCGGATGGTTT
+
FFFFFFFFFFF:FFFFFFFFFFF:FFFFFFFFFFF,FFF:FFFFFFFFFFF,FFFFFFFFFFF,FFFFFFFFFFF,FFFFFFFFFFF,FFFFFFFFFFF,FFFFFFFFFFF,FFFFFFFFFFF
FFFFFFFFFFF:FFFFFFFFFFF,FFFFFFFFFFF,FFFFFFFFFFF,FFFFFFFFFFF,FFFFFFFFFFF,FFFFFFFFFFF,FFFFFFFFFFF,FFFFFFFFFFF,FFFFFFFFFFF,FFFFFFFFFFF
FFF
@A00721:190:HGJW7DSXY:4:1223:16550:4288_2:N:0:TCTGCAAG+GCTGCACT
GACTACTCGACTTTTATCTGGAGTTGACTAGGGTCATGGCAGATACTACCGATAAGGTGAAAAATAT
GCAGGTCAAAGATTCTGTAGCTCTGAGGGCGGTTGAGGGAGC
+
:F:,FF,,,F,F:,,:FF,F,,FF:,,,,,F:,F,FFF,:,F,FFF:FF,F,F:FF::FF:FF:FF:
,FF,,FF:FF,F,,:F,,F,,F,,:FF,F:,F,F,FF::F,:
@A00721:190:HGJW7DSXY:4:2623:28411:13777_1:N:0:TCTGCAAG+GCTGCACT
CTAAGAGTCTTTATGATTCAAAACCTATCGTTGTGCTACCTTACAAGGTTGAGGAGACTTTACAGCGG
CTTATTGTCGCGCAGTTTCCAGAATTGCGGTTGAAGTTCACCCATTCTATCTTGAATGCTCACGCCGT
CGC

```

FF,:FFFF:FFFFFFFF:FF:,F::FF:F:F:FFFFFFFFFFFFFFF,,FF:FFFFFFFFFFFFFF:FFFFFF  
 FFFFF,FFFFFF,,FFFFFFFF::FFF:FFFFFFFF,FFFFFF:FFF:,FFFFFFFFFFFFFF:FFFF  
 FF:  
 @A00721:190:HGJW7DSXY:4:2119:32642:3317\_1:N:0:TCTGCAAG+GCTGCACT  
 GAGGCGATATTCGTTTTTCATATCCAAAACCTCCTTGAATGGAGTACATATTTGCAACCTATTCTTGAT  
 GTGAAAGATGCATCGAGGTATACGTCTAGGAACATTGATTGGGAACGTACCTACTCACGAGACGTCAT  
 GAA  
 +  
 FFFFFFFFFFFFFFFFFFFFFFFF:FFFFFFFFFFFFFFFFFFFFFFFFFFFFFFFFFFFFFFFFFFFFFFFFF,FFFFFFFFFFFF  
 FFFFFFFFFFFFFFFFFFFFFFFF:FFFFFFFFFFFF:FFFFFFFFFFFFFFFFFFFF:FFFFFFFFFFFFFFFFFFFF  
 FFF  
 @A00721:190:HGJW7DSXY:4:2232:19732:21825\_2:N:0:TCTGCAAG+GCTGCACT  
 GTTCTGTTACAAGAACGCTTTGGATTGTGACCATAAAGCCTCAGTTGCGATAGCTGTAGAGGTATACG  
 ATATCTCTCTTGATGATGTAGCCACTATAATGCTTAAGAGAGAGATTG  
 +  
 FFFFFFFFFFFFFFFFFFFFFFFF:FFFFF:FFFFFFFFFFFFFFFFFFFFFFFFFFFFFFFFFFFFFFFFFFFFF:FFFFF  
 FFFFFFFFFFFFFFFFFFFFFFFF:FFFFFFFFFFFFFFFFFFFF  
 @A00721:190:HGJW7DSXY:4:2157:27814:29496\_2:N:0:TCTGCAAG+GCTGCACT  
 TGACCTTGGTATCGTTATCCGTCATGGAGATGATGGCGCATCACTTGATTACTATATGCCCGAAGGAT  
 TGGGTTATTCTCACAACAAAGATAAGATTTTATCTTTCTTCAAACACC  
 +  
 FFFFFFFFFFFFFFFFFFFFFFFF:FFFFFFFFFFFFFFFFFFFFFFFFFFFFFFFFFFFFFFFFFFFFF  
 FFFFFFFFFFFFFFFFFFFFFFFF:FFFFFFFFFFFFFFFFFFFF  
 @A00721:190:HGJW7DSXY:4:1169:2392:3380\_1:N:0:TCTGCAAG+GCTGCACT  
 TGAGTTCCGAATAACTCGTAATAAATCTTTCTCTAGTGGACAATTGAGAATACCTATTTCCGTACCAA  
 GAGCCACTGCCAATCTCATCGCTATACGCATACCTGATTGGAAGAAGCGAGGTTCTGTTCTCAATAAA  
 AAT  
 +  
 FFFFFFFFFFFFFFFFFFFFFFFF:FFFFFFFFFFFFFFFFFFFFFFFFFFFFFFFFFFFFFFFFFFFFF:  
 FFFFFFFFFFFFFFFFFFFFFFFF:FFFFFFFFFFFFFFFFFFFF  
 FFF  
 @A00721:190:HGJW7DSXY:4:1132:1163:11490\_1:N:0:TCTGCAAG+GCTGCACT  
 CTTCATAAGGGCTATTCAGTACGTCATGGGGATCACTTCTTCGGTCAATGACAAAACCTTCGAATATG  
 TTACGACATGGCTTCGTAACAACAGTACGAGGATTGTCATCTCGGGGAAAGTGATTCACCAAGATGTT  
 CA  
 +  
 FFFFFFFF:FFFFFFFFFFFFFFFFFFFFFFFFFFFFFFFFFFFFF:FFFFFFFFFFFFFFFFFFFFF  
 FFFFFFFFFFFFFFFFFFFFFFFF:FFFFFFFFFFFFFFFFFFFFF  
 FF  
 @A00721:190:HGJW7DSXY:4:2119:1615:8077\_1:N:0:TCTGCAAG+GCTGCACT  
 GAAGGTCGCAGCGATCTTACTCGTTATCGGAGCTAAGAAGAAGACTTTGGGTACACGTTATGCTCGCA  
 AACTTAACGTTAGTACCGGAGGTGATCTCTGCTTCTGCGTTACTGAGAGAAAAGATTACAGACGCC  
 TAC  
 +  
 FFFFFFFFFFFFFFFFFFFFFFFF:FFFFFFFFFFFFFFFFFFFFFFFFFFFFFFFFFFFFFFFFFFFFF  
 FFFFFFFFFFFFFFFF:FFFFFFFFFFFFFFFFFFFFF  
 FFF  
 @A00721:190:HGJW7DSXY:4:2109:11080:25034\_2:N:0:TCTGCAAG+GCTGCACT  
 AACGAATCTTGAAACTACGGTCCTTATCAAAGAAAATGGTGAACCGGTCTCTAAATCTTTGAGATTG  
 AGAAGATTGAAGAACACGTCAAGAAGTCGCTCGGCGTTGTTCTTGAA  
 +  
 FFFFFFFFFFFFFFFFFFFFFFFF:FFFFFFFFFFFFFFFFFFFFF  
 FFFFFFFFFFFFFFFFFFFFFFFF:FFFFFFFFFFFFFFFFFFFF





$+$ 

@A00721:190:HGJW7DSXY:4:2177:21974:31876\_1:N:0:TCTGCAAG+GCTGCACT  
GCTCTTCCGATCTGCTGGATGGATCTTTTGATGGTATGTTTCACATTGCGTGATCACTTCCCGTGGAC  
TTGGGAAGAGATTAAACATAAAATCCAGCGATTCTATTATGTCGCTAAAGCCTGTCCAGTTGTCTGATG  
ATG

 $+$ 

@A00721:190:HGJW7DSXY:4:2539:7808:36839\_1:N:0:TCTGCAAG+GCTGCACT  
CACAAGGATTACTAAGTCTGAGATCTGCCACTTCTAATTTTAGGAAACGTCGCGAAAAAGAAAGTTCAT  
GAGGATGTCTTGTCGAAAAATATCGCCGGGAAGCTTCTAATAGAGGATCCTGATGACATTATTTCAAC  
GGA

 $+$ 

@A00721:190:HGJW7DSXY:4:1408:22806:25332\_2:N:0:TCTGCAAG+GCTGCACT  
TACCACAGAAACCGTCTCAGGAAGTGTCTCCACTGATTCGGAATTAGAGAAAGACGACCTTCTTGTGG  
GGACTGAGACCTCTGAATTTTCAGGGTGCCCTGATGAGGACGTTGAAA

+

@A00721:190:HGJW7DSXY:4:2104:8576:25958\_1:N:0:TCTGCAAG+GCTGCACT  
TTCTAAGAGTGTTCAAAAGACCAGAAACGTAACAAGAAGAATAAAGGTAGGAAGGGGAGAAAACAGA  
ACAAGCGAGCGGTTGAAGAGAAAAC TGATATGGTTGCGGCTGATCGTACCCCAATTCCTGCTAGAAAG  
ATC

+

@A00721:190:HGJW7DSXY:4:1502:23312:5321\_1:N:0:TCTGCAAG+GCTGCACT  
AATGATCTTCCAGAGTTTCGTAGTGTCGTTATTTTGGTGATTTTATCAAAGAGTAAGTTTCTGCTAG  
TCGCGACGATAGTATTTATCGGAGTGATATTAACAAGTTAAACTTCGAACTGACCACTTACAAGAG

 $+$ 

@A00721:190:HGJW7DSXY:4:1657:32325:21590\_2:N:0:TCTGCAAG+GCTGCACT  
CCACTGAAC TTATAGCGACTTTTGT CGAATTTTCGCAAAGGTCTTGAAGTACGTATTGCTACTGCT  
AATCGTAATTCGCGAGAAGAGCAGATCGGAAGAGCGTCGTGTAGGGAA

$$+$$

@A00721:190:HGJW7DSXY:4:1249:18177:16783\_2:N:0:TCTGCAAG+GCTGCACT  
AATTAAGACAGACGTGAAAGTTATGATGAGTGATCGTATTAGAACAGCTGATTCTTATTGCATGAACG  
TCGCTGAGGTCAAACCTGTGGACGTTCTTTTCATCGACGAATTATTCA

+

```

FFFFFFFFFFFFFFFF:FFFFFFFFFFFFFFFFFFFFFFFFFFFFFFFFFFFFFFFFFFFFFFFF:F
FFFFFFFFFFFFFFFF:FFFFFFFF:FFFFFFFFFFFFFFFF:FF:FFFFF

```

@A00721:190:HGJW7DSXY:4:1151:28004:13698\_1:N:0:TCTGCAAG+GCTGCACT  
ATCTACTTAAGGCGGCTTATACCATAGGTTACGGTGATTCCAATCAAATCGGATTCATCAATCGTATT  
GATCTCCAAGTCGAACTACTTCAACATCAACGACATCATTCTTGATGAGTGTCGTTCTTATCGAAG  
TCT

+

:FFFFFF:FFFFFF,FFF:FFFFFF:FFF:FFFFFF  
FFFFFFFFFFFFFFFF:FFFFFFFFFFFFFFFFFFFFFFFF  
FFF

@A00721:190:HGJW7DSXY:4:1253:24858:7404\_2:N:0:TCTGCAAG+GCTGCACT  
TGCCCGGCCGACGTTTGTGCGAACTCTCAGAGGTTTACGGCAGAAAAATTTCTCCTGCTTGTAATTC  
GAGAGAGGACACTATGGAATTAGACCTATCAGATGTCTTGACGACTT

+

FFFFFFFFFFFFFFFFFFFFFFFFFFFFFFFFFFFFFFFF  
FFFFFFFFFFFFFFFF:FFFFFFFFFFFFFFFF

@A00721:190:HGJW7DSXY:4:1669:13096:33755\_2:N:0:TCTGCAAG+GCTGCACT  
TGTAAGTTAAACGATGCTACTTGTGAGAGGATCAATCACAGTAAGTAAGTGTACGTTTAGCACGGG  
AGGTTGCAGATTCAACCCCTTATATCGAGGCTATCGAGGACGATGAGT

+

FFFFFFFFFFFFFFFFFFFFFFFFFFFFFFFFFFFFFFFF  
:FFF:FFFFFF:FFFFFFFF:FFFFF,FFF

@A00721:190:HGJW7DSXY:4:2550:27480:5525\_2:N:0:TCTGCAAG+GCTGCACT  
GACGACAAGCCTCAAGAGGGTAGAGGACCACCTGGATCTTCTACTGTCTCTGCCTTCCAAGATTTCTT  
AGAAGAGGTTATTCCTGGAACCACCTTAACGTCACTCGGTAATCTTTC

+

FFFFFFFFFFFFFFFFFFFFFFFFFFFFFFFFFFFFFFFF  
FFFFFFFFFFFFFFFFFFFFFFFF:FFFFFF:F::FFFF

@A00721:190:HGJW7DSXY:4:1418:5737:20008\_2:N:0:TCTGCAAG+GCTGCACT  
AAGGCTAATACCTTTATAGGTAAGAAGCCCTTGAGCCGCGTAGTCAGCGCGTTTAGCTGTATCATCA  
GTCAGAGTATACCCGATAGGGTACCGAGTCTCCAAGAGAATATTTATT

+

FFFFFFFFFFFFFFFFFFFFFFFFFFFFFFFFFFFFFFFF  
FFFFFFFFFFFFFFFFFFFFFFFFFFFFFFFF

@A00721:190:HGJW7DSXY:4:1326:28556:12962\_2:N:0:TCTGCAAG+GCTGCACT  
TCAATTGATAGATTGGGTCAACAATAGGACGCTAGTATACTTCGTAAAGTCGACAGCGAAATGGTCA  
ATATTGATAATTGGACCGACTATATGACCTATTTAAGCTCATGGTGA

+

FFFFFFFFFFFFFFFFFFFFFFFFFFFFFFFFFFFFFFFF  
FFFFFFFFFFFFFFFFFFFFFFFFFFFFFFFF

@A00721:190:HGJW7DSXY:4:1514:15989:4476\_2:N:0:TCTGCAAG+GCTGCACT  
GTTCTTGAGAGAGTCAAACAGTGCTTTTACCCAACATTTTATGTATACAGAGATGACCAGTGA  
CGATTTCTCCCGAAGCTCTTCTCTCTTAGGAGGTCATGATGACTA

+

FFFFFFFFFFFFFFFFFFFFFFFFFFFFFFFFFFFFFFFF  
FFFFFFFFFFF:FFFFFFFFFFFFFFFFFFFFFFFF

@A00721:190:HGJW7DSXY:4:2320:21721:27305\_2:N:0:TCTGCAAG+GCTGCACT  
CCAGGAGTATCCATAACGATTTGTCAATTTACCACCTTGTCAACGACGACGTGGAACGGCCAACACT  
TTCTTTGGTAATTGTATGATCACTTTGATGATTTTATCACTTTATTAT

+

FFF:F::,,FFFF:,FFF,:FF,,FFF:FFF:,FFFFFF:F:FF,:FF,FFF:FFFFFFF  
FFFF,:,,FFFF:FFF,:FFFF,FFFFFFFF:FF,FF,:FFFF

@A00721:190:HGJW7DSXY:4:2142:17164:6918\_2:N:0:TCTGCAAG+GCTGCACT  
CCAATAACTGATCATTCTGATCATATGATTTTGGACAATGGTTTGAAGCGAAATTTTGGAGGATAA  
ACCAGCGTACTTCTGCTCGGATTTATTCTTTTGTCAATGATTACAT

+

[illegible]

@A00721:190:HGJW7DSXY:4:2445:5882:19789\_2:N:0:TCTGCAAG+GCTGCACT  
GTTGGATGTCAAGAAGGGTTCAGAATGGGATTCTACGTAGTTTATGACTTTGGTGGTGGTACTTTTCG  
ATACTTCTATCGTCTTACGTTACGGTAATTACTATAGTGTTATTTATT

+

FFFFFFFFFFFFFFFFFFFFFFFFFFFFFFFFFFFFFFFFFFFFFFFFFFFFFFFFFFFFFFFFFFFFFFFF  
FFFFFFFFFFFFFFFFFFFFFFFFFFFFFFFFFFFFFFFFFFFFFFFFFFFFFFFFFFFFFFFFFFFFFFFF  
FF:FFFFFFFF

@A00721:190:HGJW7DSXY:4:2274:18059:35055\_1:N:0:TCTGCAAG+GCTGCACT  
TTGGAGGTCGTGACGTTGATGAAGCTATAAGAGCGTTCTTATTACGGCGCACTTCTTTACCCGCCACC  
ACACAACTTTCAGTTTCACAACTGAAGGAGGAGGTTTCTGTTACTGGAACCCCTCGTCAATACTTTT  
CAA

+

FF::FFFFF,FFFF:FFFFFFFF::FF,FFFFFFFFFF:FFFFFFFFFF:FF:FFFFFFFFFFFFFFFF  
FF:FFFFFFFFFFFF:FF::F,FFF:FFFF,FFFF::FFFF:FFFFFFFFFFFFFFFF:FFF:FFFF  
FF:

@A00721:190:HGJW7DSXY:4:2418:16116:36886\_2:N:0:TCTGCAAG+GCTGCACT  
CGTCTTTTCTGGAACGTAGTTTTACTATTATGAACAAAGTTATCAAAGATAGTGGCATTCAAGGCAA  
ACTTACCCTGATTCCGGCCGGTGGTAGCTCATTTCTACCAGAGATCGG

+

FFFFFFFFFFFFFFFFFFFFFFFFFFFFFFFFFFFFFFFFFFFFFFFFFFFFFFFFFFFFFFFFFFFFFFFF  
FFFFFFFFFFFFFFFFFFFFFFFFFFFFFFFFFFFFFFFFFFFFFFFFFFFFFFFFFFFFFFFFFFFFFFFF  
FF,FFFFFFFF

@A00721:190:HGJW7DSXY:4:2333:26512:35634\_1:N:0:TCTGCAAG+GCTGCACT  
AAACAGCTATTAAGCTGTTGAGCGGGTAATTACACCTAAACGAGCTCGATCTGCCATCGCTGAAGGA  
TGTGCACTCTTTTCTGCTACTTTAACGGAGCGTAGTGACTCTTCGTCGATTGTATCAACAGTAACAT  
TAC

+

FFFFFFFFFFFFFFFFFFFFFFFFFFFFFFFFFFFFFFFFFFFFFFFFFFFFFFFFFFFFFFFFFFFFFFFF  
FFFFFFFFFFFFFFFFFFFFFFFFFFFFFFFFFFFFFFFFFFFFFFFFFFFFFFFFFFFFFFFFFFFFFFFF  
FFF

@A00721:190:HGJW7DSXY:4:2522:29342:11506\_1:N:0:TCTGCAAG+GCTGCACT  
CGTTGAAGGCTAACTCCAAGTAATTATGAAGACTGTGATTTATCTTTCACTCTGGCCTTGTATGAG  
GGTGTCTTAATCGTAACATTAATAATTTCAATCTTCTTAAAAAGAAGATAGAGAGTCATACTTTGG

+

FFFF:F:FFFFFFFFFFFF,FFFFFFFF:FFFFFFFFFFFFFFFFFFFFFFFFFFFFFFFF:FFFFFFFF  
FFFFFFFF:FF:FFF,FF:FFFFFFFF,FFFFFFFF,FFFFFFFFFFFFFFFFFFFF:F:FFF,FFFF

@A00721:190:HGJW7DSXY:4:2311:6623:12806\_2:N:0:TCTGCAAG+GCTGCACT  
TGGTTGTTATCTCGAAAAGTCTCTTCTAAAAGGAACGTCAGTTCTAACCCAAAGAGAATATCTAAAAT  
ATTTACAAAATCTTACCACTATCTACGAACCTAAAGTTCTGAAGACGT

+

FFFFFFFFFFFFFFFFFFFFFFFFFFFFFFFFFFFFFFFFFFFFFFFFFFFFFFFFFFFFFFFFFFFFFFFF  
FFFFFFFFFFFFFFFFFFFFFFFFFFFFFFFFFFFFFFFFFFFFFFFFFFFFFFFFFFFFFFFFFFFFFFFF  
FFFFF:FFFFFFFFFFFFFFFF

@A00721:190:HGJW7DSXY:4:2401:11776:7795\_1:N:0:TCTGCAAG+GCTGCACT  
TGGCACTACCTCGGTACAATCTTACTTGGAACGAAGGCGACCTGTTCCGGAGTTTTTACGGGATCCGG  
AATGTTCTGTCTATATTAGGTGAAGCGAAATACGATTTCGAACGTCAACGTTACCGAGTTTCGTTTC  
GTA

+

FFFFFFFFFFFFFFFFFFFFFFFFFFFFFFFFFFFFFFFFFFFFFFFFFFFFFFFFFFFFFFFFFFFFFFFF  
FFFFFFFFFFFFFFFFFFFFFFFFFFFFFFFFFFFFFFFFFFFFFFFFFFFFFFFFFFFFFFFFFFFFFFFF  
FFF

@A00721:190:HGJW7DSXY:4:2224:31575:4507\_1:N:0:TCTGCAAG+GCTGCACT  
ATTGATAAAGAACTTCATGAATTTTCAGAGGATGAAAAATTTTCTTCCTTGATTATTAATATAAAGAA  
TCTTTACCAGGACTCTACTACAGGAGGCAGTCTTCTGATCGTAAGAAGTTTATAAGGAACATATCCA  
TTT

+

:FFFFFFFFFFFFFFFF:FFF:FFFFFFFFFF:FFFFF:FFFFFFFFFFFFFFFFFFFFFFFF

@A00721:190:HGJW7DSXY:4:2567:10547:25989\_2:N:0:TCTGCAAG+GCTGCACT  
AACTCTAAGTGGTAATACTGTCTTTCCAAGCTTACCTGTATCTTCAATGAAATTGGACTCTTCGATAG  
GGGACATTTTATCGTGGGCTTTCCGTAAAGGAAGATCTGTTATCGACG

@A00721:190:HGJW7DSXY:4:1101:15212:28526\_1:N:0:TCTGCAAG+GCTGCACT  
CTATTATTGATTTTTATGAGATTGATACGTTAACAGAAGATGATGTTAGAGTAGAATTCCTGAAGAGT  
CCTTCCGTAACCAACTTCTTGACAATTTTCTTCAATCCTTCGATAATAGTTAAATCTAGGATTATGTC  
TGT

@A00721:190:HGJW7DSXY:4:2402:21169:27665\_2:N:0:TCTGCAAG+GCTGCACT  
ATTGACTGATTATCTAAAGATTGAAGGAAAATTTATCCTCGTTTAACTTACTTAGACTTTCCCTACGA  
TACAAATGATAACTTCTAATTTACGTTTGCTACTCAGAGCTGGTCCTC

@A00721:190:HGJW7DSXY:4:2540:18096:16016\_1:N:0:TCTGCAAG+GCTGCACT  
CTCAGGAGTCCCGGCATTTGATAATAATGACGAGACTTTCGTCATAATCGCTGCATATTACGGATTAC  
ACGTTACCAGCGCATCTCGTGTCGAGCCTCGACCCGATTATATGGTATTAAC TTATAAAGGTGAGGAG  
ACC

@A00721:190:HGJW7DSXY:4:1227:13847:10473\_1:N:0:TCTGCAAG+GCTGCACT  
AACTATGTTATGTTCTCTGATCATTTTGACAATCTCTTCTTATAATAAAATAAATAATATTACTA  
ATGGCAAATAGTGGAAGGCTCCAGTCAACACTAGTTCGAGTGCTGCTTTGGATTACGATGACGTGAG  
AAT

@A00721:190:HGJW7DSXY:4:2446:12337:18255\_1:N:0:TCTGCAAG+GCTGCACT  
TAGTTTTTACCTCGACCAACATTAAGGCGGCGGCGACTAATCTTAAAGCTTCACCCAAAATGAAGGAC  
ACTTCGAAACTGAATAATGATGCACTACAAACAAGTATCGCTAATCATCTGAAAAAGGCTCTAAAGGA  
CAC

@A00721:190:HGJW7DSXY:4:1268:12020:36902\_1:N:0:TCTGCAAG+GCTGCACT  
GAGGATATTCGCCATTGTGGTACGAATTGGTCCAACATTTACCACCAAATTCTTTTGATACAACCTCTA  
GCCTTCAAGTGGGGTATGCCTGCGGAATACGCTTGCTATTACCAGATTGGTTCGAACCCGTTGATGC  
TAT

[illegible]

@A00721:190:HGJW7DSXY:4:1254:5620:23062\_2:N:0:TCTGCAAG+GCTGCACT  
TATTCAAGCTTGTCTGTTTAAAGACTGCAGAGGCTGTCAAACAAGCCCAGACTCAAGGAGTCCAATCAA  
AGGTTTTGAATTTAGCTCAACTGGGGAGACGTGCTTAAATGGGTGATA

+

FFFF:FFFFFFFF:F:FFFF:FFFFFFFFFFFFFFFFFFFFFFFFFFFFFFFFFFFFFFFFFFFF  
FFFF:FFFFFFFFFFFFFFFFFFFFFFFFFFFFFFFFFFFFFFFFFFFFFFFFFFFFFFFFFFFF

@A00721:190:HGJW7DSXY:4:1230:1362:27806\_1:N:0:TCTGCAAG+GCTGCACT  
AGATAGTGGGATAATAGTTCTACCGATACGTAGTGAACGCGTTCGTAGAACCAAGTACTTTCCGTCTG  
AAGAGTTTAGAGCTGCTATTGATTATGTAACCGATAGGAGTTGTATAGTTGAAGATGTGGCTTTAGAC  
GAT

+

FFFFFFFFFFFFFFFFFFFF:FFFFFFFFFFFFFFFFFFFFFFFFFFFFFFFFFFFFFFFFFFFFFFFF  
FFFFFFFFFFFFFFFFFFFFFFFFFFFFFFFFFFFFFFFFFFFFFFFFFFFFFFFFFFFFFFFFFFFF  
FFF

@A00721:190:HGJW7DSXY:4:1213:18466:21198\_2:N:0:TCTGCAAG+GCTGCACT  
ATGTTGACTGACGAAGATTTTCCACAGATTTGTCTACGTTGCAGATCGCCACTCCAAACACTATATA  
CATTATAAAATATAAAAAATAAGGGAGTCATAACTTTTGTACCAAATT

+

FFFFF:FFFFFFFFFFFFFFFFFFFFFFFFFFFFFFFFFFFFFFFFFFFFFFFFFFFFFFFFFFFFF  
FFFFFFFFFFFFFFFFFFFFFFFFFFFFFFFFFFFFFFFFFFFFFFFFFFFFFFFFFFFFFFFFFFFF

@A00721:190:HGJW7DSXY:4:2129:13584:15906\_2:N:0:TCTGCAAG+GCTGCACT  
CGAAGTCTCTGATTTTATTAATCATTACTTTAACGATCTCTCGTCAATTTACTCTGTACTTGATCTAC  
GTCGTTTAACTGTCGGAACAACCTTTACTTAGAATGACTCTATCTTTT

+

FFFFFFFFFFFFFFFFFFFFF:FFFFFFFFFFFFFFFFFFFFFFFFFFFFFFFFFFFFFFFFFFFFFFFF  
FFFFFFFFFFFF:FFFFFFFFFFFFFFFFFFFF:FFFFFFFFFFFFFFFFFFFFFFFFFFFF

@A00721:190:HGJW7DSXY:4:2540:21893:20212\_2:N:0:TCTGCAAG+GCTGCACT  
CTCACTATCGTTTTCTGCTTTTTCTTAGCTAATAGATTAATAAAGGATGAGTACGAAAACCAACTCTT  
CGTTACGAGACCTGATGGTAGAATAGATTTAGTCTCTACACCCATCTC

+

FFFFFFFFFFFF:F:FFFFFFFFFFFFF:FFFFFFFF:FFFFFFFFFFFFFFFFFFFFFFFFFFFFF  
FFFFFFFF:FFFFFFFFFFFFFFFFFFFFFFFFFFFF:FFFFFFFF:FFFFFFFF

@A00721:190:HGJW7DSXY:4:1616:1452:13808\_2:N:0:TCTGCAAG+GCTGCACT  
AGCGAGTTTTCTTCTGAACGTAATACACGAAGAGATCATCCGCAAACGACTCGAAACCGAGACGCC  
GTAGATCAAAGTCCCTTCTAACTTTAGATTATGAATCCTGCCTTTACT

+

FFFFFFFFFFFFFFFFFFFFFFFFFFFFFFFFFFFFFFFFFFFFFFFFFFFFFFFFFFFF,FFFFFFFFFFFFFFFFFFFFF  
FFFFFFFFFFFFFFFFFFFFF:FFFFFFFFFFFF,FFFFFFFFFFFF,FFFFF

@A00721:190:HGJW7DSXY:4:1259:7066:19366\_2:N:0:TCTGCAAG+GCTGCACT  
CTTTTCGATAGTGATTGTTATCAATTTAAATACATTACTGTTTCAAATCATCTTTACTCACAGACTCC  
GAAAATGGTTTCAAATGAGGTCAAAGCTCTATTTATTAACGAACATAT

+

FFFFFFFFFFFFFFFFFFFFFFFFFFFFFFFFFFFFFFFFFFFFFFFFFFFFFFFFFFFFFFFFFFF  
FFFFFFFFFFFFFFFFFFFFF:FFFFF::FFFFFFFFFFFFFFFFFFFFF:FFF

@A00721:190:HGJW7DSXY:4:2563:21549:7467\_2:N:0:TCTGCAAG+GCTGCACT  
AACTTCAATTCCTTCGATGTTTATATTTTCTATAAGGGAAAATAGCAATAATCAAATTCGACAAAT  
TTTAGAACTTTATTTAGAACTCTCTCCGATCACCTTGGTGTGATCTC

+

F:FFFFFFFFFFFFFFFF:FFFFFFFFFFFFFFFFFFFFFFFFFFFFFFFFFFFFFFFFFFFFF::  
FFFF:FFFFFFFFFFFFFFFFFFFFFFFFFFFFFFFFFFFFFFFFFFFFFFFFFFFF

@A00721:190:HGJW7DSXY:4:2471:16839:8077\_1:N:0:TCTGCAAG+GCTGCACT  
TCAATAAGATGTATGATGATAATCTACTATTTTTAAATAGTGATATTCAGCGTATACTTGAATACTTT  
ATCAAAGATTTGGCTTGGTCTATTTACCGCAAAAAGTTGGAAGAGGTCTATGATATTTATTTTACTTA  
TAC







@A00721:190:HGJW7DSXY:4:1134:7636:8672\_2:N:0:TCTGCAAG+GCTGCACT  
GATCTTGAGGACGTACATTTAACGTGGCAGAATTCGGTAACTTACCATATTGTTCCCTTCCGGGAAGTT  
GTGGGATTTAACTTTGACTCAACTACTCCGATCAGATCCGGATGGTTT

+

FFFFFFFFFFFFFFFF:FFFFFFFF:FFFFFF:FFFFFFFFFFFFFFFFFFFFFFFFFFFFFFFFFFFF  
FFFFFFFFFFFFFFFFFFFFFFFFFFFFFFFFFFFFFFFFFFFFFFFFFFFFFFFF:FFF:FF:FF

@A00721:190:HGJW7DSXY:4:1261:7798:32033\_2:N:0:TCTGCAAG+GCTGCACT  
CAGATACTACCGATAAGGTGAAAAATATGCAGGTCAAAGATTCTGTAGCTCTGAGGGCGGTTGAGGGA  
GCCGTTTTGGCCGACTTTAACTATTCTAAGAGTCTTTATGATTCAAAA

+

FFFFFFFFFFFFFFFFFFFFFFFFFFFFFFFFFFFFFFFFFFFFFFFFFFFFFFFFFFFFFFFF:FFFF:F  
FFFFFFFFFFFFFFFF:FFFFFFFFFFFFFFFFFFFFFFFFFFFFFFFFFFFFFFFF:

@A00721:190:HGJW7DSXY:4:2262:12011:30937\_1:N:0:TCTGCAAG+GCTGCACT  
GTTTCCAGAATTGCGGTTGAAGTTCACCCATTCTATCTTGAATGCTCACGCCGTCGCAGCCATATCGA  
GACTATGTTATAATCACTTGTTAAAGTACAGATTTAGTGATTTAGATATTATTGATATTGGAGGCGAT  
ATT

+

FFFFFFFFFFFFFFFFFFFFFFFFFFFFFFFFFFFFFFFFFFFFFFFFFFFFFFFFFFFFFFFF:FF  
FFF:FFFFFFFFFFFFFFFFFFFFFFFFFFFFFFFFFFFFFFFFFFFFFFFFFFFFFFFFFFFFFFFFFFFF  
FFF

@A00721:190:HGJW7DSXY:4:2359:24180:25363\_2:N:0:TCTGCAAG+GCTGCACT  
ACATATTTGCAACCCTATTCTTGATGTGAAAGATGCATCGAGGTATACGTCTAGGAACATTGATTGGG  
AACGTACCTACTCACGAGACGTCATGAAAGCTATCGGAGGGAAGCAAA

+

FFFFFFFFFFFFFFFF:FFFFFFFFFFFFFFFFFFFFFFFFFFFFFFFFFFFFFFFFFFFFFFFF:FFFFFFF  
FFFFFFFFF:FFFFFFF:FFFFFFFFFFFFFFFF:FFFFFFFFFFFFFFF

@A00721:190:HGJW7DSXY:4:1526:16432:4523\_1:N:0:TCTGCAAG+GCTGCACT  
TTACAAGAACGCTTTGGATTGTGACCATAAAGCCTCAGTTGCGATAGCTGTAGAGGTATACGATATCT  
CTCTTGATGATGTAGCCACTATAATGCTTAAGAGAGAGATTGATGTATGTCATTTCTGTTAGTTTGT  
CCC

+

FFFFFFF:FFFFFFF:FFFFFFFFFFFFFFFFFFFFFFFF:FFFFFFFFFFFFFFFFFFFFFFFFFFFF  
FFFFFFFFFFFFFFFFFFFFFFFFFFFFFFFFFFFFFFFFFFFFFFFFFFFFFFFFFFFF:FF:FFFFFFFFFFFFF  
FFF

@A00721:190:HGJW7DSXY:4:2173:22010:10614\_1:N:0:TCTGCAAG+GCTGCACT  
TCATGGAGATGATGGCGCATCACTTGATTACTATATGCCCAGAGATTGGGTATTCTCACAAAGATA  
AGATTTTATCTTTCTTCAAACACCCTGTTTTCTTAAGGGCGGACAATTGTTCCATTGTGAACCTTG  
GGG

+

FFF:FFFFFFFFFFFFFFFFFFFFFFFFFFFFFFFFFFFFFFFF:FFFFFFFFFFFFFFFFFFFFFFFF  
FFFFFFFFFFFFFFFFFFFFFFFFFFFFFFFFFFFFFFFFFFFFFFFFFFFFFFFFFFFF:FFFF:FFFFFFFFF:F  
FFF

@A00721:190:HGJW7DSXY:4:1265:4282:21120\_1:N:0:TCTGCAAG+GCTGCACT  
TGAGTTCCGAATAACTCGTAATAAATCTTCTCTAGTGGACAATTCAGAATACCTATTTCCGTACCAA  
GAGCCACTGCCAATCTCATCGCTATACGCATACCTGATTGGAAGAAGCGAGGTTTCGTTCTCAATAAA  
AAT

+

FFFFFFFFFFFFFFFFFFFFFFFFFFFFFFFFFFFFFFFFFFFFFFFFFFFFFFFFFFFFFFFFFFFF  
FFFFFFFFFFFFFFFFFFFF,FFFFFFFFFFFFFFFFFFFFFFFFFFFFFFFFFFFFFFFFFFFFFFFFFFFF  
FFF

@A00721:190:HGJW7DSXY:4:1312:13639:36573\_1:N:0:TCTGCAAG+GCTGCACT  
ATAAGGGCTATTAGTACGTCATGGGGATCACTTCTTCGGTCAATGACAAAACCTTCGAATATGTTAC  
GACATGGCTTCGTAACAACAGTGCGAGGATTGTCATCTCGGGGAAAGTGATTCACCAAGATGTTCATA  
TAG

[illegible]

FFFFFFFFFFFFFFFFFFFFFFFFFFFFFFFFFFFFFFFFFFFFFFFFFFFFFFFFFFFFFFFFFFFFFFFF  
FFF

@A00721:190:HGJW7DSXY:4:2405:13069:33270\_1:N:0:TCTGCAAG+GCTGCACT  
GTTTTTGGTATAAATCCTGATGGCTCAGTACAGGGAGGAGGTAATAGTTATAAAACCTTCTTTTATCA  
TTGCAACAGGACTTTGAGAAGACTGTTGAAATGGACAAAATCTGGGATCATAGGTATGTGTCACGCTA  
CAC

+  
FFFF:FFFFFF:F,FFFFFFF::FF:FFF:FFFFFF:F::F:FFFFF,:F:FFF:FFFFFFFFFFFFFFF,  
F:FFFFFFFFF:FFFFFFF,FFFFFFFFFFFF:FFFFFFFFFFFF::FFF:FFFFFFFFFFFF,FF:,F:  
F:F

@A00721:190:HGJW7DSXY:4:2265:22598:11694\_1:N:0:TCTGCAAG+GCTGCACT  
CGCCATATCAGATTAGAGACATGCCAGTTAGAGTTCTTCTAACCAGGACTGATGGTGAGATTCTTTTA  
CCTTTTGGAGGTCCAGGAACCTTTACTCCTAGTGTCTTTTCTAGAGTCCAAGGACGTTTCCGTCGGAG  
GAT

+  
FFFFFFFFFFFFFFFFFFFFFFFFFFFFFFFFFFFFFFFFFFFFFFFFFFFFFFFFFFFFFFFFFFFFFF  
FFFFFFFFFFFFFFFFFFFFFFFFFFFFFFFFFFFFFFFFFFFFFFFFFFFFFFFFFFFFFFFFFFFFFF  
FFF

@A00721:190:HGJW7DSXY:4:2110:17463:10755\_2:N:0:TCTGCAAG+GCTGCACT  
ACACTCTATTGAATCCCTTTTCCACGATGAAAGCTCTTTATGAGGTGCTCCATGCAAATTTACAGTTC  
CTCTTTGGTGATATCGCCTCTGTCTTTCTCCTTTAATCGTGAGGTTA

+  
FFFFFFFFFFFFFFFFFFFFFFFFFFFFFFFFFFFFFFFFFFFFFFFFFFFFFFFFFFFFFFFFFFFF:F:F:FFFFF:FFFFFFFFF:F,FFFFFFFFF  
FF:FF:FFFFFFFFFFFFFFFFF,FFFFFFFFF,FFFFFFFFFFFFFFFFF

@A00721:190:HGJW7DSXY:4:2629:8115:32424\_1:N:0:TCTGCAAG+GCTGCACT  
GCTCTTCCGATCTGCTGGATGGATCTTTTGATGGTATGTTTACATTGCGTGATCACTTCCCGTGGAC  
TTGGGAAGAGATTAAACATAAAATCCAGCGATTCTATTATGTCGCTAAAGCCTGTCCAGTTGTCGATG  
ATG

+  
FFFFFFFFFFFFFFFFFFFFFFFFFFFFFFFFFFFFFFFFFFFFFFFFFFFFFFFFFFFFFFFFFFFF,FFFFFFFFF  
FFFFFFFFFFFFFFFFF:FFFFF:FFFFFFFFFFFFFFFFFFFFFFFFFFFFFFFFFFFFFFFFFFFFF  
FFF

@A00721:190:HGJW7DSXY:4:2608:22544:17895\_1:N:0:TCTGCAAG+GCTGCACT  
CACAAGGATTACTAAGTCTGAGATCTGCCACTTCTAATTTTAGGAAACGTGCGGAAAAGAAAGTTTCAT  
GAGGATGTCTTGGTCGAAAAATATCGCCGGGAACCTTCTAATAGAGGATCCTGATGACATTATTTCAAC  
GGA

+  
FFFFF:FFFFFFFFFFFFFFFFFFFFFFFFFFFFFFFFFFFFFFFFFFFFFFFFFFFFFFFFFFFF:F  
FFFF:FFFFFFFFFFFFFFFFFFFFFFFFFFFFFFFFFFFFFFFFFFFFFFFFFFFFFFFFFFFFF  
FFF

@A00721:190:HGJW7DSXY:4:2256:28971:16094\_2:N:0:TCTGCAAG+GCTGCACT  
TACCACAGAAACCGTCTCAGGAACTGTCTCCACTGATTCGGAATTAGAGAAAGACGACCTTCTTGTGG  
GGACTGAGACCTCTGAATTTTCAGGGTGCCCTGATGAGGACGTTGAAA

+  
FFFFFFFFFFFFFFFFFFFFFFFFFFFFFFFFFFFFFFFFFFFFFFFFFFFFFFFFFFFF:F:FFFFFFFFFFFFFFFFFFFFFFFFF  
FFFFFFFFFFFFFFFFFFFFFFFFFFFFFFFFFFFFFFFFFFFFFFFFFFFFFFFFFFFF

@A00721:190:HGJW7DSXY:4:2121:32108:32142\_1:N:0:TCTGCAAG+GCTGCACT  
TTCTAAGAGTGTTTCAAAAGACCAGAAACGTAACAAGAAGATAAAGGTAGGAAGGGGAGAAAACAGA  
ACAAGCGAGCGGTTGAAGAGAAACTGATATGGTTGCGGCTGATCGTACCCCAATTCCTGCTAGAAAG  
ATC

+  
FF,:FFFFFF,:F:FFF:FFFF::FFFF:FFFFFFF,FFFFFFFFFFFF:FFFFFFFFFFFF:FFF  
FFFFFFFFFFFFFFFFFFFFFFFFF:FFFF:FFFF:FFFFFFFFFFFFFFFFF:FFFFFFFFFFFFF  
FFF

$+$  $+$ 

+

+

+

+

+

+

+

```
FFFF,F:FFF,FFFFFFFF::FFFFFFFF,FF,FFFFFFF:F:FF,FFFFFFFF,F,FF,FFFFFFFFFFFF
FFFFFFFF,FFFFFFFFFFFFFFFFFFFFFFFFFFFFFFFF::F:FFFFFFF::
```

 $+$ 

+

+

+

+

+

 $+$ 

+

@A00721:190:HGJW7DSXY:4:2329:14073:3317\_2:N:0:TCTGCAAG+GCTGCACT  
GGACCTTAAGCGATGGATCGGGGTTAATTCTAAAACATTACCCGAAAGACGTGCTAAATTTAAACCAT  
TGTACGATGTCGTCTGTCTCGGCGATCACTTTTCTACTAAGAATTGGTC

+

FFFFFFFFFFFFFFFFFFFFFFFFFFFFFFFFFFFFFFFF:FFF:FFFFFFFF:FFFFFFFFFFFFFFFFFFFF  
FFFFFFFFFFFFFFFFFFFFFFFFFFFFFFFFFFFFFFFFFFFFFFFFFFFFFFFFFFFFFFFF

@A00721:190:HGJW7DSXY:4:1627:18864:28870\_2:N:0:TCTGCAAG+GCTGCACT  
GAGTGAAAGGCTTCAATTGTAGTGGTTTGGTCGTTTCAGTACCCAGTCAGTATACCTCTACGCAAAGA  
TATTTTCATGAAACTACAGAGGAACGTACCGGATTACCTGTCTTTTCAT

+

FFFFFFFFFFFF,FFFF:FF:FFFFFFFFFFFFFFFFFFFFFFFFFFFFFFFF:FFFFFFFFFFFFFFFF:FFFF  
FFFFFFFFFFFFFFFFFFFFFFFFFFFFFFFFFFFFFFFFFFFFFFFFFFFFFFFF

@A00721:190:HGJW7DSXY:4:2445:6397:19147\_2:N:0:TCTGCAAG+GCTGCACT  
GTTGGATGTCAAGAAGGGTTCAGAATGGGATTCTACGTAGTTTATGACTTTGGTGGTGGTACTTTTCG  
ATACTTCTATCGTCTTACGTTACGTAATTACTATAGTGTATTATT

+

F:FF,FFFFFFFFFFFFFFFFFFFFFFFFFFFFFFFF:FFFFFFFF:FFFFFF:,FFFFFFFFFFFFFFFFFFFF  
FFF:FFFFFFFF:FFFFFFFFFFFF,FFFFFFFFFFFFFFFFFFFF,FFFF::F

@A00721:190:HGJW7DSXY:4:2349:17616:10958\_1:N:0:TCTGCAAG+GCTGCACT  
TTGGAGGTCGTGACGTTGATGAAGCTATAAGAGCGTTCTTATTACGGCGCACTTCTTTACCCGCCACC  
ACACAACCTTCAGTTTCACAACCTGAAGGAGGAGGTTTCTGTTACTGGAAAACCCTCGTCAATACTTTT  
CAA

+

FFFFFFFFFFFFFFFFFFFFFFFFFFFFFFFFFFFFFFFFFFFFFFFFFFFFFFFFFFFFFFFF:FFFFFFFFFFFF  
FFFFFFFFFFFFFFFFFFFFFFFFFFFFFFFFFFFFFFFFFFFFFFFFFFFFFFFFFFFFFFFFFFFFFFFFFFFF  
FFF

@A00721:190:HGJW7DSXY:4:2448:30174:8187\_2:N:0:TCTGCAAG+GCTGCACT  
CGTCCTTTTCTGGAACGTAGTTTTACTATTATGAACAAAGTTATCAAAGATAGTGGCATTCAAGGCAA  
ACTTACCCTGATTCCGGCCGGTGGTAGCTCATTTCTACCAGAGATCGG

+

FFFFFFFFFFFFFFFFFFFFFFFFFFFFFFFFFFFFFFFF,FFFFFFFFFFFFFF:FFFF:FFFFFFFFFFFF  
FFFFFFFFFFFFFFFFFFFFFFFFFFFFFFFFFFFFFFFFFFFFFFFFFFFFFFFFFFFFFFFF

@A00721:190:HGJW7DSXY:4:1225:23348:8359\_1:N:0:TCTGCAAG+GCTGCACT  
AACAGCTATTAAAGCTGTTGAGCGGGTAATTACACCTAAACGAGCTCGATCTGCCATCGCTGAAGGAT  
GTGCACTCTTTTCTGCTACTTTAACGGAGCGTAGTGTACTCTTCGTCGATTGTATCAACAGTAACATT  
AC

+

FFFFF:FFFFFFFFFFFFFFFFFFFFFFFFFFFFFFFFFFFFFFFFFFFFFFFFFFFFFFFFFFFFFFFFFFFF  
FFFFFFFFFFFFFFFFFFFFFFFFFFFFFFFFFFFFFFFFFFFFFFFFFFFFFFFFFFFFFFFFFFFFFFFFFFFF  
FF

@A00721:190:HGJW7DSXY:4:1421:30915:8406\_2:N:0:TCTGCAAG+GCTGCACT  
AGGCTAAACTCCAAGGTAATTATGAAGACTGTGATTTATCTTTCACTCTGGCCTTGTATGAGGGTGTT  
TCTAATCGTAACATTAATAATTTCAATCTTCTTAAAAAGAAGATAGAG

+

FFFFFFF:FFFFF:FFFFFFFFFFFFFFFFFFFFFFFFFFFFFFFFFFFFFFFFFFFFFFFFFFFFFFFFFFFF  
FFFFFFFFFFFF:FFFF:FFFFFFFFFFFFFFFFFFFFFFFFFFFFFFFF:FFFFFFFFFFFF

@A00721:190:HGJW7DSXY:4:1428:15275:22435\_2:N:0:TCTGCAAG+GCTGCACT  
GCTATCGTTCAGGTGCATGGGGTTGGATAGCCAATATTGAAGTGGACACCTCTGGTAGTATCGAAGTA  
AAGATAACCAATAAGGAAGGAGCTTATACTATGGTTGAATCAACTAAG

+

FFFFFFFFFFFFFFFFFFFFFFFFFFFFFFFFFFFFFFFFFFFFFFFFFFFFFFFFFFFFFFFF:FFFFFFFFFFFF  
FFFFFFFFFFFFFFFFFFFFFFFFFFFFFFFFFFFFFFFFFFFFFFFFFFFFFFFFFFFFFFFF

@A00721:190:HGJW7DSXY:4:2311:8124:15499\_2:N:0:TCTGCAAG+GCTGCACT  
TGTTGTTATCTCGAAAAGTCTCTTCTAAAAGGAACGTCAAGTTCTAACCCAAAGAGAATATCTAAAAT

$+$ 

@A00721:190:HGJW7DSXY:4:2474:28863:1689\_1:N:0:TCTGCAAG+GCTGCACT

+

@A00721:190:HGJW7DSXY:4:1126:29243:7326\_1:N:0:TCTGCAAG+GCTGCACT

+

@A00721:190:HGJW7DSXY:4:2604:5213:36166 2:N:0:TCTGCAAG+GCTGCACT

 $+$ 

@A00721:190:HGJW7DSXY:4:1638:32606:6261 1:N:0:TCTGCAAG+GCTGCACT

+

@A00721:190:HGJW7DSXY:4:2411:8576:10238 2:N:0:TCTGCAAG+GCTGCACT

+

@A00721:190:HGJW7DSXY:4:2648:12183:9972 1:N:0:TCTGCAAG+GCTGCACT

+

@A00721:190:HGJW7DSXY:4:1626:1325:8578 1:N:0:TCTGCAAG+GCTGCACT

+

FFFFFFFFFFFFFFFFFFFFFFFFFFFFFFFFFFFFFFFFFFFFFFFFFFFFFFFFFFFFFFFFFFFFFFFF  
FFF

@A00721:190:HGJW7DSXY:4:2546:31331:26976\_1:N:0:TCTGCAAG+GCTGCACT  
TAGTTTTTACCTCGACCAACATTAAGGCGGCGGCGACTAATCTTAAAGCTTCACCCAAAATGAAGGAC  
ACTTCGAAACTGAATAATGATGCACTACAAACAAGTATCGCTAATCATCTGAAAAAGGCTCTAAAGGA  
CAC

+

FFF:FFFFFF:FFFF:FFFFFFFFFFFFFFFFFFFFFFFFFFFFFFFFFFFFFFFFFFFFFFFFFFFFF:FFFFFFFFFFFFF  
FFFFFFFFFFFFFFFFFFFFFFFFFFFFFFFFFFFFFFFFFFFFFFFFFFFFFFFFFFFFFFFFFFFFFFFFF  
FFF

@A00721:190:HGJW7DSXY:4:1513:18448:28056\_1:N:0:TCTGCAAG+GCTGCACT  
GAGGATATTCGCCATTGTGGTACGAATTGGTCCAACATTTACCACCAAATTCTTTTGATACAACCTA  
GCCTTCAAGTGGGGTATGCCTGCGGAATACGCTTGCTATTACCAGATTGGTTCAACCCGTTGATGC  
TAT

+

FFFFF:F:FFFFFFFFFFFFFFFFFFFFFFFFFFFFFFFFFFFFFFFFFFFFFFFFFFFFFFFFFFFFF,F  
FFFFFFFFFFFFFFFFFFFFFFFFFFFFFFFFFFFFFFFFFFFFFFFFFFFFFFFFFFFFFFFFFFFFFFFFF:FFFFF  
FFF

@A00721:190:HGJW7DSXY:4:1369:1226:20055\_2:N:0:TCTGCAAG+GCTGCACT  
TATTCAAGCTTGTGCTTTAAAGACTGCAGAGGCTGTCAAACAAGCCCAGACTCAAGGAGTCCAATCAA  
AGGTTTTGAATTTAGCTCAACTGGGGAGACGTGCTTAAATGGGTGATA

+

FFFFFFFFFFFFFFFFFFFFFFFFFFFFFFFFFFFFFFFFFFFFFFFFFFFFF:FFFFFFFFFFFFFFFFFFFFF,FFFFF  
FFFFFFFFFFFFFFFFFFFF:FFFFFFFFFFFFFFFFFFFFFFFFFFFFFFFFFFFFFFFFFFFFF

@A00721:190:HGJW7DSXY:4:1230:1814:28025\_1:N:0:TCTGCAAG+GCTGCACT  
AGATAGTGGGATAATAGTTCTACCGATACGTAGTGAACGCGTTCGTAGAACCAAGTACTTTCCGTCTG  
AAGAGTTTAGAGCTGCTATTGATTATGTAACCGATAGGAGTTGTATAGTTGAAGATGTGGCTTTAGAC  
GAT

+

FFFFFFFFFFFFFFFFFFFFFFFFFFFFFFFFFFFFFFFFFFFFFFFFFFFFF:FFFFFFFFF,FFFFF  
FFFFFFFFFFFFFFFFFFFFFFFFFFFFFFFFFFFFF:FFF:FFFFFFFFFFFFFFFFFFFFFFFFFFFFF  
FFF

@A00721:190:HGJW7DSXY:4:1264:6027:13056\_2:N:0:TCTGCAAG+GCTGCACT  
ATGTTGACTGACGAAGATTTTCCACAGATTTGTCTACGTTGCAGATCGCCACTCCAAACACTATATA  
CATTATAAAATATAAAAAATAAGGGAGTCATAACTTTTGTACCAAATT

+

FFFFFFFFFFFFFFFFFFFFFFFFFFFFFFFFFFFFFFFFFFFFFFFFFFFFF:FFFFFFFFF,FFFF  
F:FFFFFFFFFFFFFFFFFFFFFFFFFFFFFFFFFFFFFFFFFFFFFFFFFFFFF

@A00721:190:HGJW7DSXY:4:2336:29984:6073\_2:N:0:TCTGCAAG+GCTGCACT  
CGAAGTCTCTGATTTTATTAATCATTACTTTAACGATCTCTCGTCAATTTACTCTGTACTTGATCTAC  
GTCGTTTAACTGTCGGAACAACCTTTACTTAGAATGACTCTATCTTTT

+

:FFFFFF:FFFFFFFFFFFFFFFFFFFFFFFFFFFFFFFFFFFFFFFFFFFFF,FFFFFFFFF:FFFFFF,FFFFFFF:  
FFFFFFFFFFFFF,FFFFFFFFFFFFFFFFFFFFFFFFFFFFFFFFFFFFFFFFFFFFF:FFF

@A00721:190:HGJW7DSXY:4:1125:5385:7592\_1:N:0:TCTGCAAG+GCTGCACT  
CTCTATCGTTTTCTGCTTTTCTTAGCTAATAGATTAATAAAGGATGAGTACGAAAACCAACTCTTCG  
TTACGAGACCTGATGGTAGAATAGATTTAGTCTCTACACCCATCTCAACGAGGATAAAGCGAGTTTTTC  
CGT

+

FFF,FF:FFFFFFFFFFFFFFFFFFFFF:FFFFFF:FFFFFFFFFFFFFFFFFFFFF,FFFFFFFFFFFFFFFFFFFFF  
FFFFFFFFFFFFFFFFFFFFFFFFFFFFFFFFFFFFFFFFFFFFFFFFFFFFFFFFFFFFFFFFFFFFFFFFF  
FFF

@A00721:190:HGJW7DSXY:4:1241:14995:1971\_2:N:0:TCTGCAAG+GCTGCACT  
AGAGATCATCCGCAAACGACTCGAAACCGAGACGCCGTAGATCAAAGTCCCTTCTAACTTTAGATTAT



+

@A00721:190:HGJW7DSXY:4:1517:1985:33959\_2:N:0:TCTGCAAG+GCTGCACT  
CTTTTCGATAGTGATTGTTATCAATTTAAATACATTACTGTTTCAAATCATCTTTACTCACAGACTCC  
GAAATGGTTTCAAATGAGGTCAAAGCTCTATTTATTAAACGAACAT

+

@A00721:190:HGJW7DSXY:4:2656:15139:8703\_2:N:0:TCTGCAAG+GCTGCACT  
AACTTCAATTCCTTCGATGTTTATATTTTCTATAAGGGAAAATAGCAATAATCAAATTTGACAAAT  
TTTAGAACTTTATTTAGAACTCTCTCCGATCACCTTGGTGTGATCTC

+

@A00721:190:HGJW7DSXY:4:2607:15148:26788\_1:N:0:TCTGCAAG+GCTGCACT  
TCAATAAGATGTATGATGATAATCTACTATTTTTAAATAGTGATATTCAGCGTATACTTGAATACTTT  
ATCAAAGATTTGGCTTGGTCTATTTACCGCAAAAAGTTGGAAGAGGTCTATGATATTTATTTTACTTA  
TAC

 $+$ 

@A00721:190:HGJW7DSXY:4:1409:12879:26991\_2:N:0:TCTGCAAG+GCTGCACT  
CTTGACTGTTGATAATATTACAATAGCTCTTTCTCAGAAGATTAGAGAAGTAACCGGTGAACACGTCG  
GTAGCATTGATTTACTTTTACCGTTAGAACTGAAAAAGATTCTTTTCG

+

@A00721:190:HGJW7DSXY:4:2452:23439:18035\_1:N:0:TCTGCAAG+GCTGCACT  
AAACGATTCTTCGACTATATTAAGAAATAAAAATACTTCAAGTACCTGAACCTTTACATTTTTTAATGG  
TATGGTATAATGTGTCTTACAAATAGAACCTTCACTCTCGGTAATGAGAGTGTATTCCTTAATATTCT  
AGT

+

@A00721:190:HGJW7DSXY:4:2307:26738:2456\_1:N:0:TCTGCAAG+GCTGCACT  
TTACTAGGATTTATCACACTCCTAAATTTGATAGCAATTTATGTTTTAAATGCTAGGAAAATTTTAGA  
AAAACCTCCATTGTATAGTTCAAGGAGTACTTAATTCAATAGCTTTAGTATTATTTACTATCGCCTTTA  
TTG

+

@A00721:190:HGJW7DSXY:4:2264:17155:16767\_1:N:0:TCTGCAAG+GCTGCACT  
CTTACACAAAAGTGACGCGGAAGGAATCTTAATTGATTGAAGCTAGGCGTTGGGGAGAATGAACTGC  
CGCTTCCCGGAAGAAACGATCTATTTACAGAGTATTTAGAGTAGTCCAAAGTTTGTATAAATTTATAT  
GAT

+

[illegible]

@A00721:190:HGJW7DSXY:4:1605:25455:24126\_2:N:0:TCTGCAAG+GCTGCACT  
GCTCCAACTGGCAGCCAGACGTAGGGTCAAACCTACTACCGCCGGTCGGCAGATCGGCACCACTGGT  
CTCTACGTTACAGGGACCCGCTGTGCAGAATAACCTTCCCAAATCTAGA

+

FFFFFFFFFFFFFFFFFFFFFFFFFFFFFFFFFFFFFFFFFFFFFFFFFFFFFFFFFFFFFFFFFFFFFFFF  
FFFFFFFFFFFFFFFFFFFFFFFFFFFFFFFFFFFFFFFFFFFFFFFFFFFFFFFFFFFFFFFF

@A00721:190:HGJW7DSXY:4:1627:22661:8422\_2:N:0:TCTGCAAG+GCTGCACT  
ACCACTCAAAGGAAACGGGCTGTTGCCAGAGGAAAGCAGCGACCACCGAGGTCGCTCGTAACATTGA  
CGGCAGTCCCGTCATCTCTGTGGGAAGTACCTCAGTCAAA

+

FFFFFFFF,F:FFFF:FFFF::FF:F,F:FF,FFFF:FFFFFFFF:FFFF:FFFFFF,FFFFFFFF  
FFFFFF:F:,FFFFFFFFFFFF,FFFFFFFF:FFFF,F:FFFFFF

@A00721:190:HGJW7DSXY:4:1504:6705:29011\_2:N:0:TCTGCAAG+GCTGCACT  
CACTCCCATGCCAATCAATGATGTGACTATACAGTTCGGCCATTTCAAGAGTGGTCAATACGTCGTGG  
GAGGTACTGAAGCCTTCCCCTCCGCTGGCACGAAGAACTCCCAAGC

+

FFFFFFF,FFFFFFFFFFFF:FFFFFFFFFFFFFFFFFFFFFFFFFFFFFFFFFFFFFFFFFFFFFFFF  
FFFFFFFFFFFF:FFFFFFFFFFFFFFFFFFFFFFFFFFFFFFFFFFFFFFFFFFFFFFFF

@A00721:190:HGJW7DSXY:4:2439:23077:22952\_2:N:0:TCTGCAAG+GCTGCACT  
TGACCAGAATGAAAAGGGGTTTACCAGGGTAGTCTCTAAGTCTACCAGGAAGAGGGGAAATGTCCCA  
AACTGAGAAGAATAAAGGGAAAGGTCCATCAGGACCTAAGAAGGGGA

+

FFFFFFFFFFFFFFFFFFFFFFFFFFFFFFFFFFFFFFFFFFFFFFFFFFFFFFFFFFFFFFFFFFFFFFFF  
FFFFFFFFFFFFFFFFFFFFFFFFFFFFFFFFFFFFFFFFFFFFFFFFFFFFFFFFFFFFFFFF

@A00721:190:HGJW7DSXY:4:1503:10212:16924\_1:N:0:TCTGCAAG+GCTGCACT  
CTCCCACCATCTGGGGTTGGGAATAAGAAATCTGCACGGGCCAAAGAGGCCGCTGCTACGAAGTCGCT  
GAAGGCGGCTTGGGTCAATTAAGGGTAGCTGTAAAGTTGCGCTGCCGACCCCATCTTTGAGACCAAGA  
CTC

+

FFFFFFFF:FFFFFFFFFFFFFFFFFFFFFFFF:FFFFFFFFFFFFFFFFFFFFFFFFFFFFFFFFFFFF  
FFFFFFFFFFFFFFFF:FFFFFFFFFFFFFFFFFFFFFFFFFFFFFFFFFFFFFFFFFFFFFFFFFFFF  
FFF

@A00721:190:HGJW7DSXY:4:1322:16559:35556\_2:N:0:TCTGCAAG+GCTGCACT  
AAATCTGTTGAATTCGTCACTGAGGACGAAGGTGAGAGGACTTTTCGCTACTGGCGACAACTGAGAG  
CACTCGCTGGGGAAAGAGAATTGCGTGGGTGTAAGGCCGACGCTTCGA

+

FFFFFFFFFFFFFFFFFFFFFFFFFFFFFFFFFFFFFFFFFFFFFFFFFFFFFFFFFFFFFFFFFFFFFFFF  
FFFFFFFFFFFFFFFFFFFFFFFFFFFFFFFFFFFFFFFFFFFFFFFFFFFFFFFFFFFFFFFF

@A00721:190:HGJW7DSXY:4:1331:28818:28354\_1:N:0:TCTGCAAG+GCTGCACT  
GTCAACGGCGTTTGGAGGATTTTATCCGCGCTTAAGTATGGGGCGAAGATCCCCTATGGAGTCTTGAA  
GGACTTAGGTTGGCATATTTATGCCGACGATAATAAGCATGTACCCTTAAGCACCGAGGTAAGCTCG  
GGA

+

FFFF:FFFF,FFFF:FFFF,FFFFFFFFFFFFFFFFFFFFFFFFFFFFFFFFFFFFFFFFFFFFFFFF  
FFFFFFFFFFFFFFFFFFFFFFFFFFFFFFFFFFFFFFFFFFFFFFFFFFFFFFFFFFFFFFFFFFFF  
FFF

@A00721:190:HGJW7DSXY:4:2440:25355:21355\_1:N:0:TCTGCAAG+GCTGCACT  
GATCTTGCAGAGTGAAGTTCAGACGTGTGCTCTTCCGATCTGTTAAACTCTTGCTCCTTCTGT  
GGGTGAGGGTTTTTGTATATTACTGGTTCTGGGAGGCTGCTTCTCCATAATTACAACCTCTCTT  
TAG

+

FFF,FFFFFFFFFFFFFFFFFFFFFFFFFFFFFFFFFFFFFFFFFFFFFFFFFFFFFFFFFFFFFFFF  
FFFFFFFF,FFFFFFFFFFFFFFFF:FFFFFFFFFFFFFFFFFFFFFFFFFFFFFFFF:FFFFFFFFFFFF  
FFF

$+$ 

@A00721:190:HGJW7DSXY:4:1217:22155:3286\_2:N:0:TCTGCAAG+GCTGCACT  
ATGATTGATAGTTACGGCTCGTATCGAGTTGGAGGGAGGAAGTTCTCCGAAATTAAGACGGGGGGAT  
TAAGAGTCCAGCTGTAAGTGTCAATTCAGAGAGGGGAGCTCTGAAAAG

+

@A00721:190:HGJW7DSXY:4:2502:31114:10848\_2:N:0:TCTGCAAG+GCTGCACT  
AGTTTTAGGAAGGCTCTAGAGAAGATCTCACCACCTGTAGAAGGCAAGTGGAGAGTCCAGAAGAAGAT  
GAATAAGGATTATTTGAAGAAGGGGTTACCACTTCCTAAGGTGGATGA

+

@A00721:190:HGJW7DSXY:4:1144:18819:33802\_2:N:0:TCTGCAAG+GCTGCACT  
GATCTTGAGGACGTACATTTAACGTGGCAGAATTCGGTAACCTTACCATATTGTTCTTCCGGAAGTT  
GTGGGATTTAACTTTGACTCAACTACTCCGATCAGATCCGGATGGTTT

+

@A00721:190:HGJW7DSXY:4:1407:11704:21136\_2:N:0:TCTGCAAG+GCTGCACT  
CAGATACTACCGATAAGGTGAAAAATATGCAGGTCAAAGATTCTGTAGCTCTGAGGGCGGTTGAGGGA  
GCCGTTTTGGCCGACTTTAACTATTCTAAGAGTCTTTATGATTCAAAA

+

@A00721:190:HGJW7DSXY:4:2456:22318:7138\_1:N:0:TCTGCAAG+GCTGCACT  
GTTTCCAGAATTGCGGTTGAAGTTCACCCATTCTATCTTGAATGCTCACGCCGTCGCAGCCATATCGA  
GACTATGTTATAATCACTTGTTAAAGTACAGATTTAGTGATTTAGATATTATTGATATTGGAGGCGAT  
ATT

+

@A00721:190:HGJW7DSXY:4:2375:3649:23375\_2:N:0:TCTGCAAG+GCTGCACT  
ACATATTTGCAACCCTATTCTTGATGTGAAAGATGCATCGAGGTATACGTCTAGGAACATTGATTGGG  
AACGTACCTACTCACGAGACGTCATGAAAGCTATCGGAGGGAAGCAAA

+

@A00721:190:HGJW7DSXY:4:2317:29360:6245\_1:N:0:TCTGCAAG+GCTGCACT  
TTACAAGAACGCTTTGGATTGTGACCATAAAGCCTCAGTTGCGATAGCTGTAGAGGTATACGATATCT  
CTCTTGATGATGTAGCCACTATAATGCTTAAGAGAGAGATTGATGTATGTCATTTCGTCTTAGTTTGT  
CCC

+

@A00721:190:HGJW7DSXY:4:2246:15872:18239\_1:N:0:TCTGCAAG+GCTGCACT  
TCATGGAGATGATGGCGCATCACTTGATTACTATATGCCCCGAAGGATTGGGTTATTCTCACAAAGATA

AGATTTTATCTTTCTTCAAACACCCTGTTTTCTTAAGGGCGGACAATTGTTCCATTGTGAACTCTTG  
GGG

+

FFFFFFFFFFFFFFFFFFFFFFFFFFFFFFFFFFFFFFFFFFFFFFFFFFFFFFFFFFFFFFFF:FFF,FFF  
FFFFFFFFFFFFFFFFFFFFFFFF,FFFFFFFFFFFFFFFFFFFFFFFF,,FFFFFFFFFFFFFFFF  
FFF

@A00721:190:HGJW7DSXY:4:1274:31295:6151\_1:N:0:TCTGCAAG+GCTGCACT  
TGAGTTCCGAATAACTCGTAATAAATCTTTCTCTAGTGGACAATTCAGAATACCTATTTCCGTACCAA  
GAGCCACTGCCAATCTCATCGCTATACGCATACCTGATTGGAAGAAGCGAGGTTCTGTTCTCAATAAA  
AAT

+

:FFFFFFFF:FFFFFFFFFFFFFFFFFFFFFFFFFFFFFFFFFFFFFFFFFFFFFFFF:FFFF:FFFFFFFF  
FFF:F:FFFFFFFFFFFFFFFFFFFFFFFFFFFFFFFFFFFFFFFFFFFFFFFFFFFFFFFF:FFFFFFFF  
FFF

@A00721:190:HGJW7DSXY:4:1657:29776:10410\_1:N:0:TCTGCAAG+GCTGCACT  
ATAAGGGCTATTAGTACGTCATGGGGATCACTTCTTCGGTCAATGACAAAACCTTCGAATATGTTAC  
GACATGGCTTCGTAACAACAGTGCAGGATTGTCATCTCGGGAAAGTGATTCACCAAGATGTTCATA  
TAG

+

FFFFFFFFFFFFFFFF:FFFFFFFFFFFFFFFFFFFFFFFFFFFFFFFFFFFFFFFFFFFFFFFF  
FFFFFFFFFFFFFFFFFFFFFFFFFFFFFFFFFFFFFFFFFFFFFFFFFFFFFFFFFFFFFFFF  
FFF

@A00721:190:HGJW7DSXY:4:1128:32624:10457\_1:N:0:TCTGCAAG+GCTGCACT  
AAGGTCGCAGCGATCTTACTCGTTATCGGAGCTAAGAAGAAGACTTTGGGTACACGTTATGCTCGCAA  
ACTTAACGTTAGTACCGAGGTGATCTCTCTGCTTCTGCGTACTGAGAGAAAAGATTCAGGACGCCT  
ACG

+

FFFFFFFFFFFFFFFF:FFFFFFFFFFFFFFFFFFFFFFFFFFFFFFFFFFFFFFFF:FFFFFFFF  
FFFFFFFFFFFFFFFFFFFFFFFFFFFFFFFFFFFFFFFFFFFFFFFFFFFFFFFF:FFFFFFFF  
FFF

@A00721:190:HGJW7DSXY:4:2152:15076:30733\_2:N:0:TCTGCAAG+GCTGCACT  
AACGAATCTTGAAACTACGGTCCTTATCAAAGAAAATGGTGAACCGGTCTCTAAATCTTTGAGATTG  
AGAAGATTGAAGAACACGTCAAGAAGTCGCTCGGCGTTGTTCTTGAAA

+

FFFFFFFFFFFFFFFFFFFFFFFFFFFFFFFFFFFFFFFFFFFFFFFFFFFFFFFFFFFFFFFF:FFF  
:FFFFFFFFFFFFFFFFFFFFFFFFFFFFFFFFFFFFFFFFFFFFFFFF

@A00721:190:HGJW7DSXY:4:2353:8865:11490\_1:N:0:TCTGCAAG+GCTGCACT  
AAGGAGGCTGATCATGGAGTCTTTGTACCTTCTGTCAAACCTCGAGGTTAGCTACGAGAGGTGATCC  
CGGATGTGGATTGAAGGCTGGCTCTAAGGGAGACTCCTTCTTTTGAATGTTGTAAAGAATTGGGTG  
AGA

+

F:FFFFFFFF,FFFFFFFFFFFFFFFFFFFFFFFF:FFFFFFFFFFFFFFFFFFFFFFFF  
FFFFFFFFFFFFFFFFFFFFFFFFFFFFFFFFFFFFFFFFFFFFFFFFFFFFFFFF  
FFF

@A00721:190:HGJW7DSXY:4:2222:30996:33912\_1:N:0:TCTGCAAG+GCTGCACT  
ATAACTTCTTTTCAAAAATGCGGATGGGTCTACTGATGTTTCTACAGAGTGCAGTCGTTTCAACA  
CTTATCACCACCTTTGAAAGGAAAATAATTGGTGATGAAAATACGTATGTCGGTGGGGTTCTCAAGGC  
TCT

+

FFFFFFFFFFFF:FFFFFFFFFFFFFFFFFFFFFFFFFFFFFFFF:FFFFFFFFFFFFFFFF  
FFFFFF:FFFFFFFFFFFFFFFFFFFFFFFFFFFFFFFFFFFFFFFFFFFFFFFF  
FFF

@A00721:190:HGJW7DSXY:4:1539:22064:1658\_1:N:0:TCTGCAAG+GCTGCACT  
GATTCTTAAAAGAAGTTTATTAAACTTCAGAGTCTCTTGAAGTCCAGGTAGCTAATGTTCTTGCAA

TAGCCACAGACTTTCTGGGAAAAGAGACCTCTGTTGGTAGAGGAGTTGAGAGAATTACTCAGATTCAA  
TCT

+

FFF:FFFFFFFFFFFFFFFFFFFFFFFFFFFFFFFFFFFFFFFFFFFFFFFFFFFFFFFFFFFFFFFF  
FFFFFFFFFFFFFFFFFFFFFFFFFFFFFFFFFFFFFFFFFFFFFFFFFFFFFFFFFFFFFFFFFFFF  
FFF

@A00721:190:HGJW7DSXY:4:2434:24885:2754\_1:N:0:TCTGCAAG+GCTGCACT  
GGAGTGGCTAGGTTTTAAAAGATCCTTTGCACAAGCAATACCTTCCACTGAGTTCATCACCCAGAGTT  
TCGACGTCGCGGAAAACGATGAAGATTTCCACACTGTTGAGAATCTTCTGATGCTGAATTTGAGGAA  
AAT

+

FFF:FF,,F::FFFF:FF:FFFF:F:,,:F,FFFFFF,F,F,FFFF,FFFFFFFFFFFF:FFF:,FFF  
FF,::FF,F,FFFF,FFFFFFFFFFFF:FFFF:F,FF:F:FFF:FF,FFFF,FFFF:FFFFFFFF,F  
F:F

@A00721:190:HGJW7DSXY:4:2112:27896:7185\_1:N:0:TCTGCAAG+GCTGCACT  
GAGTGACTGGAGTTCAGACGTGTCTCTTCCGATCTGTTATAAACCTTCTTTTATCATTGCAACAGG  
ACTTTGAGAAGACTGTTGAAATGGACAAAATCTGGGATCATAGGTATGTGTCACGCTACACTCGAAAT  
ATG

+

F:FFF:FF:F:FF:FFF:FFFFFFFFFFFF::FF:FFFFFF:::F,F:FFFFFFFFFFFF:F:,F:F  
:FFFFFFFF:FFFFFFFFFFFF,FFF,F::FF:FFF,F:FFFFFF,FFFFFFFF:F::FFF:F:FFF:F,F  
,FF

@A00721:190:HGJW7DSXY:4:2434:4643:2707\_1:N:0:TCTGCAAG+GCTGCACT  
CGCCATATCAGATTAGAGACATGCCAGTTAGAGTTCTTCTAACCAGGACTGATGGTGAGATTCTTTTA  
CCTTTTGGAGGTCCAGGAACCTTTACTCCTAGTGTCTTTTCTAGAGTCCAAGGACGTTTCCGTCGGAG  
GAT

+

FFFFFFFFFFFFFFFFFFFF:FF:FFFFFF:FFF:FFFFFFFFFFFFFFFFFFFFFFFFFFFFFFFF  
FFFFFFFFFFFFFFFFFFFFFFFFFFFFFFFFFFFFFFFFFFFFFFFFFFFFFFFFFFFFFFFFFFFF  
FFF

@A00721:190:HGJW7DSXY:4:2538:31946:32111\_2:N:0:TCTGCAAG+GCTGCACT  
ACACTCTATTGAATCCCTTTTCCACGATGAAAGCTCTTTATGAGGTGCTCCATGCAATTTACAGTTC  
CTCTTTGGTGATATCGCCTCTGTCTTTTCTCTTTAATCGTGAGGTTA

+

FFFFFFFFFFFFFFFFFFFFFFFFFFFFFFFFFFFFFFFFFFFF:FFFFFF:FFFFFFFFFFFFFFFF:  
FFF,FFFFFFFFFFFFFFFFFFFFFFFFFFFFFFFFFFFF,FFFF:FFFFFFFF

@A00721:190:HGJW7DSXY:4:2602:32714:7420\_1:N:0:TCTGCAAG+GCTGCACT  
GCTCTTCCGATCTGATGGATGTATATTTTGATGGTATTTTTCACATTGCTTGATCACTTCCCGTGGAC  
TTGGGAAGAGATTAAACATAAAATCCAGCGATTCTATTATGTCGCTAAAGCCTGTCCAGTTGTCGATG  
ATG

+

FFFF:,F:,,:FFF:,,:FFFF,F:,,:F:,FFF:F:F,FF,FF::FFF:,F,F,FF,,FFFF,FF,F,  
F,FF,F::FFFFFFFF,,FFFF,FFF,FF:FFF,:FFFF::FFFFFFFFFFFF:F:FFFFFFFF,FFF  
FFF

@A00721:190:HGJW7DSXY:4:2630:8540:21073\_1:N:0:TCTGCAAG+GCTGCACT  
CACAAGGATTACTAAGTCTGAGATCTGCCACTTCTAATTTTAGGAAACGTCGCGAAAAGAAAGTTCAT  
GAGGATGTCTTGTCGAAAAATATCGCCGGGAACCTTCTAATAGAGGATCCTGATGACATTATTTCAAC  
GGA

+

FFFFFFFFFFFFFFFFFFFFFFFFFFFFFFFFFFFF:FFFFFFFFFFFFFFFFFFFFFFFFFFFFFFFF  
FFFFFFFFFFFFFFFFFFFFFFFFFFFF:FFFFFFFFFFFFFFFFFFFFFFFFFFFFFFFFFFFF:FFFFF  
FFF

@A00721:190:HGJW7DSXY:4:2267:31439:6433\_2:N:0:TCTGCAAG+GCTGCACT  
TACCACAGAAACCGTCTCAGGAAGTGTCTCCACTGATTCGGAATTAGAGAAAGACGACCTTCTTGTGG

$+$ 

@A00721:190:HGJW7DSXY:4:2160:11134:11506\_1:N:0:TCTGCAAG+GCTGCACT  
TTCTAAGAGTGTTTCAAAGACCAGAAACGTAACAAGAAGAATAAAGGTAGGAAGGGGAGAAAACAGA  
ACAAGCGAGCGGTTGAAGAGAAAACGTATATGGTTGCGGCTGATCGTACCCCAATTCCTGCTAGAAAG  
ATC

+

@A00721:190:HGJW7DSXY:4:2178:22318:7451\_2:N:0:TCTGCAAG+GCTGCACT  
AGAGTTACGTAGTGGTCGTTCTTTTGGTGATTTTATCAAAGAGAAAGTTTCTGCTAGTCGCGACGATA  
GTATTTATCGGAGTGATATTAACAAGTTAACTTCGAACCTGACCACTT

+

@A00721:190:HGJW7DSXY:4:2304:29894:15248\_2:N:0:TCTGCAAG+GCTGCACT  
CCACTGAAC TTATAGCGACTTTTGT CGAATTTTCGCAAAGGTCTTGAAGTACGTATTGCTACTGCT  
AATCGTAATTCGCGAGAAGAGCAGATCGGAAGAGCGTCGTGTAGGGAA

+

@A00721:190:HGJW7DSXY:4:1362:23701:10567\_2:N:0:TCTGCAAG+GCTGCACT  
AATTAAGACAGACGTGAAAGTTATGATGAGTGATCGTATTAGAACAGCTGATTCTTATTGCATGAACG  
TCGCTGAGGTCAAACCTGTGGACGTTCTTTTCATCGACGAATTATTCA

+

@A00721:190:HGJW7DSXY:4:1526:25265:1814\_1:N:0:TCTGCAAG+GCTGCACT  
ATCTACTTAAGGCGGCTTATACCATAGGTTACGGTGATTCCAATCAAATCGGATTCATCAATCGTATT  
GATCTCCAAGTCGCAAACACTTCAACATCAACGACATCATTCTTGATGAGTGTCGTTCTTATCGAAG  
TCT

+

@A00721:190:HGJW7DSXY:4:1613:19633:9345\_2:N:0:TCTGCAAG+GCTGCACT  
TGCCCCGGCCGACGTTTGTCTGCGAACTCTCAGAGGTTTACGGCAGAAAAATTTCTCTGCTTGTAATTC  
GAGAGAGGACACTATGGAAATTAGACCTATCAGATGTCTTGACGACTT

+

@A00721:190:HGJW7DSXY:4:2560:24695:4930\_2:N:0:TCTGCAAG+GCTGCACT  
AAACGATGCTACTTGTGAGAGGATCAATCACAGTAAGGAAGTGTACGTTTAGCACGGGAGGTTGCAG  
ATTCAACCCCTTATATCGAGGCTATCGAGGACGATGAGTATCTTGAAG

+

@A00721:190:HGJW7DSXY:4:2523:16712:16532\_2:N:0:TCTGCAAG+GCTGCACT  
AGAGGACCACCTGGATCTTCTACTGTCTCTGCCTTCCAAGATTTCTTAGAAGAGGTTATTCCTGGAAC  
CACCTTAACGTCACCTCGGTAATCTTTAGCCGAATTAAGTACTAATGA

+

```

FFFFFFFFFFFFFFFFFFFFFFFFFFFFFFFFFFFFFFFFFFFFFFFFFFFFFFFFFFFFF
FFFFFFFFFFFFFFFFFFFFFFFFFFFFFFFFFFFFFFFFFFFFFFFFFFFFFFFFFFFFF
@A00721:190:HGJW7DSXY:4:2219:9778:32737_2:N:0:TCTGCAAG+GCTGCACT
AAGGCTAATACCTTTATAGGTAAAGAAGCCCTTGAGCCGCGTAGTCAGCGCGTTTAgctgtatcatca
GTCAGAGTATACCCGATAGGGTACCGAGTCTCCAAGAGAATATTTATT
+
FFFFFFFFFFFFFFFFFFFFFFFFFFFFFFFFFFFFFFFFFFFFFFFFFFFFFFFFFFFFF
FFFFFFFFFFFFFFFFFFFFFFFFFFFFFFFFFFFFFFFFFFFFFFFFFFFFFFFFFFFFF
@A00721:190:HGJW7DSXY:4:2338:11071:16783_2:N:0:TCTGCAAG+GCTGCACT
TCAATTGATAGATTGGGTCAACAATAGGGACGCTAGTATACTTCGTAAAGTCGACAGCGAAATGGTGA
ATATTGATAATTGGACCGACTATATGACCTATTTTAAGCTCATGGTGA
+
FFFFFFFFFFFFFFFFFFFFFFFFFFFFFFFFFFFFFFFFFFFFFFFFFFFFFFFFFFFFF
FFFFFFFFFF,FFFFFFFFFFFF:FFFFFFFFFFFFFFFFFFFFFFFFFFFFFFFFFFFFF
@A00721:190:HGJW7DSXY:4:1618:24713:7999_2:N:0:TCTGCAAG+GCTGCACT
GTTCTTGTGAGGAGAGTCAAACAGTGTCTTTTACCCAACATTTTTATGTATACAGAGATGACCAGTGA
CGATTTCTCCCGAAGCTCTTCTCTCTCTTAGGAGGTCATGATGACTA
+
FFFFFFFFFFFF:F:FFFFFFFFFFFFFFFFFFFFFFFFFFFF:F:FFFFF:F:FFFFF:F:FFFFFFFFFFFFFFFFFFFFF
FFFFFFFFFF:F:FFFFFFFFFFFFFFFFFFFFFFFFFFFF:F:FFFFF:F:FFFFF,
@A00721:190:HGJW7DSXY:4:2558:9824:24580_2:N:0:TCTGCAAG+GCTGCACT
CCAGGAGTATCCATAACGATTTGTcatttaccacctttgctcaacgacgaagtggaaacgccaacact
TTCTTTGGTAATTGTATGATCACTTTGATGATTTTATCACTTTATTAT
+
FFFFFFFFFFFFFFFFFFFFFFFFFFFFFFFFFFFFFFFFFFFFFFFFFFFFFFFFFFFFF
FFFFFFFFFFFFFFFFFFFFFFFFFFFFFFFFFFFFFFFFFFFFFFFFFFFFFFFFFFFFF
@A00721:190:HGJW7DSXY:4:2128:14100:13448_1:N:0:TCTGCAAG+GCTGCACT
CGATATTCGATTGAGGGTCGTTATACCTATTcgcctatctgtgctttgaattgtataagatcaaattt
TAAACGATTCCGAGAGGTTTATCCTGATGTGGAGGGAGTTCTTGAAGCATCCCGACCTTTCCTTGTGA
AAA
+
::FFFFFFFF:FF:FFFFFFFF:FFFFF,FFFFF:FFFFFFFFFFFFFFFFFFFFFFFFFFFFFFFFFFFFF::FFFFFFFF
FFFFFFFFFFFFFFFFFFFFF:FFFFFFFFFFFFFFFFFFFFFFFFFFFFFFFFFFFFFFFFFFFFFFFFFFFFFFFFFFFFF
FFF
@A00721:190:HGJW7DSXY:4:1310:19289:6026_2:N:0:TCTGCAAG+GCTGCACT
CGTATCTCAAAGATCGACTTCGAGACAGGTGATATTGTTGAGCGAGAGCGACCAAGATCTAAATTCGG
TAACGGTGCGTGGCGCTTTATTTTAAAAAGCTCCCTCCTCTCGCAAGT
+
FFFFFFFFFFFFFFFFFFFFF::FFFFFFFFFFFFFFFFFFFFFFFFFFFFFFF,F:F,:FFFFFFFFFFFFF:FFFFFFFFFFFF
FFFFFFFFFFFFFFFFFFFFFFFFFFFFF:FFFFFFFFFFFFF,FFFFFFFFFFFFF
@A00721:190:HGJW7DSXY:4:1635:6858:18912_1:N:0:TCTGCAAG+GCTGCACT
TGACGATCATTAAAGACTCTCTTCTTCTTTGTTTCCTTCTTTGCACTGATTTTTCCTCATCAGCTTGT
GTTTTACCTAATCTGTGTTTTTACGATAAACAACTATCAGTTGATTAAAGACTCTTCCGAAAGGCCAACT
TTG
+
FFFFFFFFFFFFFFFFFFFFFFFFFFFFFFFFFFFFFFFFFFFFFFFFFFFFFFFFFFFFF:FFFFFFFFFFFFFFFFFFFFF
FF,FFFFFFFFFFFFFFFFFFFFFFFFFFFFFFFFFFFFFFFFFFFFFFFFFFFFFFFFFFFFFFFFFFFFFFFFFFFFF
FFF
@A00721:190:HGJW7DSXY:4:2628:21866:33786_2:N:0:TCTGCAAG+GCTGCACT
GGGTGAAGCACAAcGTTTGACCGTGACGAActGTGGTGTTCCTTGATCTACGTTACGGATATACTCTCC
TTGAGTTCACTCGTAAGGACACTACCACTTATTACGATATTTCTTTAG
+
FFFFFFFFFFFFFFFFFFFFFFFFFFFFFFFFFFFFFFFFFFFFFFFFFFFFFFFFFFFFF
FFFFFFFFFFFFFFFFFFFFFFFFFFFFF:FFFFFFFFFFFFFFFFFFFFF:F

```

@A00721:190:HGJW7DSXY:4:1452:13801:28056\_2:N:0:TCTGCAAG+GCTGCACT  
ATCACTCATTTTTAGTGAGATTATTAACAAACGCACTAAACGTCTTCGACAACAGCAGGGGTTTTTCGAA  
TAGTGATAGCCACCCGCTTACAGAGGGGCAGCAGCATGACCATAATT

+

FFFFFFFFFFFFFFFFFFFFFFFFFFFFFFFFFFFFFFFFFFFFFFFFFFFFFFFFFFFFFFFFFFFFFFFF  
FFFFFFFFFFFFFFFFFFFFFFFFFFFFFFFFFFFFFFFFFFFFFFFFFFFFFFFFFFFFFFFF

@A00721:190:HGJW7DSXY:4:2453:12798:16078\_2:N:0:TCTGCAAG+GCTGCACT  
TGTCTGTCTCGCCTCTTCGAATGAAGTTTTAATGCTTAACAACAATGATAGTGAATTTATACCTACAA  
TCATTGGTTTTTCTAATAATGATGACACTATTGTTTATGGATATGATG

+

FFFFFFFFFFFFFFFFFFFFFFFFFFFFFFFFFFFFFFFFFFFFFFFFFFFFFFFFFFFFFFFFFFFFFFFF  
FFFFFFFFFFFFFFFFFFFFFFFFFFFFFFFFFFFFFFFFFFFFFFFFFFFFFFFFFFFFFFFF

@A00721:190:HGJW7DSXY:4:2443:21097:25034\_2:N:0:TCTGCAAG+GCTGCACT  
GGACCTTAAGCGATGGATCGGGGTTAATTCTAAACATTACCCGAAAGACGTGCTAAATTAACCAT  
TGTACGATGTCGTCTGTCTCGCGCATCACTTTTCTACTAAGAATTGGTC

+

F:FFFFFFFFFFFFFFFFFFFFFFFFFFFFFFFFFFFFFFFFFFFFFFFFFFFFFFFFFFFFFFFF  
,FFFFFFF::FFFFFFFFF:FFFF:FFFF,,FFFFFF:FFF,FF::FF

@A00721:190:HGJW7DSXY:4:1663:14416:21668\_2:N:0:TCTGCAAG+GCTGCACT  
GAGTGAAAGGCTTCAATTGTAGTGGTTTGGTCGTTTCAGTACCCAGTCAGTATACCTCTACGCAAAGA  
TATTTTCATGAAACTACAGAGGAACGTACCGGATTACCTGTCTTTTCAT

+

FF:FFFFFFFFFFFFFFFFFFFFFFFFFFFFFFFFFFFFFFFFFFFFFFFFFFFFFFFFFFFFFFFF  
FFFF:FFFFFFFFFFFFFFFFFFFFFFFFFFFFFFFFFFFFFFFFFFFFFFFFFFFFFFFF

@A00721:190:HGJW7DSXY:4:2477:26585:11209\_2:N:0:TCTGCAAG+GCTGCACT  
GTTGGATGTCAAGAAGGGTTCAGAATGGGATTCTACGTAGTTTATGACTTTGGTGGTGGTACTTTTCG  
ATACTTCTATCGTCTTACGTTACGGTAATTACTATAGTGTTATTTATT

+

FFFFFFFFFFFFFFFFFFFFFFFFFFFFFFFFFFFFFFFFFFFFFFFFFFFFFFFFFFFFFFFFFFFFFFFF  
FFFFFFFFFFFFFFFFFFFFFFFFFFFFFFFFFFFFFFFFFFFFFFFFFFFFFFFFFFFFFFFF

@A00721:190:HGJW7DSXY:4:2163:6750:9079\_1:N:0:TCTGCAAG+GCTGCACT  
GGTCGTGACGTTGATGAAGCTATAAGAGCGTTCTTATTACGGCGCACTTCTTTACCCGCCACCACACA  
ACTTTTCAGTTTCACAACCTGAAGGAGGAGGTTTCTGTTACTGGAAAACCCTCGTCAATACTTTTCAATA  
ATA

+

FFFFFFFFFFFFFFFFFFFFFFFFFFFFFFFFFFFFFFFFFFFFFFFFFFFFFFFFFFFFFFFFFFFFFFFF  
FFFFFFFFFFFFFFFFFFFFFFFFFFFFFFFFFFFFFFFFFFFFFFFFFFFFFFFFFFFFFFFF  
FFF

@A00721:190:HGJW7DSXY:4:2448:30481:7467\_2:N:0:TCTGCAAG+GCTGCACT  
CGTCCTTTTCTGGAACGTAGTTTTACTATTATGAACAAAGTTATCAAAGATAGTGGCATTCAAGGCAA  
ACTTACCCTGATTCCGGCCGGTGGTAGCTCATTTCTACCAGAGATCGG

+

FFFFFFFFFFFFFFFFFFFFFFFFFFFFFFFFFFFFFFFFFFFFFFFFFFFFFFFFFFFFFFFFFFFFFFFF  
FFFFFF:FFFFFFFFFFFFFFFFFFFFFFFFFFFFFFFFFFFFFFFF:F:FFFF:FFFF

@A00721:190:HGJW7DSXY:4:1126:13810:12696\_1:N:0:TCTGCAAG+GCTGCACT  
AACAGCTATTAAAGCTGTTGAGCGGGTAATTACACCTAAACGAGCTCGATCTGCCATCGCTGAAGGAT  
GTGCACTCTTTTCTGCTACTTTAACGGAGCGTAGTGTACTCTTCGTCGATTGTATCAACAGTAACATT  
ACT

+

FFFFFFFFFFFFFFFFFFFFFFFFFFFFFFFFFFFFFFFFFFFFFFFFFFFFFFFFFFFFFFFFFFFFFFFF  
FFFFFFFFFFFFFFFFFFFFFFFFFFFFFFFFFFFFFFFFFFFFFFFFFFFFFFFFFFFFFFFF  
FFF

@A00721:190:HGJW7DSXY:4:1566:17933:24565\_2:N:0:TCTGCAAG+GCTGCACT  
AGGCTAAACTCCAAGGTAATTATGAAGACTGTGATTTATCTTTCACTCTGGCCTTGTATGAGGGTGT



TCTAATCGTAACATTAATAATTTCAATCTTCTTAAAAAGAAGATAGAG  
+  
FFFFFFFFFFFFFFFF:FFFFFFFFFFFFFFFFFFFFFFFFFFFFFFFFFFFFFFFFFFFFFFFF  
FFFFFFFFFFFFFFFFFFFFFFFFFFFFFFFFFFFFFFFFFFFFFFFF,FFF:FF  
@A00721:190:HGJW7DSXY:4:1625:22869:31986\_2:N:0:TCTGCAAG+GCTGCACT  
GCTATCGTTCAGGTGCATGGGGTTGGATAGCCAATATTGAAGTGGACACCTCTGGTAGTATCGAAGTA  
AAGATAACCAATAAGGAAGGAGCTTATACTATGGTTGAATCAACTAAG  
+  
FFFFFFFFFFFFFFFFFFFFFFFFFFFFFFFFFFFFFFFFFFFFFFFFFFFFFFFFFFFFFFFF  
FFFFFFFFFFFFFFFF:F:FFFFFFFFFFFFFFFFFFFFFFFFFFFFFFFF:FF  
@A00721:190:HGJW7DSXY:4:2505:10194:35336\_2:N:0:TCTGCAAG+GCTGCACT  
TGGTTGTTATCTCGAAAAGTCTCTTCTAAAAGGAACGTCAGTTCTAACCCAAAGAGAATATCTAAAAT  
ATTTACAAAATCTTACCACTATCTACGAACCTAAAGTTCTGAAGACGT  
+  
FFFFFFFFFFFFFFFFFFFFFFFFFFFFFFFFFFFFFFFFFFFFFFFFFFFFFFFFFFFFFFFF  
FFFFFFFFFFFFFF:FFFFFFF,FFFFFFFFFFFF:FFFF:FFFFFFFF  
@A00721:190:HGJW7DSXY:4:2577:1533:35650\_1:N:0:TCTGCAAG+GCTGCACT  
TGGCACTACCTCGGTACAATCTTACTTGGAACGAAGCGACCTGTTCCGGAGTTTTTACGGGATCCGG  
AATGTTCTGTCTATATTAGGTGAAGCGAAATACGATTTCAACGTCAACGTTACCCGAGTTTCGTTTC  
GTA  
+  
FFF:,FF,FFF:F,FFFFFFFF:,F:FFFF:FF,FFF:FFFFFFFFFFFFFFFFFFFF:FFFFF  
:FFFFFFFFFFFF:FF,FFFFFFFFFFFFFFFFFFFF:,FFFF:,FFFFF:F,:FFFFFFFF  
:FF  
@A00721:190:HGJW7DSXY:4:1260:2410:8328\_1:N:0:TCTGCAAG+GCTGCACT  
ATAAAGAACTTCATGAATTTTCAGAGGATGAAAAATTTCTTCCTTGATTTTAATATAAAGAATCTT  
TACCAGGACTCCTACTACAGGAGGCAGTCTTCTGATCGTAAGAAGTTTATAAGGAACATATCCATTG  
TTG  
+  
FFFFFFFFFFFFFFFFFFFFFFFFFFFFFFFFFFFFFFFFFFFFFFFFFFFFFFFFFFFFFFFF  
FFFFFFFFFFFFFFFFFFFFFFFFFFFFFFFFFFFFFFFFFFFFFFFFFFFFFFFFFFFFFFFF  
FFF  
@A00721:190:HGJW7DSXY:4:2605:1913:1924\_2:N:0:TCTGCAAG+GCTGCACT  
AACTCTAAGTGGTAATACTGTCTTTCCAAGCTTACCTGTATCTTCAATGAAATTGGACTCTTCGATAG  
GGGACATTTTATCGTGGGCTTTCCGTAAAGGAAGATCTGTTATCGACG  
+  
FF,FFFFFFFF:FFFFFFFFFFFFFFFFFFFFFFFFFFFFFFFFFFFFFFFF,FFFFFFFFFFFFFFFF:FF  
FFFFFFFFFFFFFFFF:FFFFFFFF:F:FFFFFFFFFFFFFFFF:FF,  
@A00721:190:HGJW7DSXY:4:2246:8350:30671\_1:N:0:TCTGCAAG+GCTGCACT  
CTATTATTGATTTTTATGAGATTGATACGTTAACAGAAGATGATGTTAGAGTAGAATTCCTGAAGAGT  
CCTTCCGTAACCACTTCTTGACAATTTTCTTCAATCCTTCGATAATAGTTAAATCTAGGATTATGTC  
TGT  
+  
FFFFFFFFFFFFFFFFFFFFFFFFFFFFFFFFFFFFFFFFFFFFFFFFFFFFFFFFFFFFFFFF  
FFFFFFFFFFFFFFFFFFFFFFFFFFFFFFFFFFFFFFFFFFFFFFFF:FFF,,FFFFFFFF  
FFF  
@A00721:190:HGJW7DSXY:4:2414:26784:23265\_2:N:0:TCTGCAAG+GCTGCACT  
ATTGACTGATTATCTAAAGATTGAAGGAAAATTTATCCTCGTTTAACTTACTTAGACTTTCCTACGA  
TACAAATGATAACTTCTAATTTACGTTTGCTACTCAGAGCTGGTCCTC  
+  
,FFF:F,FFFFFFFF:FFFFFF:FFFF,FFFFFFFFFFFFFFFFFFFFFFFFFFFFFFFF  
FFFFFFFFFFFFFFFF:FFFFFFFFFFFFFFFFFFFFFFFFFFFFFFFF  
@A00721:190:HGJW7DSXY:4:2516:9932:30373\_1:N:0:TCTGCAAG+GCTGCACT  
TCAGGAGTCCCGCATTTGATAATAATGACGAGACTTTCGTCATAATCGCTGCATATTACGATTACA

CGGTACCAGCGCATCTCGTGTCGAGCCTCGACCCGATTATATGGTATTAAGGTGAGGAGA  
CC

+

FFF,,F:FFFFFF,FFFFFF,F:FFFFFFFFFFFFFF,FF:FFFF:F:FFFF:F:,FFFFFFF,  
FFFF,FF::F:,F:FFFF:FFFF:FFF:F,F:,F,FFFF:FFFFFFFF:,F:FF,,F:FFF,FF:F,  
,F

@A00721:190:HGJW7DSXY:4:2111:15438:15734\_1:N:0:TCTGCAAG+GCTGCACT  
AACTATGTTATGTTCTCTGATCATTTTGACAATCTCTTCTTATAATAAAATAAATAATATTA  
ATGGCAAATAGTGGAAGGCTCCAGTCAACACTAGTTCGAGTGCTGCTTTGGATTACGATGACGTGAG  
AAT

+

FF,FFFFFFFFFFFFFFFFFFFFFFFFFFFFFFFFFFFFFFFFFFFFFFFFFFFFFFFFFFFFFFFF  
FFFFFFFFFFFFFFFFFFFFFFFFFFFFFFFFFFFFFFFFFFFFFFFFFFFFFFFFFFFFFFFFFFFF  
FFF

@A00721:190:HGJW7DSXY:4:1160:19081:23985\_1:N:0:TCTGCAAG+GCTGCACT  
TTTACCTCGACCAACATTAAGGCGGCGGCGACTAATCTTAAAGCTTCACCCAAATGAAGGACACTTC  
GAACTGAATAATGATGCACTACAAACAAGTATCGCTAATCATCTGAAAAAGGCTCTAAAGGACACTA  
TAC

+

FF:FFFFFFFFFFFFFFFFFFFFFFFFFFFFFFFFFFFFFFFFFFFFFFFFFFFFFFFFFFFFFFFF  
FFFFFFFFFFFFFFFFFFFFFFFFFFFFFFFFFFFFFFFFFFFFFFFFFFFFFFFFFFFFFFFFFFFF  
FFF

@A00721:190:HGJW7DSXY:4:1525:2456:21684\_1:N:0:TCTGCAAG+GCTGCACT  
GAGGATATTCGCCATTGTGGTACGAATTGGTCCAACATTACCACCAAATTCTTTTGATACAACCTA  
GCCTTCAAGTGGGGTATGCCTGCGGAATACGCTTGCTATTCACCAGATTGGTTCGAACCCGTTGATGC  
TAT

+

FFFFFFFFFFFFFFFFFFFFFFFFFFFFFFFFFFFFFFFFFFFFFFFFFFFFFFFFFFFFFFFF:  
FFFFFFFFFFFFFFFFFFFFFFFFFFFFFFFFFFFFFFFFFFFFFFFFFFFFFFFFFFFFFFFFFFFF  
FFF

@A00721:190:HGJW7DSXY:4:1407:11749:20744\_2:N:0:TCTGCAAG+GCTGCACT  
TATTCAAGCTTGTCGTTTAAAGACTGCAGAGGCTGTCAAACAAGCCCAGACTCAAGGAGTCCAATCAA  
AGGTTTTGAATTTAGCTCAACTGGGGAGACGTGCTTAAATGGGTGATA

+

FFFFFFFFFFFFFFFFFFFFFFFFFFFFFFFFFFFFFFFFFFFFFFFFFFFFFFFFFFFFFFFF:  
FFFFFFFFFFFFFFFFFFFFFFFFFFFFFFFFFFFFFFFFFFFFFFFFFFFFFFFFFFFFFFFFFFFF

@A00721:190:HGJW7DSXY:4:1271:26205:14904\_1:N:0:TCTGCAAG+GCTGCACT  
AGATAGTGGGATAATAGTTCTACCGATACGTAGTGAACGCGTTCGTAGAACCAAGTACTTTCCGTCTG  
AAGAGTTAGAGCTGCTATTGATTATGTAACCGATAGGAGTTGTATAGTTGAAGATGTGGCTTTAGAC  
GAT

+

FFFFFFFFFFFFFFFFFFFFFFFFFFFFFFFFFFFFFFFFFFFFFFFFFFFFFFFFFFFFFFFF:  
FFFFFFFFFFFFFFFFFFFFFFFFFFFFFFFFFFFFFFFFFFFFFFFFFFFFFFFFFFFFFFFFFFFF  
FFF

@A00721:190:HGJW7DSXY:4:1654:29785:28213\_2:N:0:TCTGCAAG+GCTGCACT  
ATGTTGACTGACGAAGATTTTCCACAGATTTGTCTACGATGCAGATCGCCACTCCAAACACTATATA  
CATTATAAAATATAAAAAATAAGGGAGTCATAACTTTTGTACCAAATT

+

FFFFFFFFFFFFFFFFFFFFFFFFFFFFFFFFFFFFFFFFFFFFFFFFFFFFFFFFFFFFFFFF:  
FFFFFFFFFFFFFFFFFFFFFFFFFFFFFFFFFFFFFFFFFFFFFFFFFFFFFFFFFFFFFFFFFFFF

@A00721:190:HGJW7DSXY:4:2445:24858:1673\_2:N:0:TCTGCAAG+GCTGCACT  
CGAAGTCTCTGATTTTATTAATCATTACTTTAACGATCTCTCGGTCAATTTACTCTGTACTTGATCTAC  
GTCGTTTAACTGTCGGAACAACCTTTACTTAGAATGACTCTATCTTTT

+

FFFFFFFFFFFFFFFFFFFFFFFFFFFFFFFFFFFFFFFFFFFFFFFFFFFFFFFFFFFFFFFFFFFFFFFFFFFFFFFF  
FFFFFFFFFFFFFFFFFFFFFFFFFFFFFFFFFFFFFFFFFFFFFFFFFFFFFFFFFFFFFFFFFFFFFFFF:FFF  
@A00721:190:HGJW7DSXY:4:1202:23547:33630\_1:N:0:TCTGCAAG+GCTGCACT  
CTCTATCGTTTTCTGCTTTTTCTTAGCTAATAGATTAATAAAGGATGAGTACGAAAACCAACTCTTCG  
TTACGAGACCTGATGGTAGAATAGATTTAGTCTCTACACCCATCTCAACGAGGATAAAGCGAGTTTTTC  
CGT  
+  
FFFF:FF,FFFFFFFFFFFFFFFFFFFF::FFF,FFFFFFFFFFFFFFFFFFFF::F:FF,FFFFFFFFFFFF  
FFFFFFFFFFFFFFFFFFFFFFFFFFFFFFFFFFFFFFFFFFFFFFFFFFFFFFFFFFFFFFFF:FFFFFFFFFFFFFFFF  
FFF  
@A00721:190:HGJW7DSXY:4:1241:15591:1188\_2:N:0:TCTGCAAG+GCTGCACT  
AGAGATCATCCGCAAACGACTCGAAACCGAGACGCCGTAGATCAAAGTCCCTTCTAACTTTAGATTAT  
GAATCCTGCCAGATCGGAAGAGCGTCGTGTAGGGAAGAGTGTAGTGG  
+  
FFFFFFFFFFFFFFFFFFFFFFFFFFFFFFFFFFFFFFFFFFFFFFFFFFFFFFFFFFFFFFFFFFFFFFFF:FFFFFFFFFFFF::FFF,FFFFFFF  
FFFFFFFFFFFFFFFFFFFF,FFFFFFFF,F,FFFF,FF:FFF:FFFF,  
@A00721:190:HGJW7DSXY:4:1613:7609:19617\_2:N:0:TCTGCAAG+GCTGCACT  
CTTTTCGATAGTGATTGTTATCAATTTAAATACATTACTGTTTCAAATCATCTTTACTCACAGACTCC  
GAAATGGTTTCAAATGAGGTCAAAGCTCTATTTATTAACGAACAT  
+  
FFFFFFFFFFFFFFFFFFFFFFFFFFFFFFFFFFFFFFFFFFFFFFFFFFFFFFFFFFFFFFFFFFFFFFFF:FFFFFFFFFFFFFFFFFFF  
FFFFFFFFFFFFFFFF:FFFFFFFFF:FFFFFFFFFFFFFFFF:FFF,FFFF  
@A00721:190:HGJW7DSXY:4:2607:15148:26788\_2:N:0:TCTGCAAG+GCTGCACT  
TTCCTTCGATGTTTATATTTTTCTATAAGGGAAAATAGCAATAATCAAATTTGACAAATTTTAGAAC  
TTTATTTCAGAACTCTCTCCGATCACCTTGGTGTGATCTCCCGGAGGA  
+  
FFFFFFFFFFFFFFFFFFFFFFFFFFFFFFFFFFFFFFFFFFFFFFFFFFFFFFFFFFFFFFFFFFFFFFFF,FF:FFFF  
FFFF:FFFFFFFFFFFFFFFFFFFFFFFF:FFFFFFFFFFFFFFFFFFFF  
@A00721:190:HGJW7DSXY:4:2508:18123:19570\_2:N:0:TCTGCAAG+GCTGCACT  
TAAATAGTGATATTACGCGTATACTTGAATACTTTATCAAAGATTTGGCTTGGTCTATTTACCGCAA  
AAGTTGGAAGAGGTCTATGATATTTATTTACTTATACTTTAAATAGC  
+  
FFFFFFFFFFFFFFFFFFFFFFFFFFFFFFFFFFFFFFFFFFFFFFFFFFFFFFFFFFFFFFFFFFFFFFFF:FFFFFFFFFFFF  
FFFFFFFFF::FFFFFFFFFFFFFFFFFFFFFFFFFFFFFFFFFFFFFFFFFFFFFFFF  
@A00721:190:HGJW7DSXY:4:1639:18593:28338\_2:N:0:TCTGCAAG+GCTGCACT  
CTTGACTGTTGATAATATTACAATAGCTCTTTCTCAGAAGATTAGAGAAGTAACCGGTGAACACGTCG  
GTAGCATTGATTTACTTTTACCGTTAGAACTGAAAAAGATTCTTTTCG  
+  
FFFFFFFFF:FFFFFFFFF:FFFFFFFFFFFFFFFF,FFFFFFFFFFFF:F,FFFFFFFFFFFFFFFFFFFF  
:FFFFFFFFFFFFFFFFFFFFF:,FFFFFFFFF:FFF::F,FFFFFF:  
@A00721:190:HGJW7DSXY:4:2577:25455:31078\_1:N:0:TCTGCAAG+GCTGCACT  
AACGATTCTTCGACTATATTAAAGAAATAAAAATACTTCAAGTACCTGAACCTTACATTTTAAATGGT  
ATGGTATAATGTGTCTTACAAATAGAACCTTCACTCTCGGTAATGAGAGTGATTCTTAATATTCTA  
GT  
+  
FFFFFFFFFFFFFFFFFFFFFFFFFFFFFFFFFFFFFFFFFFFFFFFFFFFFFFFFFFFFFFFFFFFFFFFF,FFFFFFFFF  
FFFFFFFFFFFFFFFFFFFFFFFFFFFFFFFFFFFFFFFFFFFFFFFFFFFFFFFFFFFFFFFFFFFFFFFFFFFF  
FF  
@A00721:190:HGJW7DSXY:4:2463:6099:17315\_1:N:0:TCTGCAAG+GCTGCACT  
TTACTAGGTTTTATCACACTCCTAAATTTGTTAGCAATTTATGTTTTAAATGCTAGGAAAATTTTAGA  
AAAACCTCATTGTATAGTTCAAGGAGTACTTAATTCAATAGCTTTAGTATTATTTACTATCGCCTTTA  
TTG  
+  
FF:FF,FF,FFFFF,F,FFFFFFFF,,FF,,FFF,,FFFFFFFF:FFF,F,FF,FF,F,F,FFFFFFFF

@A00721:190:HGJW7DSXY:4:2366:21151:6370\_1:N:0:TCTGCAAG+GCTGCACT  
CTTACACAAAAGTGACGCGGAAGGAATCTTAATTGATTGAAGCTAGGCGTTGGGGAGAATGAACTGC  
CGCTTCCCGGAAGAAACGATCTATTTACAGAGTATTTAGAGTAGTCCAAAGTTTGTATAAATTTATAT  
GAT

[illegible]

@A00721:190:HGJW7DSXY:4:1616:15655:14450\_2:N:0:TCTGCAAG+GCTGCACT  
GCTCCAACCTGGCACGCCAGACGTAGGGTCAAACCTACTACCGCCGGTCGGCAGATCGGCACCACTGGT  
CTCTACGTTACAGGGACCCGCTGTGCAGAATAACCTTCCCAAATCTAGA

```
+
FFFFFFFFFFFFFFFFFFFFFFFFFFFFFFFFFFFF,F:FFFFFFFFFFFFFFFFFFFFFFFFFFFFFFFFFFFF,FFFFFFF
FFFFFFFFFFFF:FFFFFFFFFFFFFFFFFFFF:FFFFFFFFFFFF:F:FFF:FF
```

@A00721:190:HGJW7DSXY:4:2354:8748:25755\_2:N:0:TCTGCAAG+GCTGCACT  
ACCACTCAAAGGAAACGGGCTGTTGCCAGAGGAAAGCAGCGACCACCGAGGTCGCTCGTAACATTGA  
CGGCAGTCCCCTCATCTCTGTGGGAAGTGGGAGTACCTCAGTCAA

[illegible]

@A00721:190:HGJW7DSXY:4:1549:21612:10958\_2:N:0:TCTGCAAG+GCTGCACT  
CACTCCCATGCCAATCAATGATGTGACTATACAGTTCGGCCATTTCAAGAGTGGTCAATACGTCGTGG  
GAGGTACTGAAGCCTTCCCCTCCGCTGGCAGGAAGAACTCCCAAGC

[illegible]

@A00721:190:HGJW7DSXY:4:2452:3857:16407\_2:N:0:TCTGCAAG+GCTGCACT  
TGACCAGAATGAAAAGGGGTTTACCAGGGTAGTCTCTAAGTCTACCAGGAAGAGGGGAAATGTCCCCA  
AAACTGAGAAGAATAAAGGGAAAGGTCCATCAGGACCTAAGAAGGGGA

[illegible]

@A00721:190:HGJW7DSXY:4:1656:13883:34773\_1:N:0:TCTGCAAG+GCTGCACT  
CTCCCACCATCTGGGGTTGGGAATAAGAAATCTGCACGGGCAAAGAGGCCGCTGCTACGAAGTCGCT  
GAAGGCGGCTTGGGTCATTAAGGGTAGCTGTAAAGTTGCGCCTGCCGACCCCATCTTTGAGACCAAGA  
CTC

[illegible]

@A00721:190:HGJW7DSXY:4:1359:7817:9518\_2:N:0:TCTGCAAG+GCTGCACT  
AAATCTGTTGAATTCGTCACCTGAGGACGAAGGTGAGAGGACTTTTCGCTACTGGCGACAACTGAGAG  
CACTCGCTGGGGAAAGAGAATTGCGTGGGTTGAAGGCCGACGCTTCGA

```

+
FFFFF:FFFFFFFFFFFFFFFFFFFFFFFF:FFFFFFFFFFFFFF:FFFFFFFFFFFFFFFFFFFFFFFF:
FFFFFFFFFFFFFFFFFFFFFF,FF:FF:FFFF,FFFFFFFFFFFFFFFFFFFF

```

@A00721:190:HGJW7DSXY:4:1348:20654:27774\_1:N:0:TCTGCAAG+GCTGCACT  
GTCAACGGCGTTTGGAGGATTTTATCCGCGCTTAAGTATGGGGCGAAGATCCCCTATGGAGTCTTGAA  
GGACTTAGGTTGGCATATTTATGCCGACGATAATAAGCATGTCACCCCTAAGCACCGAGGTAAGCTCG  
GGA

```

+
FFFFFFFF:FFFFFFFFFFFFFF, :FFFFFFFFFFFFFFFFFFFFFFFFFFFFFFFFFFFFFFFFFFFFFFFF

```

FFFFFFFFFFFFFFFFFFFFFFFFFFFFFFFFFFFFFFFFFFFFFFFFFFFFFFFFFFFFFFFFFFFFFFFF  
FFF

@A00721:190:HGJW7DSXY:4:1124:11324:13620\_1:N:0:TCTGCAAG+GCTGCACT  
TCTCACTATTTTTGCCCAGAATGCGGGCCTTCTGACTGATGAGGTTAAACTCTTGCTCCTTCTGTGG  
GTGAGGGTTTTTGTATATTCACTGGTTCTGGGAGGCTGCTTTCCTCCATAATTACAACCTCTCTTTA  
GAG

+

F:F:FFFFFFFFF,,FFFF,:FFFF:, ,FFFFFFF,FFFFFFF,:F:F::FFFFF:FF,FFFF:, :F  
FFFFFFFF:FFFFFFFFF,FFFF,: :FFFF::F:FFFFFFFF:FF:F,FFFFFF:F:F,F,FFFF,  
:FF

@A00721:190:HGJW7DSXY:4:2671:21305:15781\_2:N:0:TCTGCAAG+GCTGCACT  
TTGGGCAAATTCACATATGGTAGACGTTGTCACACTTTTCTTGAAAATTTTCTTTCTCCGTCA  
TTGGGGATTTCGATGTGAGAAGGTGGAAGGTGTCAAGGGTCTTCTTCA

+

FFFFFFFFFFFFFFFF:FFFFFFFFFFFFFFFFFFFFFFFFFFFFFFFFFFFFFFFFFFFFFFFFF:  
F:FFFFFFFFFFFFFFFFFFFFFFFFFFFFFFFFFFFFFFFFFFFFFFFFFFFFFFFFF

@A00721:190:HGJW7DSXY:4:1269:2745:22404\_2:N:0:TCTGCAAG+GCTGCACT  
ATGATTGATAGTTACGGCTCGTATCGAGTTGGAGGGAGGAAGTTCTCCGAAATTAAGACGGGGGAT  
TAAGAGTCCAGCTGTAAGTGCATTTAGAGAGGGGAGCTCTGAAAAG

+

FFFFFFFFFFFFFFFFFFFFFFFFFFFFFFFFFFFFFFFFFFFFFFFFFFFFFFFFFFFFFFFFF:  
FFFFFFFFFFFFFFFFFFFFFFFFFFFFFFFFFFFFFFFFFFFFFFFFFFFFFFFFF: :FFF

@A00721:190:HGJW7DSXY:4:2634:20681:8437\_2:N:0:TCTGCAAG+GCTGCACT  
AGTTTGAGGAAGGCTCTAGAGAAGATCTCACCACCTGGAGAAGGCAAGTGGAGAGTCCAGAAGTTGAT  
GAAGAAGGATTATTTGAAGCAGGGGTACCACTTCTAAGGTGGATGA

+

FFFFFFFFFFFFFFFFFFFFFFFFFFFFFFFFFFFFFFFFFFFFFFFFF:F:FFF:FFFFFFFFFFFF:FF  
FFFFFFFFFFFFF:FFFFFFF,FFFFFF:FFFFFFFFFFFFFFFFF

@A00721:190:HGJW7DSXY:4:1325:18032:34569\_2:N:0:TCTGCAAG+GCTGCACT  
GATCTTGAGGACGTACATTTAACGTGGCAGAATTCGGTAACCTTACCATATTGTTCTTCCGGGAAGTT  
GTGGGATTTAACTTTGACTCACTACTCCGATCAGATCCGGATGGTTT

+

FFF:FFF:FFFFFFFFF::FFFFFFFFFFFF:FFFFFFFFFFFFFFFFF,FFFFFFFFFFFFFFFFF:FFFF  
FFFF:FFFFFFFFFFFFFFFFFFFFFFFFFFFFFFFFFFFFFFFFF:FFFF,F

@A00721:190:HGJW7DSXY:4:1535:18032:19288\_2:N:0:TCTGCAAG+GCTGCACT  
CAGATACTACCGATAAGGTGAAAAATATGCAGGTCAAAGATTCTGTAGCTCTGAGGGCGGTTGAGGGA  
GCCGTTTTGCCGACTTTAACTATTCTAAGAGTCTTTATGATTCAAAA

+

FFFFFFFFFFFFFFFFFFFFFFFFFFFFFFFFFFFFFFFFFFFFFFFFF,FFFFFFFFFFFFFFFFF:FFFF  
:FFFFFFFFFFFFFFFFF:FFFFFFFFFFFFFFFFF:FFFFFFFFFFFFFFFFF

@A00721:190:HGJW7DSXY:4:1622:16025:33285\_1:N:0:TCTGCAAG+GCTGCACT  
AGAATTGCGGTTGAAGTTCACCATTTCTATCTTGAATGCTCACGCCGTCGAGCCATATCGAGACTAT  
GTTATAATCACTTGTTAAAGTACAGATTTAGTGATTTAGATATTATTGATATTGGAGGCGATATTCGT  
TTT

+

FFFFFFFFFFFFFFFFFFFFFFFFFFFFFFFFFFFFFFFFFFFFFFFFF  
FFFFFFFFFFFFFFFFFFFFFFFFFFFFFFFFFFFFFFFFFFFFFFFFF  
FFF

@A00721:190:HGJW7DSXY:4:2414:12762:17080\_2:N:0:TCTGCAAG+GCTGCACT  
ACATATTTGCAACCCTATTCTTGATGTGAAAGATGCATCGAGGTATACGTCTAGGAACATTGATTGGG  
AACGTACCTACTCACGAGACGTCATGAAAGCTATCGAGAGGAAGCAAA

+

FFFFFFFFFFFFFFFFFFFFFFFFFFFFFFFFFFFFFFFFFFFFFFFFF:FFFFFFFFFFFFFFFFF  
FFFFFFFFFFFFFFFFFFFFFFFFFFFFFFFFFFFFFFFFFFFFFFFFF

@A00721:190:HGJW7DSXY:4:2418:30300:27915\_1:N:0:TCTGCAAG+GCTGCACT  
TTACAAGAACGCTTTGGATTGTGACCATAAAGCCTCAGTTGCGATAGCTGTAGAGGTATACGATATCT  
CTCTTGATGATGTAGCCACTATAATGCTTAAGAGAGAGATTGATGTATGTCATTTCTGCTTAGTTTGT  
CCC

+

FFFFFFF,FFFFFFF:FFFFFFF:FFFFFFF:F:FFFFFFF,FFFF::FFFFFFF:FFFFFFF,FF  
FFFFFFF,FFFFFF,FF:FFFFFFFFFFFFFFFFFFFFFFFFFFFFFFFFFFFFFFFFFFFFFFFFF::  
:FF

@A00721:190:HGJW7DSXY:4:2253:31620:6057\_1:N:0:TCTGCAAG+GCTGCACT  
TCATGGAGATGATGGCGCATCACTTGATTACTATATGCCCGAAGGATTGGGTATTCTCACAAAGATA  
AGATTTTATCTTTCTTCAAACACCCTGTTTTCTTAAGGGCGGACAATTGTTCCATTGTGAACCTTG  
GGG

+

FFFFFFFFFFFFFFFFFFFFFFFFFFFFFFFFFFFFFFFFFFFFFFFFFFFFFFFFFFFFFFFFFFFFF  
FFFFFFFFFFFFFFFFFFFFFFFFFFFFFFFFFFFFFFFFFFFFFFFFFFFFFFFFFFFFFFFFFFFFF:FFFFFFFFFFFFF  
FFF

@A00721:190:HGJW7DSXY:4:1316:1515:31673\_1:N:0:TCTGCAAG+GCTGCACT  
TGAGTTCCGAATAACTCGTAATAAATCTTTCTCTAGTGGACAATTGAGAATACCTATTTCCGTACCAA  
GAGCCACTGCCAATCTCATCGCTATACGCATACCTGATTGGAAGAAGCGAGGTTTCGTTCTCAATAAA  
AAT

+

FFFFFFFFFFFFFFFFFFFF,FFFFFF::FFFFFFFFF:F:FFFFFF:FF:FFFFFFFFFFFFFFFFFFFF  
:FFFFFF,FFFFFFFF,FFFFFFFFFFFFFFFF,FFFFFF:FFFFFFFFF:FFFF:FFFF::  
FFF

@A00721:190:HGJW7DSXY:4:1115:10872:33473\_1:N:0:TCTGCAAG+GCTGCACT  
AAGGGCTATTCAGTACGTCATGGGGATCACTTCTTCGGTCAATGACAAAACCTTCGAATATGTTACGA  
CATGGCTTCGTAACAACAGTGCAGGATTGTCATCTCGGGAAAGTGATTCACCAAGATGTTTCATATA  
GAT

+

:FF:F,FFFF:FFFF:FFFFFFFFFFFF:FFFFFFFFFFFF:FFFFFFFFFFFFFFFFFFFFF:::F  
FFFFFFFFFFFFFFFFFFFF:FFFFF:FFFFFFFFFFFFFFFFFFFF,FFFFFFFFFFFFFFFFFFFFF  
FFF

@A00721:190:HGJW7DSXY:4:1223:28628:34194\_1:N:0:TCTGCAAG+GCTGCACT  
AAGGTCGCAGCGATCTTACTCGTTATCGGAGCTAAGAAGAAGACTTTGGGTACACGTTATGCTCGCAA  
ACTTAACGTTAGTACCGGAGGTGATCTCTCTGCTTCTGCGTTACTGAGAGAAAAGATTCAGGACGCCT  
ACG

+

FFFFFFFFFFFFFFFFFFFFFFFFFFFFFFFFFFFFFFFFFFFFFFFFFFFFFFFFFFFFFFFFFFFFF  
FFFFFFFFFFFFFFFFFFFFFFFFFFFFFFFFFFFFFFFFFFFFFFFFFFFFFFFFFFFFFFFFFFFFF  
FFF

@A00721:190:HGJW7DSXY:4:1130:3025:37012\_2:N:0:TCTGCAAG+GCTGCACT  
ATCTTGAAACTACGGTCCTTATCAAAGAAAATGGTGAACCGGTCTCTAAATCTTTGAGATTGAGAAG  
ATTGAAGAACACGTCAAGAAGTCGCTCGCGTTGTTCTTGAAAACCAA

+

FFFFFFFFFFFFFFFFFFFFFFFFFFFFFFFFFFFFFFFFFFFFFFFFFFFFFFFFFFFFFFFFFFFFF  
FFFFFFFFFFFFFFFFFFFFFFFFFFFFFFFFFFFFFFFFFFFFFFFFFFFFFFFFFFFFFFFFFFFFF

@A00721:190:HGJW7DSXY:4:2155:24352:5776\_1:N:0:TCTGCAAG+GCTGCACT  
GCTGATCATGGAGTCTTTGTACCTTCTGTCAAACCTTCGAGGTTGAGCTACGAGAGGTGATCCCGGATG  
TGGATTGAAGGCTGGCTCTAAGGGAGACTCCTTCTTTTGAATGTTGTAAAGAATTGGGTTGAGAAGT  
GTG

+

FFFFFFFFFFFFFFFFF:FFFFFFFFFFFFFFFFF:FFFFFFFFFFFFFFFFFFFFFFFFFFFFFFFFFFFFF  
FFFFFFFFFFFFFFFFFFFFFFFFFFFFFFFFFFFFFFFFF:FFFFFFFFFFFFFFFFF:FFFFFFFFFFFFFFFFFFFFF  
FFF







@A00721:190:HGJW7DSXY:4:2604:18195:20791\_2:N:0:TCTGCAAG+GCTGCACT  
AAACGATGCTACTTGTGAGAGGATCAATCACAGTAAGGAAGTGTACGTTTAGCACGGGAGGTTGCAG  
ATTCAACCCCTTATATCGAGGCTATCGAGGACGATGAGTATCTTGAAG

@A00721:190:HGJW7DSXY:4:2531:20066:3583\_2:N:0:TCTGCAAG+GCTGCACT  
AGAGGACCACCTGGATCTTCTACTGTCTCTGCCTTCCAAGATTTCTTAGAAGAGGTTATTCCTGGAAC  
CACCTTAACGTCACCTCGGTAATCTTTCAGCCGAATTAAGTACTAATGA

@A00721:190:HGJW7DSXY:4:2273:26377:14544\_2:N:0:TCTGCAAG+GCTGCACT  
AAGGCTAATACCTTTATAGGTAAGAATCCCCTTGAGACGCGTAGTCAGCGCGTTTAGCTGTATCATCA  
GTCAGAGTATACCCGATAGGTTACCGAGTCTCAAAGAGAATATTTATT

@A00721:190:HGJW7DSXY:4:2338:7835:6511\_2:N:0:TCTGCAAG+GCTGCACT  
TCAATTGATAGATTGGGTCAACAATAGGGACGCTAGTATACTTCGTAAAGTCGACAGCGAAATGGTCA  
ATATTGATAATTGGACCGACTATATGACCTATTTTAAGCTCATGGTGA

@A00721:190:HGJW7DSXY:4:1639:15393:27618\_2:N:0:TCTGCAAG+GCTGCACT  
GTTCTTGTGAGGAGAGTCAAACAGTGTCTTTTACCCAACATTTTATGTATACAGAGATGACCATTGA  
CGATTTCTCCCGGAAGCTCTTCTCTCTCTTAGGAGGTCATGATGACTA

@A00721:190:HGJW7DSXY:4:1124:22327:6120\_1:N:0:TCTGCAAG+GCTGCACT  
CAGGAGTATCCATAACGATTTGTCATTTACCACCTTTGCTCAACGACGAAGTGGAACGGCCAACACTT  
TCTTTGGTAATTGTATGATCACTTTGATGATTTTATCACTTTATTATGACCTTGAAAGTTTTTCGGCT  
GTG

@A00721:190:HGJW7DSXY:4:2224:32895:37012\_1:N:0:TCTGCAAG+GCTGCACT  
CGATATTCGATTGAGGGTCGTTATACCTATTCGGCTATCTGTGCTTTGAATTGTATAAGATCANATTT  
TAAACGATTCCGAGAGGTTTATCCTGATGTGGAGGGAGTTCTTGAAGNATCCCGACCTTTCCTTGTGA  
AAA

@A00721:190:HGJW7DSXY:4:1449:10004:30373\_2:N:0:TCTGCAAG+GCTGCACT  
CGTATCTCAAAGATCGACTTCGAGACAGGTGATATTGTTGAGCGAGAGCGACCAAGATCTAAATTCGG  
TAACGGTGCGTGGCGCTTTATTTTAAAAAGCTCCCTCCTCTCGCAAGT

[illegible]

@A00721:190:HGJW7DSXY:4:2204:7238:29183\_1:N:0:TCTGCAAG+GCTGCACT  
TGACGATCATTAAGACTCTCTTTCTTCTTTGTTTCCTTCTTTGCACTGATTTTCTCATCAGCTTGT  
GTTTTACCTAATCTGTGTTTTTACGATAACAACATCAGTTGATTAAGACTCTTCCGAAAGGCGAACT  
TTG

+

FFFFFFFFFFFFFFFFFFFFFFFFFFFFFFFFFFFFFFFFFFFFFFFFFFFFFFFFFFFFFFFFFFFFFFFF  
FFFFFFFFFFFFFFFFFFFFFFFFFFFFFFFFFFFFFFFFFFFFFFFFFFFFFFFFFFFFFFFFFFFFFFFF  
FFF

@A00721:190:HGJW7DSXY:4:2628:22417:33270\_2:N:0:TCTGCAAG+GCTGCACT  
GGGTGAAGCACAACTTTGACCGTGACGAACGTGGTGTCTTGATCTACGTTACGGATATACTCTCC  
TTGAGTTCACTCGTAAGGACACTACCACTTATTACGATATTTCTTTAG

+

FFFFFFFFFFFFFFFFFFFFFFFFFFFFFFFFFFFFFFFFFFFFFFFFFFFFFFFFFFFFFFFFFFFFFFFF  
FFFFFFFFFFFFFFFFFFFFFFFFFFFFFFFFFFFFFFFFFFFFFFFFFFFFFFFFFFFFFFFFFFFFFFFF

@A00721:190:HGJW7DSXY:4:2133:18150:20964\_2:N:0:TCTGCAAG+GCTGCACT  
ATCACTCATTTTAGTGAGATTATTAACAAACGCACTAAACGTCTTCGACAACAGCAGGGGTTTTCGAA  
TAGAGATAGCCACCCGCCTTACAGAGGGGCAGCAGCATGACCATAATT

+

F,FFF:FFFF::FFF:F,F:,F:FFFFFFFFF,:FFF:FF,FFFF:FFFFFF:FF:FFF,FFFFFFF  
,FF,:F,FFFF:,F,FFF:,F,F:FF,FFFF,:::,F,FFFF,FF,F

@A00721:190:HGJW7DSXY:4:2521:5891:4617\_2:N:0:TCTGCAAG+GCTGCACT  
TGTCTGTCTCGCCTCTTCGAATGAAGTTTTAATGCTTAACAACAATGATAGTGAATTTATACCTACAA  
TCATTGGTTTTCTAATAATGATGACACTATTGTTTATGGATATGATG

+

FFFFFFFFFFFFFFFFFFFFFFFFFFFFFFFFFFFFFFFFFFFFFFFFFFFFFFFFFFFFFFFFFFFFFFFF  
,:FFFFFFFFFFFFFFFFFFFFFFFFFFFFFFFFFFFFFFFFFFFFFFFFFFFFFFFFFFFFFFFF

@A00721:190:HGJW7DSXY:4:1468:24930:6746\_1:N:0:TCTGCAAG+GCTGCACT  
AGACGTGCTAAATTAACCAATTGTACGATGTCGTCTGTCTCGCGATCACTTTTCTACTAAGAATTGG  
TCCTACTTTTGGACAAGGCCAACTTCGTAATCTTCATGAGATCGTTTCTTTCTTTATCTCTTTGGTTG  
TTA

+

FFFFF:FFFFFFFFFFFFFFFFFFFFFFFFFFFFFFFFFFFFFFFFFFFFFFFFFFFFFFFFFFFFFFFF  
FFFFFFFFFFFFFFFFFFFFFFFFFFFFFFFFFFFFFFFFFFFFFFFFFFFFFFFFFFFFFFFFFFFFFFFF  
FFF

@A00721:190:HGJW7DSXY:4:1674:28257:25786\_2:N:0:TCTGCAAG+GCTGCACT  
GAGTGAAAGGCTTCAATTGTAGTGGTTTGGTCGTTTCAGTACCCAGTCAGTATACCTCTACGCAAAGA  
TATTTTCATGAAAACCTACAGAGGAACGTACCGGATTACCTGTCTTTTCAT

+

FFFFFFFFFFFFFFFFFFFFFFFFFFFFFFFFFFFFFFFFFFFFFFFFFFFFFFFFFFFFFFFFFFFFFFFF  
FFFFFFFFFFFFFFFFFFFFFFFFFFFFFFFFFFFFFFFFFFFFFFFFFFFFFFFFFFFFFFFFFFFFFFFF

@A00721:190:HGJW7DSXY:4:1165:25382:13009\_1:N:0:TCTGCAAG+GCTGCACT  
GTTGGATGTCAAGAAGGGTTCAGAATGGGATTCTTACGTAGTTTATGACTTTGGTGGTGGTACTTTTCG  
ATACTTCTATCGTCTTACGTTACGGTAATTACTATAGTGTTATTTATTCTGGTGGTGGTATGATAATCTT  
GGA

+

F:FFFFFFFF::FF:FFFFFFFF,FFFFFFFFFFFFFFFFFFFFFFFFFFFFFFFFFFFFFFFFFFFFFFFF  
FFF:FFFFFF:FFFFFF,FFFF,FFFF::FFFFFFFFFFFFFFFF,FFFFFFFFFFFFFFFFFFFFFFFF  
FFF

@A00721:190:HGJW7DSXY:4:1125:31358:13307\_1:N:0:TCTGCAAG+GCTGCACT  
TGATGAAGCTATAAGAGCGTTCTTATTACGGCGCACTTCTTTACCCGCCACCACAACTTTTCAGTTT  
CACAACCTGAAGGAGGAGGTTTCTGTTACTGGAAAACCTCGTCAATACTTTTCAATAATATACGTCTT  
GAA

+

FFFFFF,F,FFF:FFFFFFFF:FFF,FF:FF:F:,F,FF:F:FFF,FF:FFF:FFF:FFF:FFF::FFF

F::FFFFFFFFFFFFFFFF:FFFFFFFF:, :FFFFFF, FFFFFFFFFF:FFFFFFFFFFFFFFFF:FFFF  
FFF

@A00721:190:HGJW7DSXY:4:1554:20627:10723\_1:N:0:TCTGCAAG+GCTGCACT  
CCTTTTCTGGAACGTAGTTTTACTATTATGAACAAAGTTATCAAAGATAGTGGCATTCAAGGCAAAC  
TACCTGATTCCGGCCGGTGGTAGCTCATTTCTACCAGGGGCTATTACTCTTGCTGAAACAGCTATTA  
AAG

+

:FFFFFFFF:FFFFFFFFFFFFFFFFFFFFFFFF, FFFFFFFF: :FFFFFFFFFFFFFFFF:FFF:FF  
FFFFFFFFFFFFFFFF:FFF, FFFFFFFFFF:FFFFFF:FFFFFF:FFFFFFFFFFFFFFFFFFFF  
FFF

@A00721:190:HGJW7DSXY:4:1136:12084:4319\_1:N:0:TCTGCAAG+GCTGCACT  
GTAATTACACCTAACGAGCTCGATCTGCCATCGCTGAAGGATGTGCACTCTTTCTGCTACTTTAAC  
GGAGCGTAGTGTACTCTTCGTCGATTGTATCAACAGTAACATTACTTCTAATAAAGGTCTCTATCAAG  
CTC

+

FFFF:FFFFFFFF:FFFFFFFFFFFFFFFFFFFFFFFFFFFFFFFFFFFFFFFFFFFFFFFFFFFFFFFF  
FFFFFFFFFFFFFFFFFFFFFFFFFFFFFFFFFFFFFFFFFFFFFFFFFFFFFFFFFFFFFFFFFFFFFFFF:FFFF  
FFF

@A00721:190:HGJW7DSXY:4:1566:18014:24424\_2:N:0:TCTGCAAG+GCTGCACT  
AGGCTAACTCCAAGGTAATTATGAAGACTGTGATTTATCTTTCACTCTGGCCTTGATGAGGGTGTT  
TCTAATCGTAACATTAATAATTTCAATCTTCTTAAAAAGAAGATAGAG

+

FFFFFFFFFFFFFFFFFFFFFFFFFFFFFFFFFFFFFFFFFFFFFFFFFFFFFFFFFFFFFFFFFFFFFFFF  
FFFF:FFFFFFFFFFFFFFFFFFFFFFFFFFFFFFFFFFFFFFFF:FFFFFFFFFF

@A00721:190:HGJW7DSXY:4:1660:27995:15969\_2:N:0:TCTGCAAG+GCTGCACT  
GCTATCGTTCAGGTGCATGGGGTTGGATAGCCAATATTGAAGTGGACACCTCTGGTAGTATCGAAGTA  
AAGATAACCAATAAGGAAGGAGCTTATACTATGGTTGAATCAACTAAG

+

FFF:FFFF, FFFFFFFFFFFFFFFFFFFFFFFFFF:FFFFFFFFFFFF:FFFFFF:FFFFFFFFFFFF  
FFFFFFFFFFFF:FFFFFFFFFFFF:F:, FFFFFFFFFFFFFFFFFF

@A00721:190:HGJW7DSXY:4:1478:32533:3881\_2:N:0:TCTGCAAG+GCTGCACT  
GTTGTTATCTCGAAAAGTCTCTTCTAAAAGGAACGTCAAGTTCTAACCCAAAGAGAATATCTAAAATAT  
TTACAAAATCTTACCACTATCTACGAACCTAAAGTTCTGAAGACGTTG

+

FFFFFFFFFFFFFFFFFFFFFFFFFFFFFFFFFFFFFFFFFFFFFFFFFFFFFFFFFFFFFFFFFFFFFFFF  
FFFF:FFFFFFFFFFFFFFFFFFFF, F:FF:FFFFFFFFFFFFFFFF

@A00721:190:HGJW7DSXY:4:1140:9444:18975\_1:N:0:TCTGCAAG+GCTGCACT  
GGCACTACCTCGGTACAATCTTACTTGGAACGAAGGCGACCTGTTCCGGAGTTTTTACGGGATCCGGA  
ATGTTCTGTCTATATTAGGTGAAGCGAAATACGATTTCAACGTCAACGTTACCGAGTTTCGTTTCG  
TAC

+

FFFFFFFFFFFFFFFFFFFFFFFFFFFFFFFFFFFFFFFFFFFFFFFFFFFFFFFFFFFFFFFFFFFFFFFF  
FFFFFFFFFFFFFFFFFFFFFFFFFFFFFFFFFFFFFFFFFFFFFFFFFFFFFFFFFFFFFFFFFFFFFFFF  
FFF

@A00721:190:HGJW7DSXY:4:1424:4481:25911\_1:N:0:TCTGCAAG+GCTGCACT  
ATAAAGAACTTCATGAATTTTCAGAGGATGAAAAATTTCTTCCTTGATTTTAATATAAAGAATCTT  
TACCAGGACTCCTACTACAGGAGGCAGTCTTCTGATCGTAAGAAGTTTATAAGGAACATATCCATTG  
TTG

+

FFFFFFFFFFFFFFFF:FFFFFFF:FFFFFFFFFFFFFFFFFFFFFFFF:FFFFFFFFFFFFFFFFFFFF  
FFFFFFFFFFFFFFFFFFFFFFFFFFFFFFFFFFFFFFFFFFFFFFFFFFFFFFFFFFFFFFFFFFFFFFFF  
FFF

@A00721:190:HGJW7DSXY:4:1166:10664:29512\_1:N:0:TCTGCAAG+GCTGCACT  
CTCTAAGTGGTAATACTGTCTTTCCAAGCTTACCTGTATCTTCAATGAAATTGGACTCTTCGATAGGG

GACATTTTATCGTGGGCTTTCCGTAAAGGAAGATCTGTTATCGACGGTTTATCGTTTACGAAGTATCA  
CTC

+

FFFFFFFFFFFFFFFFFFFFFFFFFFFFFFFFFFFFFFFFFFFFFFFFFFFFFFFFFFFFFFFFFFFFFFFF  
FFFFFFFFFFFFFFFFFFFFFFFFFFFFFFFFFFFFFFFFFFFFFFFFFFFFFFFFFFFFFFFFFFFFFFFF  
FFF

@A00721:190:HGJW7DSXY:4:2355:7636:15060\_1:N:0:TCTGCAAG+GCTGCACT  
CTATTATTGATTTTTATGAGATTGATACGTTAACAGAAGATGATGTTAGAGTAGAATTCCTGAAGAGT  
CCTTCCGTAACCAACTTCTTGACAATTTCTTCAATCCTTCGATAATAGTTAAATCTAGGATTATGTC  
TGT

+

FFFFFFFFFFFFFFFFFFFFFFFFFFFFFFFFFFFFFFFFFFFFFFFFFFFFFFFFFFFFFFFFFFFFFFFF  
FFFFFFFFFFFFFFFFFFFFFFFFFFFFFFFFFFFFFFFFFFFFFFFFFFFFFFFFFFFFFFFFFFFFFFFF  
FFF

@A00721:190:HGJW7DSXY:4:2448:11189:29262\_2:N:0:TCTGCAAG+GCTGCACT  
ATTGACTGATTATCTAAAGATTGAAGGAAAATTTATCCTCGTTTAACTTACTTAGACTTTCTACGA  
TACAAATGATAACTTCTAATTTACGTTTGCTACTCAGAGCTGGTCCTC

+

FFFFFF:FFFFFFFFFFFFFFFFFFFF,FFFFFFFFFFFFFFFFFFFFFFFFFFFFFFFFFFFFFFFF  
FFFFFFFFFFFFFF:FFFFFFFFFFFFFFFFFFFFFFFFFFFFFFFFFFFFFFFFFFFFFFFF

@A00721:190:HGJW7DSXY:4:1427:5303:26240\_2:N:0:TCTGCAAG+GCTGCACT  
CAGGAGTCCCGGCATTTGATAATAATGACGAGACTTTCGTCATAATCGCTGCATATTACGGATTACAC  
GGTACCAGCGCATCTCGTGTGCGAGCCTCGACCCGATTATATGGTATTA

+

FFFFFFFFFFFFFF:FFFFFFFFFFFFFFFFFFFF:,FFF:FF:FFFFFFFFFFFF,FFFF:FFFFF  
FFFFFFFFFFFFFFFFFFFFFFFFFFFFFFFFFFFFFFFFFFFFFFFF:FFFF:FFFFF

@A00721:190:HGJW7DSXY:4:2220:26015:14763\_1:N:0:TCTGCAAG+GCTGCACT  
AACTATGTTATGTTCTCTGATCATTTTGACAATCTCTTCTTATAATAAATAAATAATATTACTA  
ATGGCAAATAGTGGAAGGCTCCAGTCAACACTAGTTGAGTGCTGCTTTGGATTACGATGACGTGAG  
AAT

+

FF:FFFFFFFFFFFFFF:FFFFFFFFFFFF,FFF:FF:FFFFFFFFFFFFFFFFFFFFFFFF:FFFFFFF  
FFFFFFFFFFFFFFFFFFFFFFFFFFFFFFFFFFFFFFFFFFFFFFFFFFFFFFFFFFFFFFFFFFFFFFFF  
FFF

@A00721:190:HGJW7DSXY:4:1443:27905:4257\_1:N:0:TCTGCAAG+GCTGCACT  
TTTACCTCGACCAACATTAAGGCGGCGGCGACTAATCTTAAAGCTTACCCAAAATGAAGGACACTTC  
GAAACTGAATAATGATGCACTACAAACAAGTATCGCTAATCATCTGAAAAGGCTCTAAAGGACACTA  
TAC

+

F,FFFFFFFFFFFFFF:FFFFFFFFFFFFFFFFFFFFFFFFFFFFFFFFFFFFFFFFFFFFFFFFFFFFF  
:FFFFFFFFFFFFFFFFFFFFFFFFFFFFFFFFFFFFFFFFFFFFFFFFFFFFFFFFFFFFFFFFFFFFF  
,FF

@A00721:190:HGJW7DSXY:4:1603:3929:34413\_1:N:0:TCTGCAAG+GCTGCACT  
GAGGATATTCGCCATTGTGGTACGAATTGGTCCAACATTTACCACCAAATCTTTTGATACAACCTA  
GCCTTCAAGTGGGGTATGCCTGCGGAATACGCTTGCTATTACCAGATTGGTTCAACCCGTTGATGC  
TAT

+

FFFFF:F,FFFFFFFFFFFFFFFFFFFFFFFFFFFFFFFFFFFFFFFFFFFFFFFFFFFFFFFFFFFFF  
FFFFFFFFFFFFFFFFFFFFFFFFFFFFFFFFFFFFFFFFFFFFFFFFFFFFFFFFFFFFFFFFFFFFF  
FFF

@A00721:190:HGJW7DSXY:4:1436:31123:18505\_2:N:0:TCTGCAAG+GCTGCACT  
TATTCAAGCTTGTGCTTTAAAGACTGCAGAGGCTGTCAAACAAGCCCAGACTCAAGGAGTCCAATCAA  
AGGTTTTGAATTTAGCTCAACTGGGGAGACGTGCTTAAATGGGTGATA

+

[illegible]

@A00721:190:HGJW7DSXY:4:2113:16812:20556\_2:N:0:TCTGCAAG+GCTGCACT  
CTTGACTGTTGATAATATTACAATAGCTCTTTCTCAGAAGATTAGAGAAGTAACCGGTGAACACGTCG  
GTAGCATTGATTTACTTTTACCGTTAGAACTGAAAAAGATTCTTTTCG







@A00721:190:HGJW7DSXY:4:1228:1208:17550\_1:N:0:TCTGCAAG+GCTGCACT  
AAGGTCGCAGCGATCTTACTCGTTATCGGAGCTAAGAAGAAGACTTTGGGTACACGTTATGCTCGCAA  
ACTTAACGTTAGTACCGGAGGTGATCTCTCTGCTTCTGCGTTACTGAGAGAAAAGATTGAGGACGCCT  
ACG

+

FFFFFFFFFFFFFFFFFFFFFFFFFFFFFFFFFFFFFFFFFFFFFFFFFFFFFFFFFFFFFFFFFFFFFFFF  
FFFFFFFFFFFFFFFFFFFFFFFFFFFFFFFFFFFFFFFFFFFFFFFFFFFFFFFFFFFFFFFFFFFFFFFF  
FFF

@A00721:190:HGJW7DSXY:4:2455:22652:14794\_2:N:0:TCTGCAAG+GCTGCACT  
ATCTTGAAACTACGGTCCTTATCAAAGAAAATGGTGAACCGTCTCTAAATCTTTTGAGATTGAGAAG  
ATTGAAGAACACGTCAAGAAGTCGCTCGGCGTTGTTCTTGAAAACCAA

+

FFFFFFFFFFFFFFFFFFFFFFFFFFFFFFFFFFFFFFFFFFFFFFFFFFFFFFFFFFFFFFFFFFFFFFFF  
FFFFFFFFFFFFFFFFFFFFFFFFFFFFFFFFFFFFFFFFFFFFFFFFFFFFFFFFFFFFFFFFFFFFFFFF

@A00721:190:HGJW7DSXY:4:2206:10285:28729\_1:N:0:TCTGCAAG+GCTGCACT  
GCTGATCATGGAGTCTTTGTACCTTCTGTCAAACCTTCGAGGTTGAGTACGAGAGGTGATCCCGGATG  
TGGATTGAAGGCTGGCTCTAAGGGAGACTCCTTCTTTTGAATGTTGTAAAGAATTGGGTTGAGAAGT  
GTG

+

FFFFFFFFFFFFFFFFFFFFFFFFFFFFFFFFFFFFFFFFFFFFFFFFFFFFFFFFFFFFFFFFFFFFFFFF  
FFFFFFFFFFFFFFFFFFFFFFFFFFFFFFFFFFFFFFFFFFFFFFFFFFFFFFFFFFFFFFFFFFFFFFFF  
FFF

@A00721:190:HGJW7DSXY:4:2440:7003:8171\_1:N:0:TCTGCAAG+GCTGCACT  
ATAACTTCTTTTTCAAATAATGCGGATGGGTCTACTGATGTTTTCTACAGAGTGCAGTCGTTTCAACA  
CTTATCACCCTTTTGAAGGAAAATAATTGGTGATGAAAATACGTATGTCGGTGGGGTTCTCAAGGC  
TCT

+

FFFFFFFFFFFFFFFFFFFFFFFFFFFFFFFFFFFFFFFFFFFFFFFFFFFFFFFFFFFFFFFFFFFFFFFF  
F:FFFFF:FFFFF,FFFFFFFFFFFFFFFFFFFFFFFFFFFFFFFFFFFFFFFFFFFFFFFFFFFFFFFF  
FFF

@A00721:190:HGJW7DSXY:4:2173:13386:36198\_1:N:0:TCTGCAAG+GCTGCACT  
GATTCTTAAAAGAAGTTTATTAATACTTCAGAGTCTCTTGGAAGTCCAGGTAGCTAATGTTCTTGCAA  
TAGCCACAGACTTTCTGGGAAAAGAGACCTCTGTTGGTAGAGGAGTTGAGAGAATTACTCAGATTCAA  
TCT

+

F,FFFFFFFFFFFFFFFFFFFFFFFFFFFFFFFFFFFFFFFFFFFFFFFFFFFFFFFFFFFFFFFFFFFF  
FFFFFFFFFFFFFFFFFFFFFFFFFFFFFFFFFFFFFFFFFFFFFFFFFFFFFFFFFFFFFFFFFFFFFFFF  
FFF

@A00721:190:HGJW7DSXY:4:1228:10936:36338\_1:N:0:TCTGCAAG+GCTGCACT  
TGGCTAGGTTTTAAAGATCCTGTGCACAAGCAATACCTTCCACTGAGTTCATCACCAGAGTTTCGA  
CGTCGCGGAAAACGATGAAGATTTCCACACTGTTGAGAATCTTCTGATGCTGAATTTGAGGAAAATT  
TTT

+

FFFFFFFFFFFFFFFFFFFFFFFFFFFFFFFFFFFFFFFFFFFFFFFFFFFFFFFFFFFFFFFFFFFFFFFF  
FFFFFFFFFFFFFFFFFFFFFFFFFFFFFFFFFFFFFFFFFFFFFFFFFFFFFFFFFFFFFFFFFFFFFFFF  
FFF

@A00721:190:HGJW7DSXY:4:1625:14434:21981\_2:N:0:TCTGCAAG+GCTGCACT  
CAGTACAGGGAGGAGGTAATAGTTATAAACCTTCTTTTATCATTGCAACAGGACTTTGAGAAGACTG  
TTGAAATGGACAAAATCTGGGATCATAGGTATGTGTACGCTACACTC

+

FFFFFFFFFFFFFFFFFFFFFFFFFFFFFFFFFFFFFFFFFFFFFFFFFFFFFFFFFFFFFFFFFFFFFFFF  
FFFFFFFFFFFFFFFFFFFFFFFFFFFFFFFFFFFFFFFFFFFFFFFFFFFFFFFFFFFFFFFFFFFFFFFF

@A00721:190:HGJW7DSXY:4:2553:9046:17816\_1:N:0:TCTGCAAG+GCTGCACT  
CGCCATATCAGATTAGAGACATGCCAGTTAGAGTTCTTCTAACCAGGACTGATGGTGAGATTCTTTTA

CCTTTTGGAGGTCCAGGAACCTTTACTCCTAGTGTCTTTTCTAGAGTCCAAGGACGTTTCCGTCGGAG  
GAT

+

FFFFFFFFFFFFFF:FFFFFFFF:FFFFFFFFFFFFFFFFFFFFFFFFFFFFFFFFFFFFFFFFFFFFFFFF:FFF  
FFFFFFFFFFFFFFFFFFFFFFFFFFFFFFFFFFFFFFFFFFFFFFFFFFFFFFFFFFFFFFFFFFFFFFFF  
FFF

@A00721:190:HGJW7DSXY:4:2633:19587:15718\_2:N:0:TCTGCAAG+GCTGCACT  
ACACTCTATTGAATCCCTTTTCCACGATGAAAGCTCTTTATGAGGTGCTCCATGCAAATTTACAGTTC  
CTCTTTGGTGATATCGCCTCTGTCTTTCTCCTTTAATCGTGAGGTTA

+

FFFF:F,FFFFFFFFFFFFFFFFFFFFFFFFFFFFFFFFFFFFFFFFFFFFFFFFFFFFFFFFFFFFFFFF:FFF  
FFFF,FFF:F:FFFFFFFFFFFFFF:FFF:F:FFFFFFFFFFFFFF:FFFF

@A00721:190:HGJW7DSXY:4:2171:14055:27524\_1:N:0:TCTGCAAG+GCTGCACT  
GTTTCGGTTTCAGCTGGATGGATCTTTTGATGGTATGTTTCACATTGCGTGATCACTTCCCGTGGACT  
TGGGAAGAGATTAAACATAAAATCCAGCGATTCTATTATGTCGCTAAAGCCTGTCCAGTTGTCGATGA  
TGT

+

FFFFFFFFFFFFFFFFFFFFFFFFFFFFFFFFFFFFFFFFFFFFFFFFFFFFFFFFFFFFFFFFFFFFFFFF  
FFFFFFFFFFFFFFFFFFFFFFFFFFFFFFFFFFFFFFFFFFFFFFFFFFFFFFFFFFFFFFFFFFFFFFFF  
FFF

@A00721:190:HGJW7DSXY:4:2630:8757:21699\_1:N:0:TCTGCAAG+GCTGCACT  
CACAAGGATTACTAAGTCTGAGATCTGCCACTTCTAATTTTAGGAAACGTCGCGAAAAGAAAGTTCAT  
GAGGATGTCTTGGTCGAAAAATATCGCCGGGAACCTCTAATAGAGGATCCTGATGACATTATTTCAAC  
GGA

+

::FFFF:FFFFFFFFFFFFFFFFFFFFFFFFFFFFFFFFFFFFFFFFFFFFFFFFFFFFFFFFFFFFFFFF  
FFFFFFFFFFFFFFFFFFFFFFFFFFFFFFFFFFFFFFFFFFFFFFFFFFFFFFFFFFFFFFFFFFFFFFFF,FFFF  
FFF

@A00721:190:HGJW7DSXY:4:1335:11207:17487\_1:N:0:TCTGCAAG+GCTGCACT  
AGAAACCGTCTCAGGAAGTGTCTCCACTGATTCGGAATTAGAGAAAGACGACCTTCTTGTGGGGACTG  
AGACCTCTGAATTTTCAGGGTGCCCTGATGAGGACGTTGAAAGGGATAATTTCAACTCTGAGACTTCT  
AAG

+

FFFFFFFFFFFFFFFFFFFFFFFFFFFFFFFFFFFFFFFFFFFFFFFFFFFFFFFFFFFFFFFFFFFFFFFF  
FFFFFFFFFFFFFFFFFFFFFFFFFFFFFFFFFFFFFFFFFFFFFFFFFFFFFFFFFFFFFFFFFFFFFFFF  
FFF

@A00721:190:HGJW7DSXY:4:1168:3486:36777\_1:N:0:TCTGCAAG+GCTGCACT  
AGACCAGAAACGTAACAAGAATAAAGGTAGGAAGGGGAGAAAACAGAACAAAGCGAGCGGTTGAAG  
AGAAAAGTATGATTGCGGCTGATCGTACCCCAATTCCTGCTAGAAAGATCACTCTCGGCGATACC  
ACT

+

FFFFFFFFFFFFFFFFFFFFFFFFFFFFFFFFFFFFFFFFFFFFFFFFFFFFFFFFFFFFFFFFFFFFFFFF  
FFFFFFFFFF:FF,FFFFFFFFFFFFFFFFFFFFFFFFFFFFFFFFFFFFFFFFFFFFFFFFFFFFFFFF  
FFF

@A00721:190:HGJW7DSXY:4:1605:14959:9706\_2:N:0:TCTGCAAG+GCTGCACT  
TAGTGGTCGTTCTTTTGGTGATTTTATCAAAGAGAAAGTTTCTGCTAGTCGCGACGATAGTATTTATC  
GGAGTGATATTAACAAGTTAACTTCGAACTGACCACTTACAAGAGTG

+

FFFFFFFFFFF:F,FFFFFFFFFFFFFFFFFFFFFFFFFFFFFFFFFFFFFFFFFFFFFFFFFFFFFFFF  
FF:FFFFFFFFFFFFFFFF::FFFF:FFFFFFFFFF,F:FFFFFFFFFF

@A00721:190:HGJW7DSXY:4:2622:30318:35931\_2:N:0:TCTGCAAG+GCTGCACT  
CCACTGAACTTATAGCGACTTTTGTGCAATTTTCGAAAAGGTCTTGAAGTACGTATTGTCACTGCT  
AATCGTAATTCGCGAGAAGAGCAGATCGGAAGAGCGTCGTGTAGGGAA

+

FFFFFFFFFFFFFFFFFFFFFFFFFFFFFFFFFFFFFFFFFFFFFFFFFFFFFFFFFFFFFFFFFFFFFFFF  
FFFFFFFFFFFFFFFFFFFFFFFFFFFFFFFFFFFFFFFFFFFFFFFFFFFFFFFFFFFFFFFFFFFFFFFF  
@A00721:190:HGJW7DSXY:4:1441:15040:30295\_2:N:0:TCTGCAAG+GCTGCACT  
AATTAAGACAGACGTGAAAGTTATGATGAGTGATCGTATTAGAACAGCTGATTCTTATTGCATGAACG  
TCGCTGAGGTCAAACCTGTGGACGTTCTTTTCATCGACGAATTATTCA  
+  
FFFFFFFFFFFFFFFFFFFFFFFFFFFFFFFFFFFFFFFFFFFFFFFFFFFFFFFFFFFFFFFFFFFFFFFF:  
FFFFFFFFFFFFFFFF,FFFFFFFFFFFFFFFFFFFFFFFFFFFFFFFFFFFFFFFFFFFFFFFF:  
@A00721:190:HGJW7DSXY:4:2462:13874:4131\_1:N:0:TCTGCAAG+GCTGCACT  
ATCTACTTAAGGCGCTTATACCATAGGTTACGGTGATTCCAATCAAATCGGATTCATCAATCGTATT  
GATCTCCAAGTCGAAACTACTTCAACATCAACGACATCATTCTTGATGAGTGTCGTTCTTATCGAAG  
TCT  
+  
FFFFFFFFFFFFFFFFFFFFFFFFFFFFFFFFFFFFFFFFFFFFFFFFFFFFFFFFFFFFFFFFFFFFFFFF  
FFFFFFFFFFFFFFFFFFFFFFFFFFFFFFFFFFFFFFFFFFFFFFFFFFFFFFFFFFFFFFFFFFFFFFFF  
FFF  
@A00721:190:HGJW7DSXY:4:1253:24858:7404\_1:N:0:TCTGCAAG+GCTGCACT  
GCCCCGCCGACGTTTGTGCGGAACTCTCAGAGTTTACGGCAGAAAAATTTCTCCTGCTTGTAATTCTG  
AGAGAGGACACTATGGAAATTAGACCTATCAGATGTCTTGACGACTTCGAATTTGAGGACGGAGTTAA  
ATA  
+  
FFFFFFFFFFFFFFFFFFFFFFFFFFFFFFFFFFFFFFFFFFFFFFFFFFFFFFFFFFFFFFFFFFFFFFFF  
FFFFFFFFFFFFFFFFFFFFFFFFFFFFFFFFFFFFFFFFFFFFFFFFFFFFFFFFFFFFFFFFFFFFFFFF  
FFF  
@A00721:190:HGJW7DSXY:4:1334:1217:33630\_1:N:0:TCTGCAAG+GCTGCACT  
AACGATGCTACTTGTGAGAGGATCAATCACAGTAAGGAACTGTCACGTTTAGCACGGGAGGTTGCAGA  
TTCAACCCCTTATATCGAGGCTATCGAGGACGATGAGTATCTTGAAGTTGTTGACGACAAGCCTCAAG  
AGG  
+  
F:FF:FFFFFF:FFFFFFFFFFFFFFFFFFFFFFFFFFFFFFFFFFFFFFFFFFFFFFFFFFFFFFFFFFFFF,FFFFFFFFFFFFFFFFFFFFF  
FFFFFFFFFFFFFFFFFFFFFFFFFFFFFFFFFFFFFFFFFFFFFFFFFFFFFFFFFFFFFFFFFFFFFFFF  
FFF  
@A00721:190:HGJW7DSXY:4:1541:1362:29716\_2:N:0:TCTGCAAG+GCTGCACT  
ACCACCTTAACGTCACTCGGTAATCTTTCAGCCGAATTAAGTACTAATGAGTTCAAGTCGGTTGTGCA  
TCGAATTAAGATCAAGGCTAATACCTTTATAGGTAAGAAGCCCCTTGA  
+  
FFFFFFFFFFFFFFFFFFFFFFFFFFFFFFFFFFFFFFFFFFFFFFFFFFFFFFFFFFFFFFFFFFFFFFFF  
:FFFFFFFFFFFFFFFFFFFFFFFFFFFFFFFFFFFFFFFFFFFFFFFFFFFFFFFFFFFFFFFFFFFFFFFF  
@A00721:190:HGJW7DSXY:4:2327:1805:1673\_1:N:0:TCTGCAAG+GCTGCACT  
AAGAGAATATTTATTCTTATGAGGCTCGAACTTCAACGTTTTTACAACGGAAAGACATATCGCACCC  
GAAATTTTTGGGCAGAATGCTCTTAACGCGTTCTTGAACGGTGTTTTGATCAGTCTAAGTTGGATAA  
+  
F:FF::FFFFFF:FFFF:F,FFFFFFFFFFFF::FF:FFFF,::FF:,,,F,,FFFF,F,FFF::F,FF  
FFFFFFFFF,:F,FFF:FFF,FFFF,FFF:FFFFFFFF::,FFFFFFFFFFFF::FFFFFFFFF,,FFFF  
@A00721:190:HGJW7DSXY:4:2560:24288:25019\_2:N:0:TCTGCAAG+GCTGCACT  
TCAATTGATAGATTGGGTCAACAATAGGGACGCTAGTATACTTCGTAAAGTCGACAGCGAAATGGTCA  
ATATTGATAATTGGACCGACTATATGACCTATTTTAAGCTCATGGTGA  
+  
FFFFFFFFFFFFFFFFFFFFFFFFFFFFFFFFFFFFFFFFFFFFFFFFFFFFFFFFFFFFFFFFFFFFFFFF  
FFFFFFFFFFFFFFFFFFFFFFFFFFFFFFFFFFFFFFFFFFFFFFFFFFFFFFFFFFFFFFFFFFFFFFFF  
@A00721:190:HGJW7DSXY:4:2212:17436:7044\_2:N:0:TCTGCAAG+GCTGCACT  
GTTCTTGTGAGGAGAGTCAAACAGTGTCTTTTACCCAACATTTTTATGTATACAGAGATGACCAAGTGA  
CGATTTCTCCCGGAAGCTCTTCTCTCTCTTAGGAGGTCATGATGACTA  
+

FFFFFFFFFFFFFFFFFFFFFFFFFFFFFFFFFFFFFFFFFFFFFFFFFFFFFFFFFFFFFFFF  
FFFFF:FFFFFFFFFFFFFFFFFFFFFFFFFFFFFFFFFFFFFFFFFFFFFFFF  
@A00721:190:HGJW7DSXY:4:1336:16251:8782\_1:N:0:TCTGCAAG+GCTGCACT  
CAGGAGTATCCATAACGATTTGTCATTTACCACCTTTGCTCAACGACGAAGTGGAACGGCCAACACTT  
TCTTTGGTAATTGTATGATCACTTTGATGATTTTATCACTTTATTATGACCTTGAAAGTTTTTCGGCT  
GTG  
+  
FFFFFFFFFFFFFFFF:FFFFFFFFFFFFFFFFFFFFFFFFFFFFFFFFFFFFFFFFFFFFFFFF  
FFFFFFFFFFFFFFFF:FFFFFFFFFFFFFFFFFFFFFFFFFFFFFFFF:FFFFFF:FFFFFFFFFFFFFFFF  
FFF  
@A00721:190:HGJW7DSXY:4:2326:32226:5791\_1:N:0:TCTGCAAG+GCTGCACT  
CGATATTCGATTGAGGGTCGTTATACCTATTCGGCTATCTGTGCTTTGAATTGTATAAGATCAAATTT  
TAAACGATTCCGAGAGGTTTATCCTGATGTGGAGGGAGTTCTTGAAGCATCCCGACCTTTCCTTGTGA  
AAA  
+  
FF:FF:FFFFFFFFFFFFFFFF:FFFFF:FF::FFFFFFFF:FFFFFFFFFFFFFFFFFFFF  
:FF:FFFFFFFFFFFFFFFFFFFFFFFFFFFFFFFFFFFFFFFFFFFFFFFFFFFFFFFFFFFF  
FFF  
@A00721:190:HGJW7DSXY:4:1528:32859:30718\_2:N:0:TCTGCAAG+GCTGCACT  
CGTATCTCAAAGATCGACTTCGAGACAGGTGATATTGTTGAGCGAGAGCGACCAAGATCTAAATTCGG  
TAACGGTGCGTGGCGCTTTATTTTAAAAAGCTCCCTCCTCTCGCAAGT  
+  
FFFFFFFFFFFFFFFFFFFFFFFFFFFFFFFFFFFFFFFFFFFFFFFFFFFFFFFFFFFF  
FFFFFFFFFFFFFFFFFFFFFFFFFFFFFFFFFFFFFFFFFFFFFFFFFFFF  
@A00721:190:HGJW7DSXY:4:2215:16071:3270\_1:N:0:TCTGCAAG+GCTGCACT  
TGACGATCATTAAGACTCTTTCTTCTTTGTTTCCTTCTTTGCACTGATTTTTCCTCATCAGCTTGT  
GTTTTACCTAATCTGTGTTTTTACGATAACAACTATCAGTTGATTAAGACTCTCCGAAAGGCGAACT  
TTG  
+  
FFFFFFFFFFFFFFFF:FFFFFFFFFFFFFFFFFFFFFFFFFFFFFFFFFFFFFFFFFFFF  
F:FFFFFFFFFFFFFFFFFFFFFFFFFFFFFFFFFFFFFFFFFFFFFFFFFFFFFFFFFFFF  
FFF  
@A00721:190:HGJW7DSXY:4:2664:3613:23187\_2:N:0:TCTGCAAG+GCTGCACT  
GGGTGAAGCACAACGTTTGACCGTGACGAAGTGTGGTGTCTTGATCTACGTTACGGATATACTCTCC  
TTGAGTTCACTCGTAAGGACACTACCACTTATTACGATATTTCTTTAG  
+  
FFFFFFFFFFFFFFFFFFFFFFFFFFFFFFFF:FFFFFF:FFFFFFFFFFFF:FFFFFFFFF,FFFFFFFF  
FFFFF,FFFFFFFFFFFFFFFFFFFF,FFFFFFFFF:F,:FF:FFFF,  
@A00721:190:HGJW7DSXY:4:2154:20763:16501\_2:N:0:TCTGCAAG+GCTGCACT  
ATCACTCATTTTAGTGAGATTATTAACGCACTAAACGTCTTCGACAACAGCAGGGGTTTTCGAA  
TAGTGATAGCCACCCGCCTTACAGAGGGGCAGCAGCATGACCATAATT  
+  
FFFFFFFFFFFFFFFFFFFFFFFFFFFFFFFFFFFFFFFFFFFFFFFFFFFFFFFFFFFF  
FFFFFFFFFFFFFFFFFFFFFFFFFFFFFFFFFFFFFFFFFFFFFFFFFFFF  
@A00721:190:HGJW7DSXY:4:2533:28402:9001\_2:N:0:TCTGCAAG+GCTGCACT  
TGTCTGTCTCGCCTCTTCGAATGAAGTTTTAATGCTTAACAACAATGATAGTGAATTTATACCTACAA  
TCATTGGTTTTTCTAATAATGATGACACTATTGTTTATGGATATGATG  
+  
:,:F,FFFFFFFFF,FFFFF:FF,FFFFFF,FFFFFF:FFFFFF,FFFF:,FFFFFF:,F:F,FF  
F:FF:, :FFF,FF:F:FFF:FF:,FFFFFF:FFFFFF,,FFFF:::  
@A00721:190:HGJW7DSXY:4:1551:18069:4382\_1:N:0:TCTGCAAG+GCTGCACT  
AGACGTGCTAAATTAACCATTTGTACGATGTCGTCTGTCTCGCGATCACTTTTCTACTAAGAATTGG  
TCCTACTTTTGGACAAGGCCAACTTCGTAATCTTCATGAGATCGTTTCTTTCTTTATCTCTTTGGTTG  
TTA

[illegible]

@A00721:190:HGJW7DSXY:4:1510:16125:31704\_2:N:0:TCTGCAAG+GCTGCACT  
GTTGTTATCTCGAAAAGTCTCTTCTAAAAGGAACGTCAGTTCTAACCCAAAGAGAATATCTAAAATAT  
TTACAAAATCTTACCACTATCTACGAACCTAAAGTTCTGAAGACGTTG

+

FFFFFFFFFFFFFFFFFFFFFFFFFFFFFFFFFFFFFFFFFFFFFFFFFFFFFFFFFFFFFFFFFFFFFFFF  
FFFFFFFFFFFFFFFFFFFFFFFFFFFFFFFFFFFFFFFFFFFFFFFFFFFFFFFFFFFFFFFFFFFFFFFF

@A00721:190:HGJW7DSXY:4:1352:31774:16219\_1:N:0:TCTGCAAG+GCTGCACT  
GGCACTACCTCGGTACAATCTTACTTGGAACGAAGGCGACCTGTTCCGGAGTTTTTACGGGATCCGGA  
ATGTTCTGTCTATATTAGGTGAAGCGAAATACGATTTCAACGTCACCGAGTTTCGTTTCG  
TAC

+

FFFFFFFFFFFF:FFFFFFFF:FFFFFFFFFFFFFFFFFFFFFFFFFFFFFFFFFFFFFFFFFFFFFFFF  
FFFFFFFFFFFFFFFFFFFFFFFFFFFFFFFFFFFFFFFFFFFFFFFFFFFFFFFFFFFFFFFFFFFFFFFF  
FFF

@A00721:190:HGJW7DSXY:4:1424:5276:26913\_1:N:0:TCTGCAAG+GCTGCACT  
ATAAAGAACTTCATGAATTTTCAGAGGATGAAAAATTTTCTTCCTTGATTTTAATATAAAGAACTCT  
TACCAGACTCCTACTACAGGAGGCAGTCTTCTGATCGTAAGAAGTTTATAAGGAACATATCCATTG  
TTG

+

FFFFFFFFFFFFFFFFFFFFFFFFFFFFFFFFFFFFFFFFFFFFFFFFFFFFFFFFFFFFFFFFFFFFFFFF  
,FFFFFFFFFFFFFFFFFFFFFFFFFFFFFFFFFFFFFFFFFFFFFFFFFFFFFFFFFFFFFFFFFFFFFFFF  
FFF

@A00721:190:HGJW7DSXY:4:1369:9399:22968\_1:N:0:TCTGCAAG+GCTGCACT  
CTCTAAGTGGAATACTGTCTTTCCAAGCTTACCTGTATCTTCAATGAAATTGGACTCTTCGATAGGG  
GACATTTTATCGTGGGCTTCCGTAAAGGAAGATCTGTTATCGACGGTTTATCGTTTACGAAGTATCA  
CTC

+

FFFFFFFFFFFFFF,FFFFFFFFFFFFFFFFFFFFFFFFFFFFFFFFFFFFFFFFFFFFFFFFFFFFFFFF  
FFFFFFFFFFFFFFFFFFFFFFFFFFFFFFFFFFFFFFFFFFFFFFFFFFFFFFFFFFFFFFFFFFFFFFFF  
FFF

@A00721:190:HGJW7DSXY:4:1567:14290:23171\_1:N:0:TCTGCAAG+GCTGCACT  
ACAGAAGATGATGTTAGAGTAGAATTCCTGAAGAGTCCTTCCGTAACCAACTTCTTGACAATTTTCTT  
CAATCCTTCGATAATAGTTAAATCTAGGATTATGTCTGTGTTGAAAGACTTTCTACCGATAAGGGTCA  
CTA

+

FFFFFFFFFFFFFF:F:FFFFFFFFFFFFFFFFFFFFFFFF::FFFF,FFFFFFFFFFFFFFFF,,:  
FFFFFF:FFF,F:FF:FFFFFF:FFFFFF:F:FFF,:FFFF:FFFFFFFFFFFFFFFF:FFFF:FFF  
FFF

@A00721:190:HGJW7DSXY:4:2448:14832:28119\_2:N:0:TCTGCAAG+GCTGCACT  
ATTGACTGATTATCTAAAGATTGAAGGAAAATTTATCCTCGTTTAACTTACTTAGACTTTCCTACGA  
TACAAATGATAACTTCTAATTTACGTTTGCTACTCAGAGCTGGTCCTC

+

FFFFFFFFFFFFFFFFFFFFFFFFFFFFFFFFFFFFFFFFFFFFFFFFFFFFFFFFFFFFFFFFFFFFFFFF  
FFFFFFFFFFFFFFFFFFFFFFFFFFFFFFFFFFFFFFFFFFFFFFFFFFFFFFFFFFFFFFFFFFFFFFFF

@A00721:190:HGJW7DSXY:4:1443:30861:1204\_2:N:0:TCTGCAAG+GCTGCACT  
CAGGAGTCCCGGCATTTGATAATAATGACGAGACTTTCGTCATAATCGCTGCATATTACGGATTACAC  
GGTACCAGCGCATCTCGTGTGCGAGCCTCGACCCGATTATATGGTATTA

+

FFFFFFFFFFFFFFFFFFFFFFFFFFFFFFFFFFFFFFFFFFFFFFFFFFFFFFFFFFFFFFFFFFFFFFFF  
FFFFFFFFFFFFFFFFFFFFFFFFFFFFFFFFFFFFFFFFFFFFFFFFFFFFFFFFFFFFFFFFFFFFFFFF

@A00721:190:HGJW7DSXY:4:2438:31557:15687\_1:N:0:TCTGCAAG+GCTGCACT  
AACTATGTTATGTTCTCTGATCATTTTGACAATCTCTTATTATAATAAATAAATAAATAATATTACTA  
ATGGCAAATAGTGGAAGGCTCCAGTCAACACTAGTTTCGAGTGCTGCTTTGGATTACGATGACGTGAG  
AAT

+  
FF,FFF,FFFFFF::FF:F:FFFFFFFFFFFFFFFFFFFF,F:FFFFFFFFFFFFFFFFFFFFFFFF:FFFF  
FFF:FFFFFFFFFFFFFFFFFFFFFFFFFFFFFFFFFFFFFFFFFFFFFFFFFFFFFFFFFFFFFFFF  
FFF  
@A00721:190:HGJW7DSXY:4:1659:2962:11036\_1:N:0:TCTGCAAG+GCTGCACT  
TTTACCTCGACCAACATTAAGGCGGCGGCGACTAATCTTAAAGCTTCACCCAAAATGAAGGACACTTC  
GAAACTGAATAATGATGCACTACAAACAAGTATCGCTAATCATCTGAAAAAGGCTCTAAAGGACACTA  
TAC  
+  
FFFFFFFFFFFFFFFF:FFFFFFFFFFFFFFFF:FFFFFFFFFFFFFFFFFFFFFFFFFFFFFFFFFFFF  
FFFFFFFFFFFFFFFFFFFFFFFFFFFFFFFFFFFFFFFFFFFFFFFFFFFFFFFFFFFFFFFFFFFF  
FFF  
@A00721:190:HGJW7DSXY:4:2124:27001:31125\_1:N:0:TCTGCAAG+GCTGCACT  
GAGGATATTGCCATTGTGGTACGAATTGGTCCAACATTTACCACCAAATTCTTTTGATACAACCTCTA  
GCCTTCAAGTGGGGTATGCCTGCGGAATACGCTTGCTATTACCAGATTGGTTCAACCCGTTGATGC  
TAT  
+  
:FFFF,:::,FF,FFFF::FFFFFFFFFFFFFF,F:F:FF,FFF,:F:, :FFF,FFFFFFFF,FF,F:F:  
F,FFF:,FFFFFF:FFFFFFFFFFFFFF,FFFF::FFFF,F,:F,F::FFFF:FFFF:FFFFFF:  
FFF  
@A00721:190:HGJW7DSXY:4:1654:7301:1454\_2:N:0:TCTGCAAG+GCTGCACT  
TATTCAAGCTTGTCGTTTAAAGACTGCAGAGGCTGTCAAACAAGCCCAGACTCAAGGAGTCCAATCAA  
AGGTTTTGAATTTAGCTCAACTGGGGAGACGTGCTTAAATGGGTGATA  
+  
FFFFFFFFF:FFFFFFFF,:FFFFFFFFFFFFFF,FFFFFFFFFFFFFFFFFFFFFFFFFFFFFFFFFFFF  
FFFFFFFFFFFFFFFFFFFF:F::FFF:FFFFFFFFFFFF:FFFFFFFFFFFF  
@A00721:190:HGJW7DSXY:4:1534:8106:3129\_1:N:0:TCTGCAAG+GCTGCACT  
AGATAGTGGGATAATAGTTCTACCGATACGTAGTGAACGCGTTCGTAGAACCAAGTACTTTCCGTCTG  
AAGAGTTTAGAGCTGCTATTGATTATGTAACCGATAGGAGTTGTATAGTTGAAGATGTGGCTTTAGAC  
GAT  
+  
FFFFFFFFF:FFFFFFFFFFFFFFFFFFFFFFFFFFFFFFFFFFFFFFFFFFFFFFFFFFFFFFFFFFFF:FFFFFFF  
FFFFFFFFFFFFFFFFFFFFFFFFFFFFFFFFFFFFFFFFFFFFFFFFFFFFFFFFFFFFFFFFFFFF  
FFF  
@A00721:190:HGJW7DSXY:4:2224:10339:10911\_2:N:0:TCTGCAAG+GCTGCACT  
ATGTTGACTGACGAAGATTTTCCACAGATTTGTCTACGTTGCAGATCGCCACTCCAAACACTATATA  
CATTATAAAATATAAAAAATAAGGGAGTCATAACTTTTGTACCAAATT  
+  
FFFFFFFFFFFFFFFFFFFFFFFFFFFFFFFFFFFFFFFFFFFFFFFFFFFFFFFFFFFFFFFFFFFF  
FFFFFF:FFFFFFFFFFFFFFFFFFFFFFFFFFFFFFFFFFFFFFFFFFFFFFFFFFFF  
@A00721:190:HGJW7DSXY:4:1267:18376:19852\_1:N:0:TCTGCAAG+GCTGCACT  
CGAAGTCTCTGATTTTATTAATCATTACTTTAACGATCTCTCGGTCATTTACTCTGTACTTGATCTAC  
GTCGTTTAACTGTCGGAACAACCTTTACTTAGAATGACTCTATCTTTTCAGACACTTCTTATATTATT  
TA  
+  
FFFFFFFFFFFFFFFFFFFFFFFFFFFFFFFFFFFFFFFFFFFFFFFFFFFFFFFFFFFFFFFFFFFF  
FFFFFFFFFFFF:FFFFFFFFFFFFFFFFFFFFFFFFFFFFFFFFFFFF:FFFF:FFFFFFFFFFFF  
FF  
@A00721:190:HGJW7DSXY:4:2348:28989:21104\_1:N:0:TCTGCAAG+GCTGCACT  
CTCTATCGTTTTCTGCTTTTTCTTAGCTAATAGATTAATAAAGGATGAGTACGAAAACCAACTCTTCG  
TTACGAGACCTGATGGTAGAATAGATTTAGTCTCTACACCCATCTCAACGAGGATAAAGCGAGTTTTTC  
CGT  
+  
FFFFFFFFFFFFFFFF:FFFFFFFFFFFF,FFFFFFFFFFFFFF:F:FFF,FFFFFFFFFFFFFFFF:FFF

@A00721:190:HGJW7DSXY:4:1456:13458:25895\_2:N:0:TCTGCAAG+GCTGCACT  
AGAGATCATCCGAAACGACTCGAAACCGAGACGCCGTAGATCAAAGTCCCTTCTAACTTTAGATTAT  
GAATCCTGCCAGATCGGAAGAGCGTCGTGTAGGGAAAGAGTGTAGTGC

```

+
FFFFFFFFFFFFFFFFFFFFFFFFFFFFFFFFFFFFFFFFFFFFFFFFFFFFFFFFFFFFFFFFFFFFFFFF
FFFFFFFFFFFFFFFFFFFFFFFFFFFFFFFFFFFFFFFFFFFFFFFFFFFFFFFFFFFFFFFFFFFFFFFF
@A00721:190:HGJW7DSXY:4:1253:1099:36119_2:N:0:TCTGCAAG+GCTGCACT
CCTTCGATGTTTATATTTTCTATAAGGGAAAATAGCAATAATCAAATTTTCGACAAATTTTAGAACTT
TATTTCAGAACTCTCTCCGATCACCTTGGTGTGATCTCCCGGAGGATC

```

```

+
FFFFFFFFFFFFFFFFFFFFFFFFFFFFFFFFFFFFFFFFFFFFFFFFFFFFFFFFFFFFFFFFFFFFFFFF
FFFFFFFFFFFFFFFFFFFFFFFFFFFFFFFFFFFFFFFFFFFFFFFFFFFFFFFFFFFFFFFFFFFFFFFF
@A00721:190:HGJW7DSXY:4:1222:1108:8390_1:N:0:TCTGCAAG+GCTGCACT
CTTGACTGTTGATAATATTACAATAGCTCTTTCTCAGAAGATTAGAGAAGTAACCGGTGAACACGTCG
GTAGCATTGATTTACTTTTACCGTTAGAACTGAAAAAGATTCTTTTCGAAAAGAAACCTATAAGTTAC
AAA

```

```
+
FFFFFFFFFFFFFF:FFFFFFFFFFFFFFFFFFFFFFFFFFFFFFFFFFFFFFFFFFFFFFFFFFFFFF
FFFFFFFFFFFFFFFFFFFFFFFFFFFFFFFFFFFFFFFFFFFFFFFFFFFFFFFFFFFFFFFFFFFFFF
FFF
@A00721:190:HGJW7DSXY:4:1511:32334:11772_2:N:0:TCTGCAAG+GCTGCACT
GAAATTTTtagAAAACTCCATTGTATAGTTCAAGGAGTACTTAATTCAATAGCTTTAGTATTATTTA
CTATCGCCTTTATTGAAAATTGTATAAGATTTAATTGCTTACACAAAA
```

[illegible]



@A00721:190:HGJW7DSXY:4:2611:3061:11710\_2:N:0:TCTGCAAG+GCTGCACT  
ACCACTCAAAGGAAACGGGCTGTTGCCAGAGGAAAGCAGCGACCACCGAGGTCGCTCGTAACATTGA  
CGGCAGTCCCGTCATCTCTGTGGAACTGAGGCAGTACCTCAGTCAAA

+

FFFFFF:F,FFFFFFFF:FFFFFFFFFFFFFF,FF:FFFFFFFF:FFFFFFFF,FFFFFF  
FFFF:FFFFFFFFFFFFFFFFFFFFFFFFFFFFFFFF,FF:FFF:FFF

@A00721:190:HGJW7DSXY:4:1627:23303:25911\_2:N:0:TCTGCAAG+GCTGCACT  
CACTCCCATGCCAATCAATGATGTGACTATACAGTTCGGCCATTTCAAGAGTGGTCAATACGTCGTGG  
GAGGTACTGAAGCCTTCCCTCCGCTGGCACGAAGAACAACCTCCCAAGC

+

FFFFFFFFFFFFFFFFFFFFFFFFFFFFFFFFFFFFFFFF,FFFFFFFFFFFFFFFFFFFFFFFF  
FFFFFFFFFFFFFFFFFFFFFFFFFFFFFFFFFFFFFFFFFFFFFFFFFFFFFFFF

@A00721:190:HGJW7DSXY:4:2545:3893:7012\_2:N:0:TCTGCAAG+GCTGCACT  
TGACCAGAAATGAAAAGGGTTTACCAGGGTAGTCTCTAAGTCTACCAGGAAGAGGGGAAATGTCCCCA  
AAACTGAGAAGAATAAAGGGAAAGGTCCATCAGGACCTAAGAAGGGGA

+

FFFFFFFFFFFFFFFFFFFFFFFFFFFFFFFFFFFFFFFFFFFFFFFFFFFFFFFFFFFFFFFF  
FFFFFFFFFFFFFFFFFFFFFFFFFFFFFFFFFFFFFFFFFFFFFFFFFFFFFFFF

@A00721:190:HGJW7DSXY:4:2420:23149:6981\_1:N:0:TCTGCAAG+GCTGCACT  
CTCCCACCATCTGGGGTTGGGAATAAGAAATCTGCACGGGCCAAAGAGGCCGCTGCTACGAAGTCGCT  
GAAGGCGGCTTGGGTCAATTAAGGGTAGCTGTAAAGTTGCGCCTGCCGACCCCATCTTTGAGACCAAGA  
CTC

+

FFFFFFFFFFFFFFFFFFFFFFFFFFFFFFFFFFFFFFFFFFFFFFFFFFFFFFFFFFFFFFFF  
FFFFFFFFFFFFFFFFFFFFFFFFFFFFFFFFFFFFFFFFFFFFFFFFFFFFFFFF  
FFF

@A00721:190:HGJW7DSXY:4:1456:11107:33098\_2:N:0:TCTGCAAG+GCTGCACT  
AAATCTGTTGAATTCGTCACTGAGGACGAAGGTGAGAGGACTTTTGGCTACTGGCGACAACTGAGAG  
CAGTCGCTGGGGAAGAGAATTGCGTGGGTGAAGGCCGACGCTTCGA

+

F:FFF:FFFFFFFFFFFFFFFFFFFFFFFFFFFFFFFFFFFFFFFFFFFFFFFFFFFFFFFF,FFFFFF  
FFFFFF:FFFFFFFF:FFF:FFFFFF:FFFFFFFFFFFFFF

@A00721:190:HGJW7DSXY:4:1664:24279:6840\_1:N:0:TCTGCAAG+GCTGCACT  
GTCAACGGCGTTTGGAGATTTTATCCGCGCTTAAGTATGGGGCGAAGATCCCCTATGGAGTCTTGAA  
GGACTTAGGTTGGCATATTTATGCCGACGATAATAAGCATGTCACCCTTAAGCACCGAGGTAAGCTCG  
GGA

+

FFFFFFF:F:FFFFFFFF,FFFFFFFFFFFFFFFFFFFFFFFFFFFFFFFFFFFFFFFF:FFFFF  
FFFFFFFFFFFFFFFFFFFFFFFFFFFFFFFFFFFFFFFFFFFFFFFFFFFFFFFF  
FFF

@A00721:190:HGJW7DSXY:4:1329:28248:7733\_1:N:0:TCTGCAAG+GCTGCACT  
TCTCACTATTTTTGCCAGAAATGCGGGCCTTCTGACTGATGAGGTTAAACTCTTGCTCCTTCTGTGG  
GTGAGGGTTTTTGTATATTAATCACTGGTTCTGGGAGGCTGCTTTCCTCCATAATTACAACCTCTTTA  
GAG

+

FFFFFFFFFFFFFFFFFFFFFFFFFFFFFFFFFFFFFFFF:FFF:FFFFFFFFFFFFFFFF  
FFFFFF:FFFFFFFFFFFFFFFFFFFFFFFFFFFFFFFF:FFFFFFFFFFFFFFFF  
FFF

@A00721:190:HGJW7DSXY:4:2630:10728:4664\_2:N:0:TCTGCAAG+GCTGCACT  
AAATTCACATATGGTAGACGTTGTCACTTTTCTTGAAAATTTTCTTTCTCCGTCATTGGGG  
ATTTGATGTGAGAAGGTGGAAGGTGTCAAGGGTCTTCTTCATGCTGA

+

FFFFFFF:FF:FFFFFFFF:FFFFFFFFFFFFFFFFFFFFFFFFFFFFFFFF:FFFF  
:FFFF:FFFFFFFFFFFFFFFF,FFFFFFFFFFFFFFFF

@A00721:190:HGJW7DSXY:4:1570:8648:4664\_2:N:0:TCTGCAAG+GCTGCACT  
ATGATTGATAGTTACGGCTCGTATCGAGTTGGAGGGAGGAAGTTCTCCGAAATTAAAGACGGGGGGAT  
TAAGAGTCCAGCTGTAAGTGCATTTAGAGAGGGGAGCTCTGAAAAG

+

F:FFFFFFFFF:,FF:FF::FFFFFFFFFFFF:FFFFFFFFFFFFFFFFFFFFFFFFFFFFFFFF:FFFFFFFF  
FFFFFFFF:FFFFFFFFFFFF:FFFFFFFFFFFF:FFFFFFFF:FFFFFFFF

@A00721:190:HGJW7DSXY:4:1545:19488:5274\_2:N:0:TCTGCAAG+GCTGCACT  
GTTTGAGGAAGGCTCTAGAGAAGATCTCACCACCTGGAGAAGGCAAGTGGAGAGTCCAGAAGTTGATG  
AAGAAGGATTATTTGAAGCAGGGGTTACCACTTCCTAAGGTGGATGAG

+

FFFFFFFFFFFFFFFFFFFF:FFFFFFFFFFFFFFFFFFFFFFFFFFFFFFFF:FFFFFFFFFFFFFFFFFFFFFFFF  
FFFFFFFFFFFFFFFFFFFFFFFFFFFFFFFFFFFFFFFFFFFFFFFFFFFFFFFFFFFFFFFF,FFF

@A00721:190:HGJW7DSXY:4:1562:31123:4633\_2:N:0:TCTGCAAG+GCTGCACT  
GATCTTGAGGACGTACATTTAACGTGGCAGAATTCGGTAACCTTACCATATTGTTCTTCCGGGAAGTT  
GTGGGATTTAACTTTGACTCAACTACTCCGATCAGATCCGGATGGTTT

+

FFF:FFFFF,FFFFFFFFFFFF,FFFFFF:FFFF:FFFFFFFFFFFFFFFF:FFFFFFFF::F:FF:F  
FFFFFFFFF:,FFFFFF:FFFFFFFFFFFFFFFF:FFFFFFFF

@A00721:190:HGJW7DSXY:4:1614:13340:8970\_2:N:0:TCTGCAAG+GCTGCACT  
CAGATACTACCGATAAGGTGAAAAATATGCAGGTCAAAGATTCTGTAGCTCTGAGGGCGGTTGAGGGA  
GCCGTTTTGGCCGACTTTAACTATTCTAAGAGTCTTTATGATTCAAAA

+

FFFFFFFFFFFFFFFFFFFFFFFFFFFFFFFF:FFFFFFFFFFFFFFFFFFFFFFFFFFFFFFFF:FFFFFFFF  
FFFFFFFFFFFFFFFFFFFFFFFF:FFFFFFFFFFFFFFFFFFFFFFFFFFFFFFFF

@A00721:190:HGJW7DSXY:4:2125:26648:18991\_1:N:0:TCTGCAAG+GCTGCACT  
AGAATTGCGGTTGAAGTTCACCCATTCTATCTTGAATGCTCACGCCGTCGCAGCCATATCGAGACTAT  
GTTATAATCACTTGTTAAAGTACAGATTTAGTGATTTAGATATTATTGATATTGGAGGCGATATTCGT  
TTT

+

FFFFFFFFFFFFFFFFFFFFFFFFFFFFFFFF:FFFFFFFFFFFF:FFFFFFFFFFFFFFFF:FFFFF:FFFF,FFF  
FFFFFFFFFFFFFFFFFFFFFFFFFFFFFFFF:FFFFFFFFFFFFFFFFFFFFFFFFFFFFFFFF:FFFFFFFFFFFF  
FFF

@A00721:190:HGJW7DSXY:4:2215:4300:18333\_1:N:0:TCTGCAAG+GCTGCACT  
ACATATTTGCAACCCTATTCTTGATGTGAAAGATGCATCGAGGTATACGTCTAGGAACATTGATTGGG  
AACGTACCTACTCACGAGACGTCATGAAAGCTATCGGAGGGAAGCAAAATGTTTCGTTCTGTTACAAG  
AAC

+

FFFF:FFFFFFFFFFFF:FFFFFFFFFFFFFFFFFFFFFFFFFFFFFFFF:FFFFFFFFFFFFFFFFFFFF  
FFFFFFFFF:FFFFFFFFFFFFFFFFFFFFFFFFFFFFFFFFFFFFFFFFFFFFFFFFFFFFFFFFFFFFFFFF  
FFF

@A00721:190:HGJW7DSXY:4:1467:13386:14403\_1:N:0:TCTGCAAG+GCTGCACT  
CTCAGTTGCGATAGCTGTAGAGGTATACGATATCTCTCTTGATGATGTAGCCACTATAATGCTTAAGA  
GAGAGATTGATGTATGTCATTTCTGTTAGTTTGTCCCGCGAATTATTGGACACGATGAAAAATGAC  
ATA

+

FFFFFFFFFFFFFFFFFFFFFFFFFFFFFFFFFFFFFFFFFFFFFFFFFFFFFFFFFFFFFFFFFFFFFFFF  
FFFFFFFFFFFFFFFFFFFFFFFFFFFFFFFFFFFFFFFFFFFFFFFFFFFFFFFFFFFFFFFFFFFFFFFF  
FFF

@A00721:190:HGJW7DSXY:4:2449:11948:15076\_1:N:0:TCTGCAAG+GCTGCACT  
TCATGGAGATGATGGCGCATCACTTGATTACTATATGCCCGAAGGATTGGGTTATTCTCACAAAGATA  
AGATTTTATCTTTCTTCAAACACCCTGTTTTCTTAAGGGCGGACAATTGTTCCATTGTGAACCTTG  
GGG

+

FFFFFFFFFFFFFFFFFFFF:FFFFFFFFFFFFFFFFFFFFFFFFFFFFFFFFFFFFFFFFFFFFFFFF:FFFF

FFFFFFFFFFFFFFFFFFFF:FF:FFFFFFFFFFFFFFFFFFFFFFFFFFFFFFFFFFFFFFFFFFFF  
FFF

@A00721:190:HGJW7DSXY:4:1558:5584:27226\_1:N:0:TCTGCAAG+GCTGCACT  
TGAGTTCCGAATAACTCGTAATAAATCTTTCTCTAGTGGACAATTCAGAATACCTATTTCCGTACCAA  
GAGCCACTGCCAATCTCATCGCTATACGCATACCTGATTGGAAGAAGCGAGGTTCTGTTCTCAATAAA  
AAT

+

FFFFFFFFFFFFFFFFFFFF:FFFFFFFFFFFFFFFFFFFFFFFFFFFFFFFFFFFFFFFFFFFF  
FFFFFFFFFFFFFFFFFFFFFFFFFFFFFFFFFFFFFFFFFFFFFFFFFFFFFFFFFFFFFFFFFFFF  
FF:

@A00721:190:HGJW7DSXY:4:1275:15221:9345\_1:N:0:TCTGCAAG+GCTGCACT  
AAGGGCTATTACGTACGTCATGGGGATCACTTCTTCGGTCAATGACAAAACCTTCGAATATGTTACGA  
CATGGCTTCGTAACAACAGTGCAGAGATTGTCATCTCGGGGAAAGTGATTCACCAAGATGTTTCATATA  
GAT

+

FFFFFFFFFFFFFFFFFFFFFFFFFFFFFFFFFFFFFFFFFFFFFFFFFFFFFFFFFFFFFFFFFFFF  
FFFFFFFFFFFFFFFFFFFFFFFFFFFFFFFFFFFFFFFFFFFFFFFFFFFFFFFFFFFFFFFFFFFF  
FFF

@A00721:190:HGJW7DSXY:4:1236:17626:4617\_1:N:0:TCTGCAAG+GCTGCACT  
AAGGTCGCAGCGATCTTACTCGTTATCGGAGCTAAGAAGAAGACTTTGGGTACACGTTATGCTCGCAA  
ACTTAACGTTAGTACCGGAGGTGATCTCTCTGCTTCTGCGTTACTGAGAGAAAAGATTCAGGACGCCT  
ACG

+

FFFFFFFFFFFF:FFFFFFFFF,FFFFFF:FFFFFFFFFFFFFF:FFFFFFFFFFFFFFFFFFFF  
FFFFFFFFFFFFFFFFFFFFFFFFFFFF:FFFFFFFFFFFFFFFFFFFFFFFFFFFFFFFFFFFF  
FFF

@A00721:190:HGJW7DSXY:4:2604:29740:14418\_2:N:0:TCTGCAAG+GCTGCACT  
ATCTTGAAACTACGGTCCTTATCAAAGAAAATGGTGAACCGGTCTCTAAATCTTTTGAGATTGAGAAG  
ATTGAAGAACACGTCAAGAAGTCGCTCGGCGTTGTTCTTGAAAACCAA

+

FFFFFFFFFFFFFFFFFFFF:FFF,FFFFFFFFFFFFFFFFFFFFFFFFFFFF,F:FFFF:FFFFFF  
,FF:FFFFFFFFFFFF:FF,FF:F:FFFF,FFFFFF:FFF,F:FF

@A00721:190:HGJW7DSXY:4:2229:26024:2002\_1:N:0:TCTGCAAG+GCTGCACT  
GCTGATCATGGAGTCTTTGTACCTTCTGTCAAACCTTCGAGGTTACGCTACGAGAGGTGATCCCGGATG  
TGGATTGAAGGCTGGCTCTAAGGGAGACTCCTTCTTTTGAATGTTGTAAAGAATTGGGTTGAGAAGT  
GTG

+

FF,FF:FF:FFFFFFFFFFFF:FFFFFFFFFFFF:FFFFFFFFFFFFFFFFFFFFFFFFFFFF:FF  
:FFFFFFFFFFFFFFFFFFFF:FFFFFFFFF,FFFFFF:FFF:FF:FF:FFFFFFFFFFFFFFFF  
FFF

@A00721:190:HGJW7DSXY:4:2463:11758:36886\_1:N:0:TCTGCAAG+GCTGCACT  
ATAACTTCTTTTTCAAAAATGCGGATGGGTCTACTGATGTTTCTACAGAGTGAGTCGTTTCAACA  
CTTATCACCACCTTTTCAAAGGAAAATAATTGGTGATGAAAATACGTATGTCGGTGGGGTTCTCAAGGC  
TCT

+

FFF,FF:FF:FFFFFF:FFFFFFFFFFFF:FFFFFFFFFFFFFFFFFFFFFFFFFFFF  
FF:FFFF:F,FFFFFF:FFFF:FF:FFFFFFFFFFFFFFFFFFFFFFFFFFFFFFFFFFFF  
FFF

@A00721:190:HGJW7DSXY:4:2246:20247:18552\_1:N:0:TCTGCAAG+GCTGCACT  
GATTCTTAAAAGAAGTTTATTA AAAACTTCAGAGTCTCTTGGAAGTCCAGGTAGCTAATGTTCTTGCAA  
TAGCCACAGACTTTCTGGGAAAAGAGACCTCTGTTGGTAGAGGAGTTGAGAGAATTACTCAGATTCAA  
TCT

+

FFFF,F:FFFFFFFFFFFFFFFFFFFFFFFFFFFFFFFFFFFF::FFFFF,FFFFFFFFFFFF



@A00721:190:HGJW7DSXY:4:1169:2410:1532\_1:N:0:TCTGCAAG+GCTGCACT  
AGACCAGAAACGTAACAAGAATAAAGGTAGGAAGGGGAGAAAACAGAACAAGCGAGCGGTTGAAG  
AGAAAACGATATGGTTGCGGCTGATCGTACCCCAATTCCTGCTAGAAAGATCACTCTCGGCGATACC  
ACT

+

FFF::FFFF:FFFFFFFFFFFFFF:FFFF:FFFFFFFFFFFFFFF:FF::F:FF:F:FFFFFF  
FFFF:FFFFFFFF:FFF,FFFFFFFFFFFFFF:F:F:FFFFFFFFFFFFFFF  
F:F

@A00721:190:HGJW7DSXY:4:2219:30834:22013\_2:N:0:TCTGCAAG+GCTGCACT  
TAGTGGTCGTTCTTTTGGTGATTTTATCAAAGAGAAAGTTCTGCTAGTCGCGACGATAGTATTTATC  
GGAGTGATATTAACAAGTTAACTTCGAAGTACCACTTACAAGAGTG

+

FFFFFFFFFFFF:FFFFFFFFFFFFFF:FFFFFFFFFFFFFFF:FFFFFFFFFFFFFFF  
FF:FFFFFFFFFFFFFFF,FFFF,F

@A00721:190:HGJW7DSXY:4:2174:16839:32503\_2:N:0:TCTGCAAG+GCTGCACT  
CTGCTAATCGTAATTCGCGAGAAGAGATAGTACTAAAGTTTGGCACTTCTAGTTCATCGCGGTATT  
TGTGAAATTAAGACAGACGTGAAAGTTATGATGAGTGATCGTATTAGA

+

FFFFFFFFFFFF:FFFFFFFFFFFFFF:FFFFFFFFFFFFFFF:FFFFFFFFFFFFFFF  
:FFFFFFFFFFFFFFF

@A00721:190:HGJW7DSXY:4:2227:7581:28839\_1:N:0:TCTGCAAG+GCTGCACT  
CGACGAATTATTCATGATTCACGCTGGTCAGACCCTTTTCTTACACATCTACTTAAGGCGGCTTATA  
CCATAGGTTACGGTGATTCCAATCAAATCGGATTCATCAATCGTATTGATCTCCAAGTCGAACTAC  
TTC

+

FFFFF:FFFFFFFFFFFFFF:FFFFFFFFFFFFFFF:FFFFFFFFFFFFFFF:FFF:F  
FFFFFFFFFFFFFFF:FFFFFFFFFFFFFFF:FFFFFFFFFFFFFFF:FFFFFFFFFFFFFFF  
FFF

@A00721:190:HGJW7DSXY:4:2366:32090:18396\_2:N:0:TCTGCAAG+GCTGCACT  
GAGTGTCTGTTCTTATCGAAGTCTCAGTTATCGCTGCCCGCCGACGTTTGTGCGCAACTCTCAGAGGT  
TTACGGCAGAAAAATTTCTCCTGCTTGTAAATTCGAGAGAGGACACTAT

+

FFFFFFFFFFFFFF:FFFFFFFFFFFFFF,FFFFFFFFFFFFFFF  
FFFFFFFFFFFF:FFFFFFFFFFFFFF:FFFF

@A00721:190:HGJW7DSXY:4:1420:27715:12915\_1:N:0:TCTGCAAG+GCTGCACT  
AACGATGCTACTTGTGAGAGGATCAATCACAGTAAGGAAGTGTACGTTTAGCACGGGAGGTTGCAGA  
TTCAACCCCTTATATCGAGGCTATCGAGGACGATGAGTATCTTGAAGTTGTTGACGACAAGCCTCAAG  
AGG

+

FFFFFFFFFFFFFF:FFFFFFFFFFFFFF:FFFFFFFFFFFFFFF:FFFFFFFFFFFFFFF  
FFFFFFFFFF:FF,FFFFFF:FFFFFFFFFFFFFF:FFFFFFFFFFFFFFF:FFFFFFFFFFFFFFF  
FFF

@A00721:190:HGJW7DSXY:4:1677:20726:8891\_2:N:0:TCTGCAAG+GCTGCACT  
ACCACCTTAACGTCACTCGGTAATCTTTCAGCCGAATTAAGTACTAATGAGTTCAAGTCGGTTGTCGA  
TCGAATTAAGATCAAGGCTAATACCTTTATAGGTAAGAAGCCCCTTGA

+

FFFFFFFFFFFFFF:FFFFFFFFFFFFFF,FFFFFFFFFFFF  
FFFFFFFFFFFFFF:FF,FFFFFFFFFFFFFF

@A00721:190:HGJW7DSXY:4:1130:19425:12179\_2:N:0:TCTGCAAG+GCTGCACT  
TGATAGATTGGGTCAACAATAGGGACGCTAGTATACTTCGTAAAGTCGACAGCGAAATGGTCAATATT  
GATAATTGACCGACTATATGACCTATTTAAGCTCATGGTGAAAAGG

+

FFFFFFFFFFFFFF:FFFFFFFFFFFFFF,FFFFFFFFFFFFFF:FF  
FFFFFFFFFFFF:FFFFFFFFF:FFFFFFFFF:FFFFFFF

@A00721:190:HGJW7DSXY:4:2214:19280:3286\_2:N:0:TCTGCAAG+GCTGCACT  
GTTCTTGTGAGGAGAGTCAAACAGTGTCTTTTACCCAACATTTTTATGTATACAGAGATGACCAGTGA  
CGATTTCTCCCGAAGCTCTTCTCTCTCTTAGGAGGTCATGATGACTA

+

FFFFFFFFFFFFFFFFFFFFFFFFFFFFFFFFFFFFFFFFFFFFFFFFFFFFFFFFFFFFFFFFFFFFFFFFFFFFFFFF:FFFFFFFFFFFF  
FFFF:FFFFFFFFFFFFFFFFFFFFFFFFFFFFFFFFFFFFFFFFFFFFFFFFFFFFFFFFFFFFFFFFFFFFFFFF

@A00721:190:HGJW7DSXY:4:1413:27670:10958\_1:N:0:TCTGCAAG+GCTGCACT  
CAGGAGTATCCATAACGATTTGTCAATTTACCACCTTTGCTCAACGACGAAGTGGAACGGCCAACACTT  
TCTTTGGTAATTGTATGATCACTTTGATGATTTTATCACTTTATTATGACCTTGGAAGTTTTTCGGCT  
GTG

+

FFFFFFFFFFFFFFFFFFFFFFFFFFFFFFFFFFFFFFFFFFFFFFFFFFFFFFFFFFFFFFFFFFFFFFFFFFFFFFFF  
FFFFFFFFFFFFFFFFFFFFFFFFFFFFFFFFFFFFFFFFFFFFFFFFFFFFFFFFFFFFFFFFFFFFFFFFFFFFFFFF:FFFFFFFFFFFFFFFF  
FFF

@A00721:190:HGJW7DSXY:4:2345:14244:11162\_1:N:0:TCTGCAAG+GCTGCACT  
CGATATTCGATTGAGGGTCGTTATACCTATTCTGGCTATCTGTGCTTTGAATTGTATAAGATCAAATTT  
TAAACGATTCCGAGAGGTTTATCCTGATGTGGAGGGAGTTCTTGAAGCATCCCGACCTTTCCTTGTGA  
AAA

+

:FFFF,FFF,FFFFFF:FF,FFF:FFFF:FFFFFFFF:F:FFFF:FFFF,FFFFFFFF:F:FF:FFF:  
F:F,FFFFFFFFFFFFFFFFFFFFFFFFFFFFFFFFFFFFFFFF:FFFF:FFFFFFFFFFFFFFFF:F:FFFFFFFFFFFF  
FFF

@A00721:190:HGJW7DSXY:4:1538:29080:27774\_2:N:0:TCTGCAAG+GCTGCACT  
CGTATCTCAAAGATCGACTTCGAGACAGGTGATATTGTTGAGCGAGAGCGACCAAGATCTAAATTCGG  
TAACGGTGCGTGGCGCTTTATTTTAAAAAGCTCCCTCCTCTCGCAAGT

+

FFFFFFFFFFFFFFFFFFFF:FFFFFFFFFFFFFFFFFFFFFFFFFFFFFFFFFFFFFFFFFFFFFFFFFFFFFFFF  
FFFFFFFFFFFFFFFFFFFFFFFFFFFFFFFFFFFFFFFFFFFFFFFFFFFFFFFFFFFFFFFFFFFFFFFF

@A00721:190:HGJW7DSXY:4:2255:15447:27962\_1:N:0:TCTGCAAG+GCTGCACT  
TGACGATCATTAAGACTCTTTTCTTCTTTGTTTCCTTCTTTGCACTGATTTTTCCTCATCAGCTTGT  
GTTTTACCTAATCTGTGTTTTTACGATAACAACATATCAGTTGATTAAGACTCTTCCGAAAGGCGAACT  
TTG

+

FFFFFFFFFFFFFFFFFFFFFFFFFFFFFFFFFFFFFFFFFFFFFFFFFFFFFFFFFFFFFFFFFFFFFFFFFFFFFFFF  
FFFFFFFFFFFFFFFFFFFFFFFFFFFFFFFFFFFFFFFFFFFFFFFFFFFFFFFFFFFFFFFFFFFFFFFFFFFFFFFF  
FFF

@A00721:190:HGJW7DSXY:4:2411:8992:14841\_1:N:0:TCTGCAAG+GCTGCACT  
AGCACAACGTTTGACCGTGACGAAGTGTGGTGTCTTGATCTACGTTACGGATATACTCTCCTTGAGT  
TCACTCGTAAGGACACTACCACTTATTACGATATTTCTTTAGTCGATGGGTTTTCGACTCCTTTAAGC  
GTC

+

FFFFFFFFFFFFFFFFFFFFFFFFFFFFFFFFFFFFFFFFFFFFFFFFFFFFFFFFFFFFFFFFFFFFFFFFFFFFFFFF  
FFFFFFFFFFFFFFFFFFFFFFFFFFFFFFFFFFFFFFFFFFFFFFFFFFFFFFFFFFFFFFFFFFFFFFFFFFFFFFFF  
FFF

@A00721:190:HGJW7DSXY:4:2156:5421:22717\_2:N:0:TCTGCAAG+GCTGCACT  
ATCACTCATTTTAGTGAGATTATTAACGCACTAAACGTCTTCGACAACAGCAGGGGTTTTTCGAA  
TAGTGATAGCCACCCGCTTACAGAGGGGCAGCAGCATGACCATAATT

+

FFFFFFFFFFFFFFFFFFFFFFFFFFFFFFFFFFFFFFFFFFFFFFFFFFFFFFFFFFFFFFFFFFFFFFFFFFFFFFFF  
FFFFFFFFFFFFFFF:FFFFFFFFFFFFFFFFFFFFFFFFF:FFFFFFFFFFFFFFF

@A00721:190:HGJW7DSXY:4:2544:32579:18615\_2:N:0:TCTGCAAG+GCTGCACT  
TGTCTGTCTCGCCTCTTCGAATGAAGTTTTAATGCTTAACAACAATGATAGTGAATTTATACCTACAA  
TCATTGGTTTTTCTAATAATGATGACACTATTGTTTATGGATATGATG

+

@A00721:190:HGJW7DSXY:4:1551:18891:4210\_1:N:0:TCTGCAAG+GCTGCACT  
AGACGTGCTAAATTAACCATTGTACGATGTCGTCTGTCTCGCGATCACTTTTCACTAAGAATTGG  
TCCTACTTTTGGACAAGGCCAACTTCGTAATCTTCATGAGATCGTTTCTTTCTTTATCTCTTTGGTTG  
TTA

@A00721:190:HGJW7DSXY:4:2117:11641:9283\_2:N:0:TCTGCAAG+GCTGCACT  
GAGTGAAGGCTTCAATTGTAGTGGTTTGGTCGTTTCAGTACCCAGTCAGTATACCTCTACGCAAAGA  
TATTTTCATGAAAACACAGAGGAACGTACCGGATTACCTGTCTTTTCAT

@A00721:190:HGJW7DSXY:4:1316:1045:32236\_1:N:0:TCTGCAAG+GCTGCACT  
GTTGGATGTCAAGAAGGGTTCAGAATGGGATTCTACGTAGTTTATGACTTTGGTGGTGGTACTTTTCG  
ATACTTCTATCGTCTTACGTTACGGTAATTACGATAGTGTTATTTATTCTGGTGGTGGTATGATAATCTT  
GGA

@A00721:190:HGJW7DSXY:4:1467:19759:7404\_1:N:0:TCTGCAAG+GCTGCACT  
TGATGAAGCTATAAGAGCGTTCTTATTACGGCGCACTTCTTTACCCGCCACCACACAACCTTTTCAGTTT  
CACAACCTGAAGGAGGAGGTTTCTGTTACTGGAAAACCTCGTCAATACTTTTCAATAATATACGTCTT  
GAA

@A00721:190:HGJW7DSXY:4:1562:7410:32706\_1:N:0:TCTGCAAG+GCTGCACT  
CCTTTTCTGGAACGTAGTTTTACTATTATGAACAAAGTTATCAAAGATAGTGGCATTCAAGGCAAAC  
TACCCTGATTCCGGCCGGTGGTAGCTCATTTCTACCAGGGGCTATTACTCTTGCTGAAACAGCTATTA  
AAG

@A00721:190:HGJW7DSXY:4:2112:21920:25801\_1:N:0:TCTGCAAG+GCTGCACT  
GTAATTACACCTAAACGAGCTCGATCTGCCATCGCTGAAGGATGTGCACTCTTTTCTGCTACTTTAAC  
GGAGCGTAGTGTACTCTTCGTCGATTGTATCAACAGTAACATTACTTCTAATAAAGGTCTCTATCAAG  
CTC

@A00721:190:HGJW7DSXY:4:1678:6786:20572\_1:N:0:TCTGCAAG+GCTGCACT  
GGCTAAACTCCAAGGTAATTATGAAGACTGTGATTTATCTTTCACTCTGGCCTTGTATGAGGGTGT  
CTAATCGTAACATTAATAATTTCAATCTTCTTAAAAAGAAGATAGAGAGTCATACTTTGGGCTATCGT  
TCA

---

FFFFFFFFFFFFFFFF,FFFFFF,FFFFFFFFFFFFFFFFFFFFFFFFFFFFFFFFFFFFFFFF:FFFFFFFFF  
FFF

@A00721:190:HGJW7DSXY:4:2149:26006:1376\_2:N:0:TCTGCAAG+GCTGCACT  
GTTGTTATCTCGAAAAGTCTCTTCTAAAAGGAACGTCAGTTCTAACCCAAAGAGAATATCTAAAATAT  
TTACAAAATCTTACCACTATCTACGAACCTAAAGTTCTGAAGACGTTG

+  
FFFFFFFFFFFFFFFFFFFFFFFFFFFFFFFFFFFFFFFFFFFFFFFFFFFFFFFFFFFFFFFF  
FFFFFFFFFFFFFFFFFFFFFFFFFFFFFFFFFFFFFFFFFFFFFFFFFFFFFFFFF:

@A00721:190:HGJW7DSXY:4:1426:8169:27727\_1:N:0:TCTGCAAG+GCTGCACT  
GGCACTACCTCGGTACAATCTTACTTGGAACGAAGGCGACCTGTTCCGGAGTTTTACGGGATCCGGA  
ATGTTCTGTCTATATTAGGTGAAGCGAAATACGATTTGAACGTCAACGTTACCGAGTTTCGTTTCG  
TAC

+  
FFFFFFFFFFFFFFFFFFFFFFFF:FFFFFFFFFFFFFFFFFFFFFFFFFFFFFFFFFFFFFFFF  
FFFFFFFFFFFFFFFFFFFFFFFFFFFFFFFF:FFFF,FFFFFFFFFFFFFFFFFFFFFFFFFFFFF  
FFF

@A00721:190:HGJW7DSXY:4:2329:11089:16376\_1:N:0:TCTGCAAG+GCTGCACT  
ATAAAGAACTTCATGAATTTTCAGAGGATGAAAAATTTCTTCCTTGATTTTAATATAAAGAACTCT  
TACCAGGACTCCTACTACAGGAGGCAGTCTTCTGATCGTAAGAAGTTTATAAGGAACATATCCATTG  
TTG

+  
FFFFFFFFF::FFFFFF:FFFFFFFFFFFFFFFFFFFFFFFFFFFFFFFFFFFFFFFF:FF:FFF:FFFFFFFF  
FFFFFFFFFFFFFFFFFFFFFFFF:FFFFFFFFFFFFFFFFFFFFFFFFFFFFFFFFFFFFFFFFF,,FFFFFFFFF  
FFF

@A00721:190:HGJW7DSXY:4:2535:20401:17033\_1:N:0:TCTGCAAG+GCTGCACT  
CTCTAAGTGGTAATACTGTCTTTCCAAGCTTACCTGTATCTTCAATGAAATTGGACTCTTCGATAGGG  
GACATTTTATCGTGGGCTTCCGTAAAGGAAGATCTGTTATCGACGGTTTATCGTTTACGAAGTATCA  
CTC

+  
FFFF:FFFFFFFFFFFFFFFF,FFFFFFFFFFFFFFFFFFFFFFFFFFFFFFFF:FFFFFFFFFFFFFFFF  
FFFFFFFFFFFFFFFFFFFFFFFFFFFFFFFFFFFFFFFFFFFFFFFFFFFFFFFFFFFFFFFF  
FFF

@A00721:190:HGJW7DSXY:4:2371:21097:7091\_1:N:0:TCTGCAAG+GCTGCACT  
ACAGAAGATGATGTTAGAGTAGAATTCCTGAAGAGTCCTTCCGTAACCACTTCTTGACAATTTTCTT  
CAATCCTTCGATAATAGTTAAATCTAGGATTATGTCTGTGTTGAAAGACTTTCTACCGATAAGGGTCA  
CTA

+  
FFFFFFFFFFFFFFFFFFFFFFFFFFFFFFFFFFFFFFFFFFFFFFFFFFFFFFFFFFFFFFFF:FFFFF  
FFFFFFFFFFFFFFFFFFFFFFFFFFFFFFFFFFFFFFFFFFFFFFFFFFFFFFFF:FFFF:FFFFF:FF:F  
FFF

@A00721:190:HGJW7DSXY:4:2656:22860:3223\_2:N:0:TCTGCAAG+GCTGCACT  
ATTGACTGATTATCTAAAGATTGAAGGAAAATTTATCCTCGTTTAACTTACTTAGACTTTCCTACGA  
TACAAATGATAACTTCTAATTTACGTTTGCTACTCAGAGCTGGTCCTC

+  
FFFFFFFFFFFFFFFF,FFFFFFFFFFFFFFFFFFFFFFFFFFFFFFFFFFFFFFFFFFFFFFFF  
FFFFFFFFFFFFFFFFFFFFFFFFFFFFFFFFFFFFFFFFFFFFFFFFFFFFFFFF

@A00721:190:HGJW7DSXY:4:1659:17219:5321\_2:N:0:TCTGCAAG+GCTGCACT  
CAGGAGTCCCGGCATTTGATAATAATGACGAGACTTTCGTCATAATCGCTGCATATTACGGATTACAC  
GGTACCAGCGCATCTCGTGTGCGAGCCTCGACCCGATTATATGGTATTA

+  
FFFFFFFFFFFFFFFFFFFFFFFFFFFFFFFFFFFFFFFF:FFFFFFFFFFFFFFFFFFFFFFFFFFFFF  
FFFFFFFFFFFFFFFFFFFFFFFFFFFFFFFFFFFFFFFF,FFFF:FF:FFFFFFFF

@A00721:190:HGJW7DSXY:4:2528:16694:35571\_1:N:0:TCTGCAAG+GCTGCACT  
AACTATGTTATGTTCTCTGATCATTTTGACAATCTCTTCTATAATAAATAAATAAATAATATTACTA



ATGGCAAATAGTGGAAGGCTCCAGTCAACACTAGTTCGAGTGCTGCTTTGGATTACGATGACGTGAG  
AAT

+

FFFFFFFFFFFFFFFFFFFFFFFFFFFFFFFFFFFFFFFFFFFFFFFFFFFFFFFFFFFFFFFFFFFFFFFF  
F:FFFFFFFFFFFFFFFFFFFFFFFFFFFFFFFFFFFFFFFFFFFFFFFFFFFFFFFFFFFFFFFFFFFFFFFF  
FF:

@A00721:190:HGJW7DSXY:4:2251:12888:24565\_1:N:0:TCTGCAAG+GCTGCACT  
TTTACCTCGACCAACATTAAGGCGGCGGCGACTAATCTTAAAGCTTCACCCAAAATGAAGGACACTTC  
GAAACTGAATAATGATGCACTACAAACAAGTATCGCTAATCATCTGAAAAAGGCTCTAAAGGACACTA  
TAC

+

FFFFFFFF:FFFFF:FFFFFFFF:FFFFFFFFFFFFFFFFFFFFFFFF:FFFFF,FFFF:FFFFFFFF:FFFFF  
FFFFFFFFFFFFFFFFFFFFFFFFFFFFFFFFFFFFFFFFFFFFFFFFFFFFFFFFFFFFFFFFFFFFFFFF:FFFFFFFFFFFFF  
FFF

@A00721:190:HGJW7DSXY:4:2124:27136:30921\_1:N:0:TCTGCAAG+GCTGCACT  
GAGGATATTCGCCATTGTGGTACGAATTGGTCCAACATTTACCACCAAATTCTTTTGATACAACCTA  
GCCTTCAAGTGGGGTATGCCTGCGGAATACGCTTGCTATTACCAGATTGGTTCGAACCCGTTGATGC  
TAT

+

FFFFFFFFFFFFFFFF:FFFFFFFFFFFFFFFFFFFFFFFF:FFFFFFFFFFFFFFFFFFFFFFFFFFFFFFFF,  
FFFFFFFFFFFFFFFFFFFFFFFFFFFFFFFFFFFFFFFFFFFFFFFFFFFFFFFFFFFFFFFFFFFFFFFF  
FFF

@A00721:190:HGJW7DSXY:4:2330:19416:6057\_2:N:0:TCTGCAAG+GCTGCACT  
TATTCAAGCTTGTGCTTTAAAGACTGCAGAGGCTGTCAAACAAGCCCAGACTCAAGGAGTCCAATCAA  
AGGTTTTGAATTTAGCTCAACTGGGGAGACGTGCTTAAATGGGTGATA

+

FFFFFFFFFFFFFFFFFFFFFFFFFFFFFFFFFFFFFFFFFFFFFFFFFFFFFFFFFFFFFFFFFFFFFFFF  
FFFFFFFFFFFFFFFFFFFFFFFFFFFFFFFFFFFFFFFFFFFFFFFFFFFFFFFFFFFFFFFF

@A00721:190:HGJW7DSXY:4:1617:32081:28620\_1:N:0:TCTGCAAG+GCTGCACT  
AGATAGTGGGATAATAGTTCTACCGATACGTAGTGAACGCGTTCGTAGAACCAAGTACTTTCCGTCTG  
AAGAGTTTAGAGCTGCTATTGATTATGTAACCGATAGGAGTTGTATAGTTGAAGATGTGGCTTTAGAC  
GAT

+

:FFFFF,F:FFFFFFFF:FFFFFFFFFFFFFFFFFFFFFFFFFFFFFFFF:FFFFFFFFFFFFFFFF  
FFFFFFFFFFFFFFFFFFFFFFFFFFFFFFFFFFFFFFFFFFFFFFFFFFFFFFFFFFFFFFFFFFFFFFFF  
FFF

@A00721:190:HGJW7DSXY:4:2431:3025:7545\_2:N:0:TCTGCAAG+GCTGCACT  
ATGTTGACTGACGAAGATTTTCCACAGATTTGTCTACGTTGCAGATCGCCACTCCAAACACTATATA  
CATTATAAAATATAAAAATAAGGGAGTCATAACTTTTGTACCAAATT

+

FFFFFFFFFFFFFFFFFFFFFFFFFFFFFFFFFFFFFFFFFFFFFFFF:FFFFFFFFFFFFFFFF:FFFF  
FFFFFFFF:FFFFF:FFFFFFFFFFFFFFFFFFFFFFFFFFFFFFFF

@A00721:190:HGJW7DSXY:4:1277:29270:2268\_1:N:0:TCTGCAAG+GCTGCACT  
CGAAGTCTCTGATTTTATTAATCATTACTTTAACGATCTCTCGGTCATTTACTCTGTACTTGATCTAC  
GTCGTTTAACTGTCGGAACAACCTTTACTTAGAATGACTCTATCTTTTCAGACACTTCTTATATTATT  
TAC

+

FFFFFFFFFFFFFFFFFFFFFFFFFFFFFFFFFFFFFFFF,FF:FFFFFFFF:FFFFFFFFFFFFFFFF  
FFFFFFFFFFFFFFFFFFFFFFFFFFFFFFFFFFFFFFFF,FFFFFFFF:FFFFFFFFFFFFFFFF  
FFF

@A00721:190:HGJW7DSXY:4:2422:30373:13479\_1:N:0:TCTGCAAG+GCTGCACT  
CTCTATCGTTTTCTGCTTTTCTTAGCTAATAGATTAATAACGGATGAGTCCGAAAACCAACTCTTCG  
TTACGAGACCTGATGGTAGAATAGATTTAGTCTCTACACCCATCTCAACGAGGATAAAGCGAGTTTTCT  
CGT

+  
FF:,FFFFFFF::FF:FFFFF,F:FFFF,FFFFF:F,FF::,FF:F:FFF,F:F,FFFFFF:,:,F:::  
FFF:FFFFF:F,,FF,FFF,FFF,FF:F::FFF,FFFF:FFF::FFF:,FF,FFF:FF:FFFFFFF:F  
FFF  
@A00721:190:HGJW7DSXY:4:1610:16649:33771\_2:N:0:TCTGCAAG+GCTGCACT  
AGAGATCATCCGCAAACGACTCGAAACGAGACGCCGTAGATCAAAGTCCCTTCTAACTTTAGATTAT  
GAATCCTGCCAGATCGGAAGAGCGTCGTGTAGGGAAAGAGTGTAGTGC  
+  
FFFFFFFFFFFFFFFFFFFFFFFFFFFFFFFFFFFFFFFFFFFFFFFFFFFFFFFFFFFFFFFFFFFFFFFF  
FFFFFFFFFFFFFFFFFFFFFFFFFFFFFFFF:F:FFFF:FFFFFFFFFFFF:  
@A00721:190:HGJW7DSXY:4:2221:17445:14043\_2:N:0:TCTGCAAG+GCTGCACT  
CTTTTCGATAGTGATTGTTATCAATTTAAATACATTACTGTTTCAAATCATCTTTACTCACAGACTCC  
GAAATGGTTTCAAATGAGGTCAAAGCTCTATTTATTAAACGAAGTAT  
+  
FFFFFFFFFFFFFFF:,FFFFFFFFFFFFFFFFFFFFFFFFFFFFFFFFFFFFFFFFFFFFFFFFFFFFF  
FFFFFFFFFFFFFFF:FF:FFFFFFFF:FFFFFFFFFFFFFFFFFFFFF  
@A00721:190:HGJW7DSXY:4:1316:21070:20572\_2:N:0:TCTGCAAG+GCTGCACT  
CCTTCGATGTTTATATTTTCTATAAGGGAAAATAGCAATAATCAAATTCGACAAATTTAGAACTT  
TATTTCAAGACTCTCTCCGATCACCTTGGTGTGATCTCCCGAGGATC  
+  
FFFFFFFFFFFFFFFFFFFFFFFFFFFFFFFFFFFFFFFFFFFFFFFFFFFFFFFFFFFFFFFFFFFFFFFF  
FF:FFFFFFFFFFFFFFFFFFFFFFFFFFFFFFFF:FFFFFFFFFFFFFFFFFFFFF  
@A00721:190:HGJW7DSXY:4:2570:5439:21026\_2:N:0:TCTGCAAG+GCTGCACT  
TAAATAGTGATATTCAGCGTATACTTGAATACTTTATCAAAGATTTGGCTTGGTCTATTTACCGCAA  
AAGTTGGAAGAGGTCTATGATATTTATTTTACTTATACTTTAAATAGC  
+  
FFFFFFFFFFFFFFFFFFFFFFFFFFFFFFFFFFFFFFFFFFFFFFFFFFFFFFFFFFFFFFFFFFFFFFFF  
FFFFFFFFFFFFFFF:FF:FFFFFFFFFFFFFFFFFFFFFFFFFFFFFFFFFFFFF:  
@A00721:190:HGJW7DSXY:4:1318:30490:19194\_1:N:0:TCTGCAAG+GCTGCACT  
CTTGACTGTTGATAATATTACAATAGCTCTTCTCAGAAGATTAGAGAAGTAACCGGTGAACACGTCG  
GTAGCATTGATTTACTTTTACCGTTAGAACTGAAAAGATTCTTTTCGAAAAGAAACCTATAAGTTAC  
AAA  
+  
FFFFFFFFFFFFFFFFFFFFFFFFFFFFFFFFFFFFFFFFFFFFFFFFFFFFFFFFFFFFFFFFFFFFFFFF  
FFFFFFFFFFFFFFFFFFFFFFFFFFFFFFFFFFFFFFFFFFFFFFFFFFFFFFFFFFFFFFFF:FFFFFFF  
FFF  
@A00721:190:HGJW7DSXY:4:1639:18593:28338\_1:N:0:TCTGCAAG+GCTGCACT  
AATAAAAATACTTCAAGTACCTGAACCTTTACATTTTAAATGGTATGGTATAATGTGTCTTACAAATAG  
AACCTTCACTCTCGGTAATGAGAGTGTATTCCTTAATATTCTAGTAACCGCTATGTGGCATTACTAG  
GAT  
+  
FFFFFFFFF:FFF,FFFFFF:F,FF,FFFF:,FFFFFFFFFFFFFFFFFFFFFFFFFFFFFFFFFFFFF  
FFFFFFFFFFFF:FFFFF:FFFFFFFFF:FFFFFFFFFFFFFFFFFFFF:,FFFFFFF,:FFFFFFFF  
FFF  
@A00721:190:HGJW7DSXY:4:1574:25021:5932\_2:N:0:TCTGCAAG+GCTGCACT  
GAAATTTTAGAAAACTCCATTGTATAGTTCAAGGAGTACTTAATTCAATAGCTTTAGTATTATTTA  
CTATCGCCTTTATTGAAAATTGTATAAGAGTTAATTGCTTACACAAAA  
+  
FFFFFFFFFFFFFFFFFFFFFFFFFFFFFFFFFFFFFFFFFFFFFFFFFFFFFFFFFFFFFFFFFFFFFFFF  
FFFFFFFFFFFFFFFFFFFFFFFFFFFFFFFFFFFFFFFFFFFFFFFFFFFFFFFFFFFF,FF  
@A00721:190:HGJW7DSXY:4:2329:14389:19993\_2:N:0:TCTGCAAG+GCTGCACT  
GCTCCAAGTGGCAGCCAGACGTAGGGTCAAACCTACTACCGCCGGTCGGCAGATCGGCACCACTGGT  
CTCTACGTTCAAGGACCCGCTGTGCAGAATAACCTTCCCAAATCTAGA  
+

FFFFFFFFFFFFFFFFFFFFFFFFFFFFFFFFFFFFFFFFFFFFFFFFFFFFFFFFFFFFFFFFFFFFFFFFFFFFFFFF  
FFFFFFFFFFFFFFFFFFFFFFFFFFFFFFFFFFFFFFFFFFFFFFFFFFFFFFFFFFFFFFFFFFFFFFFFFFFFFFFF  
@A00721:190:HGJW7DSXY:4:1314:22607:8140\_1:N:0:TCTGCAAG+GCTGCACT  
CTCAAAGGAAACGGGCTGTTGCCAGAGGAAAGCAGCGACCACCGAGGTCGCTCGTAACATTGACGGC  
AGTCCCGTCATCTCTGTGGGAAGTACCTCAGTCAAAGTCACATTACCACTCCCATGCC  
AAT  
+  
FFFFFFFFFFFFFFFFFFFFFFFFFFFFFFFFFFFFFFFFFFFFFFFFFFFFFFFFFFFFFFFFFFFFFFFFFFFFFFFF  
FFFFFFFFFFFFFFFFFFFFFFFFFFFFFFFFFFFFFFFFFFFFFFFFFFFFFFFFFFFFFFFFFFFFFFFFFFFFFFFF  
FFF  
@A00721:190:HGJW7DSXY:4:2312:21775:9330\_2:N:0:TCTGCAAG+GCTGCACT  
GACTATACAGTTCGGCCATTTCAAGAGTGGTCAATACGTCGTGGGAGGTACTGAAGCCTTCCCCTCCG  
CTGGCACGAAGAACTCCCAAGCCAATCAATAGTTCTTCTGACCAGA  
+  
FFFFFFFFFFFFFFFFFFFFFFFFFFFFFFFFFFFFFFFFFFFFFFFFFFFFFFFFFFFFFFFFFFFFFFFFFFFFFFFF  
FFFFFFFFFFFFFFFFFFFFFFFFFFFFFFFFFFFFFFFFFFFFFFFFFFFFFFFFFFFFFFFFFFFFFFFFFFFFFFFF  
@A00721:190:HGJW7DSXY:4:1133:1452:36824\_1:N:0:TCTGCAAG+GCTGCACT  
GACGTGTGCTCTTCCGATCTGGAAGAGGGGAAATGTCCCCAAACTGAGAAGAATAAAGGGAAAGGTC  
CATCAGGACCTAAGAAGGGGAAATTACCCCTAATTCTGAAGGAAGATCTCCACCATCTGGGGTTGGG  
AAT  
+  
FFFFFFFFFFFFFFFFFFFFFFFFFFFFFFFFFFFFFFFFFFFFFFFFFFFFFFFFFFFFFFFFFFFFFFFFFFFFFFFF  
FFFFFFFFFFFFFFFFFFFFFFFFFFFFFFFFFFFFFFFFFFFFFFFFFFFFFFFFFFFFFFFFFFFFFFFFFFFFFFFF  
FFF  
@A00721:190:HGJW7DSXY:4:1224:17598:33004\_2:N:0:TCTGCAAG+GCTGCACT  
ACGGGCCAAAGAGGCCGCTGCTACGAAGTCGCTGAAGGCGCTTGGGTCATTAAGGGTAGCTGTAAAG  
TTGCGCCTGCCGACCCCATCTTTGAGACCAAGACTCTCTACAGTAGGT  
+  
FFFFFFFFF::F:FFFFFFFFFFFFFFFFFFFFFFFFFFFFFFFFFFFFFFFFFFFFFFFFFFFFFFFFFFFFFFFF  
FFFFFFFFFFFFFFFFFFFFFFFFFFFFFFFFFFFFFFFFFFFFFFFFFFFFFFFFFFFFFFFFFFFFFFFFFFFFFFFF  
@A00721:190:HGJW7DSXY:4:1520:20699:34021\_2:N:0:TCTGCAAG+GCTGCACT  
AAATCTGTTGAATTCGTCAGTACGAGGACGAAGGTGAGAGGACTTTTGGCTACTGGCGACAACTGAGAG  
CAGTCGCTGGGGAAGAGAATTGCGTGGGTGAAGGCCGACGCTTCGA  
+  
FFFFFFFFFFFFFFFFFFFFFFFFFFFFFFFFFFFFFFFFFFFFFFFFFFFFFFFFFFFFFFFFFFFFFFFFFFFFFFFF  
FFFFFFFFFFFFFFFFFFFFFFFFFFFFFFFFFFFFFFFFFFFFFFFFFFFFFFFFFFFFFFFFFFFFFFFFFFFFFFFF  
@A00721:190:HGJW7DSXY:4:1668:26702:31266\_1:N:0:TCTGCAAG+GCTGCACT  
GTCAACGGCGTTTGAGGATTTTATCCGCGCTTAAGTATGGGCGAAGATCCCCTATGGAGTCTTGAA  
GGACTTAGGTTGGCATATTTATGCCGACGATAATAAGCATGTCACCCTTAAGCACCGAGGTAAGCTCG  
GGA  
+  
FFFFFFFFFFFFFFFFFFFFFFFFFFFFFFFFFFFFFFFFFFFFFFFFFFFFFFFFFFFFFFFFFFFFFFFFFFFFFFFF  
FFFFFFFFFFFFFFFFFFFFFFFFFFFFFFFFFFFFFFFFFFFFFFFFFFFFFFFFFFFFFFFFFFFFFFFFFFFFFFFF  
FFF  
@A00721:190:HGJW7DSXY:4:1361:8296:32017\_1:N:0:TCTGCAAG+GCTGCACT  
TCTCACTATTTTTGCCAGAATGCGGGCCTTCTGACTGATGAGGTTAAACTCTTGCTCCTTCTGTGG  
GTGAGGGTTTTTGTATATTACTGGTTCTGGGAGGCTGCTTTCCTCCATAATTACAACCTCTCTTTA  
GAG  
+  
FFFFFFFFFFF:FFFFFFFFFFFFFFFFFFFFFFFFFFFFFFFFFFFFFFFFFFFFFFFFFFFFFFFFFFFFFFFF  
FFFFFFFFFFFFFFFFFFFFFFFFFFFFFFFFFFFFFFFFFFFFFFFFFFFFFFFFFFFFFFFFFFFFFFFFFFFFFFFF  
FFF  
@A00721:190:HGJW7DSXY:4:2246:22037:35336\_1:N:0:TCTGCAAG+GCTGCACT  
ATTCCACATATGGTAGACGTTGTCACACTTTTCTTGAAAATTTTCTTCTCCGTCATTGGGGAT

TTCGATGTGAGAAGGTGGAAGGTGTCAAGGGTCTTCTTCATGCTGATCTTTCAGGACCTAATCACATC  
ATG

+

FFFFFFFFFFFFFFFFFFFFFFFFFFFFFFFFFFFFFFFFFFFFFFFFFFFFFFFFFFFFFFFFFFFFFFFFFFFFFFFF  
FFFFFFFFFFFFFFFFFFFFFFFFFFFFFFFFFFFFFFFFFFFFFFFFFFFFFFFFFFFFFFFFFFFFFFFFFFFFFFFF  
FFF

@A00721:190:HGJW7DSXY:4:2541:31937:2503\_1:N:0:TCTGCAAG+GCTGCACT  
ACGGCTCGTATCGAGTTGGAGGGAGGAAGTTCTCCGAAATTAAAGACGGGGGGATTAAGAGTCCAGCT  
GTAAGTGTCAATTCAGAGAGGGGAGCTCTGAAAAGGAACTTCGTGAGAAGATGAGGAAGTCTAAGAG  
GAG

+

FFFFF:FFFFFFFFFFFFFFFFFFFFFFFFFFFFFFFFFFFFFFFFFFFFFFFFFFFFFFFFFFFFFFFFFFFFFFFF  
FFFFFFFFFFFFFFFFFFFFFFFFFFFFFFFFFFFFFFFFFFFFFFFFFFFFFFFFFFFFFFFFFFFFFFFFFFFFFFFF  
FFF

@A00721:190:HGJW7DSXY:4:1469:29451:11193\_1:N:0:TCTGCAAG+GCTGCACT  
AAGGCTCTAGAGAAGATCTCACCACCTGGAGAAGGCAAGTGGAGAGTCCAGAAAGTTGATGAAGAAGGA  
TTATTTGAAGCAGGGGTACCCTTCCTAAGGTGGATGAGGGAGGTTGTTTCTTTGGAGTTTATAGATA  
ATC

+

FFFFFFFFFFFFFFFFFFFFFFFFFFFFFFFFFFFFFFFFFFFFFFFFFFFFFFFFFFFFFFFFFFFFFFFFFFFFFFFF  
FFFFFFFFFFFFFFFFFFFFFFFFFFFFFFFFFFFFFFFFFFFFFFFFFFFFFFFFFFFFFFFFFFFFFFFFFFFFFFFF  
,:,:,  
::FFF:FFFFFFFFFFFFFFFFFFFFFFFFFFFFFFFFFFFFFFFFFFFFFFFFFFFFFFFFFFFFFFFFFFFFFFFF  
,FF

@A00721:190:HGJW7DSXY:4:2142:27760:19006\_2:N:0:TCTGCAAG+GCTGCACT  
GATCTTGAGGACGTACATTTAACGTGGCAGAATTCGGTAACCTACCATATTGTTCTTCCGGGAAGTT  
GTGGGATTTAACTTTGACTCAACTACTCCGATCAGATCCGGATGGTTT

+

FFFFFFFFFFFFFFFFFFFFFFFFFFFFFFFFFFFFFFFFFFFFFFFFFFFFFFFFFFFFFFFFFFFFFFFFFFFFFFFF  
FFFFFFFFFFFFFFFFFFFFFFFFFFFFFFFFFFFFFFFFFFFFFFFFFFFFFFFFFFFFFFFFFFFFFFFFFFFFFFFF  
:FFFFFFFF:FFF:FFF:F

@A00721:190:HGJW7DSXY:4:2106:11143:35383\_2:N:0:TCTGCAAG+GCTGCACT  
CAGATACTACCGATAAGGTGAAAAATATGCAGGTCAAAGATTCTGTAGCTCTGAGGGCGGTTGAGGGA  
GCCGTTTTGGCCGACTTTAACTATTCTAAGAGTCTTTATGATTCAAAA

+

FFFFFFFFFFFFFFFFFFFFFFFFFFFFFFFFFFFFFFFFFFFFFFFFFFFFFFFFFFFFFFFFFFFFFFFFFFFFFFFF  
FFFFFFFFFFFFFFFFFFFFFFFFFFFFFFFFFFFFFFFFFFFFFFFFFFFFFFFFFFFFFFFFFFFFFFFFFFFFFFFF

@A00721:190:HGJW7DSXY:4:2241:28510:9001\_1:N:0:TCTGCAAG+GCTGCACT  
AGAATTGCGGTTGAAGTTCACCCATTCTATCTTGAATGCTCACGCCGTCGCAGCCATATCGAGACTAT  
GTTATAATCACTTGTTAAAGTACAGATTTAGTGATTTAGATATTATTGATATTGGAGGCGATATTCGT  
TTT

+

FFFF,FFFFFFFFFFFFFFFFFFFFFFFFFFFFFFFFFFFFFFFFFFFFFFFFFFFFFFFFFFFFFFFFFFFFFFFF  
FFFFFFFFFFFFFFFFFFFFFFFFFFFFFFFFFFFFFFFFFFFFFFFFFFFFFFFFFFFFFFFFFFFFFFFFFFFFFFFF  
FF:

@A00721:190:HGJW7DSXY:4:2225:11505:18411\_1:N:0:TCTGCAAG+GCTGCACT  
ACATATTTGCAACCCTATTCTTGATGTGAAAGATGCATCGAGGTATACGTCTAGGAACATTGATTGGG  
AACGTACCTACTCAGAGACGTCATGAAAGCTATCGAGGGAAGCAAAATGTTTCGTTCTGTTACAAG  
AAC

+

FFFFFFFFFFFFFFFFFFFFFFFFFFFFFFFFFFFFFFFFFFFFFFFFFFFFFFFFFFFFFFFFFFFFFFFFFFFFFFFF  
FFFFFFFF:FFFFFFFFFFFFFFFFFFFFFFFFFFFFFFFFFFFFFFFFFFFFFFFFFFFFFFFFFFFFFFFFFFFFFFFF  
FFF

@A00721:190:HGJW7DSXY:4:1473:22598:2206\_1:N:0:TCTGCAAG+GCTGCACT  
CTCAGTTGCGATAGCTGTAGAGGTATACGATATCTCTCTTGATGATGTAGCCACTATAATGCTTAAGA  
GAGAGATTGATGTATGTCATTTCTGCTTAGTTTGTCCCGCGCAATTATTGGACACGATGAAAAATGAC  
ATA

@A00721:190:HGJW7DSXY:4:2449:24641:18270\_1:N:0:TCTGCAAG+GCTGCACT  
TCATGGAGATGATGGCGCATCACTTGATTACTATATGCCCAGGATTGGGTTATTCTCACAAAGATA  
AGATTTTATCTTTCTTCAAACACCCTGTTTTCTTAAGGGCGGACAATTGTTCCATTGTGAACCTCTTG  
GGG

@A00721:190:HGJW7DSXY:4:1643:12355:6950\_1:N:0:TCTGCAAG+GCTGCACT  
TGAGTTCCGAATAACTCGTAATAAATCTTTCTCTAGTGACAATTGAGAATACCTATTTCCGTACCAA  
GAGCCACTGCCAATCTCATCGCTATACGCATACCTGATTGGAAGAAGCGAGGTTCTGTTCTCAATAAA  
AAT

@A00721:190:HGJW7DSXY:4:1323:18331:16799\_1:N:0:TCTGCAAG+GCTGCACT  
AAGGGCTATTACGTACGTCATGGGGATCACTTCTTCGGTCAATGACAAAACCTTCGAATATGTTACGA  
CATGGCTTCGTAACAACAGTGCGAGGATTGTCATCTCGGGGAAAGTGATTCACCAAGATGTTTCATATA  
GAT

@A00721:190:HGJW7DSXY:4:1249:29505:13260\_1:N:0:TCTGCAAG+GCTGCACT  
AAGGTCGCAGCGATCTTACTCGTTATCGGAGCTAAGAAGAAGACTTTGGGTACACGTTATGCTCGCAA  
ACTTAACGTTAGTACCGGAGGTGATCTCTCTGCTTCTGCGTTACTGAGAGAAAAGATTCAGGACGCCT  
ACG

@A00721:190:HGJW7DSXY:4:2645:28076:15515\_2:N:0:TCTGCAAG+GCTGCACT  
ATCTTGAAACTACGGTCCTTATCAAAGAAAATGGTGAACCGGTCTCTAAATCTTTTGAGATTGAGAAG  
ATTGAAGAACACGTCAAGAAGTCGCTCGGCGTTGTTCTTGAAAACCAA

@A00721:190:HGJW7DSXY:4:2233:5086:33066\_1:N:0:TCTGCAAG+GCTGCACT  
GCTGATCATGGAGTCTTTGTACCTTCTGTCAAACCTTCGAGGTTACGCTACGAGAGGTGATCCCGGATG  
TGGATTGAAGGCTGGCTCTAAGGGAGACTCCTTCTTTTTGAATGTTGTAAAGAATTGGGTTGAGAAGT  
GTG

@A00721:190:HGJW7DSXY:4:2522:8250:34632\_1:N:0:TCTGCAAG+GCTGCACT  
ATAACTTCTTTTTCAAAAATGCGGATGGGTCTACTGATGTTTTCTACAGAGTGCAGTCGTTTCAACA  
CTTATCACCACCTTTTGAAAGGAAATAATTGGTGATGAAAATACGTATGTCGGTGGGGTTCTCAAGGC  
TCT

[illegible][illegible]

```
FFF:FFFFFFFFFFFFFFFFFFFFFFFFFFFFFFFFFFFFFFFFFFFFFFFFFFFFFFFFFFFFFFFF
FFFFFFFFFFFFFFFFFFFFFFFF:FFFFF:FFFFFFFFFFFFFFFFFFFFFFFFFFFFFFFFFFFFF
FFF
```

```
FF:FF:F,::FF:FFFF:FF,FFFFFFFFFFFFFF,,FFF::FF::FFF:F:FFF::FFFF:F:FFFF
FF:FFFF:,FFFF:FFF::FFF:F:FF:F,FFFF,FFF:FFFFFFFF:
```

```
FFFFFFFFFFFFFFFFFFFFFFFFFFFFFFFFFFFFFFFFFFFFFFFFFFFFFFFFFFFFFFFFFFFFFFFFF
FFFFFFFFFFFFFFFFFFFFFFFFFFFFFFFFFFFFFFFFFFFFFFFFFFFFFFFFFFFF
```

[illegible][illegible][illegible]

@A00721:190:HGJW7DSXY:4:1234:24578:34632\_1:N:0:TCTGCAAG+GCTGCACT  
ACCGTCTCAGGAAGTGTCTCCACTGATTCGGAATTAGAGAAAGACGACCTTCTTGTGGGGACTGAGAC  
CTCTGAATTTTCAGGGTGCCCTGATGAGGACGTTGAAAGGGATAATTTCAACTCTGAGACTTCTAAGA  
GTG

+

FFFFFFFFFFFFFFFFFFFFFFFF,FFFFFFFF:FFFFFFFFFFFFFFFFFFFFFFFFFFFFFFFFFFFFFFFF  
FFFFFFFFFFFFFFFFFFFFFFFF:FFFFFFFFFFFFFFFFFFFFFFFFFFFFFFFFFFFFFFFFFFFFFFFF  
FFF

@A00721:190:HGJW7DSXY:4:1558:10456:30968\_1:N:0:TCTGCAAG+GCTGCACT  
GTAACAAGAAGAATAAAGGTAGGAAGGGGAGAAAACAGAACAAAGCGAGCGGTTGAAGAGAAAAGTATGAT  
ATGGTTGCGGCTGATCGTACCCCAATTCCTGCTAGAAAGATCACTCTCGGCGATACCACTGATCTTCC  
AGA

+

FFFFFFFFFFFFFFFF:FFFFFFFFFFFFFFFFFFFFFFFFFFFFFFFFFFFFFFFFFFFFFFFFFFFFFFFF  
FFFFFFFFFFFFFFFFFFFFFFFF:FFFFFFFFFFFFFFFFFFFFFFFFFFFFFFFFFFFFFFFFFFFFFFFF  
FFF

@A00721:190:HGJW7DSXY:4:2249:6352:25645\_2:N:0:TCTGCAAG+GCTGCACT  
CTGCTAATCGTAATTCGCGAGAAGAGATAGTGACTAAAGTTTTGGCACTTCTAGTTCATCGCGGTATT  
TGTGAAATTAAGACAGACGTGAAAGTTATGATGAGTGATCGTATTAGA

+

FFFFFFFFFFFFFFFFFFFFFFFFFFFFFFFFFFFFFFFF:FFFFFFFFFFFFFFFFFFFFFFFFFFFFFFFF:FFFFF:F  
FFFFFFFFFFFF:FFFFFFFFFFFFFFFFFFFFFFFFFFFFFFFFFFFFFFFFFFFFFFFFFFFFFFFF

@A00721:190:HGJW7DSXY:4:2247:31819:27633\_1:N:0:TCTGCAAG+GCTGCACT  
CGACGAATTATTCATGATTCACGCTGGTCAGACCCTTTTTCTTACACATCTACTTAAGGCGGCTTATA  
CCATAGGTTACGGTGATTCCAATCAAATCGGATTCATCAATCGTATTGATCTCCAAGTCGAAACTAC  
TTC

+

FFFFFFFFFFFFFFFFFFFFFFFF:FFFFFFFFFFFFFFFFFFFFFFFF,FFFFFFFFFFFFFFFFFFFFFFFF  
FFFFFFFFFFFFFFFFFFFFFFFF:FFFFFFFF:FFFFFFFF:FFFFFFFFFFFFFFFFFFFFFFFFFFFFF  
FFF

@A00721:190:HGJW7DSXY:4:1328:18493:29731\_1:N:0:TCTGCAAG+GCTGCACT  
TGTCGTTCTTATCGAAGTCTCAGTTATCGCTGCCCGCCGACGTTTGTGCGGAACTCTCAGAGGTTTA  
CGGCAGAAAAATTTCTCCTGCTTGTAAATTCGAGAGAGGACACTATGGAAATTAGACCTATCAGATGTC  
TTG

+

FFFFF:FFFFFFFF,FFFFFFFFFFFFFFFFFFFFFFFFFFFFFFFF:FFFFFFFFFFFFFFFFFFFFFFFF  
FFFFFFFFFFFFFFFFFFFFFFFFFFFFFFFFFFFFFFFFFFFFFFFFFFFFFFFFFFFFFFFFFFFFFFFF  
FFF

@A00721:190:HGJW7DSXY:4:1540:14027:28322\_1:N:0:TCTGCAAG+GCTGCACT  
AACGATGCTACTTGTGAGAGGATCAATCACAGTAAGGAAGTGTACGTTTAGCACGGGAGGTTGCAGA  
TTCAACCCCTTATATCGAGGCTATCGAGGACGATGAGTATCTTGAAGTTGTTGACGACAAGCCTCAAG  
AGG

+

FFFFFFFFFFFFFFFFFFFFFFFFFFFFFFFFFFFFFFFFFFFFFFFFFFFFFFFFFFFFFFFFFFFFFFFF:  
FFFFFFFFFFFFFFFFFFFFFFFFFFFFFFFFFFFFFFFFFFFFFFFFFFFFFFFFFFFFFFFFFFFFFFFF  
FFF

@A00721:190:HGJW7DSXY:4:2131:12807:18411\_1:N:0:TCTGCAAG+GCTGCACT  
ACCACCTTAACGTCACTCGGTAATCTTTCAGCAGAATTAAGTACTAATGAGTTCAAGTCGGTTGTCGA  
TCGAATTAAGATCAAGGCTAATACCTTTATAGGTAAGAAGCCCCTTGAGCCGCGTAGTCAGCGCGTTT  
AG

+

F,FF,,,:FFF:FF,F,F,F,FFF:FFFFFFFF,FF,FFFF:,,:F,FFFF,,,:FF,FFFFFF:,  
F:FF,FF:,,FFFF:,F::FFFF::FF,F::,FF::F,F,FFFFFFFF,FFF:FFFF:FFF:F,FFF  
:,

@A00721:190:HGJW7DSXY:4:1136:6352:32753\_2:N:0:TCTGCAAG+GCTGCACT  
TGATAGATTGGGTCAACAATAGGGACGCTAGTATACTTCGTAAAGTCGACAGCGAAATGGTCAATATT  
GATAATTGGACCGACTATATGACCTATTTTAAGCTCATGGTGAAAAGG

+

FFFFFFFFFFFFFFFFFFFFFFFFFFFFFFFFFFFFFFFFFFFFFFFFFFFFFFFFFFFFFFFFFFFFFFFF  
FFFFFFFF:FFFFFFFFFFFFFFFFFFFFFFFFFFFFFFFFFFFFFFFFFFFFFFFFFFFFFFFF

@A00721:190:HGJW7DSXY:4:2214:20148:4852\_2:N:0:TCTGCAAG+GCTGCACT  
GTTCTTGTGAGGAGAGTCAAACAGTGTCTTTTACCCAACATTTTTATGTATACAGAGATGACCACTGA  
CGATTTCTCCCGAAGCTCTTCTCTCTCTTAGGAGGTCATGATGACTA

+

F:FFFFFFFFFFFFFFFFFFFFFFFFFFFFFFFFFFFFFFFFFFFFFFFFFFFFFFFFFFFFFFFF:F,FFFFFFFFFFFFFFFF:F,FFFFFFFFFFFFFFFF:F  
F:FFF::F:FFFFFF,,FFFFFFFFFFFFFFFF,FF:FFF:FFF:F:FF

@A00721:190:HGJW7DSXY:4:1444:12057:8249\_1:N:0:TCTGCAAG+GCTGCACT  
CAGGAGTATCCATAACGATTTGTCACTTACCACCTTTGCTCAACGACGAAGTGGAACGGCCAACACTT  
TCTTTGGTAATTGTATGATCACTTTGATGATTTTATCACTTTATTATGACCTTGGAAGTTTTTCGGCT  
GTG

+

FFFFFFFFFFFFFFFFFFFFFFFFFFFFFFFFFFFFFFFFFFFFFFFFFFFFFFFFFFFFFFFFFFFFFFFF  
FFFFFFFFFFFFFFFFFFFFFFFFFFFFFFFFFFFFFFFFFFFFFFFFFFFFFFFFFFFFFFFFFFFFFFFF  
FFF

@A00721:190:HGJW7DSXY:4:2359:13196:22936\_1:N:0:TCTGCAAG+GCTGCACT  
CGATATTCGATTGAGGGTCGTTATACCTATTCGGCTATCTGTGCTTTGAATTGTATAAGATCAAATTT  
TAAACGATTCCGAGAGGTTTATCCTGATGTGGAGGGAGTTCTTGAAGCATCCCGACCTTTCCTTGTGA  
AAA

+

F:FFFFFFFFFFFFFFFFFFFFFFFFFFFFFFFFFFFFFFFFFFFFFFFFFFFFFFFFFFFFFFFFFFFFFFFF  
:FFFFFFFFFFFFFFFFFFFFFFFFFFFFFFFFFFFFFFFFFFFFFFFFFFFFFFFFFFFFFFFFFFFFFFFF  
FFF

@A00721:190:HGJW7DSXY:4:1559:27914:9815\_2:N:0:TCTGCAAG+GCTGCACT  
CGTATCTCAAAGATCGACTTCGAGACAGGTGATATTGTTGAGCGAGAGCGACCAAGATCTAAATTCGG  
TAACGGTGCGTGCGCTTTATTTTAAAAAGCTCCCTCCTCTCGCAAGT

+

FFFFFFFFFFFFFFFFFFFFFFFFFFFFFFFFFFFFFFFFFFFFFFFFFFFFFFFFFFFFFFFFFFFFFFFF  
FFFFFFFFFFFFFFFFFFFFFFFFFFFFFFFFFFFFFFFFFFFFFFFFFFFFFFFFFFFFFFFF:FFF

@A00721:190:HGJW7DSXY:4:2405:4444:22310\_1:N:0:TCTGCAAG+GCTGCACT  
TGACGATAATTAAGACTCTTTCTTCTTTGTTTCCTTCTTTGCACTGATTTTCTCTCATCAGCTTGT  
GTTTTACCTAATCTGTGTTTTTACGATAACAACATCAGTTGATTAAGACTCTTCCGAAAGGCGAACT  
TTG

+

FFF,FFF,FFF,FF,FF,F,FFF,FF,FFFFFFFF,FFFFFFFF,,F:F:FFFFFFFFF,,F,FF:F  
,:FFFFFFFF:FFF:FFFF:FFF,:F::FF::,FFF::FFFF,FFFF,FF:FF:,F:,FFF:FF::F  
FFF

@A00721:190:HGJW7DSXY:4:2453:12870:28479\_1:N:0:TCTGCAAG+GCTGCACT  
AGCACAACGTTTGACCGTGACGAACGTGGTGTCTTGATCTACGTTACGGATATACTCTCCTTGAGT  
TCACTCGTAAGGACACTACCACTTATTACGATATTTCTTTAGTCGATGGGTTTTCGACTCCTTTAAGC  
GTC

+

FFFFFFFFFFFF:FFFFFFFFFFFFFFFFFFFFFFFFFFFFFFFFFFFFFFFFFFFFFFFFFFFFFFFF  
FFFFFFFFFFFFFFFFFFFF:FFFFFFFFFFFFFFFFFFFFFFFFFFFFFFFFFFFFFFFFFFFFFFFF  
FFF

@A00721:190:HGJW7DSXY:4:2175:29948:16532\_2:N:0:TCTGCAAG+GCTGCACT  
ATCACTCATTTTAGTGAGATTATTAACGCACTAAACGTCTTCGACAACAGCAGGGGTTTTCGAA  
TAGTGATAGCCACCCGCCTTACAGAGGGGCAGCAGCATGACCATAATT

+



FFFFFFFF:FFFFFFFFFFFFFFFF:FFF:FFFFFFFFFFFFFFFF:FFFFFFFFFFFFFFFF:FFFFFFFF,FFFF  
FF,F::FFFF:FFFFFFFF:FFFFFFFFFFFFFFFFFFFFFFFF:F,F:FF,  
@A00721:190:HGJW7DSXY:4:2613:22155:24925\_2:N:0:TCTGCAAG+GCTGCACT  
TGTCTGTCTCGCCTCTTCGAATGAAGTTTAAATGCTTAACAACAATGATAGTGAATTTATACCTACAA  
TCATTGGTTTTCTAATAATGATGACACTATTGTTTATGGATATGATG

+

FFFFFFFFFFFFFFFFFFFFFFFFFFFFFFFFFFFFFFFFFFFFFFFFFFFFFFFFFFFFFFFF:FFFFFFF  
F:FFF::FFFFFFFF:FFFF,FF::FFFF:FFFF,FFFFFFFF  
@A00721:190:HGJW7DSXY:4:1566:26368:11303\_1:N:0:TCTGCAAG+GCTGCACT  
AGACGTGCTAAATTAACCATTGTACGATGTCGTCTGTCTCGCGCATCACTTTTCTACTAAGAATTGG  
TCCTACTTTTGGACAAGGCCAACTTCGTAATCTTCATGAGATCGTTTCTTTCTTTATCTCTTTGGTTG  
TTA

+

FFFFFFFFFFFFFFFFFFFFFFFF:FFFFFF:FFFFFFFFFFFFFFFFFFFFFFFFFFFFFFFFFFFFFFFF  
FFFFFFFFFFFFFFFFFFFFFFFFFFFFFFFFFFFFFFFFFFFFFFFFFFFFFFFFFFFFFFFFFFFFFFFF  
FFF  
@A00721:190:HGJW7DSXY:4:2272:30472:19288\_2:N:0:TCTGCAAG+GCTGCACT  
GAGTGAAAGGCTTCAATTGTAGTGGTTTGGTCGTTTCAGTACCCAGTCAGTATACCTCTACGCAAAGA  
TATTTTCATGAAAACCTACAGAGGAACGTACCGGATTACCTGTCTTTCAT

+

FFFFFFF:FFFFFF:FFF:FFFFFFFFFFFFFFFFFFFFFFFFFFFFFFFFFFFFFFFFFFFFFFFF:FFF  
FFFFFFFFFFFFFFFFFFFFFFFF,FFFFFFFFFFFF:FFFFFFFFF:,  
@A00721:190:HGJW7DSXY:4:1417:13105:21840\_1:N:0:TCTGCAAG+GCTGCACT  
GTTGGATGTCAAGAAGGGTTCAGAATGGGATTCTACGTAGTTTATGACTTTGGTGGTGGTACTTTTCG  
ATACTTCTATCGTCTTACGTTACGGTAATTACTATAGTGTTATTTATTCTGGTGGTGGTATGATAATCTT  
GGA

+

FFFFFFFFFFFFFFFFFFFFFFFFFFFFFFFFFFFFFFFFFFFFFFFFFFFFFFFFFFFFFFFFFFFFFFFF  
FFF:FFFFFFFFFFFFFFFFFFFFFFFFFFFF:F:FFFFFFFFFFFFFFFFFFFFFFFFFFFFFFFFFFFF  
FFF  
@A00721:190:HGJW7DSXY:4:1554:17219:24267\_1:N:0:TCTGCAAG+GCTGCACT  
TGATGAAGCTATAAGAGCGTTCTTATTACGGCGCACTTCTTTACCCGCCACCACAACTTTTCAGTTT  
CACAACCTGAAGGAGGAGGTTTCTGTTACTGGAAAACCTCGTCAATACTTTTCAATAATATACGTCTT  
GAA

+

FFFF,F:F:FFFF:,FFFFFF,FFF:F,F,,,FFFFFF:FFF:FFF,,FF,FF,FF::FF:F:,FF,  
FF,:F:FFFFFFFFFFFFFFFF,FFFF:,FF,F,FF:FF:F,FFFF,FFFFFFFFFFFF,,F:,FF  
,FF  
@A00721:190:HGJW7DSXY:4:2671:21658:31078\_1:N:0:TCTGCAAG+GCTGCACT  
TACTATTATGAACAAAGTTATCAAAGATAGTGGCATTCAAGGCAAACCTTACCCTGATTCCGGCCGGTG  
GTAGCTCATTTCTACCAGGGGCTATTACTCTTGCTGAAACAGCTATTAAAGCTGTTGAGCGGGTAATT  
ACA

+

FFFFFFF:FFFFFFFFFFFFFFFFFFFFFFFFFFFFFFFFFFFFFFFFFFFFFFFFFFFFFFFFFFFFFFFF  
FFFFFFFFF:FFFFFFFFFFFFFFFFFFFFFFFFFFFFFFFFFFFFFFFFFFFFFFFF:FFFFFFFFFFFFFFFF  
FFF  
@A00721:190:HGJW7DSXY:4:2523:32877:3443\_1:N:0:TCTGCAAG+GCTGCACT  
ATCGCTGAAGGATGTGCACTCTTTTCTGCTACTTTAACGGAGCGTAGTGTACTCTTCGTGCGATTGTAT  
CAACAGTAACATTACTTCTAATAAAGGTCTCTATCAAGCTCGTATTATCGTCGCTGCTGGATCTGCGT  
TAC

+

FFFFFFFFFFFFFFFFFFFFFFFFFFFFFFFFFFFF:F:FFFFFFFFFFFFFFFFFFFFFFFFFFFFFFFF  
FFFFFF,FFFFFFFFFFFFFFFFFFFFFFFFFFFF:FFFFFFFFFFFFFFFFFFFFFFFFFFFFFFFFFFFF  
FFF

+

@A00721:190:HGJW7DSXY:4:2250:9616:9032\_2:N:0:TCTGCAAG+GCTGCACT  
GTTGTTATCTCGAAAAGTCTCTTCTAAAAGGAACGTCAAGTTCTAACCCAAAGAGAATATCTAAAATAT  
TTACAAAATCTTACCACTATCTACGAACCTAAAGTTCTGAAGACGTTG

+

@A00721:190:HGJW7DSXY:4:2364:12111:19304\_1:N:0:TCTGCAAG+GCTGCACT  
GGCACTACCTCGGTACAATCTTACTTGGAACGAAGGCGACCTGTTCCGGAGTTTTTACGGGATCCGGA  
ATGTTCTGTCTATATTAGGTGAAGCGAAATACGATTTCAACGTCAACGTTACCGAGTTTCGTTTCG  
TAC

+

@A00721:190:HGJW7DSXY:4:1461:4571:4492\_2:N:0:TCTGCAAG+GCTGCACT  
TCATGAATTTTCAGAGGATGAAAAATTTTCTTCCTTGGATTTTAATATAAAGAATCTTTACCAGGACT  
CCTACTACAGGAGGCAGTCTTCTGATCGTAAGAAGTTTATAAGGAACA

+

@A00721:190:HGJW7DSXY:4:2571:27317:25254\_1:N:0:TCTGCAAG+GCTGCACT  
CTCTAAGTGGTAATACTGTCTTTCCAAGCTTACCTGTATCTTCAATGAAATTGGACTCTTCGATAGGG  
GACATTTTATCGTGGGCTTTCCGTAAAGGAAGATCTGTTATCGACGGTTTATCGTTTACGAAGTATCA  
CTC

+

@A00721:190:HGJW7DSXY:4:2413:7500:35368\_1:N:0:TCTGCAAG+GCTGCACT  
ACAGAAGATGATGTTAGAGTAGAATTCCTGAAGAGTCCTTCCGTAACCAACTTCTTGACAATTTTCTT  
CAATCCTTCGATAATAGTTAAATCTAGGATTATGTCTGTGTTGAAAGACTTTCTACCGATAAGGGTCA  
CTA

+

@A00721:190:HGJW7DSXY:4:2670:14733:23813\_2:N:0:TCTGCAAG+GCTGCACT  
ATTGACTGATTATCTAAAGATTGAAGGAAAATTTATCCTCGTTTAACTTACTTAGACTTTCTACGA  
TACAAATGATAACTTCTAATTTACGTTTGCTACTCAGAGCTGGTCCTC

+

@A00721:190:HGJW7DSXY:4:1665:31186:16016\_2:N:0:TCTGCAAG+GCTGCACT  
CAGGAGTCCCGGCATTTGATAATAATGACGAGACTTTCGTCATAATCGCTGCATATTACGGATTACAC  
GGTACCAGCGCATCTCGTGTGCGAGCCTCGACCCGATTATATGGTATTA

+

```

FFFFFFFFFFFFFFFFFFFFFFFFFFFFFFFFFFFFFFFFFFFFFFFFFFFFFFFFFFFFFFFFFFFFFFFF
FFFF,FFFFFF:FFFFFFFFFFFFFFFFFFFF:FFFFFFFFFFFFFFFFFFFFFFFFFFFF

```

@A00721:190:HGJW7DSXY:4:1562:27624:23375\_1:N:0:TCTGCAAG+GCTGCACT  
ACTATGTTATGTTCTCTGATCATTTTGACAATCTCTTCTTATAATAAAATAAATAATATTACTAA  
TGGCAAATAGTGGAAGGCTCCAGTCAACACTAGTTCGAGTGCTGCTTTGGATTACGATGACGTGAGA  
AT

+

FFFFFFFFFFFFFFFF,FFFF,FFFFFFFF,FFFF:,FFFF,FFFF:FF:FFFFFFFF::FFF:,F:F  
FFFFF,:FFFF:FFF,,F,FFF:FF:,F:FFFFFFFFF:::FFFFF::FFF:,F:FFFF:FFFFFF  
FF

@A00721:190:HGJW7DSXY:4:2434:15537:31093\_1:N:0:TCTGCAAG+GCTGCACT  
TTTACCTCGACCAACATTAAGGCGGCGGCGACTAATCTTAAAGCTTCACCCAAAATGAAGGACACTTC  
GAAACTGAATAATGATGCACTACAAACAAGTATCGCTAATCATCTGAAAAAGGCTCTAAAGGACACTA  
TAC

+

FFFFFFF:FFFFFFFFFFFFFFFFFFFFFFFFFFFFFFFFFFFFFFFFFFFFFFFFFFFFFFFFFFFFF  
FFFFFFFFFFFFFFFFFFFFFFFFFFFFFFFFFFFFFFFFFFFFFFFFFFFFFFFFFFFFFFFFFFFFF  
FFF

@A00721:190:HGJW7DSXY:4:2207:4399:18787\_1:N:0:TCTGCAAG+GCTGCACT  
GAGGATATTCGCCATTGTGGTACGAATTGGTCCAACATTTACCACCAAATTCTTTTGATACAACCTA  
GCCTTCAAGTGGGGTATGCCTGCGGAATACGCTTGCTATTCACCAGATTGGTTCGAACCCGTTGATGC  
TAT

+

FFFFFFFFFFFFFFFFFFFFFFFFFFFFFFFFFFFFFFFFFFFFFFFFFFFFFFFFFFFFFFFFFFFFF  
FFFFFFFFFFFFFFFFFFFFFFFFFFFFFFFFFFFFFFFFFFFFFFFFFFFFFFFFFFFFFFFFFFFFF  
FFF

@A00721:190:HGJW7DSXY:4:2425:7591:9627\_2:N:0:TCTGCAAG+GCTGCACT  
TATTCAAGCTTGTGCTTTAAAGACTGCAGAGGCTGTCAAACAAGCCAGACTCAAGGAGTCCAATCAA  
AGGTTTTGAATTTAGCTCAACTGGGGAGACGTGCTTAAATGGGTGATA

+

FFFF,FFF,FFFF:FFFFFFFFFFFF:F,FFFFFFFFFFFFFFFFFFFFFFFFFFFFFFFFFFFF,FFFFF  
FFFFFFFFFFFFFFFFFFFFFFFFFFFFFFFFFFFFFFFFFFFFFFFFFFFFFFFFFFFFFFFFFFFFF

@A00721:190:HGJW7DSXY:4:2534:9860:8015\_1:N:0:TCTGCAAG+GCTGCACT  
AGATAGTGGGATAATAGTTCTACCGATACGTAGTGAACGCGTTCGTAGAACCAAGTACTTTCCGTCTG  
AAGAGTTTAGAGCTGCTATTGATTATGTAACCGATAGGAGTTGTATAGTTGAAGATGTGGCTTTAGAC  
GAT

+

FFFFFFFFF,FFFFFFF:FFFFFFFFFFFFFFFFFFFFFFFFFFFFFFFFFFFFFFFFFFFFFFFFFFFFF  
FFFFFFFFFFFFFFFFFFFFFFFFFFFFFFFFFFFFFFFFFFFFFFFFFFFFFFFFFFFFFFFFFFFFF  
FFF

@A00721:190:HGJW7DSXY:4:2519:19045:13463\_2:N:0:TCTGCAAG+GCTGCACT  
ATGTTGACTGACGAAGATTTTCCACAGATTTGTCTACGTTGCAGATCGCCACTCCAAACACTATATA  
CATTATAAAATATAAAAAATAAGGGAGTCATAACTTTTGTTACCAAATT

+

FFFFFFFFFFFFFFFFFFFFFFFFFFFFFFFFFFFFFFFFFFFFFFFFFFFFFFFFFFFFFFFFFFFFF  
FFFFFFFFFFFFFFFFFFFFFFFFFFFFFFFFFFFFFFFFFFFFFFFFFFFFFFFFFFFFFFFFFFFFF:FFF

@A00721:190:HGJW7DSXY:4:2211:29405:18349\_1:N:0:TCTGCAAG+GCTGCACT  
CGAAGTCTCTGATTTTATTAATCATTACTTTAACGATCTCTCGGTCATTTACTCTGTACTTGATCTAC  
GTCGTTTAACTGTGCGGAACAACCTTTACTTAGAATGACTCTATCTTTAAGACACTTCTTATATTATT  
TAA

+

FFFFFFFFFFFFFFFFFFFFFFFFFFFFFFFFFFFFFFFFFFFFFFFFFFFFFFFFFFFFFFFFFFFFF:FFF:FFFFFFFFFFFF:FFFF  
FFFFFFFFF:,F::FFF:FFF:,FFF,FFF,FFF,,F:,F:F:FFF,F,:FF::FFFFFFFFF:F  
F::

@A00721:190:HGJW7DSXY:4:1433:16794:27320\_2:N:0:TCTGCAAG+GCTGCACT  
CTATCGTTTTCTGCTTTTCTTAGCTAATAGATTAATAAAGGATGAGTACGAAAACCAACTCTTCGTT

ACGAGACCTGATGGTAGAATAGATTTAGTCTCTACACCCAACCTCAACG  
+  
FF,FFF:FFFFFF:FFF,FFFFFFFFF:F:FFFFFFFFFFFFFFFFFFFF:FFFFFFFF:FFFFFFF  
F:FFFFFFFFFFFFFFFFFFFFFFFF,FFFFFFFFF,FFFFFFF  
@A00721:190:HGJW7DSXY:4:1165:22200:11819\_2:N:0:TCTGCAAG+GCTGCACT  
GAGTTTTCCGTCCTGAACGTAATACACGAAGAGATCATCCGCAAACGACTCGAAACCGAGACGCCGTA  
GATCAAAGTCCCTTCTAACTTTAGATTATGAATCCTGCCTTTACTCAT  
+  
FFFFFFFFFFFFFFFFFFFFFFFFFFFFFFFFFFFFFFFF:FFFFFFFFF::FFFFFFFFF:FFFFFFFFF  
FFFFFFFFFFFFFFFFFFFFFFFFFFFFFFFFFFFFFFFFFFFFFFFFFFFFFFFF  
@A00721:190:HGJW7DSXY:4:2342:9923:2018\_2:N:0:TCTGCAAG+GCTGCACT  
CTTTTCGATAGTGATTGTTATCAATTTAAATACATTACTGTTTCAAATCATCTTTACTCACAGACTCC  
GAAATGGTTTCAAATGAGGTCAAAGCTCTATTTATTAAACGAACAT  
+  
FFFFFFFFFFFFFFFFFFFFFFFFFFFFFFFFFFFFFFFFFFFFFFFFFFFFFFFFFFFFFFFFFFFFFFFF  
FFFFFFFFFFFFFFFFF,FFFFF,FFFFFFFFFFFFF:F:FFFFFFF  
@A00721:190:HGJW7DSXY:4:1347:11930:14011\_2:N:0:TCTGCAAG+GCTGCACT  
CCTTCGATGTTTATATTTTCTATAAGGGAAAATAGCAATAATCAAATTCGACAAATTTAGAACTT  
TATTCAGAACTCTCTCCGATCACCTTGGTGTGATCTCCCGGAGGATC  
+  
FFFFFFFFFFFFFFFFFFFFFFFFFFFFFFFFFFFFFFFFFFFFFFFFFFFFFFFFFFFFFFFFFFFFFFFF  
FFFFFFFFFFFFFFFFF:FFFFFFFFFFFFFFFFFFFFFFFFFFFFFFFF  
@A00721:190:HGJW7DSXY:4:2511:16622:7388\_2:N:0:TCTGCAAG+GCTGCACT  
AGTGATATTCAGCGTATACTTGAATACTTTATCAAAGATTTGGCTTGGTCTATTTACCGCAAAAAGTT  
GGAAGAGGTCTATGATATTTATTTTACTTATACTTTAAATAGCACCGA  
+  
FFFFFFFFFFFFFFFFFFFFFFFFFFFFFFFFFFFFFFFFFFFFFFFFFFFFFFFFFFFFFFFFFFFFFFFF  
FFFFF:FFFFFFFFF:FFFFFFFFFFFFFFFFFFFFFFFFFFFFFFFF:FFFFFFF  
@A00721:190:HGJW7DSXY:4:1274:7229:27038\_2:N:0:TCTGCAAG+GCTGCACT  
TTGATAATATTACAATAGCTCTTCTCAGAAGATTAGAGAAGTAACCGGTGAACACGTCCGGTAGCATT  
GATTTACTTTTACCGTTAGAACTGAAAAAGATTCTTTTCGAAAAGAAA  
+  
FFFFFFFFFFFFFFFFFFFFFFFFFFFFFFFFFFFFFFFFFFFFFFFFFFFFFFFFFFFFFFFFFFFFFFFF  
FFFFFFFFFFFFFFFFFFFFFFFFFFFFFFFFFFFFFFFFFFFFFFFFFFFFFFFFF:  
@A00721:190:HGJW7DSXY:4:1626:4237:27618\_1:N:0:TCTGCAAG+GCTGCACT  
AACGATTCTTCGACTATATTAAAGAAATAAAAATACTTCAAGTACCTGAACCTTACATTTTAAATGGT  
ATGGTATAATGTGTCTTACAAATAGAACCTTCACTCTCGGTAATGAGAGTGATTCTTAATATTCTA  
GTA  
+  
FFFFFFFFFFFFFFFFFFFFFFFFFFFFFFFFFFFFFFFFFFFFFFFFFFFFFFFFFFFFFFFFFFFFFFFF  
FFFFFFFFFFFFFFFFFFFFFFFFFFFFFFFFFFFFFFFFFFFFFFFFFFFFFFFFFFFFFFFFFFFFFFFF  
FFF  
@A00721:190:HGJW7DSXY:4:1220:29713:36010\_1:N:0:TCTGCAAG+GCTGCACT  
ACTAGGATTTATCACACTCCTAAATTTGATAGCAATTTATGTTTTAAATGCTAGGAAAATTTAGAAA  
AACTCCATTGTATAGTTCAAGGAGTACTTAATTCAATAGCTTTAGTATTATTTACTATCGCCTTTATT  
GAA  
+  
FFFFFFFFFFFFFFFFFFFFFFFFFFFFFFFFFFFFFFFFFFFFFFFFFFFFFFFFFFFFFFFFFFFFFFFF  
FFFFFFFFFFFFFFFFFFFFFFFFFFFFFFFFFFFFFFFFFFFFFFFFF:FFFFF:FFFFFFFFFFFFFFFFFFFF  
FFF  
@A00721:190:HGJW7DSXY:4:1526:5575:16188\_1:N:0:TCTGCAAG+GCTGCACT  
ACACAAAAGTGACGCGCGAAGGAATCTTAATTGATTGAAGCTAGGCGTTGGGGAGAATGAACTGCCGC  
TTCCCGGAAGAAACGATCTATTTACAGAGTATTTAGAGTAGTCCAAAGTTTGTATAAATTTATATGAT  
TTT

+  
FF:FFFFFFFF:FFF,:F:FFFFFF:FFFFFFFFFFFFFFFF:FFF,:FFFFFF:FF:FFFFFF  
FFF:FFF:FF:FFFFFF:FFFFFFFFFFFFFFFFFFFFFFFF:FFFFFFFFFFFF:FFFFFFFFFF  
FFF  
@A00721:190:HGJW7DSXY:4:2351:6388:36041\_2:N:0:TCTGCAAG+GCTGCACT  
GCTCCAAGTGGCAGCCAGACGTAGGGTCAAACCTACTACCGCCGGTCGGCAGATCGGCACCACTGGT  
CTCTACGTTCAAGGACCCGCTGTGCAGAATAACCTTCCCAAATCTAGA  
+  
FFFFFFFFFFFFFFFFFFFFFFFFFFFFFFFFFFFFFFFFFFFFFFFFFFFFFFFFFFFFFFFF  
FFFFFFFF:FFFFFFFFFFFFFFFFFFFF:F:FFFFFFFFFFFFFFFF  
@A00721:190:HGJW7DSXY:4:2518:7419:20823\_1:N:0:TCTGCAAG+GCTGCACT  
CTCAAAGGAAACGGGCTGTTGCCAGAGGAAAGCAGCGACCACCGAGGTCGCTCGTAACATTGACGGC  
AGTCCCGTCATCTCTGTGGGAAGTACCTCAGTCAAAGTCACATTCACCACTCCCATGCC  
AAT  
+  
FFFFF:FFFF,FFF,FFF,F,F,,FFF:F:FF::F,FFFFFFFFFFFF:FF,FFFFFFFFFFFF  
FFF,FFFF:F:FFFFFF,FFFFFF,F::FFFFFFFF:FFFFF:FFFF:FFFFFFFFFFFF:FF  
FFF  
@A00721:190:HGJW7DSXY:4:2333:25174:17566\_2:N:0:TCTGCAAG+GCTGCACT  
GACTATACAGTTCGGCCATTTCAAGAGTGGTCAATACGTCGTGGGAGGTACTGAAGCCTTCCCCTCCG  
CTGGCACGAAGAACTCCCAAGCCAATCAATAGTTCTTCTGACCAGA  
+  
FFFFFFFFFFFFFFFFFFFFFFFFFFFFFFFFFFFFFFFFFFFFFFFFFFFFFFFFFFFF,FFFFFFFFFFFFFFFF  
FFFFFFFFFFFF:FFFFFFFFFFFF:FF,FFFFFFFFFFFFFFFFFFFF  
@A00721:190:HGJW7DSXY:4:1323:14986:16047\_1:N:0:TCTGCAAG+GCTGCACT  
GACGTGTGCTCTTCCGATCTGGAAGAGGGGAAATGTCCCCAAACTGAGAAGAATAAAGGGAAAGGTC  
CATCAGGACCTAAGAAGGGGAAATTACCCCTAATTCTGAAGGAAGATCTCCACCATCTGGGGTTGGG  
AAT  
+  
FFFFFFFFFFFFFFFFFFFFFFFFFFFFFFFFFFFFFFFFFFFFFFFFFFFFFFFFFFFF::F  
FFFFFFFFFFFFFFFFFFFF:FFFFFFFFFFFFFFFFFFFFFFFFFFFFFFFFFFFFFFFFFFFF  
FFF  
@A00721:190:HGJW7DSXY:4:1324:17291:26271\_2:N:0:TCTGCAAG+GCTGCACT  
ACGGGCCAAAGAGGCCGCTGCTACGAAGTCGCTGAAGGCGGCTTGGGTCATTAAGGGTAGCTGTAAAG  
TTGCGCCTGCCGACCCCATCTTTGAGACCAAGACTCTCTACAGTAGGT  
+  
FFF,,FF,F,:FFFFFFFF:F:FF:FF:FFFF,:FFFF,FFF,FF:FFFF:,FF:FFF,FFF  
::F,:FFFF,F,F:FFFFFF::FFFFFF:FF:FFFFFF,FFF,F  
@A00721:190:HGJW7DSXY:4:1522:3929:25989\_2:N:0:TCTGCAAG+GCTGCACT  
AAATCTGTTGAATTCGTCACTGAGGACGAAGGTGAGAGGACTTTTGGCTACTGGCGACAACTGAGAG  
CAGTCGCTGGGGAAGAGAATTGCGTGGGTGAAGGCCGACGCTTCGA  
+  
FFFF:,,:FFFF:F,FFFFFFFFFFFFFFFF:FFFF:FF:FFFFFFFF,F:FFFFFFFF:FFFF  
FFF:FFF:FFFFFFFF,F,FFFF::FFF,FFFFFFFF:FFFF  
@A00721:190:HGJW7DSXY:4:1672:21025:32643\_1:N:0:TCTGCAAG+GCTGCACT  
GTCAACGGCGTTTGGAGGATTTTATCCGCGCTTAATGAGGCGAAGATCCCCTATGGAGTCTTGAA  
GGACTTAGTTGGCATATTTATGCCGACGATAATAAGCATGTCACCCTTAAGCACCGAGGTAAGCTCG  
GGA  
+  
FFFFFFFFFF,FFFFFFFFFFFFFFFFFFFFFFFFFFFFFFFFFFFFFFFFFFFFFFFFFFFF  
FFFFFFFFFFFFFFFFFFFFFFFFFFFFFFFFFFFFFFFFFFFFFFFFFFFFFFFFFFFFFFFF  
FFF  
@A00721:190:HGJW7DSXY:4:2164:6171:3380\_1:N:0:TCTGCAAG+GCTGCACT  
TCTCACTATTTTGGCCAGAATGCGGGCTTCTGACTGATGAGGTTAAACTCTTGCTCCTTCTGTGG

GTGAGGGTTTTTGTATATTCACTGGTTCTGGGAGGCTGCTTCTCCATAATTACAACCTCTCTTTA  
GAG

+

FFFFFFFFFFFFFFFFFFFFFFFFFFFFFFFFFFFFFFFFFFFFFFFFFFFFFFFFFFFFFFFFFFFFFFFFFFFFFFFF  
FFFFFFFFFFFFFFFFFFFFFFFFFFFFFFFFFFFFFFFFFFFFFFFFFFFFFFFFFFFFFFFFFFFFFFFFFFFFFFFF  
FFF

@A00721:190:HGJW7DSXY:4:2553:22318:14935\_1:N:0:TCTGCAAG+GCTGCACT  
ATTCCCACATATGGTAGACGTTGTCACACTTTTCTTGAAAATTTTCTTTCTCCGTCAATTGGGGAT  
TTCGATGTGAGAAGGTGGAAGGTGTCAAGGGTCTTCTTCATGCTGATCTTTCAGGACCTAATCACATC  
ATG

+

FFFFFFFF,F,FFFFFFFFFFFF:FFFFFF:FFFFFFFFFFFF:FFFFFF,FFFFFFFFFFFF:FFFFFF  
FFFFFFFFFFFFFFFFFFFFFFFFFFFFFFFFFFFFFFFFFFFFFFFFFFFFFFFFFFFFFFFFFFFFFFFFFFFF  
FFF

@A00721:190:HGJW7DSXY:4:2422:14045:36495\_1:N:0:TCTGCAAG+GCTGCACT  
GCTCGTATCGAGTTGGAGGGAGGAAGTTCTCCGAAATTAAGACGGGGGGATTAAAGAGTCCAGCTGTA  
ACTGTCAATTCAGAGAGGGGAGCTCTGAAAAGGAACTTCGTCAGAAGATGAGGAAGTCTAAGAGGAG  
GAG

+

FFF,FF:FFF,FFFFF,FFF:FFFFFFFFF:FFFFFFFFFFFFFFFFFFFFFFFFFFFFFFFFFFFFFFFFFFFF  
FFFFFFFFFFFFFFFFFFFF:FFFFF:FFFFFFFFFFFFFFFFFFFFFFFFFFFFFFFFFFFFFFFFFFFFFFFF  
FFF

@A00721:190:HGJW7DSXY:4:2617:32452:33051\_1:N:0:TCTGCAAG+GCTGCACT  
CTCTAGAGAAGATCTCACCACCTGGAGAAGGCAAGTGGAGAGTCCAGAAGTTGATGAAGAAGGATTAT  
TTGAAGCAGGGGTTACCACTTCCTAAGGTGGATGAGGGAGGTTGTTTCTTTGGAGTTTATAGATAATCT  
TTT

+

FFFFFFFFFFFFFFFFFFFF,F:FFFFFFFFFFFFFFFFFFFFFFFFFFFFFFFFFFFFFFFFFFFFFFFFFFFFF:FFFFFFFFFFFFFFFFFFFF:FF  
FFFFFFFFFFFFFFFFFFFFFFFFFFFFFFFFFFFFFFFFFFFFFFFFFFFFFFFFFFFFFFFFFFFFFFFFFFFF  
FFF

@A00721:190:HGJW7DSXY:4:2261:15781:22310\_2:N:0:TCTGCAAG+GCTGCACT  
GATCTTGAGGACGTACATTTAACGTGGCAGAATTCGGTAACCTTACCATATTGTTCTTCCGGGAAGTT  
GTGGGATTTAACTTTGACTCAGCTACTCCGATCAGATCCGGATGGTTT

+

FFFFFFFFFFFFFFFFFFFFFFFFFFFF:FFFFFFFFFFFFFFFFFFFFFFFFFFFFFFFFFFFFFFFFFFFFFFFFFFFF:FFF  
FFFFFFFFFFFFFFFFFFFF:FFFFFFF,FFFFFFFFFFFF:FFFFFFFFFFFFFFFFFFFF,F

@A00721:190:HGJW7DSXY:4:2365:27425:17801\_2:N:0:TCTGCAAG+GCTGCACT  
CAGATACTACCGATAAGGTGAAAAATATGCAGGTCAAAGATTCTGTAGCTCTGAGGGCGGTTGAGGGA  
GCCGTTTTGGCCGACTTTAACTATTCTAAGAGTCTTTATGATTCAAAA

+

FFFFFFFFFFFFFFFFFFFFFFFFFFFFFFFFFFFFFFFFFFFFFFFFFFFFFFFFFFFFFFFFFFFFFFFFFFFF:FFFFFFFFFFFFFFFFFFFF  
FFFFFFFFFFFFFFFFFFFFFFFFFFFF,FFFFFFFFFFFFFFFFFFFFFF:FFFFF

@A00721:190:HGJW7DSXY:4:2320:13639:3474\_1:N:0:TCTGCAAG+GCTGCACT  
AGAATTGCGGTTGAAGTTCACCATTTCTATCTTGAATGCTCACGCCGTCGCAGCCATATCGAGACTAT  
GTTATAATCACTTGTTAAAGTACAGATTTAGTGATTTAGATATTATTGATATTGGAGGCGATATTTCGT  
TTT

+

FFFF,FFFFFFFFFFFF:FFFFFFFFFFFF:FFFFFFFFFFFFFFFFFFFFFFFFFFFFFFFFFFFFFFFFFFFF  
FFFFFFFFFFFFFFFFFFFF:FFFFFFFFFFFFFFFFFFFFFFFFFFFFFFFFFFFFFFFFFFFFFFFFFFFF  
FFF

@A00721:190:HGJW7DSXY:4:2225:12002:18959\_1:N:0:TCTGCAAG+GCTGCACT  
ACATATTTGCAACCCTATTCTTGATGTGAAAGATGCATCGAGGTATACGTCTAGGAACATTGATTGGG  
AACGTACCTACTCACGAGACGTCATGAAAGCTATCGGAGGGAAGCAAAATGTTTCGTTCTGTTACAAG  
AAC

+  
FFFF:FFFFFFFFFFFFFFFFFFFFFFFF,FFFFFF:FFFFFFFFFFFFFFFFFFFFFFFFFFFFFFFFFFFFFFFF  
FFFFFFFF,FFFFFFFFFFFFFFFFFFFFFFFFFFFFFFFFFFFFFFFFFFFFFFFFFFFFFFFFFFFFFFFF:  
FFF  
@A00721:190:HGJW7DSXY:4:2410:31304:34757\_1:N:0:TCTGCAAG+GCTGCACT  
CTCAGTTTAGATAGCTGTAGAGGTATACGATATCTCTCTTGATGATGTAGCCACTATAATGCTTAAGA  
GAGAGATTGATGTATGTCATTTCTGCTTAGTTTGTCCCGCGCAATTATTGGACACGATGAAAAATGAC  
ATA  
+  
FF:FFFF,,FFFF,,FFFFFFFF:FFFF:FFFFFFFF::FF,FFF:::FFFF:F:FFFFFFFFFFFF,FFF  
F,FF,,FFFFFFFFFF,F,FFFF:F,FFFFFFFFFFFF,F::FFF:FFFFFFFFFFFF:FFFF,F,FFF:,  
:F:  
@A00721:190:HGJW7DSXY:4:2577:16206:11710\_1:N:0:TCTGCAAG+GCTGCACT  
TCATGGAGATGATGGCGCATCACTTGATTACTATATGCCCCAAGGATTGGGTATTCTCACAAGATA  
AGATTTTATCTTTCTTCAAACACCCTGTTTTCTTAAGGGCGGACAATTGTTCCATTGTGAACCTCTG  
GGG  
+  
FFFFF:FFFFFFFFFFFFFFFFFFFFFFFFFFFFFFFF,FFFFFF:FFFFFFFFFFFFFFFFFFFFFFFFFFFFFFFF  
FFFF,FFFFFFFFFFFF::F:FFFFFFFFFFFFFFFFFFFFFFFFFFFFFFFFFFFFFFFFFFFFFFFFFFFF  
FFF  
@A00721:190:HGJW7DSXY:4:1670:32560:36620\_1:N:0:TCTGCAAG+GCTGCACT  
TGAGTTCCGAATAACTCGTAATAAATCTTTCTCTAGTGGACAATTCAGAATACCTATTTCCGTACCAA  
GAGCCACTGCCAATCTCATCGCTATACGCATACCTGATTGGAAGAAGCGAGGTTCTGTTCTCAATAAA  
AAT  
+  
:FFFFFFFFFFFF:FFFFFFFFFFFFFFFFFFFFFFFFFFFFFFFF:FFFFFFFFFFFFF:FFFFFFFFFFFFFFFFFFFFF:FF  
FFFF:FFFFFFFFFFFFFFFFFFFFFFFFFFFFFFFFFFFFFFFFFFFFFFFFFFFFFFFFFFFFFFFFFFFFF:FFFFF  
,FF  
@A00721:190:HGJW7DSXY:4:1445:15989:22764\_1:N:0:TCTGCAAG+GCTGCACT  
AAGGGCTATTACGTACGTCATGGGGATCACTTCTTCGGTCAATGACAAAACCTTCGAATATGTTACGA  
CATGGCTTCGTAACAACAGTGCAGGATTGTCATCTCGGGGAAAGTGATTCACCAAGATGTTTCATATA  
GAT  
+  
FFFFFFFFFFFFFFFFFFFFFFFFFFFFFFFFFFFFFFFFFFFFFFFFFFFFFFFFFFFFFFFFFFFFF::FFF,FFF  
FFFFFFFFFFFFFFFFFFFFFFFFFFFFFFFFFFFFFFFFFFFFFFFFFFFFFFFFFFFFFFFFFFFFFFFFFFFF  
FFF  
@A00721:190:HGJW7DSXY:4:1416:3893:32659\_1:N:0:TCTGCAAG+GCTGCACT  
AAGGTCGCAGCGATCTTACTCGTTATCGGAGCTAAGAAGAAGACTTTGGGTACACGTTATGCTCGCAA  
ACTTAACGTTAGTACCGGAGGTGATCTCTCTGCTTCTGCGTTACTGAGAGAAAAGATTACAGGACGCCT  
ACG  
+  
FFFFFFFFFFFF:FF:FFFFFFFF:FFFFFFFFFFFF:FFFFFFFFFFFF:FFFFF:F,FF,FFFFFFFFFFFF  
,:FFFFFFFF:FFF,,FFFFFFFF:FFFFFFFF:FFFFFFFFFFFFFFFF:FFFFF::FFFFFFFF:FFF:F  
:FF  
@A00721:190:HGJW7DSXY:4:1337:30120:28447\_1:N:0:TCTGCAAG+GCTGCACT  
TCTTGAAACTACGGTCCTTATCAAAGAAAATGGTGAACCGGTCTCTAAATCTTTTGAGATTGAGAAGA  
TTGAAGAACACGTCAAGAAGTCGCTCGGCGTTGTTCTTGAAAACCAAGTTAAGAAGGAGGCTGATCAT  
GGA  
+  
:F:FFFFFFFFFFFFFFFFFFFFFFFFFFFFFFFFFFFFFFFFFFFFFFFFFFFFFFFFFFFFFFFFFFFFF  
FFFFFFFFFFFFFFFFFFFFFFFFFFFFFFFFFFFFFFFFFFFFFFFFFFFFFFFFFFFFFFFFFFFFF:FFFFFFFFFFFFF:FFFFF,  
FFF  
@A00721:190:HGJW7DSXY:4:1133:18123:31782\_2:N:0:TCTGCAAG+GCTGCACT  
TCAAACCTTCGAGGTTTCAGCTACGAGAGGTGATCCCGGATGTGGATTGAAGGCTGGCTCTAAGGGAGAC

+

@A00721:190:HGJW7DSXY:4:2607:28727:2174\_1:N:0:TCTGCAAG+GCTGCACT  
ATAACTTCTTTTCAAAAATGCGGATGGGTCTACTGATGTTTTCTACAGAGTGCAGTCGTTTCAACA  
CTTATCACCACTTTTGAAAGGAAAATAATTGGTGATGAAAATACGTATGTCGGTGGGGTTCTCAAGGC  
TCT

+

@A00721:190:HGJW7DSXY:4:2549:3450:32268\_1:N:0:TCTGCAAG+GCTGCACT  
GATTCTTAAAGAAGTTTATTAACCTTCAGAGTCTCTTGAAGTCCAGGTAGCTAATGTTCTTGCAA  
TAGCCACAGACTTTCTGGGAAAAGAGACCTCTGTTGGTAGAGGAGTTGAGAGAATTACTCAGATTCAA  
TCT

+

@A00721:190:HGJW7DSXY:4:2147:19370:21543\_1:N:0:TCTGCAAG+GCTGCACT  
AAAAGATCCTTTGCACAAGCAATACCTTCCACTGAGTTCATCACCCAGAGTTTCGACGTCGCGGAAAA  
CGATGAAGATTTCCACACTGTTTCGAGAATCTTCTGATGCTGAATTTGAGGAAAATTTTTCGGAAGTTT  
TTG

+

@A00721:190:HGJW7DSXY:4:2218:6596:3771\_2:N:0:TCTGCAAG+GCTGCACT  
CAGTACAGGGAGGAGGTAATAGTTATAAAACCTTCTTTATCATTGCAACAGGACTTTGAGAAGACTG  
TTGAAATGGACAAAATCTGGGATCATAGGTATGTGTACGCTACACTC

 $+$ 

@A00721:190:HGJW7DSXY:4:1454:23854:15875\_2:N:0:TCTGCAAG+GCTGCACT  
CCATATCAGATTAGAGACATGCCAGTTAGAGTTCTTCTAACCAGGACTGATGGTGAGATTCTTTTACC  
TTTTGGAGGTCCAGGAACCTTTACTCCTAGTGTCTTTTCTAGAGTCCA

+

@A00721:190:HGJW7DSXY:4:2657:15872:19680\_2:N:0:TCTGCAAG+GCTGCACT  
CTCTATTGAATCCCTTTTCCACGATGAAAGCTCTTTATGAGGTGCTCCATGCAAATTTACAGTTCCTC  
TTTGGTGATATCGCCTCTGTCCTTTCTCCTTTAATCGTGAGGTTACGA

+

@A00721:190:HGJW7DSXY:4:2541:12644:29935\_1:N:0:TCTGCAAG+GCTGCACT  
GTTTCGGTTTCAGCTGGATGGATCTTTTGATGGTATGTTTCACATTGCGTGATCACTTCCCGTGGACT  
TGGAAGAGATTAAACATAAAATCCAGCGATTCTATTATGTCGCTAAAGCCTGTCCAGTTGTCGATGA  
TGT

+

[illegible]



$+$  $+$ 

+

+

+

+

+

[illegible]

@A00721:190:HGJW7DSXY:4:1171:17318:18333\_1:N:0:TCTGCAAG+GCTGCACT  
ACCACCTTAACGTCACTCGGTAATCTTTCAGCCGAATTAAGTACTAATGAGTTCAAGTCGGTTGTCGA  
TCGAATTAAGATCAAGGCTAATACCTTTATAGGTAAGAAGCCCCTTGAGCCGCGTAGTCAGCGCGTTT  
AGC

+

FFFFFFFFFFFFFFFFFFFFFFFFFFFFFFFFFFFFFFFFFFFFFFFFFFFFFFFFFFFFFFFFFFFFFFFF  
F:FFFFFFFFFFFFFFFFFFFFFFFFFFFFFFFFFFFFFFFFFFFFFFFFFFFFFFFFFFFFFFFFFFFF  
FFF

@A00721:190:HGJW7DSXY:4:1324:32615:4523\_2:N:0:TCTGCAAG+GCTGCACT  
TGATAGATTGGGTCAACAATAGGGACGCTAGTATACTTCGTAAAGTCGACAGCGAAATGGTCAATATT  
GATAATTGGACCGACTATATGACCTATTTTAAGCTCATGGTGAAAAGG

+

FFFFFFFFFFFFFFFFFFFFFFFFFFFFFFFFFFFFFFFFFFFFFFFFFFFFFFFFFFFFFFFFFFFFFFFF  
FFFFFF:FFFFFFFFFFFFFFFFFFFFFFFFFFFFFFFFFFFFFFFFFFFFFFFFFFFFFFFFFFFFFFFF

@A00721:190:HGJW7DSXY:4:2302:15899:21230\_2:N:0:TCTGCAAG+GCTGCACT  
GTTCTTGTGAGGAGAGTCAAACAGTGTCTTTTACCCAACATTTTTATGTATACAGAGATGACCACTGA  
CGATTTCTCCCGGAAGCTCTTCTCTCTCTTAGGAGGTCATGATGACTA

+

FFFFFFFFFFFFFFFFFFFFFF,FFFFFFFFFFFFFFFFFFFFFFFFFFFFFFFFFFFFFFFFFFFFFFFF:FFFFFF  
FFFFFFFFFFFFFFFFFFFFFFFFFFFFFFFFFFFFFFFFFFFFFFFFFFFFFFFFFFFFFFFFFFFF:FF

@A00721:190:HGJW7DSXY:4:1575:13123:7686\_1:N:0:TCTGCAAG+GCTGCACT  
CAGGAGTATCCATAACGATTTGTCAATTTACCACCTTTGCTCAACGACGAAGTGGAACGGCCAACACTT  
TCTTTGGTAATTGTATGATCACTTTGATGATTTTATCACTTTATTATGACCTTGAAAGTTTTTCGGCT  
GTG

+

FFFFFFFFFFFFFFFFFFFFFFFFFFFFFFFFFFFFFFFFFFFFFFFFFFFFFFFFFFFFFFFFFFFFFFFF  
:FFFFFFFFFFFFFFFFFFFFFFFFFFFFFFFFFFFFFFFFFFFFFFFFFFFFFFFFFFFFFFFFFFFF  
FFF

@A00721:190:HGJW7DSXY:4:2411:5023:7216\_1:N:0:TCTGCAAG+GCTGCACT  
CGATATTCGATTGAGGGTCGTTATACCTATTCGGCTATCTGTGCTTTGAATTGTATAAGATCAAATTT  
TAAACGATTCCGAGAGGTTTATCCTGATGTGGAGGGAGTTCTTGAAGCATCCCGACCTTTCCTTGTA  
AAA

+

:,:FFF:F,,FF:,F:FF:,FFFFFF:FFFFFF::FFF:FFFF,FFF,F,FF:FFFF:,F::FFFFFF  
FF,FFFFFFFFFFFFFFFFFFFFFFFFFFFFFFFFFFFFFFFFFFFFFFFFFFFFFFFFFFFFFFFFFFFF:FFFFFFFF  
FFF

@A00721:190:HGJW7DSXY:4:2435:31665:8735\_2:N:0:TCTGCAAG+GCTGCACT  
TCGAGACAGGTGATATTGTTGAGCGAGAGCGACCAAGATCTAAATTCGGTAACGGTGCGTGGCGCTTT  
ATTTTAAAAGCTCCCTCCTCTCGCAAGTTTGATCTGATAGATCGGAA

+

FFFFFFFFFFFFFFFFFFFFFFFFFFFFFFFFFFFFFFFFFFFFFFFFFFFFFFFFFFFFFFFFFFFFFFFF  
FFFFFFFFFFFFFFFFFFFFFFFFFFFFFFFFFFFFFFFFFFFFFFFFFFFFFFFFFFFFFFFFFFFF:F

@A00721:190:HGJW7DSXY:4:2405:4806:22498\_1:N:0:TCTGCAAG+GCTGCACT  
TGACGATCATTAAGACTCTTTCTTCTTTGTTTCCTTCTTTGCACTGATTTTTCCTCATCAGCTTGT  
GTTTTACCTAATCTGTGTTTTTACGATAACAACATCAGTTGATTAAGACTCTTCCGAAAGGCGAACT  
TTG

+

FFFFFFFFFFFFFFFFFFFFFFFFFFFFFFFFFFFFFFFFFFFFFFFFFFFFFFFFFFFFFFFFFFFFFFFF  
FFFFFFFFFFFFFFFFFFFFFFFFFFFFFFFFFFFFFFFFFFFFFFFFFFFFFFFFFFFFFFFFFFFF  
FFF

@A00721:190:HGJW7DSXY:4:2628:21866:33786\_1:N:0:TCTGCAAG+GCTGCACT  
AGCACAACGTTTGACCGTGACGAAGTGTGGTGTCTTGTATCTACGTTACGGATATACTCTCCTTGAGT  
TCACTCGTAAGGACACTACCACTTATTACGATATTTCTTTAGTCGATGGGTTTTCGACTCCTTTAAGC  
GTC

+  
FFFFFFFFFFFFFFFFFFFFFFFFFFFFFFFFFFFFFFFFFFFFFFFFFFFFFFFFFFFFFFFFFFFFFFFF  
FFFFFFFFFFFFFFFFFFFFFFFFFFFFFFFFFFFFFFFFFFFFFFFFFFFFFFFFFFFFFFFFFFFFFFFF  
FFF  
@A00721:190:HGJW7DSXY:4:2234:5819:7842\_2:N:0:TCTGCAAG+GCTGCACT  
ATCACTCATTTTAGTGAGATTATTAACGCACTAAACGTCTTCGACAACAGCAGGGGTTTTCGAA  
TAGTGATAGCCACCCGCCTTACAGAGGGGCAGCAGCATGACCATAATT  
+  
FFFFFFFFFFFFFFFFFFFFFFFFFFFFFFFFFFFFFFFFFFFFFFFFFFFFFFFFFFFFFFFFFFFFFFFF  
FFFFFFFFFFFFFFFFFFFFFFFFFFFFFFFFFFFFFFFFFFFFFFFFFFFFFFFFFFFFFFFFFFFFFFFF  
@A00721:190:HGJW7DSXY:4:2622:30291:9549\_2:N:0:TCTGCAAG+GCTGCACT  
TGTCTGTCTCGCCTCTTCGAATGAAGTTTTAATGCTTAACAACAATGATAGTGAATTTATACCTACAA  
TCATTGGTTTTCTAATAATGATGACACTATTGTTTATGGATATGATG  
+  
FFFFFFFFFFFFFFFFFFFFFFFFFFFFFFFFFFFFFFFFFFFFFFFFFFFFFFFFFFFFFFFFFFFFFFFF  
FFFFFFFFFFFFFFFFFFFFFFFFFFFFFFFFFFFFFFFFFFFFFFFFFFFFFFFFFFFFFFFFFFFFFFFF  
@A00721:190:HGJW7DSXY:4:1566:26756:10598\_1:N:0:TCTGCAAG+GCTGCACT  
AGACGTGCTAAATTAACCAATTGTACGATGTCGTCTGTCTCGCGCATCACTTTTCACTAAGAATTGG  
TCCTACTTTTGGACAAGGCCAACTTCGTAATCTTCATGAGATCGTTTCTTTCTTTATCTCTTTGGTTG  
TTA  
+  
FFF:FF,FFFFFFFFFFFFFFFFFFFFFFFFFFFFFFFFFFFFFFFFFFFFFFFFFFFFFFFFFFFFFFFF  
FFFFFFFFFFFFFFFFFFFFFFFFFFFFFFFFFFFFFFFFFFFFFFFFFFFFFFFFFFFFFFFFFFFFFFFF  
FFF  
@A00721:190:HGJW7DSXY:4:2327:27706:15342\_2:N:0:TCTGCAAG+GCTGCACT  
GAGTGAAAGGCTTCAATTGTAGTGGTTTGGTCGTTTCAGTACCCAGTCAGTATACCTCTACGCAAAGA  
TATTTTCATGAAACTACAGAGGAACGTACCGGATTACCTGTCTTTTCAT  
+  
FFF:FFFFFFFFFFFFFFFFFFFFFFFFFFFFFFFFFFFFFFFFFFFFFFFFFFFFFFFFFFFFFFFF  
FFFFFFFFFFFFFFFFFFFFFFFFFFFFFFFFFFFFFFFFFFFFFFFFFFFFFFFFFFFFFFFFFFFFFFFF  
@A00721:190:HGJW7DSXY:4:1463:29894:17159\_1:N:0:TCTGCAAG+GCTGCACT  
GTTGGATGTCAAGAAGGGTTCAGAATGGGATTCTACGTAGTTTATGACTTTGGTGGTGGTACTTTTCG  
ATACTTCTATCGTCTTACGTTACGGTAATTACTATAGTGTTATTTATTCTGGTGGTGGTATGATAATCTT  
GGA  
+  
FFFFFFFFFFFFFFFFFFFFFFFFFFFFFFFFFFFFFFFFFFFFFFFFFFFFFFFFFFFFFFFFFFFFFFFF  
FFFF:FFFFFFFFFFFFFFFFFFFFFFFFFFFFFFFFFFFFFFFFFFFFFFFFFFFFFFFFFFFFFFFF  
FFF  
@A00721:190:HGJW7DSXY:4:1562:11379:10332\_1:N:0:TCTGCAAG+GCTGCACT  
TGATGAAGCTATAAGAGCGTTCTTATTACGGCGCACTTCTTTACCCGCCACCACAACTTTTCAGTTT  
CACAACGAAGGAGGAGTTTCTGTTACTGGAAAACCTCGTCAATACTTTTCAATAATATACGTCTT  
GAA  
+  
FFFFFFFFFFFFFFFFFFFFFFFFFFFFFFFFFFFFFFFFFFFFFFFFFFFFFFFFFFFFFFFFFFFFFFFF  
FFFFFFFFFFFFFFFFFFFFFFFFFFFFFFFFFFFFFFFFFFFFFFFFFFFFFFFFFFFFFFFFFFFFFFFF  
FFF  
@A00721:190:HGJW7DSXY:4:1175:2302:29590\_2:N:0:TCTGCAAG+GCTGCACT  
TGAACAAAGTTATCAAAGATAGTGGCATTCAAGGCAAACTTACCCTGATTCCGGCCGGTGGTAGCTCA  
TTTCTACCAGGGGCTATTACTCTTGCTGAAACAGCTATTAAAGCTGTT  
+  
FFFFFFFFFFFFFFFFFFFFFFFFFFFFFFFFFFFFFFFFFFFFFFFFFFFFFFFFFFFFFFFFFFFFFFFF  
FFFFFFFFFFFFFFFFFFFFFFFFFFFFFFFFFFFFFFFFFFFFFFFFFFFFFFFFFFFFFFFFFFFFFFFF  
@A00721:190:HGJW7DSXY:4:2636:32353:6324\_1:N:0:TCTGCAAG+GCTGCACT  
ATCGCTGAAGGATGTGCACTCTTTTCTGCTACTTTAACGGAGCGTAGTGTACTCTTCGTCGATTGTAT

CAACAGTAACATTACTTCTAATAAAGGTCTCTATCAAGCTCGTATTATCGTCGCTGCTGGATCTGCGT  
TAC

+

FFFFFFFFFFFFFFFFFFFFFFFFFFFFFFFFFFFFFFFF:F:FFFFFFFFFFFFFFFFFFFFFFFFFFFFFFFF  
FFFFFFFFFFFFFFFFFFFFFFFFFFFFFFFFFFFFFFFF:FFFF:FFFFFFFFFFFFFFFFFFFFFFFFFFFFFFFF  
FFF

@A00721:190:HGJW7DSXY:4:1410:16432:26663\_2:N:0:TCTGCAAG+GCTGCACT  
GTAATTATGAAGACTGTGATTTATCTTTCCTCTGGCCTTGATGAGGGTGTTTCTAATCGTAACATT  
AATAATTTCAATCTTCTTAAAAAGAAGATAGAGAGTCATACTTTGGGC

+

FF:FFFFFFFFFFFFFFFFFFFFFFFFFFFFFFFFFFFFFFFF:F,FFFFFFFFFFFFFFFFFFFFFFFFFFFFFFFF  
FFFFFFFFFFFFFFFFFFFFFFFFFFFFFFFFFFFFFFFFFFFFFFFFFFFFFFFFFFFFFFFFFFFFFFFF,FF

@A00721:190:HGJW7DSXY:4:2372:12183:25316\_2:N:0:TCTGCAAG+GCTGCACT  
GTTGTTATCTCGAAAAGTCTCTTCTAAAAGGAACGTCAAGTCTAACCCAAAGAGAATATCTAAAATAT  
TTACAAAATCTTACCACTATCTACGAACCTAAAGTTCTGAAGACGTTG

+

FFFFFFFFFFFFFFFFFFFFFFFFFFFFFFFFFFFFFFFFFFFFFFFFFFFFFFFFFFFFFFFFFFFFFFFFFFFF  
FFFFFFFFFFFFFFFFFFFFFFFFFFFFFFFFFFFFFFFF:FFFF:FFFFFFFFFFFF,FFFFFF

@A00721:190:HGJW7DSXY:4:2406:9968:17033\_1:N:0:TCTGCAAG+GCTGCACT  
GGCACTACCTCGGTACAATCTTACTTGGAACGAAGGCGACCTGTTCCGGAGTTTTTACGGGATCCGGA  
ATGTTCTGTCTATATTAGGTGAAGCGAAATACGATTTCAACGTCAACGTTACCGAGTTTCGTTTCG  
TAC

+

FFFFFFFFFFFFFFFFFFFFFFFFFFFFFFFF:F:FFFFFFFFFFFFFFFFFFFFFFFF:FFFFFFFFFFFFFFFFFFFFFFFF  
FFFFFFFFFFFFFFFFFFFFFFFFFFFFFFFFFFFFFFFFFFFFFFFFFFFFFFFFFFFFFFFFFFFFFFFF:FFFFFFFFFFFFFFFF  
FFF

@A00721:190:HGJW7DSXY:4:1509:21088:16282\_2:N:0:TCTGCAAG+GCTGCACT  
TCATGAATTTTCAGAGGATGAAAAATTTTCTTCCTTGGAATTTTAATATAAAGAATCTTTACCAGGACT  
CCTACTACAGGAGGCAGTCTTCTGATCGTAAGAAGTTTATAAGGAACA

+

FFFFFFFFFFFFFFFFFFFFFFFFFFFFFFFF:FFFFFFFFFFFFFFFFFFFFFFFFFFFFFFFFFFFFFFFFFFFFFFFF  
FFFFFFFFFFFFFFFFFFFFFFFFFFFFFFFFFFFFFFFF:FFFFFFFFFFFFFFFFFFFFFFFF

@A00721:190:HGJW7DSXY:4:2635:3613:18521\_1:N:0:TCTGCAAG+GCTGCACT  
CTCTAAGTGGTAATACTGTCTTTCCAAGCTTACCTGTATCTTCAATGAAATTGGACTCTTCGATAGGG  
GACATTTTATCGTGGGCTTTCCGTAAAGGAAGATCTGTTATCGACGGTTTATCGTTTACGAAGTATCA  
CTC

+

FFFF:FFFFFFFF,FFFFFF:FFFF:FFFFFFFFFFFFFFFFFFFFFFFFFFFFFFFFFFFFFFFFFFFFFFFF  
FFFFFFFFFFFFFFFFFFFFFFFFFFFFFFFFFFFFFFFFFFFFFFFFFFFFFFFFFFFFFFFFFFFFFFFFFFFFFFFF  
FFF

@A00721:190:HGJW7DSXY:4:2561:20464:25034\_1:N:0:TCTGCAAG+GCTGCACT  
ACAGAAGATGATGTTAGAGTAGAATTCCTGAAGAGTCCTTCCGTAACCAACTTCTTGACAATTTTCTT  
CAATCCTTCGATAATAGTTAAATCTAGGATTATGTCTGTGTTGAAAGACTTTCTACCGATAAGGGTCA  
CTA

+

FFFFFFFFFFFFFFFFFFFFFFFFFFFFFFFFFFFFFFFFFFFFFFFFFFFFFFFFFFFFFFFFFFFFFFFFFFFF  
FFFFFFFFFFFFFFFFFFFFFFFFFFFFFFFFFFFFFFFFFFFFFFFFFFFFFFFFFFFFFFFFFFFFFFFFFFFFFFFF  
FFF

@A00721:190:HGJW7DSXY:4:2366:22788:23296\_2:N:0:TCTGCAAG+GCTGCACT  
AATGACTGATTAAAAAAGATTGAAGGAAAATGTTATCCTCGTTTAACTTACTTAGACTTTTCTACGA  
TACAAATGATAACTTCTAATTTACTATTGATACTCAGAGCTTTTCCTC

+

:,,:FF,:FFF:,,,FFFF,FFFF,,FFF:F,,,FFF,FF:F,FF:FF:FFF:FFFFFFFF:,F:,F  
FFFFFFFF,FF,F:::FFF,F:FFF,,,F,,:F,FFF:F,F,,FFFF





@A00721:190:HGJW7DSXY:4:2353:5177:30812\_2:N:0:TCTGCAAG+GCTGCACT  
GCTCCAACCTGGCACGCCAGACGTAGGGTCAAACCTACTACCGCCGGTCGGCAGATCGGCACCACTGGT  
CTCTACGTTACAGGGACCCGCTGTGCAGAATAACCTTCCCAAATCTAGA

@A00721:190:HGJW7DSXY:4:1627:22661:8422\_1:N:0:TCTGCAAG+GCTGCACT  
AAAGGAAACGGGATGTTGCCCTGAGGAAAGAATCGACAACCGAGTTCGCTCGTTACATTGACGGCAGT  
CCCGTCATCTCTGTGGGAACAGAGGCAGTACCTCAGTCAAAAGTCACATTACCCTCCCATACCAAT  
CAA

@A00721:190:HGJW7DSXY:4:1421:6460:15562\_2:N:0:TCTGCAAG+GCTGCACT  
TATACAGTTCGGCCATTTCAAGAGTGGTCAATACGTCGTGGGAGGTACTGAAGCCTTCCCCTCCGCTG  
GCACGAAGAACACTCCCAAGCCAATCAATAGTTCTTCTGACCAGAATG

@A00721:190:HGJW7DSXY:4:1324:7229:4178\_1:N:0:TCTGCAAG+GCTGCACT  
GACGTGTGCTCTTCCGATCTGGAAGAGGGGAAATGTCCCAAAGCTGAGAAGAATAAAGGGAAAGGTC  
CATCAGGACCTAAGAAGGGGAAATTACCCCTAATTCTGAAGGAAGATCTCCCACCATCTGGGGTTGGG  
AAT

@A00721:190:HGJW7DSXY:4:1343:30129:25113\_2:N:0:TCTGCAAG+GCTGCACT  
ACGGGCCAAAGAGGCCGCTGCTACGAAGTCGCTGAAGGCGGCTTGGGTCATTAAGGGTAGCTGTAAAG  
TTGCGCCTGCCGACCCCATCTTTGAGACCAAGACTCTCTACAGTAGGT

@A00721:190:HGJW7DSXY:4:1549:1949:17143\_2:N:0:TCTGCAAG+GCTGCACT  
AAATCTGTTGAATTCGTCACCTGAGGACGAAGGTGAGAGGACTTTTGGCTACTGGCGACAACTGAGAG  
CAGTCGCTGGGGAAAGAGAATTGCGTGGGTTGAAGGCCGACGCTTCGA

@A00721:190:HGJW7DSXY:4:2113:7952:32737\_1:N:0:TCTGCAAG+GCTGCACT  
GTCAACGGCGTTTTGGAGGATTTTATCCGCGCTTAAGTATGGGGCGAAGATCCCCTATGGAGTCTTGAA  
GGACTTAGGTTGGCATATTTATGCCGACGATAATAAGCATGTCACCCCTAAGCACCGAGGTAAGCTCG  
GGA

@A00721:190:HGJW7DSXY:4:2443:22661:18192\_1:N:0:TCTGCAAG+GCTGCACT  
TCTCACTATTTTTGCCAGAATGCGGGCCTTCTGACTGATGAGGTTAAACTCTTGCTCCTTCTGTGG  
GTGAGGGTTTTGTATATTCCTGTTCTGGGAGGCTGCTTTCCTCCATAATTACAACCTCTCTTTA  
GAG

@A00721:190:HGJW7DSXY:4:1353:1416:12618\_1:N:0:TCTGCAAG+GCTGCACT  
TCCCACATATGGTAGACGTTGTCACACTTTTCTTGAAAATTTTTCTTTTCTCCGTCATTGGGGATTT  
CGATGTGAGAAGGTGGAAGGTGTCAAGGGTCTTCTTCATGCTGATCTTTCAGGACCTAATCACATCAT  
GAT

@A00721:190:HGJW7DSXY:4:2623:4191:1360\_1:N:0:TCTGCAAG+GCTGCACT  
GCTCGTATCGAGTTGGAGGGAGGAAGTTCTCCGAAATTAAAGACGGGGGGGATTAAGAGTCCAGCTGTA  
ACTGTCATTTTCAGAGAGGGGAGCTCTGAAAAGGAAACTTCGTCAGAAGATGAGGAAGTCTAAGAGGAG  
GAG

@A00721:190:HGJW7DSXY:4:2158:2627:6292\_1:N:0:TCTGCAAG+GCTGCACT  
TCTAGAGAAGATCTCCCCCCTGGAGATGGCAAGTGGAGAGTCCAGAAGTTGATGAAGAAGGATTATG  
TGAAGCAGGGGTTACCACTTCCTAAGGTGGATGAGGGAGGTTGTTTCTTTGGAGTTTATAGATAATCTT  
TT

@A00721:190:HGJW7DSXY:4:2278:7066:29262\_2:N:0:TCTGCAAG+GCTGCACT  
GATCTTGAGGACGTACATTTAACGTGGCAGAATTCGGTAAC TTACCATATTGTTCTTCCGGAAGTT  
GTGGGATTTAACTTTGACTCAACTACTCCGATCAGATCCGGATGGTTT

@A00721:190:HGJW7DSXY:4:2535:21685:13275\_2:N:0:TCTGCAAG+GCTGCACT  
CAGATACTACCGATAAGGTGAAAAATATGCAGGTCAAAGATTCTGTAGCTCTGAGGGCGGTTGAGGGA  
GCCGTTTTGGCCGACTTTAACTATTCTAAGAGTCTTTATGATTCAAAA

@A00721:190:HGJW7DSXY:4:2345:4770:3051\_1:N:0:TCTGCAAG+GCTGCACT  
AGATTTGCTGTTGAAGTTCACCCATTCTATCTTGAATGCTCACGCCGTCGCAGCCATATCGAGACTAT  
TTTATAATCACTTGTTAAAGTACAGATTTAGTGATTTAGATATTATTGATATTGGAGGCGATATTCGT  
TTT

@A00721:190:HGJW7DSXY:4:2261:21197:11146\_1:N:0:TCTGCAAG+GCTGCACT  
ACATATTTGCAACCCTATTCTTGATGTGAAAGATGCATCGAGGTATACGTCTAGGAACATTGATTGGG  
AACGTACCTACTCACGAGACGTCATGAAAGCTATCGGAGGGAAGCAAAATGTTTCGTTCTGTTACAAG  
AAC

```
FFFFFFFFFFFFFFFF:FFFFFFFFFFFFFFFF:FFFFFFFFFFFFFF:FFFFFFFFFFFF
FFFFFFFFFFFFFF,FFFFFFFFFFFFFFFF:FFFFFFFFFFFFFFFFFFFFFFFFFFFFFFFF
FFF
```



@A00721:190:HGJW7DSXY:4:2419:21766:12038\_1:N:0:TCTGCAAG+GCTGCACT  
CTCAGTTGCGATAGCTTTAGAGGTATACTATATCTCTCTTGATGATGTAGACACTATAATGCTTAAGA  
GAGAGATTGATGTATGTCATTTCTGTCTTAGTTTGTCCCGCGCAATTATTGGACACGATGAAAAATGAC  
ATA

+

FFF,FFF,,F,:FF:F,FF,:FFFF,,:FFFFFF,F:FFFFFFFF,F:,FFFFFF,FFFFFF:FF  
:FFFFFFFFFFFFFFFF,FFF,F::FFFFFFFFF::F,FFF,:FF:FFF:,F,,F,FFF:FFFF  
FFF

@A00721:190:HGJW7DSXY:4:1224:8413:15436\_1:N:0:TCTGCAAG+GCTGCACT  
TGGAGATGATGGCGCATCACTTGATTACTATATGCCCGAAGGATTGGGTTATTCTCACAAACAAAGATA  
AGATTTTATCTTTCTTCAAACACCCTGTTTTCTTAAGGGCGGACAATTGTTCCATTGTGAACCTCTG  
GGG

+

FFFFFFFFFFFFFFFF:FFFFFFFFFFFFFFFF:FFFFFFFFFFFFFFFFFFFFFFFFFFFFFFFF:FF,FFFF  
FFFFFFFFFFFFFFFF,FFFFFFFFFFFFFFFFFFFFFFFFFFFFFFFFFFFFFFFFFFFFFFFFFFFFF  
FFF

@A00721:190:HGJW7DSXY:4:2110:27299:6840\_1:N:0:TCTGCAAG+GCTGCACT  
TGAGTTCCGAATAACTCGTAATAAATCTTCTCTAGTGGACAATTCAGAATACCTATTTCCGTACCAA  
GAGCCACTGCCAATCTCATCGCTATACGCATACCTGATTGGAAGAAGCGAGGTTTCGTTCTCAATAAA  
AAT

+

F:FFFF::,FFFF:FFFF:F:FF:FF:FFFFFFFFFFFF:FF:FFFFFFFF:FF,FFFFFFFFFFFFFFF  
FFFFF:FFF:FFFFFFFFF:FFFFFFFFFFFFFFFFFFFFFFFFFFFFFFFFFFFFFFFF:FFFFFFFFFF  
FFF

@A00721:190:HGJW7DSXY:4:1573:5882:34538\_1:N:0:TCTGCAAG+GCTGCACT  
AAGGGCTATTCAGTACGTCATGGGGATCACTTCTTCGGTCAATGACAAAACCTTCGAATATGTTACGA  
CATGGCTTCGTAACAACAGTGCAGGATTGTCATCTCGGGAAAGTGATTACCAAGATGTTTCATATA  
GAT

+

FFFFFFFFFFFFFFFFFFFFFFFFFFFFFFFFFFFFFFFFFFFFFFFFFFFFFFFFFFFFFFFF:FFFFFFFFFFFFFFF  
FFFFFFFFFFFFFFFFFFFFFFFFFFFFFFFFFFFFFFFFFFFFFFFFFFFFFFFFFFFFFFFFFFFFFFFFF  
FFF

@A00721:190:HGJW7DSXY:4:1503:28872:13698\_1:N:0:TCTGCAAG+GCTGCACT  
AAGGTCGCAGCGATCTTACTCGTTATCGGAGCTAAGAAGAAGACTTTGGGTACACGTTATGCTCGCAA  
ACTTAACGTTAGTACCGGAGGTGATCTCTCTGCTTCTGCGTTACTGAGAGAAAAGATTAGGACGCCT  
ACG

+

FFFFFFFFFFFFFFF:FFFFFFFFFFFFFFFFFFFFFFFFFFFFFFFFFFFFFFFFFFFFFFFFFFFFFFF  
FFFFFFFFFFFFFFFFFFFFFFFFFFFFFFFFFFFFFFFFFFFFFFFFFFFFFFFFFFFFFFFFFFFFFFF  
FFF

@A00721:190:HGJW7DSXY:4:1645:26892:25332\_1:N:0:TCTGCAAG+GCTGCACT  
TCTTGAAACTACGGTCCTTATCAAAGAAAATGGTGAACCGTCTCTAAATCTTTGAGATTGAGAAGA  
TTGAAGAACACGTCAAGAAGTCGCTCGGCGTTGTTCTTGAAAACCAAGTTAAGAAGGAGGCTGATCAT  
GGA

+

FFFFFFFFFFFFFFFFFFFFFFFFFFFFFFFFFFFFFFFFFFFFFFFFFFFFFFFFFFFFFFFFF  
FFFFFFFFFFFFFFFFFFFFFFFFFFFFFFFFFFFFFFFFFFFFFFFFFFFFFFFFFFFFFFFFFFFFFFF  
FFF

@A00721:190:HGJW7DSXY:4:1154:15790:29716\_2:N:0:TCTGCAAG+GCTGCACT  
TCAAACCTTCGAGGTTTCAGCTACGAGAGGTGATCCCGGATGTGGATTGAAGGCTGGCTCTAAGGGAGAC  
TCCTTCTTTTTGAATGTTGTAAAGAATTGGGTTGAGAAGTGTGCTTTA

+

FFFFFFFFFFFFFFFFFFFFFFFFFFFFFFFFFFFFFFFFFFFFFFFFFFFFFFFFFFFFFFFFF  
FFFFFFFFFFFFF,FFFFFFFFFFFF,FFFFFFFFFFFFFFFFFFFFFFFF

@A00721:190:HGJW7DSXY:4:2607:28890:1673\_1:N:0:TCTGCAAG+GCTGCACT  
ATAACTTCTTTTTCAAAAATGCGGATGGGTCTACTGATGTTTTCTACAGAGTGCAGTCGTTTCAACA  
CTTATCACCACCTTTGAAAGGAAAATAATTGGTGATGAAAATACGTATGTCGGTGGGGTTCTCAAGGC  
TCT

+

FFFFFF,FFFFFFFFFFFFFFFFFFFFFFFFFFFFFFFFFFFFFFFFFFFFFFFFFFFFFFFFFFFFFFFF  
FFFFFFFFFFFFFFFFFFFFFFFFFFFFFFFFFFFFFFFFFFFFFFFFFFFFFFFFFFFFFFFFFFFFFFFF  
FFF

@A00721:190:HGJW7DSXY:4:2560:21160:24330\_1:N:0:TCTGCAAG+GCTGCACT  
GATTCTTAAAAGAAGTTTATTAACCTTCAGAGTCTCTTGAAGTCCAGGTAGCTAATGTTCTTGCAA  
TAGCCACAGACTTTCTGGGAAAAGAGACCTCTGTTGGTAGAGGAGTTGAGAGAATTACTCAGATTCAA  
TCT

+

FFFFFFFF,F:FFFFFFFF:FFFFFFFFFFFFFFFFFFFFFFFFFFFFFFFFFFFFFFFFFFFFFFFF  
:FFFFFFFFFFFFFFFF:FFFFFFFFFFFFFFFF:FFFFFFFFFFFFFFFFFFFFFFFFFFFFFFFFFFFF  
FFF

@A00721:190:HGJW7DSXY:4:2271:7184:9831\_1:N:0:TCTGCAAG+GCTGCACT  
AAAAGATCCTTGCACAAGCAATACCTTCCACTGAGTTCATCACCAGAGTTTCGACGTGCGGAAAA  
CGATGAAGATTTCCACACTGTTGAGAATCTTCTGATGCTGAATTTGAGGAAAATTTTTCGGAAGTTT  
TTG

+

FFFFFFFFFFFFFFFFFFFFFFFFFFFFFFFFFFFFFFFFFFFFFFFFFFFFFFFFFFFFFFFFFFFFFFFF  
FFFFFFFFFFFFFFFFFFFFFFFFFFFFFFFFFFFFFFFFFFFFFFFFFFFFFFFFFFFFFFFFFFFFFFFF  
FFF

@A00721:190:HGJW7DSXY:4:2374:30011:21277\_2:N:0:TCTGCAAG+GCTGCACT  
CAGTACAGGGAGGAGGTAATAGTTATAAACCTTCTTTTATCATTGCAACAGGACTTTGAGAAGACTG  
TTGAAATGGACAAAATCTGGGATCATAGGTATGTGTACGCTACACTC

+

FFFFFFFFFFFFFFFFFFFFFFFFFFFFFFFFFFFFFFFFFFFFFFFFFFFFFFFFFFFFFFFFFFFFFFFF  
FFFFFFFFFFFFFFFFFFFFFFFFFFFFFFFFFFFFFFFFFFFFFFFFFFFFFFFFFFFFFFFFFFFFFFFF

@A00721:190:HGJW7DSXY:4:1502:20681:31360\_2:N:0:TCTGCAAG+GCTGCACT  
CCATATCAGATTAGAGACATGCCAGTTAGAGTTCTTCTAACCCAGGACTGATGGTGAGATTCTTTTACC  
TTTTGGAGGTCCAGGAACCTTTACTCCTAGTGTCTTTTCTAGAGTCCA

+

FF:FFFFFFFF:FF:F:FFFF,:FF:F:FFFF:FFFFFFFFFFFF::FFFFFF:FFFFFFFFFFFFFFFF::  
:FFFF:FFFF::FFFFFF:FF:FF:F,FFFFFF:F:FFFF:FFFFF

@A00721:190:HGJW7DSXY:4:2618:7229:3959\_1:N:0:TCTGCAAG+GCTGCACT  
GTTTCGGTTTCAGCTGGATGGATCTTTTGATGGTATGTTTCACATTGCGTGATCACTTCCCGTGGACT  
TGGGAAGAGATTAAACATAAAATCCAGCGATTCTATTATGTCGCTAAAGCCTGTCCAGTTGTCGATGA  
TGT

+

FFFFFF:FFFFFFFF:FFFFFF:FFFFFFFF,FFF:FF::FFFFFF:FFFF:,FFFFFFFFF  
FFF:FFFF:FFFFFFFFFFFFFFFFFFFFFFFFFFFFFFFFFFFFFFFFFFFFFFFFFFFFFFFFFFFF  
FFF

@A00721:190:HGJW7DSXY:4:1130:8829:17503\_1:N:0:TCTGCAAG+GCTGCACT  
TTACTAAGTCTGAGATCTGCCACTTCTAATTTTAGGAAACGTCGCGAAAAGAAAGTTCATGAGGATGT  
CTTGGTCGAAAATATCGCCGGAACCTTCTAATAGAGGATCCTGATGACATTATTTCAACGGATACCG  
ATC

+

FFFFFFFFFFFFFFFFFFFFFFFFFFFFFFFFFFFFFFFFFFFFFFFFFFFFFFFFFFFFFFFFFFFFFFFF  
FFFFFFFFFFFFFFFFFFFFFFFFFFFFFFFFFFFFFFFFFFFFFFFFFFFFFFFFFFFFFFFFFFFFFFFF  
FFF

@A00721:190:HGJW7DSXY:4:1449:7681:5431\_1:N:0:TCTGCAAG+GCTGCACT  
ACCGTCTCAGGAAGTGTCTCCACTGATTCGGAATTAGAGAAAGACGACCTTCTTGTGGGGACTGAGAC

CTCTGAATTTTCAGGGTGCCCTGATGAGGACGTTGAAAGGGATAATTTCAACTCTGAGACTTCTAAGA  
GTG

+

FFFFFFFFFFFFFFFFFFFFFFFFFFFFFFFFFFFFFFFFFFFFFFFFFFFFFFFFFFFFFFFFFFFFFFFF  
FFFFFFFFFFFFFFFFFFFFFFFFFFFFFFFFFFFFFFFFFFFFFFFFFFFFFFFFFFFFFFFFFFFFFFFF  
FFF

@A00721:190:HGJW7DSXY:4:2458:20654:32565\_1:N:0:TCTGCAAG+GCTGCACT  
GTAACAAGAAGAATAAAGGTAGGAAGGGGAGAAAACAGAACAGCGAGCGGTTGAAGAGAAAACCTGAT  
ATGGTTGCGGCTGATCGTACCCCAATTCTGCTAGAAAGATCACTCTCGGCGATACCACTGATCTTCC  
AGA

+

:FFFFFFFFFFFFFFFFFFFFFFFFFFFFFFFFFFFFFFFFFFFFFFFFFFFFFFFFFFFFFFFFFFFF  
FFFFFFFFFFFFFFFFFFFFFFFFFFFFFFFFFFFFFFFFFFFFFFFFFFFFFFFFFFFFFFFFFFFFFFFF  
FFF

@A00721:190:HGJW7DSXY:4:2353:30346:32597\_2:N:0:TCTGCAAG+GCTGCACT  
CTGCTAATCGTAATTCGCGAGAAGAGATAGTGACTAAAGTTTTGGCACTTCTAGTTCATCGCGGTATT  
TGTGAAATTAAGACAGACGTGAAAGTTATGATGAGTGATCGTATTAGA

+

FFFFFFFFFFFFFFF:FFFFFFFFFFFFFFFFFFFFFFFFFFFFFFFFFFFFFFFFFFFFFFFFFFFFFFF  
:FFFFFFFFFFFF:FF,F::F:FFFFFFFFFFFF:FFFFFFFFFFFFFFF:FFFF

@A00721:190:HGJW7DSXY:4:2355:9525:21527\_1:N:0:TCTGCAAG+GCTGCACT  
CGACGAATTATTCATGATTCACGCTGGTCAGACCCTTTTTCTTACACATCTACTTAAGGCGGCTTATA  
CCATAGGTTACGGTGATTCCAATCAAATCGGATTCATCAATCGTATTGATCTCCAAGTCGCAAACTAC  
TTC

+

FFFFFFFFFFFFFFFFFFFF:FF:FFFFFFFFFFFFFFFFFFFFFFFFFFFFFFFFFFFFFFFFFFFFFFF  
FFFFFFFFFFFF:FFFFFFFFFFFFFFFFFFFFFFFFFFFFFFFFFFFFFFFFFFFFFFFFFFFFFFFFFFFF  
FFF

@A00721:190:HGJW7DSXY:4:1401:7148:35415\_1:N:0:TCTGCAAG+GCTGCACT  
TGTCGTTCTTATCGAAGTCTCAGTTATCGCTGCCCGGCCGACGTTTGTGCGGAACTCTCAGAGGTTTA  
CGGCAGAAAAATTTCTCCTGCTTGTAATTCGAGAGAGGACACTATGGAAATTAGACCTATCAGATGTC  
TTG

+

FFF:FFFFFFFFFFFFFFFFFFFFFFFFFFFFFFFFFFFFFFFFFFFFFFFFFFFFFFFFFFFFFFFFFFFF  
FFFFF:FFFFFFFFFFFFFFFFFFFFFFFFFFFFFFFFFFFFFFFFFFFFFFFFFFFFFFFFFFFFFFFFFFFF  
FFF

@A00721:190:HGJW7DSXY:4:2123:8594:27649\_1:N:0:TCTGCAAG+GCTGCACT  
AACGATGCTACTTGTGAGAGGATCAATCACAGTAAGGAAGTGTACGTTTAGCACGGGAGGTTGCAGA  
TTCAACCCCTTATATCGAGGCTATCGAGGACGATGAGTATCTTGAAGTTGTTGACGACAAGCCTCAAG  
AGG

+

FFFFFFF:FFFFFFFFFFFFFFFFFFFFFFFFFFFFFFFFFFFFFFFFFFFFFFFFFFFFFFFFFFFFFFF  
F:FFFFFFFFFFFF:FFFFFFFFFFFFFFFFFFFFFFFFFFFFFFFFFFFFFFFFFFFFFFFFFFFFFFFFFFFF  
FFF

@A00721:190:HGJW7DSXY:4:1230:11216:15593\_1:N:0:TCTGCAAG+GCTGCACT  
ACCACCTTAACGTCACTCGGTAATCTTTCAGCCGAATTAAGTACTAATGAGTTCAAGTCGGTTGTCGA  
TCGAATTAAGATCAAGGCTAATACCTTTATAGGTAAGAAGCCCCTTGAGCCGCGTAGTCAGCGCGTTT  
AGC

+

FFFFFFFFFFFFFFFFFFFFFFFFFFFFFFFFFFFFFFFFFFFFFFFFFFFFFFFFFFFFFFFFFFFFFFF  
FFFFFFFFFFFFFFFFFFFFFFFFFFFFFFFFFFFFFFFFFFFFFFFFFFFFFFFFFFFFFFFFFFFFFFF  
FFF

@A00721:190:HGJW7DSXY:4:1516:22625:23390\_2:N:0:TCTGCAAG+GCTGCACT  
TGATAGATTGGGTCAACAATAGGGACGCTAGTATACTTCGTAAAGTCGACAGCGAAATGGTCAATATT

GATAATTGGACCGACTATATGACCTATTTTAAGCTCATGGTGAAAAGG

+

FFFFFFFFFFFFFFFF:FFFFFFFF:FFFFFFFFFFFFFFFF:FFFFFFFFFFFFFFFF:FFFFFFF  
FFFFFFFFFFFFFFFFFFFFFFFFFFFFFFFF:FFFFFFFFFFFF

@A00721:190:HGJW7DSXY:4:2308:29423:25989\_2:N:0:TCTGCAAG+GCTGCACT  
GTTCTTGTGAGGAGAGTCAAACAGTGTCTTTTACCCAACATTTTATGTATACAGAGATGACCAGTGA  
CGATTTCTCCCGAAGCTCTTCTCTCTCTTAGGAGGTCATGATGACTA

+

FFFFFFFFFFFFFFFFFFFFFFFFFFFFFFFFFFFFFFFFFFFFFFFFFFFFFFFFFFFFFFFF  
FFFFF:F:FFFFFFFFFFFFFFFFFFFFFFFFFFFFFFFFFFFFFFFF

@A00721:190:HGJW7DSXY:4:2205:3812:29669\_1:N:0:TCTGCAAG+GCTGCACT  
CAGGAGTATCCATAACGATTTGTCAATTTACCACCTTTGCTCAACGACGAAGTGGAACGGCCAACACTT  
TCTTTGGTAATTGTATGATCACTTTGATGATTTTATCACTTTATTATGACCTTGGAAGTTTTTCGGCT  
GTG

+

FFFFFFFFFFFFFFFF:FFFFFFFFFFFFFFFF:FFFFFFFFFFFFFFFFFFFFFFFF  
FFFFFFFFFFFFFFFF:FFFFFFFFFFFFFFFFFFFFFFFFFFFFFFFFFFFFFFFF  
FFF

@A00721:190:HGJW7DSXY:4:2529:12020:25285\_1:N:0:TCTGCAAG+GCTGCACT  
CGATATTCGATTGAGGGTCGTTATACCTATTCGGCTATCTGTGCTTTGAATTGTATAAGATCAAATTT  
TAAACGATTCCGAGAGGTTTATCCTGATGTGGAGGGAGTTCTTGAAGCATCCCGACCTTCTCTGTGA  
AAA

+

FFF::FFFF:F:FFFFFFFFFFFFFFFFFFFFFFFFFFFFFFFFFFFFFFFF:FFFFFFFFFFFF  
FFFFFFFFFFFFFFFF:FFFFFFFFFFFFFFFFFFFFFFFFFFFFFFFFFFFFFFFF  
FFF

@A00721:190:HGJW7DSXY:4:2565:29270:32174\_2:N:0:TCTGCAAG+GCTGCACT  
TCGAGACAGGTGATATTGTTGAGCGAGAGCGACCAAGATCTAAATTCGGTAACGGTGCGTGGCGCTTT  
ATTTTAAAAGCTCCCTCCTCTCGCAAGTTTGATCTGATAGATCGGAA

+

FFFFFFFFFFFFFFFFFFFFFFFF:FFFFFFFFFFFFFFFFFFFFFFFFFFFFFFFF  
FF,FFFFFFFFFFFFFFFFFFFFFFFFFFFFFFFF

@A00721:190:HGJW7DSXY:4:2456:22444:34287\_2:N:0:TCTGCAAG+GCTGCACT  
TGTTTCCTTCTTTGCACTGATTTTCTCATCAGCTTGTTTACCTAATCTGTGTTTTACGATAA  
CAACTATCAGTTGATTAAGACTCTTCCGAAAGGCGAACTTTGGGAATT

+

FFFFFFFFFFFFFFFFFFFFFFFF:FFFFFFFFFFFFFFFFFFFFFFFFFFFFFFFF  
FFFFFFFFFFFFFFFF:FFFFFFFFF:FFFFF,FFFFF

@A00721:190:HGJW7DSXY:4:2628:22417:33270\_1:N:0:TCTGCAAG+GCTGCACT  
AGCACAACGTTTGACCGTGACGAAGTGTGGTGTCTTGATCTACGTTACGGATATACTCTCCTTGAGT  
TCACTCGTAAGGACACTACCACTTATTACGATATTTCTTTAGTCGATGGGTTTTCGACTCCTTTAAGC  
GTC

+

FFFFFFFFFFFFFFFFFFFFFFFFFFFFFFFFFFFFFFFF:FFFFFFFFFFFFFFFF  
FFFFFFFFFFFFF,FFFFFFFFFFFFFFFFFFFFFFFFFFFFFFFF  
FFF

@A00721:190:HGJW7DSXY:4:2249:28311:18521\_2:N:0:TCTGCAAG+GCTGCACT  
ATCACTCATTTTAGTGAGATTATTAACGCACTAAACGTCTTCGACAACAGCGGGGTTTTCGAA  
TAGTGATAGCCACCCGCTTACAGAGGGGCAGCAGCATGACCATAATT

+

FFFFFFFFFFFFFFFFFFFFFFFF:FFFFFFFFFFFFFFFF,FFFFF,  
FFFFFFFFF:FFFFFFFFFFFFFFFFFFFFFFFFFFFFFFFF,FF

@A00721:190:HGJW7DSXY:4:1153:4399:5729\_2:N:0:TCTGCAAG+GCTGCACT  
CTGTCTCGCCTCTTCGAATGAAGTTTAAATGCTTAACAACAATGATAGTGAATTTATACCTACAATCA

$+$ 

@A00721:190:HGJW7DSXY:4:1668:16776:8093\_1:N:0:TCTGCAAG+GCTGCACT  
AGACGTGCTAAATTAACCATTTGTACGATGTCGTCTGTCTCGCGATCACTTTTCACTAAGAATTGG  
TCCTACTTTTGGACAAGGCCAACTTCGTAATCTTCATGAGATCGTTTCTTTCTTTATCTCTTTGGTTG  
TTA

+

@A00721:190:HGJW7DSXY:4:2337:8522:4852\_2:N:0:TCTGCAAG+GCTGCACT  
GAGTGAAGGCTTCAATTGTAGTGGTTTGGTCGTTTCAGTACCCAGTCAGTATACCTCTACGCAAAGA  
TATTTTCATGAAACTACAGAGGAACGTACCGGATTACCTGTCTTTTCAT

+

@A00721:190:HGJW7DSXY:4:1677:6705:27195\_1:N:0:TCTGCAAG+GCTGCACT  
GTTGGATGTCAAGAAGGGTTCAGAATGGGATTCTACGTAGTTTATGACTTTGGTGGTGGTACTTTTCG  
ATACTTCTATCGTCTTACGTTACGGTAATTACTATAGTGTTATTTATTCTGGTGGTGGTATGATAATCTT  
GGA

+

@A00721:190:HGJW7DSXY:4:2314:5728:15107\_1:N:0:TCTGCAAG+GCTGCACT  
TGATGAAGCTATAAGAGCGTTCTTATTACGGCGCACTTCTTTACCCGCCACCACACAACCTTTTCAGTTT  
CACAACCTGAAGGAGGAGGTTTCTGTACTGGAAAACCTCGTCAATACTTTTCAATAATATACGTCTT  
GAA

+

@A00721:190:HGJW7DSXY:4:1227:16785:16877\_2:N:0:TCTGCAAG+GCTGCACT  
TGAACAAAGTTATCAAAGATAGTGGCATTCAAGGCAAACTTACCCTGATTCCGGCCGGTGGTAGCTCA  
TTTCTACCAAGGGGCTATTACTCTTGCTGAAACAGCTATTAAGCTGTT

+

@A00721:190:HGJW7DSXY:4:2666:16993:32863\_1:N:0:TCTGCAAG+GCTGCACT  
ATCGCTGAAGGATGTGCACTCTTTTCTGCTACTTTAACGGAGCGTAGTGTACTCTTCGTCGATTGTAT  
CAACAGTAACATTACTTCTAATAAAGGTCTCTATCAAGCTCGTATTATCGTCGCTGCTGGATCTGCGT  
TAC

+

@A00721:190:HGJW7DSXY:4:1424:1452:3223\_2:N:0:TCTGCAAG+GCTGCACT  
GTAATTATGAAGACTGTGATTTATCTTTCACCTCTGGCCTTGATGAGGGTGTTTCTAATCGTAACATT  
AATAATTTCAATCTTCTTAAAAAGAAGATAGAGAGTCATACTTTGGGC

+

@A00721:190:HGJW7DSXY:4:2362:2663:26522\_2:N:0:TCTGCAAG+GCTGCACT  
CCAAAGAGAATATCTAAAATATTTACAAAATCTTACCCTATCTACGAACCTAAAGTTCTGAAGACGT  
TGCTTGTGCTTCTCTCTTAATGGCACTACCTCGGTACAATCTTACT

+

FFFFFFFFFFFFFFFFFFFFFFFFFFFFFFFFFFFFFFFFFFFFFFFFFFFFFFFFFFFFFFFFFFFFFFFF  
FFFFFFFFFFFFFFFFFFFFFFFFFFFFFFFFFFFFFFFFFFFFFFFFFFFFFFFFFFFFFFFF

@A00721:190:HGJW7DSXY:4:2528:27245:29951\_2:N:0:TCTGCAAG+GCTGCACT  
GCGACCTGTTCCGGAGTTTTACGGGATCCGGAATGTTCTGTCTATATTAGGTGAAGCGAAATACGAT  
TTGAACGTCAACGTTACCGAGTTTCGTTTCGTACCTTGATGCTGAC

+

FFFFFFFFFFFFFFFFFFFF,FFFF:FFFFFFFFFFFFFFFF::FFFFFFFFFFFFFFFF:FFFFFFFFFFFF  
FFFFFFFF:FFFFFF::FFFF:FF:FFF:FFFFFF:F,FFFFFFFF

@A00721:190:HGJW7DSXY:4:1610:14290:20478\_2:N:0:TCTGCAAG+GCTGCACT  
TCATGAATTTTTCAGAGGATGAAAAATTTTCTTCTTGATTTTAATATAAGAATCTTTACCAGGACT  
CCTACTACAGGAGGCAGTCTTCTGATCGTAAGAAGTTTATAAGGAACA

+

FFFFFFFFFFFFFFFFFFFFFFFFFFFFFFFFFFFFFFFFFFFFFFFFFFFFFFFFFFFFFFFFFFFFFFFF  
FFFFFFFFFFFFFFFFFFFF:FFFFFFFFFFFFFFFFFFFFFFFFFFFFFFFFFFFFFFFF

@A00721:190:HGJW7DSXY:4:1470:28320:35446\_2:N:0:TCTGCAAG+GCTGCACT  
AAGTGGTAATACTGTCTTTCCAAGCTTACCTGTATCTTCAATGAAATTGGACTCTTCGATAGGGGACA  
TTTTATCGTGGGCTTTCGTAAGGAAGATCTGTTATCGACGGTTTAT

+

FFFFFFFFFFFFFFFFFFFFFFFFFFFFFFFFFFFFFFFFFFFFFFFFFFFFFFFFFFFFFFFFFFFFFFFF  
FFFFFFFFFFFF:FFFFFFFFFFFFFFFFFFFFFFFFFFFFFFFFFFFFFFFF

@A00721:190:HGJW7DSXY:4:2441:24587:27665\_2:N:0:TCTGCAAG+GCTGCACT  
TGTTAGAGTAGAATTCCTGAAGAGTCCTTCCGTAACCACTTCTTGACAATTTCTTCAATCCTTCGA  
TAATAGTTAAATCTAGGATTATGTCTGTGTTGAAAGACTTTCTACCGA

+

FFFFFFFFFFFF:F:F,FFFF:,FFF,FFF,,:F:F:FFFFFF:FFFF::FFFFFFFFFFFFFFFF:F  
FFFFFFFFFFFF:FFFFFFFFFFFFFFFFFFFFFFFFFFFFFFFFFFFFFFFF

@A00721:190:HGJW7DSXY:4:1308:25211:20917\_2:N:0:TCTGCAAG+GCTGCACT  
GACTGATTATCTAAAGATTGAAGGAAAAATTTATCCTCGTTTAACTTACTTAGACTTTCCTACGATAC  
AAATGATAACTTCTAATTTACGTTTGCTACTCAGAGCTGGTCCTCTCA

+

FFFFFFFFFFFFFFFFFFFFFFFFFFFFFFFFFFFFFFFFFFFFFFFFFFFFFFFFFFFFFFFFFFFF:FFFFFFFFFFFFFFFF  
FFFFFFFFFFFFFFFFFFFFFFFFFFFFFFFFFFFFFFFFFFFFFFFF:FFFFFFFFFFFF

@A00721:190:HGJW7DSXY:4:2438:23158:20744\_2:N:0:TCTGCAAG+GCTGCACT  
CAGGAGTCCCGGCATTTGATAATAATGACGAGACTTTCGTCATAATCGCTGCATATTACGGATTACAC  
GGTACCAGCGCATCTCGTGTGAGCCTCGACCCGATTATATGGTCTTA

+

FF:FF,FFF,FFF:FF:FFFF,FFFF,FFFF,FFFF:FFFF:FFFF:FFFF:FFFFFFFF:FF  
F,:FF:, :FF:FFFFFFFFFFFFFFFFFFFF:FFFFFFFFFF,FF,FFF

@A00721:190:HGJW7DSXY:4:1634:3341:21527\_2:N:0:TCTGCAAG+GCTGCACT  
TATGTTCTCTGATCATTTTGACAATCTCTTCTTATAATAAATAAATAAATAATATTACTAATGGCAA  
TAGTGAAAGGCTCCAGTCAACACTAGTTCGAGTGCTGCTTTGGATTA

+

FFFFFFFFFFFFFFFFFFFFFFFFFFFFFFFFFFFFFFFFFFFFFFFFFFFFFFFFFFFFFFFFFFFF:FFFFFFFFFFFFFFFF  
FFFFFFFFFFFFFFFFFFFFFFFFFFFFFFFFFFFFFFFF:FFFFFFFFFFFFFFFF

@A00721:190:HGJW7DSXY:4:2676:15808:11522\_1:N:0:TCTGCAAG+GCTGCACT  
AATAGGTGAAGGGATAGTTTTTACCTCGACCAACATTAAGGCGGCGGCGACTAATCTTAAAGCTTCAC  
CCAAAATGAAGGACACTTCGAAACTGAATAATGATGCACTACAAACAAGTATCGCTAATCATCTGAAA  
AAG

+

FFFFFF:FFFFFF, :FFFF:FFFFFFFFFFFFFFFF:FFFFFFFFFF:FF:FFFFFFFFFFFF:FFF,

[illegible]





@A00721:190:HGJW7DSXY:4:1448:9941:12477\_1:N:0:TCTGCAAG+GCTGCACT  
GACGTGTGCTCTTCCGATCTGGAAGAGGGGAAATGTCCCCAAAAGTGAAGAATAAAGGGAAAGGTC  
CATCAGGACCTAAGAAGGGGAAATTACCCCTAATTCTGAAGGAAGATCTCCACCATCTGGGGTTGGG  
AAT

+

FFFFFFFFFFFFFFFFFFFFFFFFFFFFFFFFFFFFFFFFFFFFFFFFFFFFFFFFFFFFFFFFFFFFFFFF:F  
FFFFFFFFFFFFFFFFFFFFFFFFFFFFFFFFFFFFFFFFFFFFFFFFFFFFFFFFFFFFFFFFFFFFFFFF:FFF

@A00721:190:HGJW7DSXY:4:1343:31467:23610\_2:N:0:TCTGCAAG+GCTGCACT  
ACGGGCCAAAGAGGCCGCTGCTACGAAGTCGCTGAAGGCGCTTGGGTCATTAAGGGTAGCTGTAAAG  
TTGCGCCTGCCGACCCCATCTTTGAGACCAAGACTCTCTACAGTAGGT

+

FFFFFFFF,FFFFFFFFFFFFFFFFFFFFFFFFFFFFFFFFFFFFFFFFFFFFFFFFFFFFFFFFFFFFFFFF:F  
FFFFFFFFFFFFFFFFFFFFFFFFFFFFFFFFFFFFFFFFFFFFFFFFFFFFFFFFFFFFFFFFFFFFFFFF:FFF:FFF

@A00721:190:HGJW7DSXY:4:1565:31241:31704\_2:N:0:TCTGCAAG+GCTGCACT  
AAATCTGTTGAATTCGTCACCTGAGGACGAAGGTGAGAGGACTTTTGGCTACTGGCGACAAAGTGAAG  
CAGTCGCTGGGGAAAGAGAATTGCGTGGGTTGAAGGCCGACGCTTCGA

+

FFFFFFFFFFFFFFFFFFFFFFFFFFFFFFFFFFFFFFFFFFFFFFFFFFFFFFFFFFFFFFFFFFFFFFFF,F:FFF  
FFFFFFFFFFFFFFFFFFFFFFFFFFFFFFFFFFFFFFFFFFFFFFFFFFFFFFFFFFFFFFFFFFFFFFFF

@A00721:190:HGJW7DSXY:4:2204:16125:16642\_1:N:0:TCTGCAAG+GCTGCACT  
GTCAACGGCGTTTGGAGGATTTTATCCGCGCTTAAGTATGGGGCGAAGATCCCCTATGGAGTCTTGAA  
GGACTTAGGTTGGCATATTTATGCCGACGATAATAAGCATGTCACCCTTAAGCACCGAGGTAAGCTCG  
GGA

+

FFFFFFFFFFFFFFFFFFFFFFFFFFFFFFFFFFFFFFFFFFFFFFFFFFFFFFFFFFFFFFFFFFFFFFFF  
FFFFFFFFFFFF:F:FFFFFFFFFFFFFFFFFFFFFFFFFFFFFFFFFFFFFFFFFFFFFFFFFFFFFFFFFFFF  
FFF

@A00721:190:HGJW7DSXY:4:2659:13386:21073\_1:N:0:TCTGCAAG+GCTGCACT  
TCTCACTATTTTTGCCAGAATGCGGGCCTTCTGACTGATGAGGTTAAAGTCTTGCTCCTTCTGTGG  
GTGAGGGTTTTTGTATATTTACTGTTCTGGGAGGCTGCTTTCCTCCATAATTACAACCTCTCTTTA  
GAG

+

FFFFFFFFFFFFFFFFFFFF:FFF:FFFFF,FFFFFFFF:FFFFFFFFFFFFFFFFFFFFFFFFFFFFFFFF  
FFFFFFFF,FFFFFFFFFFFFFFFFFFFFFFFFFFFFFFFFFFFFFFFFFFFFFFFFFFFFFFFFFFFFFFFF  
FFF

@A00721:190:HGJW7DSXY:4:2262:18846:32409\_1:N:0:TCTGCAAG+GCTGCACT  
TCCACATATGGTAGACGTTGTCACTTTTCTTGAAAATTTTCTTTCTCCGTCAATTGGGGATTT  
CGATGTGAGAAGGTGGAAGGTGTCAAGGCTTCTTTCATGCTGATCTTTCAGGACCTAATCACATCAT  
GAT

+

FFFFFFF,FFFFFFFFFFFF:FFFFFFFFFFFFFFFFFFFFFFFFFFFFFFFFFFFFFFFFFFFFFFFFFFFF  
FFFFFFFFFFFFFFFFFFFFFFFFFFFFFFFFFFFFFFFFFFFFFFFFFFFFFFFFFFFFFFFFFFFFFFFFFFFF  
FFF

@A00721:190:HGJW7DSXY:4:2673:22860:3067\_1:N:0:TCTGCAAG+GCTGCACT  
GCTCGTATCGAGTTGGAGGGAGGAAGTTCTCCGAAATTAAGACGGGGGGATTAAGAGTCCAGCTGTA  
ACTGTCATTTAGAGAGGGGAGCTCTGAAAAGGAACTTCGTCAGAAGATGAGGAAGTCTAAGAGGAG  
GAG

+

FFFFFFFFFFFFFFFFFFFFFFFFFFFFFFFFFFFFFFFFFFFFFFFFFFFFFFFFFFFFFFFFFFFFFFFF  
FFFFFFFFFFFFFFFFFFFFFFFFFFFFFFFFFFFFFFFFFFFFFFFFFFFFFFFFFFFFFFFFFFFFFFFFFFFF  
FFF

@A00721:190:HGJW7DSXY:4:1158:12201:12477\_1:N:0:TCTGCAAG+GCTGCACT  
TCTAGAGAAGATCTCACACCTGGAGAAGGCAAGTGGAGAGTCCAGAAGTTGATGAAGAAGGATTATT

TGAAGCAGGGGTTACCACTTCCTAAGGTGGATGAGGGAGGTTGTTTCTTTGGAGTTTTAGATAATCTT  
TTG

+

F,FFFFFFFFFFFFFF,FFFFFFFFFFFFFF,FFFFFFFFFFFFFF,FFF:FFFFFFFF:FFFFF  
FFFFFFFF:FFFFFFFF::FFFF:F,FFFF:FFFF:FF:FFFFFFFFFFFFFFFFFFFFFFFF:FFFF  
FFF

@A00721:190:HGJW7DSXY:4:2301:7437:3912\_2:N:0:TCTGCAAG+GCTGCACT  
GATCTTGAGGACGTACATTTAACGTGGCAGAATTCGGTAACTTACCATATTGTTCTTCCGGGAAGTT  
GTGGGATTTAACTTTGACTCAACTACTCCGATCAGATCCGGATGGTTT

+

FFFF:FFFFFFFFFFFFFFFFFFFFFFFFFFFFFFFFFFFFFFFFFFFFFFFFFFFFFFFFFFFFFFFF, F  
FFFFFFFFFFFFFFFFFFFFFFFFFFFFFFFFFFFFFFFFFFFFFFFF:FFF:FFFFFF

@A00721:190:HGJW7DSXY:4:2522:3857:26303\_1:N:0:TCTGCAAG+GCTGCACT  
TGCTCTTCCGATCTAAGGTGAAAAATATGCAGGTCAAAGATTCTGTAGCTCTGAGGGCGGTTGAGGGA  
GCCGTTTTGGCCGACTTTAACTATTCTAAGAGTCTTTATGATTCAAACCTATCGTTGTCGTACCTTA  
CAA

+

FFFFFFFFFFFFFFFFFFFFFFFFFFFFFFFFFFFFFFFFFFFFFFFFFFFFFFFFFFFFFFFFFFFF  
FFFFFFFFFFFFFFFFFFFFFFFFFFFFFFFFFFFFFFFFFFFFFFFFFFFFFFFFFFFFFFFFFFFF  
FFF

@A00721:190:HGJW7DSXY:4:2463:4535:35086\_1:N:0:TCTGCAAG+GCTGCACT  
AGAATTGCGGTTGAAGTTCACCCATTCTATCTTGAATGCTCACGCCGTCGCAGCCATATCGAGACTAT  
GTTATAATCACTTGTTAAAGTACAGATTTAGTGATTTAGATATTATTGATATTGGAGGCGATATTCGT  
TTT

+

FFFFFFFFFFFFFFFFFFFF:FFFFFFFFFFFFFFFFFFFFFFFFFFFFFFFFFFFFFFFFFFFFFFFFFFFF  
FFFFFFFFFFFFFFFFFFFFFFFFFFFFFFFFFFFFFFFFFFFFFFFFFFFFFFFFFFFFFFFFFFFF  
FFF

@A00721:190:HGJW7DSXY:4:2278:32063:6887\_1:N:0:TCTGCAAG+GCTGCACT  
ACATATTTGCAACCCTATTCTTGATGTGAAAGATGCATCGAGGTATACGTCTAGGAACATTGATTGGG  
AACGTACCTACTCACGAGACGTCATGAAAGCTATCGGAGGGAAGCAAAATGTTTCGTTCTGTTACAAG  
AAC

+

F:FFFFF:,FFF,,:FFFFFFFF:FF,FFFF:, ,F:FFF,FFFFFFFF:,FFFFFFFF:FFF,FFFF:F  
FFFFFFFF,FF,FF,FF::FF,FFFFFFFFFFFF,FF:F,,FF:,FFFFF,FFF:FF:,F,FFF:F:F  
FFF

@A00721:190:HGJW7DSXY:4:2466:11614:11898\_1:N:0:TCTGCAAG+GCTGCACT  
CTCAGTTGCGATAGCTGTAGAGGTATACGATATCTCTCTTGATGATGTAGCCACTATAATGCTTAAGA  
GAGAGATTGATGTATGTCATTTCTGCTTAGTTTGTCCCGCGCAATTATTGGACACGATGAAAAATGAC  
ATA

+

FFFFFFFFFFFFFFFFFFFFFFFFFFFFFFFFFFFFFFFFFFFFFFFFFFFFFFFFFFFFFFFFFFFF  
FFFFFFFFFFFFFFFFFFFFFFFFFFFFFFFFFFFFFFFFFFFFFFFFFFFFFFFFFFFFFFFFFFFF  
FFF

@A00721:190:HGJW7DSXY:4:1405:2058:16924\_1:N:0:TCTGCAAG+GCTGCACT  
TGGAGATGATGGCGCATCACTTGATTACTATATGCCCGAAGGATTGGGTTATTCTCACAAACAAAGATA  
AGATTTTATCTTTCTTCAAACACCCTGTTTTCTTAAGGGCGGACAATTGGTCCATTGTGAACTCTTG  
GGG

+

FFFFFFFFF:FFFFFFFFFFFFFFFFFFFFFFFFFFFFFFFFFFFFFFFFFFFFFFFFFFFFFFFFFFFF  
FFFFFFFFFFFFFFFFFFFF:FFF,FFFFFFFFFFFFFFFFFFFFFFFFFFFFFFFFFFFFFFFFFFFF,FFFFFFFFFFFFFFFFFFFF  
F:F

@A00721:190:HGJW7DSXY:4:2401:8151:21778\_1:N:0:TCTGCAAG+GCTGCACT  
TGAGTTCCGAATAACTCGTAATAAATCTTTCTCTAGTGGACAATTCAGAATACCTATTTCCGTACCAA

GAGCCACTGCCAATCTCATCGCTATACGCATACCTGATTGGAAGAAGCGAGGTTCTGTTCTCAATAAA  
AAT

+

FFFFFFFF:FFFFFFFFFFFFFFFF:FFFFFFFF:F:FFFFFFFFF::FFF::FFFFFFFF:FFFFFF  
FFFFFF,FFFFFFFFFFFF::FFFFFFFF:FFFF,FFFFFFFF:FF:FFFF:FFFFFF,FFFF  
FFF

@A00721:190:HGJW7DSXY:4:1608:1561:30405\_1:N:0:TCTGCAAG+GCTGCACT  
AAGGGCTATTTCAGTACGTCATGGGGATCACTTCTTCGGTCAATGACAAAACCTTCGAATATGTTACGA  
CATGGCTTCGTAACAACAGTGCGAGGATTGTCATCTCGGGGAAAGTGATTACCAAGATGTTTCATATA  
GAT

+

FFFFFFFF:FFFFFFFFFFFFFFFFFFFFFFFF:FFFFFFFFFFFFFFFFFFFFFFFFFFFFFFFFFFFF  
FFFFFF:FFFFFFFFFFFFFFFFFFFFFFFFFFFFFFFFFFFFFFFFFFFFFFFFFFFFFFFFFFFFF  
FFF

@A00721:190:HGJW7DSXY:4:1537:1958:9330\_1:N:0:TCTGCAAG+GCTGCACT  
AAGGTCGCAGCGATCTTACTCGTTATCGGAGCTAAGAAGAAGACTTTGGGTACACGTTATGCTCGCAA  
ACTTAACGTTAGTACCGGAGGTGATCTCTCTGCTTCTGCGTACTGAGAGAAAAGATTGAGGACGCCT  
ACG

+

FFFFFFFFFFFFFFFFFFFFFFFFFFFFFFFF:FFFFFFFFFFFFFFFFFFFFFFFFFFFFFFFFFFFF  
FFFF:FFFFFFFFFFFFFFFFFFFFFFFFFFFFFFFFFFFFFFFFFFFFFFFFFFFFFFFFFFFFF  
FFF

@A00721:190:HGJW7DSXY:4:2146:28185:15640\_1:N:0:TCTGCAAG+GCTGCACT  
TCTTGAAACTACGGTCCTTATCAAAGAAAATGGTGAACCGGTCTCTAAATCTTTTGAGATTGAGAAGA  
TTGAAGAACACGTCAAGAAGTCGCTCGGCGTTGTTCTTGAAAACCAAGTTAAGAAGGAGGCTGATCAT  
GGA

+

FFFFFFFFFFFFFF:F::FFF:FFFF:FFFFFFFFFFFFFFFF:FFFFFFFFFFFFFFFFFFFFFFFF  
FFFFFFFFFFFFFFFFFFFFFFFFFFFFFFFFFFFFFFFFFFFFFFFFFFFFFFFFFFFFFFFFFFFF:F::FF,  
FFF

@A00721:190:HGJW7DSXY:4:1517:29921:4523\_2:N:0:TCTGCAAG+GCTGCACT  
TCAAACCTTCGAGGTTTCAGCTACGAGAGGTGATCCCGGATGTGGATTGAAGGCTGGCTCTAAGGGAGAC  
TCCTTCTTTTTGAATGTTGTAAAGAATTGGGTTGAGAAGTGTGCTTTA

+

FFFF:FFFFFFFFFFFFFFFFFFFFFFFFFFFFFFFFFFFFFFFFFFFFFFFFFFFFFFFFFFFFFFFF  
FFFFFFFFFFFFFFFF:FFFF:FFFFFFFFFFFFFFFFFFFFFFFFFFFFFFFF

@A00721:190:HGJW7DSXY:4:2616:24496:34648\_1:N:0:TCTGCAAG+GCTGCACT  
ATAACTTCTTTTTCAAAAATGCGGATGGGTCTACTGATGTTTCTACAGAGTGCAGTCGTTTCAACA  
CTTATCACCACCTTTGAAAGGAAAATAATTGGTGATGAAAATACGTATGTCGGTGGGGTTCTCAAGGC  
TCT

+

FFFFFFFFF:FFFF,FFFFFFFFFFFFFFFFFFFFFFFFFFFFFFFFFFFFFFFFFFFFFFFFFFFF  
FFFFFFFFFFFFFFFFFFFFFFFFFFFFFFFFFFFFFFFFFFFFFFFFFFFFFFFFFFFFFFFFFFFF  
FFF

@A00721:190:HGJW7DSXY:4:2611:13223:25833\_1:N:0:TCTGCAAG+GCTGCACT  
GATTCTTAAAGAAGTTTATTAACCTTCAGAGTCTCTTGAAGTCCAGGTAGCTAATGTTCTTGCAA  
TAGCCACAGACTTTCTGGGAAAAGAGACCTCTGTTGGTAGAGGAGTTGAGAGAATTACTCAGATTCAA  
TCT

+

FFFF:F::FFF,FFFFFFFFFFFFFFFFFFFFFFFFFFFFFFFFFFFFFFFFFFFFFFFFFFFF,FFFFFFF:FFFFFFF  
FFFFFFFFFFFFFFFFFFFFFFFFFFFFFFFF:FFFFFFFFFFFF:FFFFFFFFFFFFFFFFFFFFFFFFF:  
FFF

@A00721:190:HGJW7DSXY:4:2601:8431:16564\_1:N:0:TCTGCAAG+GCTGCACT  
AAAAGATCCTTGCACAAGCAATACCTTCCACTGAGTTCATCACCCAGAGTTTCGACGTCGCGGAAAA

CGATGAAGATTTCCACACTGTTTCGAGAATCTTCTGATGCTGAATTTGAGGAAAATTTTTCGGAAGTTT  
TTG

+

FFFFFFFFFFFFFFFFFFFFFFFFFFFFFFFFFFFFFFFFFFFFFFFFFFFFFFFFFFFFFFFFFFFFFFFF  
FFFFFFFF:FFFFFFFFFFFFFFFFFFFFFFFFFFFFFFFFFFFFFFFFFFFFFFFFFFFFFFFFFFFFFFFF  
FFF

@A00721:190:HGJW7DSXY:4:2441:15429:12743\_2:N:0:TCTGCAAG+GCTGCACT  
CAGTACAGGGAGGAGGTAATAGTTATAAACCTTCTTTTATCATTGCAACAGGACTTTGAGAAGACTG  
TTGAAATGGACAAAATCTGGGATCATAGGTATGTGTACGCTACACTC

+

FFFFFF:FFFFFFFF:FFFFFFFFFFFFFFFFFFFFFFFFFFFFFFFFFFFFFFFFFFFFFFFFFFFFFF  
FFFFFFFFFFFF:FFFFFFFFFFFF,:FFFFFFFFFFFFFFFFFFFF

@A00721:190:HGJW7DSXY:4:1534:16712:3161\_2:N:0:TCTGCAAG+GCTGCACT  
CCATATCAGATTAGAGACATGCCAGTTAGAGTTCTTCTAACCGAGGACTGATGGTGAGATTCTTTTACC  
TTTTGGAGGTCCAGGAACCTTTACTCCTAGTGTCTTTTCTAGAGTCCA

+

FFFFFFFFFFFFFFFFFFFFFFFFFFFFFFFFFFFFFFFFFFFFFFFFFFFFFFFFFFFFFFFFFFFFFF:FFFF  
,FFFFFFFFFFFFFFFF:FFF,FFFFFFFFFFFFFF:,FFFFFFFFFFFF

@A00721:190:HGJW7DSXY:4:1156:29785:10207\_1:N:0:TCTGCAAG+GCTGCACT  
TTTCGGTTTCAGCTGGATGGATCTTTTGATGGTATGTTTCACATTGCGTGATCACTTCCCGTGGACTT  
GGGAAGAGATTAAACATAAAATCCAGCGATTCTATTATGTCGCTAAAGCCTGTCCAGTTGTCGATGAT  
GTT

+

FFFFFFFFFFFFFFFFFFFFFF:FFFFFF:FFFFFFFF:FFFF:FFFFFFFFFFFF,FFFFFFFFFFFF  
FFFFFFFFFFFFFFFFFFFFFFFFFFFFFFFFFFFFFFFFFFFFFFFFFFFFFFFFFFFFFFFFFFFFFF:FFFFFFFFFFFF  
FFF

@A00721:190:HGJW7DSXY:4:1312:5963:15327\_1:N:0:TCTGCAAG+GCTGCACT  
TTACTAAGTCTGAGATCTGCCACTTCTAATTTTAGGAAACGTCGCGAAAAGAAAGTTTCATGAGGATGT  
CTTGGTCGAAAATATCGCCGGAACCTTCTAATAGAGGATCCTGATGACATTATTTCAACGGATACCG  
ATC

+

FFFFF,FFFFFFFF:FFFFFFFFFFFFFFFFFFFFFFFFFFFFFFFFFFFFFFFFFFFFFFFFFFFFFF  
FFFFFFFFFFFFFFFFFFFFFFFFFFFFFF:FFFFFFFFFFFFFFFFFFFF,FFFFFF:FFFFFFFFFFFFFFFFFFFF  
FFF

@A00721:190:HGJW7DSXY:4:1612:4273:8265\_1:N:0:TCTGCAAG+GCTGCACT  
ACCGTCTCAGGAAGTGTCTCCACTGATTCGGAATTAGAGAAAGACGACCTTCTTGTGGGGACTGAGAC  
CTCTGAATTTTCAGGGTGCCCTGATGAGGACGTTGAAAGGGATAATTTCAACTCTGAGACTTCTAAGA  
GTG

+

FFFFFFFFFFFFFFFFFFFFFFFFFFFFFFFFFFFFFFFFFFFFFFFFFFFFFFFFFFFFFFFFFFFFFF:FFFFFFFFFFFF  
FFFFFFFFFFFFFFFFFFFFFFFFFFFFFF:FFFF:FFFFFFFFFFFFFFFFFFFFFFFFFFFFFFFFFFFF  
FFF

@A00721:190:HGJW7DSXY:4:2460:23845:36088\_1:N:0:TCTGCAAG+GCTGCACT  
GTAACAAGAAGAATAAAGGTAGGAAGGGGAGAAAACAGAACAAAGCGAGCGGTTGAAGAGAAAAGTATGAT  
ATGGTTGCGGCTGATCGTACCCCAATTCTGCTAGAAAGATCACTCTCGGCGATACCACTGATCTTCC  
AGA

+

FFFFFFFFFFFFFFFFFFFFFFFFFFFFFFFFFFFFFFFFFFFFFFFFFFFFFFFFFFFFFFFFFFFFFF,FF:FFFFFFFFFFFFFFFFFFFFFFFFFFFF  
,FFFFFFFFFFFFFFFFFFFFFFFFFFFFFFFFFFFFFFFFFFFFFFFFFFFFFFFFFFFFFFFFFFFF,FFFFFFFFFFFFFFFFFFFFFFFFFFFFFFFFFFFF  
FFF

@A00721:190:HGJW7DSXY:4:2318:25066:19038\_2:N:0:TCTGCAAG+GCTGCACT  
CTAGTTCATCGCGGTATTTGTGAAATTAAGACAGACGTGAAAGTTATGATGAGTGATCGTATTAGAAC  
AGCTGATTCTTATTGCATGAACGTCGCTGAGGTCAAACCTGTGGACGT

+



@A00721:190:HGJW7DSXY:4:2104:31593:34882\_2:N:0:TCTGCAAG+GCTGCACT  
GAGGGTCGTTATACCTATTCGGCTATCTGTGCTTTGAATTGTATAAGATCAAATTTAAACGATTCCG  
AGAGGTTTATCCTGATGTGGAGGGAGTTCTTGAAGCATCCCACCTTT

[illegible]

+

```
FFFFFFFFFFFFFFFFFFFFFFFFFFFFFFFFFFFFFFFFFFFFFFFFFFFFFFFFFFFFFFFFFFFFFFFFFFFFF  
FFFFFFFFFFFFFFFFFFFFFFFFFFFFFFFFFFFFFF:FFFFFFFF:FF:FFFF
```

+

[illegible]

+

[illegible]

+

```
FFFFFFFFFFFFFFFFFFFFFFFFFFFFFFFFFFFFFFFFFFFFFFFFFFFFFFFFFFFFFFFFFFF  
FFFFFFFFF;FFFFFFFFFFFFFFFFFFFFFFFFFFFFFFFFFFFFFFFF,F
```

+

```
FFFFFFFFFFFFFFFFFFFFFFFFFFFFFFFFFFFFFFFFFFFFFFFFFFFFFFFFFFFFFFFFFFFFF  
: FFFFFFFFFFFFFFFFFFFFFFFFFFFFFFFFFFFFFFFFFFFFFFFFFFFFFFFF
```

+

```
FFFFFFFFFFFFFFFFFFFFFFFFFFFFFFFFFFFFFFFFFFFFFFFFFFFFF:FFFFFFFFFFFF
FFFFFFFFFF:FFFFFFFFFFFFFFFFFFFFFFFFFFFFFFFFFFFFFFFFFFFFFFFFFFFFFFF
FFF
```

+

[illegible]

@A00721:190:HGJW7DSXY:4:2327:27706:15342\_1:N:0:TCTGCAAG+GCTGCACT  
GTTGGATGTCAAGAAGGGTTCAGAATGGGATTCTACGTAGTTTATGACTTTGGTGGTGGTACTTTTCG  
ATACTTCTATCGTCTTACGTTACGGTAATTACTATAGTGTTATTTATTCTGGTGGTGGTATGATAATCTT  
GGA

+

FFFFF:,F:FFFFFFFFFFFFFFFFFFFFFFFFFFFFFFFFFFFFFFFFFFFFFFFFFFFFFFFFFFFFFFFF  
FFFFFFFFFFFFFFFFFFFFFFFFFFFFFFFFFFFFFFFFFFFFFFFFFFFFFFFFFFFFFFFFFFFFFFFF  
FFF

@A00721:190:HGJW7DSXY:4:2416:1624:28291\_1:N:0:TCTGCAAG+GCTGCACT  
TGATGAAGCTATAAGAGCGTTCTTATTACGGCGCACTTCTTTACCCGCCACCACACAACCTTTCAGTTT  
CACAACCTGAAGGAGGAGGTTTCTGTTACTGGAAAACCTCGTCAATACTTTTCAATAATATACGTCTT  
GAA

+

FF:FFF:FFFFFFFF:FFFFFFFFFFFFFFFFFFFFFFFFFFFFFFFFFFFFFFFFFFFFFFFFFFFFFFFF  
FFFFFFFF:FFFFFFFFFFFFFFFFFFFFFFFFFFFFFFFFFFFFFFFFFFFFFFFFFFFFFFFFFFFFFFFF  
FFF

@A00721:190:HGJW7DSXY:4:1244:4354:1642\_2:N:0:TCTGCAAG+GCTGCACT  
TGAACAAAGTTATCAAAGATAGTGGCATTCAAGGCAAACCTACCCTGATTCCGGCCGGTGGTAGCTCA  
TTTCTACCAGGGGCTATTACTCTTGCTGAAACAGCTATTAAAGCTGTT

+

FFFFFFFFF::FFFFFFFFFFFFFFFFFFFFFFFFFFFFFFFFFFFFFFFFFFFFFFFFFFFFFFFFFFFFF:FFFF:FF::  
FFFFFFFFFFFFFFFF:FFFFFFFF:FFFFFF:FFFFFFFFFFFFFFFF:

@A00721:190:HGJW7DSXY:4:2122:11722:8923\_1:N:0:TCTGCAAG+GCTGCACT  
AAGGATGTGCACTCTTTTCTGCTACTTTAACGGAGCGTAGTGTACTCTTCGTCGATTGTATCAACAGT  
AACATTACTTCTAATAAAGGTCTCTATCAAGCTCGTATTATCGTCGCTGCTGGATCTGCGTTACCGTT  
GAA

+

:FFFFFFFFFFFF:FFFFFFFFFFFFFFFFFFFFFFFFFFFFFFFFFFFFFFFFFFFFFFFFFFFFFFFFFFFF  
FFFFFFFFFFFFFFFFFFFFFFFFFFFFFFFFFFFFFFFFFFFFFFFFFFFFFFFFFFFFFFFFFFFFFFFF  
FFF

@A00721:190:HGJW7DSXY:4:1460:3631:7153\_2:N:0:TCTGCAAG+GCTGCACT  
GTAATTATGAAGACTGTGATTTATCTTTCCTCTGGCCTTGATGAGGGTGTCTTCTAATCGTAACATT  
AATAATTTCAATCTTCTTAAAAAGAAGATAGAGAGTCATACTTTGGGC

+

FFFFFFFFFFFFF:FFFFFFFFFFFFFFFFFFFFFFFFFFFFFFFFFFFFFFFFFFFFFFFFFFFFFFFFFFFF  
FFFFFFFFFFFFF:FFFFFFFFFFFFFFFFFFFFFFFFFFFFFFFFFFFFFFFFFFFFFFFFFFFFFFFF:FF

@A00721:190:HGJW7DSXY:4:2411:8919:7326\_2:N:0:TCTGCAAG+GCTGCACT  
CCAAAGAGAATATCTAAAATATTTACAAAATCTTACCACTATCTACGAACCTAAAGTTCTGAAGACGT  
TGCTTGTGCTTCCTCCTTTAATGGCACTACCTCGGTACAATCTTACT

+

FFFFFFFFFFFFFFFFFFFFFFFFFFFFFFFFFFFFFFFFFFFFFFFFFFFFFFFFFFFFFFFFFFFFF:FFFFFFFFFFFFFFFFFFFFFFFFFFFFFFFF  
FFFFFFFFFFFFFFFFFFFFFFFFFFFFFFFFFFFFFFFFFFFFFFFFFFFFFFFFFFFFFFFF:FFFFFFFF

@A00721:190:HGJW7DSXY:4:2528:28655:31109\_2:N:0:TCTGCAAG+GCTGCACT  
GCGACCTGTTCCGGAGTTTTTACGGGATCCGGAATGTTCTGTCTATATTAGGTGAAGCGAAATACGAT  
TTCGAACGTCAACGTTACCGAGTTTCGTTTCGTACCTTGATGCTGAC

+

FFFFFFFFFFFFFFFFFFFFFFFFFFFFFFFFFFFFFFFFFFFFFFFFFFFFFFFFFFFFFFFFFFFFF,FFFFFF:FFFFFFFFFFFFFFFFFFFF  
FFFFFFFFFFFFFFFFFFFFFFFFFFFFFFFFFFFFFFFFFFFFFFFFFFFFFFFFFFFFFFFF:FFFFFF:FFF

@A00721:190:HGJW7DSXY:4:2313:13765:7388\_2:N:0:TCTGCAAG+GCTGCACT  
TCATGAATTTTCAGAGGATGAAAAATTTTCTTCTTGGATTTTAAATATAAAGAATCTTTACCAGGACT  
CCTACTACAGGAGGCAGTCTTCTGATCGTAAGAAGTTTATAAGGAACA

+

FFFFFF,F:FFFFFFFF:FFFFF,FFFFFFFF:FFFF:::F,FFFFFFFFFFFFFFFFFFFFF,:FFFFF  
FFFFFFFFFFFF:FFF,F,:FFF,F:FF,FFFFFFFF::FFFFFFFF,FFFF

@A00721:190:HGJW7DSXY:4:2233:14588:19961\_2:N:0:TCTGCAAG+GCTGCACT  
AAGTGGTAATACTGTCTTTCCAAGCTTACCTGTATCTTCAATGAAATTGGACTCTTCGATAGGGGACA  
TTTTATCGTGGGCTTTCCGTAAAGGAAGATCTGTTATCGACGGTTTAT

+

FFFFFFFFFFFFFFFFFFFFFFFFFFFFFFFFFFFFFFFFFFFFFFFFFFFFFFFFFFFFFFFFFFFFFFFF  
FFFFFF:FFFFFFFFFFFFFFFFFFFFFFFFFFFFFFFFFFFFFFFFFFFFFFFFFFFFFFFFFFFFFFFF

@A00721:190:HGJW7DSXY:4:2510:22616:16830\_2:N:0:TCTGCAAG+GCTGCACT  
TGTTAGAGTAGAATTCCTGAAGAGTCCTTCCGTAAACCACTTCTTGACAATTTCTTCAATCCTTCGA  
TAATAGTTAAATCTAGGATTATGTCTGTGTTGAAAGACTTTCTACCGA

+

F:FFFFFFFF:FFFFFFFFFFFFFFFFFFFFFFFFFFFFFFFFFFFFFFFFFFFFFFFFFFFFFFFFFFFF  
FFFFFFFFFFFFFFFFFFFFFFFFFFFFFFFFFFFFFFFFFFFFFFFFFFFFFFFFFFFFFFFFFFFFFFFF

@A00721:190:HGJW7DSXY:4:1519:5204:16642\_2:N:0:TCTGCAAG+GCTGCACT  
GACTGATTATCTAAAGATTGAAGGAAAATTTATCCTCGTTTAACTTACTTAGACTTTCTACGATAC  
AAATGATAACTTCTAATTTACGTTTGCTACTCAGAGCTGGTCCTCTCA

+

FF:F:FFFFFFFF:FFFFF:F:FFFFFFFFFFFFFFFFFFFFFFFFFFFFFFFFFFFFFFFFFFFFFFFF  
FFFF:F:F:FFF:FFFFFFFF,FF:FFFFFFFFFFFFFFFFFFFFFFFFFFFFFFFFFFFFFFFF

@A00721:190:HGJW7DSXY:4:2528:30572:34773\_2:N:0:TCTGCAAG+GCTGCACT  
CAGGAGTCCCGGCATTTGATAATAATGACGAGACTTTCGTCATAATCGCTGCATATTACGGATTACAC  
GGTACCAGCGCATCTCGTGTGAGCCTCGACCCGATTATATGGTATTA

+

FFFFFFFFFFFFFFFFFFFFFFFFFFFFFFFFFFFFFFFFFFFFFFFFFFFFFFFFFFFFFFFFFFFFFFFF  
FFFFFF:FFFFFFFFFFFFFFFFFFFFFFFFFFFFFFFFFFFFFFFFFFFFFFFFFFFFFFFFFFFFFFFF

@A00721:190:HGJW7DSXY:4:2666:11912:30326\_2:N:0:TCTGCAAG+GCTGCACT  
TATGTTCTCTGATCATTTTGACAATCTCTTCTTATAATAAATAAATAAATAATATTACTAATGGCAA  
TAGTGAAAGGCTCCAGTCAACACTAGTTCGAGTGCTGCTTTGGATTA

+

FFFFFFFFFFFFFFFFFFFFFFFFFFFFFFFFFFFFFFFFFFFFFFFFFFFFFFFFFFFFFFFFFFFFFFFF  
FFFFFFFFF:FFFFFFFFFFFFFFFFFFFFFFFFFFFFFFFFFFFFFFFFFFFFFFFFFFFFFFFFFFFF

@A00721:190:HGJW7DSXY:4:1338:3721:8563\_2:N:0:TCTGCAAG+GCTGCACT  
ATAGGTGAAGGGATAGTTTTACCTCGACCAACATTAAGGCGGCGGCGACTAATCTTAAAGCTTCACC  
CAAAATGAAGGACACTTCGAAACTGAATAATGATGCACAGATCGGAAG

+

:F::FFFFFFFFFFFFFFFFFFFFFFFFFFFFFFFFFFFFFFFFFFFFFFFFFFFFFFFFFFFFFFFF  
FFFFFFFFF:FFFFFFFF,FFFFFFFFFFFFFFFFFFFFFFFFFFFFFFFFFFFFFFFF

@A00721:190:HGJW7DSXY:4:2507:17146:36198\_1:N:0:TCTGCAAG+GCTGCACT  
GAGGATATTCGCCATTGTGGTACGAATTGGTCCAACATTTACCACCAAATTTCTTTTGATACTA  
GCCTTCAAGTGGGTATGCCTGCGGAATACGCTTGCTATTACCAGATTGGTTCGAACCCGTTGATGC  
TAT

+

FFFFFFFFF:FFFFFFFFFFFFFFFFFFFFFFFFFFFFFFFFFFFFFFFFFFFFFFFFFFFFFFFFFFFF  
FFFFFFFFFFFFFFFFFFFFFFFFFFFFFFFFFFFFFFFFFFFFFFFFFFFFFFFFFFFFFFFFFFFFFFFF  
FFF

@A00721:190:HGJW7DSXY:4:1112:16396:19993\_1:N:0:TCTGCAAG+GCTGCACT  
ATTCAAGCTTGTCGTTTAAAGACTGCAGAGGCTGTCAAACAAGCCAGACTCAAGGAGTCCAATCAAA  
GGTTTTGAATTTAGCTCAACTGGGGAGACGTGCTTAAATGGGTGATAAAATTATTTAGAGATCTTT  
CTA

+

FFFFF:F,FFFF,FFFFFFFFFFFFFFFFFFFFFFFF,FFFFFFFFFFFFFFFFFFFFFFFF:FFFFF  
F:FFFFFFFFFFFFFFFFFFFFFFFFFFFFFFFFFFFFFFFFFFFFFFFFFFFFFFFFFFFFFFFFFFFF  
FFF

@A00721:190:HGJW7DSXY:4:1238:23421:16564\_2:N:0:TCTGCAAG+GCTGCACT  
ATAGTGGGATAATAGTTCTACCGATACGTAGTGAACGCGTTCGTAGAACCAAGTACTTTCCGTCTGAA



GAGTTTAGAGCTGCTATTGATTATGTAACCGATAGGAGTTGTATAGTT  
+  
FFFFFFFFFFFFFFFFFFFFFFFFFFFFFFFFFFFFFFFFFFFFFFFFFFFFFFFFFFFFFFFFFFFFFFFF  
FFFFFF:FFFFFF:FFFFFFFFFFFFFFFFFFFFFFFFFFFFFFFFFFFFFFFFFFFFFFFF  
@A00721:190:HGJW7DSXY:4:2115:25256:18239\_2:N:0:TCTGCAAG+GCTGCACT  
ATCCTTTAAGGACTATGTTGACTGACGAAGATTTCCACAGATTTGTCTACGTTGCAGATCGCCACT  
CCAAACACTATATACATTATAAAATATAAAAATAAGGGAGTCATAACT  
+  
FFFFFFFFFFFFFFFFFFFFFFFFFFFFFFFFFFFFFFFF:FFFFFFFFFFFFFFFFFFFFFFFFFFFF,FFFF  
FFFFFFFFFFFFFFFFFFFFFFFFFFFFFFFFFFFFFFFFFFFFFFFFFFFFFFFFFFFFFFFF:F  
@A00721:190:HGJW7DSXY:4:2430:15257:14763\_2:N:0:TCTGCAAG+GCTGCACT  
AATTCTTGCTTTCAACGAAGTCTCTGATTTTATTAATCATTACTTTAACGATCTCTCGGTCATTTAC  
TCTGTACTTGATCTACGTCGTTTAACTGTCGGAACAACCTTTACTTAG  
+  
FFFFFFFFFFFFFFFF:FFFFFFFFFFFFFFFFFFFFFFFFFFFFFFFFFFFFFFFFFFFFFFFFFFFFF  
FFFF:FF:FFFFFFFFFFFFFFFF:FFFF:FFFFFFFFFFFFFFFFFFFF:  
@A00721:190:HGJW7DSXY:4:1316:31602:32988\_1:N:0:TCTGCAAG+GCTGCACT  
CTATCGTTTTCTGCTTTTCTTAGCTAATAGATTAATAAAGGATGAGTACGAAAACCAACTCTTCGTT  
ACGAGACCTGATGGTAGAATAGATTTAGTCTCTACACCCATCTCAACGAGGATAAAGCGAGTTTTCCG  
TCC  
+  
:FFFFFFFFFFFF:FFFFFFFFFFFF:F,:FFFFFFFF:FFFFFFFFFFFF:FFFFFFFFFFFFFFFF  
FFFFFFFFFFFFFFFFFFFF:FFFFFFFFFFFFFFFFFFFF:FFFFFFFFFFFFFFFFFFFF  
FFF  
@A00721:190:HGJW7DSXY:4:1663:31910:37027\_2:N:0:TCTGCAAG+GCTGCACT  
AGAGATCATCCGCAAACGACTCGAAACCGAGACGCCGTAGATCAAAGTCCCTTCTAACTTTAGATTAT  
GAATCCTGCCAGATCGGAAGAGCGTCGGGTAGGGAAGAGTGTAGTGG  
+  
FFFFFFFFFFFFFFFFFFFFFFFFFFFFFFFFFFFFFFFFFFFFFFFFFFFFFFFFFFFFFFFFFFFF:FFF  
FFFFFFFFFFFFFFFFFFFF,FFFFFFFF,F,FFFF:FF:FFFFFFFF,  
@A00721:190:HGJW7DSXY:4:2324:20401:11584\_1:N:0:TCTGCAAG+GCTGCACT  
CTTTTCGATAGTGATTGTTATCAATTTAAATACATTACTGTTTCAACTCATCTTTACTCACAGACTCC  
GAAAATGTTTTCAAATGAGGTCAAAGCTCTATTTATTAACGAACATTATCCGATTCTTCGAGGGTA  
TCA  
+  
F:,F:FFF:FFFFFFFFFFFF:FFFFFFFFFFFF:FFFFFFFFFFFFFFFFFFFF,FFF:FFFFFFFFFFFFFFFF  
FFFFFFFFFFFFFFFFFFFFFFFFFFFFFFFFFFFFFFFFFFFFFFFFFFFFFFFFFFFF:FF:FFFFFFFFFFFFFFFF  
FFF  
@A00721:190:HGJW7DSXY:4:2572:32253:27759\_2:N:0:TCTGCAAG+GCTGCACT  
CCTTCGATGTTTATATTTTCTATAAGGGAAAATAGCAATAATCAAATTTGACAAATTTAGAACTT  
TATTTCAGAACTCTCTCCGATCACCTTGGTGTGATCTCCCGGAGGATC  
+  
FFFFFFFFFFFFFFFFFFFFFFFFFFFFFFFFFFFFFFFFFFFFFFFFFFFFFFFFFFFFFFFFFFFF  
FFFFFFFFFFFFFFFFFFFFFFFFFFFFFFFFFFFFFFFFFFFFFFFFFFFFFFFFFFFF  
@A00721:190:HGJW7DSXY:4:2645:13259:1689\_1:N:0:TCTGCAAG+GCTGCACT  
AGCGTATACTTGAATACTTTATCAAAGATTTGGCTTGGTCTATTTACCGCAAAAAGTTGGAAGAGGTC  
TATGATATTTATTTTACTTATACTTTAAATAGCACCGATTATAACTTGACTGTTGATAATATTACAAT  
AGC  
+  
FFF:FFFFFF:FFFF:FFFF:FFFFFFFFFFFF,FF:FFFFFFFFFFFFFFFFFFFFFFFFFFFF:  
FFFFFFFFFFFFFFFFFFFFFFFFFFFFFFFFFFFFFFFFFFFFFFFFFFFFFFFFFFFFFFFFFFFF  
FFF  
@A00721:190:HGJW7DSXY:4:1405:12228:29935\_2:N:0:TCTGCAAG+GCTGCACT  
AAGATTAGAGAAGTAACCGGTGAACACGTCGGTAGCATTGATTTACTTTTACCGTTAGAACTGAAAAA

+

@A00721:190:HGJW7DSXY:4:1212:8983:25880\_1:N:0:TCTGCAAG+GCTGCACT  
TAAAAATACTTCAAGTACCTGAACCTTTACATTTTTAATGGTATGGTATAATGTGTCTTACAAATAGAA  
CCTTCACTCTCGGTAATGAGAGTGTATTCCTTAATATTCTAGTAACCGCTATGTGGGCATTACTAGGA  
TTT

+

@A00721:190:HGJW7DSXY:4:2213:28601:34741\_2:N:0:TCTGCAAG+GCTGCACT  
AAAACTCCATTGTATAGTTCAAGGAGTACTTAATTC AATAGCTTTAGTATTATTTACTATCGCCTTT  
ATTGAAAATTGTATAAGAGTTAATTGCTTACACAAAAGTGACGCGCGA

+

@A00721:190:HGJW7DSXY:4:2507:29161:8093\_2:N:0:TCTGCAAG+GCTGCACT  
GCTCCAACTGGCACGCCAGACGTAGGGTCAAACCTACTACCGCCGGTCGGCAGATCGGCACCACTGGT  
CTCTACGTTACAGGGACCCGCTGTGCAGAATAACCTTCCCAAATCTAGA

+

@A00721:190:HGJW7DSXY:4:2433:12843:28401\_1:N:0:TCTGCAAG+GCTGCACT  
AAAGGAAACGGGCTGTTGCCAGAGGAAAGCAGCGACCACCGAGGTCGCTCGTAACATTGACGGCAGT  
CCCGTCATCTCTGTGGGAAGTGAAGCAGTACCTCAGTCAAAAGTCACATTCACTACTCCCATACCAAT  
CAA

+

@A00721:190:HGJW7DSXY:4:1475:9607:32816\_2:N:0:TCTGCAAG+GCTGCACT  
TATACAGTTCGGCCATTTCAAGAGTGGTCAATACGTCGTGGGAGGTACTGAAGCCTTCCCCTCCGCTG  
GCACGAAGAACA CTCCCAAGCCAATCAATAGTTCTTCTGACCAGAATG

+

@A00721:190:HGJW7DSXY:4:2220:31530:5619\_1:N:0:TCTGCAAG+GCTGCACT  
GACGTGTGCTCTTCCGATCTGGAAGAGGGGAAATGTCCC~~AAA~~ACTGAGAAGAATAAAGGGAAAGGTC  
CATCAGGACCTAAGAAGGGGAAATTACCCCTAATTCTGAAGGAAGATCTCCCACCATCTGGGGTTGGG  
AAT

+

@A00721:190:HGJW7DSXY:4:1633:6668:21527\_2:N:0:TCTGCAAG+GCTGCACT  
ACGGGCCAAAGAGGCCGCTGCTACGAAGTCGCTGAAGGCGGCTTGGGTCATTAAGGGTAGCTGTAAAG  
TTGCGCCTGCCGACCCCATCTTTGAGACCAAGACTCTCTACAGTAGGT

+

@A00721:190:HGJW7DSXY:4:1659:20482:4492\_2:N:0:TCTGCAAG+GCTGCACT  
AAATCTGTTGAATTCGTCACTGAGGACGAAGGTGAGAGGACTTTTGGCTACTGGCGACAAACTGAGAG

CAGTCGCTGGGGACAGAGAATTGCGTGGGTGAAGGCCGACGCTTCGA

```

FFFFFFFFFFFFFFFFFFFFFFFFFFFFFFFFFFFFFFFFFFFFFFFFFFFFFFFFFFFFFFFFFFFFFFFF:F:FFF
FFFFFFFFFFFFFFF,FFFFFFFFFFFFF:FFF:FFFFFFFFFFFFFFFFFFFFFFF

```

GGA

[illegible] $+$ 

@A00721:190:HGJW7DSXY:4:2262:21206:31328\_1:N:0:TCTGCAAG+GCTGCACT  
TCCCACATATGGTAGACGTTGTCACACTTTTCTTGAAAATTTTTCTTTTCTCCGTCATTGGGGATTT  
CGATGTGAGAAGGTGGAAGGTGTCAAGGGTCTTCTTCATGCTGATCTTTCAGGACCTAATCACATCAT  
GAT

[illegible] $+$ 

@A00721:190:HGJW7DSXY:4:1645:28890:26443\_2:N:0:TCTGCAAG+GCTGCACT  
GTTTGAGGAAGGCTCTAGAGAAGATCTCACCACCTGGAGAAGGCAAGTGGAGAGTCCAGAAGTTGATG  
AAGAAGGATTATTTGAAGCAGGGGTTACCACTTCCTAAGGTGGATGAG

```

FFFFFFFFFFFFFFFF:FFFFFFFFFFFFFFFFFFFFFFFFFFFFFFFFFFFFFFFF
FFFFFFFFFFFFFFFFFFFFFFFFFFFFFFFFFFFFFFFFFFFFFFFF:FF:

```

 $+$ 

@A00721:190:HGJW7DSXY:4:1402:9715:29496\_1:N:0:TCTGCAAG+GCTGCACT  
CTCTTCCGATCTGTGAAAAATATGCAGGTCAAAGATTCTGTAGCTCTGAGGGCGGTTGAGGGAGCCGT  
TTTGGCCGACTTTAACTATTCTAAGAGTCTTTATGATTCAAACCTATCGTTGTCGTACCTTACAAGG  
TTG

[illegible]

@A00721:190:HGJW7DSXY:4:2320:12075:3740\_1:N:0:TCTGCAAG+GCTGCACT  
GAATTGCGGTTGAAGTTCACCCATTCTATCTTTATTGCTCACGCAGTCGCAGCCATATCGAGACTATG  
TTATAATCACTTGTTAAAGTACAGATTTTGTGTTTTAGTTATTATTGATATTGGAGGCGATATTCGTT  
TT

@A00721:190:HGJW7DSXY:4:1314:3947:36824\_1:N:0:TCTGCAAG+GCTGCACT  
ATTTGCAACCCTATTCTTGATGTGAAAGATGCATCGAGGTATACGTCTAGGAACATTGATTGGGAACG  
TACCTACTCACGAGACGTCATGAAAGCTATCGGAGGGAAGCAAATGTTTCGTTCTGTTACAAGAACG  
CTT

@A00721:190:HGJW7DSXY:4:2620:21802:13041\_1:N:0:TCTGCAAG+GCTGCACT  
CTCAGTTGCGATAGCTGTAGAGGTATACGATATCTCTCTTGATGATGTAGCCACTATAATGCTTAAGA  
GAGAGATTGATGTATGTCATTTCTTCTTAGTTTGTCCCGCGCAATTATTGGACACGATGAAAAATGAC  
ATA

@A00721:190:HGJW7DSXY:4:2202:4209:27320\_1:N:0:TCTGCAAG+GCTGCACT  
TGGAGATGATGGCGCATCACTTGATTACTATATGCCCCGAAGGATTGGGTTATTCTCACAAACAAAGATA  
AGATTTTATCTTTCTTCAAACACCCTGTTTTCTTAAAGGGCGGACAATTGTTCCATTGTGAACCTCTTG  
GGG

@A00721:190:HGJW7DSXY:4:1467:26666:28980\_2:N:0:TCTGCAAG+GCTGCACT  
AGTTCCGAATAACTCGTAATAAATCTTTCTCTAGTGGACAATTGAGAATACCTATTTCCGTACCAAGA  
GCCACTGCCAATCTCATCGCTATACGCATACCTGATTGGAAGAAGCGA

@A00721:190:HGJW7DSXY:4:2144:3821:25708\_1:N:0:TCTGCAAG+GCTGCACT  
AAGGGCTATTACGTACGTCATGGGGATCACTTCTTCGGTCAATGACAAAACCTTCGAATATGTTACGA  
CATGGCTTCGTAACAACAGTGCGAGGATTGTCATCTCGGGGAAAGTGATTCACCAAGATGTTTCATATA  
GAT

@A00721:190:HGJW7DSXY:4:2118:19289:4178\_1:N:0:TCTGCAAG+GCTGCACT  
AAGGTCGCAGCGATCTTACTCGTTATCGGAGCTAAGAAGAAGACTTTGGGTACACGTTATGCTCGCAA  
ACTTAACGTTAGTACCGGAGGTGATCTCTCTGCTTCTGCGTTACTGAGAGAAAAGATTCAGGACGCCT  
ACG

@A00721:190:HGJW7DSXY:4:2151:11189:20181\_1:N:0:TCTGCAAG+GCTGCACT  
TCTTGAAACTACGGTCCTTATCAAAGAAAATGGTGAACCGGTCTCTAAATCTTTTGAGATTGAGAAGA  
TTGAAGAACACGTCAAGAAGTCGCTCGGCGTTGTTCTTGAAAACCAAGTTAAGAAGGAGGCTGATCAT  
GGA

+

F:F,FFFFFFFFFFFFFFFFFFFFFFFFFFFFFFFFFFFFFFFFFFFFFFFFFFFFFFFFFFFFFFFFFFFFFFFF  
FFFFFFFFFFFFFFFFFFFFFFFFFFFFFFFFFFFFFFFFFFFFFFFFFFFFFFFFFFFFFFFFFFFFFFFFFFFF  
FFF

@A00721:190:HGJW7DSXY:4:2420:14633:1720\_2:N:0:TCTGCAAG+GCTGCACT  
TCAAACCTCGAGGTTTACGCTACGAGAGGTGATCCCGGATGTGGATTGAAGGCTGGCTCTAAGGGAGAC  
TCCTTCTTTTTGAATGTTGTAAAGAATTGGGTTGAGAAGTGTGCTTTA

+

FFFFFF:FFFFFFFFFFFFFFFFFFFFFFFFFFFFFFFFFFFFFFFFFFFFFFFFFFFFFFFFFFFFFFFFFFFF  
FFFFFFFFFFFFFFFFFFFFFFFFFFFFFFFFFFFFFFFFFFFFFFFFFFFFFFFFFFFFFFFFFFFFFFFFFFFF  
FFFF

@A00721:190:HGJW7DSXY:4:2637:25355:11804\_1:N:0:TCTGCAAG+GCTGCACT  
ATAACTTCTTTTTCAAAAATGCGGATGGGTCTACTGATGTTTTCTACAGAGTGCAGTCGTTTCAACA  
CTTATCACCACTTTTGAAAGGAAAATAATTGGTGATGAAAATACGTATGTCGGTGGGGTTCTCAAGGC  
TCT

+

FFFFFF:FFFFFFFFFFFFFFFFFFFFFFFFFFFFFFFFFFFFFFFFFFFFFFFFFFFFFFFFFFFFFFFFFFFF  
FFFFFFFFFFFFFFFFFFFFFFFFFFFFFFFFFFFFFFFFFFFFFFFFFFFFFFFFFFFFFFFFFFFFFFFFFFFF  
FFF

@A00721:190:HGJW7DSXY:4:2632:23692:24893\_1:N:0:TCTGCAAG+GCTGCACT  
GATTCTTAAAAGAAGTTTATTAAAACCTTCAGAGTCTTTGGAAGTCCAGGTAGCTAATGTTCTTGCAA  
TAGCCACAGACTTTCTGGGAAAAGAGACCTCTGTTGGTAGAGGAGTTGAGAGAATTACTCAGATTCAA  
TCT

+

FFFFFFFFFFFFFFFFFFFFFFFFFFFFFFFFFFFFFFFFFFFFFFFFFFFFFFFFFFFFFFFFFFFFFFFFFFFF  
FFFFFFFFFFFFFFFFFFFFFFFFFFFFFFFFFFFFFFFFFFFFFFFFFFFFFFFFFFFFFFFFFFFFFFFFFFFF  
FFF

@A00721:190:HGJW7DSXY:4:2631:4155:3959\_1:N:0:TCTGCAAG+GCTGCACT  
AAAAGATCCTTTGCACAAGCAATACCTTCCACTGAGTTCATCACCCAGAGTTTCGACGTCGCGGAAAA  
CGATGAAGATTTCCACACTGTTTCGAGAATCTTCTGATGCTGAATTTGAGGAAAATTTTTCGGAAGTTT  
TTG

+

FFFFFFFFFFFFFFFFFFFFFFFFFFFFFFFFFFFFFFFFFFFFFFFFFFFFFFFFFFFFFFFFFFFFFFFFFFFF  
FFFFFFFFFFFFFFFFFFFFFFFFFFFFFFFFFFFFFFFFFFFFFFFFFFFFFFFFFFFFFFFFFFFFFFFFFFFF  
FFF

@A00721:190:HGJW7DSXY:4:2507:5339:7012\_2:N:0:TCTGCAAG+GCTGCACT  
CAGTACAGGGAGGAGGTAATAGTTATAAAACCTTCTTTTATCATTGCAACAGGACTTTGAGAAGACTG  
TTGAAATGGACAAAATCTGGGATCATAGGTATGTGTCACGCTACACTC

+

FFFFFFFFF:FFFFF:FF:FFFFFFFFFFFFFFFFFFFFFFFFFFFFFFFFFFFFFFFFFFFFFFFFFFFFFFFF  
FFFFFFFFFFFFFFFFFFFFFFFFFFFFFFFFFFFFFFFFFFFFFFFFFFFFFFFFFFFFFFFFFFFFFFFFFFFF  
,

@A00721:190:HGJW7DSXY:4:1570:4273:22232\_2:N:0:TCTGCAAG+GCTGCACT  
CCATATCAGATTAGAGACATGCCAGTTAGAGTTCTTCTAACCCAGGACTGATGGTGAGATTCTTTTACC  
TTTTGGAGGTCCAGGAACCTTTACTCCTAGTGTCTTTTCTAGAGTCCA

+

FFFFFFFFFFFFFFFFFFFFFFFFFFFFFFFFFFFFFFFFFFFFFFFFFFFFFFFFFFFFFFFFFFFFFFFFFFFF  
FFFFFFFFFFFF,FFFF,FF:FFFFF:,,:FFFFF,FFFF,FFFF:FF

@A00721:190:HGJW7DSXY:4:1156:29794:10347\_1:N:0:TCTGCAAG+GCTGCACT  
TTTCGGTTTCAGCTGGATGGATCTTTTGATGGTATGTTTCACATTGCGTGATCACTTCCCGTGGACTT  
GGGAAGAGATTAAACATAAAATCCAGCGATTCTATTATGTCGCTAAAGCCTGTCCAGTTGTCGATGAT  
GTT

[illegible][illegible]

```
:FFFFFFFFFFFFFFF:FFFFFF,FFF,FFFF:FFFFFFFF:FFFFFFFF:FFFFFFFFFFFFFFF:FFFFF  
F:FFFF:FFFFFFFFFFFFFFFFFFFFFFFFFFFF:FFFFFFFFFFFFFFFFFFFFFFFFFFFF:FFF:FFFF  
FFF
```

```

FFFFFFFFFFFFFFFF,FFFFFFFFFFFFFFFF,FFFFFFFFFFFFFFFF
FFFFFFFFFFFFFFFFFFFFFFFFFFFFFFFFFFFFFFFFFFFFFFFF
FFF

```

[illegible][illegible]

```

FFFFFFFFFFFFFFFFFFFFFFFF:FFFFFFFFFFFFFFFFFFFFFFFF:FFFFFFFFFFFFFFFF
FFFFFFFFFFFFFFFFFFFFFFFF:FFFFFFFFFFFFFFFFFFFFFFFFFFFFFFFFFFFFFFFF:FFFFFFFF
FFF

```

@A00721:190:HGJW7DSXY:4:2541:27019:11929\_1:N:0:TCTGCAAG+GCTGCACT  
AACGATGCTACTTGTGAGAGGATCAATCACAGTAAGGAAGTGTACGTTTAGCACGGGAGGTTGCAGA

TTCAACCCCTTATATCGAGGCTATCGAGGACGATGAGTATCTTGAAGTTGTTGACGACAAGCCTCAAG  
AGG

+

:FF:FF:F,,,:FFFFFFFF,FFFFFFFF:FFF,FFF,,F:FFFF:FFFFFFFFFFFFFFFF:FFFF:F  
FF:FFFF:,FFF,FF,FFFFFFFF,FFFF:FFFFFFFF:,FFF,,FFFFFF:,F,FF,:FFFFFF  
,FF

@A00721:190:HGJW7DSXY:4:2339:28501:13683\_1:N:0:TCTGCAAG+GCTGCACT  
ACCACCTTAACGTCACCTCGTAATCTTTCAGCCGAATTAAGTACTAATGAGTTCAAGTCGGTTGTCTGA  
TCGAATTAAGATCAAGGCTAATACCTTTATAGGTAAGAAGCCCTTGAGCCGCGTAGTCAGCGCGTTT  
AGC

+

FFFFFFFFFFFFFFFFFFFFFFFFFFFFFFFFFFFFFFFFFFFFFFFFFFFFFFFFFFFFFFFFFFFFFFFF  
FFFFFFFFFFFFFFFFFFFFFFFFFFFFFFFFFFFFFFFFFFFFFFFFFFFFFFFFFFFFFFFFFFFFFFFF  
FFF

@A00721:190:HGJW7DSXY:4:1468:10456:15123\_1:N:0:TCTGCAAG+GCTGCACT  
AATAGGGACGCTAGTATACTTCGTAAAGTCGACAGCGAAATGGTCAATATTGATAATTGGACCGACTA  
TATGACCTATTTTAAGCTCATGGTGAAAAGGGAAGCTAAGGTTAACTTGATGCTTCAGCCTTTTCGA  
AGC

+

FFFFFFFFFFFFFFFF,FFFF:FFFFFFFFFFFFFFFFFFFFFFFFFFFFFFFFFFFFFFFFFFFFFFFF:  
FFFFFFFFFFFFFFFFFFFFFFFFFFFFFFFFFFFFFFFFFFFFFFFFFFFFFFFFFFFFFFFFFFFFFFFF:  
FFF

@A00721:190:HGJW7DSXY:4:2544:4417:14184\_2:N:0:TCTGCAAG+GCTGCACT  
GTTCTTGTGAGGAGAGTCAAACAGTGTCTTTTACCCAACATTTTATGTATACAGAGATGACCAGTGA  
CGATTTCTCCCGAAGCTCTTCTCTCTCTTAGGAGGTCATGATGACTA

+

FFFFFFFFFFFFFFFFFFFFFFFFFFFFFFFFFFFFFFFFFFFFFFFFFFFFFFFFFFFFFFFFFFFFFFFF:  
FFFFF:FFFFFFFFF:FFFFFFFFFFFFFFFFFFFFFFFFFFFFFFFFFFFFFFFFFFFFFFFF

@A00721:190:HGJW7DSXY:4:2460:9209:36479\_1:N:0:TCTGCAAG+GCTGCACT  
CAGGAGTATCCATAACGATTTGTCAATTTACCACCTTTGCTCAACGACGAAGTGGAACGGCCAACACTT  
TCTTTGGTAATTGTATGATCACTTTGATGATTTTATCACTTTATTATGACCTTGGAAGTTTTCGGCT  
GTG

+

FFFFFFFFFFFFF::FFFFFFFF,FFFFFFFFF::F:FFFFFFFFFFFFFFFF:FFFFFFFFFFFFFFFF  
FFFFFFFFFFFFFFFFFFFFFFFFFFFFFFFFFFFFFFFFFFFFFFFFFFFFFFFFFFFFFFFFFFFFFFFF  
FFF

@A00721:190:HGJW7DSXY:4:2158:7943:10739\_2:N:0:TCTGCAAG+GCTGCACT  
GAGGGTCGTTATACCTATTCGGCTATCTGTGCTTTGAATTGTATAAGATCAAATTTAAACGATTCCG  
AGAGGTTTATCCTGATGTGGAGGGAGTTCTTGAAGCATCCCGACCTT

+

FFFFFFFFFFFFFFFFFFFFFFFFFFFFFFFFFFFFFFFFFFFFFFFFFFFFFFFFFFFFFFFFFFFFFFFF:  
FFFFFFFFFFFFFFFFFFFFFFFFFFFFFFFFFFFFFFFFFFFFFFFFFFFFFFFFFFFFFFFF

@A00721:190:HGJW7DSXY:4:1160:22806:20823\_1:N:0:TCTGCAAG+GCTGCACT  
AGACAGGTGATATTGTTGAGCGAGAGCGACCAAGATCTAAATTCGGTAACGGTGCGTGCGCTTTATT  
TTAAAAAGCTCCCTCCTCTCGCAAGTTTGATCTGATACTTATCACGAAAGGACTTGAGTCTTTTGATC  
AGT

+

FF:FFF:FFFFFFFFF:FFFF::FFFFFF:FFFFFFFFF:FFFFFFFFFFFFFFFFFFFFFFFF:FFF:FF  
FFFFFFFFFFFFFFFFFFFFFFFFFFFFFFFF:FFFFF:FFFFFFFFFFFFFFFFFFFFFFFFFFFFFFFF:FFFFF:F  
FFF

@A00721:190:HGJW7DSXY:4:2264:13657:12242\_1:N:0:TCTGCAAG+GCTGCACT  
ATTTTTCCTCATCAGCTTGTGTTTTACCTAATCTGTGTTTTTACGATAACAACATCAGTTGATTAAG  
ACTCTTCCGAAAGGCGAACTTTGGGAATTTGAAGCTCAGGGTGAAGCACAACTTTGACCGTGACGAA  
CTG

[illegible][illegible]

```

FFFFFFFFFFFFFF:FFFFFFFF:FFFFFFFF:FFFFFFFFFFFFFFFFFFFFFFFFFFFFFFFF:FFFFFFFFFFFFFFFF
FFF:FFFFF,FFFFFFFF:FFFFFF::FFF:FFFF:FFFF:FFF:F:F

```

[illegible]

```

FFFFFFFFFFFFFFFFFFFF:FFFFFFFFFFFF:FFFFFFFFFFFFFFFFFFFFFFFFFFFFFFFF:FFFFFFFF
FFFF,FFFFFFFFFFFF:FF:FFFFFFFFFFFF:FF:FFF:FFFFFFFF:FFFFFFFFFFFF:FFF:F:FFFFF
FFF

```

```

FFFFFFFFFFFFFFFF::F:FFFFFFFFFFFFFFFFFFFFFFFFFFFFFFFF:F:FFFFFFFFFFFFFFF
FFFFFFFFFFFFFFF:F:F:FFF,FFFFFFFFFFFFFFFF:FFFFFFFFFFFFFFF

```

[illegible][illegible]



@A00721:190:HGJW7DSXY:4:1338:14344:35289\_2:N:0:TCTGCAAG+GCTGCACT  
TGAACAAAGTTATCAAAGATAGTGGCATTCAAGGCAAACCTTACCCTGATTCCGGCCGGTGGTAGCTCA  
TTTCTACCAGGGGCTATTACTCTTGCTGAAACAGCTATTAAAGCTGTT

+

FFFFFFFFFFFFFFFFFFFFFFFFFFFFFFFFFFFFFFFFFFFFFFFFFFFFFFFFFFFFFFFFFFFFFFFF  
FFFFFFFFFFFFFFFFFFFFFFFFFFFFFFFFFFFFFFFFFFFFFFFFFFFFFFFFFFFFFFFFFFFFFFFF

@A00721:190:HGJW7DSXY:4:2134:29252:16110\_1:N:0:TCTGCAAG+GCTGCACT  
AAGGATGTGCACTCTTTTCTGCTACTTTAACGGAGCGTAGTGTACTCTTCGTCGATTGTATCAACAGT  
AACATTACTTCTAATAAAGGTCTCTATCAAGCTCGTATTATCGTCGCTGCTGGATCTGCGTTACCGTT  
GAA

+

FFFFFFFFFFFFFFFF,FFFFFFFFFFFFFFFFFFFFFFFFFFFFFFFFFFFFFFFFFFFFFFFFFFFFFFFF  
FFF:FFFFFFFFFFFFFFFFFFFFFFFFFFFFFFFFFFFFFFFFFFFFFFFFFFFFFFFFFFFFFFFF  
FFF

@A00721:190:HGJW7DSXY:4:2126:11324:9799\_2:N:0:TCTGCAAG+GCTGCACT  
GTAATTATGAAGACTGTGATTTATCTTTCACCTCTGGCCTTGATGAGGGTGTTTCTAATCGTAACATT  
AATAATTTCAATCTTCTTAAAAAGAAGATAGAGAGTCATACTTTGGGC

+

FFFFFFFFFFFFFFFFFFFFFFFFFFFFFFFFFFFFFFFFFFFFFFFFFFFFFFFFFFFFFFFFFFFFFFFF  
FFFFFFFFFFFFFFFFFFFFFFFFFFFFFFFFFFFFFFFFFFFFFFFFFFFFFFFFFFFFFFFFFFFFFFFF

@A00721:190:HGJW7DSXY:4:2412:24641:1454\_2:N:0:TCTGCAAG+GCTGCACT  
CCAAAGAGAATATCTAAAATATTTACAAAATCTTACCCTATCTACGAACCTAAAGTTCTGAAGACGT  
TGCTTGTGCTTCCTCCTTTAATGGCACTACCTCGGTACAATCTTACT

+

FFFFFFFFFFFFFFFFFFFFFFFFFFFFFFFFFFFFFFFFFFFFFFFFFFFFFFFFFFFFFFFFFFFFFFFF  
FFFFFFFFFFFFFFFFFFFFFFFFFFFFFFFFFFFFFFFFFFFFFFFFFFFFFFFFFFFFFFFFFFFFFFFF  
FFFFFFFFFFFFFFFFFFFFFFFFFFFFFFFFFFFFFFFFFFFFFFFFFFFFFFFFFFFFFFFFFFFFFFFF

@A00721:190:HGJW7DSXY:4:1151:15058:7185\_2:N:0:TCTGCAAG+GCTGCACT  
GGAGTTTTTACGGGATCCGGAATGTTCTGTCTATATTAGGTGAAGCGAAATACGATTTCTGAACGTCAA  
CGTTCACCGAGTTTCGTTTCGTACCTTGATGCTGACTTTCGTCAATAT

+

FFFFFFFFFFFFFFFFFFFFFFFFFFFFFFFFFFFFFFFFFFFFFFFFFFFFFFFFFFFFFFFFFFFFFFFF  
FFFFFFFFFFFFFFFFFFFFFFFFFFFFFFFFFFFFFFFFFFFFFFFFFFFFFFFFFFFFFFFFFFFFFFFF

@A00721:190:HGJW7DSXY:4:2326:15374:22106\_2:N:0:TCTGCAAG+GCTGCACT  
TCATGAATTTTACAGAGGATGAAAAATTTTCTTCCTTGATTTTAAATATAAAGAATCTTTACCAGGACT  
CCTACTACAGGAGGCAGTCTTCTGATCGTAAGAAGTTTATAAGGAACA

+

FFFFFFFFFFFFFFFFFFFFFFFFFFFFFFFFFFFFFFFFFFFFFFFFFFFFFFFFFFFFFFFFFFFFFFFF  
FFFFFFFFFFFFFFFFFFFFFFFFFFFFFFFFFFFFFFFFFFFFFFFFFFFFFFFFFFFFFFFFFFFFFFFF

@A00721:190:HGJW7DSXY:4:2240:29432:8750\_2:N:0:TCTGCAAG+GCTGCACT  
AAGTGGTAATACTGTCTTTCCAAGCTTACCTGTATCTTCAATGAAATTGGACTCTTCGATAGGGGACA  
TTTTATCGTGGGCTTTCCGTAAAGGAAGATCTGTTATCGACGGTTTAT

+

FFFF:FFFFFFFFFFFFFFFFFFFFFFFFFFFFFFFFFFFFFFFFFFFFFFFFFFFFFFFFFFFFFFFF  
F,FFFFF:FFF::F:,:::FFF:FFFFFFFFFFFFFFFFFFFFFFFF,F,:FFFFFF

@A00721:190:HGJW7DSXY:4:2578:20871:25457\_2:N:0:TCTGCAAG+GCTGCACT  
TGTTAGAGTAGAATTCCTGAAGAGTCCTTCCGTAAACCAACTTCTTGACAATTTCTTCAATCCTTCGA  
TAATAGTTAAATCTAGGATTATGTCTGTGTTGAAAGACTTTCTACCGA

+

FFFFFFFFFFFFFFFFFFFFFFFFFFFFFFFFFFFFFFFFFFFFFFFFFFFFFFFFFFFFFFFFFFFFFFFF  
FFFFFFFFFFFFFFFFFFFFFFFFFFFFFFFFFFFFFFFFFFFFFFFFFFFFFFFFFFFFFFFFFFFFFFFF

@A00721:190:HGJW7DSXY:4:1525:2908:22623\_2:N:0:TCTGCAAG+GCTGCACT  
GACTGATTATCTAAAGATTGAAGGAAAATTTATCCTCGTTTAACTTACTTAGACTTTCTACGATAC  
AAATGATAACTTCTAATTTACGTTTGCTACTCAGAGCTGGTCCTCTCA

+

```
FFFFFFFFFFF,FFFFFFFFFFFFFFFFFFFFFFFFFFFFFFFFFFFFFFFF:F  

FFFFFFFFFFFFFFFFFFFFFFFFFFFFFFFFFFFFFFFF:FFFF,FFFFFFFFFFFFFFFFFFFFFFFF  

@A00721:190:HGJW7DSXY:4:1375:21323:35352_2:N:0:TCTGCAAG+GCTGCACT  

AGTCCCGGCATTTGATAATAATGACGAGACTTTTCGTGATAATCGCTGCATATTACGGATTACACGGTA  

CCAGCGCATCTCGTGTCGAGCCTCGACCCGATTATATGGTATTAACCT  

+  

FFFFFFFFFFFFFFFFFFFFFFFFFFFFFFFFFFFFFFFFFFFFFFFFFFFFFFFFFFFFFFFF,FFFFFFFF:FFFFFFFF  

FFFFFFFFFFFFFFFFFFFFFFFFFFFFFFFFFFFFFFFFFFFFFFFFFFFFFFFFFFFFFFFF:FFFF:FFF,FFFFF:  

@A00721:190:HGJW7DSXY:4:1238:13819:3505_2:N:0:TCTGCAAG+GCTGCACT  

TGTTCTCTGATCATTTTTGACAATCTCTTCTTATAATAAAATAAATAAATAATATTACTAATGGCAAATA  

GTGGAAAGGCTCCAGTCAACACTAGTTCGAGTGCTGCTTTGGATTACG  

+  

:FFFFFFFFFFFFFFFFFFFFFFFFFFFFFFFFFFFFFFFFFFFFFFFFFFFFFFFFFFFFFFFFFFFFFFFF::  

FFFFF::FFFFFFFFFFFFFFFFFFFFFFFFFFFFFFFFFFFFFFFFFFFFFFFFFFFFFFFF,FF  

@A00721:190:HGJW7DSXY:4:1342:23393:10661_2:N:0:TCTGCAAG+GCTGCACT  

ATAGGTGAAGGATAGTTTTACCTCGACCAACATTAAGGCGGCGGCGACTAATCTTAAAGCTTCACC  

CAAATGAAGGACACTTCGAAACTGAATAATGATGCACAGATCGGAAG  

+  

FFFFFFFFFFFFFFFFFFFFFFFFFFFFFFFFFFFFFFFFFFFFFFFFFFFFFFFFFFFFFFFFFFFFFFFFFFFF  

FFFFF:FFFFFFFFF:FFFFFFFFFFFFFFFF:FFFFFFFFFFFFFFFFFFFFFFFF  

@A00721:190:HGJW7DSXY:4:1214:8323:34632_2:N:0:TCTGCAAG+GCTGCACT  

AGGATATTCGCCATTGTGGTACGAATTGGTCCAACATTTACCACCAAATTCTTTGATACAACTCTAG  

CCTTCAAGTGGGGTATGCCTGCGGAATACGCTTGCTATTCACCAGATT  

+  

FFFFFFFFFFFFFFFFFFFFFFFFFFFFFFFFFFFFFFFFFFFFFFFFFFFFFFFFFFFFFFFFFFFFFFFFFFFF  

FFFFFFFFFFFFFFFFFFFFFFFFFFFFFFFFFFFFFFFFFFFFFFFFFFFFFFFFFFFFFFFF  

@A00721:190:HGJW7DSXY:4:1112:16396:19993_2:N:0:TCTGCAAG+GCTGCACT  

TGCTATGTCAGAAGAAGCTATTCAAGCTTGTCGTTTAAAGACTGCAGAGGCTGTCAAACAAGCCCAGA  

CTCAAGGAGTCCAATCAAAGGTTTTGAATTTAGCTCAACTGGGGAGAC  

+  

FFFFFFFFFFFFFFFFFFFFFFFFFFFFFFFFFFFFFFFFFFFFFFFFFFFFFFFFFFFFFFFFFFFFFFFFFFFF  

FFFFFFFFFFFFFFFFFFFFFFFFFFFFFFFFFFFFFFFFFFFFFFFFFFFFFFFFFFFFFFFF  

@A00721:190:HGJW7DSXY:4:1303:7247:15577_2:N:0:TCTGCAAG+GCTGCACT  

ATAGTGGGATAATAGTTCTACCGATACGTAGTGAACGCGTTTCGTAGAACCAAGTACTTTCCGTCTGAA  

GAGTTTAGAGCTGCTATTGATTATGTAACCGATAGTAGTTGTATAGTT  

+  

FFF:F,FFFFFF:F:FF:FFF:FFFFFFFFFFFFFFFF::F:F,FFFFFF,FFFFFF:FFF:F::FFFF  

FF:FFFF,FFFFFFFF:,FF,FF,FFF,,:F:FF,F,:,:,FFFFFF,F  

@A00721:190:HGJW7DSXY:4:2317:7663:15483_2:N:0:TCTGCAAG+GCTGCACT  

ATCCTTTAAGGACTATGTTGACTGACGAAGATTTTCCACAGATTTGTCTACGTTGCAGATCGCCACT  

CCAAACACTATATACATTATAAAAATATAAAAAATAAGGGAGTCATAACT  

+  

FFFF,F:FFFFFFF,FFFFFFFFFFFFFFFF:FFFFFF::FFFF:F:FFFFFFFFFFFF:FFF::F::FF  

FFF,FFFF:F:F:F:FF:FFFFFFFFFFFFFFFF:FFF:FF::F::FF  

@A00721:190:HGJW7DSXY:4:1518:17598:29778_2:N:0:TCTGCAAG+GCTGCACT  

GGCTTTCAACGAAGTCTCTGATTTTATTAATCATTACTTTAACGATCTCTCGGTCATTTACTCTGTAC  

TTGATCTACGTCGTTTAACTGTGCGGAACAACCTTTACTTAGAATGACT  

+  

FFFFFFFF:FFFFFFFFFFFFFFFFFFFFFFFFFFFFFFFFFFFFFFFFFFFFFFFFFFFFFFFFFFFFFFFF:FF  

FFFFFFFFFFFFFFFFFFFFFFFFFFFFFFFFFFFFFFFFFFFFFFFFFFFFFFFFFFFFFFFF  

@A00721:190:HGJW7DSXY:4:1316:31882:32315_1:N:0:TCTGCAAG+GCTGCACT  

CTATCGTTTTCTGCTTTTTCTTAGCTAATAGATTAATAAAGGATGAGTACGAAAACCAACTCTTCGTT  

ACGAGACCTGATGGTAGAATAGATTTAGTCTCTACACCCATCTCAACGAGGATAAAGCGAGTTTCCG  

TCC
```

+  
FFFFFFFFFFFFFFFFFFFFFFFF:FF,F:FFFFFFFFFFFFFFFF:FF:FF,FFFFFFFFFFFFFFFF  
FFFFFFFFFFFFFFFFFFFFFFFFFFFFFFFFFFFFFFFFFFFFFFFFFFFFFFFFFFFFFFFF  
FFF  
@A00721:190:HGJW7DSXY:4:1676:10746:3129\_2:N:0:TCTGCAAG+GCTGCACT  
AGAGATCATCCGCAAACGACTCGAAACGAGACGCCGTAGATCAAAGTCCCTTCTAACTTTAGATTAT  
GAATCCTGCCAGATCGGAAGAGCGTCGTGTAGGGAAAGAGTGTAGTGG  
+  
FFFFFFFFFFFFFFFFFFFFFFFFFFFFFFFFFFFFFFFF:FFFFFFFFFFFFFFFF:FFFFFFF  
FFFFFFFFFFFFFFFF:FFFFFFFFF,:FFF,:F,FFF:,F:F,  
@A00721:190:HGJW7DSXY:4:2357:8368:30295\_1:N:0:TCTGCAAG+GCTGCACT  
CTTTTCGATAGTGATTGTTATCAATTTAAATACATTACTGTTTCAAATCATCTTTACTCACAGACTCC  
GAAAATGGTTTCAAATGAGGTCAAAGCTCTATTTATTAAACGAATATTATCCGATTCTTCGAGGGTA  
TCA  
+  
F:F:FFFFFFFFFFFFFFFF:FFFFFF:FFFFFFFFFFFFFFFF:FFFFFFFFFFFFFFFF  
FFFFFFFFFFFFFFFFFFFFFFFFFFFFFFFF:FFFFFFFFFFFFFFFFFFFFFFFFFFFFFFFF  
FFF  
@A00721:190:HGJW7DSXY:4:2606:30508:34162\_2:N:0:TCTGCAAG+GCTGCACT  
CCTTCGATGTTTATATTTTCTATAAGGGAAAATAGCAATAATCAAATTTGACAAATTTAGAACTT  
TATTTCAAGACTCTCTCCGATCACCTTGGTGTGATCTCCCGGAGGATC  
+  
FFFFFFFFFFFFFFFFFFFFFFFFFFFFFFFFFFFFFFFF:FFFFFFFFFFFFFFFF:FFFFFFFFFFFFFFFF  
FFFFFFF,FFFFFFFFFFFFFFFFFFFFFFFFFFFFFFFFFFFFFFFF  
@A00721:190:HGJW7DSXY:4:1123:26069:29168\_2:N:0:TCTGCAAG+GCTGCACT  
CGTATACTTGAATACTTTATCAAAGATTTGGCTTGGTCTATTTACCGCAAAAAGTTGGAAGAGGTCTA  
TGATATTTATTTTACTTATACTTTAAATAGCACCGATTATAACTTGAC  
+  
FFF:FFFFFFFFFFFFFFFFFFFFFFFFFFFFFFFFFFFFFFFFFFFFFFFFFFFFFFFFFFFFFFFF:FFF  
:F:FFFFFFFFFFFFFFFFFFFFFFFFFFFFFFFFFFFFFFFFFFFFFFFFFFFFFFFF:F  
@A00721:190:HGJW7DSXY:4:1125:15691:6277\_2:N:0:TCTGCAAG+GCTGCACT  
ACAATAGCTCTTCTCAGAAGATTAGAGAAGTAACCGGTGAACACGTCGGTAGCATTGATTTACTTTT  
ACCGTTAGAACTGAAAAAGATTCTTTTCGAAAAGAAACCTATAAGTTA  
+  
FFFFFFFFFFFFFFFFFFFFFFFFFFFFFFFFFFFFFFFFFFFFFFFFFFFFFFFFFFFFFFFFFFFFFFFF  
FFFFFFFFFFFFFFFFFFFFFFFFFFFFFFFFFFFFFFFFFFFFFFFFFFFFFFFF  
@A00721:190:HGJW7DSXY:4:1212:9399:25347\_1:N:0:TCTGCAAG+GCTGCACT  
TAAAAATACTTCAAGTACCTGAACCTTTACATTTTTAATGGTATGGTATAATGTGTCTTACAAATAGAA  
CCTTCACTCTCGTAATGAGAGTGTATTCCTTAATATTCTAGTAACCGCTATGTGGGCATTACTAGGA  
TTT  
+  
FFFFFFFFFFFFFFFFFFFFFFFFFFFFFFFFFFFFFFFFFFFFFFFFFFFFFFFFFFFFFFFFFFFFFFFF  
FFFFFFFFFFFFFFFFFFFFFFFF:FFFFFF:FFFFFFFFFFFFFFFFFFFFFFFFFFFFFFFF  
FFF  
@A00721:190:HGJW7DSXY:4:2460:17155:34773\_2:N:0:TCTGCAAG+GCTGCACT  
AAAAACTCCATTGTATAGTTCAAGGAGTACTTAATTCAATAGCTTTAGTATTATTTACTATCGCCTTT  
ATTGAAAATTGTATAAGAGTTAATTGCTTACACAAAAGTGACGCGCA  
+  
FFFFFFFFFFFFFFFFFFFFFFFF,F,FFFFFFFFFFFFFFFF,FFFFF:FF::FF:FFFF,:F::FF:  
,:FF,:FFFFFFFFFFFFFFFF::FF,FF:FFFFFF:F,,F,:FF::FFF  
@A00721:190:HGJW7DSXY:4:2512:27507:9518\_2:N:0:TCTGCAAG+GCTGCACT  
GCTCCAACCTGGCACGCCAGACGTAGGGTCAAACCTACTACCGCCGGTCGGCAGATCGGCACCACTGGT  
CTCTACGTTACAGGACCCGCTGTGCAGAATAACCTTCCCAAATCTAGA  
+

FFFFFFFFFFF,F:FFF:FFF:FFFFFFFFFFFFFFFFFFFFFFFF:  
FFFF:FFFFFFFFFF:FFFFFFFFFF,FFFFFFFFFFFF:FFFF  
@A00721:190:HGW7DSXY:4:2611:3061:11710\_1:N:0:TCTGCAAG+GCTGCACT  
AAAGGAAACGGGCTGTTGCCAGAGGAAAGCAGCGACCACCGAGGTGCTCGTAACATTGACGGCAGT  
CCCGTCATCTCTGTGGGAAGTACCTCAGTCAAAGTACATTACCACTCCCATAACCAAT  
CAA  
+  
FFFFFF:FFFFFF:FFF:FFFFFFFFFFFFFFFFFFFFFFFFFFFFFFFF  
FFFFFFFFFFFFFFFFFFFFFFFFFFFFFFFFFFFFFFFFFFFFFFFF  
F:F  
@A00721:190:HGW7DSXY:4:2323:7473:22764\_2:N:0:TCTGCAAG+GCTGCACT  
TATACAGTTCGGCCATTTCAAGAGTGGTCAATACGTGCTGGGAGGTACTGAAGCCTTCCCCTCCGCTG  
GCACGAAGAAGACTCCAAGCCAATCAATAGTTCTTGACCAGAATG  
+  
FFFFFFFFFFFFFFFFFFFFFFFFFFFFFFFFFFFFFFFFFFFFFFFF  
FFFFFFFFFFFFFFFFFFFFFFFFFFFFFFFFFFFFFFFF  
@A00721:190:HGW7DSXY:4:2378:25970:31970\_1:N:0:TCTGCAAG+GCTGCACT  
GACGTGTGCTCTCCGATCTGGAAGAGGGGAAATGTCCCCAAAAGTGAAGAATAAAGGGAAAGGTC  
CATCAGGACCTAAGAAGGGGAAATTACCCCTAATTCTGAAGGAAGATCTCCCACCATCTGGGGTTGG  
AAT  
+  
FFFFFFFFFFFFFFFFFFFFFFFFFFFFFFFFFFFF:FFFFFFFFFFFFFFFF  
FF:FFFFFFFFFFFFFFFFFFFFFFFFFFFFFFFFFFFFFFFF  
FFF  
@A00721:190:HGW7DSXY:4:2113:18900:9674\_2:N:0:TCTGCAAG+GCTGCACT  
ACGGGCCAAAGAGGCCGCTGCTACGAAGTCGCTGAAGGCGGCTTGGGTCTTAAGGGTAGCTGTAAAG  
TTGCGCCTGCCGACCCCATCTTTGAGACCAAGACTCTCTACAGTAGGT  
+  
FFFFFFFFFFFFFFFFFFFFFFFFFFFFFFFFFFFFFFFFFFFF:F  
FFFFFFFFFFFFFFFFFFFFFFFFFFFFFFFFFFFFFFFF  
@A00721:190:HGW7DSXY:4:2121:31024:24878\_2:N:0:TCTGCAAG+GCTGCACT  
AAATCTGTTGAATTCGTCACTGAGGACGAAGGTGAGAGGACTTTTCGCTACTGGCGACAACTGAGAG  
CACTCGCTGGGGAAGAGAATTGCGTGGGTGAAGGCCGACGCTTCGA  
+  
FFFFFFFFFFFFFFFFFFFFFFFFFFFFFFFFFFFFFFFFFFFFFFFF  
FFFFFFFFFFFFFFFFFFFFFFFFFFFF:FFFFFFFF:FFFFFFF  
@A00721:190:HGW7DSXY:4:2304:6117:29966\_1:N:0:TCTGCAAG+GCTGCACT  
GTCAACGGCGTTTGGAGGATTTTATCCGCGCTTAAGTATGGGGCGAAGATCCCCTATGGAGTCTTGAA  
GGACTTAGGTTGGCATATTTATGCCGACGATAATAAGCATGTCACCCTTAAGCACCGAGGTAAGCTCG  
GGA  
+  
FFFFFFF:FFFFFFFFFFFFFFFFFFFFFFFFFFFFFFFFFFFFFFFF  
FFFFFFFFFFFFFFFFFFFFFFFFFFFFFFFFFFFFFFFFFFFFFFFF  
FFF  
@A00721:190:HGW7DSXY:4:2332:4246:2801\_1:N:0:TCTGCAAG+GCTGCACT  
CACTATTTTTGCCAGAAATGCGGGCTTTCTGACTGATGAGGTTAAAACTCTTGCTCCTTCTGTGGGTG  
AGGGTTTTTGTATATTCACTGGTTCTGGGAGGCTGCTTCTCCATAATTACAACCTCTCTTTAGAG  
AGC  
+  
FFFFFFFFFFFFFFFFFFFFFFFFFFFFFFFFFFFFFFFFFFFFFFFF  
FFFFFFFFFFFFFFFFFFFFFFFFFFFFFFFFFFFFFFFFFFFFFFFF  
FFF  
@A00721:190:HGW7DSXY:4:2262:21649:30812\_1:N:0:TCTGCAAG+GCTGCACT  
TCCACATATGGTAGACGTTGTCACACTTTTCTTGAAAATTTTCTTTCTCCGTCATTGGGGATTT

CGATGTGAGAAGGTGGAAGGTGTCAAGGGTCTTCTTCATGCTGATCTTTCAGGACCTAATCACATCAT  
GAT

+

FFFFFFFFFFFFFFFFFFFFFFFFFFFFFFFFFFFFFFFFFFFFFFFFFFFFFFFFFFFFFFFFFFFFFFFF  
FFFFFFFFFFFFFFFFFFFFFFFFFFFFFFFFFFFFFFFFFFFFFFFFFFFFFFFFFFFFFFFFFFFFFFFF  
FFF

@A00721:190:HGJW7DSXY:4:2541:31937:2503\_2:N:0:TCTGCAAG+GCTGCACT  
ATCGAGTTGGAGGGAGGAAGTTCTCCGAAATTAAAGACGGGGGATTAAGAGTCCAGCTGTAAGTGT  
ATTTGAGAGAGGGGAGCTCTGAAAAGGAACTTCGTGAGAAAGATGAGG

+

FFFFFFFFFFFFFFFFFFFFFFFFFFFFFFFFFFFFFFFFFFFFFFFFFFFFFFFFFFFFFFFFFFFFFFFF  
FFFFFFFFFFFFFFFFFFFFFFFFFFFFFFFFFFFFFFFFFFFFFFFFFFFFFFFFFFFFFFFFFFFFFFFF

@A00721:190:HGJW7DSXY:4:2218:29243:15280\_2:N:0:TCTGCAAG+GCTGCACT  
GTTTGAGGAAGGCTCTAGAGAAGATCTCACCACCTGGAGAAGGCAAGTGGAGAGTCCAGAAGTTGATG  
AAGAAGGATTATTTGAAGCAGGGGTTACCACTTCCTAAGGTGGATGAG

+

FFFFFFFFFFFFFFFFFFFFFFFFFFFFFFFFFFFFFFFFFFFFFFFFFFFFFFFFFFFFFFFFFFFFFFFF  
FFFFFFFFFFFFFFFFFFFFFFFFFFFFFFFFFFFFFFFFFFFFFFFFFFFFFFFFFFFFFFFFFFFFFFFF

@A00721:190:HGJW7DSXY:4:1109:17861:28698\_2:N:0:TCTGCAAG+GCTGCACT  
ATCTTGAGGACGTACATTTAAAGTGGCAGAAATTCGGTAACTTACCATATTGTTCTTCCGGGAAGTTG  
TGGGATTTAACTTTGACTCAACTACTCCGATCAGATCCGGATGGTTTG

+

FFF:FFFFFFFF:FF:FFFFFFFFFFFFFFFF, :FF:FFFFFFFFFFFFFFFF,FFFFFFFFFFFFFFFF  
FFFFFFFF:FFFFFFFFFFFFFFFFFFFFFFFF:FF:FFF:FFFFFFFF: :FFF, F

@A00721:190:HGJW7DSXY:4:1402:9878:29434\_1:N:0:TCTGCAAG+GCTGCACT  
CTCTTCCGATCTGTGAAAAATATGCAGGTCAAAGATTCTGTAGCTCTGAGGGCGGTTGAGGGAGCCGT  
TTTGGCCGACTTTAACTATTCTAAGAGTCTTTATGATTCAAAACCTATCGTTGTCGTACCTTACAAGG  
TTG

+

FFFFFFFFFFFFFFFFFFFFFFFFFFFFFFFFFFFFFFFFFFFFFFFFFFFFFFFFFFFFFFFFFFFFFFFF  
FFFFFFFFFFFFFFFFFFFFFFFFFFFFFFFFFFFFFFFFFFFFFFFFFFFFFFFFFFFFFFFFFFFFFFFF  
FFF

@A00721:190:HGJW7DSXY:4:1178:17833:32503\_2:N:0:TCTGCAAG+GCTGCACT  
GCGGTTGAAGTTCACCCATTCTATCTTGAATGCTCACGCCGTCGCAGCCATATCGAGACTATGTTATA  
ATCACTTGTTAAAGTACAGATTTAGTGATTTAGATATTATTGATATTG

+

FFFFFFFFFFFFFFFFFFFFFFFFFFFFFFFFFFFFFFFFFFFFFFFFFFFFFFFFFFFFFFFFFFFFFFFF  
FFFFFFFFFFFFFFFFFFFFFFFFFFFFFFFFFFFFFFFFFFFFFFFFFFFFFFFFFFFFFFFFFFFFFFFF

@A00721:190:HGJW7DSXY:4:1108:17445:12727\_2:N:0:TCTGCAAG+GCTGCACT  
TCATATCCAAACTCCTTGAATGGAGTACATATTTGCAACCCTATTCTTGATGTGAAAGATGCATCGA  
GGTATACGTCTAGGAACATTGATTGGGAACGTACCTACTCACGAGACG

+

FFFFFFFFFFFFFFFFFFFFFFFFFFFFFFFFFFFFFFFFFFFFFFFFFFFFFFFFFFFFFFFFFFFFFFFF  
FFFFFFFFFFFFFFFFFFFFFFFFFFFFFFFFFFFFFFFFFFFFFFFFFFFFFFFFFFFFFFFFFFFFFFFF

@A00721:190:HGJW7DSXY:4:2635:9769:25238\_2:N:0:TCTGCAAG+GCTGCACT  
CGGAGGGAAGCAAAATGTTTCGTTCTGTTACAAGAACGCTTTGGATTGTGACCATAAAGCCTCAGTTG  
CGATAGCTGTAGAGGTATACGATATCTCTCTTGATGATGTAGCCACTA

+

FFFFFFFFFFFFFFFFFFFFFFFFFFFFFFFFFFFFFFFFFFFFFFFFFFFFFFFFFFFFFFFFFFFFFFFF  
FFFFFFFFFFFFFFFFFFFFFFFFFFFFFFFFFFFFFFFFFFFFFFFFFFFFFFFFFFFFFFFFFFFFFFFF

@A00721:190:HGJW7DSXY:4:2223:17219:14309\_2:N:0:TCTGCAAG+GCTGCACT  
TCATTTCTGTTAGTTTGTCCCGGCGAATTATTGGACACGATGAAAAATGACATACCCGTTCTGACC  
TTGGTATCGTTATCCGTCATGGAGATGATGCCGCATCACTTGATTACT

+

F:FFFFFFFFFFFFFFFFFFFFFFFFFFFFFFFFFFFFFFFFFFFFFFFFFFFFFFFFFFFFFFFF  
FFFFFFFFFFFFFFFFFFFFFFFFFFFFFFFF:FFFFF:FFFFFFFFFFFFFFFF  
@A00721:190:HGJW7DSXY:4:2225:31439:28948\_2:N:0:TCTGCAAG+GCTGCACT  
AGTTCCGAATAACTCGTAATAAATCTTTCTCTAGTGGACAATTCAGAATACCTATTTCCGTACCAAGA  
GCCACTGCCAATCTCATCGCTATACGCATACCTGATTGGAAGAAGCGA  
+  
FFFFFFFFFFFFFFFFFFFFFFFFFFFFFFFF:FFFFF:F:FFFFFFFFFFFFFFFFFFFFFFFFF:  
FFFFF:FFFFFFFFFFFFFFFFFFFFFFFF:FFFFF:FFFF:FFFFFFFF:  
@A00721:190:HGJW7DSXY:4:2308:11695:25222\_1:N:0:TCTGCAAG+GCTGCACT  
AAGGGCTATTCACTACGTATGGGGATCACTTCTTCGGTCAATGACAAAACCTTCGAATATGTTACGA  
CATGGCTTCGTAACAACAGTGCAGGATTGTCATCTCGGGGAAAGTGATTACCAAGATGTTTCATATA  
GAT  
+  
FFFFFFFFFFFFFFFF:FFFFFFFFFFFFFFFF:FFFFFFFFFFFFFFFFFFFFFFFFFFFFFFFF:FFF  
FFFFFFFFFFFFFFFFFFFFFFFFFFFFFFFFFFFFFFFFFFFFFFFFFFFFFFFFFFFFFFFFFFFFF  
FFF  
@A00721:190:HGJW7DSXY:4:2223:25201:33332\_1:N:0:TCTGCAAG+GCTGCACT  
AAGGTCGCAGCGATCTTACTCGTTATCGGAGCTAAGAAGAAGACTTTGGGTACACGTTATGCTCGCAA  
ACTTAACGTTAGTACCGGAGGTGATCTCTCTGCTTCTGCGTTACTGAGAGAAAAGATTGAGGACGCCT  
ACG  
+  
FFFFFFFFFFFFFFFFFFFFFFFFFFFFFFFFFFFFFFFFFFFFFFFFFFFFFFFFFFFFFFFFFFFFF  
FFFFFFFFFFFFFFFFFFFFFFFFFFFFFFFFFFFFFFFFFFFFFFFFFFFFFFFFFFFFFFFFFFFFF  
FFF  
@A00721:190:HGJW7DSXY:4:2511:18430:21668\_1:N:0:TCTGCAAG+GCTGCACT  
TCTTGAAACTACGGTCCTTATCAAGGAAAATGGTGAACCGGTCTCTAAATCTTTTGAGATTGAGAAGA  
TTGAAGAACACGTCAAGAAGTCGCTCGGCGTTGTTCTTGAAAACCAAGTTAAGAAGGAGGCTGATCAT  
GGA  
+  
FFFFFFFFFFFFFFFF:FFFFFFFFFFFFFFFFFFFFFFFFFFFFFFFFFFFFFFFF,FFFFFFFFFFFFFFFF  
FFFFFFFFFFFFFFFFFFFFFFFFFFFFFFFFFFFFFFFFFFFFFFFFFFFFFFFFFFFFFFFFFFFFF:FFFFF  
FFF  
@A00721:190:HGJW7DSXY:4:2438:6849:32831\_2:N:0:TCTGCAAG+GCTGCACT  
TCAAACCTTCGAGGTTTCAGCTACGAGAGGTGATCCCGGATGTGGATTGAAGGCTGGCTCTAAGGGAGAC  
TCCTTCTTTTTGAATGTTGTAAAGAATTGGGTTGAGAAGTGTGCTTTA  
+  
FFFFFFFFFFFFFFFFFFFFFFFFFFFFFFFFFFFFFFFFFFFFFFFFFFFFFFFFFFFFFFFFFFFFF  
FFFFFFFFF:FFFFFFFFFFFFFFFFFFFFFFFFFFFFFFFFFFFFF:FFFFF  
@A00721:190:HGJW7DSXY:4:1220:7943:10895\_1:N:0:TCTGCAAG+GCTGCACT  
TTTTCAAAAATGCGGATGGGTCTACTGATGTTTTCTACAGAGTGCAGTCGTTTCAACACTTATCACC  
ACTTTTGAAAGGAAAATAATTGGTGATGAAAATACGTATGTCGGTGGGGTTCTCAAGGCTCTCATCGC  
CAC  
+  
FFF,FFFFFFFFFFFFFFFFFFFFFFFFFFFFFFFFFFFFFFFFFFFFFFFFFFFFFFFFFFFFF:FF  
FFFFFFFFFFFFFFFFFFFFFFFFFFFFFFFFFFFFFFFFFFFFFFFFFFFFFFFFFFFFFFFFFFFFF  
FFF  
@A00721:190:HGJW7DSXY:4:1440:6705:29919\_2:N:0:TCTGCAAG+GCTGCACT  
ATTCTTAAAAGAAGTTTATTAATAAATTCAGAGTCTCTTGGAAGTCCAGGTAGCTAATGTTCTTGCAAT  
AGCCACAGACTTTCTGGGAAAAGAGACCTCTGTTGGTAGAGGAGTTGA  
+  
FFFFFFFFFFFFFFFFFFFFFFFFFFFF:F:FFFFFFFFF:FFFFFFFFFFFFFFFFFFFFFFFFFFFFF  
FFFFFFFFFFFFFFFFFFFFF:FFFFFFFFFFFFFFFFFFFFFFFFFFFFF: :  
@A00721:190:HGJW7DSXY:4:1119:31430:21574\_2:N:0:TCTGCAAG+GCTGCACT  
CAGATTCAATCTGGCATCACTGAACGTCTACAACGAGTTAGGGAGTGGCTAGGTTTTAAAGATCCTT

$+$ 

@A00721:190:HGJW7DSXY:4:2671:25283:8453\_1:N:0:TCTGCAAG+GCTGCACT

+

@A00721:190:HGJW7DSXY:4:1575:8214:16470\_2:N:0:TCTGCAAG+GCTGCACT

+

@A00721:190:HGJW7DSXY:4:1163:28393:28745 1:N:0:TCTGCAAG+GCTGCACT

+

@A00721:190:HGJW7DSXY:4:1457:8919:29904 1:N:0:TCTGCAAG+GCTGCACT

+

@A00721:190:HGJW7DSXY:4:2268:22128:25817 1:N:0:TCTGCAAG+GCTGCACT

 $+$ 

@A00721:190:HG1W7DSXY:4:2639:4698:3302 1:N:0:TCTGCAAG+GCTGCACT

+

@A00721:190:HG1W7DSXY:4:1148:14470:19132 1:N:0:TCTGCAAG+GCTGCACT

GTTCATCGCGGTATTTGTGAAATTAAGACAGACGTGAAAGTTATGATGAGTGATCGTATTAGAACAGC  
TGATTCTTATTGCATGAACGTCGCTGAGGTCAAACCTGTGGACGTTCTTTTCATCGACGAATTATTCA  
TGA

+  
FFFFFFFFFFFFFFFFFFFFFFFF:FFF:F,F,,:FFF::FFFF:FF:FF:FFFFFFFFFFFFFFFF:FFFFF:  
FFFFF:FFFFFFFFFFFFFF,FFFFFFFFFFFFFFFFFFFFFFFFFFFFFFFF,FFFFFFFF:FFF,FFFFFF  
:::  
@A00721:190:HGJW7DSXY:4:2631:2754:11115\_1:N:0:TCTGCAAG+GCTGCACT  
ATCTACTTAAGGCGGCTTATACCATAGGTTACGGTGATTCCAATCAAATCGGATTCATCAATCGTATT  
GATCTCCAAGTCGCAAACACTTCAACATCAACGACATCATTCTTGATGAGTGTCGTTCTTATCGAAG  
TCT  
+  
FFFFFFFFFFFFFFFFFFFFFFFF:FFFFFFFFFFFFFFFFFFFFFFFFFFFFFFFFFFFFFFFFFFFFFFFF  
FFFFFFFF:FFFFFFFFFFFFFFFFFFFFFFFFFFFFFFFFFFFFFFFFFFFFFFFFFFFFFFFFFFFFFFFF  
FFF  
@A00721:190:HGJW7DSXY:4:1527:19226:9173\_1:N:0:TCTGCAAG+GCTGCACT  
GCCCCGCCGACGTTTGTGCGCAACTCTCAGAGTTTACGGCAGAAAAATTTCTCCTGCTTGTAAATTCG  
AGAGAGGACACTATGGAAATTAGACCTATCAGATGTCTTGACGACTTCGAATTTGAGGACGGAGTTAA  
ATA  
+  
FFFFFFFFFFFFFF,FFFFFFFFFFFFFFFFFFFFFFFFFFFFFFFFFFFFFFFFFFFFFFFFFFFFFFFF  
FFFFFFFFFFFFFFFFFFFFFFFFFFFFFFFFFFFFFFFFFFFFFFFFFFFFFFFFFFFFFFFFFFFFFFFF  
FFF  
@A00721:190:HGJW7DSXY:4:1334:1217:33630\_2:N:0:TCTGCAAG+GCTGCACT  
ATGCTACTTGTGAGAGGATCAATCACAGTAAGGAAGTGTACGTTTAGCACGGGAGGTTGCAGATTCA  
ACCCCTTATATCGAGGCTATCGAGGACGATGAGTATCTTGAAGTTGTT  
+  
FFFFFFFFFFFFFFFFFFFFFFFFFFFFFFFFFFFFFFFFFFFFFFFFFFFFFFFFFFFFFFFFFFFFFFFF  
FFFFFFFFFFFFFFFFFFFFFFFFFFFFFFFFFFFFFFFF:FFFF:FFFFFFF  
@A00721:190:HGJW7DSXY:4:2543:24306:4539\_2:N:0:TCTGCAAG+GCTGCACT  
AGAGGACCACCTGGATCTTCTACTGTCTCTGCCTTCCAAGATTTCTTAGAAGAGGTTATTCCTGGAAC  
CACCTTAACGTCACCTCGGTAATCTTTCAGACGAATTAAGTACTAATGA  
+  
FFFFF::FFFF:FF:FFFFFFFFFFFFFFFFFFFFFFFFFFFFFFFF,F:FFF:,FFFFFFFFFFFFFF,FF:  
:FF:FFFF:FFF,FF:FFFFFFFF:FFF:,F,FFFFFFFF:FFF:FF  
@A00721:190:HGJW7DSXY:4:2321:25961:10974\_2:N:0:TCTGCAAG+GCTGCACT  
AAGGCTAATACCTTTATAGGTAAGAAGCCCTTGAGCCGCGTAGTCAGCGCGTTTAGCTGTATCATCA  
GTCAGAGTATACCCGATAGGGTACCGAGTCTCCAAGAGAATATTTATT  
+  
:FFFFFFFF:FFFFFFFFFFFFFFFFFFFFFFFF:FFFFFFFFFFFFFFFFFFFFFFFF:FFFFFFFFFFFFFF  
FFFFFFFFFFFFFFFFFFFFFFFF:FFFFFFFFFFFFFFFFFFFFFFFFFFFFFFFF  
@A00721:190:HGJW7DSXY:4:2127:28854:8124\_1:N:0:TCTGCAAG+GCTGCACT  
AATAGGGACGCTAGTATACTTCGTAAAGTCGACAGCGAAATGGTCAATATTGATAATTGGACCGACTA  
TATGACCTATTTAAGCTCATGGTGAAAAGGGAAGCTAAGGTTAACTTGATGCTTCAGCCTTTTCGA  
AGC  
+  
F:FFFFFFFF,FFFFFFFFFFFFFFFFFFFFFFFFFFFFFFFFFFFFFFFFFFFFFFFFFFFFFFFFFFFF  
FFFFFFFFFFFFFFFFFFFFFFFFFFFFFFFFFFFFFFFFFFFFFFFFFFFFFFFFFFFFFFFFFFFFFFFF  
FFF  
@A00721:190:HGJW7DSXY:4:2677:4481:17644\_2:N:0:TCTGCAAG+GCTGCACT  
GTTCTTGTGAGGAGAGTCAAACAGTGTCTTTTACCCAACATTTTTATGTATACAGAGATGACCAAGTGA  
CGATTTCTCCCGAAGCTCTTCTCTCTCTTAGGAGGTCATGATGACTA  
+  
FF:FFFFFFFFFFFFFFFF:FFFF,FFFFFFFF:FFFFFF:, ,FFFFFFFF:FF:FFFF:FFFFFF:F:  
FFFFF,F:F:FF:FF,FFFF,FFFFFFFFFFFFFF,F:FFFFFFFF,F  
@A00721:190:HGJW7DSXY:4:2558:9824:24580\_1:N:0:TCTGCAAG+GCTGCACT  
CAGGAGTATCCATAACGATTTGTCAATTTACCACCTTTGCTCAACGACGAAGTGAACGGCCAACACTT



TCTTTGGTAATTGTATGATCACTTTGATGATTTTATCACTTTATTATGACCTTGGAAGTTTTTCGGCT  
GTG

+

FFFFFFFFFFFFFFFFFFFFFFFFFFFFFFFFFFFFFFFFFFFFFFFFFFFFFFFFFFFFFFFFFFFFFFFF  
FFFFFFFFFFFFFFFFFFFFFFFFFFFFFFFFFFFFFFFFFFFFFFFFFFFFFFFFFFFFFFFFFFFFFFFF  
FFF

@A00721:190:HGJW7DSXY:4:2355:27977:33348\_2:N:0:TCTGCAAG+GCTGCACT  
GAGGGTCGTTATACCTATTCGGCTATCTGTGCTTTGAATTGTATAAGATCAAATTTTAAACGATTCCG  
AGAGGTTTATCCTGATGTGGAGGGAGTTCTTGAAGCATCCCGACCTTT

+

FFFFFFFF:FFFFFF:::F:FFFFFFFFFFFFFFFFFFFFFFFF:FFFFFF:FFFFFFFFFFFFFFFF  
FFFF,FFFF:FFFF:FFF:FFFFFFFFFFFF,F:FFF:FFFFFF

@A00721:190:HGJW7DSXY:4:1176:2700:25363\_1:N:0:TCTGCAAG+GCTGCACT  
AGACAGGTGATATTGTTGAGCGAGAGCGACCAAGATCTAAATTCGTAACGGTGCGTGCGCTTTATT  
TAAAAAGCTCCCTCCTCTCGCAAGTTTGATCTGATACTTATCACGAAAGGACTTGAGTCTTTTGATC  
AGT

+

FFFFFFFFFFFFFFFFFFFFFFFFFFFFFFFFFFFFFFFFFFFFFFFFFFFFFFFFFFFFFFFFFFFFFFFF  
FFFFFFFFFFFFFFFFFFFFFFFFFFFFFFFFFFFFFFFFFFFFFFFFFFFFFFFFFFFFFFFFFFFFFFFF  
FFF

@A00721:190:HGJW7DSXY:4:2310:12933:19319\_1:N:0:TCTGCAAG+GCTGCACT  
ATTTTTCCTCATCAGCTTGTGTTTTACCTAATCTGTGTTTTACGATAACAACATCAGTTGATTAAAG  
ACTCTTCCGAAAGGCGAACTTTGGGAATTTGAAGCTCAGGGTGAAGCACACGTTTGACCGTGACGAA  
CTG

+

FFFFFFFFFFFFFFFFFFFFFFFFFFFFFFFFFFFFFFFFFFFFFFFFFFFFFFFFFFFFFFFFFFFFFFFF  
FFFFFFFFFFFFFFFFFFFFFFFFFFFFFFFFFFFFFFFFFFFFFFFFFFFFFFFFFFFFFFFFFFFF:FFFFFFFF  
FFF

@A00721:190:HGJW7DSXY:4:2542:10592:35869\_2:N:0:TCTGCAAG+GCTGCACT  
ATCACTCATTTTAGTGAGATTATTAACGCACTAAACGTTCTCGACAACAGCAGGGGTTTTCGAA  
TAGTGATAGCCACCCGCTTACAGAGGGGCAGCAGCATGACCATAATT

+

FFFFFFFFFFFFFFFFFFFFFFFFFFFFFFFFFFFFFFFFFFFFFFFFFFFFFFFFFFFFFFFFFFFFFFFF,  
FFFFFFFFFFFFFFFFFFFFFFFF:FFFFFFFFFFFFFFFFFFFFFFFF

@A00721:190:HGJW7DSXY:4:2205:23276:18098\_2:N:0:TCTGCAAG+GCTGCACT  
CTGTCTCGCTCTTCGAATGAAGTTTAAATGCTTAACAACAATGATAGTGAATTTATACCTACAATCA  
TTGGTTTTCTAATAATGATGACACTATTGTTTATGGATATGATGCTA

+

FFFFFFFFFFFFFFFF:FFFFFFFF:FFFFFFFFFFFFFFFF:FFFFFFFFFFFFFFFFFFFFFFFF  
FFFFFFFFFFFFFFFFFFFFFFFFFFFF,FFFFFFFFFFFFFFFF

@A00721:190:HGJW7DSXY:4:2603:21549:28792\_1:N:0:TCTGCAAG+GCTGCACT  
AGACGTGCTAAATTAACCAATTGTACGATGTCGTCTGTCTCGCGATCACTTTTACTAAGAATTGG  
TCCTACTTTTGGACAAGGCCAACTTCGTAATCTTCATGAGATCGTTTCTTTCTTTATCTCTTTGGTTG  
TTA

+

FFFFFFFFFFFFFFFFFFFFFFFFFFFFFFFFFFFFFFFFFFFFFFFFFFFFFFFFFFFFFFFFFFFF:FFFFFF  
FFFFFFFFFFFFFFFFFFFFFFFFFFFFFFFFFFFFFFFFFFFFFFFFFFFFFFFFFFFFFFFFFFFF,FFFF  
FFF

@A00721:190:HGJW7DSXY:4:2414:8522:15843\_2:N:0:TCTGCAAG+GCTGCACT  
GAGTGAAAGGCTTCAATTGTAGTGGTTTGGTCGTTTCAGTACCCAGTCAGTATACCTCTACGCAAAGA  
TATTTTCATGAAAACACAGAGGAACGTACCGGATTACCTGTCTTTCAT

+

FFFFFFFFFFFFFFFFFFFFFFFFFFFFFFFFFFFFFFFFFFFFFFFFFFFFFFFFFFFFFFFFFFFF  
FFFFFFFFFFFF:FFFFFFFFFFFFFFFFFFFFFFFFFFFFFFFF

@A00721:190:HGJW7DSXY:4:2669:19967:13620\_1:N:0:TCTGCAAG+GCTGCACT  
GTTGGATGTCAAGAAGGGTTCAGAATGGGATTCTACGTAGTTTATGACTTTGGTGGTGGTACTTTTCG  
ATACTTCTATCGTCTTACGTTACGGTAATTACTATAGTGTTATTTATTCTGGTGGTGGTATGATAATCTT  
GGA

+

FFFFFFFFFFFFFFFFFFFFFFFFFFFFFFFFFFFFFFFFFFFFFFFFFFFFFFFFFFFFFFFFFFFFFFFF  
FFFFFFFFFFFFFFFFFFFFFFFFFFFFFFFFFFFFFFFFFFFFFFFFFFFFFFFFFFFFFFFFFFFFFFFF  
FFF

@A00721:190:HGJW7DSXY:4:1257:23131:18724\_1:N:0:TCTGCAAG+GCTGCACT  
GATGAAGCTATAAGAGCGTTCTCATTACGGCGCACTTCTTTACCCGCCACCACACAACCTTTCAGTTTC  
ACAACGAAGGAGGAGGTTTCTGTTACTGGAACCCCTCGTCAATACTTTTCAATAATATACGTCTTG  
AAC

+

FFFFFFFFFFFFFFFFFFFFFFFFFFFFFFFFFFFFFFFFFFFFFFFFFFFFFFFFFFFFFFFFFFFFFFFF  
FFFFFFFFFFFFFFFFFFFFFFFFFFFFFFFFFFFFFFFFFFFFFFFFFFFFFFFFFFFFFFFFFFFFFFFF  
FFF

@A00721:190:HGJW7DSXY:4:1369:23276:11929\_2:N:0:TCTGCAAG+GCTGCACT  
TGAACAAAGTTATCAAAGATAGTGGCATTCAAGGCAAACCTACCCTGATTCCGGCCGGTGGTAGCTCA  
TTTCTACCAGGGGCTATTACTCTTGCTGAAACAGCTATTAAAGCTGTT

+

FFFFFFFFFFFFFFFFFFFFFFFFFFFFFFFFFFFFFFFFFFFFFFFFFFFFFFFFFFFFFFFFFFFFFFFF  
FFFFF:FFFFFFFFF,FFFFFFFFFFFFFFFFFFFFFFFFFFFFFFFFFFFFFFFFFFFFFFFFFFFF

@A00721:190:HGJW7DSXY:4:1519:2926:28698\_1:N:0:TCTGCAAG+GCTGCACT  
AGGATGTGCACTCTTTTCTGCTACTTTAACGGAGCGTAGTGACTCTTCGTCGATTGTATCAACAGTA  
ACATTACTTCTAATAAAGGTCTCTATCAAGCTCGTATTATCGTCGCTGCTGGATCTGCGTTACCGTTG  
AAG

+

FFFFFF:FFFFFFF:FFFFFFFFF:F::FFFFFFFFFFFFFFFFFFFFFFFFFFFFFFFFFFFFFFFF  
FFFFFFFF:FFFF:FFFFFFFFFFFFFFFFFFFFFFFFFFFFFFFFFFFFFFFFFFFFFFFFFFFFFFFF  
FFF

@A00721:190:HGJW7DSXY:4:2126:11731:12446\_2:N:0:TCTGCAAG+GCTGCACT  
GTAATTATGAAGACTGTGATTTATCTTTCACCTCTGGCCTTGATGAGGGTGTCTAATCGTAACATT  
AATAATTTCAATCTTCTTAAAAAGAAGATAGAGAGTCATACTTTGGGC

+

FFF:FFFFFFFFFFF,FFFFFFFFF::FFFFF:FFFFFFFFF:FFFFFFFFFFFFF:FFFFFFFFFFFF:F  
FFFFFFFFFFFFFFFFFFFFFFFFFFFFFFFFFFFFFFFFFFFFFFFFFFFFF,FFFFFFFFFFF

@A00721:190:HGJW7DSXY:4:1204:6325:4085\_1:N:0:TCTGCAAG+GCTGCACT  
CAAAGAGAATATCTAAATATTTACAAATCTTACCCTATCTACGAACCTAAAGTTCTGAAGACGTT  
GCTTGTCGCTTCTCTTTAATGGCACTACCTCGGTACAATCTTACTTGGAACGAAGGCGACCTGTTC  
CGG

+

FFF:FFFFFFFFFFFFFFFFFFFFFFFFFFFFFFFFFFFFFFFFFFFFFFFFFFFF:FF,FFFFFFFFFFFFFFFF  
FFFFFFFFFFFFFFFFFFFFFFFFFFFFFFFFFFFFFFFFFFFFFFFFFFFFFFFFFFFFFFFFFFFFFFFF  
FFF

@A00721:190:HGJW7DSXY:4:2212:24352:3897\_1:N:0:TCTGCAAG+GCTGCACT  
TCTGTCTATATTAGGTGAAGCGAAATACGATTTCAACGTCAACGTTACCGAGTTTCGTTTCGTACC  
TTGATGCTGACTTTCGTCAATATGATTTGATCTGGTTGCTCAATTCTAAGCGTGTTCCGCTTAGTGCG  
AGG

+

FFFFFFFFFFFFFFFFFFFFFFFFFFFFFFFFFFFFFFFFFFFFFFFFFFFFFFFFFFFFFFFFFFFFFFFF  
FFFFFFFFFFFFFFFFFFFFFFFFFFFFFFFFFFFFFFFFFFFFFFFFFFFFFFFFFFFFFFFFFFFFFFFF  
FFF

@A00721:190:HGJW7DSXY:4:2360:7789:7341\_2:N:0:TCTGCAAG+GCTGCACT  
TCATGAATTTTCAGAGGATGAAAAATTTTCTTCCTTGATTTTAATATAAAGAATCTTTACCAGGACT

CCTACTACAGGAGGCAGTCTTCTGATCGTAAGAAGTTTATAAGGAACA  
+  
FFFFFFFFFFFFFFFFFFFFFFFFFFFFFFFFFFFFFFFFFFFFFFFFFFFFFFFFFFFFFFFFFFFFFFFF  
FFFFFFFFFFFFFFFFFFFFFFFF:FFFF:FFFFFFFFFFFFFFFFFFFFFFFF  
@A00721:190:HGJW7DSXY:4:2269:24288:2503\_2:N:0:TCTGCAAG+GCTGCACT  
AAGTGGTAATACTGTCTTTCCAAGCTTACCTGTATCTTCAATGAAATTGGACTCTTCGATAGGGGACA  
TTTTATCGTGGGCTTTCCGTAAAGGAAGATCTGTTATCGACGGTTTAT  
+  
FFFFFFFFFFFFFFFFFFFFFFFFFFFFFFFFFFFFFFFFFFFFFFFFFFFFFFFFFFFFFFFFFFFFFFFF  
FFFFFFFFFFFFFFFFFFFFFFFF:F:FFFFFFFFFFFFFFFFFFFFFFFFFFFFFFFF  
@A00721:190:HGJW7DSXY:4:1673:4698:33301\_1:N:0:TCTGCAAG+GCTGCACT  
TAGAGTAGAATTCCTGAAGAGTCCTTCCGTAAACCACTTCTTGACAATTTTCTTCAATCCTTCGATAA  
TAGTTAAATCTAGGATTATGTCTGTGTTGAAAGACTTTCTACCGATAAGGGTCACTAGTCTTACACAA  
TTA  
+  
FFFFFFFFFFFFFFFFFFFFFFFFFFFFFFFFFFFFFFFFFFFFFFFFFFFFFFFFFFFFFFFFFFFFFFFF:  
FFFFFFFFFFFFFFFFFFFF,FFFFFFFFFFFFFFFFFFFFFFFFFFFFFFFFFFFFFFFFFFFFFFFFFFFFF  
FFF  
@A00721:190:HGJW7DSXY:4:1548:16251:31735\_2:N:0:TCTGCAAG+GCTGCACT  
GACTGATTATCTAAAGATTGAAGGAAAATTTTATCCTCGTTTAACTTACTTAGACTTTCTACGATAC  
AAATGATAACTTCTAATTTACGTTTGCTACTCAGAGCTGGTCCTCTCA  
+  
FF:F:,FFFFFFFFF:FFF:FF::F,F,FF,FFFFFFFF:FF:FFFF:FFFF:FFFFFFFF:F:FFFF  
FFFF:FFFFFFFFFFFF:FFFFFFFFFF,FFF,FFFF,FFFFFF:FF:FF  
@A00721:190:HGJW7DSXY:4:1504:24017:2722\_2:N:0:TCTGCAAG+GCTGCACT  
AGTCCCGCATTTGATAATAATGACGAGACTTTCGTCAATAATCGCTGCATATTACGGATTACACGGTA  
CCAGCGCATCTCGTGTGAGCCTCGACCCGATTATATGGTATTAACCT  
+  
FFFFFFFFFFFF:FFFFFFFFFFFFFFFFFFFFFFFFFFFFFFFFFFFFFFFFFFFFFFFFFFFFFFFFFFFF  
FF:FFFFFFFFFFFFFFFFFFFFFFFFFFFFFFFFFFFFFFFFFFFFFFFF:FFFFFF  
@A00721:190:HGJW7DSXY:4:1238:15103:4445\_2:N:0:TCTGCAAG+GCTGCACT  
TGTTCTCTGATCATTTTGACAATCTCTTCTTATAATAATAATAATAATATTACTAATGGCAAATA  
GTGGAAAGGCTCCAGTCAACACTAGTTCGAGTGCTGCTTTTGATTACG  
+  
FFFFFFFFFFFFFFFFFFFFFFFFFFFFFFFFFFFFFFFFFFFFFFFFFFFFFFFFFFFFFFFFFFFF,FFFFFFFFFFFF  
FFFFFFFFFFFF:FFFFFFFFFFFF,FFFFFFFFFFFFFFFFFFFF:FFFFFF  
@A00721:190:HGJW7DSXY:4:1352:21151:25097\_2:N:0:TCTGCAAG+GCTGCACT  
ATAGGTGAAGGGATAGTTTTTACCTCGACCAACATTAAGGCGCGCGGACTAATCTTAAAGCTTCACC  
CAAAATGAAGGACACTTCGAACTGAATAATGATGCACAGATCGGAAG  
+  
FFFFFFFFFFFFFFFFFFFFFFFFFFFFFFFFFFFFFFFFFFFFFFFFFFFFFFFFFFFFFFFFFFFF:FFFFFF  
FFFFFFFFFFFFFFFFFFFFFFFFFFFFFFFFFFFFFFFFFFFFFFFF:FFFFFFFFFFFFFFFF  
@A00721:190:HGJW7DSXY:4:1232:32497:21950\_2:N:0:TCTGCAAG+GCTGCACT  
AGGATATTCGCCATTGTGGTACGAATTGGTCCAACATTTACCACCAAATTCTTTTGATACAACTCTAG  
CCTTCAAGTGGGGTATGCCTGCGGAATACGCTTGCTATTCACCAGATT  
+  
FFFFFFFFFFFFFFFFFFFFFFFFFFFFFFFFFFFFFFFFFFFFFFFFFFFFFFFFFFFFFFFFFFFF  
FFFFFF:FFFFFFFFFFFFFFFFFFFFFFFFFFFFFFFFFFFFFFFFFFFF::FFF:F  
@A00721:190:HGJW7DSXY:4:1117:27516:3740\_2:N:0:TCTGCAAG+GCTGCACT  
TGCTATGTCAGAAGAAGCTATTCAAGCTTGTCGTTTAAAGACTGCAGAGGCTGTCAAACAAGCCCAGA  
CTCAAGGAGTCCAATCAAAGGTTTTGAATTTAGCTCAACTGGGGAGAC  
+  
FFF::FFF,FFFFFFFFFF,FFFFFFFFFFFF:FFF,FFFF:FFFFFFFFFFFF:FFFFFF:F:FFFF,FF  
FFFFFFFF:FFFFFF:F::FFFFFFFFFFFF:FFFFFF:FF:FFFF:FFF



+

@A00721:190:HGJW7DSXY:4:1220:20889:10582\_1:N:0:TCTGCAAG+GCTGCACT  
TAAAAATACTTCAAGTACCTGAACCTTTACATTTTTAATGGTATGGTATAATGTGTCTTACAAATAGAA  
CCTTCACTCTCGGTAATGAGAGTGTATTCCTTAATATTCTAGTAACCGCTATGTGGGCATTACTAGGA  
TTT

+

@A00721:190:HGJW7DSXY:4:2509:24749:11412\_2:N:0:TCTGCAAG+GCTGCACT  
AAAACTCCATTGTATAGTTCAAGGAGTACTTAATTC AATAGCTTTAGTATTATTTACTATCGCCTTT  
ATTGAAAATTGTATAAGAGTTAATTGCTTACACAAAAGTGACGCGCGA

+

@A00721:190:HGJW7DSXY:4:1209:26169:14904\_2:N:0:TCTGCAAG+GCTGCACT  
AACTGGCACGCCAGACGTAGGGTCAAACCTACTACCGCCGGTCGGCAGATCGGCACCACTGGTCTCTA  
CGTTCAGGGACCCGCTGTGCAGAATAACCTTCCCAAATCTAGATCTGC

+

@A00721:190:HGJW7DSXY:4:2469:15971:14622\_1:N:0:TCTGCAAG+GCTGCACT  
GCTGTTGCCAGAGGAAAGCAGCGACCAACCGAGGTCGCTCGTAACATTGATGGCAGTCCCGTCATCTC  
TGTGGGAAGTGAAGCAGTACCTCAGTCAAAAGTCACATTCACCACTCCCATGCCAATCAATGATGTGA  
CT

 $+$ 

@A00721:190:HGJW7DSXY:4:2656:28537:27336\_2:N:0:TCTGCAAG+GCTGCACT  
TCAATACGTCGTGGGAGGTACTGAAGCCTTCCCCTCCGCTGGCACGAAGAACTCCCAAGCCAATCA  
ATAGTTCTTCTGACCAGAATGAAAAGGGGTTTACCAGGGTAGTCTCTA

+

@A00721:190:HGJW7DSXY:4:2167:12671:31986\_1:N:0:TCTGCAAG+GCTGCACT  
AGAGGGGAAATGTCCCCAAACTGAGAAGAATAAAGGGAAAGGTCCATCAGGACCTAAGAAGGGGAAA  
TTACCCCTAATTCTGAAGGAAGATCTCCCACCATCTGGGGTTGGGAATAAGAAATCTGCACGGGCCAA  
AGA

+

@A00721:190:HGJW7DSXY:4:1319:13856:28557\_1:N:0:TCTGCAAG+GCTGCACT  
CGAAGTCGCTGAAGGCGGCTTGGGTCATTAAGGGTAGCTGTAAAGTTGCGCCTGCCGACCCCATCTTT  
GAGACCAAGACTCTCTACAGTAGGTTCTGTGCCTACTATGAGCAAATCTGTTGAATTCGTCACTGAGGA  
CGA

+

[illegible]

+

@A00721:190:HGJW7DSXY:4:1369:27606:2926\_2:N:0:TCTGCAAG+GCTGCACT  
GCGAAGATCCCCTATGGAGTCTTGAAGGACTTAGGTTGGCATATTTATGCCGACGATAATAAGCATGT  
CACCCTTAAGCACCGAGGTAAGCTCGGGACTTACAAGAGAGAGTGTGA

+

@A00721:190:HGJW7DSXY:4:2447:24053:3724\_1:N:0:TCTGCAAG+GCTGCACT  
CACTATTTTTGCCAGAATGCGGGCTTTCTGACTGATGAGGTTAAACTCTTGCTCCTTCTGTGGGTG  
AGGGTTTTTGTATATTCACCTGGTTCTGGGAGGCTGCTTTCCTCCATAATTACAACCTCTCTTTAGAG  
AGC

+

@A00721:190:HGJW7DSXY:4:2630:10728:4664\_1:N:0:TCTGCAAG+GCTGCACT  
TCCACATATGGTAGACGTTGTCACACTTTTCTTGAAAAATTTTTCCTTTCCTCCGTCATTGGGGATTT  
CGATGTGAGAAGGTGGAAGGTGTCAAGGGTCTTCTTCATGCTGATCTTTCAGGACCTAATCACATCAT  
GAT

+

@A00721:190:HGJW7DSXY:4:1350:17164:18161\_2:N:0:TCTGCAAG+GCTGCACT  
GAGTTGGAGGGAGGAAGTTCTCCGAAATTAAGACGGGGGGATTAAGAGTCCAGCTGTAAGTGTCTATT  
TCAGAGAGGGGAGCTCTGAAAAGGAACTTCGTCTAGAAGATGAGGAAG

 $+$ 

@A00721:190:HGJW7DSXY:4:2264:16893:30436\_2:N:0:TCTGCAAG+GCTGCACT  
GTTTGAGGAAGGCTCTAGAGAAGATCTCACCACTGGAGAAGGCAAGTGGAGAGTCCAGAAGTTGATG  
AAGAAGGATTATTTGAAGCAGGGGTTACCACTTCCTAAGGTGGATGAG

+

@A00721:190:HGJW7DSXY:4:1151:4951:30264\_2:N:0:TCTGCAAG+GCTGCACT  
ATCTTGAGGACGTACATTTAACGTGGCAGAATTCGGTAACTTACCATATTGTTCTTCCGGGAAGTTG  
TGGGATTTAACTTTGACTCAACTACTCCGATCAGATCCGGATGGTTTG

+

@A00721:190:HGJW7DSXY:4:2171:9417:8061\_1:N:0:TCTGCAAG+GCTGCACT  
CTCTTCCGATCTGTGAAAAATATGCAGGTCAAAGATTCTGTAGCTCTGAGGGCGGTTGAGGGAGCCGT  
TTTGCCGACTTTAACTATTCTAAGAGTCTTTATGATTCAAAACCTATCGTTGTCGTACCTTACAAGG  
TTG

+

FFFFFFFFFFFFFFFF:FFFFFFFF:FFFFFFFFFFFFFFFFFFFFFFFF:FFFFFFFFFFFFFFFFFFFFFFFFFFFFFFFF:FFF  
FFF

@A00721:190:HGJW7DSXY:4:1268:24840:23844\_2:N:0:TCTGCAAG+GCTGCACT  
GCGGTTGAAGTTCACCCATTCTATCTTGAATGCTCACGCCGTCGCAGCCATATCGAGACTATGTTATA  
ATCACTTGTTAAAGTACAGATTTAGTGATTTAGATATTATTGATATTG

+

FFFFFFFFFFFFFFFFFFFFFFFFFFFFFFFFFFFFFFFF:FFFFFFFFFFFFFFFFFFFFFFFFFFFFFFFFFFFFFFFF  
FFFFFFFFFFFFFFFFFFFFFFFFFFFFFFFFFFFFFFFF:FFFFFFFFFFFFFFFF,

@A00721:190:HGJW7DSXY:4:1130:1063:10410\_2:N:0:TCTGCAAG+GCTGCACT  
TCATATCCAAACTCCTTGAATGGAGTACATATTTGCAACCCTATTCTTGATGTGAAAGATGCATCGA  
GGTATACGTCTAGGAACATTGATTGGGAACGTACCTACTCACGAGACG

+

FFFFFFFFF:,FFFFFFFFFFFFFFFFFFFFFFFFFFFFFFFFFFFFFFFF:FFFFFFFFFFFFFFFFFFFFFFFF  
FFFFFFFFFFFFFFFFFFFFFFFFFFFFFFFFFFFFFFFF:FFFFFF:FFFFFFFFFFFF

@A00721:190:HGJW7DSXY:4:2517:11008:35180\_2:N:0:TCTGCAAG+GCTGCACT  
GTTCTGTTACAAGAACGCTTTGGATTGTGACCATAAAGCCTCAGTTGCGATAGCTGTAGAGGTATACG  
ATATCTCTCTTGATGATGATAGCCACTATAATGCTTAAGAGAGAGATTG

+

FFFFFFFFFFFFFFFFFFFFFFFFFFFFFFFFFFFFFFFFFFFFFFFFFFFFFFFFFFFFFFFFFFFFFFFFFFFFFFFF  
FFFFFFFFFFFFFFFFFFFFFFFFFFFFFFFFFFFFFFFFFFFFFFFFFFFFFFFFFFFFFFFFFFFFFFFF

@A00721:190:HGJW7DSXY:4:1167:7943:33129\_1:N:0:TCTGCAAG+GCTGCACT  
GGAGATGATGGCGCATCACTTGATTACTATATGCCCGAAGGATTGGGTTATTCTCACAACAAAGATAA  
GATTTTATCTTTCTTCAAACACCCTGTTTTCTTAAGGGCGGACAATTGTTCCATTGTGAACCTCTGG  
GGA

+

FFFFFFFFFFFFFFFFFFFFFFFFFFFFFFFFFFFFFFFFFFFFFFFFFFFFFFFFFFFFFFFFFFFFFFFFFFFFFFFF  
FFFFFFFFFFFFFFFFFFFFFFFF:FFFFFF,FFFFFFFFFFFFFFFFFFFFFFFF,FFFFFFFFFFFFFFFFFFFF  
FFF

@A00721:190:HGJW7DSXY:4:2649:20618:32221\_2:N:0:TCTGCAAG+GCTGCACT  
AGTTCCGAATAACTCGTAATAAATCTTTCTCTAGTGACAATTCAGAATACCTATTTCCGTACCAAGA  
GCCACTGCCAATCTCATCGCTATACGCATACCTGATTGGAAGAAGCGA

+

FFFFFFFFFFFFFFFFFFFFFFFFFFFFFFFFFFFFFFFF,FFFFFF:FFFFFFFFFFFF:FFFFFFFFFFFFFFFF  
FFFFFFFFFFFF,FFFFFFFFFFFFFFFFFFFFFFFFFFFFFFFFFFFFFFFF

@A00721:190:HGJW7DSXY:4:2630:26015:19085\_1:N:0:TCTGCAAG+GCTGCACT  
AAGGGCTATTAGTACGTCATGGGGATCACTTCTTCGGTCAATGACAAAACCTTCGAATATGTTACGA  
CATGGCTTCGTAACAACAGTGCAGGATTGTCATCTCGGGGAAAGTGATTCACCAAGATGTTTCATATA  
GAT

+

FFFFF:FFFFFFFFFFFFFFFFFFFFFFFFFFFFFFFFFFFFFFFFFFFFFFFFFFFFFFFFFFFFFFFF:FFFFF  
FFFFFFFFFFFFFFFFFFFFFFFFFFFFFFFFFFFFFFFFFFFFFFFFFFFFFFFFFFFFFFFFFFFFFFFFFFFF  
FFF

@A00721:190:HGJW7DSXY:4:2255:29306:28228\_1:N:0:TCTGCAAG+GCTGCACT  
AAGGTCGCAGCGATCTTACTCGTTATCGGAGCTAAGAAGAAGACTTTGGGTACACGTTATGCTCGCAA  
ACTTAACGTTAGTACCGGAGGTGATCTCTCTGCTTCTGCGTTACTGAGAGAAAAGATTCAGGACGCCT  
ACG

+

FFFFFFFFFFFFFFFFFFFFFFFFFFFFFFFFFFFFFFFFFFFFFFFFFFFFFFFFFFFFFFFFFFFFFFFFFFFF  
FFFFFFFFFFFFFFFFFFFFFFFFFFFFFFFFFFFFFFFFFFFFFFFFFFFFFFFFFFFFFFFFFFFFFFFFFFFF  
FFF

@A00721:190:HGJW7DSXY:4:2657:6470:7623\_1:N:0:TCTGCAAG+GCTGCACT  
TCTTGAAACTACGGTCCTTATCAAAGAAAATGGTGAACCGGTCTCTAAATCTTTTGAGATTGAGAAGA  
TTGAAGAACACGTCAAGAAGTCGCTCGGCGTTGTTCTTGAAAACCAAGTTAAGAAGGAGGCTGATCAT  
GGA

+  
FFFFFFFFFFFFFFFFFFFFF, FFFF:FFFFFFFFFFFFFFFFFFFFFFFFFFFFFFFFFFFFFFFFFFFFFFFF  
FFFFFFFFFFFFFFFFFFFFFFFFFFFFFFFFFFFFFFFFFFFFFFFFFFFFFFFFFFFFFFFFFFFFFFFF: FFFFFFFFFFFFFFFFFFFFFFFF  
FFF  
@A00721:190:HGJW7DSXY:4:2516:28266:31563\_2:N:0:TCTGCAAG+GCTGCACT  
TCAAACCTTCGAGGTTCAGCTACGAGAGGTGATCCCGGATGTGGATTGAAGGCTGGCTCTAAGGGAGAC  
TCCTTCTTTTTGAATGTTGTAAAGAATTGGGTTGAGAAGTGTGCTTTA  
+  
FFFF:FFFFFFFFFFFFFFFFFFFFFFFFFFFFFFFFFFFFFFFFFFFFFFFFFFFFFFFFFFFFFFFF, FFFFFFFF  
FFFFFFFFFF:FFFFFFFFFFFFFF, FF:FFFFFFFF:FFFFFFFFFFFFFF  
@A00721:190:HGJW7DSXY:4:1269:14525:21230\_1:N:0:TCTGCAAG+GCTGCACT  
TTTTCAAAAATGCGGATGGGTCTACTGATGTTTTCTACAGAGTGAGTCGTTTCAACACTTATCACC  
ACTTTTGAAAGGAAAATAATTGGTGATGAAAATACGTATGTCGGTGGGGTTCTCAAGGCTCTCATCGC  
CAC  
+  
FFFFFFFFFFFFFFFFFFFFFFFFFFFFFFFFFFFFFFFFFFFFFFFFFFFFFFFFFFFFFFFFFFFFFFFF  
FFFFFFFFFFFFFFFFFFFFFFFFFFFFFFFFFFFFFFFFFFFFFFFFFFFFFFFFFFFFFFFFFFFFFFFF: FFFF  
FFF  
@A00721:190:HGJW7DSXY:4:1562:27181:23641\_2:N:0:TCTGCAAG+GCTGCACT  
ATTCTTAAAAGAAGTTTATTA AAACTTCAGAGTCTCTTGGAAGTCCAGGTAGCTAATGTTCTTGCAAT  
AGCCACAGACTTTCTGGGAAAAGAGACCTCTGTTGGTAGAGGAGTTGA  
+  
FFFFFFFFFFFFFFFFFFFFFFFFFFFFFFFFFFFFFFFFFFFFFFFFFFFFFFFFFFFFFFFFFFFFFFFF, F  
FFFFFFFFFFFFFFFFFFFFFFFF: FFFFFFFFFFFFFFFFFFFFFFF: FFFFFFFFFF  
@A00721:190:HGJW7DSXY:4:1245:30581:13808\_2:N:0:TCTGCAAG+GCTGCACT  
CAGATTCAATCTGGCATCACTGAACGTCTACAACGAGTTAGGGAGTGGCTAGGTTTTAAAAGATCCTT  
TGCACAAGCAATACCTTCCACTGAGTTCATCACCCAGAGTTTCGACGT  
+  
FFFFFFFFFFFFFFFFFFFFFFFFFFFFFFFFFFFFFFFFFFFFFFFFFFFFFFFFFFFFFFFFFFFFFFFF: FFF: FFF  
FFFFFFFFFFFFFFFFFFFFFFFFFFFFFFFFFFFFFFFFFFFFFFFFFFFFFFFF, FFFFFFFFFF  
@A00721:190:HGJW7DSXY:4:1325:24641:7028\_2:N:0:TCTGCAAG+GCTGCACT  
GTACAGGGAGGAGGTAATAGTTATA AAACCTTCTTTTATCATTGCAACAGGACTTTGAGAAGACTGTT  
GAAATGGACAAAATCTGGGATCATAGGTATGTGTACGCTACACTCGA  
+  
FFFFFFFFFFFFFFFFFFFFFFFFFFFFFFFFFFFFFFFFFFFFFFFFFFFFFFFFFFFFFFFFFFFFFFFF  
FFFFFFFFFFFFFFFFFFFFFFFF: FFFF: FFF:, FFFFFFFFFFFFFFFFFFFFFFFF  
@A00721:190:HGJW7DSXY:4:1613:20229:28447\_2:N:0:TCTGCAAG+GCTGCACT  
CCATATCAGATTAGAGACATGCCAGTTAGAGTTCTTCTAAC CAGGACTGATGGTGAGATTCTTTTACC  
TTTTGGAGGTCCAGGAACCTTTACTCCTAGTGTCTTTTCTAGAGTCCA  
+  
FFFFFFFFFFFFFFFFFFFFFFFFFFFFFFFFFFFFFFFFFFFFFFFFFFFFFFFFFFFFFFFFFFFFFFFF  
FFFFFFFFFFFFFFFFFFFFFFFFFFFFFFFFFFFFFFFFFFFFFFFFFFFFFFFFFFFFFFFF  
@A00721:190:HGJW7DSXY:4:1207:1877:30671\_1:N:0:TCTGCAAG+GCTGCACT  
TTTCGTTTTAGCTGGATGGATCTTTTGATGGTATGTTTACATTGCGTGATCACTTCCC GTGGACTT  
GGGAAGAGATTAAACATAAAATCCAGCGATTCTATTATGTCGCTAAAGCCTGTCCAGTTGT CGATGAT  
GTT  
+  
FFFFFFF: FFFFFFFFFFFFFFFFFFFFFFF: FFFFFFFFFFFFFFFFFFFFFFFFFFFFFFFFF: FFFFFFFFFF  
FFFFFFFFFFFFFFFFFFFFFFFFFFFFFFFFFFFFFFFFFFFFFFFFFFFFFFFFFFFFFFFFFFFFFFFF  
FFF  
@A00721:190:HGJW7DSXY:4:1512:5511:4648\_1:N:0:TCTGCAAG+GCTGCACT  
TTACTAAGTCTGAGATCTGCCACTTCTAATTTTAGGAAACGTCGCGAAAAAGAAAGTTCATGAGGATGT  
CTTGGTCGAAAAATATCGCCGGGA ACTTCTAATAGAGGATCCTGATGACATTATTTCAACGGATACCG  
ATC



+  
FFFFFFFF:FFFFFF:FF:F:FFFFFFFFF:FFFFFF:FFFF:FFFFFFFFFFFFFFFFFFFF::FFF  
FFFFFFFFFFFFFFFFFFFF:FFFFFFFFFFFFFFFF,FFFFFFFFFFFFFFFFFFFFFFFF  
FFF  
@A00721:190:HGJW7DSXY:4:2301:19651:30264\_1:N:0:TCTGCAAG+GCTGCACT  
ACCGTCTCAGGAAGTGTCTCCACTGATTCGGAATTAGAGAAAGACGACCTTCTTGTGGGGACTGAGAC  
CTCTGAATTTTCAGGGTGCCCTGATGAGGACGTTGAAAGGGATAATTTCAACTCTGAGACTTCTAAGA  
GTG  
+  
FFFFFFFFFFFFFFFFFFFFFFFFFFFFFFFFFFFFFFFFFFFFFFFFFFFFFFFFFFFFFFFFFFFF  
FFFFFFFFFFFFFFFFFFFFFFFFFFFFFFFFFFFFFFFFFFFFFFFFFFFFFFFFFFFFFFFFFFFF  
FFF  
@A00721:190:HGJW7DSXY:4:2639:5448:3787\_1:N:0:TCTGCAAG+GCTGCACT  
GTAACAAGAAGAATAAAGGTAGGAAGGGGAGAAAACAGAACAAAGCGAGCGGTTGAAGAGAAAAGTATG  
ATGTTGCGGCTGATCGTACCCCAATTCCTGCTAGAAAGATCACTCTCGGCGATACCACTGATCTTCC  
AGA  
+  
FFFFFFFFFFFFFFFFFFFF:FFFFFFFFFFFFFFFFFFFFFFFFFFFFFFFFFFFFFFFFFFFFFFFF:FF  
FFFFFFFFFFFFFFFFFFFF:FFF,FFFFFFFFFFFFFFFFFFFFFFFFFFFFFFFFFFFFFFFFFFFF  
FFF  
@A00721:190:HGJW7DSXY:4:1217:12879:26553\_1:N:0:TCTGCAAG+GCTGCACT  
GTTTCATCGCGGTATTTGTGAAATTAAGACAGACGTGAAAGTTATGATGAGTGATCGTATTAGAACAGC  
TGATTCTTATTGCATGAACGTCGCTGAGGTCAAACCTGTGGACGTTCTTTTCATCGACGAATTATTCA  
TGA  
+  
FFFFFFFFFFFFFFFFFFFFFFFFFFFFFFFFFFFFFFFFFFFFFFFFFFFFFFFFFFFFFFFFFFFF  
FFF:FFFFFFFFFFFFFFFFFFFFFFFFFFFFFFFFFFFFFFFFFFFFFFFFFFFFFFFFFFFFFFFF  
FFF  
@A00721:190:HGJW7DSXY:4:2228:25382:34115\_1:N:0:TCTGCAAG+GCTGCACT  
TCTACTTAAGCGCGCTTATACCATAGGTTACGGTGATTCCAATCAAATCGGATTCATCAATCGTATTG  
ATCTCCAAGTCGCAAACTACTTCAACATCAACGACATCATTCTTGATGAGTGTCGTTCTTATCGAAGT  
CT  
+  
FF,:FFFFFFFFFFFFFFFFFFFFFFFFFFFFFFFF,FFFF,FFFFFFFFFFFFFFFFFFFFFFFF  
FFFFFFFFFFFFFFFFFFFFFFFFFFFF:FF:FFFFFFFFFFFFFFFFFFFFFFFFFFFFFFFFFFFF  
FF  
@A00721:190:HGJW7DSXY:4:1613:19633:9345\_1:N:0:TCTGCAAG+GCTGCACT  
GCCCCGCCGACGTTTGTGCGGAACTCTCAGAGTTTACGGCAGAAAAATTTCTCCTGCTTGTAAATTCG  
AGAGAGGACACTATGGAAATTAGACCTATCAGATGTCTTGACGACTTCGAATTTGAGGACGGAGTTAA  
ATA  
+  
FFFFFFFFFFFFFFFFFFFFFFFFFFFFFFFFFFFFFFFF:FFFF:FFFFFFFFFFFFFFFFFFFF  
FFFFFFFFFFFFFFFFFFFFFFFFFFFFFFFFFFFFFFFFFFFFFFFFFFFFFFFFFFFFFFFFFFFF  
FFF  
@A00721:190:HGJW7DSXY:4:1420:27715:12915\_2:N:0:TCTGCAAG+GCTGCACT  
ATGCTACTTGTGAGAGGATCAATCACAGTAAGGAAGTGTACGTTTAGCACGGGAGGTTGCAGATTCA  
ACCCCTTATATCGAGGCTATCGAGGACGATGAGTATCTTGAAGTTGTT  
+  
FFFFFFFFFFFF:FFFFFFFFFFFFFFFF:FFF:FFFFFFFFFFFFFFFFFFFFFFFF:FFFF:FFFFFFFF  
FFFF,FFFFFFFFFFFF:FFFFFFFFFFFFFFFF:FFFFFFFFFFFF  
@A00721:190:HGJW7DSXY:4:1623:1145:9017\_1:N:0:TCTGCAAG+GCTGCACT  
AGAGGACCACCTGGATCTTCTACTGTCTCTGCCTTCCAAGATTTCTTAGAAGAGGTTATTCTGGAAC  
CACCTTAACGTCACCTCGGTAATCTTTCAGCCGAATTAAGTACTAATGAGTTCAAGTCGGTTGTCGATC  
GAA

+  
FFFFFFFFFFFFFFFFFFFF:FFFFFF:FFFFFFFFFFFFFFFF:FF:F:FFFFFFFFFFFFFFFFFFFF  
FFFFFFFF:FFFFFF:FFFFFFFFFFFFFFFFFFFFFFFFFFFFFFFFFFFFFFFFFFFFFFFFFFFF  
FFF  
@A00721:190:HGJW7DSXY:4:1263:6370:9893\_1:N:0:TCTGCAAG+GCTGCACT  
TAATACCTTTATAGGTAAGAAGCCCCTTGAGCCGCGTAGTCAGCGCGTTTAGCTGTATCATCAGTCAG  
AGTATACCCGATAGGGTACCGAGTCTCCAAGAGAATATTTATTCTTATGAGGCTCGAACTTCAACGT  
TTT  
+  
:FFFFFFFFFFFFFFFF,FFFFFFFFFFFFFFFF,FFFFFFFFFFFFFFFFFFFFFFFFFFFFFFFF  
FFFFFFFFFFFF,FFFFFFFFFFFFFFFFFFFFFFFFFFFF:F,FFFFFFFFFFFFFFFFFFFF:FFFF  
FFF  
@A00721:190:HGJW7DSXY:4:2304:10836:34256\_1:N:0:TCTGCAAG+GCTGCACT  
AATAGGGACGCTAGTATACTTCGTAAAGTCGACAGCGAAATGGTCAATATTGATAATTGGACCGACTA  
TATGACCTATTTTAAGCTCATGGTGAAGGGAAGCTAAGGTTAACTTGATGCTTCAGCCTTTTCGA  
AGC  
+  
FFFFFFFFFFFFFFFFFFFF,FFFF:FFFFFFFFFFFFFFFFFFFFFFFFFFFFFFFFFFFFFFFFFFFF  
FFFFFFFFFFFFFFFFFFFFFFFFFFFFFFFFFFFFFFFFFFFF:FFFFFFFFFFFFFFFFFFFFFFFFFFFF  
FFF  
@A00721:190:HGJW7DSXY:4:2127:25717:2691\_2:N:0:TCTGCAAG+GCTGCACT  
TGTGAGGAGAGTCAAACAGTGTCTTTTACCCAACATTTTATGTATACAGAGATGACCAGTGACGATT  
TCTCCCGAAGCTCTTCTCTCTTAGGAGGTCATGATGACTACTCTA  
+  
FFF,FFFFFFFFFFFFFFFFFFFFFFFFFFFF:FFF:FFFFFFFFFFFFFFFFFFFFFFFFFFFF:FFFFFFFFFFFF  
FFF:FFF:FFF:FF:FFFFFFFF,F,FFFFF:FFFFFF,FF:F,F:  
@A00721:190:HGJW7DSXY:4:2228:10185:24706\_1:N:0:TCTGCAAG+GCTGCACT  
GAGTATCCATAACGATTTGTCAATTTACCACCTTTGCTCAACGACGAAGTGGAACGGCCAACACTTTCT  
TTGGTAATTGTATGATCACTTTGATGATTTTATCACTTTATTATGACCTTGGAAGTTTTCGGCTGTG  
GTT  
+  
FFFFFFFFFFFFFFFFFFFFFFFFFFFFFFFFFFFF,FFFFFFFFFFFFFFFFFFFFFFFFFFFFFFFFFFFF  
FFFFFFFFFFFF:FF:FFFFFFFFFFFFFFFFFFFFFFFFFFFFFFFFFFFFFFFFFFFFFFFFFFFF  
FFF  
@A00721:190:HGJW7DSXY:4:2378:18141:36385\_2:N:0:TCTGCAAG+GCTGCACT  
GAGGGTCGTTATACCTATTCGGCTATCTGTGCTTTGAATTGTATAAGATCAAATTTAAACGATTCCG  
AGAGGTTTATCCTGATGTGGAGGGAGTTCTTGAAGCATCCCGACCTTT  
+  
FFFFFFFFFFFFFFFFFFFFFFFFFFFFFFFFFFFF:FF:FFFFFFFFFFFFFFFF:F::FFF:F  
FFFFFFFFFFFF:FFFF::F,:FFFFFFFFFFFF:FFFF,FFFF:F  
@A00721:190:HGJW7DSXY:4:1518:9182:14732\_1:N:0:TCTGCAAG+GCTGCACT  
AGACAGGTGATATTGTTGAGCGAGAGCGACCAAGATCTAAATTCGGTAACGGTGCGTGGCGCTTTATT  
TTAAAAAGCTCCCTCCTCTCGCAAGTTTGATCTGATACTTATCACGAAAGGACTTGAGTCTTTTGATC  
AGT  
+  
FFFFFFFFFFFFFFFFFFFFFFFFFFFFFFFFFFFF:FFFFFFFFFFFFFFFFFFFFFFFFFFFFFFFFFFFF  
FFFF:FFFFFFFFFFFFFFFFFFFFFFFFFFFFFFFFFFFFFFFFFFFFFFFFFFFFFFFFFFFF  
FFF  
@A00721:190:HGJW7DSXY:4:2310:13684:18897\_1:N:0:TCTGCAAG+GCTGCACT  
ATATTTCCCTCATCAGCTTGTGTTTTACCTAATCTGTGTTTTTACGATAACAACATCAGTTGATTAAAG  
ACTCTTCCGAAAGGCGAACTTTGGGAATTTGAAGCTCAGGGTGAAGCACAACTTTGACCGTGACGAA  
CTG  
+  
F:,FF:FFFF,FFF,,FF::FFF:FFFFFF,FF:,F:FF:FFFFFFFF:FFFF:,FF::FF:FFFFFF

FFFF::FF:FFFFFFFFF,F:FFFFFFFF,FF:FF:FF:FFFF:FFFF:FFFF:FFFF,FFFF  
FFF

@A00721:190:HGJW7DSXY:4:2566:4119:22654\_2:N:0:TCTGCAAG+GCTGCACT  
ATCACTCATTTTAGTGAGATTATTAACGCGACTAAACGTCTTCGACAACAGCAGGGGTTTTCGAA  
TAGTGATAGCCACCCGCCTTACAGAGGGGCAGCAGCATGACCATAATT

+  
FFFFFFFFFFFFFFFFFFFFFFFF:FFFFFFFFFFFFFFFFFFFFFFFFFFFFFFFFFFFFFFFF:FFFF  
FFFFFFFF:FFFF:FFFFFFFF:FFFFFFFFFFFFFFFF

@A00721:190:HGJW7DSXY:4:2320:26323:21778\_2:N:0:TCTGCAAG+GCTGCACT  
CTGTCTCGCCTCTTCGAATGAAGTTTAAATGCTTAACAACAATGATAGTGAATTTATACCTACAATCA  
TTGGTTTTTCTAATAATGATGACACTATTGTTTATGGATATGATGCTA

+  
FFFFFFFFFFFFFFFFFFFFFFFF:FFFFFFFFFFFFFFFFFFFFFFFFFFFFFFFFFFFFFFFF:FF  
FFFFFFFFFFFFFFFFFFFFFFFF:FF:FFFFFFFFFFFFFFFFFFFFFFFF

@A00721:190:HGJW7DSXY:4:1310:5909:5776\_1:N:0:TCTGCAAG+GCTGCACT  
ATTAACCATTTGTACGATGTCGTCTGTCTCGGCATCACTTTTCTACTAAGAATTGGTCTACTTTTG  
GACAAGCCAACCTTCGTAATCTTCATGAGATCGTTTCTTTCTTTATCTCTTTGGTTGTTAGGGATTTT  
GAG

+  
FFFFFFFFFFFFFFFF:FFFFFFFFFFFFFFFFFFFFFFFFFFFFFFFF:FFFFFFFFFFFFFFFF  
FFFFFFFFFFFFFFFFFFFFFFFFFFFFFFFF:FFFFFFFFFFFFFFFFFFFFFFFFFFFFFFFF  
FFF

@A00721:190:HGJW7DSXY:4:2176:26024:22889\_1:N:0:TCTGCAAG+GCTGCACT  
GCTTCAATTGTAGTGGTTTGGTCGTTTCAGTACCCAGTCAGTATACCTCTACGCAAAGATATTTTCATG  
AAACTACAGAGGAACGTTCCGGATTACCTGTCTTTCATATTATGAATGAACCTTCGGCCGCTCTCTT  
TG

+  
FFFFFFFFFFFFFFFF,F:FFFF:FFFF:FFFFFFFF:FFFFFFFFFFFF,F:FFFF:FF:FFFF:  
FFFFFFFFFFFFFFFF:FFF:FFFF:F,:FF:FFFFFFFFFFFFFFFF:F:FFFF:FFFF,F:FFF  
FF

@A00721:190:HGJW7DSXY:4:1646:8947:32612\_1:N:0:TCTGCAAG+GCTGCACT  
GGATGTCAAGAAGGGTTCAGAATGGGATTCCTACGTAGTTTATGACTTTGGTGGTGGTACTTTTCGATA  
CTTCTATCGTCTTACGTTACGTAATTACTATAGTGTTATTTATTCTGGTGGTGGTATGATAATCTTGA  
GGT

+  
FFFFFFFFFFFFFFFFFFFFFFFF:FFFFFFFFFFFFFFFFFFFFFFFFFFFFFFFFFFFFFFFF  
FFFFFFFFFFFFFFFFFFFFFFFFFFFFFFFFFFFFFFFFFFFFFFFFFFFFFFFFFFFFFFFF  
FFF

@A00721:190:HGJW7DSXY:4:1152:24858:17394\_2:N:0:TCTGCAAG+GCTGCACT  
AGCGTTCTTATTACGGCGCACTTCTTTACCCGCCACCACAACTTTCAGTTTCACAACTGAAGGAGG  
AGGTTTCTGTTACTGGAAAACCTCGTCAATACTTTTCAATAATATAC

+  
FFFFFFFFFFFFFFFFFFFFFFFFFFFFFFFFFFFFFFFFFFFFFFFFFFFFFFFFFFFFFFFF  
FFFFFFFFFFFFFFFFFFFFFFFFFFFFFFFFFFFFFFFFFFFFFFFF,FFFF

@A00721:190:HGJW7DSXY:4:1414:6723:15264\_2:N:0:TCTGCAAG+GCTGCACT  
TGAACAAAGTTATCAAAGATAGTGGCATTCAAGGCAACTTACCCTGATTCCGGCCGGTGGTAGCTCA  
TTTCTACCAGGGGCTATTACTCTTGCTGAAACAGCTATTAAAGCTGTT

+  
FFFFF:FFFFFFFFFFFFFFFFFFFFFFFF:FF:FFFFFFFF,FFFFFFFFFFFFFFFF  
FFFFFFFFFFFFFFFF: :FFFFFF,FFFFFFFFFFFFFFFF:FFF:

@A00721:190:HGJW7DSXY:4:1537:29125:3709\_1:N:0:TCTGCAAG+GCTGCACT  
AGGATGTGCACTTTTTCTGCTACTTTAACGGAGCGTAGTGTACTCTTCGTCGATTGTATCAACAGTA  
ACATTACTTCTAATAAAGGTCTCTATCAAGCTCGTATTATCGTCGCTGCTGGATCTGCGTTACCGTTG  
AAG

+  
FFFFFFFFFFFFFFFFFFFFFFFFFFFFFFFFFFFFFFFFFFFFFFFFFFFFFFFFFFFFFFFFFFFFFFFF  
FFFFFFFFFFFFFFFFFFFFFFFFFFFFFFFFFFFFFFFFFFFFFFFFFFFFFFFFFFFFFFFFFFFFFFFF  
FFF  
@A00721:190:HGJW7DSXY:4:2126:11975:12430\_2:N:0:TCTGCAAG+GCTGCACT  
GTAATTATGAAGACTGTGATTTATCTTTCACCTCTGGCCTTGTATGAGGGTGTCTTCTAATCGTAACATT  
AATAATTTCAATCTTCTTAAAAAGAAGATAGAGAGTCATACTTTGGGC  
+  
FFFFFFFFFFFFFFFFFFFFFFFFFFFFFFFFFFFFFFFFFFFFFFFFFFFFFFFFFFFFFFFFFFFFFFFF  
FFFFFFFFFFFFFFFFFFFFFFFFFFFFFFFFFFFFFFFFFFFFFFFFFFFFFFFFFFFFFFFFFFFFFFFF  
@A00721:190:HGJW7DSXY:4:1270:23773:24659\_1:N:0:TCTGCAAG+GCTGCACT  
CAAAGAGAATATCTAAATATTTACAAATCTTACCACTATCTACGAACCTAAAGTTCTGAAGACGTT  
GCTTGTGCGCTTCCTCTTAAATGGCACTACCTCGGTACAATCTTACTTGGAACGAAGGCGACCTGTTC  
CGG  
+  
FFFFFFFFFFFFFFFFFFFFFFFFFFFFFFFFFFFFFFFFFFFFFFFFFFFFFFFFFFFFFFFFFFFFFFFF  
FFFFFFFFFFFFFFFFFFFFFFFFFFFFFFFFFFFFFFFFFFFFFFFFFFFFFFFFFFFFFFFFFFFFFFFF  
FFF  
@A00721:190:HGJW7DSXY:4:2308:14669:22013\_1:N:0:TCTGCAAG+GCTGCACT  
TCTGTCTATATTAGGTGAAGCGAAATACGATTTTCAACGTCAACGTTACCGAGTTTCGTTTCGTACC  
TTGATGCTGACTTTCGTCAATATGATTTGATCTGGTTGCTCAATTCTAAGCGTGTTCGCTTAGTGCG  
AGG  
+  
FFFFF:FFFFFFFFFFFFFFFFFFFFFFFFFFFFFFFFFFFFFFFFFFFFFFFFFFFFFFFFFFFFFFFF  
FFFFFFFFFFFFFFFFFFFFFFFFFFFFFFFFFFFFFFFFFFFFFFFFFFFFFFFFFFFFFFFFFFFFFFFF  
FFF  
@A00721:190:HGJW7DSXY:4:1661:22227:18912\_1:N:0:TCTGCAAG+GCTGCACT  
TTCTTCCTTGATTTTAAATATAAAGAATCTTTACCAGGACTCCTACTACAGGAGGCAGTCTTCTGATC  
GTAAGAAGTTTATAAGGAACATATCCATTTGTTGTAATAGGGTCATCAACTTAGAACTCGAACTCTA  
AGT  
+  
FFFFF:FFFFFFFFFFFFFFFFFFFFFFFFFFFFFFFFFFFFFFFFFFFFFFFFFFFFFFFFFFFFFFFF  
FFFFFFFFFFFFFFFFFFFFFFFFFFFFFFFFFFFFFFFFFFFFFFFFFFFFFFFFFFFFFFFFFFFFFFFF  
FFF  
@A00721:190:HGJW7DSXY:4:1470:23393:24032\_1:N:0:TCTGCAAG+GCTGCACT  
CAAGCTTACCTGTATCTTCAATGAAATTGGACTCTTCGATAGGGGACATTTTATCGTGGGCTTTCCGT  
AAAGGAAGATCTGTTATCGACGGTTTATCGTTTACGAAGTATCACTCCACCGGTGAATGGTTTAAGAA  
TAC  
+  
FFFFFFFFFFFFFFFFFFFFFFFFFFFFFFFFFFFFFFFFFFFFFFFFFFFFFFFFFFFFFFFFFFFFFFFF  
FFFFFFFFFFFFFFFFFFFFFFFFFFFFFFFFFFFFFFFFFFFFFFFFFFFFFFFFFFFFFFFFFFFFFFFF  
FFF  
@A00721:190:HGJW7DSXY:4:2115:11261:5963\_1:N:0:TCTGCAAG+GCTGCACT  
TAGAGTAGAATTCCTGAAGAGTCCATCCGTAACCAACTTCTTGACAATTTTCTTCAATCCTTCGATAA  
TAGTTAAATCTAGTATTATGTCTGTGTTGAAAGACTTTCTACCGATAAGGGTCACTAGTCTTACACAA  
TTA  
+  
FF,F,:F:FFFFFFFF:FFFFFFFF,FFF,FFF,:FF:,FFFF,FFFFFFFFFFFF,,FF,F,F,F,FFFF  
,F:F:FFFFFFFF:,FFFF,FFF:F:,FFFF:F,F,FF:F,,:FFF,F,FF:F:FFF,FFFF:FFF:  
FFF  
@A00721:190:HGJW7DSXY:4:1215:17906:14434\_1:N:0:TCTGCAAG+GCTGCACT  
GACTGATTATCTAAAGATTGAAGGAAAATTTTATCCTCGTTTAACTTACTTAGACTTTCTACGATAC  
AAATGATAACTTCTAATTTACGTTTGTACTCAGAGCTGGTCCTCTCAGCAAAGGGATGCATGGTGTT  
ATC

+  
FFFFFFFFFFFFFFFFFFFFFFFFFFFFFFFFFFFFF,F:FFFFFFFFFFFFFFFFFFFFFF  
FFFFFFFFFFFFFFFFFFFFFFFFFFFFFFFFFFFFFFFFFFFFFFFFFFFFFFFFFFFFFFFFFF  
FFF

@A00721:190:HGJW7DSXY:4:1131:23032:7748\_2:N:0:TCTGCAAG+GCTGCACT  
GGCATTGTATAATACGACTTCGCATCGCATATTACGATTACACGGTACCAGCG  
CATCTCGTGCGAGCCGACCCGATTATATGGTTAACTTATAAAG

+  
FFFFFFFFFFFFFFFF:F:FFFFFFFFFFFFFFFFFFFFFFFFFFFFFFFFFFFFFFFF  
FFFFFFFFFFFFFFFFFFFFFFFFFFFFFFFFFFFFFFFFFFFFFFFFFFFFFFFF

@A00721:190:HGJW7DSXY:4:1550:3206:21230\_2:N:0:TCTGCAAG+GCTGCACT  
TGTTCTCTGATCATTTTTGACAATCTCTTTATAATAAAAATAATAATAATTACTAATGGCAAATA  
GTGGAAAGGCTCCAGTCAACACTAGTTCGAGTGCTGCTTTGGATTACG

+  
FFFFFFFFFFFFFFFFFFFFFFFFFFFFFFFFFFFFFFFFFFFFFFFFFFFFFFFFFFFFFFFF  
FFFFFFFFFFFFFFFFFFFFFFFFFFFFFFFFFFFFFFFFFFFFFFFFFFFFFFFF

@A00721:190:HGJW7DSXY:4:2123:3251:21057\_2:N:0:TCTGCAAG+GCTGCACT  
ATAGGTGAAGGATAGTTTTACCTCGACCAACATTAAGGCGGCGGCGACTAATCTTAAAGCTTACC  
CAAATGAAGCACCTTCGAACTGAATAATGATGCACTACAAACAAG

+  
FFFFFFFFF:FFFFFFFFFFFFFFFFFFFFFFFFFFFFFFFFFFFFFFFF:FFFFFFFFFFFFFFFF  
FFFFFFFFFFFFFFFFFFFFFFFF:FFFFFFFFF:FFFFFFFFFFFF,FFFF

@A00721:190:HGJW7DSXY:4:1559:24189:5431\_2:N:0:TCTGCAAG+GCTGCACT  
AGGATATTCGCCATTGTGGTACGAATTGGTCCAACATTTACCACCAAATCTTTTGATACAACCTTAG  
CCTTCAAGTGGGGTATGCCTGCGGAATACGCTTGCTATTCACCAGATT

+  
FFFFFFFFFFFFFFFFFFFFFFFFFFFFFFFFFFFFFFFFFFFFFFFFFFFFFFFFFFFFFFFF:  
FFFFF:FFFFFFFFFFFF:FFFFF,FFFFFFFFFFFFFFFFFFFF,FFFF

@A00721:190:HGJW7DSXY:4:1117:28311:3834\_2:N:0:TCTGCAAG+GCTGCACT  
TGCTATGTCAGAAGAAGCTATTCAAGCTTGTGCTTTAAAGACTGCAGAGGCTGTCAAACAAGCCCAGA  
CTCAAGGAGTCCAATCAAAGGTTTTGAATTTAGCTCAACTGGGGAGAC

+  
FFFF:FFFFFFFFFFFFFFFFFFFFFFFFFFFFFFFFFFFFFFFF:FFFFF:FFFFFFFFFFFFFFFF  
FFFFFFFFFFFFFFFFFFFFFFFFFFFFFFFFFFFFFFFF:FFFFFFFFFFFFFFFF

@A00721:190:HGJW7DSXY:4:2171:3504:33270\_2:N:0:TCTGCAAG+GCTGCACT  
ATAGTGGGATAATAGTTCTACCGATACGTAGTGAACGCGTTCGTAGAACCAAGTACTTTCCGTCTGAA  
GAGTTTAGAGCTGCTATTGATTATGTAACCGATAGGAGTTGTATAGTT

+  
FFFFFFFFFFFFFFFFFFFFFFFFFFFFFFFFFFFFFFFFFFFFFFFFFFFFFFFFFFFFFFFF:FFFFFFFFFFFFFFFF  
FFFFFFFFFFFFFFFFFFFF:,FF:FF:FFFFFFFFF:FFFFFFFFFFFF:F

@A00721:190:HGJW7DSXY:4:2650:4372:17863\_2:N:0:TCTGCAAG+GCTGCACT  
ATCCTTTAAGGACTATGTTGACTGACGAAGATTTCCACAGATTTGTCTACGTTGCAGATCGCCACT  
CAAACACTATATACATTATAAAATATAAAAAATAAGGGAGTCATAACT

+  
FFFFFFFFFFFFFFFFFFFFFFFFFFFFFFFFFFFFFFFFFFFFFFFFFFFFFFFFFFFFFFFF  
FFFFFFFFFFFFFFFFFFFFFFFFFFFFFFFFFFFFFFFFFFFFFFFFFFFFFFFF

@A00721:190:HGJW7DSXY:4:2477:14959:12148\_2:N:0:TCTGCAAG+GCTGCACT  
GGCTTTCAACGAAGTCTCTGATTTTATTAATCATTACTTTAACGATCTCTCGGTCATTTACTCTGTAC  
TTGATCTACGTCGTTTAACTGTCGGAACAACCTTTACTTAGAATGACT

+  
FFFFFFFFFFFFF:FFFFFFFFFFFFFFFFFFFFFFFFFFFFFFFFFFFFFFFFFFFFFFFF  
FFFFFFFFFFFFFFFFFFFFFFFFFFFFFFFFFFFFFFFFFFFFFFFFFFFFFFFF

@A00721:190:HGJW7DSXY:4:1617:28655:24533\_1:N:0:TCTGCAAG+GCTGCACT  
CTATCGTTTTCTGCTTTTTCTTAGCTAATAGATTAATAAAGGATGAGTACGAAAACCAACTCTTCGTT

ACGAGACCTGATGGTAGAATAGATTTAGTCTCTACACCCATCTCAACGAGGATAAAGCGAGTTTTCCG  
TCC

+

FFFFFFFFFFFFFFFF,FFFFFFFF:FFFFFFFFFFFFFFFF:FFFF:FFFF::FFFFFFFFFFFFFFFF  
FFFFFFFFFFFFFFFFFFFFFFFFFFFFFFFFFFFFFFFFFFFFFFFFFFFFFFFFFFFFFFFFFFFFFFFF  
FFF

@A00721:190:HGJW7DSXY:4:2675:10818:32440\_2:N:0:TCTGCAAG+GCTGCACT  
AGAGATCATCCGCAAACGACTCGAAACCGAGACGCCGTAGATCAAAGTCCCTTCTAACTTTAGATTAT  
GAATCCTGCCAGATCGGAAGAGCGTCGTGTCGGGAAAGAGTGTAGTGC

+

FFFFFFFFFFFFFFFF:FF:FFFFFFFFFFFFFFFFFFFFFFFFFFFFFFFFFFFFFFFFFFFFFFFFFFFF  
FFFFFFFFFFFFFFFFFFFFFFFF:FFFFFFFFFF,FFFF,:FFFFFFFFFF,

@A00721:190:HGJW7DSXY:4:2662:21088:34381\_1:N:0:TCTGCAAG+GCTGCACT  
CTTTTCGATAGTGATTGTTATCAATTTAAATACATTACTGTTTCAAATCATCTTTACTCACAGACTCC  
GAAATGGTTTCAAATGAGGTCAAAGCTCTATTTATTAACGAACTATTATCCGATTCTTCGAGGGTA  
TCA

+

FFFFFFFFFFFFFFFFFFFFFFFFFFFFFFFFFFFFFFFFFFFFFFFFFFFFFFFFFFFFFFFFFFFFFFFF  
FFFFFFFFFFFFFFFFFFFFFFFFFFFFFFFFFFFFFFFFFFFFFFFF:FFFFFF:FFFFFFFFFFFFFFFFF  
FFF

@A00721:190:HGJW7DSXY:4:2167:30924:4038\_2:N:0:TCTGCAAG+GCTGCACT  
CGATGTTTATATTTTCTATAAGGGAATAAGCAATAATCAAATTCGACAAATTTAGAACTTTATT  
TCAGAACTCTCTCCGATCACCTTGGTGTGATCTCCCGGAGGATCTTTT

+

FFFFFFFFFFFFFFFFFFFFFFFFFFFFFFFFFFFFFFFFFFFFFFFFFFFFFFFFFFFFFFFFFFFFFF:  
FFFFFFFFFFFFFFFFFFFFFFFF:FFFFFFFFFF:FFFFFFFFFFFFFFFFFFFF

@A00721:190:HGJW7DSXY:4:1355:26142:30765\_2:N:0:TCTGCAAG+GCTGCACT  
CGTATACTTGAATACTTTATCAAAGATTTGGCTTGGTCTATTTACCGCAAAAAGTTGGAAGAGGTCTA  
TGATATTTATTTTACTTAACTTTAAATAGCACCGATTATAACTTGAC

+

FFFFFFFFFFFFFFFFFFFFFFFFFFFFFFFFFFFFFFFFFFFFFFFFFFFFFFFFFFFFFFFFFFFFFF:  
FFFFFFFFFFFFFFFFFFFFFFFF,FFFFFFFFFFFF:FFFFFFFFFFFF::FF

@A00721:190:HGJW7DSXY:4:1403:2031:29590\_2:N:0:TCTGCAAG+GCTGCACT  
ACAATAGCTCTTCTCAGAAGATTAGAGAAGTAACCGGTGAACACGTCGGTAGCATTGATTTACTTTT  
ACCGTTAGAACTGAAAAAGATTCTTTTCGAAAAGAAACCTATAAGTTA

+

FF,FFFF:F:FFFF:F:FF:FFFFFFFF:FFFFFFFF:FFFFFFFF:FFFF,FFF,FFFFFFFF  
FFF:FFF,FFFF,FFFFF::FFFFFFFFFFFFFFFFFFFFFFFFFFFFFFFF

@A00721:190:HGJW7DSXY:4:1266:19144:9909\_1:N:0:TCTGCAAG+GCTGCACT  
TAAAAATACTTCAAGTACCTGAACCTTACATTTTTAATGGTATGGTATAATGTGTCTTACAAATAGAA  
CCTTCACTCTCGGTAATGAGAGTGTATTCCTTAATATTCTAGTAACCGCTATGTGGGCATTACTAGGA  
TTT

+

FFFFFFFFFFFFFFFFFFFFFFFFFFFFFFFFFFFFFFFFFFFFFFFFFFFFFFFFFFFFFFFFFFFFFF:  
FFFFFFFFFFFFFFFFFFFFFFFFFFFFFFFF:FFFFFF:FFFFFFFFFFFFFFFF:FFFFFFFFFFFF  
F:F

@A00721:190:HGJW7DSXY:4:2510:14525:9612\_2:N:0:TCTGCAAG+GCTGCACT  
AAAAACTCCATTGTATAGTTCAAGGAGTACTTAATTCAATAGCTTTAGTATTATTACTATCGCCTTT  
ATTGAAAATTGTATAAGAGTTAATTGCTTACACAAAAGTGACGCGCA

+

FFFFFFFFFFFFFFFFFFFFFFFFFFFFFFFFFFFFFFFFFFFFFFFFFFFFFFFFFFFFFFFFFFFFFF:  
FFFF:FFF:FFFFF:FFF:FFFFFFFFFFFFFFFF:FFFF:F:FFFF:

@A00721:190:HGJW7DSXY:4:1339:4553:8844\_2:N:0:TCTGCAAG+GCTGCACT  
AACTGGCACGCCAGACGTAGGGTCAAACCTACTACCGCCGGTCGGCAGATCGGCACCACTGGTCTCTA

+

@A00721:190:HGJW7DSXY:4:2626:6714:21699\_1:N:0:TCTGCAAG+GCTGCACT  
ACGTGTGCTCTTCCGATCTCCGCGACCAACCGAGGTCGCTCGTAACATTGACGGCAGTCCCGTCATCTC  
TGTGGGAAGTGAAGGAGTACCTCAGTCAAAAGTCACATTACCACTCCCATGCCAATCAATGATGTGA  
CT

+

@A00721:190:HGJW7DSXY:4:2656:29658:28119\_2:N:0:TCTGCAAG+GCTGCACT  
TCAATACGTCGTGGGAGGTACTGAAGCCTTCCCCTCCGCTGGCACGAAGAACTCCCAAGCCAATCA  
ATAGTTCTTCTGACCAGAATGAAAAGGGGTTTACCAGGGTAGTCTCTA

+

@A00721:190:HGJW7DSXY:4:2228:24587:35587\_1:N:0:TCTGCAAG+GCTGCACT  
AGAGGGGAAATGTCCCCAAACTGAGAAGAATAAAGGGAAAGGTCCATCAGGACCTAAGAAGGGGAAA  
TTACCCCTAATTCTGAAGGAAGATCTCCCACCATCTGGGGTTGGGAATAAGAAATCTGCACGGGCCAA  
AGA

+

@A00721:190:HGJW7DSXY:4:1425:24469:16188\_1:N:0:TCTGCAAG+GCTGCACT  
CGAAGTCGCTGAAGGCGGCTTGGGTCATTAAGGGTAGCTGTAAAGTTGCGCCTGCCGACCCCATCTTT  
GAGACCAAGACTCTCTACAGTAGGTTCTGTCCTACTATGAGCAAATCTGTTGAATTCGTCACCTGAGGA  
CGA

+

@A00721:190:HGJW7DSXY:4:1523:30798:27367\_1:N:0:TCTGCAAG+GCTGCACT  
ACTTTTGGCTACTGGCGACAACTGAGAGCAGTCGCTGGGGAAAGAGAATTGCGTGGGTTGAAGGCCG  
ACGCTTCGAGCTTGAGTGTGACGAGGCCGGTGACGTTTTTGTCAACGGCGTTTGGAGGATTTTATCCG  
CGC

 $+$ 

@A00721:190:HGJW7DSXY:4:1556:26449:6652\_2:N:0:TCTGCAAG+GCTGCACT  
GCGAAGATCCCCTATGGAGTCTTGAAGGACTTAGGTTGGCATATTTATGCCGACGATAATAAGCATGT  
CACCCTTAAGCACCGAGGTAAGCTCGGGACTTACAAGAGAGAGTGTGA

+

@A00721:190:HGJW7DSXY:4:2521:25554:27367\_1:N:0:TCTGCAAG+GCTGCACT  
CACTATTTTTGCCAGAATGCGGGCTTTCTGACTGATGAGGTTAAACTCTTGCTCCTTCTGTGGGTG  
AGGGTTTTTGTATATTCAC TGGTTCTGGGAGGCTGCTTCTCCATAATTACAACCTCTCTTTAGAG  
AGC

+

[illegible]

FFFFFFFFFFFFFFFFFFFFFFFFFFFFFFFFFFFFFFFFFFFFFFFFFFFFFFFFFFFFFFFFFFFFFFFFFFFFFFFF  
FFF

@A00721:190:HGJW7DSXY:4:1450:24858:17550\_1:N:0:TCTGCAAG+GCTGCACT  
AGTTTCAGACGTGTGCTCTTCCGATCTCTTTTCTTGAAAATTTTCTTTCTCCGTCATTGGGGATTT  
CGATGTGAGAAGGTGGAAGGTGTCAAGGGTCTTCTTCATGCTGATCTTTCAGGACCTAATCACATCAT  
GAT

+  
FFFFFFFFFFFFFFFFFFFFFFFFFFFFFFFFFFFFFFFFFFFFFFFFFFFFFFFFFFFFFFFFFFFFFFFFFFFFFFFF  
FFFFFFFFFFFFFFFFFFFFFFFFFFFFFFFFFFFFFFFFFFFFFFFFFFFFFFFFFFFFFFFFFFFFFFFFFFFFFFFF  
FFF

@A00721:190:HGJW7DSXY:4:1454:10420:20165\_2:N:0:TCTGCAAG+GCTGCACT  
GAGTTGGAGGGAGGAAGTTCTCCGAAATTAAAGACGGGGGGATTAAGAGTCCAGCTGTAAGTGTCACT  
TCAGAGAGGGGAGCTCTGAAAAGGAACTTCGTCAGAAGATGAGGAAG

+  
FFFFFFFFFFFFFFFFFFFF:FFFFFF:FFFFFFFFFFFFFFFFFFFFFFFFFFFFFFFF:FFFF,FFFFFFFFFFFFFFFF:FFFF  
FFFFFFFFFFFFFFFFFFFFFFFFFFFFFFFFFFFFFFFFFFFFFFFFFFFFFFFFFFFFFFFFFFFFFFFFFFFFFFFF

@A00721:190:HGJW7DSXY:4:2307:17671:15060\_2:N:0:TCTGCAAG+GCTGCACT  
GTTTGAGGAAGGCTCTAGAGAAGATCTCACCACCTGGAGAAGGCAAGTGGAGAGTCCAGAAGTTGATG  
AAGAAGGATTATTTGAAGCAGGGGTTACCACTTCCTAAGGTGGATGAG

+  
FFFFFFFFFFFFFFFFFFFFFFFFFFFFFFFFFFFFFFFFFFFFFFFFFFFFFFFFFFFFFFFFFFFFFFFFFFFFFFFF  
FFFFF:FFFFFFFFFFFFFFFFFFFFFFFFFFFFFFFFFFFFFFFF,FFFFFF:FFFF

@A00721:190:HGJW7DSXY:4:1338:7600:20979\_2:N:0:TCTGCAAG+GCTGCACT  
ATCTTGAGGACGTACATTTAACGTGGCAGAAATTCGGTAACCTACCATATTGTTCTTCCGGGAAGTTG  
TGGGATTAACTTTGACTCAACTACTCCGATCAGATCCGATGGTTTG

+  
FFFFFFFFFFFFFFFFFFFF,FFFFFFFFFFFFFFFFFFFFFFFFFFFFFFFFFFFF::F:FFFFFFFF:FFFFFFFFFFFFF  
FFFFFFFFFFFF:FF,FFFFFFFFFFFFFFFFFFFF:FF:FF,FFFF,FF

@A00721:190:HGJW7DSXY:4:2522:3857:26303\_2:N:0:TCTGCAAG+GCTGCACT  
ATGCAGGTCAAAGATTCTGTAGCTCTGAGGGCGGTTGAGGGAGCCGTTTTGGCCGACTTTAACTATTC  
TAAGAGTCTTTATGATTCAAACCTATCGTTGTCGTACCTTACAAGGT

+  
FFFFFFFFFFFFFFFFFFFFFFFFFFFFFFFFFFFFFFFFFFFFFFFFFFFFFFFFFFFFFFFFFFFFFFFFFFFFFFFF  
FFFFFFFFFFFFFFFFFFFFFFFFFFFFFFFFFFFFFFFFFFFFFFFFFFFFFFFFFFFFFFFFFFFFFFFFFFFFFFFF

@A00721:190:HGJW7DSXY:4:1268:24894:23156\_2:N:0:TCTGCAAG+GCTGCACT  
GCGGTTGAAGTTCACCCATTCTATCTTGAATGCTCACGCCGTCGCAGCCATATCGAGACTATGTTATA  
ATCACTTGTTAAAGTACAGATTTAGTGATTTAGATATTATTGATATTG

+  
FFFFFFFFFFFFFFFFFFFFFFFFFFFFFFFFFFFFFFFFFFFFFFFFFFFFFFFFFFFFFFFFFFFFFFFFFFFFFFFF  
FFFFFFFFFFFFFFFFFFFFFFFFFFFFFFFFFFFFFFFFFFFFFFFFFFFFFFFFFFFFFFFF:FFFFFFF

@A00721:190:HGJW7DSXY:4:1211:21296:33896\_2:N:0:TCTGCAAG+GCTGCACT  
TCATATCCAAAACCTCCTTGAATGGAGTACATATTTGCAACCCTATTCTTGATGTGAAAGATGCATCGA  
GGTATACGTCTAGGAACATTGATTGGGAACGTACCTACTCACGAGACG

+  
FFFFFFFFFFFFFFFFFFFFFFFFFFFFFFFFFFFFFFFFFFFFFFFFFFFFFFFFFFFFFFFFFFFFFFFFFFFFFFFF  
FFF:FFFFFFFFFFFFFFFFFFFFFFFFFFFFFFFFFFFFFFFFFFFFFFFFFFFFFFFFFFFFFFFFFFFFFFFF

@A00721:190:HGJW7DSXY:4:2545:5005:31673\_2:N:0:TCTGCAAG+GCTGCACT  
GTTCTGTTACAAGAACGCTTTGGATTGTGACCATAAAGCCTCAGTTGCGATAGCTGTAGAGGTATACG  
ATATCTCTCTTGATGATGTAGCCACTATAATGCTTAAGAGAGAGATTG

+  
FFFFFFFFFFFFFFF:FFFFFFFFFFFFFFFFFFFFFFFFFFFFFFFFFFFFFFFFFFFFFFFFFFFFFFFFFFFFF  
FFFFFFFFFFFFFFFFFFFFFFFFFFFFFFFFFFFFFFFFFFFFFFFFFFFFFFFFFFFFFFFFFFFFFFFF

@A00721:190:HGJW7DSXY:4:1327:12057:8782\_1:N:0:TCTGCAAG+GCTGCACT  
GGAGATGATGGCGCATCACTTGATTACTATATGCCCGAAGGATTGGGTTATTCTCACAACAAAGATAA



GATTTTATCTTTCTTCAAACACCCTGTTTTCCTTAAGGGCGGACAATTGTTCCATTGTGAACTCTTGG  
GGA

+

FFFFFFFFFFFFFFFFFFFFFFFFFFFFFFFFFFFFFFFFFFFFFFFFFFFFFFFFFFFFFFFFFFFFFFFF  
FFFFF:FFFFFFFFFFFFFFF,FFFFFFFFFFFFFFFFFFFFFFFFFFFFFFFFFFFFFFFF:FFFF:FFFF:FFFFF  
FFF

@A00721:190:HGJW7DSXY:4:1331:14299:3740\_1:N:0:TCTGCAAG+GCTGCACT  
AGTGACTGGTGTTCAGACGTGTGCTCTTCCGATCTATTTCAGAATACCTATTTCCGTACCAAGAGCCAC  
TGCCAATCTCATCGCTATACGCATACCTGATTGGAAGAAGCGAGGTTGTTCTCAATAAAAAATTTT  
CTC

+

F:FF,:FFF,FFFFFFFFFFFFFFF,FFFF,FF:FFF:FFFFFFFF:FFFFFFFF:FFF:,::FF:F,FF  
FF,FFFFFFFFF:FFFFFFFF,FFF::FFFFFFFFFFFFFFF,F:,FF,FFFFFFFFFFFFFFFFFFFF  
:FF

@A00721:190:HGJW7DSXY:4:2327:13431:13949\_2:N:0:TCTGCAAG+GCTGCACT  
ACGTGATGGGGATCACTTCTTCGGTCAATGACAAAACCTTCGAATATGTTACGACATGGCTTCGTAAC  
AACAGTGCGAGGATTGTCATCTCGGGGAAAGTGATTACCAAGATGTT

+

FFFFFFFFFFFFFFFFFFFFFFFFFFFFFFFFFFFFFFFFFFFFFFFFFFFFFFFFFFFFFFFFFFFFFFFF  
FFFFFFFFFFFFFFFFFFFFFFFFFFFFFFFFFFFFFFFFFFFFFFFFFFFFFFFFFFFFFFFF

@A00721:190:HGJW7DSXY:4:2509:28890:21684\_1:N:0:TCTGCAAG+GCTGCACT  
AAGGTCGCAGCGATCTTACTCGTTATCGGAGCTAAGAAGAAGACTTTGGGTACACGTTATGCTCGCAA  
ACTTAACGTTAGTACCGGAGGTGATCTCTCTGCTTCTGCGTACTGAGAGAAAAGATTCAGGACGCCT  
ACG

+

FFFFFFFFFFFFFFFFFFFFFFFFFFFFFFFFFFFFFFFFFFFFFFFFFFFFFFFFFFFFFFFFFFFFFFFF  
FFFFFFFFFFFFFFFFFFFFFFFFFFFFFFFFFFFFFFFFFFFFFFFFFFFFFFFFFFFFFFFFFFFFFFFF  
FFF

@A00721:190:HGJW7DSXY:4:1363:29351:10332\_2:N:0:TCTGCAAG+GCTGCACT  
TTGAAACTACGGTCCTTATCAAAGAAAATGGTGAACCGGTCTCTAAATCTTTTGAGATTGAGAAGATT  
GAAGAACACGTCAAGAAGTCGCTCGGCGTTGTTCTTGAAAACCAAGTT

+

FF:F::FFFFFFFFFFFFFFFFF:FFFFFFFF:FFFFF:FFFFFFFFFFFF,FFFF:FFFFFFFFFFFF  
FFFFFFFFFFFFF,FFFFFFFF,FFFFFF:FFFFFFFFFFFF:,FFF:F

@A00721:190:HGJW7DSXY:4:1253:32524:11851\_1:N:0:TCTGCAAG+GCTGCACT  
CTGATCATGGAGTCTTTGTACCTTCTGTCAAACCTCGAGGTTGAGCTACGAGAGGTGATCCCGGATGT  
GGATTGAAGGCTGGCTCTAAGGGAGACTCCTTCTTTTGAATGTTGTAAGAATTGGGTTGAGAAGTG  
TGC

+

FFFFFFFFFFFFFFFFFFFFFFFFFFFFFFFFFFFFFFFFFFFFFFFFFFFFFFFFFFFFFFFFFFFFFFFF  
FFFFFFFFFFFFFFFFFFFFFFFFFFFFFFFFFFFFFFFFFFFFFFFFFFFFFFFFFFFFFFFFFFFFFFFF  
FFF

@A00721:190:HGJW7DSXY:4:1303:14633:1532\_1:N:0:TCTGCAAG+GCTGCACT  
TTTTCAAAAATGCGGATGGGTCTACTGATGTTTTCTACAGAGTGCAGTCGTTTCAACACTTATCACC  
ACTTTTGAAAGGAAAATAATTGGTGATGAAAATACGTATGTCGGTGGGTTCTCAAGGCTCTCATCGC  
CAC

+

FFFFFFFFFFFFFFFFF:FFFFFFFFFFFFFFFFFFFFFFFFFFFFFFFFFFFFFFFFFFFFFFFFFFFF  
FFFFFFFFFFFFFFFFFFFFFFFFFFFFFFFFFFFFFFFFFFFFFFFFFFFFFFFFFFFFFFFFFFFFFFFF  
FFF

@A00721:190:HGJW7DSXY:4:1622:18819:25128\_2:N:0:TCTGCAAG+GCTGCACT  
ATTCTTAAAAGAAGTTTATTAAACTTCAGAGTCTCTTGGAAGTCCAGGTAGCTAATGTTCTTGCAAT  
AGCCACAGACTTTCTGGGAAAAGAGACCTCTGTTGGTAGAGGAGTTGA

+

FFFFFFFFFFFFFFFFFFFFFFFFFFFFFFFFFFFFFFFFFFFFFFFFFFFFFFFFFFFFFFFF  
F:FFFFFFFFFFFFFFFFFFFFFFFFFFFFFFFFFFFFFFFFFFFFFFFF  
@A00721:190:HGJW7DSXY:4:1517:25201:12633\_2:N:0:TCTGCAAG+GCTGCACT  
CAGATTCAATCTGGCATCACTGAACGTCTACAACGAGTTAGGGAGTGGCTAGGTTTTAAAGATCCTT  
TGCACAAGCAATACCTTCCACTGAGTTCATCACCCAGAGTTTCTACGT

+  
FFFF,FFFF::FFFFFFFF:FFFF:FFFFF:FF:FFFF:FFFFFFFFFFFFFFFFFFFF,FFFFF  
F,:F:FF,FFFFFFFF:FF,:F,F:FF,FF:F,F:FFF:FF,FF::  
@A00721:190:HGJW7DSXY:4:1618:19786:28526\_2:N:0:TCTGCAAG+GCTGCACT  
GTACAGGGAGGAGGTAATAGTTATAAAACCTTCTTTTATCATTGCAACAGGACTTTGAGAAGACTGTT  
GAAATGGACAAAATCTGGGATCATAGGTATGTGTCACGCTACACTCGA

+  
FFFFFFFFFFFFFFFF:FFFFFFFFFFFFFFFFFFFFFFFFFFFFFFFFFFFFFFFFFFFF,F  
FFFFFFFFFFFFFFFFFFFFFFFFFFFFFFFFFFFFFFFFFFFFFFFFFFFFFFFF  
@A00721:190:HGJW7DSXY:4:1642:2130:11318\_2:N:0:TCTGCAAG+GCTGCACT  
CCATATCAGATTAGAGACATGCCAGTTAGAGTTCTTCTAACCAGGACTGATGGTGAGATTCTTTTACC  
TTTTGGAGGTCCAGGAACCTTTACTCCTAGTGTCTTTTCTAGAGTCCA

+  
FFFFFFFFFFFFFFFFFFFFFFFFFFFFFFFFFFFFFFFFFFFFFFFFFFFFFFFFFFFF:FFFFFFFFFFFFFFFFFFFFFFFF  
FFFFFFFFFFFFFFFFFFFFFFFFFFFFFFFFFFFF,FFFFFFFF,FFFFFFFFFFFFF  
@A00721:190:HGJW7DSXY:4:1568:10782:16282\_1:N:0:TCTGCAAG+GCTGCACT  
TTTCGGTTTCAGCTGGATGGATCTTTTGATGGTATGTTTCACATTGCGTGATCACTTCCCGTGGACTT  
GGGAAGAGATTAAACATAAAATCCAGCGATTCTATTATGTCGCTAAAGCCTGTCCAGTTGTCGATGAT  
GTT

+  
FFFFF:FFFFFFFFFFFFFFFFFFFFFFFFFFFFFFFFFFFFFFFFFFFFFFFFFFFFFFFFFFFF,F  
FFFFFFFFFFFFFFFFFFFFFFFFFFFFFFFFFFFFFFFFFFFFFFFFFFFFFFFFFFFF,FFFFFFFFFFFFFFFFFFFFFFFF  
FFF  
@A00721:190:HGJW7DSXY:4:2312:9435:21308\_1:N:0:TCTGCAAG+GCTGCACT  
TTACTAAGTCTGAGATCTGCCACTTCTAATTTTAGGAAACGTCGCGAAAAGAAAGTTCATGAGGATGT  
CTTGGTCGAAAATATCGCCGGAACCTTCTAATAGAGGATCCTGATGACATTATTTCAACGGATACCG  
ATC

+  
FFFFFFFFFFFFFFFFFFFFFFFFFFFFFFFFFFFFFFFFFFFFFFFFFFFFFFFFFFFF::FF  
FFFFFFFFFFFFFFFFFFFFFFFFFFFFFFFFFFFFFFFFFFFFFFFFFFFFFFFFFFFF  
FFF  
@A00721:190:HGJW7DSXY:4:2546:4191:32612\_1:N:0:TCTGCAAG+GCTGCACT  
ACCGTCTCAGGAAGTGTCTCCACTGATTTCGGAATTAGAGAAAGACGACCTTCTTGTGGGGACTGAGAC  
CTCTGAATTTTCAGGGTGCCTGATGAGGACGTTGAAAGGGATAATTTCAACTCTGAGACTTCTAAGA  
GTG

+  
FFFFFFFFFFFFFFFFFFFFFFFFFFFFFFFFFFFFFFFFFFFFFFFFFFFFFFFFFFFF  
FFFFFFFFFFFFFFFFFFFFFFFFFFFFFFFFFFFFFFFFFFFFFFFFFFFFFFFFFFFF  
FFF  
@A00721:190:HGJW7DSXY:4:2610:5448:8108\_1:N:0:TCTGCAAG+GCTGCACT  
TGTGCTCTTCCGATCTGATATGGTTGCGGCTGATCGTACCCCAATTCTGCTAGAAAGATCACTCTCG  
GCGATACCACTGATCTTCCAGAGTTACGTAGTGGTCTTTTGGTGATTTTATCAAAGAGAAAGTT  
TCT

+  
FFFFFFFFFFFFFFFFFFFFFFFFFFFFFFFFFFFFFFFFFFFFFFFFFFFFFFFFFFFF  
FFFFFFFFFFFFFFFFFFFFFFFFFFFFFFFFFFFFFFFFFFFFFFFFFFFFFFFFFFFF  
FFF  
@A00721:190:HGJW7DSXY:4:1521:21630:10582\_1:N:0:TCTGCAAG+GCTGCACT  
GTTTCATCGCGGTATTTGTGAAATTAAGACAGACGTGAAAGTTATGATGAGTGATCGTATTAGAACAGC





ATACTTCTATCGTCTTACGTTACGGTAATTACTATAGTGTTATTTATTCTGGTGGTGATGATAATCTT  
GGA

+

FFFFFFFFFFFFFFFFFFFFFFFFFFFFFFFFFFFFFFFFFFFFFFFFFFFFFFFFFFFFFFFFFFFFFFFF  
FFFFFFFFFFFFFFFFFFFFFFFFFFFFFFFFFFFFFFFFFFFFFFFFFFFFFFFFFFFFFFFFFFFFFFFF  
FFF

@A00721:190:HGJW7DSXY:4:2376:3712:16344\_1:N:0:TCTGCAAG+GCTGCACT  
GATGAAGCTATAAGAGCGTTCTTATTACGGCGCACTTCTTTACCCGCCACCACACAACCTTTCAGTTTC  
ACAACGAAGGAGGAGGTTTCTGTTACTGAAAACCCCTCGTCAATACTTTTCAATAATATACGTCTTG  
AAC

+

FFFFFFFFFFFFFFFFFFFFFFFFFFFFFFFF,FFFFFFFF:FFFFFFFFFFFF:FFF:FFF:FFFFFFFFFFFF  
FFFFFFFFFFFFFFFFFFFFFFFFFFFFFFFFFFFFFFFFFFFFFFFFFFFFFFFFFFFFFFFFFFFFFFFF  
FFF

@A00721:190:HGJW7DSXY:4:1451:16134:16313\_2:N:0:TCTGCAAG+GCTGCACT  
TGAACAAAGTTATCAAAGATAGTGGCATTCAAGGCAAACCTTACCCTGATTCCGGCCGGTGGTAGCTCA  
TTTCTACCAGGGGCTATTACTCTTGCTGAAACAGCTATTAAAGCTGTT

+

FFFFF,FFFFFFFFFFFF:FFFFFFFFFFFFFFFF,FFFFFFFFFFFFFFFFFFFFFFFFFFFFFFFFFFFF  
FFFFFFFFFFFFFFFFFFFFFFFFFFFFFFFFFFFFFFFFFFFFFFFFFFFFFFFFFFFFFFFF:FFFFFFF,FFF

@A00721:190:HGJW7DSXY:4:1558:31991:8234\_1:N:0:TCTGCAAG+GCTGCACT  
AGGATGTGCACTCTTTCTGCTACTTTAACGGAGCGTAGTGTACTCTTCGTCGATTGTATCAACAGTA  
ACATTACTTCTAATAAAGGTCTCTATCAAGCTCGTATTATCGTCGCTGCTGGATCTGCGTTACCGTTG  
AAG

+

FFFFFFFFFFFFFFFFFFFFFFFFFFFFFFFFFFFFFFFFFFFFFFFFFFFFFFFFFFFFFFFFFFFFFFFF  
FFFFFFFFFFFFFFFFFFFFFFFFFFFFFFFF,FFFFFFFFFFFFFFFFFFFFFFFFFFFFFFFFFFFFFFFF  
FFF

@A00721:190:HGJW7DSXY:4:2161:21992:31000\_2:N:0:TCTGCAAG+GCTGCACT  
GTAATTATGAAGACTGTGATTTATCTTTCACCTCTGGCCTTGATGAGGGTGTTTCTAATCGTAACATT  
AATAATTTCAATCTTCTTAAAAAGAAGATAGAGAGTCATACTTTGGGC

+

FFFFFFFFFFFFFFFFFFFFFFFFFFFFFFFFFFFFFFFFFFFFFFFFFFFFFFFFFFFFFFFFFFFFFFFF  
FFFFFFFFFFFFFFFFFFFFFFFFFFFFFFFF:FFFFFFFFFFFFFFFFFFFFFFFFFFFFFFFFFFFF

@A00721:190:HGJW7DSXY:4:2156:29107:29512\_1:N:0:TCTGCAAG+GCTGCACT  
CAAAGAGAATATCTAAATATTTACAAATCTTACCCTATCTACGAACCTAAAGTTCTGAAGACGTT  
GCTTGTCGCTTCCTCTTAATGGCACTACCTCGGTACAATCTTACTTGGAACGAAGGCGACCTGTTC  
CGG

+

FFFFFFFFFFFFFFFFFFFFFFFFFFFFFFFFFFFFFFFF,FFFFFF:FFFFFFFFFFFF,FFFFFFFFFFFF  
FFFFFFFFF,FFFFFFFFFFFFFFFFFFFFFFFFFFFFFFFFFFFFFFFFFFFFFFFFFFFFFFFFFFFF  
FFF

@A00721:190:HGJW7DSXY:4:2323:19226:11083\_1:N:0:TCTGCAAG+GCTGCACT  
TCTGTCTATATTAGGTGAAGCGAAATACGATTTCAACGTCAACGTTACCGAGTTTTGTTTCGTACC  
TTGATGCTGACTTTCGTCAATATGATTTGATCTGGTTGCTCAATTCTAAGCGTGTTCCGCTTAGTGCG  
AGG

+

FFFFFFFFFFFFFFFFFFFFFFFFFFFFFFFF,FFFFFFFFFFFFFFFFFFFFFFFFFFFFFFFFFFFFFFFF  
FFFFFFFFFFFFFFFFFFFFFFFFFFFFFFFFFFFFFFFFFFFFFFFFFFFFFFFFFFFFFFFFFFFFFFFF  
FFF

@A00721:190:HGJW7DSXY:4:2119:5213:30091\_1:N:0:TCTGCAAG+GCTGCACT  
TTCTTCCTTGATTTTAATATAAAGAATCTTTACCAGGACTCCTACTACAGGAGGCAGTCTTCTGATC  
GTAAGAAGTTTATAAGGAACATATCCATTTGTTGTAATAGGGTCATCAACTTAGAACTCGAAACTCTA  
AGT

+  
FFF,FFFFFFFFFFFFFFFFFFFFFFFFFFFFFFFFFFFFFFFFFFFFFFFFFFFFFFFFFFFFFFFFFFFFFFFF  
FFFFFFFFFFFFFFFFFFFFFFFFFFFFFFFFFFFFFFFFFFFFFFFFFFFFFFFFFFFFFFFFFFFFFFFFFFFF  
FFF  
@A00721:190:HGJW7DSXY:4:1663:2157:34851\_1:N:0:TCTGCAAG+GCTGCACT  
CAAGCTTACCTGTATCTTCAATGAAATTGGACTCTTCGATAGGGGACATTTTATCGTGGGCTTTCCGT  
AAAGGAAGATCTGTTATCGACGGTTTATCGTTTACGAAGTATCACTCCACCGGTGAATGGTTTAAGAA  
TAC  
+  
FFFFFFFFFFFFFFFFFFFFFFFFFFFFFFFFFFFFFFFFFFFFFFFFFFFFFFFFFFFFFFFFFFFFFFFF:FFFFFFFFFFFFFFFFFFFF  
FFFFFFFFFFFFFFFFFFFFFFFFFFFFFFFFFFFFFFFFFFFFFFFFFFFFFFFFFFFFFFFFFFFFFFFFFFFF  
FFF  
@A00721:190:HGJW7DSXY:4:2542:3468:24471\_1:N:0:TCTGCAAG+GCTGCACT  
TAGAGTAGAATTCCTGAAGAGTCCTTCCGTAACCAACTTCTTGACAATTTTCTTCAATCCTTCGATAA  
TAGTTAAATCTAGGATTATGTCTGTGTGAAAGACTTTCTACCGATAAGGGTCACTAGTCTTACACAA  
TTA  
+  
FFFFFFFFFFFFFFFFFFFFFFFFFFFFFFFFFFFFFFFFFFFFFFFFFFFFFFFFFFFFFFFFFFFFFFFFFFFF  
FFFFFFFFFFFFFFFFFFFFFFFFFFFFFFFFFFFFFFFFFFFFFFFFFFFFFFFFFFFFFFFFFFFFFFFFFFFF  
FFF  
@A00721:190:HGJW7DSXY:4:1525:12924:21997\_1:N:0:TCTGCAAG+GCTGCACT  
GACTGATTATCTAAAGATTGAAGGAAAATTTTATCCTCGTTTAACTTACTTAGACTTTTCTACGATAC  
AAATGATAACTTCTAATTTACGTTTGCTACTCAGAGCTGGTCTCTCAGCAAAGGGATGCATGGTGTT  
ATC  
+  
FFFFFFFFFFFFFFFFFFFFFFFFFFFFFFFFFFFFFFFFFFFFFFFFFFFFFFFFFFFFFFFFFFFFFFFFFFFF  
:FFFFFF:FFFFFFFFFFFFFFFFFFFFFFFFFFFFFFFFFFFFFFFFFFFFFFFFFFFFFFFFFFFFFFFFFFFF  
FFF  
@A00721:190:HGJW7DSXY:4:1149:12933:7607\_2:N:0:TCTGCAAG+GCTGCACT  
GGCATTGTGATAATAATGACGAGACTTTTCGTCATAATCGCTGCATATTACGGATTACACGGTACCAGCG  
CATCTCGTGTGAGCCTCGACCCGATTATATGGTATTAACCTATAAAG  
+  
FFFFFFFFFFFFFFFFFFFFFFFFFFFFFFFFFFFFFFFFFFFFFFFFFFFFFFFFFFFFFFFFFFFFFFFFFFFF  
FFFFFFFFFFFFFFFFFFFFFFFF:FFF:FFFFFFFFFFFFFFFFFFFFFFFFFFFFFFFFFFFFFFFFFFFF  
@A00721:190:HGJW7DSXY:4:1550:3405:21136\_2:N:0:TCTGCAAG+GCTGCACT  
TGTTCTCTGATCATTTTGACAATCTCTTCTTATAATAAATAAATAAATAATATTACTAATGGCAAATA  
GTGGAAAGGCTCCAGTCAACACTAGTTCGAGTGCTGCTTTGGATTACG  
+  
FFFFFFFFFFFFFFFFFFFFFFFFFFFFFFFFFFFFFFFFFFFFFFFFFFFFFFFFFFFFFFFFFFFFFFFFFFFF,FFFF,FFFFFFF  
FFF:FFFFFFF:FFFFFFFFFFFFFFFFFFFFFFFF:FFFFFFFFFFFFFFFFFFFF  
@A00721:190:HGJW7DSXY:4:2304:3983:22294\_2:N:0:TCTGCAAG+GCTGCACT  
ATAGGTGAAGGGATAGTTTTTACCTCGACCAACATTAAGGCGGCGGCGACTAATCTTAAAGCTTCACC  
CAAAATGAAGGACACTTCGAAACTGAATAATGATGCACAGATCGGAAG  
+  
FFFFFFFFFFFFFFFFFFFFFFFFFFFFFFFFFFFFFFFFFFFFFFFFFFFFFFFFFFFFFFFFFFFFFFFFFFFF  
FFFFFFFFFFFFFFFFFFFFFFFFFFFFFFFFFFFFFFFFFFFFFFFFFFFFFFFFFFFFFFFFFFFF  
@A00721:190:HGJW7DSXY:4:1652:17987:8249\_2:N:0:TCTGCAAG+GCTGCACT  
AGGATATTCGCCATTGTGGTACGAATTGGTCCAACATTTACCACCAAATTCTTTTGATACAACCTCTAG  
CCTTCAAGTGGGGTATGCCTGCGGAATACGCTTGCTATTCACCAGATT  
+  
FFFFFFFFFFFFFFFFFFFFFFFFFFFFFFFFFFFFFFFFFFFFFFFFFFFFFFFFFFFFFFFFFFFFFFFFFFFF  
FFFFFFFFFFFFFFFFFFFFFFFFFFFFFFFFFFFFFFFFFFFFFFFFFFFFFFFFFFFFFFFFFFFF  
@A00721:190:HGJW7DSXY:4:1272:11451:7952\_2:N:0:TCTGCAAG+GCTGCACT  
TGCTATGTCAGAAGAAGCTATTCAAGCTTGTCGTTTAAAGACTGCAGAGGCTGTCAAACAAGCCCAGA



$+$ 

@A00721:190:HGJW7DSXY:4:2224:14425:23218\_1:N:0:TCTGCAAG+GCTGCACT  
TAAAAATACTTCAAGTACCTGAACCTTTACATTTTTTAATGGTATGGTATAATGTGTCTTACAAATAGAA  
CCTTCACTCTCGGTAATGAGAGTGTATTCCTTAATATTCTAGTAACCGCTATGTGGGCATTACTGGGA  
TTT

+

@A00721:190:HGJW7DSXY:4:2608:17951:24627\_2:N:0:TCTGCAAG+GCTGCACT  
AAAACTCCATTGTATAGTTCAAGGAGTACTTAATTC AATAGCTTTAGTATTATTTACTATCGCCTTT  
ATTGAAAATTGTATAAGAGTTAATTGCTTACACAAAAGTGACGCGCGA

+

@A00721:190:HGJW7DSXY:4:1355:24523:10457\_2:N:0:TCTGCAAG+GCTGCACT  
AACTGGCACGCCAGACGTAGGGTCAAACCTACTACCGCCGGTCGGCAGATCGGCACCACTGGTCTCTA  
CGTTCAGGGACCCGCTGTGCAGAATAACCTTCCCAAATCTAGATCTGC

+

@A00721:190:HGJW7DSXY:4:1136:6099:13714\_2:N:0:TCTGCAAG+GCTGCACT  
AGGTCGCTCGTAACATTGACGGCAGTCCCGTCATCTCTGTGGGAAGTGGAGGAGTACCTCAGTCAAAA  
GTCACATTCACTACTCCCATGCCAATCAATGATGTGACTATACAGTTC

+

@A00721:190:HGJW7DSXY:4:1554:1823:14199\_1:N:0:TCTGCAAG+GCTGCACT  
ATACGTCGTGGGAGGTACTGAAGCCTTCCCCTCCGCTGGCAGGAAGCACTCCCAAGCCAATCAATA  
GTTCTTCTGACCAGAATGAAAAGGGGTTTACCAGGGTAGTCTCTAAGTCTACCAGGAAGAGGGGAAT  
GTC

 $+$ 

@A00721:190:HGJW7DSXY:4:2656:3423:22983\_2:N:0:TCTGCAAG+GCTGCACT  
AGGTCCATCAGGACCTAAGAAGGGGAAATTACCCCTAATTCTGAAGGAAGATCTCCACCATCTGGGG  
TTGGGAATAAGAAATCTGCACGGGCCAAAGAGGCCGCTGCTACGAAGT

+

@A00721:190:HGJW7DSXY:4:1654:23882:30514\_1:N:0:TCTGCAAG+GCTGCACT  
TCTTGAGAGTGACTGGAGTTCAGACGTGTGCTCTTCCGATCTCTTTGAGACCAAGACTCTCTACAGT  
AGGTTCTGTCCTACTATGAGCAAATCTGTTGAATTCGTCACTGAGGACGAAGGTGAGAGGACTTTTGG  
CTA

 $+$ [illegible]



@A00721:190:HGJW7DSXY:4:2304:6117:29966\_2:N:0:TCTGCAAG+GCTGCACT  
CGTGGGTTGAAGGCCGACGCTTCGAGCTTGAGTGTGACGAGGCCGGTGACGTTTTTGTCAACGGCGTT  
TGGAGGATTTTATCCGCGCTTAACCTATGGGGCGAAGATCCCCTATGGA

+

FFFFFFFFFFFFFFFFFFFFFFFFFFFFFFFFFFFFFFFFFFFFFFFFFFFFFFFFFFFFFFFFFFFFFFFF  
FFFFFFFFFFFFFFFFFFFFFFFFFFFFFFFFFFFFFFFFFFFFFFFFFFFFFFFFFFFFFFFF

@A00721:190:HGJW7DSXY:4:1165:11216:10833\_2:N:0:TCTGCAAG+GCTGCACT  
TATTTATGCCGACGATAATAAGCATGTACCCCTTAAGCACCGAGGTAAGCTCGGGACTTACAAGAGAG  
AGTGTGAGAGAGTCGCTCTCACTATTTTTGCCGAGAATGCGGGCCTTC

+

FF:FFFFFFFFFFFFFFFFFFFFFFFFFFFFFFFFFFFFFFFFFFFFFFFFFFFFFFFFFFFFFFFFFFFF  
FFFFFFFFFFFFFFFFFFFFFFFFFFFFFFFFFFFFFFFFFFFFFFFFFFFFFFFFFFFFFFFF

@A00721:190:HGJW7DSXY:4:2602:30092:35321\_1:N:0:TCTGCAAG+GCTGCACT  
GAGAGCATTAGAAGGAAGTTGGGCAAATTCACACATATGGTAGACGTTGTCACACTTTTCTTGAAAAT  
TTTTCTTTCTCCGTCATTGGGGATTTTCGATGTGAGAAGGTGGAAGGTGTCAAGGGTCTTCTTCATG  
CTG

+

FFFF: :FF:FFFF,FFFFFFFFFFFFFFFFFFFFFFFFFFFFFFFFFFFFFFFFFFFFFFFFFFFF: :FFFF:FF:FFFF  
FFFFFFFFFFFFFFFFFFFFFFFFFFFFFFFFFFFFFFFFFFFFFFFFFFFFFFFFFFFFFFFFFFFFFFFF  
FFF

@A00721:190:HGJW7DSXY:4:1656:2582:4586\_2:N:0:TCTGCAAG+GCTGCACT  
ATGATTGATAGTTACGGCTCGTATCGAGTTGGAGGGAGGAAGTTCTCCGAAATTAAAGACGGGGGGAT  
TAAGAGTCCAGCTGTAACGTCAATTCAGAGAGGGGAGCTCTGAAAAG

+

FFFFFFFFFFFFFFFFFFFFFFFFFFFF,FFFFFFFFFFFFFFFFFFFF:FFFFFFFFFFFFFFFFFFFFFFFF  
FFFFFFFFFFFFFFFFFFFFFFFFFFFFFFFFFFFFFFFFFFFFFFFFFFFFFFFFFFFFFFFF

@A00721:190:HGJW7DSXY:4:2402:13657:32127\_2:N:0:TCTGCAAG+GCTGCACT  
GTTTGAGGAAGGCTCTAGAGAAGATCTCACACCTGGAGAAGGCAAGTGGAGAGTCCAGAAGTTGATG  
AAGAAGGATTATTTGAAGCAGGGGTTACCACTTCCTAAGGTGGATGAG

+

FFFFFFFFFFFFFFFFFFFFFFFFFFFFFFFFFFFFFFFFFFFFFFFFFFFFFFFFFFFFFFFFFFFF:FFFFF  
FFFFFFFFFFFFFFFFFFFFFFFFFFFF:FFFFFFFFFFFF:FFFFFFFF,FFF

@A00721:190:HGJW7DSXY:4:1363:24605:31485\_2:N:0:TCTGCAAG+GCTGCACT  
ATCTTGAGGACGTACATTTAACGTGGCAGAATTCCGTAACCTACCATATTGTTCTTCCGGGAAGTTG  
TGGGATTTAACTTTGACTCAACTACTCCGATCAGATCCGATGGTTTG

+

FFFFFFFFFFFFFFFFFFFFFFFFFFFFFFFFFFFFFFFFFFFF:F:FFFF:FFFFFFFFFFFFFFFF:F,FFFF  
FFFFFFFFFFFFFFFFFFFFFFFFFFFFFFFFFFFFFFFFFFFF:FFFFFFFFFFFF

@A00721:190:HGJW7DSXY:4:1402:9715:29496\_2:N:0:TCTGCAAG+GCTGCACT  
CAGGTCAAAGATTCTGTAGCTCTGAGGGCGGTTGAGGGAGCCGTTTTGGCCGACTTTAACTATTCTAA  
GAGTCTTTATGATTCAAAACCTATCGTTGTCGTACCTTACAAGGTTGA

+

FFFFFFFFFFFFFFFFFFFFFFFFFFFFFFFFFFFFFFFFFFFF, :FFFFFFFF:FFFFFFFFFFFF,  
FFFFFFFFFFFFFFFF:FF:FFFFFFFFFFFFFFFFFFFFFFFFFFFF:FFF

@A00721:190:HGJW7DSXY:4:1373:8341:10676\_2:N:0:TCTGCAAG+GCTGCACT  
GCGGTTGAAGTTCACCCATTCTATCTTGAATGCTCACGCCGTCGAGCCATATCGAGACTATGTTATA  
ATCACTTGTTAAAGTACAGATTTAGTGATTTAGATATTATTGATATTG

+

FFFFFFF,FFFFFFFFFFFFFFFFFFFFFFFFFFFFFFFFFFFF:FFFFFFFFFFFFFFFFFFFFFFFFFFFF  
FFFFFFFFFFFFFFFFFFFFFFFFFFFF:FFFFFFFFFFFFFFFFFFFF:F:FF

@A00721:190:HGJW7DSXY:4:1226:28935:2503\_2:N:0:TCTGCAAG+GCTGCACT  
TCATATCCAAAACCTCCTTGAATGGAGTACATATTTGCAACCCTATTCTTGATGTGAAAGATGCATCGA  
GGTATACGTCTAGGAACATTGATTGGGAACGTACCTACTCACGAGACG

+





FFFFFFFFFFFFFFFFFFFFFFFFFFFFFFFFFFFFFFFFFFFFFFFFFFFFFFFFFFFFFFFFFFFFFFFF  
FFF

@A00721:190:HGJW7DSXY:4:2555:22661:15217\_2:N:0:TCTGCAAG+GCTGCACT  
TGGTTGCGGCTGATCGTACCCCAATTCCTGCTAGAAAGATCACTCTCGGCGATACCACTGATCTTCCA  
GAGTTACGTAGTGGTCGTTCTTTTGGTGATTTTATCAAAGAGAAAGTT

+

FFFFFFFFFFFFFFFFFFFFFFFFFFFFFFFFFFFFFFFFFFFFFFFFFFFFFFFFFFFFFFFFFFFFFFFF  
FFFFFFFFFFFFFFFFFFFFFFFFFFFFFFFFFFFFFFFFFFFFFFFFFFFFFFFFFFFFFFFF

@A00721:190:HGJW7DSXY:4:1611:29225:33505\_1:N:0:TCTGCAAG+GCTGCACT  
GTTTCATCGCGGTATTTGTGAAATTAAGACAGACGTGAAAGTTATGATGAGTGATCGTATTAGAACAGC  
TGATTCTTATTGCATGAACGTCGCTGAGGTCAAACCTGTGGACGTTCTTTTCATCGACGAATTATTCA  
TGA

+

:FFFFFFFFFFFFFFFFFFFFFFFFFFFFFFFFFFFFFFFFFFFFFFFFFFFFFFFFFFFFFFFFFFFFF,FFFFFFFFFFFFFFFFFFFFFFFFF:  
FFFFFFFFFFFFFFFFFFFFFFFFFFFFFFFFFFFFFFFFFFFFFFFFFFFFFFFFFFFFFFFFFFFFFFFFF:FFFFFFFFFFFFFFFFFFFFFFFFF  
FFF

@A00721:190:HGJW7DSXY:4:1303:6135:21512\_1:N:0:TCTGCAAG+GCTGCACT  
CTACTTAAGGCGGCTTATACCATAGGTTACGGTGATTCCAATCAAATCGGATTCATCAATCGTATTGA  
TCTCCAAGTCGCAAACTACTTCAACATCAACGACATCATTCTTGATGAGTGTCGTTCTTATCGAAGTC  
TCA

+

FFFFFFFFFFFFFFFFFFFFFFFFFFFFFFFFFFFFFFFFFFFFFFFFFFFFFFFFFFFFFFFFFFFFFFFF  
FFFFFFFFFFFFFFFFFFFFFFFFFFFFFFFFFFFFFFFFFFFFFFFFFFFFFFFFFFFFFFFFFFFFFFFFF,FFFFFFFFFFFFFFFFFFFFFFFFFFFFFFFFF  
FFF

@A00721:190:HGJW7DSXY:4:2570:20925:34350\_2:N:0:TCTGCAAG+GCTGCACT  
CGGCCGACGTTTGTGCGGAACTCTCAGAGGTTTACGGCAGAAAAATTTCTCCTGCTTGTAAATTCGAGA  
GAGGACACTATGGAAATTAGACCTATCAGATGTCTTGACGACGTCGAA

+

FFFFFF:FF,FFFFFFFFFFFFFFFFFFFFFFFFFFFFFFFFFFFFFFFFFFFFFFFFFFFFFFFFFFFFF,FFFFFFFF:FFF  
FFFFFF:FFFFFFFFFFFFFFFFFFFFFFFFFFFFFFFFFFFFFFFFFFFFFFFFFFFFFFFFFFFFFFFFF,,F,F

@A00721:190:HGJW7DSXY:4:1610:11125:14058\_2:N:0:TCTGCAAG+GCTGCACT  
ATGCTACTTGTGAGAGGATCAATCACAGTAAGGAACTGTCACGTTTAGCACGGGAGGTTGCAGATTCA  
ACCCCTTATATCGAGGCTATCGAGGACGATGAGTATCTTGAAGTTGTT

+

FFFFFFFFFFFFFFFFFFFFFFFFFFFFFFFFFFFFFFFFFFFFFFFFFFFFFFFFFFFFFFFFFFFFFFFF  
FFFFFFFFFF:FFF:FFFF:FFFFFFFFFFFF:FFFFFFFFFFFFFFFFFFFFFFFF

@A00721:190:HGJW7DSXY:4:2104:25744:32174\_1:N:0:TCTGCAAG+GCTGCACT  
AGAGGACCACCTGGATCTTCTACTGTCTCTGCCTTCCAAGATTTCTTAGAAGAGGTTATTCCTGGAAC  
CACCTTAACGTCACTCGGTAATCTTTCAGCCGAATTAAGTACTAATGAGTTCAAGTCGTTGTCGATC  
GAA

+

FF,FF:,F,F,F,:FF,FFFF:FFFFFFFF:F,FF,F:FFFFFF:FFF,FFFF:FFFFFFFFFFFFFFFFF  
,FF:FFFFFF:,F:,FFFFFFFFFFFFFFFF:FFFF:FFFFFFFFFFFFFFFFFFFFFFFFFFFFFFFFF:  
FFF

@A00721:190:HGJW7DSXY:4:1540:6442:9204\_1:N:0:TCTGCAAG+GCTGCACT  
TAATACCTTTATAGGTAAGAAGCCCCTTGAGCCGCGTAGTCAGCGCGTTTAGCTGTATCATCAGTCAG  
AGTATACCCGATAGGGTACCGAGTCTCCAAGAGAATATTTATTCTTATGAGGCTCGAACTTCAACGT  
TTT

+

FFF,FFFFFFFFFFFFFFFFFFFFFFFFFFFFFFFFFFFFFFFFFFFFFFFFFFFFFFFFFFFFFFFFF:FFFFFFFFFFFFFFFFF:FFFFFFFF:F:FFFFFFFFF  
FFFF:FFFFFFFFFFFFFFFFFFFFFFFFFFFFFFFFFFFFFFFFFFFFFFFFFFFFFFFFFFFFFFFFF:FFFFFFFFFFFFFFFFFFFFFFFFFFFFFFFFF:FFFFFFFFF  
FFF

@A00721:190:HGJW7DSXY:4:1170:31114:8469\_1:N:0:TCTGCAAG+GCTGCACT  
ATAGGGACGCTAGTATACTTCGTAAAGTCGACAGCGAAATGGTCAATATTGATAATTGGACCGACTAT

ATGACCTATTTTAAGCTCATGGTGAAAAGGGAAGCTAAGGTTAACTTGATGCTTCAGCCTTTTCGAA  
GCA

+

:FFF:FFFF,FF,FFF,FFFFFFFFFFFFFFFFFFFFFFFFFFFFFFFFFFFFFFFF:FFFF:FFFFFFFF  
FFFFFFFFFFFFFFFFFFFFFFFFFFFFFFFFFFFFFFFFFFFFFFFFFFFFFFFFFFFFFFFF  
FFF

@A00721:190:HGJW7DSXY:4:2326:1127:6793\_1:N:0:TCTGCAAG+GCTGCACT  
GAGTATCCATAACGATTTGTCATTTACCACCTTTGCTCAACGACGAAGTGGAACGGCCAACACTTTCT  
TTGGTAATTGTATGATCACTTTGATGATTTTATCACTTTATTATGACCTTGAAAGTTTTTCGGCTGTG  
GTT

+

FFFFFFFFFFFFFFFFFFFFFFFFFFFFFFFFFFFFFFFFFFFFFFFFFFFFFFFFFFFFFFFF:FFFF  
FFFFFFFFFFFFFFFFFFFFFFFFFFFFFFFFFFFFFFFFFFFFFFFFFFFFFFFFFFFFFFFF  
FFF

@A00721:190:HGJW7DSXY:4:2532:14208:12978\_2:N:0:TCTGCAAG+GCTGCACT  
GAGGGTCGTTATACCTATTCGGCTATCTGTGCTTTGAATTGTATAAGATCAAATTTTAAACGATTCCG  
AGAGGTTTATCCTGATGTGGAGGGAGTTCTTGAAGCATCCCGACCTTT

+

FFFFFFFFFFFFFFFFFFFFFFFFFFFFFFFFFFFFFFFFFFFFFFFFFFFFFFFFFFFFFFFF:FFFF  
FFFFFFFFFFFFFFFFFFFFFFFFFFFFFFFFFFFFFFFFFFFFFFFFFFFFFFFFFFFFFFFF

@A00721:190:HGJW7DSXY:4:2321:20202:5165\_1:N:0:TCTGCAAG+GCTGCACT  
AGACAGGTGATATTGTTGAGCGAGAGCGACCAAGATCTAAATTCGTAACGGTGCGTGCGCTTTATT  
TTAAAAAGCTCCCTCCTCTCGCAAGTTTGATCTGATACTTATCACGAAAGGACTTGAGTCTTTTGATC  
AGT

+

FFF,,F:FFFF:FFFFFFFF,,FFFFFFFF:FFFFF:FFF,FFFFFFFF,FFFFFFFF:,,,FFFFF  
FFFFFFFFFFFFFFFF:FFFF:FFFFFFFF:FFFFFFFFFFFFFFFFFFFFFFFF,FFFFFF,FFFFFF  
F:F

@A00721:190:HGJW7DSXY:4:2378:10474:27555\_1:N:0:TCTGCAAG+GCTGCACT  
ATTTTTCCTCATCAGCTTGTGTTTTACCTAATCTGTGTTTTTACGATAACAACATCAGTTGATTAAG  
ACTCTTCCGAAAGGCGAACTTTGGGAATTTGAAGCTCAGGGTGAAGCACAACGTTTGACCGTGACGAA  
CTG

+

FFFF:FFFFFFFFF:FFFFFFFFFFFFFFFFFFFFFFFFFFFFFFFFFFFFFFFFFFFFFFFF:FFFF,FFFFFFFF  
FF:FFFFFFFFFFFF,FFFFFFFFFFFFFFFF:FFFFFFFFFFFF:FFF:FFFFFFFFFFFFFFFFFFFF::  
FFF

@A00721:190:HGJW7DSXY:4:2606:11134:21465\_2:N:0:TCTGCAAG+GCTGCACT  
ATCACTCATTTTAGTGAGATTATTAACGCACTAAACGTCTTCGACAACAGCCGGGTTTTTCGAA  
TAGTGATAGCCACCCGCTTACAGAGGGGCAGCAGCATGACCATAATT

+

FFFFFFFFFFFFFFFFFFFFFFFFFFFFFFFFFFFFFFFFFFFFFFFFFFFFFFFFFFFFFFFF,FFFFFFFFFFFF  
FFFFFFFFFFFFFFFFFFFFFFFFFFFFFFFFFFFFFFFFFFFFFFFFFFFFFFFFFFFFFFFF

@A00721:190:HGJW7DSXY:4:2543:8278:26757\_2:N:0:TCTGCAAG+GCTGCACT  
CTGTCTCGCCTCTTCGAATGAAGTTTTAATGCTTAACAACAATGATAGTGAATTTATACCTACAATCA  
TTGGTTTTTCTAATAATGATGACACTATTGTTTATGGATATGATGCTA

+

FFFFFFFFFFFFFFFFFFFFFFFFFFFFFFFFFFFFFFFFFFFFFFFFFFFFFFFFFFFFFFFFFFFFFFFF  
FFFFFFFFFFFFFFFFFFFFFFFF:FFFF:F:F:F:FFFFFFFFFFFFFFFFFFFF,FF

@A00721:190:HGJW7DSXY:4:1601:27489:14716\_1:N:0:TCTGCAAG+GCTGCACT  
ATTAACCATTTGTACGATGTCGTCTGTCTCGCGCATCACTTTTACTAAGAATTGGTCTACTTTTG  
GACAAGGCCAACTTCGTAATCTTCATGAGATCGTTTCTTTCTTTATCTCTTTGTTGTTAGGGATTTT  
GAG

+

:FFFFFFFF,,FFFFFF:FF:FFFFFFFFFFFFFFFFFFFFFFFFFFFFFFFF:FFFF:FFF,FFFF:FFFFF:FFF

FFFFFFFFFFFFFF:FFFFFFFFFFFFFF:FFFFFFFFFFFFFF:FFFFFFFF:FFFFFFFFFFFFFF  
FFF

@A00721:190:HGJW7DSXY:4:1504:29215:31203\_2:N:0:TCTGCAAG+GCTGCACT  
AATTGTAGTGGTTTGGTCGTTTCAGTACCCAGTCAGTATACCTCTACGCAAAGATATTTTCATGAAAAC  
TACAGAGGAACGTACCGGATTACCTGTCTTTCATATTATGAATGAACC

+

FFFFFFFFFFFFFFFFFFFFFFFFFFFFFFFFFFFFFFFFFFFFFFFFFFFFFFFFFFFFFFFF:FFFFFFFFFFFFFF  
FFFFFFFFFFFFFF:FFFFFFFFFFFFFFFFFFFFFFFFFFFFFF:FFFFFFFFFFFFFF:FFF

@A00721:190:HGJW7DSXY:4:1649:17146:15687\_1:N:0:TCTGCAAG+GCTGCACT  
GGATGTCAAGAAGGGTTCAGAAATGGGATTCTACGTAGTTTATGACTTTGGTGGTGGTACTTTCGATA  
CTTCTATCGTCTTACGTTACGTAATTACTATAGTGTTATTTATTCTGGTGGTGGTATGATAATCTTGGA  
GGT

+

FFFFF:FFFFFFFFFFFFFF:FFFFFFFF:FFF:FFFFFFFF:FFFFFFFFFFFFFFFFFFFFFFFF:F:::  
FFF:FFF,:FFFFFFFF,FFF:FFFFFFFF:FFFFFFFFFFFFFFFFFFFFFFFF:FFFFFFFF:FF  
FFF

@A00721:190:HGJW7DSXY:4:1535:22589:27524\_2:N:0:TCTGCAAG+GCTGCACT  
AGCGTTCTTATTACGGCGCACTTCTTTACCCGCCACCACACAACCTTTCAGTTTCACAACCTGAAGGAGG  
AGGTTTCTGTTACTGGAAAACCCTCGTCAATACTTTTCAATAATATAC

+

FFFFF:FFFFFFFFFFFFFF,FFFFFFFFFFFFFFFFFFFFFFFFFFFFFFFFFFFFFFFF:FF  
FFFFFFFFFFFFFFFF,FFFFFFFFFFFFFFFFFFFFFFFFFFFFFFFF

@A00721:190:HGJW7DSXY:4:1453:31394:20384\_2:N:0:TCTGCAAG+GCTGCACT  
TGAACAAAGTTATCAAAGATAGTGGCATTCAAGGCAAACCTTACCCTGATTCCGGCCGGTGGTAGCTCA  
TTTCTACCAGGGGCTATTACTCTTGCTGAAACAGCTATTAAAGCTGTT

+

FFFFFFFFFFFFFFFFFFFFFFFFFFFFFFFFFFFFFFFFFFFFFFFFFFFFFFFFFFFFFFFF  
FFFFFFFFFFFFFFFFFFFFFFFFFFFFFF:FFFFFFFFFFFFFFFFFFFFFFFF

@A00721:190:HGJW7DSXY:4:1627:21811:3380\_1:N:0:TCTGCAAG+GCTGCACT  
AGGATGTGCACTCTTTTCTGCTACTTTAACGGAGCGTAGTGTACTCTTCGTCGATTGTATCAACAGTA  
ACATTACTTCTAATAAAGGTCTCTATCAAGCTCGTATTATCGTCGCTGCTGGATCTGCGTTACCGTTG  
AAG

+

FFFFFFFFFFFFFFFFFFFFFFFF:FFFF:FFFFFFFFFFFFFFFFFFFFFFFFFFFFFFFF  
FFFFFFFFFFFFFFFFFFFFFFFFFFFFFFFFFFFFFFFFFFFFFFFFFFFFFFFFFFFFFFFF  
FFF

@A00721:190:HGJW7DSXY:4:2161:22327:31078\_2:N:0:TCTGCAAG+GCTGCACT  
GTAATTATGAAGACTGTGATTTATCTTTCACCTCTGGCCTTGATGAGGGTGTCTAATCGTAACATT  
AATAATTTCAATCTTCTTAAAAAGAAGATAGAGAGTCATACTTTGGGC

+

FFF,F:FFFFFF:,FFFFFFFFFFFFFF:FFFFFFFFFFFFFF,FF:FFFFFF,FFFFFF:FFFF  
FFFFFFFFFFFFFFFFFFFFFFFF:FFFFFFFF:F:F:FFFF,FFFF:

@A00721:190:HGJW7DSXY:4:2431:31195:8923\_1:N:0:TCTGCAAG+GCTGCACT  
CAAAGAGAATATCTAAATATTTACAAATCTTACCACTATCTACGAACCTAAAGTTCTGAAGACGTT  
GCTTGTGCTTCTCTCTTAATGGCACTACCTCGGTACAATCTTACTTGGAACGAAGGCGACCTGTTC  
CGG

+

FFFFFFFFFFFFFFFFFFFFFFFFFFFFFFFFFFFFFFFF:FFFFFFFFFFFFFFFFFFFFFFFF  
FFFFFFFFF:FFFFFFFFFFFFFFFF:FFFFFFFFFFFFFFFFFFFFFFFFFFFFFFFF  
FFF

@A00721:190:HGJW7DSXY:4:2333:5538:1157\_1:N:0:TCTGCAAG+GCTGCACT  
TCTGTCTATATTAGGTGAAGCGAAATACGATTTTCAACGTCAACGTTACCGAGTTTCGTTTCGTACC  
TTGATGCTGACTTTCGTCAATATGATTTGATCTGGTTGCTCAATTCTAAGCGTGTTCGCTTAGTGCG  
AGG

[illegible][illegible]

```
FFFFFFFFFFFFFFFFFFFFF:FFFFFFFFFFFFFFFFFFFFFFFFFFFFFFFFFFFFFFFF
FFFFFFFFFF:FFFFFFFFFFFFFFFFFFFFFFFFFFFFFFFFFFFFFFFFFFFFFFFFFFFF
FFF
```

```
FFFFFFFFFFFFFFFFFFFFFFFFFFFFFFFFFFFFFFFFFFFFFFFFFFFFFFFFFFFFFFF  
FFFFFFFFFFFFFFFFFFFF::FFFFFFFFFFFFFFFFFFFFFFFFFFFFFFFFFFFFFFFFFFFF:FFFFFFF  
FFF
```

[illegible][illegible]

```
,FFFFFFFFFFFFFFFFFFFFFFFFFFFFFFFFFFFFFFFFFFFFFFFFFFFFFFFFFFFFF:FFFFFFF  
FFFFFFFFFFFFFFFFFFFFFFFFFFFFFFFFFFFFFFFFFFFFFFFFFFFFFFFFFFFF
```

[illegible]

$+$  $+$ 

+

 $+$ 

+

+

+

+



[illegible]

```
+  
FFFFFFFFFFFFFFFFFFFFFFFFFFFFFFFFFFFFFFFFFFFFFFFFFFFFFFFFFFFFFFFFFFFFF:FF,FFF  
,FFFFF;FFFFFFFFFFFFFFFFFFFFFFFFFFFFFFFFFFFFFFFFFFFFFFFFFFFFFFFF
```

```
+
F:FFFFFF,FFFFFFFFFFFF:FFFFFFFFFFFFFFFFFFFFFFFFFFFF:FFFFFFFFFFFF:FFF:F,:F
FFFFFFFFFFFFFFFFFFFFFFFFFFFFFFFFFFFFFFFFFFFFFFFFFFFFFFFF
```

[illegible]

```
+  
FFFFFFFFFFFFFFFFFFFFFFFFFFFFFFFFFFFFFFFFFFFFFFFFFFFFF:FFFFFFFFFFFFFFFFFFFFFF  
FFFFFFFFFFFFFFFFFFFFFFFFFFFFFFFFFFFFFFFFFFFFFFFFFFFFFF
```

[illegible]

+  
F,,,:,,,:F,FF,,,FF:,FF,F::,FFF,FF,,,,,:FFF,:F,:F,FFFFFF,F,FFFFFF  
..FFF::F:F..FF.FF.F..F.FF..FF.....F:F.FFFFFFF:..F.

[illegible]

@A00721:190:HGJW7DSXY:4:1114:4689:25895\_1:N:0:TCTGCAAG+GCTGCACT  
TCAGACGTGTGCTCTTCCGATCTCCTAATTCTGAAGGAAGATCTCCCACCATCTGGGGTTGGGAATAA  
GAAATCTGCACGGGCCAAAGAGGCCGCTGCTACGAAGTCGCTGAAGGCGGCTTGGGTCATTAAGGGTA  
GCT

+

FFFF:FFFFFFFFFFFFFFFFFFFFFFFFFFFFFFFFFFFFFFFFFFFFFFFFFFFFFFFFFFFFFFFF  
FFFFFFFFFFFFFFFFFFFFFFFFFFFFFFFFFFFFFFFFFFFFFFFFFFFFFFFFFFFFFFFFFFFFFFFF  
FFF

@A00721:190:HGJW7DSXY:4:2313:12870:35963\_1:N:0:TCTGCAAG+GCTGCACT  
CCGACCCCATCTTTGAGACCAAGACTCTCTACAGTAGGTTCTGCCTACTATGAGCAAATCTGTTGAA  
TTCGTCACTGAGGACGAAGGTGAGAGGACTTTTGGCTACTGGCGACAACTGAGAGCAGTCGCTGGGG  
AAA

+

FFFFFFFFFFFFFFFFFFFFFFFFFFFFFFFFFFFFFFFFFFFFFFFFFFFFFFFFFFFFFFFFFFFF  
FFFFFFFFFFFFFFFFFFFFFFFFFFFFFFFFFFFFFFFFFFFFFFFFFFFFFFFFFFFFFFFFFFFFFFFF  
FFF

@A00721:190:HGJW7DSXY:4:2405:21459:8970\_1:N:0:TCTGCAAG+GCTGCACT  
GTCAACGGCGTTTGGAGGATTTTATCCGCGCTTAAGTATGGGGCGAAGATCCCCTATGGAGTCTTGAA  
GGACTTAGGTTGGCATATTTATGCCGACGATAATAAGCATGTCACCCTTAAGCACCGAGGTAAGCTCG  
GGA

+

FFFFFFFFF:FFFFFFFFFFFFFFFFFFFFFFFFFFFFFFFFFFFFFFFFFFFFFFFFFFFFFFFFFFFF  
FFFFFFFFFFFFFFFFFFFFFFFFFFFFFFFFFFFFFFFFFFFFFFFFFFFFFFFFFFFFFFFFFFFFFFFF  
FFF

@A00721:190:HGJW7DSXY:4:2640:23628:32205\_1:N:0:TCTGCAAG+GCTGCACT  
CACTATTTTGGCCAGAATGCGGGCTTTCTGACTGATGAGGTTAAACTCTTGCTCCTTCTGTGGGTG  
AGGGTTTTGTTATATTCAGTGGTTCTGGGAGGCTGCTTCTCCATAATTACAACCTCTCTTTAGAG  
AGC

+

FFFFFFFFFFFFFFFFFFFFFFFFF:FFFFFFFFFFFFFFFFFFFFFFFFFFFFFFFFFFFFFFFFFFFF  
FFFFFFFFFFFFFFFFF:FFFFFFFFF,FFFFFFFFFFFFFFFFFFFFFFFFF:FFFFFFFFFFFFFFFFF  
FFF

@A00721:190:HGJW7DSXY:4:2175:2456:30295\_1:N:0:TCTGCAAG+GCTGCACT  
AGTTTCAGACGTGTGCTCTTCCGATCTCTTTTCTTGAAAATTTTCTTTCTCCGTCAATTGGGGATTT  
CGATGTGAGAAGGTGGAAGGTGTCAAGGGTCTTCTTCATGCTGATCTTTCAGGACCTAATCACATCAT  
GAT

+

:FFFFFFFFFFFFFFFFFFFFFFFFF:FFFFFFFFFFFFFFFFFFFFFFFFFFFFFFFFFFFFFFFFFFFF  
FFFFFFFFFFFFFFFFFFFFFFFFFFFFFFFFFFFFFFFFFFFFFFFFFFFFFFFFFFFFFFFFFFFFFFFF  
FFF

@A00721:190:HGJW7DSXY:4:2321:13494:24549\_2:N:0:TCTGCAAG+GCTGCACT  
GAGTTGGAGGGAGGAAGTTCTCCGAAATTAAGACGGGGGATTAAGAGTCCAGCTGTAAGTGTGATT  
TCAGAGAGGGGAGCTCTGAAAAGGAACTTCGTCAGAAGATGAGGAAG

+

FFFFFFFFFFFFFFFFFFFFFFFFF:FFFFFFFFFFFFFFFFFFFFFFFFFFFFFFFFFFFFFFFFFFFF  
FFFFFFFFFFFFFFFFFFFFFFFFFFFFFFFFFFFFFFFFFFFFFFFFFFFFFFFFFFFFFFFFFFFF

@A00721:190:HGJW7DSXY:4:2501:20772:20807\_2:N:0:TCTGCAAG+GCTGCACT  
GTTTGAGGAAGGCTCTAGAGAAGATCTCACCACCTGGAGAAGGCAAGTGGAGAGTCCAGAAGTTGATG  
AAGAAGGATTATTTGAAGCAGGGGTTACCACTTCCTAAGGTGGATGAG

+

FFFFFFFFFFFFFFFFFFFFFFFFF:FFFFFFFFFFFFFFFFFFFFFFFFFFFFFFFFFFFFFFFFFFFF  
FFFFFFFFFFFFFFFFFFFFFFFFFFFFFFFFFFFFFFFFFFFFFFFFFFFFFFFFF:FFF:FFFFFFF

@A00721:190:HGJW7DSXY:4:1616:8296:31234\_2:N:0:TCTGCAAG+GCTGCACT  
ATCTTGAGGACGTACATTTAACGTGGCAGAATTTCGGTAACTTACCATATTGTTCTTCCGGGAAGTTG

+

@A00721:190:HGJW7DSXY:4:1402:9878:29434\_2:N:0:TCTGCAAG+GCTGCACT  
CAGGTCAAAGATTCTGTAGCTCTGAGGGCGTTGAGGGAGCCGTTTTGCCGACTTTAACTATTCTAA  
GAGTCTTTATGATTCAAAACCTATCGTTGTCGTACCTTACAAGTTGA

+

@A00721:190:HGJW7DSXY:4:1564:8043:35556\_2:N:0:TCTGCAAG+GCTGCACT  
GCGTTGAAGTTCACCCATTCTATCTTGAATGCTCACGCCGTCGCAGCCATATCGAGACTATGTTATA  
ATCACTTGTTAAAGTACAGATTTAGTGATTTAGATATTATTGATATTG

+

@A00721:190:HGJW7DSXY:4:1364:7916:31923\_2:N:0:TCTGCAAG+GCTGCACT  
TCATATCCAAACTCCTTGAATGGAGTACATATTTGCAACCCTATTCTTGATGTGAAAGATGCATCGA  
GGTATACGTCTAGGAACATTGATTGGGAACGTACCTACTCACGAGACG

+

@A00721:190:HGJW7DSXY:4:2505:23104:17707\_1:N:0:TCTGCAAG+GCTGCACT  
TTACAAGAACGCTTTGGATTGTGACCATAAAGCCTCAGTTGCGATAGCTGTAGAGGTATACGATATCT  
CTCTTGATGATGTAGCCACTATAATGCTTAAGAGAGAGATTGATGTATGTCATTTGCTCTTAGTTTGT  
CCC

+

@A00721:190:HGJW7DSXY:4:2636:4146:9580\_1:N:0:TCTGCAAG+GCTGCACT  
GGAGATGATGGCGCATCACTTGATTACTATATGCCCCAAGGATTGGGTATTCTCACAACAAAGATAA  
GATTTTATCTTTCTTCAAACACCCTGTTTTCTTAAGGGCGGACAATTGTTCCATTGTGAACCTCTTGG  
GGA

+

@A00721:190:HGJW7DSXY:4:1501:25238:25379\_1:N:0:TCTGCAAG+GCTGCACT  
AGTGACTGGAGTTCAGACGTGTGCTCTTCCGATCTATTCAGAATACCTATTTCCGTACCAAGAGCCAC  
TGCCAATCTCATCGCTATACGCATACCTGATTGGAAGAAGCGAGGTCGTTCTCAATAAAAATTTTT  
CTC

+

@A00721:190:HGJW7DSXY:4:1201:21513:35274\_1:N:0:TCTGCAAG+GCTGCACT  
ACGTCATGGGGATCACTTCTTCGGTCAATGACAAAACCTTCGAATATGTTACGACATGGCTTCGTAAC  
AACAGTGCGAGGATTGTCATCTCGGGGAAAGTGATTCACCAAGATGTTTCATATAGATACGAGATACCT  
AG

+

[illegible]





FFFFFFFFFFFFFFFFFFFFFFFFFFFFFFFFFFFFFFFFFFFFFFFFFFFFFFFFFFFFFFFFFFFFFFFF  
 FFFFFFFFFFFFFFFFFFFFFFFFFFFFFFFFFFFFFFFFFFFFFFFFFFFFFFFFF

+

+

+

+

+

+

+

[illegible]

FFFFFFFFFFFFFFFF:FFFFFFFFFFFFFFFFFFFFFFFFFFFFFFFFFFFFFFFFFFFFFFFFFFFFFFFFFFFFFFFF:FFFFFFFF  
FFF

@A00721:190:HGJW7DSXY:4:2206:12292:2331\_2:N:0:TCTGCAAG+GCTGCACT  
GTAATTATGAAGACTGTGATTTATCTTTCACCTCTGGCCTTGTATGATGGTGTCTTCTAATCGTAACATT  
AATAATTTCAATCTTCTTAAAAAGAAGATAGAGAGTCATACTTTGGGC

+

FFFFF:FF:FF,FF,FFFF:F:FFFF:F,FFFF:FFFFFF:FF,,F,F,:FFFFFFFF:F,:FFFFF:  
FFFFFFFFFFFFFFFFFFFF,FFFFFFFFFFFFFFFFFFFF:FF:FF::FFFF,F

@A00721:190:HGJW7DSXY:4:2101:10267:31109\_2:N:0:TCTGCAAG+GCTGCACT  
CTAAAATATTTACAAAATCTTACCACTATCTACGAACCTAAAGTTCTGAAGACGTTGCTTGTGCGCTTC  
CTCCTTTAATGGCACTACCTCGGTACAATCTTACTTGGAACGAAGCGC

+

FFFFFFFFFFFFFFFFFFFFFFFFFFFFFFFFFFFFFFFFFFFFFFFFFFFFFFFFFFFFFFFFFFFFFFFFFFFFFFFF:FF  
FFFFF:FFFFFFFFFFFFFFFFFFFFFFFFFFFFFFFFFFFFFFFFFFFFFFFFFFFFFFFFFFFFFFFF:FFFFFFF

@A00721:190:HGJW7DSXY:4:2335:25970:18129\_1:N:0:TCTGCAAG+GCTGCACT  
TCTGTCTATATTAGGTGAAGCGAAATACGATTTTCAACGTCAACGTTACCGAGTTTCGTTTCGTACC  
TTGATGCTGACTTTTCGTCAATATGATTTGATCTGGTTGCTCAATTCTAAGCGTGTTCGCTTAGTGCG  
AGG

+

:FFFFFFFFFFFFFFFFFFFFFFFFFFFFFFFFFFFFFFFFFFFFFFFFFFFFFFFFFFFFFFFFFFFFFFFFFFFFFFFF  
FFFFFFFFFFFFFFFFFFFFFFFFFFFFFFFFFFFFFFFFFFFFFFFFFFFFFFFFFFFFFFFFFFFFFFFFFFFFFFFF  
FFF

@A00721:190:HGJW7DSXY:4:2242:3016:25723\_1:N:0:TCTGCAAG+GCTGCACT  
TTCTTCTTGGATTTTAAATATAAAGAATCTTTACCAGGACTCCTACTACAGGAGGCAGTCTTCTGATC  
GTAAGAAGTTTATAAGGAACATATCCATTTGTTGTAATAGGGTCATCAACTAGAACTCGAACTCTA  
AGT

+

FFFFFFFFFFFFFFF:FFFFF:FFFFFFFFFFFFFFFFFFFFFFFFFFFFFFFFFFFFFFFFFFFFFFFFFFFFFFFF  
FFFFFFFFFFFFFFFFFFFF:FFF:FFFFFFFFFFFFFFFFFFFFFFFFFFFFFFFFFFFFFFFFFFFFFFFFFFFFF:FFFFF  
FFF

@A00721:190:HGJW7DSXY:4:2576:9444:34225\_1:N:0:TCTGCAAG+GCTGCACT  
CAAGCTTACCTGTATCTTCAATGAAATTGGACTCTTCGATAGGGGACATTTTATCGTGGGCTTTCCGT  
AAAGGAAGATCTGTTATCGACGGTTTATCGTTTACGAAGTATCACTCCACCGGTGAATGGTTTAAGAA  
TAC

+

FFFFFFFFFFFFFFFFFFFFFFFFFFFFFFFFFFFFFFFFFFFFFFFFFFFFFFFFFFFFFFFFFFFFFFFFFFFFFFFF:FFFFF  
FFFFFFFFFFFFFFFFFFFFFFFFFFFFFFFFFFFFFFFFFFFFFFFFFFFFFFFFFFFFFFFFFFFFFFFFFFFFFFFF  
FFF

@A00721:190:HGJW7DSXY:4:1266:26648:31767\_2:N:0:TCTGCAAG+GCTGCACT  
GAGTCCTTCCGTAACCAACTTCTTGACAATTTTCTTCAATCCTTCGATAATAGTTAAATCTAGGATTA  
TGTCTGTGTTGAAAGACTTTCTACCGATAAGGGTCACTAGTCTTACAC

+

FFFFFFFFFFFFFFFFFFFFFFFFFFFFFFFFFFFFFFFFFFFFFFFFFFFFFFFFFFFFFFFFFFFFFFFFFFFFFFFF:FFFFF  
FF:FFFFFFFFFFFFFFFFFFFFFFFFFFFFFFFFFFFFFFFFFFFFFFFFFFFFFFFFFFFFFFFFFFFFFFFF

@A00721:190:HGJW7DSXY:4:2402:21169:27665\_1:N:0:TCTGCAAG+GCTGCACT  
GACTGATTATCTAAAGATTGAAGGAAAATTTATCCTCGTTTAACTTACTTAGACTTTCTACGATAC  
AAATGATAACTTCTAATTTACGTTTGCTACTCAGAGCTGGTCTCTCAGCAAAGGGATGCATGGTGTT  
ATC

+

FFF:FFFFFFFFFFFFFFFFFFFFFFFFFFFFFFFFFFFFFFFFFFFFFFFFFFFFFFFFFFFFFFFFFFFFFFFF  
FFFFFFFFFFFFFFFFFFFFFFFFFFFFFFFFFFFFFFFFFFFFFFFFFFFFFFFFFFFFFFFFFFFFFFFFFFFFFFFF  
FFF

@A00721:190:HGJW7DSXY:4:1349:13114:26396\_2:N:0:TCTGCAAG+GCTGCACT  
GGCATTGATAATAATGACGAGACTTTCGTCATAATCGCTGCATATTACGGATTACACGGTACCAGCG



CATCTCGTGTGAGCCTCGACCCGATTATATGGTATTAACCTATAAAG

+

FFF,,,FFFFFF:F:FFFF:FFFFFF,::FF,F,:FFFFFF,FFFFFFFFFFFF:FFFF:FF,,F:FFFF  
FFFFFFFF:FFFFFFFF:FFFF:FFF,FF,F:F:F,FF:F,FFFFFFFF

@A00721:190:HGJW7DSXY:4:2229:31584:15483\_2:N:0:TCTGCAAG+GCTGCACT  
TGTTCTCTGATCATTTTGACAATCTCTTCTTATAATAATAATAATAATATTACTAATGGCAAATA  
GTGGAAAGGCTCCAGTCAACACTAGTTCGAGTGCTGCTTTGATTACG

+

FFFFFFFFFFFFFFFFFFFFFFFFFFFFFFFFFFFFFFFFFFFFFFFFFFFFFFFFFFFFFFFF:FFFFFFFFFFFFFFFF  
FFFFFFFFFFFFFFFFFFFFFFFFFFFFFFFFFFFFFFFFFFFFFFFFFFFFFFFFFFFFFFFF

@A00721:190:HGJW7DSXY:4:2369:15347:22654\_2:N:0:TCTGCAAG+GCTGCACT  
ATAGGTGAAGGATAGTTTTACCTCGACCAACATTAAGGCGGCGGCGACTAATCTTAAAGCTTCACC  
CAAAATGAAGGACACTTCGAACTGAATAATGATGCACAGATCGGAAG

+

FFFFFFFFFFFFFFFFFFFFFFFF:FF:FFFFFFFFFFFFFFFFFFFFFFFF:FFFFFFFFFFFFFFFF:FF  
FFFFFFFFFFFFFFFFFFFFFFFFFFFFFFFFFFFFFFFF:FF:FFFF:FFFFFFFF

@A00721:190:HGJW7DSXY:4:2220:21377:12179\_2:N:0:TCTGCAAG+GCTGCACT  
AGGATATTCGCCATTGTGGTACGAATTGGTCCAACATTTACCACCAAATTCTTTTGATACAACTCTAG  
CCTTCAAGTGGGGTATGCCTGCGGAATACGCTTGCTATTCACCAGATT

+

FFFFFFFFFFFFFFFFFFFFFFFFFFFFFFFFFFFFFFFFFFFFFFFFFFFFFFFFFFFFFFFF  
FFFFFFFFFFFFFFFFFFFFFFFFFFFFFFFFFFFFFFFFFFFFFFFFFFFFFFFF

@A00721:190:HGJW7DSXY:4:1642:5294:11788\_2:N:0:TCTGCAAG+GCTGCACT  
TGCTATGTCAGAAGAAGCTATTCAAGCTTGTGCTTTAAAGACTGCAGAGGCTGTCAAACAAGCCCAGA  
CTCAAGGAGTCCAATCAAAGGTTTTGAATTTAGCTCAACTGGGGAGAC

+

FFFFFFFFFFFFFFFFFFFFFFFFFFFFFFFFFFFFFFFFFFFFFFFFFFFFFFFFFFFFFFFF  
FFFFFFFFFFFFFFFFFFFFFFFFFFFFFFFFFFFFFFFF:FFFFFFFFFFFFFFFF

@A00721:190:HGJW7DSXY:4:1506:32479:28588\_1:N:0:TCTGCAAG+GCTGCACT  
AATAGTTCTACCGATACGTAGTGAACGCGTTCGTAGAACCAAGTACTTTCCGTCTGAAGAGTTTAGAG  
CTGCTATTGATTATGTAACCGATAGGAGTTGTATAGTTGAAGATGTGGCTTTAGACGATAATCCTTTA  
AGG

+

FF:F:F:, :F:FFFFFFFF,FFF,FFFFFFFF,FFFFFF:::,F::F, : ,F:FF:FFF:FFF,FF:F:F  
FFFFFFFFFFFF:F:FFFF: :FFFFFFFFFFFF:FFFFFFFFFF:FF:FFFF,F,FF:FFFFFFFF:FFF  
FFF

@A00721:190:HGJW7DSXY:4:2306:29993:8970\_1:N:0:TCTGCAAG+GCTGCACT  
GAAGATTTTCCCACAGATTTGTCTACGTTGCAGATCGCCACTCCAAACACTATATACATTATAAAATA  
TAAAAATAAGGGAGTCATAACTTTTGTTACCAAATTCTTGGCTTTCAACGAAGTCTCTGATTTTATTA  
ATC

+

FFFFFFFFFFFF:FFFFFFFFFFFFFFFFFFFFFFFFFFFFFFFFFFFFFFFFFFFFFFFFFFFFFFFF  
FFFFFFFFFFFFFFFFFFFFFFFFFFFFFFFFFFFFFFFFFFFFFFFFFFFFFFFFFFFFFFFF  
FFF

@A00721:190:HGJW7DSXY:4:1257:30752:35399\_2:N:0:TCTGCAAG+GCTGCACT  
ATCTCTCGTCAATTTACTCTGTACTTGATCTACGTCGTTTAACTGTCGGAACAACCTTTACTTAGAAT  
GACTCTATCTTTTCAGACACTTCTTATATTATTTACAATAGTTAATAT

+

FFFFFFFFFF:FF:FFFFFFFFFFFFFFFFFFFFFFFFFFFFFFFFFFFFFFFF:FFFFFFFFFFFF,FFFFFFFF:FFF  
FFFFFFFFFF:FFFFFFFFFFFFFFFFFFFFFFFFFFFFFFFFFFFFFFFFFFFFFFFF

@A00721:190:HGJW7DSXY:4:2212:6234:18020\_1:N:0:TCTGCAAG+GCTGCACT  
CTATCGTTTTCTGCTTTTTCTTAGCTAATAGATTAATAAAGGATGAGTACGAAAACCAACTCTTCGTT  
ACGAGACCTGATGGTAGAATAGATTTAGTCTCTACACCCATCTCAACGAGGATAAAGCGAGTTTTCCG  
TCC

+  
FFFFFFFFFFFFFFFF,FFFFFFFFFFFFFFFF,FFFFFFFFFFFFFFFFFFFFFFFFFFFFFFFF:FFFFFFFFFFFFFFFF  
FFFFFFFFFFFFFFFFFFFFFFFFFFFFFFFFFFFFFFFFFFFFFFFFFFFFFFFFFFFFFFFFFFFFFFFFFFFFFFFF  
FFF  
@A00721:190:HGJW7DSXY:4:2225:26223:23234\_1:N:0:TCTGCAAG+GCTGCACT  
AGATAAGCCGCACACGACTCGAAACCGAGACGCCGTAGATCAAAGTCCCTTCTAACTTTAGATTATGA  
ATCCTGCCTTTACTCATTTTATAGCAGTTATTTATGTTGTACTTTTTATAATTTATAACCTTCTT  
+  
:,:,,:F:,,F,FFFFFFFFFFFFFFFFFFFFFFFFFFFFFFFFFFFFFFFFFFFFFFFFFFFFFFFF  
FFFFF:FFFFFFFFFFFFFFFFFFFFFFFFFFFFFFFFFFFFFFFFFFFFFFFFFFFFFFFFFFFFFFFF  
@A00721:190:HGJW7DSXY:4:1373:4399:15687\_2:N:0:TCTGCAAG+GCTGCACT  
TTTCGATAGTGATTGTTATCAATTTAAATACATTACTGTTTCAAATCATCTTTACTCACAGACTCCGA  
AAATGGTTTCAAATGAGGTCAAAGCTCTATTTATTAAACGAACCTATTA  
+  
FFFFFFFFFFFFFFFFFFFFFFFFFFFFFFFFFFFFFFFFFFFFFFFFFFFFFFFFFFFFFFFFFFFFFFFF  
FFFFFFFFFFFFFF,FFFFFFFFF:FFFFFFFFFFFFFF,FFFFFFFFF  
@A00721:190:HGJW7DSXY:4:2311:25798:10410\_2:N:0:TCTGCAAG+GCTGCACT  
CGATGTTTATATTTTCTATAAGGGAAAATAGCAATAATCAAATTTGACAAAATTTAGAACTTTATT  
TCAGAACTCTCTCCGATCACCTTGGTGTGATCTCCCGAGGATCTTTT  
+  
FFFFFFFFFFF:FFFFFFF:FFFFFFFFFFFFFFFFFFFFFFFFFFFFFFFF:FFFFFFFFF:FFFFFFFFFFFFFFF  
FFFFFFFFFFFFFFF:FFFFFFFFFFFFFFFFFFFFFFFFFFFFFFFFFFFFFFFF  
@A00721:190:HGJW7DSXY:4:1646:8748:32080\_2:N:0:TCTGCAAG+GCTGCACT  
CGTATACTTGAATACTTTATCAAAGATTTGGCTTGGTCTATTTACCGCAAAAAGTTGGAAGAGGTCTA  
TGATATTTATTTTACTTATACTTTAAATAGCACCGATTATAACTTGAC  
+  
FFFFFFFFFFFFFFFFFFFFFFFFFFFFFFFFFFFFFFFFFFFFFFFFFFFFFFFFFFFFFFFFFFFFFFFF  
FFFF,FFFFFFFFFFFFFFFFFFFFFFFFFFFFFFFFFFFFFFFFFFFFFFFF  
@A00721:190:HGJW7DSXY:4:2277:24424:20650\_2:N:0:TCTGCAAG+GCTGCACT  
ACAATAGCTCTTTCTCAGAAGATTAGAGAAGTAACCGGTGAACACGTCCGTAGCATTGATTTACTTTT  
ACCGTTAGAACTGAAAAAGATTCTTTTCGAAAAGAAACCTATAAGTTA  
+  
F:FFFFFFFFFFFFFFFF:FFFFFFFFFFF:FFFFF,FFF:FF::FFFFFFFFF:FFFFFFFFFFFFFFF  
FFFFFFFFFFFFFFFFFFFFFFFFFFFFFFFFFFFFFFFFFFFFFFFFFFFFFFFF  
@A00721:190:HGJW7DSXY:4:2557:4182:25989\_1:N:0:TCTGCAAG+GCTGCACT  
TAAAAATACTTCAAGTACCTGAACCTTACATTTTTAATGGTATGGTATAATGTGTCTTACAAATAGAA  
CCTTCACTCTCGGTAATGAGAGTGTATTCCTTAATATTCTAGTAACCGCTATGTGGGCATTACTAGGA  
TTT  
+  
FF:FFFFFFF,FFFFFFF:FFFF:FFFFFFFFFFFFFFFF,FFFFFFFFFFFFFFFF:FFFFFFFFFFF  
F:FFFFFFFFFFFFFFFFFFFFFFFFFFFFFFFFFFFFFFFF:FFFFFFF:FFFFF:FFFF,FFFFFFFFF:FFFFFFF  
F,F  
@A00721:190:HGJW7DSXY:4:2621:2329:1955\_2:N:0:TCTGCAAG+GCTGCACT  
AAAAACTCCATTGTATAGTTCAAGGAGTACTTAATTCAATAGCTTTAGTATTATTTACTATCGCCTTT  
ATTGAAAATTGTATAAGAGTTAATTGCTTACACAAAAGTGACGCGCGA  
+  
FFFFFFFFFFF:FFFFFFFFFFFFFFFFFFFFFFFFFFFFFFFFFFFFFFFFFFFFFFFFFFFFFFFFFFFF,F  
FFFFFFFFFFFFFFFFFFFFFFFFFFFFFFFFFFFFFFFFFFFFFFFFFFFFFFFF  
@A00721:190:HGJW7DSXY:4:1278:25952:27868\_1:N:0:TCTGCAAG+GCTGCACT  
TGGCACGCCAGACGTAGGGTCAAACCTACTACCGCCGGTCGGCAGATCGGCACCACTGGTCTCTACGT  
TCAGGGACCCGCTGTGCAGAATAACCTTCCCAAATCTAGATCTGCACAGAAGAAGGCTGAAGGTCGTT  
ACC  
+  
FFFFFFFFFFFFFFFFF:FFFFFFFFFFFF,FFFFFFFFFFFFFFFFFFFFFFFFFFFFFFFFFFFFFFFF





GCCAATCTCATCGCTATACGCATACCTGATTGGAAGAAGCGAGGTTCTGTTCTCAATAAAAAATTTTTC  
TC

+

FF:F:F:,FFFFFFF,:FF:FFFF::F:F,FFFFFFFFFFFFFFFFFFFF,:FF:FFFF:FFFFFFF,FFF  
F,,:FFFFF,FFF,F,FF:F,,FF::FFFFFFF:FFFF:F:FFFFFFFFFFFF:F:FFF,FFFFFFFFF,  
F,

@A00721:190:HGJW7DSXY:4:2358:3757:2143\_2:N:0:TCTGCAAG+GCTGCACT  
GTCATGGGGATCACTTCTTCGGTCAATGACAAAACCTTCGAATATGTTAAGACGTGGCTTCGTAACAA  
CAGTGCGAGTATTGTCATCTCGGGGAAAGTGATTACCAAGATGTTCA

+

,FFFFFF,,F,FFFFFF,FFF:FF:FFFFFFFFF:F,F:,F,FF:FF,,FF,FFFF::FF,,,FF,FF,  
F:,F,FFFFFFFFF,:FFFFFFFFF:F::FFFFFFFFF:FFFFFFFFF:FF

@A00721:190:HGJW7DSXY:4:2550:15908:28416\_2:N:0:TCTGCAAG+GCTGCACT  
CAGCGATCTTACTCGTTATCGGAGCTAAGAAGAAGACTTTGGGTACACGTTATGCTCGAAACTTAAC  
GTTAGTACCGGAGGTGATCTCTCTGCTTCTGCGTTACTGAGAGAAAAG

+

::F:FF,FFFF:FFFFFFFFF::FFFFFFFFF:FFF:,FFFFFFF:FFFF::F,FFFFFFFFFFFFF  
::FFFF::FFF,FFFFFFFFF:FFFF:FFF,F,F:F:F,FFFFFFFFF

@A00721:190:HGJW7DSXY:4:2155:24352:5776\_2:N:0:TCTGCAAG+GCTGCACT  
TTGAAACTACGGTCCTTATCAAAGAAAATGGTGAACCGGTCTCTAAATCTTTTGAGATTGAGAAGATT  
GAAGAACACGTCAAGAAGTCGCTCGGCGTTGTTCTTGAAAACCAAGTT

+

FFFFFFFFFFFFFFFFFFFFFFFFFFFFFFFFFFFFFFFFFFFFFFFFFFFFFFFFFFFFFFFFFFFFFFFFF  
FFFFFFFFFFFFFFFFF:FFFFFFFFFFFFFFFFFFFFFFFFFFFFFFFFFFFFFFFFFFFFFFFFFFFFFFFFF  
FFF

@A00721:190:HGJW7DSXY:4:2364:28691:24439\_1:N:0:TCTGCAAG+GCTGCACT  
CTGATCATGGAGTCTTTGTACCTTCTGTCAAACCTTCGAGGTTACAGTACGAGAGGTGATCCCGGATGT  
GGATTGAAGGCTGGCTCTAAGGGAGACTCCTTCTTTTGAATGTTGTAAAGAATTGGGTTGAGAAGTG  
TGC

+

FFFFFFFFFFFFFFFFFFFFFFFFFFFFFFFFFFFFFFFFFFFFFFFFFFFFFFFFFFFFFFFFFFFFFFFFF  
FFFFFFFFFFFFFFFFF:FFFFFFFFFFFFFFFFFFFFFFFFFFFFFFFFFFFFFFFFFFFFFFFFFFFFFFFFF  
FFF

@A00721:190:HGJW7DSXY:4:1477:31729:14951\_1:N:0:TCTGCAAG+GCTGCACT  
TTTTCAAAAATGCGGATGGGTCTACTGATGTTTTCTACAGAGTGCAGTCGTTTCAACACTTATCACC  
ACTTTTGAAAGGAAAATAATTGGTGATGAAAATACGTATGTCGGTGGGTTCTCAAGGCTCTCATCGC  
CAC

+

F:FFFFFFFFFFFFFFFFFFFFFFFFFFFFFFFFFFFFFFFFFFFFFFFFFFFFFFFFFFFFFFFFFFFFF  
FFFFFFFFFFFFFFFFF:FFFFFFFFFFFFFFFFF:FFFFFFFFFFFFFFFFF:FFFFF  
FFF

@A00721:190:HGJW7DSXY:4:2112:31810:23171\_2:N:0:TCTGCAAG+GCTGCACT  
ATTCTTAAAAGAAGTTTATTAACCTTCAGAGTCTCTTGGAAGTCCAGGTAGCTAATGTTCTTGCAAT  
AGCCACAGACTTTCTGGGAAAAGAGACCTCTGTTGGTAGAGGAGTTGA

+

FFFFFFFFFFFFFFFFFFFFFFFFFFFFFFFFFFFFFFFFFFFFFFFFFFFFFFFFFFFFFFFFFFFFFFFFF  
FFFFFFFFFFFFFFFFF:FFFFFFFFFFFFFFFFF:FF::FFFFFFFFF

@A00721:190:HGJW7DSXY:4:2357:15402:7811\_2:N:0:TCTGCAAG+GCTGCACT  
CAGATTCAATCTGGCATCACTGAACGTCTACAACGAGTTAGGGAGTGGCTAGGTTTTAAAGATCCTT  
TGCACAAGCAATACCTTCCACTGAGTTCATCACCCAGAGTTTCGACGT

+

FFFFFFFFFFFFFFFFFFFFFFFFFFFFFFFFFFFFFFFFFFFFFFFFFFFFFFFFFFFFFFFFFFFFFFFFF  
FFFFFFFFFFFFFFFFF:FF:FFFFFFFFFFF:FFFFFFFFFFFFFFFFF

@A00721:190:HGJW7DSXY:4:2660:11134:27696\_2:N:0:TCTGCAAG+GCTGCACT  
GTACAGGGAGGAGGTAATAGTTATAAACCTTCTTTTATCATTGCAACAGGACTTTGAGAAGACTGTT

+

@A00721:190:HGJW7DSXY:4:2339:14335:32393\_2:N:0:TCTGCAAG+GCTGCACT  
CCATATCAGATTAGAGACATGCCAGTTAGAGTTCTTCTAACCAGGACTGATGGTGAGATTCTTTTACC  
TTTTGGAGGTCCAGGAACCTTTACTCCTAGTGTCTTTTCTAGAGTCCA

+

@A00721:190:HGJW7DSXY:4:2274:9498:34037\_1:N:0:TCTGCAAG+GCTGCACT  
TTTCGGTTTCAGCTGGATGGATCTTTTGATGGTATGTTTCACATTGCGTGATCACTTCCCGTGGACTT  
GGGAAGAGATTAAACATAAAATCCAGCGATTCTATTATGTCGCTAAAGCCTGTCCAGTTGTCGATGAT  
GTT

+

@A00721:190:HGJW7DSXY:4:1130:8829:17503\_2:N:0:TCTGCAAG+GCTGCACT  
TACTAAGTCTGAGATCTGCCACTTCTAATTTTAGGAAACGTCGCGAAAAGAAAGTTCATGAGGATGTC  
TTGGTCGAAAAATATCGCCGGGAACCTTCTAATAGAGGATCCTGATGAC

+

@A00721:190:HGJW7DSXY:4:1130:19750:18787\_1:N:0:TCTGCAAG+GCTGCACT  
TACCGATCTCAGTTCTACACAGAAACCGTCTCAGGAAGTGTCTCCACTGATTCGGAATTAGAGAAAG  
ACGACCTTCTTGTTGGGGACTGAGACCTCTGAATTTTCAGGGTGCCCTGATGAGGACGTTGAAAGGGAT  
AAT

+

@A00721:190:HGJW7DSXY:4:1162:19307:26694\_2:N:0:TCTGCAAG+GCTGCACT  
TCTAAGAGTGTTC AAAAGACCAGAAACGTAACAAGAAGAATAAAGGTAGGAAGGGGAGAAAACAGAA  
CAAGCGAGCGGTTGAAGAGAAAACTGATATGGTTGCGGCTGATCGTAC

+

@A00721:190:HGJW7DSXY:4:2126:6334:3850\_1:N:0:TCTGCAAG+GCTGCACT  
GGCGATACCACTGATCTTCCAGAGTTACGTAGTGGTCGTTCTTTTGGTGATTTTATCAAAGAGAAAGT  
TTCTGCTAGTCGCGACGATAGTATTTATCGGAGTGATATTAACAAGTTAACTTCGAACTGACCACTT  
ACA

+

@A00721:190:HGJW7DSXY:4:2220:15528:4836\_1:N:0:TCTGCAAG+GCTGCACT  
GTTTCATCGCGGTATTTGTGAAATTAAGACAGACGTGAAAGTTATGATGAGTGATCGTATTAGAACAGC  
TGATTCTTATTGCATGAACGTCGCTGAGGTCAAACCTGTGGACGTTCTTTTCATCGACGAATTATTCA  
TGA

+

[illegible]

@A00721:190:HGJW7DSXY:4:2260:16405:6887\_1:N:0:TCTGCAAG+GCTGCACT  
CTACTTAAGGCGGCTTATACCATAGGTTACGGTGATTCCAATCAAATCGGATTCATCAATCGTATTGA  
TCTCCAAGTCGCAAACACTTCAACATCAACGACATCATCTTGATGAGTGTCGTTCTTATCGAAGTC  
TCA

+

FFFFFFFFFFFFFFFFFFFFFFFFFFFFFFFFFFFFFFFFFFFFFFFFFFFFFFFFFFFFFFFFFFFFFFFF  
FFFFFFFFFFFFFFFFFFFFFFFFFFFFFFFFFFFFFFFFFFFFFFFFFFFFFFFFFFFFFFFFFFFFFFFF  
FFF

@A00721:190:HGJW7DSXY:4:2674:1425:3333\_2:N:0:TCTGCAAG+GCTGCACT  
GAACTCTCAGAGGTTTACGGCAGAAAAATTTCTCCTGCTTGTAATTCGAGAGAGGACACTATGGAAAT  
TAGACCTATCAGATGTCTTGACGACTTCGAATTTGAGGACGGAGTTAA

+

FFFFFFFFFFFFFFFFFFFFFFFFFFFFFFFFFFFFFFFFFFFFFFFFFFFFFFFFFFFFFFFFFFFFFFFF  
FFFFFFFFFFFFFFFFFFFFFFFFFFFFFFFFFFFFFFFFFFFFFFFFFFFFFFFFFFFFFFFFFFFFFFFF

@A00721:190:HGJW7DSXY:4:2520:26838:29465\_2:N:0:TCTGCAAG+GCTGCACT  
ATGCTACTTGTGAGAGGATCAATCACAGTAAGGAAGTGTACGTTTAGCACGGGAGGTTGCAGATTCA  
ACCCCTTATATCGAGGCTATCGAGGACGATGAGTATCTTGAAGTTGTT

+

FFFFFFFFFFFFFFFFFFFFFFFFFFFFFFFFFFFFFFFFFFFFFFFFFFFFFFFFFFFFFFFFFFFFFFFF  
FFFFFFFFFFFFFFFFFFFFFFFFFFFFFFFFFFFFFFFFFFFFFFFFFFFFFFFFFFFFFFFFFFFFFFFF

@A00721:190:HGJW7DSXY:4:2367:5493:4836\_1:N:0:TCTGCAAG+GCTGCACT  
TCTGGACCACCTGGATCTTCTACTGTCTCTGCCTTCCAAGATTTCTTAGAAGAGGTTATTCCTGGAAC  
CACCTTAACGTCACTCGGTAATCTTTCAGCCGAATTAAGTACTAATGAGTTCAAGTCGGTTGTCGATC  
GAA

+

FFFFFFFFFFFFFFFFFFFFFFFFFFFFFFFFFFFFFFFFFFFFFFFFFFFFFFFFFFFFFFFFFFFFFFFF  
FFFFFFFFFFFFFFFFFFFFFFFFFFFFFFFFFFFFFFFFFFFFFFFFFFFFFFFFFFFFFFFFFFFFFFFF  
FF:

@A00721:190:HGJW7DSXY:4:2138:29107:1673\_1:N:0:TCTGCAAG+GCTGCACT  
TAATACCTTTATAGGTAAGAAGCCCTTGAGCCGCGTAGTCAGCGCGTTTAGCTGTATCATCAGTCAG  
AGTATACCCGATAGGGTACCGAGTCTCCAAGAGAATATTTATTCTTATGAGGCTCGAACTTCAACGT  
TTT

+

FFFFFFFFFFFFFFFFFFFFFFFFFFFFFFFFFFFFFFFFFFFFFFFFFFFFFFFFFFFFFFFFFFFFFFFF  
FFFFFFFFFFFFFFFFFFFFFFFFFFFFFFFFFFFFFFFFFFFFFFFFFFFFFFFFFFFFFFFFFFFFFFFF  
FFF

@A00721:190:HGJW7DSXY:4:2174:32389:24706\_1:N:0:TCTGCAAG+GCTGCACT  
ATAGGGACGCTAGTATACTTCGTAAAGTCGACAGCGAAATGGTCAATATTGATAATTGGACCGACTAT  
ATGACCTATTTTAAGCTCATGGTGAAAAGGGAAGCTAAGGTTAACTTGATGCTTCAGCCTTTTCGAA  
GCA

+

FF:FFFFFF:FF:FFFF,FF:FFFFFF:FFFFFF:FFFFFFFFFFFFFFFF,FFFFFFFFFFFFFFFF,F  
FF:FFFFFFFF:FFFFFFFFFFFFFFFFFFFFFFFFFFFFFFFFFFFFFFFFFFFFFFFFFFFFFFFF  
FFF

@A00721:190:HGJW7DSXY:4:2412:9408:33379\_1:N:0:TCTGCAAG+GCTGCACT  
GAGTATCCATAACGATTTGTCATTTACCACCTTTGCTCAACGACGAAGTGGAACGGCCAACACTTTCT  
TTGGTAATTGTATGATCACTTTGATGATTTTATCACTTTATTATGACCTTGAAAGTTTTCGGCTGTG  
GTT

+

FF:FFFFFFFFFFFFFFFFFFFFFFFFFFFFFFFFFFFFFFFFFFFFFFFFFFFFFFFFFFFFFFFF  
F:FFFFFFFFFFFFFFFFFFFFFFFFFFFFFFFFFFFFFFFFFFFFFFFFFFFFFFFFFFFFFFFF  
FFF

@A00721:190:HGJW7DSXY:4:1167:23529:8766\_2:N:0:TCTGCAAG+GCTGCACT  
TATCTGTGCTTTGAATTGTATAAGATCAAATTTTAAACGATTCCGAGAGGTTTATCCTGATGTGGAGG





+

+

+

+

+

+

+

+

[illegible]

@A00721:190:HGJW7DSXY:4:1427:24532:17080\_2:N:0:TCTGCAAG+GCTGCACT  
GAGTCTTCCGTAACCAACTTCTTGACAATTTCTTCAATCTTCGATAATAGTTAAATCTAGGATTA  
TGTCTGTGTTGAAAGACTTTCTACCGATAAGGGTCACTAGTCTTACAC

@A00721:190:HGJW7DSXY:4:2411:8576:10238\_1:N:0:TCTGCAAG+GCTGCACT  
GACTGATTATCTAAAGATTGAAGGAAAATTTTATCCTCGTTTAACTTACTTAGACTTTCTACGATAC  
AAATGATAACTTCTAATTTACGTTTGCTACTCAGAGCTGGTCCTCTCAGCAAAGGGATGCATGGTGTT  
ATC

@A00721:190:HGJW7DSXY:4:1442:26259:16658\_2:N:0:TCTGCAAG+GCTGCACT  
GGCATTGATAATAATGACGAGACTTCGTCATAATCGCTGCATATTACGGATTACACGGTACCAGCG  
CATCTCGTGTCGAGCCTCGACCCGATTATATGGTATTAAC TTATAAAG

@A00721:190:HGJW7DSXY:4:2229:31819:15421\_2:N:0:TCTGCAAG+GCTGCACT  
TGTTCTCTGATCATTTTGACAATCTCTTCTTATAATAAATAAATAAATAATATTACTAATGGCAAATA  
GTGGAAAGGCTCCAGTCAACACTAGTTCGAGTGCTGCTTTGGATTACG

@A00721:190:HGJW7DSXY:4:2458:5773:10520\_2:N:0:TCTGCAAG+GCTGCACT  
ATAGGTGAAGGGATAGTTTTACCTCGACCAACATTAAGGCGGCGGCGACTAATCTTAAAGCTTCACC  
CAAATGAAGGACACTTCGAAACTGAATAATGATGCACAGATCGGAAG

@A00721:190:HGJW7DSXY:4:2364:4589:7842\_2:N:0:TCTGCAAG+GCTGCACT  
AGGATATTCGCCATTGTGGTACGAATTGGTCCAACATTTACCACCAAATTTCTTTGATACAACTCTAG  
CCTTCAAGTGGGGTATGCCTGCGGAATACGCTTGCTATTCACCAGATT

@A00721:190:HGJW7DSXY:4:2364:27145:11678\_2:N:0:TCTGCAAG+GCTGCACT  
TGCTATGTCAGAAGAAGCTATTCAAGCTTGTGTTTTAAAGACTGCAGAGGCTGTCAAACAAGCCCAGA  
CTCAAGGAGTCCAATCAAAGGTTTTGAATTTAGCTCAACTGGGGAGAC

@A00721:190:HGJW7DSXY:4:1511:17472:33849\_1:N:0:TCTGCAAG+GCTGCACT  
AATAGTTCTACCGATACGTAGTGAACGCGTTCGTAGAACCAAGTACTTTCCGTCTGAAGAGTTTAGAG  
CTGCTATTGATTATGTAACCGATAGGAGTTGTATAGTTGAAGATGTGGCTTTAGACGATAATCCTTTA  
AGG

[illegible]

@A00721:190:HGJW7DSXY:4:2431:3025:7545\_1:N:0:TCTGCAAG+GCTGCACT  
GAAGATTTTCCCACAGATTTGTCTACGTTGCAGATCGCCACTCCAAACACTATATACATTATAAAATA  
TAAAAATAAGGGAGTCATAACTTTTGTACCAAATTCTTGGCTTTCAACGAAGTCTCTGATTTTATTA  
ATC

+

FFFFFFFFFFFFFFFFFFFFFFFFFFFFFFFFFFFFFFFFFFFFFFFFFFFFFFFFFFFFFFFFFFFFFFFF  
FFFFFFFFFFFFFFFFFFFFFFFFFFFFFFFFFFFFFFFFFFFFFFFFFFFFFFFFFFFFFFFFFFFFFFFF  
FFF

@A00721:190:HGJW7DSXY:4:1263:15049:33755\_2:N:0:TCTGCAAG+GCTGCACT  
ATCTCTCGGTCATTTACTCTGTACTTGATCTACGTCGTTTAACTGTGGAACAACCTTTACTTAGAAT  
GACTCTATCTTTTACAGACACTTCTTATATTATTTACAATAGTTAATAT

+

FFFFF:FFFFFFFFFFFFFFFFFFFFFFFFFFFFFFFFFFFFFFFFFFFFFFFFFFFFFFFFFFFFFFFF  
FFFFFFFFFFFFFFFFFFFFFFFFFFFFFFFFFFFFFFFFFFFFFFFFFFFFFFFFFFFFFFFFFFFFFFFF

@A00721:190:HGJW7DSXY:4:2502:31367:31140\_1:N:0:TCTGCAAG+GCTGCACT  
CTATCGTTTTCTGCTTTTTCTTAGCTAATAGATTAATAAAGGATGAGTACGAAAACCAACTCTTCGTT  
ACGAGACCTGATGGTAGAATAGATTTAGTCTCTACACCCATCTCAACGAGGATAAAGCGAGTTTTCCG  
TCC

+

:FFF,FFF::FF,FFFFFFFFFFFF,FFFF:FFFFFFFFFFFFFFFFFFFF,FFFFFFFF:FFFFFFFFFFFF  
FFFFFFFFFFFFFFFFFFFFFFFFFFFFFFFFFFFFFFFFFFFFFFFFFFFFFFFFFFFFFFFFFFFFFFFF  
FFF

@A00721:190:HGJW7DSXY:4:2613:24768:15452\_1:N:0:TCTGCAAG+GCTGCACT  
AACACCCCCACACGACTCGAAACCGAGACGCCGTAGATCAAAGTCCCTTCTAACTTTAGATTATGAAT  
CCT

+

:,:,FF,FF,FFFFFFFFFFFFFFFFFFFFFFFFFFFFFFFFFFFFFFFFFFFFFFFFFFFFFFFFFFFF  
FFF

@A00721:190:HGJW7DSXY:4:1413:28049:5541\_2:N:0:TCTGCAAG+GCTGCACT  
TTTCGATAGTGATTGTTATCAATTTAAATACATTACTGTTCAAATCATCTTTACTCACAGACTCCGA  
AAATGGTTTCAAATGAGGTCAAAGCTCTATTTATTAAACGAACCTATTA

+

FF:FFF:FFFFFFFFFFFF:FFFFFF,FFFFFFFFFFFFFFFFFFFF:FFFFFFFFFFFFFFFFFFFF  
FFFFFFFFFFFFFFFFFFFF:FFFFFFFFFFFFFFFFFFFFFFFFFFFFFFFFFFFFFFFFFFFFFFFF

@A00721:190:HGJW7DSXY:4:2506:14380:28119\_2:N:0:TCTGCAAG+GCTGCACT  
CGATGTTTATATTTTCTATAAGGGAAAATAGCAATAATCAAATTTGACAAAATTTAGAACTTTATT  
TCAGAACTCTCTCCGATCACCGTGGTGTGATCTCCCGAGGATCTTTT

+

FFFFFFFFFFFFFFFFFFFFFFFFFFFFFFFFFFFFFFFFFFFFFFFFFFFFFFFFFFFFFFFFFFFF  
FFFF:FFFFFFFFFFFFFFFFFFFF,FFFFFFFFFFFFFFFFFFFFFFFFFFFFFFFFFFFF

@A00721:190:HGJW7DSXY:4:2175:15573:6950\_2:N:0:TCTGCAAG+GCTGCACT  
CGTATACTTGAATACTTTATCAAAGATTTGGCTTGGTCTATTTACCGCAAAAAGTTGGAAGAGGTCTA  
TGATATTTATTTTACTTATACTTTAAATAGCACCGATTATAACTTGAC

+

FFFFFFFFFFFFFFFFFFFFFFFFFFFFFFFFFFFFFFFFFFFFFFFFFFFFFFFFFFFFFFFFFFFF  
FFFFFFFFFFFFFFFFFFFFFFFFFFFFFFFFFFFFFFFFFFFFFFFFFFFFFFFFFFFFFFFFFFFF

@A00721:190:HGJW7DSXY:4:2278:16649:16736\_2:N:0:TCTGCAAG+GCTGCACT  
ACAATAGCTCTTTCTCAGAAGATTAGAGAAGTAACCGGTGAACACGTCGGTAGCATTGATTTACTTTT  
ACCGTTAGAACTGAAAAAGATTCTTTTCGAAAAGAAACCTATAAGTTA

+

FFFFFFF:FF:FFFFF,FFFFFFFFF:FFFFFFFFFFFFFFFFFFFF:F:F:FFFF,FFFFFFFFFFFF:F,FFF:  
F:FF:FFF:F,FFFFFFFFFFFF:FFFFFF:FFFFFFF::FFFFFFFFF

@A00721:190:HGJW7DSXY:4:2645:20311:4664\_1:N:0:TCTGCAAG+GCTGCACT  
TAAAAATACTTCAAGTACCTGAACCTTACATTTTTAATGGTATGGTATAATGTGTCTTACAAATAGAA

CCTTCACTCTCGGTAATGAGAGTGTATTCCTTAATATTCTAGTAACCGCTATGTGGGCATTACTAGGA  
TTT

+

FFFFFFFFFFFFFFFFFFFFFFFFFFFFFFFFFFFFFFFFFFFFFFFFFFFFFFFFFFFFFFFFFFFFFFFF:FF  
FFFFFFFFFFFFFFFFFFFFFFFFFFFFFFFFFFFFFFFFFFFFFFFFFFFFFFFFFFFFFFFFFFFFFFFF:FFFFFFFFFFFFFFFFFFFFFFFF  
FFF

@A00721:190:HGJW7DSXY:4:1160:14271:33379\_2:N:0:TCTGCAAG+GCTGCACT  
CTCCATTGTATAGTTCAAGGAGTACTTAATTCAATAGCTTTAGTATTATTTACTATCGCCTTTATTGA  
AAATTGTATAAGAGTTAATTGCTTACACAAAAGTGACGCGCAAGGAA

+

FFFFFFFFFFFFFFFFFFFFFFFFFFFFFFFFFFFFFFFFFFFFFFFFFFFFFFFFFFFFFFFFFFFFFFFF  
FFFFFFFFFFFFFFFFFFFFFFFFFFFFFFFFFFFFFFFFFFFFFFFFFFFFFFFFFFFFFFFFFFFFFFFF

@A00721:190:HGJW7DSXY:4:1351:8495:4867\_1:N:0:TCTGCAAG+GCTGCACT  
TGGCACGCCAGACGTAGGGTCAAACCTACTACCGCCGGTCGGCAGATCGGCACCACTGGTCTCTACGT  
TCAGGGACCCGCTGTGCAGAATAACCTTCCCAAATCTAGATCTGCACAGAAGAAGGCTGAAGGTCGTT  
ACC

+

FFFFFFFFFFFFFFFFFFFFFFFFFFFFFFFFFFFFFFFFFFFFFFFFFFFFFFFFFFFFFFFFFFFFFFFF  
FFFFFFFFFFFFFFFFFFFFFFFFFFFFFFFFFFFFFFFFFFFFFFFFFFFFFFFFFFFFFFFFFFFFFFFF,FFFFFFFFFFFFFFFFFFFFFFFF  
FFF

@A00721:190:HGJW7DSXY:4:1431:14009:8093\_2:N:0:TCTGCAAG+GCTGCACT  
CTCGTAACATTGACGGCAGTCCCGTCATCTCTGTGGAACTGAGGCAGTACCTCAGTCAAAAGTCACA  
TTCACCACTCCCATACCAATCAATGATGTGACTATACAGTTCGGCCAT

+

FFFFFFFFFFFFFFFFFFFFFFFFFFFFFFFFFFFFFFFFFFFFFFFFFFFFFFFFFFFFFFFFFFFFFFFF:FFFF:FFFFFFFF:FFFFFFFF  
FFFFFFFFFFFFFFFFFFFFFFFF:FFFF:FFFFFFFFFFFFFFFFFFFFFFFFFFFFFFFF,FFFFFFFFFFFFFFFFFFFFFFFF

@A00721:190:HGJW7DSXY:4:1574:27742:35446\_1:N:0:TCTGCAAG+GCTGCACT  
ATACGTCGTGGGAGGTACTGAAGCCTTCCCTCCGCTGGCACGAAGAACTCCCAAGCCAATCAATA  
GTTCTTCTGACCAGAATGAAAAGGGGTTTACCAGGCTAGTCTCTAAGTCTACCAGGAAGAGGGGAAAT  
GTC

+

F::FFFFFFFFFFFFFFFFFFFFFFFF:FFFFFFFFFFFFFFFFFFFFFFFF:FFFFFF:FFFF:FFFF:FFFF:FF  
FFFFFFFF:FFFFFFFF:FFFFFFFFFFFFFFFF:FFFFFFFFFFFFFFFFFFFFFFFFFFFFFFFFFFFFFFFF  
FFF

@A00721:190:HGJW7DSXY:4:1555:25518:4570\_1:N:0:TCTGCAAG+GCTGCACT  
TCAGACGTGTGCTCTTCCGATCTCCTAATTCTGAAGGAAGATCTCCACCATCTGGGGTTGGGAATAA  
GAAATCTGCACGGGCCAAAGAGGCCGCTGCTACGAAGTCGCTGAAGGCGGCTTGGGTCTTAAGGGTA  
GCT

+

FFFF:FFFFFFFFFFFFFFFFFFFFFFFF:FFFFFFFFFFFFFFFFFFFFFFFFFFFFFFFFFFFFFFFF  
FFFFFFFFFFFFFFFFFFFFFFFFFFFFFFFFFFFFFFFFFFFFFFFFFFFFFFFFFFFFFFFFFFFFFFFF:FF  
FFF

@A00721:190:HGJW7DSXY:4:2367:21432:6167\_1:N:0:TCTGCAAG+GCTGCACT  
CCGACCCCATCTTTGAGACCAAGACTCTCTACAGTAGGTTCTGCCTACTATGAGCAAATCTGTTGAA  
TTCGTCACTGAGGACGAAGGTGAGAGGACTTTTGGCTACTGGCGACAACTGAGAGCAGTCGCTGGGG  
AAA

+

FFFFFFFFFFFFFFFFFFFFFFFFFFFFFFFFFFFFFFFFFFFFFFFFFFFFFFFFFFFFFFFFFFFFFFFF  
FFFFFFFFFFFFFFFFFFFFFFFFFFFFFFFFFFFFFFFFFFFFFFFFFFFFFFFFFFFFFFFFFFFFFFFF  
FFF

@A00721:190:HGJW7DSXY:4:2455:7473:32252\_1:N:0:TCTGCAAG+GCTGCACT  
GTCAACGGCGTTTGGAGATTTTATCCGCGCTTAATCTATGGGGCGAAGATCCCCTATGGAGTCTTGAA  
GGACTTAGGTTGGCATATTTATGCCGACGATAATAAGCATGTCACCCTTAAGCACCGAGGTAAGCTCG  
GGA

+  
FFFFFFFFFFFFFF::FFFFFFFF:FFFFFFFFFFFFFFFFFFFFFFFF:FFFFFFFFFFFFFF:FFFFF:FFFFF  
FFFFFFFFFFFFFFFFFFFFFFFFFFFFFFFFFFFFFFFFFFFFFFFFFFFFFFFFFFFFFFFFFFFFFFFF  
FFF  
@A00721:190:HGJW7DSXY:4:1166:25798:12790\_1:N:0:TCTGCAAG+GCTGCACT  
TCCGATCTAGAATGCGGGCTTTCTGACTGATGAGGTTAAACTCTTGCTCCTTCTGTGGGTGAGGGTT  
TTTGTATATTACTGTTCTGGGAGGCTGCTTCTCCATAATTACAACCTCTCTTTAGAGAGCATT  
AGA  
+  
FFFFFFFFFFFFFFFFFFFFFFFFFFFFFFFFFFFFFFFF:FF:FFFFFFFF:FFFFFFFFFFFFFFFF  
FFFFFFFFFFFFFFFFFFFFFFFFFFFFFFFFFFFFFFFF:FFFFFFFFFFFFFFFFFFFFFFFF  
FFF  
@A00721:190:HGJW7DSXY:4:2556:16649:5055\_1:N:0:TCTGCAAG+GCTGCACT  
AGTTCAGACGTGTGCTCTTCCGATCTCTTTCTTGAAAATTTTCTTTCTCCGTCATTGGGGATT  
CGATGTGAGAAGGTGGAAGGTGTCAAGGTCTTCTTCATGCTGATCTTTCAGGACCTAATCACATCAT  
GAT  
+  
FFFFFFFFFFFFFFFFFFFFFFFFFFFFFFFFFFFFFFFFFFFFFFFFFFFFFFFFFFFFFFFF:FFFFFFFF  
FFFFFFFFFFFFFFFFFFFFFFFFFFFFFFFFFFFFFFFFFFFFFFFFFFFFFFFFFFFFFFFF  
FFF  
@A00721:190:HGJW7DSXY:4:1154:23547:8265\_2:N:0:TCTGCAAG+GCTGCACT  
AGTTGGAGGGAGGAAGTTCTCCGAAATTAAGACGGGGGATTAAGAGTCCAGCTGTAAGTGTCAAT  
CAGAGAGGGGAGCTCTGAAAAGGAACTTCGTGAGAAGATGAGGAAGA  
+  
FFFFFFFFFFFFFFFFFFFFFFFFFFFFFFFFFFFFFFFFFFFFFFFFFFFFFFFFFFFFFFFF  
FFFFFFFFFFFFFFFFFFFFFFFF:FFFFFFFF:FFFFFFFFFFFFFFFF:FF  
@A00721:190:HGJW7DSXY:4:1164:14678:24439\_1:N:0:TCTGCAAG+GCTGCACT  
TTTGAGGAAGGCTCTAGAGAAGATCTCACCACTGGAGAAGGCAAGTGGAGAGTCCAGAAGTTGATGA  
AGAAGGATTATTTGAAGCAGGGGTTACCACTTCCTAAGGTGGATGAGGGAGGTTGTTTCTTTGAGTT  
TTA  
+  
FFFFFFFFFFFFFFFFFFFFFFFFFFFF,FFFFFFFFFFFFFFFFFFFFFFFFFFFFFFFF  
FFFFFFFFFFFFFFFFFFFFFFFF:FFFFFFFFFFFFFFFFFFFFFFFFFFFFFFFF  
FFF  
@A00721:190:HGJW7DSXY:4:2513:28655:5932\_2:N:0:TCTGCAAG+GCTGCACT  
ATCTTGAGGACGTACATTTAACGTGGCAGAAATTCGGTAACTTACCATATTGTTCTTCCGGGAAGTTG  
TGGGATTAACTTTGACTCACTACTCCGATCAGATCCGATGGTTTG  
+  
FFFFFFFFFFFFFFFFFFFFFFFFFFFFFFFFFFFFFFFFFFFFFFFFFFFFFFFFFFFFFFFF  
FFFFFFFFFFFFFFFFFFFFFFFFFFFFFFFFFFFFFFFF:FFFFF  
@A00721:190:HGJW7DSXY:4:1355:19669:15828\_2:N:0:TCTGCAAG+GCTGCACT  
AGGTCAAAGATTCTGTAGCTCTGAGGGCGGTTGAGGGAGCCGTTTTGGCCGACTTTAACTATTCTAAG  
AGTCTTTATGATTCAAACCTATCGTTGTCGTACCTTACAAGGTTGAG  
+  
FFFFFFFFFFFFFFFFFFFFFFFFFFFFFFFFFFFFFFFFFFFFFFFFFFFFFFFF:F:FFFFFFFF  
:FFFFFFFFFFFFFFFF:FFFFFFFFFFFFFFFF:FFFFF  
@A00721:190:HGJW7DSXY:4:2137:1479:26694\_2:N:0:TCTGCAAG+GCTGCACT  
GCGGTTGAAGTTCACCATCTATCTTGAATGCTCACGCCGTCGCAGCCATATCGAGACTATGTTATA  
ATCACTTGTTAAAGTACAGATTTAGTGATTTAGATATTATTGATATTG  
+  
FFFFFFFFFFFFFFFFFFFFFFFFFFFFFFFFFFFFFFFFFFFFFFFFFFFFFFFF  
FFFFFFFF,FFFFFFFF,FFFFFFFFFFFFFFFF  
@A00721:190:HGJW7DSXY:4:1672:23276:26804\_2:N:0:TCTGCAAG+GCTGCACT  
TCATATCCAAAACCTCCTTGAATGGAGTACATATTTGCAACCCTATTCTTGATGTGAAAGATGCATCGA

GGTATACGTCTAGGAACATTGATTGGGAACGTACCTACTCACGAGACG  
+  
FFFFFFFFFFFFFFFFFFFFFFFFFFFFFFFFFFFFFFFFFFFFFFFFFFFFFFFFFFFFFFFFFFFFFFFF  
FFFFFFFFFFFFFFFFFFFFFFFFFFFFFFFFFFFFFFFFFFFFFFFFFFFFFFFFFFFFFFFFFFFFFFFF  
@A00721:190:HGJW7DSXY:4:1149:17571:7185\_2:N:0:TCTGCAAG+GCTGCACT  
TACAAGAACGCTTTGGATTGTGACCATAAAGCCTCAGTTGCGATAGCTGTAGAGGTATACGATATCTC  
TCTTGATGATGTAGCCACTATAATGCTTAAGAGAGAGATTGATGTATG  
+  
FFFFFFFFFFFFFFFFFFFFFFFFFFFFFFFFFFFFFFFFFFFFFFFFFFFFFFFFFFFFFFFFFFFFFFFF  
FFFFFFFFFFFFFFFFFFFFFFFFFFFFFFFFFFFFFFFFFFFFFFFFFFFFFFFFFFFFFFFFFFFFFFFF  
FFFFFFFF:FF,FFFF,,FFFFFFFFFFFFFFFF,FFFF:FFF,FFFFFFFF  
@A00721:190:HGJW7DSXY:4:1513:10384:3349\_1:N:0:TCTGCAAG+GCTGCACT  
GAGATGATGGCGCATCACTTGATTACTATATGCCCGAAGGATTGGGTATTCTCACAACAAAGATAAG  
ATTTTATCTTTCTTCAAACACCCTGTTTCTTAAGGGCGGACAATTGTTCCATTGTGAACCTCTGGG  
GAC  
+  
FFFFFFFFFFFFFFFFFFFFFFFFFFFFFFFFFFFFFFFFFFFFFFFFFFFFFFFFFFFFFFFFFFFFFFFF  
FFFFFFFFFFFFFFFFFFFFFFFFFFFFFFFFFFFFFFFFFFFFFFFFFFFFFFFFFFFFFFFFFFFFFFFF  
FFF  
@A00721:190:HGJW7DSXY:4:1159:9254:23030\_1:N:0:TCTGCAAG+GCTGCACT  
AATAACTCGTAATAAATCTTTCTCTAGTGGACAATTGAGAATACCTATTTCCGTACCAAGAGCCACTG  
CCAATCTCATCGCTATACGCATACCTGATTGGAAGAAGCGAGGTTCTGTTCTCAATAAAAATTTTCT  
CAA  
+  
FFFFFFFFFFFFFFFFFFFFFFFFFFFFFFFFFFFFFFFFFFFFFFFFFFFFFFFFFFFFFFFFFFFFFFFF  
FFFFF:FFFFFFFFFFFFFFFFFFFFFFFFFFFFFFFFFFFFFFFFFFFFFFFFFFFFFFFFFFFFFFFF  
FFF  
@A00721:190:HGJW7DSXY:4:2378:19443:11459\_2:N:0:TCTGCAAG+GCTGCACT  
GTCATGGGGATCACTTCTTCGGTCAATGACAAAACCTTCGAATATGTTACGACATGGCTTCGTAAACAA  
CAGTGCGAGGATTGTCATCTCGGGGAAAGTGATTCACCAAGATGTTCA  
+  
FFFFFFFFFFFFFFFFFFFFFFFFFFFFFFFFFFFFFFFFFFFFFFFFFFFFFFFFFFFFFFFFFFFFFFFF  
FFFFFFFFFFFFFFFFFFFFFFFFFFFFFFFFFFFFFFFFFFFFFFFFFFFFFFFFFFFFFFFFFFFFFFFF  
@A00721:190:HGJW7DSXY:4:2446:23095:29716\_2:N:0:TCTGCAAG+GCTGCACT  
AGCGATCTTACTCGTTATCGGAGCTAAGAAGAAGACTTTGGGTACACGTTATGCTCGCAAACCTTAACG  
TTAGTACCGGAGGTGATCTCTCTGCTTCTGCGTTACTGAGAGAAAAGA  
+  
FFFFFFFFFFFFFFFFFFFFFFFFFFFFFFFFFFFFFFFFFFFFFFFFFFFFFFFFFFFFFFFFFFFFFFFF  
FFFFFFFFFFFFFFFFFFFFFFFFFFFFFFFFFFFFFFFFFFFFFFFFFFFFFFFFFFFFFFFFFFFFFFFF  
@A00721:190:HGJW7DSXY:4:2534:19117:6825\_2:N:0:TCTGCAAG+GCTGCACT  
TTGAAACTACGGTCCTTATCAAAGAAAATGGTGAACCGGTCTCTAAATCTTTTGAGATTGAGAAGATT  
GAAGAACACGTCAAGAAGTCGCTCGGCGTTGTTCTTGAAAACCAAGTT  
+  
F:FFFFFFFFFFFFFFFFFFFFFFFFFFFFFFFFFFFFFFFFFFFFFFFFFFFFFFFFFFFFFFFFFFFF  
FF:FFFFFFFFFFFF:F:FFFF:FFFFFFFFFFFFFFFFFFFFFFFFFFFFFFFFFFFFFFFF:FFF  
@A00721:190:HGJW7DSXY:4:2509:24415:2378\_2:N:0:TCTGCAAG+GCTGCACT  
GTACCTTCTGTCAAACCTTCGAGGTTGAGTACGAGAGGTGATCCCGGATGTGGATTGAAGGCTGGCTC  
TAAGGGAGACTCCTTCTTTTGAATGTTGTAAGAATTGGGAGATCGG  
+  
FFFFFFFFFFFFFFFFFFFFFFFFFFFFFFFFFFFFFFFFFFFFFFFFFFFFFFFFFFFFFFFFFFFFFFFF  
FFFFFFFFFFFFFFFFFFFFFFFFFFFFFFFFFFFFFFFFFFFFFFFFFFFFFFFFFFFFFFFFFFFFFFFF  
@A00721:190:HGJW7DSXY:4:1523:20654:1532\_1:N:0:TCTGCAAG+GCTGCACT  
TTTTCAAAAATGCGGATGGGTCTACTGATGTTTTCTACAGAGTGCAGTCGTTTCAACACTTATCACC  
ACTTTTGAAAGGAAAATAATTGGTGATGAAAATACGTATGTCGGTGGGGTTCTCAAGGCTCTCATCGC  
CAC

+  
FFFFFFFFFFFFFFFFFFFFFFFFFFFFFFFFFFF:FFFFFFFFFFFFFFFFFFFFFFFFFFFF  
FFFFFFFFFFFFFFFFFFFFFFFFFFFF:F:FFFFFFFFFFFFFFFFFFFFFFFFFFFF  
FFF

@A00721:190:HGJW7DSXY:4:2137:6262:28964\_2:N:0:TCTGCAAG+GCTGCACT  
ATTCTTAAAAGAAGTTTATTA AAAACTTCAGAGTCTCTTGGAAGTCCAGGTAGCTAATGTTCTTGCAAT  
AGCCACAGACTTTCTGGGAAAAGAGACCTCTGTTGGTAGAGGAGTTGA

+  
FFFFFFFF:F:FF::, FFFFFFFFFFFFFFFFFFFFFFFFFFFFFFFFFFFFFFFFFF  
FFFFFFFFFFFFFFFFFFFFFFFFFFFFFFFFFFFFFFFFFFFF:

@A00721:190:HGJW7DSXY:4:2434:24885:2754\_2:N:0:TCTGCAAG+GCTGCACT  
CAGATTCAATCTGGCATCACTGAACGTCTACAACGAGTTAGGGAGTGGCTAGGTTTTAAAGATCCTT  
TGCACAAGCAATACTTCCA CTGAGTTCATCACCCAGAGTTTCGACGT

+  
FFFF:FFFFFF:::FFFFFF:FFFFFF,F FF:F:,,F:,FFF:F:FFF,FFF,,,FF:F,FFF,,,F:  
:F,FFFFFFFFFFFFFFFFFFFFFFFFFFFF,F:FFFF,F:FFFF,F:

@A00721:190:HGJW7DSXY:4:1609:14850:14810\_1:N:0:TCTGCAAG+GCTGCACT  
TTCTTTTATCATTGCAACAGGACTTTGAGAAGACTGTTGAAATGGACAAAATCTGGGATCATAGGTAT  
GTGTCACGCTACACTCGAAATATGGGCCCTCATAAGGAAGTATAGTTGGCGTCTTGTCGTTGACGTCA  
TTA

+  
FFFFFFFFFFFFFFFFFFFFFFFF:F:FFFFFFFFFFFFFFFFFFFFFFFFFFFF:F:FFFF  
FFFFFFFFFFFFFFFFFFFFFFFFFFFFFFFFFFFFFFFFFFFFFFFFFFFFFFFFFFFF  
FFF

@A00721:190:HGJW7DSXY:4:2339:14751:33051\_2:N:0:TCTGCAAG+GCTGCACT  
CCATATCAGATTAGAGACATGCCAGTTAGAGTTCTTCTAAC CAGGACTGATGGTGAGATTCTTTTACC  
TTTTGGAGGTCCAGGAACCTTTACTCCTAGTGTCTTTTCTAGAGTCCA

+  
FFFFFFFFFFFFFFFFFFFFFFFF:F:FFFF,F:FFFF,F:FFFF,F:FFFF,  
FFFFFFFFFFFFFFFFFFFFFFFFFFFFFFFFFFFFFFFFFFFF

@A00721:190:HGJW7DSXY:4:2512:1118:35837\_1:N:0:TCTGCAAG+GCTGCACT  
TTTCGGTTTCAGCTGGATGGATCTTTT GATGGTATGTTTCACATTGCGTGATCACTTCCC GTGGACTT  
GGGAAGAGATTAAACATA AAATCCAGCGATTCTATTATGTCGCTAAAGCCTGTCCAGTTGTCGATGAT  
GTT

+  
FFF:F:FFFF:F:FFFF,F:FFFF,F:FFFF,F:FFFF,F:FFFF,F:FFFF,  
FFFF:F:FFFF,F:FFFF,F:FFFF,F:FFFF,F:FFFF,F:FFFF,

F

@A00721:190:HGJW7DSXY:4:1312:5963:15327\_2:N:0:TCTGCAAG+GCTGCACT  
TACTAAGTCTGAGATCTGCCACTTCTAATTTTAGGAAACGTCGCGAAAAGAAAGTTCATGAGGATGTC  
TTGGTCGAAAAATATCGCCGGGA ACTTCTAATAGAGGATCCTGATGAC

+  
FFFFFFFFFFFFFFFFFFFFFFFFFFFFFFFFFFFFFFFFFFFFFFFFFFFFFFFFFFFF  
FFFFFFFFFFFFFFFFFFFFFFFF:F:FFFF,F:FFFF,F:FFFF,

@A00721:190:HGJW7DSXY:4:1229:14199:16282\_1:N:0:TCTGCAAG+GCTGCACT  
TACCGATCTCAGTTCTACCACAGAAACCGTCTCAGGA ACTGTCTCCA CTGATT CGGAATT AGAGAAAG  
ACGACCTTCTTGTGGGGACTGAGACCTCTGAATTTTCAGGGTGCCCTGATGAGGACGTTGAAAGGGAT  
AAT

+  
FFFFFFFFFFFFFFFFFFFFFFFFFFFFFFFFFFFFFFFFFFFFFFFFFFFFFFFFFFFF  
FFFFFFFFFFFFFFFFFFFFFFFF:F:FFFF,F:FFFF,F:FFFF,F:FFFF,  
F,F

@A00721:190:HGJW7DSXY:4:1241:21667:34663\_2:N:0:TCTGCAAG+GCTGCACT  
TCTAAGAGTGT TTTCAA AAGACCAGAAACGTAA CAAGA GAATAAAGGTAGGAAGGGGAGAAA ACAGAA

CAAGCGAGCGGTTGAAGAGAAAAGTATGATATGGTTGCGGCTGATCGTAC

+

FFFFFFFFFFFFFFFFFFFFFFFFFFFFFFFFFFFFFFFFFFFFFFFFFFFFFFFFFFFFFFFF  
FFFFFFFFFFFFFFFFFFFFFFFFFFFFFFFFFFFFFFFFFFFFFFFFFFFFFFFFFFFFFFFF

@A00721:190:HGJW7DSXY:4:2139:19190:1407\_1:N:0:TCTGCAAG+GCTGCACT  
GGCGATACCACTGATCTTCCAGAGTTACGTAGTGGTCGTTCTTTTGGTGATTTTATCAAAGAGAAAGT  
TTCTGCTAGTCGCGACGATAGTATTTATCGGAGTGATATTAACAAGTTAACTTCGAACTGACCACTT  
ACA

+

FFFFFFFFFFFFFFFFFFFFFFFFFFFFFFFFFFFFFFFFFFFFFFFFFFFFFFFFFFFFFFFF:FFFFFFFF  
FFFFFFFFFFFFFFFFFFFFFFFFFFFFFFFFFFFFFFFFFFFFFFFFFFFFFFFFFFFFFFFF  
FFF

@A00721:190:HGJW7DSXY:4:2642:17734:8688\_1:N:0:TCTGCAAG+GCTGCACT  
GTTTCATCGCGGTATTTGTGAAATTAAGACAGACGTGAAAGTTATGATGAGTGATCGTATTAGAACAGC  
TGATTCTTATTGCATGAACGTCGCTGAGGTCAAACCTGTGGACGTTCTTTTCATCGACGAATTATTCA  
TGA

+

FFFFFFFFFF:FFFFFFFFFFFFFFFFFFFFFFFFFFFFFFFFFFFFFFFFFFFFFFFFFFFFFFFF:FFFFF  
FFFFFFFFFFFFFFFFFFFFFFFFFFFFFFFFFFFFFFFFFFFFFFFFFFFFFFFFFFFFFFFF  
FFF

@A00721:190:HGJW7DSXY:4:1151:13313:23453\_1:N:0:TCTGCAAG+GCTGCACT  
ACTTAAGGCGGCTTATACCATAGGTTACGGTGATTCCAATCAAATCGGATTCATCAATCGTATTGATC  
TCCAAGTCGCAAACACTTCAACATCAACGACATCATTCTTGATGAGTGTCGTTCTTATCGAAGTCTC  
AGT

+

FFFFFFFFFFFFFFFFFFFFFFFFFFFFFFFFFFFFFFFFFFFFFFFFFFFFFFFFFFFFFFFF  
FFFFFFFFFFFFFFFFFFFFFFFFFFFFFFFFFFFFFFFFFFFFFFFFFFFFFFFFFFFFFFFF, FFFFFF  
FFF

@A00721:190:HGJW7DSXY:4:2636:25337:3662\_1:N:0:TCTGCAAG+GCTGCACT  
ACGGCAGAAAAATTTCTCCTGCTTGTAATTCGAGAGAGGACACTATGGAAATTAGACCTATCAGATGT  
CTTGACGACTTCGAATTTGAGGACGGAGTTAAATATATTACTTTCACTCAAGGTGAAAAGTTTGAAAT  
TAA

+

FF:FFFFFFFFFFFFFFFFFFFFFFFFFFFFFFFFFFFFFFFFFFFFFFFFFFFFFFFFFFFFFFFF  
FFFFFFFFFFFFFFFFFFFFFFFFFFFFFFFFFFFFFFFFFFFFFFFFFFFFFFFFFFFFFFFF  
FFF

@A00721:190:HGJW7DSXY:4:2541:27019:11929\_2:N:0:TCTGCAAG+GCTGCACT  
ATGCTACTTGTGAGAGGATCAATCACAGTAAGGAAGTGCACGTTTAGCACGGGAGGTTGAGATTCA  
ACCCCTGATATCGAGGCTATCGAGGACGATGAGTATCTTGAAGTTGTT

+

FFFFF:FFFFFFFFFFFF:FFFFFFFFFFFFF:FFFFFFFFF,F,F:FFFFFFFFF:FFFF:, :FFF  
FFFFF:,FFF:F:FFFFFFF,:F:FFFFFFF,FFFFFFFFFFFF:FFF

@A00721:190:HGJW7DSXY:4:2512:10872:15624\_1:N:0:TCTGCAAG+GCTGCACT  
TCTGGACCACCTGGATCTTCTACTGTCTCTGCCTTCCAAGATTTCTTAGAAGAGGTTATTCCTGGAAC  
CACCTTAACGTCACTCGGTAATCTTTCAGCCGAATTAAGTACTAATGAGTTCAAGTCGGTTGTCGATC  
GAA

+

FFFFFFFFFFFFFFFF:FFFFFFFFFFFFFFFFFFFFFFFFFFFFFFFFFFFFFFFFFFFFFFFF  
FFFFFFFFFFFFFFFFFFFFFFFFFFFFFFFFFFFFFFFFFFFFFFFFFFFFFFFFFFFFFFFF  
FFF

@A00721:190:HGJW7DSXY:4:2208:17598:15843\_1:N:0:TCTGCAAG+GCTGCACT  
TAATACCTTTATAGGTAAGAAGCCCCTTGAGCCGCGTAGTCAGCGGTTTAGCTGTATCATCAGTCAG  
AGTATACCCGATAGGGTACCGAGTCTCCAAGAGAATATTTATTCTTATGAGGCTCGAACTTCAACGT  
TTT



+  
FFF,FFFFFFFFFFFFFFFFFFFFFFFF:FFF,FFFFFFFFFFFF,F:FFFFFFFF:FFFFFF  
FFF:FFF:FFFFFFFF:F:FFFF:FFFFFFFFFFFFFFFFFFFFFFFF:FFFFFFFF,FFF,FFF  
FFF  
@A00721:190:HGJW7DSXY:4:2273:22788:11522\_1:N:0:TCTGCAAG+GCTGCACT  
ATAGGGACGCTAGTATACTTCGTAAAGTCGACAGCGAAATGGTCAATATTGATAATTGGACCGACTAT  
ATGACCTATTTTAAGCTCATGGTGAAAAGGGAAGCTAAGGTTAACTTGATGCTTCAGCCTTTTCGAA  
GCA  
+  
FFFFFFFFFFFFFFFFFFFFFFFFFFFFFFFFFFFFFFFFFFFFFFFFFFFFFFFFFFFFFFFF  
FFFFFFFFFFFFFFFFFFFFFFFFFFFFFFFFFFFFFFFF:FFFFFFFFFFFFFFFFFFFFFFFF  
FFF  
@A00721:190:HGJW7DSXY:4:2504:25464:34194\_1:N:0:TCTGCAAG+GCTGCACT  
GAGTATCCATAACGATTTGTCAATTTACCACCTTTGCTCAACGACGAAGTGGAACGGCCAACACTTTCT  
TTGGTAATTGTATGATCACTTTGATGATTTTATCACTTTATTATGACCTTGGAAGTTTTTCGGCTGTG  
GTT  
+  
FFFFFFFFF:FFFFFFFFFFFFFFFFFFFF:FFFFFFFFFFFFFFFFFFFFFFFFFFFFFFFF  
FFFFFFFFFFFFFFFFFFFFFFFFFFFFFFFFFFFFFFFFFFFFFFFFFFFFFFFFFFFFFFFF  
FFF  
@A00721:190:HGJW7DSXY:4:1542:15248:8578\_2:N:0:TCTGCAAG+GCTGCACT  
TATCTGTGCTTTGAATTGTATAAGATCAAATTTTAAACGATTCCGAGAGGTTTATCCTGATGTGGAGG  
GAGTTCTTGAAGCATCCCGACCTTTCCTTGTGAAAATTTTGATGCGGT  
+  
F:FFFFFFFFF:FFF:FFFFFFFFFFFFFFFFFFFFFFFFFFFFFFFFFFFFFFFF:FFFFFF:FFFFFF  
FFFFFFFFFFFFFFFFFFFFFFFFFFFFFFFFFFFF:FFFF:FFFFFF  
@A00721:190:HGJW7DSXY:4:2431:26368:7044\_1:N:0:TCTGCAAG+GCTGCACT  
GACAGGTGATATTGTTGAGCGAGAGCGACCAAGATCTAAATTCGGTAACGGTGCGTGGCGCTTTATTT  
TAAAAAGCTCCCTCCTCTCGCAAGTTTGATCTGATACTTATCACGAAAGGACTTGAGTCTTTTGATCA  
GTC  
+  
F,FFF,F,FFFF:F:FFF,FFFF,:FF:,FF:FF,F,FFFF:FFFFFF:FFFF,FFF:FFFFFF  
FF:FFFF:FFF:F::FFFF:FFFFFF::F:FFFFFFFFFFFFFFFFFFFFFFFF:FFF:FFFFFF,  
FFF  
@A00721:190:HGJW7DSXY:4:2447:16080:28056\_1:N:0:TCTGCAAG+GCTGCACT  
TCCTCATCAGCTTGTGTTTTACCTAATCTGTGTTTTTACGATAACAACACTATCAGTTGATTAAGACTCT  
TCCGAAAGCGCACTTTGGAATTTGAAGCTCAGGTGAAGCACACGTTTGACCGTGACGAACTGTG  
GTG  
+  
FF:FF,F:F:FFF,FFFFFF:::FFFFFFFFF:FFFFFF:FFFFFFFFFFFFFFFF,FFF  
:FFF:,F:FFFFFFFF,FFFFFFFF,FFFF:FFF:FFFFFFFFF:F,F:FFF:FFFF,  
FFF  
@A00721:190:HGJW7DSXY:4:2176:27516:7811\_2:N:0:TCTGCAAG+GCTGCACT  
CATTTTAGTGAGATTATTAACGCACTAAACGTCTTCGACAACAGCAGGGTTTTCGAATAGTGA  
TAGCCACCCGCTTACAGAGGGGCAGCAGCATGACCATAATTGGTATT  
+  
FFFFFFF::FFFFFFFFF:FFFFFFFFFFFFFFFFFFFFFFFF:FFFFFFF:FF:FFFFFFFFF  
FF,F::FFFF:FFFFFFFFFFFFFFFF:FFFFFFF:FFFF:,FF,  
@A00721:190:HGJW7DSXY:4:1175:14036:34319\_2:N:0:TCTGCAAG+GCTGCACT  
TGTCTCGCCTCTTGAATGAAGTTTTAATGCTTAACAACAATGATAGTGAATTTATACCTACAATCAT  
TGGTTTTTCTAATAATGATGACACTATTGTTTATGGATATGATGCTAT  
+  
FFFFFFFFFFFFFFFFFFFFFFFFFFFFFFFFFFFFFFFFFFFFFFFFFFFFFFFFFFFFFFFF:FFFF  
FFFFFF:FFFFFFFFFFFF:FFFFFFFFFFFFFFFFFFFFFFFF:FFFF

@A00721:190:HGJW7DSXY:4:2273:12617:35900\_1:N:0:TCTGCAAG+GCTGCACT  
ATTAACCATTGTACGATGTCGTCTGTCTCGCGATCACTTTTCTACTAAGAATTGGTCTACTTTTG  
GACAAGGCCAACTTCGTAATCTTCATGAGATCGTTTCTTTCTTTATCTCTTTGGTTGTTAGGGATTTT  
GAG

+

FFFFFFFFFFFFFFFFFFFFFFFFFFFFFFFFFFFFFFFFFFFFFFFFFFFFFFFFFFFFFFFFFFFFFFFFFFFFFFFF  
FFFFFFFFFFFFFFFFFFFFFFFFFFFFFFFFFFFFFFFFFFFFFFFFFFFFFFFFFFFFFFFFFFFFFFFFFFFFFFFF  
FFF

@A00721:190:HGJW7DSXY:4:2201:30436:32503\_2:N:0:TCTGCAAG+GCTGCACT  
AATTGTAGTGGTTTGGTCGTTTACGTACCCAGTCAGTATACCTCTACGCAAAGATATTTTCATGAAAAC  
TACAGAGGAACGTACCGGATTACCTGTCTTTCATATTATGAATGAACC

+

FF:FFFFFFFFFFFFFFFFFFFFFFFFFFFFFFFFFFFFFFFFFFFFFFFFFFFFFFFFFFFFFFFFFFFFFFFF  
FFFFFFFFFFFFFFFFFFFFFFFFFFFFFFFFFFFFFFFFFFFFFFFFFFFFFFFFFFFFFFFFFFFFFFFF  
FFF

@A00721:190:HGJW7DSXY:4:1125:2058:10786\_2:N:0:TCTGCAAG+GCTGCACT  
TCAAGAAGGGTTCAGAATGGGATTCCTACGTAGTTTATGACTTTGGTGGTGGTACTTTTCGATACTTCT  
ATCGTCTTACGTTACGGTAATTACTATAGTGTTATTTATTCTGGTGGT

+

FFFFFFFF:FFFFFFFFFFFFFFFFFFFFFFFFFFFFFFFFFFFFFFFFFFFFFFFFFFFFFFFFFFFFFFFF  
FFF:FFFFF::FFFFFFFF:FFFFFFFFFFFFFFFFFFFFFFFFFFFFFFFFFFFFFFFFFFFFFFFF

@A00721:190:HGJW7DSXY:4:2310:9760:5838\_1:N:0:TCTGCAAG+GCTGCACT  
GGTCGTGACGTTGATGAAGCTATAAGAGCGTTCTTATTACGGCGCACTTCTTTACCCGCCACCACACA  
ACTTTTCAGTTTCACAACTGAAGGAGGAGTTTCTGTTACTGGAAAACCCTCGTCAATACTTTTCAATA  
ATA

+

FFFFFFFFFFFFFFFFFFFFFFFFFFFFFFFFFFFFFFFFFFFFFFFFFFFFFFFFFFFFFFFFFFFFFFFF  
FFFFFFFFFFFFFFFFFFFFFFFFFFFFFFFFFFFFFFFFFFFFFFFFFFFFFFFFFFFFFFFFFFFFFFFF  
FFF

@A00721:190:HGJW7DSXY:4:2169:23005:22263\_2:N:0:TCTGCAAG+GCTGCACT  
TGAACAAAGTTATCAAAGATAGTGGCATTCAAGGCAAACCTACCCTGATTCCGGCCGGTGGTAGCTCA  
TTTCTACCAGGGCTATTACTCTTGCTGAAACAGCTATTAAAGCTGTT

+

FFFFFFFFFFFFFFFFFFFFFFFFFFFFFFFFFFFFFFFFFFFFFFFFFFFFFFFFFFFFFFFFFFFFFFFF  
FFFFFFFFFFFFFFFFFFFFFFFFFFFFFFFFFFFFFFFFFFFFFFFFFFFFFFFFFFFFFFFFFFFFFFFF

@A00721:190:HGJW7DSXY:4:1225:10565:25989\_1:N:0:TCTGCAAG+GCTGCACT  
GGATGTGCACTCTTTTCTGCTACTTTAACGGAGCGTAGTGACTCTTCGTCGATTGTATCAACAGTAA  
CATTACTTCTAATAAAGGTCTCTATCAAGCTCGTATTATCGTCGCTGCTGGATCTGCGTTACCGTTGA  
AGG

+

FFFFFFFFFFFFFFFFFFFFFFFFFFFFFFFFFFFFFFFFFFFFFFFFFFFFFFFFFFFFFFFFFFFFFFFF  
FFFFFFFFFFFFFFFFFFFFFFFFFFFFFFFFFFFFFFFFFFFFFFFFFFFFFFFFFFFFFFFFFFFFFFFF  
FFF

@A00721:190:HGJW7DSXY:4:2615:27534:28729\_2:N:0:TCTGCAAG+GCTGCACT  
GTAATTATGAAGACTGTGATTTATCTTTCACCTCTGGCCTTGATGAGGGTGTTTCTAATCGTAACATT  
AATAATTTCAATCTTCTTAAAAAGAAGATAGAGAGTCATACTTTGGGC

+

FFFFFFFFFFFFFFFFFFFFFFFFFFFFFFFFFFFFFFFFFFFFFFFFFFFFFFFFFFFFFFFFFFFFFFFF  
F:F,FFFFFFFF:FFF:FFFFFFFF:FFFFFFFFFFFFFFFF:FFFFFFFF::

@A00721:190:HGJW7DSXY:4:2101:10610:29575\_2:N:0:TCTGCAAG+GCTGCACT  
CTAAAATATTTACAAAATCTTACCACTATCTACGAACCTAAAGTTCTGAAGACGTTGCTTGTGCTTC  
CTCCTTAATGGCACTACCTCGGTACAATCTTACTTGGAACGAAGCG

+

FFFFFFFFFFFFFFFFFFFFFFFFFFFFFFFFFFFFFFFFFFFFFFFFFFFFFFFFFFFFFFFFFFFFFFFF  
:FFFFFFFFF::FFFFFFFFFFFFFFFFFFFFFFFFFFFFFFFFFFFFFFFFFFFFFFFF,FF

@A00721:190:HGJW7DSXY:4:2601:27615:2472\_1:N:0:TCTGCAAG+GCTGCACT  
TCTGTCTATATTAGGTGAAGCGAAATACGATTTTCAACGTTCAACGTTACCGAGTTTCGTTTCGTACC  
TTGATGCTGACTTTCGTCAATATGATTTGATCTGGTTGCTCAATTCTAAGCGTGTTCGCTTAGTGCG  
AGG

+

FFFFFFFFFFFFFFFFFFFFFFFFFFFFFFFFFFFFFFFFFFFFFFFFFFFFFFFFFFFFFFFFFFFFFFFF  
FFFFFFFFFFFFFFFFFFFFFFFFFFFFFFFFFFFFFFFFFFFFFFFFFFFFFFFFFFFFFFFFFFFFFFFF  
FFF

@A00721:190:HGJW7DSXY:4:2542:8992:30937\_1:N:0:TCTGCAAG+GCTGCACT  
TTCTTCCTTGGAATTTTAAATAAAGAATCTTTACCAGGACTCCTACTACAGGAGGCAGTCTTCTGATC  
GTAAGAAGTTTATAAGGAACATATCCATTTGTTGTAATAGGGTCATCAACTTAGAACTCGAACTCTA  
AGT

+

FFFFFFFFFFFFFFFFFFFFFFFFFFFFFFFFFFFFFFFFFFFFFFFFFFFFFFFFFFFFFFFFFFFFFFFF  
FFFFFFFFFFFFFFFFFFFFFFFFFFFFFFFFFFFFFFFFFFFFFFFFFFFFFFFFFFFFFFFFFFFFFFFF  
FFF

@A00721:190:HGJW7DSXY:4:1413:26404:4946\_1:N:0:TCTGCAAG+GCTGCACT  
AATGAAATTGGACTCTTCGATAGGGGACATTTTATCGTGGGCTTTCCGTAAAGGAAGATCTGTTATCG  
ACGTTTATCGTTTACGAAGTATCACTCCACCGGTGAATGGTTTAAGAATACTATAAATAGAATAGCT  
ATT

+

FFFFF:FFFFFFFFFFFFFFFFFFFFFFFFFFFFFFFFFFFFFFFFFFFFFFFFFFFFFFFFFFFFFFFF  
FFFFFFFFFFFFFFFFFFFFFFFFFFFFFFFFFFFFFFFFFFFFFFFFFFFFFFFFFFFFFFFFFFFFFFFF  
FFF

@A00721:190:HGJW7DSXY:4:1557:16450:22748\_2:N:0:TCTGCAAG+GCTGCACT  
GAGTCCTTCCGTAACCAACTTCTTGACAATTTTCTTCAATCCTTCGATAATAGTTAAATCTAGGATTA  
TGTCTGTGTTGAAAGACTTCTACCGATAAGGGTCACTAGTCTTACAC

+

FFFFFFFFFFFFFFFFFFFFFFFFFFFFFFFFFFFFFFFFFFFFFFFFFFFFFFFFFFFFFFFFFFFFFFFF  
FFFFFFFFFFFFFFFFFFFFFFFFFFFFFFFFFFFFFFFFFFFFFFFFFFFFFFFFFFFFFFFFFFFFFFFF

@A00721:190:HGJW7DSXY:4:2414:26784:23265\_1:N:0:TCTGCAAG+GCTGCACT  
GACTGATTATCTAAAGATTGAAGGAAAATTTTATCCTCGTTTAACTTACTTAGACTTTCCTACGATAC  
AAATGATAACTTCTAATTTACGTTTGCTACTCAGAGCTGGTCTCTCAGCAAAGGGATGCATGGTGTT  
ATC

+

FFFFFFFFFFFFFFFFFFFFFFFFFFFFFFFFFFFFFFFFFFFFFFFFFFFFFFFFFFFFFFFFFFFFFFFF  
FFFFFFFFFFFFFFFFFFFFFFFFFFFFFFFFFFFFFFFFFFFFFFFFFFFFFFFFFFFFFFFFFFFFFFFF  
FFF

@A00721:190:HGJW7DSXY:4:1614:15962:22654\_2:N:0:TCTGCAAG+GCTGCACT  
GGCATTTGATAATAATGACGAGACTTTCGTGATAATCGCTGCATATTACGATTACACGGTACCAGCG  
CATCTCGTGTGAGCCTCGACCCGATTATATGGTATTAACCTATAAAG

+

FFFFFFFFFFFFFFFFFFFFFFFFFFFFFFFFFFFFFFFFFFFFFFFFFFFFFFFFFFFFFFFFFFFFFFFF  
FFFFFFFFFFFFFFFFFFFFFFFFFFFFFFFFFFFFFFFFFFFFFFFFFFFFFFFFFFFFFFFFFFFFFFFF  
FFFF:FFF:FFFFFFFFFFFFFFFF

@A00721:190:HGJW7DSXY:4:2261:8115:29199\_2:N:0:TCTGCAAG+GCTGCACT  
TGTTCTCTGATCATTTTGACAATCTCTTCTTATAATAAATAAATAAATAATATTACTAATGGCAAATA  
GTGGAAGGCTCCAGTCAACACTAGTTCGAGTGCTGCTTTGGATTACG

+

FFFFFFFFFFFFFFFFFFFFFFFFFFFFFFFFFFFFFFFFFFFFFFFFFFFFFFFFFFFFFFFFFFFFFFFF  
FFFFFFFFFFFFFFFFFFFFFFFFFFFFFFFFFFFFFFFFFFFFFFFFFFFFFFFFFFFFFFFFFFFFFFFF

@A00721:190:HGJW7DSXY:4:2468:25021:10191\_2:N:0:TCTGCAAG+GCTGCACT  
ATAGGTGAAGGGATAGTTTTTACCTCGACCAACATTAAGGCGGCGGCGACTAATCTTAAAGCTTCACC  
CAAAATGAAGGACACTTCGAAACTGAATAATGATGCACTACAAACAAG

+

FFFFFFFFFFF  
FFFF:FFFFFFFFFFFFFFFFFFFFFFFFFFFFFFFFFFFFFFFFFFFFFFFFFFFFFFFFFFFFFFFF  
@A00721:190:HGJW7DSXY:4:2527:1624:3834\_2:N:0:TCTGCAAG+GCTGCACT  
AGGATATTGCCATTGTGGTACGAATTGGTCCAACATTTACCACCAAATTCTTTTGATACAACCTCTAG  
CCTTCAAGTGGGGTATGCCTGCGGAATACGCTTGCTATTACCAGATT  
+  
FFFFFFFFF,FFFFFFFFFFFFFFFF:FFF:FFFFFFFFFFFFFFFF:FFF,FF:F,FFFFFFFFF  
FFFF:F:FFF,FFFF,FFF:FFF:FFFFFFFF,:FFFF,FFFF  
@A00721:190:HGJW7DSXY:4:2476:29161:27289\_2:N:0:TCTGCAAG+GCTGCACT  
TGCTATGTCAGAAGAAGCTATTCAAGCTTGTGCTTTAAAGACTGCAGAGGCTGTCAAACAAGCCCAGA  
CTCAAGGAGTCCAATCAAAGGTTTTGAATTTAGCTCAACTGGGGAGAC  
+  
FFFFFFFFFFFFFFFFFFFFFFFFFFFFFFFFFFFFFFFF:FFFFFFFFFFFFFFFFFFFFFFFF,FFFFF  
FFFFFFFFFFFFFFFFFFFFFFFFFFFFFFFF:FFFFFFFFFFFFFFFF  
@A00721:190:HGJW7DSXY:4:1627:2799:5682\_1:N:0:TCTGCAAG+GCTGCACT  
AATAGTTCTACCGATACGTAGTAACGCGTTCGTAGAACCAAGTACTTTCCGTCTGAAGAGTTTAGAG  
CTGCTATTGATTATGTAACCGATAGGAGTTGTATAGTTGAAGATGTGGCTTTAGACGATAATCCTTTA  
AGG  
+  
FFFFFFFFFFFFFFFFFFFFFFFF:FFFFFFFFFFFFFFFFFFFFFFFFFFFFFFFFFFFFFFFFFFFFFFFF  
FFFFFFFFFFFFFFFFFFFFFFFFFFFFFFFFFFFFFFFFFFFFFFFFFFFFFFFFFFFFFFFFFFFFFFFF  
FFF  
@A00721:190:HGJW7DSXY:4:2519:19045:13463\_1:N:0:TCTGCAAG+GCTGCACT  
GAAGATTTTCCCACAGATTTGTCTACGTTGCAGATCGCCACTCCAAACACTATATACATTATAAAAATA  
TAAAAATAAGGGAGTCATAACTTTTGTTACCAAATTCTTGGCTTTCAACGAAGTCTCTGATTTTATTA  
ATC  
+  
FFFFFFFFFFFFFFFFFFFFFFFF:FFFFFFFFFFFFFFFFFFFFFFFFFFFFFFFFFFFFFFFFFFFFFFFF  
FFFFFFFFFFFFFFFFFFFFFFFFFFFFFFFFFFFFFFFFFFFFFFFFFFFFFFFFFFFFFFFFFFFFFFFF  
FFF  
@A00721:190:HGJW7DSXY:4:1264:18792:31469\_2:N:0:TCTGCAAG+GCTGCACT  
ATCTCTCGGTCATTTACTCTGTACTTGATCTACGTCGTTTAACTGTGCGAACAACTTTACTTAGAAT  
GACTCTATCTTTTCAGACACTTCTTATATTATTTACAATAGTTAATAT  
+  
FFFFFFFFFFFFFFFFFFFFFFFFFFFFFFFFFFFFFFFFFFFFFFFFFFFFFFFFFFFFFFFFFFFFFFFF,FFFF  
FFF:F:F:FF:FFFFFFFF:FFFFF:FFF:F:,FFFFFF:FFFF  
@A00721:190:HGJW7DSXY:4:1508:30915:5650\_2:N:0:TCTGCAAG+GCTGCACT  
TTTTCTTAGCTAATAGATTAATAAAGGATGAGTACGAAAACCAACTCTTCGTTACGAGACCTGATGGT  
AGAATAGATTTAGTCTCTACACCATCTCAACGAGGATAAAGCGAGTT  
+  
FFFFFFFFFFFFFFFFFFFFFFFFFFFFFFFFFFFFFFFFFFFFFFFFFFFFFFFFFFFFFFFF:FFFFFFF:F  
F:FFFFFFFFFFFFFFFFFFFFFFFF:FFFFFFFFFFFFFFFF  
@A00721:190:HGJW7DSXY:4:2537:29839:27398\_1:N:0:TCTGCAAG+GCTGCACT  
ATCATCCGAAAACGACTCGAAACCGAGACGCCGTAGATCAAAGTCCCTTCTAACTTTAGATTATGAAT  
CCTGCCTTTACTC  
+  
F,,F::,F,FFFFFFFFF:FFFFFFFFFFFFFFFFFFFFFFFFFFFFFFFFFFFFFFFFFFFFFFFF  
FFFFFFFFFFFFF  
@A00721:190:HGJW7DSXY:4:2609:14425:19335\_2:N:0:TCTGCAAG+GCTGCACT  
TTTCGATAGTGATTGTTATCAATTTAAATACATTACTGTTTCAAATCATCTTTACTCACAGACTCCGA  
AAATGTTTCAAATGAGGTCAAAGCTCTATTTATTAACGAACCTATTA  
+  
FFFFFFFFFFFFFFFFFFFFFFFFFFFFFFFFFFFFFFFFFFFFFFFFFFFFFFFFFFFFFFFF:FFFFF  
FF:FFFFFFFFFFFFFFFFFFFFFFFFFFFFFFFFFFFFFFFF







$+$  $+$ 

+

+

+

+

+

+

@A00721:190:HGJW7DSXY:4:1558:11577:16658\_1:N:0:TCTGCAAG+GCTGCACT  
TCTCCGATCTGCTGGATGGATCTTTTGATGGTATGTTTCACATTGCGTGATCACTTCCCGTGGACTT



GGGAAGAGATTAAACATAAAATCCAGCGATTCTATTATGTCGCTAAAGCCTGTCCAGTTGTCGATGAT  
GTT

+

FFFFFFFFFFFFFFFFFFFFFFFFFFFFFFFFFFFFFFFFFFFFFFFFFFFFFFFFFFFFFFFFFFFFFFFF  
FFFFFFFFFFFFFFFFFFFFFFFFFFFFFFFFFFFFFFFFFFFFFFFFFFFFFFFFFFFFFFFFFFFFFFFF  
FFF

@A00721:190:HGJW7DSXY:4:1364:16170:30686\_2:N:0:TCTGCAAG+GCTGCACT  
TACTAAGTCTGAGATCTGCCACTTCTAATTTTAGGAAACGTCGCGAAAAGAAAGTTCATGAGGATGTC  
TTGGTCGAAAAATATCGCCGGGAACCTTCTAATAGAGGATCCTGATGAC

+

FFFFFFFFFFFFFFFFFFFFFFFFFFFFFFFFFFFFFFFFFFFFFFFFFFFFFFFFFFFFFFFFFFFFFFFF  
FFFFF:FFFFFFFFFFFFFFFFFFFFFFFFFFFFFFFFFFFFFFFFFFFFFFFFFFFFFFFFFFFFFFFF

@A00721:190:HGJW7DSXY:4:1275:7012:23093\_1:N:0:TCTGCAAG+GCTGCACT  
TACCGATCTCAGTTCTACCACAGAAACCGTCTCAGGAACGTCTCCACTGATTCGGAATTAGAGAAAG  
ACGACCTTCTTGTGGGGACTGAGACCTCTGAATTTTCAGGGTGCCCTGATGAGGACGTTGAAAGGGAT  
AAT

+

FFFFFFFFFFFFFFFFFFFFFFFFFFFFFFFFFFFFFFFFFFFFFFFFFFFFFFFFFFFFFFFFFFFFFFFF  
FFFFFFFFFFFFFFFFFFFFFFFFFFFFFFFFFFFFFFFFFFFFFFFFFFFFFFFFFFFFFFFFFFFFFFFF  
FFF

@A00721:190:HGJW7DSXY:4:2306:30038:1282\_2:N:0:TCTGCAAG+GCTGCACT  
TCTAAGAGTGTTCAAAAGACCAGAAACGTAACAAGAATAAAGGTAGGAAGGGGAGAAAACAGAA  
CAAGCGAGCGGTTGAAGAGAAAACCTGATATGGTTGCGGCTGATCGTAC

+

FFFFFFFFFFFFFFFFFFFFFFFFFFFFFFFFFFFFFFFFFFFFFFFFFFFFFFFFFFFFFFFFFFFFFFFF  
FFFFFFFFFFFFFFFFFFFFFFFFFFFFFFFFFFFFFFFFFFFFFFFFFFFFFFFFFFFFFFFFFFFFFFFF

@A00721:190:HGJW7DSXY:4:2220:1850:4633\_1:N:0:TCTGCAAG+GCTGCACT  
GGCGATACCACTGATCTTCCAGAGTTACGTAGTGGTCGTTCTTTTGGTGATTTTATCAAAGAGAAAGT  
TTCTGCTAGTCGCGACGATAGTATTTATCGGAGTGATATTAACAAGTTAACTTCGAACCTGACCACTT  
ACA

+

FF:FFFFFFFFFFFFFFFFFFFFFFFFFFFFFFFFFFFFFFFFFFFFFFFFFFFFFFFFFFFFFFFFFFFF  
FFFFFFFFFFFFFFFFFFFFFFFFFFFFFFFFFFFFFFFFFFFFFFFFFFFFFFFFFFFFFFFFFFFFFFFF  
FFF

@A00721:190:HGJW7DSXY:4:2524:32208:4257\_1:N:0:TCTGCAAG+GCTGCACT  
TTCATCGCGGTATTTGTGAAATTAAGACAGACGTGAAAGTTATGATGAGTGATCGTATTAGAACAGCT  
GATTCTTATTGCATGAACGTCGCTGAGGTCAAACCTGTGGACGTTCTTTTCATCGACGAATTATTCAT  
GA

+

FFFFFFFFFFFFFFFFFFFFFFFFFFFFFFFFFFFFFFFFFFFFFFFFFFFFFFFFFFFFFFFFFFFFFFFF  
FFFFFFFFF:FFFFFFFFFFFFFFFFFFFFFFFFFFFFFFFFFFFFFFFFFFFFFFFFFFFFFFFFFFFF  
FF

@A00721:190:HGJW7DSXY:4:1152:3857:27367\_1:N:0:TCTGCAAG+GCTGCACT  
ACTTAAGGCGGCTTATACCATAGGTTACGGTGATTCCAATCAAATCGGATTCATCAATCGTATTGATC  
TCCAAGTCGCAAACTACTTCAACATCAACGACATCATTCTTGATGAGTGTGTTCTTATCGAAGTCTC  
AGT

+

FFFFFFFFF:F:FFF:FFFFFFFFFFFFFFFFFFFFFFFFFFFFFFFFFFFFFFFFFFFFFFFFFFFF  
FFFFFFFFFFFFFFFFFFFFFFFFFFFFFFFFFFFFFFFFFFFFFFFFFFFFFFFFFFFFFFFFFFFFFFFF  
FFF

@A00721:190:HGJW7DSXY:4:2148:4381:4225\_2:N:0:TCTGCAAG+GCTGCACT  
AAGGAACGTGCACGTTTAGCACGGGAGGTTGCAGATTCAACCCCTTATATCGAGGCTATCGAGGACGA  
TGAGTATCTTGAAGTTGTTGACGACAAGCCTCAAGAGGGTAGAGGACC

+



@A00721:190:HGJW7DSXY:4:1241:18177:2002\_2:N:0:TCTGCAAG+GCTGCACT  
TGTCTCGCCTCTTGAATGAAGTTTTAATGCTTAACAACAATGATAGTGAATTTATACCTACAATCAT  
TGGTTTTTCTAATAATGATGACACTATTGTTTATGGATATGATGCTAT

+

FFFFFFFFFFFFFF:FFFFFFFFFFFFFF:FFFFFFFFFFFFFF:FFFFFFFFFFFFFF:FFFFFFFFFFFFFF  
FFFFFFFFFFFFFF:FFFFFFFFFFFFFF,FFFFFF:FFFFFF:FFFFFFFF

@A00721:190:HGJW7DSXY:4:2273:12626:35916\_1:N:0:TCTGCAAG+GCTGCACT  
ATTAAAACCATTTGTACGATGTCGTCTGTCTCGGCGATCACTTTTCACTAAGAATTGGTCCTACTTTTG  
GACAAGGCCAACTTCGTAATCTTCATGAGATCGTTTCTTTCTTTATCTCTTTGGTTGTTAGGGATTTT  
GAG

+

FFFFFFFFFFFFFF:FFFFFFFFFFFFFF:FFFFFFFFFFFFFF:FFFFFFFFFFFFFF:FFFFFFFFFFFFFF  
FFFFFFFFFFFFFF:FFFFFFFFFFFFFF:FFFFFFFFFFFFFF:FFFFFFFFFFFFFF:FFFFFFFFFFFFFF  
FFF

@A00721:190:HGJW7DSXY:4:2242:4182:20635\_2:N:0:TCTGCAAG+GCTGCACT  
AATTGTAGTGGTTTGGTCGTTTCACTACCGAGTCAGTATACCTCTACGCAAAGATATTTTCATGAAAAC  
TACAGAGGAACGTACCGGATTACCTGTCTTTCATATTATGAATGAACC

+

F:FFF:FFFFFFFFFFFFFF:FFFFFFFFFFFFFF:FFFFFFFFFFFFFF:FF:FFFFFFFFFFFFFF:F  
FFFFFFFFFFFF,FFFF:FFFFFFFFFFFFFF:FFFFFFFFFFFFFF:FFFFFFFFFFFFFF:

@A00721:190:HGJW7DSXY:4:1125:2483:10300\_2:N:0:TCTGCAAG+GCTGCACT  
TCAAGAAGGGTTCAGAATGGGATTCCTACGTAGTTTATGACTTTGGTGGTGGTACTTTGATACTTCT  
ATCGTCTTACGTTACGGTAATTACTATAGTGTTATTTATTCTGGTGGT

+

FFFFFFFFFFFFFF:FFFFFFFFFFFFFF:FFFFFFFFFFFFFF:FFFFFFFFFFFFFF:FFFFFFFFFFFFFF  
FFFFFFFFFFFFFF:FFFFFFFFFFFFFF:FFFFFFFFFFFFFF:FFFFFFFFFFFFFF:FFFFFFFFFFFFFF

@A00721:190:HGJW7DSXY:4:2445:5882:19789\_1:N:0:TCTGCAAG+GCTGCACT  
GGTCGTGACGTTGATGAAGCTATAAGAGCGTTCTTATTACGGCGCACTTCTTTACCCGCCACCACACA  
ACTTTTCAGTTTCACAACTGAAGGAGGAGGTTTCTGTTACTGGAAAACCCTCGTCAATACTTTTCAATA  
ATA

+

FFFFFFFFFFFFFF:FFFFFFFFFFFFFF:FFFFFFFFFFFFFF:FFFFFFFFFFFFFF:FFFFFFFFFFFFFF  
FFFFFFFFFFFFFF:FFFFFFFFFFFFFF:FFFFFFFFFFFFFF:FFFFFFFFFFFFFF:FFFFFFFFFFFFFF  
FFF

@A00721:190:HGJW7DSXY:4:2169:24189:24565\_2:N:0:TCTGCAAG+GCTGCACT  
TGAACAAAGTTATCAAAGATAGTGGCATTCAAGGCAAACCTTACCCTGATTCCGGCCGGTGGTAGCTCA  
TTTCTACCAGGGGCTATTACTCTTGCTGAAACAGCTATTAAAGCTGTT

+

FFFFFFFFFFFFFF:FFFFFFFFFFFFFF:FFFFFFFFFFFFFF:FFFFFFFFFFFFFF:FFFFFFFFFFFF  
:FFFFFFFFFFFFFF:FFFFFFFFFFFFFF:FFFFFFFFFFFFFF:FFFFFFFFFFFFFF

@A00721:190:HGJW7DSXY:4:1254:18493:33865\_1:N:0:TCTGCAAG+GCTGCACT  
GGATGTGCACTCTTTTCTGCTACTTTAACGGAGCGTAGTGACTCTTCGTCGATTGTATCAACAGTAA  
CATTACTTCTAATAAAGGTCTCTATCAAGCTCGTATTATCGTCGCTGCTGGATCTGCGTTACCGTTGA  
AGG

+

FFFFFFFFFFFFFF:FFFFFFFFFFFFFF:FFFFFFFFFFFFFF:FFFFFFFFFFFFFF:FFFFFFFFFFFF  
FFFFFFFFFFFFFF:FFFFFFFFFFFFFF:FFFFFFFFFFFFFF:FFFFFFFFFFFFFF:FFFFFFFFFFFF  
FFF

@A00721:190:HGJW7DSXY:4:2665:6280:28119\_2:N:0:TCTGCAAG+GCTGCACT  
GTAATTATGAAGACTGTGATTTATCTTTCACTCTGGCCTTGTATGAGGGTGTTTCTAATCGTAACATT  
AATAATTTCAATCTTCTTAAAAAGAAGATAGAGAGTCATACTTTGGGC

+

FFFFFFFFFFFFFF:FFFFFFFFFFFFFF:FFFFFFFFFFFFFF:FFFFFFFFFFFFFF:FFFFFFFFFFFF  
FFFFFFFFFFFFFF:FFFFFFFFFFFFFF:FFFFFFFFFFFFFF:FFFFFFFFFFFFFF:FFFFFFFFFFFF

@A00721:190:HGJW7DSXY:4:2101:10628:29450\_2:N:0:TCTGCAAG+GCTGCACT  
CTAAAATATGTACCAAATCTTACCACTCACTACGAACCTAAAGTTCTGAAGACGTTGCTTGTGCTTC  
CACCTTTAATTGCCCGACCTCGGTCCACTAGTACTTGAAAGAAGGCT

+

,:,FFF,F,,FF,,FFFFFF,FFFF,,F,:FFFFFF:F:,F,FF,FFFF:, ,FFFF:F:F:, ,F,  
F,FFF:F,FF,FF,, ,FFFF,: , ,F,: , ,F:F:, ,F,,:F:, ,F,

@A00721:190:HGJW7DSXY:4:2605:15176:21543\_1:N:0:TCTGCAAG+GCTGCACT  
TCTGTCTATATTAGGTGAAGCGAAATACGATTTTGAACGTCAACGTTACCGAGTTTTGTTTCGTACC  
TTGATGCTGACTTTTCGTCAATATGATTTGATCTGGTTGCTCAATTCTAAGCGTGTTCCGCTTAGTGCG  
AGG

+

FFFFFFFFFFFFFFFFFFFFFFFFFFFFFFFFFFFFFFFFFFFFFFFFFFFFFFFFFFFFFFFFFFFFFFFF  
FFFFFFFFFFFFFFFFFFFFFFFFFFFFFFFFFFFFFFFFFFFFFFFFFFFFFFFFFFFFFFFFFFFFFFFF  
FFF

@A00721:190:HGJW7DSXY:4:2621:11930:30044\_1:N:0:TCTGCAAG+GCTGCACT  
TTCTTCTTGGATTTTAAATAAAGAATCTTTACCAGGACTCCTACTACAGGAGGCAGTCTTCTGATC  
GTAAGAAGTTTATAAGGAACATATCCATTTGTTGTAATAGGGTCATCAACTAGAACTCGAAACTCTA  
AGT

+

FFFFF:FFF,FF:FFFFFFFFFFFFFFFFFFFFFFFFFFFFFFFFFFFFFFFFFFFFFFFFFFFFFFFF  
FFFFFFFFF:FFFFFFFFFFFFFFFFFFFFFFFFFFFFFFFFFFFFFFFFFFFFFFFFFFFFFFFFFFFF  
FFF

@A00721:190:HGJW7DSXY:4:2132:6017:6370\_1:N:0:TCTGCAAG+GCTGCACT  
AATGAAATTGGACTCTTCGATAGGGGACATTTTATCGTGGGCTTCCGTAAAGGAAGATCTGTTATCG  
ACGGTTTATCGTTTACGAAGTATCACTCCACCGGTGAATGGTTTAAGAATACTATAAATAGAATAGCT  
ATT

+

FFFFFFFFFFFFFFFFFFFFFFFFFFFFFFFFFFFFFFFFFFFFFFFFFFFFFFFFFFFFFFFFFFFFFF  
FFFFFFFFF:FFFFFFFFFFFFFFFFFFFFFFFFFFFFFFFFFFFFFFFFFFFFFFFFFFFFFFFFFFFF  
FFF

@A00721:190:HGJW7DSXY:4:2364:28058:11224\_2:N:0:TCTGCAAG+GCTGCACT  
GAGTCCTTCCGTAACCAACTTCTTGACAATTTTCTTCAATCCTTCGATAATAGTTAAATCTAGGATTA  
TGTCTGTGTTGAAAGACTTTCTACCGATAAGGGTCACTAGTCTTACAC

+

FFFFFFFFFFFFFFFFFFFFFFFFFFFFFFFFFFFFFFFFFFFFFFFFFFFFFFFFFFFFFFFFFFFFFF  
FF:FFFFFFFF:FFF  
FF:FFFFFF:FFFFFFFFFFFF:FFFFFF:FFFFFF: :FFF:FFFF

@A00721:190:HGJW7DSXY:4:2448:11189:29262\_1:N:0:TCTGCAAG+GCTGCACT  
GACTGATTATCTAAAGATTGAAGGAAAATTTTATCCTCGTTTAACTTACTTAGACTTTCTACGATAC  
AAATGATAACTTCTAATTTACGTTTGCTACTCAGAGCTGGTCCTCTCAGCAAAGGGATGCATGGTGTT  
ATC

+

FFFFFFFFFFFFFFFFFFFFFFFFFFFFFFFFFFFFFFFFFFFFFFFFFFFFFFFFFFFFFFFFFFFFFF  
FFFFFFFFF:FFFFFFFFFFFFFFFFFFFFFFFFFFFFFFFFFFFFFFFFFFFFFFFFFFFFFFFFFFFF  
FFF

@A00721:190:HGJW7DSXY:4:2113:11017:23390\_2:N:0:TCTGCAAG+GCTGCACT  
GGCATTGATAATAATGACGAGACTTTCGTCATAATCGCTGCATATTACGGATTACACGGTACCAGCG  
CATCTCGTGTGAGCCTCGACCCGATTATATGGTATTAACCTATAAAG

+

FFFFFFFFFFF:FFFFFFFFFFFFFF,FFF:FFFFFF:FFFF:FFFFFFFFFFFFFFFFFFFFFFFF  
FFFFFFFFFFFFFFFFFFFFFFFFFFFFFFFFFFFFFFFFFFFFFFFFFFFFFFFFFFFFFFFF

@A00721:190:HGJW7DSXY:4:2572:30544:7357\_2:N:0:TCTGCAAG+GCTGCACT  
TGTTCTCTGATCATTTTGACAATCTCTTCTTATAATAAATAAATAAATAATATTACTAATGGCAAATA  
GTGGAAGGCTCCAGTCAACACTAGTTCGAGTGCTGCTTTGGATTACG

+

[illegible]

@A00721:190:HGJW7DSXY:4:2658:17626:26162\_2:N:0:TCTGCAAG+GCTGCACT  
TTTCGATAGTGATTGTTATCAATTTAAATACATTACTGTTTCAAATCATCTTTACTCACAGACTCCGA  
AAATGGTTTCAAATGAGGTCAAAGCTCTATTTATTAACGAACATTA

@A00721:190:HGJW7DSXY:4:2245:11559:31093\_1:N:0:TCTGCAAG+GCTGCACT  
TCTATAAGGGAAAATAGCAATAATCAAATTTGACAAATTTTAGAACTTTATTTTCAGAACTCTCTCCG  
ATCACCTTGGTGTGATCTCCCGGAGGATCTTTTCAATAAGATGTATGATGATAATCTACTATTTTTAA  
ATA

@A00721:190:HGJW7DSXY:4:2319:18909:4053\_2:N:0:TCTGCAAG+GCTGCACT  
CGTATACTTGAATACTTTATCAAAGATTTGGCTTGGTCTATTTACCGCAAAAAGTTGGAAGAGGTCTA  
TGATATTTATTTTACTTATACTTTAAATAGCACCGATTATAACTTGAC

@A00721:190:HGJW7DSXY:4:1411:16595:8813\_2:N:0:TCTGCAAG+GCTGCACT  
TAGCTCTTTCTCAGAAGATTAGAGAAGTAACCGGTGAACACGTCGGTAGCATTGATTTACTTTTACCG  
TTAGAAGTAAAAAGATTCTTTTCGAAAAGAAACCTATAAGTTACAAA

@A00721:190:HGJW7DSXY:4:2462:2347:27038\_1:N:0:TCTGCAAG+GCTGCACT  
AAAATACTTCAAGTACCTGAACCTTTACATTTTTAATGGTATGGTATAATGTGTCTTACAAATAGAACC  
TTCACCTCTCGGTAATGAGAGTGTATTCCTTAATATTCTAGTAACCGCTATGTGGGCATTACTAGGATT  
TAT

@A00721:190:HGJW7DSXY:4:1402:22019:3239\_2:N:0:TCTGCAAG+GCTGCACT  
CTCCATTGTATAGTTCAAGGAGTACTTAATTCAATAGCTTTAGTATTATTTACTATCGCCTTTATTGA  
AAATTGTATAAGAGTTAATTGCTTACACAAAAGTGACGCGCGAAGGAA

@A00721:190:HGJW7DSXY:4:1563:6524:11443\_1:N:0:TCTGCAAG+GCTGCACT  
TGGCACGCCAGACGTAGGGTCAAACCTACTACCGCCGGTCGGCAGATCGGCACCACTGGTCTCTACGT  
TCAGGGACCCGCTGTGCAGAATAACCTTCCCAAATCTAGATCTGCACAGAAGAAGGCTGAAGGTCGTT  
ACC

@A00721:190:HGJW7DSXY:4:2268:18304:30091\_2:N:0:TCTGCAAG+GCTGCACT  
CTCGTAACATTGACGGCAGTCCCCTCATCTCTGTGGGAAGTGAAGCAGTACCTCAGTCAAAAGTCACA  
TTCACCACTCCCATACCAATCAATGATGTGACTATACAGTTCGGCCAT

@A00721:190:HGJW7DSXY:4:1627:23303:25911\_1:N:0:TCTGCAAG+GCTGCACT  
ATACGTCGTGGGAGGTACTGAAGCCTTCCCCTCCGCTGGCACGAAGAACAACCTCCCAAGCCAATCAATA  
GTTCTTCTGACCAGAATGAAAAGGGGTTTACCAGGGTAGTCTCTAAGTCTACCAGGAAGAGGGGAAAT  
GTC

+

FFFFFFFFFFFFFFFFFFFFFFFFFFFFFFFFFFFFFFFFFFFFFFFFFFFFFFFFFFFFFFFFFFFFFFFF  
FFFFFFFFFFFFFFFFFFFFFFFFFFFFFFFFFFFFFFFFFFFFFFFFFFFFFFFFFFFFFFFFFFFFFFFF  
FFF

@A00721:190:HGJW7DSXY:4:2276:1705:34601\_1:N:0:TCTGCAAG+GCTGCACT  
TCAGACGTGTGCTCTTCCGATCTCCTAATTCTGAAGGAAGATCTCCACCATCTGGGGTTGGGAATAA  
GAAATCTGCACGGGCCAAAGAGGCCGCTGCTACGAAGTCGCTGAAGGCGGCTTGGGTCTTAAGGGTA  
GCT

+

FFFFFFFFFFFFFFFFFFFFFFFFFFFFFFFFFFFFFFFFFFFFFFFFFFFFFFFFFFFFFFFFFFFFFFFF  
FFFFFFFFFFFFFFFFFFFFFFFFFFFFFFFFFFFFFFFFFFFFFFFFFFFFFFFFFFFFFFFFFFFFFFFF  
FFF

@A00721:190:HGJW7DSXY:4:2376:15492:3082\_1:N:0:TCTGCAAG+GCTGCACT  
CCGACCCCATCTTTGAGACCAAGACTCTCTACAGTAGGTTCTGTCCTACTATGAGCAAATCTGTTGAA  
TTCGTCCTGAGGACGAAGGTGAGAGGACTTTTGGCTACTGGCGACAACTGAGAGCAGTCGCTGGGG  
AAA

+

FFFFFFFFFFFFFFFFFFFFFFFFFFFFFFFFFFFFFFFFFFFFFFFFFFFFFFFFFFFFFFFFFFFFFFFF  
FFFFFFFFFFFFFFFFFFFFFFFFFFFFFFFFFFFFFFFFFFFFFFFFFFFFFFFFFFFFFFFFFFFFFFFF  
FFF

@A00721:190:HGJW7DSXY:4:1178:25075:30076\_1:N:0:TCTGCAAG+GCTGCACT  
CGTGTGCTCTTCCGATCTATTTTATCCGCGCTTAAGTATGGGGCGAAGATCCCCTATGGAGTCTTGAA  
GGACTTAGGTTGGCATATTTATGCCGACGATAATAAGCATGTACCCCTTAAGCACCGAGGTAAGCTCG  
GGA

+

FFFFFFF:FFFFFFFFFFFFFFFFFFFFFFFFFFFFFFFFFFFFFFFFFFFFFFFFFFFFFFFFFFFFFFFF  
FFFFFFFFF:FFFFFFFFFFFFFFFFF:FFFFFFFFFFFFFFFFF:FFFFFFFFFFFFFFFFFFFFFFFF  
FFF

@A00721:190:HGJW7DSXY:4:2343:1407:11443\_1:N:0:TCTGCAAG+GCTGCACT  
TCCGATCTAGAATGCGGGCTTTCTGACTGATGAGGTTAAACTCTTGCTCCTTCTGTGGGTGAGGGTT  
TTTGTATATTCACTGGTTCTGGGAGGCTGCTTCTCCATAATTACAACCTCTCTTTAGAGAGCATT  
AGA

+

FFFFFFFFFFFFFFFFFFFFFFFFFFFFFFFFFFFFFFFFFFFFFFFFFFFFFFFFFFFFFFFFFFFFFFFF  
FFFFFFFFFFFFFFFFFFFFFFFFFFFFFFFFFFFFFFFFFFFFFFFFFFFFFFFFFFFFFFFFFFFFFFFF  
FFF

@A00721:190:HGJW7DSXY:4:1202:24605:4335\_2:N:0:TCTGCAAG+GCTGCACT  
TAGACGTTGTCACACTTTTCTTGAAAATTTTCTTTCTCCGTCATTGGGGATTTGATGTGAGAAG  
GTGGAAGGTGTCAAGGGTCTTCTTCATGCTGATCTTTCAGGACCTAAT

+

FFFFFFFFFFFFFFFFFFFFFFFFFFFFFFFFFFFFFFFFFFFFFFFFFFFFFFFFFFFFFFFFFFFFFFFF  
FFFF:FFFFFFFFFFFFFFFFFFFFFFFFFFFFFFFFFFFFFFFFFFFFFFFFFFFFFFFFFFFFFFFF  
FFFF:FFFFFFFFFFFFFFFFFFFFFFFFFFFFFFFFFFFFFFFFFFFFFFFFFFFFFFFFFFFFFFFF

@A00721:190:HGJW7DSXY:4:1561:10529:6480\_2:N:0:TCTGCAAG+GCTGCACT  
AGTTGGAGGGAGGAAGTTCTCCGAAATTAAGACGGGGGATTAAGAGTCCAGCTGTAAGTGTCAATT  
CAGAGAGGGGAGCTCTGAAAAGGAACTTCGTGAGAAGATGAGGAAGA

+

FFFFFFFFFFFFFFFFF,FFFFFFFFFFFFFFFFFFFFFFFFFFFFFFFFFFFFFFFFFFFFFFFFFFFFF:  
FFFFFFFFF:FFFFF:FFFFF:FF:FFFFFFFFFFFFFFFFFFFFFFFFFFFFFFFFFFFFFFFFFFFFF

@A00721:190:HGJW7DSXY:4:1663:29921:2487\_1:N:0:TCTGCAAG+GCTGCACT  
TTTGAGGAAGGCTCTAGAGAAGATCTCACCACCTGGAGAAGGCAAGTGGAGAGTCCAGAAGTTGATGA





CAGTGCGAGTATTGTCATCTCGGGGAAAGTGATTCACCAAGATGTTCA  
+  
FFFFFFFFFFFFFFFFFFFFFFFFFFFFFFFFFFFFFFFFFFFFFFFFFFFFFFFFFFFFFFFF  
FFFFFFFFFFFFFFFFFFFFFFFFFFFFFFFFFFFFFFFFFFFFFFFFFFFFFFFFFFFFFFFF  
@A00721:190:HGJW7DSXY:4:1277:24749:19648\_1:N:0:TCTGCAAG+GCTGCACT  
ACTGGAGTTCAGACGTGTGCTCTTCCGATCTCTTTGGGTACACGTTATGCTCGCAAACCTAACGTTAG  
TACCGGAGGTGATCTCTCTGCTTCTGCGTACTGAGAGAAAAGATTACAGGACGCCTACGGTGACTTTA  
TGG  
+  
FFFFFFFFFFFFFFFFFFFFFFFFFFFFFFFFFFFFFFFFFFFFFFFFFFFFFFFFFFFFFFFF  
FFFFFFFFFFFFFFFFFFFFFFFFFFFFFFFFFFFFFFFFFFFFFFFFFFFFFFFFFFFFFFFF  
FFF  
@A00721:190:HGJW7DSXY:4:1109:31882:6511\_2:N:0:TCTGCAAG+GCTGCACT  
TGAAACTACGGTCCTTATCAAAGAAAATGGTGAACCGGTCTCTAAATCTTTGAGATTGAGAAGATTG  
AAGAACACGTCAAGAAGTCGCTCGGCGTTGTTCTTGAAAACCAAGTTA  
+  
FFFFFFFFFFFFFFFFFFFFFFFFFFFFFFFFFFFFFFFFFFFFFFFFFFFFFFFFFFFFFFFF  
FFF:FFFFFFFFFFFFFFFFFFFFFFFFFFFFFFFFFFFFFFFFFFFFFFFFFFFFFFFF  
@A00721:190:HGJW7DSXY:4:1361:5132:19523\_2:N:0:TCTGCAAG+GCTGCACT  
TACCTTCTGTCAAACCTTCGAGGTTACAGCTACGAGAGGTGATCCCGATGTGGATTGAAGGCTGGCTCT  
AAGGGAGACTCCTTCTTTTGAATGTTGTAAAGAATTGGGTTGAGAAG  
+  
FFFF,FFFFFFFFFFFFFFFFFFFFFFFFFFFFFFFFFFFFFFFFFFFFFFFFFFFFFFFF  
FFF:FFFFFFFFFFFFFFFFFFFFFFFFFFFFFFFFFFFFFFFFFFFFFFFFFFFFFFFF  
@A00721:190:HGJW7DSXY:4:1535:6903:5995\_1:N:0:TCTGCAAG+GCTGCACT  
TTTTCAAAAATGCGGATGGGTCTACTGATGTTTTCTACAGAGTGCAGTCGTTCAACACTTATCACC  
ACTTTTGAAAGGAAAATAATTGGTGATGAAAATACGTATGTCGGTGGGGTTCTCAAGGCTCTCATCGC  
CAC  
+  
FFF:FFF:FFFFFFFFFFFFFFFFFFFFFFFFFFFFFFFFFFFFFFFFFFFFFFFFFFFFFFFF  
FFFFFFFFFFFFFFFFFFFFFFFFFFFFFFFFFFFFFFFFFFFFFFFFFFFFFFFFFFFFFFFF  
FFF  
@A00721:190:HGJW7DSXY:4:2509:4372:2018\_2:N:0:TCTGCAAG+GCTGCACT  
ATTCTTAAAAGAAGTTTATTAACCTTCAGAGTCTCTTGAAAGTCCAGGTAGCTAATGTTCTTGCAAT  
AGCCACAGACTTTCTGGGAAAAGAGACCTCTGTTGGTAGAGGAGTTGA  
+  
F:FFFFFFFFFFFFFFFFFFFFFFFFFFFFFFFFFFFFFFFFFFFFFFFFFFFFFFFFFFFFFFFF  
F:FFFFFFFFFFFFFFFFFFFFFFFFFFFFFFFFFFFFFFFFFFFFFFFFFFFFFFFFFFFFFFFF  
@A00721:190:HGJW7DSXY:4:1209:26096:3818\_2:N:0:TCTGCAAG+GCTGCACT  
AGATTCAATCTGGCATCACTGAACGTCTACAACGAGTTAGGGAGTGGCTAGGTTTTAAAGATCCTTT  
GCACAAGCAATACCTTCCACTGAGTTCATCACCCAGAGTTTCGACGTC  
+  
FFFFFFFFFFFFFFFFFFFFFFFFFFFFFFFFFFFFFFFFFFFFFFFFFFFFFFFFFFFFFFFF  
FFFFFFFFFFFFFFFFFFFFFFFFFFFFFFFFFFFFFFFFFFFFFFFFFFFFFFFFFFFFFFFF  
@A00721:190:HGJW7DSXY:4:2142:29839:34100\_1:N:0:TCTGCAAG+GCTGCACT  
TTCTTTTATCATTGCAACAGGACTTTGAGAAGACTGTTGAAATGGACAAAATCTGGGATCATAGGTAT  
GTGTCACGCTACACTCGAAATATGGGCCCTCATAAGGAAGTATAGTTGGCGTCTTGTCGTTGACGTCA  
TTA  
+  
FF,FFFFFFFFFFFFFFFFFFFFFFFFFFFFFFFFFFFFFFFFFFFFFFFFFFFFFFFFFFFFFFFF  
FFFFFFFFFFFFFFFFFFFFFFFFFFFFFFFFFFFFFFFFFFFFFFFFFFFFFFFFFFFFFFFF  
FFF  
@A00721:190:HGJW7DSXY:4:2423:6442:35039\_2:N:0:TCTGCAAG+GCTGCACT  
CCATATCAGATTAGAGACATGCCAGTTAGAGTTCTTCTAACCAGGACTGATGGTGAGATTCTTTTACC

TTTTGGAGGTCCAGGAACCTTTACTCCTAGTGTCTTTTCTAGAGTCCA

+

FFFF:FF:FF::FFFFFF:FFFFFFFFFFFFFF:FFFFFFFFFFFFFF:FFFF  
:FFFFFFFFFFFFFF,F,FFFFFF,F,FFF::,FFF:FFFFFF:

@A00721:190:HGJW7DSXY:4:1674:22146:25755\_2:N:0:TCTGCAAG+GCTGCACT  
GTTTCAGCTGGATGGATCTTTTGATGGTATGTTTCACATTGCGTGATCACTTCCCGTGGACTTGGGAA  
GAGATTAAACATAAAATCCAGCGATTCTATTATGTCGCTAAAGCCTGT

+

FFFFFFFFFFFFFFFFFFFFFFFFFFFFFFFFFFFFFFFFFFFFFFFFFFFFFFFFFFFF  
FFFFFFFFFFFFFFFF:FFFF:,FFFF:FFFFFFFFFFFFFFFF

@A00721:190:HGJW7DSXY:4:1457:8919:29904\_2:N:0:TCTGCAAG+GCTGCACT  
TACTAAGTCTGAGATCTGCCACTTCTAATTTTAGGAAACGTCGCGAAAAGAAAGTTCATGAGGATGTC  
TTGGTCGAAAAATATCGCCGGAACTTCTAATAGAGGATCCTGATGAC

+

FFFFFFFFFFFFFFFFFFFFFFFFFFFFFFFFFFFFFFFFFFFFFFFFFFFFFFFFFFFF  
FFFFFFFFFFFFFFFF:FFFF:,FFFF:FFFFFFFFFFFFFFFF

@A00721:190:HGJW7DSXY:4:1455:7780:5321\_1:N:0:TCTGCAAG+GCTGCACT  
TACCGATCTCAGTTCTACCACAGAAACCGTCTCAGGAACTGTCTCCACTGATTCGGAATTAGAGAAAG  
ACGACCTTCTTGTTGGGGACTGAGACCTCTGAATTTTCAGGGTGCCTGATGAGGACGTTGAAAGGGAT  
AAT

+

FFFFFFFFFFFFFFFFFFFFFFFFFFFFFFFFFFFFFFFFFFFFFFFFFFFFFFFFFFFF  
FFFFFFFFFFFFFFFF:FFFF:,FFFF:FFFFFFFFFFFFFFFF  
FFF

@A00721:190:HGJW7DSXY:4:2314:30047:13260\_2:N:0:TCTGCAAG+GCTGCACT  
TCTAAGAGTGTTCAAAAGACCAGAAACGTAACAAGAAGAATAAAGGTAGGAAGGGGAGAAAACAGAA  
CAAGCGAGCGGTTGAAGAGAAAACCTGATATGGTTGCGGCTGATCGTAC

+

FFFFFFFFFFFFFFFFFFFFFFFFFFFFFFFFFFFFFFFFFFFFFFFFFFFFFFFFFFFF  
FFFFFFFFFFFFFFFF:FFFF:,FFFF:FFFFFFFFFFFFFFFF

@A00721:190:HGJW7DSXY:4:2415:29179:3333\_1:N:0:TCTGCAAG+GCTGCACT  
GGCGATACCACTGATCTTCCAGAGTTACGTAGTGGTCGTTCTTTTGGTGATTTTATCAAAGAGAAAGT  
TTCTGCTAGTCGCGACGATAGTATTTATCGGAGTGATATTAACAAGTTAACTTCGAAGTACCACTT  
ACA

+

FF:FFFFFFFFFFFFFFFFFFFFFFFFFFFFFFFFFFFFFFFFFFFFFFFFFFFFFFFF  
FFF:FFFFFFFFFFFFFFFFFFFFFFFFFFFFFFFFFFFFFFFFFFFFFFFFFFFFFFFF  
FFF

@A00721:190:HGJW7DSXY:4:2435:9263:1939\_1:N:0:TCTGCAAG+GCTGCACT  
TCGCGGTATTTGTGAAATTAAGACAGACGTGAAATTTATGATGAGTGATCGTATTAGAACAGCTGATT  
CTTATTGCATGAACGTCGCTGAGGTCAAACCTGTGGACGTTCTTTTCATCGACGAATTATTCATGATT  
CAC

+

FFFFFFFFFFFFFFFFFFFFFFFFFFFFFFFFFFFFFFFFFFFFFFFFFFFFFFFFFFFF  
FFFFFFFFFFFFFFFF:FFFF:,FFFF:FFFFFFFFFFFFFFFF  
FFF

@A00721:190:HGJW7DSXY:4:1332:32832:11851\_1:N:0:TCTGCAAG+GCTGCACT  
ACTTAAGGCGGCTTATACCATAGGTTACGGTGATTCCAATCAAATCGGATTCATCAATCGTATTGATC  
TCCAAGTCGCAAACTAATTCAACATCAACGAAATCATTCTTGATGAGTGTGCTTCTTATCGAAGTCTC  
AGT

+

F:F,,:FF,:,:F:FF::,FFFFFFFFFFFFFFFF:FF:FFFF,F:FFF,:::FFF,:FF,FF,  
F:,FF:FFF:F,FFFF,FFFF:,F,FFFF,:F,,:FFFF,FFF,FFFFFFFF,FFF,F:,,:FF,  
F,F

@A00721:190:HGJW7DSXY:4:2503:9127:5807\_2:N:0:TCTGCAAG+GCTGCACT  
AAGGAAGTGTACGTTTAGCACGGGAGGTTGCAGATTCAACCCCTTATATCGAGGCTATCGAGGACGA  
TGAGTATCTTGAAGTTGTTGACGACAAGCCTCAAGAGGGTAGAGGACC

+

FFFFFFFFFFFFFFFFFFFFFFFFFFFFFFFFFFFFFFFFFFFFFFFFFFFFFFFFFFFFFFFFFFFFFFFF  
FFFFFFFFFFFFFFFFFFFFFFFFFFFFFFFFFFFFFFFFFFFFFFFFFFFFFFFFFFFFFFFFFFFFFFFF

@A00721:190:HGJW7DSXY:4:2462:6424:1532\_1:N:0:TCTGCAAG+GCTGCACT  
ACCACCTTAACGTCACTCGGTAATCTTTCAGCCGAATTAAGTACTAATGAGTTCAAGTCGGTTGTCTGA  
TCGAATTAAGATCAAGGCTAATACCTTTATAGGTAAGAAGCCCCTTGAGCCGCGTAGTCAGCGCGTTT  
AGC

+

FFFFFFFFFFFFFFFFFFFFFFFFFFFFFFFFFFFFFFFFFFFFFFFFFFFFFFFFFFFFFFFFFFFFFFFF  
FFFFFFFFFFFFFFFFFFFFFFFFFFFFFFFFFFFFFFFFFFFFFFFFFFFFFFFFFFFFFFFFFFFFFFFF  
FFF

@A00721:190:HGJW7DSXY:4:1326:28556:12962\_1:N:0:TCTGCAAG+GCTGCACT  
CGAAATGGTCAATATTGATAATTGGACCGACTATATGACCTATTTAAGCTCATGGTGAAGGGAAG  
CTAAGGTAAACTTGATGCTTCAGCCTTTTCGAAGCATAACCCCGCACAGAATATCGTTTATCACGCA  
AAA

+

FFFFFFFF:FFFFFFFFFFFFFFFFFFFFFFFFFFFFFFFFFFFFFFFFFFFFFFFFFFFFFFFFFFFFFFF  
FFFFFFFFFFFFFFFFFFFFFFFFFFFFFFFFFFFFFFFFFFFFFFFFFFFFFFFFFFFFFFFFFFFFFFFF  
FFF

@A00721:190:HGJW7DSXY:4:2508:22471:18709\_1:N:0:TCTGCAAG+GCTGCACT  
GAGTATCCATAACGATTTGTCAATTTACCACCTTTGCTCAACGACGAAGTGGAACGGCCAACACTTTCT  
TTGGTAATTGTATGATCACTTTGATGATTTTATCACTTTATTATGACCTTGAAAGTTTTTCGGCTGTG  
GTT

+

FFFFFF:FFFFFFFFFFFFFFFFFFFFFFFFFFFFFFFFFFFFFFFFFFFFFFFFFFFFFFFFFFFFFFF  
FFFFFFFFFFFFFFFFFFFFFFFFFFFFFFFFFFFFFFFFFFFFFFFFFFFFFFFFFFFFFFFFFFFFFFFF  
FFF

@A00721:190:HGJW7DSXY:4:1660:14389:36652\_2:N:0:TCTGCAAG+GCTGCACT  
TATCTGTGCTTTGAATTGTATAAGATCAAATTTTAAACGATTCCGAGAGGTTTATCCTGATGTGGAGG  
GAGTTCTTGAAGCATCCCGACCTTTCCTTGTGAAAATTTTGATGCGGT

+

FFFFFFFFFFFFFFFFFFFFFFFFFFFFFFFFFFFFFFFFFFFFFFFFFFFFFFFFFFFFFFFFFFFFFFF  
FFFFFFFF:FFFFFFFFFFFFFFFFFFFF,FFF:FFFFFFFFFFFFFFFFFFFFFFFF

@A00721:190:HGJW7DSXY:4:1160:22806:20823\_2:N:0:TCTGCAAG+GCTGCACT  
TGATATTGTTGAGCGAGAGCGACCAAGATCTAAATTCGGTAACGGTTCGTGGCGCTTTATTTTAAAAA  
GCTCCCTCCTCTCGCAAGTTTGATCTGATACTTATCACGAAAGGACTT

+

FFFFFFF,FFF:FFFFFFFFFFFFFFFFFFFF,FFFFFFFFF:FFFFFFF:FF:FFFFFFFFF:FFFFFFF  
FFFFFFFFF,,F:FF:FFFFFFFFFFFFFFFFFFFFFFFFFFFF:FF,FFFF

@A00721:190:HGJW7DSXY:4:2570:14036:10676\_1:N:0:TCTGCAAG+GCTGCACT  
TCCTCATCAGCTTGTGTTTTACCTAATCTGTGTTTTTACGATAACAACATCAGTTGATTAAGACTCT  
TCCGAAAGGCGAACTTTGGGAATTTGAAGCTCAGGGTGAAGCACAAACGTTTGACCGTGACGAACTGTG  
GTG

+

FFFFFFFFFFFFFFFFFFFFFFFFFFFFFFFFFFFFFFFFFFFFFFFFFFFFFFFFFFFFFFFFFFFFFFF  
FFFFFFFFFFFFFFFFFFFFFFFFFFFFFFFFFFFFFFFFFFFFFFFFFFFFFFFFFFFFFFFFFFFFFFFF  
FFF

@A00721:190:HGJW7DSXY:4:2549:2808:1532\_2:N:0:TCTGCAAG+GCTGCACT  
CATTTTAGTGAGATTATTAACGCACTAAACGTCTTCGACAACAGCAGGGGTTTTCGAATAGTGA  
TAGCCACCCGCTTACAGAGGGGCAGCAGCATGACCATAATTGGTATT

+

FFFFFFFFFFFFFFFFFFFFFFFFFFFFFFFFFFFFFFFFFFFFFFFFFFFFFFFFFFFFFFFF:FFFFFFF  
FFFF:FFFFFFFFFFFFFFFFFFFFFFFFFFFFFFFFFFFFFFFFFFFFFFFFFFFFFFFF  
@A00721:190:HGJW7DSXY:4:2206:20708:27868\_2:N:0:TCTGCAAG+GCTGCACT  
TGTCTCGCCTCTTCGAATGAAGTTTTAATGCTTAACAACAATGATAGTGAATTTATACCTACAATCAT  
TGGTTTTTCTAATAATGATTAACTATTGTTTATGGATATGATGCTAT  
+  
FFFF:FFFF:FF,FFFF:FFF:F:FFFF:FFFFFFFFFFFF,F,FFFFFFFF,FF:FF:F::FF,,FF  
:FFF,:FFFFFFFFFFF::F,F,FF,F,,,,FFFF,FFFFFFFF,FFF  
@A00721:190:HGJW7DSXY:4:2274:13150:1564\_1:N:0:TCTGCAAG+GCTGCACT  
ATTAACCATTGTACGATGTCGTCTGTCTCGCGCATCACTTTTCTACTAAGAATTGGTCTACTTTTG  
GACAAGGCCAACTTCGTAATCTTCATGAGATCGTTTCTTTCTTTATCTCTTTGGTTGTTAGGGATTTT  
GAG  
+  
F:FFFFFFFFFFFFFFFFFFFFFFFFFFFFFFFFFFFFFFFFFFFFFFFFFFFFFFFFFFFFFFFF:FFFFFFFFFFFFFFFF  
FFFFFFFFFFFFFFFF:FFFFFFFFFFFFFFFFFFFFFFFFFFFFFFFFFFFFFFFFFFFFFFFFFFFFFFFFFFFFFFFF  
FFF  
@A00721:190:HGJW7DSXY:4:2402:25726:22373\_2:N:0:TCTGCAAG+GCTGCACT  
AATTGTAGTGGTTTGGTCGTTTCAGTACCCAGTCAGTATACCTCTACGCAAAGATATTTTCATGAAAAC  
TACAGAGGAACGTACCGGATTACCTGTCTTTCATATTATGAATGAACC  
+  
FFFFFFFFFFFFFFFFFFFFFFFFFFFFFFFFFFFFFFFFFFFFFFFFFFFFFFFFFFFFFFFF:FFFFFFFFFFFFFFFF  
FFFFFFFFFFFFFFFF:FFFF:FFFFFF:F:FFFFFF:FFFFFFFFFFF::FF,  
@A00721:190:HGJW7DSXY:4:1149:16378:30921\_2:N:0:TCTGCAAG+GCTGCACT  
TCAAGAAGGGTTCAGAATGGGATTCCTACGTAGTTTATGACTTTGGTGGTGGTACTTTTCGATACTTCT  
ATCGTCTTACGTTACGGTAATTACTATAGTGTTATTTATTCTGGTGGT  
+  
FFFFFFFFFFFFFFFFFFFF,FFFF,FFFFFF:FFFFFFFFFFFFFFFFFFFFFFFF:FFFFFFFFFFFFFFFF  
FFFFFFFF:FFFFFFFFFFF:FFFFFFFFFFFFFFFFFFFFFFFFFFFFFFFF  
@A00721:190:HGJW7DSXY:4:2445:6397:19147\_1:N:0:TCTGCAAG+GCTGCACT  
GGTCGTGACGTTGATGAAGCTATAAGAGCGTTCTTATTACGGCGCACTTCTTTACCCGCCACCACACA  
ACTTTTCAGTTTCACAACTGAAGGAGGAGGTTTCTGTTACTGGAAAACCCTCGTCAATACTTTTCAATA  
ATA  
+  
FFFFFFFFF:FFFFFFFFFFFFFFFFF:FFFFFFF,FFFFFFFFFFFF::FFFFF:FFFF:FFFFFFFFFFFF  
FFFFFFFF:FFFFFFFFF,:FFFFF:FF:FFFFFFFFFFFF:FFFFFFFF:F,FFFFFFFFFFFFFFFF:FF  
FFF  
@A00721:190:HGJW7DSXY:4:2217:4463:14231\_2:N:0:TCTGCAAG+GCTGCACT  
TGAACAAAGTTATCAAAGATAGTGGCATTCAAGGCAAACCTACCCTGATTCCGGCCGGTGGTAGCTCA  
TTTCTACCAGGGGCTATTACTCTTGCTGAAACAGCTATTAAAGCTGTT  
+  
FFFFFFFFFFFFFFFFFFFFFFFFFFFFFFFFFFFFFFFF:FF:FFFFFF::FFFFFFFFFFFFFFFFFFFFFFFF:FF  
FFFFFFFFFFFFFFFF,F:FFFFFFFFFFFFFFFFFFFF,F,FFF:FFFFFF  
@A00721:190:HGJW7DSXY:4:1403:29758:17300\_1:N:0:TCTGCAAG+GCTGCACT  
GGATGTGCACTCTTTTCTGCTACTTTAACGGAGCGTAGTGTACTCTTCGTCGATTGTATCAACAGTAA  
CATTACTTCTAATAAAGGTCTCTATCAAGCTCGTATTATCGTCGCTGCTGGATCTGCGTTACCGTTGA  
AGG  
+  
FFFFFFFFFFFFFFFFFFFF:FFFFFFFFFFFF:FFFFFFFFFFFFFFFFFFFF::FFFFFFFFFFFFFFFF  
FFFFFFFFFFFFFFFF:FFFFFFFFFFFFFFFFFFFFFFFFFFFFFFFFFFFFFFFFFFFFFFFFFFFFFFFF:FF  
FFF  
@A00721:190:HGJW7DSXY:4:2674:15176:15342\_2:N:0:TCTGCAAG+GCTGCACT  
GTAATTATGAAGACTGTGATTTATCTTTCACCTCTGGCCTTGATGAGGGTGTTTCTAATCGTAACATT  
AATAATTTCAATCTTCTTAAAAAGAAGATAGAGAGTCATACTTTGGGC  
+

```

FFFFFFFFFFFFFFFFFFFFFFFFFFFFFFFFFFFFFFFFFFFFFFFFFFFFFFFFFFFFFFFF
FFFFFFFFFFFFFFFF:FFFF:FFFFFF:FFFF:FFFFFFFFFFFFFF,FFF
@A00721:190:HGJW7DSXY:4:2274:25509:3020_2:N:0:TCTGCAAG+GCTGCACT
CTAAAATATTTACAAAATCTTACCACTATCTACGAACCTAAAGTTCTGAAGACGTTGCTTGTGCGCTTC
CTCCTTTAATGGCACTACCTCGGTACAATCTTACTTGGAACGAAGGCG
+
FFFFFFFFFFFFFFFFFFFFFFFFFFFFFFFFFFFFFFFFFFFFFFFFFFFFFFFFFFFFFFFF
FFFFFFFFFFFFFFFF:FFFFFFFFFFFFFFFFFFFFFFF
@A00721:190:HGJW7DSXY:4:1426:24017:12649_2:N:0:TCTGCAAG+GCTGCACT
GTCTATATTAGGTGAAGCGAAATACGATTTTCAACGTCAACGTTACCCGAGTTTCGTTTCGTACCTTG
ATGCTGACTTTCGTCAATATGATTTGATCTGGTTGCTCAATTCTAAGC
+
FFFFFFFFFFFFFFFFFFFFFFFFFFFFFFFFFFFFFFFFFFFFFFFFFFFFFFFFFFFFFFFF
FFFFFFFFFFFFFFFF:FFFFFFFFFFFFFFFFFFFFFFF
@A00721:190:HGJW7DSXY:4:1262:15293:5400_1:N:0:TCTGCAAG+GCTGCACT
TCTTCCTTGGATTTTAAATAAAGAATCTTTACCAGGACTCCTACTACAGGAGGCAGTCTTCTGATCG
TAAGAAGTTTATAAGGAACATATCCATTTGTTGTAATAGGGTCATCAACTTAGAACTCGAAACTCTAA
GTG
+
FF:FFFFFFFFFFFFFFFFFFFFFFFFFFFFFFFFFFFFFFFFFFFFFFFFFFFFFFFFFFFFFF
FFFFFF:FFFFF:FFFFFFFFFFFFFFFFFFFFFFFFFFFFFFFFFFFFFFFFFFFFFFFFFFFF:F
FFF
@A00721:190:HGJW7DSXY:4:2351:29975:15828_1:N:0:TCTGCAAG+GCTGCACT
AATGAAATTGGACTCTTCGATAGGGGACATTTTATCGTGGGCTTCCGTAAAGGAAGATCTGTTATCG
ACGTTTATCGTTTACGAAGTATCACTCCACCGGTGAATGGTTTAAAGAATACTATAAATAGAATAGCT
ATT
+
F:FFF,:FFFFFFFFFFFF:FFFFFFFF:FFFFFFFFFFFFFFFFFFFFFFFFFFFF:FFFFFFFFFFFFFF
FFFFFFFFFFFFFFFFFFFFFFFFFFFFFFFFFFFFFFFFFFFFFFFFFFFFFFFFFFFFFFFFFFFF:FFFF
F:F
@A00721:190:HGJW7DSXY:4:2612:32832:27696_2:N:0:TCTGCAAG+GCTGCACT
GAGTCCTTCCGTAAACAACTTCTTGACAATTTTCTTCAATCCTTCGATAATAGTTAAATCTAGGATTA
TGTCTGTGTTGAAAGACTTTCTACCGATAAGGGTCACTAGTCTTACAC
+
FFFF:FF:FFF:FF,,FFFFFFFF,FFFF:FFFFFFFFFFFFFFFFFFFFFFFF:FFFF,FFF,,FFF:
FF:FFFFFFFFFFFFFFFFFFFFFFFFFFFFFFFF:,,FF,FFFFFFFFFFFF
@A00721:190:HGJW7DSXY:4:2448:14832:28119_1:N:0:TCTGCAAG+GCTGCACT
GACTGATTATCTAAAGATTGAAGGAAAATTTTATCCTCGTTTAACTTACTTAGACTTTTCTACGATAC
AAATGATAACTTCTAATTTACGTTTGCTACTCAGAGCTGGTCCTCTCAGCAAAGGGATGCATGGTGTT
ATC
+
FFFFFFFFFFFFFFFFFFFFFFFFFFFFFFFFFFFFFFFFFFFFFFFFFFFFFFFFFFFFFFFF
F:FFFFFFFFFFFFFFFFFFFFFFFF:FFFFFFFFFFFFFFFFFFFFFFFFFFFFFFFFFFFFFF
FFF
@A00721:190:HGJW7DSXY:4:2206:26268:5995_2:N:0:TCTGCAAG+GCTGCACT
GGCATTGATAATAATGACGAGACTTTCGTGCATAATCGCTGCATATTACGATTACACGGTACCAGCG
CATCTCGTGTGAGCCTCGACCCGATTATATGGTATTAACCTATAAAG
+
FFFFFFFFFFFFFFFFFFFFFFFFFFFFFFFFFFFFFFFFFFFFFFFFFFFFFFFFFFFFFFFF
FFFFFFFFFFFFFFFF:FFFFFFFFFFFFFFFFFFFFFFF
@A00721:190:HGJW7DSXY:4:1669:23574:4366_1:N:0:TCTGCAAG+GCTGCACT
TCTCTTCTTATAATAAATAAATAAATAATATTACTAATGGCAAATAGTGGAAGGCTCCAGTCAACAC
TAGTTCGAGTGCTGCTTTGGATTACGATGACGTGAGAATAGGTGAAGGGATAGTTTTTACCTCGACCA
ACA

```

+  
FFFFFFFFFFFFFFFFFFFFFFFFFFFFFFFFFFFFFFFFFFFFFFFFFFFFFFFFFFFFFFFFFFFFFFFFFFFFFFFF  
FFFFFFFFFFFFFFFFFFFFFFFFFFFFFFFFFFFFFFFFFFFFFFFFFFFFFFFFFFFFFFFFFFFFFFFFFFFFFFFF  
FFF  
@A00721:190:HGJW7DSXY:4:2521:20654:19539\_1:N:0:TCTGCAAG+GCTGCACT  
AGGACACTTCGAAACTGAATAATGATGCACTACAAACAAGTATCGCTAATCATCTGAAAAAGGCTCTA  
AAGGACACTATACAATATCCAGACGACGACGAAGCTTATACTACTTTAATTTTGGGTATTATGTGGAG  
ATA  
+  
FFFFFF:FFFFFFFF:FFFFFFFFFFFFFFFFFFFFFFFF,FFFFFF:FFFFFFFFFFFFFFFFFFFFFFFF  
FFFFFFFFFFFFFFFF:FFFFFFFFFFFFFFFFFFFFFFFFFFFFFFFFFFFFFFFFFFFFFFFFFFFFFFFF  
FFF  
@A00721:190:HGJW7DSXY:4:1432:5565:31735\_1:N:0:TCTGCAAG+GCTGCACT  
AGGATATTCGCCATTGTGGTACGAATTGGTCCAACATTTACCACCAAATTCTTTTGATACAACCTCTAG  
CCTTCATGTGGGGTATGCCTGCGGAATACGCTTGCTATTCACCAGATTGGTTCGAACCCGTTGATGCT  
AT  
+  
F:,FFFF:F,,,FFFFFFFFFFFF,FF:FFFFFF:FFFF,::,,FF::,FFFFFF:FFFF:FFFFF  
F,FFF:,FF,FFFF:FF::F::FFFF,FFFFFFFFFFFF:F:FFFFFFFFFFFF:F,FFFFFFFFFFFF  
FF  
@A00721:190:HGJW7DSXY:4:1117:27516:3740\_1:N:0:TCTGCAAG+GCTGCACT  
ATTCAAGCTTGTCGTTTAAAGACTGCAGAGGCTGTCAAACAAGCCAGACTCAAGGAGTCCAATCAAA  
GGTTTTGAATTTAGCTCAACTGGGGAGACGTGCTTAAATGGGTGATAAAAAATTATTTAGAGATCTTT  
CTA  
+  
FFFFFFFF:FFFFFFFF:FFFF:FFF,FFF:FFFFFF:FFFFFFFFFFFFFFFFFFFFFFFFFFFFFFFF  
FFFFFFFF:FFFFFFFFFFFFFFFFFFFFFFFF:FFFFFFFFFFFFFFFFFFFFFFFF:FFFFFFFFFFFF  
FFF  
@A00721:190:HGJW7DSXY:4:2169:17418:12994\_1:N:0:TCTGCAAG+GCTGCACT  
AATAGTTCTACCGATACGTAGTGAACGCGTTCGTAGAACCAAGTACTTTCCGTCTGAAGAGTTTAGAG  
CTGCTATTGATTATGTAACCGATAGGAGTTGTATAGTTGAAGATGTGGCTTTAGACGATAATCCTTTA  
AGG  
+  
:F:FFFFFFFFFFFFFFFF:FFFF:F:FFFF:FFFFFF:FFFFFFFF:F:FFFFFFFFFFFFFFFF  
FF:FFFFFFFFFFFFFFFF:FFFFFFFFFFFFFFFF:FFFFFFFFFFFFFFFF:FFFFFFFFFFFF:  
FFF  
@A00721:190:HGJW7DSXY:4:2661:26422:11741\_1:N:0:TCTGCAAG+GCTGCACT  
GAAGATTTTCCCACAGATTTGTCTACGTTGCAGATCGCCACTCCAAACACTATATACATTATAAAATA  
TAAAAATAAGGGAGTCATAACTTTTGTTACCAATTCTTGGCTTTCAACGAAGTCTCTGATTTTATTA  
ATC  
+  
FFFFFFFFFFFFFFFFFFFFFFFFFFFFFFFFFFFFFFFFFFFFFFFFFFFFFFFFFFFFFFFFFFFFFFFFFFFF  
FFFFFFFFF:FFFFFFFFFFFFFFFFFFFFFFFFFFFFFFFFFFFFFFFFFFFFFFFFFFFFFFFFFFFFFFFF  
FFF  
@A00721:190:HGJW7DSXY:4:1343:11360:1031\_2:N:0:TCTGCAAG+GCTGCACT  
ATCTCTCGTCAATTTACTCTGTACTTGATCTACGTCGTTTAACTGTCGGAACAACCTTTACTTAGAAT  
GACTCTATCTTTTACAGACACTTCTTATATTATTTACAATAGTTAATAT  
+  
FFFFFFFFFFFFFFFFFFFFFFFFFFFFFFFFFFFFFFFFFFFFFFFFFFFFFFFFFFFFFFFFFFFFFFFF:F  
FFFFFFFFFFFFFF,FFFFFFFFFFFF,FFFFFFFFFFFFFFFF  
@A00721:190:HGJW7DSXY:4:1523:30472:6073\_2:N:0:TCTGCAAG+GCTGCACT  
TTTTCTTAGCTAATAGATTAATAAAGGATGAGTACGAAAACCAACTCTTCGTTACGAGACCTGATGGT  
AGAATAGATTTAGTCTCTACACCCATCTCAACGAGGATAAAGCGAGTT  
+

FFFFFFFFFFFFFFFFFFFFFFFFFFFFFFFFFFFFFFFFFFFFFFFFFFFFFFFFFFFFFFFFFFFFFFFFFFFFFFFF  
FF:FFFFFFFFFFFFFFFFFFFFFFFFFFFFFFFFFFFFFFFFFFFFFFFFFFFFFFFFFFFFFFFFFFFFFFFF  
@A00721:190:HGJW7DSXY:4:1633:16604:11647\_1:N:0:TCTGCAAG+GCTGCACT  
TCACCCCAAACGACTCGAAACCGAGACGCCGTAGATCAAAGTCCCTTCTAACTTTAGAT  
+  
:::,F,,,:::FFFFFFFF:FFFFFFFFFFFFFFFFFFFFFFFFFFFFFFFFFFFFFFFFFFFFFFFF:FFF:FF:FFFFFFFF:F  
@A00721:190:HGJW7DSXY:4:2643:1805:21966\_1:N:0:TCTGCAAG+GCTGCACT  
TCGATAGTGATTGTTATCAATTTAAATACATTACTGTTTCAAATCATCTTTACTCACAGACTCCGAAA  
ATGGTTTCAAATGAGGTCAAAGCTCTATTTATTAACGAACATTATCCGATTCTTCGAGGGTATCAC  
TAC  
+  
FFFF,FFFFFFFFFFFFFFFFFFFFFFFFFFFFFFFFFFFFFFFFFFFFFFFFFFFFFFFFFFFFFFFFFFFFFFFF  
FFFFFFFFFFFFFFFFFFFFFFFFFFFFFFFFFFFFFFFFFFFFFFFFFFFFFFFFFFFFFFFFFFFFFFFF  
FFF  
@A00721:190:HGJW7DSXY:4:2374:15456:28761\_1:N:0:TCTGCAAG+GCTGCACT  
TCTATAAGGGAAAATAGCAATAATCAAATTTGACAAATTTTAGAACTTTATTTCAGAACTCTCTCCG  
ATCACCTTGGTGTGATCTCCCGGAGGATCTTTTCAATAAGATGTATGATGATAATCTACTATTTTAA  
ATA  
+  
FF:FFFFFFFFFFFFFFFFFFFFFFFFFFFFFFFFFFFFFFFFFFFFFFFFFFFFFFFFFFFFFFFFFFFFFFFF  
FFFFFFFFFFFFFFFFFFFFFFFFFFFFFFFFFFFFFFFFFFFFFFFFFFFFFFFFFFFFFFFFFFFFFFFF  
FFF  
@A00721:190:HGJW7DSXY:4:2467:18674:31735\_2:N:0:TCTGCAAG+GCTGCACT  
CGTATACTTGAATACTTTATCAAAGATTTGGCTTGGTCTATTTACCGCAAAAAGTTGAAGAGGTCTA  
TGATATTTATTTTACTTATACTTTAAATAGCACCGATTATAACTTGAC  
+  
FFFFFFFFFFFFFFFFFFFFFFFFFFFFFFFFFFFFFFFFFFFFFFFFFFFFFFFFFFFFFFFFFFFFFFFF:FFFFFFFFFFFFFFFF  
FFFFFFFFFFFFFFFFFFFFFFFFFFFFFFFFFFFFFFFFFFFFFFFFFFFFFFFFFFFFFFFFFFFFFFFF  
@A00721:190:HGJW7DSXY:4:2203:15727:26757\_2:N:0:TCTGCAAG+GCTGCACT  
TAGCTCTTCTCAGAAGATTAGAGAAGTAACCGGTGAACACGTCGGTAGCATTGATTTACTTTTACCG  
TTAGAACTGAAAAAGATTCTTTTCGAAAAGAAACCTATAAGTTACAAA  
+  
F,,F::FFFFF,FF,:::FFFFF,FFFF:FFFFF:F:FFFFF::FF,FFFFFFFFFFFF  
F:FF:::FFFFFFFFFFFFFFFFFFFFFFFF:FFF:FFFFFFFFF:FF:F  
@A00721:190:HGJW7DSXY:4:1114:20265:33082\_1:N:0:TCTGCAAG+GCTGCACT  
AAATACTTCAAGTACCTGAACCTTACATTTTAAATGGTATGGTATAATGTGTCTTACAAATAGAACCT  
TCACTCTCGGTAATGAGAGTGATTCTTAATATTCTAGTAACCGCTATGTGGGCATTACTAGGATTT  
ATC  
+  
FFFFFFFFFFFFFFFFFFFFFFFFFFFFFFFFFFFFFFFFFFFFFFFFFFFFFFFFFFFFFFFFFFFFFFFF:FFFFFFFFFFFFFFFF  
FFFFF:FFFFFFFFFFFFFFFFFFFFFFFFFFFFFFFFFFFFFFFFFFFFFFFFFFFFFFFFFFFFFFFFFFFF  
FFF  
@A00721:190:HGJW7DSXY:4:1552:1777:4069\_2:N:0:TCTGCAAG+GCTGCACT  
CTCCATTGTATAGTTCAAGGAGTACTTAATTCAATAGCTTTAGTATTATTTACTATCGCCTTTATTGA  
AAATTGTATAAGAGTTAATTGCTTACACAAAAGTGACGCGCAAGGAA  
+  
FFFFF:FFFFFFFFFFFFFFFFFFFFFFFFFFFFFFFFFFFFFFFFFFFFFFFFFFFFFFFFFFFFFFFFFFFF:FFFFFFFF  
FFFFFFFFFFFFFFFFFFFFFFFFFFFFFFFFFFFFFFFFFFFFFFFF:F:FFFFFFFFF,  
@A00721:190:HGJW7DSXY:4:1573:27299:31140\_1:N:0:TCTGCAAG+GCTGCACT  
TGGCACGCCAGACGTAGGGTCAAACCTACTACCGCCGGTCGGCAGATCGGCACCACTGGTCTCTACGT  
TCAGGGACCCGCTGTGCAGAATAACCTTCCCAAATCTAGATCTGCACAGAAGAAGGCTGAAGGTCGTT  
ACC  
+  
:FFFFFFFFFFFFFFFFFFFFFFFFFFFFFFFF,FFFFFFFFFFFFFFFFFFFFFFFFFFFFFFFFFFFFFFFF:FFF

FFFFFFFFFFFFFFFF:FFFFFFFFFFFFFFFF:FFFF:FFFFFFFFFFFFFFFFFFFFFFFFFFFFFFFFFFFFFFFF  
FFF

@A00721:190:HGJW7DSXY:4:2337:32389:32722\_2:N:0:TCTGCAAG+GCTGCACT  
CTCGTAACATTGACGGCAGTCCCGTCATCTCTGTGGGAAGTGAAGCAGTACCTCAGTCAAAAGTCACA  
TTCACCACTCCCATAACCAATCAATGATGTGACTATACAGTTCGGCCAT

+

FFFFFFFFFFFFFFFFFFFFFFFFFFFFFFFFFFFFFFFFFFFFFFFFFFFFFFFFFFFFFFFFFFFFFFFFFFFF  
FFFFFFFFFFFFFFFFFFFFFFFFFFFFFFFF:FFFFFFFFFFFFFFFFFFFFFFFF,FFFFF

@A00721:190:HGJW7DSXY:4:1627:23312:25989\_1:N:0:TCTGCAAG+GCTGCACT  
ATACGTCGTGGGAGGTACTGAAGCCTTCCCTCCGCTGGCACGAAGAACTCCCAAGCCAATCAATA  
GTTCTTCTGACCAGAATGAAAAGGGGTTTACCAGGCTAGTCTCTAAGTCTACCAGGAAGAGGGGAAAT  
GTC

+

FFFFFFFFFFFFFFFFFFFFFFFFFFFFFFFF:FFFFF:FFFFFFFFFFFFFFFFFFFFFFFF:FFFFFFFFFFFFF  
FFFFFFFFFFFFFFFFFFFF,FFFFFFFFF,FFFF:F:F:FFFFFFFFFFFFFFFF::FFF:FFFFFFFFFFFFF  
FFF

@A00721:190:HGJW7DSXY:4:2656:3423:22983\_1:N:0:TCTGCAAG+GCTGCACT  
CTCCCACCATCTGGGGTTGGGAATAAGAAATCTGCACGGGCCAAAGAGGCCGCTGCTACGAAGTCGCT  
GAAGGCGGCTTGGGTCATTAAGGGTAGCTGTAAAGTTGCGCCTGCCGACCCCATCTTTGAGACCAAGA  
CTC

+

FFFFF:FFFFFFFFFFFFFFFFFFFFFFFF:FFFFFFFFFFFFFFFFFFFFFFFF:FFFFFFFFFFFFF  
FFFFFFFFFFFFFFFFFFFFFFFFFFFFFFFFFFFFFFFFFFFFFFFFFFFFFFFFFFFFFFFFFFFFFFFFFFFF  
FFF

@A00721:190:HGJW7DSXY:4:2153:11541:15468\_2:N:0:TCTGCAAG+GCTGCACT  
AAATCTGTTGAATTCGTCACTGAGGACGAAGGTGAGAGGACTTTTCGCTACTGGCGACAACTGAGAG  
CACTCGCTGGGGAAGAGAATTGCGTGGGTTGAAGGCCGACGCTTCGA

+

FFFFFFFFFFFFFFFFFFFFFFFFFFFFFFFFFFFFFFFFFFFFFFFFFFFFFFFFFFFFFFFFFFFFFFFFFFFF  
FFFFFFF:FFFFFFFFFFFFFFFFFFFFFFFF:F:FFFFFFFFFFFFFFFFFFFF

@A00721:190:HGJW7DSXY:4:1535:29550:32346\_1:N:0:TCTGCAAG+GCTGCACT  
CGTGTGCTCTTCCGATCTATTTTATCCGCGCTTAAGTATGGGGCGAAGATCCCCTATGGAGTCTTGAA  
GGACTTAGGTTGGCATATTTATGCCGACGATAATAAGCATGTCACCCTTAAGCACCGAGGTAAGCTCG  
GGA

+

FFFFFFFFFFFFFFFFFFFFFFFFFFFFFFFFFFFFFFFFFFFFFFFFFFFFFFFFFFFFFFFFFFFFFFFFFFFF  
FFFFFFFFFFFF:FFFFFFFFFFFFFFFFFFFFFFFFFFFFF:FFF:FFFFFFFFFFFFFFFFFFFFF,FFFFFFF  
FFF

@A00721:190:HGJW7DSXY:4:2366:14281:17644\_2:N:0:TCTGCAAG+GCTGCACT  
TTGCCCAGAATGCGGGCTTTCTGACTGATGAGGTTAAAGTCTTGCTCCTTCTGTGGGTGAGGGTTTT  
TGTTATATTCACTGGTTCTGGGAGGCTGCTTTCCTCCATAATTACAAC

+

FFFFFFFFFFFFFFFFFFFFFFFFFFFFFFFF:FFFFFFFFFFFFFFFFFFFFFFFFFFFFFFFFFFFFFFFF:FFFFF  
FF:F,FFFFFF:FFFFFFFFFFFFFFFFFFFFFFFFFFFFFFFF:FFFFFFFFF

@A00721:190:HGJW7DSXY:4:1219:31051:3223\_2:N:0:TCTGCAAG+GCTGCACT  
TTAGAAGGAAGTTGGGCAAATTCACATATGGTAGACGTTGTCACACTTTTCTTGAAAATTTTACT  
TTCCTCCGTCATTGGGGATTTCGATGTGAGAAGGTGGAAGGTGTCAAG

+

FFF,FFFFFFFFFFFFF:FFFFF:FF,FFFF:FFFFF:F,FFFFFFFF:FF:,FFFFFFFFF,,F  
FFFFFFFF,,FF,:FF:FFFFFFFFFFFF,FF,FF::FFFFFFFF:FF,

@A00721:190:HGJW7DSXY:4:2315:15022:30765\_2:N:0:TCTGCAAG+GCTGCACT  
ATGATTGATAGTTACGGCTCGTATCGAGTTGGAGGGAGGAAGTTCTCCGAAATTAAAGACGGGGGGAT  
TAAGAGTCCAGCTGTAAGTGTCAATTCAGAGAGGGGAGCTCTGAAAAG

+



FFFFFFFFFFFFFFFFFFFFFFFF:FF:FFFFFFFF:FFF:FFFFFFFF,FFF,FFFFFFFF  
,FF:FFFFFF,F,FFFF:FF:FFFF:FFFFFFFF,FF

@A00721:190:HGJW7DSXY:4:2101:3106:29481\_1:N:0:TCTGCAAG+GCTGCACT  
TTTGAGGAAGGCTCTAGAGAAGATCTCACCACCTGGAGAAGGCAAGTGGAGAGTCCAGAAGTTGATGA  
AGAAGGATTATTTGAAGCAGGGGTTACCACTTCCTAAGGTGGATGAGGGAGGTTGTTTCTTTGGAGTT  
TTA

+

F:FFFFFFFF:FFFFFFFFFFFFFFFF,FFFFFFFFFFFFFFFFFFFFFFFFFFFFFFFF  
FFFFFFFFFFFFFFFFFFFFFFFFFFFFFFFFFFFFFFFFFFFFFFFF:FFFFFFFFFFFF  
FFF

@A00721:190:HGJW7DSXY:4:2614:26693:26021\_2:N:0:TCTGCAAG+GCTGCACT  
TGGCAGAATTCGGTAACTTACCATATTGTTCCCTTCCGGGAAGTTGTGGGATTAACTTTGACTCAACT  
ACTCCGATCAGATCCGGATGGTTTGATTGGTATGGACTACTCGACTTT

+

:FFFFFF:FFFFFFFFFFFFFFFFFFFFFFFFFFFFFFFF:FFFFFFFFFFFFFFFFFFFFFFFF  
FFFFFFFFFFFFFFFFFFFFFFFF:FFFFFFFFFFFFFFFF

@A00721:190:HGJW7DSXY:4:2404:2383:29199\_2:N:0:TCTGCAAG+GCTGCACT  
AGGTCAAAGATTCTGTAGCTCTGAGGGCGGTTGAGGGAGCCGTTTTGGCCGACTTTAACTATTCTAAG  
AGTCTTTATGATTCAAACCTATCGTTGTCGTACCTTACAAGGTTGAG

+

FFFFFFFFFFFFFFFFFFFFFFFFFFFFFFFFFFFFFFFFFFFFFFFFFFFFFFFFFFFFFFFF  
FFFFFFFFFFFFFFFFFFFFFFFFFFFFFFFFFFFFFFFF:FFFFF

@A00721:190:HGJW7DSXY:4:2659:30635:11397\_2:N:0:TCTGCAAG+GCTGCACT  
GCGGTTGAAGTTCACCCATTCTATCTTGAATGCTCACGCCGTCGCAGCCATATCGAGACTATGTTATA  
ATCACTTGTTAAAGTACAGATTTAGTGATTAGATATTATTGATATTG

+

FFFFFFFFFFFFFFFFFFFFFFFFFFFFFFFFFFFFFFFFFFFFFFFFFFFFFFFFFFFFFFFF,FFFFF  
FFFFFFFF:FFFFFFFF:FFFFF,FFFFFFFFFFFFFFFF

@A00721:190:HGJW7DSXY:4:2267:11279:22780\_2:N:0:TCTGCAAG+GCTGCACT  
TCATATCCAAAACCTCTGAATGGAGTACATATTTGCAACCCTATTCTTGATGTGAAAGATGCATCGA  
GGTATACGTCTAGGAACATTGATTGGGAACGTACCTACTCACGAGACG

+

FFFFFFFFFFFFFFFFFFFFFFFFFFFFFFFFFFFFFFFFFFFFFFFFFFFFFFFFFFFFFFFF  
FFFFFFFFFFFFFFFF,FFFFFFFFFFFFFFFFFFFFFFFF

@A00721:190:HGJW7DSXY:4:1176:25418:20901\_2:N:0:TCTGCAAG+GCTGCACT  
TACAAGAACGCTTTGGATTGTGACCATAAAGCCTCAGTTGCGATAGCTGTAGAGGTATACGATATCTC  
TCTTGATGATGTAGCCACTATAATGCTTAAGAGAGAGATTGATGTATG

+

FFFFFFFF:FFFFFFFFFFFFFFFFFFFFFFFFFFFFFFFFFFFFFFFFFFFFFFFFFFFFFFFF  
FFFFFFFFFFFFFFFFFFFFFFFFFFFFFFFF:FFFFFFFFFFFFFFFF

@A00721:190:HGJW7DSXY:4:1610:3712:25551\_1:N:0:TCTGCAAG+GCTGCACT  
GAGATGATGGCGCATCACTTGATTACTATATGCCCGAAGGATTGGGTTATTCTCACAACAAAGATAAG  
ATTTTATCTTTCTTCAAACACCCTGTTTCTTAAGGGCGGACAATTGTTCCATTGTGAACCTTTGGG  
GAC

+

FFFFFFFFFFFFFFFFFFFFFFFFFFFFFFFFFFFFFFFF:FFFFFFFFFFFFFFFFFFFFFFFF,FFFFF  
FFFFFFFFFFFFFFFF:FFFFFFFFFFFFFFFFFFFFFFFF,FFFFFFFFFFFFFFFF  
FFF

@A00721:190:HGJW7DSXY:4:1219:23583:29747\_1:N:0:TCTGCAAG+GCTGCACT  
AATAACTCGTAATAAATCTTTCTCTAGTGGACAATTCAGAATACCTATTTCCGTACCAAGAGCCACTG  
CCAATCTCATCGCTATACGCATACCTGATTGGAAGAAGCGAGGTTCTGTTCTCAATAAAAATTTTCT  
CAA

+

FF:FF,FFFFFFFFFFFFFFFFFFFFFFFF:FFFFFFFFFFFFFFFFFFFFFFFF

@A00721:190:HGJW7DSXY:4:2508:23204:18349\_2:N:0:TCTGCAAG+GCTGCACT  
GTCATGGGGATCACTTCTTCGGTCAATGACAAAACCTTCGAATATGTTACGACATGGCTTCGTAACAA  
CAGTGCGAGGATTGTCATCTCGGGGAAAGTGATTACCAAGATGTTCA

@A00721:190:HGJW7DSXY:4:1468:17852:34663\_1:N:0:TCTGCAAG+GCTGCACT  
ACTGGAGTTCAGACGTGTGCTCTTCCGATCTCTTTGGGTACACGTTATGCTCGCAAACCTTAACGTTAG  
TACCGGAGGTGATCTCTCTGCTTCTGCGTTACTGAGAGAAAAGATTACGACGCCTACGGTGACTTTA  
TGG

@A00721:190:HGJW7DSXY:4:1403:31204:32737\_2:N:0:TCTGCAAG+GCTGCACT  
TGAAACTACGGTCCTTATCAAAGAAAATGGTGAACCGGTCTCTAAATCTTTTGAGATTGAGAAGATTG  
AAGAACACGTCAAGAAGTCGCTCGGCGTTGTTCTTGAAAACCAAGTTA

@A00721:190:HGJW7DSXY:4:1551:5972:31187\_2:N:0:TCTGCAAG+GCTGCACT  
TACCTTCTGTCAAACCTTCGAGGTTACAGCTACGAGAGGTGATCCCGGATGTGGATTGAAGGCTGGCTCT  
AAGGGAGACTCCTTCTTTTGAATGTTGTAAAGAATTGGGTTGAGAAG

@A00721:190:HGJW7DSXY:4:1604:15383:10661\_1:N:0:TCTGCAAG+GCTGCACT  
TTTTCAAAAATGCGGATGGGTCTACTGATGTTTTCTACAGAGTGAGTCGTTTCAACACTTATCACC  
ACTTTTGAAAGGAAAATAATTGGTGATGAAAATACGTATGTCGGTGGGGTTCTCAAGGCTCTCATCGC  
CAC

@A00721:190:HGJW7DSXY:4:2513:6126:32142\_2:N:0:TCTGCAAG+GCTGCACT  
ATTCTTAAAAGAAGTTTATTA AAACTTCAGAGTCTCTTGAAGTCCAGGTAGCTAATGTTCTTGCAAT  
AGCCACAGACTTTCTGGGAAAAGAGACCTCTGTTGGTAGAGGAGTTGA

@A00721:190:HGJW7DSXY:4:1209:26503:3897\_2:N:0:TCTGCAAG+GCTGCACT  
AGATTCAATCTGGCATCACTGAACGTCTACAACGAGTTAGGGAGTGGCTAGGTTTTAAAGATCCTTT  
GCACAAGCAATACCTTCCACTGAGTTCATACCCAGAGTTTCGACGTC

@A00721:190:HGJW7DSXY:4:2217:8006:13166\_1:N:0:TCTGCAAG+GCTGCACT  
TTCTTTTATCATTGCAACAGGACTTTGAGAAGACTGTTGAAATGGACAAAATCTGGGATCATAGGTAT  
GTGTCACGCTACACTCGAAATATGGGCCCTCATAAGGAAGTATAGTTGGCGTCTTGTCGTTGACGTCA  
TTA

FFFFFFFFFFFFFFFFFFFFFFFFFFFFFFFFFFFFFFFFFFFFFFFFFFFFFFFFFFFFFFFFFFFFFFFF  
FFF  
@A00721:190:HGJW7DSXY:4:2501:10077:3161\_2:N:0:TCTGCAAG+GCTGCACT  
CCATATCAGATTAGAGACATGCCAGTTAGAGTTCTTCTAACCAGGACTGATGGTGAGATTCTTTTACC  
TTTTGGAGGTCCAGGAACCTTTACTCCTAGTGTCTTTTCTAGAGTCCA  
+  
FFFFFFFF:FFFFFFFFFFFFFFFFFFFFFFFFFFFFFFFFFFFFFFFFFFFFFFFFFFFFFFFFFFFFF:FFFFFFFFFFFFFFFFFFFFF  
F:FFFFFFFFFFFFFFFFFFFFFFFFFFFFFFFFFFFFFFFFFFFFFFFFFFFFFFFFFFFFF:FFFFFFFFF:  
@A00721:190:HGJW7DSXY:4:2369:30147:35634\_2:N:0:TCTGCAAG+GCTGCACT  
GTTTCAGCTGGATGGATCTTTTGATGGTATGTTTCACATTGCGTGATCACTTCCCGTGGACTTGGGAA  
GAGATTAAACATAAAATCCAGCGATTCTATTATGTCTCTAAAGCCTGT  
+  
FFFFF,F,F:FFFFFFFFFFFFF::FFF:FF::FF:FF:F,FFFF:FF:FF,F,:FFF:FFFF:F,  
,FFFFFFFF,FFFF:FFF:FF:,FF,,F,F::FF:FF,FFFFFF,FFFF  
@A00721:190:HGJW7DSXY:4:1512:5511:4648\_2:N:0:TCTGCAAG+GCTGCACT  
TACTAAGTCTGAGATCTGCCACTTCTAATTTTAGGAAACGTCGCGAAAAGAAAGTTCATGAGGATGTC  
TTGGTCGAAAAATATCGCCGGGAACCTTCTAATAGAGGATCCTGATGAC  
+  
F::FFFFFFFFFFFFFFFFFFFFFFFFFFFF:FFFFFFFFFFFFFFFFFFFFFFFFFFFF,FFF:FFFFFFFFFFFFFFFFFFFF  
FFFFFFFFFFFFF:FFFFFFFFFFFFF:FFFF:FFFFFFFFFFFFFFFFFFFF,FFF  
@A00721:190:HGJW7DSXY:4:1463:10022:17785\_1:N:0:TCTGCAAG+GCTGCACT  
TACCGATCTCAGTTCTACCACAGAAACCGTCTCAGGAAGTGTCTCCACTGATTCGGAATTAGAGAAAG  
ACGACCTTCTTGTGGGGACTGAGACCTCTGAATTTTCAGGGTGCCCTGATGAGGACGTTGAAAGGGAT  
AAT  
+  
FFFFFFFFFFFFFFFFFFFFFFFFFFFFFFFFFFFF:FFFFFFFFFFFFFFFFFFFFFFFFFFFF,FFFFFFFFFFFFFFFFFFFFFFFFFFFF  
FFFFFFFFFFFFFFFFFFFFFFFFFFFFFFFFFFFFFFFFFFFFFFFFFFFFFFFFFFFFFFFFFFFF:FFFFFFFFFFFFFFFFFFFFFFFFFFFF  
FFF  
@A00721:190:HGJW7DSXY:4:2377:13485:26976\_1:N:0:TCTGCAAG+GCTGCACT  
TGTTTCAAAAGACCAGAAACGTAACAAGAATAAAGGTAGGAAGGGGAGAAAACAGAACAAAGCGAG  
CGGTTGAAGAGAAAACCTGATATGGTTGCGGCTGATCGTACCCCAATTCCTGCTAGAAAGATCACTCTC  
GGC  
+  
FFFFFFFFFFFFFFFFFFFFFFFFFFFFFFFFFFFFFFFFFFFFFFFFFFFFFFFFFFFFFFFFFFFF:FFFFFFFFF  
FFFFFFFFFFFFFFFFFFFFFFFFFFFFFFFFFFFFFFFFFFFFFFFFFFFFFFFFFFFFFFFFFFFF:FFFFFFFFFFFFFFFFFFFFFFFFFFFF  
FFF  
@A00721:190:HGJW7DSXY:4:1116:6063:1313\_1:N:0:TCTGCAAG+GCTGCACT  
GAGTTACGTAGTGGTCGTTCTTTTGGTGATTTTATCAAAGAGAAAGTTTCTGCTAGTCGCGACGATAG  
TATTTATCGGAGTGATATTAACAAGTTAACTTCGAACTGACCACTTACAAGAGTGTTGAAGTACCGC  
AAC  
+  
FFFFFFFFFFFFFFFFFFFFFFFFFFFFFFFFFFFF:FFFFFFFFFFFFFFFFFFFFFFFFFFFFFFFFFFFFF  
FFFFFFFFFFFFFFFFFFFFFFFFFFFF:F:FFFFFFFFFFFFFFFFFFFFFFFFFFFFFFFFFFFFFFFFFFFFF  
FFF  
@A00721:190:HGJW7DSXY:4:2626:31439:26099\_1:N:0:TCTGCAAG+GCTGCACT  
TCGCGGTATTTGTGAAATTAAGACAGACGTGAAATTTATGATGAGTGATCGTATTAGAACAGCTGATT  
CTTATTGCATGAACGTCGCTGAGGTCAAACCTGTGGACGTTCTTTTCATCGACGAATTATTCATGATT  
CAC  
+  
FFFF:FFFFFFFFFFFFFFFFFFFFFFFFFFFFFFFFFFFFFFFFFFFFFFFFFFFFFFFFFFFFFFFFFFFF  
FFFFFFFFFFFFFFFFFFFFFFFFFFFFFFFFFFFFFFFFFFFFFFFFFFFFFFFFFFFFFFFFFFFFF  
FFF  
@A00721:190:HGJW7DSXY:4:1374:2654:9220\_1:N:0:TCTGCAAG+GCTGCACT  
ACTTAAGGCGGCTTATACCATAGGTTACGGTGATTCCAATCAAATCGGATTCATCAATCGTATTGATC

TCCAAGTCGCAAACACTACTTCAACATCAACGACATCATTCTTGATGAGTGTCTGTTCTTATCGAAGTCTC  
AGT

+

FFFFFFFFFFFFFFFFFFFFFFFFFFFFFFFFFFFFFFFFFFFFFFFFFFFFFFFFFFFFFFFFFFFFFFFF:FFFF  
FFFFFFFFFFFFFFFF:FFFFFFFFFFFFFFFFFFFFFFFFFFFFFFFFFFFFFFFFFFFFFFFFFFFFFFFF  
FFF

@A00721:190:HGJW7DSXY:4:1133:24135:27571\_2:N:0:TCTGCAAG+GCTGCACT  
AACTGTCACGTTTAGCACGGGAGGTTGCAGATTCAACCCCTTATATCGAGGCTATCGAGGACGATGAG  
TATCTTGAAGTTGTTGACGACAAGCCTCAAGAGGGTAGAGGACCACCT

+

FFFFFFFFFFFFFFFFFFFFFFFFFFFFFFFFFFFFFFFFFFFFFFFFFFFFFFFFFFFFFFFFFFFFFFFF,FFFFFFFFFFFFFFFFFFFFFFFFFFFFFFFF  
FFFFFFFFFFFFFFFFFFFFFFFF:FFFF:FF:FFFFFFFFFFFF:FFFFFF

@A00721:190:HGJW7DSXY:4:2471:29532:31751\_1:N:0:TCTGCAAG+GCTGCACT  
ACCACCTTAACGTCACTCGGTAATCTTTCAGCCGAATTAAGTACTAATGAGTTCAAGTCGGTTGTCTGA  
TCGAATTAAGATCAAGGCTAATACCTTTATAGGTAAGAAGCCCCTTGAGCCGCGTAGTCAGCGCGTTT  
AGC

+

FFF:FFFFFFFFFFFFFFFFFFFFFFFF:FFFFFFFFFFFFFFFFFFFFFFFFFFFFFFFFFFFFFFFFFFFF  
FFFFFFFFFFFFFFFFFFFFFFFF:FFFFFFFFFFFFFFFFFFFFFFFFFFFFFFFFFFFFFFFFFFFFFFFFFFFF  
FFF

@A00721:190:HGJW7DSXY:4:2338:11071:16783\_1:N:0:TCTGCAAG+GCTGCACT  
CGAAATGGTCAATATTGATAATTGGACCGACTATATGACCTATTTTAAGCTCATGGTGAAAAGGGAAG  
CTAAGGTTAACTTGATGCTTCAGCCTTTTCGAAGCATAACCCCGCACAGAATATCGTTTATCACGCA  
AAA

+

FFF::F:FFFFFFFFFFFFFFFF,FFFFFFFFFFFFFFFFFFFFFFFFFFFFFFFFFFFFFFFFFFFFFFFFFFFF  
FFFFFFFFFFFFFFFFFFFFFFFFFFFFFFFFFFFFFFFFFFFFFFFFFFFFFFFFFFFFFFFFFFFFFFFFFFFF  
FFF

@A00721:190:HGJW7DSXY:4:2637:3197:26099\_1:N:0:TCTGCAAG+GCTGCACT  
GAGTATCCATAACGATTTGTCAATTTACCACCTTGTCTCAACGACGAAGTGGAACGGCCAACACTTTCT  
TTGGTAATTGTATGATCACTTTGATGATTTTATCACTTTATTATGACCTTGGAAGTTTTCGGCTGTG  
GTT

+

FFFFFFFFFFFFFFFF:FFFFFFFFFFFFFFFF:FFFFFFFFFFFF,FFFFFFFFFFFFFFFFFFFFFFFFFFFFFFFF  
FFFFFFFFFFFFFFFFFFFFFFFFFFFFFFFFFFFFFFFFFFFFFFFFFFFFFFFFFFFFFFFFFFFFFFFFFFFF  
FFF

@A00721:190:HGJW7DSXY:4:1660:14425:36151\_2:N:0:TCTGCAAG+GCTGCACT  
TATCTGTGCTTTGAATTGTATAAGATCAAATTTTAAACGATTCCGAGAGGTTTATCCTGATGTGGAGG  
GAGTTCTTGAAGCATCCCGACCTTCTCTTGTAATAATTTGATGCGGT

+

F:FFFFFFFFFFFF:FFFFFFFFFFFFFFFFFFFFFFFF:FFFFFFFFFFFFFFFFFFFFFFFFFFFFFFFFFFFF  
FFFFFFFFFFFFFFFFFFFFFFFFFFFFFFFFFFFFFFFFFFFFFFFFFFFFFFFFFFFFFFFFFFFFFFFF

@A00721:190:HGJW7DSXY:4:1176:2700:25363\_2:N:0:TCTGCAAG+GCTGCACT  
TGATATTGTTGAGCGAGAGCGACCAAGATCTAAATTCGGTAACGGTGCGTGCGCTTTATTTTAAAAA  
GCTCCCTCCTCTCGCAAGTTTGATCTGATACTTATCACGAAAGGACTT

+

FFFFFFFFFFFFFFFFFFFFFFFFFFFFFFFFFFFFFFFFFFFFFFFFFFFFFFFFFFFFFFFFFFFFFFFF:FFFFFFFFFFFFFFFF:FFFFFF:FFF  
FFFFFFFFFFFFFFFFFFFFFFFFFFFFFFFFFFFFFFFFFFFFFFFFFFFFFFFFFFFFFFFFFFFFFFFF:FFF

@A00721:190:HGJW7DSXY:4:1335:4616:6355\_1:N:0:TCTGCAAG+GCTGCACT  
CCTCATCAGCTTGTGTTTTACCTAATCTGTGTTTTTACGATAACAACCTATCAGTTGATTAAGACTCTT  
CCGAAAGGCGAACTTTGGAATTTGAAGCTCAGGGTGAAGCACACGTTTGACCGTGACGAACTGTGG  
TGT

+

FFFF,FFFFFFFFFFFFFFFF:FFF:F:FFFFFFFFFFFF,FFF:F:FFFFFFFFFFFF:FFFF:FFFFFFFF,F



@A00721:190:HGJW7DSXY:4:2274:8603:8249\_2:N:0:TCTGCAAG+GCTGCACT  
GGCATTGATAAATGACGAGACTTCGTCATAATCGCTGCATATTACGGATTACACGGTACCAGCG

CATCTCGTGTGAGCCTCGACCCGATTATATGGTATTAACCTATAAAG

+

F:FFFFFFFF:FFFFFFFF:FFFF:FFFFF::FF:F:FFFFFFFF:FFFF:FFFFFFFF:FFF:  
FFFFFFFFFFFFFFFF:FFFFFFFF::FFFF:FF:FFFFFFFFFFFFFFFF

@A00721:190:HGJW7DSXY:4:2165:17725:9173\_1:N:0:TCTGCAAG+GCTGCACT  
TCTCTTCTTATAATAAATAAATAAATAATATTACTAATGGCAAATAGTGGAAGGCTCCAGTCAACAC  
TAGTTCGAGTGCTGCTTTGGATTACGATGACGTGAGAATAGGTGAAGGGATAGTTTTTACCTCGACCA  
ACA

+

FFFFFFFFFFFFFFFFFFFFFFFFFFFFFFFF:FFFFF,FFFFFFFF:FFFFFFFFFFFFFFFFFFFF  
FFFFFFFFFFFFFFFFFFFFFFFFFFFFFFFFFFFFFFFFFFFFFFFFFFFFFFFFFFFFFFFFFFFF  
FFF

@A00721:190:HGJW7DSXY:4:2657:4589:4554\_1:N:0:TCTGCAAG+GCTGCACT  
ACACTTCGAACTGAATAATGATGCACTACAAACAAGTATCGCTAATCATCTGAAAAAGGCTCTAAAG  
GACACTATACAATATCCAGACGACGACGAAGCTTATACTACTTTAATTTTGGGTATTATGTGGAGATA  
TCG

+

FFFFFFFFF:FFFFFFFFFFFFFFFFFFFFFFFF:FFFFFFFFF,FFFFFFFFFFFFFFFFFFFFFFFF:FF  
FFFFFFFFFFFF:FFFFFFFFFFFFFFFFFFFFFFFFFFFFFFFFFFFFFFFFFFFFFFFFFFFFFFFFFFFF  
FFF

@A00721:190:HGJW7DSXY:4:1352:7256:21731\_1:N:0:TCTGCAAG+GCTGCACT  
AGGATATTCGCCATTGTGGTACGAATTGGTCCAACATTTACCACCAAATTCTTTTGATACAACCTCTAG  
CCTTCAAGTGGGGTATGCCTGCGGAATACGCTTGCTATTCACCAGATTGGTTCGAACCCGTTGATGCT  
ATG

+

FFFFFFFFFFFFFFFFFFFFFFFFFFFFFFFF:FFFFFFFFFFFFFFFFFFFFFFFF:FFFFFFFFFFFFFFFFFFFF  
FFFFFFFFFFFFFFFFFFFFFFFFFFFFFFFFFFFFFFFFFFFFFFFFFFFFFFFFFFFFFFFFFFFFFFFFFFFF  
FFF

@A00721:190:HGJW7DSXY:4:1117:28311:3834\_1:N:0:TCTGCAAG+GCTGCACT  
ATTCAAGCTTGTCGTTTAAAGACTGCAGAGGCTGTCAAACAAGCCCAGACTCAAGGAGTCCAATCAAA  
GGTTTTGAATTTAGCTCAACTGGGGAGACGTGCTTAAATGGGTGATAAAAAATTATTTAGAGATCTTTT  
CTA

+

FFFF:FFFFFFFFFFFFFFFFFFFFFFFFFFFFFFFFFFFFFFFFFFFFFFFFFFFFFFFFFFFFFFFFFFFF  
FFFFFFFFFFFFFFFFFFFFFFFFFFFFFFFFFFFFFFFFFFFFFFFFFFFFFFFFFFFFFFFFFFFFFFFFFFFF  
FFF

@A00721:190:HGJW7DSXY:4:2219:26042:7921\_1:N:0:TCTGCAAG+GCTGCACT  
AATAGTTCTACCGATACGTAGTGAACGCGTTCGTAGAACCAAGTACTTTCCGTCTGAAGAGTTTAGAG  
CTGCTATTGATTATGTAACCGATAGGAGTTGTATAGTTGAAGATGTGGCTTTAGACGATAATCCTTTA  
AGG

+

FF:FFFFFFFFFFFFFFFFFFFFFFFFFFFFFFFFFFFFFFFFFFFFFFFFFFFFFFFFFFFFFFFFFFFF  
FFFFFFFFFFFFFFFFFFFFFFFFFFFFFFFFFFFFFFFFFFFFFFFFFFFFFFFFFFFFFFFFFFFFFFFFFFFF  
FFF

@A00721:190:HGJW7DSXY:4:2661:26512:11772\_1:N:0:TCTGCAAG+GCTGCACT  
GAAGATTTTCCCACAGATTTGTCTACGTTGCAGATCGCCACTCCAAACACTATATACATTATAAAATA  
TAAAAATAAGGGAGTCATAACTTTTGTTACCAAATCTTGGCTTTCAACGAAGTCTCTGATTTTATTA  
ATC

+

FFFFFFFFFFFFFFFFFFFFFFFFFFFFFFFFFFFFFFFFFFFFFFFFFFFFFFFFFFFFFFFFFFFF:FFFFF  
FFFFFFFFFFFFFFFFFFFFFFFFFFFFFFFFFFFFFFFFFFFFFFFFFFFFFFFFFFFFFFFFFFFF:FFFFF  
FFF

@A00721:190:HGJW7DSXY:4:1345:11912:36620\_2:N:0:TCTGCAAG+GCTGCACT  
ATCTCTCGTCAATTTACTCTGTACTTGATCTACGTCGTTTAACTGTCGGAACAACCTTTACTTAGAAT

+

@A00721:190:HGJW7DSXY:4:1627:31159:15969\_2:N:0:TCTGCAAG+GCTGCACT  
TTTTCTTAGCTAATAGATTAATAAAGGATGAGTACGAAAACCACTCTTCGTTACGAGACCTGATGGT  
AGAATAGATTTAGTCTCTACACCCATCTCAACGAGGATAAAGCGAGTT

+

@A00721:190:HGJW7DSXY:4:1345:21441:26224\_2:N:0:TCTGCAAG+GCTGCACT  
TCATCCGCAAACGACTCGAAACCGAGACGCCGTAGATCAAAGTCCCTTCTAACTTTAGATTATGAATC  
CTGCCTTTACTCATTTTATAGCAGAGATCGGAAGAGCGTCGTGTAGGG

+

@A00721:190:HGJW7DSXY:4:1107:30761:20729\_1:N:0:TCTGCAAG+GCTGCACT  
CGATAGTGATTGTTATCAATTTAAATACATTACTGTTTCAAATCATCTTTACTCACAGACTCCGAAAA  
TGGTTTCAAATGAGGTCAAAGCTCTATTTATTAACGAACATTATCCGATTCTTCGAGGGTATCACT  
ACC

+

@A00721:190:HGJW7DSXY:4:2544:6894:10614\_1:N:0:TCTGCAAG+GCTGCACT  
TCTATAAGGGAAAATAGCAATAATCAAATTTGACAAATTTTAGAACTTTATTTTCAGAACTCTCTCCG  
ATCACCTTGGTGTGATCTCCCGGAGGATCTTTTCAATAAGATGTATGATGATAATCTACTATTTTTAA  
ATA

+

@A00721:190:HGJW7DSXY:4:2532:30743:27367\_2:N:0:TCTGCAAG+GCTGCACT  
CGTATACTTGAATACTTTATCAAAGATTTGGCTTGGTCTATTTACCGCAAAAAGTTGGAAGAGGTCTA  
TGATATTTATTTTACTTATACTTTAAATAGCACCGATTATAACTTGAC

+

@A00721:190:HGJW7DSXY:4:2230:30987:6245\_2:N:0:TCTGCAAG+GCTGCACT  
TAGCTCTTTCTCAGAAGATTAGAGAAGTAACCGGTGAACACGTCGGTAGCATTGATTTACTTTTACCG  
TTAGAACTGAAAAAGATTCTTTTCGAAAAAGAAACCTATAAGTTACAAA

+

@A00721:190:HGJW7DSXY:4:1319:30210:2237\_1:N:0:TCTGCAAG+GCTGCACT  
AAATACTTCAATTACCTGATCTTTACATTTTTAATGGTATGGTATAATGTGTCTTACAAATAGAACCT  
TCACTCTCGGTAATGAGTGTGTATTCCCTTAATATTCTAGTAACCGCTATGTGGGCATTACTAGGATTT  
ATC

+

@A00721:190:HGJW7DSXY:4:2121:19036:19774\_2:N:0:TCTGCAAG+GCTGCACT  
CTCCATTGTATAGTTCAAGGAGTACTTAATTCAATAGCTTTAGTATTATTTACTATCGCCTTTATTGA



AAATTGTATAAGAGTTAATTGCTTACACAAAAGTGACGCGCAAGGAA  
+  
FFFFFFFFFFFFFFFFFFFFFFFFFFFFFFFFFFFFFFFFFFFFFFFFFFFFFFFFFFFFFFFF:FFFFFF  
FFFFFFFFFFFFFFFF:FFFFFFFF:FFFFFFFFFFFFFFFFFFFFFFFF  
@A00721:190:HGJW7DSXY:4:1604:7202:27806\_1:N:0:TCTGCAAG+GCTGCACT  
TGGCACGCCAGACGTAGGGTCAAACCTACTACCGCCGGTCGGCAGATCGGCACCACTGGTCTCTACGT  
TCAGGGACCCGCTGTGCAGAATAACCTTCCCAAATCTAGATCTGCACAGAAGAAGGCTGAAGGTCGTT  
ACC  
+  
:FFFFFFFFFFFFFFFF:FFF,FFFFFFFF:FFFFFFFFFFFFFFFFFFFFFFFF,FFFFFFFF,FFFFFFFF  
FFFFFFFFFFFFFFFFFFFFFFFFFFFFFFFFFFFFFFFFFFFFFFFF:FFFFFFFFFFFFFFFFFFFFFFFF  
FFF  
@A00721:190:HGJW7DSXY:4:2458:20365:4319\_2:N:0:TCTGCAAG+GCTGCACT  
CTCGTAACATTGACGGCAGTCCCGTCATCTCTGTGGAACTGAGGCAGTACCTCAGTCAAAAGTCACA  
TTCACCACTCCCATACCAATCAATGATGTGACTATACAGTTCGGCCAT  
+  
FFFFFFFFFFFFFFFFFFFFFFFFFFFFFFFFFFFFFFFFFFFFFFFFFFFFFFFFFFFFFFFF:FFFFFF  
FFFFFFFFFFFFFFFFFFFFFFFF:FFFFFFFF,FFFFFFFFFFFFFFFF::  
@A00721:190:HGJW7DSXY:4:1647:7102:36245\_1:N:0:TCTGCAAG+GCTGCACT  
ATACGTCGTGGGAGGTACTGAAGCCTTCCCCTCCGCTGGCAGCAAGAACTCCCAAGCCAATCAATA  
GTTCTTCTGACCAGAATGAAAAGGGGTTTACCAGGGTAGTCTCTAAGTCTACCAGGAAGAGGGGAAAT  
GTC  
+  
FFFFFFFFFFFFFFFFFFFFFFFFFFFFFFFFFFFFFFFFFFFFFFFFFFFFFFFFFFFFFFFF,FFFFFFFFFFFFFFFF  
FFFFFFFFFFFFFFFFFFFFFFFFFFFFFFFFFFFFFFFFFFFFFFFF:FFFFFFFFFFFFFFFFFFFFFFFF  
FFF  
@A00721:190:HGJW7DSXY:4:1618:25870:31579\_2:N:0:TCTGCAAG+GCTGCACT  
CCACCATCTGGGGTTGGAATAAGAAATCTGCACGGGCCAAAGAGGCCGCTGCTACGAAGTCGCTGAA  
GGCGGCTTGGGTCAATAAGGGTAGCTGTAAAGTTGCGCCTGCCGACCC  
+  
FFFFF:FFFFFFFFFFFFFFFF:FFFFFFFFFFFFFFFFFFFFFFFFFFFFFFFFFFFFFFFF  
FFFFFFFFFFFFFFFFFFFFFFFFFFFFFFFFFFFFFFFFFFFFFFFFFFFFFFFF  
@A00721:190:HGJW7DSXY:4:2643:15817:26318\_1:N:0:TCTGCAAG+GCTGCACT  
CTTGACAGAGTGAAGTTCAGACGTGTGCTCTTCCGATCTCGTCACTGAGGACGAAGGTGAGAGGA  
CTTTTGGCTACTGGCGACAACTGAGAGCAGTCGCTGGGGAAAGAGAATTGCGTGGGTGAAGGCCGA  
CGC  
+  
FFFFFFFFFFFFFFFFFFFFFFFFFFFFFFFFFFFFFFFFFFFFFFFFFFFFFFFFFFFFFFFF:FFFFFFFF  
FFFFFFFFFFFFFFFFFFFFFFFFFFFFFFFFFFFFFFFFFFFFFFFFFFFFFFFFFFFFFFFF  
FFF  
@A00721:190:HGJW7DSXY:4:2220:20428:26099\_1:N:0:TCTGCAAG+GCTGCACT  
CGTGTGCTCTTCCGATCTATTTTATCCGCGCTTAAGTATGGGGCGAAGATCCCCTATGGAGTCTTGAA  
GGACTTAGGTTGGCATATTTATGCCGACGATAATAAGCATGTCACCCTTAAGCACCGAGGTAAGCTCG  
GGA  
+  
FFFFFFFFFFFFFFFFFFFFFFFFFFFFFFFFFFFFFFFFFFFFFFFFFFFFFFFFFFFFFFFF:FFFFFFFF  
FFFFFFFFFFFFFFFFFFFFFFFFFFFFFFFFFFFFFFFFFFFFFFFFFFFFFFFFFFFFFFFF  
FFF  
@A00721:190:HGJW7DSXY:4:2451:13883:4022\_2:N:0:TCTGCAAG+GCTGCACT  
TTGCCAGAAATGCGGGCTTTCTGACTGATGAGGTTAAAGTCTTGCTCCTTCTGTGGGTGAGGGTTTT  
TGTTATATTAAGTGTCTGGGAGGCTGCTTCTCCATAATTACAAC  
+  
FFFFFFFFFFFFFFFFFFFFFFFFFFFFFFFFFFFFFFFFFFFFFFFFFFFFFFFFFFFFFFFF  
FFF::FFFFF::FFFFFFFFFFFFFFFFFFFFFFFFFFFFFFFFFFFFFFFF

@A00721:190:HGJW7DSXY:4:1366:3097:27774\_2:N:0:TCTGCAAG+GCTGCACT  
TTAGAAGGAAGTTGGGCAAATTCCCACATATGGTAGACGTTGTACACTTTTCTTGAAAATTTTCT  
TTCCTCCGTCATTGGGGATTTTCGATGTGAGAAGGTGGAAGGTGTCAAG

```

FFFFFFFFFFFFFFFFFFFFFFFFFFFFFFFF,FFFFFFFFFFFFFFFFFFFFFFFFFFFFFFFFFFFFFFFF
FFFFFFFF:FFFF,FFFFFF,FFFFFF,FFF:FFFFF:FFFFFF:FFFF

```

+

```
FFFFFFFFFFFFFFFFFFFFFFFFFFFFFFFFFFFFFFFFFFFFFFFFFFFFFFFFFFFFFFFFFFFFFFFFFFFFF
FFFFFFFFFFFFFFFFFFFF,FFFFFFFFFFFFFFFFFFFFFFFFFFFFFFFFFFFFFFFFFFFFFFFFFFFFFFF
```

+

```

FFFFFF,FFFFFF:FFFFFF:FFFFFFFFFFFFFFFF:FFFFFFFFFFFFFFFF:FFFFFFFFFFFF:,FFFF
FFFFFFFFFFFF:FF,FFFFFF:FFFFFFFFFFFFFFFFFFFFFFFFFFFFFFFFFFFFFFFFFFFFFFFFFFFF
FFF

```

+

```
FFFFFFFFFFFFFFFFFFFFFFFFFFFFFFFFFFFFFFFFFFFFFFFFFFFFFFFFFFFFFFFFFFFFFFFFFFFFF
FFFFFFFFFFFFFFFFFFFFFFF:FFF:FFFFFFFFFFFFFFFFFFFFFFFFFFFFFFFF
```

+

```

FFFFFFFFFFFFFFFFFFFFFFFFFFFFFFFF:FFFFFFFFFFFFFFFFFFFFFFFFFFFFFFFF:FFFFFFFFF:
FFFFFFFFFFFFFF,FFFF:FFFFFFFF:FFFFFFFF:FFFFFFFF

```

+

```
FF,FFFFFFFFFFFFFFFFFFFF,FFFFFF,FFF,FFFFFFFFFFFFFFFFFFFFFFFFFFFFFFFFFFFF
FFFFFFFFFFFFFFFFFFFF:FFFFF,FFF:FFFFFFFFFFFFFFFF:F,,FFFFF:FFFFFFFFFFFFF
FFF
```

+

```

: FFFFF: FFFFFFFFFFFFFFFFFFFFFFFFFFFFFFFF, FFFFFFFFFFFFFFFFFFFFFFFFFFFFFFFF
FFFFFFFF: FFFFFFFFFFFFF: FFFFFFFFFFFFFFFFFFFFFFFFFFFFF: FFFFFFFFFF

```

+

[illegible]

@A00721:190:HGJW7DSXY:4:2157:27814:29496\_1:N:0:TCTGCAAG+GCTGCACT  
GAGATGATGGCGCATCACTTGATTACTATATGCCCGAAGGATTGGGTTATTCTCACAACAAAGATAAG  
ATTTTATCTTTCTTCAAACACCCTGTTTTCTTAAGGGCGGACAATTGTTCCATTGTGAACCTCTGGG  
GAC

+

FFFFFFFFFFFFFFFFFFFFFFFFFFFFFFFFFFFFFFFFFFFFFFFFFFFFFFFFFFFFFFFFFFFFFFFF  
FFFFFFFFFFFFFFFFFFFFFFFFFFFFFFFFFFFFFFFFFFFFFFFFFFFFFFFFFFFFFFFFFFFFFFFF,  
FFF

@A00721:190:HGJW7DSXY:4:1565:2320:10269\_1:N:0:TCTGCAAG+GCTGCACT  
AATAACTCGTAATAAATCTTTCTCTAGTGGACAATTGAGAATACCTATTTCCGTACCAAGAGCCACTG  
CCAATCTCATCGCTATACGCATACCTGATTGGAAGAAGCGAGGTTTCGTTCTCAATAAAAATTTTCT  
CAA

+

FFFFFFFFFFFFFFFFFFFFFFFFFFFFFFFFFFFFFFFFFFFFFFFFFFFFFFFFFFFFFFFFFFFFFFFF:  
FFFFFFFFFFFFFFFFFFFFFFFFFFFFFFFFFFFFFFFFFFFFFFFFFFFFFFFFFFFFFFFFFFFFFFFF:  
FFF

@A00721:190:HGJW7DSXY:4:1622:32832:1141\_2:N:0:TCTGCAAG+GCTGCACT  
ATGGGGATCACTTCTTCGGTCAATGACAAAACCTTCGAATATGTTACGACATGGCTTCGTAACAACAG  
TGCGAGGATTGTCATCTCGGGGAAAGTGATTACCAAGATGTTTCATAT

+

FFFFFFFFFFFFFFFFFFFFFFFFFFFFFFFFFFFFFFFFFFFFFFFFFFFFFFFFFFFFFFFFFFFFFFFF  
FFFF,FFFFFFFFFFFFFFFFFFFFFFFFFFFFFFFFFFFFFFFFFFFFFFFFFFFFFFFFFFFFFFFF

@A00721:190:HGJW7DSXY:4:1668:24795:15969\_1:N:0:TCTGCAAG+GCTGCACT  
ACTGGAGTTCAGACGTGTGCTCTTCCGATCTCTTTGGGTACACGTTATGCTCGCAAACCTTAACGTTAG  
TACCGGAGGTGATCTCTCTGCTTCTGCGTACTGAGAGAAAAGATTGAGGACGCCTACGGTGACTTTA  
TGG

+

FFFFFFFFFFFFFFFFFFFFFFFFFFFFFFFFFFFFFFFFFFFFFFFFFFFFFFFFFFFFFFFFFFFFFFFF  
:FFFFFFFFFFFFFFFFFFFFFFFFFFFFFFFFFFFFFFFFFFFFFFFFFFFFFFFFFFFFFFFFFFFFFFFF  
FFF

@A00721:190:HGJW7DSXY:4:1623:5746:33082\_2:N:0:TCTGCAAG+GCTGCACT  
TGAAACTACGGTCCTTATCAAAGAAAATGGTGAACCGGTCTCTAAATCTTTTGAGATTGAGAAGATTG  
AAGAACACGTCAAGAAGTCGCTCGGCGTTGTTCTTGAAACCAAGTTA

+

FFFFFFFFFFFFFFFFFFFFFFFFFFFFFFFFFFFFFFFFFFFFFFFFFFFFFFFFFFFFFFFFFFFFFFFF  
FFFFFFFFFFFFFFFF:FF:FFFFFFFFFFFFFFFFFFFFFFFFFFFFFFFFFFFFFFFF:FFFF

@A00721:190:HGJW7DSXY:4:1557:6894:7827\_2:N:0:TCTGCAAG+GCTGCACT  
TACCTTCTGTCAAACCTTCGAGGTTGAGCTACGAGAGGTGATCCCGATGTGGATTGAAGGCTGGCTCT  
AAGGGAGACTCCTTCTTTTGAATGTTGTAAAGAATTGGGTTGAGAAG

+

FFFFFFFFFFFFFFFFFFFFFFFFFFFFFFFFFFFFFFFFFFFFFFFFFFFFFFFFFFFFFFFFFFFFFFFF  
FFFFFFFFFFFFFFFFFFFFFFFFFFFFFFFFFFFFFFFFFFFFFFFFFFFFFFFFFFFFFFFFFFFFFFFF

@A00721:190:HGJW7DSXY:4:1637:7211:6120\_1:N:0:TCTGCAAG+GCTGCACT  
TTTTCAAAAATGCGGATGGGTCTACTGATGTTTTCTACAGAGTGCAGTCGTTTCAACACTTATCACC  
ACTTTTGAAAGGAAAATAATTGGTGATGAAAATACGTATGTCGGTGGGGTCTCAAGGCTCTCATCGC  
CAC

+

:FFFFF,FFFFFFFFFFFFFFFFFFFFFFFFFFFFFFFFFFFFFFFFFFFFFFFFFFFFFFFFFFFFFFFF  
FFFFFFFFFFFFFFFFFFFFFFFFFFFFFFFFFFFFFFFFFFFFFFFFFFFFFFFFFFFFFFFFFFFFFFFF  
FFF

@A00721:190:HGJW7DSXY:4:1214:11930:10003\_1:N:0:TCTGCAAG+GCTGCACT  
TTCTTAAAAGAAGTTTATTAATAAATTCAGAGTCTCTTGGAAGTCCAGGTAGCTAATGTTCTTGCAATA  
GCCACAGACTTTCTGGGAAAAGAGACCTCTGTTGGTAGAGGAGTTGAGAGAATTACTCAGATTCAATC  
TGG

+  
FF,FF,FFFF,, :FFFFFFFFFFFFFFF:,FFF::FFF:FFF,F::F:FFFF:FF:FFFF,FFF:FFFF  
::FFF,FF,:FFFFFFFFFFFF,FFF,:FF:FFFFFFFFFFFF:F:FFFFFFFFFFFFFFFFFFFFFFF:FFFF  
FFF  
@A00721:190:HGJW7DSXY:4:1246:7545:3223\_2:N:0:TCTGCAAG+GCTGCACT  
AAAGATCCTTTGCACAAGCAATACCTTCCACTGAGTTCATCACCCAGAGTTTCGACGTCGCGGAAAAC  
GATGAAGATTTCCACACTGTTGAGAATCTTCTGATGCTGAATTTGAG  
+  
FFFFFFFFFFFFFFFFFFFFFFFFFFFFFFFFFFFFFFFFFFFFFFFFFFFFFFFFFFFFFFFFFFFFFFFF  
FFFFFFFFFFFFFFFFFFFFFFFFFFFFFFFFFFFFFFFFFFFFFFFF::FFFFFF,F:FFF  
@A00721:190:HGJW7DSXY:4:2334:2835:20243\_1:N:0:TCTGCAAG+GCTGCACT  
TTCTTTTATCATTGCAACAGGACTTTGAGAAGACTGTTGAAATGGACAAAATCTGGGATCATAGGTAT  
GTGTCACGCTACACTCGAAATATGGGCCCTCATAAGGAAGTATAGTTGGCGTCTTGTCGTTGACGTCA  
TTA  
+  
FFFFFFFFF,FFFFFFFFFFFF:FFFFFFFFFFFF:FFFFFFFFFFFF:FFFFFFFFFFFF:FFFFFFFFFFFFFFFFFFF  
FFFFFFFFFFFFFFFFFFFF:FFFFFFFFFFFF,F:FFFFFFFFFFFFFFFFFFFFFFFFFFFFFFFFFFFFF  
FFF  
@A00721:190:HGJW7DSXY:4:2524:29884:32049\_2:N:0:TCTGCAAG+GCTGCACT  
CCATATCAGATTAGAGACATGCCAGTTAGAGTTCTTCTAACCAGGACTGATGGTGAGATTCTTTTACC  
TTTTGGAGGTCCAGGAACCTTTACTCCTAGTGTCTTTTCTAGAGTCCA  
+  
FFFFFFFFFFFFFFFFFFFFFFFFFFFFFFFFFFFFFFFFFFFFFFFFFFFFFFFFFFFFFFFFFFFFFFFF:F  
FFFFFFFFFFFFFFFFFFFFFFFFFFFFFFFFFFFFFFFFFFFFFFFFFFFFFFFFFFFFFFFF:F  
@A00721:190:HGJW7DSXY:4:2540:29640:22294\_2:N:0:TCTGCAAG+GCTGCACT  
GTTTCAGCTGGATGGATCTTTTGATGGTATGTTTCACATTGCGTGATCACTTCCCGTGGACTTGGGAA  
GAGATTAAACATAAAATCCAGCGATTCTATTATGTCGCTAAAGCCTGT  
+  
FFFFFFFFFFFFFFFFFFFFFFFFFFFFFFFFFFFFFFFFFFFFFFFFFFFFFFFFFFFFFFFFFFFFFFFF  
FFFFFFFFFFFFFFFFFFFFFFFFFFFFFFFFFFFFFFFFFFFFFFFFFFFFFFFFFFFFFFFF  
@A00721:190:HGJW7DSXY:4:2312:9435:21308\_2:N:0:TCTGCAAG+GCTGCACT  
TACTAAGTCTGAGATCTGCCACTTCTAATTTTAGGAAACGTCGCGAAAAGAAAGTTCATGAGGATGTC  
TTGGTCGAAAAATATCGCCGGGAACCTTCTAATAGAGGATCCTGATGAC  
+  
FFFFFFFFFFFFFFFFFFFFFFFFFFFFFFFFFFFFFFFFFFFFFFFFFFFFFFFFFFFFFFFFFFFFFFFF:F:FFFFFFFFFFFFFFFFFFFFFFFF:F:FFFFFFFF:FFFFFFF  
FFFFFFFFFFFF:FFFFFFFFFFFF,FFFF:FFFFFFFFFFFF:FFFF:F:F  
@A00721:190:HGJW7DSXY:4:2147:2103:33129\_1:N:0:TCTGCAAG+GCTGCACT  
TACCGATCTCAGTTCTACCACAGAAACCGTCTCAGGAAGTCTCCACTGATTCGGAATTAGAGAAAG  
ACGACCTTCTTGTTGGGGACTGAGACCTCTGAATTTTCAGGGTGCCTGATGAGGACGTTGAAAGGGAT  
AAT  
+  
FFFFFFFFFFFFFFFFFFFFFFFFFFFFFFFFFFFFFFFFFFFFFFFFFFFFFFFFFFFFFFFFFFFFFFFF:FFFFFFFFFFFFFFFFFFFFFFFF  
FFFFFFFFFFFFFFFFFFFFFFFFFFFFFFFFFFFFFFFFFFFFFFFFFFFFFFFFFFFFFFFFFFFFFFFF  
FFF  
@A00721:190:HGJW7DSXY:4:1237:27579:24330\_2:N:0:TCTGCAAG+GCTGCACT  
TTTCAAAAGACCAGAAACGTAACAAGAAGATAAAGGTAGGAAGGGGAGAAAACAGAACAGCGAGCG  
GTTGAAGAGAAAACCTGATATGTTGCGGCTGATCGTACCCCAATTCT  
+  
FFFFFFFFFFFFFFFFFFFFFFFFFFFFFFFFFFFFFFFFFFFFFFFFFFFFFFFFFFFFFFFFFFFFFFFF  
FFFFFFFFFFFFFFFFFFFFFFFFFFFFFFFFFFFFFFFFFFFFFFFFFFFFFFFFFFFFFFFF  
@A00721:190:HGJW7DSXY:4:2415:29215:3396\_1:N:0:TCTGCAAG+GCTGCACT  
GGCGATACCACTGATCTTCCAGAGTTACGTAGTGGTCTGTTCTTTTGGTGATTTTATCAAAGAGAAAGT  
TTCTGCTAGTCGCGACGATAGTATTTATCGGAGTGATATTAACAAGTTAACTTCGAAGTACCACTT  
ACA

+  
FFFFF,FFFFFFFFF::FFFFFFFFFFFF:FFFFFFFF::FF:FFF:FFFFFFFFF:FFFF:F:  
,F,FFFFFFFFFFFFF::FFFFFFFFFFFFF,FFFFFF:F,FFFFFFFFFFFFFFFFFFFF  
FFF  
@A00721:190:HGJW7DSXY:4:1630:21332:28792\_2:N:0:TCTGCAAG+GCTGCACT  
AATTAAGACAGACGTGAAAGTTATGATGAGTGATCGTATTAGAACAGCTGATTCTTATTGCATGAACG  
TCGCTGAGGTCAAACCTGTGGACGTTCTTTTCATCGACGAATTATTCA  
+  
FFFFFFFFFFFFFFFFFFFFFFFFFFFFFFFFFFFFFFFFFFFFFFFFFFFFFFFFFFFFFFFF:FFFFFFFFFFFFFFFF  
FFFFFFFFFFFFFFFF:FFFFFFFFFFFFFFFF:FFFFFFFF:FFFFF  
@A00721:190:HGJW7DSXY:4:1476:14488:24643\_1:N:0:TCTGCAAG+GCTGCACT  
ACTTAAGGCGGCTTATACCATAGGTTACGGTGATTCCAATCAAATCGGATTCATCAATCGTATTGATC  
TCCAAGTCGCAAACACTTCAACATCAACGACATCATTCTTGATGAGTGTCGTTCTTATCGAAGTCTC  
AGT  
+  
FFFFFFFFFFFFFFFFFFFFFFFFFFFFFFFFFFFFFFFFFFFFFFFFFFFFFFFFFFFFFFFF  
FFFFFFFFFFFFFFFF:FF:FFFFFFFFFFFFFFFFFFFFFFFFFFFFFFFFFFFFFFFFFFFFFFFF  
FFF  
@A00721:190:HGJW7DSXY:4:2364:9670:25817\_2:N:0:TCTGCAAG+GCTGCACT  
AACTGTCACGTTTAGCACGGGAGGTTGCAGATTCAACCCCTTATATCGAGGCTATCGAGGACGATGAG  
TATCTTGAAGTTGTTGACGACAAGCCTCAAGAGGGTAGAGGACCACCT  
+  
FFFFFFFFFFFFFFFFFFFFFFFFFFFFFFFFFFFFFFFFFFFFFFFFFFFFFFFFFFFFFFFF,FFFFFFFFFFFFFFFF  
FFFFFF:FFFFFFFFFFFFFFFFFFFFFFFF,F:FFF,FFFFFFFF:FF  
@A00721:190:HGJW7DSXY:4:2654:17400:7921\_1:N:0:TCTGCAAG+GCTGCACT  
ACCACCTTAACGTCACGTAATCTTTCAGCCGAATTAAGTACTAATGAGTTCAAGTCGGTTGTCGA  
TCGAATTAAGATCAAGGCTAATACCTTTATAGGTAAGAAGCCCTTGAGCCGCGTAGTCAGCGCGTTT  
AGC  
+  
FFFFFFFFFFFFFFFFFFFFFFFFFFFFFFFFFFFFFFFFFFFFFFFFFFFFFFFFFFFFFFFF  
FFFFFFFFFFFFFFFFFFFFFFFFFFFFFFFFFFFFFFFFFFFFFFFFFFFFFFFFFFFFFFFF  
FFF  
@A00721:190:HGJW7DSXY:4:2338:7835:6511\_1:N:0:TCTGCAAG+GCTGCACT  
CGAAATGGTCAATATTGATAATTGGACCGACTATATGACCTATTTTAAGCTCATGGTGAAGGGAAG  
CTAAGGTAAACTTGATGCTTCAGCCTTTTCGAAGCATAACCCCGCACAGAATATCGTTTATCACGCA  
AAA  
+  
F:FFFFFFFFFFFFFFFFFFFFFFFFFFFFFFFFFFFFFFFFFFFFFFFFFFFFFFFFFFFFFFFF  
F:FFFFFFFFFFFFFFFFFFFFFFFFFFFFFFFFFFFFFFFFFFFFFFFFFFFFFFFFFFFFFFFF  
FFF  
@A00721:190:HGJW7DSXY:4:2647:20112:7733\_1:N:0:TCTGCAAG+GCTGCACT  
GAGTATCCATAACGATTTGTCATTTACCACCTTTGCTCAACGACGAAGTGGAACGGCCAACACTTTCT  
TTGGTAATTGTATGATCACTTTGATGATTTTATCACTTTATTATGACCTTGAAAGTTTTTCGGCTGTG  
GTT  
+  
FFFFFFFFFFFFFFFFFFFFFFFFFFFFFFFFFFFFFFFFFFFFFFFFFFFFFFFFFFFFFFFF:FFFFFFFF  
FFFFFFFFFFFFFFFFFFFFFFFFFFFFFFFFFFFFFFFFFFFFFFFFFFFFFFFFFFFFFFFF  
FFF  
@A00721:190:HGJW7DSXY:4:2120:18249:6198\_2:N:0:TCTGCAAG+GCTGCACT  
TATCTGTGCTTTGAATTGTATAAGATCAAATTTTAAACGATTCCGAGAGGTTTATCCTGATGTGGAGG  
GAGTTCTTGAAGCATCCCGACCTTTCCTTGTGAAAATTTTGATGCGGT  
+  
FF,, :F,FF:F:FFFF,FF:FFF,FFFFFFFFFFFFFFFF:FFFFFF:FF,FFFF:F:FFF:FF:  
FFFFFFFFFFFFFFFF:FFFFFFFFFFFF,FFFFFF:FFFFFFFF:F

@A00721:190:HGJW7DSXY:4:1518:9182:14732\_2:N:0:TCTGCAAG+GCTGCACT  
TGATATTGTTGAGCGAGAGCGACCAAGATCTAAATTCGGTAACGGTGCCTGCGCTTTATTTTAAAAA  
GCTCCCTCCTCTCGCAAGTTTGATCTGATACTTATCACGAAAGGACTT

+

FFFFFFFFFFFFFFFFFFFFFFFFFFFFFFFFFFFFFFFFFFFFFFFFFFFFFFFFFFFFFFFFFFFFFFFF  
FFFFFFFFFFFFFFFFFFFFFFFFFFFFFFFFFFFFFFFFFFFFFFFFFFFFFFFFFFFFFFFFFFFFFFFF

@A00721:190:HGJW7DSXY:4:1465:10520:4335\_1:N:0:TCTGCAAG+GCTGCACT  
CCTCATCAGCTTGTGTTTTACCTAATCTGTGTTTTTACGATAACAACATCAGTTGATTAAGACTCTT  
CCGAAAGGCGAACTTTGGAATTTGAAGCTCAGGGTGAAGCACAACTTTGACCGTGACGAACTGTGG  
TGT

+

FFFFFFF:FFFFFFFFFFFFFFFFFFFFFFFFFFFFFFFFFFFFFFFFFFFFFFFFFFFFFFFFFFFFFFFF  
FFFFFFFFFFFFFFFFFFFFFFFFFFFFFFFFFFFFFFFFFFFFFFFFFFFFFFFFFFFFFFFFFFFFFFFF  
FFF

@A00721:190:HGJW7DSXY:4:1341:5367:31109\_2:N:0:TCTGCAAG+GCTGCACT  
ATTTTAGTGAGATTATTAACGCACTAAAACGTCTTCGACAACAGCAGGGGTTTTCGAATAGTGAT  
AGCCACCCGCCTTACAGAGGGGCAGCAGCATGACCATAATTGGTATTG

+

FFFFFFFFFFFFFFFFFFFFFFFFFFFFFFFFFFFFFFFFFFFFFFFFFFFFFFFFFFFFFFFFFFFFFFFF  
FFFFFFFFFFFFFFFFFFFFFFFFFFFFFFFFFFFFFFFFFFFFFFFFFFFFFFFFFFFFFFFFFFFFFFFF

@A00721:190:HGJW7DSXY:4:2210:29306:3114\_2:N:0:TCTGCAAG+GCTGCACT  
TGTCTCGCCTCTTGAATGAAGTTTTAATGCTTAACAACAATGATAGTGAATTTATACCTACAATCAT  
TGGTTTTTCTAATAATGATGACACTATTGTTTATGGATATGATGCTAT

+

FFFFFFFFF:FFFFFFF:FFFFFFFFFFFFFFFFFFFFFFFFFFFFFFFFFFFFFFFFFFFFFFFFFFFF  
FFFFFFFFFFFFFFFFFFFFFFFFFFFFFFFFFFFFFFFFFFFFFFFFFFFFFFFFFFFFFFFFFFFFFFFF

@A00721:190:HGJW7DSXY:4:2323:19488:25034\_1:N:0:TCTGCAAG+GCTGCACT  
ATTAACCATTTGTACGATGTCGTCTGTCTCGCGCATCACTTTTACTAAGAATTGGTCTACTTTTG  
GACAAGGCCAACTTCGTAATCTTCATGAGATCGTTTCTTTCTTTATCTCTTTGGTTGTTAGGGATTT  
GAG

+

FFFFFFFFF:F,F:FFFFFFFFFFFFFFFFFFFFFFFFFFFFFFFFFFFFFFFFFFFFFFFFFFFFFFFF  
FFFFFFFFFFFFFFFFFFFFFFFFFFFFFFFFFFFFFFFFFFFFFFFFFFFFFFFFFFFFFFFFFFFFFFFF  
FFF

@A00721:190:HGJW7DSXY:4:1134:27136:18082\_2:N:0:TCTGCAAG+GCTGCACT  
ATTGTAGTGGTTTGGTCGTTTCAGTACCCAGTCAGTATACCTCTACGCAAAGATATTTATGAAAAC  
ACAGAGGAACGTACCGGATTACCTGTCTTTCATATTATGAATGAACCT

+

FFFF:FFF:FFFFFFFFFFFFFFFFFFFFFFFFFFFFFFFFFFFFFFFFFFFFFFFFFFFFFFFFFFFF  
FFFFFFFFF:FFFFFFFFF:FFFFFFFFFFFFFFFFFFFFFFFFFFFFFFFFFFFFFFFFFFFFFFFF

@A00721:190:HGJW7DSXY:4:1556:13928:10895\_2:N:0:TCTGCAAG+GCTGCACT  
TCAAGAAGGGTTCAGAATGGGATTCTACGTAGTTTATGACTTTGGTGGTGACTTTTCGATACTTCT  
ATCGTCTTACGTTACGGTAATTACTATAGTGTTATTTATTCTGGTGGT

+

FFFFFFFFFFFFFFFFFFFFFFFFFFFFFFFFFFFFFFFFFFFFFFFFFFFFFFFFFFFFFFFFFFFFFFFF  
FFFFFFFFF:FFFFFFFFF:FFFFFFFFFFFFFFFFFFFFFFFFFFFFFFFFFFFFFFFFFFFFFFFF

@A00721:190:HGJW7DSXY:4:1670:15537:12524\_2:N:0:TCTGCAAG+GCTGCACT  
GACGTTGATGAAGCTATAAGAGCGTTCTTATTACGGCGCACTTCTTTACCCGCCACCACAACTTTC  
AGTTTCACAACTGAAGGAGGAGGTTTCTGTTACTGGAACCTCGTC

+

FFFFFFFFFFFFFFFFFFFFFFFFFFFFFFFFFFFFFFFFFFFFFFFFFFFFFFFFFFFFFFFFFFFFFFFF  
FFFFFFFFF:FFFFFFFFF:FFFFFFFFFFFFFFFFFFFFFFFFFFFFFFFFFFFFFFFFFFFFFFFF

@A00721:190:HGJW7DSXY:4:2216:5719:14184\_1:N:0:TCTGCAAG+GCTGCACT  
CTGGAGTTCAGACGTGTGCTCTTCCGATCTGTGAAATTAACGCGTCCTTTTCTGGAACGTAGTTTAC

TATTATGAACAAAGTTATCAAAGATAGTGGCATTCAAGGCAAACCTTACCCTGATTCCGGCCGGTGGTA  
GCT

+

FFFFFFFFFFFFFFFFFFFFFFFFFFFFFFFFFFFFFFFFFFFFFFFFFFFFFFFFFFFFFFFFFFFFFFFF  
FFFFFFFFFFFFFFFFFFFFFFFFFFFFFFFFFFFFFFFFFFFFFFFFFFFFFFFFFFFFFFFFFFFFFFFF:FFFFFFFFFFFFFF  
FFF

@A00721:190:HGJW7DSXY:4:1226:10013:27132\_1:N:0:TCTGCAAG+GCTGCACT  
AACAGCTATTAAAGCTGTTGAGCGGGTAATTACACCTAAACGAGCTCGATCTGCCATCGCTGAAGGAT  
GTGCACTCTTTTCTGCTACTTTAACGGAGCGTAGTGTACTCTTCGTCGATTGTATCAACAGTAACATT  
ACT

+

FFFFF:FFFFFFFFFFFFFFFFFFFFFFFFFFFFFFFFFFFFFFFFFFFFFFFFFFFFFFFFFFFFFFFF  
FFFFFFFFFFFFFFFFFFFFFFFFFFFFFFFFFFFFFFFFFFFFFFFFFFFFFFFFFFFFFFFFFFFFFFFF  
FFF

@A00721:190:HGJW7DSXY:4:2143:9064:7169\_1:N:0:TCTGCAAG+GCTGCACT  
GGCTAAACTCCAAGGTAATTATGAAGACTGTGATTTATCTTTCACTCTGGCCTTGTATGAGGGTGT  
CTAATCGTAACATTAATAATTTCAATCTTCTTAAAAAGAAGATAGAGAGTCATACTTTGGGCTATCGT  
TCA

+

FF:FFFFFFFF:FFF:FFFFFFFF:FFFFFFFFFFFFFFFFFFFFFFFFFFFFFFFFFFFFFFFFFFFF  
FFFFFFFFFFFFFFFFFFFFFFFFFFFFFFFFFFFFFFFFFFFFFFFFFFFFFFFFFFFFFFFFFFFFFFFF  
FFF

@A00721:190:HGJW7DSXY:4:2457:12870:25254\_2:N:0:TCTGCAAG+GCTGCACT  
CTAAAATATTTACAAAATCTTACCCTATCTACGAACCTAAAGTTCTGAAGACGTTGCTTGTGCTTC  
CTCCTTTAATGGCACTACCTCGGTACAATCTTACTTGGAACGAAGGCG

+

FFFFFFFFFFFFFFFFFFFFFFFFFFFFFFFFFFFFFFFFFFFFFFFFFFFFFFFFFFFFFFFFFFFFF:FFFFFFFFFFFFFFFF  
FFFFF:FFFFFFFFFFFFFFFFFFFFFFFFFFFFFFFFFFFFFFFFFFFFFFFFFFFFFFFFFFFF

@A00721:190:HGJW7DSXY:4:2214:22950:8985\_2:N:0:TCTGCAAG+GCTGCACT  
GTCTATATTAGGTGAAGCGAAATACGATTTTCAACGTCAACGTTACCGAGTTTCGTTTCGTACCTTG  
ATGCTGACTTTTCGTCAATATGATTTGATCTGGTTGCTCAATTCTAAGC

+

FFFFFFFFFFFFFFFFFFFFF:FFFFFFFFFFFFFFFF:FFFFFFFFFFFFFFFFFFFFFFFFFFFFF  
FFFFF:FFFFFFFFFFFFFFFFFFFFFFFFFFFFFFFFFFFFFFFFFFFFFFFFFFFFF,

@A00721:190:HGJW7DSXY:4:1635:13078:7232\_1:N:0:TCTGCAAG+GCTGCACT  
TCTTCCTTGGATTTTAAATATAAAGAATCTTTACCAGGACTCCTACTACAGGAGGCAGTCTTCTGATCG  
TAAGAAGTTTATAAGGAACATATCCATTTGTTGTAATAGGGTCATCAACTTAGAACTCGAACTCTAA  
GTG

+

FFFFFFFFF::FFFFFF,FFFFFFFFFFFFFFFFFFFFFFFFFFFFFFFFFFFFFFFFFFFFFFFF:FFFFFFFF:FFFFFFF:FFF  
FFFFF,FFFFFF::FFF:F:FFF::FFFFFFFFFFFFFFFFFFFFFFFFFFFFFFFFFFFFFFFF:FF:  
FFF

@A00721:190:HGJW7DSXY:4:2451:18475:21966\_1:N:0:TCTGCAAG+GCTGCACT  
AATGAAATTGGACTCTTCGATAGGGGACATTTTATCGTGGGCTTTCCGTAAAGGAAGATCTGTTATCG  
ACGGTTTATCGTTTACGAAGTATCACTCCACCGGTGAATGGTTTAAAGAATACTATAAATAGAATAGCT  
ATT

+

FFFF::FFFFFFFF:FFFFF,FFF,FF:FFFF:F:FFF:F:FFFFFFFFFFFFFFFFFFFFFFFFFFFF  
FFFFFFFFFFFFFFFFFFFFFFFFFFFFFFFFFFFFFFFFFFFFFFFF:FFFFFFFF:FFFFFFFFFFFFF:F:FF,  
FFF

@A00721:190:HGJW7DSXY:4:1619:32859:17159\_2:N:0:TCTGCAAG+GCTGCACT  
CAACTTCTTGACAATTTTCTTCAATCCTTCGATAATAGTTAAATCTAGGATTATGTCTGTGTTGAAAG  
ACTTTCTACCGATAAGGGTCACTAGTCTTACACAATTAAGAAATAATC

+

FFFFFFFF:FFFFFFFF:FFFFFFFFFFFFFFFFFFFFFFFFFFFFFFFFFFFFFFFFFFFFFFFF  
FFFFFFFFFFFFFFFFFFFFFFFFFFFFFFFFFFFFFFFFFFFFFFFFFFFFFFFFFFFFFFFF  
@A00721:190:HGJW7DSXY:4:1631:16043:20948\_2:N:0:TCTGCAAG+GCTGCACT  
ACTATCTAAAGATTGAAGGAAAATTTTATCCTCGTTTAACTTACTTAGACATTCCTACGATACAAATG  
ATAACTTCTAATTTACGTTTGCTACTCAGAGCTGGTCTCTCAGCAA  
+  
FFFFFFFF:FFFFFFFF:F:FFFFFFFFFFFFFFFFFFFFFFFFFFFFFFFFFFFFFFFF,FFFFFFFFFFFFFFFF  
FFFFFFFFFFFFFFFFFFFFFFFF:FF:FFFFFFFF:FFFFFFFFFFFF:F:  
@A00721:190:HGJW7DSXY:4:2205:10239:10645\_2:N:0:TCTGCAAG+GCTGCACT  
AGTCCCGCATTTGATAATAATGACGAGACTTTCGTGATAATCGCTGCATATTACGGATTACACGGTA  
CCAGCGCATCTCGTGTGAGCCTCGACCCGATTATATGGTATTAATT  
+  
FFFFFFFFFFFFFFFFFFFFFFFFFFFFFFFFFFFFFFFFFFFFFFFFFFFFFFFFFFFFFFFF  
FFFFFFFFFFFFFFFFFFFFFFFFFFFFFFFFFFFFFFFFFFFFFFFFFFFFFFFF  
@A00721:190:HGJW7DSXY:4:2229:31584:15483\_1:N:0:TCTGCAAG+GCTGCACT  
TCTCTTCTTATAATAAATAAATAAATAATATTACTAATGGCAAATAGTGAAAGGCTCCAGTCAACAC  
TAGTTCGAGTGCTGCTTTGATTACGATGACGTGAGAATAGGTGAAGGGATAGTTTTTACCTCGACCA  
ACA  
+  
:FFFF:FFFFFFFFFFFFFFFF:FFFFFFFFFFFFFFFFFFFFFFFFFFFFFFFFFFFFFFFF  
FFFFFFFFFFFFFFFFFFFFFFFFFFFFFFFFFFFFFFFFFFFFFFFFFFFFFFFFFFFFFFFF  
FFF  
@A00721:190:HGJW7DSXY:4:1426:22887:16047\_2:N:0:TCTGCAAG+GCTGCACT  
TGAATAATGATGCACTACAAACAAGTATCGCTAATCATCTGAAAAAGGCTCTAAAGGACACTATACAA  
TATCCAGACGACGACGAAGCTTATACTACTTTAATTTTGGTATTATG  
+  
FFF:FFFFFFFFFFFFFF:FFFFFFFFFFFFFF,FF,FFFFFF:F:FFFFFFFFFFFFFFFF  
FFFFFF:FFFFFF,FF,FFFF, ,FFF:FFFF::F,FFFFFF  
@A00721:190:HGJW7DSXY:4:1361:3577:3928\_1:N:0:TCTGCAAG+GCTGCACT  
AGGATATTCGCCATTGTGGTACGAATTGGTCCAACATTTACCACCAAATTCTTTTGATACAACCTCTAG  
CCTTCAAGTGGGGTATGCCTGCGGAATACGCTTGCTATTCACCAGATTGGTTGCAACCCGTTGATGCT  
ATG  
+  
FFFFF:FFFFFFFFFFFFFFFFFFFFFFFFFFFFFFFF:FFFFFFFFFFFFFFFFFFFFFFFF  
FFFFFFFFFFFFFFFFFFFFFFFFFFFFFFFFFFFFFFFFFFFFFFFFFFFFFFFFFFFFFFFF,FFFFF  
FFF  
@A00721:190:HGJW7DSXY:4:1213:10095:34381\_1:N:0:TCTGCAAG+GCTGCACT  
ATTCAAGCTTGTGTTTAAAGACTGCAGAGGCTGTCAAACAAGCCAGACTCAAGGAGTCCAATCAAA  
GGTTTTGAATTTAGCTCAACTGGGGAGACGTGCTTAAATGGGTGATAAAAATTATTTAGAGATCTTT  
CTA  
+  
FFFF,F,:FF,F:,FFF:FFFF::F:,FF:FFFFFF:FFF:FFF,FFFFFFFF:FFFF:FF:  
FFFFFF,FFFFFFFFFFFFFFFF:FFFF:FFFFFF,FFFFFFFFFFFFFFFFFFFFFFFF,FFFFFFF  
FFF  
@A00721:190:HGJW7DSXY:4:2320:5466:20165\_1:N:0:TCTGCAAG+GCTGCACT  
AATAGTTCTACCGATACGTAGTGAACGCGTTCGTAGAACCAAGTACTTTCGTCTGAAGAGTTTAGAG  
CTGCTATTGATTATGTAACCGATAGGAGTTGTATAGTTGAAGATGTGGCTTTAGACGATAATCCTTTA  
AGG  
+  
FFFFFFFFFFFFFFFFFFFFFFFFFFFFFFFFFFFFFFFF:FFFFFFFF:FFFFFFFF  
FFFFFFFFFFFFFFFFFFFFFFFFFFFFFFFFFFFFFFFF:FFFFFFFFFFFFFFFF  
FFF  
@A00721:190:HGJW7DSXY:4:1105:8205:10692\_1:N:0:TCTGCAAG+GCTGCACT  
CCCACAGATTTGTCTACGTTGCAGATCGCCACTCCAAACACTATATACATTATAAAATATAAAAATAA



GGGAGTCATAACTTTTTGTTACCAAATTCTTGGCTTTCAACGAAGTCTCTGATTTTATTAATCATTACT  
TTA  
+  
:FFFFFFFFFFFFFFFFFFFFFFFFFFFFFFFFFFFFFFFFFFFFFFFFFFFFFFFFFFFFFFFFFFFFFFFFF  
FFFFFFFFFFFFFFFFFFFFFFFFFFFFFFFFFFFFFFFFFFFFFFFFFFFFFFFFFFFFFFFFFFFFFFFFF  
FFF  
@A00721:190:HGJW7DSXY:4:1157:18096:33646\_2:N:0:TCTGCAAG+GCTGCACT  
TCATTTACTCTGTACTTGATCTACGTCGTTTAACTGTCGGAACAACCTTTACTTAGAATGACTCTATC  
TTTTCAGACACTTCTTATATTATTTACAATAGTTAATATCATATTAGT  
+  
:FFFFFFFFFFFFFFFFFFFFFFFFFFFFFFFFFFFFFFFFFFFFFFFFFFFFFFFFFFFFFFFFFFFFFFFFF  
FFFFFFFFFFFFFFFFFFFFFFFFFFFFFFFFFFFFFFFFFFFFFFFFFFFFFFFFFFFFFFFFFFFFFFFFF  
@A00721:190:HGJW7DSXY:4:2228:2419:7498\_2:N:0:TCTGCAAG+GCTGCACT  
TTTTCTTAGCTAATAGATTAATAAAGGATGAGTACGAAAACCAACTCTTCGTTACGAGACCTGATGGT  
AGAATAGATTTAGTCTCTACACCCATCTCAACGAGGATAAAGCGAGTT  
+  
F,FFFFFFFFFFFFFFFFFFFFFFFFFFFFFFFFFFFFFFFFFFFFFFFFFFFFFFFFFFFFFFFFFFFFFFFFF  
FFFFFFFFFFFFFFFFFFFFFFFFFFFFFFFFFFFFFFFFFFFFFFFFFFFFFFFFFFFFFFFFFFFFFFFFF  
@A00721:190:HGJW7DSXY:4:1520:7175:7780\_2:N:0:TCTGCAAG+GCTGCACT  
TCATCCGCAAACGACTCGAAACCGAGACGCCGTAGATCAAAGTCCCTTCTAACTTTAGATTATGAATC  
CTGCCTTTACTCATTTTATAGCAGAGATCGGAAGAGCGTCGTGTAGGG  
+  
FFFF:FFFFFFFFFFFFFFFFFFFFFFFFFFFFFFFFFFFFFFFFFFFFFFFFFFFFFFFFFFFFFFFFFFFFF,FFFF  
FFFFF:FFFFF, :FFFFFFFFFFFFFFFFFFFFFFFFFFFFFFFFFFFFFFFFFFFFFFFFFFFFFFFFF  
@A00721:190:HGJW7DSXY:4:1110:3694:15186\_1:N:0:TCTGCAAG+GCTGCACT  
CGATAGTGATTGTTATCAATTTAAATACATTACTGTTTCAAATCATCTTTACTCACAGACTCCGAAAA  
TGGTTTCAAATGAGGTCAAAGCTCTATTTATTAACGAACATTATCCGATTCTTCGAGGGTATCACT  
ACC  
+  
FFFFFFFFFFFFFFFFFFFFFFFFFFFFFFFFFFFFFFFFFFFFFFFFFFFFFFFFFFFFFFFFFFFFFFFFF  
FFFFFFFFFFFFFFFFFFFFFFFFFFFFFFFFFFFFFFFFFFFFFFFFFFFFFFFFFFFFFFFFFFFFFFFFF  
FFF  
@A00721:190:HGJW7DSXY:4:2674:17933:1485\_1:N:0:TCTGCAAG+GCTGCACT  
TCTATAAGGGAAAATAGCAATAATCAAATTTGACAAATTTTAGAACTTTATTTAGAACTCTCTCCG  
ATCACCTTGGTGTGATCTCCCGGAGGATCTTTTCAATAAGATGTATGATGATAATCTACTATTTTAA  
ATA  
+  
FFFFFFFFFFFFFFFFFFFFFFFFFFFFFFFFFFFFFFFFFFFFFFFFFFFFFFFFFFFFFFFFFFFFFFFFF  
FFFFFFFFFFFFFFFFFFFFFFFFFFFFFFFFFFFFFFFFFFFFFFFFFFFFFFFFFFFFFFFFFFFFFFFFF  
FFF  
@A00721:190:HGJW7DSXY:4:1419:23339:36307\_2:N:0:TCTGCAAG+GCTGCACT  
GTATACTTGAATACTTTATCAAAGATTTGGCTTGGTCTATTTACCGCAAAAAGTTGGAAGAGGTCTAT  
GATATTTATTTTACTTATACTTTAAATAGCACCGATTATAACTTGACT  
+  
FFFFFFFFFFFFFFFFFFFFFFFFFFFFFFFFFFFFFFFFFFFFFFFFFFFFFFFFFFFFFFFFFFFFFFFFF  
FFFFFFFFFFFFFFFFFFFFFFFFFFFFFFFFFFFFFFFFFFFFFFFFFFFFFFFFFFFFFFFFFFFFFFFFF  
@A00721:190:HGJW7DSXY:4:2621:22092:4116\_2:N:0:TCTGCAAG+GCTGCACT  
TAGCTCTTCTCAGAAGATTAGAGAAGTAACCGGTGAACACGTCGGTAGCATTGATTTACTTTTACCG  
TTAGAACTGAAAAAGATTCTTTTCGAAAAGAAACCTATAAGTTACAAA  
+  
FFF:FFFFF:FFFF:FFFFFFFFFFFFFFFFFFFFFFFFFFFFFFFFFFFFFFFFFFFFFFFFFFFFFFFFF  
FFFFFFFFFFFFFFFFFFFFFFFFFFFFFFFFFFFFFFFFFFFFFFFFFFFFFFFFFFFFFFFFFFFFFFFFF  
@A00721:190:HGJW7DSXY:4:1658:24180:31187\_1:N:0:TCTGCAAG+GCTGCACT  
AAATACTTCAAGTACCTGAACCTTTACATTTTAAATGGTATGGTATAATGTGTCTTACAAATAGAACCT

TCACTCTCGGTAATGAGAGTGTATTCCTTAATATTCTAGTAACCGCTATGTGGGCATTACTAGGATTT  
ATC

+

FFFFFFFFFFFFFFFF:FFFFFFFFFFFFFFFF:FFFFFFFFFFFFFFFF  
FFFFFFFFFFFFFFFFFFFFFFFFFFFFFFFFFFFFFFFFFFFFFFFF  
FFF

@A00721:190:HGJW7DSXY:4:2172:17616:34726\_2:N:0:TCTGCAAG+GCTGCACT  
CTCCATTGTATAGTTCAAGGAGTACTTAATTCAATAGCTTTAGTATTATTTACTATCGCCTTTATTGA  
AAATTGTATAAGAGTTAATTGCTTACACAAAAGTGACGCGCAAGGAA

+

FFFFFFFFFFFFFFFFFFFFFFFFFFFFFFFFFFFFFFFFFFFFFFFF  
FFFFFFFFFFFFFFFFFFFFFFFFFFFFFFFFFFFFFFFF

@A00721:190:HGJW7DSXY:4:2127:14561:15123\_1:N:0:TCTGCAAG+GCTGCACT  
TGGCACGCCAGACGTAGGGTCAAACCTACTACCGCCGGTCGGCAGATCGGCACCACTGGTCTCTACGT  
TCAGGGACCCGCTGTGCAGAATAACCTTCCCAAATCTAGATCTGCACAGAAGAAGGCTGAAGGTCGTT  
ACC

+

:FFFFFFFFFFFFFF:FF,F:FFFFFF:FFFFFFFFFFFFFF:FFFFFFFFFFFFFFFF  
FFFFFFFFFFFFFFFFFFFFFFFFFFFFFFFFFFFFFFFF  
FFF

@A00721:190:HGJW7DSXY:4:2560:22742:21997\_2:N:0:TCTGCAAG+GCTGCACT  
CTCGTAACATTGACGGCAGTCCCGTCATCTCTGTGGAACTGAGGCAGTACCTCAGTCAAAAGTCACA  
TTCACCACTCCCATACCAATCAATGATGTGACTATACAGTTCGGCCAT

+

FFFFFFFFFFFFFFFFFFFFFFFFFFFFFFFF:FFFFFFFFFFFFFFFF  
FFFFFFFFFFFFFFFFFFFFFFFFFFFFFFFF

@A00721:190:HGJW7DSXY:4:1660:9760:5368\_1:N:0:TCTGCAAG+GCTGCACT  
ATACGTCGTGGGAGGTACTGAAGCCTTCCCTCCGCTGGCACGAAGAACTCCCAAGCCAATCAATA  
GTTCTTCTGACCAGAATGAAAAGGGGTTTACCAGGGTAGTCTCTAAGTCTACCAGGAAGAGGGGAAAT  
GTC

+

FFFFFFFFFFFFFFFFFFFFFFFFFFFFFFFFFFFFFFFF  
FFFFFFFFFFFFFFFFFFFFFFFFFFFFFFFF:FFFFFFFFFFFFFFFF  
FFF

@A00721:190:HGJW7DSXY:4:1625:22318:33473\_2:N:0:TCTGCAAG+GCTGCACT  
CCACCATCTGGGGTTGGAATAAGAAATCTGCACGGGCCAAAGAGGCCGCTGCTACGAAGTCGCTGAA  
GGCGGCTTGGGTCATTAAGGGTAGCTGTAAAGTTGCGCCTGCCGACCC

+

FFFFFFFFFFFFFFFFFFFFFFFFFFFFFFFFFFFFFFFF  
FFFFFFFFFFFFFF:FF:FFFFFFFFFFFFFFFF

@A00721:190:HGJW7DSXY:4:1223:19144:18239\_1:N:0:TCTGCAAG+GCTGCACT  
GTGCTCTTCCGATCTCCGACTATGAGCAAATCTGTTGAATTCGTCACTGAGGACGAAGGTGAGAGGAC  
TTTTCGCTACTGGCGACAACTGAGAGCACTCGCTGGGGAAAGAGAATTGCGTGGGTTGAAGGCCGAC  
GCT

+

FF:FFFFFFFFFFFF,,FFF,FFFFFF:FFFFFF:FFFFFFFF  
FF,FFFFFFFFFFFFFFFFFFFFFFFF:FFFFFFF:FFFFFFFF  
FFF

@A00721:190:HGJW7DSXY:4:2423:10041:25551\_1:N:0:TCTGCAAG+GCTGCACT  
CGTGTGCTCTTCCGATCTATTTTATCCGCGCTTACTATGGGGCGAAGATCCCCTATGGAGTCTTGAA  
GGACTTAGGTTGGCATATTTATGCCGACGATAATAAGCATGTCACCCTTAAGCACCGAGGTAAGCTCG  
GGA

+

FFFFFFFFFFFFFFFFFFFFFFFFFFFFFFFFFFFFFFFF



FFFFFFFFFFFFFFFFFFFFFFFFFFFFFFFFFFFFFFFFFFFFFFFFFFFFFFFFFFFFFFFFFFFFFFFF  
FFF

@A00721:190:HGJW7DSXY:4:1678:31593:20666\_1:N:0:TCTGCAAG+GCTGCACT  
CTCTTGATGATGTAGCCACTATAATGCTTAAGAGAGAGATTGATGTATGTCATTTCTGCTTAGTTTGT  
CCCGGCGAATTATTGGACACGATGAAAAATGACATACCCGTTCTGACCTTGGTATCGTTATCCGTCA  
TGG

+  
FFFFFFFFFFFFFFFFFFFFFFFFFFFFFFFFFFFFFFFFFFFFFFFFFFFFFFFFFFFFFFFFFFFFFFFF  
FFFFFFFFFFFFFFFFFFFFFFFFFFFFFFFFFFFFFFFFFFFFFFFFFFFFFFFFFFFFFFFFFFFFFFFF  
FFF

@A00721:190:HGJW7DSXY:4:2212:18701:12555\_1:N:0:TCTGCAAG+GCTGCACT  
AATAACTCGTAATAAATCTTTCTCTAGTGGACAATTGAGAATACCTATTTCCGTACCAAGAGCCACTG  
CCAATCTCATCGCTATACGCATACCTGATTGGAAGAAGCGAGGTTCTGTTCTCAATAAAAATTTTCT  
CAA

+  
FFFFFFF:FFFFFFFFFFFFFFFFFFFFFFFFFFFFFFFFFFFFFFFFFFFFFFFFFFFFFFFFFFFFFFFF  
FFFFFFFFFFFFFFFFFFFFFFFFFFFFFFFFFFFFFFFFFFFFFFFFFFFFFFFFFFFFFFFFFFFFFFFF  
FFF

@A00721:190:HGJW7DSXY:4:2558:29098:13808\_2:N:0:TCTGCAAG+GCTGCACT  
ATGGGGATCACTTCTTCGGTCAATGACAAAACCTTGAATATGTTACGACATGGCTTCGTAACAACAG  
TGCGAGGATTGTCATCTCGGGGAAAGTGATTACCAAGATGTTTCATAT

+  
FFFFFFFFFFFFFFFFFFFFFFFFFFFFFFFFFFFFFFFFFFFFFFFFFFFFFFFFFFFFFFFFFFFFFFFF  
FFFFFFFFFFFFFFFFFFFFFFFFFFFFFFFFFFFFFFFFFFFFFFFFFFFFFFFFFFFFFFFFFFFFFFFF

@A00721:190:HGJW7DSXY:4:2549:12436:16203\_1:N:0:TCTGCAAG+GCTGCACT  
ACTGGAGTTCAGACGTGTGCTCTTCCGATCTCTTTGGGTACACGTTATGCTCGCAAACCTTAACGTTAG  
TACCGGAGGTGATCTCTGCTTCTGCGTACTGAGAGAAAAGATTCAGGACGCCTACGGTGACTTTA  
TGG

+  
FFFFF:FFFFFF:FFFFFFFFFFFFFFFFFFFFFFFFFFFFFFFFFFFFFFFFFFFFFFFFFFFFFFFF  
FFFFFFFFFFFFFFFFFFFFFFFFFFFFFFFFFFFFFFFFFFFFFFFFFFFFFFFFFFFFFFFFFFFFFFFF  
FFF

@A00721:190:HGJW7DSXY:4:2103:12201:28072\_2:N:0:TCTGCAAG+GCTGCACT  
TGAAACTACGGTCCTTATCAAAGAAAATGGTGAACCGGTCTCTAAATCTTTTGAATTGAGAAGATTG  
AAGAACACGTCAAGAAGTCGCTCGGCGTTGTTCTTGAAAACCAAGTTA

+  
FFFFFFFFFFFFFFFFFFFFFFFFFFFFFFFFFFFFFFFFFFFFFFFFFFFFFFFFFFFFFFFFFFFFFFFF  
FFFFFFFFFFFFFFFFFFFFFFFFFFFFFFFFFFFFFFFFFFFFFFFFFFFFFFFFFFFFFFFFFFFFFFFF

@A00721:190:HGJW7DSXY:4:1650:7853:11522\_2:N:0:TCTGCAAG+GCTGCACT  
TACCTTCTGTCAAACCTTCGAGGTTGAGCTACGAGAGGTGATCCCGGATGTGGATTGAAGGCTGGCTCT  
AAGGGAGACTCCTTCTTTTGAATGTTGTAAAGAATTGGGTTGAGAAG

+  
FFFFFFFFFFFFFFFFFFFFFFFFFFFFFFFFFFFFFFFFFFFFFFFFFFFFFFFFFFFFFFFFFFFFFFFF  
FFFFFFFFFFFFFFFFFFFFFFFFFFFFFFFFFFFFFFFFFFFFFFFFFFFFFFFFFFFFFFFFFFFFFFFF

@A00721:190:HGJW7DSXY:4:1647:19669:33896\_1:N:0:TCTGCAAG+GCTGCACT  
TTTTCAAAAATGCGGATGGGTCTACTGATGTTTTCTACAGAGTGCAGTCGTTTCAACACTTATCACC  
ACTTTTGAAAGGAAAATAATTGGTGATGAAAATACGTATGTCGGTGGGGTTCTCAAGGCTCTCATCGC  
CAC

+  
FFFFFFFFFFFFFFFFFFFFFFFFFFFFFFFFFFFFFFFFFFFFFFFFFFFFFFFFFFFFFFFFFFFFFFFF  
FFFFFFFFFFFFFFFFFFFFFFFFFFFFFFFFFFFFFFFFFFFFFFFFFFFFFFFFFFFFFFFFFFFFFFFF  
FFF

@A00721:190:HGJW7DSXY:4:1269:25437:19680\_1:N:0:TCTGCAAG+GCTGCACT  
TTCTTAAAAGAAGTTTATTAACACTTCAGAGTCTCTTGGAAGTCCAGGTAGCTAATGTTCTTGCAATA

GCCACAGACTTTCTGGGAAAAGAGACCTCTGTTGGTAGAGGAGTTGAGAGAATTACTCAGATTCAATC  
TGG

+

FFFFFFFFFFFFFFFFFFFFFFFFFFFFFFFFFFFFFFFFFFFFFFFFFFFFFFFFFFFFFFFFFFFFFFFF  
FFFFFFFFFFFFFFFFFFFFFFFFFFFFFFFFFFFFFFFFFFFFFFFFFFFFFFFFFFFFFFFFFFFFFFFF  
FFF

@A00721:190:HGJW7DSXY:4:1262:6705:1454\_2:N:0:TCTGCAAG+GCTGCACT  
AAAGATCCTTTGCACAAGCAATACCTTCCACTGAGTTCATCACCCAGAGTTTCGACGTCGCGGAAAAC  
GATGAAGATTTCCACACTGTTGAGAATCTTCTGATGCTGAATTTGAG

+

FFFFFFFFFFFFFFFFFFFFFFFFFFFFFFFFFFFFFFFFFFFFFFFFFFFFFFFFFFFFFFFFFFFFFFFF:FF:F  
FFFFFFFFFFFFFFFFFFFFFFFFFFFFFFFFFFFFFFFFFFFFFFFFFFFFFFFFFFFFFFFFFFFFFFFF,F,FFF:FFF,F,

@A00721:190:HGJW7DSXY:4:2443:12491:26162\_1:N:0:TCTGCAAG+GCTGCACT  
TTCTTTTATCATTGCAACAGGACTTTGAGAAGACTGTTGAAATGGACAAAATCTGGGATCATAGGTAT  
GTGTCACGCTACACTCGAAATATGGGCCCTCATAAGGAAGTATAGTTGGCGTCTTGTCGTTGACGTCA  
TTA

+

FFFFFFFFFFFFFFFFFFFFFFFFFFFFFFFFFFFFFFFFFFFFFFFFFFFFFFFFFFFFFFFFFFFFFFFF:FFFFFFF  
FFFFFFFFFFFFFFFFFFFFFFFFFFFFFFFFFFFFFFFFFFFFFFFFFFFFFFFFFFFFFFFFFFFFFFFF:FFFFFFF  
FFF

@A00721:190:HGJW7DSXY:4:2410:31964:14575\_2:N:0:TCTGCAAG+GCTGCACT  
ATCAGATTAGAGACATGCCAGTTAGAGTTCTTCTAACCAGGACTGATGGTGAGATTCTTTTACCTTTT  
GGAGGTCCAGGAACCTTTACTCCTAGAGATCGGAAGAGCGTCGTGTAG

+

,FF:FF:FF:FFFFFFFFFFFFFFFFFFFFFFFFFFFFFFFFFFFFFFFFFFFFFFFFFFFFFFFFFFFFFFFF,FF  
FFF:FF::FFF,F,FF:FFFF:FFFFFF:FFFFFFFFFFFFFFFFFFFFFFFF:

@A00721:190:HGJW7DSXY:4:2633:26937:2300\_2:N:0:TCTGCAAG+GCTGCACT  
GTTTCAGCTGGATGGATCTTTTGATGGTATGTTTCACATTGCGTGATCACTTCCCGTGGACTTGGGAA  
GAGATTAAACATAAAATCCAGCGATTCTATTATGTCGCTAAAGCCTGT

+

FFFFFFF,FFFFFFFFFFFFFFFFFFFFFFFFFFFFFFFFFFFFFFFFFFFFFFFFFFFFFFFFFFFFFFFF:FFF:FFFFFFFFFFFFFFFFFFFFFFFF  
FFFFFFFFF,FFFFFFFFFFFFFFFFFFFFFFFFFFFFFFFFFFFFFFFFFFFFFFFFFFFFFFFF:F:FF

@A00721:190:HGJW7DSXY:4:2330:2600:6558\_2:N:0:TCTGCAAG+GCTGCACT  
TACTAAGTCTGAGATCTGCCACTTCTAATTTTAGGAAACGTCGCGAAAAGAAAGTTCATGAGGATGTC  
TTGGTCGAAAAATATCGCCGGGAACCTTCTAATAGAGGATCCTGATGAC

+

FFFFFFFFFFFFFFFFFFFFFFFFFFFFFFFFFFFFFFFFFFFFFFFFFFFFFFFFFFFFFFFFFFFFFFFF  
FFFFFFFFFFFFFFFFFFFFFFFFFFFFFFFFFFFFFFFFFFFFFFFFFFFFFFFFFFFFFFFF

@A00721:190:HGJW7DSXY:4:2432:11225:35430\_1:N:0:TCTGCAAG+GCTGCACT  
TACCGATCTCAGTTCTACCACAGAAACCGTCTCAGGAAGTGTCTCCACTGATTGGAATTAGAGAAAG  
ACGACCTTCTTGTTGGGACTGAGACCTCTGAATTTTCAGGGTGCCCTGATGAGGACGTTGAAAGGGAT  
AAT

+

FFFFFFFFFFFFFFFFFFFFFFFFFFFFFFFFFFFFFFFFFFFFFFFFFFFFFFFFFFFFFFFF:FFFFFFFFFFFFFFFFFFFFFFFF  
FFFFFFFFFFFFFFFFFFFFFFFFFFFFFFFFFFFFFFFFFFFFFFFFFFFFFFFFFFFFFFFF  
FFF

@A00721:190:HGJW7DSXY:4:1337:19777:11287\_2:N:0:TCTGCAAG+GCTGCACT  
TTTCAAAAGACCAGAAACGTAACAAGAATAAAGGTAGGAAGGGGAGAAAACAGAACAAAGCGAGCG  
GTTGAAGAGAAACTGATATGGTTGCGGCTGATCGTACCCCAATTCT

+

FFFFFFFFFFFFFFFFFFFFFFFFFFFFFFFFFFFFFFFFFFFFFFFFFFFFFFFFFFFFFFFF:FF:FFFFFFFF:FFFFFFFF:FFFFFFFFFFFFFFFFFFFFFFFF:FFFFFFF  
FF:FFFFFFFF:FFFF,FF:FFFFFFFFFFFFFFFFFFFFFFFF,F:FFFF:FFFF

@A00721:190:HGJW7DSXY:4:1125:23854:8891\_1:N:0:TCTGCAAG+GCTGCACT  
GAGTTACGTAGTGGTCGTTCTTTTGGTGATTTTATCAAAGAGAAAGTTTCTGCTAGTCGCGACGATAG

TATTTATCGGAGTGATATTAACAAGTTAACTTCGAACTGACCACTTACAAGAGTGTTGAAGTACCGC  
AAC

+

FFFFFFFFFFFFFFFFFFFFFFFFFFFFFFFFFFFFFFFFFFFFFFFFFFFFFFFFFFFFFFFFFFFFFFFF  
FFFFFFFFFFFFFFFFFFFFFFFFFFFFFFFFFFFFFFFFFFFFFFFFFFFFFFFFFFFFFFFFFFFFFFFF  
FFF

@A00721:190:HGJW7DSXY:4:1676:24948:29637\_2:N:0:TCTGCAAG+GCTGCACT  
AATTAAGACAGACGTGAAAGTTATGATGAGTGATCGTATTAGAACAGCTGATTCTTATTGCATGAACG  
TCGCTGAGGTCAAACCTGTGGACGTTCTTTTCATCGACGAATTATTCA

+

FFFFFFFFFFFFFFFFFFFFFFFFFFFFFFFFFFFFFFFFFFFFFFFFFFFFFFFFFFFFFFFFFFFFFFFF  
FF:FFFFFFFFFFFFFFFFFFFFFFFFFFFFFFFFFFFFFFFFFFFFFFFFFFFFFFFFFFFFFFFF

@A00721:190:HGJW7DSXY:4:1630:21332:28792\_1:N:0:TCTGCAAG+GCTGCACT  
ACTTAAGGCGGCTTATACCATAGGTTACGGTGATTCCAATCAAATCGGATTCATCAATCGTATTGATC  
TCCAAGTCGCAAACTACTTCAACATCAACGACATCATTCTTGATGAGTGTCGTTCTTATCGAAGTCTC  
AGT

+

FFFFFFFFFFFFFFFFFFFFFFFFFFFFFFFFFFFFFFFFFFFFFFFFFFFFFFFFFFFFFFFFFFFFFFFF  
FFFFFFFFFFFFFFFFFFFFFFFFFFFFFFFFFFFFFFFFFFFFFFFFFFFFFFFFFFFFFFFFFFFFFFFF  
FFF

@A00721:190:HGJW7DSXY:4:2457:22562:34929\_2:N:0:TCTGCAAG+GCTGCACT  
AACTGTCACGTTTAGCACGGGAGGTTGCAGATTCAACCCCTTATATCGAGGCTATCGAGGACGATGAG  
TATCTTGAAGTTGTTGACGACAAGCCTCAAGAGGGTAGAGGACCACCT

+

FFFFFFFFFFFFFFFFFFFFFFFFFFFFFFFFFFFFFFFFFFFFFFFFFFFFFFFFFFFFFFFFFFFFFFFF  
FFFF:FFFFFFFFFFFFFFFFFFFFFFFFFFFFFFFFFFFFFFFFFFFFFFFFFFFFFFFFFFFFFFFF

@A00721:190:HGJW7DSXY:4:2163:8974:22514\_1:N:0:TCTGCAAG+GCTGCACT  
GTGACTGGAGTTGACGCGTGCTCTTCCGATCTATTAAGTACTAATGAGTTCAAGTCGGTTGTCGAT  
CGAATTAAGATCAAGGCTAATACCTTTATAGGTAAGAAGCCCCTTGAGCCGCGTAGTCAGCGCGTTTA  
GCT

+

FFFFFFFFFFFFFFFFFFFFFFFFFFFFFFFFFFFFFFFFFFFFFFFFFFFFFFFFFFFFFFFFFFFFFFFF  
FFFFFFFFFFFFFFFFFFFFFFFFFFFFFFFFFFFFFFFFFFFFFFFFFFFFFFFFFFFFFFFFFFFFFFFF  
FFF

@A00721:190:HGJW7DSXY:4:2560:24288:25019\_1:N:0:TCTGCAAG+GCTGCACT  
CGAAATGGTCAATATTGATAATTGGACCGACTATATGACCTATTTTAAGCTCATGGTGAAGGGAAG  
CTAAGGTAACTTGATGCTTCAGCCTTTTCGAAGCATAACCCCGCACAGAATATCGTTTATCACGCA  
AAA

+

FFFFFFF,FF,FFFFFF,FFFFFFFFFFFFFFFFFFFFFFFFFFFFFFFFFFFFFFFFFFFFFFFFFFFF  
FFFFFF:FFFFFFFFFFFFFFFFFFFFFFFFFFFFFFFFFFFFFFFFFFFFFFFFFFFFFFFFFFFFFFFF  
FFF

@A00721:190:HGJW7DSXY:4:1124:22327:6120\_2:N:0:TCTGCAAG+GCTGCACT  
CATAACGATTTGTCAATTTACCACCTTTGCTCAACGACGAAGTGGAAACGGCCAACACTTTCTTTGGTAA  
TTGTATGATCACTTTGATGATTTTATCACTTTATTATGACCTTGGA

+

FFFFFFFFFFFFFFFF,::FF:FFFF,FFFFFFFFFFFFFFFFFFFFFFFFFFFFFFFFFFFFFFFFFFFF  
:FFFFFF:,F:FFFF,FFFFFFFFFFFF,::FF:FF,FFF:F:FF:F

@A00721:190:HGJW7DSXY:4:2365:28899:34945\_2:N:0:TCTGCAAG+GCTGCACT  
TATCTGTGCTTTGAATTGTATAAGATCAAATTTTAAAGATTCCGAGAGGTTTATCCTGATGTGGAGG  
GAGTTCTTGAAGCATCCCGACCTTTCTTGTGAAAATTTTGATGCGGT

+

FFFFFFF:FFFFFFF:FFFFFFFFFFFFFFFFFFFFFFFF, ,FFFF:FFFFFFFFFFFF,FFFFFFF:F,F  
:F:FFFFFFF,FFFFFF,FFFF:F:FFF:F:FFFFFFFFFFFF, ,FF

@A00721:190:HGJW7DSXY:4:1666:16803:20541\_2:N:0:TCTGCAAG+GCTGCACT  
TGATATTGTTGAGCGAGAGCGACCAAGATCTAAATTCGGTAACGGTGCCTGCGCTTTATTTTAAAAA  
GCTCCCTCCTCTCGCAAGTTTGATCTGATACTTATCACGAAAGGACTT

+

FFFFFFFFFFFFFFFFFFFFFFFFFFFFFFFFFFFFFFFFFFFFFFFFFFFFFFFFFFFFFFFFFFFFFFFF  
FFFFFFFFFFFFFFFFFFFFFFFFFFFFFFFFFFFFFFFFFFFFFFFFFFFFFFFFFFFFFFFFFFFFFFFF

@A00721:190:HGJW7DSXY:4:1543:15664:11115\_1:N:0:TCTGCAAG+GCTGCACT  
CCTCATCAGCTTGTGTTTTACCTAATCTGTGTTTTACGATAACAACATCAGTTGATTAAGACTCTT  
CCGAAAGGCGAACTTTGGAATTTGAAGCTCAGGGTGAAGCACAAACGTTTGACCGTGACGAACTGTGG  
TGT

+

FFFFFFFFFFFFFFFFFFFFFFFFFFFFFFFFFFFFFFFFFFFFFFFFFFFFFFFFFFFFFFFFFFFFFFFF  
FFFFFFFFFFFFFFFFFFFFFFFFFFFFFFFFFFFFFFFFFFFFFFFFFFFFFFFFFFFFFFFFFFFFFFFF  
FFF

@A00721:190:HGJW7DSXY:4:2150:1461:23688\_2:N:0:TCTGCAAG+GCTGCACT  
ATTTTAGTGAGATTATTAACGCACTAAAACGTCTTCGACAACAGCAGGGGTTTTCGAATAGTGAT  
AGCCACCCGCCTTACAGAGGGGCAGCAGCATGACCATAATTGGTATTG

+

FFFFFFFFFFFFFFFFFFFFFFFFFFFFFFFFFFFFFFFFFFFFFFFFFFFFFFFFFFFFFFFFFFFFFFFF  
FFFFFFFFFFFFFFFFFFFFFFFFFFFFFFFFFFFFFFFFFFFFFFFFFFFFFFFFFFFFFFFFFFFFFFFF

@A00721:190:HGJW7DSXY:4:2438:15754:15812\_2:N:0:TCTGCAAG+GCTGCACT  
TGTCTCGCCTCTTCGAATGAAGTTTTAATGCTTAACAACAATGATAGTGAATTTATACCTACAATCAT  
TGGTTTTTCTAATAATGATGACACTATTGTTTATGGATATGATGCTAT

+

FFFFFFFFFFFFFFFFFFFFFFFFFFFFFFFFFFFFFFFFFFFFFFFFFFFFFFFFFFFFFFFFFFFFFFFF  
FFFFFFFFFFFFFFFFFFFFFFFFFFFFFFFFFFFFFFFFFFFFFFFFFFFFFFFFFFFFFFFFFFFFFFFF  
:::FF,FF:FFFFFFFFF:F,F,:FFFFFFFFF,FFF,,FF:FFFF

@A00721:190:HGJW7DSXY:4:1114:21522:12430\_1:N:0:TCTGCAAG+GCTGCACT  
TTAAAACCATTTGTACGATGTCGTCTGTCTCGGCGATCACTTTTCACTAAGAATTGGTCTACTTTTGG  
ACAAGGCCAACTTCGAATCTTCATGAGATCGTTTCTTTCTTTATCTCTTTGGTTGTTAGGGATTTTG  
AGA

+

: ,FFFFFFFFFFFFFFFFFFFFFFFFFFFFFFFFFFFFFFFFFFFFFFFFFFFFFFFFFFFFFFFF  
FFFFFFFFFFFFFFFFFFFFFFFFFFFFFFFFFFFFFFFFFFFFFFFFFFFFFFFFFFFFFFFFFFFFFFFF  
FFF

@A00721:190:HGJW7DSXY:4:1304:19316:31438\_2:N:0:TCTGCAAG+GCTGCACT  
ATTGTATTGGTTTGGTCGTTTCAGTACCCAGTCAGTATACCTCTACGCAAAGATATTTTATGAAAAC  
ACAGAGGAACGTACCGGATTACCTGTCTTTCATATTATGAATGAACCT

+

F:FF:F,FFFFFFFFFFFFFFFFFFFFFFFFFFFFFFFFFFFFFFFFFFFFFFFFFFFFFFFFFFFFFFFF  
FFFFFFFFF,FFFFFFFFF:FFFFFFFFFFFFFFFFFFFFFFFFFFFFFFFFFFFFFFFF

@A00721:190:HGJW7DSXY:4:1556:22616:11506\_2:N:0:TCTGCAAG+GCTGCACT  
TCAAGAAGGGTTCAGAATGGGATTCCTACGTAGTTTATGACTTTGGTGGTGGTACTTTGATACTTCT  
ATCGTCTTACGTTACGGTAATTACTATAGTGTTATTTATTCTGGTGGT

+

FFFFFFFFFFFFFFFFFFFFFFFFFFFFFFFFFFFFFFFFFFFFFFFFFFFFFFFFFFFFFFFFFFFFFFFF  
FFFFFFFFFFFFFFFFFFFFFFFFFFFFFFFFFFFFFFFFFFFFFFFFFFFFFFFFFFFFFFFFFFFFFFFF

@A00721:190:HGJW7DSXY:4:2365:6171:15624\_2:N:0:TCTGCAAG+GCTGCACT  
GACGTTGATGAAGCTATAAGAGCGTTCTTATTACGGCGCACTTCTTTACCCGCCACCACAACTTTC  
AGTTTCACTAAGGAGGAGGTTTCTGTTACTGGAACCTCGTC

+

FFFFFFFFFFFFFFFFFFFFFFFFFFFFFFFFFFFFFFFFFFFFFFFFFFFFFFFFFFFFFFFFFFFFFFFF  
FFFFFFFFFFFFFFFFFFFFFFFFFFFFFFFFFFFFFFFFFFFFFFFFFFFFFFFFFFFFFFFFFFFFFFFF

@A00721:190:HGJW7DSXY:4:2256:6768:19914\_1:N:0:TCTGCAAG+GCTGCACT  
CTGGAGTTCAGACGTGTGCTCTTCCGATCTGTGAATTAACGCGTCCTTTTCTGGAACGTAGTTTTAC

TATTATGAACAAAGTTATCAAAGATAGTGGCATTCAAGGCAAACCTTACCCTGATTCCGGCCGGTGGTA  
GCT

+

FFFFFFFFFFFFFFFFFFFFFFFFFFFFFFFFFFFFFFFFFFFFFFFFFFFFFFFFFFFFFFFFFFFFFFFF  
FFFFFFFF:FFFFFFFFFFFFFFFFFFFFFFFFFFFFFFFFFFFFFFFFFFFFFFFFFFFFFFFFFFFFFFFF  
FFF

@A00721:190:HGJW7DSXY:4:1459:18765:12226\_1:N:0:TCTGCAAG+GCTGCACT  
AACAGCTATTAAAGCTGTTGAGCGGGTAATTACACCTAAACGAGCTCGATCTGCCATCGCTGAAGGAT  
GTGCACTCTTTTCTGCTACTTTAACGGAGCGTAGTGTACTCTTCGTCGATTGTATCAACAGTAACATT  
ACT

+

FFFFFFFFFFFFFFFFFFFFFFFFFFFFFFFFFFFFFFFFFFFFFFFFFFFFFFFFFFFFFFFFFFFFFFFF  
FFFFFFFFFFFFFFFFFFFFFFFFFFFFFFFFFFFFFFFFFFFFFFFFFFFFFFFFFFFFFFFFFFFFFFFF  
FFF

@A00721:190:HGJW7DSXY:4:2259:25681:11240\_1:N:0:TCTGCAAG+GCTGCACT  
GGCTAAACTCCAAGGTAATTATGAAGACTGTGATTTATCTTTCACTCTGGCCTTGTATGAGGGTGT  
CTAATCGTAACATTAATAATTTCAATCTTCTTAAAAAGAAGATAGAGAGTCATACTTTGGGCTATCGT  
TCA

+

FFFFFF:FFFFFFFFFFFFFFFFFFFFFFFFFFFFFFFFFFFFFFFFFFFFFFFFFFFFFFFFFFFFFFFF  
FFFFFFFFFFFFFFFFFFFFFFFFFFFFFFFFFFFFFFFFFFFFFFFFFFFFFFFFFFFFFFFFFFFFFFFF  
FFF

@A00721:190:HGJW7DSXY:4:2633:25111:22467\_2:N:0:TCTGCAAG+GCTGCACT  
CTAAAATATTTACAAAATCTTACCCTATCTACGAACCTAAAGTTCTGAAGACGTTGCTTGTGCTTC  
CTCCTTTAATGGCACTACCTCGGTACAATCTTACTTGGAACGAAGGCG

+

FFFFFFFFFFFFFFFFFFFFFFFFFFFFFFFFFFFFFFFFFFFFFFFFFFFFFFFFFFFFFFFFFFFFFFFF  
FFFFFFFFFFFFFFFFFFFFFFFFFFFFFFFFFFFFFFFFFFFFFFFFFFFFFFFFFFFFFFFFFFFFFFFF

@A00721:190:HGJW7DSXY:4:2475:19397:30671\_2:N:0:TCTGCAAG+GCTGCACT  
GTCTATATTAGGTGAAGCGAAATACGATTTGCAACGTCAACGTTACCGAGTTTCGTTTCGTACCTTG  
ATGCTGACTTTTCGTCAATATGATTTGATCTGGTTGCTCAATTCTAAGC

+

FFFFFFFFFFFFFFFF:FFFFFFFFFFFFFFFFFFFFFFFFFFFFFFFFFFFFFFFFFFFFFFFF:FFFFFF  
FFFFFFFFFFFFFFFFFFFFFFFFFFFFFFFFFFFFFFFFFFFFFFFFFFFFFFFFFFFFFFFF:FFFF:FFFFFF

@A00721:190:HGJW7DSXY:4:1676:24433:18474\_1:N:0:TCTGCAAG+GCTGCACT  
TCTTCCTTGGATTTTAATATAAAGAATCTTTACCAGGACTCCTACTACAGGAGGCAGTCTTCTGATCG  
TAAGAAGTTTATAAGGAACATATCCATTTGTTGTAATAGGGTCATCAACTTAGAACTCGAACTCTAA  
GTG

+

FFFF,:FFFF:F:FFF:FF,,FFFFFFFF:FFFF:FFF:FFF,FFFFFF,FFFFF::,FFFFF  
F:FF,,FFFFF::FFFFFFFF:FF,FFFF:FFFFFF,FFFFFFFF,FFFFF:,FF::F:FF,FFF  
FF:

@A00721:190:HGJW7DSXY:4:2472:19162:2738\_1:N:0:TCTGCAAG+GCTGCACT  
AATGAAATTGGACTCTTCGATAGGGGACATTTTATCGTGGGCTTTCCGTAAAGGAAGATCTGTTATCG  
ACGGTTTATCGTTTACGAAGTATCACTCCACCGGTGAATGGTTTAAGAATACTATAAATAGAATAGCT  
ATT

+

FFFFFFFFFFFFFFFFFFFFFFFFFFFFFFFF,F:FFFFFFFFFFFFFFFFFFFFFFFFFFFFFFFFFFFF  
FFFFFFFFFFFFFFFFFFFFFFFFFFFFFFFFFFFFFFFFFFFFFFFFFFFFFFFFFFFFFFFFFFFFFFFF  
FFF

@A00721:190:HGJW7DSXY:4:1673:4698:33301\_2:N:0:TCTGCAAG+GCTGCACT  
CAACTTCTTGACAATTTTCTTCAATCCTTCGATAATAGTTAAATCTAGGATTATGTCTGTGTTGAAAG  
ACTTTCTACCGATAAGGGTCACTAGTCTTACACAATTAAGAAATAATC

+



```

FFFFFFFFFFFFFFFFFFFFFFFFFFFFFFFFFFFFFFFFFFFFFFFFFFFFFFFFFFFFFFFF:FF
FFFFFFFFFFFFFFF,FFFFFFFFFFFFFFFFFFFFFFFFFFFFFFFFFFFFFFFFFFFFFFFFF
@A00721:190:HGJW7DSXY:4:2273:31096:9377_2:N:0:TCTGCAAG+GCTGCACT
ACTATCTAAAGATTGAAGGAAAATTTTATCCTCGTTTAACTTACTTAGACTTTCTACGATACAAATG
ATAACTTCTAATTTACGTTTGCTACTCAGAGCTGGTCTCTCAGCAAA
+
FFFFFFFFFFFFFF:FFFFFFFFF:FFFFFFFFFFFFFFFFFFFFFFFFFFFFFFFFFFFFFFFF:FFF
FFFFFFFFFFFFFFFFFFFFFFFFFFFFFFFFFFFFFFFFFFFFFFFFFFFFFFFFFFFFFFFFF,
@A00721:190:HGJW7DSXY:4:2215:31015:21261_2:N:0:TCTGCAAG+GCTGCACT
AGTCCCGGCATTTGATAATAATGACGAGACTTTCGTGATAATCGCTGCATATTACGGATTACACGGTA
CCAGCGCATCTCGTGTGAGCCTCGACCCGATTATATGGTATTAAGTT
+
FFFFFFFFF:FFFFFFFFFFFFFFFFFFFFFFFFFFFFFFFFFFFFFFFFFFFFFFFFFFFFFFFFF
FFFFFFFFFFFFFFFFFFFFFFFFFFFFFFFFFFFFFFFFFFFFFFFFFFFFFFFFFFFFFFFFF
@A00721:190:HGJW7DSXY:4:2229:31819:15421_1:N:0:TCTGCAAG+GCTGCACT
TCTCTTCTTATAATAATAATAATAATAATATTACTAATGGCAAATAGTGGAAGGCTCCAGTCAACAC
TAGTTCGAGTGCTGCTTTGGATTACGATGACGTGAGAATAGGTGAAGGGATAGTTTTTACCTCGACCA
ACA
+
F::,,, :FFFFFFFFF:FFFF,,FFF:FFFF,FFFFF:,FFFF:FFFF:,F,FFFFFF,F,FF,F,
F:FF::,, :F:,FF,FFF,,,FF,FF,FF,: ,FFFFFFFF,FFFFFFFFFFFFFFF,,FFF:, :F,FF,,F
FFF
@A00721:190:HGJW7DSXY:4:1428:28763:1110_2:N:0:TCTGCAAG+GCTGCACT
TGAATAATGATGCACTACAAACAAGTATCGCTAATCATCTGAAAAAGGCTCTAAAGGACACTATACAA
TATCCAGACGACGACGAAGCTTATACTACTTTAATTTTGGGTATTATG
+
FFFFFFFFFFFFFFFFFFFFFFFFFFFFFFFFFFFFFFFFFFFFFFFFFFFFFFFFFFFFFFFFF
FFFFFFFFFFFFFFF:FFFFFFFFFFFFFFFFFFFFFFF:FFFFFFF:FFFF
@A00721:190:HGJW7DSXY:4:1625:3152:9612_1:N:0:TCTGCAAG+GCTGCACT
AGGATATTGCCATTGTGGTACGAATTGGTCCAACATTTACCACCAAATTCCTTTGATACAACCTCTAG
CCTTCAAGTGGGGTATGCCTGCGGAATACGCTTGCTATTCACCAGATTGTTTCGAACCCGTTGATGCT
ATG
+
FFFFFFFFFFFFFFFFFFFFFFFFFFFFFFFFFFFFFFFFFFFFFFFFFFFFFFFFFFFFFFFFF
FFFFFFFFFFFFFFFFFFFFFFFFFFFFFFF:FFFFFFFFFFFFFFFFFFFFFFF:FFFFFFFFFFFFFFF
FFF
@A00721:190:HGJW7DSXY:4:1224:26621:27211_1:N:0:TCTGCAAG+GCTGCACT
ATTCAAGCTTGTGTTTTAAAGACTGCAGAGGCTGTCAAACAAGCCAGACTCAAGGAGTCCAATCAAA
GGTTTTGAATTTAGCTCAACTGGGGAGACGTGCTTAAATGGGTGATAAAAATTATTTAGAGATCTTTT
CTA
+
FFFFFFF,FFFFFF:FFFFFFFFFFFFFFFFFFFFFFFFFFFFFFFFFFFFFFFFFFFFFFFFF
FFFFFFFFFFFFFFFFFFFFFFFFFFFFFFFFFFFFFFFFFFFFFFFFFFFFFFFFFFFFFFFFF
FFF
@A00721:190:HGJW7DSXY:4:2538:29143:22185_1:N:0:TCTGCAAG+GCTGCACT
TATTGTTCTTCCGATACTTAGTGAACGCGTTCGTAGATCCAAGTACTTTCCGTCTGAAGAGTTTAGAG
CTGCTATTGTTTATGTAACCGTTAGGAGTTGTTTAGTTGTAGATGTGGCTTTAGACGATAATCCTTTA
AGG
+
:F,:FFF:F,F,FFFF,, :FFF,,,,, ,FFF,FF,:F,: ,FF,,FFF,FFF:FFFFFF:FFF:F,F,,
,FFFF::FF,FF,FF:FF,F:,F:FF,F:F:, ,FFFF:, ,FF,FFFFFFFFFFFF,FF:FFFF,:FFFF
FFF
@A00721:190:HGJW7DSXY:4:1144:30011:13041_1:N:0:TCTGCAAG+GCTGCACT
CCCACAGATTTGTCTACGTTGCAGATCGCCACTCCAAACACTATATACATTATAAAAATATAAAAATAA

```

GGGAGTCATAACTTTTGTACCAAATTCTTGGCTTTCAACGAAGTCTCTGATTTTATTAATCATTACT  
TTA

+

:FF:FF:FFFFFF:FFFFFFFFFFFFFFFFFFFFFFFFFFFFFFFFFFFFFFFFFFFFFFFFFFFFFFFFFFFFFFFF  
FFFFFFFFFFFFFFFFFFFFFFFFFFFFFFFFFFFFFFFFFFFFFFFFFFFFFFFFFFFFFFFFFFFFFFFFFFFFFFFF  
FFF

@A00721:190:HGJW7DSXY:4:1169:15474:7028\_2:N:0:TCTGCAAG+GCTGCACT  
TCATTTACTCTGTACTTGATCTACGTCGTTTAACTGTGCGAACAACCTTTACTTAGAATGACTCTATC  
TTTTCAGACACTTCTTATATTATTTACAATAGTTAATATCATATTAGT

+

:FFFFFFFF:F:FFFF:FFFFFFFFFFFFFFFFFFFFFFFFFFFFFFFFFFFFFFFFFFFFFFFFFFFFFFFFFFFF  
FFFFFFFFFFFFFFFFFFFFFFFFFFFFFFFFFFFFFFFFFFFFFFFFFFFFFFFFFFFFFFFFFFFFFFFFFFFF

@A00721:190:HGJW7DSXY:4:2335:28465:36417\_2:N:0:TCTGCAAG+GCTGCACT  
TTTTCTTAGCTAATAGATTAATAAAGGATGAGTACGAAAACCAACTCTTCGTTACGAGACCTGATGGT  
AGAATAGATTTAGTCTCTACACCCATCTCAACGAGGATAAAGCGAGTT

+

FFFFFFFF:FFFFFFFFFFFFFFFFFFFFFFFFFFFFFFFFFFFFFFFFFFFFFFFFFFFFFFFFFFFFFFFFFFFF  
F::FFFFFFFFFFFFFFFFFFFFFFFFFFFFFFFFFFFFFFFFFFFFFFFFFFFFFFFFFFFFFFFFFFFF,FFFFF

@A00721:190:HGJW7DSXY:4:2267:26847:36088\_2:N:0:TCTGCAAG+GCTGCACT  
TCATCCGCAAACGACTCGAAACCGAGACGCCGTAGATCAAAGTCCCTTCTAACTTTAGATTATGAAAC  
CTGCCTTTACTCATTTTATAGCAGAGATCGGAAGAGCGTCTTGTCGGG

+

FFFFF,F:FFFF:F:FF:FFFF,FFFFFFFFF:F:FFFFFF:FFFFF:,F:FFFF::F:FF:FF,,  
:FFFF,:FF,FFF:F:FFFFF:F:FFFF:,F,F:FFFF,F:,,,FF

@A00721:190:HGJW7DSXY:4:1261:2220:20400\_1:N:0:TCTGCAAG+GCTGCACT  
CGATAGTGATTGTTATCAATTTAAATACATTACTGTTTCAAATCATCTTTACTCACAGACTCCGAAAA  
TGGTTTCAAATGAGGTCAAAGCTCTATTTATTAACGAACATTATCCGATTCTTCGAGGGTATCACT  
ACC

+

FFFFFFFFFFFFFFFFFFFFFFFFFFFFFFFFFFFFFFFFFFFFFFFFFFFFFFFFFFFFFFFFFFFFFFFFFFFF  
FFFFFFFFFFFFFFFFFFFFFFFFFFFFFFFFFFFFFFFFFFFFFFFFFFFFFFFFFFFFFFFFFFFFFFFFFFFFFFFF  
FFF

@A00721:190:HGJW7DSXY:4:1663:20003:19476\_2:N:0:TCTGCAAG+GCTGCACT  
GGAAAATAGCAATAATCAAATTTGACAAATTTTAGAACTTTATTTCAGAACTCTCTCCGATCACCTT  
GGTGTGATCTCCCGGAGGATCTTTTCAATAAGATGTATGATGATAATC

+

FFFFFFFFFFFFFFFFFFFFFFFFFFFFFFFFFFFFFFFFFFFFFFFFFFFFFFFFFFFFFFFFFFFFFFFFFFFF  
FFFFFFFFFFFFFFFFFFFFFFFFFFFFFFFFFFFFFFFFFFFFFFFFFFFFFFFFFFFFFFFFFFFFFFFFFFFF

@A00721:190:HGJW7DSXY:4:1512:8169:3145\_2:N:0:TCTGCAAG+GCTGCACT  
GTATACTTGAATACTTTATCAAAGATTTGGCTTGGTCTATTTACCGCAAAAAGTTGAAGAGGTCTAT  
GATATTTATTTTACTTATACTTTAAATAGCACCGATTATAACTTGACT

+

FFFFFFFFFFFFFFFFFFFFFFFFFFFFFFFFFFFFFFFFFFFFFFFFFFFFFFFFFFFFFFFFFFFFFFFFFFFF  
FFFFFFFFFFFFFFFFFFFFFFFFFFFFFFFFFFFFFFFFFFFFFFFFFFFFFFFFFFFFFFFFFFFFFFFFFFFF

@A00721:190:HGJW7DSXY:4:2637:4363:35509\_2:N:0:TCTGCAAG+GCTGCACT  
TAGCTCTTCTCAGAAGATTAGAGAAGTAACCGGTGAACACGTCGGTAGCATTGATTTACTTTTACCG  
TTAGAACTGAAAAAGATTCTTTTCGAAAAGAAACCTATAAGTTACAAA

+

FFFFFFFFFFFFFFFFFFFFFFFFFFFFFFFFFFFFFFFFFFFFFFFFFFFFFFFFFFFFFFFFFFFFFFFFFFFF  
FFFFFFFFFFFFFFFFFFFFFFFFFFFFFFFFFFFFFFFFFFFFFFFFFFFFFFFFFFFFFFFFFFFFFFFFFFFF,F

@A00721:190:HGJW7DSXY:4:2312:3206:35039\_1:N:0:TCTGCAAG+GCTGCACT  
AAATACTTCAAGTACCTGAACCTTTACATTTTAAATGGTATGGTATAATGTGTCTTACAAATAGAACCT  
TCACTCTCGGTAATGAGAGTGTATTCCTTAATATTCTAGTAACCGCTATGTGGGCATTACTAGGATTT  
ATC

[illegible]

$$+ \begin{matrix} F,,:FF:F::F,::,F,:FF:F,F,F,,, :F:::,:::,F,F,,,FF,,,,FFFFF,F,F,,, : \\ F,,,FF,,,,:,,, :F,,FFFF,FF:FF,F:,F:,,,F,FFF:,F:, \end{matrix}$$

```
+
FFFFFFFFFFFFFFFFFFFFFFFFFFFFFFFF,FFFFFFFFFFFF::FF:FFFFFFFFFFFFFFFFFFFFFFFF,FFFFFFFF
FFFFFFFFFFFFFFFF:FFFFFFFFFFFFFFFFFFFFFFFFFFFFFFFFFFFFFFFFFFFFFFFF:FFF
```

```
+
FFFFFFFFFFFFFFFFFFFFFFFFFFFFFFFFFFFFFFFFFFFFFFFFFFFFFFFFFFFFFFFFFFFFFFFFFFFF
FFFFFFFFFFFFFFFFFFFFFFFFFFFFFFFFFFFFFFFFFFFFFFFF:F,:FFFF:FF
```

```

+
FFF,F,FFFFFFFFF::,F:F:FF,F:F,:F,:FFFFFF:FF:FFFFFF:FF,FFF:,FFFF,FF,:,
FFFF,FFF::FFFF:,FF,F,FFF,FFF,F,,:FFF:,FFF:,FF:,FFFFFFF:,FFFFFFF,FFF
FFF

```

```
+
FFFFFFFFFFFFFFFFFFFFFFFFFFFFFFFFFFFFFFFFFFFFFFFFFFFFFFFFFFFFFFFFFFFFFFFFFFFFFFFF:
F:FF:FF:FFFFFFFF:FFF::F:FFFFFFFFFFFFFFFFFFFFFFFFFFFFFFFFFFFFFFFFFFFFFFFF
```

```
+  
FFFFFFFFFFFFFFFFFFFFFFFFFFFFFFFFFFFFFFFFFFFFFFFFFFFFFFFFFFFFF,  
FFFFFFFFFFFFFFFFFFFFFFFFFFFFFFFFFFFFFFFFFFFFFFFFFFFFFFFFFFFF
```

```
+
FF,F:FF:F,F:,FFFFFF:FFFFFFFF,::FFFFFFFF,FF,FFFFFFFFFFFFFFFF:FFFFFFFF
FFF,F:F:FFFFFFFF:F:FFFFFFFFFFFFFFFF:FFFFFFFFFFFFFFFF,FFFF:F:F:FFF:FFF,F,
FFF
```

[illegible]

@A00721:190:HGJW7DSXY:4:2502:5891:27445\_1:N:0:TCTGCAAG+GCTGCACT  
CTCTTGATGATGTAGCCACTATAATGCTTAAGAGAGAGATTGATGTATGTCATTTTCGTCTTAGTTTGT  
CCCGGCGAATTATTGGACACGATGAAAAATGACATACCCGTTCTGACCTTGGTATCGTTATCCGTCA  
TGG

+

:FFFFFFFFFFFFFFFFFFFFFFFFFFFFFFFFFFFFFFFFFFFFFFFFFFFFFFFFFFFFFFFFFFFFFFFF  
FFFFFFFFFFFFFFFFFFFFFFFFFFFFFFFFFFFFFFFFFFFFFFFFFFFFFFFFFFFFFFFFFFFFFFFF  
FFF

@A00721:190:HGJW7DSXY:4:2656:14751:21559\_1:N:0:TCTGCAAG+GCTGCACT  
AATAACTCGTAATAAATCTTTCTCTAGTGGACAATTGAGAATACCTATTTCCGTACCAAGAGCCACTG  
CCAATCTCATCGCTATACGCATACCTGATTGGAAGAAGCGAGGTTTCGTTCTCAATAAAAATTTTCT  
CAA

+

FFFFFFFFFFFFFFFFFFFFFFFFFFFFFFFFFFFFFFFFFFFFFFFFFFFFFFFFFFFFFFFFFFFFFFFF  
FFFFFFFFFFFFFFFFFFFFFFFFFFFFFFFFFFFFFFFFFFFFFFFFFFFFFFFFFFFFFFFFFFFFFFFF  
FFF

@A00721:190:HGJW7DSXY:4:2558:29713:14184\_2:N:0:TCTGCAAG+GCTGCACT  
ATGGGGATCACTTCTTCGGTCAATGACAAAACCTTCGAATATGTTACGACATGGCTTCGTAACAACAG  
TGCGAGGATTGTCATCTCGGGGAAAGTGATTACCAAGATGTTTCATAT

+

FFFFFFFFFFFFFFFFFFFFFFFFFFFFFFFFFFFFFFFFFFFFFFFFFFFFFFFFFFFFFFFFFFFFFFFF  
FFFFFFFFFFFFFFFFFFFFFFFFFFFFFFFFFFFFFFFFFFFFFFFFFFFFFFFFFFFFFFFFFFFFFFFF  
FFFF,FF,FFFF,FF:FFFF

@A00721:190:HGJW7DSXY:4:2621:5927:18928\_1:N:0:TCTGCAAG+GCTGCACT  
ACTGGAGTTCAGACGTGTGCTCTTCCGATCTCTTTGGGTACACGTTATGCTCGCAAACCTTAACGTTAG  
TACCGGAGGTGATCTCTCTGCTTCTGCGTACTGAGAGAAAAGATTGAGGACGCCTACGGTGACTTTA  
TGG

+

FFFFFFFFFFFFFFFFFFFFFFFFFFFFFFFFFFFFFFFFFFFFFFFFFFFFFFFFFFFFFFFFFFFFFFFF  
FFFFFFFFFFFFFFFFFFFFFFFFFFFFFFFFFFFFFFFFFFFFFFFFFFFFFFFFFFFFFFFFFFFFFFFF  
FFF

@A00721:190:HGJW7DSXY:4:2232:18340:7545\_2:N:0:TCTGCAAG+GCTGCACT  
TGAAACTACGGTCCTTATCAAAGAAAATGGTGAACCGGTCTCTAAATCTTTTGAGATTGAGAAGATTG  
AAGAACACGTCAAGAAGTCGCTCGGCGTTGTTCTTGAAACCAAGTTA

+

FFFFFFFFFFFFFFFFFFFFFFFFFFFFFFFFFFFFFFFFFFFFFFFFFFFFFFFFFFFFFFFFFFFFFFFF  
FFFFFFFFFFFFFFFFFFFFFFFFFFFFFFFFFFFFFFFFFFFFFFFFFFFFFFFFFFFFFFFFFFFFFFFF  
FF

@A00721:190:HGJW7DSXY:4:2226:27254:35697\_2:N:0:TCTGCAAG+GCTGCACT  
TACCTTCTGTCAAACCTTCGAGGTTGAGCTACGAGAGGTGATCCCGATGTGGATTGAAGGCTGGCTCT  
AAGGGAGACTCCTTCTTTTGAATGTTGTAAAGAATTGGGTTGAGAAG

+

FFFFFFFFFFFFFFFFFFFFFFFFFFFFFFFFFFFFFFFFFFFFFFFFFFFFFFFFFFFFFFFFFFFFFFFF  
FFFFFFFFFFFFFFFF:FF:FFFFFFFFFFFFFFFFFFFFFFFFFFFFFFFFFFFFFFFF

@A00721:190:HGJW7DSXY:4:1673:28890:34648\_1:N:0:TCTGCAAG+GCTGCACT  
TTTTCAAAAATGCGGATGGGTCTACTGATGTTTTCTACAGAGTGCAGTCGTTTCAACACTTATCACC  
ACTTTTGAAAGGAAAATAATTGGTGATGAAAATACGTATGTCGGTGGGGTCTCAAGGCTCTCATCGC  
CAC

+

FFFFFFFFFFFFFFFFFFFFFFFFFFFFFFFFFFFFFFFFFFFFFFFFFFFFFFFFFFFFFFFFFFFFFFFF  
FFFFFFFFFFFFFFFFFFFFFFFFFFFFFFFFFFFFFFFFFFFFFFFFFFFFFFFFFFFFFFFFFFFFFFFF  
FFF

@A00721:190:HGJW7DSXY:4:1478:30544:25864\_1:N:0:TCTGCAAG+GCTGCACT  
TTCTTAAAAGAAGTTTATTAATAAATTCAGAGTCTCTTGGAAGTCCAGGTAGCTAATGTTCTTGCAATA  
GCCACAGACTTTCTGGGAAAAGAGACCTCTGTTGGTAGAGGAGTTGAGAGAATTACTCAGATTCAATC  
TGG

+  
FFFFFFFFFFFFFFFFFFFFFFFFFFFFFFFFFFFFFFFFFFFFFFFFFFFFFFFFFFFFFFFFFFFFFFFF  
FFFFFFFFFFFFFFFFFFFFFFFFFFFFFFFFFFFFFFFFFFFFFFFFFFFFFFFFFFFFFFFFFFFFFFFF  
FFF  
@A00721:190:HGJW7DSXY:4:1269:4517:14638\_2:N:0:TCTGCAAG+GCTGCACT  
AAAGATCCTTTGCACAAGCAATACCTTCCACTGAGTTCATCACCCAGAGTTTCGACGTCGCGGAAAAC  
GATGAAGATTTCCACACTGTTCGAGAATCTTCTGATGCTGAATTTGAG  
+  
FFFFFFFFFFFFFFFFFFFFFFFFFFFFFFFFFFFFFFFFFFFFFFFFFFFFFFFFFFFFFFFFFFFFFFFF:FFFFFFFF  
FFFFFFFFFFFFFFFFFFFFFFFFFFFFFFFFFFFFFFFFFFFFFFFFFFFFFFFFFFFFFFFFFFFFFFFF  
@A00721:190:HGJW7DSXY:4:2626:20148:9706\_1:N:0:TCTGCAAG+GCTGCACT  
TTCTTTTATCATTGCAACAGGACTTTGAGAAGACTGTTGAAATGGACAAAATCTGGGATCATAGGTAT  
GTGTCACGCTACACTCGAAATATGGGCCCTCATAAGGAAGTATAGTTGGCGTCTTGTCTTGACGTCA  
TTA  
+  
FFFFFFFFFFFF,FFFFFFFFFFFFFFFFFFFFFFFFFFFFFFFFFFFFFFFFFFFFFFFFFFFFFFFFFFFF  
FFFFFFFFFFFFFFFFFFFFFFFFFFFFFFFFFFFFFFFFFFFFFFFFFFFFFFFFFFFFFFFFFFFFFFFF  
FFF  
@A00721:190:HGJW7DSXY:4:1170:11695:9533\_2:N:0:TCTGCAAG+GCTGCACT  
CAGATTAGAGACATGCCAGTTAGAGTTCTTCTAACCAGGACTGATGGTGAGATTCTTTTACCTTTTGG  
AGGTCCAGGAACCTTTACTCCTAGTGTCTTTTCTAGAGTCCAAGGACG  
+  
FFFFFFFFFFFF:FFFF,FFFFFFFFFFFFFFFFFFFFFFFFFFFFFFFFFFFFFFFFFFFFFFFFFFFF:FFFFFFFF  
FFFFFFFFFFFFFFFFFFFFFFFFFFFFFFFFFFFFFFFFFFFFFFFFFFFFFFFFFFFFFFFFFFFFFFFF  
@A00721:190:HGJW7DSXY:4:2602:32714:7420\_2:N:0:TCTGCAAG+GCTGCACT  
TTTTGATGGTATGTTTCACATTGCGTGATCACTTCCCGTGGACTTGGAAGAGATTAAACATAAAATC  
CAGCGATTCTATTATGTCGCTAAAGCCTGTCCAGTTGTGCGATGATGTT  
+  
FFFF,FF:,F:F:F:FFFFFFFF:FF,:FF:FFF:FFF,F,FFFF:,FFFF:FFF:FFF,FFFF:FFF  
FFFF,FFFF:F,FF,FFF,F:FF,,FF:FF:FFFFFFFF,FF:::F  
@A00721:190:HGJW7DSXY:4:2466:19470:32362\_2:N:0:TCTGCAAG+GCTGCACT  
TACTAAGTCTGAGATCTGCCACTTCTAATTTTAGGAAACGTCGCGAAAAGAAAGTTCATGAGGATGTC  
TTGGTCGAAAATATCGCCGGGACCTTCTAATAGATGATCCTGATGAC  
+  
FFFFFF:FFF,FFF::FF,F,F:,FFFFFF,FFF:F,FF,FFF,:FF,:FFFFFFFF,FF:F:FFF:  
,FF,FFFFFFFF,FF,,F:F,FF,:FFF:F,FFFF,FFFFFFFF:FFF:  
@A00721:190:HGJW7DSXY:4:2630:3161:9878\_1:N:0:TCTGCAAG+GCTGCACT  
TACCGATCTCAGTTCTACCACAGAAACCGTCTCAGGAAGTGTCTCCACTGATTCGGAATTAGAGAAAG  
ACGACCTTCTTGTGGGGACTGAGACCTCTGAATTTTCAGGGTGCCCTGATGAGGACGTTGAAAGGGAT  
AAT  
+  
FFFFFFFFFFFFFFFFFFFFFFFFFFFFFFFFFFFFFFFFFFFFFFFFFFFFFFFFFFFFFFFFFFFFFFFF  
FFFFFFFFFFFFFFFFFFFFFFFFFFFFFFFFFFFFFFFFFFFFFFFFFFFFFFFFFFFFFFFFFFFFFFFF  
FFF  
@A00721:190:HGJW7DSXY:4:2377:13485:26976\_2:N:0:TCTGCAAG+GCTGCACT  
TTTCAAAAGACCAGAAACGTAACAAGAATAAAGGTAGGAAGGGGAGAAAACAGAACAGCGAGCG  
GTTGAAGAGAAAACCTGATATGGTTGCGGCTGATCGTACCCCAATTCT  
+  
FFFFFF:FFFF,FF:FFFFFFFFFFFFFFFFFFFFFFFFFFFFFFFFFFFFFFFFFFFFFFFFFFFF  
FF:FFFFFFFFFFFFFFFFFFFFFFFFFFFFFFFFFFFFFFFFFFFFFFFFFFFFFFFFFFFFFFFF  
@A00721:190:HGJW7DSXY:4:1367:24334:19554\_1:N:0:TCTGCAAG+GCTGCACT  
GAGTTACGTAGTGGTCGTTCTTTTGGTGATTTTATCAAAGAGAAAGTTTCTGCTAGTCGCGACGATAG  
TATTTATCGGAGTGATATTAACAAGTTAACTTCGAACTGACCACTTACAAGAGTGTTGAAGTACCGC  
AAC

[illegible]

@A00721:190:HGJW7DSXY:4:2321:20202:5165\_2:N:0:TCTGCAAG+GCTGCACT  
TGATATTGTTGAGCGAGAGCGACCAAGATCTAAATTCGGTAACGGTGCGTGGCGCTTTATTTTAAAAA  
GCTCCCTCCTCTCGCAAGTTTGATCTGATACTTATCACGAAAGGACTT

+

FFFFFFFFFFFFFF:FFFFFF:FFFFFFFFFFFFFFFFFFFFFFFFFFFFFFFF:FFFF:FFFFFFFFFFFFFF:FF  
::FF:FFFFFFFFFFFFFF:FF:F::F:FFFFFFFFFFFFFFFFFFFFFFFF

@A00721:190:HGJW7DSXY:4:1618:8802:15796\_1:N:0:TCTGCAAG+GCTGCACT  
CCTCATCAGCTTGTGTTTTACCTAATCTGTGTTTTTACGATAACAACCTATCAGTTGATTAAGACTCTT  
CCGAAAGGCGAACTTTGGAATTTGAAGCTCAGGGTGAAGCACAACTTTGACCGTGACGAACTGTGG  
TGT

+

:FFF:F:FFFF:FFF:FFF:F,FFFFFFFFFFFFFFFFFFFFFFFFFFFFFFFF:FF:FFFF  
:FFFFFFFFFFFFFFFFFFFFFFFFFFFFFFFFFFFFFFFFFFFFFFFF:FFFFFFFFFFFFFFFF  
FFF

@A00721:190:HGJW7DSXY:4:1232:27254:25426\_2:N:0:TCTGCAAG+GCTGCACT  
TTTTAGTGAGATTATTAACGCACTAAACGTCTTCGACAACAGCAGGGGTTTTCGAATAGTGATA  
GCCACCCGCTTACAGAGGGGCAGCAGCATGACCATAATTGGTATTGA

+

FFFFFFFFFFFFFFFFFFFFFFFFFFFFFFFFFFFFFFFFFFFFFFFF:FFFFFFFFFFFFFFFF  
FFFFFFFFFFFFFFFFFFFFFFFFFFFFFFFFFFFFFFFF:F,F:FFF::FFFF

@A00721:190:HGJW7DSXY:4:2450:7762:16532\_2:N:0:TCTGCAAG+GCTGCACT  
TGTCTCGCCTCTTGAATGAAGTTTTAATGCTTAACAACAATGATAGTGAATTTATACCTACAATCAT  
TGGTTTTTCTAATAATGATGACACTATTGTTTATGGATATTATGCTAT

+

F:F:FFFF,F:,FF,FF:F::F,FFFFFFFFFFFFFFFF:FFFF:FFFFFFFF,FFFF,,FFF:FFFF,  
,:F,FFFF:FFFFFF:FFF:FFFFFFFF::F,FFFFFF,FFFFFF

@A00721:190:HGJW7DSXY:4:1178:30689:19727\_1:N:0:TCTGCAAG+GCTGCACT  
TTAAAACCATTTGTACGATGTCGTCTGTCTCGCGCATCTTTTCACTAAGAATTGGTCTACTTTTGG  
ACAAGGCCAACTTCGAATCTTCATGAGATCGTTTCTTTCTTTATCTCTTTGGTTGTTAGGGATTTTG  
AGA

+

FFFFFFFFFFFFFFFFFFFFFFFFFFFFFFFFFFFFFFFFFFFFFFFF:FFFFFFFF  
FFFFFFFFFFFFFFFFFFFFFFFFFFFFFFFF,FFF:FFFF:FFFFFF:FFFFFF:FFFFFFFF  
FFF

@A00721:190:HGJW7DSXY:4:1333:9191:18850\_2:N:0:TCTGCAAG+GCTGCACT  
ATTGTAGTGGTTTGGTCGTTTCAGTACCCAGTCAGTATACCTCTACGCAAAGATATTTATGAAAAC  
ACAGAGGAACGTACCGGATTACCTGTCTTTCATATTATGAATGAACCT

+

FFFFFFFFFFFFFFFFFFFFFFFFFFFFFFFFFFFFFFFFFFFFFFFF:FFFF:FFFFFFFF  
FFFFFFFFFFFFFFFFFFFFFFFF:FFFFFFFFFFFFFFFF:FF:FF

@A00721:190:HGJW7DSXY:4:1128:13593:26694\_1:N:0:TCTGCAAG+GCTGCACT  
AGGGTTCAGAATGGGATTCCTACGTAGTTTATGACTTTGGTGGTACTTTCGATACTTCTATCGTC  
TTACGTTACGGTAATTACTATAGTGTTATTTATTCTGGTGGTGATGATAATCTTGGAGGTCGTGACGT  
TGA

+

FFFF:FFFFFFFFFFFFFFFFFFFFFFFFFFFFFFFFFFFFFFFF:FFFFFFFF  
FFFFFFFFFFFFFFFFFFFFFFFFFFFFFFFFFFFFFFFFFFFFFFFFFFFFFFFF  
FFF

@A00721:190:HGJW7DSXY:4:2566:14977:19257\_2:N:0:TCTGCAAG+GCTGCACT  
AGCGTTCTTATTACGGCGCACTTCTTTACCCGCCACCACAACTTTTCACTTTCACAACCTGAAGGAGG  
AGGTTTCTGTTACTGGAAAACCTCGTCAATACTTTTCAATAATATAC

+

FFFFFFFFFFFFFFFFFFFFFFFFFFFFFFFFFFFFFFFFFFFFFFFF:FFFFFFFF  
FFFFFFFFFFFFFFFFFFFFFFFFFFFFFFFFFFFFFFFF



@A00721:190:HGJW7DSXY:4:2349:15374:10582\_2:N:0:TCTGCAAG+GCTGCACT  
TGAACAAAGTTATCAAAGATAGTGGCATTCAAGGCAAACCTTACCCTGATTCCGGCCGGTGGTAGCTCA  
TTTCTACCAGGGGCTATTACTCTTGCTGAAACAGCTATTAAAGCTGTT

+

FFFFFFFFFFFFFFFFFFFFFFFFFFFFFFFFFFFFFFFFFFFFFFFFFFFFFFFFFFFFFFFFFFFFFFFF  
FFFFFFFFFFFFFFFFFFFFFFFFFFFFFFFFFFFFFFFFFFFFFFFFFFFFFFFFFFFFFFFFFFFFFFFF

@A00721:190:HGJW7DSXY:4:2123:18873:19523\_1:N:0:TCTGCAAG+GCTGCACT  
GGATGTGCACTCTTTTCTGCTACTTTAACGGAGCGTAGTGTACTCTTCGTCGATTGTATCAACAGTAA  
CATTACTTCTAATAAAGGTCTCTATCAAGCTCGTATTATCGTCGCTGCTGGATCTGCGTTACCGTTGA  
AGG

+

FFFFFFFFFFFFFFFFFFFFFFFFFFFFFFFFFFFFFFFFFFFFFFFFFFFFFFFFFFFFFFFFFFFFFFFF  
FFFFFFFFFFFFFFFFFFFFFFFFFFFFFFFFFFFFFFFFFFFFFFFFFFFFFFFFFFFFFFFFFFFFFFFF  
FFF

@A00721:190:HGJW7DSXY:4:1520:13286:25441\_1:N:0:TCTGCAAG+GCTGCACT  
AAGACTGTGATTTATCTTTCACTCTGGCCTTGTATGAGGGTGTTCCTAATCGTAACATTAATAATTC  
AATCTTCTTAAAAAGAAGATAGAGAGTCATACTTTGGGCTATCGTTCAGGTGCATGGGGTTGGATAGC  
CAA

+

FFFFFFFFFFFFFFFFFFFFFFFFFFFFFFFFFFFFFFFFFFFFFFFFFFFFFFFFFFFFFFFFFFFFFFFF,FFFF  
FFFF:FFFFFFFFFFFFFFFFFFFFFFFFFFFFFFFFFFFFFFFFFFFFFFFFFFFFFFFFFFFFFFFFFFFF  
FFF

@A00721:190:HGJW7DSXY:4:1255:30879:35023\_2:N:0:TCTGCAAG+GCTGCACT  
ATATTTACAAAATCTTACCCTATCTACGAACCTAAAGTTCTGAAGACGTTGCTTGTGCTTCCTCCT  
TTAATGGCACTACCTCGGTACAATCTTACTTGGAACGAAGGCGACCTG

+

FFFFFFFFFFFFFFFFFFFFFFFFFFFFFFFFFFFFFFFFFFFFFFFFFFFFFFFFFFFFFFFFFFFFFFFF  
FFFFFFFFFFFFFFFFFFFFFFFFFFFFFFFFFFFFFFFFFFFFFFFFFFFFFFFFFFFFFFFFFFFFFFFF

@A00721:190:HGJW7DSXY:4:2475:19416:30514\_2:N:0:TCTGCAAG+GCTGCACT  
GTCTATATTAGGTGAAGCGAAATACGATTTTCAACGTCAACGTTACCGAGTTTCGTTTCGTACCTTG  
ATGCTGACTTTCGTCAATATGATTTGATCTGGTTGCTCAATTCTAAGC

+

FFFFFFFFFFFFFFFFFFFFFFFFFFFFFFFFFFFFFFFFFFFFFFFFFFFFFFFFFFFFFFFFFFFFFFFF  
FFFFFFFFFFFFFFFFFFFFFFFFFFFFFFFFFFFFFFFFFFFFFFFFFFFFFFFFFFFFFFFFFFFFFFFF

@A00721:190:HGJW7DSXY:4:2125:15835:9126\_1:N:0:TCTGCAAG+GCTGCACT  
TCTTCCTTGGATTTTAAATATAAAGAATCTTTACCAGGACTCCTACTACAGGAGGCAGTCTTCTGATCG  
TAAGAAGTTTATAAGGAACATATCCATTTGTTGTAATAGGGTCATCAACTTAGAACTCGAACTCTAA  
GTG

+

FF,F:FFFFFFFFFFFFFFFFFFFFFFFFFFFFFFFFFFFFFFFFFFFFFFFFFFFFFFFFFFFFFFFF  
FFFFFFFFFFFFFFFFFFFFFFFFFFFFFFFFFFFFFFFFFFFFFFFFFFFFFFFFFFFFFFFFFFFFFFFF  
FFF

@A00721:190:HGJW7DSXY:4:2556:5484:30373\_1:N:0:TCTGCAAG+GCTGCACT  
AATGAAATTGGACTCTTCGATAGGGGACATTTTATCGTGGGCTTTCGTAAAGGAAGATCTGTTATCG  
ACGTTTATCGTTTACGAAGTATCACTCCACCGGTGAATGGTTTAAAGAATACTATAAATAGAATAGCT  
ATT

+

FFF:FFFFFFFFFFFFFFFFFFFFFFFFFFFFFFFFFFFFFFFFFFFFFFFFFFFFFFFFFFFFFFFF  
FFFFFFFFFFFF:FFFFFFFFFFFFFFFFFFFFFFFFFFFFFFFFFFFFFFFFFFFFFFFFFFFFFFFFFFFF  
FFF

@A00721:190:HGJW7DSXY:4:2542:3468:24471\_2:N:0:TCTGCAAG+GCTGCACT  
CAACTTCTTGACAATTTTCTTCAATCCTTCGATAATAGTTAAATCTAGGATTATGTCTGTGTTGAAAG  
ACTTTCTACCGATAAGGGTCACTAGTCTTACACAATTAAGAAATAATC

+

FFFFFFFFFFFFFFFFFFFFFFFFFFFFFFFFFFFFFFFFFFFFFFFFFFFFFFFFFFFFFFFFFFFFFFFFFFFFFFFF  
FFFFFFFFFFFFFFFFFFFFFFFFFFFFFFFFFFFFFFFFFFFFFFFFFFFFFFFFFFFFFFFFFFFFFFFFFFFFFFFF  
@A00721:190:HGJW7DSXY:4:2368:15619:18458\_2:N:0:TCTGCAAG+GCTGCACT  
ACTATCTAAAGATTGAAGGAAAATTTATCCTCGTTTAACTTACTTAGACTTTCCTACGATACAAATG  
ATAACTTCTAATTTACGTTTGCTACTCAGAGCTGGTCTCTCAGCAA  
+  
FFFFFFFFFFFFFFFFFFFFFFFFFFFFFFFFFFFFFFFFFFFFFFFFFFFFFFFFFFFFFFFFFFFFFFFFFFFFFFFF  
FFFFFFFFFFFFFFFFFFFFFFFFFFFFFFFFFFFFFFFFFFFFFFFFFFFFFFFFFFFFFFFFFFFFFFFFFFFFFFFF  
@A00721:190:HGJW7DSXY:4:2317:22462:19038\_2:N:0:TCTGCAAG+GCTGCACT  
AGTCCCGCATTTGATAATAATGACGAGACTTTCGTGATAATCGCTGCATATTACGGATTACACGGTA  
CCAGCGCATCTCGTGTGAGCCTCGACCCGATTATATGGTATTA  
+  
FFFFFFFFFFFFFFFFFFFFFFFFFFFFFFFFFFFFFFFFFFFFFFFFFFFFFFFFFFFFFFFFFFFFFFFFFFFFFFFF  
FFFFFFFFFFFFFFFFFFFFFFFFFFFFFFFFFFFFFFFFFFFFFFFFFFFFFFFFFFFFFFFFFFFFFFFFFFFFFFFF  
@A00721:190:HGJW7DSXY:4:2261:8115:29199\_1:N:0:TCTGCAAG+GCTGCACT  
TCTCTTCTTATAATAAAATAAAATAATATTACTAATGGCAAATAGTGGAAGGCTCCAGTCAACAC  
TAGTTCGAGTGCTGCTTTGGATTACGATGACGTGAGAATAGGTGAAGGGATAGTTTTTACCTCGACCA  
ACA  
+  
FFFFFFFFFFFFFFFFFFFFFFFFFFFFFFFFFFFFFFFFFFFFFFFFFFFFFFFFFFFFFFFFFFFFFFFFFFFFFFFF  
FFFFFFFFFFFFFFFFFFFFFFFFFFFFFFFFFFFFFFFFFFFFFFFFFFFFFFFFFFFFFFFFFFFFFFFFFFFFFFFF  
FFF  
@A00721:190:HGJW7DSXY:4:1455:2112:17487\_2:N:0:TCTGCAAG+GCTGCACT  
TGAATAATGATGCACTACAAACAAGTATCGCTAATCATCTGAAAAAGGCTCTAAAGGACACTATACAA  
TATCCAGACGACGACGAAGCTTATACTACTTTAATTTTGGTATTATG  
+  
,FFFF:FFFFFF:FFFF:FFFFFFFFFFFF,FFFFFFFFFFFFFFFFFFFFFFFFFFFFFFFFFFFF,FFF:F  
FFFFFFFFFFFFFFFFFFFF:FFFFFFFFFFFFFFFFFFFFFFFFFFFFFFFFFFFF  
@A00721:190:HGJW7DSXY:4:2105:31467:19758\_1:N:0:TCTGCAAG+GCTGCACT  
AGGATATTCGCCATTGTGGTACGAATTGGTCCAACATTTACCACCAAATTCTTTTGATACAACCTCTAG  
CCTTCAAGTGGGGTATGCCTGCGGAATACGCTTGCTATTCACCAGATTGGTTGCAACCCGTTGATGCT  
ATG  
+  
FFFFFFFFFFFFFFFFFFFFFFFFFFFFFFFFFFFFFFFFFFFFFFFFFFFFFFFFFFFFFFFFFFFFFFFFFFFFFFFF  
FFFFFFFFFFFFFFFFFFFFFFFFFFFFFFFFFFFFFFFFFFFFFFFFFFFFFFFFFFFFFFFFFFFFFFFFFFFFFFFF  
FFF  
@A00721:190:HGJW7DSXY:4:1224:26666:26976\_1:N:0:TCTGCAAG+GCTGCACT  
ATTCAAGCTTGTGTTTAAAGACTGCAGAGGCTGTCAAACAAGCCAGACTCAAGGAGTCCAATCAAA  
GGTTTTGAATTTAGCTCAACTGGGGAGACGTGCTTAAATGGGTGATAAAAATTATTTAGAGATCTTTT  
CTA  
+  
FFFFFFFFFFFFFFFFFFFFFFFFFFFFFFFFFFFFFFFFFFFFFFFFFFFFFFFFFFFFFFFFFFFFFFFFFFFFFFFF  
FFFFFFFFFFFFFFFFFFFFFFFFFFFFFFFFFFFFFFFFFFFFFFFFFFFFFFFFFFFFFFFFFFFFFFFFFFFFFFFF  
FFF  
@A00721:190:HGJW7DSXY:4:2271:32750:35383\_1:N:0:TCTGCAAG+GCTGCACT  
ATAGTTCTACCGATACGTAGTGAACGCGTTCGTAGAACCAAGTACTTTCGTGTAAGAGTTTAGAGC  
TGCTATTGATTATGTAACCGATAGGAGTTGTATAGTTGAAGATGTGGCTTTAGACGATAATCCTTTAA  
GG  
+  
FFFF,FF:FFFF:FF:FFFF:FFFFFFFF:,F,F:FF:FFF:F,FF,:FFFFFFFFFFFF:FFFFFFF  
FF,FFFF:FFFFFFFFFFFFFFFFFFFFFFFFFFFF:FFFF:FFFFFFFFFFFFFFFFFFFFFFFFFFFF  
FF  
@A00721:190:HGJW7DSXY:4:1268:26422:32941\_1:N:0:TCTGCAAG+GCTGCACT  
CCCACAGATTTGTCTACGTTGCAGATCGCCACTCCAAACACTATATACATTATAAAATATAAAAATAA



+  
FFFFFFFFFFFFFFFFFFFFFFFFFFFFFFFFFFFFFFFFFFFFFFFFFFFFFFFFFFFFFFFFFFFFFFFFFFFFFFFF  
FFFFFFFFFFFFFFFFFFFFFFFFFFFFFFFFFFFFFFFFFFFFFFFFFFFFFFFFFFFFFFFFFFFFFFFFFFFFFFFF  
FFF  
@A00721:190:HGJW7DSXY:4:1528:32904:25316\_1:N:0:TCTGCAAG+GCTGCACT  
GTATAGTTCAAGGAGTACTTAATTCAATAGCTTTAGTATTATTTACTATCGCCTTTATTGAAAATTGT  
ATAAGAGTTAATTGCTTACACAAAAGTGACGCGCGAAGGAATCTTAATTGATTGAAGCTAGGCGTTGG  
GGA  
+  
F:FFFFF:FF:F:FFFFFFFFFFFFFFFFFFFFFFFFFFFFFFFFFFFFFFFFFFFFFFFFFFFFFFFFFFFFFFF  
FF:FFFFFFFFFFFFFFFFFFFFFFFFFFFFFFFFFFFFFFFFFFFFFFFFFFFFFFFFFFFFFFFFFFFFFFFFF  
FFF  
@A00721:190:HGJW7DSXY:4:1604:6831:29575\_1:N:0:TCTGCAAG+GCTGCACT  
GGCACGCCAGACGTCGGGTCAAACCTACTACCGCCGGTCGGCAGATCGGCACCACTGGTCTCTACGTT  
CAGGGACCCGCTGTGCAGAATAACCTTCCCAAATCTAGATCTGCACAGAAGAAGGCTGAAGGTCGTTA  
CC  
+  
F::FFFFFFFFFFFF,FFFFFFFFFFFF,FFFFFFFFFFFF,,FFFFFFFF,FFFFFFFF:FFFFFFFFF:FFFF  
F:FFFFFFFFF:FFFFFFFFFFFFFFFFF:FFFFF::F:FF:FFFFFFFFFFFFFFFF,FFFFF:FFFFFFFFF  
FF  
@A00721:190:HGJW7DSXY:4:2153:22688:33458\_2:N:0:TCTGCAAG+GCTGCACT  
ACGGCAGTCCCCTCATCTCTGTGGGAAGTGAAGGAGTACCTCAGTCAAAAGTCACATTCACCACTCCC  
ATACCAATCAATGATGTGACTATACAGTTCGGCCATTTCAAGAGTGGT  
+  
FFFFFFFFFFFFFFFFF:FFFFFFFFFFFFFFFFFFFFFFFFFFFFFFFFFFFFFFFFFFFFFFFFFFFFFFFFFFFF  
FFFFFFFFFFFFFFFFFFFFFFFFF:FFFFFFFFFFFFFFFFFFFFFFFFF:FFF:FFF  
@A00721:190:HGJW7DSXY:4:1614:11035:24799\_2:N:0:TCTGCAAG+GCTGCACT  
GGAGGTACTGAAGCCTTCCCCTCCGCTGGCACGAAGAACACTCCCAAGCCAATCAATAGTTCTTCTGA  
CCAGAATGAAAAGGGGTTTACCAGGGTAGTCTCTAAGTCTACCAGGAA  
+  
FFFFFFFFFFFFFFFFFFFFFFFFF:FFFFFFFFFFFFFFFFFFFFFFFFFFFFFFFFFFFFFFFFFFFFFFFFFFFF  
FFFFFFFFFFFFFFFFF:FFFFFFFFFFFFFFFFFFFFFFFFFFFFFFFFF::FFFF  
@A00721:190:HGJW7DSXY:4:2443:22842:15186\_2:N:0:TCTGCAAG+GCTGCACT  
CAAACTGATAAGAATAAAGGGAAAGGTCCATCAGGACCTAAGAAGGGGAAATTACCCCTAATTCTGA  
AGGAAGATCTCCACCATCTGGGGTTGGAATAAGAAATCTGCAGATC  
+  
FFFFFFFFF:FFFFFFFFF:FFFFFFFFFFFFFFFFFFFFFFFFFFFFFFFFFFFFFFFFFFFFFFFFFFFFFFFFF  
:FFFFFFFFFFFFFFFFFFFFFFFFF,FFFFFFFFFFFFFFFFFFFFFFFFF  
@A00721:190:HGJW7DSXY:4:1445:2980:33082\_2:N:0:TCTGCAAG+GCTGCACT  
CTACGAAGTCGCTGAAGGCGGCTTGGGTCATTAAGGGTAGCTGTAAAGTTGCGCCTGCCGACCCCATC  
TTTGAGACCAAGACTCTCTACAGTAGGTTCTGCCTACTATGAGCAAT  
+  
FFFFFFFFFFFFFFFFFFFFFFFFFFFFFFFFF:F:FFFFFFFFFFFFF,FFFFFFFFFFFFFFFFFFFFFFFFF  
:FFFFFFFFFFFFFFFFFFFFFFFFF:FFFFFFFFF:FFFFFFFFF  
@A00721:190:HGJW7DSXY:4:1460:21197:8359\_1:N:0:TCTGCAAG+GCTGCACT  
TCGTCACTGAGGACGAAGGCGAGAGGACTTTTGGCTACTGGCGACAACTGAGAGCAGTCGCTGGGGA  
AAGAGAATTGCGTGCGTTGAAGGCCGACGCTTCGAGCTTGAGTGTGACGAGGCCGGTGACGTTTTTGT  
CAA  
+  
FFFFFFFFFFFFFFFFFFFFFFFFF,FFFFFFFFFFFFFFFFFFFFFFFFF:FFFFFFFFFFFFFFFFFFFFFFFF  
FFFFF:F:FFFFFFFFFFFFFFFFFFFFFFFFFFFFFFFFFFFFFFFFFFFFFFFFFFFFFFFFFFFFFFFFF  
FFF  
@A00721:190:HGJW7DSXY:4:1666:7726:25113\_1:N:0:TCTGCAAG+GCTGCACT  
TTTATCCGCGCTTAAGTATGGGGCGAAGATCCCCTATTGAGTCTTGAAGGACTTAGGTTGGCATATTT

ATGCCGACGATAATAAGCATGTCACCCTTAAGCACCGAGGTAAGCTCGGGACTTACAAGAGAGAGTGT  
GAG

+

FFFFFFFFFFFFFFFFFFFFFFFFFFFFFFFFFFFFFFFFFFFFFFFFFFFFFFFFFFFFFFFFFFFFFFFF  
,FFFFFFFFFFFFFFFF:FFFFFFFFFFFFFFFFFFFFFFFFFFFFFFFFFFFFFFFFFFFFFFFFFFFF  
FFF

@A00721:190:HGJW7DSXY:4:2140:4083:24878\_2:N:0:TCTGCAAG+GCTGCACT  
TTCTGACTGATGAGGTTAAACTCTTGCTCCTTCTGTGGGTGAGGGTTTTTGTATATTCACTGGTTC  
TGGGAGGCTGCTTTCCTCCATAATTACAACCTCTCTTTAGAGAGCATT

+

FFFFFFFFFFFFFFFFFFFFFFFFFFFFFFFFFFFFFFFF:F::F:FFFFF,FFFFFFFFFFFFFFFF,FFFFFFFF  
FFFFFFFF:FFFFFFFFFFFFFFFFFFFFFFFF:FFFFFFFFFFFFFFFFFFFF:

@A00721:190:HGJW7DSXY:4:2167:17418:34663\_2:N:0:TCTGCAAG+GCTGCACT  
TAGACGTTGTCACTTTTCTTGAAAATTTTCTTTCTCCTCGTCATTGGGGATTTCGATGTGAGAAG  
GTGGAAGGTGTCAAGGGTCTTCTTCATGCTGATCTTTCAGGACCTAAT

+

FFFFFFFFFFFFFFFFFFFFFFFFFFFFFFFFFFFFFFFF:F,F,FFFF:FFFFFFFF,FFFFF  
F:FFFFFFFFFFFF:FFFFFFFFFFFFFFFFFFFF:FF:F:FFFFFFFF

@A00721:190:HGJW7DSXY:4:2240:21142:29089\_2:N:0:TCTGCAAG+GCTGCACT  
AGTTGGAGGGAGGAAGTTCTCCGAAATTAAGACGGGGGATTAAGAGTCCAGCTGTAAGTGTCAATT  
CAGAGAGGGGAGCTCTGAAAAGGAACTTCGTCAGAAGATGAGGAAGA

+

FFFFFFFFFFFFFFFFFFFFFFFFFFFFFFFFFFFFFFFF:FFFFFFFF:FFFFFFFFFFFFFFFFFFFF  
FFFFFFFFFFFF:FFFFFF:FF:FFF:FFFFFFFFFFFFFFFFFFFFFFFFFFFF

@A00721:190:HGJW7DSXY:4:1312:29740:35994\_1:N:0:TCTGCAAG+GCTGCACT  
AGGAAGGCTCTAGAGAAGATCTCACCACTGGAGAAGGCAAGTGGAGAGTCCAGAAGTTGATGAAGAA  
GGATTATTTGAAGCAGGGGTTACCACTTCCTAAGGTGGATGAGGGAGGTTGTTCTTTGGAGTTTATAG  
ATA

+

FFFFFFFFFFFFFFFFFFFFFFFFFFFFFFFFFFFFFFFF:FFFFFFFFFFFFFFFFFFFFFFFFFFFFFFFF  
FFFFFFFFFFFFFFFFFFFFFFFFFFFFFFFFFFFFFFFFFFFFFFFFFFFFFFFF:FFFFFFFFFFFFFFFFFFFF  
FFF

@A00721:190:HGJW7DSXY:4:1165:1850:5259\_2:N:0:TCTGCAAG+GCTGCACT  
AGAATTCGTAACCTTACCATATTGTTCTTCCGGGAAGTTGTGGGATTTAACTTTGACTCAACTACTC  
CGATCAGATCCGGATGGTTTGATTGGTATGGACTACTCGACTTTTGAT

+

FFFFFFFFFFFFFFFFFFFFFFFFFFFFFFFFFFFFFFFFFFFFFFFFFFFFFFFFFFFFFFFFFFFFFFFF  
FFFFFFFFFFFFFFFFFFFFFFFFFFFFFFFFFFFFFFFFFFFFFFFFFFFFFFFFFFFF

@A00721:190:HGJW7DSXY:4:1563:20618:27023\_2:N:0:TCTGCAAG+GCTGCACT  
GGTCAAAGATTCTGTAGCTCTGAGGGCGGTTGAGGGAGCCGTTTTGGCCGACTTTAACTATTCTAAGA  
GTCTTTATGATTCAAAACCTATCGTTGTCGTACCTTACAAGGTTGAGG

+

FFFFFF:FFFFFFFFFFFFFFFFFFFFFFFFFFFFFFFF:FFFFFFFFFFFFFFFFFFFFFFFFFFFFFFFF:FF  
FFFFFFFFFFFFFFFFFFFFFFFF,FFFFFFFFFFFFFFFFFFFFFFFFFFFFFFFF:

@A00721:190:HGJW7DSXY:4:1466:32488:13385\_1:N:0:TCTGCAAG+GCTGCACT  
CAGCCATATCGAGACTAGGTTATAATCACTTGTTAAAGTACAGATTTAGTGATTTAGATATTATTGAT  
ATTGGAGGCGATATTCGTTTTCATATCCAAAACCTCTTGAATGGAGTACATATTTGCAACCCTATTCT  
TGA

+

FF,F,F,FF:F:FFF:FFF,FFFF:FFFFF::FFFFF,FFFFFFFFFFFFFFFF:FFFFF:FFFFFFFFFFFF  
FFFF:FFFFFFFFFFFFF::FFFFFFFFFFFF,FFF:F,FFF,FFFFFFFFFFFF:F,FFFFFFFFFFFFFFFF  
FFF

@A00721:190:HGJW7DSXY:4:2359:24180:25363\_1:N:0:TCTGCAAG+GCTGCACT  
GCATCGAGGTATACGTCTAGGAACATTGATTGGGAACGTACCTACTCACGAGACGTCATGAAAGCTAT



@A00721:190:HGJW7DSXY:4:2134:1298:20306\_1:N:0:TCTGCAAG+GCTGCACT  
TTCTTAAAAGAAGTTTATTTAACTTCAGAGTCTCTTGGAAGTCCAGGTAGCTAATGTTCTTGCAATA  
GCCACAGACTTTCTGGGAAAAGAGACCTCTGTTGGTAGAGGAGTTGAGAGAATTACTCAGATTCAATC  
TGG

+

FFFFFFFFFFFFFFFFFFFFFFFFFFFFFFFFFFFFFFFFFFFFFFFFFFFFFFFFFFFFFFFFFFFFFFFF  
FFFFFFFFFFFFFFFFFFFFFFFFFFFFFFFFFFFFFFFFFFFFFFFFFFFFFFFFFFFFFFFFFFFFFFFF  
FFF

@A00721:190:HGJW7DSXY:4:1304:13774:20337\_2:N:0:TCTGCAAG+GCTGCACT  
AAAGATCCTTTGCACAAGCAATACCTTCCACTGAGTTCATCACCCAGAGTTTCGACGTCGCGGAAAAC  
GATGAAGATTTCCACACTGTTGAGAATCTTCTGATGCTGAATTTGAG

+

FFFFFFFFFFFFFFFFFFFFFFFFFFFFFFFFFFFFFFFFFFFFFFFFFFFFFFFFFFFFFFFFFFFFFFFF  
FFFFFFFFFFFFFFFFFFFFFFFFFFFFFFFFFFFFFFFFFFFFFFFFFFFFFFFFFFFFFFFFFFFFFFFF  
FFF:

@A00721:190:HGJW7DSXY:4:2626:20283:9815\_1:N:0:TCTGCAAG+GCTGCACT  
TTCTTTTATCATTGCAACAGGACTTTGAGAAGACTGTTGAAATGGACAAAATCTGGGATCATAGGTAT  
GTGTCACGCTACACTCGAAATATGGGCCCTCATAAGGAAGTATAGTTGGCGTCTTGTGCTTGACGTCA  
TTA

+

F:FFFF:FFFFFFFFFFFFFFFFFFFFFFFFFFFFFFFFFFFFFFFFFFFFFFFFFFFFFFFFFFFFFFFF  
FFFFFFFFFFFFFFFFFFFFFFFFFFFFFFFFFFFFFFFFFFFFFFFFFFFFFFFFFFFFFFFFFFFFFFFF  
FFF

@A00721:190:HGJW7DSXY:4:1239:31720:33630\_2:N:0:TCTGCAAG+GCTGCACT  
CAGATTAGAGACATGCCAGTTAGAGTTCTTCTAACCAGGACTGATGGTGAGATTCTTTTACCTTTTGG  
AGGTCCAGGAACCTTTACTCCTAGTGTCTTTCTAGAGTCCAAGGACG

+

FFFFFFFFFFFFFFFFFFFFFFFFFFFFFFFFFFFFFFFFFFFFFFFFFFFFFFFFFFFFFFFFFFFFFFFF  
FFFFFFFFFFFFFFFFFFFFFFFFFFFFFFFFFFFFFFFFFFFFFFFFFFFFFFFFFFFFFFFFFFFFFFFF  
FFF:

@A00721:190:HGJW7DSXY:4:2629:8115:32424\_2:N:0:TCTGCAAG+GCTGCACT  
TTTTGATGGTATGTTTCACATTGCGTGATCACTTCCCGTGGACTTGGGAAGAGATTAAACATAAAATC  
CAGCGATTCTATTATGTCGCTAAAGCCTGTCCAGTTGTCGATGATGTT

+

FFFFFFFFFFFFFFFFFFFFFFFFFFFFFFFFFFFFFFFFFFFFFFFFFFFFFFFFFFFFFFFFFFFFFFFF  
FFFFF:FFFFFFFFFFFFFFFFFFFFFFFFFFFFFFFFFFFFFFFFFFFFFFFFFFFFFFFFFFFFFFFF  
FFF:

@A00721:190:HGJW7DSXY:4:1221:13801:9267\_1:N:0:TCTGCAAG+GCTGCACT  
TACTAAGTCTGAGATCTGCCACTTCTAATTTTAGGAAACGTCGCGAAAAGAAAGTTTCATGAGGATGTC  
TTGGTCGAAAAATATCGCCGGGAACCTTCTAATAGAGGATCCTGATGACATTATTTCAACGGATACCGA  
TCT

+

FFFFFFFFFFFFFFFFFFFFFFFFFFFFFFFFFFFFFFFFFFFFFFFFFFFFFFFFFFFFFFFFFFFFFFFF  
FFFFF:FFFFFFFFFFFFFFFFFFFFFFFFFFFFFFFFFFFFFFFFFFFFFFFFFFFFFFFFFFFFFFFF  
FFF

@A00721:190:HGJW7DSXY:4:1139:15103:19977\_1:N:0:TCTGCAAG+GCTGCACT  
CGTCTCAGGAAGTGTCTCCACTGATTCGGAATTAGAGAAAGACGACCTTCTTGTGGGGACTGAGACCT  
CTGAATTTTCAGGGTGCCTGATGAGGACGTTGAAAGGGATAATTTCAACTCTGAGACTTCTAAGAGT  
GTT

+

FFFFFFFFFFFFFFFFFFFFFFFFFFFFFFFFFFFFFFFFFFFFFFFFFFFFFFFFFFFFFFFFFFFFFFFF  
F:FFFFFFFFFFFFFFFFFFFFFFFFFFFFFFFFFFFFFFFFFFFFFFFFFFFFFFFFFFFFFFFFFFFFFFFF  
FFF

@A00721:190:HGJW7DSXY:4:2610:5448:8108\_2:N:0:TCTGCAAG+GCTGCACT  
GCTGATCGTACCCCAATTCCTGCTAGAAAGATCACTCTCGGCGATACCACTGATCTTCAGAGTTACG  
TAGTGGTCGTTCTTTTGGTGATTTTATCAAAGAGAAAGTTTCTGCTAG

+

FFFFFFFFFFFFFFFFFFFFFFFFFFFFFFFFFFFFFFFFFFFFFFFFFFFFFFFFFFFFFFFFFFFFFFFF  
FFFFFFFFFFFFFFFF:FFFFFFFFFFFFFFFFFFFFFFFF:FFFFFFFFFFFFFFF  
@A00721:190:HGJW7DSXY:4:2118:24478:34115\_2:N:0:TCTGCAAG+GCTGCACT  
AATTAAGACAGACGTGAAAGTTATGATGAGTGATCGTATTAGAACAGCTGATTCTTATTGCATGAACG  
TCGCTGAGGTCAAACCTGTGGACGTTCTTTTCATCGACGAATTATTCA  
+  
FFFFFFFFFFFFFFFF:FFFFFFFFFFFFFFFF:FFFFFFF:FFFFFFFFF:FFFFFFFFFFFFFFFFFFFFFFFF  
FFFFFFFFFFFFFFFF:FFFFFFFFFFFFFFFFFFFFFFFF:FFFFF,FFFFFFFF  
@A00721:190:HGJW7DSXY:4:1672:10050:23750\_1:N:0:TCTGCAAG+GCTGCACT  
ACTTAAGCGGCTTATACCATAGGTTACGGTGATTCCAATCAAATCGGATTCATCAATCGTATTGATC  
TCCAAGTCGCAAACACTACTTCAACATCAACGACATCATTCTTGATGAGTGTCGTTCTTATCGAAGTCTC  
AGT  
+  
FFFFFFFFFFFF,F:FFFFFFFFFFFFFFFFFFFFFFFFFFFFFFFFFFFFFFFFFFFFFFFFFFFFFFFFFFFF  
FF:F:FFFFFFFFFFFFFFFFFFFFFFFFFFFFFFFFFFFFFFFFFFFFFFFFFFFFFFFFFFFFFFFF:FFFFF  
FFF  
@A00721:190:HGJW7DSXY:4:2523:28791:1344\_2:N:0:TCTGCAAG+GCTGCACT  
AACTGTCACGTTTAGCACGGGAGGTTGCAGATTCAACCCCTTATATCGAGGCTATCGAGGACGATGAG  
TATCTTGAAGTTGTTGACGACAAGCCTCAAGAGGGTAGAGGACCACCT  
+  
FFFFFFFFFFFFFFFFFFFFFFFFFFFFFFFFFFFFFFFFFFFFFFFFFFFFFFFFFFFFFFFFFFFFFFFF  
FFFFFFF:FFFFFFFFFFFFFFFFFFFFFFFFFFFFFFFF:FFFFFFFFFFFFF  
@A00721:190:HGJW7DSXY:4:2236:18096:19554\_1:N:0:TCTGCAAG+GCTGCACT  
GTGACTGGAGTTCAGACGTGTGCTCTTCCGATCTATTAAGTACTAATGAGTTCAAGTCGGTTGTGCGAT  
CGAATTAAGATCAAGGCTAATACCTTTATAGGTAAGAAGCCCCTTGAGCCGCGTAGTCAGCGCGTTTA  
GCT  
+  
FFFFFFFFFFFFFFFFFFFFFFFFFFFFFFFF:FFFFFFFFFFFFFFFFFFFFFFFF,F:FFFFFFFFFFFFFFFFFFFF  
FFFFFFFFFFFFFFFFFFFFFFFFFFFFFFFFFFFFFFFFFFFFFFFFFFFFFFFFFFFFFFFFFFFFFFFF:FFF  
FFF  
@A00721:190:HGJW7DSXY:4:1575:13123:7686\_2:N:0:TCTGCAAG+GCTGCACT  
CATAACGATTTGTCAATTTACCACCTTTGCTCAACGACGAAGTGGAACGGCCAACACTTTCTTTGGTAA  
TTGTATGATCACTTTGATGATTTTATCACTTTATTATGACCTTGGA  
+  
FFFFFFFFFFFFFFFFFFFFFFFFFFFFFFFFFFFFFFFFFFFFFFFFFFFFFFFFFFFFFFFFFFFFFFFF  
FFFFFFFFFFFFFFFFFFFFFFFFFFFFFFFF:FFFFFFFFFFFFFFFFFFFFFFFF  
@A00721:190:HGJW7DSXY:4:1328:22218:1986\_1:N:0:TCTGCAAG+GCTGCACT  
ATCTGTGCTTTGAATTGTATAAGATCAAATTTTAAACGATTCCGAGAGGTTTATCCTGATGTGGAGGG  
AGTTCTTGAAGCATCCCGACCTTTCCTTGTGAAAATTTTGATGCGGTTTCATAAGATTATCAGTAATC  
CTG  
+  
FFFFFFFFFFFFFFFFFFFFFFFFFFFFFFFFFFFFFFFFFFFFFFFFFFFFFFFFFFFFFFFFFFFFFFFF  
FFFFFFFFFFFFFFFFFFFFFFFFFFFFFFFFFFFFFFFFFFFFFFFFFFFFFFFFFFFFFFFFFFFFFFFF  
FFF  
@A00721:190:HGJW7DSXY:4:1127:18511:25128\_2:N:0:TCTGCAAG+GCTGCACT  
GATATTGTTGAGCGAGAGCGACCAAGATCTAAATTCGGTAACGGTGCGTGCGCTTTATTTTAAAAAG  
CTCCCTCCTCTCGCAAGTTTGATCTGATACTTATCACGAAAGGACTTG  
+  
FFFFFFFFFFFFFFFFFFFFFFFFFFFFFFFFFFFFFFFFFFFFFFFFFFFFFFFFFFFFFFFFFFFFFFFF  
FFFFFFFFFFFFFFFFFFFFFFFFFFFFFFFFFFFFFFFFFFFFFFFFFFFFFFFFFFFFFFFF  
@A00721:190:HGJW7DSXY:4:2225:23086:5494\_1:N:0:TCTGCAAG+GCTGCACT  
CCTCATCAGCTTGTGTTTTACCTAATCTGTGTTTTTACGATAACAACATATCAGTTGATTAAGACTCTT  
CCGAAAGGCGAACTTTGGAATTTGAAGCTCAGGGTGAAGCACACGTTTGACCGTGACGAACTGTGG  
TGT



+  
FFFF:FFFFFFFFFFFFFFFF:FFFFFFFFFFFFFFFFFFFFFFFFFFFFFFFFFFFFFFFFFFFFFFFF  
FFFFFFFFFFFFFFFFFFFFFFFFFFFFFFFFFFFFFFFFFFFFFFFFFFFFFFFFFFFFFFFF:FFFFFFFFFFFFFFFFFFFFFFFF  
FFF  
@A00721:190:HGJW7DSXY:4:1562:15438:8437\_2:N:0:TCTGCAAG+GCTGCACT  
TTTTAGTGAGATTATTAACGCACTAAACGTCTTCGACAACAGCAGGGGTTTTCGAATAGTGATA  
GCCACCCGCTTACAGAGGGGCAGCAGCATGACCATAATTGGTATTGA  
+  
FFFFFFFFFFFFFFFFFFFFFFFFFFFFFFFFFFFFFFFFFFFFFFFFFFFFFFFFFFFFFFFFFFFFFFFF  
FFFFFFFFFFFFFFFFFFFFFFFFFFFFFFFFFFFFFFFFFFFFFFFFFFFFFFFFFFFFFFFF,FFFF:FFFF  
@A00721:190:HGJW7DSXY:4:2540:28411:34350\_2:N:0:TCTGCAAG+GCTGCACT  
TGTCTCGCCTCTTCGAATGAAGTTTTAATGCTTAACAACAATGATAGTGAATTTATACCTACAATCAT  
TGGTTTTTCTAATAATGATGACACTATTGTTTATGGATATGATGCTAT  
+  
FFFFFFFFFFFFFFFFFFFFFFFFFFFFFFFFFFFFFFFFFFFFFFFFFFFFFFFFFFFFFFFFFFFFFFFF:FF  
FFFFFFFFFFFFFFFFFFFFFFFFFFFFFFFFFFFFFFFFFFFFFFFFFFFFFFFFFFFFFFFF  
@A00721:190:HGJW7DSXY:4:1209:12626:33755\_1:N:0:TCTGCAAG+GCTGCACT  
TTAAAACCATTTGTACGATGTCGTCTGTCTCGGCGATCACTTTTCTACTAAGAATTGGTCCTACTTTTGG  
ACAAGGCCAACTTCGTAATCTTCATGAGATCGTTTCTTTCTTTATCTCTTTGTTGTTAGGGATTTTG  
AGA  
+  
FFFFFFFFFFFFFFFFFFFF,FFFFFFFFFFFFFFFFFFFFFFFFFFFFFFFFFFFFFFFF:FFFFFFFFFFFFFFFFFFFFFFFF  
FFFFFFFFFFFFFFFFFFFFFFFFFFFFFFFFFFFFFFFFFFFFFFFFFFFFFFFFFFFFFFFF:FFFFFFFFFFFFFFFFFFFFFFFF  
FFF  
@A00721:190:HGJW7DSXY:4:1436:15365:30577\_2:N:0:TCTGCAAG+GCTGCACT  
ATTGTAGTGGTTTGGTCGTTTCAGTACCCAGTCAGTATACCTCTACGCAAAGATATTTTCATGAAAAC  
ACAGAGGAACGTACCGGATTACCTGTCTTTCATATTATGAATGAACCT  
+  
FFFFFFFFFFFFFFFFFFFFFFFFFFFFFFFFFFFFFFFFFFFFFFFFFFFFFFFFFFFFFFFFFFFFFFFF:FF  
FFFFFFFF:FFFFFFFF:FFFF:FFFFFFFFFFFFFFFFFFFFFFFF  
@A00721:190:HGJW7DSXY:4:1360:15293:33051\_1:N:0:TCTGCAAG+GCTGCACT  
AGGGTTTCAAGATGGGATTCCTACGTAGTTTATGACTTTGGTGGTGGTACTTTTCGATACTTCTATCGTC  
TTACGTTACGTAATTACTATAGTGTTATTTATTCTGGTGGTGATGATAATCTTGGAGGTCGTGACGT  
TGA  
+  
FFFFFFFFFFFFFFFFFFFFFFFFFFFFFFFFFFFFFFFFFFFFFFFFFFFFFFFFFFFFFFFFFFFFFFFF  
FF:FFFFFFFFFFFFFFFFFFFFFFFFFFFFFFFF,FFFFFFFF:FFFFFFFFFFFFFFFFFFFFFFFFFFFFFFFF  
FFF  
@A00721:190:HGJW7DSXY:4:2618:27082:9126\_2:N:0:TCTGCAAG+GCTGCACT  
AGCGTTCTTATTACGGCGCACTTCTTTACCCGCCACCACAACTTTTCAGTTTCACAACTGAAGGAGG  
AGGTTTCTGTTACTGGAAAACCTCGTCAATACTTTTCAATAATATAC  
+  
FFFFFFFFFFFFFFFFFFFFFFFFFFFFFFFFFFFFFFFFFFFFFFFFFFFFFFFFFFFFFFFFFFFFFFFF  
FFFFFFFFFFFFFFFFFFFFFFFFFFFFFFFFFFFFFFFFFFFFFFFFFFFFFFFFFFFFFFFF  
@A00721:190:HGJW7DSXY:4:2511:3902:32988\_2:N:0:TCTGCAAG+GCTGCACT  
TGAACCAAGTTATCAAAGATAGTGGCATTCAAGGCAAACTTACCCTGATTCCGGCCGGTGGTAGCTCA  
TTTCTACCAGGGGCTATTACTCTTGCTGAAACAGCTATTAAAGCTGTT  
+  
FFF:F,FFFFFFFF,F:FFFFFF:F:FFFFFFFFF:, :FF:FFFFFFFFFFF:F:FF,FFFFFF  
FFFF:FFFFFFFFFFFFFFFFFFFFFFFF,FFF:FFF:FFFFFFFFF, :FFF  
@A00721:190:HGJW7DSXY:4:2221:14055:22420\_1:N:0:TCTGCAAG+GCTGCACT  
GGATGTGCACTCTTTTCTGCTACTTTAACGGAGCGTAGTGACTCTTCGTCGATTGTATCAACAGTAA  
CATTACTTCTAATAAAGGTCTCTATCAAGCTCGTATTATCGTCGCTGCTGGATCTGCGTTACCGTTGA  
AGG





$+$ 

@A00721:190:HGJW7DSXY:4:2101:22327:9627\_1:N:0:TCTGCAAG+GCTGCACT  
CGATAGTGATTGTTATCAATTTAAATACATTACTGTTTCAAATCATCTTTACTCACAGACTCCGAAAA  
TGGTTTCAAATGAGGTCAAAGCTCTATTTATTAACGAACATTATCCGATTCTTCGAGGGTATCACT  
ACC

$$+$$

@A00721:190:HGJW7DSXY:4:2275:29767:27430\_2:N:0:TCTGCAAG+GCTGCACT  
GGAAAATAGCAATAATCAAATTCGACAAATTTTAGTACTTTATTTAGAACTCTCTCCGATCACCTT  
GGTGTGATCTCCCGGAGGATCTTTTCAATAAGATGTATGATGATAATC

+

@A00721:190:HGJW7DSXY:4:2305:6677:1752\_2:N:0:TCTGCAAG+GCTGCACT  
GTATACTTGAATACTTTATCAAAGATTTGGCTTGGTCTATTTACCGCAAAAAGTTGGAAGAGGTCTAT  
GATATTTATTTTACTTATACTTTAAATAGCACCGATTATAACTTGACT

+

@A00721:190:HGJW7DSXY:4:1128:10999:14278\_2:N:0:TCTGCAAG+GCTGCACT  
TCTTCTCAGAAGATTAGAGAAGTAACCGGTGAACACGTCGGTAGCATTGATTTACTTTTACCGTTAG  
AACTGAAAAAGATTCTTTTCGAAAAGAAACCTATAAGTTACAAACGAT

+

@A00721:190:HGJW7DSXY:4:1159:19470:8970\_2:N:0:TCTGCAAG+GCTGCACT  
ACTTCAAGTACCTGAACCTTTACATTTTAAATGGTATGGTATAATGTGTCTTACAAATAGAACCTTCAC  
TCTCGGTAATGAGAGTGTATTCCCTTAATATTCTAGTAACCGCTATGTG

+

@A00721:190:HGJW7DSXY:4:1617:8856:9909\_1:N:0:TCTGCAAG+GCTGCACT  
GTATAGTTCAAGGAGTACTTAATTCAATAGCTTTAGTATTATTTACTATCGCCTTTATTGAAAATTGT  
ATAAGAGTTAATTGCTTACACAAAAGTGACGCGCAAGGAATCTTAATTGATTGAAGCTAGGCGTTGG  
GGA

+

@A00721:190:HGJW7DSXY:4:1662:19723:25316\_1:N:0:TCTGCAAG+GCTGCACT  
ACGCCAGACGTAGGGTCAAACCTACTACCGCCGGTCGGCAGATCGGCACCACTGGTCTCTACGTTGAG  
GGACCCGCTGTGCAGAATAACCTTCCCAAATCTAGATCTGCACAGAAGAAGGCTGAAGGTCGTTACCG  
GAC

+

[illegible]

@A00721:190:HGJW7DSXY:4:2258:19289:29481\_2:N:0:TCTGCAAG+GCTGCACT  
ACGGCAGTCCCGTCATCTCTGTGGGAACTGAGGCAGTACCTCAGTCAAAAGTCACATTCACTACCTCCC  
ATACCAATCAATGATGTGACTATACAGTTCGGCCATTTCAAGAGTGGT

+

FFFFFFFFFFFFFFFFFFFFFFFFFFFFFFFFFFFFFFFFFFFFFFFFFFFFFFFFFFFFFFFFFFFFFFFFFFFFFFFF  
FFFFFFFFFFFFFFFFFFFFFFFFFFFFFFFFFFFFFFFFFFFFFFFFFFFFFFFFFFFFFFFFFFFFFFFFFFFFFFFF

@A00721:190:HGJW7DSXY:4:1665:4191:23187\_2:N:0:TCTGCAAG+GCTGCACT  
GGAGGTACTGAAGCCTTCCCCTCCGCTGGCACGAAGAACAACCTCCCAAGCCAATCAATAGTTCTTCTGA  
CCAGAATGAAAAGGGGTTTACCAGGGTAGTCTCTAAGTCTACCAGGAA

+

FFFFFFFFFFFF:FFFFFFFFFFFFFFFFFFFFFFFFFFFFFFFFFFFFFFFFFFFFFFFFFFFFFFFFFFFFFFFF  
FFFFFFFFFFFFFFFFFFFFFFFFFFFFFFFFFFFFFFFFFFFFFFFFFFFFFFFFFFFFFFFFFFFFFFFFFFFFFFFF

@A00721:190:HGJW7DSXY:4:2571:30029:22028\_2:N:0:TCTGCAAG+GCTGCACT  
CAAACTGAGAAGAATAAAGGGAAAGGTCCATCAGGACCTAAGAAGGGGAAATTACCCCTAATTCTGA  
AGGAAGATCTCCACCATCTGGGGTTGGAATAAGAAATCTGCACGGG

+

FFFFFFFFFFFFFFFFFFFFFFFFFFFFFFFFFFFFFFFFFFFFFFFFFFFFFFFFFFFFFFFFFFFFFFFFFFFFFFFF  
FFFFFFFFFFFFFFFFFFFFFFFFFFFFFFFFFFFFFFFFFFFFFFFFFFFFFFFFFFFFFFFFFFFFFFFFFFFFFFFF

@A00721:190:HGJW7DSXY:4:1560:4896:7028\_2:N:0:TCTGCAAG+GCTGCACT  
CTACGAAGTCGCTGAAGGCGGCTTGGGTCATTAAGGGTAGCTGTAAAGTTGCGCCTGCCGACCCCATC  
TTTGAGACCAAGACTCTCTACAGTAGGTCGTGCCTACTATGAGCAAT

+

FFFFFFFFFFFFFFFFFFFFFFFFFFFF:FFFFFFFF:FFFFFFFFFFFFFFFFFFFFFFFFFFFFFFFFFFFFFFFF  
FFFFFFFFFFFFFFFFFFFFFFFFFFFFFFFFFFFFFFFFFFFFFFFFFFFFFFFFFFFFFFFFFFFFFFFFFFFFFFFF

@A00721:190:HGJW7DSXY:4:1613:28149:11663\_1:N:0:TCTGCAAG+GCTGCACT  
TCGTCACTGAGGACGAAGGTGAGAGGACTTTTGGCTACTGGCGACAACTGAGAGCAGTCGCTGGGGA  
AAGAGAATTGCGTGCGTGAAGGCCGACGCTTCGAGCTTGAGTGTGACGAGGCCGGTGACGTTTTTGT  
CAA

+

FFFFFFFFFFFFFFFFFFFFFFFFFFFF:FFFFFFFFFFFFFFFFFFFFFFFFFFFFFFFFFFFFFFFFFFFFFFFF  
FFFFFFFFFFFFFFFFFFFFFFFFFFFFFFFFFFFFFFFFFFFFFFFFFFFFFFFFFFFFFFFFFFFFFFFFFFFFFFFF  
FFF

@A00721:190:HGJW7DSXY:4:2229:6596:27539\_1:N:0:TCTGCAAG+GCTGCACT  
TTTATCCGCGCTTAACCTATGGGGCGAAGATCCCCTATTGAGTCTTGAAGGACTTAGGTTGGCATATTT  
ATGCCGACGATAATAAGCATGTACCCCTTAAGCACCGAGGTAAGCTCGGGACTTACAAGAGAGAGTGT  
GAG

+

FFFF,FFFF:FFFF:::FFFF:FFF,FFFF,FFFFFFFF,FFF:FFFFFFFF,FFFF,:FFFFF  
F:FF,FFF:FFFFFFFF:FFF:F:FFFFFFFF:FFFFFFFFFFFF:FF:FFFFFFFFFFFFFFFFFFFFF  
F:F

@A00721:190:HGJW7DSXY:4:2163:1280:19523\_2:N:0:TCTGCAAG+GCTGCACT  
TTCTGACTGATGAGGTTAAACTCTTGCTCCTTCTGTGGGTGAGGGTTTTTGTATATTCACTGGTTC  
TGGGAGGCTGCTTCTCCTCCATAATTACAACCTCTCTTTAGAGAGCATT

+

FFFFFFFFFFFFFFFFFFFFFFFFFFFFFFFFFFFFFFFFFFFFFFFFFFFFFFFFFFFFFFFFFFFFFFFFFFFFFFFF  
FFFFFFFFFFFFFFFFFFFFFFFFFFFFFFFFFFFFFFFFFFFFFFFFFFFFFFFFFFFFFFFFFFFFFFFFFFFFFFFF

@A00721:190:HGJW7DSXY:4:2306:27588:18082\_2:N:0:TCTGCAAG+GCTGCACT  
TAGACGTTGTCACTTTTCTTGAAAATTTTCTTTCTCCGTCATTGGGGATTTCGATGTGAGAAG  
GTGGAAGGTGTCAAGGGTCTTCTTCATGCTGATCTTTCAGGACCTAAT

+

FFFFFFFFFFFFFFFFFFFFFFFFFFFFFFFFFFFFFFFFFFFFFFFFFFFFFFFFFFFFFFFFFFFFFFFFFFFFFFFF  
FFFFFFFFFFFFFFFFFFFFFFFFFFFFFFFFFFFFFFFFFFFFFFFFFFFFFFFFFFFFFFFFFFFFFFFFFFFFFFFF

@A00721:190:HGJW7DSXY:4:2561:11487:11616\_2:N:0:TCTGCAAG+GCTGCACT  
AGTTGGAGGGAGGAAGTTCTCCGAAATTAAGACGGGGGATTAAGAGTCCAGCTGTAAGTGTCAATTT

$+$ 

FFFFFFFFFFFFFFFFFFFFFFFFFFFFF:FFFFFFFFFFFFFFFFFFFFFFFFFFFF,FF

GGAT

+

FFF

AGAs

+

[illegible]

GGT

+

+

CAGC

+

FFF

GCA<sup>+</sup>

+

FFF

TCT

+

FFF

TAA

+

AATC



FFFFFFFFFFFFFFFFFFFFFFFFFFFFFFFFFFFFFFFFFFFFFFFFFFFFFFFFFFFFFFFFFFFFFFFF  
FFF

@A00721:190:HGJW7DSXY:4:1320:18593:28244\_2:N:0:TCTGCAAG+GCTGCACT  
CAGATTAGAGACATGCCAGTTAGAGTTCTTCTAACCAGGACTGATGGTGAGATTCTTTTACCTTTTG  
AGGTCCAGGAACCTTTACTCCTAGTGTCTTTTCTAGAGTCCAAGGACG

+  
FFFFFFFFFFFFFFFFFFFFFFFFFFFFFFFFFFFFFFFFFFFFFFFFFFFFFFFFFFFFFFFFFFFFFFFF  
FFFFFFFFFFFFFFFFFFFFFFFFFFFFFFFFFFFFFFFFFFFFFFFFFFFFFFFFFFFFFFFFFFFFFFFF  
FFFFFFFFFFFFFFFFFFFFFFFFFFFFFFFFFFFFFFFFFFFFFFFFFFFFFFFFFFFFFFFFFFFFFFFF

@A00721:190:HGJW7DSXY:4:1641:14959:25833\_1:N:0:TCTGCAAG+GCTGCACT  
TTGGGAAGAGATTAAACATAAAATCCAGCGATTCTATTATGTCGCTAAAGCCTGTCCAGTTGTCGATG  
ATGTTGCGGCTGTGGGGATTAACCTCCCTCGTGAAACTTACGACGATGTTCTCGCTCGCATTTACAA  
GGA

+  
FFFFFFFFFFFFFFFFFFFFFFFFFFFFFFFFFFFFFFFFFFFFFFFFFFFFFFFFFFFFFFFFFFFFFFFF  
FFFFFFFFFFFFFFFFFFFFFFFFFFFFFFFFFFFFFFFFFFFFFFFFFFFFFFFFFFFFFFFFFFFFFFFF  
FFF

@A00721:190:HGJW7DSXY:4:1468:6180:26256\_1:N:0:TCTGCAAG+GCTGCACT  
GAGATCTGCCACTTCTAATTTTAGGAAACGTCGCGAAAAGAAAGTTTCATGAGGATGTCTTGGTCGAAA  
AATATCGCCGGAACCTTCTAATAGAGGATCCTGATGACATTATTTCAACGGATACCGATCTCAGTTCT  
ACC

+  
FFFFFFFFFFFFFFFFFFFFFFFFFFFFFFFFFFFFFFFFFFFFFFFFFFFFFFFFFFFFFFFFFFFFFFFF  
FFFFFFFFFFFFFFFFFFFFFFFFFFFFFFFFFFFFFFFFFFFFFFFFFFFFFFFFFFFFFFFFFFFFFFFF  
FFF

@A00721:190:HGJW7DSXY:4:1510:32380:15389\_2:N:0:TCTGCAAG+GCTGCACT  
CAGGAAGTGTCTCCACTGATTCGGAATTAGAGAAAGACGACCTTCTTGTGGGACTGAGACCTCTGAA  
TTTTCAGGGTGCCCTGATGAGGACGTTGAAAGGGATAATTTCAACTCT

+  
FFFFFFFFFFFFFFFFFFFFFFFFFFFFFFFFFFFFFFFFFFFFFFFFFFFFFFFFFFFFFFFFFFFFFFFF  
FFFFFFFFFFFFFFFFFFFFFFFFFFFFFFFFFFFFFFFFFFFFFFFFFFFFFFFFFFFFFFFFFFFFFFFF  
FFFFFFFFFFFFFFFFFFFFFFFFFFFFFFFFFFFFFFFFFFFFFFFFFFFFFFFFFFFFFFFFFFFFFFFF

@A00721:190:HGJW7DSXY:4:1116:6063:1313\_2:N:0:TCTGCAAG+GCTGCACT  
TCAAAAGACCAGAAACGTAACAAGAAGATAAAGGTAGGAAGGGGAGAAAACAGAACAAGCGAGCGGT  
TGAAGAGAAAAGTATGATGTTGCGGCTGATCGTACCCCAATTCCTGC

+  
FFFFFFFFFFFFFFFFFFFFFFFFFFFFFFFFFFFFFFFFFFFFFFFFFFFFFFFFFFFFFFFFFFFFFFFF  
FFFFFFFFFFFFFFFFFFFFFFFFFFFFFFFFFFFFFFFFFFFFFFFFFFFFFFFFFFFFFFFFFFFFFFFF  
FFFFFFFFFFFFFFFFFFFFFFFFFFFFFFFFFFFFFFFFFFFFFFFFFFFFFFFFFFFFFFFFFFFFFFFF

@A00721:190:HGJW7DSXY:4:1405:18050:12994\_1:N:0:TCTGCAAG+GCTGCACT  
GAGTTACGTAGTGGTCGTTCTTTTGGTGATTTTATCAAAGAGAAAGTTTCTGCTAGTCGCGACGATAG  
TATTTATCGGAGTGATATTAACAAGTTAACTTCGAACTGACCACTTACAAGAGTGTTGAAGTACCGC  
AAC

+  
FFFFFFFFFFFFFFFFFFFFFFFFFFFFFFFFFFFFFFFFFFFFFFFFFFFFFFFFFFFFFFFFFFFFFFFF  
FFFFFFFFFFFFFFFFFFFFFFFFFFFFFFFFFFFFFFFFFFFFFFFFFFFFFFFFFFFFFFFFFFFFFFFF  
FFF

@A00721:190:HGJW7DSXY:4:2139:15040:32737\_2:N:0:TCTGCAAG+GCTGCACT  
AATTAAGACAGACGTGAAAGTTATGATGAGTGATCGTATTAGAACAGCTGATTCTTATTGCATGAACG  
TCGCTGAGGTCAAACCTGTGGACGTTCTTTTCATCGACGAATTATTCA

+  
FFFFFFFFFFFFFFFFFFFFFFFFFFFFFFFFFFFFFFFFFFFFFFFFFFFFFFFFFFFFFFFFFFFFFFFF  
FFFFFFFFFFFFFFFFFFFFFFFFFFFFFFFFFFFFFFFFFFFFFFFFFFFFFFFFFFFFFFFFFFFFFFFF

@A00721:190:HGJW7DSXY:4:2118:24225:33802\_1:N:0:TCTGCAAG+GCTGCACT  
ACTTAAGGCGGCTTATACCATAGGTTACGGTGATTCCAATCAAATCGGATTCATCAATCGTATTGATC  
TCCAAGTCGCAAACTACTTCAACATCAACGACATCATTCTTGATGAGTGTCGTTCTTATCGAAGTCTC  
AGT



+++++  
FFFFFFFFFFFF::FFFFFFFFFFFFFFFFFFFFFFFFFFFFFFFFFFFFFFFFFFFFFFFFFFFFFFF:FFFFFFFFFFFFFFFFFFFFFFFF  
FFFFFFFFFFFFFFFFFFFFFFFFFFFFFFFFFFFFFFFFFFFFFFFFFFFFFFFFFFFFFFFFFFFFFFFFFFFFFFFFFFFFFFFFFFFFF  
FFF  
@A00721:190:HGJW7DSXY:4:2645:21793:28494\_2:N:0:TCTGCAAG+GCTGCACT  
AACTGTACGTTTAGCACGGGAGGTTGCAGATTCAACCCCTTATATCGAGGCTATCGAGGACGATGAG  
TATCTTGAAGTTGTTGACGACAAGCCTCAAGAGGGTAGAGGACCACCT  
+  
FFFFFFFFFFFFFFFFFFFFFFFFFFFFFFFFFFFFFFFFFFFFFFFFFFFFFFFFFFFFFFFFFFFFFFFFFFFFFFFFFFFFF  
FFFFFFFFFFFFFFFFFFFFFFFFFFFFFFFFFFFFFFFFFFFFFFFF:F:FFFFFFFFFFFFFFFF  
@A00721:190:HGJW7DSXY:4:2471:5945:23688\_1:N:0:TCTGCAAG+GCTGCACT  
GTGACTGGAGTTTCAGACGTGTGCTCTTCCGATCTATTAAGTACTAATGAGTTCAAGTCGGTTGTGCGAT  
CGAATTAAGATCAAGGCTAATACTTTATAGGTAAGAAGCCCCTTGAGCCGCGTAGTCAGCGCGTTTA  
GCT  
+  
FFFFFFFFFFFFFFFFFFFFFFFFFFFFFFFFFFFFFFFFFFFFFFFFFFFFFFFFFFFFFFFFFFFFFFFFFFFFFFFFFFFF,  
FFFFFFFFFFFFFFFFFFFFFFFFFFFFFFFFFFFFFFFFFFFFFFFFFFFFFFFFFFFFFFFFFFFFFFFFFFFFFFFFFFFFF  
FFF  
@A00721:190:HGJW7DSXY:4:2205:3812:29669\_2:N:0:TCTGCAAG+GCTGCACT  
CATACGATTTGTCAATTTACCACCTTTGCTCAACGACGAAGTGAACGCCAACACTTTCTTTGGTAA  
TTGTATGATCACTTTGATGATTTTTATCACTTTATTATGACCTTGAAA  
+  
FFFFFFFFFFFFFFFFFFFFFFFFFFFFFFFFFFFFFFFFFFFFFFFFFFFFFFFFFFFFFFFFFFFFFFFFFFFFFFFFFFFF  
FFFFFFFFFFFFFFFFFFFFFFFFFFFFFFFFFFFFFFFFFFFFFFFFFFFFFFFFFFFFFFFFFFFFFFFFFFFFF  
@A00721:190:HGJW7DSXY:4:1442:15510:25535\_1:N:0:TCTGCAAG+GCTGCACT  
ATCTGTGCTTTGAATTGTATAAGATCAAATTTTAAACGATTCCGAGAGGTTTATCCTGATGTGGAGGG  
AGTTCTTGAAGCATCCCGACCTTTCCTTGTAATAATTTGATGCGGTTTCATAAGATTATCAGTAATC  
CTG  
+  
FFFFFFF:FFFFFFFFFFFFFFFFFFFFFFFFFFFFFFFFFFFFFFFFFFFFFFFFFFFFFFFFFFFFFFFFFFFFFFFFFFFFF  
FFFFFFFFFFFFFFFFFFFFFFFFFFFFFFFFFFFFFFFFFFFFFFFFFFFFFFFFFFFFFFFFFFFFFFFFFFFFFFFFFFFF  
FFF  
@A00721:190:HGJW7DSXY:4:1170:18096:25598\_2:N:0:TCTGCAAG+GCTGCACT  
GATATTGTTGAGCGAGAGCGACCAAGATCTAAATTCGGTAACGGTGCGTGCGCTTTATTTTAAAAAG  
CTCCCTCCTCTCGCAAGTTTGATCTGATACTTATCACGAAAGGACTTG  
+  
FFFFFFFFFFFFFFFFFFFFFFFFFFFFFFFFFFFFFFFFFFFFFFFFFFFFFFFFFFFFFFFFFFFFFFFFFFFFFFFFFFFF  
FFFFFFFFFFFFFFFFFFFFFFFFFFFFFFFF,F:FFFFFFFFFFFFFFFFFFFFFFFFFFFFFFFFFFFFF  
@A00721:190:HGJW7DSXY:4:2230:2483:16908\_1:N:0:TCTGCAAG+GCTGCACT  
CCTCCTCAGCTTGTGTTTTTACCTAATCTGTGTTTTTACGATAACAACCTATCAGTTGATTAAGACTCTT  
CCGAAAGGCGAACTTTGGGAATTTGAAGCTCAGGGTGAAGCACAACTTTGACCGTGACGAACTGTGG  
TGT  
+  
FFFF,FFFFFFFFFFFF,,FFFFFFFFFFFFFFFFFFFFFFFF:F:FFFF,FFFFFFFFFFFFFFFFFFFFFFFFFFFFF  
FFF:FFFFFFFFFFFFFFFFFFFFFFFFFFFFFFFFFFFFFFFFFFFFFFFFFFFFFFFFFFFFFFFFFFFFFFFFFFFFF  
FFF  
@A00721:190:HGJW7DSXY:4:1665:28962:14137\_2:N:0:TCTGCAAG+GCTGCACT  
TTTTAGTGAGATTATTA AAAACGCACTAAATCGTCTTTCGACAACAGCAGGGGTTTTCGAATAGTGATA  
GCCACACGCCTTACAGAGGGGCAGCAGCATGACCATAATTGGTATTGA  
+  
FFFFF::FFFFFFFFFFFF:F:FF:, , F,:F:F,:FFFFFFFF,F:FF,FFFFF:,FFFF:, , F,F:FFFFF  
:FFFF,FFFFFFFF,F,:FFF::FF,F::FF:F::FFFF,FF:FF,FFF:  
@A00721:190:HGJW7DSXY:4:1131:11342:16626\_1:N:0:TCTGCAAG+GCTGCACT  
TCGCCTCTTTCGAATGAAGTTTTAATGCTTAACAACAATGATAGTGAATTTATACCTACAATCATTTGGT

TTTTCTACTAATGATGACACTATTGTTTATGGTTATGATGCTATTACTCATGATGGTTACGGTAAGGG  
AGG

```

FFFFFFFF:FFFFFFFFFFFFFFFFFFFFFFFF:FFFFFFFFFFFFFFFFFFFFFFFF,FFFFFFFFFFFFFFFFFFFFFFFF:
FFFFFFFFFFFFFFFFFFFFFFFFFFFFFFFF:FFF,FFFFFFFF:FFFFFFFFFFFFFFFFFFFFFFFFFFFFFFFFFFFFFFFF
FFF

```

+

```
FFFF:FFFFFFFFFFFFFFFFFFFFFFFFFFFFFFFFFFFFFFFFFFFFFFFFFFFFFFFFFFFF
FFFFFF:FFFFFFFFFFFF:FF,FFFFFFFFFFFFFFFFFFFFFFFFFFFFFFFFFFFFFFFFFFFF
FFF
```

 $+$ 

```
FFFFFFFFFFFFFFFFFFFFFFFFFFFFFFFFFFFFFFFFFFFFFFFFFFFFF:FFFFFFFFF:FFFFFFFFFFFFFFFFFF
FFFFFFFFFFFFFF:FFFFFFFFFFFFFFFFFFFFFFFFFFFF:FFFFFFF:FFFF:F,F
```

+

```
FFFFFFFFF:FFF:FFFFFFFFF,FFFFFFFFFFFFFFFFFFFFFFFFFFFFF:FFF:FFFFFFFFFFFF  
FFFFFFFFFFFFFFFFFFFFFFFFFF:FFFFFFFFFFFFFFFFFFFFFFFFFFFFFFFFFFFFFFFFFFFF:  
FFF
```

+

```
FFFFFFFFFFFFFFFFFFFFFFFFFFFFFFFFFFFFFFFFFFFFFFFFFFFFFFFFFFFF;FFFFFFF
FFFFFFFFFFFFFFFFFFFFFFFFFFFFFFFFFFFFFFFFFFFFFFFFFFFFFFFFFFFF
```

 $+$ 

```
FFFFFFFFFFFFFFFFFFFFFFFFFFFFFFFFFFFFF:FFFFFFFFFFFFFFFFFFFFFFFFFFFFFFF  
FFFFFFF:E;FFF:FFFFFFFFFFFFFFFFFFFFFFFFFFFFFFFFFFFFF:FFFF
```

+

[illegible] $+$ [illegible]

FFFFFFFFFFFFFFFFFFFFFFFFFFFFFFFFFFFFFFFFFFFFFFFFFFFFFFFFFFFFFFFF  
FFF

@A00721:190:HGJW7DSXY:4:2260:16920:17989\_2:N:0:TCTGCAAG+GCTGCACT  
ATATTTACAAAATCTTACCACTATCTACGAACCTAAAGTTCTGAAGACGTTGCTTGTGCTTCCTCCT  
TTAATGGCACTACCTCGGTACAATCTTACTTGGAACGAAGGCGACCTG

+

FFFFFFFFFFFFFFFFFFFFFFFFFFFFFFFFFFFFFFFFFFFFFFFFFFFFFFFFFFFFFFFF  
FFFFFFFFFFFFFFFFFFFFFFFFFFFFFFFFFFFFFFFFFFFFFFFFFFFFFFFFFFFFFFFF

@A00721:190:HGJW7DSXY:4:2166:14226:2425\_1:N:0:TCTGCAAG+GCTGCACT  
GTCTATATTAGGTGAAGCGAAATACGATTTCAACGTCAACGTTACCGAGTTTCGTTTCGTACCTTG  
ATGCTGACTTTCGTCAATATGATTTGATCTGGTTGCTCAATTCTAAGCGTGTTCGCTTAGTGCGAGG  
CCT

+

FFFFFFFFFFFFFFFFFFFFFFFFFFFFFFFFFFFFFFFFFFFFFFFFFFFFFFFFFFFFFFFF  
FFFFFFFFFFFFFFFFFFFFFFFFFFFFFFFFFFFFFFFFFFFFFFFFFFFFFFFFFFFFFFFF  
FFF

@A00721:190:HGJW7DSXY:4:2208:5014:33348\_1:N:0:TCTGCAAG+GCTGCACT  
TCTTCCTTGGATTTTAATATAAAGAATCTTTACCAGGACTCCTACTACAGGAGGCAGTCTTCTGATCG  
TAAGAAGTTTATAAGGAACATATCCATTTGTTGTAATAGGGTCATCAACTTAGAACTCGAAACTCTAA  
GTG

+

FFFFFFFFFFFFFFFFFFFFFFFFFFFFFFFFFFFFFFFFFFFFFFFFFFFFFFFFFFFFFFFF  
FFFFFFFFFFFFFFF::FFFFFFFFFFFFFFFFFFFFFFFFFFFFFFFFFFFFFFFFFFFFFFFF  
FFF

@A00721:190:HGJW7DSXY:4:1241:13042:19758\_2:N:0:TCTGCAAG+GCTGCACT  
GAAATTGGACTCTTCGATAGGGGACATTTTATCGTGGGCTTCCGTAAAGGAAGATCTGTTATCGACG  
GTTTATCGTTTACGAAGTATCACTCCACCGTGAATGGTTAAGAATA

+

FFFFFFFFFFFFFFFFFFFFFFFFFFFFFFFFFFFFFFFFFFFFFFFFFFFFFFFFFFFFFFFF  
FFFFFFFFFFFFF:FFFFFFFFFFFFFFFFFFFFFFFFFFFFFFFFFFFFFFFF,FFFF

@A00721:190:HGJW7DSXY:4:2670:14733:23813\_1:N:0:TCTGCAAG+GCTGCACT  
GACTGATTATCTAAAGATTGAAGGAAAATTTTATCCTCGTTTAACTTACTTAGACTTTCCTACGATAC  
AAATGATAACTTCTAATTTACGTTTGCTACTCAGAGCTGGTCTCTCAGCAAAGGGATGCATGGTGTT  
ATC

+

FFFFFFFFFFFFFFFFFFFFFFFFFFFFFFFFFFFFFFFFFFFFFFFFFFFFFFFFFFFFFFFF  
FF:FFFFFFFFFFFFFFFFFFFFFFFFFFFFFFFFFFFFFFFFFFFFFFFFFFFFFFFFFFFF  
FFF

@A00721:190:HGJW7DSXY:4:2459:2121:10895\_2:N:0:TCTGCAAG+GCTGCACT  
GGCATTGATAATAATGACGAGACTTTCGTGATAATCGCTGCATATTACGATTACACGGTACCAGCG  
CATCTCGTGTGAGCCTCGACCCGATTATATGGTATTAACCTATAAAG

+

FFFFFFFFFFFFFFFFFFFFFFFFFFFFFFFFFFFFFFFFFFFFFFFFFFFFFFFFFFFFFFFF  
FFFFFFFFFFFFFFFFFFFFFFFFFFFFFFFFFFFFFFFFFFFFFFFFFFFFFFFFFFFFFFFF

@A00721:190:HGJW7DSXY:4:1102:31114:29418\_2:N:0:TCTGCAAG+GCTGCACT  
CTTCTTATAATAAATAAATAAATAATATTACTAATGTCAAATAGTGGAAGGCTCCAGTCAACACTAG  
TTCGAGTGCTGCTTTGGATTACGATGACGTGAGAATAGGTGAAGGGAT

+

FFFFFFFFFFFFFFFFFFFFFFFFFFFFFFFFFFFFFFFFFFFFFFFFFFFFFFFFFFFFFFFF  
FFFFFFFFFFFFFFFFFFFFF::FFFFF,FFFFF:FFFFFFFFFFFFFFFFF:F:FF

@A00721:190:HGJW7DSXY:4:1108:7618:29966\_1:N:0:TCTGCAAG+GCTGCACT  
GACCAACATTAAGGCGGCGGCGACTAATCTTAAAGCTTCACCCAAAATGAAGGACAATTGAAAACCTGA  
ATAATGATGCACTACAAACAAGTATCGCTAATCATCTGAAAAAGGCTCTAAAGGACACTATACAATAT  
CCA

+  
FFF,FFF,FFFFFFFF:FF:FF,FFFFFF:FFF,,FF:F:F,FFFFFFFF:FFF,FFF,FFFF,F  
FFFF:FFFF:FFFF:FFF:,FFFFFFFFFFFF:FFFFFFFFFFFF:FFFFFFFFFFFFFFFFFF  
FFF  
@A00721:190:HGJW7DSXY:4:2448:9869:1391\_1:N:0:TCTGCAAG+GCTGCACT  
AGGATATTCGCCATTGTGGTACGAATTGGTCCAACATTTACCACCAAATCTTTTGATACAACCTAG  
CCTTCAAGTGGGGTATGCCTGCGGAATACGCTTGCTATTCACCAGATTGGTTCGAACCCGTTGATGCT  
ATG  
+  
FFFFFF:FFFFFFFFFFFFFFFFFFFFFFFFFFFFFFFFFFFFFFFFFFFFFFFFFFFFFFFFFFFFFFFF  
FFFFFFFFFFFFFFFFFFFFFFFFFFFFFFFFFFFFFFFFFFFFFFFFFFFFFFFFFFFFFFFFFFFFFFFF  
FFF  
@A00721:190:HGJW7DSXY:4:1302:22887:33426\_1:N:0:TCTGCAAG+GCTGCACT  
ATTCAAGCTTGTCGTTTAAAGACTGCAGAGGCTGTCAAACAAGCCCAGACTCAAGGAGTCCAATCAAA  
GGTTTTGAATTTAGCTCAACTGGGGAGACGTGCTTAAATGGGTGATAAAAATTATTTAGAGATCTTTT  
CTA  
+  
FFFFFFF:FFFFFFFFFFFFFFFFFFFFFFFFFFFFFFFFFFFFFFFFFFFFFFFFFFFFFFFFFFFFFFFF  
FFFFFFF:FFFFFFFFFFFFFFFFFFFFFFFFFFFFFFFFFFFFFFFFFFFFFFFFFFFFFFFFFFFFFFFF  
F:F  
@A00721:190:HGJW7DSXY:4:2667:27606:4272\_2:N:0:TCTGCAAG+GCTGCACT  
ATCCTTTAAGGACTATGTTGACTGACGAAGATTTCCACAGATTTGTCTACGTTGCAGATCGCCACT  
CCAAACACTATATACATTATAAAATATAAAAATAAGGGAGTCATAACT  
+  
FFFFFFFFFFFFFFFFFFFFFFFFFFFFFFFFFFFFFFFFFFFFFFFFFFFFFFFFFFFFFFFFFFFFFFFF  
FFFFFFFFFFFFFFFFFFFFFFFFFFFFFFFFFFFFFFFFFFFFFFFFFFFFFFFFFFFFFFFF  
@A00721:190:HGJW7DSXY:4:2578:27887:24893\_2:N:0:TCTGCAAG+GCTGCACT  
GGCTTTCAACGAAGTCTCTGATTTTATTAATCATTACTTTAACGATCTCTCGGTCATTTACTCTGTAC  
TTGATCTACGTCGTTTAACTGTCGGAACAACCTTTACTTAGAATGACT  
+  
FFFFFFF:F:FFFFFFFFFFFFFFFFFFFFFFFFFFFFFFFFFFFFFFFFFFFFFFFFFFFFFFFFFFFFFFFF  
FFFFFFFFFFFFFFFFFFFFFFFFFFFFFFFFFFFFFFFFFFFFFFFFFFFFFFFFFFFFFFFF  
@A00721:190:HGJW7DSXY:4:2525:16694:19977\_2:N:0:TCTGCAAG+GCTGCACT  
TTTTCTTAGCTAATAGATTAATAAAGGATGAGTACGAAAACCAACTCTTCGTTACGAGACCTGATGGT  
AGAATAGATTTAGTCTCTACACCCATCTCAACGAGGATAAAGCGAGTT  
+  
FFFFFFFFFFFFFFFFFFFFFFFFFFFFFFFFFFFFFFFFFFFFFFFFFFFFFFFFFFFFFFFFFFFFFFFF  
FFFF,FFFFFFFFFFFFFFFFFFFFFFFFFFFFFFFFFFFFFFFFFFFFFFFF,FFF::FFF  
@A00721:190:HGJW7DSXY:4:2525:11207:24064\_2:N:0:TCTGCAAG+GCTGCACT  
TCATCCGCAAACGACTCGAAACCGAGACGCCGTAGATCAAAGTCCCTTCTAACTTTAGATTATGAATC  
CTGCCTTTACTCATTTTATAGCAGAGATCGGAAGAGCGTCGTGTAGGG  
+  
FFFFFFFFFFFFFFFFFFFFFFFFFFFFFFFFFFFFFFFFFFFFFFFFFFFFFFFFFFFFFFFFFFFFFFFF  
FFFFFF,FFFFFFFFFFFFF:FFFFFFFFFFFFFFFFFFFFFFFFFFFFFFFF:FFFFFF  
@A00721:190:HGJW7DSXY:4:2135:25563:17644\_1:N:0:TCTGCAAG+GCTGCACT  
CGATAGTGATTGTTATCAATTTAAATACATTACTGTTTCAAATCATCTTTACTCACAGACTCCGAAAA  
TGGTTTCAAATGAGGTCAAAGCTCTATTTATTAACGAACATTATCCGATTCTTCGAGGGTATCACT  
ACC  
+  
FFFFFFFFFFFFFFFFFFFFFFFFFFFFFFFFFFFFFFFFFFFFFFFFFFFFFFFFFFFFFFFFFFFFFFFF  
FFFFFFFFFFFFFFFFFFFFFFFFFFFFFFFFFFFFFFFFFFFFFFFFFFFFFFFFFFFFFFFFFFFFFFFF  
FFF  
@A00721:190:HGJW7DSXY:4:2424:15845:34976\_2:N:0:TCTGCAAG+GCTGCACT  
GGAAAATAGCAATAATCAAATTTGACAAATTTTAGAACTTTATTTCAGAACTCTCTCCGATCACCTT

+

@A00721:190:HGJW7DSXY:4:2322:1244:10848\_2:N:0:TCTGCAAG+GCTGCACT  
GTATACTTGAATACTTTATCAAAGATTTGGCTTGGTCTATTTACCGCAAAAAGTTGGAAGAGGTCTAT  
GATATTTATTTTACTTATACTTTAAATAGCACCGATTATAAATTGACT

+

@A00721:190:HGJW7DSXY:4:1131:17879:19116\_2:N:0:TCTGCAAG+GCTGCACT  
TCTTTCTCAGAAGATTAGAGAAGTAACCGGTGAACACGTCGGTAGCATTGATTTACTTTTACCGTTAG  
AACTGAAAAAGATTCTTTTCGAAAAGAAACCTATAAGTTACAAACGAT

+

@A00721:190:HGJW7DSXY:4:1211:15510:17863\_2:N:0:TCTGCAAG+GCTGCACT  
ACTTCAAGTACCTGAACCTTTACATTTTAAATGGTATGGTATAATGTGTCTTACAAATAGAACCTTCAC  
TCTCGGTAATGAGAGTGTATTCCTTAATATTCTAGTAACCGCTATGTG

+

@A00721:190:HGJW7DSXY:4:2122:18304:24580\_1:N:0:TCTGCAAG+GCTGCACT  
GTATAGTTCAAGGAGTACTTAATTCAATAGCTTTAGTATTATTTACTATCGCCTTTATTGAAAATTGT  
ATAAGAGTTAATTGCTTACACAAAAGTGACGCGCAAGGAATCTTAATTGATTGAAGCTAGGCGTTGG  
GGA

+

@A00721:190:HGJW7DSXY:4:2620:16315:5165\_1:N:0:TCTGCAAG+GCTGCACT  
ACGCCAGACGTAGGGTCAAACCTACTACCGCCGGTCGGCAGATCGGCACCACTGGTCTCTACGTTCA  
GGACCCGCTGTGCAGAATAACCTTCCCAAATCTAGATCTGCACAGAAGAAGGCTGAAGGTCGTTACCG  
GAC

+

@A00721:190:HGJW7DSXY:4:2345:18828:7138\_2:N:0:TCTGCAAG+GCTGCACT  
ACGGCAGTCCCGTCATCTCTGTGGGAAGTGAAGCAGTACCTCAGTCAAAAGTCACATTCACCACTCCC  
ATACCAATCAATGATGTGACTATACAGTTCGGCCATTTCAAGAGTGGT

+

@A00721:190:HGJW7DSXY:4:2116:11921:35164\_2:N:0:TCTGCAAG+GCTGCACT  
GGAGGTACTGAAGCCTTCCCCTCCGCTGGCACGAAGAACACTCCCAAGCCAATCAATAGTTCTTCTGA  
CCAGAATGAAAAGGGGTTTACCAGGGTAGTCTCTAAGTCTACCAGGAA

+

@A00721:190:HGJW7DSXY:4:2574:13277:35916\_2:N:0:TCTGCAAG+GCTGCACT  
 CAAAAGTATAAGAATAAAGGGAAAGGTCCATCAGGACCTAAGAAGGGGAAATTACCCCTAATTCTGA  
 AGGAAGATCTCCCAACATCTGGGGTTGGGAATAAGAAATCTGCAGATC

+

FFFFFFFFFFF:  
FFFF:FFFFFFFFFFFFFFFFFFFF::FFFF,FFFFFF:FFFFFFFF  
@A00721:190:HGJW7DSXY:4:2225:7256:4789\_2:N:0:TCTGCAAG+GCTGCACT  
CTACGAAGTCGCTGAAGGCGCCTTGGGTCAATTAAGGGTAGCTGTAAAGTTGCGCCTGCCGACCCCATC  
TTTGAGACCAAGACTCTCTACAGTAGGTTCGTGCCTACTATGAGCAAT  
+  
FFFFFFFFFFFFFFFFFFFF:FFF:,FFFFFFF,:::FFFFF,FFFFFFFFFFFFFFFFFFFF:FFFFFFFFFFFF  
,,FFFFFFFFFFFFFFFFFFFF:::FFF,FFFFFFFFFFFF,,FF:FFFF,  
@A00721:190:HGJW7DSXY:4:1624:26106:10191\_1:N:0:TCTGCAAG+GCTGCACT  
TCGTCACTGAGGACGAAGGTGAGAGGACTTTTGGCTACTGGCGACAACTGAGAGCAGTCGCTGGGGA  
AAGAGAATTGCGTGGGTGAAGGCCGACGCTTCGAGCTTGAGTGTGACGAGGCCGGTGACGTTTTTGT  
CAA  
+  
FFFFFFFFFFFFFFFFFFFFFFFFFFFFFFFFFFFFFFFFFFFFFFFFFFFFFFFFFFFFFFFFFFFFFFFFFFFF  
FFFFFFFF:FFFFFFFFFFFFFFFFFFFFFFFFFFFFFFFFFFFFFFFFFFFFFFFFFFFFFFFFFFFFFFFFFFFF  
FFF  
@A00721:190:HGJW7DSXY:4:2353:19479:21950\_1:N:0:TCTGCAAG+GCTGCACT  
TTTATCCGCGCTTAATACTATGGGGCGAAGATCCCCCTATTGAGTCTTGAAGGACTTAGGTTGGCATATTT  
ATGCCGACGATAATAAGCATGTCACCCTTAAGCACCGAGTAAGCTCGGGACTTACAAGAGAGAGTGT  
GAG  
+  
FF:FFFFFFFFFFFF:FFFFFFFFFFFFFFFFFFFFFFFFFFFFFFFFFFFFFFFFFFFFFFFFFFFFFFFFFFFF  
FFFFFFFFFFFF,F,FFFFFFFFFFFFFFFFFFFFFFFFFFFFFFFFFFFFFFFFFFFFFFFFFFFFFFFFFFFF  
FFF  
@A00721:190:HGJW7DSXY:4:2343:1407:11443\_2:N:0:TCTGCAAG+GCTGCACT  
TTCTGACTGATGAGGTTAAAACCTTGCTCCTTCTGTGGGTGAGGGTTTTTGTATATTTCACTGGTTC  
TGGGAGGCTGCTTTCCTCCATAATTACAACCTCTCTTTAGAGAGCATT  
+  
FFFF:F:FFFFFFFFFFFFFFFFFFFFFFFFFFFFFFFFFFFF:FFFFFFFF:FF:FFFFFFFFFFFFFFFFFFFF:F:  
FFFFFFFFFFFFFFFFFFFF,FFFFFFFF:FFFFFF:FFFFFFFFFFFFFFFFFFFF:F  
@A00721:190:HGJW7DSXY:4:2362:19886:26099\_2:N:0:TCTGCAAG+GCTGCACT  
TAGACGTTGTCACACTTTTCTTGAAAATTTTTCCTTTCCTCCGTCATTGGGGATTTCGATGTGAGAAG  
GTGGAAGGTGTCAAGGGTCTTCTTCATGCTGATCTTTCAGGACCTAAT  
+  
FFFFFFFFFFFFFFFFFFFFFFFFFFFFFFFFFFFFFFFFFFFFFFFFFFFF,FFFFFFFFFFFFFFFFFFFFFFFF  
FFFFFFFFFFFFFFFFFFFFFFFFFFFFFFFFFFFFFFFFFFFFFFFFFFFFFFFFFFFFFFFFFFFF  
@A00721:190:HGJW7DSXY:4:2672:23963:30812\_2:N:0:TCTGCAAG+GCTGCACT  
AGTTGGAGGGAGGAAGTTCTCCGAAATTAAGACGGGGGATTAAGAGTCCAGCTGTAAGTGTCAATTT  
CAGAGAGGGGAGCTCTGAAAAGGAACTTCGTGAGAAGATGAGGAAGA  
+  
FFFFFFFFFFFFFFFFFFFF:FFFFFFFFFFFFFFFF::::FFFFFFFFFFFFFFFF:FFFFFFFFFFFFFFFFFFFF:F  
FFFFFFFFFFFFFFFFFFFFFFFFFFFFFFFFFFFF:FFFFFFFFFFFFFFFFFFFF:FF  
@A00721:190:HGJW7DSXY:4:1477:27624:17487\_1:N:0:TCTGCAAG+GCTGCACT  
AGGAAGGCTCTAGAGAAGATCTCACCACTGGAGAAGGCAAGTGGAGAGTCCAGAAGTTGATGAAGAA  
GGATTATTTGAAGCAGGGGTTACCACTTCCTAAGGTGGATGAGGGAGGTTGTTTCTTTGGAGTTTTAG  
ATA  
+  
FFFFFFFFFFFF:FFFFFFFFFFFFFFFF,FFFFFFFFFFFFFFFFFFFFFFFFFFFFFFFFFFFFFFFFFFFF:F  
FFFFF:FFFFFFFFFFFFFFFF:FFFFFFFFFFFFFFFFFFFF:FFFFFFFFFFFFFFFFFFFFFFFFFFFF  
FFF  
@A00721:190:HGJW7DSXY:4:1272:7925:29496\_2:N:0:TCTGCAAG+GCTGCACT  
AGAATTCGGTAACTTACCATATTGTTCTTCCGGGAAGTTGTGGGATTTAACTTTGACTCAACTACTC  
CGATCAGATCCGGATGGTTTGATTGGTATGGACTACTCGAGATCGGAA  
+

FFFFFFFFFFFFFFFFFFFFFFFFFFFFFFFFFFFFFFFFFFFFFFFFFFFFFFFFFFFFFFFFFFFFFFFF  
FFFFFFFFFFFFFFFFFFFFFFFFFFFFFFFFFFFFFFFFFFFFFFFFFFFFFFFFFFFFFFFF:FF  
@A00721:190:HGJW7DSXY:4:2474:19361:23844\_2:N:0:TCTGCAAG+GCTGCACT  
GGTCAAAGATTCTGTAGCTCTGAGGGCGGTTGAGGGAGCCGTTTTGGCCGACTTTAACTATTCTAAGA  
GTCTTTATGATTCAAAACCTATCGTTGTCGTACCTTACAAGGTTGAGG  
+  
FFFFFFFFFFFFFFFFFFFFFFFFFFFFFFFFFFFFFFFFFFFFFFFFFFFFFFFFFFFFFFFFFFFFFFFF  
FFFFFFFFFFFFFFFFFFFFFFFFFFFFFFFFFFFFFFFFFFFFFFFFFFFFFFFFFFFFFFFF:FF  
@A00721:190:HGJW7DSXY:4:2201:24361:25958\_1:N:0:TCTGCAAG+GCTGCACT  
CAGCCATATCGAGACTATGTTATAATCACTTGTTAAAGTACAGATTTAGTGATTTAGATATTATTGAT  
ATTGGAGGCGATATTCGTTTCATATCCAAAACCTCCTTGAATGGAGTACATATTTGCAACCCTATTCT  
TGA  
+  
FFFFFFFFFFFFFFFFFFFFFFFFFFFFFFFFFFFFFFFFFFFFFFFFFFFFFFFFFFFFFFFFFFFFFFFF  
FFFFFFFFFFFFFFFFFFFFFFFFFFFFFFFFFFFFFFFFFFFFFFFFFFFFFFFFFFFFFFFFFFFFFFFF  
FFF  
@A00721:190:HGJW7DSXY:4:2414:12762:17080\_1:N:0:TCTGCAAG+GCTGCACT  
GCATCGAGGTATACGTCTAGGAACATTGATTGGGAACGTACCTACTCACGAGACGTATGAAAGCTAT  
CGGAGGGAAGCAAATGTTTCGTTCTGTTACAAGAACGCTTTGGATTGTGACCATAAAGCCTCAGTTG  
CGA  
+  
FFFFFFFFFFFFFFFFFFFFFFFFFFFFFFFFFFFFFFFFFFFFFFFFFFFFFFFFFFFFFFFFFFFFFFFF  
FFFFFFFFFFFFFFFFFFFFFFFFFFFFFFFFFFFFFFFFFFFFFFFFFFFFFFFFFFFFFFFFFFFFFFFF  
FFF  
@A00721:190:HGJW7DSXY:4:1160:5819:6558\_1:N:0:TCTGCAAG+GCTGCACT  
GTGACTGGAGTTCAGACGTGTGCTCTTCCGATCTGATTGATGTATGTCATTTCTGTTAGTTTGTCCC  
GGCGAATTATTGGACACGATGAAAAATGACATACCCGTTCTTGACCTTGGTATCGTTATCCGTCATGG  
AGA  
+  
FFFFFFFFFFFFFFFFFFFFFFFFFFFFFFFFFFFFFFFFFFFFFFFFFFFFFFFFFFFFFFFFFFFFFFFF  
FFFFFFFFFFFFFFFFFFFFFFFFFFFFFFFFFFFFFFFFFFFFFFFFFFFFFFFFFFFFFFFFFFFFFFFF  
FFF  
@A00721:190:HGJW7DSXY:4:2403:21612:36041\_2:N:0:TCTGCAAG+GCTGCACT  
TAACTCGTAATAAATCTTTCTCTAGTGACAATTGAGAATACCTATTTCCGTACCAAGAGCCACTGCC  
AATCTCATCGCTATACGCATACCTGATTGGAAGAAGCGAGAGATCGGA  
+  
FFFFFFFFFFFFFFFFFFFFFFFFFFFFFFFFFFFFFFFFFFFFFFFFFFFFFFFFFFFFFFFFFFFFFFFF  
FFFFFFFFFFFFFFFFFFFFFFFFFFFFFFFFFFFFFFFFFFFFFFFFFFFFFFFFFFFFFFFFFFFFFFFF  
@A00721:190:HGJW7DSXY:4:2558:29098:13808\_1:N:0:TCTGCAAG+GCTGCACT  
CTTCGGTCAATGACAAAACCTTCGAATATGTTACGACATGGCTTCGTAACAACAGTGCGAGGATTGTC  
ATCTCGGGGAAAGTGATTCACCAAGATGTTTCATATAGATACGAGATACCTAGAGAAGGTCGAGCGAT  
CTT  
+  
FFF:FFFFFFFFFFFFFFFFFFFFFFFFFFFFFFFFFFFFFFFFFFFFFFFFFFFFFFFFFFFFFFFF  
FFFFFFFFFFFFFFFFFFFFFFFFFFFFFFFFFFFFFFFFFFFFFFFFFFFFFFFFFFFFFFFFFFFFFFFF  
FFF  
@A00721:190:HGJW7DSXY:4:1126:26332:24267\_2:N:0:TCTGCAAG+GCTGCACT  
TAAGAAGAAGACTTTGGGTACACGTTATGCTCGCAAACCTAACGTTAGTACCGGAGGTGATCTCTCTG  
CTTCTGCGTTACTGAGAGAAAAGATTACAGGACGCCTACGGTGACTTTA  
+  
FFFFFFFFFFFFFFFFFFFFFFFFFFFFFFFFFFFFFFFFFFFFFFFFFFFFFFFFFFFFFFFFFFFFFFFF  
FFFFFFFFFFFFFFFFFFFFFFFFFFFFFFFFFFFFFFFFFFFFFFFFFFFFFFFFFFFFFFFFFFFFFFFF  
@A00721:190:HGJW7DSXY:4:2226:1190:25347\_2:N:0:TCTGCAAG+GCTGCACT  
GAAACTACGGTCCTTATCAAAGAAAATGGTGAACCGGTCTCTAAATCTTTTGAGATTGAGAAGATTGA

+

[illegible]

+

FFFFFFFF:FFFFFFFFFFFFFFFFFFFFFFFFFFFFFFFF,FFFFFFFFFFFF

+

FFF

+

FFF

+

FFFFFFFFFFFFFFFFFFFFFFFFFFFFFFFF,FFFFFFFFFFFFFFFFFFFF:FFFFFF

+

FFFFFFFF:FFFFFFFFFFFFFFFFFFFFFFFFFFFFFFFFFFFFFFFFFFFFFFFFFFFFFFFF

+

```
FFFFFFFFFFFFFFFFFFFFFFFFFFFFFFFFFFFFF:FFFFFFFFFFFFFFFF:F
```

+

FFF

@A00721:190:HGJW7DSXY:4:2124:13648:10441\_1:N:0:TCTGCAAG+GCTGCACT  
GAGATCTGCCACTTCTAATTTTAGGAAACGTCGCGAAAAAGAAAGTTTCATGAGGATGTCTTGGTCGAAA



AATATCGCCGGGAACTTCTAATAGAGGATCCTGATGACATTATTTCAACGGATACCGATCTCAGTTCT  
ACC

+

FF:FFFFFF,FFFF:FFFFFFFFFFFFFFFFFFFFFFFFFFFFFFFFFFFFFFFFFFFFFFFFFFFFFFFFFFFFFFFF:FFFFFFF  
FFFFFFFFFFFFFFFFFFFFFFFFFFFFFFFFFFFFFFFFFFFFFFFFFFFFFFFFFFFFFFFFFFFFFFFFFFFFFFFF:FFFFFF  
FFF

@A00721:190:HGJW7DSXY:4:1665:20708:18443\_2:N:0:TCTGCAAG+GCTGCACT  
CAGGAAGTGTCTCCACTGATTCGGAATTAGAGAAAGACGACCTTCTTGTGGGGACTGAGACCTCTGAA  
TTTTCAGGGTGCCCTGATGAGGACGTTGAAAGGGATAATTTCAACTCT

+

FFFFFFFFFFFFFFFFFFFFFFFFFFFFFFFFFFFFFFFFFFFFFFFFFFFFFFFFFFFFFFFFFFFFFFFF:FFFFFFFFFFFFFFFFFFFFFFFF:FFF  
FFFFFFFFFFFFFFFFFFFFFFFFFFFFFFFFFFFFFFFFFFFFFFFFFFFFFFFFFFFFFFFFFFFFFFFF

@A00721:190:HGJW7DSXY:4:1125:23854:8891\_2:N:0:TCTGCAAG+GCTGCACT  
TCAAAAGACCAGAAACGTAACAAGAAGATAAAGGTAGGAAGGGGAGAAAACAGAACAAGCGAGCGGT  
TGAAGAGAAAAGTATGATATGTTGCGGCTGATCGTACCCCAATTCCTGC

+

FFFFFFFFFFFFFFFFFFFFFFFFFFFFFFFFFFFFFFFFFFFFFFFFFFFFFFFFFFFFFFFFFFFFFFFF:FFFFFFFFFFFFFFFFFFFFFFFF:FFF  
FFFFFFFFFFFFFFFFFFFFFFFFFFFFFFFFFFFFFFFFFFFFFFFFFFFFFFFFFFFFFFFFFFFFFFFF

@A00721:190:HGJW7DSXY:4:1405:18231:14340\_1:N:0:TCTGCAAG+GCTGCACT  
GAGTTACGTAGTGGTCGTTCTTTTGGTGATTTTATCAAAGAGAAAGTTTCTGCTAGTCGCGACGATAG  
TATTTATCGGAGTGATATTAACAAGTTAACTTCGAAGTACCACTTACAAGAGTGTTGAAGTACCGC  
AAC

+

FFFFFFFFFF:FFFF,FFFFFFFFFFFFFFFFFFFFFFFFFFFFFFFFFFFFFFFFFFFFFFFFFFFFFFFFFFFFFFFF:FFFFFFFFFFFFFFFFFFFFFFFF:FFF  
FFFFF:,FFFFFFFFFFFFFFFFFFFFFFFFFFFFFFFFFFFFFFFFFFFFFFFFFFFFFFFFFFFFFFFFFFFFFFFFFFFFFFFF:FFFF  
FFF

@A00721:190:HGJW7DSXY:4:2150:10194:1391\_2:N:0:TCTGCAAG+GCTGCACT  
AATTAAGACAGACGTGAAAGTTATGATGAGTGATCGTATTAGAACAGCTGATACTTATTGCATGAACG  
TCGCTGAGGTCAAACCTGTGGACGTTCTTTTCATCGACGAATTATTCA

+

FF:FFF,FFFF,,FFFF:F,FFFFFFFFFFFFFFFF,F,F:FF,FF:FFFF,FF,,F:F,FFFFFFFFFF  
F:,F,:FF,F::FFFFFF,,:FF,F::F,:FFF,,FFFFFF,,FFF,F

@A00721:190:HGJW7DSXY:4:2118:24478:34115\_1:N:0:TCTGCAAG+GCTGCACT  
ACTTAAGGCGGCTTATACCATAGGTTACGGTGATTCCAATCAAATCGGATTCATCAATCGTATTGATC  
TCCAAGTCGCAAACTACTTCAACATCAACGACATCATTCTTGATGAGTGTCGTTCTTATCGAAGTCTC  
AGT

+

FFFFFFFFFFFFFFFFFFFFFFFFFFFFFFFFFFFFFFFFFFFFFFFFFFFFFFFFFFFFFFFFFFFFFFFF:FFFFFFFFFFFFFFFFFFFFFFFF:FFF  
FFFFFFFFFFFFFFFFFFFFFFFFFFFFFFFFFFFFFFFFFFFFFFFFFFFFFFFFFFFFFFFFFFFFFFFFFFFFFFFF:FFFFFFFFFFFFFFFFFFFFFFFF:FFF  
FFF

@A00721:190:HGJW7DSXY:4:1171:17318:18333\_2:N:0:TCTGCAAG+GCTGCACT  
CTGTCACGTTTAGCACGGGAGGTTGCAGATTCAACCCCTTATATCGAGGCTATCGAGGACGATGAGTA  
TCTTGAAGTTGTTGACGACAAGCCTCAAGAGGGTAGAGGACCACCTGG

+

FFFFFFFFFFFFFFFFFFFFFFFFFFFFFFFFFFFFFFFFFFFFFFFFFFFFFFFFFFFFFFFFFFFFFFFF,FFFFFFFFFFFFFFFFFFFFFFFFFFFFFFFF:FFF  
FF:FFF:FFFFFFFFFFFFFFFFFFFFFFFFFFFFFFFFFFFFFFFFFFFFFFFF:FFFF:FFFFFF

@A00721:190:HGJW7DSXY:4:2543:24306:4539\_1:N:0:TCTGCAAG+GCTGCACT  
TTAACGTCACGTAATCTTTCAGCAGAATTAAGTACTAATGAGTTCAAGTCGGTTGTCGATCGAAT  
TAAGATCAAGGCTAATACCTTTATAGGTAAGAAGCCCTTGAGCCGCGTAGTCAGCGCGTTTAGCTGT  
AT

+

FFFFF,FFFFF,:FF::F:FFFFFF,,:FFFF,F:FFFFFF:FFFFF::FF:FFF:FFFFFF:FFF,:F:  
F:FFFF::FFFF::FF,FFFFFF:FFFFFFFFFFFFFFFFFFFFFFFF::FFFFFFFFFF,F,F:FFFFFFFF  
FF

$+$ 

+

+

+

+

+

 $+$  $+$

+

©

+

9

+

④

+

6

+

©

+

©

+

©

@A00721:190:HGJW7DSXY:4:2326:16902:8155\_1:N:0:TCTGCAAG+GCTGCACT  
TCTTCCTTGGATTTTAAATATAAAGAATCTTTACCAGGACTCCTACTACAGGAGGCAGTCTTCTGATCG

TAAGAAGTTTATAAGGAACATATCCATTTGTTGTAATAGGGTCATCAACTTAGAACTCGAAACTCTAA  
GTG

+

FFFFFFFFFFFFFFFFFFFFFFFFFFFFFFFFFFFFFFFFFFFFFFFFFFFFFFFFFFFFFFFFFFFFFFFF  
FFFFFFFFFFFFFFFF:FFFF:FFFFFFFFFFFFFFFFFFFFFFFFFFFFFFFFFFFFFFFFFFFFFFFF  
FFF

@A00721:190:HGJW7DSXY:4:1369:24614:5916\_2:N:0:TCTGCAAG+GCTGCACT  
GAAATTGGA CTCTTCGATAGGGGACATTTTATCGTGGGCTTCCGTAAAGGAAGATCTGTTATCGACG  
GTTTATCGTTTACGAAGTATCACTCCACCGGTGAATGGTTAAGAATA

+

FFFF:FFFFFFFFFFFFFFFFFFFFFFFFFFFFFFFF,FFFFFFFFFFFFFF:FFFFFFFFFFFFFFFFFFFFF:  
:FFFFFFFFFFFF:FFFFFFFFF:F:FFFFFF:FFFFFFFFFFFFFFFFFFFF

@A00721:190:HGJW7DSXY:4:2105:21160:16031\_1:N:0:TCTGCAAG+GCTGCACT  
ACTGATTATCTAAAGATTGAAGGAAAATTTTATCCTCGTTTAACTTACTTAGACTTTTCTACGATACA  
AATGATAACTTCTAATTTACGTTTGCTACTCAGAGCTGGTCCTCTCAGCAAAGGGATGCATGGTGTTA  
TC

+

FFF:FFFF:FFFFFFFFF,FFFFFFFF:FFFF,FFFFFFFFFFFFFFFFFFFFFFFFFFFFFFFF,FF,FFFFF  
FFFFFFFFFFFF:F:FFFF:FFFFFF:FFF:FFFFFFFFFFFF,FFF:FFFFFFFFFFFFFFFFFFFFF  
FF

@A00721:190:HGJW7DSXY:4:1135:11369:12070\_1:N:0:TCTGCAAG+GCTGCACT  
GCATTTGATAATAATGACGAGACTTTCGTCATAATCGCTGCATATTACGGATTACACGGTACCAGCGC  
ATCTCGTGTGCGAGCCTCGACCCGATTATATGGTATTA ACTTATAAAGGTGAGGAGACCATTTTCTTGC  
TGA

+

FFF:FFFFFFFFFFFFFFFFFFFFFFFFFFFFFFFFFFFFFFFFFFFFFFFFFFFFFFFFFFFFFFFFFFFF,F  
FFFFFFFFFFFFFFFFFFFFFFFFFFFFFFFFFFFFFFFFFFFFFFFFFFFFFFFFFFFFFFFFFFFF:FFFFFFFFFFF  
FFF

@A00721:190:HGJW7DSXY:4:1175:32805:31062\_2:N:0:TCTGCAAG+GCTGCACT  
CTTCTTATAATAATAATAATAATATTACTAATGGCAAATAGTGGAAGGCTCCAGTCAACACTAG  
TTCGAGTGCTGCTTTGGATTACGATGACGTGAGAATAGGTGAAGGGAT

+

FFFFFFFFFFFF:FFFFFFFF:FFFFFFFFFFFFFFF:F:FFFFFFFFFFFF,F:FFFFFFFF:F:FFFFFFF,  
FFFFF:FF:FF:FFFFFFFFFFFFFF:FF:FFFFFFFFFFFFFFFFFFFF

@A00721:190:HGJW7DSXY:4:1321:19786:11772\_1:N:0:TCTGCAAG+GCTGCACT  
GACCAACATTAAGGCGGCGGCGACTAATCTTAAAGCTTCACCCAAAATGAAGGACACTTCGAAACTGA  
ATAATGATGCACTACAAACAAGTATCGCTAATCATCTGAAAAAGGCTCTAAAGGACACTATACAATAT  
CCA

+

FFF,FFFFFFFFFFFFFFFFFFFFFFFFFFFFFFFF:FFF:FFF:FFFFFF:FFFFFF::FF:FFFF:F  
FFFFFFFFFFFFFFFFFFFF:FFFFFFFFF,FFFFFFFFFFFFFFFFFFFF:FFFFFFFFFFFFFFFFFFFFF  
FFF

@A00721:190:HGJW7DSXY:4:2545:27868:8359\_1:N:0:TCTGCAAG+GCTGCACT  
AGGATATTCGCCATTGTGGTACGAATTGGTCCAACATTTACCACCAAATTCTTTTGATACAACTCTAG  
CCTTCAAGTGGGGTATGCCTGCGGAATACGCTTGCTATTACCAGATTGGTTCGAACCCGTTGATGCT  
ATG

+

F:FFFFFFFFFFFFFFFFFFFF:FFFFFFFF:FFFFFFFFFFFFFFFFFFFF,FFFFFFFFFFFFFF:FFFF  
FFFFFFFFFFFFFFFFFFFFFFFFFFFFFFFFFFFFFFFFFFFFFFFFFFFFFFFFFFFFFFFFFFFFFFFF  
FFF

@A00721:190:HGJW7DSXY:4:1374:32398:12571\_1:N:0:TCTGCAAG+GCTGCACT  
ATTCAAGCTTGTCGTTTAAAGACTGCAGAGGCTGTCAAACAAGCCAGACTCAAGGAGTCCAATCAAA  
GGTTTTGAATTTAGCTCAACTGGGGAGACGTGCTTAAATGGGTGATAAAAAATTATTTAGAGATCTTTT  
CTA

+  
FFFFFFFF:FFFF:FFFFFFFFFFFFFFFF:FFFFFFFFFFFFFFFFFFFFFFFF:FFFFFFFF,FFFF  
F::FFF:FFFFFFFFFFFFFFFFFFFFFFFFFFFFFFFFFFFFFFFF: F:FFFFFFFF  
FFF  
@A00721:190:HGJW7DSXY:4:2516:8657:21496\_2:N:0:TCTGCAAG+GCTGCACT  
AACCTTTAAGGACTATGTTGACTGACGAAGATTTTCACACAGATTTGTCTAAGTTGCAGATCGCCACT  
CCAAACACTATATACAGTATAAAATATAAAAAATAAGGGAGTCATAACT  
+  
F,,FFFF,,F,FF,:F:F:F:F,FFF,F,F,FF,FF,FF,FFFF:FFF,:,,,FFF,F::,F:FFF  
F,FFFFFFFF,FFFF:F,FFFF:FFFFF::FFFF:, ,FFFFFFFF:FF  
@A00721:190:HGJW7DSXY:4:2653:12002:9627\_2:N:0:TCTGCAAG+GCTGCACT  
GGCTTTCAACGAAGTCTCTGATTTTATTAATCATTACTTTAACGATCTCTCGGTCATTTACTCTGTAC  
TTGATCTACGTCGTTTAACTGTGCGAACAACTTTACTTAGAATGACT  
+  
FFFFFFFFFFFFFFFFFFFFFFFFFFFFFFFFFFFFFFFFFFFFFFFFFFFFFFFFFFFFFFFF  
FFFFFFFFFFFFFFFFFFFFFFFFFFFFFFFFFFFFFFFFFFFFFFFFFFFFFFFF  
@A00721:190:HGJW7DSXY:4:1311:25635:23907\_1:N:0:TCTGCAAG+GCTGCACT  
TTTCTTAGCTAATAGATTAATAAAGGATGAGTACGAAAACCAACTCTTCGTTACGAGACCTGATGGTA  
GAATAGATTTAGTCTCTACACCCATCTCAACGAGGATAAAGCGAGTTTTCCGTCCTGAACGTAATACA  
CGA  
+  
FFFFFFFF:FFFFFFFFFFFFFFFFFFFFFFFFFFFFFFFFFFFFFFFFFFFFFFFFFFFFFFFF  
FFFFFFFFFFFFFFFFFFFFFFFFFFFFFFFFFFFFFFFFFFFFFFFFFFFFFFFFFFFFFFFF  
FFF  
@A00721:190:HGJW7DSXY:4:2106:30237:33567\_2:N:0:TCTGCAAG+GCTGCACT  
CAAACGACTCGAAACCGAGACGCCGTAGATCAAAGTCCCTTCTAACTTTAGATTATGAATCCTGCCTT  
TACTCATTTTATAGCAGTTATTTATGTTGTACTTTTTATAATTTATAA  
+  
FFFFFFFFFFFFFFFFFFFFFFFFFFFFFFFFFFFFFFFFFFFFFFFFFFFFFFFFFFFFFFFF: F  
FFFFFFFFFFFFFFFFFFFFFFFFFFFFFFFF:FFFFFFFFFFFFFFFF  
@A00721:190:HGJW7DSXY:4:2303:16369:14497\_1:N:0:TCTGCAAG+GCTGCACT  
CGATAGTGATTGTTATCAATTTAAATACATTACTGTTTCAAATCATCTTTACTCACAGACTCCGAAAA  
TGGTTTCAAATGAGGTCAAAGCTCTATTTATTAACGAACATTATCCGATTCTTCGAGGGTATCACT  
ACC  
+  
FFFFFFFFFFFFFFFFFFFFFFFFFFFFFFFFFFFFFFFF:FFFFFFFFFFFFFFFFFFFFFFFF  
FFFFFFFFFFFFFFFFFFFFFFFFFFFFFFFFFFFFFFFFFFFFFFFFFFFFFFFFFFFFFFFF  
FFF  
@A00721:190:HGJW7DSXY:4:2378:1868:34569\_2:N:0:TCTGCAAG+GCTGCACT  
TAATCAAATTTGACAAATTTAGAACTTTATTTGAACTCTCTCCGATCACCTTGGTGTGATCTCC  
CGGAGGATCTTTTCAATAAGATGTATGATGATAATCTACTATTTTTAA  
+  
FFFFFFFFFFFFFFFF:FFFFFFFFFFFFFFFFFFFFFFFFFFFFFFFFFFFFFFFF:FFFFFFFF  
FFFFFFFFFFFFFFFFFFFFFFFFFFFFFFFFFFFFFFFFFFFFFFFFFFFFFFFF  
@A00721:190:HGJW7DSXY:4:2327:12870:27195\_2:N:0:TCTGCAAG+GCTGCACT  
GTATACTTGAATACTTTATCAAAGATTTGGCTTGGTCTATTTACCGCAAAAAGTTGGAAGAGGTCTAT  
GATATTTATTTTACTTATACTTTAAATAGCACCGATTATAACTTGACT  
+  
FFFFFFFFFFFFFFFFFFFFFFFFFFFFFFFFFFFFFFFFFFFFFFFFFFFFFFFF:FFFF:  
FFFFFFFFFFFFFFFFFFFFFFFF:FFFFFFFFFFFFFFFF  
@A00721:190:HGJW7DSXY:4:1147:30183:11835\_2:N:0:TCTGCAAG+GCTGCACT  
TCTTTCTCAGAAGATTAGAGAAGTAACCGGTGAACACGTCGGTAGCATTGATTTACTTTTACCGTTAG  
AACTGAAAAAGATTCTTTTCGAAAAGAAACCTATAAGTTACAAACGAT  
+

[illegible]

@A00721:190:HGJW7DSXY:4:2560:31349:33833\_1:N:0:TCTGCAAG+GCTGCACT  
TTTATCCGCGCTTA ACTATGGGGCGAAGATCCCCTATTGAGTCTTGAAGGACTTAGGTTGGCATATTT  
ATGCCGACGATAATAAGCATGTCAACCCTTAAGCACCGAGGTAAGCTCGGGACTTACAAGAGAGAGTGT  
GAG

@A00721:190:HGJW7DSXY:4:2615:27679:35336\_2:N:0:TCTGCAAG+GCTGCACT  
TTCTGACTGATGAGGTTAAACTCTTGCTCCTTCTGTGGGTGAGGGTTTTTGTATAGTCACTGGTTC  
TGGGAGGCTGCTTTCCTCCATAATTACAACCTCTCTTTAGAGAGCATT

@A00721:190:HGJW7DSXY:4:2369:5294:1955\_2:N:0:TCTGCAAG+GCTGCACT  
TAGACGTTGTACACTTTTCTTGAAATTTTCTTTCCTCCGTCATTGGGGATTTGATGTGAGAAG  
GTGGAAGGTGTCAAGGGTCTTCTTCATGCTGATCTTTCAGGACCTAAT

@A00721:190:HGJW7DSXY:4:1317:12689:22028\_1:N:0:TCTGCAAG+GCTGCACT  
CTTCCGATCTGGAAGTTCTCCGAAATTAAGACGGGGGATTAAGAGTCCAGCTGTAAGTGTCAATTC  
AGAGAGGGGAGCTCTGAAAAGGAACTTCGTCAGAAGATGAGGAAGTTCTCCGAAATTAAGACGGGG  
GGA

@A00721:190:HGJW7DSXY:4:2352:10230:10817\_2:N:0:TCTGCAAG+GCTGCACT  
GAAGTTGATGAAGAAGGATTATTTGAAGCAGGGGTTACCACTTCTAAGGTGGATGAGGGAGGTTGTT  
TCTTTGGAGTTTTAGATAATCTTTTGAGAAGGGGTCATAGAGCCAGCA

@A00721:190:HGJW7DSXY:4:1330:21477:21934\_2:N:0:TCTGCAAG+GCTGCACT  
AGAATTCGGTAACTTACCATAATTGTTCTTCCGGGAAGTTGTGGGATTTAACTTTGACTCAACTACTC  
CGATCAGATCCGGATGGTTTGATTGGTATGGACTACTCGACTTTTGTAT

@A00721:190:HGJW7DSXY:4:2577:1678:23437\_2:N:0:TCTGCAAG+GCTGCACT  
GGTCAAAGATTCTGTAGCTCTGAGGGCGGTTGAGGGGGCCGTTTTGGCCGACTTTAACTATTCTAAGA  
GTCTTTATGATTCAAAACCTATCGTTGTCGTACCTTACAAGGTTGAGG

@A00721:190:HGJW7DSXY:4:2275:9579:25723\_1:N:0:TCTGCAAG+GCTGCACT  
CAGCCATATCGAGACTATGTTATAATCACTTGTTAAAGTACAGATTTAGTGATTTAGATATTATTGAT  
ATTGGAGGCGATATTCGTTTTCATATCCAAAACCTCCTTGAATGGAGTACATATTTGCAACCCTATTCT  
TGA

.....

@A00721:190:HGJW7DSXY:4:1105:7536:25191\_1:N:0:TCTGCAAG+GCTGCACT  
ATCGAGGTATACGTCTAGGAACATTGATTGGGAACGTACCTACTCACGAGACGTCATGAAAGCTATCG  
GAGGGAAGCAAAATGTTTCGTTCTGTTACAAGAACGCTTTGGATTGTGACCATAAAGCCTCAGTTGCG  
ATA

@A00721:190:HGJW7DSXY:4:2553:18484:25614\_1:N:0:TCTGCAAG+GCTGCACT  
GTGACTGGAGTTCAGACGTGTGCTCTTCCGATCTGATTGATGTATGTCAATTCGTCCTTAGTTTGTCCC  
GGCGAATTATTGGACACGATGAAAAATGACATACCCGTTCTTGACCTTGGTATCGTTATCCGTCATGG  
AGA

@A00721:190:HGJW7DSXY:4:2508:22064:16939\_2:N:0:TCTGCAAG+GCTGCACT  
TAACTCGTAATAAATCTTTCTCTAGTGACAATTCAGAATACCTATTTCCGTACCAAGAGCCACTGCC  
AATCTCATCGCTATACGCATACCTGATTGGAAGAAGCGAGAGATCGGA

@A00721:190:HGJW7DSXY:4:2558:29713:14184\_1:N:0:TCTGCAAG+GCTGCACT  
CTTCGGTCAATGACAAAACCTTCGAATATGTTACGACATGGCTTCGTAACAACAGTGCGAGGATTGTC  
ATCTCGGGGAAAGTGATTCACCAAGATGTTTCATATAGATACGAGATACCTAGAGAAGGTCGCAGCGAT  
CTT

@A00721:190:HGJW7DSXY:4:1204:8458:21684\_2:N:0:TCTGCAAG+GCTGCACT  
TAAGAAGAAGACTTTGGGTACACGTTATGCTCGCAAACCTTAACGTTAGTACCGGAGGTGATCTCTCTG  
CTTCTGCGTTACTGAGAGAAAAGATT CAGGACGCCTACGGTGACTTTA

@A00721:190:HGJW7DSXY:4:2509:22525:21277\_2:N:0:TCTGCAAG+GCTGCACT  
GAAACTACGGTCCTTATCAAAGAAAATGGTGAACCGGTCTCTAAATCTTTTGAGATTGAGAAGATTGA  
AGAACACGTCAAGAAGTCGCTCGGCGTTGTTCTTGAAAACCAAGTTAA

@A00721:190:HGJW7DSXY:4:1118:14687:10833\_2:N:0:TCTGCAAG+GCTGCACT  
TTCGAGGTTACGCTACGAGAGGTGATCCCGATGTGGATTGAAGGCTGGCTCTAAGGGAGACTCCTTC  
TTTTTGAATGTTGTAAGAATTGGGTTGAGAAGTGTGCTTTACAAGGA

@A00721:190:HGJW7DSXY:4:2259:16532:36730\_1:N:0:TCTGCAAG+GCTGCACT  
TTTTCAAAAATGCGGATGGGTCTACTGATGTTTTCTACAGAGTGAGTCGTTTCAACACTTATCACC  
ACTTTTGAAAGGAAAATAATTGGTGATGAAAATACGTATGTCGGTGGGGTTCTCAAGGCTCTCATCGC  
CAC



[illegible]

+

@A00721:190:HGJW7DSXY:4:2405:13069:33270\_2:N:0:TCTGCAAG+GCTGCACT  
AAAGATCCTTTGCACAAGCAATACCTTCCACTGAGTTCATCACCCAGAGTTTCGACGTCGCGGAAAC  
GATGAAGATTTCCACACTGTTGAGAATCTTCTGATGCTGAATTTGAG

```
FFFFF:FFFFFFFF:FFFFFFFFFFFFFFFFFFFFFFFFFFFFFFFF,FFFFFFFF  
FFFFFFFFFFFFFFFFFFFFFFFFFFFFFFFFFFFFFFFF,F:F
```

+

@A00721:190:HGJW7DSXY:4:2515:19849:18458\_2:N:0:TCTGCAAG+GCTGCACT  
CAGATTAGAGACATGCCAGTTAGAGTTCTTCTAACCAGGACTGATGGTGAGATTCTTTTACCTTTTG  
AGGTCCAGGAACCTTTACTCCTAGTGTCTTTTCTAGAGTCCAAGGACG

```
FFFFFFFFFFFFFFFFFFFFFFFFFFFFFFFFFFFFFFFFFFFFFFFFFFFFFFFFFFFFF
FFFFFFFFFFFFFFFFFFFFFFFFFFFFFFFFFFFFFFFFFFFFFFFFFFFFFF
```

 $+$ 

@A00721:190:HGJW7DSXY:4:2267:11894:20275\_1:N:0:TCTGCAAG+GCTGCACT  
GAGATCTGCCACTTCTAATTTTAGGAAACGTCGCGAAAAGAAAGTTTCATGAGGATGTCTTGGTCGAAA  
AATATCGCCGGAACCTTCTAATAGAGGATCCTGATGACATTATTTCAACGGATACCGATCTCAGTTCT  
ACC

[illegible]

+

@A00721:190:HGJW7DSXY:4:1367:24334:19554\_2:N:0:TCTGCAAG+GCTGCACT  
TCAAAAAGACCAGAAACGTAACAAGAAGAATAAAGGTAGGAAGGGGAGAAAAACAGAACAAAGCGAGCGGT

+

@A00721:190:HGJW7DSXY:4:1532:32145:4272\_1:N:0:TCTGCAAG+GCTGCACT  
GAGTTACGTAGTGGTCGTTCTTTTGGTGATTTTATCAAAGAGAAAGTTTCTGCTAGTCGCGACGATAG  
TATTTATCGGAGTGATATTAACAAGTTAAACTTCGAACTGACCACTTACAAGAGTGTTGAAGTACCGC  
AAC

+

@A00721:190:HGJW7DSXY:4:2304:10728:1658\_2:N:0:TCTGCAAG+GCTGCACT  
AATTAAGACAGACGTGAAAGTTATGATGAGTGATCGATTAGAACAGCTGATTCTTATTGCATGAACG  
TCGCTGAGGTCAAACCTGTGGACGTTCTTTTCATCGACGAATTATTCA

+

@A00721:190:HGJW7DSXY:4:2150:10194:1391\_1:N:0:TCTGCAAG+GCTGCACT  
ACTTAAGGCGGATTATACCATAGGTTACGGTGATTCCAATCAAATAGGATTCATCAATCGTTTTTTTC  
TCCAAGTCGCAAACACTTCAACATCAACGACATCATTCTTGATGAGTGTCGTTCTTATCGAAGTCTC  
AGT

+

@A00721:190:HGJW7DSXY:4:1230:11216:15593\_2:N:0:TCTGCAAG+GCTGCACT  
CTGTCACGTTTAGCACGGGAGGTTGCAGATTCAACCCCTTATATCGAGGCTATCGAGGACGATGAGTA  
TCTTGAAGTTGTTGACGACAAGCCTCAAGAGGGTAGAGGACCACCTGG

+

@A00721:190:HGJW7DSXY:4:1426:4381:5603\_2:N:0:TCTGCAAG+GCTGCACT  
TCACTCGGTAATCTTTAGCCGAATTAAGTACTAATGAGTTCAAGTCGGTTGTCGATCGAATTAAGAT  
CAAGGCTAATACCTTTATAGGTAAGAAGCCCCCTTGAGCCGCGTAGTCA

+

@A00721:190:HGJW7DSXY:4:1119:22544:9032\_1:N:0:TCTGCAAG+GCTGCACT  
ATTTGTCATTTACCACTTTGCTCAACGACGAAGTGGAAACGGCCAACACTTTCTTTGGTAATTGTATG  
ATCACTTTGATGATTTTATCACTTTATTATGACCTTGGAAAGTTTTCGGCTGTGGTTGTCGCTGGGGA  
CGA

+

@A00721:190:HGJW7DSXY:4:1643:15944:27759\_1:N:0:TCTGCAAG+GCTGCACT  
ATCTGTGCTTTGAATTGTATAAGATCAAAATTTTAAACGATTCCGAGAGGTTTATCCTGATGTGGAGGG  
AGTTCTTGAAGCATCCCGACCTTTCCTTGTGAAAATTTTGATGCGGTTTCATAAGATTATCAGTAATC  
CTG

+

[illegible]

@A00721:190:HGJW7DSXY:4:1506:9471:7623\_2:N:0:TCTGCAAG+GCTGCACT  
GATATTGTTGAGCGAGAGCGACCAAGATCTAAATTCGGTAACGGTGCGTGCGCTTTATTTTAAAAAG  
CTCCCTCCTCTCGCAAGTTTGATCTGATACTTATCACGAAAGGACTTG

+

FFFFFFFFFFFFFFFFFFFFFFFFFFFFFFFFFFFFFFFFFFFFFFFFFFFFFFFFFFFFFFFFFFFFFFFFFFFFFFFF  
FFFFFFFFFFFFFFFFFFFFFFFFFFFFFFFFFFFFFFFFFFFFFFFFFFFFFFFFFFFFFFFFFFFFFFFFFFFFFFFF

@A00721:190:HGJW7DSXY:4:2508:31991:29966\_1:N:0:TCTGCAAG+GCTGCACT  
CCTCATCAGCTTGTGTTTTACCTAATCTGTGTTTTTACGATAACAACATCAGTTGATTAAGACTCTT  
CCGAAAGGCGAACTTTGGAATTTGAAGCTCAGGGTGAAGCACAACTTTGACCGTGACGAACTGTGG  
TGT

+

FFFFFFFFFFFFFFFFFFFFFFFFFFFFFFFFFFFFFFFFFFFFFFFFFFFFFFFFFFFFFFFFFFFFFFFFFFFFFFFF  
FFFFFFFFFFFFFFFFFFFFFFFFFFFFFFFFFFFFFFFFFFFFFFFFFFFFFFFFFFFFFFFFFFFFFFFFFFFFFFFF  
FFF

@A00721:190:HGJW7DSXY:4:2501:3378:3677\_2:N:0:TCTGCAAG+GCTGCACT  
TTTTAGTGAGATTATTAACGCACTAAACGTCTTCGACAACAGCAGGGGTTTTCGAATAGTGATA  
GCCACCCGCTTACAGAGGGGCAGCAGCATGACCATAATTGGTATTGA

+

FFFFFFFFFFFF:FFFFFFFFFFFFFFFFFFFFFFFFFFFFFFFFFFFFFFFFFFFFFFFFFFFFFFFFFFFFFFFF  
FFFFFFFFFFFFFFFFFFFFFFFFFFFFFFFFFFFFFFFFFFFFFFFFFFFFFFFFFFFFFFFFFFFFFFFFFFFFFFFF  
FFFFF:FFF

@A00721:190:HGJW7DSXY:4:1254:32515:20572\_1:N:0:TCTGCAAG+GCTGCACT  
TCGCTCTTCGAATGAAGTTTTAATGCTTAACAACAATGATAGTGAATTTATACCTACAATCATTGGT  
TTTTCTAATAATGATGACACTATTGTTTATGGATATGATGCTATTACTCATGATGGTTACGGTCAGGG  
AGG

+

:FFFFFFFFFFFFFFFFFFFFFFFFFFFFFFFFFFFFFFFFFFFFFFFFFFFFFFFFFFFFFFFFFFFFFFFFFFFFF  
FFFFFFFFFFFFFFFFFFFFFFFFFFFFFFFFFFFFFFFFFFFFFFFFFFFFFFFFFFFFFFFFFFFFFFFFFFFFF  
FFF

@A00721:190:HGJW7DSXY:4:1450:31078:34303\_1:N:0:TCTGCAAG+GCTGCACT  
TTAAAACCATTTGTACGATGTCGTCTGTCTCGGCGATCACTTTTCACTAAGAATTGGTCCTACTTTTGG  
ACAAGGCCAACTTCGTAATCTTCATGAGATCGTTTCTTTCTTTATCTCTTTGGTTGTTAGGGATTTTG  
AGA

+

:FFF:FFFFFFFFFFFFFFFFFFFFFFFFFFFFFFFFFFFFFFFFFFFFFFFFFFFFFFFFFFFFFFFFFFFFFFFF  
FFFFFFFFFFFFFFFFFFFFFFFFFFFFFFFFFFFFFFFFFFFFFFFFFFFFFFFFFFFFFFFFFFFFFFFFFFFFF  
FFF

@A00721:190:HGJW7DSXY:4:1560:12192:35853\_2:N:0:TCTGCAAG+GCTGCACT  
ATTGTAGTGGTTTGGTCGTTTCAGTACCCAGTCAGTATACCTCTACGCAAAGATATTTTATGAAACT  
ACAGAGGAACGTACCGGATTACCTGTCTTTCATATTATGAATGAACCT

+

FFFFFFFFFFFFFFFFFFFFFFFFFFFFFFFFFFFFFFFFFFFFFFFFFFFFFFFFFFFFFFFFFFFFFFFFFFFFF  
F:FFFFFF,FFFFFFFFFFFFFFFFFFFFFFFFFFFFFFFFFFFFFFFFFFFFFFFFFFFFFFFFFFFFFFFF

@A00721:190:HGJW7DSXY:4:1515:10601:26115\_1:N:0:TCTGCAAG+GCTGCACT  
AGGGTTCAGAATGGGATTCCTACGTAGTTTATGACTTTGGTGGTGGTACTTTCGATACTTCTATCGTC  
TTACGTTACGGTAATTACTATAGTGTTATTTATTCTGGTGGTGATGATAATCTTGGAGGTCGTGACGT  
TGA

+

FFFFFFFFFFFFFFFFFFFFFFFFFFFFFFFFFFFFFFFFFFFFFFFFFFFFFFFFFFFFFFFFFFFFFFFFFFFFF  
FFFFFFFFFFFFFFFFFFFFFFFFFFFFFFFFFFFFFFFFFFFFFFFFFFFFFFFFFFFFFFFFFFFFFFFFFFFFF  
FFF

@A00721:190:HGJW7DSXY:4:2668:17852:17127\_2:N:0:TCTGCAAG+GCTGCACT  
AGCGTTCTTATTACGGCGCACTTCTTTACCCGCCACCACAACTTTCAGTTTCACAACCTGAAGGAGG  
AGGTTTCTGTTACTGGAAAACCCTCGTCAATACTTTTCAATAATATAC

+

FFFFFFFFFFFFFFFFFFFFFFFFFFFFFFFFFFFFFFFFFFFFFFFFFFFFFFFFFFFFFFFFFFFFFFFF  
FFFFFFFFFFFFFFFFFFFFFFFFFFFFFFFFFFFFFFFFFFFFFFFFFFFFFFFFFFFFFFFFFFFFFFFF  
@A00721:190:HGJW7DSXY:4:2606:15465:21449\_2:N:0:TCTGCAAG+GCTGCACT  
TGAACAAAGTTATCAAAGATAGTGGCATTCAAGGCAAACCTACCCTGATTCCGGCCGGTGGTAGCTCA  
TTTCTACCAGGGGCTATTACTCTTGCTGAAACAGCTATTAAAGCTGTT

+  
FFFFFFFFFFFFFFFFFFFFFFFFFFFFFFFFFFFFFFFFFFFFFFFFFFFFFFFFFFFFFFFFFFFFFFFF  
FFFFF:FFFFFFFFFFFFFFFFFFFFFFFFFFFFFFFFFFFFFFFFFFFFFFFFFFFFFFFFFFFFFFFF  
@A00721:190:HGJW7DSXY:4:1610:30798:9017\_1:N:0:TCTGCAAG+GCTGCACT  
GATGTGCACTCTTTTCTGCTACTTTAACGGAGCGTAGTGTACTCTTCGTCGATTGTATCAACAGTAAC  
ATTACTTCTAATAAAGGTCTCTATCAAGCTCGTATTATCGTCGCTGCTGGATCTGCGTTACCGTTGAA  
GGC

+  
FFFFFFFFFFFFF:FFF::FFFFFFFFFF:FF,FFFFFFFFF:FFFFFFFFF:FFF:FFFFFFFF:FFF:FFFF  
:FFF::FFFFFFFFF,:F:FF,FFFFFFFF:FFFFFFFFFFFF,FF:, ,FF,FFF:F,FFFFFFFFFFFF:F:  
FFF  
@A00721:190:HGJW7DSXY:4:2472:10610:35462\_1:N:0:TCTGCAAG+GCTGCACT  
AAGACTGTGATTTATCTTTCACTCTGGCCTTGATGAGGGTGTCTTAATCGTAACATTAATAATTTCT  
AATCTTCTTAAAAAGAAGATAGAGAGTCATACTTTGGGCTATCGTTCAGGTGCATGGGGTTGGATAGC  
CAA

+  
FFFFFFFFFFFFFFFFFFFF:FFFFFFFFFFFFFFFFFFFFFFFFFFFFFFFFFFFFFFFFFFFFFFFFFFFF  
FFFFFFFFFFFFFFFFFFFFFFFFFFFFFFFFFFFFFFFFFFFFFFFFFFFFFFFFFFFFFFFFFFFFFFFF  
FFF  
@A00721:190:HGJW7DSXY:4:2337:2871:24095\_2:N:0:TCTGCAAG+GCTGCACT  
ATATTTACAAAATCTTACCCTATCTACGAACCTAAAGTTCTGAAGACGTTGCTTGTGCTTCTCTCCT  
TTAATGGCACTACCTCGGTACAATCTTACTTGGAACGAAGGCGACCTG

+  
FFFFFFFFFFFFFFFFFFFFFFFFFFFFFFFFFFFFFFFFFFFFFFFFFFFFFFFFFFFFFFFFFFFFFFFF  
FFFFFFFFFFFFFFFFFFFFFFFFFFFFFFFFFFFFFFFFFFFFFFFFFFFFFFFFFFFFFFFFFFFFFFFF  
@A00721:190:HGJW7DSXY:4:2475:19397:30671\_1:N:0:TCTGCAAG+GCTGCACT  
GTCTATATTAGGTGAAGCGAAATACGATTTTCAACGTCAACGTTACCGAGTTTCGTTTCGTACCTTG  
ATGCTGACTTTTCGTCAATATGATTTGATCTGGTTGCTCAATTCTAAGCGTGTTCGCTTAGTGCGAGG  
CCT

+  
FFFFFFFFFFFFFFFFFFFFFFFFFFFFFFFFFFFFFFFFFFFFFFFFFFFFFFFFFFFFFFFFFFFFFFFF  
FFFFFFFFFFFFFFFFFFFF:FFFFFFFFFFFFFFFFFFFFFFFFFFFFFFFFFFFFFFFFFFFFFFFFFFFF  
FFFFFFFFFFFFFFFFFFFF:FFFFFFFFFFFFFFFFFFFFFFFFFFFFFFFFFFFFFFFFFFFFFFFFFFFF  
FFF  
@A00721:190:HGJW7DSXY:4:2515:10357:1485\_1:N:0:TCTGCAAG+GCTGCACT  
TCTTCCTTGGATTTTAATATAAAGAATCTTTACCAGGACTCCTACTACAGGAGGCAGTCTTCTGATCG  
TAAGAAGTTTATAAGGAACATATCCATTTGTTGTAATAGGGTCATCAACTTAGAACTCGAAACTCTAA  
GTG

+  
FFFFFFF:FFFF:FFFFFFFFFFFFFFFFFFFFFFFFFFFFFFFFFFFFFFFFFFFFFFFFFFFFFFFF  
FFFFFFFFFFFFFFFFFFFFFFFFFFFFFFFFFFFFFFFFFFFFFFFFFFFFFFFFFFFFFFFFFFFFFFFF  
FFF  
@A00721:190:HGJW7DSXY:4:1447:15293:32393\_2:N:0:TCTGCAAG+GCTGCACT  
GAAATTGGACTCTTCGATAGGGGACATTTTATCGTGGGCTTCCGTAAAGGAAGATCTGTTATCGACG  
GTTTATCGTTTACGAAGTATCACTCCACCGGTGAATGGTTAAGAATA

+  
FFFFFFFFFFFFFFFFFFFFFFFFFFFFFFFFFFFFFFFFFFFFFFFFFFFFFFFFFFFFFFFFFFFFFFFF  
FFFFFFFFFFFFFFFFFFFF:FFFFFFFFFFFFFFFFFFFFFFFFFFFFFFFFFFFFFFFFFFFFFFFF:  
FFFFFFFFFFFFFFFFFFFF:FFFFFFFFFFFFFFFFFFFF:FFFFFFFFFFFFFFFFFFFF  
@A00721:190:HGJW7DSXY:4:2366:22788:23296\_1:N:0:TCTGCAAG+GCTGCACT  
ACTGATTATCTAAAGATTTAATGTAAAGTTTATCATCGATTTACTTACTTAGTCTTTCTACGATAGA

ATTGATAACTTCTTATTTACGTTTGCTTCTCTGTGCTGGTCCTCTCAGCAAAGGTATGCATGGTGTTA  
TC

+

F,F:FFFF,FF,,,:FFF,F,,F,,FF,FFFFFF,:,,,F,F,,F:,FFF,,FFFFFF:,,,F:,,,  
,,:FF:,FF,,,F,FF:F:,,,FFF,FF,FF,,F,,,FFFF,,FFF,F,,FFFFFF,FFF,,F:,:F:FF  
F,

@A00721:190:HGJW7DSXY:4:1427:20663:29637\_1:N:0:TCTGCAAG+GCTGCACT  
GCATTTGATAATAATGACGAGACTTTTCGTCATAATCGCTGCATATTACGGATTACACGGTACCAGCGC  
ATCTCGTGTGCGAGCCTCGACCCTATTATATGGTATTAACCTATAAAGGTGAGGAGACCATTTTCTTGC  
TGA

+

FFFFFFFFFFFFFFFFFFFFFFFFFFFFFFFFFFFFFFFFFFFFFFFFFFFFFFFFFFFFFFFFFFFFFFFF  
FFFFFFFFFFFFFFFFFFFFFFFFFFFFFFFF:F,FFFFFFFFFFFFFFFFFFFFFFFFFFFFFFFFFFFFF  
FFF

@A00721:190:HGJW7DSXY:4:1367:25979:31516\_2:N:0:TCTGCAAG+GCTGCACT  
CTTCTTATAATAATAATAATAATAATATTACTAATGGCAAATAGTGGAAAGGCTCCAGTCAACACTAG  
TTCGAGTGCTGCTTTGGATTACGATGACGTGAGAATAGGTGAAGGGAT

+

FFFFFFFFFFFFFFFFFFFFFFFFFFFFFFFFFFFFFFFFFFFFFFFFFFFFFFFFFFFFFFFFFFFFFFFF  
FFFFFFFFFFFFFFF:FFFFFFFFFFFFFFFFFFFFFFFFF,FFFFFFFFFFFFFFF

@A00721:190:HGJW7DSXY:4:2245:19452:3082\_1:N:0:TCTGCAAG+GCTGCACT  
GACCAACATTAAGGCGGCGGCGACTAATCTTAAAGCTTCACCCAAATGAAGGACACTTCGAACTGA  
ATAATGATGCACTACGAACAAGTATCGCTAATCATCTGAAAAAGGCTCTAAAGGACACTATACAATAT  
CCA

+

FF,FFFFFFFFFFFFFFFFFFFFFFFF:FFFF,F,FFFF:FFFFFF:FFFFFF:FFF:FFF:FF:FFFFFFFF  
FFFFFFFFFFFFFFFF,FFFFFFFFFFFFFFFFFFFFFFFFFFFFF:FFFFFFFFFFFFFFFFFFFFFFFF  
FFF

@A00721:190:HGJW7DSXY:4:2564:18195:14998\_1:N:0:TCTGCAAG+GCTGCACT  
AGGATATTCGCCATTGTGGTACGAATTGGTCCAACATTTACCACCAAATTCTTTTGATACAACCTCTAG  
CCTTCAAGTGGGGTATGCCTGCGGAATACGCTTGCTATTCACCAGATTGGTTGCAACCCGTTGATGCT  
ATG

+

FFFF:FFFFFFFFFFFFFFFFFFFFFFFFFFFFFFFFFFFFFFFFFFFFFFFFFFFFFFFFFFFFFFFF  
FFFFFFFFFFFFFFFFFFFFFFFFFFFFFFFFFFFFF:FFFFFFFFFFFFFFFFFFFFFFFFFFFFF:FFFFF  
FFF

@A00721:190:HGJW7DSXY:4:1423:15582:35931\_1:N:0:TCTGCAAG+GCTGCACT  
ATTCAAGCTTGTCGTTTAAAGACTGCAGAGGCTGTCAAACAAGCCAGACTCAAGGAGTCCAATCAAA  
GGTTTTGAATTTAGCTCAACTGGGGAGACGTGCTTAAATGGGTGATAAAAATTATTTAGAGATCTTT  
CTA

+

FFFFFFF,FF:F:FFFFFFFFFFFFFFFFFFFFF::FF,FFFFFF:F:FFFFFFFFFFFFFFFFFFFFF:FFFFFF  
::FFFFFFF:FFFFFFFFFFFFFFFFFFFFF:FFFFFFFFFFFFFFFFFFFFFFFFFFFFFFFFFFFFF  
FF:

@A00721:190:HGJW7DSXY:4:1263:7102:8625\_1:N:0:TCTGCAAG+GCTGCACT  
ATCCTTTAAGGACTATGTTGACTGACGAAGATTTTCCCACAGATTTGTCTACGTTGCAGATCGCCACT  
CCAAACACTATATACATTATAAAATATAAAAATAAGGGAGTCATAACTTTTGTACCAAATTCTTGGC  
TTT

+

FFFFFFFFFFFFFFFFFFFFFFFFFFFFFFFFFFFFFFFFFFFFFFFFFFFFFFFFFFFFFFFFFFFFF  
F:FFFFFFFFFFFFFFFFFFFFFFFFFFFFFFFFFFFFFFFFFFFFFFFFFFFFFFFFFFFFFFFFFFFFF  
FFF

@A00721:190:HGJW7DSXY:4:1540:4996:25394\_2:N:0:TCTGCAAG+GCTGCACT  
ATTTTATTAATCATTACTTTAACGATCTCTCGGTCATTTACTCTGTACTTGATCTACGTCGTTAACT

GTCGGAACAACCTTTACTTAGAATGACTCTATCTTTTCAGACACTTCT

+

FFFFFFFFFFFFFFFFFFFFFFFF:FFFFF::FFFFFFFFFFFFFFFFFFFFFFFF:FFFFF,FFFFF,FFFFF  
FF:FFFF:FFFFF:,FF,FFFFFF,FFFFFFFF:,FF:FFFFFF

@A00721:190:HGJW7DSXY:4:1346:15537:32377\_1:N:0:TCTGCAAG+GCTGCACT  
TTTCTTAGCTAATAGATTAATAAAGGATGAGTACGAAAACCACTCTTCGTTACGAGACCTGATGGTA  
GAATAGATTTAGTCTCTACACCCATCTCAACGAGGATAAAGCGAGTTTTCCGTCCTGAACGTAATACA  
CGA

+

FFFFFFFFFFFFFFFFFFFFFFFFFFFFFFFFFFFFFFFFFFFFFFFFFFFFFFFFFFFFFFFF  
FFFFFFFFFFFFFFFFFFFFFFFFFFFFFFFFFFFFFFFFFFFFFFFFFFFFFFFFFFFFFFFF  
FFF

@A00721:190:HGJW7DSXY:4:2242:20048:27853\_2:N:0:TCTGCAAG+GCTGCACT  
CAAACGACTCGAAACCGAGACGCCGTAGATCAAAGTCCCTTCTAACTTTAGATTATGAATCCTGCCTT  
TACTCATTTTATAGCAGTTATTTATGTTGTACTTTTTATAATTTATAA

+

FFFFFFFFFFFFFFFFFFFFFFFFFFFFFFFFFFFFFFFF:FFFFFFFFFFFFFFFFFFFFFFFF  
FFFFFFFFFFFFFFFFFFFFFFFF:FF:,FFFFFFFFFFFFFFFFFFFFFFFF:FFFF

@A00721:190:HGJW7DSXY:4:2344:31928:32863\_1:N:0:TCTGCAAG+GCTGCACT  
CGATAGTGATTGTTATCAATTTAAATACATTACTGTTTCAAATCATCTTTACTCACAGACTCCGAAAA  
TGGTTTCAAATGAGGTCAAAGCTCTATTTATTAACGAACATTATCCGATTCTTCGAGGGTATCACT  
ACC

+

:FFFFFFFFFFFFFFFFFFFFFFFFFFFFFFFFFFFFFFFF,FFF:FFFFFFFFFFFFFFFF  
FFFFFFFFFFFFFFFFFFFFFFFFFFFFFFFFFFFFFFFFFFFFFFFFFFFFFFFFFFFFFFFF  
FFF

@A00721:190:HGJW7DSXY:4:2471:16839:8077\_2:N:0:TCTGCAAG+GCTGCACT  
TAATCAAATTTGACAAATTTTAGAACTTTATTTCAGAACTCTCTCCGATCACCTTGGTGTGATCTCC  
CGGAGGATCTTTCAATAAGATGTATGATGATAATCTACTATTTTTAA

+

FFFFFFFFFFFFFFFFFFFFFFFFFFFFFFFFFFFFFFFFFFFFFFFFFFFFFFFFFFFFFFFF  
FFFFFFFFFFFFFFFFFFFFFFFFFFFFFFFFFFFFFFFF:FFFFFFFFFFFFFFFF

@A00721:190:HGJW7DSXY:4:2510:16631:22122\_2:N:0:TCTGCAAG+GCTGCACT  
GTATACTTGAATACTTTATCAAAGATTTGGCTTGGTCTATTTACCGCAAAAAGTTGGAAGAGGTCTAT  
GATATTTATTTTACTTATACTTTAAATAGCACCGATTATAACTTGACT

+

FFF:FFFFFFFFFFFFFFFFFFFFFFFFFFFFFFFF,FFFFFFFFFFFFFFFFFFFFFFFF  
FFFFFFFFFFFFFFFFFFFFFFFF:FFFFFFFF:FFFFFFFFFFFFFFFF:FFF

@A00721:190:HGJW7DSXY:4:1212:12491:12915\_2:N:0:TCTGCAAG+GCTGCACT  
TCTTTCTCAGAAGATTAGAGAAGTAACCGGTGAACACGTCGGTAGCATTGATTTACTTTTACCGTTAG  
AACTGAAAAAGATTCTTTTCGAAAAGAAACCTATAAGTTACAAACGAT

+

FFFFF:FFFFF:,F::F:FFFFFFFF:FFFFFFFFFFFFFFFF:FF,FFF::FF:F:, :FFFFFFFF  
FFF:FFFFFFFF,FFF:FFFFFFFF:FF::FFFFFFFF:

@A00721:190:HGJW7DSXY:4:1536:31485:35947\_2:N:0:TCTGCAAG+GCTGCACT  
ACTTCAAGTACCTGAACCTTACATTTTAAATGGTATGGTATAATGTGTCTTACAAATAGAACCTTCAC  
TCTCGGTAATGAGAGTGTATTCCTTAATATTCTAGTAACCGCTATGTG

+

FFFFFFFFFFFF:FFFF:FFFFFFFFFFFFFFFFFFFFFFFFFFFFFFFF:FFFFFF:FFFF  
FFFFFFFFFFFFFFFFFFFFFFFFFFFFFFFFFFFFFFFFFFFFFFFF

@A00721:190:HGJW7DSXY:4:2278:29740:36432\_1:N:0:TCTGCAAG+GCTGCACT  
GTATAGTTCAAGGAGTACTTAATTCAATAGCTTTAGTATTATTTACTATCGCCTTTATTGAAAATTGT  
ATAAGAGTTAATTGCTTACACAAAAGTGACGCGCAAGGAATCTTAATTGATTGAAGCTAGGCGTTGG  
GGA

+  
FFFFF:FF:FFFFFFFFFFFFFFFFFFFFFFFFFFFFFFFFFFFFFFFFFFFFFFFFFFFFFFFFFFFFFFFF  
FFFFFFFFFFFFFFFFFFFFFFFFFFFFFFFFFFFFFFFFFFFFFFFFFFFFFFFFFFFFFFFFFFFFFFFF  
FFF  
@A00721:190:HGJW7DSXY:4:1323:21685:2127\_1:N:0:TCTGCAAG+GCTGCACT  
TGCTCTTCCGATCTGTCAAACCTACTACCGCCGGTCGGCAGATCGGCACCACTGGTCTCTACGTTTCAG  
GGACCCGCTGTGCAGAATAACCTTCCCAAATCTAGATCTGCACAGAAGAAGGCTGAAGGTCGTTACCG  
GAC  
+  
FFFFFFFFFFFFFF:FFFFFFFFFFFFFFFFFFFFFFFFFFFFFFFFFFFFFFFFFFFFFFFFFFFFFFFF  
FFFFFFFFFFFFFFFFFFFFFFFFFFFFFFFFFFFFFFFFFFFFFFFFFFFFFFFFFFFFFFFFFFFFFFFF  
FFF  
@A00721:190:HGJW7DSXY:4:2628:12726:31015\_2:N:0:TCTGCAAG+GCTGCACT  
ACGGCAGTCCCGTCATCTCTGTGGGAACTGAGGCAGTACCTCAGTCAAAAGTCACATTCACCACTCCC  
ATACCAATCAATGATGTGACTATACAGTTCGGCCATTTCAAGAGTGGT  
+  
FFFFFFFFFFFFFFFFFFFFFFFFFFFFFFFFFFFFFFFFFFFFFFFFFFFFFFFFFFFFFFFFFFFFFFFF  
FFFFFFFFFFFFFFFFFFFFFFFFFFFFFFFFFFFFFFFFFFFFFFFFFFFFFFFFFFFFFFFFFFFFFFFF  
@A00721:190:HGJW7DSXY:4:2475:17526:29590\_2:N:0:TCTGCAAG+GCTGCACT  
GGAGGTACTGAAGCCTTCCCCTCCGCTGGCAGCAAGAACAACCTCCCAAGCCAATCAATAGTTCTTCTGA  
CCAGAATGAAAAGGGGTTTACCAGGGTAGTCTCTAAGTCTACCAGGAA  
+  
FFFFFFFFFFFFFFFFFFFFFFFFFFFFFFFFFFFFFFFFFFFFFFFFFFFFFFFFFFFFFFFFFFFFFFFF  
FFFFFFFFFF:FFFFFFFFFFFFFFFFFFFFFFFFFFFFFFFFFFFFFFFFFFFFFFFFFFFFFFFF  
@A00721:190:HGJW7DSXY:4:2222:32344:18677\_1:N:0:TCTGCAAG+GCTGCACT  
AAAAGTGAAGAATAAAGGGAAAGGTCCATCAGGACCTAAGAAGGGGAAATTACCCCTAATTCTGAA  
GGAAGATCTCCCACCATCTGGGGTTGGGAATAAGAAATCTGCACGGGCCAAAGAGGCCGCTGCTACGA  
AGT  
+  
FFFFFFFFF:FF:FFFFFF:FFFFF::FFFFFFFFFFFF,FFFFFF:,::FFF,:FFF,FFFFFF:FFFF  
FFFFFFFF:FFFFFFFFFF:FFF:FFFFFFFFFFFF:FFFFFFFFFFFFFFFFFFFFFFFF:F:FFFF:FFFF  
FFF  
@A00721:190:HGJW7DSXY:4:2274:28754:30185\_1:N:0:TCTGCAAG+GCTGCACT  
TCTTGCAGAGTGAAGTTCAGACGTGTGCTCTTCCGATCTCTTTGAGACCAAGACTCTCTACAGT  
AGGTTCTGCCTACTATGAGCAAATCTGTTGAATTCGTCACTGAGGACGAAGGTGAGAGGACTTTTGG  
CTA  
+  
FFF:FFFFFFFFFFFFFFFFFFFFFFFFFFFFFFFFFFFFFFFFFFFFFFFFFFFFFFFFFFFFFFFF  
FFFFFFFFFFFFFFFFFFFFFFFFFFFFFFFFFFFFFFFFFFFFFFFFFFFFFFFFFFFFFFFFFFFFFFFF  
FFF  
@A00721:190:HGJW7DSXY:4:2436:4137:10755\_2:N:0:TCTGCAAG+GCTGCACT  
CGTGGGTTGAAGGCCGACGCTTCGAGCTTGAGTGTGACGAGGCCGGTGACGTTTTTGTCAACGGCGTT  
TGGAGATTTTATCCGCGCTTAACCTATGGGGCGAAGATCCCCTATGGA  
+  
FFFFFFFFFFFFFFFFFFFFFFFFFFFFFFFFFFFFFFFFFFFFFFFFFFFFFFFFFFFFFFFFFFFFFFFF  
FFFFFFFFFFFFFF:FFFFFFFFFFFFFFFFFFFFFFFFFFFFFFFFFFFFFFFF:FFFFF  
@A00721:190:HGJW7DSXY:4:1329:28248:7733\_2:N:0:TCTGCAAG+GCTGCACT  
TATTTATGCCGACGATAATAAGCATGTCAACCCTTAAGCACCGAGGTAAGCTCGGGACTTACAAGAGAG  
AGTGTGAGAGAGTGCCTCTCACTATTTTTGCCAGAATGCGGGCCTTC  
+  
FFFFFFFFFFFFFFFFFFFFFFFFFFFFFFFFFFFFFFFFFFFFFFFFFFFFFFFFFFFFFFFFFFFFFFFF  
FFFFFFFFFFFFFFFFFFFFFFFFFFFFFFFFFFFFFFFFFFFFFFFFFFFFFFFFFFFFFFFF  
@A00721:190:HGJW7DSXY:4:2602:30110:35321\_1:N:0:TCTGCAAG+GCTGCACT  
GAGAGCATTAGAAGGAAGTTGGGCAAATTCACACATATGGTAGACGTTGTCACACTTTTCTTGAAAAT

TTTTCTTTCTCCGTCATTGGGGATTTCGATGTGAGAAGGTGGAAGGTGTCAAGGGTCTTCTTCATG  
CTG

+

F:FFF,,,:FF,F,,FFFF::,FF::,FFF:F,,F:FFFF,F:FFFFFF,F::FFFFFFFF,:F,FF  
FFFFF,FFFFFFFFF:::FFFFFFFFF:,FFF:FF,FFFFFF:FFFF:F:,F:FF:FF,FFFF  
FFF

@A00721:190:HGJW7DSXY:4:2552:9218:27915\_2:N:0:TCTGCAAG+GCTGCACT  
ATGATTGATAGTTACGGCTCGTATCGAGTTGGAGGGAGGAAGTTCTCCGAAATTAAAGACGGGGGGAT  
TAAGAGTCCAGCTGTAACGTGTCATTTAGAGAGGGGAGCTCTGAAAAG

+

FFFFFFFFFFFFFFFFFFFFFFFFFFFFFFFFFFFFFFFFFFFFFFFFFFFFFFFFFFFFFFFFFFFFFFFF  
FF:FFFFFFFFFFFFFFFFFFFFFFFFFFFFFFFFFFFFFFFFFFFFFFFFFFFFFFFFFFFFFFFF

@A00721:190:HGJW7DSXY:4:1514:5647:18129\_1:N:0:TCTGCAAG+GCTGCACT  
AGGAAGGCTCTAGAGAAGATCTCCCCACCTGGAGAAGGCAAGTGGAGAGTCCAGAAGTTGATGAAGAA  
GGATTATTTGAAGCAGGGTTACCACTTCCTAAGGTGGATGAGGGAGGTTGTTTCTTTGGAGTTTATAG  
ATA

+

:FFF:FFFFFFFFFFFFFFFFFFFFFFFFFFFFFFFFFFFFFFFFFFFFFFFFFFFFFFFFFFFFFFFF  
FFFFFFFFFFFFFFFFFFFFFFFFFFFFFFFFFFFFFFFFFFFFFFFFFFFFFFFFFFFFFFFFFFFFFFFF  
FFF

@A00721:190:HGJW7DSXY:4:1335:6271:8093\_2:N:0:TCTGCAAG+GCTGCACT  
AGAATTCGGTAACCTTACCATATTGTTCTTCCGGGAAGTTGTGGGATTTAACTTTGACTCAACTACTC  
CGATCAGATCCGGATGGTTTGATTGGTATGGACTACTCGAGATCGGAA

+

FFFFF:FFF:FFFFFFFFFFFFFFFFFFFFFFFFFFFFFFFFFFFFFFFFFFFFFFFFFFFFFFFF  
F:FFFFFFFFFFFFFF:F:FFFFFFFFF::FFFFFFFFFFFFFFFFFFFFFFFF

@A00721:190:HGJW7DSXY:4:2651:11912:32080\_2:N:0:TCTGCAAG+GCTGCACT  
GGTCAAAGATTCTGTAGCTCTGAGGGCGGTTGAGGGAGCCGTTTGGCCGACTTTAACTATTCTAAGA  
GCCTTTATGATTCAAAACCTATCGTTGTCGTACCTTACAAGGTTGAGG

+

F:FF,FFFF:FFF:FFF:FFFF,FFFF:FFFFFFFFFFFFFFFFFFFFFFFF,FFF,FFFFF:F,FF,,FFF,F  
FFFFFFFFF:FFFFFFFFFFFF:F,FFFFFFFF:FFF,FFFF,FFF:F

@A00721:190:HGJW7DSXY:4:2417:5710:30639\_1:N:0:TCTGCAAG+GCTGCACT  
GAGGCGATATTCGTTTTTCATATCCAAAACCTCTTGAATGGAGTACATATTTGCAACCCTATTCTTGAT  
GTGAAAGATGCATCGAGGTATACGTCTAGGAACATTGATTGGGAACGTACCTACTCACGAGACGTCAT  
GAA

+

FFFFFFFFFFFFFFFFFFFFFFFFFFFFFFFFFFFFFFFFFFFFFFFFFFFFFFFFFFFFFFFFFFFFFFFF  
FFFFFFFFFFFFFFFFFFFFFFFFFFFFFFFFFFFFFFFFFFFFFFFFFFFFFFFFFFFFFFFFFFFFFFFF  
FFF

@A00721:190:HGJW7DSXY:4:1309:29360:32111\_2:N:0:TCTGCAAG+GCTGCACT  
TACAAGAACGCTTTGGATTGTGACCATAAAGCCTCAGTTGCGATAGCTGTAGAGGTATACGATATCTC  
TCTTGATGATGTAGCCACTATAATGCTTAAGAGAGAGATTGATGTATG

+

FFFFFFFFFFFFFFFFFFFFFFFFFFFFFFFFFFFFFFFFFFFFFFFFFFFFFFFFFFFFFFFFFFFFFFFF  
FFFFFFFFFFFFFFFFFFFFFFFFFFFFFFFFFFFFFFFFFFFFFFFFFFFFFFFFFFFFFFFF

@A00721:190:HGJW7DSXY:4:2544:25961:34835\_2:N:0:TCTGCAAG+GCTGCACT  
TAACTCGTAATAAATCTTTCTCTAGTGGACAATTCAGAATACCTATTTCCGTACCAAGAGCCACTGCC  
AATCTCATCGCTATACGCATACCTGATTGGAAGAAGCGAGAGATCGGA

+

FFFFFFFFFFFFFFFFFFFFFFFFFFFFFFFFFFFFFFFFFFFFFFFFFFFFFFFFFFFFFFFFFFFFFFFF  
FFFFFFFFFFFFFFFFFFFFFFFFFFFFFFFFFFFFFFFFFFFFFFFFFFFFFFFFFFFFFFFF

@A00721:190:HGJW7DSXY:4:2620:25301:14591\_1:N:0:TCTGCAAG+GCTGCACT  
CTTCGGTCAATGACAAAACCTTCGAATATGTTACGACATGGCTTCGTAACAACAGTGCGAGGATTGTC



ATCTCGGGGAAAGTGATTCACCAAGATGTTTCATATAGATACGAGATACCTAGAGAAGGTCGCAGCGAT  
CTT

+

FFFFFFFFFFFFFFFFFFFFFFFFFFFFFFFFFFFFFFFFFFFFFFFFFFFFFFFFFFFFFFFFFFFFFFFF  
FFFFFFFFFFFFFFFF:FFFFFFFFFFFFFFFFFFFFFFFFFFFFFFFFFFFFFFFFFFFFFFFFFFFFFFFF  
FFF

@A00721:190:HGJW7DSXY:4:2115:9643:21699\_2:N:0:TCTGCAAG+GCTGCACT  
TAAGAAGAAGACTTTGGGTACACGTTATGCTCGCAAACCTAACGTTAGTACCGGAGGTGATCTCTCTG  
CTTCTGCGTTACTGAGAGAAAAGATTACAGGACGCCTACGGTGACTTTA

+

FFFFFFFFFFFFFFFFFFFFFFFF:FFFFFFFFFFFFFF,FFFFFFFFFFFFFF:FFFFFFFFFFFFFFFF  
FFFFFFFFFFFFFF,FFFFFFFFFFFFFFFFFFFFFFFFFFFFFFFFFFFFFFFFFFFFFFFF

@A00721:190:HGJW7DSXY:4:2645:3052:13322\_2:N:0:TCTGCAAG+GCTGCACT  
GAAACTACGGTCCTTATCAAAGAAAATGGTGAACCGGTCTCTAAATCTTTTGAGATTGAGAAGATTGA  
AGAACACGTCAAGAAGTCGCTCGGCGTTGTTCTTGAAAACCAAGTTAA

+

FFFFFFFFFFFFFFFFFFFFFFFFFFFFFFFFFFFFFFFFFFFFFFFFFFFFFFFF,FFFFF::FFFFF,FFFFF  
FFFFFFFFFFFFFFFFFFFFFFFFFFFFFFFF,FFFFFFFFFFFFFF:FFFFF

@A00721:190:HGJW7DSXY:4:1145:12644:19038\_2:N:0:TCTGCAAG+GCTGCACT  
TTCGAGGTTACAGCTACGAGAGGTGATCCCGGATGTGGATTGAAGGCTGGCTCTAAGGGAGACTCCTTC  
TTTTGAATGTTGTAAAGAATTGGGTTGAGAAGTGTGCTTTACAAGGA

+

FFFFFFFFFFFFFFFFFFFFFFFFFFFFFFFFFFFFFFFFFFFFFFFFFFFFFFFFFFFFFFFFFFFFFFFF  
FFFFFFFFFFFFFF,FF:FFFFFFFFFFFFFF:FFFFFFFFFFFFFF

@A00721:190:HGJW7DSXY:4:2339:31846:4507\_1:N:0:TCTGCAAG+GCTGCACT  
TTTTCAAAAATGCGGATGGGTCTACTGATGTTTTCTACAGAGTGCAGTCGTTCAACACTTATCACC  
ACTTTTGAAAGGAAAATAATTGGTGATGAAAATACGTATGTCGGTGGGGTTCTCAAGGCTCTCATCGC  
CAC

+

::,FFF:F:FFFFFFFFF:FFFFFF:F,F,:FFFFFFFFFFFFFFFFFFFFFFFF,FFFFFFFFFF,FF  
FFFFFFFFFFFFFFFFFFFFFFFF::FFFFFFFFFFFFFFFFFFFFFFFFFFFFFFFFFFFFFFFFFFFF  
FFF

@A00721:190:HGJW7DSXY:4:2502:29125:4053\_1:N:0:TCTGCAAG+GCTGCACT  
TTCTTAAAATAAGTTTATTAACCTTCAGAGTCTCTTGGAAGTCCAGGTAGCTAATGTTCTTGCAATA  
GCCACAGACTTTCTGGGAAAAGAGACCTCTGTTGGTAGAGGAGTTGAGAGAATTACTCAGATTCAATC  
TGG

+

FFF:FFFF,,:FFFFFFFFFFFFFFFF:F:,FFFFFFFFFFFF,FF:FF,F,F,FFFF,FF,FFF::  
FF:FFFF:FFFF,FF,:FF:FF::F,:F,FFFF,FFF:, ,FFFFFFFF:F,F:FFFF:F:, :F,F,FF  
FF,

@A00721:190:HGJW7DSXY:4:2671:25283:8453\_2:N:0:TCTGCAAG+GCTGCACT  
AAAGATCCTTTGCACAAGCAATACCTTCCACTGAGTTCATCACCCAGAGTTTCGACGTCGCGGAAAAC  
GATGAAGATTTCCACACTGTTGAGAATCTTCTGATGCTGAATTTGAG

+

FFFFFFFFFFFFFFFFFFFFFFFFFFFFFFFFFFFFFFFFFFFFFFFFFFFFFFFFFFFFFFFFFFFFFFFF  
FFFFFFFFFFFFFFFFFFFFFFFFFFFFFFFFFFFFFFFFFFFFFFFFFFFFFFFF

@A00721:190:HGJW7DSXY:4:2112:27896:7185\_2:N:0:TCTGCAAG+GCTGCACT  
TCTTTTATCATTGCAACAGGACTTTGAGAAGACTGTTGAAATGGACAAAATCTGGGATCATAGGTATG  
TGTCACGCTACACTCGAAATATGGGCCCTCATAAGAGATCGGAAGAGC

+

FFFFFFFFFFFFFFFFFFFFFFFF:FFFFFFFFFFFFFFFFFFFFFFFFFFFFFFFF:FFFFFFFFFF  
,FFFF,FFF:FFF:FFFFF,:F,FFFFFFFF,F,FF::FFF:F:F

@A00721:190:HGJW7DSXY:4:1534:17047:24251\_1:N:0:TCTGCAAG+GCTGCACT  
GATTAGAGACATGCCAGTTAGAGTTCTTCTAACCAGGACTGATGGTGAGATTCTTTTACCTTTTGAG

GTCCAGGAACCTTTACTCCTAGTGTCTTTTCTAGAGTCCAAGGACGTTTCCGTCGGAGGATGACAGGT  
GGG

+

FFF,FFFFFFFFFFFFFFFFFFFFFFFFFFFFFFFFFFFFFFFFFFFFFFFFFFFFFFFFFFFFFFFF  
FFFFFFFFFFFF:FFFFFFFFFFFFFFFFFFFFFFFFFFFFFFFFFFFFFFFFFFFFFFFFFFFFFFFF  
FFF

@A00721:190:HGJW7DSXY:4:1204:26078:3912\_1:N:0:TCTGCAAG+GCTGCACT  
ATTAAACATAAAATCCAGCGATTCTATTATGTCGCTAAAGCCTGTCCAGTTGTGATGATGTTTCGGGC  
TGTGGGGATTAACTTCCCTCGTGAACTTACGACGATGTTCTCGCTCGCATTTACAAGGATTACTAA  
GTC

+

FFFFFFFFFFFFFFFFFFFFFFFFFFFFFFFFFFFFFFFFFFFFFFFFFFFFFFFFFFFFFFFFFFFF  
FFFFFFFFFFFFFFFFFFFFFFFFFFFFFFFFFFFFFFFFFFFFFFFFFFFFFFFFFFFFFFFFFFFF  
FFF

@A00721:190:HGJW7DSXY:4:1526:6406:13964\_2:N:0:TCTGCAAG+GCTGCACT  
ACTTCTAATTTTAGGAAACGTCGCGAAAAGAAAGTTTCTGAGGATGTCTTGGTGGGAAATATCGCCG  
GGAACCTCTAATAGAGGATCCTGATGACATTATTTCAACGGATACCGA

+

FFFFFFFFF:FFFFFFFFF:FFFF:FFFFFFFFFFFFFFFFFFFFFFFFFFFFFFFFFFFFFFFFF:FFFF:F,  
FFFF:FFFFFFFFF:FFFFFFFFF,FFFFFFFFFFFF,FFFF:FFFF

@A00721:190:HGJW7DSXY:4:1221:14543:8829\_1:N:0:TCTGCAAG+GCTGCACT  
CGTCTCAGGAAGTGTCTCCACTGATTCGGAATTAGAGAAAAGACGACCTTCTTGTGGGGACTGAGACCT  
CTGAATTTTCAGGGTGCCCTGATGAGGACGTTGAAAGGGATAATTTCAACTCTGAGACTTCTAAGAGT  
GTT

+

FFFFFFFFFFFFFFFFFFFFFFFFFFFFFFFFFFFFFFFFFFFFFFFFFFFFFFFFFFFFFFFFFFFF  
FFFFFFFFFFFFFFFFFFFFFFFFFFFFFFFFFFFFFFFFFFFFFFFFFFFFFFFFFFFFFFFFFFFF  
FFF

@A00721:190:HGJW7DSXY:4:2212:22010:5415\_1:N:0:TCTGCAAG+GCTGCACT  
GAGTTACGTAGTGGTGGTCTTTTGGTGAATTTATCAAAGAGAAAGTTTCTGCTAGTCGCGACGATAG  
TATTTATCGGAGTGATATTAACAAGTTAACTTCAACTGACCACTTACAAGAGTGTTGAAGTACCGC  
AAC

+

FFFFFFFFFFFFFFFFFFFFFFFFFFFFFFFFFFFFFFFFFFFFFFFFFFFFFFFFFFFFFFFFFFFF  
FFFFFFFFFFFFFFFFFFFFFFFFFFFFFFFFFFFFFFFFFFFFFFFFFFFFFFFFFFFFFFFFFFFF  
FFF

@A00721:190:HGJW7DSXY:4:2319:30355:3583\_2:N:0:TCTGCAAG+GCTGCACT  
AATTAAGACAGACGTGAAAGTTATGATGAGTGATCGTATTAGAACAGCTGATTCTTATTGCATGAACG  
TCGCTGAGGTCAAACCTGTGGACGTTCTTTTCATCGACGAATTATTCA

+

FFFFFFFFFFFFFFFFFFFFFFFFFFFFFFFFFFFFFFFFFFFFFFFFFFFFFFFFFFFFFFFFFFFF  
FFFFFFFFFFFFFFFFFFFFFFFFFFFFFFFFFFFFFFFFFFFFFFFFFFFFFFFFFFFF:F

@A00721:190:HGJW7DSXY:4:2167:14470:32534\_1:N:0:TCTGCAAG+GCTGCACT  
ACTTAAGGCGGCTTATACCATAGGTTACGGTGATTCCAATCAAATCGGATTCATCAATCGTATTGATC  
TCCAAGTCGCAAACCTACTTCAACATCAACGACATCATTCTTGATGAGTGTCGTTCTTATCGAAGTCTC  
AGT

+

FFFFFFFFFFFFFFFFFFFFFFFFFFFFFFFFFFFFFFFFFFFFFFFFFFFFFFFFFFFFFFFFFFFF  
FFFFFFFFFFFFFFFFFFFFFFFFFFFFFFFFFFFFFFFFFFFFFFFFFFFFFFFFFFFF:FFF  
FFF

@A00721:190:HGJW7DSXY:4:1459:11496:28479\_2:N:0:TCTGCAAG+GCTGCACT  
CTGTCACGTTTAGCACGGGAGGTTGCAGATTCAACCCCTTATATCGAGGCTATCGAGGACGATGAGTA  
TCTTGAAGTTGTTGACGACAAGCCTCAAGAGGGTAGAGGACCACCTGG

+

FFFFFFFFFFFFFFFFFFFF,FF:FFFFFFFFFFFFFFFFFFFFFFFFFFFFFFFFFFFFFFFF:FFFFFFF  
:FFFFFF,FFFFFFFFFFFFFF:FFFFF,:FFFFFFFFFFFFFFFFFFFFFF  
@A00721:190:HGJW7DSXY:4:2464:27588:22216\_2:N:0:TCTGCAAG+GCTGCACT  
TCACTCGGTAATCTTTTCAGCCGAATTAAGTACTAATGAGTTCAAGTCGGTTGTTCGATCGAATTAAGAT  
CAAGGCTAATACCTTTATAGGTAAGAAGCCCCTTGAGCCGCGTAGTCA

+  
FFFFFFFFFFFFFFFFFFFFFFFFFFFFFFFFFFFFFFFFFFFFFFFFFFFFFFFFFFFFFFFF:FFFFFFFF:FFFFFFFFFFFFFFFFFFFF  
FFFFFFFFFFFF,FFFFF,FFFFFFFFFFFFFFFFFFFFFFFFFFFFFFFFFFFFFFFFFFFFF,  
@A00721:190:HGJW7DSXY:4:1161:12599:19742\_1:N:0:TCTGCAAG+GCTGCACT  
ATTTGTCAATTTACCACCTTTGCTCAACGACGAAGTGAACGGCCAACACTTTATTTTGTAAATGTATG  
ATCACTTTGATGATTTTATCACTTTATTATGACCTTGGAAGTTTTTCGGCTGTGGTTGTTCGCTGGGGA  
CGA

+  
FFFFFFF:FFF:FF:FFFFF,F:F,FF:FFF::FF,F:FFFFF,:F:FFF:,FF,,FF,:FFFFFFF  
FF:F,FFFFFF:FFFFFFFFF,:FFF:FFFFF,,,FF:FF:FFFFFFF:F,FFFFFFFFF,FFF:FFFF  
FFF  
@A00721:190:HGJW7DSXY:4:2257:13819:32753\_1:N:0:TCTGCAAG+GCTGCACT  
ATCTGTGCTTTGAATTGTATAAGATCAAATTTTAAACGATTCCGAGAGGTTTATCCTGATGTGGAGGG  
AGTTCTTGAAGCATCCCGACCTTTCCTTGTAAGAAATTTTGATGCGGTTTCATAAGATTATCAGTAATC  
CTG

+  
FFFFFFFFFFFFFFFFFFFFFFFFFFFFFFFFFFFFFFFFFFFFFFFFFFFFFFFFFFFFFFFF:FFFFFFFFF  
FFFFFFFFFFFFFFFFFFFFFFFFFFFFFFFFFFFFFFFFFFFFFFFFFFFFFFFFFFFFFFFFFFFFFFFFF  
FFF  
@A00721:190:HGJW7DSXY:4:1508:20518:22968\_2:N:0:TCTGCAAG+GCTGCACT  
GATATTGTTGAGCGAGAGCGACCAAGATCTAAATTCGGTAACGGTGCGTGCGCTTTATTTTAAAAAG  
CTCCCTCCTCTCGCAAGTTTGATCTGATACTTATCACGAAAGGACTTG

+  
FFFFFFFFFFFFFFFFFFFFFFFFFFFFFFFFFFFFFFFFFFFFFFFFFFFFFFFFFFFFFFFF:FFFFFFFFF  
FFFFFFFFFFFF:FFFFFFFFFFFFFFFFFFFFFFFFFFFFFFFFFFFFFFFFFFFFFFFFF  
@A00721:190:HGJW7DSXY:4:2330:29731:28275\_1:N:0:TCTGCAAG+GCTGCACT  
CTCATCAGCTTGTGTTTTACCTAATCTGTGTTTTTACGATAACAACACTATCAGTTGATTAAGACTCTTC  
CGAAAGGCGAACTTTGGGAATTTGAAGCTCAGGCTGAAGCACAACGTTTGACCGTGACGAAGTGTGGT  
GT

+  
FFFFFFF:::FF:FFFFF,FF:FFFFFFFFFFFFFFFFFFFFFFFFFFFFFFFFFFFFFFFFFFFFFFFFF  
FFFFFFFFF:F:FFFFFFFFFFFFFFFFF,FFFFFFF::FFFFFFFFF::FFFFFFFFFFFFFFFFFFFFF  
FF  
@A00721:190:HGJW7DSXY:4:2633:27868:22388\_2:N:0:TCTGCAAG+GCTGCACT  
TTTTAGTGAGATTATTAACAAACGCACTAAACGCTCTTCGACAACAGCAGGGGTTTTCGAATAGTGATA  
GCCACCCGCCTTACAGAGGGGCAGCAGCATGACCATAATTGGTATTGA

+  
FFFFFFFFF,FFFFFFFFFFFFFFFFFFFFFFFFFFFFFFFFFFFFFFFFFFFFFFFFFFFFFFFF:FFFFFFF:FF:FFFFFF:FFFFFFFFFFFFF  
FFFFFFFFFFFFF:FFFFFFFFF:FFFFFFF:FFFFFFFFF:FFFFFFFFF  
@A00721:190:HGJW7DSXY:4:1265:19425:3505\_1:N:0:TCTGCAAG+GCTGCACT  
TCGCCTCTTGAATGAAGTTTTAATGCTTAACAACAATGATAGTGAATTTATACCTACAATCATTGGT  
TTTTCTAATAATGATGACACTATTGTTTATGGATATGATGCTATTACTCATGATGGTTACGGTCAGGG  
AGG

+  
FFFFFFFFFFFFFFFFFFFFFFFFFFFF,FFFFFFFFFFFFF:FFFFFFF:FFFFFFFFFFFFFFFFFFFFFFFFF  
FFFFFFFFFFFFF:FFFFFFFFFFFFF,FFFFFFFFFFFFFFFFFFFFFFFFFFFFFFFFFFFFFFFFFFFFF  
FFF  
@A00721:190:HGJW7DSXY:4:2211:5719:8578\_1:N:0:TCTGCAAG+GCTGCACT  
TTAAAACCATTTGTACGATGTCGTCTGTCTCGGCGATCACTTTTCACTAAGAATTGGTCCTACTTTTGG

ACAAGGCCAACTTCGTAATCTTCATGAGATCGTTTCTTTCTTTATCTCTTTGGTTGTTAGGGATTTTG  
AGA

+

FFFFFFFFFFFFFFFFFFFFFFFFFFFFFFFFFFFFFFFFFFFFFFFFFFFFFFFFFFFFFFFFFFFFFFFFFFFFFFFF  
FFFFFFFFFFFFFFFFFFFFFFFFFFFFFFFFFFFFFFFFFFFFFFFFFFFFFFFFFFFFFFFFFFFFFFFFFFFFFFFF  
FFF

@A00721:190:HGJW7DSXY:4:1622:10303:30577\_2:N:0:TCTGCAAG+GCTGCACT  
ATTGTAGTGGTTTGGTCGTTTCAGTACCCAGTCAGTATACCTCTACGCAAAGATATTTTCATGAAAAC  
ACAGAGGAACGTACCGGATTACCTGTCTTTCATATTATGAATGAACCT

+

FFFFFFFFFFFF,FFFFFFFFFFFFFFFFFFFFFFFFFFFFFFFFFFFFFFFFFFFFFFFFFFFFFFFFFFFFFFFF  
FFFFFFFFFFFFFFFFFFFFFFFFFFFFFFFFFFFFFFFFFFFFFFFFFFFFFFFFFFFFFFFFFFFFFFFFFFFFFFFF

@A00721:190:HGJW7DSXY:4:1527:22200:4366\_1:N:0:TCTGCAAG+GCTGCACT  
AGGGTTCAGAATGGGATTCCTACGTAGTTTATGACTTTGGTGGTGGTACTTTCGATACTTCTATCGTC  
TTACGTTACGTAATTACTATAGTGTTATTTATTCTGGTGGTGATGATAATCTTGGAGGTCGTGACGT  
TGA

+

FF:FFFFFFFF,FFFFFFFFFFFFFFFFFFFFFFFFFFFFFFFFFFFFFFFFFFFFFFFFFFFFFFFFFFFFFFFF  
FFFFFFFFFFFFFFFFFFFFFFFFFFFFFFFFFFFFFFFFFFFFFFFFFFFFFFFFFFFFFFFFFFFFFFFFFFFFFFFF  
FFF

@A00721:190:HGJW7DSXY:4:1107:11351:16235\_2:N:0:TCTGCAAG+GCTGCACT  
GCGTTCTTATTACGGCGCACTTCTTTACCCGCCACCACACAACCTTTCAGTTTCACAACTGAAGGAGGA  
GTTTTCTGTACTGGAAAACCCTCGTCAATACTTTTCAATAATATACG

+

FFFFFFFFFFFFFFFFFFFFFFFFFFFFFFFFFFFFFFFFFFFFFFFFFFFFFFFFFFFFFFFFFFFFFFFFFFFFFFFF  
FFFFFFFFFFFFFFFFFFFFFFFFFFFFFFFFFFFFFFFFFFFFFFFFFFFFFFFFFFFFFFFFFFFFFFFFFFFFFFFF

@A00721:190:HGJW7DSXY:4:2671:21658:31078\_2:N:0:TCTGCAAG+GCTGCACT  
TGAACAAAGTTATCAAAGATAGTGGCATTCAAGGCAAACCTACCCTGATTCCGGCCGGTGGTAGCTCA  
TTTCTACCAGGGGCTATTACTCTTGCTGAAACAGCTATTAAAGCTGTT

+

FFFFFFFFFFFFFFFFFFFFFFFFFFFFFFFFFFFFFFFFFFFFFFFFFFFFFFFFFFFFFFFFFFFFFFFFFFFFFFFF  
FFFFFFFFFFFFFFFFFFFFFFFFFFFFFFFFFFFFFFFFFFFFFFFFFFFFFFFFFFFFFFFFFFFFFFFFFFFFFFFF

@A00721:190:HGJW7DSXY:4:2169:23005:22263\_1:N:0:TCTGCAAG+GCTGCACT  
GATGTGCACTCTTTTCTGCTACTTTAACGGAGCGTAGTGACTCTTCGTCGATTGTATCAACAGTAAC  
ATTACTTCTAATAAAGGTCTCTATCAAGCTCGTATTATCGTCGCTGCTGGATCTGCGTTACCGTTGAA  
GGC

+

FFFFFFFFFFFFFFFFFFFFFFFFFFFFFFFFFFFFFFFFFFFFFFFFFFFFFFFFFFFFFFFFFFFFFFFFFFFFFFFF  
FFFFFFFFFFFF:FFFFFFFFFFFFFFFFFFFFFFFFFFFFFFFFFFFFFFFFFFFFFFFFFFFFFFFFFFFFFFFF  
FFF

@A00721:190:HGJW7DSXY:4:2676:16016:14418\_1:N:0:TCTGCAAG+GCTGCACT  
AAGACTGTGATTTATCTTTCCTCTGGCCTTGTATGAGGGTGTCTTAATCGTAACATTAATAATTTTC  
AATCTTCTTAAAAAGAAGATAGAGAGTCATACTTTGGGCTATCGTTACGGTGCATGGGGTTGGATAGC  
CAA

+

FFFFFFFFFFFFFFFFFFFFFFFFFFFFFFFFFFFFFFFFFFFFFFFFFFFFFFFFFFFFFFFFFFFFFFFFFFFFFFFF  
FFFFFFFFFFFFFFFFFFFFFFFFFFFFFFFFFFFFFFFFFFFFFFFFFFFFFFFFFFFFFFFFFFFFFFFFFFFFFFFF  
FFF

@A00721:190:HGJW7DSXY:4:2362:1796:22200\_2:N:0:TCTGCAAG+GCTGCACT  
ATATTTACAAAATCTTACCCTATCTACGAACCTAATGTTCTGAAGACGTTGCTTGTGCGCTCCTCCT  
GTAATGGCACTACCTCGGTACAAGCTGACTTGGTCCGAGGGCGGCGTG

+

FF:,FFFF,,:FFFFFFFF::FFFF,FF:FFFF,,F:::FF:FF,:FFFF,:F:F:F:,FF:F:,F  
,,, :FFFF,F,F:F,:F,:::,,, :F,,FFF,: :F,F,:F,: :F

@A00721:190:HGJW7DSXY:4:2475:19416:30514\_1:N:0:TCTGCAAG+GCTGCACT  
GTCTATATTAGGTGAAGCGAAATACGATTTTCAACGTCAACGTTACCGAGTTTCGTTTCGTACCTTG  
ATGCTGACTTTCGTCAATATGATTTGATCTGGTTGCTCAATTCTAAGCGTGTCCGCTTAGTGCGAGG  
CCT

+

FFFFFF:FFFFFFFFFFFFFFFFFFFFFFFFFFFFFFFFFFFFFFFFFFFFFFFFFFFFFFFFFFFFFFFF  
FFFFFFFFFFFFFFFFFFFFFFFFFFFFFFFFFFFFFFFFFFFFFFFFFFFFFFFFFFFFFFFF:FFFFFFFFFFFFFFFF  
FFF

@A00721:190:HGJW7DSXY:4:2628:9326:31923\_1:N:0:TCTGCAAG+GCTGCACT  
TCTTCCTTGGATTTTAAATATAAAGAATCTTTACCAGGACTCCTACTACAGGAGGCAGTCTTCTGATCG  
TAAGAAGTTTATAAGGAACATATCCATTTGTTGTAATAGGGTCATCAACTTAGAACTCGAAACTCTAA  
GTG

+

FFFFFFFFFFFFFFFFFFFFFFFFFFFFFFFFFFFFFFFFFFFFFFFFFFFFFFFFFFFFFFFFFFFFFFFF  
FFFFFFFFFFFFFFFFFFFFFFFFFFFFFFFFFFFFFFFFFFFFFFFFFFFFFFFFFFFFFFFFFFFFFFFFFFFF  
FFF

@A00721:190:HGJW7DSXY:4:1670:28140:35289\_2:N:0:TCTGCAAG+GCTGCACT  
GAAATTGGACTCTTCGATAGGGGACATTTTATCGTGGGCTTCCGTAAAGGAAGATCTGTTATCGACG  
GTTTATCGTTTACGAAGTATCACTCCACCGGTGAATGGTTTAAGAATA

+

FFFFFFFFFFFFFF:FFFF:FFFFFFFFFFFFFFFFFFFFFFFFFFFFFFFFFFFFFFFFFFFFFFFFFFFF  
FFFFFFFFFFFFFFFFFFFFFFFFFFFFFFFFFFFFFFFFFFFFFFFFFFFFFFFFFFFFFFFF:FFFF

@A00721:190:HGJW7DSXY:4:2523:25003:7435\_2:N:0:TCTGCAAG+GCTGCACT  
ACTATCTAAAGATTGAAGGAAAATTTTATCCTCGTTTAACTTACTTAGACTTTCCTACGATACAAATG  
ATAACTTCTAATTTACGTTTGCTACTCAGAGCTGGTCTCTCAGCAA

+

FFFFFFFFFFFFFFFFFFFF:FFFFFFFFFFFFFFFFFFFF,FFFFF,FFF:FFFFF:FFFFFFFFFFFF  
FFFFFFFFF:FFFF:FFFFFFFFFFFFFFFFFFFFFFFFFFFF:FFF:FFF,FFFFFF

@A00721:190:HGJW7DSXY:4:2516:9932:30373\_2:N:0:TCTGCAAG+GCTGCACT  
AGTCCCGGCATTTGATAAATAATGACGAGACTTTCGTGATAATCGCTGCATATTACGGATTACACGGTA  
CCAGCGCATCTCGTGTGCGAGCCTCGACCCGATTATATGGTATTAATT

+

:F:F,:FFFFFFFFFFFFFFFFFFFF:FFFFF,FF,FFFFFFFFFFFF,FFFF:FF,FF,FFFFFFFF, :FF,FF,  
,FFF:FFF,FF,FFF:F:FFFFFFFFFFFFFFFFFFFF,FF,:,,FFFFFFFF

@A00721:190:HGJW7DSXY:4:1375:26386:27179\_2:N:0:TCTGCAAG+GCTGCACT  
CTTCTTATAATAAATAAATAAATAATATTACTAATGGCAAATAGTGGAAGGCTCCAGTCAACACTAG  
TTCGAGTGCTGCTTTGGATTACGATGACGTGAGAATAGGTGAAGGGAT

+

FFFFFFFFFFFFFFFFFFFFFFFFFFFFFFFFFFFFFFFFFFFFFFFFFFFFFFFFFFFFFFFFFFFFFFFF::  
FFFFFFFFFF:FFFFFFFFFFFFFFFFFFFFFFFFFFFFFFFFFFFFFFFFFFFF:FFFF:FFF

@A00721:190:HGJW7DSXY:4:2409:4155:2863\_1:N:0:TCTGCAAG+GCTGCACT  
GACCAACATTAAGGCGGCGGCGACTAATCTTAAAGCTTCACCCAAAATGAAGGACACTTCGAAACTGA  
ATAATGATGCACTACAAACAAGTATCGCTAATCATCTGAAAAAGGCTCTAAAGGACACTATACAATAT  
CCA

+

FFFFFFFFFFFFFFFFFFFFFFFFFFFF,F:FFFFFFFFFFFFFFFFFFFF::FFFFFFFFFFFFFFFFFFFF,FFFFF:F  
FFFFFFFFFFFFFFFFFFFF,FFF:FFFFFF:FFFF,FFFFFFFFFFFFFFFFFFFFFFFFFFFFFFFFFFFFFFFF  
FFF

@A00721:190:HGJW7DSXY:4:1252:11379:5541\_2:N:0:TCTGCAAG+GCTGCACT  
TTCGCCATTGTGGTACGAATTGGTCCAACATTTACCACCAAATTCTTTTGATACAACTCTAGCCTTCA  
AGTGGGGTATGCCTGCGGAATACGCTTGCTATTACCAGATTGGTTTCG

+

FFFFFFFFFFFFFFFFFFFFFFFFFFFFFFFFFFFFFFFFFFFF:FFFFFF:FFFFFFFFFFFFFFFFFFFF  
FFFFFFFFF:FFFFFFFFFFFFFFFFFFFFFFFFFFFFFFFFFFFFFFFFFFFFFFFFFFFF



@A00721:190:HGJW7DSXY:4:2508:18123:19570\_1:N:0:TCTGCAAG+GCTGCACT  
TTTATCAAAGATTTGGCTTGGTCTATTTACCGCAAAAAGTTGGAAGAGGTCTATGATATTTATTTTAC  
TTATACTTTAAATAGCACCGATTATAACTTGACTGTTGATAATATTACAATAGCTCTTTCTCAGAAGA  
TT

+  
FFFFFFFFFFFFFFFFFFFFFFFFFFFFFFFFFFFFFFFFFFFFFFFFFFFFFFFFFFFFFFFFFFFFFFFF  
FFFFFFFFFFFFFFFFFFFFFFFFFFFFFFFFFFFFFFFFFFFFFFFFFFFFFFFFFFFFFFFFFFFFFFFF  
FF

@A00721:190:HGJW7DSXY:4:1121:4481:30264\_1:N:0:TCTGCAAG+GCTGCACT  
GGTGAACACGTCGGTAGCATTGATTTACTTTTACCGTTAGAACTGAAAAAGATTCTTTTCGAAAAGAA  
ACCTATAAGTTACAAACGATTCTTCGACTATATTAAAGAAATAAAAATACTTCAAGTACCTGAACCTT  
ACA

+  
FFF,FFFFFFFF,FFFFFFFFFFFFFFFF:FFFFF,:FFFFFF:FFFF,FFFF:FFFFFFFF:FF  
FFFFFFFF:FFFFFFFFFFFFFFFFFFFFFFFFFFFFFFFFFFFFFFFFFFFFFFFFFFFFFFFFFFFFFFFF  
FFF

@A00721:190:HGJW7DSXY:4:1113:27805:23531\_2:N:0:TCTGCAAG+GCTGCACT  
CAAATAGAACCTTCACTCTCGGTAATGAGAGTGATTCTTAATATTCTAGTAACCGCTATGTGGCA  
TTACTAGGATTTATCACACTCCTAAATTTGATAGCAATTTATGTTTA

+  
F:FFFFFFFFFFFFFFFFFFFFFFFFFFFFFFFFFFFFFFFFFFFFFFFFFFFFFFFFFFFFFFFFFFFFFFFF  
:FFFFFF:FFFFFFFFFFFFFFFFFFFFFFFFFFFFFFFFFFFFFFFFFFFFFFFFFFFFFFFFFFFFFFFF

@A00721:190:HGJW7DSXY:4:2349:25681:36166\_1:N:0:TCTGCAAG+GCTGCACT  
GTATAGTTCAAGGAGTACTTAATTCAATAGCTTTAGTATTATTTACTATCGCCTTTATTGAAAATTGT  
ATAAGAGTTAATTGCTTACACAAAAGTGACGCGCAAGGAATCTTAATTGATTGAAGCTAGGCGTTGG  
GGA

+  
FFFFFFFFFFFF,FFFFFF:FFFFFFFFFFFFFFFFFFFFFFFFFFFFFFFFFFFFFFFFFFFFFFFFFFFFF  
FFFFFFFFFFFFFFFFFFFFFFFFFFFFFFFFFFFFFFFFFFFFFFFFFFFFFFFFFFFFFFFFFFFFFFFF  
FFF

@A00721:190:HGJW7DSXY:4:2338:1099:33959\_1:N:0:TCTGCAAG+GCTGCACT  
TGCTCTTCCGATCTGTCAAACCTACTACCGCCGGTCGGCAGATCGGCACCACTGGTCTCTACGTTACG  
GGACCCGCTGTGCAGAATAACCTTCCCAAATCTAGATCTGCACAGAAGAAGGCTGAAGGTCGTTACCG  
GAC

+  
FFFFFFFFFFFFFFFFFFFFFFFFFFFFF:FFFFFFFFFFFFFFFFFFFFFFFFFFFFFFFFFFFFFFFFFFFF  
FFFFFFFFFFFFFFFFFFFFFFFFFFFFFFFFFFFFFFFFFFFFFFFFFFFFFFFFFFFFFFFFFFFFFFFF  
FFF

@A00721:190:HGJW7DSXY:4:2661:5954:27085\_2:N:0:TCTGCAAG+GCTGCACT  
ACGGCAGTCCCGTCATCTCTGTGGAACTGAGGCAGTACCTCAGTCAAAAGTCACATTCACCACTCCC  
ATACCAATCAATGATGTGACTATACAGTTCGGCCATTTCAAGAGTGGT

+  
FFFF:FFFFFF:,FFF,F:F,,::F,FFFF:F,FFFFFFFF:F,FFFFFFFFFFFF::FFFFFF  
FF:F:FF,FF:FFFF:FFF:FFFFFFFF,FFFF,FFFFFFFFF:,

@A00721:190:HGJW7DSXY:4:2644:15980:15671\_2:N:0:TCTGCAAG+GCTGCACT  
GGAGGTACTGAAGCCTTCCCCTCCGCTGGCACGAAGAACTCCCAAGCCAATCAATAGTTCTTCTGA  
CCAGAATGAAAAGGGGTTACCAGGGTAGTCTCTAAGTCTACCAGGAA

+  
FFFFFFFFFFFFFFFFFFFFFFFFFFFFFFFFFFFFFFFFFFFFFFFFFFFFFFFFFFFFFFFFFFFFFFFF  
FFFFFFFFFFFF:FFFFFFFFFFFFFFFFFFFFFFFFFFFFFFFFFFFFFFFFFFFFFFFF

@A00721:190:HGJW7DSXY:4:2307:15727:15389\_1:N:0:TCTGCAAG+GCTGCACT  
AAAAGTGAAGAATAAAGGGAAAGGTCCATCAGGACCTAAGAAGGGGAAATTACCCCTAATTCTGAA  
GGAAGATCTCCCACCATCTGGGGTTGGGAATAAGAAATCTGCACGGGCCAAAGAGGCCGCTGCTACGA  
AGT

+  
FFFFFFFF:FFFFFFFF:FFFFFFFFFFFFFFFFFFFFFFFFFFFFFFFFFFFFFFFFFFFFFFFF  
FFFFFFFFFFFFFFFFFFFFFFFFFFFFFFFFFFFFFFFFFFFFFFFFFFFFFFFFFFFFFFFFFFFF  
FFF  
@A00721:190:HGJW7DSXY:4:1316:24261:8688\_1:N:0:TCTGCAAG+GCTGCACT  
TGCAGAGTGACTGGAGTTCAGACGTGTTCTCTTCCGATCTCTTTGAGACCAAGACTCTCTACAGTAGG  
TTCGTGCCTACTATGAGCAAATCTGTTGAATTCGTCACTGAGGACGAAGGTGAGAGGACTTTTGGCTA  
+  
F:FFF:FF::FFF,F:FF:F,,,F,FF,FF:FFFF:FFF::FFFF:FFFF:FFF:FFFF:,,F,FF  
FF:FFF::FFFF:FF::FFF::FFFF::,,FF,F,F,F:,F::F:FF:F:FF:,FFFFF::,F,  
@A00721:190:HGJW7DSXY:4:2455:7473:32252\_2:N:0:TCTGCAAG+GCTGCACT  
CGTGGGTTGAAGGCCGACGCTTCGAGCTTGAGTGTGACGAGGCCGGTGACGTTTTTGTCAACGGCGTT  
TGGAGGATTTTATCCGCGCTTAACCTATGGGGCGAAGATCCCCTATGGA  
+  
FFFFFFFFFFFFFFFFFFFFFFFFFFFFFFFFFFFFFFFFFFFFFFFFFFFFFFFFFFFFFFFFFFFF  
FFFFFFFFFFFFFFFFFFFFFFFFFFFFFFFFFFFFFFFFFFFFFFFFFFFFFFFFFFFF  
@A00721:190:HGJW7DSXY:4:1361:8296:32017\_2:N:0:TCTGCAAG+GCTGCACT  
TATTTATGCCGACGATAATAAGCATGTCAACCCTTAAGCACCGAGGTAAGCTCGGGACTTACAAGAGAG  
AGTGTGAGAGAGTCGCTCTCACTATTTTTGCCAGAATGCGGCCTTC  
+  
FFFFFFF:FFFFFFFFFFFFFFFFFFFFFFFFFFFFFFFFFFFFFFFFFFFFFFFFFFFFFFFFFFFF  
FFFFFFFFFFFFFFFFFFFFFFFFFFFFFFFFFFFFFFFFFFFFFFFFFFFFFFFFFFFF:F:  
@A00721:190:HGJW7DSXY:4:1469:29451:11193\_2:N:0:TCTGCAAG+GCTGCACT  
TTAGAAGGAAGTTGGGCAAATTCCCACATATGGTAGACGTTGTCACTTTTCTTGAAAATTTTCTCT  
TTCCTCCGTCATTGGGGATTTTCGATGTGAGAAGGTGGAAGGTGTCAAG  
+  
FFFFFFFFFFFFFFFFFFFFFFFFFFFF:FFF:FF,FFFFFFFFFFFFFFFFFFFF:FF:F:FFFFFFFFFFFF,FFFF:F  
FFF:F:FFFF::FF:FFFFFF,FFFFFFFFFFFFFFFFFFFF,FFFF:FFFF  
@A00721:190:HGJW7DSXY:4:1135:29695:26866\_1:N:0:TCTGCAAG+GCTGCACT  
TGATTGATAGTTACGGCTCGTATCGAGTTGGAGGGAGGAAGTTCTCCGAAATTAAAGACGGGGGGATT  
AAGAGTCCAGCTGTAACCTGTCATTTTCAGAGAGGGGAGCTCTGAAAAGGAACTTCGTCAGAAGATGAG  
GAA  
+  
FFFFFFFFFFFFFFFFFFFFFFFFFFFFFFFFFFFFFFFFFFFFFFFFFFFFFFFFFFFFFFFFFFFF  
FFFFFFFFFFFFFFFFFFFFFFFFFFFFFFFFFFFFFFFFFFFFFFFFFFFFFFFFFFFFFFFFFFFF  
FFF  
@A00721:190:HGJW7DSXY:4:1523:17011:22404\_1:N:0:TCTGCAAG+GCTGCACT  
AGGAAGGCTCTAGAGAAGATCTCACCACTGGAGAAGGCAAGTGGAGAGTCCAGAAGTTGATGAAGAA  
GGATTATTTGAAGCAGGGGTTACCACTTCCTAAGGTGGATGAGGGAGGTTGTTTCTTTGGAGTTTATG  
ATA  
+  
FFFFFFFFFFFFFFFFFFFFFFFFFFFFFFFFFFFFFFFFFFFFFFFFFFFFFFFFFFFFFFFFFFFF  
FFFFFFF:FFFFFFFFFFFFFFFFFFFF:FFFFFFFFFFFFFFFFFFFF:FFFFFFFFFFFFFFFFFFFF  
FFF  
@A00721:190:HGJW7DSXY:4:1336:28113:27477\_2:N:0:TCTGCAAG+GCTGCACT  
AGAATTCGGTAACTTACCATATTGTTCTTCCGGGAAGTTGTGGGATATAACTTTGACTCAACTACTC  
CGATCAGATCCGGATGGTTTGATTGGTATGGACTACTCGACTTTTGAT  
+  
F:F,FFF,F:FFF:FFF,F,FFF:FFFF,,F:FF:,FF:,FFFF:,FFFF:,FFFFFFFFFFF,  
FFF,FF,:F:F:FF,,FFFFF:,F:,F,FFFF:F:FFF,,FF:F:  
@A00721:190:HGJW7DSXY:4:1123:9073:10347\_2:N:0:TCTGCAAG+GCTGCACT  
ATTCTGTAGCTCTGAGGGCGGTTGAGGGAGCCGTTTTGGCCGACTTTAACTATTCTAAGAGTCTTTAT  
GATTCAAAACAGATCGGAAGAGCGTCGTGTAGGGAAAGAGTGTAGTGC  
+



FFFFFFFFFFFFFFFFFFFFFFFFFFFFFFFFFFFFFFFFFFFFFFFFFFFFFFFFFFFFFFFFFFFFFFFF  
FFFFFFFFF:F:FFFFFFFFFFFFFFFFFFFFFFFF:FFFFF,FFFFF:FFF  
@A00721:190:HGJW7DSXY:4:2468:16703:5713\_1:N:0:TCTGCAAG+GCTGCACT  
GAGGCGATATTCGTTTTCATATCCAAACTCCTTGAATGGAGTACATATTTGCAACCCTATTCTTGAT  
GTGAAAGATGCATCGAGGTATACGTCTAGGAACATTGATTGGGAACGTACCTACTCACGAGACGTCAT  
GAA  
+  
FFFFFFFFFFFFFFFFFFFFFFFF,FFFFFFFFFFFFFFFFFFFFFFFFFFFFFFFFFFFFFFFFFFFFFFFF  
FFFFFFFFFFFFFFFFFFFFFFFFFFFFFFFFFFFFFFFFFFFFFFFFFFFFFFFFFFFFFFFFFFFFFFFF  
FFF  
@A00721:190:HGJW7DSXY:4:1413:16197:18364\_2:N:0:TCTGCAAG+GCTGCACT  
TACAAGAACGCTTTGGATTGTGACCATAAAGCCTCAGTTGCGATAGCTGTAGAGGTATACGATATCTC  
TCTTGATGATGTAGCCACTATAATGCTTAAGAGAGAGATTGATGTATG  
+  
FFFFFFFFFFFFFFFFFFFFFFFFFFFF:FF:FFFFFFFF:FFFFFFFFFFFFFFFFFFFF::FFFFFFFF  
FFFFF:FFFFFFFFFFFF:FFFFFFFFFFFFFFFFFFFFFFFFFFFFFFFFFFFFFFFF  
@A00721:190:HGJW7DSXY:4:2616:13006:13213\_2:N:0:TCTGCAAG+GCTGCACT  
AAGAGCCACTGCCAATCTCATCGCTATACGCATACCTGATTGGAAGAAGCGAGGTTCTTCCTCAATA  
AAAATTTTTCTCAAGAGATTATGGTTGATAAAGTTTTCTTCATAAGGG  
+  
FFFFFFFFFFFFFFFFFFFFFFFFFFFF:FFFFFFFFFFFFFFFFFFFF:FFFFFFFFFFFFFFFFFFFF  
FFFFFFFFFFFFF:FFFFFFF,FFFFFFFFFFFFFFFFFFFFFFFFFFFFFFFF  
@A00721:190:HGJW7DSXY:4:1235:11252:3944\_1:N:0:TCTGCAAG+GCTGCACT  
ACGAGATCTTGACAGAGTGACTGGAGTTCAGACGTGTGCTCTTCCGATCTCAACAGTGCGAGGATTGTC  
ATCTCGGGGAAAGTGATTCACCAAGATGTTTCATATAGATACGAGATACCTAGAGAAGGTCGAGCGAT  
CTT  
+  
:::FFFF:FFFFFF:FFFFFFFFFFFFFFFFFFFFFFFFFFFFFFFFFFFF:FFFFFFFFFFFF,FFFFFFFFFFFF:FFF  
FFFFFFFF,FFFFFFFFFFFF:F,FFFFFFFFFFFFFFFFFFFFFFFFFFFFFFFFFFFFFFFFFFFFFFFF  
FFF  
@A00721:190:HGJW7DSXY:4:2234:16459:1251\_2:N:0:TCTGCAAG+GCTGCACT  
TAAGAAGAAGACTTTGGGTACACGTTATGCTCGCAAACCTAACGTTAGTACCGGAGGTGATCTCTCTG  
CTTCTGCGTTACTGAGAGAAAAGATTACAGGACGCCTACGGTGACTTTA  
+  
FFFFFFFFFFFFF:FFFFFFFFFFFFF:FFFFFFFFFFFFF:FFFFFFFFFFFFFFFFFFFFFFFFFFFF  
FFFFFFFFFFFFFFFFFFFFFFFFFFFFFFFFFFFFFFFFFFFFFFFFFFFFFFFFFFFFFFFF  
@A00721:190:HGJW7DSXY:4:1158:21061:33583\_2:N:0:TCTGCAAG+GCTGCACT  
AAACTACGGTCCTTATCAAAGAAAATGGTGAACCGGTCTCTAAATCTTTTGAGATTGAGAAGATTGAA  
GAACACGTCAAGAAGTCGCTCGGCGTTGTTCTTGAAAACCAAGTTAAG  
+  
FFFFFFFFFFFFFFFFFFFFFFFFFFFFFFFFFFFFFFFFFFFFFFFFFFFFFFFFFFFFFFFFFFFF:FF:FFFF:FFFF  
FFFFFFFFFFFFFFFFFFFFFFFFFFFFFFFFFFFFFFFFFFFFFFFFFFFFFFFFFFFFFFFF  
@A00721:190:HGJW7DSXY:4:1160:6894:2033\_2:N:0:TCTGCAAG+GCTGCACT  
TTCGAGGTTACAGTACGAGAGGTGATCCCGGATGTGGATTGAAGGCTGGCTCTAAGGGAGACTCCTTC  
TTTTTGAATGTTGTAAAGAATTGGGTTGAGAAGTGTGCTTTACAAGGA  
+  
FFFFFFFFFFFFFFFFFFFFFFFFFFFFFFFFFFFFFFFFFFFFFFFFFFFFFFFFFFFFFFFFFFFF:FFFFFFFFFFFF  
FFFFF,FFFFFFFFFFFF:FFFFFF:F:FFFF:FFFFFFFFFFFF::F:FF  
@A00721:190:HGJW7DSXY:4:2375:8106:7795\_1:N:0:TCTGCAAG+GCTGCACT  
TTTTCAAAAATGCGGATGGGTCTACTGATGTTTTCTACAGAGTGAGTCGTTTCAACACTTATCACC  
ACTTTTGAAAGGAAAATAATTGGTGATGAAAATACGTATGTCGGTGGGGTTCTCAAGGCTCTCATCGC  
CAC  
+  
FFF,, ,FFFFFFFFFFFFFFFFFFFF:FFFFFF:FFFFFFFF:FFFFFFFFFFFFFFFFFFFFFFFF



FFFFFFFFF::FFFFFFFFF:FFFF,FFFF:FFF:FFFFFFFFFFFFFFFFFFFFFFFFF:FF  
,FF

@A00721:190:HGJW7DSXY:4:2349:9453:17362\_1:N:0:TCTGCAAG+GCTGCACT  
GAGTTACGTAGTGGTCGTTCTTTTGGTGATTTTATCAAAGAGAAAGTTTCTGCTAGTCGCGACGATAG  
TATTTATCGGAGTGATATTAACAAGTTAACTTCGAACTGACCACTTACAAGAGTGTTGAAGTACCGC  
AAC

+

FFFFFFFFFFFF:FFFFFFFFFFFFFFFFFFFFFFFFFFFFFFFFFFFFFFFFFFFFFFFFF  
FFFFFFFFFFFFFFFFFFFFFFFFFFFFFFFFFFFFFFFFFFFFFFFFFFFFFFFFFFFFFFFFF  
FFF

@A00721:190:HGJW7DSXY:4:2471:1994:15436\_2:N:0:TCTGCAAG+GCTGCACT  
AATTAAGACAGACGTGAAAGTTATGATGAGTGATCGTATTAGAACAGCTGATTCTTATTGCATGAACG  
TCGCTGAGGTCAAACCTGTGGACGTTCTTTTCATCGACGAATTATTCA

+

FFFFFFFFFFFFFFFFFFFFFFFF:FFFFFFFFFFFFFFFFFFFFFFFFFFFFFFFFFFFFF  
FFFFFFFFFFFFFFFFFFFFFFFFFFFFFFFFFFFFFFFFFFFFFFFFFFFFFFFFFFFFF

@A00721:190:HGJW7DSXY:4:2207:10719:15671\_1:N:0:TCTGCAAG+GCTGCACT  
ACTTAAGCGGCTTATACCATAGGTTACGGTGATTCCAATCAAATCGGATTCATCAATCGTATTGATC  
TCCAAGTCGCAAACACTTCAACATCAACGACATCATTCTTGATGAGTGTCGTTCTTATCGAAGTCTC  
AGT

+

FFFFFFFFFFF,FFFFFFFFFFFFFFFFFFFFFFFFFFFFFFFFFFFFFFFFFFFFFFFFF  
FFFFFFFFFFFFFFFFFFFFFFFFFFFFFFFFFFFFFFFFFFFFFFFFFFFFFFFFFFFFFFFFF  
FFF

@A00721:190:HGJW7DSXY:4:2339:28501:13683\_2:N:0:TCTGCAAG+GCTGCACT  
CTGTCACGTTTAGCACGGAGGTTGCAGATTCAACCCCTTATATCGAGGCTATCGAGGACGATGAGTA  
TCTTGAAGTTGTTGACGACAAGCCTCAAGAGGGTAGAGGACCACCTGG

+

FFFFFFFFFFFFFFFFFFFFFFFFFFFFFFFFFFFFFFFFFFFFFFFF:FFFFFFFFFFFFFFF  
FFFFFFFFFFFFFFFFFFFFFFFFFFFFFFFFFFFFFFFFFFFFFFFF:FF

@A00721:190:HGJW7DSXY:4:1333:32642:14184\_2:N:0:TCTGCAAG+GCTGCACT  
CTCGGTAATCTTTCAGCCGAATTAAGTACTAATGAGTTCAAGTCGTTGTCGATCGAATTAAGATCAA  
GGCTAATACCTTTATAGGTAAGAAGCCCTTGAGCCGCGTAGTCAGCG

+

FFFFFFFFFFFFFFF,FFFF,:FFFFFFFFFFFFFF:FFFF,FFFFFF,,F:FF,F:FFFF::FFFFF  
FFFFF:FFFFFFFFF:FFFFFFFFF:FF:,FFFFFFFFF:FFF

@A00721:190:HGJW7DSXY:4:1223:11586:12665\_1:N:0:TCTGCAAG+GCTGCACT  
ATTTGTCATTTACCACCTTTGCTCAACGACGAAGTGAACGGCCAACACTTTCTTTGGTAATTGTATG  
ATCACTTTGATGATTTTATCACTTTATTATGACCTTGAAAGTTTTCGGCTGTGGTTGTCGCTGGGGA  
CGA

+

FFFFFFFFFFFFFFFFF:FFFFFFFFFFFFFFFFFFFFFFFFFFFFFFFFFFFFFFFFFFFFF  
FFFFFFFFFFFFFFFFFFFFFFFFFFFFFFFFFFFFFFFFFFFFFFFFFFFFFFFFFFFFFFFFF  
FFF

@A00721:190:HGJW7DSXY:4:2349:26594:35994\_1:N:0:TCTGCAAG+GCTGCACT  
ATCTGTGCTTTGAATTGTATAAGATCAAATTTTAAACGATTCCGAGAGGTTTATCCTGATGTGGAGGG  
AGTTCTTGAAGCATCCCGACCTTTCCTTGTAAGAAATTTGATGCGGTTTCATAAGATTATCAGTAATC  
CTG

+

FF:FFFF:FFFFFFFFFFFFFFFFFFFFFFFF,FFFF:FFFFFFFFFFFFFFFFFFFFFFFFF  
FFFFFFFFFFFFFFFFFFFFFFFFFFFFFFFFFFFFFFFFFFFFFFFFFFFFFFFFFFFFFFFFF  
FFF

@A00721:190:HGJW7DSXY:4:1534:7744:36104\_2:N:0:TCTGCAAG+GCTGCACT  
GATATTGTTGAGCGAGAGCGACCAAGATCTAAATTCGGTAACGGTGCGTGCGCTTTATTTTAAAAAG



@A00721:190:HGJW7DSXY:4:1260:27796:26929\_2:N:0:TCTGCAAG+GCTGCACT  
GAACAAAGTTATCAAAGATAGTGGCATTCAAGGCAAACCTTACCCTGATTCCGCCGGTGGTAGCTCAT  
TTCTACCAGGGGCTATTACTCTTGCTGAAACAGCTATTAAAGCTGTTG

+

FFFFFFFFFFFFFFFF:FFFF:FFFFFFFFFFFFFFFF,FFFFFFFFFFFFFFFFFFFFFFFFFFFFFFFF  
:FFFFFF:FFFFFF,FFFFFFFFFFFFFFFFFFFFFFFF:FFFFFFFF

@A00721:190:HGJW7DSXY:4:2169:24189:24565\_1:N:0:TCTGCAAG+GCTGCACT  
GATGTGCACTCTTTTCTGCTACTTTAACGGAGCGTAGTGTACTCTTCGTCGATTGTATCAACAGTAAC  
ATTACTTCTAATAAAGGTCTCTATCAAGCTCGTATTATCGTCGCTGCTGGATCTGCGTTACCGTTGAA  
GGC

+

FFFFFFFFFFFFFFFFFFFFFFFFFFFFFFFF,FFFFFFFFFFFFFFFFFFFFFFFFFFFFFFFFFFFFFFFF  
FFFFFFFFFFFFFFFF:FFFFFFFFFFFFFFFFFFFFFFFFFFFFFFFFFFFFFFFFFFFFFFFFFFFFFFFF  
FFF

@A00721:190:HGJW7DSXY:4:1268:6234:29919\_1:N:0:TCTGCAAG+GCTGCACT  
TTATCTTTCACTCTGGCCTTGTATGAGGGTGTCTCTAATCGTAACATTAATAATTTCAATCTTCTTAA  
AAAGAAGATAGAGAGTCATACTTTGGGCTATCGTTCAGGTGCATGGGGTTGGATAGCCAATATTGAAG  
TGG

+

FFFFFFFFFFFFFFFFFFFFFFFFFFFFFFFF:FFFFFFFF:FFFFFFFFFFFFFFFFFFFFFFFFFFFFFFFF:FFFFF  
FFFFFFFFFFFFFFFFFFFFFFFFFFFFFFFFFFFFFFFFFFFFFFFFFFFFFFFFFFFFFFFFFFFFFFFF  
FFF

@A00721:190:HGJW7DSXY:4:2403:26494:12148\_2:N:0:TCTGCAAG+GCTGCACT  
ATATTTACAAAATCTTACCCTATCTACGAACCTAAAGTTCTGAAGACGTTGCTTGTGCTTCCTCCT  
TTAATGGCACTACCTCGGTACAATCTTACTTGAACGAAGGCGACCTG

+

FFFFFFFFFFFFFFFFFFFFFFFFFFFFFFFFFFFFFFFFFFFFFFFFFFFFFFFFFFFFFFFFFFFFFFFF  
FFFFFFFFFFFFFFFFFFFFFFFFFFFFFFFFFFFFFFFFFFFFFFFF:FFFFFF

@A00721:190:HGJW7DSXY:4:1219:14498:24439\_1:N:0:TCTGCAAG+GCTGCACT  
AGACGTGTGCTCTTCCGATCTATACGATTTCAACGTCAACGTTACCGAGTTTCGTTTCGTACCTTG  
ATGCTGACTTTTCGTCAATATGATTTGATCTGGTTGCTCAATTCTAAGCGTGTTCGCTTAGTGCGAGG  
CCT

+

FFFFFFFFFFFFFFFFFFFFFFFFFFFFFFFFFFFFFFFF:FFFFFFFFFFFFFFFFFFFFFFFFFFFFFFFF  
FFFFFFFFFFFFFFFFFFFFFFFFFFFFFFFFFFFFFFFFFFFFFFFFFFFFFFFFFFFFFFFF:FFFFFFFF  
FFF

@A00721:190:HGJW7DSXY:4:1158:26042:31156\_2:N:0:TCTGCAAG+GCTGCACT  
CCTTGGAATTTAATATAAAGAATCTTTACCAGGACTCTACTACAGGAGGCAGTCTTCTGATCGTAAG  
AAGTTTATAAGGAACATATCCATTTGTTGTAATAGTGTCACTCACTTA

+

FFFFFFFFFFFFFFFFFFFFFFFF,FFF,:FFF::,:FF:FF:FFFF:FF:F:FFFF:FFFF:FF,FFF:F  
FF::F,FFFFFFFF:FFFFFF,FFFFFFFFFFF:,FFFFFFFF

@A00721:190:HGJW7DSXY:4:2303:30436:31876\_2:N:0:TCTGCAAG+GCTGCACT  
AAGTGGTAATACTGTCTTTCCAAGCTTACCTGTATCTTCAATGAAATTGGACTCTTCGATAGGGGACA  
TTTTATCGTGGGCTTTCCGTAAAGGAAGATCTGTTATCGACGTTTAT

+

FFFFFFFFFFFFFFFFFFFFFFFFFFFFFFFFFFFFFFFFFFFFFFFFFFFFFFFFFFFFFFFFFFFFFFFF  
FFFFFFFFFFFFFFFFFFFFFFFFFFFFFFFFFFFFFFFF:FFFFFFFF

@A00721:190:HGJW7DSXY:4:2621:1850:12712\_2:N:0:TCTGCAAG+GCTGCACT  
ACTATCTAAAGATTGAAGGAAAATTTTATCCTCGTTTAACTTACTTAGACTTTCCTACGATACAAATG  
ATAACTTCTAATTTACGTTTGCTACTCAGAGCTGGTCTCTCAGCAA

+

FFFFFFFFFFFFF::FFFFFFFFFFFFFFFF:FFFFFFFFFFFFFFFFFFFFFFFF:FFFFFF:FFF::  
FFFFFFFF:FFFFFFFF:FFFF:FFFFFFFFFFFFFFFF:FFFFFFFF

@A00721:190:HGJW7DSXY:4:2540:18096:16016\_2:N:0:TCTGCAAG+GCTGCACT  
AGTCCCGGCATTTGATAATAATGACGAGACTTTCGTGATAATCGCTGCATATTACGGATTACACGGTA  
CCAGCGCATCTCGTGTGAGCCTCGACCCGATTATATGGTATTAACCT

+

FFFFFFFFFFFF:FFFFFFFFFFFF:FF:FFFFFFFF:FFFFFFFFFFFF,FFFFFFFF,FF::,FFFFFFFF,FFF  
FFFFFFFFFFFFFFFFFFFFFFFF:FF::FFFF::FF:FFFF,,,FFFFFFFF

@A00721:190:HGJW7DSXY:4:1553:29378:6997\_2:N:0:TCTGCAAG+GCTGCACT  
CTTCTTATAATAATAATAATAATAATATTACTAATGGCAAATAGTGGAAAGGCTCCAGTCAACACTAG  
TTCGAGTGTGCTTTGGATTACGATGACGTGAGAATAGGTGAAGGGAT

+

FFFFFFFFFFFFFFFFFFFFFFFFFFFFFFFFFFFFFFFFFFFFFFFFFFFFFFFFFFFFFFFFFFFFFFFFFFFF  
FFFFFFFFFFFFFFFFFFFFFFFFFFFFFFFFFFFFFFFF,FFFFFFFFFFFFFFFFFFFFFFFF

@A00721:190:HGJW7DSXY:4:2420:20247:11412\_1:N:0:TCTGCAAG+GCTGCACT  
GACCAACATTAAGGCGGCGGCGACTAATCTTAAAGCTTCACCCAAAATGAAGGACACTTCGAAACTGA  
ATAATGATGCACTACAAACAAGTATCGCTAATCATCTGAAAAAGGCTCTAAAGGACACTATACAATAT  
CCA

+

:FF,FFFFFFFF:FFFF:F,FFFFFFFF,FFFFFFFFFFFF:FFF:F:FFF:FFFF:FFFF:FF  
:FFFFF::FF:FFFFFFFF:FFFF,FF:FFFFFFFF:FFFFFFFFFFFF:FFFFFFFFFFFFFFFF  
FFF

@A00721:190:HGJW7DSXY:4:1306:15311:8563\_2:N:0:TCTGCAAG+GCTGCACT  
TTCGCCATTGTGGTACGAATTGGTCCAACATTTACCACCAAATTCTTTTGATACAACTCTAGCCTTCA  
AGTGGGGTATGCCTGCGGAATACGCTTGCTATTCACCAGATTGGTTTCG

+

FFFFFFFFFFFFFFFFFFFFFFFFFFFFFFFFFFFFFFFFFFFFFFFFFFFFFFFFFFFFFFFFFFFFFFFFFFFF  
FFFFFFFFFFFFFFFFFFFFFFFFFFFFFFFFFFFFFFFF:FFFFFFFFFFFF

@A00721:190:HGJW7DSXY:4:2276:30544:4257\_2:N:0:TCTGCAAG+GCTGCACT  
ATGTCAGAAGAAGCTATTCAAGCTTGTGTTTAAAGACTGCAGAGGCTGTCAAACAAGCCAGACTCA  
AGGAGTCCAATCAAAGGTTTGAATTTAGCTCAACTGGGAGACGTGC

+

FFFFFFFFFFFFFFFFFFFFFFFFFFFFFFFFFFFFFFFF:FFFFFFFFFFFFFFFFFFFFFFFFFFFF,FFFFFFFFFFFF  
FFFFFFFFFFFFFF:FFFFFFFFFFFFFF:FFFFFFFFFFFFFFFF

@A00721:190:HGJW7DSXY:4:1346:5141:29496\_1:N:0:TCTGCAAG+GCTGCACT  
ATCCTTTAAGGACTATGTTGACTGACGAAGATTTCCACAGATTTGTCTACGTTGCAGATCGCCACT  
CCAAACACTATATACATTATAAAATATAAAAATAAGGGAGTCATAACTTTTGTACCAAATTCTTGGC  
TTT

+

:FFFFFFFFFFFFFFFFFFFFFFFFFFFFFFFFFFFFFFFFFFFFFFFFFFFFFFFFFFFFFFFFFFFFFFFFFFFF  
FFF:FFFFFFFFFFFFFFFFFFFFFFFFFFFFFFFFFFFFFFFFFFFFFFFFFFFFFFFFFFFFFFFFFFFF  
FFF

@A00721:190:HGJW7DSXY:4:1607:17282:29512\_2:N:0:TCTGCAAG+GCTGCACT  
ATTTTATTAATCATTACTTTAACGATCTCTCGGTCATTTACTCTGTACTTGATCTACGTCGTTTAACT  
GTCGGAACAACCTTTACTTAGAATGACTCTATCTTTTCAGACACTTCT

+

FFFFFFFFFFFFFF:FFFFFFFFFFFFFFFFFFFFFFFFFFFFFFFFFFFFFFFFFFFFFFFFFFFFFFFFFFFF:FFFFF  
FFFFFFFFFFFFFFFFFFFFFFFFFFFFFFFFFFFFFFFFFFFFFFFFFFFFFFFFFFFFFFFFFFFF,,

@A00721:190:HGJW7DSXY:4:2451:18466:24142\_1:N:0:TCTGCAAG+GCTGCACT  
GCTCTTCCGATCTGATTAATAAAGGATGAGTACGAAAACCACTCTTCGTTACGAGACCTGATGGTAG  
AATAGATTTAGTCTCTACCCCATCTCAACGAGGATAAAGCGAGTTTTCCGTCCTGAACGTAATACAC  
GAA

+

FFFFFFFF:FFFF::FFFFFFFF:FFFFFFFF:,FFF::FFF::FF,FFF:FFFF:F:FFFF,FFFF  
FFFFFFFF:FF:FFFFFFFFFFFFFFFFFFFFFFFF:FFF,FFFFFFFFFFFFFFFFFFFF:FFFFFFFFFFFFFFFF  
FFF

@A00721:190:HGJW7DSXY:4:2309:10257:28995\_1:N:0:TCTGCAAG+GCTGCACT  
ACGACTCGAAACCGAGACGCCGTA  
+  
FFFFFFF:FFFFFFFFFFFFFFFFF  
@A00721:190:HGJW7DSXY:4:1270:3260:8516\_1:N:0:TCTGCAAG+GCTGCACT  
TTATGAATCCTGCCTTTACTCATTTTATAGCAGTTATTTATGTTGTACTTTTTATAATTTATAACCTT  
CTTATACTTTTGGGTATGTTTTGTGAAAAACATGAGATACCCAAGTCTATCGAAGACATTATCTCTTA  
TGT  
+  
FFFFFFFF:FF:FFFF:FFFFFFFFFFFFFFFFFFFFFFFFFFFFFFFFFFFFFFFF:FFFFFF:FFFFFFFF  
FFFFFFFFFFFFFFFFFFFF::FFFFFFFFFFFFFFFFFFFFFFFFFFFFFFFFFFFFFFFFFFFFFFFFFFFF  
FFF  
@A00721:190:HGJW7DSXY:4:2536:31087:3944\_1:N:0:TCTGCAAG+GCTGCACT  
CGATAGTGATTGTTATCAATTTAAATACATTACTGTTTCAAATCATCTTTACTCACAGACTCCGAAAA  
TGGTTTCAAATGAGGTCAAAGCTCTATTTATTAACGAACATTATCCGATTCTTCGAGGGTATCACT  
ACC  
+  
FFFFFFFFFFFFFFFFFFFFFFFFFFFFFFFF:FFFFFFFF:FFFFFFFF: :F,FFFFFF,FFFFFF:FFFFF  
FFFFFFFFFFFFFFFFFFFFFFFF:FFFFFFFFFFFFFFFFFFFFFFFFFFFFFFFFFFFFFFFFFFFFFFFFFFFF  
FFF  
@A00721:190:HGJW7DSXY:4:1106:30960:16250\_2:N:0:TCTGCAAG+GCTGCACT  
ATTTGACAAATTTTAGAACTTTATTTAGAACTCTCTCCGATCACCTTGGTGTGATCTCCCGGAGGA  
TCTTTTCAATAAGATGTATGATGATAATCTACTATTTTAAATAGTGA  
+  
FFFFFFFFFFFFFFFFFFFFFFFFFFFFFFFF:FFFFFFFFFFFFFFFFFFFFFFFFFFFFFFFFFFFFFFFFFFFF  
FFFFFFFFFFFFFFFF:FFFFFFFF:FFFFFFFFFFFFFFFFFFFFFFFFFFFF  
@A00721:190:HGJW7DSXY:4:1123:26069:29168\_1:N:0:TCTGCAAG+GCTGCACT  
TTTATCAAAGATTTGGCTTGGTCTATTTACCGCAAAAAGTTGGAAGAGGTCTATGATATTTATTTTAC  
TTATACTTTAAATAGCACCGATTATAACTTGACTGTTGATAATATTACAATAGCTCTTCTCAGAAGA  
TTA  
+  
FFFFFFFFFFFFFFFFFFFFFFFF:FF:FFFF,FFFFFFFFFFFFFFFFFFFFFFFFFFFFFFFF:FFFFFFFFFFFFFFFF  
F:FFFFFFFFFFFFFFFFFFFFFFFFFFFFFFFFFFFFFFFFFFFFFFFFFFFFFFFF:FFFFFFFF,FFFFFFFF  
FFF  
@A00721:190:HGJW7DSXY:4:1171:28320:2472\_1:N:0:TCTGCAAG+GCTGCACT  
GGTGAACACGTCGGTAGCATTGATTTACTTTTACCGTTAGAACTGAAAAAGATTCTTTTCGAAAAGAA  
ACCTATAAGTTACAAACGATTCTTCGACTATATTAAGAAATAAAAATACTTCAAGTACCTGAACTTT  
ACA  
+  
FFFFFFFFFFFFFFFFFFFFFFFFFFFFFFFF:FFFFFFFFFFFFFFFFFFFFFFFFFFFFFFFF,FFFF:FFFFFFF  
FFFFFFFFFFFFFFFFFFFFFFFFFFFFFFFFFFFFFFFFFFFFFFFFFFFFFFFF:FFFFFFFFFFFFFFFFFFFF  
FFF  
@A00721:190:HGJW7DSXY:4:1160:21893:14982\_2:N:0:TCTGCAAG+GCTGCACT  
CAAATAGAACCTTCACTCTCGTAATGAGAGTGTATTCCTTAATATTCTAGTAACCGCTATGTGGGCA  
TTACTAGGATTTATCACACTCCTAAATTTGATAGCAATTTATGTTTTA  
+  
FFFFFFFFFFFFFFFFFFFFFF,FFFFFFFFFFFFFFFFFFFFFFFFFFFFFFFFFFFFFFFF:FFFFFFFFFFFFFFFF  
FFFFFFFFFFFFFFFFFFFFFFFFFFFFFFFFFFFFFFFFFFFFFFFF:FFFFFFFFFFFF  
@A00721:190:HGJW7DSXY:4:2560:17960:7263\_1:N:0:TCTGCAAG+GCTGCACT  
GGAGTACTTAATTCAATAGCTTTAGTATTATTTACTATCGCCTTTATTGAAAATTGTATAAGAGTTAA  
TTGCTTACACAAAAGTGACGCGCAAGGAATCTTAATTGATTGAAGCTAGGCGTTGGGGAGAATGAAC  
TGC  
+  
FFFFFFFFFFFFFFFFFFFFFFFF:FFFFFFFFFFFFFFFFFFFFFFFFFFFFFFFFFFFFFFFFFFFFFFFFFFFF

FFFFFFFFFFFFFFFFFFFFFFFF: , FFFFFFFFFFFFFFFFFFFFFFFFFFFFFFFFFFFFFFFFFF  
FFF

@A00721:190:HGJW7DSXY:4:2338:2257:35556\_1:N:0:TCTGCAAG+GCTGCACT  
TGCTCTTCCGATCTGTCAAACCTACTACCGCCGGTCGGCAGATCGGCACCACTGGTCTCTACGTTACG  
GGACCCGCTGTGCAGAATAACCTTCCCAAATCTAGATCTGCACAGAAGAAGGCTGAAGGTCGTTACCG  
GAC

+  
: FFFFFFFFFFFFFFFFFFFFFFFFFF: FFFFFFFFFF: FFFFFFFFFFFFFFFFFFFFFFFFFF  
FFFFFFFFFFFFFFFFFFFFFFFFFFFFFFFF: FFF, FFFFFFFFFFFFFFFFFFFFFFFFFF  
FFF

@A00721:190:HGJW7DSXY:4:2575:20817:8923\_2:N:0:TCTGCAAG+GCTGCACT  
GCAGTCCCGTCATCTCTGTGGGAAGTACCTCAGTCAAAAGTCACATTCACCACTCCCATG  
CCAATCAATGATGTGACTATACAGTTCGGCCATTTCAAGAGTGGTCAA

+  
FFFFFFFFFFFFFFFFFFFFFFFFFFFFFFFFFFFFFFFFFFFFFFFFFFFFFFFFFFFFFFFFF  
FFFFFFFFFFFFFFFFFFFFFFFFFFFFFFFFFFFFFFFFFFFFFFFFFFFFFFFFFFFF

@A00721:190:HGJW7DSXY:4:2306:32470:20024\_1:N:0:TCTGCAAG+GCTGCACT  
GAGGTACTGAAGCCTTCCCCTCCGCTGGCACGAAGAACACTCCCAAGCCAATCAATAGTTCTTCTGAC  
CAGAATGAAAAGGGGTTTACCAGGGTAGTCTCTAAGTCTACCAGGAAGAGGGGAAATGTCCCCAAAAC  
TGA

+  
FF, FFFFFFFFF: FFFFFFFFF: FFFFFFFFFFFFFFFFFF: FFFF, FFFF, : FFFFFFFFFFFFF  
F: : FFFFFFFFFFFFFFFFFF: FFFFFFFFFFFFFFFFFFFFFFFFFFFFFFFFFF  
FFF

@A00721:190:HGJW7DSXY:4:1203:26820:26052\_2:N:0:TCTGCAAG+GCTGCACT  
ACCATCTGGGGTTGGGAATAAGAAATCTGCACGGGCCAAAGAGGCCGCTGCTACGAAGTCGCTGAAGG  
CGGCTTGGGTCATTAAGGAGATCGGAAGAGCGTCGTGTAGGGAAAGAG

+  
FFFFF: FFFFFFFFFFFFFFFFFFFFFFFFFFFFFFFFFFFFFFFFFFFFFFFFFFFFFFFFFF  
FFFF, FFFFFFFFF: FFFFFFFFFFFFFFFFFF: FF, FFFFFFFFF

@A00721:190:HGJW7DSXY:4:1322:16559:35556\_1:N:0:TCTGCAAG+GCTGCACT  
GTGCTCTTCCGATCTCCTACTATGAGCAAATCTGTTGAATTCGTCCTGAGGACGAAGGTGAGAGGAC  
TTTTCGCTACTGGCGACAAACTGAGAGCACTCGCTGGGGAAAGAGAATTGCGTGGGTTGAAGGCCGAC  
GCT

+  
FFFFFFFFFFFFF: FFFF: FF: : FFFFFFFF: FFFFFFFFFFFFFFFFFFFFFFFFFF  
FFFFFFFFFFFFFFFFFFFFFFFFFFFFFFFFFFFFFFFFFFFFFFFFFFFFFFFFFFFFFFFFF  
FFF

@A00721:190:HGJW7DSXY:4:2507:24560:2472\_1:N:0:TCTGCAAG+GCTGCACT  
CGTGTGCTCTTCCGATCTATTTTATCCGCGCTTAAGTATGGGGCGAAGATCCCCTATGGAGTCTTGAA  
GGACTTAGGTTGGCATATTTATGCCGACGATAATAAGCATGTCACCCTTAAGCACCGAGGTAAGCTCG  
GGA

+  
FFFFFFFFFFFFFFFFFFFFFFFF: FFFFFFFFFFFFFFFFFFFFFFFFFFFFFFFFFF  
FFFFFFFFF: FFFFFFFFFFFFFFFFFFFFFFFFFFFFFFFFFF: FFFF, FFF, FFF, , FFFFFFFF: F: FFF  
FFF

@A00721:190:HGJW7DSXY:4:2618:8630:33285\_2:N:0:TCTGCAAG+GCTGCACT  
TTCTGACTGATGAGGTTAAACTCTTGCTCCTTCTGTGGGTGAGGGTTTTTGTATATTCACTGGTTC  
TGGGAGGCTGCTTCTCCATAATTACAACCTCTCTTTAGAGAGCATT

+  
FFFF, FFFFFFFFFF: FFFFFFFFF: : FFFFFFFFF: F: FFFF, FFF, FFF, , FFFFFFFF: F: FFF  
FFFFFFFFFFFFFFFFF, FFFF: FFFF: FFFFFFFFFF, FFFF, FF:

@A00721:190:HGJW7DSXY:4:2570:4001:3662\_2:N:0:TCTGCAAG+GCTGCACT  
TAGACGTTGTCACACTTTTCTTGAAATTTTCTTTCTCCGTCATTGGGGATTTCGATGTGAGAAG



+

@A00721:190:HGJW7DSXY:4:1367:24804:1423\_1:N:0:TCTGCAAG+GCTGCACT

+

@A00721:190:HGJW7DSXY:4:2363:21811:14873\_2:N:0:TCTGCAAG+GCTGCACT

+

@A00721:190:HGJW7DSXY:4:1371:6099:19194 2:N:0:TCTGCAAG+GCTGCACT

+

@A00721:190:HGJW7DSXY:4:1214:16215:19899 2:N:0:TCTGCAAG+GCTGCACT

 $+$ 

@A00721:190:HGJW7DSXY:4:2523:22670:34741 1:N:0:TCTGCAAG+GCTGCACT

GAA

```
FFFF:FFFFFFFF:FFFFFFFFFFFF:FFFFFFFFFFFFFFFFFFFFFFFF,FFFFFFFFFFFF
```

@A00721:190:HGJW7DSXY:4:1450:13268:13228 2:N:0:TCTGCAAG+GCTGCACT

+

@A00721:190:HGJW7DSXY:4:1149:10664:20275 1:N:0:TCTGCAAG+GCTGCACT

GGT

[illegible]

@A00721:190:HGJW7DSXY:4:2223:21414:14434 1:N:0:TCTGCAAG+GCTGCACT

CAAGATGTTTCATATAGATACGAGATACCTAGAGAAGGTCGCAGCGATCTTACTCGTTATCGGAGCTAA  
GAA

+

FFFFFFFFFFFF:FFFFFFFFFFFFFFFFFFFFFFFFFFFFFFFFFFFFFFFFFFFFFFFFFFFFFFFFFFFF  
FFFFFFFFFFFFFFFFFFFFFFFFFFFF,FFFFFFFFFFFFFFFFFFFFFFFFFFFFFFFFFFFFFFFFFFFFFFFFFFFF  
FFF

@A00721:190:HGJW7DSXY:4:1549:25554:34663\_1:N:0:TCTGCAAG+GCTGCACT  
TCGCAAACTTAACGTTAGTACCGGAGGTGATCTCTCTGCTTCTGCGTTACTGAGAGAAAAGATTCAGG  
ACGCCTACGGTGACTTTATGGACAAGATGCAAGTTCTTGGGAAATACTTGTTTCCCTTTTTAGGTTTA  
GTA

+

FF:FFFF:FFFF:FFFF,F:FF:FFFFFFFF:FFFF,FFFFFF:FF:,FFFFFF:FF,FFFF,F,F  
F:FFFF:FFFF,FFFFFFFF:FFF,:FFFFFFFFFFFF::,F,:FF:FFF,,:FFFFFFFFFFFF:  
FF:

@A00721:190:HGJW7DSXY:4:1360:2564:11099\_2:N:0:TCTGCAAG+GCTGCACT  
AAACTACGGTCCTTATCAAAGAAAATGGTGAACCGGTCTCTAAATCTTTTGAGATTGAGAAGATTGAA  
GAACACGTCAAGAAGTCGCTCGGCGTTGTTCTTGGAAACCAAGTTAAG

+

FFFFFFFFFFFFFF,FFFFFFFFFFFFFFFFFFFFFFFFFFFFFFFFFFFFFFFF:FFFFFF:FFFFFF:FFFFF  
FFFFFFFFFFFFFFFFFFFFFFFFFFFFFFFFFFFFFFFFFFFFFFFF:FFFFFFFFFFFF

@A00721:190:HGJW7DSXY:4:1521:8820:4711\_2:N:0:TCTGCAAG+GCTGCACT  
TTCGAGGTTCACTACGAGAGGTGATCCCGGATGTGGATTGAAGGCTGGCTCTAAGGGAGACTCCTTC  
TTTTTGAATGTTGTAAAGAATTGGGTTGAGAAGTGTGCTTTACAAGGA

+

FFFFFFFFFFFFFFFFFFFFFFFFFFFFFFFFFFFFFFFFFFFFFFFFFFFFFFFFFFFFFFFFFFFFFFFFFFFF  
FFFFFFFFFFFFFFFFFFFFFFFFFFFFFFFFFFFFFFFFFFFFFFFFFFFFFFFFFFFFFFFF

@A00721:190:HGJW7DSXY:4:2452:20934:17675\_1:N:0:TCTGCAAG+GCTGCACT  
TTTTCAAAAATGCGGATGGGTCTACTGATGTTTTCTACAGAGTGCAGTCGTTTCAACACTTATCACC  
ACTTTTGAAAGGAAAATAATTGGTGATGAAAATACGTATGTCGGTGGGGTTCTCAAGGCTCTCATCGC  
CAC

+

FFFFFFFFFF,FF:FFFFFFFFFFFFFFFFFFFFFFFFFFFFFFFF:FFFFFFFFFFFFFFFFFFFFFFFFFFFF:FF  
FFFF:FFFFFF:FFFFFFFFFFFFFFFFFFFFFFFFFFFFFFFFFFFFFFFFFFFFFFFFFFFFFFFFFFFF  
:FF

@A00721:190:HGJW7DSXY:4:1310:11876:24001\_1:N:0:TCTGCAAG+GCTGCACT  
AGAAGTTTATTAACCTTCAGAGTCTCTTGAAGTCCAGGTAGCTAATGTTCTTGCAATAGCCACAGA  
CTTTCTGGGAAAAGAGACCTCTGTTGGTAGAGGAGTTGAGAGAATTACTCAGATTCAATCTGGCATCA  
CTG

+

FFFFFFFFFFFFFFFFFFFF:FFFFFFFFFFFFFFFFFFFFFFFFFFFFFFFF:FFFFFFFFFFFFFFFFFFFFFFFFFFFF  
FFFFFFFFFFFFFFFFFFFFFFFFFFFFFFFFFFFFFFFFFFFFFFFFFFFFFFFFFFFFFFFFFFFFFFFFFFFF  
FFF

@A00721:190:HGJW7DSXY:4:1233:11550:7936\_1:N:0:TCTGCAAG+GCTGCACT  
CCTTTGCACAAGCAATACCTTCCACTGAGTTCATCACCCAGAGTTTCGACGTCGCGGAAAACGATGAA  
GATTTCCACACTGTTTCGAGAATCTTCTGATGCTGAATTTGAGGAAAATTTTCGGAAGTTTTTGGTAT  
AAA

+

FFFFFFFFFFFF:FFFFFFFFFFFFFFFFFFFFFFFFFFFFFFFFFFFFFFFFFFFFFFFFFFFFFFFFFFFF  
FFFFFFFFFFFFFFFFFFFFFFFFFFFFFFFFFFFFFFFFFFFFFFFFFFFFFFFFFFFFFFFFFFFFFFFFFFFF  
FFF

@A00721:190:HGJW7DSXY:4:1639:10004:30749\_1:N:0:TCTGCAAG+GCTGCACT  
ACAGGACTTTGAGAAGACTGTTGAAATGGACAAAATCTGGGATCATAGGTATGTGTACGCTACACTC  
GAAATATGGGCCCTCATAAGGAAGTATAGTTGGCGTCTTGTCTGACGTCATTACAGTCTGGAAGTT  
AGA

[illegible]

FFFFFFFFFFFFFFFFFFFFF:F,FFFFFFFFFFFFFFFFFFFFFFFFFFFFFFFFFFFFFFFFFFFFFFFFF  
FFF

@A00721:190:HGJW7DSXY:4:2356:15157:18568\_2:N:0:TCTGCAAG+GCTGCACT  
CTGTCACGTTTAGCACGGGAGGTTGAGATTCAACCCCTTATATCGAGGCTATCGAGGACGATGAGTA  
TCTTGAAGTTGTTGACGACAAGCCTCAAGAGGGTAGAGGACCACCTGG

+

FFFFFFFFFFFFFFFFFFFFFFFFFFFFFFFFFFFFFFFFFFFFFFFFFFFFFFFFFFFFFFFFFFFFFFFFF  
FFFFFFFFFFFFFFFFFFFFFFFFFFFFFFFFFFFFFFFFFFFFFFFFFFFFFFFFFFFFFFFFFFFFFFFFF

@A00721:190:HGJW7DSXY:4:1650:26847:10880\_2:N:0:TCTGCAAG+GCTGCACT  
CTCGGTAATCTTTCAGCCGAATTAAGTACTAATGAGTTCAAGTCGGTTGTCGATCGAATTAAGATCAA  
GGCTAATACCTTTATAGGTAAGAAGCCCTTGAGCCGCGTAGTCAGCG

+

FFFFFFFFFFF:FFF:FFFFFFFFFFFFFFFFFFFFFFFFFFFFFFFFFFFFFFFFFFFFFFFFFFFFF:FFFFFFFFF  
FFFFFFFFFFFFFFFFFFFFFFFFFFFFFFFFFFFFFFFFFFFFFFFFFFFFFFFFFFFFFFFFFFFFFFFFF

@A00721:190:HGJW7DSXY:4:2544:3269:3114\_1:N:0:TCTGCAAG+GCTGCACT  
ATTTGTCAATTTACCACCTTTGCTCAACGACGAAGTGAACGCCAACACTTTCTTTGGTAATTGTATG  
ATCACTTTGATGATTTTATCACTTTATTATGACCTTGAAAGTTTTTCGGCTGTGGTTGTCGCTGGGA  
CGA

+

FFFFFFFFFFFFFFFFFFFFF::FFFF:F:FFFFFF:FFFFFFFFFFFFFFFFFFFFF:FFFFFFFFFFFFFFFFF:FFF  
FFFFFFFFFFFFFFFFFFFFFFFFFFFFFFFFFFFFFFFFFFFFFFFFFFFFFFFFFFFFFFFFFFFFFFFFF  
FFF

@A00721:190:HGJW7DSXY:4:2426:12861:26271\_1:N:0:TCTGCAAG+GCTGCACT  
ATCTGTGCTTTGAATTGTATAAGATCAAATTTTAAACGATTCCGAGAGGTTTATCCTGATGTGGAGGG  
AGTTCTTGAAGCATCCCGACCTTTCCTTGTAAGAAATTTTGATGCGGTTTCATAAGATTATCAGTAATC  
CTG

+

FFFFFFF:FFFFFFFFFFFFFFFFF:FFFFFFFFF:,FFFFFFFFFFFFFFFFFFFFFFFFFFFFFFFFFFFFF  
FFFFFFFFFFFFFFFFFFFFFFFFFFFFFFFFFFFFFFFFFFFFFFFFFFFFFFFFFFFFFFFFFFFFFFFFF  
FFF

@A00721:190:HGJW7DSXY:4:2127:17553:29982\_2:N:0:TCTGCAAG+GCTGCACT  
GATATTGTTGAGCGAGAGCGACCAAGATCTAAATTCGGTAACGGTGCGTGCGCTTTATTTTAAAAAG  
CTCCCTCCTCTCGCAAGTTTGATCTGATACTTATCACGAAAGGACTTG

+

FFFFFFFFFFFFFFFFFFFFFFFFFFFFFFFFFFFFFFFFFFFFFFFFFFFFFFFFFFFFFFFFFFFFFFFFF  
F:FFFFFFFFFFFFFFFFFFFFFFFFFFFFFFFFFFFFFFFFFFFFFFFFFFFFFFFFFFFFFFFFFFFFF

@A00721:190:HGJW7DSXY:4:2619:30020:23484\_1:N:0:TCTGCAAG+GCTGCACT  
TTTACGATAACAACATATCAGTTGATTAAGACTCTTCCGAAAGCGAACTTTGGGAATTTGAAGCTCAG  
GGTGAAGCACAACGTTTGACCGTGACGAACTGTGGTGTCTTGATCTACGTTACGGATATACTCTCCT  
TGA

+

FFFF:FFFFFFFFFFFFFFFFFFFFF:FFFFFFFFFFFFFFFFFFFFFFFFFFFFFFFFFFFFF:FFFFFFFFFFFFF  
FFFFFFFFFFFFFFFFFFFFFFFFFFFFFFFFFFFFFFFFFFFFFFFFFFFFFFFFFFFFFFFFFFFFFFFFF  
FFF

@A00721:190:HGJW7DSXY:4:2212:8965:25034\_2:N:0:TCTGCAAG+GCTGCACT  
CGCACTAAAACGTCTTCGACAACAGCGGGGTTTTCGAATAGTGATAGCCACCCGCCTTACAGAGGGG  
CAGCAGCATGACCATAATTGGTATTGACTTTGGTACCACCTTTTCTAC

+

FFFFFFFFFFFFFFFFFFFFFFFFFFFFFFFFFFFFF:FFFFFFFFFFFFFFFFFFFFFFFFFFFFFFFFFFFFF  
FFFFFFFFFFFFFFFFFFFFF:,FFFFFFFFFFFFFFFFFFFFFFFFFFFFFFFFFFFFF

@A00721:190:HGJW7DSXY:4:2548:9498:18850\_1:N:0:TCTGCAAG+GCTGCACT  
TTCGAATGAAGTTTTAATGCTTAACAACAATGATAGTGAATTTATACCTACAATCATTGGTTTTTCTA  
ATAATGATGACACTATTGTTTATGGATATGATGCTATTACTCATGATGGTTACGGTCAGGGAGGATTC  
TCA

FFFFFFFFFFFFFFFFFFFFFFFFFFFFFFFFFFFFFFFFFFFFFFFFFFFFFFFFFFFFFFF  
 FFFFFFFFFFFFFFFFFFFFFFFFFFFFFF:FFFFFFFFFFFFFFFFFFFFFFFFFFFFFFF  
 FFF

@A00721:190:HGJW7DSXY:4:2453:7419:6230\_1:N:0:TCTGCAAG+GCTGCACT  
 TTA AAACCATTTGTACGATGTCGTCTGTCTCGGCGATCACTTTTTCACTAAGAATTGGTCTACTTTTG  
 ACAAGGCCAACTTCGTAATCTTCATGAGATCGTTTCTTTCTTTATCTCTTTGTTGTTAGGGATTTTG  
 AGA

+

:FFFFFFFFFFFFFFFFFFFFFFFFFFFFFFFFFFFFFFFFFFFFFFFF:F:FFF:FFF:FFFFFFFFFFFF  
 FFFFFFFFFFFFFFFFFFFFFFFFFF,FFFFFFFFFFFFFFFFFFFFFFFFFFFFFFFFFFFFFFFFFFFF  
 FFF

@A00721:190:HGJW7DSXY:4:2251:31349:6370\_2:N:0:TCTGCAAG+GCTGCACT  
 ATTGTAGTGGTTTGGTCGTTTCAGTACCCAGTCAGTATACTCTACGCAAAGATATTTTCATGA AACT  
 ACAGAGGAACGTACCGGATTACCTGTCTTTCATATTATGAATGAACCT

+

FFFFFFFFFFFFFFFFFFFF:FFFFFFFFFFFFFFFFFFFFFFFFFFFFFFFFFFFF:FFFFFFFFFFF:F:F,FF  
 FFF,FFFFFFFFFFFFFFFFFFFFFFFFFFFFFFFFFFFFFFFFFFFF:FF:FFF,F

@A00721:190:HGJW7DSXY:4:2628:20193:29324\_1:N:0:TCTGCAAG+GCTGCACT  
 AGGGTT CAGAATGGGATT CCTACGTAGTTTATGACTTTGGTGGTGGTACTTTCGATACTTCTATCGTC  
 TTACGTTACGGTAATTACTATAGTGTTATTTATTCTGGTGGTGATGATAATCTTGGAGGTCGTGACGT  
 TGA

+

FFFFFFFFFFFFFFFFFFFFFFFFFFFFFFFFFFFFFFFFFFFFFFFFFFFFFFFFFFFFFFFFFFFF  
 FFFFFFFFFFFFFFFFFFFFFF:FFFFFFFFFFFFFFFFFFFFF,FFFFFFFFFFFFFFFFFFFFFFFFFFFF  
 FFF

@A00721:190:HGJW7DSXY:4:1551:4029:9345\_2:N:0:TCTGCAAG+GCTGCACT  
 GCGTTCCTTATTACGGCGCACTTCTTTACCCGCCACCACACA ACTTTTCAGTTTCACA ACTGAAGGAGGA  
 GGTTTCTGT TACTGGAAA ACCCTCGTCAATACTTTTCAATA ATATACG

+

FFFFFFFFFFFFFFFFFFFFFFFFFFFFFFFFFFFFFFFFFFFFFFFFFFFFFFFFFFFFFFFFFFFF  
 FFFFFFFFFFFFFFFFFFFFFFFFFFFFFFFFFFFFFFFFFFFFFFFFFFFFFF

@A00721:190:HGJW7DSXY:4:2158:32072:34240\_2:N:0:TCTGCAAG+GCTGCACT  
 GAACAAAGTTATCAAAGATAGTGGCATTCAAGGCAA CTTACCCTGATTCCGGCCGGTGGTAGCTCAT  
 TTCTACCAGGGGCTATTACTCTTGCTGAAACAGCTATTAAAGCTGTTG

+

FFFFFFFFFFFFFFFFFFFF:FFFFFFFFFFFFFFFFFFFFFFFFFFFFFFFFFFFF:FFFFFFFFFFFFFFFFFFFF  
 FFFFFFFFFFFFFFFFFFFFFFFFFFFFFFFFFFFFFFFFFFFFFFFFFFFFFF

@A00721:190:HGJW7DSXY:4:2349:15374:10582\_1:N:0:TCTGCAAG+GCTGCACT  
 GATGTGCACTCTTTTCTGCTACTTTAACGGAGCGTAGTGACTCTTCGTCGATTGTATCAACAGTAAC  
 ATTACTTCTAATAAAGGTCTCTATCAAGCTCGTATTATCGTCGCTGCTGGATCTGCGTTACCGTTGAA  
 GGC

+

FFFFFFFFF:FFFFFFFFFFFFFFFFFFFFFFFFFFFFFFFFFFFFFFFFFFFFFFFFFFFFFFFFFFFFF  
 FFFFFFFFFFFFFFFFFFFFFFFFFFFFFFFFFFFFFFFFFFFFFFFFFFFFFF  
 FFF

@A00721:190:HGJW7DSXY:4:1377:8549:17707\_1:N:0:TCTGCAAG+GCTGCACT  
 TTATCTTTCACTCTGGCCTTGTATGAGGGTGTTTCTAATCGTAACATTAATAATTTCAATCTTCTTAA  
 AAAGAAGATAGAGAGTCATACTTTGGGCTATCGTTCAGGTGCATGGGGTTGGATAGCCAATATTGAAG  
 TGG

+

FFFFFFFFFFFFFFFFFFFFFFFFFFFFFFFFFFFFFFFFFFFF,FFFFFFFFF:FFF:FFFF,:FF:FFFF  
 FFFFFFFFFFFFFFFFFFFFFF:FFFFFFFFFFFF:FFFFFFFFFFFFFFFFFFFFFFFFFFFFFFFFFFFF  
 FFF

@A00721:190:HGJW7DSXY:4:2434:9706:21934\_2:N:0:TCTGCAAG+GCTGCACT  
ATATTTACAAAATCTTACCCTATCTACGAACCTAAAGTTCTGAAGACGTTGCTTGTGCTTCCTCCT  
TTAATGGCACTACCTCGGTACAATCTTACTTGAACGAAGGCGACCTG

+

FFFFFFFFFFFFFFFFFFFFFFFFFFFFFFFFFFFFFFFFFFFFFFFFFFFFFFFFFFFFFFFFFFFFFFFF  
FFFFFFFFFFFFFFFFFFFFFFFFFFFFFFFFFFFFFFFFFFFFFFFFFFFFFFFFFFFFFFFFFFFFFFFF

@A00721:190:HGJW7DSXY:4:1219:17300:24972\_1:N:0:TCTGCAAG+GCTGCACT  
AGACGTGTGCTCTTCCGATCTATACGATTTCGAACGTCAACGTTACCGAGTTTCGTTTCGTACCTTG  
ATGCTGACTTTCGTCAATATGATTTGATCTGGTTGCTCAATTCTAAGCGTGTTCGCTTAGTGCGAGG  
CCT

+

FFFFFFFFFFFFFFFFFFFFFFFFFFFFFFFFFFFFFFFFFFFFFFFFFFFFFFFFFFFFFFFFFFFFFFFF  
FFFFFFFFFFFFFFFFFFFFFFFFFFFFFFFFFFFFFFFFFFFFFFFFFFFFFFFFFFFFFFFFFFFFFFFF  
FFF

@A00721:190:HGJW7DSXY:4:1170:16016:36307\_2:N:0:TCTGCAAG+GCTGCACT  
CCTTGGATTTAATATAAAGAATCTTTACCAGGACTCCTACTACAGGAGGCAGTCTTCTGATCGTAAG  
AAGTTTATAAGGAACATATCCATTTGTTGTAATAGGGTCATCAACTTA

+

FFFFFFFFFFFFFFFFFFFFFFFFFFFFFFFFFFFFFFFFFFFFFFFFFFFFFFFFFFFFFFFFFFFFFFFF  
FFFFFFFFFFFFFFFFFFFFFFFFFFFFFFFFFFFFFFFFFFFFFFFFFFFFFFFFFFFFFFFFFFFFFFFF

@A00721:190:HGJW7DSXY:4:2303:6958:29262\_2:N:0:TCTGCAAG+GCTGCACT  
AAGTGGTAATACTGTCTTCCAAGCTTACCTGTATCTTCAATGAAATTGGACTCTTCGATAGGGGACA  
TTTTATCGTGGGCTTTCGTAAGGAAGATCTGTTATCGACGGTTTAT

+

FFFFFFFFFFFFFFFFFFFFFFFFFFFFFFFFFFFFFFFFFFFFFFFFFFFFFFFFFFFFFFFFFFFFFFFF  
FFFFFFFFFFFFFFFFFFFFFFFFFFFFFFFFFFFFFFFFFFFFFFFFFFFFFFFFFFFFFFFFFFFFFFFF

@A00721:190:HGJW7DSXY:4:2621:4725:13839\_2:N:0:TCTGCAAG+GCTGCACT  
ACTATCTAAAGATTGAAGGAAAATTTATCCTCGTTTAACTTACTTAGACTTTCCTACGATACAAATG  
ATAACTTCTAATTTACGTTTGCTACTCAGAGCTGGTCTCTCAGCAA

+

FFFFFFF:FFFFFFFFFFFFFFFFFFFFFFFFFFFFFFFFFFFFFFFFFFFFFFFFFFFFFFFFFFFFFFF:F:FF  
FFF:FFFFFFFFFFFFFFFFFFFFFFFFFFFFFFFFFFFFFFFFFFFFFFFFFFFFFFFFFFFFFFFFF:

@A00721:190:HGJW7DSXY:4:2648:12183:9972\_2:N:0:TCTGCAAG+GCTGCACT  
AGTCCCGCATTTGATAATAATGACGAGACTTTCGTCATAATCGCTGCATATTACGGATTACACGGTA  
CCAGCGCATCTCGTGTGAGCCTCGACCCGATTATATGGTATTTACTT

+

FFFFFFFFF:FFFFFFFFFFFFFFFFFFFFFFFFFFFFFFFFFFFFFFFFFFFFFFFFFFFFFFFFFFFFFFF  
FFFFFFFFFFFFFFFFFFFFFFFFFFFFFFFFFFFFFFFFFFFFFFFFFFFFFFFFFFFFFFFFFFFFFFF

@A00721:190:HGJW7DSXY:4:1666:16116:7106\_2:N:0:TCTGCAAG+GCTGCACT  
CTTCTTATAATAATAAATAAATAATATTACTAATGGCAAATAGTGGAAGGCTCCAGTCAACACTAG  
TTCGAGTGCTGCTTTGGATTACGATGACGTGAGAATAGGTGAAGGGAT

+

FFFFFFFFFFFFFFFFFFFFFFFFFFFFFFFFFFFFFFFFFFFFFFFFFFFFFFFFFFFFFFFFFFFFFFF:F  
FFFFFFFFFFFFFFFFFFFFFFFFFFFFFFFFFFFFFFFFFFFFFFFFFFFFFFFFFFFFFFFFFFFFFFF,F:FFFFFFFFFFFF

@A00721:190:HGJW7DSXY:4:2645:8305:29841\_1:N:0:TCTGCAAG+GCTGCACT  
GACCAACATTAAGGCGGCGCGACTAATCTTAAAGCTTCACCCAAAATGAAGGACACTTCGAAACTGA  
ATAATGATGCACTACAAACAAGTATCGCTAATCATCTGAAAAAGGCTCTAAAGGACACTATACAATAT  
CCA

+

FFFFFFFFFFFFFFFFFFFFFFFFFFFFFFFFFFFFFFFFFFFFFFFFFFFFFFFFFFFFFFFFFFFFFFF  
FFFFFFFFFFFFFFFFFFFFFFFFFFFFFFFFFFFFFFFFFFFFFFFFFFFFFFFFFFFFFFFFFFFFFFF  
FFF

@A00721:190:HGJW7DSXY:4:1531:23710:33191\_2:N:0:TCTGCAAG+GCTGCACT  
TTCGCCATTGTGGTACGAATTGGTCCAACATTTACCACCAAATTCTTTTGATACAACTCTAGCCTTCA

AGTGGGGTATGCCTGCGGAATACGCTTGCTATTACCAGATTGGTTCG  
+  
FFFFFFFFFFFFFFFFFFFFFFFFFFFFFFFFFFFFFFFFFFFFFFFFFFFFFFFFFFFFFFFFFFFFFFFF  
FFFFFFFFFFFFFFFFFFFFFFFFFFFFFFFFFFFFFFFFFFFFFFFFFFFFFFFFFFFFFFFFFFFFFFFF  
@A00721:190:HGJW7DSXY:4:2276:31385:3928\_2:N:0:TCTGCAAG+GCTGCACT  
ATGTCAGAAGAAGCTATTCAAGCTTGTCGTTTAAAGACTGCAGAGGCTGTCAAACAAGCCCAGACTCA  
AGGAGTCCAATCAAAGGTTTTGAATTTAGCTCAACTGGGGAGACGTGC  
+  
FFFFFFFFFFFF:FFFFFFFFFFFFFFFFFFFFFFFFFFFFFFFFFFFFFFFFFFFFFFFFFFFFFFFFFFFF  
F:FFFFFFFFFFFFFFFFFFFFFFFFFFFFFFFFFFFFFFFFFFFFFFFFFFFFFFFFFFFFFFFFFFFFFFFF  
@A00721:190:HGJW7DSXY:4:1409:8187:15765\_1:N:0:TCTGCAAG+GCTGCACT  
ATCCTTTAAGGACTATGTTGACTGACGAAGATTTTCCCACAGATTTGTCTACGTTGCAGATCGCCACT  
CCAAACACTATATACATTATAAAATATAAAAATAAGGGAGTCATAACTTTTGTACCAAATTCTTGGC  
TTT  
+  
FFFF:FFFFFFFF:FFFFFFFFFFFFFFFFFFFFFFFFFFFFFFFFFFFFFFFFFFFFFFFFFFFFFFFFFFFF  
FFFFFFFFFFFFFFFFFFFFFFFFFFFFFFFFFFFFFFFFFFFFFFFFFFFFFFFFFFFFFFFFFFFFFFFFFFFF  
FFF  
@A00721:190:HGJW7DSXY:4:2214:8992:19695\_2:N:0:TCTGCAAG+GCTGCACT  
ATTTTATTAATCATTACTTTAACGATCTCTCGGTCACTTACTCTGTACTTGATCTACGTCGTTTAACT  
GTCGGAACAACCTTTACTTAGAATGACTCTATCTTTTACAGACACTTCT  
+  
FFFFFFFFFFFFFFFFFFFFFFFFFFFFFFFFFFFFFFFFFFFFFFFFFFFFFFFFFFFFFFFFFFFFFFFFFFFF  
FF:FFFFFFFFFFFFFFFFFFFFFFFFFFFFFFFFFFFFFFFFFFFFFFFFFFFFFFFFFFFFFFFFFFFFFFFF  
@A00721:190:HGJW7DSXY:4:2516:15157:3912\_1:N:0:TCTGCAAG+GCTGCACT  
GCTCTTCCGATCTGATTAATAAAGGATGAGTACGAAAACCAACTCTTCGTTACGAGACCTGATGGTAG  
AATAGATTTAGTCTCTACACCCATCTCAACGAGGATAAAGCGAGTTTTCCGTCCTGAACGTAATACAC  
GAA  
+  
FFFFFFF:FFFFFFFFFFFFFFFFFFFFFFFFFFFFFFFFFFFFFFFFFFFFFFFFFFFFFFFFFFFFFFFFFFFF  
FFFFFFFFFFFFFFFFFFFFFFFFFFFFFFFFFFFFFFFFFFFFFFFFFFFFFFFFFFFFFFFFFFFFFFFFFFFF  
FFF  
@A00721:190:HGJW7DSXY:4:2157:24334:9690\_2:N:0:TCTGCAAG+GCTGCACT  
CGAAACCGAGACGCCGTAGATCAAAGTCCCTTCTAACTTTAGATTATGAATCCTGCCTTTACTCATTT  
TATAGCAGTTATTTATGTTGTACTTTTTATAATTTATAACCTTCTTAT  
+  
FFFFFFFFFFFFFFFFFFFFFFFFFFFFFFFFFFFFFFFFFFFFFFFFFFFFFFFFFFFFFFFFFFFFFFFFFFFF  
FFFFFFF,FFFFFFFFFFFFFFFFFFFFFFFFFFFFFFFFFFFFFFFFFFFFFFFFFFFFFFFFFFFFFFFFFFFF  
@A00721:190:HGJW7DSXY:4:2619:8703:19163\_1:N:0:TCTGCAAG+GCTGCACT  
CGATAGTGATTGTTATCAATTTAAATACATTACTGTTTCAAATCATCTTTACTCACAGACTCCGAAAA  
TGGTTTCAAATGAGGTCAAAGCTCTATTTATTAACGAACATTATCCGATTCTTCGAGGGTATCACT  
ACC  
+  
FFFFFFFFFFFFFFFFFFFFFFFFFFFFFFFFFFFFFFFFFFFFFFFFFFFFFFFFFFFFFFFFFFFFFFFFFFFF  
FFFFFFFFFFFFFFFFFFFFFFFFFFFFFFFFFFFFFFFFFFFFFFFFFFFFFFFFFFFFFFFFFFFFFFFFFFFF  
FFF  
@A00721:190:HGJW7DSXY:4:1249:5755:35697\_2:N:0:TCTGCAAG+GCTGCACT  
ATTTTCGACAAATTTTAGAACTTTATTTCAAGACTCTCTCCGATCACCTTGGTGTGATCTCCCGGAGGA  
TCTTTTCAATAAGATGTATGATGATAATCTACTATTTTTAAATAGTGA  
+  
FFFFFFFFFFFFFFFFFFFFFFFFFFFFFFFFFFFFFFFFFFFFFFFFFFFFFFFFFFFFFFFFFFFFFFFFFFFF  
FFFFFFFFFFFFFFFFFFFFFFFFFFFFFFFFFFFFFFFFFFFFFFFFFFFFFFFFFFFFFFFFFFFFFFFFFFFF  
@A00721:190:HGJW7DSXY:4:1278:7880:12508\_1:N:0:TCTGCAAG+GCTGCACT  
TTTATCAAAGATTTGGCTTGGTCTATTTACCGCAAAAAGTTGAAGAGGTCTATGATATTTATTTTAC

+

@

+

@

+

@

+

@

+

@

+

@

+

@

+



+

@A

+

@

+

@A

+

@

+

@A

+

@A

+

@A

 $+$ [illegible]

FFFFFFFFFFFFFFFFFFFFFFFFFFFFFFFFFFFFFFFFFFFFFFFFFFFFFFFFFFFFFFFFFFFFFFFF  
FFF

@A00721:190:HGJW7DSXY:4:1467:13386:14403\_2:N:0:TCTGCAAG+GCTGCACT  
TACAAGAACGCTTTGGATTGTGACCATAAAGCCTCAGTTGCGATAGCTGTAGAGGTATACGATATCTC  
TCTTGATGATGTAGCCACTATAATGCTTAAGAGAGAGATTGATGTATG

+  
FFFFFF:FFFFFFFFFFFFFFFFFFFFFFFFFFFFFFFFFFFFFFFFFFFFFFFFFFFFFFFFFFFFFFF  
FFFFFFFFFFFFFFFFFFFFFFFFFFFFFFFFFFFFFFFFFFFFFFFFFFFFFFFFFFFFFFFF

@A00721:190:HGJW7DSXY:4:1237:22281:17378\_1:N:0:TCTGCAAG+GCTGCACT  
CCAATCTCATCGCTATACGCATACCTGATTGGAAGAAGCGAGGTTCTTCCTCAATAAAAATTTGTCT  
CAAGAGATTATGGTTGATAAAGTTTTCTTCATAAGGGCTATTAGTACGTCATGGGGATCACTTCTTC  
GGT

+  
::FFFFFFFF:FFFFFFFF:FFFFFFFFFFFFFFFFFFFFFFFFFFFFFFFFFFFFFFFFFFFFFFFFF,FFFFFFFF:FFFF,FFF  
:FF:,FFFF:FFFFFFFF:FFFFFFFFFFFFFFFF:FFFFFF:,FFFFFFFFFFFFFFFF:FFFFFF  
FFF

@A00721:190:HGJW7DSXY:4:2343:27380:13401\_1:N:0:TCTGCAAG+GCTGCACT  
TCGAATATGTTACGACATGGCTTCGTAACAACAGTGCAGGATTGTCATCTCGGGGAAAGTGATTCAC  
CAAGATGTTTATAGATACGAGATACCTAGAGAAGGTCGCAGCGATCTTACTCGTTATCGGAGCTAA  
GAA

+  
FFFFFF:FF,FFFFFFFFFFFFFFFFFFFFFFFFFFFFFFFFFFFFFFFFFFFFFFFFFFFFFFFFFFFFF  
FFFFFFFFFFFFFFFFFFFFFFFFFFFFFFFFFFFFFFFFFFFFFFFFFFFFFFFFFFFFFFFF:FFF:FFFFFFFFFFFFFFFF  
FFF

@A00721:190:HGJW7DSXY:4:2160:4833:29152\_1:N:0:TCTGCAAG+GCTGCACT  
TCGCAAACTTAACGTTAGTACCGGAGGTGATCTCTCTGCTTCTGCGTTACTGAGAGAAAAGATTCAGG  
ACGCTACGGTGACTTTATGGACAAGATGCAAGTTCTTGGAATACTTGTTTCCCTTTTAGGTTTA  
GTA

+  
FFFFFFFFFFFFFFFFFFFFFFFFFFFFFFFFFFFFFFFFFFFFFFFFFFFFFFFFFFFFFFFFFFFFFFF  
FFFFFFFFFFFFFFFFFFFFFFFFFFFFFFFFFFFFFFFFFFFFFFFFFFFFFFFFFFFFFFFFFFFFFFF  
FFF

@A00721:190:HGJW7DSXY:4:1617:2239:28855\_2:N:0:TCTGCAAG+GCTGCACT  
AAACTACGGTCCTTATCAAAGAAAATGGTGAACCGGTCTCTAAATCTTTTGAGATTGAGAAGATTGAA  
GAACACGTCAAGAAGTCGCTCGGCGTTGTTCTTGAAAACCAAGTTAAG

+  
:FFFFFFFFFFFFFFFFFFFFFFFFFFFFFFFFFFFFFFFFFFFFFFFFFFFFFFFFFFFFFFFF:FFFF:FFFFFFFFFFFFFFF  
FFFFFFFF:FFFFFFFFFFFFFF:FFFFFFFFFFFFFFFFFFFFFFFF

@A00721:190:HGJW7DSXY:4:2358:27651:34632\_2:N:0:TCTGCAAG+GCTGCACT  
TTCGAGGTTACGCTACGAGAGGTGATCCCGATGTGGATTGAAGGCTGGCTCTAAGGGAGACTCCTTC  
TTTTTGAATGTTGTAAAGAATTGGGTTGAGAAGTGTGCTTTACAAGGA

+  
FFFFFFFFFFFFFFFFFFFFFFFFFFFFFFFFFFFFFFFFFFFFFFFFFFFFFFFFFFFFFFFFFFFFFFF,FFFFFFFFFFFFFFFFFFFFF:FFFFFF,FFFFFFF  
F:FFFF:FFFF:F:FFF:FFFF:FFFFFFFFFFFFFF:FFFF

@A00721:190:HGJW7DSXY:4:2464:4670:13557\_1:N:0:TCTGCAAG+GCTGCACT  
TTTTCAAAAATGCGGATGGGTCTACTGATGTTTTCTACAGAGTGCAGTCGTTTCAAACTTATCACC  
ACTTTTGAAAGGAAAATAATTGGTGATGAAAATACGTATGTCGGTGGGGTTCTCAAGGCTCTCATCGC  
CAC

+  
FFF:FFFFFFFFFFFFFFFFFFFFFFFFFFFFFFFFFFFFFFFFFFFFFFFFFFFFFFFFFFFFFFFF:FFFF:FFFF:FFFFFFFFFFFFFFFF  
FFFFFFFFFFFFFFFFFFFFFFFFFFFFFFFFFFFFFFFFFFFFFFFFFFFFFFFFFFFFFFFFFFFFFFF  
FFF

@A00721:190:HGJW7DSXY:4:2445:21802:30013\_1:N:0:TCTGCAAG+GCTGCACT  
AGAAGTTTATTAACCTCAGAGTCTCTTGAAGTCCAGGTAGCTAATGTTCTTGCAATAGCCACAGA

CTTTCTGGGAAAAGAGACCTCTGTTGGTAGAGGAGTTGAGAGAATTACTCAGATTCAATCTGGCATCA  
CTG

+

FFFFFFFFFFFFFFFFFFFFFFFFFFFFFFFFFFFFFFFFFFFFFFFFFFFFFFFFFFFFFFFFFFFFFFFF  
FFFFFFFFFFFFFFFFFFFFFFFFFFFFFFFFFFFFFFFFFFFFFFFFFFFFFFFFFFFFFFFFFFFFFFFF  
FFF

@A00721:190:HGJW7DSXY:4:1259:12255:28667\_1:N:0:TCTGCAAG+GCTGCACT  
CCTTTGCACAAGCAATACCTTCCACTGAGTTCATCACCCAGAGTTTCGACGTCGCGGAAAACGATGAA  
GATTTCCACACTGTTTCGAGAATCTTCTGATGCTGAATTTGAGGAAAATTTTTCGGAAGTTTTTGGTAT  
AAA

+

FFFFFFFFFFFFFFFFFFFFFFFFFFFFFFFFFFFFFFFFFFFFFFFFFFFFFFFFFFFFFFFFFFFFFFFF  
FFFFFFFFFFFFFFFFFFFFFFFFFFFFFFFFFFFFFFFFFFFFFFFFFFFFFFFFFFFFFFFFFFFFFFFF  
FFF

@A00721:190:HGJW7DSXY:4:2122:28203:30358\_1:N:0:TCTGCAAG+GCTGCACT  
ACAGGACTTTGAGAAGACTGTTGAAATGGACAAAATCTGGGATCATAGGTATGTGTACGCTACACTC  
GAAATATGGGCCCTCATAAGGAAGTATAGTTGGCGTCTTGTCGTTGACGTCATTACAGTCTGGAAGTT  
AGA

+

FFFFFFFFFFFFFFFFFFFFFFFFFFFFFFFFFFFFFFFFFFFFFFFFFFFFFFFFFFFFFFFFFFFFFFFF  
FFFFFFFFFFFFFFFFFFFFFFFFFFFFFFFFFFFFFFFFFFFFFFFFFFFFFFFFFFFFFFFFFFFFFFFF  
FFF

@A00721:190:HGJW7DSXY:4:2613:22824:18818\_1:N:0:TCTGCAAG+GCTGCACT  
GATTAGAGACATGCCAGTTAGAGTTCTTCTAACCAGGACTGATGGTGAGATTCTTTTACCTTTTGGAG  
GTCCAGGAACCTTTACTCCTAGTGTCTTTTCTAGAGTCCAAGGACGTTTCCGTCGGAGGATGACAGGT  
GGG

+

FFFFFFFFFFFFFFFFFFFFFFFFFFFFFFFFFFFFFFFFFFFFFFFFFFFFFFFFFFFFFFFFFFFFFFFF  
FFFFFFFFFFFFFFFFFFFFFFFFFFFFFFFFFFFFFFFFFFFFFFFFFFFFFFFFFFFFFFFFFFFFFFFF  
FFF

@A00721:190:HGJW7DSXY:4:2147:20211:16986\_1:N:0:TCTGCAAG+GCTGCACT  
ATTAAACATAAAATCCAGCGATTCTATTATGTCGCTAAAGCCTGTCCAGTTGTGATGATGTTCCGGGC  
TGTGGGGATTAACCTTCCCTCGTGAAACTTACGACGATGTTCTCGCTCGCATTTACAAGGATTACTAA  
GTC

+

FFFFFFFFFFFFFFFFFFFFFFFFFFFFFFFFFFFFFFFFFFFFFFFFFFFFFFFFFFFFFFFFFFFFFFFF  
FFFFFFFFFFFFFFFFFFFFFFFFFFFFFFFFFFFFFFFFFFFFFFFFFFFFFFFFFFFFFFFFFFFFFFFF  
FFF

@A00721:190:HGJW7DSXY:4:2269:2003:16016\_2:N:0:TCTGCAAG+GCTGCACT  
ACTTCTAATTTTAGGAAACGTCGCGAAAAGAAAGTTCATGAGGATGTCTTGGTCGAAAATATCGCCG  
GGAATTCTAATAGAGGATCCTGATGACATTATTTCAACGGATACCGA

+

FFFFFFFFFFFFFFFFFFFFFFFFFFFFFFFFFFFFFFFFFFFFFFFFFFFFFFFFFFFFFFFFFFFFFFFF  
FFF:FFFFF:FFFFFFFFFFFFFFFFFFFFFFFFFFFFFFFFFFFFFFFFFFFFFFFFFFFFFFFF

@A00721:190:HGJW7DSXY:4:1455:24704:7106\_1:N:0:TCTGCAAG+GCTGCACT  
CGTCTCAGGAAGTGTCTCCACTGATTCGGAATTAGAGAAAGACGACCTTCTTGTTGGGACTGAGACCT  
CTGAATTTTACAGGTGCCCTGATGAGGACGTTGAAAGGGATAATTTCAACTCTGAGACTTCTAAGAGT  
GTT

+

FFFFFFFFFFFF:FFFFFFFFFFFFFFFFFFFFFFFFFFFFFFFFFFFFFFFFFFFFFFFFFFFFFFFF  
FFFFFFFFFFFFFFFFFFFFFFFFFFFFFFFFFFFFFFFFFFFFFFFFFFFFFFFFFFFFFFFFFFFFFFFF  
FFF

@A00721:190:HGJW7DSXY:4:2607:1497:32049\_2:N:0:TCTGCAAG+GCTGCACT  
AATTAAGACAGACGTGAAAGTTATGATGAGTGATCGTATTAGAACAGCTGATTCTTATTGCATGAACG

TCGCTGAGGTCAAACCTGTGGACGTTCTTTTCATCGACGAATTATTCA

+

FFFFFFFFFFFFFFFFFFFFFFFFFFFFFFFFFFFFFFFF:FFFF,FFFFFFFFFFFFFFFF:FFFF:FF  
:FFFFFFFFFFFFFFFFFFFFFFFFFFFFFFFFFFFFFFFF

@A00721:190:HGJW7DSXY:4:2319:30355:3583\_1:N:0:TCTGCAAG+GCTGCACT  
ACTTAAGGCGGCTTATACCATAGGTTACGGTGATTCCAATCAAATCGGATTCATCAATCGTATTGATC  
TCCAAGTCGCAAACACTACTTCAACATCAACGACATCATTCTTGATGAGTGTCTGTTCTTATCGAAGTCTC  
AGT

+

FFFFFFFFFFFFFFFFFFFFFFFFFFFFFFFFFFFFFFFF:FFFF:FFFFFFFFFFFFFFFFFFFFFFFF:FF:FFFFFFFFFFFFFFFF  
FFFFFFFFFFFFFFFFFFFFFFFFFFFFFFFFFFFFFFFFFFFFFFFFFFFFFFFFFFFFFFFFFFFFFFFF  
FFF

@A00721:190:HGJW7DSXY:4:2462:6424:1532\_2:N:0:TCTGCAAG+GCTGCACT  
CTGTCACGTTTAGCACGGGAGGTTGAGATTCAACCCCTTATATCGAGGCTATCGAGGACGATGAGTA  
TCTTGAAGTTGTTGACGACAAGCCTCAAGAGGGTAGAGGACCACCTGG

+

FFFFFFFFFFFFFFFFFFFFFFFFFFFFFFFFFFFFFFFFFFFFFFFFFFFFFFFFFFFFFFFFFFFFFFFF,FFFFF  
FFFFFFFFFFFFFFFFFFFFFFFFFFFFFFFFFFFFFFFFFFFFFFFFFFFFFFFFFFFFFFFF

@A00721:190:HGJW7DSXY:4:2314:8196:6230\_2:N:0:TCTGCAAG+GCTGCACT  
CTCGTAATCTTTCAGCCGAATTAAGTACTAATGAGTTCAAGTCGGTTGTCGATCGAATTAAGATCAA  
GGCTAATACCTTTATAGGTAAGAAGCCCTTGAGCCGCGTAGTCAGCG

+

FFFFFFFFFFFFFFFF,FFFFFFFF:FFFFFFFFFFFFFFFF:FFFF:FFFFFFFFFFFFFFFF  
:FFFFFFFF,FF:FFFFFFFF:FFFF:FFFF:FFF:FF,FFFFFF

@A00721:190:HGJW7DSXY:4:2551:14615:29089\_1:N:0:TCTGCAAG+GCTGCACT  
ATTTGTCATTTACCACCTTTGCTCAACGACGAAGTGAACGCCAACACTTTCTTTGGTAATTGTATG  
ATCACTTTGATGATTTTATCACTTTATTATGACCTTGGAAGTTTTCGGCTGTGGTTGTGCTGGGGA  
CGA

+

F,FFFFFFFF:FFFFF,FFFFFFFFFFFFFFFF:FFFFFFFFFFFFFFFFFFFFFFFFFFFFFFFF  
FFFFFFFFFFFFFFFFFFFFFFFFFFFFFFFFFFFFFFFFFFFFFFFFFFFFFFFFFFFFFFFF  
FFF

@A00721:190:HGJW7DSXY:4:2153:14778:29309\_2:N:0:TCTGCAAG+GCTGCACT  
TTGTATAAGATCAAATTTTAAACGATTCCGAGAGGTTTATCCTGATGTGGAGGGAGTTCTTGAAGCAT  
CCCGACCTTCTCTGTGAAAATTTTGATGCGGTTTCATAAGATTATCA

+

:FFFFFFFFFFFFFFFFFFFFFFFFFFFFFFFFFFFFFFFFFFFFFFFFFFFFFFFFFFFFFFFF  
FFFFFFFFFFFFFFFFFFFFFFFF:FFFFFFFFFFFFFFFFFFFFFFFF

@A00721:190:HGJW7DSXY:4:2364:32750:18380\_2:N:0:TCTGCAAG+GCTGCACT  
GATATTGTTGAGCGAGAGCGACCAAGATCTAAATTCGGTAACGGTGCGTGGCGCTTTATTTTAAAAG  
CTCCCTCCTCTCGCAAGTTTGATCTGATACTTATCACGAAAGGACTTG

+

FFFFFFFFFFFFFFFFFFFFFFFFFFFFFFFFFFFFFFFFFFFFFFFFFFFFFFFFFFFFFFFF:FFFFFFFFFFFF  
FFFFFFFFFFFFFFFFFFFFFFFF:FFFFFFFFFFFF:FFF:FF:FFF:F

@A00721:190:HGJW7DSXY:4:2461:31403:8312\_2:N:0:TCTGCAAG+GCTGCACT  
TCAGTTGATTAAGACTCTTCCGAAAGGCGAACTTTGGGAATTTGAAGCTCAGGGTGAAGCACAACTG  
TGACCGTGACGAAGTGTGGTGTCTTGATCTACGTTACGGATATACTC

+

FFFFFFFFFFFFFFFFFFFFFFFFFFFFFFFFFFFFFFFFFFFFFFFFFFFFFFFF:FFFF,FFFFFFFF  
FF:FFFF,FF:F:FFFFFFFFFFFFFFFFFFFFFFFFFFFFFFFF

@A00721:190:HGJW7DSXY:4:2269:27480:23688\_2:N:0:TCTGCAAG+GCTGCACT  
CGCACTAAAACGTCTTCGACAACAGCAGGGGTTTTCGAATAGTGATAGCCACCCGCCTTACAGAGGGG  
CAGCAGCATGACCATAATTGGTATTGACTTTGGTACCACCTTTCTAC

+

@A00721:190:HGJW7DSXY:4:1304:7066:13980\_1:N:0:TCTGCAAG+GCTGCACT  
TCGAATGAAGTTTTAATGCTTAACAACAATGATAGTGAATTTATACCTACAATCATTGGTTTTTCTAA  
TAATGATGACACTATTGTTTATGGATATGATGCTATTACTCATGATGGTTACGGTCAGGGAGGATTCT  
CA

@A00721:190:HGJW7DSXY:4:1163:26205:14841\_1:N:0:TCTGCAAG+GCTGCACT  
TAAACCATTTGTACGATGTCGTCTGTCTCGGCGATCACTTTTCTACTAAGAATTGGTCTACTTTTGA  
CAAGGCCAACTTCGTAATCTTCATGAGATCGTTTCTTTCTTTATCTCTTTGGTTGTTAGGGATTTTGA  
GA

@A00721:190:HGJW7DSXY:4:2278:32389:26396\_2:N:0:TCTGCAAG+GCTGCACT  
ATTGTAGTGGTTTGGTCGTTTCAGTACCCAGTCAGTATACCTCTACGCAAAGATATTTTCATGAAACT  
ACAGAGGAACGTACCGGATTACCTGTCTTTCATATTATGAATGAACCT

@A00721:190:HGJW7DSXY:4:2628:20365:30029\_1:N:0:TCTGCAAG+GCTGCACT  
AGGGTTTCAGAAATGGGATTCTACGTAGTTTATGACTTTGGTGGTGGTACTTTTCGATACTTCTATCGTC  
TTACGTTACGGTAATTACTATAGTGTTATTTATTCTGGTGGTGATGATAATCTTGGAGGTCGTGACGT  
TGA

@A00721:190:HGJW7DSXY:4:2323:21305:27367\_2:N:0:TCTGCAAG+GCTGCACT  
GCGTTCTTATTACGGCGCACTTCTTTACCCGCCACCACACAACCTTTTCAGTTTCACAACCTGAAGGAGGA  
GGTTTCTGTTACTGGAAAACCTCGTCAATACTTTTCAATAATATACG

@A00721:190:HGJW7DSXY:4:2173:1967:4993\_2:N:0:TCTGCAAG+GCTGCACT  
GAACAAAGTTATCAAAGATAGTGGCATTCAAGGCAAACCTTACCCTGATTCCGGCCGGTGGTAGCTCAT  
TTCTACCAGGGGCTATTACTCTTGCTGAAACAGCTATTAAAGCTGTTG

@A00721:190:HGJW7DSXY:4:2606:15465:21449\_1:N:0:TCTGCAAG+GCTGCACT  
GATGTGCACTCTTTTCTGCTACTTTAACGGAGCGTAGTGTACTCTTCGTCGATTGTATCAACAGTAAC  
ATTACTTCTAATAAAGGTCTCTATCAAGCTCGTATTATCGTCGCTGCTGGATCTGCGTTACCGTTGAA  
GGC

@A00721:190:HGJW7DSXY:4:2271:32696:23641\_1:N:0:TCTGCAAG+GCTGCACT  
TTATCTTTCACTCTGGCCTTGATGAGGGTGTTTCTAATCGTAACATTAATAATTTCAATCTTCTTAA

AAAGAAGATAGAGAGTCATACTTTGGGCTATCGTTCAGGTGCATGGGGTTGGATAGCCAATATTGAAG  
TGG

+

FF:FFFFFFFFFFFFFFFFFFFFFFFFFFFFFFFFFFFFFFFFFFFFFFFFFFFFFFFFFFFFFFFF  
FFFFFFFFFFFFFFFFFFFFFFFFFFFFFFFFFFFFFFFFFFFFFFFFFFFFFFFFFFFFFFFF  
FFF

@A00721:190:HGJW7DSXY:4:2444:26096:9987\_2:N:0:TCTGCAAG+GCTGCACT  
ATATTTACAAAATCTTACCACTATCTACGAACCTAAAGTTCTGAAGACGTTGCTTGTCTGCTTCCTCCT  
TTAATGGCACTACCTCGGTACAATCTTACTTGGAACGAAGGCGACCTG

+

FFFFFFFFFFFFFFFFFFFFFFFFFFFFFFFFFFFFFFFFFFFFFFFFFFFFFFFFFFFFFFFF  
FFFFFFFFFFFFFFFFFFFFFFFFFFFFFFFFFFFFFFFFFFFFFFFFFFFFFFFFFFFFFFFF

@A00721:190:HGJW7DSXY:4:1260:8232:14434\_1:N:0:TCTGCAAG+GCTGCACT  
AGACGTGTGCTCTTCCGATCTATACGATTTCTGAACGTCAACGTTACCGAGTTTCGTTTCGTACCTTG  
ATGCTGACTTTCGTCAATATGATTTGATCTGGTTGCTCAATTCTAAGCGTGTTCGCTTAGTGCGAGG  
CCT

+

FFFFFFFFFFFFFFFFFFFFFFFFFFFFFFFFFFFFFFFFFFFFFFFFFFFFFFFFFFFFFFFF  
FFFFFFFFFFFFFFFFFFFFFFFFFFFFFFFFFFFFFFFFFFFFFFFFFFFFFFFFFFFFFFFF  
FFF

@A00721:190:HGJW7DSXY:4:1368:14217:10989\_2:N:0:TCTGCAAG+GCTGCACT  
CCTTGGAATTTAATATAAAGAATCTTTACCAGGACTCCTACTACAGGAGGCAGTCTTCTGATCGTAAG  
AAGTTTATAAGGAACATATCCATTTGTTGTAATAGGGTCATCAACTTA

+

:FFF:FFF:FFFFFFFFFF,FF,FFFFFFFFFFFF:FFF,FF,F:F,FF,FFFFFFFFFFFFFFFF  
FFF,,:F:FFF:FFFFFFFFFFFF,:FFFFFF,FF:FFFFFFFFFF,F

@A00721:190:HGJW7DSXY:4:2362:24379:12618\_2:N:0:TCTGCAAG+GCTGCACT  
AAGTGGAATACTGTCTTCCAGCTTACCTGTATCTTCAATGAAATTGGACTCTTCGATAGGGGACA  
TTTTATCGTGGGCTTTCGTAAGGAAGATCTGTTATCGACGGTTTAT

+

FFFFFFFFFFFFFFFFFFFFFFFFFFFFFFFFFFFFFFFFFFFFFFFFFFFFFFFFFFFFFFFF  
FFFFFFFFFFFFFFFFFFFFFFFFFFFFFFFFFFFFFFFFFFFFFFFFFFFFFFFFFFFFFFFF

@A00721:190:HGJW7DSXY:4:1308:25211:20917\_1:N:0:TCTGCAAG+GCTGCACT  
TTATCTAAAGATTGAAGGAAAATTTATCCTCGTTTAACTTACTTAGACTTTCCTACGATACAAATGA  
TAACCTCTAATTTACGTTTGCTACTCAGAGCTGGTCCTCTCAGCAAAGGGATGCATGGTGTTATCTCC  
TCA

+

FFFF:FFFFFFFFFFFFFFFFFFFFFFFFFFFFFFFFFFFFFFFFFFFFFFFFFFFFFFFF  
FFFFFFFFFFFFFFFFFFFFFFFFFFFFFFFFFFFFFFFFFFFFFFFFFFFFFFFFFFFFFFFF  
FFF

@A00721:190:HGJW7DSXY:4:1427:5303:26240\_1:N:0:TCTGCAAG+GCTGCACT  
TAATAATGACGAGACTTTCGTATAATCGCTGCATATTACGGATTACACGGTACCAGCGCATCTCGTG  
TCGAGCCTCGACCCGATTATATGGTATTAACCTATAAAGGTGAGGAGACCATTTCTTGCTGAAATTT  
ATA

+

FFFFFFFFFFFFFFFFFFFFFFFFFFFFFFFFFFFFFFFFFFFFFFFFFFFFFFFFFFFFFFFF  
FFFFFFFFFFFFFFFFFFFFFFFFFFFFFFFFFFFFFFFFFFFFFFFFFFFFFFFFFFFFFFFF  
FFF

@A00721:190:HGJW7DSXY:4:2105:3866:22936\_2:N:0:TCTGCAAG+GCTGCACT  
CTTCTTATAATAATAATAATAATATTACTAATGGCAAATAGTGGAAGGCTCCAGTCAACACTAG  
TTCGAGTGCTGCTTTGGATTACGATGACGTGAGAATAGGTGAAGGGAT

+

FFFFFFF:FFFFFFFFFFFFFFFFFFFFFFFFFFFFFFFFFFFFFFFFFFFFFFFFFFFFFFFF:::  
FFFFFFFFF:FFFFFFFFFFFFFFFFFFFFFFFFFFFFFFFFFFFFFFFFFFFFFFFFFFFFFFFF

@A00721:190:HGJW7DSXY:4:1220:1307:14027\_1:N:0:TCTGCAAG+GCTGCACT  
ACCAACATTAAGGCGGCGGCGACTAATCTTAAAGCTTCACCCAAAATGAAGGACACTTCGAAACTGAA  
TAATGATGCACTACAAACAAGTATCGCTAATCATCTGAAAAAGGCTCTAAAGGACACTATACAATATC  
CAG

+

FFFFFFFFFFFFFFFFFFFFFFFF:FFFFFF:FFFFFFFFFFFFFFFF:FFFFFFFFFFFFFFFF:FFFFFFFF  
FFFFFFFFFFFFFFFF: ,FFFFFF:FFFFFFFFFFFFFFFFFFFFFFFFFFFFFFFF:FFFFFFFFFFFFFFFF  
FFF

@A00721:190:HGJW7DSXY:4:2269:13738:10755\_2:N:0:TCTGCAAG+GCTGCACT  
TTCGCCATTGTGGTACGAATTGGTCCAACATTTACCACCAAATTCTTTTGATACTAGCCTTCA  
AGTGGGGTATGCCTGCGGAATACGCTTGCTATTACACGATTGGTTTCG

+

FFFFFFFFFFFFFFFFFFFFFFFFFFFFFFFFFFFFFFFFFFFFFFFFFFFFFFFFFFFFFFFFFFFFFFFF  
FFFFFFFFFFFFFFFFFFFFFFFFFFFFFFFFFFFFFFFFFFFFFFFFFFFFFFFF,FFFFFF

@A00721:190:HGJW7DSXY:4:2357:11767:35963\_2:N:0:TCTGCAAG+GCTGCACT  
ATGTCAGAAGAAGCTATTCAAGCTTGTCGTTTAAAGACTGCAGAGGCTGTCAAACAAGCCAGACTCA  
AGGAGTCCAATCAAAGGTTTTGAATTTAGCTCAACTGGGGAGACGTGC

+

FFFFFFFFFFFFFFFFFFFFFFFFFFFFFFFFFFFFFFFFFFFFFFFFFFFFFFFFFFFFFFFFFFFFFFFF  
FFFFFFFFFFFFFFFFFFFFFFFFFFFFFFFFFFFFFFFFFFFFFFFFFFFFFFFF

@A00721:190:HGJW7DSXY:4:1449:16125:25285\_1:N:0:TCTGCAAG+GCTGCACT  
ATCCTTTAAGGACTATGTTGACTGACGAAGATTTCCACAGATTTGTCTACGTTGCAGATCGCCACT  
CCAAACACTATATACATTATAAAATATAAAAATAAGGGAGTCATACTTTTGTACCAAATTCTTGGC  
TTT

+

FF::FFF:F: , ,FFFFFFFFFFFFFFFF:FFFFFFFFFFFFFFFF:FFFF:FFFFFFFFFFFFFFFF  
:FFFF:FFFFFF,FFFFFFFFFFFFFF,::,FF::: :F:FF,F:FFFFFFFF:FFFF,FFFFF:FF  
FFF

@A00721:190:HGJW7DSXY:4:2330:2998:25880\_2:N:0:TCTGCAAG+GCTGCACT  
ATTTTATTAATCATTACTTTAACGATCTCTCGTCAATTTACTCTGTACTTGATCTACGTCGTTAACT  
GTCGGAACAACCTTTACTTAGAATGACTCTATCTTTTCAGACACTTCT

+

FFFFFFFFFFFFFFFFFFFFFFFFFFFFFFFFFFFFFFFFFFFFFFFFFFFFFFFFFFFFFFFFFFFFFFFF  
FFFFFFFFFFFFFFFFFFFFFFFFFFFFFFFFFFFFFFFFFFFFFFFFFFFFFFFF

@A00721:190:HGJW7DSXY:4:1254:18710:7373\_1:N:0:TCTGCAAG+GCTGCACT  
ACGTGTGCTCTTCCGATCTTAAAGGATGAGTACGAAAACCAACTCTTCGTTACGAGACCTGATGGTAG  
AATAGATTTAGTCTCTACACCCATCTCAACGAGGATAAAGCGAGTTTTCCGTCCTGAACGTAATACAC  
GAA

+

FFFFFFFFFFFFFFFFFFFFFFFFFFFFFFFFFFFFFFFFFFFFFFFFFFFFFFFFFFFFFFFFFFFFFFFF  
FFFFFFFFFFFFFFFFFFFFFFFF:FFFFFFFFFFFFFFFF:FFFFFFFFFFFFFFFFFFFFFFFF  
FFF

@A00721:190:HGJW7DSXY:4:2550:12789:16313\_2:N:0:TCTGCAAG+GCTGCACT  
CGAAACCGAGACGCCGTAGATCAAAGTCCCTTCTAACTTTAGATTATGAATCCTGCCTTTACTCATTT  
TATAGCAGTTATTTATGTTGTACTTTTTATAATTTATAACCTTCTTAT

+

FFFFFFFFFFFFFFFFFFFFFFFFFFFFFFFFFFFFFFFF:FFFF:FFFFFFFFFFFFFFFFFFFFFFFF:F  
FFFFFF:F:FFFFFFFFFFFFFFFF:FFFFFFFFFFFFFFFF

@A00721:190:HGJW7DSXY:4:2651:28890:23218\_1:N:0:TCTGCAAG+GCTGCACT  
CGATAGTGATTGTTATCAATTTAAATACATTACTGTTTCAAATCATCTTTACTCACAGACTCCGAAAA  
TGGTTTCAAATGAGGTCAAAGCTCTATTTATTAACGAACATTATCCGATTCTTCGAGGGTATCACT  
ACC

+

:FFFFFFFF:FFFFFFFF:FFFFFFFFFFFFFFFFFFFFFFFFFFFFFFFFFFFFFFFF

@A00721:190:HGJW7DSXY:4:2121:15275:1485\_2:N:0:TCTGCAAG+GCTGCACT  
ATTTGACAAATTTTAGAACTTTATTTAGAAGCTCTCTCCGATCACCTTGGTGTGATCTCCCGGAGGA  
TCTTTTCAATAAGATGTATGATGATAATCTACTATTTTTAAATAGTGA

@A00721:190:HGJW7DSXY:4:1434:18900:21605\_1:N:0:TCTGCAAG+GCTGCACT  
TTTATCAAAGATTTGGCTTGGTCTATTTACCGCAAAAGTTGGAAGAGGTCTATGATATTTATTTTAC  
TTATACTTTAAATAGCACCGATTATAACTTGACTGTTGATAATATTACAATAGCTCTTTCTCAGAAGA  
TTA

@A00721:190:HGJW7DSXY:4:1256:5141:13620\_1:N:0:TCTGCAAG+GCTGCACT  
GGTGAACACGTCGGTAGCATTGATTTACTTTTACCGTTAGAACTGAAAAAGATTCTTTTCGAAAAGAA  
ACCTATAAGTTACAAACGATTCTTCGACTATATTAAGAAATAAAAAATACTTCAAGTACCTGAACTTT  
ACA

@A00721:190:HGJW7DSXY:4:1478:10583:20729\_2:N:0:TCTGCAAG+GCTGCACT  
CAAATAGAACCTTCACTCTCGGTAATGAGAGTGTATTCCTTAATATTCTAGTAACCGCTATGTGGCA  
TTACTAGGATTTATCACACTCCTAAATTTGATAGCAATTTATGTTTA

@A00721:190:HGJW7DSXY:4:1602:29912:11177\_1:N:0:TCTGCAAG+GCTGCACT  
GAGTACTTAATTCAATAGCTTTAGTATTATTTACTATCGCCTTTATTGAAAATTGTATAAGAGTTAAT  
TGCTTACACAAAAGTGACGCGCGAAGGAATCTTAATTGATTGAAGCTAGGCGTTGGGGAGAATGAACT  
GC

@A00721:190:HGJW7DSXY:4:2551:22345:13510\_1:N:0:TCTGCAAG+GCTGCACT  
TGCTCTTCCGATCTGTCAAACCTACTACCGCCGGTCGGCAGATCGGCACCACTGGTCTCTACGTTCA  
GGACCCGCTGTGCAGAATAACCTTCCCAAATCTAGATCTGCACAGAAGAAGGCTGAAGGTCGTTACCG  
GAC

@A00721:190:HGJW7DSXY:4:1531:6903:18991\_2:N:0:TCTGCAAG+GCTGCACT  
CCCGTCATCTCTGTGGGAAGTACCTCAGTCAAAAGTCACATTACCACTCCCATACCAAT  
CAATGATGTGACTATACAGTTCGGCCATTCAAGAGTGGTCAATACGT

@A00721:190:HGJW7DSXY:4:1236:15085:32471\_2:N:0:TCTGCAAG+GCTGCACT  
CCTTCCCCCTCCGCTGGCACGAAGAACACTCCCAAGCCAATCAATAGTTCTTCTGACCAGAATGAAAAG



GGGTTTACCAGGGTAGTCTCTAAGTCTACCAGGAAGAGGGGAAATGTC  
+  
FFFFFFFFFFFFFFFFFFFFFFFFFFFFFFFFFFFFFFFFFFFFFFFFFFFFFFFFFFFFFFFFFFFFFFFF  
FFFFFFFFFFFFFFFFFFFFFFFFFFFFFFFFFFFFFFFFFFFFFFFFFFFFFFFFFFFFFFFFFFFFFFFF  
@A00721:190:HGJW7DSXY:4:1440:27190:19460\_2:N:0:TCTGCAAG+GCTGCACT  
ACCATCTGGGGTTGGGAATAAGAAATCTGCACGGGCCAAAGAGGCCGCTGCTACGAAGTCGCTGAAGG  
CGGCTTGGGTCATTAAGGAGATCGGAAGAGCGTCGTGTAGGGAAAGAG  
+  
FFFFFF:FFFF:FFFF:FFFFFFFFFFFFFFFFFFFFFFFFFFFFFFFFFFFFFFFFFFFFFFFFFFFF  
FFFF,,FF:FFF:FFFFFFFFFFFFFFFF:FFFF,FF:F,:FFFF,FFFF  
@A00721:190:HGJW7DSXY:4:2121:31024:24878\_1:N:0:TCTGCAAG+GCTGCACT  
GTGCTCTTCCGATCTCCTACTATGAGCAAATCTGTTGAATTCGTCACTGAGGACGAAGGTGAGAGGAC  
TTTTCGCTACTGGCGACAACTGAGAGCACTCGCTGGGGAAAGAGAATTGCGTGGGTGAAGGCCGAC  
GCT  
+  
FFFF:FFFFFFFFFFFFFFFFFFFFFFFFFFFFFFFFFFFFFFFFFFFFFFFFFFFFFFFFFFFFFFFF  
FFFFFFFFFFFFFFFFFFFFFFFFFFFFFFFFFFFFFFFFFFFFFFFFFFFFFFFFFFFFFFFFFFFFFFFF  
FFF  
@A00721:190:HGJW7DSXY:4:1154:15935:29058\_1:N:0:TCTGCAAG+GCTGCACT  
CAACGGCGTTTGGAGGATTTTATCCGCGCTTAATCTGTTGAATTCGTCACTGAGGACGAAGGTGAGAGGAC  
ACTTAGTTGGCATATTTATGCCGACGATAATAAGCATGTCACCCTTAAGCACCGAGGTAAGCTCGGG  
ACT  
+  
FFFFFFFF,FFFFFF:FFFFFFFFFFFFFFFFFFFFFFFFFFFFFFFFFFFFFFFFFFFFFFFFFFFF  
FFFFFFFFFFFFFFFFFFFFFFFFFFFFFFFFFFFFFFFFFFFFFFFFFFFFFFFFFFFFFFFFFFFFFFFF  
FFF  
@A00721:190:HGJW7DSXY:4:2640:2148:31422\_2:N:0:TCTGCAAG+GCTGCACT  
TTAGAAGGAAGTTGGGCAAATTCACATATGGTAGACGTTGTCACACTTTTCTTGAAAATTTTTCCT  
TTCCTCCGTCATTGGGGATTTCGATGTGAGAAGGTGGAAGGTGTCAAG  
+  
FFFFFFFFFFFFFFFFFFFFFFFFFFFFFFFFFFFFFFFFFFFFFFFFFFFFFFFFFFFFFFFFFFFF  
FF,FFFFFFFF,FFFFFFFFFFFFFFFF:FFFFFFFFFFFF:FFFFFFFFFFFF  
@A00721:190:HGJW7DSXY:4:1406:13241:31344\_1:N:0:TCTGCAAG+GCTGCACT  
TGATTGATAGTTACGGCTCGTATCGAGTTGGAGGGAGGAAGTTCTCCGAAATTAAGACGGGGGGATT  
AAGAGTCCAGCTGTAAGTGTCAATTCAGAGAGGGGAGCTCTGAAAAGGAACTTCGTGAGAAGATGAG  
GAA  
+  
FFFFFF,FFFF,FFFFFF:FFFF:FF,FFFFFFFFFFFFFFFFFFFFFFFFFFFFFFFFFFFFFFFF  
FFFFFFFFFFFFFFFFFFFFFFFFFFFFFFFFFFFFFFFFFFFFFFFFFFFFFFFFFFFFFFFFFFFFFFFF  
FFF  
@A00721:190:HGJW7DSXY:4:1166:31331:6402\_2:N:0:TCTGCAAG+GCTGCACT  
GGAAGGCTCTAGAGAAGATCTCACCACTGGAGAAGGCAAGTGGAGAGTCCAGAAGTTGATGAAGAAG  
GATTATTTGAAGCAGGGGTTACCACTTCCTAAGGTGGATGAGGGAGGT  
+  
FFFFFFFFFFFFFFFFFFFFFFFFFFFFFFFFFFFFFFFFFFFFFFFFFFFFFFFFFFFFFFFFFFFF  
FFFFFFFFFFFFFF:FFFFFFFFFFFFFFFF:F,FFFFFFFFFFFFFFFF,FFFF  
@A00721:190:HGJW7DSXY:4:1510:8766:9408\_2:N:0:TCTGCAAG+GCTGCACT  
AGAATTCGTAACCTACCATATTGTTCTTCCGGGAAGTTGTGGGATTTAACTTTGACTCACTACTC  
CGATCAGATCCGATGGTTTGATTGGTATGGACTACTCGACTTTTGAT  
+  
FFFFFFFFFFFFFFFFFFFFFFFFFFFFFFFFFFFFFFFFFFFFFFFFFFFFFFFFFFFFFFFFFFFF  
FFF:F,FFFFFFFFFFFF:FFFFFFFFFFFFFFFFFFFFFFFFFFFFFFFFFFFFFFFFFFFF  
@A00721:190:HGJW7DSXY:4:1320:8757:29966\_2:N:0:TCTGCAAG+GCTGCACT  
ATTCTGTAGCTCTGAGGGCGGTTGAGGGAGCCGTTTTGGCCGACTTTAACTACTCTAAGAGTCTTTAT

GATTCAAAACCTATCGTTGTCGTACCTTACAAGGTTGAGGAGACTTTA

+

FF:FFFFFFFFFFFFFFFFFFFFFFFF:F:FFFF:FFFFFFFF:F::FF,FF:FFF,F,FFF,FFFF:F  
FFFF:FF,F:FFFF:FFF:F,FFFFFFFFFFFF::FFF:,FFFF:FFFF

@A00721:190:HGJW7DSXY:4:2566:26558:6057\_1:N:0:TCTGCAAG+GCTGCACT  
GAGGCGATATTCGTTTTCATATCCAAAACCTCTTGAATGGAGTACATATTTGCAACCCTATTCTTGAT  
GTGAAAGATGCATCGAGGTATACGTCTAGGAACATTGATTGGGAACGTACCTACTCACGAGACGTCAT  
GAA

+

FFFFFFFFFFFFFFFFFFFFFFFFFFFFFFFFFFFFFFFFFFFFFFFFFFFFFFFFFFFFFFFFFFFF  
FFFFFFFFFFFFFFFFFFFFFFFFFFFFFFFFFFFFFFFFFFFFFFFFFFFFFFFFFFFFFFFFFFFF  
FFF

@A00721:190:HGJW7DSXY:4:1473:22598:2206\_2:N:0:TCTGCAAG+GCTGCACT  
TACAAGAACGCTTTGGATTGTGACCATAAAGCCTCAGTTGCGATAGCTGTAGAGGTATACGATATCTC  
TCTTGATGATGTAGCCACTATAATGCTTAAGAGAGAGATTGATGTATG

+

FFFFF:FFFFFFFFFFFFFFFFFFFFFFFFFFFFFFFFFFFFFFFFFFFFFFFFFFFFFFFFFFFF  
FFFFFFFFFFFFFFFF:FFFFFFFFFFFFFF:F:FFFFFFFFFFFFFFFFFFFF

@A00721:190:HGJW7DSXY:4:1304:16188:18223\_1:N:0:TCTGCAAG+GCTGCACT  
CCAATCTCATCGCTATACGCATACCTGATTGGAAGAAGCGAGGTTCTTCCTCAATAAAAATTTTCT  
CAAGAGATTATGGTTGATAAAGTTTTCTTCATAAGGGCTATTACGTACGTCATGGGGATCACTTCTTC  
GGT

+

FFFFFFFFFFFFFFFFFFFF,FFFF:FFFF,FFFFFFFFFFFFFFFFFFFF:F:FFF:FFFFFFFFFFFF  
FF,FFF::FFFFFFFFFFFF::FFFFFFFFFFFFFFFFFFFFFFFFFFFFFFFFFFFFFFFFFFFF  
FFF

@A00721:190:HGJW7DSXY:4:2451:2754:21731\_1:N:0:TCTGCAAG+GCTGCACT  
TCGAATATGTTACGACATGGCTTCGTAACAACAGTGCGAGGATTGTCATCTCGGGGAAAGTGATTCAC  
CAAGATGTTTCATATAGATACGAGATACCTAGAGAAGGTCGACGATCTTACTCGTTATCGGAGCTAA  
GAA

+

FFFFF::FFFF,FFFFFFFFFFFFFFFFFFFFFFFFFFFFFFFFFFFFFFFFFFFFFFFFFFFF  
FFFFFFFFFFFFFF:FFFFFFFFFFFFFFFFFFFFFFFFFFFFFFFFFFFFFFFFFFFFFFFFFFFF  
FFF

@A00721:190:HGJW7DSXY:4:2218:31819:13761\_1:N:0:TCTGCAAG+GCTGCACT  
TCGCAAACTTAACGTTAGTACCGGAGGTGATCTCTCTGCTTCTGCGTTACTGAGAGAAAAGATTACAG  
ACGCCTACGGTGACTTTATGGACAAGATGCAAGTTCTTGGAATACTTGTTTCCCTTTTATAGTTTA  
GTA

+

:FFFFFFFFFFFF:FFFFFFFFFFFFFFFFFFFFFFFFFFFFFFFFFFFFFFFFFFFFFFFFFFFF  
FFFFFFFFFFFFFFFFFFFFFFFFFFFFFFFFFFFFFFFFFFFFFFFFFFFFFFFFFFFF,FFFFFFFFFFFF  
FFF

@A00721:190:HGJW7DSXY:4:2552:4942:29465\_2:N:0:TCTGCAAG+GCTGCACT  
AAACTACGGTCCTTATCAAAGAAAATGGTGAACCGGTCTCTAAATCTTTTGAGATTGAGAAGATTGAA  
GAACACGTCAAGAAGTCGCTCGGCGTTGTTCTTGAAAACCAAGTTAAG

+

FFFFFFFFFFFFFFFFFFFFFFFFFFFFFFFFFFFFFFFFFFFFFFFFFFFFFFFFFFFF:F:FFFF:FFFF:F  
FFFFFFFFFFFFFFFFFFFFFFFFFFFF,FFFFFFFFF:FFFFFFFFF

@A00721:190:HGJW7DSXY:4:2477:12427:33191\_2:N:0:TCTGCAAG+GCTGCACT  
TTCGAGGTTACGCTACGAGAGGTGATCCCGGATGTGGATTGAAGGCTGGCTCTAAGGGAGACTCCTTC  
TTTTTGAATGTTGTAAAGAATTGGGTTGAGAAGTGTGCTTTACAAGGA

+

FFFFFFFFFFFFFFFF:FFFFFFFFFFFFFFFF:F,FFFFFFFF:FFFFFFFFFFFF:FFFFFFFFF  
F,FFFFFFFF:FFFFFFFFFFFFFFFF:FFF:FF,FFF:F::FFFFFFF

@A00721:190:HGJW7DSXY:4:2659:6008:7670\_1:N:0:TCTGCAAG+GCTGCACT  
TTTTCAAAATGCGGATGGGTCTACTGATGTTTTCTACAGAGTGCAGTCGTTTCAACACTTATCACC  
ACTTTTGAAAGGAAAATAATTGGTGATGAAAATACGTATGTCGGTGGGGTCTCAAGGCTCTCATCGC  
CAC

+

F:FFFFFFFFFFFFFFFFFFFFFFFFFFFFFFFFFFFFFFFFFFFFFFFFFFFFFFFFFFFFFFFFFFFFFFFF  
FFFFFFFFFFFFFFFFFFFFFFFFFFFFFFFFFFFFFFFFFFFFFFFFFFFFFFFFFFFFFFFFFFFFFFFF  
FFF

@A00721:190:HGJW7DSXY:4:1348:16947:19727\_2:N:0:TCTGCAAG+GCTGCACT  
TTAAAACTTCAGAGTCTCTTGGAAGTCCAGGTAGCTAATGTTCTTGCAATAGCCACAGACTTTCTGGG  
AAAAGAGACCTCTGTTGTAGAGGAGTTGAGAGAATTACTCAGATTCAA

+

FFFFFFFFFFFFFFFFFFFFFFFFFFFFFFFFFFFFFFFFFFFFFFFFFFFFFFFFFFFFFFFFFFFFFFFF:  
FFFFFFFFFFFFFFFFFFFFFFFFFFFFFFFFFFFFFFFFFFFFFFFFFFFFFFFFFFFFFFFFFFFFFFFF

@A00721:190:HGJW7DSXY:4:1465:7536:12477\_1:N:0:TCTGCAAG+GCTGCACT  
CCTTTGCACAAGCAATACCTTCCACTGAGTTCATCACCCAGAGTTTCGACGTCGCGGAAAACGATGAA  
GATTTCCACACTGTTTCGAGAATCTTCTGATGCTGAATTTGAGGAAAATTTTTCGGAAGTTTTTGGTAT  
AAA

+

FFFFFFFFFFFFFFFFFFFFFFFFFFFFFFFFFFFFFFFFFFFFFFFFFFFFFFFFFFFFFFFFFFFFFFFF  
FFFFFFFFFFFFFFFFFFFFFFFFFFFFFFFFFFFFFFFFFFFFFFFFFFFFFFFFFFFFFFFFFFFFFFFF  
FFF

@A00721:190:HGJW7DSXY:4:2331:3631:26005\_1:N:0:TCTGCAAG+GCTGCACT  
ACAGGACTTTGAGAAGACTGTTGAAATGGACAAAATCTGGGATCATAGGTATGTGTACGCTACACTC  
GAAATATGGGCCCTCATAAGGAAGTATAGTTGGCGTCTTGTCGTTGACGTCATTACAGTCTGGAAGTT  
AGA

+

FF:FFFFFFFFFFFFFFFFFFFFFFFFFFFFFFFFFFFFFFFFFFFFFFFFFFFFFFFFFFFFFFFFFFFFFFFF:  
FF:FFFFFFFFFFFFFFFFFFFFFFFFFFFFFFFFFFFFFFFFFFFFFFFFFFFFFFFFFFFFFFFFFFFFFFFF  
FFF

@A00721:190:HGJW7DSXY:4:2304:21296:7498\_1:N:0:TCTGCAAG+GCTGCACT  
AGTTAGAGTCTCTTAACCAGGACTGATGGTGAGATTCTTTTACCTTTTGGAGGTCCAGGAACCTTTA  
CTCCTAGTGTCTTTTCTAGAGTCCAAGGACGTTTCCGTCGGAGGATGACAGGTGGGAGACCGCTCAAT  
AAC

+

FFFFFFFFFFFFF:FFFFFFFFFFFFFFFFFFFFFFFFFFFFFFFFFFFFFFFFFFFFFFFFFFFFFFFFFFFF  
FFFF:FFFFFFFFFFFFFFFFFFFFFFFFFFFFFFFFFFFFFFFFFFFFFFFFFFFFFFFFFFFFFFFFFFFF  
FFF

@A00721:190:HGJW7DSXY:4:2244:16966:8766\_1:N:0:TCTGCAAG+GCTGCACT  
ATTAAACATTTTTTTTTTTCGATTCTATTATGTCGCTAAAGCCTGTCCAGTTGTGATGATGTTTCGGGC  
TGTGGGGATTAACCTCCCTCGTGAACTTACGACGATGTTCTCGCTCGCATTTACAAGGATTACTAA  
GTC

+

FFFFF:FF:.....F:FFFF:FFFFFFFFF:F,FF:F::FFFF,FFFFFFFF,,FFFFFFFF,FFF  
FFFFFFFFFFFF,FFF:FFFFFFFFFFFFFFFFFFFF::FFFFFFFFFFFFFFFFFFFF:FFF:FFFFFFFF  
FFF

@A00721:190:HGJW7DSXY:4:2336:29631:22529\_2:N:0:TCTGCAAG+GCTGCACT  
ACTTCTAATTTTAGGAAACGTCGCGAAAAGAAAGTTCATGAGGATGTCTTGGTCGAAAATATCGCCG  
GGAACCTCTAATAGAGGATCCTGATGACATTATTTCAACGGATACCGA

+

FFFFFFFFFFFFFFFFFFFFFFFFFFFFFFFFFFFFFFFFFFFFFFFFFFFFFFFFFFFFFFFFFFFFFFFF  
FFF,F:FFF:FF,FFFFFFFFFFFFFFFFFFFFFFFFFFFFFFFFFFFFFFFFFFFFFFFF

@A00721:190:HGJW7DSXY:4:1457:30816:29966\_1:N:0:TCTGCAAG+GCTGCACT  
CGTCTCAGGAAGTGTCTCCACTGATTCGGAATTAGAGAAAGACGACCTTCTTGTGGGGACTGAGACCT



@A00721:190:HGJW7DSXY:4:2511:22055:11005\_2:N:0:TCTGCAAG+GCTGCACT  
TCAGTTGATTAAGACTCTTCCGAAAGGCGAACTTTGGGAATTTGAAGCTCAGGGTGAAGCACAACTGTT  
TGACCGTGACGAAGTGTGGTGTCTTGATCTACGTTACGGATATACTC

+

FFFFFFFFFFFFFFFFFFFFFFFFFFFFFFFFFFFFFFFFFFFFFFFFFFFFFFFFFFFFFFFFFFFFFFFF  
FFFFFFFFFFFFFFFFFFFFFFFFFFFFFFFFFFFFFFFFFFFFFFFFFFFFFFFFFFFFFFFF

@A00721:190:HGJW7DSXY:4:2363:16839:30655\_2:N:0:TCTGCAAG+GCTGCACT  
CGCACTAAAACGTCTTCGACAACAGCAGGGGTTTTCGAATAGTGATAGCCACCCGCCTTACAGAGGGG  
CAGCAGCATGACCATAATTGGTATTGACTTTGGTACCACCTTTTCTAC

+

FFFFFFFFF:FFFFFFFFFFFFFFFFFFFFFFFFFFFFFFFFFFFFFFFFFFFFFFFFFFFFFFFF:FFF:  
F,FFFFFFFFFFFFFFFFFFFFFFFFFFFFFFFFFFFFFFFFFFFFFFFFFFFFFFFF

@A00721:190:HGJW7DSXY:4:1401:8892:7467\_2:N:0:TCTGCAAG+GCTGCACT  
AATGAAGTTTTAATGCTTAACAACAATGATAGTGAATTTATACCTACAATCATTGGTTTTTCTAATAA  
TGATGACACTATTGTTTATGGATATGATGCTATTACTCATGATGGTTA

+

:F:FFFFFFFFFFFFFFFFFFFFFFFFFFFFFFFFFFFFFFFFFFFFFFFFFFFFFFFF:FFF:  
FFFFFFFFFFFFFFFFFFFFFFFFFFFFFFFFFFFFFFFFFFFFFFFFFFFFFFFF

@A00721:190:HGJW7DSXY:4:2443:21097:25034\_1:N:0:TCTGCAAG+GCTGCACT  
AAAACCATTTGTACGATGTCGTCTGTCTCGGCGATCACTTTTCACTAAGAATTGGTCCTACTTTTGGAC  
AAGGCCAACTTCGTAATCTTCATGAGATCGTTTCTTTCTTTATCTCTTTGGTTGTTAGGGATTTTGAG  
A

+

FFFFFFFFF,FFF:F:FFFFFFFF:FFFFFFFFFFFFFFFFFFFFFFFF:FFFFFF:FF:FF,F,FFF:FF,FFF:FFF  
FFFF:F::FFFFFFFFFFFFF:::FFFFFFFFF,FFFFFF,FFFFFFFFFFFFFFFFFFFFFFFF:FFFFFF  
F

@A00721:190:HGJW7DSXY:4:2350:27724:9987\_2:N:0:TCTGCAAG+GCTGCACT  
ATTGTAGTGGTTTGGTCGTTTCAGTACCCAGTCAGTATACCTCTACGCAAAGATATTTTCATGAAAAC  
ACAGAGGAACGTACCGGATTACCTGTCTTTCATATTATGAATGAACCT

+

FFFFFFFFFFFFFFFFFFFFFFFFFFFFFFFFFFFFFFFFFFFFFFFFFFFFFFFFFFFFFFFFFFFFFFFF  
FFFFFFFF:FFFFFFFFFFFFFFFFFFFFFFFFFFFFFFFFFFFFFFFFFFFFFFFF:F

@A00721:190:HGJW7DSXY:4:1207:2031:36636\_1:N:0:TCTGCAAG+GCTGCACT  
TTCAGAAATGGGATTCTACGTAGTTTATGACTTTGGTGGTGGTACTTTTCGATACTTCTATCGTCTTAC  
GTTACGGTAATTACTATAGTGTTATTTATTCTGGTGGTGGTGGTACTTTGGAGGTCGTGACGTTGAT  
GAA

+

:FFFFFFFFFFFF:FFFFFFFFFFFFFFFFFFFFFFFFFFFFFFFFFFFFFFFFFFFFFFFF:FFFFFFFFFFFFFFFF  
FF,FFFFFFFFFFFF:,FFFFFFFFFFFFFFFFFFFFFFFFFFFFFFFFFFFFFFFFFFFFFFFFFFFFFFFF  
FFF

@A00721:190:HGJW7DSXY:4:1113:16405:24987\_2:N:0:TCTGCAAG+GCTGCACT  
GTTCTTATTACGGCGCACTTCTTTACCCGCCACCACACAACCTTTCAGTTTCACAACCTGAAGGAGGAGG  
TTTCTGTACTGGAAAACCCTCGTCAATACTTTTCAATAATATACGTC

+

FFFFFFFFFFFFFFFFFFFFFFFFFFFFFFFFFFFFFFFFFFFFFFFFFFFFFFFFFFFFFFFFFFFFFFFF  
FFFFFFFFFFFFFFFFFFFFFFFFFFFFFFFFFFFFFFFFFFFFFFFFFFFFFFFF

@A00721:190:HGJW7DSXY:4:2173:2003:5024\_2:N:0:TCTGCAAG+GCTGCACT  
GAACAAAGTTATCAAAGATAGTGGCATTCAAGGCAAACCTTACCCTGATTCCGGCCGGTGGTAGCTCAT  
TTCTACCAGGGGCTATTACTCTTGCTGAAACAGCTATTAAAGCTGTTG

+

FFFFFFFFFFFFFFFFFFFFFFFFFFFFFFFFFFFFFFFFFFFFFFFFFFFFFFFFFFFFFFFFFFFFFFFF  
FFFFFFFFFFFFFFFF:FFFFFFFFFFFFFFFFFFFFFFFFFFFFFFFFFFFFFFFF

@A00721:190:HGJW7DSXY:4:2468:29704:10786\_1:N:0:TCTGCAAG+GCTGCACT  
GGCTAAACTCCAAGGTAATTATGAAGACTGTGATTTATCTTCACTCTGGCCTTGTATGAGGGTGT



FFFFFFFFFFFFFFFFFFFFFFFFFFFFFFFFFFFFFFFFFFFFFFFFFFFFFFFFFFFFFFFF:FFFFFFFFFFFFFFFFFFFF  
FFF

@A00721:190:HGJW7DSXY:4:1466:29677:29434\_2:N:0:TCTGCAAG+GCTGCACT  
TGAATAATGATGCACTACAAACAAGTATCGCTAATCATCTGAAAAAGGCTCTAAAGGACACTATACAA  
TATCCAGACGACGACGAAGCTTATACTACTTTAATTTTGGGTATTATG

+

FFFFFFFFFFFFFFFFFFFFFFFFFFFFFFFFFFFFFFFFFFFFFFFFFFFFFFFFFFFFFFFF:FFFFFFFF:FFFF  
FFFFFFFFFFFFFFFFFFFFFFFFFFFFFFFFFFFFFFFFFFFFFFFFFFFFFFFFFFFFFFFF:FFFF

@A00721:190:HGJW7DSXY:4:2417:4092:10050\_2:N:0:TCTGCAAG+GCTGCACT  
TTCGCCATTGTGGTACGAATTGGTCCAACATATACCACCAAATTCTTTTGATACAACTCTAGCCATCA  
AGTTGGGTATGCCTGCGGAATACGCTTGCTATTACACGATTGGTTTCG

+

:,:,FFFFF,:F,,FF,FF:FF,F:FFFFFF,:FF,FFF:FF,,FFFFFFF,FFFFFFFFFFFFF,:FF  
:FF,F,,FFF,FF:F,,FFFFFFF,,FFFFFFFFFFFF,FF:F,,:,,FF

@A00721:190:HGJW7DSXY:4:2419:2202:15013\_2:N:0:TCTGCAAG+GCTGCACT  
ATGTCAGAAGAAGCTATTCAAGCTTGTCGTTTAAAGACTGCAGAGGCTGTCAAACAAGCCAGACTCA  
AGGAGTCCAATCAAAGGTTTTGAATTTAGCTCAACTGGGGAGACGTGC

+

FFFFFFFFF:FF:FF:FF:FFFFFFFFFFFFFFFFFFFF,FFFFFFFFFFFFFFFF:FFFFFFFF:F:F,FF:F:F  
F:FFFFFF:,F:F,FF,F:F,FFFF,FFF:FFF,FF:FFFF:FF,,FF

@A00721:190:HGJW7DSXY:4:1519:12906:5337\_1:N:0:TCTGCAAG+GCTGCACT  
ATCCTTTAAGGACTATGTTGACTGACGAAGATTTCCACAGATTTGTCTACGTTGCAGATCGCCACT  
CCAAACACTATATACATTATAAAATATAAAAATAAGGGAGTCATAACTTTTGTACCAAATTCTTGGC  
TTT

+

FFFFFFFFF:FFFFFFFFFFFFFFFFFFFFFFFFFFFFFFFFFFFFFFFFFFFFFFFFFFFFFFFF:FFFFFFFFFFFFFFFFFFFFFFFF  
FFFFFFFFF:FFFF:FFFFFFFFF,FFFFFFFFFFFFFFFFFFFFFFFFFFFFFFFFFFFFFFFF:FFFFFFFF  
FFF

@A00721:190:HGJW7DSXY:4:2452:4915:31422\_2:N:0:TCTGCAAG+GCTGCACT  
ATTTTATTAATCATTACTTTAACGATCTCTCGTCAATTTACTCTGTACTTGATCTACGTCGTTTAACT  
GTCGGAACAACCTTTACTTAGAATGACTCTATCTTTTCAGACACTTCT

+

FFFFFFFFFFFFFFFFFFFFFFFFFFFFFFFFFFFFFFFFFFFFFFFFFFFFFFFFFFFFFFFF:FFFFFFFF  
FFFFFFFFFFFFFFFFFFFFFFFFFFFFFFFFFFFFFFFFFFFFFFFFFFFFFFFF,FF:FFFFFFFF

@A00721:190:HGJW7DSXY:4:1575:6216:20807\_1:N:0:TCTGCAAG+GCTGCACT  
ACGTGTGCTCTTCCGATCTTAAAGGATGAGTACGAAAACCAACTCTTCGTTACGAGACCTGATGGTAG  
AATAGATTTAGTCTCTACACCCATCTCAACGAGGATAAAGCGAGTTTTCCGTCCTGAACGTAATACAC  
GAA

+

FFFFFFFFFFFFFFFFFFFF:FFFFFFFFFFFFFFFFFFFFFFFFFFFFFFFFFFFFFFFFFFFFFFFF  
FFFFFFFFFFFFFFFFFFFFFFFFFFFFFFFFFFFFFFFFFFFFFFFFFFFFFFFFFFFFFFFFFFFFFFFF  
FFF

@A00721:190:HGJW7DSXY:4:1419:6424:7639\_1:N:0:TCTGCAAG+GCTGCACT  
TTATGAATCCTGCCTTTACTCATTTTATAGCAGTTATTTATGTTGTACTTTTATAATTTATAACCTT  
CTTATACTTTTGGGTATGTTTTGTGAAAAACATGAGATACCCAAGTCTATCGAAGACATTATCTCTTA  
TGT

+

FFFFFFFFFFFFFFFFF:FFFFFFFFFFFFFFFFFFFF:FFFFFFFFFFFFFFFFFFFFFFFFFFFFFFFF  
FFFFFFFFFFFFFFFFFFFFFFFFFFFFFFFFFFFFFFFFFFFFFFFFFFFFFFFFFFFFFFFFFFFFFFFF  
FFF

@A00721:190:HGJW7DSXY:4:2178:16260:24549\_1:N:0:TCTGCAAG+GCTGCACT  
GATAGTGATTGTTATCAATTTAAATACATTACTGTTTCAAATCATCTTTACTCACAGACTCCGAAAAT  
GGTTTCAAATGAGGTCAAAGCTCTATTTATTAACGAACACTATTATCCGATTCTTCGAGGGTATCACTA  
CC

```

+
FFFFFFFFFFFFFFFFFFFFFFFFFFFFFFFFFFFFFFFFFFFFFFFFFFFFFFFFFFFFF:FFFFFFFFFFFFFFFFFFFFFFFFFFFFFFFFFFFFFFFFFFFFFFFFFFFFF
FFFFFFFFFFFFFFFFFFFFFFFFFFFFFFFFFFFFFFFFFFFFFFFFFFFFFFFFFFFFF:FFFFFFFFFFFFFFFFFFFFFFFFFFFFFFFFFFFFFFFFFFFFFFFFFFFFF
FF
@A00721:190:HGJW7DSXY:4:2121:16025:1376_2:N:0:TCTGCAAG+GCTGCACT
ATTTTCACAAATTTTAGAACTTTATTTTCCGAATCCTCTCGGATCACCTTGGTGTGATCTCCCGGAGGA
TCTTTTCAATAAGATGTATGATGATAATCTACTATTTTTTAATAGTGA
+
FFFFFFFFFF:FF,:FFFFFFF:FFFFFFFFFFFFFFFFFFFFFFFFFFFFFFFFFFFFF:FFFFFFFFFFFFFFFFFFFFFFFFFFFFFFFFFFFFF
FFFFFFFFFFFFFFFFF:FFFFFFFFFFFFFFFFF:FFFFFFFFFFFFFFFFFFFFF:FFFFFFF
@A00721:190:HGJW7DSXY:4:1514:8115:19586_1:N:0:TCTGCAAG+GCTGCACT
TTTATCAAAGATTGGCTTGGTCTATTTACCGCAAAAAGTTGGAAGAGGACTATGATATTTATTTTAC
TTATACTTTAAATAGCACCGATTATAACTTGACTGTTGATAATATTACAATAGCTCTTTCTCAGAAGA
TTA
+
F:F:FFFFFFFFF:FFFFF,FFFFFFFFFFFFFFFFFFFFFFFFFFFFFFFFFFFFF:F,FFFFFFFFFFFFFFFFFFFFFFFFFFFFFFFFFFFFF
FFFFFFFFFFFFFFFFFFFFFFFFFFFFFFFFFFFFFFFFFFFFFFFFFFFFFFFFFFFFF:FFF
FFF
@A00721:190:HGJW7DSXY:4:1363:16541:10441_1:N:0:TCTGCAAG+GCTGCACT
GGTGAACACGTCGGTAGCATTTACTTTTACCGTTAGAACTGAAAAAGATTCTTTTTCGAAAAGAA
ACCTATAAGTTACAAACGATTCTTCGACTATATTAAGAAATAAAAATACTTCAAGTACCTGAACCTT
ACA
+
FFFFFFFFFFFFFFFFFFFFFFFFF:FFFFFFFFFFFFFFFFFFFFFFFFFFFFFFFFFFFFFFFFFFFFFFFFFFFFFFFFFFFFFFFFFFFFFFFFFFFFFFFFFFFFF
FFFFFFFFF::F:FFFFFFFFFFFFFFFFFFFFF,FFFFFFFFFFFFFFFFFFFFFFFFFFFFFFFFFFFFFFFFFFFFFFFFFFFFFFFFFFFFFFFFFFFFF
FFF
@A00721:190:HGJW7DSXY:4:1608:28917:6136_2:N:0:TCTGCAAG+GCTGCACT
CAAATAGAACCTTCACTCTCGGTAATGAGAGTGTATTCCTTAATATTCTAGTAACCGCTATGTGGGCA
TTACTAGGATTTATCACACTCCTAAATTTGATAGCAATTTATGTTTA
+
FFFFFFFFFFFFFFFFFFFFFFFFFFFFFFFFFFFFFFFFFFFFFFFFFFFFFFFFFFFFF:FFFFFFFFFFFFFFF:FFFFFFF:
FFF,FFFFFFFFFFFFFFFFFFFFFFFFFFFFFFFFFFFFF:FFFFF,,FFFFFFFF:F:
@A00721:190:HGJW7DSXY:4:2160:9643:25207_1:N:0:TCTGCAAG+GCTGCACT
GAGTACTTAATTCAATAGCTTTAGTATTATTTACTATCGCCTTTATTGAAAATTGTATAAGAGTTAAT
TGCTTACACAAAAGTGACGC CGAAGGAATCTTAATTGATTGAAGCTAGGCGTTGGGGAGAATGAAC
GC
+
FFFFF,FFFFF:FFF::F::FFFF:FFFFFFFFFFFFFFFFFFFFFFFFFFFFFFFFFFFFF,FFFFFFFFF
FFFFFFFFFFFFFFFFFFFFFFFFFFFFF::FFFF:FFFFFFFFFFFFFFFFFFFFFFFFFFFFFFFFFFFFF
FF
@A00721:190:HGJW7DSXY:4:1115:17083:35587_1:N:0:TCTGCAAG+GCTGCACT
TCCGATCTGTCAAACCTAGTCCC GCCGGTCGGCATATCGGCACC ACTGGTCTCTACGTT CAGGGACCC
GCTGTGCAGAATAACCTTCCA ACTCTAGATCTGCACAGAAGAAGGCTGAAGGTCGTTACCGGAC
+
FF:,FF,:FF:F,,F,F,,,F::F:F,,:FF,FF:FFFFFF,F,,:FFFF::,FFF,,FFFFFFF
F,,F:F,:FFF::FFF,,F,F:F,FF::,FFF,FFFFF:FFF:F:FF:F,F:FF,FFF::FF,:F
@A00721:190:HGJW7DSXY:4:1652:26259:35822_2:N:0:TCTGCAAG+GCTGCACT
CCCGTCATCTCTGTGGGA ACTGAGGCAGTACCTCAGTCAAAAAGTCACATT CACCACTCCC ATACCAAT
CAATGATGTGACTATACAGTT CGGCCATTTCAAGAGTGGTCAATACGT
+
FFFFFFF:FFFFFFFFFFFFFFFFFFFFFFFFFFFFFFFFFFFFFFFFFFFFFFFFFFFFF:FFFFFFFFFFFFFFFFFFFFFFFFFFFFFFFFFFFFF
FFFFFFFFFFFFFFFFFFFFF:FFFFFFFFFFFFFFFFFFFFFFFFFFFFFFFFFFFFFFFFFFFFF
@A00721:190:HGJW7DSXY:4:1537:9986:27649_2:N:0:TCTGCAAG+GCTGCACT
CCTTCCCCCTCCGCTGGC AC GAAGAACACTCCCAAGCCAAT CAATAGTTCTTCTGACCAGAATGAAAAG

```



+

@A00721:190:HGJW7DSXY:4:2103:6027:13025\_2:N:0:TCTGCAAG+GCTGCACT  
ACCATCTGGGGTTGGGAATAAGAAATCTGCACGGGCCAAAGAGGCCGCTGCTACGAAGTCGCTGAAGG  
CGGCTTGGGTCATTAAGGAGATCGGAAGAGCGTCGTGTAGGGAAAGAG

+

@A00721:190:HGJW7DSXY:4:2153:11541:15468\_1:N:0:TCTGCAAG+GCTGCACT  
GTGCTCTTCCGATCTCCTACTATGAGCAAATCTGTTGAATTCGTCACTGAGGACGAAGGTGAGAGGAC  
TTTTCGCTACTGGCGACAAACTGAGAGCACTCGCTGGGGAAAGAGAATTGCGTGGGTGAAGGCCGAC  
GCT

+

@A00721:190:HGJW7DSXY:4:1229:12599:6433\_1:N:0:TCTGCAAG+GCTGCACT  
CAACGCGCTTTGGATGATTTTATCCGCGCTTAACTATGGGGCGAAGATCCCCTATGGAGTCTTGAAGG  
ACTTAGGTTGGCATATTTATGCCGACGATAATAAGCATGTCACCCTTAAGCACCGAGGTAAGCTCGGG  
ACT

+

@A00721:190:HGJW7DSXY:4:2676:6876:2347\_2:N:0:TCTGCAAG+GCTGCACT  
TTAGAAGGAAGTTGGGCAAATTCACATATGGTAGACGTTGTACACTTTTCTTGAAAATTTTCT  
TTCTCCGTCATTGGGGATTCGATGTGAGAAGGTGGAAGGTGTCAAG

+

@A00721:190:HGJW7DSXY:4:1470:13033:13197\_1:N:0:TCTGCAAG+GCTGCACT  
TGATTGATAGTTACGGCTCGTATCGAGTTGGAGGGAGGAAGTTCTCCGAAATTAAGACGGGGGGATT  
AAGAGTCCAGCTGTAAGTGTCAATTCAGAGAGGGGAGCTCTGAAAAGGAACTTCGTCAGAAGATGAG  
GAA

+

@A00721:190:HGJW7DSXY:4:1169:24831:17628\_2:N:0:TCTGCAAG+GCTGCACT  
GGAAGGCTCTAGAGAAGATCTCACCACCTGGAGAAGGCAAGTGGAGAGTCCAGAAGTTGATGAAGAAG  
GATTATTTGAAGCAGGGGTTACCACTTCCTAAGGTGGATGAGGGAGGT

+

@A00721:190:HGJW7DSXY:4:1625:13358:6057\_2:N:0:TCTGCAAG+GCTGCACT  
AGAATTCGGTAACTTACCATAATTGTTCTTCCGGGAAGTTGTGGGATTTAACTTTGACTCAACTACTC  
CGATCAGATCCGGATGGTTTGATTGGTATGGACTACTCGACTTTTGAT

+

@A00721:190:HGJW7DSXY:4:1430:5339:9486\_2:N:0:TCTGCAAG+GCTGCACT  
ATTCTGTAGCTCTGAGGGCGGTTGAGGGAGCCGTTTTGGCCGACTTTAACTACTCTAAGAGTCTTTAT

+

@A00721:190:HGJW7DSXY:4:1105:7536:25191\_2:N:0:TCTGCAAG+GCTGCACT  
GCGATATTCGTTTTCATATCCAAACTCCTTGAATGGAGTACATATTTGCAACCCTATTCTTGATGTG  
AAAGATGCATCGAGGTATACGTCTAGGAACATTGATTGGGAACGTACC

+

@A00721:190:HGJW7DSXY:4:1531:15628:16031\_2:N:0:TCTGCAAG+GCTGCACT  
TACAAGAACGCTTTGGATTGTGACCATAAAGCCTCAGTTGCGATAGCTGTAGAGGTATACGATATCTC  
TCTTGATGATGTAGCCACTATAATGCTTAAGAGAGAGATTGATGTATG

+

@A00721:190:HGJW7DSXY:4:1307:22417:18114\_1:N:0:TCTGCAAG+GCTGCACT  
CCAATCTCATCGCTATACGCATACCTGATTGGAAGAAGCGAGGTTCTTCCTCAATAAAAAATTTTTCT  
CAAGAGATTATGGTTGATAAAGTTTTCTTCATAAGGGCTATTACGTACGTCATGGGGATCACTTCTTC  
GGT

+

@A00721:190:HGJW7DSXY:4:1161:17544:34162\_1:N:0:TCTGCAAG+GCTGCACT  
CGAATATGTTACGACATGGCTTCGTAACAACAGTGCGAGGATTGTCATCTCGGGGAAAGTGATTACCC  
AAGATGTTTCATATAGATACGAGATACCTAGAGAAGGTCGCAGCGATCTCACTCGTTATCGGAGCTAAG  
AAG

 $+$ 

@A00721:190:HGJW7DSXY:4:2259:22200:23563\_1:N:0:TCTGCAAG+GCTGCACT  
TCGCAAACTTAACGTTAGTACCGGAGGTGATCTCTCTGCTTCTGCGTTACTGAGAGAAAAGATTCAAGG  
ACGCCTACGGTGACTTTATGGACAAGATGCAAGTTCTTGGGAAATACTTGTTTCCCTTTTTAGGTTTA  
GTA

+

@A00721:190:HGJW7DSXY:4:2629:12816:30953\_2:N:0:TCTGCAAG+GCTGCACT  
AAACTACGGTCCTTATCAAAGAAAATGGTGAACCGGTCTCTAAATCTTTTGAGATTGAGAAGATTGAA  
GAACACGTCAAGAAGTCGCTCGGCGTTGTTCTTGAAAACCAAGTTAAG

+

@A00721:190:HGJW7DSXY:4:2622:10257:10614\_2:N:0:TCTGCAAG+GCTGCACT  
TTCGAGGTTACGCTACGAGAGGTGATCCCGGATGTGGATTGAAGGCTGGCTCTAAGGGAGACTCCTTC  
TTTTTGAATGTTGTAAGAATTGGGTTGAGAAGTGTGCTTTACAAGGA

+

@A00721:190:HGJW7DSXY:4:2659:6587:8140\_1:N:0:TCTGCAAG+GCTGCACT  
TTTTCAAAAATGCGGATGGGTCTACTGATGTTTTCTACAGAGTGCAGTCGTTTCAACACTTATCACC

ACTTTTGAAAGGAAAATAATTGGTGATGAAAATACGTATGTCGGTGGGGTTCTCAAGGCTCTCATCGC  
CAC

+

FFFFFFFFFFFFFFFF:FFFFFFFFFFFFFFFFFFFFFFFFFFFFFFFFFFFFFFFFFFFFFFFF  
FFFFFFFFFFFFFFFFFFFFFFFFFFFFFFFFFFFFFFFFFFFFFFFFFFFFFFFFFFFFFFFF  
FFF

@A00721:190:HGJW7DSXY:4:1477:30165:10864\_2:N:0:TCTGCAAG+GCTGCACT  
TTAAAACTTCAGAGTCTCTTGGAAGTCCAGGTAGCTAATGTTCTTGCAATAGCCACAGACTTTCTGGG  
AAAAGAGACCTCTGTTGTAGAGGAGTTGAGAGAATTACTCAGATTCAA

+

FFFFFFFFFFFFFFFFFFFFFFFFFFFFFFFFFFFFFFFF:FFFFFFFFFFFFFFFFFFFFFFFF  
FFFFFFFFFFFFFFFFFFFFFFFFFFFFFFFF:FFFFFFFFFFFFFFFFFFFFFFFF

@A00721:190:HGJW7DSXY:4:1465:7835:13307\_1:N:0:TCTGCAAG+GCTGCACT  
CCTTTGCACAAGCAATACCTTCCACTGAGTTCATCACCCAGAGTTTCGACGTCGCGGAAAACGATGAA  
GATTTCCACACTGTTTCGAGAATCTTCTGATGCTGAATTTGAGGAAAATTTTTCGGAAGTTTTTGTAT  
AAA

+

FFFFFFFFFFFFFFFFFFFFFFFFFFFFFFFFFFFFFFFFFFFFFFFFFFFFFFFFFFFFFFFF  
FFFFFFFFFFFFFFFFFFFFFFFFFFFFFFFFFFFFFFFFFFFFFFFFFFFFFFFFFFFFFFFF  
FFF

@A00721:190:HGJW7DSXY:4:2671:10239:3411\_1:N:0:TCTGCAAG+GCTGCACT  
ACAGGACTTTGAGAAGACTGTTGAAATGGACAAAATCTGGGATCATAGGTATGTGTACGCTACACTC  
GAAATATGGGCCCTCATAAGGAAGTATAGTTGGCGTCTTGTCTGACGTCATTACAGTCTGGAAGTT  
AGA

+

FFFFFFFFFFFFFFFFFFFFFFFFFFFFFFFFFFFFFFFFFFFFFFFFFFFFFFFFFFFFFFFF  
FFFFFFFFFFFFFFFFFFFFFFFFFFFFFFFFFFFFFFFFFFFFFFFFFFFFFFFFFFFFFFFF  
FFF

@A00721:190:HGJW7DSXY:4:2565:29776:1266\_1:N:0:TCTGCAAG+GCTGCACT  
AGTTAGAGTCTTCTTAACCAGGACTGATGGTGAGATTCTTTTACCTTTTGGAGGTCCAGGAACCTTTA  
CTCCTAGTGTCTTTCTAGAGTCCAAGGACGTTTCCGTCGGAGGATGACAGGTGGGAGACCGCTCAAT  
AAC

+

FFFFFFFFFFFFFFF:FFFFFFFFFFFFFFFFFFFFFFFFFFFFFFFF:FFFFFFFFFFFFFFFF  
FFFFFFFFFFFFFFFFFFFFFFFFFFFFFFFFFFFFFFFFFFFFFFFFFFFFFFFFFFFFFFFF  
FFF

@A00721:190:HGJW7DSXY:4:1365:16062:3317\_1:N:0:TCTGCAAG+GCTGCACT  
TTAAACATAAAATCCAGCGATTCTATTATGTCGCTAAAGCCTGTCCAGTTGTCGATGATGTTCTGGGCT  
GTGGGGATTAACCTCCCTCGTGAAACTTACGACGATGTTCTCGCTCGCATTTACAAGGATTACTAAG  
TCT

+

:FFFFFFFFFFFFFFFFFFFFFFFFFFFFFFFFFFFFFFFFFFFFFFFFFFFFFFFFFFFFFFFF  
FFFF:FFFFFFFFFFFFFFFFFFFFFFFFFFFFFFFFFFFFFFFFFFFFFFFFFFFFFFFFFFFF:FF  
FFF

@A00721:190:HGJW7DSXY:4:2502:2031:30718\_2:N:0:TCTGCAAG+GCTGCACT  
ACTTCTAATTTTAGGAAACGTCGCGAAAAGAAGGTTTCATGAGGATGTCTTGGTCGAAAATATCGCCG  
GGAACCTCTAATAGAGGATCCTGATGACATTATTTCAACGGATACCGA

+

FFFFFFFFFFFFFFFFFFFFFFFFFFFFFFFF:FFFFFFFFF:FFFFFFFFFFFFFFFFFFFF  
FFFF:FFFF:F:,FFFFFFFFF:FFFFFFF:FFFFFFFFFFFF

@A00721:190:HGJW7DSXY:4:1533:9869:11287\_1:N:0:TCTGCAAG+GCTGCACT  
CGTCTCAGGAAGTGTCTCCACTGATTTCGGAATTAGAGAAAGACGACCTTCTTGTGGGGACTGAGACCT  
CTGAATTTTCAGGGTGCCTGATGAGGACGTTGAAAGGGATAATTTCAACTCTGAGACTTCTAAGAGT  
GTT

```
+  
FFFFFFFFFFFFFFFFFFFFFFFFFFFFFFFFFFFFF:FFFFFFFFFFFFFFFFFFFFFFFFFFFFFFFFFFFF  
FFFFFFFFFFFFFFFFFFFFFFFFFFFFFFFFFFFFFFFFFFFFFFFFFFFFFFFFFFFFFFFFFFFFFFFFFF  
FFF  
@A00721:190:HGJW7DSXY:4:1168:2736:17190_1:N:0:TCTGCAAG+GCTGCACT  
AATTAAGACAGACGTGAAAGTTATGATGAGTGATCGTATTAGAACAGCTGATTCTTATTGCATGAACG  
TCGCTGAGGTCAAACCTGTGGACGTTCTTTTCATCGACGAATTATTTCATGATTCACGCTGGTCAGACC  
CTT  
+  
FFFFFFFFFFFFFFFFFFFFFFFFFFFFFFFFFFFFFFFFFFFFFFFFFFFFFFFFFFFFFFFFFFFFFFFFFF  
FFFFFFFFFFFFFFFFFFFFFFFFFFFFFFFFFFFFFFFFFFFFFFFFFFFFFFFFFFFFFFFFFFFFFFFFFF  
FFF  
@A00721:190:HGJW7DSXY:4:2471:1994:15436_1:N:0:TCTGCAAG+GCTGCACT  
ACTTAAGGCGGCTTATAACCATAGGTTACGGTGATTCCAATCAAATCGGATTCATCAATCGTATTGATC  
TCCAAGTCGCAAACACTACTTCAACATCAACGACATCATTCTTGATGAGTGTCGTTCTTATCGAAGTCTC  
AGT  
+  
FFFFFFFFFFFFFFFFFFFFFFFFFFFFFFFFFFFFFFFFFFFF:FFFFFFFFFFFFFFFFFFFFFFFFFFFFF  
FFFFFFFFFFFFFFFFFFFFFFFFFFFF:F:FFFFFF:FFFFFFFFFFFFFFFFFFFFFFFFFFFFFFFFFF  
FFF  
@A00721:190:HGJW7DSXY:4:2654:17400:7921_2:N:0:TCTGCAAG+GCTGCACT  
CTGTCACGTTTTAGCACGGGAGGTTGAGATTCAACCCCTTATATCGAGGCTATCGAGGACGATGAGTA  
TCTTGAAGTTGTTGACGACAAGCCTCAAGAGGGTAGAGGACCACCTGG  
+  
FFFFFFFFFFFFFFFFFFFFFFFFFFFFFFFFFFFFFFFFFFFFFFFFFFFFFFFFFFFFFFFFFFFFFFFFFF  
FFFFFFF:FFFFFFFFFFFFFFFFFFFFFFFFFFFFFFFFFFFFFFFFFFFFFFFFFFFFFFFFFFFFF  
@A00721:190:HGJW7DSXY:4:2321:13150:5760_2:N:0:TCTGCAAG+GCTGCACT  
CTCGGTAATCTTTCAGCCGAATTAAGTACTAATGAGTTCAAGTCGGTTGTCGATCGAATTAAGATCAA  
GGCTAATACCTTTATAGGTAAGAAGCCCCCTTGAGCCGCGTAGTCAGCG  
+  
FFFFFFF::FFFFFFF::FFF:FFFFFFFFFFFFFFFF:F,FFFFFF:::FFFFFF:F::FFFF:FFFF  
F,FFFF:FFF,FFFF:,FFF:,F:F,FF,FFFFFF:FFFFFFF:,FF  
@A00721:190:HGJW7DSXY:4:1220:14344:34569_1:N:0:TCTGCAAG+GCTGCACT  
ATTTACCACCTTTGCTCAACGACGAAGTGGAACGCCAACACTTTCTTTGGTAATTGTATGATCACTT  
TGATGATTTTATCACTTTATTATGACCTTGAAAGTTTTTCGCTGTGGTTGTCGCTGGGGACGATTCC  
ATT  
+  
FFFFFFFFFFFFFFFFFFFFFFFFFFFF:FFFFFFFFFFFFFFFFFFFFFFFFFFFFFFFFFFFFFFFFFFFF  
FFFFFFFFFFFFFFFFFFFFFFFFFFFFFFFFFFFFFFFFFFFFFFFFFFFFFFFFFFFFFFFFFFFFFFFFFF  
FFF  
@A00721:190:HGJW7DSXY:4:2366:16712:20478_2:N:0:TCTGCAAG+GCTGCACT  
TTGTATAAGATCAAATTTTAAACGATTCCGAGAGGTTTATCCTGATGTGGAGGGAGTTCTTGAAGCAT  
CCCACCTTTCCTTGTGAAAATTTTGATGCGGTTTCATAAGATTATCA  
+  
FFFFFFFFFFFFFFFFFFFFFFFFFFFF:FFFFFFFFFFFFFFFFFFFFFFFFFFFFFFFFFFFFFFFFFFFF  
FFFFFFFFFFFFFFFFFFFFFFFFFFFF:FFFFFFFFFFFFFFFFFFFFFFFFFFFFFFFFFFFFF  
@A00721:190:HGJW7DSXY:4:2378:31656:34115_2:N:0:TCTGCAAG+GCTGCACT  
GATATTGTTGAGCGAGAGCGACCAAGATCTAAATTTCGGTAACGGTGCGTGCGCTTTATTTTAAAAAG  
CTCCCTCCTCTCGCAAGTTTGATCTGATACTTATCACGAAAGGACTTG  
+  
FFFFFFFFFFFFFFFFFFFFFFFFFFFFFFFFFFFFFFFFFFFFFFFFFFFFFFFFFFFFFFFFFFFFFFFFFF  
FFFFFFFFFFFFFFFFFFFFFFFFFFFFFFFFFFFFFFFFFFFFFFFFFFFFFFFFFFFFFFFFFFFFFFFFFF  
@A00721:190:HGJW7DSXY:4:2557:22281:15248_2:N:0:TCTGCAAG+GCTGCACT  
TCAGTTGATTAAGACTCTTCCGAAAGGCGAACTTTGGGAATTTGAAGCTCAGGGTGAAGCACAACGTT
```

+

@A00721:190:HGJW7DSXY:4:2406:20094:6292\_2:N:0:TCTGCAAG+GCTGCACT  
CGCACTAAAACGTCTTCGACAACAGCAGGGGTTTTCGAATAGTGATAGCCACCCGCCTTACAGAGGGG  
CAGCAGCATGACCATAATTGGTATTGACTTTGGTACCACCTTTTCTAC

+

@A00721:190:HGJW7DSXY:4:2327:28375:8453\_2:N:0:TCTGCAAG+GCTGCACT  
AATGAAGTTTTAATGCTTAACAACAATGATAGTGAATTTATACCTACAATCATTGGTTTTTCTAATAA  
TGATGACACTATTGTTTATGGATATGATGCTATTACTCATGATGGTTA

+

@A00721:190:HGJW7DSXY:4:2323:21016:22388\_2:N:0:TCTGCAAG+GCTGCACT  
TACGATGTCGTCTGTCTCGGCGATCACTTTTCTACTAAGAATTGGTCTACTTTTGGACAAGGCCAACT  
TCGTAATCTTCATGAGATCGTTTCTTTCTTTATCTCTTTGGTTGTTAG

+

@A00721:190:HGJW7DSXY:4:2418:13621:29590\_2:N:0:TCTGCAAG+GCTGCACT  
GAGTGAAGGCTTCAATTGTAGTGGTTTGGTCGTTTCAGTACCCAGTCAGTATACCTCTACGCAAAGA  
TATTTTCATGAAACTACAGAGGAACGTACCGGATTACCTGTCTTTTCAT

+

@A00721:190:HGJW7DSXY:4:1361:10059:3662\_1:N:0:TCTGCAAG+GCTGCACT  
TTCAGAATGGGATTCTACGTAGTTTATGACTTTGGTGGTGGTACTTTCGATACTTCTATCGTCTTAC  
GTTACGGTAATTACTATAGTGTTATTTATTCTGGTGGTGATGATAATCTTGGAGGTCGTGACGTTGAT  
GAA

+

@A00721:190:HGJW7DSXY:4:1227:25545:30201\_2:N:0:TCTGCAAG+GCTGCACT  
GTTCTTATTACGGCGCACTTCTTTACCCGCCACCACACAACCTTTCAAGTTTCACAACTGAAGGAGGAGG  
TTTCTGTTACTGGAAAACCTCGTCAATACTTTTTCAATAATATACGTC

+

@A00721:190:HGJW7DSXY:4:2476:15817:22936\_2:N:0:TCTGCAAG+GCTGCACT  
GAACAAAGTTATCAAAGATAGTGGCATTCAAGGCAAACCTTACCCTGATTCCGGCCGGTGGTAGCTCAT  
TTCTACCAGGGGCTATTACTCTTGCTGAAACAGCTATTAAAGCTGTTG

+

@A00721:190:HGJW7DSXY:4:2649:9769:7326\_1:N:0:TCTGCAAG+GCTGCACT  
TTATCTTTCACCTCTGGCCTTGTATGAGGGTGTTTCTAATCGTAACATTAATAATTTCAATCTTCTTAA  
AAAGAAGATAGAGAGTCATACTTTGGGCTATCGTTCAGGTGCATGGGGTTGGATAGCCAATATTGAAG  
TGG

+

[illegible]

F:FFFFFFFFFFFFFFFFFFFFFFFFFFFFFFFFFFFFFFFFFFFFFFFFFFFFFFFFFFFFFFFF  
FFF  
@A00721:190:HGJW7DSXY:4:2528:9878:11209\_2:N:0:TCTGCAAG+GCTGCACT  
ATATTTACAAAATCTTACCACTATCTACGAACCTAAAGTTCTGAAGACGTTGCTTGTCTCCTCCT  
TTAATGGCACTACCTCGGTACAATCTTACTTGGAACGAAGGCGACCTG  
+  
FFFFFFFFFFFFFFFFFFFFFFFFFFFFFFFFFFFFFFFFFFFFFFFFFFFFFFFFFFFFFFFF  
:FFFFFFFFFFFFFFFF:FFFF,FFFFFFFF,FFFFFFFFFFFFFFFFFFFFFFFF:FF  
@A00721:190:HGJW7DSXY:4:2320:8404:1423\_1:N:0:TCTGCAAG+GCTGCACT  
AGACGTGTGCTCTTCCGATCTATACGATTTTCAACGTCAACGTTACCGAGTTTCGTTTCGTACCTTG  
ATGCTGACTTTTCGTCAATATGATTTGATCTGGTTGCTCAATTCTAAGCGTGTTCGCTTAGTGCGAGG  
CCT  
+  
FFFFFFFFFFFFFFFFFFFFFFFFFFFFFFFFFFFFFFFFFFFFFFFFFFFFFFFFFFFFFFFF  
FFFFFFFFFFFFFFFFFFFFFFFFFFFFFFFFFFFFFFFFFFFFFFFFFFFFFFFFFFFFFFFF  
FFF  
@A00721:190:HGJW7DSXY:4:1573:18927:15452\_2:N:0:TCTGCAAG+GCTGCACT  
CCTTGGAATTTAATATAAAGAATCTTTACCAGGACTCCTACTACAGGAGGCAGTCTTCTGATCGTAAG  
AAGTTTATAAGGAACATATCCATTTGTTGTAATAGGGTCATCAACTTA  
+  
FFFFFFFFFFFFFF:FFFFFFFF,FFFFFFFF:F,,FFFF:FFFFFFFFFFFFFFFFFFFFFFFF:FFFF  
FFFFFFFFFFFFFFFFFFFFFFFF:FFFFFFFF:FFFF:F,FFFFFFFF:F  
@A00721:190:HGJW7DSXY:4:1445:10601:9862\_2:N:0:TCTGCAAG+GCTGCACT  
AGTGGTAATACTGTCTTTCCAAGCTTACCTGTATCTTCAATGAAATTGGACTCTTCGATAGGGGACAT  
TTTATCGTGGGCTTTCCGTAAAGGAAGATCTGTTATCGACGTTTATC  
+  
FFFFFFFFFFFFFFFFFFFFFFFFFFFFFFFFFFFFFFFFFFFFFFFFFFFFFFFFFFFFFFFF  
FFFFFFFFFFFFFFFFFFFFFFFFFFFFFFFFFFFFFFFFFFFFFFFFFFFFFFFF:  
@A00721:190:HGJW7DSXY:4:1525:2908:22623\_1:N:0:TCTGCAAG+GCTGCACT  
TTATCTAAAGATTGAAGGAAAATTTATCCTCGTTTAACTTACTTAGACTTTCCTACGATACAAATGA  
TAACTTCTAATTTACGTTTGCTACTCAGAGCTGGTCCTCTCAGCAAAGGGATGCATGGTGTATCTCC  
TCA  
+  
FFFFFFFFFFFFFFFFFFFFFFFFFFFFFFFFFFFFFFFFFFFFFFFFFFFFFFFFFFFFFFFF  
FFFFFFFFFFFFFFFFFFFFFFFFFFFFFFFFFFFFFFFFFFFFFFFFFFFFFFFFFFFFFFFF  
FFF  
@A00721:190:HGJW7DSXY:4:1665:31186:16016\_1:N:0:TCTGCAAG+GCTGCACT  
TAATAATGACGAGACTTTTCGTATAATCGCTGCATATTACGATTACACGGTACCAGCGCATCTCGTG  
TCGAGCCTCGACCCGATTATATGGTATTAACCTATAAAGGTGAGGAGACCATTTTCTTGCTGAAATTT  
ATA  
+  
FFFFFFFFFFFFFFFFFFFFFFFFFFFFFFFFFFFFFFFFFFFFFFFFFFFFFFFFFFFFFFFF  
FFFFFFFFFFFFFFFFFFFFFFFFFFFFFFFFFFFFFFFFFFFFFFFFFFFFFFFFFFFFFFFF  
FFF  
@A00721:190:HGJW7DSXY:4:1157:12337:6793\_2:N:0:TCTGCAAG+GCTGCACT  
CTTATAATAAATAAATAAATAATATTACTAATGGCAAATAGTGGAAGGCTCCAGTCAACACTAGTTC  
GAGTGCTGCTTTGGATTACGATGACGTGAGAATAGGTGAAGGGATAGT  
+  
FFFFFFFFFFFFFFFFFFFFFFFFFFFFFFFFFFFFFFFFFFFFFFFFFFFFFFFFFFFFFFFF  
FFFFFFFFFFFFFFFFFFFFFFFFFFFFFFFFFFFFFFFFFFFFFFFFFFFFFFFF:FFF  
@A00721:190:HGJW7DSXY:4:1232:30626:18740\_1:N:0:TCTGCAAG+GCTGCACT  
ACCAACATTAAGGCGGCGGCGACTAATCTTAAAGCTTACCCAAAATGAAGGACACTTCGAAACTGAA  
TAATGATGCACTACAAACAAGTATCGCTAATCATCTGAAAAAGGCTCTAAAGGACACTATACAATATC  
CAG

+  
FF:FFFFFFFFFFFFFFFFFFFFFFFFFFFFFFFFFFFFFFFFFFFFFFFFFFFFFFFFFFFFFFFF:FFFFFFFF  
FFFFFFFFFFFFFFFFFFFFFFFFFFFFFFFFFFFFFFFFFFFFFFFFFFFFFFFFFFFFFFFFFFFFFFFF  
FFF  
@A00721:190:HGJW7DSXY:4:2425:24153:24439\_2:N:0:TCTGCAAG+GCTGCACT  
TTCGCCATTGTGGTACGAATTGGTCCAACATTTACCACCAAATTCTTTTGATACAACTCTAGCCTTCA  
AGTGGGGTATGCCTGCGGAATACGCTTGCTATTACCCAGATTGGTTTCG  
+  
FFFFFFFFFFFFFFFFFFFFFFFFFFFFFFFFFFFFFFFFFFFFFFFFFFFFFFFFFFFFFFFFFFFFFFFF:FFFFFFF  
FFFFFFFFFFFFFFFFFFFFFFFFFFFFFFFFFFFFFFFFFFFFFFFFFFFFFFFFFFFFFFFFFFFFFFFF  
@A00721:190:HGJW7DSXY:4:2419:4463:13197\_2:N:0:TCTGCAAG+GCTGCACT  
ATGTCAGAAGAAGCTATTCAAGCTTGTCGTTTAAAGACTGCAGAGGCTGTCAAACAAGCCCAGACTCA  
AGGAGTCCAATCAAAGGTTTTGAATTTAGCTCAACTGGGGAGACGTGC  
+  
FFFFFFFFFFFFFFFFFFFFFFFFFFFFFFFFFFFFFFFFFFFFFFFFFFFFFFFFFFFFFFFFFFFFFFFF  
FFFFFFFFFFFFFFFFFFFFFFFFFFFFFFFFFFFFFFFFFFFFFFFFFFFFFFFFFFFFFFFFFFFFFFFF  
@A00721:190:HGJW7DSXY:4:1553:18032:16125\_1:N:0:TCTGCAAG+GCTGCACT  
ATCCTTTAAGGACTATGTTGACTGACGAAGATTTTCCCACAGATTTGTCTACGTTGCAGATCGCCACT  
CCAAACACTATATACATTATAAAATATAAAAATAAGGGAGTCATAACTTTTGTTACCAAATTCTTGGC  
TTT  
+  
FF:FFFFFFFFFFFFFFFFFFFFFFFFFFFFFFFFFFFFFFFFFFFFFFFFFFFFFFFFFFFFFFFFFFFFFFFF  
FFFFFFFFFFFFFFFFFFFFFFFFFFFFFFFFFFFFFFFFFFFFFFFFFFFFFFFFFFFFFFFFFFFFFFFF:FFF:FFF  
FFF  
@A00721:190:HGJW7DSXY:4:2452:5132:30452\_2:N:0:TCTGCAAG+GCTGCACT  
ATTTTATTAATCATTACTTTAACGATCTCTCGGTCAATTTACTCTGTACTTGATCTACGTCGTTTAACT  
GTCGGAACAACCTTTACTTAGAATGACTCTATCTTTTCAGACACTTCT  
+  
FFFFFFFFFFFFFFFFFFFFFFFFFFFFFFFFFFFFFFFFFFFFFFFFFFFFFFFFFFFFFFFFFFFFFFFF  
FFFF:FFFFFFFFFFFFFFFFFFFFFFFFFFFFFFFFFFFFFFFFFFFFFFFFFFFFFFFFFFFFFFFF  
@A00721:190:HGJW7DSXY:4:2108:28845:5228\_1:N:0:TCTGCAAG+GCTGCACT  
ACGTGTGCTCTTCCGATCTTAAAGGATGAGTACGAAAACCAACTCTTCGTTACGAGACCTGATGGTAG  
AATAGATTTAGTCTCTACACCCATCTCAACGAGGATAAAGCGAGTTTTCCGTCCTGAACGTAATACAC  
GAA  
+  
FFFFFFFFFFFFFF:FFFFFF:FFFFFFFFFFFFFFFFFFFFFFFFFFFFFFFFFFFFFFFFFFFFFFFF  
FFFFFFFFFFFFFFFFFFFFFFFFFFFFFFFFFFFFFFFFFFFFFFFFFFFFFFFFFFFFFFFFFFFFFFFF  
FFF  
@A00721:190:HGJW7DSXY:4:1617:18674:4429\_1:N:0:TCTGCAAG+GCTGCACT  
TTATGAATCCTGCCTTTACTCATTTTATAGCAGTTATTTATGTTGTACTTTTTATAATTTATAACCTT  
CTTATACTTTTGGGTATGTTTTGTGAAAAACATGAGATACCCAAGTCTATCGAAGACATTATCTCTTA  
TGT  
+  
:FFFFFFFFFFFFFF:FFFFFFFFFFFFFFFFFFFFFFFFFFFFFFFFFFFFFFFFFFFFFFFFFFFFFFFF  
FFFFFFFFFFFFFFFFFFFFFFFFFFFFFFFFFFFFFFFFFFFFFFFFFFFFFFFFFFFFFFFFFFFFFFFF  
FFF  
@A00721:190:HGJW7DSXY:4:1267:10330:34601\_2:N:0:TCTGCAAG+GCTGCACT  
GATTGTTATCAATTTAAATACATTACTGTTTCAAATCATCTTTACTCACAGACTCCGAAAATGGTTTC  
AAATGAGGTCAAAGCTCTATTTATTAACGAACATTATCCGATTCTT  
+  
FFFFFFFFFFFFFFFFFFFFFFFFFFFFFFFFFFFFFFFFFFFFFFFFFFFFFFFFFFFFFFFFFFFFFFFF  
FFFFFFFFFFFFFFFFFFFFFFFFFFFFFFFFFFFFFFFFFFFFFFFFFFFFFFFFFFFFFFFFFFFFFFFF  
@A00721:190:HGJW7DSXY:4:2317:30002:21261\_2:N:0:TCTGCAAG+GCTGCACT  
ATTTGACAAATTTTAGAACTTTATTTCAAGACTCTCTCCGATCACCTTGGTGTGATCTCCCGGAGGA

+

@A00721:190:HGJW7DSXY:4:1646:8748:32080\_1:N:0:TCTGCAAG+GCTGCACT  
TTTATCAAAGATTTGGCTTGGTCTATTTACCGCAAAAGTTGGAAGAGGTCTATGATATTTATTTTAC  
TTATACTTTAAATAGCACCATTATAACTTGACTGTTGATAATATTACAATAGCTCTTTCTCAGAAGA  
TTA

+

@A00721:190:HGJW7DSXY:4:2407:26738:19742\_1:N:0:TCTGCAAG+GCTGCACT  
GGTGAACACGTCGGTAGCATTGATTTACTTTTACCGTTAGAACTGAAAAAGATTCTTTTCGAAAAGAA  
ACCTATAAGTTACAAACGATTCTTCGACTATATTAAGAAATAAAAATACTTCAAGTACCTGAACCTT  
ACA

+

@A00721:190:HGJW7DSXY:4:1643:9914:22952\_2:N:0:TCTGCAAG+GCTGCACT  
CAAATAGAACCTTCACTCTCGGTAATGAGAGTGTATTCCTTAATATTCTAGTAACCGCTATGTGGCA  
TTACTAGGATTTATCACACTCCTAAATTTGATAGCAATTTATGTTTTA

+

@A00721:190:HGJW7DSXY:4:1170:25111:18427\_1:N:0:TCTGCAAG+GCTGCACT  
GAGTACTTAATTCAATAGCTTTAGTATTATTTACTATCGCCTTTATTGAAAATTGTATAAGAGTTAAT  
TGCTTACACAAAAGTGACGCGCGAAGGAATCTTAATTGATTGAAGCTAGGCGTTGGGGAGAATGAACT  
GCC

 $+$ 

@A00721:190:HGJW7DSXY:4:1446:2691:36182\_2:N:0:TCTGCAAG+GCTGCACT  
ACGTAGGGTCAAACCTACTACCGCCGGTCGGCAGATCGGCACCACTGGTCTCTACGTTCAAGGACCCG  
CTGTGCAGAATAACCTTCCCAAATCTAGATCTGCACAGAAGAAGGCTG

+

@A00721:190:HGJW7DSXY:4:2132:9317:4476\_2:N:0:TCTGCAAG+GCTGCACT  
CCCGTCATCTCTGTGGGAAGTACCTCAGTCAAAAGTCACATTCACCACTCCCATACCAAT  
CAATGATGTGACTATACAGTTCGGCCATTCAAGAGTGGTCAATACGT

+

@A00721:190:HGJW7DSXY:4:2344:16749:7952\_1:N:0:TCTGCAAG+GCTGCACT  
ATCTAAGAACTCCCAAGCCAATCAATAGTTCTTCTGACCAGAATGAAAAGGGGTTTACCAGGGTAG  
TCTCTAAGTCTACCAGGAAGAGGGGAAATGTCCCCAAACTGAGAAGAATAAAGGGAAAGGTCCATCA  
GGA

+

[illegible]



@A00721:190:HGJW7DSXY:4:2361:22824:25488\_2:N:0:TCTGCAAG+GCTGCACT  
ACCATCTGGGGTTGGGAATAAGAAATCTGCACGGGCCAAAGAGGCCGCTGCTACGAAGTCGCTGAAGG  
CGGCTTGGGTCATTAAGGGTAGCTGTAAAGTTGCGCCTGCCGACCCCA

+

FFFFFFFFFFFFFFFFFFFFFFFFFFFFFFFFFFFFFFFFFFFFFFFFFFFFFFFFFFFFFFFFFFFFFFFF  
FFFFFFFFFFFFFFFFFFFFFFFFFFFFFFFFFFFFFFFFFFFFFFFFFFFFFFFFFFFFFFFFFFFFFFFF

@A00721:190:HGJW7DSXY:4:2625:3703:33959\_1:N:0:TCTGCAAG+GCTGCACT  
GTGCTCTTCCGATCTCCTACTATGAGCAAATCTGTTGAATTCGTCACTGAGGACGAAGGTGAGAGGAC  
TTTTCGCTACTGGCGACAACTGAGAGCACTCGCTGGGGAAAGAGAATTGCGTGGGTGAAGGCCGAC  
GCT

+

FFF,FFF:,FFFF::F,:FFFF,F,FF,F,FFF,,,FFFFFF:F,,F::FF,,F,,:FFFF,,:F,  
:,FFFF,F:,:FF:FFF,F,:F,F:FFF,:FF:FFFFFFFFFFFF,FF:FF:FFFF:FFFFFF,:F,F  
F:F

@A00721:190:HGJW7DSXY:4:2307:11270:28087\_1:N:0:TCTGCAAG+GCTGCACT  
CAACGGCGTTTGGAGGATTTTATCCGCGCTTAATCTATGGGGCGAAGATCCCCTATGGAGTCTTGAAGG  
ACTTAGGTTGGCATATTTATGCCGACGATAATAAGCATGTCACCCTTAAGCACCGAGGTAAGCTCGGG  
ACT

+

FFFFFFFF:FFFFFFFFFFFFFFFFFFFFFFFFFFFFFFFFFFFFFFFFFFFFFFFFFFFFFFFFFFFFF:FFFFFFFF  
FFFFFFFFFFFFFFFFFFFFFFFFFFFFFFFFFFFFFFFFFFFFFFFFFFFFFFFFFFFFFFFFFFFFFFFFFFFF  
FFF

@A00721:190:HGJW7DSXY:4:1249:30761:20040\_1:N:0:TCTGCAAG+GCTGCACT  
TAGAAGGAAGTTGGGCAAATCCACATATGGTAGACGTTGTCACACTTTTCTTGAATTTTTCCTT  
TCCTCCGTCATTGGGGATTTGATGTGAGAAGGTGGAAGGTGTCAAGGGTCTTCTTCATGCTGATCTT  
TCA

+

FFFFFFFF:FFFFFFFFFFFF:FFFFFFFF:FFFFFFFFFFFFFFFFFFFFFFFFFFFFFFFFFFFFFFFFF:  
FFFFFFFFFFFFFFFFFFFFFFFFFFFFFFFFFFFFFFFFFFFFFFFFFFFFFFFFFFFFFFFFFFFFFFFFFFFF  
FFF

@A00721:190:HGJW7DSXY:4:2316:12735:34131\_1:N:0:TCTGCAAG+GCTGCACT  
TGATTGATAGTTACGGCTCGTATCGAGTTGGAGGGAGGAAGTTCTCCGAAATTAAAGACGGGGGGATT  
AAGAGTCCAGCTGTAACCTGTCATTTAGAGAGGGGAGCTCTGAAAAGGAACTTCGTCAGAAGATGAG  
GAA

+

FFFFFFFFFFFF:FFFFFFFFFFFF:FFFFFFFFFFFF:FFFFFFFFFFFFFFFFFFFF:FFFFFFFFFFFFF  
FFFFFFFFFFFFFFFFFFFFFFFFFFFFFFFFFFFFFFFFFFFFFFFFFFFFFFFFFFFFFFFFFFFFFFFFFFFF  
FFF

@A00721:190:HGJW7DSXY:4:1368:10131:22263\_2:N:0:TCTGCAAG+GCTGCACT  
GGAAGGCTCTAGAGAAGATCTCACCACTGGAGAAGGCAAGTGGAGAGTCCAGAAGTTGATGAAGAAG  
GATTATTTGAAGCAGGGGTTACCACTTCCTAAGGTGGATGAGGGAGGT

+

FFF:FFFFFFFFFFFFFFFFFFFFFFFFFFFFFFFFFFFFFFFFFFFFFFFFFFFFFFFFFFFF,FFFFFFFFF::FFFF  
FFF,FFFFFFFFFFFFFFFFFFFFFFFFFFFFFFFF:FFFFFFFFF:FFFFFFF

@A00721:190:HGJW7DSXY:4:2121:11605:22842\_2:N:0:TCTGCAAG+GCTGCACT  
AGAATTCGGTAACCTACCATATTGTTCTTCCGGGAAGTTGTGGGATTTAACTTTGACTCAACTACTC  
CGATCAGATCCGATGGTTTGATTGGTATGGACTACTCGACTTTTGAT

+

FFFFFFFFFFFFFFFFFFFFFFFFFFFFFFFFFFFFFFFFFFFFFFFFFFFFFFFFFFFFFFFFFFFFF:FFFFFFFFFFFFFFFFFFFFFFFFFFFFFFFF  
FFFFFFFFFFFFFFFF:FF,FFFF:FFFFFFFFFFFFFFFFFFFFFFFFFFFFFFFF

@A00721:190:HGJW7DSXY:4:1474:17852:18724\_2:N:0:TCTGCAAG+GCTGCACT  
ATTCTGTAGCTCTGAGGGCGGTTGAGGGAGCCGTTTTGCCGACTTTAACTATTCTAAGAGTCTTTAT  
GATTCAAAACAGATCGGAAGAGCGTCGTGTAGGGAAGAGTGTAGTGG

+

```
FFFFFFFFFFFFFFFFFFFFFFFFFFFFFFFFFFFFF,FFFFFFFFFF,FF:FFFFFFF,FFFFFFF  
:FFF::FFFFF:FFF:FFFFFFF:F,F,:FFFF,FFFFFFF:F:FF,  
@A00721:190:HGW7DSXY:4:1469:7907:19257_2:N:0:TCTGCAAG+GCTGCACT  
GCGATATTCTTTTCATATCCAAACTCCTTGAATGGAGTACATATTTGCAACCCTATTCTTGATGTG  
AAAGATGCATCGAGGTATACGTCTAGGAACATTGATTGGGAACGTACC
```

```

+
FFFFFF,FFF:FFF:FFFF,,FF:FFFFFF:FFF,FFFFFFF:FF:FF,,FFF,F,FFFFFFFFFFFF,
FFF:F::FF::F:F,:FFFF,:F:F,FFFF,,FF,,FFFF,F,:,:F:,
@A00721:190:HGJW7DSXY:4:1414:21784:15671_1:N:0:TCTGCAAG+GCTGCACT
CCAATCTCATCGCTATACGCATACCTGATTGGAAGAAGCGAGGTTCTGTTCTCAATAAAAAATTTTTCT
CAAGAGATTATGGTTGATAAAGTTTTCTTCATAAGGGCTATTAGTACGTCATGGGGATCACTTCTTC
GGT

```

```
+
FFFFFFFFFFFFFFFFFFFFFFFFFFFFFFFFFFFFFFFFFFFFFFFFFFFFFFFFFFFFFFFF
FFFFFFFFFFFFFFFFFFFFFFFFFFFFFFFFFFFFFFFFFFFFFFFFFFFFFFFFFFFFFFFF
FFF
@A00721:190:HGJW7DSXY:4:2550:15908:28416_1:N:0:TCTGCAAG+GCTGCACT
TCGCAAACTTATCGTTAGTACCGGAGGTGATCTCTCTGCTTCTGCGTTTCTGAGAGAAAAGATTCAAG
ACGCCTACGGTGACTTTATGGACAAGATGCAAGTTCTTGGGAAATACTTGTTTCCCTTTTATAGTTTA
GTA
```

```
+  
FFFFFFFFFFFFFFFFFFFFF:FFFFFFFFFFFFFFFFFFFFFFFFFFFFFFFFFFFF::FFFFFFFFFFFFFF:FF  
FFFFFFFFFFFFFF:F:FF  
@A00721:190:HGJW7DSXY:4:2103:23592:34240_2:N:0:TCTGCAAG+GCTGCACT  
GGTTCAGCTACGAGAGGTGATCCCGGATGTGGATTGAAGGCTGGCTCTAAGGGAGACTCCTTCTTTTT  
GAATGTTGTAAAGAATTGGGTTGAGAAGCGTGCGATCGGAAGAGCGT
```

+

FFFFFFFFFFFFFFFFFFFFFFFFFFFFFFFFFFFFFFFFFFFFFFFFFFFFFFFFFFFFFFFF:FFFF:F:FF:FFFFFFFF  
FF:FFFFFF:FFF:F:F:FFFFFF,FF::FF:FFFFFFFFF,FFFFFF  
@A00721:190:HGJW7DSXY:4:2215:13087:4366\_2:N:0:TCTGCAAG+GCTGCACT  
TAAAACTTCAGAGTCTCTTGGAAGTCCAGGTAGCTAATGTTCTTGCAATAGCCACAGACTTTCTGGG  
AAAAGAGACCTCTGTTGTAGAGGAGTTGAGAGAATTACTCAGATTCAA

+  
FFFFFFFFFFFFFFFFFFFFFFFFFFFFFFFFFFFFFFFFFFFFFFFFFFFFFFFF:F,,FF:FFFFFFFFFFFFFFFFFFFFFFFF,FFF  
::F:FFFFFFFFFFFFFF:FF,FFFFFF:FFFFFFFFFFFFFFFFFFFFFFFFFFFFFF  
@A00721:190:HGJW7DSXY:4:2173:24632:24549\_1:N:0:TCTGCAAG+GCTGCACT  
CCTTTGCACAAGCAATACCTTCCACTGAGTTCATCACCCAGAGTTTCGACGTCGCGGAAAACGATGAA  
GATTTCCACACTGTTGAGAATCTTCTGATGCTGAATTTGAGGAAAATTTTTCGGAAGTTTTTGGTAT  
AAA

+  
:FFFFFFFFF:FFFFFFFFFFFFFFFFFFFFFFFFFFFFFFFFFFFFFFFFFFFFFFFFFFFFFFFFFFFFFFFF  
FFFFFFFFFFFFFFFFFFFFFFFFFFFFFFFFFFFFFFFFFFFFFFFFFFFFFFFFFFFFFFFF:FFFFFFFFF  
FFF  
@A00721:190:HGJW7DSXY:4:2618:25012:34413\_2:N:0:TCTGCAAG+GCTGCACT  
TCATAGGTATGTGTACGCTACACTCGAAATATGGGCCCTCATAAGGAAGTATAGTTGGCGTCTTGTC  
GTTGACGTCATTACAGTCTGGAAGTTAGATCATTTGTTGAGGAAGATC

+  
FFFFFFFFFFFFFFFFFFFFFFFFFFFFFFFFFFFFFFFFFFFFFFFFFFFFFFFFFFFFFFFFFFFFFFFF  
FFFFFFFFFFFFFFFFFFFFFFFFFFFFFFFFFFFFFFFFFFFFFFFFFFFFFFFFFFFFFFFF  
@A00721:190:HGJW7DSXY:4:2608:14687:3129\_1:N:0:TCTGCAAG+GCTGCACT  
AGTTAGAGTTCTTCTAACCAGGACTGATGGTGAGATTCTTTTACCTTTTGGAGGTCCAGGAACCTTTA  
CTCCTAGTGTCTTTTCTAGAGTCCAAGGACGTTTCCGTGCGAGGATGACAGGTGGGAGACCGCTCAAT  
AAC

+  
FFFFFFFFFFFFFFFFFFFFFFFFFFFFFFFFFFFFFFFFFFFFFFFFFFFFFFFFFFFFFFFFFFFFFFFF  
FFFFFFFFFFFFFFFFFFFFFFFFFFFFFFFFFFFFFFFFFFFFFFFFFFFFFFFFFFFFFFFFFFFFFFFF  
FFF  
@A00721:190:HGJW7DSXY:4:1527:22399:6057\_1:N:0:TCTGCAAG+GCTGCACT  
TTAAACATAAAATCCAGCGATTCTATTATGTGCTAAAGCCTGTCCAGTTGTGATGATGTTGCGGCT  
GTGGGGATTAACCTCCCTCGTGAAACTTACGACGATGTTCTCGCTCGCATTTTACAAGGATTACTAAG  
TCT

+  
FFFFFFFFFFFFFFFFFFFFFFFFFFFFFFFFFFFFFFFFFFFFFFFFFFFFFFFFFFFFFFFFFFFFFFFF  
FFFFFFFFFFFFFFFFFFFFFFFFFFFFFFFFFFFFFFFFFFFFFFFFFFFFFFFFFFFFFFFFFFFFFFFF  
FFF  
@A00721:190:HGJW7DSXY:4:2502:2085:33536\_2:N:0:TCTGCAAG+GCTGCACT  
ACTTCTAATTTTAGGAAACGTCGCGAAAAGAAAGTTCATGAGGATGTCTTGGTCGAAAAATATCGCCG  
GGAACCTCTAATAGAGGATCCTGATGACATTATTTCAACGGATACCGA

+  
FF:FFFFFFFFFFFFFFFFFFFFFFFFFFFFFFFFFFFFFFFFFFFFFFFFFFFFFFFFFFFFFFFF  
FFFFF:FFFFFFFFFFFFFFFFFFFFFFFFFFFFFFFFFFFFFFFFFFFFFFFFFFFFFFFF  
@A00721:190:HGJW7DSXY:4:1643:30707:18630\_1:N:0:TCTGCAAG+GCTGCACT  
CGTCTCAGGAAGTGTCTCCACTGATTGCGAATTAGAGAAAGACGACCTTCTGTGGGACTGAGACCT  
CTGAATTTTACAGGTGCCCTGATGAGGACGTTGAAAGGGATAATTTCAACTCTGAGACTTCTAAGAGT  
GTT

+  
FFFFFFF:FFFF,FFFFFFFFFFFFFFFF:FFF,FFFFFFFFFFFFFFFF:FFFFFFFFFFFFFFFF  
FFFFFFFFFFFFFFFFFFFFFFFFFFFFFFFFFFFFFFFFFFFFFFFFFFFFFFFFFFFFFFFF:FFFFFFFF  
FFF  
@A00721:190:HGJW7DSXY:4:1334:30861:26162\_1:N:0:TCTGCAAG+GCTGCACT  
AATTAAGACAGACGTGAAAGTTATGATGAGTGATCGTATTAGAACAGCTGATTCTTATTGCATGAACG

TCGCTGAGGTCAAACCTGTGGACGTTCTTTTCATCGACGAATTATTCATGATTCACGCTGGTCAGACC  
CTT

+

FFFFFFFFFFFFFFFFFFFFFFFFFFFFFFFFFFFFFFFFFFFFFFFFFFFFFFFFFFFFFFFFFFFFFFFF  
FFFFFFFF:FFFFFFFF:FF:FFFF:FFFFFFFF:FFFFFFFFFFFFFFFFFFFFFFFF  
FFF

@A00721:190:HGJW7DSXY:4:2511:20799:1438\_1:N:0:TCTGCAAG+GCTGCACT  
ACTTAAGGCGGCTTATACCATAGGTTACGGTGATTCCAATCAAATCGGATTCATCAATCGTATTGATC  
TCCAAGTCGAACTACTTCAACATCAACGACATCATTCTTGATGAGTGTCTTCTTATCGAAGTCTC  
AGT

+

F:FFFFFFFF:FFFFFFFF:FFFFFFFFFFFFFFFFFFFFFFFFFFFFFFFFFFFFFFFFFFFFFFFF  
FFFFFFFFFFFFFFFFFFFFFFFFFFFFFFFFFFFFFFFFFFFFFFFFFFFFFFFFFFFFFFFF:FFFF  
FFF

@A00721:190:HGJW7DSXY:4:2243:11071:28714\_2:N:0:TCTGCAAG+GCTGCACT  
ACGGGAGGTTGCAGATTCAACCCCTTATATCGAGGCTATCGAGGACGATGAGTATCTTGAAGTTGTTG  
ACGACAAGCCTCAAGAGGGTAGAGGACCACCTGGATCTTCTACTGTCT

+

FFFFFFFFFFFFFFFFFFFFFFFFFFFFFFFFFFFFFFFFFFFFFFFF:FFFFFFFFFFFFFFFF  
FFFFFFFFFFFFFFFFFFFFFFFFFFFFFFFFFFFFFFFFFFFFFFFFFFFFFFFF

@A00721:190:HGJW7DSXY:4:2622:2266:22106\_2:N:0:TCTGCAAG+GCTGCACT  
CTCGGTAATCTTTCAGCCGAATTAAGTACTAATGAGTTCAAGTCGGGTGTCGATCGAATTAAGATCAA  
GGCTAATACCTTTATAGGTAAGAAGCCCCGTGAGCCGCGTAGTCAGCG

+

FFFFF:FFFF,FFFFFFFFFFFFFFFF:FFFFFFFF:FF,FFF,FF:FF,FFFFFFFFFFFFFFFF  
FFF::FFFF:,F,FFFF,FFFFFFFF,FFFFFFFF,FF:F:FFF

@A00721:190:HGJW7DSXY:4:2108:18448:3004\_1:N:0:TCTGCAAG+GCTGCACT  
ATTTACCACCTTTGCTCAACGACGAAGTGGAACGGCCAACACTTTCTTTGGTAATTGTATGATCACTT  
TGATGATTTTATCACTTTATTATGACCTTGAAAGTTTTCGGCTGTGTTGTCGCTGGGGACGATTCC  
ATT

+

FFFFFFFFF,FFF::FFFFFFFF:FFF:FFFFFFFF:F:FF:FFFFFFFFFFFFFFFF  
FFFFFFFFF:F:FFFFFFFFFFFFFFFFFFFFFFFFFFFFFFFFFFFFFFFF:FFFF  
FFF

@A00721:190:HGJW7DSXY:4:2414:8133:21433\_2:N:0:TCTGCAAG+GCTGCACT  
AAGATCAAATTTAAACGATTCCGAGAGGTTTATCTGATGTGGAGGGAGTTCTTGAAGCATCCCGAC  
CTTTCCTTGTAAGATTTTATGATGCGGTTTCATAAGATTATCAGTAATC

+

FFFFFFFF:FFFF:FFFF,FFFFFFFF:FFFFFFFF:FFF,FFFFFFFFFFFFF,F::  
FFFF:FFF:FFFF:FFF:FFFFFFFFF:F:FF:FFF:FFF

@A00721:190:HGJW7DSXY:4:2414:15013:34726\_2:N:0:TCTGCAAG+GCTGCACT  
GATATTGTTGAGCGAGAGCGACCAAGATCTAAATTCGGTAACGGTGCGTGGCGCTTTATTTTAAAAAG  
CTCCCTCCTCTCGCAAGTTTGATCTGATACTTATCACGAAAGGACTTG

+

FFFFFFFFFFFFFFFFFFFFFFFFFFFFFFFFFFFFFFFFFFFFFFFFFFFFFFFFFFFFFFFF  
FFFFFFFFFFFFFFFFFFFFFFFFFFFFFFFF:FFFF:FFFF

@A00721:190:HGJW7DSXY:4:2561:14163:33536\_2:N:0:TCTGCAAG+GCTGCACT  
TCAGTTGATTAAGACTCTTCCGAAAGGCGAACTTTGGGAATTTGAAGCTCAGGGTGAAGCACACGTT  
TGACCGTGACGAAGTGTGGTGTCTTGATCTACGTTACGGATATACTC

+

FFFFFFFFFFFFFFFFFFFFFFFFFFFFFFFFFFFFFFFFFFFFFFFFFFFFFFFFFFFFFFFF  
FFFFFFFFFFFFFFFFFFFFFFFFFFFFFFFFFFFFFFFFFFFFFFFF

@A00721:190:HGJW7DSXY:4:2421:30599:23703\_2:N:0:TCTGCAAG+GCTGCACT  
CGCACTAAAACGTCTTCGACAACAGCAGGGGTTTTGAATAGTAGCCACCCGCCTTACAGAGGGG

CAGCAGCATGACCATAATTGGTATTGACTTTGGTACCACCTTTTCTAC  
+  
FFFFFFFF,F:FFFF:FFFFFFFF:FFFFFF:FF,FFFFFFFF:FFF,FFFFFFFFFFFFFFFF:::,  
FFFF:FFFF::FFFF:::FFFF::FFFFFF,:FFFFFFFF  
@A00721:190:HGJW7DSXY:4:2407:24080:21402\_2:N:0:TCTGCAAG+GCTGCACT  
AATGAAGTTTTAATGCTTAACAACAATGATAGTGAATTTATACCTACAATCATTGGTTTTCTAATAA  
TGATGACACTATTGTTTATGGATATGATGCTATTACTCATGATGGTTA  
+  
FFFFFFFFFFFFFFFFFFFF,FFFFFFFFFFFFFFFFFFFFFFFFFFFFFFFFFFFFFFFFFFFF  
FFFFF:FFFF:FFFFFFFFFFFF,FFFFFFFFFFFFFFFF::FFF  
@A00721:190:HGJW7DSXY:4:2673:2745:21590\_2:N:0:TCTGCAAG+GCTGCACT  
TACGATGTCGTCTGTCTCGCGATCACTTTTCTACTAAGAATTGGTCCTACTTTTGGACAAGGCCAACT  
TCGTAATCTTCATGAGATCGTTTCTTTCTTTATCTCTTTGGTTGTTAG  
+  
FFFFFFFFFFFFFFFFFFFFFFFFFFFFFFFFFFFFFFFFFFFFFFFFFFFFFFFFFFFF:FFFFFFFFFFFFF  
FFFFFFFFFFFFFFFFFFFFFFFFFFFFFFFFFFFFFFFFFFFFFFFFFFFFFFFFFFFF  
@A00721:190:HGJW7DSXY:4:2526:16767:34162\_2:N:0:TCTGCAAG+GCTGCACT  
GAGTGAAAGGCTTCAATTGTAGTGGTTTGGTCGTTTCAGTACCCAGTCAGTATACCTCTACGCAAAGA  
TATTTTCATGAAAACACAGAGGAACGTACCGGATTACCTGTCTTTTCAT  
+  
FFFFFFFFFFFFFFFFFFFFFFFFFFFFFFFFFFFFFFFFFFFFFFFFFFFF:FFFFFFFFFFFFFFFFFFFF  
FFFFFFFFFFFFFFFFFFFFFFFFFFFFFFFFFFFFFFFFFFFFFFFFFFFF:FFFF  
@A00721:190:HGJW7DSXY:4:2620:26467:23563\_1:N:0:TCTGCAAG+GCTGCACT  
TTCAGAATGGGATTCTACGTAGTTTATGACTTTGGTGGTGGTACTTTTCGATACTTCTATCGTCTTAC  
GTTACGGTAATTACTATAGTGTTATTTATTCTGGTGGTGATGATAATCTTGGAGGTCGTGACGTTGAT  
GAA  
+  
FFFFFFFFFFFFFFFFFFFF,FFFFFFFF:FFFF:FFFF:FFFF:FFFF:FFFFFFFFFFFFFFFFFFFF:F  
FFFFFFFF:FFFFFFFFFFFFFFFFFFFFFFFFFFFFFFFFFFFF:FFFF:FFFF:FFFF:F:FF:FFFF  
FFF  
@A00721:190:HGJW7DSXY:4:1323:29098:31031\_2:N:0:TCTGCAAG+GCTGCACT  
GTTCTTATTACGGCGCACTTCTTTACCCGCCACCACACAACCTTTCAGTTTCACAACCTGAAGGAGGAGG  
TTTCTGTACTGGAAAACCCTCGTCAATACTTTTCAATAATATACGTC  
+  
FFFFFFFFFFFFFFFFFFFFFFFFFFFFFFFFFFFFFFFFFFFFFFFFFFFFFFFFFFFF:FFFFFFFFFFFFF  
FFFFFFFFFFFFFFFFFFFFFFFFFFFFFFFFFFFFFFFFFFFFFFFFFFFFFFFFFFFF  
@A00721:190:HGJW7DSXY:4:1351:16613:4586\_1:N:0:TCTGCAAG+GCTGCACT  
AGTGGCATTCAAGGCAAACCTTACCCTGATTCCGGCCGGTGGTAGCTCATTTCTACCAGGGGCTATTAC  
TCTTGCTGAAACAGCTATTAAAGCTGTTGAGCGGGTAATTACACCTAAACGAGCTCGATCTGCCATCG  
CTG  
+  
FFFFFFFFFFFFFFFFFFFFFFFFFFFFFFFFFFFF:FFFFFFFFFFFFFFFFFFFFFFFFFFFFFFFFFFFFF  
FFFFFFFFFFFFFFFFFFFFFFFFFFFF:FFFFFFFFFFFFFFFFFFFF:FFFFFFFFFFFFFFFFFFFFFFFFF  
FFF  
@A00721:190:HGJW7DSXY:4:2336:6686:8656\_1:N:0:TCTGCAAG+GCTGCACT  
ACGTGTGCTCTTCCGATCTATAATTTCAATCTTCTTAAAAAGAAGATAGAGAGTCATACTTTGGGCTA  
TCGTTCAAGTGCATGGGGTTGGATAGCCAATATTGAAGTGGACACCTCTGGTAGTATCGAAGTAAAGA  
TAA  
+  
FFFFFFF:F:FFF:FFFFFFFFFFFFFFFFFFFFFFFFFFFFFFFFFFFFFFFFFFFF:FFFFFFFFF  
FFF:FFFFFFFFFFFFFFFFFFFF:FFFFFFFFFFFFFFFFFFFFFFFFFFFFFFFFFFFFFFFFFFFFF  
FFF  
@A00721:190:HGJW7DSXY:4:1255:30879:35023\_1:N:0:TCTGCAAG+GCTGCACT  
CAAAATCTTACCACTATCTACGAACCTAAAGTTCTGAAGACGTTGCTTGTGCTTCTCTTTAATGG



@A00721:190:HGJW7DSXY:4:2441:8196:25770\_2:N:0:TCTGCAAG+GCTGCACT  
TTCGCCATTGTGGTACGAATTGGTCCAACATTTACCACCAAATTCTTTTGATACTAGCCTTCA  
AGTGGGGTATGCCTGCGGAATACGCTTGCTATTACCAGATTGGTTGC

+

FFFFFFFFFFFFFFFFFFFFFFFFFFFFFFFFFFFFFFFFFFFFFFFFFFFFFFFFFFFFFFFFFFFF  
FFFFFFFF:FFFFFFFFFFFFFFFFFFFFFFFF:FFFFFFFFFFFFFFFF

@A00721:190:HGJW7DSXY:4:2566:19009:27242\_2:N:0:TCTGCAAG+GCTGCACT  
ATGTCAGAAGAAGCTATTCAAGCTTGTCGTTTAAAGACTGCAGAGGCTGTCAAACAAGCCCAGACTCA  
AGGAGTCCAATCAAAGGTTTTGAATTTAGCTCAACTGGGGAGACGTGC

+

FF:FFFFFFFFFFFFFFFFFFFFFFFF:F:FFFFFF::,F:FF,F,F,FFFFFF:FFF:F:FFFF:FFF  
FFFFFFFFFFFFFFFFFFFFFFFF,FFFFFF,FF,FFF,F:FFFFFF:FF:

@A00721:190:HGJW7DSXY:4:2244:30798:14465\_1:N:0:TCTGCAAG+GCTGCACT  
ATCCTTTAAGGACTATGTTGACTGACGAAGATTTCCACAGATTTGTCTACGTTGCAGATCGCCACT  
CCAAACACTATATACATTATAAAATATAAAAATAAGGGAGTCATACTTTTGTACCAAATTCTTGGC  
TTT

+

FFF::FFFFFFFF:FFFFFFFFFFFFFFFF:FFFFFF:FF:FFFFFFFFFFFFFFFFFFFFFFFFFFFF  
F:FFFFFFFFFFFFFFFFFFFFFFFFFFFFFFFFFFFFFFFFFFFFFFFFFFFFFFFFFFFFFFFFFFFF  
FFF

@A00721:190:HGJW7DSXY:4:1208:27579:26490\_1:N:0:TCTGCAAG+GCTGCACT  
ATTACTTTAACGATCTCTCGGTCATTTACTCTGTACTTGATCTACGTCGTTTAACTGTCGGAACAACC  
TTTACTTAGAATGACTCTATCTTTTCAGACACTTCTTATATTATTACAATAGTTAATATCATATTAG  
TAA

+

FFFFF:FFFFFFFFFFFFFFFFFFFF,FFFFFFFFFFFFFFFFFFFFFFFF:FFFFFFFFFFFFFFFFFFFF  
FFFFFFFFF:FFFFFFF:FFFFFFFFFFFFFFFFFFFFFFFFFFFFFFFFFFFFFFFFFFFFFFFFFFFFF  
FFF

@A00721:190:HGJW7DSXY:4:2347:24578:1251\_1:N:0:TCTGCAAG+GCTGCACT  
ACGTGTGCTCTTCCGATCTTAAAGGATGAGTACGAAAACCACTCTTCGTTACGAGACCTGATGGTAG  
AATAGATTTAGTCTCTACACCCATCTCAACGAGGATAAAGCGAGTTTTCCGTCCTGAACGTAATACAC  
GAA

+

FFFFFFFFFFFFFFFFFFFFFFFFFFFFFFFFFFFFFFFFFFFFFFFFFFFFFFFFFFFFFFFFFFFF  
FFFFFFFFFFFFFFFFFFFFFFFFFFFFFFFFFFFFFFFFFFFFFFFFFFFFFFFFFFFFFFFFFFFF  
FFF

@A00721:190:HGJW7DSXY:4:2547:29071:22905\_1:N:0:TCTGCAAG+GCTGCACT  
TTATGAATCCTGCCTTTACTCATTTTATAGCAGTTATTTATGTTGTACTTTTTATAATTTATAACCTT  
CTTATACTTTTGGGTATGTTTTGTGAAAAACATGAGATACCCAAGTCTATCGAAGACATTATCTCTTA  
TGT

+

FFFFFFFFFFFF,FFFFFFFFFFFFFFFFFFFFFFFFFFFFFFFFFFFFFFFFFFFFFFFFFFFF:FFFFF  
FFFFFFFFFFFFFFFFFFFFFFFFFFFFFFFFFFFFFFFFFFFFFFFFFFFFFFFFFFFFFFFFFFFF  
FFF

@A00721:190:HGJW7DSXY:4:1267:9362:35117\_2:N:0:TCTGCAAG+GCTGCACT  
GATTGTTATCAATTTAAATACATTACTGTTTCAAATCATCTTTACTCACAGACTCCGAAAATGGTTTC  
AAATGAGGTCAAAGCTCTATTTATTAACGAACATTATCCGATTCTT

+

FFFFFFFFFFFFFFFFFFFFFFFFFFFFFFFFFFFFFFFFFFFFFFFFFFFFFFFFFFFFFFFFFFFF  
FFFFFFFFFFFFFFFFFFFFFFFFFFFFFFFFFFFFFFFFFFFFFFFFFFFFFFFF

@A00721:190:HGJW7DSXY:4:2443:29396:16172\_2:N:0:TCTGCAAG+GCTGCACT  
ATTTGACAAATTTTGAACCTTTATTTCAAGACTCTCTCCGATCACCTTGGTGTGATCTCCCGAGGA  
TCTTTTCAATAAGATGTATGATGATAATCTACTATTTTTAAATAGTGA

+

FFFFFFFFFFFFFFFFFFFFFFFFFFFFFFFFFFFFFFFFFFFFFFFFFFFFFFFFFFFFFFFFFFFFFFFF  
FFF,FFFFFFFFFFFFFFFFFFFFFFFFFFFFFFFFFFFFFFFFFFFFFFFFFFFFFFFFFFFFFFFF

@A00721:190:HGJW7DSXY:4:2175:15573:6950\_1:N:0:TCTGCAAG+GCTGCACT  
TTTATCAAAGATTTGGCTTGGTCTATTTACCGCAAAAAGTTGGAAGAGGTCTATGATATTTATTTTAC  
TTATACTTTAAATAGCACCGATTATAACTTGACTGTTGATAATATTACAATAGCTCTTTCTCAGAAGA  
TTA

+

FFFFFFFFFFFFFFFFFFFFFFFFFFFFFFFFFFFFFFFFFFFFFFFFFFFFFFFFFFFFFFFFFFFFFFFF  
FFFFFF:FFFFFFFFFFFFFFFFFFFFFFFFFFFFFFFFFFFFFFFFFFFFFFFFFFFFFFFFFFFFFFFF  
FFF

@A00721:190:HGJW7DSXY:4:2562:11867:10645\_1:N:0:TCTGCAAG+GCTGCACT  
GGTGAACACGTCGGTAGCATTGATTTACTTTTACCGTTAGAACTGAAAAAGATTCTTTTCGAAAAGAA  
ACCTATAAGTTACAAACGATTCTTCGACTATATTAAGAAATAAAAATACTTCAAGTACCTGAACCTT  
ACA

+

FFFFFF:FFFFFFFFFFFFFFFFFFFFFFFFFFFFFFFFFFFFFFFFFFFFFFFFFFFFFFFFFFFFFFFF  
FFFFFFFFFFFFFFFFFFFF,FFFFFFFFFFFFFFFFFFFFFFFFFFFFFFFFFFFFFFFFFFFFFFFF:FFFF  
FFFFFFFFFFFFFFFFFFFF,FFFFFFFFFFFFFFFFFFFF:FFFFFFFFFFFFFFFFFFFF:FF:FFFFFFFFFFFFFFFFFFFF  
FFF

@A00721:190:HGJW7DSXY:4:2259:21513:2487\_2:N:0:TCTGCAAG+GCTGCACT  
CAAATAGAACCTTCACTCTCGGTAATGAGAGTGTATTCCTTAATATTCTAGTAACCGCTATGTGGGCA  
TTACTAGGATTTATCACACTCCTAAATTTGATAGCAATTTATGTTTTA

+

FFFFFFFFFFFFFFFFFFFFFFFFFFFFFFFFFFFFFFFFFFFFFFFFFFFFFFFFFFFFFFFFFFFFFFFF  
FFFFFFFFFFFF:FFFF:FFFFFF:F,FF,FFFF,FFFFFFFFFFFFFFFFFFFF

@A00721:190:HGJW7DSXY:4:1311:23493:14810\_1:N:0:TCTGCAAG+GCTGCACT  
GAGTACTTAATTCAATAGCTTTAGTATTATTTACTATCGCCTTTATTGAAAATTGTATAAGAGTTAAT  
TGCTTACACAAAAGTGACGCGGAAGGAATCTTAATTGATTGAAGCTAGGCGTTGGGGAGAATGAAC  
GCC

+

FFFFF:FFFFFFFFFFFF:FF:FFFFFFFF:FFFFFFFFFFFFFFFFFFFFFFFFFFFFFFFFFFFFFFFF  
FFFFFFFFFFFFFFFFFFFFFFFFFFFFFFFFFFFFFFFF:FFFFFFFFFFFFFFFFFFFFFFFFFFFFFFFF  
FFF

@A00721:190:HGJW7DSXY:4:2174:19117:8077\_2:N:0:TCTGCAAG+GCTGCACT  
ACGTAGGGTCAAACCTACTACCGCCGGTCGGCAGATCGGCACCACTGGTCTCTACGTTCAGGGACCCG  
CTGTGCAGAATAACCTTCCCAAATCTAGATCTGCACAGAAGAAGGCTG

+

,FFFFFFFFFFFF:FFFFFFFFFFFFFFFFFFFFFFFFFFFFFFFFFFFFFFFFFFFFFFFFFFFFFFFF  
F:FFFFFFFFFFFFFFFF:FFFFF:FFFFFFFFFFFFFFFF:FFFFFFFF

@A00721:190:HGJW7DSXY:4:2478:26332:15906\_2:N:0:TCTGCAAG+GCTGCACT  
CCCGTCATCTCTGTGGGAAGTACCTCAGTCAAAAAGTCACATTCACCACTCCCATACCAAT  
CAATGATGTGACTATACAGTTCGGCCATTTCAAGAGTGGTCAATACGT

+

FFFFFFFFFFFFFFFFFFFFFFFFFFFFFFFFFFFFFFFFFFFFFFFFFFFFFFFFFFFFFFFFFFFFFFFF  
FFFFFFFFFFFFFFFFFFFFFFFFFFFFFFFFFFFFFFFFFFFFFFFFFFFFFFFFFFFFFFFF

@A00721:190:HGJW7DSXY:4:2430:27832:25300\_1:N:0:TCTGCAAG+GCTGCACT  
ATCTAAGAACTCCCAAGCCAATCAATAGTTCTTCTGACCAGAATGAAAAGGGGTTTACCAGGGTAG  
TCTCTAAGTCTACCAGGAAGAGGGGAAATGTCCCCAAAAGTGAAGAATAAAGGGAAAGGTCCATCA  
GGA

+

FF:FFFFFF:FFFFFFFFFFFFFFFFFFFFFFFFFFFFFFFFFFFFFFFF:FFFFFFFFF:FFFFFFFFFFFFFF  
FFFFFFFFFFFFFFFFFFFFFFFFFFFFFFFFFFFFFFFFFFFFFFFFFFFFFFFF:FFFFFFFFFFFF:FFFFFFFF  
FFF

@A00721:190:HGJW7DSXY:4:2369:8684:31626\_2:N:0:TCTGCAAG+GCTGCACT  
ACCATCTGGGGTTGGGAATAAGAAATCTGCACGGGCCAAAGAGCGCTGCTACGAAGTCGCTGAAGG



CGGCTTGGGTCATTAAGGGTAGCTGTAAAGTTGCGCCTGCCGACCCCA

+

FFFFFFFFFFFFFFFFFFFFFFFFFFFFFFFFFFFFFFFFFFFFFFFFFFFFFFFFFFFFFFFF  
FFFFFFFFFFFFFFFFFFFFFFFFFFFFFFFFFFFFFFFFFFFFFFFFFFFFFFFF

@A00721:190:HGJW7DSXY:4:1142:12798:10410\_1:N:0:TCTGCAAG+GCTGCACT  
TACAGTAGGTTCTGCTACTATGAGCAATCTGTTGAATTCGTCACTGAGGACGAAGGTGAGAGGACT  
TTTGGCTACTGGCGACAACTGAGAGCAGTCGCTGGGGAAAGAGAATTGCGTGGGTTGAAGGCCGACG  
CTT

+

FFFFFFFFFFFFFFFFFFFFFFFFFFFFFFFFFFFFFFFFFFFFFFFFFFFFFFFFFFFFFFFF  
FFFFFFFFFFFFFFFFFFFFFFFFFFFFFFFFFFFFFFFFFFFFFFFFFFFFFFFFFFFFFFFF  
FFF

@A00721:190:HGJW7DSXY:4:2363:13702:33614\_1:N:0:TCTGCAAG+GCTGCACT  
CAACGGCGTTTGGAGGATTTTATCCGCGCTTAAGTATGGGGCGAAGATCCCCTATGGAGTCTTGAAGG  
ACTTAGGTTGGCATATTTATGCCGACGATAATAAGCATGTACCCTTAAGCACCGAGGTAAGCTCGGG  
ACT

+

F:,FFF:FFFFFF,FFFFFFFFFF,FFFFFFFFF,F,F:F:FFFFFF,FFF:F:FF:FF,FF:FFF:F:F  
:FFFFFFFFF,FFFFFFFFF:,FF:FFFFFFFF:F:FFFFFF,FFFFFFF,FFFFFFFFFF:FFFFF  
FFF

@A00721:190:HGJW7DSXY:4:1273:25409:17942\_1:N:0:TCTGCAAG+GCTGCACT  
TAGAAGGAAGTTGGGCAAATCCACATATGGTAGACGTTGTCACACTTTTCTTGAAAATTTTCCTT  
TCCTCCGTCATTGGGGATTTGATGTGAGAAGGTGGAAGGTGTCAAGGGTCTTCTTCATGCTGATCTT  
TCA

+

FFFFFFFFFFFFFFFFFFFFFFFFFFFFFFFFFFFFFFFFFFFFFFFFFFFFFFFFFFFFFFFF:F:FFFFF  
FFFFFFFFFFFFFFFFFFFFFFFFFFFFFFFFFFFFFFFFFFFFFFFFFFFFFFFFFFFFFFFFFFFFF  
FFF

@A00721:190:HGJW7DSXY:4:2327:25590:13056\_1:N:0:TCTGCAAG+GCTGCACT  
TGATTGATAGTTACGGCTCGTATCGAGTTGGAGGGAGGAAGTTCTCCGAAATTAAAGACGGGGGGATT  
AAGAGTCCAGCTGTAAGTGTCAATTCAGAGAGGGGAGCTCTGAAAAGGAACTTCGTCAGAAGATGAG  
GAA

+

FFFFFFFFFFFFFFFFFFFFFFFFFFFFFFFFFFFFFFFFFFFFFFFFFFFFFFFFFFFFFFFF  
FFFFFFFFFFFFFFFFFFFFFFFFFFFFFFFFFFFFFFFFFFFFFFFFFFFFFFFFFFFFFFFFFFFFF  
FFF

@A00721:190:HGJW7DSXY:4:1368:11849:23046\_2:N:0:TCTGCAAG+GCTGCACT  
GGAAGGCTCTAGAGAAGATCTCACCACCTGGAGAAGGCAAGTGGAGAGTCCAGAAGTTGATGAAGAAG  
GATTATTTGAAGCAGGGGTTACCACTTCCTAAGGTGGATGAGGGAGGT

+

FFFFFFFFFFFFFFFFFFFFFFFFFFFFFFFFFFFFFFFFFFFFFFFFFFFFFFFFFFFFFFFF  
FFFFFFFFFFFFFFFFFFFFFFFFFFFFFFFFFFFFFFFFFFFFFFFFFFFFFFFFFFFFFFFFFFFFF,FFF,FFFFFFFFFFFFF

@A00721:190:HGJW7DSXY:4:2148:26982:7513\_2:N:0:TCTGCAAG+GCTGCACT  
AGAATTCGTAACCTTACCATATTGTTCCCTCCGGGAAGTTGTGGGATTTAACTTTGACTCAACTACTC  
CGATCAGATCCGGATGGTTTGATTGGTATGGACTACTCGACTTTTGAT

+

F:FFFFFFFFFFFFFFFFF,FFFFFFFFFFFFFFFFF:,FFFFFFFFFFFFFFFFFFFFFFFFFFFFF:FFF  
FFFFFFFFF,FFFFF:FFF,FFFFFFFFFFFFFFFFFFFFFFFFFFFFFFFFFFFFF

@A00721:190:HGJW7DSXY:4:1560:13910:29183\_2:N:0:TCTGCAAG+GCTGCACT  
ATTCTGTAGCTCTGAGGGCGGTTGAGGGAGCCGTTTTGGCCGACTTTAACTATTCTAAGAGTCTTTAT  
GATTCAAAACAGATCGGAAGAGCGTCGTGTAGGGAAGAGTGTAGTGG

+

FFFFFFFFFFFFFFFFF:FFFFFFFFFFFFFFFFFFFFFFFFFFFFFFFFFFFFFFFFFFFFFFFFFFFFF  
FFFFFFFFFFFFF:FFF:FFFF:FFF:FF:F,FFFF:,FFFFFFFF:FF,

@A00721:190:HGJW7DSXY:4:1508:11071:25426\_2:N:0:TCTGCAAG+GCTGCACT  
GCGATATTCGTTTTTCATATCCAAACTCCTTGAATGGAGTACATATTTGCAACCCTATTCTTGATGTG  
AAAGATGCATCGAGGTATACGTCTAGGAACATTGATTGGGAACGTACC

+

FFFFFFFFFFFFFFFFFFFFFFFFFFFFFFFFFFFFFFFFFFFFFFFFFFFFFFFFFFFFFFFFFFFFFFFF  
F,:FFFFFFFFFFFFFFFFFFFFFFFFFFFFFFFFFFFFFFFFFFFFFFFFFFFFFFFFFFFFFFFFF:

@A00721:190:HGJW7DSXY:4:2138:11586:6057\_2:N:0:TCTGCAAG+GCTGCACT  
TACAAGAACGCTTTGGATTGTGACCATAAAGCCTCAGTTGCGATAGCTGTAGAGGTATACGATATCTC  
TCTTGATGATGTAGCCACTATAATGCTTAAGAGAGAGATTGATGTATG

+

FFFFFFFFFFFFFFFFFFFFFFFFFFFFFFFFFFFFFFFFFFFFFFFFFFFFFFFFFFFFFFFFFFFFFFFF  
FFFFFFFFFFFFFFFFFFFFFFFFFFFFFFFFFFFFFFFFFFFFFFFFFFFFFFFFFFFFFFFFF:FFFFF

@A00721:190:HGJW7DSXY:4:1641:16161:35775\_1:N:0:TCTGCAAG+GCTGCACT  
CCAATCTCATCGCTATACGCATACCTGATTGGAAGAAGCGAGGTTCTTCCTCAATAAAAATTTTCT  
CAAGAGATTATGGTTGATAAAGTTTTCTTCATAAGGGCTATTAGTACGTCATGGGGATCACTTCTTC  
GGT

+

FFFFFFFFFFFFFFFFFFFFFFFFFFFFFFFFFFFFFFFFFFFFFFFFFFFFFFFFFFFFFFFFFFFFFFFF  
FFFFFFFFFFFFFFFFFFFFFFFFFFFFFFFFFFFFFFFFFFFFFFFFFFFFFFFFFFFFFFFFF:FFFF  
FFF

@A00721:190:HGJW7DSXY:4:1245:20699:17206\_1:N:0:TCTGCAAG+GCTGCACT  
CGAATATGTTACGACATGGCTTCGTAACAACAGTGCGAGGATTGTCATCTCGGGGAAAGTGATTCACC  
AAGATGTTTCATATAGATACGAGATACCTAGAGAAGGTCGCAGCGATCTTACTCGTTATCGGAGCTAAG  
AAG

+

:FFFF:FFFFFFFFFFFFFFFFFFFFFFFFFFFFFFFFFFFFFFFFFFFFFFFFFFFFFFFFFFFFFFFF  
F:FFFFFFFFFFFFF:FFFFFFFFFFFFFFFFFFFFFFFFFFFFFFFFFFFFFFFFFFFFFFFFFFFFF,FFFFFFFFFFFF  
FFF

@A00721:190:HGJW7DSXY:4:2544:9299:4539\_2:N:0:TCTGCAAG+GCTGCACT  
TAACGTTAGTACCGGAGGTGATCTCTCTGCTTCTGCGTTACTGAGAGAAAAGATTGAGGACGCCTACG  
GTGACTTTATGGACAAGATGCAAGTTCTTGGAATACTTGTTTCCCT

+

FFFFFFFFFFFFFFFFFFFFFFFFFFFFFFFFFFFFFFFFFFFFFFFFFFFFFFFFFFFFFFFFFFFFFFFF  
FFFFFFFFFFFFFFFFFFFFFFFFFFFFFFFFFFFFFFFFFFFFFFFFFFFFFFFFFFFFFFFFF

@A00721:190:HGJW7DSXY:4:1350:10619:6198\_2:N:0:TCTGCAAG+GCTGCACT  
AACTACGGTCCTTATCAAAGAAAATGGTGAACCGGTCTCTAAATCTTTTGAGATTGAGAAGATTGAAG  
AACACGTCAAGAAGTCGCTCGGCGTTGTTCTTTAAAACCAAGTTAAGA

+

FFFFFFFFFFFFFFFFFFFFFFFFFFFFFFFFFFFFFFFFFFFFFFFFFFFFFFFFFFFFFFFFFFFFFFFF  
FFFFFFFFFFFFFFFFFFFFFFFFFFFFFFFFFFFFFFFFFFFFFFFFFFFFFFFFFFFFFFFFF,FFFF:FFFF:FFFF

@A00721:190:HGJW7DSXY:4:2264:3305:36245\_2:N:0:TCTGCAAG+GCTGCACT  
GGTTCAGCTACGAGAGGTGATCCCGGATGTGGATTGAAGGCTGGCTCTAAGGGAGACTCCTTCTTTTT  
GAATGTTGTAAAGAATTGGGTTGAGAAGCGTGCAGATCGGAAGAGCGT

+

FFFFFFFFFFFFFFFFFFFFFFFFFFFFFFFFFFFFFFFFFFFFFFFFFFFFFFFFFFFFFFFFFFFFFFFF  
FFFFFFFFFFFFFFFFFFFFFFFFFFFFFFFFFFFFFFFFFFFFFFFFFFFFFFFFFFFFFFFFF,FFFF:FFFF:FFFF

@A00721:190:HGJW7DSXY:4:1637:7211:6120\_2:N:0:TCTGCAAG+GCTGCACT  
TGCGGATGGGTCTACTGATTTTTCTACAGAGTGCAGTCGTTTCAACACTTATCACCCTTTTGAAA  
GGAAAATAATTGGTGATGAAAATACGTATGTCGGTGGGGTTCTCAAGG

+

FFFFFFFFFFFFFFFFFFFFFFFFFFFFFFFFFFFFFFFFFFFFFFFFFFFFFFFFFFFFFFFFFFFFFFFF  
:FFFFFFFFFFFF:FFFF,,:FFFF:FF:FFF:FF:FFFF:FFFFFFFF:F

@A00721:190:HGJW7DSXY:4:2264:15899:28369\_2:N:0:TCTGCAAG+GCTGCACT  
TTAAAACTTCAGAGTCTCTTGGAAGTCCAGGTAGCTAATGTTCTTGCAATAGCCACAGACTTTCTGGG



@A00721:190:HGJW7DSXY:4:2554:16468:3521\_1:N:0:TCTGCAAG+GCTGCACT  
ACTTAAGGCGGCTTATACCATAGGTTACGGTGATTCCAATCAAATCGGATTCATCAATCGTATTGATC  
TCCAAGTCGCAAACACTTCAACATCAACGACATCATTCTTGATGAGTGTCTTCTTATCGAAGTCTC  
AGT

+  
FFFFFFFFFFFFFFFFFFFFFFFFFFFFFFFFFFFFFFFFFFFFFFFFFFFFFFFFFFFFFFFFFFFFFFFF  
FFFFFFFFFFFFFFFFFFFFFFFFFFFFFFFFFFFFFFFFFFFFFFFFFFFFFFFFFFFFFFFFFFFFFFFF  
FFF

@A00721:190:HGJW7DSXY:4:2525:18041:7780\_2:N:0:TCTGCAAG+GCTGCACT  
ACGGGAGGTTGCAGATTCAACCCCTTATATCGAGGCTATCGAGGACGATGAGTATCTTGAAGTTGTTG  
ACGACAAGCCTCAAGAGGGTAGAGGACCACCTGGATCTTCTACTGTCT

+  
FFFFFFFFFFFFFFFFFFFFFFFFFFFFFFFFFFFFFFFFFFFFFFFFFFFFFFFFFFFFFFFFFFFFFFFF  
FFFFFFFFFFFFFFFFFFFFFFFFFFFFFFFFFFFFFFFFFFFFFFFFFFFFFFFFFFFFFFFFFFFFFFFF

@A00721:190:HGJW7DSXY:4:1148:26404:34976\_2:N:0:TCTGCAAG+GCTGCACT  
CGGTAATCTTTCAGCCGAATTAAGTACTAATGAGTTCAAGTCGGTTGTGCGATCGAATTAAGATCAAGG  
CTAATACCTTTATAGGTAAGAAGCCCTTGAGCCGCGTAGTCAGCGCG

+  
FFFF:FFFFFFFFFFFFFFFFFFFFFFFFFFFFFFFFFFFFFFFFFFFFFFFFFFFFFFFFFFFFFFFF  
FFFFFFFFFFFFFFFFFFFFFFFFFFFFFFFFFFFFFFFFFFFFFFFFFFFFFFFFFFFFFFFFFFFFFFFF

@A00721:190:HGJW7DSXY:4:2131:19000:36777\_1:N:0:TCTGCAAG+GCTGCACT  
ATTTACCACCTTTGCTCAACGACGAAGTGGAACGGCCAACACTTTCTTTGGTAATTGTATGATCACTT  
TGATGATTTTATCACTTTATTATGACCTTGAAAGTTTTTCGGCTGTGGTTGTCGCTGGGGACGATTCC  
ATT

+  
FFFFFFFFFFFFFFFFFFFFFFFFFFFFFFFFFFFFFFFFFFFFFFFFFFFFFFFFFFFFFFFFFFFFFFFF  
FFFFFFFFFFFFFFFFFFFFFFFFFFFFFFFFFFFFFFFFFFFFFFFFFFFFFFFFFFFFFFFFFFFFFFFF  
FFF

@A00721:190:HGJW7DSXY:4:2414:8684:21762\_2:N:0:TCTGCAAG+GCTGCACT  
AAGATCAAATTTTAAACGATTCCGAGAGGTTTATCCTGATGTGGAGGGAGTTCTTGAAGCATCCCGAC  
CTTTCCTTGTGAAAATTTTGATGCGGTTTCATAAGATTATCAGTAATC

+  
FFFFFFFFFFFFFFFFFFFF:F::F:FF:F:FFFFFFFF:FFFFF:F:FFFFFFFF,FFFFF::, :FFFF::FF  
:FFFFFFFF:FFFFFF::, FFFFF, FFFFFFFFFF, FFFFFFFFFF, FFF

@A00721:190:HGJW7DSXY:4:2440:11794:31031\_2:N:0:TCTGCAAG+GCTGCACT  
GATATTGTTGAGCGAGAGCGACCAAGATCTAAATTCGGTAACGGTGCGTGCGCTTTATTTTAAAAAG  
CTCCCTCCTCTCGCAAGTTTGATCTGATACTTATCACGAAAGGACTTG

+  
FFFFFFFFFFFFFFFFFFFFFFFFFFFFFFFFFFFFFFFFFFFFFFFFFFFFFFFFFFFFFFFFFFFFFFFF  
FFFFFFFFFFFFFFFFFFFFFFFFFFFFFFFFFFFFFFFFFFFFFFFFFFFFFFFFFFFFFFFF:FFFFF

@A00721:190:HGJW7DSXY:4:2571:26115:2816\_2:N:0:TCTGCAAG+GCTGCACT  
TCAGTTGATTAAGACTCTTCCGAAAGGCGAACTTTGGGAATTTGAAGCTCAGGGTGAAGCACAACGTT  
TGACCGTGACGAAGTGTGGTGTCTTGATCTACGTTACGGATATACTC

+  
, FFFFFFFFFFFFFFFFFFFFFFFFFFFFFFFFFFFFFFFFFFFFFFFFFFFFFFFFFFFFFFFFFFFFFF  
FFFFFFFFFFFFFF:FFFFFFFFFFFFFFFFFFFFFFFFFFFFFFFFFFFFFFFFFFFFFFFF

@A00721:190:HGJW7DSXY:4:2536:4300:9157\_2:N:0:TCTGCAAG+GCTGCACT  
CGCACTAAAACGTCTTCGACAACAGCAGGGGTTTTCGAATAGTGATAGCCACCCGCCTTACAGAGGGG  
CAGCAGCATGACCATAATTGGTATTGACTTTGGTACCACCTTTTCTAC

+  
FFFFFFFFF, FFFFFFFFFF:FFFF:FFFFFF:, FFFFFFFFFFFFFFFFFFFFFFFFFF:FFFFFFFFF  
FFFFFFFFFFFFFFFFFFFFFFFFF, FFFFFFFFFFFFFFFFFFFFFFFFFF

@A00721:190:HGJW7DSXY:4:2407:24080:21433\_2:N:0:TCTGCAAG+GCTGCACT  
AATGAAGTTTTAATGCTTAACAACAATGATAGTGAATTTATACCTACAATCATTGGTTTTTCTAATAA





@A00721:190:HGJW7DSXY:4:2608:5864:27305\_2:N:0:TCTGCAAG+GCTGCACT  
ATGTCAGAAGAAGCTATTCAAGCTTGTGCTTTAAAGACTGCAGAGGCTGTCAAACAAGCCAGACTCA  
AGGAGTCCAATCAAAGGTTTTGAATTTAGCTCAACTGGGGAGACGTGC

+

FFFFFFFFFFFFFFFFFFFFFFFFFFFFFFFFFFFFFFFF:FFFF,FFFFFFFF:FFFFFFFF,FFF:FFFFFFFF:FF  
F,FFFFFFFF::,FF:FFFF:,FFF,FF:F,FFF:F:FFF:FF:FFF

@A00721:190:HGJW7DSXY:4:2308:19877:8609\_1:N:0:TCTGCAAG+GCTGCACT  
ATCCTTTAAGGACTATGTTGACTGACGAAGATTTTCCCACAGATTTGTCTACGTTGCAGATCGCCACT  
CCAAACACTATATACATTATAAAATATAAAAATAAGGGAGTCATAACTTTTGTACCAAATTCCTGGC  
TTT

+

:FFFFFFFFFFFF:FFFFFFFFFFFFFFFFFFFFFFFFFFFFFFFFFFFFFFFFFFFFFFFFFFFFFFFFFFFF  
FFFFFFFFFFFFFFFFFFFFFFFFFFFFFFFFFFFFFFFFFFFFFFFFFFFFFFFFFFFFFFFFFFFFFFFFFFFF:FFFFFFFFFFFF  
FFF

@A00721:190:HGJW7DSXY:4:1208:27896:26757\_1:N:0:TCTGCAAG+GCTGCACT  
ATTACTTTAACGATCTCTCGGTCATTTACTCTGTACTTGATCTACGTCGTTTAACTGTCCGAACAACC  
TTTACTTAGAATGACTCTATCTTTTCAGACACTTCTTATATTATTTACAATAGTTAATATCATATTAG  
TAA

+

FFFFFFFFFFFFFFFFFFFFFFFFFFFFFFFFFFFFFFFFFFFFFFFFFFFFFFFFFFFFFFFFFFFFFFFFFFFF:FFFFFFFFFFFFFFFFFFFF  
F:F:FFFFFFFFFFFFFFFFFFFFFFFFFFFFFFFFFFFFFFFFFFFFFFFFFFFFFFFFFFFFFFFFFFFFFFFFFFFF:FFFFFFFFFFFF  
FFF

@A00721:190:HGJW7DSXY:4:1143:30400:23672\_1:N:0:TCTGCAAG+GCTGCACT  
CTCTTCCGATCTGATTAATAAAGGATGAGTACGAAAACCAACTCTTCGTTACGAGACCTGATGGTAGA  
ATAGATTTAGTCTCTACACCCATCTCAACGAGGATAAAGCGAGTTTTCCGTCCTGAACGTAATACAG  
AA

+

:F,FFF::F:FFFFFF,FF,FFF,F:F,FFF:::F,FF::FFFFFF:FFF:F:F:F,FFFF:FFFF  
:FF:FFFFFF,FFF,FF,FFFFFFFF:F::F:FFFF:F,FFFFFFFF:FFF,::,:::FFF:FFF:, ,  
FF

@A00721:190:HGJW7DSXY:4:2625:11722:23359\_1:N:0:TCTGCAAG+GCTGCACT  
TTATGAATCCTGCCTTTACTCATTTTATAGCAGTTATTTATGTTGTACTTTTTATAATTTATAACCTT  
CTTATACTTTTGGGTATGTTTTGTGAAAAACATGAGATACCCAAGTCTATCGAAGACATTATCTCTTA  
TGT

+

FFFFFFFFFFFF:FFFFFFFFFFFFFFFFFFFFFFFFFFFFFFFFFFFFFFFFFFFFFFFFFFFFFFFFFFFFFFFFFFFF  
FFFFFFFFFFFFFFFFFFFFFFFFFFFFFFFFFFFFFFFFFFFFFFFFFFFFFFFFFFFFFFFFFFFFFFFFFFFF  
FFF

@A00721:190:HGJW7DSXY:4:1270:25138:10676\_2:N:0:TCTGCAAG+GCTGCACT  
GATTGTTATCAATTTAAATACATTACTGTTTCAAATCATCTTTACTCACAGACTCCGAAAATGGTTTC  
AAATGAGGTCAAAGCTCTATTTATTAAACGAACATTATCCGATTCTT

+

FFFFFFFFFFFFFFFFFFFFFFFFFFFFFFFFFFFFFFFFFFFFFFFFFFFFFFFFFFFFFFFFFFFFFFFFFFFF  
FFFFFFFFFFFFFFFF:FFFFFFFFFFFFFFFFFFFFFFFFFFFF:FFFFFFFFFFFF

@A00721:190:HGJW7DSXY:4:2528:31232:8265\_2:N:0:TCTGCAAG+GCTGCACT  
ATTTGACAAATTTTAGAACTTTATTTCAAGACTCTCTCCGATCACCTTGGTGTGATCTCCCGGAGGA  
TCTTTTCAATAAGATGTATGATGATAATCTACTATTTTTAAATAGTGA

+

FF,FFFFFFFFFFFFFFFFFFFFFFFFFFFFFFFFFFFFFFFFFFFFFFFFFFFFFFFFFFFFFFFFFFFF,FFFFFFFFFFFF:FFFF  
FFFFFFFFFFFF,FFFFFFFF,FFFFFFFFFFFFFFFF,FFF:FFF

@A00721:190:HGJW7DSXY:4:2230:13937:3646\_1:N:0:TCTGCAAG+GCTGCACT  
TTTATCAAAGATTTGGCTTGGTCTATTTACCGAAAAAGTTGGAAGAGGTCTATGATATTTATTTTAC  
TTATACTTTAAATAGCACCGATTATAACTTGACTGTTGATAATATTACAATAGCTCTTCTCAGAAGA  
TTA

+  
FFFFFFFFF,:FFFF:FF,FFFF::FF,F,FFF:F,FFFF,FFFFFFFFFFFF:FFFFFFFFFFFFF  
FFFFFFFFFFFFFFFFFFFFFFFFFFFFFFFFFFFFFFFFFFFFFFFFFFFFFFFFFFFFFFFFFFFFFFFF  
FFF

@A00721:190:HGJW7DSXY:4:2130:17083:4742\_1:N:0:TCTGCAAG+GCTGCACT  
GTGAACACGTCTGTAGCATTGATTTAAATTTACCGTTAGAACTGAAAAAGATTCTTTTCGAAAAGAAA  
CCTATAAGTTACAAACGATTCTTCGACTATATTAAGAAATAAAAATACTTCAAGTACCTGAACTTTA  
CA

+  
FFF:F:FFF:,,FF,F,FFFFFFFF:,,,F:FF,FFFF,F,,FFFFF::F,FF,,FFFF,FF:F,,FF  
F:FFFF,,FFFFFF:F:FFFF::,,FFFFFF:F,FFFFFF::F,F,FFFFFF:FF,FFFF,FFFF  
:F

@A00721:190:HGJW7DSXY:4:2307:26738:2456\_2:N:0:TCTGCAAG+GCTGCACT  
CAAATAGAACCTTCACTCTCGTAATGAGAGTGTATTCCTTAATATTCTAGTAACCGCTATGTGGGCA  
TTACTAGGATTTATCACACTCCTAAATTTGATAGCAATTTATGTTTTA

+  
FFFFFFFFFFFFFFFFFFFFFFFFFFFFFFFFFFFFFFFFFFFFFFFFFFFFFFFFFFFFFFFFFFFFFFFF:FFFFF  
FFFFFFFFFFFFFFFFFFFFFFFFFFFFFFFFFFFFFFFFFFFFFFFFFFFFFFFFFFFFFFFFFFFFFFFF

@A00721:190:HGJW7DSXY:4:1332:29948:36855\_1:N:0:TCTGCAAG+GCTGCACT  
GAGTACTTAATTCAATAGCTTTAGTATTATTTACTATCGCCTTTATTGAAAATTGTATAAGAGTTAAT  
TGCTTACACAAAAGTGACGCGCAAGGAATCTTAATTGATTGAAGCTAGGCGTTGGGGAGAATGAACT  
GCC

+  
FFFFFFFFFFFFFFFFFFFFFFFFFFFFFFFFFFFFFFFFFFFFFFFFFFFFFFFFFFFFFFFFFFFFFFFF  
FFFFFFFFFFFFFFFFFFFFFFFFFFFFFFFFFFFFFFFFFFFFFFFFFFFFFFFFFFFFFFFFFFFFFFFF  
FFF

@A00721:190:HGJW7DSXY:4:2206:29875:27837\_2:N:0:TCTGCAAG+GCTGCACT  
ACGTAGGGTCAAACCTACTACCGCCGGTCGGCAGATCGGCACCACTGGTCTCTACGTTCAGGGACCCG  
CTGTGCAGAATAACCTTCCCAATCTAGATCTGCACAGAAGAAGGCTG

+  
FFFFFFFFFFFFFFFFFFF,FFF:FFFFFFFFFFFFFFFFFFFFFFFFFFFFFFFF:FFFFFF:FFFF:F::FFFFFFFFF  
FFFFFFFFFF,FF:FF:FFFF:FFFFFFFF:FFFFFFFFFFFFFFFFFFFFFFFF

@A00721:190:HGJW7DSXY:4:1509:19470:10222\_1:N:0:TCTGCAAG+GCTGCACT  
CATCTCTGTGGGAAGTGAAGGAGTACCTCAGTCAAAAGTCACATTCACCACTCCCATGCCAATCAATG  
ATGTGACTATACAGTTCGGCCATTTCAAGAGTGGTCAATACGTCGTGGGAGGTACTGAAGCCTTCCCC  
TCC

+  
FFFFFFFFFFFFFFFFFFFFFFFFFFFFFFFFFFFFFFFFFFFFFFFFFFFFFFFFFFFFFFFFFFFFFFFF  
FFFFFFFFFFFFFFFFFFFFFFFFFFFFFFFFFFFFFFFFFFFFFFFFFFFFFFFFFFFFFFFFFFFFFFFF  
FFF

@A00721:190:HGJW7DSXY:4:2415:17987:6245\_2:N:0:TCTGCAAG+GCTGCACT  
GCCAATCAATAGTTCTTCTGACCAGAATGAAAAGGGGTTTACCAGGGTAGTCTCTAAGTCTACCAGGA  
AGAGGGGAAATGTCCCCAAAACCTGAGAAGAATAAAGGGAAAGGTCCAT

+  
F:,FFFFFFFFF,FF,FFF:FFFFFFFF:FFFFFF:,F:F:FF:F:,FFFFFF:F,FF:FF:F:FFFFF  
FFF,F::FFFF:FF,FFFF,FFFFFFFF:FFFFFF,FFF:FFF:FFF

@A00721:190:HGJW7DSXY:4:2547:19660:6292\_2:N:0:TCTGCAAG+GCTGCACT  
ACCATCTGGGGTTGGGAATAAGAAATCTGCACGGCCAAAGAGGCCGCTGCTACGAAGTCGCTGAAGG  
CGGCTTGGGTCATTAAGGCTAGCTGTAAAGTTGCGCCTGCCGACCCCA

+  
FFFFFFFFFFFFFFFFFFFFFFFFFFFFFFFFFFFFFFFFFFFFFFFFFFFFFFFFFFFFFFFFFFFFFFFF  
FFFFFFFFFFFFFFFFFFFFFFFFFFFFFFFFFFFFFFFFFFFFFFFFFFFFFFFFFFFFFFFF

@A00721:190:HGJW7DSXY:4:1369:20636:3129\_1:N:0:TCTGCAAG+GCTGCACT  
TACAGTAGGTTCTGTCCTACTATGAGCAATCTGTTGAATTCGTCACTGAGGACGAAGGTGAGAGGACT



TTTGGCTACTGGCGACAACTGAGAGCAGTCGCTGGGGAAAGAGAATTGCGTGGGTTGAAGGCCGACG  
CTT

+

FFFFFFFFFFFFFFFFFFFFFFFFFFFFFFFFFFFFFFFFFFFFFFFFFFFFFFFFFFFFFFFFFFFFFFFF  
FFFFFFFFFFFFFFFFFFFFFFFFFFFFFFFFFFFFFFFFFFFFFFFFFFFFFFFFFFFFFFFFFFFFFFFF  
FFF

@A00721:190:HGJW7DSXY:4:2406:13711:12587\_1:N:0:TCTGCAAG+GCTGCACT  
CAACGGCGTTTGGAGGATTTTATCCGCGCTTAAGTATGGGGCGAAGATCCCCTATGGAGTCTTGAAGG  
ACTTAGGTTGGCATATTTATGCCGACGATAATAAGCATGTCAACCCTTAAGCACCGAGGTAAGCTCGGG  
ACT

+

FFFFFFFFFFFFFFFFFFFFFFFFFFFFFFFFFFFFFFFFFFFFFFFFFFFFFFFFFFFFFFFFFFFFFFFF  
FFFFFFFFFFFFFFFFFFFFFFFFFFFFFFFFFFFFFFFFFFFFFFFFFFFFFFFFFFFFFFFFFFFFFFFF  
FFF

@A00721:190:HGJW7DSXY:4:1433:4372:3959\_1:N:0:TCTGCAAG+GCTGCACT  
TAGAAGGAAGTTGGGCAAATCCCACATATGGTAGACGTTGTCACACTTTTCTTGAAAATTTTCTT  
TCCTCCGTCATTGGGGATTTGATGTGAGAAGGTGGAAGGTGTCAAGGGTCTTCTTCATGCTGATCTT  
TCA

+

FFFFFFFFFFFFFFFFFFFFFFFFFFFFFFFFFFFFFFFFFFFFFFFFFFFFFFFFFFFFFFFFFFFFFFFF  
FFFFFFFFFFFFFFFFFFFFFFFFFFFFFFFFFFFFFFFFFFFFFFFFFFFFFFFFFFFFFFFFFFFFFFFF  
FFF

@A00721:190:HGJW7DSXY:4:2327:25988:13369\_1:N:0:TCTGCAAG+GCTGCACT  
TGATTGATAGTTACGGCTCGTATCGAGTTGGAGGGAGGAAGTTCTCCGAAATTAAAGACGGGGGGATT  
AAGAGTCCAGCTGTAAGTGTCAATTCAGAGAGGGGAGCTCTGAAAAGGAAACTTCGTCAGAAGATGAG  
GAA

+

FFFFFFFFFFF:FFFFFFFFFFF:FFF:FFFFFFFFFFFFFFFFFFFFFFFFFFFFFFFFFFFFFFFFFFFF  
FFFFFFFFFFFFFFFFFFFFFFFFFFFFFFFFFFFFFFFFFFFFFFFFFFFFFFFFFFFFFFFFFFFFFFFF  
FFF

@A00721:190:HGJW7DSXY:4:1504:12861:14027\_2:N:0:TCTGCAAG+GCTGCACT  
GGAAGGCTCTAGAGAAGATCTCACCACCTGGAGAAGGCAAGTGGAGAGTCCAGAAGTTGATGAAGAAG  
GATTATTTGAAGCAGGGGTTACCACTTCCTAAGGTGGATGAGGGAGGT

+

FFFFFFFFFFFFFFFFFFFFFFFFFFFFFFFFFFFFFFFFFFFFFFFFFFFFFFFFFFFFFFFFFFFFFFFF  
FFFFFFFFFFFFFFFFFFFFFFFFFFFFFFFFFFFFFFFFFFFFFFFFFFFFFFFFFFFFFFFF

@A00721:190:HGJW7DSXY:4:2214:8440:21245\_2:N:0:TCTGCAAG+GCTGCACT  
AGAATTCGGTAACCTACCATATTGTTCTTCCGGGAAGTTGTGGGATTTAACTTTGACTCAACTACTC  
CGATCAGATCCGATGGTTTGATTGGTATGGACTACTCGACTTTTGAT

+

FFFFFFFFFFFFFFFFFFFFFFFFFFFFFFFFFFFFFFFFFFFFFFFFFFFFFFFFFFFFFFFFFFFFFFFF  
FFFFFFFFFFFFFFFFFFFFFFFFFFFFFFFFFFFFFFFFFFFFFFFFFFFFFFFFFFFFFFFF

@A00721:190:HGJW7DSXY:4:1101:4255:9893\_1:N:0:TCTGCAAG+GCTGCACT  
TTCTGTAGCTCTGAGGGCGGTTGAGGGAGCCGTTTTGGCCGACTTTAACTATTCTAAGAGTCTTTATG  
ATTCAAAACCTATCGTTGTCGTACCTTACAAGGTTGAGGAGACTTTACAGCGGCTTATTGTCGCGCAG  
TTT

+

FF:FFFFFFF:FF,:FFFF,FFFFFFF,FFFFFFF,FF:FFFFFFFFF,FFFF,,F,FFFFFFF:F:  
FF:FFFFF,FFFF:FFF:F:FFFF:FF:FFFF:FFF:FFFFFFFFFFFFFFFFFFFF,FFFFFFF,FFF  
F,F

@A00721:190:HGJW7DSXY:4:1620:22281:28244\_2:N:0:TCTGCAAG+GCTGCACT  
GCGATATTCTGTTTTTCATATCCAAAACCTCCTTGAATGGAGTACATATTTGCAACCCTATTCTTGATGTG  
AAAGATGCATCGAGGTATACGTCTAGGAACATTGATTGGGAACGTACC

+

FFFFFFFFFFFFFFFFFFFFFFFFFFFFFFFFFFFFFFFFFFFFFFFFFFFFFFFFFFFFFFFFFFFFFFFF  
FFFFFFFFFFFFFFFFFFFFFFFFFFFFFFFFFFFFFFFFFFFFFFFFFFFFFFFFFFFFFFFFFFFFFFFF  
@A00721:190:HGJW7DSXY:4:2176:20419:2190\_2:N:0:TCTGCAAG+GCTGCACT  
TACAAGAACGCTTTGGATTGTGACCATAAAGCCTCAGTTGCGATAGCTGTAGAGGTATACGATATCTC  
TCTTGATGATGTAGCCACTATAATGCTTAAGAGAGAGATTGATGTATG  
+  
FFFFFFFFFFFFFFFFFFFFFFFFFFFFFFFFFFFFFFFFFFFFFFFFFFFFFFFFFFFFFFFFFFFFFFFF  
FFFFFFFFFFFFFFFFFFFFFFFFFFFFFFFFFFFFFFFFFFFFFFFFFFFFFFFFFFFFFFFFFFFFFFFF  
@A00721:190:HGJW7DSXY:4:2210:23122:22185\_1:N:0:TCTGCAAG+GCTGCACT  
CCAATCTCATCGCTATACGCATACCTGATTGGAAGAAGCGAGGTTCTGTTCTCAATAAAAATTTTCT  
CAAGAGATTATGGTTGATAAAGTTTTCTTCATAAGGGCTATTAGTACGTCATGGGGATCACTTCTTC  
GGT  
+  
FFFFFFFFFFFF:FFFF:FFFFFFFFFFFFFFFFFFFF,FFFFFFFFFFFFFFFFFFFFFFFFFFFF:F:FFFF  
FFFFFFFFFFFF:FFFFFFFFFFFFFFFFFFFFFFFFFFFFFFFFFFFFFFFFFFFFFFFFFFFFFFFFFFFF  
FFF  
@A00721:190:HGJW7DSXY:4:1336:8865:32346\_1:N:0:TCTGCAAG+GCTGCACT  
CGAATATGTTACGACATGGCTTCGTAACAACAGTGCAGGATTGTCTCGGGGAAAGTGATTCACC  
AAGATGTTTATAGATACGAGATACCTAGAGAAGGTCGCAGCGATCTTACTCGTTATCGGAGCTAAG  
AAG  
+  
FFFF:FFFFFFFFFFFF:FF,FFFFFFFFFFFFFFFFFFFF,FFFFFFFFFFFFFFFFFFFF,FFFF,FF:FFFF  
FFFFFFFFFFFFFFFFFFFFFFFFFFFF:FF,FFF::FFFFFFFFFFFFFFFFFFFFFFFFFFFFFFFFFFFF  
FFF  
@A00721:190:HGJW7DSXY:4:1325:11107:24768\_2:N:0:TCTGCAAG+GCTGCACT  
TAGTACCGGAGGTGATCTCTGCTTCTGCGTTACTGAGAGAAAAGATTCAGGACGCCTACGGTGACT  
TTATGGACAAGATGCAAGTTCTTGGGAAATACTTGTTTCCCTTTTTAG  
+  
FFFFFFFFFFFFFFFFFFFFFFFFFFFFFFFFFFFFFFFFFFFFFFFFFFFFFFFFFFFFFFFFFFFFFFFF  
F:FFFFFFFFFFFFFFFFFFFFFFFFFFFFFFFFFFFFFFFFFFFFFFFFFFFFFFFFFFFFFFFFFFFF  
@A00721:190:HGJW7DSXY:4:1350:11740:7263\_2:N:0:TCTGCAAG+GCTGCACT  
AACTACGGTCCTTATCAAAGAAAATGGTGAACCGGTCTCTAAATCTTTTGAGATTGAGAAGATTGAAG  
AACACGTCAAGAAGTCGCTCGGCGTTGTTCTTGAAAACCAAGTTAAGA  
+  
FFFFFFFFFFFFFFFFFFFFFFFFFFFFFFFFFFFFFFFFFFFFFFFFFFFFFFFFFFFFFFFFFFFF:,FFFFFFFFFFFFFFFFFFFFFFFFFFFF  
FFFFFFFFFFFFFFFFFFFFFFFFFFFF,FFFFFFFFFFFFFFFFFFFFFFFFFFFF  
@A00721:190:HGJW7DSXY:4:2265:2546:31548\_2:N:0:TCTGCAAG+GCTGCACT  
GGTTCAGCTACGAGAGGTGATCCCGGATGTGGATTGAAGGCTGGCTCTAAGGGAGACTCCTTCTTTTT  
GAATGTTGTAAAGAATTGGGTTGAGAAGCGTGCAGATCGGAAGAGCGT  
+  
FFFFFFFFFFFFFFFFFFFFFFFFFFFFFFFFFFFFFFFFFFFFFFFFFFFFFFFFFFFFFFFFFFFF:FFFFFFFFFFFF:FFFFFFFFFFFFFFFF:F  
FFFFFFFF:FFFFFFF,FFFF:FFFFFFFFFFFFFFFFFFFF::FFFF:  
@A00721:190:HGJW7DSXY:4:2114:25907:21590\_2:N:0:TCTGCAAG+GCTGCACT  
TGCGGATGGGTCTACTGATGTTTTCTACAGAGTGCAGTCGTTTCAACACTTATCACCCTTTTGAAA  
GGAAAATAATTGGTGATGAAAATACGTATGTCGGTGGGGTTCTCAAGG  
+  
FFFFFFFFFFFFFFFFFFFFFFFFFFFFFFFFFFFFFFFFFFFFFFFFFFFFFFFFFFFFFFFFFFFF:FF,FF:FF,,F:FFF,FFF:FFF  
:FFFFFFFF:F,FF:F:,FFFF,F:FFFF:FF:FF:FFFF,FFFF,F  
@A00721:190:HGJW7DSXY:4:2433:31403:26162\_2:N:0:TCTGCAAG+GCTGCACT  
TAAAACTTCAGAGTCTCTTGGAAGTCCAGGTAGCTAATGTTCTTGAATAGCCACAGACTTTCTGGG  
AAAAGAGACCTCTGTTGTAGAGGAGTTGAGAGAATTACTCAGATTCAA  
+  
:FFFFFFFFFFFF:FFFF:FFFFFFFFFFFFFFFFFFFF:F:FFFFFFFFFFFFFFFF:FFFFFFFFFFFF,FFFF  
F,FFFFFFFFFFFFFFFFFFFF:FFFFFFFFFFFF:FFFF:FFFFFFFFFFFF

[illegible]



@A00721:190:HGJW7DSXY:4:1371:15049:23610\_1:N:0:TCTGCAAG+GCTGCACT  
TCGGCGATCACTTTTCACTAAGAATTGGTCCTACTTTTGGACAAGGCAACTTCGTAATCTTCATGAG  
ATCGTTTCTTTCTTTATCTCTTTGGTTGTTAGGGATTTTGAGAGAGTGAAAGGCTTCAATTGTAGTGG  
TTT

+

FFFFFFFFFFFFFFFFFFFFFFFFFFFFFFFFFFFFFFFFFFFFFFFFFFFFFFFFFFFFFFFFFFFFFFFF  
FFFFFFFFFFFFFFFFFFFFFFFFFFFFFFFFFFFFFFFFFFFFFFFFFFFFFFFFFFFFFFFFFFFFFFFF  
FFF

@A00721:190:HGJW7DSXY:4:1561:14262:16266\_2:N:0:TCTGCAAG+GCTGCACT  
GTACCCAGTCAGTATACCTCTACGCAAAGATATTTTCATGAAAACCTACAGAGGAACGTACCGGATTACC  
TGTCTTTTCATATTATGAATGAACCTTCGGCCGCTCTCTTTGCTTCGAT

+

FFFFFFFFFFFFFFFFFFFFFFFFFFFFFFFFFFFFFFFFFFFFFFFFFFFFFFFFFFFFFFFFFFFFFFFF  
FFFFFFFFFFFFFFFFFFFFFFFFFFFFFFFFFFFFFFFFFFFFFFFFFFFFFFFFFFFFFFFFFFFFFFFF  
FFF

@A00721:190:HGJW7DSXY:4:1413:9995:35994\_1:N:0:TCTGCAAG+GCTGCACT  
TCAGAATGGGATTCCTACGTAGTTTATGACTTTGGTGGTGGTACTTTTCGATACTTCTATCGTCTTACG  
TTACGGTAATTACTATAGTGTTATTTATTCTGGTGGTGATGATAATCTTGGAGGTCGTGACGTTGATG  
AAG

+

FF:FFFFFFFFFFFFFFFFFFFFFFFFFFFFFFFFFFFFFFFFFFFFFFFFFFFFFFFFFFFFFFFFFFFF  
FFFFFFFFFFFFFFFFFFFFFFFFFFFFFFFFFFFFFFFFFFFFFFFFFFFFFFFFFFFFFFFFFFFFFFFF  
FFF

@A00721:190:HGJW7DSXY:4:1537:14769:25598\_2:N:0:TCTGCAAG+GCTGCACT  
GTTCTTATTACGGCGCACTTCTTTACCCGCCACCACACAACCTTTCAGTTTCACAACCTGAAGGAGGAGG  
TTTCTGTAAATGGAAAACCCTCGTCAATACTTTTCAATAATATACGTC

+

FFFFF:FFFFFF,FF:F,FF:FFFF,FFFFFFFFF:FFFF:FFF:FFFFFFFFF:F::FFFF,::F  
FFFFFFFFF:,F,,FFFF,::F,FF:FFFF,FFFFFFFF:FFFFFFFF:F,

@A00721:190:HGJW7DSXY:4:1624:14371:31297\_1:N:0:TCTGCAAG+GCTGCACT  
AGTGGCATTCAAGGCAAACCTTACCCTGATTCCGGCCGGTGGTAGCTCATTTCTACCAGGGGCTATTAC  
TCTTGCTGAAACAGCTATTAAAGCTGTTGAGCGGGTAATTACACCTAAACGAGCTCGATCTGCCATCG  
CTG

+

FFFFFFFFFFFFFFFFFFFFFFFFFFFFFFFFFFFFFFFFFFFFFFFFFFFFFFFFFFFFFFFFFFFFFFFF  
FFFFFFFFFFFFFFFFFFFFFFFFFFFFFFFFFFFFFFFFFFFFFFFFFFFFFFFFFFFFFFFFFFFFFFFF  
FFF

@A00721:190:HGJW7DSXY:4:2457:29008:23766\_1:N:0:TCTGCAAG+GCTGCACT  
ACGTGTGCTCTTCCGATCTATAATTTCAATCTTCTTAAAAAGAAGATAGAGAGTCATACTTTGGGCTA  
TCGTTACAGTGCATGGGGTTGGATAGCCAATATTGAAGTGGACACCTCTGGTAGTATCGAAGTAAAGA  
TAA

+

::FFFFFFFFFFFFFFFFFFFFFFFFFFFFFFFFFFFFFFFFFFFFFFFFFFFFFFFFFFFFFFFFFFFF  
FFFFFFFFFFFFFFFFFFFFFFFFFFFFFFFFFFFFFFFFFFFFFFFFFFFFFFFFFFFFFFFFFFFFFFFF  
FFF

@A00721:190:HGJW7DSXY:4:2362:1796:22200\_1:N:0:TCTGCAAG+GCTGCACT  
CAAAATCTTACCACTATCTACGAACCTACAGTTCTGAAGACGTTGCTTGTGCTTCCTCCTTTAATGG  
CACTACCTCGGTACAATCTTACTTGAACGAAGGCGACCTGTTCCGGAGTTTTTACGGGATCCGGAAT  
GTT

+

FF,::,FF,:FF,F,F:F:,F,F:FF,F,F:F,F:F,FFFFFF:FFFF,FFF,FFFFFF:FFF,FFF  
FFFF,FFFF::FFFF:F,FFF:F:FFFFFFFFFFFFFFFFFFFFFFFFFFFFFFFFFFFFFFFFFFFF  
FFF

@A00721:190:HGJW7DSXY:4:2320:8404:1423\_2:N:0:TCTGCAAG+GCTGCACT  
ACGTCAACGTTACCGAGTTTCGTTTCGTACCTTGATGCTGACTTTCGTCAATATGATTTGATCTGGT

TGCTCAATTCTAAGCGTGTTCCGCTTAGTGCGAGGCCTCTCTTCTACG  
+  
FFFFFFFFFFFFFFFFFFFFFFFFFFFFFFFFFFFFFFFFFFFFFFFFFFFFFFFFFFFFFFFFFFFFFFFF  
FFFFFFFFFFFFFFFFFFFFFFFFFFFFFFFFFFFFFFFFFFFFFFFFFFFFFFFFFFFFFFFFFFFFFFFF:  
@A00721:190:HGJW7DSXY:4:2578:30689:26804\_2:N:0:TCTGCAAG+GCTGCACT  
CCTTGGATTTTAATATAAAGAATCTTTACCAGGACTCCTACTACAGGAGGCAGTCTTCTGATCGTAAG  
AAGTTTATAAGGAACATATCCATTTGTTGTAATAGGGTCATCAACTTA  
+  
FFFFFFFFFFFFFFFFFFFFFFFFFFFFFFFFFFFFFFFFFFFFFFFFFFFFFFFFFFFFFFFFFFFFFFFF  
FFFFFFFFFFFFFFFFFFFFFFFFFFFFFFFFFFFFFFFFFFFFFFFFFFFFFFFFFFFFFFFFFFFFFFFF:  
@A00721:190:HGJW7DSXY:4:2608:6343:32894\_2:N:0:TCTGCAAG+GCTGCACT  
AGTGGTAATACTGTCTTTCCAAGCTTACCTGTATCTTCAATGAAATTGGACTCTTCGATAGGGGACAT  
TTTATCGTGGGCTTTCCGTCAAGGAAGATCTGTTATCGACGGTTTATC  
+  
:FFFFFFFFFFFFFFFFFFFFFFFFFFFFFFFFFFFFFFFFFFFFFFFFFFFFFFFFFFFFFFFFFFFFFFFF,FFF,FFFF  
FFF:FFFFFFFFFFFFFFFFFFFFFFFFFFFFFFFFFFFFFFFFFFFFFFFFFFFFFFFFFFFFFFFFFFFF  
@A00721:190:HGJW7DSXY:4:1530:24867:22576\_2:N:0:TCTGCAAG+GCTGCACT  
CTAAAGATTGAAGGAAAAATTTATCCTCGTTTAACTTACTTAGACTTTCTACGATACAAATGATAAC  
TTCTAATTTACGTTTGCTACTCAGAGCTGGTCCTCTCAGCAAAGGGAT  
+  
FFFFFFFFFFFFFFFFFFFFFFFFFFFFFFFFFFFFFFFFFFFFFFFFFFFFFFFFFFFFFFFFFFFFFFFF:FFFF:FFFFFF  
FFFFFFFF:FFFFFFFFFFFFFFFFFFFFFFFFFFFFFFFFFFFFFFFFFFFFFFFFFFFFFFFFFFFFFFFF  
@A00721:190:HGJW7DSXY:4:1644:20103:34773\_1:N:0:TCTGCAAG+GCTGCACT  
GCATTTGATAATAATGACGAGACTTTCGTCATAATCGCTGCATATTACGGATTACACGGTACCAGCGC  
ATCTCGTGTGAGCCTCGACCCGATTATATGGTATTAACCTATAAAGGTGAGGAGACCATTTTCTTGC  
TGA  
+  
FFFFFFFFFFFFFFFFFFFFFFFFFFFFFFFFFFFFFFFFFFFFFFFFFFFFFFFFFFFFFFFFFFFFFFFF  
FFFFFFFFFFFFFFFFFFFFFFFFFFFFFFFFFFFFFFFFFFFFFFFFFFFFFFFFFFFFFFFFFFFFFFFF  
FFF  
@A00721:190:HGJW7DSXY:4:1644:22381:19680\_2:N:0:TCTGCAAG+GCTGCACT  
CTTATAATGAATAAATAAATAATATTACTAATGGCAAATAGTGGAAGGCTCCAGTCAACACTAGTTC  
GAGTGCTGCTTTGGATTACGATGACGTGAGAATAGGTGAAGGGATAGT  
+  
FFFFFFFFF,FFFFFFFFFFFFFFFFFFFFFFFFFFFFFFFFFFFFFFFFFFFFFFFFFFFFFFFFFFFFFFFF  
FFFFFFFFFFFFFFFFFFFFFFFFFFFFFFFFFFFFFFFFFFFFFFFFFFFFFFFFFFFFFFFFFFFFFFFF  
@A00721:190:HGJW7DSXY:4:1444:10447:30608\_1:N:0:TCTGCAAG+GCTGCACT  
ACCAACATTAAGGCGGCGGCGACTAATCTTAAAGCTTACCCAAAATGAAGGACACTTCGAAACTGAA  
TAATGATGCACTACAAACAAGTATCGCTAATCATCTGAAAAAGGCTCTAAAGGACACTATACAATATC  
CAG  
+  
F:FFFFFFFFFFFFFFFFFFFFFFFFFFFFFFFFFFFFFFFFFFFFFFFFFFFFFFFFFFFFFFFFFFFFFFFF  
FFFFFFFFFFFFFFFFFFFFFFFFFFFFFFFFFFFFFFFFFFFFFFFFFFFFFFFFFFFFFFFFFFFFFFFF  
FFF  
@A00721:190:HGJW7DSXY:4:2641:16514:4163\_2:N:0:TCTGCAAG+GCTGCACT  
TTCGCCATTGTGGTACGAATTGGTCCAACATTTACCACCAAATTCTTTTGATACTAGCCTTCA  
AGTGGGGTATGCCTGCGGAATACGCTTGCTATTACACGATTGGTTTCG  
+  
FFFFFFFFFFFFFFFFFFFFFFFFFFFFFFFFFFFFFFFFFFFFFFFFFFFFFFFFFFFFFFFFFFFFFFFF  
FFFFFFFFFFFFFFFFFFFFFFFFFFFFFFFFFFFFFFFFFFFFFFFFFFFFFFFFFFFFFFFFFFFFFFFF  
@A00721:190:HGJW7DSXY:4:2639:12527:3082\_2:N:0:TCTGCAAG+GCTGCACT  
ATGTCAGAAGAAGCTATTCAAGCTTGTCGTTTAAAGACTGCAGAGGCTGTCAAACAAGCCAGACTCA  
AGGAGTCCAATCAAAGGTTTTGAATTTAGCTCAACTGGGGAGACGTGC  
+



$+$ 

@A00721:190:HGJW7DSXY:4:2362:15456:29543\_2:N:0:TCTGCAAG+GCTGCACT  
TTACATTTTAAATGGTATGGTATAATGTGTCTTACAAATAGAACCTTCACTCTCGGTAATGAGAGTGT  
ATTCCTTAATATTCTAGTAACCGCTATGTGGGCATTACTAGGATTTAT

+

@A00721:190:HGJW7DSXY:4:1342:26621:10300\_1:N:0:TCTGCAAG+GCTGCACT  
GAGTACTTAATTC AATAGCTTTAGTATTATTTACTATCGCCTTTATTGAAAATTGTATAAGAGTTAAT  
TGCTTACACAAATGTGTGCGCGGAAGGAATCTTAATTGTTTGAAGCTAGGCGTTGGGGAGAATGAACT  
GCC

+

@A00721:190:HGJW7DSXY:4:2518:12852:7780\_2:N:0:TCTGCAAG+GCTGCACT  
ACGTAGGGTCAAACCTACTACCGCCGGTCGGCAGATCGGCACCACTGGTCTCTACGTTCAAGGACCCG  
CTGTGCAGAATAACCTTCCCAAATCTAGATCTGCACAGAAGAAGGCTG

+

@A00721:190:HGJW7DSXY:4:2246:28836:8312\_1:N:0:TCTGCAAG+GCTGCACT  
CATCTCTGTGGGAAGTGAAGCAGTACCTCAGTCAAAAGTCACATTCACCACTCCCATGCCAATCAATG  
ATGTGACTATACAGTTCGGCCATTTCAAGAGTGGTCAATACGTCGTGGGAGGTACTGAAGCCTTCCCC  
TCC

+

@A00721:190:HGJW7DSXY:4:2455:26738:12821\_2:N:0:TCTGCAAG+GCTGCACT  
GCCAATCAATAGTTCTTCTGACCAGAATGAAAAGGGTTTACCAGGGTAGTCTCTAAGTCTACCAGGA  
AGAGGGGAAATGTCCCCAAAACCTGAGAAGAATAAAGGGAAAGGTCCAT

+

@A00721:190:HGJW7DSXY:4:2561:17038:15186\_2:N:0:TCTGCAAG+GCTGCACT  
GGGGTTGGGAATAAGAAATCTGCACGGGCCAAAGAGGCCGCTGCTACGAAGTCGCTGAAGGCGGCTTG  
GGTCATTAAGGGTAGCTGTAAAGTTGCGCCTGCCGACCCCATCTTTGA

+

@A00721:190:HGJW7DSXY:4:1407:7003:22326\_1:N:0:TCTGCAAG+GCTGCACT  
TACAGTAGGTTCTGTCCTACTATGAGCAATCTGTTGAATTCGTCACTGAGGACGAAGGTGAGAGGACT  
TTTGGCTACTGGCGACAACTGAGAGCAGTCGCTGGGGAAAGAGAATTGCGTGGGTTGAAGGCCGACG  
CTT

+

```

FFFFFFFFFFFFFFFF:FFFFFFFFFFFF:F:F,:FFFFFF:FFFFFF:FFFFFF:FFFFFF
FFFFFFFFFFFFFFFF:FFFFFFFF:FFFFFFFFFFFFFFFFFFFFFFFFFFFFFFFFFFFFFF
FF:

```



@A00721:190:HGJW7DSXY:4:1106:28058:23218\_2:N:0:TCTGCAAG+GCTGCACT  
CGTTTGGAGGATTTTATCCGCGCTTAACTATGGGGCGAAGATCCCCTATGGAGTCTTGAAGGACTTAG  
GTTGGCATATTTATGCCGACGATAATAAGCATGTACCCCTTAAGCACC

+

FF:FFFFFFFFFFFFFFFFFFFFFFFFFFFFFFFFFFFFFFFFFFFFFFFFFFFFFFFFFFFFFFFFFFFFFFFF  
FFFFFFFFFFFFFFFFFFFFFFFFFFFFFFFFFFFFFFFFFFFFFFFFFFFFFFFFFFFFFFFFFFFFFFFF

@A00721:190:HGJW7DSXY:4:2353:12057:31203\_1:N:0:TCTGCAAG+GCTGCACT  
CAAGAGAGAGTGTGAGAGAGTCGCTCTCACTATTTTTGCCAGAATGCGGGCTTTCTGACTGATGAGG  
TTAAACTCTTGCTCCTTCTGTGGGTGAGGGTTTTTGTATATTCACTGGTTCTGGGAGGCTGCTTTC  
CTC

+

FFFFFFFFFFFFFFFFFFFFFFFFFFFFFFFFFFFFFFFFFFFFFFFFFFFFFFFFFFFFFFFFFFFFFFFF  
FFFFFFFFFFFFFFFFFFFFFFFFFFFFFFFFFFFFFFFFFFFFFFFFFFFFFFFFFFFFFFFFFFFFFFFF  
FFF

@A00721:190:HGJW7DSXY:4:2553:28727:7153\_1:N:0:TCTGCAAG+GCTGCACT  
TAGAAGGAAGTTGGGCAAATCCCACATATGGTAGACGTTGTCACACTTTTCTTGAATTTTTCTT  
TCCTCCGTCATTGGGGATTTTCGATGTGAGAAGGTGGAAGGTGTCAAGGGTCTTCTTCATGCTGATCTT  
TCA

+

FFFFFFFFFFFFFFFF,FFFFFFFFFFFFFFFFFFFFFFFFFFFFFFFFFFFFFFFFFFFFFFFFFFFFFFFF  
FFFFFFFFFFFFFFFFFFFFFFFFFFFFFFFFFFFFFFFFFFFFFFFFFFFFFFFFFFFFFFFFFFFFFFFF  
FFF

@A00721:190:HGJW7DSXY:4:2508:3016:27038\_1:N:0:TCTGCAAG+GCTGCACT  
TGATTGATAGTTACGGCTCGTATCGAGTTGGAGGGAGGAAGTTCTCCGAAATTAAGACGGGGGGATT  
AAGAGTCCAGCTGTAAGTGTCAATTCAGAGAGGGGAGCTCTGAAAAGGAACTTCGTCAGAAGATGAG  
GAA

+

FFFF:F:FFFF::FFF:FFFFFFFF:FFFFFFFF:FFFFFFFF:FFFF::FFFFFFFFFFFFFFFFFFFF  
FFFFFFFFFFFFFFFFFFFFFFFFFFFFFFFFFFFFFFFFFFFFFFFFFFFFFFFFFFFFFFFFFFFFFFFF  
FFF

@A00721:190:HGJW7DSXY:4:1504:18005:9846\_2:N:0:TCTGCAAG+GCTGCACT  
GGAAGGCTCTAGAGAAGATCTCACCACTGGAGAAGGCAAGTGGAGAGTCCAGAAGTTGATGAAGAAG  
GATTATTTGAAGCAGGGGTACCCTTCCTAAGGTGGATGAGGGAGGT

+

FFFFFFFFFFFFFFFFFFFFFFFFFFFFFFFFFFFFFFFFFFFFFFFFFFFFFFFFFFFFFFFFFFFFFFFF  
FFFFFFFFFFFFFFFFFFFFFFFFFFFFFFFFFFFFFFFFFFFFFFFFFFFFFFFFFFFFFFFF

@A00721:190:HGJW7DSXY:4:2336:32560:35524\_2:N:0:TCTGCAAG+GCTGCACT  
AGAATTCGTAACCTACCATATTGTTCTTCCGGGAAGTTGTGGGATTTAACTTTGACTCAACTACTC  
CGATCAGATCCGATGGTTTGATTGGTATGGACTACTCGAGATCGGAA

+

FFFFFFFFFFFFFFFFFFFFFFFFFFFFFFFFFFFFFFFFFFFFFFFFFFFFFFFFFFFFFFFFFFFFFFFF  
FFFFFFFFFFFF, ,FFFFFFFF:FFFFFFFFFFFFFFFFFFFFFFFFFFFFFFFF

@A00721:190:HGJW7DSXY:4:1117:23764:30279\_1:N:0:TCTGCAAG+GCTGCACT  
TTCTGTAGCTCTGAGGGCGGTTGAGGGAGCCGTTTTGGCCGACTTTAACTATTCTAAGAGTCTTTATG  
ATTCAAAACCTATCGTTGTCGTACCTTACAAGTTGAGGAGACTTTACAGCGGCTTATTGTCGCGCAG  
TTT

+

FF:FFFFFFFFFFFFFFFFFFFFFFFFFFFFFFFFFFFFFFFFFFFFFFFFFFFFFFFFFFFFFFFFFFFF  
FFFFFFFFFFFF:FFFFFFFFFFFFFFFFFFFFFFFFFFFFFFFFFFFFFFFFFFFFFFFFFFFFFFFFFFFF  
FFF

@A00721:190:HGJW7DSXY:4:2166:7627:15045\_2:N:0:TCTGCAAG+GCTGCACT  
GCGATATTCTGTTTTCATATCCAAAACCTCTTGAATGGAGTACATATTTGCAACCCTATTCTTGATGTG  
AAAGATGCATCGAGGTATACGTCTAGGAACATTGATTGGGAACGTACC

+

[illegible]

@A00721:190:HGJW7DSXY:4:2445:1217:11021\_2:N:0:TCTGCAAG+GCTGCACT  
AATACCTTCCACTGAGTTCATCACCAGAGTTTCGACGTCGCGAAAACGATGAAGATTTCCACACTG  
TTCGAGAATCTTCTGATGCTGAATTTGAGGAAAATTTTTCGGAAGTTT

+

FFFFFFFF:FFFFFFFFFFFFFFFFFFFFFFFFFFFFFFFFFFFFFFFFFFFFFFFFFFFFFFFF  
FFFFFFFFFFFFFFFFFFFFFFFFFFFFFFFFFFFFFFFFFFFFFFFFFFFFFFFFFFFFFFFF

@A00721:190:HGJW7DSXY:4:2308:18304:10363\_2:N:0:TCTGCAAG+GCTGCACT  
GTATGTGTCACGCTACACTCGAAATATGGGCCCTCATAAGGAAGTATAGTTGGCGTCTTGTCGTTGAC  
GTCATTACAGTCTGGAAGTTAGATCATTTGTTTCAGGAAGATCTCTACA

+

FFFF:FFFFFFFFFFFFFFFFFFFF,FFFFFFFFFFFFFFFFFFFFFFFFFFFFFFFF:FFFFFFFFFFFFFFFF  
FFFFFFFFFFFFFFFFFFFFFFFFFFFFFFFFFFFFFFFFFFFFFFFFFFFFFFFFFFFFFFFF

@A00721:190:HGJW7DSXY:4:1129:17861:23782\_2:N:0:TCTGCAAG+GCTGCACT  
TAGAGTTCTTCTAACCAGGACTGATGGTGAGATTCTTTTACCTTTTGAGAGTCCAGGAACCTTTACTC  
CTAGTGTCTTTTCTAGAGTCCAAGGACGTTTCCGTCGGAGGATGACAG

+

FFFFFFFFFFFFFFFFFFFF:FFFFFFFFFFFFFFFFFFFFFFFFFFFFFFFFFFFFFFFFFFFFFFFFFFFFFFFF  
FFFFFFFFFFFF:FFFFFFFFFFFFFFFFFFFFFFFFFFFFFFFFFFFFFFFFFFFFFFFFFFFFFFFF

@A00721:190:HGJW7DSXY:4:1443:25509:34240\_1:N:0:TCTGCAAG+GCTGCACT  
TAAACATAAAATCCAGCGATTCTATTATGTCGCTAAAGCCTGTCCAGTTGTCGATGATGTTTCGGGCTG  
TGGGGATTAACCTCCCTCGTGAACTTACGACGATGTTCTCGCTCGCATTTCACAAGGATTACTAAGT  
CT

+

FFFFFFFFFFFFFFFFFFFFFFFF:FFFFFFFFFFFFFFFFFFFFFFFFFFFFFFFFFFFFFFFFFFFFFFFFFFFF  
FFFFFFFFFFFFFFFFFFFFFFFFFFFFFFFFFFFFFFFFFFFFFFFFFFFFFFFFFFFFFFFFFFFFFFFF:F  
FF

@A00721:190:HGJW7DSXY:4:2545:30879:35023\_2:N:0:TCTGCAAG+GCTGCACT  
ATTTTAGTAACTTAGCGAAAAGAAAGTACATGAGGATGACTTGGTCGAAAAATATCGCCGGGAACCT  
ATAATAGAGGCTCCTGATGACATTATTTCAAACATAACGATCTCAGT

+

F,FF,:F,F:F,,FFFFFFFF,FFFF,,:F,,,,F,,,F,F:F:FFFFFFFF,FFF,F,FFFF:F,  
,FFF,F,FF,,FF,,FFF,FFF,FF,,,FFF,,,:F::FFFFFF,F,F

@A00721:190:HGJW7DSXY:4:2155:23845:12132\_1:N:0:TCTGCAAG+GCTGCACT  
CGTCTCAGGAAGTGTCTCCACTGATTTCGGAATTAGAGAAAGACGACCTTCTTGTGGGACTGAGACCT  
CTGAATTTTCAGGGTGCCTGATGAGGACGTTGAAAGGGATAATTTCAACTCTGAGACTTCTAAGAGT  
GTT

+

FFFFFFFFFFFFFFFFFFFFFFFFFFFFFFFFFFFFFFFF:FFFFFFFFFFFFFFFFFFFFFFFF:FFFFFFFF  
FFFFFFFFFFFFFFFFFFFFFFFFFFFFFFFFFFFFFFFFFFFFFFFFFFFFFFFFFFFFFFFFFFFFFFFF  
FFF

@A00721:190:HGJW7DSXY:4:1357:15863:1438\_1:N:0:TCTGCAAG+GCTGCACT  
AATTAAGACAGACGTGAAAGTTATGATGAGTGATCGTATTAGAACAGCTGATTCTTATTGCATGAACG  
TCGCTGAGGTCAAACCTGTGGACGTTCTTTTCATCGACGAATTATTTCATGATTACGCTGGTCAGACC  
CTT

+

FFFFFFFFFFFF:FFFFFFFFFFFFFFFF:FFFFFFFFFFFFFFFFFFFFFFFF:FFFFFFFFFFFFFFFFFFFF  
FFFFFFFFFFFFFFFFFFFFFFFFFFFFFFFF,FFFFFFFFFFFFFFFFFFFFFFFFFFFFFFFFFFFFFFFF  
FFF

@A00721:190:HGJW7DSXY:4:2151:12933:28244\_1:N:0:TCTGCAAG+GCTGCACT  
TTTATGCGGATTATACCATAGTTACGTTGATTCCAATCAAATCGGATTCATCAATCGTATTGATCTC  
CAAGTCGCAAACACTACTTCAACATCAACGACATCATTCTTGATGAGTGTCGTTCTTATCGAAGTCTCAG  
T

+

:F,F,,FF:, ,FFFF,F,F:FFFF::F,F,,FFFF,,FFFFFFFF:FFFF,F,FF,FFF:FFFFFF

F

A

+

F

C

F

F

A

F

F

G

F

F

C

F

F

**G**

F

■

**A**

F

F

@A00721:190:HGJW7DSXY:4:1178:21169:31015\_2:N:0:TCTGCAAG+GCTGCACT  
GAAGTTTTAATGCTTAACAACAAATGATAGTGAATTTATACCTACAATCATTGGTTTTTCTAATAATGA  
TGACACTATTGTTTATGGATATGATGCTATTACTCATGATGGTTACGG

[illegible]

@A00721:190:HGJW7DSXY:4:1553:13268:8249\_1:N:0:TCTGCAAG+GCTGCACT  
TCGCGCATCACTTTTCACTAAGAATTGGTCCTACTTTTGGACAAGGCCAACTTCGTAATCTTCATGAG  
ATCGTTTCTTTCTTTATCTCTTTGGTTGTTAGGGATTTTGAGAGAGTGAAAGGCTTCAATTGTAGTGG  
TTT

[illegible]

@A00721:190:HGJW7DSXY:4:1576:10122:31328\_2:N:0:TCTGCAAG+GCTGCACT  
GTACCCAGTCAGTATACCTCTACGCAAAGATATTTTCATGAAACTACAGAGGAACGTACCGGATTACC  
TGTCTTTTCATATTATGAATGAACCTTCGGCCGCTCTCTTTGCTTCGAT

[illegible]

@A00721:190:HGJW7DSXY:4:1531:1081:19272\_1:N:0:TCTGCAAG+GCTGCACT  
TCAGAATGGGATTCTACGTAGTTTATGACTTTGGTGGTGGTACTTTGATACTTCTATCGTCTTACG  
TTACGGTAATTACTATAGTGTTATTTATTCTGGTGGTGATGATAATCTTGGAGGTCGTGACGTTGATG  
AAG

```

FFFFFFFFFFFFFFFF:FFFFFF:FFFFFFFFFFFFFFFFFFFFFFFF:FFFFFFFFFFFFFFFFFFFFFFFF
FFFFFFFFFFFFFF,FFF:FFFFFFFFFFFF:FFFFFFFFFFFFFFFFFFFFFFFFFFFFFFFFFFFFFFFF
FFF

```

@A00721:190:HGJW7DSXY:4:1666:9706:6934\_2:N:0:TCTGCAAG+GCTGCACT  
GTTCTTATTACGGCGCACTTCTTTACCCGCCACCACACAACCTTTCAAGTTTCACAACTGAAGGAGGAGG  
TTTCTGTTACTGGAAAACCTCGTCAATACTTTTTCAATAATATACGTC

```

FFFFFFFFFFFFFFFFFFFFFFFFFFFFFFFFFFFFFFFFFFFFFFFFFFFFFFFFFFFFFFFFFFFFFFFFFFFFFFFF
FFFFFFFF:FFFFFFFF:FFFFFFFFFFFFFFFFFFFFFFFFFFFFFFFFFFFFFFFFFFFFFFFFFFFFFFFF

```

@A00721:190:HGJW7DSXY:4:2135:5312:23124\_1:N:0:TCTGCAAG+GCTGCACT  
AGTGGCATTCAAGGCAAACTTACCCTGATTCCGGCCGGTGGTAGCTCATTTCTACCAGGGGCTATTAC  
TCTTGCTGAAACAGCTATTAAGCTGTTGAGCGGGTAATTACACCTAAACGAGCTCGATCTGCCATCG  
CTG

[illegible]

@A00721:190:HGJW7DSXY:4:2568:24939:11866\_1:N:0:TCTGCAAG+GCTGCACT  
ACGTGTGCTCTTCCGATCTATAATTTCAATCTTCTTAAAAAGAAGATAGAGAGTCATACTTTGGGCTA  
TCGTTCAAGTGCATGGGGTTGGATAGCCAATATTGAAGTGGACACCTCTGGTAGTATCGAAGTAAAGA  
TAA

[illegible]

@A00721:190:HGJW7DSXY:4:2434:9706:21934\_1:N:0:TCTGCAAG+GCTGCACT  
CAAAATCTTACCACTATCTACGAACCTAAAGTTCTGAAGACGTTGCTTGTGCTTCCTCCTTTAATGG  
CACTACCTCGGTACAATCTTACTTGGAACGAAGGCGACCTGTTCCGGAGTTTTTACGGGATCCGGAAT  
GTT

+  
FFFF:FFFFFFFFFFFFFFFFFFFFFFFF:F:FFFFFFFFFFFFFFFFFFFFFFFF: , FFFFFFF:FFFFFF  
FFFFFFFFFFFFFFFFFFFFFFFFFFFFFFFFFFFFFFFFFFFFFFFFFFFFFFFF:F, FFFFFFFFFFFFFFFF  
FFF  
@A00721:190:HGJW7DSXY:4:2605:5791:27492\_2:N:0:TCTGCAAG+GCTGCACT  
ACGTCAACGTTACCGAGTTTCGTTTCGTACCTTGATGCTGACTTTCGTCAATATGATTTGATCTGGT  
TGCTCAATTCTAAGCGTGTTCGCTTAGTGCGAGGCCTCTCTTCTACG  
+  
FFFFFFFFFFFFFFFFFFFFFFFFFFFFFFFFFFFFFFFFFFFFFFFFFFFFFFFFFFFFFFFF  
FFFFFFFFFFFFFFFFFFFFFFFFFFFFFFFF:F:FFFFFFFFFFFFFFFF  
@A00721:190:HGJW7DSXY:4:2675:26567:30091\_2:N:0:TCTGCAAG+GCTGCACT  
CCTTGGAATTTAATATAAAGAATCTTTACCAGGACTCCTACTACAGGAGGCAGTCTTCTGATCGTAAG  
AAGTTTATAAGGAACATATCCATTTGTTGTAATAGGGTCATCAACTTA  
+  
FFFFFFFFFFFFFFFFFFFFFFFFFFFFFFFFFFFFFFFFFFFFFFFFFFFFFFFFFFFFFFFF  
FFFFFFFFFFFFFFFFFFFFFFFFFFFFFFFFFFFFFFFFFFFFFFFFFFFFFFFF  
@A00721:190:HGJW7DSXY:4:2629:11080:24502\_2:N:0:TCTGCAAG+GCTGCACT  
AGTGGTAATACTGTCTTTCCAAGCTTACCTGTATCTTCAATGAAATTGGACTCTTCGATAGGGGACAT  
TTTATCGTGGGCTTTCGTAAAGGAAGATCTGTTATCGACGTTTATC  
+  
FFFFFFFFFFFFFFFFFFFFFFFFFFFFFFFFFFFFFFFFFFFFFFFFFFFFFFFFFFFFFFFF: FFFFFFF: ,  
FF: FFFFFFFFFFFFF:F: FFFF: FFFFFFFFF: FFFFFFFFF: FFFF  
@A00721:190:HGJW7DSXY:4:2307:10484:17581\_2:N:0:TCTGCAAG+GCTGCACT  
CTAAAGATTGAAGGAAAATTTATCCTCGTTTAACTTACTTAGACTTTTCTACGATACAAATGATAAC  
TTCTAATTTACGTTTGCTACTCAGAGCTGGTCCTCTCAGCAAAGGGAT  
+  
FFFFFFFFFFFFFFFFFFFFFFFFFFFFFFFFFFFFFFFF:F: FFFFFFFFFFFFFFFFFFFFFFFFFF  
FFFFFFFFFFFF, F: FFFFFFFFFFFFFFFFFFFFFFFFFF  
@A00721:190:HGJW7DSXY:4:1668:21576:22983\_1:N:0:TCTGCAAG+GCTGCACT  
GCATTTGATAATAATGACGAGACTTTCGTCATAATCGCTGCATATTACGGATTACACGGTACCAGCGC  
ATCTCGTGTGCGAGCCTCGACCCGATTATATGGTATTAACCTATAAAGGTGAGGAGACCATTTTCTTGC  
TGA  
+  
FFFFFFFFFFFFFFFFFFFFFFFFFFFFFFFFFFFFFFFFFFFFFFFFFFFFFFFFFFFFFFFF  
FFFFFFFFFFFFFF: FFFFFFFFFFFFFFFFFFFFFFFFFF  
FFF  
@A00721:190:HGJW7DSXY:4:1661:23167:14309\_2:N:0:TCTGCAAG+GCTGCACT  
CTTATAATAAATAAATAAATAATATTACTAATGGCAAATAGTGGAAGGCTCCAGTCAACACTAGTTC  
GAGTGCTGCTTTGGATTACGATGACGTGAGAATAGGTGAAGGGATAGT  
+  
FFFFFFFFFFFFFFFFFFFFFFFFFFFFFFFFFFFFFFFFFFFFFFFFFFFFFFFFFFFFFFFF  
FFFFFFFFFFF: FFFFFFFFFFFFFFFFFFFFFFFFFF  
@A00721:190:HGJW7DSXY:4:2133:31602:34835\_1:N:0:TCTGCAAG+GCTGCACT  
ACCAACATTAAGGCGGCGGCGACTAATCTTAAAGCTTCACCCAAAATGAAGGACACTTCGAAACTGAA  
TAATGATGCACTACAAACAAGTATCGCTAATCATCTGAAAAAGGCTCTAAAGGACACTATACAATATC  
CAG  
+  
FF: FFFFFFFFFFFFFFFFFFFFFFFFFF: FFFFFFFFFFFFFFFFFFFFFFFFFF  
FFFFFFFFFFFFFFFFFFFF: FFFFFFFFFFFFFFFFFFFFFFFFFF: FFFFFFFFFFFFFFFFFFFFFF  
FFF  
@A00721:190:HGJW7DSXY:4:2663:29197:9283\_2:N:0:TCTGCAAG+GCTGCACT  
TTCGCCATTGTGGTACGAATTGGTCCAACATTTACCACCAAATTCTTTTGATACAACCTCTAGCCTTCA  
AGTGGGGTATGCCTGCGGAATACGCTTGCTATTACCAGATTGGTTTCG  
+

FFFFFFFFFFFFFFFFFFFFFFFFFFFFFFFFFFFFFFFFFFFFFFFFFFFFFFFFFFFFFFFF:FFFFF:FFFFFFFFFFFFFF  
FFFFFFFFF,FFFFFFFFFFFFFFFFFFFFFFFFFFFFFFFFFFFFFFFF,FFF,FFFFFF  
@A00721:190:HGJW7DSXY:4:1254:5620:23062\_1:N:0:TCTGCAAG+GCTGCACT  
ATGTCAGAAGAAGCTATTCAAGCTTGTCTGTTTAAAGACTGCAGAGGCTGTCAAACAAGCCCAGACTCA  
AGGAGTCCAATCAAAGGTTTTGAATTTAGCTCAACTGGGGAGACGTGCTTAAATGGGTGATAAAAATT  
ATT  
+  
FFFFFFFFFFFFFFFFFFFFFFFFFFFFFFFFFFFFFFFFFFFFFFFFFFFFFFFFFFFFFFFF:FFFFFFFFFFFFFFFFFFFFFFFFFFFFFFFF  
FFFFFFFF:FFFFFFFF:FFFFF,FFFFFFFFFF:FF:FFFFFFFFF,FFF:FFFF:F:,FFFFFFFFFFFFFF  
FFF  
@A00721:190:HGJW7DSXY:4:2532:26449:4304\_1:N:0:TCTGCAAG+GCTGCACT  
ATCCTTTAAGGACTATGTTGACTGACGAAGATTTTCCACAGATTTGTCTACGTTGCAGATCGCCACT  
CCAAACACTATATACATTATAAAATATAAAAATAAGGGAGTCATAACTTTTGTACCAAATTCTTGGC  
TTT  
+  
FFFF:FFFFFFFFFFFFFFFFFFFFFFFFFFFFFFFFFFFFFFFFFFFFFFFFFFFFFFFFFFFFFFFF:FFFFFFFFFFFFFFFFFFFFFFFF  
FFFFFFFFFFFFFFFFFFFFFFFFFFFFFFFFFFFFFFFFFFFFFFFFFFFFFFFFFFFFFFFFFFFFFFFFFFFFFFFFFFFFFFFF  
FFF  
@A00721:190:HGJW7DSXY:4:2228:12038:32174\_1:N:0:TCTGCAAG+GCTGCACT  
ATTACTTTAACGATCTCTCGGTCATTTACTCTGTACTTGATCTACGTCGTTTAACTGTGGAACAACC  
TTTACTTAGAATGACTCTATCTTTTCAGACACTTCTTATATTATTACAATAGTTAATATCATATTAG  
TAA  
+  
FFFFF:FFFFFFFFFFFFFFFFFFFFFFFFFFFFFFFFFFFFFFFFFFFFFFFFFFFFFFFFFFFFFFFF:FFFFFFFFFFFFFFFFFFFFFFFF  
FFFFFFFFFFFFFFFFFFFFFFFFFFFFFFFFFFFFFFFFFFFFFFFFFFFFFFFFFFFFFFFFFFFFFFFFFFFFFFFFFFFFFFFF  
FFF  
@A00721:190:HGJW7DSXY:4:1256:20473:18161\_2:N:0:TCTGCAAG+GCTGCACT  
AGCTAATAGATTAATAAAGGATGAGTACGAAAACCAACTCTTCGTTACGAGACCTGATGGTAGAATAG  
ATTTAGTCTCTACACCCATCTCAACGAGGATAAAGCGAGTTTTCCGTC  
+  
FFFF,FFFFFFFFFFFFFFFFF:FFFFFFFFFFFFFFFFFFFFFFFFFFFFFFFFFFFFFFFF:FFFFFFFFFFFFFFFFFFFFFFFF  
FFFFFFFFFFFFF:FFFFF:FFFFFFFFFFFFFFFFFFFFFFFF:FFFFFFFFFF:FF  
@A00721:190:HGJW7DSXY:4:2537:29839:27398\_2:N:0:TCTGCAAG+GCTGCACT  
TCATCCGCAAACGACTCGAAACCGAGACGCCGTAGATCAAAGTCCCTTCTAACTTTAGATTATGAATC  
CTGCCTTTACTCATTTTATAGCAGAGATCGGAAGAGCGTCGTGTAGGG  
+  
FFFFFFFFFFFFFFFFFFFFFFFFFFFFFFFFFFFFFFFFFFFFFFFFFFFFFFFFFFFFFFFF:FFFFFFFF  
FFFFFFFFFFFFFFFFFFFFFFFFFFFFFFFFFFFFFFFFFFFFFFFFFFFFFFFFFFFFFFFF  
@A00721:190:HGJW7DSXY:4:1270:26729:11271\_2:N:0:TCTGCAAG+GCTGCACT  
GATTGTTATCAATTTAAATACATTACTGTTTCAAATCATCTTTACTCACAGACTCCGAAAATGGTTTC  
AAATGAGGTCAAAGCTCTATTTATTAAACGAACATTATCCGATTCTT  
+  
FFFFFFFFFFFFFFFFFFFFFFFFFFFFFFFFFFFFFFFFFFFFFFFFFFFFFFFF:FFF:FFFFFFFF:FFFFFFFFFFFFFFFF:FFFFF:  
FFFFFFFFFFFFFFFFFFFFFFFFFFFFFFFF:FFF:F,FFFFFFFFFFFFFFFF:FFF  
@A00721:190:HGJW7DSXY:4:1249:21052:16344\_2:N:0:TCTGCAAG+GCTGCACT  
TTTCGACAAATTTTAGAACTTTATTTAGAACTCTCTCCGATCACCTTGGTGTGATCTCCCGGAGGAT  
CTTTTCAATAAGATGTATGATGATAATCTACTATTTTAAATAGTGAT  
+  
FFFFFFFF:FF:FFFFFFFF:F:FFFFFFFFFFFFFFFF:FFFFFFFFFF:FFFFFFFFFFFFFFFFFFFFFFFF  
FFFFFFFFFFFFFFFFFFFFFFFFFFFFFFFFFFFFFFFFFFFFFFFFFFFFFFFF:FFFF  
@A00721:190:HGJW7DSXY:4:2467:18674:31735\_1:N:0:TCTGCAAG+GCTGCACT  
TTTATCAAAGATTTGGCTTGGTCTATTTACCGCAAAAAGTTGGAAGAGGTCTATGATATTTATTTTAC  
TTATACTTTAAATAGCACCGATTATAACTTGACTGTTGATAATATTACAATAGCTCTTCTCAGAAGA  
TTA

+  
FFFFFFFFFFFFFFFF:FFFFFF:FFFF:FFFFFFFFFFFFFFFFFFFFFFFF,FFFFFFFFFFFFFFFF  
FFFFFFFFFFFFFFFFFFFFFFFFFFFFFFFFFFFFFFFFFFFFFFFF,FFFFFFFFFFFFFFFF  
FFF  
@A00721:190:HGJW7DSXY:4:2534:17978:2284\_2:N:0:TCTGCAAG+GCTGCACT  
CGTCGGTAGCATTGATTTACTTTTACCGTTAGAACTGAAAAAGATTCTTTTCGAAAAGAAACCTATAA  
GTTACAAACGATTCTTCGACTATATTAAGAAATAAAAAATACTTCAAG  
+  
FFFFFFFFFFFFFFFFFFFFFFFFFFFFFFFFFFFFFFFFFFFFFFFFFFFFFFFFFFFFFFFF  
FFFFFFFFFFFFFFFFFFFFFFFFFFFFFFFFFFFFFFFF:FFFFFF  
@A00721:190:HGJW7DSXY:4:1122:26539:8876\_1:N:0:TCTGCAAG+GCTGCACT  
TTACATTTTAAATGGTATGGTATAATGTGTCTTACAAATAGAACCTTCACTCTCGGTAATGAGAGTGT  
ATTCTTAATATTCTAGTAACCGCTATGTGGGCATTACTAGGATTTATCACACTCCTAAATTTGATAG  
CAA  
+  
FFFFFFFFF:FFFFFFFFFFFFFFFFFFFFFFFFFFFFFFFFFFFFFFFF,FFFFFFFFFFFFFFFF  
FFFFFFFFFFFFFFFFFFFFFFFFFFFFFFFFFFFFFFFFFFFFFFFFFFFFFFFFFFFFFFFF  
FFF  
@A00721:190:HGJW7DSXY:4:1362:6750:2597\_1:N:0:TCTGCAAG+GCTGCACT  
GAGTACTTAATTCAATAGCTTTAGTATTATTTACTATCGCCTTTATTGAAAATTGTATAAGAGTTAAT  
TGCTTACACAAAAGTGACGCGCAAGGAATCTTAATTGATTGAAGCTAGGCGTTGGGGAGAATGAAGT  
GCC  
+  
FFF:FFFFFFFF:FFFFFFFFFFFFFFFFFFFFFFFFFFFFFFFFFFFFFFFFFFFFFFFF  
:FFFFFFFFFFFFFFFFFFFFFFFFFFFFFFFF,FFFFFFFFFFFFFFFFFFFFFFFF  
FFF  
@A00721:190:HGJW7DSXY:4:1446:2691:36182\_1:N:0:TCTGCAAG+GCTGCACT  
TAGGGTCAAACCTACTACCGCCGGTCGGCAGATCGGCACCACTGGTCTCTACGTTACAGGGACCCGCTG  
TGCAGAATAACCTTCCCAAATCTAGATCTGCACAGAAGAAGGCTGAAGGTCGTTACCGGACGACCACT  
CAA  
+  
FFFFFFFFF,FFFFFF,FFFFFFFFFFFFFF:FFFFFFFFFFFFFFFFFFFFFFFF  
FFFFFFFFFFFFFFFFFFFFFFFF:FFFFFFFFFFFFFFFFFFFFFFFF  
FFF  
@A00721:190:HGJW7DSXY:4:2260:17969:30044\_1:N:0:TCTGCAAG+GCTGCACT  
CATCTCTGTGGGAAGTGAAGGAGTACCTCAGTCAAAAGTCACATTCACTACTCCCATGCCAATCAATG  
ATGTGACTATACAGTTCGGCCATTTCAAGAGTGGTCAATACGTCGTGGGAGGTACTGAAGCCTTCCCC  
TCC  
+  
FFFFFFFFFFFFFFFFFFFFFFFFFFFFFFFFFFFFFFFF:FFFFFFFFFFFFFFFF  
FFFFFFFFFFFFFFFFFFFFFFFF:FFFFFFFFFFFFFFFF  
FFF  
@A00721:190:HGJW7DSXY:4:2535:32099:24236\_2:N:0:TCTGCAAG+GCTGCACT  
GCCAATCAATAGTTCTTCTGACCAGAATGAAAAGGGGTTTACCAGGGTAGTCTCTAAGTCTACCAGGA  
AGAGGGGAAATGTCCCCAAAACCTGAGAAGAATAAAGGGAAAGGTCCAT  
+  
FFFFFFFFFFFFFFFFFFFFFFFFFFFFFFFFFFFFFFFF:FFFFFFF  
FFFFFFFFFFFFFFFFFFFFFFFFFFFFFFFF  
@A00721:190:HGJW7DSXY:4:1472:11822:31892\_1:N:0:TCTGCAAG+GCTGCACT  
AAATCTGCACGGCCAAAGAGGCCGCTGCTACGAAGTCGCTGAAGGCGGCTTGGGTCAATTAAGGGTAG  
CTGTAAAGTTGCGCCTGCCGACCCCATCTTTGAGACCAAGACTCTCTACAGTAGGTTCTGTCCTACTA  
TGA  
+  
FFFFFFFFF:FFFFFFF:FFFFFFFFFFFFFFFF:FFFFFFFFF:FFFFFFFFFFFFFFFF:FFFF





FFFFFFFFFFFFFFFFFFFFFFFFFFFFFFFFFFFFFFFFFFFFFFFFFFFFFFFFFFFFFFFFFFFFFFFF  
FFF

@A00721:190:HGJW7DSXY:4:2406:18783:34178\_2:N:0:TCTGCAAG+GCTGCACT  
GCGATATTCGTTTTCATATCCAAACTCCTTGAATGGAGTACATATTTGCAACCCTATTCTTGATGTG  
AAAGATGCATCGAGGTATACGTCTAGGAACATTGATTGGGAACGTACC

+  
FFFFFFFFFFFFFFFFFFFFFFFFFFFFFFFFFFFFFFFFFFFFFFFFFFFFFFFFFFFFFFFFFFFFFFF,FFFFFFFF,FFFF  
F,FFFFFFFFFFFFFFFFFFFF:FFFFFFFF:FFFFFFFFFFFFFFFFFFFFFFFF

@A00721:190:HGJW7DSXY:4:2403:32316:19257\_2:N:0:TCTGCAAG+GCTGCACT  
TACAAGAACGCTTTGGATTGTGACCATAAAGCCTCAGTTGCGATAGCTGTAGAGGTATACGATATCTC  
TCTTGATGATGTAGCCACTATAATGCTTAAGAGAGAGATTGATGTATG

+  
FFFFFFFFFFFFFFFFFFFFFFFFFFFFFFFFFFFFFFFFFFFFFFFFFFFFFFFFFFFFFFFFFFFFFFF  
FFFFFFFFFFFFFFFFFFFF:FFFFFFFF,FFF:::FFFFFFFFFFFFFF:FF

@A00721:190:HGJW7DSXY:4:2439:16550:4257\_1:N:0:TCTGCAAG+GCTGCACT  
CCAATCTCATCGCTATACGCATACCTGATTGGAAGAAGCGAGGTTCTTCTCAATAAAAATTTTTCT  
CAAGAGATTATGGTTGATAAAGTTTTCTTCATAAGGGCTATTCAGTACGTCATGGGGATCACTTCTTC  
GGT

+  
FFFFFFFFFFFFF:FFFFFFFFFFFFFFFFFFFFFFFFFFFFFFFFFFFFFFFFFFFFFFFFFFFFFFFFFFFFF  
FFFFFFFFFFFFFFFFFFFFFFFFFFFFFFFFFFFFFFFFFFFFFFFFFFFFFFFFFFFFFFFFFFFFFFFFFFFFF  
FFF

@A00721:190:HGJW7DSXY:4:1407:24334:30358\_1:N:0:TCTGCAAG+GCTGCACT  
CGAATATGTTACGACATGGCTTCGTAACAACAGTGCGAGGATTGTCATCTCGGGGAAAGTGATTACCC  
AAGATGTTTCATATAGATACGAGATACCTAGAGAAGGTCGCAGCGATCTTACTCGTTATCGGAGCTAAG  
AAG

+  
:FF::FFFFFFFFFFFFFFFFFFFFFFFFFFFFFFFFFFFFFFFFFFFFFFFFFFFFFFFFFFFFFFFFFFFFF  
FFFFFFFFFFFFFFFFFFFFFFFFFFFFFFFFFFFFFFFFFFFFFFFFFFFFFFFFFFFFFFFFFFFFFFFFFFFFF:FFF  
FFF

@A00721:190:HGJW7DSXY:4:1431:16812:26099\_2:N:0:TCTGCAAG+GCTGCACT  
TAGTACCGGAGGTGATCTCTCTGCTTCTGCGTTACTGAGAGAAAAGATTCAGGACGCCTACGGTGACT  
TTATGGACAAGATGCAAGTTCTTGGGAAATACTTGTTTTCCCTTTTTTAG

+  
FFFFFFFFFFFFFFFFFFFFFFFFFFFFFFFFFFFFFFFFFFFFFFFFFFFFFFFFFFFFFFFFFFFFFFF:FFFFFFFFFFFFFFF,F  
FFFFFFFFFFFFFFFFFFFFFFFFFFFFFFFFFFFFFFFFFFFFFFFFFFFFFFFFFFFFFFFFFFFFF,FFFFFFFF

@A00721:190:HGJW7DSXY:4:2345:32805:2942\_2:N:0:TCTGCAAG+GCTGCACT  
AACTACGGTCCTTATCAAAGAAAATGGTGAACCGGTCTCTAAATCTTTTGAGATTGAGAAGATTGAAG  
AACACGTCAAGAAGTCGCTCGGCGTTGTTCTTGAAAACCAAGTTAAGA

+  
FFFFFFFFFFFFFFFFFFFFF:,FFFF:FFFF,F:FFFFFFFFFFFFFFFFFFFFF:F:FFF:FFFF,FFFFFFF  
:FFFFFFFFFFFFFFFFFFFFFFFFFFFFFFFFFFFFFFFFFFFFF,FF:,F:F:FFFFF

@A00721:190:HGJW7DSXY:4:2370:8504:23109\_2:N:0:TCTGCAAG+GCTGCACT  
GGTTCAGCTACGAGAGGTGATCCCGGATGTGGATTGAAGGCTGGCTCTAAGGGAGACTCCTTCTTTTT  
GAATGTTGTAAAGAATTGGGTTGAGAAGTGTGCTTTACAAGGAGTTAG

+  
FFFFFFFFFFFFFFFFFFFFFFFFFFFFFFFFFFFFFFFFFFFFFFFFFFFFFFFFFFFFFFFFFFFFFFF:FFF  
FFFFFFFFFFFFFFF:FF,FFFFFFFFFFFFFFFFFFFFFFFFFFFFFFFFFFFFF

@A00721:190:HGJW7DSXY:4:2464:4670:13557\_2:N:0:TCTGCAAG+GCTGCACT  
TGCGGATGGGTCTACTGATGTTTTCTACAGAGTGCAGTCGTTCAACACTTATCACCCTTTTGAAA  
GGAAAATAATTGGTGATGAAAATACGTATGTGCGGTGGGGTTCTCAAGG

+  
FFFFFFFFFFFFFFFFFFFFFFFFFFFFFFFFFFFFFFFFFFFFFFFFFFFFFFFFFFFFFFFFFFFFFFF:F:FFFFFFFFF:FFFF:F:  
FFFFFFF:F:F:FF:F:F:FFFFFFFFF::FF:FFF:FFFFFFF:F:FF:F

@A00721:190:HGJW7DSXY:4:2602:31629:13213\_2:N:0:TCTGCAAG+GCTGCACT  
TAAAACTTCAGAGTCTCTTGGAAGTCCAGGTAGCTAATGTTCTTGCAATAGCCACAGACTTTCTGGG  
AAAAGAGACCTCTGTTGTAGAGGAGTTGAGAGAATTACTCAGATTCAA

+

FFFFFFFFFFFFFFFFFFFFFFFFFFFFFFFFFFFFFFFFFFFFFFFFFFFFFFFFFFFFFFFFFFFFFFFF  
FFFFFFFFFFFFFFFFFFFFFFFFFFFFFFFFFFFFFFFFFFFFFFFFFFFFFFFFFFFFFFFFFFFFFFFF

@A00721:190:HGJW7DSXY:4:2532:7862:13009\_2:N:0:TCTGCAAG+GCTGCACT  
AATACCTTCCACTGAGTTCATCACCCAGAGTTTCGACGTCGCGGAAAACGATGAAGATTTCCACACTG  
TTCGAGAATCTTCTGATGCTGAATTTGAGGAAAATTTTTCGGAAGTTT

+

FFFFFFFFFFFFFFFFFFFFFFFFFFFFFFFFFFFFFFFFFFFFFFFFFFFFFFFFFFFFFFFFFFFFFFFF  
FFF:FFFFFFFFFFFFFFFFFFFFFFFFFFFFFFFFFFFFFFFFFFFFFFFFFFFFFFFFFFFFFFFF

@A00721:190:HGJW7DSXY:4:2506:18276:20243\_2:N:0:TCTGCAAG+GCTGCACT  
GTATGTGTACGCTACACTCGAAATATGGGCCCTCATAAGGAAGTATAGTTGGCGTCTTGTCTGCTTAC  
GTCATTACAGTCTGGAAGTTAGATCATTTGTTTCAGGAAGATCTCTACA

+

F:FFFFF:FFFFFFFFFFFF:FFFFFFFFFFFFFFFFFFFFFFFFFFFFFFFFFFFFFFFF:FFFFFFFFF:,FFFFFFFFFFFF  
FF,FFFFFFFF:FF,F:FFFFFFFFFFFF:F:FF:FFFF:FFF,FFFFFFFF:F

@A00721:190:HGJW7DSXY:4:1372:30454:7545\_2:N:0:TCTGCAAG+GCTGCACT  
TAGAGTTCTTCTAACCAGGACTGATGGTGAGATTCTTTTACCTTTTGAGGTCCAGGAACCTTTACTC  
CTAGTGTCTTTTCTAGAGTCCAAGGACGTTTCCGTCGGAGGATGACAG

+

FFFFFFFFFFFFFFFFFFFFFFFFFFFFFFFFFFFFFFFFFFFFFFFFFFFFFFFFFFFFFFFFFFFFFFFF  
FFFFFFFFFFFFFFFFFFFFFFFFFFFFFFFFFFFFFFFFFFFFFFFFFFFFFFFFFFFFFFFFFFFFFFFF

@A00721:190:HGJW7DSXY:4:1632:32786:20134\_2:N:0:TCTGCAAG+GCTGCACT  
ACATAAAATCCAGCGATTCTATTATGTCGCTAAAGCCTGTCCAGTTGTCGATGATGTTTCGGGCTGTGG  
GGATTAACCTCCCTCGTGAAACTTACGACGATGTTCTCGCTCGCATTT

+

:FFFFFFFFFFFFFFFFF:,FFFFFFFFFFFFFFFFFFFFFFFFFFFFFFFFFFFFFFFF:FFFFFFFFFFFFFFFF  
FFFFFFFFFFFFFFFFFFFFFFFFFFFFFFFFFFFFFFFFFFFFFFFFFFFFFFFFFFFFFFFFFFFFFFFF

@A00721:190:HGJW7DSXY:4:1335:10719:17143\_2:N:0:TCTGCAAG+GCTGCACT  
TAAGTCTGAGATCTGCCACTTCTAATTTTAGGAAACGTCGCGGAAAAGAAAGTTCATGAGGATGTCTTG  
GTCGAAAAATATCGCCGGAACCTTCTAATAGAGGATCCTGATGACATT

+

FFFFFFFFFFFFFFFFFFFFFFFFFFFFFFFFFFFFFFFFFFFFFFFFFFFFFFFFFFFFFFFFFFFFFFFF  
FFFFFFFFFFFFFFFFFFFFFFFFFFFFFFFFFFFFFFFFFFFFFFFFFFFFFFFFFFFFFFFFFFFFFFFF

@A00721:190:HGJW7DSXY:4:2630:3649:10692\_1:N:0:TCTGCAAG+GCTGCACT  
TACCGATCTCAGTTCTACCACAGAAACCGTCTCAGGAAGTGTCTCCACTGATTCGGAATTAGAGAAAG  
ACGACCTTCTTGTGGGGACTGAGACCTCTGAATTTTCAGGGTGCCCTGATGAGGACGTTGAAAGGGAT  
AAT

+

FFFF:FFFF,FFFFFF:F:FFFF,FF,FFFFFFFFFFFFFFFFFFFFFFFFFFFFFFFF:FFFFFFF:FF::FF  
FFFFFFFFFFFFFFF:FFF:FFFFFF:FFFFFFFFFFFFFFFFFFFFFFFFFFFFFFFFFFFFFFFF  
F:F

@A00721:190:HGJW7DSXY:4:1405:18050:12994\_2:N:0:TCTGCAAG+GCTGCACT  
TCAAAAGACCAGAAACGTAACAAGAAGATAAAGGTAGGAAGGGGAGAAAACAGAACAAGCGAGCGGT  
TGAAGAGAAAACCTGATATGGTTGCGGCTGATCGTACCCCAATTCTCTGC

+

FFFFFFFFFFFFFFFFFFFFFFFFFFFFFFFFFFFFFFFFFFFFFFFFFFFFFFFFFFFFFFFFFFFFFFFF  
FFFFFFFFFFFFFFFFFFFFFFFFFFFFFFFFFFFFFFFFFFFFFFFFFFFFFFFFFFFFFFFFFFFFFFFF

@A00721:190:HGJW7DSXY:4:1636:23610:7122\_1:N:0:TCTGCAAG+GCTGCACT  
AATTAAGACAGACGTGAAAGTTATGATGAGTGATCGTATTAGAACAGCTGATTCTTATTGCATGAACG  
TCGCTGAGGTCAAACCTGTGGACGTTCTTTTCATCGACGAATTATTTCATGATTCACGCTGGTCAGACC  
CTT

[illegible]

@A00721:190:HGJW7DSXY:4:1329:23746:20541\_1:N:0:TCTGCAAG+GCTGCACT  
TCAGTTGATTAAGACTCTTCCGAAAGGCGAACTTTGGGAATTTGAAGCTCAGGGTGAAGCACAACGTT  
TGACCGTGACGAAGTGTGGTGTCTTGATCTACGTTACGGATATACTCTCTTTGAGTTCACTCGTAAG  
GAC

+

FFFFFFFFFFFFFFFFFFFFFFFFFFFFFFFFFFFFFFFFFFFFFFFFFFFFFFFFFFFFFFFFFFFFFFFF  
FFFFFFFFFFFFFFFFFFFFFFFFFFFFFFFFFFFFFFFFFFFFFFFFFFFFFFFFFFFFFFFFFFFFFFFF  
FFF

@A00721:190:HGJW7DSXY:4:1372:6497:34100\_1:N:0:TCTGCAAG+GCTGCACT  
CGGCATACGAGATCTTGACAGAGTGACTGGAGTTCAGACGTGTGCTCTTCCGATCTCAGAGGGCAGCA  
GCATGACCATAATTGGTATTGACTTTGGTACCACCTTTTCTACTGTCTGTCTCGCCTCTTCGAATGAA  
GTT

+

F::FFFFFF,FFFF,FFFFFFFFFFFFFFFFFFFFFFFFFFFFFFFFFFFFFFFFFFFFFFFFFFFFFFF  
FFFFFFFFFFFF:FFFFFFFFFFFFFFFFFFFFFFFFFFFFFFFFFFFFFFFFFFFFFFFFFFFFFFFFF  
FFF

@A00721:190:HGJW7DSXY:4:2361:31494:6183\_2:N:0:TCTGCAAG+GCTGCACT  
CTACAATCATTGGTTTTCTAATAATGATGACACTATTGTTTATGGATATGATGCTATTACTCATGAT  
GGTTACGGTCAGGGAGGATTCTCAGTTTACAAGGACCTTAAGCGATGG

+

FFFFFFFFFFFFFFFFFFFFFFFFFFFFFFFFFFFFFFFFFFFFFFFFFFFFFFFFFFFFFFFFFFFFFFF:FFFFFFFFFFFFFFF  
FFFFF:FFFFFFFFFFFFFFFFFFFFFFFFFFFFFFFFFFFFFFFFFFFFFFFFFFFFFFFFFFFFFFFFF

@A00721:190:HGJW7DSXY:4:2468:31394:15749\_1:N:0:TCTGCAAG+GCTGCACT  
TCGGCGATCACTTTTCACTAAGAATTGGTCCTACTTTTGGACAAGGCCAACTTCGTAATCTTCATGAG  
ATCGTTTCTTTCTTTATCTCTTTGGTTGTTAGGGATTTTGAGAGAGTGAAAGGCTTCAATTGTAGTGG  
TTT

+

FFFFFFFFFFFFFFFFFFFFFFFFFFFFFFFFFFFFFFFFFFFFFFFFFFFFFFFFFFFFFFFFFFFFFFF:FFFFFFFFFFFFFFFFF  
FFFFFFFFFFFFFFFFFFFFFFFFFFFFFFFFFFFFFFFFFFFFFFFFFFFFFFFFFFFFFFFFFFFFFFF  
FFF

@A00721:190:HGJW7DSXY:4:1634:26115:6762\_2:N:0:TCTGCAAG+GCTGCACT  
GTACCCAGTCAGTATACCTCTACGCAAAGATATTTTCATGAAACTACAGAGGAACGTACCGGATTACC  
TGTCTTTTCATATTATGAATGAACCTTCGGCCGCTCTCTTTGCTTCGAT

+

FFFFFF:FFFFFFFFFFFFFFFFFFFFFFFFFFFFFFFFFFFFFFFFFFFFFFFFFFFFFFFFFFFFFFF:FFFFFFFFFFFFFFF  
FFFFFFFFF:FFFFFFFFF:FFFFFFFFFFFFFFFFFFFFFFFFFFFFFFFFFFFFFFFFF::FFFF

@A00721:190:HGJW7DSXY:4:1543:20057:8202\_1:N:0:TCTGCAAG+GCTGCACT  
TCAGAATGGGATTCCTACGTAGTTTATGACTTTGGTGGTGGTACTTTCGATACTTCTATCGTCTTACG  
TTACGGTAATTACTATAGTGTTATTTATTCTGGTGGTGGTATGATAATCTTGGAGGTCGTGACGTTGATG  
AAG

+

FF,FFFFFFFFF:FFFFFFFFFFFFFFFFFFFFFFFFFFFFFFFFFFFFFFFFFFFFFFFFFFFFFFFFF,FFFF:FFFFFFFFFFFFFFF  
FFFFFFFFFFFFFFFFFFFFFFFFFFFFFFFFFFFFFFFFFFFFFFFFFFFFFFFFFFFFFFFFFFFFFFF:FFFFFFFFFFFFFFF  
FFF

@A00721:190:HGJW7DSXY:4:2129:25066:29716\_2:N:0:TCTGCAAG+GCTGCACT  
GTTCTTATTACGGCGCACTTCTTTACCCGCCACCACAACTTTCAGTTTCACAACTGAAGGAGGAGG  
TTTCTGTTACTGGAAAACCTCGTCAATACTTTTCAATAATATACGTC

+

FFFFFFFFFFFFFFFFFFFFFFFFFFFFFFFFFFFFFFFFFFFFFFFFFFFFFFFFFFFFFFFFFFFFFFF  
FFFFFFFFFFFFFFFFFFFFFFFFFFFFFFFFFFFFFFFFFFFFFFFFFFFFFFFFFFFFFFFFFFFFFFF:FFFFF

@A00721:190:HGJW7DSXY:4:2328:1732:13823\_1:N:0:TCTGCAAG+GCTGCACT  
AGTGGCATTCAAGGCAAACCTTACCCTGATTCCGGCCGGTGGTAGCTCATTTCTACCAGGGGCTATTAC  
TCTTGCTGAAACAGCTATTAAAGCTGTTGAGCGGGTAATTACACCTAAACGAGCTCGATCTGCCATCG  
CTG

[illegible]

@A00721:190:HGJW7DSXY:4:2232:30915:10598\_1:N:0:TCTGCAAG+GCTGCACT  
ACCAACATTAAGGCGGCGGCTACTAATCTTAAAGCTTCACCCAAAATGAAGGACACTTCGAAACTGAA  
TAATGATGCACTACAAACAAGTATCGCTAATCATCTGAAAAAGGCTCTAAAGGACACTATACAATATC  
CAG

+

FFFFF,FFFFFFFFF:,F,F,FF,FFF:FFF,,F:FFFF:FF,FF:F:FFF:FFFFF,FFFFF:FF  
FF:F,FFF,F:FF,F:FF:,F,FFFFFFFFF:FFFFFFFFF:FFFFFFFFF:FFFFFFFFF  
FFF

@A00721:190:HGJW7DSXY:4:1214:8323:34632\_1:N:0:TCTGCAAG+GCTGCACT  
CGCCATTGTGGTACGAATTGGTCCAACATTTACCACCAAATCTTTTGATACAACCTAGCCTTCAAG  
TGGGGTATGCCTGCGGAATACGCTTGCTATTACCAGATTGGTTCGAACCCGTTGATGCTATGTCAGA  
AGA

+

FFFFFFFFFFFFFFFFFFFFFFFFFFFFFFFFFFFFFFFFFFFFFFFFFFFFFFFFFFFFFFFFFFFFF  
FFFFFFFFFFFFFFFFFFFFFFFFFFFFFFFFFFFFFFFFFFFFFFFFFFFFFFFFFFFFFFFFFFFFF  
FFF

@A00721:190:HGJW7DSXY:4:1172:20175:3333\_2:N:0:TCTGCAAG+GCTGCACT  
TGTCGTTTAAAGACTGCAGAGGCTGTCAAACAAGCCAGACTCAAGGAGTCCAATCAAAGTTTTGAA  
TTAGCTCAACTGGGGAGACGTGCTTAAATGGGTGATAAAAATTATTT

+

FFFFFFFFFFFFFFFFFFFFFFFFFFFFFFFFFFFFFFFFFFFFFFFFFFFFFFFFFFFFFFFFFFFFF:FFFF  
FFFFFFFFFFFFFFFFFFFFFFFFFFFFFFFFFFFFFFFFFFFFFFFFFFFFFFFFFFFFFFFFFFFFF  
FFF

@A00721:190:HGJW7DSXY:4:1354:7600:17378\_2:N:0:TCTGCAAG+GCTGCACT  
AAGGACTATGTTGACTGACGAAGATTTTCCACAGATTTGTCTACGTTGCAGATCGCCACTCCAAACA  
CTATATACATTATAAAATATAAAAATAAGGGAGTCATAACTTTTGTTA

+

FFFFFFFFFFFFFFFFFFFFFFFFFFFFFFFFFFFFFFFFFFFFFFFFFFFFFFFFFFFFFFFFFFFFF  
FFFFFFFF:FFFFFFFFFFFF:FFFF:FFFFFFFFFFFFFFFFFFFFFFFFFFFFF

@A00721:190:HGJW7DSXY:4:1359:11749:31203\_2:N:0:TCTGCAAG+GCTGCACT  
GAAGTCTCTGATTTTATTAATCATTACTTTAACGATCTCTCGGTCATTTACTCTGTACTTGATCTACG  
TCGTTTAACTGTCGGAACAACCTTTACTTAGAATGACTCTATCTTTTC

+

FFFFFFFFFFFFFFFFFFFFFFFFFFFFFFFFFFFFFFFFFFFFFFFFFFFFFFFFFFFFFFFFFFFFF:FFFFF:FFFFFFFFFFFFFFFFFFFFFFFFFFFFF  
FFFFFFFFFFFFFFFFFFFFFFFFFFFFF:FFFFFFFFFFFFFFFFFFFFFFFFFFFFF

@A00721:190:HGJW7DSXY:4:1545:9751:30874\_2:N:0:TCTGCAAG+GCTGCACT  
AGCTAATAGATTAATAAAGGATGAGTACGAAAACCAACTCTTCGTTACGAGACCTGATGGTAGAATAG  
ATTTAGTCTCTACACCCATCTCAACGAGGATAAAGCGAGTTTTCCGTC

+

FFFFFFFFFFFFFFFFFFFFFFFFFFFFFFFFFFFFFFFFFFFFFFFFFFFFFFFFFFFFFFFFFFFFF,FFFFFFFFF:  
FFFFFFFFFFFFFFFFFFFFFFFFFFFFF:FFFFFFFFFFFFFFFFFFFF:FFFFF

@A00721:190:HGJW7DSXY:4:2614:16577:2988\_1:N:0:TCTGCAAG+GCTGCACT  
CATCCGCAAACGACTCGAAACCGAGACGCCGTAGATCAAAGTCCCTTCTAACTTTAGATTATGAATCC  
TGCCTTTACTCATTTTATAGCAGTTATTTATGTTGTACTTTTTATAATTTATAACCTT

+

FF,,F,,F,:FFFFFF:,F:FFF:F:FF,:FFFFFF,:F::FF,FFF:,F,FFF:FFFFFFFF::FF,  
FFFFFFFF:FF:F:FFFF:FFFFFFFFF:FFFFF,:FFFFFFFFFFFFFFFFF:,FFFF

@A00721:190:HGJW7DSXY:4:1324:30346:28181\_2:N:0:TCTGCAAG+GCTGCACT  
GATTGTTATCAATTTAAATACATTACTGTTTCAAATCATCTTTACTCACAGACTCCGAAAATGGTTTC  
AAATGAGGTCAAAGCTCTATTTATTAACGAACCTATTATCCGATTCTT

+

FF,FFFFFFFFFFFFFFFFFFFFFFFFFFFFFFFFFFFFFFFFFFFFFFFFFFFFFFFFFFFFFFFFFFFFF  
FFFFFFFFFFFFFFFFFFFFFFFFFFFFF:FFFF,FFFFFF:FFFFFFF

@A00721:190:HGJW7DSXY:4:1567:9824:32189\_2:N:0:TCTGCAAG+GCTGCACT  
TTTCGACAAATTTTAGAACTTTATTTCAGAACTCTCTCCGATCACCTTGGTGTGATCTCCCGGAGGAT

CTTTTCAATAAGATGTATGATGATAATCTACTATTTTTTAAATAGTGAT

+

FFFFFFFFFFFFFFFFFFFFFFFFFFFFFFFFFFFFFFFFFFFFFFFFFFFFFFFFFFFFFFFFFFFFFFFF  
FFFFFFFFFFFFFFFFFFFFFFFFFFFFFFFFFFFFFFFFFFFFFFFFFFFFFFFFFFFFFFFF

@A00721:190:HGJW7DSXY:4:2532:30743:27367\_1:N:0:TCTGCAAG+GCTGCACT  
TTTATCAAAGATTTGGCTTGGTCTATTTACCGCAAAAAGTTGGAAGAGGTCTATGATATTTATTTTAC  
TTATACTTTAAATAGCACCGATTATAACTTGACTGTTGATAATATTACAATAGCTCTTTCTCAGAAGA  
TTA

+

FFFFFFFFFFFF:FFF:FFFFFFFFFFFFFFFFFFFFFFFFFFFFFFFFFFFFFFFFFFFFFFFFFFFFFFFF  
FFFFFFFFFFFFFFFFFFFFFFFFFFFFFFFFFFFFFFFFFFFFFFFFFFFFFFFFFFFFFFFFFFFFFFFF  
FFF

@A00721:190:HGJW7DSXY:4:1359:28049:7075\_2:N:0:TCTGCAAG+GCTGCACT  
TCGGTAGCATTGATTTACTTTTACCGTTAGAACTGAAAAAGATTCTTTTCGAAAAGAAACCTATAAGT  
TACAAACGATTCTTCGACTATATTAAAGAAATAAAAATACTTCAAGTA

+

FFFFFFFFFFFFFFFFFFFFFFFFFFFFFFFFFFFFFFFFFFFFFFFFFFFFFFFFFFFFFFFFFFFFFFFF  
FFFFFFFFFFFFFFFFFFFFFFFFFFFFFFFFFFFFFFFFFFFFFFFFFFFFFFFFFFFFFFFF

@A00721:190:HGJW7DSXY:4:1418:15402:33520\_1:N:0:TCTGCAAG+GCTGCACT  
ATTTTAAATGGTATGGTATAATGTGTCTTACAAATAGAACCTTCACTCTCGGTAATGAGAGTGATTC  
CTTAATATTCTAGTAACCGCTATGTGGGCATTACTAGGATTATCACACTCCTAAATTTGATAGCAAT  
TTA

+

FFFFFFFFFFFFFFFFFFFFFFFFFFFFFFFFFFFFFFFFFFFFFFFFFFFFFFFFFFFFFFFFFFFFFFFF  
FFFFFFFFFFFFFFFFFFFFFFFFFFFFFFFFFFFFFFFFFFFFFFFFFFFFFFFFFFFFFFFFFFFFFFFF  
FFF

@A00721:190:HGJW7DSXY:4:1509:13838:31375\_1:N:0:TCTGCAAG+GCTGCACT  
GAGTACTTAATTCAATAGCTTTAGTATTATTTACTATCGCCTTTATTGAAAATTGTATAAGAGTTAAT  
TGCTTACACAAAAGTGACGCGGAAGGAATCTTAATTGATTGAAGCTAGGCGTTGGGGAGAATGAAC  
GCC

+

FFFFF:FFFFFFFFFFFFFFFFFFFFFFFFFFFFFFFFFFFFFFFFFFFFFFFFFFFFFFFFFFFFFFFF  
FFFFFFFFFFFFFFFFFFFFFFFFFFFFFFFFFFFFFFFFFFFFFFFFFFFFFFFFFFFFFFFFFFFFFFFF  
FFF

@A00721:190:HGJW7DSXY:4:2174:19117:8077\_1:N:0:TCTGCAAG+GCTGCACT  
TAGGGTCAAACCTACTACCGCCGGTCGGCAGATCGGCACCACTGGTCTCTACGTTACAGGGACCCGCTG  
TGCAGAATAACCTTCCCAAATCTAGATCTGCACAGAAGAAGGCTGAAGGTCGTTACCGGACGACCACT  
CAA

+

FFFFFFFFFFFFFFFFFFFFFFFFFFFFFFFFFFFFFFFFFFFFFFFFFFFFFFFFFFFFFFFFFFFFFFFF  
FFFFFFFFFFFFFFFFFFFFFFFFFFFFFFFFFFFFFFFFFFFFFFFFFFFFFFFFFFFFFFFFFFFFFFFF  
FFF

@A00721:190:HGJW7DSXY:4:1331:3161:29512\_1:N:0:TCTGCAAG+GCTGCACT  
CAGACGTGTGCTCTTCCGATCTCTCAGTCAAAGTCACATTCACCACTCCCATGCCAATCAATGATGT  
GACTATACAGTTCGGCCATTTCAAGAGTGGTCAATACGTCGTGGGAGGTACTGAAGCCTTCCCCTCCG  
CTG

+

FFF:FFFFFFFFFFFFFFFFFFFFFFFFFFFFFFFFFFFFFFFFFFFFFFFFFFFFFFFFFFFFFFFF  
FFFFFFFFFFFFFFFFFFFFFFFFFFFFFFFFFFFFFFFFFFFFFFFFFFFFFFFFFFFFFFFFFFFFFFFF  
FFF

@A00721:190:HGJW7DSXY:4:2556:14091:35070\_2:N:0:TCTGCAAG+GCTGCACT  
GCCAATCAATAGTTCTTCTGACCAGAATGAAAAGGGGTTTACCAGGGTAGTCTCTAAGTCTACCAGGA  
AGAGGGGAAATGTCCCCAAAACCTGAGAAGAATAAAGGGAAAGGTCCAT

+



FFFFFFFFFFFFFFFFFFFFFFFFFFFFFFFFFFFFFFFFFFFFFFFFFFFFFFFFFFFFFFFFFFFFFFFFFFFFFFFF  
FFFFFFFFFFFFFFFFFFFFFFFFFFFFFFFFFFFFFFFFFFFFFFFFFFFFFFFFFFFFFFFFFFFFFFFFFFFFFFFF  
@A00721:190:HGJW7DSXY:4:1309:15582:9251\_1:N:0:TCTGCAAG+GCTGCACT  
CGAGATCTTGAGAGTGACTGGAGTTCAGACGTGTGCTCTTCCGATCTGCTGGGTCTTAAGGGTAG  
CTGTAAAGTTGCGCCTGCCGACCCCATCTTTGAGACCAAGACTCTCTACAGTAGGTTCTGTCCTACTA  
TGA  
+  
FF:FFFFFFFFFFFFFFFFFFFFFFFFFFFFFFFFFFFFFFFFFFFFFFFFFFFFFFFFFFFFFFFFFFFFFFFF  
FFFFFFFFFFFFFFFFFFFFFFFFFFFFFFFFFFFFFFFFFFFFFFFFFFFFFFFFFFFFFFFFFFFFFFFFFFFF  
FFF  
@A00721:190:HGJW7DSXY:4:1315:10592:29888\_2:N:0:TCTGCAAG+GCTGCACT  
GAATTCGTCAGTGAAGGTGAGAGGACTTTTGGCTACTGGCGACAACTGAGAGCAGTCGCTG  
GGGAAAGAGAATTGCGTGGGTGAAGGCCGACGCTTCGAGCTTGAGTG  
+  
:FFFFFFFFFFFFFFFFFFFFFFFFFFFFFFFFFFFFFFFFFFFFFFFFFFFFFFFFFFFFFFFFFFFFFFFF  
FFFFFFFFFFFFFFFFFFFFFFFFFFFFFFFFFFFFFFFFFFFFFFFFFFFFFFFFFFFFFFFFFFFFFFFF  
@A00721:190:HGJW7DSXY:4:1225:7428:24032\_2:N:0:TCTGCAAG+GCTGCACT  
CGTTTGGAGGATTTTATCCGCGCTTAAGTATGGGGCGAAGATCCCCTATGGAGTCTTGAAGGACTTAG  
GTTGGCATATTTATGCCGACGATAATAAGCATGTCAACCTTAAGCACC  
+  
FFFFFFFFFFFFFFFFFFFFFFFFFFFFFFFFFFFFFFFFFFFFFFFFFFFFFFFFFFFFFFFFFFFFFFFF  
FFFFFFFFFFFFFFFFFFFFFFFFFFFFFFFFFFFFFFFFFFFFFFFFFFFFFFFFFFFFFFFFFFFFFFFF  
@A00721:190:HGJW7DSXY:4:2606:8811:3881\_1:N:0:TCTGCAAG+GCTGCACT  
CAAGAGAGAGTGTGAGAGAGTCGCTCTCACTATTTTTGCCGAGAATGCGGGCTTTCTGACTGATGAGG  
TAAAACTCTTGCTCCTTCTGTGGGTGAGGGTTTTTGTATATTCACTGGTTCTGGGAGGCTGCTTTC  
CTC  
+  
FFFFFFFFFFFFFFFFFFFFFFFFFFFFFFFFFFFFFFFFFFFFFFFFFFFFFFFFFFFFFFFFFFFFFFFF  
FFFFFFFFFFFFFFFFFFFFFFFFFFFFFFFFFFFFFFFFFFFFFFFFFFFFFFFFFFFFFFFFFFFFFFFF  
FFF  
@A00721:190:HGJW7DSXY:4:1377:19976:26287\_2:N:0:TCTGCAAG+GCTGCACT  
ACACTTTTCTTGAAAATTTTCTTTTCTCCGTCATTGGGGATTTTCGATGTGAGAAGGTGGAAGGTGT  
CAAGGGTCTTCTTCATGCTGATCTTACAGGACCTAATCACATCATGAT  
+  
FFFFFFFFFFFFFFFF:FFFFFFFFFFFFFFFFFFFFFFFFFFFFFFFFFFFFFFFFFFFFFFFF:FFFFFFFFFFFFFFFF:FF  
FFFFFFFFFFFFFFFFFFFFFFFFFFFFFFFFFFFFFFFFFFFFFFFFFFFFFFFFFFFFFFFFFFFFFFFF  
@A00721:190:HGJW7DSXY:4:2556:17020:31187\_1:N:0:TCTGCAAG+GCTGCACT  
CTTCCGATCTGGAAGTTCTCCGAAATTAAGACGGGGGATTAAGAGTCCAGCTGTAAGTGTCAATTC  
AGAGAGGGGAGCTCTGAAAAGGAACTTCGTCAGAAGATGAGGAAGTTCTCCGAAATTAAGACGGGG  
GGA  
+  
:,FF:F:FFF:FF::FFFFFF,FFFFFFFF,FFFFFFFF:FFFFFFFFF, :FFFFFFFF: ,FFFF:  
FFF:FFFF, ,FFFFFF,FFFF:F::FFFF:FFFFFF:FFFFFFFFFFFFFFFFFFFFFFFF: ,FFFF  
FFF  
@A00721:190:HGJW7DSXY:4:2671:26847:8093\_2:N:0:TCTGCAAG+GCTGCACT  
GAAGTTGATGAAGAAGGATTATTTGAAGCAGGGGTACCCTTCTAAGGTGGATGAGGGAGGTTGTT  
TCTTTGGAGTTTTAGATAATCTTTTGAGAAGGGGTCATAGAGCCAGCA  
+  
FFFFFFFFFFFF:FFFFFFFFFFFFFFFFFFFFFFFFFFFFFFFFFFFFFFFFFFFFFFFFFFFFFFFFFFFF  
FFFFFFFFFFFFFFFFFFFFFFFFFFFFFFFFFFFFFFFFFFFFFFFFFFFFFFFFFFFFFFFFFFFFFFFF  
@A00721:190:HGJW7DSXY:4:2508:18258:10473\_2:N:0:TCTGCAAG+GCTGCACT  
AGAATTCGTAACCTTACCATATTGTTCTTCCGGGAAGTTGTGGGATTTAACTTTGACTCAACTACTC  
CGATCAGATCCGGATGGTTTGATTGGTATGGACTACTCGACTTTTGAT  
+



@A00721:190:HGJW7DSXY:4:1169:6424:6668\_2:N:0:TCTGCAAG+GCTGCACT  
CTTATCACCACCTTTTGAAAGGAAAATAATTGGTGATGAAAATACGTATGTGCGGTGGGGTTCTCAAGGC  
TCTCATCGCCACTGGGATTCTAAGGGGTTCCATAAGATATTATCTGAC

+

FFFFFFFFFFFFFFFFFFFFFFFF, , FFFF:FFFFFF:F:F:FFFFFF,F:FFFFFFFFFFFFFFFF  
FFFFFFFFFFFFFFFFFFFFFFFF,F:FFFFFFFF,FFFF:FF:FFFFFF::

@A00721:190:HGJW7DSXY:4:2611:10465:9972\_2:N:0:TCTGCAAG+GCTGCACT  
TTAAACTTCAGAGTCTCTTGAAGTCCAGGTAGCTAATGTTCTTGCAATAGCCACAGACTTTCTGGG  
AAAAGAGACCTCTGTTGTAGAGGAGTTGAGAGAATTACTCAGATTCAA

+

FFFFFFFFFFFFFFFFFFFFFFFFFFFFFFFFFFFFFFFF:FFFFFFFFFFFFFFFFFFFFFFFF  
FFFFFFFFFFFFFFFFFFFFFFFFFFFFFFFFFFFFFFFFFFFFFFFFFFFFFFFF

@A00721:190:HGJW7DSXY:4:2443:12491:26162\_2:N:0:TCTGCAAG+GCTGCACT  
GTGCGGAAAACGATGAAGATTTCCACACTGTTGAGAATCTTCTGATGCTGAATTTGAGGAAAATTT  
TTCGGAAGTTTTTGGTATAAATCCTGATGGCTCAGTACAGGGAGGAGG

+

FFFFFFFFFFFFFFFFFFFFFFFFFFFFFFFFFFFFFFFFFFFFFFFFFFFFFFFFFFFFFFFF  
FFFFFFFFFFFFFFFFFFFFFFFFFFFFFFFFFFFFFFFFFFFFFFFFFFFFFFFF

@A00721:190:HGJW7DSXY:4:1476:2537:20290\_1:N:0:TCTGCAAG+GCTGCACT  
ATGTGTCACGCTACACTCGAAATATGGGCCCTCATAAGGAAGTATAGTTGGCGTCTTGTGCTTGACGT  
CATTACAGTCTGGAAGTTAGATCATTTGTTGAGGAAGATCTCTACAGAGATTATCGAGAGTTGTGATC  
TAG

+

FFFFFFFFFFFFFFFFFFFFFFFFFFFFFFFFFFFFFFFF:FFFFFFFFFFFFFFFFFFFFFFFF  
FF,FFFFFFFFFFFFFFFF,FFFFFFFFFFFFFFFFFFFFFFFFFFFFFFFFFFFFFFFF  
FFF

@A00721:190:HGJW7DSXY:4:2115:13982:15029\_2:N:0:TCTGCAAG+GCTGCACT  
TAGAGTTCTTCTAACCAGGACTGATGGTGAGATTCTTTTACCTTTTGAGGTCCAGGAACCTTTACTC  
CTAGTGTCTTTTCTAGAGTCCAAGGACGTTTCCGTCGGAGGATGACAG

+

FFFFFFFFFFFFFFFFFFFFFFFFFFFFFFFFFFFFFFFFFFFFFFFFFFFFFFFFFFFFFFFF  
FFFFFFFFFFFFFFFFFFFFFFFFFFFFFFFFFFFFFFFFFFFFFFFFFFFFFFFF

@A00721:190:HGJW7DSXY:4:2159:3305:22247\_2:N:0:TCTGCAAG+GCTGCACT  
ACATAAAATCCAGCGATTCTATTATGTCGCTAAAGCCTGTCCAGTTGTCGATGATGTTGCGGCTGTGG  
GGATTAACCTCCCTCGTGAAACTTACGACGATGTTCTCGCTCGCATTT

+

, FFFFFFFFFFFFF, , :FFFF::FFFFFFFFFFFFFFFFFFFFFFFF, FFFFFFFFFFFFFFFFF  
FFFFFFFFFFFFFFFFFFFFFFFFFFFFFFFFFFFFFFFF:FFFFFFFF

@A00721:190:HGJW7DSXY:4:1335:11207:17487\_2:N:0:TCTGCAAG+GCTGCACT  
TAAGTCTGAGATCTGCCACTTCTAATTTTAGGAAACGTCGCGAAAAGAAAGTTCATGAGGATGTCTTG  
GTCGAAAAATATCGCCGGAACTTCTAATAGAGGATCCTGATGACATT

+

F:FFFFFFFFFFFFFFFFFFFFFFFF:FFFFFFFFFFFFFFFFFFFFFFFFFFFFFFFF  
FFFFFFF:FFFF:FFFFFFFFFFFFFFFF:FFFFFFFFFFFFFFFF

@A00721:190:HGJW7DSXY:4:2647:29423:23234\_1:N:0:TCTGCAAG+GCTGCACT  
TACCGATCTCAGTTCTACCACAGAAACCGTCTCAGGAAGTGTCTCCACTGATTGCGGAATTAGAGAAAG  
ACGACCTTCTGTGGGACTGAGACCTCTGAATTTTCAGGGTGCCTGATGAGGACGTTGAAAGGGAT  
AAT

+

FFFFFFFFFFFFFFFFFFFFFFFFFFFFFFFFFFFFFFFF:FFFF:FFFFFFFFFFFF:FFFFFFFF:FF  
FFFFFFFF:FFFFFFFFFFFFFFFFFFFFFFFFFFFFFFFFFFFFFFFFFFFFFFFF  
FFF

@A00721:190:HGJW7DSXY:4:1405:18231:14340\_2:N:0:TCTGCAAG+GCTGCACT  
TCAAAAGACCAGAAACGTAACAAGAAGAATAAAGGTAGGAAGGGGAGAAAACAGAACAAAGCGAGCGGT

TGAAGAGAAAAC TGATATGGTTGCGGCTGATCGTACCCCAATTCCTGC  
+  
FFFFFFFFFFFFFFFF,FFFFFFFFFFFFFFFF,FFFFFF:FFFFFFFFFFFFFFFFFFFFFFFFFFFFFFFF  
FFFFFFFFFFFFFFFFFFFFFFFF:FFFFFFFFFFFFFFFFFFFFFFFFFFFFFFFF  
@A00721:190:HGJW7DSXY:4:2145:2935:14184\_1:N:0:TCTGCAAG+GCTGCACT  
AATTAAGACAGACGTGAAAGTTATGATGAGTGATCGTATTAGAACAGCTGATTCTTATTGCATGAACG  
TCGCTGAGGTCAAACCTGTGGACGTTCTTTTCATCGACGAATTATTTCATGATTCACGCTGGTCAGACC  
CTT  
+  
FFFFFFFFFFFFFFFFFFFFFFFF:FFF,FFFFFFFFFFFFFFFFFFFFFFFF:FFFF:FFFFFFFF  
FFFFFFFFFFFFFFFFFFFFFFFFFFFFFFFFFFFFFFFFFFFFFFFFFFFFFFFFFFFFFFFFFFFFFFFF  
FFF  
@A00721:190:HGJW7DSXY:4:1471:3432:18584\_2:N:0:TCTGCAAG+GCTGCACT  
AGGCGGCTTATACCATAGGTTACGGTGATTCCAATCAAATCGGATTCATCAATCGTATTGATCTCCAA  
GTCGCAAACTACTTCAACATCAACGACATCATTCTTGATGAGTGTCGT  
+  
FFFFFFFFFFFFFFFFFFFFFFFFFFFFFFFFFFFFFFFFFFFFFFFFFFFFFFFFFFFFFFFFFFFFFFFF  
FFFFFFFFFFFFFFFFFFFFFFFFFFFFFFFFFFFFFFFFFFFFFFFFFFFFFFFFFFFFFFFF  
@A00721:190:HGJW7DSXY:4:1322:19171:2347\_2:N:0:TCTGCAAG+GCTGCACT  
TCTCAGTTATCGCTGCCCGCCGACGTTTGTGCGCAACTCTCAGAGGTTTACGGCAGAAAAATTTCTC  
CTGCTTGTAAATTCGAGAGAGGACACTATGGAAATTAGACCTATCAGAT  
+  
FFFFFFFFFFFFFFFFFFFFFFFFFFFFFFFFFFFFFFFFFFFFFFFFFFFFFFFFFFFFFFFFFFFFFFFF  
FFFFFFF:FFFFFFFFFFFFFFFFFFFFFFFFFFFFFFFFFFFFFFFFFFFFFFFF  
@A00721:190:HGJW7DSXY:4:1511:21640:26506\_1:N:0:TCTGCAAG+GCTGCACT  
CGGGAGGTTGCAGATTCAACCCCTTATATCGAGGCTATCGAGGACGATGAGTATCTTGAAGTTGTTGA  
CGACAAGCCTCAAGAGGGTAGAGGACCACCTGGATCTTCTACTGTCTCTGCCTTCCAAGATTTCTTAG  
AAG  
+  
FFFFFFFFFFFFFFFFFFFFFFFFFFFFFFFFFFFFFFFFFFFFFFFFFFFFFFFFFFFFFFFFFFFFFFFF  
FFFFFFFFFFFFFFFFFFFFFFFFFFFFFFFFFFFFFFFFFFFFFFFFFFFFFFFFFFFFFFFF  
FFF  
@A00721:190:HGJW7DSXY:4:1340:16486:2581\_2:N:0:TCTGCAAG+GCTGCACT  
CGGTAATCTTTCAGCCGAATTAAGTACTAATGAGTTCAAGTCGGTTGTCGATCGAATTAAGATCAAGG  
CTAATACCTTTATAGGTAAGAAGCCCTTGAGCCGCGTAGTCAGCGCG  
+  
FFFF:FFFFFFFFFFFFFFFFFFFFFFFFFFFFFFFFFFFFFFFFFFFFFFFFFFFFFFFFFFFFFFFF  
FFFFFFFF:FFFFFFFFFFFFFFFFFFFFFFFFFFFFFFFFFFFFFFFF,FFFFFFFF  
@A00721:190:HGJW7DSXY:4:1108:8160:7420\_2:N:0:TCTGCAAG+GCTGCACT  
CGATTGGTCAACGTCGGAGTGTTACTGCTAACACATTCTTTGGTAATTGTATGATCACTCTTATGATG  
CTCTCTCTTTATTACGACCTTCGGAAGTTTAGAGCCGTCGCTGTCGCC  
+  
FFFFFFFFFFFFFFFFFFFFFFFFFFFFFFFFFFFFFFFFFFFFFFFFFFFFFFFFFFFFFFFFFFFFFFFF  
FFFFFFFFFFFFFFFFFFFFFFFFFFFFFFFFFFFFFFFFFFFFFFFFFFFFFFFFFFFFFFFF  
@A00721:190:HGJW7DSXY:4:2406:18005:23750\_2:N:0:TCTGCAAG+GCTGCACT  
TTTTAAACGATTCCGAGAGGTTTATCCTGATGTGGAGGGAGTTCTTGAAGCATCCCGACCTTTCCTTG  
TGAAAATTTTGATGCGGTTTCATAAGATTATCAGTAATCCTGATTCTA  
+  
FFFFF:FFFFFFFFFFFFFFFFFFFFFFFFFFFFFFFFFFFFFFFFFFFFFFFFFFFFFFFFFFFFFFFF:F  
FFFFFFFFFFFFFFFF:FFF:FFF:FFFFFFFF:FFFFFFFF,FFFF  
@A00721:190:HGJW7DSXY:4:2267:6017:22060\_1:N:0:TCTGCAAG+GCTGCACT  
TTGAGCGAGAGCGACCAAGATCTAAATTCGTAACGGTGCGTGGCGCTTTATTTTAAAAAGCTCCCTC  
CTCTCGCAAGTTTGATCTGATACTTATCACGAAAGGACTTGAGTCTTTTGATCAGTCTCTGACTTGAC  
CAT

+  
FFFFF:F:FFFFF:FFF:F::FFFF,FFF:FFFF,FFFFFF::FF,FFFFFFFFF:FFFFFF:FFF  
:FFFF:FF:FFFFFFFFF:FFFFFF,FFF:,F::FFF:FFFFFFFFF:F,FF::FFFF  
:FF

@A00721:190:HGJW7DSXY:4:1629:25220:31861\_1:N:0:TCTGCAAG+GCTGCACT  
TCAGTTGATTAAGACTCTTCCGAAAGGCGAACTTTGGGAATTTGAAGCTCAGGGTGAAGCACAACTGTT  
TGACCGTGACGAACTGTGGTGTCTTGATCTACGTTACGGATATACTCTCTTTGAGTTCACTCGTAAG  
GAC

+  
FFFFFFFFFFFFFFFFF:FFFFFFFFFFFFFFFFFFFFFFFFFFFFFFFFFFFFFFFFFFFFFFFFF  
FFFFFFFFFFFFFFFFFFFFFFFFFFFFFFFFFFFFFFFFFFFFFFFFFFFFFFFFF:FFFFFFFFFFFFFFFFF  
FFF

@A00721:190:HGJW7DSXY:4:1471:15365:22060\_1:N:0:TCTGCAAG+GCTGCACT  
CGGCATACGAGATCTTGCAGAGTGACTGGAGTTCAGACGTGTGCTCTTCCGATCTCAGAGGGGCAGCA  
GCATGACCATAATTGGTATTGACTTTGGTACCACCTTTTCTACTGTCTGTCTCGCCTCTTCGAATGAA  
GTT

+  
FFFFF:FF::FFFFF:FFFFFFFFFFFFFFFFFFFFFFFFFFFFFFFFFFFFFFFFF,FFFFFFFFF  
FFFFFFFFFFFFFFFFFFFFFFFFFFFFFFFFFFFFFFFFFFFFFFFFF,FFFFFFFFF:FFFFFFFFF  
FFF

@A00721:190:HGJW7DSXY:4:2423:25201:24502\_2:N:0:TCTGCAAG+GCTGCACT  
CTACAATCATTGGTTTTCTAATAATGATGACACTATTGTTTATGGATATGATGCTATTACTCATGAT  
GGTTACGGTCAGGGAGGATTCTCAGTTTACAAGGACCTTAAGCGATGG

+  
FFFFFFFFFFFFFFFFFFFFFFFFF:FFF:F:FFFFFFFFFFFFFFFFFFFFFFFFF  
FFFFFFFFFFFFFFFFFFFFFFFFFFFFFFFFFFFFFFFFF:FFF

@A00721:190:HGJW7DSXY:4:2655:26901:5963\_1:N:0:TCTGCAAG+GCTGCACT  
TCGGCGATCACTTTTCACTAAGAATTGGTCCTACTTTTGGACAAGGCAACTTCGTAATCTTCATGAG  
ATCGTTTCTTTCTTTATCTCTTTGGTTGTAGGGATTTGAGGGAGTGAAAGGCTTCAATTGTAGTGG  
TTT

+  
FFFF:FFFFFFFFFFFFFFFFFFFFFFFFFFFFFFFFFFFFFFFFFFFFFFFFF  
FFFFFFFFFFFFFFFFFFFFFFFFFFFFFFFFFFFFFFFFF:FFFFFFFFFFFFFFFFF  
FFF

@A00721:190:HGJW7DSXY:4:2207:2374:25645\_2:N:0:TCTGCAAG+GCTGCACT  
GTACCCAGTCAGTATACCTCTACGCAAAGATATTTTCATGAAACTCCAGAGGAACGTACCGGATTACC  
TGTCTTTCATATTATGAATGAACCTTCGGCCGCTCTCTTTGCTTCGAT

+  
FFFFFFFFFFFFFFFFFFFFFFFFF:FFFFFFFFFFFFFFFFF,FFFFFFFFF  
FFFFFFFFF:FFFFFFFFFFFFFFFFFFFFFFFFF:

@A00721:190:HGJW7DSXY:4:2263:17155:15734\_1:N:0:TCTGCAAG+GCTGCACT  
TCAGAATGGGATTCTACGTAGTTTATGACTTTGGTGGTACTTTTCGATACTTCTATCGTCTTACG  
TTACGGTAATTACTATAGTGTTATTTATTCTGGTGGTGATGATAATCTTGGAGGTCGTGACGTTGATG  
AAG

+  
FFFFFFFFFFFFFFFFFFFFFFFFF:FFFFFFFFFFFFFFFFF,FFFFFFFFF  
FFFFFFFFF,FFFFFFFFFFFFFFFFFFFFFFFFF:

@A00721:190:HGJW7DSXY:4:2313:24026:3302\_2:N:0:TCTGCAAG+GCTGCACT  
GTTCTTATTACGGCGCACTTCTTTACCCGCCACCACAACTTTCAGTTTCACAACTGAAGGAGGAGG  
TTTCTGTACTGGAAAACCCTCGTCAATACTTTTCAATAATATACGTC

+  
FFFFFFF:FFFFFFFFFFFFFFFFFFFFFFFFFFFFFFFFFFFFFFFFF:FFF:FFFF  
FFFFFFFFF,FFFFFFFFF:FFFFFFFFF

@A00721:190:HGJW7DSXY:4:2570:14895:24189\_1:N:0:TCTGCAAG+GCTGCACT  
AGTGGCATTCAAGGCAAACTTACCCTGATTCCGGCCGGTGGTAGCTCATTTCTACCAGGGGCTATTAC  
TCTTGCTGAAACAGCTATTAAAGCTGTTGAGCGGGTAATTACACCTAAACGAGCTCGATCTGCCATCG  
CTG

@A00721:190:HGJW7DSXY:4:1261:31611:16908\_1:N:0:TCTGCAAG+GCTGCACT  
TCTAATCGTAACATTAATAATTTCAATCTTCTTAAAAAGAAGATAGAGAGTCATACTTTGGGCTATCG  
TTCAGGTGCATGGGGTTGGATAGCCAATATTGAAGTGGACACCTCTGGTAGTATCGAAGTAAAGATAA  
CCA

@A00721:190:HGJW7DSXY:4:2461:7618:12524\_1:N:0:TCTGCAAG+GCTGCACT  
CAAAATCTTACCACTATCTACGAACCTAAAGTTCTGAAGACGTTGCTTGTCGCTTCCTCCTTTAATGG  
CACTACCTCGGTACAATCTTACTTGGAACGAAGGCGACCTGTTCCGGAGTTTTTACGGGATCCGGAAT  
GTT

@A00721:190:HGJW7DSXY:4:1255:12346:11350\_1:N:0:TCTGCAAG+GCTGCACT  
TGGATTTTAATATAAAGAATCTTTACCAGGACTCCTACTACAGGAGGCAGTCTTCTGATCGTAAGAAG  
TTTATAAGGAACATATCCATTTGTTGTAATAGGGTCATCAACTTAGAACTCGAACTCTAAGTGGTAA  
TAC

@A00721:190:HGJW7DSXY:4:2206:4725:6355\_2:N:0:TCTGCAAG+GCTGCACT  
GAAATTGGACTCTTCGATAGGGGACATTTTATCGTGGGCTTTCCGTAAAGGAAGATCTGTTATCGACG  
GTTTATCGTTTACGAAGTATCACTCCACCGGTGAATGGTTTAAAGAATA

@A00721:190:HGJW7DSXY:4:2344:20853:16908\_2:N:0:TCTGCAAG+GCTGCACT  
CTAAAGATTGAAGGAAATTTATCCTCGTTTAACTTACTTAGACTTTCCTACGATACAAATGATAAC  
TTCTAATTTACGTTTGCTACTCAGAGCTGGTCCTCTCAGCAAAGGGAT

@A00721:190:HGJW7DSXY:4:2333:27453:25895\_1:N:0:TCTGCAAG+GCTGCACT  
GCATTTGATAATAATGACGAGACTTTTCGTCATAATCGCTGCATATTACGGATTACACGGTACCAGCGC  
ATCTCGTGTCGAGCCTCGACCCGATTATATGGTATTAACCTATAAAGGTGAGGAGACCATTTTCTTGC  
TGA

@A00721:190:HGJW7DSXY:4:2261:28266:19820\_2:N:0:TCTGCAAG+GCTGCACT  
CTTATAATAAATAAATAAATAATATTACTAATGGCAAATAGTGGAAAGGCTCCAGTCAACACTAGTTC

+

@

+

@

+

@

+

@

+

@

+

@

+

@

+

@

+

FFFFFFFFFFFFFFFFFFFFFFFFFFFFFFFFFFFFFFFFFFFFFFFFFFFFFFFFFFFFFFFFFFFFFFFFFFFFFFFF  
FFF

@A00721:190:HGJW7DSXY:4:1421:1208:2675\_2:N:0:TCTGCAAG+GCTGCACT  
GATTGTTATCAATTTAAATACATTACTGTTTCAAATCATCTTTACTCACAGACTCCGAAAATGGTTTC  
AAATGAGGTCAAAGCTCTATTTATTAAACGAACATTATCCGATTCTT

+  
FF:FFFFFFFFFFFFFFFFFFFFFFFFFFFFFFFFFFFFFFFFFFFFFFFFFFFFFFFFFFFFFFFFFFFFFFFF  
FFFFF:FFFFF:,FFFFFFFFFFFFFFFFFFFFFFFFFFFFFFFFFFFFFFFFFFFFFFFFFFFFFFFFFFFF

@A00721:190:HGJW7DSXY:4:2114:20283:25974\_2:N:0:TCTGCAAG+GCTGCACT  
TTTCGACAAATTTTAGAACTTTATTTAGAACTCTCTCCGATCACCTTGGTGTGATCTCCCGGAGGAT  
CTTTTCAATAAGATGTATGATGATAATCTACTATTTTTAAATAGTGAT

+  
FFFFFFFFFFFFFFFFFFFFFFFFFFFFFFFFFFFFFFFFFFFFFFFFFFFFFFFFFFFFFFFFFFFFFFFFFFFF  
FFFFFFFFFFFFFFFFFFFFFFFFFFFFFFFFFFFFFFFFFFFFFFFFFFFFFFFFFFFFFFFFFFFFFFFFFFFF

@A00721:190:HGJW7DSXY:4:1355:26142:30765\_1:N:0:TCTGCAAG+GCTGCACT  
TTATCAAAGATTTGGCTTGGTCTATTTACCGCAAAAAGTTGGAAGAGGTCTATGATATTTATTTTACT  
TACACTTTAAATAGCACCGATTATAACTTGACTGTTGATAATATTACAATAGCTCTTCTCAGAAGAT  
TA

+  
FFFF:FFFFFFFFFFFFF::F:FFFFFFFFFFFFFFFFFFFFFFFFFFFFFFFFFFFFFFFFFFFFFFFFFFFF  
FF,FF:FFFFFFFFFFFFFFFFFFFFFFFFFFFFFFFFFFFFFFFFFFFFFFFFFFFFFFFFFFFFFFFFFFFF  
FF

@A00721:190:HGJW7DSXY:4:1528:29649:35305\_2:N:0:TCTGCAAG+GCTGCACT  
TCGGTAGCATTGATTTACTTTTACCGTTAGAACTGAAAAAGATTCTTTTCGAAAAGAAACCTATAAGT  
TACAAACGATTCTTCGACTATATTAAGAAATAAAAATACTTCAAGTA

+  
FFFFFFFFFFFFFFFFFFFFF:FFFFFFFFFFFFFFFFFFFFF:FFFF,FFFFFFFFFFFF:FFFFFFFFFFFF  
FFFFF:F,FFFFFFFFFFFFFFFFFFFFF::F:FFFFF:FFFFFFFFFFFF:FF

@A00721:190:HGJW7DSXY:4:1560:11577:20823\_1:N:0:TCTGCAAG+GCTGCACT  
ATTTTTAATGGTATGGTATAATGTGTCTTACAAATAGAACCTTCACTCTCGGTAATGAGAGTGATTC  
CTTAATATTCTAGTAACCGCTATGTGGGCATTACTAGGATTTATCACACTCCTAAATTTGATAGCAAT  
TTA

+  
FFFFFFFFFFFFFFFFFFFFFFFFFFFFFFFFFFFFFFFFFFFFFFFFFFFFFFFFFFFFFFFFFFFFFFFFFFFF  
FFFFFFFFFFFFFFFFFFFFFFFFFFFFFFFFFFFFFFFFFFFFFFFFFFFFFFFFFFFFFFFFFFFFFFFFFFFF  
FFF

@A00721:190:HGJW7DSXY:4:1509:15248:26396\_1:N:0:TCTGCAAG+GCTGCACT  
GAGTACTTAATTCAATAGCTTTAGTATTATTTACTATCGCCTTTATTGAAAATTGTATAAGAGTTAAT  
TGCTTACACAAAAGTGACGCGCAAGGAATCTTAATTGATTGAAGCTAGGCGTTGGGGAGAATGAAC  
GCC

+  
FFFFFFFFFFFFFFFFFFFFFFFFFFFFFFFFFFFFFFFFFFFFFFFFFFFFFFFFFFFFFFFFFFFFFFFFFFFF  
FFFFFFFFFFFFFFFFFFFFFFFFFFFFFFFFFFFFFFFFFFFFFFFFFFFFFFFFFFFFFFFFFFFFFFFFFFFF  
FFF

@A00721:190:HGJW7DSXY:4:2206:29875:27837\_1:N:0:TCTGCAAG+GCTGCACT  
TAGGGTCAAACCTACTACCGCCGGTCGGCAGATCGGCACCACTGGTCTCTACGTTACAGGGACCCGCTG  
TGCAGAATAACCTTCCCAAATCTAGATCTGCACAGAAGAAGGCTGAAGGTCGTTACCGGACGACCACT  
CAA

+  
F:FFFFFFFFFFFFFFFFFFFFF:FFFFF,FFFFF:FFFFFFFFFFFFFFFFFFFFFFFFFFFFFFFFFFFF  
FFFFFFFFFFFFFFFFFFFFFFFFFFFFFFFFFFFFFFFFFFFFFFFFFFFFFFFFFFFFFFFFFFFFFFFFFFFF  
FFF

@A00721:190:HGJW7DSXY:4:1331:4309:30561\_1:N:0:TCTGCAAG+GCTGCACT  
CAGACGTGTGCTCTTCCGATCTCTCAGTCAAAAGTCACATTCACCACTCCCATGCCAATCAATGATGT



GACTATACAGTTCGGCCATTTCAAGAGTGGTCAATACGTCGTGGGAGGTACTGAAGCCTTCCCCTCCG  
CTG

+

FFFFFFFFFFFFFFFFFFFF:FFF:FFFFFFFFFFFFFFFF:FFFFFFFFFFFF:FFFFFFFF,FFFFFF  
FFFFFFFFFFFFFFFFFFFFFFFFFFFFFFFFFFFFFFFFFFFFFFFFFFFFFFFFFFFFFFFFFFFFFFFF  
FFF

@A00721:190:HGJW7DSXY:4:2621:20961:7795\_2:N:0:TCTGCAAG+GCTGCACT  
GCCAATCAATAGTTCTTCTGACCAGAATGAAAAGGGTTTACCAGGGTAGTCTCTAAGTCTACCAGGA  
AGAGGGGAAATGTCCCCAAAACCTGAGAAGAATAAAGGGAAAGGTCCAT

+

FFFFFFFFFFFFFFFFFFFFFFFFFFFFFFFFFFFFFFFFFFFFFFFFFFFFFFFFFFFFFFFFFFFFFFFF  
FFFFFFFFFFFFFFFFFFFFFFFFFFFFFFFFFFFFFFFFFFFFFFFF:FFFF

@A00721:190:HGJW7DSXY:4:1570:8359:23766\_1:N:0:TCTGCAAG+GCTGCACT  
CGCGATCTTGAGAGTGACTGGAGTTCAGACGTGTGCTCTTCCGATCTGCTTGGGTCATTAAGGGTAG  
CTGTAAAGTTGCGCCTGCCGACCCCATCTTTGAGACCAAGACTCTCTACAGTAGGTTCTGTCCTACTA  
TGA

+

::,F:F,FFFFFFFF:FFFFFF:F,FFFFFFFF:FF:F,FF:FF:FFFFFFFF:FFFF,F  
FFFFFFFF:FFFFFF::FFFFFFFF,FF,,FF:FF,::,FFF:FFF:FFF:FFFFFF  
FFF

@A00721:190:HGJW7DSXY:4:1350:2410:5822\_2:N:0:TCTGCAAG+GCTGCACT  
GAATTCGTCACTGAGGACGAAGGTGAGAGGACTTTTGGCTACTGGCGACAACTGAGAGCAGTCGCTG  
GGGAAAGAGAATTGCGTGGGTTGAAGGCCGACGCTTCGAGCTTGAGTG

+

FFF,FF::FFFFFFFFFFFF,::FFFF:FF::FFFFFFFF,FF:FFFF,FFFFFFFFFFFFFFFF  
FFFFFF:FF:FFFFFF:FFF:FFFFFFFFFFFFFFFF,FFFFFF

@A00721:190:HGJW7DSXY:4:1543:32045:28119\_2:N:0:TCTGCAAG+GCTGCACT  
CGTTTGGAGATTTTATCCGCGCTTAACCTATGGGGCGAAGATCCCCTATGGAGTCTTGAAGGACTTAG  
GTTGGCATATTTATGCCGACGATAATAAGCATGTACCCCTAAGCACC

+

FFFFFFFFFFFFFFFFFFFFFFFFFFFFFFFFFFFFFFFFFFFFFFFF:FFFFFFFFFFFFFFFFFFFF  
FFFFFFFFFFFFFFFFFFFFFFFFFFFFFFFFFFFFFFFFFFFFFFFF

@A00721:190:HGJW7DSXY:4:1325:21522:20572\_1:N:0:TCTGCAAG+GCTGCACT  
AGAGAGAGTGTGAGAGAGTCGCTCTCACTATTTTTGCCAGAATGCGGGCTTCTGACTGATGAGGTT  
AAAACCTTGCTCCTTCTGTGGGTGAGGGTTTTTGTATATTCACTGGTTCTGGGAGGCTGCTTTCCT  
C

+

FFFFFFFFFFFFFFFF:FFFFFFFFFFFFFFFF:F::FFFFFFFFFFFFFFFFFFFFFFFFFFFF  
:FFFFFF,FFFFFFFFFFFFFFFFFFFFFFFFFFFFFFFF:FF:FFFF,FFFFFFFFFFFFFFFF  
F

@A00721:190:HGJW7DSXY:4:1377:19985:25833\_2:N:0:TCTGCAAG+GCTGCACT  
ACACTTTTCTTGAAAATTTTCTTTCTCCGTCATTGGGGATTTCGATGTGAGAAGGTGGAAGGTGT  
CAAGGGTCTTCTTCATGCTGATCTTTCAGGACCTAATCACATCATGAT

+

FFFF:FFFFFFFFFFFFFFFFFFFFFFFF:FFFFFFFFFFFFFFFFFFFF,FFF:FFFF  
FFFFFFFFFFFFFFFFFFFFFFFFFFFFFFFF:FFFFFF,FFF

@A00721:190:HGJW7DSXY:4:1601:18258:15671\_2:N:0:TCTGCAAG+GCTGCACT  
CGAAATTAAAGACGGGGGATTAAGAGTCCAGCTGTAACCTGTCATTTAGAGAGGGGAGCTCTGAAAA  
GGAACTTCGTCAGAAGATGAGGAAGTCTAAGAGGAGGAGTTTGAGGA

+

FFFFFFFFFF:FF:FFFFFFFF:FFFFFFFFFFFFFFFFFFFF,FFFFFFFFFFFFFFFFFFFF  
FFF,FFFF:FF,FFF:FFFFFF:FFFF:F:FFFFFFFFFFFF:FFF

@A00721:190:HGJW7DSXY:4:2316:8395:28244\_2:N:0:TCTGCAAG+GCTGCACT  
AAGAAGGATTATTTGAAGCAGGGTTACCACTTCCTAAGGTGGATGAGGGAGGTTGTTTCTTTGGAGT

TTTAGATAATCTTTTGAGAAGGGGTCATAGAGCCAGCAAGAGAAGCTT  
+  
FFFFFFFFFFFFFFFFFFFFFFFFFFFFFFFFFFFFFFFFFFFFFFFFFFFFFFFFFFFFFFFFFFFFFFFF  
FFFFFFFFFFFFFFFFFFFFFFFFFFFFFFFFFFFFFFFFFFFFFFFFFFFFFFFFFFFFFFFFFFFFFFFF  
@A00721:190:HGJW7DSXY:4:2567:15176:35759\_2:N:0:TCTGCAAG+GCTGCACT  
AGAATTCGGTAACTTACCATATTGTTCTTCCGGGAAGTTGTGGGATTTAACTTTGACTCAACTACTC  
CGATCAGATCCGGATGGTTTGAGTGGTATGGACTACTCGACTTTTGAT  
+  
FFFFFFFFFFF:FFFFFFFFFFF,FFFFFFFFFFFFFFFFFFF,FFFFFFF,FFFFFFFFFFFFFFFFFFF:F  
FFFFFFFFFFFFFFFFFFF:FFF,:FF,FFFFFFFFFFFFFFFFFFFFFFFFFFFFFFFFFFF:  
@A00721:190:HGJW7DSXY:4:1452:5195:36949\_1:N:0:TCTGCAAG+GCTGCACT  
TTCTGTAGCTCTGAGGGCGGTTGAGGGAGCCGTTTGGCCGACTTTAACTATTCTAAGAGTCTTTATG  
ATTCAAAACCTATCGTTGTCGTACCTTACAAGGTTGAGGAGACTTTACAGCGGCTTATTGTCGCGCAG  
TTT  
+  
FFFFFFFFFFFFFFFFFFFFFFFFFFFFFFFFFFFFFFFFFFFFFFFFFFFFFFFFFFFFFFFFFFFFFFFF  
FFFFFFFFFFFFFFFFFFFFFFFFFFFFFFFFFFFFFFFFFFFFFFFFFFFFFFFFFFFFFFFFFFFFFFFF  
FFF  
@A00721:190:HGJW7DSXY:4:1477:13503:16297\_1:N:0:TCTGCAAG+GCTGCACT  
GCGATATTCGTTTTTCATATCCAAAACCTCCTTGAATGGAGTACATATTTGCAACCCTATTCTTGATGTG  
AAAGATGCATCGAGGTATACGTCTAGGAACATTGATTGGGAACGTACCTACTCACGAGACGTCATGAA  
AGC  
+  
FFFFFFFFFFFFFFFFFFFFFFFFFFFFFFFFFFFFFFFFFFFFFFFFFFFFFFFFFFFFFFFFFFFFFFFF:FFFFFFFFFFF  
FFFFFFFFFFFFFFFFFFFFFFFFFFFFFFFFFFFFFFFFFFFFFFFFFFFFFFFFFFFFFFFFFFFFFFFF  
FFF  
@A00721:190:HGJW7DSXY:4:2419:21766:12038\_2:N:0:TCTGCAAG+GCTGCACT  
TACAAGAACGCTTTGGATTGTGACCATAAAGCCTCAGTTGCGATAGCTGTAGAGGTATACGATATCTC  
TCTTGATGATGTAGCCACTATAATGCTTAAGAGAGAGATTGATGTATG  
+  
FFFFFFFFF,::::FFFFFFF,:FFF,F,FFF,,FF,FFF:FFFFFF:F,F:FF,FFFFFFFF,FF:FFFFF  
F:FFFFFFFF:F,,F:FFFFFFFF:,,FF,F:FFFFFFFF:FF:FF:,F:F  
@A00721:190:HGJW7DSXY:4:2102:4887:13557\_2:N:0:TCTGCAAG+GCTGCACT  
ATCTCATCGCTATACGCATACCTGATTGGAAGAAGCGAGGTTTCGTTCTCAATAAAAATTTTTCTCAA  
GAGATTATGGTTGATAAAGTTTTCTTCATAAGGGCTATTACGTACGTC  
+  
FFFFFFFFFFFFFFFFFFFFFFFFFFFFFFFFFFFFFFFFFFFFFFFFFFFFFFFFFFFFFFFFFFFFFFFF  
FFFFFFFFFFFFFFFFFFF:F:FFFFFFFFFFFFFFFFFFF:FFFFFFFFFFFFFFFFFFF  
@A00721:190:HGJW7DSXY:4:2158:32081:30906\_1:N:0:TCTGCAAG+GCTGCACT  
ACGAGATCTTGCAGAGTGACTGGAGTTCATACGTGTGCTCTTCCGATCTCAACAGTGCGAGGATTGTG  
ATCTCGGGGAAAGTGATTCACCAAGATGTTTCATATAGATACGAGATACCTAGAGAAGGTCGCAGCGAT  
CTT  
+  
FFF,FFFFF:FFFFFFFFFFFFF:FFFFFFFFFFFFFFFFFFFFFFFFFFFFFFFFFFFFFFFF,FFFFFFFFFFFFFFFFFFF  
FFFFFFFFFFFFFFFFFFFFFFFFFFFFFFFFFFFFFFFFFFFFFFFFFFFFFFFFFFFFFFFFFFFFFFFF  
FFF  
@A00721:190:HGJW7DSXY:4:1250:32615:11256\_2:N:0:TCTGCAAG+GCTGCACT  
AAGAAGACTTTGGGTACACGTTATGCTCGCAAACCTTAACGTTAGTACCGGAGGTGATCTCTCTGCTTC  
TGCGTTACTGAGAGAAAAGATTACAGACGCCTACGGTGACTTTATGGA  
+  
FFF:FFFFFFFFFFFFFFFFFFFFFFFFFFFFFFFFFFFFFFFFFFFFFFFFFFFFFFFFFFFFFFFFFFF  
FF:FFFFFFFFFFFFFFFFFFF:FFF:FFFFFFFFFFFFFFFFFFFFFFFFFFFFFFFFFFF  
@A00721:190:HGJW7DSXY:4:1128:14859:35430\_2:N:0:TCTGCAAG+GCTGCACT  
CTACGGTCCTTATCAAAGAAAATGGTGAACCGGTCTCTAAATCTTTTGAGATTGAGAAGATTGAAGAA

CACGTCAAGAAGTCGCTCGGCGTTGTTCTTGAAAACCAAGTTAAGAAG  
+  
FFFFFFFF,FF:FFFFFFFFFFFFFFFFFFFFFFFF:FFFFFF:FFFFFF:FF:FF:FFFFFFFFFFFF  
:FFFFFFFFFFFF,FF,:FFFFFFFFFFFF::F,FFF:FFF:FFF  
@A00721:190:HGJW7DSXY:4:2517:25527:14857\_2:N:0:TCTGCAAG+GCTGCACT  
GGTTCAGCTACGAGAGGTGATCCCGGATGTGGATTGAAGGCTGGCTCTAAGGGAGACTCCTTCTTTTT  
GAATGTTGTAAAGAATTGGGTTGAGAAGTGTGCTTTACAAGGAGTTAG  
+  
FFFFFFFFFFFFFFFFFFFFFFFFFFFFFFFFFFFFFFFFFFFFFFFFFFFFFFFFFFFFFFFFFFFF  
FFFFFFFFFFFFFFFFFFFFFFFFFFFFFFFFFFFFFFFFFFFFFFFF:FFFFFF  
@A00721:190:HGJW7DSXY:4:2124:9986:30874\_2:N:0:TCTGCAAG+GCTGCACT  
CTTATCACCACCTTTTGAAGGAAAATAATTGGTGATGAAAATACGTATGTCGGTGGGGTTCTCAAGGC  
TCTCATCGCCACTGGGATTCTAAGGGGTTCCATAAGATATTATCTGAC  
+  
FFFFFFFFFFFFFFFF,FFFFFF:FFFFFF:FFFFFFFFFFFF:F::FFF:FFFFFFFFFFFFFFFFFFFF  
FFFFFFFFFFFF:F:FFFFFFFFFFFFFFFFFFFFFFFF:F:FFFFFFFFFFFF  
@A00721:190:HGJW7DSXY:4:1113:9607:24737\_2:N:0:TCTGCAAG+GCTGCACT  
TTCAGAGTCTCTTGGAAGTCCAGGTAGCTAATGTTCTTGCAATAGCCACAGACTTTCTGGGAAAAGAG  
ACCTCTGTTGGTAGAGGAGTTGAGAGAATTACTCAGATTCAATCTGGC  
+  
FFFFFFFFFFFFFFFFFFFFFFFFFFFFFFFFFFFF:FFFFFF:FFFFFFFFFFFFFFFFFFFFFFFF:FFF  
FFFF,FFFFFFFFFFFFFFFFFFFF::FFFFFFFFFFFF,FF::F  
@A00721:190:HGJW7DSXY:4:2626:20148:9706\_2:N:0:TCTGCAAG+GCTGCACT  
GTCGCGAAAACGATGAAGATTTCCACACTGTTTCGAGAATCTTCTGATGCTGAATTTGAGGAAAATTT  
TTCGGAAGTTTTTGGTATAAATCCTGATGGCTCAGTACAGGGAGGAGG  
+  
FFFFFFFFFFFFFFFFFFFFFFFFFFFFFFFFFFFF:FFFFFFFFFFFFFFFFFFFFFFFF:F:FFFFFFFFFFFF  
FFFFFFFF:F:FFFFFF:FFFFFFFFFFFFFFFFFFFFFFFF:FFFFFF  
@A00721:190:HGJW7DSXY:4:1611:24777:24330\_1:N:0:TCTGCAAG+GCTGCACT  
ATGTGTCACGCTACACTCGAAATATGGGCCATCATTTGGAAGTATAGTTGGCGTCTTGTGCTTGACGT  
CATTACAGTCTGGAAGTTAGATCATTTGTTTCAGGAAGATCTCTACAGAGATTATCGAGAGTTGTGATC  
TAG  
+  
:FF:F,,FF::FF::,,FFF,F::F,FF,F,F::,,,:FF,FFFFFFFF:F:F,FF:FFFFFFFFFFFF  
FF,FF,FFFFFF::FFFF,:FFFF:F:F,,,,:FFFFFFFF:F,FFF,F,FFFF,,F,,:FF:F:FFF  
FF,  
@A00721:190:HGJW7DSXY:4:2115:14109:15092\_2:N:0:TCTGCAAG+GCTGCACT  
TAGAGTTCTTCTAACCAGGACTGATGGTGAGATTCTTTTACCTTTTGAGGTCCAGGAACCTTTACTC  
CTAGTGTCTTTTCTAGAGTCCAAGGACGTTTCCGTCGGAGGATGACAG  
+  
FFFFFFFFFFFFFFFFFFFFFFFFFFFFFFFFFFFFFFFFFFFFFFFFFFFFFFFFFFFFFFFFFFFF:FFFFFF  
FFFFFFFFFFFFFFFFFFFFFFFFFFFFFFFFFFFFFFFFFFFFFFFFFFFFFFFFFFFF  
@A00721:190:HGJW7DSXY:4:1146:26214:13041\_2:N:0:TCTGCAAG+GCTGCACT  
TAAAGCCTGTCCAGTTGTCGATGATGTTTCGGGCTGTGGGATTAACCTCCCTCGTGAACTTACGACG  
ATGTTCTCGCTCGCATTTACAAGGATTACTAAGTCTGAGATCTGCCA  
+  
FFFFFFFFFFFFFFFFFFFFFFFFFFFFFFFFFFFFFFFFFFFFFFFFFFFFFFFFFFFFFFFFFFFF  
FFFFFFFF:FFFFFFFFFFFFFFFFFFFFFFFFFFFFFFFFFFFF:FFFF  
@A00721:190:HGJW7DSXY:4:1315:15176:28150\_1:N:0:TCTGCAAG+GCTGCACT  
CTTCTAATAGAGGATCCTGATGACATTATTTCAACGGATACCGATCTCAGTTCTACCACAGAAACCGT  
CTCAGGAAGTGTCTCCACTGATTCGGAATTAGAGAAAGACGACCTTCTTGTGGGACTGAGACCTCTG  
AAT  
+  
FFFFFFFFFFFFFFFFFFFF,FFFF,FFFF:FF:FFFFFFFFFFFFFFFFFFFF:FFFFFFFFFFFFFFFF

FFFFFFFFFFFFFFFFFFFFFFFFFFFFFFFFFFFFFFFFFFFFFFFFFFFFFFFFFFFFFFFFFFFFFFFFFFFFFFFF  
FFF

@A00721:190:HGJW7DSXY:4:2211:14507:31782\_1:N:0:TCTGCAAG+GCTGCACT  
AGGACGTTGAAAGGGATAATTTCAACTCTGAGACTTCTAAGAGTGTTTCAAAAGACCAGAAACGTAAC  
AAGAAGAATAAAGGTAGGAAGGGGAGAAAACAGAACAGCGAGCGGTTGAAGAGAAACTGATATGGT  
TGC

+

FF:FFF:FFFF:F,FFFFFFFFFFFFFFFFFFFFFFFFFFFFFFFFFFFFFFFFFFFFFFFFFFFFFFFFFFFF  
FFFFFF:FFFFFFFFFFFFFFFFFFFFFFFFFFFFFFFFFFFFFFFFFFFFFFFFFFFFFFFFFFFFFFFFFFFF  
FFF

@A00721:190:HGJW7DSXY:4:2242:30282:13416\_1:N:0:TCTGCAAG+GCTGCACT  
AATTAAGACAGACGTGAAAGTTATGATGAGTGATCGTATTAGAACAGCTGATTCTTATTGCATGAACG  
TCGCTGAGGTCAAACCTGTGGACGTTCTTTTCATCGACGAATTATTCATGATTCACGCTGGTCAGACC  
CTT

+

FFFFFFFFFFFFFFFFFFFFFFFFFFFFFFFFFFFFFFFFFFFFFFFFFFFFFFFFFFFFFFFFFFFFFFFFFFFF  
FFFFFFFFFFFFFFFFFFFFFFFFFFFFFFFFFFFFFFFFFFFFFFFFFFFFFFFFFFFFFFFFFFFFFFFFFFFF  
FFF

@A00721:190:HGJW7DSXY:4:1510:23457:36918\_2:N:0:TCTGCAAG+GCTGCACT  
AGGCGGCTTATACCATAGGTTACGGTGATTCCAATCAAATCGGATTCATCAATCGTATTGATCTCCAA  
GTCGCAAACTACTTCAACATCAACGACATCATTCTTGATGAGTGTCGT

+

FFFFFFFFFFFFFFFFFFFFFFFFFFFFFFFFFFFFFFFFFFFFFFFFFFFFFFFFFFFFFFFFFFFFFFFFFFFF  
FFFFFFFFFFFFFFFFFFFFFFFFFFFFFFFFFFFFFFFFFFFFFFFFFFFFFFFFFFFFFFFFFFFFFFFFFFFF

@A00721:190:HGJW7DSXY:4:1402:8395:26459\_2:N:0:TCTGCAAG+GCTGCACT  
TCTCAGTTATCGCTGCCCCGCCGACGTTTGTGCGCAACTCTCAGAGGTTTACGGCAGAAAAATTTCTC  
CTGCTTGAATTCGAGAGAGGACACTATGGAATTAGACCTATCAGAT

+

FFFFFFFFFFFFFFFFFFFFFFFFFFFFFFFFFFFFFFFFFFFFFFFFFFFFFFFFFFFFFFFFFFFFFFFFFFFF  
FFFFFFFFFFFFFFFFFFFFFFFFFFFFFFFFFFFFFFFFFFFFFFFFFFFFFFFFFFFFFFFFFFFFFFFFFFFF

@A00721:190:HGJW7DSXY:4:1511:21902:14779\_1:N:0:TCTGCAAG+GCTGCACT  
CGGGAGGTTGCAGATTCAACCCCTTATATCGAGGCTATCGAGGACGATGAGTATATTGAAGTTGTTGA  
CGACAAGCCTCAAGAGGGTAGAGGACCACCTGGATCTTCTACTGTCTCTGCCTTCCAAGATTTCTTAG  
AAG

+

FFFF::F,FFFFFFFFFFFF:F:FFF:FFFFFF,FF,,,F,FFF,F,FF:FF:F,FFFFFFFFF:FFF  
FFFFFFFFFFFF:FFFF:FFFFFFFF:FF:FFF,:FFFF:FF,,FFFFFFFFFFFF,FFFFFFFF:F:F  
FFF

@A00721:190:HGJW7DSXY:4:1374:21938:11647\_2:N:0:TCTGCAAG+GCTGCACT  
CGGTAATCTTTCAGCCGAATTAAGTACTAATGAGTTCAAGTCGGTTGTCGATCGAATTAAGATCAAGG  
CTAATACCTTTATAGGTAAGAAGCCCTTGAGCCGCGTAGTCAGCGCG

+

FFFFFFFFFFFFFFFFFFFFFFFFFFFFFFFFFFFFFFFFFFFFFFFFFFFFFFFFFFFFFFFFFFFFFFFFFFFF  
FFFFFFFFFFFF:FFFFFFFFFFFFFFFFFFFFFFFF:FF:FFFFFFFFFFFF

@A00721:190:HGJW7DSXY:4:1122:10230:4178\_2:N:0:TCTGCAAG+GCTGCACT  
CGATTGGTCAACGTGCGAGTGGTACTGCTAACACATTCTTTGGTAATTGTATGATCACTCTTATGATG  
CTCTCTCTTTATTACGACCTTCGGAAGTTTAGAGCCGTCGCTGTCGCC

+

FFFFFFFFFFFFF:FFFFFFFFF:FFFFFFFFFFFFFFFFFFFFFFFFFFFFFFFFFFFFFFFFFFFFFFFFFFFF  
FFFFFFFFFFFFFFFFFFFFFFFF:FFFFFFFFFFFFFFFFFFFFFFFF:FFFFF

@A00721:190:HGJW7DSXY:4:2416:13223:10207\_2:N:0:TCTGCAAG+GCTGCACT  
TTTTAAACGATTCCGAGAGGTTTATCCTGATGTGGAGGGAGTTCTTGAAGCATCCCTACCTTTCCTTG  
TGAAAATTTTGATGCGGTTTCATAAGATTATCAGTAATCCTGATTCTA

+

FFFFFFFFFFFFFFFF:FFFFFFFFFFFFFFFFFFFFFFFFFFFFFFFFFFFFFFFFFFFFFFFF:FFFFFFFFFFFFFFFFFFFFFFFFFFFFFFFFFFFFFFFF:FF  
:FFFFFFFFFFFFFFFFFFFFFFFFFFFFFFFFFFFFFFFFFFFFFFFFFFFFFFFFFFFFFFFFFFFFFFFFFFFFFFFFFFFFFFFFFFFFFFFFFFFFFFFF  
@A00721:190:HGJW7DSXY:4:2320:12201:35086\_1:N:0:TCTGCAAG+GCTGCACT  
TTGAGCGAGAGCGACCAAGATCTAAATTCGGTAACGGTGCCTGGCGCTTTATTTTAAAAAGCTCCCTC  
CTCTCGCAAGTTTGATCTGATACTTATCACGAAAGGACTTGAGTCTTTTGATCAGTCTCTGACTTGAC  
CAT  
+  
FFFFFFFFFFFFFFFFFFFFFFFFFFFFFFFFFFFFFFFFFFFFFFFFFFFFFFFFFFFFFFFFFFFFFFFFFFFFFFFFFFFFFFFFFFFFFFFFFFFFFFFF  
FFFFFFFFFFFFFFFFFFFFFFFFFFFFFFFFFFFFFFFFFFFFFFFFFFFFFFFFFFFFFFFFFFFFFFFFFFFFFFFFFFFFFFFFFFFFFFFFFFFFFFFF  
FFF  
@A00721:190:HGJW7DSXY:4:2310:5620:26287\_1:N:0:TCTGCAAG+GCTGCACT  
TCAGTTGATTAAGACTCTTCCGAAAGGCGAACTTTGGGAATTTGAAGCTCAGGGTGAAGCACAACTT  
TGACCGTGACGAAGTGTGGTGTCTTGATCTACGTTACGGATATACTCTCCTTGAGTTCAGTTCGTAAG  
GAC  
+  
FFFFFFFFFFFFFFFFFFFF,FFFFF:FFFFF:F:FFFFFFFFFFFFF,,FFFFFFFFFFFF:FFFFF:FFFFF  
F,F,FFFFF,FF,FFFFFFFFFFFFFFFFFFFFFFFFFFFFFFFFFFFFFFFFFFFFFFFF:FFFFFFFFF:FFFFFFFFFFFF:FFFFFFFFF  
F:F  
@A00721:190:HGJW7DSXY:4:2577:21441:24565\_1:N:0:TCTGCAAG+GCTGCACT  
CGGCATACGAGATCTTGCAGAGTGACTGGAGTTCAGACGTGTGCTCTTCCGATCTCAGAGGGGCAGCA  
GCATGACCATAATTGGTATTGACTTTGGTACCACCTTTTCTACTGTCTGTCTCGCCTCTTGAATGAA  
GTT  
+  
FFFFFFFFFF,FFFFFFFFFFFFFFFFFFFFFFFFFFFFFFFFFFFFFFFFFFFFFFFF:FFFFFFFFFFFF,FFFFFFFFFFFF  
FFFFFFFFFFFFFFFFFFFFFFFFFFFFFFFFFFFFFFFFFFFFFFFFFFFFFFFFFFFFFFFFFFFFFFFFFFFFFFFFFFFFFFFFFFFFFFFF  
FFF  
@A00721:190:HGJW7DSXY:4:2520:24297:13542\_2:N:0:TCTGCAAG+GCTGCACT  
CTACAATCATTGGTTTTTCTAATAATGATGACACTATTGTTTATGGATATGATGCTATTACTCATGAT  
GGTTACGGTCAGGGAGGATTCTCAGTTTACAAGGACCTTAAGCGATGG  
+  
FFFFFFFFFFFFFFFFFFFFFFFFFFFFFFFFFFFFFFFFFFFFFFFFFFFFFFFFFFFFFFFFFFFFFFFFFFFFFFFFFFFFFFFFFFFFFFFFFFFFFFFF  
FFFFFFFFFFFFFFFFFFFFFFFFFFFFFFFFFFFFFFFFFFFFFFFFFFFFFFFFFFFFFFFFFFFFFFFFFFFFFFFFFFFFFFFFFFFFFFFF  
@A00721:190:HGJW7DSXY:4:2539:31222:34741\_1:N:0:TCTGCAAG+GCTGCACT  
TCACTTTTCTACTAAGAATTGGTCCTACTTTTGGACAAGGCCAACTTCGTAATCTTCATGAGATCGTTT  
CTTTCTTTATCTCTTTGTTGTTAGGGATTTTGGAGAGAGTGAAAGGCTTCAATTGTAGTGTTTGGTC  
GTT  
+  
FFFFF:FFFFFFFFF:FFFFFFFFFFFFFFFFFFFFFFFFFFFFFFFFFFFFFFFFFFFFFFFFFFFFFFFFFFFFFFFFFFFFFFFFFFFFFFFF  
FFFFFFFFFFFFFFFFFFFFFFFFFFFFFFFFFFFFFFFFFFFFFFFFFFFFFFFFFFFFFFFFFFFFFFFFFFFFFFFFFFFFFFFFFFFFFFFF  
FFF  
@A00721:190:HGJW7DSXY:4:1202:6144:22216\_2:N:0:TCTGCAAG+GCTGCACT  
TCTACGCAAAGATATTTTCATGAAAACAACAGAGGAACGTACCGGATTACCTGTCTTTTCATATTATGAA  
TGAACCTTCGGCCGCTCTCTTTGCTTCGATGTTGGATGTCAAGAAGGG  
+  
FFFFFFFFFFFFFFFFFFFFFFFFFFFFFFFFFFFF,FFFFFFFFFFFFFFFFFFFFFFFFFFFFFFFFFFFFFFFFFFFFFFFF:FFFFFFFFFF  
FFFFFFFFFFFFFFFFFFFFFFFFFFFFFFFFFFFFFFFFFFFFFFFFFFFFFFFFFFFFFFFFFFFFFFFFFFFFFFFFFFFFFFFF  
@A00721:190:HGJW7DSXY:4:1413:9995:35994\_2:N:0:TCTGCAAG+GCTGCACT  
CCTACGTAGTTTATGACTTTGGTGGTGGTACTTTCGATACTTCTATCGTCTTACGTTACGGTAATTAC  
TATAGTGTTATTTATTCTGGTGGTGGTATGATAATCTTGGAGGTCGTGAC  
+  
FFFFFFFFFFFFFFFFFFFF,FFFFFFFFFFFFFFFFFFFFFFFFFFFFFFFFFFFFFFFFFFFFFFFFFFFFFFFFFFFFFFFFFFFFFFFF  
F:FFFFFFFFFFFFFFFFFFFFFFFFFFFFFFFFFFFFFFFFFFFFFFFFFFFFFFFFFFFFFFFFFFFFFFFFFFFFFFFF  
@A00721:190:HGJW7DSXY:4:2368:27218:34945\_2:N:0:TCTGCAAG+GCTGCACT  
GTTCTTATTACGGCGCACTTCTTTACCCGCCACCACACAACCTTTCAGTTTCACAACCTGAAGGAGGAGG

+

@A00721:190:HGJW7DSXY:4:2421:24623:27759\_1:N:0:TCTGCAAG+GCTGCACT

+

@A00721:190:HGJW7DSXY:4:1347:1859:19335\_1:N:0:TCTGCAAG+GCTGCACT

+

@A00721:190:HGJW7DSXY:4:2528:9878:11209\_1:N:0:TCTGCAAG+GCTGCACT

+

@A00721:190:HGJW7DSXY:4:1444:19135:36323\_1:N:0:TCTGCAAG+GCTGCACT

+

@A00721:190:HGJW7DSXY:4:2304:28709:2550\_2:N:0:TCTGCAAG+GCTGCACT

+

@A00721:190:HGJW7DSXY:4:1129:11605:32393\_2:N:0:TCTGCAAG+GCTGCACT

+

@A00721:190:HGJW7DSXY:4:2436:31928:11694\_1:N:0:TCTGCAAG+GCTGCACT

+

[illegible]

@A00721:190:HGJW7DSXY:4:1435:15239:28604\_2:N:0:TCTGCAAG+GCTGCACT  
GATTGTTATCAATTTAAATACATTACTGTTTCAAATCATCTTTACTCACAGACTCCGAAAATGGTTTC  
AAATGAGGTCAAAGCTCTATTTATTAAACGAACATTATCCGATTCTT

+

FF:FFFFFFFFFFFFFFFFFFFFFFFFFFFFFFFFFFFFFFFFFFFFFFFFFFFFFFFFFFFFFFFF  
FF:FFFF,FFFF:FFFFFFFFFFFFFFFFFFFFFFFFFFFFFFFFFFFFFFFFFFFFFFFF

@A00721:190:HGJW7DSXY:4:2169:20374:3427\_2:N:0:TCTGCAAG+GCTGCACT  
TTTCGACAAATTTTAGAACTTTATTTAGAACTCTCTCCGATCACCTTGGTGTGATCTCCCGAGGAT  
CTTTTCAATAAGATGTATGATGATAATCTACTATTTTTAAATAGTGAT

+

FFFFFFFFFFFF:FFFFFFFFFFFFFFFFFFFFFFFFFFFFFFFFFFFFFFFFFFFFFFFFFFFFFFFF  
FFFFFFFFFFFFFFFFFFFFFFFFFFFFFFFFFFFFFFFFFFFFFFFFFFFFFFFFFFFFFFFF

@A00721:190:HGJW7DSXY:4:1124:8386:34053\_1:N:0:TCTGCAAG+GCTGCACT  
TTATCAAAGATTTGGCTTGGTCTATTTACCGCAAAAAGTTGGAAGAGGTCTATGATATTTATTTACT  
TATACTTTAAATAGCACCGATTATAACTTGACTGTTGATAATATTACAATAGCTCTTCTCAGAAGAT  
TAG

+

FFFFFFFFFFFFFFFFFFFFFFFFFFFF:FFFFFFFFFFFF:FFFFFFFFFFFFFFFFFFFF:FFFFFFFFFFFFFFFFFFFF  
FFFFFFFFFFFFFFFFFFFFFFFFFFFFFFFFFFFFFFFFFFFFFFFFFFFFFFFFFFFFFFFFFFFF  
FFF

@A00721:190:HGJW7DSXY:4:2327:26603:29215\_2:N:0:TCTGCAAG+GCTGCACT  
TCGGTAGCATTGATTTACTTTTACCGTTAGAACTGAAAAAGATTCTTTTCGAAAAGAAACCTATAAGT  
TACAAACGATTCTTCGACTATATTAAAGAAATAAAAATACTTCAAGTA

+

FFFFFFFFFFFFFFFFFFFFFFFFFFFFFFFFFFFFFFFFFFFFFFFFFFFFFFFFFFFFFFFFFFFF  
FFFFFFFFFFFFFFFFFFFFFFFFFFFFFFFFFFFFFFFFFFFF:FFFFFFFF

@A00721:190:HGJW7DSXY:4:2560:11632:25739\_1:N:0:TCTGCAAG+GCTGCACT  
ATTTTTAATGGTATGGTATAATGTGTCTTACAAATAGAACCTTCACTCTCGGTAATGAGAGTGATTC  
CTTAATATTCTAGTAACCGCTATGTGGGCATTACTAGGATTTATCACACTCCTAAATTTGATAGCAAT  
TTA

+

FFFFFFFFFFFFF:FFFFFFFFFFFFFFFFFFFFFFFFFFFFFFFFFFFFFFFFFFFFFFFFFFFFFFFF  
FFFFFFFFFFFFFFFFFFFFFFFFFFFF:F:FFFFFFFFFFFFFFFFFFFFFFFFFFFFFFFFFFFF:FFFFFFFFFFFF  
,FF

@A00721:190:HGJW7DSXY:4:1510:10972:29105\_1:N:0:TCTGCAAG+GCTGCACT  
GAGTACTTAATTCAATAGCTTTAGTATTATTTACTATCGCCTTTATTGAAAATTGTATAAGAGTTAAT  
TGCTTACACAAAAGTGACGCGCAAGGAATCTTAATTGATTGAAGCTAGGCGTTGGGGAGAATGAAC  
GCC

+

FFFFFFFFFFFFFFFFFFFF:FFFFFFFFFFFFFFFFFFFF,FFFFFFFFFFFFFFFFFFFFFFFFFFFFFFFF  
FFFFFFFFFFFFFFFFFFFFFFFFFFFF,FFFFFFFFFFFFFFFFFFFFFFFFFFFFFFFFFFFFFFFFFFFF  
FFF

@A00721:190:HGJW7DSXY:4:2518:12852:7780\_1:N:0:TCTGCAAG+GCTGCACT  
TAGGGTCAAACCTACTACCGCCGGTCGGCAGATCGGCACCACTGGTCTCTACGTTACAGGGACCCGCTG  
TGCAGAATAACCTTCCCAAATCTAGATCTGCACAGAAGAAGGCTGAAGGTCGTTACCGGACGACCACT  
CAA

+

F,FFF:FFF,F:FFF,F:,FF,FFF,FFF,FFF,FF:FF:,FF:FFFFFFFFFFFF:FFFFFFFF:FF  
F:FFFFFFFFFFFF:FF:,FF:,F,FFF,:FF:FFFFFFFF:FFF:FFFF:FF,:FFFFFFFFFFFF  
FF:

@A00721:190:HGJW7DSXY:4:1573:22092:28260\_1:N:0:TCTGCAAG+GCTGCACT  
CAGACGTGTGCTCTTCCGATCTCTCAGTCAAAAGTCACATTCACCACTCCCATGCCAATCAATGATGT  
GACTATACAGTTCGGCCATTTCAAGAGTGGTCAATACGTCGTGGGAGGTACTGAAGCCTTCCCCTCCG  
CTG



+  
FFF:FFFFFFFFFFFFFFFFFFFF:FF:FFFF:FFFFFFFFFFFFFFFFFFFF,FFFFFF:FFFFFFFF  
FFFFFFFFFFFFFFFFFFFFFFFFFFFFFFFFFFFFFFFFFFFFFFFFFFFFFFFFFFFFFFFFFFFFFFFF  
FFF  
@A00721:190:HGJW7DSXY:4:1552:9498:1689\_1:N:0:TCTGCAAG+GCTGCACT  
CAATCAATAGTTCTTCTGACCAGAATGAAAAGGGGTTTACCAGGGTAGTCTCTAAGTCTACCAGGAAG  
AGGGGAAATGTCCCCAAAAGTGAAGAATAAAGGGAAAGGTCCATCAGGACCTAAGAAGGGGAAATT  
ACC  
+  
FFFFFF:F:FF:FFFFFFFFFFFFFFFFFFFF:FFFFFFFFFFFF:FFFFFFFFFFFFFFFFFFFFFFFFFFFF  
FFFFFFFFFFFF,FFFFFFFFFFFFFFFFFFFF:FFFF,FFFFFFFFFFFFFFFFFFFFFFFFFFFFFFFFFFFF  
FFF  
@A00721:190:HGJW7DSXY:4:1503:27787:5995\_2:N:0:TCTGCAAG+GCTGCACT  
ATCTGCACGGGCCAAAGAGGCCGCTGCTACGAAGTCGCTGAAGGCGGCTTGGGTCATTAAGGGTAGCT  
GTAAAGTTGCGCCTGCCGACCCCATCTTTGAGACCAAGACTCTCTACA  
+  
FFFFFFFFFFFFFFFFFFFF::FFFFFFFFFFFFFFFFFFFFFFFFFFFFFFFFFFFF,FFFFFF:::FFFFF,FFF  
F,FFFFFFFFFFFFFFFFFFFFFFFFFFFF,FFFFFFFFFFFFFFFFFFFFFFFFFFFF  
@A00721:190:HGJW7DSXY:4:2209:5285:29528\_2:N:0:TCTGCAAG+GCTGCACT  
AAATCTGTTGAATTCGTCACCTGAGGACGAAGGTGAGAGGACTTTTGGCTACTGGCGACAACTGAGAG  
CAGTCGCTGGGGAAAGAGAATTGCGTGGGTGAAGGCCGACGCTTCGA  
+  
FFFFFFFFFFFFFFFFFFFFFFFFFFFFFFFFFFFF:FFFFFFFFFFFFFFFFFFFFFFFFFFFFFFFFFFFF  
FFFFFFFFFFFFFFFFFFFFFFFFFFFF,FFFFFFFFFFFF,FFFFFFFFFFFFFFFFFFFFFFFFFFFF  
@A00721:190:HGJW7DSXY:4:2254:5719:19852\_2:N:0:TCTGCAAG+GCTGCACT  
CGTTTGGAGGATTTTATCCGCGCTTAAGTATGGGGCGAAGATCCCCTATGGAGTCTTGAAGGACTTAG  
GTTGGCATATTTATGCCGACGATAATAAGCATGTCACCCTTAAGCACC  
+  
FFFFFFFFFFFFFFFFFFFFFFFFFFFFFFFFFFFFFFFFFFFFFFFFFFFFFFFFFFFF:FFFF:FFFFFFFFFFFF  
FFFFFFFFFFFFFFFFFFFFFFFFFFFFFFFFFFFFFFFFFFFFFFFFFFFFFFFFFFFF:FFF  
@A00721:190:HGJW7DSXY:4:1227:8648:1814\_2:N:0:TCTGCAAG+GCTGCACT  
AGAGAGTGTGAGAGAGTCGCTCTCACTATTTTTGCCAGAATGCGGGCTTTCTGACTGATGAGGTTAA  
AACTCTTGCTCCTTCTGTGGGTGAGGGTTTTTGTATATTCACTGGTT  
+  
FFFFFFFFFFFFFFFFFFFFFFFFFFFF:FF:F:,FFFFFFFF:FF:FFFF:FFFF:FF,F::FFFFFFFF,FFF  
FFF,::FF:F,FF,F:FFFFFFFF:FFFFFFFF:FF:FFFF,F:FFF:F  
@A00721:190:HGJW7DSXY:4:1504:6732:36542\_2:N:0:TCTGCAAG+GCTGCACT  
ACACTTTTCTTGAAAATTTTCTTTCTCCGTCATTGGGGATTTGATGTGAGAAGGTGAAGGTGT  
CAAGGGTCTTCTTCATGCTGATCTTTCAGGACCTAATCACATCATGAT  
+  
FFFFFFFFFFFFFFFFFFFFFFFFFFFFFFFFFFFF:FF,FFFFFFFFFFFFFFFFFFFFFFFFFFFF:FFFF:FF  
FFFFFFFFFFFF,FFFFFFFFFFFFFFFFFFFF,FFFFFFFFFFFFFFFFFFFF:FF,  
@A00721:190:HGJW7DSXY:4:1632:10899:9596\_2:N:0:TCTGCAAG+GCTGCACT  
CGAAATTAAAGACGGGGGGATTAAGAGTCCAGCTGTAAGTGTCAATTCAGAGAGGGGAGCTCTGAAAA  
GGAACTTCGTCAGAAGATGAGGAAGTCTAAGAGATCGGAAGAGCGTC  
+  
FFFFFFFFFFFFFFFFFFFFFFFFFFFFFFFFFFFF:FFFF:F:F:FFFFFFFFFFFFFFFFFFFF:FFFFFFFF:  
FFFFFFFFFFFFFFFFFFFFFFFFFFFFFFFFFFFFFFFFFFFFFFFFFFFF:FFFF:FFFF  
@A00721:190:HGJW7DSXY:4:2403:22797:3427\_2:N:0:TCTGCAAG+GCTGCACT  
AAGAAGGATTATTTGAAGCAGGGGTTACCACTTCCTAAGGTGGATGAGGGAGGTTGTTTCTTTGGAGT  
TTTAGATAATCTTTTGAGAAGGGGTCATAGAGCCAGCAAGAGAAGCTT  
+  
,F:, ,FFFFFFFF,FFFFFFFF:FFFFFFFF::FFFFFFFF:FF::FFFFFFFFFFFF:FFFFFF  
FFF:FFFFFFFFFFFFFFFFFFFF:FFFFFFFF:FF:FFF, ,FFFFFFFF,

@A00721:190:HGJW7DSXY:4:2647:2003:4679\_2:N:0:TCTGCAAG+GCTGCACT  
AGAATTCGTAACCTTACCATATTGTTCTTCCGGGAAGTTGTGGGATTTAACTTTGACTCAACTACTC  
CGATCAGATCCGGATGGTTTGATTGGTATGGACTACTCGACTTTTGAT

+

FFF,FFFFFFFFFFFFFFFF:FFFFFFFFFFFFFFFF:F,FFFFFFFFFFFFFFFFFFFFFFFF  
FFFFFFFFFFFFFFFF:F:FFFFF,FFF:FFFFFFFFFFFFFFFF

@A00721:190:HGJW7DSXY:4:1550:18168:29199\_1:N:0:TCTGCAAG+GCTGCACT  
TTCTGTAGCTCTGAGGGCGTTGAGGGAGCCGTTTTGGCCGACTTTAACTATTCTAAGAGTCTTTATG  
ATTCAAAACCTATCGTTGTCGTACCTTACAAGGTTGAGGAGACTTTACAGCGGCTTATTGTGCGCGCAG  
TTT

+

FFFFF:FFFFFFFFFFFFFFFFFFFFFFFFFFFFFFFFFFFFFFFFFFFFFFFFFFFFFFFF  
FFFFFFFFFFFFFFFFFFFFFFFFFFFFFFFFFFFFFFFFFFFFFFFFFFFFFFFFFFFFFFFF  
FFF

@A00721:190:HGJW7DSXY:4:2428:1208:11663\_1:N:0:TCTGCAAG+GCTGCACT  
GCGATATTCGTTTTCATATCCAAAACCTCCTTGAATGGAGTACATATTTGCAACCCTATTCTTGATGTG  
AAAGATGCATCGAGGTATACGTCTAGGAACATTGATTGGGAACGTACCTACTCACGAGACGTCATGAA  
AGC

+

FFFFFFFFFFFFFFFFFFFFFFFFFFFFFFFFFFFFFFFFFFFFFFFFFFFFFFFF:FFFFFFFFFFFFFFFF  
FFFFFFFFFFFFFFFFFFFFFFFFFFFFFFFFFFFFFFFFFFFFFFFFFFFFFFFFFFFFFFFF:FFF  
FFF

@A00721:190:HGJW7DSXY:4:2514:14208:20494\_2:N:0:TCTGCAAG+GCTGCACT  
TACAAGAACGCTTTGGATTGTGACCATAAAGCCTCAGTTGCGATAGCTGTAGAGGTATACGATATCTC  
TCTTGATGATGTAGCCACTATAATGCTTAAGAGAGAGATTGATGTATG

+

FFFFFFFFFFFFFFFFFFFFFFFFFFFFFFFFFFFFFFFFFFFFFFFFFFFFFFFF:FFFFFFFFFFFFFFFF  
FFFFFFFFFFFFFFFFFFFFFFFF,FFFFFFFFF:FFFFFFF,FFFFFFFFF

@A00721:190:HGJW7DSXY:4:2178:7581:19664\_2:N:0:TCTGCAAG+GCTGCACT  
ATCTCATCGCTATACGCATACCTGATTGGAAGAAGCGAGGTTGTTTCTCAATAAAAATTTTCTCAA  
GAGATTATGGTTGATAAAGTTTTCTTCATAAGGGCTATTACAGTACGTC

+

FFFFFFFFFFFFFFFFFFFFFFFFFFFFFFFFFFFFFFFFFFFFFFFFFFFFFFFF:FFFFFFFFFFFFFFFF  
FFFF,FFFF,:FF:FFFF:FFFFFFFFFFFFFFFF:FFFFFFFFF

@A00721:190:HGJW7DSXY:4:2358:27905:9987\_1:N:0:TCTGCAAG+GCTGCACT  
ACGAGATCTTGCAGAGTGACTGGAGTTCAGACGTGTGCTCTTCCGATCTCAACAGTGCGAGGATTGTC  
ATCTCGGGGAAAGTGATTCACCAAGATGTTTCATATAGATACGAGATACCTAGAGAAGGTCGAGCGAT  
CTT

+

FF,FFFF::FFFFFFFF:FFF:FFFFFFFF:FFFF,,FFFFFFFFF:,FF:FFFFFFFFFFFF:  
FFFFFFFF:FFFFFFFFFFFFFFFFFFFFFFFFFFFFFFFFFFFFFFFFFFFFFFFF:FFFFFFFFFFFFFFFF  
FFF

@A00721:190:HGJW7DSXY:4:1250:6307:33520\_2:N:0:TCTGCAAG+GCTGCACT  
AAGAAGACTTTGGGTACACGTTATGCTCGCAAACCTTAACGTTAGTACCGAGGTGATCTCTCTGCTTC  
TGCGTTACTGAGAGAAAAGATTACAGGACGCCTACGGTGACTTTATGGA

+

FFFFFFFFFFFFFFFFFFFFFFFFFFFFFFFFFFFFFFFFFFFFFFFFFFFFFFFFFFFFFFFF  
FFFFFFFFFFFFFFFF:FFFFFFFFFFFFFFFF:FFFFFFFFFFFFFFFF

@A00721:190:HGJW7DSXY:4:1407:17671:27179\_2:N:0:TCTGCAAG+GCTGCACT  
CTACGGTCCTTATCCAAGAAAATGGTGAACCGGTCTCTAAATCTTTTGAGATTGAGAAGATTGAAGAA  
CACGTCAAGAAGTCGCTCGCGCTTGTCTTGAAAACCAAGTTAAGAAG

+

FFFFFFFFFFFF,FF,FFFFFF:FFFF:FFFFFFFFFFFF,F:FFF,FFFFFFFF:FFF:FFFFFF  
FFFFFFFFFFFFFFFFFFFF:F:FFFFFFFFFFFFFFFFFFFF,F:FFF

@A00721:190:HGJW7DSXY:4:2531:12310:30452\_2:N:0:TCTGCAAG+GCTGCACT  
GGTTCAGCTACGAGAGGTGATCCCGGATGTGGATTGAAGGCTGGCTCTAAGGGAGACTCCTTCTTTTT  
GAATGTTGTAAAGAATTGGGTTGAGAAGCGTGCAGATCGGAAGAGCGT

+

FFFFFFFFFFFFFFFFFFFFFFFFFFFFFFFFFFFFFFFFFFFFFFFFFFFFFFFFFFFFFFFFFFFFFFFF:FF  
FFFFFFFF:FFFFFF:FFFFFF:FFFFFFFFFFFFFFFFFFFFFFFF

@A00721:190:HGJW7DSXY:4:2242:25057:20995\_2:N:0:TCTGCAAG+GCTGCACT  
CTTATCACCACCTTTTGAAAGGAAAATAATTGGTGATGAAAATACGTATGTCGGTGGGGTTCTCAAGGC  
TCTCATCGCCACTGGGATTCTAAGGGGTTCCATAAGATATTATCTGAC

+

FFFFFFFF:FF,FFFFFFFF:FFFFFFFF,,F:FFF:F:FFFFFFFF,FFFF:FFFFFFFF  
FFFF:FFFF:FFFFFFFF:FFFF:FFFFFFFF,FFF,FFFF:

@A00721:190:HGJW7DSXY:4:1139:19108:22467\_2:N:0:TCTGCAAG+GCTGCACT  
TTCAGAGTCTCTTGAAGTCCAGGTAGCTAATGTTCTTGCAATAGCCACAGACTTTCTGGGAAAAGAG  
ACCTCTGTTGGTAGAGGAGTTGAGAGAATTACTCAGATTCAATCTGGC

+

FFFFFFFFFFFFFFFFFFFFFFFFFFFFFFFFFFFFFFFFFFFFFFFFFFFFFFFFFFFFFFFFFFFF,FFFFFFFF  
FFFFFFFF:FFFFFF:F:FFFF:FFFFFFFFFFFF,FFF:FF

@A00721:190:HGJW7DSXY:4:2626:20283:9815\_2:N:0:TCTGCAAG+GCTGCACT  
GTCGCGGAAAACGATGAAGATTTCCACACTGTTGAGAATCTTCTGATGCTGAATTTGAGGAAAATTT  
TTCGAAGTTTTTGGTATAAATCCTGATGGCTCAGTACAGGGAGGAGG

+

FFFFFFFFFFFFFFFFFFFFFFFFFFFFFFFFFFFFFFFFFFFFFFFFFFFFFFFFFFFFFFFFFFFF  
FFF:FFFFFFFFFFFF,FFFFFFFFFFFFFFFFFFFFFFFFFFFFFFFF

@A00721:190:HGJW7DSXY:4:2308:18304:10363\_1:N:0:TCTGCAAG+GCTGCACT  
ATGTGTCACGCTACACTCGAAATATGGGCCCTCATAAGGAAGTATAGTTGGCGTCTTGTGCTTGACGT  
CATTACAGTCTGGAAGTTAGATCATTTGTTGAGGAAGATCTCTACAGAGATTATCGAGAGTTGTGATC  
TAG

+

FFFFFFFF:FFFFFFFFFFFFFFFF:FFFFFFFFFFFF:FFFFFFFFFFFF:FFFFFFFFFFFF  
FFFF:FFFF:FFFFFFFF:FFFFFFFFFFFF,:FFFFFFFFFFFFFFFFFFFFFFFFFFFFFFFF:FF  
FFF

@A00721:190:HGJW7DSXY:4:2153:23529:19883\_2:N:0:TCTGCAAG+GCTGCACT  
TAGAGTTCTTCTAACCAGGACTGATGGTGAGATTCTTTTACCTTTTGAGAGTCCAGGAACCTTTACTC  
CTAGTGTCTTTTCTAGAGTCCAAGGACGTTTCCGTCGGAGGATGACAG

+

FFFFFFFFFFFFFFFFFFFFFFFFFFFFFFFFFFFFFFFFFFFFFFFFFFFFFFFFFFFFFFFFFFFF  
FFFFFFFFFFFFFFFFFFFFFFFFFFFFFFFFFFFFFFFFFFFFFFFFFFFFFFFF

@A00721:190:HGJW7DSXY:4:1378:12472:14387\_2:N:0:TCTGCAAG+GCTGCACT  
TAAAGCCTGTCCAGTTGTCGATGATGTTGCGGCTGTGGGGATTAACCTCCCTCGTGAAACTTACGACG  
ATGTTCTCGCTCGCATTTACAAGGATTACTAAGTCTGAGATCTGCCA

+

FFFFFFFFFFFF:FFFFFFFFFFFFFFFF:FFFFFFFFFFFF:FFFF:FFFFFFFFFFFFFFFF  
FFF:FFFFFFFFFFFFFFFFFFFF,:FFFFFFFFFFFFFFFF

@A00721:190:HGJW7DSXY:4:1368:7916:12414\_1:N:0:TCTGCAAG+GCTGCACT  
CTTCTAATAGAGGATCCTGATGACATTATTTCAACGGATACCGATCTCAGTTCTACCACAGAAACCGT  
CTCAGGAAGTGTCTCCACTGATTCGGAATTAGAGAAAGACGACCTTCTTGTGGGGACTGAGACCTCTG  
AAT

+

FFFFFFFFFFFFFFFFFFFF:FFFF:FFFFFFFFFFFF:FFFFFFFF:F,FFF:FFFFFFFFFFFF  
FFFFFFFFFFFFFFFFFFFFFFFFFFFFFFFFFFFFFFFFFFFFFFFFFFFFFFFFFFFFFFFFFFFF  
FFF

@A00721:190:HGJW7DSXY:4:2463:7066:33959\_1:N:0:TCTGCAAG+GCTGCACT  
AGGACGTTGAAAGGGATAATTTCAACTCTGAGACTTCTAAGAGTGTTTCAAAGACCAGAAACGTAAC

AAGAAGAATAAAGGTAGGAAGGGGAGAAAAACAGAACAAGCGAGCGGTTGAAGAGAAAACCTGATATGGT  
TGC

+

FFFFFFFF,FFFFFFFFFFFFFFFFFFFFFFFFFFFFFFFFFFFFFFFFFFFFFFFFFFFFFFFFFFFFFFFF  
FFFFFFFFFFFFFFFFFFFFFFFFFFFFFFFFFFFFFFFFFFFFFFFFFFFFFFFFFFFFFFFFFFFFFFFF  
FFF

@A00721:190:HGJW7DSXY:4:2611:28420:28197\_1:N:0:TCTGCAAG+GCTGCACT  
AATTAAGACAGACGTGAAAGTTATGATGAGTGATCGTATTAGAACAGCTGATTCTTATTGCATGAACG  
TCGCTGAGGTCAAACCTGTGGACGTTCTTTTCATCGACGAATTATTTCATGATTCACGCTGGTCAGACC  
CTT

+

FFFFFFFFFFFFFFFFFFFFFFFFFFFFFFFFFFFFFFFFFFFFFFFFFFFFFFFFFFFFFFFFFFFFFFFF  
FFFFFFFFFFFFFFFFFFFFFFFFFFFFFFFFFFFFFFFFFFFFFFFFFFFFFFFFFFFFFFFFFFFFFFFF  
F:F

@A00721:190:HGJW7DSXY:4:2244:10691:33692\_2:N:0:TCTGCAAG+GCTGCACT  
AGGCGGCTTATACCATAGGTTACGGTGATTCCAATCAAATCGGATTCATCAATCGTATTGATCTCCAA  
GTCGCAAACTACTTCAACATCAACGACATCATTCTTGATGAGTGTCGT

+

FFFFFFFFFFFFFFFFFFFFFFFFFFFFFFFFFFFFFFFFFFFFFFFFFFFFFFFFFFFFFFFFFFFFFFFF  
FFFFFFFFFFFFFFFFFFFFFFFFFFFFFFFFFFFFFFFFFFFFFFFFFFFFFFFFFFFFFFFFFFFFFFFF

@A00721:190:HGJW7DSXY:4:1354:6008:8390\_2:N:0:TCTGCAAG+GCTGCACT  
TATCGCTGCCCGCCGCGCTTTGTGCGAACTCTCAGAGGTTTACGCGAGAAAAATTTCTCCTGCTTG  
TAATTCGAGAGAGGACACTATGGAAATTAGACCTATCAGATGTCTTGA

+

FF:FFFFFFFFFFFFFFFFFFFFFFFFFFFFFFFFFFFFFFFFFFFFFFFFFFFFFFFFFFFFFFFFFFFF  
FFFFFFFFFFFFFFFFFFFFFFFFFFFFFFFFFFFFFFFFFFFFFFFFFFFFFFFFFFFFFFFFFFFFFFFF

@A00721:190:HGJW7DSXY:4:1563:3513:31563\_1:N:0:TCTGCAAG+GCTGCACT  
CGGGAGGTTGCAGATTCAACCCCTTATATCGAGGCTATCGAGGACGATGAGTATCTTGAAGTTGTTGA  
CGACAAGCCTCAAGAGGGTAGAGGACCACCTGGATCTTCTACTGTCTCTGCCTTCCAAGATTTCTTAG  
AAG

+

FFFFFFFFFFFFFFFFFFFFFFFFFFFFFFFFFFFFFFFFFFFFFFFFFFFFFFFFFFFFFFFFFFFFFFFF  
FFFFFFFFFFFFFFFFFFFFFFFFFFFFFFFFFFFFFFFFFFFFFFFFFFFFFFFFFFFFFFFFFFFFFFFF  
FFF

@A00721:190:HGJW7DSXY:4:1446:4101:18302\_2:N:0:TCTGCAAG+GCTGCACT  
CGGTAATCTTTCAGCCGAATTAAGTACTAATGAGTTCAAGTCGGTTGTGATCGAATTAAGATCAAGG  
CTAATACCTTTATAGGTAAGAAGCCCTTGAGCCGCGTAGTCAGCGCG

+

FFFFFFFFFFFFFFFFFFFFFFFFFFFFFFFFFFFFFFFFFFFFFFFFFFFFFFFFFFFFFFFFFFFFFFFF  
FF:FFFFF:F:FFFFFFFFFFFFFFFFFFFFFFFFFFFFFFFFFFFFFFFFFFFFFFFFFFFFFFFFFFFF

@A00721:190:HGJW7DSXY:4:1122:8495:4241\_2:N:0:TCTGCAAG+GCTGCACT  
CGATTGGTCAACGTCGGAGTGGTACTGCTAACACATTCTTTGGTAATTGTATGATCACTCTTATGATG  
CTCTCTCTTTATTACGACCTTCGGAAGTTTAGAGCCGTCGCTGTCGCC

+

FFFFFFFFFFFFFFFFFFFFFFFFFFFFFFFFFFFFFFFFFFFFFFFFFFFFFFFFFFFFFFFFFFFFFFFF  
FFFFFFFFFFFFFFFFFFFFFFFFFFFFFFFFFFFFFFFFFFFFFFFFFFFFFFFFFFFFFFFFFFFFFFFF

@A00721:190:HGJW7DSXY:4:2456:4878:8406\_2:N:0:TCTGCAAG+GCTGCACT  
TTTTAAACGATTCCGAGAGGTTTATCCTGATGTGGAGGGAGTTCTTGAAGCATCCCTACCTTTCCTTG  
TGAAAATTTTGATGCGGTTTCATAAGATTATCAGTAATCCTGATTCTA

+

FFFFF:FFFFFFFFFFFFFFFFFFFFFFFFFFFFFFFFFFFFFFFFFFFFFFFFFFFFFFFFFFFFFFFF  
FFFFFFFFFFFFFFFFFFFFFFFFFFFFFFFFFFFFFFFFFFFFFFFFFFFFFFFFFFFFFFFFFFFFFFFF

@A00721:190:HGJW7DSXY:4:2501:13702:6965\_1:N:0:TCTGCAAG+GCTGCACT  
TTGAGCGAGAGCGACCAAGATCTAAATTCGGTAACGGTGCGTGCGCTTTATTTTAAAAGCTCCCTC

CTCTCGCAAGTTTGATCTGATACTTATCACGAAAGGACTTGAGTCTTTTGATCAGTCTCTGACTTGAC  
CAT

+

FFFFFFFFFFFFFFFFFFFFFFFFFFFFFFFFFFFFFFFFFFFFFFFFFFFFFFFFFFFFFFFFFFFFFFFF  
FFFFFFFFFFFFFFFFFFFFFFFFFFFFFFFFFFFFFFFFFFFFFFFFFFFFFFFFFFFFFFFFFFFFFFFF  
FFF

@A00721:190:HGJW7DSXY:4:2524:26160:24189\_1:N:0:TCTGCAAG+GCTGCACT  
TCAGTTGATTAAGACTCTTCCGAAAGGCGAACTTTGGGAATTTGAAGCTCAGGGTGAAGCACAACGTT  
TGACCGTGACGAAGTGTGGTGTCTTGATCTACGTTACGGATATACTCTCCTTGAGTTCACCTCGTAAG  
GAC

+

FFFFFFFFFFFFFFFFFFFFFFFFFFFFFFFFFFFFFFFFFFFFFFFFFFFFFFFFFFFFFFFFFFFFFFFF  
FFFFFFFFFFFFFFFFFFFFFFFFFFFFFFFFFFFFFFFFFFFFFFFFFFFFFFFFFFFFFFFFFFFFFFFF  
FFF

@A00721:190:HGJW7DSXY:4:1123:31765:16391\_2:N:0:TCTGCAAG+GCTGCACT  
AAAACGTCTTCGACAACAGCAGGGGTTTTCGAATAGTGATAGCCACCCGCTTACAGAGGGGCAGCAG  
CATGACCATAATTGGTATTGACTTTGGTACCACCTTTTCTACTGTCTG

+

FFFFFFFFFFFF::FFF:FFFFFFFF::FF:FFFFFFFFFFFFFFFFFFFF,,F:FFFF,FF,: ,FF::F  
,FF:FFFF,FF:F:FFFF:FFFF,FFF,FF,FF:FFFFFFFFFFFF

@A00721:190:HGJW7DSXY:4:2659:21911:14074\_2:N:0:TCTGCAAG+GCTGCACT  
GAAGTTTTAATGCTTAACAACAATGATAGTGAATTTATACCTACAATCATTGGTTTTCTAATAATGA  
TGACACTATTGTTTATGGATATGATGCTATTACTCATGATGGTTACGG

+

FFFFFFFFFFFFFFFFFFFFFFFFFFFFFFFFFFFFFFFFFFFFFFFFFFFFFFFFFFFFFFFFFFFFFFFF  
FFFFFFFF:FFFFFFFFFFFFFFFFFFFFFFFFFFFFFFFFFFFFFFFFFFFFFFFF:F

@A00721:190:HGJW7DSXY:4:2539:32000:33270\_1:N:0:TCTGCAAG+GCTGCACT  
TCACTTTTCACTAAGAATTGGTCCTACTTTTGGACAAGGCCAACTTCGTAATCTTCATGAGATCGTTT  
CTTTCTTTATCTCTTTGGTTGTTAGGGATTTGAGAGAGTGAAAGGCTTCAATTGTAGTGGTTTGGTC  
GTT

+

F:FFFFFFFF:FFFFFFFFFFFFFFFFFFFFFFFFFFFFFFFFFFFFFFFFFFFFFFFFFFFFFFFFFFFF  
FF:FFFFFFFFFFFFFFFFFFFFFFFFFFFFFFFFFFFFFFFFFFFFFFFF:FFFFFFFFFFFFFFFFFFFF  
FFF

@A00721:190:HGJW7DSXY:4:1419:10872:8015\_2:N:0:TCTGCAAG+GCTGCACT  
TCTACGCAAAGATATTTTCATGAAACTACAGAGGAACGTACCGGATTACCTGTCTTTCATATTATGAA  
TGAACCTTCGGCCGCTCTCTTTGCTTCGATGTTGGATGTCAAGAAGGG

+

FFFFFFFF:FFFFFFFFFFFFFFFFFFFFFFFFFFFFFFFFFFFFFFFFFFFFFFFFFFFFFFFFFFFF  
FFFFF:FFFFFFFF:FF,FFF:FFFF,F::FFFFFFFF:FFF

@A00721:190:HGJW7DSXY:4:1543:20057:8202\_2:N:0:TCTGCAAG+GCTGCACT  
CCTACGTAGTTTATGACTTTGGTGGTGGTACTTTGATACTTCTATCGTCTTACGTTACGGTAATTAC  
TATAGTGTATTATTCTGGTGGTATGATAATCTTGGAGGTCGTGAC

+

FFFFFFFFFFFFFFFFFFFFFFFFFFFFFFFFFFFFFFFFFFFFFFFFFFFFFFFFFFFFFFFFFFFF  
FFFFF:FFFFFFFFFFFFFFFFFFFFFFFFFFFFFFFFFFFFFFFFFFFF

@A00721:190:HGJW7DSXY:4:2475:3866:18584\_2:N:0:TCTGCAAG+GCTGCACT  
GTTCTTATTACGGCGCACTTCTTTACCCGCCACCACACAACCTTTCAGTTTCACAAGGAGGAGG  
TTTCTGTACTGGAAAACCCTCGTCAATACTTTTCAATAATATACGTC

+

F:FFFFFFFFFFFFFFFF:FFFFFFFFFFFFFFFFFFFFFFFFFFFFFFFFFFFFFFFFFFFFFFFFFFFF  
FFFFFFFFFFFFFFFFFFFFFFFFFFFFFFFFFFFFFFFFFFFFFFFF

@A00721:190:HGJW7DSXY:4:1620:32099:9737\_2:N:0:TCTGCAAG+GCTGCACT  
TTCCGGCCGGTGGTAGCTCATTTCTACCAGGGGCTATTACTCTTGCTGAAACAGCTATTAAAGCTGTT

+

@A00721:190:HGJW7DSXY:4:1421:30915:8406\_1:N:0:TCTGCAAG+GCTGCACT

+

@A00721:190:HGJW7DSXY:4:1133:10908:22169\_2:N:0:TCTGCAAG+GCTGCACT

+

@A00721:190:HGJW7DSXY:4:2605:5791:27492 1:N:0:TCTGCAAG+GCTGCACT

+

@A00721:190:HGJW7DSXY:4:1445:26865:23531 1:N:0:TCTGCAAG+GCTGCACT

+

@A00721:190:HGJW7DSXY:4:2344:27064:12101 2:N:0:TCTGCAAG+GCTGCACT

+

@A00721:190:HGJW7DSXY:4:1329:3206:27712 2:N:0:TCTGCAAG+GCTGCACT

+

@A00721:190:HGJW7DSXY:4:2441:24695:27696 1:N:0:TCTGCAAG+GCTGCACT

+

[illegible]

@A00721:190:HGJW7DSXY:4:2366:1362:22827\_2:N:0:TCTGCAAG+GCTGCACT  
CTTATAATAAATAAATAAATAATATTACTAATGGCAAATAGTGGAAAGGCTCCAGTCAACACTAGTTC  
GAGTGCTGCTTTGGATTACGATGACGTGAGAATAGGTGAAGGGATAGT

+

FFFFFFFFFFFFFFFFFFFFFFFFFFFFFFFFFFFFFFFFFFFFFFFFFFFFFFFFFFFFFFFFFFFFFFFF  
FFFFFFFFFFFFFFFFFFFFFFFFFFFFFFFFFFFFFFFFFFFFFFFFFFFFFFFFFFFFFFFFFFFFFFFF

@A00721:190:HGJW7DSXY:4:2512:6433:9721\_1:N:0:TCTGCAAG+GCTGCACT  
ACCAACATTAAGGCGGCGGCGACTAATCTTAAAGCTTCACCCAAAATGAAGGACACTTCGAAACTGAA  
TAATGATGCACTACAAACAAGTATCGCTAATCATCTGAAAAAGGCTCTAAAGGACACTATACAATATC  
CAG

+

FFFFFF:FFF:FFFF:F::,F,FFFF:FFFFFF,F:FFF:FFFFFFFF:F:FFF,FFF,FFFFFFFF  
FF:FF:F::F:FFFFFF:FFFFFFFF:FFFF,FF:FFFFFFFFFFFFFFFFFFFFFFFFFFFFFFFFFFFF  
FFF

@A00721:190:HGJW7DSXY:4:1652:17987:8249\_1:N:0:TCTGCAAG+GCTGCACT  
CGCCATTGTGGTACGAATTGGTCCAACATTTACCACCAAATCTTTTGATACTAGCCTTCAAG  
TGGGGTATGCCTGCGGAATACGCTTGCTATTCACCAGATTGTTTGAACCCGTTGATGCTATGTCAGA  
AGA

+

FFFFFFFFFFFFFFFFFFFFFFFFFFFFFFFFFFFFFFFFFFFFFFFFFFFFFFFFFFFFFFFFFFFFFFFF  
FFFFFFF:FFFFFFFFFFFFFFFFFFFFFFFFFFFFFFFFFFFFFFFFFFFFFFFFFFFFFFFFFFFFFFFF  
FFF

@A00721:190:HGJW7DSXY:4:1367:28727:35618\_2:N:0:TCTGCAAG+GCTGCACT  
TGTCGTTTAAAGACTGCAGAGGCTGTCAAACAAGCCAGACTCAAGGAGTCCAATCAAAGTTTTGAA  
TTTAGCTCAACTGGGGAGACGTGCTTAAATGGGTGATAAAAATTATTT

+

FFFFFFFFFFFFFFFFFFFFFFF:FFFFFFFFFFFFFFFFFFFFFFFFFFFFFFFFFFFFFFFFFFFFFFF:FF,FFFFFF  
F:FFFFFFFF:FFFFFFFFFFFFFFFFFFFFFFF:,FFFFFFFF:F:FF:FFF

@A00721:190:HGJW7DSXY:4:1521:7880:2425\_2:N:0:TCTGCAAG+GCTGCACT  
AAGGACTATGTTGACTGACGAAGATTTCCACAGATTTGTCTACGTTGCAGATCGCCACTCCAAACA  
CTATATACATTATAAAATATAAAAATAAGGGAGTCATAACTTTTGTTA

+

FF,FFFFFFFFFFFFFFFFFFFFFFFFFFFFFFFFFFFFFFFFFFFFFFFFFFFFFFFFFFFFFFFFFFFF  
FFFFFFFFF:FFFFFFFFFFFFFFFFFFFFFFFFFFFFFFFFFFFFFFFFFFFFFFF:FFF

@A00721:190:HGJW7DSXY:4:2523:12355:16595\_2:N:0:TCTGCAAG+GCTGCACT  
GAAGTCTCTGATTTTATTAATCATTACTTTAACGATCTCTCGGTCATTTACTCTGTACTTGATCTACG  
TCGTTTAACTGTCGGAACAACCTTTACTTAGAATGACTCTATCTTTTC

+

FFFFFFFFFFFFFFFFFFFFFFF::FFFFFFFFFFFFFFFFFFFFFFFFFFFFFFFFFFFFFFFFFFFFFFF  
FF:FFFFFFFFFFFFFFFFFFFFFFFFFFFFFFFFFFFFFFFFFFFFFFFFFFFFFFFFFFFFFFFF

@A00721:190:HGJW7DSXY:4:2573:8467:15781\_2:N:0:TCTGCAAG+GCTGCACT  
AGCTAATAGATTAATAAAGGATGAGTACGAAAACCAACTCTTCGTTACGAGACCTGATGGTAGAATAG  
ATTTAGTCTCTACACCCATCTCAACGAGGATAAAGCGAGTTTTCCGTC

+

FFFFFFFFFFFFFFFFFFFFFFFFFFFFFFFFFFFFFFFFFFFFFFFFFFFFFFFFFFFFFFFFFFFFFF  
FFFFFFFFFFFFFFFFFFFFFFFFFFFFFFFFFFFFFFFFFFFFFFFFFFFFFFFFFFFFFFFF

@A00721:190:HGJW7DSXY:4:2520:17092:27336\_1:N:0:TCTGCAAG+GCTGCACT  
ACCCGCACACGACTCGAAACCGAGACGCCGTAGATCAAAGTCCCTTCTAACTTTAGATTATGAATCCT  
GCCTTTACTCA

+

F,F::,,FFFFFFFFFFFFFFFFFFFFFFFFFFFFFFFFFFFFFFFFFFFFFFFFFFFFFFFFFFFFF:FFFFFFFFFFFFFFFFFFFFFFFF  
FFFFFFFFFFFF

@A00721:190:HGJW7DSXY:4:1435:15456:28792\_2:N:0:TCTGCAAG+GCTGCACT  
GATTGTTATCAATTTAAATACATTACTGTTTCAAATCATCTTTACTCACAGACTCCGAAAATGGTTTC

AAATGAGGTCAAAGCTCTATTTATTAACGAACTATTATCCGATTCTT  
+  
FFFFFFFFFFFFFFFFFFFFFFFFFFFFFFFFFFFFFFFFFFFFFFFFFFFFFFFFFFFFFFFFFFFFFFFF  
FFFFFFFFFFFFFFFFFFFFFFFFFFFFFFFFFFFFFFFFFFFFFFFFFFFFFFFFFFFFFFFFFFFFFFFF  
@A00721:190:HGJW7DSXY:4:2427:11840:12038\_2:N:0:TCTGCAAG+GCTGCACT  
TTTCGACAAATTTTAGAACTTTATTTTCAGAACTCTCTCCGATCACCTTGGTGTGATCTCCCGGAGGAT  
CTTTTCAATAAGATGTATGATGATAATCTACTATTTTTAAATAGTGAT  
+  
FF:FFFFFFFF:,FFFFFF:FFFFFFFFFFFFFFFF:FFFFFF:FFFFFFFF:FFFFFF:FF  
F:FF,FF:FFFFFFFFFFFFFFFF,FFFF:FFFFFFFF:::FF  
@A00721:190:HGJW7DSXY:4:1364:30101:20807\_1:N:0:TCTGCAAG+GCTGCACT  
TTATCAAAGATTTGGCTTGGTCTATTTACCGCAAAAAGTTGGAAGAGGTCTATGATATTTATTTTACT  
TATACTTTAAATAGCACCGATTATAACTTGACTGTTGATAATATTACAATAGCTCTTCTCAGAAGAT  
TAG  
+  
FF:FFFFFFFF:FFF:FFFFFFFF,FFFFFFFFFFFFFFFFFFFFFFFFFFFFFFFFFFFFFFFF  
FFFFFFFFFFFFFFFFFFFFFFFF:FFFFFFFF:FFFFFFFFFFFFFFFFFFFFFFFF  
FFF  
@A00721:190:HGJW7DSXY:4:1211:15510:17863\_1:N:0:TCTGCAAG+GCTGCACT  
GGTAGCATTGATTTACTTTTACCGTTAGAACTGAAAAAGATTCTTTTCGAAAAGAACTATAAGTTA  
CAAACGATTCTTCGACTATATTAAAGAAATAAAAATACTTCAAGTACCTGAACTTTACATTTTAAATG  
GTA  
+  
FFFFFFFFFFFFFFFFFFFFFFFFFFFFFFFFFFFFFFFFFFFFFFFFFFFFFFFFFFFFFFFFFFFFFFFF  
FFFFFFFFFFFFFFFFFFFFFFFF:FFFFFFFF:FFFFFFFFFFFFFFFFFFFFFFFF  
FFF  
@A00721:190:HGJW7DSXY:4:2463:6099:17315\_2:N:0:TCTGCAAG+GCTGCACT  
CAAATAGAACCTTCACTCTCGTAATGAGAGTGTATTCCTTAATATTCTAGTAACCGCTATGTGGGCA  
TTACTAGGATTTATCACACTCCTAAATTTGATAGCAATTTATGTTTA  
+  
FFFFFF:FFFFFFFF:FF,FF,F:FFF:FFF:FFFFFF,FFFFFFFFFFFFFFFF:FF,FFFF  
:FFFFFFFF:FFF:FFFFFFFFFFFFFFFFFFFFFFFF,FF:FFF  
@A00721:190:HGJW7DSXY:4:1526:10890:25676\_1:N:0:TCTGCAAG+GCTGCACT  
GAGTACTTAATTCAATAGCTTTAGTATTATTTACTATCGCCTTTATTGAAAATTGTATAAGAGTTAAT  
TGCTTACACAAAAGTGACGCGCAAGGAATCTTAATTGATTGAAGCTAGGCGTTGGGGAGAATGAACT  
GCC  
+  
FFFFFFFFFFFFFFFFFFFFFFFFFFFFFFFFFFFFFFFFFFFFFFFFFFFFFFFFFFFFFFFFFFFFFFFF  
FFFFFFFFFFFFFFFFFFFFFFFF:FFFF:FFFFFFFFFFFFFFFFFFFFFFFFFFFFFFFF  
FFF  
@A00721:190:HGJW7DSXY:4:1203:32253:25379\_1:N:0:TCTGCAAG+GCTGCACT  
CTACTACCGCCGGTCGGCAGATCGGCACCACTGGTCTCTACGTTCAAGGACCCGCTGTGCAGAATAAC  
CTTCCCAAATCTAGATCTGCACAGAAGAAGGCTGAAGGTCGTTACCGGACGACCACTCAAAGGAAACG  
GGC  
+  
FFFFFFFFFFFFFFFF:FFF:FFFFFFFFFFFFFFFFFFFFFFFFFFFFFFFFFFFFFFFF  
FFFFFFFF:FFFF:FFFFFFFFFFFFFFFFFFFFFFFFFFFFFFFF:FFFFFF  
FFF  
@A00721:190:HGJW7DSXY:4:2105:11053:11741\_1:N:0:TCTGCAAG+GCTGCACT  
CAGACGTGTGCTCTTCCGATCTCTCAGTCAAAAAGTCACATTCACCACTCCCATGCCAATCAATGATGT  
GACTATACAGTTCGGCCATTTCAAGAGTGGTCAATACGTCGTGGGAGGTACTGAAGCCTTCCCCTCCG  
CTG  
+  
FFFFFFFFFFFFFFFF:FF:FFFFFFFFFFFFFFFFFFFFFFFFFFFFFFFF:FFFFFF



FFFFFFFFFFFFFFFFFFFFFFFFFFFFFFFFFFFFFFFFFFFFFFFFFFFFFFFFFFFFFFFFFFFFFFFFFFFFFFFF  
FFF

@A00721:190:HGJW7DSXY:4:2147:13223:15530\_1:N:0:TCTGCAAG+GCTGCACT  
CAATCAATAGTTCTTCTGACCAGAATGAAAAGGGGTTTACCAGGGTAGTCTCTAAGTCTACCAGGAAG  
AGGGGAAATGTCCCCAAAACCTGAGAAGAATAAAGGGAAAGGTCCATCAGGACCTAAGAAGGGGAAATT  
ACC

+

FF:FFFF:FF:FFFFFFFFFFFFFFFFFFFFFFFFFFFFFFFFFFFFFFFFFFFFFFFFFFFFFFFFFFFFFFFF  
FFFFFFFFFFFFFFFFFFFFFFFFFFFFFFFFFFFFFFFFFFFFFFFFFFFFFFFFFFFFFFFFFFFFFFFFFFFFF,FFFFFFFFFFFFFFFFFFFFFFFFFFFFFFFF:FFFF:FFF  
FFF

@A00721:190:HGJW7DSXY:4:1623:31051:34006\_2:N:0:TCTGCAAG+GCTGCACT  
ATCTGCACGGGCCAAAGAGGCCGCTGCTACGAAGTCGCTGAAGCGGCTTGGGTCATTAAGGGTAGCT  
GTAAAGTTGCGCCTGCCGACCCCATCTTTGAGACCAAGACTCTCTACA

+

FFFFFFFFFFFFFFFFFFFFFFFFFFFFFFFFFFFFFFFFFFFFFFFFFFFFFFFFFFFFFFFFFFFFFFFFFFFFF:F,:F,FFFFFFFF  
FFFFFFFFFFFFFFFFFFFFFFFFFFFFFFFFFFFFFFFFFFFFFFFFFFFFFFFFFFFFFFFFFFFFFFFFFFFFF

@A00721:190:HGJW7DSXY:4:2245:28031:12868\_2:N:0:TCTGCAAG+GCTGCACT  
AAATCTGTTGAATTCGTCACTGAGGACGAAGGTGAGAGGACTTTTGGCTACTGGCGACAACTGAGAG  
CAGTCGCTGGGGAAAGAGAATTGCGTGGGTGAAGGCCGACGCTTCGA

+

FFFFFFFFFFFFFFFFFFFFFFFFFFFFFFFFFFFFFFFFFFFFFFFFFFFFFFFFFFFFFFFFFFFFFFFFFFFFF  
FFFFFFFFFFFFFFFFFFFFFFFFFFFFFFFFFFFFFFFFFFFFFFFFFFFFFFFFFFFFFFFFFFFFFFFFFFFFF

@A00721:190:HGJW7DSXY:4:2370:9607:3411\_2:N:0:TCTGCAAG+GCTGCACT  
CGTTTGGAGGATTTTATCCGCGCTTAAGTATGGGGCGAAGATCCCCTATGGAGTCTTGAAGGACTTAG  
GTTGGCATATTTATGCCGACGATAATAAGCATGTCACCTTAAGCACC

+

FFFFFFFFFFFFFFFFFFFFFFFFFFFFFFFFFFFFFFFFFFFFFFFFFFFFFFFFFFFFFFFFFFFFFFFFFFFFF  
FFFF:F:FFFFFFFFFFFFFFFFFFFFFFFFFFFFFFFFFFFFFFFFFFFFFFFFFFFFFFFFFFFFFFFFFFFFF

@A00721:190:HGJW7DSXY:4:1325:21522:20572\_2:N:0:TCTGCAAG+GCTGCACT  
AGAGAGTGTGAGAGAGTCGCTCTCACTATTTTGGCCAGAATGCGGGCTTTCTGACTGATGAGGTTAA  
AACTCTTGCTCCTTCTGTGGGTGAGGGTTTTGTTATATTCACTGGTT

+

FFFFFFFFFFFFFFFFFFFFFFFFFFFFFFFFFFFFFFFFFFFFFFFFFFFFFFFFFFFFFFFFFFFFFFFFFFFFF  
:F::FFF:,F:FF::FF:,FF,F::F:FF:FFF,FFFF,FFF:FFF:F  
:F::FFF:,F:FF::FF,F:FFF:FFFFFFFF,FFFFFFFF:FF:FF,F

@A00721:190:HGJW7DSXY:4:1559:19777:9283\_2:N:0:TCTGCAAG+GCTGCACT  
ACACTTTTCTTGAAAATTTTCCTTTCTCCGTCATTGGGGATTTTCGATGTGAGAAGGTGGAAGGTGT  
CAAGGGTCTTCTTCATGCTGATCTTTCAGGACCTAATCACATCATGAT

+

FFFFFFFFFFFFFFFFFFFFFFFFFFFFFFFFFFFFFFFFFFFFFFFFFFFFFFFFFFFFFFFFFFFFFFFFFFFFF  
FFFFFFFFFFFFFFFFFFFFFFFFFFFFFFFFFFFFFFFFFFFFFFFFFFFFFFFFFFFFFFFFFFFFFFFFFFFFF

@A00721:190:HGJW7DSXY:4:1650:16893:26710\_2:N:0:TCTGCAAG+GCTGCACT  
CGAAATTAAAGACGGGGGGATTAAGAGTCCAGCTGTAAGTGTCAATTCAGAGAGGGGAGCTCTGAAAA  
GGAAACTTCGTCAGAAGAGGAGGAAGTCTAAGAGATCGGAAGAGCGTC

+

FFFFFFFFFFFFFFFFFFFFFFFFFFFFFFFFFFFFFFFFFFFFFFFFFFFFFFFFFFFFFFFFFFFFFFFFFFFFF  
FFFFFFFF::FFFFFFFFF,FFFF,FFFFFFFFFFFFFFFFFFFFFFFF:FFF

@A00721:190:HGJW7DSXY:4:2434:22598:10817\_2:N:0:TCTGCAAG+GCTGCACT  
AAGAAGGATTATTTGAAGCAGGGGTTACCACTTCCTAAGGTGGATGAGGGAGGTTGTTTCTTTGGAGT  
TTAGATAATCTTTTGAGAAGGGGTCATAGAGCCAGCAAGAGAAGCTT

+

FFFFFFFFFFFFFFFFFFFFFFFFFFFFFFFFFFFFFFFFFFFFFFFFFFFFFFFFFFFFFFFFFFFFFFFFFFFFF  
FFFFFFFFFFFFFFFFFFFFFFFFFFFFFFFFFFFFFFFFFFFFFFFFFFFFFFFFFFFFFFFFFFFFFFFFFFFFF,FFFFFFFFFFF:FFF:

@A00721:190:HGJW7DSXY:4:2663:22932:2347\_2:N:0:TCTGCAAG+GCTGCACT  
AGAATTCGTAACCTTACCATATTGTTCTTCCGGGAAGTTGTGGGATTTAACTTTGACTCAACTACTC

CGATCAGATCCGGATGGTTTGATTGGTATGGACTACTCGAGATCGGAA

+

FFFFFFFF:F:F:FFFFFFFFFFFFFFFFFFFFFFFFFFFFFFFFFFFFFFFF:F:FFFFFFFFFFFF:FFFFFFFF:FFF:  
FFFFFFFFFFFF:FFFFFFFFFFFFFFFFFFFFFFFFFFFFFFFFFFFFFFFF:FF:FFFF,F:

@A00721:190:HGJW7DSXY:4:1558:10972:15013\_1:N:0:TCTGCAAG+GCTGCACT  
TTCTGTAGCTCTGAGGGCGGTTGAGGGAGCCGTTTTGGCCGACTTTAACTATTCTAAGAGTCTTTATG  
ATTCAAAACCTATCGTTGTCGTACCTTACAAGGTTGAGGAGACTTTACAGCGGCTTATTGTGCGCGCAG  
TTT

+

FFFFFFFFFFFFFFFFFFFFFFFFFFFFFFFFFFFFFFFFFFFFFFFFFFFFFFFFFFFFFFFFFFFFFFFFFFFFFFFF  
FFFFFFFFFFFFFFFFFFFFFFFFFFFFFFFFFFFFFFFFFFFFFFFFFFFFFFFFFFFFFFFFFFFFFFFFFFFFFFFF  
FFF

@A00721:190:HGJW7DSXY:4:2525:3405:32346\_2:N:0:TCTGCAAG+GCTGCACT  
TTCGTTTTTCATATCCAAACCTCTTGAATGGAGTACATATTTGCAACCCTATTCTTGATGTGAAAGAT  
GCATCGAGGTATACGTCTAGGAACATTGATTGGGAACGTACCTACTCA

+

FFFFFFFFFFFFFFFFFFFFFFFFFFFFFFFFFFFFFFFFFFFFFFFFFFFFFFFFFFFFFFFFFFFFFFFFFFFFFFFF  
FFFFFFFFFFFFFFFFFFFFFFFFFFFFFFFFFFFFFFFFFFFFFFFFFFFFFFFFFFFFFFFFFFFFFFFFFFFFFFFF

@A00721:190:HGJW7DSXY:4:2620:21802:13041\_2:N:0:TCTGCAAG+GCTGCACT  
TACAAGAACGCTTTGGATTGTGACCATAAAGCCTCAGTTGCGATAGCTGTAGAGGTATACGATATCTC  
TCTTGATGATGTAGCCACTATAATGCTTAAGAGAGAGATTGATGTATG

+

FFFFFFFFFFFFFFFFFFFFFFFFFFFFFFFFFFFFFFFFFFFFFFFFFFFFFFFFFFFFFFFFFFFFFFFFFFFFFFFF  
FFFFFFFFFFFFFFFFFFFFFFFFFFFFFFFFFFFFFFFFFFFFFFFFFFFFFFFFFFFFFFFFFFFFFFFFFFFFFFFF

@A00721:190:HGJW7DSXY:4:1165:5936:36980\_2:N:0:TCTGCAAG+GCTGCACT  
CTCATCGCTATACGCATACCTGATTGGAAGAAGCGAGGTTTCGTTCTCAATAAAAATTTTTCTCAAGA  
GATTATGGTTGATAAAGTTTTCTTCATAAGGGCTATTACGTACGTCAT

+

FFFFFFFFFFFFFFFFFFFFFFFFFFFFFFFFFFFFFFFFFFFFFFFFFFFFFFFFFFFFFFFFFFFFFFFFFFFFFFFF  
FFFFF:FFFFFFFFFFFFFFFFFFFFFFFFFFFFFFFFFFFFFFFFFFFFFFFFFFFFFFFFFFFFFFFFFFFFFFFF

@A00721:190:HGJW7DSXY:4:1239:5791:14058\_2:N:0:TCTGCAAG+GCTGCACT  
TTCGGTCAATGACAAAACCTTCGAATATGTTACGACATGGCTTCGTAACAACAGTGCGAGGATTGTCA  
TCTCGGGGAAAGTGATTACCAAGATGTTTCATATAGATACGAGATACC

+

FFFFFFFFFFFFFFFFFFFFFFFFFFFFFFFFFFFFFFFFFFFFFFFFFFFFFFFFFFFFFFFFFFFFFFFFFFFFFFFF  
FFFFFFFFFFFFFFFFFFFF:FFFFFFFFFFFFFFFFFFFFFFFFFFFFFFFFFFFFFFFFFFFFFFFFFFFFFFFF

@A00721:190:HGJW7DSXY:4:2376:3495:15186\_1:N:0:TCTGCAAG+GCTGCACT  
CTGGAGTTCAGACGTGTGCTCTTCCGATCTCTTTGGGTACACGTTATGCTCGAACTTAACGTTAGT  
ACCGGAGGTGATCTCTCTGCTTCTGCGTTACTGAGAGAAAAGATTACAGGACGCCTACGGTGACTTTAT  
GG

+

FFFFFFFFFFFFFFFFFFFFFFFFFFFFFFFFFFFFFFFFFFFFFFFFFFFFFFFFFFFFFFFFFFFFFFFFFFFFFFFF  
FFFFFFFFFFFFFFFFFFFFFFFFFFFFFFFFFFFFFFFFFFFFFFFFFFFFFFFFFFFFFFFFFFFFFFFFFFFFFFFF  
FF

@A00721:190:HGJW7DSXY:4:1573:17924:5822\_2:N:0:TCTGCAAG+GCTGCACT  
CTACGGTCTTATCAAAGAAAATGGTGAACCGGTCTCTAAATCTTTTGAGATTGAGAAGATTGAAGAA  
CACGTCAAGAAGTCGCTCGGCGTTGTTCTTGAAAACCAAGTTAAGAAG

+

FFFFF::FFFFFFFFFFFFFFFFFFFFFFFFFFFFFFFFFFFFFFFFFFFFFFFFFFFFFFFFFFFFFFFFFFFFF  
FFFFFFFFFFFFFFFFFFFF:FFF::F, :FFFFFFFFF:FFFFFFFFFFFFF:

@A00721:190:HGJW7DSXY:4:2577:20546:4507\_2:N:0:TCTGCAAG+GCTGCACT  
GGTTCAGCTACGAGAGGTGATCCCGGATGTGGATTGAAGGCTGGCTCTAAGGGAGACTCCTTCTTTTT  
GAATGTTGTAAAGAATTGGGTTGAGAAGCGTGCAGATCGGAAGAGCGT

+

FFFFFFFFFFFFFFFFFFFFFFFF:FFFFFF:FFFFFF:FFFFFFFFFFFFFFFFFFFFFFFF:FFFFFFF:F,F  
FFF:FF:FFFFFFFFFFFFFFFFFFFFFFFFFFFFFFFFFFFFFFFF:FFFF  
@A00721:190:HGJW7DSXY:4:2663:27697:11224\_2:N:0:TCTGCAAG+GCTGCACT  
CTTATCACCACCTTTTGAAGGAAAATAATTGGTGATGAAAATACGTATGTCGGTGGGGTTCTCAAGGC  
TCTCATCGCCACTGGGATTCTAAGGGGTTCCATAAGATATTATCTGAC  
+  
FFFFFFFFFFFFFFFF:FFFFFFFFFFFFFFFF:FFFFFFFFF::FFFFFFFFFFFFFFFFFFFFFFFFFFFFF  
FFFFFFFFF:FFFFFF:FFFFFFFFFFFFFFFFFFFFFFFFFFFFFFFFFFFFFFFF  
@A00721:190:HGJW7DSXY:4:1265:3161:3145\_2:N:0:TCTGCAAG+GCTGCACT  
TTCAGAGTCTCTTGGAAGTCCAGGTAGCTAATGGTCTTGCAATAGCCACAGACTTTCTGGGAAAAGAG  
ACCTCTGTTGGTAGAGGAGTTGAGAGAATTACTCAGATTCAATCTGGC  
+  
FFFF::FFFFFFF:FFF:FFFFFFFFFFFF,F::,FFFFFFFFF:FFF:FFFFFF:FFFFF,FFFFFFF  
FFFFF:FFF:F::FFFFFFFFFFFFFFFFFFFFFFFFFFFFF:F:F,FFFFFF:F  
@A00721:190:HGJW7DSXY:4:2640:29487:21840\_2:N:0:TCTGCAAG+GCTGCACT  
GTCGCGGAAAACGATGAAGATTTCCACACTGTTGAGAATCTTCTGATGCTGAATTTGAGGAAAATTT  
TTCGGAAGTTTTTGGTATAAATCCTGATGGCTCAGTACAGGGAGGAGG  
+  
FFFFFFFFFFFFFFFFFFFFFFFFFFFFFFFFFFFFFFFFFFFFFFFFFFFFFFFFFFFFFFFFFFFFFFFFF  
FFF:FFFFFFFFFFFFFFFFFFFFFFFFFFFFFFFFFFFFFFFFFFFFFFFFFFFFFFFFF  
@A00721:190:HGJW7DSXY:4:2506:18276:20243\_1:N:0:TCTGCAAG+GCTGCACT  
ATGTGTCACGCTACACTCGAAATATGGGCCCTCATAAGGAAGTATAGTTGGCGTCTTGTGCTTGACGT  
CATTACAGTCTGGAAGTTAGATCATTTGTTTCAGGAAGATCTCTACAGAGATTATCGAGAGTTGTGATC  
TAG  
+  
FFFFFFF,F,FFFFFFFFF:FFFFFFFFF:FFFF,FFFFFFFFF::FFFFF,FFFFFFFFFFFFFFFFF  
FFFFFFFFF,F,FFFFFFFFF::FFFFF:FFFFFFFFF:FFFFFF:FFFFFFFFF:FFFFFFFFF:  
FFF  
@A00721:190:HGJW7DSXY:4:2573:17761:25520\_2:N:0:TCTGCAAG+GCTGCACT  
TAGAGTTCTTCTAACCAGGACTGATGGTGAGATTCTTTTACCTTTTGAGGTCCAGGAACCTTTACTC  
CTAGTGTCTTTTCTAGAGTCCAAGGACGTTTCCGTCGGAGGATGACAG  
+  
FFFFFFFFFFFFFFFFFFFFFFFFFFFFFFFFFFFFFFFFFFFFFFFFFFFFFFFFFFFFFFFFFFFFFFFFF  
FFFFFFFFF:FFF,FFFFFFFFF:FF:FFFFFFFFFFFFFFFFFFFFFFFFF  
@A00721:190:HGJW7DSXY:4:1417:27154:1266\_2:N:0:TCTGCAAG+GCTGCACT  
TAAAGCCTGTCCAGTTGTGATGATGTTGCGGCTGTGGGATTAACCTCCCTCGTGAACTTACGACG  
ATGTTCTCGCTCGCATTTTACAAGGATTACTAAGTCTGAGATCTGCCA  
+  
FFFFFFFFFFFFFFFFFFFFFFFFFFFFFFFFFFFFFFFFFFFFFFFFFFFFFFFFFFFFFFFFFFFFFFFFF  
FFFFFFFFF:FFFFFFFFFFFFFFFFFFFFFFFFFFFFFFFFFFFFFFFFFFFFFFFFF:FF  
@A00721:190:HGJW7DSXY:4:1436:31096:10504\_1:N:0:TCTGCAAG+GCTGCACT  
CTTCTAATAGAGGATCCTGATGACATTATTTCAACGGATACCGATCTCAGTTCTACCACAGAAACCGT  
CTCAGGAACTGTCTCCACTGATTCGGAATTAGAGAAAGACGACCTTCTTGTGGGACTGAGACCTCTG  
AAT  
+  
:FFFFFFFFFFFFFFFFFFFFFFFF:FFFFFFFFFFFFFFFFFFFFFFFFFFFFFFFFFFFFFFFFF  
FFFFFFFFF:FFFFFFFFFFFFFFFFFFFFFFFFFFFFFFFFFFFFFFFFFFFFFFFFF  
FFF  
@A00721:190:HGJW7DSXY:4:1276:17571:19398\_1:N:0:TCTGCAAG+GCTGCACT  
GGACGTTGAAAGGGATAATTTCAACTCTGAGACTTCTAAGAGTGTTTCAAAAGACCAGAAACGTAACA  
AGAAGAATAAAGGTAGGAAGGGGAGAAAACAGAACAAAGCGAGCGGTTGAAGAGAAAACCTGATATGGTT  
GC  
+  
FFFFFFFFFFFFFFFFFFFFFFFF:FFFFFFFFFFFFFFFFFFFFFFFFFFFFFFFFF::FFFFFFFFFFFFFFFFF

@A00721:190:HGJW7DSXY:4:1109:14073:21605\_1:N:0:TCTGCAAG+GCTGCACT  
ATTAAGACAGACGTGAAAGTTATGATGAGTGATCGTATTAGAACAGCTGATTCTTATTGCATGAACGT  
CGCTGAGGTCAAACCTGTGGACGTTCTTTTCATCGACGAATTATTCATGATTCACGCTGGTCAGACCC  
TTT

@A00721:190:HGJW7DSXY:4:2566:17969:5087\_2:N:0:TCTGCAAG+GCTGCACT  
AGGCGGCTTATACCATAGGTTACGGTGATTCCAATCAAATCGGATTCAATCGTATTGATCTCCAA  
GTCGCAAACACTTCAACATCAACGACATCATTCTTGATGAGTGTCGT

@A00721:190:HGJW7DSXY:4:2567:26847:36808\_2:N:0:TCTGCAAG+GCTGCACT  
TATCGCTGCCCCGCCGACGTTTGTGCGAACTCTCAGAGTTTACGGCAGAAAAATTTCTCCTGCTTG  
TAATTCGAGAGAGGACACTATGGAAATTAGACCTATCAGATGTCTTGA

@A00721:190:HGJW7DSXY:4:1563:3866:31391\_1:N:0:TCTGCAAG+GCTGCACT  
CGGGAGGTTGCAGATTCAACCCCTTATATCGAGGCTATCGAGGACGATGAGTATCTTGAAGTTGTTGA  
CGACAAGCCTCAAGAGGGTAGAGGACCACCTGGATCTTCTACTGTCTCTGCCTTCCAAGATTTCTTAG  
AAG

@A00721:190:HGJW7DSXY:4:1452:6470:6527\_2:N:0:TCTGCAAG+GCTGCACT  
CGGTAATCTTTCAGCCGAATTAAGTACTAATGAGTTCAGTCGGTTGTCGATCGAATTAAGATCAAGG  
CTAATACCTTTATAGGTAAGAAGCCCTTGAGCCGCGTAGTCAGCGCG

@A00721:190:HGJW7DSXY:4:1376:25328:7592\_2:N:0:TCTGCAAG+GCTGCACT  
CGATTGGTCAACGTCGGAGTGGTACTGCTAACACATTCTTTGGTAATTGTATGATCACTCTTATGATG  
CTCTCTCTTTATTACGACCTTCGGAAGTTTAGAGCCGTCGCTGTCGCC

@A00721:190:HGJW7DSXY:4:2474:31485:24486\_2:N:0:TCTGCAAG+GCTGCACT  
TTTTAAACGATTCCGAGAGTTTATCCTGATGTGGAGGGAGTTCTTGAAGCATCCCGACCTTTCCTTG  
TGAAAATTTTGATGCGGTTTCATAAGATTATCAGTAATCCTGATTCTA

@A00721:190:HGJW7DSXY:4:2320:12201:35086\_2:N:0:TCTGCAAG+GCTGCACT  
GCGAGAGCGACCAAGATCTAAATTCGGTAACGGTGCGTGCGCTTTATTTTAAAAGCTCCCTCCTCT  
CGCAAGTTTGATCTGATACTTATCACGAAAGGACTTGAGTCTTTTGAT

```
FFFFFFFFFFFFFFFFFFFFFFFFFFFFFFFFFFFFFFFFFFFFFFFFFFFFFFFFFFFFF,FFFFFFFFFFFFFFFFFFFF
FFF:FFFFFFFFFFFFFFFFFFFFFFFFFFFFFFFFFFFFFFFFFFFFFFFFFFFFFF
```

@A00721:190:HGJW7DSXY:4:1245:28646:6981\_2:N:0:TCTGCAAG+GCTGCACT  
GTTGATTAAGACTCTTCCGAAAGGCGAACTTTGGGAATTTGAAGCTCAGGGTGAAGCACAACGTTTGA  
CCGTGACGAACTGTGGTGTCTTGATCTACGTTACGGATATACTCTCT

+

FFFFF::FFFFFFF,FFFFFFFFFFFFFFF,,FFFFFFFFFFFFFFF:FFF:FFFFFFF,FFFFF:FF:FF  
,FFFFFFFFF:FF:FFFFFF:FFFFFFFFF:FFFFFFFFFFFFFFF

@A00721:190:HGJW7DSXY:4:1304:7066:13980\_2:N:0:TCTGCAAG+GCTGCACT  
AAAACGTCTTCGACAACAGCAGGGGTTTTCGAATAGTGATAGCCACCCGCCTTACAGAGGGGCAGCAG  
CATGACCATAATTGGTATTGACTTTGGTACCACCTTTTCTACTGTCTG

+

FFF:FFFFFFFFF:FFFFFFFFFFFFFFF:FFFFFFFFFFFFFFF:FFFFFFFFFFFFFFF  
F:FFFFFFFFFFFFFFF,FFFFFFFFFFFFFFF

@A00721:190:HGJW7DSXY:4:2662:8585:18991\_2:N:0:TCTGCAAG+GCTGCACT  
GAAGTTTTAATGCTTAACAACAATGATAGTGAATTTATACCTACAATCATTGTTTTCTAATAATGA  
TGACACTATTGTTTATGGATATGATGCTATTACTCATGATGGTTACGG

+

FFFFFFFFFFFFFFFFFFFFFFFFFFFFFFFFFFFFFFFFFFFFFFFFFFFFFFFFFFFFFFFFF::  
FF:FFFFFFFFFFFFFFFFF,FF::FFFFFFFFF:FF,FFFF,F

@A00721:190:HGJW7DSXY:4:2554:21504:6198\_1:N:0:TCTGCAAG+GCTGCACT  
TCACTTTTCACTAAGAATTGGTCCTACTTTTGGACAAGGCCAATTTCGTAATCTTCATGAGATCGTTT  
CTTTCTTTATCTCTTTGGTTGTTAGGGATTTTGAGAGAGTGAAAGGCTTCAATTGTAGTGGTTTGGTC  
GTT

+

FFFFFFFFFFFFFFFFFFFFFFFFFFFFFFFFFFFFFFFFFFFFFFFFFFFFFFFFFFFFFFFFF:F:FFFFFFFFFFFFFFFFF  
FFFFF:FFFFFFFFF:FFFFFFFFFFFFFFFFFFFFFFFFFFFFFFFFFFFFFFFFFFFFFFFFF  
FFF

@A00721:190:HGJW7DSXY:4:1608:6162:21809\_2:N:0:TCTGCAAG+GCTGCACT  
TCTACGCAAAGATATTTTCATGAAAACCTACAGAGGAACGTACCGGATTACCTGTCTTTCATATTATGAA  
TGAACCTTCGGCCGCTCTCTTTGCTTCGATGTTGGATGTCAAGAAGGG

+

FFFFFFFFFFFFFFFFFFFFFFFFFFFFFFFFFFFFFFFFFFFFFFFFFFFFFFFFFFFFFFFFF:FFFFFFFFFFFFFFF:FFFFFFFFF  
FFFFFFFFFFFFFFFFFFFFFFFFFFFFFFFFF:FFFFFFFFF:FFFFFFF

@A00721:190:HGJW7DSXY:4:2263:17155:15734\_2:N:0:TCTGCAAG+GCTGCACT  
CCTACGTAGTTTATGACTTTGGTGGTGGTACTTTGATACTTCTATCGTCTTACGTTACGGTAATTAC  
TATAGTGTTATTTATTCTGGTGGTGGTGGTATGATAATCTTGGAGGTCGTGAC

+

FFFFFFFFFFFFFFFFFFFFFFFFFFFFFFFFFFFFFFFFFFFFFFFFFFFFFFFFFFFFFFFFF  
F:FFFFF:F:FFFFFFFFFFFFFFFFFFFFFFFFFFFFFFFFFFFFFFFFF

@A00721:190:HGJW7DSXY:4:2609:28528:12195\_2:N:0:TCTGCAAG+GCTGCACT  
GTTCTTATTACGGCGCACTTCTTTACCCGCCACCACACAACCTTTCAGTTTCACAACCTGAAGGAGGAGG  
TTTCTGTTACTGGAAAACCCTCGTCAATACTTTTCAATAATATACGTC

+

FFFFFFFFFFFFFFFFFFFFFFFFFFFFFFFFFFFFFFFFFFFFFFFFFFFFFFFFFFFFFFFFF:  
:FFFFFFFFFFFFFFFFFFFFFFFFFFFFFFFFFFFFFFFFF

@A00721:190:HGJW7DSXY:4:1647:18692:6809\_2:N:0:TCTGCAAG+GCTGCACT  
TTCCGGCCGGTGGTAGCTCATTTCTACCAGGGGCTATTACTCTTGCTGAAACAGCTATTAAAGCTGTT  
GAGCGGGTAATTACACCTAAACGAGCTCGATCTGCCATCGCTGAAGGA

+

FFFFFFFFFFFFFFFFFFFFFFFFFFFFFFFFFFFFFFFFFFFFFFFFFFFFFFFFFFFFFFFFF:F  
FFFFFFFFFFFFFFFFFFFFFFFFFFFFFFFFFFFFFFFFF

@A00721:190:HGJW7DSXY:4:1566:17933:24565\_1:N:0:TCTGCAAG+GCTGCACT  
TCTAATCGTAACATTAATAATTTCAATCTTCTTAAAAAGAAGATAGAGAGTCATACTTTGGGCTATCG  
TTCAGGTGCATGGGGTTGGATAGCCAATATTGAAGTGGACACCTCTGGTAGTATCGAAGTAAAGATAA  
CCA

+  
FFFFFFFFFFFFFFFFFFFFFFFFFFFFFFFFFFFFFFFFFFFFFFFFFFFFFFFFFFFFFFFFFFFFFFFF  
FFFFFFFFFFFFFFFFFFFFFFFFFFFFFFFFFFFFFFFFFFFFFFFFFFFFFFFFFFFFFFFFFFFFFFFF  
FFF  
@A00721:190:HGJW7DSXY:4:1214:14778:16658\_2:N:0:TCTGCAAG+GCTGCACT  
AAATCTTACCACTATCTACGAACCTAAAGTTCTGAAGACGTTGCTTGTGCTTCCTCCTTTAATGGCA  
CTACCTCGGTACAATCTTACTTGGAACGAAGGCGACCTTCCGGAGTTT  
+  
FFFFFFFFFFFFFFFFFFFFFFFFFFFFFFFFFFFFFFFFFFFFFFFFFFFFFFFFFFFFFFFFFFFFFFFF  
FFFFFFFFFFFFFFFFFFFFFFFF:F,FFFF:F:FFF:FFFFFFFFFFFFFFFFFFFFFFFF  
@A00721:190:HGJW7DSXY:4:1310:16215:31391\_1:N:0:TCTGCAAG+GCTGCACT  
TCTATATTAGGTGAAGCGAAATACGATTTCAACGTCAACGTTACCGAGTTTCGTTTCGTACCTTGA  
TGCTGACTTTCGTCAATATGATTTGATCTGTTGCTCAATTCTAAGCGTGTTCCGCTTAGTGCGAGGC  
CTC  
+  
FFFFFFFFFFFFFFFFFFFFFFFFFFFFFFFFFFFFFFFFFFFFFFFFFFFFFFFFFFFFFFFFFFFFFFFF  
FFFFFFFFFFFFFFFFFFFFFFFFFFFFFFFFFFFFFFFFFFFFFFFFFFFFFFFFFFFFFFFFFFFFFFFF  
FFF  
@A00721:190:HGJW7DSXY:4:1523:16604:32189\_1:N:0:TCTGCAAG+GCTGCACT  
TGGATTTTAATATACAGAATCTTTACCAGGACTCCTACTACAGGAGGCAGTCTTCTGATCGTAAGAAG  
TTTATAAGGAACATATCCATTTGTTGTAATAGGTCATCAACTTAGAACTCGAACTCTAAGTGGTAA  
TAC  
+  
F,F:FFFFFFFF:F,:FFFF:FF,FFF,FFFF:,FF,F,FFFFFFFF:FFFFFFFFFF,FF::F:F:  
FFFFFFFF,F:,FFFFFFFF:FFFFFFFFFFFFFFFF,F:FFFFFFFF:FFF::FF,:FFFFFF:,FFF:FF:  
FFF  
@A00721:190:HGJW7DSXY:4:2430:14841:28416\_2:N:0:TCTGCAAG+GCTGCACT  
GAAATTGGACTCTTCGATAGGGGACATTTTATCGTGGGCTTCCGTAAAGGAAGATCTGTTATCGACG  
GTTTATCGTTTACGAAGTATCACTCCACCGGTGAATGGTTAAGAATA  
+  
FFFFFFFFFFFFFFFFFFFFFFFFFFFFFFFFFFFFFFFFFFFFFFFFFFFFFFFFFFFFFFFFFFFFFFFF  
FFFFFFFFFFFFFFFFFFFFFFFFFFFFFFFFFFFFFFFFFFFFFFFFFFFFFFFFFFFFFFFFFFFFFFFF  
@A00721:190:HGJW7DSXY:4:1371:2193:22670\_2:N:0:TCTGCAAG+GCTGCACT  
GATTGAAGGAAAATTTTATCCTCGTTTAACTTACTTAGACTTTCCTACGATACAAATGATAACTTCTA  
ATTTACGTTTGCTACTCAGAGCTGGTCCTCTCAGCAAAGGGATGCATG  
+  
FFFFFFFFFFF:FFFFFF:FFFFFFFFFFFFFFFFFFFFFFFFFFFFFFFFFFFFFFFFFFFFFFFFFFFF  
FFFFFFFFFFFFFFFFFFFFFFFFFFFFFFFFFFFFFFFFFFFFFFFFFFFFFFFFFFFFFFFFFFFFFFFF  
@A00721:190:HGJW7DSXY:4:2556:30743:1063\_1:N:0:TCTGCAAG+GCTGCACT  
GCATTTGATAATAATGACGAGACTTTCGTCATAATCGCTGCATATTACGGATTACACGGTACCAGCGC  
ATCTCGTGTGAGCCTCGACCCGATTATATGGTATTAAGGTGAGGAGACCATTTTCTTGC  
TGA  
+  
:FFFFFFFFFFFFFFFFFFFFFFFFFFFFFFFFFFFFFFFFFFFFFFFFFFFFFFFFFFFFFFFFFFFFFFFF  
FFFFFFFFFFFFFFFFFFFFFFFFFFFFFFFFFFFFFFFFFFFFFFFFFFFFFFFFFFFFFFFFFFFFFFFF  
FFF  
@A00721:190:HGJW7DSXY:4:2424:24442:32236\_2:N:0:TCTGCAAG+GCTGCACT  
CTTATAATAAATAAATAAATAATATTACTAATGGCAAATAGTGGAAGGCTCCAGTCAACACTAGTTC  
GAGTGCTGCTTTGGATTACGATGACGTGAGAATAGGTGAAGGGATAGT  
+  
FFFFFFFFFFFFFFFFFFFFFFFFFFFFFFFFFFFFFFFFFFFFFFFFFFFFFFFFFFFFFFFFFFFFFFFF  
FFFFFFFFFFF:FFFFFFFFFFFFFFFFFFFFFFFFFFFFFFFFFFFFFFFFFFFFFFFFFFFFFFFF  
@A00721:190:HGJW7DSXY:4:2603:28429:25989\_1:N:0:TCTGCAAG+GCTGCACT  
ACCAACATTAAGGCGGCGGCGACTAATCTTAAAGCTTAACCCAACTGAAGGACACTTCGAAACTTAA

TAATGATGCACTACAAACAAGTATCGCTAATCATCTGAAAAAGGCTCTAAAGGACACTATACAATATC  
CAG

+

F::FF,FFF:,FF,FF,FF,,,FFFFFF,FF:::,FF,,,:FFF,FFF:FFF:::,FF,::,FF,FF  
FF,FF,F,FF,FF,:FF,:F:FFF::,FFFFFF:F:F,FF:FFFF:FFFFFFFF:FFFFFF,:F,:FFF  
::F

@A00721:190:HGJW7DSXY:4:2118:11288:21355\_1:N:0:TCTGCAAG+GCTGCACT  
CGCCATTGTGGTACGAATTGGTCCAACATTTACCACCAAATCTTTTGATACAACTCTAGCCTTCAAG  
TGGGGTATGCCTGCGGAATACGCTTGCTATTACCAGATTGGTTCGAACCCGTTGATGCTATGTCAGA  
AGA

+

FFFFFFFFFFFFFF:FFFFFFFFFFFFFF:FFFFFFFFFFFFFF:FFFFFFFFFFFFFF:FFF  
FFFFFFFFFFFFFF:FFFFFFFFFFFFFF:FFFFFFFFFFFFFF:FFFFFFFFFFFFFF:FFF  
FFF

@A00721:190:HGJW7DSXY:4:1457:6054:28948\_2:N:0:TCTGCAAG+GCTGCACT  
TGTCGTTTAAAGACTGCAGAGGCTGTCAAACAAGCCAGACTCAAGGAGTCCAATCAAAGTTTTGAA  
TTTAGCTCAACTGGGGAGACGTGCTTAAATGGGTGATAAAAATTATTT

+

FFFFFFFF:FFFF:FFFFFFFFFFFFFF,FFFFFFFFFFFFFFFFFFFFFFFFFFFFFFFF:FF  
:FFFFFFFF:FFFFFFFFFFFFFFFFFFFFFFFFFFFFFFFF:FFF,FFFFFF

@A00721:190:HGJW7DSXY:4:2337:31259:20807\_2:N:0:TCTGCAAG+GCTGCACT  
AAGGACTATGTTGACTGACGAAGATTTCCACAGATTTGTCTACGTTGCAGATCGCCACTCCAAACA  
CTATATACATTATAAAATATAAAAATAAGGGAGTCATAACTTTTGTTA

+

FFFFFFFFFFFFFFFFFFFFFFFFFFFFFFFFFFFFFFFFFFFFFFFFFFFFFFFFFFFFFFFF  
F:FFFFFFFFFFFFFF:FFFFFFFFFFFFFFFFFFFFFFFFFFFFFFFFFFFFFFFF

@A00721:190:HGJW7DSXY:4:2258:12129:14105\_1:N:0:TCTGCAAG+GCTGCACT  
ATTACTTTAACGATCTCTCGGTCATTTACTCTGTACTTGATCTACGTCGTTTAACTGTCGGAACAACC  
TTTACTTAGAATGACTCTATCTTTTCAGACACTTCTTATATTATTTACAATAGTTAATATCATATTAG  
TAA

+

FF:FFFFFFFFFFFFFFFFFFFFFFFFFFFFFFFFFFFFFFFFFFFFFFFFFFFFFFFFFFFF  
FFF:FFFFFFFFFFFFFF:F:F:FFFFFFFFFFFFFFFFFFFFFFFFFFFFFFFFFFFFFFFF  
FFF

@A00721:190:HGJW7DSXY:4:1127:15411:20134\_2:N:0:TCTGCAAG+GCTGCACT  
TAATAGATTAATAAAGGATGAGTACGAAAACCAACTCTTCGTTACGAGACCTGATGGTAGAATAGATT  
TAGTCTCTACCCCATCTCAACGAGGATAAAGCGAGTTTTCCGTCCTG

+

FFFFFFFFFFFFFFFFFFFFFFFFFFFFFFFFFFFFFFFF,FFFFFFFFFFFFFF:FFF,FFF  
FFFFFFFFFFFFFFFFFFFFFF:F:FFFFFF,FFFFFFFFFFFFFF

@A00721:190:HGJW7DSXY:4:1121:32732:11804\_1:N:0:TCTGCAAG+GCTGCACT  
ACCCACACGACTCGAAACCGAGACGCCGTAGATCAAAGTCCCTTCTAACTTTAGATTATGAATCCT  
GCCTTTACTCATTTTATAGCAGTTA

+

: ,FF, :F,FFFF:FFFFFFFFFFFFFFFFFFFFFFFFFFFFFFFFFFFFFFFFFFFFFFFF  
FFFFFFFFFFFFFFFFFFFFFFFF

@A00721:190:HGJW7DSXY:4:2632:13078:31407\_2:N:0:TCTGCAAG+GCTGCACT  
GATTGTTATCAATTTAAATACATTACTGTTTCAAATCATCTTTACTCACAGACTCCGAAAATGGTTTC  
AAATGAGGTCAAAGCTCTATTTATTAACGAATATTATCCGATTCTT

+

FFFFFFFFFFFFFFFFFFFFFFFFFFFFFFFF:FFFFFFFFFFFFFFFFFFFFFFFFFFFFFF  
FF:FFFFFFFFFFFFFFFFFFFFFFFF:FFFF:FFFFFFFF:FF

@A00721:190:HGJW7DSXY:4:2537:28619:4241\_2:N:0:TCTGCAAG+GCTGCACT  
TTTCGACAAATTTTAGAACTTTATTTAGAACTCTCTCCGATCACCTTGGTGTGATCTCCCGGAGGAT

CTTTTCAATAAGATGTATGATGATAATCTACTATTTTTTAAATAGTGAT

+

FFFFFFFFFFFFFFFFFFFFFFFFFFFFFFFFFFFFFFFFFFFFFFFFFFFFFFFFFFFFFFFFFFFFFFFF  
FFFFFFFFFFFFFFFFFFFFFFFFFFFFFFFFFFFFFFFFFFFFFFFFFFFFFFFFFFFFFFFFFFFFFFFF

@A00721:190:HGJW7DSXY:4:1420:4562:6699\_1:N:0:TCTGCAAG+GCTGCACT  
TTATCAAAGATTTGGCTTGGTCTATTTACCGCAAAAAGTTGGAAGAGGTCTATGATATTTATTTTACT  
TATACTTTAAATAGCACCGATTATAACTTGACTGTTGATAATATTACAATAGCTCTTTCTCAGAAGAT  
TAG

+

FFFFFFFFFFFFFFFFFFFFFFFFFFFFFFFFFFFFFFFFFFFFFFFFFFFFFFFFFFFFFFFFFFFFFFFF  
FFFFFFFFFFFFFFFFFFFFFFFFFFFFFFFFFFFFFFFFFFFFFFFFFFFFFFFFFFFFFFFFFFFFFFFF  
FFF

@A00721:190:HGJW7DSXY:4:1608:9164:4805\_1:N:0:TCTGCAAG+GCTGCACT  
GGTAGCATTGATTTACTTTTACCGTTAGAACTGAAAAAGATTCTTTTCGAAAAGAAACCTATAAGTTA  
CAAACGATTCTTCGACTATATTAAAGAAATAAAAATACTTCAAGTACCTGAACCTTACATTTTAAATG  
GTA

+

FFFFFFF:FFFFFFFFFFFFFFFFFFFFFFFFFFFFFFFFFFFFFFFFFFFFFFFFFFFFFFFFFFFFFFFF  
FFFFFFFFFFFFFFFFFFFFFFFFFFFFFFFFFFFFFFFFFFFFFFFFFFFFFFFFFFFFFFFFFFFFFFFF  
FFF

@A00721:190:HGJW7DSXY:4:2671:9833:21433\_1:N:0:TCTGCAAG+GCTGCACT  
TTCCTCTCGGTAATGAGAGTGTATTCCTTAATATTCTAGTAACCGCTATGTGGGCATTACTAGGATT  
TATCACACTCCTAAATTTGATAGCAATTTATGTTTTAAATGCTAGGAAAATTTAGAAAACTCCATT  
GTA

+

FFFFFFFFFFFFFFFFFFFFFFFFFFFFFFFFFFFFFFFFFFFFFFFFFFFFFFFFFFFFFFFFFFFFFFFF  
FFFFFFFFFFFFFFFFFFFFFFFFFFFFFFFFFFFFFFFFFFFFFFFFFFFFFFFFFFFFFFFFFFFFFFFF  
FFF

@A00721:190:HGJW7DSXY:4:1511:32145:12070\_1:N:0:TCTGCAAG+GCTGCACT  
CTTAATTCAATAGCTTTAGTATTATTTACTATCGCCTTTATTGAAAATTGTATAAGAGTTAATTGCTT  
ACACAAAAGTGACGCGCGAAGGAATCTTAATTGATTGAAGCTAGGCGTTGGGGAGAATGAAGTCCCGC  
TTC

+

FFFFFFFFFFFFFF:FFFFFFFFFFFF:FFFFFFFFFFFFFFFFFFFFFFFF:FFFFFFFFFFFFFFFFFFFF  
FFFFFFFFFFFFFFFFFFFFFFFF:FFFFFFFFF:FFFFFFF:FFFFFFFFFFFFFFFFFFFFFFFFFFFF  
FFF

@A00721:190:HGJW7DSXY:4:1347:7093:23109\_1:N:0:TCTGCAAG+GCTGCACT  
CTACTACCGCCGGTCGGCAGATCGGCACCACTGGTCTCTACGTTACAGGACCCGCTGTGCAGAATAAC  
CTTCCCAAATCTAGATCTGCACAGAAGAAGGCTGAAGGTCGTTACCGGACGACCACTCAAAGGAAACG  
GGC

+

FFFF:FFFFFFFFFFFFFFFFFFFFFFFFFFFFFFFFFFFFFFFFFFFFFFFFFFFFFFFFFFFFFFFF  
FFFFFFFFF,:FFFFFFFFFFFFFFFFFFFFFFFFFFFFFFFFFFFFFFFFFFFFFFFFFFFFFFFFFFFF  
FFF

@A00721:190:HGJW7DSXY:4:2374:6894:6449\_1:N:0:TCTGCAAG+GCTGCACT  
CAGACGTGTGCTCTTCCGATCTCTCAGTCAAAAGTCACATTCACCACTCCCATGCCAATCAATGATGT  
GACTATACAGTTCGGCCATTTCAAGAGTGGTCAATACGTCGTGGGAGGTACTGAAGCCTTCCCTCCG  
CTG

+

FFFFFFFFFFF:FFFF:,FFF:FF:F:FFF:FFFFFFFFF,FFFFFF,F,FFFF:F::FFFF:FF,FF  
FFFFFFFFFFFFFFFF::F,FFFFFFFFFFFF,:FFFFFFFFFFFFFFFFFFFFFFFF,FFFFFFFFFFFF  
,FF

@A00721:190:HGJW7DSXY:4:2147:13666:17049\_1:N:0:TCTGCAAG+GCTGCACT  
CAATCAATAGTTCTTCTGACCAGAATGAAAAGGGTTTACCAGGTAGTCTCTAAGTCTACCAGGAAG



AGGGGAAATGTCCCCAAAAGTGAAGAATAAAGGGAAAGGTCCATCAGGACCTAAGAAGGGGAAATT  
ACC

+

:FFFF:FF:FFFFFFFFFFFFFFFFFFFFFFFFFFFFFFFFFFFFFFFF:FFFF,FFFFFFFFFFFFFFFF  
FFFFFFFFFFFFFFFF:FFFFFFFFFFFFFFFFFFFFFFFFFFFFFFFFFFFFFFFF:FFFFFFFFFFFFFFFFFFFFFFFF,:  
FFF

@A00721:190:HGJW7DSXY:4:2313:12870:35963\_2:N:0:TCTGCAAG+GCTGCACT  
ATCTGCACGGGCCAAAGAGGCCGCTGCTACGAAGTCGCTGAAGCGGCTTGGGTCATTAAGGGTAGCT  
GTAAAGTTGCGCCTGCCGACCCCATCTTTGAGACCAAGACTCTCTACA

+

FFFFFFFFFFFFFFFF:FFFFFFFFFFFFFFFFFFFFFFFFFFFFFFFFFFFFFFFF,F,FFFFFFFF  
F::FFFFFFFFFFFFFFFFFFFFFFFFFFFFFFFFFFFFFFFFFFFFFFFF

@A00721:190:HGJW7DSXY:4:2323:17237:9580\_2:N:0:TCTGCAAG+GCTGCACT  
AAATCTGTTGAATTCGTCAGTGAAGGACGAAGGTGAGAGGACTTTTGGCTACTGGCGACAACTGAGAG  
CAGTCGCTGGGGAAAGAGAATTGCGTGGGTGAAGGCCGACGCTTCGA

+

FFFFFFFFFFFFFFFFFFFFFFFFFFFFFFFFFFFFFFFFFFFFFFFFFFFFFFFF:FFFFFFFFFFFFFFFF  
FFFFFFFFFFFFFFFFFFFFFFFFFFFFFFFFFFFFFFFFFFFFFFFFFFFFFFFF

@A00721:190:HGJW7DSXY:4:2442:32452:17018\_2:N:0:TCTGCAAG+GCTGCACT  
CGTTTGGAGATTTTATCCGCGCTTAAGTATGGGGCGAAGATCCCCTATGGAGTCTTGAAGGACTTAG  
GTTGGCATATTTATGCCGACGATAATAAGCATGTCAACCTTAAGCACC

+

FFFFFFFFFFFFFFFFFFFFFFFFFFFFFFFFFFFFFFFFFFFFFFFFFFFFFFFF:FFFFFFFFFFFFFFFF  
FFFFFFFFFFFFFFFF:FFFFFFFFFFFFFFFFFFFFFFFF:FFFFFFFF:FFFF

@A00721:190:HGJW7DSXY:4:2353:12057:31203\_2:N:0:TCTGCAAG+GCTGCACT  
AGAGAGTGTGAGAGAGTCGCTCTCACTATTTTGGCCAGAATGCGGGCTTCTGACTGATGAGGTTAA  
AACTCTTGCTCCTTCTGTGGGTGAGGGTTTTGTTATATTCACTGGTT

+

FFFFFFFFFFFFFFFFFFFFFFFFFFFFFFFF:FFFFFFFF,F,FF,F:FFFFFFFF:FFFF:FFFFFFFFFFFF  
FF:FFFF:F:,FFF,FFFFFFFFFFFFFFFFFFFFFFFF,FFF,FFF

@A00721:190:HGJW7DSXY:4:1627:19859:36198\_2:N:0:TCTGCAAG+GCTGCACT  
ACACTTTTCTTGAAAATTTTCTTTCTCCGTCATTGGGGATTTGATGTGAGAAGGTGGAAGGTGT  
CAAGGGTCTTCTTCATGCTGATCTTTCAGGACCTAATCACATCATGAT

+

FFFFFFFFFFFFFFFFFFFFFFFFFFFFFFFF:FF:FF::FFFFFFFF:FFFFFFFFFFFFFFFF::FFFF:  
FFFFFFFFFFFFFFFFFFFFFFFFFFFFFFFF:FFFFFFFFFFFFFFFF

@A00721:190:HGJW7DSXY:4:1661:4182:20322\_2:N:0:TCTGCAAG+GCTGCACT  
CGAAATTAAGACGGGGGGATTAAGAGTCCAGCTGTAAGTGTCACTTCAGAGAGGGGAGCTCTGAAAA  
GGAAGTTCGTCAGAAGATGAGGAAGTCTAAGAGATCGGAAGAGCGTC

+

FFFFFFFFF:F:FFF:FFFFFFFFFFFFFFFF:FFFFFFFFFFFFFFFFFFFFFFFF:FFFFFFFFFFFF  
FFF:FFFF:FFFFFFFFFFFFFFFF,FFFFFFFFFF:FF:FFFF,:F

@A00721:190:HGJW7DSXY:4:2460:27877:27477\_2:N:0:TCTGCAAG+GCTGCACT  
AAGAAGGATTATTTGAAGCAGGGGTTACCACTTCCTAAGGTGGATGAGGGAGGTTGTTTCTTTGGAGT  
TTAGATAATCTTTGAGAAGGGTCATAGAGCCAGCAAGAGAAGCTT

+

FFFFFFFFFFFF:FFFFFFFFFFFFFFFF:FFFFFFFFFFFF:FFFFFFFFFFFFFFFFFFFFFFFFFFFF  
FFFFFFFFFFFFFFFFFFFFFFFF:FFFFFFFFFF:FF:FFFFFFFFFFFF

@A00721:190:HGJW7DSXY:4:1241:32099:31876\_2:N:0:TCTGCAAG+GCTGCACT  
GAATTCGGTAAGTACCATATTGTTCTTCCGGAAGTTGTGGGATTTAACTTTGACTCAACTACTCC  
GATCAGATCCGGATGGTTTGATTGGTATGGACTACTCGACTTTTGATC

+

FFF:FFFFFFFF,F,FFFFFFFFFFFF,FFFF:FFFFFFFF:FFFFFFFFFFFFFFFFFFFF,FFFF,F  
,FFFF:FFF,FFFF:FFFFFFFF:FF:,FF:FFFFFFFF,FFF

@A00721:190:HGJW7DSXY:4:1610:7310:18411\_1:N:0:TCTGCAAG+GCTGCACT  
TTCTGTAGCTCTGAGGGCGGTTGAGGGAGCCGTTTTGGCCGACTTTAACTATTCTAAGAGTCTTTATG  
ATTCAAAACCTATCGTTGTCGTACCTTACAAGTTGAGGAGACTTTACAGCGGCTTATTGTCGCGCAG  
TTT

+

FFFF,,FFFFFFFFFFFFFFFFFFFFFFFFFFFFFFFF:F:FFFFFFFFFFFFFFFFFFFFFFFF,FFF,FF::F:FF  
FFFFFFFFFFFFFFFFFFFFFFFFFFFFFFFFFFFFFFFFFFFFFFFFFFFFFFFFFFFFFFFFFFFFFFFF  
FFF

@A00721:190:HGJW7DSXY:4:2267:11351:24064\_2:N:0:TCTGCAAG+GCTGCACT  
TCATATCCAAAACCTCCTTGAATGGAGTACATATTTGCAACCCTATTCTTGATGTGAAAGATGCATCGA  
GGTATACGTCTAGGAACATTGATTGGGAACGTACCTACTCACGAGACG

+

FFFFFFFFFFFFFFFF:FFF:FFFFFFFFFFFFFFFFFFFFFFFFFFFFFFFFFFFFFFFF:FFF:FFFFFFFF,FF  
FFFFFFFFFFFFFFFF:F:FFFFFFFF,FFF:,FFFFFFFF:F,FFF::FFF

@A00721:190:HGJW7DSXY:4:1204:14859:25222\_1:N:0:TCTGCAAG+GCTGCACT  
CAAGAACGCTTTGGATTGTGACCATAAAGCCTCAGTTGCGATAGCTGTAGAGGTATACGATATCTCTC  
TTGATGATGTAGCCACTATAATGCTTAAGAGAGAGATTGATGTATGTCATTCGTCTTAGTTTGTCCC  
GGC

+

FFFFFFF,:FFFFFFFFFFFFFFFF:FFFFFFFFFFFFFFFF:FFFFFFFFFFFFFFFFFFFFFFFF  
FFFFFFFFFFFFFFFF,FFFFFFFF:FFF:F:FFFFFFFFFFFFFFFF::FFFFFFFFFFFFFFFF:::  
F:F

@A00721:190:HGJW7DSXY:4:1220:9824:13651\_2:N:0:TCTGCAAG+GCTGCACT  
CTCATCGCTATACGCATACCTGATTGGAAGAAGCGAGGTTCTTCTCAATAAAAATTTTTCTCAAGA  
GATTATGGTTGATAAAGTTTTCTTCATAAGGGCTATTACGTACGTCAT

+

FFFFFFFFFFFFFFFFFFFFFFFFFFFFFFFFFFFFFFFFFFFFFFFFFFFFFFFFFFFFFFFF,FFFFFFFFFFFFFFFF:FF  
FFFFFFFF,FFFF,FFF:FFF:FFF::FFFFFFFFFFFFFFFF:F

@A00721:190:HGJW7DSXY:4:1466:32633:22968\_2:N:0:TCTGCAAG+GCTGCACT  
TTCGGTCAATGACAAAACCTTCGAATATGTTACGACATGGCTTCGTAACAACAGTGCGAGGATTGTCA  
TCTCGGGGAAAGTGATTCACCAAGATGTTTCATATAGATACGAGATACC

+

FFFFFFFFFFFFFFFFFFFFFFFFFFFFFFFFFFFFFFFFFFFFFFFFFFFFFFFFFFFFFFFFFFFFFFFF  
FFFFFFFFFFFFFFFF:FFFFFFFFFFFFFFFFFFFFFFFFFFFFFFFFFFFFFFFF

@A00721:190:HGJW7DSXY:4:2466:25644:9862\_1:N:0:TCTGCAAG+GCTGCACT  
CTGGAGTTCAGACGTGTGCTCTTCCGATCTCTTTGGGTACACGTTATGCTCGAACTTAACGTTAGT  
ACCGGAGGTGATCTCTCTGCTTCTGCGTTACTGAGAGAAAAGATTACAGGACGCCTACGGTGACTTTAT  
GG

+

FFFFFFFFFFF:FFFFFFFFFFFFFFFFFFFFFFFFFFFFFFFFFFFFFFFFFFFFFFFF,FFFFFFFFFFFFFFFF  
:FFFFFFFFFFFFFFFFFFFFFFFFFFFFFFFFFFFFFFFFFFFFFFFFFFFFFFFFFFFFFFFF  
FF

@A00721:190:HGJW7DSXY:4:2569:5041:9533\_2:N:0:TCTGCAAG+GCTGCACT  
CTACGGTCCTTATCAAAGAAAATGGTGAACCGGTCTCTAAATCTTTTGAGATTGAGAAGATTGAAGAA  
CACGTCAAGAAGTCGCTCGGCGTTGTTCTTGAAAACCAAGTTAAGAAG

+

FFFFFFFFFFFFFFFFFFFFFFFFFFFFFFFFFFFFFFFFFFFFFFFFFFFFFFFFFFFFFFFFFFFFFFFF  
FFFFFFFFFFFFFFFFFFFFFFFF,FFFFFFFFFFFFFFFFFFFFFFFF:F

@A00721:190:HGJW7DSXY:4:2644:11749:11130\_2:N:0:TCTGCAAG+GCTGCACT  
GGTTCAGCTACGAGAGGTGATCCCGGATGTGGATTGAAGGCTGGCTCTAAGGGAGACTCCTTCTTTTT  
GAATGTTGTAAAGAATTGGGTTGAGAAGTGTGCTTTACAAGGAGTTAG

+

F,:FFFF,FFF,F:FFFFFFFF:F:FFFF,FF:FFFFFFFFFFFFFFFF:,F,FFFFFFFF,,:F:  
F,FF,FFF:FFFF,,F,,F::FF,FFF,FF,,F::FFFF,F,FF:FF



@A00721:190:HGJW7DSXY:4:2331:24117:10535\_2:N:0:TCTGCAAG+GCTGCACT  
GTTACGGTGATTCCAATCAAATCGGATTCATCAATCGTATTGATCTCCAAGTCGAACTACTTCAAC  
ATCAACGACATCATTCTTGATGAGTGTCTTCTTATCGAAGTCTCAGT

+

FFFFFFFFFFFFFFFFFFFFFFFFFFFFFFFFFFFFFFFFFFFFFFFFFFFFFFFFFFFFFFFFFFFFFFFF  
FFFFFFFFFFFFFFFFFFFFFFFFFFFFFFFFFFFFFFFFFFFFFFFFFFFFFFFFFFFFFFFFFFFFFFFF

@A00721:190:HGJW7DSXY:4:1646:31123:34256\_1:N:0:TCTGCAAG+GCTGCACT  
CGGGAGGTTGCAGATTCAACCCCTTATATCGAGGCTATCGAGGACGATGAGTATCTTGAAGTTGTTGA  
CGACAAGCCTCAAGAGGGTAGAGGACCACCTGGATCTTCTACTGTCTCTGCCTTCCAAGATTTCTTAG  
AAG

+

FFFFFFFFFFFFFFFFFFFFFFFFFFFFFFFFFFFFFFFFFFFFFFFFFFFFFFFFFFFFFFFFFFFFFFFF  
FFFFFFFFFFFFFFFFFFFFFFFFFFFFFFFFFFFFFFFFFFFFFFFFFFFFFFFFFFFFFFFFFFFFFFFF  
FFF

@A00721:190:HGJW7DSXY:4:1522:31774:35884\_2:N:0:TCTGCAAG+GCTGCACT  
CGGTAATCTTTCAGCCGAATTAAGTACTAATGAGTTCAAGTCGTTGTGATCGAATTAAGATCAAGG  
CTAATACCTTTATAGGTAAGAAGCCCTTGAGCCGCGTAGTCCGCGCG

+

FFFFFFFFFFFFFF:FFFFF::FFFFFFFFFFFFFFFFFFFFFFFFFFFFFFFFFFFFFFFFFFFFFFFF  
FFFFFFFFFFFF:FFFFFFFFFFFFFFFFFFFFFFFFFFFFFFFFFFFFFFFFFFFFFFFFFFFF,FFFFF

@A00721:190:HGJW7DSXY:4:1552:26946:10520\_2:N:0:TCTGCAAG+GCTGCACT  
CGATTGGTCAACGTCGGAGTGGTACTGCTAACACATTCTTTGGTAATTGTATGATCACTCTTATGATG  
CTCTCTCTTTATTACGACCTTCGGAAGTTTAGAGCCGTCGCTGTCGCC

+

FFFFFFFFFFFFFFFFFFFFFFFFFFFFFFFFFFFFFFFFFFFFFFFFFFFFFFFFFFFFFFFFFFFFFFFF  
FFFFFFFF:F,FFFFFFFFFFFFFFFFFFFFFFFFFFFFFFFFFFFFFFFFFFFFFFFFFFFFFFFFFFFF

@A00721:190:HGJW7DSXY:4:2501:14516:35086\_2:N:0:TCTGCAAG+GCTGCACT  
TTTTAAACGATTCCGAGAGGTTTATCCTGATGTGGAGGGAGTTCTTGAAGCATCCCAGCTTTCCTTG  
TGAAAATTTTGATGCGGTTTCATAAGATTATCAGTAATCCTGATTCTA

+

FFFFFFF:FFFFFFFFFFFFFFFFFFFFFFFFFFFFFFFFFFFFFFFFFFFFFFFFFFFFFFFFFFFFFFFF  
FFFFFFFFFFFFFFFFFFFFFFFFFFFFFFFFFFFFFFFFFFFFFFFFFFFFFFFFFFFFFFFFFFFFFFFF

@A00721:190:HGJW7DSXY:4:2501:13702:6965\_2:N:0:TCTGCAAG+GCTGCACT  
GCGAGAGCGACCAAGATCTAAATTTCGTAACGGTGCCTGGCGCTTTATTTTAAAAAGCTCCCTCCTCT  
CGCAAGTTTGATCTGATACTTATCACGAAAGGACTTGAGTCTTTTGAT

+

FFFFFFFFFFFFFFFFFFFFFFFFFFFFFFFFFFFFFFFFFFFFFFFFFFFFFFFFFFFFFFFFFFFFFFFF  
FFFFFFFFFFFFFFFFFFFFFFFFFFFFFFFFFFFFFFFFFFFFFFFFFFFFFFFFFFFFFFFFFFFFFFFF

@A00721:190:HGJW7DSXY:4:1329:23746:20541\_2:N:0:TCTGCAAG+GCTGCACT  
GTTGATTAAGACTCTTCCGAAAGGCGAACTTTGGGAATTTGAAGCTCAGGGTGAAGCACAACGTTTGA  
CCGTGACGAACTGTGGTGTTCTTGATCTACGTTACGGATATACTCTCT

+

FFFFFFFFFFFFFFFFFFFFFFFFFFFFFFFFFFFFFFFFFFFFFFFFFFFFFFFFFFFFFFFFFFFFFFFF  
FFFFFFFFFFFFFFFFFFFFFFFFFFFFFFFFFFFFFFFFFFFFFFFFFFFFFFFFFFFFFFFFFFFFFFFF

@A00721:190:HGJW7DSXY:4:1363:17155:7654\_2:N:0:TCTGCAAG+GCTGCACT  
AAAACGTCTTCGACAACAGCAGGGGTTTTCGAATAGTGATAGCCACCCGCTTACAGAGGGGCAGCAG  
CATGACCATAATTGGTATTGACTTTGGTACCACCTTTTCTACTGTCTG

+

FFFFFFFFFFFFFFFFFFFFFFFFFFFFFFFFFFFFFFFFFFFFFFFFFFFFFFFFFFFFFFFFFFFFFFFF  
FFFFFFFFFFFFFFFFFFFFFFFFFFFFFFFFFFFFFFFFFFFFFFFFFFFFFFFFFFFFFFFFFFFFFFFF

@A00721:190:HGJW7DSXY:4:1634:7193:8813\_1:N:0:TCTGCAAG+GCTGCACT  
TGTTTTAATGCTTAACAACAATGATAGTGAATTTATACCTACAATCATTGGTTTTTCTAATAATGATG  
ACACTATTGTTTATGGATATGATGCTATTACTCATGATGGTTACGGTCAGGGAGGATTCTCAGTTTAC  
AA

+  
FFFFF,FF:FFF,FFFFFFFFFFFF:FFFFFFFFFFFF:FFFFFFFFFFFF:FFFFFFFF:FFFFFFFF,  
FFFFFFFF:FFFFFFFFFFFF:FFFFFFFFFFFFFFFFFFFFFFFFFFFFFFFF:FFFFFFFF:FFFFFF:  
F:  
@A00721:190:HGJW7DSXY:4:1436:23466:24001\_2:N:0:TCTGCAAG+GCTGCACT  
AATTGGTCCTACTTTTGGACAAGGCCAACTTCGTAATCTTCATGAGATCGTTTCTTTCTTTATCTCTT  
TGGTTGTTAGGGATTTTGGAGAGAGTGAAAGGCTTCAATTGTAGTGGTT  
+  
FFFFFFFFFFFFFFFF:FFFFFFFF,FFFFFFFFFFFFFFFFFFFFFFFFFFFFFFFFFFFFFFFF: ,F  
FFFFFFFFFFFFFFFF:FFFFFFFFFFFFFFFFFFFFFFFFFFFFFFFF:FFFFFF  
@A00721:190:HGJW7DSXY:4:2516:18186:13479\_2:N:0:TCTGCAAG+GCTGCACT  
GTACCCAGTCAGTATACCTCTACGCAAAGATATTTTCATGAAAACCTACAGAGGAACGTACCGGATTACC  
TGTCTTTCATATTATGAATGAACCTTCGGCCGCTCTCTTTGCTTCGAT  
+  
FFFFFFFF:FFFFFFFFFFFFFFFFFFFFFFFFFFFFFFFFFFFFFFFFFFFFFFFFFFFFFFFFFFFFFFFF  
FFFFFFFFFFFFFFFFFFFFFFFFFFFFFFFFFFFFFFFFFFFFFFFFFFFFFFFF:FF::  
@A00721:190:HGJW7DSXY:4:2323:16080:10300\_1:N:0:TCTGCAAG+GCTGCACT  
TCAGAATGGGATTCTACGTAGTTTATGACTTTGGTGGTGGTACTTTCGATACTTCTATCGTCTTACG  
TTACGGTAATTACTATAGTGTTATTTATTCTGGTGGTGATGATAATCTTGGAGGTCGTGACGTTGATG  
AAG  
+  
FF,FFFFFFFFFFFFFFFFFFFFFFFFFFFFFFFFFFFFFFFFFFFFFFFFFFFFFFFFFFFFFFFFFFFF  
FFFFFFFFFFFFFFFFFFFFFFFFFFFFFFFF:FFFFFFFFFFFFFFFF:FFFFFFFFFFFFFFFFFFFF  
FFF  
@A00721:190:HGJW7DSXY:4:1513:26106:35117\_1:N:0:TCTGCAAG+GCTGCACT  
GTTCTTATTACGGCGCACTTCTTTACCCGCCACCACACAACCTTCAGTTTCACAACTGAAGGAGGAGG  
TTTCTGTTACTGGAAAACCTCGTCAATACTTTTCAATAATATACGTCTTGAACCTACTTATGACGAT  
CTA  
+  
FFFFFFFFFFFFFFFFFFFFFFFFFFFFFFFFFFFFFFFFFFFFFFFFFFFFFFFFFFFFFFFFFFFFFFFF  
FFFFFFF:FFFFFFFFFFFFFFFFFFFFFFFFFFFFFFFFFFFFFFFFFFFFFFFFFFFFFFFFFFFFFFFF  
FFF  
@A00721:190:HGJW7DSXY:4:1647:19859:4695\_2:N:0:TCTGCAAG+GCTGCACT  
TTCCGGCCGGTGGTAGCTCATTCTACCAGGGGCTATTACTCTTGCTGAAACAGCTATTAAAGCTGTT  
GAGCGGGTAATTACACCTAAACGAGCTCGATCTGCCATCGCTGAAGGA  
+  
FFFFFFFFFFFFFFFFFFFFFFFFFFFFFFFFFFFFFFFFFFFFFFFFFFFFFFFFFFFFFFFFFFFFFFFF:  
FFFFFFFFFFFFFFFFFFFFFFFFFFFFFFFFFFFFFFFFFFFFFFFFFFFFFFFF:FFFFFF  
@A00721:190:HGJW7DSXY:4:1658:27977:8578\_1:N:0:TCTGCAAG+GCTGCACT  
TCTAATCGTAACATTAATAATTTCAATCTTCTTAAAAAGAAGATAGAGAGTCATACTTTGGGCTATCG  
TTCAGGTGCATGGGGTTGGATAGCCAATATTGAAGTGGACACCTCTGGTAGTATCGAAGTAAAGATAA  
CCA  
+  
FFFFFFFFFFFFFFFFFFFF,FFFFFFFFFFFFFFFFFFFFFFFFFFFFFFFFFFFFFFFFFFFFFFFFFFFF  
FFFFFFFFFFFFFFFFFFFFFFFF:FFFFFFFFFFFFFFFF:FFFFFFFFFFFFFFFF:FFFFFFFFFFFF  
FFF  
@A00721:190:HGJW7DSXY:4:1359:14570:4210\_2:N:0:TCTGCAAG+GCTGCACT  
AAATCTTACCACTATCTACGAACCTAAAGTTCTGAAGACGTTGCTTGTGCTTCTCTCTTTAATGGCA  
CTACCTCGGTACAATCTTACTTGAACGAAGGCGACCTTCGGAGTTT  
+  
FF,FFFF:F:FFFF:FFFFFFFF:FF:FF:F:FF,FFFF:FF:FFFF:FFFFFFFF,F,FFF:FF  
FF:,FFFFFFFF:FF:F,FFF,,FFFFFFFF::F:F:F:FFFFFFFF,  
@A00721:190:HGJW7DSXY:4:1610:24325:7889\_1:N:0:TCTGCAAG+GCTGCACT  
TCTATATTAGGTGAAGCGAAATACGATTTCAACGTCACGTTTACCGAGTTTCGTTTCGTACCTTGA



FFFFFFFFFFFFFFFFFFFFF:F:FFFFFFFFFFFFFFFFFFFFFFFFFFFFFFFFFFFFFFFFFFFFF  
FFF

@A00721:190:HGJW7DSXY:4:1460:18213:35164\_2:N:0:TCTGCAAG+GCTGCACT  
TGTCGTTTAAAGACTGCAGAGGCTGTCAAACAAGCCAGACTCAAGGAGTCCAATCAAAGGTTTTGAA  
TTAGCTCAACTGGGAGACGTGCTTAAATGGGTGATAAAAATTATTT

+  
FFFFFFFFFFFFFFFFFFFFFFFFFFFFFFFFFFFFFFFFFFFFF:FFFFF:FFFFFFFFFFFFFFF,FFFFFFFFF  
FFFFFFFFFFFFFFFFFFFFFFFFFFFFFFFFFFFFFFFFFFFFFFFFFFFFFFFFFFFFFFFFF

@A00721:190:HGJW7DSXY:4:2625:5846:11271\_2:N:0:TCTGCAAG+GCTGCACT  
AAGGACTATGTTGACTGACGAAGATTTTCCCACAGATTTGTCTACGTTGCAGATCGCCACTCCAAACA  
CTATATACATTATAAAATATAAAAATAAGGGAGTCATAACTTTTGTTA

+  
FFFFFFFFFFFFFFFFFFFFFFFFFFFFFFFFFFFFFFFFFFFFF:FFFFFFFFFFFFFFFFFFFFFFFFFFFFF  
FFFFFFFFF:FFFFFFFFFFFFFFFFFFFFFFFFFFFFFFFFFFFFF:FFFFFFF

@A00721:190:HGJW7DSXY:4:2430:15257:14763\_1:N:0:TCTGCAAG+GCTGCACT  
ATTACTTTAACGATCTCTCGGTCATTTACTCTGTACTTGATCTACGTCGTTTAACTGTCCGAACAACC  
TTTACTTAGAATGACTCTATCTTTTCAGACACTTCTTATATTATTTACAATAGTTAATATCATATTAG  
TAA

+  
FFFFFFFFFFFFFFFFFFFFFFFFFFFFFFFFFFFFFFFFFFFFF:FFFFFFFFFFFFFFFFFFFFFFFFFFFFF  
FFFFF:FFFFFFFFFFFFFFFFFFFFFFFFFFFFFFFFFFFFF:FFFFFFFFF  
FFF

@A00721:190:HGJW7DSXY:4:1218:26612:7091\_2:N:0:TCTGCAAG+GCTGCACT  
TAATAGATTAATAAAGGATGAGTACGAAAACCAACTCTTCGTTACGAGACCTGATGGTAGAATAGATT  
TAGTCTCTACACCATCTCAACGAGGATAAAGCGAGTTTTCCGTCCTG

+  
FFFFFFFFFFFFFFFFFFFFFFFFFFFFFFFFFFFFFFFFFFFFF:FFFFFFFFFFFFFFFFFFFFFFFFFFFFF  
FFFFFFFFFFFFFFFFFFFFFFFFFFFFFFFFFFFFFFFFFFFFFFFFFFFFFFFFFFFFFFFFF

@A00721:190:HGJW7DSXY:4:1606:24325:13244\_1:N:0:TCTGCAAG+GCTGCACT  
ACCCCAACACGACTCGAAACCGAGACGCCGTAGATCAAAGTCCCTTCTAACTTTAGA

+  
:,FF:,,:FFFFFFFFFFFFFFFFFFFFFFFFFFFFFFFFFFFFFFFFFFFFFFFFFFFFF  
@A00721:190:HGJW7DSXY:4:1413:30508:21762\_2:N:0:TCTGCAAG+GCTGCACT  
AATTTAAATACATTACTGTTTCAAATCATCTTTACTCACAGACTCCGAAAATGGTTTCAAATGAGGTC  
AAAGCTCTATTTATTAACGAACCTATTATCCGATTCTTCGAGGGTATC

+  
FFFFFFFFFFFFFFFFFFFFFFFFFFFFFFFFFFFFFFFFFFFFF,FFFFFFFFFFFFFFF:FFFFFFF  
FFFF,FFFF:FFFFFFFFF,FFFFFFFFFF,FFFFFFFFF:FFFFFFFFF:

@A00721:190:HGJW7DSXY:4:2567:32615:6339\_2:N:0:TCTGCAAG+GCTGCACT  
TTTCGACAAATTTTAGAACTTTATTTCAGAACTCTCTCCGATCACCTTGGTGTGATCTCCCGGAGGAT  
CTTTTCAATAAGATGTATGATGATAATCTACTATTTTAAATAGTGAT

+  
FFFFFFFFFFFFFFFFFFFFF:FFFFFFFFFFFFFFFFFFFFFFFFFFFFFFFFFFFFFFFFFFFFFFFFFFFFF  
FFFFFFF:FFFFFFF:FFFFFFF,FFFFFFFFFF:FFF:FFFFFFFFF

@A00721:190:HGJW7DSXY:4:2123:9959:4492\_1:N:0:TCTGCAAG+GCTGCACT  
TTATCAAAGATTTGGCTTGGTCTATTTACCGCAAAAAGTTGGAAGAGGTCTATGATATTTATTTTACT  
TATACTTTAAATAGCACCGATTATAACTTGACTGTTGATAATATTACAATAGCTCTTTCTCAGAAGAT  
TAG

+  
FFFFFFFFFFFFFFFFFFFFFFFFFFFFFFFFFFFFF,FFFFFFFFFFFFFFFFFFFFFFFFFFFFFFFFFFFFF:FFFFFFF  
FFFFFFFFFFFFFFFFFFFFFFFFFFFFFFFFFFFFFFFFFFFFFFFFFFFFFFFFFFFFFFFFF  
FFF

@A00721:190:HGJW7DSXY:4:2164:11379:31501\_1:N:0:TCTGCAAG+GCTGCACT  
GGTAGCATTGATTTACTTTTACCGTTAGAACTGAAAAAGATTCTTTTCGAAAAGAAACCTATAAGTTA

CAAACGATTCTTCGACTATATTAAAGAAATAAAAATACTTCAAGTACCTGAACTTTACATTTTAAATG  
GTA

+

FFFFFFFFFFFFFFFFFFFFFFFFFFFFFFFFFFFFFFFFFFFFFFFFFFFFFFFFFFFFFFFFFFFFFFFF  
FFFFFFFFFFFFFFFFFFFFFFFFFFFFFFFFFFFFFFFFFFFFFFFFFFFFFFFFFFFFFFFFFFFFFFFF:FFFFFFFF  
FFF

@A00721:190:HGJW7DSXY:4:1212:9399:25347\_2:N:0:TCTGCAAG+GCTGCACT  
TCTCGGTAATGAGAGTGTATTCCTTAATATTCTAGTAACCGCTATGTGGGCATTACTAGGATTTATCA  
CACTCCTAAATTTGATAGCAATTTATGTTTTAAATGCTAGGAAAATTT

+

FFFFFFFFFFFFFFFFFFFFFFFFFFFFFFFFFFFFFFFFFFFFFFFFFFFFFFFFFFFFFFFFFFFFFFFF  
FFFFFFFF, :FFFFFFFFFFFFFFFFFFFFFFFFFFFFFFFFFFFFFFFFFFFFFFFFFFFFFFFF

@A00721:190:HGJW7DSXY:4:1534:6497:18850\_1:N:0:TCTGCAAG+GCTGCACT  
GAGTACTTAATTCAATAGCTTTAGTATTATTTACTATCGCCTTTATTGAAAATTGTATAAGAGTTAAT  
TGCTTACACAAAAGTGACGCGCAAGGAATCTTAATTGATTGAAGCTAGGCGTTGGGGAGAATGAAGT  
GCC

+

FFFFF:FFFFFFFF: :FFFFFFFFFFFFFFFFFFFFFFFFFFFFFFFFFFFFFFFFFFFFFFFFFFFF  
FFFFFFFFFFFFFFFFFFFFFFFFFFFFFFFFFFFFFFFFFFFFFFFFFFFFFFFFFFFFFFFFFFFFFFFF  
FFF

@A00721:190:HGJW7DSXY:4:1529:9435:28948\_1:N:0:TCTGCAAG+GCTGCACT  
CTACTACCGCCGGTCGGCAGATCGGCACCACTGGTCTCTACGTTACAGGGACCCGCTGTGCAGAATAAC  
CTTCCCAAATCTAGATCTGCACAGAAGAAGGCTGAAGGTCGTTACCGGACGACCACTCAAAGGAAACG  
GGC

+

FF:FFFFFFFFFFFFFFFFFFFFFFFFFFFFFFFFFFFFFFFFFFFFFFFFFFFFFFFFFFFFFFFFFFFF  
FFFFFFFFFFFF, FF:F:FFFFFFFFFFFFFFFFFFFFFFFFFFFFFFFFFFFFFFFFFFFFFFFFFFFF  
FFF

@A00721:190:HGJW7DSXY:4:2461:32099:22326\_1:N:0:TCTGCAAG+GCTGCACT  
CAGACGTGTGCTCTTCCGATCTCTCAGTCAAAAGTCACATTCACCACTCCCATGCCAATCAATGATGT  
GACTATACAGTTCGGCCATTTCAAGAGTGGTCAATACGTCGTGGGAGGTACTGAAGCCTTCCCTCCG  
CTG

+

FFFFFFF:FFFFFF:F:FF:FFF,FFFF, :FF: :FFFFFF:FFFFFF:F:F, F:FF:F:FFFFFF:F  
FFFFFFF, FFF:FF, FF:F:FFFFFFFFFFFF:FF:FFFFFF:FFFFFF, FFFFFFFFFFFFFFFFFFFFF  
FFF

@A00721:190:HGJW7DSXY:4:2161:24252:20196\_1:N:0:TCTGCAAG+GCTGCACT  
CAATCAATAGTTCTTCTGACCAGAATGAAAAGGGTTTACCAGGGTAGTCTCTAAGTCTACCAGGAAG  
AGGGGAAATGTCCCCAAACTGAGAAGAATAAAGGGAAGGTCCATCAGGACCTAAGAAGGGGAAATT  
ACC

+

FFFFFFFFFFFFFFFFFFFFFFFFFFFFFFFFFFFFFFFFFFFFFFFFFFFFFFFFFFFFFFFFFFFFFFFF  
FFFFFFFFFFFFFFFFFFFFFFFFFFFFFFFFFFFFFFFFFFFFFFFFFFFFFFFFFFFFFFFFFFFFFFFF  
FFF

@A00721:190:HGJW7DSXY:4:2318:31702:13495\_2:N:0:TCTGCAAG+GCTGCACT  
ATCTGCACGGGCCAAAGAGGCCGCTGCTACGAAGTCGCTGAAGGCGGCTTGGGTCATTAAGGGTAGCT  
GTAAAGTTGCGCCTGCCGACCCCATCTTTGAGACCAAGACTCTCTACA

+

FFFFFFFFFFFFFFFF, F:FFFFFFFFFFFFFFFFFFFFFFFFFFFFFFFF, FFFF:FFFFFFFFFFFFFFFF, :FF  
FFFFFFFFFFFFFFFF:FFFFFFFFFFFFFFFFFFFFFFFFFFFFFFFFFFFFFFFF

@A00721:190:HGJW7DSXY:4:2576:4453:13088\_2:N:0:TCTGCAAG+GCTGCACT  
AAATCTGTTGAATTCGTCACTGAGGACGAAGGTGAGAGGACTTTTGGCTACTGGCGACAACTGAGAG  
CAGTCGCTGGGGAAAGAGAATTGCGTGGGTGAAGGCCGACGCTTCGA

+



FFFFFFFFFFFFFFFFFFFFFFFFFFFFFFFFFFFFFFFFFFFFFFFFFFFFFFFFFFFFFFFF  
FFFFFFFF:FFFF:FFFFFFFFFFFFFFFFFFFFFFFFFFFFFFFFFFFFFFFF  
@A00721:190:HGJW7DSXY:4:2443:2239:6245\_2:N:0:TCTGCAAG+GCTGCACT  
CGTTTGGAGATTTTATCCGCGCTTAATACTATGGGGCGAAGATCCCCTATGGAGTCTTGAAGGACTTAG  
GTTGGCATATTTATGCCGACGATAATAAGCAGGTCACCCTTAAGCACC  
+  
FFF:FFFFFFFF:FFF:FFFFFFFF,FFFFFFFFFFFF:FFFFFFFF,FFF:FFF::F:FFFFFFFF  
FFFFFFFFFFFF:FFFFFFFFFFFFFFFFFFFF,FFFFFFFFFFFF:FFF  
@A00721:190:HGJW7DSXY:4:2606:8811:3881\_2:N:0:TCTGCAAG+GCTGCACT  
AGAGAGTGTGAGAGAGTCGCTCTCACTATTTTTGCCAGAATGCGGGCTTTCTGACTGATGAGGTAA  
AACTCTTGCTCCTTCTGTGGGTGAGGGTTTTGTTATATTCACTGGTT  
+  
FFFFFFFFFFFFFFFFFFFFFFFF:FFFF,F:FFFFFFFF,FF,:FFF:FF,:FFF:,F,:F,FFFF  
FF,F:FF:FF,F,F:,:FFF,:,:FFFFFFFF::FF:FFF,F,,FFF  
@A00721:190:HGJW7DSXY:4:2336:14479:14231\_2:N:0:TCTGCAAG+GCTGCACT  
ACACTTTTCTTGAAAATTTTCTTTTCTCCGTCATTGGGGATTTGATGTGAGAAGGTGAAGGTGT  
CAAGGGTCTTCTTCATGCTGATCTTTCAGGACCTAATCACATCATGAT  
+  
FFFFFFFFFFFFFFFFFFFFFFFFFFFFFFFFFFFFFFFFFFFFFFFFFFFFFFFFFFFFFFFF  
FFFFFFFFFFFFFFFFFFFFFFFFFFFFFFFFFFFFFFFFFFFFFFFFFFFFFFFF  
@A00721:190:HGJW7DSXY:4:2174:12536:30154\_2:N:0:TCTGCAAG+GCTGCACT  
CGAAATTAAGACGGGGGATTAAGAGTCCAGCTGTAAGTGTCACTTCAGAGAGGGGAGCTCTGAAAA  
GAAACTTCGTCAGAAGATGAGGAAGTCTAAGAGGAGGAGTTTGAGGA  
+  
FFFFFFFFFFFFFFFFFFFFFFFFFFFFFFFFFFFFFFFFFFFFFFFFFFFFFFFFFFFFFFFF  
FFF:FFFFFFFFFFFFFFFFFFFFFFFFFFFFFFFFFFFFFFFFFFFFFFFF:F  
@A00721:190:HGJW7DSXY:4:2566:15085:8077\_2:N:0:TCTGCAAG+GCTGCACT  
AAGAAGGATTATTTGAAGCAGGGGTACCATTCTAAGGTGGATGAGGGAGGTTGTTTCTTTGGAGT  
TTTAGATAATCTTTGAGAAGGGTCATAGAGCCAGCAAGAGAAGCTT  
+  
FFFFFFFFFFFFFF:FFFFFFFF:FFFFFFFFFFFFFFFFFFFFFFFF:FFFFFFFFFFFFFFFF:FFFFFFFF  
FFFF,F,FFFF:FFF:FFFFFFFFFFFF,FF:FFF:FFFFFFFF  
@A00721:190:HGJW7DSXY:4:1313:2410:18411\_2:N:0:TCTGCAAG+GCTGCACT  
GAATTCGGTAACCTTACCATATTGTTCTTCCGGGAAGTAGTGGGATTTAACTTTGACTCAACTACTCC  
GATCAGATCCGGATGGTTTGATTGGTATGGACTACTCGACTTTTGATC  
+  
FFFFFFFFFFFFFFFFFFFFFFFFFFFFFFFFFFFFFFFF,FFFFFFFFFFFFFFFFFFFFFFFF  
FFFF:FFFFFFFF,FFFFFFFFFFFFFFFFFFFFFFFFFFFFFFFF  
@A00721:190:HGJW7DSXY:4:1611:10104:13855\_1:N:0:TCTGCAAG+GCTGCACT  
TTCTGTAGCTCTGAGGGCGGTTGAGGGAGCCGTTTTGGCCGACTTTAACTATTCTAAGAGTCTTTATG  
ATTCAAAACCTATCGTTGTCGTACCTTACAAGTTGAGGAGACTTTACAGCGGCTTATTGTCGCGCAG  
TTT  
+  
FFFFF:FFFFFFFFFFFFFFFFFFFFFFFFFFFFFFFFFFFFFFFF:F:FFFF:FFFF:FFFFFFFF  
FFFFFFFFFFFFFFFFFFFFFFFFFFFFFFFFFFFFFFFFFFFFFFFFFFFFFFFFFFFFFFFF  
FFF  
@A00721:190:HGJW7DSXY:4:2449:17698:29011\_2:N:0:TCTGCAAG+GCTGCACT  
TCATATCCAAAACCTCTTGAATGGAGTACATATTTGCAACCCTATTCTTGATGTGAAAGATGCATCGA  
GGTATACGTCTAGGAACATTGATTGGGAACGTACCTACTCACGAGACG  
+  
FFFFFFFFFFFFFFFFFFFFFFFFFFFFFFFF:FFFFFFFFFFFF:FFFFFFFFFFFFFFFF,FFFFFF:FFF  
FFF:FFFFFFFFFFFF,FFFFFF:FFFFFF,FFFF:FFF:FFFF  
@A00721:190:HGJW7DSXY:4:1652:25346:5963\_1:N:0:TCTGCAAG+GCTGCACT  
CAAGAACGCTTTGGATTGTGACCATAAAGCCTCAGTTGCGATAGCTGTAGAGGTATACGATATCTCTC





$+$ 

@A00721:190:HGJW7DSXY:4:1566:5665:34475\_2:N:0:TCTGCAAG+GCTGCACT  
CGATTGGTCAACGTCGGAGTGGTACTGCTAACACATTCTTTGGTAATTGTATGATCACTCTTATGATG  
CTCTCTCTTTATTACGACCTTCGGAAGTTTAGAGCCGTCGCTGTCGCC

+

@A00721:190:HGJW7DSXY:4:2533:24225:29575\_2:N:0:TCTGCAAG+GCTGCACT  
TTTTAAACGATTCCGAGAGGTTTATCCTGATGTGGAGGGAGTTCTTGAAGCATCCCGACCTTTCCTTG  
TGAAAATTTTGATGCGGTTTCATAAGATTATCAGTAATCCTGATTCTA

+

@A00721:190:HGJW7DSXY:4:2659:22842:34757\_2:N:0:TCTGCAAG+GCTGCACT  
TCGAGAGCGACCAAGATCTAAATTCGGTAACGGTGCGTGTGCTTTATTTTAAAAGCTCCCTCCTCT  
CGCAAGTTTTATCTGATACTTATCACGAAAGGACTAGAGTCTTTTGAT

+

@A00721:190:HGJW7DSXY:4:1629:25220:31861\_2:N:0:TCTGCAAG+GCTGCACT  
GTTGATTAAGACTCTTCCGAAAGGCCAACTTTGGGAATTTGAAGCTCAGGGTGAAGCACAACTTTGA  
CCGTGACGAACTGTGGTGTTCTTGATCTACGTTACGGATATACTCTCT

+

@A00721:190:HGJW7DSXY:4:1453:13666:21277\_2:N:0:TCTGCAAG+GCTGCACT  
AAAACGTCTTCGACAACAGCAGGGGTTTTCGAATAGTGATAGCCACCCGCCTTACAGAGGGGCAGCAG  
CATGACCATAATTGGTATTGACTTTGGTACCACCTTTTCTACTGTCTG

 $+$ 

@A00721:190:HGJW7DSXY:4:1232:19452:12853\_1:N:0:TCTGCAAG+GCTGCACT  
GTTTTAATGCTTAACAACAATGATAGTGAATTTATACCTACAATCATTGGTTTTTCTAATAATGATGA  
CACTATTGTTTATGGATATGATGCTATTACTCATGATGGTTACGGTCAGGGAGGATTCTCAGTTTACA  
AGG

+

@A00721:190:HGJW7DSXY:4:1516:15157:21136\_2:N:0:TCTGCAAG+GCTGCACT  
AATTGGTCTACTTTTGGACAAGGCCAACTTCGTAATCTTCATGAGATCGTTTCTTTCTTTATCTCTT  
TGGTTGTTAGGGATTTTGAAGAGAGTGAAGGCTTCAATTGTAGTGGTT

+

@A00721:190:HGJW7DSXY:4:2516:18358:14215\_2:N:0:TCTGCAAG+GCTGCACT  
GTACCCAGTCAGTATACCTCTACGCAAAGATATTTTCATGAAACTACAGAGGAACGTACCGGATTACC  
TGTCTTTTCATATTATGAATGAACCTTCGGCCGCTCTCTTTGCTTCGAT

+

@A00721:190:HGJW7DSXY:4:2348:19407:2534\_1:N:0:TCTGCAAG+GCTGCACT  
TCAGAATGGGATTCTACGTAGTTTATGACTTTGGTGGTGGTACTTTTCGATACTTCTATCGTCTTACG  
TTACGGTAATTACTATAGTGTTATTTATTCTGGTGGTGATGATAATCTTGGAGGTCGTGACGTTGATG  
AAG

+

FF:FFFFFFFF:FFFFFFFFFFFFFFFFFFFFFFFFFFFFFFFFFFFFFFFFFFFFFFFFFFFFFFFF  
FFFFFFFFFFFFFFFF::FFFFFFFFFFFFFFFF:FFFFFFFFFFFFFFFFFFFFFFFFFFFFFFFFFFFF  
FFF

@A00721:190:HGJW7DSXY:4:1617:16351:31688\_1:N:0:TCTGCAAG+GCTGCACT  
GTTCTTATTACGGCGCACTTCTTTACCCGCCACCACACAACCTTTCAGTTTCACAACCTGAAGGAGGAGG  
TTTCTGTTACTGGAAAACCTCGTCAATACTTTTCAATAATATACGTCTTGAACCTACTTATGACGAT  
CTA

+

FFFFFFFFFFFFFFFFFFFFFFFFFFFFFFFFFFFFFFFFFFFFFFFFFFFFFFFFFFFFFFFFFFFF  
FFFFFFFFFFFFFFFFFFFFFFFFFFFFFFFFFFFFFFFFFFFFFFFFFFFFFFFFFFFFFFFFFFFF  
FFF

@A00721:190:HGJW7DSXY:4:2211:12798:13072\_2:N:0:TCTGCAAG+GCTGCACT  
TTCCGGCCGGTGGTAGCTCATTCTACCAGGGGCTATTACTCTTGCTGAAACAGCTATTAAAGCTGTT  
GAGCGGGTAATTACACCTAAACGAGCTCGATCTGCCATCGCTGAAGGA

+

FFFFFFFFFFFFFFFFFFFFFFFFFFFFFFFFFFFFFFFFFFFFFFFFFFFFFFFFFFFFFFFFFFFF  
FFFFFFFFFFFFFFFFFFFFFFFFFFFFFFFFFFFFFFFFFFFFFFFFFFFFFFFFFFFFFFFFFFFF  
FFF

@A00721:190:HGJW7DSXY:4:1566:18014:24424\_1:N:0:TCTGCAAG+GCTGCACT  
CTAATCGTAACATTAATAATTTCAATCTTCTTAAAAAGAAGATAGAGAGTCATACTTTGGGCTATCGT  
TCAGGTGCATGGGGTTGATAGCCAATATTGAAGTGGACACCTCTGGTAGTATCGAAGTAAAGATAAC  
CA

+

FFFFFFFFFFFFFFFFFFFFFFFFFFFFFFFFFFFFFFFFFFFFFFFFFFFFFFFFFFFFFFFFFFFF  
FFFFFFFFFFFFFFFFFFFFFFFFFFFFFFFFFFFFFFFFFFFFFFFFFFFFFFFFFFFFFFFFFFFF  
FF

@A00721:190:HGJW7DSXY:4:1378:20094:1344\_2:N:0:TCTGCAAG+GCTGCACT  
AAATCTTACCACTATCTACGAACCTAAAGTTCTGAAGACGTTGCTTGTGCTTCTCTCTTTAATGGCA  
CTACCTCGGTACAATCTTACTTGAACGAAGGCGACCTTCCGGAGTTT

+

FFFFFFFFFFFFFFFFFFFFFFFFFFFFFFFFFFFFFFFFFFFFFFFFFFFFFFFFFFFFFFFFFFFF  
FFFFFFFFFFFFFFFFFFFFFFFFFFFFFFFFFFFFFFFFFFFFFFFFFFFFFFFFFFFFFFFFFFFF

@A00721:190:HGJW7DSXY:4:1612:13602:18568\_1:N:0:TCTGCAAG+GCTGCACT  
TCTATATTAGGTGAAGCGAAATACGATTTCAACGTCAACGTTACCGAGTTTCGTTTCGTACCTTGA  
TGCTGACTTTCGTCAATATGATTTGATCTGGTTGCTCAATTCTAAGCGTGTTCGCTTAGTGCGAGGC  
CTC

+

F:FFFFFFFFFFFFFFFF:FFFFFFFFFFFFFFFFFFFFFFFFFFFFFFFFFFFFFFFFFFFFFFFF  
FFFFFFFFFFFFFFFFFFFFFFFFFFFFFFFFFFFFFFFFFFFFFFFFFFFFFFFFFFFFFFFFFFFF  
FFF

@A00721:190:HGJW7DSXY:4:2259:31919:8328\_1:N:0:TCTGCAAG+GCTGCACT  
TGGATTTTAATATAAAGAATCTTTACCAGGACTCCTACTACAGGAGGCAGTCTTCTGATCGTAAGAAG  
TTTATAAGGAACATATCCATTTGTTGTAATAGGTCATCAACTTAGAACTCGAACTCTAAGTGGTAA  
TAC

+

FFFFFFFFFFFFFFFFFFFFFFFFFFFFFFFFFFFFFFFFFFFFFFFFFFFFFFFFFFFFFFFFFFFF  
FFFFF:FF:FFFFFFFFFF:FFFFFFFFFF:FFFFFFFFFFFFFFFFFFFFFFFFFFFFFFFFFFFF  
FFF

@A00721:190:HGJW7DSXY:4:2642:7726:25238\_2:N:0:TCTGCAAG+GCTGCACT  
GAAATTGGACTCTTCGATAGGGGACATTTTATCGTGGGCTTCCGTAAAGGAAGATCTGTTATCGACG

+

@A00721:190:HGJW7DSXY:4:1632:6280:36229\_2:N:0:TCTGCAAG+GCTGCACT  
GATTGAAGGAAAATTTATCCTCGTTTAACTTACTTAGACTTTCTACGATACAAATGATACTTCTA  
ATTTACGTTTGCTACTCAGAGCTGGTCCTCTCAGCAAAGGGATGCATG

+

@A00721:190:HGJW7DSXY:4:2648:8043:2174\_1:N:0:TCTGCAAG+GCTGCACT  
GCATTTGATAATAATGACGAGACTTTTCGTCATAATCGCTGCATATTACGGATTACACGGTACCAGCGC  
ATCTCGTGTCGAGCCTCGACCCTATTATATGGTATTAAC TTATAAAGGTGAGGAGACCATTTTCTTGC  
TGA

+

@A00721:190:HGJW7DSXY:4:2610:11044:14794\_2:N:0:TCTGCAAG+GCTGCACT  
CTTATAATAAATAAATAAATAATATTACTAATGGCAAATAGTGGAAAGGCTCCAGTCAACACTAGTTC  
GAGTGCTGCTTTGGATTACGATGACGTGAGAATAGGTGAAGGGATAGT

+

@A00721:190:HGJW7DSXY:4:2475:3974:6934\_1:N:0:TCTGCAAG+GCTGCACT  
GATCTATTAAGGCGGCGGCGACTAATCTTAAAGCTTCACCCAAATGAAGGACACTTCGAAACTGAAT  
AATGATGCACTACAAACAAGTATCGCTAATCATCTGAAAAAGGCTCTAAAGGACACTATACAATATCC  
AGA

 $+$ 

@A00721:190:HGJW7DSXY:4:2364:4589:7842\_1:N:0:TCTGCAAG+GCTGCACT  
CGCCATTGTGGTACGAATTGGTCCAACATTTACCACCAAAATTCTTTTGATACAACCTCTAGCCTTCAAG  
TGGGGTATGCCTGCGGAATACGCTTGCTATTACCAGATTGGTTCGAACCCGTTGATGCTATGTCAGA  
AGA

+

@A00721:190:HGJW7DSXY:4:2134:6460:33066\_2:N:0:TCTGCAAG+GCTGCACT  
TGTCGTTTAAAGACTGCAGAGGCTGTCAAACAAGCCAGACTCAAGGAGTCCAATCAAAGGTTTTGAA  
TTTAGCTCAACTGGGGAGACGTGCTTAAATGGGTGATAAAAAATTATT

+

@A00721:190:HGJW7DSXY:4:1370:29803:18067\_1:N:0:TCTGCAAG+GCTGCACT  
CCCACAGATTTGTCTACGTTGCAGATCGCCACTCCAAACACTATATACATTATAAAATATAAAAATAA  
GGGAGTCATAACTTTTGTTACCAAATTCTTGGCTTTC AACGAAGTCTCTGATTTTATTAATCATTACT  
TTA

+

[illegible]

@A00721:190:HGJW7DSXY:4:1473:31259:32800\_2:N:0:TCTGCAAG+GCTGCACT  
TCATTTACTCTGTACTTGATCTACGTCGTTTAACTGTCGGAACAACCTTTACTTAGAATGACTCTATC  
TTTTCAGACACTTCTTATATTATTTACAATAGTTAATATCATATTAGT

+

FFFFFFFFFFFFFFFFFFFFFFFFFFFFFFFFFFFFFFFFFFFFFFFFFFFFFFFFFFFFFFFFFFFFFFFF  
:FFFFFFFFFFFFFFFFFFFFFFFFFFFFFFFFFFFFFFFFFFFFFFFFFFFFFFFFFFFFFFFF

@A00721:190:HGJW7DSXY:4:1320:26666:20494\_2:N:0:TCTGCAAG+GCTGCACT  
TAATAGATTAATAAAGGATGAGTACGAAAACCAACTCTTCGTTACGAGACCTGATGGTAGAATAGATT  
TAGTCTCTACACCCATCTCAACGAGGATAAAGCGAGTTTTCCGTCCTG

+

FFFFFFF:FFFFFFFFFFFFFFFFFFFFFFFFFFFFFFFFFFFFFFFFFFFFFFFFFFFFFFFFFFFFFFFF  
FFFFFFFFFFFFFFFFFFFFFFFFFFFFFFFFFFFFFFFFFFFFFFFFFFFFFFFFFFFFFFFF:FFFFFFF

@A00721:190:HGJW7DSXY:4:1219:8730:33489\_2:N:0:TCTGCAAG+GCTGCACT  
TCCGCAAACGACTCGAAACCGAGACGCCGTAGATCAAAGTCCCTTCTAACTTTAGATTATGAATCCTG  
CCTTTACTCATTTTATAGCAGTTATTTATGTTGTACTTTTTATAATTT

+

FFF:FFFFFFFFFFFFFFFFFFFFFFFFFFFFFFFFFFFFFFFFFFFFFFFFFFFFFFFFFFFFFFFF:FFF:FFFFFFFFFFFFFFFFFFFFFFFF:FFFF,FF  
FFFFFFFFFFFFFFFFFFFFFFFF:FF:FFFFFFFF:FF:FF,FFFFFFFF

@A00721:190:HGJW7DSXY:4:2245:11559:31093\_2:N:0:TCTGCAAG+GCTGCACT  
AATTTAAATACATTACTGTTTCAAATCATCTTTACTCACAGACTCCGAAAATGGTTTCAAATGAGGTC  
AAAGCTCTATTTATTAACGAACATTATCCGATTCTTCGAGGGTATC

+

FFFFFFFFFFFFFFFFFFFFFFFFFFFFFFFFFFFFFFFFFFFFFFFFFFFFFFFFFFFFFFFF:FFFFFFFFFFFFFFFFFFFFFFFF:FF  
FFFFFFFFFFFFFFFFFFFFFFFF,FFFFFFFFFFFFFFFF:FFFFF,FFFFFF

@A00721:190:HGJW7DSXY:4:2654:18774:1376\_2:N:0:TCTGCAAG+GCTGCACT  
TTTCGACAAATTTTAGAACTTTATTTAGAACTCTCTCCGATCACCTTGGTGTGATCTCCCGGAGGAT  
CTTTTCAATAAGATGTATGATGATAATCTACTATTTTAAATAGTGAT

+

FFFFFF:FFF:,FFF:FF,F:FFFFF,F:FFF:F:FFFFFFFFF::FF,F:,FFF:FFF::FFFFFFFF  
FFFFFFFFFFFFFFFF::FFFFFFFFFFFFFF,F:F:FF:F:F:FFF:FFFFFF

@A00721:190:HGJW7DSXY:4:2174:20546:7670\_1:N:0:TCTGCAAG+GCTGCACT  
TTATCAAAGATTTGGCTTGGTCTATTTACCGCAAAAAGTTGGAAGAGGTCTATGATATTTATTTTACT  
TATACTTTAAATAGCACCGATTATAACTTGACTGTTGATAATATTACAATAGCTCTTCTCAGAAGAT  
TAG

+

FFFFFFFFFFFFFFFFFFFFFFFFFFFFFFFFFFFFFFFFFFFFFFFFFFFFFFFFFFFFFFFF:FFFFFFFFFFFFFFFFFFFFFFFF:FFFFFFFF  
FFFFFFFFFFFFFFFFFFFFFFFFFFFFFFFFFFFFFFFFFFFFFFFFFFFFFFFFFFFFFFFFFFFFFFFF  
FFF

@A00721:190:HGJW7DSXY:4:2170:9073:13761\_1:N:0:TCTGCAAG+GCTGCACT  
GGTAGCATTGATTTACTTTTACCGTTAGAACTGAAAAAGATTCTTTTCGAAAAGAAACCTATAAGTTA  
CAAACGATTCTTCGACTATATTAAGAAATAAAAATACTTCAAGTACCTGAACTTTACATTTTAAATG  
GTA

+

FFFFFFFFFFFFFFFFFFFFFFFFFFFFFFFFFFFFFFFFFFFFFFFFFFFFFFFFFFFFFFFF:FFFFFFFFFFFFFFFFFFFFFFFF:FFFFFFFF  
FFFFFFFFFFFFFFFFFFFFFFFFFFFFFFFFFFFFFFFFFFFFFFFFFFFFFFFFFFFFFFFFFFFFFFFF  
:FF

@A00721:190:HGJW7DSXY:4:1220:20889:10582\_2:N:0:TCTGCAAG+GCTGCACT  
TCTCGGTAATGAGAGTGATTCCTTAATATTCTAGTAACCGCTATGTGGGCATTACTAGGATTTATCA  
CACTCCTAAATTTGATAGCAATTTATGTTTTAAATGCTAGGAAAATTT

+

FFFFF:FFFFFFFFFFFFFFFFFFFFFFFFFFFFFFFFFFFFFFFFFFFFFFFFFFFFFFFFFFFFFFFF  
FFFFFFFFFF,FFFFFFFFFFFF:FFFFFFFFF,FFFFFFFFFFFFFFFF

@A00721:190:HGJW7DSXY:4:1638:30472:3787\_1:N:0:TCTGCAAG+GCTGCACT  
GAGTACTTAATTCAATAGCTTTAGTATTATTTACTATCGCCTTTATTGAAAATTGTATAAGAGTTAAT





@A00721:190:HGJW7DSXY:4:2178:3929:26616\_2:N:0:TCTGCAAG+GCTGCACT  
CGAAATTAAGACGGGGGATTAAGAGTCCAGCTGTAAGTGTGATTTTCTGAGAGGGGAGCTCTGAAAA  
GGAAGTTCGTCAGAAGATGAGGAAGTCTAAGAGGAGGAGTTTGAGGA

+

FFFFFFFFFFFFFFFFFFFFFFFFFFFFFFFFFFFFFFFFFFFFFFFFFFFFFFFFFFFFFFFFFFFFFFFF  
FFFFFFFFFFFFFFFFFFFFFFFFFFFFFFFFFFFFFFFFFFFFFFFFFFFFFFFFFFFFFFFFFFFFFFFF

@A00721:190:HGJW7DSXY:4:2657:27877:15671\_2:N:0:TCTGCAAG+GCTGCACT  
AAGAAGGATTATTTGAAGCAGGGGTTACCACTTCCTAAGGTGGATGAGGGAGGTTGTTTCTTTGGAGT  
TTTAGATAATCTTTTGAGAAGGGGTCATAGAGCCAGCAAGAGAAGCTT

+

FFFFFFFFFFFFFFFFFFFF:FFFFFFFFFFFFFF:FFFFFFFFFFFFFFFFFFFFFFFFFFFFFFFFFFFF  
F:FFFFFFFFFFFFFFFFFFFFFFFFFFFF:F:FFFF:FFFFFFFFFFFFFF

@A00721:190:HGJW7DSXY:4:1322:22164:1078\_2:N:0:TCTGCAAG+GCTGCACT  
GAATTCGGTAAGTACCATATTGTTCTTCCGGAAGTTGTGGGATTTAACTTTGACTCAACTACTCC  
GATCAGATCCGGATGGTTTGATTGGTATGGACTACTCGACTTTTGATC

+

FFFFFFFFFFFFFFFFFFFF:FFFFFFFFFFFFFF,FFFFFFFFFFFFFFFFFFFFFFFFFFFFFFFFFFFF  
FFFF:FFFFFFFF,FF:FFFFFFFFFFFFFFFFFFFFFFFFFFFFFFFFFFFFFFFF

@A00721:190:HGJW7DSXY:4:1653:28013:30937\_1:N:0:TCTGCAAG+GCTGCACT  
TTCTGTAGCTCTGAGGGCGGTTGAGGGAGCCGTTTGGCCGACTTTAACTATTCTAAGAGTCTTTATG  
ATTCAAAACCTATCGTTGTCGTACCTTACAAGTTGAGGAGACTTTACAGCGGCTTATTGTCGCGCAG  
TTT

+

FFFFFFFFFFFFFFFFFFFFFFFFFFFFFFFFFFFFFFFFFFFFFFFFFFFFFFFFFFFFFFFFFFFF:F:FFFFFFFFFFFFFFFF  
FFFFFFFFFFFFFFFF: ,FFFFFFFFFFFFFFFFFFFFFFFFFFFFFFFFFFFF: :FFFFFFFFFFFFFFFFFFFFFFFF  
FFF

@A00721:190:HGJW7DSXY:4:2505:15709:21652\_2:N:0:TCTGCAAG+GCTGCACT  
TCATATCCAAACTCCTTGAATGGAGTACATATTTGCAACCCTATTCTTGATGTGAAAGATGCATCTA  
GGTATACGTCTATGAACATTGATTGGGAACGTACCTACTCACGAGACG

+

F,FFFFFFFFFFFFFFFF,FF::FFFFFFFFFFFF:F:FF,F,FF,F:FFF:FFFFFFFF:FFFFFF,,F  
F,FFFF,FFFF,FFF,,FF:F:FFFFFF,FFFF:FFFFFFFF,FFF

@A00721:190:HGJW7DSXY:4:2462:28456:28447\_1:N:0:TCTGCAAG+GCTGCACT  
CAAGAACGCTTTGGATTGTGACCATAAAGCCTCAGTTGCGATAGCTGTAGAGGTATACGATATCTCTC  
TTGATGATGTAGCCACTATAATGCTTAAGAGAGAGATTGATGTATGTCATTTCTGCTTAGTTTGTC  
GGC

+

FFFFFFFFFFFFFFFFFFFFFFFFFFFFFFFFFFFFFFFFFFFFFFFFFFFFFFFFFFFFFFFFFFFF  
FFF:FFFFFFFFFFFFFFFFFFFFFFFFFFFFFFFFFFFFFFFFFFFFFFFFFFFFFFFFFFFFFFFFFFFF  
FFF

@A00721:190:HGJW7DSXY:4:1549:21721:21825\_2:N:0:TCTGCAAG+GCTGCACT  
CTCATCGCTATACGCATACCTGATTGGAAGAAGCGAGGTTCTTCTCAATAAAAAATTTTCTCAAGA  
GATTATGGTTGATAAAGTTTTCTTCATAAGGGCTATTACGTACGTCAT

+

FFFFFFFFFFFFFFFFFFFFFFFFFFFFFFFFFFFF,FFFFFF:FFFFFFFFFFFFFF:FFFFFFFFFFFFFF  
FFFFFFFFFFFFFFFFFFFFFFFFFFFFFFFFFFFFFFFFFFFFFFFFFFFFFFFFFFFFFFFFFFFF

@A00721:190:HGJW7DSXY:4:2223:21414:14434\_2:N:0:TCTGCAAG+GCTGCACT  
TTCGGTCAATGACAAAACCTTCGAATATGTTACGACATGGCTTCGTAACAACAGTGCGAGGATTGTCA  
TCTCGGGGAAAGTGATTCACCAAGATGTTTCATATAGATACGAGATACC

+

FFFFFFFFFFFFFFFFFFFFFFFFFFFFFFFFFFFFFFFFFFFFFFFFFFFFFFFFFFFFFFFFFFFF  
FFFFFFFFFFFFFFFFFFFFFFFFFFFFFFFFFFFFFFFFFFFF:FFFFFFFFFFFF

@A00721:190:HGJW7DSXY:4:1238:17842:32049\_2:N:0:TCTGCAAG+GCTGCACT  
TTACTCGTTATCGGAGCTAAGAAGAAGACTTTGGGTACACGTTATGCTCGCAAACCTTAACGTTAGTAC

+

@

+

@

+

@

+

@

+

@

+

@

+

@

+

@

@A00721:190:HGJW7DSXY:4:1560:20292:6699\_1:N:0:TCTGCAAG+GCTGCACT  
CTTCTAATAGAGGATCCTGATGACATTATTTCAACGGATACCGATCTCAGTTCTACCACAGAAACCGT  
CTCAGGAACGTCTCCACTGATTCGGAATTAGAGAAAGACGACCTTCTTGTGGGGACTGAGACCTCTG  
AAT

+  
FFFFFFFF:FFFFFFFFFFFFFFFFFFFFFFFFFFFFFFFFFFFFFFFFFFFFFFFFFFFFFFFFFFFFFFFFFFFFFFFF  
FFFFFFFFFFFFFFFFFFFFFFFFFFFFFFFFFFFFFFFFFFFFFFFFFFFFFFFFFFFFFFFFFFFFFFFFFFFFFFFF  
FFF  
@A00721:190:HGJW7DSXY:4:2618:25717:3129\_2:N:0:TCTGCAAG+GCTGCACT  
GGATAATTTCAACTCTGAGACTTCTAAGAGTGTTCAAAAGACCAGAAACGTAACAAGAAGAATAAAG  
GTAGGAAGGGGAGAAAACAGAACAAGCGAGCGGTTGAAGAGAAAACCTG  
+  
FFFFFFFFFFFFFFFFFFFFFFFFFFFFFFFFFFFFFFFFFFFFFFFFFFFFFFFFFFFFFFFFFFFFFFFFFFFFFFFF  
FFFFFFFFFFFFFFFFFFFFFFFFFFFFFFFFFFFFFFFFFFFFFFFFFFFFFFFFFFFFFFFFFFFFFFFFFFFFFFFF  
@A00721:190:HGJW7DSXY:4:2215:5900:15718\_1:N:0:TCTGCAAG+GCTGCACT  
ATTAAGACAGACGTGAAAGTTATGATGAGTGATCGTATTAGAACAGCTGATTCTTATTGCATGAACGT  
CGCTGAGGTCAAACCTGTGGACGTTCTTTTCATCGACGAATTATTCATGATTCACGCTGGTCAGACCC  
TTT  
+  
FFFFFFFFFFFFFFFFFFFFFFFFFFFFFFFFFFFFFFFFFFFFFFFFFFFFFFFFFFFFFFFFFFFFFFFFFFFFFFFF  
FFFFFFFFFFFFFFFFFFFFFFFFFFFFFFFFFFFFFFFFFFFFFFFFFFFFFFFFFFFFFFFFFFFFFFFFFFFFFFFF  
FFF  
@A00721:190:HGJW7DSXY:4:2629:16224:12023\_2:N:0:TCTGCAAG+GCTGCACT  
GTTACGGTGATTCCAATCAAATCGGATTCATCAATCGTATTGATCTCCAAGTCGAACTACTTCAAC  
ATCAACGACATCATTCTTGATGAGTGTCGTTCTTATCGAAGTCTCAGT  
+  
FFFFFFFFFFFFFFFFFFFFFFFFFFFFFFFFFFFFFFFFFFFFFFFFFFFFFFFFFFFFFFFFFFFFFFFFFFFFFFFF  
FFFFFFFFFFFFFFFFFFFFFFFFFFFFFFFFFFFFFFFFFFFFFFFFFFFFFFFFFFFFFFFFFFFFFFFFFFFFFFFF  
@A00721:190:HGJW7DSXY:4:2525:18041:7780\_1:N:0:TCTGCAAG+GCTGCACT  
CGGGAGGTTGCAGATTCAACCCCTTATATCGAGGCTATCGAGGACGATGAGTATCTTGAAGTTGTTGA  
CGACAAGCCTCAAGAGGGTAGAGGACCACCTGGATCTTCTACTGTCTCTGCCTTCCAAGATTTCTTAG  
AAG  
+  
FFFFFFFFFFFFFFFFFFFFFFFFFFFFFFFFFFFFFFFFFFFFFFFFFFFFFFFFFFFFFFFFFFFFFFFFFFFFFFFF  
FFFFFFFFFFFFFFFFFFFFFFFFFFFFFFFFFFFFFFFFFFFFFFFFFFFFFFFFFFFFFFFFFFFFFFFFFFFFFFFF  
FFF  
@A00721:190:HGJW7DSXY:4:1538:1479:20337\_2:N:0:TCTGCAAG+GCTGCACT  
CGGTAATCTTTCAGCCGAATTAAGTACTAATGAGTTCAAGTCGGTTGTGATCGAATTAAGATCAAGG  
CTAATACCTTTATAGGTAAGAAGCCCTTGAGCCGCGTAGTCAGCGCG  
+  
FFFFFFFFFFFFFFFFFFFFFFFFFFFFFFFFFFFFFFFFFFFFFFFFFFFFFFFFFFFFFFFFFFFFFFFFFFFFFFFF  
FFFFFFFFFFFFFFFFFFFFFFFFFFFFFFFFFFFFFFFFFFFFFFFFFFFFFFFFFFFFFFFFFFFFFFFFFFFFFFFF  
@A00721:190:HGJW7DSXY:4:1631:26928:28056\_2:N:0:TCTGCAAG+GCTGCACT  
CGATTGGTCAACGTCGGAGTGGTACTGCTAACACATTCTTGGTAATTGTATGATCACTCTTATGATG  
CTCTCTCTTTATTACGACCTTCGGAAGTTTAGAGCCGTCGCTGTCGCC  
+  
FFFFFFFFFFFFFFFFFFFFFFFFFFFFFFFFFFFFFFFFFFFFFFFFFFFFFFFFFFFFFFFFFFFFFFFFFFFFFFFF  
FFFFFFFFFFFFFFFFFFFFFFFFFFFFFFFFFFFFFFFFFFFFFFFFFFFFFFFFFFFFFFFFFFFFFFFFFFFFFFFF  
@A00721:190:HGJW7DSXY:4:2533:25003:28354\_2:N:0:TCTGCAAG+GCTGCACT  
TTTTAAACGATTCCGAGAGGTTTATCCTGATGTGGAGGGAGTTCTTGAAGCATCCCGACCTTTCCTTG  
TGAAAATTTTGATGCGGTTTCATAAGATTATCAGTAATCCTGATTCTA  
+  
FFFFFFF:FFFFFFFFFFFFFFFFFFFFFFFFFFFFFFFFFFFFFFFFFFFFFFFFFFFFFFFFFFFFFFFFFFFFFF:  
FFFFFFFFF,FFFF:F:FF:F,:FFFFFFFFFFFFFFFFF:F,F,FFFFFF  
@A00721:190:HGJW7DSXY:4:2468:27245:31454\_2:N:0:TCTGCAAG+GCTGCACT  
CTAAATTCGGTAACGGTGCGTGGCGCTTTATTTTAAAAAGCTCCCTCCTCTCGCAAGTTTGATCTGAT  
ACTTATCACGAAAGGACTTGAGTCTTTTGATCAGTCTCTGACTTGACC  
+

FFFFFFFFFFFFFFFFFFFFFFFFFFFFFFFFFFFFFFFFFFFFFFFFFFFFFFFFFFFFFFFFFFFFFFFFFFFFFFFF  
FFFF:FFFFFFFFFFFFFFFFFFFFFFFFFFFFFFFFFFFFFFFFFFFFFFFFFFFFFFFFFFFFFFFF:FF  
@A00721:190:HGJW7DSXY:4:1168:20112:30655\_1:N:0:TCTGCAAG+GCTGCACT  
GTTGATTAAGACTCTTCCGAAAGGCGAACTTTGGGAATTTGAAGCTCAGGGTGAAGCACAACTTTGA  
CCGTGACGAACTGTGGTGTCTTGATCTACGTTACGGATATACTCTCCTTGAGTTCACTCGTAAGGAC  
ACT  
+  
FFFFFFFFFFFFFFFFFFFFFFFFFFFFFFFFFFFFFFFFFFFFFFFFFFFFFFFFFFFFFFFFFFFFFFFFFFFFFFFF  
FFFFFFFFFFFFFFFFFFFFFFFFFFFFFFFFFFFFFFFFFFFFFFFFFFFFFFFFFFFFFFFFFFFFFFFFFFFFFFFF  
FFF  
@A00721:190:HGJW7DSXY:4:1472:8648:16908\_2:N:0:TCTGCAAG+GCTGCACT  
AAAACGTCTTCGACAACAGCAGGGGTTTTGAATAGTGATAGCCACCCGCCTTACAGAGGGGCAGCAG  
CATGACCATAATTGGTATTGACTTTGGTACCACCTTTTCTACTGTCTG  
+  
FFFFFFF:F:FFFFFFFFFFFFFFFFFFFFFFFFFFFFFFFFFFFFFFFFFFFFFFFFFFFFFFFFFFFFFFFF  
FFF,FFFFFFFFFFFFFFFFFFFFFFFFFFFFFFFFFFFFFFFFFFFFFFFFFFFFFFFFFFFFFFFFFFFFFFFF  
FFF  
@A00721:190:HGJW7DSXY:4:1341:5367:31109\_1:N:0:TCTGCAAG+GCTGCACT  
GTTTTAATGCTTAACAACAATGATAGTGAATTTATACCTACAATCATTGGTTTTTCTAATAATGATGA  
CACTATTGTTTATGGATATGATGCTATTACTCATGATGGTTACGGTCAGGGAGGATTCTCAGTTTACA  
AGG  
+  
FFFFFFFFFFFFFFFFFFFFFFFFFFFFFFFFFFFFFFFFFFFFFFFFFFFFFFFFFFFFFFFFFFFFFFFFFFFFFFFF  
FFFFFFFFFFFFFFFFFFFFFFFFFFFFFFFFFFFFFFFFFFFFFFFFFFFFFFFFFFFFFFFFFFFFFFFFFFFFFFFF  
FFF  
@A00721:190:HGJW7DSXY:4:1671:20898:2926\_2:N:0:TCTGCAAG+GCTGCACT  
AATTGGTCCTACTTTTTGGACAAGGCCAACTTCGTAATCTTCATGAGATCGTTTCTTTCTTTATCTCTT  
TGGTTGTTAGGGATTTTGAGAGAGTGAAAGGCTTCAATTGATGTTG  
+  
FFFFFFFFFFFFFFFFFFFFFFFFFFFFFFFFFFFFFFFFFFFFFFFFFFFFFFFFFFFFFFFFFFFFFFFFFFFFFFFF  
FFF:FFF:FFFFFFFFFFFFFFFFFFFFFFFFFFFFFFFFFFFFFFFFFFFFFFFFFFFFFFFFFFFFFFFF  
@A00721:190:HGJW7DSXY:4:1453:25672:36652\_2:N:0:TCTGCAAG+GCTGCACT  
CAGTCAGTATACCTCTACGCAAAGATATTTTCATGAAAACCTACAGAGGAACGTACCGGATTACCTGTCT  
TTCATATTATGAATGAACCTTCGGCCGCTCTCTTTGCTTCGATGTTGG  
+  
FFFFFFFFFFFFFFFFFFFFFFFFFFFFFFFFFFFFFFFFFFFFFFFFFFFFFFFFFFFFFFFFFFFFFFFFFFFFFFFF  
FFF:FFF:FFFFFFFFFFFFFFFFFFFFFFFFFFFFFFFFFFFFFFFFFFFFFFFFFFFFFFFFFFFFFFFF  
@A00721:190:HGJW7DSXY:4:2370:17427:20337\_1:N:0:TCTGCAAG+GCTGCACT  
TCAGAATGGGATTCCTACGTAGTTTATGACTTTGGTGGTGGTACTTTGATACTTCTATCGTCTTACG  
TTACGGTAATTACTATAGTGTTATTTATTCTGGTGGTGGTATGATAATCTTGAGGTCGTGACGTTGATG  
AAG  
+  
FF,FFFFFFFFFFFFFFFFFFFFFFFFFFFFFFFFFFFFFFFFFFFFFFFFFFFFFFFFFFFFFFFFFFFFFFFF  
FFFFFFFFFFFFFFFFFFFFFFFFFFFFFFFFFFFFFFFFFFFFFFFFFFFFFFFFFFFFFFFFFFFFFFFFFFFFFFFF  
FFF  
@A00721:190:HGJW7DSXY:4:2421:19180:3803\_1:N:0:TCTGCAAG+GCTGCACT  
GTTCTTATTACGGCGCACTTCTTTACCCGCCACCACAACTTTTCAGTTTCACAACTGAAGGAGGAGG  
TTTCTGTTACTGGAAAACCCTCGTCAATACTTTTCAATAATATACGTCTTGAACCTACTTATGACGAT  
CTA  
+  
FFFFFFFFFFFFFFFFFFFFFFFFFFFFFFFFFFFFFFFFFFFFFFFFFFFFFFFFFFFFFFFFFFFFFFFFFFFFFFFF  
FFFFFFFFFFFFFFFFFFFFFFFFFFFFFFFFFFFFFFFFFFFFFFFFFFFFFFFFFFFFFFFFFFFFFFFFFFFFFFFF  
FFF  
@A00721:190:HGJW7DSXY:4:2250:5267:4820\_2:N:0:TCTGCAAG+GCTGCACT  
TTCCGGCCGGTGGTAGCTCATTTCTACCAGGGGCTATTACTCTTGCTGAAACAGCTATTAAAGCTGTT

GAGCGGGTAATTACACCTAAACGAGCTCGATCTGCCATCGCTGAAGGA

+

FFFFFFFFFFFFFFFFFFFFFFFFFFFFFFFFFFFFFFFFFFFFFFFFFFFFFFFFFFFFFFFFFFFFFFFF  
FFFFFFFFFFFFFFFFFFFFFFFFFFFFFFFFFFFFFFFFFFFFFFFFFFFFFFFFFFFFFFFF

@A00721:190:HGJW7DSXY:4:1241:7708:7639\_1:N:0:TCTGCAAG+GCTGCACT  
CTAATCGTAACATTAATAATTTCAATCTTCTTAAAAAGAAGATAGAGAGTCATACTTTGGGCTATCGT  
TCAGGTGCATGGGGTTGCATAGCCAATATTGAAGTGGACACCTCTGGTAGTATCGAAGTAAAGATAAC  
CAA

+

FFFFFF,FFF,FFF:FFFFFFFFFFFFFFFF:FF:FFFFFF,F:FFFFFFFF:FFFFFFFFFFFF,F:FFFFFF  
F,:FFF::,FFFFFFFFFFFFFFFF:FFFFFFFFFFFFFFFF,FFFFFFFFF:FFFFFFFFFFFF:FFFFFF  
FFF

@A00721:190:HGJW7DSXY:4:1444:11487:1814\_2:N:0:TCTGCAAG+GCTGCACT  
AAATCTTACCCTATCTACGAACCTAAAGTTCTGAAGACGTTGCTTGTGCTTCCTCCTTTAATGGCA  
CTACCTCGGTACAATCTTACTTGAACGAAGGCGACCTTCCGGAGTTT

+

FFFFFFFFFFFF,FFFFFFFFFFFFFFFFFFFFFFFFFFFFFFFF:FFFFFFFFFFFF:FF,FFFFFFFF:FFF:FF  
FFFFFFFFFFFF,FF::FFFFFFFFFFFF::FF,FFFFFFFFF,FFFFFFF

@A00721:190:HGJW7DSXY:4:1121:29342:19492\_1:N:0:TCTGCAAG+GCTGCACT  
CTATATTAGGTGAAGCGAAATACGATTTCAACGTCAACGTTACCGAGTTTCGTTTCGTACCTTGAT  
GCTGACTTTCGTCAATATGATTTGATCTGGTTGCTCAATTCTAAGCGTGTTCGCTTAGTGCGAGGCC  
TCT

+

FFFFFFFFFFFFFFFFFFFFFFFFFFFFFFFFFFFFFFFF:FFFFFFFFFFFFFFFFFFFFFFFFFFFFFFFF:FFFFF  
FFFFFFFFFFFFFFFFFFFFFFFFFFFFFFFFFFFFFFFFFFFFFFFFFFFFFFFFFFFFFFFF:FF,FFFFFFFF:FFFFFFFFFFFFFFFF  
FFF

@A00721:190:HGJW7DSXY:4:1421:6542:28228\_2:N:0:TCTGCAAG+GCTGCACT  
GGATTTTAATATAAAGAATCTTTACCAGGACTCCTACTACAGGAGGCAGTCTTCTGATCGTAAGAAGT  
TTATAAGGAACATATCCATTTGTTGTAATAGGGTCATCAACTTAGAAC

+

FFFFFFFFFFFFFFFFFFFFFFFFFFFFFFFFFFFFFFFFFFFFFFFFFFFFFFFFFFFFFFFFFFFFFFFF  
FFFFFFFFFFFFFFFFFFFFFFFFFFFFFFFFFFFFFFFFFFFFFFFFFFFFFFFFFFFFFFFF

@A00721:190:HGJW7DSXY:4:1169:2365:13260\_2:N:0:TCTGCAAG+GCTGCACT  
TGGTAATACTGTCTTTCCAAGCTTACCTGTATCTTCAATGAAATTGGACTCTTCGATAGGGGACATTT  
TATCGTGGGCTTTCGTAAAGGAAGATCTGTTATCGACGGTTTATCGT

+

FFFFFFFFFFFFFFFFFFFFFFFFFFFFFFFFFFFFFFFF:FFFFFFFFFFFFFFFF:FFFFFFFFFFFF  
FFFFFFFFFFFFFFFFFFFFFFFFFFFFFFFFFFFF,FFFFFFFFFFFFFFFFFFFFF

@A00721:190:HGJW7DSXY:4:2113:16758:24815\_2:N:0:TCTGCAAG+GCTGCACT  
GATTGAAGGACAATTTTATCCTCGTTTAACTTACTTAGACTTTCCTACGATACAAATGATAACTTCTA  
ATTTACGTTTGCTACTCAGAGCTGGTCCTCTCAGCAAAGGGATGCATG

+

FFFFFFFFFFFF,FFFF:FFFFFFFFFFFFFFFFFFFFFFFFFFFFFFFF:FFFFFFFFFFFFFFFFFFFF,FFFFFFFF  
,FFFF:F:FFFFFFFF:FFFFFFFFFFFF:F:FFFFFFFF:FFFFFFFF:

@A00721:190:HGJW7DSXY:4:2650:17183:18505\_1:N:0:TCTGCAAG+GCTGCACT  
GCATTTGATAATAATGACGAGACTTTCGTACATAATCGCTGCATATTACGGATTACACGGTACCAGCGC  
ATCTCGTGTGAGCCTCGACCCTATTATATGGTATTAACCTATAAAGGTGAGGAGACCATTTTCTTGC  
TGA

+

FFFFFFFFFFFFFFFFFFFFFFFFFFFFFFFF:FFFFFFFFFFFFFFFFFFFFFFFFFFFFFFFFFFFFFFFF  
FFFFFFFFFFFFFFFFFFFFFFFFFFFFFFFFFFFFFFFFFFFFFFFFFFFFFFFFFFFFFFFFFFFFFFFF  
FFF

@A00721:190:HGJW7DSXY:4:2678:14380:29277\_2:N:0:TCTGCAAG+GCTGCACT  
CTTATAATAAATAAATAAATAATATTACTAATGGCAAATAGTGGAAGGCTCCAGTCAACACTAGTTC

+

@A00721:190:HGJW7DSXY:4:2538:9670:18333\_1:N:0:TCTGCAAG+GCTGCACT  
GATCTATTAAGGCGGCGGCGACTAATCTTAAAGCTTCACCCAAAATGAAGGACACTTCGAAACTGAAT  
AATGATGCACTACAAACAAGTATCGCTAATCATCTGAAAAAGGCTCTAAAGGACACTATACAATATCC  
AGA

+

@A00721:190:HGJW7DSXY:4:2527:1624:3834\_1:N:0:TCTGCAAG+GCTGCACT  
CGCCATTGTGGTACGAATTGGTCCAACATTTACCACCAAATTCTTTTGATACAACCTCTAGCCTTCAAG  
TGGGGTATGCCTGCGGAATACGCTTGCTATTACCAGATTGGTTCGAACCCGTTGATGCTATGTCAGA  
AGA

+

@A00721:190:HGJW7DSXY:4:2226:23366:10394\_2:N:0:TCTGCAAG+GCTGCACT  
TGTCGTTTAAAGACTGCAGAGGCTGTCAAACAAGCCCAGACTCAAGGAGTCCAATCAAAGGTTTTGAA  
TTTAGCTCAACTGGGGAGACGTGCTTAAATGGGTGATAAAAAATTATTT

+

@A00721:190:HGJW7DSXY:4:1453:25084:1251\_1:N:0:TCTGCAAG+GCTGCACT  
CCCACAGATTTGTCTACGTTGCAGATCGCCACTCCAAACACTATATACATTATAAAATATAAAAATAA  
GGGAGTCATAACTTTTGTTACCAAATTCTTGGCTTTC AACGAAGTCTCTGATTTTATTAATCATTACT  
TTA

+

@A00721:190:HGJW7DSXY:4:1601:17607:34053\_2:N:0:TCTGCAAG+GCTGCACT  
TCATTTACTCTGTACTTGATCTACGTCGTTTAACTGTGCGAACAACTTTACTTAGAATGACTCTATC  
TTTTCAGACACTTCTTATATTATTTACAATAGTTAATATCATATTAGT

+

@A00721:190:HGJW7DSXY:4:1328:28845:26866\_2:N:0:TCTGCAAG+GCTGCACT  
TAATAGATTAATAAAGGATGAGTACGAAAACCACTCTTCGTTACGAGACCTGATGGTAGAATAGATT  
TAGTCTCTACCCCATCTCAACGAGGATAAAGCGAGTTTTCCGTCCTG

+

@A00721:190:HGJW7DSXY:4:2123:22679:22764\_2:N:0:TCTGCAAG+GCTGCACT  
TCCGCAAACGACTCGAAACCGAGACGCCGTAGATCAAAGTCCCTTCTAACTTTAGATTATGAATCCTG  
CCTTTACTCATTTTATAGCAGTTATTTATGTTGTACTTTTTATAATTT

+

@A00721:190:HGJW7DSXY:4:2374:15456:28761\_2:N:0:TCTGCAAG+GCTGCACT  
AATTTAAATACATTACTGTTTCAAATCATCTTTACTCACAGACTCCGAAAATGGTTTCAAATGAGGTC

+

@A00721:190:HGJW7DSXY:4:2261:10809:30639\_2:N:0:TCTGCAAG+GCTGCACT  
TTTCGACAAATTTTAGAACTTTATTTTCAGAACTCTCTCCGATCACCTTGGTGTGATCTCCCGGAGGATC  
TTTTCAATAAGATGTATGATGATAATCTACTATTTTTAAATAGTGATA

+

@A00721:190:HGJW7DSXY:4:2461:5204:25034\_1:N:0:TCTGCAAG+GCTGCACT  
TTATCAAAGATTTGGCTTGGTCTATTTACCGCAAAAAGTTGGAAGAGGTCTATGATATTTATTTTACT  
TATACTTTAAATAGCACCGATTATAACTTGACTGTTGATAATATTACAATAGCTCTTTCTCAGAAGAT  
TAG

+

@A00721:190:HGJW7DSXY:4:2170:9525:13823\_1:N:0:TCTGCAAG+GCTGCACT  
GGTAGCATTGATTTACTTTTACCGTTAGAACTGAAAAAGATTCTTTTCGAAAAGAAACCTATAAGTTA  
CAAACGATTCTTCGACTATATTAAAGAAATAAAAATACTTCAAGTACCTGAACCTTTACATTTTTAATG  
GTA

+

@A00721:190:HGJW7DSXY:4:1266:19144:9909\_2:N:0:TCTGCAAG+GCTGCACT  
TCTCGGTAATGAGAGTGTATTCCTTAATATTCTAGTAACCGCTATGTGGGCATTACTAGGATTTATCA  
CACTCCTAAATTTGATAGCAATTTATGTTTTAAATGCTAGGAAATTT

+

@A00721:190:HGJW7DSXY:4:2138:5990:36479\_1:N:0:TCTGCAAG+GCTGCACT  
GAGTACTTAATTCAATAGCTTTAGTATTATTTAATATCGCCTTTATTGAAAATTGTATAAGAGTTAAT  
TGCTTACACAAAAGTGACGCGGATGGAATCTTAATTGATTGAAGCTAGGCGTTGGGGAGAATGAACT  
GCC

+

@A00721:190:HGJW7DSXY:4:2167:3441:17754\_1:N:0:TCTGCAAG+GCTGCACT  
CTACTACCGCCGGTCGGCAGATCGGCACCACTGGTCTCTACGTTACAGGGACCCGCTGTGCAGAATAAC  
CTTCCCAAATCTAGATCTGCACAGAAGAAGGCTGAAGGTCGTTACCGGACGACCACTCAAAGGAAACG  
GGC

+

@A00721:190:HGJW7DSXY:4:2548:23158:26193\_1:N:0:TCTGCAAG+GCTGCACT  
CAGACGTGTGCTCTTCCGATCTCTCAGTCAAAAGTCACATTCACCACTCCCATGCCAATCAATGATGT  
GACTATACAGTTCGCCATTTCAGAGTGGTCAATACGTCGTGGGAGGTACTGAAGCCTTCCCCTCCG  
CTG

+

[illegible]







FFFFFFFFF:FFFFFF:FFFFFFFFFFFFFFFFFFFFFFFFF,F:FFF:FFFFFFFFFFFF,FFFF  
FFFFFFFF:FFFFFF:FFFF:FF:FFFF,FFFF,:FFFFFFFFF:  
@A00721:190:HGJW7DSXY:4:2144:14895:35180\_2:N:0:TCTGCAAG+GCTGCACT  
TTCAGAGTCTCTTGAAGTCCAGGTAGCTAATGTTCTTGAATAGCCACAGACTTTCTGGGAAAAGAG  
ACCTCTGTTGGTAGAGGAGTTGAGAGAATTACTCAGATTCAATCTGGC

+

FFFFFFFFF:FFFFFFFFFFFFFFFFFFFFFFFFF:FFFFFFFFFFFFFFFFFFFFFFFFF:FFF  
FFFFFFFFFFFFFFFF:FFFFFFFFFFFFFFFFFFFFFFFF:FFFFFFFFFFFF:  
@A00721:190:HGJW7DSXY:4:1625:14434:21981\_1:N:0:TCTGCAAG+GCTGCACT  
ACGCTACACTCGAAATATGGGCCCTCATAAGGAAGTATAGTTGGCGTCTTGTCTGACGTCATTACA  
GTCTGGAAGTTAGATCATTTGTTGAGGAAGATCTCTACAGAGATTATCGAGAGTTGTGATCTAGTTCT  
AAA

+

FFFFFFFFFFFFFFFFFFFFFFFFF:FFFFFFFFFFFFFFFFFFFFFFFFFFFFFFFFF:F:FF  
FFFFFFFFFFFFFFFFFFFFFFFFFFFFFFFFF,FFFFFFFFFFFFFFFFFFFFFFFFFFFFF  
FFF  
@A00721:190:HGJW7DSXY:4:1534:16712:3161\_1:N:0:TCTGCAAG+GCTGCACT  
TCTTCTAACCAGGACTGATGGTGAGATTCTTTACCTTTTGGAGGTCCAGGAACCTTTACTCCTAGTG  
TCTTTTCTAGAGTCCAAGGACGTTTCCGTCGGAGGATGACAGGTGGGAGACCGCTCAATAACACTCTT  
GAA

+

FFFFFFFFFFFFFFFFF:FF:FFFFFFFFFFFFFFFFFFFFFFFFFFFFFFFFFFFFFFFFF  
FFFFFFF:FFFFFFFFFFFFFFFFFFFFFFFFF:FFFFFFFFFFFFFFFFFFFFFFFFFFFFF  
F:F  
@A00721:190:HGJW7DSXY:4:2173:5963:27258\_2:N:0:TCTGCAAG+GCTGCACT  
TAAAGCCTGTCCAGTTGTCGATGATGTTTCGGGCTGTGGGATTAACCTCCCTCGTGAACTTACGACG  
ATGTTCTCGCTCGCATTTACAAGGATTACTAAGTCTGAGATCTGCCA

+

FFFFFFFFFFFFFFFFFFFFFFFFFFFFFFFFFFFFFFFFFFFFFFFFFFFFFFFFFFFFFFFFF  
FFFFFFFFFFFFFFFFFFFFFFFFFFFFFFFFFFFFFFFFFFFFFFFFFFFFFFFFF  
@A00721:190:HGJW7DSXY:4:1639:3269:1297\_1:N:0:TCTGCAAG+GCTGCACT  
CTTCTAATAGAGGATCCTGATGACATTATTTCAACGATACCGATCTCAGTTCTACCACAGAAACCGT  
CTCAGGAAGTGTCTCCACTGATTCGGAATTAGAGAAAGACGACCTTCTTGTGGGGACTGAGACCTCTG  
AAT

+

FFFFFFFFFFFFFFFFFFFFFFFFFFFFFFFFF:FFFFFFFFFFFFF:FFFF:FFFFFFFFFFFFFFFFF  
FFFFFFFFF:FFFFF:FFFFFFFFFFFFFFFFFFFFFFFFF:FFFFFFFFFFFFFFFFFFFFF  
FFF  
@A00721:190:HGJW7DSXY:4:1532:32145:4272\_2:N:0:TCTGCAAG+GCTGCACT  
TCAAAAGACCAGAAACGTAACAAGAAGAATAAAGGTAGGAAGGGGAGAAAACAGAACAAGCGAGCGGT  
TGAAGAGAAAAGTATGATTGCGGCTGATCGTACCCAATTCCTGC

+

FFFFFFFFFFFFF::FFFFFFF:FFFFFF:FFF,FFFFFFFFFFFFFFFFFFFFFFFFF:FFFFFFF  
FFFFFFFFF:FFFFFFFFFFFFFFFFFFFFF:FFFFFFFFFFFFFFFFFFFF:  
@A00721:190:HGJW7DSXY:4:2452:26078:13056\_1:N:0:TCTGCAAG+GCTGCACT  
ATTAAGACAGACGTGAAAGTTATGATGAGTGATCGTATTAGAAGAGCTGATTCTTATTGCATGAACGT  
CGCTGAGGTCAAACCTGTGGACGTTCTTTTCATCGACGAATTATTCATGATTCACGCTGGTCAGACCC  
TTT

+

FFFFFFFFFFFF,FFFFFFFFFFFFFFFFFFFFFFFFFFFFFFFFFFFFFFFFFFFFFFFFF  
FFFFFFFFFFFFFFFFFFFFFFFFFFFFFFFFFFFFFFFFFFFFFFFFF:FF:FFFFFFFFFFFFF  
FFF  
@A00721:190:HGJW7DSXY:4:2640:25409:27211\_2:N:0:TCTGCAAG+GCTGCACT  
GTTACGGTGATTCCAATCAAATCGGATTCATCAATCGTATTGATCTCCAAGTCGAACTACTTCAAC

ATCAACGACATCATTCTTGATGAGTGTGCGTTCTTATCGAAGTCTCAGT  
+  
FFFFFFFFFFFFFFFFFFFFFFFFFFFFFFFFFFFFFFFFFFFFFFFFFFFFFFFFFFFFFFFF:FFFFFFFF  
FFFFFFFFFFFFFFFFFFFFFFFFFFFFFFFFFFFFFFFFFFFFFFFFFFFFFFFFFFFFFFFF  
@A00721:190:HGJW7DSXY:4:2509:10827:33990\_1:N:0:TCTGCAAG+GCTGCACT  
GGGAGGTTGCAGATTCAACCCCTTATATCGAGGCTATCGAGGACGATGAGTATCTTGAAGTTGTTGAC  
ACAAGCCTCAAGAGGGTAGAGGACCACCTGGATCTTCTACTGTCTCTGCCTTCCAAGATTTCTTAGAA  
GAG  
+  
FFFFFFFFFFFFFFFFFFFFFFFFFFFFFFFFFFFFFFFFFFFFFFFFFFFFFFFFFFFFFFFF:FFFFFFFF  
FFFFFFFFFFFFFFFFFFFFFFFFFFFFFFFFFFFFFFFFFFFFFFFFFFFFFFFFFFFFFFFF  
FFF  
@A00721:190:HGJW7DSXY:4:1538:2501:22357\_2:N:0:TCTGCAAG+GCTGCACT  
CGGTAATCTTTCAGCCGAATTAAGTACTAATGAGTTCAAGTCGTTGTGCGATCGAATTAAGATCAAGG  
CTAATACCTTTATAGGTAAGAAGCCCTTGAGCCGCGTAGTCAGCGCG  
+  
FFFFFFFFFFFFFFFFFFFFFFFF,F:FFFFFF:FFFF:FFFFFFFFFFFFFFFF,FFFF:FFFFFFFF  
FFFFFF:FF:FFFFFFFFFFFF:FFFF:F:FF:FFFFFFFFFFFFFFFF  
@A00721:190:HGJW7DSXY:4:2107:32271:25629\_2:N:0:TCTGCAAG+GCTGCACT  
CGATTGGTCAACGTCGGAGTGGTACTGCTAACACATTCTTTGGTAATTGTATGATCACTCTTATGATG  
CTCTCTCTTTATTACGACCTTCGGAAGTTTAGAGCCGTCGCTGTGCGC  
+  
FFFFFFFFFFFFFFFFFFFFFFFFFFFFFFFFFFFFFFFFFFFFFFFFFFFFFFFFFFFFFFFF:FFFFFF  
FFFFFFFFFFFFFFFF:FFFFFF,FFFFFFFF:F:FFFFFFFFFFFFFFFF  
@A00721:190:HGJW7DSXY:4:2644:15176:13620\_2:N:0:TCTGCAAG+GCTGCACT  
TTTTAAACGATTCCGAGAGGTTTATCCTGATGTGGAGGGAGTTCTTGAAGCATCCCGACCTTTCCTTG  
TGAAAATTTTGATGCGGTTTCATAAGATTATCAGTAATCCTGATTCTA  
+  
FFFFFFFFFFFFFFFFFFFFFFFFFFFFFFFFFFFFFFFFFFFFFFFFFFFFFFFFFFFFFFFF:FFFFFFFF  
FFFFFFFFFFFFFFFFFFFFFFFFFFFFFFFFFFFFFFFFFFFFFFFFFFFFFFFFFFFFFFFF  
@A00721:190:HGJW7DSXY:4:2664:2040:18333\_2:N:0:TCTGCAAG+GCTGCACT  
CTAAATTCGGTAACGGTGCCTGGCGCTTTATTTTAAAAAGCTCCCTCCTCTCGCAAGTTTGATCTGAT  
ACTTATCACGAAAGGACTTGAGTCTTTTGATCAGTCTCTGACTTGACC  
+  
FFFFFFFFFFFFFFFFFFFFFFFFFFFFFFFFFFFFFFFFFFFFFFFFFFFFFFFFFFFFFFFF:FFFFFFFF  
FFFFFFFFFFFFFFFFFFFFFFFFFFFFFFFFFFFFFFFFFFFFFFFFFFFFFFFFFFFFFFFF  
@A00721:190:HGJW7DSXY:4:1217:32651:5055\_1:N:0:TCTGCAAG+GCTGCACT  
GTTGATTAAGACTCTTCCGAAAGGCGAACTTTGGGAATTTGAAGCTCAGGGTGAAGCACAACGTTTGA  
CCGTGACGAACTGTGGTGTCTTGATCTACGTTACGGATATACTCTCCTTGAGTTCACTCGTAAGGAC  
ACT  
+  
FFFFF:FFFFFFFFFFFFFF,FFFFFFFFFFFFFFFFFFFFFFFFFFFFFFFF:FFFFF:FFFFFFFF,FFFF  
FFFFFFFFFFFFFFFFFFFFFFFFFFFFFFFFFFFFFFFFFFFFFFFFFFFFFFFFFFFFFFFF  
FFF  
@A00721:190:HGJW7DSXY:4:1570:10357:3114\_2:N:0:TCTGCAAG+GCTGCACT  
AAAACGTCTTCGACAACAGCAGGGGTTTTCGAATAGTGATAGCCACCCGCTTACAGAGGGGCAGCAG  
CATGACCATAATTGGTATTGACTTTGGTACCACCTTTTCTACTGTCTG  
+  
FFF:FFF:FFFFFFFF,FFFFFFFFFFFFFFFFFFFFFFFF,FFFFFFFFFFFF:FFFFFFFFFFFF:F  
FFFF:FF,FFFFFFFF:FFFF,FFFFFFFFFFFF:FFFFFFFFFFFF  
@A00721:190:HGJW7DSXY:4:2150:1461:23688\_1:N:0:TCTGCAAG+GCTGCACT  
GTTTTAATGCTTAACAACAATGATAGTGAATTTATACCTACAATCATTGGTTTTCTAATAATGATGA  
CACTATTGTTTATGGATATGATGCTATTACTCATGATGGTTACGGTCAGGGAGGATTCTCAGTTTACA  
AGG

+  
FFFFFFFFFFFFFFFFFFFFFFFFFFFFFFFFFFFFFFFFFFFFF:FFFFFFFFFFFFFFFFFFFF  
FFFFFFFFFFFFFFFFFFFFFFFFFFFFFFFFFFFFFFFFFFFFFFFFFFFFFFFFFFFFFFFFFFFFFF  
FFF

@A00721:190:HGJW7DSXY:4:2302:30816:28025\_2:N:0:TCTGCAAG+GCTGCACT  
AATTGGTCTACTTTTGACAAGGCCAACTTCGTAATCTTCATGAGATCGTTTCTTTCTTTATCTCTT  
TGGTTGTTAGGGATTTTGAGAGAGTGAAAGGCTTCAATTGTAGTGGTT

+  
FFFFFFFFFFFFFFFFF:FFFFFFFFFFFFFFFFFFFFFFFFFFFFFFFFFFFFFFFFFFFFFFFFFFFFF  
FFFFFF:FFFFFFFFFFFFFFFFFFFFFFFFFFFFFFFF:FFFFFF:FFFFF

@A00721:190:HGJW7DSXY:4:1562:11207:26663\_2:N:0:TCTGCAAG+GCTGCACT  
CAGTCAGTACCTCTACGCAAAGATATTTTCATGAAAACCTACAGAGGAACGTACCGGATTACCTGTCT  
TTCATATTATGAATGAACCTTCGC CGCTCTCTTTGCTTCGATGTTGG

+  
FFFFFFFFFFFFFFFFFFFFFFFFF:FFFFFFFFFFFFFFFFFFFFFFFFFFFFFFFFFFFFFFFFFFFFFFFFFFFFF  
FFF:FFFFFFFFFFFFFFFFFFFFFFFFFFFFFFFFFFFFFFFFFFFFFFFF,F F

@A00721:190:HGJW7DSXY:4:2370:17454:20322\_1:N:0:TCTGCAAG+GCTGCACT  
TCAGAATGGGATTCCTACGTAGTTTTATGACTTTGGTGGTGGTACTTTTCGATACTTCTATCGTCTTACG  
TTACGGTAATTACTATAGTGTTATTTATTCTGGTGGTGATGATAATCTTGAGGTCGTGACGTTGATG  
AAG

+  
FF,FFFFFFFFFFFFFFFFFFFFFFFFFFFFFFFFFFFFFFFFFFFFFFFFFFFFFFFFFFFFFFFFFFFFFF  
FFFFFFFFFFFFFFFFF:FFFFFFFFFFFFFFFFFFFFFFFFFFFFFFFFFFFFFFFFFFFFFFFF,F FFFFFFFFFFFFFFFF  
FFF

@A00721:190:HGJW7DSXY:4:2454:4291:2848\_1:N:0:TCTGCAAG+GCTGCACT  
GTTCTTATTACGGCGCACTTCTTTACCCGCCACCACACAACCTTTCAGTTTCACAACTGAAGGAGGAGG  
TTTCTGTTACTGGAAAACCTCGTCAATACTTTTCAATAATATACGTCTTGAAC TACTTATGACGAT  
CTA

+  
FFFFFFF:FFFFFFFFFFFFFFFFFFFFFFFFFFFFFFFFFFFFFFFFFFFFFFFFFFFFFFFFFFFFFFFFFFFF  
FFFFFFFFFFFFFFFFFFFFFFFFFFFFFFFFFFFFFFFFFFFFFFFF:F FFFFFFFFFFFFFFFFFFFFFF  
FFF

@A00721:190:HGJW7DSXY:4:2511:6569:19476\_2:N:0:TCTGCAAG+GCTGCACT  
TTCCGGCCGGTGGTAGCTCATTTCTACCAGGGGCTATTACTCTTGCTGAAACAGCTATTAAAGCTGTT  
GAGCGGGTAATTACACCTAAACGAGCTCGATCTGCCATCGCTGAAGGA

+  
FFFFFFFFFFFFFFFFFFFFFFFFFFFFFFFFFFFFFFFFFFFFFFFFFFFFFFFFFFFFFFFFFFFFFFFFFFFFF  
FFFFFFFFF:FFFFFFFFFFFFFFFFFFFFFFFFFFFFFFFFFFFFFFFF:FFFFFFFFF:FFF

@A00721:190:HGJW7DSXY:4:1355:21676:20713\_1:N:0:TCTGCAAG+GCTGCACT  
CTAATCGTAACATTAATAATTTCAATCTTCTTAAAAAGAA GATAGAGAGTCATACTTTGGGCTATCGT  
TCAGGTGCATGGGGTTGCATAGCCAATATTGAAGTGGACACCTCTGGTAGTATCGAAGTAAAGATAAC  
CAA

+  
:FFFFFFFFFFFFFFFFFFFFFFFFFFFFFFFFFFFFFFFFFFFFF:FFFFFFFFFFFFFFFFFFFFFFFFFFFFF  
FFFFFFFFFFFFFFFFFFFFFFFFFFFFFFFFFFFFFFFFFFFFFFFFFFFFFFFFFFFFFFFFFFFFFFFF:F F  
FFF

@A00721:190:HGJW7DSXY:4:1562:12219:35775\_2:N:0:TCTGCAAG+GCTGCACT  
AAATCTTACCACTATCTACGAACCTAAAGTTCTGAAGACGTTGCTTGTGCTTCCTCTTTAATGGCA  
CTACCTCGGTACAATCTTACTTGGAACGAAGGCGACCTTCCGGAGTTT

+  
FFFFFFFFFFFFFFFFFFFFFFFFFFFFFFFFFFFFFFFFFFFFFFFF:F FFFFFFFFFFFFFFFFFFFFFFFFF  
FFFFFFFFFFFFFFFFFFFFFFFFFFFFFFFF:F FFFFFFFFFFFFFFFFFFFFFFFFF

@A00721:190:HGJW7DSXY:4:2238:5602:23531\_1:N:0:TCTGCAAG+GCTGCACT  
CTATATTAGGTGAAGCGAAATACGATTTTCGAACGTCAACGTT CACCGAGTTTCGTTTCGTACCTTGAT

GCTGACTTTCGTCAATATGATTTGATCTGGTTGCTCAATTCTAAGCGTGTTCCGCTTAGTGCGAGGCC  
TCT

+

F:FFFFFFFF:FF:FFFF:FFFFFF, :FFFFFFFFFFFF:FFFF, FFF, FF, FFFFFFFFFF, , F:  
, FF, FFF: F, F, FFFFFFFFF:FFFF:F: , , FFFFFFFFF:FFFFFFFF, :FFFFF:FF, F: , F:  
:FF

@A00721:190:HGJW7DSXY:4:2221:32750:26083\_2:N:0:TCTGCAAG+GCTGCACT  
GGATTTTAATATAAAGAATCTTTACCAGGACTCCTACTACAGGAGGCAGTCTTCTGATCGTAAGAAGT  
TTATAAGGAACATATCCATTTGTTGTAATAGGGTCATCAACTTAGAAC

+

FFFFFFFFFFFFFFFF:FFFF:FFFFFFFFFFFFFFFFFFFFFFFFFFFFFFFFFFFFFFFF:FFFFFFFF:FFF  
FFFFFFFF:FFFFFFFF:FF:FFFFF:FF:FF, FFFFFFFFFFFFFFFFFF

@A00721:190:HGJW7DSXY:4:1177:5873:36432\_2:N:0:TCTGCAAG+GCTGCACT  
TGGTAATACTGTCTTTCCAAGCTTACCTGTATCTTCAATGAAATTGGACTCTTCGATAGGGGACATTT  
TATCGTGGGCTTTCGTAAAGGAAGATCTGTTATCGACGGTTTATCGT

+

FFF:FF:FFFFFFFFFFFFFFFFFFFFFFFFFFFFFFFFFFFFFFFFFFFFFFFF:FFFFFFFF:F  
FFFFFFFFFFFF:FFFFFFFFFFFFFFFFFFFFFFFFFFFFFFFFFFFFFFFF

@A00721:190:HGJW7DSXY:4:2140:27498:12414\_2:N:0:TCTGCAAG+GCTGCACT  
GATTGAAGGAAAATTTATCCTCGTTTAACTTACTTAGACTTTCCTACGATACAAATGATAACTTCTA  
ATTTACGTTTGCTACTCAGAGCTGGTCCTCTCAGCAAAGGGATGCATG

+

FFFFFFFFFFFFFF:FFFFFFFF:FFFFFFFFFFFFFFFFFFFFFFFFFFFFFFFFFFFFFFFFFFFFFFFF  
FFFFFFFFFFFFFFFFFFFFFFFF:FFFFFFFFFFFFFFFFFFFFFFFF:FFFFF

@A00721:190:HGJW7DSXY:4:2672:5412:9267\_1:N:0:TCTGCAAG+GCTGCACT  
GCATTTGATAATAATGACGAGACTTTCGTCAATAATCGCTGCATATTACGGATTACACGGTACCAGCGC  
ATCTCGTGTGCGAGCCTCGACCCTATTATATGGTATTAAGTTATAAAGGTGAGGAGACCATTTTCTTGC  
TGA

+

FFFFFFFFFFFFFFFFFFFFFFFFFFFFFFFFFFFFFFFFFFFFFFFFFFFFFFFFFFFFFFFF  
FFFFFFFFFFFFFFFFFFFFFFFF:FFFFFFFFFFFFFFFFFFFFFFFFFFFFFFFFFFFFFFFF  
FFF

@A00721:190:HGJW7DSXY:4:2343:31159:29027\_2:N:0:TCTGCAAG+GCTGCACT  
AAATAAATAATATTACTAATGGCAAATAGTGGAAGGCTCCAGTCAACACTAGTTCGAGTGCTGCTTT  
GGATTACGATGACGTGAGAATAGGTGAAGGGATAGTTTTTACCTCGAC

+

FFFFFFFFFFFFFFFFFFFFFFFF, FFFFFFFFFFFFFFFFFFFFFFFFFFFFFFFFFFFFFFFFFF  
FFFFFFF, FFFFFFFFFFFFFFFFFFFFFFFFFFFFFFFFFF

@A00721:190:HGJW7DSXY:4:1634:13150:18787\_2:N:0:TCTGCAAG+GCTGCACT  
TGAATAATGATGCACTACAAACAAGTATCGCTAATCATCTGAAAAAGGCTCTAAAGGACACTATACAA  
TATGCAGACGACGACGAAGCTTATACTACTTTAATTTTGGGTATTATG

+

FFFFFFFFFFFFFFFFFFFFFFFFFFFFFFFFFFFFFFFFFFFFFFFF:FFFFFFFFFFFFFFFF  
FFFFFFFFFFFFFFFFFFFFFFFFFFFFFFFFFFFFFFFF, FFFFFFFF, FFFF

@A00721:190:HGJW7DSXY:4:2534:22444:4539\_1:N:0:TCTGCAAG+GCTGCACT  
CGCCATTGTGGTACGAATTGGTCCAACATTTACCACCAAATTCTTTTGATACAACTCTAGCCTTCAAG  
TGGGGTATGCCTGCGGAATACGCTTGCTATTACACGATTGGTTTCAACCCGTTGATGCTATGTCAGA  
AGA

+

FFFFFFFFF:FFFFFFFFFFFFFFFFFFFFFFFFFFFFFFFFFFFFFFFF:FFFFFFFFF  
FFFFFFFFFFFFFFFFFFFFFFFFFFFFFFFFFFFFFFFFFFFFFFFFFFFFFFFFFFFFFFFF  
FFF

@A00721:190:HGJW7DSXY:4:2244:13666:34522\_2:N:0:TCTGCAAG+GCTGCACT  
TGTCGTTTAAAGACTGCAGAGGCTGTCAAACAAGCCAGACTCAAGGAGTCCAATCAAAGGTTTTGAA

+

@A00721:190:HGJW7DSXY:4:2337:17454:10457\_1:N:0:TCTGCAAG+GCTGCACT  
CCCACAGATTTGTCTACGTTGCAGATCGCCACTCCAAACACTATATACATTATAAAATATAAAAATAA  
GGGAGTCATAACTTTTGTTACCAAATTCTTGGCTTTCAACGAAGTCTCTGATTTTATTAATCATTACT  
TTA

+

@A00721:190:HGJW7DSXY:4:2101:6542:14043\_2:N:0:TCTGCAAG+GCTGCACT  
TCATTTACTCTGTACTTGATCTACGTCGTTTAACTGTGGAACAACCTTTACTTAGAATGACTCTATC  
TTTTCAGACACTTCTTATATTATTTACAATAGTTAATATCATATTAGT

+

@A00721:190:HGJW7DSXY:4:1505:31747:32330\_2:N:0:TCTGCAAG+GCTGCACT  
TAATAGATTAATAAAGGATGAGTACGAAAACCACTCTTCGTTACGAGACCTGATGGTAGAATAGATT  
TAGTCTCTACCCCATCTCAACGAGGATAAAGCGAGTTTTCCGTCCTG

+

@A00721:190:HGJW7DSXY:4:2216:31937:17816\_2:N:0:TCTGCAAG+GCTGCACT  
TCCGCAAACGACTCGAAACCGAGACGCCGTAGATCAAAGTCCCTTCTAACTTTAGATTATGAATCCTG  
CCTTTACTCATTTTATAGCAGTTATTTATGTTGTACTTTTTATAATTT

+

@A00721:190:HGJW7DSXY:4:2544:6894:10614\_2:N:0:TCTGCAAG+GCTGCACT  
AATTTAAATACATTACTGTTTCAAATCATCTTTACTCACAGACTCCGAAAATGGTTTCAAATGAGGTC  
AAAGCTCTATTTATTAACGAAGTATTATCCGATTCTTCGAGGGTATC

 $+$ 

@A00721:190:HGJW7DSXY:4:2266:2428:23359\_2:N:0:TCTGCAAG+GCTGCACT  
TTCGACAAATTTTAGAACTTTATTTCAGAACTCTCTCCGATCACCTTGGTGTGATCTCCCGGAGGATC  
TTTTCAATAAGATGTATGATGATAATCTACTATTTTTAAATAGTGATA

+

@A00721:190:HGJW7DSXY:4:2512:19208:11553\_1:N:0:TCTGCAAG+GCTGCACT  
TTATCAAAGATTTGGCTTGGTCTATTTACCGCAAAAAGTTGGAAGAGGTCTATGATATTTATTTTACT  
TATACTTTAAATAGCACCGATTATAACTTGACTGTTGATAATATTACAATAGCTCTTTCTCAGAAGAT  
TAG

+

@A00721:190:HGJW7DSXY:4:2332:10782:36636\_1:N:0:TCTGCAAG+GCTGCACT  
GGTAGCATTGATTTACTTTTACCGTTAGAACTGAAAAAGATTCTTTTCGAAAAGAAACCTATAAGTTA  
CAAACGATTCTTCGACTATATTAAAGAAATAAAAATACTTCAAGTACCTGAACCTTTACATTTTTAATG  
GTA

+  
FFFFFFFFFFFFFFFFFFFFFFFFFFFFFFFFFFFFFFFFFFFFFFFFFFFFFFFFFFFFFFFFFFFFFFFFFFFFFFFF  
FFFFFFFFFFFFFFFFFFFFFFFFFFFFFFFFFFFFFFFFFFFFFFFFFFFFFFFFFFFFFFFFFFFFFFFFFFFFFFFF  
FFF  
@A00721:190:HGJW7DSXY:4:2224:14425:23218\_2:N:0:TCTGCAAG+GCTGCACT  
TCTCGGTAATGAGAGTGTATTCCTTAATATTCTAGTAACCGCTATGTGGGCATTACTGGGATTTATCA  
CACTCCTAAATTTGATAGCAATTTATGTTTTAAATGCTAGGAAAATTT  
+  
FFFFFFFFF,FFFFFFFFFFFFFFFFF:F::F,FFFFFFFFFFFFFFFFF,FFFFFFFFF:FFFFFFFFFFFFFFFFF  
FFFFFFFFF::FFFF,FFFFFFFFFFFFFFFFF:FFFFFFFFFFFFFFFFFFFFF  
@A00721:190:HGJW7DSXY:4:2138:7726:36479\_1:N:0:TCTGCAAG+GCTGCACT  
GAGTACTTAATTCATAGCTTTAGTATTATTTACTATCGCCTTTATTGAAAATTGTATAAGAGTTAAT  
TGCTTACACAAAAGTGACGCGCAAGGAATCTTAATTGATTGAAGCTAGGCGTTGGGGAGAATGAAC  
GCC  
+  
FFFFFFFFFFFFFFFFFFFFFFFFFFFFFFFFFFFFFFFFFFFFFFFFFFFFFFFFFFFFFFFFFFFFFFFFFFFFFFFF  
FFFFFFFFFFFFFFFFFFFFFFFFFFFFFFFFFFFFFFFFFFFFFFFFFFFFFFFFFFFFFFFFFFFFFFFFFFFFFFFF  
FFF  
@A00721:190:HGJW7DSXY:4:2167:4056:19476\_1:N:0:TCTGCAAG+GCTGCACT  
CTACTACCGCCGGTCGGCAGATCGGCACCACTGGTCTCTACGTTACAGGACCCGCTGTGCAGAATAAC  
CTTCCCAAATCTAGATCTGCACAGAAGAAGGCTGAAGGTCGTTACCGGACGACCACTCAAAGGAAACG  
GGC  
+  
FF:FFFFFFFFFFFFFFFFF:FFFFFFFFFFFFFFFFFFFFFFFFFFFFFFFFFFFFFFFFFFFFFFFFF:FFF  
FFFFFFFFF:FFFF:FFFFFFFFFFFFFFFFFFFFFFFFFFFFFFFFFFFFFFFFFFFFFFFFFFFFFFFFF  
FFF  
@A00721:190:HGJW7DSXY:4:1658:4562:18192\_1:N:0:TCTGCAAG+GCTGCACT  
TGTGGGAACTGAGGCAGTACCTCAGTCAAAAAGTCACATTCACCACTCCCATACCAATCAATGATGTGA  
CTATACAGTTCGGCCATTTCAAGAGTGGTCAATACGTCGTGGGAGGTACTGAAGCCTTCCCCTCCGCT  
GGC  
+  
FFFFFFFFFFFFFFFFFFFFFFFFFFFFFFFFFFFFFFFFFFFFFFFFFFFFFFFFFFFFFFFFFFFFFFFFFFFFFFFF  
FFFFFFFFFFFFFFFFFFFFFFFFFFFFFFFFFFFFFFFFFFFFFFFFFFFFFFFFFFFFFFFFFFFFFFFFFFFFFFFF  
FFF  
@A00721:190:HGJW7DSXY:4:2542:29053:31391\_1:N:0:TCTGCAAG+GCTGCACT  
CAATCAATAGTTCTTCTGACCAGAATGAAAAGGGGTTTACCAGGGTAGTCTCTAAGTCTACCAGGAAG  
AGGGGAAATGTCCCCAAAACCTGAGAAGAATAAAGGGAAAGGTCCATCAGGACCTAAGAAGGGGAAATT  
ACC  
+  
FFF,FFFFFFFFF,FFFFFFFFFFFFFFFFFFFFFFFFFFFFFFFFFFFFFFFFFFFFFFFFFFFFFFFFF  
FFFFFFFFFFFFFFFFFFFFFFFFFFFFFFFFFFFFFFFFFFFFFFFFFFFFFFFFFFFFFFFFFFFFFFFFF:FFFFF:  
FFF  
@A00721:190:HGJW7DSXY:4:1317:21206:28667\_2:N:0:TCTGCAAG+GCTGCACT  
TGCACGGGCCAAAGAGGCCGCTGCTACGAAGTCGCTGAAGGCGGCTTGGGTCATTAAGGGTAGCTGTA  
AAGTTGCGCCTGCCGACCCCATCTTTGAGACCAAGACTCTCTACAGTA  
+  
:FFFFFFFFFFFFFFFFFFFFFFFFFFFFFFFFFFFFFFFFFFFFFFFFFFFFFFFFFFFFFFFFFFFFFFFFF  
FFFFFFFFFFFFFFFFFFFFFFFFFFFFFFFFFFFFFFFFFFFFFFFFFFFFFFFFFFFFFFFFFFFFFFFFF  
@A00721:190:HGJW7DSXY:4:1124:3549:14121\_2:N:0:TCTGCAAG+GCTGCACT  
CTGTTGAATTCGTCACTGAGGACGAAGGTGAGAGGACTTTTGGCTACTGGCGACAACTGAGAGCAGT  
CGCTGGGGAAGAGAATTGCGTGGGTTGAAGGCCGACGCTTCGAGCTT  
+  
FFFFFFFFFFFFFFFFFFFFFFFFFFFFFFFFFFFFFFFFFFFFFFFFFFFFFFFFFFFFFFFFFFFFFFFFF  
FFFF:FFFF,FFFFFFFFFFFFFFFFF:F:FFFFF:FFFFFFFFFFFFF

+

+

+

+

+

+

+

+

[illegible]



@A00721:190:HGJW7DSXY:4:1611:8106:4726\_2:N:0:TCTGCAAG+GCTGCACT  
CTCATCGCTATACGCATACCTGATTGGAAGAAGCGAGGTTCTTCCTCAATAAAAATTTTCTCAAGA  
GATTATGGTTGATAAAGTTTTCTTCATAAGGGCTATTACAGTACGTCAT

+

FFFFFFFFFFFFFFFF:FFFFFFFFFFFFFFFFFFFFFFFFFFFFFFFFFFFFFFFFFFFFFFFF:FF  
FFFF:FFFFFFFFFFFFFFFFFFFFFFFFFFFFFFFFFFFFFFFFFFFFFFFF:F:

@A00721:190:HGJW7DSXY:4:2451:2754:21731\_2:N:0:TCTGCAAG+GCTGCACT  
TTCGGTCAATGACAAAACCTTCGAATATGTTACGACATGGCTTCGTAACAACAGTGCGAGGATTGTCA  
TCTCGGGGAAAGTGATTACCAAGATGTTTCATATAGATACGAGATACC

+

FFFFFFFFFFFFFFFFFFFFFFFFFFFFFFFFFFFFFFFFFFFFFFFFFFFFFFFFFFFFFFFFFFFFFFFF:FFFF  
FFFFFFFFF:FFFFFFFFFFFFFFFFFFFFFFFFFFFFFFFFFFFFFFFFFFFFFFFF

@A00721:190:HGJW7DSXY:4:1614:29740:13291\_2:N:0:TCTGCAAG+GCTGCACT  
TTACTCGTTATCGGAGCTAAGAAGAAGACTTTGGGTACACGTTATGCTCGCAAACCTTAACGTTAGTAC  
CGGAGGTGATCTCTCTGCTTCTGCGTTACTGAGAGAAAAGATTACAGGA

+

FFFFFFFFFFFFFFFFFFFFFFFFFFFFFFFFFFFFFFFFFFFFFFFFFFFFFFFFFFFFFFFFFFFFFFFF,FFFFFFFFF  
FFFFFFFFFFFFFFFFFFFFFFFFFFFFFFFFFFFFFFFFFFFFFFFFFFFFFFFFFFFFFFFF,FFFFFFF

@A00721:190:HGJW7DSXY:4:2567:6135:23797\_2:N:0:TCTGCAAG+GCTGCACT  
ACGGTCTTATCAAAGAAAATGGTGAACCGGTCTCTAAATCTTTTGAGATTGAGAAGATTGAAGAACA  
CGTCAAGAAGTCGCTCGGCGTTGTTCTTGAAAACCAAGTTAAGAAGGA

+

FFFFFFFFFFFFFFFFFFFFFFFFFFFFFFFFFFFFFFFFFFFFFFFFFFFFFFFFFFFFFFFFFFFFFFFFFFFF  
FFFFFFFFFFFFFFFFFFFFFFFFFFFFFFFFFFFFFFFFFFFFFFFFFFFFFFFFFFFFFFFF

@A00721:190:HGJW7DSXY:4:1643:1850:18944\_2:N:0:TCTGCAAG+GCTGCACT  
TCAGCTACGAGAGGTGATCCCGGATGTGGATTGAAGGCTGGCTCTAAGGGAGACTCCTTCTTTTGA  
TGTTGTAAAGAATTGGGTTGAGAAGTGCTTTACAAGGAGTTAGACT

+

FFFFF:FFFFFFFFFFFFFFFFFFFFFFFFFFFFFFFFFFFFFFFFFFFFFFFFFFFFFFFFFFFFFFFFFFFF:FFFFF  
FFFFFFFFFFFFFFFFFFFFFFFFFFFFFFFFFFFFFFFFFFFFFFFFFFFFFFFFFFFFFFFF

@A00721:190:HGJW7DSXY:4:2574:14669:9173\_2:N:0:TCTGCAAG+GCTGCACT  
ATCACCACCTTTTGAAAGGAAAATAATTGGTGATGAAAATACGTATGTCGGTGCGGTTCTCAAGGCTCT  
CATCGCCACTGGGATTCTAAGGGGTTCCATAAGATATTATAGATCGGA

+

FFFFFFFFFFFFFFFFFFFFFFFFFFFFFFFFFFFFFFFFFFFFFFFFFFFFFFFFFFFFFFFFFFFFFFFF:FFFFFFF  
FFFFFFF:F:FFFF,FFFF,FFFFFFFFFFFFFFFF:FFFFFFFFFFFFFF

@A00721:190:HGJW7DSXY:4:2176:6894:7764\_2:N:0:TCTGCAAG+GCTGCACT  
TTCAGAGTCTCTTGGAAGTCCAGGTAGCTAATGTTCTTGCAATAGCCACAGACTTTCTGGGAAAAGAG  
ACCTCTGTTGGTAGAGGAGTTGAGAGAATTACTCAGATTCAATCTGGC

+

FFFFFFFFFFFF:FFFFFFFFFFFFFFFFFFFF:F:F:FFFFFFFFFFFFFFFFFFFFFFFFFFFFFFFFFFFF:FFF  
FFFFFFFFFFFF:,FFFFFFFFFFFFFFFFFFFFFFFFFFFFFFFFFFFFFFFFFFFFFFFF

@A00721:190:HGJW7DSXY:4:1643:12427:10488\_1:N:0:TCTGCAAG+GCTGCACT  
ACGCTACACTCGAAATATGGGCCCTCATAAGGAAGTATAGTTGGCGTCTTGTCGTTGACGTCATTACA  
GTCTGGAAGTTAGATCATTTGTTTCAGGAAGATCTCTACAGAGATTATCGAGAGTTGTGATCTAGTTCT  
AAA

+

FFFFFFFFFFFFFFFFFFFFFFFFFFFF,FFFFFFFFFFFF:FFFFFFFFFF:FFFFFFFFFFFFFFFFFFFF:F:FF  
F::FFFFFFFFFFFFFFFFFFFF:FFFFFFFFFFFFFFFFFFFFFFFFFFFFFFFFFFFFFFFFFFFFFFFF  
FFF

@A00721:190:HGJW7DSXY:4:1570:4273:22232\_1:N:0:TCTGCAAG+GCTGCACT  
TCTTCTAACCAGGACTGATGGTGAGATTCTTTTACCTTTTGGAGGTCCAGGAACCTTTACTCCTAGTG  
TCTTTTCTAGAGTCCAAGGACGTTTCCGTCGGAGGATGACAGGTGGGAGACCGCTCAATAACACTCTT  
GAA

+  
FFFF:FF:FFF:FFFFFFFFFFFFFF,FF,FFFF,FFFFFFFF:FF,FFFFFFFF:FFFFFFF  
FFFFFFFFFFFFFF:FFFFFFFFFFFFFF:FFFF,FFFFFFFFFFFFFF:FFF:FFFFFFFF  
:FF  
@A00721:190:HGJW7DSXY:4:2371:20537:28917\_2:N:0:TCTGCAAG+GCTGCACT  
TAAAGCCTGTCCAGTTGTCGATGATGTTCTGGGCTGTGGGGATTAACCTCCCTCGTGAACTTACGACG  
ATGTTCTCGCTCGCATTTTACAAGGATTACTAAGTCTGAGATCTGCCA  
+  
FFFFFFFFFFFFFF:FFFFFFFFFFFFFFFFFFFFFFFFFFFFFFFFFFFFFFFFFFFFFF  
FFFFFFFFFFFFFFFFFFFFFFFFFFFFFFFFFFFFFFFF:FFFFFFFF  
@A00721:190:HGJW7DSXY:4:2245:32199:12352\_1:N:0:TCTGCAAG+GCTGCACT  
CTTCTAATAGAGGATCCTGATGACATTATTTCAACGATACCGATCTCAGTTCTACCACAGAAACCGT  
CTCAGGAAGTGTCTCCACTGATTCGGAATTAGAGAAAGACGACCTTCTTGTGGGGACTGAGACCTCTG  
AAT  
+  
F:FF:FFFF::FFFF:FF:FFFFFFFF,FFFFFFFFFFFFFFFF:FFF:FFFFFFFF,FFFFFFF  
F:FFFFFFFFFFFFFF:FFFFFFFFFFFFFFFFFFFFFFFFFFFFFFFFFFFFFFFFFFFFFF:F  
FFF  
@A00721:190:HGJW7DSXY:4:1669:28953:9173\_2:N:0:TCTGCAAG+GCTGCACT  
TCAAAAGACCAGAAACGTAACAAGAAGAATAAAGGTAGGAAGGGGAGAAAACAGAACAGCGAGCGGT  
TGAAGAGAAAAGTATGTTGCGGCTGATCGTACCCAATTCCTGC  
+  
FFFFFFFFFFFFFFFFFFFFFFFFFFFFFFFF:FFFFFFFFFFFFFFFF:FFFFFFFFFFFF,  
FF,FFFFFFFFFFFFFFFFFFFFFFFFFFFFFFFFFFFFFFFF  
@A00721:190:HGJW7DSXY:4:2452:26946:12336\_1:N:0:TCTGCAAG+GCTGCACT  
ATTAAGACAGACGTGAAAGTTATGATGAGTGATCGTATTAGAACAGCTGATTCTTATTGCATGAACGT  
CGCTGAGGTCAAACCTGTGGACGTTCTTTTCATCGACGAATTATTCATGATTCACGCTGGTCAGACCC  
TTT  
+  
FFFFFFFFFFFFFFFFFFFFFFFFFFFFFFFFFFFFFFFFFFFFFFFFFFFFFFFFFFFFFFFF  
FFFFFFFFFFFFFFFFFFFFFFFFFFFFFFFFFFFFFFFFFFFFFFFFFFFFFFFFFFFFFFFF  
FFF  
@A00721:190:HGJW7DSXY:4:2657:7283:23218\_2:N:0:TCTGCAAG+GCTGCACT  
GTTACGGTGATTCCAATCAAATCGGATTCATCAATCGTATTGATCTCCAAGTCGAACTACTTCAAC  
ATCAACGACATCATTCTTGATGAGTGTCGTTCTTATCGAAGTCTCAGT  
+  
FFFFFFFFFFFFFFFFFFFFFFFFFFFFFFFFFFFFFFFFFFFFFFFF:FFFFFFFFFFFF:FFFFF  
FFFFFFFFFFFFFFFFFFFFFFFFFFFFFFFFFFFFFFFFFFFFFFFF:FF  
@A00721:190:HGJW7DSXY:4:1165:22281:4445\_1:N:0:TCTGCAAG+GCTGCACT  
GGAGGTTGCAGATTCAACCCCTTATATCGAGGCTATCGAGGACGATGAGTATCTTGAAGTTGTTGACG  
ACAAGCCTCTAGAGGGTAGAGGACCACCTGGATCTTCTACTGTCTCTGCCTTCCAAGATTTCTTAGAA  
GAG  
+  
F::FFFF,,:F:FFF:F:,,:FF:FFF,F:F:FFFF:FFFF,FFFFFFFF,FFFFFFFFFFFFFF:  
FFFFF:FFF,FFF::FFFF,,FFF:FF:FFFFFFFFF:,FF:FFFF:FFFF:F:FFFFFF:FF  
FFF  
@A00721:190:HGJW7DSXY:4:1539:24994:34194\_2:N:0:TCTGCAAG+GCTGCACT  
CGGTAATCTTTCAGCCGAATTAAGTACTAATGAGTTCAAGTCGGTTGTCGATCGAATTAAGATCAAGG  
CTAATACCTTTATAGGTAAGAAGCCCTTGAGCCGCGTAGTCAGCGCG  
+  
FFFFFFFFF:FFFFFFFFFFFFFFFFFFFFFFFFFFFFFFFF,FFFFF::FFFFFFFFF:FFFFFFFFFFFF  
FFFFFFFFFFFFFFFFFFFFFFFFFFFFFFFFFFFFFFFFFFFFFFFFFFFFFFFF  
@A00721:190:HGJW7DSXY:4:2469:27959:17253\_2:N:0:TCTGCAAG+GCTGCACT  
CGATTGGTCAACGTCGGAGTGGTACTGCTAACACATTCTTGGTAATTGTATGATCACTCTTATGATG

CTCTCTCTTTATTACGACCTTCGGAAGTTTAGAGCCGTCGCTGTCGCC  
+  
FFFFFFFFFFFFFFFFFFFFFFFFFFFFFFFFFFFFFFFFFFFFFFFFFFFFFFFFFFFFFFFFFFFFFFFF  
FFFFFFFFFFFFFFFFFFFFFFFFFFFFFFFFFFFFFFFFFFFFFFFFFFFFFFFFFFFFFFFF  
@A00721:190:HGJW7DSXY:4:1619:24189:28917\_2:N:0:TCTGCAAG+GCTGCACT  
TTTAAACGATTCCGAGAGGTTTATCCTGATGTGGAGGGAGTTCTTGAAGCATCCCGACCTTTCCTTGT  
GAAAATTTTGATGCGGTTTCATAAGATTATCAGTAATCCTGATTCTAC  
+  
FFFFFFFFFFFFFFFFFFFF:FFFFFFFFFFFFFFFF:F:FFFFFFFF:FFFF:FFFFFFFFFFFF:FFFF  
F:FFFFFFFFFFFFFFFFFFFFFFFFFFFFFFFFFFFFFFFFFFFFFFFFFFFFFFFF:F  
@A00721:190:HGJW7DSXY:4:1259:11740:29590\_1:N:0:TCTGCAAG+GCTGCACT  
GTTGATTAAGACTCTTCCGAAAGGCGAACTTTGGGAATTTGAAGCTCAGGGTGAAGCACAACGTTTGA  
CCGTGACGAACTGTGGTGTCTTGATCTACGTTACGGATATACTCTCCTTGAGTTCACTCGTAAGGAC  
ACT  
+  
FFFFFFFFFFFFFFFFFFFF:FFFFFFFFFFFFFFFF:FFFFFFFFFFFFFFFFFFFFFFFFFFFFFFFFFFFF  
FFFFFFFFFFFFFFFFFFFFFFFFFFFFFFFFFFFFFFFFFFFFFFFFFFFFFFFFFFFFFFFFFFFFFFFF  
FFF  
@A00721:190:HGJW7DSXY:4:1627:18692:21089\_2:N:0:TCTGCAAG+GCTGCACT  
AAAACGTCTTCGACAACAGCAGGGGTTTTCGAATAGTGATAGCCACCCGCTTACAGAGGGGCAGCAG  
CATGACCATAATTGGTATTGACTTTGGTACCACCTTTTCTACTGTCTG  
+  
FFF:FFFFFFFFFFFFFFFFFFFF:FFFFFFFFFFFFFFFFFFFFFFFFFFFFFFFFFFFF:FFFFFFFFFFFF  
::FF:FFFF:FFFFFFFFFFFF:FFFFFFFFFFFFFFFFFFFFFFFFFFFFFFFFFFFF  
@A00721:190:HGJW7DSXY:4:2525:28266:18693\_1:N:0:TCTGCAAG+GCTGCACT  
GTTTTAATGCTTAACAACAATGATAGTGAATTTATACCTACAATCATTGGTTTTTCTAATAATGATGA  
CACTATTGTTTATGGATATGATGCTATTACTCATGATGGTTACGGTCAGGGAGGATTCTCAGTTTACA  
AGG  
+  
FFFFFFFFFFFFFFFFFFFFFFFFFFFFFFFFFFFF:FF:FFFFFFFFFFFFFFFFFFFF:FFFFFFFFFFFF  
FFFFFFFFFFFFFFFFFFFFFFFFFFFFFFFFFFFFFFFFFFFFFFFFFFFFFFFFFFFFFFFFFFFFFFFF  
FFF  
@A00721:190:HGJW7DSXY:4:2302:31195:28307\_2:N:0:TCTGCAAG+GCTGCACT  
AATTGGTCCTACTTTTTGACAAGGCCAACTTCGTAATCTTCATGAGATCGTTTCTTTCTTTATCTCTT  
TGGTTGTTAGGGATTTTGAGAGAGTGAAAGGCTTCAATTGTAGTGTT  
+  
FFFFFFFFFFFFFFFFFFFFFFFFFFFFFFFFFFFFFFFFFFFFFFFFFFFFFFFFFFFFFFFFFFFFFFFF,FF  
FFFFFFFFFFFF:FFFFFFFFFFFF:FFFFFFFFFFFF:FFF:FFFF:FFFFF  
@A00721:190:HGJW7DSXY:4:1663:29514:3161\_2:N:0:TCTGCAAG+GCTGCACT  
CAGTCAGTATACCTCTACGCAAAGATATTTTCATGAAAACCTACAGAGGAACGTACCGGATTACCTGTCT  
TTCATATTATGAATGAACCTTCGCCGCTCTCTTTGCTTCGATGTTGG  
+  
FFFFFFFFF:FFFFFFFFFFFFFFFFFFFFFFFFFFFFFFFFFFFFFFFFFFFFFFFFFFFFFFFFFFFF:FFFFFFFFFFFF  
FFFFFFFFF:FFFFFFFFFFFFFFFFFFFFFFFFFFFFFFFFFFFFFFFFFFFFFFFFFFFFF  
@A00721:190:HGJW7DSXY:4:2424:21341:17660\_1:N:0:TCTGCAAG+GCTGCACT  
TCAGAATGGGATTCTACGTAGTTTATGACTTTGGTGGTGGTACTTTGATACTTCTATCGTCTTACG  
TTACGGTAATTACTATAGTGTTATTTATTCTGGTGGTGGTATGATAATCTTGAGGTCGTGACGTTGATG  
AAG  
+  
FFFFFFFFFFFFFFFFFFFFFFFFFFFFFFFFFFFFFFFFFFFFFFFFFFFFFFFFFFFFFFFFFFFFFFFF  
FFFFFFFFFFFFFFFFFFFFFFFFFFFFFFFFFFFFFFFFFFFFFFFFFFFFFFFFFFFFFFFFFFFFFFFF  
FFF  
@A00721:190:HGJW7DSXY:4:1107:11351:16235\_1:N:0:TCTGCAAG+GCTGCACT  
ATTACGGCGCACTTCTTTACCCGCCACCACACAACCTTTCAGTTTCACAACCTGAAGGAGGAGGTTTCTG

+

@A00721:190:HGJW7DSXY:4:2622:24144:11678\_2:N:0:TCTGCAAG+GCTGCACT  
TTCCGCCCGGTGGTAGCTCATTCTACCAGGGGCTATTACTCTTGCTGAAACAGCTATTAAAGCTGTT  
GAGCGGGTAATTACACCTAAACGAGCTCGATCTGCCATCGCTGAAGGA

+

@A00721:190:HGJW7DSXY:4:2109:13295:17347\_1:N:0:TCTGCAAG+GCTGCACT  
CTAATCGTAACATTAATAATTTCAATCTTCTTAAAAAGAAAGATAGAGAGTCATACTTTGGGCTATCGT  
TCAGGTGCATGGGGTTGCATAGCCAATATTGAAGTGGACACCTCTGGTAGTATCGAAGTAAAGATAAC  
CAA

+

@A00721:190:HGJW7DSXY:4:1562:12906:36213\_2:N:0:TCTGCAAG+GCTGCACT  
AAATCTTACCACTATCTACGAACCTAAAGTTCTGAAGACGTTGCTTGTGCTTCTCTTTAATGGCA  
CTACCTCGGTACAATCTTACTTGGAACGAAGGCGACCTTCCGGAGTTT

+

@A00721:190:HGJW7DSXY:4:2650:14516:3051\_1:N:0:TCTGCAAG+GCTGCACT  
CTATATTAGGTGAAGCGAAATACGATTTCTGAACGTCAACGTTACCGAGTTTCGTTTCGTACCTTGAT  
GCTGACTTTCGTCAATATGATTTGATCTGGTTGCTCAATTCTAAGCGTGTTCCGCTTAGTGCGAGGCC  
TCT

+

@A00721:190:HGJW7DSXY:4:2362:31964:34428\_2:N:0:TCTGCAAG+GCTGCACT  
GGATTTTAATATAAAGAATCTTTACCAGGACTCCTACTACAGGAGGCAGTCTTCTGATCGTAAGAAGT  
TTATAAGGAACATATCCATTTGTTGTAATAGGGTCATCAACTTAGAAC

 $+$ 

@A00721:190:HGJW7DSXY:4:2425:5258:35618\_2:N:0:TCTGCAAG+GCTGCACT  
TGGTAATACTGTCTTTCCAAGCTTACCTGTATCTTCAATGAAATTGGACTCTTCGATAGGGGACATTT  
TATCGTGGGCTTTCCGTAAAGGAAGATCTGTTATCGACGGTTTATCGT

+

@A00721:190:HGJW7DSXY:4:2654:26738:18552\_2:N:0:TCTGCAAG+GCTGCACT  
GATTGAAGGAAAATTTATCCTCGTTTAACTTACTTAGACTTTTCTACGATACAAATGATAACTTCTA  
ATTTACGTTTGCTACTCAGAGCTGGTCCTCTCAGCAAAGGGATGCATG

+

@A00721:190:HGJW7DSXY:4:2438:23158:20744\_1:N:0:TCTGCAAG+GCTGCACT  
TAATAATGACGAGACTTTCGTCAATCGCTGCATATTACGGATTACACGGTACCAGCGCATCTCGTG

TCGAGCCTCGACCCGATTATATGGTATTAACCTTATAAAGGTGAGGAGACCATTTTCTTGCTGAAATTT  
ATA

+

FFFFFFFFF:FFF:FFFF:FF,FF,FFFF:F:FFF,FFF:,FFFF:FFF,FFFFFF::FFF,F:FFF  
FFFFFFFFFFFFFFFF:FFFFFFFFF,FFFFFFFF:FFFF,FFFFFFFF:FFFFFFFF,FFFF,FFF  
FF:

@A00721:190:HGJW7DSXY:4:2526:12861:8328\_2:N:0:TCTGCAAG+GCTGCACT  
AAATAAATAATATTACTAATGGCAAATAGTGGAAAGGCTCCAGTCAACACTAGTTCGAGTGCTGCTTT  
GGATTACGATGACGTGAGAATAGGTGAAGGGATAGTTTTTACCTCGAC

+

FFFFFFFFFFFFFFFFFFFFFFFFFFFFFFFFFFFFFFFFFFFFFFFFFFFFFFFFFFFFFFFF,FFFF:FF  
FFFFFFFFFFFFFFFFFFFFFFFF:FFF:FFFFFFFFFFFFFFFF:FFF:FF

@A00721:190:HGJW7DSXY:4:2137:32398:4492\_2:N:0:TCTGCAAG+GCTGCACT  
TGAATAATGATGCACTACAAACAAGTATCGCTAATCATCTGAAAAAGGCTCTAAAGGACACTATACAA  
TATCCAGACGACGACGAAGCTTATACTACTTTAATTTTTGGGTATTATG

+

FFFFFFFFFFFFFFFFFFFFFFFFFFFFFFFFFFFFFFFFFFFFFFFFFFFFFFFFFFFFFFFF,FFFF:FF  
FFFFFFFFFFFFFFFFFFFFFFFF:FFF:FFFFFFFFFFFFFFFF:FFF:FF

@A00721:190:HGJW7DSXY:4:1144:27154:21872\_1:N:0:TCTGCAAG+GCTGCACT  
CTTCCGATCTCGAATTGGTCCAACATTTACCACCAAATCTTTTGATACAACCTCTAGCCTTCAAGTGG  
GGTATGCCTGCGGAATACGCTTGCTATTCACCAGATTGGTTCGAACCCGTTGATGCTATGTCAGAAGA  
AGC

+

FFFFFFFFFFFFFFFFFFFFFFFFFFFFFFFF:FFF:FFFFFFFFFFFFFFFFFFFFFFFFFFFFFFFF  
FFFFFFFFFFFFFFFFFFFFFFFF:FFFFFFFFFFFFFFFFFFFFFFFFFFFFFFFF:FFFFFFFFFFFFFFFF  
FFF

@A00721:190:HGJW7DSXY:4:2575:7862:32268\_2:N:0:TCTGCAAG+GCTGCACT  
TGTCGTTTAAAGACTGCAGAGGCTGTCAAACAAGCCAGACTCAAGGAGTCCAATCAAAGTTTTGAA  
TTAGCTCAACTGGGGAGACGTGCTTAAATGGGTGATAAAAATTATTT

+

FFFFFFFFFFFFFFFFFFFFFFFFFFFFFFFFFFFFFFFFFFFFFFFFFFFFFFFFFFFFFFFF  
FFFFFFFFFFFFFFFFFFFFFFFFFFFFFFFFFFFFFFFFFFFFFFFFFFFFFFFF

@A00721:190:HGJW7DSXY:4:2432:26982:14278\_1:N:0:TCTGCAAG+GCTGCACT  
CCCACAGATTTGTCTACGTTGCAGATCGCCACTCAAACACTATATACATTATAAAATATAAAAATAA  
GGGAGTCATAACTTTTGTACCAAATTCTTGGCTTTCAACGAAGTCTCTGATTTTATTAATCATTACT  
TTA

+

FFFFFFFFF:FFFFFFFF:FFFFFFFFFFFFFFFF:FFFFFFFFFFFFFFFF,FFFFFFFFFFFFFFFF,  
FFFFFFFFFFFFFFFFFFFFFFFF:FFF:FFFFFFFFFFFFFFFFFFFFFFFFFFFFFFFFFFFFFFFF  
FFF

@A00721:190:HGJW7DSXY:4:2165:13928:33818\_2:N:0:TCTGCAAG+GCTGCACT  
TCATTTACTCTGTACTTGATCTACGTCGTTAACTGTGGAACAACCTTTACTTAGAATGACTCTATC  
TTTTCAGACACTTCTTATATTATTTACAATAGTTAATATCATATTAGT

+

FFFFFFFFFFFFFFFFFFFFFFFFFFFFFFFFFFFFFFFFFFFFFFFFFFFFFFFFFFFFFFFF  
FFFFFFFFFFFFFFFFFFFFFFFFFFFFFFFFFFFFFFFFFFFFFFFF

@A00721:190:HGJW7DSXY:4:1573:5312:34053\_2:N:0:TCTGCAAG+GCTGCACT  
TAATAGATTAATAAAGGATGAGTACGAAAACCAACTCTTCGTTACGAGACCTGATGGTAGAATAGATT  
TAGTCTCTACCCCATCTCAACGAGGATAAAGCGAGTTTTCCGTCCTG

+

F:FFFFFFFFFFFFFFFFFFFFFFFFFFFFFFFFFFFFFFFFFFFFFFFFFFFFFFFF:FFF  
FFFFFFFFFFFF:FFFFFFFF:FFFFFFFF:FFFFF:FFFFFFFF

@A00721:190:HGJW7DSXY:4:2467:25880:25269\_2:N:0:TCTGCAAG+GCTGCACT  
TCCGCAAACGACTCGAAACCGAGACGCCGTAGATCAAAGTCCCTTCTAACTTTAGATTATGAATCCTG

CCTTTACTCATTTTATAGCAGTTATTTATGTTGTACTTTTATAATTT  
+  
FFFFFFFFFFFFFFFFFFFFFFFFFFFFFFFFFFFFFFFFFFFFFFFFFFFFFFFFFFFFFFFFFFFFFFFF  
FFFFFFFFFFFFFFFFFFFFFFFFFFFFFFFFFFFFFFFFFFFFFFFFFFFFFFFFFFFFFFFFFFFFFFFF  
@A00721:190:HGJW7DSXY:4:2674:17933:1485\_2:N:0:TCTGCAAG+GCTGCACT  
AATTTAAATACATTACTGTTTCAAATCATCTTTACTCACAGACTCCGAAAATGGTTTCAAATGAGGTC  
AAAGCTCTATTTATTAACGAACATTATCCGATTCTTCGAGGGTATC  
+  
FFFFFFFFFFFFFFFFFFFFFFFFFFFFFFFFFFFFFFFFFFFFFFFFFFFFFFFFFFFFFFFFFFFFFFFF  
FFFFFFFFFFFFFFFFFFFFFFFFFFFFFFFFFFFFFFFFFFFFFFFFFFFFFFFFFFFFFFFFFFFFFFFF  
@A00721:190:HGJW7DSXY:4:2266:2492:23719\_2:N:0:TCTGCAAG+GCTGCACT  
TTCGACAAATTTAGAACTTTATTTCAAGAACTCTCTCCGATCACCTTGGTGTGATCTCCCGGAGGATC  
TTTTCAATAAGATGTATGATGATAATCTACTATTTTAAATAGTGATA  
+  
FFFFFFFFFFFFFFFFFFFFFFFFFFFFFFFFFFFFFFFFFFFFFFFFFFFFFFFFFFFFFFFFFFFFFFFF,FFFFFFFFFFFFFFFFFFFFFFFF  
FFFFFFFFFFFFFFFFFFFFFFFFFFFFFFFFFFFFFFFFFFFFFFFFFFFFFFFFFFFFFFFFFFFFFFFF  
@A00721:190:HGJW7DSXY:4:1144:14931:20306\_2:N:0:TCTGCAAG+GCTGCACT  
ATCAAAGATTTGGCTTGGTCTATTTACCGCAAAAAGTTGGAAGAGGTCTATGATATTTATTTACTTA  
TACTTTAAATAGCACCGATTATAACTTGACTGTTGATAATATTACAAT  
+  
FFFFF:FFFFFFFFFFFFFFFFFFFFFFFFFFFFFFFFFFFFFFFFFFFFFFFFFFFFFFFFFFFFFFFFF,F,FFFFFFFFFFFFFFFFFFFFFFFF  
FFFFFFFFFFFFFFFFFFFFFFFFFFFFFFFFFFFFFFFFFFFFFFFFFFFFFFFFFFFFFFFFFFFFFFFF  
@A00721:190:HGJW7DSXY:4:1405:12228:29935\_1:N:0:TCTGCAAG+GCTGCACT  
AGAAGATTAGAGAAGTAACCGGTGAACACGTGCGTAGCATTGATTTACTTTTACCGTTAGAACTGAAA  
AAGATTCTTTTCGAAAAGAAACCTATAAGTTTCAAACGATTCTTCGACTATATTAAAGAAATAAAAAT  
ACT  
+  
FF,,F,FFFFFFFF:FFF,FFFFFF::,F,:F,F:F:F,FF:,FFFFFFFF,::,:FFF:FF,F,FFF  
FF,:FF,FFFF,FFF:FFFFFFFFF::F,FF:F,FF,FFFFFFFF:FFF,FFFFFFFFFFFF  
FFF  
@A00721:190:HGJW7DSXY:4:2435:20564:21480\_2:N:0:TCTGCAAG+GCTGCACT  
CTTTACATTTTAAATGGTATGGTATAATGTGTCTTACAAATAGAACCTTCACTCTCGGTAATGAGAGT  
GTATTCCTTAATATTCTAGTAACCGCTATGTGGGCATTACTAGGATTT  
+  
FFFFFFFFFFFFFFFFFFFFFFFFFFFFFFFFFFFFFFFFFFFFFFFFFFFFFFFFFFFFFFFFFFFFFFFF  
FFFFF,FFFFFFFF:FFFFFFFFFFFFFFFFFFFFFFFFFFFFFFFFFFFFFFFFFFFFFFFF:F  
@A00721:190:HGJW7DSXY:4:2162:12491:1548\_1:N:0:TCTGCAAG+GCTGCACT  
GAGTACTTAATTCAATAGCTTTAGTATTATTTACTATCGCCTTTATTGAAAATTGTATAAGAGTTAAT  
TGCTTACACAAAAGTGACGCGCAAGGAATCTTAATTGATTGAAGCTAGGCGTTGGGGAGAATGAAC  
GCC  
+  
FFFFFFFFFFFFFFFFFFFFFFFFFFFFFFFFFFFFFFFFFFFFFFFFFFFFFFFFFFFFFFFFFFFFFFFF:F  
FFFFFFFFFFFFFFFFFFFFFFFFFFFFFFFFFFFFFFFFFFFFFFFFFFFFFFFFFFFFFFFFFFFFFFFF  
FFF  
@A00721:190:HGJW7DSXY:4:2203:7057:16063\_1:N:0:TCTGCAAG+GCTGCACT  
CTACTACCGCCGGTCGGCAGATCGGCACCACTGGTCTCTACGTTACGGGACCCGCTGTGCAGAATAAC  
CTTCCCAAATCTAGATCTGCACAGAAGAAGGCTGAAGGTCGTTACCGGACGACCACTCAAAGGAAACG  
GGC  
+  
FF,FFFFFFFFFFFFFFFFFFFFFFFFFFFFFFFFFFFFFFFFFFFFFFFFFFFFFFFFFFFFFFFFFFFF  
F:FFFFFFFFFFFFFFFFFFFFFFFFFFFFFFFFFFFFFFFFFFFFFFFFFFFFFFFFFFFFFFFFFFFF  
FFF  
@A00721:190:HGJW7DSXY:4:2102:14027:24439\_1:N:0:TCTGCAAG+GCTGCACT  
TGTGGGAAGTGAAGCAGTACCTCAGTCAAAAAGTCACATTCACCACTCCCATACCAATCAATGATGTGA



```

FFFFFFFFFFFFFFFFFFFFFF,FFFFFFFFFFFFFFFF:FFFFFFFFFFFFFFFFFFFFFFFFFFFFFFFFFFFFFFFF
FFFFFFFF:FFFFFFFFFFFFFFFF:FFFFFFFFFFFFFFFFFFFFFFFFFFFFFFFFFFFFFFFF

```

+

@A00721:190:HGJW7DSXY:4:1452:9308:6840\_1:N:0:TCTGCAAG+GCTGCACT  
ATTTGCAACCCTATTCTTGATGTGAAAGATGCATCGAGGTATACGTCTAGGAACATTGATTGGGAACG  
TACCTACTCACGAGACGTCATGAAAGCTATCGGAGGGAAGCAAATGTTTCGTTCTGTTACAAGAACG  
CTT

[illegible]

+

@A00721:190:HGJW7DSXY:4:2109:9146:3991\_2:N:0:TCTGCAAG+GCTGCACT  
CTCATCGCTATACGCATACCTGATTGGAAGAAGCGAGGTTCTTCCTCAATAAAAATTTTTCTCAAGA  
GATTATGGTTGATAAAGTTTTCTTCATAAGGGCTATTCAAGTACGTCAT

```

FFFFFFFFFFFFFFFFFFFFFFFFFFFFFFFFFFFFFFFFFFFFFFFFFFFFFFFFFFFFFFFFFFFFFFFFFFFFFFFF
FFFFF,FFFFFFFFF:FFFFFFFFF:,FFFFFFFFFFFFFFFFFFFFFFFF

```

+

@A00721:190:HGJW7DSXY:4:1535:25889:9846\_2:N:0:TCTGCAAG+GCTGCACT  
AAGAAGACTTTGGGTACACGTTATGCTCGAACTTAACGTTAGTACCGGAGGTGATCTCTCTGCTTC  
TGCGTTACTGAGAGAAAAAGATTGAGGACGCCTACGGTGACTTTATGGA

```
FFFFFFFF:FFFFFFFF:F,FFFFFFFF:FFFFFFFFFFFFFFFFFFFFFFFFFFFFFFFF
FFFFFFFFFFFFFFFFFFFFFFFFFFFFFFFFFFFFFFFFFFFFFFFFFF,FFFF
```

+

@A00721:190:HGJW7DSXY:4:2364:4562:28588\_2:N:0:TCTGCAAG+GCTGCACT  
TCAGCTACGAGAGGTGATCCCGGATGTGGATTGAAGGCTGGCTCTAAGGGAGACTCCTTCTTTTTGAA



TGTTGTAAAGAATTGGGTTGAGAAGTGTGCTTTACAAGGAGTTAGACT  
+  
FFFFFF:FFFFFFFFFFFFFFFFFFFFFFFFFFFFFFFFFFFFFFFFFFFFFFFFFFFFFFFFFFFFFFFF:~,FFF:  
FFFF:FFFF,FFFFFFFFFFFFFFFFFFFFFFFFFFFFFFFFFFFFFFFFFFFFFFFFFFFFFFFF  
@A00721:190:HGJW7DSXY:4:2574:16351:8735\_2:N:0:TCTGCAAG+GCTGCACT  
ATCACCACCTTTTGAAGGAAAATAATTGGTGATGAAAATACGTATGTCGGTGGGGTTCTCAAGGCTCT  
CATCGCCACTGGGATTCTAAGGGGTTCCATAAGATATTATAGATCGGA  
+  
FFFFFFFFFFFFFFFFFFFFFFFFFFFFFFFFFFFFFFFFFFFFFFFFFFFFFFFFFFFFFFFF:FFFF:  
FFFFFFFFFFFFFFFFFFFFFFFFFFFFFFFFFFFFFFFFFFFFFFFFFFFFFFFFFFFFFFFF  
@A00721:190:HGJW7DSXY:4:2258:26928:26616\_2:N:0:TCTGCAAG+GCTGCACT  
TTCAGAGTCTCTTGAAGTCCAGGTAGCTAATGTTCTTGCATAGCCACAGACTTTCTGGGAAAAGAG  
ACCTCTGTTGGTAGAGGAGTTGAGAGAATTACTCAGATTCAATCTGGC  
+  
FFFFFFFFFFFFFFFFFFFFFFFFFFFFFFFFFFFFFFFFFFFFFFFFFFFFFFFFFFFFFFFF:FFFF:  
FFFFFFFFFFFFFFFFFFFFFFFFFFFFFFFFFFFFFFFFFFFFFFFFFFFFFFFFFFFFFFFF  
@A00721:190:HGJW7DSXY:4:2218:6596:3771\_1:N:0:TCTGCAAG+GCTGCACT  
ACGCTACACTCGAAATATGGGCCCTCATAAGGAAGTATAGTTGGCGTCTTGTCGTTGACGTCATTACA  
GTCTGGAAGTTAGATCATTTGTTGAGGAAGATCTCTACAGAGATTATCGAGAGTTGTGATCTAGTTCT  
AAA  
+  
FFFFFFFFFFFFFFFFFFFFFFFFFFFFFFFFFFFFFFFFFFFFFFFFFFFFFFFFFFFFFFFF:FFFF:  
:FFFFFFFFFFFFFFFFFFFFFFFFFFFFFFFFFFFFFFFFFFFFFFFFFFFFFFFFFFFFFFFF  
FFF  
@A00721:190:HGJW7DSXY:4:1613:20229:28447\_1:N:0:TCTGCAAG+GCTGCACT  
TCTTCTAACCAGGACTGATGGTGAGATTCTTTACCTTTTGGAGGTCCAGGAACCTTTACTCCTAGTG  
TCTTTCTAGAGTCCAAGGACGTTTCCGTCGGAGGATGACAGGTGGGAGACCGCTCAATAACACTCTT  
GAA  
+  
FFFFFFFFFFFFFFFFFFFFFFFFFFFFFFFFFFFFFFFFFFFFFFFFFFFFFFFFFFFFFFFF:FFFF:  
FFFFFFFFFFFFFFFFFFFFFFFFFFFFFFFFFFFFFFFFFFFFFFFFFFFFFFFFFFFFFFFF  
FFF  
@A00721:190:HGJW7DSXY:4:2378:3721:33865\_2:N:0:TCTGCAAG+GCTGCACT  
TAAAGCCTGTCCAGTTGTCGATGATGTTTCGGGCTGTGGGATTAACCTCCCTCGTGAACTTACGACG  
ATGTTCTCGCTCGCATTTACAAGGATTACTAAGTCTGAGATCTGCCA  
+  
FFFFFFFFFFFFFFFFFFFFFFFFFFFFFFFFFFFFFFFFFFFFFFFFFFFFFFFFFFFFFFFF:FFFF:  
FFF:FFFFFFFFFFFFFFFFFFFFFFFFFFFFFFFFFFFFFFFFFFFFFFFFFFFFFFFF  
@A00721:190:HGJW7DSXY:4:2264:14434:35446\_1:N:0:TCTGCAAG+GCTGCACT  
CTTCTAATAGAGGATCCTGATGACATTATTTCAACGATACCGATCTCAGTTCTACCACAGAAACCGT  
CTCAGGAAGTGTCTCCACTGATTCGGAATTAGAGAAAGACGACCTTCTTGTGGGACTGAGACCTCTG  
AAT  
+  
FFFFFFF:F:FFFFFFFFF:FFF,FFF:FFFFFFFFFFFFFFFFFFFFFFFFFFFFFFFFFFFFFFFF:FFFFFFFFF  
FFFFFFFFFFFFFFFFFFFFFFFFFFFFFFFFFFFFFFFFFFFFFFFFFFFFFFFFFFFFFFFFFFFFFFFF  
FFF  
@A00721:190:HGJW7DSXY:4:2212:22010:5415\_2:N:0:TCTGCAAG+GCTGCACT  
TCAAAAGACCAGAAACGTAACAAGAAGATAAAGGTAGGAAGGGGAGAAAACAGAACAGCGAGCGGT  
TGAAGAGAAACTGATATGGTTGCGGCTGATCGTACCCAATTCTCTGC  
+  
FFFFFFFFFFFFFFFFFFFFFFFFFFFFFFFFFFFFFFFFFFFFFFFFFFFFFFFFFFFFFFFF:FFFF:  
FFFFFFFFFFFFFFFFFFFFFFFFFFFFFFFFFFFFFFFFFFFFFFFFFFFFFFFFFFFFFFFF  
@A00721:190:HGJW7DSXY:4:1358:30092:25363\_1:N:0:TCTGCAAG+GCTGCACT  
CGTGAAAGTTATGATGAGTGATCGTATTAGAACAGCTGATTCTTATTGCATGAACGTCGCTGAGGTCA

AACCTGTGGACGTTCTTTTCATCGACGAATTATTCATGATTCACGCTGGTCAGACCCTTTTCTTACA  
CAT

+

FFFFFFFFFFFFFFFFFFFFFFFFFFFFFFFFFFFFFFFFFFFFFFFFFFFFFFFFFFFFFFFFFFFFFFFF  
FFFFFFFFF:FFFFFFFFFFFFFFFFFFFFFFFFFFFFFFFFFFFFFFFFFFFFFFFFFFFFFFFFFFFF  
FFF

@A00721:190:HGJW7DSXY:4:1342:7374:1861\_1:N:0:TCTGCAAG+GCTGCACT  
GGTGATTCCAATCAAATCGGATTCATCAATCGTATTGATCTCCAAGTCGCAAACACTTCAACATCAA  
CGACATCATTCTTGATGAGTGTCTGTTCTTATCGAAGTCTCAGTTATCGCTGCCCGGCCGACGTTTGTC  
GCG

+

F:FFFFFFFFF:,FF:FFFFFF:FFFF:FFFF:FFFF:FFFFFF,FFFFFFFFF:FFFF:  
FFFFFFFFF:FFFFFFFFFFFFFFFFFFFFFFFFFFFFFFFFFFFFFFFFFFFFFFFFFFFFFFFFFFFF  
:FF

@A00721:190:HGJW7DSXY:4:1215:30526:21136\_1:N:0:TCTGCAAG+GCTGCACT  
GGAGGTTGCAGATTCAACCCCTTATATCGAGGCTATCGAGGACGATGAGTATCTTGAAGTTGTTGACG  
ACAAGCCTCAAGAGGGTAGAGGACCACCTGGATCTTCTACTGTCTCTGCCTTCCAAGATTTCTTAGAA  
GAG

+

FFFFFFFFF:FFFFFFFFFFFFFFFFFFFFFFFFFFFFFFFFFFFF,:FFFFFFFF:FF:FFFFFFFFF  
FFFFFFFFF:FFFFFFFFF:FF:FF:FF,FFFFFFFFF:FFFF,FFFF:,FFFFFF:FFFF:F  
FFF

@A00721:190:HGJW7DSXY:4:1568:16568:10488\_2:N:0:TCTGCAAG+GCTGCACT  
CGGTAATCTTTCAGCCGAATTAAGTACTAATGAGTTCAAGTCGTTGTGATCGAATTAAGATCAAGG  
CTAATACCTTTATAGGTAAGAAGCCCTTGAGCCGCGTAGTCAGCGCG

+

FFFFFFFFFFFFFFFFFFFFFFFFFFFFFFFFFFFFFFFFFFFF:FFFF:FFF:FFFFFFFFF  
FFFFF,FFFF:FFFFFFFF:FFFF,FFF:FFFFFFFFF:FF

@A00721:190:HGJW7DSXY:4:2673:10294:9267\_2:N:0:TCTGCAAG+GCTGCACT  
CGATTGGTCAACGTCGGAGTGGTACTGCTAACACATTCTTTGGTAATTGTATGATCACTCTTATGATG  
CTCTCTCTTTATTACGACCTTCGGAAGTTTAGAGCCGTCGCTGTGCC

+

FFFFFFFFFFFFFFFFFFFFFFFFFFFFFFFFFFFFFFFFFFFFFFFFFFFFFFFFFFFFFFFFFFFF  
FFFFFFFFFFFFFFFFFFFFFFFFFFFFFFFFFFFFFFFFFFFFFFFFFFFFFFFFFFFF

@A00721:190:HGJW7DSXY:4:2170:31060:32080\_2:N:0:TCTGCAAG+GCTGCACT  
TTTAAACGATTCCGAGAGGTTTATCCTGATGTGGAGGGAGTTCTTGAAGCATCCCGACCTTCTTGT  
GAAATTTTGATGCGGTTTCATAAGATTATCAGTAATCCTGATTCTAC

+

FFFFFFFFFFFFFF:FFFFFFFFFFFFFFFFFFFFFFFFFFFFFFFFFFFFFFFFFFFFFFFFFFFF:F:FF  
FFF:FFFF:FFFF:FFFFFFFFFFFFFFFF:FFFFFF,FFFFFF

@A00721:190:HGJW7DSXY:4:1265:15763:30545\_1:N:0:TCTGCAAG+GCTGCACT  
GTTGATTAAGACTCTTCCGAAAGGCGAACTTTGGGAATTTGAAGCTCAGGGTGAAGCACAACGTTTGA  
CCGTGACGAACTGTGGTGTCTTGATCTACGTTACGGATATACTCTCCTTGAGTTCACTCGTAAGGAC  
ACT

+

FFFFFFFFFFFFFFFFFFFFFFFFFFFFFFFFFFFFFFFFFFFFFFFFFFFFFFFFFFFFFFFFFFFF  
FFFFF:FFFFFFFFFFFFFFFFFFFFFFFFFFFFFFFFFFFFFFFFFFFFFFFFFFFF:FFFFFFFFFFFF  
FFF

@A00721:190:HGJW7DSXY:4:2464:14778:34601\_2:N:0:TCTGCAAG+GCTGCACT  
AAAACGTCTTCGACAACAGCAGGGGTTTTCGAATAGTGATAGCCACCCGCTTACAGAGGGGCAGCAG  
CATGACCATAATTGGTATTGACTTTGGTACCACCTTTTCTACTGTCTG

+

FFFFFFFFFFFFFF:FF:FFFFFFFF:FFFFFFFFFFFFFFFFFFFFFFFFFFFF:FFFFFFFFFFFF  
FFFFFFFFFFFFFFFFFFFFFFFFFFFFFFFFFFFFFFFFFFFFFFFFFFFF

@A00721:190:HGJW7DSXY:4:2662:8585:18991\_1:N:0:TCTGCAAG+GCTGCACT  
CTTAACAACAATGATAGTGAATTTATACCTACAATCATTGGTTTTTCTAATAATGATGACACTATTGT  
TTATGGATATGATGCTATTACTCATGATGGTTACGGTCAGGGAGGATTCTCAGTTTACAAGGACCTTA  
AGC

+

FFFFFFFF:FFFFFFFFFFFFFFFFFFFFFFFFFFFFFFFFFFFFFFFFFFFFFFFFFFFFFFFFFFFFFFFF  
FFFFFFFFFFFFFFFFFFFFFFFFFFFFFFFFFFFFFFFFFFFFFFFFFFFFFFFFFFFFFFFFFFFFFFFF  
FFF

@A00721:190:HGJW7DSXY:4:2348:23538:3646\_2:N:0:TCTGCAAG+GCTGCACT  
AATTGGTCCTACTTTTGGACAAGGCCAACTTCGTAATCTTCATGAGATCGTTTCTTTCTTTATCTCTT  
TGGTTGTTAGGGATTTTGGAGAGAGTGAAAGGCTTCAATTGTAGTGGTT

+

:FFFFFFFFFFFFFFFFFFFFFFFFFFFFFFFFFFFFFFFFFFFFFFFFFFFFFFFFFFFFFFFFFFFFFFFF,  
FFFFFFFFFFFFFFFFFFFFFFFFFFFFFFFFFFFFFFFFFFFFFFFFFFFFFFFFFFFFFFFFFFFFFFFF  
FFF

@A00721:190:HGJW7DSXY:4:2106:9182:33270\_2:N:0:TCTGCAAG+GCTGCACT  
CAGTCAGTATACCTCTACGCAAAGATATTTTCATGAAAACCTACAGAGGAACGTACCGGATTACCTGTCT  
TTCATATTATGAATGAACCTTCGGCCGCTCTCTTTGCTTCGATGTTGG

+

FFFFFFFFFFFFFFFFFFFFFFFFFFFFFFFFFFFFFFFFFFFFFFFFFFFFFFFFFFFFFFFFFFFFFFFF  
FFFFFFFFFFFFFFFFFFFFFFFFFFFFFFFFFFFFFFFFFFFFFFFFFFFFFFFFFFFFFFFFFFFFFFFF

@A00721:190:HGJW7DSXY:4:2512:30382:29653\_1:N:0:TCTGCAAG+GCTGCACT  
TCAGAATGGGATTCCTACGTAGTTTATGACTTTGGTGGTGGTACTTTTCGATACTTCTATCGTCTTACG  
TTACGGTAATTACTATAGTGTTATTTATTCTGGTGGTGATGATAATCTTGAGGTCGTGACGTTGATG  
AAG

+

F,FFF,FF:F:FF,,FFF:FFFFFF:FFF,FFFFFF,FFF,F::F:FFF,F,F:FFFFFFFFFFFFFFF  
FFFFFFFFF,FFFFFFFF,FF::FFF:F,FFF:F:FFFFFFFFF::FFFFFFFFF:FFFFFFFFFFFF  
FFF

@A00721:190:HGJW7DSXY:4:1264:7075:29434\_1:N:0:TCTGCAAG+GCTGCACT  
ATTACGGCGCACTTCTTTACCCGCCACCACAACTTTTCAGTTTCACAACTGAAGGAGGAGGTTTCTG  
TACTGGAAAACCCTCGTCAATACTTTTCAATAATATACGCTTGAACCTCACTTATGACGATCTAGTG  
AAA

+

:FFFFFFFFFFFFFFFF:FFFFFFFFFFFFFFFFFFFFFFFF:FFFFFFFFF:FFFFFFFFFFFFFFFFFFFF  
FFFFFFFFFFFFFFFF:FFFFFFFFFFFFFFFFFFFFFFFFFFFFFFFFFFFFFFFFFFFFFFFFFFFFFFFF  
FFF

@A00721:190:HGJW7DSXY:4:1425:15085:3630\_1:N:0:TCTGCAAG+GCTGCACT  
TTCTACCAGGGGCTATTACTCTTGCTGAAACAGCTATTAAAGCTGTTGAGCGGGTAATTACACCTAAA  
CGAGCTTGATCTGCCATCGCTGAAGGATGTGCACTCTTTTCTGCTACTTTAACGGAGCGTAGTGTACT  
CTT

+

FFFF:FF,FFF:FFFF::F:FFF:FFFF:FFFFFFFF:FF:FFFFFFFFF:FFFFF:FFFFF,:  
FFF:FFF:::FF:,FF,,FFF:,,:FFFFFFFFFFFF,FF:F,FFFFFFFF,FF:FF:FFFFF  
FFF

@A00721:190:HGJW7DSXY:4:2203:28094:6026\_1:N:0:TCTGCAAG+GCTGCACT  
CTAATCGTAACATTAATAATTTCAATCTTCTTAAAAAGAAGATAGAGAGTCATACTTTGGGCTATCGT  
TCAGGTGCATGGGGTTGCATAGCCAATATTGAAGTGACACCTCTGGTAGTATCGAAGTAAAGATAAC  
CAA

+

FFFF:FFFFFFFFFFFFFFFFFFFFF:F:FFFF:FFFF:FFFFFFFFFFFFFFFFFFFFFFFFFFFF  
FFFFFFFFFFFFFFFFFFFFFFFFFFFFFFFFFFFFFFFFFFFFFFFFFFFFFFFFFFFFFFFFFFFFFFFF  
FFF

@A00721:190:HGJW7DSXY:4:1636:4444:4586\_2:N:0:TCTGCAAG+GCTGCACT  
AAATCTTACCACTATCTACGAACCTAAAGTTCTGAAGACGTTGCTTGTGCTTCGTCTTTAATGGCA

+

@A00721:190:HGJW7DSXY:4:1206:6903:29575\_2:N:0:TCTGCAAG+GCTGCACT

+

@A00721:190:HGJW7DSXY:4:2472:24903:19727\_2:N:0:TCTGCAAG+GCTGCACT

+

@A00721:190:HGJW7DSXY:4:2442:24162:15186\_2:N:0:TCTGCAAG+GCTGCACT

+

@A00721:190:HGJW7DSXY:4:2662:19009:4664\_2:N:0:TCTGCAAG+GCTGCACT

+

@A00721:190:HGJW7DSXY:4:1270:30445:35681\_2:N:0:TCTGCAAG+GCTGCACT

+

@A00721:190:HGJW7DSXY:4:2662:2998:17018\_2:N:0:TCTGCAAG+GCTGCACT

+

@A00721:190:HGJW7DSXY:4:2330:13150:7889 2:N:0:TCTGCAAG+GCTGCACT

+

@A00721:190:HGJW7DSXY:4:1144:27679:22091 1:N:0:TCTGCAAG+GCTGCACT

+

FF

$+$ 

@A00721:190:HGJW7DSXY:4:2650:4372:17863\_1:N:0:TCTGCAAG+GCTGCACT  
CCCACAGATTTGTCTACGTTGCAGATCGCCACTCCAAACACTATATACATTATAAAATATAAAAATAA  
GGGAGTCATAACTTTTGTACCAAATTCTTGGCTTCAACGAAGTCTCTGATTTTATTAATCATTACT  
TTA

$$+$$

@A00721:190:HGJW7DSXY:4:2165:14488:34068\_2:N:0:TCTGCAAG+GCTGCACT  
TCATTTACTCTGTACTTGATCTACGTCGTTTAACTGTCGGAACAACCTTTACTTAGAATGACTCTATC  
TTTTCAGACACTTCTTATATTATTTACAATAGTTAATATCATATTAGT

+

@A00721:190:HGJW7DSXY:4:1674:28221:8218\_2:N:0:TCTGCAAG+GCTGCACT  
TAATAGATTAATAAAGGATGAGTACGAAAACCACTCTTCGTTACGAGACCTGATGGTAGAATAGATT  
TAGTCTCTACCCCATCTCAACGAGGATAAAGCGAGTTTTCCGTCCTG

+

@A00721:190:HGJW/DSXY:4:1407:27670:14058\_1:N:0:TCTGCAAG+GCTGCACT  
CCCCACACGACTCGAAACCGAGACGCCGTAGATCAAAGTCCCTTCTAACTTTAGAT

 $+$ 

@A00721:190:HGJW7DSXY:4:1141:17852:30279\_1:N:0:TCTGCAAG+GCTGCACT  
TCACAGACTCCGAAATGGTTTCAAATGAGGTCAAAGCTCTATTTATTAACGAAGCTATTATCCGATT  
CTTCGAGGGTATCACTACCACTGATCTGCCGACTTTAGTCAAGGAAGCTTCAATTCCTTCGATGTTTAT  
ATT

+

@A00721:190:HGJW7DSXY:4:2352:22417:12132\_2:N:0:TCTGCAAG+GCTGCACT  
TTCGACAAATTTAGAACTTTATTTCAGAACTCTCTCCGATCACCTTGGTGTGATCTCCCGGAGGATC  
TTTTCAATAAGATGTATGATGATAATCTACTATTTTTAAATAGTGATA

+

@A00721:190:HGJW7DSXY:4:1266:13801:12148\_2:N:0:TCTGCAAG+GCTGCACT  
ATCAAAGATTTGGCTTGGTCTATTTACCGCAAAAAGTTGAAGAGGTCTATGATATTTATTTACTTA  
TACTTTAAATAGCACCGATTATAACTTGACTGTTGATAATATTACAAT

+

@A00721:190:HGJW7DSXY:4:1528:5972:33098\_1:N:0:TCTGCAAG+GCTGCACT  
AGAAGATTAGAGAAGTAACCGGTGAACACGTCGGTAGCATTGATTTACTTTTACCGTTAGAACTGAAA  
AAGATTCTTTTCGAAAAGAAACCTATAAGTTACAAACGATTCTTCGACTATATTAAGAAATAAAAAT  
ACT

+  
FFFFFFFFFFFFFFFFFFFFFFFFFFFFFFFFFFFFFFFFFFFFFFFFFFFFFFFFFFFFFFFF:FFFFFFFF:FFFF  
F:FF:FF:FFFF,FFFFFFFFFFFFFFFFFFFFFFFFFFFFFFFFFFFFFFFFFFFFFFFF: :FFFFFFFFFFFF  
FFF  
@A00721:190:HGJW7DSXY:4:1130:6253:14700\_1:N:0:TCTGCAAG+GCTGCACT  
TTACATTTTAAATGGTATGGTATAATGTGTCTTACAAATAGAACCTTCACTCTCGGTAATGAGAGTGT  
ATTCTTAATATTCTAGTAACCGCTATGTGGGCATTACTAGGATTTATCACACTCCTAAATTTGATAG  
CAA  
+  
FFF:FFFFFFFFFFFFFFFFFFFFFFFFFFFFFFFFFFFFFFFFFFFFFFFFFFFFFFFFFFFF,FFFFFFFFFFFFFFFFFFFFFFFFFFFFFFFF  
FFFFFFFFFFFFFFFFFFFFFFFFFFFFFFFFFFFFFFFFFFFFFFFFFFFFFFFFFFFFFFFFFFFFFFFF: :FF:FFF  
FFF  
@A00721:190:HGJW7DSXY:4:2210:3115:28432\_1:N:0:TCTGCAAG+GCTGCACT  
GAGTACTTAATTCAATAGCTTTAGTATTATTTACTATCGCCTTTATTGAAAATTGTATAAGAGTTAAT  
TGCTTACACAAAAGTGACGCGCAAGGAATCTTAATTGATTGAAGCTAGGCGTTGGGGAGAATGAAGT  
GCC  
+  
FFFFFFFFFFFF:FFFFFFFFFFFFFFFFFFFFFFFFFFFFFFFFFFFFFFFFFFFFFFFFFFFFFFFFFFFFFFFFFFFF:F  
FFFFFFFFFFFFFFFFFFFFFFFFFFFFFFFFFFFFFFFFFFFFFFFFFFFFFFFFFFFFFFFFFFFFFFFFFFFFFFFFFFFF: :FF:FFF  
FFF  
@A00721:190:HGJW7DSXY:4:2223:10113:25989\_1:N:0:TCTGCAAG+GCTGCACT  
CTACTACCGCCGGTCGGCAGATCGGCACCACTGGTCTCTACGTTTCAGGGACCCGCTGTGCAGAATAAC  
CTTCCCAAATCTAGATCTGCACAGAAGAAGGCTGAAGGTCGTTACCGGACGACCACTCAAAGGAAACG  
GGC  
+  
FFFFFFFFFFFFFFFFFFFFFFFFFFFFFFFFFFFFFFFFFFFFFFFFFFFFFFFFFFFFFFFFFFFFFFFFFFFFFFFFFFFF  
FFFFFFFF:FFFFF, :F,FFFFFFFFFFFF:FFFFFFFFFFFFFFFFFFFFFFFFFFFFFFFFFFFFFFFFFFFF:FFFFF  
FFF  
@A00721:190:HGJW7DSXY:4:2153:22688:33458\_1:N:0:TCTGCAAG+GCTGCACT  
TGTGGGAAGTGAAGCAGTACCTCAGTCAAAAGTCACATTCACCACTCCCATACCAATCAATGATGTGA  
CTATACAGTTCGGCCATTTCAAGAGTGGTCAATACGTCGTGGGAGGTACTGAAGCCTTCCCTCCGCT  
GGC  
+  
FFFFFFFFFFFFFFFF:FF:,FFFFFFFF:FFF:FFFFFFFF: :FFFFFFFFFFFFFFFFFFFF: :FF: :F:FFFFF  
FFFFFFFFFFFFFFFFFFFFFFFFFFFFFFFFFFFFFFFFFFFFFFFFFFFFFFFFFFFFFFFFFFFFFFFFFFFF:FFFFFFFFFFFFFFFFFFFF  
FFF  
@A00721:190:HGJW7DSXY:4:2554:31259:9596\_1:N:0:TCTGCAAG+GCTGCACT  
CAATCAATAGTTCTTCTGACCAGAATGAAAAGGGGTTTACCAGGGTAGTCTCTAAGTCTACCAGGAAG  
AGGGGAAATGTCCCCAAACTGAGAAGAATAAAGGGAAAGGTCCATCAGGACCTAAGAAGGGGAAATT  
ACC  
+  
FFF:FFFFFFFFFFFFFFFFFFFFFFFFFFFFFFFFFFFFFFFFFFFFFFFFFFFFFFFFFFFFFFFFFFFFFFFFFFFF  
FFFF:FFFFFFFFFFFFFFFFFFFFFFFFFFFFFFFFFFFFFFFFFFFFFFFFFFFFFFFFFFFFFFFFFFFFFFFFFFFF:FFFFFFFFFFFFFFFFFFFF  
FFF  
@A00721:190:HGJW7DSXY:4:1665:6054:20431\_2:N:0:TCTGCAAG+GCTGCACT  
TGCACGGGCCAAAGAGGCCGCTGCTACGAAGTCGCTGAAGGCGGCTTGGGTCATTAAGGGTAGCTGTA  
AAGTTGCGCCTGCCGACCCCATCTTTGAGACCAAGACTCTCTACAGTA  
+  
FFFFFFFFFFFFFFFFFFFFFFFFFFFFFFFFFFFFFFFFFFFFFFFFFFFFFFFFFFFFFFFFFFFFFFFFFFFF  
FFFFFFFFFFFFFFFFFFFFFFFFFFFFFFFFFFFFFFFFFFFFFFFFFFFFFFFFFFFFFFFFFFFF  
@A00721:190:HGJW7DSXY:4:1359:17472:34757\_2:N:0:TCTGCAAG+GCTGCACT  
CTGTTGAATTCGTCACTGAGGACGAAGGTGAGAGGACTTTTGGCTACTGGCGACAACTGAGAGCAGT  
CGCTGGGGAAAGAGAATTGCGTGGGTTGAAGGCCGACGCTTCGAGCTT  
+

```
FFF,FFFFFFFFFFFFFFFFFFFFFFFFFFFFFFFFFFFFFFFFFFFFFFFFFFFFFFFFFFFFF:FFF:FFFFFFFFFFFFFFFF
FFFFFFFFFFFF,FFFFFFFFFFFFFFFFFFFFFFFFFFFFFFFFFFFFFFFFFFFFFFFFFFFFFFF,
@A00721:190:HGJW7DSXY:4:1272:4634:13275_1:N:0:TCTGCAAG+GCTGCACT
TTTGGAGGATTTTATCCGCGCTTAACCTATGGGGCGAAGATCCCCTATGGAGTCTTGAAGGACTTAGGT
TGGCATATTTATGCCGACGATAATAAGCATGTACCCTTAAGCACCGAGGTAAGCTCGGGACTTACAA
GAG
+
:FFFFFFFFFFFFFFFFFFFFFFFFFFFFFFFFFFFFFFFFFFFFFFFFFFFFFFFFFFFFFFFFFFFFF
FFFFFFFFFFFFFFFFFFFFFFFFFFFFFFFFFFFFFFFFFFFFFFFFFFFFFFFFFFFFFFFFFFFFF
FFF
@A00721:190:HGJW7DSXY:4:1422:29640:15499_2:N:0:TCTGCAAG+GCTGCACT
ACTTTTCTTGAAAATTTTTCCTTTCCTCCGTCATTGGGGATTTCGATGTGAGAAGGTGGAAGGTGTCA
AGGGTCTTCTTCATGCTGATCTTTCAGGACCTAATCACATCATGATTG
+
FFFFFFFFFFFFFFFFFFFFFFFFFFFFFFFFFFFFFFFFFFFFFFFFFFFFFFFFFFFFFFFFFFFFF
FFFF:FFFFFFFFFFFFFFFFFFFFFFFFFFFFFFFFFFFFFFFFFFFFFFFFFFFFFFFFFFFFFFF
@A00721:190:HGJW7DSXY:4:2510:19416:16047_2:N:0:TCTGCAAG+GCTGCACT
CGAAATTAAGACGGGGGGATTAAGAGTCCAGCTGTAACCTGTCATTTAGAGAGGGGAGCTCTGAAAA
GAAACTTCGTCAGAAGATGAGGAAGTCTAAGAGATCGGAAGAGCGTC
+
FFFFFFFFFFFFFFFFFFFFFFFFFFFFFFFFFFFFFFFFFFFFFFFFFFFFFFFFFFFFFFFFFFFFF
FFFFFFFFFFFFFFFFFFFFFFFFFFFFFFFFFFFFFFFFFFFFFFFFFFFFFFFFFFFFFFF
@A00721:190:HGJW7DSXY:4:2677:21875:33739_2:N:0:TCTGCAAG+GCTGCACT
AAGAAGGATTATTTGAAGCAGGGGTACCCTTCCCTAAGGTGGATGAGGGAGGTTGTTTCTTTGGAGT
TTAGATAATCTTTGAGAAGGGGTATAGAGCCAGCAAGAGAAGCTT
+
FFFFFFFFFFFFFFFFFFFFFFFFFFFFFFFFFFFFFFFFFFFFFFFFFFFFFFFFFFFFFFFFFFFFF
FFFFFFFFFFFFFFFFFFFFFFFFFFFFFFFFFFFFFFFFFFFFFFFFFFFFFFFFFFFFFFF
@A00721:190:HGJW7DSXY:4:2167:30508:15530_2:N:0:TCTGCAAG+GCTGCACT
GAATTCGGTAACCTTACCATATTGTTCTTCCGGGAAGTTGTGGGATTTAACTTTGACTCAACTACTCC
GATCAGATCCGGATGGTTTGATTGGTATGGACTACTCGACTTTTGATC
+
FFFFFFFFFFFFFFFFFFFFFFFFFFFFFFFFFFFFFFFFFFFFFFFFFFFFFFFFFFFFFFFFFFFFF
FFFFFFFFFFFFFFFFFFFFFFFFFFFFFFFFFFFFFFFFFFFFFFFFFFFFFFFFFFFFFFF
@A00721:190:HGJW7DSXY:4:1126:4634:2973_1:N:0:TCTGCAAG+GCTGCACT
TCTGTAGCTCTGAGGGCGGTTGAGGGAGCCGTTTTGGCCGACTTTAACTATTCTAAGAGTCTTTATGA
TTCAAACCTATCGTTGTCGTACCTTACAAGGTTGAGGAGACTTTACAGCGGCTTATTGTCGCGCAGT
TT
+
FFFF: :FFFFFFFFFFFFFFFFFFFFFFFFFFFFFFFFFFFFFFFFFFFFFFFFFFFFFFFFFFFFF,FFFFFFF
FFFFFFFFFFFFFFFFFFFFFFFFFFFFFFFFFFFFFFFFFFFFFFFFFFFFFFFFFFFFFFFFFFFFF
FF
@A00721:190:HGJW7DSXY:4:1552:2962:30295_1:N:0:TCTGCAAG+GCTGCACT
ATTTGCAACCCTATTCTTGATGTGAAAGATGCATCGAGGTATACGTCTAGGAACATTGATTGGGAACG
TACCTACTCACGAGACGTCATGAAAGCTATCGGAGGGAAGCAAATGTTTCGTTCTGTTACAAGAACG
CTT
+
FFFFFFFFFFFF:FFF:FFFFFFFFFFFFFFFFFFFFFFFFFFFFFFFFFFFFFFFFFFFFFFFFFFFFF
FFFFF:FFFFFFFFFFFFFFFFFFFFFFFFFFFFFFFFFFFFFFFFFFFFFFFFFFFFFFFFFFFFF
FFF
@A00721:190:HGJW7DSXY:4:1422:20238:21981_1:N:0:TCTGCAAG+GCTGCACT
TGCGATAGCTGTAGAGGTATACGATATCTCTCTTGATGATGTAGCCACTATAATGCTTAAGAGAGAGA
TTGATGTATGTCATTTGCTCTTAGTTTGTCCCGGCGAATTATTGGACACGATGAAAAATGACATACCC
GTT
```

FFFFFFFFFFFFFFFFFFFFFFF:FFFFFFFFFFFFFFFFFFFFFFF:FFFFFFFFFFFFFFFFFFFFFFF  
 FFFFFFFFFFFFFFFFFFFFFFFFFFFFFFFFFFFFFFFFFFFFFFFFFFFFFFFFFFFFFF  
 FFF  
 @A00721:190:HGJW7DSXY:4:2220:10285:10974\_2:N:0:TCTGCAAG+GCTGCACT  
 CTCATCGCTATACGCATACCTGATTGGAAGAAGCGAGGTTCGTTCCCTCAATAAAAATTTTTCTCAAGA  
 GATTATGGTTGATAAAGTTTTCTTCATAAGGGCTATTCAAGTACGTCAT  
 +  
 FFFFFFFFFFFFFFFFFFFFFFFFFFFFFFFFFFFFFFFF:FFFFFFFFFFFFFFFFFFFFFFF:FFFFFFFF:F  
 FF:FFFFFF,F:FFFFFFFFFFFFFFFF:F:FFF:FFF,FFFFFFFFF  
 @A00721:190:HGJW7DSXY:4:1141:29695:21386\_1:N:0:TCTGCAAG+GCTGCACT  
 TCGGTCAATGACAAACCTTCGAATATGTTACGACATGGCTTCGTAACAACAGTGCGAGGATTGTCAT  
 CTCGGGGAAAGTGATTCACCAAGATGTTTCATATAGATACGAGATACCTAGAGAAGGTCGCAGCGATCT  
 TAC  
 +  
 FFFFFFFF:FFFFFFFFFFFFFFFFF:FF:F,FFFFFFFFFFFFFFFFFFFFFFFFFFFFFFFFF:FFFFF  
 FFFFFFFFFFFFFFFFFFFFFFFFFFFFFFFFFFFFFFFFFF, :FF:FFFFFFFFFFFFFFFFFFFFF  
 FFF  
 @A00721:190:HGJW7DSXY:4:2113:10899:31579\_2:N:0:TCTGCAAG+GCTGCACT  
 AAGAAGACTTTGGGTACACGTTATGCTCGCAAACCTTAACGTTAGTAGCGGAGGTGATCTCTCTGCTTC  
 TGCGTTACTGAGAGAAAAGATTCAGGACGCCTACGGTGACTTTATGGA  
 +  
 FFFFFFFFFFFFFFFFFFFFFFFFFFFFFFFFFFFFFFFFFFFFFFFFFFFFFFFFFFFFFFFFFF  
 FFFFFFFF:FFFFFFFFFFFFFFFFF:FFFFFFFFFFFFFFFFF:FFFFFFFFF  
 @A00721:190:HGJW7DSXY:4:2645:14136:8155\_1:N:0:TCTGCAAG+GCTGCACT  
 ATCTTTTGAGATTGAGAAGATTGAAGAACACGTCAAGAAGTCGCTCGGCGTTGTTCTTGAAAACCAAG  
 TTAAGAAGGAGGCTGATCATGGAGTCTTTGTACCTTCTGTCAAACCTTCGAGGTTAGCTACGAGAGGT  
 GAT  
 +  
 FFFFFFFFFFFFFFFFFFFFFFFFFFFFFFFFFFFFFFFF:FFFFFFFFFFFFFFFFFFFFFFFFFFFFFFFFF:  
 :FFF:FF::FF:F:FF:FF:FFFFFFFFFFFFFFFFFFFFFFFFF:FFFFFFFFFFFFFFFFFFFFF  
 FFF  
 @A00721:190:HGJW7DSXY:4:1363:25120:34820\_2:N:0:TCTGCAAG+GCTGCACT  
 TTGAAGGCTGGCTCTAAGGGAGACTCCTTCTTTTTGAATGTTGTAAAGAATTGGGTTGAGAAGTGTGC  
 TTTACAAGGAGTTAGACTCTTCTTCAAGTTTTTAGATCTTCTTGATAA  
 +  
 FFFFFFFFFFFFFFFFFFFFFFFFFFFFFFFFFFFFFFFFFFFFFFFFFFFFFFFFFFFFFFFF:FFFF:FFFFFFFFFFFFF  
 FFFFFFFFFFFFFFFFFFFFFFFFFFFFFFFFFFFFFFFFFFFFFFFFFFFFFFFF  
 @A00721:190:HGJW7DSXY:4:2574:16631:7404\_2:N:0:TCTGCAAG+GCTGCACT  
 ATCACCCTTTTGAAGGAAAAATAATTGGTGATGAAAATACGTATGTGCGGTGGGGTTCTCAAGGCTCT  
 CATGCCACTGGGATTCTAAGGGGTTCCATAAGATATTATAGATCGGA  
 +  
 FFFFFFFFFFFFFFFFFFFFFFFFFFFFFFFFFFFFFFFFFFFFFFFFFFFFFFFFFFFFFFFFFF  
 FFFFFFFFFFFFFFFFFFFFFFFFFFFFFFFFFFFFFFFFFFFFFFFFFFFFFFFF  
 @A00721:190:HGJW7DSXY:4:2432:17390:21402\_2:N:0:TCTGCAAG+GCTGCACT  
 TTCAGAGTCTCTTGAAGTCCAGGTAGCTAATGTTCTTGCAATAGCCACAGACTTTCTGGGAAAAGAG  
 ACCTCTGTTGGTAGAGGAGTTGAGAGAATTACTCAGATTCAATCTGGC  
 +  
 FFFFFFFFFFFFFFFFFFFFFFFFFFFFFFFFFFFFFFFF:FFFFFFFFFFFFFFFFFFFFFFFFFFFFFFFFF:FFFFFFFFF  
 FFFFFFFFFFFFFFFFFFFFFFFFFFFFFFFFFFFFFFFFFFFFFFFFFFFFFFFF  
 @A00721:190:HGJW7DSXY:4:2268:4056:33285\_1:N:0:TCTGCAAG+GCTGCACT  
 ACGCTACACTCGAAATATGGGCCCTCATAAGGAAGTATAGTTGGCGTCTTGTCGTTGACGTCATTACA  
 GTCTGGAAGTTAGATCATTTGTTCAGGAAGATCTCTACAGAGATTATCGAGAGTTGTGATCTAGTTCT  
 AAA



[illegible]



@A00721:190:HGJW7DSXY:4:2607:2844:36323\_1:N:0:TCTGCAAG+GCTGCACT  
TCAGAATGGGATTCTACGTAGTTTATGACTTTGGTGGTGGTACTTTGATACTTCTATCGTCTTACG  
TTACGGTAATTACTATAGTGTTATTTATTCTGGTGGTGATGATAATCTTGGAGGTCGTGACGTTGATG  
AAG

+

FF,FFFFFFFF, :FF:FFFFFFFF,FFFFFFFFFFFFFFFFFFFFFFFFFFFFFFFFFFFFFFFF  
FFFFFFFFFFFFFFFF:F:FFFFFFFFFFFFFFFFFFFFFFFFFFFFFFFFFFFFFFFF,FFFFFFFFFFFFFFFF  
FFF

@A00721:190:HGJW7DSXY:4:1551:4029:9345\_1:N:0:TCTGCAAG+GCTGCACT  
ATTACGGCGCACTTCTTTACCCGCCACCACACAACCTTTCAGTTTCACAACCTGAAGGAGGAGGTTTCTG  
TACTGGAAAACCCTCGTCAATACTTTTCAATAATATACGTCTTGAACCTCACTTATGACGATCTAGTG  
AAA

+

FFFFFFFFFFFFFFFF:FFFFFFFFFFFFFFFFFFFFFFFFFFFFFFFFFFFFFFFF:FFFFFFFFFFFFFFFF  
FFFFFFFFFFFFFFFFFFFFFFFFFFFFFFFFFFFFFFFFFFFFFFFFFFFFFFFFFFFFFFFF:FFFFFFFF  
FFF

@A00721:190:HGJW7DSXY:4:1438:21468:12461\_1:N:0:TCTGCAAG+GCTGCACT  
TTCTACCAGGGGCTATTACTCTTGCTGAAACAGCTATTAAAGCTGTTGAGCGGGTAATTACACCTAAA  
CGAGCTTGATCTGCCATCGCTGAAGGATGTGCACTCTTTTCTGCTACTTTAACGGAGCGTAGTGACT  
CTT

+

FFFFFF:FFFFFFFFFFFFFFFFFFFFFFFFFFFFFFFFFFFFFFFFFFFFFFFFFFFFFFFF  
FFFFFFFFFFFFFFFFFFFFFFFFFFFFFFFFFFFFFFFFFFFFFFFFFFFFFFFFFFFFFFFF:FFFFFF  
FFF

@A00721:190:HGJW7DSXY:4:2203:28872:6308\_1:N:0:TCTGCAAG+GCTGCACT  
CTAATCGTAACATTAATAATTTCAATCTTCTTAAAAAGAAGATAGAGAGTCATACTTTGGGCTATCGT  
TCAGGTGCATGGGGTTGCATAGCCAATATTGAAGTGGACACCTCTGGTAGTATCGAAGTAAAGATAAC  
CAA

+

FFFFFFFFFFFFFFFFFFFFFFFFFFFFFFFFFFFFFFFFFFFFFFFFFFFFFFFFFFFFFFFF  
FFFFFFFFFFFFFFFFFFFFFFFFFFFFFFFFFFFFFFFFFFFFFFFFFFFFFFFFFFFFFFFF:FFFFFF  
FFF

@A00721:190:HGJW7DSXY:4:2112:7383:12117\_2:N:0:TCTGCAAG+GCTGCACT  
AAATCTTACCCTATCTACGAACCTAAAGTTCTGAAGACGTTGCTTGTGCTTCTCTTTAATGGCA  
CTACCTCGGTACAATCTTACTTGAACGAAGGCGACCTTCCGGAGTTT

+

FFFFFFFFFFFFFFFFFFFFFFFFFFFFFFFFFFFFFFFFFFFFFFFFFFFFFFFFFFFFFFFF  
FFFFFFFFFFFFFFFFFFFFFFFFFFFFFFFFFFFFFFFFFFFFFFFFFFFFFFFF

@A00721:190:HGJW7DSXY:4:2212:24352:3897\_2:N:0:TCTGCAAG+GCTGCACT  
TATATTAGGTGAAGCGAAATACGATTTCAACGTCAACGTTACCGAGTTTCGTTTCGTACCTTGATG  
CTGACTTTCGTCAATATGATTTGATCTGGTTGCTCAATTCTAAGCGTG

+

FFFFFFFFFFFFFF:FFFFFFFFFFFFFFFFFFFFFFFFFFFFFFFFFFFFFFFFFFFFFFFF  
FFFFFFFFFFFFFFFFFFFFFFFFFFFFFFFFFFFFFFFF:FFFFFFFF:FF,FFFF

@A00721:190:HGJW7DSXY:4:2540:27425:19053\_2:N:0:TCTGCAAG+GCTGCACT  
GGATTTTAATATAAAGAATCTTACCAGGACTCCTACTACAGGAGGAGTCTTCTGATCGTAAGAAGT  
TTATAAGGAACATATCCATTTGTTGTAATAGGGTCATCACTTAGAAC

+

FFFFFFFFFFFFFFFFFFFFFF:FFFFFFFFFFFFFF:FFFFFFFFFFFFFFFF:FFFFFFFF  
FFFFFFFFFFFFFFFF:FFFFFF:FFFFFFFFFFFFFF:FFFFFF

@A00721:190:HGJW7DSXY:4:1161:2275:26663\_2:N:0:TCTGCAAG+GCTGCACT  
ATACTGTCTTTCCAAGCTTACCTGTATCTTCAATGAAATTGGACTCTTCGATAGGGGACATTTTATCG  
TGGGCTTTCGTAAGGAAGATCTGTTATCGACGGTTTATCGTTTACG

+

```
FF FFFF  
FFFFFFFF FFFFFFFF:FFFF,FFFFFFFF:  
@A00721:190:HGJW7DSXY:4:1128:29324:17957_2:N:0:TCTGCAAG+GCTGCACT  
GGAAAATTTTATCCTCGTTTTAACTTAGACTTTCTACGATACAAATGATACTTCTAATTACG  
TTTGCTACTCAGAGCTGGTCCTCTCAGCAAAGGGATGCATGGTGTTAT  
+  
FFF,F::FFFF:FFFFFFFFFFFFFFFFFFFFFFFFFFFFFFFFFFFFFFFFFFFFFFFFFFFFFFFF  
FFFFFFFFFFFFFFFFFFFFFFFFFFFFFFFFFFFFFFFFFFFFFFFFFFFFFFFFFFFFFFFF  
@A00721:190:HGJW7DSXY:4:2243:14931:25003_2:N:0:TCTGCAAG+GCTGCACT  
AATAATGACGAGACTTTCGT CATAATCGCTGCATATTACGGATTACACGGTACCAGCGCATCTCGTGT  
CGAGCCTCGACCCGATTATATGGTATTA ACTTATAAAGGTGAGGAGAC  
+  
FFFFFFFFFFFFFFFFFFFFFFFFFFFFFFFFFFFFFFFFFFFFFFFFFFFFFFFFFFFFFFFFFFFFFFFF  
FFFFFFFFFFFFFFFFFFFFFFFFFFFFFFFFFFFFFFFFFFFFFFFFFFFFFFFFFFFFFFFFFFFFFFFF  
@A00721:190:HGJW7DSXY:4:1363:4345:4914_1:N:0:TCTGCAAG+GCTGCACT  
TAAATAATATTACTAATGGCAAATAGTGGAAGGCTCCAGTCAACACTAGTTCGAGTGCTGCTTTGGA  
TTACGATGACGTGAGAATAGGTGAAGGGATAGTTTTTACCTCGACCAACATTAAGGCGGCGGCGACTA  
ATC  
+  
FFFFFFFFFFFFFFFFFFFFFFFFFFFFFFFFFFFFFFFFFFFFFFFFFFFFFFFFFFFFFFFFFFFFFFFF  
FFFFFFFFFFFFFFFFFFFFFFFFFFFFFFFFFFFFFFFFFFFFFFFFFFFFFFFFFFFFFFFFFFFFFFFF  
FFF  
@A00721:190:HGJW7DSXY:4:1252:11379:5541_1:N:0:TCTGCAAG+GCTGCACT  
TGTGGTACGAATTGGTCCAACATTTACCACCAAATTC TTTTGATACAACTCTAGCCTTCAAGTGGGGT  
ATGCCTGCGGAATACGCTTGCTATTACCAGATTGGTTCGAACCCGTTGATGCTATGTCAGAAGAAGC  
TAT  
+  
FFFFFFFFFFFFFFFFFFFFFFFFFFFFFFFFFFFFFFFFFFFFFFFFFFFFFFFFFFFFFFFFFFFFFFFF  
FFFFFFFFFFFFFFFFFFFFFFFFFFFFFFFFFFFFFFFFFFFFFFFFFFFFFFFFFFFFFFFFFFFFFFFF  
FFF  
@A00721:190:HGJW7DSXY:4:1409:23032:29230_2:N:0:TCTGCAAG+GCTGCACT  
GTTTAAAGACTGCAGAGGCTGTCAAACAAGCCCAGACTCAAGGAGTCCAATCAAAGGTTTTGAATTTA  
GCTCAACTGGGGAGACGTGCTTAAATGGGTGATAAAAAATTATTTAGAG  
+  
FFFFFFF:FFF:FFFFFFFF:FFFFFFFFFFFFFFFFFFFFFFFFFFFFFFFFFFFFFFFFFFFFFFFF  
FFFFFFFFFFFFFFFFFFFFFFFFFFFFFFFFFFFFFFFFFFFFFFFFFFFFFFFFFFFFFFFFFFFFFFFF  
FFF  
@A00721:190:HGJW7DSXY:4:2652:4110:3599_1:N:0:TCTGCAAG+GCTGCACT  
CCCACAGATTTGTCTACGTTGCAGATCGCCACTCCAAACACTATATACATTATAAAATATAAAAAATAA  
GGGAGTCATAACTTTTGTTACCAAATTC TTGGCTTTCAACGAAGTCTCTGATTTTATTAATCATTACT  
TTA  
+  
FFFFFFFFFFFFFFFFFFFFFFFFFFFFFFFFFFFFFFFFFFFFFFFFFFFFFFFFFFFFFFFFFFFFFFFF  
FFFFFFFFFFFFFFFFFFFFFFFFFFFFFFFFFFFFFFFFFFFFFFFFFFFFFFFFFFFFFFFFFFFFFFFF  
FFF  
@A00721:190:HGJW7DSXY:4:2459:25473:22529_2:N:0:TCTGCAAG+GCTGCACT  
TCATTTACTCTGTACTTGATCTACGTCGTTTAACTGTCGAACAACCTTTACTTAGAATGACTCTATC  
TTTTCAGACACTTCTTATATTATTTACAATAGTTAATATCATATTAGT  
+  
FFFFFFFFFFFFFFFFFFFFFFFFFFFFFFFFFFFFFFFFFFFFFFFFFFFFFFFFFFFFFFFFFFFFFFFF  
FFFFFFFFFFFFFFFFFFFFFFFFFFFFFFFFFFFFFFFFFFFFFFFFFFFFFFFFFFFFFFFFFFFFFFFF  
@A00721:190:HGJW7DSXY:4:2150:7563:17409_2:N:0:TCTGCAAG+GCTGCACT  
TAATAGATTAATAAAGGATGAGTACGAAAACCAACTCTTCGTTACGAGACCTGATGGTAGAATAGATT  
TAGTCTCTACCCCATCTCAACGAGGATAAAGCGAGTTTTCCGTCCTG
```

```
FFFTTTTTTTTTTTTTTTTTTTTTTTTTTTTTTTTTTTTTTTT:FFFFFFFFFFFFFFFFFFFFFFFFFFF  
FFFFFFFFFFFFFFFFFFFFFFFFFFFFFFFFFFFFFFFFFFFFF:FFFFFFF:FFFFFFF  
@A00721:190:HGJW7DSXY:4:2419:1108:17910_1:N:0:TCTGCAAG+GCTGCACT  
CCCCACACGACTCGAAACCGAGACGCCGTAGATCAAAGTCCTTCTAACTTTAGAT  
+  
FF,,F,FFFFFFFFFFFFFFFFFFFFFFFFFFFFFFFFFFFFF  
@A00721:190:HGJW7DSXY:4:1147:30752:24126_1:N:0:TCTGCAAG+GCTGCACT  
TCACAGACTCCGAAAATGGTTTCAAATGAGGTCAAAGCTCTATTTATTAAACGAATAATTATCCGATT  
CTTCGAGGGTATCACTACCCTGATCTGCCGACTTTAGTCAAGGAACCTCAATCCTTCGATGTTTAT  
ATT  
+  
FFFFFFFFFFFFFFFFFFFFFFFFFFFFFFFFFFFFF:FFFFFFFFFFFFFFFFFFFFFFFFFFFFF  
FFFFFFFFFFFFFFFFFFFFFFFFFFFFFFFFFFFFFFFFFFFFF  
FFF  
@A00721:190:HGJW7DSXY:4:2355:19470:33364_2:N:0:TCTGCAAG+GCTGCACT  
TTCGACAAATTTTAGAACCTTTATTTAGAAGTCTCTCCGATCACCTTGTTGTGATCTCCCGGAGGATC  
TTTTCAATAAGATGTATGATGATAATCTACTATTTTTAAATAGTGATA  
+  
FFFFFFFFFFFFFFFFFFFFFFFFFFFFFFFFFFFFF:FFFFFFFFFFFFFFFFFFFFFFFFFFFFF  
FFFFFFFFFFFFFFFFFFFFFFFFFFFFFFFFFFFFFFFFFFFFF  
@A00721:190:HGJW7DSXY:4:1425:27055:12743_2:N:0:TCTGCAAG+GCTGCACT  
ATCAAAGATTTGGCTTGGTCTATTTACCGCAAAAAGTTGGAAGAGGTCTATGATATTTATTTACTTA  
TACTTTAAATAGCACCGATTATAACTTGACTGTTGATAATATTACAAT  
+  
FFFFFFFFFFFFFFFFFFFFFFFFFFFFFFFFFFFFF:FFFFFFFFFFFFFFFFFFFFFFFFFFFFF  
FFFFFFFFFFFFFFFFFFFFFFFFFFFFFFFFFFFFFFFFFFFFF  
@A00721:190:HGJW7DSXY:4:1649:9923:10567_1:N:0:TCTGCAAG+GCTGCACT  
AGAAGATTAGAGAAGTAACCGGTGAACACGTCGGTAGCATTTGATTTACTTTTACCGTTAGAACTGAAA  
AAGATTCTTTTCGAAAAGAAACCTATAAGTTACAAACGATTCTTCGACTATATTAAGAAATAAAAAAT  
ACT  
+  
FFFFFFFFFFF,FFFFFFFFF:FFFFFFFFFFF:FFFFFFFFFFFFFFFFFFFFF:FFFFFFF:FFFFFFF:FFF  
FF::FFFFFFFFF:FFFFFFFFFFFFFFFFFFFFF:FFFFFFFFFFFFFFFFFFFFF:FFFFFFFFFFF  
FFF  
@A00721:190:HGJW7DSXY:4:1558:27733:22905_1:N:0:TCTGCAAG+GCTGCACT  
TTACATTTTTAATGGTATGGTATAATGTGTCTTACAAATAGAACCTTCACTCTCGGTAATGAGAGTGT  
ATTCTTAATATTCTAGTAACCGCTATGTGGGCATTACTAGGATTTATCACACTCCTAAATTTGATAG  
CAA  
+  
FFFFFFFFFFFFFFFFFFFFFFFFFFFFFFFFFFFFF:FFFFFFFFFFFFFFFFFFFFFFFFFFFFF  
FFFFFFFFFFFFFFFFFFFFFFFFFFFFFFFFFFFFFFFFFFFFF,FFFFFFFFF  
FFF  
@A00721:190:HGJW7DSXY:4:2328:7844:4742_1:N:0:TCTGCAAG+GCTGCACT  
GAGTACTTAATTCAATAGCTTTAGTATTATTTACTATCGCCTTTATTGAAAATTGTATAAGAGTTAAT  
TGCTTACACAAAAGTGACGCGCAAGGAATCTTAATTGATTGAAGCTAGGCGTTGGGGAGAATGAAGT  
GCC  
+  
FFFFF:FFFFFFF:::F,F:FFF:FFFFFFFFFFFFFFFFFFFFF:FFFFF::FFFFFFFFFFFFFFFFF,:,  
FF:FF:FF:FFFFFFFFFFFFFFFFF,FFFFFFFFF::FFFFFFFFF,FFFFFFFFFFFFFFFFFFFFF:::  
FFF  
@A00721:190:HGJW7DSXY:4:2245:25256:34021_1:N:0:TCTGCAAG+GCTGCACT  
CTACTACCGCCGGTCGGCAGATCGGCACCACTGGTCTCTACGTTACAGGACCCGCTGTGCAGAATAAC  
CTTCCCAAATCTAGATCTGCACAGAAGAAGGCTGAAGGTCGTTACCGGACGACCACTCAAAGGAAACG  
GGC
```

+  
FFFFFFFFFFFFFFFFFFFFFFFFFFFFFFFFFFFFFFFFFFFFFFFFFFFFFFFFFFFFFFFFFFFFFFFF  
FFFFFFFF:FF::F::F,FFFFFFFFFFFFFFFFFFFFFFFFFFFFFFFFFFFFFFFFFFFFFFFFFFFF  
FFF  
@A00721:190:HGJW7DSXY:4:2258:19289:29481\_1:N:0:TCTGCAAG+GCTGCACT  
TGTGGGAAGTGAAGCAGTACCTCAGTCAAAAGTCACATTCACCACTCCCATAACCAATCAATGATGTGA  
CTATACAGTTCGGCCATTTCAAGAGTGGTCAATACGTCGTGGGAGGTACTGAAGCCTTCCCCTCCGCT  
GGC  
+  
FFFFFFFFFFFFFFFFFFFFFFFFFFFFFFFFFFFFFFFFFFFFFFFFFFFFFFFFFFFFFFFFFFFFFFFF  
FFFFFFFFFFFFFFFFFFFFFFFFFFFFFFFFFFFFFFFFFFFFFFFFFFFFFFFFFFFFFFFFFFFFFFFF  
FFF  
@A00721:190:HGJW7DSXY:4:1102:31367:30201\_2:N:0:TCTGCAAG+GCTGCACT  
AATCAATAGTTCTTCTGACCAGAATGAAAAGGGGTTTACCAGGGTAGTCTCTAAGTCTACCAGGAAGA  
GGGGAAATGTCCCCAAACTGAGAAGAATAAAGGGAAAGGTCCATCAG  
+  
FFFFFFFFF:FFFFFFFFFFFFFFFF:FFF:FFFFFFFFFFFFFFFFFFFFFFFFFFFFFFFFFFFFFFFF:FF  
FFFFFFFFFFFFFFFF:F:FFFFFFFFFFFFF,F:FFFFFFFFFFFFFFFF  
@A00721:190:HGJW7DSXY:4:2118:21034:9768\_2:N:0:TCTGCAAG+GCTGCACT  
TGCACGGGCCAAAGAGGCCGCTGCTACGAAGTCGCTGAAGGCCGCTTGGGTCATTAAGGGTAGCTGTA  
AAGTTGCGCCTGCCGACCCCATCTTTGAGACCAAGACTCTCTACAGTA  
+  
:FFFFFFFFFFFFFFFFFFFFFFFFFFFFFFFFFFFFFFFFFFFFFFFFFFFFFFFFFFFFFFFFFFFFFFFF  
FFF:FFFFFFFFFFFFFFFFFFFFFFFFFFFFFFFFFFFFFFFFFFFFFFFF:F:FFFFFFFFFFFFF  
@A00721:190:HGJW7DSXY:4:1523:30798:27367\_2:N:0:TCTGCAAG+GCTGCACT  
CTGTTGAATTCGTCACTGAGGACGAAGGTGAGAGGACTTTTGGCTACTGGCGACAACTGAGAGCAGT  
CGCTGGGGAAAGAGAATTGCGTGGGTGAAGGCCGACGCTTCGAGCTT  
+  
F:FFFFFFFFF:FFFFFFFFFFFFFFFFFFFFFFFFFFFFFFFFFFFFFFFFFFFFFFFFFFFFFFFFFFFF  
FFFFFFFFFFFFFFFF:,FFFFF,FFFFFFFFFFFFFFFFFFFFFFFFFFFFFFFFFFFFFFFF  
@A00721:190:HGJW7DSXY:4:1549:29152:13401\_1:N:0:TCTGCAAG+GCTGCACT  
TTTGGAGGATTTTATCCGCGCTTAAGTATGGGGCGAAGATCCCCTATGGAGTCTTGAAGGACTTAGGT  
TGGCATATTTATGCCGACGATAATAAGCATGTCACCCCTTAAGCACCGAGGTAAGCTCGGGACTTACAA  
GAG  
+  
:FFFFFFFFFFFFF:FFFFFFFFFFFFFFFFFFFFFFFFFFFFFFFFFFFFFFFFFFFFFFFFFFFFFFFFFFFF  
,FFFFFFFFFFFFFFFFFFFFFFFFFFFFFFFFFFFFFFFFFFFFFFFFFFFFFFFFFFFFFFFFFFFFFFFF  
FFF  
@A00721:190:HGJW7DSXY:4:1504:18421:15076\_2:N:0:TCTGCAAG+GCTGCACT  
ACTTTTCTTGAAAATTTTTCCTTTCCGTCATTGGGGATTTCGATGTGAGAAGGTGAAGGTGTCA  
AGGGTCTTCTTCATGCTGATCTTTCAGGACCTAATCACATCATGATTG  
+  
FFFFFFFFFFFFFFFFFFFFFFFFFFFFFFFFFFFFFFFFFFFFFFFFFFFFFFFFFFFFFFFFFFFFFFFF  
FFFFFFFFFFFFFFFFFFFFFFFFFFFFFFFFFFFFFFFFFFFFFFFFFFFFFFFFFFFFFFFFFFFFFFFF  
@A00721:190:HGJW7DSXY:4:2538:19678:11710\_2:N:0:TCTGCAAG+GCTGCACT  
CGAAATTAAAGACGGGGGATTAAGAGTCCAGCTGTAAGTGTCAATTCAGAGAGGGGAGCTCTGAAAA  
GGAACTTCGTGAGAAGATGAGGAAGTCTAAGAGGAGGAGTTTGAGGA  
+  
FFFFFFFFFFFFFFFFFFFFFFFFFFFFFFFFFFFFFFFFFFFFFFFFFFFFFFFFFFFFFFFFFFFFFFFF  
FFFFFFFFFFFFFFFFFFFFFFFFFFFFFFFFFFFFFFFFFFFFFFFFFFFFFFFFFFFFFFFFFFFFFFFF  
@A00721:190:HGJW7DSXY:4:2522:13132:16031\_2:N:0:TCTGCAAG+GCTGCACT  
GGATTATTTGAAGCAGGGGTTACCACTTCCTAAGGTGGATGAGGGAGGTTGTTTCTTTGGAGTTTATG  
ATAATCTTTTGAGAAGGGGTCATAGAGCCAGCAAGAGAAGCTTATATG  
+

```
FFFFF:FFFFFFFFFFFFFFFFFFFFFFFFFFFFFFFFFFFFFFFFFFFFFFFFFFFFFFFFFFFFFFF  
FFFFFFFFFFFFFFFFFFFFFFFFFFFFFFFFFFFFFFFFFFFFFFFFFFFFFFFF
```

 $+$ 

+

+

+

+

+

+





@A00721:190:HGJW7DSXY:4:2349:9453:17362\_2:N:0:TCTGCAAG+GCTGCACT  
TCAAAAGACCAGAAACGTAACAAGAAGAATAAAGGTAGGAAGGGGAGAAAACAGAACAGCGAGCGGT  
TGAAGAGAAAACATGATATGGTTGCGGCTGATCGTACCCCAATTCCTGC

+

FFFF,FFFFFFFFFFFFFFFFFFFFFFFFFFFFFFFFFFFFFFFFFFFFFFFFFFFFFFFFFFFFFFFF  
FFFFFFFFFFFFFFFFFFFFFFFFFFFFFFFFFFFFFFFFFFFFFFFFFFFFFFFFFFFFFFFF

@A00721:190:HGJW7DSXY:4:1567:29668:36464\_1:N:0:TCTGCAAG+GCTGCACT  
CGTGAAGTTATGATGAGTGATCGTATTAGAACAGCTGATTCTTATTGCATGAACGTCGCTGAGGTCA  
AACCTGTGGACGTTCTTTTCATCGACGAATTATTCATGATTCACGCTGGTCAGACCCTTTTCTTACA  
CAT

+

FFFFFFFFFFFF:FFFFFFFFFFFFFFFFFFFFFFFFFFFFFFFFFFFFFFFFFFFFFFFFFFFFFFFF  
FFFFFFFFFFFFFFFFFFFFFFFF:FFFFFFFFFFFF:FFFFFFFFFFFFFFFFFFFFFFFFFFFFFFFF  
FFF

@A00721:190:HGJW7DSXY:4:1550:18855:8061\_1:N:0:TCTGCAAG+GCTGCACT  
GGTGATTCCAATCAAATCGGATTCATCAATCGTATTGATCTCCAAGTCGAACTACTTCAACATCAA  
CGACATCATTCTTGATGAGTGTCTTCTTATCGAAGTCTCAGTTATCGCTGCCCGGCCGACGTTTGT  
GCG

+

FFFFFFFFFFFFFFFFFFFFFFFFFFFFFFFFFFFFFFFFFFFFFFFFFFFFFFFFFFFFFFFFFFFF,FFFF  
FFFFFFFFFFFFFFFFFFFFFFFFFFFFFFFFFFFFFFFFFFFFFFFFFFFFFFFFFFFFFFFFFFFF  
FFF

@A00721:190:HGJW7DSXY:4:1358:29821:12023\_1:N:0:TCTGCAAG+GCTGCACT  
GGAGGTTGCAGATTCAACCCCTTATATCGAGGCTATCGAGGACGATGAGTATCTTGAAGTTGTTGACG  
ACAAGCCTCAAGAGGGTAGAGGACCACCTGGATCTTCTACTGTCTCTGCCTTCCAAGATTTCTTAGAA  
GAG

+

FFFFFFFFFFFFFFFFFFFFFFFFFFFFFFFFFFFFFFFFFFFFFFFFFFFFFFFFFFFFFFFFFFFF  
FFFFFFFFFFFFFFFFFFFFFFFFFFFFFFFFFFFFFFFFFFFFFFFFFFFFFFFFFFFFFFFFFFFF  
FFF

@A00721:190:HGJW7DSXY:4:1638:19660:9236\_2:N:0:TCTGCAAG+GCTGCACT  
CGGTAATCTTTCAGCCGAATTAAGTACTAATGAGTTCAAGTCGTTGTGATCGAATTAAGATCAAGG  
CTAATACCTTTATAGGTAAGAAGCCCTTGAGCCGCGTAGTCAGCGCG

+

FFFFFFFFFF:FF:FFFFFFFFFFFFFFFFFFFFFFFFFFFFFFFF:FFFFF::FFFFFFFFFFFFFFFF  
FFFFFFFF:FFFFFFFFFFFFFFFFFFFFFFFFFFFFFFFFFFFFFFFFFFFFFFFF

@A00721:190:HGJW7DSXY:4:1138:27661:2206\_1:N:0:TCTGCAAG+GCTGCACT  
CTGGAGTTCAGACGTGTGCTCTTCCGATCTCTTGGTAATTGTATGATCACTTTGATGATTTTATCAC  
TTTATTATGACCTTGAAAGTTTTCGGCTGTGGTTGTGCTGGGGACGATTCCATTCTGTTTTCAAAG  
ACT

+

FFFFFFFFFFFF:FFFFFFFF:FFFFFFFFFF:F:FFFFF:FFFFFFFFFFFFFFFFFFFFFFFFFFFF  
FFFFFFFFFFFFFFFFFFFFFFFFFFFFFFFFFFFFFFFFFFFFFFFFFFFFFFFFFFFF,FFFFFFFF  
FFF

@A00721:190:HGJW7DSXY:4:2428:4246:13009\_2:N:0:TCTGCAAG+GCTGCACT  
TTTAAACGATTCCGAGAGGTTTATCCTGATGTGGAGGGAGTTCTTGAAGCATCCCGACCTTCTTGT  
GAAATTTTGATGCGGTTTCATAAGATTATCAGTAATCCTGATTCTAC

+

FFFFFFFFFFFFFFFFFFFFFFFFFFFFFFFFFFFFFFFFFFFFFFFFFFFFFFFFFFFFF,:FFF:FFF  
FFFFFFFFFFFFFFFF:F:FFFFFFFFFFFFFFFF:FFFFFFFFFFFFFF

@A00721:190:HGJW7DSXY:4:1448:4164:31939\_1:N:0:TCTGCAAG+GCTGCACT  
GTTGATTAAGACTCTTCCGAAAGGCGAACTTTGGGAATTTGAAGCTCAGGGTGAAGCACAACGTTTGA  
CCGTGACGAACTGTGGTGTTCTTGATCTACGTTACGGATATACTCTCCTTGAGTTCACTCGTAAGGAC  
ACT

[illegible]

@A00721:190:HGJW7DSXY:4:2330:6144:27289\_1:N:0:TCTGCAAG+GCTGCACT  
CTAATCGTAACATTAATAATTTCAATCTTCTTAAAAAGAAGATAGAGAGTCATACTTTGGGCTATCGT  
TCAGGTGCATGGGGTTGCATAGCCAATATTGAAGTGGACACCTCTGGTAGTATCGAAGTAAAGATAAC  
CAA

+

FFFFFFFF:FFFFFFFFFFFFFFFFFFFFFFFFFFFFFFFFFFFFFFFFFFFFFFFFFFFFFFFFFFFFFFFF  
FFFFFFFFFFFFFFFF:FFFFFFFFFFFFFFFFFFFFFFFFFFFFFFFFFFFFFFFFFFFFFFFFFFFFFFFF  
FFF

@A00721:190:HGJW7DSXY:4:2214:17336:5431\_2:N:0:TCTGCAAG+GCTGCACT  
AAATCTTACCACTATCTACGAACCTAAAGTTCTGAAGACGTTGCTTGTGCTTCCTCCTTTAATGGCA  
CTACCTCGGTACAATCTTACTTGAACGAAGGCGACCTTCCGGAGTTT

+

FFFFFFFFFFFFFFFFFFFFFFFFFFFFFFFFFFFFFFFFFFFFFFFFFFFFFFFFFFFFFFFFFFFFFFFF:FF  
FFFFFFFFFFFFFFFFFFFFFFFFFFFFFFFF:FFFFFFFFFFFFFFFFFFFFFFFFFFFFFFFF

@A00721:190:HGJW7DSXY:4:2308:14669:22013\_2:N:0:TCTGCAAG+GCTGCACT  
TATATTAGGTGAAGCGAAATACGATTTTCAACGTCAACGTTACCGAGTTTCGTTTCGTACCTTGATG  
CTGACTTTCGTCAATATGATTTGATCTGGTTGCTCAATTCTAAGCGTG

+

FFFFFFFFFFFFFFFF:FFFFFFFFFFFFFFFFFFFFFFFFFFFFFFFF:FFFFFFFFFFFF:FFFFFFFFFFFF  
F:FFFFFFFFFFFFFFFFFFFFFFFF:FFFFFFFFFFFFFFFFFFFFFFFF:FFF:FFF

@A00721:190:HGJW7DSXY:4:1120:13548:22983\_2:N:0:TCTGCAAG+GCTGCACT  
GATTTTAATATAAAGAATCTTTACCAGGACTCCTACTACAGGAGGCAGTCTTCTGATCGTAAGAAGTT  
TATAAGGAACATATCCATTTGTTGTAATAGGGTCATCAACTTAGAACT

+

FFFFFFFFFFFFFFFFFFFFFFFFFFFFFFFFFFFFFFFFFFFFFFFFFFFFFFFFFFFFFFFFFFFFFFFF  
FFFFFFFFFFFFFFFFFFFFFFFFFFFFFFFFFFFFFFFFFFFFFFFFFFFFFFFFFFFFFFFF

@A00721:190:HGJW7DSXY:4:1174:28384:30765\_2:N:0:TCTGCAAG+GCTGCACT  
ATACTGTCTTTCCAAGCTTACCTGTATCTTCAATGAAATTGGACTCTTCGATAGGGGACATTTTATCG  
TGGGCTTTCGTAAGGAAGATCTGTTATCGACGGTTTATCGTTTACG

+

FFFFFFFFFFFFFF:FFFFFF:FFFFFFFFFFFFFF:FFFFFFFFFFFFFFFFFFFFFFFFFFFFFF:FFFFFFFF  
FFFFFFFFFFFFFF:F:FFFFF:FFFFFFFFFF:FFFFFFFFFFFFFFFF

@A00721:190:HGJW7DSXY:4:1259:14552:14512\_2:N:0:TCTGCAAG+GCTGCACT  
GGAAAATTTTATCCTCGTTTAACTTACTTAGACTTTTCTACGATACAAATGATAACTTCTAATTTACG  
TTTGCTACTCAGAGCTGGTCCTCTCAGCAAAGGGATGCATGGTGTTAT

+

FFF:FFFFFFFFFFFFFFFFFFFFFFFFFFFFFFFFFFFFFFFFFFFFFFFFFFFFFFFFFFFFFFFF:FFFFFFFFFFFF:FFFFFFF  
FFFFFFFFFFFFFFFFFFFFFFFFFFFFFFFFFFFFFFFF:FFFFFFFFFFFFFFFFFFFFFFFF

@A00721:190:HGJW7DSXY:4:2257:9833:10066\_2:N:0:TCTGCAAG+GCTGCACT  
AATAATGACGAGACTTTCGTCATAATCGCTGCATATTACGGATTACACGGTACCAGCGCATCTCGTGT  
CGAGCCTCGACCCGATTATATGGTATTAATTATAAAGGTGAGGAGAC

+

FFFFFFFFFFFFFFFFFFFFFFFFFFFFFFFFFFFFFFFFFFFFFFFFFFFFFFFFFFFFFFFFFFFFFFFF  
FFFFFFFFFFFFFFFFFFFFFFFFFFFFFFFFFFFFFFFFFFFFFFFFFFFFFFFFFFFFFFFF:

@A00721:190:HGJW7DSXY:4:1367:27190:14606\_1:N:0:TCTGCAAG+GCTGCACT  
TAAATAATATTACTAATGGCAAATAGTGGAAGGCTCCAGTCAACACTAGTTCGAGTGCTGCTTTGGA  
TTACGATGACGTGAGAATAGGTGAAGGGATAGTTTTTACCTCGACCAACATTAAGGCGGCGGCGACTA  
ATC

+

FFFF:FFFFFFFFFF:FFFFFFFFFFFFFFFFFFFFFFFFFFFFFFFF:FFFFFFFFFFFFFFFFFFFFFFFF:FF  
FFFFFF:FFFFFFFFFFFFFFFFFFFFFFFFFFFFFFFFFFFFFFFFFFFFFFFFFFFFFFFFFFFFFFFF  
FFF

@A00721:190:HGJW7DSXY:4:1306:15311:8563\_1:N:0:TCTGCAAG+GCTGCACT  
TGTGGTACGAATTGGTCCAACATTTACCACCAAATTCTTTTGATACAACCTCTAGCCTTCAAGTGGGGT

ATGCCTGCGGAATACGCTTGCTATTACCAGATTGGTTCGAACCCGTTGATGCTATGTCAGAAGAAGC  
TAT

+

FFFFFFFF:FFFFFFFFFFFFFFFFFFFFFFFF:FFFF,FFFFFFFFFFFFFFFFFFFFFFFF  
FFFFFFFFFFFFFFFFFFFFFFFFFFFFFFFFFFFFFFFFFFFFFFFFFFFFFFFF:FFFFFFFFFFFFFFF  
FFF

@A00721:190:HGJW7DSXY:4:1504:27841:25066\_2:N:0:TCTGCAAG+GCTGCACT  
GTTTAAAGACTGCAGAGGCTGTCAAACAAGCCAGACTCAAGGAGTCCAATCAAAGTTTTGAATTTA  
GCTCAACTGGGGAGACGTGCTTAAATGGGTGATAAAAATTATTTAGAG

+

FFFFFF:FF::FFFFFFFFFFFFFFFF:FF:FFFF:FF:FFF,:FFFFFFFFFFFF,FFFFFFF:FFF  
:F:FFFF:FFFFFFFFFFFF,FFFF,F::F:FFFFFFFF:FFFFFFFF

@A00721:190:HGJW7DSXY:4:2667:27606:4272\_1:N:0:TCTGCAAG+GCTGCACT  
CCCACAGATTTGTCTACGTTGCAGATCGCCACTCCAAACACTATATACATTATAAAATATAAAAATAA  
GGGAGTCATAACTTTTTGTTACCAATTCTTGGCTTTCAACGAAGTCTCTGATTTTATTAATCATTACT  
TTA

+

FFFFFFFF:FFF:FFFFFFFFFFFFFFFF:FFFFFFFF:FFFFFFFFFFFFFFFFFFFF:FFFFFFFFFFFF  
FFFFFFFFFFFFFFFFFFFFFFFFFFFFFFFFFFFFFFFFFFFFFFFFFFFFFFFFFFFFFFFFFFFFFFFF  
FFF

@A00721:190:HGJW7DSXY:4:2533:29640:15969\_2:N:0:TCTGCAAG+GCTGCACT  
TCATTTACTCTGTACTTGATCTACGTCGTTAACTGTCGGAACAACCTTTACTTAGAATGACTCTATC  
TTTTCAGACACTTCTTATATTATTTACAATAGTTAATATCATATTAGT

+

FFFF:F,FFFFFFFFFFFFFFFFFFFF:FF:FF,FF:F:FF:FFFFFFFFFFFF:FFFF:FFFFFF  
:FFFFFFFFFFFFFFFFFFFF:FFF:FFFF:FF:FFFFFFFF:FFFF

@A00721:190:HGJW7DSXY:4:2153:9679:31720\_2:N:0:TCTGCAAG+GCTGCACT  
TAATAGATTAATAAAGGATGAGTACGAAAACCAACTCTTCGTTACGAGACCTGATGGTAGAATAGATT  
TAGTCTCTACCCCATCTCAACGAGGATAAAGCGAGTTTTCCGTCCTG

+

FFFFFFFFFFFFFFFFFFFFFFFFFFFFFFFFFFFFFFFFFFFF:F:FFFFFFFFFFFFFFFFFFFF  
FFFFFFFFFFFF:F:FFFFFF:FFFFFFFF:FFFFFFFF:FFFF

@A00721:190:HGJW7DSXY:4:2317:1768:18865\_1:N:0:TCTGCAAG+GCTGCACT  
CCCCAAACGACTCGAAACCGAGACGCCGTAGATCAAAGTCCCTTCTAACTTTAGATT

+

F:,F,FFFFFFFFFFFFFFFFFFFFFFFFFFFFFFFFFFFFFFFFFFFFFFFFFFFFFFFF

@A00721:190:HGJW7DSXY:4:1259:7066:19366\_1:N:0:TCTGCAAG+GCTGCACT  
TCACAGACTCCGAAATGGTTTCAAATGAGGTCAAAGCTCTATTTATTAAACGAACTATTATCCGATT  
CTTCGAGGGTATCACTACCACTGATCTGCCGACTCTAGTCAAGGAAGTCAATTCCTTCGATGTTTAT  
ATT

+

FFFFFFFFFFFFFFFFFFFFFFFFFFFFFFFFFFFFFFFFFFFFFFFFFFFFFFFFFFFFFFFFFFFF  
FFFFFFFFFFFFFFFFFFFFFFFFFFFFFFFFFFFFFFFFFFFFFFFFFFFFFFFFFFFFFFFFFFFF  
FFF

@A00721:190:HGJW7DSXY:4:2377:1570:8625\_2:N:0:TCTGCAAG+GCTGCACT  
TTCGACAAATTTAGAACTTTATTTCAGAACTCTCTCCGATCACCTTGGTGTGATCTCCCGAGGATC  
TTTTCAATAAGATGTATGATGATAATCTACTATTTTTAAATAGTGATA

+

FFFFFFFF:FFFFFFFFFFFFFFFFFFFFFFFFFFFFFFFFFFFFFFFFFFFFFFFFFFFF:FFFF  
FFFFFFFFFFFFFFFFFFFFFFFFFFFFFFFFFFFFFFFFFFFFFFFFFFFFFFFF

@A00721:190:HGJW7DSXY:4:1501:22327:28667\_2:N:0:TCTGCAAG+GCTGCACT  
ATCAAAGATTTGGCTTGGTCTATTTACCGCAAAAAGTTGAAGAGGTCTATGATATTTATTTACTTA  
TACTTTAAATAGCACCGATTATAACTTGACTGTTGATAATATTACAAT

+

@A00721:190:HGJW7DSXY:4:1659:19208:32189\_1:N:0:TCTGCAAG+GCTGCACT  
AGAAGATTAGAGAAGTAACCGGTGAACACGTCGGTAGCATTGATTTACTTTTACCGTTAGAACTGAAA  
AAGATTCTTTTCGAAAAGAAACCTATAAGTTACAAACGATTCTTCGACTATATTAAGAAATAAAAAT  
ACT

@A00721:190:HGJW7DSXY:4:2133:13114:1658\_1:N:0:TCTGCAAG+GCTGCACT  
TTACATTTTTTAATGGTATGGTATAATGTGTCTTACAAATAGAACCTTCACTCTCGGTAATGAGAGTGT  
ATTCCTTAATATTCTAGTAACCGCTATGTGGGCATTACTAGGATTTATCACACTCCTAAATTTGATAG  
CAA

@A00721:190:HGJW7DSXY:4:2510:12780:33238\_1:N:0:TCTGCAAG+GCTGCACT  
GAGTACTTAATTCAATAGCTTTAGTATTATTTACTATCGCCTTTATTGAAAATTGTATAAGAGTTAAT  
TGCTTACACAAAAGTGACGCGCGAAGGAATCTTAATTGATTGAAGCTAGGCGTTGGGGAGAATGAACT  
GCC

@A00721:190:HGJW7DSXY:4:2263:18367:19335\_1:N:0:TCTGCAAG+GCTGCACT  
CTACTACCGCCGGTCGGCAGATCGGCACCACTGGTCTCTACGTTTCAGGGACCCGCTGTGCAGAATAAC  
CTTCCCAAATCTAGATCTGCACAGAAGAAGGCTGAAGGTCGTTACCGGACGACCACTCAAAGGAAACG  
GGC

@A00721:190:HGJW7DSXY:4:2345:18828:7138\_1:N:0:TCTGCAAG+GCTGCACT  
TGTGGGAAGTGAAGCAGTACCTCAGTCAAAAGTCACATTCACCACTCCCATACCAATCAATGATGTGA  
CTATACAGTTTCGGCCATTCAAGAGTGGTCAATACGTCGTGGGAGGTACTGAAGCCTTCCCCTCCGCT  
GGC

@A00721:190:HGJW7DSXY:4:1507:12952:19789\_2:N:0:TCTGCAAG+GCTGCACT  
AATCAATAGTTCTTCTGACCAGAATGAAAAGGGGTTTACCAGGGTAGTCTCTAAGTCTACCAGGAAGA  
GGGGAAATGTCCCCAAAACTGAGAAGAATAAAGGGAAAGGTCCATCAG

@A00721:190:HGJW7DSXY:4:2120:31150:2550\_2:N:0:TCTGCAAG+GCTGCACT  
TGCACGGGCCAAAGAGGCCGCTGCTACGAAGTCGCTGAAGGCGGCTTGGGTCATTAAGGGTAGCTGTA  
AAGTTGCGCCTGCCGACCCCATCTTTGAGACCAAGACTCTCTACAGTA

[illegible]



@A00721:190:HGJW7DSXY:4:2206:1696:16642\_1:N:0:TCTGCAAG+GCTGCACT  
TGCGATAGCTGTAGAGGTATACGATATCTCTCTTGATGATGTAGCCACTATAATGCTTAAGAGAGAGA  
TTGATGTATGTCATTTCTGCTTAGTTTGTCCCGCGAATTATTGGACACGATGAAAAATGACATACCC  
GTT

+

FFFFFFFFFFFFFFFFFFFFFFFFFFFFFFFFFFFFFFFFFFFFFFFFFFFFFFFFFFFFFFFFFFFFFFFF  
FFFFFFFFFFFFFFFFFFFFFFFFFFFFFFFFFFFFFFFFFFFFFFFFFFFFFFFFFFFFFFFFFFFFFFFF  
FFF

@A00721:190:HGJW7DSXY:4:1165:5936:36980\_1:N:0:TCTGCAAG+GCTGCACT  
ATCGCTATACGCATACCTGATTGGAAGAAGCGAGGTTCTTCTCAATAAAAAATTTTCTCAAGAGAT  
TATGGTTGATAAAGTTTCTTCATAAGGGCTATTAGTACGTCATGGGGATCACTTCTTCGGTCAATG  
ACA

+

FFF:FFF:FF:FFFFFFFFFFFFFFFF:FFFFFFFFFFF:F:FFFFFFFFFFF:FFFFFFFFFFFF  
FFFFFFFFFFFFFFFFFFFFFFFFFFFFFFFFFFFFFFFFFFFFFFFFFFFFFFFFFFFFFFFFFFFFFFFF  
FFF

@A00721:190:HGJW7DSXY:4:1201:17517:34710\_2:N:0:TCTGCAAG+GCTGCACT  
ATATGTTACGACATGGCTTCGTAACAACAGTGCAGGATTGTCATCTCGGGGAAAGTGATTCACCAAG  
ATGTTTATATAGATACGAGATACCTAGAGAAGGTCGCAGCGATCTTAC

+

FFFFFFFFFFFFFFFFFFFFFFFFFFFFFFFFFFFFFFFF:FFFFFFFFFFFFF:FFFFF:FFFFFFFFF  
FFFFFFFFFFFFFFFFFFFFFFFFFFFFFFFFFFFFFFFF:FFFFFFFFFFFFF

@A00721:190:HGJW7DSXY:4:2511:10691:16250\_2:N:0:TCTGCAAG+GCTGCACT  
AAGAAGACTTTGGGTACACGTTATGCTCGCAAACCTTAACGTTAGTACCGAGGTGATCTCTCTGCTTC  
TGCGTTACTGAGAGAAAAGATTCAGGACGCCTACGGTGACTTTATGGA

+

FFFFFFFFFFFFFFFFFFFFFFFFFFFFFFFFFFFFFFFFFFFFFFFFFFFFFFFFFFFFFFFFFFFFFFFF  
FFFFFFFFFFFFFFFFFFFFFFFFFFFFFFFFFFFFFFFFFFFFFFFFFFFFFFFFFFFFFFFFFFFFFFFF

@A00721:190:HGJW7DSXY:4:1328:27507:6230\_2:N:0:TCTGCAAG+GCTGCACT  
TCTTTTGAGATTGAGAAGATTGAAGAACACGTCAAGAAGTCGCTCGGCGTTGTTCTTGAAAACCAAGT  
TAAGAAGGAGGCTGATCATGGAGTCTTTGTACCTTCTGTCAAACCTCG

+

FF,FFFFFFFF:FFFF:FFFFFFFFFFFFFFFFFFFFFFFFFFFFFFFFFFFFFFFFFFFFFFFFFFFF  
FFFFFFFFFFFFFFFFFFFFFFFFFFFFFFFFFFFFFFFFFFFFFFFFFFFFFFFFFFFFFFFFFFFFFFFF

@A00721:190:HGJW7DSXY:4:2262:7265:20901\_2:N:0:TCTGCAAG+GCTGCACT  
CCGGATGTGGATTGAAGGCTGGCTCTAAGGGAGACTCCTTCTTTTGAATGTTGTAAAGAATTGGGT  
GAGAAGTGTGCTTTACAAGGAGTTAGACTCTTCTTCAAGTTTTTAGAT

+

FFFFFFFFFFFFFFFFFFFFFFFFFFFFFFFFFFFFFFFFFFFFFFFFFFFFFFFFFFFFFFFFFFFF:FFFFFFFFFFFFF:FF  
FFFFFFFFF:FFFFFFFFFFFFFFFFFFFFFFFFFFFFFFFFFFFFF:FFFFFFFFF

@A00721:190:HGJW7DSXY:4:2635:20943:33630\_2:N:0:TCTGCAAG+GCTGCACT  
ATCACCCTTTTGAAGGAAAATAATTGGTGATGAAAATACGTATGTCGGTGGGGTTCTCAAGGCTCT  
CATCGCCACTGGGATTCTAAGGGGTTCCATAAGATATTATAGATCGGA

+

F:FFFFFF:FFFFFFFFFFFFFFFF:FFFFFFFFFFFFF:FFFFFFFFF:FFFFFFFFFFF,FFF  
FFFF:FFFF:::F:FFFFFFFFFFFFFFFF:F:FFFFFFFFF:F:F

@A00721:190:HGJW7DSXY:4:2628:29912:27586\_2:N:0:TCTGCAAG+GCTGCACT  
TTCAGAGTCTCTTGAAGTCCAGGTAGCTAATGTTCTTGCAATAGCCACAGACTTTCTGGGAAAAGAG  
ACCTCTGTTGGTAGAGGAGTTGAGAGAATTACTCAGATTCAATCTGGC

+

FFFFFFFFFFFFFFFFFFFFFFFFFFFFFFFFFFFFFFFFFFFFFFFFFFFFFFFFFFFFFFFFFFFF:FFFFFFFFFFFFF  
FFFFFFFFFFFFFFFFFFFFFFFFFFFFFFFFFFFFFFFFFFFFFFFFFFFFFFFFFFFFFFFFFFFFFFFF

@A00721:190:HGJW7DSXY:4:2401:20980:25050\_1:N:0:TCTGCAAG+GCTGCACT  
ACGCTACACTCGAAATATGGGCCCTCATAAGGAAGTATAGTTGGCGTCTTGTCGTTGACGTCATTACA

GTCTGGAAGTTAGATCATTTGTTTCAGGAAGATCTCTACAGAGATTATCGAGAGTTGTGATCTAGTTCT  
AAA

+

FFFFFFFFFFFFFFFFFFFFFFFFFFFFFFFFFFFFFFFFFFFFFFFFFFFFFFFFFFFFFFFFFFFFFFFF:FFF  
FFFFFFFFFFFFFFFFFFFFFFFFFFFFFFFFFFFFFFFFFFFFFFFFFFFFFFFFFFFFFFFFFFFFFFFFFFF  
FFF

@A00721:190:HGJW7DSXY:4:2264:30481:13604\_1:N:0:TCTGCAAG+GCTGCACT  
TCTTCTAACCAGGACTGATGGTGAGATTCTTTTACCTTTTGGAGGTCCAGGAACCTTTACTCCTAGTG  
TCTTTTCTAGAGTCCAAGGACGTTTCCGTCGGAGGATGACAGGTGGGAGACCGCTCAATAACACTCTT  
GAA

+

FFFFFFFFFFFFFFFFFFFFFFFFFFFFFFFFFFFFFFFF:FF:FFFFFFFFFFFFFFFFFFFFFFFFFFFFF  
FFFFFFFFFFFFFFFFFFFFFFFFFFFFFFFFFFFFFFFFFFFFFFFFFFFFFFFFFFFFFFFFFFFFFFFFFFF  
FFF

@A00721:190:HGJW7DSXY:4:1366:20211:24158\_2:N:0:TCTGCAAG+GCTGCACT  
AAAGCCTGTCCAGTTGTCGATGATGTTCTGGGCTGTGGGGATTAACTTCCCTCGTGAAACTTACGACGA  
TGTTCTCGCTCGCATTTACAGATCGGAAGAGCGTCGTGTAGGGAAAG

+

FFFFFFFFFFFFFFFFFFFFFFFFFFFFFFFF:FFFFFFFFFFFFFFFFFFFFFFFFFFFFFFFFFFFFFFFF  
:FFFFFFFFFFFFFFFFFFFFFFFF: ,FFFFFFFFFFFFFFFFFFFF,FFFFFFFF

@A00721:190:HGJW7DSXY:4:2353:12599:8782\_1:N:0:TCTGCAAG+GCTGCACT  
CTTCTAATAGAGGATCCTGATGACATTATTTCAACGGATACCGATCTCAGTTCTACCACAGAAACCGT  
CTCAGGAAGTGTCTCCACTGATTCGGAATTAGAGAAAGACGACCTTCTTGTGGGGACTGAGACCTCTG  
AAT

+

FFFFFFFFFFFFFFFFFFFFFFFFFFFFFFFF:FF:FFFFFFFFFFFFFFFFFFFF:FFFFFFFFFFFFFFFFFFFF  
FFFFFFFFFFFFFFFFFFFFFFFFFFFFFFFFFFFFFFFFFFFFFFFFFFFFFFFFFFFFFFFFFFFFFFFFFFF  
FFF

@A00721:190:HGJW7DSXY:4:2603:20898:14763\_2:N:0:TCTGCAAG+GCTGCACT  
TCAAAAGACCAGAAACGTAACAAGAAGATAAAGGTAGGAAGGGGAGAAAACAGAACAAAGCGAGCGGT  
TGAAGAGAAAAGTATGATGTTGCGGCTGATCGTACCCCAATTCCTGC

+

FFFFFFFFFFFFFFF:FFFFFF:FFFFFFFFFFFFFFFFFFFFFFFFFFFFFFFFFFFFFFFFFFFFFFFF  
FF:FFFFFFFFFFFFFFFFFFFFFFFFFFFFFFFFFFFFFFFFFFFFFFFFFFFFFFFFFFFFFFFF:F

@A00721:190:HGJW7DSXY:4:2555:19226:30561\_1:N:0:TCTGCAAG+GCTGCACT  
CGTGAAAGTTATGATGAGTGATCGTATTAGAACAGCTGATTCTTATTGCATGAACGTCGCTGAGGTCA  
AACCTGTGGACGTTCTTTTCATCGACGAATTATTCATGATTCACGCTGGTCAGACCCTTTTCTTACA  
CAT

+

FFFFFFFFFFFFFFFFFFFFFFFFFFFFFFFFFFFFFFFFFFFFFFFFFFFFFFFFFFFFFFFFFFFFFFFF  
FFFFFFFFFFFFFFFFF:FFFF:FFFFFFFFFFFFFFFFFFFFFFFFFFFFFFFFFFFFFFFFFFFFFFFF  
FFF

@A00721:190:HGJW7DSXY:4:1662:22525:9471\_1:N:0:TCTGCAAG+GCTGCACT  
GGTGATTCCAATCAAATCGGATTCATCAATCGTATTGATCTCCAAGTCGCAAACTACTTCAACATCAA  
CGACATCATTCTTGATGAGTGTCGTTCTTATCGAAGTCTCAGTTATCGCTGCCCGGCCGACGTTTGTC  
GCG

+

FFFFFFFFFFFFFFFFFFFFFFFFFFFFFFFFFFFFFFFFFFFFFFFFFFFFFFFFFFFFFFFFFFFFFFFF  
FFFFFFFFFFFFFFFFFFFFFFFFFFFFFFFFFFFFFFFFFFFFFFFFFFFFFFFFFFFFFFFFFFFFFFFF  
FFF

@A00721:190:HGJW7DSXY:4:1454:31729:19993\_1:N:0:TCTGCAAG+GCTGCACT  
GGAGGTTGCAGATTCAACCCCTTATATCGAGGCTATCGAGGACGATGAGTATCTTGAAGTTGTTGACG  
ACAAGCCTCAAGAGGGTAGAGGACCACCTGGATCTTCTACTGTCTCTGCCTTCCAAGATTTCTTAGAA  
GAG



+  
FFFFFFFFFFFF:FFFF:FFFFFFFFFFFFFFFFFFFFFFFFFFFFFFFFFFFFFFFFFFFFFFFFFFFFFFFFFFFFFFFF:FFFF  
FFFFFFFFFFFFFFFFFFFFFFFFFFFFFFFFFFFFFFFFFFFFFFFFFFFFFFFFFFFFFFFFFFFFFFFFFFFFFFFFFFFF  
FFF  
@A00721:190:HGJW7DSXY:4:1646:24189:18584\_2:N:0:TCTGCAAG+GCTGCACT  
CGGTAATCTTTCAGCCGAATTAAGTACTAATGAGTTCAAGTCGGTTGTCGATCGAATTAAGATCAAGG  
CTAATACCTTTATAGGTAAGAAGCCCCCTTGAGCCGCGTAGTCAGCGCG  
+  
FFFFFFFFFF:FFFFFFFFFFFFFFFFFFFFFFFFFFFFFFFFFFFFFFFFFFFFFFFFFFFFFFFFFFFFFFFF:FFFFF:FFFF  
FFFFFFFFFFFFFFFFFFFFFFFFFFFFFFFFFFFFFFFFFFFFFFFFFFFFFFFFFFFFFFFFFFFFFFFFFFFF  
@A00721:190:HGJW7DSXY:4:1449:17354:36119\_1:N:0:TCTGCAAG+GCTGCACT  
CTGGAGTTCAGACGTGTGCTCTTCCGATCTCTTTGGTAATTGTATGATCACTTTGATGATTTTATCAC  
TTTATTATGACCTTGGAAGTTTTCGGCTGTGGTTGTCGCTGGGGACGATTCCATTCTGTTTTCAAAG  
ACT  
+  
FFFFFFF::,FFFFFFFF,FFFFF,F,FFF,FFFFFFFF,FFF:F,FF:F::FFFFF:FFFFFFFFFFFF  
FFFFFFFFFFFF,FF:FFFFFFFFFFFF,FFFFFFFFFFFF:FFFFFFFFF:FFFFFFFFFFFFFFFFFFFF  
FFF  
@A00721:190:HGJW7DSXY:4:2458:25211:33943\_2:N:0:TCTGCAAG+GCTGCACT  
TTTAAACGATTCCGAGAGGTTTATCCTGATGTGGAGGGAGTTCTTGAAGCATCCCGACCTTTCCTTGT  
GAAATTTTGATGCGGTTTCATAAGATTATCAGTAATCCTGATTCTAC  
+  
FFFFF,FFFFFFFFFFFFFFFFFFFFFFFFFFFFFFFFFFFFFFFFFFFFFFFFFFFFFFFFFFFFFFFFFFFF  
FFFFFFFFFFFFFFFFFFFFFFFFFFFFFFFFFFFFFFFFFFFFFFFFFFFFFFFFFFFFFFFFFFFF  
@A00721:190:HGJW7DSXY:4:1448:4345:31814\_1:N:0:TCTGCAAG+GCTGCACT  
GTTGATTAAGACTCTTCCGAAAGGCGAACTTTGGGAATTTGAAGCTCAGGGTGAAGCACACGTTTGA  
CCGTGACGAACTGTGGTGTTCTTGATCTACGTTACGGATATACTCTCCTTGAGTTCACTCGTAAGGAC  
ACT  
+  
FFF,FFFFFFFFF:FFFFFFFFF:FFFFFFFFF:FFFFFFFFF:FFF,FFFFFFFFF:FFFF  
FFFFFFFF:FFFFFFFFF:FFFFF,FFFFFFFFFFFFFFFFFFFFFFFFFFFFFFFFF:FFFFFFFFFFFF  
FFF  
@A00721:190:HGJW7DSXY:4:2171:29939:8437\_2:N:0:TCTGCAAG+GCTGCACT  
GACAACAGCAGGGGTTTTCGAATAGTGATAGCCACCCGCCCTTACAGAGGGGCAGCAGCATGACCATAA  
TTGGTATTGACTTTGGTACCACCTTTTCTACTGTCTGTCTCGCCTCTT  
+  
FFFFFFFFFFFFFFFFFFFFFFFFFFFFFFFFFFFFFFFFFFFFFFFFFFFFFFFFFFFFFFFFFFFF  
FFFFFFFFFFFF:FFFFFFFFFFFFFFFFFFFFFFFFFFFFFFFFFFFFFFFFFFFF  
@A00721:190:HGJW7DSXY:4:1452:13801:28056\_1:N:0:TCTGCAAG+GCTGCACT  
TTAACAACAATGATAGTGAATTTATACCTACAATCATTGGTTTTTCTAATAATGATGACACTATTGTT  
TATGGATATGATGCTATTACTCATGATGGTTACGGTCAGGGAGGATTCTCAGTTTACAAGGACCTTAA  
GCG  
+  
FFFFFFFFFFFFFFFFFFFFFFFFFFFFFFFFFFFFFFFFFFFFFFFFFFFFFFFFFFFFFFFFFFFF: F  
FFFFFFFFFFFFFFFFFFFFFFFFFFFFFFFFFFFFFFFFFFFFFFFFFFFFFFFFFFFFFFFFFFFF  
FFF  
@A00721:190:HGJW7DSXY:4:1127:12264:18662\_1:N:0:TCTGCAAG+GCTGCACT  
TTGGTCTACTTTTGGACAAGGCAACTTCGTAATCTTCATGAGATCGTTTCTTTCTTTATCTCTTTG  
GTTGTTAGGGATTTTGAGAGAGAGAAAGGCTTCAATTGTAGTGGTTTGGTCGTTTCAGTACCCAGTCA  
GTA  
+  
FFFFFFFFFFFFFFFFFFFFFFFFFFFFFFFFFFFFFFFFFFFFFFFFFFFFFFFFFFFFFFFFFFFF  
FFFFFFFFFFFFFFFFFFFFFFFFFFFF,FFFFFFFFFFFFFFFFFFFFFFFFFFFFFFFFFFFF  
FFF

@A00721:190:HGJW7DSXY:4:1501:4038:7858\_2:N:0:TCTGCAAG+GCTGCACT  
CAAAGATATTTTCATGAAACTACAGAGGAACGTACCGGATTACCTGTCTTTTCATATTATGAATGAACC  
TTCGGCCGCTCTCTTTGCTTCGATGTTGGATGTCAAGAAGGGTTCAGA

+

FFFFFFFF:FFFFFFFFFFFFFFFFFFFFFFFFFFFFFFFFFFFFFFFFFFFFFFFFFFFFFFFFFFFFFFFF  
FFFFFFFFFFFFFFFFFFFFFFFFFFFFFFFF:FFF,FFF,FFFFFFFFFFFFFF

@A00721:190:HGJW7DSXY:4:1617:16351:31688\_2:N:0:TCTGCAAG+GCTGCACT  
GGTGGTGGTACTTTTCGATACTTCTATCGTCTTACGTTACGGTAATTACTATAGTGTTATTTATTCTGG  
TGGTGATGATAATCTTGAGGTCGTGACGTTGATGAAGCTATAAGAGC

+

FFFFFFFFFFFFFFFFFFFFFFFFFFFFFFFFFFFFFFFFFFFFFFFFFFFFFFFFFFFFFFFFFFFFFFFF  
FFFFFFFFFFFFFFFFFFFFFFFFFFFFFFFF:FFFFFFFFFFFFFFFFFFFFFFFFFFFFFFFFFFFFFFFF

@A00721:190:HGJW7DSXY:4:1415:9706:29919\_2:N:0:TCTGCAAG+GCTGCACT  
TTCACAACTGAAGGAGGAGTTTCTGTTACTGGAAAACCTCGTCAATACTTTCAATAATATACGTC  
TTGAACTCACTTATGACGATCTAGTGAAATTAACGCGTCCTTTTCTGG

+

FFFFFFFFFFFFFFFFFFFFFFFFFFFFFFFFFFFFFFFFFFFFFFFFFFFFFFFFFFFFFFFFFFFFFFFF  
FFFFF:FFFFFFFFFFFFFFFFFFFFFFFFFFFFFFFF:FFFF:FF,FFFFF

@A00721:190:HGJW7DSXY:4:1536:26684:27821\_1:N:0:TCTGCAAG+GCTGCACT  
TTCTACCAGGGGCTATTACTCTTGCTGAAACAGCTATTAAAGCTGTTGAGCGGGTAATTACACATAAA  
CGAGCTTGATCTGCCATCGCTGAAGGATGTGCACTCTTTTCTGCTACTTTAACGGAGCGTTGTGTACT  
CTT

+

FFFF,,F,,F,:,FFFFF:,FFF:FF,FFFFFFFFF:,FFFFFFFFF:,FFFFFFFFFFFF,,F:F:  
,:F,:F::,FFF:F,FF:,FF:FF,,FF,FF,,,:FFFFFFFF,FFFFFFFFF,FF,:F:F,F,FF::F  
FFF

@A00721:190:HGJW7DSXY:4:2607:7536:20901\_1:N:0:TCTGCAAG+GCTGCACT  
CTAATCGTAACATTAATAATTTCAATCTTCTTAAAAAGAAGATAGAGAGTCATACTTTGGGCTATCGT  
TCAGGTGCATGGGGTTGCATAGCCAATATTGAAGTGACACCTCTGGTAGTATCGAAGTAAAGATAAC  
CAA

+

:FFFF:FFFFFFFFFFFF:FFFFFFFFFFFFFFFFFFFFFFFFFFFFFFFFFFFFFFFFFFFFFFFFFFFF  
FFFFFFFFFFFFFFFFFFFFFFFFFFFFFFFFFFFFFFFFFFFFFFFFFFFFFFFFFFFFFFFFFFFFFFFF  
FFF

@A00721:190:HGJW7DSXY:4:2304:18982:14450\_2:N:0:TCTGCAAG+GCTGCACT  
AAATCTTACCCTATCTACGAACCTAAAGTTCTGAAGACGTTGCTTGTGCTTCCTCTTTAATGGCA  
CTACCTCGGTACAATCTTACTTGAACGAAGGCGACCTTCCGGAGTTT

+

FFFFFFFFFFFFFFFFFFFFFFFFFFFFFFFFFFFFFFFFFFFFFFFFFFFFFFFFFFFFFFFFFFFFFFFF  
FFFFFFFFFFFFFFFFFFFFFFFFFFFFFFFFFFFFFFFFFFFFFFFFFFFFFFFFFFFFFFFF

@A00721:190:HGJW7DSXY:4:2333:5538:1157\_2:N:0:TCTGCAAG+GCTGCACT  
TATATTAGGTGAAGCGAAATACGATTTTCAACGTCAACGTTACCGAGTTTCGTTTCGTACCTTGATG  
CTGACTTTCGTCAATATGATTTGATCTGGTTGCTCAATTCTAAGCGTG

+

FFF:FFFFFFFFF:FFFFFFF:FFFFFFFFFFFF:FFFFFFF:FFFFFFFFFFFFFFFFFFFFFFFFFFFF  
FFFFFFFFFFFFFFF::F:FFFFFFFFFFFFFFFFFFFFFFFFFFFF:FFFFFFF:FFFF:FF

@A00721:190:HGJW7DSXY:4:1565:11686:35196\_2:N:0:TCTGCAAG+GCTGCACT  
GATTTTAATATAAAGAATCTTTACCAGGACTCCTACTACAGGAGGCAGTCTTCTGATCGTAAGAAGTT  
TATAAGGAACATATCCATTTGTTGTAATAGGTCATCAACTTATACT

+

FFFFFFFFF:FFFFFFFFFFFF:FFF:F:FFFFF:FFFFFFF:FF:FF::FFFFFFFFFFFFFFFFFFFF:FFFF  
FFFFFFF:FF:FFFFFFFFFFFF:FFFFFFFFF:,FFFFFFFFFFFF:,FFFF

@A00721:190:HGJW7DSXY:4:1175:29586:22357\_2:N:0:TCTGCAAG+GCTGCACT  
ATACTGTCTTTCCAAGCTTACCTGTATCTTCAATGAAATTGGACTCTTCGATAGGGGACATTTTATCG

TGGGCTTTCGTAAGGAAGATCTGTTATCGACGGTTTATCGTTTACG  
+  
FFFFFFFFFFFFFFFFFFFFFFFFFFFFFFFFFFFFFFFFFFFFFFFFFFFFFFFFFFFFFFFFFFFFFFFF  
FFFFFFFFFFFFFFFFFFFFFFFFFFFFFFFFFFFFFFFFFFFFFFFFFFFFFFFFFFFFFFFFFFFFFFFF  
@A00721:190:HGJW7DSXY:4:1348:27236:21104\_2:N:0:TCTGCAAG+GCTGCACT  
GGAAAATTTTATCCTCGTTTAACTTACTTAGACTTTCTACGATACAAATGATACTTCTAATTTACG  
TTTGCTACTCAGAGCTGGTCCTCTCAGCAAAGGGATGCATGGTGTAT  
+  
FFFFFFFF:FFFFFFFFFFFFFFFFFFFFFFFF:F,FFFFFFFFFFFFFFFFFFFFFFFFFFFFFFFFFFFF  
FFFFFFFFFFFFFFFFFFFFFFFFFFFFFFFFFFFFFFFFFFFFFFFFFFFFFFFFFFFFFFFFFFFFFFFF  
@A00721:190:HGJW7DSXY:4:2369:11433:26428\_2:N:0:TCTGCAAG+GCTGCACT  
AATAATGACGAGACTTTCGTCATAATCGCTGCATATTACGGATTACACGGTACCAGCGCATCTCGTGT  
CGAGCCTCGACCCGATTATATGGTATTAATAAAGGTGAGGAGAC  
+  
FFFFFFFFFFFFFFFFFFFFFFFFFFFFFFFFFFFFFFFFFFFFFFFFFFFFFFFFFFFFFFFFFFFFFFFF:FFFFFFFFFFFFFFFF  
FFFFFFFFFFFFFFFFFFFFFFFFFFFFFFFFFFFFFFFFFFFFFFFFFFFFFFFFFFFFFFFFFFFFFFFF:FFFFFFF,FFFF  
@A00721:190:HGJW7DSXY:4:1528:15492:25692\_1:N:0:TCTGCAAG+GCTGCACT  
TAAATAATATTACTAATGGCAAATAGTGGAAGGCTCCAGTCAACACTAGTTCGAGTGCTGCTTTGGA  
TTACGATGACGTGAGAATAGGTGAAGGGATAGTTTTTACCTCGACCAACATTAAGGCGGCGGCGACTA  
ATC  
+  
FFFFFFFFFFFFFFFFFFFFFFFFFFFFFFFFFFFFFFFFFFFFFFFFFFFFFFFFFFFFFFFFFFFFFFFF:FFFFFFFFFFFFFFFF  
FFFFFFFFFFFFFFFFFFFFFFFFFFFFFFFFFFFFFFFFFFFFFFFFFFFFFFFFFFFFFFFFFFFFFFFF:FFFFFFF,FFFFFFFF  
FFF  
@A00721:190:HGJW7DSXY:4:1431:5095:10222\_1:N:0:TCTGCAAG+GCTGCACT  
TGTGGTACGAATTGGTCCAACATTTACCACCAAATTCCTTTGATACAACTCTAGCCTTCAAGTGGGGT  
ATGCCTGCGGAATACGCTTGCTATTACCAGATTGGTTCGAACCCGTTGATGCTATGTGAGAAGAAGC  
TAT  
+  
FFFFFFFFFFFFFFFFFFFFFFFFFFFFFFFFFFFFFFFFFFFFFFFFFFFFFFFFFFFFFFFFFFFFFFFF:FFFFFFFFFFFFFFFF  
FFFFFFFFFFFFFFFFFFFFFFFFFFFFFFFFFFFFFFFFFFFFFFFFFFFFFFFFFFFFFFFFFFFFFFFF:FFF  
@A00721:190:HGJW7DSXY:4:1649:10954:1423\_2:N:0:TCTGCAAG+GCTGCACT  
GTTTAAAGACTGCAGAGGCTGTCAAACAAGCCAGACTCAAGGAGTCCAATCAAAGGTTTTGAATTTA  
GCTCAACTGGGGAGACGTGCTTAAATGGGTGATAAAAATTATTTAGAG  
+  
FF:FFFFFFFFFFFF,FFFFFFFFFFFF:FFFFFFFFFFFF:FFFFFFFFFFFF:FFFFFFFFFFFF,F:FFFF  
F,FF:FFFFFFFFFFFF:F:FFFF:FFFFFFFFFFFFFFFFFFFFFFFF:FF  
@A00721:190:HGJW7DSXY:4:2659:32570:33849\_1:N:0:TCTGCAAG+GCTGCACT  
CCACAGATTTGTCTACGTTGCAGATCGCCACTCCAAACACTATATACATTATAAAATATAAAAAATAAG  
GGAGTCATAACTTTTGTACCAAATCTTGCTTTCAACGAAGTCTCTGATTTTATTAATCATTACTT  
TA  
+  
FFFFFFFFFFFFFFFFFFFFFFFFFFFFFFFF:FFFFFFF:FFF,FFFFFFFF:FFFFFFFFFFFFFFFFFFFFFFFF  
FFFFFFFFFFFFFFFFFFFFFFFFFFFFFFFFFFFFFFFFFFFFFFFFFFFFFFFFFFFFFFFFFFFFFFFF  
FF  
@A00721:190:HGJW7DSXY:4:2676:16947:1595\_2:N:0:TCTGCAAG+GCTGCACT  
TCATTTACTCTGTACTTGATCTACGTCGTTTAACTGTGGAACAACCTTTACTTAGAATGACTCTATC  
TTTTCAGACACTTCTTATATTATTTACAATAGTTAATATCATATTAGT  
+  
FFFFFFFFFFFFFFFFFFFF,FFFFFFFFF:FFFFFFFFFFFFFFFFFFFFFFFFFFFFFFFF:FFFFFFFFF:FFFFFFFFF  
FFFFFFFFFFFFFFFFFFFFFFFFFFFFFFFFFFFFFFFFFFFFFFFFFFFFFFFFFFFFFFFFFFFFFFFF:FFF  
@A00721:190:HGJW7DSXY:4:2539:7826:21496\_2:N:0:TCTGCAAG+GCTGCACT  
TAATAGATTAATAAAGGATGAGTACGAAAACCAACTCTTCGTTACGAGACCTGATGGTAGAATAGATT

$+$ 

@A00721:190:HGJW7DSXY:4:2407:23918:12571\_1:N:0:TCTGCAAG+GCTGCACT  
CCCCACACGACTCGAAACCGAGACGCCGTAGATCAAAGTCCCTTCTAACTTTAGATT

+

@A00721:190:HGJW7DSXY:4:1517:1985:33959\_1:N:0:TCTGCAAG+GCTGCACT  
TCACAGACTCCGAAAATGGTTTCAAATGAGGTCAAAGCTCTATTTATTAACGAAGCTATTATCCGATT  
CTTCGAGGGTATCACTACCACTGATCTGCCGACTTTAGTCAAGGAAGTTCAATTCTTCGATGTTTAT  
ATT

+

@A00721:190:HGJW7DSXY:4:2473:2871:16579\_2:N:0:TCTGCAAG+GCTGCACT  
TTCGACAAATTTTAGAACTTTATTTCAGAACTCTCTCCGATCACCTTGGTGTGATCTCCCGGAGGATC  
TTTTCAATAAGATGTATGATGATAATCTACTATTTTTAAATAGTGATA

+

@A00721:190:HGJW7DSXY:4:1638:29143:32863\_2:N:0:TCTGCAAG+GCTGCACT  
ATCAAAGATTTGGCTTGGTCTATTTACCGCAAAAAGTTGGAAGAGGTCTATGATATTTATTTTACTTA  
TACTTTAAATAGCACCGATTATAACTTGACTGTTGATAATATTACAAT

+

@A00721:190:HGJW7DSXY:4:2265:26558:22185\_1:N:0:TCTGCAAG+GCTGCACT  
AGAAGATTAGAGAAGTAACCGGTGAACACGTCGGTAGCATTGATTTACTTTTACCGTTAGAACTGAAA  
AAGATTCTTTTCGAAAAGAAACCTATAAGTTACAAACGATTCTTCGACTATATTAAGAAATAAAAAAT  
ACT

+

@A00721:190:HGJW7DSXY:4:2409:18412:21887\_1:N:0:TCTGCAAG+GCTGCACT  
TTACATTTTTTAATGGTATGGTATAATGTGTCTTACAAATAGAACCCTTCACTCTCGGTAATGAGAGTGT  
ATTCCTTAATATTCTAGTAACCGCTATGTGGGCATTACTAGGATTTATCACACTCCTAAATTTGATAG  
CAA

+

@A00721:190:HGJW7DSXY:4:2515:27887:23046\_1:N:0:TCTGCAAG+GCTGCACT  
GGAGTTCAGACGTGTGCTCTTCCGATCTATTTACTATCGCCTTTATTGAAAATTGTATAAGAGTTAAT  
TGCTTACACAAAAGTGACGCGCGAAGGAATCTTAATTGATTGAAGCTAGGCGTTGGGGAGAATGAACT  
GCC

+

@A00721:190:HGJW7DSXY:4:2263:18927:19836\_1:N:0:TCTGCAAG+GCTGCACT  
CTACTACCGCCGGTCGGCAGATCGGCACCACTGGTCTCTACGTTTCAGGGACCCGCTGTGCAGAATAAC

+

@A00721:190:HGJW7DSXY:4:2357:1353:4867\_1:N:0:TCTGCAAG+GCTGCACT  
TGTGGGAAGTGAAGCAGTACCTCAGTCAAAAGTCACATTCACTACTCCCATACCAATCAATGATGTGA  
CTATACAGTTTCGGCCATTTCAGAGTGGTCAATACGTCGTGGGAGGTACTGAAGCCTTCCCCTCCGCT  
GGC

+

@A00721:190:HGJW7DSXY:4:2132:28040:16517\_2:N:0:TCTGCAAG+GCTGCACT  
AATCAATAGTTCTTCTGACCAGAATGAAAAGGGGTTTACCAGGGTAGTCTCTAAGTCTACCAGGAAGA  
GGGGAAATGTCCCCAAACTGAGAAGAATAAAGGGAAAGGTCCATCAG

+

@A00721:190:HGJW7DSXY:4:2170:15971:26522\_2:N:0:TCTGCAAG+GCTGCACT  
TGCACGGGCCAAAGAGGCCGCTGCTACGAAGTCGCTGAAGGCGGCTTGGGTATTAAGGGTAGCTGTA  
AAGTTGCGCCTGCCGACCCCATCTTTGAGACCAAGACTCTCTACAGTA

+

@A00721:190:HGJW7DSXY:4:1557:19045:18975\_2:N:0:TCTGCAAG+GCTGCACT  
CTGTTGAATTCGTCCTGAGGACGAAGGTGAGAGGACTTTTGGCTACTGGCGACAACTGAGAGCAGT  
CGCTGGGGAAAAGAGAATTGCGTGGGTTGAAGGCCGACGCTTCGAGCTT

+

@A00721:190:HGJW7DSXY:4:2665:24361:8609\_1:N:0:TCTGCAAG+GCTGCACT  
TTTGGAGGATTTTATCCGCGCTTA ACTATGGGGCGAAGATCCCCTATGGAGTCTTGAAGGACTTAGGT  
TGGCATATTTATGCCGACGATAATAAGCATGTCACCCCTTAAGCACCGAGGTAAGCTCGGGACTTACAA  
GAG

+

@A00721:190:HGJW7DSXY:4:1558:15383:14857\_2:N:0:TCTGCAAG+GCTGCACT  
ACTTTTCTTGAAAATTTTTCCTTTCCTCCGTCATTGGGGATTTCGATGTGAGAAGGTGGAAGGTGTCA  
AGGGTCTTCTTCATGCTGATCTTTCAGGACCTAATCACATCATGATTG

+

@A00721:190:HGJW7DSXY:4:1130:8232:24298\_1:N:0:TCTGCAAG+GCTGCACT  
CGAAATTAAAGACGGGGGGATTAAGAGTCCAGCTGTAAC TGTCAATTCAGAGAGGGGAGCTCTGAAAA  
GGAAACTTCGTCAGAAGATGAGGAAGTCTAAGAGGAGGAGTTTGAGGAAGGCTCTAGAGAAGATCTCC  
CCA

+

[illegible]

@A00721:190:HGJW7DSXY:4:1201:2826:35258\_1:N:0:TCTGCAAG+GCTGCACT  
GATTATTTGAAGCAGGGGTTACCACTTCCTAAGGTGGATGAGGGAGGTTGTTTCTTTGGAGTTTTAGA  
TAATCTTTTGAGAAGGGGTCATAGAGCCAGCAAGAGAAGCTTATATGCTGGTTTAAGTGATGATTATC  
ACT

+

FFFF,FFFFFFFF:FFFFFFFF:FFFF:FF,FFF:FFFFFFFF:FFF:FFFFFFFFFFFFFFF  
F:FFFFFFFF::FFFFFF,FFFFFFFFFFFFFFFFFFFFFFFFFFFFFFFF:FFFFFFFF  
FFF

@A00721:190:HGJW7DSXY:4:1253:31810:17347\_1:N:0:TCTGCAAG+GCTGCACT  
ATTCGGTAACTTACCATATTGTTCTTCCGGAAGTTGTGGGATTTAACTTTGACTCAACTACTCCGA  
TCAGATCCGGATGGTTTGATTGGTATGGACTIONTCTGAGTTGTCTAGGGTCATGGCA  
GAT

+

FFFFFFFFFFFFFFFFFFFFFFFFFFFFFFFFFFFFFFFFFFFFFFFFFFFFFFFFFFFFFFFF  
FFFFFFFFFFFFFFFFFFFFFFFFFFFFFFFFFFFFFFFFFFFFFFFFFFFFFFFFFFFFFFFF  
FFF

@A00721:190:HGJW7DSXY:4:1117:23764:30279\_2:N:0:TCTGCAAG+GCTGCACT  
TCTGAGGGCGGTTGAGGGAGCCGTTTTGCCGACTTTAACTATTCTAAGAGTCTTATGATTCAAAC  
CTATCGTTGTCGTACCTTACAAGTTGAGGAGACTTTACAGCGGCTTA

+

FFFFFFFFFFF,FFFFFFFFFFFFFFFFFFFFFFFFFFFFFFFFFFFFFFFFFFFFFFFFFFFF,FFFFFFFFFFFF,  
FFFF,FFFFFFFFFFFFFF:FFFFF:FFFFFFFFFFFFFF,FFFF:F

@A00721:190:HGJW7DSXY:4:2314:23547:31751\_1:N:0:TCTGCAAG+GCTGCACT  
ATTTGCAACCCTATTCTTGATGTGAAAGATGCATCGAGGTATACGTCTAGGAACATTGATTGGGAACG  
TACCTACTCACGAGACGTCATGAAAGCTATCGGAGGGAAGCAAATGTTTCGTTCTGTTACAAGAACG  
CTT

+

FFFFFFFFFFFFFFFFFFFFFFFFFFFFFFFFFFFFFFFFFFFFFFFFFFFFFFFFFFFFFFFF  
FFFFFFFFFFFFFFFFFFFFFFFFFFFFFFFFFFFFFFFFFFFFFFFFFFFFFFFFFFFFFFFF  
FFF

@A00721:190:HGJW7DSXY:4:2232:19732:21825\_1:N:0:TCTGCAAG+GCTGCACT  
TGCGATAGCTGTAGAGGTATACGATATCTCTCTTGATGATGTAGCCACTATAATGCTTAAGAGAGAGA  
TTGATGTATGTCATTTCTGCTTAGTTTGTCCCGCGCAATTATTGGACACGATGAAAAATGACATACCC  
GTT

+

FF:FFFFFFFF:FFFFFFFFFFFFFFFFFFFFFFFFFFFFFFFFFFFFFFFFFFFFFFFFFFFF  
FFFFFFFFFFFFFFFFFFFFFFFFFFFFFFFFFFFFFFFFFFFFFFFFFFFFFFFFFFFFFFFF  
FFF

@A00721:190:HGJW7DSXY:4:1220:9824:13651\_1:N:0:TCTGCAAG+GCTGCACT  
ATCGCTATACGCATACCTGATTGGAAGAAGCGAGTTTCGTTCTCAATAAAAAATTTTCTCAAGAGAT  
TATGGTTGATAAAGTTTTCTTCATAAGGGCTATTCAGTACGTCATGGGGATCACTTCTTCGGTCAATG  
ACA

+

:FFFFFFFFFFFFFFFFFFFFFFFFFFFFFFFFFFFFFFFFFFFFFFFFFFFFFFFFFFFF:FFFFFFFFFFFF  
FFFFFFFFFFFFFFFFFFFFFFFFFFFFFFFFFFFFFFFFFFFFFFFFFFFFFFFFFFFFFFFF  
FFF

@A00721:190:HGJW7DSXY:4:1249:29505:13260\_2:N:0:TCTGCAAG+GCTGCACT  
ATATGTTACGACATGGCTTCGTAACAACAGTGCAGGATTGTCATCTCGGGGAAAGTGATTCACCAAG  
ATGTTTCATATAGATACGATACCTAGAGAAGGTCGAGCGATCTTAC

+

FFFFFFFFFFFFFFFFFFFFFFFFFFFFFFFFFFFFFFFFFFFFFFFFFFFFFFFFFFFF:FFFFFFFFFFFF  
FFFFFFFFFFFFFFFFFFFFFFFFFFFFFFFFFFFFFFFFFFFFFFFFFFFFFFFFFFFF

@A00721:190:HGJW7DSXY:4:2511:11659:16047\_2:N:0:TCTGCAAG+GCTGCACT  
AAGAAGACTTTGGGTACACGTTATGCTCGCAACTIONTACGTTAGTACCGAGGTGATCTCTCTGCTTC

+

@A00721:190:HGJW7DSXY:4:1222:25735:2378\_1:N:0:TCTGCAAG+GCTGCACT  
TGAGATTGAGAAGATTGAAGAACACGTCAAGAAGTCGCTCGGCGTTGTTCTTGAAAACCAAGTTAAGA  
AGGAGGCTGATCATGGAGTCTTTGTACCTTCTGTCAAACCTTCGAGGTTACAGCTACGAGAGGTGATCCC  
GGA

+

@A00721:190:HGJW7DSXY:4:1316:14036:26584\_1:N:0:TCTGCAAG+GCTGCACT  
TGCTGGCTCTAAGGGAGACTCCTTCTTTTTGAATGTTGTAAAGAATTGGGTTGAGAAGTGTGCTTTAC  
AAGGAGTTAGACTCTTCTTCAAGTTTTTAGATCTTCTTGATAATCTTAAAGAAAAATTTTCGAATAAA  
CTA

+

@A00721:190:HGJW7DSXY:4:1671:3170:36824\_1:N:0:TCTGCAAG+GCTGCACT  
AATAATTGGTGATGAAAATACGTATGTCGGTGGGGTTCTCAAGGCTCTCATCGCCACTGGGATTCTAA  
GGGGTTCCATAAGATATTATCTGACATTGTGGTTCAATGATCAGGATTCTTCTTTTGGTCCTTACGTC  
TTA

+

@A00721:190:HGJW7DSXY:4:1303:27651:26396\_1:N:0:TCTGCAAG+GCTGCACT  
CAGAGTCTCTTGGAAGTCCAGGTAGCTAATGTTCTTGCAATAGCCACAGACTTTCTGGGAAAAGAGAC  
CTCTGTTGGTAGAGGAGTTGAGAGAATTACTCAGATTCAATCTGGCATCACTGAACGTCTACAACGAG  
TTA

+

@A00721:190:HGJW7DSXY:4:2441:15429:12743\_1:N:0:TCTGCAAG+GCTGCACT  
ACGCTACACTCGAAATATGGGCCCTCATAAGGAAGTATAGTTGGCGTCTTGTCGTTGACGTCATTACA  
GTCTGGAAGTTAGATCATTTGTTCAGGAAGATCTCTACAGAGATTATCGAGAGTTGTGATCTAGTTCT  
AAA

+

@A00721:190:HGJW7DSXY:4:2423:6442:35039\_1:N:0:TCTGCAAG+GCTGCACT  
TCTTCTAACCAGGACTGATGGTGAGATTCTTTTACCTTTTGGAGGTCCAGGAACCTTTTACTCCTAGTG  
TCTTTTCTAGAGTCCAAGGACGTTTCCGTCGGAGGATGACAGGTGGGAGACCGCTCAATAACACTCTT  
GAA

 $+$ 

@A00721:190:HGJW7DSXY:4:1539:29613:20901\_2:N:0:TCTGCAAG+GCTGCACT  
AAAGCCTGTCCAGTTGTCGATGATGTTCTGGGCTGTGGGGATTAACTTCCCTCGTGAAACTTACGACGA

TGTTCTCGCTCGCATTTACAGATCGGAAGAGCGTCGTGTAGGGAAAG

+

FFFF:FFFFFFFFFFFFFF,FF:FFF:F,FFFFFFFFFFFFFFFFFFFFFFFF:FFFFFFFFFFFFFFFFFFFFFF  
FFFFFFFF:FFFFFFFFFFFFFFFF:FFFFFFFFFF,FFFF:FFFF

@A00721:190:HGJW7DSXY:4:2502:2031:30718\_1:N:0:TCTGCAAG+GCTGCACT  
CTTCTAATAGAGGATCCTGATGACATTATTTCAACGGATACCGATCTCAGTTCTACCACAGAAACCGT  
CTCAGGAACTGTCTCCACTGATTCGGAATTAGAGAAAGACGACCTTCTTGTGGGGACTGAGACCTCTG  
AAT

+

FFFFFFFFFFFFFFFFFFFFFFFFFFFFFFFFFFFFFFFF:FFFFFFFFFFFFFFFFFFFFFFFFFFFFFFFF:FFFFF  
FFFFFFFFFFFFFFFFFFFFFFFF:FFFFFFFFFFFFFF:FFFFFFFFFFFFFFFFFFFFFFFFFFFFFFFFFFFF  
FFF

@A00721:190:HGJW7DSXY:4:1162:19307:26694\_1:N:0:TCTGCAAG+GCTGCACT  
AAAAGACCAGAAACGTAACAAGAAGAATAAAGGTAGGAAGGGGAGAAAACAGAACAAGCGAGCGGTTG  
AAGAGAAAACCTGATATGTTGCGGCTGATCGTACCCCAATTCCTGCTAGAAAGATCACTCTCGGCGAT  
ACC

+

FF:FFFFFFFFFFFFFFFFFFFFFFFF:FFFFFFFFFFFFFFFFFFFFFFFF:FFFFFFFFFFFFFFFFFFFFFF:FF  
FFFFFFFF:FFFFFFFFFFFFFFFFFFFFFFFFFFFFFFFF: :FFFFFFFFFFFFFFFFFFFFFFFF:FFFFFFF  
FFF

@A00721:190:HGJW7DSXY:4:2614:31729:28948\_1:N:0:TCTGCAAG+GCTGCACT  
GTGAAAGTTATGATGAGTGATCGTATTAGAACAGCTGATTCTTATTGCATGAACGTCGCTGAGGTCAA  
ACCTGTGGACGTTCTTTTCATCGACGAATTATTCATGATTCACGCTGGTCAGACCCTTTTCTTACAC  
AT

+

FF:FFFFFFFFFFFFFFFFFFFFFFFFFFFFFFFF:FFFFFFFFFFFFFFFFFFFFFFFFFFFFFFFFFFFF  
FFFFFFFFFFFFFFFFFFFF:FFFFFFFFFFFFFFFFFFFFFFFFFFFFFFFFFFFFFFFF:FFFFFFFFFFFFFFF  
FF

@A00721:190:HGJW7DSXY:4:1143:27706:16282\_2:N:0:TCTGCAAG+GCTGCACT  
TGATTCCAATCAAATCGGATTCATCAATCGTATTGATCTCCAAGTCGCAAACTACTTCAACATCAACG  
ACATCATTCTTGATGAGTGTCGTTCTTATCGAAGTCTCAGTTATCGCT

+

FFFFFFFFFFFFFFFFFFFFFF:FFF:FFFFFFFFFFFFFFFFFFFFFFFFFFFFFFFF:FFFFFFFFFFFFFFFFFFFF  
FFFFFFFFFFFFFFFFFFFFFFFFFFFFFFFFFFFFFFFF:FFF,FFFFFFFFFF

@A00721:190:HGJW7DSXY:4:1505:12500:14685\_1:N:0:TCTGCAAG+GCTGCACT  
GGAGGTTGCAGATTCAACCCCTTATATCGAGGCTATCGAGGACGATGAGTATCTTGAAGTTGTTGACG  
ACAAGCCTCAAGAGGGTAGAGGACCACCTGGATCTTCTACTGTCTCTGCCTTCCAAGATTTCTTAGAA  
GAG

+

FFFFFFF:FFFFFFFFFFFFFFFFFFFFFFFFFFFFFFFFFFFFFFFFFFFFFFFFFFFFFFFFFFFFFFFFFFFF  
FFFFFFFFFFFFFFFFFFFFFFFFFFFFFFFFFFFFFFFFFFFFFFFFFFFFFFFFFFFFFFFFFFFFFFFFFFFF  
FFF

@A00721:190:HGJW7DSXY:4:2229:15130:6997\_2:N:0:TCTGCAAG+GCTGCACT  
CGGTAATCTTTCAGCCGAATTAAGTACTAATGAGTTCAAGTCGGTTGTCGATCGAATTAAGATCAAGG  
CTAATACCTTTATAGGTAAGAAGCCCTTGAGCCGCGTAGTCAGCGCG

+

FFFFFFFFFFFFFFFFFFFFFFFFFFFFFFFFFFFFFFFF: :FFFFFFFFFFFFFFFFFFFFFF:FFF  
FFFFFFFFFFFFFFFFFFFFFFFFFFFFFFFF, :FFFFFFFFFFFFFFFFFFFF

@A00721:190:HGJW7DSXY:4:1546:14534:22467\_1:N:0:TCTGCAAG+GCTGCACT  
CTGGAGTTCAAGCGTGCTCTTCCGATCTCTTGGTAATTGTATGATCACTTTGATGATTTTATCAC  
TTTATTATGACCTTGAAAGTTTTCGGCTGTGGTTGTCGCTGGGGACGATTCCATTCTGTTTTCAAAG  
ACT

+

:F:FFFFFFFF,F:FFFFFFFF::FF,FFFF::FFFFFFFF,FF:FF::FFF::FF:FFFFFFFF



F:FFFFFFFF:FFFF:,F::FFFF:,FFFF:FFFFFFFF:F,FFFFFFFF::FF:FFFF,F:,FF:  
F:F  
@A00721:190:HGJW7DSXY:4:2458:26539:34428\_2:N:0:TCTGCAAG+GCTGCACT  
TTTAAACGATTCCGAGAGGTTTATCCTGATGTGGAGGGAGTTCTTGAAGCATCCCGACCTTTCCTTGT  
GAAATTTTGTATGCGGTTTCATAAGATTATCAGTAATCCTGATTCTAC  
+  
FFFFFFFFFFFFFFFF,FFFFFFFFFFFFFFFFFFFFFFFFFFFFFFFFFFFFFFFFFFFFFFFF::FF  
FFFFFFFFFFFFFFFFFFFFFFFFFFFFFFFFFFFFFFFFFFFFFFFFFFFFFFFF  
@A00721:190:HGJW7DSXY:4:1458:7102:8343\_1:N:0:TCTGCAAG+GCTGCACT  
GTTGATTAAGACTCTTCCGAAAGGCGAACTTTGGGAATTTGAAGCTCAGGGTGAAGCACACGTTTGA  
CCGTGACGAACTGTGGTGTTCTTGATCTACGTTACGGATATACTCTCCTTGAGTTCACTCGTAAGGAC  
ACT  
+  
FFFFFFFFFFFFFFFFFFFFFFFFFFFFFFFF:FFFFFFFFFFFFFF:FFFFFFFFFFFFFFFFFFFFFFFF  
FFFFFFFFFFFFFFFFFFFFFFFFFFFFFFFFFFFFFFFFFFFFFFFFFFFFFFFF,FFFFFFFFFFFFFFFF  
FFF  
@A00721:190:HGJW7DSXY:4:2249:19678:8797\_2:N:0:TCTGCAAG+GCTGCACT  
GACAACAGCAGGGGTTTTCGAATAGTGATAGCCACCCGCTTACAGAGGGGCAGCAGCATGACCATAA  
TTGGTATTGACTTTGGTACCACCTTTTCTACTGTCTGTCTCGCCTCTT  
+  
FFFFFFFFFFFFF,:FF,:F:F:FF:FF::FF:FFFFFFFF:FFF:FFFF,:FFFF:FFF,F,:FF  
FFFFFFFF::,FFFF:FFFFFFFFFFFFFF,FFFF:FFFFFFFFFFFFFF  
@A00721:190:HGJW7DSXY:4:2154:20763:16501\_1:N:0:TCTGCAAG+GCTGCACT  
TTAACAACAATGATAGTGAATTTATACCTACAATCATTGGTTTTTCTAATAATGATGACACTATTGTT  
TATGGATATGATGCTATTACTCATGATGGTTACGGTCAGGAGGATTCTCAGTTTACAAGGACCTTAA  
GCG  
+  
:FFFFFFFFFFFFFFFFFFFFFFFFFFFFFFFFFFFFFFFFFFFFFFFFFFFFFFFFFFFFFFFF  
FFFFFFFFFFFFFFFFFFFFFFFFFFFFFFFFFFFFFFFFFFFFFFFFFFFFFFFFFFFFFFFF  
FFF  
@A00721:190:HGJW7DSXY:4:1162:19081:19570\_1:N:0:TCTGCAAG+GCTGCACT  
TTGGTCTACTTTTGGACAAGGCAACTTCGTAATCTTCATGAGATCGTTTCTTTCTTTATCTCTTGG  
GTTGTTAGGGATTTTGAGAGAGTGAAAGGCTTCAATTGTAGTGGTTTGGTCGTTTCACTACCCAGTCA  
GTA  
+  
FFFFFFFFFFFFFFFFFFFFFFFFFFFFFFFFFFFFFFFFFFFFFFFFFFFFFFFFFFFFFFFF:F  
FFFFFFFFFFFFFFFFFFFFFFFFFFFFFFFFFFFFFFFFFFFFFFFFFFFFFFFF:FFFFFFFFFFFFFFFF  
FFF  
@A00721:190:HGJW7DSXY:4:1531:1081:19272\_2:N:0:TCTGCAAG+GCTGCACT  
CAAAGATATTTTCATGAAAACCTACAGAGGAACGTACCGGATTACCTGTCTTTCATATTATGAATGAACC  
TTCGCCGCTCTCTTTGCTTCGATGTTGGATGTCAAGAAGGGTTCAGA  
+  
FFFFFFFFF:FFFFFFFFFFFFFFFFFFFFFFFFFFFFFFFFFFFFFFFFFFFFFFFFFFFFFFFF:FFFFFFFF  
FFFF:FFFFFFFFF,FFF:F,FF:F:FFFFFFFFFFFFFF:FFFFFFF  
@A00721:190:HGJW7DSXY:4:2421:19180:3803\_2:N:0:TCTGCAAG+GCTGCACT  
GGTGGTGGTACTTTGATACTTCTATCGTCTTACGTTACGGTAATTACTATAGTGTTATTTATTCTGG  
TGGTGATGATAATCTTGAGGTCGTGACGTTGATGAAGCTATAAGAGC  
+  
FFFF:FFFF:FFFFFF:FFFFFFFFFFFFFFFF:FF,FFFFFFFFFFFFFFFFFFFFFFFFFFFFFFFF  
FFFFFFFFFFFFFFFFFFFFFFFF,FFFFFFFFFFFFFFFF:F:FFFFFFF  
@A00721:190:HGJW7DSXY:4:1462:7374:10410\_2:N:0:TCTGCAAG+GCTGCACT  
TTCACAACTGAAGGAGGAGTTTCTGTTACTGGAAAACCTCGTCAATACTTTTCAATAATATACGTC  
TTGAACTCACTTATGACGATCTAGTGAAATTAACGCGTCCTTTTCTGG  
+

```
F:FFFFFFFFFFFFFF:FFFFFFFFFFFF,FFFFFF,F,FFF:FFFFFFFFFFFFFFFFFFFFFFFFFFFFFFF:
FFFFFFFFF:FF:E:E:FFF...:FF:FFFFFFFFFFFFFFFFFFFFFFFFFFFFFFF
```

@A00721:190:HGJW7DSXY:4:1643:13060:21856\_1:N:0:TCTGCAAG+GCTGCACT  
TAAATAATATTACTAATGGCAAATAGTGAAAGGCTCCAGTCAACACTAGTTCGAGTGCTGCTTTGGA  
TTACGATGACGTGAGAATAGGTGAAGGGATAGTTTTTACCTCGACCAACATTAAGGCGGCGGCGACTA  
ATC

+

FFFFFFFF:FFFFFFFFFFFFFFFFFFFFFFFFFFFFFFFFFFFFFFFFFFFFFFFFFFFFFFFFFFFFFFFF  
FFFFFFFFFFFFFFFFFFFFFFFFFFFFFFFFFFFFFFFFFFFFFFFFFFFFFFFFFFFFFFFFFFFFFFFF  
FFF

@A00721:190:HGJW7DSXY:4:1531:23710:33191\_1:N:0:TCTGCAAG+GCTGCACT  
TGTGGTACGAATTGGTCCAACATTTACCACCAAATTCCTTTGATACAACCTAGCCTTCAAGTGGGGT  
ATGCCTGCGGAATACGCTTGCTATTCACCAGATTGGTTCGAACCCGTTGATGCTATGTCAGAAGAAGC  
TAT

+

FFFFFFFFFFFFFFFFFFFFFFFFFFFFFFFFFFFFFFFFFFFFFFFFFFFFFFFFFFFFFFFFFFFFFFFF  
FFFFFFFFFFFFFFFFFFFFFFFFFFFFFFFFFFFFFFFFFFFFFFFFFFFFFFFFFFFFFFFFFFFFFFFF  
FFF

@A00721:190:HGJW7DSXY:4:2127:10981:27555\_2:N:0:TCTGCAAG+GCTGCACT  
GTTTAAAGACTGCAGAGGCTGTCAAACAAGCCAGACTCAAGGAGTCCAATCAAAGTTTTGAATTTA  
GCTCAACTGGGGAGACGTGCTTAAATGGGTGATAAAAATTATTTAGAG

+

FF:FFFFFFFFFFFFFFFFFFFFFFFFFFFFFFFFFFFFFFFFFFFFFFFFFFFFFFFFFFFFFFFF,FFFFFFFF  
FFFFFFFFFFFFFFFFFFFFFFFFFFFFFFFFFFFFFFFFFFFFFFFFFFFFFFFFFFFFFFFFFFFFFFFF  
FFF

@A00721:190:HGJW7DSXY:4:2610:15763:35994\_2:N:0:TCTGCAAG+GCTGCACT  
GATCGCCACTCCAAACACTATATACATTATAAAATATAAAAATAAGGGAGTCATAACTTTTGTTACCA  
AATTCTTGCTTTCAACGAAGTCTCTGATTTTATTAATCATTACTTTA

+

FFFFFFFFFFFFFFFFFFFFFFFFFFFFFFFF,FF:FF::FFFFFFFF,FF:FFFFFFFFFFFFFFFFFFFF  
FF:FFFFFFFFFFFFFFFF:FFFFFFFFFFFFFFFF:FFFFFF:,FFF

@A00721:190:HGJW7DSXY:4:2221:21603:35618\_2:N:0:TCTGCAAG+GCTGCACT  
CATTTACTCTGTACTTGATCTACGTCGTTAACTGTCGGAACAACCTTTACTTAGAATGACTCTATCT  
TTTCAGACACTTCTTATATTATTTACAATAGTTAATATCATATTAGTA

+

FFFFFFFFFFFFFFFFFFFFFFFFFFFFFFFFFFFFFFFFFFFFFFFFFFFFFFFFFFFFFFFFFFFFFFFF  
FFFFFFFFFFFFFFFFFFFFFFFFFFFFFFFFFFFFFFFFFFFFFFFFFFFFFFFFFFFFFFFFFFFFFFFF

@A00721:190:HGJW7DSXY:4:2560:6976:10222\_2:N:0:TCTGCAAG+GCTGCACT  
TAATAGATTAATAAAGGATGAGTACGAAAACCAACTCTTCGTTACGAGACCTGATGGTAGAATAGATT  
TAGTCTCTACACCATCTCAACGAGGATAAAGCGAGTTTTCCGTCCTG

+

FFFFFFFFFFFFFFFFFFFFFFFFFFFFFFFFFFFFFFFFFFFFFFFFFFFFFFFFFFFFFFFFFFFFFFFF:FFFF  
FFFFFFFF:FFFFFFFFFFFFFFFFFFFFFFFF::F:FFFFFFFF

@A00721:190:HGJW7DSXY:4:2414:4616:5572\_1:N:0:TCTGCAAG+GCTGCACT  
CCCCAACGACTCGAAACCGAGACGCCGTAGATCAAAGTCCCTTCTAACTTTAGATT

+

F:,,,:FFFFFFFFFFFFFFFFFFFFFFFFFFFFFFFFFFFFFFFFFFFFFFFFFFFFFFFF

@A00721:190:HGJW7DSXY:4:1613:7609:19617\_1:N:0:TCTGCAAG+GCTGCACT  
TCACAGACTCCGAAAATGGTTTCAAATGAGGTCAAAGCTCTATTTATTAACGAACCTATTATCCGATT  
CTTCGAGGGTATCACTACCACTGATCTGCCGACTTTAGTCAAGGAACCTCAATTCCTTCGATGTTTAT  
ATT

+

:FFFFFFFFFFFFFFFFFFFFFFFFFFFFFFFFFFFFFFFFFFFFFFFFFFFFFFFFFFFFFFFF  
FFFFFFFFFFFFFFFFFFFFFFFFFFFFFFFFFFFFFFFFFFFFFFFFFFFFFFFFFFFFFFFFFFFFFFFF  
FFF

@A00721:190:HGJW7DSXY:4:2674:4354:23312\_2:N:0:TCTGCAAG+GCTGCACT  
TTCGACAAATTTAGAACTTTATTTCAGAACTCTCTCCGATCACCTTGGTGTGATCTCCCGGAGGATC

+

@A00721:190:HGJW7DSXY:4:2134:26693:12649\_2:N:0:TCTGCAAG+GCTGCACT  
ATCAAAGATTTGGCTTGGTCTATTTACCGCAAAAAGTTGGAAGAGGTCTATGATATTTATTTTACTTA  
TACTTTAAATAGCACCGATTATAACTTGACTGTTGATAATATTACAAT

+

@A00721:190:HGJW7DSXY:4:2451:23945:21919\_1:N:0:TCTGCAAG+GCTGCACT  
AGAAGATTAGAGAAGTAACCGGTGAACACGTCGGTAGCATTGATTTACTTTTACCGTTAGAACTGAAA  
AAGATTCTTTTCGAAAAGAAACCTATAAGTTACAAACGATTCTTCGACTATATTAAGAAATAAAAAT  
ACT

+

@A00721:190:HGJW7DSXY:4:2625:14000:17190\_1:N:0:TCTGCAAG+GCTGCACT  
ATTTTTAATGGTATGGTATAATGTGTCTTACAAATAGAACCTTCACTCTCGGTAATGAGAGTGATTC  
CTTAATATTCTAGTAACCGCTATGTGGGCATTACTAGGATTTATCACACTCCTAAATTTGATAGCAAT  
TTA

+

@A00721:190:HGJW7DSXY:4:1574:25021:5932\_1:N:0:TCTGCAAG+GCTGCACT  
CTTAATTCAATAGCTTTAGTATTATTTACTATCGCCTTTATTGAAAATTGTATAAGAGTTAATTGCTT  
ACACAAAAGTGACGCGCGAAGGAATCTTAATTGATTGAAGCTAGGCGTTGGGGAGAATGAACTGCCGC  
TTC

+

@A00721:190:HGJW7DSXY:4:2358:19813:9627\_1:N:0:TCTGCAAG+GCTGCACT  
CTACTACCGCCGGTCGGCAGATCGGCACCACTGGTCTCTACGTTACGGGACCCGCTGTGCAGAATAAC  
CTTCCCAAATCTAGATCTGCACAGAAGAAGGCTGAAGGTCGTTACCGGACGACCACTCAAAGGAAACG  
GGC

+

@A00721:190:HGJW7DSXY:4:2628:12726:31015\_1:N:0:TCTGCAAG+GCTGCACT  
TGTGGGAAGTGAAGGAGTACCTCAGTCAAAAGTCACATTCACCACTCCCATACCAATCAATGATGTGA  
CTATACAGTTCGGCCATTTCAAGAGTGGTCAATACGTCGTGGGAGGTACTGAAGCCTTCCCCTCCGCT  
GGC

 $+$ 

@A00721:190:HGJW7DSXY:4:2143:23122:4178\_2:N:0:TCTGCAAG+GCTGCACT  
AATCAATAGTTCTTCTGACCAGAATGAAAAGGGGTTTACCAGGGTAGTCTCTAAGTCTACCAGGAAGA  
GGGGAAATGTCCCCAAAACTGAGAAGAATAAAGGGGAAAGGTCCATCAG

+

FFFFFFFFFFFFFFFFFFFFFFFFFFFFFFFFFFFFFFFFFFFFFFFFFFFFFFFFFFFFFFFFFFFFFFFF  
FFFFF:FFFFFFFFFFFFFFFFFFFFFFFFFFFFFFFFFFFFFFFFFFFFFFFFFFFFFFFFFFFFFFFF  
@A00721:190:HGJW7DSXY:4:2238:16278:10081\_2:N:0:TCTGCAAG+GCTGCACT  
TGCACGGGCCAAAGAGGCCGCTGCTACGAAGTCGCTGAAGGCGGCTTGGGTCATTAAGGGTAGCTGTA  
AAGTTGCGCCTGCCGACCCCATCTTTGAGACCAAGACTCTCTACAGTA  
+  
FFFFFFFFFFFF:FFFFFFFFFFFFFFFFFFFFFFFFFFFFFFFFFFFFFFFFFFFFFFFFFFFFFFFF:FF  
FFFFFFFFFFFFFFFFFFFFFFFFFFFFFFFFFFFFFFFFFFFFFFFFFFFFFFFFFFFFFFFFFFFF  
@A00721:190:HGJW7DSXY:4:2177:3070:29481\_2:N:0:TCTGCAAG+GCTGCACT  
CTGTTGAATTCGTCACTGAGGACGAAGGTGAGAGGACTTTTGGCTACTGGCGACAACTGAGAGCAGT  
CGCTGGGGAAAGAGAATTGCGTGGGTTGAAGGCCGACGCTTCGAGCTT  
+  
FFFFFFFFFFFFFFFFFFFFFFFFFFFFFFFFFFFFFFFF:FFF:FFFFF:FFFFFFFFFFFFFF:FFFFFFF  
FFFFFFFFFFFFFFFFFFFFFFFFFFFFFFFFFFFFFFFF:FFFFFFFFF:FFF  
@A00721:190:HGJW7DSXY:4:1158:6723:13980\_2:N:0:TCTGCAAG+GCTGCACT  
TTGGAGGATTTTATCCGCGCTTAAGTATGGGGCGAAGATCCCCTATGGAGTCTTGAAGGACTTAGGTT  
GGCATATTTATGCCGACGATAATAAGCAGATCGGAAGAGCGTCGTGTA  
+  
:FFFFFFFFFFFFFFFFFFFFFFFFFFFFFFFFFFFFFFFFFFFFFFFFFFFFFFFFFFFFFFFF:FFFFFFFFFFFF  
FFFFF:FFFFFFFFFFFF,FFFFFFFFFFFFFFFFFFFFFFFFFFFFFFFFFFFFFFFF  
@A00721:190:HGJW7DSXY:4:1643:32814:14293\_2:N:0:TCTGCAAG+GCTGCACT  
ACTTTTCTTGAAAATTTTTCCTTTCCCTCCGTCATTGGGGATTTCGATGTGAGAAGGTGGAAGGTGTCA  
AGGGTCTTCTTCATGCTGATCTTTCAGGACCTAATCACATCATGATTG  
+  
FFFFFFFFFFFF:FFFFFFFFFFFFFFFFFFFFFFFF:FFFFFFFFFFFFFFFFFFFFFFFFFFFFFFFFFFFF  
FFFFFFFFFFFFFFFFFFFF,FFFFFFFFFFFFFFFFFFFFFFFFFFFFFFFFFFFFFFFF  
@A00721:190:HGJW7DSXY:4:1350:17164:18161\_1:N:0:TCTGCAAG+GCTGCACT  
CGAAATTAAAGACGGGGGGATTAAAGAGTCCAGCTGTAAGTGTCAATTCAGAGAGGGGAGCTCTGAAAA  
GGAACTTCGTGAGAAGATGAGGAAGTCTAAGAGGAGGAGTTTGAGGAAGGCTCTAGAGAAGATCTCA  
CCA  
+  
FFFFFFFFFFFFFFFFFFFFFFFFFFFFFFFFFFFFFFFFFFFFFFFFFFFFFFFFFFFFFFFFFFFFFFFF:FFFFFFF  
FFFFFFFFFFFFFFFFFFFFFFFFFFFFFFFFFFFFFFFFFFFFFFFFFFFFFFFFFFFFFFFFFFFFFFFF,FFF  
@A00721:190:HGJW7DSXY:4:1301:5945:33019\_1:N:0:TCTGCAAG+GCTGCACT  
GATTATTTGAAGCAGGGGTTACCACTTCCTAAGGTGGATGAGGGAGGTTGTTTCTTTGGAGTTTTAGA  
TAATCTTTTGAGAAGGGGTCATAGAGCCAGCAAGAGAAGCTTATATGCTGGTTTAAGTGATGATTATC  
ACT  
+  
FF:FFFFFFFFFFFFFFFFFFFFFFFFFFFFFFFFFFFFFFFFFFFFFFFFFFFFFFFFFFFFFFFF:FFFFFFFFF:FFFFFF:FFFFF  
:FFFFFFFFFFFF:FFFFFFFFFFFFFFFFFFFFFFFFFFFFFFFFFFFFFFFF,FFFFFFFFFFFF:FFFFFFFFFFFFFFFF  
FFF  
@A00721:190:HGJW7DSXY:4:1334:21748:36808\_1:N:0:TCTGCAAG+GCTGCACT  
ATTCGGTAACTTACCATATTGTTCTTCCGGGAAGTTGTGGGATTTAACTTTGACTCAACTACTCCGA  
TCAGATCCGGATGGTTTGATTGGTATGGAATACTCGACTTTTATCTGGAGTTGTCTAGGGTCATGGCA  
GAT  
+  
F:FFFFFFFFFFFF:FFFFFFFFFFFF:FFFFFFFFFFFFFFFFFFFFFFFFFFFFFFFFFFFFFFFFFFFF  
FFFFFFFFFFFFFFFFFFFFFFFFFFFFFFFFFFFFFFFFFFFFFFFFFFFFFFFFFFFFFFFF,FFFFFFFFFFFFFFFFFFFF  
FFF  
@A00721:190:HGJW7DSXY:4:2103:16089:30702\_2:N:0:TCTGCAAG+GCTGCACT  
TCTGAGGGCGGTTGAGGGAGCCGTTTTGGCCGACGTTAACTATTCTAAGAGTCTTTATGATTCAAAC  
CTATCGTTGTCGTACCATACAAGGTTGAGGAGACTTTACAGCGGCTGA  
+

FF:F:F:, :FFF:FFFFFF:FFFF,FFFF,F:F,FFFF,FFF::FF:F,FFFF:F,FFFFFFFF  
:FF::,FFFF:F:FF,FF,,,FFF:, :FFF:FFFFFF,F,F:, ,F  
@A00721:190:HGJW7DSXY:4:2401:1407:35712\_1:N:0:TCTGCAAG+GCTGCACT  
ATTTGCAACCCTATTCTTGATGTGAAAGATGCATCGAGGTATACGTCTAGGAACATTGATTGGGAACG  
TACCTACTCACGAGACGTCATGAAAGCTATCGGAGGGAAGCAAATGTTTCGTTCTGTTACAAGAACG  
CTT

+  
FFFF:FFFFFFFFFFFFFFFFFFFFFFFFFFFFFFFFFFFFFFFFFFFFFFFFFFFFFFFFFFFFFFFF  
FFFFFFFFFFFFFFFFFFFFFFFFFFFFFFFFFFFFFFFFFFFFFFFFFFFFFFFFFFFFFFFFFFFFFFFF  
FFF

@A00721:190:HGJW7DSXY:4:2517:11008:35180\_1:N:0:TCTGCAAG+GCTGCACT  
TGCGATAGCTGTAGAGGTATACGATATCTCTCTTGATGATGTAGCCACTATAATGCTTAAGAGAGAGA  
TTGATGTATGTCATTTTCGTCTTAGTTTGTCCCGCGCAATTATTGGACACGATGAAAAATGACATACCC  
GTT

+  
FFFFFFFFFFFFFFFFFFFFFFFFFFFFFFFFFFFFFFFFFFFFFFFFFFFFFFFFFFFFFFFF:FFFF::FFFFFFFFFFFFFFFF  
FFFFFFFFFFFFFFFFFFFFFFFFFFFFFFFFFFFFFFFFFFFFFFFFFFFFFFFFFFFFFFFFFFFFFFFF:FFFF  
FFF

@A00721:190:HGJW7DSXY:4:1549:21685:21887\_1:N:0:TCTGCAAG+GCTGCACT  
ATCGCTATACGCATACCTGATTGGAAGAAGCGAGGTTTCGTTCTCAATAAAAATTTTCTCAAGAGAT  
TATGGTTGATAAAGTTTTCTTCATAAGGGCTATTCAGTACGTCATGGGGATCACTTCTTCGGTCAATG  
ACA

+  
FFFFFFFFFFFFFFFFFFFFFFFFFFFFFFFFFFFFFFFFFFFFFFFFFFFFFFFFFFFFFFFF:FFFFF  
FFFFFFFFFFFF:FFFFFFFFFFFFFFFFFFFFFFFFFFFFFFFFFFFFFFFFFFFFFFFFFFFFFFFF  
FFF

@A00721:190:HGJW7DSXY:4:1343:24758:24079\_2:N:0:TCTGCAAG+GCTGCACT  
ATATGTTACGACATGGCTTCGTAACAACAGTGCAGGATTGTCATCTCGGGGAAAGTGATTCACCAAG  
ATGTTTCATATAGATACGAGATACCTAGAGAAGGTCGCAGCGATCTTAC

+  
FFFFFFFFFFFFFFFFFFFFFFFFFFFFFFFFFFFFFFFFFFFFFFFFFFFFFFFFFFFFFFFF:FFFFFFFFFFFFFFFF  
FFFFFFFFFFFFFFFFFFFFFFFFFFFFFFFFFFFFFFFFFFFFFFFFFFFFFFFFFFFFFFFF

@A00721:190:HGJW7DSXY:4:1607:11360:9549\_2:N:0:TCTGCAAG+GCTGCACT  
TAGTACCGGAGGTGATCTCTCTGCTTCTGCGTTACTGAGAGAAAAGATTGAGGACGCCTACGGTGACT  
TTATGGACAAGATGCAAGTTCTTGGGAAATACTTGTTTCCCTTTTATAG

+  
FFFFFFFFFFFFFFFFFFFFFFFFFFFFFFFFFFFFFFFFFFFFFFFFFFFFFFFFFFFFFFFF:FFFFFFFFFFFFFFFF  
FFFFFFFFFFFF:FFFFFFFFFFFFFFFFFFFF:FFFFFFFFFFFF:FFFFFFFF

@A00721:190:HGJW7DSXY:4:1238:17842:32049\_1:N:0:TCTGCAAG+GCTGCACT  
TGAGATTGAGAAGATTGAAGAACACGTCAAGAAGTCGCTCGGCGTTGTTCTTGAAAACCAAGTTAAGA  
AGGAGGCTGATCATGGAGTCTTGTACCTTCTGTCAAACCTTCGAGGTTTCAGCTACGAGAGGTGATCCC  
GGA

+  
FFFFFFFFFFFFFFFFFFFFFFFFFFFFFFFFFFFFFFFFFFFFFFFFFFFFFFFFFFFFFFFF:FFFFFFFFFFFFFFFF  
FFFFF:FFF:FFFFFFFFFFFFFFFFFFFFFFFFFFFFFFFFFFFFFFFFFFFFFFFFFFFFFFFF  
FFF

@A00721:190:HGJW7DSXY:4:1339:16640:5478\_1:N:0:TCTGCAAG+GCTGCACT  
TGCTGGCTCTAAGGGAGACTCCTTCTTTTGAATGTTGTAAAGAATTGGGTTGAGAAGTGCTTTAC  
AAGGAGTTAGACTCTTCTTCAAGTTTTAGATCTTCTTGATAATCTTAAAGAAAAATTTTCGAATAAA  
CTA

+  
FFFFFFFFFFFFFFFFFFFFFFFFFFFF,FFFFFFFF:FFFFFFFFFFFFFFFFFFFFFFFFFFFFFFFF  
FFFFFFFFFFFFFFFFFFFFFFFFFFFF:FFFFFFFFFFFFFFFFFFFFFFFFFFFFFFFFFFFFFFFF  
FFF

@A00721:190:HGJW7DSXY:4:1308:28384:1924\_1:N:0:TCTGCAAG+GCTGCACT  
GGTGATGAAAATACGTATGTCGGTGGGGTTCTCAAGGCTCTCATCGCCACTGGGATTCTAAGGGGTTTC  
CATAAGATATTATCTGACATTGTGGTTCAATGATCAGGATTCTTCTTTTGGTCCTTACGTCTTAAGTA  
ATT

+

FFFFFFFFFFFFFFFFFFFFFFFFFFFFFFFFFFFFFFFFFFFFFFFFFFFFFFFFFFFFFFFFFFFFFFFF  
FFFFFFFFFFFFFF:FFFFFFFFFFFFFFFFFFFFFFFFFFFFFFFFFFFFFFFFFFFFFFFFFFFFFFFF  
FFF

@A00721:190:HGJW7DSXY:4:1534:8567:16423\_1:N:0:TCTGCAAG+GCTGCACT  
CAGAGTCTCTTGGAAGTCCAGGTAGCTAATGTTCTTGCAATAGCCACAGACTTTCTGGGAAAAGAGAC  
CTCTGTTGGTAGAGGAGTTGAGAGAATTACTCAGATTCAATCTGGCATCACTGAACGTCTACAACGAG  
TTA

+

FFFFFFFFFFFFFFFFFFFFFFFFFFFFFFFFFFFFFFFFFFFFFFFFFFFFFFFFFFFFFFFFFFFFFF:FFFFFFFF  
FFFFFFFFFFFFFFFFFFFFFFFFFFFFFFFFFFFFFFFFFFFFFFFFFFFFFFFFFFFFFFFFFFFFFF:FFFF  
FFF

@A00721:190:HGJW7DSXY:4:2447:20717:13260\_1:N:0:TCTGCAAG+GCTGCACT  
ACGCTACACTCGAAATATGGGCCCTCATAAGGAAGTATAGTTGGCGTCTTGTCTGACGTCAATTACA  
GTCTGGAAGTTAGATCATTTGTTGAGGAAGATCTCTACAGAGATTATCGAGAGTTGTGATCTAGTTCT  
AAA

+

FFFFFFFFFFFFFFFFFFFFFFFFFFFFFFFFFFFFFFFFFFFFFFFFFFFFFFFFFFFFFFFFFFFFFF:FFFFFFFF  
FFFFFFFFFFFFFFFFFFFFFFFFFFFFFFFFFFFFFFFFFFFFFFFFFFFFFFFFFFFFFFFFFFFFFF:FFFF  
FFF

@A00721:190:HGJW7DSXY:4:2501:10077:3161\_1:N:0:TCTGCAAG+GCTGCACT  
TCTTCTAACCAGGACTGATGGTGAGATTCTTTTACCTTTTGGAGGTCCAGGAACCTTTACTCCTAGTG  
TCTTTTCTAGAGTCCAAGGACGTTTCCGTCGGAGGATGACAGGTGGGAGACCGCTCAATAACACTCTT  
GAA

+

FFFFFFFFFFFFFFFFFFFFFFFFFFFFFFFFFFFFFFFFFFFFFFFFFFFFFFFFFFFFFFFFFFFFFF:FFFFFFFF  
FFFFFFFFFFFFFFFFFFFFFFFFFFFFFFFFFFFFFFFFFFFFFFFFFFFFFFFFFFFFFFFFFFFFFF:FFFF  
FFF

@A00721:190:HGJW7DSXY:4:2508:12563:6370\_2:N:0:TCTGCAAG+GCTGCACT  
AAAGCCTGTCCAGTTGTCGATGATGTTGCGGCTGTGGGGATTAACTTCCCTCGTGAAACTTACGACGA  
TGTTCTCGCTCGCATTTACAGATCGGAAGAGCGTCGTGTAGGGAAAG

+

FFFFF:FFFFFFFFFFFFFFFFFFFFFFFFFFFFFFFFFFFFFFFFFFFFFFFFFFFFFFFFFFFFFFF  
F:FFFFFFFFFFFFFFFFFFFFFFFFFFFFFFFFFFFFFFFFFFFFFFFFFFFFFFFFFFFFFFF,F,F

@A00721:190:HGJW7DSXY:4:2502:2085:33536\_1:N:0:TCTGCAAG+GCTGCACT  
CTTCTAATAGAGGATCCTGATGACATTATTTCAACGGATACCGATCTCAGTTCTACCACAGAAACCGT  
CTCAGGAAGTGTCTCCACTGATTCGGAATTAGAGAAAGACGACCTTCTTGTGGGGACTGAGACCTCTG  
AAT

+

::FFFFFFFFFFFFFFFFFFFFFFFFFFFFFFFFFFFFFFFFFFFFFFFFFFFFFFFFFFFFFFF  
FFFFFFFFFFFFFFFFFFFFFFFFFFFFFFFFFFFFFFFFFFFFFFFFFFFFFFFFFFFFFFF:FFFFF:FFFFFFFFFFFFFFFFFFFFFFFFFFFFFFFFFFFFFFFF  
FFF

@A00721:190:HGJW7DSXY:4:1241:21667:34663\_1:N:0:TCTGCAAG+GCTGCACT  
AAAAGACCAGAAACGTAACAAGAAGATAAAGGTAGGAAGGGGAGAAAACAGAACAAGCGAGCGGTTG  
AAGAGAAAAGTATGTTGCGGCTGATCGTACCCCAATTCCTGCTAGAAAGATCACTCTCGGCGAT  
ACC

+

FFFFFFFF:FFFFFFFFFFFFFFFFFFFFFFFFFFFFFFFFFFFFFFFFFFFFFFFFFFFFFFFFFFFFFF:FFFFFFFF  
FFFFFFFFFFFFFFFFFFFFFFFFFFFFFFFFFFFFFFFFFFFFFFFFFFFFFFFFFFFFFF:FFFFFFFFFFFFFFFFFFFFFFFFFFFFFFFFFFFFFFFF  
FFF

@A00721:190:HGJW7DSXY:4:1413:12147:7028\_1:N:0:TCTGCAAG+GCTGCACT  
GTGAAAGTTATGATGAGTGATCGTATTAGAACAGCTGATTCTTATTGCATGAACGTCGCTGAGGTCAA  
ACCTGTGGACGTTCTTTTCATCGACGAATTATTCATGATTCACGCTGGTCAGACCCTTTTCTTACAC  
ATC

+

FFFFFFFFFFFFFFFFFFFFFFFFFFFFFFFFFFFFFFFFFFFFFFFFFFFFFFFFFFFFFFFFFFFFFFFF  
FFFFFFFFFFFFFFFFFFFFFFFFFFFFFFFFFFFFFFFFFFFFFFFFFFFFFFFFFFFFFFFFFFFFFFFF::FFFFFFFF  
FFF

@A00721:190:HGJW7DSXY:4:1208:16504:20870\_2:N:0:TCTGCAAG+GCTGCACT  
TGATTCCAATCAAATCGGATTCATCAATCGTATTGATCTCCAAGTCGAACTACTTCAACATCAACG  
ACATCATTCTTGATGAGTGTCGTTCTTATCGAAGTCTCAGTTATCGCT

+

FFFFFFF:FFFFFFFFF:FFF:FFF:FFFFFFFFFFF:FF:FFFFFFFFFFFFF,FFFFFFFFFFFFF  
FFFFFFFFFFFFFFFFFFFFFFFFFFFFFFFFFFFFFFFFFFFFFFFFFFFFFFFFFFFFFFFFFFFFFFFFF:F:F

@A00721:190:HGJW7DSXY:4:1613:14516:29230\_1:N:0:TCTGCAAG+GCTGCACT  
GGAGGTTGCAGATTCAACCCCTTATATCGAGGCTATCGAGGACGATGAGTATCTTGAAGTTGTTGACG  
ACAAGCCTCAAGAGGGTAGAGGACCACCTGGATCTTCTACTGTCTCTGCCTTCCAAGATTTCTTAGAA  
GAG

+

FFFFFFFFFFFFFFFFFFFFF:FFFFFFFFFFFFFFFFFFFFFFFFFFFFFFFFFFFFFFFFFFFFFFFFFFFF  
FFFFFFFFF:FFFFFFFFFFFFFFFFFFFFFFFFFFFFFFFFFFFFFFFFFFFFFFFFFFFFFFFFFFFFFFFFFFFF  
FFF

@A00721:190:HGJW7DSXY:4:2426:7355:30921\_2:N:0:TCTGCAAG+GCTGCACT  
CGGTAATCTTTCAGCCGAATTAAGTACTAATGAGTTCAAGTCGTTGTGCGATCGAATTAAGATCAAGG  
CTAATACCTTTATAGGTAAGAAGCCCTTGAGCCGCGTAGTCAGCGCG

+

FFFFFFFFFFFFFFFFFFFFFFFFFFFFFFFFFFFFFFFFFFFFFFFFFFFFFFFFFFFFFFFFFFFFFFFF  
FFFFFFF:FFFFFFFFF:FFFFFFFFFFFFF:FFFFFFFFFFFFFFFFFFFFF

@A00721:190:HGJW7DSXY:4:1636:31250:31469\_1:N:0:TCTGCAAG+GCTGCACT  
CTGGAGTTCAGACGTGTGCTCTTCCGATCTCTTGGTAATTGTATGATCACTTTGATGATTTTATCAC  
TTTATTATGACCTTGGAAGTTTTCGGCTGTGGTTGTGCTGGGGACGATTCCATTCTGTTTTCAAAG  
ACT

+

FFFFFFFFFFFFFFFFFFFFFFFFFFFFFFFFFFFFFFFFFFFFFFFFFFFFFFFFFFFFFFFFFFFFFFFF  
FFFFFFFFFFFFFFFFFFFFFFFFFFFFFFFFFFFFFFFFFFFFFFFFFFFFFFFFFFFFFFFFFFFFFFFFFFFF  
FFF

@A00721:190:HGJW7DSXY:4:2519:10981:20854\_2:N:0:TCTGCAAG+GCTGCACT  
TTTAAACGATTCCGAGAGGTTTATCCTGATGTGGAGGGAGTTCTTGAAGCATCCCGACCTTCTTGT  
GAAAATTTTGATGCGGTTTCATAAGATTATCAGTAATCCTGATTCTAC

+

FFFFF,FFFFFFFFFFFFFFFFF:FFFFFFFFF::FFFFF:FFFFFFFFFFFFFFFFFFFFFFFFFFFFF:FFFF  
FFFFFFFF:FFFFFFFFFFFFFFFFFFFFFFFFFFFFFFFFFFFFFFFFFFFFFFFFFFFFFFFFFFFFFFFF

@A00721:190:HGJW7DSXY:4:1467:4255:29684\_1:N:0:TCTGCAAG+GCTGCACT  
GTTGATTAAGACTCTTCCGAAAGGCGAACTTTGGGAATTTGAAGCTCAGGGTGAAGCACAACGTTTGA  
CCGTGACGAACTGTGGTGTTCTTGATCTACGTTACGATATACTCTCCTTGAGTTCACTCGTAAGGAC  
ACT

+

FFFFFFFFFFFFFFFFFFFFFFFFFFFFFFFFFFFFFFFFFFFFFFFFFFFFFFFFFFFFFFFFFFFFFFFF  
FFFFFFFFFFFFFFFFFFFFFFFFFFFFFFFFFFFFFFFFFFFFFFFFFFFFFFFFFFFFFFFFFFFFFFFFFFFF  
FFF

@A00721:190:HGJW7DSXY:4:2626:4246:5682\_2:N:0:TCTGCAAG+GCTGCACT  
GACAACAGCAGGGGTTTTCGAATAGTGATAGCCACCCGCTTACAGAGGGGCAGCAGCATGACCATAA  
TTGGTATTGACTTTGGTACCACCTTTTCTACTGTCTGTCTCGCCTCTT

+



FFF:FFFFFFFFFFFFFF,FFFFFFFFFFFFFFFFFFFFFFFFFFFFFFFFFFFFFFFFFFFF  
FFFFFFFFFFFFFFFFFFFFFFFFFFFFFFFFFFFFFFFFFFFFFFFFFFFFFFFF

@A00721:190:HGJW7DSXY:4:2156:5421:22717\_1:N:0:TCTGCAAG+GCTGCACT  
TTAACAACAATGATAGTGAATTTATACCTACAATCATTGGTTTTCTAATAATGATGACACTATTGTT  
TATGGATATGATGCTATTACTCATGATGGTTACGGTCAGGGAGGATTCTCAGTTTACAAGGACCTTAA  
GCG

+  
FFFFFFFFFFFFFFFFFFFFFFFFFFFFFFFFFFFFFFFFFFFFFFFFFFFFFFFF:FFFFFFFFFFFFFFFFFFFFFFFF:FFFFFFFFFFFFFFFFFFFF  
FFFFFFFFFFFFFFFFFFFFFFFFFFFFFFFFFFFFFFFFFFFFFFFFFFFFFFFFFFFFFFFFFFFFFFFFFFFFFFFFFFFFFFFFFFFFFFFF  
FFF

@A00721:190:HGJW7DSXY:4:1563:5249:14121\_1:N:0:TCTGCAAG+GCTGCACT  
TTGGTCTACTTTTGGACAAGGCCAACTTCGTAATCTTCATGAGATCGTTTCTTTCTTTATCTCTTTG  
GTTGTTAGGGATTTTGAGAGAGTGAAAGGCTTCAATTGTAGTGGTTTGGTCGTTTCAGTACCCAGTCA  
GTA

+  
FFFFFFFFFFFFFFFFFFFFFFFFFFFFFFFFFFFFFFFFFFFFFFFFFFFFFFFFFFFFFFFFFFFFFFFFFFFFFFFFFFFFFFFFFFFF  
FFFFFFFFFFFFFFFFFFFFFFFFFFFFFFFFFFFFFFFFFFFFFFFFFFFFFFFFFFFFFFFFFFFFFFFFFFFFFFFFFFFFFFFFFFFF  
FFF

@A00721:190:HGJW7DSXY:4:1533:10059:30154\_2:N:0:TCTGCAAG+GCTGCACT  
CAAAGATATTTTCATGAAAACACTACAGAGGAACGTACCGGATTACCTGTCTTTCATATTATGAATGAACC  
TTCGGCCGCTCTCTTTGCTTCGATGTTGGATGTCAAGAAGGGTTCAGA

+  
FFFFFFFFFFFFFFFFFFFFFFFFFFFFFFFFFFFFFFFFFFFFFFFFFFFFFFFFFFFFFFFFFFFFFFFFFFFFFFFFFFFFFFFFFFFF  
FFFFFFFFFFFFFFFFFFFFFFFFFFFFFFFFFFFFFFFFFFFFFFFFFFFFFFFFFFFFFFFFFFFFFFFFFFFFFFFFFFFFFFFFFFFF  
FFF

@A00721:190:HGJW7DSXY:4:2454:4291:2848\_2:N:0:TCTGCAAG+GCTGCACT  
GGTGGTGGTACTTTTCGATACTTCTATCGTCTTACGTTACGGTAATTACTATAGTGTTATTTATTCTGG  
TGGTGATGATAATCTTGAGGTCGTGACGTTGATGAAGCTATAAGAGC

+  
FFFFFFFFFFFF:FFFFFFFFFFFFFFFFFFFFFFFFFFFFFFFFFFFFFFFFFFFFFFFFFFFFFFFFFFFFFFFFFFFFFFFFFFFF  
FFFFFFFFFFFFFFFFFFFFFFFFFFFFFFFFFFFFFFFFFFFFFFFFFFFFFFFFFFFFFFFFFFFFFFFFFFFFFFFFFFFFFFFFFFFF  
FFF

@A00721:190:HGJW7DSXY:4:1513:3414:30608\_2:N:0:TCTGCAAG+GCTGCACT  
TTCACAACTGAAGGAGGAGTTTCTGTTACTGGAAAACCTCGTCAATACTTTTCAATAATATACGTC  
TTGAACTCACTTATGACGATCTAGTGAAATTAACGCGTCTTTTCTGG

+  
FFFFFFFFFFFFFFFFFFFFFFFFFFFFFFFFFFFFFFFFFFFFFFFFFFFFFFFFFFFFFFFFFFFFFFFFFFFFFFFFFFFFFFFFFFFF  
FFFFFFFFFFFFFFFFFFFFFFFFFFFFFFFFFFFFFFFFFFFFFFFFFFFFFFFFFFFFFFFFFFFFFFFFFFFFFFFFFFFFFFFFFFFF  
FFF

@A00721:190:HGJW7DSXY:4:2330:26955:16986\_1:N:0:TCTGCAAG+GCTGCACT  
TTCTACCAGGGGCTATTACTCTTGCTGAAACAGCTATTAAAGCTGTTGAGCGGGTAATTACACCTAAA  
CGAGCTTGATCTGCCATCGCTGAAGGATGTGCACTCTTTTCTGCTACTTTAACGGAGCGTAGTGTACT  
CTT

+  
FFFFFFFFFFFFFF:FFF,FFFFFFFF:FFFFFFFFFFFFFFFFFFFFFFFFFFFFFFFFFFFFFFFFFFFFFFFFFFFFFFFFFFFF  
FFFFFFFFFFFFFFFFFFFFFFFFFFFFFFFFFFFFFFFFFFFFFFFFFFFFFFFFFFFFFFFFFFFFFFFFFFFFFFFFFFFFFFFFFFFF  
FFF

@A00721:190:HGJW7DSXY:4:2201:18855:8469\_1:N:0:TCTGCAAG+GCTGCACT  
TTCCGATCTTTTCAATCTTCTTAAAAAGAAGATAGAGAGTCATACTTTGGGCTATCGTTCAGGTGCAT  
GGGGTTGGATAGCCAATATTGAAGTGGACACCTCTGGTAGTATCGAAGTAAAGATAACCAATAAGGAA  
GGA

+  
:FFFFFFFFFFFFFFFFFFFFFFFFFFFFFFFFFFFFFFFFFFFFFFFFFFFFFFFFFFFFFFFFFFFFFFFFFFFFFFFFFFFFFFFFFFFF  
FFFFFFFFFFFFFFFFFFFFFFFFFFFFFFFFFFFFFFFFFFFFFFFFFFFFFFFFFFFFFFFFFFFFFFFFFFFFFFFFFFFFFFFFFFFF  
FFF

@A00721:190:HGJW7DSXY:4:2460:15763:17581\_2:N:0:TCTGCAAG+GCTGCACT  
AAATCTTACCACTATCTACGAACCTAAAGTTCTGAAGACGTTGCTTGTGCTTCCTCCTTTAATGGCA

CTACCTCGGTACAATCTTACTTGGAACGAAGGCGACCTTCCGGAGTTT  
+  
FFFFFFFFFFFFFFFFFFFFFFFFFFFFFFFFFFFFFFFFFFFFFFFFFFFFFFFFFFFFFFFFFFFFFFFF:FF  
FFFFFFFFFFFFFFFFFFFFFFFFFFFFFFFFFFFFFFFFFFFFFFFFFFFFFFFFFFFFFFFFFFFFFFFF  
@A00721:190:HGJW7DSXY:4:2601:27615:2472\_2:N:0:TCTGCAAG+GCTGCACT  
TATATTAGGTGAAGCGAAATACGATTTTGAACGTCAACGTTACCGAGTTTCGTTTCGTACCTTGATG  
CTGACTTTCGTCAATATGATTTGATCTGGTTGCTCAATTCTAAGCGTG  
+  
FFFFFFFFFFFFFFFFFFFFFFFFFFFFFFFFFFFFFFFFFFFFFFFFFFFFFFFFFFFFFFFFFFFFFFFF  
FFFFFFFFFFFFFFFFFFFFFFFFFFFFFFFFFFFFFFFFFFFFFFFFFFFFFFFFFFFFFFFFFFFFFFFF  
@A00721:190:HGJW7DSXY:4:2114:5249:23578\_2:N:0:TCTGCAAG+GCTGCACT  
GATTTTAATATAAAGAATCTTTACCAGGACTCCTACTACAGGAGGCAGTCTTCTGATCGTAAGAAGTT  
TATAAGGAACATATCCATTTGTTGTAATAGGGTCATCAACTTAGAACT  
+  
FFFFFFFFFFFFFFFFFFFFFFFFFFFFFFFFFFFFFFFFFFFFFFFFFFFFFFFFFFFFFFFFFFFFFFFF  
FFFFFFFFFFFFFFFFFFFFFFFFFFFFFFFFFFFFFFFFFFFFFFFFFFFFFFFFFFFFFFFFFFFFFFFF  
@A00721:190:HGJW7DSXY:4:1470:5312:7310\_2:N:0:TCTGCAAG+GCTGCACT  
ATACTGTCTTTCCAAGCTTACCTGTATCTTCAATGAAATTGGACTCTTCGATAGGGGACATTTTATCG  
TGGGCTTTCGTAAGGAAGATCTGTTATCGACGTTTATCGTTTACG  
+  
FFFFFFFFFFFFFFFFFFFFFFFFFFFFFFFFFFFFFFFFFFFFFFFFFFFFFFFFFFFFFFFFFFFFFFFF  
FFFFFFFFFFFFFFFFFFFFFFFFFFFFFFFFFFFFFFFFFFFFFFFFFFFFFFFFFFFFFFFFFFFFFFFF  
@A00721:190:HGJW7DSXY:4:1609:30355:9940\_2:N:0:TCTGCAAG+GCTGCACT  
GGAAAATTTTATCCTCGTTTAACTTACTTAGACTTTCCTACGATACAAATGATAACTTCTAATTTACG  
TTTGCTACTCAGAGCTGGTCCTCTCAGCAAAGGGATGCATGGTGTTAT  
+  
FFF:FFFFFFFFFFFFFFFFFFFFFFFFFFFFFFFFFFFFFFFFFFFFFFFFFFFFFFFFFFFFFFFFFFFF  
FFF:FFFFFFFFFFFFFFFFFFFFFFFFFFFFFFFFFFFFFFFFFFFFFFFFFFFFFFFFFFFFFFFFFFFF  
@A00721:190:HGJW7DSXY:4:1204:28492:4586\_1:N:0:TCTGCAAG+GCTGCACT  
AATAATGACGAGACTTTCGTCATAATCGCTGCATATTACGGATTACACGGTACCAGCGCATCTCGTGT  
CGAGCCTCGACCCGATTATATGGTATTAATAAAGGTGAGGAGACCATTTTCTTGCTGAAATTTA  
TAG  
+  
FFFFFFFFFFFFFFFFFFFFFFFFFFFFFFFFFFFFFFFFFFFFFFFFFFFFFFFFFFFFFFFFFFFFFFFF  
FFFFFFFFFFFFFFFFFFFFFFFFFFFFFFFFFFFFFFFFFFFFFFFFFFFFFFFFFFFFFFFFFFFFFFFF  
FFF  
@A00721:190:HGJW7DSXY:4:2528:16947:33536\_1:N:0:TCTGCAAG+GCTGCACT  
TAAATAATATTACTAATGGCAAATAGTGGAAGGCTCCAGTCAACACTAGTTCGAGTGCTGCTTTGGA  
TTACGATGACGTGAGAATAGGTGAAGGGATAGTTTTTACCTCGACCAACATTAAGGCGGCGGCGACTA  
ATC  
+  
FF,FFF::FFFFFFFFFFFFFFFFFFFFFFFFFFFFFFFFFFFFFFFFFFFFFFFFFFFFFFFFFFFFFFFF  
FFFFFFFFFFFFFFFFFFFFFFFFFFFFFFFFFFFFFFFFFFFFFFFFFFFFFFFFFFFFFFFFFFFFFFFF  
FFF  
@A00721:190:HGJW7DSXY:4:2269:13738:10755\_1:N:0:TCTGCAAG+GCTGCACT  
TGTGGTACGAATTGGTCCAACATTTACCACCAAATTCTTTTGATACAACTCTAGCCTTCAAGTGGGGT  
ATGCCTGCGGAATACGCTTGCTATTACCAGATTGGTTCGAACCGTTGATGCTATGTCAGAAGAAGC  
TAT  
+  
FFFFFFFFFFFFFFFFFFFFFFFFFFFFFFFFFFFFFFFFFFFFFFFFFFFFFFFFFFFFFFFFFFFFFFFF:FFFFFFF  
FFFFFFFFFFFFFFFFFFFFFFFFFFFFFFFFFFFFFFFFFFFFFFFFFFFFFFFFFFFFFFFFFFFFFFFF  
FFF  
@A00721:190:HGJW7DSXY:4:2655:8440:34961\_2:N:0:TCTGCAAG+GCTGCACT  
GTTTAAAGACTGCAGAGGCTGTCAAACAAGCCAGACTCAAGGAGTCCAATCAAAGGTTTTGAATTTA

+

@A00721:190:HGJW7DSXY:4:1518:17598:29778\_1:N:0:TCTGCAAG+GCTGCACT  
CACTCCAAACACTATATACATTATAAAATATAAAAATAAGGGAGTCATAACTTTTGTACCAAATTCT  
TGGCTTTCAACGAAGTCTCTGATTTTATTAATCATTACTTTAACGATCTCTCGGTCATTTACTCTGTA  
CTT

+

@A00721:190:HGJW7DSXY:4:1262:31530:20494\_2:N:0:TCTGCAAG+GCTGCACT  
GTCGGAACAACCTTTACTTAGAATGACTCTATCTTTTCAGACACTTCTTATATTATTTACAATAGTTA  
ATATCATATTAGTAATACTCACTATCGTTTTCTGCTTTTTCTTAGCTA

+

@A00721:190:HGJW7DSXY:4:1177:5828:35916\_1:N:0:TCTGCAAG+GCTGCACT  
ATGAGTACGAAACAAACTCTTCGTTACTAGACCTGTTGGTATAATAGATTTAGTCTATACACCCATC  
TCAACGAGTATAAAGCGATTTTTCTTCCTGAACGTAATACACGAAGATATCAACCGCAAACGACTCG  
A

+

@A00721:190:HGJW7DSXY:4:2106:30237:33567\_1:N:0:TCTGCAAG+GCTGCACT  
TATGAATCCTGCCTTTACTCATTTTATAGCAGTTATTTATGTTGTACTTTTTATAATTTATAACCTTC  
TTATACTTTTGGGTATGTTTTGTGAAAAACATGAGATACCCAAGTCTATCGAAGACATTATCTCTTAT  
GTA

+

@A00721:190:HGJW7DSXY:4:1631:25491:13416\_1:N:0:TCTGCAAG+GCTGCACT  
TCACAGACTCCGAAATGGTTTCAAATGAGGTCAAAGCTCTATTTATTAACGAAGCTATTATCCGATT  
CTTCGAGGGTATCACTACCACTGATCTGCCGACTTTAGTCAAGGAAGCTTCAATTCCTTCGATGTTTAT  
ATT

+

@A00721:190:HGJW7DSXY:4:1117:10673:20854\_1:N:0:TCTGCAAG+GCTGCACT  
TTTGACAAATTTTAGAACTTTATTTTCAAGACTCTCTCCGATCACCTTGGTGTGATCTCCCGGAGGATC  
TTTTCAATAAGATGTATGATGATAATCTACTATTTTTAAATAGTGATATTAGCGGTATACTTGAATAC  
TTT

+

@A00721:190:HGJW7DSXY:4:1316:16649:19304\_1:N:0:TCTGCAAG+GCTGCACT  
TGGTCTATTTACCGCAAAAAGTTGGAAGAGGTCTATGATATTTATTTTACTTATACTTTAAATAGCAC  
CGATTATAACTTGACTGTTGATAATATTACAATAGCTCTTTCTCAGAAGATTAGAGAAGTAACCGGTG  
AAC

[illegible]

$+$ 

+

+

+

+

+

+

@A00721:190:HGJW7DSXY:4:2403:15221:27038\_1:N:0:TCTGCAAG+GCTGCACT  
ATTTGCAACCCTATTCTTGATGTGAAAGATGCATCGAGGTATACGTCTAGGAACATTGATTGGGAACG  
TACCTACTCACGAGACGTCATGAAAGCTATCGGAGGGAAGCAAATGTTTCGTTCTGTTACAAGAACG  
CTT

```

+
FFFFFFFFFFFFFFFFFFFFFFFFFFFFFFFFFFFFFFFFFFFFFFFFFFFFFFFFFFFFFFFF
FFFFFFFFFFFFFFFFFFFFFFFFFFFFFFFFFFFFFFFFFFFFFFFFFFFFFFFFFFFFFFFF
FFF
@A00721:190:HGJW7DSXY:4:2545:5005:31673_1:N:0:TCTGCAAG+GCTGCACT
TGCGATAGCTGTAGAGGTATACGATATCTCTCTTGATGATGTAGCCACTATAATGCTTAAGAGAGAGA
TTGATGTATGTCATTTTCGTCTTAGTTTGTCCCGGCGAATTATTGGACACGATGAAAAATGACATACCC
GTT
+
FFFFFFFFFFFFFFFFFFFFFFFFFFFFFFFFFFFFFFFFFFFFFFFFFFFFFFFFFFFFFFFF
FFFFFFFFFFFFFFFFFFFFFFFFFFFFFFFFFFFFFFFFFFFFFFFFFFFFFFFFFFFFFFFF
FFF
@A00721:190:HGJW7DSXY:4:1549:21721:21825_1:N:0:TCTGCAAG+GCTGCACT
ATCGCTATACGCATACCTGATTGGAAGAAGCGAGGTTTCGTTCTCAATAAAAATTTTTCTCAAGAGAT
TATGGTTGATAAAGTTTTCTTCATAAGGGCTATTTCAGTACGTCATGGGGATCACTTCTTCGGTCAATG
ACA
+
FFFFFFFFFFFFFFFFFFFFFFFFFFFFFFFFFFFFFFFFFFFFFFFFFFFFFFFFFFFFFFFF
FFFFFFFFFFFFFFFFFFFFFFFFFFFFFFFFFFFFFFFFFFFFFFFFFFFFFFFFFFFFFFFF
FFF
@A00721:190:HGJW7DSXY:4:1416:3893:32659_2:N:0:TCTGCAAG+GCTGCACT
ATATGTTACGACATGGCTTCGTAACAACAGTGCAGGATTGTCATCTCGGGGAAAGTGATTCACCAAG
ATGTTTCATATAGATACGAGATACCTAGAGAAGGTCGCAGCGATCTTAC
+
FFFFFFFFFFFFFFFFFFFFFFFFFFFFFFFFFFFFFFFFFFFFFFFFFFFFFFFFFFFFFFFF
FFFFFFFFFFFFFFFFFFFFFFFFFFFFFFFFFFFFFFFFFFFFFFFFFFFFFFFFFFFFFFFF
FFF
@A00721:190:HGJW7DSXY:4:1607:11514:8531_2:N:0:TCTGCAAG+GCTGCACT
TAGTACCGGAGGTGATCTCTCTGCTTCTGCGTTACTGAGAGAAAAGATTCAGGACGCCTACGGTGACT
TTATGGACAAGATGCAAGTTCTTGGGAAATACTTGTTTCCCTTTTTCAG
+
FFFFFFFFFFFFFFFFFFFFFFFFFFFFFFFFFFFFFFFFFFFFFFFFFFFFFFFFFFFFFFFF
FFFFFFFFFFFFFFFFFFFFFFFFFFFFFFFFFFFFFFFFFFFFFFFFFFFFFFFFFFFFFFFF
FFF
@A00721:190:HGJW7DSXY:4:1575:4191:3302_1:N:0:TCTGCAAG+GCTGCACT
TGAGATTGAGAAGATTGAAGAACACGTCAAGAAGTCGCTCGGCGTTGTTCTTGAAAACCAAGTTAAGA
AGGAGGCTGATCATGGAGTCTTGTACCTTCTGTCAAACCTTCGAGGTTTCAGCTACGAGAGGTGATCCC
GGA
+
FFFFF:FFFFFFFFFFFFFFFFFFFFFFFFFFFFFFFFFFFFFFFFFFFFFFFFFFFFFFFF
FFFFFFFFFFFFFFFFFFFFFFFFFFFFFFFFFFFFFFFFFFFFFFFFFFFFFFFFFFFFFFFF
FFF
@A00721:190:HGJW7DSXY:4:1454:27823:26913_1:N:0:TCTGCAAG+GCTGCACT
TGCTGGCTCTAAGGGGAGACTCCTTCTTTTGAATGTTGTAAAGAATTGGGTTGAGAAGTGTGCTTTAC
AAGGAGTTAGACTCTTCTTCAAGTTTTTAGATCTTCTTGATAATCTTAAAGAAAAATTTTCGAATAAA
CTA
+
FFF:FFFFFFFFFFFFFFFFFFFFFFFFFFFFFFFFFFFFFFFFFFFFFFFFFFFFFFFF
FFFFFFFFFFFFFFFFFFFFFFFFFFFFFFFFFFFFFFFFFFFFFFFFFFFFFFFFFFFFFFFF
FFF
@A00721:190:HGJW7DSXY:4:2168:27037:36292_1:N:0:TCTGCAAG+GCTGCACT
CAGAGTCTCTTGGAAGTCCAGGTAGCTAATGTTCTTGCAATAGCCACAGACTTTCTGGGAAAAGAGAC
CTCTGTTGGTAGAGGAGTTGAGAGAATTACTCAGATTCAATCTGGCATCACTGAACGTCTACAACGAG
TTA
+
FFFFFFF:FFFFFFFFFFFFFFFFFFFFFFFFFFFFFFFFFFFFFFFFFFFFFFFF
FFFFF:FFFFFFFFFFFFFFFFFFFFFFFFFFFFFFFFFFFFFFFFFFFFFFFF

```



@A00721:190:HGJW7DSXY:4:1613:14805:23218\_1:N:0:TCTGCAAG+GCTGCACT  
GGAGGTTGCAGATTCAACCCCTTATATCGAGGCTATCGAGGACGATGAGTATCTTGAAGTTGTTGACG  
ACAAGCCTCAAGAGGGTAGAGGACCACCTGGATCTTCTACTGTCTCTGCCTTCCAAGATTTCTTAGAA  
GAG

+

FFFFFFFFFFFFFFFFFFFFFFFFFFFFFFFFFFFFFFFFFFFFFFFFFFFFFFFFFFFFFFFFFFFFFFFF  
FFFFFFFFFFFFFFFFFFFFFFFFFFFFFFFFFFFFFFFFFFFFFFFFFFFFFFFFFFFFFFFFFFFFFFFF  
FFF

@A00721:190:HGJW7DSXY:4:2468:21658:25222\_2:N:0:TCTGCAAG+GCTGCACT  
CGGTAATCTTTCAGCCGAATTAAGTACTAATGAGTTCAAGTCGGTTGTGCGATCGAATTAAGATCAAGG  
CTAATACCTTTATAGGTAAGAAGCCCTTGAGCCGCGTAGTCAGCGCG

+

FFFFFFFF:FFFFFFFFFFFFFFFFFFFFFFFFFFFFFFFFFFFFFFFFFFFFFFFFFFFFFFFFFFFFFFFF  
FFFFFFFFFFFFFFFFFFFFFFFFFFFFFFFFFFFFFFFFFFFFFFFFFFFFFFFFFFFFFFFFFFFFFFFF

@A00721:190:HGJW7DSXY:4:2132:5285:21449\_1:N:0:TCTGCAAG+GCTGCACT  
CTGGAGTTCAGACGTGTGCTCTTCCGATCTCTTTGGTAATTGTATGATCACTTTGATGATTTTATCAC  
TTTATTATGACCTTGAAAGTTTTCGGCTGTGGTTGTGCGCTGGGACGATTCCATTCTGTTTTCAAAG  
ACT

+

FFFFFFFFFFFFFFFFFFFFFFFFFFFFFFFFFFFFFFFFFFFFFFFFFFFFFFFFFFFFFFFFFFFFFFFF  
FFFFFFFFFFFFFFFFFFFFFFFFFFFFFFFFFFFFFFFFFFFFFFFFFFFFFFFFFFFFFFFFFFFFFFFF  
FFF

@A00721:190:HGJW7DSXY:4:1272:25518:22608\_1:N:0:TCTGCAAG+GCTGCACT  
AACGATTCCGAGAGGTTTATCCTGATGTGGAGGGAGTTCTTGAAGCATCCCGACCTTCTTGTGAAA  
ATTTTGATGCGGTTTCATAAGATTATCAGTAATCCTGATTCTACTACGGATTCATGGACCTTCCATCC  
TGT

+

F:FFF:FFFFFFFFFFFFFFFFFFFFFFFFFFFFFFFFFFFFFFFFFFFFFFFFFFFFFFFFFFFFFFFF  
FFFFFFFFFFFFFFFFFFFFFFFFFFFFFFFFFFFFFFFFFFFFFFFFFFFFFFFFFFFFFFFFFFFFFFFF  
FFF

@A00721:190:HGJW7DSXY:4:1534:32081:23578\_1:N:0:TCTGCAAG+GCTGCACT  
GTTGATTAAGACTCTTCCGAAAGGCGAACTTTGGGAATTTGAAGCTCAGGGTGAAGCACAACGTTTGA  
CCGTGACGAACTGTGGTGTTCTTGATCTACGTTACGGATATACTCTCCTTGAGTTCACTCGTAAGGAC  
ACT

+

FFFFF:FFFFFFFFFFFFFFFFFFFF:F:FFFFFFFFFFFFFFFFFFFFFFFFFFFFFFFFFFFFFFFF  
FFFFFFFFFFFFFFFFFFFFFFFFFFFFFFFFFFFFFFFFFFFFFFFFFFFFFFFFFFFFFFFFFFFFFFFF  
FFF

@A00721:190:HGJW7DSXY:4:1108:25292:35055\_2:N:0:TCTGCAAG+GCTGCACT  
AGCAGGGGTTTTCGAATAGTAGCCACCCGCTTACAGAGGGGCAGCAGCATGACCATAATTGGTA  
TTGACTTTGGTACCACCTTTTCTACTGTCTGTCTCGCCTCTTCAATG

+

FFFFFFFFFFFF:FFFFFFFFFFFFFFFFFFFFFFFFFFFFFFFFFFFFFFFFFFFFFFFFFFFFFFFF  
FFFFFFFFFFFFFFFFFFFFFFFFFFFFFFFFFFFFFFFFFFFFFFFFFFFFFFFFFFFFFFFFFFFF:F:F

@A00721:190:HGJW7DSXY:4:2175:29948:16532\_1:N:0:TCTGCAAG+GCTGCACT  
TTAACAACAATGATAGTGAATTTATACCTACAATCATTGGTTTTCTAATAATGATGACACTATTGTT  
TATGGATATGATGCTATTACTCATGATGGTTACGGTCAGGGAGGATTCTCAGTTTACAAGGACCTTAA  
GCG

+

F:FFFFFFFFFFFFFFFF:FFFFFFFFFF,FF,FF,FF,FFFF,FFFF,FFFF:FFFFFF:F:F:FFFF  
F,FFFF,,FFF:FFFFFFFF:F,F:FFFFFFFF:FFFFFF:FFFF:,:FFFF:,FFFFFF,F  
FFF

@A00721:190:HGJW7DSXY:4:2323:21016:22388\_1:N:0:TCTGCAAG+GCTGCACT  
TTGGTCCTACTTTTGGACAAGGCCAACTTCGTAATCTTCATGAGATCGTTTCTTTCTTTATCTCTTG



GTTGTTAGGGATTTTGAGAGAGTGAAAGGCTTCAATTGTAGTGGTTTGGTCGTTTCAGTACCCAGTCA  
GTA

+

FFFFFFFFFFFFFFFFFFFFFFFFFFFFFFFFFFFFFFFFFFFFFFFFFFFFFFFFFFFFFFFFFFFFFFFFFFFFFFFF  
FFFFFFFFFFFFFFFFFFFFFFFFFFFFFFFFFFFFFFFFFFFFFFFFFFFFFFFFFFFFFFFFFFFFFFFFFFFFFFFF  
FFF

@A00721:190:HGJW7DSXY:4:1605:22028:2065\_2:N:0:TCTGCAAG+GCTGCACT  
CAAAGATATTTTCATGAAAACCTACAGAGGAACGTACCGGATTACCTGTCTTTTCATATTATGAATGAACC  
TTCGGCCGCTCTCTTTGCTTCGATGTTGGATGTCAAGAAGGGTTCAGA

+

FFF:FFFFFFFFFFFFFFFFFFFFFFFFFFFFFFFFFFFFFFFFFFFFFFFFFFFFFFFFFFFFFFFFFFFFFFFF  
FFFFFFFFFFFFFFFFFFFFFFFFFFFFFFFFFFFFFFFFFFFFFFFFFFFFFFFFFFFFFFFFFFFFFFFF  
F,F,FFFF:FFFFFFFFFFFFFFFFFFFFFFFFFFFFFFFFFFFFFFFFFFFFFFFFFFFFFFFFFFFFFFFF

@A00721:190:HGJW7DSXY:4:1125:2058:10786\_1:N:0:TCTGCAAG+GCTGCACT  
GTGGTGGTACTTTTCGATACTTCTATCGTCTTACGTTACGGTAATTACTATAGTGTTATTTATTCTGGT  
GGTGATGATAATCTTGAGGTCGTGACGTTGATGAAGCTATAAGAGCGTTCTTATTACGGCGCACTTC  
TTT

+

FFFFFFFFFFFF,F:FFFFFFFFFFFFFFFFFFFFFFFFFFFFFFFFFFFFFFFFFFFFFFFFFFFFFFFFFFFF  
FFFFFFFFFFFFFFFFFFFFFFFFFFFFFFFFFFFFFFFFFFFFFFFFFFFFFFFFFFFFFFFFFFFFFFFFFFFF  
FFF

@A00721:190:HGJW7DSXY:4:2140:3965:22545\_2:N:0:TCTGCAAG+GCTGCACT  
TTCACAACTGAAGGAGGAGTTTCTGTTACTGGAAAACCTCGTCAATACTTTTCAATAATATACGTC  
TTGAACTCACTTATGACGATCTAGTGAAATTAACGCGTCCTTTTCTGG

+

FFFFF:FFFFFFFFFFFFFFFFFFFFFFFFFFFFFFFFFFFFFFFFFFFFFFFFFFFFFFFFFFFFFFFFFFFF  
FFFFFFFFFFFFFFFFFFFFFFFFFFFFFFFFFFFFFFFFFFFFFFFFFFFFFFFFFFFFFFFFFFFFFFFF  
F:FFFF

@A00721:190:HGJW7DSXY:4:1374:15103:33191\_1:N:0:TCTGCAAG+GCTGCACT  
CTGGAGTTCAGACGTGTGCTCTTCCGATCTCAGCTATTAAAGCTGTTGAGCGGGTAATTACACCTAAA  
CGAGCTCGATCTGCCATCGCTGAAGGATGTGCACTCTTTTCTGCTACTTTAACGGAGCGTAGTGTACT  
CTT

+

FFFFFFFFFFFFFFFFFFFFFFFFFFFFFFFFFFFFFFFFFFFFFFFFFFFFFFFFFFFFFFFFFFFFFFFFFFFF  
FFFFFFFFFFFFFFFFFFFFFFFFFFFFFFFFFFFFFFFFFFFFFFFFFFFFFFFFFFFFFFFFFFFFFFFFFFFF  
FFF

@A00721:190:HGJW7DSXY:4:2224:16251:14951\_1:N:0:TCTGCAAG+GCTGCACT  
TTCCGATCTTTTCAATCTTCTTAAAAAGAAGATAGAGAGTCATACTTTGGGCTATCGTTCAGGTGCAT  
GGGGTTGGATAGCCAATATTGAAGTGGACACCTCTGGTAGTATCGAAGTAAAGATAACCAATAAGGAA  
GGA

+

FFF:FFF:FFFFFFFFFFFFFFFFFFFFFFFFFFFFFFFFFFFFFFFFFFFFFFFFFFFFFFFFFFFFFFFFFFFF  
FFFFFFFFFFFFFFFFFFFFFFFFFFFFFFFFFFFFFFFFFFFFFFFFFFFFFFFFFFFFFFFFFFFFFFFFFFFF  
FFF

@A00721:190:HGJW7DSXY:4:2643:8739:29121\_2:N:0:TCTGCAAG+GCTGCACT  
AAATCTTACCACTATCTACGAACCTAAAGTTCTGAAGACGTTGCTTGTGCTTCCTCCTTTAATGGCA  
CTACCTCGGTACAATCTTACTTGGAACGAAGGCGACCTTCCGGAGTTT

+

FFFFFFFFFFFFFFFFFFFFFFFFFFFFFFFFFFFFFFFFFFFFFFFFFFFFFFFFFFFFFFFFFFFFFFFFFFFF  
FFFFFFFFFFFFFFFFFFFFFFFFFFFFFFFFFFFFFFFFFFFFFFFFFFFFFFFFFFFFFFFFFFFFFFFF

@A00721:190:HGJW7DSXY:4:2135:31033:5948\_2:N:0:TCTGCAAG+GCTGCACT  
GATTTTAATATAAAGAATCTTTACCAGGACTCCTACTACAGGAGGCAGTCTTCTGATCGTAAGAAGTT  
TATAAGGAACATATCCATTTGTTGTAATAGGGTCATCAACTTAGAACT

+

FFFFF:FFFFFFFFF:FFFFFFF:FFFFF:FFFFFFFFF:FFFFFFFFF,FFFFFFFFFFF:FFF:FFFFFF::F  
FFFFFFFF:FFFFFFFF:FF,,FFFFFFFFFFFFFFFF:FFFFFFFFF::F,F

@A00721:190:HGJW7DSXY:4:1527:3396:17832\_2:N:0:TCTGCAAG+GCTGCACT  
ATACTGTCTTTCCAAGCTTACCTGTATCTTCAATGAAATTGGACTCTTCGATAGGGGACATTTTATCG  
TGGGCTTCCGTAAAGGAAGATCTGTTATCGACGTTTATCGTTTACG

+

FFFFFFFFFFFFFFFF,FFFFFFFFFFFFFFFF:FFFFFFFFFFFFFFFF,FFFFFFFF  
FFFFFFFF:FFFFFFFF:FFFFFFFF:FFFFF:FFFFF

@A00721:190:HGJW7DSXY:4:2236:4444:27101\_2:N:0:TCTGCAAG+GCTGCACT  
GGAAAATTTTATCCTCGTTTAACTTACTTAGACTTTCTACGATACAAATGATAACTTCTAATTTACG  
TTTGCTACTCAGAGCTGGTCCTCTCAGCAAAGGGATGCATGGTGTTAT

+

FFFFFFFFFFFFFFFFFFFFFFFFFFFFFFFF:FFFFFFFFFFFFFFFFFFFFFFFF  
FFFFFFFFFFFFFFFFFFFFFFFF:FFF:FFFFF:

@A00721:190:HGJW7DSXY:4:1355:29785:31407\_1:N:0:TCTGCAAG+GCTGCACT  
AATAATGACGAGACTTTCGTCATAATCGCTGCATATTACGGATTACACGGTACCAGCGCATCTCGTGT  
CGAGCCTCGACCCGATTATATGGTATTAACCTATAAAGGTGAGGAGACCATTTTCTTGCTGAAATTTA  
TAG

+

FFFFFFFFFFFFFFFFFFFFFFFFFFFFFFFF,FFFFFFFFFFFFFFFF  
FFFFFFFFFFFFFFFFFFFFFFFF:FFFFFFFFFFFFFFFF  
FFF

@A00721:190:HGJW7DSXY:4:1211:24243:13886\_2:N:0:TCTGCAAG+GCTGCACT  
ATATTACTAATGGCAAATAGTGGAAGGCTCCAGTCAACACTAGTTCGAGTGCTGCTTTGGATTACGA  
TGACGTGAGAATAGGTGAAGGGATAGTTTTTACCTCGACCAACATTAA

+

FFFFFFFFFFFFFFFFFFFFFFFFFFFFFFFFFFFFFFFFFFFFFFFF  
FFFFFFFFFFFFFFFF,FFFFFFFF:

@A00721:190:HGJW7DSXY:4:2314:3161:7717\_1:N:0:TCTGCAAG+GCTGCACT  
TGTGGTACGAATTGGTCCAACATTTACCACCAAATCTTTTGATACAACTCTAGCCTTCAAGTGGGGT  
ATGCCTGCGGAATACGCTTGCTATTACCAGATTGGTTCGAACCGTTGATGCTATGTCAGAAGAAGC  
TAT

+

FFFFFFFFFFFFFFFFFFFFFFFFFFFFFFFFFFFFFFFFFFFFFFFF  
FFFFFFFFFFFFFFFFFFFFFFFFFFFFFFFF:FFFFF  
FFF

@A00721:190:HGJW7DSXY:4:1202:28890:11350\_2:N:0:TCTGCAAG+GCTGCACT  
GTTAAAGACTGCAGAGGCTGTCAAACAAGCCCAGACTCAAGGAGTCCAATCAAAGGTTTTGAATTTAG  
CTCAACTGGGAGACGTGCTTAAATGGGTGAGATCGGAAGAGCGTCGT

+

FFFFFFF:FFFFFFFFFFFFFFFF,FF:FFFFFFFF,FFFFF:FFFFF:  
FF:FFFFFFFF,FFFFFFFF,FF:FF

@A00721:190:HGJW7DSXY:4:2124:31114:16016\_1:N:0:TCTGCAAG+GCTGCACT  
CACTCCAAACACTATATACATTATAAAATATAAAATAAGGGAGTCATAACTTTTGTTACCAAATCT  
TGGCTTTCAACGAAGTCTCTGATTTTATTAATCATTACTTTAACGATCTCTCGGTCATTTACTCTGTA  
CTT

+

FFFFFFFFFFFFFFFFFFFFFFFFFFFFFFFFFFFFFFFFFFFFFFFF  
FFFFFFFFFFFFFFFFFFFFFFFF:FFFFF  
FFF

@A00721:190:HGJW7DSXY:4:1507:6569:16501\_2:N:0:TCTGCAAG+GCTGCACT  
GTCGGAACAACCTTTACTTAGAATGACTCTATCTTTTACAGACACTTCTTATATTATTACAATAGTTA  
ATATCATATTAGTAATACTCACTATCGTTTTCTGCTTTTCTTAGCTA

+

F:FFFFFFFFFFFFFFFF,FFFFFFFF:FFFFF:F,FFFFFFFF:FFFFF  
FFFFFFFF:F:FFFFFFFF:FFF:,FFFFFFFF

@A00721:190:HGJW7DSXY:4:1308:9995:15452\_2:N:0:TCTGCAAG+GCTGCACT  
GAGTACGAAAACCAACTCTTCGTTACGAGACCTGATGGTAGAATAGATTTAGTCTCTACACCCATCTC  
AACGAGGATAAAGCGAGTTTTCCGTCTGAACGTAATACACGAAGAGA

+

FFFFFFFFFFFFFFFFFFFFFFFFFFFFFFFFFFFFFFFFFFFFFFFFFFFFFFFFFFFFFFFFFFFFFFFF  
FFFFFFFFFFFFFFFFFFFFFFFFFFFFFFFFFFFFFFFFFFFFFFFFFFFFFFFFFFFFFFFFFFFFFFFF

@A00721:190:HGJW7DSXY:4:2242:20048:27853\_1:N:0:TCTGCAAG+GCTGCACT  
TATGAATCCTGCCTTTACTCATTTTATAGCAGTTATTTATGTTGTACTTTTTATAATTTATAACCTTC  
TTATACTTTTGGGTATGTTTTGTGAAAAACATGAGATACCCAAGTCTATCGAAGACATTATCTCTTAT  
GTA

+

F:FFFFFFFFFFFFFFFFFFFFFFFFFFFFFFFFFFFFFFFFFFFFFFFFFFFFFFFFFFFFFFFF,FFFFFFF  
FFFFFFFFFFFFFFFFFFFFFFFFFFFFFFFFFFFFFFFFFFFFFFFFFFFFFFFFFFFFFFFFFFFFFFFF  
FFF

@A00721:190:HGJW7DSXY:4:2158:11397:11835\_1:N:0:TCTGCAAG+GCTGCACT  
TCACAGACTCCGAAAATGGTTTCAAATGAGGTCAAAGCTCTATTTATTAAACGAACATTATCCGATT  
CTTCGAGGGTATCACTACCACTGATCTGCCGACTTTAGTCAAGGAACCTCAATTCCTTCGATGTTTAT  
ATT

+

FFFFFFFFFFF:FFFFFFFFFFFFFFFFFFFFFFFFFFFFFFFFFFFFFFFFFFFFFFFFFFFFFFFFFFFF  
FFFFFFFFFFF:FFFFFFFFFFFFFFFFFFFFFFFFFFFFFFFFFFFFFFFFFFFFFFFFFFFFFFFFFFFF  
FFF

@A00721:190:HGJW7DSXY:4:1247:16098:27524\_1:N:0:TCTGCAAG+GCTGCACT  
TTTCGACAAATTTTAGAACTTTATTTCAGAACTCTCTCCGATCACCTTGGTGTGATCTCCCGGAGGATC  
TTTTCAATAAGATGTATGATGATAATCTACTATTTTTAAATAGTGATATTCAGCGTATACTTGAATAC  
TTT

+

FFFFFFFFFFFFFFFFFFFFFFFFFFFFFFFFFFFFFFFFFFFFFFFFFFFFFFFFFFFFFFFFFFFFFFFF  
FFFFFFFFFFFFFFFFFFFFFFFFFFFFFFFFFFFFFFFFFFFFFFFFFFFFFFFFFFFFFFFFFFFFFFFF  
FFF

@A00721:190:HGJW7DSXY:4:2201:2275:27320\_1:N:0:TCTGCAAG+GCTGCACT  
TGGTCTATTTACCGCAAAAAGTTGGAAGAGGTCTATGATATTTATTTTACTTATACTTTAAATAGCAC  
CGATTATAACTTGACTGTTGATAATATTACAATAGCTCTTTCTCAGAAGATTAGAGAAGTAACCGGTG  
AAC

+

FFFFFFFFFFFFFFFFFFFFFFFFFFFFFFFFFFFFFFFFFFFFFFFFFFFFFFFFFFFFFFFFFFFFFFFF  
FFFFFFFFFFFFFFFFFFFFFFFFFFFFFFFFFFFFFFFFFFFFFFFFFFFFFFFFFFFFFFFFFFFFFFFF  
FFF

@A00721:190:HGJW7DSXY:4:2548:9146:2769\_1:N:0:TCTGCAAG+GCTGCACT  
GATTTACTTTTACCGTTAGAACTGAAAAAGATTCTTTTCGAAAAGAAACCTATAAGTTACAAACGATT  
CTTCGACTATATTAAAGAAATAAAAATACTTCAAGTACCTGAACCTTACATTTTTAATGGTATGGTAT  
AAT

+

FFFFFFFFFFFFFFFFFFFFFFFFFFFFFFFFFFFFFFFFFFFFFFFFFFFFFFFFFFFFFFFFFFFFFFFF  
FFFFFFFFFFFFFFFFFFFFFFFFFFFFFFFFFFFFFFFFFFFFFFFFFFFFFFFFFFFFFFFFFFFFFFFF  
FFF

@A00721:190:HGJW7DSXY:4:2557:4182:25989\_2:N:0:TCTGCAAG+GCTGCACT  
TCTCGGTAATGAGAGTGATTCCTTAATATTCTAGTAACCGCTATGTGGGCATTACTAGGATTTATCA  
CACTCCTAAATTTGATAGCAATTTATGTTTTAAATGCTAGGAAAATTT

+

FFFFFFFFFFFFFFFFFFFFFFFFFFFFFFFFFFFFFFFFFFFFFFFFFFFFFFFFFFFFFFFFFFFFFFFF  
FFFFFFFFF:,FF,FFFFFF:FF,FFFFFFFFF,:FFFFFFFFFFFFFFFFF

@A00721:190:HGJW7DSXY:4:1511:32334:11772\_1:N:0:TCTGCAAG+GCTGCACT  
ATTAATTCAATAGCTTTAGTATTATTTACTATCGCCTTTATTGAAAATTGTATAAGAGTTAATTGCTT

+

@

+

@

+

@

+

@

+

@

+

@

+

@

+



@A00721:190:HGJW7DSXY:4:1435:3495:11710\_2:N:0:TCTGCAAG+GCTGCACT  
ATATGTTACGACATGGCTTCGTAACAACAGTGCAGGATTGTCATCTCGGGGAAAGTGATTCAACAAG  
ATGTTTCATATAGATACGAGATACCTAGAGAAGGTCGAGCGATCTTAC

+

:FFFFFF:FFFFFFFFFFFFFFFFFFFFFFFFFFFFFFFFFFFFFFFFFFFFFFFFFFFFFFFFFFFFFFFF  
F,FFFFFFFFFFFFFFFF,FFFFFF,FF,FF:FFF:FFFFFF:FF:FFFFFFFF

@A00721:190:HGJW7DSXY:4:2218:8630:10927\_2:N:0:TCTGCAAG+GCTGCACT  
TAGTACCGGAGGTGATCTCTCTGCTTCTGCGTTACTGAGAGAAAAGATTGAGGACGCCTACGGTGACT  
TTATGGACAAGATGCAAGTTCTTGGGAAATACTTGTTTTCCCTTTTTAG

+

FFFFFFFFFFFFFFFFFFFFFFFFFFFFFFFFFFFFFFFFFFFFFFFFFFFFFFFFFFFFFFFFFFFFFFFF  
FFFFFF:FFFFFFFFFFFFFFFF:FFFFFF:FFFFFFFF,FFF:FFF

@A00721:190:HGJW7DSXY:4:1614:29740:13291\_1:N:0:TCTGCAAG+GCTGCACT  
TGAGATTGAGAAGATTGAAGAACACGTCAAGAAGTCGCTCGGCGTTGTTCTTGAAAACCAAGTTAAGA  
AGGAGGCTGATCATGGAGTCTTGTACCTTCTGTCAAACCTTCGAGGTTTCAGCTACGAGAGGTGATCCC  
GGA

+

FFFFFFFFFFFFFFFFFFFFFFFFFFFFFFFFFFFFFFFFFFFFFFFFFFFFFFFFFFFFFFFFFFFFFFFF  
FFFFFFFFFFFFFFFF:FFFFFFFF:FFFFFFFFFFFFFFFFFFFFFFFFFFFFFFFFFFFFFFFFFFFFFF  
FFF

@A00721:190:HGJW7DSXY:4:1568:13386:30279\_1:N:0:TCTGCAAG+GCTGCACT  
TGCTGGCTCTAAGGGAGACTCCTTCTTTTGAATGTTGTAAAGAATTGGGTTGAGAAGTGCTTTAC  
AAGGAGTTAGACTCTTCTTCAAGTTTTTAGATCTTCTTGATAATCTTAAAGAAAAATTTTCGAATAAA  
CTA

+

FFFFFFFFFFFFFFFFFFFFFFFFFFFFFFFFFFFFFFFFFFFFFFFFFFFFFFFFFFFFFFFFFFFFFFFF  
FFFFFFFFFFFFFFFFFFFFFFFFFFFFFFFFFFFFFFFFFFFFFFFFFFFFFFFFFFFFFFFFFFFFFFFF  
FFF

@A00721:190:HGJW7DSXY:4:2621:26250:21840\_1:N:0:TCTGCAAG+GCTGCACT  
CAGAGTCTCTTGAAGTCCAGGTAGCTAATGTTCTTGCAATAGCCACAGACTTTCTGGGAAAAGAGAC  
CTCTGTTGGTAGAGGAGTTGAGAGAATTACTCAGATTCAATCTGGCATCACTGAACGTCTACAACGAG  
TTA

+

FFFFFFFFFFFFFFFFFFFFFFFFFFFFFFFFFFFFFFFFFFFFFFFFFFFFFFFFFFFFFFFFFFFFFFFF  
FFFFFFFFFFFFFFFFFFFFFFFFFFFFFFFFFFFFFFFFFFFFFFFFFFFFFFFFFFFFFFFFFFFFFFFF  
FFF

@A00721:190:HGJW7DSXY:4:2511:20654:18944\_1:N:0:TCTGCAAG+GCTGCACT  
ACGCTACACTCGAAATATGGGCCCTCATAAGGAAGTATAGTTGGCGTCTTGTCGTTGACGTCATTACA  
GTCTGGAAGTTAGATCATTTGTTGAGGAAGATCTCTACAGAGATTATCGAGAGTTGTGATCTAGTTCT  
AAA

+

F:F:FFFFFFFFFFFFFFFFFFFFFFFFFFFFFFFFFFFFFFFFFFFFFFFFFFFFFFFFFFFFFFFF  
FFFFFFFFFFFFFFFFFFFFFFFFFFFFFFFFFFFFFFFFFFFFFFFFFFFFFFFFFFFFFFFFFFFFFFFF  
FFF

@A00721:190:HGJW7DSXY:4:2466:7139:23844\_1:N:0:TCTGCAAG+GCTGCACT  
TTCTAACCAGGACTGATGGTGAGATTCTTTTACCTTTTGGAGGTCCAGGAACCTTTACTCCTAGTGTC  
TTTTCTAGAGTCCAAGGACGTTTCCGTCGGAGGATGACAGGTGGGAGACCGCTCAATAACACTCTATT  
GAA

+

:FFFFFFFFFFFFFFFFFFFFFFFFFFFFFFFFFFFFFFFFFFFFFFFFFFFFFFFFFFFFFFFFFFFF  
FFFFFFFFFFFFFFFFFFFFFFFFFFFFFFFFFFFFFFFFFFFFFFFFFFFFFFFFFFFFFFFFFFFFFFFF  
FFF

@A00721:190:HGJW7DSXY:4:1355:22878:23234\_2:N:0:TCTGCAAG+GCTGCACT  
CCTGTCCAGTTGTGATGATGTTTCGGGCTGTGGGGATTAACCTCCCTCGTGAAACTTACGACGATGTT

$+$ 

@A00721:190:HGJW7DSXY:4:2536:22679:20071\_1:N:0:TCTGCAAG+GCTGCACT  
CTTCTAATAGAGGATCCTGATGACATTATTTCAACGGATACCGATCTCAGTTCTACCACAGAAACCGT  
CTCAGGAAGTGTCTCCACTGATTCGGAATTAGAGAAAGACGACCTTCTTGTGGGGACTGAGACCTCTG  
AAT

+

@A00721:190:HGJW7DSXY:4:2306:30038:1282\_1:N:0:TCTGCAAG+GCTGCACT  
AAAAGACCAGAAACGTAACAAGAAGAATAAAAGGTAGGAAGGGGAGAAAACAGAACAAGCGAGCGGTTG  
AAGAGAAAACCTGATATGGTTGCGGCTGATCGTACCCCAATTCTGCTAGAAAGATCACTCTCGGCGAT  
ACC

+

@A00721:190:HGJW7DSXY:4:2272:5493:17832\_1:N:0:TCTGCAAG+GCTGCACT  
GTGAAAGTTATGATGAGTGATCGTATTAGAACAGCTGATTCTTATTGCATGAACGTCGCTGAGGTCAA  
ACCTGTGGACGTTCTTTTCATCGACGAATTATTCATGATTCACGCTGGTCAGACCCTTTTCTTACAC  
ATC

+

@A00721:190:HGJW7DSXY:4:1319:18050:15812\_2:N:0:TCTGCAAG+GCTGCACT  
TGATTCCAATCAAATCGGATTCATCAATCGTATTGATCTCCAAGTCGAACTACTTCAACATCAACG  
ACATCATTCTTGATGAGTGTCGTTCTTATCGAAGTCTCAGTTATCGCT

 $+$ 

@A00721:190:HGJW7DSXY:4:2242:24505:8860\_1:N:0:TCTGCAAG+GCTGCACT  
GGAGGTTGCAGATTCAACCCCTTATATCGAGGCTATCGAGGACGATGAGTATCTTGAAGTTGTTGACG  
ACAAGCCTCAAGAGGGTAGAGGACCACCTGGATCTTCTACTGTCTCTGCCTTCCAAGATTTCTTAGAA  
GAG

+

@A00721:190:HGJW7DSXY:4:2520:15148:13385\_2:N:0:TCTGCAAG+GCTGCACT  
CGGTAATCTTTCAGCCGAATTAAGTACTAATGAGTTCAGTCGGTTGTCGATCGAATTAAGATCAAGG  
CTAATACCTTTATAGGTAAGAAGCCCTTGAGCCGCGTAGTCAGCGCG

+

@A00721:190:HGJW7DSXY:4:2376:9118:3756\_1:N:0:TCTGCAAG+GCTGCACT  
CTGGAGTTTCAGACGTGTGCTCTTCCGATCTCTTTGGTAATTGTATGATCACTTTGATGATTTTATCAC  
TTTATTATGACCTTGGAAAGTTTTCGGCTGTGGTTGTCGCTGGGGACGATTCCATTCTGTTTTCAAAG  
ACT

+

[illegible]





TTGAACTCACTTATGACGATCTAGTGAAATTAACGCGTCCTTTTCTGG  
+  
FFFFFFFFFFFFFFFFFFFFFFFFFFFFFFFFFFFFFFFFFFFFFFFFFFFFFFFFFFFFFFFF  
FFFFFFFFFFFFFFFFFFFFFFFFFFFFFFFFFFFFFFFFFFFFFFFFFFFFFFFF  
@A00721:190:HGJW7DSXY:4:2520:22923:12790\_1:N:0:TCTGCAAG+GCTGCACT  
CTGGAGTTCAGACGTGTGCTCTTCCGATCTCAGCTATTAAGCTGTTGAGCGGGTAATTACACCTAAA  
CGAGCTCGATCTGCCATCGCTGAAGGATGTGCACTCTTTTCTGCTACTTTAACGGAGCGTAGTGTACT  
CTT  
+  
FFFFFFFFFFFFFFFFFFFFFFFFFFFFFFFFFFFFFFFFFFFFFFFFFFFFFFFFFFFFFFFF  
FFFFFFFFFFFFFFFFFFFFFFFFFFFFFFFFFFFFFFFFFFFFFFFFFFFFFFFFFFFFFFFF  
FFF  
@A00721:190:HGJW7DSXY:4:2309:11831:16877\_1:N:0:TCTGCAAG+GCTGCACT  
TTCCGATCTTTTCAATCTTCTTAAAAAGAAGATAGAGAGTCATACTTTGGGCTATCGTTCAGGTGCAT  
GGGGTTGGATAGCCAATATTGAAGTGGACACCTCTGGTAGTATCGAAGTAAAGATAACCAATAAGGAA  
GGA  
+  
FF::,FF,FFFF,FF:FF,FFFFFFFF:FFFFFFFFFFFFFFFF:FFFFFFFF:F,F,FFFF,FF,::F  
,F:FFFFFFFF:,,: ,FFFFFF,FFFFFF,FFFFFFFF:FFF:FF:, ,F,F:FFF,FFFF:FF,F:FF  
FF:  
@A00721:190:HGJW7DSXY:4:2671:19985:31281\_2:N:0:TCTGCAAG+GCTGCACT  
AAATCTTACCCTATCTACGAACCTAAAGTTCTGAAGACGTTGCTTGTGCTTCCTCTTTAATGGCA  
CTACCTCGGTACAATCTTACTTGAACGAAGGCGACCTTCCGGAGTTT  
+  
FFFFFFFFFFFFFFFFFFFFFFFFFFFFFFFFFFFFFFFFFFFFFFFFFFFFFFFFFFFFFFFF: ,FFFF  
FFFF:FFFFFFFFFFFFFFFFFFFFFFFFFFFFFFFF:FFFFFFFFFFFFFFFF  
@A00721:190:HGJW7DSXY:4:2238:28953:6762\_2:N:0:TCTGCAAG+GCTGCACT  
GATTTTAATATAAAGAATCTTTACCAGGACTCCTACTACAGGAGGCAGTCTTCTGATCGTAAGAAGTT  
TATAAGGAACATATCCATTTGTTGTAATAGGGTCATCAACTTAGAACT  
+  
FFFFFFFFFFFFFFFFFFFFFFFFFFFFFFFFFFFFFFFFFFFFFFFFFFFFFFFFFFFFFFFF:FFFFFFFFFFFFFFFFFFFFFFFF  
FFFFFFFFFFFFFFFFFFFFFFFFFFFFFFFFFFFFFFFFFFFFFFFFFFFFFFFF  
@A00721:190:HGJW7DSXY:4:2132:6017:6370\_2:N:0:TCTGCAAG+GCTGCACT  
ATACTGTCTTTCCAAGCTTACCTGTATCTTCAATGAAATTGACTCTTCGATAGGGGACATTTTATCG  
TGGGCTTTCGTAAGGAAGATCTGTTATCGACGGTTTATCGTTTACG  
+  
FFFFFFFFFFFFFFFFFFFFFFFFFFFFFFFFFFFFFFFFFFFFFFFFFFFFFFFFFFFFFFFF:F:FFFFFFFFFFFFFFFF  
FFFFFFFFF:FFFFFF:FF:FFFFFFFFF:FFFFFFFFFFFFFF:FF  
@A00721:190:HGJW7DSXY:4:2356:24758:16720\_2:N:0:TCTGCAAG+GCTGCACT  
GGAAAATTTTATCCTCGTTAACTTACTTAGACTTTCCTACGATACAAATGATAACTTCTAATTTACG  
TTTGCTACTCAGAGCTGGTCCTCTCAGCAAAGGATGCATGGTGTTAT  
+  
FFFFFFFFFFFFFFFFFFFFFFFFFFFFFFFFFFFFFFFFFFFFFFFFFFFFFFFFFFFFFFFF:FFFFFFFFFFFFFFFFFFFFFFFF  
FFFFFFFFFFFFFFFFFFFFFFFFFFFFFFFFFFFFFFFFFFFFFFFFFFFFFFFF,FFFFFFF  
@A00721:190:HGJW7DSXY:4:1376:21025:13917\_1:N:0:TCTGCAAG+GCTGCACT  
AATAATGACGAGACTTTCGTCATAATCGCTGCATATTACGGATTACACGGTACCAGCGCATCTCGTGT  
CGAGCCTCGACCCGATTATATGGTATTAAGTTATAAAGGTGAGGAGACCATTTTCTTGCTGAAATTTA  
TAG  
+  
FFFFFFFFFFFFFFFFFFFF,FFFFFFFFFFFFFFFFFFFFFFFFFFFFFFFF:FFFFFFFFFFFFFFFFFFFFFFFF  
FFFFFFFFFFFFFFFFFFFFFFFFFFFFFFFFFFFFFFFFFFFFFFFFFFFFFFFFFFFFFFFF  
FFF  
@A00721:190:HGJW7DSXY:4:1503:11460:23312\_2:N:0:TCTGCAAG+GCTGCACT  
ATATAACTAATGGCAAATAGTGGAAAGGCTCCAGTCAACACAAGTTCGAGTGCTGCTTTGGATTACGA

TGACGTGAGAATAGGTGAAGGGATAGTTTTTACCTCGACCAACATTAA

+

F,F,,F::FFF:FFF:F,F:, ,FFFF,F:F:,F,FFFFFFF,F,F,F:FFF:, ,:, ,:F,FF,F:FF  
,,FFFF:F:F:FF,F,FFF, ,FFF,:F,,FF,F,F:FFFFFFFFF:

@A00721:190:HGJW7DSXY:4:2417:4092:10050\_1:N:0:TCTGCAAG+GCTGCACT  
TGTGGTACGAATTGGTCCAAAATTTACCACCAAATTCTTTTGATACAACCTCTAGCCTTCAAGTGGGGT  
ATGCCTGCGGAATACGCTTGCTATTACCAGATTGGTTGAACCCGTTGATGCTATGTCAGAAGAAGC  
TAT

+

FFFFFF:FF,FFF:FF:FF,,FFF:,FFF::FF:FFF:FFFFFFFF,::FF:FFFFFFFF::FFFFFF:F  
FFF:FFF:FFFFFFFF, ,FF:FFFF,FFFF,F::FFFFFFFFFFFFFFFFF:F:FFFFFF,FFFFFFFF  
FFF

@A00721:190:HGJW7DSXY:4:1323:18819:33144\_2:N:0:TCTGCAAG+GCTGCACT  
GTAAAGACTGCAGAGGCTGTCAAACAAGCCCAGACTCAAGGAGTCCAATCAAAGGTTTTGAATTTAG  
CTCAACTGGGAGACGTGCTTAAATGGGTGAGATCGGAAGAGCGTCGT

+

FFFFFFFFFFFFFFFFFFFF:FFFFFFFFFFFFFFFFFFFFFFFFFFFFFFFFFFFFFFFFFFFFFFFFFFFF  
FFFFFFFFFFFFFFFFFFFFFFFFFFFFFFFFFFFF:FFFFFF:FFFFFFFFFFFFFFFF

@A00721:190:HGJW7DSXY:4:2477:14959:12148\_1:N:0:TCTGCAAG+GCTGCACT  
CACTCCAAACACTATATACATTATAAAATATAAAAATAAGGGAGTCATAACTTTTGTTACCAAATTCT  
TGGCTTTCAACGAAGTCTCTGATTTTATTAATCATTACTTTAACGATCTCTCGGTCATTTACTCTGTA  
CTT

+

FFFFFFFFFFFFFFFFFFFFFFFFFFFFFFFFFFFF:FF:FFFFFFFFFFFFFFFFFFFFFFFFFFFFFFFFFFFF  
FFFFFFFFFFFFFFFFFFFFFFFFFFFFFFFFFFFFFFFFFFFFFFFFFFFFFFFFFFFF,FFFFFFFFFFFFFFFFFFFF  
FFF

@A00721:190:HGJW7DSXY:4:1535:6397:26318\_2:N:0:TCTGCAAG+GCTGCACT  
GTCGGAACAACCTTTACTTAGAATGACTCTATCTTTTCAGACACTTCTTATATTATTTACAATAGTTA  
ATATCATATTAGTAATACTCACTATCGTTTTCTGCTTTTTCTTAGCTA

+

FFFFFFFFFFFFFFFFFFFFFFFFFFFFFFFFFFFF:FFFFFF:FFFFFFFFFFFFFFFFFFFFFFFFFFFF  
FFFFFFFFFFFFFFFFFFFFFFFFFFFFFFFFFFFF:F::FFFFFFFFFFFFFFFFFFFF,FF

@A00721:190:HGJW7DSXY:4:1607:8639:16203\_2:N:0:TCTGCAAG+GCTGCACT  
GAGTACGAAAACCAACTCTTCGTTACGAGACCTGATGGTAGAATAGATTTAGTCTCTACACCCATCTC  
AACGAGGATAAAGCGAGTTTTCCGTCTGAACGTAATACACGAAGAGA

+

FFFFF:FFFFFFFFFFFFFFFF:FFFFFFFFFFFFFFFFFFFFFFFFFFFF,FF:FFFFFFFFFFFFFFFFFFFF  
FFFFFFFFFFFFFFFFFFFFFFFFFFFFFFFFFFFF,FFFF:FFFFFFFFFFFF

@A00721:190:HGJW7DSXY:4:1257:13458:30185\_2:N:0:TCTGCAAG+GCTGCACT  
ATCCTGCCTTTACTCATTTTATAGCAGTTATTTATGTTGTACTTTTTATAATTTATAACCTTCTTATA  
CTTTTGGGTATGTTTTGTGAAAAACATGAGATACCAAGTCTATCGAA

+

FFFFFFFFFFFFFFFFFFFFFFFFFFFFFFFFFFFF:FFFFFFFF  
FFFFFFFFFFFFFFFFFFFFFFFFFFFFFFFFFFFFFFFFFFFFFFFFFFFF:FF

@A00721:190:HGJW7DSXY:4:2221:17445:14043\_1:N:0:TCTGCAAG+GCTGCACT  
TCACAGACTCCGAAAATGGTTTCAAATGAGGTCAAAGCTCTATTTATTAAACGAACCTATTATCCGATT  
CTTCGAGGGTATCACTACCACTGATCTGCCGACTTTAGTCAAGGAACCTCAATTCCTTCGATGTTTAT  
ATT

+

FFFFFFFFFFFFFFFFFFFFFFFFFFFFFFFFFFFF:FFFFFFFFFFFFFFFFFFFFFFFFFFFFFFFFFFFF  
FFFFFFFFFFFFFFFFFFFFFFFFFFFFFFFFFFFFFFFFFFFFFFFFFFFF:FFFFFFFFFFFF:FFFF  
FFF

@A00721:190:HGJW7DSXY:4:2564:12011:25175\_1:N:0:TCTGCAAG+GCTGCACT  
TTGACAAATTTTAGAACTTTATTTCAGAACTCTCTCCGATCACCTTGGTGTGATCTCCCGGAGGATC

TTTTCAATAAGATGTATGATGATAATCTACTATTTTTTAAATAGTGATATTCAGCGTATACTTGAATAC  
TTT

+

F:F:FFFFFFFFFFFFFFFF:FFFFFFFFFFFFFFFFFFFFFFFFFFFFFFFFFFFFFFFFFFFFFFFF  
FFFFFFFFFFFFFFFFFFFFFFFFFFFFFFFFFFFFFFFFFFFFFFFFFFFFFFFFFFFFFFFFFFFFFFFF  
FFF

@A00721:190:HGJW7DSXY:4:1226:19488:24345\_1:N:0:TCTGCAAG+GCTGCACT  
TTACCGCAAAAAGTTGGAAGAGGTCTATGATATTTATTTTACTTATACTTTAAATAGCACCGATTATA  
ACTTGACTGTTGATAATATTACAATAGCTCTTCTCAGAAGATTAGAGAAGTAACCGGTGAACACGTC  
GGT

+

FFFFFFFFFFFFFFFFFFFFFFFFFFFFFFFFFFFFFFFFFFFFFFFFFFFFFFFFFFFFFFFFFFFFFFFF  
FFFFFFFFFFFFFFFFFFFFFFFFFFFFFFFFFFFFFFFFFFFFFFFFFFFFFFFFFFFFFFFFFFFFFFFF  
FFF

@A00721:190:HGJW7DSXY:4:1156:7066:15013\_1:N:0:TCTGCAAG+GCTGCACT  
ACTTTTACCGTTAGAACTGAAAAAGATTCTTTTCGAAAAGAAACCTATAAGTTACAAACGATTCTTCG  
ACTATATTAAGAAATAAAAATACTTCAAGTACCTGAACTTTACATTTTTAATGGTATGGTATAATGT  
GTC

+

FFFFFFFF:F:FFFF:FFFFFFFFFFFFFFFFFFFFFFFFFFFFFFFFFFFFFFFFFFFFFFFF:FFFFFFFF:FFFF  
FFFFFFFFFFFFFFFFFFFFFFFFFFFFFFFFFFFFFFFFFFFFFFFFFFFFFFFFFFFFFFFFFFFFFFFF  
FFF

@A00721:190:HGJW7DSXY:4:2645:20311:4664\_2:N:0:TCTGCAAG+GCTGCACT  
TCTCGGTAATGAGAGTGTATTCCTTAATATTCTAGTAACCGCTATGTGGCATTACTAGGATTTATCA  
CACTCCTAAATTTGATAGCAATTTATGTTTTAAATGCTAGGAAAATTT

+

FFFFFFFFFFFFFFFFFFFF:FFFFFFFFFFFF,FFFFFFFFFFFFFFFFFFFFFFFFFFFFFFFFFFFF  
FFFFFFFF:FFFFFFFFFFFF:FFFFFFFFFFFFFFFFFFFFFFFFFFFFFFFFFFFF

@A00721:190:HGJW7DSXY:4:2142:24587:12508\_2:N:0:TCTGCAAG+GCTGCACT  
TTAATTCAATAGCTTTAGTATTATTTACTATCGCCTTTATTGAAAATTGTATAAGAGTTAATTGCTTA  
CACAAAAGTGACGCGCAAGGAATCTTAATTGATTGAAGCTAGGCGTT

+

FFFFFFFFFFFFFFFFFFFF:FFFFFFFFFFFF:FFFFFFFFFFFFFFFFFFFFFFFFFFFFFFFFFFFF  
FFFFFFFFFFFFFFFFFFFFFFFFFFFFFFFFFFFF:FFFFFFFFFFFFFFFFFFFF:

@A00721:190:HGJW7DSXY:4:2351:23050:36902\_1:N:0:TCTGCAAG+GCTGCACT  
TACTACCGCCGGTCGGCAGATCGGCACCACTGGTCTCTACGTTCAAGGACCCGCTGTGCAGAATAACC  
TTCCCAAATCTAGATCTGCACAGAAGAAGGCTGAAGGTCGTTACCGGACGACCACTCAAAGGAAACGG  
GC

+

FF:FF::FFF,FFFFFF:FFFF:FF,F:FFF:FFFFFFFF:FFFFFF,F:,F,:FFF,FFFFFF:FFF  
FFF,FF,,F:FFFF,,FFF:,FFFF::F::FF,FF,FFFFFFFFFFFF:FF:F:FFFF,F::F:,F  
,F

@A00721:190:HGJW7DSXY:4:1653:1163:33473\_2:N:0:TCTGCAAG+GCTGCACT  
TGGGAAGTGAAGCAGTACCTCAGTCAAAAGTCACATTACCACTCCCATACCAATCAATGATGTGACT  
ATACAGTTCGGCCATTTCAAGAGTGGTCAATACGTCGTGGGAGGTACT

+

FFF:FFF,FFFFFFFFFFFFFFFFFFFF,:FFFF:FFF,FFFF:FFFFFFFFFFFF:FFFFF::FFF  
FFF:FFFFFF:FFF,FF,FFF,,F,FF,FFFFFFFFFFFF:FF:FF

@A00721:190:HGJW7DSXY:4:2618:1172:4836\_1:N:0:TCTGCAAG+GCTGCACT  
ATCTAAGAACTCCCAAGCCAATCAATAGTTCTTCTGACCAGAATGAAAAGGGGTTTACCAGGGTAG  
TCTCTAAGTCTACCAGGAAGAGGGGAAATGTCCCAAACTGAGAAGAATAAAGGGAAAGGTCCATCA  
GGA

+

FF:FFFFFFFFFFFF::FFFF:FF:FFFFFFFFFFFFFFFFFFFFFFFFFFFF:FFFFFFFFFFFFFFFFFFFF

FFFFFFFFFFFFFFFFFFFFFFFFFFFFFFFFFFFFFFFFFFFFFFFFFFFFFFFFFFFFFFFFFFFFFFFFFFFFFFFF  
FFF

@A00721:190:HGJW7DSXY:4:2375:7346:7639\_2:N:0:TCTGCAAG+GCTGCACT  
ACGGGCCAAAGAGGCCGCTGCTACGAAGTCGCTGAAGGCGGCTTGGGTCATTAAGGGTAGCTGTAAAG  
TTGCGCCTGCCGACCCCATCTTTGAGACCAAGACTCTCTACAGTAGGT

+  
FFFFFFFFFFFFFFFFFFFFFFFFFFFFFFFFFFFFFFFFFFFFFFFFFFFFFFFFFFFFFFFFFFFFFFFFFFFFFFFF  
FFFFFFFFFFFFFFFFFFFFFFFFFFFFFFFFFFFFFFFFFFFFFFFFFFFFFFFFFFFFFFFFFFFFFFFFFFFFFFFF

@A00721:190:HGJW7DSXY:4:2563:27407:16016\_2:N:0:TCTGCAAG+GCTGCACT  
CTGTTGAATTCGTCACTGAGGACGAAGGTGAGAGGACTTTTGGCTACTGGCGACAACTGAGAGCAGT  
CGCTGGGGAAAGAGAATTGCGTGCGTTGAAGGCCGACGCTTCGAGCTT

+  
FFFFF:FF:F:FFFFFFFFFFFFFFFFFFFFFFFFFFFFFFFFFFFFFFFFFFFFFFFFFFFFFFFFFFFFFFFF  
FFFFFFFFFFFF:FFFF:FFFFFFFFFFFFFFFFFFFFFFFFFFFFFFFFFFFFFFFFFFFFFFFFFFFFFFFF

@A00721:190:HGJW7DSXY:4:1416:29008:17315\_1:N:0:TCTGCAAG+GCTGCACT  
TGGAGGATTTTATCCGCGCTTAATACTATGGGGCGAAGATCCCCTATGGAGTCTTGAAGGACTTAGGTTG  
GCATATTTATGCCGACGATAATAAGCATGTCACCCTTAAGCACCGAGGTAAGCTCGGGACTTACAAGA  
GAG

+  
FFFFFFFFFFFFFFFFFFFFFFFFFFFFFFFFFFFFFFFFFFFFFFFFFFFFFFFFFFFFFFFFFFFFFFFFFFFFFFFF  
FFFFFFFFFFFFFFFFFFFFFFFFFFFFFFFFFFFFFFFFFFFFFFFFFFFFFFFFFFFFFFFFFFFFFFFFFFFFFFFF  
FFF

@A00721:190:HGJW7DSXY:4:2347:22761:34835\_2:N:0:TCTGCAAG+GCTGCACT  
ACTTTTCTTGAAAATTTTTCCTTTCCTCCGTCATTGGGGATTTCGATGTGAGAAGGTGGAAGGTGTCA  
AGGGTCTTCTTCATGCTGATCTTTCAGGACCTAATCACATCATGATTG

+  
FFF:FF,FFFFFFFF,FFF:FFFF::F:FFFFFFFF::FFFF:F:FF:FFF:FFF,::FFFF,F,FFF  
FF,FFFF:FFF:F,,:F:FFF:FF,F:FFFFFFFF:FFFFFFFF:FFF:

@A00721:190:HGJW7DSXY:4:2178:3929:26616\_1:N:0:TCTGCAAG+GCTGCACT  
CGAAATTAAGACGGGGGGATTAAGAGTCCAGCTGTAAGTGTCACTTTCAGAGAGGGGAGCTCTGAAAA  
GGAACTTCGTGAGAAGATGAGGAAGTCTAAGAGGAGGAGTTTGAGGAAGGCTCTAGAGAAGATCTCA  
CCA

+  
FFFFFFFFFFFFFFFFFFFFFFFFFFFFFFFFFFFFFFFFFFFFFFFFFFFFFFFFFFFFFFFFFFFFFFFFFFFFFFFF  
FFFFFFFFFFFFFFFFFFFFFFFFFFFFFFFFFFFFFFFFFFFFFFFFFFFFFFFFFFFFFFFFFFFFFFFFFFFFFFFF,  
FFF

@A00721:190:HGJW7DSXY:4:1475:4698:17174\_1:N:0:TCTGCAAG+GCTGCACT  
GATTTTTTTGAAGCAGGGGTTACCACTTCCTAAGGTGGATGAGGGAGGTTGTTTCTTTGGAGTTTTAGA  
TAATCTTTTGAGAAGGGGTCATAGAGCCAGCAAGAGAAGCTTATATGCTGGTTTAAGTGATGATTATC  
ACT

+  
F::F,,FFF:FFFFFFFF,FFFFFFFFFFFFFFFF,FFFFFFFFFFFFFFFFFFFFFFFFFFFFFFFFFFFFF:FFFF  
FF,FFFFFFFF:F::FFFFFFFFFFFFFFFF,FFFFFFFFFFFFFFFFFFFFFFFFFFFFFFFFFFFFFFFFFFFF  
FFF

@A00721:190:HGJW7DSXY:4:2357:25635:17801\_1:N:0:TCTGCAAG+GCTGCACT  
ATTCGGTAACTTACCATATTGTTCTTCCGGGAAGTTGTGGGATTTAACTTTGACTCAACTACTCCGA  
TCAGATCCGGATGGTTTGATTGGTATGGACTACTCGACTTTTATCTGGAGTTGTCTAGGGTCATGGCA  
GAT

+  
FFFFFFFFFFFF:FFFF:FFFFFFFFFFFFFFFFFFFFFFFFFFFFFFFFFFFFFFFFFFFFFFFFFFFFFFFF  
FFFFFFFFFFFFFFFFFFFFFFFFFFFFFFFFFFFFFFFFFFFFFFFFFFFFFFFFFFFFFFFFFFFFFFFFFFFF  
FFF

@A00721:190:HGJW7DSXY:4:2216:5602:17707\_1:N:0:TCTGCAAG+GCTGCACT  
TGAGGGCGGTTGAGGGAGCCGTTTTGGCCGACTTTAACTATTCTAAGAGTCTTTATGATTCAAAACCT

ATCGTTGTCGTCCTTACAAGGTTGAGGAGACTTTACAGCGGCTTATTGTCGCGCAGTTTCCAGAATT  
GCG

+

FFFFFFFFFFFFFFFFFFFFFFFFFFFFFFFFFFFFFFFFFFFFFFFFFFFFFFFFFFFFFFFFFFFFFFFF  
FFFFFFFFFFFF,FFFFFFFFFFFFFFFFFFFFFFFFFFFFFFFFFFFFFFFFFFFFFFFFFFFFFFFFFFFF:FFFFFFFF  
FFF

@A00721:190:HGJW7DSXY:4:1340:32479:30185\_2:N:0:TCTGCAAG+GCTGCACT  
TTTGCAACCCTATTCTTGATGTGAAAGATGCATCGAGGTATACGTCTAGGAACATTGATTGGGAACGT  
ACCTACTCACGAGACGTCATGAAAGCTATCGGAGGGAAGCAAAATGTT

+

FFFFFFFFFFFFFFFFFFFFFFFFFFFFFFFFFFFFFFFFFFFFFFFFFFFFFFFFFFFFFFFFFFFFFFFF:FFFF  
FFFFFFFFFFFFFFFFFFFFFFFFFFFFFFFFFFFFFFFFFFFFFFFFFFFFFFFFFFFFFFFFFFFF,F,F,FFF:

@A00721:190:HGJW7DSXY:4:1134:15429:27931\_2:N:0:TCTGCAAG+GCTGCACT  
TGATGATGTAGCCACTATAATGCTTAAGAGAGAGATTGATGTATGTCATTTCTGCTTAGTTTGTCCCG  
GCGAATTATTGGACACGATGAAAAATGACATACCCGTTCTGACCTTG

+

FFF::FF,FFFFFFFFFFFFFFFFFFFF:FF::FFF:FF:FFFFFFFFF:F:::FFFFFFFFFFFFFFFF:FFF  
FFFFFFFF,FFFFFFFFFFFF:FFFFFFFFFFFFFFFFFFFFFFFFFFFFFFFFFFFF::FF

@A00721:190:HGJW7DSXY:4:1611:8106:4726\_1:N:0:TCTGCAAG+GCTGCACT  
ATCGCTATACGCATACCTGATTGGAAGAAGCGAGGTTCTTCCTCAATAAAAATTTTCTCAAGAGAT  
TATGGTTGATAAAGTTTTCTTCATAAGGGCTATTAGTACGTCATGGGGATCACTTCTTCGGTCAATG  
ACA

+

FFF:FFFFFFFFFFFFFFFFFFFFFFFFFFFFFFFFFFFFFFFFFFFFFFFFFFFFFFFFFFFFFFFFFFFF:FFFF  
FFFFF:FFFFFFFFFFFFFFFFFFFFFFFFFFFFFFFFFFFFFFFFFFFFFFFFFFFFFFFFFFFFFFFFFFFF  
FFF

@A00721:190:HGJW7DSXY:4:1435:3531:12305\_2:N:0:TCTGCAAG+GCTGCACT  
ATATGTTACGACATGGCTTCGTAACAACAGTGCAGGATTGTCATCTCGGGGAAAGTGATTCACCAAG  
ATGTTTCATATAGATACGAGATACCTAGAGAAGGTCGAGCGATCTTAC

+

FFFFFFFFFFFFFFFFFFFFFFFFFFFFFFFFFFFFFFFFFFFFFFFFFFFFFFFFFFFFFFFFFFFF:FFFFFFFFFFFFFFFF  
FFFFFFFF:FFFFFFFFFFFFFFFFFFFFFFFFFFFFFFFFFFFFFFFFFFFFFFFFFFFFFFFFFFFF

@A00721:190:HGJW7DSXY:4:1154:32515:34538\_1:N:0:TCTGCAAG+GCTGCACT  
TGACTGGAGTTCAGACGTGTGCTCTTCCGATCTCTGAGAGAAAAGATTCAGGACGCCTACGGTGACTT  
TATGGACAAGATGCAAGTCTTGGGAAATACTTGTTCCTTTTTTAGGTTTAGTAGGTGATCTTGAC  
GTC

+

FFFFFFFFFFFFFFFFFFFFFFFFFFFFFFFFFFFFFFFFFFFFFFFFFFFFFFFFFFFFFFFFFFFF:FFFF,FFFFFFFFFFFFFFFF  
FFFFFFFF::FFFFFFFFFFFFFF,FFFFFFFFFFFFFFFFFFFF::FFF,FFFFFFFFFFFFFFFFFFFFFFFF  
FFF

@A00721:190:HGJW7DSXY:4:1629:5629:2848\_1:N:0:TCTGCAAG+GCTGCACT  
TGAGATTGAGAAGATTGAAGAACACGTCAAGAAGTCGCTCGGCGTTGTTCTTGAAAACCAAGTTAAGA  
AGGAGGCTGATCATGGAGTCTTTGTACCTTCTGTCAAACCTTCGAGGTTTACGCTACGAGAGGTGATCCC  
GGA

+

FFFFFFFFFFFFFFFFFFFF:FFF:FFFFFFFFFFFFFFFFFFFFFFFFFFFFFFFFFFFFFFFFFFFFFFFFFFFFFFFFFFFF:FFF  
FFFFFFFFFFFFFFFFFFFFFFFFFFFFFFFFFFFFFFFFFFFFFFFFFFFFFFFFFFFFFFFFFFFFFFFFFFFF  
FFF

@A00721:190:HGJW7DSXY:4:2458:10963:7764\_1:N:0:TCTGCAAG+GCTGCACT  
TGCTGGCTCTTAGGGAGACTCCTTCTTTTTGAATGTTGTATAGAATTGGGTTGAGAAGTGCTTTAC  
AAGGAGTTAGACTCTTCTTCTAGTTTTTAGATCTTCTTGATAATCTTAAAGAAAAATTTTCGAATAAA  
CTA

+

FF,FFF,F,F,FF:FFFF,F,:FF:F:FFFF,FFFFFF,,F,,,::,F,F:,,,FFFF:F,,FFFF,

:FFF:FF:FFFFFFFFF,,:FFFFFF:F:F,FF:F:F,FFFF:FFFF:FFFF:::FFF,F,,:FFF  
FF:

@A00721:190:HGJW7DSXY:4:2657:13196:4241\_1:N:0:TCTGCAAG+GCTGCACT  
CAGAGTCTCTTGAAGTCCAGGTAGCTAATGTTCTTGAATAGCCACAGACTTTCTGGGAAAAGAGAC  
CTCTGTTGGTAGAGGAGTTGAGAGAATTACTCAGATTCAATCTGGCATCACTGAACGTCTACAACGAG  
TTA

+

FFFFFFFFFFFFFFFFFFFFFFFFFFFFFFFFFFFFFFFFFFFFFFFFFFFFFFFFFFFFFFFFFFFFFFFF  
FFFFFFFFFFFFFFFFFFFFFFFFFFFFFFFFFFFFFFFFFFFFFFFFFFFFFFFFFFFFFFFFFFFFFFFF  
FFF

@A00721:190:HGJW7DSXY:4:2535:3061:25582\_1:N:0:TCTGCAAG+GCTGCACT  
ACGCTACACTCGAAATATGGGCCCTCATAAGGAAGTATAGTTGGCGTCTTGTCGTTGACGTCATTACA  
GTCTGGAAGTTAGATCATTTGTTGAGGAAGATCTCTACAGAGATTATCGAGAGTTGTGATCTAGTTCT  
AAA

+

FFFFFFFFF:FFFFFFFFFFFFFFFFFFFFFFFFFFFFFFFFFFFFFFFFFFFFFFFFFFFFFFFFFFFFF  
FFFFFFFFFFFFFFFFFFFFFFFFFFFFFFFFFFFFFFFFFFFFFFFFFFFFFFFFFFFFFFFFFFFFFFFF  
FFF

@A00721:190:HGJW7DSXY:4:2641:11695:20682\_1:N:0:TCTGCAAG+GCTGCACT  
TTCTAACCAGGACTGATGGTGAGATTCTTTTACCTTTTGGAGGTCCAGGAACCTTTACTCCTAGTGTC  
TTTTCTAGAGTCCAAGGACGTTTCCGTCGGAGGATGACAGGTGGGAGACCGCTCAATAACACTCTATT  
GAA

+

FFFFFFFFFFFFFFFFFFFFFFFFFFFFFFFFFFFFFFFFFFFFFFFFFFFFFFFFFFFFFFFFFFFFFFFF  
FFFFFFFFFFFFFFFFFFFFFFFFFFFFFFFFFFFFFFFFFFFFFFFFFFFFFFFFFFFFFFFFFFFFFFFF  
FFF

@A00721:190:HGJW7DSXY:4:2208:24370:7247\_2:N:0:TCTGCAAG+GCTGCACT  
CCTGTCCAGTTGTGATGATGTTGCGGCTGTGGGGATTAACCTCCCTCGTGAACTTACGACGATGTT  
CTCGCTCGCATTTACAAGGATTACTAAGTCTGAGATCTGCCACTTCT

+

FFFFFFFFFFFFFFFFFFFFFFFFFFFFFFFFFFFFFFFFFFFFFFFFFFFFFFFFFFFFFFFFFFFFFFFF  
FFFFFFFFFFFFFFFFFFFFFFFFFFFFFFFFFFFFFFFFFFFFFFFFFFFFFFFFFFFFFFFFFFFFFFFF

@A00721:190:HGJW7DSXY:4:2545:30879:35023\_1:N:0:TCTGCAAG+GCTGCACT  
CTTCTAATAGAGGATCCTGATGACATTATTTCAACGGATACCGATCTCAGTTCTACCACAGAAACCGT  
CTCAGGAAGTGTCTCCACTGATTCGGAATTAGAGAAAGACGACCTTCTTGTGGGACTGAGACCTCTG  
AAT

+

:FFFFFFF:FFF,F,:F,FF:FF,FF::F,FFFF:F,FFFF:FFFFFFF,:FF:::,FF:,,::F  
F:F:,,FFFF:,FF,F:,F,,F:,F,FFF:::FFFFFFF,F::FFF:FFFFFF,FF,:FFFFFF,:  
FFF

@A00721:190:HGJW7DSXY:4:2314:30047:13260\_1:N:0:TCTGCAAG+GCTGCACT  
AAAAGACCAGAAACGTAACAAGAAGAATAAAGGTAGGAAGGGAGAAAACAGAACAAGCGAGCGGTTG  
AAGAGAAAAGTATGATATGGTTGCGGCTGATCGTACCCCAATTCCTGCTAGAAAGATCACTCTCGGCGAT  
ACC

+

FFFF:FFFF:FFF,,FFFFFF,FFFFFFFFFFFFFFFFFFFFFFFFFFFFFFFFFFFFFFFFFFFFF  
FFFFFFFFFFFFFFFFFFFFFFFFFFFFFFFFFFFFFFFFFFFFFFFFFFFFFFFFFFFFFFFFFFFFFFFF  
FFF

@A00721:190:HGJW7DSXY:4:2449:24840:15515\_1:N:0:TCTGCAAG+GCTGCACT  
GTGAAAGTTATGATGAGTGATCGTATTAGAACAGCTGATTCTTATTGCATGATCGTCGCTGAGGTCAA  
ACCTGTGGACGTTCTTTTCATCGACGAATTATTCATGATTCACGCTGGTCAGACCATTTTTCTTACAC  
ATC

+

F:,F::FFF,FF,FF,F:FFF:FF,FF:FFF:,FFFFFFFFF:F:FFFFFF,:FF:FFFFFFFFF

:F:FFFFFFFFFFFFFFFF:FF:,F:FFFFF,FF:,FF,FFF:FFFFF:FF:FFFF,F:FFF,:FFF:,  
,F:  
@A00721:190:HGJW7DSXY:4:1607:12219:16485\_2:N:0:TCTGCAAG+GCTGCACT  
TGATTCCAATCAAATCGGATTCATCAATCGTATTGATCTCCAAGTCGCAAACTACTTCAACATCAACG  
ACATCATTCTTGATGAGTGTCTTCTTATCGAAGTCTCAGTTATCGCT  
+  
FFFFFFFFFFFFFFFFFFFFFFFFFFFFFFFFFFFFFFFFFFFFFFFFFFFFFFFFFFFFFFFFFFFFFFFF  
FFFFFFFFFFFFFFFFFFFFFFFFFFFFFFFFFFFFFFFFFFFFFFFFFFFFFFFFFFFFFFFFFFFFFFFF  
@A00721:190:HGJW7DSXY:4:2509:10782:33943\_1:N:0:TCTGCAAG+GCTGCACT  
GGAGGTTGCAGATTCAACCCCTTATATCGAGGCTATCGAGGACGATGAGTATCTTGAAGTTGTTGACG  
ACAAGCCTCAAGAGGGTAGAGGACCACCTGGATCTTCTACTGTCTCTGCCTTCCAAGATTTCTTAGAA  
GAG  
+  
FFFFFFFFFFFFFFFFFFFFFFFFFFFFFFFFFFFFFFFFFFFFFFFFFFFFFFFFFFFFFFFFFFFFFFFF  
FFFFFFFFFFFFFFFFFFFFFFFFFFFFFFFFFFFFFFFFFFFFFFFFFFFFFFFFFFFFFFFFFFFFFFFF  
FFF  
@A00721:190:HGJW7DSXY:4:2549:20302:33458\_2:N:0:TCTGCAAG+GCTGCACT  
CGGTAATCTTTCAGCCGAATTAAGTACTAATGAGTTCAAGTCGGTTGTGATCGAATTAAGATCAAGG  
CTAATACCTTTATAGGTAAGAAGCCCTTGAGCCGCGTAGTCAGCGCG  
+  
FFFF:FFFFFFFFFFFFFFFFFFFFFFFFFFFFFFFFFFFFFFFFFFFFFFFFFFFFFFFFFFFFFFFF  
FFFFFFFF:FFFFFFFFFFFFFFFFFFFFFFFFFFFFFFFFFFFFFFFFFFFFFFFFFFFFFFFFFFFF  
FFF  
@A00721:190:HGJW7DSXY:4:2553:15248:19852\_1:N:0:TCTGCAAG+GCTGCACT  
CTGGAGTTCAGACGTGTGCTCTTCCGATCTCTTTGGTAATTGTATGATCACTTTGATGATTTTATCAC  
TTTATTATGACCTTGAAAGTTTTCGGCTGTGGTTGTGCTGGGACGATTCCATTCTGTTTTCAAAG  
ACT  
+  
FF:FFFFFFFFFFFFFFFFFFFFFFFFFFFFFFFFFFFFFFFFFFFFFFFFFFFFFFFFFFFFFFFF:F  
FFFFFFFFFFFFFFFFFFFFFFFFFFFFFFFFFFFFFFFFFFFFFFFFFFFFFFFFFFFFFFFFFFFFFFFF  
FFF  
@A00721:190:HGJW7DSXY:4:1170:17689:12806\_2:N:0:TCTGCAAG+GCTGCACT  
GATTCCGAGAGGTTTATCCTGATGTGGAGGGAGTTCTTGAAGCATCCCGACCTTTCCTTGTA  
TTGATGCGTTTCATAAGATTATCAGTAATCCTGATTCTACTACGGAT  
+  
FFFFFFFFFFFFFFFFFFFFFFFFFFFFFFFFFFFFFFFFFFFFFFFFFFFFFFFFFFFFFFFF:F  
FFFFFFFF:FFFFFFFFFFFFFFFFFFFFFFFFFFFFFFFFFFFFFFFFFFFFFFFFFFFFFFFF,FFF  
@A00721:190:HGJW7DSXY:4:2103:12481:21261\_1:N:0:TCTGCAAG+GCTGCACT  
GTTGATTAAGACTCTTCCGAAAGGCGAACTTTGGGAATTTGAAGCTCAGGGTGAAGCACAACGTTTGA  
CCGTGACGAACTGTGGTGTCTTGATCTACGTTACGGATATACTCTCCTTGAGTTCACTCGTAAGGAC  
ACT  
+  
FFFFFFFFFFFFFFFFFFFFFFFF,FFFFFFFF:FFFFFFFFFFFFFFFFFFFFFFFFFFFFFFFF:FFF  
FFFFFFFFFFFFFFFFFFFFFFFFFFFFFFFFFFFFFFFFFFFFFFFFFFFFFFFFFFFFFFFFFFFF  
FFF  
@A00721:190:HGJW7DSXY:4:1331:4851:4820\_2:N:0:TCTGCAAG+GCTGCACT  
AGCAGGGGTTTTCGAATAGTAGCCACCCGCTTACAGAGGGGCAGCAGCATGACCATAATTGGTA  
TTGACTTTGGTACCACCTTTTCTACTGTCTGTCTCGCTCTTCAATG  
+  
FFFFFFFFFFFFFFFF:FFFFFFFFFFFFFFFFFFFFFFFFFFFFFFFFFFFFFFFFFFFFFFFFFFFF  
FFFFFFFFFFFFFFFFFFFFFFFFFFFFFFFFFFFFFFFFFFFFFFFFFFFFFFFFFFFFFFFFFFFF  
@A00721:190:HGJW7DSXY:4:2278:27715:32800\_1:N:0:TCTGCAAG+GCTGCACT  
TTAACAACAATGATAGTGAATTTATACCTACAATCATTGGTTTTTCTAATAATGATGACACTATTGTT  
TATGGATATGATGCTATTACTCATGATGGTTACGGTCAGGGAGGATTCTCAGTTTACAAGGACCTTAA  
GCG

+  
FFFFFFFF,FFFFFFFFFFFFFFFFFFFFFFFFFFFFFFFFFFFFFFFFFFFFFFFFFFFFFFFFFFFFFFFF  
FFFFFFFFFFFFFFFFFFFFFFFFFFFFFFFFFFFFFFFFFFFFFFFFFFFFFFFFFFFFFFFFFFFFFFFF  
FFF  
@A00721:190:HGJW7DSXY:4:1443:25545:20776\_2:N:0:TCTGCAAG+GCTGCACT  
TGGTCCTACTTTTGGACAAGGCCAACTTCGTAATCTTCATGAGATCGTTTCTTTCTTTATCTCTTTGG  
TTGTTAGGGATTTTGAGAGAGTGAAAGGCTTCAATTGTAGTGGTTTGG  
+  
FFFFFFFFFFFFFFFFFFFFFFFFFFFFFFFFFFFFFFFFFFFFFFFFFFFFFFFFFFFFFFFFFFFFFFFF  
FFFFFFFFFFFFFFFFFFFFFFFFFFFFFFFFFFFFFFFFFFFFFFFFFFFFFFFFFFFFFFFFFFFFFFFF  
@A00721:190:HGJW7DSXY:4:2153:26892:30592\_2:N:0:TCTGCAAG+GCTGCACT  
CAGTCAGTATACCTCTACGCAAAGATATTTTCATGAAAACCTACAGAGGAACGTACCGGATTACCTGTCT  
TTCATATTATGAATGAACCTTCGGCCGCTCTCTTTGCTTCGATGTTGG  
+  
FFFFFFFFFFFFFFFFFFFFFFFFFFFFFFFFFFFFFFFFFFFFFFFFFFFFFFFFFFFFFFFFFFFFFFFF  
FFFFFFFFFFFFFFFFFFFFFFFFFFFFFFFFFFFFFFFFFFFFFFFFFFFFFFFFFFFFFFFFFFFFFFFF  
@A00721:190:HGJW7DSXY:4:1420:4083:10786\_2:N:0:TCTGCAAG+GCTGCACT  
AATGGGATTCCTACGTAGTTTATGACTTTGGTGGTGGTACTTTCGATACTTCTATCGTCTTACGTTAC  
GGTAATTACTATAGTGTTATTTATTCTGGTGGTGGTATGATAATCTTGGA  
+  
FFFFFFFFFFFFFFFFFFFFFFFFFFFFFFFFFFFFFFFFFFFFFFFFFFFFFFFFFFFFFFFFFFFFFFFF  
FFFFFFFFFFFFFFFFFFFFFFFFFFFFFFFFFFFFFFFFFFFFFFFFFFFFFFFFFFFFFFFFFFFFFFFF  
@A00721:190:HGJW7DSXY:4:2323:21305:27367\_1:N:0:TCTGCAAG+GCTGCACT  
ATTACGGCGCACTTCTTTACCCGCCACCACACAACCTTTCAGTTTCACAACCTGAAGGAGGAGGTTTCTG  
TACTGGAAAACCCTCGTCAATACTTTTCAATAATATACGTCTTGAACCTCACTTATGACGATCTAGTG  
AAA  
+  
FFFFFFFFFFFFFFFFFFFFFFFFFFFFFFFFFFFFFFFFFFFFFFFFFFFFFFFFFFFFFFFFFFFFFFFF  
FFFFFFFFFFFFFFFFFFFFFFFFFFFFFFFFFFFFFFFFFFFFFFFFFFFFFFFFFFFFFFFFFFFFFFFF  
FFF  
@A00721:190:HGJW7DSXY:4:2207:28854:27790\_2:N:0:TCTGCAAG+GCTGCACT  
ACCAGGGGCTATTACTCTTGCTGAAACAGCTATTAAAGCTGTTGAGCGGTAATTACACCTAAACGAG  
CTCGATCTGCCATCGCTGAAGGATGTGCACTCTTTTCTGCTACTTTAA  
+  
FFFFFFFFFFFFFFFFFFFFFFFFFFFFFFFFFFFFFFFFFFFFFFFFFFFFFFFFFFFFFFFFFFFFFFFF  
FFFFFFFFFFFFFFFFFFFFFFFFFFFFFFFFFFFFFFFFFFFFFFFFFFFFFFFFFFFFFFFFFFFFFFFF  
@A00721:190:HGJW7DSXY:4:2309:12002:17143\_1:N:0:TCTGCAAG+GCTGCACT  
TTCCGATCTTTTCAATCTTCTTAAAAAGAAGATAGAGAGTCATACTTTGGGCTATCGTTTCAGGTGCAT  
GGGGTTGGATAGCCAATATTGAAGTGGACACCTCTGGTAGTATCGAAGTAAAGATAACCAATAAGGAA  
GGA  
+  
FFF,:FF:FFFFFFFF:FFF:FFFFFFFFFFFFFFFFFFFFFFFFFFFFFFFFFFFFFFFF:F:FFFFFFFF  
FFFFFFFFFFFFFFFFFFFFFFFFFFFFFFFFFFFFFFFFFFFFFFFFFFFFFFFFFFFFFFFFFFFFFFFF  
FFF  
@A00721:190:HGJW7DSXY:4:1147:4887:30185\_1:N:0:TCTGCAAG+GCTGCACT  
AATCTTACCACTATCTACGAACCTAAAGTTCTGAAGACGTTGCTTGTGCTTCCTCCTTTAATGGCAC  
TACCTCGGTACAATCTTACTTGGAACGAAGGCGACCTGTTCCGGAGTTTTTACGGGATCCGGAATGTT  
CTG  
+  
FFFFFFFFFFFFFFFF:F:FFFFFFFF:F:FFFF:FFFFFFFFFFFFFFFFFFFFFFFF,FFFFFFFF  
F:FFFFFFFFFFFFFFFF:FFFFFFFFFFFFFFFFFFFFFFFF:FFFFFFFFFFFFFFFFFFFFFFFF  
FFF  
@A00721:190:HGJW7DSXY:4:2244:30888:28025\_2:N:0:TCTGCAAG+GCTGCACT  
GATTTTAATATAAAGAATCTTTACCAGGACTCCTACTACAGGAGGCAGTCTTCTGATCGTAAGAAGTT



TATAAGGAACATATCCATTTGTTGTAATAGGGTCATCAACTTAGAACT

```
FFFFFFFFFFFFFFFFFFFFFFFFFFFFFFFFFFFFFFFFFFFFFFFFFFFFFFFFFFFFFFF:FFFFFFFFF  
FFFFFFFFFFFFFFFFFF:,FFFFFFFF:F:FFFFFFFFFFFFFFFFFFFF:F
```

+

```
FF,FFFFFFFFFFFFFFFFFFFFFFFFFFFFFFFF,FFFFFFFF:FFFF,FFFFFFFFFFFFFFFF
F:FFFFFFFF:FFFF:FFF:F:::FFF,FFFFFFFF,FFFF
```

+

```
FFFFFFFFFFFFFFFFFFFFFFFFFFFFFFFFFFFFFFFFFFFFFFFFFFFFFFFFFFFFFFF
FFFFFFFFFFFFFFFFFFFFFFFFFFFFFFFFFFFFFFFFFFFFFFFFFFFF
```

+

[illegible]

+

[illegible]

+

```

FFFFFFFFFFFFFFFFFFFFFFFFFFFFFFFFFFFFFFFFFFFFFFFFFFFFFFFFFFFFFFFF:FFFFFFFF
FFFFFFFFFFFFFFFFFFFFFFFFFFFFFFFF:FFFFFFFFFFFFFFFFFFFFFFFF:FFFFFFFFFFFFFFFF
FFF

```

+

[illegible]

+

[illegible]



@A00721:190:HGJW7DSXY:4:2425:8386:27821\_2:N:0:TCTGCAAG+GCTGCACT  
TTAATTCAATAGCTTTAGTATTATTTACTATCGCCTTTATTGAAAATTGTATAAGAGTTAATTGCTTA  
CACAAAAGTGACGCGCGAAGGAATCTTAATTGATTGAAGCTAGGCGTT

+

FFFF, :FFFFFFFFFFFFFFFF:FFFFFFFFFFFFFFFFFFFFFFFF:FFFFFF,FFFFFF:F:FFFF:  
FFFFFFFF:FFFFFFFFFFFFFFFF:FFF,FFFF,FFFF:, :FFFF

@A00721:190:HGJW7DSXY:4:1139:2465:22263\_2:N:0:TCTGCAAG+GCTGCACT  
TACCGCCGGTCGGCAGATCGGCACCACTGGTCTCTACGTTCAGGGACCCGCTGTGCAGAATAACCTTC  
CCAAATCTAGATCTGCACAGAAGAAGGCTGAAGGTCGTTACCGGACGA

+

F:FFFFFFFFFFFFFFFF:FFFFFFFFFFFFFFFFFFFFFFFF:FFFFFFFFFFFFFFFF:FFFF:FFFFFFFF  
FFFFFFFFFFFFFFFFFFFFFFFF:FF,FFFFFFFF:, FFFFF:F:FFFF

@A00721:190:HGJW7DSXY:4:1673:5086:15593\_2:N:0:TCTGCAAG+GCTGCACT  
TGGGAAGTGAAGCAGTACCTCAGTCAAAAGTCACATTCACCACTCCCATACCAATCAATGATGTGACT  
ATACAGTTCGGCCATTTCAAGAGTGGTCAATACGTCGTGGGAGGTACT

+

FFFFFFFFFFFFFFFFFFFFFFFFFFFFFFFFFFFFFFFF:FFFFFFFFFFFFFFFF:FFFFFFF  
:FFFFFFFF:FFFFFFFFFFFFFFFFFFFFFFFFFFFFFFFF:FFFF,FF

@A00721:190:HGJW7DSXY:4:2530:32334:32534\_1:N:0:TCTGCAAG+GCTGCACT  
AATCAATAGTTCTTCTGACCAGAATGAAAAGGGGTTACCAGGGTAGTCTCTAAGTCTACCAGGAAGA  
GGGGAATGTCCCCAAACTGAGAAGAATAAAGGGAAAGGTCCATCAGGACCTAAGAAGGGGAAATTA  
CC

+

FFFFFFFFFFFFFFFF:FFFFFFFFFFFFFFFFFFFFFFFFFFFFFFFFFFFFFFFF:FFFFFFFFFF  
FF:, F:FFFFFFFFFFFFFF,FFFF:FFFFFFFFFFFFFF,FFFFFFFFFFFFFFFF:FFFFFFFF  
FF

@A00721:190:HGJW7DSXY:4:2515:3278:2566\_2:N:0:TCTGCAAG+GCTGCACT  
ACGGGCCAAAGAGGCCGCTGCTACGAAGTCGCTGAAGGCGGCTTGGGTCTTAAGGGTAGCTGTAAAG  
TTGCGCCTGCCGACCCATCTTTGAGACCAAGACTCTCTACAGTAGGT

+

FFFFFFFFFFFFFFFFFFFFFFFF:FFFFFFFFFFFFFFFFFFFFFFFFFFFF:F,FFFFFF:FF,FFFFF  
F:FFFFFF:FFFFFFFFFFFFFFFF:FFF:F:FFFFFFFFFF,FF,FFF

@A00721:190:HGJW7DSXY:4:1509:14208:30639\_2:N:0:TCTGCAAG+GCTGCACT  
GAATTCGTCACTGAGGACGAAGGTGAGAGGACTTTTGGCTACTGGCGACAACTGAGAGCAGTCGCTG  
GGGAAAGAGAATTGCGTGGGTTGAAGGCCGACGCTTCGAGCTTGAGTG

+

FFFFFFF:FFFFFFFFFFFFFFFF:FFFFFFFFFFFFFFFFFFFFFFFF:FFFFFFFFFFFFFFFF  
:FFF:FFFFFFFF,FFFFFFFFFFFFFFFFFFFFFFFFFFFFFFFF

@A00721:190:HGJW7DSXY:4:2160:17815:16031\_1:N:0:TCTGCAAG+GCTGCACT  
TGGAGGATTTTATCCGCGCTTAAGTATGGGGCGAAGATCCCTATGGAGTCTTGAAGGACTTAGGTTG  
GCATATTTATGCCGACGATAATAAGCATGTACCCTTAAGCACCGAGGTAAGCTCGGGACTTACAAGA  
GAG

+

FFFFFFFFFFFF:FFFFFFFFFFFFFFFF:FFFFFFFFFFFFFFFF:F:FFFFFFFFFFFFFFFFFFFF  
FFFFFFFFFFFFFFFFFFFFFFFF:FFFFFFFFFFFFFFFFFFFFFFFFFFFFFFFFFFFFFFFF  
FFF

@A00721:190:HGJW7DSXY:4:2377:11270:8703\_2:N:0:TCTGCAAG+GCTGCACT  
ACTTTTCTTGAATAATTTTCTTTTCTCCGTCATTGGGGATTTGATGTGAGAAGGTGAAGGTGTCA  
AGGGTCTTCTTCATGCTGATCTTTCAGGACCTAATCACATCATGATTG

+

FFFFFFFFFFFFFFFFFFFFFFFFFFFFFFFFFFFFFFFFFFFFFFFFFFFFFFFFFFFFFFFFFFFF  
FFFFFFFFFFFFFFFFFFFFFFFFFFFFFFFF:FFFF:FFFFFFFFFFFF

@A00721:190:HGJW7DSXY:4:2321:13494:24549\_1:N:0:TCTGCAAG+GCTGCACT  
CGAAATTAAAGACGGGGGGATTAAGAGTCCAGCTGTAAGTGTCAATTCAGAGAGGGGAGCTCTGAAAA

GGAAACTTCGTCAGAAGATGAGGAAGTCTAAGAGGAGGAGTTTGAGGAAGGCTCTAGAGAAGATCTCA  
CCA

+

FFF:FFFFFFFFFFFF,FFFFFFFFFFFFFFFFFFFFFFFFFFFFFFFFFFFFFFFFFFFFFFFFFFFF  
FFFFFFFF:FFFFFFFFFFFF:FFFFFFFFFFFFFFFFFFFFFFFFFFFFFFFFFFFFFFFFFFFFFFFFFFFF  
FFF

@A00721:190:HGJW7DSXY:4:1624:31629:18098\_1:N:0:TCTGCAAG+GCTGCACT  
GATTATTTGAAGCAGGGGTTACCACTTCCTAAGGTGGATGAGGGAGGTTGTTTCTTTGGAGTTT  
TAGATAATCTTTTGAGAAGGGGTCATAGAGCCAGCAAGAGAAGCTTATATGCTGGTTAAGTGATGATTATC  
ACT

+

FFF,FFF:FFFFFFFF:FFFFFFFFFFFFFFFFFFFFFFFFFFFFFFFFFFFFFFFFFFFFFFFFFFFF  
FFFFFFFFFFFFFFFFFFFFFFFFFFFFFFFFFFFFFFFFFFFFFFFFFFFFFFFFFFFFFFFFFFFFFFFFFFFF  
FFF

@A00721:190:HGJW7DSXY:4:1109:17861:28698\_1:N:0:TCTGCAAG+GCTGCACT  
GGTAACTTACCATATTGTTCCCTTCCGGGAAGTTGTGGGATTTAACTTTGACTCAACTACTCCGATCAG  
ATCCGGATGGTTTGATTGGTATGGACTACTCGACTTTTGATCTGGAGTTGTCTAGGGTCATGGCAGAT  
ACT

+

F:FF,FFF:FF:F,FFFF,FFFF,F,F:FF:FFFFFF:FFF:FFFFFFFFFFFFFFFF:FFFFFFFF::  
FFF:FFFF,FFFFFFFFFFFFFFFFFFFFFFFFFFFF,FFFFFFFFFFFFFFFFFFFF,FFFFFFFFFFFFFFFFFFFF  
FFF

@A00721:190:HGJW7DSXY:4:2217:7907:11271\_1:N:0:TCTGCAAG+GCTGCACT  
TGAGGGCTGTTGAGGGAGCCGTTTTGGCCGACTTTAACTATTCTAAGAGTCTTTATGATTCAAAACCT  
ATCGTTGTCGTACCTTACAAGGTTGAGGAGACTTTACAGCGGCTTATTGTCGCGCAGTTTCCAGAATT  
GCG

+

FFFFFFF,FFFFFFFFFFFF,FFFFFFFFFFFF::F:FFFFFFFFFFFF:FFFFF,FFFFF,FFFFFF::F:F  
FFFFFFFFFFFFFFFFFFFFF,F:FF,:FFF:FFFFFFFFF,F:FFF:,FFF,FF:FFFF,FF::FF,FF  
:F,

@A00721:190:HGJW7DSXY:4:1436:7817:22357\_2:N:0:TCTGCAAG+GCTGCACT  
TTTGCAACCCTATTCTTGATGTGAAAGATGCATCGAGGTATACGTCTAGGAACATTGATTGGGAACGT  
ACCTACTCACGAGACGTCATGAAAGCTATCGGAGGGAAGCAAAATGTT

+

FFFFFFFFFFFF:FFFFFFFFFFFF:FFF:FFFFFFFFFFFFFFFFFFFFFFFFFFFFFFFFFFFF:F:FFFFFFFFFFFFF  
FFFFFFFFFFFFFFFFFFFFFFFFFFFFFFFFFFFFFFFFFFFFFFFFFFFFFFFFFFFFFFFFFFFF

@A00721:190:HGJW7DSXY:4:1250:29116:29152\_2:N:0:TCTGCAAG+GCTGCACT  
TGATGATGTAGCCACTATAATGCTTAAGAGAGAGATTGATGTATGTCATTTCTGCTTAGTTTGTCCCG  
GCGAATTATTGGACACGATGAAAAATGACATACCCGTTCTGACCTTG

+

FFFFFFFFFFFFFFFFFFFFFFFFFFFFFFFFFFFFFFFFFFFFFFFFFFFF:FFFFFFFFFFFFFFFFFFFFF  
FFFFFFFFFFFFFFFFFFFFFFFFFFFFFFFFFFFFFFFFFFFFFFFFFFFF:FFFFF,FF

@A00721:190:HGJW7DSXY:4:2109:9146:3991\_1:N:0:TCTGCAAG+GCTGCACT  
ATCGCTATACGCATACCTGATTGGAAGAAGCGAGGTTGTTTCCTCAATAAAAAATTTTCTCAAGAGAT  
TATGGTTGATAAAGTTTCTTCATAAGGGCTATTAGTACGTCATGGGGATCACTTCTTCGGTCAATG  
ACA

+

FFFFFFFFFFFFFFFFFFFFFFFFFFFF:FFFFFFFFFFFFFFFF:F:FFFFFFFFFFFFFFFFFFFFFFFFFFFF  
FFFFFFFFFFFFFFFFFFFFFFFFFFFFFFFFFFFFFFFFFFFFFFFFFFFF:FFFFF,FF  
FFF

@A00721:190:HGJW7DSXY:4:1470:32127:25974\_2:N:0:TCTGCAAG+GCTGCACT  
ATATGTTACGACATGGCTTCGTAACAACAGTGCAGGATTGTCATCTCGGGGAAAGTGATTACCAAG  
ATGTTTATATAGATACGAGATACCTAGAGAAGGTCGACGATCTTAC

+



@A00721:190:HGJW7DSXY:4:2649:22462:19194\_1:N:0:TCTGCAAG+GCTGCACT  
CTTCTAATAGAGGATCCTGATGACATTATTTCAACGGATACCGATCTCAGTTCTACCACAGAAACCGT  
CTCAGGAAGTGTCTCCACTGATTTCGGAATTAGAGAAAGACGACCTTCTTGTGGGGACTGAGACCTCTG  
AAT

+

:FFF,FFFFFF,FFFF:FFFFFF,F,FFFF:F:FFF:FFFFFFFF, :FFFFFFFF,FFFF:  
FFF:FFFFFF:FFFFF, :,FFFFFFFF:FFF:FF: :FFFFFFFFFFFFFFFFFFFFFFFF:FF,FF:  
FFF

@A00721:190:HGJW7DSXY:4:2414:9507:21120\_1:N:0:TCTGCAAG+GCTGCACT  
AAAAGACCAGAAACGTAACAAGAAGATAAAGGTAGGAAGGGAGAAAACAGAACAGCGAGCGGTTG  
AAGAGAAAAGTATGATGTTGCGGCTGATCGTACCCCAATTCCTGCTAGAAAGATCACTCTCGGCGAT  
ACC

+

FF:FFFFFFFFFFFFFFFFFFFFFFFFFFFFFFFFFFFFFFFFFFFFFFFFFFFFFFFFFFFFFFFF  
FFFFFFFFFFFFFFFFFFFFFFFFFFFFFFFFFFFFFFFFFFFFFFFFFFFFFFFFFFFFFFFFFFFF  
FFF

@A00721:190:HGJW7DSXY:4:1668:8024:32299\_1:N:0:TCTGCAAG+GCTGCACT  
CTTCCGATCTGATGAGTGATCGTATTAGAAGCTGATTCTTATTGCATGAACGTCGCTGAGGTCAA  
CCTGTGGACGTTCTTTTCATCGACGAATTATTCATGATTCACGCTGGTCAGACCCTTTTCTTACACA  
TCT

+

FFFFFFFFFFFFFFFFFFFFFFFFFFFFFFFFFFFFFFFFFFFFFFFFFFFFFFFFFFFFFFFFFFFF  
FFFFFFFFFFFFFFFFFFFFFFFFFFFFFFFFFFFFFFFFFFFFFFFFFFFFFFFFFFFFFFFFFFFF  
FFF

@A00721:190:HGJW7DSXY:4:1669:32633:4711\_2:N:0:TCTGCAAG+GCTGCACT  
TGATTCCAATCAAATCGGATTCATCAATCGTATTGATCTCCAAGTCGAACTACTTCAACATCAACG  
ACATCATCTTGATGAGTGTGCTTCTTATCGAAGTCTCAGTTATCGCT

+

FFFFFFFFFFFFFFFFFFFFFFFFFFFFFFFFFFFFFFFF,FFFFFFFFFFFFFF,FFFFFFF:,FFFFF:FF  
FFFFFFFFFFFFFFFFFFFFFFFFFFFFFFFF:FFFFFFF:FFFF,FFFFFFFF

@A00721:190:HGJW7DSXY:4:1367:11360:23516\_1:N:0:TCTGCAAG+GCTGCACT  
GAGGTTGCAGATTCAACCCCTTATATCGAGGCTATCGAGGACGATGAGTATCTTGAAGTTGTTGACGA  
CTAGCCTCAAGAGGGTAGAGGACCACCTGGATCTTCTAATGTCTCTGCCTTCCAAGATTTCTTAGAAG  
AG

+

F, :F:FF::FF:FF:FF,FFF:,FF:F:,FF,FFFFFFFF:, :FFF:FFFFFF,,FFFFF:,FFF,FF,  
:, :, ,FFFF,F,FF:FFFFFFFF,FFFF:FF,FFF:F,FFF::F,,FFFFFF,FFFFF,:FF, :, ,  
:F

@A00721:190:HGJW7DSXY:4:2549:29197:14826\_2:N:0:TCTGCAAG+GCTGCACT  
CGGTAATCTTTCAGCCGAATTAAGTACTAATGAGTTCAAGTCGTTGTGCGATCGAATTAAGATCAAGG  
CTAATACCTTTATAGGTAAGAAGCCCTTGAGCCGCGTAGTCAGCGCG

+

FFFFFFFFFFFFFFFFFFFFFFFFFFFFFFFFFFFFFFFF:FFFFFFFFFFFFFF:FF:FFFFFFFFFF  
FFFFFFFFFFFFFFFFFFFFFFFFFFFFFFFFFFFFFFFF:FFFFFFFFFFFFFFF

@A00721:190:HGJW7DSXY:4:2653:12870:25034\_1:N:0:TCTGCAAG+GCTGCACT  
CTGGAGTTCAGACGTGTGCTCTTCCGATCTCTTGGAATTGTATGATCACTTTGATGATTTTATCAC  
TTTATTATGACCTTGGAAGTTTTCGGCTGTGGTTGTGCTGGGACGATTCCATTCTGTTTTCAAAG  
ACT

+

FFFFFFFF:FFFFFFFF:FFFFF,FFFF:: :FFFFFFFFFFFFFFFFFFFFFFFFFFFFFFFFFFFF  
FFFFFFFFFF: :FFFFFFFFFFFFFFFFFFFFFFFF:FFFFFFFFFFFFFF:FFFFF,FFFFFFFFFFFFFFFF  
:FF

@A00721:190:HGJW7DSXY:4:1170:17806:12727\_2:N:0:TCTGCAAG+GCTGCACT  
GATTCCGAGAGGTTTATCCTGATGTGGAGGGAGTTCTTGAAGCATCCGACCTTTCCTTGTGAAAATT

+

@A00721:190:HGJW7DSXY:4:2103:14018:22983\_1:N:0:TCTGCAAG+GCTGCACT

+

@A00721:190:HGJW7DSXY:4:1468:1796:5948\_2:N:0:TCTGCAAG+GCTGCACT

+

@A00721:190:HGJW7DSXY:4:2530:23466:11945 1:N:0:TCTGCAAG+GCTGCACT

+

@A00721:190:HGJW7DSXY:4:2538:32081:21637 2:N:0:TCTGCAAG+GCTGCACT

+

@A00721:190:HGJW7DSXY:4:1452:25482:25457 2:N:0:TCTGCAAG+GCTGCACT

+

@A00721:190:HGJW7DSXY:4:1177:25997:32737 2:N:0:TCTGCAAG+GCTGCACT

+

@A00721:190:HG1W7DSXY:4:2264:8097:30389 2:N:0:TCTGCAAG+GCTGCACT

 $+$ 

@A00721:190:HG1W7DSXY:4:2317:31150:19179 1:N:0:TCTGCAAG+GCTGCACT

GGA

[illegible]



@A00721:190:HGJW7DSXY:4:1454:25961:24690\_2:N:0:TCTGCAAG+GCTGCACT  
GTTAAAGACTGCAGAGGCTGTCAAACAAGCCCAGACTCAAGGAGTCCAATCAAAGGTTTGAATTTAG  
CTCAACTGGGGAGACGTGCTTAAATGGGTGAGATCGGAAGAGCGTCGT

@A00721:190:HGJW7DSXY:4:2576:5575:11741\_1:N:0:TCTGCAAG+GCTGCACT  
CACTCCAAACACTATATACATTATAAAATATAAAAATAAGGGAGTCATAACTTTTGTACCAAATTCT  
TGGCTTTCAACGAAGTCTCTGATTTTATTAATCATTACTTTAACGATCTCTCGGTCATTTACTCTGTA  
CTT

@A00721:190:HGJW7DSXY:4:2271:31060:4460\_2:N:0:TCTGCAAG+GCTGCACT  
GTCGGAACAACCTTTACTTAGAATGACTCTATCTTTTCAGACCCTTCTTATATTATTTACAATAGTTA  
ATATCATATTAGTAATACTCACTATCGTTTTCTGCTTTTTCTTAGCTA

@A00721:190:HGJW7DSXY:4:2343:24731:7028\_2:N:0:TCTGCAAG+GCTGCACT  
GAGTACGAAAACCAACTCTTCGTTACGAGACCTGATGGTAGAATAGATTTAGTCTCTACACCCATCTC  
AACGAGGATAAAGCGAGTTTTCCGTCTGAACGTAATACACGAAGAGA

@A00721:190:HGJW7DSXY:4:1662:22652:14105\_2:N:0:TCTGCAAG+GCTGCACT  
ATCCTGCCTTTACTCATTTTATAGCAGTTATTTATGTTGTACTTTTTATAATTTATAACCTTCTTATA  
CTTTTGGGTATGTTTTGTGAAAAACATGAGATACCCAAGTCTATCGAA

@A00721:190:HGJW7DSXY:4:1205:11107:23829\_1:N:0:TCTGCAAG+GCTGCACT  
ACAGACTCCGAAATGGTTTCAAATGAGGTCAAAGCTCTATTTATTAACGAAGCTATTATCCGATTCT  
TCGAGGGTATCACTACCACTGATCTGCCGACTTTAGTCAAGGAAGCTTCAATTCCTTCGATGTTTATAT  
TTT

@A00721:190:HGJW7DSXY:4:1106:30960:16250\_1:N:0:TCTGCAAG+GCTGCACT  
CGACAAATTTTAGAACTTTATTTTCAGAACTCTCTCCGATCACCTTGGTGTGATCTCCCGGAGGATCTT  
TTCAATAAGATGTATGATGATAATCTACTATTTTTAAATAGTGATATTCAGCGTATACTTGAATACTT  
TAT

@A00721:190:HGJW7DSXY:4:1414:13874:6637\_1:N:0:TCTGCAAG+GCTGCACT  
TTACCGCAAAAAGTTGGAAGAGGTCTATGATATTTATTTTACTTATACTTTAAATAGCACCGATTATA  
ACTTGACTGTTGATAATATTACAATAGCTCTTTCTCAGAAGATTAGAGAAGTAACCGGTGAACACGTC  
GGT

FFFFFFFFFFFFFFFFFFFFFFFFFFFFFFFFFFFFFFFFFFFFFFFFFFFFFFFFFFFFFFFFFFFFFFFFFFFFFFFF  
FFF

@A00721:190:HGJW7DSXY:4:1460:7826:2988\_1:N:0:TCTGCAAG+GCTGCACT  
ACTTTTACCGTTAGAACTGAAAAAGATTCTTTTCGAAAAGAAACCTATAAGTTACAAACGATTCTTCG  
ACTATATTAAAGAAATAAAAATACTTCAAGTACCTGAACTTTACATTTTAAATGGTATGGTATAATGT  
GTC

+

FFFFFFFF,FFFFFFFFFFFFFFFFFFFFFFFFFFFFFFFFFFFFFFFFFFFFFFFFFFFFFFFFFFFFFFFF  
FFFFFFFFFFFFFFFFFFFFFFFFFFFFFFFFFFFFFFFFFFFFFFFFFFFFFFFFFFFFFFFFFFFFFFFF  
FFF

@A00721:190:HGJW7DSXY:4:1220:14615:30154\_2:N:0:TCTGCAAG+GCTGCACT  
ATGAGAGTGTATTCCTTAATATTCTAGTAACCGCTATGTGGGCATTACTAGGATTTATCACACTCCTA  
AATTTGATAGCAATTTATGTTTTAAATGCTAGGAAAATTTAGAAAAA

+

FFFFFFFFFFFFFFFFFFFFFFFFFFFFFFFFFFFFFFFFFFFFFFFFFFFFFFFFFFFFFFFFFFFFFFFF  
FFFFFF:FFFFFFFFFFFFFFFFFFFFFFFFFFFFFFFFFFFFFFFFFFFFFFFFFFFFFFFFFFFFFFFF

@A00721:190:HGJW7DSXY:4:2328:13494:33536\_1:N:0:TCTGCAAG+GCTGCACT  
TTAATTCAATAGCTTTAGTATTATTTACTATCGCCTTTATTGAAAATTGTATAAGAGTTAATTGCTTA  
CACAAAAGTGACGCGCAAGGAATCTTAATTGATTGAAGCTAGGCGTTGGGGAGAATGAACTGCCGCT  
TC

+

FFFFFFFFFFFF,FFFFFFFFFFFFFFFFFFFF,F:FFFFFFFFFFFFFFFFFFFFFFFF,FF:FFF:FFFF  
FFFFF:FFFF:FFFFFFF:FFFFFFFF:FFFFFF:FFFFFF:FFFFFFFF:FFF:FFFFFFFF,FF:  
FF

@A00721:190:HGJW7DSXY:4:1515:12436:34366\_2:N:0:TCTGCAAG+GCTGCACT  
TACCGCCGGTCGGCAGATCGGCACCACTGGTCTCTACGTTACGGGACCCGCTGTGCAGAATAACCTTC  
CCAAATCTAGATCTGCACAGAAGAAGGCTGAAGGTCGTTACCGGACGA

+

FFFFFFFFFFFF:FFFFFFFFFFFFFFFFFFFFFFFFFFFFFFFFFFFFFFFFFFFFFFFFFFFFFFFF  
FFFFFFFFFFFFFFFFFFFFFFFFFFFFFFFFFFFFFFFF,FFFFFFFFFFFFFFFF

@A00721:190:HGJW7DSXY:4:1673:5701:14873\_2:N:0:TCTGCAAG+GCTGCACT  
TGGGAAGTGAAGCAGTACCTCAGTCAAAAGTCACATTCACCACTCCCATACCAATCAATGATGTGACT  
ATACAGTTCGCCCATTTCAAGAGTGGTCAATACGTCGTGGGAGGTACT

+

FFFFFFFFFFFFFFFFFFFFFFFFFFFFFFFFFFFFFFFFFFFFFFFFFFFFFFFFFFFFFFFFFFFFFFFF  
FFFFFFFFFFFFFFFFFFFF:FFFFF:FFFFFFFFFFFFFFFF:FFFFFFFFFFFF

@A00721:190:HGJW7DSXY:4:1120:24352:10473\_1:N:0:TCTGCAAG+GCTGCACT  
AATCAATAGTTCTTCTGACCAGAATGAAAAGGGGTTACCAGGGTAGTCTCTAAGTCTACCAGGAAGA  
GGGGAATGTCCCAAAACTGAGAAGAATAAAGGGAAAGGTCCATCAGGACCTAAGAAGGGGAAATTA  
CCC

+

FFFFFFFFFFFF:FFFFFFFFFFFFFFFFFFFFFFFFFFFFFFFFFFFFFFFFFFFFFFFFFFFFFFFF  
FFFFFFFFFFFFFFFFFFFFFFFFFFFFFFFFFFFFFFFFFFFFFFFFFFFFFFFFFFFFFFFFFFFFFFFF  
FFF

@A00721:190:HGJW7DSXY:4:2578:24270:6543\_2:N:0:TCTGCAAG+GCTGCACT  
ACGGGCCAAAGAGGCCGCTGCTACGAAGTCGCTGAAGGCGGCTTGGGTCATTAAGGGTAGCTGTAAAG  
TTGCGCCTGCCGACCCCATCTTTGAGACCAAGACTCTCTACAGTAGGT

+

FFFFFFFFFFFFFFFFFFFFFFFFFFFFFFFFFFFFFFFFFFFFFFFFFFFFFFFFFFFFFFFFFFFFF  
FFF:FFFFFFFFFFFFFFFFFFFFFFFFFFFFFFFFFFFFFFFFFFFFFFFFFFFFFFFFFFFFFFFF

@A00721:190:HGJW7DSXY:4:1509:15203:29825\_2:N:0:TCTGCAAG+GCTGCACT  
GAATTCGTCACTGAGGACGAAGGTGAGAGGACTTTTGGCTACTGGCGACAACTGAGAGCAGTCGCTG  
GGGAAAGAGAATTGCGTGGGTTGAAGGCCGACGCTTCGAGCTTGAGTG

+

FFFFFFFFFFFFFFFFFFFFFFFFFFFFFFFFFFFFFFFFFFFFFFFFFFFFFFFFFFFFFFFFFFFFFFFFFFFFFFFF  
FFFFFFFFFFFFFFFFFFFFFFFFFFFFFFFFFFFFFFFFFFFFFFFFFFFFFFFFFFFFFFFFFFFFFFFFFFFFFFFF

@A00721:190:HGJW7DSXY:4:2625:19434:21183\_1:N:0:TCTGCAAG+GCTGCACT  
TTTATCCGCGCTTAAGTATGGGGCGAAGATCCCCTATTGAGTCTTGTAGGACTTAGGTTGGAATATTT  
ATGCCGACGATAATAAGCATGTCAAACCTTAAGCACCGAGGTAAGCTCGGGACTTACAAGAGAGAGTGT  
GAG

+  
FFFF::FF,FFFFFFFF:FF,FFFF,F,F,F,:FFFF:F,F:FFF,F,:F,FFF,FFF,:,,F,FFF  
,FF,:FF:FFFFFFFF,FFFFFFFF,,FFF:FFFF,FF:,FFF,:F:F:FFFFFF,FF,FFFF:F:FFF  
FFF

@A00721:190:HGJW7DSXY:4:2633:14190:22279\_2:N:0:TCTGCAAG+GCTGCACT  
ACTTTTCTTGAAAATTTTTCCTTTCCTCCGTCATTGGGGATTTCGATGTGAGAAGGTGGAAGGTGTCA  
AGGGTCTTCTTCATGCTGATCTTTCAGGACCTAATCACATCATGATTG

+  
FFF:FFFFFFFFFFFFFFFF:FFFFFF:FF:FFF:FF:FFFFFFFFFFFFFFFFFFFFFFFF,FFFFFFFF:FFFF  
FFFFFFFFFFFFFFFF:FFFFFFFF:FFF:FFF:FFFFFFFFFFFFFFFF:F

@A00721:190:HGJW7DSXY:4:2331:26304:10974\_1:N:0:TCTGCAAG+GCTGCACT  
CGAAATTAAGACGGGGGATTAAGAGTCCAGCTGTAAGTGTCACTTTCAGAGAGGGGAGCTCTGAAAA  
GGAACTTCGTCAGAAGATGAGGAAGTCTAAGAGGAGGAGTTTGAAGGAAGGCTCTAGAGAAGATCTCA  
CCA

+  
FFFFFFFFFFFFFFFF:FFFFFFFFFFFFFFFFFFFFFFFFFFFFFFFF:FFFFFFFFFFFFFFFFFFFFFFFF  
FFFFFFFFFFFFFFFFFFFFFFFFFFFFFFFFFFFFFFFFFFFFFFFFFFFFFFFFFFFFFFFFFFFFFFFFFFFF,  
FFF

@A00721:190:HGJW7DSXY:4:2202:14579:25895\_1:N:0:TCTGCAAG+GCTGCACT  
GATTATTTGAAGCAGGGGTTACCACTTCCTAAGGTGGATGAGGGAGGTTGTTTCTTTGGAGTTTTAGA  
TAATCTTTTGAGAAGGGGTCATAGAGCCAGCAAGAGAAGCTTATATGCTGGTTTAAGTGATGATTATC  
ACT

+  
F::F,:FF,:FFFF:FFFFFFFF:F:F:FFFFFFFF:FFFFFFFF:FFFFFFFFFFFFFFFF:F  
FFFFFFFFFFFFFFFF,FFFFFFFFFFFF:FFFFFFFF:FFFFFFFFFFFF:FFFFFFFFFFFF  
F,F

@A00721:190:HGJW7DSXY:4:1151:4951:30264\_1:N:0:TCTGCAAG+GCTGCACT  
GGTAACTTACCATATTGTTCCCTTCGGGAAGTTGTGGGATTTAACTTTGACTCAACTACTCCGATCAG  
ATCCGGATGGTTTGATTGGTATGGACTACTCGACTTTTGATCTGGAGTTGTCTAGGGTCATGGCAGAT  
ACT

+  
FFFFFFFFFFFFFFFFFFFFFFFF:FFFFFFFFFFFFFFFFFFFFFFFFFFFFFFFFFFFFFFFFFFFFFFFF  
FFFFFFFFFFFFFFFFFFFFFFFFFFFFFFFFFFFFFFFFFFFFFFFFFFFFFFFFFFFFFFFFFFFFFFFFFFFF  
FFF

@A00721:190:HGJW7DSXY:4:2522:2130:28322\_1:N:0:TCTGCAAG+GCTGCACT  
TGAGGGCGTTGAGGGAGCCGTTTTGGCCGACTTTAACTATTCTAAGAGTCTTTATGATTCAAAACCT  
ATCGTTGTCGTACCTTACAAGGTTGAGGAGACTTTACAGCGGCTTATTGTGCGCAGTTTCCAGAATT  
GCG

+  
FFFFFFFFFFFFFFFFFFFFFFFFFFFFFFFFFFFFFFFFFFFFFFFF:FFFFFFFFFFFFFFFFFFFFFFFF  
FFFFFFFFFFFFFFFFFFFFFFFFFFFFFFFFFFFFFFFFFFFFFFFFFFFFFFFFFFFFFFFFFFFFFFFFFFFF  
FFF

@A00721:190:HGJW7DSXY:4:2158:30002:11052\_2:N:0:TCTGCAAG+GCTGCACT  
TTTGCAACCCTATTCTTGATGTGAAAGATGCATCGAGGTATACGTCTAGGAACATTGATTGGGAACGT  
ACCTACTCACGAGACGTCATGAAAGCTATCGGAGGGAAGCAAAATGTT

+  
FFFFFFFFFFFFFFFFFFFFFFFFFFFFFFFFFFFFFFFF:FFFFFFFFFFFFFFFFFFFFFFFFFFFFFFFF  
FFFFFFFFFFFFFFFFFFFFFFFF:FFFFFFFFFFFFFFFF::F:FFFF

@A00721:190:HGJW7DSXY:4:2213:32425:15781\_1:N:0:TCTGCAAG+GCTGCACT  
CGCTACACTCGAAATATGGGCCCTCATAAGGAAGTATAGTTGGCGTCTTGTCGTTGACGTCATTACAG  
TCTGGAAGTTAGATCATTTGTTTCAGGAAGATCTCTACAGAGATTATCGAGAGTTGTGATCTAGTTCTA  
AA



@A00721:190:HGJW7DSXY:4:2558:1958:33411\_2:N:0:TCTGCAAG+GCTGCACT  
CGGTAATCTTTCAGCCGAATTAAGTACTAATGAGTTCAAGTCGGTTGTCGATCGAATTAAGATCAAGG  
CTAATACCTTTATAGGTAAGAAGCCCCTTGAGCCGCGTCGTCAGCGCG

+

FFFFFFFFFFFFFFFFFFFFFFFFFFFFFFFFFFFFFFFFFFFFFFFFFFFFFFFFFFFFFFFFFFFFFFFF  
FFFFFFFFFFFFFFFFFFFFFFFFFFFFFFFFFFFFFFFFFFFFFFFFFFFFFFFFFFFFFFFFFFFFFFFF

@A00721:190:HGJW7DSXY:4:1130:18114:18677\_2:N:0:TCTGCAAG+GCTGCACT  
CTTTGGTAATTGTATGATCACTTTGATGATTTTATCACTTTATTATGACCTTGAAAGTTTTTCGGCTG  
TGGTTGTCGCTGGGGACGATTCCATTCTGTTTTCAAAGACTCCAATAA

+

: ,F: ,FFFF:FFFFFFFF:FF:FFFFFFFF:FFFFFFFFFFFFFFFF,FF:F,FFFFFFFF::FF: , ,:F:F  
F: , ,FFFF,F,FFFFFFFF:FFF:F:FFFF,FFFFFFFF::FFFFFFFF

@A00721:190:HGJW7DSXY:4:1266:17680:30295\_2:N:0:TCTGCAAG+GCTGCACT  
GATTCCGAGAGGTTTATCCTGATGTGGAGGGAGTTCTTGAAGCATCCCGACCTTTCCTTGTAATAATT  
TTGATGCGGTTTCATAAGATTATCAGTAATCCTGATTCTACTACGGAT

+

FFFFFFFFFFFFFFFFFFFFFFFFFFFFFFFFFFFFFFFFFFFFFFFFFFFFFFFFFFFFFFFFFFFFFFFF  
FFFFFFFFFFFFFFFFFFFFFFFFFFFFFFFFFFFFFFFFFFFFFFFFFFFFFFFFFFFFFFFFFFFFFFFF

@A00721:190:HGJW7DSXY:4:2133:29197:1611\_1:N:0:TCTGCAAG+GCTGCACT  
GTTGATTAAGACTCTTCCGAAAGGCGAACTTTGGGAATTTGAAGCTCAGGGTGAAGCACACGTTTGA  
CCGTGACGAACTGTGGTGTCTTGATCTACGTTACGGATATACTCTCCTTGAGTTCACTCGTAAGGAC  
ACT

+

:FFFFFFFFFFFFFFFF:FFFFFFFF:FFFFF,FFFFFFFFFFFFFFFF:FFFFFFFFFFFFFFFF:FFFF  
FFFFFFFFFFFFFFFFFFFFFFFFFFFFFFFFFFFFFFFF:FFFFFFFFFFFFFFFFFFFFFFFFFFFFFFFF  
FFF

@A00721:190:HGJW7DSXY:4:1542:22643:1532\_2:N:0:TCTGCAAG+GCTGCACT  
AGCAGGGGTTTTTCGAATAGTAGCCACCCGCCTTACAGAGGGGCAGCAGCATGACCATAATTGGTA  
TTGACTTTGGTACCACCTTTTCTACTGTCTGTCTCGCCTCTTCAATG

+

FFFFFFFFFFFFFFFFFFFFFFFFFFFFFFFFFFFFFFFFFFFFFFFFFFFFFFFFFFFFFFFFFFFFFFFF  
FFFFFFFFFFFFFFFFFFFFFFFFFFFFFFFFFFFFFFFFFFFFFFFFFFFFFFFFFFFFFFFFFFFFFFFF

@A00721:190:HGJW7DSXY:4:2542:10592:35869\_1:N:0:TCTGCAAG+GCTGCACT  
TTAACAACAATGATAGTGAATTTATACCTACAATCATTGGTTTTTCTAATAATGATGACACTATTGTT  
TATGGATATGATGCTATTACTCATGATGGTTACGGTCAGGGAGGATTCTCAGTTTACAAGGACCTTAA  
GCG

+

FFFFFFFFFFFFFFFF:FFFFFFFFFFFFFFFFFFFFFFFFFFFFFFFFFFFFFFFF,FFFFFFFFFFFFFFFF  
FFFFFFFFFFFFFFFFFFFFFFFFFFFFFFFFFFFFFFFFFFFFFFFFFFFFFFFFFFFFFFFF:FFFFFFFFFFFFFFFF  
FFF

@A00721:190:HGJW7DSXY:4:2617:17255:24768\_2:N:0:TCTGCAAG+GCTGCACT  
GAGTGAAAGGCTTCAATTGTAGTGGTTTGGTCTTTAGTACCCAGTCAGTATACCTCTACGCAAAGA  
TATTTTCATGAAACTACAGAGGAACGTACCGGATTACCTGTCTTTCAT

+

FFF:FFFFFFFF: ,FFFF:FFFF:FFFFFFFFFFFFFFFFFFFFFFFF:FF::FFFFFFFF:F::FF  
FFFFFFFFFFFFFFFFFFFFFFFF:FFFFFFFFFFFFFFFFFFFFFFFF,FFFF

@A00721:190:HGJW7DSXY:4:1524:9091:32518\_2:N:0:TCTGCAAG+GCTGCACT  
AATGGGATTCTACGTAGTTTATGACTTTGGTGGTGGTACTTTCGATACTTCTATCGTCTTACGTTAC  
GGTAATTACTATAGTGTTATTTATTCTGGTGGTGGTACTTTCGATACTTCTATCGTCTTACGTTAC

+

FFFFFFFFFFFFFFFF:FF,FFF:FFFFFFFFFFFFFFFFFFFFFFFF,FFFFFFFFFFFFFFFF  
FFFFFFFF,FFFFFFFF,FFFFFFFF:FFFFFFFFFFFFFFFF,FF

@A00721:190:HGJW7DSXY:4:1201:32606:36104\_2:N:0:TCTGCAAG+GCTGCACT  
ACGGCGCACTTCTTTACCGCCACCACAACTTTCAGTTTCACTGAAGGAGGAGTTTCTGTTA

+

@A00721:190:HGJW7DSXY:4:2143:32805:30812\_1:N:0:TCTGCAAG+GCTGCACT  
TTCCGATCTATTACTCTTGCTGAAACAGCTATTAAGCTGTTGAGCGGGTAATTACACCTAAACGAGC  
TCGATCTGCCATCGCTGAAGGATGTGCACTCTTTTCTGCTACTTTAACGGAGCGTAGTGTACTCTTCG  
TCG

+

@A00721:190:HGJW7DSXY:4:2340:11252:13902\_1:N:0:TCTGCAAG+GCTGCACT  
TTCCGATCTTTCAATCTTCTTAAAAAGAAGATAGAGAGTCATACTTTGGGCTATCGTTCAGGTGCAT  
GGGGTTGGATAGCCAATATTGAAGTGGACACCTCTGGTAGTATCGAAGTAAAGATAACCAATAAGGAA  
GGA

+

@A00721:190:HGJW7DSXY:4:1177:4707:29778\_1:N:0:TCTGCAAG+GCTGCACT  
AATCTTACCACTATCTACGAACCTAAAGTTCTGAAGACGTTGCTTGTGCTTCCTCCTTTAATGGCAC  
TACCTCGGTACAATCTTACTTGGAACGAAGGCGACCTGTTCCGGAGTTTTTACGGGATCCGGAATGTT  
CTG

+

@A00721:190:HGJW7DSXY:4:2441:1985:14669\_2:N:0:TCTGCAAG+GCTGCACT  
GATTTTAATATAAAGAATCTTTACCAGGACTCCTACTACAGGAGGCAGTCTTCTGATCGTAAGAAGTT  
TATAAGGAACATATCCATTTGTTGTAATAGGGTCATCAACTTAGAACT

+

@A00721:190:HGJW7DSXY:4:2351:29975:15828\_2:N:0:TCTGCAAG+GCTGCACT  
ATACTGTCTTTCCAAGCTTACCTGTATCTTCAATGAAATTGGACTCTTCGATAGGGGACATTTTATCG  
TGGGCTTTCCGTAAAGGAAGATCTGTTATCGACGGTTTATCGTTTACG

+

@A00721:190:HGJW7DSXY:4:1244:28646:7326\_1:N:0:TCTGCAAG+GCTGCACT  
AAAATTTTATCCTCGTTTAACTTACTTAGACTTTCTACGATACAAATGATAACTTCTAATTTACGTT  
TGCTACTCAGAGCTGGTCCTCTCAGCAAAGGGATGCATGGTGTTATCTCCTCAGGAGTCCCGGCATT  
GAT

+

@A00721:190:HGJW7DSXY:4:1568:21612:21042\_1:N:0:TCTGCAAG+GCTGCACT  
GACTTTTCGTCATAATCGCTGCATATTACGGATTACACGGTACCAGCGCATCTCGTGTGAGCCTCGAC  
CCGATTATATGGTATTAACCTATAAAGGTGAGGAGACCATTTTCTTGCTGAAATTTATAGAAGATTAT  
TTT

+

[illegible]

FFFFFFFFFFFFFFFFFFFFFFFFFFFFFFFFFFFFFFFFFFFFFFFFFFFFFFFFFFFFFFFFFFFFFFFF  
FFF

@A00721:190:HGJW7DSXY:4:1429:27841:12164\_1:N:0:TCTGCAAG+GCTGCACT  
TACTAATGGCAAATAGTGGAAGGCTCCAGTCAACACTAGTTCGAGTGCTGCTTTGGATTACGATGAC  
GTGAGAATAGGTGAAGGGATAGTTTTTACCTCGACCAACATTAAGGCGGCGGCGACTAATCTTAAAGC  
TTC

+

FF::FFFF:FFFFFFFFFFFFFFFFFFFFFFFFFFFFFFFFFFFFFFFFFFFFFFFFFFFFFFFFFFFF,FFFFFFFF  
FFFFFFFFFFFFFFFFFFFFFFFFFFFFFFFFFFFFFFFFFFFFFFFFFFFFFFFFFFFFFFFF:FFFFFFFF:FFFFFFFFFFFFFFFF  
FFF

@A00721:190:HGJW7DSXY:4:2540:13413:20682\_1:N:0:TCTGCAAG+GCTGCACT  
TGTGGTACGAATTGGTCCAACATTTACCACCAAATTCTTTTGATACAACCTAGCCTTCAAGTGGGGT  
ATGCCTGCGGAATACGCTTGCTATTCACCAGATTGGTTCGAACCCGTTGATGCTATGTCAGAAGAAGC  
TAT

+

FFFFFFFFFFFFFFFF:FFFFFFFFFFFFFFFFFFFFFFFFFFFFFFFFFFFFFFFFFFFFFFFFFFFFFFFF  
FFFFFFFFFFFFFFFFFFFFFFFF:FFFFFFFFFFFFFFFFFFFFFFFFFFFFFFFFFFFFFFFF:FFFFFFFFFFFFFFFF  
FFF

@A00721:190:HGJW7DSXY:4:2132:8919:24205\_2:N:0:TCTGCAAG+GCTGCACT  
GTTAAAGACTGCAGAGGCTGTCAAACAAGCCCAGACTCAAGGAGTCCAATCAAAGGTTTTGAATTTAG  
CTCAACTGGGGAGACGTGCTTAAATGGGTGAGATCGGAAGAGCGTCGT

+

FFFFFFF:FFFFFFFFF:FFFFFFFFFFF:FFFFF:FFFFFFFFFFFFFFFFFFFFF::FFFFFFF:FFFF:F  
FFFFFFFFFFFFFFFF:FFFFFFF:F:FFFFFFF:F:FFFFFFFFFF,FFFFF

@A00721:190:HGJW7DSXY:4:2578:27887:24893\_1:N:0:TCTGCAAG+GCTGCACT  
CACTCCAAACACTATATACATTATAAAATATAAAAATAAGGGAGTCATAACTTTTGTTACCAAATTCT  
TGGCTTTCAACGAAGTCTCTGATTTTATTAATCATTACTTTAACGATCTCTCGGTCATTTACTCTGTA  
CTT

+

FFFFFFF:FFFFFFFFFFFFFFFFFFFFFFFFFFFFFFFFFFFFFFFFFFFFFFFFFFFFFFFFFFFF:FFFFFFFF  
FFFFF:FFFFFFFFFFFFFFFFFFFFFFFFFFFFFFFFFFFFFFFFFFFFFFFFFFFFFFFFFFFF:FFFFFFFF  
FFF

@A00721:190:HGJW7DSXY:4:2341:2700:20885\_2:N:0:TCTGCAAG+GCTGCACT  
GTCGGAACAACCTTTACTTAGAATGACTCTATCTTTTCAGACACTTCTTATATTATTTACAATAGTTA  
ATATCATATTAGTAATACTCACTATCGTTTTCTGCTTTTTCTTAGCTA

+

FFFFFFFFFFFFFFFFFFFFFFFFFFFFFFFFFFFFFFFFFFFFFFFFFFFFFFFFFFFF:FFFFFFFF  
FFFFFFFFFFFFFFFFFFFFFFFF:FFFFFFFFF:FFFFF,FF:FFFFFFFFFFFF

@A00721:190:HGJW7DSXY:4:2404:16658:6480\_2:N:0:TCTGCAAG+GCTGCACT  
GAGTACGAAAACCAACTCTTCGTTACGAGACCTGATGGTAGAATAGATTTAGTCTCTACACCCATCTC  
AACGAGGATAAAGCGAGTTTTCCGTCTGAACGTAATACACGAAGAGA

+

FFFFFFFFFFFFFFFFFFFFFFFFFFFFFFFFFFFFFFFFFFFFFFFFFFFFFFFFFFFF:FFFFFFFF  
FFFFFFFFFFFFFFFFFFFFFFFFFFFFFFFFFFFFFFFFFFFFFFFFFFFFFFFFFFFF

@A00721:190:HGJW7DSXY:4:1351:30002:12806\_1:N:0:TCTGCAAG+GCTGCACT  
ACAGACTCCGAAAATGGTTTCAAATGAGGTCAAAGCTCTATTTATTAACGAACCTATTATCCGATTCT  
TCGAGGGTATCACTACCACTGATCTGCCGACTTTAGTCAAGGAACCTCAATTCCTTCGATGTTTATAT  
TTT

+

FFFFFFFFFFFFFFFFFFFFFFFFFFFFFFFFFFFFFFFFFFFFFFFFFFFFFFFFFFFF:FFFFFFFF  
FFFFFFFFFFFFFFFFFFFFFFFFFFFFFFFFFFFFFFFFFFFFFFFFFFFFFFFFFFFF:FFFFFFFF  
FFF

@A00721:190:HGJW7DSXY:4:1249:5755:35697\_1:N:0:TCTGCAAG+GCTGCACT  
CGACAAATTTTAGAACTTTATTTCAGAACTCTCTCCGATCACCTTGGTGTGATCTCCCGAGGATCTT



TTCAATAAGATGTATGATGATAATCTACTATTTTTTAAATAGTGATATTCAGCGTATACTTGAATACTT  
TAT

+

F:F,FFFFFFFFFFFFFFFFFFFFFFFFFFFFFFFFFFFFFFFFFFFFFFFFFFFFFFFFFFFFFFFFFFFFFFFF  
FFFFFFFFFFFFFFFFFFFFFFFFFFFFFFFFFFFFFFFFFFFFFFFFFFFFFFFFFFFFFFFFFFFFFFFFFFFF  
FFF

@A00721:190:HGJW7DSXY:4:2118:13747:18317\_1:N:0:TCTGCAAG+GCTGCACT  
TTACCGCAAAAAGTTGGAAGAGGTCTATGATATTTATTTTACTTATACTTTAAATAGCACCGATTATA  
ACTTGACTGTTGATAATATTACAATAGCTCTTTCTCAGAAGATTAGAGAAGTAACCGGTGAACACGTC  
GGT

+

FFFFFFFFFFFFFFFFFFFFFFFFFFFFFFFFFFFFFFFFFFFFFFFFFFFFFFFFFFFFFFFFFFFFFFFFFFFF  
FFFFFFFFFFFFFFFFFFFFFFFFFFFFFFFFFFFFFFFFFFFFFFFFFFFFFFFFFFFFFFFFFFFFFFFFFFFF  
FFF

@A00721:190:HGJW7DSXY:4:1517:25943:17738\_1:N:0:TCTGCAAG+GCTGCACT  
ACTTTTACCGTTAGAACTGAAAAAGATTCTTTTCGAAAAGAAACCTATAAGTTACAAACGATTCTTCG  
ACTATATTAAGAAATAAAAATACTTCAAGTACCTGAACTTTACATTTTTAATGGTATGGTATAATGT  
GTC

+

FF:FFFFFF:FFFFFF:FFFFFFFFFFFFFFFFFFFFFFFFFFFFFFFFFFFFFFFFFFFFFFFFFFFFFFFF  
FFFFFFFFFFFFFFFFFFFFFFFFFFFFFFFFFFFFFFFFFFFFFFFFFFFFFFFFFFFFFFFFFFFFFFFFFFFF  
FFF

@A00721:190:HGJW7DSXY:4:1330:15998:15421\_2:N:0:TCTGCAAG+GCTGCACT  
ATGAGAGTGTATTCCTTAATATTCTAGTAACCGCTATGTGGGCATTACTAGGATTTATCACACTCCTA  
AATTTGATAGCAATTTATGTTTTAAATGCTAGGAAAATTTAGAAAAA

+

FFFFF:FFFFFFFFF:FFFFFFFFFFFFFFFFFFFFFFFFFFFFFFFFFFFFFFFFFFFFFFFFFFFFFFFF  
FFFFFFFF:FFFFFFFFFFFFFFFF:FFFFFFFFFFFFFFFF:FFFF:FFFFFFFFF:

@A00721:190:HGJW7DSXY:4:1321:7157:10535\_1:N:0:TCTGCAAG+GCTGCACT  
TAATTCAATAGCTTTAGTATTATTTACTATCGCCTTTATTGAAAATTGTATAAGAGTTAATTGCTTAC  
ACAAAAGTGACGCGCGAAGGAATCTTAATTGATTGAAGCTAGGCGTTGGGAGAATGAACTGCCGCTT  
C

+

FFFFF:FFFFFFFFFFFFFFFFFFFFFFFFFFFFFFFFFFFFFFFFFFFFFFFFFFFFFFFFFFFFFFFFFFFF  
FFFFFFFFFFFFFFFFFFFF,FFFFFFFFFFFFFFFFFFFFFFFFFFFFFFFFFFFFFFFFFFFFFFFFFFFFF:  
F

@A00721:190:HGJW7DSXY:4:2370:25861:35759\_2:N:0:TCTGCAAG+GCTGCACT  
TACCGCCGGTCGGCAGATCGGCACCACTGGTCTCTACGTTACGGGACCGCTGTGCAGAATAACCTTC  
CCAAATCTAGATCTGCACAGAAGAAGGCTGAAGGTCGTTACCGGACGA

+

FFFFFFF:FFFF:FF:FFFFFFFFFFFFFFFFFFFFFFFFFFFFFFFFFFFFFFFFFFFFFFFFFFFFFFFF  
FFFFFFFF:FFFFFFF,FFF:FFFFF::FFFF::FFFF,FF:FFFFFFF

@A00721:190:HGJW7DSXY:4:2107:31412:20290\_2:N:0:TCTGCAAG+GCTGCACT  
TGGGAACTGAGGCAGTACCTCAGTCAAAAGTCACATTCACCACTCCCATACCAATCAATGATGTGACT  
ATACAGTTCGGCCATTTCAAGAGTGGTCAATACGTCGTGGGAGGTACT

+

FFFFFFFFFFFFFFFFFFFFFFFFFFFFFFFFFFFFFFFFFFFFFFFFFFFFFFFFFFFFFFFFFFFFFFFFFFFF  
FFFFFFFFFFFFFFFFFFFFFFFFFFFFFFFFFFFFFFFFFFFFFFFFFFFFFFFFFFFFFFFFFFFFFFFFFFFF

@A00721:190:HGJW7DSXY:4:1223:7609:6151\_1:N:0:TCTGCAAG+GCTGCACT  
AATCAATAGTTCTTCTGACCAGAATGAAAAGGGGTTTACCAGGGTAGTCTCTAAGTCTACCAGGAAGA  
GGGGAAATGTCCCCAAAAGTGAAGAATAAAGGGAAAGGTCCATCAGGACCTAAGAAGGGGAAATTA  
CCC

+

FFFFFFFFFFFFFFF,FFFFFFFFFFFFFFFFFFFFFFFFFFFFFFFFFFFFFFFFFFFFFFFFFFFFFFFF  
FFFF:FFFFFFF:FFFFFFFFFFFFFFFFFFFFFFFFFFFFFFFF

FFFFFFFFFFFFFFFFFFFFFFFFFFFFFFFF,F,FFFFFF:FFFFFFFFFFFFFFFFFFFFFFFFFFFFFFFF,F  
FFF

@A00721:190:HGJW7DSXY:4:1235:4155:24408\_2:N:0:TCTGCAAG+GCTGCACT  
CGGGCCAAAGAGGCCGCTGCTACGAAGTCGCTGAAGGCGGCTTGGGTCATTAAGGGTAGCTGTAAAGT  
TGCGCCTGCCGACCCCATCTTTGAGACCAAGACTCTCTACAGTAGGTT

+

FFFFFF,FFFFFFFFFFFFFFFFFFFF::FFFFFFFFFFFFFFFFFFFFFFFFFFFFFFFFFFFFFFFF:FFF:  
FFFFFFFFFFFFFFFFFFFFFFFFFFFFFFFFFFFFFFFFFFFFFFFFFFFFFFFFFFFFFFFF

@A00721:190:HGJW7DSXY:4:2141:13539:16861\_2:N:0:TCTGCAAG+GCTGCACT  
GAATTCGTCACCTGAGGACGAAGGTGAGAGGACTTTTGGCTACTGGCGACAACTGAGAGCAGTCGCTG  
GGGAAAGAGAATTGCGTGGGTTGAAGGCCGACGCTTCGAGCTTGAGTG

+

FFFFFFFFFFFFFFFFFFFFFFFFFFFFFFFFFFFFFFFFFFFFFFFFFFFFFFFFFFFFFFFFFFFFFFFF:F:F  
FFFF:FFFF,FFFF:FFFF:FFFFFFFFFFFFFFFFFFFFFFFFFFFFFFFF

@A00721:190:HGJW7DSXY:4:2660:27471:33223\_1:N:0:TCTGCAAG+GCTGCACT  
TTTATCCGCGCTTAACCTATGGGGCGAAGATCCCCTATTGAGTCTTGAAGGACTTAGGTTGGCATATTT  
ATGCCGACGATAATAAGCATGTACCCCTTAAGCACCGAGGTAAGCTCGGGACTTACAAGAGAGAGTGT  
GAG

+

FFFFFFFFFFFFFFFFFFFFFFFFFFFFFFFFFFFFFFFF:FFFFFFFFFFFFFF:FFFFFFFFFFFFFFFF  
,FFFFFFFFF:FFFFFFFFF:FFFFFFFFFFFFFFFFFFFFFFFFFFFFFFFFFFFFFFFFFFFFFFFF:  
FFF

@A00721:190:HGJW7DSXY:4:2635:25934:31657\_2:N:0:TCTGCAAG+GCTGCACT  
ACTTTTCTTGAAAATTTTCTTTCTCCGTCATTGGGGATTTCGATGTGAGAAGGTGGAAGGTGTCA  
AGGGTCTTCTTCATGCTGATCTTTCAGGACCTAATCACATCATGATTG

+

FFFFFF::FF:FFFFFFFFFFFFFFFFFFFFFFFFFFFFFFFF:FFFFFFFFFFFFFFFFFFFFFFFFFFFF,FFFF  
FFFFFFFFFFFF:FFFFFFFFFFFFFF:FFFFFFFFFFFFFFFF

@A00721:190:HGJW7DSXY:4:2538:19678:11710\_1:N:0:TCTGCAAG+GCTGCACT  
CGAAATTAAAGACGGGGGGATTAAGAGTCCAGCTGTAACCTGTCATTTAGAGAGGGGAGCTCTGAAAA  
GGAACTTCGTCAGAAGATGAGGAAGTCTAAGAGGAGGAGTTTGAGGAAGGCTCTAGAGAAGATCTCC  
CCA

+

FFFFFFFFFFFFFFFFFFFF:FFFFFFFFFFFFFFFFFFFFFFFFFFFFFFFFFFFFFFFF:FFFFFFFFFFFF  
FFFFFFFFFFFFFFFFFFFFFFFFFFFFFFFFFFFFFFFFFFFFFFFFFFFFFFFFFFFFFFFFFFFFFFFF,  
FFF

@A00721:190:HGJW7DSXY:4:2231:2230:27305\_1:N:0:TCTGCAAG+GCTGCACT  
GATTATTTGAAGCAGGGGTTACCACTTCCTAAGGTGGATGAGGGAGGTTGTTTCTTTGGAGTTTTAGA  
TAATCTTTTGAGAAGGGGTCATAGAGCCAGCAAGAGAAGCTTATATGCTGGTTTAAGTGATGATTATC  
ACT

+

FFFF:FF:F,FF:FFFFFFFFFFFF:FFFF:FFFFFFFF:FFFFFFFF:FFFFFFFFFFFFFFFF  
FF,FFFFFFFFFFFFFFFFFFFFFFFFFFFFFFFFFFFFFFFFFFFFFFFFFFFFFFFFFFFFFFFFFFFF  
FFF

@A00721:190:HGJW7DSXY:4:1338:7600:20979\_1:N:0:TCTGCAAG+GCTGCACT  
GGTAAATTACCATATTGTTCCCTTCGGGAAGTTGTGGGATTTAACTTTGACTCAACTACTCCGATCAG  
ATCCGGATGGTTTGATTGGTATGGACTACTCGACTTTTGATCTGGAGTTGTCTAGGGTCATGGCAGAT  
ACT

+

FF:FF,FFFF,FF:FFFF:FFFFF,FFF,FFFF,FFF::FFFFFFFFF,FFFFFFFFFFFFFFFF  
:F:FF:FFFF:FFF:FF:FF,FFFFFFFF::FF,FFFFF,FFF:FFFFFFFFFFFF:FFFFFFFF  
F:F

@A00721:190:HGJW7DSXY:4:2533:12608:14935\_1:N:0:TCTGCAAG+GCTGCACT  
TGAGGGCGGTTGAGGGAGCCGTTTTGCCGACTTTAACTATTCTAAGAGTCTTTATGATTCAAAACCT







@A00721:190:HGJW7DSXY:4:2329:1814:12461\_2:N:0:TCTGCAAG+GCTGCACT  
AATGGGATTCCTACGTAGTTTATGACTTTGGTGGTGGTACTTTGATACTTCTATCGTCTTACGTTAC  
GGTAATTACTATAGTGTTATTTATTCTGGTGGTGATGATAATCTTGGA

```

FFFFFFFFFFFFFFFFFFFFFFFFFFFFF:FFFFFFFFFFFFFFFF:FFFFFFFFFFFFFFFFFFFFFFFFFFFFFFFF
FFF:FFFFFFF:FFFFFFFFFFFF:FFFFFFFFFFFFFFFFFFFFFFFFFFFFFFFF

```

@A00721:190:HGJW7DSXY:4:1618:5701:30718\_2:N:0:TCTGCAAG+GCTGCACT  
ACGGCGCACTTCTTTACCCGCCACCACAACTTTTCAGTTTCACAACTGAAGGAGGAGGTTTCTGTTA  
CTGGAAAACCTCGTCAATACTTTTCAATAATATACGTCTTGAAGTCA

[illegible]

@A00721:190:HGJW7DSXY:4:2346:18177:1282\_1:N:0:TCTGCAAG+GCTGCACT  
TTCCGATCTATTACTCTTGCTGAAACAGCTATTAAGCTGTTGAGCGGGTAATTACACCTAAACGAGC  
TCGATCTGCCATCGCTGAAGGATGTGCACTCTTTTCTGCTACTTTAACGGAGCGTAGTGTACTCTTCG  
TCG

[illegible]

@A00721:190:HGJW7DSXY:4:2450:28284:26678\_1:N:0:TCTGCAAG+GCTGCACT  
TTCCGATCTTTTCAATCTTCTTAAAAAGAAGATAGAGAGTCATACTTTGGGCTATCGTTTCAGGTGCAT  
GGGGTTGGATAGCCAATATTGAAGTGGACACCTCTGGTAGTATCGAAGTAAAGATAACCAATAAGGAA  
GGA

```
+
FFFFFFFFFFFFFFFF:FFFFFFFFFFFF::FFF:FFF:FFFFFFFFFFFFFFFFFFFFFFFFFFFFFFFF,FF
:FFFFFF:FFFF:FFFFFFFFFFFF:FFFFFFFFFFFFFFFFFFFFFFFF,FFFFFFFFFFFF:F::F::F:FF
FFF
```

@A00721:190:HGJW7DSXY:4:1202:4001:34632\_1:N:0:TCTGCAAG+GCTGCACT  
AATCTTACCACTATCTACGAACCTAAAGTTCTGAAGACGTTGCTTGTGCTTCCTCCTTTAATGGCAC  
TACCTCGGTACAATCTTACTTGGAACGAAGGCGACCTGTTCCGGAGTTTTTACGGGATCCGGAATGTT  
CTG

[illegible]

@A00721:190:HGJW7DSXY:4:2441:2763:14888\_2:N:0:TCTGCAAG+GCTGCACT  
GATTTTAATATAAAGAATCTTTACCAGGACTCCTACTACAGGAGGCAGTCTTCTGATCGTAAGAAGTT  
TATAAGGAACATATCCATTTGTTGTAATAGGGTCATCAACTTAGAACT

```

+
FFFFFFFF:FFFFFFFFFFFFFFFFFFFFFFFFFFFFFFFFFFFFFFFFFFFFFFFFFFFFFFFFFFFFFFFF
FFFFFFFF:FF:FFFF,F:FFFFFFFFFFFFFFFFFFFFFFFFFFFFFFFFFFFFFFFF:FFFF

```

@A00721:190:HGJW7DSXY:4:2422:18177:4100\_2:N:0:TCTGCAAG+GCTGCACT  
ATACTGTCTTTCCAAGCTTACCTGTATCTTCAATGAAATTGGACTCTTCGATAGGGGACATTTTATCG  
TGGGCTTTCCGTAAAGGAAGATCTGTTATCGACGGTTTATCGTTTACG

[illegible]

@A00721:190:HGJW7DSXY:4:1342:4218:12555\_1:N:0:TCTGCAAG+GCTGCACT  
AAAATTTTATCCTCGTTTAACTTACTTAGACTTTCTACGATACAAATGATACTTCTAATTTACGTT  
TGCTACTCAGAGCTGGTCCTCTCAGCAAAGGGATGCATGGTGTTATCTCCTCAGGAGTCCCGGCATT  
GAT

[illegible]

FFFFFFFFFFFFFFFFFFFFFFFFFFFFFFFFFFFFFFFFFFFFFFFFFFFFFFFFFFFFFFFFFFFFFFFF  
FFF

@A00721:190:HGJW7DSXY:4:1620:23827:21120\_1:N:0:TCTGCAAG+GCTGCACT  
GACTTTCGTCATAATCGCTGCATATTACGGATTACACGGTACCAGCGCATCTCGTGTGAGCCTCGAC  
CCGATTATATGGTATTAACCTATAAAGGTGAGGAGACCATTTTCTTGCTGAAATTTATAGAAGATTAT  
TTT

+  
F:FFFFFFFFFFFFFFFFFFFFFFFFFFFFFFFFFFFFFFFFFFFFFFFFFFFFFFFFFFFFFFFFFFFFFFFF,FFFFFFFF:FFF:FFFFFFFFFFFFFFFF:FFFFFF  
FFFFFFFFFFFFFFFFFFFFFFFFFFFFFFFFFFFFFFFFFFFFFFFFFFFFFFFFFFFFFFFFFFFFFFFF:FFFFFFFFFFFFFFFFFFFFFFFF:FFFFFFFFFFFFFFFFFFFF  
FFF

@A00721:190:HGJW7DSXY:4:1663:11460:32831\_1:N:0:TCTGCAAG+GCTGCACT  
TACTAATGGCAAATAGTGGAAGGCTCCAGTCAACACTAGTTCGAGTGCTGCTTTGGATTACGATGAC  
GTGAGAATAGGTGAAGGGATAGTTTTTACCTCGACCAACATTAAGGCGGCGGCGACTAATCTTAAAGC  
TTC

+  
FFFFFFFFFFFFFFFFFFFFFFFFFFFFFFFFFFFFFFFFFFFFFFFFFFFFFFFFFFFFFFFFFFFFFFFF:FFFFFFFF  
FFFFFFFFFFFFFFFFFFFFFFFFFFFFFFFFFFFFFFFFFFFFFFFFFFFFFFFFFFFFFFFFFFFFFFFFFFFFFFFF  
FFF

@A00721:190:HGJW7DSXY:4:2641:16514:4163\_1:N:0:TCTGCAAG+GCTGCACT  
TGTGGTACGAATTGGTCCAACATTTACCACCAAATTCTTTTGATACAACTCTAGCCTTCAAGTGGGGT  
ATGCCTGCGGAATACGCTTGCTATTCACCAGATTGGTTCGAACCCGTTGATGCTATGTCAGAAGAAGC  
TAT

+  
FFFFFFFFFFFFFFFFFFFFFFFFFFFFFFFFFFFFFFFFFFFFFFFFFFFFFFFFFFFFFFFFFFFFFFFFFFFFFFFF  
FFFFFFFFFFFFFFFFFFFFFFFFFFFFFFFFFFFFFFFFFFFFFFFFFFFFFFFFFFFFFFFFFFFFFFFF:FFFFFFFFFFFFFFFFFFFFFFFF  
FFF

@A00721:190:HGJW7DSXY:4:2440:4309:10958\_2:N:0:TCTGCAAG+GCTGCACT  
GTTAAAGACTGCAGAGGCTGTCAAACAAGCCCAGACTCAAGGAGTCCAATCAAAGGTTTTGAATTTAG  
CTCAACTGGGGAGACGTGCTTAAATGGGTGAGATCGGAAGAGCGTCGT

+  
FFFFFFFFFFFFFFFFFFFFFFFFFFFFFFFFFFFFFFFFFFFFFFFFFFFFFFFFFFFFFFFFFFFFFFFFFFFFFFFF  
FFFFFFFFFFFFFFFFFFFFFFFFFFFFFFFFFFFFFFFFFFFFFFFFFFFFFFFFFFFFFFFFFFFFFFFF

@A00721:190:HGJW7DSXY:4:2653:12002:9627\_1:N:0:TCTGCAAG+GCTGCACT  
CACTCCAAACACTATATACATTATAAAATATAAAAATAAGGGAGTCATAACTTTTGTACCAAATTCT  
TGGCTTTCAACGAAGTCTCTGATTTTATTAATCATTACTTTAACGATCTCTCGGTCATTTACTCTGTA  
CTT

+  
FFFFFFFFFFFFFFFFFFFFFFFFFFFFFFFFFFFFFFFFFFFFFFFFFFFFFFFFFFFFFFFFFFFFFFFFFFFFFFFF  
FFFFFFFFFFFFFFFFFFFFFFFFFFFFFFFFFFFFFFFFFFFFFFFFFFFFFFFFFFFFFFFFFFFFFFFF:FF:FFFFFFFFFFFF:FFFFFFFF  
FFF

@A00721:190:HGJW7DSXY:4:2477:15167:28823\_2:N:0:TCTGCAAG+GCTGCACT  
GTCGGAACAACCTTTACTTAGAATGACTCTATCTTTTCAGACACTTCTTATATTATTTACAATAGTTA  
ATATCATATTAGTAATACTCACTATCGTTTTCTGCTTTTTCTTAGCTA

+  
FFFFFFFFFFFFFFFFFFFFFFFFFFFFFFFFFFFFFFFFFFFFFFFFFFFFFFFFFFFFFFFFFFFFFFFFFFFFFFFF  
:FFFFFFFFFFFFFFFFFFFFFFFFFFFFFFFFFFFFFFFFFFFFFFFFFFFFFFFFFFFFFFFFFFFFFFFF,FFFFFFFF,FFF

@A00721:190:HGJW7DSXY:4:2477:15167:28823\_1:N:0:TCTGCAAG+GCTGCACT  
AGTACGAAAACCAACTCTTCGTTACGAGACCTGATGGTAGAATATATTTATTCTCTACACCCATCTCA  
ACGAGTATAAAGCGTTTTTCCGTCCTGAACGTAATACACGAAGAGATCATCCGCAAACGACTCGAA  
CC

+  
F:FF,,FFFF,,FF,,F:,,,FFF:,,:FF,F,,F,,FF:FFF:,,,FFF,,,:,:,FF,FFFF:FF:,F  
F:F,F,F:FF,F:F,,FFF,F,FFF,F:F:,,:FFF:,,:F,FF,F:F:,F:,,:FFFFFFFFFFFF  
FF

@A00721:190:HGJW7DSXY:4:1373:4399:15687\_1:N:0:TCTGCAAG+GCTGCACT  
ACAGACTCCGAAAATGGTTTCAAATGAGGTCAAAGCTCTATTTATTAACGAACTATTATCCGATTCT  
TCGAGGGTATCACTACCACTGATCTGCCGACTTTAGTCAAGGAACCTTCAATTCCTTCGATGTTTATAT  
TTT

+

FFFFFFFFFFFFFFFFFFFFFFFFFFFFFFFFFFFFFFFFFFFFFFFFFFFFFFFFFFFFFFFFFFFFFFFFF:  
FFFFFFFFFFFFFFFFFFFFFFFFFFFFFFFFFFFFFFFFFFFFFFFFFFFFFFFFFFFFFFFFFFFFFFFFF:FFFFF  
FFF

@A00721:190:HGJW7DSXY:4:1324:19343:35775\_1:N:0:TCTGCAAG+GCTGCACT  
CGACAAATTTTAGAACTTTATTTCAGAACTCTCTCCGATCACCTTGGTGTGATCTCCCGGAGGATCTT  
TTCAATAAGATGTATGATGATAATCTACTATTTTTAAATAGTGATATTACAGCGTATACTTGAATACTT  
TAT

+

FFFFFFFFFFFFFFFFFFFFFFFFFFFFFFFFFFFFFFFFFFFFFFFFFFFFFFFFFFFFFFFFFFFFFFFFF  
FFFFFFFFF:FFFFFFFFFFFFFFFFFFFFFFFFFFFFFFFFFFFFFFFFFFFFFFFFFFFFFFFFFFFFFFFFF  
FFF

@A00721:190:HGJW7DSXY:4:2160:11785:17174\_1:N:0:TCTGCAAG+GCTGCACT  
TTACCGCAAAAAGTTGGAAGAGGTCTATGATATTTATTTTACTTATACTTTAAATAGCACCGATTATA  
ACTTGACTGTTGATAATATTACAATAGCTCTTCTCAGAAGATTAGAGAAGTAACCGGTGAACACGTC  
GGT

+

FFFFFFFFFFFFFFFFFFFFFFFFFFFFFFFFFFFFFFFFFFFFFFFFFFFFFFFFFFFFFFFFFFFFFFFFF  
FFFFFFFFF:FFFFFFFFFFFFF:FFFFFFFFFFFFFFFFFFFFFFFFFFFFFFFFFFFFFFFFFFFFFFFFF:FFFF,  
FFFFF  
FFF

@A00721:190:HGJW7DSXY:4:1578:16586:31594\_1:N:0:TCTGCAAG+GCTGCACT  
ACTTTTACCGTTAGAACTGAAAAAGATTCTTTTCGAAAAGAAACCTATAAGTTACAAACGATTCTTCG  
ACTATATTAAGAAATAAAAATACTTCAAGTACCTGAACTTACATTTTTAATGGTATGGTATAATGT  
GTC

+

FFFFFFFFFFFFFFFFFFFFFFFFFFFFFFFFFFFFFFFFFFFFFFFFFFFFFFFFFFFFFFFFFFFFFFFFF  
FF:FFFFFFFFFFFFFFFFFFFFFFFFFFFFFFFFFFFFFFFFFFFFFFFFFFFFFFFFFFFFFFFFF:FFFFF  
FFF

@A00721:190:HGJW7DSXY:4:2548:9146:2769\_2:N:0:TCTGCAAG+GCTGCACT  
ATGAGAGTGTATTCCTTAATATTCTAGTAACCGCTATGTGGGCATTACTAGGATTTATCACACTCCTA  
AATTTGATAGCAATTTATGTTTTAAATGCTAGGAAAATTTTAGAAAAA

+

FFFFFFFFFFFFFFFFF:FFF:FFFFFFFFFFFFFFFFFFFFFFFFFFFFFFFFFFFFFFFFFFFFFFFFF:FF  
FFF:FFFFFFFFFFFFFFFFF:FFFFFFFFFFFFFFFFFFFFFFFFFFFFFFFFFFFFFFFFFFFFFFFFF

@A00721:190:HGJW7DSXY:4:1170:26449:11099\_1:N:0:TCTGCAAG+GCTGCACT  
TAATTCAATAGCTTTAGTATTATTTACTATCGCCTTTATTGAAAATTGTATAAGAGTTAATTGCTTAC  
ACAAAAGTGACGCGCGAAGGAATCTTAATTGATTGAAGCTAGGCGTTGGGAGAATGAACTGCCGCTT  
CCC

+

FFFFFFFFFFFFF,FFF:FFFFFFFFFFFFFFFFFFFFFFFFFFFFFFFFFFFFFFFFFFFFFFFFFFFFFFFFF  
FFFFFFFFFFFFFFFFFFFFFFFFFFFFFFFFFFFFFFFFFFFFFFFFFFFFFFFFFFFFFFFFFFFFFFFFF  
FFF

@A00721:190:HGJW7DSXY:4:2469:20094:10708\_2:N:0:TCTGCAAG+GCTGCACT  
TACCGCCGTCGCGCAGATCGGCACCACTGGTCTCTACGTTACGGGACCCGCTGTGCAGAATAACCTTC  
CCAAATCTAGATCTGCACAGAAGAAGGCTGAAGGTCGTTACCGGACGA

+

FFFFFFFFFFFFFFFFFFFFFFFFFFFFFFFFFFFFFFFFFFFFFFFFFFFFFFFFFFFFFFFFFFFFFFFFF  
FFFFFFFFFFFFFFFFFFFFFFFFFFFFFFFFFFFFFFFFFFFFFFFFFFFFFFFFFFFFFFFFFFFFFFFFF

@A00721:190:HGJW7DSXY:4:2155:8513:28134\_2:N:0:TCTGCAAG+GCTGCACT  
TGGAAGTGAAGCAGTACCTCAGTCAAAAGTCACATTCACCACTCCCATACCAATCAATGATGTGACT



+

@A00721:190:HGJW7DSXY:4:1228:3676:32784\_1:N:0:TCTGCAAG+GCTGCACT  
AATCAATAGTTCTTCTGACCAGAATGAAAAGGGGTTTACCAGGGTAGTCTCTAAGTCTACCAGGAAGA  
GGGGAAATGTCCCCAAACTGAGAAGAATAAAGGGAAAGGTCCATCAGGACCTAAGAAGGGGAAATTA  
CCC

+

@A00721:190:HGJW7DSXY:4:1505:10131:14058\_2:N:0:TCTGCAAG+GCTGCACT  
CGGGCCAAAGAGGCCGCTGCTACGAAGTCGCTGAAGGCGGCTTGGGTCATTAAGGGTAGCTGTAAAGT  
TGCGCCTGCCGACCCCATCTTTGAGACCAAGACTCTCTACAGTAGGTT

+

@A00721:190:HGJW7DSXY:4:2143:3766:2002\_2:N:0:TCTGCAAG+GCTGCACT  
GAATTCGTCACCTGAGGACGAAGGTGAGAGGACTTTTGGCTACTGGCGACAACTGAGAGCAGTCGCTG  
GGGAAAGAGAATTGCGTGGGTTGAAGGCCGACGCTTCGAGCTTGAGAG

+

@A00721:190:HGJW7DSXY:4:1410:2049:14090\_2:N:0:TCTGCAAG+GCTGCACT  
TTATCCGCGCTTA ACTATGGGGCGAAGATCCCCTATGGAGTCTTGAAGGACTTAGGTTGGCATATTTA  
TGCCGACGATAATAAGCATGTCACCCTTAAGCACCGAGGTAAGCTCGG

+

@A00721:190:HGJW7DSXY:4:1212:31801:32550\_2:N:0:TCTGCAAG+GCTGCACT  
TTTCTTGAAAATTTTCTTTCTCCGTCATTGGGGATTTGATGTGAGAAGGTGGAAGGTGTCAAGG  
GTCTTCTTCATGCTGATCTTTCAGGACCTAATCACATCATGATTGATA

+

@A00721:190:HGJW7DSXY:4:1317:12689:22028\_2:N:0:TCTGCAAG+GCTGCACT  
AAATTAAGACGGGGGATTAAGAGTCCAGCTGTAAGTGTCACTTCAGAGAGGGGAGCTCTGAAAAGG  
AAACTTCGTCAGAAGATGAGGAAGTTCCTCCGAAATTAAGACGGGGGG

+

@A00721:190:HGJW7DSXY:4:2335:9281:3161\_1:N:0:TCTGCAAG+GCTGCACT  
GATTATTTGAAGCAGGGGTACCCTTCTAAGGTGGATGAGGGAGGTTGTTTCTTTGGAGTTTAGA  
TAATCTTTTGAGAAGGGGTCATAGAGCCAGCAAGAGAAGCTTATATGCTGGTTTAAAGTGATGATTATC  
ACT

 $+$ 

@A00721:190:HGJW7DSXY:4:1363:24605:31485\_1:N:0:TCTGCAAG+GCTGCACT  
GGTAACTTACCATATTGTTCCCTTCCGGGAAGTTGTGGGATTTAACTTTGACTCAACTACTCCGATCAG  
ATCCGGATGTTTGATTGGTATGGACTACTCGACTTTTGATCTGGAGTTGTCTAGGGTCATGGCAGAT  
ACT

[illegible]



@A00721:190:HGJW7DSXY:4:2642:24532:14450\_2:N:0:TCTGCAAG+GCTGCACT  
AAGGCTAATACCTTTATAGGTAAGAAGCCCTTGAGCCGCGTAGTCAGCGCGTTTAGCTGTATCATCA  
GTCAGAGTATACCCGATAGGGTACCGAGTCTCCAAGAGAATATTTATT

+

FFFFFFFFFFFFFFFFFFFFFFFFFFFFFFFFFFFFFFFFFFFFFFFFFFFFFFFFFFFFFFFFFFFFFFFF:FFFFFFFFFFFFFFFF  
FFFFFFFFFFFFFFFFFFFFFFFFFFFFFFFFFFFFFFFFFFFFFFFFFFFFFFFFFFFFFFFFFFFFFFFF

@A00721:190:HGJW7DSXY:4:1251:20338:35399\_2:N:0:TCTGCAAG+GCTGCACT  
CTTTGGTAATTGTATGATCACTTTGATGATTTTATCACTTTATTATGACCTTGAAAGTTTTTCGGCTG  
TGGTTGTCGCTGGGGACGATTCCATTCTGTTTTCAAAGACTCCAATAA

+

FFFFFFFFFFFFFFFFFFFFFFFFFFFFFFFFFFFFFFFFFFFFFFFFFFFFFFFFFFFFFFFFFFFFFFFF:FFFFFFFF  
FFFFFFFF:FFF::FFFFFFFFFFFFFFFFFFFFFFFFFFFFFFFFFFFFFFFFFFFFFFFF

@A00721:190:HGJW7DSXY:4:1433:18168:6746\_2:N:0:TCTGCAAG+GCTGCACT  
GATTCCGAGAGGTTTATCCTGATGTGGAGGGAGTTCTTGAAGCATCCCGACCTTTCCTTGTGAAAATT  
TTGATGCGGTTTCATAAGATTATCAGTAATCCTGATTCTACTACGGAT

+

F:FFF,FFFFFFFFF:F,F:FFFF::,F:, ,FFF,FFFFFFFF, :,FFF,,F:F:FFF,:FFFF,FFF  
FFFFFFFF:FFFFFFFFFFFFFFFFFFFFFFFF,FFFFF,F:FFF,FFF:, ,FFF,

@A00721:190:HGJW7DSXY:4:2177:5348:25692\_1:N:0:TCTGCAAG+GCTGCACT  
GTTGATTAAGACTCTTCCGAAAGGCGAACTTTGGGAATTTGAAGCTCAGGGTGAAGCACACGTTTGA  
CCGTGACGAACTGTGGTGTCTTGATCTACGTTACGGATATACTCTCCTTGAGTTCACTCGTAAGGAC  
ACT

+

FFFF:FFFFFFFFFFFFFFFFFFFFFFFF:FF,FFFFFFFFFFFFFFFFFFFFFFFFFFFFFFFFFFFFFFFF:FFFFF:  
:FFFFF:FFFFFFFFFFFFFFFFFFFFFFFF:FFFFF:FFFFFFFFFFFFFFFFFFFFFFFF:FFFFFFFFFFFFF  
FFF

@A00721:190:HGJW7DSXY:4:2234:32398:8876\_2:N:0:TCTGCAAG+GCTGCACT  
AGCAGGGGTTTTTCGAATAGTAGCCACCCGCCTTACAGAGGGGCAGCAGCATGACCATAATTGGTA  
TTGACTTTGGTACCACCTTTTCTACTGTCTGTCTCGCCTCTTCGAATG

+

FFFFFFFFFFFFFFFFFFFFFFFFFFFFFFFFFFFFFFFFFFFFFFFFFFFFFFFFFFFFFFFFFFFFFFFF  
FFFFFFFFFFFFFFFFFFFFFFFFFFFFFFFFFFFFFFFFFFFFFFFFFFFFFFFFFFFFFFFF:FF

@A00721:190:HGJW7DSXY:4:2606:11134:21465\_1:N:0:TCTGCAAG+GCTGCACT  
TTAACAACAATGATAGTGAATTTATACCTACAATCATTGGTTTTTCTAATAATGATGACACTATTGTT  
TATGGATATGATGCTATTACTCATGATGGTTACGGTCAGGGAGGATTCTCAGTTTACAAGGACCTTAA  
GCG

+

FFFFFFFFFFFFFFFFFFFFFFFFFFFFFFFFFFFFFFFFFFFFFFFFFFFFFFFFFFFFFFFFFFFFFFFF  
FFFFFFFFFFFFFFFFFFFFFFFFFFFFFFFFFFFFFFFFFFFFFFFFFFFFFFFFFFFFFFFFFFFFFFFF:  
FFF

@A00721:190:HGJW7DSXY:4:2669:19967:13620\_2:N:0:TCTGCAAG+GCTGCACT  
GAGTGAAAGGCTTCAATTGTAGTGGTTTGGTCTTTAGTACCCAGTCAGTATACCTCTACGCAAAGA  
TATTTTCATGAAACTACAGAGGAACGTACCGGATTACCTGTCTTTCAT

+

FFFFFFFFFFFFFFFFFFFF,FFF,FF:FFFFFFFFFFFF,FFFFFFFFFFFFFFFFFFFFFFFF:FFFFFFFFFFFFFFFF  
FFFFFFFFFFFFFFFFFFFFFFFFFFFFFFFF,::FFFFFFFFFFFF:FFFFFFFFFFFF

@A00721:190:HGJW7DSXY:4:2529:21395:22044\_2:N:0:TCTGCAAG+GCTGCACT  
AATGGGATTTCCTACGTAGTTTATGACTGTGGTGGTGGTACTTTCGATACTTCTATCGTCTTACGTTAC  
GGTAATTACTATAGTGTTATTTATTCTGGTGGTGGTGGTACTTTCGATACTTCTATCGTCTTACGTTAC

+

FFFFFFFFFFFFFFFFFFFFFFFF:FFFFF,FFFFFFFFFFFFFFFFFFFFFFFF:FFFFF,FFFFFFFFFFFFFFFF  
FFFFFFFFFFFF:FFFFFFFFFFFF,FFFFF:FFFFFFFFFFFFFFFF:FFFFF:F

@A00721:190:HGJW7DSXY:4:2333:32371:9017\_2:N:0:TCTGCAAG+GCTGCACT  
ACGGCGCACTTCTTTACCCGCCACCACACAACCTTTCAGTTTCACAACCTGAAGGAGGAGTTTCTGTTA

+

@A00721:190:HGJW7DSXY:4:2433:11623:9126\_1:N:0:TCTGCAAG+GCTGCACT  
TTCCGATCTATTACTCTTGCTGAAACAGCTATTAAGCTGTTGAGCGGGTAATTACACCTAAACGAGC  
TCGATCTGCCATCGCTGAAGGATGTGCACTCTTTTCTGCTACTTTAACGGAGCGTAGTGTACTCTTCG  
TCG

+

@A00721:190:HGJW7DSXY:4:2556:27471:12618\_1:N:0:TCTGCAAG+GCTGCACT  
TTCCGATCTTTTCAATCTTCTTAAAAAGAAGATAGAGAGTCATACTTTGGGCTATCGTTCAGGTGCAT  
GGGGTTGGATAGCCAATATTGAAGTGGACACCTCTGGTAGTATCGAAGTAAAGATAACCAATAAGGAA  
GGA

+

@A00721:190:HGJW7DSXY:4:1202:4056:34726\_1:N:0:TCTGCAAG+GCTGCACT  
AATCTTACCACTATCTACGAACCTAAAGTTCTGAAGACGTTGCTTGTGCTTCCTCCTTTAATGGCAC  
TACCTCGGTACAATCTTACTTGGAACTGAAGGCGACCTGTTCCGGAGTTTTTACGGGATCCGGAATGTT  
CTG

+

@A00721:190:HGJW7DSXY:4:2536:27832:20165\_2:N:0:TCTGCAAG+GCTGCACT  
GATTTTAATATAAAGAATCTTTACCAGGACTCCTACTACAGGAGGCAGTCTTCTGATCGTAAGAAGTT  
TATAAGGAACATATCCATTTGTTGTAATAGGGTCATCAACTTAGAACT

+

@A00721:190:HGJW7DSXY:4:2451:18475:21966\_2:N:0:TCTGCAAG+GCTGCACT  
ATACTGTCTTTCCAAGCTTACCTGTATCTTCAATGAAATTGGACTCTTCGATAGGGGACATTTTATCG  
TGGGCTTTCCGTAAAGGAAGATCTGTTATCGACGGTTTATCGTTTACG

+

@A00721:190:HGJW7DSXY:4:1658:4544:5321\_1:N:0:TCTGCAAG+GCTGCACT  
AAAATTTTATCCTCGTTTAACTTACTTAGACTTTCTACGATACAAATGATACTTCTAATTTACGTT  
TGCTACTCAGAGCTGGTCCTCTCAGCAAAGGGATGCATGGTGTTATCTCCTCAGGAGTCCCGGCATTT  
GAT

+

@A00721:190:HGJW7DSXY:4:1651:20654:36479\_1:N:0:TCTGCAAG+GCTGCACT  
GACTTTTCGTCATAATCGCTGCATATTACGGATTACACGGTACCAGCGCATCTCGTGTGAGCCTCGAC  
CCGATTATATGGTATTAAC TTATAAAGGTGAGGAGACCATTTTCTTGCTGAAATTTATAGAAGATTAT  
TTT

+

[illegible]

FFFFFFFFFFFFFFFFFFFFFFFFFFFFFFFFFFFFFFFFFFFFFFFFFFFFFFFFFFFFFFFFFFFFFFFF  
FFF

@A00721:190:HGJW7DSXY:4:1663:12029:33066\_1:N:0:TCTGCAAG+GCTGCACT  
TACTAATGGCAAATAGTGGAAAGGCTCCAGTCAACACTAGTTCGAGTGCTGCTTTGGATTACGATGAC  
GTGAGAATAGGTGAAGGGATAGTTTTTACCTCGACCAACATTAAGGCGGCGGCGACTAATCTTAAAGC  
TTC

+

FFFF:F,FF:FFFFFFFF:FFFFFFFF:FFFF:F:FFFFFFFFFFFFFFFFFFFFFFFFFFFFFFFF  
FFFFFFFFFFFFFFFF:FFFFFFFFFFFFFFFFFFFFFFFFFFFFFFFFFFFFFFFFFFFFFFFF  
:FF

@A00721:190:HGJW7DSXY:4:2663:29197:9283\_1:N:0:TCTGCAAG+GCTGCACT  
TGTGGTACGAATTGGTCCAACATTTACCACCAAATTCTTTTGATACAACCTAGCCTTCAAGTGGGGT  
ATGCCTGCGGAATACGCTTGCTATTCACCAGATTGGTTCGAACCGTTGATGCTATGTCAGAAGAAGC  
TAT

+

F:FFFF:,FF:FFFF:FFFFFFFF:FFFFFFFF:FFFFFFFF:FFFFFFFF:FFFFFFFF:FFFF  
FFFFFFFF:FFF:FFFFFFFF:FFFFFFFF:FFFFF:FF:FF:FFFFFFFFFFFFFFFF  
FFF

@A00721:190:HGJW7DSXY:4:2551:10800:29622\_2:N:0:TCTGCAAG+GCTGCACT  
GTTAAAGACTGCAGAGGCTGTCAAACAAGCCCAGACTCAAGGAGTCCAATCAAAGGTTTTGAATTTAG  
CTCAACTGGGGAGACGTGCTTAAATGGGTGAGATCGGAAGAGCGTCGT

+

FFFFFFFFFFFFFFFFFFFFFFFFFFFFFFFFFFFFFFFFFFFFFFFFFFFFFFFF:FFFFFFFF  
FFF:FFFFFFFF:FFFF:FFFFFFFF:FFFFFFFF

@A00721:190:HGJW7DSXY:4:2317:7663:15483\_1:N:0:TCTGCAAG+GCTGCACT  
CTATATACATTATAAAATATAAAATAAGGGAGTCATAACTTTTGTTACCAAATCTTGGCTTTCAAC  
GAAGTCTCTGATTTTATTAATCATTACTTTAACGATCTCTCGGTCATTTACTCTGTACTTGATCTACG  
TCG

+

FFF:FFFFFFFF,,:FFF::FF:FFFF:FFFF:FF:FFFF:FFFF:FFFF:FFFF:FFFF  
FFFFFFFFFFFFFFFF:FFFFFFFF:FFFFFFFF:FFFFF:FFFF:FFFF,FF  
FFF

@A00721:190:HGJW7DSXY:4:1610:30165:5541\_2:N:0:TCTGCAAG+GCTGCACT  
TGACTCTATCTTTTCAGACACTTCTTATATTATTTACAATAGTTAATATCATATTAGTAATACTCACT  
ATCGTTTTCTGCTTTTTCTTAGCTAATAGATTAATAAAGGATGAGTAC

+

FFFFFFFFFFFFFFFFFFFFFFFFFFFFFFFFFFFFFFFFFFFFFFFFFFFFFFFF  
FFFFFFFFFFFFFFFFFFFFFFFFFFFFFFFFFFFFFFFFFFFFFFFF

@A00721:190:HGJW7DSXY:4:1119:28411:24392\_2:N:0:TCTGCAAG+GCTGCACT  
CTTCGTTACGAGACCTGATGGTAGAATAGATTTAGTCTCTACACCCATCTCAACGAGGATAAAGCGAG  
TTTTCCGTCCTGAACGTAATACACGAAGAGATCATCCGCAAACGACTC

+

FFFFFFFFFFFFFFFFFFFFFFFFFFFFFFFFFFFFFFFFFFFFFFFFFFFFFFFF  
FFFFFFFFFFFFFFFFFFFFFFFFFFFFFFFFFFFFFFFF

@A00721:190:HGJW7DSXY:4:1413:28049:5541\_1:N:0:TCTGCAAG+GCTGCACT  
ACAGACTCCGAAAATGGTTTCAAATGAGGTCAAAGCTCTATTTATTAACGAACTATTATCCGATTCT  
TCGAGGGTATCACTACCACTGATCTGCCGACTTTAGTCAAGGAACCTCAATTCCTTCGATGTTTATAT  
TTT

+

FFFFFFFFFFFFFFFFFFFFFFFFFFFFFFFFFFFFFFFFFFFFFFFFFFFFFFFF  
FFFFFFFFFFFFFFFFFFFFFFFFFFFFFFFF,FFFFFFFF  
FFF

@A00721:190:HGJW7DSXY:4:1412:18050:30405\_1:N:0:TCTGCAAG+GCTGCACT  
CGACAAATTTAGAACTTTATTTCAGAACTCTCTCCGATCACCTTGGTGTGATCTCCCGGAGGATCTT



```
FFFFFFFFFFFFFFFFFFFFFFFFFFFFFFFFFFFFF::FFFFFFFFF:FFFFFFFFFFFFFFFFFFFFFFFFFFFFFFF:,  
FFF  
@A00721:190:HGJW7DSXY:4:1505:11216:15248_2:N:0:TCTGCAAG+GCTGCACT  
CGGGCCAAAGAGGCCGCTGCTACGAAGTCGCTGAAGGCGGCTTGGGTACTTAAGGGTAGCTGTAAAGT  
TGCGCCTGCCGACCCCATCTTTGAGACCAAGACTCTCTACAGTAGGTT  
+  
FFFFFFFFFFFFFFFFFFFFFFFFFFFFFFFFFFFFFFFFFFFFFFFFFFFFFFFFFFFFFFFFFFFFFFFFF:FFFFFFFFFFFFFFFFF  
FFFFFFFFFFFFFFFFFFFFFFFFFFFFFFFFFFFFFFFFFFFFFFFFFFFFFFFFFFFFFFFFFFFFFFFFF  
@A00721:190:HGJW7DSXY:4:2238:21685:8359_2:N:0:TCTGCAAG+GCTGCACT  
GAATTCGTCACTGAGGACGAAGGTGAGAGGACTTTTGGCTACTGGCGACAACTGAGAGCAGTCGCTG  
GGGAAAGAGAATTGCGTGGGTGAAGGCCGACGCTTCGAGCTTGAGTG  
+  
FFFFFFFFFFFFFFFFFFFFFFFFFFFFFFFFFFFFFFFFFFFFFFFFFFFFFFFFFFFFFFFFFFFFFFFFF  
FFFF:FFFFFFFFFFFFFF:FFFFFFFFFFFFFFFFFFFFFFFFFFFFFFFFFFFFFFFFFFFFFFFFF  
@A00721:190:HGJW7DSXY:4:2178:16215:17675_2:N:0:TCTGCAAG+GCTGCACT  
TTATCCGCGCTTAATACTATGGGGCGAAGATCCCTATGGAGTCTTGAAGGACTTAGGTTGGCATATTTA  
TGCCGACGATAATAAGCATGTCACCCTTAAGCACCGAGGTAAGCTCG  
+  
FFFFFFFFFFFFFFFFFFFFFFFFFFFFFFFFFFFFFFFFFFFFFFFFFFFFFFFFFFFFFFFFFFFFFFFFF  
FFFFFFFFFFFFFFFFFFFFFFFFFFFFFFFFFFFFFFFFFFFFFFFFFFFFFFFFFFFFFFFFFFFFFF:F  
@A00721:190:HGJW7DSXY:4:1314:15835:3145_2:N:0:TCTGCAAG+GCTGCACT  
TTTCTTGAAAATTTTTCTTTCTCCGTCATTGGGGATTTCGATGTGAGAAGGTGGAAGGTGTCAAGG  
GTCTTCTTCATGCTGATCTTTCAGGACCTAATCACATCATGATTGATA  
+  
FFFFFFFFFFFFFFFFFFFFFFFFFFFFFFFFFFFFFFFFFFFFFFFFFFFFFFFFFFFFFFFFFFFFFFFFF  
FFFFFFFFFFFFFFFFFFFFFFFFFFFFFFFFFFFFFFFFFFFFFFFFFFFFFFFFFFFFFFFFFFFFFFF  
@A00721:190:HGJW7DSXY:4:1367:24804:1423_2:N:0:TCTGCAAG+GCTGCACT  
AAATTAAGACGGGGGGATTAAGAGTCCAGCTGTAAGTGCATTTTCAGAGAGGGGAGCTCTGAAAAGG  
AACTTCGTCAGAAGATGAGGAAGTTCTCCGAAATTAAGACGGGGGG  
+  
FFFFFFFFFF:FFFFFFFF:F:FFFFFFFFFFFFFF,F:FFFFFFFFFFFFFFFFFFFFFFFFFFFFFFFFF  
F::FFFFF,F:FF:FFFFFFFF:FFFFFFFFFFFFFFFFFFFFFFFFFFFFFFFFF  
@A00721:190:HGJW7DSXY:4:2437:10149:32503_1:N:0:TCTGCAAG+GCTGCACT  
GATTATTTGAAGCAGGGGTACCCTTCCTAAGGTGGATGAGGGAGGTTGTTTCTTTGGAGTTTLAGA  
TAATCTTTTGAGAAGGGGTCATAGAGCCAGCAAGAGAAGCTTATATGCTGGTTTAAGTGATGATTATC  
ACT  
+  
FFF,, ,FFF,FFF:FFFFFFFF,FFFFFFFFFFFFFFFFFFFFFFFF,FFF:FFFFFFFFFFFFFFFFF  
FFFFFFFFFFFFFFFFFFFFFFFFFFFFFFFFFFFFFFFFFFFFFFFFFFFFFFFFFFFFFFFFF:FFFFFFFFFFFFFFFFFFFFFFFFF  
FFF  
@A00721:190:HGJW7DSXY:4:1616:8296:31234_1:N:0:TCTGCAAG+GCTGCACT  
GGTAACCTACCATATTGTTCCCTTCGGGAAGTTGTGGGATTTAACTTTGACTCACTACTCCGATCAG  
ATCCGGATGTTTTGATTGGTATGGACTACTCGACTTTTGATCTGGAGTTGTCTAGGGTCATGGCAGAT  
ACT  
+  
FFFFFFFFFF:FFFFFFFFFFFFFFFFFFFFFFFFFFFFFFFFFFFFFFFFFFFFFFFFFFFFFFFFFFFFFFF  
FFFFFFFFFFFFFFFFFFFFFFFFFFFFFFFFFFFFFFFFFFFFFFFFFFFFFFFFFFFFFFFFFFFFFFF  
FFF  
@A00721:190:HGJW7DSXY:4:2653:32452:9565_1:N:0:TCTGCAAG+GCTGCACT  
TGAGGGCGGTTGAGGGAGCCGTTTTGGCCGACTTTAACTATTCTAAGAGTCTTTATGATTCAAACCT  
ATCGTTGTCGTACCTTACAAGTTGAGGAGACTTTACAGCGGCTTATTGTCGCGCAGTTTCCAGAATT  
GCG  
+
```







@A00721:190:HGJW7DSXY:4:1441:10556:33677\_2:N:0:TCTGCAAG+GCTGCACT  
CTTTGGTAATTGTATGATCACTTTGATGATTTTATCACTTTATTATGACCTTGGAAGTTTTTCGGCTG  
TGTTGTCGCTGGGGACGATTCCATTCTGTTTTCAAAGACTCCAATAA

+

FF:FFF:FFFFFFFF:FFFFFFFFFFFFFF:FFFFFFFFFFFFFFFFFFFFFFFFFFFFFFFFFFFF  
FFFFFFFFFFFFFFFFFFFFFFFFFFFFFFFFFFFF:FFFFFF:FFFFFFFF

@A00721:190:HGJW7DSXY:4:1514:25581:14982\_2:N:0:TCTGCAAG+GCTGCACT  
GATTCCGAGAGGTTTATCCTGATGTGGAGGGAGTTCTTGAAGCATCCCGACCTTTCCTTGTGAAAATT  
TTGATGCGGTTTTATAAGATTATCAGTAATCCTGATTCTACTACGGAT

+

FFFFFFFF:FFFFFFFFFFFFFFFFFFFFFFFFFFFFFFFFFFFFFFFFFFFFFFFFFFFFFFFFFFFF,FFFFFFFF  
FFFFFFFFFFFFFFFFFFFFFFFFFFFFFFFFFFFFFFFFFFFFFFFFFFFFFFFFFFFFFFFF

@A00721:190:HGJW7DSXY:4:2221:22634:17801\_1:N:0:TCTGCAAG+GCTGCACT  
GTTGATTAAGACTCTTCCGAAAGCGAACTTTGGGAATTTGAAGCTCAGGGTGAAGCACAACGTTTGA  
CCGTGACGAACTGTGGTGTTCTTGATCTACGTTACGGATATACTCTCCTTGAGTTCACTCGTAAGGAC  
ACT

+

FFFFFFFFFFFFFFFFFFFFFFFFFFFFFFFFFFFFFFFFFFFFFFFFFFFFFFFFFFFFFFFFFFFF  
FFFFFFFFFFFFFFFFFFFFFFFFFFFFFFFFFFFFFFFFFFFFFFFFFFFFFFFFFFFFFFFFFFFF  
FFF

@A00721:190:HGJW7DSXY:4:2278:18521:25864\_2:N:0:TCTGCAAG+GCTGCACT  
AGCAGGGGTTTTCGAATAGTGATAGCCACCCGCTTACAGAGGGGCAGCAGCATGACCATAATTGGTA  
TTGACTTTGGTACCACCTTTTCTACTGTCTGTCTCGCCTCTTCAATG

+

FFF:FFFFFFFFFFFFFFFFFFFFFFFFFFFFFFFFFFFFFFFFFFFFFFFFFFFFFFFFFFFFFFFF  
FFFFFFFFFFFFFFFFFFFFFFFFFFFFFFFFFFFFFFFFFFFFFFFFFFFFFFFFFFFF

@A00721:190:HGJW7DSXY:4:1634:7193:8813\_2:N:0:TCTGCAAG+GCTGCACT  
AACACAATGATAGTGAATTTATACCTACAATCATTGGTTTTCTAATAATGATGACACTATTGTTTA  
TGATATGATGCTATTACTCATGATGGTTACGGTCAGGGAGGATTCTC

+

FFFFFFFFFFFFFFFFFFFFFFFFFFFFFFFFFFFF:FF:FFFFFFFF:FFFFFFFFFFFFFFFFFFFF  
FFFFFFFFFFFFFFFFFFFFFFFFFFFF:FFFFFFFFFFFF:FFFFFFFF

@A00721:190:HGJW7DSXY:4:2674:19452:32393\_2:N:0:TCTGCAAG+GCTGCACT  
GAGTGAAAGGCTTCAATTGTAGTGGTTTGGTCGTTTCAGTACCCAGTCAGTATACCTCTACGCAAAGA  
TATTTTCATGAAAACCTACAGAGGAACGTACCGGATTACCTGTCTTTCAT

+

FFFFFFFFFFFFFFFFFFFFFFFFFFFFFFFFFFFFFFFFFFFFFFFFFFFFFFFFFFFFFFFFFFFF  
FFFFFFFFFFFF,F:FFFFFFFFFFFFFFFFFFFFFFFFFFFFFFFF

@A00721:190:HGJW7DSXY:4:2323:16080:10300\_2:N:0:TCTGCAAG+GCTGCACT  
CCTACGTAGTTTATGACTTTGGTGGTGGTACTTTCGATACTTCTATCGTCTTACGTTACGGTAATTAC  
TATAGTGTTATTTATTCTGGTGGTGGTGGTACTTTGAGGTCGTGAC

+

FFFFFFFFFFFF,FFFFFFFFFFFFFFFFFFFFFFFFFFFFFFFFFFFFFFFFFFFFFFFFFFFF:FFFF:FFFFFFFF  
F::FFFFFFFFFFFFFFFFFFFFFFFFFFFF:FFFFFFFFFFFFFFFF

@A00721:190:HGJW7DSXY:4:2410:25852:17080\_2:N:0:TCTGCAAG+GCTGCACT  
ACGGCGCACTTCTTTACCCGCCACCACAACTTTCAGTTTCACACTGAAGGAGGAGGTTTCTGTTA  
CTGAAAACCTCGTCAATACTTTTCAATAATATACGTCTTGAACCTCA

+

FFFFFFFFFFFFFFFFFFFFFFFFFFFFFFFFFFFFFFFFFFFFFFFFFFFFFFFFFFFFFFFFFFFF  
FFFFFFFFFFFFFFFFFFFFFFFFFFFFFFFFFFFFFFFFFFFFFFFFFFFF:FFFF

@A00721:190:HGJW7DSXY:4:2433:11975:9111\_1:N:0:TCTGCAAG+GCTGCACT  
TTCCGATCTATTACTCTTGCTGAAACAGCTATTAAAGCTGTTGAGCGGGTAATTACACCTAAACGAGC  
TCGATCTGCCATCGCTGAAGGATGTGCACTCTTTTCTGCTACTTTAACGGAGCGTAGTGACTCTTCG  
TCG

+  
FFFFFFFF:FFFFFFFFFFFFFFFFFFFFFFFFFFFFFFFFFFFFFFFFFFFFFFFFFFFFFFFFFFFFF:FFFFFFFFFFFFFFFFFFFFFFFFFFFFFFFFFFFFFFFFFFFFFFFFFFFFFFFFFFFFFFF  
FFFFFFFFFFFFFFFFFFFFFFFFFFFFFFFFFFFFFFFFFFFFFFFFFFFFFFFFFFFFFFFFFFFFFFFFF:FFFFFFFFFFFFFFFFFFFFFFFFFFFFFFFFFFFFFFFFFFFFFFFFFFFFFFFFFFFFFFF  
FFF  
@A00721:190:HGJW7DSXY:4:2556:5746:30953\_1:N:0:TCTGCAAG+GCTGCACT  
TTCCGATCTTTTTCAATCTTCTTA AAAAGAAGATAGAGAGTCATACTTTGGGCTATCGTTTCAGGTGCAT  
GGGGTTGGATAGCCAATATTGAAGTGACACCTCTGGTAGTATCGAAGTAAAGATAACCAATAAGGAA  
GGA  
+  
FFFFFFFF:FFFFFFFFFFFFFFFFFFFFFFFFFFFFFFFFFFFFFFFFFFFFFFFFFFFFFFFFFFFFFFFFF  
FFFFFFFFFFFFFFFFFFFFFFFFFFFFFFFFFFFFFFFFFFFFFFFFFFFFFFFFFFFFFFFFFFFFFFFFF  
FFF  
@A00721:190:HGJW7DSXY:4:1224:27190:10974\_1:N:0:TCTGCAAG+GCTGCACT  
AATCTTACC ACTCTCTACGAACCTAAAGTTCTGAAGACGTTGCTTGT CGCTTCCTCCTTTAATGGCAC  
TACCTCGGTACAATCTTACTTGGAACGAAGGCGACCTGTTCCGGAGTTTTTTACGGGATCCGGAATGTT  
CTG  
+  
F, FFF: FFFFFF, FFFFFFFFFFFFFFFFFF: FFFFFFFFFFFFFFFF: FFFFFFFFFFFFFFFF: FFFFFFFF  
FFFFFFFFFFFFFFFFFFFFFFFFFFFFFFFFFFFFFFFFFFFFFFFFFFFFFFFFFFFFFFFFFFFFFFFFF  
FFF  
@A00721:190:HGJW7DSXY:4:1128:12762:2080\_2:N:0:TCTGCAAG+GCTGCACT  
TTAATATAAAGAATCTTTACCAGGACTCCTACTACAGGAGGCAGTCTTCTGATCGTAAGAAGTTTATA  
AGGAACATATCCATTTGTTGTAATAGGGTCATCAACTTAGAACTCGAA  
+  
FFFFFFFFFFFFFFFFFFFFFFFFFFFFFFFFFFFFFFFFFFFFFFFFFFFFFFFFFFFFFFFFFFFFFFFFF  
FFFFFFFFFFFFFFFFF, FFFFFFFFFFFFFFFFFF: FFFFFFFFFFFFFFFF  
@A00721:190:HGJW7DSXY:4:2472:19162:2738\_2:N:0:TCTGCAAG+GCTGCACT  
ATACTGTCTTTCCAAGCTTACCTGTATCTTCAATGAAATTGGACTCTTCGATAGGGGACATTTTATCG  
TGGGCTTTCCGTAAAGGAAGATCTGTTATCGACGTTTATCGTTTACG  
+  
FFFFFFFFFFFFFFFFFFFFFFFFFFFFFFFFFFFFFFFFFFFFFFFFFFFFFFFFFFFFFFFFFFFFFFFFF  
FFFFFFFFFFFFFFFFFFFFFFFFFFFFFFFFFFFFFFFFFFFFFFFFFFFFFFFFFFFFFFFFFFFFFFFFF  
@A00721:190:HGJW7DSXY:4:2463:2654:17456\_1:N:0:TCTGCAAG+GCTGCACT  
AAAATTTTATCCTCGTTTAACTTACTTAGACTTTCTACGATACAAATGATAACTTCTAATTTACGTT  
TGCTACTCAGAGCTGGTCCTCTCAGCAAAGGGATGCATGGTGTTATCTCCTCAGGAGTCCCGCATTT  
GAT  
+  
FFFFFFFFFFFFFFFFFFFFFFFFFFFFFFFFFFFFFFFFFFFFFFFFFFFFFFFFFFFFFFFFFFFFFFFFF  
FFFFFFFFFFFFFFFFFFFFFFFFFFFFFFFFFFFFFFFFFFFFFFFFFFFFFFFFFFFFFFFFFFFFFFFFF  
FFF  
@A00721:190:HGJW7DSXY:4:2143:9742:15953\_1:N:0:TCTGCAAG+GCTGCACT  
GACTTTCGT CATAATCGCTGCATATTACGGATTACACGGTACCAGCGCATCTCGTGTGCGAGCCTCGAC  
CCGATTATATGGTATTA AACTTATAAAGGTGAGGAGACCATTTCTTGCTGAAATTTATAGAAGATTAT  
TTT  
+  
FFFFF:, FFF: FFFFF: FFFFFFFFFFFFFFFFFF: FFFFFF::, FF: FFFF:F: FFFFFF: FFF  
: FFFFFFFFFF, FFFFF: FFFFFFFFFF: FFFF: FFFFFFFFFFFFFFFFFFFFFFFFFFFFFF: FFFF:  
FFF  
@A00721:190:HGJW7DSXY:4:2526:12861:8328\_1:N:0:TCTGCAAG+GCTGCACT  
TACTAATGGCAAATAGTGGAAGGCTCCAGTCAACACTAGTTCGAGTGCTGCTTTGGATTACGATGAC  
GTGAGAATAGGTGAAGGGATAGTTTTTACCTCGACCAACATTAAGGCGGCGGCGACTAATCTTAAAGC  
TTC  
+  
FFFFF,F,FFFFF.FFFFFFFFFF:FFFFFFFFFFFFFF:FFFFFFFFFFFF:,FFFFFFFFFFFFFFFF

@A00721:190:HGJW7DSXY:4:2418:19434:10441\_1:N:0:TCTGCAAG+GCTGCACT  
TTACCGCAAAAAGTTGGAAGAGGTCTATGATATTTATTTTACTTATACTTTAAATAGCACCGATTATA



@A00721:190:HGJW7DSXY:4:2625:14742:6073\_2:N:0:TCTGCAAG+GCTGCACT  
GAATTCGTCCTACTGAGGACGAAGGTGAGAGGACTTTTGGCTACTGGCGACAACTGAGAGCAGTCGCTG  
GGGACAGAGAATTGCGTGGGTGAAGGCCGACGCTTCGAGCTTGAGTG

+

FFFFFFFFFFFFFFFFFFFFFFFFFFFFFFFFFFFFFFFFFFFFFFFFFFFFFFFFFFFFFFFFFFFFFFFFFFFFFFFF  
FFFF,FFFFFFFFFFFFFFFFFFFFFFFFFFFFFFFFFFFFFFFFFFFFFFFFFFFFFFFFFFFFFFFFFFFFFFFF

@A00721:190:HGJW7DSXY:4:2629:3694:3161\_2:N:0:TCTGCAAG+GCTGCACT  
TTATCCGCGCTTAAGTATGGGGCGAAGATCCCCTATGGAGTCTTGAAGGACTTAGGTTGGCATATTTA  
TGCCGACGATAATAAGCATGTCACCCTTAAGCACCAGGTAAGCTCGG

+

FFFFFFFFFFFFFFFFFFFFFFFFFFFFFFFFFFFFFFFFFFFFFFFFFFFFFFFFFFFFFFFFFFFFFFFFFFFFFFFF  
FFFFFFFFFFFFFFFF,FF:FFF:FFFFFFFFFFFFFFFFFFFFFFFFFFFFFFFFFFFFFFFFFFFFFFFF

@A00721:190:HGJW7DSXY:4:1360:14082:15295\_2:N:0:TCTGCAAG+GCTGCACT  
TTTCTTGAAAATTTTCTTTCTCCGTCATTGGGGATTTGATGTGAGAAGGTGGAAGGTGTCAAGG  
GTCTTCTTCATGCTGATCTTTCAGGACCTAATCACATCATGATTGATA

+

FFFFFFFFFFFFFFFFFFFFFFFFFFFFFFFFFFFFFFFFFFFFFFFFFFFFFFFFFFFFFFFFFFFFFFFFFFFFFFFF  
FFFFFFFFFFFFFFFFFFFFFFFFFFFFFFFFFFFFFFFFFFFFFFFFFFFFFFFFFFFFFFFFFFFFFFFFFFFFFFFF

@A00721:190:HGJW7DSXY:4:2147:4209:14011\_2:N:0:TCTGCAAG+GCTGCACT  
AAATTAAGACGGGGGATTAAGAGTCCAGCTGTAAGTGTCAATTCAGAGAGGGGAGCTCTGAAAAGG  
AACTTCGTCAGAAGATGAGGAAGTTCTCCGAAATTAAGACGGGGGG

+

FFFFFFFFFFFFFFFFFFFFFFFFFFFFFFFFFFFFFFFFFFFFFFFFFFFFFFFFFFFFFFFFFFFFFFFFFFFFFFFF  
FFFFFFFFFFFFFFFFFFFFFFFFFFFFFFFFFFFFFFFFFFFFFFFFFFFFFFFFFFFFFFFFFFFFFFFFFFFFFFFF

@A00721:190:HGJW7DSXY:4:1165:25183:7874\_2:N:0:TCTGCAAG+GCTGCACT  
ATTATTTGAAGCAGGGGTACCACTTCCTAAGGTGGATGAGGGAGGTTGTTTCTTTGGAGTTTAGAT  
AATCTTTTGAGAAGGGGTCATAGAGCCAGCAAGAGAAGCTTATATGCT

+

FFFFFFFFFFFFFFFFFFFFFFFFFFFFFFFFFFFFFFFFFFFFFFFFFFFFFFFFFFFFFFFFFFFFFFFFFFFFFFFF  
FFFFFFFFFFFFFFFFFFFFFFFFFFFFFFFFFFFFFFFFFFFFFFFFFFFFFFFFFFFFFFFFFFFFFFFFFFFFFFFF

@A00721:190:HGJW7DSXY:4:2443:19614:31015\_1:N:0:TCTGCAAG+GCTGCACT  
GGTAACTTACCATATTGTTCTTCCGGGAAGTTGTGGGATTTAACTTTGACTCAACTACTCCGATCAG  
ATCCGGATGGTTTGATTGGTATGGACTACTCGACTTTTGATCTGGAGTTGTCTAGGGTCATGGCAGAT  
ACT

+

FFFFFFFFFFFFFFFFFFFFFFFFFFFFFFFFFFFFFFFFFFFFFFFFFFFFFFFFFFFFFFFFFFFFFFFFFFFFFFFF  
FFFFFFFFFFFFFFFFFFFFFFFFFFFFFFFFFFFFFFFFFFFFFFFFFFFFFFFFFFFFFFFFFFFFFFFFFFFFFFFF  
FFF

@A00721:190:HGJW7DSXY:4:2653:32579:9439\_1:N:0:TCTGCAAG+GCTGCACT  
TGAGGGCGGTTGAGGGAGCCGTTTTGGCCGACTTTAACTATTCTAAGAGTCTTTATGATTCAAAACCT  
ATCGTTGTGCTACCTTACAAGTTGAGGAGACTTTACAGCGGCTTATTGTCGCGCAGTTTCCAGAATT  
GCG

+

FFFFFFFFFFFFFFFFFFFFFFFFFFFFFFFFFFFFFFFFFFFFFFFFFFFFFFFFFFFFFFFFFFFFFFFFFFFFFFFF  
FFFFFFFFFFFFFFFFFFFFFFFFFFFFFFFFFFFFFFFFFFFFFFFFFFFFFFFFFFFFFFFFFFFFFFFFFFFFFFFF  
FFF

@A00721:190:HGJW7DSXY:4:1526:16432:4523\_2:N:0:TCTGCAAG+GCTGCACT  
CAACCCTATTCTTGATGTGAAAGATGCATCGAGGTATACGTCTAGGAACATTGATTGGGAACGTACCT  
ACTCACGAGACGTCATGAAAGCTATCGGAGGGAAGCAAAATGTTTCGT

+

FFFFFFFFFFFF:FFFFFFFF:FFFFFFFFFFFFFFFF:FF:FFFFFF:F:FFF:FFFFFFFFFFFF:FFFF  
:FFFF:FFFFFFFFFFFFFFFFFFFFFFFFFFFFFFFFFFFFFFFF:FFFFFFF::

@A00721:190:HGJW7DSXY:4:2357:30373:26224\_2:N:0:TCTGCAAG+GCTGCACT  
TGATGATGTAGCCACTATAATGCTTAAGAGAGAGATTGATGTATGTCATTCGTCTTAGTTTGTCCCG

GCGAATTATTGGACACGATGAAAAATGACATACCCGTTCTGACCTTG

+

FFFFF:FFFFFFFFFFFFFFFFFFFFF:FFFFF,FFFFFFFFFFFFFFFF:FFFFFFFFF:FFFFFFFFF  
FFFF:FFFFFFFFFFFFFFFF,FFF:FFFFFFFF,FFFFFFF:::FFF

@A00721:190:HGJW7DSXY:4:1337:31919:34632\_1:N:0:TCTGCAAG+GCTGCACT  
TCGGTCAATGACAAAACCTTCGAATATGTTACGACATGGCTTCGTAACAACAGTGCGAGGATTGTCAT  
CTCGGGGAAAGTGATTCACCAAGATGTTTCATATAGATACGAGATACCTAGAGAAGGTCGCAGCGATCT  
TAC

+

FFFFFFFFFFFFFFFFFFFFFFFFF:FFFFFFFFFFFFFFFFFFFFFFFFFFFFFFFFFFFFFFFFF  
FFFFFFFFFFFFFFFFFFFFFFFFFFFFFFFFFFFFFFFFFFFFFFFFFFFFFFFFFFFFFFFFFFFFF  
FFF

@A00721:190:HGJW7DSXY:4:1535:25889:9846\_1:N:0:TCTGCAAG+GCTGCACT  
TACCGGAGGTGATCTCTGCTTCTGCGTTACTGAGAGAAAAGATTCAGGACGCCTACGGTGACTTTA  
TGGACAAGATGCAAGTTCTTGGGAAATACTTGTTTCCCTTTTTAGGTTTAGTAGGTGATCTTGACGTC  
GAT

+

:FFFFFFFFFFFFFFFF:FFFFFFFFFFFFFFFFFFFFFFFFFFFFFFFFF:FF:FFFFFFFFFFFFFFFF:FFF  
FFFFFFFFFFFFFFFFFFFFFFFFFFFFFFFFFFFFFFFFFFFFFFFFFFFFFFFFFFFFFFFFFFFFF  
FFF

@A00721:190:HGJW7DSXY:4:1616:7979:22639\_1:N:0:TCTGCAAG+GCTGCACT  
TGAGAAGATTGAAGAACACGTCAAGAAGTCGCTCGGCGTTGTTCTTGAAAACCAAGTTAAGAAGGAGG  
CTGATCATGGAGTCTTTGTACCTTCTGTCAAACCTCGAGGTTAGCTACGAGAGGTGATCCCGGATGT  
GGA

+

FFFFFFFFFFFFFFFF,FFFFFFFFFFFFFFFFFFFFFFFFFFFFFFFFF:FFFFFFFFFFFFFFFF:F:,FFFF  
F:FF,FF,FFFF:FFFFFFFFFFFFFFFF:FFFFFFFFFFFFFFFFFFFFFFFFFFFFFFFFFFFFF  
FFF

@A00721:190:HGJW7DSXY:4:2420:14633:1720\_1:N:0:TCTGCAAG+GCTGCACT  
GAATGTTGTAAAGAATTGGGTTGAGAAGTGTGCTTTACAAGGAGTTAGACTCTTCTTCAAGTTTTTAG  
ATCTTCTTGATAATCTTAAAGAAAAATTTTTCGAATAAACTAATGAGAGGTATAGGCTTAGTCAAGTCT  
GTA

+

FFFFF:FFFFFFFFFFFFFFFFFFFFFFFFFFFFFFFFFFFFFFFFFFFFFFFFFFFFFFFFFFFFF  
FFFFFFFFFFFFFFFFFFFFFFFFFFFFFFFFFFFFF:F,FFFFFFFFFFFFFFFFFFFFFFFFFFFFF  
FFF

@A00721:190:HGJW7DSXY:4:1528:10068:20118\_1:N:0:TCTGCAAG+GCTGCACT  
CTGGAGTTCAGACGTGTGCTCTTCCGATCTGTTCTTGCAATAGCCACAGACTTTCTGGGAAAAGAGAC  
CTCTGTTGGTAGAGGAGTTGAGAGAATTACTCAGATTCAATCTGGCATCACTGAACGTCTACAACGAG  
TTA

+

FFFFFFFFFFFFFFFFFFFFFFFFFFFFFFFFFFFFFFFFFFFFFFFFFFFFFFFFFFFFFFFFFFFFF  
FFFFFFFFFFFFFFFFFFFFFFFFFFFFFFFFFFFFFFFFFFFFFFFFFFFFFFFFFFFFFFFFFFFFF  
FFF

@A00721:190:HGJW7DSXY:4:1578:30138:26537\_2:N:0:TCTGCAAG+GCTGCACT  
AGGACTGATGGTGAGATTCTTTTACCTTTTGGAGGTCCAGGAACCTTTACTCCTAGTGTCTTTTCTAG  
AGTCCAAGGACGTTTCCGTCGGAGGATGACAGGTGGGAGACCGCTCAA

+

FFFFFFFFFFFFFFFFFFFFFFFFFFFFF:FFFFFFFFFFFFFFFFFFFFFFFFFFFFFFFFFFFFF:FFFFF  
FFFFFFFFF:FFFFFFFFFFFFFFFFFFFFFFFFFFFFFFFFFFFFFFFFFFFFF

@A00721:190:HGJW7DSXY:4:2519:2076:12633\_1:N:0:TCTGCAAG+GCTGCACT  
TACTAAGTCTGAGATCTGCCACTTCTAATTTTAGGAAACGTCGCGAAAAGAAAGTTTCATGAGGATGTC  
TTGGTCGAAAAATATCGCCGGGAACCTTCTAATAGAGGATCCTGATGACATTATTTCAACGGATACCGA  
TCT



+  
FFFFFFFFFFFFFFFF:FFF:FFF,FFFFFFFFFFFFFFFF:FF,FFFFFFFF,FFFFFFFF  
FFFFFFFFFFFFFFFF:FFFFFFFFFFFFFFFF:FFFFFFFFFFFFFFFF:FFFFFFFF  
FFF  
@A00721:190:HGJW7DSXY:4:2633:11912:9533\_1:N:0:TCTGCAAG+GCTGCACT  
CGTCTCAGGAAGTGTCTCCACTGATTCGGAATTAGAGAAAGACGACCTTCTTGTGGGACTGAGACCT  
CTGAATTTTCAGGGTGCCTGATGAGGACGTTGAAAGGGATAATTTCAACTCTGAGACTTCTAAGAGT  
GTT  
+  
FF:FFFFFFFFFFFFFFFFFFFFFFFFFFFFFFFFFFFFFFFF:FFFFFFFFFFFFFFFF  
FFFFFFFFFFFFFFFFFFFFFFFFFFFFFFFFFFFFFFFFFFFFFFFFFFFFFFFF  
FFF  
@A00721:190:HGJW7DSXY:4:1357:18837:16423\_1:N:0:TCTGCAAG+GCTGCACT  
CCGATCTAGTGATCGTATTAGAACAGCTGATTCTTATTGCATGAACGTCGCTGAGGTCAAACCTGTGG  
ACGTTCTTTTCATCGACGAATTATTCATGATTCACGCTGGTCAGACCCTTTTCTTACACATCTACTT  
AAG  
+  
FFFFFFFFFFFFFFFFFFFFFFFFFFFFFFFFFFFFFFFF:FFF:FFFFFFFFFFFFFFFF  
FFFFFFFFFFFFFFFFFFFFFFFFFFFFFFFF:FFFFFFFFFFFFFFFF  
FFF  
@A00721:190:HGJW7DSXY:4:1226:25744:26631\_1:N:0:TCTGCAAG+GCTGCACT  
CAATCAAATCGGATTCATCAATCGTATTGATCTCCAAGTCGAACTACTTCAACATCAACGACATCA  
TTCTTGATGAGTGTCGTTCTTATCGAAGTCTCAGTTATCGCTGCCCGCCGACGTTTGTGCGAACTC  
TCA  
+  
FFFFFFFFF:F:FFFFFFFFFFFFFFFFFFFFFFFFFFFFFFFFFFFFFFFF  
FFFFFFFFFFFFFFFFFFFFFFFFFFFFFFFFFFFFFFFFFFFFFFFF  
FFF  
@A00721:190:HGJW7DSXY:4:2503:9127:5807\_1:N:0:TCTGCAAG+GCTGCACT  
GAGGTTGCAGATTCAACCCCTTATATCGAGGCTATCGAGGACGATGAGTATCTTGAAGTTGTTGACGA  
CAAGCCTCAAGAGGGTAGAGGACCACCTGGATCTTCTACTGTCTCTGCCTTCCAAGATTTCTTAGAAG  
AGG  
+  
FFFF:FFFFFFFFFFFFFFFFFFFFFFFFFFFFFFFFFFFFFFFF  
FFFFFFFFFFFFFFFFFFFFFFFFFFFFFFFFFFFFFFFF  
FFF  
@A00721:190:HGJW7DSXY:4:2228:2727:24752\_1:N:0:TCTGCAAG+GCTGCACT  
TAATACCTTTATAGGTAAGAAGCCCTTGAGCCGCGTAGTCAGCGGTTTAGCTGTATCATCAGTCAG  
AGTATACCCGATAGGGTACCGAGTCTCCAAGAGAATATTTATTCTTATGAGGCTCGAACTTCAACGT  
TTT  
+  
FFFF:FFFFF:FFFFF,FFFFFFFF:FFFFFFFFFFFFFFFF  
FFFF,FFFFFFFFFFFFFFFF:FFFF:FFFFFFFF  
FFF  
@A00721:190:HGJW7DSXY:4:1574:17978:3975\_2:N:0:TCTGCAAG+GCTGCACT  
CTTTGGTAATTGTATGATCACTTTGATGATTTTATCACTTTATTATGACCTTGAAAGTTTTCGGCTG  
TGGTTGTCGCTGGGGACGATTCCATTCTGTTTTCAAAGACTCCAATAA  
+  
:FFFFFFFFFFFFFFFFFFFFFFFFFFFFFFFFFFFFFFFF:FF  
FFFFFFFFFFFFFFFFFFFFFFFFFFFFFFFF:FFFFF  
@A00721:190:HGJW7DSXY:4:1553:4390:9095\_2:N:0:TCTGCAAG+GCTGCACT  
GATTCCGAGAGGTTTATCCTGATGTGGAGGAGTTCTTGAAGCATCCCGACCTTTCCTTGTGAAAATT  
TTGATGCGGTTTCATAAGATTATCAGTAATCCTGATTCTACTACGGAT  
+

@A00721:190:HGJW7DSXY:4:2265:16839:15280\_1:N:0:TCTGCAAG+GCTGCACT  
GTTGATTAAGACTCTTCCGAAAGGCGAACTTTGGGAATTTGATGCTCAGGGTGAAGCACAACTTTGA  
CCGTGACGAACTGTGGTGTTCTTGATCTACGTTACGGATATACTCTCCTTGAGTTCCTCGTAAGGAC  
ACT

+

```
:FFFFFFF,F,FFFFFF:FFFF:F:FF,:FFFF:F,FFFFFF,:FF,,F:FFFFFF::FFFFFFFFFFFF
:FFFF:,FFF:F,F,FFFFFF:FFFFFF,F,FFFF,,F,:FFFF,F,FFFFFF:FFFFFF,F,:F,FFFFF
F,F
```

@A00721:190:HGJW7DSXY:4:2526:32877:18411\_2:N:0:TCTGCAAG+GCTGCACT  
AGCAGGGGTTTTCGAATAGTGATAGCCACCCGCTTACAGAGGGGCAGCAGCATGACCATAATTGGTA  
TTGACTTTGGTACCACCTTTTCTACTGTCTGTCTCGCCTCTTGAATG

+

[illegible]

@A00721:190:HGJW7DSXY:4:2552:7274:33912\_2:N:0:TCTGCAAG+GCTGCACT  
CTACAATCATTGTTTTCTAATAATGATGACACTATTGTTTATGGATATGATGCTATTACTCATGAT  
GGTTACGGTCAGGGAGGATTCTCAGTTTACAAGGACCTTAAGCGATGG

+

[illegible]

@A00721:190:HGJW7DSXY:4:1510:2862:8140\_2:N:0:TCTGCAAG+GCTGCACT  
GAAAGGCTTCAATTGTAGTGGTTTGGTCGTTTCAGTACCCAGTCAGTATACCTCTACGCAAAGATATT  
TCATGAAAACTACAGAGGAACGTTCCGGATTACCTGTCTTTCATATTA

+

```

FFFFFFFFFFFFFFFF,FFFFFFFFFFFFFFFFFFFFFFFFFFFFFFFFFFFFFFFFFFFFFFFF
FFFFFFF:FFFFFFF,FFFFF:FFFFFFFFFFFFFFFFFFFFFFFFFFFFFFFF:FFFF

```

@A00721:190:HGJW7DSXY:4:2348:19407:2534\_2:N:0:TCTGCAAG+GCTGCACT  
CCTACGTAGTTTATGACTTTGGTGGTGGTACTTTCGATACTTCTATCGTCTTACGTTACGGTAATTAC  
TATAGTGTTATTTATTCTGGTGGTGATGATAATCTTGGAGGTCGTGAC

+

```

FFFFFFFFFFFFFFFF:FF:FFFFFFFFFFFFFFFFFFFFFFFFFFFFFFFF:FFFF:FFFF
FFFFFFFF:F:FFFFFFFFFFFFFFFF:FFFFFFFFFFFFFFFF

```

@A00721:190:HGJW7DSXY:4:2460:2175:11678\_2:N:0:TCTGCAAG+GCTGCACT  
ACGGCGCACTTCTTTACCCGCCACCACACAACTTTTCAGTTTCACAACTGAAGGAGGAGGTTTCTGTTA  
CTGGAAAACCTCGTCAATACTTTTCAATAATATACGTCTTGAACTCA

 $+$ [illegible]

@A00721:190:HGJW7DSXY:4:2435:7798:7420\_1:N:0:TCTGCAAG+GCTGCACT  
TTCCGATCTATTACTCTTGCTGAAACAGCTATTAAGCTGTTGAGCGGGTAATTACACCTAAACGAGC  
TCGATCTGCCATCGCTGAAGGATGTGCACTCTTTTCTGCTACTTTAACGGAGCGTAGTGTACTCTTCG  
TCG

+

[illegible]

@A00721:190:HGJW7DSXY:4:1144:29731:37043\_1:N:0:TCTGCAAG+GCTGCACT  
ATTAATAATTTCAATCTTCTTAAAAAGAAGATAGAGAGTCATACTTTGGGCTATCGTTCAGGTGCATG  
GGGTTGGATAGCCAATATTGAAGTGGACACCTCTGGTAGTATC

+

[illegible]

@A00721:190:HGJW7DSXY:4:1240:20211:33959\_1:N:0:TCTGCAAG+GCTGCACT  
AATCTTACCCTATCTACGAACCTAAAGTTCTGAAGACGTTGCTTGTGCTTCCTCCTTTAATGGCAC  
TACCTCGGTACAATCTTACTTGGAACGAAGGCGACCTGTTCCGGAGTTTTTACGGGATCCGGAATGTT  
CTG

+

FFFF:FFFFFFFFFFFFFFFFFFFFFFFF:F,FFFFFFFFFFFFFFFFFFFFFFFFFFFFFFFFFFFFFFFF  
FFFFFFFFFFFFFFFFFFFFFFFFFFFFFFFFFFFFFFFFFFFFFFFFFFFFFFFFFFFFFFFFFFFFFFFF  
FFF

@A00721:190:HGJW7DSXY:4:1335:25183:11099\_2:N:0:TCTGCAAG+GCTGCACT  
TTAATATAAAGAATCTTTACCAGGACTCCTACTACAGGAGGCAGTCTTCTGATCGTAAGAAGTTTATA  
AGGAACATATCCATTTGTTGTAATAGGGTCATCAACTTAGAACTCGAA

+

FFFFFFFFFFFFFFFFFFFFFFFFFFFFFFFFFFFFFFFFFFFFFFFFFFFFFFFFFFFFFFFFFFFFFFFF  
FFFFFFFFFFFFFFFFF:,F,FFFFFFFFFFFF:FFFFFFFFFFFFFFFFFFFF

@A00721:190:HGJW7DSXY:4:2556:5484:30373\_2:N:0:TCTGCAAG+GCTGCACT  
ATACTGTCTTTCCAAGCTTACCTGTATCTTCAATGAAATTGGACTCTTCGATAGGGGACATTTTATCG  
TGGGCTTTCGTAAGGAAGATCTGTTATCGACGGTTTATCGTTTACG

+

FFFFFFFFFFFFFFFFFFFFFFFFFFFFFFFFFFFFFFFFFFFFFFFFFFFFFFFFFFFFFFFFFFFFFFFF  
FF:FFFFFF,F,FFFFFFFFFFFFFFFF:FFFFFFFFFFFF:FFFFFF

@A00721:190:HGJW7DSXY:4:2502:24912:35086\_1:N:0:TCTGCAAG+GCTGCACT  
AAAATTTTATCCTCGTTTAACTTACTTAGACTTTCTACGATACAAATGATAACTTCTAATTTACGTT  
TGCTACTCAGAGCTGGTCCTCTCAGCAAAGGGATGCATGGTGTATCTCCTCAGGAGTCCCGCATT  
GAT

+

F:FFFFFFFFFFFF:FFFF:FFFFFFFF,FFFF:FFFFFF:FFFFFFFF,FF,FFFFFF:FFF  
FFFFFFFFFFFFFFFFFFFFFFFF:FFFFFFFF,F,FFFFFF:FF,FFFFFFFF:FFFFFFFFFFFFFFFF  
FFF

@A00721:190:HGJW7DSXY:4:2215:29984:29152\_1:N:0:TCTGCAAG+GCTGCACT  
GACTTTCGTCATAATCGCTGCATATTACGGATTACACGGTACCAGCGCATCTCGTGTGAGCCTCGAC  
CCGATTATATGGTATTAATAAAGGTGAGGAGACCATTTTCTTGCTGAAATTTATAGAAGATTAT  
TTT

+

FFFFFF:FFFFFFFFFFFFFFFF:FFFFFFFFFFFFFFFF:FFFFFFFFFFFFFFFFFFFFFFFFFFFF  
FFFFFFFFFFFFFFFFFFFFFFFFFFFFFFFFFFFFFFFFFFFFFFFFFFFFFFFFFFFFFFFFFFFFFFFF  
FFF

@A00721:190:HGJW7DSXY:4:1157:12337:6793\_1:N:0:TCTGCAAG+GCTGCACT  
CTAATGGCAAATAGTGGAAGGCTCCAGTCAACACTAGTTCGAGTGCTGCTTTGGATTACGATGACGT  
GAGAATAGGTGAAGGGATAGTTTTTACCTCGACCAACATTAAGGCGGCGGCGACTAATCTTAAAGCTT  
CAC

+

FFFFFFFFFFFFFFFFFFFFFFFFFFFFFFFFFFFFFFFFFFFFFFFFFFFFFFFFFFFFFFFFFFFFFFFF  
FFFFFFFFFFFFFFFFFFFFFFFFFFFFFFFFFFFFFFFFFFFFFFFFFFFFFFFFFFFFFFFFFFFFFFFF  
FFF

@A00721:190:HGJW7DSXY:4:1419:32850:20870\_2:N:0:TCTGCAAG+GCTGCACT  
CAACATTTACCACCAAATCTTTTGATACAACTCTAGCCTTCAAGTGGGGTATGCCTGCGGAATACGC  
TTGCTATTCACCAGATTGGTTCGAACCCGTTGATGCGATGTCAGAAGA

+

FFFFFFFFFFFFFFFFFFFFFFFFFFFFFFFFFFFFFFFFFFFFFFFFFFFFFFFFFFFFFFFFFFFFFFFF  
FFFFFFFFFFFF:FFFFFFFFFFFFFFFFFFFFFFFF,F,FFFFFFFFFFFF

@A00721:190:HGJW7DSXY:4:1405:30707:36417\_1:N:0:TCTGCAAG+GCTGCACT  
CTGCAGAGGCTGTCAAACAAGCCAGACTCAAGGAGTCCAATCAAAGTTTTGAATTTAGCTCAACTG  
GGGAGACGTGCTTAAATGGGTGATAAAATTATTTAGAGATCTTTTCTACTTACAAAGGACAATTCAG  
TTT

[illegible]

@A00721:190:HGJW7DSXY:4:2659:9326:22623\_2:N:0:TCTGCAAG+GCTGCACT  
ATGAGAGTGTATTCCTTAATATTCTAGTAACCGCTATGTGGGCATTACTAGGATTTATCACACTCCTA  
AATTTGATAGCAATTTATGTTTTAAATGCTAGGAAAATTTAGAAAAA

+

FFFFFFFFFFFFFFFFFFFFFFFFFFFFFFFFFFFFFFFFFFFFFFFFFFFFFFFFFFFFFFFFFFFFFFFF  
FFFFF:FFFFFFFFFFFFFFFFFFFFFFFFFFFFFFFFFFFFFFFFFFFFFFFFFFFFFFFF

@A00721:190:HGJW7DSXY:4:2171:17562:30655\_1:N:0:TCTGCAAG+GCTGCACT  
TAATTCAATAGCTTTAGTATTATTTACTATCGCCTTTATTGAAAATTGTATAAGAGTTAATTGCTTAC  
ACAAAAGTGACGCGCGAAGGAATCTTAATTGATTGAAGCTAGGCGTTGGGGAGAATGAAGTGCCTT  
CCC

+

FF:FFFFFF,FF,FFFFFFFFFFFFFFFFFFFFFFFFFFFFFFFFFFFFFFFFFFFFFFFFFFFFFFFF  
FFFFF:FFFFFFFFF:,FFFF:FFFFFFFFFFFFFFFFFFFFFFFFFFFFFFFFFFFFFFFFFFFFFFFF  
FFF

@A00721:190:HGJW7DSXY:4:1101:14959:14497\_1:N:0:TCTGCAAG+GCTGCACT  
CCGCCGTCGGCAGATCGGCACCACTGGTCTCTACGTTCAAGGACCGCTGTGCAGAATAACCTTCCC  
AAATCTAGATCTGCACAGAAGAAGGCTGAAGGTCGTTACCGACGACCACTCAAAGGAAACGGGCTGT  
TGC

+

FFFFFFF,FFFFF:F,FFFFFFFFFFFFFFFFFFFFFFFFFFFFFFFFFFFFFFFFFFFFFFFFFFFF  
FFFFFFFFFFFFFFFFFFFFFFFFFFFFFFFFFFFFFFFFFFFFFFFFFFFFFFFFFFFFFFFFFFFF  
FFF

@A00721:190:HGJW7DSXY:4:1552:9498:1689\_2:N:0:TCTGCAAG+GCTGCACT  
GGGAACTGAGGCAGTACCTCAGTCAAAAGTCACATTCACCACTCCCATACCAATCAATGATGTGACTA  
TACAGTTCGGCCATTTCAAGAGTGGTCAATACGTCGTGGGAGGTACTG

+

FFFFFFFFF:FFFFFFFFFFFFFFFFFFFFFFFFFFFFFFFFFFFFFFFFFFFFFFFFFFFFFFFFFFFF  
FFFFFFFFFFFFF:FFFFFFFFFFFFFFFFFFFF,FFFFFFFFFFFFFFFFFFFFF

@A00721:190:HGJW7DSXY:4:2127:2763:27477\_1:N:0:TCTGCAAG+GCTGCACT  
AATCAATAGTTCTTCTGACCAGAATGAAAAGGGGTTTACCAGGGTAGTCTCTAAGTCTACCAGGAAGA  
GGGGAAATGTCCCCAAAACTGAGAAGAATAAAGGGAAAGGTCCATCAGGACCTAAGAAGGGGAAATTA  
CCC

+

FFFFFFFFFFFFF:FFFFFFFFFFFFFFFFFFFF:FFFFFFFFFF:FFFFFFF:FFFFFFFFF,FFFFFFFFFFFFF:  
FFFFFFFFFFFFFFFFFFFFFFFFFFFFFFFFFFFF,FFFFFFFFFFFFFFFFFFFFFFFFFFFFFFFFFFFF  
FFF

@A00721:190:HGJW7DSXY:4:2126:27227:16611\_2:N:0:TCTGCAAG+GCTGCACT  
CGGGCCAAAGAGGCCGCTGCTACGAAGTCGCTGAAGGCGGCTTGGGTCATTAAGGGTAGCTGTAAAGT  
TGCGCCTGCCGACCCCATCTTTGAGACCAAGACTCTCTACAGTAGGTT

+

FFFFFFFFFFFFFFFFFFFFFFFFFFFFFFFFFFFFFFFFFFFFFFFFFFFFFFFFFFFFFFFFFFFF  
FFFFFFFFFFFFFFFFFFFFF:FFFFFFFFFFFFFFFFFFFFFFFFFFFFF:FFFFF

@A00721:190:HGJW7DSXY:4:2667:4788:22373\_2:N:0:TCTGCAAG+GCTGCACT  
GAATTCGTCACTGAGGACGAAGGTGAGAGGACTTTTGGCTACTGGCGACAACTGAGAGCAGTCGCTG  
GGGAAAGAGAATTGCGTGGGTTGAAGGCCGACGCTTCGAGCTTGAGTG

+

FFFFFFFFFFFFFFFFFFFFFFFFFFFFFFFFFFFFFFFFFFFFFFFFFFFFFFFFFFFFFFFFFFFF  
FFFFFFFFFFFFF:FFFFFFFFFFFFFFFFFFFFFFFFFFFFFFFFFFFFF:FFFFFFF

@A00721:190:HGJW7DSXY:4:1646:7148:36417\_2:N:0:TCTGCAAG+GCTGCACT  
CTTAATATGGGGCGAAGATCCCCTATGGAGTCTTGAAGGACTTAGGTTGGCATATTTATGCCGACGA  
TAATAAGCATGTCAACCTTAAGCACCGAGGTAAGCTCGGACTTACAA

+

FFFFFFFFFFFFFFFFFFFFFFFFFFFFFFFFFFFFFFFFFFFFFFFFFFFFFFFFFFFFFFFFFFFF  
FFFFF:FFFFFFFFFFFFFFFFFFFF:FFFFF:FFFFFFFFFFFFFFFFFFFFFFFFFFFFF,  
FFFFF:FFFFFFFFFFFFFFFFFFFF:FFFFFFFFFFFFFFFFFFFFFFFFFFFFF:

@A00721:190:HGJW7DSXY:4:2142:9914:29246\_2:N:0:TCTGCAAG+GCTGCACT  
TTTCTTGAAAATTTTCTTTCTCCGTCATTGGGGATTTCGATGTGAGAAGGTGGAAGGTGTCAAGG  
GTCTTCTTCATGCTGATCTTTCAGGACCTAATCACATCATGATTGATA

+

FFFFFFFFFFFFFF:FFFFFFFF:FFF::FFFFFFFF:FF,FFFF,:F:FFF:FFF:FFFFFFFF:F  
FFFFFFFFFFFFFF:FF,FFFF,FFFFFFFFFFFFFF::FFFFFFFF:FF

@A00721:190:HGJW7DSXY:4:2556:17020:31187\_2:N:0:TCTGCAAG+GCTGCACT  
AAATTAAAGACGGGGGATTAAGAGTCCAGCTGTAAGTGTCAATTCAGAGAGGGGAGCTCTGAAAAGG  
AAACTTCGTCAGAAGATGAGGAAGTTCTCCGAAATTAAGACGGGGG

+

FFFFFFFFFFFFFFFFFFFFFFFFFFFFFFFFFFFFFFFFFFFFFFFFFFFFFFFFFFFFFFFFFFFFFFFF  
FFF:FFFFFFFFFFFFFFFF:FFFF:FFF:FFF,:FFF:FFF,FF,F

@A00721:190:HGJW7DSXY:4:1633:9344:15796\_2:N:0:TCTGCAAG+GCTGCACT  
ATTATTTGAAGCAGGGGTACCACCTTCTAAGGTGGATGAGGGAGGTTGTTTCTTTGGAGTTTATAGAT  
AATCTTTTGAGAAGGGGTCATAGAGCCAGCAAGAGAAGCTTATATGCT

+

FFF:FFFFFFFFFFFFFFFFFFFFFFFFFFFFFFFFFFFFFFFFFFFFFFFFFFFFFFFFFFFFFFFFFFFF  
FFFFFFFFFFFFFF:FF:FFFFFFFF:FFFFFFFFFFFFFFFFFFFFFFFF

@A00721:190:HGJW7DSXY:4:2513:28655:5932\_1:N:0:TCTGCAAG+GCTGCACT  
GGTAACTTACCATATTGTTCTTCCGGGAAGTTGTGGGATTAACTTTGACTCAACTACTCCGATCAG  
ATCCGGATGGTTTGATTGGTATGGACTACTCGACTTTTGATCTGGAGTTGTCTAGGGTCATGGCAGAT  
ACT

+

FFFFFFFFFFFFFFFFFFFFFFFFFFFFFFFFFFFFFFFFFFFFFFFFFFFFFFFFFFFFFFFFFFFFFFFF  
FFFFFFFFFFFFFFFFFFFFFFFFFFFFFFFFFFFFFFFFFFFFFFFFFFFFFFFFFFFFFFFFFFFFFFFF  
FFF

@A00721:190:HGJW7DSXY:4:2401:25690:13041\_2:N:0:TCTGCAAG+GCTGCACT  
GGGCGGTTGAGGGAGCCGTTTTGGCCGACTTTAACTATTCTAAGAGTCTTTATGATTCAAAACCTATC  
GTTGTCGTACCTTACAAGGTTGAGGAGACTTTACAGCGGCTTATTGTC

+

FFFFF,FFFFFFFFFFFFFF:FFFFFF:FFFF:FFFFFFFFFFFF:FFFFFF:FF,:FFF,FFFF  
FFFF:FF:FF:FF:FF:FFF,:FFFFFFFFFFFFFFFF:FFFF,FF

@A00721:190:HGJW7DSXY:4:2317:29360:6245\_2:N:0:TCTGCAAG+GCTGCACT  
CAACCCTATTCTTGATGTGAAAGATGCATCGAGGTATACGTCTAGGAACATTGATTGGGAACGTACCT  
ACTCACGAGACGTCATGAAAGCTATCGGAGGGAAGCAAAATGTTTCGT

+

FFFFFFFFFFFFFF,FFFFFF:FFFFFFFFFFFFFFFFFFFFFFFFFFFFFFFF:FFFFFFFFFFFFFFFF:F  
FFFFFFFFFFFFFFFFFFFFFFFFFFFFFFFFFFFFFFFFFFFFFFFFFFFFFFFF

@A00721:190:HGJW7DSXY:4:2525:15691:14231\_2:N:0:TCTGCAAG+GCTGCACT  
TGATGATGTAGCCACTATAATGCTTAAGAGAGAGATTGATGTATGTCATTTCTGCTTAGTTTGTCCCG  
GCGAATTATTGGACACGATGAAAAATGACATACCCGTTCTGACCTTG

+

FFFFFFFFFFFFFFFFFFFFFFFFFFFFFFFFFFFFFFFFFFFFFFFFFFFFFFFFFFFFFFFFFFFFFFFF  
FFFFF:FFFFFFFFFFFFFFFFFFFFFFFFFFFFFFFFFFFFFFFF:FFFF

@A00721:190:HGJW7DSXY:4:1503:22046:29997\_1:N:0:TCTGCAAG+GCTGCACT  
TCGGTCAATGACAAAACCTTCGAATATGTTACGACATGGCTTCGTAACAACAGTGCGAGGATTGTCAT  
CTCGGGGAAAGTGATTCACCAAGATGTTTCATATAGATACGAGATACCTAGAGAAGGTGCGAGCGATCT  
TAC

+

FFFFFFFFFFFFFFFFFFFFFFFFFFFFFFFF:FFFFFFFFFFFFFFFF:FFFFFFFFFFFFFFFFFFFFF  
FFFFFFFFFFFFFFFFFFFFFFFFFFFFFFFFFFFFFFFFFFFFFFFFFFFFFFFFFFFFFFFFFFFFF  
FFF

@A00721:190:HGJW7DSXY:4:2422:21115:24909\_1:N:0:TCTGCAAG+GCTGCACT  
TACCGGAGGTGATCTCTGCTTCTGCGTTACTGAGAGAAAAGATTACAGACGCCTACGGTGACTTTA

TGGACAAGATGCAAGTTCTTGGGAAATACTTGTTTCCCTTTTTAGGTTTAGTAGGTGATCTTGACGTC  
GAT

+

:FFFFFFFFFFFFFFFFFFFFFFFFFFFFFFFFFFFFFFFFFFFFFFFFFFFFFFFFFFFFFFFFFFFFFFFF  
FFFFF,FFFFFFFFFFFFFFFFFFFFFFFFFFFFFFFFFFFFFFFFFFFFFFFFFFFFFFFFFFFFFFFF  
FFF

@A00721:190:HGJW7DSXY:4:2154:26341:10974\_1:N:0:TCTGCAAG+GCTGCACT  
TGAGAAGATTGAAGAACACGTCAAGAAGTCGCTCGGCGTTGTTCTTGAAAACCAAGTTAAGAAGGCGG  
CTGATCATGGAGTCTTTGTACCTTCTGTCAAACCTCGAGGTTACAGCTACGAGAGGTGATCCCGGATGT  
GGA

+

FFFFFFFFFFFFFFFFFFFFFFFFFFFFFFFFFFFFFFFFFFFFFFFFFFFFFFFFFFFFFFFFFFFFFFFF  
F:FF:FFFFFFFFFFFFFFFFFFFFFFFFFFFFFFFFFFFFFFFFFFFFFFFFFFFFFFFFFFFFFFFF  
FF:

@A00721:190:HGJW7DSXY:4:2438:6849:32831\_1:N:0:TCTGCAAG+GCTGCACT  
GAATGTTGTAAAGAATTGGGTTGAGAAGTGTGCTTTACAAGGAGTTAGACTCTTCTTCAAGTTTTTAG  
ATCTTCTTGATAATCTTAAAGAAAAATTTTCAATAAACTAATGAGAGGTATAGGCTTAGTCAAGTCT  
GTA

+

FFFF:FFFFFFFFFFFFFFFFFFFFFFFFFFFFFFFFFFFFFFFFFFFFFFFFFFFFFFFFFFFFFFFF  
FFFFFFFFFFFFFFFFFFFFFFFFFFFFFFFFFFFFFFFFFFFFFFFFFFFFFFFFFFFFFFFFFFFFFFFF  
FFF

@A00721:190:HGJW7DSXY:4:1614:25066:25739\_1:N:0:TCTGCAAG+GCTGCACT  
CTGGAGTTCAGACGTGTGCTCTTCCGATCTGTTCTTGCAATAGCCACAGACTTTCTGGGAAAAGAGAC  
CTCTGTTGGTAGAGGAGTTGAGAGAATTACTCAGATTCAATCTGGCATCACTGAACGTCTACAACGAG  
TTA

+

FFFFFFFFFFFFFFFFFFFFFFFFFFFFFFFFFFFFFFFFFFFFFFFFFFFFFFFFFFFFFFFFFFFFFFFF  
FFF:FFFFFFFFFFFFFFFFFFFFFFFFFFFFFFFFFFFFFFFFFFFFFFFFFFFFFFFFFFFFFFFF  
FFF

@A00721:190:HGJW7DSXY:4:1623:32099:16626\_2:N:0:TCTGCAAG+GCTGCACT  
AGGACTGATGGTGAGATTCTTTTACCTTTTGGAGGTCCAGGAACCTTTACTCCTAGTGTCTTTTCTAG  
AGTCCAAGGACGTTTCCGTCGGAGGATGACAGGTGGGAGACCGCTCAA

+

FFFFFFFFFFFFFFFFFFFFFFFFFFFFFFFFFFFFFFFFFFFFFFFFFFFFFFFFFFFFFFFFFFFFFFFF  
FFFFFFFFFFFFFFFFFFFFFFFFFFFFFFFFFFFFFFFFFFFFFFFFFFFFFFFFFFFFFFFF:F

@A00721:190:HGJW7DSXY:4:2420:10086:11068\_2:N:0:TCTGCAAG+GCTGCACT  
TAAGTCTGAGATCTGCCACTTCTAATTTTAGGAAACGTCGCGAAAAGAAAGTTCATGAGGATGTCTTG  
GTCGAAAAATATCGCCGGAACTTCTAATAGAGGATCCTGATGACATT

+

FF:FFFFFFFFFFFFFFFFFFFFFFFFFFFFFFFFFFFFFFFFFFFFFFFFFFFFFFFFFFFFFFFF  
FFFFFFFFF:FFFFFFFFFFFFFFFFFFFFFFFF,F,FFFFFFFFFFFFFFFFFFFFFFFF

@A00721:190:HGJW7DSXY:4:1345:19605:14904\_1:N:0:TCTGCAAG+GCTGCACT  
AGTGACTGGAGTTCAGACGTGTGCTCTTCCGATCTACTGTCTCCACTGATTCGGAATTAGAGAAAGAC  
GACCTTCTGTGGGGACTGAGACCTCTGAATTTTCAGGGTGCCCTGATGAGGACGTTGAAAGGGATAA  
TTT

+

FFFFFFFFFFFFFFFFFFFFFFFFFFFFFFFFFFFFFFFFFFFFFFFFFFFFFFFFFFFFFFFFFFFFFFFF  
FFFFFFFFFFFFFFFFFFFFFFFFFFFFFFFFFFFFFFFFFFFFFFFFFFFFFFFFFFFFFFFFFFFFFFFF  
FFF

@A00721:190:HGJW7DSXY:4:1230:25925:4993\_1:N:0:TCTGCAAG+GCTGCACT  
AGACCAGAAACGTAACAAGAATAAAGGTAGGAAGGGGAGAAAACAGAACAAGCGAGCGGTTGAAG  
AGAAAACGATATGGTTGCGGCTGATCGTACCCCAATTCTGCTAGAAAGATCACTCTCGGCGATACC  
ACT

[illegible]



@A00721:190:HGJW7DSXY:4:2551:30092:2315\_2:N:0:TCTGCAAG+GCTGCACT  
AGCAGGGGTTTTTCGAATAGTGATAGCCACCCGCCCTTACAGAGGGGCAGCAGCATGACCATAATTGGTA  
TTGACTTTGGTACCACCTTTTCTACTGTCTGTCTCGCCTCTTCGAATG

@A00721:190:HGJW7DSXY:4:1335:25843:15060\_2:N:0:TCTGCAAG+GCTGCACT  
TTAATATAAAGAATCTTTACCAGGACTCCTACTACAGGAGGCAGTCTTCTGATCGTAAGAAGTTTATA  
AGGAACATATCCATTTGTTGTAATAGGGTCATCAACTTAGAACTCGAA

+

FFFFFFFF:FFFFFFFFFFFFFFFFFFFFFFFFFFFFFFFFFFFFFFFFFFFFFFFFFFFFFFFFFFFFFFFF,FFFFFFFF:FFFF:F  
FFFFFFFFFFFFFFFFFFFFFFFFFFFFFFFFFFFFFFFFFFFFFFFFFFFFFFFFFFFFFFFF:

@A00721:190:HGJW7DSXY:4:2643:13494:12211\_2:N:0:TCTGCAAG+GCTGCACT  
ATACTGTCTTTCCAAGCTTACCTGTATCTTCAATGAAATTGGACTCTTCGATAGGGGACATTTTATCG  
TGGGCTTCCGTAAAGGAAGATCTGTTATCGACGGTTTATCGTTTACG

+

FFF:FF,FFFFFFFFFFFFFFFF,FFFFFFFF:F:FFFFFFFF:FFFFFFFF::FFFF:FFFFFF  
FFFFFFFFFFFFFFFFFFFFFFFFFFFFFFFFFFFFFFFFFFFFFFFFFFFFFFFF:FF:F:FF,FFFFFF:F

@A00721:190:HGJW7DSXY:4:1118:24469:15812\_2:N:0:TCTGCAAG+GCTGCACT  
TTTAACTTACTTAGACTTTCCTACGATACAAATGATAACTTCTAATTTACGTTTGCTACTCAGAGCTG  
GTCCTCTCAGCAAAGGGATGCATGGTGTATCTCCTCAGGAGTCCCG

+

FFFFFFFFFFFFFFFFFFFFFFFFFFFFFFFFFFFFFFFFFFFFFFFFFFFFFFFFFFFFFFFF:FFFFFFFFFFFFFFFFFFFFFFFF  
FFF:FFFF:FFFFFFFFFFFFFFFFFFFFFFFFFFFFFFFFFFFFFFFFFFFFFFFF

@A00721:190:HGJW7DSXY:4:1118:24469:15812\_1:N:0:TCTGCAAG+GCTGCACT  
TAATGACGAGACTTTCGTCATAATCGCTGCATATTACGGATTACACGGTACCAGCGCATCTCGTGTCG  
AGCCTCGACCCGATTATATGGTATTAAGGTGAGGAGACCATTTTCTTGCTGAAATTTATA  
GAA

+

FFFFFFFFFFFFFFFFFFFFFFFFFFFFFFFFFFFFFFFFFFFFFFFFFFFFFFFFFFFFFFFF:FFFFFFFFFFFFFFFFFFFFFFFF  
FFFFFFFFFFFFFFFFFFFFFFFFFFFFFFFFFFFFFFFFFFFFFFFFFFFFFFFFFFFFFFFFFFFFFFFFFFFFFFFF  
FFF

@A00721:190:HGJW7DSXY:4:2216:32479:32064\_1:N:0:TCTGCAAG+GCTGCACT  
CTAATGGCAAATAGTGGAAGGCTCCAGTCAACACTAGTTCGAGTGCTGCTTTGGATTACGATGACGT  
GAGAATAGGTGAAGGGATAGTTTTTACCTCGACCAACATTAAGCGGCGGCGACTAATCTTAAAGCTT  
CAC

+

FFF,FFFFFFFFFFFFFFFFFFFFFFFFFFFFFFFF:FF:FFFF:FFFF:FFFF:FFFF:FFFF:FFFF  
FFFFFFFFFFFFFFFFFFFFFFFF:FFFFFFFFFFFFFFFFFFFFFFFFFFFFFFFFFFFFFFFFFFFFFFFF  
FFF

@A00721:190:HGJW7DSXY:4:1519:1108:15624\_2:N:0:TCTGCAAG+GCTGCACT  
CAACATTTACCACCAAATCTTTTGATACAACTCTAGCCTTCAAGTGGGGTATGCCTGCGGAATACGC  
TTGCTATTCACCAGATTGGTTCGAACCCGTTGATGCTATGTCAGAAGA

+

FFFFFF,FFFFFF,FFFF:FFFFFFFFFFFFFFFFFFFFFFFFFFFFFFFFFFFFFFFFFFFFFFFF,FFF  
FFFF:F:FFF,FFFFFF:FFFFFFFFFFFFFFFF:FFFFFFFF

@A00721:190:HGJW7DSXY:4:1430:8901:4257\_1:N:0:TCTGCAAG+GCTGCACT  
CTGCAGAGGCTGTCAAACAAGCCAGACTCAAGGAGTCCAATCAAAGGTTTTGAATTTAGCTCAACTG  
GGGAGACGTGCTTAAATGGGTGATAAAATTATTTAGAGATCTTTTCTACTTACAAAGGACAATTCAG  
TTT

+

FFFFFFFF:F:FFFFFFFF:FFFFFFFF,FFFFFFFF:FFFFFFFF,FFFFFFFFFFFF  
FFFFFFFFFFFFFFFFFFFFFFFFFFFFFFFFFFFFFFFFFFFFFFFFFFFFFFFF:FFFFFFFFFFFFFFFF:FF  
FF:

@A00721:190:HGJW7DSXY:4:1378:12436:14857\_1:N:0:TCTGCAAG+GCTGCACT  
TATACATTATAAAATATAAAATAAGGGAGTCATAACTTTGTTACCAAATCTTGCTTTCAACGAA  
GTCTCTGATTTTATTAATCATTACTTTAACGATCTCTCGGTCATTTACTCTGTACTTGATCTACGTCG  
TTT

+

FFFF,FF:FFFFFFFF:F:FFFF,:FFFFFFFF:FFFFFFFFFFFFFFFFFFFFFFFF:FF:





@A00721:190:HGJW7DSXY:4:1136:31629:35258\_1:N:0:TCTGCAAG+GCTGCACT  
AATTAAGACGGGGGATTAAGAGTCCAGCTGTAAGTGTCTTTTCTAGAGAGGGGAGCTCTGAAAAGGA  
AACTTCGTGAGAAGATGAGGAAGTCTAAGAGGAGGAGTTTGAGGAAGGCTCTAGAGAAGATCTCACCA  
CCT

+

FFFFFFFFFFFFFFFFFFFFFFFFFFFFFFFFFFFFFFFFFFFFFFFFFFFFFFFFFFFFFFFFFFFFFFFF:FF  
FFFFFFFFFFFFFFFFFFFFFFFFFFFFFFFFFFFFFFFFFFFFFFFFFFFFFFFFFFFFFFFFFFFFFFFF  
FFF

@A00721:190:HGJW7DSXY:4:1638:22146:27007\_2:N:0:TCTGCAAG+GCTGCACT  
ATTATTTGAAGCAGGGGTTACCACTTCCTAAGGTGGATGAGGGAGGTTGTTTCTTTGGAGTTTATAGAT  
AATCTTTTGAGAAGGGGTCATAGAGCCAGCAAGAGAAGCTTATATGCT

+

FFFFFFFFFFFFFFFFFFFFFFFFFFFFFFFFFFFFFFFFFFFFFFFFFFFFFFFFFFFFFFFFFFFFFFFF:FFFFFFFFFFFFFFF  
FFFFFF:FFFFFFFFFFFFFFFF:FFFFFFFFFFFFFFFFFFFFFFFFFFFFFFFF:F

@A00721:190:HGJW7DSXY:4:2513:28782:4930\_1:N:0:TCTGCAAG+GCTGCACT  
GGTAACTTACCATATTGTTCTTCCGGGAAGTTGTGGGATTTAACTTTGACTCAACTACTCCGATCAG  
ATCCGGATGGTTTGATTGGTATGGACTACTCGACTTTTGATCTGGAGTTGTCTAGGGTCATGGCAGAT  
ACT

+

FFFFFFFFFF,FFFFFFFFFFFFFFFFFFFFFFFFFFFFFFFFFFFFFFFFFFFFFFFFFFFFFFFFFFFFFFFF  
FFFFFFFFFFFFFFFFFFFFFFFFFFFFFFFFFFFFFFFFFFFFFFFFFFFFFFFFFFFFFFFFFFFFFFFF  
FFF

@A00721:190:HGJW7DSXY:4:1351:18575:4163\_1:N:0:TCTGCAAG+GCTGCACT  
TAAGAGTCTTTATGATTCAAAACCTATCGTTGTCTGACCTTACAAGGTTGAGGAGACTTTACAGCGGC  
TTATTGTCGCGCAGTTTCCAGAATTGCGGTTGAAGTTCACCCATTCTATCTTGAATGCTCACGCCGTC  
GC

+

FFFFFFF,FFFFFFFFFFFFFFFFFFFFFFFFFFFFFFFFFFFFFFFFFFFFFFFFFFFFFFFFFFFFFFFF  
FFFFFFFFFFFFFFFFFFFFFFFFFFFFFFFFFFFFFFFFFFFFFFFFFFFFFFFFFFFFFFFFFFFFFFFF:FFFFFFFFFFFF:FFFFFFFFFFFFFFF  
FF

@A00721:190:HGJW7DSXY:4:2418:30300:27915\_2:N:0:TCTGCAAG+GCTGCACT  
CAACCCTATTCTTGATGTGAAAGATGCATCGAGGTATACGTCTAGGAACATTGATTGGGAACGTACCT  
ACTCACGAGACGTCATGAAAGCTATCGGAGGGAAGCAAAATGTTTCGT

+

FFFFFFF:FFFFFF:FFFFFFF:F:FFFFFFFFFFFFFF:F,FFFFFFFF,:F,FFFF:FF:FFFFFF  
FFFFFFFFFFFF,FFFFFFFFF::FFF:F::FFF:FFFFFF:FFF:FF

@A00721:190:HGJW7DSXY:4:2540:5222:23938\_2:N:0:TCTGCAAG+GCTGCACT  
TGATGATGTAGCCACTATAATGCTTAAGAGAGAGATTGATGTATGTCATTTCTGCTTAGTTTGTCCCG  
GCGAATTATTGGACACGATGAAAAATGACATACCCGTTCTGACCTTG

+

FFF:FFFFFFFFFFFFFFFFFFFFFFFFFFFFFFFFFFFFFFFFFFFFFFFFFFFFFFFFFFFFFFFF::FFFFFFFFF:FFFFFFF  
FFFFFFFFF,FFFFFFFFF:FFFFFFFFFFFFFFFFFFFFFFFFFFFFFFFFFFFF,F

@A00721:190:HGJW7DSXY:4:2230:17644:33833\_1:N:0:TCTGCAAG+GCTGCACT  
TCGGTCAATGACAAAACCTTCGAATATGTTACGACATGGCTTCGTAACAACAGTGCGAGGATTGTCAT  
CTCGGGGAAAGTGATTCACCAAGATGTTTCATATAGATACGAGATACCTAGAGAAGGTCGCAGCGATCT  
TAC

+

FFFFFFFFFFFFFFFFFFFFFFFFFFFFFFFF:F::F,FFFFFFFFFFFFFFFFFFFFFFFFFFFFFFFF  
FFFFFFFFFFFFFFFFFFFFFFFFFFFFFFFFFFFFFFFFFFFFFFFFFFFFFFFFFFFFFFFF:FFFFFFFFFFFFFFFF  
FFF

@A00721:190:HGJW7DSXY:4:1317:15637:19648\_2:N:0:TCTGCAAG+GCTGCACT  
ACCGGAGGTGATCTCTCTGCTTCTGCGTTACTGAGAGAAAAGATTCAGGACGCCTACGGTGACTTTAT  
GGACAAGATGCAAGTTCTTGGGAAATACTGTTTTCCCTTTTATAGTTT

+

```

FFFFFFFFFFFFFFFF:FFFFFFFFFFFFFFFF:FFFFFFFFFFFFFFFFFFFFFFFFFFFFFFFFFFFFFFFF
FFFFFFFFFFFFFF:F:FFFFFFFFFFFFFFFFFFFFFFFFFFFFFFFFFFFFFFFF

```

+

@A00721:190:HGJW7DSXY:4:2516:28266:31563\_1:N:0:TCTGCAAG+GCTGCACT  
GAATGTTGTAAAGAATTGGGTTGAGAAGTGTGCTTTACAAGGAGTTAGACTCTTCTTCAAGTTTTT  
ATCTTCTTGATAATCTTAAAGAAAAATTTTCGAATAAACTAATGAGAGGTATAGGCTTAGTCAAGTCT  
GTA

[illegible]

+

@A00721:190:HGJW7DSXY:4:1640:17192:3897\_2:N:0:TCTGCAAG+GCTGCACT  
AGGACTGATGGTGAGATTCTTTTACCTTTTGGAGGTCCAGGAACCTTTACTCCTAGTGTCTTTTCTAG  
AGTCCAAGGACGTTTCCGTCGGAGGATGACAGGTGGGAGACCGCTCAA

[illegible]

+

@A00721:190:HGJW7DSXY:4:2253:32642:27899\_2:N:0:TCTGCAAG+GCTGCACT  
CAGGAAGTGTCTCCACTGATTCGGAATTAGAGAAAGACGACCTTCTTGTGGGGACTGAGACCTCTGAA  
TTTTCAGGGTGCCCTGATGAGGACGTTGAAAGGGATAATTTCAACTCT

```
F:FFFFFFFFFFFFFFFFFFFFFFFFFFFFFFFF:FFFFFF:FFFFFFFF:FFFFFFFFFFFFFF,FFFFFFFF
FFFFFFFF:FFFFFF,FFF::FFF:FFFFFF:E,:FFFFFFFFFFFFFFFF:FFF
```

+



@A00721:190:HGJW7DSXY:4:2573:32181:2832\_2:N:0:TCTGCAAG+GCTGCACT  
CTACAATCATTGGTTTTTCTAATAATGATGACACTATTGTTTATGGATATGATGCTATTACTCATGAT  
GGTTACGGTCAGGGAGGATTCTCAGTTTACAAGGACCTTAAGCGATGG

+

FFFFFF,FFFFFFFFFFFFFFFFFFFFFFFFFFFFFFFFFFFFFFFFFFFFFFFFFFFFFFFFFFFFFFFF,FF  
FFFFFFFFFFFFFFFFFFFFFFFFFFFFFFFFFFFFFFFFFFFFFFFFFFFFFFFFFFFFFFFF:FFFF:F

@A00721:190:HGJW7DSXY:4:1510:2862:8140\_1:N:0:TCTGCAAG+GCTGCACT  
GGCTTCAATTGTAGTGGTTTGGTCGTTTCAGTACCCAGTCAGTATACCTCTACGCAAAGATATTTTCAT  
GAAACTACAGAGGAACGTTCCGGATTACCTGTCTTTCATATTATGAATGAACCTTCGGCCGCTCTCT  
TTG

+

FFFFFFFFFFFFFFFFFFFFFFFFFFFFFFFFFFFFFFFFFFFFFFFFFFFFFFFFFFFFFFFF:FFFFFFFFFFFFFFFF:FFFF  
FFFFFFFFFFFFFFFFFFFFFFFFFFFFFFFF:FFFFFFFFFFFFFFFFFFFFFFFFFFFFFFFF:FFFF  
FFF

@A00721:190:HGJW7DSXY:4:2370:17454:20322\_2:N:0:TCTGCAAG+GCTGCACT  
CCTACGTAGTTTATGACTTTGGTGGTGGTACTTTCGATACTTCTATCGTCTTACGTTACGGTAATTAC  
TATAGTGTTATTTATTCTGGTGGTGATGATAATCTTGGGGTCGTGAC

+

FFFFFFFFFFFFFFFF:FFFFFFFF:FFFF:F,FFFFFFFFFFFFFFFFFFFFFFFFFFFFFFFF:FFFF  
FFFF,FFF,FFF:FFFFFFFFFFFFFFFFFFFFFFFF:FFFFFFFF:F

@A00721:190:HGJW7DSXY:4:2174:7545:3599\_2:N:0:TCTGCAAG+GCTGCACT  
TTCACAACTGAAGGAGGAGTTTCTGTTACTGGAAAACCTCGTCAATACTTTCAATAATATACGTC  
TTGAACTCACTTATGACGATCTAGTGAAATTAACGCGTCCTTTTCTGG

+

F:FFFFFF,:FFFF:FFFFFFFFFFFFFFFFFFFFFFFF:FFFFFFFF:FFFF,FFFFFFFFFFFF:F:  
:FFFF:FFF,,FF:FFFF:FF,FFFF:FFF::FFF,:FFF:F

@A00721:190:HGJW7DSXY:4:2626:2889:8406\_1:N:0:TCTGCAAG+GCTGCACT  
TTCCGATCTATTACTCTTGCTGAAACAGCTATTAAAGCTGTTGAGCGGGTAATTACACCTAAACGAGC  
TCGATCTGCCATCGCTGAAGGATGTGCACTCTTTCTGCTACTTTAACGGAGCGTAGTGACTCTTCG  
TCG

+

FFFFFFFFF:F,FFFF:FFFFFFFFFFFFFFFF:F,FFFFFFFFFFFFFFFFFFFFFFFF:FFFFFF  
FFFFFFFFFFFFFFFFFFFFFFFFFFFFFFFFFFFFFFFFFFFFFFFF:FFFFFFFF:FFFFFFFF  
FFF

@A00721:190:HGJW7DSXY:4:1569:18674:8907\_1:N:0:TCTGCAAG+GCTGCACT  
ATTAATATTTTATATCTTCTTAAAAAGAAGATAGAGAGTCATACTTTGGGCTATCGTTCAGGTGCATG  
GGGTTGGATAGCCAATATTGAAGTGAAACCTCTGGTAGTATCGAAGTAAAGATAACCAATAAGGAAG  
GAG

+

FF:,FFF,FFF,,,F,FF,FF:FFFF,,FFFF,FFF:FF,FF:,FF,F,,FFF:FFF::FF:F,FFF  
,F,FF:FFF:F:F,FFFF,:FFFF,F,,F,F,FF:FF,F:F,:FF:FFF::FF:,F,FFFF,F,,FF  
:,:

@A00721:190:HGJW7DSXY:4:1344:11261:8594\_1:N:0:TCTGCAAG+GCTGCACT  
AATCTTACCACTATCTACGAACCTAAAGTTCTGAAGACGTTGCTTGTCGCTTCCTCCTTTAATGGCAC  
TACCTCGGTACAATCTTACTTGGAACGAAGCGACCTGTTCCGGAGTTTTTACGGGATCCGGAATGTT  
CTG

+

F,FFFFFFFF:FFFFFFFFFFFFFFFFFFFFFFFFFFFFFFFF:FFFFFF:FFFFFFFF  
FFFFFFFFFFFFFFFFFFFFFFFFFFFFFFFFFFFFFFFFFFFFFFFFFFFFFFFFFFFFFFFF  
FFF

@A00721:190:HGJW7DSXY:4:1147:15908:13667\_1:N:0:TCTGCAAG+GCTGCACT  
AATATAAAGAATCTTTACCAGGACTCCTACTACAGGAGGCAGTCTTCTGATCGTAAGAAGTTTATAAG  
GAACATATCCATTTGTTGTAATAGGGTCATCAACTTAGAACTCGAACTCTAAGTGGTAATACTGTCT  
TTC



```
+
FFFFFFFFFFFFFFFFFFFFFFFFFFFFFFFFFFFFF:FFFFFFFFFFFFFFFFFFFFFFFFFFFFFFF
FFFFFFFFFFFFFFFFFFFFFFFFFFFFFFFFFFFFFFFFFFFFFFFFFFFFFFFFFFFFFFFFFFFFFFF
FFF
@A00721:190:HGJW7DSXY:4:1174:28384:30765_1:N:0:TCTGCAAG+GCTGCACT
TGGACTCTTCGATAGGGGACATTTTATCGTGGGCTTTCCGTAAAGGAAGATCTGTTATCGACGGTTTA
TCGTTTACGAAGTATCACTCCACCGGTGAATGGTTTAAGAATACTATAAATAGAATAGCTATTACTAC
TAA
+
FFFFFFFFFFFFFFFFFFFFFFFFFFFFFFFFFFFFFFFFFFFFFFFFFFFFFFFFFFFFFFFFFFFFFFF
FFFFFFFFFFFFFFFFFFFFFFFFFFFFFFFFFFFFFFFFFFFFFFFFFFFFFFFFFFFFFFFFFFFFFFF
FFF
@A00721:190:HGJW7DSXY:4:1174:25554:15499_2:N:0:TCTGCAAG+GCTGCACT
TTTAACTTACTTAGACTTTTCCTACGATACAAATGATAACTTCTAATTTACGTTTGCTACTCAGAGCTG
GTCCTCTCAGCAAAGGGATGCATGGTGTTATCTCCTCAGGAGTCCCGG
+
FFFFFFFFFFFFFFFFFFFFFFFFFFFFFFFFFFFFFFFF:F,FFFFFFFFFFFF:FFFFFFFFFF:FF
FFF,FFFFFFFFFFFFFFFFFFFFFFFFFFFFFFFF:FFFFF
@A00721:190:HGJW7DSXY:4:1174:25554:15499_1:N:0:TCTGCAAG+GCTGCACT
TAATGACGAGACTTTCGTCATAATCGCTGCATATTACGGATTACACGGTACCAGCGCATCTCGTGTCG
AGCCTCGACCCGATTATATGGTATTAACTTATAAAGGTGAGGAGACCATTTTCTTGCTGAAATTTATA
GAA
+
FFFFFFFFFFFFFFFFFFFFFFFFFFFFFFFF:F:FFFFFFFFFFFFFFFFFFFFFFFFFFFFFFFFFFFFF
FFFFF:FF::FFFFFFFFFFFFFFFFFFFFFFFF:F:FFFFFFFFFFFFFFFFFFFFFFFFFFFFFFFFF
FFF
@A00721:190:HGJW7DSXY:4:2261:28266:19820_1:N:0:TCTGCAAG+GCTGCACT
CTAATGGCAAATAGTGGAAGGCTCCAGTCAACACTAGTTCGAGTGCTGCTTTGGATTACGATGACGT
GAGAATAGGTGAAGGGATAGTTTTTACCTCGACCAACATTAAGGCGGCGGCGACTAATCTTAAAGCTT
CAC
+
FFFFFFFFFFFFFFFFFFFFFFFFFFFFFFFFFFFFFFFFFFFFFFFFFFFFFFFFFFFFFFFFFFFFFFF
FFFFFFFFFFFFFFFFFFFFFFFFFFFFFFFFFFFFFFFFFFFFFFFFFFFFFFFFFFFFFFFFFFFFFFF
FFF
@A00721:190:HGJW7DSXY:4:1549:17752:25128_2:N:0:TCTGCAAG+GCTGCACT
CAACATTTACCACCAAATTCTTTTGATACAACCTCTAGCCTTCAAGTGGGGTATGCCTGCGGAATACGC
TTGCTATTCACCAGATTGGTTCGAACCCGTTGATGCTATGTCAGAAGA
+
FFFF:FFFFFFFFFFFFFFFFFFFFFFFF:F:FFFFFFFFFFFFFFFFFFFFFFFFFFFFFFFF:F:FFFFFFF
FFFF:FFFFFFF,F:FFFFFFFFFFFFFFFF:F:FFFFFFFFFFFFFFF
@A00721:190:HGJW7DSXY:4:2314:3468:6621_1:N:0:TCTGCAAG+GCTGCACT
CTGCAGAGGCTGTCAAACAAGCCCAGACTCAAGGAGTCCAATCAAAGGTTTGAATTTAGCTCAACTG
GGGAGACGTGCTTAAATGGGTGATAAAAATTATTTAGAGATCTTTTCTACTTACAAAGGACAATTGAG
TTT
+
FFFFFFF::FFF:FFFF:FFFFF,F:FFF,FFFFFFF,FFF:,FFF,,FFFFFFFFFFFF:,FFFFFFF
:,F:FF,:F:,FFFFFFFFFFF:FF::FFFFFFFFFFF,F,FFFFFFFFFFFFFFFFF:,FFFF,F:FFF
FFF
@A00721:190:HGJW7DSXY:4:1420:22941:24815_1:N:0:TCTGCAAG+GCTGCACT
TATACATTATAAAATATAAAAAATAAGGGAGTCATAACTTTTGTTACCAAATTCCTTGCTTTCAACGAA
GTCTCTGATTTTATTAATCATTACTTTAACGATCTCTCGGTCATTTACTCTGTACTTGATCTACGTCG
TTT
+
FFFFFFFFFFFFFFFFFFFFFFFFFFFFFFFF:F:FFFFF::FFFFFFFFFFFFFFFF,FFFFFFF,FFFFFFFFFF:FFF
```

FFFF,FFFFFFFFFFFFFFFFFFFFFFFFFFFFFFFFFFFFFFFF:FF:FFFFFFFFFFFFFFFFFFFFFFFF  
FFF

@A00721:190:HGJW7DSXY:4:2206:13295:1720\_2:N:0:TCTGCAAG+GCTGCACT  
TGACTCTATCTTTTCAGACACTTCTTATATTATTTACAATAGTTAATATCATATTAGTAATACTCACT  
ATCGTTTTCTGCTTTTTCTTAGCTAATAGATTAATAAAGGATGAGTAC

+

FFFFFFFFFFFFFFFFFFFFFFFFFFFFFFFFFFFFFFFF:FFFFFFFFFFFFFFFFFFFFFFFFFFFFFFFF  
FFFFFFFFFFFFFFFFFFFFFFFFFFFFFFFFFFFFFFFF:FFFFFFFFFFFFFFFFFFFFFFFF

@A00721:190:HGJW7DSXY:4:1633:16604:11647\_2:N:0:TCTGCAAG+GCTGCACT  
CTTCGTTACGAGACCTGATGGTAGAATAGATTTAGTCTCTACACCCATCTCAACGAGGATAAAGCGAG  
TTTTCCGTCCTGAACGTAATACACGAAGAGATCATCCGCAAACGACTC

+

FFFF:FFFFFF:FFFFFFFFFFFFFFFFFFFFFFFF:FFFFFFFFFFFFFF:FFFFFFF,FFFFFFF::FFF  
FF:FFFFFFFFF:FFFFFFFFFFFFFFFFFFFFFFFF:FFFFFFFFFFFFFF

@A00721:190:HGJW7DSXY:4:2609:14425:19335\_1:N:0:TCTGCAAG+GCTGCACT  
ACAGACTCCGAAAATGGTTTCAAATGAGGTCAAAGCTCTATTTATTAAACGAACTATTATCCGATTCT  
TCGAGGGTATCACTACCACTGATCTGCCGACTTTAGTCAAGGAACCTTCAATTCCTTCGATGTTTATAT  
TTT

+

FFFFFFFFFFFFFFFFF:FFFFFFFFFFFFFFFFFFFFFFFFFFFFFFFFFFFFFFFFFFFFFFFFFFFFFFFF  
FFFFFFFFFFFFFFFFFFFFFFFFFFFFFFFFFFFFFFFFFFFFFFFFFFFFFFFFFFFFFFFF:FFFFFFFFFFFFFFFF  
FFF

@A00721:190:HGJW7DSXY:4:2121:15275:1485\_1:N:0:TCTGCAAG+GCTGCACT  
CGACAAATTTTAGAACTTTATTTCAGAACTCTCTCCGATCACCTTGGTGTGATCTCCCGGAGGATCTT  
TTCAATAAGATGTATGATGATAATCTACTATTTTTAAATAGTGATATTCAAGCGTATACTTGAATACTT  
TAT

+

FFFFFFFFFFFFFFFFF:FFFFFFFFFFFFFFFFFFFFFFFFFFFFFFFFFFFFFFFFFFFFFFFF:FFFFFFF  
FFFF:FF:FFFFFFFFFFFFFFFFFFFFFFFF:FFFFFFFFFFFFFFFFFFFFFFFFFFFFFFFFFFFFFFFF  
FFF

@A00721:190:HGJW7DSXY:4:1256:5113:15076\_2:N:0:TCTGCAAG+GCTGCACT  
TACCGCAAAAAGTTGGAAGAGGTCTATGATATTTATTTTACTTATACTTTAAATAGCACCGATTATAA  
CTTGACTGTTGATAATATTACAATAGCTCTTTCTCAGAAGATTAGAGA

+

FFFFFFFFFFFFFFFFF:FFFFFFF,FFFFFFFFFFFFFFFFFFFFFFFFFFFFFFFF,FFFFFFFFFFFF  
FFFFFFFFFFFFFFFFFFFFFFFFFFFFFFFFFFFFFFFFFFFFFFFFFFFFFFFFFFFFFFFF

@A00721:190:HGJW7DSXY:4:2556:16043:2942\_1:N:0:TCTGCAAG+GCTGCACT  
GGTAGCATTGATTTACTTTTACCGTTAGAACTGAAAAAGATTCTTTTCGAAAAGAAACCTATAAGTTA  
CAAACGATTCTTCGACTATATTAAAGAAATAAAAATACTTCAAGTACCTGAACTTTACATTTTAAAG  
GTA

+

FFFFFFFFFFFFFFFFF:FFFFFFF:FFFFFFFFFFFFFFFFFFFFFFFF:FFFFFFFFFFFFFFFFFFFFFF  
FF,FFFFFFFFFFFFFFFFFFFFFFFF:FFFFFFFFFFFFFFFFFFFFFFFFFFFFFFFFFFFFFFFF  
FFF

@A00721:190:HGJW7DSXY:4:1416:22580:1517\_1:N:0:TCTGCAAG+GCTGCACT  
ATGAGAGTGTATTCCTTAATATTCTAGTAACCGCTATGTGGGCATTACTAGGATTTATCACACTCCTA  
AATTTGATAGCAATTTATGTTTTAAATGCTAGGAAAATTTAGAAAACTCCATTGTATAGTTCAAGG  
AGT

+

FFFFFFFFFFFFFFFFF:FFFFFFFFFFFFFFFFFFFFFFFFFFFFFFFFFFFFFFFFFFFFFFFF  
FFFFFFFFFFFFFFFFFFFFFFFF,FFFFFFF:FFFFFFFFFFFFFFFFFFFFFFFF:FFFFFFFFFFFFFFFF  
FFF

@A00721:190:HGJW7DSXY:4:1572:29713:19132\_1:N:0:TCTGCAAG+GCTGCACT  
TAGCTTTAGTATTATTTACTATCGCCTTTATTGAAAATTGTATAAGAGTTAATTGCTTACACAAAAGT

GACGCGGAAGGAATCTTAATTGATTGAAGCTAGGCGTTGGGGAGAATGAACTGCCGCTTCCCGGAAG  
AAA

+

FFFF:F:FFFFFFFFFFFFFFFFFFFFFFFFFFFFFFFFFFFFFFFFFFFFFFFFFFFFFFFFFFFFFFFFFFFFFFFF  
FFFFFFFFFFFFFFFFFFFFFFFFFFFFFFFFFFFFFFFFFFFFFFFFFFFFFFFFFFFFFFFFFFFFFFFFFFFFFFFF  
FFF

@A00721:190:HGJW7DSXY:4:1263:24343:32409\_1:N:0:TCTGCAAG+GCTGCACT  
CCGCCGGTCGGCAGATCGGCACCACTGGTCTCTACGTTACGGGACCGCTGTGCAGAATAACCTTCCC  
AAATCTAGATCTGCACAGAAGAAGGCTGAAGGTCGTTACCGACGACCACTCAAAGGAAACGGGCTGT  
TGC

+

FFFFFFFFFFFFFFFFFFFFFFFFFFFFFFFFFFFFFFFFFFFFFFFFFFFFFFFFFFFFFFFFFFFFFFFFFFFFF  
FF,FFFF:FFFFFFFF:FFFFFFFFFFFFFFFFFFFFFFFFFFFFFFFFFFFFFFFFFFFFFFFFFFFFFFFF:  
FFF

@A00721:190:HGJW7DSXY:4:2147:13666:17049\_2:N:0:TCTGCAAG+GCTGCACT  
GGGAACTGAGGCAGTACCTCAGTCAAAAGTCACATTCACCACTCCCATACCAATCAATGATGTGACTA  
TACAGTTCGGCCATTTCAAGAGTGGTCAATACGTCGTGGGAGGTACTG

+

FFFFFFFFF:FFFFFFFFFFFFFFF,FFFFFFFFFFFFFFFFFFFFFFFFFFFFFFFFFFFFFFFFFFFFFFFF:  
FFFFFFFFF:FFFFFFFFFFFFFFFFFFFFFFFFFFFFFFFFFFFFFFFFFFFFFFFF:FF:FFFF,FFF

@A00721:190:HGJW7DSXY:4:2257:17626:26976\_1:N:0:TCTGCAAG+GCTGCACT  
AATCAATAGTTCTTCTGACCAGAATGAAAAGGGGTTTACCAGGGTAGTCTCTAAGTCTACCAGGAAGA  
GGGGAATGTCCCAAAACTGAGAAGAATAAAGGGAAAGTCCATCAGGACCTAAGAAGGGGAAATTA  
CCC

+

FFFFFFFFFFFFFFFFFFFFFFFFFFFFFFFFFFFFFFFFFFFFFFFFFFFFFFFFFFFFFFFFFFFFFFFFFFFF  
FFFF:FFFFFFFFFFFFFFFFFFFFF:FFFFF:FFFFFFFFFFFFFFFFFFFFFFFFFFFFFFFFFFFFFFFF  
FFF

@A00721:190:HGJW7DSXY:4:2247:30174:10410\_2:N:0:TCTGCAAG+GCTGCACT  
CGGGCCAAAGAGGCCGCTGCTACGAAGTCGCTGAAGGCGGCTTGGGTGCTTAAGGGTAGCTGTAAAGT  
TGCGCCTGCCGACCCCATCTTTGAGACCAAGACTCTCTACAGTAGGTT

+

FFFFF:FFFFFFFFFFFFFFFFFFFFFFFFFFFFFFFFFFFFFFFFFFFFFFFFFFFFFFFFFFFFFFFFFFFF  
FFFFFFFFFFFFFFFFFFFFFFFFFFFFFFFFFFFFFFFFFFFFFFFFFFFFFFFFFFFFFFFFFFFF

@A00721:190:HGJW7DSXY:4:1659:28022:7185\_1:N:0:TCTGCAAG+GCTGCACT  
TCGTCACTGAGGACGAAGGTGAGAGGACTTTTGGCTACTGGCGACACACTGAGAGCAGTCGCTGGGGA  
AAGAGAATTGCGTGGGTGAAGGCCGACGCTTCGAGCTTGAGTGTGACGAGGCCGGTGACGTTTTTGT  
CAA

+

FFFFFFFFFFFFFFF:FFFFFFFFFFFFFFFFFFFFFFFFFFFFFFFFFFFFFFFFFFFFFFFF:F,FFFFFFFFFFFFFFFF  
FFFFFFFF:FFFFFFFFFFFFF:FFF,FFFFFFFFFFF:FFFFFFFFF:FFFFFFFFFFFFF:FFFFFFFFF  
FF:

@A00721:190:HGJW7DSXY:4:2423:10041:25551\_2:N:0:TCTGCAAG+GCTGCACT  
CTTGACTATGGGGCGAAGATCCCCTATGGAGTCTTGAAGGACTTAGGTTGGCATATTTATGCCGACGA  
TAATAAGCATGTCAACCTTAAGCACCGAGGTAAGCTCGGGACTTACAA

+

FFFFFFFFFFFFFFFFFFFFFFFFFFFFF:FFFFFFFFFFFFFFFFFFFFFFFFFFFFFFFFFFFFFFFFFFFFF  
FFFFFFFFFFFFFFFFFFFFFFFFFFFFFFFFFFFFFFFFFFFFFFFFFFFFFFFFFFFFFFFFFFFF

@A00721:190:HGJW7DSXY:4:2537:17481:7529\_2:N:0:TCTGCAAG+GCTGCACT  
TTTCTTGAAAATTTTCTTTCTCCGTCATTGGGGATTTCGATGTGAGAAGGTGGAAGGTGTCAAGG  
GTCTTCTTCATGCTGATCTTTCAGGACCTAATCACATCATGATTGATA

+

FFFFFFFFFFFFFFFFFFFFFFFFFFFFF,,FFFFFFFFFFFFFFFFF,FFFFFFFFFFFFFFFFFFFFF  
FFFFF:FFFFFFFFFFFFF,FFFFFFFFFFFFFFFFFFFFF,FFFFFFFFF



@A00721:190:HGJW7DSXY:4:2374:25229:16720\_1:N:0:TCTGCAAG+GCTGCACT  
TGAGAAGATTGAAGAACACGTCAAGAAGTCGCTCGGCGTTGTTCTTGAAAACCAAGTTAAGAAGGAGG  
CTGATCATGGAGTCTTTGTACCTTCTGTCAAACCTCGAGGTTACAGCTACGAGAGGTGATCCCGGATGT  
GGA

+

FFFFFFFFFFFFFFFFFFFFFFFFFFFFFFFFFFFFFFFFFFFFFFFFFFFFFFFFFFFFFFFFFFFFFFFFFFFF::,FFFF  
F::F:F:FFFFF:F:FFFFFFFFFFFFFFFFFFFFFFFFFFFFFFFFFFFFFFFFFFFFFFFFFFFFFFFFFFFF  
FFF

@A00721:190:HGJW7DSXY:4:2548:1551:2613\_1:N:0:TCTGCAAG+GCTGCACT  
GAATGTTGTAAAGAATTGGGTTGAGAAGTGTGCTTTACAAGGAGTTAGACTCTTCTTCAAGTTTTTAG  
ATCTTCTTGATAATCTTAAAGAAAAATTTTCAATAAACTAATGAGAGGTATAGGCTTAGTCAAGTCT  
GTA

+

FFFFFFFFFFFFFFFFFFFFFFFFFFFFFFFFFFFFFFFFFFFFFFFFFFFFFFFFFFFFFFFFFFFFFFFFFFFF  
FFFFFFFFFFFFFFFFFFFFFFFFFFFFFFFFFFFFFFFFFFFFFFFFFFFFFFFFFFFFFFFFFFFFFFFFFFFF  
FFF

@A00721:190:HGJW7DSXY:4:1301:16758:31767\_1:N:0:TCTGCAAG+GCTGCACT  
CTAATGTTCTTGCAATAGCCACAGACTTTCTGGGAAAAGAGACCTCTGTTGGTAGAGGAGTTGAGAGA  
ATTACTCAGATTCAATCTGGCATCACTGAACGTCTACAACGAGTTAGGGAGTGGCTAGGTTTTAAAAG  
ATC

+

FFFFFFFFFFFFFFFFFFFFFFFFFFFFFFFFFFFFFFFFFFFFFFFFFFFFFFFFFFFFFFFFFFFFFFFFFFFF  
FFFFFFFFFFFFFFFFFFFFFFFFFFFFFFFFFFFFFFFFFFFFFFFFFFFFFFFFFFFFFFFFFFFFFFFFFFFF  
FFF

@A00721:190:HGJW7DSXY:4:1658:13602:19445\_2:N:0:TCTGCAAG+GCTGCACT  
AGGACTGATGGTGAGATTCTTTTACCTTTTGGAGGTCCAGGAACCTTTACTCCTAGTGTCTTTTCTAG  
AGTCCAAGGACGTTTCCGTCGGAGGATGACAGGTGGGAGACCGCTCAA

+

FF,FFFFFFFFFFFFFFF::F:FFFFFFFFFFFFFFF,FFFFFFFFFFFFFFFFFFFF:F,F:FF::,FFFFF  
FFFF:FF:FFFFFFF:FFFF:FFFFFFFFFFFFFFFFFFFFFFFFFFFF:F:FF

@A00721:190:HGJW7DSXY:4:1139:23430:24001\_2:N:0:TCTGCAAG+GCTGCACT  
TCTGCCACTTCTAATTTTAGGAAACGTCGCGAAAAGAAAGTTCATGAGGATGTCTTGGTCGAAAAATA  
TCGCCGGAACCTTCTAATAGAGGATCCTGATGACATTATTTCAACGGA

+

FFFFFFFFFFFFFFF::F:FFFFFFFFFFFFFFFFFFFFFFFFFFFF:FFFFFFFFFFFFFFFFFFFFFFFFFFFF  
FFFF:FFFF,FFFFF:F:FFFFFFFFFFFFFFFFFFFFFFFFFFFFF,F

@A00721:190:HGJW7DSXY:4:1344:27859:13260\_2:N:0:TCTGCAAG+GCTGCACT  
GTCTCAGGAAGTGTCTCCACTGATTCGGAATTAGAGAAAGACGACCTTCTTGTGGGGACTGAGACCTC  
TGAATTTTCAGGGTGCCCTGATGAGGACGTTGAAAGGGATAATTTCAA

+

FFFFFFFFF:FFFFFFFFFFFFFFFFFFFFFFFFFFFFFFFFFFFFFFFFFFFFFFFFFFFFFFFFFFFFFFFFFFFF  
FFFFFFFFFFFFFFFFFFFFFFFFFFFF,FFFFFFFFF,FFFFFFFFFFFFFFFFFFFF

@A00721:190:HGJW7DSXY:4:2207:1118:25817\_1:N:0:TCTGCAAG+GCTGCACT  
AGACCAGAAACGTAACAAGAAGATAAAGGTAGGAAGGGGAGAAAACAGAACAAAGCGAGCGGTTGAAG  
AGAAAACGATATGGTTGCGGCTGATCGTACCCCAATTCTGCTAGAAAGATCACTCTCGGCGATACC  
ACT

+

FFFFFFFFF:FFFFFFFFFFFFFFFFFFFFFFFFFFFFFFFFFFFFFFFFFFFFFFFFFFFFFFFFFFFFFFFFFFFF  
FFFFFFFFFFFFFFFFFFFFFFFFFFFF:FFFFFFFFFFFFFFFFFFFFFFFFFFFFFFFFFFFFFFFFFFFFF  
FFF

@A00721:190:HGJW7DSXY:4:1503:8314:11162\_1:N:0:TCTGCAAG+GCTGCACT  
CCGATCTAGTGATCGTATTAGAACAGCTGATTCTTATTGCATGAACGTCGCTGAGGTCAAACCTGTGG  
ACGTTCTTTTCATCGACGAATTATTCATGATTCACGCTGGTCAGACCCTTTTCTTACACATCTACTT  
AAG

+  
F:FFFFFFFFFFFFFFFF:FFFFFFFFFFFFFF,FFFFFFFFFFFFFFFFFFFFFFFFFFFFFFFFFFFFFFFF  
FFFF:FFFFFFFFFFFFFFFFFFFFFFFFFFFFFFFFFFFFFFFF:FFFFFFFFFF:FFFFFFF  
FFF  
@A00721:190:HGJW7DSXY:4:1516:5737:17816\_1:N:0:TCTGCAAG+GCTGCACT  
CAATCAAATCGGATTCATCAATCGTATTGATCTCCAAGTCGCAAATACTTCAACATCAACGACATCA  
TTCTTGATGAGTGTCGTTCTTATCGAAGTCTCAGTTATCGCTGCCCGCCGACGTTTGTGCGAACTC  
TCA  
+  
FFFFFFFFFFFFFFFF:FFFFFFFFFFFF,FFFFFFF:FFFFFFFFFFFFFFFFFFFFFFFFFFFFFFFF  
FFFFFFFFFFFFFFFFFFFFFFFFFFFFFFFF,FFFFFFFFFFFFFFFFFFFFFFFFFFFFFFFF:FFFFFFFFF:FFF  
FFF  
@A00721:190:HGJW7DSXY:4:2349:12689:25254\_2:N:0:TCTGCAAG+GCTGCACT  
GATTCAACCCCTTATATCGAGGCTATCGAGGACGATGAGTATCTTGAAGTTGTTGACGACAAGCCTCA  
AGAGGGTAGAGGACCACCTGGATCTTCTACTGTCTCTGCCTTCCAAGA  
+  
FFFFFFFFFFFFFFFFFFFFFFFFFFFFFFFFFFFFFFFFFFFFFFFFFFFFFFFFFFFFFFFFFFFFF  
FFFFFFFFFFFFFFFFFFFFFFFFFFFFFFFFFFFFFFFFFFFFFFFFFFFFFFFFFFFFF  
@A00721:190:HGJW7DSXY:4:1128:25021:34084\_2:N:0:TCTGCAAG+GCTGCACT  
TACCTTTATAGGTAAGAAGCCCTTGAGCCGCGTAGTCAGCGCGTTTAGCTGTCTCATCAGTCAGAGT  
ATACCGGATAGGGTACCGAGTCTCCAAGAGAATATTTATTCTTATGAG  
+  
FFFF:FFFFFF:FFFFFFFFFFFFFFFFFFFFFFFF:FFFF:FFFFFF,FFFFFFF,FFFFFFF,FFFFFF  
FFFFFFFFFFFFFFFFFFFFFFFFFFFFFFFFFFFFFFFF,FF:FFFFFFFFF  
@A00721:190:HGJW7DSXY:4:2142:17164:6918\_1:N:0:TCTGCAAG+GCTGCACT  
CTTTGGTAATTGTATGATCACTTTGATGATTTTATCACTTTATTATGACCTTGGAAGTTTTCGGCTG  
TGTTGTGCTGCTGGGGACGATTCCATTCTGTTTTCAAAGACTCCAATAACTGATCATTCTGATCATATG  
ATT  
+  
FFFFFFF,FFFFFFFFFFFF:FFFFFFFFFFFFFFFFFFFFFFFFFFFFFFFFFFFFFFFFFFFFFFFF  
FFFFFFFFFFFFFFFFFFFFFFFF:FFFFFFFFFFFFFFFFFFFFFFFFFFFFFFFFFFFFFFFF,FFFFFFFFFFFF  
FFF  
@A00721:190:HGJW7DSXY:4:2123:30517:27759\_2:N:0:TCTGCAAG+GCTGCACT  
GATTCCGAGAGGTTTATCCTGATGTGGAGGGAGTTCTTGAAGCATCCCGACCTTTCCTTGTAAGAAATT  
TTGATGCGGTTTCATAAGATTATCAGTAATCCTGATTCTACTACGGAT  
+  
FFFFFFFFFFFFFFFFFFFFFFFFFFFFFFFFFFFFFFFFFFFFFFFFFFFFFFFFFFFFFFFFFFFFF  
FFFFFFFFFFFFF:FFFFFFFFFFFFFF,FFFFFFFFFFFFFFFFFFFFFFFFFFFFFFFF:FFFF  
@A00721:190:HGJW7DSXY:4:2336:31910:7435\_1:N:0:TCTGCAAG+GCTGCACT  
GTTGATTAAGACTCTTCCGAAAGGCGAACTTTGGGAATTTGAAGCTCAGGGTGAAGCACAACGTTTGA  
CCGTGACGAACTGTGGTGTTCTTGATCTACGTTACGGATATACTCTCCTTGAGTTCACTCGTAAGGAC  
ACT  
+  
FFFFFFFFFFFFFFFFFFFFFFFFFFFFFFFF:FFFFF,FF,FFFFFFFFFFFFFFFFFFFFFFFF:FFFF  
FFFFFFFFFFFFFFFFFFFFFFFFFFFFFFFFFFFFFFFFFFFFFFFFFFFFFFFFFFFFFFFFFFFFF  
FFF  
@A00721:190:HGJW7DSXY:4:2641:18005:16329\_2:N:0:TCTGCAAG+GCTGCACT  
AGCAGGGGTTTTCGAATAGTAGCCACCCGCTTACAGAGGGGAGCAGCATGACCATAATTGGTA  
TTGACTTTGGTACCACCTTTTCTACTGTCTGTCTCGCTCTTCAATG  
+  
FFFFFFFFFFFFFFFFFFFFFFFFFFFFFFFF:FFFFFFFFFFFFFFFF:FFFFFFFFFFFFFFFF  
FFFFFFFFFFFFFFFFFFFFFFFFFFFFFFFFFFFFFFFFFFFFFFFFFFFFFFFF:FFFF  
@A00721:190:HGJW7DSXY:4:2644:10646:7404\_2:N:0:TCTGCAAG+GCTGCACT  
CTACAATCATTGGTTTTTCTAATAATGATGACACTATTGTTTATGGATATGATGCTATTACTCATGAT

GGTTACGGTCAGGGAGGATTCTCAGTTTACAAGGACCTTAAGCGATGG

@A00721:190:HGJW7DSXY:4:1175:29586:22357\_1:N:0:TCTGCAAG+GCTGCACT  
TGGACTCTTCGATAGGGGACATTTTATCGTGGGCTTTCCGTAAAGGAAGATCTGTTATCGACGGTTTA  
TCGTTTACGAAGTATCACTCCACCGGTGAATGTTTAAAGAATACTATAAATAGAATAGCTATTACTAC  
TAA

+

FFFFFFFFFFFF:FFFFFFFFFFFFFFFFFFFFFFFFFFFFFFFFFFFFFFFFFFFFFFFFFFFFFFFFFFFF  
FFFFFFFFFFFFFFFFFFFFFFFFFFFFFFFFFFFFFFFFFFFFFFFFFFFFFFFFFFFFFFFFFFFFFFFFFFFF  
FFF

@A00721:190:HGJW7DSXY:4:1254:16360:23156\_2:N:0:TCTGCAAG+GCTGCACT  
TTTAACCTACTTAGACTTTCCTACGATACAAATGATAACTTCTAATTTACGTTTGCTACTCAGAGCTG  
GTCCTCTCAGCAAAGGGATGCATGGTGTATCTCCTCAGGAGTCCCGG

+

FFF:FFFFFFFFFFFF:FFFFFFFFFFFFFFFFFFFFFFFFFFFFFFFFFFFFFFFFFFFFFFFFFFFFFFFFFFFF  
FFFFFFFFFFFF:FFFFFFFFFFFFFFFFFFFFFFFFFFFFFFFFFFFFFFFFFFFFFFFFFFFFFFFFFFFF

@A00721:190:HGJW7DSXY:4:1221:3396:11663\_1:N:0:TCTGCAAG+GCTGCACT  
TAATGACGAGACTTTCGTCATAATCGCTGCATATTACGGATTACACGGTACCAGCGCATCTCGTGTCTG  
AGCCTCGACCCGATTATATGGTATTAACCTATAAAGGTGAGGAGACCATTTTCTTGCTGAAATTTATA  
GAA

+

FFFFFFFFFFFFFFFFFFFFFFFFFFFFFFFFFFFFFFFFFFFFFFFFFFFFFFFFFFFFFFFFFFFFFFFFFFFF:FFFFFFFFFFFF  
FFFFFFFFFFFFFFFFFFFFFFFFFFFFFFFFFFFFFFFFFFFFFFFFFFFFFFFFFFFFFFFFFFFFFFFFFFFF  
FFF

@A00721:190:HGJW7DSXY:4:2424:24442:32236\_1:N:0:TCTGCAAG+GCTGCACT  
CTAATGGCAAATAGTGGAAGGCTCCAGTCAACACTAGTTCGAGTGCTGCTTTGGATTACGATGACGT  
GAGAATAGGTGAAGGGATAGTTTTTACCTCGACCAACATTAAGGCGGCGGCGACTAATCTTAAAGCTT  
CAC

+

FFFFFFFFFFFF,FFFFFFFFFFFFFFFFFFFFFFFFFFFFFFFFFFFFFFFFFFFFFFFFFFFFFFFFFFFFFFFFFFFF  
FFFFFFFFFFFFFFFFFFFFFFFFFFFF:FFF:FFFFFFFFFFFFFFFFFFFFFFFFFFFFFFFFFFFFFFFFFFFF  
FFF

@A00721:190:HGJW7DSXY:4:1621:18846:11772\_2:N:0:TCTGCAAG+GCTGCACT  
CAACATTTACCACCAAATCTTTTGATACAACCTCTAGCCTTCAAGTGGGGTATGCCTGCGGAATACGC  
TTGCTATTCACCAGATTGGTTCGAACCCGTTGATGCTATGTCAGAAGA

+

FFFFFFFFFFFFFFFFFFFFFFFFFFFFFFFFFFFFFFFFFFFFFFFFFFFFFFFFFFFFFFFFFFFFFFFFFFFF  
FFFFFFFFFFFFFFFFFFFFFFFFFFFFFFFFFFFFFFFFFFFFFFFFFFFFFFFFFFFFFFFFFFFFFFFFFFFF

@A00721:190:HGJW7DSXY:4:2665:9742:6652\_1:N:0:TCTGCAAG+GCTGCACT  
CTGCAGAGGCTGTCAAACAAGCCAGACTCAAGGAGTCCAATCAAAGTTTTGAATTTAGCTCAACTG  
GGGAGACGTGCTTAAATGGGTGATAAAAATTATTTAGAGATCTTTTCTACTTACAAAGACAATTCAG  
TTT

+

FFFFFFFFFFFFFFFFFFFFFFFFFFFFFFFFFFFFFFFFFFFFFFFFFFFFFFFFFFFFFFFFFFFFFFFFFFFF  
FFFFFFFFFFFFFFFFFFFFFFFFFFFFFFFFFFFFFFFFFFFFFFFFFFFFFFFFFFFFFFFFFFFFFFFFFFFF  
FFF

@A00721:190:HGJW7DSXY:4:1458:29161:3646\_1:N:0:TCTGCAAG+GCTGCACT  
TATACATTATAAAATATAAAAATAAGGGAGTCATAACTTTTGTTACCAAATCTTGCTTTCAACGAA  
GTCTCTGATTTTATTAATCATTACTTTAACGATCTCTCGGTCATTTACTCTGTACTTGATCTACGTCG  
TTT

+

FFFFFFFFFFFFFFFFFFFFFFFFFFFFFFFFFFFFFFFFFFFFFFFFFFFFFFFFFFFFFFFFFFFFFFFFFFFF  
FFFFFFFFFFFF:FFFFFFFFFFFF:FFFFFFFFFFFFFFFF:F:FFFFFFFFFFFFFFFFFFFFFFFFFFFF  
FFF

@A00721:190:HGJW7DSXY:4:2249:24388:25316\_2:N:0:TCTGCAAG+GCTGCACT  
TGACTCTATCTTTTCAGACACTTCTTATATTATTTACAATAGTTAATATCATATTAGTAATACTCACT



ATCGTTTTCTGCTTTTTCTTAGCTAATAGATTAATAAAGGATGAGTAC  
+  
FFFFFFFFFFFFFFFFFFFFFFFF:FFFFFFFFFFFFFFFFFFFFFFFF:FFFFFFFFFFFFFFFFFFFFFFFF  
FFFFFFFFFFFFFFFFFFFFFFFF, :FFFFFFFFFFFF:FFF:,FF,F:FF:  
@A00721:190:HGJW7DSXY:4:2103:11134:2832\_2:N:0:TCTGCAAG+GCTGCACT  
CTTCGTTACGAGACCTGATGGTAGAATAGATTTAGTCTCTACACCCATCTCAACGAGGATAAAGCGAG  
TTTTCCGTCCTGAACGTAATACACGAAGAGATCATCCGCAAACGACTC  
+  
FFFFFFFFFFFFFFFFFFFFFFFFFFFFFFFF:FFFFFFFFFFFFFFFFFFFFFFFFFFFFFFFFFFFFFFFF  
FFFFFFFFFFFFFFFFFFFFFFFFFFFFFFFFFFFFFFFFFFFFFFFFFFFFFFFFFFFFFFFF  
@A00721:190:HGJW7DSXY:4:2623:28592:1125\_1:N:0:TCTGCAAG+GCTGCACT  
ACAGACTCCGAAAATGGTTTCAAATGAGGTCAAAGCTCTATTTATTAAACGAACTATTATCCGATTCT  
TCGAGGGTATCACTACCACTGATCTGCCGACTTTAGTCAAGGAAGTTCAATTCCTTCGATGTTTATAT  
TTT  
+  
FFFFFFFFFFFFFFFFFFFFFFFFFFFFFFFFFFFFFFFFFFFFFFFFFFFFFFFFFFFFFFFFFFFFFFFF  
FFFFFFFFFFFFFFFFFFFFFFFFFFFFFFFFFFFFFFFFFFFFFFFFFFFFFFFFFFFFFFFFFFFFFFFF  
FFF  
@A00721:190:HGJW7DSXY:4:2121:16025:1376\_1:N:0:TCTGCAAG+GCTGCACT  
CGACAAATTTTAGAACTTTATTTCAAGACTCTCTCCGATCACCTTGGTGTGATCTCCCGGAGGATCTT  
TTCAATAAGATGTATGATGATAATCTACTATTTTTAAATAGTGATATTCAAGCGTATACTTGAATACTT  
TAT  
+  
:FF,F,FFFFFFFFFFFF:FFFFFF:FFFFFFFFFFFFFFFFFFFFFFFF:FFFFFF:FFFFFF:FFFFFFFFFFFF  
FFFFFFFFFFFFFFFFFFFFFFFFFFFF,FFFFFF:FFFFFFFFFFFF:FFFFFFFFFFFFFFFFFFFFFFFFFFFF  
:FF  
@A00721:190:HGJW7DSXY:4:1256:5141:13620\_2:N:0:TCTGCAAG+GCTGCACT  
TACCGCAAAAAGTTGGAAGAGGTCTATGATATTTATTTTACTTATACTTTAAATAGCACCGATTATAA  
CTTGACTGTTGATAATATTACAATAGCTCTTCTCAGAAGATTAGAGA  
+  
FFFFFFFFFFFFFFFFFFFFFFFFFFFFFFFF:FFFFFFFFFFFFFFFFFFFFFFFFFFFFFFFFFFFFFFFF  
FFFFFFFFFFFFFFFFFFFFFFFFFFFFFFFFFFFFFFFFFFFFFFFFFFFFFFFFFFFFFFFF  
@A00721:190:HGJW7DSXY:4:2145:25012:35415\_1:N:0:TCTGCAAG+GCTGCACT  
GTAGCATTGATTTACTTTTACCGTTAGAACTGAAAAAGATTCTTTTCGAAAAGAAACCTATAAGTTAC  
AAACGATTCTTCGACTATATTAAAGAAATAAAAATACTTCAAGTACCTGAACTTTACATTTTAAATGG  
TAT  
+  
FFFFFFFFFFFFFFFFFFFF,F:FF:FFF:FFFFFFFFFFFFFFFFFFFFFFFFFFFFFFFF:FFFFFFFFFFFF  
F,FFFFFFFF:FFFFFFFFFFFFFFFFFFFFFFFFFFFFFFFFFFFFFFFFFFFFFFFFFFFFFFFFFFFFFFFF  
FFF  
@A00721:190:HGJW7DSXY:4:1436:29152:9111\_1:N:0:TCTGCAAG+GCTGCACT  
ATGAGAGTGTATTCCTTAATATTCTAGTAACCGCTATGTGGGCATTACTAGGATTTATCACACTCCTA  
AATTTGATAGCAATTTATGTTTTAAATGCTAGGAAAATTTAGAAAAACTCCATTGTATAGTTCAAGG  
AGT  
+  
FFFFFFFFFFFFFFFFFFFF: :FFFFFFFFFFFFFFFFFFFFFFFFFFFFFFFFFFFFFFFFFFFFFFFFFFFF  
FFFF:FFFFFFFFFFFFFFFFFFFFFFFFFFFFFFFFFFFFFFFFFFFFFFFFFFFFFFFFFFFFFFFFFFFF  
FFF  
@A00721:190:HGJW7DSXY:4:2452:9625:7232\_1:N:0:TCTGCAAG+GCTGCACT  
TAGCTTTAGTATTATTTACTATCGCCTTTATTGAAAATTGTATAAGAGTTAATTGCTTACACAAATGT  
GACGCGCAAGGAATCTTAATTGATTGAAGCTAGGCGTTGGGGAGAATGAACTGCCGCTTCCCGGAAG  
AAA  
+  
FFF:FFFFFFFFFFFF:FFFFFFFF:FFFFFFFFFFFFFFFFFFFFFFFFFFFFFFFF,FFFFFFFFFFFF,FF

FFFFFFFFFFFFFFFF:FFFFFFFFFFFFFFFFFFFFFFFFFFFFFFFFFFFFFFFFFFFFFFFF  
FFF

@A00721:190:HGJW7DSXY:4:2136:27425:21214\_1:N:0:TCTGCAAG+GCTGCACT  
CCGCCGGTCGGCAGATCGGCACCACTGGTCTCTACGTTCAAGGACCGCTGTGCAGAATAACCTTCCC  
AAATCTAGATCTGCACAGAAGAAGGCTGAAGGTCGTTACCGACGACCACTCAAAGGAAACGGGCTGT  
TGC

+

FFFFFFFFFFFFFFFF,FFFFFFFFFFFFFFFF:FFFFFFFFFFFFFFFFFFFFFFFFFFFFFFFF  
::FFFF:F,FFFFFFFFFFFFFFFFFFFFFFFFFFFFFFFF:FFFFFFFFFFFFFFFFFFFFFFFF  
FFF

@A00721:190:HGJW7DSXY:4:2161:24252:20196\_2:N:0:TCTGCAAG+GCTGCACT  
GGGAACTGAGGCAGTACCTCAGTCAAAAGTCACATTCACCACTCCCATACCAATCAATGATGTGACTA  
TACAGTTCGGCCATTTCAAGAGTGGTCAATACGTCGTGGGAGGTACTG

+

FFFF:FFFFFFFFFFFFFFFFFFFFFFFFFFFFFFFFFFFFFFFFFFFFFFFFFFFFFFFFFFFF  
FFFFFFFFFFFFFFFFFFFFFFFFFFFFFFFFFFFFFFFFFFFFFFFFFFFFFFFFFFFF

@A00721:190:HGJW7DSXY:4:2257:17644:28447\_1:N:0:TCTGCAAG+GCTGCACT  
AATCAATAGTTCTTCTGACCAGAATGAAAAGGGGTTTACCAGGGTAGTCTCTAAGTCTACCAGGAAGA  
GGGGAAATGTCCCCAAAACTGAGAAGAATAAAGGGAAAGGTCCATCAGGACCTAAGAAGGGGAAATTA  
CCC

+

FFFFFFFFFFFFFF,FFFFFFFFFFFFFFFFFFFFFFFFFFFFFFFFFFFFFFFFFFFFFFFFFFFF  
FFFFFFFFFFFFFFFFFFFFFFFFFFFFFF,FFF,F:F:FFFF:FFFFFFFFFFFFFFFFFFFFFF:FF  
FFF

@A00721:190:HGJW7DSXY:4:2410:21124:28870\_2:N:0:TCTGCAAG+GCTGCACT  
CGGGCCAAAGAGGCCGCTGCTACGAAGTCGCTGAAGGCGGCTTGGGTCATTAAGGGTAGCTGTAAAGT  
TGCGCCTGCCGACCCCATCTTTGAGACCAAGACTCTCTACAGTAGGTT

+

FFFFFFFFFFFFFFFFFFFFFFFFFFFFFFFFFFFFFFFF:FFF,FFFFFFFFFFFFFF:FFFFFF,FF  
:FFFFFFFFFFFFFFFF:FFFFFFFFFFFFFFFFFFFFFFFF

@A00721:190:HGJW7DSXY:4:1662:13386:8923\_1:N:0:TCTGCAAG+GCTGCACT  
TCGTCACTGAGGACGAAGGTGAGAGGACTTTTGGCTACTGGCGACAACTGAGAGCAGTCGCTGGGGA  
AAGAGAATTGCGTGGGTGAAGGCCGACGCTTCGAGCTTGAGTGTGACGAGGCCGGTGACGTTTTGT  
CAA

+

FFFFFFFFFFFFFFFFFFFFFFFFFFFFFFFFFFFFFFFFFFFFFFFFFFFFFFFFFFFFFFFFFFFF  
FFFFFFFFFFFFFFFFFFFFFFFFFFFFFFFFFFFFFFFF:FFFFFFFFFFFFFFFFFFFFFFFF  
FFF

@A00721:190:HGJW7DSXY:4:2445:32054:2738\_2:N:0:TCTGCAAG+GCTGCACT  
CTTAATAATGAGGCGAAGATCCCCTATGGAGTCTTGAAGGACTTAGGTTGGCATATTTATGCCGACGA  
TAATAAGCATGTCACCCTTAAGCACCGAGGTAAGCTCGGGACTTACAA

+

FFFFFFFFF:FFFFFFFFFFFF:FFFFFFFFFF,FFF:FFFFFFFFFFFFFFFFFFFFFFFFFFFF,FF:  
F,:::FFFF:F:FFFFFFFFFF:FF::F,FFF:FFFFFFFFFFFF::F

@A00721:190:HGJW7DSXY:4:1129:7880:26130\_1:N:0:TCTGCAAG+GCTGCACT  
AAAATTTTCTTTCTCCGTCATTGGGGATTTGATGTGAGAAGGTGGAAGGTGTCAAGGGTCTTCT  
TCATGCTGATCTTTCAGGACCTAATCACATCATGATTGATAGTTACGGCTCGTATCGAGTTGGAGGGA  
GGA

+

FFFFFFFFFFFF,:FFFFFFFFFFFFFFFFFFFFFFFFFFFFFFFFFFFFFFFFFFFFFFFFFFFF  
FFFFFFFFFFFFFFFFFFFFFFFFFFFFFFFFFFFFFFFF:FFFF:FFFFFFF:FFFFFFFFFFFFFF  
FFF

@A00721:190:HGJW7DSXY:4:2306:21133:5588\_1:N:0:TCTGCAAG+GCTGCACT  
AATTAAGACGGGGGATTAAGAGTCCAGCTGTAAGTGTCAATTCAGAGAGGGGAGCTCTGAAAAGGA

AACTTCGTCAGAAGATGAGGAAGTCTAAGAGGAGGAGTTTGAGGAAGGCTCTAGAGAAGATCTCACCA  
CCT

+

FFFFF,FF:FFFFFFFFFFFFFFFFFFFFFFFF:FFFF:FFFFFFFFFFFFFFFFFFFFFFFFFFFFFFFF  
FFFFFFFFFFFFFFFFFFFFFFFFFFFFFFFFFFFFFFFFFFFFFFFFFFFFFFFFFFFFFFFFFFFFFFFF  
FFF

@A00721:190:HGJW7DSXY:4:2144:10963:21167\_2:N:0:TCTGCAAG+GCTGCACT  
ATTATTTGAAGCAGGGGTTACCACTTCCTAAGGTGGATGAGGGAGGTTGTTTCTTTGGAGTTTATAGAT  
AATCTTTTGAGAAGGGGTCATAGAGCCAGCAAGAGAAGCTTATATGCT

+

FFFFFFFFFFFFFFFFFFFFFFFFFFFFFFFFFFFFFFFFFFFFFFFFFFFFFFFFFFFFFFFFFFFFFFFF  
FFFFFFFFFFFFFFFFFFFFFFFFFFFFFFFFFFFFFFFF:FFFFFFFFFFFF

@A00721:190:HGJW7DSXY:4:1146:2835:5776\_2:N:0:TCTGCAAG+GCTGCACT  
ACTTACCATATTGTTCTTCCGGGACGTTGTGGGATTTAACTTTGACTCAACTACTCCGATCAGATCC  
GGATGGTTTGATTGGTATGGACTACTCGACTTTTGATCTGGAGTTGTC

+

FFFFFFFFFFF:FFFFFF:FFFFFF:FF,FFFFFFFFFFFFFFFFFFFFFFFFFFFFFFFFFFFFFFFF  
FFFFFFF,:FFFFFFFFFFFFFFFFFFFFFFFFFFFFFFFF,FFFFFFFFFFFF,FF:F

@A00721:190:HGJW7DSXY:4:1304:18629:19194\_2:N:0:TCTGCAAG+GCTGCACT  
AAGAGTCTTTATGATTCAAAACCTATCGTTGTCGTACCTTACAAGGTTGAGGAGACTTTACAGCGGCT  
TATTGTCGCGCAGTTTCCAGAATTGCGGTTGAAGTTCACCCATTCTAT

+

FFFFFFFFFFFFFFFFFFFFFFFFFFFFFFFFFFFFFFFFFFFFFFFFFFFFFFFFFFFFFFFFFFFFFFFF  
:FFFFFFFFFFFF:FFFFFFFFFFFFFFFFFFFFFFFF:FFFFFFFFFFFF,FFFFF

@A00721:190:HGJW7DSXY:4:2505:23104:17707\_2:N:0:TCTGCAAG+GCTGCACT  
CAACCCTATTCTTGATGTGAAAGATGCATCGAGGTATACGTCTAGGAACATTGATTGGGAACGTACCT  
ACTCACGAGACGTCATGAAAGCTATCGGAGGGAAGCAAAATGTTTCGA

+

FFF:F:FFFFFF::FFF,FFFFFFFFFFFFFF:FF,FFFFF,FF:F,F:,FF:FFFFFF:,FFFF:FFFF  
FF:,FF:FFFF:,FF,:FFFF,F::F,:FFF,F:FFFFFF,:FFF,

@A00721:190:HGJW7DSXY:4:2631:8359:34538\_2:N:0:TCTGCAAG+GCTGCACT  
TGATGATGTAGCCACTATAATGCTTAAGAGAGAGATTGATGTATGTCATTTCTGCTTAGTTTGTCCCG  
GCGAATTATTGGACACGATGAAAAATGACATACCCGTTCTGACCTTG

+

FFFFFFFFFFFFFFFFFFFFFFFFFFFFFFFFFFFFFFFF:FFFFFFFFFFFFFFFFFFFF,FFFFFFFFFFFFFFFF  
FFFFFF:FFFFFFFFFFFFFFFFFFFF:FFF:FFFFFF:FFFFFFFFFFFFFFF

@A00721:190:HGJW7DSXY:4:2516:24822:6684\_1:N:0:TCTGCAAG+GCTGCACT  
TCGGTCAATGACAAAACCTTCGAATATGTTACGACATGGCTTCGTAACAACAGTGCGAGGATTGTCAT  
CTCGGGGAAAGTGATTCACCAAGATGTTTCATATAGATACGAGATACCTAGAGAAGGTCGCAGCGATCT  
TAC

+

FF:FFFFFFFFFFFFFFFFFFFFFFFFFFFFFFFF:FFFFFFFFFFFFFFFFFFFFFFFF:FFFFFFFFFFFFFFFF  
FFFFFF:FFFFFFFFFFFFFFFFFFFFFFFFFFFFFFFFFFFFFFFFFFFFFFFFFFFFFFFFFFFFFFFF  
FFF

@A00721:190:HGJW7DSXY:4:2410:23538:6277\_2:N:0:TCTGCAAG+GCTGCACT  
ACCGGAGGTGATCTCTCTGCTTCTGCGTTACTGAGAGAAAAGATTACAGGACGCCTACGGTGACTTTAT  
GGACAAGATGCAAGTCTTGGGAAATACTTGTTTCCCTTTTAGGTTT

+

FFFFFFFFFFFFFFFFFFFFFFFFFFFFFFFFFFFFFFFFFFFFFFFFFFFFFFFFFFFFFFFFFFFFFFFF  
FFFF,FFFFFF:FFFFFF:FFFFFFFFFFFF:F:FFFFFFFFFFFF:F

@A00721:190:HGJW7DSXY:4:1173:26539:6026\_1:N:0:TCTGCAAG+GCTGCACT  
CTTGACAGAGTGAAGTTCAGACGTGTGCTCTTCCGATCTCTTGAAAACCAAGTTAAGAAGGAGGC  
TGATCATGGAGTCTTTGTACCTTCTGTCAAACCTTCGAGGTTACGCTACGAGAGGTGATCCCGGATGTG  
GAT

[illegible]

+

@A00721:190:HGJW7DSXY:4:2431:6234:3897\_2:N:0:TCTGCAAG+GCTGCACT  
GATTCAACCCCTTATATCGAGGCTATCGAGGACGATGAGTATCTTGAAGTTGTTGACGACAAGCCTCA  
AGAGGGTAGAGGACCACCTGGATCTTCTACTGTCTCTGCCTTCCAAGA

+

@A00721:190:HGJW7DSXY:4:1128:25192:35321\_2:N:0:TCTGCAAG+GCTGCACT  
TACCTTTATAGGTAAGAAGCCCCCTTGAGCCGCGTAGTCAGCGCGTTTAGCTGTATCATCAGTCAGAGT  
ATACCCGATAGGGTACCGAGTCTCCAAGAGAATATTTATTCTTATGAG

+

@A00721:190:HGJW7DSXY:4:1636:31250:31469\_2:N:0:TCTGCAAG+GCTGCACT  
TATGATCACTTTGATGATTTTATCACTTTATTATGACCTTGAAAGTTTTTCGGCTGTGGTTGTCGCTG  
GGGACGATTCCATTCTGTTTTCAAAGACTCCAATAACTGATAGATCGG

+

@A00721:190:HGJW7DSXY:4:2123:6759:34835\_2:N:0:TCTGCAAG+GCTGCACT  
GATTCCGAGAGGTTTATCCTGATGTGGAGGGAGTTCTTGAAGCATCCCGACCTTTCCTTGTGAAAATT  
TTGATGCGGTTTCATAAGATTATCAGTAATCCTGATTCTACTACGGAT

+

@A00721:190:HGJW7DSXY:4:2343:14922:27868\_1:N:0:TCTGCAAG+GCTGCACT  
GTTGATTAAGACTCTTCCGAAAGGCGAACTTTGGGAATTTGAAGCTCAGGGTGAAGCACAACTTTGA  
CCGTGACGAACTGTGGTGTTCTTGATCTACGTTACGGATATACTCTCCTTGAGTTCACTCGTAAGGAC  
ACT

+

@A00721:190:HGJW7DSXY:4:2653:26702:35681\_2:N:0:TCTGCAAG+GCTGCACT  
AGCAGGGGTTTTCTGAATAGTGATAGCCACCCGCCTTACAGAGGGGCAGCAGCATGACCATAATTGGTA  
TTGACTTTGGTACCACCTTTTCTACTGTCTGTCTCGCCTCTTTCGAATG

+

@A00721:190:HGJW7DSXY:4:1447:1307:27430\_1:N:0:TCTGCAAG+GCTGCACT  
CTACAATCATTGTTTTTCTAATAATGATGACACTATTGTTTATGGATATGATGCTATTACTCATGAT  
GGTTACGGTCAGGGAGGATTCTCAGTTTACAAGGACCTTAAGCGATGGATCGGGGTTAATTCTAAAC  
ATT

$$+$$

```
FF,:FFFFFFFFFFFFFFFFFFFFFFFF:FFFF:FFFFFF:FF:,FFFFFFFFFFFFFFFF:FFFFFFFF:
FFFFFFFFFFFFFFFFFFFFFFFFFFFFFFFF:FFFFFFFFFFFF:FFFFFFFFFF:FFFFFFFFFFFFFFFF:FFFF
FFF
```



FFFFFFFFFFFFFFFFFFFFFFFFFFFFFFFFFFFFFFFFFFFFFFFFFFFFFFFFFFFFFFFF:FFFFFFF  
FFF

@A00721:190:HGJW7DSXY:4:1359:32796:28635\_2:N:0:TCTGCAAG+GCTGCACT  
TTTAAGTACTTAGACTTTCTACGATACAAATGATAACTTCTAATTTACGTTTGCTACTCAGAGCTG  
GTCCTCTCAGCAAAGGGATGCATGGTGTATCTCCTCAGGAGTCCCG

+  
FFFFFFFF:FFFFFFFFFFFFFFFFFFFFFFFFFFFFFFFFFFFFFFFFFFFFFFFF:FF:FFFFFFFF:FFFF:FFFF  
FFFFFFFFFFFF:FFF:FFFF:FFFFF:F:FF:FFFFFFFFFFFF

@A00721:190:HGJW7DSXY:4:1254:16360:23156\_1:N:0:TCTGCAAG+GCTGCACT  
TAATGACGAGACTTTTCGTACATAATCGCTGCATATTACGGATTACACGGTACCAGCGCATCTCGTGTGC  
AGCCTCGACCCGATTATATGGTATTAAGGTATAAAGGTGAGGAGACCATTTCTTGCTGAAATTTATA  
GAA

+  
FFFFFFFFFFFFFFFFFFFFFFFFFFFFFFFFFFFFFFFFFFFFFFFFFFFFFFFFFFFFFFFF  
FFFFFFFFFFFFFFFF:FFFFFFFFFFFFFFFFFFFFFFFFFFFFFFFFFFFFFFFFFFFFFFFF  
FFF

@A00721:190:HGJW7DSXY:4:2549:3441:17472\_1:N:0:TCTGCAAG+GCTGCACT  
CTAATGGCAAATAGTGAAAGGCTCCAGTCAACACTAGTTCGAGTGCTGCTTTGGATTACGATGACGT  
GAGAATAGGTGAAGGGATAGTTTTTACCTCGACCAACATTAAGGCGGCGGCGACTAATCTTAAAGCTT  
CAC

+  
:FFFFFFFFFFFFFFFFFFFFFFFFFFFFFFFF:FFFFFFFF:FFFFFFFFFFFFFFFFFFFFFFFF  
FFFFFF:FFF:FFFFFFFFFFFFFFFFFFFFFFFFFFFFFFFFFFFFFFFFFFFFFFFF  
FFF

@A00721:190:HGJW7DSXY:4:1665:24596:20917\_2:N:0:TCTGCAAG+GCTGCACT  
CAACATTTACCACCAAATCTTTTGATACAACTCTAGCCTTCAAGTGGGGTATGCCTGCGGAATACGC  
TTGCTATTACCAGATTGGTTCGAACCCGTTGATGCTATGTCAGAAGA

+  
FFFFFFFFFFFFFFFFFFFFFFFFFFFFFFFFFFFFFFFFFFFFFFFFFFFFFFFFFFFFFFFF:FF  
FFFFFFFFFFFF:FFFFFFFFFFFF:FFF:FFFFFFFFFFFF

@A00721:190:HGJW7DSXY:4:2327:17409:20682\_1:N:0:TCTGCAAG+GCTGCACT  
TTCAGAGGCTGTCAAACAAGCCCAGAATCAAGTATTCCAATCAAAGTTTTTAAATTTAGCTCAACTGG  
GGAGACGTGCTTAAATGGGTGATAAAAATTATTTAGAGATCTTTTCTACTTACAAAGGACAATTCAGT  
TT

+  
F,:F,F,:FF,:FFF,FF,:F,F:F,F,F,:,,,:F,:F,FFFF:,FFFF,FFFFFFFF:F,:F,F,:  
FFFF,,F:,FFFFFFF,:F,:FFF:FFFF:FFFFF:F:F:F,F:FFFFFFFFFFFFFFFF:FFF  
FF

@A00721:190:HGJW7DSXY:4:1629:4761:6511\_1:N:0:TCTGCAAG+GCTGCACT  
TATACATTATAAAATATAAAAATAAGGGAGTCATAACTTTTGTTACCAAATCTTGCTTTCAACGAA  
GTCTCTGATTTTATTAATCATTACTTTAACGATCTCTCGGTCAATTAATCTGTACTTGATCTACGTCG  
TTT

+  
F,F:FFFFFFFFFFFFFFFFFFFFFFFFFFFFFFFFFFFFFFFFFFFFFFFFFFFFFFFF  
FFFFFFFFFFFFFFFF:FFFFFFFFFFFFFFFFFFFFFFFFFFFFFFFFFFFFFFFF  
FFF

@A00721:190:HGJW7DSXY:4:2309:1741:34475\_2:N:0:TCTGCAAG+GCTGCACT  
TGACTCTATCTTTTCAGACACTTCTTATATTATTTACAATAGTTAATATCATATTAGTAATACTCACT  
ATCGTTTTCTGCTTTTTCTTAGCTAATAGATTAATAAAGGATGAGTAC

+  
FFFFFFFFFFFFFFFFFFFFFFFFFFFFFFFF:FFFFFFFFFFFFFFFFFFFFFFFF:FFFF  
FFFFFFFFFFFF:FFFFFFFFFFFFFFFF:F:FFFFFFFFFFFF

@A00721:190:HGJW7DSXY:4:2245:20573:21339\_2:N:0:TCTGCAAG+GCTGCACT  
CTTCGTTACGAGACCTGATGGTAGAATAGATTTAGTCTCTACCCATCTCAACGAGGATAAAGCGAG

TTTTCCGTCCTGAACGTAATACACGAAGAGATCATCCGCAAACGACTC

+

FFFFFFFFFFFFFF:FFFFFFFFFFFFFF:FFFFFFFFFFFFFF:FFFFFFFFFFFFFF  
FFFFFFFFFFFFFF:FFFFFFFFFFFFFF:FFFFF

@A00721:190:HGJW7DSXY:4:2658:17626:26162\_1:N:0:TCTGCAAG+GCTGCACT  
ACAGACTCCGAAAATGGTTTCAAATGAGGTCAAAGCTCTATTTATTAAACGAACTATTATCCGATTCT  
TCGAGGGTATCACTACCACTGATCTGCCGACTTTAGTCAAGGAAGTTCAATTCCTTCGATGTTTATAT  
TTT

+

:FFFFFF:FFFF,F:FFFF:FFFF:FFFFFF:F:FF:FFFFFFFFFFFF,FFFFFFFF:F:F:FFFF  
FFFFFFFFFFFFFFFFFFFFFFFF,FFFFFFFFFFFFFFFF:F,FFFFFFFFFFFFFFFF  
FFF

@A00721:190:HGJW7DSXY:4:2129:19913:20509\_1:N:0:TCTGCAAG+GCTGCACT  
CGACAAATTTTAGAACTTTATTTCAAGCTCTCTCCGATCACCTTGGTGTGATCTCCCGGAGGATCTT  
TTCAATAAGATGTATGATGATAATCTACTATTTTTAAATAGTGATATTCAGCGTATACTTGAATACTT  
TAT

+

:FFFFFFFFFFFFFFFFFFFFFFFFFFFFFFFFFFFFFFFFFFFFFFFFFFFFFFFF  
FFFFFFFFFFFFFFFFFFFFFFFFFFFFFFFFFFFFFFFFFFFFFFFFFFFFFFFF  
FFF

@A00721:190:HGJW7DSXY:4:1363:16541:10441\_2:N:0:TCTGCAAG+GCTGCACT  
TACCGCAAAAAGTTGGAAGAGGTCTATGATATTTATTTACTTATACTTTAAATAGCACCGATTATAA  
CTTGACTGTTGATAATATTACAATAGCTCTTTCTCAGAAGATTAGAGA

+

FFFFFFFF:F:F:FFFFFFFF:FFF,FFFFFFFFFFFFFFFFFFFFFFFF:FFFF  
FFFFFFFF:FFFFFFFFFFFFFFFFFFFFFFFFFFFFFFFF:F

@A00721:190:HGJW7DSXY:4:2145:8721:17597\_1:N:0:TCTGCAAG+GCTGCACT  
GTAGCATTGATTTACTTTTACCGTTAGAACTGAAAAAGATTCTTTTCGAAAAGAAACCTATAAGTTAC  
AAACGATTCTTCGACTATATTAAAGAAATAAAAATACTTCAAGTACCTGAAGTTTACATTTTAAATGG  
TAT

+

FFF::FFF:FFFFF:,F:FF:FFFFFFFFFFFFFFFF:FF:FFFFFFFFFFFF,F::FFF  
FFFFFFFFFFFFFFFF:FFFFFFFFFFFFFFFF:FFFF:FFFFFFFF:FFFFFFFFFFFF  
FFF

@A00721:190:HGJW7DSXY:4:1436:31557:6605\_1:N:0:TCTGCAAG+GCTGCACT  
ATGAGAGTGTATTCCTTAATATTCTAGTAACCGCTATGTGGGCATTACTAGGATTTATCACACTCCTA  
AATTTGATAGCAATTTATGTTTTAAATGCTAGGAAAATTTAGAAAACTCCATTGTATAGTTCAAGG  
AGT

+

FFFFFFFFFFFFFFFFFFFFFFFFFFFFFFFF:FFFFFFFFFFFFFFFF:FFFFFFFFFFFF  
FFFFFFFFFFFFFFFFFFFFFFFF:FFFFFFFFFFFFFFFF:FFFFFFFFFFFFFFFF  
FFF

@A00721:190:HGJW7DSXY:4:1103:20256:7388\_2:N:0:TCTGCAAG+GCTGCACT  
AGCTTTAGTATTATTTACTATCGCCTTTATTGAAAATTGTATAAGAGTTAATTGCTTACACAAAAGTG  
ACGCGCGAAGGAATCTTAATTGATTGAAGCTAGGCGTTGGGAGAATG

+

FFFFFFFFFFFFFFFFFFFFFFFFFFFFFFFF:FFFFFFFFFFFFFFFF:FFFFFFFFFFFF  
FFFFFFFFFFFFFFFFFFFFFFFFFFFFFFFF

@A00721:190:HGJW7DSXY:4:2371:1416:35571\_1:N:0:TCTGCAAG+GCTGCACT  
CCGCCGTCGGCAGATCGGCACCACTGGTCTCTACGTTCAAGGACCGCTGTGCAGAATAACCTTCCC  
AAATCTAGATCTGCACAGAAGAAGGCTGAAGGTCGTTACCGACGACCACTCAAAGGAAACGGGCTGT  
TGC

+

FFFFFFFFFFFFFFFFFFFFFFFFFFFFFFFFFFFFFFFFFFFFFFFFFFFFFFFF



FF,:FFFFFFFFFFFFFFFFFFFFFFFFFFFFFFFFFFFFFFFFFFFFFFFFFFFFFFFFFFFFFFFF  
FFF

@A00721:190:HGJW7DSXY:4:2359:3893:30874\_2:N:0:TCTGCAAG+GCTGCACT  
GGGAACTGAGGCAGTACCTCAGTCAAAAGTCACATTCACCACTCCCATACCAATCAATGATGTGACTA  
TACAGTTCGGCCATTTCAAGAGTGGTCAATACGTCGTGGGAGGTACTG

+  
FFFFFFFFFFFFFFFFFFFFFFFFFFFFFFFFFFFFFFFFFFFFFFFFFFFFFFFFFFFFFFFF  
FFFFFFFFFFFFFFFFFFFFFFFFFFFFFFFFFFFFFFFFFFFFFFFFFFFFFFFF

@A00721:190:HGJW7DSXY:4:2415:17987:6245\_1:N:0:TCTGCAAG+GCTGCACT  
AATCAATAGTTCTTCTGACCAGAATGAAAAGGGGTTTACCAGGGTAGTCTCTAAGTCTACCAGGAAGA  
GGGGAAATGTCCCCAAAAGTGAAGAATAAAGGGAAAGGTCCATCAGGACCTAAGAAGGGGAAATTA  
CCC

+  
FFF,F,F,FF:F:FFF:,F::F,FFF:F,F::FFFFFF:F,F:::FFF,F:F,FF:,,:,FF,:  
F,,:FFF,::,,:FFF:FFFF:FF:F,::F,F,:FF:F,FFFF,FF,F:FFF:,F,:FF:F,F,:  
:FF

@A00721:190:HGJW7DSXY:4:2410:21386:28855\_2:N:0:TCTGCAAG+GCTGCACT  
CGGGCCAAAGAGGCCGCTGCTACGAAGTCGCTGAAGGCGGCTTGGGTCTTAAGGGTAGCTGTAAAGT  
TGCGCCTGCCGACCCCATCTTTGAGACCAAGACTCTCTACAGTAGGTT

+  
FFFFFFFFFFFFFFFFFFFFFFFFFFFFFFFFFFFFFFFFFFFFFFFFFFFFFFFFFFFFFFFF,  
FFFFFFFFFFFFFFFFFFFFFFFFFFFFFFFFFFFFFFFFFFFFFFFFFFFFFFFF

@A00721:190:HGJW7DSXY:4:2127:13729:23923\_1:N:0:TCTGCAAG+GCTGCACT  
TCGTCACTGAGGACGAAGGTGAGAGGACTTTTGGCTACTGGCGACAACTGAGAGCAGTCGCTGGGGA  
AAGAGAATTGCGTGGGTGAAGGCCGACGCTTCGAGCTTGAGTGTGACGAGGCCGGTGACGTTTTGT  
CAA

+  
FFFFFFFFFFFFFFFFFFFFFFFFFFFFFFFFFFFFFFFFFFFFFFFFFFFFFFFFFFFFFFFF:FFFFFFFFFFFFFFFF  
:FFFFFFFFFFFFFFFFFFFFFFFFFFFFFFFFFFFFFFFFFFFFFFFFFFFFFFFFFFFFFFFF  
FFF

@A00721:190:HGJW7DSXY:4:2467:16369:26553\_2:N:0:TCTGCAAG+GCTGCACT  
CTTAAGCATGTACCCCTTAAGCACCGAGGTAAGCTCGGACTTACAA

+  
FFFFFFF:FFFFFFFFFFFFFFFFFFFFFFFFFFFFFFFFFFFFFFFFFFFFFFFFFFFFFFFF  
FFFFFFFFFFFFFFFFFFFFFFFFFFFFFFFFFFFFFFFFFFFFFFFFFFFFFFFF:

@A00721:190:HGJW7DSXY:4:1129:8052:26146\_1:N:0:TCTGCAAG+GCTGCACT  
AAAATTTTCTTTCTCCGTCAATTGGGATTTGATGTGAGAAGGTGGAAGGTGTCAAGGGTCTTCT  
TCATGCTGATCTTTCAGGACCTAATCACATCATGATTGATAGTTACGGCTCGTATCGAGTTGGAGGGA  
GGA

+  
FFFFFFF:FFFFFFFFFFFFFFFFFFFFFFFFFFFFFFFFFFFFFFFFFFFFFFFFFFFFFFFF:FFFFFFFF  
FFFFFFFFF:FFFFFFFFFFFFFFFFFFFFFFFFFFFFFFFFFFFFFFFFFFFFFFFF:FFFFFFFF  
FFF

@A00721:190:HGJW7DSXY:4:2669:5330:35430\_1:N:0:TCTGCAAG+GCTGCACT  
AATTAAAGACGGGGGATTAAGAGTCCAGCTGTAAGTGTCAATTCAGAGAGGGGAGCTCTGAAAAGGA  
AACTTCGTGAGAAGATGAGGAAGTCTAAGAGGAGGAGTTTGAGGAAGGCTCTAGAGAAGATCTACCA  
CCT

+  
FFFFFFF,FFFFFFFFFFFFFFFFFFFFFFFFFFFFFFFFFFFFFFFFFFFFFFFFFFFFFFFF:FFFFFFFF  
FFFFFFFFF:FFFFFFFFFFFFFFFFFFFFFFFFFFFFFFFFFFFFFFFFFFFFFFFF:FFFFFFFF  
FFF

@A00721:190:HGJW7DSXY:4:2304:5068:7545\_2:N:0:TCTGCAAG+GCTGCACT  
ATTATTTGAAGCAGGGTTACCACTTCCTAAGGTGGATGAGGGAGGTTGTTTCTTTGGAGTTTATAGT

$+$ 

@A00721:190:HGJW7DSXY:4:1169:12933:10582\_2:N:0:TCTGCAAG+GCTGCACT  
ACTTACCATATTGTTCTTCCGGGAAGTTGTGGGATTTAACTTTGACTCAACTACTCCGATCAGATCC  
GGATGGTTTGATTGGTATGGACTACTCGACTTTTGATCTGGAGTTGTC

+

@A00721:190:HGJW7DSXY:4:1351:18575:4163\_2:N:0:TCTGCAAG+GCTGCACT  
AAGAGTCTTTATGATTCAAAACCTATCGTTGTCGTACCTTACAAGTTGAGGAGACTTTACAGCGGCT  
TATTGTCGCGCAGTTTCCAGAATTGCGGTTGAAGTTCACCCATTCTAT

+

@A00721:190:HGJW7DSXY:4:2572:25093:15828\_2:N:0:TCTGCAAG+GCTGCACT  
CAACCCTATTCTAGATGTGAAAGATGCATCGAGGTATACGTCTAGGAAAATTGATTGGGAAAGAACCT  
ACTCACGAGACGTCATGAAAGCTATCGGAGGGAAGCAAAATGTATCGT

+

@A00721:190:HGJW7DSXY:4:1369:16984:36793\_1:N:0:TCTGCAAG+GCTGCACT  
TGATGATGTAGCCACTATAATGCTTAAGAGAGAGATTGATGTATGTCATTTCTGCTTAGTTTGTCCCG  
GCGAATTATTGGACACGATGAAAAATGACATACCCGTTCTGACCTTGGTATCGTTATCCGTCATGGA  
GAT

+

@A00721:190:HGJW7DSXY:4:2644:19470:31610\_1:N:0:TCTGCAAG+GCTGCACT  
TCGGTCAATGACAAAACCTTCGAATATGTTACGACATGGATTCTGAACAACAGTGCGAGGATTGTCAT  
CTCGGGGAAATTGATTCACCAAGATGTTTCATATAGATACGAGATACCTAGAGAAGGTCGCAGCGATCT  
TAC

+

@A00721:190:HGJW7DSXY:4:2113:10899:31579\_1:N:0:TCTGCAAG+GCTGCACT  
ACCGGAGGTGATCTCTCTGCTTCTGCGTTACTGAGAGAAAAGATTGAGGACGCCTACGGTGACTTTAT  
GGACAAGATGCAAGTTCCTGGGAAATACTTGTTTCCCTTTTtaggtttAGTtaggtGATCTTGACGTCG  
AT

+

@A00721:190:HGJW7DSXY:4:1311:17580:2409\_1:N:0:TCTGCAAG+GCTGCACT  
CTTGCAGAGTGACTGGAGTTCAGACGTGTGCTCTTCCGATCTCTTGAAAACCAAGTTAAGAAGGAGGC  
TGATCATGGAGTCTTTGTACCTTCTGTCAAACCTTCGAGGTTAGCTACGAGAGGTGATCCCGGATGTG  
GAT

+

[illegible]

@A00721:190:HGJW7DSXY:4:1273:21224:9345\_1:N:0:TCTGCAAG+GCTGCACT  
GTAAAGAATTGGGTTGAGAAGTGTGCTTTACAAGGAGTTAGACTCTTCTTCAAGTTTTTAGATCTTCT  
TGATAATCTTAAAGAAAAATTTTCGAATAAACTAATGAGAGGTATAGGCTTAGTCAAGTCTGTACTTA  
CAT

+

FFFFFFFFFFFFFFFFFFFFFFFFFFFFFFFFFFFFFFFFFFFFFFFFFFFFFFFFFFFFFFFFFFFFFFFF  
FFFFFFFFFFFFFFFFFFFFFFFFFFFFFFFFFFFFFFFFFFFFFFFFFFFFFFFFFFFFFFFFFFFFFFFF  
FFF

@A00721:190:HGJW7DSXY:4:2451:30029:6026\_1:N:0:TCTGCAAG+GCTGCACT  
CTAATGTTCTTGCAATAGCCACAGACTTTCTGGGAAAAGAGACCTCTGTTGGTAGAGGAGTTGAGAGA  
ATTACTCAGATTCAATCTGGCATCACTGAACGTCTACAACGAGTTAGGGAGTGGCTAGGTTTTAAAAG  
ATC

+

FFFFFFFFFFFFFFFFFFFFFFFFFFFFFFFFFFFFFFFFFFFFFFFFFFFFFFFFFFFFFFFFFFFFFFFF  
FFFFFFFFFFFFFFFFFFFFFFFFFFFFFFFFFFFFFFFFFFFFFFFFFFFFFFFFFFFFFFFFFFFFFFFF  
FFF

@A00721:190:HGJW7DSXY:4:2269:29803:16595\_2:N:0:TCTGCAAG+GCTGCACT  
AGGACTGATGGTGAGATTCTTTTACCTTTTGGAGGTCCAGGAACCTTTACTCCTAGTGTCTTTTCTAG  
AGTCCAAGGACGTTTCCGTCGGAGGATGACAGGTGGGAGACCGCTCAA

+

FFFFFFFFFFFFFFFFFFFFFFFFFFFFFFFFFFFFFFFFFFFFFFFFFFFFFFFFFFFFFFFFFFFFFFFF  
FFFFFFFFFFFFFFFFFFFFFFFFFFFFFFFFFFFFFFFFFFFFFFFFFFFFFFFFFFFFFFFFFFFFFFFF

@A00721:190:HGJW7DSXY:4:1239:13711:31344\_2:N:0:TCTGCAAG+GCTGCACT  
TCTGCCACTTCTAATTTTAGGAAACGTCGCGAAAAGAAAGTTCATGAGGATGTCTTGGTCGAAAAATA  
TCGCCGGGACCTTCTAATAGAGGATCCTGATGACATTATTTCAACGGA

+

FFFFFFFFFFFFFFFFFFFFFFFFFFFFFFFFFFFFFFFFFFFFFFFFFFFFFFFFFFFFFFFFFFFFFFFF  
FFFFFFFFFFFFFFFFFFFFFFFFFFFFFFFFFFFFFFFFFFFFFFFFFFFFFFFFFFFFFFFFFFFFFFFF

@A00721:190:HGJW7DSXY:4:2134:26630:32925\_2:N:0:TCTGCAAG+GCTGCACT  
GTCTCAGGAAGTGTCTCCACTGATTCGGAATTAGAGAAAGACGACCTTCTTGTGGGGACTGAGACCTC  
TGAATTTTCAGGGTGCCCTGATGAGGACGGTGAAAGGGATAATTTCAA

+

FFFFFFFFFFFFFFFFFFFFFFFFFFFFFFFFFFFFFFFFFFFFFFFFFFFFFFFFFFFFFFFFFFFFFFFF  
FFFFFFFFFFFFFFFFFFFFFFFFFFFFFFFFFFFFFFFFFFFFFFFFFFFFFFFFFFFFFFFFFFFFFFFF  
FFFFFFFFFFFFFFFFFFFFFFFFFFFFFFFFFFFFFFFFFFFFFFFFFFFFFFFFFFFFFFFFFFFFFFFF

@A00721:190:HGJW7DSXY:4:2237:26847:29387\_1:N:0:TCTGCAAG+GCTGCACT  
AGACCAGAAACGTAACAAGAAGATAAAGGTAGGAAGGGGAGAAAACAGAACAAAGCGAGCGGTTGAAG  
AGAAAAGTATGATTGCGGCTGATCGTACCCCAATTCTGCTAGAAAGATCACTCTCGGCGATACC  
ACT

+

FFFFFFFFFFFFFFFFFFFFFFFFFFFFFFFFFFFFFFFFFFFFFFFFFFFFFFFFFFFFFFFFFFFFFFFF  
FFFFFFFFFFFFFFFFFFFFFFFFFFFFFFFFFFFFFFFFFFFFFFFFFFFFFFFFFFFFFFFFFFFFFFFF  
FFF

@A00721:190:HGJW7DSXY:4:1663:10981:36448\_1:N:0:TCTGCAAG+GCTGCACT  
CCGATCTAGTGATCGTATTAGAACAGCTGATTCTTATTGCATGAACGTCGCTGAGGTCAAACCTGTGG  
ACGTTCTTTTCATCGACGAATTATTCATGATTCACGCTGGTCAGACCCTTTTCTTACACATCTACTT  
AAG

+

:FFFFFFFFFFFFFFFFFFFFFFFFFFFFFFFFFFFFFFFFFFFFFFFFFFFFFFFFFFFFFFFFFFFFFFFF  
FFFFFFFFFFFFFFFFFFFFFFFFFFFFFFFFFFFFFFFFFFFFFFFFFFFFFFFFFFFFFFFFFFFFFFFF  
FFF

@A00721:190:HGJW7DSXY:4:2314:4698:5494\_1:N:0:TCTGCAAG+GCTGCACT  
CAATCAAATCGGATTCATCAATCGTATTGATCTCCAAGTCGAACTACTTCAACATCAACGACATCA  
TTCTTGATGAGTGTGCTTCTTATCGAAGTCTCAGTTATCGCTGCCCGGCCGACGTTTGTGCGGAATC  
TCA

+  
FF,FFF,F,FF:FF:FF:FFFFFFFFFFFFFFFFFFFF::FFFF::FFF:FFFFFF:::FFFFFFFF  
:FFFFFFFFFFFFFFFFFFFF:FF:FFFFFFFFFFFFFFFFFFFFFFFFFFFFFFFFFFFFFFFF  
FFF  
@A00721:190:HGJW7DSXY:4:2636:18575:32722\_2:N:0:TCTGCAAG+GCTGCACT  
GATTCAACCCCTTATATCGAGGCTATCGAGGACGATGAGTATCTTGAAGTTGTTGACGACAAGCCTCA  
AGAGGGTAGAGGACCACCTGGATCTTCTACTGTCTCTGCCTTCCAAGA  
+  
FFFFFFFFFFFF:FFFFFFFFFFFFFFFFFFFFFFFFFFFFFFFFFFFF:FFFFFFFFFFFFFFFF:FFFFFFF  
:FFFFFFFFFFFFFFFFFFFFFFFFFFFFFFFFFFFFFFFFFFFFFFFFFFFFFFFFFFFFF  
@A00721:190:HGJW7DSXY:4:1448:27597:33066\_2:N:0:TCTGCAAG+GCTGCACT  
TACCTTTATAGGTAAGAAGCCCTTGAGCCGCGTAGTCAGCGCTTTAGCTGTATCATCAGTCAGAGT  
ATACCCGATAGGGTACCGAGTCTCCAAGAGAATATTTATTCTTATGAG  
+  
F,FF:FFFFFFFFFFFFFFFFFFFFFFFFFFFFFFFFFFFF:FFFFFFFFFFFFFFFF:FFF:FFFFFFFFF  
FFFFFFFFF::FFFF:FFFF:FFFFFFFFFFFFFFFFFFFFFFFFFFFFFFFFFFFFF  
@A00721:190:HGJW7DSXY:4:2132:5285:21449\_2:N:0:TCTGCAAG+GCTGCACT  
TATGATCACTTTGATGATTTTATCACTTTATTATGACCTTGGAAAGTTTTCGGCTGTGGTTGTCGCTG  
GGGACGATTCCATTCTGTTTTCAAAGACTCCAATAACTGATAGATCGG  
+  
FFFFFFFFFFFFFFFFFFFFFFFFFFFFFFFFFFFFFFFFFFFFFFFFFFFFFFFFFFFFFFFFFFFFF  
FFFFFFFFFFFFFFFFFFFFFFFFFFFFFFFFFFFFFFFFFFFFFFFFFFFFFFFFFFFFF  
@A00721:190:HGJW7DSXY:4:2152:32570:9956\_2:N:0:TCTGCAAG+GCTGCACT  
GATTCCGAGAGGTTTATCCTGATGTGGAGGGAGTTCTTGAAGCATCCCGACCTTTCCTTGAAAAATT  
TTGATGCGGTTTCATAAGATTATCAGTAATCCTGATTCTACTACGGAT  
+  
FFFFFFFFFFFFFFFFFFFFFFFFFFFFFFFFFFFFFFFFFFFFFFFFFFFFFFFFFFFFFFFFFFFFF  
FFFFF:FFFFFFFFFFFFFFFFFFFFFFFFFFFFFFFFFFFFFFFFFFFFFFFFFFFFF  
@A00721:190:HGJW7DSXY:4:2436:24126:2534\_1:N:0:TCTGCAAG+GCTGCACT  
GTTGATTAAGACTCTTCCGAAAGGCGAACTTTGGGAATTTGAAGCTCAGGGTGAAGCACAACGTTTGA  
CCGTGACGAACTGTGGTGTTCTTGATCTACGTTACGGATATACTCTCCTTGAGTTCACTCGTAAGGAC  
ACT  
+  
F:FFFFFFFFFFFFFFFFFFFFFFFFFFFFFFFFFFFFFFFFFFFFFFFFFFFFFFFFFFFFFFFFFFFF,FFFF  
FFFFFFFFFFFFFFFFFFFFFFFFFFFFFFFFFFFFFFFFFFFFFFFFFFFFFFFFFFFFFFFFFFFFF  
FFF  
@A00721:190:HGJW7DSXY:4:2654:18059:35806\_2:N:0:TCTGCAAG+GCTGCACT  
AGCAGGGGTTTTCGAATAGTGATAGCCACCCGCTTACAGAGGGGCAGCAGCATGACCATAATTGGTA  
TTGACTTTGGTACCACCTTTTCTACTGTCTGTCTCGCCTCTTCAATG  
+  
FFFFFFFFFFFFFFFFFFFFFFFFFFFFFFFFFFFFFFFFFFFFFFFFFFFFFFFFFFFFF:FFFFFFFFFF:FFFFF  
FFFFFFFFFFFFFFFFFFFFFFFFFFFFFFFFFFFFFFFFFFFFFFFFFFFFFFFFFFFFF  
@A00721:190:HGJW7DSXY:4:2331:32741:36182\_1:N:0:TCTGCAAG+GCTGCACT  
CTACAATCATTGGTTTTTCTAATAATGATGACACTATTGTTTATGGATATGATGCTATTACTCATGAT  
GGTTACGGTCAGGGAGGATTCTCAGTTTACAAGGACCTTAAGCGATGGATCGGGGTTAATTCTAAAAC  
ATT  
+  
FF:FFF,FFFFFF,FFFFFFFFFFFF:FFFFFFFFFFFF,FFFFFFFFFFFFFFFF:FFFF:FFFFFFF  
FFFFFFFF:FFFFFFFFFFFFFFFFFFFFFFFFFFFFFFFFFFFFFFFFFFFFFFFFFFFFF:F  
FFF  
@A00721:190:HGJW7DSXY:4:1224:5837:9251\_2:N:0:TCTGCAAG+GCTGCACT  
TGGTTTGGTCGTTTCAGTACCCAGTCAGTATACCTCTACGCAAAGATATTTTCATGAAAACCTACAGAGG  
AACGTACCGGATTACCTGTCTTTTCATATTATGAATGAACCTTCGGCCG  
+

```

FFFFFFFF:FFFFFFFFFFFFFFFFFFFFFFFF:FFFFFFFFFFFFFFFFFFFFFFFF:FFFFFFFF
F,FFFFFF:FFFFFFFFFFFFFFFFFFFFFFFF:FFFFFFFFFFFFFFFFFFFFFFFF:FFFF

```

+

@A00721:190:HGJW7DSXY:4:2566:14977:19257\_1:N:0:TCTGCAAG+GCTGCACT  
TGAAGGAGGAGGTTTCTGTTACTGGAAAACCTCGTCAATACTTTTCAATAATATACGTCTTGAACTC  
ACTTATGACGATCTAGTGAAATTAACGCGTCCTTTTCTGGAACGTAGTTTACTATTATGAACAAAGT  
TAT

[illegible]

+

@A00721:190:HGJW7DSXY:4:2336:6686:8656\_2:N:0:TCTGCAAG+GCTGCACT  
TTCTTAAAAAGAAGATAGAGAGTCATACTTTGGGCTATCGTTCAGGTGCATGGGGTTGGATAGCCAAT  
ATTGAAGTGGACACCTCTGGTAGTATCGAAGTAAAGATAACCAATAAG

```
FFFFFFFFFFFFFFFFFFFFFFFFFFFFFFFFFFFFFFFFFFFFF:FFFFFFFFFFFFFFF
```

```
FFFFFFFFFFFFFFFFFFFFFFFFFFFFFFFFFFFFFFFFFFFFF
```

+

@A00721:190:HGJW7DSXY:4:2659:10610:33144\_1:N:0:TCTGCAAG+GCTGCACT  
AATATAAAGAATCTTTACCAGGACTCCTACTACAGGAGGCAGTCTTCTGATCGTAAGAAGTTTATAAG  
GAACATATCCATTTGTTGTAATAGGGTCATCAACTTAGAACTCGAAACTCTAAGTGGTAATACTGTCT  
TTC

```

FFFFFFFF:FFFFFFFFFFFFFFFFFFFFFFFFFFFFFFFFFFFFFFFF:FFFFFFFF,FFFFF:FFFF
FF:FFFFFFFFFFFFFFFFFFFFFFFF:FFFFFFFFFFFFFFFF:FFFFFFFFFFFFFFFFFFFFFFFF
FFF

```

+

@A00721:190:HGJW7DSXY:4:2131:23927:3192\_2:N:0:TCTGCAAG+GCTGCACT  
TTTAACTTACTTAGACTTTCCTACGATACAAATGATAACTTCTAATTTACGTTTGCTACTCAGAGCTG  
GTCCTCTCAGCAAAGGGATGCATGGTGTATCTCCTCAGGAGTCCCG

+

FFFFFFFFFFFFFFFFFFFFFFFFFFFFFFFFFFFFFFFFFFFFFFFFFFFFFFFFFFFFFFFFFFFFFFFF:FF  
FFFFFFFFFFFF:FF:FFFF:FFFFFFFFFFFFFFFFFFFFFFFFFFFFFFFFFFFFFFFF

@A00721:190:HGJW7DSXY:4:1359:32796:28635\_1:N:0:TCTGCAAG+GCTGCACT  
TAATGACGAGACTTTCGTCATAATCGCTGCATATTACGGATTACACGGTACCAGCGCATCTCGTGTCTG  
AGCCTCGACCCGATTATATGGTATTAACCTATAAAGGTGAGGAGACCATTTTCTTGCTGAAATTTATA  
GAA

+

FFFFFFFFFFFFFFFFFFFFFFFFFFFFFFFF:FFFF,FFFFFFFF:FFFFFFFF:FFFFFFFFFFFFFFFFFFFFFFFF  
FFFFFFFFFFFFFFFF:FFFF,FFFFFFFFFFFF:FFFFFFFFFFFFFFFFFFFFFFFFFFFFFFFFFFFFFFFF  
FFF

@A00721:190:HGJW7DSXY:4:2610:11044:14794\_1:N:0:TCTGCAAG+GCTGCACT  
CTAATGGCAAATAGTGAAAGGCTCCAGTCAACACTAGTTCGAGTGCTGCTTTGGATTACGATGACGT  
GAGAATAGGTGAAGGGATAGTTTTTACCTCGACCAACATTAAGGCGGCGGCGACTAATCTTAAAGCTT  
CAC

+

:FFFFFFFF:FFFFFFFF:FFFFFFFFFFFFFFFFFFFFFFFFFFFFFFFF:FFFFFFFFFFFFFFFFFFFFFFFF  
FFFFFFFFFFFFFFFFFFFFFFFFFFFFFFFFFFFFFFFFFFFFFFFFFFFFFFFFFFFFFFFFFFFFFFFFFFFF  
FFF

@A00721:190:HGJW7DSXY:4:1665:24677:18208\_2:N:0:TCTGCAAG+GCTGCACT  
CAACATTTACCACCAAATTCTTTTGATACAACCTCTAGCCTTCAAGTGGGGTATGCCTGCGGAATACGC  
TTGCTATTCACCAGATTGGTTCGAACCCGTTGATGCTATGTCAGAAGA

+

FFFFFFFFFFFFFFFFFFFFFFFFFFFFFFFF:FFFFFFFFFFFFFFFFFFFFFFFFFFFFFFFFFFFFFFFFFFFF  
FFFFFFFFFFFF,FF:FFFFFFFFFFFFFFFFFFFF:FFFFFFFFFFFFFFFF

@A00721:190:HGJW7DSXY:4:1512:13060:22263\_2:N:0:TCTGCAAG+GCTGCACT  
CAGAGGCTGTCAAACAAGCCCAGACTCAAGGAGTCCAATCAAAGGTTTTGAATTTAGCTCAACTGGGG  
AGACGTGCTTAAATGGGTGATAAAAATTATTTAGAGATCTTTTCTACT

+

FFFFFFFFFFFFFFFFFFFFFFFFFFFFFFFFFFFFFFFFFFFFFFFFFFFFFFFFFFFFFFFFFFFFFFFF  
FFFFFFFFFFFFFFFF:FFFFF:FFFFF:FFFFFFFFFFFFFFFFFFFFFFFF

@A00721:190:HGJW7DSXY:4:2109:3992:3333\_1:N:0:TCTGCAAG+GCTGCACT  
TATACATTATAAAATATAAAAATAAGGGAGTCATAACTTTTGTTACCAAATTCTTGCTTTCAACGAA  
GTCTCTGATTTTATTAATCATTACTTTAACGATCTCTCGGTCATTTACTCTGTACTTGATCTACGTCG  
TTT

+

FFFFFFFFFFFFFFFFFFFFFFFF:FFF:FFFFFFFF:FFF:FFFFFFFFFFFFFFFF:FFFFFFFF:FF  
FFFFFFFFFFFFFFFF:F,FFFFFFFFFFFF:FFFFFFFFFFFFFFFFFFFFFFFFFFFFFFFFFFFFFFFF  
FFF

@A00721:190:HGJW7DSXY:4:2562:26250:4085\_2:N:0:TCTGCAAG+GCTGCACT  
TGACTCTATCTTTTCAGACACTTCTTATATTATTTACAATAGTTAATATCATATTAGTAATACTCACT  
ATCGTTTTCTGCTTTTTCTTAGCTAATAGATTAATAAAGGATGAGTAC

+

FFFFFFFFFFFFFFFFFFFFFFFFFFFFFFFFFFFFFFFFFFFFFFFFFFFFFFFFFFFFFFFFFFFFFFFF  
FFFFFFFFFFFFFFFFFFFFFFFFFFFFFFFFFFFFFFFF:FFFFFFFF

@A00721:190:HGJW7DSXY:4:2247:6289:29387\_2:N:0:TCTGCAAG+GCTGCACT  
CTTCGTTACGAGACCTGATGGTAGAATAGATTTAGTCTCTACACCCATCTCAACGAGGATAAAGCGAG  
TTTTCCGTCCTGAACGTAATACACGAAGAGATCATCCGCAAACGACTC

+

FFFFFFFFFFFFFFFFFFFFFFFFFFFFFFFFFFFFFFFFFFFFFFFFFFFFFFFFFFFFFFFFFFFFFFFF  
FFFFFFFFFFFFFFFFFFFFFFFFFFFFFFFFFFFFFFFFFFFFFFFF

@A00721:190:HGJW7DSXY:4:2278:19750:36886\_2:N:0:TCTGCAAG+GCTGCACT  
GACTCCGAAAATGGTTTCAAATGAGGTCAAAGCTCTATTTATTAAACGAACATTATCCGATTCTTCG  
AGGGTATCACTACCACTGATCTGCCGACTTTAGTCAAGGAAC TTCAAT

+

:F::FFFFFFFF::FFFFFF:FFFFFFFFFFFFFF:FFFFFFFFFFFFFF::F:FFFFFFFF::FFF,FF:F  
F:F:F:FFFFFFFF:FFFFFFFF,F:FF,:F:FFF:FF:FFF,F:FFF:

@A00721:190:HGJW7DSXY:4:2159:13557:36714\_1:N:0:TCTGCAAG+GCTGCACT  
CGACAAATTTTAGAACTTTATTTCAGAACTCTCTCCGATCACCTTGGTGTGATCTCCCGGAGGATCTT  
TTCAATAAGATGTATGATGATAATCTACTATTTTTAAATAGTGATATTACGCGTATACTTGAATACTT  
TAT

+

FFFFFFFFFFFFFFFFFFFFFF,F,FFF::FFFFFFF:,F:FF,FFFFFFFF:FF:FF:FF,:FFFF:FF  
FF::FFF:FFF:FFFFFFFFF:F,FFFFFFFFFFFFFFFFFFFFFF,FFFF:F:FF,FFFFF,FFFFF  
F,F

@A00721:190:HGJW7DSXY:4:2130:17083:4742\_2:N:0:TCTGCAAG+GCTGCACT  
TACCGCAAAAAGTTGGAAGAGGTCTATGATATTTATTTTACTTATACTTTAAATAGCACCGATTATAA  
CTTGACTGTTGATAATATTACAATAGCTCTTTCTCAGAAGATTAGAGA

+

FFFFFFFFF:FFFFFF,FFF:FFF:FFFFFF:FFF:,FF:FF,F:FFFFFFFF,FFF:FF:FFFF  
FFFFFFFF::FFFFFFFFFFFFFFFF,,:,FFFFFFFFFFFF:FF:FFF

@A00721:190:HGJW7DSXY:4:2324:25183:9471\_1:N:0:TCTGCAAG+GCTGCACT  
GTAGCATTGATTTACTTTTACCGTTAGAACTGAAAAAGATTCTTTTCGAAAAGAAACCTATAAGTTAC  
AAACGATTCTTCGACTATATTAAAGAAATAAAAATACTTCAAGTACCTGAACTTTACATTTTAAATG  
TAT

+

FFFFFFFFFFFFFFFFFFFFFFFF:F:FFFFFFFFFFFFFFFF:FFFFFFFFFFFFFFFFFFFFFFFF  
FFFFFFFFFFFFFFFFFFFFFFFFFFFFFFFFFFFFFFFFFFFFFFFFFFFFFFFFFFFFFFFFFFFF  
FFF

@A00721:190:HGJW7DSXY:4:1523:18195:7232\_1:N:0:TCTGCAAG+GCTGCACT  
ATGAGAGTGTATTCCTTAATATTCTAGTAACCGCTATGTGGGCATTACTAGGATTTATCACACTCCTA  
AATTTGATAGCAATTTATGTTTTAAATGCTAGGAAAATTTAGAAAACCTCCATTGTATAGTTCAAGG  
AGT

+

FFFFFFFFFFFFFFFFFFFFFFFFFFFFFFFFFFFFFFFFFFFFFFFFFFFFFFFFFFFFFFFFFFFF,FFFFFFFFFFFFFFFF  
FFFFFFFFFFFFFFFFFFFFFFFF:FFFFFFFFFFFFFFFFFFFFFFFFFFFFFFFFFFFFFFFFFFFFFFFF:FFFFFFFFFFFFFFFF  
FFF

@A00721:190:HGJW7DSXY:4:1224:3794:13385\_2:N:0:TCTGCAAG+GCTGCACT  
AGCTTTAGTATTATTTACTATCGCCTTTATTGAAAATTGTATAAGAGTTAATTGCTTACACAAAAGTG  
ACGCGGAAGGAATCTTAATTGATTGAAGCTAGGCGTTGGGAGAATG

+

FFFFFFFFFFFFFFFFFFFFFFFFFFFFFFFFFFFFFFFFFFFFFFFFFFFFFFFFFFFFFFFFFFFF,FFFF  
FFFFFFFFFFFFFFFFFFFFFFFFFFFFFFFFFFFFFFFFFFFFFFFFFFFFFFFFFFFFFFFFFFFF

@A00721:190:HGJW7DSXY:4:2425:31864:10269\_1:N:0:TCTGCAAG+GCTGCACT  
CCGCCGGTCGGCAGATCGGCACCACTGGTCTCTACGTTACGGACCGCTGTGCAGAATAACCTTCCC  
AAATCTAGATCTGCACAGAAGAAGGCTGAAGGTCGTTACCGACGACCACTCAAAGGAAACGGGCTGT  
TGC

+

FFFFFFFFFFFFFFFFFFFFFFFFFFFFFFFFFFFFFFFFFFFFFFFFFFFFFFFFFFFFFFFFFFFF:FFFF  
F,FFFFFFFFFFFFFFFFFFFFFFFFFFFFFFFFFFFFFFFFFFFFFFFFFFFFFFFFFFFFFFFFFFFF  
FFF

@A00721:190:HGJW7DSXY:4:2530:32334:32534\_2:N:0:TCTGCAAG+GCTGCACT  
GGGAACTGAGGCAGTACCTCAGTCAAAAGTCACATTCACCACTCCCATACCAATCAATGATGTGACTA  
TACAGTTCGGCATTTCAGAGTGGTCAATACGTCGTGGGAGGTACTG

+

FFFF:FFFFFFFFFFFFFFFFFFFFFFFFFFFFFFFFFFFFFFFFFFFFFFFFFFFFFFFFFFFFFFFF::F  
FFFFFFFFFFFF:FFFFFFFFFFFF:FFFFFFFFFFFFFFFFFFFFFFFFFFFFFFFFFFFF  
@A00721:190:HGJW7DSXY:4:2556:14091:35070\_1:N:0:TCTGCAAG+GCTGCACT  
AATCAATAGTTCTTCTGACCAGAATGAAAAGGGGTTTACCAGGGTAGTCTCTAAGTCTACCAGGAAGA  
GGGGAATGTCCCCAAAAGTGAAGAATAAAGGGAAAGTCCATCAGGACCTAAGAAGGGGAAATTA  
CCC  
+  
FFFFFFFFFFFFFFFFFFFFFFFFFFFFFFFFFFFFFFFFFFFF,FFFFFFFFFFFF,FFFFFFFFFFFFFFFFFFFFFFFFFFFF  
FFFFFFFFFFFFFFFFFFFFFFFFFFFFFFFFFFFF:FFFFF:FFFFF:FFFFFFFFFFFFFFFFFFFFFFFFFFFFF  
FFF  
@A00721:190:HGJW7DSXY:4:2566:5629:36292\_2:N:0:TCTGCAAG+GCTGCACT  
CGGGCCAAAGAGGCCGCTGCTACGAAGTCGCTGAAGGCGGCTTGGGTCTTAAGGGTAGCTGTAAAGT  
TGCGCCTGCCGACCCCATCTTTGAGACCAAGACTCTCTACAGTAGGTT  
+  
FFFFFFFFFFFFFFFFFFFFFFFFFFFFFFFFFFFFFFFFFFFFFFFFFFFFFFFFFFFF:FFFFFFF:FFFFF:FFFF  
FFFFFFFFFFFFFFFFFFFFFFFFFFFFFFFFFFFFFFFFFFFFFFFFFFFFFFFFFFFFFFFFFFFF  
@A00721:190:HGJW7DSXY:4:2131:26539:36933\_1:N:0:TCTGCAAG+GCTGCACT  
TCGTCACTGAGGACGAAGGTGAGAGGACTTTTGGCTACTGGCGACAACTGAGAGCAGTCGCTGGGGA  
AAGAGAATTGCGTGGGTGAAGGCCGACGCTTCGAGCTTGAGTGTGACGAGGCCGGTGACGTTTTTGT  
CAA  
+  
FFFFFFFFFFFFFFF:FFFFFFFFFFFFFFF:FF:FFFFFFF,FFFFFFFFFFFFFFFFFFFF:F:FFFFFFFFFFFFFFF  
FF:FFFFFFFFFFFFFFFFFFFFFFFFFFFFFFFFFFFF:FFFFFFFFFFFFFFFFFFFFFFFFFFFFFFFFFFFFF,FFFFF  
FFF  
@A00721:190:HGJW7DSXY:4:2507:24560:2472\_2:N:0:TCTGCAAG+GCTGCACT  
CTTAAGTATGGGGCGAAGATCCCCTATGGAGTCTTGAAGGACTTAGGTTGGCATATTTATGCCGACGA  
TAATAAGCATGTCAACCTTAAGCACCGAGGTAAGCTCGGGACTTACAA  
+  
FFFFFFFFFFFFFFFFFFFFFFFFFFFFFFFFFFFF,FFFFFFFFFFFFFFFFFFFFFFFFFFFFFFFFFFFFFFFFFFFFF  
FFFFFFFFFFFFFFFFFFFFFFFFFFFFFFFFFFFFFFFFFFFF:FFFFFFFFFFFFFFFFFFFF  
@A00721:190:HGJW7DSXY:4:1234:29839:20165\_1:N:0:TCTGCAAG+GCTGCACT  
AAAATTTTTCCTTTCCTCCGTCAATTGGGGATTTTCGATGTGAGAAGGTGGAAGGTGTCAAGGGTCTTCT  
TCATGCTGATCTTTCAGGACCTAATCACATCATGATTGATAGTTACGGCTCGTATCGAGTTGGAGGGA  
GGA  
+  
FFFFFFF,FFFF,FFFFFFFFFFFFFFFFFFFFFFFFFFFF:FFFFFFFFFFFFFFFFFFFFFFFFFFFFFFFFFFFFF  
FFFFFFFFFFFFFFFFFFFFFFFFFFFFFFFFFFFFFFFFFFFFFFFFFFFFFFFFFFFFF,FFFF:FFFFFFFFFFFFFFFFFFFF  
FFF  
@A00721:190:HGJW7DSXY:4:1306:20112:3662\_2:N:0:TCTGCAAG+GCTGCACT  
TAAAGACGGGGGATTAAGAGTCCAGCTGTAAGTGTCAATTCAGAGAGGGGAGCTCTGAAAAGGAAAC  
TTCGTCAGAAGATGAGGAAGTCTAAGAGGAGGAGTTTGAGGAAGGCTC  
+  
FFFFFFFFFFFFFFFFFFFF:FFFFFFFFFFFFFFFFFFFFFFFFFFFF:FFFFFFFFF,F,FFFFFFFFFFFFFFFFFFFFF  
FFFFFFFFFFFFFFFFFFFF:FFFFFFFFFFFFFFFFFFFFFFFFFFFFFFFFFFFF:FFFFF  
@A00721:190:HGJW7DSXY:4:2470:27425:8782\_2:N:0:TCTGCAAG+GCTGCACT  
ATTATTTGAAGCAGGGGTTACCACTTCCTAAGGTGGATGAGGGAGGTTGTTTCTTTGGAGTTTTAGAT  
AATCTTTTGAGAAGGGGTCATAGAGCCAGCAAGAGAAGCTTATATGCT  
+  
FFFFFFFFFFFFFFFFFFFFFFFFFFFFFFFFFFFFFFFFFFFFFFFFFFFFFFFFFFFFFFFFFFFF:FF:  
,FFFFFFFFFFFFFFFFFFFF:FFFFFFFFFFFFFF:FFFFFFF,FFFFFFFFFFFFF  
@A00721:190:HGJW7DSXY:4:1526:20401:34882\_2:N:0:TCTGCAAG+GCTGCACT  
ACTTACCATATTGTTCCCTTCCGGGAAGTTGTGGGATTTAACTTTGACTCAACTACTCCGATCAGATCC  
GGATGGTTTGATTGGTATGGACTACTCGACTTTTGATCTGGAGTTGTC  
+



FF:FFFFFFFF:FFFFFFFFFFFF:FF,FFF:FFFFFF:FFFF,FFFF:FFFFFFFF,FFFFFFFF  
:FF:F:FFFF:FFF:FFFFFFFFFFFF:FF:FFFFFFFFFFFF  
@A00721:190:HGJW7DSXY:4:1375:7157:22028\_2:N:0:TCTGCAAG+GCTGCACT  
AAGAGTCTTTATGATTCAAAACCTATCGTTGTCGTACCTTACAAGTTGAGGAGACTTTACAGCGGCT  
TATTGTCGCGCAGTTTCCAGAATTGCGGTTGAAGTTCACCCATTCTAT  
+  
FFFFFFFFFFFF:FFFF:FFFFFFFFFFFFFFFFFF,FFFFFFFFFFFFFFFFFFFFFFFFFFFF  
:F:FFFFFFFFFFFFFFFFFFFFFFFFFFFF:FFFFFFFFFFFF:F  
@A00721:190:HGJW7DSXY:4:2572:25554:18693\_2:N:0:TCTGCAAG+GCTGCACT  
CAACCCTATTCTTGATGTGAAAGATGCATCGAGGTATACGTCTAGGAACATTGATTGGGAACGTACCT  
ACTCACGAGACGTCATGAAAGCTATCGGAGGGAAGCAAAATGTTTCGT  
+  
FFFFFFFFF:FFFF:F,FFF,FFFFFF:F,FFFFFF:FFF,FF,F,F:FF:FFFFFFFFFFFF:F  
FFFFFFFFF::F:FFFFFFFFFFFFFFFFFFFF,:FF,FFFFFFFF,F:FFF  
@A00721:190:HGJW7DSXY:4:1371:29514:24768\_1:N:0:TCTGCAAG+GCTGCACT  
TGATGATGTAGCCACTATAATGCTTAAGAGAGAGATTGATGTATGTCATTTCTGCTTAGTTTTGTCCCG  
GCGAATTATTGGACACGATGAAAAATGACATACCCGTTCTGACCTTGGTATCGTTATCCGTCATGGA  
GAT  
+  
FFFFF:FFFFFFFFFFFFFFFFFFFFFFFFFFFFFFFFFFFFFFFFFFFFFFFFFFFFFFFFFFFF  
FFFFFFFF,FFFFFFFFFFFFFFFFFFFFFFFFFFFFFFFFFFFFFFFFFFFFFFFFFFFFFFFFFFFF:FFFFFFFF  
FFF  
@A00721:190:HGJW7DSXY:4:1130:12156:11992\_2:N:0:TCTGCAAG+GCTGCACT  
CGGTCAATGACAAAACCTTCGAATATGTTACGACATGGCTTCGTAACAACAGTGCGAGGATTGTCATC  
TCGGGGAAAGTGATTACCAAGATGTTTCATATAGATACGAGATACCTA  
+  
FFFFFFFFFFFFF,FFFFFFFFFFFFFFFFFFFFFFFFFFFFFFFFFFFF,FFFFFFFFFFFFF:FFFF:F:  
FFFFFFFF:FFFFFFFFFFFF,FFFFFFFFFFFFF,FFFFFFFFFFFFF:  
@A00721:190:HGJW7DSXY:4:1629:5629:2848\_2:N:0:TCTGCAAG+GCTGCACT  
TTACTCGTTATCGGAGCTAAGAAGAAGACTTTGGGTACACGTTATGCTCGCAAACCTAACGTTAGTAC  
CGGAGGTGATCTCTCTGCTTCTGCGTTACTGAGAGAAAAGATTGAGGA  
+  
FFFFFFFFF:FFFFFFFFFFFFF:FFF:FFFFFF,FFFF,F,FFFFFFFFFFFFF:FF,FFFFF  
:FFFFFFFFFFFFF::FFFFFFFF:F,FFFFFFFFF:FFF:FFFFF  
@A00721:190:HGJW7DSXY:4:1328:11171:23782\_1:N:0:TCTGCAAG+GCTGCACT  
CTTGACAGAGTGAAGTTCAGACGTGTGCTCTTCCGATCTCTTGAAAACCAAGTTAAGAAGGAGGC  
TGATCATGGAGTCTTTGTACCTTCTGTCAAACCTTCGAGGTTGAGCTACGAGAGGTGATCCCGGATGTG  
GAT  
+  
FF:FFFF:FFFFFFFFFFFFFFFFFFFFFFFFFFFFFFFFFFFFFFFFFFFFFFFFFFFFFFFFFFFF  
:FF,FFFFFFFFFFFFFFFFFFFFFFFFFFFF:FFF:FFFFFFFFFFFFFFFFFFFFFFFFFFFFFFFFFFFF  
FFF  
@A00721:190:HGJW7DSXY:4:1363:25120:34820\_1:N:0:TCTGCAAG+GCTGCACT  
GTAAAGAATTGGGTTGAGAAGTGTGCTTTACAAGGAGTTAGACTCTTCTTCAAGTTTTTAGATCTTCT  
TGATAATCTTAAAGAAAAATTTTCGAATAAACTAATGAGAGGTATAGGCTTAGTCAAGTCTGTACTTA  
CAT  
+  
FFFFFFFFFFFFFFFFFFFFFFFFFFFFFFFFFFFFFFFFFFFFFFFFFFFFFFFFFFFFFFFFFFFF  
FFFFFFFFFFFFFFFFFFFFFFFFFFFFFFFFFFFFFFFFFFFFFFFFFFFFFFFFFFFFFFFFFFFF  
FFF  
@A00721:190:HGJW7DSXY:4:2472:22336:34820\_1:N:0:TCTGCAAG+GCTGCACT  
CTAATGTTCTTGCAATAGCCACAGACTTTCTGGGAAAAGAGACCTCTGTTGGTAGAGGAGTTGAGAGA  
ATTACTCAGATTCAATCTGGCATCACTGAACGTCTACAACGAGTTAGGGAGTGGCTAGGTTTTAAAG  
ATC

```

+
FFFFFFFFFFFFFFFFFFFFFFFFFFFFFFFFFFFFFFFFFFFFF,FFFFFF:FFFFFFFFFFFFFFFFFF
FFFFFFFFFFFFFFFFFFFFFFFFFFFFFFFFFFFFFFFFFFFFFFFFFFFFFFFFFFFFFFFFFFFFFFFFFFF
FFF
@A00721:190:HGJW7DSXY:4:2269:30120:16078_2:N:0:TCTGCAAG+GCTGCACT
AGGACTGATGGTGAGATTCTTTTACCTTTTGGAGGTCCAGGAACCTTTACTCCTAGTGTCTTTTCTAG
AGTCCAAGGACGTTTTCCGTCGGAGGATGACAGGTGGGAGACCGCTCAA
+
FFFFFFFFFFFFFFFFFFFFFFFFFFFFFFFFFFFFFFFFFFFFF:FFFFFFFFFFFFFFFFFFFFFFFFFFFF
FFFFFFF:FFFFFFFFFFFFFFFFFFFFFFFFFFFFFFFFFFFFFFFFFFFFF
@A00721:190:HGJW7DSXY:4:1269:15564:24345_2:N:0:TCTGCAAG+GCTGCACT
TCTGCCACTTCTAATTTTAGGAAACGTCGCGAAAAGAAAGTTCATGAGGATGTCTTGGTCGAAAAATA
TCGCCGGGAAC TTCTAATAGAGGATCCTGATGACATTATTCAACGGA
+
FFFFFFFFFFFFFFFFFFFFFFFFFFFFFFFFFFFFFFFFFFFFF::FFFFFFFFFFFFFFFFFFFFFFFFFFFF
FFFFFFFFFFFFFFFFFFFFFFFFFFFFFFFFFFFFFFFFFFFFF:FF:FFFFFFFFFFFFFFFFFFFF
@A00721:190:HGJW7DSXY:4:2178:22535:25363_2:N:0:TCTGCAAG+GCTGCACT
GTCTCAGGAAC TGTCTCCACTGATT CGGAATTAGAGAAAGACGACCTTCTGTGGG GACTGAGACCTC
TGAATTTTCAGGGTGCCCTGATGAGGACGTTGAAAGGGATAATTTCAA
+
FFFFFFFFFFFFFFFFFFFFFFFFFFFFFFFFFFFFFFFFFFFFF::FFFFFFFFFFFFFFFFFFFFFFFFFFFFF:FFFFFFFFFFFFFFFFFFFF
FFFFFFFFFFFFFFFFFFFFFFFFFFFFFFFFFFFFFFFFFFFFF:FFFFFFF
@A00721:190:HGJW7DSXY:4:2508:2808:6668_1:N:0:TCTGCAAG+GCTGCACT
AGACCAGAAACGTAACAAGAAGATAAAGGTAGGAAGGGGAGAAAACAGAACAAAGCGAGCGGTTGAAG
AGAAAAC TGATATGGTTGCGGCTGATCGTACCCCAATTCTGCTAGAAAGATCACTCTCGGC GATACC
ACT
+
FFFFFFFFFF,,FFFFFFF:F,FFFF,F::FF,F:,FF:FF,F:FFFF::FFFFFFFFF:FFFFFF:F
FFFFFFFFFF:FFFFFFFFFF:FFFFFFFF:FFFFF::F:FFFFFFFFFFFFFFFF:FF:FFFFF::FFFFF
FFF
@A00721:190:HGJW7DSXY:4:2222:10474:25238_1:N:0:TCTGCAAG+GCTGCACT
CCGATCTAGTGATCGTATTAGAACAGCTGATTCTTATTGCATGAACGTCGCTGAGGTCAAACCTGTGG
ACGTTCTTTTCATCGACGAATTATTCATGATTCACGCTGGTCAGACCCTTTTTCTTACACATCTACTT
AAG
+
:FFFFFFFFF:FFFFFFFFFFFFFFFFFFFFFFFFFFFFFFFFFFFFFFFFFFFFFFFFFFFFFFFFFFFFFFFFFFFF
FFFFFFFFFFFFFFFFFFFFFFFFFFFFFFFFFFFFFFFFFFFFFFFFFFFFFFFFFFFFFFFFFFFFFFFFFFFF,FFFFFFFFFFFFFFFFFFFF
FFF
@A00721:190:HGJW7DSXY:4:2314:5502:6449_1:N:0:TCTGCAAG+GCTGCACT
CAATCAAATCGGATTCATCAATCGTATTGATCTCCAAGTCGAAACTACTTCAACATCAACGACATCA
TTCTTGATGAGTGTCGTTCTTATCGAAGTCTCAGTTATCGCTGCCCGGCCGACGTTTGTGCGGAAC TC
TCA
+
FFFFFFFFFFFF:FFFFFFFFFFFFFFFFFFFFFFFFFFFFFFFFFFFFFFFFFFFFFFFFFFFFFFFFFFFFFFFFFFFF:FFFFFFFFFFFFFFFFFFFF
FFFFFFFFFFFFFFFFFFFFFFFFFFFFFFFFFFFFFFFFFFFFFFFFFFFFFFFFFFFFFFFFFFFFFFFFFFFFF
FFF
@A00721:190:HGJW7DSXY:4:1133:24135:27571_1:N:0:TCTGCAAG+GCTGCACT
ATTCAACCCCTTATATCGAGGCTATCGAGGACGATGAGTATCTTGAAGTTGTTGACGACAAGCCTCAA
GAGGGTAGAGGACCACCTGGATCTTCTACTGTCTCTGCCTTCCAAGATTTCTTAGAAGAGGTTATTCC
TGG
+
FF:FFFFFFFFFFFFFFFFFFFFFFFFFFFFFFFFFFFFFFFFFFFFF:FFFFFFFFFFFFFFFFFFFFFFFFFFFFF:FFFF
FFFFFFFFFFFFFFFFFFFFFFFFFFFFF:FFFFFFFFFFFFFFFFFFFFFFFFFFFFFFFFFFFFFFFFFFFFF
FFF

```



@A00721:190:HGJW7DSXY:4:2617:17128:17284\_1:N:0:TCTGCAAG+GCTGCACT  
TGAAGGAGGAGGTTTCTGTTACTGGAAAACCCTCGTCAATACTTTTCAATAATATACGTCTTGAACCTC  
ACTTATGACGATCTAGTGAAATTAACGCGTCCTTTTCTGGAACGTAGTTTACTATTATGAACAAAGT  
TAT

+

FFFFFFFFFFFFFFFFFFFFFFFFFFFFFFFFFFFFFFFFFFFFFFFFFFFFFFFFFFFFFFFFFFFFFFFFFFFFFFFF  
FFFFFFFFFFFFFFFFFFFFFFFFFFFFFFFFFFFFFFFFFFFFFFFFFFFFFFFFFFFFFFFFFFFFFFFFFFFFFFFF  
FFF

@A00721:190:HGJW7DSXY:4:1212:30861:17613\_2:N:0:TCTGCAAG+GCTGCACT  
CAGGGGCTATTACTCTTGCTGAAACAGCTATTAAAGCTGTTGAGCGGGTAATTACACCTAAACGAGCT  
TGATCTGCCATCGCTGAAGGATGTGCACTCTTTTCTGCTACTTTAACG

+

FFFFFFFFFFFFFFFFFFFFFFFFFFFFFFFFFFFFFFFFFFFFFFFFFFFFFFFFFFFFFFFFFFFFFFFFFFFFFFFF  
FFFFFFFFFFFFFFFFFFFFFFFFFFFFFFFFFFFFFFFFFFFFFFFFFFFFFFFFFFFFFFFFFFFFFFFFFFFFFFFF  
FFF

@A00721:190:HGJW7DSXY:4:2413:25843:21793\_2:N:0:TCTGCAAG+GCTGCACT  
TTCTTAAAAAGAAGATAGAGAGTCATACTTTGGGCTATCGTTCAGGTGCATGGGGTTGGATAGCCAAT  
ATTGAAGTGGACACCTCTGGTAGTATCGAAGTAAAGATAACCAATAAG

+

FFFFFFFFF:FFFFFFFFFFFFFFFFFFFFFFFFFFFFFFFFFFFFFFFFFFFFFFFFFFFFFFFFFFFFFFFFFFFF  
FFFFFFFFFFFFFFFFFFFFFFFFFFFFFFFFFFFFFFFFFFFFFFFFFFFFFFFFFFFFFFFFFFFFFFFFFFFFFFFF  
FFF

@A00721:190:HGJW7DSXY:4:1478:12102:25520\_1:N:0:TCTGCAAG+GCTGCACT  
AATCTTACCCTATCTACGAACCTAAAGTTCTGAAGACGTTGCTTGTGCGCTTCCTCCTTTAATGGCAC  
TACCTCGGTACAATCTTACTTGAACGAAGGCGACCTGTTCCGGAGTTTTTACGGGATCCGGAATGTT  
CTG

+

FFFFFFFFFFFFFFFFFFFFFFFFFFFFFFFFFFFFFFFFFFFFFFFFFFFFFFFFFFFFFFFFFFFFFFFFFFFFFFFF  
FFFFFFFFFFFFFFFFFFFFFFFFFFFFFFFFFFFFFFFFFFFFFFFFFFFFFFFFFFFFFFFFFFFFFFFFFFFFFFFF  
FFF

@A00721:190:HGJW7DSXY:4:1203:15555:27085\_2:N:0:TCTGCAAG+GCTGCACT  
TATAAAGAATCTTTACCAGGACTCCTACTACAGGAGGCAGTCTTCTGATCGTAAGAAGTTTATAAGGA  
ACATATCCATTTGTTGTAATAGGGTCATCAACTTAGAACTCGAACTC

+

FFFFFFFFFFFFFFFFFFFFFFFFFFFFFFFFFFFFFFFFFFFFFFFFFFFFFFFFFFFFFFFFFFFFFFFFFFFFFFFF  
FFFFFFFFFFFFFFFFFFFFFFFFFFFFFFFFFFFFFFFFFFFFFFFFFFFFFFFFFFFFFFFFFFFFFFFFFFFFFFFF  
FFF

@A00721:190:HGJW7DSXY:4:1170:1561:36761\_1:N:0:TCTGCAAG+GCTGCACT  
TGTCTTTCCAAGCTTACCTGTATCTTCAATGAAATTGGACTCTTCGATAGGGGACATTTTATCGTGGG  
CTTTCCGTAAAGGAAGATCTGTTATCGACGTTTATCGTTTACGAAGTATCACTCCACCGGTGAATGG  
TTT

+

FFFFF:FFFFFFFF:FFFFFFFF:FFFFFFFFFFFFFFFFFFFFFFFFFFFFFFFFFFFFFFFFFFFFFFFFFFFF  
FFFFFFFFFFFFFFFFFFFFFFFFFFFFFFFFFFFFFFFFFFFFFFFFFFFFFFFFFFFFFFFFFFFFFFFFFFFFFFFF  
FFF

@A00721:190:HGJW7DSXY:4:2153:27236:26334\_2:N:0:TCTGCAAG+GCTGCACT  
TTTAACTTACTTAGACTTTCCTACGATACAAATGATAACTTCTAATTTACGTTTGCTACTCAGAGCTG  
GTCCTCTCAGCAAAGGGATGCATGGTGTATCTCCTCAGGAGTCCCGG

+

:FFFFFFFFFFFFFFFFFFFFFFFFFFFFFFFFFFFFFFFFFFFFFFFFFFFFFFFFFFFFFFFFFFFFFFFFFFFF  
FFFFFFFFFFFFFFFFFFFFFFFFFFFFFFFFFFFFFFFFFFFFFFFFFFFFFFFFFFFFFFFFFFFFFFFFFFFFFFFF  
FFF

@A00721:190:HGJW7DSXY:4:1559:21296:3803\_1:N:0:TCTGCAAG+GCTGCACT  
TAATGAAGATACTTTCGTCATAATCGCTGCATATTACGGATTACACGGTACCAGCGCATCTCGTGTGCG  
AGCCTAGACCCGATTATATGTTATTAAGTTATAAAGGTGAGGAGACCATTTTCTTGCTGAAATTTATA  
GAA

+

FFFFFF,FF,,FFFF:FFFFFFFF:FFFFFFFFFFFFFFFF:FFFF:,F,:FFF:FFF,:FFF,F:FF:F,,



FFFFFFFFFFFFFFFFFFFFFFFFFFFFFFFFFFFFFFFFFFFFFFFFFFFFFFFFFFFFFFFFFFFFFFFFFFFFFFFF  
FFF

@A00721:190:HGJW7DSXY:4:2407:26738:19742\_2:N:0:TCTGCAAG+GCTGCACT  
TACCGCAAAAAGTTGGAAGAGGTCTATGATATTTATTTTACTTATACTTTAAATAGCACCGATTATAA  
CTTGACTGTTGATAATATTACAATAGCTCTTTCTCAGAAGATTAGAGA

+

FFFFFFFFFFFF:FFFFFFFFFFFFFFFFFFFFFFFFFFFFFFFFFFFFFFFFFFFFFFFFFFFFFFFFFFFFFFFF  
FFFFFFFFFFFFFFFFFFFFFFFFFFFFFFFFFFFFFFFF:FFFFFF:FFFFFFFFFFFFFFFFFFFF

@A00721:190:HGJW7DSXY:4:2412:3079:23797\_1:N:0:TCTGCAAG+GCTGCACT  
GTAGCATTGATTTACTTTTACCGTTAGAACTGAAAAAGATTCTTTTCGAAAAGAAACCTATAAGTTAC  
AAACGATTCTTCGACTATATTAAAGAAATAAAAATACTTCAAGTACCTGAACTTTACATTTTAAATGG  
TAT

+

FFF:FF:FFFFFFFF,::,,FF::FFFFFFFF:FFFFFFFF,FF,F:FFFF:FFFFFFFF,FFFF  
F:,FFFFFFFFFFFF:FFF:FFFFFFFFFFFF,FFFFFFFFFFFFFFFFFFFFFFFFFFFFFFFFFFFF  
FFF

@A00721:190:HGJW7DSXY:4:1539:30002:30561\_1:N:0:TCTGCAAG+GCTGCACT  
ATGAGAGTGTATTCCTTAATATTCTAGTAACCGCTATGTGGGCATTACTAGGATTTATCACACTCCTA  
AATTTGATAGCAATTTATGTTTTAAATGCTAGGAAAATTTAGAAAACTCCATTGTATAGTTCAAGG  
AGT

+

FFFFFFFFFFFF:F:F:FFFFFFFFFFFF:FFFFFFFFFFFFFFFFFFFFFFFFFFFF,,F:FFFFFFFF:FFF  
::FFFFFFFF,FFFFFFFFFFFFFFFFFFFF,FF,FFFFFF,FFFFFFFFFFFFFFFFFFFF,FFFFFF:FFFF  
F:F

@A00721:190:HGJW7DSXY:4:1225:6415:33301\_2:N:0:TCTGCAAG+GCTGCACT  
AGCTTTAGTATTATTTACTATCGCCTTTATTGAAAATTGTATAAGAGTTAATTGCTTACACAAAAGTG  
ACGCGCGAAGGAATCTTAATTGATTGAAGCTAGGCGTTGGGAGAATG

+

FFFFFFFFFFFFFFFFFFFFFFFFFFFFFFFFFFFFFFFFFFFFFFFFFFFFFFFFFFFFFFFFFFFFFFFFFFFF  
FFFFFFFFFFFF:FFFFFFFFFFFFFFFFFFFFFFFFFFFFFFFFFFFFFFFFFFFFFFFFFFFF

@A00721:190:HGJW7DSXY:4:2553:31783:24596\_1:N:0:TCTGCAAG+GCTGCACT  
CCGCCGTCGGCAGATCGGCACCACTGGTCTCTACGTTCAAGGACCCGCTGTGCAGAATAACCTTCCC  
AAATCTAGATCTGCACAGAAGAAGGCTGAAGGTCGTTACCGACGACCACTCAAAGGAAACGGGCTGT  
TGC

+

FFFFFFFFFFFFFFFFFFFFFFFFFFFFFFFFFFFFFFFFFFFFFFFFFFFFFFFFFFFFFFFFFFFFFFFFFFFF  
FFFFFFFFFFFF:FFFFFFFFFFFFFFFFFFFFFFFFFFFFFFFFFFFFFFFFFFFFFFFFFFFFFFFFFFFF  
FFF

@A00721:190:HGJW7DSXY:4:2542:28248:32753\_2:N:0:TCTGCAAG+GCTGCACT  
GGGAACTGAGGCAGTACCTCAGTCAAAAGTCACATTCACCACTCCCATACCAATCAATGATGTGACTA  
TACAGTTCGGCCATTTCAAGAGTGGTCAATACGTCGTGGGAGGTACTG

+

FFFF:FFFFFFFFFFFFFFFFFFFFFFFFFFFFFFFFFFFFFFFFFFFFFFFFFFFFFFFFFFFFFFFFFFFF  
FFFFFFFFFFFFFFFFFFFFFFFFFFFFFFFFFFFFFFFFFFFFFFFFFFFFFFFFFFFFFFFFFFFF

@A00721:190:HGJW7DSXY:4:2621:20961:7795\_1:N:0:TCTGCAAG+GCTGCACT  
AATCAATAGTTCTTCTGACCAGAATGAAAAGGGGTTTACCAGGGTAGTCTCTAAGTCTACCAGGAAGA  
GGGGAAATGTCCCAAAACTGAGAAGAATAAAGGGAAAGGTCATCAGGACCTAAGAAGGGGAAATTA  
CCC

+

FFF:F:FFFF::FFFFFFFFFFFFFFFFFFFFFFFFFFFFFFFFFFFF,FFFFFFFFFFFFFFFFFFFFFFFFFFFF  
FF:FFFFFFFFFFFFFFFFFFFFFFFFFFFF::F:FFFF:FFFFFFFFFFFFFFFFFFFFFFFFFFFFFFFFFFFF  
FFF

@A00721:190:HGJW7DSXY:4:2659:9543:10066\_2:N:0:TCTGCAAG+GCTGCACT  
CGGGCCAAAGAGGCCGCTGCTACGAAGTCGCTGAAGGCGGCTTGGGTCATTAAGGGTAGCTGTAAAGT

+

@A00721:190:HGJW7DSXY:4:2253:31647:20572\_1:N:0:TCTGCAAG+GCTGCACT  
TCGTCCTGAGGACGAAGGTGAGAGGACTTTTGGCTACTGGCGACAACTGAGAGCAGTCGCTGGGGA  
AAGAGAATTGCGTGGGTTGAAGGCCGACGCTTCGAGCTTGAGTGTGACGAGGCCGGTGACGTTTTTGT  
CAA

+

@A00721:190:HGJW7DSXY:4:2550:13557:10066\_2:N:0:TCTGCAAG+GCTGCACT  
CTTA ACTATGGGGCGAAGATCCCCTATGGAGTCTTGAAGGACTTAGGTTGGCATATTTATGCCGACGA  
TAATAAGCATGTCACCCTTAAGCACCGAGGTAAGCTCGGGACTTACAA

+

@A00721:190:HGJW7DSXY:4:1320:25843:27899\_1:N:0:TCTGCAAG+GCTGCACT  
AAAATTTTTCCTGTCCTCCGTCATTGGGGATTTTCGATGTGAGAAGGTGGAAGGTGTCAAGGGTCTTCT  
TCATGCTGATCTTTCAGGACCTAATCACATCATGATTGATAGTTACGGCTCGTATCGAGTTGGAGGGA  
GGA

+

@A00721:190:HGJW7DSXY:4:2122:11225:7341\_2:N:0:TCTGCAAG+GCTGCACT  
TAAAGACGGGGGATTAAGAGTCCAGCTGTAAGTGTCAATTCAGAGAGGGGAGCTCTGAAAAGGAAAC  
TTCGTGAGAAGATGAGGAAGTCTAAGAGGAGGAGTTTGAGGAAGGCTC

+

@A00721:190:HGJW7DSXY:4:1611:28357:8202\_1:N:0:TCTGCAAG+GCTGCACT  
ATTATTTGAAGCAGGGGTTACCACTTCATAAGGTGGATGAGGGAGGTTGTTTCTTTGGAGTTTTAGAT  
AATCTTGTGAGATTGGTTCATAGAGCCATCAAGAGAATCTTATATGCTGGTTTAAGTGATGATTATCA  
CT

+

@A00721:190:HGJW7DSXY:4:2125:22119:34006\_2:N:0:TCTGCAAG+GCTGCACT  
ACTTACCATATTGTTCTTCCGGGAAGTTGTGGGATTTAACTTTGACTCAACTACTCCGATCAGATCC  
GGATGGTTTGAGTGGTATGGACTACTCGACTTTTGATCTGGAGTTGTC

+

@A00721:190:HGJW7DSXY:4:1509:20085:30170\_2:N:0:TCTGCAAG+GCTGCACT  
AAGAGTCTTTATGATTCAAAACCTATCGTTGTCGTACCTTACAAGTTGAGGAGACTTTACAGCGCT  
TATTGTCGCGCAGTTTCCAGAATTGCGGTTGAAGTTCACCCATTCTAT

+

@A00721:190:HGJW7DSXY:4:2677:29993:9471\_2:N:0:TCTGCAAG+GCTGCACT  
CAACCCTATTCTTGATGTGAAAGATGCATCGAGGTATACGTCTAGGAACATTGATTGGGAACGTACCT

ACTCACGAGACGTCATGAAAGCTATCGGAGGGAAGCAAAATGTTTCGT  
+  
FFFFFFFF:FFFFFFFFFFFFFFFFFFFFFFFFFFFFFFFFFFFFFFFFFFFFFFFFFFFFFFFFFFFFFFFF  
FFFFFFFFFFFFFFFFFFFFFFFFFFFFFFFFFFFFFFFF,FFF,FF:FFFFFF  
@A00721:190:HGJW7DSXY:4:1648:27697:25786\_1:N:0:TCTGCAAG+GCTGCACT  
TGATGATGTAGCCACTATAATGCTTAAGAGAGAGATTGATGTATGTCATTTCTGCTTAGTTTGTCCCG  
GCGAATTATTGGACACGATGAAAAATGACATACCCGTTCTGACCTTGGTATCGTTATCCGTCATGGA  
GAT  
+  
FFFFFFFFFFFFFFFF:FF:FFFFFFFFFFFFFFFFFFFFFFFFFFFFFFFFFFFFFFFFFFFFFFFFFFFFFF  
FFFFFFFFFFFFFFFFFFFFFFFFFFFFFFFFFFFFFFFF,FFFFFFFFFFFFFFFFFFFFFFFFFFFFFFFF  
FFF  
@A00721:190:HGJW7DSXY:4:1141:29695:21386\_2:N:0:TCTGCAAG+GCTGCACT  
CGGTCAATGACAAAACCTTCGAATATGTTACGACATGGCTTCGTAACAACAGTGCGAGGATTGTCATC  
TCGGGGAAGTGATTACCAAGATGTTTCATATAGATACGAGATACCTA  
+  
FFFFFFFFFFFFFFFFFFFFFFFFFFFFFFFFFFFFFFFFFFFFFFFFFFFFFFFFFFFFFFFFFFFFFFFF  
FFFFFFF:FFFFFFFFFFFF:FFFFFFFFFFFFFFFFFFFFFFFFFFFFFFFFFFFFFFFF  
@A00721:190:HGJW7DSXY:4:2107:7446:4554\_2:N:0:TCTGCAAG+GCTGCACT  
TTACTCGTTATCGGAGCTAAGAAGAAGACTTTGGGTACACGTTATGCTCGCAAACCTAACGTTAGTAC  
CGGAGGTGATCTCTCTGCTTCTGCGTTACTGAGAGAAAAGATTTCAGGA  
+  
FFFFFFFFFFFFFFFFFFFFFFFFFFFFFFFFFFFFFFFFFFFFFFFFFFFFFFFFFFFFFFFFFFFFFFF:FFFFF:FFFFFFF  
FFFFFFFFFFFFFFFFFFFFF:FFFFFFFFFFFFFFFFFFFFF:FFFFF:FFF  
@A00721:190:HGJW7DSXY:4:1677:28655:32049\_1:N:0:TCTGCAAG+GCTGCACT  
CTTGCAGAGTGACTGGAGTTCAGACGTGTGCTCTTCCGATCTCTTGAAAACCAAGTTAAGAAGGAGGC  
TGATCATGGAGTCTTTGTACCTTCTGTCAAACCTTCGAGGTTACGCTACGAGAGGTGATCCCGGATGTG  
GAT  
+  
FF:FFFFFFFFFFFFFFFFFFFFFFFFFFFFFFFFFFFFFFFFFFFFFFFFFFFFFFFFFFFFFFFFFFFFF,FFF:FFFFFFFFFFFFFFFFFFFFF  
:FF:FF:FFFFFFFFFFFFFFFFFFFFFFFFFFFFFFFFFFFFFFFFFFFFFFFFFFFFFFFFFFFFFFFFFFFFF  
FFF  
@A00721:190:HGJW7DSXY:4:1475:22128:20650\_1:N:0:TCTGCAAG+GCTGCACT  
GTAAAGAATTGGGTTGAGAAGTGTGCTTTACAAGGAGTTAGACTCTTCTTCAAGTTTTTAGATCTTCT  
TGATAATCTTAAAGAAAAATTTTGAATAAACTAATGAGAGGTATAGGCTTAGTCAAGTCTGTACTTA  
CAT  
+  
FFFFFFFFFFFFFFFFFFFFFFFFFFFFFFFFFFFFFFFFFFFFFFFFFFFFFFFFFFFFFFFFFFFFFFF:FFFFFFF  
FFFFFFFFFFFFFFFFFFFFFFFFFFFFFFFFFFFFF:FFFFFFF:FFFFFFFFFFFFFFFFFFFFFFFFFFFFF  
FFF  
@A00721:190:HGJW7DSXY:4:1417:9462:9330\_1:N:0:TCTGCAAG+GCTGCACT  
CAATAGCCACAGACTTTTCTGGGAAAAGAGACCTCTGTTGGTAGAGGAGTTGAGAGAATTACTCAGATT  
CAATCTGGCATCACTGAACGTCTACAACGAGTTAGGGAGTGGCTAGGTTTTAAAAGATCCTTTGCACA  
AGC  
+  
FFFFFFFFFFFFFFFFFFFFFFFFFFFFFFFFFFFFFFFFFFFFFFFFFFFFFFFFFFFFFFFFFFFFFFFF  
FFFFFFFFFFFFFFFFFFFFFFFFFFFFFFFFFFFFFFFFFFFFFFFFFFFFFFFFFFFFFFFFFFFFFFFF  
FFF  
@A00721:190:HGJW7DSXY:4:2270:24560:11115\_2:N:0:TCTGCAAG+GCTGCACT  
AGGACTGATGGTGAGATTCTTTTACCTTTTGGAGGTCCAGGAACCTTTACTCCTAGTGTCTTTTCTAG  
AGTCCAAGGACGTTTCCGTGCGAGGATGACAGGTGGGAGACCGCTCAA  
+  
FFFFFFFFFFFFFFFFFFFFFFFFFFFFFFFFFFFFFFFFFFFFFFFFFFFFFFFFFFFFFFFFFFFFFFF:FFFFFFF:  
FFFFFFFFFFFFFFF:F:FFFFFFFFFFFFF:FFFFFFFFFFFFFFFFFFFFF





@A00721:190:HGJW7DSXY:4:2535:20781:24737\_1:N:0:TCTGCAAG+GCTGCACT  
GTTGATTAAGACTCTTCCGAAAGGCGAACTTTGGGAATTTGAAGCTCAGGGTGAAGCACAACGTTTGA  
CCGTGACGAACTGTGGTGTCTTGATCTACGTTACGGATATACTCTCCTTGAGTTCACTCGTAAGGAC  
ACT

+

FFFFFFFFFFFFFFFFFFFFFFFFFFFFFFFFFFFFFFFFFFFFFFFFFFFFFFFFFFFFFFFFFFFFFFFF  
FFFFFFFFFFFFFFFFFFFFFFFFFFFFFFFFFFFFFFFFFFFFFFFFFFFFFFFFFFFFFFFFFFFFFFFF  
FFF

@A00721:190:HGJW7DSXY:4:1161:11207:35869\_2:N:0:TCTGCAAG+GCTGCACT  
CAGGGGTTTTCTGAATAGTGATAGCCACCCGCCTTACAGAGGGCAGCAGCATGACCATAATTGGTATT  
GACTTTGGTACCACCTTTTCTACTGTCTGTCTCGCCTCTTCGAATGAA

+

FFFFFFFFFFFFFFFFFFFFFFFFFFFFFFFFFFFFFFFFFFFFFFFFFFFFFFFFFFFFFFFFFFFFFFFF:F  
FFFFFFFFFFFFFFFFFFFFFFFFFFFFFFFFFFFFFFFFFFFFFFFFFFFFFFFFFFFFFFFFFFFFFFFF

@A00721:190:HGJW7DSXY:4:1431:5963:23156\_1:N:0:TCTGCAAG+GCTGCACT  
ACAATCATTGGTTTTCTAATAATGATGACACTATTGTTTATGGATATGATGCTATTACTCATGATGG  
TTACGGTCAGGGAGGATTCTCAGTTTACAAGGACCTTAAGCGATGGATCGGGTTAATTCTAAAACAT  
TAC

+

FFFFF:FFFF:FFFFFFFFFFFF:FFF,FFFFFFFFFFFFFFFF,FFFFFFFF:F::FFFFFFFFFFFFF  
FFFFFFFFFFFFFFFFFFFFFFFFFFFFFFFFFFFFFFFFFFFFFFFFFFFFFFFFFFFFFFFFFFFFFFFF,  
FFF

@A00721:190:HGJW7DSXY:4:1437:21983:18897\_2:N:0:TCTGCAAG+GCTGCACT  
TGGTTTGGTCGTTTCAGTACCCAGTCAGTATACCTCTACGCAAAGATATTTTCATGAAAACCTACAGAGG  
AACGTACCGGATTACCTGTCTTTCATATTATGAATGAACCTTCGGCCG

+

FFFFFFFFFFFF:F:FFFFFFFF,FFFFFF:FF::F:FF:FF,FFFF::FFF:FFFFFFFFFFFF  
FF:FF:F:FF:F,::F:,FF:F::FF,FFFFFF::FFF,F:F:FFF:F

@A00721:190:HGJW7DSXY:4:1556:13928:10895\_1:N:0:TCTGCAAG+GCTGCACT  
GTGGTGGTACTTTCGATACTTCTATCGTCTTACGTTACGGTAATTACTATAGTGTTATTTATTCTGGT  
GGTGATGATAATCTTGAGGTCGTGACGTTGATGAAGCTATAAGAGCGTTCTTATTACGGCGCACTTC  
TTT

+

FFFF::FFFF,FFFFFFFFFFFFFFFFFFFFFFFFFFFFFFFFFFFFFFFF,FFFFFFFFFFFFFFFFFFFF  
FFFFFFFFFFFFFFFFFFFFFFFFFFFFFFFFFFFFFFFFFFFFFFFFFFFFFFFFFFFFFFFFFFFFFFFFFFFF  
FFF

@A00721:190:HGJW7DSXY:4:2627:1949:22936\_1:N:0:TCTGCAAG+GCTGCACT  
TGAAGGAGGAGGTTTCTGTTACTGGAACCCTCGTCAATACTTTTCAATAATATACGTCTTGAACCTC  
ACTTATGACGATCTAGTGAAATTAACGCGTCCTTTTCTGGAACGTAGTTTACTATTATGAACAAAGT  
TAT

+

FFF:FFFFFF:FFFFFFFFFFFFFFFFFFFFFFFFFFFFFFFFFFFFFFFFFFFFFFFFFFFFFFFF::FFFFFFFFFFFFF  
FFFFFFFFFFFFFFFFFFFFFFFFFFFFFFFFFFFFFFFFFFFFFFFFFFFFFFFFFFFFFFFFFFFFFFFF:FFFFFFFFFFFFFFFFFFFF  
FFF

@A00721:190:HGJW7DSXY:4:1425:14995:4006\_2:N:0:TCTGCAAG+GCTGCACT  
CAGGGGCTATTACTCTTGCTGAAACAGCTATTAAAGCTGTTGAGCGGGTAATTACACCTAAACGAGCT  
TGATCTGCCATCGCTGAAGGATGTGCACTCTTTTCTGCTACTTTAACG

+

FFFFFFFFFFFFFF:FFFFFFFFFFFFFFFFFFFFFFFFFFFFFFFFFFFFFFFFFFFFFFFFFFFFFFFFFFFFF  
FFFFFFFFFFFFFFFFFFFFFFFFFFFFFFFFFFFFFFFFFFFFFFFFFFFFFFFFFFFFFFFFFFFFFFFF

@A00721:190:HGJW7DSXY:4:2457:29008:23766\_2:N:0:TCTGCAAG+GCTGCACT  
TTCTTAAAAAGAAGATAGAGAGTCATACTTTGGGCTATCGTTCAGGTGCATGGGGTTGGATAGCCAAT  
ATTGAAGTGGACACCTCTGGTAGTATCGAAGTAAAGATAACCAATAAG

+

[illegible]

+

@A00721:190:HGJW7DSXY:4:1338:1054:23390\_2:N:0:TCTGCAAG+GCTGCACT  
TATAAAGAATCTTTACCAGGACTCCTACTACAGGAGGCAGTCTTCTGATCGTAAGAAGTTTATAAGGA  
ACATATCCATTTGTTGTAATAGGGTCATCAACTTAGAACTCGAACTC

```

FFFFFFFF:FFFFFFFFFFFFFFFFFFFFFFFFFFFFFFFF:FFFFFFFF,FFFFFFFFFFFFFFFFFFFFFFFF
FFFFFFFFFFFFFFFFFFFFFFFF,F,:FFFFF:FFFFFFFF:FFFFFFFFFFFFFFFF

```

+

@A00721:190:HGJW7DSXY:4:2535:25780:7560\_2:N:0:TCTGCAAG+GCTGCACT  
TTTACTTACTTAGACTTTCCTACGATACAAATGATAACTTCTAATTTACGTTTGCTACTCAGAGCTG  
GTCCTCTCAGCAAAGGGATGCATGGTGTATCTCCTCAGGAGTCCCGG

```

FFFFFFFFFFFFFFFFFFFFFFFFFFFFFFFFFFFFFFFFFFFFFFFFFFFFFFFFFFFFFFFFFFFFFFFF
FFFFFFFFFFFFFFFF,FFFFFFFFFFFFFFFFFFFFFFFFFFFFFFFFFFFFFFFF

```

+

@A00721:190:HGJW7DSXY:4:2343:31159:29027\_1:N:0:TCTGCAAG+GCTGCACT  
AATGGCAAATAGTGGAAGGCTCCAGTCAACACTAGTTCGAGTGCTGCTTTGGATTACGATGACGTGA  
GAATAGGTGAAGGGATAGTTTTTACCTCGACCAACATTAAGGCGGCGGCGACTAATCTTAAAGCTTCA  
CCC

[illegible]

+

@A00721:190:HGJW7DSXY:4:1537:30364:36886\_2:N:0:TCTGCAAG+GCTGCACT  
CAGAGGCTGTCAAACAAGCCCAGACTCAAGGAGTCCAATCAAAGGTTTTGAATTTAGCTCAACTGGGG

+

@A00721:190:HGJW7DSXY:4:1107:17833:10864\_2:N:0:TCTGCAAG+GCTGCACT  
TTATAAAATATAAAAATAAGGGAGTCATAACTTTTGTTACCAAATTCCTGGCTTTCACGAAGTCTCT  
GATTTTATTAATCATTACTTTAACGATCTCTCGGTCATTTACTCTGTA

+

@A00721:190:HGJW7DSXY:4:2563:19271:36119\_2:N:0:TCTGCAAG+GCTGCACT  
GTCGGAACAACCTTTACTTAGAATGACTCTATCTTTTCAGACACTTCTTATATTATTTACAATAGTTA  
ATATCATATTAGTAATACTCACTATCGTTTTCTGCTTTTTCTTAGCTA

+

@A00721:190:HGJW7DSXY:4:2350:27760:8672\_1:N:0:TCTGCAAG+GCTGCACT  
TACGAAAACCAACTCTTCGTTCCGAGACCTTATGGTAGAATATATTTAGTATCTACACCCATCTCAAC  
GTGTATAAAGCTATTTTTCCGTCCTGAACTTAATACACGAAGAGATCATCCGCAAACGACTCGA

+

@A00721:190:HGJW7DSXY:4:2372:4842:29763\_2:N:0:TCTGCAAG+GCTGCACT  
GACTCCGAAAAATGGTTTCAAATGAGGTCAAAGCTCTATTTATTAACGAACATTATCCGATTCTTCG  
AGGGTATCACTACCACTGATCTGCCGACTTTAGTCAAGGAACCTCAAT

+

@A00721:190:HGJW7DSXY:4:2275:29767:27430\_1:N:0:TCTGCAAG+GCTGCACT  
CGACAAATTTTACTTTTATTTTCAGAACTCTCTCCGATCACCTTGGTGTGATCTCCCGGAGGATCTT  
TTCAATAAGATGTATGATGATAATCTACTATTTTTAAATAGTGATATTCAGCGTATACTTGAATACTT  
TAT

+

@A00721:190:HGJW7DSXY:4:2562:11867:10645\_2:N:0:TCTGCAAG+GCTGCACT  
TACCGCAAAAAGTTGGAAGAGGTCTATGATATTTATTTACTTATACTTTAAATAGCACCGATTATAA  
CTTGACTGTTGATAATATTACAATAGCTCTTTCTCAGAAGATTAGAGA

+

@A00721:190:HGJW7DSXY:4:1170:9064:21418\_2:N:0:TCTGCAAG+GCTGCACT  
TAGCATTGATTTACTTTTACCGTTAGAACTGAAAAAGATTCTTTTCGAAAAGAAACCTATAAGTTACA  
AACGATTCTTCGACTATATTAAAGAAATAAAAAATACTTCAAGTACCTG

+

@A00721:190:HGJW7DSXY:4:1117:12988:29997\_2:N:0:TCTGCAAG+GCTGCACT  
TTTTAATGGTATGGTATAATGTGTCTTACAAATAGAACCTTCACTCTCGGTAATGAGAGTGTATTCCT  
TAATATTCTAGTAACCGCTATGTGGGCATTACTAGGATTTATCACACT

+

```
FFFFF:FFFFFFFFFFFFFFFFFFFFFFFFFFFFFFFFFFFFFFFFFFFFFFFFFFFFFFFFFFFFFFF  
FFFFFFFFFFFFFFFFFFFFFFFFFFFFF:FFFFFFFFFFFFFFFFFFFFFF
```

@A00721:190:HGJW7DSXY:4:2213:28601:34741\_1:N:0:TCTGCAAG+GCTGCACT  
TAATTCAATAGCTTTAGTATTATTTACTATCGCCTTTATTGAAAATTGTATAAGAGTTAATTGCTTAC  
ACAAAAGTGACGCGCGAAGGAATCTTAATTGATTGAAGCTAGGCGTTGGGGAGAATGAAGTCCGCTT  
CCC

+

FFFFFFFFFFFF,FFFFFFFFF:FFF::FFFF:F:FFFFFFFF:FFFFF:FFFFF:FFFFF,FFFFFFFF  
FFFFFFFFFFFF:FFFF,:FFF,:FFFFFFFFFFFFFFFFFFFFFFFFFFFFFFFFFFFFFFFFFFFFFFFF  
FFF

@A00721:190:HGJW7DSXY:4:1113:3920:33458\_2:N:0:TCTGCAAG+GCTGCACT  
GCCGGTCGGCAGATCGGCACCACTGGTCTCTACGTTACGGACCCGCTGTGCAGAATAACCTTCCCAA  
ATCTAGATCTGCACAGAAGAAGGCTGAAGGTCGTTACCGGACGACCAC

+

FFFFFFFFFFFFFFFFFFFFFFFFFFFFFFFFFFFFFFFFFFFFFFFFFFFFFFFFFFFFFFFFFFFFFFFFF:FFFFF:FFFFF:FFFFF:FFFFF  
FFFFFFFFFFFFFFFFFFFFFFFFFFFFFFFFFFFFFFFFFFFFFFFFFFFFFFFFFFFFFFFFFFFFFFFFF

@A00721:190:HGJW7DSXY:4:2542:29053:31391\_2:N:0:TCTGCAAG+GCTGCACT  
GGGAAGTGAAGGAGTACCTCAGTCAAAAGTCACATTCACCACTCCCATACCAATCAATGATGTGACTA  
TACAGTTCGGCCATTTCAAGAGTGGTCAATACGTCGTGGGAGGTACTG

+

FFFFFFFFFFFFFFFFFFFFFFFFFFFFFFFFFFFFFFFFFFFFFFFFFFFFFFFFFFFFFFFFFFFFFFFFF,FFFFFFFF  
FFFFFFFFF:FFFFFFFFFFFFFFFFFFFFFFFFFFFFFFFFFFFFFFFFFFFFFFFFFFFFFFFFFFFFFFFFF

@A00721:190:HGJW7DSXY:4:2127:20717:28134\_1:N:0:TCTGCAAG+GCTGCACT  
GCAGAGTGACTGGAGTTCAGACGTGTGCTCTTCCGATCTCAGGGTAGTCTCTAAGTCTACCAGGAAGA  
GGGGAATGTCCCCAAAAGTGAAGAATAAAGGGAAAGTCCATCAGGACCTAAGAAGGGGAAATTA  
CCC

+

FFFFFFFFFFFFFFFFFFFFFFFFFFFFFFFFFFFFFFFFFFFFFFFFFFFFFFFFFFFFFFFFFFFFFFFFF:FFFFF:FFFFF:FFFFF:FFFFF  
FFFFFFFFFFFF,FFFFFFFFFFFFFFFFFFFFFFFFFFFFFFFFFFFFFFFFFFFFFFFFFFFFFFFFFFFFF  
FFF

@A00721:190:HGJW7DSXY:4:1319:30879:30483\_2:N:0:TCTGCAAG+GCTGCACT  
GGCCAAAGAGGCCGCTGCTACGAAGTCGCTGAAGGCGGCTTGGGTCATTAAGGGTAGCTGTAAAGTTG  
CGCCTGCCGACCCCATCTTTGAGACCAAGACTCTCTACAGTAGGTTG

+

FFFF:F:FFFFFFFFFFFFFFFFFFFFFFFFFFFFFFFFFFFFFFFFFFFFFFFFFFFFFFFFFFFFFFFFF,FFFFFFFFFFFFFFFFFFFFF:  
FFFFFFFFFFFFFFFFFFFFFFFFFFFFFFFFFFFFFFFFFFFFFFFFFFFFFFFFFFFFFFFFFFFFFFFFF

@A00721:190:HGJW7DSXY:4:2276:24514:32894\_1:N:0:TCTGCAAG+GCTGCACT  
TCGTCACTGAGGACGAAGGTGAGAGGACTTTTGGCTACTGGCGACAAAGTGAAGAGCAGTCGCTGGGGA  
AAGAGAATTGCGTGGGTGAAGGCCGACGCTTCGAGCTTGAGTGTGACGAGGCCGGTGACGTTTTTGT  
CAA

+

::FF:F:FFFF::FF:,FFFFFF,,:FFFFFFFF:FFFFFF,,F,,,F:FF:,F:FFFFFF:FF  
FFFFFF,,:,FFFFFFFF:FFF::FFFF:FFFFFFFF:FFF,FFFFFF:F,F:FF:FF:::F:FFFF:F  
FF:

@A00721:190:HGJW7DSXY:4:2676:6551:11240\_2:N:0:TCTGCAAG+GCTGCACT  
CTTAAGTATGGGGCGAAGATCCCCTATGGAGTCTTGAAGGACTTAGGTTGGCATATTTATGCCGACGA  
TAATAAGCATGTACCCCTAAGCACCGAGGTAAGCTCGGGACTTACAA

+

FFFFFFFFFFFFFFFFFFFFFFFFFFFFFFFFFFFFFFFFFFFFFFFFFFFFFFFFFFFFFFFFFFFFFFFFF  
FFFFFFFFFFFFFFFFFFFFFFFFFFFFFFFFFFFFFFFFFFFFFFFFFFFFFFFFFFFFFFFFFFFFFFFFF

@A00721:190:HGJW7DSXY:4:2110:29243:29340\_1:N:0:TCTGCAAG+GCTGCACT  
AAAATTTTCTTTCTCCGTCAATTGGGATTTGATGTGAGAAGGTGGAAGGTGTCAAGGTCCTTCT  
TCATGCTGATCTTTCAGGACCTAATCACATCATGATTGATAGTTACGGCTCGTATCGAGTTGGAGGGA  
GGA

+

FFFFFFFFFFFF::FFFFFF:FFFF,FFF:FFF:FFFFFFFFFFFFFFFFFFFFFFFFFFFFFFFFFFFFF,FFF

FFFFFFFFFFFFFFFFFFFFFFFFFFFFFFFFFFFFFFFFFFFFFFFFFFFFFFFFFFFFFFFFFFFFFFFFFFFFFFFF  
FFF

@A00721:190:HGJW7DSXY:4:2306:4309:8359\_2:N:0:TCTGCAAG+GCTGCACT  
TAAAGACGGGGGATTAAGAGTCCAGCTGTAAGTGTCAATTCAGAGAGGGGAGCTCTGAAAAGGAAAC  
TTCGTCAGAAGATGAGGAAGTCTAAGAGGAGGAGTTTGAGGAAGGCTC

+  
FFFFFFFFFFFFFFFFFFFFFFFFFFFFFFFFFFFFFFFFFFFFFFFFFFFFFFFFFFFFFFFFFFFFFFFFFFFFFFFF  
FFFFFFFF:FFFF,FFFFFFFFFFFFFFFFFFFFFFFFFFFFFFFFFFFFFFFFFFFFFFFFFFFFFFFF

@A00721:190:HGJW7DSXY:4:2650:4960:34162\_1:N:0:TCTGCAAG+GCTGCACT  
TATTTGAAGCAGGGGTACCACCTCCTAAGGTGGATGAGGGAGGTTGTTTCTTTGGAGTTTTAGATAA  
TCTTTTGAGAAGGGGTCATAGAGCCAGCAAGAGAAGCTTATATGCTGGTTTAAGTGATGATTATCACT

+  
FF:,F,FF:,F,:F:,FF:FFFF:FFFFFFFFFFFFFFFFFFFFFFFFFFFFFFFFFFFFFFFFFFFFFFFF  
FFF:FFFFFFFFFFFFFFFFFFFFFFFFFFFFFFFFFFFFFFFFFFFFFFFFFFFFFFFFFFFFFFFF:F::FFFF:,FFFFF

@A00721:190:HGJW7DSXY:4:2142:28637:20243\_2:N:0:TCTGCAAG+GCTGCACT  
ACTTACCATATTGTTCCCTTCCGGGAAGTTGTGGGATTTAACTTTGACTCAACTACTCCGATCAGATCC  
GGATGGTTTGATTGGTATGGACTACTCGACTTTTGATCTGGAGTTGTC

+  
FFFFFFFFFFFFFFFFFFFFFFFFFFFFFFFFFFFFFFFFFFFFFFFFFFFFFFFFFFFFFFFFFFFFFFFFFFFFFFFF  
FFFFFFFFF:F:FFF:FFFFF::FFFFFF,FFFFFFFFFFFFFFFFFFFFFFFFFFFFFFFF

@A00721:190:HGJW7DSXY:4:1517:11849:32409\_2:N:0:TCTGCAAG+GCTGCACT  
AAGAGTCTTTATGATTCAAAACCTATCGTTGTCTGACCTTACAAGTTGAGGAGACTTTACAGCGGCT  
TATTGTCGCGCAGTTTCCAGAATTGCGGTTGAAGTTCACCCATTCTAT

+  
FFFFFFFFFFFFFFFFFFFFFFFFFFFFFFFFFFFFFFFFFFFFFFFFFFFFFFFFFFFFFFFFFFFFFFFFFFFFFFFF  
FFFFFFFFFFFFFFFFFFFFFFFFFFFFFFFFFFFFFFFFFFFFFFFFFFFFFFFFFFFFFFFFFFFFFFFF

@A00721:190:HGJW7DSXY:4:1211:28899:23265\_2:N:0:TCTGCAAG+GCTGCACT  
AACCCTATTCTTGATGTGAAAGATGCATCGAGGTATACGTCTAGGAACATTGATTGGGAACGTACCTA  
CTCACGAGACGTCATGAAAGCTATCGGAGGGAAGCAAAATGTTTCGTT

+  
FFFFF:FFFFFFFF:FFFFFFFFF,FFFFFFFF:FFFFFFFFFFFF,F:FFFF,FFFFF:FFFFFFFF  
FFFFFFFFFFFFFFFFFFFFFFFFFFFFFFFFFFFFFFFFFFFFFFFFFFFFFFFFFFFFFFFF:FFFFFF:FFF

@A00721:190:HGJW7DSXY:4:2358:27037:9987\_1:N:0:TCTGCAAG+GCTGCACT  
TGATGATGTAGCCACTATAATGCTTAAGAGAGAGATTGATGTATGTCATTTCTGCTTAGTTTTGTCCCG  
GCGAATTATTGGACACGATGAAAATGACATACCCGTTCTGACCTTGGTATCGTTATCCGTCATGGA  
GAT

+  
FFFFFFFFFFFFFFFFFFFFFFFFFFFFFFFFFFFFFFFFFFFFFFFFFFFFFFFFFFFFFFFFFFFFFFFFFFFFFFFF  
FFFF,FFF:FFFFFFFFFFFFFFFF:FFFFFFFFFFFFFFFFFFFFFFFFFFFFFFFFFFFFFFFF,F:FFFFFFFF  
FFF

@A00721:190:HGJW7DSXY:4:1263:7021:8422\_2:N:0:TCTGCAAG+GCTGCACT  
CGGTCAATGACAAAACCTTCGAATATGTTACGACATGGCTTCGTAACAACAGTGCGAGGATTGTCATC  
TCGGGGAAAGTGATTACCAAGATGTTTCATATAGATACGAGATACCTA

+  
FFFFFFFFFFFFFFFFFFFFFFFFFFFFFFFFFFFFFFFFFFFFFFFFFFFFFFFFFFFFFFFFFFFFFFFFFFFFFFFF  
FFFFFFFF:FFFFFFFFFFFF:FFFFFFFFFFFFFFFFFFFFFFFFFFFFFFFFFFFFFFFF:F

@A00721:190:HGJW7DSXY:4:2161:26115:35289\_2:N:0:TCTGCAAG+GCTGCACT  
TTACTCGTTATCGGAGCTAAGAAGAAGACTTTGGGTACACGTTATGCTCGCAAACCTAACGTTAGTAC  
CGGAGGTGATCTCTCTGCTTCTGCGTTACTGAGAGAAAAGATTTCAGGA

+  
FFFFFFFFFFFFFFFFFFFFFFFFFFFFFFFFFFFFFFFFFFFFFFFFFFFFFFFFFFFFFFFFFFFFFFFFFFFFFFFF  
FFFFFFFF:FFFFFFFFFFFFFFFFFFFFFFFFFFFFFFFFFFFFFFFF:FFFFFF:FFF

@A00721:190:HGJW7DSXY:4:2255:18367:12790\_1:N:0:TCTGCAAG+GCTGCACT  
CTTGCAGAGTGACTGGAGTTCAGACGTGTGCTCTTCCGATCTCTTGAAAACCAAGTTAAGAAGGAGGC



FF:FF:FFFFFFFFFFFF:FFFFFF:FFFFFFFFFFFFFFFFFFFFFFFFFFFFFFFF:FFFF:FFFFFFFF  
FFF

@A00721:190:HGJW7DSXY:4:2457:22562:34929\_1:N:0:TCTGCAAG+GCTGCACT  
ATTCAACCCCTTATATCGAGGCTATCGAGGACGATGAGTATCTTGAAGTTGTTGACGACAAGCCTCAA  
GAGGGTAGAGGACCACCTGGATCTTCTACTGTCTCTGCCTTCCAAGATTTCTTAGAAGAGGTTATTCC  
TGG

+

FFFFFFFFFFFFFFFFFFFFFFFFFFFFFFFFFFFFFFFFFFFFFFFFFFFFFFFFFFFFFFFF  
FFFFFFFFFFFFFFFFFFFFFFFFFFFFFFFFFFFFFFFFFFFFFFFFFFFFFFFF:FFFFFFFFFFFFFFFF  
FFF

@A00721:190:HGJW7DSXY:4:1122:24623:18959\_1:N:0:TCTGCAAG+GCTGCACT  
TACCTTTATAGGTAAGAAGCCCTTGAGCCGCGTAGTCAGCGCTTTAGCTGTATCATCAGTCAGAGT  
ATACCCGATAGGGTACCGAGTCTCCAAGAGAATATTTATTCTTATGAGGCTCGAACTTCAACGTTTT  
CAC

+

FFFFFFFFFFFFFFFFFFFFFFFFFFFFFFFFFFFFFFFFFFFFFFFFFFFFFFFFFFFFFFFF:FFFFFFFFFFFFFFFF  
FFFFFFFFFFFFFFFFFFFFFFFFFFFFFFFFFFFFFFFFFFFFFFFFFFFFFFFFFFFFFFFFFFFFFFFF  
FFF

@A00721:190:HGJW7DSXY:4:2653:12870:25034\_2:N:0:TCTGCAAG+GCTGCACT  
TATGATCACTTTGATGATTTTATCACTTTATTATGACCTTGAAAGTTTTTCGGCTGTGGTTGTCGCTG  
GGGACGATTCCATTCTGTTTTCAAAGACTCCAATAACTGATAGATCGG

+

FF:FFFFFFFF:FF:FFFFFFFF,FF:,FFFFFFFF,FFFFFFFFFFFF:,FFFFFFFF:FFF  
FFFFFFFFFF:FF:F:FFFFFFFF:FFFFFFFF:FFFFFFFF:F

@A00721:190:HGJW7DSXY:4:2253:15049:35509\_2:N:0:TCTGCAAG+GCTGCACT  
GATTCCGAGAGGTTTATCCTGATGTGGAGGGAGTTCTTGAAGCATCCCGACCTTTCCTTGTGAAAATT  
TTGATGCGGTTTTATAAGATTATCAGTAATCCTGATTCTACTACGGAT

+

FFFFFFFFFFFFFFFFFFFFFFFFFFFFFFFFFFFFFFFFFFFFFFFFFFFFFFFFFFFFFFFF  
FFFFFFFFFFFFFFFFFFFFFFFFFFFFFFFFFFFFFFFFFFFFFFFFFFFFFFFF

@A00721:190:HGJW7DSXY:4:1233:7925:7764\_2:N:0:TCTGCAAG+GCTGCACT  
TTGATTAAGACTCTTCCGAAAGGCGAACTTTGGGAATTTGAAGCTCAGGGTGAAGCACAACTTTGAC  
CGTGACGAACTGTGGTGTCTTGATCTACGTTACGGATATACTCTCCT

+

FFFFFFFFFFFFFFFFFFFFFFFFFFFFFFFFFFFFFFFFFFFFFFFFFFFFFFFFFFFFFFFF  
FFFFFFFFFFFFFFFFFFFFFFFFFFFFFFFFFFFFFFFFFFFFFFFFFFFFFFFF

@A00721:190:HGJW7DSXY:4:1223:1750:20055\_2:N:0:TCTGCAAG+GCTGCACT  
CAGGGGTTTTCGAATAGTGATAGCCACCCGCTTACAGAGGGGCAGCAGCATGACCATAATTGGTATT  
GACTTTGGTACCACCTTTTCTACTGTCTGTCTCGCCTCTTCGAATGAA

+

FFFFFFFFFFFFFF,FF:FFFF:FFFF,FFF,FFFFFFFFFFFFFFFFFFFFFFFFFFFF,,:FFFF  
FFFFFFFFFF:FFFF:FFFFF:,FFFFF:FFFFFF:FFF,:FF

@A00721:190:HGJW7DSXY:4:2175:27597:5321\_1:N:0:TCTGCAAG+GCTGCACT  
ACAATCATTGGTTTTTCTAATAATGATGACACTATTGTTTATGGATATGATGCTATTACTCATGATGG  
TTACGGTCAGGGAGGATTCTCAGTTTACAAGGACCTTAAGCGATGGATCGGGGTTAATTCTAAAACAT  
TAC

+

FFFFFFFFFFFF:FFFFF:FFFFFFFFFFFFFFFFFFFFFFFFFFFFFFFFFFFFFFFF:FFFFFFFF  
FFFFFFFFFFFFFFFFFFFFFFFFFFFFFFFFFFFFFFFFFFFFFFFFFFFFFFFFFFFFFFFF:FFFFFFFF  
FFF

@A00721:190:HGJW7DSXY:4:1562:13006:21793\_2:N:0:TCTGCAAG+GCTGCACT  
TGGTTTGGTCGTTTCAGTACCCAGTCAGTATACCTCTACGCAAAGATATTTTCATGAAAACCTACAGAGG  
AACGTACCGGATTACCTGTCTTTTCATATTATGAATGAACCTTCGGCCG

+



@A00721:190:HGJW7DSXY:4:1556:22616:11506\_1:N:0:TCTGCAAG+GCTGCACT  
GTGGTGGTACTTTTCGATACTTCTATCGTCTTACGTTACGGTAATTACTATAGTGTTATTTATTCTGGT  
GGTGATGATAATCTTGAGGTCGTGACGTTGATGAAGCTATAAGAGCGTTCTTATTACGGCGCACTTC  
TTT

[illegible]

@A00721:190:HGJW7DSXY:4:2668:17852:17127\_1:N:0:TCTGCAAG+GCTGCACT  
TGAAGGAGGAGGTTTCTGTTACTGGAAAACCTCGTCAATACTTTTCAATAATATACGTCTTGAACTC  
ACTTATGACGATCTAGTGAAATTAACGCGTCCTTTTCTGGAACGTAGTTTACTATTATGAACAAAGT  
TAT

```
FFFFFFFFFFFFFFFFFFFFFFFFFFFFFFFFFFFFF:FFFFFF:FFFF:FFFF:FFFFFFFFFFFFFF
FFFFFFFFFFFFFFFFFFFFFFFFFFFFFFFFFFFFF
FFF
```

@A00721:190:HGJW7DSXY:4:1425:15085:3630\_2:N:0:TCTGCAAG+GCTGCACT  
CAGGGGCTATTACTCTTGCTGAAACAGCTATTAAGCTGTTGAGCGGGTAATTACACCTAAACGAGCT  
TGATCTGCCATCGCTGAAGGATGTGCACTCTTTTCTGCTACTTTAACG

```
F:FFFFFFFFFFFF,FFFFFFFFFFFFFFFF:FFFFFFFFFFFF:FFFF,FFF:F:FFFFFFFFF:FFFFFFFFFFFF
F:FFFFFF,FFFFFFFFFFFF,:FFFFFF:FFFFFFFFFFFF:FF:FFFF:FFFF:
```

@A00721:190:HGJW7DSXY:4:2568:24939:11866\_2:N:0:TCTGCAAG+GCTGCACT  
TTCTTAAAAAGAAGATAGAGAGTCATACTTTGGGCTATCGTTCAGGTGCATGGGGTTGGATAGCCAAT  
ATTGAAGTGGACACCTCTGGTAGTATCGAAGTAAAGATAACCAATAAG

[illegible]

@A00721:190:HGJW7DSXY:4:1531:8115:11819\_1:N:0:TCTGCAAG+GCTGCACT  
AATCTTACCACTATCTACGAACCTAAAGTTCTGAAGACGTTGCTTGTCGCTTCCTCCTTTAATGGCAC  
TACCTCGGTACAATCTTACTTGGAACGAAGGCGACCTGTTCCGGAGTTTTTACGGGATCCGGAATGTT  
CTG

[illegible]

@A00721:190:HGJW7DSXY:4:1402:13792:17268\_2:N:0:TCTGCAAG+GCTGCACT  
TATAAAGAATCTTTACCAGGACTCCTACTACAGGAGGCAGTCTTCTGATCGTAAGAAGTTTATAAGGA  
ACATATCCATTTGTTGTAATAGGGTCATCAACTTAGAACTCGAAACTC

```

FFFFFFFFFFFFFFFFFFFFFFFFFFFFFFFF:F,FFFFFFFFFFFFFFFFFFFFFFFF:FFFFFFFF,FF
FFFFFFFFFFFFFFFF:FF:FFFF:FFFFFFFFFFFFFFFF:FFFFFFFFFFFF

```

@A00721:190:HGJW7DSXY:4:1455:7862:13917\_1:N:0:TCTGCAAG+GCTGCACT  
TGTCTTTCCAAGCTTACCTGTATCTTCAATGAAATTGGACTCTTCGATAGGGACATTTTATCGTGGG  
CTTCCGTAAAGGAAGATCTGTTATCGACGTTTATCGTTTACGAAGTATCACTCCACCGGTGAATGG  
TTT

```
FF:FFFFFFFFFFFFFFFF:FFFFFFFFFFFFFF:FFFFFFFFFFFFFF,FFFFFFFFFFFFFFFF
FFFFFFFFFFFFFFFF:FFFFFFFFFFFFFFFF:FFFFFFFFFFFFFF:FFFFFFFFF
FFF
```

@A00721:190:HGJW7DSXY:4:1149:26784:1908\_1:N:0:TCTGCAAG+GCTGCACT  
ACTTACTTAGACTTTTCTACGATACAAATGATAACTTCTAATTTACGTTTGCTACTCAGAGCTGGTCC

TCTCAGCAAAGGGATGCATGGTGTATCTCCTCAGGAGTCCCGGCATTTGATAATAATGACGAGACTT  
TCG

+

FFF,FFFFFFFFFFFFFFFFFFFFFFFFFFFFFFFFFFFFFFFFFFFFFFFFFFFFFFFFFFFFFFFF  
FFFFFFFFFFFFFFFFFFFFFFFFFFFFFFFFFFFFFFFFFFFFFFFFFFFFFFFFFFFFFFFF:FFFFFFFF  
FFF

@A00721:190:HGJW7DSXY:4:2517:27706:4476\_1:N:0:TCTGCAAG+GCTGCACT  
GTACCAGCGCATCTCGTGTGAGCCTCGACCCGATTATATGGTATTAACCTATAAAGGTGAGGAGACC  
ATTTTCTTGCTGAAATTTATAGAAGATTATTTTGACAGAATCAATAAGAATCATCGATTCTCGATTCTG  
TAG

+

FFFFFFFF,F:FFFFFFFF,:FFFF:FFFF:F:F,:FFFFFFFFFFFFFF:FFFFFFFFFFFFFFFF  
FFFFFFFFFFFF,FFFFFFFFFF,F:FFFFFFFFFFFFFFFFFFFFFFFF:FFFFFFFFFF,FFFFFFFFFFFF  
FFF

@A00721:190:HGJW7DSXY:4:2436:17327:21981\_1:N:0:TCTGCAAG+GCTGCACT  
AATGGCAAATAGTGAAAGGCTCCAGTCAACACTAGTTCGAGTGCTGCTTTGATTACGATGACGTGA  
GAATAGGTGAAGGGATAGTTTTTACCTCGACCAACATTAAGGCGGCGGCGACTAATCTTAAAGCTTCA  
CCC

+

FFFFFFFFFFFFFFFFFFFFFFFFFFFFFFFFFFFFFFFFFFFFFFFFFFFFFFFFFFFFFFFFFFFF  
FFFFFFFFFFFFFFFFFFFFFFFFFFFFFFFFFFFFFFFFFFFFFFFFFFFFFFFFFFFFFFFFFFFF  
FFF

@A00721:190:HGJW7DSXY:4:2619:18747:23030\_2:N:0:TCTGCAAG+GCTGCACT  
CAACATTTACCACCAAATCTTTTGATACAACCTCTAGCCTTCAAGTGGGGTATGCCTGCGGAATACGC  
TTGCTATTCACCAGATTGGTTCGAACCCGTTGATGCTATGTCAGAAGA

+

FFFFFFFFFFFFFFFFFFFFFFFFFFFFFFFFFFFFFFFFFFFFFFFFFFFFFFFFFFFFFFFFFFFF  
FFFFFFFFFFFFFFFFFFFF:FFFFFFFFFFFFFFFFFFFFFFFFFFFFFFFFFFFFFFFFFFFFFFFF  
FFFFFFFFFFFFFFFFFFFF:FFFFFFFFFFFFFFFFFFFFFFFFFFFFFFFF:FFFFFFFFFFFF

@A00721:190:HGJW7DSXY:4:1547:15176:33411\_2:N:0:TCTGCAAG+GCTGCACT  
CAGAGGCTGTCAAACAAGCCCAGACTCAAGGAGTCCAATCAAAGGTTTTGAATTTAGCTCAACTGGGG  
AGACGTGCTTAAATGGGTGATAAAAATTATTTAGAGATCTTTTCTACT

+

FFFFFFFFFFFFFFF:FFFFFFFFFFFFFFFFFFFFFFFFFFFFFFFFFFFFFFFFFFFFFFFFFFFF  
FFFFFFFFFFFF:FF:F:FF:,FFFFFFFFFFFF:FFFFFFFFF:FFFFFFFFFFFF

@A00721:190:HGJW7DSXY:4:1140:14660:26631\_2:N:0:TCTGCAAG+GCTGCACT  
TTATAAAATATAAAATAAGGGAGTCATAACTTTTGTTACCAAATCTTGGCTGTCAACGAAGTCTCT  
GATTTTATTAATCATTACTTTAACGATCTCTCGGTCATTTACTCTGTA

+

FFFFF,FFFFFFFFFFFFFFFFFFFFFFFFFFFFFFFFFFFFFFFFFFFFFFFFFFFFFFFFFFFF  
FFFFFFFFFFFFFFFFFFFFFFFFFFFFFFFFFFFFFFFFFFFFFFFFFFFFFFFFFFFF

@A00721:190:HGJW7DSXY:4:2648:23954:17613\_2:N:0:TCTGCAAG+GCTGCACT  
TGACTCTATCTTTTCAGACACTTCTTATATTATTTACAATAGTTAATATCATATTAGTAATACTCACT  
ATCGTTTTCTGCTTTTTCTTAGCTAATAGATTAATAAAGGATGAGTAC

+

::FFFFFFFF:F,FFFFFFFFFFFF:FF:FFFF,FFFF:FFFFFF:F:FF:FFFFFFFF,F,FFFF:  
FFF,FF::FFF,FFFFFFFF:FFFFFFFF:FFFFFF:FFF,F:F,F

@A00721:190:HGJW7DSXY:4:2318:25446:22232\_2:N:0:TCTGCAAG+GCTGCACT  
CTTCGTTACGAGACCTGAGGTTAGAATAGATTTAGTCTCTACCCCATCTCAACGAGGATAAAGCGAG  
TTTTCCGTCCTGAACGTAATACACGAAGAGATCATCCGCAAACGACTC

+

FFFFFFFFFFFFFFFFFFFF,FFFFFFFFFFFF,:FFFFFFFFFFFF,FFFFFFFFFFFFFFFF:FF,F:FFFF  
FFFFFFFFFFFFFFFFFFFF,FFFFFF:FFFFFFFFFFFFFFFFFFFFFFFF

@A00721:190:HGJW7DSXY:4:2530:19162:29230\_2:N:0:TCTGCAAG+GCTGCACT  
GACTCCGAAAATGGTTTCAAATGAGGTCAAAGCTCTATTTATTAACGAACATTATCCGATTCTTCG

AGGGTATCACTACCACTGATCTGCCGACTTTAGTCAAGGAACTTCAAT

+

FFFFFFFFFFFF,FFF:FFFF:FFFFFFFF,F:FFFFFFFFFFFF,FFF:FFFFF:::FFFF:FFFFFFFF  
FF:FFFF,FFFF:FFFFFFFFFFFF,F:,FFFFFFFFFFFFF:FFFF

@A00721:190:HGJW7DSXY:4:2317:30002:21261\_1:N:0:TCTGCAAG+GCTGCACT  
CGACAAATTTTAGAACTTTATTTCAGAACTCTCTCCGATCACCTTGGTGTGATCTCCCGGAGGATCTT  
TTCAATAAGATGTATGATGATAATCTACTATTTTTAAATAGTGATATTACAGCGTATACTTGAATACTT  
TAT

+

FFFFFFFFFFFFFFFFFFFFFFFFFFFFFFFFFFFFFFFFFFFFFFFFFFFFFFFFFFFFFFFFFFFFFFFF  
FFFFFFFFFFFFFFFFFFFFFFFFFFFFFFFFFFFFFFFFFFFFFFFFFFFFFFFFFFFFFFFFFFFFFFFF  
FFF

@A00721:190:HGJW7DSXY:4:1133:14064:32706\_1:N:0:TCTGCAAG+GCTGCACT  
TACCGCAAAAAGTTGGAAGAGGTCTATGATATTTATTTACTTATACTTTAAATAGCACCGATTATAA  
CTTGACTGTTGATAATATTACAATAGCTCTTCTCAGAAGATTAGAGAAGTAACCGGTGAACACGTCG  
GTA

+

FFFFFFFFFFFFFFFF:FFFFFFFFFFFFFFFFFFFFFFFFFFFFFFFFFFFFFFFFFFFFFFFFFFFFFFF  
FFFFFFFFFFFFFFFFFFFFFFFFFFFFFFFFFFFFFFFFFFFFFFFFFFFFFFFFFFFFFFFFFFFFFFFF  
FFF

@A00721:190:HGJW7DSXY:4:1145:11107:21230\_1:N:0:TCTGCAAG+GCTGCACT  
AACGATTCTTCGACTATATTAAAGAAATAAAAATACTTCAAGTACCTGAACTTTACATTTTAAATGGT  
ATGGTATAATGTGTCTTACAAATAGAACCTTCACTCTCGGTAATGAGAGTGTATTCCTTAATATTCTA  
GTA

+

:FFFFFFFFFFFFFFFF:FFFFFFFFFFFFFFFF:FFFFFFFFFFFFFFFFFFFFFFFFFFFFFFFF  
FFFFFFFFFFFF,FFFFFFFFFFFFFFFF:FFFFFFFFFFFFFFFFFFFFFFFFFFFFFFFFFFFFFFFF  
FFF

@A00721:190:HGJW7DSXY:4:2132:8368:29262\_1:N:0:TCTGCAAG+GCTGCACT  
ACTAGGATTTATCACACTCCTAAATTTGATAGCAATTTATGTTTTAAATGCTAGGAAAATTTAGAAA  
AACTCCATTGTATAGTTCAAGGAGTACTTAATTCAATAGCTTTAGTATTATTTACTATCGCCTTTATT  
GAA

+

FFFFFFFFFFFFFFFFFFFF:FFFFF:FFFFFFFFFFFFFFFF:FFF:FFFFFFFFFFFFFFFFFFFFFFF  
FFFFFFFFFFFFFFFFFFFFFFFFFFFFFFFFFFFF:FFFFFFFFFFFFFFFFFFFFFFFFFFFFFFFFFFFF  
FFF

@A00721:190:HGJW7DSXY:4:1665:21911:4961\_1:N:0:TCTGCAAG+GCTGCACT  
ACACAAAAGTGACGCGCGAAGGAATCTTAATTGATTGAAGCTAGGCGTTGGGGAGAATGAACTGCCGC  
TTCCCGGAAGAAACGATCTATTTACAGAGTATTTAGAGTAGTCCAAAGTTTGTATAAATTTATATGAT  
TTT

+

FFFFF:FFFFFFFFF,F,FF:FFFFFFFFF:FFFFFFFFF:FFFFF:FFFFFFFFFFFFFFFFFFFFF  
FFFFF::FFFFF::FFFFFFFFFFFF:FFFFFFFFFFFFFFFFFFFFFFFF:FFFFFFFFFFFFFFFFFFFF  
FFF

@A00721:190:HGJW7DSXY:4:1159:28673:21652\_2:N:0:TCTGCAAG+GCTGCACT  
GCCGGTCGGCAGATCGGCACCACTGGTCTCTACGTTACGGGACCCGCTGTGCAGACTAACCTTCCCAA  
ATCTAGATCTGCACAGAAGAAGGCTGAAGGTCGTTACCGGACGACCAC

+

FFFFFFFFFFFFFFFFFFFFFFFFFFFFFFFFFFFFFFFFFFFFFFFFFFFFFFFFFFFFFFFFFFFF,FFFFFFFFFFFFF  
FFFFFFFFFFFFFFFFFFFF:FFFFFFFFFFFFFFFFFFFFFFFFFFFFFFFFFFFF

@A00721:190:HGJW7DSXY:4:2547:4155:11068\_2:N:0:TCTGCAAG+GCTGCACT  
GGGAACTGAGGCAGTACCTCAGTCAAAAGTCACATTCACCACTCCCATACCAATCAATGATGTGACTA  
TACAGTTCGGCCATTTCAAGAGTGGTCAATACGTCGTGGGAGGTACTG

+

FFFF:FFFFFFFFFFFFFFFF:FFFFFFFFFFFFFFFFFFFFFFFFFFFFFFFFFFFFFFFF  
FFFFFFFFFFFFFFFFFFFFFFFFFFFFFFFFFFFFFFFFFFFFFFFFFFFFFFFF

@A00721:190:HGJW7DSXY:4:2266:11153:13103\_1:N:0:TCTGCAAG+GCTGCACT  
GCAGAGTGACTGGAGTTCAGACGTGTGCTCTTCCGATCTCAGGGTAGTCTCTAAGTCTACCAGGAAGA  
GGGGAATGTCCCCAAACTGAGAAGAATAAAGGGAAAGTCCATCAGGACCTAAGAAGGGGAAATTA  
CCC

+  
FFFFFFFFFFFFFFFFFFFFFFFFFFFFFFFFFFFFFFFF:F,FFFFFFFFFFFFFFFFFFFFFFFF  
FFFFFFFFFFFFFFFFFFFFFFFFFFFFFFFFFFFFFFFF:FFFFFFFFFFFFFFFFFFFFFFFF, ,F  
FFF

@A00721:190:HGJW7DSXY:4:1408:15510:11663\_2:N:0:TCTGCAAG+GCTGCACT  
GGCCAAAGAGGCCGCTGCTACGAAGTCGCTGAAGGCGGCTTGGGTCATTAAGGGTAGCTGTAAAGTTG  
CGCCTGCCGACCCCATCTTTGAGACCAAGACTCTCTACAGTAGGTTTCG

+  
FFFFFFFFFFFFFFFFFFFFFFFFFFFFFFFFFFFFFFFF:F,FF:FFFFFFFFFFFFFFFF  
FFFFFFFFFFFFFFFFFFFFFFFFFFFFFFFFFFFFFFFFFFFFFFFFFFFFFFFF

@A00721:190:HGJW7DSXY:4:2637:26657:28557\_1:N:0:TCTGCAAG+GCTGCACT  
TCGTCACTGAGGACGAAGGTGAGAGGACTTTTGGCTACTGGCGACAACTGAGAGCAGTCGCTGGGGA  
AAGAGAATTGCGTGGGTGAAGGCCGACGCTTCGAGCTTGAGTGTGACGAGGCCGGTGACGTTTTTGT  
CAA

+  
FFFFFFFFFFFFFFFFFFFFFFFFFFFFFFFFFFFFFFFFFFFFFFFFFFFFFFFFFFFFFFFF  
FFFFFFF:FFFFFFFFFFFFFFFFFFFFFFFFFFFFFFFFFFFFFFFFFFFFFFFFFFFFFFFF  
FFF

@A00721:190:HGJW7DSXY:4:1150:2266:1094\_2:N:0:TCTGCAAG+GCTGCACT  
TTAACTATGGGGCGAAGATCCCCTATGGAGTCTTGAAGGACTTAGGTTGGCATATTTATGCCGACGAT  
AATAAGCATGTACCCCTTAAGCACCGAGAGATCGGAAGAGCGTCGTGT

+  
FFFFFFFFFFFFFFFFFFFFFFFF,FFFFFFFFFFFFFFFFFFFFFFFFFFFFFFFFFFFFFFFF  
FFF:FFFFFFFFFFFFF:FFFFFFFFFFFFFFFFFFFFFFFFFFFFFFFFFFFFF:

@A00721:190:HGJW7DSXY:4:2213:23836:24643\_1:N:0:TCTGCAAG+GCTGCACT  
AAAATTTTCTTTCTCCGTCAATTGGGGATTTGATGTGAGAAGGTGGAAGGTGTCAAGGGTCTTCT  
TCATGCTGATCTTTCAGGACCTAATCACATCATGATTGATAGTTACGGCTCGTATCGAGTTGGAGGGA  
GGA

+  
FFFFFFFFFFFF, :FFFFFFFFF:FFFFFFFFFFFFFFFFFFFFFFFF:FFFFFFFFFFFF:FFFFFFFF  
FFFFFFFFFFFF:FFFFFFFFFFFFFFFF:FFFFFFFFF:FFFFFFFFFFFFFFFFFFFFFFFF:FFFFFFF  
FFF

@A00721:190:HGJW7DSXY:4:2341:6741:19899\_2:N:0:TCTGCAAG+GCTGCACT  
TAAAGACGGGGGATTAAGAGTCCAGCTGTAACTGTCATTTAGAGAGGGGAGCTCTGAAAAGGAAAC  
TTCGTCAGAAGATGAGGAAGTCTAAGAGGAGGAGTTTGAGGAAGGCTC

+  
FFFFFFFFFFFFFFFFFFFFFFFFFFFFFFFF:FFFFFFFFFFFFFFFFFFFFFFFFFFFFFFFF  
FFFFFFFFFFFFF:FFFFFFFFFFFFFFFFFFFFFFFFFFFFFFFFFFFFFFFF

@A00721:190:HGJW7DSXY:4:1113:9426:25081\_1:N:0:TCTGCAAG+GCTGCACT  
TATTTGAAGCAGGGGTACCACTTCCTAAGGTGGATGAGGGAGGTTGTTTCTTTGGAGTTTATAGATAA  
TCTTTTGAGAAGGGGTCATAGAGCCAGCAAGAGAAGCTTATATGCTGGTTTAAGTGATGATTATCACT  
CCT

+  
FFF:FFFFF,FFFF,FFFFFFFFFFFFFFFFFFFFFFFFFFFFFFFFFFFFFFFF:FFFFFFFFFFFF:FFF:  
FFFFFFFFFFFFFFFFFFFFFFFFFFFFFFFFFFFFFFFFFFFFFFFFFFFFFFFFFFFFFFFF  
FFF

@A00721:190:HGJW7DSXY:4:1211:25003:32393\_1:N:0:TCTGCAAG+GCTGCACT  
ATATTGTTCTTCCGGGAAGTTGTGGGATTTAACTTTGACTCAACTACTCCGATCAGATCCGGATGGT

TTGATTGGTATGGACTACTCGACTTTTGATCTGGAGTTGTCTAGGGTCATGGCAGATACTACCGATAA  
GGT

+

FFFFFFFFFFFFFFFFFFFF,FFFFFFFF:FFFFFFFFFFFFFFFFFFFFFFFFFFFFFFFFFFFFFFFFFFFF  
FFFFFFFFFFFFFFFFFFFFFFFFFFFFFFFFFFFFFFFFFFFFFFFFFFFFFFFFFFFFFFFFFFFFFFFFFFFF  
FFF

@A00721:190:HGJW7DSXY:4:1533:26811:31798\_2:N:0:TCTGCAAG+GCTGCACT  
AAGAGTCTTTATGATTCAAAACCTATCGTTGTCTGACCTTACAAGTTGAGGAGACTTTACAGCGGCT  
TATTGTCGCGCAGTTTCCAGAATTGCGGTTGAAGTTCACCCATTCTAT

+

FFFFFFFFFFFF:FFF:FFFFFFFFFFFFFFFFFFFFFFFFFFFFFFFFFFFFFFFFFFFF:FFFFFF:FFFFFFFFFFFFFFFF  
FFFF:FFFF:FF:FF:FFFFFF,FFFFFFFFFFFFFFFF,FF:F:FFF

@A00721:190:HGJW7DSXY:4:1269:9534:33755\_2:N:0:TCTGCAAG+GCTGCACT  
AACCCTATTCTTGATGTGAAAGATGCATCGAGGTATACGTCTAGGAACATTGATTGGGAACGTACCTA  
CTCACGAGACGTCATGAAAGCTATCGGAGGGAAGCAAAATGTTTCGTT

+

FFFFFFFFFFFFFFFFFFFF:FF:FFFFFFFFFFFF:FFFFFFFFFFFFFFFFFFFFFFFFFFFFFFFFFFFFFFFFFFFF  
FFF:FFFFFFFFFFFFFFFFFFFFFFFFFFFFFFFFFFFFFFFFFFFF:FFFFF

@A00721:190:HGJW7DSXY:4:2419:30490:33536\_1:N:0:TCTGCAAG+GCTGCACT  
TGATGATGTAGCCACTATAATGCTTAAGAGAGAGATTGATGTATGTCATTTCTGCTTAGTTTGTCCCG  
GCGAATTATTGGACACGATGAAAAATGACATACCCGTTCTGACCTTGGTATCGTTATCCGTCATGGA  
GAT

+

FFFFFFFFFFFFFFFFFFFFFFFFFFFFFFFFFFFFFFFFFFFFFFFFFFFFFFFFFFFFFFFFFFFFFFFFFFFF:FFFFFFFF  
FFFFFFFF:FFFFFFFFFFFFFFFFFFFFFFFFFFFFFFFFFFFFFFFFFFFFFFFFFFFFFFFFFFFFFFFFFFFF  
FFF

@A00721:190:HGJW7DSXY:4:2230:17644:33833\_2:N:0:TCTGCAAG+GCTGCACT  
CGGTCAATGACAAAACCTTCGAATATGTTACGACATGGCTTCGTAACAACAGTGCGAGGATTGTCATC  
TCGGGGAAAGTGATTACCAAGATGTTTCATATAGATACGAGATACCTA

+

FFFFFFFFFFFFFFFFFFFFFFFFFFFFFFFFFFFFFFFFFFFFFFFFFFFFFFFFFFFFFFFFFFFFFFFFFFFF  
FFFFFFFF:FFFFFFFFFFFFFFFFFFFFFFFF:FFFFFFFFFFFFFFFFFFFFF

@A00721:190:HGJW7DSXY:4:2433:3097:8359\_2:N:0:TCTGCAAG+GCTGCACT  
TTACTCGTTATCGGAGCTAAGAAGAAGACTTTGGGTACACGTTATGCTCGAAACTTAACGTTAGTAC  
CGGAGGTGATCTCTCTGCTTCTGCGTTACTGAGAGAAAAGATTGAGGA

+

FFFFFFFFFFFFFFFFFFFFFFFFFFFFFFFFFFFF::FFFFFFFFFFFF,FFFFF:FFFFFFFFFFFFFFFFFFFF  
FFFFFFFFFFFFFFFF:FFFFFFFFFFFFFFFFFFFF:FFFFFFF:FFFFFFFFFFFF

@A00721:190:HGJW7DSXY:4:1310:19144:19085\_2:N:0:TCTGCAAG+GCTGCACT  
AGAACACGTCAAGAAGTCGCTCGGCGTTGTTCTTGAAAACCAAGTTAAGAAGGAGGCTGATCATGGAG  
TCTTTGTACCTTCTGTCAAACCTTCGAGGTACAGCTACGAGAGGTGATC

+

F:FFFFF:F,F::FFF,FFFFF:FFFFFFF:F:FF:F:FF:F:FFFF,,F:F:::,FFFFF::,,FFF  
:,F,F:FFFF,FF::F,,FFFFFFFF::F,F,:FFFFFFFF:F:FFF

@A00721:190:HGJW7DSXY:4:1423:27977:35759\_2:N:0:TCTGCAAG+GCTGCACT  
TTGAAGGCTGGCTCTAAGGGAGACTCCTTCTTTTGAATGTTGTAAAGAATTGGGTTGAGAAGTGTGC  
TTTACAAGGAGTTAGACTCTTCTTCAAGTTTTTAGATCTTCTTGATAA

+

F:FFFFF:FFFFFFFFFFFFFFFFFFFFFFFF,FFFFFFFFFFFFFFFFFFFF:FF,FFFFFFFFFFFFFFFFFFFF  
FFFF:FFFFFFFFFFFF,FFFFFFFFFFFFFFFFFFFF:FFFFFFFFF:FFFF

@A00721:190:HGJW7DSXY:4:2144:14895:35180\_1:N:0:TCTGCAAG+GCTGCACT  
CAATAGCCACAGACTTTCTGGGAAAAGAGACCTCTGTTGGTAGAGGAGTTGAGAGAATTACTCAGATT  
CAATCTGGCATCACTGAACGTCTACAACGAGTTAGGGAGTGGCTAGGTTTTAAAGATCCTTTGCACA  
AGC

+  
FFFFFFFF:FFFFFFFFFFFFFFFFFFFFFFFFFFFFFFFFFFFFFFFFFFFFFFFFFFFFFFFFFFFFFFFFFFFFFFFF  
FFFFFFFFFFFFFFFFFFFFFFFFFFFFFFFFFFFFFFFFFFFFFFFFFFFFFFFFFFFFFFFFFFFFFFFFFFFFFFFF  
FFF  
@A00721:190:HGJW7DSXY:4:2551:30309:2660\_2:N:0:TCTGCAAG+GCTGCACT  
AGGACTGATGGTGAGATTCTTTTACCTTTTGGAGGTCCAGGAACCTTTACTCCTAGTGTCTTTTCTAG  
AGTCCAAGGACGTTTCCGTGCGAGGATGACAGGTGGGAGACCGCTCAA  
+  
FFFFFFFFFFFFFFFFFFFFFFFFFFFFFFFFFFFFFFFFFFFFFFFFFFFFFFFFFFFFFFFFFFFFFFFFFFFFFFFF  
FFFFFFFFFFFFFFFFFFFFFFFFFFFFFFFFFFFFFFFFFFFFFFFFFFFFFFFFFFFFFFFFFFFFFFFFFFFFFFFF  
FFFFFFFFFFFFFFFFFFFFFFFFFFFFFFFFFFFFFFFFFFFFFFFFFFFFFFFFFFFFFFFFFFFFFFFFFFFFFFFF  
@A00721:190:HGJW7DSXY:4:2132:20256:24862\_2:N:0:TCTGCAAG+GCTGCACT  
TCTGCCACTTCTAATTTTAGGAAACGTCGCGAAAAGAAAGTTCATGAGGATGTCTTGGTCGAAAAATA  
TCGCCGGAACCTTCTAATAGAGGATCCTGATGACATTATTTCAACGGA  
+  
FFFFFFFFFFFFFFFFFFFFFFFFFFFFFFFFFFFFFFFFFFFFFFFFFFFFFFFFFFFFFFFFFFFFFFFFFFFFFFFF  
FFFFFFFFFFFFFFFFFFFFFFFFFFFFFFFFFFFFFFFFFFFFFFFFFFFFFFFFFFFFFFFFFFFFFFFFFFFFFFFF  
@A00721:190:HGJW7DSXY:4:2436:2121:26741\_1:N:0:TCTGCAAG+GCTGCACT  
GTCTCTGTAAGTGTCTCCAGTGATTGCGAATTAGAGAAAGACGACCTTCTTGTGGGGACTGAGACCTC  
TGAATTTTCAGGGTGCCCTGTTGAGGACGTTGAAAGGGATAATTTCAACTCTGAGACTTCTAAGAGTG  
+  
FF,FF,F,F,,,FF:FFF,,FFFF:F,:,FF:F,FF,F:F,FFF:FF:FFFF,F,F:FF,FFF:,F:  
FFFFFFFFF:FF:F,F,,F,,FF:FFF,FFFFFF,:FF:F,FFFFFF:FFFFFFFFF:FFFFFFFFF  
@A00721:190:HGJW7DSXY:4:2361:7392:26099\_1:N:0:TCTGCAAG+GCTGCACT  
CCGATCTAGTGATCGTATTAGAACAGCTGATTCTTATTGCATGAACGTCGCTGAGGTCAAACCTGTGG  
ACGTTCTTTTCATCGACGAATTATTCATGATTCACGCTGGTCAGACCCTTTTCTTACACATCTACTT  
AAG  
+  
FFFFFFFFFFFFFFFFFFFFFFFFFFFFFFFFFFFFFFFFFFFFFFFFFFFFFFFFFFFFFFFFFFFFFFFFFFFFFFFF  
FFFFFFFFFFFFFFFFFFFFFFFFFFFFFFFFFFFFFFFFFFFFFFFFFFFFFFFFFFFFFFFFFFFFFFFFFFFFFFFF  
FFF  
@A00721:190:HGJW7DSXY:4:2564:25229:18380\_1:N:0:TCTGCAAG+GCTGCACT  
CAATCAAATCGGATTCATCAATCGTATTGATCTCCAAGTCGAAACTACTTCAACATCAACGACATCA  
TTCTTGATGAGTGTGCTTCTTATCGAAGTCTCAGTTATCGCTGCCCGCCGACGTTTGTGCGGAACTC  
TCA  
+  
FFFFFFFFF:FFFFFFFFFFFFFFFFFFFFFFFFFFFFFFFFFFFFFFFFFFFFFFFFFFFFFFFFFFFFFFFFFFFF  
FFF:FFFFFF:FFFFFFF,FFFF:FFFF:FFFFFFF:FFFF:FFFFFFFFFFFFFFFF:FFFF:FF  
FFF  
@A00721:190:HGJW7DSXY:4:2472:24144:24549\_1:N:0:TCTGCAAG+GCTGCACT  
ATTCAACCCCTTATATCGAGGCTATCGAGGACGATGAGTATCTTGAAGTTGTTGACGACAAGCCTCAA  
GAGGGTAGAGGACCACCTGGATCTTCTACTGTCTCTGCCTTCCAAGATTTCTTAGAAGAGGTTATTCC  
TGG  
+  
FFFFFFFFFFFFFFFFFFFFFFFFFFFFFFFFFFFFFFFFFFFFFFFFFFFFFFFFFFFFFFFFFFFFFFFFFFFF  
FFFFFFFFFFFFFFFFFFFFFFFFFFFFFFFFFFFFFFFFFFFFFFFFFFFFFFFFFFFFFFFFFFFFFFFFFFFF  
FFF  
@A00721:190:HGJW7DSXY:4:1128:25021:34084\_1:N:0:TCTGCAAG+GCTGCACT  
TACCTTTATAGGTAAGAAGCCCTTGAGCCGCGTAGTCAGCGCGTTTAGCTGTATCATCAGTCAGAGT  
ATACCCGATAGGGTACCGAGTCTCCAAGAGAATATTTATTCTTATGAGGCTCGAACTTCAACGTTTT  
CAC  
+  
FFF:FFFFFFFFFFFFFFFFFFFF:FFFF:FFFF:FFFF:FFFF:FFFFFFFFF,FFFFFFFFF:FFFFF  
FFFFFFFFFFFFFFFFFFFF:F:FFFFFF:FFFFFFFFFFFF:FFFFFFFFFFFFFFFF:FFFFFFFFF:FF  
FFF

@A00721:190:HGJW7DSXY:4:1104:30599:1031\_1:N:0:TCTGCAAG+GCTGCACT  
CACTTTGATGATTTTATCACTTTATTATGACCTTGGAAAGTTTTCGGCTGTGGTTGTCGCTGGGGACG  
ATTCCATTCTGTTTTCAAAGACTCCAATAACTGATCATTCTGATCATATGATTTTGGACAATGGTTTC  
GAA

+

FFFFFFFFFFFFFFFFFFFFFFFFFFFFFFFFFFFFFFFFFFFFFFFFFFFFFFFFFFFFFFFFFFFFFFFF  
FFFFFFFFFFFFFFFFFFFFFFFFFFFFFFFFFFFFFFFFFFFFFFFFFFFFFFFFFFFFFFFFFFFFFFFF  
FFF

@A00721:190:HGJW7DSXY:4:2333:31394:2785\_2:N:0:TCTGCAAG+GCTGCACT  
GATTCCGAGAGGTTTATCCTGATGTGGAGGGAGTTCTTGAAGCATCCCGACCTTTCCTTGTGAAAATT  
TTGATGCGGTTTCATAAGATTATCAGTAATCCTGATTCTACTACGGAT

+

FFFFFFFFFFFFFFFFFFFFFFFFFFFFFFFFFFFFFFFFFFFFFFFFFFFFFFFFFFFFFFFFFFFFFFFF  
FFFFF:FFFFFFFFFFFFFFFFFFFFFFFFFFFFFFFFFFFFFFFFFFFFFFFFFFFFFFFFFFFFFFFF

@A00721:190:HGJW7DSXY:4:1609:20374:31046\_2:N:0:TCTGCAAG+GCTGCACT  
TTGATTAAGACTCTTCCGAAAGGCGAACTTTGGGAATTTGAAGCTCAGGGTGAAGCACAACGTTTGAC  
CGTGACGAACTGTGGTGTCTTGATCTACGTTACGGATATACTCTCCT

+

FFFFFFFFFFFFFFFFFFFFFFFFFFFFFFFFFFFFFFFFFFFFFFFFFFFFFFFFFFFFFFFFFFFFFFFF  
FFFFF:F:FFFFFFFFFFFFFFFFFFFFFFFFFFFFFFFFFFFFFFFFFFFFFFFFFFFFFFFFFFFFFF

@A00721:190:HGJW7DSXY:4:1231:9381:15107\_2:N:0:TCTGCAAG+GCTGCACT  
CAGGGGTTTTCGAATAGTGATAGCCACCCGCCTTACAGAGGGGCAGCAGCATGACCATAATTGGTATT  
GACTTTGGTACCACCTTTTCTACTGTCTGTCTCGCCTCTTCGAATGAA

+

FFFFFFFFFFFFFFFFFFFFFFFFFFFFFFFFFFFFFFFFFFFFFFFFFFFFFFFFFFFFFFFFFFFFFFFF  
FFFF:F:FFFF:FFFFFFFFFFFFFFFFFFFFFFFFFFFFFFFFFFFFFFFFFFFFFFFFFFFFFFFF

@A00721:190:HGJW7DSXY:4:2453:12798:16078\_1:N:0:TCTGCAAG+GCTGCACT  
ACAATCATTGGTTTTCTAATAATGATGACACTATTGTTTATGGATATGATGCTATTACTCATGATGG  
TTACGGTCAGGGAGGATTCTCAGTTTACAAGGACCTTAAGCGATGGATCGGGGTTAATTCTAAAACAT  
TAC

+

FFFFFFFFFFFFFFFFFFFFFFFFFFFFFFFFFFFFFFFFFFFFFFFFFFFFFFFFFFFFFFFFFFFFFFFF  
F:FFFFFFFFFFFFFFFFFFFFFFFFFFFFFFFFFFFFFFFFFFFFFFFFFFFFFFFFFFFFFFFFFFFF  
FFF

@A00721:190:HGJW7DSXY:4:1564:15447:29904\_2:N:0:TCTGCAAG+GCTGCACT  
TGGTTTGGTCGTTTCAGTACCCAGTCAGTATACCTCTACGCAAAGATATTTTCATGAAAACATACAGAGG  
AACGTACCGGATTACCTGTCTTTTCATATTATGAATGAACCTTCGGCCG

+

FFFFFFFFFFFFFFFFFFFFFFFFFFFFFFFFFFFFFFFFFFFFFFFFFFFFFFFFFFFFFFFFFFFFFFFF  
FFFFFFFF:FFFFFFFFFFFFFFFFFFFFFFFF:FFFF,FFFFFFFF:FFFFFFFF

@A00721:190:HGJW7DSXY:4:2527:5954:11553\_2:N:0:TCTGCAAG+GCTGCACT  
CTTCTATCGTCTTACGTTACGTAATTACTATAGTGTTATTTATTCTGGTGGTATGATAATCTTGGA  
GGTCGTGACGTTGATGAAGCTATAAGAGCGTTCTTATTACGGCGCACT

+

FFFFFFFFFFFFFFFFFFFFFFFFFFFFFFFFFFFFFFFFFFFFFFFFFFFFFFFFFFFFFFFFFFFFFFFF  
FFFFFFFFFFFFFFFFFFFFFFFFFFFFFFFF:FFFFFFFFFFFFFFFFFFFFFFFFFFFFFFFF

@A00721:190:HGJW7DSXY:4:1566:10737:18239\_1:N:0:TCTGCAAG+GCTGCACT  
CCTCGTCAATACTTTTCAATAATATACGTCTTGAACCTCACTTATGACGATCTAGTGAAATTAACGCGT  
CCTTTTCTGGAACGTAGTTTTACTATTATGAACAAAGTTATCAAAGATAGTGGCATTCAAGGCAAAC  
TAC

+

FFFFFFFFFFF:FFFFFFFF:FFFFFFFFFFFFFFFFFFFFFFFFFFFFFFFFFFFFFFFFFFFFFFFF  
FFFFFFFFFFFFFFFFFFFFFFFFFFFFFFFFFFFFFFFFFFFFFFFFFFFFFFFFFFFFFFFFFFFFF:FFFFFFFFFFFFFFFFFFFFFFFF

FFF

@A00721:190:HGJW7DSXY:4:1438:21468:12461\_2:N:0:TCTGCAAG+GCTGCACT  
CAGGGGCTATTACTCTTGCTGAAACAGCTATTAAGCTGTTGAGCGGGTAATTACACCTAACGAGCT  
TGATCTGCCATCGCTGAAGGATGTGCACTCTTTTCTGCTACTTTAACG

@A00721:190:HGJW7DSXY:4:2661:16721:30953\_2:N:0:TCTGCAAG+GCTGCACT  
TTCTTAAAAAGAAGATAGAGAGTCATACTTTGGGCTATCGTTCAGGTGCATGGGGTTGGATAGCCAAT  
ATTGAAGTGGACACCTCTGGTAGTATCGAAGTAAAGATAACCAATAAG

@A00721:190:HGJW7DSXY:4:1553:27371:32049\_1:N:0:TCTGCAAG+GCTGCACT  
AATCTTACCACTATCTACGAACCTAAAGTTCTGAAGACGTTGCTTGTCGCTTCCTCCTTTAATGGCAC  
TACCTCGGTACAATCTTACTTGGAACGAAGGCGACCTGTTCCGGAGTTTTTACGGGATCCGGAATGTT  
CTG

@A00721:190:HGJW7DSXY:4:1609:32000:21402\_2:N:0:TCTGCAAG+GCTGCACT  
TATAAAGAATCTTTACCAGGACTCCTACTACAGGAGGCAGTCTTCTGATCGTAAGAAGTTTATAAGGA  
ACATATCCATTTGTTGTAATAGGGTCATCAACTTAGAACTCGAACTC

@A00721:190:HGJW7DSXY:4:2122:15863:11397\_1:N:0:TCTGCAAG+GCTGCACT  
TGTCTTTCCAAGCTTACCTGTATCTTCAATGAAATTGGACTCTTCGATAGGGGACATTTTATCGTGGG  
CTTTCCGTAAAGGAAGATCTGTTATCGACGGTTTATCGTTTACGAAGTATCACTCCACCGGTGAATGG  
TTT

@A00721:190:HGJW7DSXY:4:1163:2166:20807\_1:N:0:TCTGCAAG+GCTGCACT  
ACTTACTTAGACTTTTCCTACGATACAAATGATAACTTCTAATTTACGTTTGCTACTCAGAGCTGGTCC  
TCTCAGCAAAGGGATGCATGGTGTATCTCCTCAGGAGTCCCGGCATTTGATAATAATGACGAGACTT  
TCG

@A00721:190:HGJW7DSXY:4:2647:1271:1564\_1:N:0:TCTGCAAG+GCTGCACT  
GTACCAGCGCATCTCGTGTCGAGCCTCGACCCGATTATATGGTATTAACCTATAAAGGTGAGGAGACC  
ATTTTCTTGCTGAAATTTATAGAAGATTATTTTGACAGAATCAATAAGAATCATCGATTCTCGATTCTG  
TAG

@A00721:190:HGJW7DSXY:4:2635:11948:29199\_1:N:0:TCTGCAAG+GCTGCACT  
AATGGCAAATAGTGGAAGGCTCCAGTCAACACTAGTTCGAGTGCTGCTTTGGATTACGATGACGTGA  
GAATAGGTGAAGGGATAGTTTTTACCTCGACCAACATTAAGGCGGCGGCGACTAATCTTAAAGCTTCA  
CCC





@A00721:190:HGJW7DSXY:4:1152:4924:1939\_1:N:0:TCTGCAAG+GCTGCACT  
AACGATTCTTCGACTATATTAAAGAAATAAAAATACTTCAAGTACCTGAACTTTACATTTTTAATGGT  
ATGGTATAATGTGTCTTACAAATAGAACCTTCACTCTCGGTAATGAGAGTGTATTCCTTAATATTCTA  
GTA

@A00721:190:HGJW7DSXY:4:1112:5629:6511\_1:N:0:TCTGCAAG+GCTGCACT  
CTAGGATTTATCACACTCCTAAATTTGATAGCAATTTATGTTTTAAATGCTAGGAAAAATTTAGAAAA  
ACTCCATTGTATAGTTCAAGGAGTACTTAATTCAATAGCTTTAGTATTATTTACTATCGCCTTTATTG  
AAA

@A00721:190:HGJW7DSXY:4:1665:22046:5259\_1:N:0:TCTGCAAG+GCTGCACT  
ACACAAAAGTGACGCGCGAAGGAATCTTAATTGATTGAAGCTAGGCGTTGGGAGAATGAACTGCCGC  
TTCCCGGAAGAAACGATCTATTTACAGAGTATTTAGAGTAGTCCAAAGTTTGTATAAATTTATATGAT  
TTT

@A00721:190:HGJW7DSXY:4:1178:25048:4570\_2:N:0:TCTGCAAG+GCTGCACT  
GCCGGTCGGCAGATCGGCACCACTGGTCTCTACGTTCAGGGACCCGCTGTGCAGAATAACCTTCCCAA  
ATCTAGATCTGCACAGAAGAAGGCTGAAGGTCGTTACCGGACGACCAC

@A00721:190:HGJW7DSXY:4:2554:31259:9596\_2:N:0:TCTGCAAG+GCTGCACT  
GGGAAGTGAAGCAGTACCTCAGTCAAAAGTCACATTCACCACTCCCATACCAATCAATGATGTGACTA  
TACAGTTCGGCCATTTCAAGAGTGGTCAATACGTCGTGGGAGGTACTG

@A00721:190:HGJW7DSXY:4:2530:29441:24455\_1:N:0:TCTGCAAG+GCTGCACT  
GCAGAGTGACTGGAGTTCAGACGTGTGCTCTTCCGATCTCAGGGTAGTCTCTAAGTCTACCAGGAAGA  
GGGGAAATGTCCCCAAAACTGAGAAGAATAAAGGGAAAGTCCATCAGGACCTAAGAAGGGGAAATTA  
CCC

@A00721:190:HGJW7DSXY:4:1543:23900:21402\_2:N:0:TCTGCAAG+GCTGCACT  
GGCCAAAGAGGCCGCTGCTACGAAGTCGCTGAAGGCGGCTTGGGTCATTAAGGGTAGCTGTAAAGTTG  
CGCCTGCCGACCCCATCTTTGAGACCAAGACTCTCTACAGTAGGTTTCG

@A00721:190:HGJW7DSXY:4:2331:8766:34397\_1:N:0:TCTGCAAG+GCTGCACT  
GGACGAAGGTGAGAGGACTTTTGGCTACTGGCGACAAACTGAGAGCAGTCGCTGGGGAAAGAGAATTG





@A00721:190:HGJW7DSXY:4:2368:13096:21605\_2:N:0:TCTGCAAG+GCTGCACT  
CAGGAAGTGTCTCCACTGATTCGGAATTAGAGAAAGACGACCTTCTTGTGGGGACTGAGACCTCTGAA  
TTTTCAGGGTGCCCTGATGAGGACGTTGAAAGGGATAATTTCAACTCT

+

FFFFFFFFFFFFFFFFFFFFFFFFFFFFFFFFFFFFFFFFFFFFFFFFFFFFFFFFFFFFFFFFFFFFFFFF  
FFFFFFFFFFFFFFFFFFFFFFFFFFFFFFFFFFFFFFFFFFFFFFFFFFFFFFFFFFFFFFFFFFFFFFFF

@A00721:190:HGJW7DSXY:4:2625:31259:17863\_1:N:0:TCTGCAAG+GCTGCACT  
CCGATCTAGTGATCGTATTAGAACAGCTGATTCTTATTGCATGAACGTCGCTGAGGTCAAACCTGTGG  
ACGTTCTTTTCATCGACGAATTATTCATGATTCACGCTGGTCAGACCCTTTTCTTACACATCTACTT  
AAG

+

FF:FF:FFFF:FFFFFF:FFFFFFFFFFFFFFFFFFFFFFFFFFFFFFFFFFFFFFFFFFFFFFFFFFFF  
FFFFFFFFFFFFFFFFFFFFFFFFFFFFFFFFFFFFFFFFFFFFFFFFFFFFFFFFFFFFFFFFFFFFFFFF  
FFF

@A00721:190:HGJW7DSXY:4:2630:12861:23328\_1:N:0:TCTGCAAG+GCTGCACT  
CAATCAAATCGGATTCATCAATCGTATTGATCTCCAAGTCGAACTACTTCAACATCAACGACATCA  
TTCTTGATGAGTGTCGTTCTTATCGAAGTCTCAGTTATCGCTGCCCGCCGACGTTTGTGCGGAATC  
TCA

+

FFFFFF,F,FFFFFFFF:FFFFFFFFFFFFFFFFFFFFFFFFFFFFFFFFFFFFFFFFFFFFFFFFFFFF  
:FFFFFFFF:FFFFFFFFFFFFFFFF,FFFF:FFFFFFFFFFFFFFFF:FFFFFFFFFFFFFFFF:FFFF  
FFF

@A00721:190:HGJW7DSXY:4:2523:28791:1344\_1:N:0:TCTGCAAG+GCTGCACT  
ATTCAACCCCTTATATCGAGGCTATCGAGGACGATGAGTATCTGAAGTTGTTGACGACAAGCCTCAA  
GAGGGTAGAGGACCACCTGGATCTTCTACTGTCTCTGCCTTCCAAGATTTCTTAGAAGAGGTTATTCC  
TGG

+

FFFFFFFFFFFFFFFFFFFFFFFFFFFFFFFFFFFFFFFFFFFFFFFFFFFFFFFFFFFFFFFFFFFFFFFF  
FFFFFFFFFFFFFFFFFFFFFFFFFFFFFFFFFFFFFFFFFFFFFFFFFFFFFFFFFFFFFFFFFFFFFFFF  
FFF

@A00721:190:HGJW7DSXY:4:1128:25192:35321\_1:N:0:TCTGCAAG+GCTGCACT  
TACCTTTATAGGTAAGAAGCCCTTGAGCCGCGTAGTCAGCGGTTTAGCTGTATCATCAGTCAGAGT  
ATACCCGATAGGGTACCGAGTCTCCAAGAGAATATTTATTCTTATGAGGCTCGAACTTCAACGTTTT  
CAC

+

FFF:FFFFFFFF:FFFFFF:FFFFFFFFFFFFFFFFFFFFFFFFFFFFFFFFFFFFFFFF:FFFFFFFFFFFF  
FFFF,FFFFFFFF:FF,FFFFFFFF:FFFFFF:FF:FFFFFFFFFFFFFFFF:FF:FFFFFFFFFFFF  
FFF

@A00721:190:HGJW7DSXY:4:1232:26060:6762\_1:N:0:TCTGCAAG+GCTGCACT  
CACTTTGATGATTTTATCACTTTATTATGACCTTGAAAGTTTTCGGCTGTGGTTGTGCTGGGGACG  
ATTCCATTCTGTTTTCAAAGACTCCAATAACTGATCATTCTGATCATATGATTTGGACAATGGTTTC  
GAA

+

FFFFFFFFFFFFFFFFFFFFFFFFFFFFFFFFFFFFFFFFFFFFFFFFFFFFFFFFFFFFFFFFFFFFFFFF  
FFFFFFFFFFFFFFFFFFFFFFFFFFFFFFFFFFFFFFFFFFFFFFFFFFFFFFFFFFFFFFFFFFFFFFFF  
FFF

@A00721:190:HGJW7DSXY:4:2333:31403:2581\_2:N:0:TCTGCAAG+GCTGCACT  
GATTCCGAGAGGTTTATCCTGATGTGGAGGGAGTTCTTGAAGCATCCCGACCTTTCCTTGTGAAAATT  
TTGATGCGGTTTCATAAGATTATCAGTAATCCTGATTCTACTACGGAT

+

FFFFFFFFFFFFFFFFFFFFFFFFFFFFFFFFFFFFFFFFFFFFFFFFFFFFFFFFFFFFFFFFFFFFFFFF  
FFFFFFFFFFFFFFFFFFFFFFFFFFFFFFFFFFFFFFFFFFFFFFFFFFFFFFFFFFFFFFFF,FFF

@A00721:190:HGJW7DSXY:4:2219:7102:16548\_2:N:0:TCTGCAAG+GCTGCACT  
TTGATTAAGACTCTTCCGAAAGGCGAACTTTGGGAATTTGAAGCTCAGGGTGAAGCACAAACGTTTGAC

$+$ 

FFFFFFFF:F:FFFFFFFFFFFFFFFFFFFFFFFFFFFFFFFF,FFFFFFFF

+

```
FFF,FFFFFFFFFFFFFFFFFFFFFFFFFFFFFFFFFFFFFFFF:FFFFF
```

+

FFFFFFFFFFFFFFFFFFFFFFFF:FFFFFFFFFFFFFFFFFFFFFFFFFFFFFFFFFFFFFFFFFFFFFFFF

+

F:FFF,,FFFFFF,:F,FFF::FFF:,FF:FFF:FF::F,,FF:FFF:F

+

FFFFFFFFFFFFFFFFFFFFFFFFFFFFFFFFFFFFFFFFFFFFFFFFFFFFF:FFFFFF

+

FFF:FFFFFFFFFFFFFFFF:FFF:FFFFFFFFFFFFFFFFFFFFFFFFFFFFFFFFFFFFFFFFFFFFFFFFFFFFFFFF

+

FFFFFFFFFFFFFFFFFFFFFFFFFFFFFFFFFFFFFFFFFFFFFFFFFFFFFFFFFFFFFF

+

FFF:FFFFFFFFFFFFFFFFFFFFFFFFFFFFFFFFFFFFFFFFFFFFFFFFFFFFFFFFFFFFF

@A00721:190:HGJW7DSXY:4:2101:10267:31109\_1:N:0:TCTGCAAG+GCTGCACT

TACCTCGGTACAATCTTACTTGGAACGAAGGCGACCTGTTCCGGAGTTTTTACGGGATCCGGAATGTT

CTG

[illegible]

@A00721:190:HGJW7DSXY:4:1223:13295:2660\_2:N:0:TCTGCAAG+GCTGCACT  
TTATAAAATATAAAAATAAGGGAGTCATAACTTTTGTTACCAAATTCTTGGCTTTCAACGAAGTCTCT  
GATTTTATTAATCATTACTTTAACGATCTCTCGGTCATTTACTCTGTA

+

FFFFFFFF:FFFFFFFF:FFFFFFFFFFFFFFFFFFFFFFFFFFFFFFFFFFFFFFFFFFFFFFFF  
FFFFFFFFFFFFFFFFFFFFFFFF:FFFFFFFFFFFFFFFF:FF:FFFFFF

@A00721:190:HGJW7DSXY:4:1205:27227:5181\_2:N:0:TCTGCAAG+GCTGCACT  
CTATCTTTTCAGACACTTCTTATATTATTACAATAGTTAATATCATATTAGTAATACTCACTATCGT  
TTTCTGCTTTTTCTTAGCTAATAGATTAATAAAGGATGAGTACGAAAA

+

FFFFFFFFFFFFFFFFFFFFFFFFFFFFFFFFFFFFFFFFFFFFFFFFFFFFFFFFFFFFFFFF  
:FFFFFFFFFFFFFFFF:FFFFFFFFFFFFFFFF:FFFFFFFFFFFFFF

@A00721:190:HGJW7DSXY:4:2469:26811:6558\_2:N:0:TCTGCAAG+GCTGCACT  
TTACGAGACCTGATGGTAGAATAGATTTAGTCTCTACACCCATCTCAACGAGGATAAAGCGAGTTTTC  
CGTCCTGAACGTAATACACGAAGAGATCATCCGCAAACGACTCGAAAC

+

FFFFFFFFFFFFFFFFFFFFFFFFFFFFFFFFFFFFFFFFFFFFFFFFFFFFFFFFFFFFFFFF  
FFFFFFFFFFFFFFFF:FFFFFFFFFFFFFFFF:FFFFFFFFFFFFFF

@A00721:190:HGJW7DSXY:4:1376:14226:30044\_2:N:0:TCTGCAAG+GCTGCACT  
CTCCGAAAATGGTTTCAAATGAGGTCAAAGCTCTATTTATTAAACGAACATTATCCGATTCTTCGAG  
GGTATCACTACCACTGATCTGCCGACTTTAGTCAAGGAAC TTCAATTC

+

FFFFFFFFFFFFFFFFFFFFFFFFFFFFFFFFFFFFFFFFFFFFFFFFFFFFFFFFFFFFFFFF  
FFFFFFFFFFFFFFFF:FFFFFFFFFFFFFFFF:FFFFFFFF,FFFFFFFF

@A00721:190:HGJW7DSXY:4:2424:15845:34976\_1:N:0:TCTGCAAG+GCTGCACT  
CGACAAATTTTAGAACTTTATTTCAGAACTCTCTCCGATCACCTTGGTGTGATCTCCCGGAGGATCTT  
TTCAATAAGATGTATGATGATAATCTACTATTTTTAAATAGTGATATTAGCGTATACTTGAATACTT  
TAT

+

FFFFFFF:FFFFFFFFFFFFFFFFFFFFFFFFFFFFFFFFFFFFFFFFFFFFFFFFFFFFFFFF  
FFFFFFFFFFFF:FFFFFFFFFFFFFFFF:FFFFFFFFFFFFFFFF:FFFFFFFFFFFFFFFF  
FFF

@A00721:190:HGJW7DSXY:4:1654:24469:36824\_1:N:0:TCTGCAAG+GCTGCACT  
TACCGCAAAAAGTTGGAAGAGGTCTATGATATTTATTTTACTTATACTTTAAATAGCACCGATTATAA  
CTTGACTGTTGATAATATTACAATAGCTCTTTCTCAGAAGATTAGAGAAGTAACCGGTGAACACGTCG  
GTA

+

FFFFFFFFFFFFFFFFFFFFFFFFFFFFFFFFFFFFFFFFFFFFFFFFFFFFFFFFFFFFFFFF  
FF:FFF,FFFFF:FFFFFFFFFFFFFFFF:FFFFFFFFFFFFFFFF:FFFFFFFFFFFFFFFF  
FFF

@A00721:190:HGJW7DSXY:4:1340:29243:5071\_1:N:0:TCTGCAAG+GCTGCACT  
AACGATTCTTCGACTATATTAAAGAAATAAAAATACTTCAAGTACCTGAAC TTACATTTTAAATGGT  
ATGGTATAATGTGTCTTACAAATAGAACCTTCACTCTCGGTAATGAGAGTGATTCTTACTATTCTA  
GTA

+

:F:FFF:FFFFF,F,FFFFF:,FFFFFFFFFFFFFFFF,FF:FF:FF,:F,FFFFFFFFFFFF,FFFFF  
,FF,FFF:FFFFFFFFFFFF,FFFFF:FFF,:FFF,FFFFFF:FFFFFFFF:FFF:,FFFFFFF  
FFF

@A00721:190:HGJW7DSXY:4:1378:26612:22060\_1:N:0:TCTGCAAG+GCTGCACT  
CTAGGATTTATCACACTCCTAAATTTGATAGCAATTTATGTTTTAAATGCTAGGAAAATTTTAGAAAA  
ACTCCATTGTATAGTTCAAGGAGTACTTAATTCAATAGCTTTAGTATTATTACTATCGCCTTTATTG  
AAA

+

:F:FFFFFFF,FFFF,:FFFFFFFFFFFFFFFF:FFFF:FFFFF,FF,FFFFFFFFFFFF:FFFFFFF



FFFF:FFFFFFFFF::FF,FFFF:FFFFFFFFF::FFFFFFFFFFFFFFFFFFFFFFFF:FFFFFFFFF  
FFF

@A00721:190:HGJW7DSXY:4:1234:24623:27915\_1:N:0:TCTGCAAG+GCTGCACT  
CAAAAGTGACGCGCAAGGAATCTTAATTGATTGAAGCTAGGCGTTGGGGAGAATGAACTGCCGCTTC  
CCGGAAGAAACGATCTATTTACAGAGTATTTAGAGTAGTCCAAAGTTTGTATAAATTTATATGATTTT  
CTA

+

FFFFFFFFFFFFFFFFFFFF,FFFFFFFFFFFFFFFFFFFFFFFFFFFFFFFFFFFFFFFFFFFFFFFF  
FFFFFFFFFFFFFFFFFFFF:FFFF,FFFFFFFFFFFFFFFFFFFFFFFFFFFFFFFF:FFFFFFFFFFFFF  
FFF

@A00721:190:HGJW7DSXY:4:1326:7129:29434\_2:N:0:TCTGCAAG+GCTGCACT  
GCCGGTCGGCAGATCGGCACCACTGGTCTCTACGTTCAAGGACCCGCTGTGCAGAATAACCTTCCCAA  
ATCTAGATCTGCACAGAAGAAGGCTGAAGGTCGTTACCGGACGACCAC

+

FFFFFFFFFFFFFFFFFFFFFFFFFFFFFFFFFFFFFFFFFFFFFFFFFFFFFFFFFFFFFFFFF::FFF:F  
FFFFFFF,F,FFFFFFFFFFFFFF:FFFFFFFFF:FFFFFFFFFFFFFF

@A00721:190:HGJW7DSXY:4:2458:20365:4319\_1:N:0:TCTGCAAG+GCTGCACT  
AACTGAGGCAGTACCTCAGTCAAAAGTCACATTCACCACTCCCATACCAATCAATGATGTGACTATAC  
AGTTCGGCCATTTCAAGAGTGGTCAATACGTCGTGGGAGGTACTGAAGCCTTCCCCTCCGCTGGCAGC  
AAG

+

FFFFFFFFFFFFFFFFFFFFFFFFFFFFFFFFFFFFFFFFFFFFFFFFFFFFFFFFFFFFFFFF,FFFFFFFFFFFF  
FFFFFFFFFFFFFFFFFFFFFFFFFFFFFFFFFFFFFFFFFFFFFFFFFFFFFFFFFFFFFFFF:FFFFFFFFFFFFF  
FFF

@A00721:190:HGJW7DSXY:4:1307:9552:30561\_1:N:0:TCTGCAAG+GCTGCACT  
GCAGAGTGAAGGAGTTCAGACGTGTGCTCTTCCGATCTCCGGGTAGTCTCTAAGTCTACCAGGAAGA  
GGGGAAATGTCCCCAAACTGAGAAGAATAAAGGGAAAGGTCCATCAGGACCTAAGAAGGGGAAATTA  
CCC

+

FFFFFFFFFFFFFFFFFFFFFFFFFFFFFFFFFFFFFFFFFFFFFFFFFFFFFFFFFFFFFFFF,FFFFFFF:FFFFFFFFFFFF:FFFFFFF  
FF:FFFFFFFFFFFFFFFFFFFFFFFFFFFFFFFFFFFFFFFFFFFFFFFFFFFFFFFFFFFFFFFFFFFFFFFFF::F  
FFF

@A00721:190:HGJW7DSXY:4:1607:31376:16595\_2:N:0:TCTGCAAG+GCTGCACT  
GGCCAAAGAGGCCGCTGCTACGAAGTCGCTGAAGGCGGCTTGGGTCATTAAGGCTAGCTGTAAAGTTG  
CGCCTGCCGACCCCATCTTTGAGACCAAGACTCTCTACAGTAGGTTG

+

FFFFF:FFFFFFFFFFFFFFFFFFFFFFFFFFFFFFFFFFFFFFFFFFFFFFFFFFFFFFFFFFFFFFFF:FFFFFFFFFFFFF:FFFF  
FFFFFFFFFFFFFFFFFFFFFFFFFFFFFFFFFFFFFFFF:FFFFFFFFFFFFFFFFFFFFFFFF

@A00721:190:HGJW7DSXY:4:2333:2672:8343\_1:N:0:TCTGCAAG+GCTGCACT  
GGACGAAGGTGAGAGGACTTTTGGCTACTGGCGACAAACTGAGAGCAGTCGCTGGGGAAAGAGAATTG  
CGTGGGTTGAAGGCCGACGCTTCGAGCTTGAGTGTGACGAGGCCGCTGACGTTTTTGTCAACGGCGTT  
TGG

+

FFFFFFFFFFFFFFFFFFFFFFFF:FFFF,FFFFFFFFFFFFFFFFFFFFFFFF:FFFFFFFFF:FFFFFFFFFFFF:FFF  
FFFFFFFFFFFFFFFFFFFFFFFFFFFFFFFFFFFFFFFFFFFFFFFFFFFFFFFFFFFFFFFFFFFFFFFFF  
FFF

@A00721:190:HGJW7DSXY:4:1374:9435:11256\_2:N:0:TCTGCAAG+GCTGCACT  
TTAACTATGGGGCGAAGATCCCCTATGGAGTCTTGAAGGACTTAGGTTGGCATATTTATGCCGACGAT  
AATAAGCATGTCACCTTAAGCACCGAGAGATCGGAAGAGCGTCGTGT

+

F:FFFFFFFFFFFFFFFFFFFFFFFF,F:FFFFFFFFF,:FFFF,FFFFFFFFFFFF,FFFFFFFFFFFF:  
FFFFFFFFFFFFFFFFFFFFFFFF:FFFFFFFFFFFFFFFFFFFFFFFFFFFFFFFF,F,

@A00721:190:HGJW7DSXY:4:2601:12481:18756\_1:N:0:TCTGCAAG+GCTGCACT  
AAAATTTTCTTTCTCCGTCATTGGGGATTTGATGTGAGAAGGTGAAGGTGTCAAGGCTCTCT

TCATGCTGATCTTTTCAGGACCTAATCACATCATGATTGATAGTTACGGCTCGTATCGAGTTGGAGGGA  
GGA

+

FFF:FFFFFFFFFFFFFFFFFFFFFFFFFFFFFFFFFFFFFFFFFFFFFFFFFFFFFFFFFFFFFFFFFFFFFFFF  
FFFFFFFFFFFFFFFFFFFFFFFFFFFFFFFFFFFFFFFFFFFFFFFFFFFFFFFFFFFFFFFFFFFFFFFF  
FFF

@A00721:190:HGJW7DSXY:4:2261:23231:7247\_1:N:0:TCTGCAAG+GCTGCACT  
TCAGAGAGGGGAGCTCTGAAAAGGAACTTCGTCAGAAGATGAGGAAGTCTAAGAGGAGGAGTTTGAG  
GAAGGCTCTAGAGAAGATCTCCCCACCTGGAGAAGGCAAGTGGAGAGTCCAGAAGTTGATGAAGAAGG  
ATT

+

FFFFFFFF:FFFFFFFFFFFFFFFFFFFFFFFFFFFFFFFFFFFFFFFFFFFFFFFFFFFFFFFFFFFFFFFF  
FFFFFFFF:FFFFFFFFFFFFFFFF,FFFFFFFFFFFFFFFFFFFFFFFFFFFFFFFFFFFFFFFFFFFFFFFF  
FFF

@A00721:190:HGJW7DSXY:4:2313:19425:17378\_1:N:0:TCTGCAAG+GCTGCACT  
CCTAAGGTGGATGAGGGAGGTTGTTTCTTTGTAGTTTTAGATAATCTTTTGAGAAGGGGTCATAGAGC  
CAGCAAGAGAAGCTTATATGCTGGTTTAAGTGATGATTATCACTCCTTGAGAAGACAAGCCACATTAA  
GAT

+

FFFF:FFFF:FFFF::,,,FF,FFFF,F:F,FFFFFF:FFFF,F,FFFF,::F:F,:,F,:FFFF:F  
:,FFFFFF:::FFFF,FF:F:F:FFFF:F,FFF:FF:FF,,F:FFFF,:F:FFFF:,FFFFF  
FFF

@A00721:190:HGJW7DSXY:4:1308:18204:12696\_1:N:0:TCTGCAAG+GCTGCACT  
ATAGTGTTCTTCCGGGAAGTTGTGGGATTTAACTTTGACTCACTACTCCGATCAGATCCGGATGGT  
TTGATTGGTTTGGACTACTCGACTTTTGATCTGGAGTTGTCTAGGGTCATGGCAGATACTACCGATAA  
GGT

+

F:F,FFF:FFFFFF:FFFFFFFFFFFFFFFFFFFFFFFFFFFFFFFFFFFFFFFFFFFFFFFFFFFFFFFF  
FFFFFFFF:FFFF:FFFF:FFFF:FFFFFFFF:FFFFFFFF:FFFF:FFFFFFFFFFFFFFFFFFFFFFFF  
FFF

@A00721:190:HGJW7DSXY:4:1534:11930:27007\_2:N:0:TCTGCAAG+GCTGCACT  
AAGAGTCTTTATGATTCAAAACCTATCGTTGTCGTACCTTACAAGTTGAGGAGACTTTACAGCGGCT  
TATTGTCGCGCAGTTTCCAGAATTGCGGTTGAAGTTCACCCATTCTAT

+

FFFFFFFFFFFFFFFFFFFFFFFFFFFFFFFFFFFFFFFFFFFFFFFFFFFFFFFFFFFFFFFFFFFFFFFF  
FFFFFFFFFFFFFFFFFFFFFFFFFFFFFFFFFFFFFFFFFFFFFFFFFFFFFFFFFFFFFFFF

@A00721:190:HGJW7DSXY:4:2211:28836:17425\_2:N:0:TCTGCAAG+GCTGCACT  
AACCCTATTCTTGATGTGAAAGATGCATCGAGGTATACGTCTAGGAACATTGATTGGGAACGTACCTA  
CTCACGAGACGTCATGAAAGCTATCGGAGGGAAGCAAAATGTTTCGTT

+

FFFFFFFFFFFFFFFFFFFFFFFFFFFFFFFFFFFFFFFFFFFFFFFFFFFFFFFFFFFFFFFFFFFFFFFF  
FFFFFFFFFFFFFFFF:FFFF:FF:FFFFFFFFFFFFFFFFFFFFFFFF

@A00721:190:HGJW7DSXY:4:1107:27163:21386\_2:N:0:TCTGCAAG+GCTGCACT  
GATGATGTAGCCACTATAATGCTTAAGAGAGAGATTGATGTATGTCATTTCTGCTTAGTTTGTCCCGG  
CGAATTATTGGACACGATGAAAAATGACATACCCGTTCTGACCTTG

+

FFFFFFFFFFFFFFFFFFFFFFFFFFFFFFFFFFFFFFFFFFFFFFFFFFFFFFFFFFFFFFFFFFFFFFFF  
FFFFFFFFFFFFFFFFFFFFFFFFFFFFFFFFFFFFFFFFFFFFFFFFFFFFFFFF

@A00721:190:HGJW7DSXY:4:1509:6813:32863\_2:N:0:TCTGCAAG+GCTGCACT  
GGTCAATGACAAAACCTTCGAATATGTTACGACATGGCTTCGTAACAACAGTGCGAGGATTGTCATCT  
CGGGGAAAGTGATTCACCAAGATGTTTCATATAGATACGAGATACCTAG

+

FFFFFFFFFFFFFFFFFFFFFFFFFFFFFFFFFFFFFFFFFFFFFFFFFFFFFFFFFFFFFFFFFFFFFFFF  
FFFFFFFFFF,FFFFFFFF:FFFFFFFFFFFFFFFF:FFFFFFFFFFFFFFFF



FFFFFFFFFFFFFFFFFFFFFFFFFFFFFFFFFFFFFFFFFFFFFFFFFFFFFFFFFFFFFFFFFFFFFFFF  
FFF  
@A00721:190:HGJW7DSXY:4:2374:9046:34945\_2:N:0:TCTGCAAG+GCTGCACT  
CAAATCGGATTCATCAATCGTATTGATCTCCAAGTCGAACTACTTCAACATCAACGACATCATTCT  
TGATGAGTGTCTTCTTATCGAAGTCTCAGTTATCGCTGCCCCGCCGA  
+  
FFFFFFFFFFFFFFFF:FFFFFFFFFFFFFFFFFFFFFFFFFFFFFFFFFFFFFFFFFFFFFFFFFFFFFFFF  
FFFFFFFFFFFFFFFFFFFFFFFF:FF:,FFFFFFFFFFFFFFFFFFFFFFFFFFFFFFFF  
@A00721:190:HGJW7DSXY:4:2645:21793:28494\_1:N:0:TCTGCAAG+GCTGCACT  
ATTCAACCCCTTATATCGAGGCTATCGAGGACGATGAGTATCTTGAAGTTGTTGACGACAAGCCTCAA  
GAGGGTAGAGGACCACCTGGATCTTCTACTGTCTCTGCCTTCCAAGATTTCTTAGAAGAGGTTATTCC  
TGG  
+  
FFFFFFFFFFFFFFFF:FFFFFFFFFFFFFFFFFFFFFFFFFFFFFFFFFFFFFFFFFFFFFFFFFFFFFFFF  
FFFFFFFFFFFFFFFFFFFFFFFFFFFFFFFFFFFFFFFFFFFFFFFFFFFFFFFFFFFFFFFFFFFFFFFF  
FFF  
@A00721:190:HGJW7DSXY:4:1448:27597:33066\_1:N:0:TCTGCAAG+GCTGCACT  
TACCTTTATAGGTAAGAAGCCCTTGAGCCGCGTAGTCAGCGCGTTTAGCTGTATCATCAGTCAGAGT  
ATACCCGATAGGGTACCGAGTCTCCAAGAGAATATTTATTCTTATGAGGCTCGAACTTCAACGTTTT  
CAC  
+  
FFFFFFFFFFFFFF:FFFFFFFFFFFFFFFFFFFFFFFFFFFFFFFFFFFFFFFFFFFFFFFFFFFFFFFF  
F,FFFFFFFFFFFFFFFFFFFFFFFFFFFFFFFFFFFFFFFFFFFFFFFFFFFFFFFFFFFFFFFF:FFFFFFF:FFFFFF  
FFF  
@A00721:190:HGJW7DSXY:4:1336:30147:11898\_1:N:0:TCTGCAAG+GCTGCACT  
CACTTTGATGATTTTATCACTTTATTATGACCTTGGAAGTTTTCGGCTGTGGTTGTCGCTGGGGACG  
ATTCCATTCTGTTTTCAAAGACTCCAATAACTGATCATTCTGATCATATGATTTTGGACAATGGTTTC  
GAA  
+  
FFFF:FFFFFFFFFFFFFFFFFFFFFFFFFFFFFFFFFFFFFFFFFFFFFFFFFFFFFFFFFFFFFFFF  
FFFFFFFFFFFFFFFFFFFFFFFFFFFFFFFFFFFFFFFFFFFFFFFFFFFFFFFFFFFFFFFFFFFFFFFF  
FFF  
@A00721:190:HGJW7DSXY:4:2435:12789:19883\_2:N:0:TCTGCAAG+GCTGCACT  
GATTCCGAGAGGTTTATCCTGATGTGGAGGAGTTCTTGAAGCATCCCGACCTTTCCTTGTAATAATT  
TTGATGCGGTTTCATAAGATTATCAGTAATCCTGATTCTACTACGGAT  
+  
FFFFFFFFFFFFFFFFFFFFFFFFFFFFFFFFFFFFFFFFFFFFFFFFFFFFFFFFFFFFFFFF:F:FF:F:FFFFFFFF  
FFFFFFFFFFFFFFFFFFFFFFFF:FFFF:FFFF:FFFFFFFFFFFFFFFFFFFFFFFF  
@A00721:190:HGJW7DSXY:4:2439:1515:1736\_2:N:0:TCTGCAAG+GCTGCACT  
TTGATTAAGACTCTTCCGAAAGGCGAACTTTGGGAATTTGAAGCTCAGGGTGAAGCACACGTTTGAC  
CGTGACGAACTGTGGTGTCTTGATCTACGTTACGGATATACTCTCCT  
+  
FFFFFFFFFFFFFFFFFFFFFFFFFFFFFFFFFFFFFFFFFFFFFFFFFFFFFFFFFFFFFFFFFFFFFFFF  
FFFFFFFFFFFFFFFFFFFFFFFFFFFFFFFFFFFFFFFFFFFFFFFFFFFFFFFFFFFFFFFF  
@A00721:190:HGJW7DSXY:4:1265:19425:3505\_2:N:0:TCTGCAAG+GCTGCACT  
CAGGGGTTTTCGAATAGTAGCCACCCGCTTACAGAGGGGCAGCAGCATGACCATAATTGGTATT  
GACTTTGGTACCACCTTTTCTACTGTCTGTCTCGCCTCTTCGAATGAA  
+  
FFFFFFFFFFFFFFFFFFFFFFFFFFFFFFFFFFFFFFFFFFFFFFFFFFFFFFFF:FF:FFFFFFFFFFFFFFFF  
FFFFFFFF:F:FFFFFFFFFF:FFFFFFFFFFFFFFFFFFFFFFFF:FFFF:FF  
@A00721:190:HGJW7DSXY:4:2544:32579:18615\_1:N:0:TCTGCAAG+GCTGCACT  
ACAATCATTGGTTTTTCTAATAATGATGACACTATTGTTTATGGATATGATGCTATTACTCATGATGG  
TTACGGTCAGGGAGGATTCTCAGTTTACAAGGACCTTAAGCGATGGATCGGGGTTAATTCTAAAACAT  
TAC

```

+
FFFF:FFFFFFFFFFFFFFFF:FFFFFFFFFFFFFFFFFFFFFFFFFFFFFFFFFFFFFFFFF,FFF:FFFFFFFFFFFFFFFF
FFFFFFFFFFFFFFFFFFFFFFFFFFFFFFFFFFFFFFFFFFFFFFFFFFFFFFFFFFFFFFFFFF
FFF
@A00721:190:HGJW7DSXY:4:2324:7916:35650_2:N:0:TCTGCAAG+GCTGCACT
TGGTTTGTCGTTCAGTACCCAGTCAGTATACCTCTACGCAAAGATATTTCATGAAACTACAGAGG
AACGTACCGGATTACCTGTCTTTCATATTATGAATGAACCTTCGGCCG
+
FFFFFFFFFFFFFFFF:FFFF:FFFFFFFFFFFFFFFFFFFFFFFFFFFFFFFFFFFFFFFFF
F,FFFFFFFFFFFFFFFFFFFFFFFFFFFFFFFFFFFFFFFF:Ff:FFFF
@A00721:190:HGJW7DSXY:4:2651:30382:20603_2:N:0:TCTGCAAG+GCTGCACT
AGTGTTATTTATTCTGGTGGTGATGATAATCCTGGAGGTCGTGACGTTGATGAAGCTATAAGAGCGTT
CTTATTACGGCGCACTTCTTTACCCGCCACCACACAACCTTCAGTTTC
+
FFFF:FFFFFFFFFFFFFFFF:FFFFFFFFF:FFFFFFFFFFFFFF:FFFFFFFFFFFFFFF
FFFFFFFFFFFFFFFFFFFFFFFFFFFFFFFFFFFFFFFF::F:FFFFFF
@A00721:190:HGJW7DSXY:4:2361:28122:33849_1:N:0:TCTGCAAG+GCTGCACT
CCTCGTCAATACTTTTCAATAATATACGTCTTGAACCTCACTTATGACGATCTAGTGAAATTAACGCGT
CCTTTTCTGGAACGTAGTTTTACTATTATGAACAAAGTTATCAAAGATAGTGGCATTCAAGGCAAAC
TAC
+
FFFFFFFFFFFFFFFFFFFFFFFFFFFFFFFFFFFFFFFFFFFFFFFFFFFFFFFFFFFFFFFFF
FFFFFFFFFFFFFFFFFFFFFFFFFFFFFFFFFFFFFFFF:FFFFFFFFFFFFFFFFFFFFFFF
FFF
@A00721:190:HGJW7DSXY:4:1536:26684:27821_2:N:0:TCTGCAAG+GCTGCACT
CAGGGGCTATTACTCTTGCTGAAACAGCTATTAAAGCTGTTGAGCGGGTAATTACACCTAAACGAGCT
TGATCTGCCATCGCTGAAGGATGTGCACTCTTTTCTGCTACTTTAACG
+
FFFF,,FFFFFF,F,F,:FFFFFFFF:F,:FFFF:,FFFFFF::FFFFFF:F,FFFFFF,:,F,
F,FFFF,:FFFFFFFFFFFF:F:FFFFF,:FFF:FFF:FF:FF,F
@A00721:190:HGJW7DSXY:4:1561:29035:36965_2:N:0:TCTGCAAG+GCTGCACT
TAAAAAGAAGATAGAGAGTCATACTTTGGGCTATCGTTCAGGTGCATGGGGTTGGATAGCCAATATTG
AAGTGGACACCTCTGGTAGTATCGAAGTAAAGATAACCAATAAGGAAG
+
FFFFFFFFFFFFFFFFFFFFFFFFFFFFFFFFFFFFFFFFFFFFFFFF:FFFFFFFFFFFFFFFFFFFFFFF
FFFFFFFFFFFFFFFFFFFF:FFFFFFFFFFFFFFFFFFFFFFFFFFFFFFFFFFFFF
@A00721:190:HGJW7DSXY:4:2101:10565:29622_1:N:0:TCTGCAAG+GCTGCACT
AATCTTACCCTATCTACGAACCTAAAGTTCTGAAGACGTTGCTTGTCGCTTCTCCTTTAATGGCAC
TACCTCGGTACAATCTTACTTGGAACGAAGGCGACCTGTTCCGGAGTTTTTACGGGATCCGGAATGTT
CTG
+
FFFFFFFFFFFFFFFFFFFFFFFFFFFFFFFF:FFFFFFFFFFFFFFFFFFFFFFFFFFFFFFFFF
FFFFFFFFFFFFFFFFFFFFFFFFFFFFFFFFFFFFFFFFFFFFFFFFFFFFFFFFFFFFFFFFF
FFF
@A00721:190:HGJW7DSXY:4:1215:11388:28354_2:N:0:TCTGCAAG+GCTGCACT
ATAAAGAATCTTTACCAGGACTCCTACTACAGGAGGCAGTCTTCTGATCGTAAGAAGTTTATAAGGAA
CATATCCATTTGTTGTAATAGGTCATCAACTTAGAACTCGAACTCT
+
FFFFF:FFFFFFFFFFFFFFFFFFFFFFFFFFFFFFFFFFFFFFFFFFFFFFFFFFFFFFFFF
FFFFFFFFFFFFFFFFFFFF:FFFFFFFF:FFFFFFFFFFFFFFFFFFFF:FFFF
@A00721:190:HGJW7DSXY:4:2213:29234:11350_1:N:0:TCTGCAAG+GCTGCACT
TGTCTTTCCAAGCTTACCTGTATCTTCAATGAAATTGGACTCTTCGATAGGGGACATTTTATCGTGGG
CTTCCGTAAAGGAAGATCTGTTATCGACGGTTTATCGTTTACGAAGTATCACTCCACCGGTGAATGG
TTT

```

+  
FFFFFFFFF:FF:FFFFFFF:FFFFF:FFFFFFFFFFFFFFFFF:FFFFFFFFFFFFFFFFFFFFFFFFF  
FFFFFFFFFFFFFFFFFFFFFFFFFFFFFFFFFFFFFFFFFFFFFFFFFFFFFFFFFFFFFFFFFFFFFFFFF  
FFF  
@A00721:190:HGJW7DSXY:4:1634:21757:24330\_1:N:0:TCTGCAAG+GCTGCACT  
ACTTACTTAGACTTTTCCTACGATACAAATGATAACTTCTAATTTACGTTTGCTACTCAGAGCTGGTCC  
TCTCAGCAAAGGGATGCATGGTGTATCTCCTCAGGAGTCCCGCATTTGATAATAATGACGAGACTT  
TCG  
+  
FFFFFFFFFFFFFFFFFFFFFFFFFFFFFFFFF:FFFFFFFFFFFFFFFFFFFFFFFFFFFFFFFFF  
FFFFFFFFFFFFFFFFFFFFFFFFFFFFFFFFFFFFFFFFFFFFFFFFFFFFFFFFFFFFFFFFFFFFFFFFF  
FFF  
@A00721:190:HGJW7DSXY:4:1660:26449:2080\_2:N:0:TCTGCAAG+GCTGCACT  
CCAGCGCATCTCGTGTGCGAGCCTCGACCCGATTATATGGTATTAACCTATAAAGGTGAGGAGACCATT  
TTCTTGCTGAAATTTATAGAAGATTATTTTGACAGAATCAATAAGAAT  
+  
FF::FFFF:FFFF:FFFFFFFFFFFFFFFFFFFFFFFFF:FFFFF::FFFFF:FFFFFFFFFFFFFFFFF  
FFFF:FFFFFFFF,FFF:FFFF:FFFFFFFFFFFFFFFFFFFFFFFFF  
@A00721:190:HGJW7DSXY:4:1503:11460:23312\_1:N:0:TCTGCAAG+GCTGCACT  
ATGGCAAATAGTGGAAGGCTCCAGTCAACACTAGTTCGAGTGCTGCTTTGGATTACGATGACGTGAG  
AATAGGTGAAGGGATAGTTTTTACCTCGACCAACATTAAGGCGGCGGCGACTAATCTTAAAGCTTCAC  
CC  
+  
:F:,FF,FF,FF,,F:FFFFF,F:FF:F,FFFFF:FFFF:FFF:FF:FFFFFFFF:FFF,FF,FFF,F  
FFFFFFFFF::F:FFFFFFFFFFFF,FFFFF:F:FFFFF,FFFFF:F:FFF::FFFFFFFF:F,FFFFF:  
FF  
@A00721:190:HGJW7DSXY:4:1144:27154:21872\_2:N:0:TCTGCAAG+GCTGCACT  
ACATTTACCACCAAATCTTTTGATACAACCTCTAGCCTTCAAGTGGGGTATGCCTGCGGAATACGCTT  
GCTATTCACCAGATTGGTTCGAACCCGTTGATGCTATGTCAGAAGAAG  
+  
FFFFFFFFFFFFFFFFFFFFFFFFFFFFFFFFFFFFFFFFFFFFFFFFFFFFFFFFFFFFFFFFFFFFFFFFF  
FFFFFFFFFFFFFFFFFFFFFFFFFFFFFFFFFFFFFFFFFFFFFFFFFFFFFFFFFFFFFFFFFFFFFFFFF  
@A00721:190:HGJW7DSXY:4:2159:12635:13135\_2:N:0:TCTGCAAG+GCTGCACT  
CAGAGGCTGTCAAACAAGCCCAGACTCAAGGAGTCCAATCAAAGGTTTTGAATTTAGCTCAACTGGGG  
AGACGTGCTTAAATGGGTGATAAAAATTATTTAGAGATCTTTTCTACT  
+  
FFFFFFFFFFFFFFFFFFFFFFFFFFFFFFFFFFFFFFFFFFFFFFFFFFFFFFFFFFFFFFFFFFFFFFFFF  
FFFFFFFFFFFFFFFFFFFFFFFFFFFFFFFFFFFFFFFFFFFFFFFFFFFFFFFFFFFFFFFFFFFFFFFFF  
@A00721:190:HGJW7DSXY:4:1248:20817:35102\_2:N:0:TCTGCAAG+GCTGCACT  
TTATAAAATATAAAAATAAGGGAGTCATAACTTTTGTTACCAAATCTTGCTTTCAACGAAGTCTCT  
GATTTTATTAATCATTACTTTAACGATCTCTCGGTCATTTACTCTGTA  
+  
FFFFFFFFF,:FFFFFFFFFFFFFFFFFFFFFFFFF,FFFFFFFFFFFFFFFFFFFFFFFF:FFFFFFFF:FFFFF  
FFFFFFFFF:FFFFFFFFFFFFFFFFF:FFFFFFFFFFFFFFFFFFFFFFFFF  
@A00721:190:HGJW7DSXY:4:1238:15176:33035\_2:N:0:TCTGCAAG+GCTGCACT  
CTATCTTTTCAGACACTTCTTATATTATTACAATAGTTAATATCATATTAGTAATACTCACTATCGT  
TTTCTGCTTTTCTTAGCTAATAGATTAATAAAGGATGAGTACGAAAA  
+  
FFFFFFFFFFFFFFFFFFFFFFFFFFFFFFFFFFFFFFFFFFFFFFFFFFFFFFFFFFFFFFFFFFFFFFFFF  
:FFFFFFFFFFFFFFFFFFFFFFFFFFFFFFFFF,F:FFF:FFFFFFFF:  
@A00721:190:HGJW7DSXY:4:1415:13937:11130\_1:N:0:TCTGCAAG+GCTGCACT  
TTACGAGACCTGTTGTTAGAAATAGATTTCTACTATACACCAATCTCACCGTGTAACGCGAGTTTTTC  
CGGCTCAACGTAATACACGAAGAGATCACCCGCAAACGACTCGAAACCGAGACGCCGTA  
+

```

+
FFFFFFFF:FFFFFFFFFFFFFFFFFFFFFFFFFFFFFFFFFFFFFFFFFFFFFFFFFFFFFFFFFFFFFFFF:FFFFFFFFFFFF
FFFFFFFFFFFFFFFFFFFFFFFFFFFFFFFFFFFFFFFF:FFFFFFFFFFFFFFFFFFFFFFFFFFFF
@A00721:190:HGJW7DSXY:4:2443:29396:16172_1:N:0:TCTGCAAG+GCTGCACT
CGACAAATTTTAGAACTTTATTTTCAGAACTCTCTCCGATCACCTTGGTGTGATCTCCCGGAGGATCTT
TTCAATAAGATGTATGATGATAATCTACTATTTTTAAATAGTGATATTCAGCGTATACTTGAATACTT
TAT

```

```
+  
FFFFFFFFFFFF:FFFFFFFFFFFFFFFFFFFFFFFFFFFFFFFFFFFFFFFFFFFFFFFFFFFFFFFFFFFFFFFFFFFFFFFFFFFFFFFF  
FFFFFFFFFFFFFFFFFFFFFFFFFFFFFFFFFFFFFFFFFFFFFFFFFFFFFFFFFFFFFFFFFFFFFFFFFFFFFFFFFFFFFFFFFFFFFFF,  
FFF  
@A00721:190:HGJW7DSXY:4:1627:17038:11960_1:N:0:TCTGCAAG+GCTGCACT  
AACGATTCTTCGACTATATTAAGAATAAAAAATACTTCAAGTACCTGAACTTTACATTTTTAATGGT  
ATGGTATAATGTGTCTTACAAATAGAACCTTCACTCTCGGTAATGAGAGTGATTCTTAATATTCTA  
GTA
```

```
+
FFF:FFFFFFFFFFFFFFFFFFFFFFFFFFFFFFFF:FF,FF,FFF:FFFFFF:,FFFF:FFFFFF:FFFF
FF,FFFFFFFFFF,FFFFFFFFFFFFFFFFFFFFFFFFFFFFFFFFFFFFFFFFFFFFFFFFFFFFFFFF
FFF
@A00721:190:HGJW7DSXY:4:1369:12427:25708_1:N:0:TCTGCAAG+GCTGCACT
CAAAGTGACGCGCAAGGAATCTTAATTGATTGAAGCTAGGCGTTGGGGAGAATGAACTGCCGCTTC
CCGGAAGAAACGATCTATTTACCGAGTATTTAGAGTAGTCCAAAGTTTGTATAAATTTATATGATTTT
CTA
```

```
+
FFFFFFFFFFFFFFFFFFFFFFFFFFFFFFFFFFFFFFFFFFFFF:FFFFFFFFFFFFFFFFFFFFFFFFFFFFFFF
F:FFFFFFFFFFFFFFFFFFFFFFFFFFFFFFFFFFFFFFFFFFFFF
```

@A00721:190:HGJW7DSXY:4:2560:22742:21997\_1:N:0:TCTGCAAG+GCTGCACT  
AACTGAGGCAGTACCTCAGTCAAAAGTCACATTCACCACTCCCATACCAATCAATGATGTGACTATAC  
AGTTCGCCATTTCAGAGTGGTCAATACGTCGTGGGAGGTACTGAAGCCTTCCCCTCCGCTGGCAGC  
AAG

+

FFFFFFFFFFFF,FFF:FFFF:FF:FFFFFFFFFFFFFFFFFFFFFFFFFFFFFFFFFFFFFFFFFFFFFFFF  
FFFFFFFFFFFFFFFFFFFFFFFFFFFFFFFFFFFFFFFFFFFFFFFFFFFFFFFFFFFFFFFFFFFFFFFF  
FFF

@A00721:190:HGJW7DSXY:4:1665:4191:23187\_1:N:0:TCTGCAAG+GCTGCACT  
CAATAGTTCTTCTGACCAGAATGAAAAGGGGTTTACCAGGGTAGTCTCTAAGTCTACCAGGAAGAGGG  
GAAATGTCCCCAAACTGAGAAGAATAAAGGGAAAGGTCCATCAGGACCTAAGAGGGGAAATTACCCC  
TAA

+

FFFFFFFFFFFFFFFFFFFFFFFFFFFFFFFFFFFFFFFFFFFFFFFFFFFFFFFFFFFFFFFFFFFFFFFF  
FFFFFFFFFFFFFFFFFFFFFFFFFFFFFFFFFFFFFFFFFFFFFFFFFFFFFFFFFFFFFFFFFFFFFFFF  
FFF

@A00721:190:HGJW7DSXY:4:1608:28546:4742\_2:N:0:TCTGCAAG+GCTGCACT  
GGCCAAAGAGGCCGCTGCTACGAAGTCGCTGAAGGCGGCTTGGGTCATTAAGGGTAGCTGTAAAGTTG  
CGCCTGCCGACCCCATCTTTGAGACCAAGACTCTCTACAGTAGGTTCTG

+

FFFFFFFFFFFFFFFFFFFFFFFFFFFFFFFFFFFFFFFFFFFFFFFFFFFFFFFFFFFFFFFFFFFFFFFF  
FFFFFFFFFFFFFFFFFFFFFFFFFFFFFFFFFFFFFFFFFFFFFFFFFFFFFFFFFFFFFFFFFFFFFFFF  
FFF

@A00721:190:HGJW7DSXY:4:2350:14045:19116\_1:N:0:TCTGCAAG+GCTGCACT  
GGACGAAGGTGAGAGGACTTTTGGCTACTGGCGACAACTGAGAGCAGTCGCTGGGGAAAGAGAATTG  
CGTGGGTTGAAGGCCGACGCTTCGAGCTTGAGTGTGACGAGGCCGGTGACGTTTTTGTCAACGGCGTT  
TGG

+

FFFFF:FFFFFFFF:FFFFFFFFFFFFFFFFFFFFFFFFFFFFFFFFFFFFFFFFFFFFFFFFFFFFFFFF  
FFFFFFFFFFFFFFFFFFFFFFFFFFFFFFFFFFFFFFFFFFFFFFFFFFFFFFFFFFFFFFFFFFFFFFFF  
FFF

@A00721:190:HGJW7DSXY:4:1644:22110:33082\_2:N:0:TCTGCAAG+GCTGCACT  
TTAACTATGGGGCGAAGATCCCCTATGGAGTCTTGAAGGACTTAGGTTGGCATATTTATGCCGACGAT  
AATAAGCATGTCACCCTTAAGCACCGAGAGATCGGAAGAGCGTCGTGT

+

FFFFFFFFFFFFFFFFFFFFFFFFFFFFFFFFFFFFFFFFFFFFFFFFFFFFFFFFFFFFFFFFFFFFFFFF  
FFFFFFFFFFFFFFFFFFFFFFFFFFFFFFFFFFFFFFFFFFFFFFFFFFFFFFFFFFFFFFFFFFFFFFFF

@A00721:190:HGJW7DSXY:4:2640:16514:32910\_1:N:0:TCTGCAAG+GCTGCACT  
AAAATTTTCTTTCTCCGTCATTGGGGATTTGATGTGAGAAGGTGGAAGGTGTCAAGGGTCTTCT  
TCATGCTGATCTTTCAGGACCTAATCACATCATGATTGATAGTTACGGCTCGTATCGAGTTGGAGGGA  
GGA

+

FFFFFFFFFFFF,:FFFFFFFFFFFFFFFFFFFFFFFFFFFFFFFFFFFFFFFFFFFFFFFFFFFFFFFF  
FFFFFFFFFFFFFFFFFFFFFFFFFFFFFFFFFFFFFFFFFFFFFFFFFFFFFFFFFFFFFFFFFFFFFFFF  
FFF

@A00721:190:HGJW7DSXY:4:2419:20826:4398\_1:N:0:TCTGCAAG+GCTGCACT  
TCAGAGAGGGGAGCTCTGAAAAGGAACTTCGTCAGAAGATGAGGAAGTCTAAGAGGAGGAGTTTGA  
GAAGGCTCTAGAGAAGATCTCACCACTGGAGAAGGCAAGTGGAGAGTCCAGAAGTTGATGAAGAAG  
ATT

+

FFFFFFFFFFFF:FFFFFFFFFFFFFFFFFFFFFFFFFFFFFFFFFFFFFFFFFFFFFFFFFFFFFFFF  
FFFFFFFFFFFFFFFFFFFFFFFFFFFFFFFFFFFFFFFFFFFFFFFFFFFFFFFFFFFFFFFFFFFFFFFF  
FFF

@A00721:190:HGJW7DSXY:4:2444:23674:25300\_1:N:0:TCTGCAAG+GCTGCACT  
CCTAAGGTGGATGAGGGAGGTTGTTTCTTTGGAGTTTATAGATAATCTTTTGAGAAGGGGTCATAGAGC



CAGCAAGAGAAGCTTATATGCTGGTTTAAAGTGATGATTATCACTCCTTGAGAAGACAAGCCACATTAA  
GAT

+

FFFFFFFFFFFFFFFFFFFF,FFFFFFFFFFFFFFFFFFFFFFFFFFFFFFFFFFFFFFFFFFFFFFFF  
FFFFFFFFFFFFFFFFFFFFFFFFFFFFFFFFFFFFFFFFFFFFFFFFFFFFFFFFFFFFFFFFFFFFFFFF  
FFF

@A00721:190:HGJW7DSXY:4:1342:12626:29653\_1:N:0:TCTGCAAG+GCTGCACT  
ATATTGTTCTTCCGGGAAGTTGTGGGATTAACTTTGACTCAACTACTCCGATCAGATCCGGATGGT  
TTGATTGGTATGGACTACTCGACTTTTGATCTGGAGTTGTCTAGGGTCATGGCAGATACTACCGATAA  
GGT

+

FFFFF:FFFFFFFFFFFFFFFFFFFF:FFFFFFFFFFFFFFFFFFFFFFFFFFFFFFFFFFFFFFFF  
FFFFFFFFFFFFFFFFFFFFFFFFFFFF:FFFFFFFFFFFFFFFFFFFFFFFFFFFFFFFFFFFFFFFF  
FFF

@A00721:190:HGJW7DSXY:4:1551:15031:7200\_2:N:0:TCTGCAAG+GCTGCACT  
AAGAGTCTTTATGATTCAAAACCTATCGTTGTCTGACCTTACAAGTTGAGGAGACTTTACAGCGGCT  
TATTGTCGCGCAGTTTCCAGAATTGCGGTTGAAGTTCACCCATTCTAT

+

FFFFFFFFFFFFFFFFFFFFFFFFFFFFFFFFFFFFFFFFFFFFFFFFFFFFFFFFFFFFFFFFFFFFF:,FF  
FFFFFFFFFFFFFFFFFFFFFFFFFFFFFFFFFFFFFFFFFFFFFFFFFFFFFFFFFFFFFFFFFFFF

@A00721:190:HGJW7DSXY:4:2616:19289:23594\_2:N:0:TCTGCAAG+GCTGCACT  
AACCCTATTCTTGATGTGAAAGATGCATCGAGGTATACGTCTAGGAACATTGATTGGGAACGTACCTA  
CTCACGAGACGTCATGAAAGCTATCGGAGGGAAGCAAAATGTTTCGTT

+

FFFFFFF:FF,FFFFFFFFFFFFFFFFFFFFFFFFFFFFFFFFFFFFFFFFFFFFFFFFFFFFFFFF  
FFFFFFFFFFFFFFFFFFFFFFFFFFFFFFFFFFFFFFFFFFFFFFFFFFFFFFFFFFFFFFFFFFFF:FF

@A00721:190:HGJW7DSXY:4:1261:1669:10676\_2:N:0:TCTGCAAG+GCTGCACT  
GATGATGTAGCCACTATAATGCTTAAGAGAGAGATTGATGTATGTCATTTCTGCTTAGTTTGTCCCGG  
CGAATTATTGGACACGATGAAAAATGACATACCCGTTCTGACCTTG

+

FFFFFFFFFFFFFFFFFFFFFFFFFFFFFFFFFFFFFFFFFFFFFFFFFFFFFFFFFFFFFFFFFFFF,FFFFFFFFFFFFFFFF  
FFF,FFFFFFFFFFFFFFFFFFFFFFFFFFFFFFFFFFFFFFFFFFFFFFFFFFFFFFFFFFFFFFFF

@A00721:190:HGJW7DSXY:4:2135:27688:27336\_2:N:0:TCTGCAAG+GCTGCACT  
GGTCAATGACAAAACCTTCGAATATGTTACGACATGGCTTCGTAACAACAGTGCGAGGATTGTCATCT  
CGGGGAAAGTGATTACCAAGATGTTTCATATAGATACGAGATACCTAG

+

FFFFFFFFFFFFFFFFFFFFFFFFFFFFFFFFFFFFFFFFFFFFFFFFFFFFFFFFFFFFFFFFFFFF  
FFFFF,FF:FFFFFFFFF:FFFFFFFFFFFFFFFFFFFFFFFFFFFFFFFFFFFFFFFF

@A00721:190:HGJW7DSXY:4:2261:16288:7529\_1:N:0:TCTGCAAG+GCTGCACT  
CTCGTTATCGAGCTAAGAAGAAGACTTTGGGTACACGTTATGCTCGAACTTAACGTTAGTACCGG  
AGGTGATCTCTCTGCTTCTGCGTTACTGAGAGAAAAGATTCAGGACGCCTACGGTGACTTTATGGACA  
AGA

+

FF,FFFFFF:FF:FFFFFFFFF:FFFFFFFFF:F:FFFFFFFFF:FFFFFFFFFFFFFFFF:FFF  
F:FFFFFFFFF:FFFFFF:FF:FFFFF:FFFFFFFFFFFFFFFFFFFFFFFFFFFFFFFFFFFF  
FFF

@A00721:190:HGJW7DSXY:4:2270:6262:31657\_2:N:0:TCTGCAAG+GCTGCACT  
AGAACACGTCAAGAAGTCGCTCGCGTTGTTCTTGAAAACCAAGTTAAGAAGGAGGCTGATCATGGAG  
TCTTTGTACCTTCTGTCAAACCTTCGAGGTTACGCTACGAGAGGTGATC

+

FFFFFFFFFFFFFFFFFFFFFFFFFFFFFFFFFFFFFFFFFFFFFFFFFFFFFFFFFFFFFFFFFFFF  
FFFFFFFFFFFFFFFFFFFFFFFFFFFFFFFFFFFFFFFFFFFFFFFFFFFFFFFFFFFFFFFFFFFF

@A00721:190:HGJW7DSXY:4:2167:24180:20353\_2:N:0:TCTGCAAG+GCTGCACT  
TTGAAGGCAGGCTCTAAGGAGACTCCTTCTTTTGAATGTTGTAAAGAATTGGGTTGAGAAGTGTGC

+

@A00721:190:HGJW7DSXY:4:2432:17390:21402\_1:N:0:TCTGCAAG+GCTGCACT  
CAATAGCCACAGACTTTCTGGGAAAAGAGACCTCTGTTGGTAGAGGAGTTGAGAGAATTACTCAGATT  
CAATCTGGCATCACTGAACGTCTACAACGAGTTAGGGAGTGGCTAGGTTTTAAAGATCCTTGCACA  
AGC

+

@A00721:190:HGJW7DSXY:4:1575:8214:16470\_1:N:0:TCTGCAAG+GCTGCACT  
AGGACTGATGGTGAGATTCTTTTACCTTTTGGAGGTCCAGGAACCTTTACTCCTAGTGTCTTTTCTAG  
AGTCCAAGGACGTTTCCGTCGGAGGATGACAGGTGGGAGACCGCTCAATAACACTCTATTGAATCCCT  
TTT

+

@A00721:190:HGJW7DSXY:4:2220:16152:17628\_2:N:0:TCTGCAAG+GCTGCACT  
TCTGCCACTTCTAATTTTAGGAAACGTCGCGAAAAGAAAGTTCATGAGGATGTCTTGGTCGAAAAATA  
TCGCCGGGAACTTCTAATAGAGGATCCTGATGACATTATTTCAACGGA

+

@A00721:190:HGJW7DSXY:4:2547:16369:7889\_2:N:0:TCTGCAAG+GCTGCACT  
CAGGAAGTGTCTCCACTGATTCGGAATTAGAGAAAGACGACCTTCTTGTGGGGACTGAGACCTCTGAA  
TTTTCAGGGTGCCCTGATGAGGACGTTGAAAGGGATAATTTCAACTCT

+

@A00721:190:HGJW7DSXY:4:1362:23701:10567\_1:N:0:TCTGCAAG+GCTGCACT  
ATGAGTGATCGTATTAGAACAGCTGATTCTTATTGCATGAACGTCGCTGAGGTCAAACCTGTGGACGT  
TCTTTTCATCGACGAATTATTCATGATTCACGCTGGTCAGACCCTTTTCTTACACATCTACTTAAGG  
CGG

+

@A00721:190:HGJW7DSXY:4:2447:3260:5509\_2:N:0:TCTGCAAG+GCTGCACT  
CAAATCGGATTCATCAATCGTATTGATCTCCAAGTCGAACTACTTCAACATCAACGACATCATTCT  
TGATGAGTGTCTTCTTATCGAAGTCTCAGTTATCGCTGCCCCGCCGA

+

@A00721:190:HGJW7DSXY:4:1547:9263:14998\_1:N:0:TCTGCAAG+GCTGCACT  
CAACCCCTTATATCGAGGCTATCGAGGACGATGAGTATCTTGAAGTTGTTGACGACAAGCCTCAAGAG  
GGTAGAGGACCACCTGGATCTTCTACTGTCTCTGCCTTCCAAGATTTCTTAGAAGAGGTTATTCTCTGG  
AAC

+

[illegible]

@A00721:190:HGJW7DSXY:4:1531:27389:4178\_1:N:0:TCTGCAAG+GCTGCACT  
TACCTTTATAGGTAAGAAGCCCCTTGAGCCGCGTAGTCAGCGCGTTTAGCTGTATCATCAGTCAGAGT  
ATACCCGATAGGGTACCGAGTCTCCAAGAGAATATTTATTCTTATGAGGCTCGAACTTCAACGTTTT  
CAC

+

FFFFFFFFFFFFFFFFFFFFFFFFFFFFFFFFFFFFFFFFFFFFFFFFFFFFFFFFFFFFFFFFFFFFFFFF  
FFFFFFFFFFFFFFFFFFFFFFFFFFFFFFFFFFFFFFFFFFFFFFFFFFFFFFFFFFFFFFFFFFFFFFFF  
FFF

@A00721:190:HGJW7DSXY:4:1501:15890:10723\_1:N:0:TCTGCAAG+GCTGCACT  
CACTTTGATGATTTTATCACTTTATTATGACCTTGGAAGTTTTCGGCTGTGGTTGTCGCTGGGGACG  
ATTCCATTCTGTTTTCAAAGACTCCAATAACTGATCATTCTGATCATATGATTTTGACAATGGTTTC  
GAA

+

FFFFFFFFFFFFFFFF:FFFFFFFFF:FFF:FFF:FFF:FFFFFFFF:FFFFFFFFFFFF:FFFFFFF  
FFFFFFFFFFFFFFFFFFFFFFFFFFFFFFFFFFFFFFFF:FFFFFF:FFFFFFFFFFFFFFFFFFFF:FFFFFFFFFFFF  
FFF

@A00721:190:HGJW7DSXY:4:2616:30978:14935\_2:N:0:TCTGCAAG+GCTGCACT  
GATTCCGAGAGGTTTATCCTGATGTGGAGGGAGTTCTTGAAGCATCCCGACCTTTCCTTGTAAGAAATT  
TTGATGCGGTTTCATAAGATTATCAGTAATCCTGATTCTACTACGGAT

+

FFFFFFFFFFFFFFFFFFFFFFFFFFFFFFFFFFFFFFFFFFFFFFFFFFFFFFFFFFFFFFFFFFFFFFFF:FF  
FFFFFFFFFFFFFFFFFFFFFFFFFFFFFFFFFFFFFFFFFFFFFFFFFFFFFFFFFFFFFFFF

@A00721:190:HGJW7DSXY:4:2464:2275:16141\_2:N:0:TCTGCAAG+GCTGCACT  
TTGATTAAGACTCTTCCGAAAGGCGAACTTTGGAATTTGAAGCTCAGGGTGAAGCACAACGTTTGAC  
CGTGACGAACTGTGGTGTCTTGATCTACGTTACGGATATACTCTCCT

+

FFFF,FFFFFFFFFFFFFFFF:FFFFFFFFF:FF:FFFFFFFFFFFFFFFFFFFFFFFFFFFFFFFFFFFF  
FFFFFFFFFFFFFFFFFFFFFFFF:FFFFFFFFFFFFFFFFFFFFFFFFFFFFFFFFFFFFFFFF

@A00721:190:HGJW7DSXY:4:1315:5330:17300\_2:N:0:TCTGCAAG+GCTGCACT  
CAGGGGTTTTCGAATAGTGATAGCCACCCGCTTACAGAGGGGCAGCAGCATGACCATAATTGGTATT  
GACTTTGGTACCACCTTTTCTACTGTCTGTCTCGCCTCTTCGAATGAA

+

F:FFFFF:FFFFFFFFFFFFFFFFFFFFFFFFFFFFFFFFFFFFFFFF:FFFFFFFFFFFFFFFFFFFFFFFF  
FFFFFFFFFFFFFFFFFFFFFFFF:FFFFFFFFFFFF:FFFFFFFFFFFFFFFF

@A00721:190:HGJW7DSXY:4:2613:22155:24925\_1:N:0:TCTGCAAG+GCTGCACT  
ACAATCATTGGTTTTCTAATAATGATGACACTATTGTTTATGGATATGATGCTATTACTCATGATGG  
TTACGGTCAGGGAGGATTCTCAGTTTACAAGGACCTTAAGCGATGGATCGGGTTAATTCTAAAACAT  
TAC

+

FFFFF:FF:FFFFFFFFFFFFFFFFFFFFFFFFFFFFFFFFFFFF,FFFFFFFFF:FFFFFFFFFFFF:FFFFF  
FFFF:FFFFFFFFFFFFFFFFFFFFFFFFFFFFFFFFFFFFFFFFFFFFFFFFFFFFFFFFFFFFFFFFFFFF  
FFF

@A00721:190:HGJW7DSXY:4:2622:26594:11976\_2:N:0:TCTGCAAG+GCTGCACT  
TGGTTTGGTCGTTTCAGTACCCAGTCAGTATACCTCTACGCAAAGATATTTTCATGAAAACCTACAGAGG  
AACGTACCGGATTACCTGTCTTTTCATATTATGAATGAACCTTCGGCCG

+

FFFFFFFFFFFFFFFFFFFFFFFF:FFFFFF:FFFFFFFFFFFFFFFFFFFFFFFFFFFFFFFFFFFFFFFF  
F::FF:FFFFFFFF:FFFFFFFFFFFFFFFFFFFFFFFFFFFFFFFF:F:FFF

@A00721:190:HGJW7DSXY:4:2662:17273:19163\_2:N:0:TCTGCAAG+GCTGCACT  
AGTGTTATTTATTCTGGTGGTGATGATAATCTTGAGGTCGTGACGTTGATGAAGCTATAAGAGCGTT  
CTTATTACGGCGCACTTCTTTACCCGCCACCACACAACCTTTCAGTTTC

+

FFFF:FFFFF,FFFFFFFFFFFFFFFF,FFFF:FFFFFFFFFFFFFFFFFFFFFFFFFFFFFFFFFFFF  
F:FFFFFFFF:FFFFFFFFFFFF:FFFFF:FFF:F,FFFF:F:FFFF

@A00721:190:HGJW7DSXY:4:2442:29740:20650\_1:N:0:TCTGCAAG+GCTGCACT  
CCTCGTCAATACTTTTCAATAATATACGTCTTGAACCTACTTATGACGATCTAGTGAAATTAACGCGT  
CCTTTTCTGGAACGTAGTTTTACTATTATGAACAAAGTTATCAAAGATAGTGGCATTCAAGGCAAAC  
TAC

+

FFFFFFFFFFFFFFFFFFFFFFFFFFFFFFFFFFFFFFFFFFFFFFFFFFFFFFFFFFFFFFFF  
FFFFFFFFFFFFFFFFFFFFFFFFFFFFFFFFFFFFFFFFFFFFFFFFFFFFFFFFFFFFFFFF  
FFF

@A00721:190:HGJW7DSXY:4:2274:20564:18818\_2:N:0:TCTGCAAG+GCTGCACT  
CAGGGGCTATTACTCTTGCTGAAACAGCTATTAAGGCTGTTGAGCGGTAATTACACCTAAACGAGCT  
TGATCTGCCATCGCTGAAGGATGTGCACTCTTTTCTGCTACTTTAACG

+

,FF,FFFF::FFFFFF:FFFFFFF:F:FFFFFF:FFFFFFF:FFFFFFF:FFFFFFF  
FFFF:F,FFFF,FF:FFFF:FF:,FFFFFF:F,:F:FFFF::FFFF

@A00721:190:HGJW7DSXY:4:2177:15736:14904\_2:N:0:TCTGCAAG+GCTGCACT  
TAAAAAGAAGATAGAGAGTCATACTTTGGGCTATCGTTCAGGTGCATGGGGTTGGATAGCCAATATTG  
AAGTGGACACCTCTGGTAGTATCGAAGTAAAGATAACCAATAAGGAAG

+

FFFFFFFFFFFFFFFFFFFFFFFF:FFFFFFF:FFFFFFF:FFFFFFF:FFFFFFF:FFFFFFF  
FFFFFFFF:FFFFFFF:FFFFFFF:FFFFFFF:FFFFFFF:FFFFFFF:F

@A00721:190:HGJW7DSXY:4:2101:10610:29575\_1:N:0:TCTGCAAG+GCTGCACT  
AATCTTACCCTATCTACGAACCTAAAGTTCTGAAGACGTTGCTTGTGCTTCCTCCTTTAATGGCAC  
TACCTCGGTACAATCTTACTTGAACGAAGGCGACCTGTTCCGGAGTTTTTACGGGATCCGGAATGTT  
CTG

+

F:FFFFFFFF:FFFFFFFFFFFFFFFFFFFFFFFFFFFFFFFFFFFFFFFFFFFFFFFF  
,FFFFFFFFFFFFFFFFFFFFFFFFFFFFFFFFFFFFFFFFFFFFFFFFFFFFFFFF  
FFF

@A00721:190:HGJW7DSXY:4:1313:31114:3396\_2:N:0:TCTGCAAG+GCTGCACT  
ATAAATAATCTTTACCAGTACTCCTACTACAGGAGGAAGTATTCAGATAGTAAGAAGTTTATAAGTAA  
CATATCCATTTGTTGTAATAGTTTCATAAACTTAGAACTAGAAAATCT

+

FFF,F,,FF,FF::,FF,,F,FFFF:,F:F,,F,:,,FFF,,F,,,FF,,FFFFFFFF,FFFF,,  
,FFFF,,FF,F:FFFF:FFF,,,,:FF,F:FFFF::F,:,:FFF,F,F

@A00721:190:HGJW7DSXY:4:2432:23366:9925\_1:N:0:TCTGCAAG+GCTGCACT  
TGTCTTTCCAAGCTTACCTGTATCTTCAATGAAATTGGACTCTTCGATAGGGGACATTTTATCGTGGG  
CTTTCCGTAAAGGAAGATCTGTTATCGACGTTTATCGTTTACGAAGTATCACTCCACCGGTGAATGG  
TTT

+

FFFFFFFFFFFFFFFFFFFFFFFF:FFFFFFFFFFFFFFFFFFFFFFFFFFFFFFFF  
FFFFFFFFFFFFFFFFFFFFFFFFFFFFFFFFFFFFFFFFFFFFFFFFFFFFFFFF  
FFF

@A00721:190:HGJW7DSXY:4:2533:17173:24596\_1:N:0:TCTGCAAG+GCTGCACT  
ACTTACTTAGACTTTTCTACGATACAAATGATAACTTCTAATTTACGTTTGCTACTCAGAGCTGGTCC  
TCTCAGCAAAGGGATGCATGGTGTATCTCCTCAGGAGTCCCGCATTTGATAATAATGACGAGACTT  
TCG

+

FFFFFFFFFFFFFFFFFFFFFFFFFFFFFFFFFFFFFFFFFFFFFFFF:FFFFFFFFFFFFFFFF  
FFFFFFFFFFFFFFFFFFFFFFFFFFFFFFFFFFFFFFFFFFFFFFFFFFFFFFFF  
FFF

@A00721:190:HGJW7DSXY:4:1663:25816:36495\_2:N:0:TCTGCAAG+GCTGCACT  
CCAGCGCATCTCGTGTGAGCCTCGACCCGATTATATGGTATTAACCTATAAAGGTGAGGAGACCATT  
TTCTTGCTGAAATTTATAGAAGATTATTTTGACAGAATCAATAAGAAT

+

[illegible]

@A00721:190:HGJW7DSXY:4:2126:22652:10755\_1:N:0:TCTGCAAG+GCTGCACT  
TACCGCAAAAAGTTGGAAGAGGTCTATGATATTTATTTTACTTATACTTTAAATAGCACCGATTATAA  
CTTGACTGTTGATAATATTACAATAGCTCTTTCTCAGAAGATTAGAGAAGTAACCGGTGAACACGTCG  
GTA

+

FFFFFFFFFFFFFFFFFFFFFFFFFFFFFFFFFFFFFFFFFFFFFFFFFFFFFFFFFFFFFFFFFFFFFFFF  
FFFFFFFFFFFFFFFFFFFFFFFFFFFFFFFFFFFFFFFFFFFFFFFFFFFFFFFFFFFFFFFFFFFFFFFF  
FFF

@A00721:190:HGJW7DSXY:4:2122:22318:1783\_1:N:0:TCTGCAAG+GCTGCACT  
AACGATTCTTCGACTATATTAAGAAATAAAAATACTTCAAGTACCTGAACCTTACATTTTAAATGGT  
ATGGTATAATGTGTCTTACAAATAGAACCTTCACTCTCGTAATGAGAGTGTATTCCTTAATATTCTA  
GTA

+

FFFFFFFFFFFFFFFFFFFFFFFFFFFFFFFFFFFFFFFFFFFFFFFFFFFFFFFFFFFFFFFFFFFFFFFF  
FFFFFFFFFFFFFFFFFFFFFFFFFFFFFFFFFFFFFFFFFFFFFFFFFFFFFFFFFFFFFFFFFFFFFFFF  
FFF

@A00721:190:HGJW7DSXY:4:2246:11053:23985\_1:N:0:TCTGCAAG+GCTGCACT  
CTAGGATTTATCACACTCCTAAATTTGATAGCAATTTATGTTTTAAATGCTAGGAAAATTTTAGAAAA  
ACTCCATTGTATAGTTCAAGGAGTACTTAATTCAATAGCTTTAGTATTATTTACTATCGCCTTTATTG  
AAA

+

FFFF:FFFFFFFFFFFFFFFF:F::,FFFFFFFF:FFFF,: ,FFFF,FF,FFFFFFFFFFFF:FFF:F:  
FFFFFFFF:FFFFFFFFFFFF:FFF,FFFFFFFFFFFFFFFFFFFFFFFFFFFFFFFFFFFF:FFF:FFFFF  
FFF

@A00721:190:HGJW7DSXY:4:1453:6596:31015\_1:N:0:TCTGCAAG+GCTGCACT  
CAAAAGTGACGCGCGAAGGAATCTTAATTGATTGAAGCTAGGCGTTGGGGAGAATGAACCTGCCGCTTC  
CCGAAGAAACGATCTATTTACAGAGTATTTAGAGTAGTCCAAAGTTTGTATAAATTTATATGATTTT  
CTA

+

FFF:FFFFFFFFFFFF:FFFFFFFFFFFFFFFFFFFFFFFFFFFFFFFFFFFFFFFFFFFFFFFFFFFFF:FFFFFFFFFFFFF  
FFFFFFFFFFFFFFFFFFFFFFFFFFFFFFFFFFFFFFFFFFFFFFFFFFFFFFFFFFFFFFFFFFFFF:FFFFFFFFFFFFF,FFFFF  
FFF

@A00721:190:HGJW7DSXY:4:1543:8223:30201\_2:N:0:TCTGCAAG+GCTGCACT  
GCCGGTCGGCAGATCGGCACCACTGGTCTCTACGTTAGGGACCCGCTGTGCAGAATAACCTTCCCAA  
ATCTAGATCTGCACAGAAGAAGGCTGAAGGTCGTTACCGGACGACCAC

+

FFFFFFFFFFFFFFFFFFFFFFFFFFFFF:,FF,FFFFFFFFFFFFFFFFFFFFF,F,FFFFFFFFFFFFFFFFFFFF  
FF:FFFFFFFFFFFFFFFFFFFF,FFFFFFFFFFFF:FFFFFFFF:FF:FFFFF

@A00721:190:HGJW7DSXY:4:2646:20582:12179\_1:N:0:TCTGCAAG+GCTGCACT  
AACTGAGGCAGTACCTCAGTCAAAAGTCACATTCACCACTCCCATACCAATCAATGATGTGACTATAC  
AGTTTCGGCCATTTCAAGAGTGGTCAATACGTCGTGGGAGGTACTGAAGCCTTCCCCTCCGCTGGCAGC  
AAG

+

FFFFFFFFFFFFFFFFFFFFFFFFFFFFFFFFFFFFFFFFFFFFFFFFFFFFFFFFFFFFFFFFFFFFFFFF  
FFFFFFFFFFFFFFFFFFFFFFFFFFFFFFFFFFFFFFFFFFFFFFFFFFFFFFFFFFFFFFFFFFFFFFFF  
FFF

@A00721:190:HGJW7DSXY:4:1102:31367:30201\_1:N:0:TCTGCAAG+GCTGCACT  
AATAGTTCTTCTGACCAGAATGAAAAGGGGTTTACCAGGGTAGTCTCTAAGTCTACCAGGAAGAGGGG  
AAATGTCCCCAAAACCTGAGAAGAATAAAGGGAAAGGTCCATCAGGACCTAAGAAGGGGAAATTACCCC  
TAA

+

FFFF,:FFFFFFFF:FFFFFFFFFFFFFFFFFFFF::FFFFF::FFF,FFFFFFFFFFFFFFFFFFFF:FFFFF:F  
FFFFFFFFFFFFFFFFFFFF:FFFFF:FFFFFFFFFFFF::FFFFFFFFFFFFFFFFFFFF:FFFFFFFFFFFFF  
FFF

@A00721:190:HGJW7DSXY:4:2277:14561:35728\_2:N:0:TCTGCAAG+GCTGCACT  
GGCCAAAGAGGCCGCTGCTACGAAGTCGCTGAAGCGGCTTGGGTCATTAAGGGTAGCTGTAAAGTTG  
CGCCTGCCGACCCCATCTTTGAGACCAAGACTCTCTACAGTAGGTTCTG

+

FFFFFFFFFFFFFFFFFFFFFFFFFFFFFFFFFFFFFFFFFFFFFFFFFFFFFFFFFFFFFFFFFFFFFFFF  
FFFFFFFFFFFFFFFFFFFFFFFFFFFFFFFFFFFFFFFFFFFFFFFFFFFFFFFFFFFFFFFFFFFFFFFF

@A00721:190:HGJW7DSXY:4:1112:28212:14935\_2:N:0:TCTGCAAG+GCTGCACT  
CGAAGGTGAGAGGACTTTTGGCTACTGGCGACAACTGAGAGCAGTCGCTGGGGAAAGAGAATTGCGT  
GGGTTGAAGGCCGACGCTTCGAGCTTGAGAGATCGGAAGAGCGTCGTG

+

FFFFFFFFFFFFFFFFFFFFFFFFFFFFFFFFFFFFFFFFFFFFFFFFFFFFFFFFFFFFFFFFFFFFFFFF  
FFFFFFFFFFFFFFFFFFFFFFFFFFFFFFFFFFFFFFFFFFFFFFFFFFFFFFFFFFFFFFFFFFFFFFFF

@A00721:190:HGJW7DSXY:4:1657:25889:33489\_2:N:0:TCTGCAAG+GCTGCACT  
TTAACTATGGGGCGAAGATCCCCTATGGAGTCTTGAAGGACTTAGGTTGGCATATTTATGCCGACGAT  
AATAAGCATGTACCCCTTAAGCACCGAGAGATCGGAAGAGCGTCGTGT

+

FFFFFFFFFFFFFFFFFFFFFFFFFFFFFFFFFFFFFFFFFFFFFFFFFFFFFFFFFFFFFFFFFFFFFFFF  
FFFFFFFFFFFFFFFFFFFFFFFFFFFFFFFFFFFFFFFFFFFFFFFFFFFFFFFFFFFFFFFFFFFFFFFF

@A00721:190:HGJW7DSXY:4:2220:10348:35289\_1:N:0:TCTGCAAG+GCTGCACT  
AAATTTTCTCTTCTCCGTCATTGGGGATTTCGATGTGAGAAGGTGGAAGGTGTCAAGGGTCTTCTT  
CATGCTGATCTTTCAGGACCTAATCACATCATGATTGATAGTTACGGCTCGTATCGAGTTGGAGGGAG  
GA

+

:F:F,F,FFF:FF:F:,F,FFFFFF,FF,FFFF,FF,F:F:F,FFFFFFFFF:::FF:FF,::,F  
FFFFFFFFFFFFFFFFFFFFFFFF:FFFF,FFFF:FFFF:::F,:::FFFF:FFF,F:FFFF:FFFF,F  
,:

@A00721:190:HGJW7DSXY:4:2440:8169:4116\_1:N:0:TCTGCAAG+GCTGCACT  
TCAGAGAGGGGAGCTCTGAAAAGGAACTTCGTCAGAAGATGAGGAAGTCTAAGAGGAGGAGTTTGA  
GAAGGCTCTAGAGAAGATCTCACCACTGGAGAAGGCAAGTGGAGAGTCCAGAAGTTGATGAAGAAG  
ATT

+

FFFFFFFFFFFFFFFFFFFFFFFFFFFFFFFFFFFFFFFFFFFFFFFFFFFFFFFFFFFFFFFFFFFFFFFF  
FFFFFFFFFFFFFFFFFFFFFFFFFFFFFFFFFFFFFFFFFFFFFFFFFFFFFFFFFFFFFFFFFFFFFFFF  
FFF

@A00721:190:HGJW7DSXY:4:2550:22073:31923\_1:N:0:TCTGCAAG+GCTGCACT  
CCTAAGGTGGATGAGGGAGTTGTTTCTTTGGAGTTTATAGATAATCTTTTGAGAAGGGGTCATAGAGC  
CAGCAAGAGAAGCTTATATGCTGGTTTAAGTGATGATTATCACTCCTTGAGAAGACAAGCCACATTAA  
GAT

+

FFFFFFFF:F:FFFFFFFF,FFFFFF:FFFFFFFFFFFFFFFFFFFFFFFFFFFFFFFFFFFFFFFFFFFF  
FFFFFFFFFFFFFFFFFFFFFFFFFFFFFFFFFFFFFFFFFFFFFFFFFFFFFFFFFFFFFFFFFFFFFFFF  
FFF

@A00721:190:HGJW7DSXY:4:1455:7789:27633\_1:N:0:TCTGCAAG+GCTGCACT  
ATATTGTTCTTCCGGGAAGTTGTGGGATTTAACTTTGACTCAACTACTCCGATCAGATCCGGATGGT  
TTGATTGGTATGGACTACTCGACTTTTGATCTGGAGTTGTCTAGGGTCATGGCAGATACTACCGATAA  
GGT

+

FF:FFF:FFFFFFFFFFFF:FFFFFFFFFFFFFFFFFFFFFFFFFFFFFFFFFFFFFFFFFFFFFFFFFFFF  
FFFFFFFFFFFFFFFFFFFFFFFFFFFFFFFFFFFFFFFFFFFFFFFFFFFFFFFFFFFFFFFFFFFFFFFF  
FFF

@A00721:190:HGJW7DSXY:4:1602:27778:12305\_2:N:0:TCTGCAAG+GCTGCACT  
AAGAGTCTTTATGATTCAAAACCTATCGTTGTCTGACCTTACAAGTTGAGGAGACTTTACAGCGGCT  
TATTGTCGCGCAGTTTCCAGAATTGCGGTTGAAGTTACCCATTCTAT

+

```

FFFFFFFFFFFFFFFFFFFFFFFFFFFFFFFFFFFFFFFFFFFFFFFFFFFFFFFFFFFFF:FFF:FFFFFFFFFFFFFFFFFFFFFF::
FFFFFFFFFFFFFFFFFFFFFFFFFFFFFFFFFFFFFFFFFFFFFFFFFFFFFFFFFFFFF
@A00721:190:HGJW7DSXY:4:2117:28149:6715_1:N:0:TCTGCAAG+GCTGCACT
CTATTCTTGATGTGAAAGATGCATCGAGGTATACGTCTAGGAACATTGATTGGGAACGTACCTACTCA
CGAGACGTCATGAAAGCTATCGGAGGGAAGCAAATGTTTCGTTCTGTTACAAGAACGCTTTGGATTG
TGA
+
FFFFFFFFFFFFFFFFFFFFFFFFFFFFFFFFFFFFFFFFFFFFFFFFFFFFFFFFFFFFFFFFFFFFFFFFFFFFFFFFFFFFFFFFFFFFFFFFFFFFFFFF
FFFFFFFFFFFFFFFFFFFFFFFFFFFFFFFFFFFFFFFFFFFFFFFFFFFFFFFFFFFFFFFFFFFFFFFFFFFFFFFFFFFFFFFFFFFFFFFFFFFFFFFF
FFF
@A00721:190:HGJW7DSXY:4:1655:30364:29590_2:N:0:TCTGCAAG+GCTGCACT
GATGATGTAGCCACTATAATGCTTAAGAGAGAGATTGATGTATGTCATTTCTGTTAGTTTGTCCCGG
CGAATTATTGGACACGATGAAAAATGACATACCCGTTCTCCTGACCTTG
+
F:FFFFFFFFFFFFFFFFFFFFFFFFFFFFFFFFFFFFFFFFFFFFFFFFFFFFFFFFFFFFFFFFFFFFFFFFFFFFFFFFFFFFFFFFFFFFFFFFFFFFF:FFFFF:FFF
FFFF,FFFFFFFFFFFFFFFF:FFFF:FFFFFFFFFFFFFFFFFFFFFFFFFFFFFFFFFFFFFFFFFFFFFFFFFFFFFFFFFFFFFFFFFFFFFFFF
@A00721:190:HGJW7DSXY:4:2437:15284:19789_2:N:0:TCTGCAAG+GCTGCACT
GGTCAATGACAAAACCTTCGAATATGTTACGACATGGCTTCGTAACAACAGTGCAGGATTGTCATCT
CGGGGAAAGTGATTCACCAAGATGTTTCATATAGATACGAGATACCTAG
+
FFFFFFFFFFFFFFFFFFFFFFFFFFFFFFFFFFFFFFFFFFFFFFFFFFFFFFFFFFFFFFFFFFFFFFFFFFFFFFFFFFFFFFFFFFFFFFFFFFFFFFFF:FFFFFFFFF
FFFFFFFFFFFFFFFFFFFFFFFFFFFFFFFFFFFFFFFFFFFFFFFFFFFFFFFFFFFFFFFFFFFFFFFFFFFFFFFFFFFFFFFFFFFFFFFFFFFFFFFF
@A00721:190:HGJW7DSXY:4:2377:14398:34381_1:N:0:TCTGCAAG+GCTGCACT
CTCGTTATCGGAGCTAAGAAGAAGACTTTGGGTACACGTTATGCTCGCAAACCTTAACGTTAGTAGCCGG
AGGTGATCTCTCTGCTTCTGCGTTACTGAGAGAAAAGATTCAGGACGCCTACGGTGACTTTATGGACA
AGA
+
FFFFFFFFFFFFFFFFFFFFFFFFFFFFFFFFFFFFFFFFFFFFFFFFFFFFFFFFFFFFFFFFFFFFFFFFFFFFFFFFFFFFFFFFFFFFFFFFFFFFFFFF
FFFFFFFFFFFFFFFFFFFFFFFFFFFFFFFFFFFFFFFFFFFFFFFFFFFFFFFFFFFFFFFFFFFFFFFFFFFFFFFFFFFFFFFFFFFFFFFFFFFFFFFF
FFF
@A00721:190:HGJW7DSXY:4:2562:16369:8422_2:N:0:TCTGCAAG+GCTGCACT
AGAACACGTCAAGAAGTCGCTCGGCGTTGTTCTTGAAAACCAAGTTAAGAAGGAGGCTGATCATGGAG
TCTTTGTACCTTCTGTCAAACCTTCGAGGTTACAGCTACGAGAGGTGATC
+
FFFFFFFFFFFFFFFFFFFFFFFFFFFFFFFFFFFFFFFFFFFFFFFFFFFFFFFFFFFFFFFFFFFFFFFFFFFFFFFFFFFFFFFFFFFFFFFFFFFFFFFF:F
:FFFFFFFFFFFFFFFFFFFFFFFFFFFFFFFFFFFFFFFFFFFFFFFFFFFFFFFFFFFFFFFFFFFFFFFFFFFFFFFFFFFFFFFFFFFFFFFFFFFFF
@A00721:190:HGJW7DSXY:4:2234:4092:24893_2:N:0:TCTGCAAG+GCTGCACT
TTGAAGGCTGGCTCTAAGGAGACTCCTTCTTTTTGAATGTTGTAAAGAATTGGGTTGAGAAGTGTGC
TTTACAAGGAGTTAGACTCTTCTTCAAGTTTTTAGATCTTCTTGATAA
+
FFFFFFFFF:FFFFFFFFFFFFFFFFFFFFFFFFF:F,FF,FFFFF:FFF,:FFFFFFFFFFF:FFFFF:F,:FFF:F
FFFFFFFFFFFFFFFFFFFFFFFFFFFFFFFFFFFFFFFFFFFFFFFFFFFFFFFFFFFFFFFFFFFFFFFFFFFFFFFFFFFFFFFFFFFFFFFFFFFFF
@A00721:190:HGJW7DSXY:4:2456:9805:36010_1:N:0:TCTGCAAG+GCTGCACT
CAATAGCCACAGACTTTCTGGGAAAAGAGACCTCTGTTGGTAGAGGAGTTGAGAGAATTACTCAGATT
CAATCTGGCATCACTGAACGTCTACAACGAGTTAGGGAGTGGCTAGGTTTTAAAGATCCTTTGCACA
AGC
+
FFFFFFFFFFFFFFFFFFFFFFFFFFFFFFFFFFFFFFFFFFFFFFFFFFFFFFFFFFFFFFFFFFFFFFFFFFFFFFFFFFFFFFFFFFFFFFFFFFFFFFFF
FFFFFFFFFFFFFFFFFFFFFFFFFFFFFFFFFFFFFFFFFFFFFFFFFFFFFFFFFFFFFFFFFFFFFFFFFFFFFFFFFFFFFFFFFFFFFFFFFFFFFFFF
FFF
@A00721:190:HGJW7DSXY:4:2339:14335:32393_1:N:0:TCTGCAAG+GCTGCACT
AGGACTGATGGTGAGATTCTTTTACCTTTTGGAGGTCCAGGAACCTTTACTCCTAGTGTCTTTTCTAG
AGTCCAAGGACGTTTCCGTCGGAGGATGACAGGTGGGAGACCGCTCAATAACACTCTATTGAATCCCT
TTT

```



FFFFFFFFFFFFFFFFFFFFFFFFFFFFFFFFFFFFFFFFFFFFFFFFFFFFFFFFFFFFF:FFFFFFFF  
FFFFFFFFFFFFFFFFFFFFFFFFFFFFFFFFFFFFFFFFFFFFFFFFFFFFFFFFFFFFF  
FFF  
@A00721:190:HGJW7DSXY:4:2273:7771:5024\_2:N:0:TCTGCAAG+GCTGCACT  
TCTGCCACTTCTAATTTTAGGAAACGTGCGGAAAAGAAAGTTCATGAGGATGTCTTGTCGAAAAATA  
TCGCCGGGACCTTCTAATAGAGGATCCTGATGACATTATTCAACGGA  
+  
FFFFFFFFFF,FFFFFF::FFFFFFFFFFFFFFFF:FFFFFFFFFFFFFFFFFFFFFFFF:F:FFFFFFFF  
FFFF::F,:FFFFFF,F:FFFFFFFFF::,FFFFFF:FFFFFF  
@A00721:190:HGJW7DSXY:4:1217:5231:13401\_1:N:0:TCTGCAAG+GCTGCACT  
AACTGTCTCCACTGATTGCGAATTAGAGAAAAGACGACCTTCTTGTGGGGACTGAGACCTCTGAATTTT  
CAGGGTGCCCTGATGAGGACGTTGAAAGGGATAATTTCAACTCTGAGACTTCTAAAAGTGTTTCAAAA  
GAC  
+  
FFFFFFFFFFFFFFFFFFFFFFFFFFFFFFFFFFFFFFFFFFFFFFFFFFFFFFFFFFFFF  
FFFFFFFFFFFFFFFFFFFFFFFFFFFFFFFFFFFFFFFFFFFFFFFFFFFFFFFFFFFFF  
FFF  
@A00721:190:HGJW7DSXY:4:1441:15040:30295\_1:N:0:TCTGCAAG+GCTGCACT  
ATGAGTGATCGTATTAGAACAGCTGATTCTTATTGCATGAACGTCGCTGAGGTCAAACCTGTGGACGT  
TCTTTTCATCGACGAATTATTCATGATTCACGCTGGTCAGACCCTTTTTCTTACACATCTACTTAAGG  
CGG  
+  
FFFFFFFFF:FFFFFFFFFFFFFFFFFFFFFFFFFFFFFFFFFFFFFFFFFFFFFFFFFFFFF  
:,FFFFFFFFFFFFFFFFFFFFFFFFFFFFFFFFFFFFFFFFFFFFF::FFFFFFFFFFFFFFFFFFFFF  
FFF  
@A00721:190:HGJW7DSXY:4:2545:16080:28150\_2:N:0:TCTGCAAG+GCTGCACT  
CAAATCGGATTCATCAATCGTATTGATCTCCAAGTCGCAAACCTACTTCAACATCAACGACATCATTTCT  
TGATGAGTGTCGTTCTTATCGAAGTCTCAGTTATCGCTGCCCCGCCGA  
+  
FFFFFFFFFFFFFFFFFFFFFFFFFFFFFFFFFFFFFFFFFFFFFFFFFFFFFFFFFFFFF  
FFFFFFFFFFFFF:FFFFFFFFFFFFFFFFFFFFFFFFF:FFFFFFFFFFFFF  
@A00721:190:HGJW7DSXY:4:1653:17264:35023\_1:N:0:TCTGCAAG+GCTGCACT  
CAACCCCTTATATCGAGGCTATCGAGGACGATGAGTATCTTGAAGTTGTTGACGACAAGCCTCAAGAG  
GGTAGAGGACCACCTGGATCTTCTACTGTCTCTGCCTTCCAAGATTTCTTAGAAGAGGTTATTCTCTGG  
AAC  
+  
FFFFF::FFFFFFFFFFFFFFFFFFFFFFFFFFFFFFFFFFFFFFFFFFFFFFFFFFFFF  
FFFFFFFFFFFFFFFFFFFFFFFFFFFFFFFFFFFFFFFFFFFFFFFFFFFFFFFFFFFFF  
FFF  
@A00721:190:HGJW7DSXY:4:2535:30626:30170\_1:N:0:TCTGCAAG+GCTGCACT  
TACCTTTATAGGTAAGAAGCCCCTTGAGCCGCGTAGTCAGCGCGTTTAGCTGTATCATCAGTCAGAGT  
ATACCCGATAGGGTACCGAGTCTCCAAGAGAATATTTATTCTTATGAGGCTCGAAACTTCAACGTTTT  
CAC  
+  
FFFFFFFFFFFFF:FFFFFFFFFFFFFFFFFFFFF:FFFFFFFFF:FFFFFFFFFFFFFFFFFFFFF  
FFFFFFFFFFFFFFFFFFFFFFFFFFFFF:FFFFFFFFFFFFFFFFFFFFFFFFFFFFFFFFFFFFF  
FFF  
@A00721:190:HGJW7DSXY:4:1503:24370:26036\_1:N:0:TCTGCAAG+GCTGCACT  
CACTTTGATGATTTTATCACTTTATTATGACCTTGGAAGTTTTCGGCTGTGGTTGTCGCTGGGGACG  
ATTCCATTCTGTTTTCAAAGACTCCAATAACTGATCATTCTGATCATATGATTTTGGACAATGGTTTC  
GAA  
+  
FFFFFFFFFFFFF:FFFFFFF:FFFFFFFFFFFFFFFFFFFFF:FFFFFFFFFFFFFFFFFFFFF:FFFFFFF



@A00721:190:HGJW7DSXY:4:2330:26955:16986\_2:N:0:TCTGCAAG+GCTGCACT  
CAGGGGCTATTACTCTTGCTGAAACAGCTATTAAAGCTGTTGAGCGGGTAATTACACCTAAACGAGCT  
TGATCTGCCATCGCTGAAGGATGTGCACTCTTTTCTGCTACTTTAACG

+

FFFFFFFFFFFFFFFFFFFFFFFFFFFFFFFFFFFFFFFFFFFFFFFFFFFFFFFFFFFFFFFFFFFFFFFF  
FFFFFFFFFFFFFFFFFFFFFFFFFFFFFFFFFFFFFFFFFFFFFFFFFFFFFFFFFFFFFFFF

@A00721:190:HGJW7DSXY:4:2201:18855:8469\_2:N:0:TCTGCAAG+GCTGCACT  
TAAAAAGAAGATAGAGAGTCATACTTTGGGCTATCGTTCAGGTGCATGGGGTTGGATAGCCAATATTG  
AAGTGGACACCTCTGGTAGTATCGAAGTAAAGATAACCAATAAGGAAG

+

FFFFFFFFFFFFFFFFFFFFFFFFFFFFFFFFFFFFFFFFFFFFFFFFFFFFFFFFFFFFFFFFFFFF:FFFFFFFF  
FFFFFFFFFFFFFFFFFFFFFFFFFFFFFFFFFFFFFFFFFFFFFFFFFFFFFFFFFFFFFFFF,FFFFFFFF:FFFF:FF

@A00721:190:HGJW7DSXY:4:2264:8829:16814\_1:N:0:TCTGCAAG+GCTGCACT  
AATCTTACCACTATCTACGAACCTAAAGTTCTGAAGACGTTGCTTGTGCGCTTCCTCCTTTAATGGCAC  
TACCTCGGTACAATCTTACTTGAACGAAGGCGACCTGTTCCGGAGTTTTTACGGGATCCGGAATGTT  
CTG

+

F:FFFFFFFFFFFFFFFFFFFFFFFFFFFFFFFFFFFFFFFFFFFFFFFFFFFFFFFFFFFFFFFFFFFF  
FFFFFFFFFFFFFFFFFFFFFFFFFFFFFFFFFFFFFFFFFFFFFFFFFFFFFFFFFFFFFFFFFFFFFFFF  
FFF

@A00721:190:HGJW7DSXY:4:1434:30382:4726\_2:N:0:TCTGCAAG+GCTGCACT  
ATAAGAATCTTTACCAGGACTCCTACTACAGGAGCAGTCTTCTGATCGTAAGAAGTTTATAAGGAA  
CATATCCATTTGTTGTAATAGGGTCATCAACTTAGAACTCGAACTCT

+

FFFFFFFFFFFFFFFFFFFFFFFFFFFFFFFFFFFFFFFFFFFFFFFFFFFFFFFFFFFFFFFFFFFF:FFFFF:FFFFFFFFFFFFFFFF  
F:FFFFFFFFFFFFFFFFFFFFFFFFFFFFFFFFFFFFFFFFFFFFFFFFFFFFFFFFFFFFFFFF,FFFFFFF

@A00721:190:HGJW7DSXY:4:2544:18539:29058\_1:N:0:TCTGCAAG+GCTGCACT  
TGTCTTTCCAAGCTTACCTGTATCTTCAATGAAATTGGACTCTTCGATAGGGGACATTTTATCGTGGG  
CTTTCGTAAAGGAAGATCTGTTATCGACGGTTTATCGTTACGAAGTATCACTCCACCGGTGAATGG  
TTT

+

FFF:FFFFFFFF:FFFF:FFFFFFFF:FFFFFFFFFFFFFFFFFFFFFFFFFFFFFFFFFFFFFFFFFFFF  
FF:FFFFFFFFFFFFFFFFFFFFFFFFFFFFFFFFFFFFFFFFFFFFFFFFFFFFFFFFFFFFFFFFFFFF:FFFFFFFFFFFF:FFFFFFFFFFFFFFFF  
FFF

@A00721:190:HGJW7DSXY:4:2552:21169:12320\_1:N:0:TCTGCAAG+GCTGCACT  
ACTTACTTAGACTTTCTACGATACAAATGATAACTTCTAATTTACGTTTGCTACTCAGAGCTGGTCC  
TCTCAGCAAAGGGATGCATGGTGTATCTCCTCAGGAGTCCCGGCATTTGATAATAATGACGAGACTT  
TCG

+

FFFFFFF:FFFFF:FFFFFFFFFFFFF:FFFFFFFFFFFFFFFFFFFFFFFFFFFFFFFFFFFF:FFFFFFFFFFFFFFFFFFFFF  
FFFFFFFFFFFFFFFFFFFFFFFFFFFFFFFFFFFFFFFFFFFFFFFFFFFFFFFFFFFFFFFFFFFFFFFF  
FFF

@A00721:190:HGJW7DSXY:4:1670:14271:1532\_2:N:0:TCTGCAAG+GCTGCACT  
CCAGCGCATCTCGTGTGAGCCTCGACCCGATTATATGGTATTAACCTATAAAGGTGAGGAGACCATT  
TTCTTGCTGAAATTTATAGAAGATTATTTTGACAGAATCAATAAGAAT

+

FFFFFFFFFFFFFFFFFFFFFFFFFFFFFFFFFFFFFFFFFFFFFFFFFFFFFFFFFFFFFFFFFFFF  
FFFFFFFFFFFFFFFFFFFFFFFFFFFFFFFFFFFFFFFFFFFFFFFFFFFFFFFFFFFFFFFF

@A00721:190:HGJW7DSXY:4:2654:23710:28275\_2:N:0:TCTGCAAG+GCTGCACT  
AGTGGAAAGGCTCCAGTCAACACTAGTTCGAGTGCTGCTTTGGATTACGATGACGTGAGAATAGGTGA  
AGGGATAGTTTTTACCTCGACCAACATTAAGGCGGCGGCGACTAATCT

+

FFFFFFFFFFFFFFFFFFFFFFFFFFFFFFFFFFFFFFFFFFFFFFFFFFFFFFFFFFFFFFFFFFFF:FFFFFFFFFFFFF:FFFFFFF  
FFFFFFFFFFFFF:FFFFFFFFFFFFFFFFFFFFFFFFFFFFFFFFFFFFFFFFFFFF:FFFFF

@A00721:190:HGJW7DSXY:4:1232:31693:29606\_2:N:0:TCTGCAAG+GCTGCACT  
ACATTTACCACCAAATTCCTTTGATACAACCTCTAGCCTTCAAGTGGGGTATGCCTGCGGAATACGCTT  
GCTATTCACCAGATTGGTTCGAACCCGTTGATGCTATGTCAGAAGAAG

+

FFFFFFFFFFFFFFFFFFFFFFFFFFFFFFFFFFFFFFFFFFFFFFFFFFFFFFFFFFFFFFFFFFFFFFFF:F  
FFFFFFFFFFFFFFFFFFFFFFFFFFFFFFFFFFFFFFFFFFFFFFFFFFFFFFFFFFFFFFFFFFFFFFFF

@A00721:190:HGJW7DSXY:4:2346:11080:29637\_2:N:0:TCTGCAAG+GCTGCACT  
CAGAGGCTGTCAAACAAGCCCAGACTCAAGGAGTCCAATCAATGGTTTTGAATTTAGATCAACTGGGG  
AGACGTGCTAAAATGGGTGATAAAAAATATTTAGAGATCTTTTCTACT

+

,F,F,:,F,F:FF,FFF,F::F:FF,:FFF,F,:,FFFFFF,,F:FFFF,F,FFFF,,FFFFFF,F:F  
FFF:F:FF,,FFF:,,,F:F:F,FFF,,FFF,FF:FFFFFF:FFF:F,

@A00721:190:HGJW7DSXY:4:1432:26422:8108\_2:N:0:TCTGCAAG+GCTGCACT  
TTATAAAATATAAAATAAGGGAGTCATAACTTTTGTTACCAAATTCCTGGCTTTCACGAAGTCTCT  
GATTTTATTAATCATTACTTTAACGATCTCTCGGTCATTTACTCTGTA

+

FFFFFFFFFFFFFFFFFFFFFFFFFFFFFFFFFFFFFFFFFFFFFFFFFFFFFFFFFFFFFFFFFFFFFFFF:F  
FFFFFFFFFFFFFFFFFFFFFFFFFFFFFFFFFFFFFFFFFFFFFFFFFFFFFFFFFFFFFFFFFFFFFFFF

@A00721:190:HGJW7DSXY:4:1306:5086:2848\_2:N:0:TCTGCAAG+GCTGCACT  
CTATCTTTTCAGACACTTCTTATATTATTACAATAGTTAATATCATATTAGTAATACTCACTATCGT  
TTTCTGCTTTTCTTAGCTAATAGATTAATAAAGGATGAGTACGAAAA

+

FF:FFFFFFFFFFFF:FFFFFFFFFFFFFFFFFFFFFFFFFFFFFFFFFFFFFFFFFFFFFFFFFFFFFFFFF  
F,FFFFFFFFFFFF:FFFFFFFFFFFFFFFFFFFF:FFFFFFFFFFFFF:FFFFF

@A00721:190:HGJW7DSXY:4:1371:31656:1892\_2:N:0:TCTGCAAG+GCTGCACT  
TACGAGACCTGATGGTAGAATAGATTTAGTCTCTACACCCATCTCAACGAGGATAAAGCGAGTTTCC  
GTCCTGAACGTAATACACGAAGAGATCATCCGCAAACGACTCGAAACC

+

FFFFFFFFFFFFFFFFFFFFFFFFFFFFFFFFFFFFFFFFFFFFFFFFFFFFFFFFFFFFFFFFFFFFFFFF:F  
FFFFFFFFFFFFFFFFFFFFFFFFFFFFFFFFFFFFFFFFFFFFFFFFFFFFFFFFFFFFFFFFFFFFFFFF

@A00721:190:HGJW7DSXY:4:2306:5565:27633\_2:N:0:TCTGCAAG+GCTGCACT  
CTCCGAAAATGGTTTCAAATGAGGTCAAAGCTCTATTTATTAACGAACCTATTATCCGATTCTTCGAG  
GGTATCACTACCACTGATCTGCCGACTTTAGTCAAGGAACCTCAATTC

+

FFFFFFFFFFFFFFFFFFFFFFFFFFFFFFFFFFFFFFFFFFFFFFFFFFFFFFFFFFFFFFFFFFFFFFFF:F  
FFFFFFFFFFFFFFFFFFFFFFFFFFFFFFFFFFFFFFFFFFFFFFFFFFFFFFFFFFFFFFFFFFFFFFFF

@A00721:190:HGJW7DSXY:4:2563:21549:7467\_1:N:0:TCTGCAAG+GCTGCACT  
CGACAAATTTTAGAACTTTATTTCAGAACTCTCTCCGATCACCTTGGTGTGATCTCCCGGAGGATCTT  
TTCAATAAGATGTATGATGATAATCTACTATTTTTAAATAGTGATATTCAGCGTATACTTGAATACTT  
TAT

+

FFFFFFFFFFFFFFFFFFFFFFFFFFFFFFFFFFFFFFFFFFFFFFFFFFFFFFFFFFFFFFFFFFFFFFFF:F  
FFFFFFFFFFFFFFFFFFFFFFFFFFFFFFFFFFFFFFFFFFFFFFFFFFFFFFFFFFFFFFFFFFFFFFFF  
FFF

@A00721:190:HGJW7DSXY:4:2318:2672:28761\_1:N:0:TCTGCAAG+GCTGCACT  
TACCGCAAAAAGTTGGAAGAGGTCTATGATATTTATTTTACTTATACTTTAAATAGCACCGATTATAA  
CTTGACTGTTGATAATATTACAATAGCTCTTCTCAGAAGATTAGAGAAGTAACCGGTGAACACGTCG  
GTA

+

FFFFFFFFFFFFFFFFFFFF,FFFFFF:FFFFFFFFFFFFFFFFFFFFFFFFFFFFFFFFFFFFFFFFFFFFF  
FFFFFFFFFFFFFFFFFFFFFFFFFFFFFFFFFFFFFFFFFFFFFFFFFFFFFFFFFFFFFFFFFFFFFFFF  
FFF

@A00721:190:HGJW7DSXY:4:2122:24605:2394\_1:N:0:TCTGCAAG+GCTGCACT  
AACGATTCTTCGACTATATTAAAGAAATAAAAATACTTCAAGTACCTGAACCTTACATTTTAAATGGT



+

@A00721:190:HGJW7DSXY:4:1678:1262:33395\_2:N:0:TCTGCAAG+GCTGCACT  
TTAACTATGGGGCGAAGATCCCCTATGGAGTCTTGAAGGACTTAGGTTGGCATATTTATGCCGACGAT  
AATAAGCATGTCACCCCTTAAGCACCGAGAGATCGGAAGAGCGTCGTGT

 $+$ 

@A00721:190:HGJW7DSXY:4:2306:22697:28714\_1:N:0:TCTGCAAG+GCTGCACT  
AAATTTTTCCTTTCCTCCGTCATTGGGGATTTCGATGTGAGAAGGTGGAAGGTGTCAAGGTCTTCTT  
CATGCTGATCTTTCAGGACCTACTCACATCATGATTGATAGTTACGGCTCGTATCGAGTTGGAGGGAG  
GA

+

@A00721:190:HGJW7DSXY:4:2538:21920:17159\_1:N:0:TCTGCAAG+GCTGCACT  
TCAGAGAGGGGAGCTCTGAAAAGGAAACTTCGTCAGAAGATGAGGAAGTCTAAGAGGAGGAGTTTGAG  
GAAGGCTCTAGAGAAGATCTCACCACCTGGAGAAGGCAAGTGGAGAGTCCAGAAGTTGATGAAGAAGG  
ATT

+

@A00721:190:HGJW7DSXY:4:2662:7808:22717\_1:N:0:TCTGCAAG+GCTGCACT  
CCTAAGGTGGATGAGGGAGGTTGTTTCTTTGGAGTTTATAGATAATCTTTTGAGAAGGGGTCATAGAGC  
CAGCAAGAGAAGCTTATATGCTGGTTTAAGTGATGATTATCACTCCTTGAGAAGACAAGCCACATTAA  
GAT

+

@A00721:190:HGJW7DSXY:4:1570:26106:27226\_1:N:0:TCTGCAAG+GCTGCACT  
ATATTGTTCTTCCGGGAAGTTGTGGGATTTAACTTTGACTCAACTACTCCGATCAGATCCGGATGGT  
TTGATTGGTATGGACTACTCGACTTTTGATCTGGAGTTGTCTAGGGTCATGGCAGATACTACCGATAA  
GGT

+

@A00721:190:HGJW7DSXY:4:1643:1362:28275\_2:N:0:TCTGCAAG+GCTGCACT  
AAGAGTCTTTATGATTCAAAACCTATCGTTGTCGTACCTTACAAGTTGAGGAGACTTTACAGCGCT  
TATTGTCGCGCAGTTTCCAGAATTGCGGTTGAAGTTCACCCATTCTAT

+

@A00721:190:HGJW7DSXY:4:2265:20383:31908\_1:N:0:TCTGCAAG+GCTGCACT  
CTATTCTTGATGTGAAAGATGCATCGAGGTATACGTCTAGGAACATTGATTGGGAACGTACCTACTCA  
CGAGACGTCATGAAAGCTATCGGAGGGAAGCAAATGTTTCGTTCTGTTACAAGAACGCTTTGGATTG  
TGA

+

[illegible]



@A00721:190:HGJW7DSXY:4:2328:20509:20071\_2:N:0:TCTGCAAG+GCTGCACT  
TCTGCCACTTCTAATTTTAGGAAACGTCGCGAAAAGAAAGTTCATGAGGATGTCTTGGTCGAAAAATA  
TCGCCGGGAAC TTCTAATAGAGGATCCTGATGACATTATTTCAACGGA

@A00721:190:HGJW7DSXY:4:1223:26087:20400\_1:N:0:TCTGCAAG+GCTGCACT  
AACTGTCTCCACTGATTCGGAATTAGAGAAAGACGACCTTCTTGTGGGGACTGAGACCTCTGAATTTT  
CAGGGTGCCCTGATGAGGACGTTGAAAGGGATAATTTCAACTCTGAGACTTCTAAGAGTGTTTCAAAA  
GAC

@A00721:190:HGJW7DSXY:4:1676:24948:29637\_1:N:0:TCTGCAAG+GCTGCACT  
ATGAGTGATCGTATTAGAACAGCTGATTCTTATTGCATGAACGTCGCTGAGGTCAAACCTGTGGACGT  
TCTTTTCATCGACGAATTATTCATGATTCACGCTGGTCAGACCCTTTTCTTACACATCTACTTAAGG  
CGG

@A00721:190:HGJW7DSXY:4:2573:22571:17190\_2:N:0:TCTGCAAG+GCTGCACT  
CAAATCGGATTCATCAATCGTATTGATCTCCAAGTCGAACTACTTCAACATCAACGACATCATTCT  
TGATGAGTGTCTTCTTATCGAAGTCTCAGTTATCGCTGCCCCGCCGA

@A00721:190:HGJW7DSXY:4:2214:18738:35415\_1:N:0:TCTGCAAG+GCTGCACT  
CAACCCCTTATATCGAGGCTATCGAGGACGATGAGTATCTTGAAGTTGTTGACGACAAGCCTCAAGAG  
GGTAGAGGACCACCTGGATCTTCTACTGTCTCTGCCTTCCAAGATTTCTTAGAAGAGGTTATTCTCTGG  
AAC

@A00721:190:HGJW7DSXY:4:1316:28311:10410\_1:N:0:TCTGCAAG+GCTGCACT  
TTCCGATCTGTAAGAAGCCCCCTTGAGCCGCGTAGTCAGCGCGTTTAGCTGTATCATCAGTCAGAGTAT  
ACCCGATAGGGTACCGAGTCTCCAAGAGAATATTTATTCTTATGAGGCTCGAAACTTCAACGTTTTCA  
CAA

@A00721:190:HGJW7DSXY:4:2152:3495:9236\_1:N:0:TCTGCAAG+GCTGCACT  
CACTTTGATGATTTTATCACTTTATTATGACCTTGGAAAGTTTTCGGCTGTGGTTGTCGCTGGGGACG  
ATTCCATTCTGTTTTCAAAGACTCCAATAACTGATCATTCTGATCATATGATTTTGGACAATGGTTTC  
GAA

[illegible]



@A00721:190:HGJW7DSXY:4:1358:27082:27477\_1:N:0:TCTGCAAG+GCTGCACT  
ATTCCGAGAGGTTTATCCTGATGTGGAGGGAGTTCTTGAAGCATCCCACCTTTCCTTGTGAAAATTT  
TGATGCGGTTTCATAAGATTATCAGTAATCCTGATTCTACTACGGATTCATGGACCTTCCATCCTGTA  
CCT

+

FFFFFFFFFFFFFFFFFFFFFFFFFFFFFFFFFFFFFFFFFFFFFFFFFFFFFFFFFFFFFFFFFFFFFFFF  
FFFFFFFFFFFFFFFFFFFFFFFFFFFFFFFFFFFFFFFFFFFFFFFFFFFFFFFFFFFFFFFFFFFFFFFF  
FFF

@A00721:190:HGJW7DSXY:4:2663:10592:1579\_1:N:0:TCTGCAAG+GCTGCACT  
TTGATTAAGACTCTTCCGAAAGGCGAACTTTGGGAATTTGAAGCTCAGGGTGAAGCACAACTTTGAC  
CGTGACGAACTGTGGTGTCTTGATCTACGTTACGGATATACTCTCCTTGAGTTCATCGTAAGGACA  
CT

+

FFFFFFFFFFFFFFFFFFFFFFFFFFFFFFFFFFFFFFFFFFFFFFFFFFFFFFFFFFFFFFFFFFFFFFFF  
FFFFFFFFFFFFFFFFFFFFFFFFFFFFFFFFFFFFFFFFFFFFFFFFFFFFFFFFFFFFFFFFFFFFFFFF  
FF

@A00721:190:HGJW7DSXY:4:1447:11162:14935\_2:N:0:TCTGCAAG+GCTGCACT  
CAGGGGTTTTCGAATAGTGATAGCCACCCGCTTACAGAGGGGCAGCAGCATGACCATAATTGGTATT  
GACTTTGGTACCACCTTTTCTACTGTCTGTCTCGCCTCTTCGAATGAA

+

FFFFFFFFFFFFFFFFFFFFFFFFFFFFFFFFFFFFFFFFFFFFFFFFFFFFFFFFFFFFFFFFFFFFFFFF  
FFFFFFFFFFFFFFFFFFFFFFFFFFFFFFFFFFFFFFFFFFFFFFFFFFFFFFFFFFFFFFFFFFFFFFFF

@A00721:190:HGJW7DSXY:4:2533:28402:9001\_1:N:0:TCTGCAAG+GCTGCACT  
CAATCATTGGTTTTTCTAATAATGATGACACTATTGTTTTTGTATTATGCTATTACTCATGATGGT  
TACGGTCAGGGAGTATTCTCAGTTTACAAGGACCTTAAGCGATGGATCGGGGTTAATTCTAAACATT  
AC

+

F:FF,::FF,FFFF,F,F:FFF,: ,FFFF,F,F::FF:,F,:FF:F,,FF,F:F:FFFF,FFFFFF  
FF,,F::FFF:F,: ,FFFFFF,FFFF,: ,:F:,FF,F,, ,FFFFFF:F,: :FF:FFFF:FF,FFFF  
:,

@A00721:190:HGJW7DSXY:4:1562:13006:21793\_1:N:0:TCTGCAAG+GCTGCACT  
TTTCAGTACCCAGTCAGTATACCTCTACGCAAAGATATTTTCATGAAAACCTACAGAGGAACGTACCGGA  
TTACCTGTCTTTTCATATTATGAATGAACCTTCGGCCGCTCTCTTTGCTTCGATGTTGGATGTCAAGAA  
GGG

+

FFFFFFFFFFFFFFFFFFFFFFFFFFFFFFFFFFFFFFFFFFFFFFFFFFFFFFFFFFFFFFFFFFFFFFFF  
FFFFFFFFFFFFFFFFFFFFFFFFFFFFFFFFFFFFFFFFFFFFFFFFFFFFFFFFFFFFFFFFFFFFFFFF  
FFF

@A00721:190:HGJW7DSXY:4:1448:25654:26193\_2:N:0:TCTGCAAG+GCTGCACT  
TATTCTGGTGGTGTGATAATCTTGAGGTCGTGACGTTGATGAAGCTATAAGAGCGTTCTTATTACG  
GCGCACTTCTTTACCCGCCACCACACAACCTTCAGTTTCACAACCTGAA

+

FFFFFFFFFFFFFFFFFFFFFFFFFFFFFFFFFFFFFFFFFFFFFFFFFFFFFFFFFFFFFFFFFFFFFFFF  
FFFFFFFFFFFFFFFFFFFFFFFFFFFFFFFFFFFFFFFFFFFFFFFFFFFFFFFFFFFFFFFFFFFFFFFF

@A00721:190:HGJW7DSXY:4:2344:7844:14920\_1:N:0:TCTGCAAG+GCTGCACT  
CTCGTCAATACTTTTCAATAATATACGTCTTGAACCTCACTTATGACGATCTAGTGAAATTAACGCGTC  
CTTTTCTGGAACGTAGTTTACTATTATGAACAAAGTTATCAAAGATAGTGGCATTCAAGGCAAACCT  
ACC

+

FFFF:FFFFFFFFFFFFFFFFFFFFFFFFFFFFFFFFFFFFFFFFFFFFFFFFFFFFFFFFFFFFFFFF  
FFFFFFFFFFFFFFFFFFFFFFFFFFFFFFFFFFFFFFFFFFFFFFFFFFFFFFFFFFFFFFFFFFFFFFFF  
FFF

@A00721:190:HGJW7DSXY:4:2152:2175:14372\_1:N:0:TCTGCAAG+GCTGCACT  
AACAGCTATTAAAGCTGTTGAGCGGGTAATTACACCTAAACGAGCTCGATCTGCCATCGCTGAAGGAT



FFFFFFFFFFFFFFFFFFFFFFFFFFFFFFFFFFFFFFFFFFFFFFFFFFFFFFFFFFFFFFFFFFFFFFFFFFFFFFFF  
FFF

@A00721:190:HGJW7DSXY:4:1603:1976:34194\_2:N:0:TCTGCAAG+GCTGCACT  
ACATTTACCACCAAATTTCTTTTGATACAACCTCTAGCCTTCAAGTGGGGTATGCCTGCGGAATACGCTT  
GCTATTCACCAGATTGGTTCGAACCCGTTGATGCTATGTCAGAAGAAG

+

FFFFF:FFFFFFFFFFFFFFFF,FFFFFFFFFFFFFFFF:FFF,,FFFFFFFFFFFFFFFFFFFFFFFFFFFFF  
FFFF,FFFF::FFFF:FFFFFFFFF,,F::FFFFFFFFFFFFFFFFFFFFF

@A00721:190:HGJW7DSXY:4:2351:32832:24408\_2:N:0:TCTGCAAG+GCTGCACT  
CAGAGGCTGTCAAACAAGCCCAGACTCAAGGAGTCCAATCAAAGGTTTTGAATTTAGCTCAACTGGGG  
AGACGTGCTTAAATGGGTGATAAAAATTATTTAGAGATCTTTTCTACT

+

FFFFFFFFFFFFFFFFFFFFFFFFFFFFFFFFFFFFFFFFFFFFFFFFFFFFFFFFFFFFFFFFFFFFFFFFFFFFF  
FFFFFFFFFFFFFFFFFFFFFFFFFFFFFFFFFFFFFFFFFFFFFFFF:FFFFFFFFF

@A00721:190:HGJW7DSXY:4:2361:2962:22592\_2:N:0:TCTGCAAG+GCTGCACT  
TTATAAAATATAAAATAAGGGAGTCATAACTTTTGTTACCAAATTTGGCTTTCAACGAAGTCTCT  
GATTTTATTAATCATTACTTTAACGATCTCTCGGTCATTTACTCTGTA

+

FFFF:FFFFFFFFFFFFFFFFFFFFFFFFFFFFFFFFFFFFFFFFFFFFFFFFFFFFFFFFFFFFFFFFFFFFF,FFFFFFFFFFFFFFFFF  
FFFFFFFFFFFFFFFFFFFFFFFFF,FFFFFFFFFFFFFFFFFFFFFFFFFFFFFFFFF

@A00721:190:HGJW7DSXY:4:1369:30129:28839\_2:N:0:TCTGCAAG+GCTGCACT  
CTATCTTTTCAGACACTTCTTATATTATTTACAATAGTTAATATCATATTAGTAATACTCACTATCGT  
TTTCTGCTTTTTCTTAGCTAATAGATTAATAAAGGATGAGTACGAAAA

+

FFFFFFFFFFFFFFFFFFFFFFFFFFFFFFFFFFFFFFFFFFFFFFFFFFFFFFFFFFFFFFFFFFFFFFFFFFFFF:  
FFFFFFFFFFFFFFFFFFFFFFFFF,FFFFFFFFFFFFFFFFFFFFFFFFFFFFFFFFF

@A00721:190:HGJW7DSXY:4:2317:1768:18865\_2:N:0:TCTGCAAG+GCTGCACT  
TACGAGACCTGATGGTAGAATAGATTTAGTCTCTACACCCATCTCAACGAGGATAAAGCGAGTTTTCC  
GTCCTGAACGTAATACACGAAGAGATCATCCGCAAACGACTCGAAACC

+

FFFFFFFFFFFFFFFFFFFFFFFFFFFFFFFFFFFFFFFFFFFFFFFFFFFFFFFFFFFFFFFFFFFFFFFFFFFFF  
FFFFFFFFFFFFFFFFFFFFFFFFFFFFFFFFFFFFFFFFFFFFFFFFFFFFFFFFFFFFFFFFF

@A00721:190:HGJW7DSXY:4:2643:3088:10347\_2:N:0:TCTGCAAG+GCTGCACT  
CTCCGAAAATGGTTTCAAATGAGGTCAAAGCTCTATTTATTAACGAACCTATTATCCGATTCTTCGAG  
GGTATCACTACCACTGATCTGCCGACTTTAGTCAAGGAACCTCAATTC

+

FFFFFFFFFFFFFFFFFFFFFFFFFFFFFFFFFFFFFFFFFFFFFFFFFFFFFFFFFFFFFFFFFFFFFFFFFFFFF  
FFFFFFFFFFFFFFFFFFFFFFFFFFFFFFFFFFFFFFFFFFFFFFFFFFFFFFFFFFFFFFFFF

@A00721:190:HGJW7DSXY:4:2656:15139:8703\_1:N:0:TCTGCAAG+GCTGCACT  
CGACAAATTTTAGAACTTTATTTCAGAACTCTCTCCGATCACCTTGGTGTGATCTCCCGAGGATCTT  
TTCAATAAGATGTATGATGATAATCTACTATTTTTAAATAGTGATATTCAGCGTATACTTGAATACTT  
TAT

+

FFFFFFFFFFFFFFFFFFFF:FFFFFFFFFFFFFFFFFFFFFFFFFFFFFFFFFFFFFFFFFFFFFFFFFFFFFFFFF  
FFFFFFFFFFFFFFFFFFFFFFFFFFFFFFFFFFFFFFFFFFFFFFFFFFFFFFFFFFFFFFFFFFFFFFFFFFFFF  
FFF

@A00721:190:HGJW7DSXY:4:2320:4056:14309\_1:N:0:TCTGCAAG+GCTGCACT  
TACCGCAAAAAGTTGGAAGAGGTCTATGATATTTATTTTACTTATACTTTAAATAGCACCGATTATAA  
CTTGACTGTTGATAATATTACAATAGCTCTTTCTCAGAAGATTAGAGAAGTAACCGGTGAACACGTCG  
GTA

+

FFFFFFFFFFFFFFFFFFFFFFFFFFFF:FFFFFFFFFFFFFFFFFFFFFFFFFFFFFFFFFFFF:FFFFFFFFFFFFFFFFF  
FFFFFFFFFFFFFFFFFFFFFFFFFFFFFFFFFFFF:FFFFFFFFFFFFFFFFFFFFFFFFFFFFFFFFFFFFFFFFFFFFF  
FFF

@A00721:190:HGJW7DSXY:4:2207:21603:2957\_1:N:0:TCTGCAAG+GCTGCACT  
AACGATTCTTCGACTATATTAAAGAAATAAAAATACTTCAAGTACCTGAACCTTTACATTTTAAATGGT  
ATGGTATAATGTGTCTTACAAATAGAACCTTCACTCTCGGTAATGAGAGTGTATTCCTTAATATTCTA  
GTA

+

FFFFFFFF:FF:FFFFFFFFFFFFFFFFFFFFFFFFFFFFFFFFFFFFFFFFFFFFFFFFFFFFFFFFFFFFFFFF  
FFFFFFFFFFFFFFFFFFFFFFFFFFFFFFFFFFFFFFFFFFFFFFFFFFFFFFFFFFFFFFFFFFFFFFFFFFFF  
FFF

@A00721:190:HGJW7DSXY:4:2305:6732:17253\_1:N:0:TCTGCAAG+GCTGCACT  
CTAGGATTTATCACACTCCTAAATTTGATAGCAATTTATGTTTTAAATGCTAGGAAAATTTTAGAAAA  
ACTCCATTGTATAGTTCAAGGAGTACTTAATTCATAGCTTTAGTATTATTACTATCGCCTTTATTG  
AAA

+

FFF:FF:FFFFFFFFFFFFFFFFFFFFFFFFFFFFFFFFFFFFFFFFFFFFFFFFFFFFFFFFFFFFFFFF,F:  
:FFFF,FFFFFFFF:FFFF,FFFFFFFFFFFFFFFFFFFFFFFFFFFFFFFFFFFFFFFFFFFFFFFFFFFF  
FFF

@A00721:190:HGJW7DSXY:4:2457:17969:34616\_1:N:0:TCTGCAAG+GCTGCACT  
CAAAAGTGACGCGCAAGGAATCTTAATTGATTGAAGCTAGGCGTTGGGAGAATGAAGTCCGCTTC  
CCGAAGAAACGATCTATTTACAGAGTATTAGAGTAGTCCAAAGTTGTATAAATTTATATGATTTT  
CTA

+

FFFFFFFFFFFFFFFFFFFFFFFFFFFFFFFFFFFFFFFFFFFFFFFFFFFFFFFFFFFFFFFFFFFFFFFF:FF  
FFFFFFFFFFFFFFFFFFFFFFFFFFFFFFFFFFFFFFFFFFFFFFFFFFFFFFFFFFFFFFFFFFFFFFFFFFFF  
FFF

@A00721:190:HGJW7DSXY:4:1562:12274:11036\_2:N:0:TCTGCAAG+GCTGCACT  
GCCGGTCGGCAGATCGGCACCACTGGTCTCTACGTTCAAGGACCCGCTGTGCAGAATAACCTTCCCAA  
ATCTAGATCTGCACAGAAGAAGGCTGAAGGTCGTTACCGGACGACCAC

+

FFFFFFFFFFFFFFFFFFFFFFFFFFFFFFFFFFFFFFFFFFFFFFFFFFFFFFFFFFFFFFFFFFFFFFFF:FFFFFFFFFFFF  
FFFFFFFFFFFFFFFFFFFFFFFFFFFFFFFFFFFFFFFFFFFFFFFFFFFFFFFFFFFFFFFFFFFFFFFF

@A00721:190:HGJW7DSXY:4:2132:9317:4476\_1:N:0:TCTGCAAG+GCTGCACT  
CTGAGGCAGTACCTCAGTCAAAAGTCACATTCACCACTCCCATACCAATCAATGATGTGACTATACAG  
TTCGGCCATTTCAAGAGTGGTCAATACGTCGTGGGAGGTACTGAAGCCTTCCCCTCCGCTGGCAGAA  
GAA

+

:FFFFFF,FFFFFF:F:FFFFFFFF:FFF:FFF,FFF:FFFFFF,FFF:, :FFFFFF,FFFFFF  
FFF,FFFFFFFFFFFFFFFF,FF,FF:FFFFFF:FFF,,FFFFFFFF,FFF:FF:FFF:FFFFFF  
::F

@A00721:190:HGJW7DSXY:4:1272:17978:15749\_1:N:0:TCTGCAAG+GCTGCACT  
AATAGTTCTTCTGACCAGAATGAAAAGGGTTTACCAGGGTAGTCTCTAAGTCTACCAGGAAGAGGGG  
AAATGTCCCCAAACTGAGAAGAATAAAGGGAAAGGTCCATCAGGACCTAAGAAGGGGAAATTACCCC  
TAA

+

:FFFF:FFFFFFFFFFFFFFFFFFFFFFFFFFFFFFFFFFFFFFFFFFFFFFFFFFFFFFFFFFFFFFFF  
FFFFFFFFFFFFFFFFFFFFFFFFFFFFFFFFFFFFFFFFFFFFFFFF:FF:FFFFFFFFFFFFFFFFFFFFFFFF:FFFF  
FFF

@A00721:190:HGJW7DSXY:4:1267:19623:31093\_1:N:0:TCTGCAAG+GCTGCACT  
CAAAGAGGCCGCTGCTACGAAGTCGCTGAAGGCGCTTGGGTATTAAGGGTAGCTGTAAAGTTGCGC  
CTGCCGACCCCATCTTTGAGACCAAGACTCTCTACAGTAGGTTCTGCCTACTATGAGCAAATCTGTT  
GAA

+

FFFFFFFFFFFFFFFFFFFFFFFFFFFFFFFFFFFFFFFFFFFFFFFFFFFFFFFFFFFFFFFFFFFFFFFF  
FFFFFFFFFFFFFFFFFFFFFFFFFFFFFFFFFFFFFFFFFFFFFFFF,FFFFFFFFFFFFFFFFFFFFFFFFFFFFFFFF:FFFF  
FFF

@A00721:190:HGJW7DSXY:4:1255:30327:18192\_2:N:0:TCTGCAAG+GCTGCACT  
CGAAGGTGAGAGGACTTTTGGCTACTGGCGACAACTGAGAGCAGTCGCTGGGGAAAGAGAATTGCGT  
GGGTTGAAGGCCGACGCTTCGAGCTTGAGAGATCGGAAGAGCGTCGTG

@A00721:190:HGJW7DSXY:4:2153:24008:9126\_2:N:0:TCTGCAAG+GCTGCACT  
TTAACTATGGGGCGAAGATCCCCTATGGAGTCTTGAAGGACTTAGGTTGGCATATTTATGCCGACGAT  
AATAAGCATGTCACCCTTAAGCACCGAGAGATCGGAAGAGCGTCGTGT

@A00721:190:HGJW7DSXY:4:1450:24858:17550\_2:N:0:TCTGCAAG+GCTGCACT  
ATTTTTCCTTTCCTCCGTCATTGGGGATTTCGATGTGAGAAGGTGGAAGGTGTCAAGGGTCTTCTTCA  
TGCTGATCTTTCAGGACCTAATCACATCATGATTGATAGTTACGGAGA

@A00721:190:HGJW7DSXY:4:2553:19407:36135\_1:N:0:TCTGCAAG+GCTGCACT  
TCAGAGAGGGGAGCTCTGAAAAGGAACTTCGTCAGAAGATGAGGAAGTCTAAGAGGAGGAGTTTGAG  
GAAGGCTCTAGAGAAGATCTCACCACCTGGAGAAGGCAAGTGGAGAGTCCAGAAGTTGATGAAGAAGG  
ATT

@A00721:190:HGJW7DSXY:4:1601:5782:3834\_2:N:0:TCTGCAAG+GCTGCACT  
AAGGTGGATGAGGGAGGTTGTTTCTTTGGAGTTTTAGATAATCTTTTGAGAAGGGGTCATAGAGCCAG  
CAAGAGAAGCTTATATGCTGGTTTAAGTGATGATTATCACTCCTTGAG

@A00721:190:HGJW7DSXY:4:2321:25870:1454\_1:N:0:TCTGCAAG+GCTGCACT  
ATATTGTTCTTCCGGGAAGTTGTGGGATTTAACTTTGACTCACTACTCCGATCAGATCCGGATGGT  
TTGATTGGTATGGACTACTCGACTTTTGATCTGGAGTTGTCTAGGGTCATGGCAGATACTACCGATAA  
GGT

@A00721:190:HGJW7DSXY:4:2161:4752:4648\_2:N:0:TCTGCAAG+GCTGCACT  
AAGAGTCTTTATGATTCAAAACCTATCGTTGTCGTACCTTACAAGTTGAGGAGACTTTACAGCGCT  
TATTGTCGCGCAGTTTCCAGAATTGCGGTTGAAGTTCACCCATTCTAT

@A00721:190:HGJW7DSXY:4:2267:11279:22780\_1:N:0:TCTGCAAG+GCTGCACT  
 CTATTCTTGATGTGAAAGATGCATCGAGGTATACGTCTAGGAACATTGATTGGGAACGTACCTACTCA  
 CGAGACGTCATGAAAGCTATCGGAGGGAAGCAAATGTTTCGTTCTGTTACAAGAACGCTTTGGATTG  
 TGA

@A00721:190:HGJW7DSXY:4:2367:9968:18098\_2:N:0:TCTGCAAG+GCTGCACT  
TCATTTCTGCTTAGTTTGTCCCGGCGAATTATTGGACACGATGAAAAATGACATACCCGTTCTGACC  
TTGGTATCGTTATCCGTCATGGAGATGATGCCGCATCACTTGATTACT

+

FFFFFFFFFFFFFFFFFFFFFFFFFFFFFFFFFFFFFFFFFFFFFFFFFFFFFFFFFFFFFFFFFFFFFFFF:FF  
FFFFFFFFFFFFFFFFFFFFFFFFFFFFFFFFFFFFFFFFFFFFFFFFFFFFFFFFFFFFFFFFFFFFFFFF

@A00721:190:HGJW7DSXY:4:2146:14751:36025\_1:N:0:TCTGCAAG+GCTGCACT  
GGTCAATGACAAAACCTTCGAATATGTTACGACATGGCTTCGTAACAACAGTGCGAGGATTGTCATCT  
CGGGGAAAGTGATTACCAAGATGTTTCATATAGATACGAGATACCTAGAGAAGGTCGCAGCGATCTTA  
CTC

+

:FFFFFFFF:FFFFFFFFFFFFFFFF:FFFF:FFFFFFFFFFFFFFFFFFFFFFFFFFFFFFFFFFFFFFFF: :FFFFFFF  
FFFFFFFFFFFFFFFFFFFFFFFFFFFFFFFFFFFFFFFFFFFFFFFFFFFFFFFFFFFFFFFFFFFFFFFF  
FFF

@A00721:190:HGJW7DSXY:4:2511:11659:16047\_1:N:0:TCTGCAAG+GCTGCACT  
ACCGGAGGTGATCTCTCTGCTTCTGCGTTACTGAGAGAAAAGATTGAGGACGCCTACGGTGACTTTAT  
GGACAAGATGCAAGTTCTTGGGAAATACTGTTTCCCTTTTATAGTTTAGTAGGTGATCTTGACGTCG  
AT

+

FFFFFFFFFFFFFFFFFFFFFFFFFFFFFFFFFFFFFFFFFFFFFFFFFFFFFFFFFFFFFFFFFFFFFFFF  
FFFFFFFFFFFFFFFFFFFFFFFFFFFFFFFFFFFFFFFFFFFFFFFFFFFFFFFFFFFFFFFFFFFFFFFF  
FF

@A00721:190:HGJW7DSXY:4:1503:17418:14622\_1:N:0:TCTGCAAG+GCTGCACT  
GAACACGTCAAGAAGTCGCTCGGCGTTGTTCTTGAAAACCAAGTTAAGAAGGAGGCTGATCATGGAGT  
CTTTGTACCTTCTGTCAAACCTTCGAGGTTGAGCTACGAGAGGTGATCCCGGATGTGGATTGAAGGCTG  
GCT

+

FFFFFFFFFFFFFFFFFFFFFFFFFFFFFFFFFFFFFFFFFFFFFFFFFFFFFFFFFFFFFFFFFFFFFFFF  
FFFFFFFFFFFFFFFFFFFFFFFFFFFFFFFFFFFFFFFFFFFFFFFFFFFFFFFFFFFFFFFFFFFFFFFF  
FFF

@A00721:190:HGJW7DSXY:4:2370:8504:23109\_1:N:0:TCTGCAAG+GCTGCACT  
TTGGGTTGAGAAGTGCTTTACAAGGAGTTAGACTCTTCTTCAAGTTTTTAGATCTTCTTGATAATC  
TTAAAGAAAAATTTTCGAATAAATAATGAGAGGTATAGGCTTAGTCAAGTCTGTACTTACATTCTTT  
ACG

+

FFFFFFFFFFFFFFFFFFFFFFFFFFFFFFFFFFFFFFFFFFFFFFFFFFFFFFFFFFFFFFFFFFFFFFFF:FF  
FFFFFFFFFFFFFFFFFFFFFFFFFFFFFFFFFFFFFFFFFFFFFFFFFFFFFFFFFFFFFFFFFFFFFFFF  
FFF

@A00721:190:HGJW7DSXY:4:2430:31638:5212\_1:N:0:TCTGCAAG+GCTGCACT  
TCTGTTGGTAGAGGAGTTGAGAGAATTACTCAGATTCAATCTGGCATCACTGAACGTCTACAACGAGT  
TAGGGAGTGGCTAGGTTTTAAAAGATCCTTGCACAAGCAATACCTTCCACTGAGTTCATCACCCAGA  
GTT

+

FFFFFFFFFFFFFF:FFFFFFFFFFFFFFFFFFFFFFFFFFFFFFFFFFFFFFFFFFFFFFFFFFFFFFFF:FFFFFFFFF  
FFFFFFFFFFFFFFFF:FFFFFFFFFFFFFFFFFFFFFFFFFFFFFFFFFFFFFFFFFFFFFFFFFFFFFFFF  
FFF

@A00721:190:HGJW7DSXY:4:2339:14778:33035\_1:N:0:TCTGCAAG+GCTGCACT  
AGGACTGATGGTGAGATTCTTTTACCTTTGGTGGTCCAGGATCCTTTACTCCTAGTGTCTTTTCTAG  
AGTCCTAGGTCGTTTCCGTCGGAGGATGACAGGTGGGAGACCGCTCAATAAACTCTATTGAATCCCT  
TTT

+

FFF,,F::F,FFFFF,FF:FF:F,,F,FFFFF,:FF::FF:F,:FFFF,:F,,:,FFFFFFFFF,F,F  
FFFF,,:F:, ,FF,F,FFF,,FF,FF,,FFFF:,FFFFFF,,:FF,FFF,, ,FF::F:F:FF:,F,,F  
FF,

@A00721:190:HGJW7DSXY:4:2560:13376:3834\_2:N:0:TCTGCAAG+GCTGCACT  
TCTGCCACTTCTAATTTTAGGAAACGTCGCGAAAAGAAAGTTCATGAGGATGTCTTGGTCGAAAAATA  
TCGCCGGAACCTTCTAATAGAGGATCCTGATGACATTATTTCAACGGA

+

FFFFFFFFFFFFFFFFFFFFFFFFFFFFFFFFFFFFFFFFFFFFFFFFFFFFFFFFFFFFFFFFFFFFFFFF:FFFFFFFF  
FFFFFFFFFFFFFFFFFFFFFFFFFFFFFFFFFFFFFFFFFFFFFFFFFFFFFFFFFFFFFFFFFFFFFFFF

@A00721:190:HGJW7DSXY:4:1229:10637:22858\_1:N:0:TCTGCAAG+GCTGCACT  
AACTGTCTCCACTGATTCTGAATTAGAGAAAGACGACCTTCTTGTGGGGACTGAGACCTCTGAATTTT  
CAGGTGCCCTGATGAGGACGTTGAAAGGGATAATTTCAACTCTGAGACTTCTAAAAGTGTTTCAAAA  
GAC

+

F:FFFF:FF,:F:FFFF,F:FFF,FFFF::FF,:FF,FFFFFFFF,FFFFFFFFFFFFFFFFFFFF,FF:F  
FFFFFFFF:FF,FFFFFFFFFFFFFFFFF:,FFFF:FFF:FFFF:FF,FFFFFFFF:FFFFFFFFFFFFFFFF  
,FF

@A00721:190:HGJW7DSXY:4:2139:15040:32737\_1:N:0:TCTGCAAG+GCTGCACT  
ATGAGTGATCGTATTAGAACAGCTGATTCTTATTGCATGAACGTCGCTGAGGTCAAACCTGTGGACGT  
TCTTTTCATCGACGAATTATTCATGATTCACGCTGGTCAGACCCTTTTCTTACACATCTACTTAAGG  
CGG

+

FFFFFFFFFFFFFFFFFFFFFFFFFFFFFFFFFFFFFFFFFFFFFFFFFFFFFFFFFFFFFFFFFFFFFFFF  
FFFFFFFFFFFFFFFFFFFFFFFFFFFFFFFFFFFFFFFFFFFFFFFFFFFFFFFFFFFFFFFFFFFFFFFF  
FFF

@A00721:190:HGJW7DSXY:4:2655:3694:14747\_2:N:0:TCTGCAAG+GCTGCACT  
CAAATCGGATTCATCAATCGTATTGATCTCCAAGTCGAAACTACTTCAACATCAACGACATCATTCT  
TGATGAGTGTCGTTCTTATCGAAGTCTCAGTTATCGCTGCCCGGCCGA

+

FFFFFFFFFFF:FFFFF:FFFFF:FFFFFFFFFFFFFFFFFFFF:FFFFF,FFFFFFFFFFFFFFFFFFFF  
FFFFFFFFFFFFFFFFFFFF:FFFFFFFFFFFF:FFFFFFFFFF,FFFFFFFF

@A00721:190:HGJW7DSXY:4:2631:1687:30154\_1:N:0:TCTGCAAG+GCTGCACT  
CAACCCCTTATATCGAGGCTATCGAGGACGATGAGTATCTTGAAGTTGTTGACGACAAGCCTCAAGAG  
GGTAGAGGACCACCTGGATCTTCTACTGTCTCTGCCTTCCAAGATTTCTTAGAAGAGGTTATTCCTGG  
AAC

+

FFFFFFFFFFFFFFFFFFFFFFFFFFFFFFFFFFFFFFFFFFFFFFFFFFFFFFFFFFFFFFFFFFFFFFFF  
FFFFFFFFFFFFFFFFFFFFFFFFFFFFFFFFFFFFFFFFFFFFFFFFFFFFFFFFFFFFFFFFFFFFFFFF  
FFF

@A00721:190:HGJW7DSXY:4:2134:27227:9251\_1:N:0:TCTGCAAG+GCTGCACT  
TTCCGATCTGTAAGAAGCCCTTGAGCCGCGTAGTCAGCGCGTTTAGCTGTATCATCAGTCAGAGTAT  
ACCCGATAGGGTACCGAGTCTCCAAGAGAATATTTATTCTTATGAGGCTCGAACTTCAACGTTTTCA  
CAA

+

FFFFFFFFFFFFFFFFFFFFFFFFFFFFFFFFFFFFFFFFFFFFFFFFFFFFFFFFFFFFFFFFFFFFFFFF  
FFFFFFFFFFFFF:FFFFFFFFFFFFFFFFFFFFFFFFFFFFFFFFFFFFFFFFFFFFFFFFFFFFFFFFFFFF  
FFF

@A00721:190:HGJW7DSXY:4:2218:9399:30076\_1:N:0:TCTGCAAG+GCTGCACT  
CACTTTGATGATTTTATCACTTTATTATGACCTTGGAAGTTTTCGGCTGTGGTTGTCGCTGGGGACG  
ATTCCATTCTGTTTTCAAAGACTCCAATAACTGATCATTCTGATCATATGATTTTGACAATGGTTTC  
GAA

+

F,FFFF,FF:FFF:FFFFFF,FFF,FFF:FFF:,F,FFFFFFFF:FFF:FFFFFF::FFF::F  
FFF:FFF:FFFFFFFF:FFFFFFFFFFFFFFFF,F:F:FFFF:FFFFFFFF:FFF:FF:FF::FFFF  
FFF

@A00721:190:HGJW7DSXY:4:1427:20726:24768\_1:N:0:TCTGCAAG+GCTGCACT  
ATTCCGAGAGGTTTATCCTGATGTGGAGGGAGTTCTTGAAGCATCCCGACCTTTCCTTGTGAAAATTT

TGATGCGGTTTCATAAGATTATCAGTAATCCTGATTCTACTACGGATTCATGGACCTTCCATCCTGTACCT

+

FFFFFFFFFFFFFFFFFFFFFFFFFFFFFFFFFFFFFFFFFFFFFFFFFFFFFFFFFFFFFFFFFFFFFFFFFFFFFFFF  
FFFFFFFFFFFFFFFFFFFFFFFFFFFFFFFFFFFFFFFFFFFFFFFFFFFFFFFFFFFFFFFFFFFFFFFFFFFFFFFF  
FFF

@A00721:190:HGJW7DSXY:4:1678:8766:21277\_1:N:0:TCTGCAAG+GCTGCACT  
TCTTCCGATCTTCTTCCGAAAGGCGAACTTTGGGAATTTGAAGCTCAGGGTGAAGCACACGTTTGAC  
CGTGACGAACTGTGGTGTCTTGATCTACGTTACGGATATACTCTCCTTGAGTTCACTCGTAAGGACA  
CTA

+

FFFFFFFFFFFFFFFFFFFFFFFFFFFFFFFFFFFFFFFFFFFFFFFFFFFFFFFFFFFFFFFFFFFFFFFFFFFFFFFF  
FFFFFFFFFFFFFFFFFFFFFFFFFFFFFFFFFFFFFFFFFFFFFFFFFFFFFFFFFFFFFFFFFFFFFFFFFFFFFFFF  
FFF

@A00721:190:HGJW7DSXY:4:1449:15483:13620\_2:N:0:TCTGCAAG+GCTGCACT  
CAGGGGTTTTCTGAATAGTGATAGCCACCCGCTTACAGAGGGGCAGCAGCATGACCATAATTGGTATT  
GACTTTGGTACCACCTTTTCTACTGTCTGTCTCGCCTCTTCAATGAA

+

FFFFFFFFFFFFFFFFFFFFFFFFFFFFFFFFFFFFFFFFFFFFFFFFFFFFFFFFFFFFFFFFFFFFFFFFFFFFFFFF  
FFFFFFFFFFFFFFFFFFFFFFFFFFFFFFFFFFFFFFFFFFFFFFFFFFFFFFFFFFFFFFFFFFFFFFFFFFFFFFFF

@A00721:190:HGJW7DSXY:4:1153:4399:5729\_1:N:0:TCTGCAAG+GCTGCACT  
AATCATTGGTTTTCTAATAATGATGACACTATTGTTTATGGATATGATGCTATTACTCATGATGGTT  
ACGGTCAGGGAGGATTCTCAGTTTACAAGGACCTTAAGCGATGGATCGGGGTTAATTCTAAACATTA  
CCC

+

FFFFFFFFFFFFFFFFFFFFFFFFFFFFFFFFFFFFFFFFFFFFFFFFFFFFFFFFFFFFFFFFFFFFFFFFFFFFFFFF  
FFFFFFFFFFFFFFFFFFFFFFFFFFFFFFFFFFFFFFFFFFFFFFFFFFFFFFFFFFFFFFFFFFFFFFFFFFFFFFFF  
FFF

@A00721:190:HGJW7DSXY:4:2207:6234:12821\_1:N:0:TCTGCAAG+GCTGCACT  
TTTCAGTACCCAGTCAGTATACCTCTACGCAAAGATATTTTCATGAAAACCTACAGAGGAACGTACCGGA  
TTACCTGTCTTTCATATTATGAATGAACCTTCGGCCGCTCTCTTTGCTTCGATGTTGGATGTCAAGAA  
GGG

+

FFFFFFFFFFFFFFFFFFFFFFFFFFFFFFFFFFFFFFFFFFFFFFFFFFFFFFFFFFFFFFFFFFFFFFFFFFFFFFFF  
FFFFFFFFFFFFFFFFFFFFFFFFFFFFFFFFFFFFFFFFFFFFFFFFFFFFFFFFFFFFFFFFFFFFFFFFFFFFFFFF  
FFF

@A00721:190:HGJW7DSXY:4:1112:30400:33285\_2:N:0:TCTGCAAG+GCTGCACT  
CGTTGATGAAGCTATAAGAGCGTTCTTATTACGGCGCACTTCTTTACCCGCCACCACACAACCTTCAG  
TTTCACAACCTGAAGGAGGAGGTTTCTGTTACTGGAAAACCCTCGTCAA

+

FFFFFFFFFFFFFFFFFFFFFFFFFFFFFFFFFFFFFFFFFFFFFFFFFFFFFFFFFFFFFFFFFFFFFFFFFFFFFFFF  
FFFFFFFFFFFFFFFFFFFFFFFFFFFFFFFFFFFFFFFFFFFFFFFFFFFFFFFFFFFFFFFFFFFFFFFFFFFFFFFF

@A00721:190:HGJW7DSXY:4:2418:16116:36886\_1:N:0:TCTGCAAG+GCTGCACT  
CTGGAGTTCAGACGTGTGCTCTTCCGATCTGTGAAATTAACGCGTCCTTTTCTGGAACGTAGTTTTAC  
TATTATGAACAAAGTTATCAAAGATAGTGGCATTCAAGGCAAACCTACCCTGATTCCGGCCGGTGGTA  
GCT

+

FFFFFFFFFFFFFFFFFFFFFFFFFFFFFFFFFFFFFFFFFFFFFFFFFFFFFFFFFFFFFFFFFFFFFFFFFFFFFFFF  
FFFFFFFFFFFFFFFFFFFFFFFFFFFFFFFFFFFFFFFFFFFFFFFFFFFFFFFFFFFFFFFFFFFFFFFFFFFFFFFF  
FFF

@A00721:190:HGJW7DSXY:4:1270:17824:28479\_2:N:0:TCTGCAAG+GCTGCACT  
GCTATTAAAGCTGTTGAGCGGGTAATTACACCTAAACGAGCTCGATCTGCCATCGCTGAAGGATGTGC  
ACTCTTTTCTGCTACTTTAACGGAGAGATCGGAAGAGCGTCGTGTAGG

+



@A00721:190:HGJW7DSXY:4:2309:11831:16877\_2:N:0:TCTGCAAG+GCTGCACT  
TAAAAAGAAGATAGAGAGTCATACTTTGGGCTATCGTTCAGGTGCATGGGGTTGGATAGCCAATATTG  
AAGTGGACACCTCTGGTAGTATCGAAGTAAAGATAACCAATAAGGAAG

@A00721:190:HGJW7DSXY:4:2360:8730:27289\_1:N:0:TCTGCAAG+GCTGCACT  
AATCTTACCACTATCTACGAACCTAAAGTTCTGAAGACGTTGCTTGTGCTTCCTCCTTTAATGGCAC  
TACCTCGGTACAATCTTACTTGGAACGAAGGCGACCTGTTCCGGAGTTTTTACGGGATCCGGAATGTT  
CTG

@A00721:190:HGJW7DSXY:4:1671:29017:17206\_2:N:0:TCTGCAAG+GCTGCACT  
ATAAAGAATCTTTACCAGGACTCCTACTACAGGAGGCAGTCTTCTGATCGTAAGAAGTTTATAAGGAA  
CATATCCATTTGTTGTAATAGGGTCATCAACTTAGAACTCGAACTCT

@A00721:190:HGJW7DSXY:4:2246:20193:9345\_1:N:0:TCTGCAAG+GCTGCACT  
TGGACTCTTCGATAGGGGACATTTTATCGTGGGCTTTCCGTAAAGGAAGATCTGTTATCGACGGTTTA  
TCGTTTACGAAGTATCACTCCACCGGTGAATGGTTTAAGAATACTATAAATAGAATAGCTATTACTAC  
TAA

@A00721:190:HGJW7DSXY:4:1133:18105:17127\_1:N:0:TCTGCAAG+GCTGCACT  
TTACTTAGACTTTTCCTACGATACAAATGATAACTTCTAATTTACGTTTGCTACTCAGAGCTGGTCCTC  
TCAGCAAAGGGATGCATGGTGTATCTCCTCAGGAGTCCCGGCATTTGATAATAATGACGAGACTTTC  
GTC

@A00721:190:HGJW7DSXY:4:2301:6334:31062\_2:N:0:TCTGCAAG+GCTGCACT  
CCAGCGCATCTCGTGTGAGCCTCGACCCGATTATATGGTATTAACCTATAAAGGTGAGGAGACCATT  
TTCTTGCTGAAATTTATAGAAGATTATTTTGACAGAATCAATAAGAAT

@A00721:190:HGJW7DSXY:4:1666:16116:7106\_1:N:0:TCTGCAAG+GCTGCACT  
CTCCAGTCAACACTAGTTCGAGTGCTGCTTTGGATTACGATGACGTGAGAATAGGTGAAGGGATAGTT  
TTTACCTCGACCAACATTAAGGCGGCGGCGACTAATCTTAAAGCTTCACCCAAAATGAAGGACACTTC  
GAA

@A00721:190:HGJW7DSXY:4:1674:24153:29262\_2:N:0:TCTGCAAG+GCTGCACT  
ACATTTACCACCAAATTCCTTTGATACAACCTCTAGCCTTCAAGTGGGGTATGCCTGCGGAATACGCTT

+

+

+

+

+

+

+

 $+$ 

@A00721:190:HGJW7DSXY:4:2227:26033:14888\_1:N:0:TCTGCAAG+GCTGCACT  
AACGATTCTTAGACGATATTAAGAAATAAAAATACTTCAAGTACCTGAACTTTACATTTTTAATGGT  
ATTGTATAATGTGTCTTAAAAATAGAACCTTCACTCTCGGTAATGAGAGTGTATTCCTTAATATTCTA  
GTA

+  
:FF:FF:,F,,FF,,FFFFFFF:FFF:FFF:FF:FF,::,FFFF,F,FFF,::FF,:F:FFFFFFF,:F  
FF,FF,FF:F:F,FFFFFF,FFF:,FFF,,FF,F:FFF,FFF,FFFFFFFFFFFF:F:F,F:FFFFFF:FF  
FF:

@A00721:190:HGJW7DSXY:4:1428:32027:25582\_2:N:0:TCTGCAAG+GCTGCACT  
TAGGATTATCACACTCCTAAATTTGATAGCAATTTATGTTTTAAATGCTAGGAAAATTTTAGAAAAA  
CTCCATTGTATAGTTCAAGGAGTACTTAATTCAATAGCTTTAGTATTA

+  
FF,FF:FFF:FFFF:FFFFFFF,F:FFFFFFFFFFFFFFFFF:FFFFFF,FFFFFFFFFFFFFFFFFFFFF  
FFFFFFFFFFFFFFFFF:FFF:FFFFFFFFFFFFFFFFFFFFF:FFFFFFF

@A00721:190:HGJW7DSXY:4:2609:28402:35336\_2:N:0:TCTGCAAG+GCTGCACT  
TTTATTGAAAATTGTATAAGAGTTAATTGCTTACACAAAAGTGACGCGCAAGGAATCTTAATTGATT  
GAAGCTAGGCGTTGGGGAGAATGAAGTCCGCTTCCCGGAAGAAACGA

+  
:FFFFFFFFFFFFFFFFFFFFFFFFFFFFFFFFFFFFFFFFFFFFFFFFFFFFFFFFFFFFFFFFF:FFFFFFF  
FFFFFFF::F:FFFFFFFFF:FFFFFFFFFFFFFFFFF:FFFF:FFFFFFF

@A00721:190:HGJW7DSXY:4:1642:30300:26757\_2:N:0:TCTGCAAG+GCTGCACT  
GCCGGTCGGCAGATCGGCACCACTGGTCTCTACGTTCAGGGACCCGCTGTGCAGAATAACCTTCCCAA  
ATCTAGATCTGCACAGAAGAAGGCTGAAGGTCGTTACCGGACGACCAC

+  
FFFFFFFFFFFFFFFFFFFFFFFFFFFFFFFFFFFFFFFFFFFFFFFFFFFFFFFFFFFFFFFFF:  
FFFFFFFFFFFFFFFFFFFFFFFFFFFFFFFFFFFFFFFFFFFFFFFFFFFFFFFFF

@A00721:190:HGJW7DSXY:4:2165:30807:30013\_1:N:0:TCTGCAAG+GCTGCACT  
CTGAGGCAGTACCTCAGTCAAAAGTCACATTCACCACTCCCATACCAATCAATGATGTGACTATACAG  
TTCGCCATTTCAAGAGTGGTCAATACGTCGTGGGAGGTAAGCCTTCCCCTCCGCTGGCACGAA  
GAA

+  
FFFFFFFFFFFFFFF:FFFFFFFFFFFFFFFFFFFFFFFFFFFFFFFFFFFFFFFFFFFFFFFFFFFFF  
FFFFFFFFFFFFFFFFFFFFFFFFFFFFFFFFFFFFFFFFFFFFFFFFFFFFFFFFFFFFFFFFF  
FFF

@A00721:190:HGJW7DSXY:4:1413:14651:33348\_1:N:0:TCTGCAAG+GCTGCACT  
AATAGTTCTTCTGACCAGAATGAAAAGGGTTTACCAGGGTAGTCTCTAAGTCTACCAGGAAGAGGGG  
AAATGTCCCCAAACTGAGAAGAATAAAGGGAAAGGTCCATCAGGACCTAAGAAGGGGAAATTACCC  
TAA

+  
FFFFFFFFFFFFFFFFFFFFFFFFFFFFFFFFFFFFFFFFFFFFFFFFFFFFFFFFFFFFFFFFF  
FFFFFFFFFFFFFFFFF:FFFFFFFFFFFFFFFFF:F:FFFFFFFFFFFFFFFFFFFFFFFFFFFFF  
FFF

@A00721:190:HGJW7DSXY:4:1374:17987:1047\_1:N:0:TCTGCAAG+GCTGCACT  
CAAAGAGGCCGCTGCTACGAAGTCGCTGAAGGCGCTTGGGTATTAAGGGTAGCTGTAAAGTTGCGC  
CTGCCGACCCATCTTTGAGACCAAGACTCTCTACAGTAGGTTCTGTCCTACTATGAGCAAATCTGTT  
GAA

+  
FFFFFFFFFFFFFFFFFFFFFFFFF:FFFFFFFFFFFFFFFFF:FFFFFFFFFFFFFFF,:FFFFFFFFFFF:FFF:  
FFF:FFFFFFF:F:FFFFFFFFF:FFFFFFFFFFF,FFFFFFFFFFFFFFFFFFFFFFFFF:FFFFFFF  
F:F

@A00721:190:HGJW7DSXY:4:1441:30563:16157\_2:N:0:TCTGCAAG+GCTGCACT  
CGAAGGTGAGAGGACTTTTGGCTACTGGCGACAACTGAGAGCAGTCGCTGGGGAAAGAGAATTGCGT  
GGGTTGAAGGCCGACGCTTCGAGCTTGAGAGATCGGAAGAGCGTCGTG

+  
FFFF:FFFFFFF:FFFFFFFFFFFFFFFFFFFFFFFFFFFFFFFFFFFFFFFFF:FFFFFFFFFFFF:FFFFFF:,FF  
FFFFFFFFF:F:FF:FFFF:FFFFFFFFFFF:FFFFFFFFFFFFF,,F

@A00721:190:HGJW7DSXY:4:2153:24252:9486\_2:N:0:TCTGCAAG+GCTGCACT  
TTAACTATGGGGCGAAGATCCCCTATGGAGTCTTGAAGGACTTAGGTTGGCATATTTATGCCGACGAT

+

@A00721:190:HGJW7DSXY:4:2175:2456:30295\_2:N:0:TCTGCAAG+GCTGCACT  
ATTTTTCCTTCTCCGTCATTGGGGATTTCGATGTGAGAAGGTGGAAGGTGTCAAGGGTCTTCTTCA  
TGCTGATCTTTCAGGACCTAATCACATCATGATTGATAGTTACGGAGA

+

@A00721:190:HGJW7DSXY:4:2558:14362:29622\_1:N:0:TCTGCAAG+GCTGCACT  
TCAGAGAGGGGAGCTCTGAAAAGGAACTTCGTCAGAAGATGAGGAAGTCTAAGAGGAGGAGTTTGAG  
GAAGGCTCTAGAGAAGATCTCACCACCTGGAGAAGGCAAGTGGAGAGTCCAGAAGTTGATGAAGAAGG  
ATT

+

@A00721:190:HGJW7DSXY:4:2262:1886:17159\_2:N:0:TCTGCAAG+GCTGCACT  
AAGGTGGATGAGGGAGGTTGTTTCTTTGGAGTTTTAGATAATCTTTTGAGAAGGGGTCATAGAGCCAG  
CAAGAGAAGCTTATATGCTGGTTTAAGTGATGATTATCACTCCTTGAG

+

@A00721:190:HGJW7DSXY:4:2366:17788:3834\_1:N:0:TCTGCAAG+GCTGCACT  
ATATTGTTCTTCCGGGAAGTTGTGGGATTTAACTTTGACTCAACTACTCCGATCAGATCCGGATGGT  
TTGATTGGTATGGACTACTCGACTTTTGATCTGGAGTTGTCTAGGGTCATGGCAGATACTACCGATAA  
GGT

+

@A00721:190:HGJW7DSXY:4:2209:17128:2127\_2:N:0:TCTGCAAG+GCTGCACT  
AAGAGTCTTTATGATTCAAAACCTATCGTTGTCGTACCTTACAAGTTGAGGAGACTTTACAGCGCT  
TATTGTCGCGCAGTTTCCAGAATTGCGGTTGAAGTTCACCCATTCTAT

+

@A00721:190:HGJW7DSXY:4:2267:11351:24064\_1:N:0:TCTGCAAG+GCTGCACT  
CTATTCTTGATGTGAAAGATGCATCGAGGTATACGTCTAGGAACATTGATTGGGAACGTACCTACTCA  
CGAGACGTCATGAAAGCTATCGGAGGGAAGCAAATGTTTCGTTCTGTTACAAGAACGCTTTGGATTG  
TGA

+

@A00721:190:HGJW7DSXY:4:2553:18484:25614\_2:N:0:TCTGCAAG+GCTGCACT  
TCATTTCTGCTTAGTTTGTCCCGGCGAATTATTGGACACGATGAAAAATGACATACCCGTTCTGACC  
TTGGTATCGTTATCCGTCATGGAGATGATGGCGCATCAGATCGGAAGA

+

@A00721:190:HGJW7DSXY:4:1171:6117:29997\_2:N:0:TCTGCAAG+GCTGCACT  
ATGACAAAACCTTCGAATATGTTACGACATGGCTTCGTAACAACAGTGCGAGGATTGTCATCTCGGGG

+

@A00721:190:HGJW7DSXY:4:2558:22046:9017\_1:N:0:TCTGCAAG+GCTGCACT  
CTCGTTATCGGAGCTAAGAAGAAGACTTTGGGTACACGTTATGCTCGCAAACCTTAACGTTAGTACCGG  
AGGTGATCTCTCTGCTTCTGCGTTACTGAGAGAAAAGATTGAGGACGCCTACGGTGACTTTATGGACA  
AGA

+

@A00721:190:HGJW7DSXY:4:1520:11279:36683\_1:N:0:TCTGCAAG+GCTGCACT  
GAACACGTCAAGAAGTCGCTCGGCGTTGTTCTTGAACCAAGTTAAGAAGGAGGCTGATCATGGAGT  
CTTTGTACCTTCTGTCAAACCTCGAGGTTACGCTACGAGAGGTGATCCCGGATGTGGATTGAAGGCTG  
GCT

+

@A00721:190:HGJW7DSXY:4:2517:25527:14857\_1:N:0:TCTGCAAG+GCTGCACT  
TTGGGTTGAGAAGTGTGCTTTACAAGGAGTTAGACTCTTCTTCAAGTTTTTAGATCTTCTTGATAATC  
TTAAAGAAAAATTTTCGAATAAACTAATGAGAGGTATAGGCTTAGTCAAGTCTGTACTTACATTCTTT  
ACG

+

@A00721:190:HGJW7DSXY:4:2458:17761:36824\_1:N:0:TCTGCAAG+GCTGCACT  
TCTGTTGGTAGAGGAGTTGAGAGAATTACTCAGATTCAATCTGGCATCACTGAACGTCTACAACGAGT  
TAGGGAGTGGCTAGGTTTTAAAGATCCTTGCACAAGCAATACCTTCCACTGAGTTCATTACCCAGA  
GTT

 $+$ 

@A00721:190:HGJW7DSXY:4:2524:29884:32049\_1:N:0:TCTGCAAG+GCTGCACT  
AGGACTGATGGTGAGATTCTTTTACCTTTTGGAGGTCCAGGAACCTTTACTCCTAGTGTCTTTTCTAG  
AGTCCAAGGACGTTTCCGTCGGAGGATGACAGGTGGGAGACCGCTCAATAACACTCTATTGAATCCCT  
TTT

+

@A00721:190:HGJW7DSXY:4:2671:28022:24627\_2:N:0:TCTGCAAG+GCTGCACT  
TCTGCCACTTCTAATTTTAGGAAACGTCGCGAAAAGAAAGTTCATGAGGATGTCTTGGTCGAAAAATA  
TCGCCGGGAACTTCTAATAGAGGATCCTGATGACATTATTTCAACGGA

+

@A00721:190:HGJW7DSXY:4:1229:9815:21277\_1:N:0:TCTGCAAG+GCTGCACT  
AACTGTCTCCACTGATTCGGAATTAGAGAAAGACGACCTTCTTGTGGGGACTGAGACCTCTGAATTTT  
CAGGGTGCCCTGATGAGGACGTTGAAAGGGATAATTTCAACTCTGAGACTTCTAAAAGTGTTCAAAA  
GAC

+  
FFF,FF:FFFFFFFF:FFFF:FFFF:FFFF:FFFFFFFF:FFFF::FFFFFFFFFFFFFFFF:FFFF  
FFFFFFFF:FFFFFFFFFFFFFFFFFFFFFFFFFFFFFFFFFFFFFFFF:FFFFFF:FFFFF:,  
FFF

@A00721:190:HGJW7DSXY:4:2304:10728:1658\_1:N:0:TCTGCAAG+GCTGCACT  
ATGAGTGATCGTATTAGAACAGCTGATTCTTATTGCATGAACGTCGCTGAGGTCAAACCTGTGGACGT  
TCTTTTCATCGACGAATTATTCATGATTCACGCTGGTCAGACCCTTTTCTTACACATCTACTTAAGG  
CGG

+  
FFFFFFFF,FFFFFFFFFFFFFFFFFFFFFFFF:FFFFFFFFFFFFFFFF:FFFFFFFFFFFFFFFF  
FFFFFFFFFFFFFFFF:FFFFFFFFFFFFFFFFFFFFFFFFFFFFFFFF:FFFFFFFF,FFF:FFFF  
FFF

@A00721:190:HGJW7DSXY:4:2139:18945:32174\_1:N:0:TCTGCAAG+GCTGCACT  
TTCAGACGTGTGCTCTTCCGATCTAACTACTTCAACATCAACGACATCATTCTTGATGAGTGTCTTC  
TTATCGAAGTCTCAGTTATCGCTGCCCGGCCGACGTTTGTGCGCAACTCTCAGAGGTTTACGGCAGAA  
AA

+  
FFFFFFFFFFFFFFFFFFFFFFFFFFFFFFFFFFFFFFFFFFFFFFFFFFFFFFFFFFFFFFFF  
FFFFFFFFFFFFFFFFFFFFFFFFFFFFFFFFFFFFFFFFFFFFFFFFFFFFFFFFFFFFFFFF  
FF

@A00721:190:HGJW7DSXY:4:2677:7319:5838\_1:N:0:TCTGCAAG+GCTGCACT  
CAACCCCTTATATCGAGGCTATCGAGGACGATGAGTATCTTGAAGTTGTTGACGACAAGCCTCAAGAG  
GGTAGAGGACCACCTGGATCTTCTACTGTCTCTGCCTTCCAAGATTTCTTAGAAGAGGTTATTCCTGG  
AAC

+  
FFFFFFFFFFFFFFFFFFFFFFFFFFFFFFFFFFFFFFFFFFFFFFFFFFFFFFFF:FFFFF:FFFFFFFFFFFF  
FFFFFFFFFFFFFFFFFFFFFFFFFFFFFFFFFFFFFFFFFFFFFFFFFFFFFFFFFFFFFFFF  
FFF

@A00721:190:HGJW7DSXY:4:2211:14226:32424\_1:N:0:TCTGCAAG+GCTGCACT  
TTCCGATCTGTAAGAAGCCCTTGAGCCGCGTAGTCAGCGCTTTAGCTGTATCATCAGTCAGAGTAT  
ACCCGATAGGGTACCGAGTCTCCAAGAGAATATTTATTCTTATGAGGCTCGAACTTCAACGTTTTCA  
CAA

+  
FFFFFFFFFFFFFFFFFFFFFFFFFFFFFFFFFFFFFFFFFFFFFFFF:FFFFFFFFFFFFFFFFFFFFFFFF  
FFFFFFFFFFFFFFFFFFFFFFFFFFFFFFFFFFFFFFFFFFFFFFFFFFFFFFFFFFFFFFFF  
FFF

@A00721:190:HGJW7DSXY:4:2218:9408:30123\_1:N:0:TCTGCAAG+GCTGCACT  
CACTTTGATGATTTTATCACTTTATTATGACCTTGGAAGTTTTCGGCTGTGGTTGTGCTGGGGACG  
ATTCCATTCTGTTTTCAAAGACTCCAATAACTGATCATTCTGATCATATGATTTGGACAATGGTTTC  
GAA

+  
FFFFFFFFFFFFFFFFFFFFFFFFFFFFFFFF:FFFFFFFFFFFFFFFFFFFFFFFFFFFFFFFFFFFF  
FFFFFFFFFFFFFFFFFFFFFFFFFFFFFFFFFFFFFFFFFFFFFFFFFFFFFFFFFFFFFFFF:FFFFF  
FFF

@A00721:190:HGJW7DSXY:4:2465:14190:12821\_1:N:0:TCTGCAAG+GCTGCACT  
ATTCCGAGAGGTTTATCCTGATGTGGAGGGAGTTCTTGAAGCATCCCGACCTTTCCTTGTGAAAATTT  
TGATGCGGTTTCATAAGATTATCAGTAATCCTGATTCTACTACGGATTCATGGACCTTCCATCCTGTA  
CCT

+  
FFFFFFFFFFFF:FFFFFFFFFFFFFFFFFFFFFFFFFFFFFFFFFFFFFFFFFFFFFFFF  
FFFFFFFFFFFFFFFFFFFFFFFFFFFFFFFFFFFFFFFFFFFFFFFFFFFFFFFFFFFFFFFF  
FFF

@A00721:190:HGJW7DSXY:4:1274:4426:21371\_1:N:0:TCTGCAAG+GCTGCACT  
GATTAAGACTCTTCCGAAAGGCGAACTTTGGAATTTGAAGCTCAGGGTGAAGCACAAACGTTTGACCG



@A00721:190:HGJW7DSXY:4:2445:13150:15906\_1:N:0:TCTGCAAG+GCTGCACT  
AATCTTACCCTATCTACGAACCTAAAGTTCTGAAGACGTTGCTTGTGCTTCCTCCTTTAATGGCAC  
TACCTCGGTACAATCTTACTTGGAACGAAGGCGACCTGTTCCGGAGTTTTTACGGGATCCGGAATGTT  
CTG

+

F:FFFFFFFF:FFFFFFFF,F:FFFFFFFFFFFFFFFFFFFFFFFFFFFFFFFFFFFFFFFFFFFFFFFFF  
:FFFFFFFFFFFFFFFFFFFFFFFFFFFFFFFFFFFFFFFFFFFFFFFFFFFFFFFFFFFFFFFFFFFFF  
FFF

@A00721:190:HGJW7DSXY:4:2166:6117:14090\_2:N:0:TCTGCAAG+GCTGCACT  
ATAAGAATCTTTACCAGGACTCCTACTACAGGAGGCAGTCTTCTGATCGTAAGAAGTTTATAAGGAA  
CATATCCATTTGTTGTAATAGGTCATCAACTTAGAACTCGAACTCT

+

FFFF,FFFFFFFFFFFFFFFFFFFFFFFFFFFFFFFFFFFFFFFFFFFFFFFFFFFFFFFFFFFFFFFFF  
FFFFF::FF:FFFFFFFFFFFFFFFFFFFFFFFFFFFFFFFFFFFFFFFFFFFFFFFFFFFFFFFFF  
F:FF:FF:FF:F

@A00721:190:HGJW7DSXY:4:1169:2365:13260\_1:N:0:TCTGCAAG+GCTGCACT  
CTCTTCGATAGGGGACATTTTATCGTGGGCTTCCGTAAAGGAAGATCTGTTATCGACGGTTTATCGT  
TTACGAAGTATCACTCCACCGGTGAATGGTTTAAGAATACTATAAATAGAATAGCTATTACTACTAAT  
GGC

+

FFFFFFFFFFFFFFFFFFFFFFFFFFFFFFFFFFFFFFFFFFFFFFFFFFFFFFFFFFFFFFFFFFFFF  
FFFFFFFFFFFFFFFFFFFFFFFFFFFFFFFFFFFFFFFFFFFFFFFFFFFFFFFFFFFFFFFFFFFFF  
FFF

@A00721:190:HGJW7DSXY:4:1244:30192:29450\_1:N:0:TCTGCAAG+GCTGCACT  
TACTTAGACTTTCCTACGATACAAATGATAACTTCTAATTTACGTTTGCTACTCAGAGCTGGTCCTC  
TCAGCAAAGGGATGCATGGTGTATCTCCTCAGGAGTCCCGCATTTGATAATAATGACGAGACTTTC  
GTC

+

FFFFFFFFFFFFFFFFFFFFFFFFFFFFFFFFFFFFFFFFFFFFFFFFFFFFFFFFFFFFFFFFFFFFF  
FFFFFFFFFFFFFFFFFFFFFFFFFFFFFFFFFFFFFFFFFFFFFFFFFFFFFFFFFFFFFFFFFFFFF  
FFF

@A00721:190:HGJW7DSXY:4:2432:25192:22200\_2:N:0:TCTGCAAG+GCTGCACT  
CCAGCGCATCTCGTGTGAGCCTCGACCCGATTATATGGTATTAACCTATAAAGGTGAGGAGACCATT  
TTCTTGCTGAAATTTATAGAAGATTATTTTGACAGAATCAATAAGAAT

+

FFFFFFFFFFFFFFFFFFFFFFFFFFFFFFFFFFFFFFFFFFFFFFFFFFFFFFFFFFFFFFFFFFFFF  
FFFFFFFFFFFFFFFFFFFFFFFFFFFFFFFFFFFFFFFFFFFFFFFFFFFFFFFFFFFFFFFFFFFFF

@A00721:190:HGJW7DSXY:4:2105:3866:22936\_1:N:0:TCTGCAAG+GCTGCACT  
CTCCAGTCAACACTAGTTCGAGTGCTGCTTGGATTACGATGACGTGAGAATAGGTGAAGGGATAGTT  
TTTACCTCGACCAACATTAAGGCGGCGGCGACTAATCTTAAAGCTTACCCAAAATGAAGGACACTTC  
GAA

+

FF,FFFFFFFF,FFF:FFFFF:FFF,FFFFFFFFFFFF:FFFF:FFFFFFFFFFFFFFFFFFFFFFFFF  
F:FFFFFFFFF:FF:FFFFFFFFFFFFFFFFFFFFFFFFFFFFFFFFFFFF,FFFFFFFFFFFF:FFFFFFFFFFFFF  
FFF

@A00721:190:HGJW7DSXY:4:2340:24831:17002\_2:N:0:TCTGCAAG+GCTGCACT  
ACATTTACCACCAAATCTTTTGATACAACCTTAGCCTTCAAGTGGGGTATGCCTGCGGAATACGCTT  
GCTATTCACCAGATTGGTTCGAACCCGTTGATGCTATGTCAGAAGAAG

+

FFFFFFFFF:FFFFFFFFFFFFFFFFFFFFFFFFFFFFFFFFFFFFFFFFFFFFFFFFFFFFFFFFFFFFF  
FFFFFFFFFFFFFFFFFFFFFFFFFFFFFFFFFFFFFFFFFFFFFFFFFFFFFFFFFFFFFFFFFFFFF

@A00721:190:HGJW7DSXY:4:2459:4743:33004\_2:N:0:TCTGCAAG+GCTGCACT  
CAGAGGCTGTCAAACAAGCCCAGACTCAAGGAGTCAATCAAAGGTTTTGAATTTAGCTCAACTGGGG  
AGACGTGCTTAAATGGGTGATAAAAATTATTTAGAGATCTTTTCTACT

+



FFFF:FFFFFFFFFFFFFFFF:FF:FFFFFFFFFFFFFFFF:FFFFFFFF::F:FFFFFFFFFFFFFF::FFF,FFFF  
FFFFFFFF,FFFFFFFF:FFF,:F,FFFFFF:FF:F,FFF:FF:FFFFFF,,F  
@A00721:190:HGJW7DSXY:4:1203:27796:27868\_2:N:0:TCTGCAAG+GCTGCACT  
ATATAAAAATAAGGGAGTCATAACTTTTGTACCAAATTCTTGGCTTTCAACGAAGTCTCTGATTTTA  
TTAATCATTACTTTAACGATCTCTCGGTCATTTACTCTGTACTTGATC  
+  
FFFFFFFFFFFFFFFFFFFFFFFFFFFFFFFFFFFFFFFFFFFFFFFFFFFFFFFFFFFFFFFFFFFFFFFF  
FFFFFFFFFFFFFFFFFFFFFFFFFFFFFFFFFFFFFFFFFFFFFFFFFFFFFFFFFFFFFFFF  
@A00721:190:HGJW7DSXY:4:2648:32353:6386\_2:N:0:TCTGCAAG+GCTGCACT  
CTATCTTTTCAGACACTTCTTATATTATTACAATAGTTAATATCATATTAGTAATACTCACTATCGT  
TTTCTGCTTTTTCTTAGCTAATAGATTAATAAAGGATGAGTACGAAAA  
+  
FFFFFFFFFFFFFFF:FFFFFFFFF:FFFFFFFFFFFFFFFFFFFFFFFFFFFFFFFFFFFFFFFFFFFFFFF:F  
FFFFFFFFFFFFFFFFFFFFFFFFFFFFFFFFFFFFFFFFFFFFFFFFFFFFFFFFFFFFFFFF  
@A00721:190:HGJW7DSXY:4:2358:25382:29136\_2:N:0:TCTGCAAG+GCTGCACT  
TACGAGACCTGATGGTAGAATAGATTTAGTCTCTACACCCATCTCAACGAGGATAAAGCGAGTTTTCC  
GTCCTGAACGTAATACACGAAGAGATCATCCGCAACGACTCGAAACC  
+  
FFFFFFFFFFFFFFFFFFFFFFFFFFFFFFFFFFFFFFFFFFFFFFFFFFFFFFFFFFFFFFFFFFFFFFFF  
FFFFFFFFFFFFFFFFFFFFFFFFFFFFFFFFFFFFFFFFFFFFFFFFFFFFFFFFFFFFFFFF:F  
@A00721:190:HGJW7DSXY:4:1342:28763:35274\_2:N:0:TCTGCAAG+GCTGCACT  
TCAAATGAGGTCAAAGCTCTATTTATTAACGAACATTTATCCGATTCTTCGAGGGTATCACTACCAC  
TGATCTGCCGACTTTAGTCAAGGAACCTCAATTCCTTCGATGTTTATA  
+  
FFFFFFFFFFFFFFFFFFFFFFFFFFFFFFFFFFFFFFFFFFFFFFFFFFFFFFFFFFFFFFFFFFFFFFFF  
:FFFFFFFFFFFFFFFFFFFFFFFFFFFFFFFFFFFFFFFFFFFFFFFFFFFFFFFFFFFFFFFF  
@A00721:190:HGJW7DSXY:4:2528:31232:8265\_1:N:0:TCTGCAAG+GCTGCACT  
GACAAATTTTAGAACTTTATTTTCAAGACTCTCTCCGATCACCTTGGTGTGATCTCCCGAGGATCTTT  
TCAATAAGATGTATGATGATAATCTACTATTTTTAAATAGTGATATTCAGCGTATACTTGAATACTTT  
AT  
+  
:FF:FFFFFFFFFFFFFFFFFFFFFFFFFFFFFFFFFFFFFFFFFFFFFFFFFFFFFFFFFFFFFFFF,FFFFFFF  
FFFFFFFFFFFFFFFFFFFFFFFFFFFFFFFFFFFFFFFFFFFFFFFFFFFFFFFFFFFFFFFFFFFFFFF  
FF  
@A00721:190:HGJW7DSXY:4:2362:15456:29543\_1:N:0:TCTGCAAG+GCTGCACT  
TACCGCAAAAAGTTGGAAGAGGTCTATGATATTTATTTTACTTATACTTTAAATAGCACCGATTATAA  
CTTGACTGTTGATAATATTACAATAGCTCTTTCTCAGAAGATTAGAGAAGTAACCGGTGAACACGTCG  
GTA  
+  
FFFFFFFFFFF:FFFFFFFFFFFFFFFFF:FFFFFFFFFFFFFFFFFFFFFFFFFFFFFFFFFFFFFFFFFFFF  
FFFFFFFFFFFFFFFFFFFFFFFFFFFFFFFFFFFFFFFFFFFFFFFFFFFFFFFFFFFFFFFFFFFFFFFF  
FFF  
@A00721:190:HGJW7DSXY:4:2254:3992:5807\_1:N:0:TCTGCAAG+GCTGCACT  
AACGATTCTTCGACTATATTAAGAAATAAAAATACTTCAAGTACCTGAACCTTACATTTTTAATGGT  
ATGGTATAATGTGTCTTACAAATAGAACCTTCACTCTCGGTAATGAGAGTGATTCTTAATATTCTA  
GTA  
+  
:FFFFFFFFF:FFFFFFFFFFFFFFFFFFFFFFFFFFFFFFFFFFFFFFFFFFFFFFFFFFFFFFFFFFFFF  
FFFFFFFFFFFFFFFFFFFFFFFFFFFFFFFFFFFFFFFFFFFFFFFFFFFFFFFFFFFFFFFFFFFFFFFF  
FFF  
@A00721:190:HGJW7DSXY:4:1626:4237:27618\_2:N:0:TCTGCAAG+GCTGCACT  
TAGGATTTATCACACTCCTAAATTTGATAGCAATTTATGTTTTAAATGCTAGGAAAATTTTAGAAAAA  
CTCCATTGTATAGTTCAAGGAGTACTTAATTCAATAGCTTTAGTATTA  
+

FFF:FFFFFFFFFFFFFFFFFFFFFFFFFFFFFFFFFFFFFFFFFFFFFFFFFFFFFFFFFFFFF  
 FFFFFFFFFFFFFFFFFFFFFFFFFFFFFFFFFFFFFFFFFFFFFFFFFFFFFFFFFFFFFF  
 @A00721:190:HGJW7DSXY:4:1172:2130:3521\_1:N:0:TCTGCAAG+GCTGCACT  
 ATTGAAAATTGTATAAGAGTTAATTGCTTACACAAAAGTGACGCGGAAGGAATCTTAATTGATTGAA  
 GCTAGGCGTTGGGGAGAATGAAGTCCCGCTTCCCAGGAAGAACGATCTATTACAGAGTATTAGAGT  
 AGT  
 +  
 FFFFFFFFFFFFFFFFFF:FFFFFF::FFFFFFFFFFFFFFFFFFFFFFFFFFFFFFFF:FFFFFFFFFFFFFFFFFFFFF  
 FFFFFFFFFFFFFFFFFFFFFFFFFFFFFFFFFFFFFFFFFFFFFFFFFFFFFFFFFFFFFFFFFFFFFFFFFF  
 FFF  
 @A00721:190:HGJW7DSXY:4:2143:4535:23093\_2:N:0:TCTGCAAG+GCTGCACT  
 GCCGGTCGGCAGATCGGCACCCTGGTCTCTACGTTCAAGGACCCGCTGTGCAGAATAACCTTCCCAA  
 ATCTAGATCTGCACAGAAGAAGGCTGAAGGTCGTTACCGGACGACCAC  
 +  
 FFFFFFFFFFFFFFFFFFFFFFFFFFFFFFFFFFFFFFFFFFFFFFFFFFFFFFFFFFFFFFFFFFFFFFFFFF  
 FFFFFFFFFFFFFFFFFFFFFFFFFFFFFFFFFFFFFFFFFFFFFFFFFFFFFFFFFFFFFFFFFFFFFFFFFF  
 @A00721:190:HGJW7DSXY:4:2267:10547:6042\_1:N:0:TCTGCAAG+GCTGCACT  
 CTGAGGCAGTACCTCAGTCAAAAGTCACATTCACCCTCCCATACCAATCAATGATGTGACTATACAG  
 TTCGCCATTTCAGAGTGGTCAATACGTCGTGGGAGGTACTGAAGCCTTCCCCTCCGCTGGCACGAA  
 GAA  
 +  
 FFFFFFFFFFFFFFFFFFFFFFFFFFFFFFFFFFFFFFFFFFFFFFFFFFFFFFFFFFFFFFFFFFFFFFFFFF  
 FFFFFFFFFFFFFFFFFFFFFFFFFFFFFFFFFFFFFFFFFFFFFFFFFFFFFFFFFFFFFFFFFFFFFFFFFF  
 FFF  
 @A00721:190:HGJW7DSXY:4:1507:12952:19789\_1:N:0:TCTGCAAG+GCTGCACT  
 AATAGTTCTTCTGACCAGAATGAAAAGGGGTTTACCAGGGTAGTCTCTAAGTCTACCAGGAAGAGGGG  
 AAATGTCCCCAAAAGTGAAGAATAAAGGGAAAGGTCCATCAGGACCTAAGAAGGGGAAATTACCCC  
 TAA  
 +  
 FFFFFFFFFFFFFFFF:FFFFFFF:FFFFFFFFFFFFFFFFFFFFFFFFFFFFFFFF:FFFFFFFFF:FFFFFFF  
 FFF:FFFFFFFFFFFFFFFFFFFF::FFFFFFFFFFFFFFFFFFFFFFFFFFFFFFFFFFFFFFFF:FFFFFFF  
 FFF  
 @A00721:190:HGJW7DSXY:4:1418:4209:4899\_1:N:0:TCTGCAAG+GCTGCACT  
 CAAAGAGGCCGCTGCTACGAAGTCGCTGAAGGCGGCTTGGGTCATTAAGGGTAGCTGTAAAGTTGCGC  
 CTGCCGACCCCATCTTTGAGACCAAGACTCTCTACAGTAGGTTCTGCTACTATGAGCAAATCTGTT  
 GAA  
 +  
 FFFFF:FFFFFFFFFFFFFFFFFFFFFFFFFFFFFFFF:FFFFFFFFFFFFFFFFFFFFFFFFFFFFFFFFFFFF  
 FFFFFFFFFFFFFFFFFFFFFFFFFFFFFFFFFFFFF,FFFFFFFFFFFFFFFFFFFFFFFFFFFFFFFFFFFF:  
 FFF  
 @A00721:190:HGJW7DSXY:4:2225:3748:2785\_2:N:0:TCTGCAAG+GCTGCACT  
 CGAAGGTGAGAGGACTTTTGGCTACTGGCGACAACTGAGAGCAGTCGCTGGGGAAAGAGAATTGCGT  
 GGGTTGAAGGCCGACGCTTCGAGCTTGAGAGATCGGAAGAGCGTCGTG  
 +  
 FFFFFFFFFFFFFFFF,FFFFFFFFFFFFFFFFFFFFFFFFFFFFFFFFFFFFFFFF:FFFFFFFFF:FFFFF  
 FFFFFFFFFFFFFFFFFFFFFFFFFFFFFFFFFFFFFFFFFFFFFFFFFFFFFFFFFFFFFFFFFF  
 @A00721:190:HGJW7DSXY:4:2354:30635:10833\_2:N:0:TCTGCAAG+GCTGCACT  
 TTAATATGGGGCGAAGATCCCCTATGGAGTCTTGAAGGACTTAGGTTGGCATATTTATGCCGACGAT  
 AATAAGCATGTCACCCTTAAGCACCGAGAGATCGGAAGAGCGTCGTG  
 +  
 FFFFFFFFFFFFFFFFFFFFFFFFFFFFFFFFFFFFFFFFFFFFFFFFFFFFFFFFFFFFFFFFFFFFFFFFFF  
 FFFFFFFFFFFFFFFFFFFFFFFFFFFFFFFFFFFFFFFFFFFFFFFFFFFFFFFFFFFFFFFFFF  
 @A00721:190:HGJW7DSXY:4:2340:14516:16141\_2:N:0:TCTGCAAG+GCTGCACT  
 ATTTTTCTTTCTCCGTCATTGGGGATTTCGATGTGAGAAGGTGGAAGGTGTCAAGGGTCTTCTTCA

TGCTGATCTTTCAGGACCTAATCACATCATGATTGATAGTTACGGCTC  
+  
FFFFFFFFFFFFFFFFFFFFFFFF,FFFFFFFFFFFFFFFFFFFFFFFFFFFFFFFFFFFFFFFF  
FFFFFFFFFFFFFFFFFFFFFFFFFFFFFFFFFFFFFFFFFFFFFFFFFFFFFFFF  
@A00721:190:HGJW7DSXY:4:2569:26738:11005\_1:N:0:TCTGCAAG+GCTGCACT  
TCAGAGAGGGGAGCTCTGAAAAGGAACTTCGTCAGAAGATGAGGAAGTCTAAGAGGAGGAGTTTGAG  
GAAGGCTCTAGAGAAGATCTCACCACCTGGAGAAGGCAAGTGGAGAGTCCAGAAGTTGATGAAGAAGG  
ATT  
+  
FF:FFFFFFFFFFFFFFFF:FFFF:FFFFFFFFFFFF:FFFFFFFFFFFFFFFFFFFFFFFFFFFFFFFF  
FFFFFFFFFFFFFFFFFFFFFFFF,FFFFFFFFFFFFFFFFFFFFFFFF:FFFFFFFFFFFFFFFFFFFF  
FFF  
@A00721:190:HGJW7DSXY:4:2330:31982:36871\_2:N:0:TCTGCAAG+GCTGCACT  
AAGGTGGATGAGGGAGGTTGTTTCTTTGGAGTTTTAGATAATCTTTTGAGAAGGGGTCATAGAGCCAG  
CAAGAGAAGCTTATATGCTGGTTTAAGTGATGATTATCACTCCTTGAG  
+  
FFFFFFFFFFFFFFFFFFFFFFFFFFFFFFFFFFFFFFFF:FFFFFFFFFFFFFFFFFFFFFFFFFFFF  
FFFFFFFFFFFFFFFFFFFFFFFFFFFFFFFFFFFFFFFF:FFFF:FFFF  
@A00721:190:HGJW7DSXY:4:2601:31891:18897\_1:N:0:TCTGCAAG+GCTGCACT  
ATATTGTTCTTCCGGGAAGTTGTGGGATTTAACTTTGACTCACTACTCCGATCAGATCCGGATGGT  
TTGATTGGTATGGACTACTCGACTTTTGATCTGGAGTTGTCTAGGGTCATGGCAGATACTACCGATAA  
GGT  
+  
F:FFFFFFFF:FFFFFFFFFFFFFFFFFFFF:FFFFFFFFFFFF:FFFFFFFFFFFFFFFFFFFFFFFF:FFFFF  
FFFF:FFFFFFFFFFFF:FFFFFFFFFFFFFFFFFFFF:FFFFFFFFFFFFFFFFFFFFFFFFFFFFFFFF  
FFF  
@A00721:190:HGJW7DSXY:4:2275:4571:4961\_2:N:0:TCTGCAAG+GCTGCACT  
AAGAGTCTTTATGATTCAAAACCTATCGTTGTCGTACCTTACAAGGTTGAGGAGACTTTACAGCGGCT  
TATTGTCGCGCAGTTTCCAGAATTGCGGTTGAAGTTCACCCATTCTAT  
+  
FFFFFFFFFFFFFFFFFFFFFFFFFFFFFFFFFFFFFFFF:FFF:FFFFFFFFFFFFFFFF:FF  
FFFFFFFFFFFFFFFFFFFF:FFFFFFFFFFFF:FFFFFFFFFFFF  
@A00721:190:HGJW7DSXY:4:2449:17698:29011\_1:N:0:TCTGCAAG+GCTGCACT  
CTATTCTTGATGTGAAAGATGCATCGAGGTATACGTCTAGGAACATTGATTGGGAACGTACCTACTCA  
CGAGACGTCATGAAAGCTATCGGAGGGAAGCAAAATGTTTCGTTCTGTTACAAGAACGCTTTGGATTG  
TGA  
+  
FFFFFFFFFFFF:,FFFFFFFFFFFFFFFFFFFFFFFF:FFFFFFFFFFFFFFFFFFFFFFFFFFFF  
FFFFFF:FFFFFF:F::FFFFFFFFFFFF:,FF:FFFFFFFFFFFF,FFFFFF:FF:FFFFFF  
FFF  
@A00721:190:HGJW7DSXY:4:2653:32289:1517\_2:N:0:TCTGCAAG+GCTGCACT  
TCATTTCTGCTTAGTTTGTCCCGCGCAATTATTGGACACGATGAAAAATGACATACCCGTTCTGACC  
TTGGTATCGTTATCCGTCATGGAGATGATGCCGCATCACTTGATTACT  
+  
FFF:FFFFFFFF:FFFFFFFFFFFF:FFFFFFFFFFFFFFFFFFFF:FFFFFFFF:FFFFFFFFFFFF  
FFFFFFFFFFFFFFFFFFFFFFFFFFFF:FFFFFFFFFFFFFFFFFFFF  
@A00721:190:HGJW7DSXY:4:1503:22046:29997\_2:N:0:TCTGCAAG+GCTGCACT  
ACAAAACCTTCGAATATGTTACGACATGGCTTCGTAACAACAGTGCAGGATTGTCATCTCGGGGAAA  
GTGATTACCAAGATGTTTCATATAGATACGAGATACCTAGAGAAGGTC  
+  
FFFFFFFFFFFFFFFFFFFFFFFFFFFFFFFFFFFF,FFFFFFFFFFFFFFFFFFFFFFFFFFFF  
FFFFFFFFFFFF:FFFFFFFFFFFFFFFFFFFFFFFFFFFF:FFFFFFFFFFFF  
@A00721:190:HGJW7DSXY:4:1475:29930:4194\_2:N:0:TCTGCAAG+GCTGCACT  
ATCGGAGCTAAGAAGAAGACTTTGGGTACACGTTATGCTCGAACTTAACGTTAGTACCGGAGGTGA

TCTCTCTGCTTCTGCGTTACTGAGAGAAAAGATTTCAGGACGCCTACGG

+

FFFFFFFFFFFFFFFFFFFFFFFFFFFFFFFFFFFFFFFFFFFFFFFFFFFFFFFFFFFFFFFFFFFFFFFF  
FFFFFFFFFFFFFFFFFFFFFFFFFFFFFFFFFFFFFFFFFFFFFFFFFFFFFFFFFFFFFFFFFFFFFFFF

@A00721:190:HGJW7DSXY:4:2567:6135:23797\_1:N:0:TCTGCAAG+GCTGCACT  
GAACACGTCAAGAAGTCGCTCGGCGTTGTTCTTGAACCAAGTTAAGAAGGAGGCTGATCATGGAGT  
CTTTGTACCTTCTGTCAAACCTTCGAGGTTACGCTACGAGAGGTGATCCCGATGTGGATTGAAGGCTG  
GCT

+

FFFFFFFFFFFFFFFFFFFFFFFFFFFFFFFFFFFFFFFFFFFFFFFFFFFFFFFFFFFFFFFFFFFFFFFF  
FFFFF:FFFFFFFFFFFFFFFFFFFFFFFFFFFFFFFFFFFFFFFFFFFFFFFFFFFFFFFFFFFFFFFF  
FFF

@A00721:190:HGJW7DSXY:4:2644:11749:11130\_1:N:0:TCTGCAAG+GCTGCACT  
TTGGGTTGAGAAGTGTGCTTTACATGGAGTTAGTCTCTTATTCAAGTTTTTAGATATTATTGATAATC  
TTAAAGAAAAATTTTAGAATAAACTAATGAGAGGTATAGGCTTAGTCAAGTCTGTACTTACATTCTTT  
ACG

+

FF,FFFF,,:,FFFFFFFFF,F,,FF,FF,F:,,F,,,,,FFFFFFFF:F,,:FF,FF:FFFF:F:F,  
FFF,:F,,FF::FFF,F,,,F:F:F,,FF,F:::,:::F,FFFF,FF,FF,FF:F,:F,F::,FFF  
::,

@A00721:190:HGJW7DSXY:4:2570:14588:29700\_1:N:0:TCTGCAAG+GCTGCACT  
TCTGTTGGTAGAGGAGTTGAGAGAATTACTCAGATTCAATCTGGCATCACTGAACGTCTACAACGAGT  
TAGGGGGTGGCTAGGTTTTAAAGATCCTTGCACAAGCAATACCTTCCACTGAGTTCATTACCCAGA  
GTT

+

FFFFFFFFFFFFFFFFFFFFFFFFFFFFFFFFFFFFFFFFFFFFFFFFFFFFFFFFFFFFFFFFFFFFFFFF  
FFFFFFFFFFFFFFFFFFFFFFFFFFFFFFFFFFFFFFFFFFFFFFFFFFFFFFFFFFFFFFFFFFFFFFFF  
FFF

@A00721:190:HGJW7DSXY:4:1567:15402:16266\_1:N:0:TCTGCAAG+GCTGCACT  
ATTCTTTTACCTTTTGGAGGTCCAGGAACCTTTACTCCTAGTGTCTTTTCTAGAGTCCAAGGACGTTT  
CCGTCGGAGGATGACAGGTGGGAGACCGCTCAATAACACTCTATTGAATCCCTTTTCCACGATGAAAG  
CTC

+

FFFFFFFFFFFFFFFFFFFFFFFFFFFFFFFFFFFFFFFFFFFFFFFFFFFFFFFFFFFFFFFFFFFFFFFF  
FFFFFFFFFFFFFFFFFFFFFFFFFFFFFFFFFFFFFFFFFFFFFFFFFFFFFFFFFFFFFFFFFFFFFFFF  
FFF

@A00721:190:HGJW7DSXY:4:2671:29405:25363\_2:N:0:TCTGCAAG+GCTGCACT  
TCTGCCACTTCTAATTTTAGGAAACGTGCGAAAAGAAAGTTCATGAGGATGTCTTGGTCGAAAAATA  
TCGCCGGAACTTCTAATAGAGGATCCTGATGACATTATTTCAACGGA

+

FFFFFFFFFFFFFFFFFFFFFFFFFFFFFFFFFFFFFFFFFFFFFFFFFFFFFFFFFFFFFFFFFFFFFFFF  
FFFFFFFFF:FFFFFFFFFFFFFFFFFFFFFFFFFFFFFFFFFFFFFFFFFFFFFFFFFFFFFFFF

@A00721:190:HGJW7DSXY:4:1352:13422:28213\_1:N:0:TCTGCAAG+GCTGCACT  
AACTGTCTCCACTGATTCGGAATTAGAGAAAGACGACCTTCTTGTGGGACTGAGACCTCTGAATTTT  
CAGGGTGCCCTGATGAGGACGTTGAAAGGGATAATTTCAACTCTGAGACTTCTAAGAGTGTTCAAAA  
GAC

+

FFFFFFFFFFFFFFFFFFFFFFFFFFFFFFFFFFFFFFFFFFFFFFFFFFFFFFFFFFFFFFFFFFFFFFFF  
FFFFFFFFFFFFFFFFFFFFFFFFFFFFFFFFFFFFFFFFFFFFFFFFFFFFFFFFFFFFFFFFFFFFFFFF  
FFF

@A00721:190:HGJW7DSXY:4:2519:15474:36245\_1:N:0:TCTGCAAG+GCTGCACT  
ATGAGTGATCGTATTAGAACAGCTGATTCTTATTGCATGAACGTCGCTGAGGTCAAACCTGTGGACGT  
TCTTTTCATCGACGAATTATTCATGATTCACGCTGGTCAGACCCTTTTCTTACACATCTACTTAAGG  
CGG

+  
FFFFFFFFFFFFFFFFFFFF,FF,FFFFFFFF:FFFFFFFF:F,F,F:FFFF::F,FFFFFFFF  
F,FFFFFFFF:,FFFFFFFF:F:FFFF::F::F:FFFFFF,FFFFFFFFFFFF:FF:FFFFFFFF  
F:F

@A00721:190:HGJW7DSXY:4:1261:7437:3286\_1:N:0:TCTGCAAG+GCTGCACT  
AATCGTATTGATCTCCAAGTCGAACTACTTCAACATCAACGACATCATTCTTGATGAGTGTCTGTT  
TTATCGAAGTCTCAGTTATCGCTGCCCCGCCGACGTTTGTGCGAACTCTCAGAGGTTTACGGCAGAA  
AAA

+  
F:F:,FFFFF,FFFFFFFFFFFF,:FF,:F,FF,:F:FF::,:F,FFF,FF:FFFFFFFF,FFFFFFFF,  
FF:FF,FF:FFFFFFFF:F:FFFFFFFF:F:FFFFFF:FFFFFFFFFFFF:FFFF,:FFFF:,  
F,:

@A00721:190:HGJW7DSXY:4:1105:8250:4476\_1:N:0:TCTGCAAG+GCTGCACT  
AACCCCTTATATCGAGGCTATCGAGGACGATGAGTATCTTGAAGTTGTTGACGACAAGCCTCAAGAGG  
GTAGAGGACCACCTGGATCTTCTACTGTCTCTGCCTTCCAAGATTTCTTAGAAGAGGTTATTCTGGA  
ACC

+  
FFFFFFFFF:FFFFFFFFFFFFFFFFFFFFFFFFFFFFFFFFFFFFFFFFFFFFFFFFFFFFFFFFFFFF  
FFFFFFFFFFFFFFFFFFFFFFFFFFFFFFFFFFFFFFFFFFFFFFFFFFFFFFFFFFFFFFFFFFFFFFFF  
FFF

@A00721:190:HGJW7DSXY:4:2440:21187:11788\_1:N:0:TCTGCAAG+GCTGCACT  
TTCCGATCTGTAAGAAGCCCTTGAGCCGCGTAGTCAGCGCTTTAGCTGTATCATCAGTCAGAGTAT  
ACCCGATAGGGTACCGAGTCTCCAAGAGAATATTTATTCTTATGAGGCTCGAACTTCAACGTTTTCA  
CAA

+  
FFFFFFFFFFFFFFFFFFFFFFFFFFFFFFFFFFFFFFFFFFFFFFFFFFFFFFFFFFFFFFFFFFFFF,FFFFFFFFFFFFFFFFFFFFFFFF  
FFFFFFFFFFFFFFFFFFFFFFFFFFFFFFFFFFFFFFFFFFFFFFFFFFFFFFFFFFFFFFFFFFFFFFFFF:FFFFFFFFFFFFFFFFFFFFFFFF  
FFF

@A00721:190:HGJW7DSXY:4:2341:18701:16470\_1:N:0:TCTGCAAG+GCTGCACT  
CACTTTGATGATTTTATCACTTTATTATGACCTTGGAAGTTTTCGGCTGTGGTTGTGCTGGGGACG  
ATTCCATTCTGTTTTCAAAGACTCCAATAACTGATCATTCTGATCATATGATTTTGACAATGGTTTC  
GAA

+  
FFFFFFFFFFFFFFFFFFFFFFFFFFFFFFFFFFFFFFFFFFFFFFFFFFFFFFFFFFFFFFFFFFFFF,FFFFFFFFFFFFFFFFFFFFFFFF  
FFFFFFFFFFFFFFFFFFFFFFFFFFFFFFFFFFFFFFFFFFFFFFFFFFFFFFFFFFFFFFFFFFFFFFFFF:FFFFFFFFFFFFFFFFFFFFFFFF  
FFF

@A00721:190:HGJW7DSXY:4:1263:3902:25254\_1:N:0:TCTGCAAG+GCTGCACT  
TTCCGAGAGGTTTATCCTGATGTGGAGGGAGTTCTTGAAGCATCCCGACCTTTCCTTGTAATAATTT  
GATGCGGTTTCATAAGATTATCAGTAATCCTGATTCTACTACGGATTCATGGACCTTCATCCTGTAC  
CT

+  
FFF:FFFFFFFFFFFFFFFFFFFFFFFFFFFFFFFFFFFFFFFFFFFFFFFFFFFFFFFFFFFFFFFFFFFFF,FFFFFFFFFFFFFFFFFFFFFFFF  
FFFFFFFFFFFFFFFFFFFFFFFFFFFFFFFFFFFFFFFFFFFFFFFFFFFFFFFFFFFFFFFFFFFFFFFFF:FFFFFFFFFFFFFFFFFFFFFFFF  
FF

@A00721:190:HGJW7DSXY:4:1334:25672:17926\_1:N:0:TCTGCAAG+GCTGCACT  
GATTAAGACTCTTCCGAAAGCGAACTTTGGGAATTTGAAGCTCAGGGTGAAGCACAACTTTGACCG  
TGACGAACTGTGGTGTCTTGATCTACGTTACGGATATACTCTCCTTGAGTTCACTCGTAAGGACACT  
ACC

+  
FFFFFFFFF:FFFFFFFFFFFFFFFFFFFFFFFFFFFFFFFFFFFFFFFFFFFFFFFFFFFFFFFFFFFFF,FFFFFFFFFFFFFFFFFFFFFFFF  
FFFFFFFFFFFFFFFFFFFFFFFFFFFFFFFFFFFFFFFFFFFFFFFFFFFFFFFFFFFFFFFFFFFFFFFFF:FFFFFFFFFFFFFFFFFFFFFFFF  
FFF

@A00721:190:HGJW7DSXY:4:1616:2311:36652\_2:N:0:TCTGCAAG+GCTGCACT  
CAGGGGTTTTCAATAGTGATAGCCACCCGCTTACAGAGGGGCAGCAGCATGACCATAATTGGTATT

$+$ 

@A00721:190:HGJW7DSXY:4:2147:15311:20275\_1:N:0:TCTGCAAG+GCTGCACT

+

@A00721:190:HGJW7DSXY:4:2622:26594:11976\_1:N:0:TCTGCAAG+GCTGCACT

+

@A00721:190:HGJW7DSXY:4:1445:21441:31360 2:N:0:TCTGCAAG+GCTGCACT

+

@A00721:190:HGJW7DSXY:4:2448:30481:7467 1:N:0:TCTGCAAG+GCTGCACT

+

@A00721:190:HGJW7DSXY:4:1655:1904:17347 2:N:0:TCTGCAAG+GCTGCACT

+

@A00721:190:HGJW7DSXY:4:2317:31150:19179 2:N:0:TCTGCAAG+GCTGCACT

+

@A00721:190:HGJW7DSXY:4:2457:12870:25254 1:N:0:TCTGCAAG+GCTGCACT

+

@A00721:190:HGJW7DSXY:4:2230:24578:4507\_2:N:0:TCTGCAAG+GCTGCACT  
ATAAGAATCTTTACCAGGACTCCTACTACAGGAGGCAGTCTTCTGATCGTAAGAAGTTTATAAGGAA  
CATATCCATTTGTTGTAATAGGGTCATCAACTTAGAACTCGAACTCT

+

FFFFFFFFFFFFFFFF:FFFFFFFFFFFFFFFFFFFFFFFFFFFFFFFFFFFFFFFFFFFFFFFF:FF  
FFFFFFFFFFFFFF:FFFFFFFFFFFFFFFFFFFFFFFFFFFFFFFFFFFFFFFFFFFFFFFF

@A00721:190:HGJW7DSXY:4:1177:5873:36432\_1:N:0:TCTGCAAG+GCTGCACT  
CTCTTCGATAGGGGACATTTTATCGTGGGCTTTCGTAAAGGAAGATCTGTTATCGACGGTTTATCGT  
TTACGAAAGTATCACTCCACCGGTGAATGGTTTAAAGAATACTATAAATAGAATAGCTATTACTACTAAT  
GGC

+

FFFFFFFFFFFFFFFFFFFFFFFF:FFFFFFFFFFFFFFFFFFFFFFFFFFFFFFFFFFFFFFFFFFFFFFFF  
FFFFFFFFFFFFFFFFFFFFFFFFFFFFFFFFFFFFFFFFFFFFFFFFFFFFFFFFFFFFFFFFFFFFFFFF  
FFF

@A00721:190:HGJW7DSXY:4:1536:16830:11757\_1:N:0:TCTGCAAG+GCTGCACT  
TTACTTAGACTTTCCTACGATACAAATGATAACTTCTAATTTACGTTTGCTACTCAGAGCTGGTCCTC  
TCAGCAAAGGGATGCATGGTGTATCTCCTCAGGAGTCCCGGCATTTGATAATAATGACGAGACTTTC  
GTC

+

FFFFFFFFFFFFFFFFFFFFFFFFFFFFFFFFFFFFFFFFFFFFFFFFFFFFFFFFFFFFFFFFFFFFFFFF  
FFFFFFFFFFFFFFFFFFFFFFFFFFFFFFFFFFFFFFFFFFFFFFFF:F:FFFFFFFFFFFFFFFFFFFFFFFF  
:FF

@A00721:190:HGJW7DSXY:4:1270:30445:35681\_1:N:0:TCTGCAAG+GCTGCACT  
AGCGCATCTCGTGTGAGCCTCGACCCGATTATATGGTATTAACCTATAAAGGTGAGGAGACCATTTT  
CTTGCTGAAATTTATAGAAGATTATTTTGACAGAATCAATAAGAATCATCGATTCTCGATTCTGATAG  
CTT

+

FFFFFFFFFFFFFFFFFFFFFFFFFFFFFFFFFFFFFFFFFFFFFFFFFFFFFFFFFFFFFFFFFFFFFFFF  
FF:FFFFFFFFFFFFFFFFFFFFFFFFFFFFFFFFFFFFFFFF:F:FFFFFFFFFFFFFFFFFFFFFFFF  
FFF

@A00721:190:HGJW7DSXY:4:1362:31403:9815\_1:N:0:TCTGCAAG+GCTGCACT  
TCCAGTCAACACTAGTTCGAGTGCTGCTTTGGATTACGATGACGTGAGAATAGGTGAAGGGATAGTTT  
TTACCTCGACCAACATTAAGGCGGCGGCGACTAATCTTAAAGCTTCACCCAAAATGAAGGACACTTCG  
AAA

+

:FFFFFFFFFFFFFFFFFFFFFFFFFFFFFFFFFFFFFFFFFFFFFFFFFFFFFFFFFFFFFFFF:FF:  
FF:FFFFFFFFFFFFFFFFFFFFFFFFFFFFFFFFFFFFFFFF:F:FFFFFFFFFFFFFFFFFFFFFFFF  
FFF

@A00721:190:HGJW7DSXY:4:2469:24641:3396\_2:N:0:TCTGCAAG+GCTGCACT  
ACATTTACCACCAAATTCTTTTGATACAACCTTAGCCTTCAAGTGGGGTATGCCTGCGGAATACGCTT  
GCTATTCACCAGATTGGTTCGAACCCGTTGATGCTATGTCAGAAGAAG

+

FFFFFFFFFFFFFFFFFFFFFFFFFFFFFFFFFFFFFFFFFFFFFFFFFFFFFFFFFFFFFFFFFFFFFFFF  
FFFFFFFFFFFFFF:FFFFFFFFFFFFFFFFFFFFFFFFFFFFFFFFFFFFFFFF

@A00721:190:HGJW7DSXY:4:2459:5385:32957\_2:N:0:TCTGCAAG+GCTGCACT  
CAGAGGCTGTCAAACAAGCCCAGACTCAAGGAGTCCAATCAAAGGTTTTGAATTTAGCTCAACTGGGG  
AGACGTGCTTAAATGGGTGATAAAAATTATTTAGAGATCTTTCTACT

+

FFFFFFFFFFFFFFFFFFFFFFFFFFFFFFFFFFFFFFFFFFFFFFFF:FFFFFFFFFFFFFFFF  
FFFFFFFFFFFFFFFFFFFFFFFFFFFFFFFFFFFFFFFFFFFFFFFF

@A00721:190:HGJW7DSXY:4:2315:30445:2425\_2:N:0:TCTGCAAG+GCTGCACT  
ATATAAAAATAAGGGAGTCATAACTTTTGTTACCAAATTTCTTGCTTTCAACTAAGTCTCTGATTTTA  
TTAATCATTAATTTAACTATCTCTCGGTCATTTACTCTGTACTTGATC

+

FFFFF:FF:FFFFFFFFFFFFFFFFFFFFFFFF,F,F:FFFF,FFFFFF:F,FFFF,FF:F,FFFF  
FFFFFFFFF,F:FFF:,FF:FFFF,FF:,FFFF,FF:FFFFFFFFF  
@A00721:190:HGJW7DSXY:4:2624:10583:2816\_2:N:0:TCTGCAAG+GCTGCACT  
TAATAGATTAATAAAGGATGAGTACGAAAACCACTCTTCGTTACGAGACCTGATGGTAGAATAGATT  
TAGTCTCTACACCCATCTCAACGAGGATAAAGCGAGTTTTCCGTCCTG

+

FFFFFF:FFFFFFFFFFFFFFFFFFFFFFFF:FFFFFFFFFFFFFFFF:F:FFF:FFFF  
FFFFFF:FFFFFFFFFFFFFFFFFFFFFFFF:FFFFFFFFFFFFFFFF  
@A00721:190:HGJW7DSXY:4:2506:13847:27070\_1:N:0:TCTGCAAG+GCTGCACT  
CCCCCACGACTCGAAACCGAGACGCCGTAGATCAAAGTCCCTTCTAACTTTAGATTATGAATCCTGC  
CTTTACTCATTTT

+

F:,,, :FFFFFFFFFFFFFFFFFFFFFFFF:FFFFFFFFFFFFFFFFFFFFFFFF  
FFFFFFFFFFFFF  
@A00721:190:HGJW7DSXY:4:1378:1642:12759\_2:N:0:TCTGCAAG+GCTGCACT  
TCAAATGAGGTCAAAGCTCTATTTATTAACGAACCTATTATCCGATTCTTCGAGGGTATCACTACCAC  
TGATCTGCCGACTTTAGTCAAGGAACCTCAATTCCTTCGATGTTTATA

+

FFFFFFFFFFFFFFFF:FFFFFFFFFFFFFFFFFFFFFFFFFFFFFFFF:FFFFFFFFFFFF  
FFFFFFFFFFFFFFFFFFFFFFFF,FFFFFFFFFFFFFFFFFFFFFF  
@A00721:190:HGJW7DSXY:4:1410:15619:25692\_1:N:0:TCTGCAAG+GCTGCACT  
GACAAATTTTAGAACTTTATTTTCAGAACTCTCTCCGATCACCTTGGTGTGATCTCCCGAGGATCTTT  
TCAATAAGATGTATGATGATAATCTACTATTTTTAAATAGTGATATTCAGCGTATACTTGAATACTTT  
ATC

+

FFF,FFFFFFFFFFFFFFFF:F:FF:FFFF,FFFF:F,FFFFFFFFFFFF:FF,FFFFFF:FF:  
F:F:FF::FFFF,FFFF:FFFFFFFFFFFFFFFF:F,:F::FFFF,:FFFFFFFF:FFF::FF  
FFF  
@A00721:190:HGJW7DSXY:4:2467:4815:8797\_1:N:0:TCTGCAAG+GCTGCACT  
TACCGCAAAAAGTTGGAAGAGGTCTATGATATTTATTTACTTATACTTTAAATAGCACCGATTATAA  
CTTGACTGTTGATAATATTACAATAGCTCTTCTCAGAAGATTAGAGAAGTAACCGGTGAACACGTCG  
GTA

+

FFFFFFFFFFFFFFFF,FFFFFFFFFFFFFFFFFFFFFFFFFFFFFFFFFFFFFFFFFF  
FFFFF:FFFFFFFFFFFFFFFFFFFFFFFFFFFFFFFFFFFFFFFFFFFFFFFFFFFFFFFF  
FFF  
@A00721:190:HGJW7DSXY:4:2513:10357:28635\_1:N:0:TCTGCAAG+GCTGCACT  
AACGATTCTTCGACTATATTAAGAAATAAAAATACTTCAAGTACCTGAACCTTACATTTTAAATGGT  
ATGGTATAATGTGTCTTACAAATAGAACCTTCACTCTCGGTAATGAGAGTGATTCCTTAATATTCTA  
GTA

+

FFFFFFFFFFFFFFFF:FFFFFFFFFFFFFFFFFFFFFFFF:FFFFFF:FFFFFFFFFFFFFF  
FFFFFFFFFFFFFFFFFFFFFFFFFFFFFFFFFFFFFFFFFFFFFFFFFFFFFFFFFFFFFFFF  
FFF  
@A00721:190:HGJW7DSXY:4:2577:25455:31078\_2:N:0:TCTGCAAG+GCTGCACT  
TAGGATTTATCACACTCCTAAATTTGATAGCAATTTATGTTTTAAATGCTAGGAAAATTTAGAAAAA  
CTCCATTGTATAGTTCAAGGAGTACTTAATTCAATAGCTTTAGTATTA

+

FFFFFFFFFFFFFFFF,FFFFFFFFFFFFFFFFF:FFFFFFFFFFFFFFFFFFFFFFFF:  
FFFFFF:FFFFFFFFFFFFFFFFFFFF:FF,FF,FFFFFFFFF  
@A00721:190:HGJW7DSXY:4:1255:27308:22670\_1:N:0:TCTGCAAG+GCTGCACT  
ATTGAAAATTGTATAAGAGTTAATTGCTTACACAAAAGTGACGCGGAAGGAATCTTAATTGATTGAA  
GCTAGGCGTTGGGGAGAATGAAGTCCGCTTCCCGGAAGAAACGATCTATTTACAGAGTATTAGAGT  
AGT





GAAGGCTCTAGAGAAGATCTCACACCTGGAGAAGGCAAGTGGAGAGTCCAGAAGTTGATGAAGAAGG  
ATT

+

F,F,FF:FFF:FF,FFFF,,,:FF,F,FFF:FFFFFFFF,FFFFFF::F:FF,FFFFFF,FFFF:FFF  
:FF,FFFFFFFFFFFF,,:FFFF,FFF,FFFF,FFFF,FFFFFFFF:FF:FFFF,FFFFFFFFFFFFF,:F  
FFF

@A00721:190:HGJW7DSXY:4:2518:24487:31469\_2:N:0:TCTGCAAG+GCTGCACT  
AAGGTGGATGAGGGAGGTTGTTTCTTTGGAGTTTATAGATAATCTTTTGAGAAGGGGTCATAGAGCCAG  
CAAGAGAAGCTTATATGCTGGTTTAAGTGATGATTATCACTCCTTGAG

+

FFFFFFFFFFFFFFFFFFFFFFFFFFFFFFFFFFFFFFFFFFFFFFFFFFFFFFFFFFFFFFFFFFFFFFFF  
FFFFFFFFFFFFFFFFFFFFFFFFFFFFFFFFFFFFFFFFFFFFFFFFFFFFFFFFFFFFFFFF

@A00721:190:HGJW7DSXY:4:2667:5339:13870\_1:N:0:TCTGCAAG+GCTGCACT  
ATATTGTTCCCTCCGGGAAGTTGTGGGATTTAACTTTGACTCACTACTCCGATCAGATCCGGATGGT  
TTGATTGGTATGGACTACTCGACTTTTGATCTGGAGTTGTCTAGGGTCATGGCAGATACTACCGATAA  
GGT

+

FFFFFF:FFFFFFFFFFFFFFFFFFFFFFFFFFFFFFFFFFFFFFFFFFFFFFFFFFFFFFFFFFFFFFFF  
FFFFFFFFFFFFFFFFFFFFFFFFFFFFFFFFFFFFFFFFFFFFFFFFFFFFFFFFFFFFFFFFFFFFFFFF  
FFF

@A00721:190:HGJW7DSXY:4:2372:20437:20353\_2:N:0:TCTGCAAG+GCTGCACT  
AAGAGTCTTTATGATTCAAAACCTATCGTTGTCTGACCTTACAAGTTGAGGAGACTTTACAGCGGCT  
TATTGTCGCGCAGTTTCCAGAATTGCGGTTGAAGTTCACCCATTCTAT

+

FFFFFFFFFFFFFFFFFFFFFFFFFFFFFFFFFFFFFFFFFFFFFFFFFFFFFFFFFFFFFFFFFFFFFFFF  
FFFFFFF:FFFFFFFFFFFFFFFFFFFFFFFFFFFFFFFFFFFFFFFFFFFFFFFFFFFFFFFF

@A00721:190:HGJW7DSXY:4:2549:2040:10567\_1:N:0:TCTGCAAG+GCTGCACT  
CTATTCTTGATGTGAAAGATGCATCGAGGTATACGTCTAGGAACATTGATTGGGAACGTACCTACTCA  
CGAGACGTCATGAAAGCTATCGGAGGGAAGCAAATGTTTCGTTCTGTTACAAGAACGCTTTGGATTG  
TGA

+

FFFFFFFFFFFFFFFFFFFFFFFFFFFFFFFFFFFFFFFFFFFFFFFFFFFFFFFFFFFFFFFFFFFFFFFF  
FFFFFFFFFFFFFFFFFFFFFFFFFFFFFFFFFFFFFFFFFFFFFFFFFFFFFFFFFFFFFFFFFFFFFFFF  
FFF

@A00721:190:HGJW7DSXY:4:2467:16776:32863\_2:N:0:TCTGCAAG+GCTGCACT  
CATTTCTGCTTAGTTTGTCCCGGCGAATTATTGGACACGATGAAAAATGACATACCCGTTCTGACCT  
TGGTATCGTTATCCGTCATGGAGATGATGGCGCATCACTTGATTACTA

+

FFFFFFFFFFFFFFFFFFFFFFFFFFFFFFFFFFFFFFFFFFFFFFFFFFFFFFFFFFFFFFFFFFFFFFFF  
FFFFFFFFFFFFFFFFFFFFFFFFFFFFFFFFFFFFFFFFFFFFFFFFFFFFFFFFFFFFFFFF

@A00721:190:HGJW7DSXY:4:2516:24415:5384\_2:N:0:TCTGCAAG+GCTGCACT  
ACAAAACCTTCGAATATGTTACGACATGGCTTCGTAACAACAGTGCGAGTATTGTCATCTCGGGGACA  
TTGATTAACCAAGATGTTTCATATAGATACTAGAAACATAGACAAGGTC

+

FFFF,,F:FFF:FF,FF,F,F,F:F:,:FF,:FFFFFFFFFFFF,F,F,FFF:,FF,FFFFFF,F,F  
,,,FF,,FFFFFFFF,FFFF,F,F:FF:,F,,:FF:,F,F,,:FFFF

@A00721:190:HGJW7DSXY:4:2332:18358:13620\_2:N:0:TCTGCAAG+GCTGCACT  
ATCGGAGCTAAGAAGAAGACTTTGGGTACACGTTATGCTCGAACTTAACGTTAGTACCGGAGGTGA  
TCTCTCTGCTTCTGCGTTACTGAGAGAAAAGATTAGGACGCCTACGG

+

FFFFFFFFFFFFFFFFFFFFFFFFFFFFFFFFFFFFFFFFFFFFFFFFFFFFFFFFFFFFFFFFFFFFFFFF  
FFFFFFFFFFFFFFFFFFFFFFFFFFFFFFFFFFFFFFFFFFFFFFFFFFFFFFFFFFFFFFFF

@A00721:190:HGJW7DSXY:4:2658:30228:22404\_1:N:0:TCTGCAAG+GCTGCACT  
GAACACGTCAAGAAGTCGCTCGGCGTTGTTCTTGAAAACCAAGTTAAGAAGGAGGCTGATCATGGAGT

CTTTGTACCTTCTGTCAAACCTTCGAGGTTACAGCTACGAGAGGTGATCCCGGATGTGGATTGAAGGCTG  
GCT

```
:FF::FFF:FFFFFFFFFFFFFFFFFFFFFFFFFFFFFFFFFFFF,FFFFFFFFF:FFFF:FF,FFFF  
FFFFFFFFFFFFFFFFF::FFFFFFFFFFFFFFFFFFFFFFFFFFFFFFFFFFFFFFFFFFFFFFFFFFFF  
FFF
```

+

```
FFF,Ffff:Ffffffffffffffff:fFFFF,: ,ffff:F:,FFFFFFFFFFFFFFFFFFFFFFF#FFFFF  
FFFFFFFFFFFFFFFFFF:fFFFF:FFFFFFFF:FfFF
```

+

[illegible]

+

```

FFFFFFFF:FFFFFFFFFFFFFFFFFFFFFFFFFFFFFFFFFFFFFFFFFFFFFFFFFFFFFFFF
FFFF:F:F:FF:FFFF:FFFFFFFFFFFFFFFFFFFFFFFFFFFFFFFF

```

+

[illegible]

+

```

FFFFFFFFFFFFFFFFFFFFFFFF:FFFFFFFFFFFFFFFFFFFFFFFFFFFFFFFFFFFFFFFF
FFFFFFFFFFFFFFFFFFFFFFFF:FFFFFFFFFFFFFFFFFFFFFFFFFFFFFFFFFFFFFFFF
FFF

```

 $+$ [illegible]

+  
FFFFFFFFFFFFFFFFFFFFFFFFFFFFFFFFFFFFFFFFFFFFF:FFFFFFFFFFFFFFFFFFFFFFFF  
FFFFFFFFFFFFFFFFFFFFFFFFFFFFFFFFFFFFFFFFFFFFFFFFFFFFFFFFFFFFFFFFFFFFFFFF  
FFF  
@A00721:190:HGJW7DSXY:4:1354:30472:1313\_1:N:0:TCTGCAAG+GCTGCACT  
AACCCCTTATATCGAGGCTATCGAGGACGATGAGTATCTTGAAGTTGTTGACGACAAGCCTCAAGAGG  
GTAGAGGACCACCTGGATCTTCTACTGTCTCTGCCTTCCAAGATTTCCTAGAAGAGGTTATTCCTGGA  
ACC  
+  
FFFF:FFFFFFFFFFFFFFF:FFFFFFFFFFFFFFFFFFFFFFFFFFFFFFFFFFFFFFFFFFFFFFFF  
FFFFFFFFFFFFFFFFFFFFFFFFFFFFFFFFFFFFFFFFFFFFFFFFFFFFFFFFFFFFFFFFFFFFFFFF  
FFF  
@A00721:190:HGJW7DSXY:4:2525:24840:21308\_1:N:0:TCTGCAAG+GCTGCACT  
TTCCGATCTGTAAGAAGCCCCTTGAGCCGCGTAGTCAGCGCGTTTAGCTGTATCATCAGTCAGAGTAT  
ACCCGATAGGGTACCGAGTCTCCAAGAGAATATTTATTGTTATGAGGCTCGAACTTCAACGTTTTCA  
CAA  
+  
FFFFFFFFFFFFFFFFFFFFFFFFFFFFFFFFFFFFFFFFFFFFFFFFFFFFFFFFFFFFFFFFFFFFFFFF:  
FFFFFFFFFFFFFFFFFFFFFFFFFFFFFFFFFFFFFFFFFFFFFFFFFFFFFFFFFFFFFFFFFFFFFFFF  
FFF  
@A00721:190:HGJW7DSXY:4:2634:26494:33035\_1:N:0:TCTGCAAG+GCTGCACT  
CACTTTGATGATTTTATCACTTTATTATGACCTTGGAAGTTTTCGGCTGTGGTTGTCGCTGGGGACG  
ATTCCATTCTGTTTTCAAAGACTCCAATACTGATCATTCTGATCATATGATTTTGGACAATGGTTTC  
GAA  
+  
FFFF:FFFFFFFFFFFFFFFFFFFFFFFFF:FFFFFFFFFFFFFFFFFFFFFFFFFFFFFFFFFFFFFFFF  
FFFFFFFFFFFFFFF,FFFFFFFFFFFFFFFFFFFFFFFFF:FFFFFFFFFFFFFFFFFFFFFFFFFFFFF  
FFF  
@A00721:190:HGJW7DSXY:4:1365:5638:32174\_2:N:0:TCTGCAAG+GCTGCACT  
TCCGAGAGGTTTATCCTGATGTGGAGGGAGTTCTTGAAGCATCCCGACCTTTCCTTGTGAAAATTTTG  
ATGCGGTTTCATAAGATTATCAGTAATCCTGATTCTACTACGGATTCA  
+  
FFFFFFFFFFFFFFFFFFFFFFFFFFFFFFFFFFFFFFFFFFFFFFFFFFFFFFFFFFFFFFFFFFFFFFFF  
FFFFFFFFFFFFFFFFFFFFFFFFFFFFFFFFFFFFFFFFFFFFFFFFFFFFFFFFFFFFFFFFFFFFFFFF  
@A00721:190:HGJW7DSXY:4:1341:29288:15702\_1:N:0:TCTGCAAG+GCTGCACT  
GATTAAGACTCTTCCGAAAGGCCGAACCTTTGGGAATTTGAAGCTCAGGGTGAAGCACACGTTTGACCG  
TGACGAACTGTGGTGTTCTTGATCTACGTTACGGATATACTCTCCTTGAGTTCACCTCGTAAGGACACT  
ACC  
+  
FFFFFFFFFFFFFFFFFFFFFFF,FFFFF:FFFFFFFFFFFFFFFFFFFFFFFFFFFFFFFFFFFFF  
FFFFFFFFFFFFFFFFFFFFFFF:FFFFFFFFFFFFFFFFFFFFFFFFFFFFFFFFFFFFF  
FFF  
@A00721:190:HGJW7DSXY:4:1642:27850:36761\_2:N:0:TCTGCAAG+GCTGCACT  
CAGGGGTTTTTCGAATAGTGATAGCCACCCGCTTACAGAGGGGCAGCAGCATGACCATAATTGGTATT  
GACTTTGGTACCACCTTTTCTACTGTCTGTCTCGCCTCTTCGAATGAA  
+  
FFFFFFFFFF:FFF:F:FFFFFFFFFFFFFFFFFFFFFFFFFFFFF:FFFFFFFFFFFFFFFFFFFFF  
FFFFFFFFFFFFFFFFFFFFF,FFFFFFFFFFFFFFFFFFFFF,FFFFF::FF  
@A00721:190:HGJW7DSXY:4:2205:23276:18098\_1:N:0:TCTGCAAG+GCTGCACT  
AATCATTGGTTTTTCTAATAATGATGACACTATTGTTTATGGATATGATGCTATTACTCATGATGGTT  
ACGGTCAGGGAGGATTCTCAGTTTACAAGGACCTTAAGCGATGGATCGGGGTTAATTCTAAAACATTA  
CCC  
+  
FFFFFFFFFFFFFFFFFFFFF,FFFFFFFFFFFFF:FF:FFFFFFFFFFFFFFFFFFFFF:FFFFFFFF



FFFFFFFFFFFFFFFFFFFFFFFFFFFFFFFFFFFFFFFFFFFFFFFFFFFFFFFFFFFFFFFFFFFFFFFF  
FFF

@A00721:190:HGJW7DSXY:4:2243:14931:25003\_1:N:0:TCTGCAAG+GCTGCACT  
AGCGCATCTCGTGTGAGCCTCGACCCGATTATATGGTATTAACCTATAAAGGTGAGGAGACCATTTT  
CTTGCTGAAATTTATAGAAGATTATTTTGACAGAATCAATAAGAATCATCGATTCTCGATTCTGATAGAG  
CTT

+  
FFFFFFFFFFFFFFFFFFFFFFFFFFFFFFFFFFFFFFFFFFFFFFFFFFFFFFFFFFFFFFFFFFFFFFFF  
FFFFFFFFFFFFFFFFFFFFFFFFFFFFFFFFFFFFFFFFFFFFFFFFFFFFFFFFFFFFFFFFFFFFFFFF:FFFFFF  
FFF

@A00721:190:HGJW7DSXY:4:1364:4779:29121\_1:N:0:TCTGCAAG+GCTGCACT  
TCCAGTCAACACTAGTTCGAGTGCTGCTTTGGATTACGATGACGTGAGAATAGGTGAAGGGATAGTTT  
TTACCTCGACCAACATTAAGGCGGCGGCGACTAATCTTAAAGCTTCACCCAAAATGAAGGACACTTCG  
AAA

+  
F:FFFFFFFF:FFFFFFFFFFFFFFFFFFFFFFFFFFFFFFFFFFFFFFFF:F:FFFFFF,FFFFFFFFFFFFFFFF:F  
FFF:FFFFFFFF:FFF:FFFFFFFFFFFFFFFFFFFFFFFF:FFFFFFFFFFFFFFFF,FFFFFFFFFFFFFFFF:  
FFF

@A00721:190:HGJW7DSXY:4:2477:6198:8155\_2:N:0:TCTGCAAG+GCTGCACT  
ACATTTACCACCAAATCTTTTGATACAACCTAGCCTTCAAGTGGGGTATGCCTGCGGAATACGCTT  
GCTATTCACCAGATTGGTTCGAACCCGTTGATGCTATGTCAGAAGAAG

+  
FFFFFFFFFFFFFFFFFFFFFFFFFFFFFFFFFFFFFFFFFFFFFFFF,FFFFFFFFFFFFFFFFFFFFFFFF  
FFFFFFFFFFFFFFFF,FFFFFFFFFFFFFFFF,FF::FFFFFFFFFFFF,FF

@A00721:190:HGJW7DSXY:4:2472:12373:34820\_2:N:0:TCTGCAAG+GCTGCACT  
CAGAGGCTGTCAAACAAGCCCAGACTCAAGGAGTCCAATCAAAGGTTTTGAATTTAGCTCAACTGGGG  
AGACGTGCTTAAATGGGTGATAAAAATTATTTAGAGATCTTTTCTACT

+  
FFFFFFFFFFFFFFFFFFFFFFFFFFFFFFFFFFFFFFFFFFFFFFFFFFFFFFFFFFFFFFFFFFFFFFFF:FFFFFFFFFFFF  
FFFFFFFFFFFFFFFFFFFFFFFFFFFFFFFFFFFFFFFFFFFFFFFF:FFFFFF:FFFFFF

@A00721:190:HGJW7DSXY:4:2503:7193:4648\_2:N:0:TCTGCAAG+GCTGCACT  
ATATAAAAATAAGGGAGTCATAACTTTTGTTACCAAATCTTGTCTTTCAACGAAGTCTCTGATTTTA  
TTAATCATTACTTTAACGATCTCTCGGTCATTTACTCTGTACTTGATC

+  
FFFFFFFFFFFF::F:F,FFFFFFFF,F::FFF,FF:FFFFFF,:FFF:FF::FF:F:FF:FFFF:FF  
,FFFFFFFFFFFF,FFF,FF:FFF,F:FFFF:FF:F:F:FFFFFFFF,

@A00721:190:HGJW7DSXY:4:2630:25599:36558\_2:N:0:TCTGCAAG+GCTGCACT  
TAATAGATTAATAAAGGATGAGTACGAAAACCAACTCTTCGTTACGAGACCTGATGGTAGAATAGATT  
TAGTCTCTACCCCATCTCAACGAGGATAAAGCGAGTTTTCCGTCCTG

+  
FFF:FFFFFFFFFFFFFFFFFFFFFFFFFFFFFFFFFFFFFFFFFFFFFFFFFFFFFFFFFFFFFFFF,FFFFFFF  
FFFFFFFF:FFFFFFFFFFFF:FFFFFFFFFFFFFFFFFFFFFFFFFFFFFFFF

@A00721:190:HGJW7DSXY:4:1508:30915:5650\_1:N:0:TCTGCAAG+GCTGCACT  
CCCCAAACGACTCGAAACCGAGACGCCGTAGATCAAAGTCCCTTCTAACTTTAGATTATGAATCCTGC  
CTTTACTCATTTTATA

+  
F:, ,F,FFFF:FFFF:FFFFFFFFFFFFFFFFFFFFFFFF:FFFFFFFFFFFFFFFFFFFFFFFFFFFFFFFF  
FFFFFFFFFFFFFFFF

@A00721:190:HGJW7DSXY:4:1652:10285:33144\_2:N:0:TCTGCAAG+GCTGCACT  
TCAAATGAGGTCAAAGCTCTATTTATTAACGAACCTATTATCCGATTCTTCGAGGGTATCACTACCAC  
TGATCTGCCGACTTTAGTCAAGGAACCTCAATTCCTTCGATGTTTATA

+  
FFFFFFFFFFFFFFFFFFFFFFFFFFFFFFFFFFFFFFFFFFFFFFFFFFFFFFFFFFFFFFFFFFFFFFFF  
FFFFFFFFFFFFFFFFFFFFFFFFFFFFFFFFFFFFFFFFFFFFFFFFFFFFFFFF



@A00721:190:HGJW7DSXY:4:1570:6795:13917\_1:N:0:TCTGCAAG+GCTGCACT  
CAAAGAGGCCGCTGCTACGAAGTCGCTGAAGGCGGCTTGGGTCATTAAGGGTAGCTGTAAAGTTGCGC  
CTGCCGACCCCATCTTTGAGACCAAGACTCTCTACAGTAGGTTCTGTCCTACTATGAGCAAATCTGTT  
GAA

@A00721:190:HGJW7DSXY:4:2330:30734:11162\_2:N:0:TCTGCAAG+GCTGCACT  
CGAAGGTGAGAGGACTTTTGGCTACTGGCGACAACTGAGAGCAGTCGCTGGGGAAGAGAATTGCGT  
GGGTTGAAGGCCGACGCTTCGAGCTTGAGAGATCGGAAGAGCGTCGTG

@A00721:190:HGJW7DSXY:4:1214:4001:14967\_2:N:0:TCTGCAAG+GCTGCACT  
TAACTATGGGGCGAAGATCCCCTATGGAGTCTTGAAGGACTTAGGTTGGCATATTTATGCCGACGATA  
ATAAGCATGTCACCCTTAAGCACCAGGTAAGCTCGGGACTTACAAGA

@A00721:190:HGJW7DSXY:4:2556:16649:5055\_2:N:0:TCTGCAAG+GCTGCACT  
ATTTTTCCTTTCCTCCGTCATTGGGGATTTCGATGTGAGAAGGTGGAAGGTGTCAAGGGTCTTCTTCA  
TGCTGATCTTTCAGGACCTAATCACATCATGATTGATAGTTACGGAGA

@A00721:190:HGJW7DSXY:4:1415:18593:29966\_1:N:0:TCTGCAAG+GCTGCACT  
GAGTTCAGACGTGTGCTCTTCCGATCTCTTCGTCAGAAGATGAGGAAGTCTAAGAGGAGGAGTTTGAG  
GAAGGCTCTAGAGAAGATCTCACCACCTGGAGAAGGCAAGTGGAGAGTCCAGAAGTTGATGAAGAAGG  
ATT

@A00721:190:HGJW7DSXY:4:2601:25834:9251\_2:N:0:TCTGCAAG+GCTGCACT  
AAGGTGGATGAGGGAGGTTGTTTCTTTGGAGTTTTAGATAATCTTTTGAGAAGGGGTCATAGAGCCAG  
CAAGAGAAGCTTATATGCTGGTTTAAGTGATGATTATCACTCCTTGAG

@A00721:190:HGJW7DSXY:4:1161:3983:5008\_1:N:0:TCTGCAAG+GCTGCACT  
TATTGTTCTTCCGGAAGTTGTGGGATTTAACTTTGACTCAACTACTCCGATCAGATCCGGATGGTT  
TGATTGGTATGGACTACTCGACTTTTGATCTGGAGTTGTCTAGGGTCATGGCAGATACTACCGATAAG  
GTG

@A00721:190:HGJW7DSXY:4:2421:27624:35775\_2:N:0:TCTGCAAG+GCTGCACT  
AAGAGTCTTTATGATTCAAAACCTATCGTTGTCGTACCTTACAAGTTGAGGAGACTTTACAGCGCT  
TATTGTCGCGCAGTTTCCAGAATTGCGGTTGAAGTTCACCCATTCTAT



FFFF:FFFFFFFFFFFFFFFFFFFFFFFFFFFFFFFFFFFFFFFFFFFFFFFFFFFFFFFFFFFFFFFF:FFFF:FFFFF  
FFFFFFFFFFFFFFFFFFFFFFFFFFFFFFFFFFFFFFFFFFFFFFFFFFFFFFFFFFFFFFFF  
@A00721:190:HGJW7DSXY:4:1664:24044:35055\_2:N:0:TCTGCAAG+GCTGCACT  
TGTGAAAGATGCATCGAGGTATACGTCTAGGAACATTGATTGGGAACGTACCTACTCACGAGACGTCA  
TGAAGCTATCGGAGGGAAGCAAATGTTTCGTTCTGTTACAAGAACG  
+  
FFFFFFFFFFFFFFFFFFFFFFFF:FFFFFFFFFFFF:FF:FFFFFFFF:FFFFFFFFFFFFFFFF:FFFFF  
FFFFFFFF:FFFFFFFF:FFFFFFFF:FFFFFFFFFFFFFFFFFFFFFFFF  
@A00721:190:HGJW7DSXY:4:1107:27163:21386\_1:N:0:TCTGCAAG+GCTGCACT  
CATTTTCGTCTTAGTTTGTCCCGGCGAATTATTGGACACGATGAAAAATGACATACCCGTTCTGACCT  
TGGTATCGTTATCCGTCATGGAGATGATGGCGCATCACTTGATTACTATATGCCCGAAGGATTGGGTT  
ATT  
+  
FFFFFFFFFFFFFFFFFFFFFFFFFFFFFFFFFFFFFFFFFFFFFFFFFFFFFFFFFFFFFFFF,FFFF:FFFFFFFF  
FFFFFFFFFFFFFFFFFFFFFFFFFFFFFFFFFFFFFFFFFFFFFFFFFFFFFFFFFFFFFFFFFFFFFFFF  
FFF  
@A00721:190:HGJW7DSXY:4:2516:24822:6684\_2:N:0:TCTGCAAG+GCTGCACT  
ACAAAACCTTCGAATATGTTACGACATGGCTTCGTAACAACAGTGCAGGATTGTCATCTCGGGGAAA  
GTGATTCACCAAGATGTTTCATATAGATACGAGATACCTAGAGAAGGTC  
+  
FFFFFFFFFFFFFFFFFFFFFFFFFFFFFFFFFFFFFFFFFFFFFFFFFFFFFFFFFFFFFFFFFFFF  
FFFF,FFFFFFFFFFFFFFFFFFFFFFFFFFFFFFFFFFFFFFFFFFFFFFFFFFFFFFFF  
@A00721:190:HGJW7DSXY:4:2372:8865:2942\_2:N:0:TCTGCAAG+GCTGCACT  
ATCGGAGCTAAGAAGAAGACTTTGGGTACACGTTATGCTCGAACTTAACGTTAGTACCGGAGGTGA  
TCTCTCTGCTTCTGCGTTACTGAGAGAAAAGATTGAGGACGCCTACGG  
+  
FFFFFFFFFFFFFFFFFFFFFFFF:FFFFFFFFFFFFFFFFFFFFFFFFFFFFFFFFFFFFFFFFFFFF  
FFFFFFFFFFFFFFFFFFFFFFFFFFFFFFFFFFFFFFFFFFFFFFFFFFFFFFFFFFFFFFFF  
@A00721:190:HGJW7DSXY:4:1604:15402:6715\_2:N:0:TCTGCAAG+GCTGCACT  
GTCAAGAAGTCGCTCGGCGTTGTTCTTGAAAACCAAGTTAAGAAGGAGGCTGATCATGGAGTCTTTGT  
ACCTTCTGTCAAACCTTCGAGGTTGAGCTACGAGAGGTGATCCCGGATG  
+  
FFFFF:FFFFFFFFFFFFFFFFFFFFFFFFFFFFFFFFFFFFFFFFFFFFFFFFFFFFFFFFFFFFFFFF:FFFFFFFFFFFFFFFF  
FFFFFFFFFFFFFFFFFFFFFFFFFFFFFFFFFFFFFFFFFFFFFFFFFFFFFFFFFFFFFFFF:FFFF:F  
@A00721:190:HGJW7DSXY:4:1236:26992:36902\_1:N:0:TCTGCAAG+GCTGCACT  
TGGGTTGAGAAGTGTGCTTTACAAGGAGTTAGACTCTTCTCAAGTTTTTAGATCTTCTTGATAATCT  
TAAAGAAAAATTTTCGAATAAACTAATGAGAGGTATAGGCTTAGTCAAGTCTGTACTTACATTCTTTA  
CGC  
+  
F,FFFF:F,FFFFFFFFFFFFFFFFFFFFFFFFFFFFFFFFFFFFFFFFFFFFFFFF:FF:FFFFFFFF:FFFFFFFFFFFF  
FFFFFFFFFFFFFFFFFFFFFFFFFFFFFFFFFFFFFFFFFFFFFFFFFFFFFFFFFFFFFFFF:FFFF  
FFF  
@A00721:190:HGJW7DSXY:4:2570:16260:28651\_1:N:0:TCTGCAAG+GCTGCACT  
TCTGTTGGTAGAGGAGTTGAGAGAATTACTCAGATTCAATCTGGCATCACTGAACGTCTACAACGAGT  
TAGGGAGTGGCTAGGTTTTAAAAGATCCTTGCACAAGCAATACCTTCCACTGAGTTCATTACCCAGA  
GTT  
+  
:FFFFFFFFFFFFFFFFFFFFFFFF:FFFFFFFFFFFFFFFFFFFFFFFFFFFFFFFFFFFFFFFFFFFF  
FFFFFFFFFFFFFFFFFFFFFFFFFFFFFFFFFFFFFFFFFFFFFFFFFFFFFFFFFFFFFFFFFFFFFFFF  
FFF  
@A00721:190:HGJW7DSXY:4:1643:21197:8923\_2:N:0:TCTGCAAG+GCTGCACT  
TTCTTTTACCTTTTGGAGGTCCAGGAACCTTTACTCCTAGTGTCTTTTCTAGAGTCCAAGGACGTTTC  
CGTCGGAGGATGACAGGTGGGAGACCGCTCAATAACACTCTATTGAAT  
+

@A00721:190:HGJW7DSXY:4:1378:12472:14387\_1:N:0:TCTGCAAG+GCTGCACT  
TCTGCCACTTCTAATTTTAGGAAACGTCGCGAAAAGAAAGTTCATGAGGATGTCTTGGTCGAAAAATA  
TCGCCGGGAAC TTCTAATAGAGGATCCTGATGACATTATTTCAACGGATACCGATCTCAGTTCTACCA  
CAG

@A00721:190:HGJW7DSXY:4:1650:31991:23422\_1:N:0:TCTGCAAG+GCTGCACT  
AACTGTCTCCACTGATTCGGAATTAGAGAAAGACGACCTTCTTGTGGGGACTGAGACCTCTGAATTTT  
CAGGGTGCCCTGATGAGGACGTTGAAAGGGATAATTTCAACTCTGAGACTTCTAAGAGTGTTTCAAAA  
GAC

@A00721:190:HGJW7DSXY:4:1125:14968:22028\_1:N:0:TCTGCAAG+GCTGCACT  
TGAGTGATCGTATTAGAACAGCTGATTCTTATTGCATGAACGTCGCTGAGGTCAAACCTGTGGACGTT  
CTTTTCATCGACGAATTATTCATGATTCACGCTGGTCAGACCCTTTTTCTTACACATCTACTTAAGGC  
GGC

@A00721:190:HGJW7DSXY:4:1565:21712:23030\_1:N:0:TCTGCAAG+GCTGCACT  
AATCGTATTGATCTCCAAGTCGCAAACTACTTCAACATCAACGACATCATTCTTGATGAGTGTCGTTCT  
TTATCGAAGTCTCAGTTATCGCTGCCCCGCCGACGTTTGTGCGCAACTCTCAGAGGTTTACGGCAGAA  
AAA

@A00721:190:HGJW7DSXY:4:1660:29758:15922\_1:N:0:TCTGCAAG+GCTGCACT  
AACCCCTTATATCGAGGCTATCGAGGACGATGAGTATCTTGAAGTTGTTGACGACAAGCCTCAAGAGG  
GTAGAGGACCACCTGGATCTTCTACTGTCTCTGCCTTCCAAGATTTCTTAGAAGAGGTTATTCTCTGGA  
ACC

@A00721:190:HGJW7DSXY:4:1120:14760:1501\_1:N:0:TCTGCAAG+GCTGCACT  
TATAGGTAAGAAGCCCCTTGAGCCGCGTAGTCAGCGCGTTTAGCTGTATCATCAGTCAGAGTATACCC  
GATAGGGTACCGAGTCTCCAAGAGAATATTTATTCTTATGAGGCTCGAAACTTCAACGTTTTACAAC  
GGA

@A00721:190:HGJW7DSXY:4:2650:32551:1783\_1:N:0:TCTGCAAG+GCTGCACT  
CACTTTGATGATTTTATCACTTTATTATGACCTTGGAAAGTTTTCGGCTGTGGTTGTCGCTGGGGACG  
ATTCCATTCTGTTTTCAAAGACTCCAATACTGATCATTCTGATCATATGATTTTGGACAATGGTTTC  
GAA

+  
FFFFFFFF:FFFFFFFF:F:FFFFFFFFFFFFFFFFFFFFFFFFFFFFFFFF  
FFFFFFFFFFFFFFFFFFFFFFFFFFFFFFFFFFFFFFFFFFFFFFFF  
FFF  
@A00721:190:HGJW7DSXY:4:1503:12943:31829\_2:N:0:TCTGCAAG+GCTGCACT  
TCCGAGAGGTTTATCCTGATGTGGAGGGAGTTCTTGAAGCATCCCGACCTTTCCTTGTGAAAATTTTG  
ATGCGGTTTCATAAGATTATCAGTAATCCTGATTCTACTACGGATTCA  
+  
FFFFFFFFFFFFFFFFFFFFFFFFFFFFFFFFFFFFFFFFFFFFFFFF  
FFFFFFFFFFFFFF:FFFFFFFFFFFFFFFFFFFFFFFF  
@A00721:190:HGJW7DSXY:4:1403:11586:2018\_1:N:0:TCTGCAAG+GCTGCACT  
GATTAAGACTCTTCCGAAAGGCGAACTTTGGGAATTTGAAGCTCAGGGTGAAGCACAACTTTGACCG  
TGACGAACTGTGGTGTCTTGATCTACGTTACGGATATACTCTCCTTGAGTTCACCTCGTAAGGACACT  
ACC  
+  
FFFFFFFFFFFFFFFFFFFFFFFF:FFFFFFFFFFFFFFFFFFFFFFFF  
FFFFFFFFFFFFFFFFFFFFFFFFFFFFFFFFFFFFFFFFFFFFFFFF  
FFF  
@A00721:190:HGJW7DSXY:4:1674:26964:13557\_2:N:0:TCTGCAAG+GCTGCACT  
CAGGGGTTTTCGAATAGTGATAGCCACCCGCTTACAGAGGGGCAGCAGCATGACCATAATTGGTATT  
GACTTTGGTACCACCTTTTCTACTGTCTGTCTCGCCTCTTCGAATGAA  
+  
FFFFFFFFFFFFFFFFFFFFFFFFFFFFFFFFFFFFFFFFFFFFFFFF  
FFFFFFFFFFFFFFFFFFFFFFFFFFFFFFFF:FFFFFFFF:FF  
@A00721:190:HGJW7DSXY:4:2320:26323:21778\_1:N:0:TCTGCAAG+GCTGCACT  
AATCATTGGTTTTCTAATAATGATGACACTATTGTTTATGGATATGATGCTATTACTCATGATGGTT  
ACGGTCAGGGAGGATTCTCAGTTTACAAGGACCTTAAGCGATGGATCGGGGTTAATTCTAAACATTA  
CCC  
+  
FFFFFFFFFFFFFFFF:FFFFFFFFFFFFFFFFFFFFFFFFFFFFFFFF  
FFFFFFFFFFFFFFFFFFFFFFFFFFFFFFFFFFFFFFFFFFFFFFFF  
FFF  
@A00721:190:HGJW7DSXY:4:2142:24388:30013\_2:N:0:TCTGCAAG+GCTGCACT  
CAGTACCCAGTCAGTATACCTCTACGCAAAGATATTTTCATGAAAACCTACAGAGGAACGTACCGGATTA  
CCTGTCTTTCATATTATGAATGAACCTTCGGCCGCTCTCTTTGCTTCG  
+  
FFFFFFFFFFFFFFFFFFFFFFFFFFFFFFFF,FFFFFFFFFFFFFFFF  
FFFFFFFFFFFFFFFFFFFFFFFFFFFFFFFFFFFFFFFF  
@A00721:190:HGJW7DSXY:4:2107:1199:31532\_2:N:0:TCTGCAAG+GCTGCACT  
CGTTGATGAAGCTATAAGAGCGTTCTTATTACGGCGCACTTCTTTACCCGCCACCACAACTTTTCAG  
TTTCACAACTGAAGGAGGAGGTTTCTGTTACTGGAAAACCCTCGTCAA  
+  
FFFFFFFFFFFFFF:FFFFFFFFFFFFFFFFFFFFFFFFFFFFFFFF  
FFFFFFFFFFFFFFFFFFFFFFFFFFFFFFFFFFFFFFFF  
@A00721:190:HGJW7DSXY:4:2404:26241:26804\_2:N:0:TCTGCAAG+GCTGCACT  
GCTATTAAAGCTGTTGAGCGGGTAATTACACCTAAACGAGCTCGATCTGCCATCGCTGAAGGATGTGC  
ACTCTTTCTGCTACTTTAACGGAGAGATCGGAAGAGCGTCGTGTAGG  
+  
FFFFFFFFFFFFFFFFFFFFFFFFFFFFFFFFFFFFFFFF  
FFFFFFFFFFFFFFFFFFFFFFFFFFFFFFFFFFFFFFFF  
@A00721:190:HGJW7DSXY:4:2450:28284:26678\_2:N:0:TCTGCAAG+GCTGCACT  
TAAAAAGAAGATAGAGAGTCATACTTTGGGCTATCGTTCAGGTGCATGGGGTTGGATAGCCAATATTG  
AAGTGGACACCTCTGGTAGTATCGAAGTAAAGATAACCAATAAGGAAG  
+

FFFFF,: ,FFFFFFFFFFFFFFFFFFFFFFFFFFFFFFFFFFFFFFFFFFFFFFFFFFFFFFFFFFFFFFFF:F:FFFFF  
::FFFFFFFFF:FFFFF::FFFFFFFFFFFFF::FFFFFFFFFF,FFFFF

@A00721:190:HGJW7DSXY:4:2101:10628:29450\_1:N:0:TCTGCAAG+GCTGCACT  
ATCTTACCACTATCTACGAACCTAAAGTTCTGAAGACGTTGCTTGTCTGCTTCCTCTTTAATGGCACT  
ACCTCGGTACAATCTTACTTGGAACGAAGGCGACCTGTTCCGGAGTTTTTACGGGATCCGGAATGTTCTG

+

F,:F:F:,FFFFFF,FFF,F:F:F,:F,FF,FFFFFFFFFFFFFFFFFFFFFFFFFFFFFFFF:FFFFFFFFFF:FF,FF,:F,,  
F:FF,F,FFFF::,FFFFFFFF,F:FFFFFF,::,,:FFFF,FFFF,FFFFFFF,,FFFF:,F:FF:FFFF  
FF

@A00721:190:HGJW7DSXY:4:2314:1895:23375\_2:N:0:TCTGCAAG+GCTGCACT  
ATAAAGAATCTTTACCAGGACTCCTACTACAGGAGGCAGTCTTCTGATCGTAAGAAGTTTATAAGGAA  
CATATCCATTTGTTGTAATAGGTCATCAACTTAGAACTCGAACTCT

+

FFFFFFFFFFFFFFFFFFFFFFFFFFFFFFFFFFFFFFFFFFFFFFFFFFFFFFFFFFFFFFFF:FFFF:FFFFFFFFFFFFFFFFFFFFFFFF:FFFFFFFFFFFFFFF  
FFFFFFFFFFFFFFF,FFFFF,FFFFFFFFFFFFFFFFFFFFFFFFFFFFFFFFFFFFFFFF

@A00721:190:HGJW7DSXY:4:2442:24162:15186\_1:N:0:TCTGCAAG+GCTGCACT  
CTCTTCGATAGGGGACATTTTATCGTGGGCTTCCGTAAAGGAAGATCTGTTATCGACGGTTTATCGT  
TTACGAAGTATCACTCCACCGGTGAATGGTTTAAGAATACTATAAATAGAATAGCTATTACTACTAAT  
GGC

+

FFFFFFFFFFFFFFFFFFFFFFFFFFFFFFFFFFFFFFFFFFFFFFFFFFFFFFFFFFFFFFFFFFFFFFFFFFFFFFFFFFFFFFFFFFFFFFFFFFFFFFFF  
FFFFFFFFFFFFFFFFFFFFFFFFFFFFFFFFFFFFFFFFFFFFFFFFFFFFFFFFFFFFFFFFFFFFFFFF:FFFFFFFFFFFFFFF  
FFF

@A00721:190:HGJW7DSXY:4:2670:8006:32643\_1:N:0:TCTGCAAG+GCTGCACT  
TTACTTAGACTTTCCTACGATACAAATGATAACTTCTAATTTACGTTTGCTACTCAGAGCTGGTCCTC  
TCAGCAAAGGGATGCATGGTGTATCTCCTCAGGAGTCCCGGCATTTGATAATAATGACGAGACTTTC  
GTC

+

FFFFFFFFFFFFFFFFFFFFFFFFFFFFFFFFFFFFFFFFFFFFFFFFFFFFFFFFFFFFFFFFFFFFFFFFFFFFFFFFFFFFFFFFFFFFFFFFFFFFFFFF  
FFFFFFFFFFFFFFFFFFFFFFFFFFFFFFFFFFFFFFFFFFFFFFFFFFFFFFFFFFFFFFFFFFFFFFFFFFFFFFFFFFFFFFFFFFFFFFFFFFFFFFFF  
FFF

@A00721:190:HGJW7DSXY:4:2257:9833:10066\_1:N:0:TCTGCAAG+GCTGCACT  
AGCGCATCTCGTGTGAGCCTCGACCCGATTATATGGTATTAACCTATAAAGGTGAGGAGACCATTTT  
CTTGCTGAAATTTATAGAAGATTATTTTGACAGAATCAATAAGAATCATCGATTCTCGATTCTGATAGAG  
CTT

+

FFFFFFFFFFFFFFFFFFFFFFFFFFFFFFFFFFFFFFFFFFFFFFFFFFFFFFFFFFFFFFFFFFFFFFFFFFFFFFFFFFFFFFFFFFFFFFFFFFFFFFFF  
FFFFFFFFFFFFFFFFFFFFFFFFFFFFFFFFFFFFFFFFFFFFFFFFFFFFFFFFFFFFFFFFFFFFFFFFFFFFFFFFFFFFFFFFFFFFFFFFFFFFFFFF  
FFF

@A00721:190:HGJW7DSXY:4:1409:6677:31469\_1:N:0:TCTGCAAG+GCTGCACT  
TCCAGTCAACACTAGTTCGAGTGCTGCTTTGGATTACGATGACGTGAGAATAGGTGAAGGGATAGTTT  
TTACCTCGACCAACATTAAGGCGGCGGCGACTAATCTTAAAGCTTCACCCAAAATGAAGGACACTTCG  
AAA

+

FFFFFF:FFFFFFFFFFFFFFFFFFFFFFFFFFFFFFFFFFFFFFFFFFFFFFFFFFFFFFFFFFFFFFFF:FFFFFFFFFFFFFFFF:FFFF  
F:FFFFFFFFFFFFFFFFFFFFFFFFFFFFFFFFFFFFFFFFFFFFFFFFFFFFFFFFFFFFFFFFFFFFFFFFFFFFFFFF,FFF  
FFF

@A00721:190:HGJW7DSXY:4:2550:10809:1141\_2:N:0:TCTGCAAG+GCTGCACT  
ACATTTACCACCAAATCTTTTGATACAACCTCTAGCCTTCAAGTGGGGTATGCCTGCGGAATACGCTT  
GCTATTCACCAGATTGGTTCGAACCCGTTGATGCTATGTCAGAAGAAG

+

FFFFFFFFFFFFFFFFFFFFFFFFFFFFFFFFFFFFFFFFFFFFFFFFFFFFFFFFFFFFFFFFFFFFFFFFFFFFFFFFFFFFFFFFFFFFFFFFFFFFFFFF  
FFFFFFFFFFFFFFFF:FFFFFFFFFFFFFFFFFFFFFFFF, ,FFFFFFFFFFFFFFF

$+$ 

@A00721:190:HGJW7DSXY:4:1121:24831:11365\_1:N:0:TCTGCAAG+GCTGCACT  
TTTTGTTACCAAATTCTTGGCTTTCAACGAAGTCTCTGATTTTATTAATCATTACTTTAACGATCTCT  
CGGTCATTTACTCTGTACTTGATCTACGTCGTTTAACTGTCGGAACAACCTTTACTTAGAATGACTCT  
AT

+

@A00721:190:HGJW7DSXY:4:2644:22363:9251\_2:N:0:TCTGCAAG+GCTGCACT  
TAATAGATTAATAAAGGATGAGTACGAAAACCACTCTTCGTTACGAGACCTGATGGTAGAATAGATT  
TAGTCTCTACCCCATCTCAACGAGGATAAAGCGAGTTTTCCGTCCTG

 $+$ 

@A00721:190:HGJW7DSXY:4:1228:17400:25332\_2:N:0:TCTGCAAG+GCTGCACT  
CCGCAACGACTCGAAACGAGACGCCGTAGATCAAAGTCCCTTCTAACTTTAGATTATGAATCCTGC  
CTTTACTCATTTTATAGCAGTTATTTATGTTGTACTTTTTTATAATTTA

+

@A00721:190:HGJW7DSXY:4:2262:1922:12587\_2:N:0:TCTGCAAG+GCTGCACT  
TCAAATGAGGTCAAAGCTCTATTTATTAACGAACATTATCCGATTCTTCGAGGGTATCACTACCAC  
TGATCTGCCGACTTTAGTCAAGGAACCTTCAATTCCTTCGATGTTTATA

+

@A00721:190:HGJW7DSXY:4:2167:30924:4038\_1:N:0:TCTGCAAG+GCTGCACT  
GACAAATTTTAGAACTTTATTTTCTGAACTCTCTCCGATCACCTTGGTGTGATCTCCCGGAGGATCTTT  
TCAATAAGATGTATGATGATAATCTACTATTTTTAAATAGTGATATTCAGCGTATACTTGAATACTTT  
ATC

+

@A00721:190:HGJW7DSXY:4:1625:10746:34475\_2:N:0:TCTGCAAG+GCTGCACT  
ACCGCAAAAAGTTGGAAGAGGTCTATGATATTTATTTTACTTATACTTTAAATAGCACCGATTATAAC  
TTGACTGTTGATAATATTACAATAGCTCTTTCTCAGAAGATTAGAGAA

 $+$ 

@A00721:190:HGJW7DSXY:4:1553:1723:30091\_2:N:0:TCTGCAAG+GCTGCACT  
TAGCATTGATTACTTTTACCGTTAGAACTGAAAAAGATTCTTTTCGAAAAGAAACCTATAAGTTACA  
AACGATTCTTCGACTATATTAAAGAAATAAAAATACTTCAAGTACCTG

+

@A00721:190:HGJW7DSXY:4:2132:8368:29262\_2:N:0:TCTGCAAG+GCTGCACT  
TTTTAATGGTATGGTATAATGTGTCTTACAAATAGAACCTTCACTCTCGGTAATGAGAGTGTATTCTT

+

@A00721:190:HGJW7DSXY:4:2509:24749:11412\_1:N:0:TCTGCAAG+GCTGCACT  
TAATTC AATAGCTTTAGTATTATTTACTATCGCCTTTATTGAAAATTGTATAAGAGTTAATTGCTTAC  
ACAAAAGTGACGCGCGAAGGAATCTTAATTGATTGAAGCTAGGCGTTGGGAGAATGAACTGCCGCTT  
CCC

+

@A00721:190:HGJW7DSXY:4:2405:14552:17801\_2:N:0:TCTGCAAG+GCTGCACT  
GCCGGTCGGCAGATCGGCACCACTGGTCTCTACGTTCAAGGACCCGCTGTGCAGAATAACCTTCCCA  
ATCTAGATCTGCACAGAAGAAGGCTGAAGGTCGTTACCGGACGACCAC

+

@A00721:190:HGJW7DSXY:4:2658:15609:18818\_2:N:0:TCTGCAAG+GCTGCACT  
CAGTACCTCAGTCAAAAGTCACATTCACCACTCCCATACCAATCAATGATGTGACTATACAGTTCGGC  
CATTTCAAGAGTGGTCAATACGTCGTGGGAGGTACTGAAGCCTTCCCC

+

@A00721:190:HGJW7DSXY:4:2132:28040:16517\_1:N:0:TCTGCAAG+GCTGCACT  
AATAGTTCTTCTGACCAGAAATGAAAAGGGGTTTACCAGGGTAGTCTCTAAGTCTACCAGGAAGAGGGG  
AAATGTCCCCAAACTGAGAAGAATAAAGGGAAAGGTCCATCAGGACCTAAGAAGGGGAAATTACCCC  
TAA

 $+$ 

@A00721:190:HGJW7DSXY:4:1666:13241:18662\_1:N:0:TCTGCAAG+GCTGCACT  
CAAAGAGGCCGCTGCTACGAAGTCGCTGAAGGCGGCTTGCGTCATTAAGGGTAGCTGTAAAGTTGCGC  
CTGCCGACCCCATCTTTGAGACCAAGACTCTCTACAGTAGGTTCTGTCCTACTATGAGCAAATCTGTT  
GAA

+

@A00721:190:HGJW7DSXY:4:2521:19958:28228\_2:N:0:TCTGCAAG+GCTGCACT  
CGAAGGTGAGAGGACTTTTGGCTACTGGCGACAACTGAGAGCAGTCGCTGGGGAAAGAGAATTGCGT  
GGGTTGAAGGCCGACGCTTCGAGCTTGAGAGATCGGAAGAGCGTCGTG

+

@A00721:190:HGJW7DSXY:4:1410:2953:11898\_2:N:0:TCTGCAAG+GCTGCACT  
TAACTATGGGGCGAAGATCCCCTATGGAGTCTTGAAGGACTTAGGTTGGCATATTTATGCCGACGATA  
ATAAGCATGTCAACCCTTAAGCACCGAGGTAAGCTCGGGACTTACAAGA

+

@A00721:190:HGJW7DSXY:4:2639:10990:27571\_2:N:0:TCTGCAAG+GCTGCACT  
ATTTTTCCTTTCCTCCGTCATTGGGGATTTCGATGTGAGAAGGTGGAAGGTGTCAAGGGTCTTCTTCA

TGCTGATCTTTCAGGACCTAATAACATCAGGATTGATAGTTACGGAGA

+

F:FF,:FFFFFF,FFFFFFFFFFFFFFFF,F,F,:FFF,FFFF,FFFFFFFF:FFFFFFFFF  
FFFFFFFFFFFFFFFFFFFF,,FFF,FF,,F,FFFFFF:FFF,FFF

@A00721:190:HGJW7DSXY:4:2123:15799:5744\_1:N:0:TCTGCAAG+GCTGCACT  
GAGTTCAGACGTGTGCTCTTCCGATCTCTTCGTCAGAAGATGAGGAAGTCTAAGAGGAGGAGTTTGAG  
GAAGGCTCTAGAGAAGATCTCACCACCTGGAGAAGGCAAGTGGAGAGTCCAGAAGTTGATGAAGAAGG  
ATT

+

FFFFFFFF,FFFFFFFFFFFFFFFFFFFFFFFFFFFFFFFFFFFFFFFFFFFFFFFF:FFFFFFFF:FFFF  
FFFFFFFFFFFFFFFFFFFF,FFFFFFFFFFFFFFFFFFFFFFFFFFFFFFFFFFFFFFFFFFFFFFFF  
FFF

@A00721:190:HGJW7DSXY:4:1209:4327:12524\_1:N:0:TCTGCAAG+GCTGCACT  
AGGTGGATGAGGGAGGTTGTTTCTTTGGAGTTTTAGATAATCTTTGAGAAGGGGTCATAGAGCCAGC  
AAGAGAAGCTTATATGCTGGTTTAAGTGATGATTATCACTCCTTGAGAAGACAAGCCACATTAAGATA  
TAA

+

FFFFFFFFFF:FF::FFF,FFFFFFFF:FFFFFFFF:FFFF,FFFFFFFFFFFFFFFF:FFFFFFFFFFFF  
FFFFFFFFFFFFFFFFFFFF:FFFFFFFFFFFFFFFFFFFFFFFF:FFFFFFFF:FFFFFFFFFFFFFFFF  
FFF

@A00721:190:HGJW7DSXY:4:1319:18304:15436\_1:N:0:TCTGCAAG+GCTGCACT  
TATTGTTCTTCCGGGAAGTTGTGGGATTTAACTTTGACTCAACTACTCCGATCAGATCCGGATGGTT  
TGATTGGTATGGACTACTCGACTTTTGATCTGGAGTTGTCTAGGGTCATGGCAGATACTACCGATAAG  
GTG

+

FFFFF,FFFFFFFFFFFFFFFFFFFFFFFFFFFFFFFFFFFFFFFFFFFFFFFFFFFFFFFFFFFFF  
FFFFFFFFFFFFFFFFFFFFFFFFFFFFFFFFFFFFFFFFFFFFFFFFFFFFFFFFFFFFFFFFFFFFF  
FFF

@A00721:190:HGJW7DSXY:4:2623:28411:13777\_2:N:0:TCTGCAAG+GCTGCACT  
AAGAGTCTTTATGATTCAAAACCTATCGTTGTCGTACCTTACAAGTTGAGGAGACTTTACAGCGGCT  
TATTGTCGCGCAGTTTCCAGAATTGCGGTTGAAGTTCACCCATTCTAT

+

FF:FFFFFFFFFFFFFFFFFFFFFFFF,F,FFF:FFFFFFFF,FFF:F,:FFF:FFFFFFFF:F,:FF  
,F,FFFF:F,FFFFFFFFFFFFFFFFFFFFFFFFFFFFFFFF:F:,FFFF

@A00721:190:HGJW7DSXY:4:2262:4987:33708\_2:N:0:TCTGCAAG+GCTGCACT  
TGTGAAAGATGCATCGAGGTATACGTCTAGGAACATTGATTGGGAACGTACCTACTCACGAGACGTCA  
TGAAAGCTATCGGAGGGAAGCAAATGTTTCGTTCTGTTACAAGAACG

+

FFFFFF:FFFFF:FFF:FFFFFFFFFFFF,FFF:FF,:FFF,FFFFFFFFFFFFFFFF:FFF  
FFFFFF,FFFFFFFFFFFF,FFF:F:FFFFFFFFFFFFFFFFFFFF

@A00721:190:HGJW7DSXY:4:1130:27615:9267\_1:N:0:TCTGCAAG+GCTGCACT  
CATTTCTGCTTAGTTTGTCCCGGCGAATTATTGGACACGATGAATAATGACATACCCGTTCTGACCT  
TGGTATCGTTATCCGTCATGGAGATGATGGCGCATCACTTGATTACTATATGCCCCAAGGATTGGGTT  
ATT

+

FFFFFF:F,FFFFFF::,:FFF,FFFFFFFF::FF,FFFF:F,,FFFF,FFF,F::FFFF,F:::,F  
F:FFFF::FF:F,FFFFFF,FFFFFF:FFF:FFF:F:FFFF:FFFF,:F,F::FFFF:FF,FF:F  
FFF

@A00721:190:HGJW7DSXY:4:2644:19470:31610\_2:N:0:TCTGCAAG+GCTGCACT  
ACAAAACCTTCGAATATGTTACGACATGGCTTCGTAACAACAGTGCAGGATTGTCATCTCGGGGAAA  
GTGATTACCAAGATGTTTCATATAGATACGAGATACCTAGAGAAGGTC

+

F:FFFF:FFFFFFFFF::FF:FFFFFF:,FFF:FFFF:FFFFFF:F:F:,FF,:FFF:F:::,FFF  
F,:FF,F:FFFFFFFFFFFFFFFF,F:F:FFFF:,F:FFFFFF,F,

@A00721:190:HGJW7DSXY:4:2374:18340:26115\_2:N:0:TCTGCAAG+GCTGCACT  
ATCGGAGCTAAGAAGAAGACTTTGGGTACACGTTATGCTCGAACTTAACGTTAGTACCGGAGGTGA  
TCTCTCTGCTTCTGCGTTACTGAGAGAAAAGATTGAGGACGCCTACGG

+

FFFFFFFFFFFFFFFFFFFFFFFFFFFFFFFFFFFFFFFFFFFFFFFFFFFFFFFFFFFFFFFFFFFFFFFF  
FFFFFFFFFFFFFFFFFFFFFFFFFFFFFFFFFFFFFFFFFFFFFFFFFFFFFFFFFFFFFFFFFFFFFFFF

@A00721:190:HGJW7DSXY:4:2228:23176:13667\_2:N:0:TCTGCAAG+GCTGCACT  
GTCAAGAAGTCGCTCGGCGTTGTTCTTGAAAACCAAGTTAAGAAGGAGGCTGATCATGGAGTCTTTGT  
ACCTTCTGTCAAACCTTCGAGGTTGAGCTACGAGAGGTGATCCCGGATG

+

FFFFFFFFFFFFFFFFFFFFFFFFFFFFFFFFFFFFFFFFFFFFFFFFFFFFFFFFFFFFFFFFFFFFFFFF  
FFFFFFFFFFFFFFFFFFFFFFFFFFFFFFFFFFFFFFFFFFFFFFFFFFFFFFFFFFFFFFFFFFFFFFFF,F

@A00721:190:HGJW7DSXY:4:1423:27977:35759\_1:N:0:TCTGCAAG+GCTGCACT  
TGGGTTGAGAAGTGTGCTTTACAAGGAGTTAGACTCTTCTTCAAGTTTTTAGATCTTCTTGATAATCT  
TAAAGAAAAATTTTCGAATAAACTAATGAGAGGTATAGGCTTAGTCAAGTCTGTACTTACATTCTTTA  
CGC

+

FFFFFFFFFFFFFF::FF:FFFF:FF,FFFFFFFFFFFF,,FFFFFF:FFFFFFFFFFFF:FFFFFFFF,FFF  
FFFFFFFFFFFFFFFFFFFF:F:F,FF:FFFFFFFFFFFF:FFFFFFFFFFFF::FFF:FFFF:FFFF,FFFFFF  
FFF

@A00721:190:HGJW7DSXY:4:2659:19741:16454\_1:N:0:TCTGCAAG+GCTGCACT  
TCTGTTGGTAGAGGAGTTGAGAGAATTACTCAGATTCAATCTGGCATCACTGAACGTCTACAACGAGT  
TAGGGAGTGGCTAGGTTTTAAAGATCCTTGCACAAGCAATACCTTCCACTGAGTTCATCACCCAGA  
GTT

+

FFFFFFFFFFFFFFFFFFFFFFFFFFFFFFFFFFFFFFFFFFFFFFFFFFFFFFFFFFFFFFFFFFFFFFFF  
FFFFFFFFFFFFFFFFFFFFFFFFFFFFFFFFFFFFFFFFFFFFFFFFFFFFFFFFFFFFFFFFFFFFFFFF  
FFF

@A00721:190:HGJW7DSXY:4:2350:29369:23171\_2:N:0:TCTGCAAG+GCTGCACT  
TTCTTTTACCTTTTGGAGGTCCAGGAACCTTTACTCCTAGTGTCTTTTCTAGAGTCCAAGGACGTTTC  
CGTCGGAGGATGACAGGTGGGAGACCGCTCAATAACACTCTATTGAAT

+

FFFFFFFFFFFFFFFFFFFFFFFFFFFFFFFFFFFFFFFFFFFFFFFFFFFFFFFFFFFFFFFFFFFFFFFF  
FFFFFFFFFFFFFFFFFFFFFFFFFFFFFFFFFFFFFFFFFFFFFFFFFFFFFFFFFFFFFFFFFFFFFFFF

@A00721:190:HGJW7DSXY:4:1417:27154:1266\_1:N:0:TCTGCAAG+GCTGCACT  
TCTGCCACTTCTAATTTTAGGAAACGTCGCGAAAAGAAAGTTCATGAGGATGTCTTGGTCGAAAAATA  
TCGCCGGAACCTTCTAATAGAGGATCCTGATGACATTATTCAACGGATACCGATCTCAGTTCTACCA  
CAG

+

FFFFFFFFFFFFFFFFFFFFFFFFFFFFFFFFFFFFFFFFFFFFFFFFFFFFFFFFFFFFFFFFFFFFFFFF  
FFFFFFFFFFFFFFFFFFFFFFFFFFFFFFFFFFFFFFFFFFFFFFFFFFFFFFFFFFFFFFFFFFFFFFFF  
FFF

@A00721:190:HGJW7DSXY:4:2411:18765:33426\_1:N:0:TCTGCAAG+GCTGCACT  
AACTGTCTCCACTGATTGGAATTAGAGAAAAGACGACCTTCTTGTGGGACTGAGACCTCTGAATTTT  
CAGGGTGCCCTGATGAGGACGTTGAAAGGGATAATTTCAACTCTGAGACTTCTAAAAGTGTTCAAAA  
GAC

+

FFFFFFFFFFFFFFFFFFFFFFFFFFFFFFFFFFFFFFFFFFFFFFFFFFFFFFFFFFFFFFFFFFFFFFFF  
FFFFFFFFFFFFFFFFFFFFFFFFFFFFFFFFFFFFFFFFFFFFFFFFFFFFFFFFFFFFFFFFFFFFFFFF  
FFF

@A00721:190:HGJW7DSXY:4:1221:8675:36965\_1:N:0:TCTGCAAG+GCTGCACT  
TGAGTGATCGTATTAGAACAGCTGATTCTTATTGCATGAACGTCGCTGAGGTCAAACCTGTGGACGTT  
CTTTTCATCGACGAATTATTCATGATTACGCTGGTCAGACCCTTTTCTTACACATCTACTTAAGGC  
GGC



+  
FFFFFFFFFFFFFFFFFFFFFFFFFFFFFFFFFFFFFFFFFFFFFFFFFFFFFFFFFFFFFFFFFFFFFFFF  
FFFF:FFFFFFFFFFFFFFFFFFFFFFFFFFFFFFFFFFFFFFFFFFFFFFFFFFFFFFFFFFFFFFFF  
FFF  
@A00721:190:HGJW7DSXY:4:1574:7636:23140\_1:N:0:TCTGCAAG+GCTGCACT  
AATCGTATTGATCTCCAAGTCGAACTACTTCAACATCAACGACATCATTCTTGATGAGTGTCGTT  
TTATCGAAGTCTCAGTTATCGCTGCCCGGCCGACGTTTGTGCGCAACTCTCAGAGGTTTACGGCAGAA  
AAA  
+  
FFFFFFFFFFFF:FFFFFFFFFFFFFFFFFFFFFFFFFFFFFFFFFFFFFFFFFFFFFFFFFFFFFFFF  
FFFFFFFFFFFFFFFFFFFFFFFFFFFFFFFFFFFFFFFFFFFFFFFFFFFFFFFFFFFFFFFFFFFFFFFF  
FFF  
@A00721:190:HGJW7DSXY:4:2203:25789:19038\_1:N:0:TCTGCAAG+GCTGCACT  
AACCCTTATATCGAGGCTATCGAGGACGATGAGTATCTTGAAGTTGTTGACGACAAGCCTCAAGAGG  
GTAGAGGACCACCTGGATCTTCTACTGTCTCTGCCTTCCAAGATTTCTTAGAAGAGGTTATTCCTGGA  
ACC  
+  
FFFFFFFFFFFFFFFFFFFFFFFFFFFFFFFFFFFFFFFFFFFFFFFFFFFFFFFFFFFFFFFFFFFFFFFF  
FFFFFFFFFFFFFFFFFFFFFFFFFFFFFFFFFFFFFFFFFFFFFFFFFFFFFFFFFFFFFFFFFFFFFFFF  
FFF  
@A00721:190:HGJW7DSXY:4:1137:16957:6277\_1:N:0:TCTGCAAG+GCTGCACT  
TATAGGTAAGAAGCCCCTTGAGCCGCGTAGTCAGCGCGTTTAGCTGTATCATCAGTCAGAGTATACCC  
GATAGGGTACCGAGTCTCCAAGAGAATATTTATTCTTATGAGGCTCGAACTTCAACGTTTTCAACA  
GGA  
+  
FFFFFFFFFFFFFFFFFFFFFFFFFFFFFFFFFFFFFFFFFFFFFFFFFFFFFFFFFFFFFFFFFFFFFFFF  
F:FFFFFFFFFFFFFFFFFFFFFFFFFFFFFFFFFFFFFFFFFFFFFFFFFFFFFFFFFFFFFFFF:FFFF  
FFF  
@A00721:190:HGJW7DSXY:4:1416:11252:7232\_1:N:0:TCTGCAAG+GCTGCACT  
TCTGATGATTTTATCACTTTATTATGACCTTGGAAGTTTTTCGGCTGTGGTTGTCGCTGGGGACGATT  
CCATTCTGTTTTCAAAGACTCCAATAACTGATCATTCTGATCATATGATTTTGGACAATGGTTTCGAA  
GCG  
+  
FFFFFFFFFFFFFFFFFFFFFFFFFFFFFFFFFFFFFFFFFFFFFFFFFFFFFFFFFFFFFFFFFFFFFFFF  
FFFFFFFFFFFFFFFFFFFFFFFFFFFFFFFFFFFFFFFFFFFFFFFFFFFFFFFFFFFFFFFFFFFFFFFF  
FFF  
@A00721:190:HGJW7DSXY:4:1528:16613:14763\_2:N:0:TCTGCAAG+GCTGCACT  
TCCGAGAGGTTTATCCTGATGTGGAGGGAGTTCTTGAAGCATCCCGACCTTTCCTTGTGAAAATTTG  
ATGCGGTTTCATAAGATTATCAGTAATCCTGATTCTACTACGGATTCA  
+  
FFFFFFFFFFFFFFFFFFFFFFFFFFFFFFFFFFFFFFFFFFFFFFFFFFFFFFFFFFFFFFFFFFFFFFFF  
FFFFFFFFFFFFFFFFFFFFFFFFFFFFFFFFFFFFFFFFFFFFFFFFFFFFFFFFFFFFFFFF  
@A00721:190:HGJW7DSXY:4:1430:23466:35994\_1:N:0:TCTGCAAG+GCTGCACT  
GATTAAGACTCTTCCGAAAGGCGAACTTTGGGAATTTGAAGCTCAGGGTGAAGCACAACGTTTGACCG  
TGACGAACTGTGGTGTCTTGATCTACGTTACGGATATACTCTCCTTGAGTTCACTCGTAAGGACACT  
ACC  
+  
FFFFFFFFFFFFFFFFFFFFFFFFFFFFFFFFFFFFFFFFFFFFFFFFFFFFFFFFFFFFFFFFFFFFFFFF  
FFFFFFFFFFFFFFFFFFFFFFFFFFFFFFFFFFFFFFFFFFFFFFFFFFFFFFFFFFFFFFFFFFFFFFFF  
FFF  
@A00721:190:HGJW7DSXY:4:2113:21893:3020\_2:N:0:TCTGCAAG+GCTGCACT  
CAGGGGTTTTCGAATAGTGATAGCCACCCGCTTACAGAGGCGCAGCAGCATGACCATAATTGGTATT  
GACTTTTGTACAACCTTTACTACTTTTCAGTCTCGCCTCAGCGAATGAA  
+

```

,FFFFF:F:,::FFFFF:,F::FFFFF:,FF:,::,FF,F,,:F,,,F,::,,:FF,::FFFFF,F:FF:,
FFF:F:,FFF,,:FF,FF,FFF,F,FF,FF,FF:::F,,F,FF,FFF
@A00721:190:HGJW7DSXY:4:2335:3875:25645_1:N:0:TCTGCAAG+GCTGCACT
AATCATTGGTTTTCTAATAATGATGACACTATTGTTTATGGATATGATGCTATTACTCATGATGGTT
ACGGTCAGGGAGGATTCTCAGTTTACAAGGACCTTAAGCGATGGATCGGGGTTAATTCTAAACATTA
CCC
+
FFFFFFFFFFFFFFFFFFFFFFFFFFFFFFFFFFFFFFFFFFFFFFFFFFFFFFFFFFFFFFFFFFFFFFFF
FFFFFFFFFFFFFFFFFFFFFFFFFFFFFFFFFFFFFFFFFFFFFFFFFFFFFFFFFFFFFFFFFFFFFFFF
FFF
@A00721:190:HGJW7DSXY:4:2563:12029:24674_2:N:0:TCTGCAAG+GCTGCACT
CAGTACCCAGTCAGTATACCTCTACGCAAAGATATTTTCATGAAACTACAGAGGAACGTACCGGATTA
CCTGTCTTTTCATATTATGAATGAACCTTCGGCCGCTCTCTTTGCTTCG
+
FFFFFFFFFFFFFFFFFFFFFFFFFFFFFFFFFFFFFFFFFFFFFFFFFFFFFFFFFFFFFFFFFFFFFFFF
FFFFFFFFFFFFF,:FFFFFFFFFFFFFFFFFFFFFFFFFFFFF:FF:FFFFFFFF
@A00721:190:HGJW7DSXY:4:2122:27805:17550_2:N:0:TCTGCAAG+GCTGCACT
CGTTGATGAAGCTATAAGAGCGTTCTTATTACGGCGCACTTCTTTACCCGCCACCACTTTTCAG
TTTCACAACTGAAGGAGGAGGTTTCTGTTACTGGAACCCTCGTCAA
+
FFFFFFFFFFFFFFFFFFFFFFFFFFFFF:FFFFFFFFFFFFFFFFFFFFF:FFFFFFFFFFFFFFFFFFFF
FFFFFFFFFFFFFFFFFFFFF:FFFFFFFFFFFFFFFFFFFFF:FFFFFFFFF,FFF
@A00721:190:HGJW7DSXY:4:2540:16839:6950_2:N:0:TCTGCAAG+GCTGCACT
GCTATTAAAGCTGTTGAGCGGGTAATTACACCTAAACGAGCTCGATCTGCCATCGCTGAAGGATGTGC
ACTCTTTTCTGCTACTTTAACGGAGAGATCGGAAGAGCGTCGTGTAGG
+
FF,FFFFFFFFFFFFF:FFF:FFF:FFFFFFFFF:FFFFFFFFFFFFFFFFFFFFF::FFFFFFFFF:FFFF,,F
FFFFFFFFFFFFF:FFFF:FF:,FFFFFFF:F:FF:FFFFFFFFF,F,FFF
@A00721:190:HGJW7DSXY:4:2556:27471:12618_2:N:0:TCTGCAAG+GCTGCACT
TAAAAAGAAGATAGAGAGTCATACTTTGGGCTATCGTTCAGGTGCATGGGGTTGGATAGCCAATATTG
AAGTGACACCTCTGGTAGTATCGAAGTAAAGATAACCAATAAGGAAG
+
:FFFFFFFFFFFFFFFFFFFFFFFFFFFFFFFFFFFFFFFFFFFFFFFFFFFFF,FFFF:FFF,FFFFFF:F:F:F
FFFFFFFFF:FFFF:FFFFFFFFFFFFF,FFFFFFF:FFFFFFFFFFFFFFFFF
@A00721:190:HGJW7DSXY:4:2555:15139:2409_1:N:0:TCTGCAAG+GCTGCACT
GGCACTACCTCGGTACAATCTTACTTGGAACGAAGGCGACCTGTTCCGGAGTTTTTACGGGATCCGGA
ATGTTCTGTCTATATTAGGTGAAGCGAAATACGATTTTGAACGTCAACGTTACCGAGTTTCGTTTCG
TAC
+
FFFFFFFFFFFFFFFFFFFFFFFFFFFFFFFFFFFFFFFFFFFFFFFFFFFFF:FFFFFFFFFFFFFFFFFFFF
FFFFFFFFFFFFFFFFFFFFF:FFFFFFFFFFFFFFFFFFFFF:FFFFFFFFFFFFFFFFFFFFF
FFF
@A00721:190:HGJW7DSXY:4:2361:19036:28510_2:N:0:TCTGCAAG+GCTGCACT
ATAAAGAATCTTTACCAGGACTCCTACTACAGGAGGCAGTCTTCTGATCGTAAGAAGTTTATAAGGAA
CATATCCATTTGTTGTAATAGGTCATCAACTTAGAACTCGAACTCT
+
FFFFFFFFFFFFFFFFFFFFFFFFFFFFFFFFFFFFFFFFFFFFFFFFFFFFF,FFFFFFFFFFFFFFFFFFFF:
FFFFFFFFFFFFFFFFFFFFF:FFFFFFFFFFFFFFFFFFFFF:FFFFFFFFFFFFFFFFFFFFF
@A00721:190:HGJW7DSXY:4:2567:10547:25989_1:N:0:TCTGCAAG+GCTGCACT
TTCGATAGGGGACATTTTATCGTGGGCTTCCGTAAGGAAGATCTGTTATCGACGGTTTATCGTTTA
CGAAGTATCACTCCACCGGTGAATGGTTTAAAGAATACTATAAATAGAATAGCTATTACTACTAATGC
GTT
+
FFFFFFFFFFFFFFFFFFFFFFFFFFFFFFFFFFFFFFFFFFFFFFFFFFFFF

```

FFFFFFFFFFFFFFFFFFFFFFFFFFFFFFFFFFFFFFFFFFFFFFFFFFFFFFFFFFFFFFFFFFFFFFFFFFFFFFFF  
FFF

@A00721:190:HGJW7DSXY:4:1165:3432:34554\_2:N:0:TCTGCAAG+GCTGCACT  
TACTTAGACTTTCTACGATACAAATGATAACTTCTAATTTACGTTTGCTACTCAGAGCTGGTCCTCT  
CAGCAAAGGGATGCATGGTGTATCTCCTCAGGAGTCCCGGCATTTGA

+

FFFFFFFFFFFFFFFFFFFFFFFFFFFFFFFFFFFFFFFFFFFFFFFFFFFFFFFFFFFFFFFFFFFFFFFFFFFFFFFF  
FFFFFFFFFFFFFFFFFFFFFFFFFFFFFFFFFFFFFFFFFFFFFFFFFFFFFFFFFFFFFFFFFFFFFFFFFFFFFFFF

@A00721:190:HGJW7DSXY:4:2422:11026:17174\_1:N:0:TCTGCAAG+GCTGCACT  
GACTTTCGTCATAATCGCTGCATATTACGGATTACACGGTACCAGCGCATCTCGTGTGAGCCTCGAC  
CCGATTATATGGTATTAACCTTATAAAGGTGAGGAGACCATTTCTTGCTGAAATTTATAGAAGATTAT  
TTT

+

FFFFFFFFFFFFFFFFFFFFFFFFFFFFFFFFFFFFFFFFFFFFFFFFFFFFFFFFFFFFFFFFFFFFFFFFFFFFFFFF  
FFFFFFFFFFFFFFFFFFFFFFFFFFFFFFFFFFFFFFFFFFFFFFFFFFFFFFFFFFFFFFFFFFFFFFFFFFFFFFFF  
FFF

@A00721:190:HGJW7DSXY:4:1660:6352:20478\_1:N:0:TCTGCAAG+GCTGCACT  
TCCAGTCAACACTAGTTCGAGTGCTGCTTTGGATTACGATGACGTGAGAATAGGTGAAGGGATAGTTT  
TTACCTCGACCAACATTAAGGCGGCGGCGACTAATCTTAAAGCTTCACCCAAAATGAAGGACACTTCG  
AAA

+

FFFFFFFFFFFFFFFFFFFFFFFFFFFFFFFFFFFFFFFFFFFFFFFFFFFFFFFFFFFFFFFFFFFFFFFFFFFFFF:  
FFFFFFFFFFFFFFFFFFFFFFFFFFFFFFFFFFFFFFFFFFFFFFFFFFFFFFFFFFFFFFFFFFFFFFFFFFFFFF:  
FFF

@A00721:190:HGJW7DSXY:4:2315:5249:22952\_2:N:0:TCTGCAAG+GCTGCACT  
CAAATTCCTTTGATACAACCTCTAGCCTTCAAGTGGGGTATGCCTGCGGAATACGCTTGCTATTCACCA  
GATTGGTTCGAACCCGTTGATGCTATGTCAGAAGAAGCTATTCAAGCT

+

FFFFFFFFFFFFFFFFFFFFFFFFFFFFFFFFFFFFFFFFFFFFFFFFFFFFFFFFFFFFFFFFFFFFFF:F:FFFFFF  
FF:FFFFFFFFFFFFFFFFFFFFFFFFFFFFFFFFFFFFFFFFFFFFFFFFFFFFFFFFFFFFFFFFFFFFFF

@A00721:190:HGJW7DSXY:4:2462:10176:1360\_2:N:0:TCTGCAAG+GCTGCACT  
AAACAAGCCCAGACTCAAGGAGTCCAATCAAAGGTTTTGAATTTAGCTCAACTGGGAGACGTGCTTA  
AATGGGTGATAAAAATTATTTAGAGATCTTTTCTACTTACAAAGGACA

+

FFFFFFFFFFFFFF:FFFF,FFFFFFFFFFFF:F:FFFFFFFFFFFFFFFFFFFFFFFF:FFFFFF:FFFFFF  
,FFFFFF:FFFF,:F,FFFFFFFFFFFFFFFFFFFFFFFFFFFFFFFF

@A00721:190:HGJW7DSXY:4:1218:31033:26584\_1:N:0:TCTGCAAG+GCTGCACT  
TTTTGTTACCAAATCTTGCTTTCAACGAAGTCTCTGATTTTATTAATCATTACTTTAACGATCTCT  
CGGTCATTTACTCTGTACTTGATCTACGTCGTTTAACTGTCGGAACAACCTTTACTTAGAATGACTCT  
AT

+

FFFFFFFFFFFFFFFFFFFFFFFFFFFFFFFFFFFFFFFFFFFFFFFFFFFFFFFFFFFFFFFFFFFFFFFFFFFF  
FFFFFFFFFFFF:FFFFFFFFFFFFFFFFFFFFFFFFFFFFFFFFFFFFFFFF:FF:F:FF:FFF:FFFF:F,F  
F:

@A00721:190:HGJW7DSXY:4:2676:18792:8860\_2:N:0:TCTGCAAG+GCTGCACT  
TAATAGATTAATAAAGGATGAGTACGAAAACCAACTCTTCGTTACGAGACCTGATGGTAGAATAGATT  
TAGTCTCTACCCCATCTCAACGAGGATAAAGCGAGTTTTCCGTCCTG

+

FFFFFFFFFFFFFFFFFFFFFFFFFFFFFFFFFFFFFFFFFFFFFFFFFFFFFFFFFFFFFFFFFFFFFF:F:FFFF  
FFFFFFFFFFFFFF:FFFFFFFFFFFFFFFFFFFFFFFFFFFFFFFFFFFFFFFF

@A00721:190:HGJW7DSXY:4:1470:28022:17331\_2:N:0:TCTGCAAG+GCTGCACT  
CCGCAAACGACTCGAAACCGAGACGCCGTAGATCAAAGTCCCTTCTAACTTTAGATTATGAATCCTGC  
CTTTACTCATTTTATAGCAGTTATTTATGTTGTACTTTTTATAATTTA

+

FFFFFFFFFFFFFFFFFFFFFFFFFFFFFFFFFFFFFFFFFFFFFFFFFFFFFFFFFFFFFFFF  
FFFFFFFFFFFF,FF:FFF:F:F::FFF,FFFFFFFFFFFFFFFFFFFF  
@A00721:190:HGJW7DSXY:4:2343:32334:4570\_2:N:0:TCTGCAAG+GCTGCACT  
TCAATGAGGTCAAAGCTCTATTTATTAACGAAGTATTATCCGATTCTTCGAGGGTATCACTACCAC  
TGATCTGCCGACTTTAGTCAAGGAAGTCAATTCCTTCGATGTTTATA

+  
FFFFFFFFFFFFFFFFFFFF:FFF:FFFFFFFFFFFF:FFFFFF,:FFFF:FFF:,F:FFFFFFFFFFFF  
FFFF:F:FFFFFFFFFFFFFFFFFFFF:FFFFFFFFFFFF,FF,F:,FFFFFFF  
@A00721:190:HGJW7DSXY:4:2238:2040:4210\_1:N:0:TCTGCAAG+GCTGCACT  
GACAAATTTTAGAAGTCTTATTTTCAAGTCTCTCCGATCACCTTGGTGTGATCTCCCGAGGATCTTT  
TCAATAAGATGTATGATGATAATCTACTATTTTTAAATAGTATTCAGCGTATACTTGAATACTTT  
ATC

+  
FFFFFFF:FFFFFFFFFFFFFFFFFFFFFFFFFFFFFFFFFFFFFFFFFFFFFFFFFFFFFFFF  
FFFFFFFFFFFFFFFFFFFFFFFFFFFFFFFFFFFFFFFFFFFFFFFFFFFFFFFFFFFFFFFF  
FFF  
@A00721:190:HGJW7DSXY:4:1448:3812:10441\_1:N:0:TCTGCAAG+GCTGCACT  
CAAAAAGTTGGAAGAGGTCTATGATATTTATTTTACTTATACTTTAAATAGCACCGATTATAACTTGA  
CTGTTGATAATATTACAATAGCTCTTTCTCAGAAGATTAGAGAAGTAACTCGGTGAACACGTCGGTAG  
CAT

+  
FFFFF:FFFFFF:FFFF:F:FFFFFFFFFFFFFFFFFFFFFFFFFFFFFFFFFFFFFFFFFFFF  
F:FFFFFFFFFFFFFFFFFFFFFFFFFFFFFFFFFFFFFFFFFFFFFFFFFFFFFFFFFFFFFFFF  
FF:  
@A00721:190:HGJW7DSXY:4:2513:12264:27524\_1:N:0:TCTGCAAG+GCTGCACT  
AACGATTCTTCGACTATATTAAAGAAATAAAAATACTTCAAGTACCTGAAGTTTACATTTTTAATGGT  
ATGGTATAATGTGTCTTACAAATAGAACCTTCACTCTCGGTAATGAGAGTGTATTCCTTAATATTCTA  
GTA

+  
:F,FFFFFFFFFFFFFFFFFFFFFFFFFFFFFFFFFFFFFFFFFFFFFFFFFFFFFFFFFFFF:FFFFFFFFFFFF:FFFFF  
FFFFFFFFFFFFFFFFFFFFFFFFFFFFFFFFFFFFFFFFFFFFFFFFFFFFFFFFFFFFFFFF  
FFF  
@A00721:190:HGJW7DSXY:4:2514:28971:21699\_1:N:0:TCTGCAAG+GCTGCACT  
TAGGATTTATCACACTCCTAAATTTGATAGCAATTTATGTTTTAAATGCTAGGAAAATTTTAGAAAAA  
CTCCATTGTATAGTTCAAGGAGTACTTAATTCAATAGCTTTAGTATTATTTACTATCGCCTTTATTGA  
AA

+  
FF::FF,FFFFFFF,:F:FFF,FF:FFF:FFFFFFFFFFFF,:FFFFFF:FF:FFFFFFFFFFFFFFFF  
FFFFFF,FFFFFF,FFFFFFFFFFFFFFFFFFFFFFFFFFFFFFFFFFFFFFFFFFFF:FFFFFFFFFFFF  
FF  
@A00721:190:HGJW7DSXY:4:2611:26666:28980\_1:N:0:TCTGCAAG+GCTGCACT  
CAAAAGTGACGCGCAAGGAATCTTAATTGATTGAAGCTAGCGTTGGGGAGAATGAAGTCCGCTTC  
CCGGAAGAAACGATCTATTTACAGAGTATTAGAGTAGTCCAAAGTTTGTATAAATTTATATGATTTT  
CTA

+  
FFFFFFFFFFFFFFFFFFFFFFFFFFFFFFFFFFFFFFFFFFFFFFFFFFFFFFFFFFFFFFFF  
FFFFFFFFFFFFFFFFFFFFFFFFFFFFFFFFFFFFFFFFFFFFFFFFFFFFFFFFFFFFFFFF:F  
FFF  
@A00721:190:HGJW7DSXY:4:2513:30834:34726\_2:N:0:TCTGCAAG+GCTGCACT  
GCCGGTCGGCAGATCGGCACCACTGGTCTCTACGTTAGGGACCGCTGTGCAGAATAACCTTCCCAA  
ATCTAGATCTGCACAGAAGAAGGCTGAAGGTCGTTACCGGACGACCAC

+  
FFFFFFFFFFFFFFFFFFFFFFFFFFFFFFFFFFFFFFFFFFFFFFFFFFFFFFFFFFFF,FFFFFFFFFFFF  
FFFFFFFFFFFFFFFFFFFFFFFFFFFFFFFFFFFF,FF:FFFFFFFFFFFF:

@A00721:190:HGJW7DSXY:4:1573:23854:35603\_1:N:0:TCTGCAAG+GCTGCACT  
CAGTACCTCAGTCAAAAGTCACATTCACTACCCATACCAATCAATGATGTGACTATACAGTTCGGC  
CATTTCAAGAGTGGTCAATACGTCGTGGGAGGTACTGAAGCCTTCCCCTCCGCTGGCACGAAGAACAC  
TCC

+

FFFFFFFFFFFFFFFFFFFFFFFFFFFFFFFFFFFFFFFFFFFFFFFFFFFFFFFFFFFFFFFFFFFFFFFF  
FFFFFFFFFFFFFFFFFFFFFFFFFFFFFFFFFFFFFFFFFFFFFFFFFFFFFFFFFFFFFFFFFFFFFFFF  
FFF

@A00721:190:HGJW7DSXY:4:2143:23122:4178\_1:N:0:TCTGCAAG+GCTGCACT  
AATAGTTCTTCTGACCAGAATGAAAAGGGGTTTACCAGGGTAGTCTCTAAGTCTACCAGGAAGAGGGG  
AAATGTCCCCAAAACCTGAGAAGAATAAAGGGAAAGGTCCATCAGGACCTAAGAAGGGGAAATTACCCC  
TAA

+

FFFFFFFFFFFFFFFFFFFFFFFFFFFFFFFFFFFFFFFFFFFFFFFFFFFFFFFFFFFFFFFFFFFFFFFF  
:F::FFFFFFFF:FFFFFFFFF,FFFFFFFFFFFF:FF:F  
:FFFFFFFFFFFFFFFFFFFFFFFF:F:F::,,FFFF:FFFFFFFFFFFFFFFF:FFFF,F:FFFF  
FFF

@A00721:190:HGJW7DSXY:4:1137:3568:27305\_1:N:0:TCTGCAAG+GCTGCACT  
AAGAGGCCGCTGCTACGAAGTCGCTGAAGGCGGCTTGGGTCTTAAGGGTAGCTGTAAAGTTGCGCCT  
GCCGACCCCATCTTTGAGACCAAGACTCTCTACAGTAGGTTCTGTCCTAAGATCGGAAGAGCACACGT  
CTG

+

F:FFFFFFFFFFFFFFFFFFFFFFFFFFFFFFFFFFFFFFFFFFFFFFFFFFFFFFFFFFFFFFFF  
F,FFFFFF,FFFFFFFFFFFFFFFFFFFFFFFFFFFFFFFFFFFFFFFFFFFFFFFF:F:FF:,F:FF:F,FF:FF:F,FFFF  
FFF

@A00721:190:HGJW7DSXY:4:2643:15817:26318\_2:N:0:TCTGCAAG+GCTGCACT  
CGAAGGTGAGAGGACTTTTGGCTACTGGCGACAACTGAGAGCAGTCGCTGGGGAAAGAGAATTGCGT  
GGGTTGAAGGCCGACGCTTCGAGCTTGAGAGATCGGAAGAGCGTCGTG

+

FFFFFFFFFFFFFFFFFFFFFFFFFFFFFFFFFFFFFFFFFFFFFFFFFFFFFFFFFFFFFFFFFFFFFFFF  
FFFFFFFFFFFFFFFFFFFFFFFFFFFFFFFFFFFFFFFFFFFFFFFFFFFFFFFFFFFFFFFF:F

@A00721:190:HGJW7DSXY:4:1516:27787:15295\_2:N:0:TCTGCAAG+GCTGCACT  
TAAGTATGGGGCGAAGATCCCCTATGGAGTCTTGAAGGACTTAGGTTGGCATATTTATGCCGACGATA  
ATAAGCATGTCACCCCTTAAGCACCGAGGTAAGCTCGGGACTTACAAGA

+

FFFFFFFFFFFFFFFF:F:FFFFFFFFFFFFFFFFFFFFFFFFFFFFFFFFFFFFFFFFFFFFFFFFFFFF,  
FFFFFFFFFFFFFFFFFFFFFFFFFFFFFFFFFFFFFFFFFFFFFFFFFFFFFFFF:F:FFFF:F

@A00721:190:HGJW7DSXY:4:1212:31801:32550\_1:N:0:TCTGCAAG+GCTGCACT  
CCTTTCTCCGTCAATTGGGATTTGATGTGAGAAGGTGAAGGTGTCAAGGGTCTTCTTCATGCTGA  
TCTTTGAGGACCTAATCATCATGATTGATGATTACGGCTCGTATCGAGTTGGAGGGAGGAAGTTCT  
CCG

+

FF:,FF:FFFFFFFFFFFFFFFFFFFFFFFFFFFFFFFFFFFFFFFFFFFFFFFFFFFFFFFFFFFF  
FFFFFFFFFFFFFFFFFFFFFFFFFFFFFFFFFFFFFFFFFFFFFFFFFFFFFFFFFFFFFFFFFFFFFFFF  
FFF

@A00721:190:HGJW7DSXY:4:2471:4237:28745\_1:N:0:TCTGCAAG+GCTGCACT  
GAGTTCAGACGTGTGCTCTTCCGATCTCTTCGTCAGAAGATGAGGAAGTCTAAGAGGAGGAGTTTGA  
GAAGGCTCTAGAGAAGATCTCACCACTGGAGAAGGCAAGTGGAGAGTCCAGAAGTTGATGAAGAAG  
ATT

+

FFFFFFFFFFFFFFFFFFFFFFFFFFFFFFFFFFFFFFFFFFFFFFFFFFFFFFFFFFFFFFFFFFFFFFFF  
FFFFFFFFFFFFFFFFFFFFFFFFFFFFFFFFFFFFFFFFFFFFFFFFFFFFFFFFFFFFFFFFFFFFFFFF  
FFF

@A00721:190:HGJW7DSXY:4:1262:5104:17159\_1:N:0:TCTGCAAG+GCTGCACT  
AGGTGGATGAGGGAGGTTGTTTCTTTGGAGTTTATAGATAATCTTTTGAGAAGGGTCTAGAGCCAGC

AAGAGAAGCTTATATGCTGGTTTAAAGTGATGATTATCACTCCTTGAGAAGACAAGCCACATTAAGATA  
TAA

+

FFFFFFFFFFFFFFFFFFFFFFFFFFFFFFFFFFFFFFFFFFFFFFFFFFFFFFFFFFFFFFFFFFFFFFFF  
FFFFFFFFFFFFFFFFFFFFFFFFFFFFFFFFFFFFFFFFFFFFFFFFFFFFFFFFFFFFFFFFFFFFFFFF  
FFF

@A00721:190:HGJW7DSXY:4:1330:21477:21934\_1:N:0:TCTGCAAG+GCTGCACT  
TATTGTTCTTCCGGGAAGTTGTGGGATTTAACCTTTGACTCACTACTCCGATCAGATCCGGATGGTT  
TGATTGGTATGGACTACTCGACTTTTGATCTGGAGTTGTCTAGGGTCATGGCAGATACTACCGATAAG  
GTG

+

FFFFF:FFFFFFFFFFFFFFFFFFFFFFFFFFFFFFFFFFFFFFFFFFFFFFFFFFFFFFFFFFFFFFFF  
FFFFF:FFFFFFFFFFFFFFFFFFFFFFFFFFFFFFFFFFFFFFFFFFFFFFFFFFFFFFFFFFFFFFFF  
FFF

@A00721:190:HGJW7DSXY:4:1533:26811:31798\_1:N:0:TCTGCAAG+GCTGCACT  
AAGAGTCTTTATGATTCAAAACCTATCGTTGTCTGACCTTACAAGTTGAGGAGACTTTACAGCGGCT  
TATTGTCGCGCAGTTTCCAGAATTGCGGTTGAAGTTCACCCATTCTATCTTGAATGCTCACGCCGTCG  
C

+

F::FFF:,FFF:,FFF,FFFF:,FFFFFFF,F,,F,FFFFFFFFF:FFFF,FFFF,FFFFFFF,:,,F  
FFFFFFFFFFFF::FFFFFFFFFFFF::FFFFFFFF:FFFF,:FFFFFFFFFFFFFFFFFFFFFFFFFFFF  
F

@A00721:190:HGJW7DSXY:4:2267:26024:37043\_2:N:0:TCTGCAAG+GCTGCACT  
TGTGAAAGATGCATCGAGGTATACGTCTAGGAACATTGATTGGGAACGTACCTACTCACGAGACGTCA  
TGAAAGCTATCGGAGGGAAGCAAATGTTTCGTTCTGTTACAAGAACG

+

FFFFFFFFFFFFFFFFFFFFFFFFFFFFFFFFFFFFFFFFFFFFFFFFFFFFFFFFFFFFFFFFFFFFFFFF  
FFFFFFFFFFFFFFFFFFFFFFFFFFFFFFFFFFFFFFFFFFFFFFFFFFFFFFFFFFFFFFFFFFFFFFFF

@A00721:190:HGJW7DSXY:4:1173:32325:24314\_1:N:0:TCTGCAAG+GCTGCACT  
CATTTCTGCTTAGTTTGTCCCGCGCAATTATTGGACACGATGAAAAATGACATACCCGTTCTGACCT  
TGGTATCGTTATCCGTCATGGAGATGATGGCGCATCACTTGATTACTATATGCCCGAAGGATTGGGTT  
ATT

+

FFFFFFFFFFFFFFFFFFFFFFFFFFFFFFFFFFFFFFFFFFFFFFFFFFFFFFFFFFFFFFFFFFFFFFFF  
FFFFFFFFFFFFFFFFFFFFFFFFFFFFFFFFFFFFFFFFFFFFFFFFFFFFFFFFFFFFFFFFFFFFFFFF  
FF:

@A00721:190:HGJW7DSXY:4:1641:28266:27242\_1:N:0:TCTGCAAG+GCTGCACT  
CGAATATGTTACGACATGGCTTCGTAACAACAGTGCGAGGATTGTCATCTCGGGGAAAGTGATTACCC  
AAGATGTTATATAGATACGAGATACCTAGAGAAGGTCGCAGCGATCTTACTCGTTATCGGAGCTAAG  
AAG

+

FFFF:FFF:FFFFF,FFFFFFFFFFFFFFFFFFFFFFFFFFFFFFFFFFFFFFFFFFFFFFFFFFFFFF  
FFFFFFFFFFFFFFFFFFFFFFFFFFFFFFFFFFFFFFFFFFFFFFFFFFFFFFFFFFFFFFFFFFFFFFFF  
FFF

@A00721:190:HGJW7DSXY:4:1475:29930:4194\_1:N:0:TCTGCAAG+GCTGCACT  
ACCGGAGGTGATCTCTCTGCTTCTGCGTTACTGAGAGAAAAGATTGAGGACGCCTACGGTGACTTTAT  
GGACAAGATGCAAGTTCTTGGGAAATACTGTTTCCCTTTTAGGTTTAGTAGGTGATCTTGACGTCG  
ATT

+

FFFFFFFFFFFF:FFFFFFFFFFFFFFFFFFFFFFFFFFFFFFFFFFFFFFFFFFFFFFFFFFFFFFFF  
FFFFFFFFFFFFFFFFFFFFFFFFFFFFFFFFFFFFFFFFFFFFFFFFFFFFFFFFFFFFFFFFFFFFFFFF  
FFF

@A00721:190:HGJW7DSXY:4:2531:2781:35211\_2:N:0:TCTGCAAG+GCTGCACT  
GTCAAGAAGTCGCTCGGCGTTGTTCTTGAAAACCAAGTTAAGAAGGAGGCTGATCATGGAGTCTTTGT

+

@A00721:190:HGJW7DSXY:4:2167:24180:20353\_1:N:0:TCTGCAAG+GCTGCACT  
TGGGTTGAGAAGTGTGGTTTACAAGGAGTTAGACTCTTCTTCATGTTTTTAGATCTTCTTGATAATCT  
TAAAGAAAAATTTTCGAATAAACTAATGAGAGGTATAGGCTTAGTCAAGTCTGTACTTACATTCTTTA  
CGC

+

@A00721:190:HGJW7DSXY:4:1276:11098:18114\_2:N:0:TCTGCAAG+GCTGCACT  
AGGAGTTGAGAGAATTACTCAGATTCAATCTGGCATCACTGAACGTCTACAACGAGTTAGGGAGTGGC  
TAGGTTTTTAAAAGATCCTTTCACAAGCAATACCTTCCACTGAGTTCA

+

@A00721:190:HGJW7DSXY:4:2447:29875:21543\_2:N:0:TCTGCAAG+GCTGCACT  
TTCTTTTACCTTTTGGAGGTCCAGGAACCTTTACTCCTAGTGTCTTTTCTAGAGTCCAAGGACGTTTC  
CGTCGGAGGATGACAGGTGGGAGACCGCTCAATAACACTCTATTGAAT

+

@A00721:190:HGJW7DSXY:4:1541:31864:24893\_1:N:0:TCTGCAAG+GCTGCACT  
TCTGCCACTTCTAATTTTAGGAAACGTCGCGAAAAGAAAGTTCATGAGGATGTCTTGGTCGAAAAATA  
TCGCCGGGAAC TTCTAATAGAGGATCCTGATGACATTATTTCAACGGATACCGATCTCAGTTCTACCA  
CAG

 $+$ 

@A00721:190:HGJW7DSXY:4:2562:17644:28009\_1:N:0:TCTGCAAG+GCTGCACT  
AACTGTCTCCACTGATTCGGAATTAGAGAAAGACGACCTTCTTGTGGGGACTGAGACCTCTGAATTTT  
CAGGGTGCCCTGATGAGGACGTTGAAAGGGATAATTTCAACTCTGAGACTTCTAAGAGTGTTCAAAA  
GAC

+

@A00721:190:HGJW7DSXY:4:1329:18918:24236\_1:N:0:TCTGCAAG+GCTGCACT  
TGAGTGATCGTATTAGAACAGCTGATTCTTATTGCATGAACGTCGCTGAGGTCAAACCTGTGGACGTT  
CTTTTCATCGACGAATTATTCATGATTCACGCTGGTCAGACCCTTTTTCTTACACATCTACTTAAGGC  
GGC

+

@A00721:190:HGJW7DSXY:4:2574:30237:28808\_1:N:0:TCTGCAAG+GCTGCACT  
AATCGTATTGATCTCCAAGTCGCAAACTACTTCAACATCAACGACATCATTCTTGATGAGTGTCTGTTT  
TTATCGAAGTCTCAGTTATCGCTGCCCCGCCGACGTTTGTGCGCAACTCTCAGAGGTTTACGGCAGAA  
AAA

+

[illegible]

@A00721:190:HGJW7DSXY:4:2213:14751:36119\_1:N:0:TCTGCAAG+GCTGCACT  
AACCCCTTATATCGAGGCTATCGAGGACGATGAGTATCTTGAAGTTGTTGACGACAAGCCTCAAGAGG  
GTAGAGGACCACCTGGATCTTCTACTGTCTCTGCCTTCCAAGATTTCTTAGAAGAGGTTATTCTGGA  
ACC

@A00721:190:HGJW7DSXY:4:1253:13792:29418\_1:N:0:TCTGCAAG+GCTGCACT  
TATAGGTAAGAAGCCCCTTGAGCCGCGTAGTCAGCGCGTTTAGCTGTATCATCAGTCAGAGTATACCC  
GATAGGGTACCGAGTCTCCAAGAGAATATTTATTCTTATGAGGCTCGAAACTTCAACGTTTTCACAAAC  
GGA

@A00721:190:HGJW7DSXY:4:2314:25988:8453\_1:N:0:TCTGCAAG+GCTGCACT  
TCTGATGATTTTATCACTTTATTATGACCTTGGAAAGTTTTTCGGCTGTGGTTGTCGCTGGGGACGATT  
CCATTCTGTTTTCAAAGACTCCAATAACTGATCATTCTGATCATATGATTTTGGACAATGGTTTCGAA  
GCG

@A00721:190:HGJW7DSXY:4:1628:16080:18787\_2:N:0:TCTGCAAG+GCTGCACT  
TCCGAGAGGTTTATCCTGATGTGGAGGGAGTTCTTGAAGCATCCCGACCTTTCCTTGTGAAAATTTTG  
ATGCGGTTTCATAAGATTATCAGTAATCCTGATTCTACTACGGATTCA

@A00721:190:HGJW7DSXY:4:1430:23710:36699\_1:N:0:TCTGCAAG+GCTGCACT  
GATTAAGACTCTTCCGAAAGGCGAACTTTGGGAATTTGAAGCTCAGGGTGAAGCACAACTTTGACCG  
TGACGAACTGTGGTGTTCTTGATCTACGTTACGGATATACTCTCCTTGAGTTCACCTCGTAAGGACACT  
ACC

@A00721:190:HGJW7DSXY:4:2138:27362:5008\_2:N:0:TCTGCAAG+GCTGCACT  
CAGGGGTTTTTCGAATAGTGATAGCCACCCGCCTTACAGAGGGGCAGCAGCATGACCATAATTGGTATT  
GACTTTGGTACCACCTTTTCTACTGTCTGTCTCGCCTCTTCGAATGAA

@A00721:190:HGJW7DSXY:4:2543:8278:26757\_1:N:0:TCTGCAAG+GCTGCACT  
AATCATTGTTTTCTAATAATGATGACACTATTGTTTATGGATATGATGCTATTACTCATGATGGTT  
ACGGTCAGGGAGGATTCTCAGTTTACAAGGACCTTAAGCGATGGATCGGGGTTAATTCTAAACATTA  
CCC

[illegible]



$+$ 

@A00721:190:HGJW7DSXY:4:2456:11623:28479\_2:N:0:TCTGCAAG+GCTGCACT  
CGTTGATGAAGCTATAAGAGCGTTCTTATTACGGCGCACTTCTTTACCCGCCACCACACAACTTTTCAG  
TTTCACAACTGAAGGAGGAGGTTTCTGTTACTGGAAAACCTCGTCAA

+

@A00721:190:HGJW7DSXY:4:2655:5041:11819\_2:N:0:TCTGCAAG+GCTGCACT  
GCTATTAAAGCTGTTGAGCGGGTAATTACACCTAAACGAGCTCGATCTGCCATCGCTGAAGGATGTGC  
ACTCTTTTCTGCTACTTTAACGGAGAGATCGGAAGAGCGTCGTGTAGG

+

@A00721:190:HGJW7DSXY:4:2556:5746:30953\_2:N:0:TCTGCAAG+GCTGCACT  
TAAAAAGAAGATAGAGAGTCATACTTTGGGCTATCGTTCAGGTGCATGGGGTTGGATAGCCAATATTG  
AAGTGGACACCTCTGGTAGTATCGAAGTAAAGATAACCAATAAGGAAG

+

@A00721:190:HGJW7DSXY:4:1405:17056:7795\_2:N:0:TCTGCAAG+GCTGCACT  
ACCTCGGTACAATCTTACTTGGAACGAAGGCGACCTGTTCCGGAGTTTTTACGGGATCCGGAATGTTCTGTCTATATTAGGTGAAGCGAAATACGATTTTCAACGTCAACGTTTCACT

+

@A00721:190:HGJW7DSXY:4:2361:19343:28479\_2:N:0:TCTGCAAG+GCTGCACT  
ATAAAGAATCTTTACCAGGACTCCTACTACAGGAGGCAGTCTTCTGATCGTAAGAAGTTTATAAGGAA  
CATATCCATTTGTTGTAATAGGGTCATCAACTTAGAACTCGAACTCT

+

@A00721:190:HGJW7DSXY:4:2605:1913:1924\_1:N:0:TCTGCAAG+GCTGCACT  
TTTCGATAGGGGACATTTTATCGTGGGCTTTCCGTAAGGAAGATCTGTTATCGACGGTTTATCGTTTA  
CGAAGTATCACTCCACCGGTGAATGGTTTAAAGAATACTATAAATAGAATAGCTATTACTACTAATGGC  
GTT

+

@A00721:190:HGJW7DSXY:4:1263:25807:17910\_2:N:0:TCTGCAAG+GCTGCACT  
TACTTAGACTTTCTACGATACAAATGATAACTTCTAATTTACGTTTGCTACTCAGAGCTGGTCTCT  
CAGCAAAGGGATGCATGGTGTTATCTCCTCAGGAGTCCCGGCATTGGA

+

@A00721:190:HGJW7DSXY:4:2622:16902:2206\_1:N:0:TCTGCAAG+GCTGCACT  
GACTTTCGTCATAATCGCTGCATATTACGGATTACACGGTACCAGCGCATCTCGTGTCGAGCCTCGAC  
CCGATTATATGGTATTAACCTATAAAGGTGAGGAGACCATTTTCTTGCTGAAATTTATAGAAGATTAT  
TTT

+  
FFFFFFFFFFFFFFFF:FFFFFFFFFFFFFFFF:FFFFFFFFFFFFFFFF:FFFFFFFFFFFFFFFF  
F:FFFFFFFF:FFFFFFFFFFFFFFFFFFFFFFFFFFFFFFFFFFFFFFFFFFFFFFFFFFFFFFFF  
FFF  
@A00721:190:HGJW7DSXY:4:2357:10601:24956\_1:N:0:TCTGCAAG+GCTGCACT  
TCCAGTCAACACTAGTTCGAGTGCTGCTTTGGATTACGATGACGTGAGAATAGGTGAAGGGATAGTTT  
TTACCTCGACCAACATTAAGGCGGCGGCGACTAATCTTAAAGCTTCACCCAAAATGAAGGACACTTCG  
AAA  
+  
F:FFFFFFFFFFFFFFFFFFFFFFFFFFFFFFFF:FFFFFFFFFFFFFFFF:FFFFFFFFFFFFFFFF  
FFFFFFFFFFFFFFFFFFFFFFFFFFFFFFFFFFFFFFFFFFFFFFFFFFFFFFFFFFFFFFFFFFFF  
FFF  
@A00721:190:HGJW7DSXY:4:2438:17906:17628\_2:N:0:TCTGCAAG+GCTGCACT  
CAAATTCTTTTGATACAACCTCTAGCCTTCAAGTGGGGTATGCCTGCGGAATACGCTTGCTATTCACCA  
GATTGGTTCGAACCCGTTGATGCTATGTCAGAAGAAGCTATTCAAGCT  
+  
FFFFFFFFFFFFFFFFFFFFFFFFFFFFFFFFFFFFFFFFFFFFFFFFFFFFFFFFFFFFFFFFFFFF:FFFFFFF,,  
FF:FFFFFFFFFFFFFFFF:FFFFFFFFFFFFFFFFFFFFFFFFFFFFFFFFFFFFFFFF  
@A00721:190:HGJW7DSXY:4:2475:28103:18944\_2:N:0:TCTGCAAG+GCTGCACT  
AAACAAGCCCAGACTCAAGGAGTCCAATCAAAGGTTTTGAATTTAGCTCAACTGGGGAGACGTGCTTA  
AATGGGTGATAAAAATTATTTAGAGATCTTTCTACTTACAAAGGACA  
+  
FFFFFFFFFFFFFFFFFFFFFFFFFFFFFFFFFFFFFFFFFFFFFFFFFFFFFFFFFFFFFFFFFFFF  
FFFFFFFFFFFFFFFF:FFF:FFFFFFFFFFFFFFFFFFFFFFFFFFFFFFFF  
@A00721:190:HGJW7DSXY:4:1601:17607:34053\_1:N:0:TCTGCAAG+GCTGCACT  
TTTTGTTACCAAATTCTTGCTTTCAACGAAGTCTCTGATTTTATTAATCATTACTTTAACGATCTCT  
CGGTCAATTTACTCTGTACTTGATCTACGTCGTTTAACTGTCGGAACAACCTTTACTTAGAATGACTCT  
AT  
+  
FFFFFFFFFFFFFFFFFFFFFFFFFFFFFFFF:FFFFFFFFFFFFFFFFFFFFFFFFFFFFFFFF:FFFFFFF  
FFFFFFF,FFFFFFFFFFFFFFFFFFFFFFFFFFFFFFFF:F:FF,,FF,FFFF,F:FFFFFFFF::F:F,F:F  
FF  
@A00721:190:HGJW7DSXY:4:1426:22580:14606\_1:N:0:TCTGCAAG+GCTGCACT  
TAATAGATTAATAAAGGATGAGTACGAAAACCAACTCTTCGTTACGAGACCTGATGGTAGAATAGATT  
TAGTCTCTACACCCATCTCAACGAGGATAAAGCGAGTTTTCCGTCCTGAACGTAATACACGAAGAGAT  
CAT  
+  
FFFFFFFFFFFFFFFF:FFFFFFF:FFFFFFFFFFFFFFFFFFFFFFFFFFFFFFFF:FFFFFFFFF:FFF  
FFFFFFFFFFFFFFFFFFFFFFFFFFFFFFFFFFFFFFFFFFFFFFFFFFFFFFFFFFFFFFFFFFFF  
FFF  
@A00721:190:HGJW7DSXY:4:2630:20175:1110\_2:N:0:TCTGCAAG+GCTGCACT  
TCAAATGAGGTCAAAGCTCTATTTATTAACGAACCTATTATCCGATTCTTCGAGGGTATCACTACCAC  
TGATCTGCCGACTTTAGTCAAGGAACCTCAATTCCTTCGATGTTTATA  
+  
:FFFFFFFFFFFFFFFF:FFFFFFFFFFFFFFFFFFFFFFFFFFFFFFFF:FFFFFFFFF,FFFFFFFFF:FFF  
FFFFFF:F:FFFFFFFFFFFF,:FFFF:FFFF::FF:,FFFFFFFF  
@A00721:190:HGJW7DSXY:4:2311:25798:10410\_1:N:0:TCTGCAAG+GCTGCACT  
GACAAATTTTAGAACTTTATTTCAAGAACTCTCTCCGATCACCTTGGTGTGATCTCCCGAGGATCTTT  
TCAATAAGATGTATGATGATAATCTACTATTTTTAAATAGTGATATTCAGCGTATACTTGAATACTTT  
ATC  
+  
FFFFFFFFFFFFFFFFFFFFFFFFFFFFFFFFFFFFFFFFFFFFFFFFFFFFFFFFFFFFFFFFFFFF:FFFF  
FFFFFFFFFFFFFFFFFFFFFFFFFFFFFFFF:FFFFFFFFFFFFFFFFFFFFFFFFFFFFFFFFFFFF  
FFF



@A00721:190:HGJW7DSXY:4:1474:26856:31657\_1:N:0:TCTGCAAG+GCTGCACT  
CAGAGTGACTGGAGTTCAGACGTGTGCTCTTCCGATCTAGCAGTCGCTGGGGAAGAGAATTGCGTGG  
GTTGAAGGCCGACGCTTCGAGCTTGAGTGTGACGAGGCCGGTGACGTTTTTGTCAACGGCGTTTGGAG  
GAT

+

FFFFFFFF,FFFFFFFF:FFFFFFFFFFFFFFFFFFFFFFFFFFFFFFFFFFFFFFFFFFFFFFFF  
FFF,FFFFFFFFFFFFFFFF,F:FFFFFFFFFFFF:FFFFFFFFFFFFFFFFFFFFFFFF:FFFFFF  
FFF

@A00721:190:HGJW7DSXY:4:1551:24117:36088\_2:N:0:TCTGCAAG+GCTGCACT  
TAACTATGGGGCGAAGATCCCCTATGGAGTCTTGAAGGACTTAGGTTGGCATATTTATGCCGACGATA  
ATAAGCATGTCACCCTTAAGCACCAGGTAAGCTCGGGACTTACAAGA

+

FF:FFFFFFFFFFFFFFFFFFFF,FFFFFFFFFFFFFFFFFFFFFFFFFFFFFFFFFFFFFFFFFFFF  
FFFFFFFFFFFFFFFFFFFFFFFFFFFFFFFFFFFFFFFFFFFFFFFFFFFFFFFFFFFFFFFF

@A00721:190:HGJW7DSXY:4:1314:15835:3145\_1:N:0:TCTGCAAG+GCTGCACT  
CCTTTCTCCGTCATTGGGGATTTTCGATGTGAGAAGGTGGAAGGTGTCAAGGGTCTTCTTCATGCTGA  
TCTTTCAGGACCTAATCACATCATGATTGATAGTTACGGCTCGTATCGAGTTGGAGGGAGGAAGTTCT  
CCG

+

FFFFFFFFFFFFFFFFFFFFFFFFFFFFFFFFFFFFFFFFFFFFFFFFFFFFFFFFFFFFFFFFFFFF  
FFFFFFFFFFFFFFFFFFFFFFFFFFFFFFFFFFFFFFFFFFFFFFFFFFFFFFFFFFFFFFFFFFFF  
FFF

@A00721:190:HGJW7DSXY:4:1201:18728:2487\_1:N:0:TCTGCAAG+GCTGCACT  
AGACGTGTGCTCTTCCGATCTGGAACTTCGTGAGAAGATGAGGAAGTCTAAGAGGAGGAGTTTGAGG  
AAGGCTCTAGAGAAGATCTACCACCTGGAGAAGGCAAGTGGAGAGTCCAGAAGTTGATGAAGAAGGA  
TTA

+

FF:FFFFFFFFFFFFFFFFFFFFFFFFFFFFFFFFFFFFFFFFFFFFFFFFFFFFFFFFFFFFFFFF  
FFFFFFFFFFFFFFFFFFFFFFFFFFFFFFFFFFFFFFFFFFFFFFFFFFFFFFFFFFFFFFFFFFFF  
FFF

@A00721:190:HGJW7DSXY:4:1410:29206:8985\_1:N:0:TCTGCAAG+GCTGCACT  
AGGTGGATGAGGGAGGTTGTTTCTTTGGAGTTTTAGATAATCTTTGAGAAGGGGTCATAGAGCCAGC  
AAGAGAAGCTTATATGCTGGTTTAAGTGATGATTATCACTCCTTGAGAAGACAAGCCACATTAAGATA  
TAA

+

FFFFFFFFFFFFFFFFF:,FFFFFFFFFFFFFFFFFFFFFFFFFFFFFFFFFFFFFFFFFFFFFFFF  
FFFFFFFFFFFFFFFFFFFFFFFFFFFFFFFFFFFFFFFFFFFFFFFFFFFFFFFFFFFFFFFFFFFF  
FFF

@A00721:190:HGJW7DSXY:4:1336:28113:27477\_1:N:0:TCTGCAAG+GCTGCACT  
TATTGTTCTTCCGGGAAGTTGTGGGATTTAACTTTGACTCACCTACTCCGATCAGATCCGGATGGTT  
TGATTGGTATGGACTACTCGACTTTTGATCTGGAGTTGTCTAGGGTCATGGCAGATACTACCGATAAG  
GTG

+

F,FF,,F:FFF,FF:FF,FFFF,F::FF:,F:FFFF,FF,,FFFF:,FFF,F:FFFF,FFF:FF  
FFFFFFFF,FFF,FF,:FF,,F,FFFFFFFFFFFF,FF:FFFF::FFFFFFFFF,:FF:,F,,FFFF,F  
FFF

@A00721:190:HGJW7DSXY:4:2234:4797:3004\_1:N:0:TCTGCAAG+GCTGCACT  
GAGTCATTATGATTCAAAACCTATCGTTGTGCTACCTTACAAGTTGAGGAGACTTTACAGCGGCTTA  
TTGTCGCGCAGTTTCCAGAATTGCGGTTGAAGTTCACCCATTCTATCTTGAATGCTCACGCCGTCGC

+

FF,F:,::,,FFF:FFFF,FFF:,F::FFFFFFFFFFFFFFFFFFFFFFFFFFFFFFFFFFFF:FFFFFF  
FFFFFFFFFFFFFFFFFFFFFFFFFFFFFFFFFFFFFFFFFFFFFFFFFFFFFFFFFFFFFFFFFFFF

@A00721:190:HGJW7DSXY:4:2554:24180:18944\_2:N:0:TCTGCAAG+GCTGCACT  
TGTGAAAGATGCATCGAGGTATACGTCTAGGAACATTGATTGGGAACGTACCTACTCACGAGACGTCA

TGAAAGCTATCGGAGGGAAGCAAAATGTTCCGTTCTGTTACAAGAACG  
+  
FFFFFFFFFFFFFFFFFFFFFFFF:FFFFFFFFFFFF:FFFFFFFFFFFFFFFFFFFFFFFFFFFFFFFFFFFFFFFF  
:FFFF:FF:FFFFFFFFFF:FFFFFFFFFFFFFFFFFFFFFFFFFFFFFFFFFFFFFFFF  
@A00721:190:HGJW7DSXY:4:1261:1669:10676\_1:N:0:TCTGCAAG+GCTGCACT  
CATTTTCGTCTTAGTTTGTCCCGCGCAATTATTGGACACGATGAAAAATGACATACCCGTTCTGACCT  
TGGTATCGTTATCCGTCATGGAGATGATGGCGCATCACTTGATTACTATATGCCCGAAGGATTGGGTT  
ATT  
+  
FFFFF:F:FFFFFFFFFF:FFFFF:FFFFFFFFFFFFFFFFFFFFFFFFFFFFFFFFFFFFFFFF:FFFFFFFFFFFFFFFF  
FFFFFFFFFFFFFFFFFFFFFFFFFFFFFFFFFFFFFFFFFFFFFFFFFFFFFFFFFFFFFFFFFFFFFFFFFFFFFFFF  
FF:  
@A00721:190:HGJW7DSXY:4:2367:24144:32283\_1:N:0:TCTGCAAG+GCTGCACT  
CGAATATGTTACGACATGGCTTCGTAACAACAGTGCAGGATTGTCATCTCGGGGAAAGTGATTACCC  
AAGATGTTTCATATAGATACGAGATACCTAGAGAAGGTCGCAGCGATCTTACTCGTTATCGGAGCTAAG  
AAG  
+  
FFFFFFFFFFFFF:F:::FFFFFFFFFF:FFFFFFFFF:FFFFFFFFFFFFFFFFFFFFFFFF:FFF:FFFFFFFFFFFF  
FFFFFFFFFFFFFFFFFFFFFFFFFFFFFFFF:FFFFFFFFFFFFFFFFFFFF::FFFFFFFFFFFFFFFFFFFFFFFF:FF  
FFF  
@A00721:190:HGJW7DSXY:4:2332:18358:13620\_1:N:0:TCTGCAAG+GCTGCACT  
ACCGGAGGTGATCTCTCTGCTTCTGCGTTACTGAGAGAAAAGATTGAGGACGCCTACGGTGACTTTAT  
GGACAAGATGCAAGTTCTTGGGAAATACTTGTTTCCCTTTTtaggtttAGTAGGTGATCTTGACGTCG  
ATT  
+  
FFFFFFFFFFFFFFFFFFFFFFFF:FFFFFFFFFFFFFFFFFFFF:FFFFFFFFFFFFFFFFFFFFFFFFFFFFFFFFFFFF  
FFFFFFFFFFFF:FFFFFFFFFFFFFFFFFFFFFFFFFFFFFFFFFFFFFFFFFFFFFFFFFFFFFFFFFFFFFFFFFFFF  
FFF  
@A00721:190:HGJW7DSXY:4:2667:29658:8328\_2:N:0:TCTGCAAG+GCTGCACT  
GTCAAGAAGTCGCTCGGCGTTGTTCTTGAAAACCAAGTTAAGAAGGAGGCTGATCATGGAGTCTTTGT  
ACCTTCTGTCAAACCTTCGAGGTTGAGCTACGAGAGGTGATCCCGGATG  
+  
FFFFFFFFFFFFFFFFFFFFFFFFFFFFFFFFFFFFFFFFFFFFFFFFFFFFFFFFFFFFFFFFFFFFFFFFFFFFFFFF  
FFFFFFFFFFFFFFFFFFFFFFFFFFFFFFFFFFFFFFFFFFFFFFFFFFFFFFFFFFFFFFFFFFFFFFFF  
@A00721:190:HGJW7DSXY:4:1104:14868:18944\_2:N:0:TCTGCAAG+GCTGCACT  
GTTGAGAAGTGTGCTTTACAAGGAGTTAGACTCTTCTTCAAGTTTTTAGATCTTCTTGATAATCTTAA  
AGAAAAATTTTCAATAAACTAATGAGAGGTATAGGCTTAGTCAAGTC  
+  
FFFFFFFFFFFFFFFFFFFFFFFFFFFFFFFFFFFFFFFFFFFFFFFFFFFFFFFFFFFFFFFFFFFFFFFFFFFFFFFF  
FFFFFFFFFFFFFFFFFFFFFFFFFFFFFFFFFFFFFFFFFFFFFFFFFFFFFFFFFFFFFFFFFFFFFFFF  
@A00721:190:HGJW7DSXY:4:2627:12147:31516\_2:N:0:TCTGCAAG+GCTGCACT  
AGGAGTTGAGAGAATTACTCAGATTCAATCTGGCATCACTGAACGTCTACAACGAGTTAGGGAGTGGC  
TAGGTTTTAAAAGATCCTTTGCACAAGCAATACCTTCCACTGAGTTCA  
+  
FFFFFFFFFFFFFFFFFFFFFFFFFFFFFFFFFFFFFFFFFFFFFFFFFFFFFFFFFFFFFFFFFFFFFFFF:FFFF:FFFFFFFFFFFF  
FFFFFFFFFFFFFFFFFFFFFFFFFFFFFFFFFFFFFFFFFFFFFFFFFFFFFFFFFFFFFFFFFFFFFFFF  
@A00721:190:HGJW7DSXY:4:2469:8739:8046\_2:N:0:TCTGCAAG+GCTGCACT  
TTCTTTTACCTTTTGGAGGTCCAGGAACCTTTGCTCCTAGTGTCTTTTCTAGAGTCCAAGGACGTTTC  
CGTCGGAGGATGACAGGTGGGAGACCGCTCAATAACACTCTATTGAAT  
+  
FFFFFFFFFFFF:FFFFFFFFFFFFFFFFFFFFFFFFFFFFFFFFFFFF,FFFFFFFFFFFFFFFFFFFFFFFFFFFFFFFF  
FFFFFFFFFFFFFFFFFFFFFFFFFFFFFFFFFFFFFFFFFFFFFFFFFFFFFFFFFFFFFFFFFFFFFFFF  
@A00721:190:HGJW7DSXY:4:1632:1967:5807\_1:N:0:TCTGCAAG+GCTGCACT  
TCTGCCACTTCTAATTTTAGGAAACGTCGCGAAAAGAAAGTTCATGAGGATGTCTTGGTCGAAAAATA

TCGCCGGGAAC TTCTAATAGAGGATCCTGATGACATTATTTCAACGGATACCGATCTCAGTTCTACCA  
CAG

+

FFFFFFFF:FFFFFFFF:FFFFFFFFFFFFFFFFFFFFFFFFFFFFFFFFFFFFFFFFFFFFFFFF  
FFFFFFFFFFFFFFFFFFFFFFFFFFFFFFFFFFFFFFFFFFFFFFFFFFFFFFFFFFFFFFFF:FFFFFFFF:FFFFFFFF  
FFF

@A00721:190:HGJW7DSXY:4:2601:23457:18756\_1:N:0:TCTGCAAG+GCTGCACT  
AACTGTCTCCACTGATTCGGAATTAGAGAAAGACGACCTTCTTGTGGGGACTGAGACCTCTGAATTTT  
CAGGGTGCCCTGATGAGGACGTTGAAAGGGATAATTTCAACTCTGAGACTTCTAAAAGTGTTCAAAA  
GAC

+

FFFFFFFFFFFFFFFFFFFFFFFFFFFFFFFFFFFFFFFFFFFFFFFFFFFFFFFFFFFFFFFFFFFF  
FFFFFFFFFFFFFFFFFFFFFFFFFFFFFFFFFFFFFFFFFFFFFFFFFFFFFFFFFFFFFFFFFFFF  
FFF

@A00721:190:HGJW7DSXY:4:1354:5104:10582\_1:N:0:TCTGCAAG+GCTGCACT  
TGAGTGATCGTATTAGAACAGCTGATTCTTATTGCATGAACGTCGCTGAGGTCAAACCTGTGGACGTT  
CTTTTCATCGACGAATTATTCATGATTCACGCTGGTCAGACCCTTTTCTTACACATCTACTTAAGGC  
GGC

+

FFFFFFFFFFFFFFFFFFFFFFFF:FFFFFFFFFFFFFFFFFFFFFFFFFFFFFFFFFFFFFFFFFFFF  
FFFFFFFFFFFFFFFFFFFFFFFFFFFFFFFFFFFFFFFFFFFFFFFFFFFFFFFFFFFFFFFFFFFF  
FFF

@A00721:190:HGJW7DSXY:4:2640:25409:27211\_1:N:0:TCTGCAAG+GCTGCACT  
AATCGTATTGATCTCCAAGTCGAACTACTTCAACATCAACGACATCATTCTTGATGAGTGTCTGTT  
TTATCGAAGTCTCAGTTATCGCTGCCCGGCCGACGTTTGTGCGAACTCTCAGAGGTTTACGGCAGAA  
AAA

+

FFFF:FFFFFFFFFFFFFFFFFFFFFFFFFFFFFFFFFFFFFFFFFFFFFFFFFFFFFFFFFFFF  
FFFFFFFF,FFFFFFFFFFFFFFFFFFFFFFFFFFFFFFFFFFFFFFFFFFFFFFFFFFFFFFFFFFFF  
FFF

@A00721:190:HGJW7DSXY:4:2214:14705:1344\_1:N:0:TCTGCAAG+GCTGCACT  
AACCCTTATATCGAGGCTATCGAGGACGATGAGTATCTTGAAGTTGTTGACGACAAGCCTCAAGAGG  
GTAGAGGACCACCTGGATCTTCTACTGTCTCTGCCTTCCAAGATTTCTTAGAAGAGGTTATTCTGGA  
ACC

+

FFFFFFFF:F:FFFFFFFFFFFFFFFFFFFFFFFFFFFFFFFFFFFFFFFFFFFFFFFFFFFFFFFF  
FFFFFFFFFFFFFFFFFFFFFFFFFFFFFFFFFFFFFFFFFFFFFFFFFFFFFFFFFFFFFFFF:FFFFFFFFFFFFFFFF  
FFF

@A00721:190:HGJW7DSXY:4:1463:1154:23844\_1:N:0:TCTGCAAG+GCTGCACT  
TATAGGTAAGAAGCCCCTTGAGCCGCGTAGTCAGCGGTTTAGCTGTATCATCAGTCAGAGTATACCC  
GATAGGGTACCGAGTCTCCAAGAGAATATTTATTCTTATGAGGCTCGAACTTCAACGTTTTCAACAAC  
GGA

+

FFFFFFFFFFFFFFFFFFFFFFFFFFFFFFFFFFFFFFFFFFFFFFFF,FFFFFFFFFFFFFFFFFFFF:FFFF  
FFFFFFFFFFFFFFFFFFFFFFFFFFFFFFFFFFFFFFFFFFFFFFFFFFFFFFFFFFFFFFFF:FFFFFFFF  
FFF

@A00721:190:HGJW7DSXY:4:1106:19642:35415\_2:N:0:TCTGCAAG+GCTGCACT  
TTGATGATTTTATCACTTTATTATGACCTTGGAAGTTTTCGGCTGTGGTTGTGCTGGGGACGATTC  
CATTCTGTTTTCAAAGACTCCAATAACTGATCATTCTGATCATATGAT

+

FFFFFFFFFFFFFFFFFFFFFFFFFFFFFFFFFFFFFFFFFFFFFFFF:FFFFFFFFFFFFFFFFFFFF  
FFFFFFFFFFFFFFFFFFFFFFFFFFFFFFFFFFFFFFFF:FFFFFFFFFFFFFFFFFFFF

@A00721:190:HGJW7DSXY:4:1648:15492:31610\_2:N:0:TCTGCAAG+GCTGCACT  
TCCGAGAGGTTTATCCTGATGTGGAGGGAGTTCTTGAAGCATCCCGACCTTTCCTTGTGAAAATTTTG

+

@A00721:190:HGJW7DSXY:4:1539:31665:14027\_1:N:0:TCTGCAAG+GCTGCACT  
GATTAAGACTCTTCCGAAAGGCCGAACCTTTGGGAATTTGAAGCTCAGGGTGAAGCACACGTTTGACCG  
TGACGAACTGTGGTGTCTTGATCTACGTTACGGATATACTCTCCTTGAGTTCACCTCGTAAGGACACT  
ACC

+

@A00721:190:HGJW7DSXY:4:2147:4010:25441\_2:N:0:TCTGCAAG+GCTGCACT  
CAGGGGTTTTCGAATAGTGATAGCCACCCGCCTTACAGAGGGGCAGCAGCATGACCATAATTGGTATT  
GACTTTGGTACCACCTTTTCTACTGTCTGTCTCGCCTCTTTCGAATGAA

+

@A00721:190:HGJW7DSXY:4:2618:8296:33927\_1:N:0:TCTGCAAG+GCTGCACT  
AATCATTGTTTTTCTAATAATGATGACACTATTGTTTATGGATATGATGCTATTACTCATGATGGTT  
ACGGTCAGGGAGGATTCTCAGTTTACAAGGACCTTAAGCGATGGATCGGGGTTAATTCTAAACATTA  
CCC

+

@A00721:190:HGJW7DSXY:4:2657:23194:25285\_2:N:0:TCTGCAAG+GCTGCACT  
CAGTACCCAGTCAGTATACCTCTACGCAAAGATATTTTCATGAAACTACAGAGGAACGTACCGGATTA  
CCTGTCTTTCATATTATGAATGAACCTTCGGCCGCTCTCTTTGCTTCG

+

@A00721:190:HGJW7DSXY:4:2365:6171:15624\_1:N:0:TCTGCAAG+GCTGCACT  
CTCGTCAATACTTTTCAATAATATACGTCTTGAACCTCACTTATGACGATCTAGTGAAATTAACGCGTC  
CTTTTCTGGAACGTAGTTTTACTATTATGAACAAAGTTATCAAAGATAGTGGCATTCAAGGCAAACCTT  
ACC

+

@A00721:190:HGJW7DSXY:4:2207:28854:27790\_1:N:0:TCTGCAAG+GCTGCACT  
CTATTAAGCTGTTGAGCGGTAATTACACCTAAACGAGCTCGATCTGCCATCGCTGAAGGATGTGCA  
CTCTTTTCTGCTACTTTAACGGAGCGTAGTGTACTCTTCGTCGATTGTATCAACAGTAACATTACTTC  
TAA

+

@A00721:190:HGJW7DSXY:4:2211:15393:31219\_2:N:0:TCTGCAAG+GCTGCACT  
GCTATCGTTCAGGTGCATGGGGTTGGATAGCCAATATTGAAGTGGACACCTCTGGTAGTATCGAAGTA  
AAGATAACCAATAAGGAAGGAGCTTATACTATGGTTGAATCAACTAAG

+

```
FF:FFFF:FFFFFFFF,FFFFFFFFFFFFFFFFFFFFFFFF:FFFFFFFFFFFFFFFFFFFFFFFF
FFFFFFFFFFFFFFFFFFFFFFFF:FFFFFFFFFFFFFFFFFFFFFFFF
```

$+$ 

@

+

@

 $+$ 

@

+

@

+

@

+

©

+

@

+



@A00721:190:HGJW7DSXY:4:2129:13584:15906\_1:N:0:TCTGCAAG+GCTGCACT  
TTTTGTTACCAAATTCTTGGCTTTCAACGAAGTCTCTGATTTTATTAATCATTACTTTAACGATCTCT  
CGGTCATTTACTCTGTACTTGATCTACGTCGTTTAACTGTCGGAACAACCTTTACTTAGAATGACTCT  
AT

+

FFFFFFFFFFFFFFFFFFFFFFFFFFFFFFFFFFFFFFFFFFFFFFFFFFFFFFFFFFFFFFFFFFFFFFFF  
FFFFFFFFFFFFFFFFFFFFFFFFFFFFFFFFFFFFFFFFFFFFFFFFFFFFFFFFFFFFFFFFFFFFFFFF  
::

@A00721:190:HGJW7DSXY:4:1464:14009:33395\_1:N:0:TCTGCAAG+GCTGCACT  
TAATAGATTAATAAAGGATGAGTACGAAAACCAACTCTTCGTTACGAGACCTGATGGTAGAATAGATT  
TAGTCTCTACACCCATCTCAACGAGGATAAAGCGAGTTTCCGTCCTGAACGTAATACACGAAGAGAT  
CAT

+

FFFF:FFFFFFFF:FFFFFFFFFFFFFFFFFFFFFFFFFFFFFFFFFFFFFFFFFFFFFFFFFFFFFFFF  
FFFFFFFFFFFFFFFFFFFFFFFFFFFFFFFFFFFFFFFFFFFFFFFFFFFFFFFFFFFFFFFFFFFFFFFF  
FFF

@A00721:190:HGJW7DSXY:4:2630:20546:1125\_2:N:0:TCTGCAAG+GCTGCACT  
TCAATGAGGTCAAAGCTCTATTTATTAAACGAAGTATTATCCGATTCTTCGAGGGTATCACTACCAC  
TGATCTGCCGACTTTAGTCAAGGAAGTCAATTCCTTCGATGTTTATA

+

FFFFFFFFFFFFFFFFFFFFFFFFFFFFFFFFFFFFFFFFFFFFFFFFFFFFFFFFFFFFFFFFFFFFFFFF  
FFFFFFFFFFFFFFFFFFFFFFFFFFFFFFFFFFFFFFFFFFFFFFFFFFFFFFFFFFFFFFFFFFFFFFFF  
FFFF

@A00721:190:HGJW7DSXY:4:2506:14380:28119\_1:N:0:TCTGCAAG+GCTGCACT  
GACAAATTTTAGAACTTTATTTTCAAGAACTCTCTCCGATCACCTTGGTGTGATCTCCCGAGGATCTTT  
TCAATAAGATGTATGATGATAATCTACTATTTTTAAATAGTGATATTCAGCGTATACTTGAATACTTT  
ATC

+

FFFFFFFFFFFFFFFFFFFFFFFFFFFFFFFFFFFFFFFFFFFFFFFFFFFFFFFFFFFFFFFFFFFFFFFF  
FFFFFFFFFFFFFFFFFFFFFFFFFFFFFFFFFFFFFFFFFFFFFFFFFFFFFFFFFFFFFFFFFFFFFFFF  
FFF

@A00721:190:HGJW7DSXY:4:2221:24424:16955\_1:N:0:TCTGCAAG+GCTGCACT  
CAAAAAGTTGGAAGAGGTCTATGATATTTATTTTACTTATACTTTAAATAGCACCGATTATAACTTGA  
CTGTTGATAATATTACAATAGCTCTTTCTCAGAAGATTAGAGAAGTAACTCGGTGAACACGTCGGTAG  
CAT

+

FFFFFFFFFFFFFFFFFFFFFFFFFFFFFFFFFFFFFFFFFFFFFFFFFFFFFFFFFFFFFFFFFFFFFFFF  
FFFFFFFFFFFFFFFFFFFFFFFFFFFFFFFFFFFFFFFFFFFFFFFFFFFFFFFFFFFFFFFFFFFFFFFF  
FFF

@A00721:190:HGJW7DSXY:4:1545:10682:13823\_2:N:0:TCTGCAAG+GCTGCACT  
ACTTCAAGTACCTGAAGTTTACATTTTAAATGGTATGGTATAATGTGTCTTACAAATAGAACCTTCAC  
TCTCGGTAATGAGAGTGATTCTTAATATTCTAGTAACCGCTATGTG

+

FFFFFFFFFFFFFFFF:FFFFFFFF:FFFFFFFFFFFFFFFFFFFFFFFFFFFFFFFF:FFFFFFFF:FFFFFFFF  
FFFFFFFFFFFFFFFFFFFFFFFFFFFFFFFFFFFFFFFFFFFFFFFF:FFFFFFFFFFFFFFFF

@A00721:190:HGJW7DSXY:4:2621:2329:1955\_1:N:0:TCTGCAAG+GCTGCACT  
TAATTCAATAGCTTTAGTATTATTTACTATCGCCTTTATTGAAAATTGTATAAGAGTTAATTGCTTAC  
ACAAAAGTGACGCGCGAAGGAATCTTAATTGATTGAAGCTAGGCGTTGGGAGAATGAAGTCCGCTT  
CCC

+

FFFFFFFFFFF:FFFFFFFFFFFFFFFFFFFFFFFF:FFFFFFFFFFFFFFFF:FFFFFFFF:FFFFFFF  
FFFFFFFFFFFFFFFF:FFFFFFFFFFFFFFFFFFFFFFFFFFFFFFFFFFFFFFFFFFFFFFFF:FFF  
FFF

@A00721:190:HGJW7DSXY:4:2545:1967:12696\_2:N:0:TCTGCAAG+GCTGCACT  
GCCGGTCGGCAGATCGGCACCACTGGTCTCTACGTTCAGGGACCCGCTGTGCAGAATAACCTTCCCAA

ATCTAGATCTGCACAGAAGAAGGCTGAAGGTCGTTACCGGACGACCAC

+

FFFFFFFFFFFFFFFFFFFFFFFFFFFFFFFFFFFFFFFFFFFFFFFFFFFFFFFFFFFFFFFFFFFFFFFF  
FFFFFFFFFFFFFFFFFFFFFFFFFFFFFFFFFFFFFFFFFFFFFFFFFFFFFFFFFFFFFFFF

@A00721:190:HGJW7DSXY:4:2371:32551:10708\_1:N:0:TCTGCAAG+GCTGCACT  
CAGTACCTCAGTCAAAAGTCACATTCACCACTCCCATACCAATCAATGATGTGACTATACAGTTCGGC  
CATTTCAAGAGTGGTCAATACGTCGTGGGAGGTACTGAAGCCTTCCCCTCCGCTGGCACGAAGAACAC  
TCC

+

FFFFFFFFFFFFFFFFFFFFFFFFFFFFFFFFFFFFFFFFFFFFFFFFFFFFFFFFFFFFFFFFFFFFFFFF  
FFFFFFFFFFFFFFFFFFFFFFFFFFFFFFFFFFFFFFFFFFFFFFFFFFFFFFFFFFFFFFFFFFFFFFFF  
FFF

@A00721:190:HGJW7DSXY:4:2450:5493:8594\_1:N:0:TCTGCAAG+GCTGCACT  
AATAGTTCTTCTGACCAGAAATGAAAAGGGGTTTACCAGGGTAGTCTCTAAGTCTACCAGGAAGAGGGG  
AAATGTCCCCAAAACCTGAGAAGAATAAAGGGAAAGGTCCATCAGGACCTAAGAAGGGGAAATTACCCC  
TAA

+

FFFFFFFFFFFFFF:FFFFFFFFFFFFFFFFFFFFFFFFFFFFFFFFFFFFFFFFFFFFFFFFFFFFFFFF  
FFFFFFFFFFFFFFFFFFFFFFFFFFFFFFFFFFFFFFFFFFFFFFFFFFFFFFFFFFFFFFFFFFFFFFFF  
FFF

@A00721:190:HGJW7DSXY:4:1402:32298:18787\_1:N:0:TCTGCAAG+GCTGCACT  
AAGAGGCCGCTGCTACGAAGTCGCTGAAGGCGGCTTGGGTCATTAAGGGTAGCTGTAAAGTTGCGCCT  
GCCGACCCCATCTTTGAGACCAAGACTCTCTACAGTAGGTTCTGTCCTAAGATCGGAAGAGCACACGT  
CTG

+

FFFFFFFFFFFFFFFFFFFFFFFFFFFFFFFFFFFFFFFFFFFFFFFFFFFFFFFFFFFFFFFFFFFFFFFF  
FFFFFFFFFFFFFFFFFFFFFFFFFFFFFFFFFFFFFFFFFFFFFFFFFFFFFFFFFFFFFFFFFFFFFFFF  
FFF

@A00721:190:HGJW7DSXY:4:2123:16179:35493\_1:N:0:TCTGCAAG+GCTGCACT  
CAGAGTGACTGGAGTTCAGACGTGTGCTCTTCCGATCTAGCAGTCGCTGGGGAAGAGAATTGCGTGG  
GTTGAAGGCCGACGCTTCGAGCTTGAGTGTGACGAGGCCGGTGACGTTTTTGTCAACGGCGTTTGGAG  
GAT

+

FFFFFFFFFFFFFF:FFFFFFFFFFFFFFFFFFFFFFFFFFFFFFFFFFFFFFFFFFFFFFFFFFFFFFFF  
FF:FFFFFFFFFFFFFFFFFFFFFFFFFFFFFFFFFFFFFFFFFFFFFFFFFFFFFFFFFFFFFFFFFFFF  
FFF

@A00721:190:HGJW7DSXY:4:2528:11406:8782\_2:N:0:TCTGCAAG+GCTGCACT  
TAACTATGGGGCGAAGATCCCCTATGGAGTCTTGAAGGACTTAGGTTGGCATATTTATGCCGACGATA  
ATAAGCATGTCACCCTTAAGCACCGAGGTAAGCTCGGGACTTACAAGA

+

FFFFFFFFFFFFFFFFFFFFFFFFFFFFFFFFFFFFFFFFFFFFFFFFFFFFFFFFFFFFFFFFFFFF,  
:FFFFFFFFFFFFFFFFFFFFFFFFFFFFFFFFFFFFFFFFFFFFFFFFFFFFFFFFFFFFFFFF

@A00721:190:HGJW7DSXY:4:1360:14082:15295\_1:N:0:TCTGCAAG+GCTGCACT  
CCTTTCCTCCGTCATTGGGGATTTGATGTGAGAAGGTGGAAGGTGTCAAGGGTCTTCTTCATGCTGA  
TCTTTCAGGACCTAATCACATCATGATTGATAGTTACGGCTCGTATCGAGTTGGAGGGAGGAAGTTCT  
CCG

+

FFFF:FFFFFFFFFFFFFFFFFFFFFFFFFFFFFFFFFFFFFFFFFFFFFFFFFFFFFFFFFFFFFFFF  
FFFFFFFFFFFFFFFFFFFFFFFFFFFFFFFFFFFFFFFFFFFFFFFFFFFFFFFFFFFFFFFFFFFFFFFF  
FFF

@A00721:190:HGJW7DSXY:4:1605:25129:4742\_1:N:0:TCTGCAAG+GCTGCACT  
AGACGTGTGCTCTTCCGATCTGGAACTTCGTGAGAAGATGAGGAAGTCTAAGAGGAGGAGTTTGAGG  
AAGGCTCTAGAGAAGATCTCACCACTGGAGAAGGCAAGTGAGAGTCCAGAAGTTGATGAAGAAGGA  
TTA

[illegible]

FFFFFFFF:FFFF,FFFFFFFFFFFFFFFFFFFFFFFF:FFFFFFFFFFFF,FFFFFFFFFFFFFFFFFFFFFFFF  
FFF

@A00721:190:HGJW7DSXY:4:1227:2718:2284\_2:N:0:TCTGCAAG+GCTGCACT  
AAGAAGTCGCTCGCGTTGTTCTTGAACCAAGTTAAGAAGGATGCTGATCATGGAGTCTTTGTACC  
TTCTGTCAAACCTTCGAGGTTACGCTACGAGAGGTGATCCCGGATGTGG

+

FFFFFFFFFFFF:FFF:FFFFFFFFFFFFFFFFFFFFFFFFFFFFF,F,:FFFFFFFF:FFFFFFFFFFFF:F  
F,FFF:FFFFFFFFFFFF,:F:F,FFFFFFFFF:FFFF,F:F:F,FF:F

@A00721:190:HGJW7DSXY:4:2328:12274:19492\_2:N:0:TCTGCAAG+GCTGCACT  
GTTGAGAAGTGTGCTTTACAAGGAGTTAGACTCTTCTTCAAGTTTTTAGATCTTCTTGATAATCTTAA  
AGAAAAATTTTCAATAAACTAATGAGAGGTATAGGCTTAGTCAAGTC

+

FFFFFFF:FFFFFFFFFFFFFFFFFFFFFFFFFFFFFFFFFFFFFFFF:FFFFFFFFFFFFFFFFFFFFF:  
FFFFFFFFFFFFFFFFFFFFFFFFFFFFFFFFFFFFFFFFFFFFFFFFFFFFFFFF

@A00721:190:HGJW7DSXY:4:2323:26946:5008\_1:N:0:TCTGCAAG+GCTGCACT  
GAGAATTACTCAGATTCAATCTGGCATCACTGAACGTCTACAACGAGTTAGGGAGTGGCTAGGTTTTA  
AAAGATCCTTTGCACAAGCAATACCTTCCACTGAGTTCATCACCCAGAGTTTCGACGTCGCGGAAAAC  
GAT

+

FFFFFFFFFFFFFFFF,FFFFFF,FFFFFFFFFFFFFFFFFFFFFFFFFFFFFFFFFFFFFFFF:FFFFFFFFFFFF  
FFFFFFFFF:FFFFFFFFFFFF:FFF:FFFFFFFFFFFFFFFFFFFFFFFFFFFFFFFFFFFFFFFFFFFFF  
FFF

@A00721:190:HGJW7DSXY:4:2625:16984:12555\_2:N:0:TCTGCAAG+GCTGCACT  
TTCTTTTACCTTTTGGAGGTCCAGGAACCTTTACTCCTAGTGTCTTTTCTAGAGTCCAAGGACGTTTC  
CGTCGGAGGATGACAGGTGGGAGACCGCTCAATAACACTCTATTGAAT

+

FFFFFFFFFFFFFFFFFFFFFFFFFFFFFFFFFFFFFFFFFFFFF:,FFFF:F:F:FFFFFFFFFFFF:FFFFFFF  
FFFF:FFFFFFFFFFFFFFFFFFFFFFFFFFFF,FFFFFFFFFFFF:FFFFFFF

@A00721:190:HGJW7DSXY:4:2477:4725:16407\_1:N:0:TCTGCAAG+GCTGCACT  
CTGCCACTTCTAATTTTAGGAAACGTCGCGAAAAGAAAGTTTCATGAGGATGTCTTGGTCGAAAAATAT  
CGCCGGGAACCTTCTAATAGAGGATCCTGATGACATTATTTCAACGATACCGATCTCTGTTCTACCAC  
AG

+

FFFF,F:F:FFFFFFFF:FFFF,:FFFFFF:FFFFFFFFFFFF:FFFFFFFFFFFFFFFFFFFFFFFF  
F::,FFFF:FFFF:, :FFFFFF:FFFFFF: :FF,FFFF:FFFFFFFF,FFFF,,FFF,F::FF:  
FF

@A00721:190:HGJW7DSXY:4:1102:7229:25066\_2:N:0:TCTGCAAG+GCTGCACT  
ACTGTCTCCACTGATTCGGAATTAGAGAAAGACGACCTTCTTGTGGGACTGAGACCTCTGAATTTTC  
AGGGTGCCCTGATGAGGACGTTGAAAGGATAATTTCAACTCTGAGAC

+

FFFFFFFFFFFFFFFFFFFFFFFFFFFFFFFFFFFFFFFFFFFFF:FFFFFFFFFFFFFFFFFFFFFFFFFFFF  
FFFFFFFFFFFFFFFFFFFFFFFFFFFFF:FFFFFFFFFFFFFFFFFFFFFFFFFFFFF

@A00721:190:HGJW7DSXY:4:2116:18819:25222\_1:N:0:TCTGCAAG+GCTGCACT  
TGAGTGATCGTATTAGAACAGCTGATTCTTATTGCATGAACGTCGCTGAGGTCAAACCTGTGGACGTT  
CTTTTCATCGACGAATTATTCATGATTCACGCTGGTCAGACCCTTTTCTTACACATCTACTTAAGGC  
GGC

+

FFFFFFFFF:FFFFFFFFFFFFFFFFFFFFFFFFFFFFFFFFFFFFF:F:FFF:FFFFFFFFFFFFFFFFFFFF  
FFFF:FFFFFFFFFFFFFFFFFFFFFFFFFFFFF:FFFFFFFFFFFFFFFFFFFFFFFFFFFFFFFFFFFF  
FFF

@A00721:190:HGJW7DSXY:4:2164:16251:8813\_2:N:0:TCTGCAAG+GCTGCACT  
TATTGATCTCCAAGTCGAACTACTTCAACATCAACGACATCATTCTTGATGAGTGTGTTCTTATC  
GAAGTCTCAGTTATCGCTGCCCGCCGACGTTTGTGCGAACTCTCAG

+

FFFFFFFFFFFFFFFFFFFFFFFFFFFFFFFFFFFFFFFFFFFFFFFFFFFFFFFFFFFFFFFFFFFFFFFF  
FFFFFFFFFFFFFFFFFFFFFFFFFFFFFFFFFFFFFFFFFFFFFFFFFFFFFFFFFFFFFFFFFFFFFFFF  
@A00721:190:HGJW7DSXY:4:2349:12689:25254\_1:N:0:TCTGCAAG+GCTGCACT  
AACCCCTTATATCGAGGCTATCGAGGACGATGAGTATCTTGAAGTTGTTGACGACAAGCCTCAAGAGG  
GTAGAGGACCACCTGGATCTTCTACTGTCTCTGCCTTCCAAGATTTCTTAGAAGAGGTTATTCCTGGA  
ACC  
+  
FFFFFFFFFFFFFFFFFFFFFFFFFFFFFFFFFFFFFFFFFFFFFFFFFFFFFFFFFFFFFFFFFFFFFFFF:FFFFFFFFFFFFFFFFFFFF  
FFFFFFFFFFFFFFFFFFFFFFFFFFFFFFFFFFFFFFFFFFFFFFFFFFFFFFFFFFFFFFFFFFFFFFFF:FFF  
FFF  
@A00721:190:HGJW7DSXY:4:1541:1362:29716\_1:N:0:TCTGCAAG+GCTGCACT  
TATAGGTAAGAAGCCCCTTGAGCCGCGTAGTCAGCGCGTTTAGCTGTATCATCAGTCAGAGTATACCC  
GATAGGGTACCGAGTCTCCAAGAGAATATTTATTCTTATGAGGCTCGAACTTCAACGTTTTTCACAAC  
GGA  
+  
FF:FFFFFFFF:FFFFFFFFFFFFFFFF:FFFFFFFFFFFFFFFFFFFFFFFFFFFFFFFFFFFFFFFF:FFF  
FFFFFFFFFFFFFFFFFFFFFFFFFFFFFFFFFFFFFFFFFFFFFFFFFFFFFFFFFFFFFFFFFFFFFFFF:FFFFFFFFFFFFFFFFFFFF  
FFF  
@A00721:190:HGJW7DSXY:4:1221:28809:36667\_2:N:0:TCTGCAAG+GCTGCACT  
TTGATGATTTTATCACTTTATTATGACCTTGGAAGTTTTTCGGCTGTGGTTGTCGCTGGGGACGATTC  
CATTCTGTTTTCAAAGACTCCAATAACTGATCATTCTGATCATATGAT  
+  
FFFFF:FFFFFFFFFFFFFFFFFFFFFFFFFFFFFFFFFFFFFFFFFFFFFFFFFFFFFFFFFFFFFFFF:FFFFFFFFFFFF  
FFFFFFFFFFFFFFFFFFFFFFFFFFFFFFFFFFFFFFFFFFFFFFFFFFFFFFFFFFFFFFFFFFFFFFFF  
@A00721:190:HGJW7DSXY:4:2227:6081:34882\_2:N:0:TCTGCAAG+GCTGCACT  
TCCGAGAGGTTTATCCTGATGTGGAGGGAGTTCTTGAAGCATCCCGACCTTTCCTTGTGAAAATTTTG  
ATGCGGTTTCATAAGATTATCAGTAATCCTGATTCTACTACGGATTCA  
+  
FFFFFFFFFFFFFFFFFFFFFFFFFFFFFFFFFFFFFFFFFFFFFFFFFFFFFFFFFFFFFFFFFFFFFFFF  
FFFFFFFFFFFFFFFFFFFFFFFFFFFFFFFFFFFFFFFFFFFFFFFFFFFFFFFFFFFFFFFFFFFFFFFF  
@A00721:190:HGJW7DSXY:4:1574:30798:16532\_1:N:0:TCTGCAAG+GCTGCACT  
GATTAAGACTCTTCCGAAAGGCGAACTTTGGGAATTTGAAGCTCAGGGTGAAGCACACGTTTGACCG  
TGACGAACTGTGGTGTCTTGATCTACGTTACGGATATACTCTCCTTGAGTTCACCTCGTAAGGACACT  
ACC  
+  
FFFFFFFFFFFFFFFFFFFFFFFFFFFFFFFFFFFFFFFFFFFFFFFFFFFFFFFFFFFFFFFFFFFFFFFF  
FFFFFFFFFFFFFFFFFFFFFFFFFFFFFFFFFFFFFFFFFFFFFFFFFFFFFFFFFFFFFFFFFFFFFFFF  
FFF  
@A00721:190:HGJW7DSXY:4:2214:21377:33191\_2:N:0:TCTGCAAG+GCTGCACT  
CAGGGGTTTTTCGAATAGTGATAGCCACCCGCCTTACAGAGGGGCAGCAGCATGACCATAATTGGTATT  
GACTTTGGTACCACCTTTTCTACTGTCTGTCTCGCCTCTTCGAATGAA  
+  
FFFFFFFF:FFFFFFFFFFFFFFFF:FFFFFFFFFFFFFFFFFFFFFFFFFFFFFFFFFFFFFFFFFFFF  
FFFFFFFFFFFFFFFFFFFFFFFFFFFFFFFFFFFFFFFFFFFFFFFFFFFFFFFFFFFFFFFF:FFFF  
@A00721:190:HGJW7DSXY:4:1355:16306:32142\_2:N:0:TCTGCAAG+GCTGCACT  
GTTTTTCTAATAATGATGACACTATTGTTTATGGATATGATGCTATTACTCATGATGGTTACGGTCAG  
GGAGGATTCTCAGTTTACAAGGACCTTAAGCGATGGATCGGGGTTAAT  
+  
FFFFFFFFFFFFFFFFFFFF:FFFFFFFFFFFFFFFFFFFF,FFFFFFFF:FFFFFFFFFFFFFFFFFFFF  
FFFFFFFFFFFFFFFFFFFF:FFFFFFFFFFFFFFFFFFFF:FFFFFFF  
@A00721:190:HGJW7DSXY:4:2172:20681:3959\_2:N:0:TCTGCAAG+GCTGCACT  
CAGTCAGTATACCTCTACGCAAAGATATTTTCATGAAAACCTACAGAGGAACGTACCGGATTACCTGTCT  
TTCATATTATGAATGAACCTTCGGCCGCTCTCTTTGCTTCGATGTTGG  
+

[illegible]



$+$ 

@

+

@

+

©

+

@

+

©

+

9

+

6

@A00721:190:HGJW7DSXY:4:1665:6054:20431\_1:N:0:TCTGCAAG+GCTGCACT  
AAGAGGCCGCTGCTACGAAGTCGCTGAAGGCGGCTTGGGTCAATTAAGGGTAGCTGTAAAGTTGCGCCT  
GCCGACCCCATCTTTGAGACCAAGACTCTCTACAGTAGGTTCTGTCCTAAGATCGGAAGAGCACACGT  
CTG



+  
FFFFFFFFFFFFFFFFFFFFFFFFFFFFFFFFFFFFF:FFFFFFFFFFFFFFFFFFFFFFFFFFFFFF  
FFFFFFFFFFFFFFFFFFFFFFFFFFFFFFFFFFFFF:FFFFFFFFFFFFFFFFFFFFFFFFFFFFFF  
FFF

@A00721:190:HGJW7DSXY:4:1127:4173:6057\_2:N:0:TCTGCAAG+GCTGCACT  
GTGAGAGGACTTTTGGCTACTGGCGACAACTGAGAGCAGTCGCTGGGGAAAGAATTGCGTGCGTT  
GAAGGCCGACGCTTCGAGCTTGAGTGTGACGAGGCCGGTGACGTTTTT

+  
F:FFFFFF:FFFFFFFFFFFFFFFFFFFFFFFFFFFFFFFFFF,FFFFFFFFFFFFFFFFFFFF:F  
FFFFFFFFFFFFFFFFFFFFFFFFFFFFFFFFFFFFF

@A00721:190:HGJW7DSXY:4:1106:28058:23218\_1:N:0:TCTGCAAG+GCTGCACT  
TAATAATGAGGCAGAACATCCCATGAGTCTTAGAGGACTTAGGTTGGCATATTTATGCCGACGATA  
ATAAGCATGTCACCCTTAAGCACCGAGGTAAGCTCGGGACTTACAAGAGAGAGTGTGAGAGAGTCTCTC  
CTC

+  
.FFFF:FFFFFFFFFFFFFFFFFFFF.FF:FFFFFFFFFFFF:FFFFFFFFFFFFFFFFFFFF:FFFFFFFFFFFF  
:FFFFFFFFFFFFFFFFFFFF.FF:FFFFFFFFFFFF:FFFFFFFFFFFFFFFFFFFF:FFFFFFFFFFFF  
FFF

@A00721:190:HGJW7DSXY:4:2142:9914:29246\_1:N:0:TCTGCAAG+GCTGCACT  
CCTTTCCTCCGTCATTGGGGATTTGATGTGAGAAGGTGGAAGGTGTCAAGGGTATTCTTCATGCTGA  
TCTTTCAGGACCTAATCACATCATGATTGATAGTTACGGCTCGTATCGAGTTGGAGGGAGGAAGTTCT  
CCG

+  
.FF:FF:FF.:FFFFFF,,FFFFFFFFFFFFFFFFFFFF,FFFFFF:FFFF,F:FF,F,FF:FFFF,:FFF  
F,FFF:F:FFFFFF:FFFF,.FFFF:F::FFFF:.F:FFFFFF,FFFFFFFF:FFFF:FFFF  
FF:

@A00721:190:HGJW7DSXY:4:2144:25554:9173\_1:N:0:TCTGCAAG+GCTGCACT  
AGACGTGTGCTCTTCCGATCTGGAACTTCGTCAGAAAGATGAGGAAGTCTAAGAGGAGGAGTTTGAGG  
AAGGCTCTAGAGAAGATCTCACCACCTGGAGAAGGCAAGTGGAGAGTCCAGAAGTTGATGAAGAAGGA  
TTA

+  
FFFFFFFF:FFFFFFFFFFFFFFFFFFFF:FFFFFFFFFFFFFFFFFFFFFFFFFFFFFFFFFFFFFFFFFF  
FFFFFFFFFFFFFFFFFFFFFFFFFFFF,FFFFFFFFFFFFFFFFFFFFFFFFFFFFFFFFFFFFFFFFFF  
:FF

@A00721:190:HGJW7DSXY:4:2262:1886:17159\_1:N:0:TCTGCAAG+GCTGCACT  
AGGTGGATGAGGGAGGTTGTTTCTTTGGAGTTTLAGATAATCTTTGAGAAGGGGTCATAGAGCCAGC  
AAGAGAAGCTTATATGCTGGTTTAAGTGATGATTATCACTCCTTGAGAAGACAAGCCACATTAAGATA  
TAA

+  
FFFF:FFFFFFFF:F:FFFFFFFFFFFFFFFFFFFFFFFFFFFFFFFFFFFFFFFFFFFFFFFFFFFFFF  
FFFFFFFFFFFFFFFFFFFFFFFFFFFFFFFFFFFFF:FFFFFFFFFFFFFFFFFFFFFFFFFFFFFF  
FFF

@A00721:190:HGJW7DSXY:4:2121:11605:22842\_1:N:0:TCTGCAAG+GCTGCACT  
TATTGTTCTTCCGGAAGTTGTGGGATTTAACTTTGACTCACTACTCCGATCAGATCCGATGGTT  
TGATTGGTATGGACTACTCGACTTTTGATCTGGAGTTGTCTAGGGTCATGGCAGATACTACCGATAAG  
GTG

+  
FFFFFFFFFFFFFFFFFFFFFFFFFFFFFFFFFFFFFFFFFFF:FFFFFFFFFFFFFFFFFFFFFFFFFF  
FFFFFFFFFFFFFFFFFFFFFFFFFFFFFFFFFFFFF:FFFFFFFFFFFFFFFFFFFFFFFFFFFFFF  
FFF

@A00721:190:HGJW7DSXY:4:1503:10041:27555\_2:N:0:TCTGCAAG+GCTGCACT  
GTCTTTATGATTCAAACCTATCGTTGTCGTACCTTACAAGTTGAGGAGACTTTACAGCGGCTTATT  
GTCGCGCAGTTTCCAGAATTGCGGTTGAAGTTCACCCATTCTATCTTG

+

@A00721:190:HGJW7DSXY:4:1517:12156:31407\_1:N:0:TCTGCAAG+GCTGCACT  
AAGATGCATCGAGGTATACGTCTAGGAACATTGATTGGGAACGTACCTACTCACGAGACGTCATGAAA  
GCTATCGGAGGGAAGCAAAATGTTTCGTTCTGTTACAAGAACGCTTTGGATTGTGACCATAAAGCCTC  
AGT

+

```

FFFFFFFF:FFFFFFFFFFFFFFFFFFFFFFFF:FFFFFFFFFFFFFFFFFFFFFFFFFFFFFFFF
FFFFFFFFFFFFFFFFFFFFFFFF,FFFFFFFFFFFFFFFFFFFFFFFF:FFFFFFFFFFFFFFFF
FFF

```

@A00721:190:HGJW7DSXY:4:1655:30364:29590\_1:N:0:TCTGCAAG+GCTGCACT  
CATTTTCGTCTTAGTTTGTCCCGGCGAATTATTGGACACGATGAAAAATGACATACCCGTTCTTGACCT  
TGGTATCGTTATCCGTCATGGAGATGATGGCGCATCACTTGATTACTATATGCCCGAAGGATTGGGTT  
ATT

+

[illegible]

@A00721:190:HGJW7DSXY:4:2136:9923:9126\_1:N:0:TCTGCAAG+GCTGCACT  
AATATGTTACGACATGGCTTCGTAACAACAGTGCGAGGATTGTCATCTCGGGGAAAGTGATTACCAA  
GATGTTTCATATAGATACGAGATACCTAGAGAAGGTCGCAGCGATCTTACTCGTTATCGGAGCTAAGAA  
GAA

+

[illegible]

@A00721:190:HGJW7DSXY:4:2374:18340:26115\_1:N:0:TCTGCAAG+GCTGCACT  
ACCGGAGGTGATCTCTCTGCTTCTGCGTTACTGAGAGAAAAGATTGAGGACGCCTACGGTGACTTTAT  
GGACAAGATGCAAGTTCCTGGGAAATACTTGTTTCCCTTTTTAGGTTTAGTGGTGATCTTGACGTCG  
ATT

+

[illegible]

@A00721:190:HGJW7DSXY:4:1356:4227:14262\_2:N:0:TCTGCAAG+GCTGCACT  
AAGAAGTCGCTCGGCGTTGTTCTTGA AACCAAGTTAAGAAGGAGGCTGATCATGGAGTCTTTGTACC  
TTCTGTCAAAC TTCGAGGTT CAGCTACGAGAGGTGATCCCGGATGTGG

+

```

FFFFFFFFFFFFFFFF,FFFFFFFFFFFFFFFF:FFFFFFF,FFFFFFFFFFFFFFFFFFFFFFFFFFFFFFFF
FFFFFFFFFFFFFF:FFFFFFFFFFFFFFFF:FFFFFFF:FFFFFFFFFFFF:FFFF

```

@A00721:190:HGJW7DSXY:4:2355:20582:35258\_2:N:0:TCTGCAAG+GCTGCACT  
GTTGAGAAGTGTGCTTTACAAGTAGTTAGACTCTTCTTCAAGTTTTTATATCTTCTTGATAATCTTAA  
AGAAAAATTATCGAATAAACTAATGAGAGGTATAGGCTTATTCAAGTC

+

```
,::,FFFF::F,FF:FFFF:FF,FFFF,FFF:,F,FFFF,,F,F,,FF,,FFFFFFF:FFFFFF,F:FFF
FFFFFFFFF,:F,FFFFFFFF,FFF,,FFF,F:,F:F:FFFF,,FF,,FF
```

@A00721:190:HGJW7DSXY:4:2475:10248:30577\_1:N:0:TCTGCAAG+GCTGCACT  
GAGAATTACTCAGATTCAATCTGGCATCACTGAACGTCTACAACGAGTTAGGGAGTGGCTAGGTTTTA  
AAAGATCCTTTGCACAAGCAATACCTTCCACTGAGTTCATCACCAGAGTTTCGACGTCGCGGAAAC  
GAT

+

[illegible]

@A00721:190:HGJW7DSXY:4:1169:17110:4382\_2:N:0:TCTGCAAG+GCTGCACT  
TCTTTTACCTTTTGGAGGTCCAGGAACCTTTACTCCTAGTGTCTTTTCTAGAGTCCAAGGACGTTTCC  
GTCGGAGGATGACAGGTGGGAGACCGCTCAATAACACTCTATTGAATC

+

FFFFFFFFFFFFFFFFFFFFFFFFFFFFFFFFFFFFFFFFFFFFFFFFFFFFFFFFFFFFFFFFFFFFFFFF  
FFFFFFFF:FFFFFFFFFFFFFFFFFFFFFFFFFFFFFFFFFFFFFFFFFFFFFFFFFFFFFFFF

@A00721:190:HGJW7DSXY:4:1167:28320:34444\_1:N:0:TCTGCAAG+GCTGCACT  
GCCACTTCTAATTTTAGGAAACGTCGCGAAAAGAAAGTTCATGAGGATGTGTTGGTCGAAAAATATCG  
CCGGGAACTTCTAATAGAGGATCCTGATGACATTATTTCAACGGATACCGATCTCAGTTCTACCACAG  
AAA

+

FFFFFFFFF::FFFFFFFFFFFFFFFFFFFFFFFFFFFFFFFFFFFFFFFFFFFFFFFFFFFFFFFF  
FFFFFFFFFFFFFFFFFFFFFFFFFFFFFFFFFFFFFFFFFFFFFFFFFFFFFFFFFFFFFFFFFFFFFFFF  
FFF

@A00721:190:HGJW7DSXY:4:1102:9679:26584\_2:N:0:TCTGCAAG+GCTGCACT  
ACTGTCTCCACTGAGTCGGAATTAGAGAAAGACGACCTTCTTGTGGGGACTGAGACCTCTGAATTTTC  
AGGGTGCCCTGATGAGGACGTTGAAAGGGATAATTTCAACTCTGAGAC

+

FFFFFFFFFFFFFFF,FFFFFF,FFFFFFFFFFFFFFFFFFFFFFF,FFFF:FFFFFFFFFFFFFFFFFFFFFFF  
FFFFFFFFF:FFFFFFFFFFFFF:FFFFFFFFFFFFF:FFFFFFFFFFFFFFFFF

@A00721:190:HGJW7DSXY:4:2257:4661:18740\_1:N:0:TCTGCAAG+GCTGCACT  
TGAGTGATCGTATTAGAACAGCTGATTCTTATTGCATGAACGTCGCTGAGGTCAAACCTGTGGACGTT  
CTTTTCATCGACGAATTATTCATGATTCACGCTGGTCAGACCCTTTTCTTACACATCTACTTAAGGC  
GGC

+

FFFFFFFFFFFFFFFFFFFFFFFFFFFFFFFFFFFFFFFFFFFFFFFFFFFFFFFFFFFFFFFFFFFFFF  
FFFFFFFFFFFFFFFFFFFFFFFFFFFFFFFFFFFFFFFFFFFFFFFFFFFFFFFFFFFFFFFFFFFFFF  
FFF

@A00721:190:HGJW7DSXY:4:2360:27362:26365\_2:N:0:TCTGCAAG+GCTGCACT  
TATTGATCTCCAAGTCGAACTACTTCAACATCAACGACATCATTCTTGATGAGTGTGTTCTTATC  
GAAGTCTCAGTTATCGCTGCCCCGCCGACGTTTGTGCGGAACTCTCAG

+

FFFFFFFFFFFFFFFFFFFFFFFFFFFFFFFFFFFFFFFFFFFFFFFFFFFFFFFFFFFFFFFFFFFF  
FFFFF:FFFFFFFFFFFFF:FFFFFFFFFFFFF,F:FFF:FFFFFFFFFFFFF

@A00721:190:HGJW7DSXY:4:2431:6234:3897\_1:N:0:TCTGCAAG+GCTGCACT  
AACCCCTTATATCGAGGCTATCGAGGACGATGAGTATCTTGAAGTTGTTGACGACAAGCCTCAAGAGG  
GTAGAGGACCACCTGGATCTTCTACTGTCTCTGCCTTCCAAGATTTCTTAGAAGAGGTTATTCCTGGA  
ACC

+

FFFFFFFFFFFFFFFFFFFFFFFFFFFFFFFFFFFFFFFFFFFFFFFFFFFFFFFFFFFFFFFFFFFFFF  
FFFFFFFFFFFFFFFFFFFFFFFFFFFFFFFFFFFFFFFFFFFFFFFFFFFFFFFFFFFFFFFFFFFFFF  
FFF

@A00721:190:HGJW7DSXY:4:1674:15103:2033\_1:N:0:TCTGCAAG+GCTGCACT  
TATAGGTAAGAAGCCCCTTGAGCCGCGTAGTCAGCGCGTTTAGCTGTATCATCAGTCAGAGTATACCC  
GATAGGGTACCGAGTCTCCAAGAGAATATTTATTCTTATGAGGCTCGAACTTCAACGTTTTCAACAAC  
GGA

+

FFFFFFFFFFFFFFFFFFFFFFFFFFFFFFFFFFFFFFFFFFFFFFFFFFFFFFFFFFFFFFFFFFFF  
FFFFFFFFFFFFFFFFFFFFFFFFFFFFFFFFFFFFFFFFFFFFFFFFFFFFFFFFFFFFFFFFFFFFFF  
FFF

@A00721:190:HGJW7DSXY:4:1564:11677:26537\_2:N:0:TCTGCAAG+GCTGCACT  
TTGATGATTTTATCACTTTATTATGACCTTGGAAGTTTTTCGGCTGTGGTTGTCGCTGGGGACGATTC  
CATTCTGTTTTCAAAGACTCCAATAACTGATCATTCTGATCATATGAT

+



FFFFFFFFFFFF:FFFFFFFFFFFFFFFFFFFFFFFFFFFFFFFFFFFFFFFFFFFFFFFFFFFFFFFFFFFFFFFF  
FFF

@A00721:190:HGJW7DSXY:4:1412:26847:31078\_2:N:0:TCTGCAAG+GCTGCACT  
ACCTCGGTACAATCTTACTTGGAACGAAGGCGACCTGTTCCGGAGTTTTTACGGGATCCGGAATGTTC  
TGTCTCTATTAGGTGAAGCGAAATACGATTTCAACGTCAACGTTCAC

+  
FFFFFFFFFFFFFFFF:FFF:FFFFFFFFFFFFFF:FFFFFFF:FFFFFFFF,FFF,FF,FFFFFFFFFF,F  
:FF:F,FFF:,FFF:FFFFFFFFFFFFFF,FFF:FFFF:FFFFFFFFFFFF

@A00721:190:HGJW7DSXY:4:2610:23484:1736\_2:N:0:TCTGCAAG+GCTGCACT  
ATAAAGAATCTTTACCAGGACTACTACTACAGGAGGCAGTCTTCTGATCGTAAGAAGTTTATAAGGAA  
CATATCCATTTGTTGTAATAGTTTCATCAACTTAGAACTCTAAACTCT

+  
FFFFFFFFFF,FFFFF:FF:FFF,F:FFFFFFFFFFFF,FFFFFF,,FFFFFF:FFFFFFFFFFFFFFFFFFFF  
FFFFFFFF,F,F::FFFFFF::F,F:FFFFFFFF,F:FFFFF,FFFFFFF

@A00721:190:HGJW7DSXY:4:2525:16785:22482\_2:N:0:TCTGCAAG+GCTGCACT  
TACTTAGACTTTCTACGATACAAATGATAACTTCTCATTTACGTTTGCTACTCAGAGCTGGTCCTCT  
CAGCAAAGGGATGCATGGTGTTATCTCCTCAGGAGTCCCGGCATTTGA

+  
FFF:FFFFFF:FFFFFF:FFFFF::FFFFFFF:,FF,F:FFFFFFFFFFFFFFFFFFFFFFFFFFFFFFFFFFFF  
FFFFFFFFFFFF,FFFF,FFFF,F:FFFFFFFFFFFF::FFFFFFF,::FF

@A00721:190:HGJW7DSXY:4:1103:19226:7169\_2:N:0:TCTGCAAG+GCTGCACT  
TCGCTGCATATTACGGATTACACGGTACCAGCGCATCTCGTGTGAGCCTCGACCCGATTATATGGTA  
TTAACTTATAAAGGTGAGGAGACCATTTTCTTGCTGAAATTTATAGAA

+  
FFFFFFFFFFFFFFFFFFFFFFFFFFFFFFFFFFFFFFFFFFFFFFFFFFFFFFFFFFFFFFFFFFFFFFFFFFFF:FFFF  
FFFFFFFFFFFFFFFFFFFFFFFFFFFFFFFFFFFFFFFFFFFFFFFFFFFFFFFFFFFFFFFFFFFFFFFF:

@A00721:190:HGJW7DSXY:4:1158:4399:18724\_1:N:0:TCTGCAAG+GCTGCACT  
AGTCAACACTAGTTCGAGTGCTGCTTTGGATTACGATGACGTGAGAATAGGTGAAGGGATAGTTTTTA  
CCTCGACCAACATTAAGGCGGCGGCGACTAATCTTAAAGCTTCACCCAAATGAAGGACACTTCGAAA  
CTG

+  
FFFFFFFFFFFFFFFFFFFFFFFFFFFFFFFFFFFFFFFFFFFFFFFFFFFFFFFFFFFFFFFFFFFFFFFFFFFF  
FFFFFFFFFFFFFFFFFFFFFFFFFFFFFFFFFFFFFFFFFFFFFFFFFFFFFFFFFFFFFFFFFFFFFFFFFFFF:F,FFFFF:  
FFF

@A00721:190:HGJW7DSXY:4:2107:19090:4711\_1:N:0:TCTGCAAG+GCTGCACT  
CAAATTCTTTTGATACAACCTTAGCCTTCAAGTGGGGTATGCCTGCGGAATACGCTTGCTATTCACCA  
GATTGGTTCGAACCCGTTGATGCTATGTCAGAAGAAGCTATTCAAGCTTGTCGTTTAAAGACTGCAGA  
GGC

+  
FFFFFFFFFFFFFFFFFFFFFFFFFFFF:FFFFFFFFFFFFFFFFFFFFFFFFFFFFFFFFFFFFFFFFFFFFF  
FFFFFFFFFFFFFFFFFFFFFFFFFFFFFFFFFFFFFFFFFFFFFFFFFFFFFFFFFFFFFFFFFFFFFFFFFFFF  
FFF

@A00721:190:HGJW7DSXY:4:1212:10664:14920\_1:N:0:TCTGCAAG+GCTGCACT  
CCCAGACTCAAGGAGTCCAATCAAAGGTTTTGAATTTAGCTCAACTGGGGAGACGTGCTTAAATGGGT  
GATAAAAATTATTTAGAGATCTTTTCTACTTACAAAGGACAATTCAGTTTCATTAATTCTACGAAAA  
GTC

+  
FFFFFFFFFFFFFFFFFFFFFFFFFFFF,FFFFFFFFFFFFFFFFFFFFFFFFFFFFFFFFFFFFFFFFFFFFF  
FFFFFFFFFFFFFFFFFFFF:FF:FFFFFFFFFFFFFFFFFFFFFFFFFFFFFFFFFFFFFFFFFFFFFFFFFFFF  
FFF

@A00721:190:HGJW7DSXY:4:2339:6822:4539\_1:N:0:TCTGCAAG+GCTGCACT  
TTTTGTTACCAAATTCTTGCTTTCAACGAAGTCTCTGATTTTATTAATCATTACTTTAACGATCTCT  
CGGTCATTTACTCTGTACTTGATCTACGTCGTTTAACTGTGGAACAACCTTTACTTAGAATGACTCT  
AT

+  
FFFFFFFFFFFFFFFFFFFFFFFFFFFFFFFFFFFFFFFFFFFFFFFFFFFFFFFFFFFFFFFFFFFFFFFF  
FFFFFFFFFFFFFFFFFFFFFFFFFFFFFFFFFFFFFFFFFFFFFFFFFFFFFFFFFFFFFFFFFFFFFFFF  
:F  
@A00721:190:HGJW7DSXY:4:2563:19271:36119\_1:N:0:TCTGCAAG+GCTGCACT  
TACTAAAACAAACTCTTCGTTACGAGACCTGTTGGTAGAATATATTTAGTCTCTACACCCATATCAAC  
GAGGATAAAGCGTGTTCCTCGTCCTGACCTTAATACACTAAGAGATCATCCGCAAACGACTCGAAACC  
+  
:,F,FF:FF,F,,,:F:,FFF:,F:FF:,,,FF,F,,,:F,,,FF:,,,::,FFFF,FF:,F,F,,  
,,,::,F:,:::,FFF:F,,:F,F,F,,,FFFF:,F,F,,,:,,F,FFF,F,FFFFFFFFFFFFFFF  
@A00721:190:HGJW7DSXY:4:1413:25744:11882\_2:N:0:TCTGCAAG+GCTGCACT  
CAAATGAGGTCAAAGCTCTATTTATTAAACGAAGTATTATCCGATTCTTCGAGGGTATCACTACCCT  
GATCTGCCGACTTTAGTCAAGGAAGTCAATTCCTTCGATGTTTATAT  
+  
FFFFFFFFFFFFFFF,FFFFFFFFFFFFFFFFFFFFFFFFFFFFFFFFFFFFFFFFFFFFFFFFFFFFFFFF  
FFFFFFFFFFFF:FF,FFFFFFFFFFFF,FFFFFFFFFFFFFFFFFFFFFFFFFFFFFFFF  
@A00721:190:HGJW7DSXY:4:1152:14651:13714\_2:N:0:TCTGCAAG+GCTGCACT  
CAAATTTTAGAACTTTATTTAGAACTCTCTCCGATCACCTTGGTGTGATCTCCCGAGGATCTTTTC  
AATAAGATGTATGATGATAATCTACTATTTTTAAATAGTGATATTCAAG  
+  
F:FFFFFFFFFFFFFFFFFFFFFFFFFFFFFFFFFFFFFFFFFFFFFFFFFFFFFFFFFFFFFFFFFFFF  
FFFFFFFFFFFFFFFFFFFFFFFFFFFFFFFFFFFFFFFFFFFFFFFFFFFFFFFFFFFFFFFFFFFF  
@A00721:190:HGJW7DSXY:4:2339:10556:8688\_2:N:0:TCTGCAAG+GCTGCACT  
ATCAAAGATTTGGCTTGGTCTATTTACCGCAAAAAGTTGGAAGAGGTCTATGATATTTATTTACTTA  
TACTTTAAATAGCACCGATTATAACTTGACTGTTGATAATATTACAAT  
+  
FFFFFFFFFFFFFFFFFFFFFFFFFFFFFFFFFFFFFFFFFFFFFFFFFFFFFFFFFFFFFFFFFFFFFFFF  
FFFFFFFFFFFFFFFFFFFFFFFFFFFFFFFFFFFFFFFFFFFFFFFFFFFFFFFFFFFFFFFFFFFF  
@A00721:190:HGJW7DSXY:4:2551:5104:36949\_1:N:0:TCTGCAAG+GCTGCACT  
AGAAGATTAGAGAAGTAACCGGTGAACACGTCGGTAGCATTGATTTACTTTTACCGTTAGAACTGAAA  
AAGATTCTTTTCGAAAAGAAACCTATAAGTTACAAACGATTCTTCGACTATATTAAAGAAATAAAAAT  
ACT  
+  
FFFFFFFFFFFFFFFFFFFFFFFFFFFFFFFFFFFFFFFFFFFFFFFFFFFFFFFFFFFFFFFFFFFFFFFF  
FFFFFFFFFFFFFFFFFFFFFFFFFFFFFFFFFFFFFFFFFFFFFFFFFFFFFFFFFFFFFFFFFFFFFFFF  
FFF  
@A00721:190:HGJW7DSXY:4:2641:19895:11898\_1:N:0:TCTGCAAG+GCTGCACT  
ATTTTAAATGGTATGGTATAATGTGTCTTACAAATAGAACCTTCACTCTCGGTAATGAGAGTGATTC  
CTTAATATTCTAGTAACCGCTATGTGGGCATTACTAGGATTTATCACACTCCTAAATTTGATAGCAAT  
TTA  
+  
FFFFFFFFFFFFFFFFFFFFFFFFFFFFFFFFFFFFFFFFFFFFFFFFFFFFFFFFFFFFFFFFFFFFFFFF  
FFFFFFFFFFFFFFFFFFFFFFFFFFFFFFFFFFFFFFFFFFFFFFFFFFFFFFFFFFFFFFFFFFFFFFFF  
FFF  
@A00721:190:HGJW7DSXY:4:1366:5719:10488\_1:N:0:TCTGCAAG+GCTGCACT  
AATTCAATAGCTTTAGTATTATTTACTATCGCCTTTATTGAAAATTGTATAAGAGTTAATTGCTTACA  
CAAAAGTGACGCGCAAGTAATCTTAATTGATTGAAGCTAGGCGTTGGGGAGAATGAAGTCCGCTTC  
CCG  
+  
FFFFFFFFFFFF:FFFFFFFFFFFFFFFFFFFFFFFFFFFFFFFFFFFFFFFFFFFFFFFFFFFFFFFFFFFF  
FFFFFFFFFFFF:FFF,FFFFFFFFFFFF:FFFFFFFFFFFFFFFFFFFFFFFFFFFFFFFFFFFFFFFFFFFF  
FFF  
@A00721:190:HGJW7DSXY:4:2562:13602:17065\_2:N:0:TCTGCAAG+GCTGCACT  
GCCGGTCGGCAGATCGGCACCACTGGTCTCTACGTTAGGGACCCGCTGTGCAGAATAACCTTCCCAA

ATCTAGATCTGCACAGAAGAAGGCTGAAGGTCGTTACCGGACGACCAC

[illegible]

+

[illegible]

+

```

FFFFFFFFFFFFFFFFFFFFFFFFFFFFFFFFFFFFFFFFFFFFFFFFFFFFFFFFFFFFFFFFFFFFFFFFFFFFFFFF
FFFFFFFFFFFFFFFF:FFFFFFFFFFFFFFFFFFFFFFFFFFFFFFFFFFFFFFFFFFFFFFFFFFFFFFFF

```

+

[illegible]

+

```
FFFFFFFFFFFFFFFFFFFFFFFFFFFFFFFFFFFFFFFFFFFFFFFFFFFFF:FFFFFFFFFFFFFFFFFFFFFFF:FFFFF
FFFFFFFFFFFFFFFFFFFFFFF:FFFFFFFFF:FFFFFFFFFFFFFFFFFFFFFFF
```

+

[illegible]

+

```

FFFFFFFFFFFFFF:FF:FF:FFFFFF:FFFFFFFFFFFFFFFFFFFFFFFFFFFFFFFFFFFFFFFF
FFFFFFFF:FFFFFFFF:FFFFFFFFFFFF:,:FFF,FFFFFFFFFFFFFFFFFFFFFFFFFFFFF:,:FFF
FFF

```

+

[illegible]

```
FFF:FFFFFFFFFFFFFFFF:FFFFFFFFFFFFFFFF:FFFFFFFFFFFFFFFF:FFFFFFFF:FFF
FF:FFFFFFFF::FFFFFFFFFFFFFFFFFFFFFFFF:FFFF,FFF:FFFFFF
```



$+$ 

@

$$+$$

@

+

©

$$+$$

@

+

@

+

©

+

6

+



FFFFFFFFFFFFFFFFFFFFFFFFFFFFFFFFFFFFFFFFFFFFFFFFFFFFFFFFFFFFFFFFFFFFFFFF  
FFF

@A00721:190:HGJW7DSXY:4:2520:22923:12790\_2:N:0:TCTGCAAG+GCTGCACT  
CTGTTGAGCGGTAATTACACCTAAACGAGCTCGATCTGCCATCGCTGAAGGATGTGCACTCTTTTCT  
GCTACTTTAACGGAGCGTAGTGTACTCTTCGTCGATTGTATAGATCGG

+

FFFFFFFFFFFFFFFF:FFFFFFFFFFFFFFFFFFFFFFFFFFFFFFFFFFFFFFFFFFFFFFFFFFFF  
FFFFFFFFFFFFFFFFFFFFFFFFFFFFFFFFFFFFFFFFFFFFFFFFFFFFFFFFFFFFFFFFFFFFFF

@A00721:190:HGJW7DSXY:4:1370:27796:35947\_1:N:0:TCTGCAAG+GCTGCACT  
CTATCGTTCAGGTGCATGGGGTTGGATAGCCAATATTGAAGTGGACACCTCTGGTAGTATCGAAGTAA  
AGATAACCAATAAGGAAGGAGCTTATACTATGGTTGAATCAACTAAGCATACTACTTTTGCTTTGATT  
ACT

+

FFFFFFFFFFFFFFFFFFFFFFFFFFFFFFFFFFFFFFFFFFFFFFFFFFFFFFFFFFFFFFFFFFFF  
FFFFFFFFFFFFFFFFFFFFFFFFFFFFFFFFFFFFFFFFFFFFFFFFFFFFFFFFFFFFFFFFFFFF  
FFF

@A00721:190:HGJW7DSXY:4:2334:14597:12179\_2:N:0:TCTGCAAG+GCTGCACT  
ACCTCGGTACAATCTTACTTGGAACGAAGGCGACCTGTTCCGGAGTTTTTACGGGATCCGGAATGTTC  
TGTCTATATTAGGTGAAGCGAAATACGATTTCAACGTCAACGTTTAC

+

FFFFFFFFFFF,FFFFFFFFFFF:FFFF::FFFFFFFFFFFFFFFF:FFFF,FFFF,::F:FF:FFF::F,FF  
FFFFFFFFFFFFFFFFFFF:F:FFFF,FFF:F,FFFFFF:FFFFFF:FFFFFF

@A00721:190:HGJW7DSXY:4:2623:12825:13777\_2:N:0:TCTGCAAG+GCTGCACT  
ATAAAGAATCTTTACCAGGACTCCTACTACAGGAGGAGTCTTCTGATCGTAAGAAGTTTATAAGGAA  
CATATCCATTTGTTGTAATAGGGTCATCAACTTAGAACTCGAAACTCT

+

FFFFFFFFFFFFFFFFFFFFFFFFFFFFFFFFFFFFFFFFFFFFFFFFFFFFFFFFFFFFFFFFFFFF  
FFFFFFFFFFFFFFFFFFFFFFFFFFFFFFFFFFFFFFFFFFFFFFFFFFFFFFFFFFFFFFFFFFFF

@A00721:190:HGJW7DSXY:4:1273:31114:17957\_1:N:0:TCTGCAAG+GCTGCACT  
TTTCTACGATACAAATGATAACTTCTAATTTACGTTTGCTACTCAGAGCTGGTCTCTCAGCAAAGG  
GATGCATGGTGTTATCTCCTCAGGAGTCCCGGCATTTGATAATAATGACGAGACTTTCGTCATAATCG  
CTG

+

FFFFFFFFFFFFFFFFFFFFFFFFFFFFFFFFFFFFFFFFFFFFFFFFFFFFFFFFFFFFFFFFFFFF  
FFFFFFFFFFFFFFFFFFFFFFFFFFFFFFFFFFFFFFFFFFFFFFFFFFFFFFFFFFFFFFFFFFFF  
FFF

@A00721:190:HGJW7DSXY:4:2369:11433:26428\_1:N:0:TCTGCAAG+GCTGCACT  
AGCGCATCTCGTGTGAGCCTCGACCCGATTATATGGTATTAACCTATAAAGGTGAGGAGACCATTTT  
CTTGCTGAAATTTATAGAAGATTATTTTGACAGAATCAATAAGAATCATCGATTCTCGATTCTGATAG  
CTT

+

FFFFFFFFFFFFFFFFFFFFFFFFFFFFFFFFFFFFFFFFFFFFFFFFFFFFFFFFFFFFFFFFFFFF  
FFFFFFFFFFFFFFFFFFFFFFFFFFFFFFFFFFFFFFFFFFFFFFFFFFFFFFFFFFFFFFFFFFFF  
FFF

@A00721:190:HGJW7DSXY:4:1170:19162:9878\_1:N:0:TCTGCAAG+GCTGCACT  
AGTCAACACTAGTTCGAGTGCTGCTTTGGATTACGATGACGTGAGAATAGGTGAAGGGATAGTTTTTA  
CCTCGACCAACATTAAGGCGGCGGCGACTAATCTTAAAGCTTCACCCAAAATGAAGGACACTTCGAAA  
CTG

+

FFFFFFFFFFFFFFFFFFFFFFFFFFFFFFFFFFFFFFFFFFFFFFFFFFFFFFFFFFFFFFFFFFFF  
FFFFFFFFFFFFFFFFFFFFFFFFFFFFFFFFFFFFFFFFFFFFFFFFFFFFFFFFFFFFFFFFFFFF  
FFF

@A00721:190:HGJW7DSXY:4:2422:18629:15749\_1:N:0:TCTGCAAG+GCTGCACT  
CAAATTCTTTTGATACAACCTCTAGCCTTCAAGTGGGGTATGCCTGCGGAATACGCTTGCTATTCACCA



TCTCGGTAATGAGAGTGTATTCCTTAATATTCTAGTAACCGCTATGTG

```

FFFFFFFFFFFFFFFFFFFFFFFF:FFFFFF:FFFFFF,:FFFFFFFF:FFFFFFFFFFFFFFFFFFFFFFFF
FFFFFFFFFFFFFFFFFFFFFFFF:FFFFFFFFFFFFFFFFFFFFFFFFFFFFFFFF

```

+

[illegible]

+

[illegible]

+

[illegible]

+

```

FFFFFFFFFFFFFFFF:FFFFFFFFFFFFFFFFFFFFFFFFFFFFFFFFFFFFFFFFFFFFFFFFFFFFFFFF
FF:FFFFFFFF:FFFFFFFFFFFFFFFFFFFFFFFF:FFFFFFFFFFFFFFFF

```

+

[illegible]

+

```
FFFFFFFFFFFFFFFFFFFFF,FFFFFFFFFFFFFFFFFFFFFFFFFFFFFFFF:FFFFFFFFFFFFFFFFFFFF  
FFFFFFFFFFFFFFFFFFFFF:FFFFFFFFFFFFFFFFFFFF
```

+

[illegible]





FFFFFFFFFFFFFFFFFFFFFFFFFFFFFFFFFFFFFFFFFFFFFFFFFFFFFFFFFFFFFFFFFFFFFFFF  
FFF

@A00721:190:HGJW7DSXY:4:2532:4779:1376\_2:N:0:TCTGCAAG+GCTGCACT  
TGATCTCCAAGTCGCAAACTACTTCAACATCAACGACATCATTCTTGATGAGTGTGCTTCTTATCGAA  
GTCTCAGTTATCGCTGCCCGGCCGACGTTTGTGCGCAACTCTCAGAGG

+  
FFFFFFFFFFFFFFFFFFFFFFFFFFFFFFFFFFFFFFFFFFFFFFFFFFFFFFFFFFFFFFFFFFFFFFFF  
FFFFFFFF:FFFFFFFFFFFFFFFFFFFFFFFFFFFFFFFFFFFFFFFFFFFFFFFFFFFFFFFF

@A00721:190:HGJW7DSXY:4:1148:15501:13088\_1:N:0:TCTGCAAG+GCTGCACT  
ACCCCTTATATCGAGGCTATCGAGGACGATGAGTATCTTGAAGTTGTTGACGACAAGCCTCAAGAGGG  
TAGAGGACCACCTGGATCTTCTACTGTCTCTGCCTTCCAAGATTTCTTAGAAGAGGTTATTCCTGGAA  
CCA

+  
FFFFFFFFFFFFFFFFFFFFFFFFFFFFFFFFFFFFFFFFFFFFFFFFFFFFFFFFFFFFFFFFFFFFFFFF  
FFFFFFFFFFFFFFFFFFFFFFFFFFFFFFFFFFFFFFFFFFFFFFFFFFFFFFFFFFFFFFFF:FFF:FFFFFFFFFFFFFFFFFFFFFFFF  
FFF

@A00721:190:HGJW7DSXY:4:2158:17987:9784\_1:N:0:TCTGCAAG+GCTGCACT  
TATAGGTAAGAAGCCCCTTGAGCCGCGTAGTCAGCGCGTTTAGCTGTATCATCAGTCAGAGTATACCC  
GATAGGGTACCGAGTCTCCAAGAGAATATTTATTCTTATGAGGCTCGAAACTTCAACGTTTTTCAACAAC  
GGA

+  
FFFFFFFFFFFFFFFFFFFFFFFFFFFFFFFFFFFFFFFFFFFFFFFFFFFFFFFFFFFFFFFFFFFFFFFF  
FFFFFFFFFFFFFFFFFFFFFFFFFFFFFFFFFFFFFFFFFFFFFFFFFFFFFFFFFFFFFFFFFFFFFFFF  
FFF

@A00721:190:HGJW7DSXY:4:2305:14281:8876\_2:N:0:TCTGCAAG+GCTGCACT  
TTGATGATTTTATCACTTTATTATGACCTTGGAAGTTTTTCGGCTGTGGTTGTCGCTGGGGACGATTC  
CATTCTGTTTTCAAAGACTCCAATAACTGATCATTCTGATCATATGAT

+  
FFFFF,FFFFFF:FFF:FFFFFFF,FFFFFFF:FFFFF,FFFFFFF:,FFF::FFFFFFFFFFFF  
FFFF,FFFFFFFFFFFF:FFFFFFFFFFFFFFFFFFFF:FF:FFFFFFFFF

@A00721:190:HGJW7DSXY:4:2532:19054:35086\_2:N:0:TCTGCAAG+GCTGCACT  
TCCGAGAGGTTTATCCTGATGTGGAGGGAGTTCTTGAAGCATCCCGACCTTTCCTTGTGAAAATTTTG  
ATGCGGTTTCATAAGATTATCAGTAATCCTGATTCTACTACGGATTCA

+  
FFFFFFFFFFFFFFFFFFFFFFFFFFFFFFFFFFFFFFFFFFFFFFFFFFFFFFFFFFFFFFFFFFFFFFFF  
FFFFFFFFF:FFF:FFFFFFFFFFFFFFFFFFFFFFFFFFFFFFFF:FFFFF:FFFFF

@A00721:190:HGJW7DSXY:4:2227:8820:34209\_1:N:0:TCTGCAAG+GCTGCACT  
GATTAAGACTCTTCCGAAAGGCGAACTTTGGGAATTTGAAGCTCAGGGTGAAGCACAACGTTTGACCG  
TGACGAACTGTGGTGTCTTGATCTACGTTACGGATATACTCTCCTTGAGTTCAGTCGTAAGGACACT  
ACC

+  
:FFFFFFFFFFFFFFFFFFFFF,FF:FFFFF,FFFFFFFFFFFFFFFFFFFFFFFFFFFFFFFFFFFFFFFF  
FFFFFFF:FFFFFFFFFFFFFFFFFFFFFFFFFFFFFFFFFFFFFFFFFFFFFFFFFFFFFFFFFFFFFFFF  
FFF

@A00721:190:HGJW7DSXY:4:2565:6560:20149\_2:N:0:TCTGCAAG+GCTGCACT  
CAGGGGTTTTTCGAATAGTGATAGCCACCCGCTTACAGAGGGGCAGCAGCATGACCATAATTGGTATT  
GACTTTGGTACCACCTTTTCTACTGTCTGTCTCGCCTCTTCGAATGAA

+  
FFFFFFFFFFFFFFFFFFFFFFFFFFFFFFFFFFFFFFFFFFFFFFFFFFFFFFFFFFFFFFFFFFFFFFFF  
FFFFFFFFFFFFFFFFFFFFFFFFFFFFFFFFFFFFFFFFFFFFFFFFFFFFFFFF:FFFF

@A00721:190:HGJW7DSXY:4:2221:31982:15013\_1:N:0:TCTGCAAG+GCTGCACT  
TTTTCTAATAATGATGACACTATTGTTTATGGATATGATGCTATTACTCATGATGGTTACGGTCAGGG  
AGGATTCTCAGTTTACAAGGACCTTAAGCGATGGATCGGGGTTAATTCTAAAACATTACCCGAAAGAC  
GTG



+  
FFFFFFFFFFFFFFFFFFFFFFFFFFFFFFFFFFFFFFFFFFFFFFFFFFFFFFFFFFFFFFFFFFFFFFFF  
FFFFFFFFFFFFFFFFFFFFFFFFFFFFFFFFFFFFFFFFFFFFFFFFFFFFFFFFFFFFFFFFFFFFFFFF  
FFF  
@A00721:190:HGJW7DSXY:4:2345:16957:31140\_2:N:0:TCTGCAAG+GCTGCACT  
CAGTCAGTATACCTCTACGCAAAGATATTTTCATGAAAACCTACAGAGGAACGTACCGGATTACCTGTCT  
TTCATATTATGAATGAACCTTCGGCCGCTCTCTTTGCTTCGATGTTGG  
+  
FFFFFFFFFFFFFFFFFFFFFFFFFFFFFFFFFFFFFFFFFFFFFFFFFFFFFFFFFFFFFFFFFFFFFFFF,FFFFFFFFFFFFFFFFFFFFFFFF  
FFF:FFF:FFFFFFFFFFFFFFFFFFFFFFFFFFFFFFFFFFFFFFFFFFFFFFFFFFFFFFFFFFFFFFFF  
@A00721:190:HGJW7DSXY:4:2122:27805:17550\_1:N:0:TCTGCAAG+GCTGCACT  
ACTTTTCAATAATATACGTCTTGAACCTCACTTATGACGATCTAGTGAAATTAACGCGTCCTTTTCTGG  
AACGTAGTTTTACTATTATGAACAAAGTTATCAAAGATAGTGGCATTCAAGGCAAACCTTACCCTGATT  
CCG  
+  
FFFFFFFFFFFFFFFFFFFFFFFFFFFFFFFFFFFFFFFFFFFFFFFFFFFFFFFFFFFFFFFFFFFFFFFF  
FFFFFFFFFFFFFFFFFFFFFFFFFFFFFFFFFFFFFFFFFFFFFFFFFFFFFFFFFFFFFFFFFFFFFFFF  
FFF  
@A00721:190:HGJW7DSXY:4:1130:7193:17550\_2:N:0:TCTGCAAG+GCTGCACT  
GGGTAATTACACCTAAACGAGCTCGATCTGCCATCGCTGAAGGATGTGCACTCTTTTCTGCTACTTTA  
ACGGAGCGTAGTGTACTCTTCGTCGATTGTATCAACAGTAACATTACT  
+  
FFFFFFFFFFFFFFFFFFFFFFFFFFFFFFFFFFFFFFFFFFFFFFFFFFFFFFFFFFFFFFFFFFFFFFFF  
FFFFFFFFFFFFFFFFFFFFFFFFFFFFFFFFFFFFFFFFFFFFFFFFFFFFFFFFFFFFFFFFFFFFFFFF  
FFF  
@A00721:190:HGJW7DSXY:4:1371:14335:19272\_1:N:0:TCTGCAAG+GCTGCACT  
CTATCGTTCAGGTGCATGGGGTTGGATAGCCAATATTGAAGTGGACACCTCTGGTAGTATCGAAGTAA  
AGATAACCAATAAGGAAGGAGCTTATACTATGGTTGAATCAACTAAGCATACTACTTTTGCTTTGATT  
ACT  
+  
FFFFFFFFFFFFFFFFFFFFFFFFFFFFFFFFFFFFFFFFFFFFFFFFFFFFFFFFFFFFFFFFFFFFFFFF  
FFFFFFFFFFFFFFFF:FFFFFFFF:FFFFFFFFFFFFFFFFFFFFFFFFFFFFFFFFFFFFFFFFFFFFFFFF  
FFF  
@A00721:190:HGJW7DSXY:4:2345:10031:28447\_2:N:0:TCTGCAAG+GCTGCACT  
ACCTCGGTACAATCTTACTTGAACGAAGGCGACCTGTTCCGGAGTTTTTACGGGATCCGGAATGTTC  
TGTCTATATTAGGTGAAGCGAAATACGATTTCAACGTCAACGTTTAC  
+  
FFFFFFFFFFFFFFFFFFFFFFFFFFFFFFFFFFFFFFFFFFFFFFFFFFFFFFFFFFFFFFFFFFFFFFFF:FFF:, , FFFF  
FFFFFFFFFFFFFFFFFFFFFFFF:FFFFFFFF,FFFFFFFFFFFFFFFFFFFFFFFF, F  
@A00721:190:HGJW7DSXY:4:2244:30888:28025\_1:N:0:TCTGCAAG+GCTGCACT  
TACAGGAGGCAGTCTTCTGATCGTAAGAAGTTTATAAGGAACATATCCATTTGTTGTAATAGGGTCAT  
CAACTTAGAACTCGAACTCTAAGTGGTAATACTGTCTTTCCAAGCTTACCTGTATCTTCAATGAAAT  
TGG  
+  
FFFFFFFF,FFF:FFF:FFF,FFFFFFFFFFFFFFFFFFFFFFFF:F:FFFFFFFFFFFFFFFF:FFF  
FFFFFFFFFFFFFFFFFFFFFFFFFFFFFFFFFFFFFFFFFFFFFFFFFFFFFFFF:FFFFFFFF:FFFFFFFF:  
FFF  
@A00721:190:HGJW7DSXY:4:1363:7148:16125\_1:N:0:TCTGCAAG+GCTGCACT  
TTTCTACGATACAAATGATAACTTCTAATTTACGTTTGCTACTCAGAGCTGGTCCTCTCAGCAAAGG  
GATGCATGGTGTTATCTCCTCAGGAGTCCCGGCATTTGATAATAATGACGAGACTTTCGTCATAATCG  
CTG  
+  
FFFFF,FFFF:FFFF:FFFF:F,FFFF,FFFFFFFF:FFFF,FFFFFFFFFFFF:FF:FF:  
FFF:FFFFFFFF:FF:F::FFFFF,F:FFFFFFFFFFFFFFFF:FFFFF:F:FF:FFFFFFFF  
,F,

@A00721:190:HGJW7DSXY:4:2532:31304:25927\_1:N:0:TCTGCAAG+GCTGCACT  
AGCGCATCTCGTGTGAGCCTCGACCCTATTATATTGTATTAACCTATAAAGGTGAGGAGACCATTTT  
CTTGCTGAAATTTATAGAAGATTATTTTGACAGACTCAATAAGAATCATCGATTCTCGATTCTGATAGAG  
CTT

+

FFFF,FFFF:FFFF:FF::F:FF:,F:FFF,F:,,FFFFFF,FFFF,:F,FF:F:F,FF,FFFFFF  
FFF:,FFFF:F:FFFFFF,F:,FF,FFFFFF::,,F,F,FFF,F,F,FF:FFFFFF,F:FFFF:,FFF:F  
:FF

@A00721:190:HGJW7DSXY:4:1315:32199:31172\_1:N:0:TCTGCAAG+GCTGCACT  
AGTCAACACTAGTTTCGAGTGCTGCTTTGGATTACGATGACTTGAGAATAGGTGAAGGGATAGTTTTTA  
CCTCGACAAACATTAAGGCGGCGGCGACTAATCTTAAAGCTTCACCCAAAATGAAGGACACTTCGAAA  
CTG

+

FF::FF,F:F,,FFFFFFF:,FF,:FF,FFFF,FFFF:F,FFF,::FFFF,FFF,FFFF,:FF,,F  
FF:F:F,,FF:FFFFFFFF:FFFFFFFF,FFFFFFFFF:FFF:FFFFFF:F,FFFF:FF:F,FFFFFF:  
FF:

@A00721:190:HGJW7DSXY:4:2329:31141:25989\_1:N:0:TCTGCAAG+GCTGCACT  
AATTCTTTTGATACAACCTCTAGCCTTCAAGTGGGGTATGCCTGCGGAATACGCTTGCTATTCACCAGA  
TTGGTTCGAACCCGTTGATGCTATGTCAGAAGAAGCTATTCAAGCTTGTCGTTTAAAGACTGCAGAGG  
CTG

+

FFFF:FFFFFFFFFFFFFFFFFFFFFFFFFFFFFFFFFFFFFFFFFFFFFFFFFFFFFFFFFFFFFFFFF,FFFFFFFF:F:FFF  
FF:FFFFFFFFFFFFFFFFFFFFFFFFFFFFFFFFFFFFFFFFFFFFFFFFFFFFFFFFFFFFFFFFF:FFFFFFFFFFFFFFFFFFFFFFFFFFFFFFFFF  
FFF

@A00721:190:HGJW7DSXY:4:1458:6063:6950\_2:N:0:TCTGCAAG+GCTGCACT  
CCAGACTCAAGGAGTCCAATCAAAGTTTTGAATTTAGCTCAACTGGGGAGACGTGCTTAAATGGGTG  
ATAAAATTATTTAGAGATCTTTCTACTTACAAAGGACAATTCAGTT

+

FFFFFFFFFFFFFFFFFFFFFFFFFFFFFFFFFFFFFFFFFFFFFFFFFFFFFFFFFFFFFFFFF  
FF:FFFFFFFFFFFFFFFFFFFFFFFFFFFFFFFFFFFFFFFFFFFFFFFFFFFFFFFFFFFFFFFFF,FFFFFFF

@A00721:190:HGJW7DSXY:4:1140:26838:23390\_1:N:0:TCTGCAAG+GCTGCACT  
TTTTGTTACCAAATTTCTTGCTTTCAACGAAGTCTCTGATTTTATTAATCATTACTTTAACGATCTCT  
CGGTCATTTACTCTGTACTTGATCTACGTCGTTTAACTGTGCGGAACAACCTTTACTTAGAATGACTCT  
ATC

+

FFFFFFFFFFFFFFFFFFFFFFFFFFFFFFFFFFFFFFFFFFFFFFFFFFFFFFFFFFFFFFFFF:FFFF  
FFFFFFFFFFFFFFFFFFFFFFFFFFFFFFFFFFFFFFFFFFFFFFFFFFFFFFFFFFFFFFFFF:FFFFF:  
FF:

@A00721:190:HGJW7DSXY:4:1177:5828:35916\_2:N:0:TCTGCAAG+GCTGCACT  
ACGAAAACCAACTCTTCGTTACGAGACCTGATGGTAGAATAGATTTAGTCTCTACACCCATCTCAACG  
AGGATAAAGCGAGTTTTCCGTCCTGAACGTAATACACGAAGAGATCAT

+

FFFFFFFFFFFFFFFFFFFFFFFFFFFFFFFFFFFFFFFFFFFFFFFFFFFFFFFFFFFFFFFFF  
FFFFFFFFFFFFFFFFFFFFFFFFFFFFFFFFFFFFFFFFFFFFFFFFFFFFFFFFFFFFFFFFF

@A00721:190:HGJW7DSXY:4:1413:26142:14418\_2:N:0:TCTGCAAG+GCTGCACT  
CAAATGAGGTCAAAGCTCTATTTATTAACGAACCTATTATCCGATTCTTCGAGGGTATCACTACCCT  
GATCTGCCGACTTTAGTCAAGGAACCTCAATTCCTTCAATGTTTATAT

+

FFF,FFFFFFFFFFFFFFFFFFFFFFFFFFFFFFFFFFFFFFFFFFFFFFFFFFFFFFFFF:FFFFFFFFFFFFFFFFF  
FFF,F:FFFFFFFFFFFFFFFFF:FFFFFFFFF,FFFF:FFFFFFFFF

@A00721:190:HGJW7DSXY:4:1237:22245:19006\_2:N:0:TCTGCAAG+GCTGCACT  
CAAATTTTAGAATTTATTTAGAACTCTCTCCGATCACCTTGGTGTGATCTCCCGGAGGATCTTTTC  
AATAAGATGTATGATGATAATCTACTATTTTTAAATAGTGATATTCAG

+

FFFFFFFFFFFFFFFFFFFFFFFFFFFFFFFFFFFFFFFFFFFFFFFFFFFFFFFFFFFFFFFFFFFFFFFF  
FFFFFFFFFFFFFF:FFFFFFFFFFFFFFFFFFFFFFFFFFFFFFFFFFFFFFFFFFFFFFFF  
@A00721:190:HGJW7DSXY:4:2434:15628:32597\_2:N:0:TCTGCAAG+GCTGCACT  
ATCAAAGATTTGGCTTGGTCTATTTACCGCAAAAAGTTGGAAGAGGTCTATGATATTTATTTTACTTA  
TACTTTAAATAGCACCGATTATAACTTGACTGTTGATAATATTACAAT  
+  
FFFFFFFFFFFFFFFFFFFFFFFFFFFFFFFFFFFFFFFFFFFFFFFFFFFFFFFFFFFFFFFFFFFFFFFF  
FFFFFFFFFFFFFF:FFFFFFFFFFFFFFFFFFFFFFFFFFFFFFFFFFFFFFFFFFFFFFFF  
@A00721:190:HGJW7DSXY:4:1649:9923:10567\_2:N:0:TCTGCAAG+GCTGCACT  
AAGATTAGAGAAGTAACCGGTGAACACGTCGGTAGCATTGATTTACTTTTACCGTTAGAACTGAAAAA  
GATTCTTTTCGAAAAGAAACCTATAAGTTACAAACGATTCTTCGACTA  
+  
FFFFFFFFFFFFFFFFFFFFFFFFFFFFFFFFFFFFFFFFFFFFFFFFFFFFFFFFFFFFFFFFFFFFFFFF  
FFFFFFFFFFFFFF:FFFFFFFFFFFFFFFFFFFFFFFFFFFFFFFFFFFFFFFFFFFFFFFF  
@A00721:190:HGJW7DSXY:4:2164:11379:31501\_2:N:0:TCTGCAAG+GCTGCACT  
ACTTCAAGTACCTGAACCTTACATTTTTAATGGTATGGTATAATGTGTCTTACAAATAGAACCTTCAC  
TCTCGGTAATGAGAGTGTATTCTTAATATTCTAGTAACCGCTATGTG  
+  
FFFFFFFFFFFFFFFFFFFFFFFFFFFFFFFFFFFFFFFFFFFFFFFFFFFFFFFFFFFFFFFFFFFFFFFF  
FFFFFFFFFFFFFF:FFFFFFFFFFFFFFFFFFFFFFFFFFFFFFFFFFFFFFFFFFFFFFFF  
@A00721:190:HGJW7DSXY:4:1542:32127:19429\_1:N:0:TCTGCAAG+GCTGCACT  
AATTCAATAGCTTTAGTATTATTTACTATCGCCTTTATTGAAAATTGTATAAGAGTTAATTGCTTACA  
CAAAAGTGACGCGCAAGTAATCTTAATTGATTGAAGCTAGGCGTTGGGGAGAATGAAGTCCGCTTC  
CCG  
+  
FFFFFFFFFFFFFFFFFFFFFFFFFFFFFFFFFFFFFFFFFFFFFFFFFFFFFFFFFFFFFFFFFFFFFFFF  
FFFFFFFFFFFFFF:FFF,FFFFFFFFFFFFFFFFFFFFFFFFFFFFFFFFFFFFFFFF  
FFFFFFFFFFFFFFFFFFFFFFFFFFFFFFFFFFFFFFFFFFFFFFFFFFFFFFFFFFFFFFFFFFFFFFFF  
FFF  
@A00721:190:HGJW7DSXY:4:1339:4553:8844\_1:N:0:TCTGCAAG+GCTGCACT  
CGGTCGGCAGATCGGCACCACTGGTCTCTACGTTACGGGACCGCTGTGCAGAATAACCTTCCCAAAT  
CTAGATCTGCACAGAAGAAGGCTGAAGGTCGTTACCGGACGACCACTCAAAGGAAACGGGCTGTTGCC  
CAG  
+  
FFFFFFFFFFFFFFFFFFFFFFFFFFFFFFFFFFFFFFFFFFFFFFFFFFFFFFFFFFFFFFFFFFFFFFFF  
FFFFF:FFFFFFFFFFFFFFFFFFFFFFFFFFFFFFFFFFFFFFFFFFFFFFFFFFFFFFFFFFFFFFFF  
FFF  
@A00721:190:HGJW7DSXY:4:2578:19452:13197\_1:N:0:TCTGCAAG+GCTGCACT  
GCTCTTCCGATCTATTCACCACTCCCATACCAATCAATGATGTGACTATACAGTTCGGCCATTTCAAG  
AGTGGTCAATACGTCGTGGGAGGTACTGAAGCCTTCCCCTCCGCTGGCACGAAGAACACTCCCAAGCC  
AAT  
+  
FFFFFFFFFFFFFFFFFFFFFFFFFFFFFFFFFFFFFFFFFFFFFFFFFFFFFFFFFFFFFFFFFFFFFFFF  
FFFFFFFFFFFFFF:FFFFFFFFFFFFFFFFFFFFFFFFFFFFFFFFFFFFFFFFFFFFFFFF  
FFF  
@A00721:190:HGJW7DSXY:4:1416:14244:33426\_1:N:0:TCTGCAAG+GCTGCACT  
AATGAAAAGGGGTTTACCAGGGTAGTCTCTAAGTCTACCAGGAAGAGGGGAAATGTCCCCAAAACCTGA  
GAAGAATAAAGGGAAAGGTCCATCAGGACCTAAGAAGGGGAAATTACCCCTAATTCTGAAGGAAGATC  
TCC  
+  
FFFFFF:FFFFFF:FFFFFFFFFFFFFFFFFFFFFFFFFFFFFFFFFFFFFFFFFFFFFFFF:FFFFFFFF  
FF: :FFFFFFFF,FFF:FFFFFFFFFFFFFFFFFFFFFFFFFFFFFFFFFFFFFFFFFFFFFFFF  
FFF  
@A00721:190:HGJW7DSXY:4:2170:15971:26522\_1:N:0:TCTGCAAG+GCTGCACT  
AAGAGGCCGCTGCTACGAAGTCGCTGAAGGCGGCTTGGGTCATTAAGGGTAGCTGTAAAGTTGCGCCT

GCCGACCCCATCTTTGAGACCAAGACTCTCTACAGTAGGTTCGTGCCTAAGATCGGAAGAGCACACGT  
CTG

+

FFFFFFFFFFFFFFFFFFFFFFFFFFFFFFFFFFFFFFFFFFFFFFFFFFFFFFFFFFFFFFFFFFFFFFFF  
FFFFFFFFFFFFFFFFFFFFFFFFFFFFFFFFFFFFFFFFFFFFFFFFFFFFFFFFFFFFFFFFFFFFFFFF  
FFF

@A00721:190:HGJW7DSXY:4:1573:23583:18474\_2:N:0:TCTGCAAG+GCTGCACT  
GTGAGAGGACTTTTGGCTACTGGCGACAACTGAGAGCAGTCGCTGGGGAAAGAGAATTGCGTGGGTT  
GAAGGCCGACGCTTCGAGCTTGAGTGTGACGAGGCCGGTGACGTTTTT

+

FFFFFFFFFFFFFFFFFFFFFFFFFFFFFFFFFFFFFFFFFFFFFFFFFFFFFFFFFFFFFFFFFFFFFFF:FFFFF  
FFFFFFFFFFFFFFFFFFFFFFFFFFFFFFFFFFFFFFFFFFFFFFFFFFFFFFFFFFFFFFFF

@A00721:190:HGJW7DSXY:4:1543:32045:28119\_1:N:0:TCTGCAAG+GCTGCACT  
TAACTATGGGGCGAAGATCCCCTATGGAGTCTTGAAGGACTTAGGTTGGCATATTTATGCCGACGATA  
ATAAGCATGTCACCCCTTAAGCACCGAGGTAAGCTCGGGACTTACAAGAGAGAGTGTGAGAGAGTCGCT  
CTC

+

FFFFF,FFFFFFFFFFFFFFFFFFFFFFFFFFFFFFFFFFFFFFFFFFFFFFFFFFFFFFFFFFFFFFFF  
:F:FFFFFFFFFFFFFFFFFFFFFFFFFFFFFFFFFFFFFFFFFFFFFFFFFFFFFFFFFFFFFFFF  
FFF

@A00721:190:HGJW7DSXY:4:1126:2944:24408\_1:N:0:TCTGCAAG+GCTGCACT  
TTTCCTCCGTCATTGGGGATTTGATGTGAGAAGGTGGAAGGTGTCAAGGTCCTTCTTCATGCTGATC  
TTTCAGGACCTAATCACATCATGATTGATAGTTACGGCTCGTATCGAGTTGGAGGGAGGAAGTTCTCC  
GAA

+

FFFFFFFFFFFFFFFFFFFFF:FFFFFFFFFFFFFFFFFFFFFFFFFFFFFFFFFFFFFFFFFFFFFFFF  
FFFFFFFFFFFFFFFFFFFFFFFFFFFFFFFFFFFFF:FFFFFFFFFFFFFFFFFFFFFFFFFFFFFFFF  
FFF

@A00721:190:HGJW7DSXY:4:1226:11993:13307\_1:N:0:TCTGCAAG+GCTGCACT  
GTCAGAAGATGAGGAAGTCTAAGAGGAGGAGTTTGAGGAAGGCTCTAGAGAAGATCTCACCACTGGA  
GAAGGCAAGTGGAGAGTCCAGAAGTTGATGAAGAAGGATTATTTGAAGCAGGGGTTACCACTTCCTAA  
GGT

+

FFFFFFFFFFFFFFF:FF:F:FFFF:FFFFF::FFFFFFFFFFFFFFFFFFFFFFFFFFFFFFFFF,FFFFFFFFF  
FFFFFFFF:FFFFFFFFFFFFFFFFFFFFFFFFFFFFFFFFFFFFF:F,FFFFFFFFFFFFFFFFFFFFF:FFFF:FFF  
FFF

@A00721:190:HGJW7DSXY:4:2567:15176:35759\_1:N:0:TCTGCAAG+GCTGCACT  
TATTGTTCTTCCGGGAAGTTGTGGGATTTAACTTTGACTCACTACTCCGATCAGATCCGGATGGTT  
TGATTGGTATGGACTACTCGACTTTTGATCTGGAGTTGTCTAGGGTCATGGCAGATACTACCGATAAG  
GTG

+

:FFF::FFFFFFFF:FFFFFFFFFFFFF:FFFFF:F:FFFFFFFFFFFFFFFFF:FFFFFFFFFFFFFFFFF  
FFFFFFFFFFFFFFFFFFFFFFFFFFFFFFFFFFFFFFFFFFFFFFFFFFFFFFFFFFFFFFFFFFFFFFFF  
FFF

@A00721:190:HGJW7DSXY:4:2243:13096:20917\_2:N:0:TCTGCAAG+GCTGCACT  
GTCTTTATGATTCAAAACCTATCGTTGTCGTACCTTACAAGGTTGAGGAGACTTTACAGCGGCTTATT  
GTCGCGCAGTTTCCAGAATTGCGGTTGAAGTTCACCCATTCTATCTTG

+

FFFFFFFFFFFFFFFFFFFFFFFFFFFFFFFFFFFFFFFFFFFFFFFFFFFFFFFFFFFFFFFFFFFFF:FFFF  
FFFFFFFFFFFFFFFFFFFFFFFFFFFFFFFFFFFFFFFFFFFFFFFFFFFFFFFFFFFFF:F:FFFFF

@A00721:190:HGJW7DSXY:4:2262:4987:33708\_1:N:0:TCTGCAAG+GCTGCACT  
AAGATGCATCGAGGTATACGTCTAGGAACATTGATTGGGAACGTACCTACTCACGAGACGTCATGAAA  
GCTATCGGAGGGAAGCAAAATGTTTCGTTCTGTTACAAGAACGCTTTGGATTGTGACCATAAAGCCTC  
AGT

+  
FFFFFFFF,FFF:FF:FFFFFFFF:FFFFFFFFFFFFFFFF:FFFFFFFFFFFFFFFF:FF  
FFFFFFFF:FFFFFFFF:FFFFFF:FFFFFF:FFFFFFFFFFFFFFFF:FFFF:FFFF  
FFF  
@A00721:190:HGJW7DSXY:4:1578:29794:27477\_2:N:0:TCTGCAAG+GCTGCACT  
ATATGTTACGACATGGCTTCGTAACAACAGTGCAGGATTGTCATCTCGGGAAAGTGATTCACCAAG  
ATGTTTCATATAGATACGAGATACCTAGAGAAGGTCGCAGCGATCTTAC  
+  
FFFFFFFFFFFFFFFFFFFFFFFFFFFFFFFFFFFFFFFFFFFFFFFFFFFFFFFF:FFFFFFFF:FFFF  
::FFFFFFFF:FFFFFFFFFFFFFFFFFFFFFFFFFFFFFFFFFFFFFFFF:FFF  
@A00721:190:HGJW7DSXY:4:2347:24722:12555\_1:N:0:TCTGCAAG+GCTGCACT  
GGAGGTGATCTCTCTGCTTCTGCGTTACTGAGAGAAAAGATTGAGGACGCTACGGTGACTTTATGGA  
CAAGATGCAAGTTCTTGGAATACTTGTTTCCCTTTTATAGTTTAGTAGGTGATCTTGACGTCGATT  
CTT  
+  
FFFFFFFFFFFFFFFFFFFFFFFFFFFFFFFFFFFFFFFFFFFFFFFFFFFFFFFFFFFFFFFF  
FFFFFFFFFFFFFFFFFFFFFFFFFFFFFFFFFFFFFFFFFFFFFFFFFFFFFFFF:FFFF  
FFF  
@A00721:190:HGJW7DSXY:4:2146:16396:32675\_2:N:0:TCTGCAAG+GCTGCACT  
AAGAAGTCGCTCGGCGTTGTTCTTGAACCAAGTTAAGAAGGAGGCTGATCATGGAGTCTTTGTACC  
TTCTGTCAAACCTTCGAGGTTTCAGCTACGAGAGGTGATCCCGGATGTGG  
+  
FFFFFFFFFFFFFFFFFFFFFFFFFFFFFFFF:FFFF:F:FFFFFFFFFFFFFFFFFFFFF:  
:FFFFFFFFFFFFFFFFFFFFFFFFFFFFFFFFFFFFFFFFFFFFFFFF:FFFF  
@A00721:190:HGJW7DSXY:4:1104:14868:18944\_1:N:0:TCTGCAAG+GCTGCACT  
GTTGAGAAGTGTGCTTTACAAGGAGTTAGACTCTTCTTCAAGTTTTTAGATCTTCTTGATAATCTTAA  
AGAAAAATTTTGAATAAACTAATGAGAGGTATAGGCTTAGTCAAGTCTGTACTTACATTCTTTACGC  
CAG  
+  
FFFFFFFFFFFFFFFFFFFFFFFFFFFFFFFF:FFFFFFFFFFFFFFFFFFFFFFFFFFFFFFFF  
FFFFFFFFFFFFFFFFFFFFFFFFFFFFFFFFFFFFFFFFFFFFFFFFFFFFFFFFFFFFFFFF  
FFF  
@A00721:190:HGJW7DSXY:4:2147:19370:21543\_2:N:0:TCTGCAAG+GCTGCACT  
ACTCAGATTCAATCTGGCATCACTGAACGTCTACAACGAGTTAGGGAGTGGCTAGGTTTTAAAGATC  
CTTTGCACAAGCAATACCTTCCACTGAGTTCATCACCCAGAGTTTCGA  
+  
FFFFFFFFFFFFFFFFFFFFFFFFFFFFFFFF:FFFFFFFFFFFFFFFFFFFFFFFFFFFFFFFF:FFFFFFFFFFFFFFFF  
FFFFFFFFFFFFFFFFFFFFFFFF:FFFF:FFFFFFFFFFFFFFFFFFFFFFFF  
@A00721:190:HGJW7DSXY:4:1423:24270:3129\_2:N:0:TCTGCAAG+GCTGCACT  
TCTTTTACCTTTTGAGGTCCAGGAACCTTACTCCTAGTGTCTTTTCTAGAGTCCAAGGACGTTTCC  
GTCGGAGGATGACAGGTGGGAGACCGCTCAATAACACTCTATTGAATC  
+  
FFFFFFFFFFFFFFFFFFFFFFFFFFFFFFFFFFFFFFFFFFFFFFFFFFFFFFFF:FFFFFFFFFFFF  
FFFFFFFFFFFFFFFF:FFFFFFFFFFFFFFFFFFFFFFFFFFFFFFFF:FFFF  
@A00721:190:HGJW7DSXY:4:1404:30933:36871\_1:N:0:TCTGCAAG+GCTGCACT  
GCCACTTCTAATTTTAGGAAACGTCGCGAAAAGAAAGTTCATGAGGATGTGTTGGTCGAAAAATATCG  
CCGGAACCTTCTAATAGAGGATCCTGATGACATTATTTCAACGGATACCGATCTCAGTTCTACCACAG  
AAA  
+  
FFFFFFFFFFFFFFFFFFFFFFFFFFFFFFFF:FFFFFFFFFFFFFF:F:F:FFFFFFFFFFFFFFFFFFFFFFFF  
FFFFFFFFFFFFFFFFFFFFFFFFFFFFFFFFFFFFFFFFFFFFFFFFFFFFFFFF:FFFFFFFFFFFFFFFF  
FFF  
@A00721:190:HGJW7DSXY:4:1333:11080:11036\_2:N:0:TCTGCAAG+GCTGCACT  
ACTGTCTCCACTGATTCGGAATTAGAGAAAGACGACCTTCTGTGGGGACTGAGACCTCTGAATTTTC

+

@A00721:190:HGJW7DSXY:4:2249:6352:25645\_1:N:0:TCTGCAAG+GCTGCACT  
TCGTATTAGAACAGCTGATTCTTATTGCATGAACGTCGCTGAGGTCAAACCTGTGGACGTTCTTTTCA  
TCGACGAATTATTCATGATTCACGCTGGTCAGACCCTTTTTCTTACACATCTACTTAAGGCGGCTTAT  
ACC

+

@A00721:190:HGJW7DSXY:4:2630:24325:2378\_2:N:0:TCTGCAAG+GCTGCACT  
TGATCTCCAAGTCGAACTACTTCAACATCAACGACATCATTCTTGATGAGTGTGTTCTTATCGAA  
GTCTCAGTTATCGCTGCCCGGCCGACGTTTGTGCGAACTCTCAGAGG

+

@A00721:190:HGJW7DSXY:4:1273:28113:21339\_1:N:0:TCTGCAAG+GCTGCACT  
ACCCCTTATATCGAGGCTATCGAGGACGATGAGTATCTTGAAGTTGTTGACGACAAGCCTCAAGAGGG  
TAGAGGACCACCTGGATCTTCTACTGTCTCTGCCTTCCAAGATTTCTTAGAAGAGGTTATTCCTGGAA  
CCA

+

@A00721:190:HGJW7DSXY:4:2421:10538:29011\_1:N:0:TCTGCAAG+GCTGCACT  
TATAGGTAAGAAGCCCCTTGAGCCGCGTAGTCAGCGCGTTTAGCTGTATCATCAGTCAGAGTATACCC  
GATAGGGTACCGAGTCTCCAAGAGAATATTTATTCTTATGAGGCTCGAAACTTCAACGTTTTCACAAAC  
GGA

+

@A00721:190:HGJW7DSXY:4:2557:23113:35352\_2:N:0:TCTGCAAG+GCTGCACT  
TTGATGATTTTATCACTTTATTATGACCTTGGAAAGTTTTCGGCTGTGGTTGTCGCTGGGGACGATTC  
CATTCTGTTTTCAAAGACTCCAATAACTGATCATTCTGATCATATGAT

+

@A00721:190:HGJW7DSXY:4:2612:32443:18286\_2:N:0:TCTGCAAG+GCTGCACT  
TCCGAGAGGTTTATCCTGATGTGGAGGGAGTTCTTGAAGCATCCCGACCTTTCCTTGTAATAATTTG  
ATGCGGTTTCATAAGATTATCAGTAATCCTGATTCTACTACGGATTCA

 $+$ 

@A00721:190:HGJW7DSXY:4:2336:16884:23469\_1:N:0:TCTGCAAG+GCTGCACT  
GATTAAGACTCTTCCGAAAGGCGAACTTTGGGAATTTGAAGCTCAGGGTGAAGCACACGTTTGACCG  
TGACGAACTGTGGTGTTCTTGATCTACGTTACGGATATACTCTCCTTGAGTTCACCTCGTAAGGACACT  
ACC

+

[illegible]



FFFFFFFFFFFFFFFFFFFFFFFFFFFFFFFFFFFFFFFFFFFFFFFFFFFFFFFFFFFFFFFFFFFFFFFFFFFFFFFF  
FFF

@A00721:190:HGJW7DSXY:4:1406:4155:18521\_1:N:0:TCTGCAAG+GCTGCACT  
TTTCTACGATACAAATGATAACTTCTAATTTACGTTTGCTACTCAGAGCTGGTCTCTCAGCAAAGG  
GATGCATGGTGTATCTCCTCAGGAGTCCCGGCATTTGATAATAATGACGAGACTTTCGTCATAATCG  
CTG

+  
FFFFFFFFFFFFFFFFFFFFFFFFFFFFFFFFFFFFFFFFFFFFFFFFFFFFFFFFFFFFFFFFFFFFFFFFFFFFFFFF  
FFFFFFFFFFFFFFFFFFFFFFFFFFFFFFFFFFFFFFFFFFFFFFFFFFFFFFFFFFFFFFFFFFFFFFFFFFFFFFFF  
FFF

@A00721:190:HGJW7DSXY:4:1309:19696:19727\_2:N:0:TCTGCAAG+GCTGCACT  
CGTGTGAGCCTCGACCCGATTATATGGTATTAACCTATAAAGGTGAGGAGACCATTTTCTTGCTGAA  
ATTTATAGAAGATTATTTTGACAGAATCAATAAGAATCATCGATTCTC

+  
FFFFFFFFFFFFFF,FFFF:FFF:FFFFFFFFFFFF,F,FFFFFFFFFFFFFFFFFFFFFFFFFFFFFFFF:FFFF  
FFFFFFFFFFFFFFFFFFFFFFFFFFFFFFFFFFFFFFFFFFFFFFFFFFFFFFFFFFFFFFFFFFFFFFFF

@A00721:190:HGJW7DSXY:4:1350:28519:25739\_1:N:0:TCTGCAAG+GCTGCACT  
AGTCAACACTAGTTCGAGTGCTGCTTTGGATTACGATGACGTGAGAATAGGTGAAGGGATAGTTTTTA  
CCTCGACCAACATTAAGGCGGCGGCGACTAATCTTAAAGCTTCACCCAAAATGAAGGACACTTCGAAA  
CTG

+  
FFFFFFFFFFFFFFFFFFFFFFFFFFFFFFFFFFFFFFFFFFFFFFFFFFFFFFFFFFFFFFFFFFFFFFFFFFFFFFFF  
FFF:FFFFFFFFFFFFFFFFFFFFFFFFFFFFFFFFFFFFFFFFFFFFFFFFFFFFFFFFFFFFFFFFFFFFFFFF  
FFF

@A00721:190:HGJW7DSXY:4:2357:32307:25034\_1:N:0:TCTGCAAG+GCTGCACT  
AATTCTTTTGATACAACTCTAGCCTTCAAGTGGGGTATGCCTGCGGAATACGCTTGCTATTCACCAGA  
TTGGTTCGAACCCGTTGATGCTATGTCAGAGAAGCTATTCAAGCTTGTCGTTTAAAGACTGCAGAGG  
CTG

+  
FFFFFFFFFFFFFFFFFFFFFFFFFFFFFFFFFFFFFFFFFFFFFFFFFFFFFFFFFFFFFFFFFFFFFFFFFFFFFFFF  
FFFFFFFFFFFFFFFFFFFFFFFFFFFFFFFFFFFFFFFFFFFFFFFFFFFFFFFFFFFFFFFFFFFFFFFFFFFFFFFF  
FFF

@A00721:190:HGJW7DSXY:4:1543:18828:21512\_2:N:0:TCTGCAAG+GCTGCACT  
CCGAGACTCAAGGAGTCCAATCAAAGTTTTGAATTTAGCTCAACTGGGGAGACGTGCTTAAATGGGTG  
ATAAAAATTATTTAGAGATCTTTTCTACTTACAAAGGACAATTCAGTT

+  
FFFFFFFFFFFFFFFFFFFFFFFFFFFFFFFFFFFFFFFFFFFFFFFFFFFFFFFFFFFFFFFFFFFFFFFFFFFFFFFF  
F:FF:F:FF:FFFFFFFFFFFFFFFFFFFFFFFFFFFFFFFFFFFFFFFFFFFFFFFFFFFFFFFFFFFFFFFF  
@A00721:190:HGJW7DSXY:4:1140:27118:22529\_1:N:0:TCTGCAAG+GCTGCACT

TTTTGTTACCAAATTCTTGCTTTCAACGAAGTCTCTGATTTTATTAATCATTACTTTAACGATCTCT  
CGGTCATTTACTCTGTACTTGATCTACGTCGTTTAACTGTCGGAACAACCTTTACTTAGAATGACTCT  
ATC

+  
FFFFFFFFFFFFFFFFFFFFFFFFFFFFFFFFFFFFFFFFFFFFFFFFFFFFFFFFFFFFFFFFFFFFFFFFFFFFFFFF  
FFFFFFFFFFFFFFFFFFFFFFFFFFFFFFFFFFFFFFFFFFFFFFFFFFFFFFFFFFFFFFFFFFFFFFFF:F:FFFFF:FFFFFFFF  
FFF

@A00721:190:HGJW7DSXY:4:1254:18710:7373\_2:N:0:TCTGCAAG+GCTGCACT  
ACGAAAACCAACTCTTCGTTACGAGACCTGATGGTAGAATAGATTTAGTCTCTACACCCATCTCAACG  
AGGATAAAGCGAGTTTTCCGTCCTGAACGTAATACACGAAGAGATCAT

+  
FFFFFFFFFFFFFFFFFFFFFFFFFFFFFFFFFFFFFFFFFFFFFFFFFFFFFFFFFFFFFFFFFFFFFFFFFFFFFFFF  
FFFFFFFFFFFFFFFFFFFFFFFFFFFFFFFFFFFFFFFFFFFFFFFFFFFFFFFFFFFFFFFFFFFFFFFF

@A00721:190:HGJW7DSXY:4:2369:15555:36198\_2:N:0:TCTGCAAG+GCTGCACT  
CAAATGAGGTCAAAGCTCTATTTATTAACGAACATTATCCGATTCTTCGAGGGTATCACTACCCT



GATCTGCCGACTTTAGTCAAGGAAC TTCAATTCCTTCGATGTTTATAT  
+  
FFFFFFFFFFFFFFFFFFFFFFFFFFFFFFFFFFFFFFFFFFFFFFFFFFFFFFFFFFFFFFFFFFFFFFFF  
FFFFFFFFFFFFFFFFFFFFFFFFFFFFFFFFFFFFFFFFFFFFFFFFFFFFFFFFFFFFFFFFFFFFFFFF  
@A00721:190:HGJW7DSXY:4:1564:11369:17926\_2:N:0:TCTGCAAG+GCTGCACT  
CAAATTTTAGAACTTTATTTTCAGAACTCTCTCCGATCACCTTGGTGTGATCTCCCGAGGATCTTTTC  
AATAAGATGTATGATGATAATCTACTATTTTTAAATAGTGATATTAG  
+  
FFFFFFFFFFFFFFFFFFFFFFFFFFFFFFFFFFFFFFFFFFFFFFFFFFFFFFFFFFFFFFFFFFFFFFFF  
FFFFFFFFFFFFFFFFFFFFFFFFFFFFFFFFFFFFFFFFFFFFFFFFFFFFFFFFFFFFFFFFFFFFFFFF  
@A00721:190:HGJW7DSXY:4:2622:4345:12994\_2:N:0:TCTGCAAG+GCTGCACT  
ATCAAAGATTTGGCTTGGTCTATTTACCGCAAAAAGTTGGAAGAGGTCTATGATATTTATTTACTTA  
TACTTTAAATAGCACCGATTATAACTTGACTGTTGATAATATTACAAT  
+  
FFFFFFFFFFFFFFFFFFFFFFFFFFFFFFFFFFFFFFFFFFFFFFFFFFFFFFFFFFFFFFFFFFFFFFFF  
FFFFFFFFFFFFFFFFFFFFFFFFFFFFFFFFFFFFFFFFFFFFFFFFFFFFFFFFFFFFFFFFFFFFFFFF  
@A00721:190:HGJW7DSXY:4:1659:19208:32189\_2:N:0:TCTGCAAG+GCTGCACT  
AAGATTAGAGAAGTAACCGGTGAACACGTCGGTAGCATTGATTTACTTTTACCGTTAGAACTGAAAAA  
GATTCTTTTCGAAAAGAAACCTATAAGTTACAAACGATTCTTCGACTA  
+  
F:FFFFFFFFFFFFFFFFFFFFFFFFFFFFFFFFFFFFFFFFFFFFFFFFFFFFFFFFFFFFFFFFFFFFFFFF  
FFFFFFFFFFFFFFFFFFFFFFFFFFFFFFFFFFFFFFFFFFFFFFFFFFFFFFFFFFFFFFFFFFFFFFFF  
@A00721:190:HGJW7DSXY:4:2170:9073:13761\_2:N:0:TCTGCAAG+GCTGCACT  
ACTTCAAGTACCTGAAC TTTACATTTTTAATGGTATGGTATAATGTGTCTTACAAATAGAACCTTCAC  
TCTCGGTAATGAGAGTGTATTCCTTAATATTCTAGTAACCGCTATGTG  
+  
FFF:FFFFFFFF,FFFFFFFFFFFFFFFFFFFFFFFFFFFFFFFFFFFFFFFFFFFFFFFFFFFFFFFFFFFF  
FFFFFFFFFFFFFFFFFFFFFFFFFFFFFFFFFFFFFFFFFFFFFFFFFFFFFFFFFFFFFFFFFFFFFFFF  
@A00721:190:HGJW7DSXY:4:2651:8196:1846\_1:N:0:TCTGCAAG+GCTGCACT  
AATTCAATAGCTTTAGTATTATTTACTATCGCCTTTATTGAAAATTGTATAAGAGTTAATTGCTTACA  
CAAAAGTGACGCGCAAGTAATCTTAATTGATTGAAGCTAGGCGTTGGGGAGAATGAACTGCCGCTTC  
CCG  
+  
FFFFFFF,FF:FFFF:FFFFFFFFFFFFFFFFFFFFFFFFFFFFFFFFFFFFFFFFFFFFFFFFFFFFFFFF  
FFFFFFFFFFFFFFFFFFFFFFFFFFFFFFFFFFFFFFFFFFFFFFFFFFFFFFFFFFFFFFFFFFFFFFFF  
FFF  
@A00721:190:HGJW7DSXY:4:1355:24523:10457\_1:N:0:TCTGCAAG+GCTGCACT  
CGGTGCGCAGATCGGCACCACTGGTCTCTACGTTAGGGACCGCTGTGCAGAATAACCTTCCCAAAT  
CTAGATCTGCACAGAAGAAGGCTGAAGGTCGTTACCGGACGACCACTCAAAGGAAACGGGCTGTTGCC  
CAG  
+  
FFFFFFFFFFFFFFFFFFFFFFFFFFFFFFFFFFFFFFFFFFFFFFFFFFFFFFFFFFFFFFFFFFFFFFFF  
FFFFFFFFFFFFFFFFFFFFFFFFFFFFFFFFFFFFFFFFFFFFFFFFFFFFFFFFFFFFFFFFFFFFFFFF  
FFF  
@A00721:190:HGJW7DSXY:4:1126:21893:25567\_1:N:0:TCTGCAAG+GCTGCACT  
GCTCTTCCGATCTAGTCACCACTCCCATACCAATCAATGATGTGACTATACAGTTCGGCCATTTCAAG  
AGTGGTCAATACGTCGTGGGAGGTACTGAAGCCTTCCCCTCCGCTGGCACGAAGAACACTCCCAAGCC  
AAT  
+  
FFFFFFFFF:FFFFF,FFFFFFFFFFFFFFFFFFFFFFFFFFFFFFFFFFFFFFFFFFFFFFFFFFFFFFFF  
FFFFFFFFFFFFFFFFFFFFFFFFFFFFFFFFFFFFFFFFFFFFFFFFFFFFFFFFFFFFFFFFFFFFFFFF  
FFF  
@A00721:190:HGJW7DSXY:4:1449:13512:1407\_1:N:0:TCTGCAAG+GCTGCACT  
AATGAAAAGGGGTTTACCAGGGTAGTCTCTAAGTCTACCAGGAAGAGGGGAAATGTCCCCAAACTGA

GAAGAATAAAGGGAAAGGTCCATCAGGACCTAAGAAGGGGAAATTACCCCTAATTCTGAAGGAAGATC  
TCC

+

FFFFFFFFFFFFFFFF:FFFFFFFFFFFFFFFFFFFFFFFFFFFFFFFFFFFFFFFFFFFFFFFF  
FFFFFFFF:.,FFFFFFFFFFFFFFFFFFFFFFFFFFFFFFFFFFFFFFFFFFFFFFFF  
FFF

@A00721:190:HGJW7DSXY:4:2238:16278:10081\_1:N:0:TCTGCAAG+GCTGCACT  
AAGAGGCCGCTGCTACGAAGTCGCTGAAGGCGGCTTGGGTCATTAAGGGTAGCTGTAAAGTTGCGCCT  
GCCGACCCCATCTTTGAGACCAAGACTCTCTACAGTAGGTTCTGTCCTAAGATCGGAAGAGCACACGT  
CTG

+

FFFFFFFFFFFFFFFFFFFFFFFFFFFFFFFF:FFFFFFFFFFFFFFFFFFFFFFFFFFFFFFFF  
FFFFFFFFFFFFFFFFFFFFFFFF:FFFFFFFFFFFFFFFF:FFFFFFF,FFFFFFFFFFFFFFFF  
FFF

@A00721:190:HGJW7DSXY:4:2374:5113:16642\_2:N:0:TCTGCAAG+GCTGCACT  
GTGAGAGGACTTTTGGCTACTGGCGACAACTGAGAGCAGTCGCTGGGGAAGAGAATTGCGTGGGT  
GAAGGCCGACGCTTCGAGCTTGAGTGTGACGAGGCCGGTGACGTTTTT

+

FFFFFFFFFFFFFFFFFFFFFFFFFFFFFFFF:FFFFFFFFFFFF  
FFFFFFFFFFFFFFFFFFFFFFFFFFFFFFFFFFFFFFFFFFFFFFFF

@A00721:190:HGJW7DSXY:4:2254:5719:19852\_1:N:0:TCTGCAAG+GCTGCACT  
TAACTATGGGGCGAAGATCCCCTATGGAGTCTTGAAGGACTTAGGTTGGCATATTTATGCCGACGATA  
ATAAGCATGTCACCCTTAAGCACCGAGGTAAGCTCGGGACTTACAAGAGAGAGTGTGAGAGAGTCGCT  
CTC

+

FFFFF:FFF:FFFFFFFFFFFFFFFFFFFFFFFFFFFFFFFFFFFFFFFFFFFFFFFF:FF  
FF:FFFFFFFFFFFFFFFFFFFFFFFFFFFFFFFFFFFFFFFFFFFFFFFFFFFFFFFF  
FFF

@A00721:190:HGJW7DSXY:4:1250:19479:11647\_1:N:0:TCTGCAAG+GCTGCACT  
TTTCCTCCGTCATTGGGGATTTGATGTGAGAAGGTGGAAGGTGTCAAGGGTCTTCTTCATGCTGATC  
TTTCAGGACCTAATCACATCATGATTGATAGTTACGGCTCGTATCGAGTTGGAGGGAGGAAGTTCTCC  
GAA

+

:FFFFFFFFFFFF:FFFFFFFFFFFFFFFFFFFFFFFFFFFFFFFFFFFFFFFFFFFFFFFF  
FFFFFFFFFFFFFFFFFFFFFFFFFFFFFFFFFFFFFFFFFFFFFFFFFFFFFFFF  
FFF

@A00721:190:HGJW7DSXY:4:1226:13241:8296\_1:N:0:TCTGCAAG+GCTGCACT  
GTCAGAAGATGAGGAAGTCTAAGAGGAGGAGTTTGAGGAAGGCTCTAGAGAAGATCTCCCCACCTGGA  
GAAGGCAAGTGGAGAGTCCAGAAGTTGATGAAGAAGGATTATTTGAAGCAGGGGTTACCACTTCCTAA  
GGT

+

:FFFFFFFFFFFF,FFFFFFFFFFFF:FF:.,FFFFFFFF:FFFFFFFFFFFF:FFFF,FFFFFFFF  
FFFFFFFFFFFFFFFFFFFFFFFFFFFFFFFF:FFFFFFFFFFFFFFFFFFFFFFFF  
FFF

@A00721:190:HGJW7DSXY:4:1340:16541:34679\_1:N:0:TCTGCAAG+GCTGCACT  
ATTGTTCTTCCGGGAAGTTGTGGGATTTAACTTTGACTCAACTACTCCGATCAGATCCGGATGGTTT  
GATTGGTATGGACTACTCGACTTTTGATCTGGAGTTGTCTAGGGTCATGGCAGATACTACCGATAAGG  
TGA

+

FFFFFFFFFFFFFFFFFFFFFFFFFFFFFFFFFFFFFFFFFFFFFFFFFFFFFFFF  
FFFFFFFFFFFFFFFFFFFFFFFFFFFFFFFFFFFFFFFFFFFFFFFF  
FFF

@A00721:190:HGJW7DSXY:4:2467:9805:6574\_2:N:0:TCTGCAAG+GCTGCACT  
GTCTTTATGATTCAAAACCTATCGTTGTCGTACCTTACAAGTTGAGGAGACTTTACAGCGGCTTATT

+

@A00721:190:HGJW7DSXY:4:2267:26024:37043\_1:N:0:TCTGCAAG+GCTGCACT  
AAGATGCATCGAGGTATACGTCTAGGAACATTGATTGGAACGTACCTACTCACGAGACGTCATGAAA  
GCTATCGGAGGGAAGCAAAATGTTTCGTTCTGTTACAAGAACGCTTTNGATTGTGACCATAAAGCCTC  
AGT

+

@A00721:190:HGJW7DSXY:4:2108:25464:26835\_2:N:0:TCTGCAAG+GCTGCACT  
ATATGTTACGACATGGCTTCGTAACAACAGTGCAGGATTGTCATCTCGGGGAAAGTGATTCACCAAG  
ATGTTTCATATAGATACGAGATACCTAGAGAAGGTCGCAGCGATCTTAC

+

@A00721:190:HGJW7DSXY:4:2432:7166:5040\_1:N:0:TCTGCAAG+GCTGCACT  
GGAGGTGATCTCTCTGCTTCTGCGTTACTGAGAGAAAAGATTACAGGACGCCTACGGTGACTTTATGGA  
CAAGATGCAAGTTCTTGGAATACTTGTTTCCCTTTTTAGGTTTAGTAGGTGATCTTGACGTCGATT  
CTT

+

@A00721:190:HGJW7DSXY:4:2440:2139:18474\_2:N:0:TCTGCAAG+GCTGCACT  
AAGAAGTCGCTCGGCGTTGTTCTTGAACCAAGTTAAGAAGGAGGCTGATCATGGAGTCTTTGTACC  
TTCTGTCAAACCTTCGAGGTTACAGCTACGAGAGGTGATCCCGGATGTGG

+

@A00721:190:HGJW7DSXY:4:1321:30083:14575\_1:N:0:TCTGCAAG+GCTGCACT  
GTTGAGAAGTGTGCTTTACAAGGAGTTAGACTCTTCTTCAAGTTTTTAGATCTTCTTGATAATCTTAA  
AGAAAAATTTTCGAATAAACTAATGAGAGGTATAGGCTTAGTCAAGTCTGTACTTACATTCTTTACGC  
CAG

+

@A00721:190:HGJW7DSXY:4:2271:7184:9831\_2:N:0:TCTGCAAG+GCTGCACT  
ACTCAGATTCAATCTGGCATCACTGAACGTCTACAACGAGTTAGGGAGTGGCTAGGTTTTAAAGATC  
CTTTGCACAAGCAATACCTTCCACTGAGTTCATCAGCCAGAGTTTCGA

+

@A00721:190:HGJW7DSXY:4:2164:28556:37043\_2:N:0:TCTGCAAG+GCTGCACT  
TCTTTTACCTTTTGGAGGTCCAGGAACCTTTACTCCTAGTGTCTTTTCTAGAGTCCAAGGACGTTTC  
GTCGGAGGATGACAGGTGGGAGACCGCTCAATAACACTCTATTGAATC

+

@A00721:190:HGJW7DSXY:4:1405:32009:1470\_1:N:0:TCTGCAAG+GCTGCACT  
GCCACTTCTAATTTTAGGAAACGTCGCGAAAAGAAAGTTTATGAGGATGTGTTGGTCGAAAAATATCG



FFFFFFFFFFFFFFFFFFFFFFFFFFFFFFFFFFFFFFFFFFFFFFFFFFFFFFFFFFFFFFFFFFFFFFFFFFFFFFFF  
FFF

@A00721:190:HGJW7DSXY:4:2340:13431:27038\_1:N:0:TCTGCAAG+GCTGCACT  
GATTAAGACTCTTCCGAAAGGCGAACTTTGGGAATTTGAAGCTCAGGGTGAAGCACACGTTTGACCG  
TGACGAACTGTGGTGTCTTGATCTACGTTACGGATATACTCTCCTTGAGTTCACCTCGTAAGGACACT  
ACC

+

FFFFFFFFFFFFFFFFFFFFFFFFFFFFFFFFFFFFFFFFFFFFFFFFFFFFFFFFFFFFFFFFFFFFFFFFFFFFFFFF  
FFFFFFFFFFFFFFFFFFFFFFFFFFFFFFFFFFFFFFFFFFFFFFFFFFFFFFFFFFFFFFFFFFFFFFFFFFFFFFFF  
FFF

@A00721:190:HGJW7DSXY:4:1227:24985:10441\_1:N:0:TCTGCAAG+GCTGCACT  
AGGGGTTTTGAATAGTGATAGCCACCCGCCTTACAGAGGGGCAGCAGCATGACCATAATTGGTATTG  
ACTTTGGTACCACCTTTTCTACTGTCTGTCTCGCCTCTTGAATGAAGTTTTAATGCTTAACAACAAT  
GAT

+

FFFFF:FFF:FFFFF:FFFFFFFFFFFFFFFFFFFFFFFFFFFFFFFFFFFFFFFFFFFFFFFFFFFFFFFFFFFF  
FFFFFFFFFFFFFFFFFFFFFFFFFFFFFFFFFFFFFFFFFFFFFFFFFFFFFFFFFFFFFFFFFFFFFFFFFFFFFFFF  
FFF

@A00721:190:HGJW7DSXY:4:1128:24189:24439\_1:N:0:TCTGCAAG+GCTGCACT  
TCTTCCGATCTTGATGACACTATTGTTTATGGATATGATGCTATTACTCATGATGGTTACGGTCAGGG  
AGGATTCTCAGTTTACAAGGACCTTAAGCGATGGATCGGGGTTAATTCTAAACATTACCCGAAAGAC  
GTG

+

FFFF:FFFFFFFFFFFFFFFFFFFFFFFFFFFFFFFFFFFFFFFFFFFFFFFFFFFFFFFFFFFFFFFFFFFFFFFF  
FFFFFFFFFFFFFFFFFFFFFFFFFFFFFFFFFFFFFFFFFFFFFFFFFFFFFFFFFFFFFFFFFFFFFFFFFFFFFFFF  
FFF

@A00721:190:HGJW7DSXY:4:2608:31467:16564\_2:N:0:TCTGCAAG+GCTGCACT  
CAGTCAGTATACCTCTACGCAAAGATATTTTCATGAAAACCTACAGAGGAACGTACCGGATTACCTGTCT  
TTCATATTATGAATGAACCTTCGGCCGCTCTCTTTGCTTCGATGTTGG

+

FFFFFFFFFFFFFFFFFFFF:FFFFFFFFFFFFFFFFFFFFFFFFFFFFFFFFFFFFFFFFFFFFFFFFFFFFFFFF  
FFFFFFFFFFFFFFFFFFFFFFFFFFFFFFFFFFFFFFFFFFFFFFFFFFFFFFFFFFFFFFFFFFFFFFFFFFFFFFFF  
FF:FFFFFFFF

@A00721:190:HGJW7DSXY:4:1254:18493:33865\_2:N:0:TCTGCAAG+GCTGCACT  
GGGTAATTACACCTAAACGAGCTCGATCTGCCATCGCTGAAGGATGTGCACTCTTTTCTGCTACTTTA  
ACGGAGCGTAGTGTACTCTTCGTCGATTGTATCAACAGTAACATTACT

+

FFFFFFFFFFFFFFFFFFFFFFFFFFFFFFFFFFFFFFFFFFFFFFFFFFFFFFFFFFFFFFFFFFFFFFFFFFFFFFFF  
FFFFFFFFFFFFFFFFFFFFFFFFFFFFFFFFFFFFFFFFFFFFFFFFFFFFFFFFFFFFFFFFFFFFFFFFFFFFFFFF

@A00721:190:HGJW7DSXY:4:1662:13729:11960\_1:N:0:TCTGCAAG+GCTGCACT  
CTATCGTTTCAGGTGCATGGGGTTGGATAGCCAATATTGAAGTGGACACCTCTGGTAGTATCGAAGTAA  
AGATAACCAATAAGGAAGGAGCTTATACTATGGTTGAATCAACTAAGCATACTACTTTTGCTTTGATT  
ACT

+

FFFFFF,FFFFFFFFFFFFFFFFFFFFFFFFFFFFFFFFFFFFFFFFFFFFFFFFFFFFFFFFFFFFFFFFFFFF  
FFFFFFFFF:FFFFFFFFFFFFFFFFFFFFFFFFFFFFFFFFFFFFFFFFFFFFFFFFFFFFFFFFFFFFFFFFFFFF  
FFF

@A00721:190:HGJW7DSXY:4:1206:2962:27352\_2:N:0:TCTGCAAG+GCTGCACT  
CGGTACAATCTTACTTGAACGAAGGCGACCTGTTCCGGAGTTTTTACGGGATCCGGAATGTTCTGTC  
GATATTAGGTGAAGCGAAATACGATTTTGAACGTCAACGTTACCGAG

+

FFFF:FFFFFFFFFFFFFFFFFFFFFFFFFFFFFFFFFFFFFFFFFFFFFFFFFFFFFFFFFFFFFFFFFFFF: :  
,FFFFFFFFFFFFFFFFFFFFFFFFFFFFFFFFFFFFFFFFFFFFFFFFFFFFFFFFFFFFFFFFFFFF:F

@A00721:190:HGJW7DSXY:4:2441:2763:14888\_1:N:0:TCTGCAAG+GCTGCACT  
GGAGGCAGTCTTCTGATCGTAAGAAGTTTATAAGGAACATATCCATTTGTTGAATAGGGTCATCAAC

TTAGAACTCGAACTCTAAGTGGTAATACTGTCTTTCCAAGCTTACCTGTATCTTCAATGAAATTGGA  
CT

+

FFFFFFFF:FFFFFFFFFFFFFFFFFFFFFFFFFFFFFFFFFFFFFFFFFFFFFFFFFFFFFFFF  
FFFFFFFF:FFFFFFFFFFFFFFFFFFFFFFFFFFFFFFFFFFFFFFFF:FFFFFFFFFFFFFFFF  
FF

@A00721:190:HGJW7DSXY:4:1519:26404:2096\_1:N:0:TCTGCAAG+GCTGCACT  
TTTCCTACGATACAAATGATAACTTCTAATTTACGTTTGCTACTCAGAGCTGGTCCTCTCAGCAAAGG  
GATGCATGGTGTATCTCCTCAGGAGTCCCGGCATTTGATAATAATGACGAGACTTTCGTCATAATCG  
CTG

+

F:FFFFFFFF:FFFFFFFFFFFFFFFFFFFFFFFFFFFFFFFFFFFFFFFFFFFFFFFFFFFFFF  
FFFFFFFFFFFFFFFFFFFFFFFFFFFFFFFFFFFFFFFFFFFFFFFFFFFFFFFFFFFFFFFF  
FFF

@A00721:190:HGJW7DSXY:4:1336:20799:32221\_2:N:0:TCTGCAAG+GCTGCACT  
CGTGTGCGAGCCTCGACCCGATTATATGGTATTAACCTTATAAAGGTGAGGAGACCATTTTCTTGCTGAA  
ATTTATAGAAGATTATTTTGACAGAATCAATAAGAATCATCGATTCTC

+

FFFFFFFFFFFFFFFF:FFFFFFFFFFFFFFFFFFFFFFFFFFFFFFFFFFFFFFFFFFFFFFFF  
FFFFFFFFFFFFFFFFFFFFFFFFFFFFFFFFFFFFFFFFFFFFFFFFFFFFFFFF

@A00721:190:HGJW7DSXY:4:2357:24695:9439\_1:N:0:TCTGCAAG+GCTGCACT  
AGTCAACACTAGTTCGAGTGCTGCTTTGGATTACGATGACGTGAGAATAGGTGAAGGGATAGTTTTTA  
CCTCGACCAACATTAAGGCGGCGGCGACTAATCTTAAAGCTTCACCCAAAATGAAGGACACTTCGAAA  
CTG

+

FFFFFFF,FFFFFFFFFFFFFFFFFFFFFFFFFFFFFFFFFFFFFFFFFFFFFFFFFFFFFF  
FFFFFFFFFFFFFFFFFFFFFFFFFFFFFFFFFFFFFFFFFFFFFFFFFFFFFFFFFFFFFFFF  
FFF

@A00721:190:HGJW7DSXY:4:1371:6632:6934\_2:N:0:TCTGCAAG+GCTGCACT  
TTCTTTTGATACAACTCTAGCCTTCAAGTGGGGTATGCCTGCGGAATACGCTTGCTATTCACCAGATT  
GGTTCGAACCCGTTGATGCTATGTCAGAAGAAGCTATTCAAGCTTGTC

+

FFFFFFFFFFFFFFFFFFFFFFFFFFFFFFFFFFFFFFFFFFFFFFFF:FFFFFFFFFFFFFFFF  
FFFFFFFFFFFFFFFFFFFFFFFF:FFFFFFFF:FFFFFFFFFFFFFFFF

@A00721:190:HGJW7DSXY:4:1174:28899:15405\_1:N:0:TCTGCAAG+GCTGCACT  
AAACAAGCCCAGACTCAAGGAGTCCAATCAAAGGTTTTGAATTTAGCTCAACTGGGGAGACGTGCTTA  
AATGGGTGATAAAAATTATTTAGAGATCTTTTCTACTTACAAAGGACAATTCAGTTTCATTAATTCTA  
CGG

+

FFFFFFFFFFFFFFFFFFFFFFFFFFFFFFFFFFFFFFFFFFFFFFFFFFFFFFFFFFFFFFFF  
FFFFFFFFFFFFFFFFFFFFFFFF:FFFFFFFFFFFFFFFFFFFFFFFF:FFFFFFFFFFFFFFFF  
FFF

@A00721:190:HGJW7DSXY:4:1157:18096:33646\_1:N:0:TCTGCAAG+GCTGCACT  
TTTTGTTACCAAATTCTTGCTTTCAACGAAGTCTCTGATTTTATTAATCATTACTTTAACGATCTCT  
CGGTCAATTTACTCTGTACTTGATCTACGTCGTTTAACTGTGCGAACAACCTTTACTTAGAATGACTCT  
ATC

+

FFFFFFFFFFFFFFFFFFFFFFFFFFFFFFFFFFFFFFFFFFFFFFFFFFFFFFFFFFFFFFFF  
FFFFFFFFFFFFFFFFFFFFFFFF:FFFF:FFFFFFFFFFFFFFFF:FFFFFFFF: :FFFFFFFF: ,FF:  
FFF

@A00721:190:HGJW7DSXY:4:1342:19840:5384\_2:N:0:TCTGCAAG+GCTGCACT  
ACGAAAACCAACTCTTCGTTACGAGACCTGATGGTAGAATAGATTTAGTCTCTACACCCATCTCAACG  
AGGATAAAGCGAGTTTTCCGTCCTGAACGTAATACACGAAGAGATCAT

+

FFFFFFFFFFFFFFFFFFFFFFFFFFFFFFFFFFFFFFFFFFFFF:FFFFFFFFFFFFFFFFFFFFFFFFFFFF  
FFFFFFFFFFFFFFFFFFFFFFFFFFFFFFFFFFFFFFFFFFFFFFFFFFFFF  
@A00721:190:HGJW7DSXY:4:2438:28999:23907\_2:N:0:TCTGCAAG+GCTGCACT  
CAAATGAGGTCAAAGCTCTATTTATTAACGAACATTATCCGATTCTTCGAGGGTATCACTACCACT  
GATCTGCCGACTTTAGTCAAGGAAC TTCAATTCCTTCGATGTTTATAT

```

+
FFFFFFFFFFFFFFFFFFFFFFFFFFFFFFFFFFFFFFFFFFFFFFFFFFFFFFFFFFFFFFFFFFFFFFFF
FFFFFFFFFFFFFFFFFFFFFFFFFFFFFFFFFFFFFFFFFFFFFFFFFFFFFFFFFFFFFFFF:
@A00721:190:HGJW7DSXY:4:2652:19605:16626_2:N:0:TCTGCAAG+GCTGCACT
ATCAAAGATTTGGCTTGGTCTATTTACCGCAAAAAGTTGGAAGAGGTCTATGATATTTATTTTACTTA
TACTTTAAATAGCACCGATTATACTTGACTGTTGATAATATTACAAT

```

```
+
FFFFFFFFFFFFFFFFFFFFFFFFFFFFFFFFFFFFF:FFFFFFFFFFFFFFFFFFFF:FFFFFFFFFFFFFFFFFFFFFFFFFFFFFFFFFFFF
FFFFFFFFFFFFFFFFFFFFFFFFFFFFFFFFFFFFF:FFFFFFFFFFFFFFFFFFFF::FFFF
@A00721:190:HGJW7DSXY:4:2170:9525:13823_2:N:0:TCTGCAAG+GCTGCACT
ACTTCAAGTACCTGAACCTTTACATTTTTTAATGGTATGGTATAATGTGTCTTACAAATAGAACCTTCAC
TCTCGGTAATGAGAGTGATTCCCTTAATATTCTAGTAACCGCTATGTG
```

CGG  
+  
FFFFFFFF:FFFFFFFFFFFFFFFFFFFFFFFFFFFFFFFFFFFFFFFFFFFFFFFFFFFFFFFFFFFFFFFF:FFFFFFFFFFFFFFFF  
FFFFFFFFFFFFFFFFFFFFFFFFFFFFFFFFFFFFFFFFFFFFFFFFFFFFFFFFFFFFFFFFFFFFFFFFFFFFFFFFFFFFFFFF  
FFF  
@A00721:190:HG1WZDSXY:4:1359:26431:33959 1:N:0:TCTGCAAG+GCTGCACT

```
FFF
@A00721:190:HGJW7DSXY:4:2153:26539:36933_1:N:0:TCTGCAAG+GCTGCACT
GTCAAAAGTCACATTCACCACTCCCATACCAATCAATGATGTGACTATACAGTTCGCCATTTCAAGA
GTGGTCAATACGTCGTGGGAGGTACTGAAGCCTTCCCCTCCGCTGGCACGAAGAACTCCCAAGCCA
ATC
+
```

@A00721:190:HGJW7DSXY:4:1449:14235:2159\_1:N:0:TCTGCAAG+GCTGCACT  
AATGAAAAGGGGTTTACCAGGGTAGTCTCTAAGTCTACCAGGAAGAGGGGAAATGTCCCCAAAACCTGA  
GAAGAATAAAGGGAAAGGTCATCAGGACCTAAGAAGGGGAAATTACCCCTAATTCTGAAGGAAGATC  
TCC

@A00721:190:HGJW7DSXY:4:1433:4227:31516\_2:N:0:TCTGCAAG+GCTGCACT  
AGGCCGCTGCTACGAAGTCGCTGAAGGCGGCTTGGGTCATTAAGGGTAGCTGTAAAGTTGCGCCTGCC  
GACCCCATCTTTGAGACCAAGACTCTCTACAGTAGGTTCTGTCCTACT

@A00721:190:HGJW7DSXY:4:2375:30572:36965\_2:N:0:TCTGCAAG+GCTGCACT  
GTGAGAGGACTTTTGGCTACTGGCGACAACTGAGAGCAGTCGCTGGGGAAAGAGAATTGCGTGGGT  
GAAGGCCGACGCTTCGAGCTTGAGTGTGACGAGGCCGGTGACGTTTTT

@A00721:190:HGJW7DSXY:4:2370:9607:3411\_1:N:0:TCGTCAAG+GCTGCACT  
TAACTATGGGGCGAAGATCCCCTATGGAGTCTTGAAGGACTTAGGTTGGCATATTTATGCCGACGATA  
ATAAGCATGTCACCCTTAAGCACCGAGGTAAGCTCGGGACTTACAAGAGAGAGTGTGAGAGAGTCGCT  
CTC

@A00721:190:HGJW7DSXY:4:1257:1949:21496\_1:N:0:TCTGCAAG+GCTGCACT  
TTTCCTCCGTCATTGGGGATTTTCGATGTGAGAAGGTGGAAGGTGTCAAGGGTCTTCTTCATGCTGATC  
TTTCAGGACCTAATCACATCATGATTGATAGTTACGGCTCGTATCGAGTTGGAGGGAGGAAGTTCTCC  
GAA

@A00721:190:HGJW7DSXY:4:1629:25762:18145\_1:N:0:TCTGCAAG+GCTGCACT  
GTCAGAAGATGAGGAAGTCTAAGAGGAGGAGTTTGAGGAAGGCTCTAGAGAAGATCTCACCACCTGGA  
GAAGGCAAGTGGAGAGTCCAGAAGTTGATGAAGAAGGATTATTTGAAGCAGGGGTTACCACTTCCTAA  
GGT

@A00721:190:HGJW7DSXY:4:2511:6045:1438\_1:N:0:TCTGCAAG+GCTGCACT  
ATTGTTCTTCCGGGAAGTTGTGGGATTTAACTTTGACTCAACTACTCCGATCAGATCCGGATGGTTT  
GATTGGTATGGACTACTCGACTTTTGATCTGGAGTTGTCTAGGGTCATGGCAGATACTACCGATAAGG  
TGA

[illegible]





CCGGGAACCTTCTAATAGAGGATCCTGATGACATTATTTCAACGGATACCGATCTCAGTTCTACCACAG  
AAA

+

FFFFFFFFFFFFFF:FFFFFFFFFFFFFFFFFFFFFFFFFFFFFFFFFFFFFFFFFFFFFFFFFFFFFFFFFFFFFFFF  
FFFFFFFFFFFFFFFFFFFFFFFFFFFFFFFFFFFFFFFFFFFFFFFFFFFFFFFFFFFFFFFFFFFFFFFFFFFFFFFF  
FFF

@A00721:190:HGJW7DSXY:4:1466:3432:6308\_2:N:0:TCTGCAAG+GCTGCACT  
ACTGTCTCCACTGATTCGGAATTAGAGAAAGACGACCTTCTTGTGGGGACTGAGACCTCTGAATTTTC  
AGGGTGCCCTGATGAGGACGTTGAAAGGATAATTTCAACTCTGAGAC

+

FFFFF:FFFFFFFFFFFFFFFFFFFFFFFFFFFFFFFFFFFFFFFFFFFFFFFFFFFFFFFFFFFFFFFF:FF:FFFF:F,:FFFFFFFFF::FFFFFFFFF:  
FF,FF,F:FFFFFFFFFFFFFF:FFFFFFFFF:FFFFFFFFF:FFFFFFFFF

@A00721:190:HGJW7DSXY:4:2353:30346:32597\_1:N:0:TCTGCAAG+GCTGCACT  
TCGTATTAGAACAGCTGATTCTTATTGCATGAACGTCGCTGAGGTCAAACCTGTGGACGTTCTTTTCA  
TCGACGAATTATTCATGATTCACGCTGGTCAGACCCTTTTCTTACACATCTACTTAAGGCGGCTTAT  
ACC

+

FFFFFFFFFFFFFF::FFFFFF:FFFFFFFFFFFFFFFFFFFFFFFFFFFFFFFFFFFFFFFFFFFFFFFFFFFFFFFF  
F:FF,FFFFFFFFFFFFFFFFFFFFFFFFFFFFFFFFFFFFFFFFFFFFFFFFFFFFFFFF,FFFFF:FFFFFFFFFFFFFFFFFFFFFFFF  
FFF

@A00721:190:HGJW7DSXY:4:2455:20157:31360\_2:N:0:TCTGCAAG+GCTGCACT  
TCCAAGTCGCAAACTACTTCAACATCAACGACATCATTCTTGATGAGTGTCTGTTCTTATCGAAGTCTC  
AGTTATCGCTGCCCGGCCGACGTTTGTGCGCAACTCTCAGAGGTTTAC

+

FFFFFFFFFFFFFFFFFFFFFFFFFFFFFFFFFFFFFFFFFFFFFFFFFFFFFFFFFFFFFFFF:FFFFFFFFFFFFFFFFFFFFFFFF  
FFFFFFFFFFFFFFFFFFFFFFFFFFFFFFFFFFFFFFFFFFFFFFFFFFFFFFFFFFFFFFFF

@A00721:190:HGJW7DSXY:4:1375:19524:14982\_1:N:0:TCTGCAAG+GCTGCACT  
ACCCCTTATATCGAGGCTATCGAGGACGATGAGTATCTTGAAGTTGTTGACGACAAGCCTCAAGAGGG  
TAGAGGACCACCTGGATCTTCTACTGTCTCTGCCTTCCAAGATTTCTTAGAAGAGGTTATTCCTGGAA  
CCA

+

FFFFFFFFF:FFFFFFFFFFFFFFFFFFFFFFFFFFFFFFFFFFFFFFFFFFFFFFFFFFFFFFFF:FFFFFFFFFFFFFFFF  
FFFFFFFFFFFFFFFFFFFFFFFFFFFFFFFFFFFFFFFFFFFFFFFFFFFFFFFFFFFFFFFFFFFFFFFFFFFFFFFF  
FFF

@A00721:190:HGJW7DSXY:4:1332:12707:25254\_1:N:0:TCTGCAAG+GCTGCACT  
AGGTAAGAAGCCCTTGAGCCGCGTAGTCAGCGCGTTTAGCTGTATCATCAGTCAGAGTATACCCGAT  
AGGGTACCGAGTCTCCAAGAGAATATTTATTCTTATGAGGCTCGAACTTCAACGTTTTCACAAACGGA  
AAG

+

FFFFFFFFFFFFFFFFFFFFFFFFFFFFFFFFFFFFFFFFFFFFFFFFFFFFFFFFFFFFFFFFFFFFFFFFFFFFFFFF  
FFFFFFFFFFFFFFFFFFFFFFFFFFFFFFFFFFFFFFFFFFFFFFFFFFFFFFFFFFFFFFFFFFFFFFFFFFFFFFFF  
FFF

@A00721:190:HGJW7DSXY:4:1574:17978:3975\_1:N:0:TCTGCAAG+GCTGCACT  
GATGATTTTATCACTTTATTATGACCTTGAAAGTTTTCGGCTGTGGTTGTCGCTGGGGACGATTCCA  
TTCTGTTTTCAAAGACTCCAATAACTGATCATTCTGATCATATGATTTTGGACAATGGTTTCGAAGCG  
AAA

+

FFFFFFFFFFFFFFFFFFFFFFFFFFFFFFFFFFFFFFFFFFFFFFFFFFFFFFFFFFFFFFFFFFFFFFFFFFFFFFFF  
FFFFFFFFFFFFFFFFFFFFFFFFFFFFFFFFFFFFFFFFFFFFFFFFFFFFFFFFFFFFFFFFFFFFFFFFFFFFFFFF  
FFF

@A00721:190:HGJW7DSXY:4:1314:29008:23484\_1:N:0:TCTGCAAG+GCTGCACT  
TCCGAGAGGTTTATCCTGATGTGGAGGGAGTTCTTGAAGCATCCCGACCTTTCCTTGTGAAAATTTTG  
ATGCGGTTTCATAAGATTATCAGTAATCCTGATTCTACTACGGATTTCATGGACCTTCCATCCTGTACC  
TCT

```

+
FFFFFFFFFFFFFFFFFFFFFFFFFFFFFFFFFFFFFFFFFFFFFFFFFFFFFFFFFFFFFFFFFFFFF
FFFFFFFFFFFFFFFFFFFFFFFFFFFFFFFFFFFFFFFFFFFFFFFFFFFFFFFFFFFFFFFFFFFFF
:FF
@A00721:190:HGJW7DSXY:4:2456:22444:34287_1:N:0:TCTGCAAG+GCTGCACT
GATTAAGACTCTTCCGAAAGGCCGAACCTTTGGGAATTTGAAGCTCAGGGTGAAGCACACGTTTGACCG
TGACGAACGTGTTGTTCTTGATCTACGTTACGGATATACTCTCCTTGAGTTCACTCGTAAGGACACT
ACC
+
:FFFFFFFFFFFFFFFFFFFFFFFFFFFFFFFFFFFFFFFFFFFFFFFFFFFFFFFFFFFFFFFFFFFFF
FFFFFFFFFFFFFFFFFFFFFFFFFFFFFFFFFFFFFFFFFFFFFFFFFFFFFFFFFFFFFFFFFFFFF
FFF
@A00721:190:HGJW7DSXY:4:1242:30246:25441_1:N:0:TCTGCAAG+GCTGCACT
AGGGGTTTTTCGAATAGTGATAGCCACCCGCCTTACAGAGGGGCAGCAGCATGACCATAATTGGTATTG
ACTTTGGTACCACCTTTTCTACTGTCTGTCTCGCCTCTTCAATGAAGTTTTAATGCTTAACAACAAT
GAT
+
FFFFFFFFFFFFFFF:FFFF:FFFFFFFFFFFFFFFFFFFFFFFFFFFFFFFFFFFFFFFFFFFFFFFFF
FFFFFFFFFFFFFFFFFFFFFFFFFFFFFFFFFFFFFFFFFFFFFFFFFFFFFFFFFFFFFFFFFFFFF
FFF
@A00721:190:HGJW7DSXY:4:1205:31946:21026_1:N:0:TCTGCAAG+GCTGCACT
TCTTCCGATCTTGATGACACTATTGTTTATGGATATGATGCTATTACTCATGATGGTTACGGTCAGGG
AGGATTCTCAGTTTACAAGGACCTTAAGCGATGGATCGGGGTTAATTCTAAAACATTACCCGAAAGAC
GTG
+
FFFFFFFFFFFFFFFFFFFFFFFFFFFFFFFFFFFFFFFFFFFFFFFFFFFFFFFFFFFFFFFFFFFFF
FFFFFFFFFFFFFFFFFFFFFFFFFFFFFFFFFFFFFFFFFFFFFFFFFFFFFFFFFFFFFFFFFFFFF
FFF
@A00721:190:HGJW7DSXY:4:2618:30427:12853_2:N:0:TCTGCAAG+GCTGCACT
CAGTCAGTATACCTCTACGCAAAGATATTTTCATGAAAACTACAGAGGAACGTACCGGATTACCTGTCT
TTCATATTATGAATGAACCTTCGGCCGCTCTCTTTGCTTCGATGTTGG
+
FFFFFFFFFFFFFFFFFFFFFFFFFFFFFFFFFFFFFFFFFFFFFFFFFFFFFFFFFFFFFFFFFFFFF, FFFFFFFFFFFFFFFFFFFFFFFFFFFFFFFFFFFFFF
FFF, FFFFFFFFFFFFFFFF:FFFFFFFFFFFFFFFFFFFFFFFFF:FFFF:FFFFF
@A00721:190:HGJW7DSXY:4:1403:29758:17300_2:N:0:TCTGCAAG+GCTGCACT
GGGTAATTACACCTAAACGAGCTCGATCTGCCATCGCTGAAGGATGTGCACTCTTTTCTGCTACTTTA
ACGGAGCGTAGTGTACTCTTCGTCGATTGTATCAACAGTAACATTACT
+
FFFFFFFFFFFFFFFFFFFFFFFFFFFFFFFFFFFFFFFFFFFFFFFFFFFFFFFFFFFFFFFFFFFFF
FFFFFFFFFFFFFFFFFFFFFFFFFFFFFFFFFFFFFFFFFFFFFFFFFFFFFFFFFFFFFFFFFFFFF
@A00721:190:HGJW7DSXY:4:1666:10230:33865_1:N:0:TCTGCAAG+GCTGCACT
CTATCGTTTCAAGTGCATGGGGTTGGATAGCCAATATTGAAGTGGACACCTCTGGTAGTATCGAAGTAA
AGATAACCAATAAGGAAGGAGCTTATACTATGGTTGAATCAACTAAGCATACTACTTTTGCTTTGATT
ACT
+
FFFFFFFFFFFFFFFFFFFFFFFFFFFFF:FFFFFFFFFFFFFFFFFFFFFFFFFFFFF:FFFFFFFFFFFFFFFFFFFFF
FFFFFFFFFFFFFFFFFFFFFFFFFFFFFFFFFFFFFFFFFFFFFFFFFFFFFFFFFFFFFFFFFFFFF
FFF
@A00721:190:HGJW7DSXY:4:1515:23628:1611_2:N:0:TCTGCAAG+GCTGCACT
CGGTACAATCTTACTTGGAACGAAGGCGACCTGTTCCGGAGTTTTTACGGGATCCGGAATGTTCTGTC
TATATTAGGTGAAGCGAAATACGATTTCAACGTCAACGTTACCGAG
+
FFFFFFFFFFFFFFFFFFFFFFFFFFFFFFFFFFFFFFFFFFFFFFFFFFFFFFFFFFFFFFFFFFFFF, FFFFFF, FFFFFFFFFF
FF: FFFFFFFFFFFFFFFFFF:FFFFFFFFFFFFFFFFFFFFFFFFFFFFF

```

@A00721:190:HGJW7DSXY:4:1203:15555:27085\_1:N:0:TCTGCAAG+GCTGCACT  
GGAGGCAGTCTTCTGATCGTAAGAAGTTTATAAGGAACATATCCATTTGTTGTAATAGGGTCATCAAC  
TTAGAACTCGAACTCTAAGTGGTAATACTGTCTTTCCAAGCTTACCTGTATCTTCAATGAAATTGGA  
CTC

+

FFFFFFFFFFFFFFFFFFFFFFFFFFFFFFFFFFFFFFFFFFFFFFFFFFFFFFFFFFFFFFFFFFFFFFFF  
FFFFFFFFFFFFFFFFFFFFFFFFFFFFFFFFFFFFFFFFFFFFFFFFFFFFFFFFFFFFFFFFFFFFFFFF  
FFF

@A00721:190:HGJW7DSXY:4:1574:17219:2503\_1:N:0:TCTGCAAG+GCTGCACT  
TTTCTACGATACAAATGATAACTTCTAATTTACGTTTGCTACTCAGAGCTGGTCCTCTCAGCAAAGG  
GATGCATGGTGTTATCTCCTCAGGAGTCCCGGCATTTGATAATAATGACGAGACTTTCGTCAATAATCG  
CTG

+

FFFFFFFFFFFFFFFFFFFFFFFFFFFFFFFFFFFFFFFFFFFFFFFFFFFFFFFFFFFFFFFFFFFFFFFF  
F:FFFFFFFFFFFFFFFFFFFFFFFFFFFFFFFFFFFFFFFFFFFFFFFFFFFFFFFFFFFFFFFFFFFFFFFF  
FFF

@A00721:190:HGJW7DSXY:4:1515:29821:24424\_2:N:0:TCTGCAAG+GCTGCACT  
CGTGTGAGCCTCGACCCGATTATATGGTATTAACCTTATAAAGGTGAGGAGACCATTTTCTTGCTGAA  
ATTTATAGAAGATTATTTTGACAGAATCAATAAGAATCATCGATTCTC

+

FFFFFFFFFFFFFFFFFFFFFFFFFFFFFFFFFFFFFFFFFFFFFFFFFFFFFFFFFFFFFFFFFFFFFFFF  
FFFFFFFFFFFFFFFFFFFFFFFFFFFFFFFFFFFFFFFFFFFFFFFFFFFFFFFFFFFFFFFFFFFFFFFF  
FFFFFFFFFFFFFFFFFFFFFFFFFFFFFFFFFFFFFFFFFFFFFFFFFFFFFFFFFFFFFFFFFFFFFFFF

@A00721:190:HGJW7DSXY:4:2420:21160:2910\_1:N:0:TCTGCAAG+GCTGCACT  
AGTCAACACTAGTTCGAGTGCTGCTTTGATTACGATGACGTGAGAATAGGTGAAGGGATAGTTTTTA  
CCTCGACCAACATTAAGGCGGCGGCGACTAATCTTAAAGCTTCACCCAAAATGAAGGACACTTCGAAA  
CTG

+

FFFFFFFFFFFFFFFFFFFFFFFFFFFFFFFFFFFFFFFFFFFFFFFFFFFFFFFFFFFFFFFFFFFFFFFF  
FFFFFFFFFFFFFFFFFFFFFFFFFFFFFFFFFFFFFFFFFFFFFFFFFFFFFFFFFFFFFFFFFFFFFFFF  
FFF

@A00721:190:HGJW7DSXY:4:2107:19090:4711\_2:N:0:TCTGCAAG+GCTGCACT  
TTCTTTTGATACAACTCTAGCCTTCAAGTGGGGTATGCCTGCGGAATACGCTTGCTATTCACCAGATT  
GGTTCGAACCCGTTGATGCTATGTCAGAAGAAGCTATTCAAGCTTGTC

+

FFFFFFFFFFFFFFFFFFFFFFFFFFFFFFFFFFFFFFFFFFFFFFFFFFFFFFFFFFFFFFFFFFFFFFFF  
FFFFFFFFFFFFFFFFFFFFFFFFFFFFFFFFFFFFFFFFFFFFFFFFFFFFFFFFFFFFFFFFFFFFFFFF

@A00721:190:HGJW7DSXY:4:2217:25500:1595\_1:N:0:TCTGCAAG+GCTGCACT  
AAACAAGCCCAGACTCAAGGAGTCCAATCAAAGGTTTTGAATTTAGCTCAACTGGGGAGACGTGCTTA  
AATGGGTGATAAAAATTATTTAGAGATCTTTTCTACTTACAAAGGACAATTCAGTTTCATTAATTCTA  
CGG

+

FFFFFFFFFFFFFFFFFFFFFFFFFFFFFFFFFFFFFFFFFFFFFFFFFFFFFFFFFFFFFFFFFFFFFFFF  
FFFFFFFFFFFFFFFFFFFFFFFFFFFFFFFFFFFFFFFFFFFFFFFFFFFFFFFFFFFFFFFFFFFFFFFF  
FFF

@A00721:190:HGJW7DSXY:4:1163:15031:22608\_1:N:0:TCTGCAAG+GCTGCACT  
TTTTGTTACCAAATTCTTGCTTTCAACGAAGTCTCTGATTTTATTAATCATTACTTTAACGATCTCT  
CGGTCAATTTACTCTGTACTTGATCTACGTCGTTTAACTGTCGGAACAACCTTTACTTAGAATGACTCT  
ATC

+

FFFFFFFFFFFFFFFFFFFFFFFFFFFFFFFFFFFFFFFFFFFFFFFFFFFFFFFFFFFFFFFFFFFFFFFF  
FFFFFFFFFFFFFFFFFFFFFFFFFFFFFFFFFFFFFFFFFFFFFFFFFFFFFFFFFFFFFFFFFFFFFFFF  
FFF

@A00721:190:HGJW7DSXY:4:1552:15148:31109\_2:N:0:TCTGCAAG+GCTGCACT  
ACGAAAACCAACTCTTCGTTACGAGACCTGATGGTAGAATAGATTTAGTCTCTACACCCATCTCAACG



GTGGTCAATACGTCGTGGGAGGTACTGAAGCCTTCCCCTCCGCTGGCACGAAGAACACTCCCAAGCCA  
ATC

+

FFFFFFFFFFFFFF:FFFFFFFFFFFFFFFFFFFFFFFFFFFFFFFFFFFFFFFFFFFFFFFFFFFFFFFF  
FFFFFFFFFFFFFFFFFFFFFFFF:FFFFFFFF:FFFFFFFFFFFFFFFFFFFFFFFFFFFFFFFFFFFFFFF  
FFF

@A00721:190:HGJW7DSXY:4:1503:16658:1407\_1:N:0:TCTGCAAG+GCTGCACT  
AATGAAAAGGGGTTTACCAGGGTAGTCTCTAAGTCTACCAGGAAGAGGGGAAATGTCCCCAAACTGA  
GAAGAATAAAGGGAAAGGTCCATCAGGACCTAAGAAGGGGAAATTACCCCTAATTCTGAAGGAAGATC  
TCC

+

:FFFF:FFFF:,F:FFFFFFFFFFFFFFFFFFFFFFFFFFFFFFFFFFFFFFFFFFFFFFFFFFFFFFFF  
FF:,FF:F,,:FFFFFF:FFFFFFFFFFFFFFFFFFFFFFFFFFFFFFFF:FFFFFFFF:FFFFFFF  
FFF

@A00721:190:HGJW7DSXY:4:1668:17680:28667\_2:N:0:TCTGCAAG+GCTGCACT  
AGGCCGCTGCTACGAAGTCGCTGAAGGCGGCTTGGGTCATTAAGGGTAGCTGTAAAGTTGCGCCTGCC  
GACCCCATCTTTGAGACCAAGACTCTCTACAGTAGGTTCTGCTGCTACT

+

FFFFFFFFFFFFFFFFFFFFFFFFFFFFFFFFFFFFFFFFFFFFFFFFFFFFFFFFFFFFFFFF:FFF:FFFFFFFFFFFF  
FFFFFFFFFFFF:FFFFFFFFFFFFFFFFFFFFFFFFFFFFFFFFFFFFFFFFFFFFFFFFFFFF

@A00721:190:HGJW7DSXY:4:2425:19732:34381\_2:N:0:TCTGCAAG+GCTGCACT  
GTGAGAGGACTTTTGGCTACTGGCGACAACTGAGAGCAGTCGCTGGGGAAAGAGAATTGCGTGGGTT  
GAAGGCCGACGCTTCGAGCTTGAGTGTGACGAGGCCGGTGACGTTTTT

+

FFFFFFFFFFFFFFFFFFFFFFFFFFFFFFFFFFFFFFFFFFFFFFFFFFFFFFFFFFFFFFFF:FFFFFF:FFFFFFFFFFFF  
FFFFFFFFFFFFFFFFFFFFFFFFFFFFFFFFFFFFFFFFFFFFFFFFFFFFFFFFFFFFFFFF

@A00721:190:HGJW7DSXY:4:2442:32452:17018\_1:N:0:TCTGCAAG+GCTGCACT  
TAACTATGGGGCGAAGATCCCCTATGGAGTCTTGAAGGACTTAGGTTGGCATATTTATGCCGACGATA  
ATAAGCATGTCACCCTTAAGCACCGAGGTAAGCTCGGGACTTACAAGAGAGAGTGTGAGAGAGTCGCT  
CTC

+

FFFFFFFFF:F:FFFFFFFFFFFFFFFFFFFFFFFF:FFFFFF:FFFFFFFFFFFFFFFFFFFFFFFFFFFF  
FFFFFFFFFFFFFFFFFFFFFFFFFFFFFFFFFFFFFFFFFFFFFFFFFFFFFFFFFFFFFFFFFFFFFFFF  
FFF

@A00721:190:HGJW7DSXY:4:1309:21884:4413\_1:N:0:TCTGCAAG+GCTGCACT  
TTTCCTCCGTCATTGGGGATTTGATGTGAGAAGGTGGAAGGTGTCAAGGGTCTTCTTCATGCTGATC  
TTTCAGGACCTAATCACATCATGATTGATAGTTACGGCTCGTATCGAGTTGGAGGGAGGAAGTTCTCC  
GAA

+

FFFFFFFFFFFFFFFFFFFFFFFFFFFFFFFFFFFFFFFFFFFFFFFFFFFFFFFFFFFFFFFFFFFF  
FFFFFFFFFFFFFFFFFFFFFFFFFFFFFFFFFFFFFFFF:FFFFFFFFFFFFFFFFFFFFFFFFFFFFFFFF  
FFF

@A00721:190:HGJW7DSXY:4:1629:25952:15248\_1:N:0:TCTGCAAG+GCTGCACT  
GTCAGAAGATGAGGAAGTCTAAGAGGAGGAGTTTGAGGAAGGCTCTAGAGAAGATCTCCCCACCTGGA  
GAAGGCAAGTGGAGAGTCCAGAAGTTGATGAAGAAGGATTATTTGAAGCAGGGGTTACCACTTCCTAA  
GGT

+

FFFFFFFFFFFFFFFFFFFFFFFFFFFFFFFFFFFFFFFF:FF:::FFFFFFFFFFFFFFFFFFFFFFFFFFFF,FFFFFFFF  
FFFFFFFFFFFFFFFFFFFFFFFFFFFFFFFFFFFFFFFF:FFFFFFFFFFFFFFFFFFFFFFFFFFFFFFFF  
FFF

@A00721:190:HGJW7DSXY:4:1158:26630:25003\_1:N:0:TCTGCAAG+GCTGCACT  
TGTTCTTCCGGGAAGTTGTGGGATTTACTTTGACTCAACTACTCCGATCAGATCCGGATGGTTTGA  
TTGGTATGGACTACTCGACTTTTGATCTGGAGTTGTCTAGGGTCATGGCAGATACTACCGATAAGGTG  
AAA

+  
FF,FF:FF,F,F,FFFFFFFFF:FFF,,FFFF,::F:,F,FFF:F,:FFF:F:,FF:F:FFFFFF  
FF::F,FFF,:F,FF:F::,FFFFFFFFF,,FFFF:F,F,F:FFFFFFFF:FF:FFF:F::FF,:FF  
,FF  
@A00721:190:HGJW7DSXY:4:1152:18873:9690\_1:N:0:TCTGCAAG+GCTGCACT  
CGTGTGCTCTTCCGATCTTATCGTTGTCGTACCTTACAAGTTGAGGAGACTTTACAGCGGCTTATTG  
TCGCGCAGTTTCCAGAATTGCGGTTGAAGTTCACCCATTCTATCTTGAATGCTCACGCCGTCGCAGCC  
ATA  
+  
FFFFFFFFFFFFFFFFFFFFFFFFFFFFFFFFFFFFFFFFFFFFFFFFFFFFFFFFFFFFFFFFFFFFFFFF  
FFFFFFFFFFFFFFFFFFFFFFFFFFFFFFFFFFFFFFFFFFFFFFFFFFFFFFFFFFFFFFFFFFFFFFFF  
FFF  
@A00721:190:HGJW7DSXY:4:2554:24415:19132\_1:N:0:TCTGCAAG+GCTGCACT  
AAGATGCATCGAGGTATACGTCTAGGAACATTGATTGGGAACGTACCTACTCACGAGACGTCATGAAA  
GCTATCGGAGGGAAGCAAAATGTTTCGTTCTGTTACAAGAACGCTTTGGATTGTGACCATAAAGCCTC  
AGT  
+  
FFFFFFFFFFFFFFFFFFFFFFFF:FFFFFFFFFFFFFFFF:FFFFFFFF:FFFF:FFFFFFFFFFFFFFFF  
FFFFFFFFF:FFFFFFFFFFFFFFFF:FFF:FFFFFFFFF:FFFFFFFFFFFFFFFFFFFFFFFF  
FFF  
@A00721:190:HGJW7DSXY:4:2261:4237:6167\_2:N:0:TCTGCAAG+GCTGCACT  
ATATGTTACGACATGGCTTCGTAACAACAGTGCAGGATTGTCATCTCGGGGAAAGTGATTCACCAAG  
ATGTTTCATATAGATACGAGATACCTAGAGAAGTTCGCAGCGATCTTAC  
+  
FFFFFFFFFFFFFFFFFFFFFFFF:FFFFFFFFFFFFFFFFFFFFFFFFFFFFFFFFF,FFFFFFFFFFFFFF  
FFFFFFFFF:FFFFFFFFFFFF:FF:FFFFFFFFFFFFFFFFFFFFFFFF  
@A00721:190:HGJW7DSXY:4:2140:18982:11725\_2:N:0:TCTGCAAG+GCTGCACT  
CTCTGCTTCTGCGTTACTGAGAGAAAAGATTGAGGACGCTACGGTGACTTTATGGACAAGATGCAAG  
TTCTTGGAATACTTGTTCCTTTTATAGTTTAGTAGGTGATCTTG  
+  
FFFFFFFFFFFFFFFFFFFFFFFF:FFFFFFFFFFFFFFFFFFFFFFFF:FFFFFF:FFFF:FF  
FFFFFFFFF,FFF:F,FFFF:FF,FF,FFFF:FFF,FFFFFFFF:  
@A00721:190:HGJW7DSXY:4:1677:8693:19053\_2:N:0:TCTGCAAG+GCTGCACT  
GCTCGGCGTTGTTCTTGAACCAAGTTAAGAAGGAGGCTGATCATGGAGTCTTTGTACCTTCTGTCA  
AACTTCGAGGTTGAGTACGAGAGGTGATCCCGGATGTGGATTGAAGG  
+  
FFFFFFFFF,FFFFFFFFFFFFFFFFFFFFFFFFFFFFFFFFF:F:FFFFFFFFFFFFFF,FFFFFF  
FFFFFFFFFFFFFFFFFFFFFFFFFFFFFFFF:FFFFFF:FFFF:FF:FFF  
@A00721:190:HGJW7DSXY:4:1510:8133:13542\_1:N:0:TCTGCAAG+GCTGCACT  
GTTGAGAAGTGTGCTTTACAAGGAGTTAGACTCTTCTTCAAGTTTTTAGATCTTCTTGATAATCTTAA  
AGAAAAATTTTGAATAAACTAATGAGAGGTATAGGCTTAGTCAAGTCTGTACTTACATTCTTTACGC  
CAG  
+  
FFFFFFFFFFFFFF:FFFFFFFFFFFF:FFFFFFFFF:FFFFFFFFFFFFFFFFFFFFFFFFFFFFFFFF  
FFFFFFFFFFFFFFFFFFFFFFFFFFFFFFFFFFFFFFFFFFFFFFFFFFFFFFFFFFFFFFFFFFFFFFFF  
FFF  
@A00721:190:HGJW7DSXY:4:2601:8431:16564\_2:N:0:TCTGCAAG+GCTGCACT  
ACTCAGATTCAATCTGGCATCACTGAACGTCTACAACGAGTTAGGGAGTGGCTAGGTTTTAAAGATC  
CTTTGCACAAGCAATACCTTCCACTGAGTTCATCACCCAGAGTTTCGA  
+  
FFFFFFFFFFFFFFFFFFFFFFFFFFFFFFFFFFFFFFFFFFFFFFFFFFFFFFFFFFFFFFFFFFFFFFFF  
FFFFFFFFFFFFFFFFFFFFFFFFFFFFFFFFFFFFFFFFFFFFFFFFFFFFFFFFFFFFFFFF  
@A00721:190:HGJW7DSXY:4:2507:16324:8688\_2:N:0:TCTGCAAG+GCTGCACT  
TCTTTTACCTTTTGAGAGTCCAGGAACCTTTACTCCTAGTGTCTTTTCTAGAGTCCAAGGACGTTTCC

+

@A00721:190:HGJW7DSXY:4:1460:1533:28823\_1:N:0:TCTGCAAG+GCTGCACT

+

@A00721:190:HGJW7DSXY:4:1470:22788:3818\_2:N:0:TCTGCAAG+GCTGCACT

+

@A00721:190:HGJW7DSXY:4:1668:8024:32299 2:N:0:TCTGCAAG+GCTGCACT

+

@A00721:190:HGJW7DSXY:4:2566:17481:20212 2:N:0:TCTGCAAG+GCTGCACT

+

@A00721:190:HGJW7DSXY:4:1475:22354:26835 1:N:0:TCTGCAAG+GCTGCACT

CCA

 $+$ [illegible]

AGGTTAAGAAAGCCCCCTTGAAGCCGCGTAGTCAAGCCCGTTTACCTGTATCATCAATCAAGATATACCCGAT  
AGGGTACCGAGTCTTCAAGAGAATATTTATTCTTATGAGGGCTCGAAACTTCAACGTTTTTCACAACGGA

AGGGTACCGAGTCTCCAAAGAGAAATATTTATTCCTATGAGGCTCGAAACTTCAACGTTTTCACAAACGGA  
AAG

 $\perp$ 

FFF

TTCTGTTTTCAAAGACTCCAATAACTGATCATTCTGATCATATGATTTTGGACAATGGTTTCGAAGCG

TTCTGTGTTTCAAGGACTTCCAATAACTGATCATTTCTGATCATATGATTTTGGACAAATGGTTTCGAAGCG  
AAA

+

[illegible]





TATATTAGGTGAAGCGAAATACGATTTTGAACGTCAACGTTACCGAG  
+  
FFFF:FFFFFFFFFFFFFFFFFFFFFFFFFFFFFFFFFFFFFFFF:FFFF:FFFFFF:FFFFFFFF  
FFF:FFFF:FFFFFFFFFFFFFFFFFFFFFFFF:FFFFFFFFFFFFFFFF  
@A00721:190:HGJW7DSXY:4:1338:1054:23390\_1:N:0:TCTGCAAG+GCTGCACT  
GGAGGCAGTCTTCTGATCGTAAGAAGTTTATAAGGAACATATCCATTTGTTGTAATAGGGTCATCAAC  
TTAGAACTCGAACTCTAAGTGGTAATACTGTCTTTCCAAGCTTACCTGTATCTTCAATGAAATTGGA  
CTC  
+  
FFFFFFFF:FF:FFFFFFFFFFFFFFFFFFFFFFFF,F:FFFFFF::FFFFFFFF:FFFFFFFFFFFFFFFF  
FFFFFFFFFFFFFFFFFFFFFFFFFFFFFFFF:FFFFFFFFFFFFFFFF:FFFFFFFFFFFFFFFF  
FFF  
@A00721:190:HGJW7DSXY:4:1635:5846:15530\_1:N:0:TCTGCAAG+GCTGCACT  
TTTCTACGATACAAATGATAACTTCTAATTTACGTTTGCTACTCAGAGCTGGTCCTCTCAGCAAAGG  
GATGCATGGTGTATCTCCTCAGGAGTCCCGGCATTTGATAATAATGACGAGACTTTCGTCATAATCG  
CTG  
+  
FFF:FFFF:FFFFFFFFFFFFFFFFFFFFFFFFFFFFFFFFFFFFFFFFFFFFFFFFFFFFFFFFFFFFFFFF  
FFFFFFFFFFFFFFFFFFFFFFFFFFFFFFFFFFFFFFFFFFFFFFFFFFFFFFFFFFFFFFFFFFFFFFFF  
FFF  
@A00721:190:HGJW7DSXY:4:1604:31801:36965\_2:N:0:TCTGCAAG+GCTGCACT  
CGTGTGAGCCTCGACCCGATTATATGGTATTAAGTTATAAAGGTGAGGAGACCATTTCTTGCTGAA  
ATTTATAGAAGATTATTTTGACAGAATCAATAAGAATCATCGATTCTC  
+  
FF:FFFFFFFFFFFFFFFFFFFFFFFFFFFFFFFFFFFFFFFF,FF:FFFFFFFFFFFFFFFFFFFFFFFF  
FFFFFFFF:FFFFFF:FFFFFFFFFFFFFFFF:FFF:,FFFFFFFF  
@A00721:190:HGJW7DSXY:4:1202:25889:15107\_1:N:0:TCTGCAAG+GCTGCACT  
AGTCAACACTAGTTCGAGTGCTGCTTTGGATTACGATGACGTGAGAATAGGTGAAGGGATAGTTTTTA  
CCTCGACCACATTAAGGCGGCGGCGACTAATCTTAAAGCTTACCCAAAATGAAGGACACTTCGAAAC  
TGA  
+  
FFFFFFFF:FFFFFFFFFFFFFFFFFFFFFFFFFFFFFFFFFFFFFFFFFFFFFFFFFFFFFFFFFFFFFFFF  
FFFFFFFFFFFF,FFFFFFFFFFFFFFFFFFFFFFFFFFFFFFFFFFFFFFFFFFFFFFFFFFFFFFFF  
:FF  
@A00721:190:HGJW7DSXY:4:2422:18629:15749\_2:N:0:TCTGCAAG+GCTGCACT  
TTCTTTTGATACAACTCTAGCCTTCAAGTGGGGTATGCCTGCGGAATACGCTTGCTATTACCAGATT  
GGTTCGAACCCGTTGATGCTATGTCAGAAGAAGCTATTCAAGCTTGTC  
+  
FF:FFFF::FFFFFFFF:F,,F:FFFFFFFF:FFFF:FFFF:FFFFFFFF:FFFFF,FFFFF  
FF,FF,FFFFF,,FF:FFF::FFFF,FFF::FFF,FFFF,FFFF  
@A00721:190:HGJW7DSXY:4:2341:7871:24862\_1:N:0:TCTGCAAG+GCTGCACT  
AAACAAGCCCAGACTCAAGGAGTCCAATCAAAGGTTTTGAATTTAGCTCAACTGGGGAGACGTGCTTA  
AATGGGTGATAAAAATTATTTAGAGATCTTTCTACTTACAAAGGACAATTCAGTTTCATTAATTCTA  
CGG  
+  
FFFFF,FF:,F,:FF:FF:,FFFFFF,FFFF,FFF:FF:,FFFF,FF:,,:FFF,F,FFFF,,FFF  
F,FFF,FFFFFF:,FFFFFFFFFFFF:,FF,F,,:FFF:FF:FFFFFF:FFF:FFFFFFFF:F:FFF,  
:FF  
@A00721:190:HGJW7DSXY:4:1169:15474:7028\_1:N:0:TCTGCAAG+GCTGCACT  
TTTTGTTACCAAATTCTTGCTTTCAACGAAGTCTCTGATTTTATTAATCATTACTTTAACGATCTCT  
CGGTCATTTACTCTGTACTTGATCTACGTCGTTTAACTGTGCGAACAACCTTTACTTAGAATGACTCT  
ATC  
+  
FFFFFFFFFFFFFFFFFFFFFFFFFFFFFFFF:FFFFFFFFFFFFFFFFFFFFFFFFFFFFFFFFFFFFFFFF

FFFFFFFFFFFFFFFFFFFFFFFFFFFFFFFFFFFFFFFFFFFFFFFFFFFFFFFFFFFFFFFFFFFFFFFF  
FFF  
@A00721:190:HGJW7DSXY:4:1552:23475:7388\_2:N:0:TCTGCAAG+GCTGCACT  
ACGAAAACCAACTCTTCGTTACGAGACCTGATGGTAGAATAGATTTAGTCTCTACACCCATCTCAACG  
AGGATAAAGCGAGTTTTCCGTCCTGAACGTAATACACGAAGAGATCAT  
+  
FFFFFF:FFFFFFFFFFFFFFFFFFFFFFFFFFFFFFFFFFFFFFFFFFFFFFFFFFFFFFFFFFFFFFFF  
FFFFFFFFFFFFFFFFFFFFFFFFFFFFFFFFFFFFFFFFFFFFFFFFFFFFFFFFFFFFFFFF  
@A00721:190:HGJW7DSXY:4:1161:14127:12461\_1:N:0:TCTGCAAG+GCTGCACT  
AAATGAGGTCAAAGCTCTATTTATTAAACGAACATTATCCGATTCTTCGAGGGTATCACTACCACTG  
ATCTGCCGACTTTAGTCAAGGAACCTCAATTCCTTCGATGTTTATATTTTTCTATAAGGGAAAAATAGC  
AAT  
+  
FFFFFFFFFFFFFFFFFFFFFFFFFFFFFFFFFFFFFFFFFFFFFFFFFFFFFFFFFFFFFFFFFFFFFFFF  
FFFFFFFFFFFFFFFFFFFFFFFFFFFFFFFFFFFFFFFFFFFFFFFFFFFFFFFFFFFFFFFF,FFFFFFFF  
FFFFFFFFFFFFFFFFFFFFFFFFFFFFFFFFFFFFFFFFFFFFFFFFFFFFFFFFFFFFFFFF  
FFF  
@A00721:190:HGJW7DSXY:4:2303:15655:8594\_2:N:0:TCTGCAAG+GCTGCACT  
CAAATTTTAGAACTTTATTTACAGAACTCTCTCCGATCACCTTGGTGTGATCTCCCGGAGGATCTTTTC  
AATAAGATGTATGATGATAATCTACTATTTTTAAATAGTGATATTCAG  
+  
FFFF:FFFFFFFFFFFFFFFFFFFFFFFFFFFFFFFFFFFFFFFFFFFFFFFFFFFFFFFFFFFFFFFF  
FFFFFFFFFFFFFFFFFFFFFFFFFFFFFFFFFFFFFFFFFFFFFFFFFFFFFFFFFFFFFFFF:FF  
@A00721:190:HGJW7DSXY:4:1411:16595:8813\_1:N:0:TCTGCAAG+GCTGCACT  
ATCAAAGATTTGGCTTGGTCTATTTACCGCAAAAAGTTGGAAGAGGTCTATGATATTTATTTTACTTA  
TACTTTAAATAGCACCGATTATAACTTGACTGTTGATAATTACAATAGCTCTTTCTCAGAAGATTAGA  
GAA  
+  
FFFFFFFFFFFFFFFFFFFFFFFFFFFFFFFFFFFFFFFFFFFFFFFFFFFFFFFFFFFFFFFF,FFFFFF,FFFF:FFFFFFFF  
FFFFFFFFFFFFFFFFFFFFFFFFFFFFFFFFFFFFFFFFFFFFFFFFFFFFFFFFFFFFFFFFFFFFFFFF  
FFF  
@A00721:190:HGJW7DSXY:4:2351:7193:14450\_2:N:0:TCTGCAAG+GCTGCACT  
TAGCATTGATTTACTTTTACCGTTAGAACTGAAAAAGATTCTTTTCGAAAAGAAACCTATAAGTTACA  
AACGATTCTTCGACTATATTAAAGAAATAAAAATACTTCAAGTACCTG  
+  
FFFFFFFFFFFFFFFFFFFFFFFFFFFFFFFFFFFFFFFFFFFFFFFFFFFFFFFFFFFFFFFFFFFFFFFF  
FFFFFFFFFFFFFFFFFFFFFFFFFFFFFFFFFFFFFFFFFFFFFFFFFFFFFFFFFFFFFFFF  
@A00721:190:HGJW7DSXY:4:2444:26910:36260\_1:N:0:TCTGCAAG+GCTGCACT  
ATGAGAGTGATTCTTAATATTCTAGTAACCGCTATGTGGGCATTACTAGGATTTATCACACTCCTA  
AATTTGATAGCAATTTATGTTTTAAATGCTAGGAAAATTTAGAAAACTCCATTGTATAGTTCAAGG  
AGT  
+  
FFFFFFFFFFFFFFFFFFFFFFFFFFFFFFFFFFFFFFFFFFFFFFFFFFFFFFFFFFFFFFFFFFFFFFFF  
FFFFFFFFFFFFFFFFFFFFFFFFFFFFFFFFFFFFFFFFFFFFFFFFFFFFFFFFFFFFFFFFFFFFFFFF  
FFF  
@A00721:190:HGJW7DSXY:4:2138:11044:21934\_2:N:0:TCTGCAAG+GCTGCACT  
AGCTTTAGTATTATTTACTATCGCCTTTATTGAAAATTGTATAAGAGTTAATTGCTTACACAAAAGTG  
ACGCGGAAGGAATCTTAATTGATTGAAGCTAGGCGTTGGGAGAATG  
+  
FFFFFFFFFFFFFFFFFFFFFFFFFFFFFFFFFFFFFFFFFFFFFFFFFFFFFFFFFFFFFFFFFFFFFFFF  
FFFFFFFFFFFFFFFFFFFFFFFFFFFFFFFFFFFFFFFFFFFFFFFFFFFFFFFFFFFFFFFF:FFF:FFF:FFFFF:FFF  
@A00721:190:HGJW7DSXY:4:1665:25364:14888\_1:N:0:TCTGCAAG+GCTGCACT  
CAGACGTGTGCTCTTCGATCTCCCAAATCTAGATCTGCACAGAAGAAGGCTGAAGGTCGTTACCGGA  
CGACCACTCAAAGGAAACGGGCTGTTGCCAGAGGAAAGCAGCGACCACCGAGGTCGCTCGTAACATT  
GAC

+  
::FFFFFFFF:FFFF:FFFFFFFFFFFFFFFF:FFFFFF:FF,F,FFFFFFFF,FFFF:FFFFFF  
FF:FFF:FFFF:FF::FFFFFFFF:FFFFFF:,FFF:FFFFFFFFFFFFFFFF:FFFF:F,FF  
FFF  
@A00721:190:HGJW7DSXY:4:2432:12210:22357\_1:N:0:TCTGCAAG+GCTGCACT  
GTCAAAAGTCACATTCACCACTCCCATACCAATCAATGATGTGACTATACAGTTCGGCCATTTCAAGA  
GTGGTCAATACGTCGTGGGAGGTACTGAAGCCTTCCCCTCCGCTGGCACGAAGAACACTCCCAAGCCA  
ATC  
+  
FFFF:F::FFFF,FFFFFFFF:FFFFFFFFFFFFFF,F,:FFFFFF,::F,F:FFFF::FFFFFFFF  
FFFF:FFFFFFFF:F::FFFFFFFF:,FFFFFFFFFFFF,FFFF:FFFFFFFFFFFFFFFF,F,  
FFF  
@A00721:190:HGJW7DSXY:4:1510:24632:21355\_1:N:0:TCTGCAAG+GCTGCACT  
AATGAAAAGGGGTTTACCAGGGTAGTCTCTAAGTCTACCAGGAAGAGGGGAAATGTCCCCAAACTGA  
GAAGAATAAAGGGAAAGGTCCATCAGGACCTAAGAAGGGGAAATTACCCCTAATTCTGAAGGAAGATC  
TCC  
+  
FFFFFFFFFFFFFFFFFFFFFFFFFFFFFFFF:FFFFFFFFFFFFFFFFFFFFFFFFFFFFFFFF  
FFFFFFFFFFFFFFFFFFFFFFFFFFFFFFFFFFFFFFFFFFFFFFFFFFFFFFFFFFFFFFFF  
FFF  
@A00721:190:HGJW7DSXY:4:2143:11415:32283\_2:N:0:TCTGCAAG+GCTGCACT  
AGGCCGCTGCTACGAAGTCGCTGAAGGCGGCTTGGGTCATTAAGGGTAGCTGTAAAGTTGCGCCTGCC  
GACCCCATCTTTGAGACCAAGACTCTCTACAGTAGGTTCTGTCCTACT  
+  
FFFFFFFFFFFFFFFFFFFFFFFFFFFFFFFF,FFFFFFFFFFFFFFFF:FFFFFFFFFFFFFFFF  
FFFFFFFFFFFFFFFFFFFFFFFFFFFFFFFFFFFFFFFFFFFFFFFFFFFFFFFF,FF  
@A00721:190:HGJW7DSXY:4:2443:2474:28260\_2:N:0:TCTGCAAG+GCTGCACT  
GTGAGAGGACTTTTGGCTACTGGCGACAACTGAGAGCAGTCGCTGGGAAAGAGAATTGCGTGGGT  
GAAGGCCGACGCTTCGAGCTTGAGTGTGACGAGGCCGGTGACGTTTT  
+  
FFFFFFFFFFFFFFFFFFFFFFFFFFFFFFFF:FFFFFF,FFFFFFFFFFFFFFFFFFFF  
FFFFFFFFFFFFFFFFFFFFFFFFFFFFFFFFFFFFFFFFFFFFFFFFFFFFFFFF  
@A00721:190:HGJW7DSXY:4:2443:2239:6245\_1:N:0:TCTGCAAG+GCTGCACT  
TAATATGGGGCGAAGATCCCCTATGGAGTCTTGAAGGACTTAGGTTGGCATATTTATGCCGACGATA  
ATAAGCATGTCACCCTTAAGCACCGAGGTAAGCTCGGACTTACAAGAGAGAGTGTGAGAGAGTCGCT  
CTC  
+  
FFFF:FFFFFFFFFFFFFFFF:,FFFFFFFFFFFFFFFFFFFFFFFFFFFFFFFF:FFFFFFFF  
FF::FFFFFFFFFFFFFFFFFFFFFFFF:FFFFFFFFFFFFFFFFFFFFFFFFFFFFFFFF  
FFF  
@A00721:190:HGJW7DSXY:4:1320:9182:25723\_1:N:0:TCTGCAAG+GCTGCACT  
TTTCCTCCGTCATTGGGATTTGATGTGAGAAGGTGGAAGGTGTCAAGGGTCTTCTTCATGCTGATC  
TTTCAGGACCTAATCACATCATGATTGATAGTTACGGCTCGTATCGAGTTGGAGGGAGGAAGTTCTCC  
GAA  
+  
F:FFF:FFFF,FFFFFFFFFFFFFFFFFFFFFFFFFFFFFFFFFFFFFFFFFFFFFFFF  
FFFFFFFFFFFFFFFFFFFFFFFFFFFFFFFFFFFFFFFFFFFFFFFFFFFFFFFF:FFFF  
FFF  
@A00721:190:HGJW7DSXY:4:1504:19443:9768\_2:N:0:TCTGCAAG+GCTGCACT  
GGAAGGCTCTAGAGAAGATCTCACCACTGGAGAAGGCAAGTGGAGAGTCCAGAAGTTGATGAAGAAG  
GATTATTTGAAGCAGGGGTACCCTTCCTAAGGTGGATGAGGGAGGT  
+  
FFFFFFFFFFFFFFFFFFFFFFFFFFFFFFFFFFFFFFFFFFFFFFFFFFFFFFFF  
FFFFFFFFFFFFFFFFFFFFFFFFFFFFFFFFFFFFFFFFFFFFFFFF

@A00721:190:HGJW7DSXY:4:1217:22327:30232\_1:N:0:TCTGCAAG+GCTGCACT  
TGTTCTTCCGGGAAGTTGTGGGATTTAACTTTGACTCAACTACTCCGATCAGATCCGGATGGTTTGA  
TTGGTATGGACTACTCGACTTTTGATCTGGAGTTGTCTAGGGTCATGGCAGATACTACCGATAAGGTG  
AAA

+

FFFFFFFFFFFFFFFFFFFFFFFFFFFFFFFFFFFFFFFFFFFFFFFFFFFFFFFFFFFFFFFFFFFFFFFF  
FFFFFFFFFFFFFFFFFFFFFFFFFFFFFFFFFFFFFFFFFFFFFFFFFFFFFFFFFFFFFFFFFFFFFFFF:FFFFFFFFFFFF  
FFF

@A00721:190:HGJW7DSXY:4:1212:3016:13385\_1:N:0:TCTGCAAG+GCTGCACT  
CGTGTGCTCTTCCGATCTTATCGTTGTCTGACCTTACAAGTTGAGGAGACTTTACAGCGGCTTATTG  
TCGCGCAGTTTCCAGAATTGCGGTTGAAGTTCACCCATTCTATCTTGAATGCTCACGCCGTCGCAGCC  
ATA

+

FFFFFFFFFFFFFFFFFFFFFFFFFFFFFFFFFFFFFFFFFFFFFFFFFFFFFFFFFFFFFFFFFFFFFFFF  
FFFFFFFFFFFFFFFFFFFFFFFFFFFFFFFFFFFFFFFFFFFFFFFFFFFFFFFFFFFFFFFFFFFFFFFF:FFFFFFFFFFFF  
FFF

@A00721:190:HGJW7DSXY:4:2611:1380:33098\_1:N:0:TCTGCAAG+GCTGCACT  
GATGCATCGAGGTATACGTCTAGGAACATTGATTGGGAACGTACCTACTCACGAGACGTTCATGAAAGC  
TATCGGAGGAAGCAAAATGTTTCGTTCTGTTACAAGAACGCTTTGGATTGTGACCATAAAGCCTCAG  
TTG

+

FFFFFFFFFFFFFFFFFFFFFFFFFFFFFFFFFFFFFFFFFFFFFFFFFFFFFFFFFFFFFFFFFFFFFFFF  
FFFFFFFFFFFFFFFFFFFFFFFFFFFFFFFFFFFFFFFFFFFFFFFFFFFFFFFFFFFFFFFFFFFFFFFF:FFFFFFFFFFFF  
FFF

@A00721:190:HGJW7DSXY:4:2374:25545:21997\_2:N:0:TCTGCAAG+GCTGCACT  
ATATGTTACGACATGGCTTCGTAACAACAGTTCGAGGATTGTCTCTCGGGGAAAGTGATTACCAAG  
ATGTTTCATATAGATACGAGATACCTAGAGAAGGTCGCAGCGATCTTAC

+

FFFFFFFFFFFFFFFFFFFFFFFFFFFFFFFFFFFFFFFFFFFFFFFFFFFFFFFFFFFFFFFFFFFFFFFF  
F:FFFF:FFFFFFFFFFFFFFFFFFFFFFFFFFFFFFFFFFFFFFFFFFFFFFFFFFFFFFFFFFFFFFFF

@A00721:190:HGJW7DSXY:4:2157:25500:19319\_2:N:0:TCTGCAAG+GCTGCACT  
CTCTGCTTCTGCGTTACTGAGAGAAAAGATTACAGACGCCACGGTGACTTTATGGACAAGATGCAAG  
TTCTTGGAATACTTGTTCCCTTTTTAGGTTTAGTAGGTGATCTTG

+

:FFFFFFFFFFFFFFFFFFFFFFFFFFFFFFFFFFFFFFFFFFFFFFFFFFFFFFFFFFFFFFFFFFFF:FFF,FFFFFFFFFFFF::F  
FFFFFFFFFFFFFFFFFFFFFFFFFFFFFFFFFFFFFFFFFFFFFFFFFFFFFFFFFFFFFFFFFFFF,FFFFF,FFFFF,FFFF:FFFFFFFF

@A00721:190:HGJW7DSXY:4:2206:10285:28729\_2:N:0:TCTGCAAG+GCTGCACT  
GCTCGGCGTTGTTCTTGAACCAAGTTAAGAAGGAGGCTGATCATGGAGTCTTTGTACCTTCTGTCA  
AACTTCGAGGTTACGCTACGAGAGGTGATCCCGGATGTGGATTGAAGG

+

FF:FFFFFFFFFFFFFFFFFFFFFFFFFFFFFFFFFFFFFFFFFFFFFFFFFFFFFFFFFFFFFFFFFFFF:FFFFFFFFFFFF:FFFFFFFF  
F:FFFFFFFFFFFFFFFFFFFFFFFFFFFFFFFFFFFFFFFFFFFFFFFFFFFFFFFFFFFFFFFFFFFF:FFFFFFFFFFFF

@A00721:190:HGJW7DSXY:4:1530:24939:24893\_1:N:0:TCTGCAAG+GCTGCACT  
GTTGAGAAGTGTGCTTTACAAGGAGTTAGACTCTTCTTCAAGTTTTTAGATCTTCTTGATAATCTTAA  
AGAAAAATTTTGAATAAACTAATGAGAGGTATAGGCTTAGTCAAGTCTGTACTTACATTCTTTACGC  
CAG

+

F:FFFFFFFFFFFFFFFFFFFFFFFFFFFFFFFFFFFFFFFFFFFFFFFFFFFFFFFFFFFFFFFFFFFF:FFFFFFFFFFFF:FFFFFFFF  
FFFFFFFFFFFFFFFFFFFF:F:FFFFFFFF,FFFFFFFFFFFFFFFFFFFFFFFFFFFFFFFFFFFFFFFFFFFFFFFFFFFFFFFF  
FFF

@A00721:190:HGJW7DSXY:4:2631:4155:3959\_2:N:0:TCTGCAAG+GCTGCACT  
ACTCAGATTCAATCTGGCATCACTGAACGTCTACAACGAGTTAGGGAGTGGCTAGGTTTTAAAAGATC  
CTTTGCACAAGCAATACCTTCCACTGAGTTCATCACCCAGAGTTTCGA

+

```

FFFFFFFF:FFFFFFFFFFFFFFFFFFFFFFFFFFFFFFFF:FFFFFF,FFFFFF:F:FFFFFFFFFFFF
FFFFFF:FF:FFF:F,FFFFFF:FFF:FFF:FFF:FFFFFFFF
@A00721:190:HGJW7DSXY:4:2575:22498:30436_2:N:0:TCTGCAAG+GCTGCACT
TCTTTTACCTTTTGGAGGTCCAGGAACCTTTACTCCTAGTGTCTTTTCTAGAGTCCAAGGACGTTTC
GTCGGAGGATGACAGGTGGGAGACCGCTCAATAACACTCTATTGAATC

```

TTCTGTTTTCAAAGACTCCAATAACTGATCATTCTGATCATATGATTTTGGACAATGGTTTCGAAGCG  
AAA

+

:FFFF:FFFFFFFFFFFFFFFFFFFFFFFFFFFFFFFFFFFFFFFFFFFFFFFFFFFFFFFFFFFFFFFFFFFFFFFF  
FFFFFFFFFFFFFFFFFFFFFFFFFFFFFFFFFFFFFFFFFFFFFFFFFFFFFFFFFFFFFFFFFFFFFFFFFFFFFFFF  
FFF

@A00721:190:HGJW7DSXY:4:2146:25527:13730\_1:N:0:TCTGCAAG+GCTGCACT  
TCCGAGAGGTTTATCCTGATGTGGAGGGAGTTCTTGAAGCATCCCGACCTTTCCTTGTGAAAATTTTG  
ATGCGGTTTCATAAGATTATCAGTAATCCTGATTCTACTACGGATTTCATGGACCTTCCATCCTGTACC  
TCT

+

FF:FFFFFFFFFFFFFFFFFFFFFFFFFFFFFFFFFFFFFFFFFFFFFFFFFFFFFFFFFFFFFFFFFFFFFFFF  
FFFFFFFFFFFFFFFFFFFFFFFFFFFFFFFFFFFFFFFFFFFFFFFFFFFFFFFFFFFFFFFFFFFFFFFFFFFFFFFF  
FFF

@A00721:190:HGJW7DSXY:4:2624:12653:11036\_1:N:0:TCTGCAAG+GCTGCACT  
GATTAAGACTCTTCCGAAAGGCGAAGCTTTGGGAATTTGAAGCTCAGGGTGAAGCACACGTTTGACCG  
TGACGAACTGTGGTGTCTTGATCTACGTTACGGATATACTCTCCTTGAGTTCACCTCGTAAGGACACT  
ACC

+

FFFFFFFFFFFFFFFF:FFFFFF:FFFFFFFFFFFFFFFFFFFFFFFFFFFFFFFFFFFFFFFFFFFFFFFFFFFF  
FFFFFFFFFFFFFFFFFFFFFFFFFFFFFFFFFFFFFFFFFFFFFFFFFFFFFFFFFFFFFFFFFFFFFFFFFFFFFFFF  
FFF

@A00721:190:HGJW7DSXY:4:1363:15112:36464\_1:N:0:TCTGCAAG+GCTGCACT  
AGGGGTTTTCGAATAGTGATAGCCACCCGCCTTACAGAGGGGCAGCAGCATGACCATAATTGGTATTG  
ACTTTGGTACCACCTTTTCTACTGTCTGTCTCGCCTCTTGAATGAAGTTTAAATGCTTAACAACAAT  
GAT

+

FFFFFFFFFFFFFFFFFFFFFFFFFFFFFFFFFFFFFFFFFFFFFFFFFFFFFFFFFFFFFFFFFFFFFFFF  
FF:FFFFFFFFFFFFFFFFFFFFFFFFFFFFFFFFFFFFFFFFFFFFFFFFFFFFFFFFFFFFFFFFFFFFFFFF  
FFF

@A00721:190:HGJW7DSXY:4:1419:6614:29919\_1:N:0:TCTGCAAG+GCTGCACT  
TCTTCCGATCTTGATGACACTATTGTTTATGGATATGATGCTATTACTCATGATGGTTACGGTCAGGG  
AGGATTCTCAGTTTACAAGGACCTTAAGCGATGGATCGGGTTAATTCTAAACATTACCCGAAAGAC  
GTG

+

FFFFF:F:F,FFFFFFFFFFFFFFFFFFFFFFFFFFFFFFFFFFFFFFFFFFFFFFFFFFFFFFFFFFFFF:FFFF:FFFFFFFF,FFFF:FFF,FFFFFFFF:F  
::FFFFFFFFFFFFFFFFFFFFFFFFFFFFFFFFFFFFFFFFFFFFFFFFFFFFFFFFFFFFFFFFFFFFFFFF  
FFF

@A00721:190:HGJW7DSXY:4:2322:3694:32910\_2:N:0:TCTGCAAG+GCTGCACT  
TCTACGCAAAGATATTTTCATGAAAACCTACAGAGGAACGTACCGGATTACCTGTCTTTCATATTATGAA  
TGAACCTTCGGCCGCTCTCTTTGCTTCGATGTTGGATGTCAAGAAGGG

+

FFFFFFFF:FFFFFFFFFFFFFFFFFFFFFFFFFFFFFFFFFFFFFFFFFFFFFFFFFFFFFFFFFFFFFFFF  
FFFFFFFFFFFFFFFFFFFFFFFFFFFFFFFFFFFFFFFFFFFFFFFFFFFFFFFFFFFFFFFFFFFFFFFF

@A00721:190:HGJW7DSXY:4:2123:18873:19523\_2:N:0:TCTGCAAG+GCTGCACT  
GGGTAATTACACCTAAACGAGCTCGATCTGCCATCGCTGAAGGATGTGCACTCTTTTCTGCTACTTTA  
ACGGAGCGTAGTGTACTCTTCGTCGATTGTATCAACAGTAACATTACT

+

FFFFFFF:FFFFFFFFFFFFFFFFFFFFFFFFFFFFFFFFFFFFFFFFFFFFFFFFFFFFFFFFFFFFFFFF  
FFFFF:FFFFFFFFFFFFFFFFFFFFFFFFFFFFFFFFFFFFFFFFFFFFFFFFFFFFFFFFFFFFFFFF

@A00721:190:HGJW7DSXY:4:2321:7148:26428\_1:N:0:TCTGCAAG+GCTGCACT  
CTATCGTTCAGGTGCATGGGGTTGGATAGCCAATATTGAAGTGGACACCTCTGGTAGTATCGAAGTAA  
AGATAACCAATAAGGAAGGAGCTTATACTATGGTTGAATCAACTAAGCATACTACTTTTGCTTTGATT  
ACT

[illegible]



@A00721:190:HGJW7DSXY:4:1365:10673:3537\_1:N:0:TCTGCAAG+GCTGCACT  
TTTTGTTACCAAATTCTTGGCTTTCAACGAAGTCTCTGATTTTATTAATCATTACTTTAACGATCTCT  
CGGTCATTTACTCTGTACTTGATCTACGTCGTTTAACTGTCGGAACAACCTTTACTTAGAATGACTCT  
ATC

+

FFFFFFFFFFFFFFFFFFFFFFFFFFFFFFFFFFFFFFFFFFFFFFFFFFFFFFFFFFFFFFFFFFFFFFFF  
FFFFFFFFFFFFFFFFFFFFFFFFFFFFFFFFFFFFFFFFFFFFFFFFFFFFFFFFFFFFFFFFFFFFFFFF  
FFF

@A00721:190:HGJW7DSXY:4:1575:6216:20807\_2:N:0:TCTGCAAG+GCTGCACT  
ACGAAAACCAACTCTTCGTTACGAGACCTGATGGTAGAATAGATTTAGTCTCTACACCCATCTCAACG  
AGGATAAAGCGAGTTTTCCGTCCTGAACGTAATACACGAAGAGATCAT

+

FFFFFFFFFFFFFFFFFFFFFFFFFFFFFFFFFFFFFFFFFFFFFFFFFFFFFFFFFFFFFFFFFFFFFFFF  
FFFFFFFFFFFFFFFFFFFFFFFFFFFFFFFFFFFFFFFFFFFFFFFFFFFFFFFFFFFFFFFFFFFFFFFF  
FFFFF,FFFFF

@A00721:190:HGJW7DSXY:4:1219:32289:19022\_1:N:0:TCTGCAAG+GCTGCACT  
AAATGAGGTCAAAGCTCTATTTATTACACGAAGTATTATCCGATTCTTCGAGGGTATCACTACCACTG  
ATCTGCCGACTTTAGTCAAGGAAGTCAATTCCTTCGATGTTTATATTTTCTATAAGGGAAAATAGC  
AAT

+

FF,:::FF:FFF:, :F,FF:FFFF:, ,FFFF,F,:F,FF,FF:FFFFF:F,,FFFF,FFFFFFFF  
,F:,,,FFF:FFF,:FFFF,FFF,F:F:FFFFFFFFFFFFFFFFFFFF,:F,F:FF:F:FFFF:F:FFFF  
:FF

@A00721:190:HGJW7DSXY:4:2416:17219:36918\_2:N:0:TCTGCAAG+GCTGCACT  
CAAATTTTAGAACTTTATTTTACGAAGTCTCTCCGATCACCTTGGTGTGATCTCCCGGAGGATCTTTTC  
AATAAGATGTATGATGATAATCTACTATTTTTAAATAGTGATATTCAG

+

FFFFFFFFFFFFFFFFFFFFFFFFFFFFFFFFFFFFFFFFFFFFFFFFFFFFFFFFFFFFFFFFFFFFFFFF  
FFFFFFFFFFFFFFFFFFFFFFFFFFFFFFFFFFFFFFFFFFFFFFFFFFFFFFFFFFFFFFFFFFFFFFFF  
FFFFFFFFF:FFF  
FFFFFFFF:FFFFFFFF:FFF,FFF,F:FFF:FFF:FF:FFFFFFFF,F,

@A00721:190:HGJW7DSXY:4:2203:15727:26757\_1:N:0:TCTGCAAG+GCTGCACT  
ATCAAAGATTTGGCTTGGTCTATTTACCGCAAAAAGTTGGAAGAGGTCTATGATATTTATTTTACTTA  
TACTTTAAATAGCACCGATTATAACTTGACTGTTGATAATTACAATAGCTCTTTCTCAGAAGATTAGA  
GAA

+

FFFFFFFFFFFFFFFFFFFFFFFFFFFFFFFFFFFFFFFFFFFFFFFFFFFFFFFFFFFFFFFFFFFFFFFF  
FFFFFFFFFFFFFFFFFFFFFFFFFFFFFFFFFFFFFFFFFFFFFFFFFFFFFFFFFFFFFFFFFFFFFFFF  
FFF

@A00721:190:HGJW7DSXY:4:2522:6253:14606\_2:N:0:TCTGCAAG+GCTGCACT  
TAGCATTGATTTACTTTTACCGTTAGAACTGAAAAAGATTCTTTTCGAAAAGAAACCTATAAGTTACA  
AACGATTCTTCGACTATATTAAAGAAATAAAAATACTTCAAGTACCTG

+

FFFFFFFFF:FFFFFFFFFFFFFFFFFFFFFFFFFFFFFFFFFFFFFFFFFFFFFFFFFFFFFFFFFFFF  
FFFFFFFFFFFFFFFFFFFFFFFFFFFFFFFFFFFFFFFFFFFFFFFFFFFFFFFFFFFFFFFFFFFFFFFF  
FFFFF:FF

@A00721:190:HGJW7DSXY:4:1141:11153:26600\_1:N:0:TCTGCAAG+GCTGCACT  
GAGAGTGATTCTTAATATTCTAGTAACCGCTATGTGGGCATTACTAGGATTTATCACACTCCTAAA  
TTTGATAGCAATTTATGTTTAAATGCTAGGAAAATTTAGAAAACTCCATTGTATAGTTCAAGGAG  
TAC

+

F:F:FFFFFFFFF:FF::F,FFF:FFF:F:F,FFFF:FF:FFFF:FFFFFFFF,FFFF:FFFF  
F,FFFFFFFF,:FFF::FFFF::FFFFFFFFFFFFFFFFFFFF:FFF,FF:FFFFFFFFFFFFFFFF  
FFF

@A00721:190:HGJW7DSXY:4:2154:22128:27070\_2:N:0:TCTGCAAG+GCTGCACT  
AGCTTTAGTATTATTTACTATCGCCTTTATTGAAAATTGTATAAGAGTTAATTGCTTACACAAAAGTG  
ACGCGCAAGGAATCTTAATTGATTGAAGCTAGGCGTTGGGAGAATG

+

FFFFFFFFFFFFFFFFFFFFFFFFFFFFFFFFFFFFFFFFFFFFFFFFFFFFFFFFFFFFFFFFFFFFFFFF  
FFFFFFFFFFFFFFFFFFFFFFFFFFFFFFFFFFFFFFFFFFFFFFFFFFFFFFFFFFFFFFFF

@A00721:190:HGJW7DSXY:4:2133:32560:11788\_1:N:0:TCTGCAAG+GCTGCACT  
CAGACGTGTGCTCTTCCGATCTCCCAAATCTAGATCTGCACAGAAGAAGGCTGAAGGTCGTTACCGGA  
CGACCACTCAAAGGAAACGGGCTGTTGCCAGAGGAAAGCAGCGACCACCGAGGTCGCTCGTAACATT  
GAC

+

F:FFFFFFFF,FFFFFFFF:FF:FFFF:F:FFF,FFFFFFFFFFFF:F:FFF:FFFFFFFFFFFF  
FFFFFFFFFFFFFFFFFFFFFFFFFFFFFFFF:FFF,FF::FFFFFFFFFFFFFFFFFFFFFFFFFFFF  
FFF

@A00721:190:HGJW7DSXY:4:1424:16857:25551\_2:N:0:TCTGCAAG+GCTGCACT  
CAAAAGTCACATTCACCACTCCCATGCCAATCAATGATGTGACTATACAGTTCGGCCATTTCAAGAGT  
GGTCAATACGTCGTGGGAGGTACTGAAGCCTTCCCCTCCGCTGGCACG

+

FFFFFFFFFFFFFFFFFFFFFFFFFFFFFFFFFFFFFFFFFFFFFFFFFFFFFFFFFFFF:FFFFFFF  
FFFF:FFFFFFFFFFFFFFFFFFFF:FFFFFFFFFFFFFFFFFFFF

@A00721:190:HGJW7DSXY:4:2475:17526:29590\_1:N:0:TCTGCAAG+GCTGCACT  
AATAGTTCTTCTGACCAGAATGAAAAGGGTTTACCAGGGTAGTCTCTAAGTCTACCAGGAAGAGGGG  
AAATGTCCCCAAACTGAGAAGAATAAAGGGAAAGGTCCATCAGGACCTAAGAAGGGGAAATTACCCC  
TAA

+

FFFFFFF:FFFFFFFFFFFFFFFFFFFFFFFFFFFFFFFFFFFFFFFFFFFFFFFFFFFFF  
FFFFFFFFFFFFFFFFFFFFFFFFFFFFFFFF:FFFFFFFFFFFFFFFFFFFFFFFFFFFFFFFFFFFF  
FFF

@A00721:190:HGJW7DSXY:4:1151:29912:34350\_2:N:0:TCTGCAAG+GCTGCACT  
ATGCCGCTGCTACGAAGTCGCTGAAGGCGCTTGGGGCATTAAGGGTAGCTGTAAAGTTGCGCCTGCC  
GACCCCATCTTTGAGACCAAGACTCTCTACAGTAGGTTCTGTCCTACG

+

F,F:F,FFF::FFFFFFFFFFFF,,:FFF:,FF,FF,F::F,,:F,,FF,F:,F,,:F:,FF:F  
:FFF:FF:FFFFFFFFFFFF:FFF,FFF:FFFF,F,FFFF,F::FFFF,

@A00721:190:HGJW7DSXY:4:2458:30300:31140\_2:N:0:TCTGCAAG+GCTGCACT  
GTGAGAGGACTTTTGGCTACTGGCGACAACTGAGAGCAGTCGCTGGGGAAAGAGAATTGCGTGGGTT  
GAAGGCCGACGCTTCGAGCTTGAGTGTGACGAGGCCGGTGACGTTTTT

+

FFFFF:FFFFFFFFFFFFFFFFFFFFFFFFFFFFFFFFFFFFFFFFFFFFFFFFFFFFF  
FFFFFFFFF:FFFFFFFFFFFFFFFFFFFFFFFFFFFFFFFFFFFFFFFFFFFF

@A00721:190:HGJW7DSXY:4:2536:27037:34851\_1:N:0:TCTGCAAG+GCTGCACT  
TAACTATGGGGCGAAGATCCCCTATGGAGTCTTGAAGGACTTAGGTTGGCATATTTATGCCGACGATA  
ATAAGCATGTCACCCTTAAGCACCGAGGTAAGCTCGGGACTTACAAGAGAGAGTGTGAGAGAGTCGCT  
CTC

+

F:FFFFFFFF,F:F:F,FF:FFFF::FFF:FF:FFFFFFFFFFFFFFFFFFFFFFFFFFFF:FFFFFFFFF:  
FF:FFFFFFF::FFF,,FFF:FFFFFF:FFFFFFFFFFFFFFFFFFFF,FFFFFFFFFFFFFF,F:FF:FFF  
FFF

@A00721:190:HGJW7DSXY:4:1357:23267:15546\_1:N:0:TCTGCAAG+GCTGCACT  
TTTCCTCCGTCATTGGGGATTTGATGTGAGAAGGTGGAAGGTGTCAAGGTCCTTTCATGCTGATC  
TTTCAGGACCTAATCACATCATGATTGATAGTTACGGCTCGTATCGAGTTGGAGGGAGGAAGTTCTCC  
GAA

+

:FFFFFFFFFFFFFFFFFFFFFFFFFFFFFFFFFFFFFFFFFFFFFFFFFFFF:FFFFFFFFFFFFF  
FFFFFFFFFFFFFFFFFFFFFFFFFFFFFFFF:FFFFFFFFFFFFFFFF:FFFFFFFFFFFFFFFFFFFF  
FFF

@A00721:190:HGJW7DSXY:4:1530:2528:22874\_2:N:0:TCTGCAAG+GCTGCACT  
GGAAGGCTCTAGAGAAGATCTCACCACTGGAGAAGGCAAGTGGAGAGTCCAGAAGTTGATGAAGAAG

GATTATTTGAAGCAGGGGTTACCACTTCCTAAGGTGGATGAGGGAGGT

FFFFF:FFFFFFFFFFFFFFFFFFFFFFFFFFFFFFFFFFFFFFFF:FFFFFFFF:FFFFFFFFFFFFFFFFFFFFFFFF  
FFF

@A00721:190:HGJW7DSXY:4:1440:12816:33176\_2:N:0:TCTGCAAG+GCTGCACT  
AATCAGATTCAATCTGGCATCACTGAACGTCTACAACGAGTTAGGGAGTGGCTAGGTTTTAAATATC  
CTTTGCACAAGCAATACCTTCCACTGAGTTCATCACCCAGAGTTTCGA

+  
F,:FFFFFFFFFFFF:F,,FF:FFFFFFFF,F:FF:F,FFFF:F,FF,F::F::,F,F,FFFF,FF,  
F::FF::,F:F,FF:F,:F:FFF,FF,FFFF,FFFF,FFF:F,,F

@A00721:190:HGJW7DSXY:4:2164:28556:37043\_1:N:0:TCTGCAAG+GCTGCACT  
CTTTTACCTTTTGGAGGTCCAGGAACCTTTACTCCTAGTGTCTTTTCTAGAGTCCAAGGACGTTCCG  
TCGGAGGATGACAGGTGGGAGACCGCTCAATAACACTCTATT

+  
FFFFFFFFFFFFFFFFFFFFFFFFFFFFFFFFFFFFFFFFFFFFFFFFFFFFFFFFFFFFFFFFFFFFFFFF  
FFFFFFFFFFFFFFFFFFFFFFFFFFFFFFFFFFFFFFFFFFFFFFFFFFFFFFFFFFFFFFFFFFFFFFFF

@A00721:190:HGJW7DSXY:4:2146:20537:17707\_1:N:0:TCTGCAAG+GCTGCACT  
GCCACTTCTAATTTTAGGAAACGTGCGGAAAAGAAAGTTTCATGAGGATGTCTTGGTCGAAAAATATCG  
CCGGAACTTCTAATAGAGGATCCTGATGACATTATTTCAACGGATACCGATCTCAGTTCTACCACAG  
AAA

+  
FFF:FFFFFFFFFFFFFFFFFFFFFFFFFFFFFFFFFFFFFFFFFFFFFFFFFFFFFFFFFFFFFFFFFFFF  
FFFFFFFFFFFFFFFFFFFFFFFFFFFFFFFFFFFFFFFFFFFFFFFFFFFFFFFFFFFFFFFFFFFFFFFF  
FFF

@A00721:190:HGJW7DSXY:4:1564:3577:9659\_2:N:0:TCTGCAAG+GCTGCACT  
ACTGTCTCCACTGATTCGGAATTAGAGAAAGACGACCTTCTTGTGGGGACTGAGACCTCTGAATTTTC  
AGGGTGCCCTGATGAGGACGTTGAAAGGATAATTTCAACTCTGAGAC

+  
FFFFFFFFFFFFFFFFFFFFFFFFFFFFFFFFFFFFFFFFFFFFFFFFFFFFFFFFFFFFFFFFFFFF,FFFF  
FFFFFFFFFFFF:FFFFFFFFFFFFFFFFFFFFFFFFFFFFFFFFFFFFFFFFFFFFFFFFFFFF

@A00721:190:HGJW7DSXY:4:2477:19000:24502\_2:N:0:TCTGCAAG+GCTGCACT  
TATTAGAACAGCTGATTCTTATTGCATGAACGTGCTGAGGTCAAACCTGTGGACGTTCTTTTCATCG  
ACGAATTATTCATGATTCACGCTGGTCAGACCCTTTTCTTACACATC

+  
FFFFFFFFFFFFFFFFFFFFFFFFFFFFFFFFFFFFFFFFFFFFFFFFFFFFFFFFFFFFFFFFFFFFFFFF  
FFFFFFFFFFFFFFFFFFFFFFFFFFFFFFFFFFFFFFFFFFFFFFFFFFFFFFFFFFFFFFFFFFFF

@A00721:190:HGJW7DSXY:4:2455:20157:31360\_1:N:0:TCTGCAAG+GCTGCACT  
CGCAAACACTTCAACATCAACGACATCATTCTTGATGAGTGTCTTCTTATCGAAGTCTCAGTTATC  
GCTGCCCGCCGACGTTTGTGCGAACTCTCAGAGGTTTACGGCAGAAAAATTTCTCCTGCTTGAAT  
TCG

+  
FFFFFFFFFFFFFFFFFFFFFFFFFFFFFFFFFFFFFFFFFFFFFFFFFFFFFFFFFFFFFFFFFFFFFFFF  
FFFFFFFFFFFFFFFFFFFFFFFFFFFFFFFFFFFFFFFFFFFFFFFFFFFFFFFFFFFFFFFFFFFFFFFF  
FFF

@A00721:190:HGJW7DSXY:4:2106:26747:3505\_1:N:0:TCTGCAAG+GCTGCACT  
ACCCCTTATATCGAGGCTATCGAGGACGATGAGTATCTTGAAGTTGTTGACGACAAGCCTCAAGAGGG  
TAGAGGACCACCTGGATCTTCTACTGTCTCTGCCTTCCAAGATTTCTTAGAAGAGGTTATTCCTGGAA  
CCA

+  
FFF:FFF:FFFFFFFFFFFFFFFFFFFFFFFFFFFFFFFFFFFFFFFFFFFFFFFFFFFFFFFFFFFFFFFF  
FFFFF:FFFFFFFFFFFFFFFFFFFFFFFFFFFFFFFFFFFFFFFFFFFFFFFFFFFFFFFFFFFFFFFF  
FFF

@A00721:190:HGJW7DSXY:4:1225:7301:36558\_1:N:0:TCTGCAAG+GCTGCACT  
GGTAAGAAGCCCCTTGAGCCGCGTAGTCAGCGGTTTAGCTGTATCATCAGTCAGAGTATACCCGATA  
GGGTACCGAGTCTCCAAGAGAATATTTATTCTTATGAGGCTCGAACTTCAACGTTTTTACAACGGAA  
AGA

[illegible]

```
FFF,FFFFFFFF,,FF:F:FFFFFFFFFFFF:FFFFFFFFFFFFFFFFFFFFFFFFFFFF,FFFFF::,
FF:FFFFFFFF:FFFFFFFF:F:FFFF,FFF,FFFFFF:,FFFF:FFFFFFFF:~FFFFFFFF:FFF:
F,,
```

@A00721:190:HGJW7DSXY:4:2374:32009:27211\_2:N:0:TCTGCAAG+GCTGCACT  
TCTTCCGAAAGGCCAACTTTGGGAATTTGAAGCTCAGGGTGAAGCACAACTTTGACCGTGACGAAC  
GTGGTGTTCTTGATCTACGTTACGGATATACTCTCCTTGAGTTCACCTC

```
F,F:FFFFFFFFFFFFFFFFFFFFFFFFFFFFFFFFFFFFFFFFFFFFFFFFFFFFFFFFFFFF
FFFFFFFFFFFFFFF:FFFFF:FFFFFFFFFFFFFFFFFFFFFFFFFFFFFFFFFFFFFFFFFFFF
FFF
```

```
FF:FF:FFFFFFFF:F:FFFFFFFF:FFFFFFFF:FFFFFFFFFFFFFFFF,FFFFFFFF
FFFFFFFF:FFFFFFFFFFFFFFFFFFFFFFFFFFFFFFFFFFFFFFFFFFFFFFFF
FFF
```

@A00721:190:HGJW7DSXY:4:2221:14055:22420\_2:N:0:TCTGCAAG+GCTGCACT  
GGGTAATTACACCTAAACGAGCTCGATCTGCCATCGCTGAAGGATGTGCACTCTTTTCTGCTACTTTA  
ACGGAGCGTAGTGTACTCTTCGTCGATTGTATCAACAGTAACATTACT

@A00721:190:HGJW7DSXY:4:2227:13286:31641\_2:N:0:TCTGCAAG+GCTGCACT  
CGGTACAATCTTACTTGAACGAAGGCGACCTGTTCCGGAGTTTTTACGGGATCCGGAATGTTCTGTC

TATATTAGGTGAAGCGAAATACGATTTGGAACGTCAACGTTACCGAG

+

FFFFFFFFFFFFFFFFFFFFFFFFFFFFFFFFFFFFFFFFFFFFFFFFFFFFFFFFFFFFFFFF:FFFFFF:FFFFFFFF  
FFFFFFFFFFFFFFFFFFFFFFFFFFFFFFFFFFFFFFFFFFFFFFFFFFFFFFFFFFFFFFFF

@A00721:190:HGJW7DSXY:4:1609:32000:21402\_1:N:0:TCTGCAAG+GCTGCACT  
GGAGGCAGTCTTCTGATCGTAAGAAGTTTATAAGGAACATATCCATTTGTTGTAATAGGGTCATCAAC  
TTAGAACTCGAACTCTAAGTGGTAATACTGTCTTTCCAAGCTTACCTGTATCTTCAATGAAATTGGA  
CTC

+

FFFFFFFFFFFFFFFFFFFFFFFFFFFFFFFF:FFFF:FFFF,FFFFFFFFFFFFFFFFFFFFFFFFFFFFFFFF  
FFFFFFFFFFFFFFFFFFFFFFFFFFFFFFFFFFFFFFFFFFFFFFFFFFFFFFFFFFFFFFFF:FFFFFFFFFFFFFFFF  
FFF

@A00721:190:HGJW7DSXY:4:2368:15619:18458\_1:N:0:TCTGCAAG+GCTGCACT  
TTTCTACGATACAAATGATACTTCTAATTTACGTTTGTACTCAGAGCTGGTCTCTCAGCAAAGG  
GATGCATGGTGTATCTCCTCAGGAGTCCCGGCATTTGATAATAATGACGAGACTTTCGTCATAATCG  
CTG

+

FFFFFFFFFFFFFFFFFFFFFFFFFFFFFFFFFFFFFFFFFFFFFFFFFFFFFFFFFFFFFFFFFFFFFFFF  
FFFFFFFFFFFFFFFFFFFFFFFFFFFFFFFFFFFFFFFFFFFFFFFFFFFFFFFFFFFFFFFFFFFFFFFF  
FFF

@A00721:190:HGJW7DSXY:4:2272:8205:8844\_2:N:0:TCTGCAAG+GCTGCACT  
CGTGTGAGCCTCGACCCGATTATATGGTATTAACCTTATAAAGGTGAGGAGACCATTTCTTGCTGAA  
ATTTATAGAAGATTATTTTGACAGAATCAATAAGAATCATCGATTCTC

+

FFFFFFFFF::FFFFFF:FFFFFFFFFFFFFFFF:FFFFFFFF:FFFFFFFFFFFFFFFFFFFFFFFF  
FFFFFFFFFFFFFFFFFFFFFFFFFFFFFFFFFFFFFFFFFFFFFFFFFFFFFFFFFFFFFFFF

@A00721:190:HGJW7DSXY:4:1644:22381:19680\_1:N:0:TCTGCAAG+GCTGCACT  
AGTCAACACTAGTTCGAGTGCTGCTTTGGATTACGATGACGTGAGAATAGGTGAAGGGATAGTTTTTA  
CCTCGACCACATTAAGGCGGCGGCGACTAATCTTAAAGCTTCACCCAAAATGAAGGACACTTCGAAAC  
TGA

+

FFFFFFF::FFFFFFFFF:FFFFFFFFF:FFFF:FFFFFFFFFFFFFFFFFFFFFFFF:FFFFFF:F  
:FFFF,FFF:FFFF:FFFFFFFFFFFFFFFFFFFFFFFFFFFFFFFF:FF:FFFF::FFFF:FFF:FFF  
FFF

@A00721:190:HGJW7DSXY:4:1329:7780:20353\_2:N:0:TCTGCAAG+GCTGCACT  
ATACAACCTAGCCTTCAAGTGGGGTATGCCTGCGGAATACGTTGCTATTCACCAGATTGGTTCGAA  
CCCGTTGATGCTATGTCAGAAGAAGCTATTCAAGCTTGTCGTTTAAAG

+

FFFFFFFFFFFFFFFF:FFFF:FFFFFFFFFFFFFFFFFFFFFFFFFFFFFFFF:FFFFFFFF,FFFFFFFF  
FFFF:FFFF:F,FFFFFFFF,FFFF:FFF,FF:FFFFFFFF:F

@A00721:190:HGJW7DSXY:4:1119:20609:25160\_2:N:0:TCTGCAAG+GCTGCACT  
ACAAGCCCAGACTCAAGGAGTCCAATCAAAGGTTTTGAATTTAGCTCAACTGGGAGACGTGCTTAA  
TGGGTGATAAAAATTATTTAGAGATCTTTTCTACTTACAAAGGACAAG

+

FFFFFFFFFFFFFFFFFFFFFFFFFFFFFFFF:FFFFFFFFF:FFFFFFFFF,FFF:FFF  
:FFFFFFFF:F:FFF:FFFFFFFF:F::F:FFFFFFFF:FFFF,,

@A00721:190:HGJW7DSXY:4:1461:20735:31548\_1:N:0:TCTGCAAG+GCTGCACT  
TTTTGTTACCAAATTCTTGCTTTCAACGAAGTCTCTGATTTTATTAATCATTACTTTAACGATCTCT  
CGGTCATTTACTCTGTACTTGATCTACGTCGTTTAACTGTGGAACAACCTTTACTTAGAATGACTCT  
ATC

+

FFFFFFFFFFFFFFFFFFFFFFFFFFFFFFFFFFFFFFFFFFFFFFFFFFFFFFFFFFFFFFFF  
FFFFFF:FFFFFFFFFFFFFFFFFFFFFFFFFFFFFFFF:FFFFFFFFFFFFFFFF

FFF

@A00721:190:HGJW7DSXY:4:1606:24325:13244\_2:N:0:TCTGCAAG+GCTGCACT  
ACGAAAACCAACTCTTCGTTACGAGACCTGATGGTAGAATAGATTTAGTCTCTACACCCATCTCAACG  
AGGATAAAGCGAGTTTTCCGTCCTGAACGTAATACACGAAGAGATCAT

+

FFFFFFFFFFFFFFFFFFFFFFFFFFFFFFFFFFFFFFFFFFFFFFFFFFFFFFFFFFFFFFFFFFFFFFFF  
FFFFFFFFFFFFFFFFFFFFFFFFFFFFFFFFFFFFFFFFFFFFFFFFFFFFFFFFFFFFFFFFFFFFFFFF

@A00721:190:HGJW7DSXY:4:1252:8350:24377\_1:N:0:TCTGCAAG+GCTGCACT  
AAATGAGGTCAAAGCTCTATTTATTAAACGAACCTATTATCCGATTCTTCGAGGGTATCACTACCACTG  
ATCTGCCGACTTTAGTCAAGGAACCTCAATTCCTTCGATGTTTATATTTTTCTATAAGGGAAAAATAGC  
AAT

+

FFFFFFFFFFFF,FFFFFFFFFFFFFFFFFFFFFFFFFFFFFFFFFFFFFFFFFFFFFFFFFFFFFFFFFFFF  
FFFFFFFFFFFFFFFFFFFFFFFFFFFFFFFFFFFFFFFFFFFFFFFFFFFFFFFFFFFFFFFFFFFFFFFF:FFFFFFFFFFFF  
FFF

@A00721:190:HGJW7DSXY:4:2527:30969:14857\_2:N:0:TCTGCAAG+GCTGCACT  
CAAATTTTAGAAGCTTTATTTACAGAACTCTCTCCGATCACCTTGGTGTGATCTCCCGAGGATCTTTTC  
AATAAGATGTATGATGATAATCTACTATTTTTAAATAGTGATATTCAG

+

FFF:FFFFFFFFFFFFFFFFFFFFFFFFFFFFFFFFFFFFFFFFFFFFFFFFFFFFFFFFFFFFFFFFFFFF  
FFFFFFFFF:FFFFFFFFFFFFFFFFFFFFFFFFFFFFFFFFFFFFFFFFFFFFFFFFFFFFFFFFFFFFFFFF

@A00721:190:HGJW7DSXY:4:2230:30987:6245\_1:N:0:TCTGCAAG+GCTGCACT  
ATCAAAGATTTGGCTTGGTCTATTTACCGCAAAAAGTTGGAAGAGGTCTATGATATTTATTTTACTTA  
TACTTTAAATAGCACCGATTATAACTTGACTGTTGATAATTACAATAGCTCTTTCTCAGAAGATTAGA  
GAA

+

FFFFFFFFFFFFFFFFFFFFFFFFFFFFFFFFFFFFFFFFFFFFFFFFFFFFFFFFFFFFFFFFFFFFFFFF  
FFFFFFFFFFFFFFFFFFFFFFFFFFFFFFFFFFFFFFFFFFFFFFFFFFFFFFFFFFFFFFFFFFFFFFFF,FFFFFFF:FFFFFFFFFFFFFFFFFFFFFFFFFFFFF:FFF  
FFF

@A00721:190:HGJW7DSXY:4:1627:17445:22968\_1:N:0:TCTGCAAG+GCTGCACT  
TAGCATTGATTTACTTTTACCGTTAGAACTGAAAAAGATTCTTTTCGAAAAGAAACCTATAAGTTACA  
AACGATTCTTCGACTATATTAAAGAAATAAAAATACTTCAAGTACCTGAACCTTACATTTTAAATGGT  
AT

+

:FF:FFFFFFFF:F,FFFFFFFFFFFFFFFF,FFFFFFFFFFFFFF:::FFFFF:FFFFFFFFFFFFFFFFFFFF  
:FFFFFFFFFFFFFF:FFFFFFFFFFFFFFFFFFFFFFFFFFFFFFFFFFFFFFFFFFFFFFFF:FFFFFFFFFFFFFFFFFFFFFFFFFFFF  
FF

@A00721:190:HGJW7DSXY:4:1172:13702:35180\_1:N:0:TCTGCAAG+GCTGCACT  
GAGAGTGTATTCCTTAATATTCTAGTAACCGCTATGTGGGCATTACTAGGATTTATCACACTCCTAAA  
TTTGATAGCAATTTATGTTTTAAATGCTAGGAAAATTTAGAAAACTCCATTGTATAGTTCAAGGAG  
TAC

+

FFFFFFFFFFFFFF:FFFFFFFFFFFFFFFFFFFFFFFFFFFFFFFFFFFFFFFFFFFFFFFFFFFFFFFFFFFF  
FFFFFFFFFFFFFFFFFFFFFFFFFFFFFFFFFFFFFFFFFFFFFFFFFFFFFFFFFFFFFFFFFFFFFFFF:FFFFFFFFFFFFFFFFFFFFFFFFFFFFFFFFFFFF  
FFF

@A00721:190:HGJW7DSXY:4:2256:4788:19648\_2:N:0:TCTGCAAG+GCTGCACT  
AGCTTTAGTATTATTTACTATCGCCTTTATTGAAAATTGTATAAGAGTTAATTGCTTACACAAAAGTG  
ACGCGCGAAGGAATCTTAATTGATTGAAGCTAGGCGTTGGGAGAATG

+

FFFFFFFFFFFFFFFFFFFFFFFFFFFFFFFFFFFFFFFFFFFFFFFFFFFFFFFFFFFFFFFFFFFFFFFF:FFFFFFF  
FFFFFFFFFFFFFFFFFFFFFFFFFFFFFFFFFFFFFFFFFFFFFFFFFFFFFFFFFFFFFFFFFFFFFFFF:FFFF:FF:FF:FFFFFFFF

@A00721:190:HGJW7DSXY:4:2363:3007:33442\_1:N:0:TCTGCAAG+GCTGCACT  
CAGACGTGTGCTCTTCGATCTCCCAAATCTAGATCTGCACAGAAGAAGGCTGAAGGTCGTTACCGGA  
CGACCACTCAAAGGAAACGGGCTGTTGCCAGAGGAAAGCAGCGACCACCGAGGTCGCTCGTAACATT  
GAC

+  
FFFFFFFFFFFFFFFFFFFFFFFFFFFFFFFFFFFFFFFFFFFFFFFFFFFFFFFFFFFFFFFFFFFFFFFFFFFFFFFF  
FFFFFFFFFFFFFFFFFFFFFFFFFFFFFFFFFFFFFFFFFFFFFFFFFFFFFFFFFFFFFFFFFFFFFFFFFFFFFFFF  
FFF  
@A00721:190:HGJW7DSXY:4:1661:10691:5760\_2:N:0:TCTGCAAG+GCTGCACT  
CAAAAGTCACATTCACCACTCCCATGCCAATCAATGATGTGACAATACAGTTCTGCCATTTCAAGAGA  
GGTCAATACGTCGTGGGAGGTACAGAAGCCTTACCCTCCGCTGGCACG  
+  
::FFFF,FFFF,FFFFF,FFFF:,F:FF,FFF,,FF,:F:,F:FFFF::,,F,F:F,FFFF,,  
FF,FFFF,,:F,FFF,F,,FFF,,FF,:F,F,F,F,FFF,F:,FFFF  
@A00721:190:HGJW7DSXY:4:2644:15980:15671\_1:N:0:TCTGCAAG+GCTGCACT  
AATAGTTCTTCTGACCAGAATGAAAAGGGGTTTACCAGGGTAGTCTCTAAGTCTACCAGGAAGAGGGG  
AAATGTCCCCAAAACCTGAGAAGAATAAAGGGAAAGGTCCATCAGGACCTAAGAAGGGGAAATTACCCC  
TAA  
+  
FFFFFFFFFFFFFFFFFFFFFFFFFFFFFFFFFFFFFFFFFFFFFFFFFFFFFFFFFFFFFFFFFFFFFFFFFFFFFFFF  
FFFFFFFFFFFFFFFFFFFFFFFFFFFFFFFFFFFFFFFFFFFFFFFFFFFFFFFFFFFFFFFFFFFFFFFFFFFFFFFF  
FFF  
@A00721:190:HGJW7DSXY:4:2409:20763:25833\_2:N:0:TCTGCAAG+GCTGCACT  
CTACGAAGTCGCTGAAGCGGCTTGGGTCATTAAGGGTAGCTGTAAAGTTGCGCCTGCCGACCCCATC  
TTTGAGACCAAGACTCTCTACAGTAGGTTCTGCTACTATGAGCAAT  
+  
FFFFFFFFFFFFFFFFFFFFFFFFFFFFFFFFFFFFFFFFFFFFFFFFFFFFFFFFFFFFFFFFFFFFFFFFFFFFFFFF  
FFFFFFFFFFFFFFFFFFFFFFFFFFFFFFFFFFFFFFFFFFFFFFFFFFFFFFFFFFFFFFFFFFFFFFFFFFFFFFFF  
@A00721:190:HGJW7DSXY:4:1273:1443:29919\_1:N:0:TCTGCAAG+GCTGCACT  
GGACTTTTGGCTACTGGCGACAACTGAGAGCAGTCGCTGGGGAAGAGAATTGCGTGGGTTGAAGGC  
CGACGCTTCGAGCTTGAGTGTGACGAGGCCGGTGACGTTTTTGTCAACGGCGTTTGGAGGATTTATC  
CGC  
+  
FFFF:FFFFFFFFFFFFFFFFFFFFFFFFFFFFFFFFFFFFFFFFFFFFFFFFFFFFFFFFFFFFFFFFFFFFFFFF  
FFFFFFFFFFFFFFFFFFFFFFFFFFFFFFFFFFFFFFFFFFFFFFFFFFFFFFFFFFFFFFFFFFFFFFFFFFFFFFFF  
FFF  
@A00721:190:HGJW7DSXY:4:1607:27588:17174\_2:N:0:TCTGCAAG+GCTGCACT  
GCGAAGATCCCCTATGGAGTCTTGAAGGACTTAGGTTGGCATATTTATGCCGACGATAATAAGCATGT  
CACCCTTAAGCACCGAGGTAAGCTCGGGACTTACAAGAGAGAGTGTGA  
+  
FFFFFFFFFFFFFFFF:FFFFFFF,FFFFFFFFFFFFFFFFFFFFFFFFFFFFFFFFFFFFFFFFFFFFFFFFFFFF  
FFFFFFFFFFFFFFFFFFFFFFFF:FFFFFFF:FFFFFFFFFFFFFFFFFFFFFFFFFFFFFFFFFFFFFFFFFFFF  
@A00721:190:HGJW7DSXY:4:1373:20844:33583\_1:N:0:TCTGCAAG+GCTGCACT  
TTTCCTCCGTCATTGGGGATTTGATGTGAGAAGGTGGAAGGTGTCAAGGGTCTTCTTCATGCTGATC  
TTTCAGGACCTAATCACATCATGATTGATAGTTACGGCTCGTATCGAGTTGGAGGGAGGAAGTTCTCC  
GAA  
+  
F:FFFFFFFFFFFFFFFFFFFFFFFFFFFFFFFFFFFFFFFFFFFFFFFFFFFFFFFFFFFFFFFFFFFFFFFFFFFF  
FFFFFFFFFFFFFFFFFFFFFFFF:FFFFFFFFFFFFFFFFFFFFFFFFFFFFFFFFFFFFFFFFFFFFFFFFFFFF  
FFF  
@A00721:190:HGJW7DSXY:4:1619:7654:25426\_2:N:0:TCTGCAAG+GCTGCACT  
GGAAGGCTCTAGAGAAGATCTCACCACTGGAGAAGGCAAGTGGAGAGTCCAGAAGTTGATGAAGAAG  
GATTATTTGAAGCAGGGGTTACCACTTCCTAAGGTGGATGAGGGAGGT  
+  
FFFFFFFFFFFFFFFFFFFFFFFFFFFFFFFFFFFFFFFFFFFFFFFFFFFFFFFFFFFFFFFFFFFFFFFFFFFFFFFF  
FF,F:FFFFFFFFFFFFFFFFFFFFFFFFFFFFFFFFFFFFFFFFFFFFFFFFFFFFFFFFFFFFFFFFFFFFFFFF  
@A00721:190:HGJW7DSXY:4:1245:8693:34616\_1:N:0:TCTGCAAG+GCTGCACT  
TGTTCTTCCGGGAAGTTGTGGGATTTAACTTTGACTCAACTACTCCGATCAGATCCGGATGGTTTGA





$+$ 

@

+

@

+

©

 $+$ 

@

+

@

+

©

+

```

FFFFFFFFFFFFFFFFFFFFFFFF:FFFFFFFFFFFF:FFFFFFFFFFFFFFFFFFFF:FFFFFFFF:F
FFFFFFFFFFFFFFFFFFFFFFFF:FF,FFFFFFFFFFFFFFFFFFFFFFFFFFFFFFFFFFFFFFFFFFFF
FFF

```

@A00721:190:HGJW7DSXY:4:2652:4824:26318\_1:N:0:TCTGCAAG+GCTGCACT  
GATGATTTTATCACTTTATTATGACCTTGGAAGTTTTTCGGCTGTGGTTGTCGCTGGGGACGATTCCA  
TTCTGTTTTCAAAGACTCCAATAACTGATCATTCTGATCATATGATTTTGGACAATGGTTTCAAGCG  
AAA

+

FFFFFFFFFFFFFF,FFFFFFFFFFFFFFFFFFFFFFFFFFFFFFFFFFFFFFFFFFFFFFFFFFFFFFFF  
FFFFFFFFFFFFFFFFFFFFFFFFFFFFFFFFFFFFFFFFFFFFFFFFFFFFFFFFFFFFFFFFFFFFFFFF  
FFF

@A00721:190:HGJW7DSXY:4:1314:29008:23484\_2:N:0:TCTGCAAG+GCTGCACT  
GAGAGGTTTATCCTGATGTGGAGGGAGTTCTTGAAGCATCCCGACCTTTCCTTGTGAAAATTTTGATG  
CGGTTTCATAAGATTATCAGTAATCCTGATTCTACTACGGATTCATGG

+

FFFFFFFFFFFFFFFFFFFFFFFFFFFFFFFFFFFFFFFFFFFFFFFFFFFFFFFFFFFFFFFFFFFFFFFF  
FFF:FFFFFFFFFFFFFFFFFFFFFFFFFFFFFFFFFFFFFFFFFFFFFFFFFFFFFFFFFFFFFFFF

@A00721:190:HGJW7DSXY:4:2412:27597:3349\_2:N:0:TCTGCAAG+GCTGCACT  
TCTTCCGAAAGGCGAACTTTGGGAATTTGAAGCTCAGGGTGAAGCACAACGTTTGACCGTGACGAACT  
GTGGTGTCTTGATCTACGTTACGGATATACTCTCCTTGAGTTCATC

+

FFFFFFFFFFFFFFFFFFFFFFFFFFFFFFFFFFFFFFFFFFFFFFFFFFFFFFFFFFFFFFFFFFFFFFFF  
F:FFFFFFFFFFFFFFFFFFFFFFFFFFFFFFFFFFFFFFFFFFFFFFFFFFFFFFFFFFFFFFFF

@A00721:190:HGJW7DSXY:4:1429:29134:34100\_1:N:0:TCTGCAAG+GCTGCACT  
AGGGGTTTTCGAATAGTGATAGCCACCCGCCTTACAGAGGGGCAGCAGCATGACCATAATTGGTATTG  
ACTTTGGTACCACCTTTTCTACTGTCTGTCTCGCCTCTTCAATGAAGTTTTAATGCTTAACAACAAT  
GAT

+

FFFFFFFFFFFFFFFFFFFFFFFFFFFFFFFFFFFFFFFFFFFFFFFFFFFFFFFFFFFFFFFFFFFFFFFF  
FFFFFFFFFFFFFFFFFFFFFFFFFFFFFFFFFFFFFFFFFFFFFFFFFFFFFFFFFFFFFFFFFFFFFFFF  
FFF

@A00721:190:HGJW7DSXY:4:2153:23149:15843\_1:N:0:TCTGCAAG+GCTGCACT  
TCTTCCGATCTTGATGACACTATTGTTTATGGATATGATGCTATTACTCATGATTACGGTCAGGG  
AGGATTCTCAGTTTACAAGGACCTTAAGCGATGGATCGGGGTTAATTCTAAACATTACCCGAAAGAC  
GTG

+

FFFFFFFFFFFFFFFFFFFFFFFFFFFFFFFFFFFFFFFFFFFFFFFFFFFFFFFFFFFFFFFFFFFFFFFF  
FFFFFFFFFFFFFFFFFFFFFFFFFFFFFFFFFFFFFFFFFFFFFFFFFFFFFFFFFFFFFFFFFFFFFFFF  
FFF

@A00721:190:HGJW7DSXY:4:1433:14018:31657\_1:N:0:TCTGCAAG+GCTGCACT  
GACTGGAGTTCAGACGTGTGCTCTTCCGATCTGGAACGTACCGATTACCTGTCTTTCATATTATGAA  
TGAACCTTCGCCGCTCTCTTGCTTCGATGTTGGATGTCAAGAAGGGTTCAGAATGGGATTCCTACG  
TAG

+

FFFFFFFFFFFFFFFFFFFFFFFFFFFFFFFFFFFFFFFFFFFFFFFFFFFFFFFFFFFFFFFFFFFFFFFF  
FFFFFFFFFFFFFFFFFFFFFFFFFFFFFFFFFFFFFFFFFFFFFFFFFFFFFFFFFFFFFFFFFFFFFFFF  
FFF

@A00721:190:HGJW7DSXY:4:2362:17336:30733\_2:N:0:TCTGCAAG+GCTGCACT  
GGGTAATTACACCTAAACGAGCTCGATCTGCCATCGCTGAAGGATGTGCACTCTTTTCTGCTACTTTA  
ACGGAGCGTAGTGTACTCTTCGTCGATTGTATCAACAGTAACATTACT

+

FFFFFFFFFFFFFFFFFFFFFFFFFFFFFFFFFFFFFFFFFFFFFFFFFFFFFFFFFFFFFFFFFFFFFFFF  
FFFFFFFFFFFFFFFFFFFFFFFFFFFFFFFFFFFFFFFFFFFFFFFFFFFFFFFFFFFFFFFFFFFFFFFF

@A00721:190:HGJW7DSXY:4:2401:11776:7795\_2:N:0:TCTGCAAG+GCTGCACT  
CGGTACAATCTTACTTGGAACGAAGGCGACCTGTTCCGGAGTTTTTACGGGATCCGGAATGTTCTGTC  
TATATTAGGTGAAGCGAAATACGATTTCAACGTCAACGTTACCGAG

+

@A00721:190:HGJW7DSXY:4:2368:10990:15922\_1:N:0:TCTGCAAG+GCTGCACT  
GGAGGCAGTCTTCTGATCGTAAGAAGTTTATAAGGAACATATCCATTTGTTGTAATAGGGTCATCAAC  
TTAGAACTCGAAACTCTAAGTGGTAATACTGTCTTCCAAAGCTTACCTGTATCTTCAATGAAATTGGA  
CTC

@A00721:190:HGJW7DSXY:4:2523:23990:6746\_1:N:0:TCTGCAAG+GCTGCACT  
TTTCTACGATACAAATGATAACTTCTAATTTACGTTTGCTACTCAGAGCTGGTCTCTCAGCAAAGG  
GATGCATGGTGTTATCTCCTCAGGAGTCCCGGCATTTGATAATAATGACGAGACTTTCGTCATAATCG  
CTG

@A00721:190:HGJW7DSXY:4:2424:21332:8375\_2:N:0:TCTGCAAG+GCTGCACT  
CGTGTCTGAGCCTCGACCCGATTATATGGTATTAACCTTATAAAGGTGAGGAGACCATTTTCTTGCTGAA  
ATTTATAGAAGATTATTTTGACAGAATCAATAAGAATCATCGATTCTC

@A00721:190:HGJW7DSXY:4:1661:23167:14309\_1:N:0:TCTGCAAG+GCTGCACT  
AGTCAACACTAGTTCGAGTGCTGCTTTGGATTACGATGACGTGAGAATAGGTGAAGGGATAGTTTTTA  
CCTCGACCACATTAAGGCGGCGGCGACTAATCTTAAAGCTTCACCCAAAATGAAGGACACTTCGAAAC  
TGA

@A00721:190:HGJW7DSXY:4:1421:19804:28745\_2:N:0:TCTGCAAG+GCTGCACT  
ATACAACCTCTAGCCTTCAAGTGGGGTATGCCTGCGGAATACGCTTGCTATTACACAGATTGGTTCGAA  
CCCGTTGATGCTATGTCAGAAGAAGCTATTCAAGCTTGTCGTTTAAAG

@A00721:190:HGJW7DSXY:4:1212:24216:13401\_2:N:0:TCTGCAAG+GCTGCACT  
ACAAGCCCAGACTCAAGGAGTCCAATCAAAGGTTTTGAATTTAGCTCAACTGGGGAGACGTGCTTAA  
TGGGTGATAAAAATTATTTAGAGATCTTTTCTACTTACAAAGGACAAT

@A00721:190:HGJW7DSXY:4:1462:27172:33865\_1:N:0:TCTGCAAG+GCTGCACT  
TTTTGTTACCAAATTCTTGGCTTTCAACGAAGTCTCTGATTTTATTAATCATTACTTTAACGATCTCT  
CGGTCATTTACTCTGTACTTGATCTACGTCGTTTAACTGTGCGGAACAACCTTTACTTAGAATGACTCT  
ATC

@A00721:190:HGJW7DSXY:4:1677:26738:23876\_2:N:0:TCTGCAAG+GCTGCACT  
ACGAAAACCAACTCTTCGTTACGAGACCTGATGGTAGAATAGATTTAGTCTCTACACCCATCTCAACG

+

@A00721:190:HGJW7DSXY:4:1272:23249:36213\_1:N:0:TCTGCAAG+GCTGCACT  
AAATGAGGTCAAAGCTCTATTTATTAACGAAGCTATTATCCGATTCTTCGAGGGTATCACTACCACTG  
ATCTGCCGACTTTAGTCAAGGAACCTCAATTCCTTCGATGTTTATATTTTTCTATAAGGGAAAATAGC  
AAT

+

@A00721:190:HGJW7DSXY:4:2610:12753:26209\_2:N:0:TCTGCAAG+GCTGCACT  
CAAATTTTAGAACTTTATTTCAAGACTCTCTCCGATCACCTTGGTGTGATCTCCCGGAGGATCTTTTC  
AATAAGATGTATGATGATAATCTACTATTTTTAAATAGTGATATTCAG

+

@A00721:190:HGJW7DSXY:4:2621:22092:4116\_1:N:0:TCTGCAAG+GCTGCACT  
ATCAAAGATTTGGCTTGGTCTATTTACCGCAAAAAGTTGAAGAGGTCTATGATATTTATTTTACTTA  
TACTTTAAATAGCACCGATTATAACTTGACTGTTGATAATTACAATAGCTCTTTCTCAGAAGATTAGA  
GAA

+

@A00721:190:HGJW7DSXY:4:2625:31593:18818\_1:N:0:TCTGCAAG+GCTGCACT  
GATTTACTTTTACCGTTAGAACTGAAAAAGATTCTTTTCGAAAAGAAACCTATAAGTTACAAACGATT  
CTTCGACTATATTAAAGAAATAAAAATACTTCAAGTACCTGAACTTTACATTTTTAATGGTATGGTAT  
AAT

+

@A00721:190:HGJW7DSXY:4:1172:13856:34507\_1:N:0:TCTGCAAG+GCTGCACT  
GAGAGTGTATTCCTTAATATTCTAGTAACCGCTATGTGGGCATTACTAGGATTTATCACACTCCTAAA  
TTTGATAGCAATTTATGTTTTAAATGCTAGGAAAATTTAGAAAACTCCATTGTATAGTTCAAGGAG  
TAC

+

@A00721:190:HGJW7DSXY:4:2451:1859:29011\_2:N:0:TCTGCAAG+GCTGCACT  
AGCTTTAGTATTATTTACTATCGCCTTTATTGAAATTGTATAAGAGTTAATTGCTTACACAAAAGTG  
ACGCGCGAAGGAATCTTAATTGATTGAAGCTAGGCGTTGGGAGAATG

+

@A00721:190:HGJW7DSXY:4:1203:3685:17112\_2:N:0:TCTGCAAG+GCTGCACT  
CGCTGTGCAGAATAACCTTCCCAAATCTAGATCTGCACAGAAGAAGGCTGAAGGTCGTTACCGGACGA  
CCACTCAAAGGAAACGGGCTGTTGCCAGAGGAAAGCAGCGACCAACCG

+

```
FFFFFFFFFFFFFFFFFFFFFFFFFFFFFFFFFFFFFFFFFFFFFFFFFFFFFFFFFFFFFFFFFFFFFFF,FFF  
FF,FFFFFFFFFFFFFFFFFFFFFFFFFFFF:FFFFFFFFFFFFFFFFFFFFFFFF
```

@A00721:190:HGJW7DSXY:4:1102:8838:2268\_1:N:0:TCTGCAAG+GCTGCACT  
AAAAGTCACATTCACTCATGCCAATCAATGATGTGACTATACAGTTCGGCCATTTCAAGAGTG  
GTCAATACGTCGTGGGAGGTACTGAAGCCTTCCCCTCCGCTGGCACGAAGAACACTCCCAAGCCAATC  
AAT

+

FFFFFFFF:FFFFFFFFFFFFFFFFFFFFFFFFFFFFFFFFFFFFFFFFFFFFFFFFFFFFFFFFFFFF  
FFFFFFFFFFFFFFFFFFFFFFFFFFFFFFFFFFFFFFFFFFFFFFFFFFFFFFFFFFFFFFFFFFFF  
FFF

@A00721:190:HGJW7DSXY:4:1523:23068:16485\_1:N:0:TCTGCAAG+GCTGCACT  
AATGAAAAGGGGTTTACCAGGGTAGTCTCTAAGTCTACCAGGAAGAGGGGAAATGTCCCCAAACTGA  
GAAGAATAAAGGGAAAGGTCCATCAGGACCTAAGAAGGGGAAATTACCCCTAATTCTGAAGGAAGATC  
TCC

+

FFFFFFFFFFFFFFFFFFFFFFFFFFFFFFFFFFFFFFFFFFFFFFFFFFFFFFFFFFFFFFFFFFFF  
FFFFFFFFFFFFFFFFFFFFFFFFFFFFFFFFFFFFFFFFFFFFFFFFFFFFFFFFFFFFFFFFFFFF  
FFF

@A00721:190:HGJW7DSXY:4:2542:7581:36323\_2:N:0:TCTGCAAG+GCTGCACT  
CTACGAAGTCGCTGAAGGCGGCTTGGGTCATTAAGGGTAGCTGTAAAGTTGCGCCTGCCGACCCCATC  
TTTGAGACCAAGACTCTCTACAGTAGGTCGTGCCTACTATGAGCAAT

+

FFFFFFFFFFFFFFFFFFFFFFFFFFFFFFFFFFFFFFFFFFFFFFFFFFFFFFFFFFFFFFFFFFFF  
F,FFFFFFFFFFFFFFFFFFFFFFFFFFFFFFFFFFFFFFFFFFFFFFFFFFFFFFFFFFFFFFFF  
F,FFFFFFFFFFFFFFFFFFFFFFFFFFFFFFFFFFFFFFFFFFFFFFFFFFFFFFFFFFFFFFFF

@A00721:190:HGJW7DSXY:4:1315:10592:29888\_1:N:0:TCTGCAAG+GCTGCACT  
GGACTTTTGGCTACTGGCGACAACTGAGAGCAGTCGCTGGGGAAAGAGAATTGCGTGGGTTGAAGGC  
CGACGCTTCGAGCTTGAGTGTGACGAGGCCGGTGACGTTTTTGTCAACGGCGTTTGGAGGATTTTATC  
CGC

+

FF:FFFFFFFF:FFFFFF:,FFFFFFFFFFFFFFFFFFFFFFFFFFFFFFFFFFFFFFFFFFFFFFFF  
FFFFFFFF:FFFFFFFFFFFFFFFFFFFFFFFFFFFFFFFFFFFFFFFFFFFFFFFFFFFFFFFFFFFF  
FFF

@A00721:190:HGJW7DSXY:4:2125:25292:16892\_2:N:0:TCTGCAAG+GCTGCACT  
GCGAAGATCCCCTATGGAGTCTTGAAGGACTTAGGTTGGCATATTTATGCCGACGATAATAAGCATGT  
CACCCCTAAGCACCGAGGTAAGCTCGGGACTTACAAGAGAGAGTGTGA

+

FFFFFFFFFFFFFFFFFFFFFFFFFFFFFFFFFFFFFFFFFFFFFFFFFFFFFFFFFFFFFFFFFFFF  
FFFFFFFFFFFFFFFFFFFFFFFFFFFFFFFFFFFFFFFFFFFFFFFFFFFFFFFFFFFFFFFFFFFF

@A00721:190:HGJW7DSXY:4:1377:19976:26287\_1:N:0:TCTGCAAG+GCTGCACT  
TTTCTCCGTCATTGGGGATTTGATGTGAGAAGGTGGAAGGTGTCAAGGGTCTTCTTCATGCTGATC  
TTACAGGACCTAATCACATCATGATTGATAGTTACGGCTCGTATCGAGTTGGAGGGAGGAAGTTCTCC  
GAA

+

FFFFFFFFFFFFFFFFFFFFFFFFFFFFFFFFFFFFFFFFFFFFFFFFFFFFFFFFFFFFFFFFFFFF  
FF,FFFFFFFFFFFFFFFFFFFFFFFFFFFFFFFFFFFFFFFFFFFFFFFFFFFFFFFFFFFFFFFF  
FFF

@A00721:190:HGJW7DSXY:4:1663:29921:2487\_2:N:0:TCTGCAAG+GCTGCACT  
GGAAGGCTCTAGAGAAGATCTCACCACTGGAGAAGGCAAGTGGAGAGTCCAGAAGTTGATGAAGAAG  
GATTATTTGAAGCAGGGGTTACCACTTCCTAAGGTGGATGAGGGAGGT

+

FFFFFFFFFFFFFFFFFFFFFFFFFFFFFFFFFFFFFFFFFFFFFFFFFFFFFFFFFFFFFFFFFFFF  
FFFFFFFFFFFFFFFFFFFFFFFFFFFFFFFFFFFFFFFFFFFFFFFFFFFFFFFFFFFFFFFFFFFF

@A00721:190:HGJW7DSXY:4:1347:17137:5776\_1:N:0:TCTGCAAG+GCTGCACT  
TGGTCATTCTGGAAGTTGTGGGATTTAAGTTTACTCAACTAATCCGATCAGATCCGGATGGTTTGA  
TTGGTATGGACTACTCGACTTTTGATCTGGTGTGTCTAGGGTCATGGCAGATACTACCGATATGGTG  
AAA

+  
FF,F,,:F:F,F:F,,:FFF:FFFFFFFF,,FFF,F,:,,,:F,,F,F:F,F,:F:FFFFFFFF  
FFF:F:FF,FFF,FF:FF,FFFF:FFFFFF,FFFF,FFFF,FFFF,:FF:FF::FF,FFF,,,F,  
:,F

@A00721:190:HGJW7DSXY:4:1553:25943:8719\_1:N:0:TCTGCAAG+GCTGCACT  
CGTGTGCTCTTCCGATCTTATCGTTGTCGTACCTTACAAGTTGAGGAGACTTTACAGCGCTTATTG  
TCGCGCAGTTTCCAGAATTGCGGTTGAAGTTCACCCATTCTATCTTGAATGCTCACGCCGTCGCAGCC  
ATA

+  
FFFFFFFFF:FFFF:FFFFFFFFFFFFFFFFFFFFFFFFFFFFFFFFFFFFFFFFFFFFFFFF  
FFFFFFFFF:FFFFFFFFFFFFFFFFFFFFFFFFFFFFFFFFFFFFFFFFFFFFFFFFFFFFFFFF  
FFF

@A00721:190:HGJW7DSXY:4:1540:7853:29058\_1:N:0:TCTGCAAG+GCTGCACT  
TGCATCGAGGTATACGTCTAGGAACATTGATTGGGAACGTACCTACTCACGAGACGTCATGAAAGCTA  
TCGGAGGGAAGCAAAATGTTTCGTTCTGTTACAAGAACGCTTTGGATTGTGACCATAAAGCCTCAGTT  
GCG

+  
F:FFFFFFFFFFFFFFFFFFFFFFFFFFFFFFFFFFFFFFFFFFFFFFFFFFFFFFFFF:,::FFFFFFFFFFFFFFFFFFFFFFFF  
F:FFFFFFF,FFFFFFFFFFFFFFFFFFFFF,F::FFFFFFF:FFFFFFFFFFFFF,F,FFFF:F,FFF  
FFF

@A00721:190:HGJW7DSXY:4:1406:30599:18129\_2:N:0:TCTGCAAG+GCTGCACT  
CTTCGTAACAACAGTGCGAGGATTGTCATCTCGGGGAAAGTGATTCACCAAGATGTTTCATATAGATAC  
GAGATACCTAGAGAAGGTCGCAGCGATCTTACTCGTTATCGGAGCTAA

+  
FFFFFFFFFFFFFFFFFFFFFFFFFFFFFFFFFFFFFFFFFFFFFFFFFFFFFFFFFFFFFFFF  
FFFFFFFFFFFFFFFFFFFFFFFFFFFFFFFFFFFFFFFFFFFFFFFFFFFFFFFFFFFF

@A00721:190:HGJW7DSXY:4:2259:10682:22122\_1:N:0:TCTGCAAG+GCTGCACT  
AAAAGATTACAGGACGCCTACGGTGACTTTATGGACAAGATGCAAGTTCTTGGGAAATACTTGTTCCTC  
TTTTAGGTTTAGTAGGTGATCTTGACGTCGATTCTTTGTATAGGGAGTGTGAGAAGACAACGAATCT  
TGA

+  
FFFFF,FFFF:FFFF:FF::FF,FFFFFFFFF,:FFFF,FFF:FFFF:F:FFFF:FFFFFFFF  
FFFFFFFFFFFFFFFFFFFFF:FFFFFFFF:FFF:FFFFFFFFFFFFFFFFFFFFFFFFFFFFF  
FFF

@A00721:190:HGJW7DSXY:4:2678:5113:23657\_2:N:0:TCTGCAAG+GCTGCACT  
TTGTTCTTGAAAACCAAGTTAAGAAGGAGGCTGATCATGGAGTCTTTGTACCTTCTGTCAAACCTCGA  
GGTTCAGCTACGAGAGGTGATCCCGGATGTGGATTGAAGGCTGGCTCT

+  
FFFFFFFFFFFFFFF:FFFFFFFFFFFFFFFFFFFFFFFFFFFFFFFFFFFFF,F:FFFFFFF,FFFFFFFFF,FFFF  
FFFFFFFFFFFFFFFFFFFFF:FFFFFFFFF:F,FFFFFFFFFFFFFFFFFFFF

@A00721:190:HGJW7DSXY:4:2328:12274:19492\_1:N:0:TCTGCAAG+GCTGCACT  
GTTGAGAAGTGTGCTTTACAAGGAGTTAGACTCTTCTTCAAGTTTTTAGATCTTCTTGATAATCTTAA  
AGAAAAATTTTCGAATAAACTAATGAGAGGTATAGGCTTAGTCAAGTCTGTACTTACATTCTTTACGC  
CAG

+  
FFFFFFFFFFFFFFF:FFFFFFFFFFFFFFFFFFFFFFFFFFFFFFFFFFFFFFFFFFFFFFFF  
FFFFFFFFFFFFFFFFFFFFFFFFFFFFFFFFFFFFFFFFFFFFFFFFFFFFFFFFFFFFF  
F:F

@A00721:190:HGJW7DSXY:4:2102:31928:29888\_2:N:0:TCTGCAAG+GCTGCACT  
AGATTCAATCTGGCATCACTGAACGTCTACAACGAGTTAGGGAGTGGCTAGGTTTTAAAGATCCTTT  
GCACAAGCAATACCTTCCACTGAGTTCATCACCCAGAGTTTCGACGTC

+  
FFFFFFFFFFFFFFFFFFFFF:FFFFFFFFFFFFF:FFFFFFFFFFFFFFFFFFFFFFFFFFFFF::FFFFF  
FFFFFFFFFFFFF,FFFFFFFFFFFFFFFFFFFFF:FFFFFFFFFFFFFFFFFFFF

@A00721:190:HGJW7DSXY:4:1169:17110:4382\_1:N:0:TCTGCAAG+GCTGCACT  
CTTTTACCTTTTGGAGGTCCAGGAACCTTTACTCCTAGTGTCTTTTCTAGAGTCCAAGGACGTTTCCG  
TCGGAGGATGACAGGTGGGAGACCGCTCAATAACACTCTATTGAATCCCTTTTCCACGATGAAAGCTC  
TTT

+

FFFFFFFFFFFFFFFFFFFFFFFFFFFFFFFFFFFFFFFFFFFFFFFFFFFFFFFFFFFFFFFFFFFFFFFF,FFFF  
FFFFFFFFFFFFFFFFFFFFFFFFFFFFFFFFFFFFFFFFFFFFFFFFFFFFFFFFFFFFFFFFFFFFFFFF  
FFF

@A00721:190:HGJW7DSXY:4:2342:20808:15483\_1:N:0:TCTGCAAG+GCTGCACT  
GCCACTTCTAATTTTAGGAAACGTCGCGAAAAGAAAGTTCATGAGGATGTCTTGTCGAAAAATATCG  
CCGGAACTTCTAATAGAGGATCCTGATGACATTATTTCAACGGATACCGATCTCAGTTCTACCACAG  
AAA

+

F:FFFFFFFFFFFFFFFFFFFFFFFFFFFFFFFFFFFFFFFFFFFFFFFFFFFFFFFFFFFFFFFFFFFF:FFFFFFFF  
FFFFFFFFFFFFFFFFFFFFFFFFFFFFFFFFFFFFFFFFFFFFFFFFFFFFFFFFFFFFFFFFFFFFFFFF  
FFF

@A00721:190:HGJW7DSXY:4:2572:1542:23015\_2:N:0:TCTGCAAG+GCTGCACT  
ACTGTCTCCACTGATTCGGAATTAGAGAAAGACGACCTTCTGTGGGGACTGAGACCTCTGAATTTTC  
AGGGTGCCCTGATGAGGACGTTGAAAGGGATAATTTCAACTCTGAGAC

+

FFFFFFFFFFFFFFFFFFFF:FFFFFFFFFFFFFFFFFFFF:FFFFFF:FFFFFFFFFFFFFFFFFFFFFFFFFFFF  
FFFFFFFFFFFFFFFFFFFFFFFFFFFFFFFFFFFFFFFFFFFFFFFFFFFFFFFFFFFFFFFFFFFF

@A00721:190:HGJW7DSXY:4:1176:26937:33395\_2:N:0:TCTGCAAG+GCTGCACT  
AGAACAGCTGATTCTTATTGCATGAACGTCGCTGAGGTCAAACCTGTGGACGTTCTTTTCATCGACGA  
ATTATTCATGATTCACGCTGGTCAGACCCTTTTTCTTACACATCTACT

+

FFFFFFFFFFFFFFFFFFFFFFFFFFFFFFFFFFFFFFFFFFFFFFFFFFFFFFFFFFFFFFFFFFFFFFFFFFFF  
FFFFFFFFFFFFFFFFFFFFFFFFFFFFFFFFFFFFFFFFFFFFFFFFFFFFFFFFFFFFFFFFFFFF

@A00721:190:HGJW7DSXY:4:1226:15121:14058\_2:N:0:TCTGCAAG+GCTGCACT  
CTACTTCAACATCAACGACATCATTCTTGATGAGTGTGCTTCTTATCGAAGTCTCAGTTATCGCTGCC  
CGGCCGACGTTTGTGCGGAACTCTCAGAGGTTTACGGCAGAAAAATT

+

FFFFFFFFFFFFFFFFFFFF:FFFFFFFFFFFFFFFFFFFFFFFFFFFFFFFFFFFFFFFFFFFFFFFFFFFFFFFFFFFF:FF  
FFFFFFFFFFFFFFFFFFFFFFFFFFFF:FFFFFFFFFFFFFFFFFFFFFFFFFFFFFFFFFFFF

@A00721:190:HGJW7DSXY:4:2239:27037:20917\_1:N:0:TCTGCAAG+GCTGCACT  
ACCCCTTATCTCGAGGCTATCGAGGACGATGAGTATCTTGAAGTTGTTGACGACAAGCCTCAAGAGGG  
TAGAGGACCACCTGGATCTTCTACTGTCTCTGCCTTCCAAGATTTCTTAGAAGAGGTTATTCCTGGAA  
CCA

+

F:F,FFFF,FFF:FF:FFFF:FFF,FFFFFFFF,FFFFFFFFFFFFFFFFFFFF:FFFFFF,,F::F  
FFFFFFFFF::FFFFFFFF:FFFFFF:FFFFFFFF::FFF,F:F:FFFFFFFFFFFF,FF,FFFF,F  
FFF

@A00721:190:HGJW7DSXY:4:1272:3269:25410\_1:N:0:TCTGCAAG+GCTGCACT  
GGTAAGAAGCCCCTTGAGCCGCGTAGTCAGCGGTTTAGCTGTATCATCAGTCAGAGTATACCCGATA  
GGGTACCGAGTCTCCAAGAGAATATTTATTCTTATGAGGCTCGAACTTCAACGTTTTCAACACGGAA  
AGA

+

FFFFFFFFFFFFFFFFFFFFFFFFFFFFFFFFFFFF,F:FFFFFFFFFFFFFFFFFFFFFFFFFFFFFFFFFFFF  
FFFFFFFFFFFFFFFFFFFFFFFFFFFFFFFFFFFFFFFFFFFFFFFFFFFFFFFFFFFFFFFFFFFFFFFF  
FFF

@A00721:190:HGJW7DSXY:4:2670:24162:33880\_1:N:0:TCTGCAAG+GCTGCACT  
GATGATTTTATCACTTTATTATGACCTTGAAAGTTTTCGGCTGTGGTTGTCGCTGGGGACGATTCCA  
TTCTGTTTTCAAAGACTCCAATAACTGATCATTCTGATCATATGATTTTGGACAATGGTTTCAAGCG  
AAA



+  
:FFFFFFFFFFFFFFFFFFFFFFFFFFFFFFFFFFFFFFFFFFFFFFFFFFFFFFFFFFFFFFFFFFFFFFFF  
:FFFFFFFFFFFFFFFFFFFFFFFFFFFFFFFFFFFFFFFFFFFFFFFFFFFFFFFFFFFFFFFFFFFFFFFF  
FFF  
@A00721:190:HGJW7DSXY:4:2145:12509:24095\_2:N:0:TCTGCAAG+GCTGCACT  
GAGAGGTTTATCCTGATGTGGAGGGAGTTCTTGAAGCATCCCGACCTTTCCTTGTGAAAATTTTGATG  
CGGTTTCATAAGATTATCAGTAATCCTGATTCTACTACGGATTCATGG  
+  
FFFFFFFFFFFFFFFFFFFFFFFFFFFFFFFFFFFFFFFFFFFFFFFFFFFFFFFFFFFFFFFFFFFFFFFF  
FFFFFFFFFFFFFFFFFFFFFFFFFFFFFFFFFFFFFFFFFFFFFFFFFFFFFFFFFFFFFFFFFFFFFFFF  
@A00721:190:HGJW7DSXY:4:2416:25789:3881\_2:N:0:TCTGCAAG+GCTGCACT  
TCTTCCGAAAGGCGAACTTTGGGAATTTGAAGCTCAGGGTGAAGCACACGTTTGACCGTGACTAACT  
GTGGTGTCTTGATCTACGTTACGGATATACTCTCCTTGAGTTCATC  
+  
FFFFFF:FFFFFFFF:F:,F::F,FFFFFFFFFFFFFF,FFFFFF,,:FFF,FFFF:F,F,F,:F,F:FF  
:F,,:FFFFFFFFFFFFFF:FFFFFF,FFFFFF:FFF:FFFF,FFFFFF  
@A00721:190:HGJW7DSXY:4:1631:15058:11256\_1:N:0:TCTGCAAG+GCTGCACT  
AGGGGTTTTCGAATAGTGATAGCCACCCGCCTTACAGAGGGGCAGCAGCATGACCATAATTGGTATTG  
ACTTTGGTACCACCTTTTCTACTGTCTGTCTCGCCTCTTCAATGAAGTTTAAATGCTTAACAACAAT  
GAT  
+  
FFFFFFFFFFFFFFFFFFFFFFFFFFFFFF:FFFFFFFFFFFFFFFFFFFFFFFFFFFFFFFFFFFFFFFF  
FFFFFFFFFFFFFFFFFFFFFFFFFFFFFFFFFFFFFFFFFFFFFFFFFFFFFFFFFFFFFFFFFFFFFFFF  
FFF  
@A00721:190:HGJW7DSXY:4:1158:20726:21198\_2:N:0:TCTGCAAG+GCTGCACT  
TTTCTAATAATGATGACACTATTGTTTATGGATATGATGCTATTACTCATGATGGTTACGGTCAGGGA  
GGATTCTCAGTTTACAAGGACCTTAAGCGATTGATCGGGGTAAATTCT  
+  
FFFFFFFFFFFFFFFFFFFFFFFFFFFFFF:FFFF:FFFFFFFFFFFFFFFFFFFFFFFFFFFFFFFFFFFF  
FFFFFFFFFFFFFFFFFFFFFFFFFFFFFFFFFFFFFF:FFFFFFFFFFFFFFFFFFFFFF  
@A00721:190:HGJW7DSXY:4:1445:18647:20603\_1:N:0:TCTGCAAG+GCTGCACT  
GACTGGAGTTCAGACGTGTGCTCTTCCGATCTGGAACGTACCGGATTACCTGTCTTTCATATTATGAA  
TGAACCTTCGGCCGCTCTCTTTGCTTCGATGTTGGATGTCAAGAAGGGTTCAGAATGGGATTCCTACG  
TAG  
+  
FFFFFFFFFFFFFFFFFFFFFFFFFFFFFF:FFFFFFFFFFFFFFFFFFFFFFFFFFFFFFFFFFFFFFFF  
FFFFFFFFFFFFFFFFFFFFFFFFFFFFFFFFFFFFFFFFFFFFFFFFFFFFFFFFFFFFFFFFFFFFFFFF  
FFF  
@A00721:190:HGJW7DSXY:4:2474:28863:1689\_2:N:0:TCTGCAAG+GCTGCACT  
CGGTACAATCTTACTTGAACGAAGGCGACCTGTTCCGGAGTTTTTACGGGATCCGGAATGTTCTGTC  
TATATTAGGTGAAGCGAAATACGATTTTCAACGTCAACGTTACCGAG  
+  
FFFFFFFFFFFFFFFFFFFFFFFFFFFFFFFFFFFFFFFFFFFFFFFFFFFFFFFFFFFFFFFFFFFFFF:FFFFFFFF  
FFFFFFFFFFFFFFFFFFFFFFFFFFFFFFFFFFFFFFFFFFFFFFFFFFFFFFFFFFFFFFFFFFFFFF  
@A00721:190:HGJW7DSXY:4:2472:24903:19727\_1:N:0:TCTGCAAG+GCTGCACT  
ATCGTAAGAAGTTTATAAGGAACATATCCATTTGTTGTAATAGGGTCATCAACTTAGAACTCGAACT  
CTAAGTGGTAATACTGTCTTCCAAAGCTTACCTGTATCTTCAATGAAATTGGACTCTTCGATAGGGGA  
CAT  
+  
FFFFFFFFFFFFFFFFFFFFFFFFFFFFFF,FFFFFFFFFFFFFFFFFFFFFFFFFFFFFFFFFFFFFFFF  
FFFFFFFFFFFFFFFFFFFFFFFFFFFFFFFFFFFFFFFFFFFFFFFFFFFFFFFFFFFFFFFFFFFFFFFF  
FFF  
@A00721:190:HGJW7DSXY:4:2523:25003:7435\_1:N:0:TCTGCAAG+GCTGCACT  
TTTCTACGATACAAATGATAACTTCTAATTTACGTTTGCTACTCAGAGCTGGTCTCTCAGCAAAGG

GATGCATGGTGTATCTCCTCAGGAGTCCCGGCATTTGATAATAATGACGAGACTTTCGTCATAATCG  
CTG

+

FFFF,FFF:FFFFFFFFFFFF:FFF:FFFFFFFF,FFF,FFF:FFFFFFFFFFFFFFFFFF:FFFFFF  
:FFFFFFFFFFFFFFFFFFFF:FFFFFFFFFFFFFFFFFFFFFFFFFFFFFFFFFFFFFFFFFFFF  
FFF

@A00721:190:HGJW7DSXY:4:2424:21911:8469\_2:N:0:TCTGCAAG+GCTGCACT  
CGTGTGAGCCTCGACCCGATTATATGGTATTAACCTATAAAGGTGAGGAGACCATTTTCTTGCTGAA  
ATTTATAGAAGATTATTTTGACAGAATCAATAAGAATCATCGATTCTC

+

FFFFFFFF:FFFF:FFFFFFFFFFFF:FFFFFFFFFFFFFFFFFFFFFFFFFFFFFFFFFFFF  
FFFFFFFFFFFFFFFFFFFFFFFFFFFFFFFFFFFFFFFFFFFFFFFFFFFFFFFFFFFF

@A00721:190:HGJW7DSXY:4:2349:30526:16407\_1:N:0:TCTGCAAG+GCTGCACT  
AGTCAACACTAGTTCGAGTGCTGCTTTGGATTACGATGACGTGAGAATAGGTGAAGGGATAGTTTTTA  
CCTCGACCACATTAAGGCGGCGGCGACTAATCTTAAAGCTTCACCCAAAATGAAGGACACTTCGAAAC  
TGA

+

FFFFFFFFFFFFFFFFFFFFFFFFFFFFFFFFFFFFFFFFFFFFFFFFFFFFFFFFFFFF:FFFFFFFFFFFFFFFFFFFF  
FFFFFFFFFFFFFFFFFFFFFFFFFFFFFFFFFFFFFFFFFFFFFFFFFFFFFFFFFFFF:FFFFFFFFFFFFFFFFFFFF  
FFF

@A00721:190:HGJW7DSXY:4:1521:27127:32440\_2:N:0:TCTGCAAG+GCTGCACT  
ATACAACCTAGCCTTCAAGTGGGGTATGCCTGCGGAATACGCTTGCTATTACAGATTGGTTCGAA  
CCCGTTGATGCTATGTCAGAAGAAGCTATTCAAGCTTGTCGTTTAAAG

+

FF:FFFF:FFFF:FF:FFFFFFFF:FFFFFFFF,FFFFFF:FF:,FFFF,FF:FFFFFFFF,FF  
FFFFFFFF:FFF:FFFFFFFFFFFFFFFFFFFFFFFFFFFFFFFFFFFF:

@A00721:190:HGJW7DSXY:4:1341:17345:10802\_2:N:0:TCTGCAAG+GCTGCACT  
ACAAGCCAGACTCAAGGAGTCCAATCAAAGGTTTTGAATTTAGCTCAACTGGGGAGACGTGCTTAA  
TGGGTGATAAAAATTATTAGAGATCTTTCTACTTACAAAGGACAAT

+

:FFFF:FFFFFFFFFFFFFFFFFFFF,FFF:FFFFFFFF:FFF:FFFFFFFFFFFFFFFFFFFF:  
FFFFFFFFFFFF,FFFFFF:FF:FF:FFFFFFFF:FFFFFF:FF:FF

@A00721:190:HGJW7DSXY:4:1466:17372:10723\_1:N:0:TCTGCAAG+GCTGCACT  
TTTTGTTACCAAATTCTTGCTTTCAACGAAGTCTCTGATTTTATTAATCATTACTTTAACGATCTCT  
CGGTCATTTACTCTGTACTTGATCTACGTCGTTTAACTGTCGGAACAACCTTACTTAGAATGACTCT  
ATC

+

FFFFFFFFFFFF:FFFFFFFFFFFFFFFFFFFFFFFFFFFFFFFFFFFFFFFFFFFF:FFFFFF  
FFFFFF,FFFFFFFFFFFFFFFFFFFFFFFFFFFFFFFFFFFFFFFFFFFFFFFFFFFFFFFFFFFF  
FFF

@A00721:190:HGJW7DSXY:4:2108:28845:5228\_2:N:0:TCTGCAAG+GCTGCACT  
ACGAAAACCAACTCTTCGTTACGAGACCTGATGGTAGAATAGATTTAGTCTCTACACCCATCTCAACG  
AGGATAAAGCGAGTTTTCCGTCCTGAACGTAATACACGAAGAGATCAT

+

FFFFFFFFFFFFFFFFFFFFFFFFFFFF:FFFFFF:FFFFFFFFFFFFFFFFFFFFFFFFFFFFFFFFFFFF:FF  
FFFFFFFFFFFFFFFFFFFFFFFFFFFFFFFFFFFF:FFFFFFFFFFFF

@A00721:190:HGJW7DSXY:4:1361:22037:18145\_1:N:0:TCTGCAAG+GCTGCACT  
AAATGAGGTCAAAGCTCTATTTATTAACGAACCTATTATCCGATTCTTCGAGGGTATCACTACCACTG  
ATCTGCCGACTTTAGTCAAGGAACCTCAATTCCTTCGATGTTTATATTTTCTATAAGGGAAAATAGC  
AAT

+

FFFFF,FFFFFFFFFFFFFFFFFFFFFFFFFFFFFFFFFFFFFFFFFFFFFFFFFFFFFFFFFFFF  
FFFFFFFFFFFFFFFFFFFFFFFFFFFF:FFFFFFFFFFFFFFFFFFFF:FFFFF,FFFFFFFFFFFFF  
FFF

@A00721:190:HGJW7DSXY:4:1204:19696:10081\_2:N:0:TCTGCAAG+GCTGCACT  
AATTTTAGAACTTTATTTTCAGAACTCTCTCCGATCACCTTGGTGTGATCTCCCGAGGATCTTTTCAA  
TAAGATGTATGATGATAATCTACTATTTTAAATAGTGATATTCAGCG

+

FFFFFFFFFFFFFF:FFFFFFFFFFFFFFFFFFFFFFFFFFFFFFFFFFFFFFFFFFFFFFFFFFFFFFFFFFFFFFFF:FF,FFFF  
FFF:FFFFFFFFFFFFFF:FF:FFFFFFFFFFFFFF:FFFFFFFFFFFF:F

@A00721:190:HGJW7DSXY:4:2637:4363:35509\_1:N:0:TCTGCAAG+GCTGCACT  
ATCAAAGATTTGGCTTGGTCTATTTACCGCAAAAAGTTGGAAGAGGTCTATGATATTTATTTTACTTA  
TACTTTAAATAGCACCGATTATAACTTGACTGTTGATAATTACAATAGCTCTTCTCAGAAGATTAGA  
GAA

+

FFFFFFFFFFFFFFFFFFFFFFFFFFFFFFFFFFFFFFFFFFFFFFFFFFFFFFFFFFFFFFFFFFFFFFFFFFFFFFF  
FFFFFFFF:FFFFFFFFFFFFFFFF:FFFFFFFFFFFFFFFFFFFFFFFFFFFFFFFFFFFFFFFFFFFFFFFFFFFFF  
FFF

@A00721:190:HGJW7DSXY:4:2652:2564:10817\_1:N:0:TCTGCAAG+GCTGCACT  
GATTTACTTTTACCGTTAGAACTGAAAAAGATTCTTTTCGAAAAGAAACCTATAAGTTACAAACGATT  
CTTCGACTATATTAAAGAAATAAAAATACTTCAAGTACCTGAACTTTACATTTTAAATGGTATGGTAT  
AAT

+

FFFFFFFFFFFFFFFFFFFFFFFFFFFFFFFFFFFFFFFFFFFFFFFFFFFFFFFFFFFFFFFFFFFFFFFFFFFFFFF  
FFFFFFFFF:FFFFFF:FFF,FFFFFFFFFFFFFFFFFFFFFFFFFFFFFFFFFFFFFFFFFFFFFFFFFFFFFFFFF:FFFFF:F  
FFF

@A00721:190:HGJW7DSXY:4:1375:14832:8108\_1:N:0:TCTGCAAG+GCTGCACT  
GAGAGTGTATTCCTTAATATTCTAGTAACCGCTATGTGGGCATTACTAGGATTTATCACACTCCTAAA  
TTTGATAGCAATTTATGTTTTAAATGCTAGGAAAATTTTAGAAAACTCCATTGTATAGTTCAAGGAG  
TAC

+

FFFFFFFFFFFFFFF:FFFFFFF:FFFFFFFFFFFFFFFFFFFFFFFFFFFFFFFFFFFFFFFFFFFFFFFFFFFFFFF  
FFFFFFFFFFFFFFFFF:FFFFFFFFFFFFFFFFFFFFFFFFFFFFFFFFFFFFFFFFFFFFFFFFFFFFFFFFFFFFFFF  
FFF

@A00721:190:HGJW7DSXY:4:2470:3568:20134\_2:N:0:TCTGCAAG+GCTGCACT  
AGCTTTAGTATTATTTACTATCGCCTTTATTGAAAATTGTATAAGAGTTAATTGCTTACACAAAAGTG  
ACGCGCGAAGGAATCTTAATTGATTGAAGCTAGGCGTTGGGAGAATG

+

FFFFFFFFFFFFFFFFFFFFFFFFFFFFFFF,FFFFFFFFFFFFFFFFFFFFFFFFFFFFFFFFFFFFFFFFFFFFFFF  
FFFFFFFFFFFFFFFFFFFFFFFFFFFFFFFFFFFFFFFFFFFFFFFFFFFFFFFFFFFFFFFFFFFFFFFFFFFFF

@A00721:190:HGJW7DSXY:4:1519:13548:29496\_2:N:0:TCTGCAAG+GCTGCACT  
CGCTGTGCAGAATAACCTTCCCAAATCTAGATCTGCACAGAAGAAGGCTGAAGGTCGTTACCGGACGA  
CCACTCAAAGGAAACGGGCTGTTGCCAGAGGAAAGCAGCGACCACCG

+

FFFFFFF:FFFFFFFFFFFFFFFF:FFFFFFFFFFFFFFFF:FFFFFFFFFFFFFFFFFFFFFFFFFFFFFFFFF  
FFFFFFFF:FFFFFFFFFFFFFFFFFFFFFFFFFFFFFFFFFFFFFFFFFFFFFFFFFFFFFFFF:FFF

@A00721:190:HGJW7DSXY:4:1203:12518:9079\_1:N:0:TCTGCAAG+GCTGCACT  
AAAAGTCACATTCACCACTCCCATGCCAATCAATGATGTGACTATACAGTTCGGCCATTTCAAGAGTG  
GTCAATACGTCGTGGGAGGTACTGAAGCCTTCCCCTCCGCTGGCACGAAGAACACTCCAAGCCAATC  
AAT

+

FFFFFFFFFFFFFFFFFFFFFFFFFFFFFFFFFFFFFFFFFFFFFFFFFFFFFFFFFFFFFFFFFFFFFFFFFFFFFFF  
FFFFFFFFFFFFFFFFFFFFFFFFFFFFFFFFFFFFFFFFFFFFFFFFFFFFFFFFFFFFFFFFFFFFFFFFFFFFFFF  
FFF

@A00721:190:HGJW7DSXY:4:1543:27073:13745\_1:N:0:TCTGCAAG+GCTGCACT  
AATGAAAAGGGGTTTACCAGGGTAGTCTCTAAGTCTACCAGGAAGAGGGGAAATGTCCCCAAAAGTGA  
GAAGAATAAAGGGAAAGGTCCATCAGGACCTAAGAAGGGGAAATTACCCCTAATTCTGAAGGAAGATC  
TCC



@A00721:190:HGJW7DSXY:4:1469:7907:19257\_1:N:0:TCTGCAAG+GCTGCACT  
ATCGAGGTATACGTCTAGGAACATTGATTGGGAACGTACCTACTCACGAGACGTCATGAAAGCTATCG  
GAGGGAAGCAAATGTTTCGTTCTGTTACAAGAACGCTTTGATTGTGACCATAAAGCCTCAGTTGCG  
ATA

+

FFFFFFFFFFFF:FFFFFFFFFFFFFFFFFFFFFFFFFFFFFFFFFFFFFFFFFFFFFFFFFFFFFFFFFFFF  
FFFFFFFFFFFFFFFFFFFFFFFFFFFFFFFFFFFFFFFFFFFFFFFFFFFFFFFFFFFFFFFFFFFFFFFFFFFF  
FFF

@A00721:190:HGJW7DSXY:4:2132:29478:28933\_2:N:0:TCTGCAAG+GCTGCACT  
CTTCGTAACAACAGTGCAGGATTGTCTCTCGGGGAAAGTGATTCACCAAGATGTTTCATATAGATAC  
GAGATACCTAGAGAAGGTCGCAGCGATCTTACTCGTTATCGGAGCTAA

+

FFFFFFFFFFFFFFFFFFFFFFFFFFFFFFFFFFFFFFFFFFFFFFFFFFFFFFFFFFFFFFFFFFFFFFFFFFFF  
FFFFFFFFFFFFFFFFFFFFFFFFFFFFFFFFFFFFFFFFFFFFFFFFFFFFFFFFFFFFFFFFFFFFFFFFFFFF

@A00721:190:HGJW7DSXY:4:2263:4553:33708\_1:N:0:TCTGCAAG+GCTGCACT  
AAAAGATTGAGGACGCCTACGGTGACTTTATGGACAAGATGCAAGTTCTTGGGAAATACTTGTTTCCC  
TTTTTAGGTTTAGTAGGTGATCTTGACGTCGATTCTTTGTATAGGGAGTGTGAGAAGACAACGAATCT  
TGA

+

FFFFFFFFFFFFFFFFFFFF:FFFFFFFFFFFFFFFF:FFFFFF,FFFFFFFFFFFFFFFF:FFFFFFFF  
FFFFFFFFFFFFFFFFFFFFFFFFFFFFFFFFFFFFFFFFFFFFFFFFFFFFFFFFFFFFFFFFFFFFFFFFFFFF  
FFF

@A00721:190:HGJW7DSXY:4:1161:20781:25582\_1:N:0:TCTGCAAG+GCTGCACT  
TTCTTGAAAACCAAGTTAAGAAGGAGGCTGATCATGGAGTCTTTGTACCTTCTGTCAAACCTTCGAGGT  
TCAGCTACGAGAGGTGATCCCGGATGTGGATTGAAGGCTGGCTCTAAGGGAGACTCCTTCTTTTTGAA  
TGT

+

FFFFFFFFFFFFFFFFFFFF,FFFFFFFFFFFF,FFFFFFFFFFFF:FFFFFFFFFFFF:FFFFFFFFFFFF  
FFFFFFFFFFFFFFFFFFFFFFFFFFFFFFFFFFFFFFFFFFFFFFFFFFFFFFFFFFFFFFFFFFFFFFFFFFFF  
FFF

@A00721:190:HGJW7DSXY:4:2355:20582:35258\_1:N:0:TCTGCAAG+GCTGCACT  
GTTGAGAAGTGTGCTTTACAAGGAGTTAGACTCTTCTTCAATTTTTTAGATCTTCTTGATAATCTTAA  
ATAAAAAATTTTGAATAAACTAATGAGAGGTATAGGCTTAGTCAAGTCTGTACTTACATTCTTTACGC  
CAG

+

:FF,,F::FFFF,FFF::F,FFFF,FFF:::F,FFFFFF,,:FFFF,,FFFFFFFF,FF:,FFFF:  
F,,FF:FFFFFF::F:F:,,:FFF,:F::FFFF,FF,,:FFFFFFFF,FFFF:FFFF:FF:,FF  
:F:

@A00721:190:HGJW7DSXY:4:2176:15854:15327\_2:N:0:TCTGCAAG+GCTGCACT  
AGATTCAATCTGGCATCACTGAACGTCTACAACGAGTTAGGGAGTGGCTAGGTTTTAAAGATCCTTT  
GCACAAGCAATACCTTCCACTGAGTTCATCACCCAGAGTTTCGACGTC

+

FFFFFFFFFFFFFFFFFFFFFFFFFFFFFFFFFFFFFFFFFFFFFFFFFFFFFFFFFFFFFFFFFFFFFFFFFFFF  
FFFFFFFFFFFFFFFFFFFFFFFFFFFFFFFFFFFFFFFFFFFFFFFFFFFFFFFFFFFFFFFFFFFFFFFFFFFF

@A00721:190:HGJW7DSXY:4:1253:10972:31109\_1:N:0:TCTGCAAG+GCTGCACT  
CTTTTACCTTTTGGAGGTCCAGGAACCTTTACTCCTAGTGTCTTTCTAGAGTCCAAGGACGTTTCCG  
TCGGAGGATGACAGGTGGGAGACCGCTCAATAACACTCTATTGAATCCCTTTTCCACGATGAAAGCTC  
TTT

+

F:FFFFFFFFFFFFFFFFFFFFFFFFFFFFFFFFFFFFFFFFFFFFFFFFFFFFFFFFFFFFFFFFFFFFFFFFFFFF  
FFFFFFF:FFFFFFFFFFFFFFFFFFFFFFFFFFFFFFFFFFFFFFFFFFFFFFFFFFFFFFFFFFFFFFFFFFFF  
FF:

@A00721:190:HGJW7DSXY:4:2456:13548:2597\_1:N:0:TCTGCAAG+GCTGCACT  
GCCACTTCTAATTTTAGGAAACGTCGCGAAAAGAAAGTTCATGAGGATGTCTTGCTCGAAAAATATCG



@A00721:190:HGJW7DSXY:4:2531:5656:33896\_2:N:0:TCTGCAAG+GCTGCACT  
TCTTCCGAAAGGCGAACTTTGGGAATTTGAAGCTCAGGGTGAAGCACAACTTTGACCGTGACGAACT  
GTGGTGTCTTGATCTACGTTACGGATATACTCTCCTTGAGTTCACCTC

+

FFFFFFFFFFFFFFFFFFFFFFFFFFFFFFFFFFFFFFFFFFFFFFFFFFFFFFFFFFFFFFFFFFFFFFFF  
FFFFFFFFFFFFFFFFFFFFFFFFFFFFFFFFFFFFFFFFFFFFFFFFFFFFFFFFFFFFFFFFFFFFFFFF

@A00721:190:HGJW7DSXY:4:2141:15637:5713\_1:N:0:TCTGCAAG+GCTGCACT  
AGGGGTTTTCGAATAGTGATAGCCACCCGCTTACAGAGGGGCAGCAGCATGACCATAATTGGTATTG  
ACTTTGGTACCACCTTTTCTACTGTCTGTCTCGCCTCTTGAATGAAGTTTTAATGCTTAACAACAAT  
GAT

+

FF:FFFFFFFFFFFFFFFFFFFFFFFFFFFFFFFFFFFFFFFFFFFFFFFFFFFFFFFFFFFFFFFFFFFF  
FFFFFFFFFFFFFFFFFFFFFFFFFFFFFFFFFFFFFFFFFFFFFFFFFFFFFFFFFFFFFFFFFFFFFFFF  
FFF

@A00721:190:HGJW7DSXY:4:1172:22426:23578\_2:N:0:TCTGCAAG+GCTGCACT  
TTTCTAATAATGATGACACTATTGTTTATGGATATGATGCTATTACTCATGATGGTTACGGTCAGGGA  
GGATTCTCAGTTTACAAGGACCTTAAGCGATTGATCGGGGTTAATTCT

+

FFFFFFFFFFFFFFFFFFFFFFFFFFFFFFFFFFFFFFFFFFFFFFFFFFFFFFFFFFFFFFFFFFFFFFFF  
FFFFFF:FFFFFFFFFFFFFFFFFFFFFFFFFFFFFFFFFFFFFFFFFFFFFFFFFFFFFFFFFFFFFFFF

@A00721:190:HGJW7DSXY:4:2612:5972:16344\_1:N:0:TCTGCAAG+GCTGCACT  
GACTGGAGTTCAGACGTGTGCTCTTCCGATCTGGAACGTACCGGATTACCTGTCTTTCATATTATGAA  
TGAACCTTCGGCCGCTCTCTTTGCTTCGATGTTGGATGTCAAGAAGGGTTCAGAATGGGATTCCTACG  
TAG

+

FFFFFFFFFFFFFFFFFFFFFFFFFFFFFFFFFFFFFFFFFFFFFFFFFFFFFFFFFFFFFFFFFFFF  
FFFFFFFFFFFFFFFFFFFFFFFFFFFFFFFFFFFFFFFFFFFFFFFFFFFFFFFFFFFFFFFFFFFFFFFF  
FFF

@A00721:190:HGJW7DSXY:4:2577:1533:35650\_2:N:0:TCTGCAAG+GCTGCACT  
CGGTACAATCTTACTTGAACGAAGGCGACCTGTTCCGGAGTTTTTACGGGATCCGGAATGTTCTGTC  
TATATTAGGTGAAGCGAAATACGATTTTCAACGTCAACGTTACCGAG

+

FFFFFFFFFFF,FFF:FFFFFFFFFFFFFFFFFFFFFFFFFFFFFFFFFFFFFFFFFFFFFFFFFFFFF  
FFFFFFFFFF:FFFFFFFFFFFFFFFFFFFFFFFFFFFFFFFFFFFFFFFFFFFFFFFFFFFFFFFFFFFF

@A00721:190:HGJW7DSXY:4:2540:27425:19053\_1:N:0:TCTGCAAG+GCTGCACT  
ATCGTAAGAAGTTTATAAGGAACATATCCATTTGTTGAATAGGGTCATCAACTTAGAACTCGAACT  
CTAAGTGGTAATACTGTCTTTCCAAGCTTACCTGTATCTTCAATGAAATTGGACTCTTCGATAGGGGA  
CAT

+

FFFFFFFFFFFFFFFFFFFFFFFFFFFFFFFFFFFFFFFFFFFFFFFFFFFFFFFFFFFFFFFFFFFF  
FFFFFFFFFFFFFFFFFFFFFFFFFFFFFFFFFFFFFFFFFFFFFFFFFFFFFFFFFFFFFFFFFFFFFFFF  
FFF

@A00721:190:HGJW7DSXY:4:2621:1850:12712\_1:N:0:TCTGCAAG+GCTGCACT  
TTTCTACGATACAAATGATAACTTCTAATTTACGTTTGCTACTCAGAGCTGGTCCTCTCAGCAAAGG  
GATGCATGGTGTTATCTCCTCAGGAGTCCCGCATTTGATAATAATGACGAGACTTTCGTCAATATCG  
CTG

+

F:FF:FFFFFFFFFFFFFFFFFFFFFFFFFFFFFFFFFFFFFFFFFFFFFFFFFFFFFFFFFFFFFFFF  
FFFFFFFFFFFFFFFFFFFFFFFFFFFFFFFFFFFFFFFFFFFFFFFFFFFFFFFFFFFFFFFFFFFFFFFF  
FFF

@A00721:190:HGJW7DSXY:4:1157:26738:26224\_2:N:0:TCTGCAAG+GCTGCACT  
GTGAGCCTCGACCCGATTATATGGTATTAATTTATAAAGGTGAGGAGACCATTTTCTTGCTGAAATT  
TATAGAAGATTATTTTGACAGAATCAATAAGAATCATCGATTCTCGAT

+

FFFF:FFFFFFFFFFFFFFFFFFFFFFFF:FFFFFFFFFFFFFFFF,FFFFFFFFFFFFFFFF:F  
 FFFF:FFFFFFFFFFFFFFFFFFFFFFFF:FFFFFFFFFFFFFFFFFFFFFFFF  
 @A00721:190:HGJW7DSXY:4:2366:1362:22827\_1:N:0:TCTGCAAG+GCTGCACT  
 AGTCAACACTAGTTCGAGTGCTGCTTTGGATTACGATGACGTGAGAATAGGTGAAGGGATAGTTTTTA  
 CCTCGACCACATTAAGGCGGCGGCGACTAATCTTAAAGCTTCACCCAAAATGAAGGACACTTCGAAAC  
 TGA  
 +  
 FFFFFFFFFFFFFFFFFFFFFFFFFFFFFFFFFFFFFFFFFFFFFFFFFFFFFFFFFFFFFFFFFF  
 FFFFFFFFFFFFFFFFFFFFFFFFFFFFFFFFFFFFFFFFFFFFFFFFFFFFFFFFFFFFFF:FFF:FFFFFFFFFFFFF  
 FFF  
 @A00721:190:HGJW7DSXY:4:2515:18945:3677\_2:N:0:TCTGCAAG+GCTGCACT  
 ATACAACCTAGCCTTCAAGTGGGGTATGCCTGCGGAATACGCTTGCTATTACCAGATTGTTTCGAA  
 CCCGTTGATGCTATGTCAGAAGAAGCTATTCAAGCTTGTCGTTTAAAG  
 +  
 FFFF:FFFFFFFFFFFFFFFFFFFFFFFFFFFFFFFFFFFFFFFFFFFFFFFFFFFFFFFFFFFF,FFFFFFFF  
 FFFFFFFFFFFFFF:FFFFFFFFFFFFFFFFFFFFFFFFF:FFFFFFFF:FFF  
 @A00721:190:HGJW7DSXY:4:1434:17400:27774\_2:N:0:TCTGCAAG+GCTGCACT  
 ACAAGCCCAGACTCAAGGAGTCCAATCAAAGGTTTTGAATTTAGCTCAACTGGGGAGACGTGCTTAA  
 TGGGTGATAAAAATTATTTAGAGATCTTTTCTACTTACAAAGGACAAT  
 +  
 FFFFFFFFFF:FFFFFFFFFFFFFFFFFFFFFFFFFFFFFFFFFFFFF:FFFFFFFFFFFFFFFF:FFFFF,FFF  
 FFFFFFFFFFFFF,FFFFFF,FFFFFFFFFFFFFFFFFFFFF:F:FFFF:,  
 @A00721:190:HGJW7DSXY:4:1473:31259:32800\_1:N:0:TCTGCAAG+GCTGCACT  
 TTTTGTACCAAATCTTGGCTTTCAACGAAGTCTCTGATTTTATTAATCATTACTTTAACGATCTCT  
 CGGTCAATTTACTCTGTACTTGATCTACGTCGTTTAACTGTGCGGAACAACCTTTACTTAGAATGACTCT  
 ATC  
 +  
 FFFFFFFFFFFFFFFFFFFFFFFFFFFFFF:FFFFFFFFFFFFFFFFFFFFFFFFFFFFFFFFFFFF,FFFFFFFF  
 FFFFFFFFFFFFFFFFFFFFFFFFFFFFFFFFFFFFFFFFFFFFFFFFFFFFFFFFFFFFFFFFFFFFFF  
 FF:  
 @A00721:190:HGJW7DSXY:4:2210:27190:21151\_2:N:0:TCTGCAAG+GCTGCACT  
 ACGAAAACCAACTCTTCGTTACGAGACCTGATGGTAGAATAGATTTAGTCTCTACACCCATCTCAACG  
 AGGATAAAGCGAGTTTTCCGTCCTGAACGTAATACACGAAGAGATCAT  
 +  
 FFFFFFFF:FFFFFFFFFFFFFFFFF:FFFFF:FFFFFFFFFFFFFFFFF:FFFFFFFFFFFFFFFF:FFFFFFFFF:  
 FFFFFFFFFF:FFFFFFFFFFFFF:FFFFFFFFFFFFFFFFFFFFF:FFFF:FF  
 @A00721:190:HGJW7DSXY:4:1413:25744:11882\_1:N:0:TCTGCAAG+GCTGCACT  
 AAATGAGGTCAAAGCTCTATTTATTAACGAACACTATTATCCGATTCTTCGAGGGTATCACTACCACTG  
 ATCTGCCGACTTTAGTCAAGGAACCTCAATTCCTTCGATGTTTATATTTTCTATAAGGGAAAATAGC  
 AAT  
 +  
 FFFFFFFFFFFFFFFFFFFFFFFFFFFFFFFFFFFFFF:FFFFFFFFFFFFFFFFFFFFFFFFFFFFFFFFFFFFF  
 FFFFFFFFFFFFFFFFFFFFFFFFFFFFFFFFFFFFFFFFFFFFFF:FFFFFFFFF:FFFFFFFFFFFFFFFFFFFFF  
 FFF  
 @A00721:190:HGJW7DSXY:4:1206:28275:18020\_2:N:0:TCTGCAAG+GCTGCACT  
 AATTTTAGAACTTTATTTTCAGAACTCTCTCCGATCACCTTGGTGTGATCTCCCGGAGGATCTTTTCAA  
 TAAGATGTATGATGATAATCTACTATTTTTTAAATAGTGATATTCAGCG  
 +  
 FFFFFFFFFFFFFFFFFFFFFFFFFFFFFFFFFFFFFF:FFFFF:FFFFFFFFFFFFFFFFFFFFFFFFF  
 FFFFF:FFFFFFFFFFFFFFFFFFFFFFFFFFFFFFFFFFFFF:FFFF  
 @A00721:190:HGJW7DSXY:4:2637:5132:33927\_1:N:0:TCTGCAAG+GCTGCACT  
 ATCAAAGATTTGGCTTGGTCTATTTACCGCAAAAAGTTGGAAGAGGTCTATGATATTTATTTTACTTA  
 TACTTTAAATAGCACCGATTATAACTTGACTGTTGATAATTACAATAGCTCTTTCTCAGAAGATTAGA  
 GAA



+  
FFFFFFFFFFFFFFFFFFFFFFFFFFFFFFFFFFFFFFFFFFFFFFFFFFFFFFFFFFFFFFFFFFFFFFFF  
FFFFFFFFFFFF:FFFFFFFFFFFFFFFFFFFFFFFFFFFFFFFFFFFFFFFFFFFFFFFFFFFFFFFFFFFF  
FFF  
@A00721:190:HGJW7DSXY:4:2659:9326:22623\_1:N:0:TCTGCAAG+GCTGCACT  
GATTTACTTTTACCGTTAGAACTGAAAAAGATTCTTTTCGAAAAGAAACCTATAAGTTACAAACGATT  
CTTCGACTATATTAAAGAAATAAAAATACTTCAAGTACCTGAACCTTACATTTTTAATGGTATGGTAT  
AAT  
+  
FFFFFFFFFFFFFFFFFFFFFFFFFFFFFFFFFFFFFFFFFFFFFFFFFFFFFFFFFFFFFFFFFFFFFFFF  
:FFFFFFFFFFFFFFFFFFFFFFFFFFFFFFFFFFFFFFFFFFFFFFFFFFFFFFFFFFFF,FFFF:FFFF  
FFF  
@A00721:190:HGJW7DSXY:4:1667:32497:5635\_1:N:0:TCTGCAAG+GCTGCACT  
GAGAGTGTATTCTTAATATTCTAGTAACCGCTATGTGGGCATTACTAGGATTTATCACACTCCTAAA  
TTTGATAGCAATTTATGTTTTAAATGCTAGGAAAATTTAGAAAAACTCCATTGTATAGTTCAAGGAG  
TAC  
+  
FFFFFFFFFFFFFFFFFFFFFFFFFFFFFFFFFFFFFFFFFFFFFFFFFFFFFFFFFFFFFFFFFFFFFFFF  
:FFFFFFFFFFFFFFFFFFFFFFFFFFFFFFFFFFFFFFFFFFFFFFFFFFFFFFFFFFFF:FFFFFFFFFFFF  
FFF  
@A00721:190:HGJW7DSXY:4:2607:29984:23547\_2:N:0:TCTGCAAG+GCTGCACT  
AGCTTTAGTATTATTTACTATCGCCTTTATTGAAAATTGTATAAGAGTTAATTGCTTACACAAAAGTG  
ACGCGCAAGGAATCTTAATTGATTGAAGCTAGGCGTTGGGAGAATG  
+  
FFFFFFFFFFFFFFFFFFFFFFFFFFFFFFFFFFFFFFFFFFFFFFFFFFFFFFFFFFFFFFFFFFFFFFFF  
FFFFFFFFFFFFFFFFFFFFFFFFFFFFFFFFFFFFFFFFFFFFFFFFFFFF:FFFFFFFF  
@A00721:190:HGJW7DSXY:4:2164:14353:29168\_2:N:0:TCTGCAAG+GCTGCACT  
CGCTGTGCAGAATAACCTTCCCAAATCTAGATCTGCACAGAAGAAGGCTGAAGGTCGTTACCGGACGA  
CCACTCAAAGGAAACGGGCTGTTGCCAGAGGAAAGCAGCGACCACCG  
+  
FFFFFFFFFFFFFFF:FFF:FFFFFFFFFFFFFFFFFFFFFFFFFFFF:F,FFFFFFFFFFFFFFFFFFFF  
FFFFFFFFFFFFFFFFFFFFFFFFFFFFFFFFFFFFFFFFFFFF:FFFFFFFFFFFF  
@A00721:190:HGJW7DSXY:4:1336:21522:27555\_1:N:0:TCTGCAAG+GCTGCACT  
AAAAGTCACATTCACCACTCCCATGCCAATCAATGATGTGACTATACAGTTCGGCCATTTCAAGAGTG  
GTCAATACGTCGTGGGAGGTACTGAAGCCTTCCCCTCCGCTGGCACGAAGAACACTCCAAGCCAATC  
AAT  
+  
FFFFFFFFFFFFFFFFFFFFF:FFFFFFFFFFFFFFFFFFFFFFFFFFFFFFFFFFFFFFFFFFFF  
FFFFFFFFFFFFFFFFFFFFFFFFFFFFFFFFFFFFFFFFFFFFFFFFFFFFFFFFFFFFFFFFFFFF  
FFF  
@A00721:190:HGJW7DSXY:4:2213:32389:16313\_1:N:0:TCTGCAAG+GCTGCACT  
AATGAAAAGGGGTTTACCAGGGTAGTCTCTAAGTCTACCAGGAAGAGGGGAAATGTCCCCAAAACCTGA  
GAAGAATAAAGGGAAAGGTCCATCAGGACCTAAGAAGGGGAAATTACCCCTAATTCTGAAGGAAGATC  
TCC  
+  
FFFFF,FFF:FFFFFFFFFFFFFFFFFFFF:FFFFFFFFFFFFF:FFFFF:FFFFFFFFFFFFFFFFFFFF  
FFF:FFFFF:FFFFFFFFFFFFFFFFFFFFFFFFFFFFFFFFFFFFF:FFFFFFFFFFFFFFFFFFFF  
FFF  
@A00721:190:HGJW7DSXY:4:1103:30743:28557\_1:N:0:TCTGCAAG+GCTGCACT  
CTACGAAGTCGCTGAAGGCGGCTTGGGTCATTAAAGGCTAGCTGTAAAGTTGCGCCTGCCGACCCCATC  
TTTGAGACCAAGACTCTCTACAGTAGGTCGTGCCTACTATGAGCAAATCTGTTGAATTGCTCACTGA  
GGA  
+  
FFFFFFFFFFFF:FFFFFFFFFFFFFFFFFFFFFFFFFFFFF:FFFFFFFFFFFFFFFFFFFFF,FFFF

@A00721:190:HGJW7DSXY:4:1509:15203:29825\_1:N:0:TCTGCAAG+GCTGCACT  
GGACTTTTGGCTACTGGCGACAACTGAGAGCAGTCGCTGGGGAAAGAGAATTGCGTGGGTTGAAGGC  
CGACGCTTCGAGCTTGAGTGTGACGAGGCCGGTGACGTTTTTGTCAACGGCGTTTGGAGGATTTTATC  
CGC

+

```
FFFFFFFFFFFFFFFFFFFFFFFFFFFFFFFFFFFFFFFFFFFFFFFFFFFFFFFFFFFFFFFFFFFFF
FFFFFFFFFFFFFFFFFFFFFF:FFFFFFFFFFFFFFFFFFFFFFFFFFFFFFFFFFFFFFFFFFFFFFFF
FFF
```

@A00721:190:HGJW7DSXY:4:2465:30834:24173\_2:N:0:TCTGCAAG+GCTGCACT  
GCGAAGATCCCCTATGGAGTCTTGAAGGACTTAGGTTGGCATATTTATGCCGACGATAATAAGCATGT  
CACCCCTTAAGCACCGAGGTAAGCTCGGGACTTACAAGAGAGAGTGTGA

+

```
FFFFFFFFFFFFFFFFFFFFFFFFFFFFFFFFFFFFFFFFFFFFFFFFFFFFFFFFFFFFFFFFFFFFFFFFFFFF  
FFFFFFFFFFFFFFFFFFFFFFFFFFFFFFFF;FFFF;FFFFFFFFFFFFFF;
```

@A00721:190:HGJW7DSXY:4:1422:29640:15499\_1:N:0:TCTGCAAG+GCTGCACT  
TTTCCTCCGTCATTGGGGATTTTCGATGTGAGAAGGTGGAAGGTGTCAAGGGTCTTCTTCATGCTGATC  
TTTCAGGACCTAATCACATCATGATTGATAGTTACGGCTCGTATCGAGTTGGAGGGAGGAAGTTCTCC  
GAA

+

[illegible]

@A00721:190:HGJW7DSXY:4:2158:2627:6292\_2:N:0:TCTGCAAG+GCTGCACT  
GGAAGGCTCTAGAGACGATCTCACCACCTGGAGAAGGCAAGTGGAGAGTCCAGAAGATGATGAAGAAG  
GATTATTTGAAGCAGGGGTACCACCTTCCTAAGGTGGATGAGGGAGGT

+

```
FFF,:F:FFFFFF,F,FFFFFFFFFFFFFFFFFFFFFFFFF:FFFFFFFFFFFFFFFFF,,FFFFFF,FFF
FF:FFFFFF:FFFF,FF,F,FFFFFFFFFFFF:FFFFF:,FFFFFFF::
```

@A00721:190:HGJW7DSXY:4:1363:22553:34225\_1:N:0:TCTGCAAG+GCTGCACT  
TGTTCTTCCGGGAAGTTGTGGGATTTAACTTTGACTCAACTACTCCGATCAGATCCGGATGGTTTGA  
TTGGTATGGACTACTCGACTTTTGATCTGGAGTTGTCTAGGGTCATGGCAGATACTACCGATAAGGTG  
AAA

+

[illegible]

@A00721:190:HGJW7DSXY:4:2657:23963:14184\_1:N:0:TCTGCAAG+GCTGCACT  
CGTGTGCTCTTCCGATCTTATCGTTGTCGTACCTTACAAGGTTGAGGAGACTTTACAGCGGCTTATTG  
TCGCGCAGTTTCCAGAATTGCGGTTGAAGTTCACCCATTCTATCTTGAATGCTCACGCCGTCGCAGCC  
ATA

+

[illegible]

@A00721:190:HGJW7DSXY:4:1508:11071:25426\_1:N:0:TCTGCAAG+GCTGCACT  
ATCGAGGTATACGTCTAGGAACATTGATTGGGAACGTACCTACTCACGAGACGTCATGAAAGCTATCG  
GAGGGAAGCAAAATGTTTCGTTCTGTTACAAGAACGCTTTGGATTGTGACCATAAAGCCTCAGTTGCG  
ATA

+

[illegible]

@A00721:190:HGJW7DSXY:4:2168:30355:25128\_2:N:0:TCTGCAAG+GCTGCACT  
CTTCGTAACAACAGTGCAGGATTGTCATCTCGGGGAAAGTGATTACCAAGATGTTTCATATAGATAC  
GAGATACCTAGAGAAGGTCGCAGCGATCTTACTCGTTATCGGAGCTAA

@A00721:190:HGJW7DSXY:4:2446:23095:29716\_1:N:0:TCTGCAAG+GCTGCACT  
AAAAGATT CAGGACGCCTACGGTGACTTTATGGACAAGATGCAAGTTCTTGGGAAATACTTGTTTTCCC  
TTTTTAGGTTTAGTAGGTGATCTTGACGTCGATTCTTTGTATAGGGAGTGTGAGAAGACAACGAATCT  
TGA

@A00721:190:HGJW7DSXY:4:1238:28628:28275\_1:N:0:TCTGCAAG+GCTGCACT  
TTCTTGAAAACCAAGTTAAGAAGGAGGCTGATCATGGAGTCTTTGTACCTTCTGTCAAAC TTCGAGGT  
TCAGCTACGAGAGGTGATCCCGGATGTGGATTGAAGGCTGGCTCTAAGGGAGACTCCTTCTTTTTGAA  
TTT

@A00721:190:HGJW7DSXY:4:2364:4562:28588\_1:N:0:TCTGCAAG+GCTGCACT  
GTTGAGAAGTGTGCTTTACAAGGAGTTAGACTCTTCTTCAAGTTTTTAGATCTTCTTGATAATCTTAA  
AGAAAAATTTTCGAATAAACTAATGAGAGGTATAGGCTTAGTCAAGTCTGTACTTACATTCTTTACGC  
CAG

@A00721:190:HGJW7DSXY:4:2534:4399:8547\_2:N:0:TCTGCAAG+GCTGCACT  
AGATTCAATCTGGCATCACTGAACGTCTACAACGAGTTAGGGAGTGGCTAGGTTTTAAAGATCCTTT  
GCACAAGCAATACCTTCCACTGAGTTCATACCCAGAGTTTCGACGTC

@A00721:190:HGJW7DSXY:4:1337:17924:26490\_1:N:0:TCTGCAAG+GCTGCACT  
CTTTTACCTTTTGGAGGTCCAGGAACCTTTACTCCTAGTGTCTTTTCTAGAGTCCAAGGACGTTTCCG  
TCGGAGGATGACAGGTGGGAGACCGCTCAATAACACTCTATTGAATCCCTTTTCCACGATGAAAGCTC  
TTT

@A00721:190:HGJW7DSXY:4:2570:24840:17143\_1:N:0:TCTGCAAG+GCTGCACT  
GCCACTTCTAATTTTAGGAAACGTCGCGAAAAGAAAGTTTCATGAGGATGTCTTGGTCGAAAAATATCG  
CCGGGAACCTTCTAATAGAGGATCCTGATGACATTATTTCAACGGATACCGATCTCAGTTCTACCACAG  
AAA

@A00721:190:HGJW7DSXY:4:1344:27859:13260\_1:N:0:TCTGCAAG+GCTGCACT  
TGTCTCCACTGATTCGGAATTAGAGAAAGACGACCTTCTTGTTGGGGACTGAGACCTCTGAATTTTCAG

GGTGCCCTGATGAGGACGTTGAAAGGGATAATTTCAACTCTGAGACTTCTAAGAGTGTTTCAAAAGAC  
CAG

+

FFFFFFFFFFFFFFFFFFFF:FFFF:FFFFFFFFFFFF:FFFFFFFFFFFFFFFFFFFFFFFFFFFF  
FFFFFFFFFFFFFFFFFFFFFFFFFFFFFFFFFFFFFFFFFFFFFFFFFFFFFFFFFFFFFFFFFFFF:FFFF  
FFF

@A00721:190:HGJW7DSXY:4:1405:22073:34741\_2:N:0:TCTGCAAG+GCTGCACT  
AGAACAGCTGATTCTTATTGCATGAACGTCGCTGAGGTCAAACCTGTGGACGTTCTTTTCATCGACGA  
ATTATTCATGATTACGCTGGTCAGACCCTTTTTCTTACACATCTACT

+

:FFFFFFFFFFFFFFFFFFFFFFFFFFFFFFFFFFFFFFFFFFFFFFFFFFFFFFFFFFFFFFFFFFFF  
FFFFFFFFFFFFFFFFFFFFFFFFFFFFFFFFFFFFFFFFFFFFFFFFFFFFFFFFFFFFFFFFFFFF

@A00721:190:HGJW7DSXY:4:1414:29758:8500\_2:N:0:TCTGCAAG+GCTGCACT  
CTACTTCAACATCAACGACATCATTCTTGATGAGTGTGCTTCTTATCGAAGTCTCAGTTATCGCTGCC  
CGGCCGACGTTTGTGCGGAACTCTCAGAGGTTTACGGCAGAAAAATTT

+

FF:FFFFFFFFFFFFFFFFFFFF:FFFFFFFFFFFFFFFFFFFF,FFFFFFFFFFFF,F:FFFFFFFFFFFFFFFFFFFF  
FFFFFFFFFFFF,FFFFFFFFFFFFFFFFFFFFFFFFFFFFFFFFFFFFFFFFFFFFFFFFFFFF

@A00721:190:HGJW7DSXY:4:2248:20057:20885\_1:N:0:TCTGCAAG+GCTGCACT  
ACCCCTTATATCGAGGCTATCGAGGACGTTGAGTATCTTGAAGTTGTTGACGACAAGCCTCAAGAGGG  
TAGAGGACCACCTGGATCTTCTACTGTCTCTGCCTTCCAAGATTTCTTAGAAGAGGTTATTCCTGGAA  
CCA

+

FFFF:,FFFF:FFFF:FF,FFFFFFFF,,FFFFFFFF,FFFFFFFFFFFF,FFFFFFFFFFFFFFFF:FFFF,F  
FFFFFFFFFFFF:F:FFF,FFFF:FFFF:FFFF:FFFFFFFFFFFF:F:FFFFFFFFFFFF:FFFFFFFF::  
FFF

@A00721:190:HGJW7DSXY:4:1452:6470:6527\_1:N:0:TCTGCAAG+GCTGCACT  
GGTAAGAAGCCCCTTGAGCCGCGTAGTCAGCGCGTTTAGCTGTATCATCAGTCAGAGTATACCCGATA  
GGGTACCGAGTCTCCAAGAGAATATTTATTCTTATGAGGCTCGAACTTCAACGTTTTCAACGGA  
AGA

+

FFFFFFFFFFFFFFFFFFFFFFFFFFFFFFFFFFFFFFFFFFFFFFFFFFFFFFFFFFFFFFFFFFFF  
FFFFFFFFFFFFFFFFFFFFFFFFFFFFFFFFFFFFFFFFFFFFFFFFFFFFFFFFFFFFFFFFFFFF  
FFF

@A00721:190:HGJW7DSXY:4:2534:18873:16172\_1:N:0:TCTGCAAG+GCTGCACT  
ATGATTTTATCACTTTATTATGACCTTGAAAGTTTTCGGCTGTGTTGTGCTGGGGACGATTCCAT  
TCTGTTTTCAAAGACTCCAATAACTGATCATTCTGATCATATGATTTTGGACAATGGTTTCAAGCGA  
AA

+

FFF:FFFFFFFFFFFFFFFFFFFFFFFFFFFFFFFFFFFFFFFFFFFFFFFFFFFFFFFFFFFF:FFFFFFFF  
FFFFFFFF:FFFFFFFFFFFFFFFFFFFF,FFFFFFFFFFFFFFFFFFFFFFFFFFFFFFFFFFFFFFFFFFFF  
FF

@A00721:190:HGJW7DSXY:4:2454:22598:33364\_1:N:0:TCTGCAAG+GCTGCACT  
TGATGTGGAGGGAGTTCTTGAAGCATCCCGACCTTTCCTTGTGAAAATTTTGATGCGGTTTCATAAGA  
TTATCAGTAATCCTGATTCTACTACGGATTCATGGACCTTCATCCTGTACCTCTTCTGGAGAGACGT  
ATC

+

FFFFFFFFFFFFFFFFFFFFFFFFFFFFFFFFFFFFFFFFFFFFFFFFFFFFFFFFFFFFFFFFFFFF  
FFFFFFFFFFFFFFFFFFFFFFFFFFFFFFFFFFFFFFFFFFFFFFFFFFFFFFFFFFFF:FFFFFFFFFFFF  
FFF

@A00721:190:HGJW7DSXY:4:1324:13250:23750\_1:N:0:TCTGCAAG+GCTGCACT  
CTTCCGATCTGAACCTTTGGGAATTTGAAGCTCAGGGTGAAGCACAACGTTTGACCGTGACGAACGTG  
GTGTTCTTGATCTACGTTACGGATATACTCTCCTTGAGTTCACTCGTAAGGACACTACCACTTATTAC  
GAT

+  
FFFFFFFFFFFF:FFFFFFFF:F:FFFFFF:FFFFFFFFFFFFFFFFFFFFFFFF:FFFFFFFF:FFF,FFFFFF  
FFFFFFFFFFFFFFFFFFFFFFFFFFFFFFFFFFFFFFFF:FFFFFFFFFFFFFFFFFFFFFFFFFFFFFFFF  
FFF  
@A00721:190:HGJW7DSXY:4:2313:9941:18740\_1:N:0:TCTGCAAG+GCTGCACT  
AGGGGTTTTCGAATAGTGATAGCCACCCGCCTTACAGAGGGGCAGCAGCATGACCATAATTGGTATTG  
ACTTTGGTACCACCTTTTCTACTGTCTGTCTCGCCTCTTTCGAATGAAGTTTTAATGCTTAACAACAAT  
GAT  
+  
FF:FFFFFF:FFFFFFFFFFFFFFFFFFFFFFFFFFFFFFFFFFFFFFFFFFFFFFFFFFFFFFFFFFFFFFFF  
FFFFFFFFFFFFFFFFFFFFFFFFFFFFFFFFFFFFFFFFFFFFFFFFFFFFFFFFFFFFFFFFFFFFFFFF  
FFF  
@A00721:190:HGJW7DSXY:4:1308:16622:35853\_2:N:0:TCTGCAAG+GCTGCACT  
TTTCTAATAATGATGACACTATTGTTTATGGATATGATGCTATTACTCATGATGGTTACGGTCAGGGA  
GGATTCTCAGTTTACAAGGACCTTAAGCGATTGATCGGGGTTAATTCT  
+  
FFFFFFFFFFFFFFFFFFFFFFFFFFFFFFFF:FFFFFFFFFFFFFFFFFFFFFFFF:FFFFFFFFFFFFFFFF  
FFFFFFFFFFFFFFFFFFFFFFFFFFFFFFFF:FFFFFFFF:F:FFFF  
@A00721:190:HGJW7DSXY:4:1110:17282:8563\_1:N:0:TCTGCAAG+GCTGCACT  
ACGCAAAGATATTTTCATGAAACTACAGAGGAACGTACCGGATTACCTGTCTTTTCATATTATGAATGA  
ACCTTCGGCCGCTCTCTTTGCTTCGATGTTGGATGTCAAGAAGGGTTCAGAATGGGATTCTACGTAG  
TTT  
+  
FFFFFFFFFFFF,FF:FFFFFFFFFFFFFFFFFFFFFFFFFFFFFFFFFFFFFFFFFFFFFFFFFFFFFFFF  
FFFFFFFFFFFFFFFFFFFFFFFFFFFFFFFFFFFFFFFFFFFFFFFFFFFFFFFFFFFFFFFFFFFFFFFF  
FFF  
@A00721:190:HGJW7DSXY:4:1257:7102:32456\_2:N:0:TCTGCAAG+GCTGCACT  
CTTACTTGAACGAAGGCGACCTGTTCCGGAGTTTTTACGGGATCCGGAATGTTCTGTCTATATTAGG  
TGAAGCGAAATACGATTTCAACGTCAACGTTACCGAGTTTTGTTTC  
+  
FFFFFFFFFFFFFFFFFFFFFFFFFFFFFFFF:FFFFFFF:FFFFFFF:F:FFFFFFFF:F,FFF  
FFFFFFFFFFFFFFFFFFFFFFFFFFFFFFFFFFFFFFFFFFFFFFFFFFFFFFFFFFFFFFFF:F  
@A00721:190:HGJW7DSXY:4:1166:10664:29512\_2:N:0:TCTGCAAG+GCTGCACT  
TAAGAAGTTTATAAGGAACATATCCATTTGTTGTAATAGGGTCATCAACTAGAACTCGAAACTCTAA  
GTGGAATACTGTCTTTCCAAGCTTACCTGTATCTTCAATGAAATTGG  
+  
FFFFFFFFFFFFFFFFFFFFFFFFFFFFFFFF:FFFFFFFFFFFFFFFFFFFFFFFFFFFFFFFFFFFFFFFF  
FFFFFFFFFFFFFFFFFFFFFFFFFFFFFFFF,FFFFFFFFFFFFFFFF,FFFFFF  
@A00721:190:HGJW7DSXY:4:2621:4725:13839\_1:N:0:TCTGCAAG+GCTGCACT  
TTTCTACGATACAAATGATAACTTCTAATTTACGTTTGCTACTCAGAGCTGGTCTCTCAGCAAAGG  
GATGCATGGTGTATCTCCTCAGGAGTCCCGGCATTTGATAATAATGACGAGACTTTCGTCATAATCG  
CTG  
+  
F,FFFFFFFFFFFFFFFFFFFFFFFFFFFFFFFFFFFFFFFFFFFFFFFFFFFFFFFFFFFFFFFF  
FFFFFFFFFFFFFFFFFFFFFFFFFFFFFFFFFFFFFFFFFFFFFFFFFFFFFFFFFFFFFFFF  
FFF  
@A00721:190:HGJW7DSXY:4:1363:29839:2910\_2:N:0:TCTGCAAG+GCTGCACT  
GTGAGCCTCGACCCGATTATATGGTATTAATAAGGTGAGGAGACCATTTTCTTGCTGAAATT  
TATAGAAGATTATTTTGACAGAATCAATAAGAATCATCGATTCTCGAT  
+  
FFFFFFFFFFFFFFFFFFFFFFFFFFFFFFFF:FFFFFFFFFFFFFFFFFFFFFFFF:FFFFFFFF:FFFFF  
FFFFFFFFFFFFFFFFFFFFFFFF,FFFFFFFFFFFFFFFF:FFFFFFF  
@A00721:190:HGJW7DSXY:4:2678:14380:29277\_1:N:0:TCTGCAAG+GCTGCACT  
AGTCAACACTAGTTCGAGTGCTGCTTTGGATTACGATGACGTGAGAATAGGTGAAGGGATAGTTTTTA



@A00721:190:HGJW7DSXY:4:1627:17038:11960\_2:N:0:TCTGCAAG+GCTGCACT  
TTTACTTTTACCGTTAGAACTGAAAAAGATTCTTTTCGAAAAGAAACCTATAAGTTACAAACGATTCT  
TCGACTATATTAAAGAAATAAAAATACTTCAAGTACCTGAACTTTACA

+

FFFFFFFFFFFFFFFFFFFFFFFFFFFFFFFFFFFFFFFFFFFFFFFFFFFFFFFFFFFFFFFFFFFFFFFF  
FFFFFF:FFFF:FFFFFF:FFFF:FFFFFFFFFFFF:FFFFFFFFFFFF

@A00721:190:HGJW7DSXY:4:2128:18683:14591\_1:N:0:TCTGCAAG+GCTGCACT  
GAGAGTGTATTCTTAATATTCTAGTAACCGCTATGTGGGCATTACTAGGATTTATCACACTCCTAAA  
TTTGATAGCAATTTATGTTTTAAATGCTAGGAAAATTTAGAAAAACTCCATTGTATAGTTCAAGGAG  
TAC

+

FFFFFFFFFFFFFFFFFFFFFFFFFFFFFFFF:FF:FFFFFFFFFFFFFFFF:FFFFFFFFFFFFFFFF  
FFFFFFFFFFFFFFFFFFFFFFFF,FFFFFFFFFFFFFFFFFFFFFFFFFFFFFFFFFFFFFFFF  
FFF

@A00721:190:HGJW7DSXY:4:2657:17526:33943\_2:N:0:TCTGCAAG+GCTGCACT  
AGCTTTAGTATTATTTACTATCGCCTTTATTGAAAATTGTATAAGAGTTAATTGCTTACACAAAAGTG  
ACGCGCGAAGGAATCTTAATTGATTGAAGCTAGGCGTTGGGAGAATG

+

FFFFFFFFFFFFFFFFFFFFFFFFFFFFFFFFFFFFFFFFFFFFFFFFFFFFFFFFFFFFFFFFFFFFFFFF  
FFFFFFFFFFFFFFFFFFFFFFFFFFFFFFFFFFFFFFFFFFFFFFFFFFFFFFFFFFFFFFFF

@A00721:190:HGJW7DSXY:4:2456:22336:31219\_2:N:0:TCTGCAAG+GCTGCACT  
CGCTGTGCAGAATAACCTTCCCAAATCTAGATCTGCACAGAAGAAGGCTGAAGGTCGTTACCGGACGA  
CCTCAAGGAAACGGGCTGTTGCCAGAGGAAAGCAGCGACCACCG

+

FFFFFFF:FFF:FFFF,FFFF:FF:FF:FFFFFFFF:FFFFFFFFFFFFFFFF:FFFFFFFF  
FFFFFFFF:FFFFFF:FFFF:FFFFFFFF: ,FFFFFFFF

@A00721:190:HGJW7DSXY:4:1452:5141:5321\_1:N:0:TCTGCAAG+GCTGCACT  
AAAAGTCACATTCACCACTCCCATGCCAATCAATGATGTGACTATACAGTTCGGCCATTTCAAGAGTG  
GTCAATACGTCGTGGGAGGTACTGAAGCCTTCCCCTCCGCTGGCACGAAGAACTCCCAAGCCAATC  
AAT

+

FFFFFFFFFFFFFFFFFFFFFFFFFFFFFFFF,FFFFFFFFFFFFFFFFFFFFFFFFFFFFFFFF:F  
FFFFFFFFFFFFFFFFFFFFFFFFFFFFFFFFFFFFFFFFFFFFFFFFFFFFFFFFFFFFFFFF  
FFF

@A00721:190:HGJW7DSXY:4:2262:27227:10347\_1:N:0:TCTGCAAG+GCTGCACT  
AATGAAAAGGGGTTTACCAGGGTAGTCTCTAAGTCTACCAGGAAGAGGGGAAATGTCCCCAAACTGA  
GAAGAATAAAGGGAAAGGTCCATCAGGACCTAAGAAGGGGAAATTACCCCTAATTCTGAAGGAAGATC  
TCC

+

FFFF, :FFFFFFFFFFFFFFFFFFFFFFFFFFFFFFFF:FFFFFFFFFFFFFFFFFFFFFFFF:FF  
FFFFFFFF:FFFF: :FFFFFFFFFFFFFFFFFFFFFFFFFFFFFFFF,FFFFFFFFFFFFFFFF  
FFF

@A00721:190:HGJW7DSXY:4:1319:30879:30483\_1:N:0:TCTGCAAG+GCTGCACT  
CTACGAAGTCGCTGAAGGCGGCTTGGGTCATTAAGGGTAGCTGTAAAGTTGCGCCTGCCGACCCATC  
TTTGAGACCAAGACTCTCTACAGTAGGTCGTGCCTACTATGAGCAAATCTGTTGAATTCGTCACTGA  
GGA

+

FFF,FFFFFFFFFFFFFFFFFFFFFFFF:FFFFFFFFFFFFFFFFFFFFFFFF  
FFFFFFFFFFFFFFFF,FFFFFFFFFFFFFFFFFFFFFFFFFFFFFFFF  
FFF

@A00721:190:HGJW7DSXY:4:2141:13539:16861\_1:N:0:TCTGCAAG+GCTGCACT  
GGACTTTTGGCTACTGGCGACAACTGAGAGCAGTCGCTGGGGAAGAGAATTGCGTGGGTTGAAGGC  
CGACGCTTCGAGCTTGAGTGTGACGAGGCCGGTGACGTTTTGTCAACGGCGTTTGGAGGATTTTATC  
CGC

+  
FFFFFFFFFFFFFFFFFFFFFFFFFFFFFFFFFFFFFFFFFFFFFFFFFFFFFFFFFFFFFFFFFFFFFFFF  
FFFFFFFFFFFFFFFFFFFFFFFFFFFFFFFFFFFFFFFFFFFFFFFFFFFFFFFFFFFFFFFFFFFFFFFF:FFFFFFFFFFFFFFFF  
FFF

@A00721:190:HGJW7DSXY:4:2571:12292:23187\_2:N:0:TCTGCAAG+GCTGCACT  
GCGAAGATCCCCTATGGAGTCTTGAAGGACTTAGGTTGGCATATTTATGCCGACGATAATAAGCATGT  
CACCCCTAAGCACCGAGGTAAGCTCGGGACTTACAAGAGAGAGTGTGA

+  
FFFFFFFFFFFFFFFF:FFFFFFFFFFFFFFFFFFFFFFFFFFFFFFFFFFFFFFFFFFFFFFFFFFFFFFFF:FFF:FFFF:FF  
FFFFFFFFFFFFFFFFFFFFFFFFFFFFFFFFFFFFFFFFFFFFFFFFFFFFFFFFFFFFFFFFFFFFFFFF

@A00721:190:HGJW7DSXY:4:1504:18421:15076\_1:N:0:TCTGCAAG+GCTGCACT  
TTTCCTCCGTCATTGGGGATTTGATGTGAGAAGGTGGAAGGTGTCAAGGGTCTTCTTCATGCTGATC  
TTTCAGGACCTAATCACATCATGATTGATAGTTACGGCTCGTATCGAGTTGGAGGGAGGAAGTTCTCC  
GAA

+  
FFFFF:FFFFFFFFFFFFFFFFFFFFFFFFFFFFFFFFFFFFFFFFFFFFFFFFFFFFFFFFFFFFFFFFFFFF  
FFFFFFFFFFFFFFFFFFFFFFFFFFFFFFFFFFFFFFFFFFFFFFFFFFFFFFFFFFFFFFFFFFFFFFFFFFFF  
FFF

@A00721:190:HGJW7DSXY:4:2158:6072:4617\_2:N:0:TCTGCAAG+GCTGCACT  
GGAAGGCTCTAGAGAAGATCTCACCACTGGAGAAGGCAAGTGGAGAGTCCAGAAGTTGATGAAGAAG  
GATTATTTGAAGCAGGGGTTACCACTTCCTAAGGTGGATGAGGGAGGT

+  
FFFFFFFFFFFFFFFFFFFFFFFFFFFF:FFFFFFFFFFFF:FFFFFFFFFFFFFFFFFFFFFFFFFFFFFFFFFFFF  
FFFFFFFFFFFFFFFFFFFFFFFFFFFFFFFFFFFF: :FFFFFFFFFFFF,FFFFFFFFFFFF

@A00721:190:HGJW7DSXY:4:1540:14913:12978\_1:N:0:TCTGCAAG+GCTGCACT  
TGTTCTTCCGGGAAGTTGTGGGATTTAACTTTGACTCAACTACTCCGATCAGATCCGGATGGTTTGA  
TTGGTATGGACTACTCGACTTTTGATCTGGAGTTGTCTAGGGTCATGGCAGATACTACCGATAAGGTG  
AAA

+  
FFFFFFFFFFFFFFFFFFFFFFFFFFFF:FFFFFFFFFFFFFFFFFFFFFFFFFFFFFFFFFFFFFFFFFFFF  
FFFFFFFFFFFFFFFFFFFFFFFFFFFFFFFFFFFFFFFFFFFFFFFFFFFFFFFFFFFFFFFFFFFFFFFFFFFF  
FFF

@A00721:190:HGJW7DSXY:4:1212:2889:14826\_2:N:0:TCTGCAAG+GCTGCACT  
TTTATGATTCAAAACCTATCGTTGTGCTACCTTACAAGGTTGAGGAGACTTTACAGCGGCTTATTGTC  
GCGCAGTTTCCAGAATTGCGGTTGAAGTTCACCCATTCTATCTTGAAT

+  
FFFFFFFFFFFFFFFFFFFFFFFFFFFFFFFFFFFFFFFFFFFFFFFFFFFFFFFFFFFFFFFFFFFF:FFFFFFFFFFFF  
FFFFFFFFFFFFFFFFFFFFFFFFFFFFFFFFFFFFFFFFFFFFFFFFFFFFFFFFFFFFFFFFFFFFFFFF

@A00721:190:HGJW7DSXY:4:1620:22281:28244\_1:N:0:TCTGCAAG+GCTGCACT  
ATCGAGGTATACGTCTAGGAACATTGATTGGGAACGTACCTACTCACGAGACGTATGAAAGCTATCG  
GAGGGAAGCAAATGTTTCGTTCTGTTACAAGAACGCTTTGGATTGTGACCATAAAGCCTCAGTTGCG  
ATA

+  
FFFFF:FFFFFFFFFFFFFFFFFFFFFFFFFFFFFFFFFFFFFFFFFFFFFFFFFFFFFFFFFFFFFFFFFFFF  
FFFFFFFFFFFFFFFFFFFFFFFFFFFFFFFFFFFFFFFFFFFFFFFFFFFFFFFFFFFFFFFFFFFFFFFFFFFF  
FFF

@A00721:190:HGJW7DSXY:4:2169:26286:2331\_2:N:0:TCTGCAAG+GCTGCACT  
CTTCGTAACAACAGTGCGAGGATTGTCATCTCGGGGAAAGTGATTCACCAAGATGTTTCATATAGATAC  
GAGATACCTAGAGAAGGTCGCAGCGATCTTACTCGTTATCGGAGCTAA

+  
FFFFFFFFFFFF:FFFFFFFFFFFFFFFFFFFFFFFFFFFFFFFFFFFF:FFFFFFFFFFFFFFFFFFFF: :FFFFFFFFFFFF  
FFFFFFFFFFFFFFFFFFFFFFFFFFFFFFFFFFFFFFFFFFFFFFFFFFFFFFFFFFFFFFFFFFFFFFFF

@A00721:190:HGJW7DSXY:4:2619:9281:36949\_1:N:0:TCTGCAAG+GCTGCACT  
AAAAGATTGAGGACGCCTACGGTGACTTTATGGACAAGATGCAAGTTCTTGGGAAATACTTGTTTCCC



TTTTTAGGTTTAGTAGGTGATCTTGACGTCGATTCTTTGTATAGGGAGTGTGAGAAGACAACGAATCT  
TGA

+

FFFFFFFFFFFFFFFFFFFFFFFFFFFFFFFF:FFFFF,FFFFFFFFFFFFFFFFFFFFFFFF:FFFFFFFFFFFFFFFF  
FFFFFFFFFFFFFFFFFFFFFFFFFFFFFFFFFFFFFFFFFFFFFFFFFFFFFFFFFFFFFFFFFFFFFFFF  
FFF

@A00721:190:HGJW7DSXY:4:1238:28800:30514\_1:N:0:TCTGCAAG+GCTGCACT  
TTATTGAAAACAAAGTTAAGAATGAGGCTGATAATGGAGTCTTTGTACATTCTGTCAAATTAGATGT  
TCAGCTACGAGAGGTGATCCCGGTTGTGGATTGAAGGCTGGCTCTAAGGGAGACTCCTTCTTTTGA  
TTT

+

FF:F:FF,F:F,FFFFF,F,,,,F,,F,FFF,,FFF,,,F,FFF:FFF,F,FFFFFFFF,FF,,,,:F  
F,F,:FFFFFF,,FFFFF,FF,F,F,F,FFFF::FF::FF:F:FF,:FFFF,:FF,,FFF,F:FFFF:  
F,F

@A00721:190:HGJW7DSXY:4:2364:4598:28557\_1:N:0:TCTGCAAG+GCTGCACT  
GTTGAGAAGTGTGCTTTACAAGGAGTTAGACTCTTCTTCAAGTTTTTAGATCTTCTTGATAATCTTAA  
AGAAAAATTTTCAATAAACTAATGAGAGGTATAGGCTTAGTCAAGTCTGTACTTACATTCTTTACGC  
CAG

+

FFFFFFFFFFFFFFFFFFFFFFFFFFFFFFFFFFFFFFFFFFFFFFFFFFFFFFFFFFFFFFFFFFFFFFFF  
FFFFFFFFFFFFFFFFFFFFFFFFFFFFFFFFFFFFFFFFFFFFFFFFFFFFFFFFFFFFFFFFFFFFFFFF  
FFF

@A00721:190:HGJW7DSXY:4:2534:4472:8578\_2:N:0:TCTGCAAG+GCTGCACT  
AGATTCAATCTGGCATCACTGAACGTCTACAACGAGTTAGGGAGTGGCTAGGTTTTAAAGATCCTTT  
GCACAAGCAATACCTTCCACTGAGTTCATCACCCAGAGTTTCGACGTC

+

FFFFFFFFFFFFFFFFFFFFFFFFFFFFFFFFFFFFFFFFFFFFFFFFFFFFFFFFFFFFFFFFFFFFFFFF  
FFFFFFFFFFFFFFFFFFFFFFFFFFFFFFFFFFFFFFFFFFFFFFFFFFFFFFFFFFFFFFFF:F

@A00721:190:HGJW7DSXY:4:1423:24270:3129\_1:N:0:TCTGCAAG+GCTGCACT  
CTTTTACCTTTTGGAGGTCCAGGAACCTTTACTCCTAGTGTCTTTCTAGAGTCCAAGGACGTTCCG  
TCGGAGGATGACAGGTGGGAGACCGCTCAATAACACTCTATTGAATCCCTTTTCCACGATGAAAGCTC  
TTT

+

FFFFFFFFFFFFFFFFFFFFFFFFFFFFFFFFFFFFFFFFFFFFFFFFFFFFFFFFFFFFFFFFFFFFFFFF  
FFFFFFFFFFFFFFFFFFFFFFFFFFFFFFFFFFFFFFFFFFFFFFFFFFFFFFFFFFFFFFFFFFFFFFFF  
FFF

@A00721:190:HGJW7DSXY:4:2628:27489:25457\_1:N:0:TCTGCAAG+GCTGCACT  
GCCACTTCTAATTTTAGGAAACGTCGCGAAAAGAAAGTTCATGAGGATGTCTTGTCGAAAAATATCG  
CCGGAACCTTCTAATAGAGGATCCTGATGACATTATTTCAACGGATACCGATCTCAGTTCTACCACAG  
AAA

+

FFFFFFFFF:FFFFFFFFFFFFFFFFFFFFFFFFFFFFFFFFFFFFFFFFFFFFFFFFFFFFFFFFFFFF  
FFFFFFFFF:FFFFF:FFFFFFFFFFFFFFFFFFFFFFFFFFFFFFFFFFFFFFFFFFFFFFFFFFFFFFFF  
FFF

@A00721:190:HGJW7DSXY:4:1446:11758:30843\_1:N:0:TCTGCAAG+GCTGCACT  
TGTCTCCACTGATTCGGAATTAGAGAAAGACGACCTTCTTGTGGGGACTGAGACCTCTGAATTTTCAG  
GGTGCCCTGATGAGGACGTTGAAAGGGATAATTTCAACTCTGAGACTTCTAAGAGTGTTTCAAAGAC  
CAG

+

FFFFFFFFF:FFFFFFFF::FFFFFFFFFFFFFFFFFFFFFFFFFFFFFFFFFFFFFFFFFFFFFFFFFFFF  
FFFFFFFFFFFFFFFFFFFFFFFFFFFFFFFFFFFFFFFFFFFFFFFFFFFFFFFFFFFFFFFFFFFFFFFF  
FFF

@A00721:190:HGJW7DSXY:4:1443:27416:24831\_2:N:0:TCTGCAAG+GCTGCACT  
AGAACAGCTGATTCTTATTGCATGAACGTCGCTGAGGTCAAACCTGTGGACGTTCTTTTCATCGACGA

ATTATTCATGATTACGCTGGTCAGACCCTTTTTCTTACACATCTACT  
+  
FFFFFFFFFFFFFFFFFFFFFFFFFFFFFFFFFFFFFFFFFFFFFFFFFFFFFFFFFFFFFFFFFFFFFFFF  
FFFFFFFFFFFFFF:F:FFFFFFFFFFFFFFFFFFFFFF:FFFFF:FFFFF  
@A00721:190:HGJW7DSXY:4:1576:4679:27727\_2:N:0:TCTGCAAG+GCTGCACT  
CTACTTCAACATCAACGACATCATTCTTGATGAGTGTCTGTTCTTATCGAAGTCTCAGTTATCGCTGCC  
CGGCCGACGTTTGTCTGCGAACTCTCAGAGGTTTACGGCAGAAAAATTT  
+  
FFFFFFFFFFFFFFFFFFFFFFFFFFFFFFFFFFFFFFFFFFFFFFFFFFFFFFFFFFFFFFFFFFFFFFFF  
FFFFFFF:FFF,:FFFFFFFF:FFFFFFFFFFFFFFFFFFFFFF:FF:FFF  
@A00721:190:HGJW7DSXY:4:2457:9679:24862\_1:N:0:TCTGCAAG+GCTGCACT  
ACCCCTTATATCGAGGCTATCGAGGACGATGAGTATCTTGAAGTTGTTGACGACAAGCCTCAAGAGGG  
TAGAGGACCACCTGGATCTTCTACTGTCTCTGCCTTCCAAGATTTCTTAGAAGAGGTTATTCCTGGAA  
CCA  
+  
FF:FFF:FFFFFFFFFFFFFFFF:FF:FFFFFFFFFFFFFFFFFFFFFFFFFFFFFFFFFFFFFFFFFFFF  
:FFFFFFFFFFFFFFFFFFFFFFFF:FFFFFFFFFFFFFFFFFFFFFF:,FFFFFFFFFFFFFFFFFFFFF  
FFF  
@A00721:190:HGJW7DSXY:4:1522:31774:35884\_1:N:0:TCTGCAAG+GCTGCACT  
GGTAAGAAGCCCCTTGAGCCGCGTAGTCAGCGGTTTAGCTGTATCATCAGTCAGAGTATACCCGATA  
GGGTACCGAGTCTCCAAGAGAATATTTATTCTTATGAGGCTCGAACTTCAACGTTTTCAACACGGAA  
AGA  
+  
:FFFFFFFFFFFFFFFFFFFFFFFF:FFFFFFFF:FFFFFFFFFFFFFFFFFFFFFFFFFFFFFFFFFFFF  
FFFFFFFFFFFFFFFFFFFFF.:FFFFFFFFFFFFFFFFFFFFFFFFFFFFFFFFFFFFFFFF:FFFFFFFFFFFF  
FFF  
@A00721:190:HGJW7DSXY:4:2634:28158:22263\_2:N:0:TCTGCAAG+GCTGCACT  
ATTTTATCACTTTATTATGACCTTGAAAGTTTTCGGCTGTGGTTGTCTGCTGGGGACGATTCCATTCT  
GTTTTCAAAGACTCCAATAACTGATCATTCTGATCATATGATTTTGGA  
+  
FFFFFFFFFFFFFFFFFFFFFFFFFFFFFFFFFFFFFFFFFFFFFFFFFFFFFFFFFFFFFFFFFFFFFFFF  
FFFFFFFFFFFFFFFFFFFFFFFFFFFFFFFFFFFFFFFFFFFFFFFFFFFFFFFFFFFFFFFF  
@A00721:190:HGJW7DSXY:4:2646:10520:7341\_1:N:0:TCTGCAAG+GCTGCACT  
TGATGTGGAGGGAGTTCTTGAAGCATCCCGACCTTCTTGTGAAAATTTTGATGCGGTTTCATAAGA  
TTATCAGTAATCCTGATTCTACTACGGATTCATGGACCTTCCATCCTGTACCTCTTCTGGAGAGACGT  
ATC  
+  
FFFFFFFFFFFFFFF:FFFFFFFFFFFFFFFFFFFF:FFFFFFFFFFFFFFFFFFFFFFFFFFFFFFFFFFFF  
FFFFFFFFF:FFFFFFFFFFFFFFFFFFFF:FFFFFFFFFFFFFFFFFFFFFFFFFFFFFFFFFFFFFFFFFFFF  
FFF  
@A00721:190:HGJW7DSXY:4:1332:5204:21277\_1:N:0:TCTGCAAG+GCTGCACT  
CTTCCGATCTGAACCTTTGGGAATTTGAAGCTCAGGGTGAAGCACAACGTTTGACCGTGACGAACTGTG  
GTGTTCTTGATCTACGTTACGGATATACTCTCCTTGAGTTCACTCGTAAGGACACTACCACTTATTAC  
GAT  
+  
FFFF,FFFFFFFFFFFFFFFFFFFFFFFFFFFFFFFFFFFFFFFFFFFFFFFFFFFFFFFFFFFFFFFFFFFF  
FFFFFFFFFFFFFFFFFFFFFFFFFFFFFFFFFFFFFFFFFFFFFFFFFFFFFFFFFFFFFFFF:FFFFFFFFFFFFF:F  
FFF  
@A00721:190:HGJW7DSXY:4:1367:30563:23484\_2:N:0:TCTGCAAG+GCTGCACT  
GGGTTTTCGAATAGTGATAGCCACCCGCTTACAGAGGGGCAGCAGCATGACCATAATTGGTATTGAC  
TTTGGTACCACCTTTTCTACTGTCTGTCTCGCCTCTTGAATGAAGTT  
+  
FFFFFFFFFFFFFFFFFFFFFFFFFFFFFFFFFFFFFFFFFFFFFFFFFFFFFFFFFFFFFFFFFFFFFFFF  
FFFFFFFFFFFFFFF:FFFFFFFFFFFFFFFFFFFFFFFFFFFFFFFFFFFFFFFF:FFFFFFFFFFFF

@A00721:190:HGJW7DSXY:4:1612:23366:24142\_2:N:0:TCTGCAAG+GCTGCACT  
TTTCTAATAATGATGACACTATTGTTTATGGATATGATGCTATTACTCATGATGGTTACGGTCAGGGA  
GGATTCTCAGTTTACAAGGACCTTAAGCGATTGATCTGGGTTAATTCT

+

,FFFFFF,FF:,FFFFFFF:F,FF,:FFFF:FFFF,FF,:FFFFFFFFF:FFFFFFF::FFFFFF,F  
,FFFF,:FFFFFFFFFFFF,F:FFFF:FFFF:FFF,F:, :FFFFFFF

@A00721:190:HGJW7DSXY:4:1356:27317:29230\_1:N:0:TCTGCAAG+GCTGCACT  
ACGCAAAGATATTTTCATGAAAACCTACAGAGGAACGTACCGGATTACCTGTCTTTCATATTATGAATGA  
ACCTTCGGCCGCTCTCTTTGCTTCGATGTTGGATGTCAAGAAGGGTTCAGAATGGGATTCTACGTAG  
TTT

+

FFFFFFFFFFFFFF:FFFFFFFF:FFFFFFFFFFFFFFFFFFFFFFFF:FFFFFFFFFFFFFFFFFFFFFFFF  
FFFFFFFFFFFFFFFFFFFFFFFFFFFFFFFFFFFFFFFFFFFFFFFFFFFFFFFFFFFFFFFFFFFFFFFF  
:FF

@A00721:190:HGJW7DSXY:4:1311:3821:8672\_2:N:0:TCTGCAAG+GCTGCACT  
CTTACTTGGAACGAAGGCGACCTGTTCCGGAGTTTTTACGGGATCCGGAATGTTCTGTCTATCTTAGG  
TGAAGCGAAATACGATTTCAACGTCAACGTTACCGAGTTTTGTTTC

+

FFFFF,FFFFFFFFF:FFFFFFFF,F::FFFFFFFFF,F,,FFFF::FFFFFFFF:FFFFF,F,FF:  
F:F::FFFFFFFF:FFF:FF,FFFF,FF:FF,FFFF,FFFF,FF:FFFF

@A00721:190:HGJW7DSXY:4:1369:9399:22968\_2:N:0:TCTGCAAG+GCTGCACT  
TAAGAAGTTTATAAGGAACATATCCATTTGTTGTAATAGGGTCATCAACTTAGAACTCGAAACTCTAA  
GTGGTAATACTGTCTTTCCAAGCTTACCTGTATCTTCAATGAAATTGG

+

FFFFFFFFFFFFFFFFFFFFFFFFFFFFFFFFFFFFFFFFFFFFFFFFFFFFFFFFFFFFFFFFFFFFFFFF  
FFFFFFFFFFFFFFFFFFFFFFFFFFFFFFFFFFFFFFFFFFFFFFFFFFFFFFFFFFFFFFFF

@A00721:190:HGJW7DSXY:4:1155:14760:10708\_2:N:0:TCTGCAAG+GCTGCACT  
TTCCTACGATACAAATGATAACTTCTAATTTACGTTTGCTACTCAGAGCTGGTCTCTCAGCAAAGGG  
ATGCATGGTGTATCTCCTCAGGAGTCCCGGCATTTGATAATAATGAC

+

FFFFFFFFFFFFFFFFFFFFFFFF:FFFFFFFFFFFFFFFFFFFFFFFFFFFFFFFFFFFFFFFFFFFFF  
FFFFFFFFFFFFFFFFFFFFFFFFFFFFFFFFFFFFFFFFFFFFFFFFFFFFFFFFFFFFFFFF

@A00721:190:HGJW7DSXY:4:1331:31539:17472\_2:N:0:TCTGCAAG+GCTGCACT  
TCGCTGCATATTACGGATTACACGGTACCAGCGCATCTCGTGTGAGCCTCGACCCGATTATATGGTA  
TTAACTTATAAAGGTGAGGAGACCATTTTCTTGCTGAAATTTATAGAA

+

FFFFFFFFFFFFFFFFFFFFFFFFFFFFFFFFFFFFFFFFFFFFFFFFFFFFFFFFFFFFFFFF:FF:FFFF  
FFFFFFFFFFFFFFFFFFFFFFFFFFFFFFFFFFFFFFFFFFFFFFFFFFFFFFFF

@A00721:190:HGJW7DSXY:4:1233:19334:6731\_2:N:0:TCTGCAAG+GCTGCACT  
GTCAACACTAGTTCGAGTGCTGCTTTGGATTACGATGACGTGAGAATAGGTGAAGGGATAGTTTTTAC  
CTCGACCAACATTAAGGCGGCGGCGACTAATCTTAAAGCTTCACCCAA

+

FFFFFFF,FFFFFFFFFFFFFF:FFFFFFFFFFFFFFFFFFFFFF,FFF:FFFFFFFFFFFFFFFF  
FFFFFFFFFFFF:FFFFFFFFFFFFFFFFFFFFFFFFFFFFFFFFFFFFFFFF

@A00721:190:HGJW7DSXY:4:2648:22227:4914\_2:N:0:TCTGCAAG+GCTGCACT  
ATACAACCTAGCCTTCAAGTGGGCTATGCCTGCCGAATACGCTTGCTATTCACCAGATTGGTTCGAA  
CCCGTAGATGCTAAGTCAGAAGAAGCTAATCAAGCTTGTCGTTTAAAG

+

FFFFF,,FFFF,:F,F,:F,F,,FFF,F,FF,,,F,,FFFFFF,:FF:FF,F:FFFF,,,F,F:F  
,,F,F,,F,,F:F,F,F,FFF,FFFFFF,F,FF:FFFF,:F,FFF:F,

@A00721:190:HGJW7DSXY:4:2365:27444:21684\_2:N:0:TCTGCAAG+GCTGCACT  
ACAAGCCCAGACTCAAGGAGTCCAATCAAAGGTTTTGAATTTAGCTCAACTGGGAGACGTGCTTAA  
TGGGTGATAAAAATTATTTAGAGATCTTTTCTACTTACAAAGGACAAT

+

FFFFFFFFFFFFFFFF:FFFFFFFFFFFF:,FFFFFFFFFFFFFFFFFFFFFFFFFFFFFFFFFFFFFFFF,F::  
FFFFFFFF:FFFFF,F,FFFFFFFF:FF:FFF:FFFFFFFFFFFFFFFF  
@A00721:190:HGJW7DSXY:4:1577:10013:24940\_1:N:0:TCTGCAAG+GCTGCACT  
TTTTGTTACCAAATTCTTGCTTTCAACGAAGTCTCTGATTTTATTAATCATTACTTTAACGATCTCT  
CGGTCATTTACTCTGTACTTGATCTACGTCGTTTAACTGTCGGAACAACCTTTACTTAGAATGACTCT  
ATC

+  
FFFFFFFFFFFFFFFF:FFFFF:FFFFFFFFFFFFFFFFFFFFFFFFFFFFFFFFFFFFFFFF:FFFFF,F,FFFF  
FFF:FFFFFFFF:FFFFFFFF:FFFFFFFF:FFFFFFFFFFFFFFFF,FFF:FF,FFF:FF:FF:FFFFF:  
FFF

@A00721:190:HGJW7DSXY:4:2350:27760:8672\_2:N:0:TCTGCAAG+GCTGCACT  
ACGAAAACCAACTCTTCGTTACGAGACCTGATGGTAGAATAGATTTAGTCTCTACACCCATCTCAACG  
AGGATAAAGCGAGTTTTCCGTCCTGAACGTAATACACGAAGAGATCAT

+  
FFFFFFFFFFFFFFFFFFFFFFFFFFFFFFFFFFFFFFFFFFFFFFFFFFFFFFFFFFFFFFFFFFFFFFFF  
FFFFFFFFFFFFFFFFFFFFFFFFFFFFFFFFFFFFFFFF:FFFFFFFF:FFFFFFFF

@A00721:190:HGJW7DSXY:4:1413:26142:14418\_1:N:0:TCTGCAAG+GCTGCACT  
AAATGAGGTCAAAGCTCTATTTATTAACGAACCTATTATCCGATTCTTCGAGGGTATCACTACCACTG  
ATCTGCCGACTTTAGTCAAGGAACCTCAATTCCTTCAATGTTTATATTTTCTATAAGGGAAAATAGC  
AAT

+  
FFFFF:FFFFFFFF:F:FFF,FFFFFFFF:FF::FFFF::FF:FFF,FF:FFF:FFFFFFFFFFFFFFFF  
FFFFFFFF:F:FFFF:FFF:F:FFF,FFFFF:FFFFF:F:FFFFF:FFFFFFFF:FFFFFFFFFFFFFFFF  
FFF

@A00721:190:HGJW7DSXY:4:2169:12283:3161\_2:N:0:TCTGCAAG+GCTGCACT  
AATTTTAGAACTTTATTTTCAGAACTCTCTCCGATCACCTTGGTGTGATCTCCCGGAGGATCTTTCAA  
TAAGATGTATGATGATAATCTACTATTTTAAATAGTGATATTCAGCG

+  
FFFFFFFFFFFFF:FFFFFFFFFFFFFFFFFFFFFFFFFFFFFFFF:FFF:FFFFFFFFFFFFFFFFFFFFFFFF  
FFFFFFFFFFFFFFFF:FFFFFFFFFFFFFFFFFFFFFFFFFFFFFFFF:FFF

@A00721:190:HGJW7DSXY:4:2367:14461:15734\_1:N:0:TCTGCAAG+GCTGCACT  
TCAAAGATTTGGCTTGGTCTATTTACCGCAAAAAGTTGGAAGAGGTCTATGATATTTATTTTACTTAT  
ACTTTAAATAGCACCGATTATAAATTGACTGTTGATAATATTACAATAGCTCTTCTCAGAAGATTAG  
AGA

+  
FFFFFFFFFFFFF:FFFFFFFFFFFFFFFFFFFFFFFFFFFFFFFFFFFFFFFFFFFFFFFFFFFFFFFFFFFF  
FFFFFFFFFFFFFFFFFFFFFFFFFFFFFFFFFFFFFFFFFFFFFFFFFFFFFFFFFFFFFFFFFFFFFFFFFFFF  
FFF

@A00721:190:HGJW7DSXY:4:2122:22318:1783\_2:N:0:TCTGCAAG+GCTGCACT  
TTTACTTTTACCGTTAGAACTGAAAAAGATTCTTTTCGAAAAGAAACCTATAAGTTACAAACGATTCT  
TCGACTATATTAAAGAAATAAAAATACTTCAAGTACCTGAACTTTACA

+  
FFFFFFFFFFFFFFFFFFFFFFFFFFFFFFFFFFFFFFFFFFFFFFFFFFFFFFFFFFFFFFFFFFFFFFFF  
FFFFFFFFFFFFFFFF:FFFFFFFFFFFFFFFFFFFFFFFFFFFFFFFFFFFFFFFF:FFF

@A00721:190:HGJW7DSXY:4:2218:23258:5478\_1:N:0:TCTGCAAG+GCTGCACT  
GAGAGTGTATTCCTTAATATTCTAGTAACCGCTATGTGGGCATTACTAGGATTTATCACACTCCTAAA  
TTTGATAGCAATTTATGTTTTAAATGCTAGGAAAATTTAGAAAACCTCATTGTATAGTTCAAGGAG  
TAC

+  
FFFFFFFFFFFFFFFF:FFFFFFFFFFFFFFFFFFFFFFFFFFFFFFFFFFFFFFFFFFFFFFFFFFFFFFFF  
FFFFFFFFFFFFFFFFFFFFFFFFFFFFFFFFFFFFFFFF:FFFFFFFFFFFFFFFFFFFFFFFFFFFFFFFF  
FFF

@A00721:190:HGJW7DSXY:4:1526:5575:16188\_2:N:0:TCTGCAAG+GCTGCACT  
GCTTTAGTATTATTTACTATCGCCTTTATTGAAAATTGTATAAGAGTTAATTGCTTACACAAAAGTGA

CGCGCGAAGGAATCTTAATTGATTGAAGCTAGGCGTTGGGGAGAATGA

+

FFFFFFFFF:FFFFFFFFFFFFFFF:FF:FFFFFFFFFFFFFFFFFFFFFFFFFFFFFFFFF:FFFFFFF  
FFFFFFFFF::FFFFFF,FFF:FF:FFFFFFFFF:,F:FFFFFFFFF

@A00721:190:HGJW7DSXY:4:2469:15971:14622\_2:N:0:TCTGCAAG+GCTGCACT  
CGCTGTGCAGAATAACCTTCCCAAATCTAGATCTGCACAGAAGAAGGCTGAAGGTCGTTACCGGACGA  
CCTCAAGGAAACGGGCTGTTGCCAGAGGAAAGCAGCGACCACCG

+

FFFFFFFFFFFFFFFFFFFFFFFFFFFFFFFFFFFFFFFFF:FFF:FFFFFFFFFFFFFFFFF:FFFFF  
FFFFFFFFF,FFFFFF:FFFFFFFFFFFFFFFFFFFFFFFFFFFFFFFFF:FFFFF

@A00721:190:HGJW7DSXY:4:1572:2058:3552\_1:N:0:TCTGCAAG+GCTGCACT  
AAAAGTCACATTCACCACTCCCATGCCAATCAATGATGTGACTATACAGTTCGGCCATTTCAAGAGTG  
GTCAATACGTCGTGGGAGGTACTGAAGCCTTCCCCTCCGCTGGCACGAAGAAGCACTCCCAAGCCAATC  
AAT

+

FFFFFFFFF:FFFFFF,FFFFFFFFFFFFFFFFFFFFFFFFFFFFFFFFFFFFFFFFFFFFFFFFF  
FFFFFFFFFFFFFFFFFFFFFFFFFFFFFFFFFFFFFFFFFFFFFFFFFFFFFFFFFFFFFFFFF  
FFF

@A00721:190:HGJW7DSXY:4:2542:25780:12790\_1:N:0:TCTGCAAG+GCTGCACT  
AATGAAAAGGGGTTTACCAGGGTAGTCTCTAAGTCTACCAGGAAGAGGGGAAATGTCCCCAAAAGTGA  
GAAGAATAAAGGGAAAGGTCCATCAGGACCTAAGAAGGGGAAATTACCCCTAATTCTGAAGGAAGATC  
TCC

+

FFFFFFFFFFF::FFFF:FFFF::FF:,F,FFFFFFFFF,F:FF:F::FFFFFFFFFFFFFFFFFFF:FF  
:FFF:FFFFFFFF,FF,FFFFFF:F:FFF:FFFF:F:FF:,FFF,FFF:FFFFFFFFF:FFFF:FFF  
FFF

@A00721:190:HGJW7DSXY:4:1332:7283:19272\_1:N:0:TCTGCAAG+GCTGCACT  
CTACGAAGTCGCTGAAGGCGGCTTGGGTCATTAAGGGTAGCTGTAAAGTTGCGCCTGCCGACCCCATC  
TTTGAGACCAAGACTCTCTACAGTAGGTCGTGCCTACTATGAGCAAATCTGTTGAATTGCTCACTGA  
GGA

+

FFFFFFFFFFFFFFFFFFFFFFFFFFFFFFFFFFFFFFFFF:FFFFFFFFFFFFFFFFFFFFFFFFFFFFF  
FFFFFFFFFFFFFFFFFFFFFFFFFFFFFFFFFFFFFFFFFFFFFFFFFFFFFFFFF:FFFFFFFFFFFFFFFFFFFFF  
FFF

@A00721:190:HGJW7DSXY:4:2143:3766:2002\_1:N:0:TCTGCAAG+GCTGCACT  
GGACTTTTGGCTACTGGAGACAACTGAGAGCAGTCGCTGGGGAAAGAGAATTGCGTGGGTTGAAGGC  
CGACGCTTCGAGCTTGAGTGTGACGAGGCCGGTGACGTTTTTGTCAACGGCGTTTGGAGGATTTTATC  
CGC

+

F:F:FF,F:FFFFFF,,F,:FF,FFFF,FFFFFFFF,FF,F,,,FF:,FFFFFFFFF,FFF,FFF:  
:,,:,:::FFF:FFF:,FFF,:,:::F,F,FFF,FFFFFFFFF:F:FF,FFFFFFFFFFF:FFFF  
,,F

@A00721:190:HGJW7DSXY:4:2603:21377:12649\_2:N:0:TCTGCAAG+GCTGCACT  
GCGAAGATCCCCTATGGAGTCTTGAAGGACTTAGGTTGGCATATTTATGCCGACGATAATAAGCATGT  
CACCCTTAAGCACCGAGGTAAGCTCGGGACTTACAAGAGAGAGTGTGA

+

FFFFFFFFF:FFFFFFFFFFFFFFFFFFFFFFFFFFFFFFFFFFFFFFFFF:FFFFFFFFFFFFF  
FFFFFFFFFFFFFFFFFFFFFFFFF:FFFFFFFFFFFFFFFFFFFFFFFFFFFFF

@A00721:190:HGJW7DSXY:4:1504:6732:36542\_1:N:0:TCTGCAAG+GCTGCACT  
TTTCCTCCGTCATTGGGGATTTGATGTGAGAAGGTGGAAGGTGTCAAGGTCTTCTTCATGCTGATC  
TTTCAGGACCTAATCACATCATGATTGATAGTTACGGCTCGTATCGAGTTGGAGGGAGGAAGTTCTCC  
GAA

+

F:FFF:FFFFFF:FFFFFFFFFFFFFFFFFFFFFFFFFFFFFFFFFFFFFFFFFFFFFFFFF

FFFFFFFFFFFFFFFF:FFFFFFFFFFFFFF:F:FFFFFFFFFFFFFFFFFFFFFFFFFFFFFFFFFFFFFFFF  
FFF

@A00721:190:HGJW7DSXY:4:2321:14769:18552\_2:N:0:TCTGCAAG+GCTGCACT  
GGAAGGCTCTAGAGAAGATCTCACCACCTGGAGAAGGCAAGTGGAGAGTCCAGAAGTTGATGAAGAAG  
GATTATTTGAAGCAGGGGTTACCACTTCCTAAGGTGGATGAGGGAGGT

+

FFFFFFFFFFFFFFFFFFFFFFFFFFFFFFFFFFFFFFFF,FFFFFF::FFFFFF:FFF,FFFFFF:FFFF:FF  
FFFFFFFF:F:FFFFFFFF:FFFFFFFFFFFFFFFF:FFF,F,FFFFFFFF

@A00721:190:HGJW7DSXY:4:1558:30996:11052\_1:N:0:TCTGCAAG+GCTGCACT  
TGTTCTTCCGGGAAGTTGTGGGATTTAACTTTGACTCACTACTCCGATCAGATCCGGATGGTTTGA  
TTGGTATGGACTACTCGACTTTTGATCTGGAGTTGTCTAGGGTCATGGCAGATACTACCGATAAGGTG  
AAA

+

FFFFFFFFFFFFFFFFFFFFFFFFFFFFFFFFFFFFFFFF:FFFFFFFFFFFFFFFFFFFFFFFFFFFFFFFF:FFFF  
FFFFFFFFFFFFFFFFFFFFFFFFFFFFFFFFFFFFFFFFFFFFFFFFFFFFFFFFFFFFFFFFFFFFFFFF  
FFF

@A00721:190:HGJW7DSXY:4:1601:18349:21840\_2:N:0:TCTGCAAG+GCTGCACT  
TTTATGATTCAAAACCTATCGTTGTCTGACCTTACAAGGTTGAGGAGACTTTACAGCGGCTTATTGTC  
GCGCAGTTTCCAGAATTGCGGTTGAAGTTCACCCATTCTATCTTGAAT

+

FFFFFFFFFFFFFFFFFFFFFFFFFFFFFFFFFFFFFFFFFFFFFFFFFFFFFFFFFFFFFFFFFFFFFFFF:FFFFF  
FFFFFFFFFFFFFFFF:FFFFFFFFFFFFFFFFFFFFFFFFFFFFFFFFFFFFFFFF

@A00721:190:HGJW7DSXY:4:2166:7627:15045\_1:N:0:TCTGCAAG+GCTGCACT  
ATCGAGGTATACGTCTAGGAACATTGATTGGGAACGTACTACTCACGAGACGTATGAAAGCTATCG  
GAGGGAAGCAAAATGTTTCGTTCTGTTACAAGAACGCTTTGATTGTGACCATAAAGCCTCAGTTGCG  
ATA

+

FFFFFFFFFFFFFFFFFFFFFFFFFFFFFFFFFFFFFFFFFFFFFFFFFFFFFFFFFFFFFFFFFFFFFFFF  
FFFFFFFFFFFFFFFFFFFFFFFFFFFFFFFFFFFFFFFFFFFFFFFFFFFFFFFFFFFFFFFFFFFFFFFF  
FFF

@A00721:190:HGJW7DSXY:4:2367:25527:26412\_2:N:0:TCTGCAAG+GCTGCACT  
CTTCGTAACAACAGTGCAGGATTGTCATCTCGGGGAAAGTGATTCACCAAGATGTTTCATATAGATAC  
GAGATACCTAGAGAAGGTCGCAGCGATCTTACTCGTTATCGGAGCTAA

+

FFFFFFFFFFFFFFFFFFFFFFFFFFFFFFFFFFFFFFFFFFFFFFFFFFFFFFFFFFFFFFFFFFFFFFFF:FFFFF  
FFFFFFFFFFFFFFFFFFFFFFFFFFFFFFFFFFFFFFFFFFFFFFFFFFFFFFFFFFFFFFFF

@A00721:190:HGJW7DSXY:4:1211:5999:11036\_1:N:0:TCTGCAAG+GCTGCACT  
AAAGATTGAGGACGCTACGGTACTTTATGGACAAGATGCAAGTTCTTGGGAAATACTTGTTCCT  
TTTTAGTTTAGTAGGTGATCTTGACGTCGATTCTTTGTATAGGAGTGTGAGAAGACAACGAATCTT  
GA

+

FFFFFFFFFFFFFFFFFFFFFFFFFFFFFFFFFFFFFFFF,FFFF:FFFFFF:FFF:F:FFFFFFFFFFFFFFFF  
FFFFFFFF::FFFFFFFFFFFFFFFFFFFFFFFF,FFFFFFFFFFFFFFFF::FFFFFF:FFFF:FFF,FFFF  
FF

@A00721:190:HGJW7DSXY:4:2203:10447:5494\_1:N:0:TCTGCAAG+GCTGCACT  
TTCTTGAAAACCAAGTTAAGAAGGAGGCTGATCATGGAGTCTTTGTACCTTCTGTCAAACCTTCGAGGT  
TCAGCTACGAGAGGTGATCCCGGATGTGGATTGAAGGCTGGCTCTAAGGGAGACTCCTTCTTTTGA  
TTT

+

FFFFFFF:FFFFFF:FFFF:FFFFFF,FFFFFFFFFFFFFFFFFFFFFFFFFFFFFFFFFFFFFFFF  
FFFFFFFFFFFFFFFFFFFFFFFFFFFFFFFFFFFFFFFFFFFFFFFFFFFFFFFFFFFFFFFFFFFFFFFF  
FFF

@A00721:190:HGJW7DSXY:4:2405:1696:29262\_1:N:0:TCTGCAAG+GCTGCACT  
GTTGAGAAGTGTGCTTTACAAGGAGTTAGACTCTTCTTCAAGTTTTTAGATCTTCTTGATAATCTTAA



FFFFFFFFFFFFFFFFFFFFFFFFFFFFFFFFFFFFFFFFFFFFFFFFFFFFFFFFFFFFFFFFFFFFFFFF  
FFF

@A00721:190:HGJW7DSXY:4:1569:25925:31673\_1:N:0:TCTGCAAG+GCTGCACT  
GGTAAGAAGCCCCTTGAGCCGCGTAGTCAGCGCGTTTAGCTGTATCATCAGTCAGAGTATACCCGATA  
GGGTACCGAGTCTCCAAGAGAATATTTATTCTTATGAGGCTCGAACTTCAACGTTTTCAACACGGAA  
AGA

+  
FFFFFFFF:FFFFFFFFFFFFFFFFFFFFFFFFFFFFFFFFFFFFFFFFFFFFFFFFFFFFFFFFFFFF  
FFFFFFFFFFFFFFFFFFFFFFFFFFFFFFFFFFFFFFFFFFFFFFFFFFFFFFFFFFFFFFFFFFFF  
FFF

@A00721:190:HGJW7DSXY:4:2430:27697:29418\_2:N:0:TCTGCAAG+GCTGCACT  
TATCACTTTATTATGACCTTGGAAGTTTTTCGGCTGTGGTTGTCGCTGGGGACGATTCCATTCTGTTT  
TCAAAGACTCCAATAACTGATCATTCTGATCATATGATTTTGGACAAT

+  
FFFFFFFFFFFFFFFFFFFFFFFFFFFFFFFFFFFFFFFFFFFFFFFFFFFFFFFFFFFFFFFFFFFF:FFFFFFFFFFFFF  
FFFFFFFFFF:FFF:FFFFFFFFFFFFFFFFFFFFFFFFFFFFFFFFFFFFFFFFFFFFFFFFFFFF

@A00721:190:HGJW7DSXY:4:1119:32497:29434\_2:N:0:TCTGCAAG+GCTGCACT  
GTGGAGGGAGTTCTTGAAGCATCCCGACCTTTCCTTGTGAAAATTTTGATGCGGTTTCATAAGATTAT  
CAGTAATCCTGATTCTACTACGGATTTCATGGACCTTCCATCCTGTACC

+  
FFFFFFFFFFFFFFFFFFFFFFFFFFFFFFFFFFFFFFFFFFFFFFFFFFFFFFFFFFFFFFFFFFFF:FFFFFFFFFFFFF  
:FFFFFFFF:,FFFFFFFFFFFFF::FFFF:FFF:FFFFFFFFFFFFFFFFFFFF

@A00721:190:HGJW7DSXY:4:2115:16071:9659\_1:N:0:TCTGCAAG+GCTGCACT  
CTTCCGATCTGAACCTTTGGGAATTTGAAGCTCAGGGTGAAGCACAACGTTTGACCGTGACGAACGTGTG  
GTGTTCTTGATCTACGTTACGGATATACTCTCCTTGAGTTCACTCGTAAGGACACTACCACTTATTAC  
GAT

+  
FFFFFFFFFFFFFFFFFFFFFFFFFFFFFFFFFFFFFFFFFFFFFFFFFFFFFFFFFFFFFFFFFFFF  
FFFFFFFFFFFFFFFFFFFFFFFFFFFFFFFFFFFFFFFFFFFFFFFFFFFFFFFFFFFFFFFFFFFF  
FFF

@A00721:190:HGJW7DSXY:4:1459:20021:23140\_2:N:0:TCTGCAAG+GCTGCACT  
GGGTTTTTCGAATAGTGATAGCCACCCGCTTACAGAGGGGCAGCAGCATGACCATAATTGGTATTGAC  
TTTGGTACCACCTTTTCTACTGTCTGTCTCGCCTCTTCGAATGAAGTT

+  
FFFF:FFFFFFFFFFFFFFFFFFFFFFFFFFFFFFFFFFFFFFFFFFFFFFFFFFFFFFFFFFFF,FFFFFFFFFFFFF  
FFFFFFFFFFFFFFFFFFFFFFFFFFFFFFFFFFFFFFFFFFFFFFFFFFFFFFFFFFFF:FFFFFFFF

@A00721:190:HGJW7DSXY:4:2215:10294:25833\_2:N:0:TCTGCAAG+GCTGCACT  
TTTCTAATAATGATGACACTATTGTTTATGGATATGATGCTATTACTCATGATGGTTACGGTCAGGGA  
GGATTCTCAGTTTACAAGGACCTTAAGCGATTGATCGGGGTTAATTCT

+  
FFFFFFFFFFFFFFFFFFFFFFFFFFFFFFFFFFFFFFFFFFFFFFFFFFFFFFFFFFFFFFFFFFFF  
FFFFFFFFFFFFFFFFFFFFFFFFFFFFFFFFFFFFFFFFFFFFFFFFFFFFFFFFFFFF

@A00721:190:HGJW7DSXY:4:1504:29215:31203\_1:N:0:TCTGCAAG+GCTGCACT  
ACGCAAAGATATTTTCATGAAAACCTACAGAGGAACGTACCGGATTACCTGTCTTTCATATTATGAATGA  
ACCTTCGGCCGCTCTCTTTGCTTCGATGTTGGATGTCAAGAAGGGTTCAGAATGGGATTCCTACGTAG  
TTT

+  
FFFFFFFFFFFFFFFFFFFF:FFFFFFFFFFFFFFFFFFFFFFFFFFFFFFFFFFFFFFFFFFFFFFFFFFFF  
FFFFFFFFFFFFFFFFFFFFFFFFFFFFFFFFFFFFFFFFFFFFFFFFFFFFFFFFFFFF,FFFFFFF  
FFF

@A00721:190:HGJW7DSXY:4:2323:19226:11083\_2:N:0:TCTGCAAG+GCTGCACT  
CTTACTTGGAACGAAGGCGACCTGTTCCGGAGTTTTTACGGGATCCGGAATGTTCTGTCTATATTAGG  
TGAAGCGAAATACGATTTTCAACGTCAACGTTCAACGAGTTTTGTTTC

+



[illegible]



@A00721:190:HGJW7DSXY:4:2543:28592:18411\_1:N:0:TCTGCAAG+GCTGCACT  
AATGAAAAGGGGTTTACCAGGGTAGTCTCTAAGTCTACCAGGAAGAGGGGAAATGTCCCCAAACTGA  
GAAGAATAAAGGGAAAGGTCATCAGGACCTAAGAAGGGGAAATTACCCCTAATTCTGAAGGAAGATC  
TCC

+

[illegible]

@A00721:190:HGJW7DSXY:4:1333:27760:19476\_1:N:0:TCTGCAAG+GCTGCACT  
CTACGAAGTCGCTGAAGGCGGCTTGGGTCATTAAGGGTAGCTGTAAAGTTGCGCCTGCCGACCCCATC  
TTTGAGACCAAGACTCTCTACAGTAGGTCGTGCCTACTATGAGCAAATCTGTTGAATTCGTCACTGA  
GGA

+

```
FFFFFFFFFFFFFFFFFFFFFFFFFFFFFFFFFFFF:FFFFFFFFFFFFFFFFFFFF,FFFFFFFFFFFFFFFFFFFFFFF
FFFFFFFFFFFFFFFFFFFFFFFFFFFFFFFFFFFF:FFFFFFFFFFFFFFFFFFFFFFFFFFFFFFFFFFFFFFFFFFFF
FFF
```

@A00721:190:HGJW7DSXY:4:2238:21685:8359\_1:N:0:TCTGCAAG+GCTGCACT  
GGACTTTTGGCTACTGGCGACAACTGAGAGCAGTCGCTGGGGAAAGAGAATTGCGTGGGTTGAAGGC  
CGACGCTTCGAGCTTGAGTGTGACGAGGCCGGTGACGTTTTTGTCAACGGCGTTTGGAGGATTTTATC  
CGC

+

[illegible]

@A00721:190:HGJW7DSXY:4:2603:22299:14591\_2:N:0:TCTGCAAG+GCTGCACT  
GCGAAGATCCCCTATGGAGTCTTGAAGGACTTAGGTTGGCATATTTATGCCGACGATAATAAGCATGT  
CACCCCTTAAGCACCGAGGTAAGCTCGGGACTTACAAGAGAGAGTGTGA

+

[illegible]

@A00721:190:HGJW7DSXY:4:1558:15383:14857\_1:N:0:TCTGCAAG+GCTGCACT  
TTTCCTCCGTCATTGGGGATTTTCATGTGAGAAGGTGGAAGGTGTCAAGGGTCTTCTTCATGCTGATC  
TTTCAGGACCTAATCACATCATGATTGATAGTTACGGCTCGTATCGAGTTGGAGGGAGGAAGTTCTCC  
GAA

+

[illegible]

@A00721:190:HGJW7DSXY:4:2423:16812:32142\_2:N:0:TCTGCAAG+GCTGCACT  
GGAAGGCTCTAGAGAAGATCTCACCACCTGGAGAAGGCAAGTGGAGAGTCCAGAAGTTGATGAAGAAG  
GATTATTTGAAGCAGGGGTTACCACTTCCTAAGGTGGATGAGGGAGGT

+

[illegible]

@A00721:190:HGJW7DSXY:4:1677:20410:7686\_1:N:0:TCTGCAAG+GCTGCACT  
TGTTCTTCCGGGAAGTTGTGGGATTTAACTTTGACTCAACTACTCCGATCAGATCCGGATGGTTTGA  
TTGGTATGGACTACTCGACTTTTGATCTGGAGTTGTCTAGGGTCATGGCAGATACTACCGATAAGGTG  
AAA

+

[illegible]

$+$ 

@A00721:190:HGJW7DSXY:4:2406:18783:34178\_1:N:0:TCTGCAAG+GCTGCACT  
ATCGAGGTATACGTCTAGGAACATTGATTGGGAACGTACCTACTCACGAGACGTCATGAAAGCTATCG  
GAGGGAAGCAAAATGTTTCGTTCTGTTACAAGAACGCTTTGGATTGTGACCATAAAGCCTCAGTTGCG  
ATA

+

@A00721:190:HGJW7DSXY:4:2415:9290:6183\_2:N:0:TCTGCAAG+GCTGCACT  
CTTCGTAACAACAGTGCAGGATTGTCATCTCGGGGAAAGTGATTACCAAGATGTTCATATAGATAC  
GAGATACCTAGAGAAGGTCGCAGCGATCTTACTCGTTATCGGAGCTAA

+

@A00721:190:HGJW7DSXY:4:1154:32515:34538\_2:N:0:TCTGCAAG+GCTGCACT  
ATTCAGGACGCCTACGGTGACTTTATGGACAAGATGCAAGTTCTTGGGAAATACTTGTTTCCCTTTT  
TAGGTTTAGTAGGTGATCTTGACGTCGATTCTTTGTATAGATCGGAAG

+

@A00721:190:HGJW7DSXY:4:2209:26422:24799\_1:N:0:TCTGCAAG+GCTGCACT  
TTCTTGAAAACCAAGTTAAGAAGGAGGCTGATCATGGAGTCTTTGTACCTTCTGTCAAACCTTCGAGGT  
TCAGCTACGAGAGGTGATCCCGGATGTGGATTGAAGGCTGGCTCTAAGGGAGACTCCTTCTTTTTGAA  
TGT

+

@A00721:190:HGJW7DSXY:4:2413:14850:16752\_1:N:0:TCTGCAAG+GCTGCACT  
GTTGAGAAGTGTGCTTTACAAGGAGTTAGACTCTTCTTCAAGTTTTTAGATCTTCTTGATAATCTTAA  
AGAAAAATTTTCGAATAAACTAATGAGAGGTATAGGCTTAGTCAAGTCTGTACTTACATTCTTTACGC  
CAG

+

@A00721:190:HGJW7DSXY:4:2122:28203:30358\_2:N:0:TCTGCAAG+GCTGCACT  
GATTCAATCTGGCATCACTGAACGTCTACAACGAGTTAGGGAGTGGCTAGGTTTTAAAGATCCTTTG  
CACAAGCAATACCTTCCACTGAGTTCATCACCCAGAGTTTCGACGTCG

+

@A00721:190:HGJW7DSXY:4:2115:14109:15092\_1:N:0:TCTGCAAG+GCTGCACT  
CTTTTACCTTTTGGAGGTCCAGGAACCTTTACTCCTAGTGTCTTTTCTAGAGTCCAAGGACGTTTCCG  
TCGGAGGATGACAGGTGGGAGACCGCTCAATAACACTCTATTGAATCCCTTTTCCACGATGAAAGCTC  
TTT

 $+$

FFFFFFFFFFFFFFFFFFFFFFFFFFFFFFFFFFFFFFFFFFFFFFFFFFFFFFFFFFFFFFFFFFFFFFFF  
FFF

@A00721:190:HGJW7DSXY:4:2342:20808:15483\_2:N:0:TCTGCAAG+GCTGCACT  
CCACTTCTAATTTTAGGAAACGTCGCGAAAAGAAAGTTCA TGAGGATGTCTTGGTCGAAAAATATCGC  
CGGGACCTTCTAATAGAGGATCCTGATGACATTATTTCAACGGATACC

+  
FFFFFFFFFFFFFFFFFFFFFFFFFFFFFFFFFFFFFFFFFFFFFFFFFFFFFFFFFFFFFFFFFFFFFFFF:FFFFFFFF  
FFFFF,FFFF::F:FFFFFFFFFFFFFFFFFFFFFFFFFFFFFFFFFFFFFFFF,FFFFF

@A00721:190:HGJW7DSXY:4:2101:24433:13620\_1:N:0:TCTGCAAG+GCTGCACT  
TGTCTCCACTGATTCGGAATTAGAGAAAGACGACCTTCTTGTGGGGACTGAGACCTCTGAATTTTCAG  
GGTGCCCTGATGAGGACGTTGAAAGGGATAATTTCAACTCTGAGACTTCTAAGAGTGTTTCAAAAGAC  
CAG

+  
FFFF: :FFFFFFFFFFFFFFFFFFFFFFFFFFFFFFFFFFFFFFFFFFFFFFFFFFFFFFFFFFFFFFFF  
FFFFFFFFFFFFFFFFFFFFFFFFFFFFFFFFFFFFFFFFFFFFFFFFFFFFFFFFFFFFFFFFFFFFFFFF  
FFF

@A00721:190:HGJW7DSXY:4:1565:21721:34444\_2:N:0:TCTGCAAG+GCTGCACT  
AGAACAGCTGATTCTTATTGCATGAACGTCGCTGAGGTCAAACCTGTGGACGTTCTTTTCATCGACGA  
ATTATTCATGATTCACGCTGGTCAGACCTTTTTCTTACACATCTACT

+  
FFF,FFFFFFFFFFFFFFFFFFFFFFFFFFFFFFFFFFFFFFFFFFFFFFFFFFFFFFFFFFFFFFFF  
FFFFFFFFFFFFFFFFFFFFFFFFFFFFFFFFFFFFFFFFFFFFFFFFFFFFFFFFFFFFFFFFFFFFFFFF  
FFFFF

@A00721:190:HGJW7DSXY:4:2660:19895:30561\_2:N:0:TCTGCAAG+GCTGCACT  
CTACTTCAACATCAACGACATCATTCTTGATGAGTGTCTTCTATCGAAGTCTCAGTTATCGCTGCC  
CGGCCGACGTTTGTGCGGAACTCTCAGAGGTTTACGGCAGAAAAATTT

+  
FFFFF:FFFFFFFFFFFFFFFFFFFFFFFFFFFFFFFFFFFFFFFFFFFFFFFFFFFFFFFFFFFFFFFF  
FFFFFFFFFFFFFFFFFFFFFFFFFFFFFFFFFFFFFFFFFFFFFFFFFFFFFFFFFFFFFFFFFFFFFFFF  
FFFFF

@A00721:190:HGJW7DSXY:4:2530:30599:28463\_1:N:0:TCTGCAAG+GCTGCACT  
ACCCCTTATATCGAGGCTATCGAGGACGATGAGTATCTTGAAGTTGTTGACGACAAGCCTCAAGAGGG  
TAGAGGACCACCTGGATCTTCTACTGTCTCTGCCTTCCAAGATTTCTTAGAAGAGGTTATTCCTGGAA  
CCA

+  
FFFFF:F,FFFFFFFF:FFFF:FFF,:FFFFFFFFFFFFFFFFFFFFFFFFFFFFFFFFFFFFFFFF:FF:FFFFF  
FFF:FFFFFFFFF,FFF,FF:FFFFFFFFFFFFFFFFFFFFFFFFFFFFFFFFFFFFFFFF:FF:FFFF:FFFFFFFFFFFF  
FFF

@A00721:190:HGJW7DSXY:4:1638:19660:9236\_1:N:0:TCTGCAAG+GCTGCACT  
GGTAAGAAGCCCCTTGAGCCGCGTAGTCAGCGCGTTTAGCTGTATCATCAGTCAGAGTATACCCGATA  
GGGTACCGAGTCTCCAAGAGAATATTTATTCTTATGAGGCTCGAACTTCAACGTTTTCAACACGGAA  
AGA

+  
FFFFFFFFFFFFFFFFFFFFFFFFFFFFFFFFFFFFFFFFFFFFFFFFFFFFFFFFFFFFFFFFFFFFFFFF  
FFFFFFFFFFFFFFFFFFFFFFFFFFFFFFFFFFFFFFFFFFFFFFFFFFFFFFFFFFFFFFFFFFFFFFFF  
FFF

@A00721:190:HGJW7DSXY:4:2507:6198:6057\_2:N:0:TCTGCAAG+GCTGCACT  
TATCACTTTATTATGACCTTGGAAGTTTTCGGCTGTGGTTGTCGCTGGGACGATTCCATTCTGTTT  
TCAAAGACTCCAATAACTGATCATTCTGATCATATGATTTTGGACAAT

+  
FFFFFFFFFFFFFFFFFFFFFFFFFFFFFFFFFFFFFFFFFFFFFFFFFFFFFFFFFFFFFFFFFFFFFFFF  
FFFFFFFFFFFFFFFFFFFFFFFFFFFFFFFFFFFFFFFFFFFFFFFFFFFFFFFFFFFFFFFFFFFFFFFF

@A00721:190:HGJW7DSXY:4:1152:20555:6214\_2:N:0:TCTGCAAG+GCTGCACT  
GTGGAGGGAGTTCTTGAAGCATCCCGACCTTTCCTTGTGAAAATTTTGATGCGGTTTCATAAGATTAT  
CAGTAATCCTGATTCTACTACGGATTCATGGACCTTCCATCCTGTACC

+

[illegible]

@A00721:190:HGJW7DSXY:4:1368:32289:7748\_2:N:0:TCTGCAAG+GCTGCACT  
GTCAACACTAGTTCGAGTGCTGCTTTGGATTACGATGACGTGAGAATAGGTGAAGGGATAGTTTTTAC  
CTCGACCAACATTAAGGCGGCGGCGACTAATCTTAAAGCTTCACCCAA

+

FFFFFFFFFFFFFFFFFFFFFFFF:FFFFFFFFFFFF:FFFFFFFFFFFFFFFFFFFFFFFFFFFFFFFF  
FFFFFFFFFFFFFFFFFFFFFFFFFFFFFFFFFFFFFFFFFFFFFFFFFFFFFFFF:FFFFF

@A00721:190:HGJW7DSXY:4:1177:29306:5462\_2:N:0:TCTGCAAG+GCTGCACT  
CTAGCCTTCAAGTGGGTATGCCTGCGGAATACGCTTGCTATTACCAGATTGGTTCGAACCCGTTGA  
TGCTATGTCAGAAGAAGCTATTCAAGCTTGTCGTTTAAAGACTGCAGA

+

FFFFFFFFFFFF,FFFFFFFFFFFF:FFFFFFFFFFFFFFFFFFFFFFFFFFFFFFFFFFFFFFFFFFFF  
:FF,FFFFFFFFFFFFFFFF:FFFFFFFFFFFF:FFF,FFFF,FFFFFFFF

@A00721:190:HGJW7DSXY:4:2419:4463:13197\_1:N:0:TCTGCAAG+GCTGCACT  
CCCAGACTCAAGGAGTCCAATCAAAGGTTTTGAATTTAGCTCAACTGGGGAGACGTGCTTAAATGGGT  
GATAAAAATTATTTAGAGATCTTTTCTACTTACAAAGGACAATTCAGTTTCATTAATTCTACGAAAA  
GTC

+

FFFFFFFFFFFFFF:FFFFFFF:,FFFFFFFFFFFFFFFFFFFFFFFFFFFFFFFFFFFFFFFFFFFF:FF  
FFFFF,FFFFFFFFFFFF:FFF:F:F:FFFFFFFFFFFFFFFFFFFFFFFFFFFFFFFFFFFFFFFFFFFF  
FFF

@A00721:190:HGJW7DSXY:4:2165:14488:34068\_1:N:0:TCTGCAAG+GCTGCACT  
TTTTGTTACCAAATCTTGCTTTCAACGAAGTCTCTGATTTTATTAATCATTACTTTAACGATCTCT  
CGGTCATTTACTCTGTACTTGATCTACGTCGTTTAACTGTCGGAACAACCTTTACTTAGAATGACTCT  
ATC

+

FFFFFFFFFFFFFFFFFFFFFFFFFFFFFFFFFFFFFFFFFFFFFFFFFFFFFFFFFFFFFFFFFFFF  
FFFFFFFFFFFFFFFFFFFFFFFFFFFFFFFFFFFFFFFFFFFFFFFFFFFFFFFFFFFFFFFFFFFF:FFF  
FFF

@A00721:190:HGJW7DSXY:4:2609:6650:3490\_2:N:0:TCTGCAAG+GCTGCACT  
ACGAAAACCAACTCTTCGTTACGAGACCTGATGGTAGAATAGATTTAGTCTCTACACCCATCTCAACG  
AGGATAAAGCGAGTTTTCCGTCCTGAACGTAATACACGAAGAGATCAT

+

FFFFFFFFFFFFFFFFFFFFFFFFFFFFFFFFFFFFFFFFFFFFFFFFFFFFFFFFFFFFFFFFFFFF  
FFFFFFFFFFFFFFFFFFFFFFFFFFFFFFFFFFFFFFFFFFFFFFFFFFFFFFFFFFFFFFFF

@A00721:190:HGJW7DSXY:4:2127:16288:22811\_1:N:0:TCTGCAAG+GCTGCACT  
AAATGAGGTCAAAGCTCTATTTATTAACGAACCTATTATCCGATTCTTCGAGGGTATCACTACCACTG  
ATCTGCCGACTTTAGTCAAGGAACCTCAATTCCTTCGATGTTTATATTTTCTATAAGGGAAAATAGC  
AAT

+

FFFFFFFFFFFFFFFFFFFFFFFFFFFFFFFF:FFFFFFFFFFFFFFFFFFFFFFFFFFFFFFFFFFFF  
FFFFFFFFFFFFFFFFFFFFFFFFFFFFFFFFFFFFFFFF:FFFFFFFFFFFFFFFFFFFFFFFFFFFF  
FFF

@A00721:190:HGJW7DSXY:4:2329:9335:35540\_2:N:0:TCTGCAAG+GCTGCACT  
AATTTTAGAACTTTATTTTCAGAACTCTCTCCGATCACCTTGGTGTGATCTCCCGGAGGATCTTTCAA  
TAAGATGTATGATGATAATCTACTATTTTAAATAGTGATATTCAGCG

+

FFFFFFFFFFFFFFFFFFFFFFFFFFFFFFFFFFFF,FFFFFFFFFFFFFFFFFFFFFFFFFFFF:FFFF  
FFFF:FFFFFFFFFFFFFFFFFFFFFFFFFFFF:FFFFFFFFFFFF:F

@A00721:190:HGJW7DSXY:4:2560:19171:25739\_1:N:0:TCTGCAAG+GCTGCACT  
TCAAAGATTTGGCTTGGTCTATTTACCGCAAAAAGTTGAAGAGGTCTATGATATTTATTTTACTTAT  
ACTTTAAATAGCACCGATTATAAATTGACTGTTGATAATATTACAATAGCTCTTCTCAGAAGATTAG  
AGA

+

FFFFFFFFFFFFFFFFFFFF:FFFFFFFFFFFFFFFFFFFFFFFFFFFF:FFFFFFFFFFFFFFFFFFFF

FFFFFFFFFFFFFFFFFFFFFFFFFFFFFFFFFFFFFFFFFFFFFFFFFFFFFFFFFFFFFFFFFFFFFFFF  
FFF

@A00721:190:HGJW7DSXY:4:2207:21603:2957\_2:N:0:TCTGCAAG+GCTGCACT  
TTTACTTTTACCGTTAGAACTGAAAAAGATTCTTTTCGAAAAGAAACCTATAAGTTACAAACGATTCT  
TCGACTATATTAAAGAAATAAAAATACTTCAAGTACCTGAACCTTTACA

+  
FFFFFFFFFFFFFFFFFFFFFFFFFFFFFFFFFFFFFFFFFFFFFFFFFFFFFFFFFFFFFFFFFFFFFFFF  
FFFFFFFFFFFFFFFFFFFFFFFFFFFFFFFFFFFFFFFFFFFFFFFFFFFFFFFFFFFFFFFFFFFFFFFF

@A00721:190:HGJW7DSXY:4:2628:29080:26897\_1:N:0:TCTGCAAG+GCTGCACT  
GAGAGTGTATTCTTAATATTCTAGTAACCGCTATGTGGGCATTACTAGGATTTATCACACTCCTAAA  
TTTGATAGCAATTTATGTTTTAAATGCTAGGAAAATTTAGAAAAACTCCATTGTATAGTTCAAGGAG  
TAC

+  
FFFFFFFFFF:FFFFFF,FFFFFFFFFFFFFFFFFFFFFFFFFFFFFFFFFFFFFFFFFFFFFFFFFFFFF:FFFFFFFFFFFF:FFFFFFFF  
FFFFFFFFFFFFFFFFFFFFFFFFFFFFFFFFFFFFFFFFFFFFFFFFFFFFFFFFFFFFFFFFFFFFFFFF  
FFF

@A00721:190:HGJW7DSXY:4:1665:22046:5259\_2:N:0:TCTGCAAG+GCTGCACT  
GCTTTAGTATTATTTACTATCGCCTTTATTGAAAATTGTATAAGAGTTAATTGCTTACACAAAAGTGA  
CGCGCGAAGGAATCTTAATTGATTGAAGCTAGGCGTTGGGGAGAATGA

+  
FFFFFFF,FFFFFFFFFFFFFFFFFFFFFFFF,FFFFFFFFFFFFFFFFFFFFFFFFFFFFFFFFFFFFF:,  
FFF:FF:FF,FFFFFFFFF,FFFFFFF:FF,FF,FFFF:, :FFFFFFF

@A00721:190:HGJW7DSXY:4:1318:24316:19053\_2:N:0:TCTGCAAG+GCTGCACT  
GCTGTGCAGAATAACCTTCCCAAATCTAGATCTGCACAGAAGAAGGCTGAAGGTCGTTACCGGACGAC  
CACTCAAAGGAAACGGGCTGTTGCCAGAGGAAAGCAGCGACCACCGA

+  
FFFFFFFFFFFFFFFFFFFFFFFFFFFFFFFFFFFFFFFFFFFFFFFFFFFFFFFFFFFFFFFFFFFFFFFF  
FFFFFFFFFFFFFFFFFFFFFFFFFFFFFFFFFFFFFFFFFFFFFFFFFFFFFFFFFFFFFFFFFFFFFFFF

@A00721:190:HGJW7DSXY:4:1662:23421:14058\_1:N:0:TCTGCAAG+GCTGCACT  
AAAAGTCACATTCACCACTCCCATGCCAATCAATGATGTGACTATACAGTTCGGCCATTTCAAGAGTG  
GTCAATACGTGCTGGGAGGTACTGAAGCCTTCCCCTCCGCTGGCACGAAGAACTCCCAAGCCAATC  
AAT

+  
FFFFFFFFFFFFFFFFFFFFFFFFFFFFFFFFFFFFFFFFFFFFFFFFFFFFFFFFFFFFFFFFFFFFFFFF  
FFFFFFFFFFFFFFFFFFFFFFFFFFFFFFFFFFFFFFFFFFFFFFFFFFFFFFFFFFFFFFFFFFFFFFFF  
FFF

@A00721:190:HGJW7DSXY:4:2545:3893:7012\_1:N:0:TCTGCAAG+GCTGCACT  
AATGAAAAGGGGTTTACCAGGGTAGTCTCTAAGTCTACCAGGAAGAGGGGAAATGTCCCCAAAAGTGA  
GAAGAATAAAGGGAAAGGTCCATCAGGACCTAAGAAGGGGAAATTACCCCTAATTCTGAAGGAAGATC  
TCC

+  
:FFFF:FFFFFFFFF,FFFFFFF:FFFF:FFFFFFFFF:FFFFFFFFFFFFFFFFF:FFFFFFFFFFFFFFFFF  
FF:FFFF:F:FFFFFFFFF:FFFFFFFFFFFFFFFFFFFFFFFFFFFFFFFFF, :FFFFFFFFFFFFFFFFF  
FFF

@A00721:190:HGJW7DSXY:4:1362:8956:7044\_1:N:0:TCTGCAAG+GCTGCACT  
CTACGAAGTCGCTGAAGGCGGCTTGGGTCATTAAGGGTAGCTGTAAAGTTGCGCCTGCCGACCCCATC  
TTTGAGACCAAGACTCTCTACAGTAGGTCGTGCCTACTATGAGCAAATCTGTTGAATTGCTCACTGA  
GGA

+  
FFFFFFFFFFFFFFFFFFFFFFFFFFFFFFFFFFFFFFFFFFFFFFFFFFFFFFFFFFFFFFFFFFFFFFFF  
FFFFFFFFFFFFFFFFFFFFFFFF:FFFFFFFFFFFFFFFFFFFFFFFFFFFFFFFFFFFFFFFFFFFFFFFF  
FFF

@A00721:190:HGJW7DSXY:4:2625:14742:6073\_1:N:0:TCTGCAAG+GCTGCACT  
GGACTTTTGGCTACTGGCGACAACTGAGAGCAGTCGCTGGGGAAAGAGAATTGCGTGGGTTGAAGGC





@A00721:190:HGJW7DSXY:4:1324:8377:9706\_2:N:0:TCTGCAAG+GCTGCACT  
ATTCAGGACGCCTACGGTGACTTTATGGACAAGATGCAAGTTCTTGGGAAATACTTGTTTCCCTTTTT  
TAGGTTTAGTAGGTGATCTTGACGTCGATTCTTTGTATAGATCGGAAG

+

FFFFFFFFFFFFFFFFFFFFFFFF:FFFFFFFFFFFFFFFFFFFFFFFFFFFFFFFFFFFFFFFF,F  
FFFFFFFFFFFFFFFFFFFFFFFFFFFFFFFFFFFFFFFFFFFFFFFFFFFFFFFFFFFFFFFF

@A00721:190:HGJW7DSXY:4:2209:27751:24878\_1:N:0:TCTGCAAG+GCTGCACT  
TTCTTGAAAACCAAGTTAAGAAGGAGGCTGATCATGGAGTCTTTGTACCTTCTGTCAAACCTTCGAGGT  
TCAGCTACGAGAGGTGATCCCGGATGTGGATTGAAGGCTGGCTCTAAGGGAGACTCCTTCTTTTTGAA  
TGT

+

FF,:F,FFFF,FFFF:,FF:FF,F,,:FFF:FFF:FF:F,F,F::,FFFFFF:FF:FF,FFF:FFF  
F:FFFFFFF,,FF:F:FF:F,,FFFFFFFFF,F:F:FFFF:FFFF:FF,FFFF,FF,FFFFFFFF  
FF:

@A00721:190:HGJW7DSXY:4:2413:15239:16861\_1:N:0:TCTGCAAG+GCTGCACT  
GTTGAGAAGTGTGCTTTACAAGGAGTTAGACTCTTCTTCAAGTTTTTAGATCTTCTTGATAATCTTAA  
AGAAAAATTTTCAATAAACTAATGAGAGGTATAGGCTTAGTCAAGTCTGTACTTACATTCTTTACGC  
CAG

+

F::FFFFFFFFFFFFFFFFFFFFFFFF:FFFFFFFFFFFFFFFFFFFFFFFFFFFFFFFFFFFFFFFF  
FFFFFFFFFFFFFFFF:FFFFFFF:FFFFFFFFFFFFFFFFFFFFFFFFFFFFFFFFFFFFFFFFFFFF  
FFF

@A00721:190:HGJW7DSXY:4:2331:3631:26005\_2:N:0:TCTGCAAG+GCTGCACT  
GATTCAATCTGGCATCACTGAACGTCTACAACGAGTTAGGGAGTGGCTAGGTTTTAAAGATCCTTTG  
CACAAGCAATACCTTCCACTGAGTTCATCACCCAGAGTTTCGACGTCG

+

FFFFFFFFFFFFFFFFFFFFFFFFFFFFFFFFFFFFFFFF:FFFF:FFFFFFFFFFFFFFFFFFFFFFFFFFFF  
FFFF,FFFFFFFF:FFFFFFFFFFFFFFFFFFFFFFFFFFFFFFFF,FFFFFFFF

@A00721:190:HGJW7DSXY:4:2153:23529:19883\_1:N:0:TCTGCAAG+GCTGCACT  
CTTTTACCTTTTGGAGGTCCAGGAACCTTTACTCCTAGTGTCTTTTCTAGAGTCCAAGGACGTTCCG  
TCGGAGGATGACAGGTGGGAGACCGCTCAATAACACTCTATTGAATCCCTTTTCCACGATGAAAGCTC  
TTT

+

:FFFFFFFFF,FFFFFFFFFFFFFFFFFFFFFFFFFFFFFFFF:FFFFFFFFFFFFFFFFFFFFFFFFFFFFFFFF:FFFF  
FFFFFFFFFFFFFFFFFFFFFFFFFFFFFFFFFFFFFFFFFFFFFFFFFFFFFFFFFFFFFFFFFFFFFFFFFFFF  
FFF

@A00721:190:HGJW7DSXY:4:2426:5023:4429\_2:N:0:TCTGCAAG+GCTGCACT  
CCACTTCTAATTTTAGGAAACGTCGCGAAAAGAAAGTTCATGAGGATGTCTTGGTCAAAAATATCGC  
CGGGAACCTTAATAGAGGATCCTGATGACATTATTTCAACGGATACC

+

FFFFFFFFFFFFFFFFFFFFFFFFFFFFFFFFFFFFFFFF:FFFFFFFFFFFFFFFFFFFFFFFFFFFFFFFFFFFF  
FFFFFFF::FFFFFFFFFFFFFFFFFFFFFFFFFFFFFFFFFFFFFFFFFFFFFFFF

@A00721:190:HGJW7DSXY:4:2134:26630:32925\_1:N:0:TCTGCAAG+GCTGCACT  
TGTCTCCACTGATTCGGAATTAGAGAAAGACGACCTTCTTGTGGGGACTGAGACCTCTGAATTTTCAG  
GGTGCCCTGATGAGGACGTTGAAAGGGATAATTTCAACTCTGAGACTTCTAAGAGTGTTTCAAAAGAC  
CAG

+

FFFFF:FFFFFFFFF:FFFFFFFFFFFFFFFFFFFFFFFF,FFFFFFFFF::FFFFFFFFF:FFFFFFFFF  
FF,FFF,FFFFFFFFF:FFFFFFFFFFFFFFFFFFFFFFFFFFFFFFFFFFFFFFFFFFFFFFFFFFFF  
FFF

@A00721:190:HGJW7DSXY:4:1663:10981:36448\_2:N:0:TCTGCAAG+GCTGCACT  
AGAACAGCTGATTCTTATTGCATGAACGTCGCTGAGGTCAAACCTGTGGACGTTCTTTTCATCGACGA  
ATTATTCATGATTCACGCTGGTCAGACCCTTTTTCTTACACATCTACT

+

FFFFFFFFFFFFFFFFFFFFFFFFFFFFFFFFFFFFFFFFFFFFFFFFFFFFFFFFFFFFFFFFFFFFFFFF  
FFFFFFFFFFFFFFFF:FFFFFFFFFFFFFFFFFFFFFFFFFFFFFFFFFFFFFFFFFFFFFFFF  
@A00721:190:HGJW7DSXY:4:1264:32362:8437\_1:N:0:TCTGCAAG+GCTGCACT  
CTACTTCAACATCAACGACATCATTCTTGATGAGTGTCTTCTTATCGAAGTCTCAGTTATCGCTGCC  
CGGCCGACGTTTGTGCGGAACTCTCAGAGGTTTACGGCAGAAAAATTTCTCCTGCTTGTAAATTCGAGA  
GAG  
+  
FFFFF:FFFFFFFFFFFFFFFFFFFFFFFFFFFFFFFFFFFFFFFFFFFFFFFFFFFFFFFFFFFFFFFF  
FFFFFFFFFFFFFFFFFFFFFFFFFFFFFFFFFFFFFFFFFFFFFFFFFFFFFFFFFFFFFFFFFFFFFFFF  
FFF  
@A00721:190:HGJW7DSXY:4:2533:32805:29590\_1:N:0:TCTGCAAG+GCTGCACT  
ACCCCTTATATCGAGGCTATCGAGGACGATGAGTATCTTGAAGTTGTTGACGACAAGCCTCAAGAGGG  
TAGAGGACCACCTGGATCTTCTACTGTCTCTGCCTTCCAAGATTTCTTAGAAGAGGTTATTCCTGGAA  
CCA  
+  
FFFFFFFFFFFFFFFFFFFFFFFFFFFFFFFFFFFFFFFFFFFFFFFFFFFFFFFFFFFFFFFFFFFFFFFF  
FFFFFFFFFFFFFFFFFFFFFFFFFFFFFFFFFFFFFFFFFFFFFFFFFFFFFFFFFFFFFFFFFFFFFFFF  
FFF  
@A00721:190:HGJW7DSXY:4:2106:1108:27555\_1:N:0:TCTGCAAG+GCTGCACT  
GGTAAGAAGCCCCTTGAGCCGCGTGGTCAGCGCGTTTAGCTGTATCATCAGTCAGAGTATACCCGATA  
GGGTACCGAGTCTCCAAGAGAATATTTATTCTTATGAGGCTCGAACTTCAACGTTTTCAACACGGAA  
AGA  
+  
FFFFFFFFFFFFFFFFFFFFFFFFFFFFFFFFFFFFFFFFFFFFFFFFFFFFFFFFFFFFFFFFFFFFFFFF  
FFFFFFFFFFFFFFFFFFFFFFFFFFFFFFFFFFFFFFFFFFFFFFFFFFFFFFFFFFFFFFFFFFFFFFFF  
FFF  
@A00721:190:HGJW7DSXY:4:2640:30734:13479\_2:N:0:TCTGCAAG+GCTGCACT  
TATCACTTTATTATGACCTTGGAAGTTTTTCGGCTGTGGTTGTCGCTGGGACGATTCCATTCTGTTT  
TCAAAGACTCCAATAACTGATCATTCTGATCATATGATTTTGGACAAT  
+  
FFFFFFFFFFFFFFFFFFFFFFFFFFFFFFFFFFFFFFFFFFFFFFFFFFFFFFFFFFFFFFFFFFFFFFFF  
FFFFFFFFFFFFFFFFFFFFFFFFFFFFFFFFFFFFFFFFFFFFFFFFFFFFFFFFFFFFFFFFFFFFFFFF  
@A00721:190:HGJW7DSXY:4:1174:31467:2347\_2:N:0:TCTGCAAG+GCTGCACT  
GTGGAGGGAGTTCTTGAAGCATCCCGACCTTCTCTTGTAAGTTTATGATGCGGTTTCATAAGATTAT  
CAGTAATCCTGATTCTACTACGGATTATGACCTTCCATCCTGTACC  
+  
FFFFFFFFFFFFFFFFFFFFFFFFFFFFFFFFFFFFFFFFFFFFFFFFFFFFFFFFFFFFFFFFFFFFFFFF  
FFFFFFFFFFFFFFFFFFFFFFFFFFFFFFFFFFFFFFFFFFFFFFFFFFFFFFFFFFFFFFFFFFFFFFFF  
@A00721:190:HGJW7DSXY:4:2464:11351:21809\_1:N:0:TCTGCAAG+GCTGCACT  
CTTCCGATCTGAACCTTTGGGAATTTGAAGCTCAGGCTGAAGCACAACGTTTGACCGTGACGAACGTG  
GTGTTCTTGATCTACGTTACGGATATACTCTCCTTGAGTTCACTCGTAAGGACACTACCACTTATTAC  
GAT  
+  
FFF::FFFFFFFF,FFFF:FFFFFFFF,FFF:,FFFFFFFF,F,:FF,FFFFFFFF,FFFFFFFFFFFF,  
FFFFF,FFFFFFFF,FFFFFFFF:FFF,:FFF:,FF:,FFF:F,FFFF:,FFF,FFFFFFFFFFFF,:  
FFF  
@A00721:190:HGJW7DSXY:4:2473:6054:10003\_2:N:0:TCTGCAAG+GCTGCACT  
GGGTTTTCGAATAGTGATAGCCACCCGCTTACAGAGGGGCAGCAGCATGACCATAATTGGTATTGAC  
TTTGGTACCACCTTTTCTACTGTCTGTCTCGCCTCTTGAATGAAGTT  
+  
FFFFFFFFFFFFFFFFFFFFFFFFFFFFFFFFFFFFFFFFFFFFFFFFFFFFFFFFFFFFFFFFFFFFFFFF  
FFF:FFFFFFFFFFFFFFFFFFFFFFFFFFFFFFFFFFFFFFFFFFFFFFFFFFFFFFFFFFFFFFFF  
@A00721:190:HGJW7DSXY:4:2409:26386:5259\_2:N:0:TCTGCAAG+GCTGCACT  
TTTCTAATAATGATGACACTATTGTTTATGGATATGATGCTATTACTCATGATGGTTACGGTCAGGGA

GGATTCTCAGTTTACAAGGACCTTAAGCGATTGATCGGGGTTAATTCT  
+  
FFFFFFFFFFFFFFFF:FFFFFFFFFFFFFFFFFFFFFFFFFFFFFFFFFFFFFFFF  
FFF:FFFFFFFFFFFFFFFF:FFFFFFFFFFFFFFFF  
@A00721:190:HGJW7DSXY:4:1674:28257:25786\_1:N:0:TCTGCAAG+GCTGCACT  
ACGCAAAGATATTTTCATGAAAACCTACAGAGGAACGTACCGGATTACCTGTCTTTTCATATTATGAATGA  
ACCTTCGGCCGCTCTCTTTGCTTCGATGTTGGATGTCAAGAAGGGTTCAGAATGGGATTCTACGTAG  
TTT  
+  
FFFFFFFFFFFFF,:F,FFFFFFFFFFFF:FFFFFFFFFFFFFFFFFFFFFFFFFFFFFFFF  
FFFFFFFFFFFFFFFFFFFFFFFFFFFFFFFFFFFFFFFFFFFFFFFFFFFFFFFF  
FFF  
@A00721:190:HGJW7DSXY:4:2605:15176:21543\_2:N:0:TCTGCAAG+GCTGCACT  
CTTACTTGGAACGAAGGCGACCTGTTCCGGAGTTTTTACGGGATCCGGAATGTTCTGTCTATATTAGG  
TGAAGCGAAATACGATTTTCAACGTCAACGTTACCGAGTTTTTGTTC  
+  
FFFFFFFFFFFFFFFFFFFFFFFFFFFFFFFFFFFFF,FFFFFFFFF:FFFFFFFFFFFFFFFF  
FFFFFFFFFFFF,FFFFFFFFFFFFFFFFFFFFFFFFFFFFFFFFFFFFFFFF  
@A00721:190:HGJW7DSXY:4:2635:3613:18521\_2:N:0:TCTGCAAG+GCTGCACT  
TAAGAAGTTTATAAGGAACATATCCATTTGTTGTAATAGGGTCATCAACTAGAACTCGAACTCTAA  
GTGGAATACTGTCTTTCCAAGCTTACCTGTATCTTCAATGAAATTGG  
+  
FFFFFFFFFFFFFFFFFFFFFFFFFFFFF:FF,FF:FFFFFFFFFFFFFFFF:FFFFF:FFF,FFFFF  
FFFFFFFFFFFFFFFFFFFFF:FFF:FFFFFFFFFFFFFFFFFFFFF:F  
@A00721:190:HGJW7DSXY:4:1625:15998:33865\_2:N:0:TCTGCAAG+GCTGCACT  
TTCCTACGATACAAATGATAACTTCTAATTTACGTTTGCTACTCAGAGCTGGTCTCTCAGCAAAGGG  
ATGCATGGTGTATCTCCTCAGGAGTCCCGGCATTTGATAATAATGAC  
+  
FFFFFFFFFFFFFFFFFFFFFFFFFFFFFFFFFFFFF:FFFFFFFFFFFFFFFFFFFFFFFF  
FFFFFFFFFFFFFFFFFFFFFFFFFFFFFFFFFFFFFFFFFFFFFFFF  
@A00721:190:HGJW7DSXY:4:2151:7374:33833\_2:N:0:TCTGCAAG+GCTGCACT  
TCGCTGCATATTACGGATTACACGTACCAGCGCATCTCGTGTGAGCCTCGACCCGATTATATGGTA  
TTAACTTATAAAGGTGAGGAGACATTTTCTTGCTGAAATTTATAGAA  
+  
FFFFFFFFFFFFFFFFFFFFFFFFFFFFFFFFFFFFF:FFFFF  
FFFFFFFFFFFFFFFFFFFFFFFFFFFFFFFFFFFFFFFF  
@A00721:190:HGJW7DSXY:4:1446:18430:1877\_2:N:0:TCTGCAAG+GCTGCACT  
GTCAACACTAGTTCGAGTGCTGCTTTGGATTACGATGACGTGAGAATAGGTGAAGGGATAGTTTTTAC  
CTCGACCAACATTAAGGCGGCGGCGACTAATCTTAAAGCTTCACCCAA  
+  
FFFFFFFFFFFFFFFFFFFFF:FF:FFFFFFFFFFFFFFFFFFFFFFFFFFFFFFFF  
FFFFFFFFFFFFFFFFFFFFFFFFFFFFFFFFFFFFFFFF  
@A00721:190:HGJW7DSXY:4:1368:29134:25551\_2:N:0:TCTGCAAG+GCTGCACT  
CTAGCCTTCAAGTGGGTATGCCTGCGGAATACGCTTGCTATTACACGATTGGTTCGAACCCGTTGA  
TGCTATGTCAGAAGAAGCTATTCAAGCTTGTCGTTTAAAGACTGCAGA  
+  
FFFFFFFFFFFFFFFFFFFFFFFFFFFFFFFFFFFFF:FFF:FFFFFFFFFFFFFFFFFFFFFFFF  
@A00721:190:HGJW7DSXY:4:2608:5864:27305\_1:N:0:TCTGCAAG+GCTGCACT  
CCCAGACTCAAGGAGTCCAATCAAAGGTTTTGAATTTAGCTCAACTGGGAGACGTGCTTAAATGGGT  
GATAAAAATTATTTAGAGATCTTTTCTACTTACAAAGGACAATTCAGTTTCATTAATTCTACGAAAA  
GTC  
+  
FFFFFFFFFFFFFFFFFFFFF,FFFFF:FFFFFFFFFFFFFFFFFFFFFFFFFFFFFFFF:FFFFFFFF

FFFFFFFFFFFF:FFFFFFFFFFFFFFFFFFFFFFFFFFFFFFFFFFFFFFFFFFFFFFFFFFFFFFFF  
FFF

@A00721:190:HGJW7DSXY:4:2336:29984:6073\_1:N:0:TCTGCAAG+GCTGCACT  
TTTTGTTACCAAATTCTTGGCTTTCAACGAAGTCTCTGATTTTATTAATCATTACTTTAACGATCTCT  
CGGTCATTTACTCTGTACTTGATCTACGTCGTTTAACTGTCGGAACAACCTTTACTTAGAATGACTCT  
ATC

+  
FFFFFFFFFFFFFFFFFFFFFFFFFFFFFFFFFFFFFFFFFFFFFFFFFFFFFFFFFFFFFFFFFFFF  
FFFFFFFFFFFFFFFFFFFFFFFFFFFFFFFFFFFFFFFFFFFFFFFF:F,FFFFFFFF:FFFFFFFF,F,FFF,F,FFF  
FFF

@A00721:190:HGJW7DSXY:4:2622:13141:26005\_2:N:0:TCTGCAAG+GCTGCACT  
ACGAAAACCAACTCTTCGTTACGAGACCTGATGGTAGAATAGATTTAGTCTCTACACCCATCTCAACG  
AGGATAAAGCGAGTTTTCCGTCCTGAACGTAATACACGAAGAGATCAT

+  
FFFFFFFFFFFFFFFFFFFFFFFFFFFFFFFFFFFFFFFFFFFFFFFFFFFFFFFFFFFFFFFFFFFF:  
FFFFFFFFFFFFFFFFFFFFFFFFFFFFFFFFFFFFFFFFFFFFFFFF:FF:FFF

@A00721:190:HGJW7DSXY:4:2334:15040:25598\_1:N:0:TCTGCAAG+GCTGCACT  
AAATGAGGTCAAAGCTCTATTTATTAACGAAGTATTATCCGATTCTTCGAGGGTATCACTACCACTG  
ATCTGCCGACTTTAGTCAAGGAAGTCAATTCCTTCGATGTTTATATTTTCTATAAGGGAAAATAGC  
AAT

+  
FFFFFFFFFFFFFFFFFFFFFFFFFFFFFFFFFFFFFFFFFFFFFFFFFFFFFFFFFFFFFFFFFFFF  
FFFFFFFFFFFFFFFFFFFFFFFFFFFFFFFFFFFFFFFFFFFFFFFF:FFFFFFFFFFFFFFFFFFFFFFF  
FFF

@A00721:190:HGJW7DSXY:4:2337:11903:22044\_2:N:0:TCTGCAAG+GCTGCACT  
AATTTTAGAAGCTTTATTTTCAGAACTCTCTCCGATCACCTTGGTGTGATCTCCCGGAGGATCTTTCAA  
TAAGATGTATGATGATAATCTACTATTTTAAATAGTGATATTCAGCG

+  
FFFFFFFFFFFFFFFFFFFFFFFFFFFFFFFFFFFFFFFFFFFFFFFFFFFFFFFFFFFFFFFFFFFF  
FFFFFFFFFFFFFFFFFFFFFFFFFFFFFFFFFFFFFFFFFFFFFFFF

@A00721:190:HGJW7DSXY:4:2266:17255:8735\_1:N:0:TCTGCAAG+GCTGCACT  
CAAAAAGTTGGAAGAGGTCTATGATATTTATTTTACTTATACTTTAAATAGCACCGATTATAACTTGA  
CTGTTGATAATATTACAATAGCTCTTCTCAGAAGATTAGAGAAGTAACTCGGTGAACACGTCGGTAG  
CAT

+  
FFFFFFFFFFFFFFFFFFFFFFFFFFFFFFFFFFFFFFFFFFFFFFFFFFFFFFFFFFFFFFFFFFFF  
FFFFFFFFFFFFFFFFFFFFFFFFFFFFFFFFFFFFFFFFFFFFFFFF:FFFFFFFFFFFFFFFFFFFFFFF  
FFF

@A00721:190:HGJW7DSXY:4:2332:10782:36636\_2:N:0:TCTGCAAG+GCTGCACT  
ACTTCAAGTACCTGAAGTCTTACATTTTAAATGGTATGGTATAATGTGTCTTACAAATAGAACCTTCAC  
TCTCGGTAATGAGAGTGATTCCTTAATATTCTAGTAACCGCTATGTG

+  
FFFFFFFFFFFFFFFFFFFFFFFFFFFFFFFFFFFFFFFFFFFFFFFFFFFFFFFFFFFFFFFFFFFF  
FFFFFFFFFFFFFFFFFFFFFFFFFFFFFFFFFFFFFFFFFFFFFFFF

@A00721:190:HGJW7DSXY:4:1344:25427:2691\_1:N:0:TCTGCAAG+GCTGCACT  
ATTCAATAGCTTTAGTATTATTTACTATCGCCTTTATTGAAAATTGTATAAGAGTTAATTGCTTACAC  
AAAAGTGACGCGGAAGGAATCTTAATTGATTGAAGCTAGGCGTTGGGAGAATGAAGTCCGCTTCC  
CGG

+  
FFFF:FFFFFFFFFFFFFFFFFFFFFFFFFFFFFFFFFFFFFFFFFFFFFFFF:FFFFFFFF:FFFFFFF  
FFFFFFFFFFFFFFFF:FFFFFFFFFFFFFFFFFFFFFFFFFFFFFFFFFFFFFFFFFFFFFFFFFFFFF  
FFF

@A00721:190:HGJW7DSXY:4:1354:1814:14278\_2:N:0:TCTGCAAG+GCTGCACT  
GCTGTGCAGAATAACCTTCCCAAATCTAGATCTGCACAGAAGAAGGCTGAAGTCGTTACCGGACGAC

CACTCAAAGGAAACGGGCTGTTGCCAGAGGAAATCAGCGACCACCGA

+

:FFFFFF:FFFFFFFFFFFF:FFF,FFFFFFFFFFFFFFFFFFFFFFFFFFFFFFFFFFFFFFFF:F:FF  
,FF,FFFF:FFFF:F,FFF::F:::,F,,FFF,:::,F:,F,,,F

@A00721:190:HGJW7DSXY:4:2150:4191:33207\_1:N:0:TCTGCAAG+GCTGCACT  
AAAAGTCACATTCACCACTCCCATGCCAATCAATGATGTGACTATACAGTTCGGCCATTTCAAGAGTG  
GTCAATACGTCGTGGGAGGTACTGAAGCCTTCCCCTCCGCTGGCACGAAGAACACTCCCAAGCCAATC  
AAT

+

:FFFFF,::F,F::F:F,,FF,FF,,FFFF:FFFFFFFFFFFF:FFFFFFFFFFFF::FFFFFFFFFFFF,F  
FF,FF:FF,F:FFFFFFFF:FF::,FFFF,::,FF,:FFF,F:FF::,FFFFFFFFFFFF:F,:FF,FFF,  
FFF

@A00721:190:HGJW7DSXY:4:2564:32027:32659\_1:N:0:TCTGCAAG+GCTGCACT  
AATGAAAAGGGGTTTACCAGGGTAGTCTCTAAGTCTACCAGGAAGAGGGGAAATGTCCCCAAACTGA  
GAAGAATAAAGGGAAAGGTCCATCAGGACCTAAGAAGGGGAAATTACCCCTAATTCTGAAGGAAGATC  
TCC

+

FFFFFFFFFFFFFFF:FF:FFFFFFFFF::FF:FFFFFFFFFFFFFFFFFFFFFFFFFFFFFFFFFFFF  
FFFFFFFFFFFF::FFFFF:FFFFFFFFFFFFFFFFFFFFFFFFFFFF:FFFFFFFFFFFFFFFFFFFFFFFFFFFF  
FFF

@A00721:190:HGJW7DSXY:4:1408:15510:11663\_1:N:0:TCTGCAAG+GCTGCACT  
CTACGAAGTCGCTGAAGGCGGCTTGGGTCATTAAGGGTAGCTGTAAAGTTGCGCCTGCCGACCCCATC  
TTTGAGACCAAGACTCTCTACAGTAGGTCGTGCCTACTATGAGCAAATCTGTTGAATTCGTCACTGA  
GGA

+

FFFFFFFFFFFFFFFFFFFFFFFFFFFFFFFFFFFFFFFFFFFFFFFFFFFFFFFFFFFFFFFFFFFF  
FFFFFFFFFFFFFFFFFFFF:F,FFFFFFFFFFFFFFFFFFFFFFFFFFFFFFFFFFFFFFFFFFFFFFFFFFFF  
FFF

@A00721:190:HGJW7DSXY:4:2667:4788:22373\_1:N:0:TCTGCAAG+GCTGCACT  
GGACTTTTGGCTACTGGCGACAACTGAGAGCAGTCGCTGGGGAAGAGAATTGCGTGGGTGAAGGC  
CGACGCTTCGAGCTTGAGTGTGACGAGGCCGGTGACGTTTTTGTCAACGGCGTTTGGAGGATTTTATC  
CGC

+

FFFFFFFFFFFFFFFFFFFFFFFFFFFFFFFFFFFFFFFFFFFFFFFFFFFFFFFFFFFFFFFFFFFF  
FFFFFFFFFFFFFFFFFFFFFFFFFFFFFFFFFFFF:FFFFFFFFFFFFFFFFFFFFFFFFFFFFFFFFFFFF:FFFFFFF  
FFF

@A00721:190:HGJW7DSXY:4:1148:29441:1814\_1:N:0:TCTGCAAG+GCTGCACT  
GCGAAGATCCCCTATGGAGTCTTGAAGGACTTAGGTTGGCATATTTATGCCGACGATAATAAGCATGT  
CACCCCTAAGCACCGAGGTAAGCTCGGGACTTACAAGAGAGAGTGTGAGAGAGTCGCTCTCACTGTTT  
TTG

+

FFFFFFFFFFFFFFFFFFFF:FFFFFFFFFFFFFFFFFFFFFFFFFFFFFFFFFFFF:FFFFFFFFFFFFFFFFFFFF  
FFFFFFFFFFFFFFFFFFFFFFFFFFFFFFFFFFFFFFFFFFFFFFFFFFFFFFFFFFFFFFFFFFFF  
F:F

@A00721:190:HGJW7DSXY:4:1627:19859:36198\_1:N:0:TCTGCAAG+GCTGCACT  
TTTCCTCCGTCATTGGGGATTTGATGTGAGAAGGTGGAAGGTGTCAAGGTCCTTCTTCATGCTGATC  
TTTCAGGACCTAATCACATCATGATTGATAGTTACGGCTCGTATCGAGTTGGAGGGAGGAAGTTCTCC  
GAA

+

FFFFFFFFFFFFFFFFFFFFFFFFFFFFFFFFFFFF:FFFFFFFFFF,FFFFFFFFFFFFFFFFFFFF  
FFFFFFFFFFFFFFFFFFFFFFFFFFFFFFFFFFFF:FFFFFFFFFFFFFFFFFFFFFFFFFFFFFFFFFFFF  
FFF

@A00721:190:HGJW7DSXY:4:1217:30382:28087\_1:N:0:TCTGCAAG+GCTGCACT  
GGAAGGCTCTAGAGAAGATCTCACCACTGGAGAAGGCAAGTGGAGAGTCCAGAAGTTGATGAAGAAG

GATTATTTGAAGCAGGGGTTACCACTTCCTAAGGTGGATGAGGGAGGTTGTTTCTTTGGAGTTTTAGA  
TAA

+

FFFFFFFFFFFFFFFFFFFFFFFFFFFFFFFFFFFFFFFFFFFFFFFFFFFFFFFFFFFFFFFFFFFFFFFF  
FFFFFFFFFFFFFFFFFFFFFFFFFFFFFFFFFFFFFFFFFFFFFFFFFFFFFFFFFFFFFFFFFFFFFFFF  
FFF

@A00721:190:HGJW7DSXY:4:2170:20618:27430\_1:N:0:TCTGCAAG+GCTGCACT  
TGTTCTTCCGGAAGTTGTGGGATTTAACTTTGACTCAACTACTCCGATCAGATCCGGATGGTTTGA  
TTGGTATGGACTACTCGACTTTTGATCTGGAGTTGTCTAGGGTCATGGCAGATACTACCGATAAGGTG  
AAA

+

FFFFFFFFFFFFFFFFFFFFFFFFFFFFFFFFFFFFFFFFFFFFFFFFFFFFFFFFFFFFFFFFFFFFFFFF  
FFFFFFFFFFFFFFFFFFFFFFFFFFFFFFFFFFFFFFFFFFFFFFFFFFFFFFFFFFFFFFFFFFFFFFFF  
FFF

@A00721:190:HGJW7DSXY:4:2125:26648:18991\_2:N:0:TCTGCAAG+GCTGCACT  
TTTATGATTCAAAACCTATCGTTGTCTGACCTTACAAGGTTGAGGAGACTTTACAGCGGCTTATTGTC  
GCGCAGTTTCCAGAATTGCGGTTGAAGTTCACCCATTCTATCTTGAAT

+

FFFFFFFFFFFFFFFFFFFFFFFFFFFFFFFFFFFFFFFFFFFFFFFFFFFFFFFFFFFFFFFFFFFFF,FFFFF  
FFFFFFFFFFFFFFFFFFFFFFFFFFFFFFFFFFFFFFFFFFFFFFFFFFFFFFFFFFFFFFFF

@A00721:190:HGJW7DSXY:4:1272:12924:37059\_1:N:0:TCTGCAAG+GCTGCACT  
CTTCCGATCTCGTCTAGGAACATTGATTGGGAACGTACCTACTCACGAGACGTCATGAAAGCTATCG  
AGGGAAGCAAATGTTTCGTTCTGTTACAAGAACGCTTTGGATNGTG

+

FFFFFFFFFFFF:FFFFFFFFFFFFFFFFFFFFFFFFFFFFFFFFFFFFFFFFFFFFFFFFFFFFFFFF  
FFFFFFFFFFFFFFFFFFFFFFFFFFFFFFFFFFFFFFFFFFFFFFFFFFFFFFFFFFFFFFFF:FFFFF#FFF

@A00721:190:HGJW7DSXY:4:2617:12391:32972\_2:N:0:TCTGCAAG+GCTGCACT  
CTTCGTAACAACAGTGCGAGGATTGTCATCTCGGGGAAAGTGATTACCAAGATGTTTCATATAGATAC  
GAGATACCTAGAGAAGAGATCGGAAGAGCGTCGTGTAGGGAAGAGTG

+

FFFFFFFFFFFFFFFFFFFFFFFFFFFFFFFFFFFFFFFFFFFFFFFFFFFFFFFFFFFFFFFFFFFFF  
FFFFFFFFFFFFFFFFFFFFFFFFFFFFFFFFFFFFFFFFFFFFFFFFFFFFFFFFFFFFFFFF:FFFFF

@A00721:190:HGJW7DSXY:4:1609:1271:5729\_2:N:0:TCTGCAAG+GCTGCACT  
ATTCAGGACGCCTACGGTGACTTTATGGACAAGATGCAAGTTCTTGGGAAATACTTGTTTCCCTTTT  
TAGGTTTAGTAGGTGATCTTGACGTCGATTCTTTGTATAGATCGGAAG

+

FFFFFFFFFFFFFFFFFFFFFFFFFFFFFFFFFFFFFFFFFFFFFFFFFFFFFFFFFFFFFFFFFFFFF  
FFFFFFFFFFFFFFFFFFFFFFFFFFFFFFFFFFFFFFFFFFFFFFFFFFFFFFFFFFFFFFFF

@A00721:190:HGJW7DSXY:4:2226:1190:25347\_1:N:0:TCTGCAAG+GCTGCACT  
TTCTTGAAAACCAAGTTAAGAAGGAGGCTGATCATGGAGTCTTTGTACCTTCTGTCAAACCTTCGAGGT  
TCAGCTACGAGAGGTGATCCCGGATGTGGATTGAAGGCTGGCTCTAAGGGAGACTCCTTCTTTTGA  
TGT

+

F:FFFFFFFF:FFFFFFFFFFFF:FFFF:FFFFFFFFFFFFFFFFFFFFFFFFFFFFFFFFFFFFF,FFFFFFFFFFFF  
FFFFFFFF:FFFFFFFFFFFFFFFFFFFFFFFFFFFFFFFFFFFFFFFFFFFFFFFFFFFFFFFFFFFFF  
FFF

@A00721:190:HGJW7DSXY:4:2546:5339:18098\_1:N:0:TCTGCAAG+GCTGCACT  
GTTGAGAAGTGTGCTTTACAAGGAGTTAGACTCTTCTTCAAGTTTTTAGATCTTCTTGATAATCTTAA  
AGAAAAATTTTGAATAAACTAATGAGAGGTATAGGCTTAGTCAAGTCTGTACTTACATTCTTTACGC  
CAG

+

FFFFFFFFFFFFFFFFFFFFFFFFFFFFFFFFFFFFFFFFFFFFFFFFFFFFFFFFFFFF:F,FFFFFFFFFFFFFFFFFFFFF:  
FFFFFFFFFFFFFFFFFFFF:F:F,FFFFFFFFF:FFFFFFFFFFFFFFFFFFFFFFFFFFFFFFFFFFFFF  
FFF

@A00721:190:HGJW7DSXY:4:2671:10239:3411\_2:N:0:TCTGCAAG+GCTGCACT  
GATTCAATCTGGCATCACTGAACGTCTACAACGAGTTAGGGAGTGGCTAGGTTTTAAAAGATCCTTTG  
CACAAGCAATACCTTCCACTGAGTTCATCACCCAGAGTTTCGACGTCG

+

FF:FFFFFFFFFFFFFFFFFFFFFFFFFFFFFFFFFFFFFFFFFFFFFFFFFFFFFFFFFFFFFFFF:FFFFFFFF:  
FFFFFFFFFFFFFFFFFFFFFFFFFFFFFFFFFFFFFFFFFFFFFFFFFFFFFFFFFFFFFFFF

@A00721:190:HGJW7DSXY:4:2422:5068:19351\_1:N:0:TCTGCAAG+GCTGCACT  
CTTTTACCTTTTGGAGGTCCAGGAACCTTTACTCCTAGTGTCTTTTCTAGAGTCCAAGGACGTTTCCG  
TCGGAGGATGACAGGTGGGAGACCGCTCAATAACACTCTATTGAATCCCTTTTCCACGATGAAAGCTC  
TTT

+

FFF,FFFFFFFFFFFFFFFFFFFFFFFFFFFFFFFFFFFFFFFFFFFFFFFFFFFFFFFFFFFFFFFF:FFFF  
FFFFFFFFFFFFFFFFFFFFFFFFFFFFFFFFFFFFFFFFFFFFFFFFFFFFFFFFFFFFFFFFFFFFF  
F:F

@A00721:190:HGJW7DSXY:4:2456:13548:2597\_2:N:0:TCTGCAAG+GCTGCACT  
CCACTTCTAATTTTAGGAAACGTCGCGAAAAGAAAGTTTCATGAGGATGTCTTGGTCGAAAAATATCGC  
CGGGAACCTCTAATAGAGGATCCTGATGACATTATTTCAACGGATACC

+

FFFFFFFFFFFFFFFFFFFFFFFFFFFFFFFFFFFFFFFFFFFFFFFFFFFFFFFFFFFFFFFFF:,FFFFFFFFFFFFFFFFFFFFF  
FFFFF:FFF:F::FFFFFFFF:FFFFF,F,FFFFF:FFFF,FFFFFFFF

@A00721:190:HGJW7DSXY:4:2178:22535:25363\_1:N:0:TCTGCAAG+GCTGCACT  
TGTCTCCACTGATTGGAATTAGAGAAAGACGACCTTCTTGTGGGGACTGAGACCTCTGAATTTTCAG  
GGTGCCCTGATGAGGACGTTGAAAGGGATAATTTCAACTCTGAGACTTCTAAGAGTGTTCAAAAGAC  
CAG

+

FFFFFFFFFFFFFFFFFFFFFFFFFFFFFFFFFFFFFFFFFFFFFFFFFFFFFFFFFFFFFFFFFFFFF  
FFFFFFFFFFFFFFFFFFFFFFFFFFFFFFFFFFFFFFFFFFFFFFFFFFFFFFFFFFFFFFFFFFFFF  
FFF

@A00721:190:HGJW7DSXY:4:2222:10474:25238\_2:N:0:TCTGCAAG+GCTGCACT  
AGAACAGCTGATTCTTATTGCATGAACGTCGCTGAGGTCAAACCTGTGGACGTTCTTTTCATCGACGA  
ATTATTCATGATTCACGCTGGTCAGACCTTTTTCTTACACATCTACT

+

FFFFFFFFFFFFFFFFFFFFFFFFFFFFFFFFFFFFFFFFFFFFFFFFFFFFFFFFFFFFFFFFFFFFF  
FFFFFFFFFFFFFFFFFFFFFFFFFFFFFFFFFFFFFFFFFFFFFFFFFFFFFFFFFFFFFFFFFFFFF,FFFFFFFFFFFFFFFFFFFF

@A00721:190:HGJW7DSXY:4:1313:16206:2253\_1:N:0:TCTGCAAG+GCTGCACT  
CTACTTCAACATCAACGACATCATTCTTGATGAGTGTGCTTCTTATCGAAGTCTCAGTTATCGCTGCC  
CGGCCGACGTTTGTGCGGAACCTCTCAGAGGTTTACGGCAGAAAAATTTCTCCTGCTTGTAAATTCGAGA  
GAG

+

F:FFFFFFFFFFFFFFFFFFFFFFFFFFFFFFFFFFFFFFFFFFFFFFFFFFFFFFFFFFFFFFFFFFFFF  
FFFFFFFFFFFFFFFFFFFFFFFFFFFFFFFFFFFFFFFFFFFFFFFFFFFFFFFFFFFFFFFFFFFFF,FF  
FFF

@A00721:190:HGJW7DSXY:4:2559:24695:5556\_1:N:0:TCTGCAAG+GCTGCACT  
ACCCCTTATATCGAGGCTATCGAGGACGATGAGTATCTTGAAGTTGTTGACGACAAGCCTCAAGAGGG  
TAGAGGACCACCTGGATCTTCTACTGTCTCTGCCTTCCAAGATTTCTTAGAAGAGGTTATTCCTGGAA  
CCA

+

FFFFFFFFFFFFFFFFFFFFFFFFFFFFFFFFFFFFFFFFFFFFFFFFFFFFFFFFFFFFFFFFFFFFF  
FFFFFFFFFFFFFFFFFFFFFFFFFFFFFFFFFFFFFFFFFFFFFFFFFFFFFFFFFFFFFFFFFFFFF  
FFF

@A00721:190:HGJW7DSXY:4:2145:31006:12164\_1:N:0:TCTGCAAG+GCTGCACT  
GGTAAGAAGCCCCTTGAGCCGCGTAGTCAGCGGTTTAGCTGTATCATCAGTCAGAGTATACCCGATA  
GGGTACCGAGTCTCCAAGAGAATATTTATTCTTATGAGGCTCGAACTTCAACGTTTTTACAACGGAA  
AGA



@A00721:190:HGJW7DSXY:4:1376:7545:28902\_2:N:0:TCTGCAAG+GCTGCACT  
ACTTTATTATGACCTTGGAAAGTTTTCGGCTGTGGTTGTCGCTGGGGACGATTCCATTCTGTTTTCAA  
AGACTCCAATAACTGATCATTCTGATCATATGATTTTGGACAATGGTT

@A00721:190:HGJW7DSXY:4:1311:28474:26850\_2:N:0:TCTGCAAG+GCTGCACT  
GTGGAGGGAGTTCTTGAAGCATCCCGACCTTTCTTGTGAAAATTTTGATGCGGTTTCATAAGATTAT  
CAGTAATCCTGATTCTACTACGGATTCATGGACCTTCCATCCTGTACC

@A00721:190:HGJW7DSXY:4:2621:16269:21934\_1:N:0:TCTGCAAG+GCTGCACT  
CTTCAGATCTGAAC TTTGTGAATTTGAAGCTCAGGGTGAAGCACAACGTTTGACCGTGACGAACTGTG  
GTGTTCTTGATCTACGTTACGGATATACTCTCCTTGAGTTCCTCGTAAGGACACTACCACTTATTAC  
GAT

@A00721:190:HGJW7DSXY:4:2475:17137:29450\_2:N:0:TCTGCAAG+GCTGCACT  
GGGTTTTCGAATAGTGATAGCCACCCGCCCTTACAGAGGGGCAGCAGCATGACCATAATTGGTATTGAC  
TTTGGTACCACCTTTTCTACTGTCTGTCTCGCCTCTTCGAATGAAGTT

@A00721:190:HGJW7DSXY:4:2519:10511:19977\_2:N:0:TCTGCAAG+GCTGCACT  
TTTCTAATAATGATGACACTATTGTTTATGGATATGATGCTATTACTCATGATGGTTACGGTCAGGGA  
GGATTCTCAGTTTACAAGGACCTTAAGCGATTGATCGGGGTTAATTCT

@A00721:190:HGJW7DSXY:4:2140:16740:26318\_1:N:0:TCTGCAAG+GCTGCACT  
ACGCAAAGATATTTTCATGAAACTACAGAGGAACGTACCGGATTACCTGTCTTTTCATATTATGAATGA  
ACCTTCGGCCGCTCTCTTTGCTTCGATGTTGGATGTCAAGAAGGGTTCAGAATGGGATTCTACGTAG  
TTT

@A00721:190:HGJW7DSXY:4:1405:17056:7795\_1:N:0:TCTGCAAG+GCTGCACT  
CTTGGAACGAAGGCGACCTGTTCCGGAGTTTTTACGGGATCCGGAATGTTCTGTCTATATTAGGTGAA  
GCGAAATACGATTTCGAACGTCAACGTTCCACCGAGTTTCGTTTCGTACCTTGATGCTGACTTTCGTCA  
ATA

@A00721:190:HGJW7DSXY:4:2409:1895:13698\_2:N:0:TCTGCAAG+GCTGCACT  
TTCTACGATACAAATGATAACTTCTAATTTACGTTTGCTACTCAGAGCTGGTCCTCTCAGCAAAGGG

ATGCATGGTGTTATCTCCTCAGGAGTCCCGGCATTTGATAATAATGAC  
+  
FFFFFFFFFFFFFFFFFFFFFFFFFFFFFFFFFFFFFFFFFFFFFFFFFFFFFFFFFFFFFFFFFFFFFFFF  
F:FFFFFFFFFFFFFFFFFFFFFFFFFFFFFFFFFFFFFFFFFFFFFFFFFFFFFFFFFFFFFFFF  
@A00721:190:HGJW7DSXY:4:2269:4833:25833\_2:N:0:TCTGCAAG+GCTGCACT  
TCGCTGCATATTACGATTACACGGTACCAGCGCATCTCGTGTGAGCCTCGACCCGATTATATGGTA  
TTAACTTATAAAGGTGAGGAGACCATTTTCTTGCTGAAATTTATAGAA  
+  
FFFFFFFFFFFFFFFFFFFFFFFFFFFFFFFFFFFFFFFFFFFFFFFFFFFFFFFFFFFFFFFFFFFFFFFF  
FFFFFFFFFFFFFFFFFFFFFFFFFFFFFFFFFFFFFFFFFFFFFFFFFFFFFFFFFFFFFFFFFFFFFFFF  
@A00721:190:HGJW7DSXY:4:1603:19253:22279\_2:N:0:TCTGCAAG+GCTGCACT  
GTCAACACTAGTTCGAGTGCTGCTTTGGATTACGATGACGTGAGAATAGGTGAAGGGATAGTTTTTAC  
CTCGACCAACATTAAGGCGGCGGCGACTAATCTTAAAGCTTCACCCAA  
+  
FFFFFFFFFFFFFFFFFFFFFFFFFFFFFFFFFFFFFFFFFFFFFFFFFFFFFFFFFFFFFFFFFFFFFFFF  
FFFFFFFFFFFFFFFFFFFFFFFFFFFFFFFFFFFFFFFFFFFFFFFFFFFFFFFFFFFFFFFFFFFFFFFF  
@A00721:190:HGJW7DSXY:4:1459:7591:14763\_2:N:0:TCTGCAAG+GCTGCACT  
CTAGCCTTCAAGTGGGGTATGCCTGCGGAATACGCTTGCTATTACCAGATTGGTTCGAACCCGTTGA  
TGCTATGTCAGAAGAAGCTATTCAAGCTTGCTGTTTAAAGACTGCAGA  
+  
FFFFFFFFFFFFFFFFFFFFFFFFFFFFFFFFFFFFFFFFFFFFFFFFFFFFFFFFFFFFFFFFFFFFFFFF  
FFFFFFFFFFFFFFFFFFFFFFFFFFFFFFFFFFFFFFFFFFFFFFFFFFFFFFFFFFFFFFFFFFFFFFFF  
@A00721:190:HGJW7DSXY:4:2639:12527:3082\_1:N:0:TCTGCAAG+GCTGCACT  
CCCAGACTCAAGGAGTCCAATCAAAGGTTTTGAATTTAGCTCAACTGGGGAGACGTGCTTAAATGGGT  
GATAAAAATTATTTAGAGATCTTTTCTACTTACAAAGGACAATTCAGTTTCATTAATTCTACGAAAA  
GTC  
+  
FFFFFFFFFFFFFFFFFFFFFFFFFFFFFFFFFFFFFFFFFFFFFFFFFFFFFFFFFFFFFFFFFFFFFFFF  
FFFFFFFFFFFFFFFFFFFFFFFFFFFFFFFFFFFFFFFFFFFFFFFFFFFFFFFFFFFFFFFFFFFFFFFF  
FFF  
@A00721:190:HGJW7DSXY:4:2445:24858:1673\_1:N:0:TCTGCAAG+GCTGCACT  
TTTTGTTACCAAATCTTGCTTTCAACGAAGTCTCTGATTTTATTAATCATTACTTTAACGATCTCT  
CGGTCATTTACTCTGTACTTGATCTACGTCGTTTAACTGTGCGAACAACCTTTACTTAGAATGACTCT  
ATC  
+  
FFFFFFFFFFFFFFFFFFFFFFFFFFFFFFFFFFFFFFFFFFFFFFFFFFFFFFFFFFFFFFFFFFFFFFFF  
FFFFFFFFFFFFFFFFFFFFFFFFFFFFFFFFFFFFFFFFFFFFFFFFFFFFFFFFFFFFFFFFFFFFFFFF  
FFF  
@A00721:190:HGJW7DSXY:4:2672:25220:16673\_2:N:0:TCTGCAAG+GCTGCACT  
ACGAAAACCAACTCTTCGTTACGAGACCTGATGGTAGAATAGATTTAGTCTCTACACCCATCTCAACG  
AGGATAAAGCGAGTTTTCCGTCCTGAACGTAATACACGAAGAGATCAT  
+  
FFFFFFFFFFFFFFFFFFFFFFFFFFFFFFFFFFFFFFFFFFFFFFFFFFFFFFFFFFFFFFFFFFFFFFFF  
FFFFFFFFFFFFFFFFFFFFFFFFFFFFFFFFFFFFFFFFFFFFFFFFFFFFFFFFFFFFFFFFFFFFFFFF  
@A00721:190:HGJW7DSXY:4:2369:15555:36198\_1:N:0:TCTGCAAG+GCTGCACT  
AAATGAGGTCAAAGCTCTATTTATTAACGAACATTATCCGATTCTTCGAGGGTATCACTACCACTG  
ATCTGCCGACTTTAGTCAAGGAACCTCAATTCCTTCGATGTTTATATTTTCTATAAGGGAAAATAGC  
AAT  
+  
FFFFFFFFFFFFFFFFFFFFFFFFFFFFFFFFFFFFFFFFFFFFFFFFFFFFFFFFFFFFFFFFFFFFFFFF  
FFFFFFFFFFFFFFFFFFFFFFFFFFFFFFFFFFFFFFFFFFFFFFFFFFFFFFFFFFFFFFFFFFFFFFFF  
FFF  
@A00721:190:HGJW7DSXY:4:2576:18756:3756\_2:N:0:TCTGCAAG+GCTGCACT  
AATTTTAGAACTTTATTTAGAACTCTCTCCGATCACCTTGGTGTGATCTCCCGAGGATCTTTTCAA

+

@A00721:190:HGJW7DSXY:4:2266:17725:8578\_1:N:0:TCTGCAAG+GCTGCACT  
CAAAAAGTTGGAAGAGGTCTATGATATTTATTTTACTTATACTTTAAATAGCACCGATTATAAATTGA  
CTGTTGATAATATTACAATAGCTCTTCTCAGAAGATTAGAGAAGTAACTCGGTGAACACGTCGGTAG  
CAT

+

@A00721:190:HGJW7DSXY:4:2643:3857:6230\_2:N:0:TCTGCAAG+GCTGCACT  
ACTTCAAGTACCTGAACCTTTACATTTTTAATGGTATGGTATAATGTGTCTTACAAATAGAACCTTCAC  
TCTCGGTAATGAGAGTGTATTCTTAATATTCTAGTAACCGCTATGTG

+

@A00721:190:HGJW7DSXY:4:1356:3369:12117\_1:N:0:TCTGCAAG+GCTGCACT  
ATTCAATAGCTTTAGTATTATTTACTATCGCCTTTATTGAAAATTGTATAAGAGTTAATTGCTTACAC  
AAAAGTGACGCGCGAAGGAATCTTAATTGATTGAAGCTAGGCGTTGGGGAGAATGAACTGCCGCTTCC  
CGG

+

@A00721:190:HGJW7DSXY:4:1414:4110:13182\_2:N:0:TCTGCAAG+GCTGCACT  
GCTGTGCAGAATAACCTTCCCAAATCTAGATCTGCACAGAAGAAGGCTGAAGGTCGTTACCGGACGAC  
CACTCAAAGGAAACGGGCTGTTGCCAGAGGAAAGCAGCGACCACCGA

+

@A00721:190:HGJW7DSXY:4:2430:17852:1188\_1:N:0:TCTGCAAG+GCTGCACT  
AAAAGTCACATTCACCACTCCCATGCCAATCAATGATGTGACTATACAGTTCGGCCATTTCAAGAGTG  
GTCAATACGTCGTGGGAGGTACTGAAGCCTTCCCCTCCGCTGGCACGAAGAACAACCTCCCAAGCCAATC  
AAT

+

@A00721:190:HGJW7DSXY:4:2667:20193:14231\_1:N:0:TCTGCAAG+GCTGCACT  
AATGAAAAGGGGTTTACCAGGGTAGTCTCTAAGTCTACCAGGAAGAGGGGAAATGTCCCCAAACTGA  
GAAGAATAAAGGGAAAGGTCCATCAGGACCTAAGAAGGGGAAATTACCCCTAATTCTGAAGGAAGATC  
TCC

+

@A00721:190:HGJW7DSXY:4:1425:1850:15092\_1:N:0:TCTGCAAG+GCTGCACT  
CTACGAAGTCGCTGAAGGCGGCTTGGGTCATTAAGGGTAGCTGTAAAGTTGCGCCTGCCGACCCCATC  
TTTGAGACCAAGACTCTCTACAGTAGGTTCTGCCTACTATGAGCAAATCTGTTGAATTCGTCACTGA  
GGA

+

FFFFFFFFFFFFFFFF:FFFFFFFFFFFFFFFFFFFFFFFFFFFFFFFFFFFFFFFF  
FFF

@A00721:190:HGJW7DSXY:4:1429:7654:5729\_1:N:0:TCTGCAAG+GCTGCACT  
GACTTTTGGCTACTGGCGACAACTGAGAGCAGTCGCTGGGAAAGAGAATTGCGTGGGTTGAAGGCC  
GACGCTTCGAGCTTGAGTGTGACGAGGCCGGTGACGTTTTGTCAACGGCGTTTGGAGGATTTTATCC  
GCG

+

FFFFF,FFFFFFFFFFFFFFFFFFFFFFFFFFFFFFFFFFFFFFFFFFFFFFFFFFFFFFFF  
F:FFFFFFFFFFFFFFFFFFFFFFFFFFFFFFFFFFFFFFFF,FFF:FFFFFFFFFFFFFFFFFFFFFFFF  
FFF

@A00721:190:HGJW7DSXY:4:1233:2175:2691\_1:N:0:TCTGCAAG+GCTGCACT  
GCGAAGATCCCCTATGGAGTCTTGAAGGACTTAGGTTGGCATATTTATGCCGACGATAATAAGCATGT  
CACCCCTAAGCACCGAGGTAAGCTCGGGACTTACAAGATAGAGTGTGAGAGAGTCGCTCTCACTATTT  
TTG

+

FFFFFFFFFFFFFFFF: :FFFFFFFFFFFFFF,FFFFF,FFFFFF:FFFFFFFFFFFFFFFF,FFFFFF  
FFFFFFFFFFFFFFFFFFFFFFFFFFFFFFFFFFFFFFFFFFFFFFFF,FFFFFFFFFFFFFFFFFFFFFFF  
FFF

@A00721:190:HGJW7DSXY:4:1643:32814:14293\_1:N:0:TCTGCAAG+GCTGCACT  
TTTCCTCCGTCATTGGGATTTGATGTGAGAAGGTGGAAGGTGTCAAGGCTCTTCTTCATGCTGATC  
TTTCAGGACCTAATCACATCATGATTGATAGTTACGGCTCGTATCGAGTTGGAGGGAGGAAGTTCTCC  
GAA

+

: :FFFFFFFFFFFFFFFFFFFFFFFFFFFFFFFFFFFFFFFFFFFFFFFF:FFFFFFFFFFFFFF  
:FFFFFFFFFFFFFFFFFFFFFFFFFFFFFFFFFFFFFFFFFFFFFFFFFFFFFFFFFFFFFFFFFFFFFFF  
FFF

@A00721:190:HGJW7DSXY:4:1253:17616:17879\_1:N:0:TCTGCAAG+GCTGCACT  
GGAAGGCTCTAGAGAAGATCTCACCACTGGAGAAGGCAAGTGGAGAGTCCAGAAGTTGATGAAGAAG  
GATTATTTGAAGCAGGGGTTACCACTTCTAAGGTGGATGAGGGAGGTTGTTTCTTTGGAGTTTATA  
TAA

+

FFFFFFFFFFFFFFFF:FFF,FFFFFFFFFFFFFFFFFFFFFFFFFFFFFFFF:FFFFFFFFFFFF  
FF:FFF:FFFFFFFFFFFFFFFFFFFFFFFFFFFFFFFFFFFFFFFFFFFFFFFFFFFFFFFFFFFFFFF  
FFF

@A00721:190:HGJW7DSXY:4:2201:8350:28855\_1:N:0:TCTGCAAG+GCTGCACT  
TGTTCTTCCGGAAGTTGTGGGATTTAACTTTGACTCAACTACTCCGATCAGATCCGGATGGTTTGA  
TTGGTATGGACTACTCGACTTTTGATCTGGAGTTGTCTAGGGTCATGGCAGATACTACCGATAAGGTG  
AAA

+

FF,FFF,FFFFFFFFFFFFFFFFFFFFFFFFFFFFFFFFFFFFFFFFFFFFFFFFFFFFFFFF  
FFFFFFFFFFFFFFFFFFFFFFFFFFFFFFFFFFFFFFFFFFFFFFFFFFFFFFFFFFFFFFFFFFFFFFF  
FFF

@A00721:190:HGJW7DSXY:4:2241:28510:9001\_2:N:0:TCTGCAAG+GCTGCACT  
TTTATGATTCAAAACCTATCGTTGTCGTACCTTACAAGGTTGAGGAGACTTTACAGCGGCTTATTGTC  
GCGCAGTTTCCAGAATTGCGGTTGAAGTTCACCCATTCTATCTTGAAT

+

FFFFFFFFFFFFFFFF:FFFFFFFFFFFFFFFFFFFFFFFF:FFFFFFFFFFFFFF:FFFFFFFFFFFF  
FFFFFFFFFFFFFFFFFFFFFFFF:FFFFFFFFFFFFFFFFFFFFFFFF

@A00721:190:HGJW7DSXY:4:1344:25681:29465\_1:N:0:TCTGCAAG+GCTGCACT  
CTTCCGATCTCGTCTAGGAACATTGATTGGGAACGTACCTACTCACGAGACGTCATGAAAGCTATCGG  
AGGGAAGCAAAATGTTTCGTTCTGTTACAAGAACGCTTTGGATTGTGACCATAAAGCCTCAGTTGCGA  
TAG

+

:FFFFFFFFFFFFFFFF:FFFFFFFFFFFFFFFF: :FFF:FFFFFFFFFFFFFFFFFFFFFF

@A00721:190:HGJW7DSXY:4:1621:24704:27054\_2:N:0:TCTGCAAG+GCTGCACT  
CTTCGTAACAACAGTGCAGGATTGTCATCTCGGGGAAAGTGATTACCAAGATGTTCATATAGATAC  
GAGATACCTAGAGAGGTCGCAGCGATCTTACTCGTTATCGGAGCTAAG

@A00721:190:HGJW7DSXY:4:2523:30020:29152\_2:N:0:TCTGCAAG+GCTGCACT  
ATTCAGGACGCCTACGGTGACTTTATGGACAAGATGCAAGTTCTTGGGAAATACTTGTTTCCCTTTT  
TAGGTTTAGTAGGTGATCTTGACGTCGATTCTTTGTATAGATCGGAAG

@A00721:190:HGJW7DSXY:4:2446:26431:24158\_1:N:0:TCTGCAAG+GCTGCACT  
TTCTTGAAAACCAAGTTAAGAAGGAGGCTGATCATGGAGTCTTTGTACCTTCTGTCAAAC TTCGAGGT  
TCAGCTACGAGAGGTGATCCCGGATGTGGATTGAAGGCTGGCTCTAAGGGAGACTCCTTCTTTTTGAA  
TGT

@A00721:190:HGJW7DSXY:4:2547:25030:31908\_1:N:0:TCTGCAAG+GCTGCACT  
GTTGAGAAGTGTGCTTTACAAGGAGTTAGACTCTTCTTCAAGTTTTTAGATCTTCTTGATAATCTTAA  
AGAAAAATTTTCGAATAAACTAATGAGAGGTATAGGCTTAGTCAAGTCTGTACTTACATTCTTTACGC  
CAG

@A00721:190:HGJW7DSXY:4:2507:16324:8688\_1:N:0:TCTGCAAG+GCTGCACT  
CTTTTACCTTTTGGAGGTCCAGGAACCTTTACTCCTAGTGTCTTTTCTAGAGTCCAAGGACGTTTCCG  
TCGGAGGATGACAGGTGGGAGACCGCTCAATAACACTCTATTGAATCCCTTTTCCACGATGAAAGCTC  
TTT

@A00721:190:HGJW7DSXY:4:2570:24840:17143\_2:N:0:TCTGCAAG+GCTGCACT  
CCACTTCTAATTTTAGGAAACGTCGCGAAAAGAAAGTTCATGAGGATGTCTTGGTCGAAAAATATCGC  
CGGGAACCTTCTAATAGAGGATCCTGATGACATTATTTCAACGGATACC

@A00721:190:HGJW7DSXY:4:2236:14986:7310\_1:N:0:TCTGCAAG+GCTGCACT  
TGTCTCCACTGATTCGGAATTAGAGAAAGACGACCTTCTTGTGGGGACTGAGACCTCTGAATTTTCAG  
GGTGCCCTGATGAGGACGTTGAAAGGGATAATTTCAACTCTGAGACTTCTAAGAGTGTTTCAAAGAC  
CAG

@A00721:190:HGJW7DSXY:4:2238:1714:5682\_2:N:0:TCTGCAAG+GCTGCACT  
AGAACAGCTGATTCTTATTGCATGAACGTCGCTGAGGTCAAACCTGTGGACGTTCTTTTCATCGACGA

ATTATTCATGATTACGCTGGTCAGACCCTTTTTCTTACACATCTACT

+

FFFFFFFFFFFFFFFFFFFFFFFFFFFFFFFFFFFFFFFFFFFFFFFFFFFFFFFFFFFFFFFFFFFFFFFF  
FFFFFFFFF:FFFFFFFFFFFFFFFFFFFFFFFFFFFFFFFFFFFFFFFFFFFFFFFFFFFFFFFF

@A00721:190:HGJW7DSXY:4:1459:23782:26741\_1:N:0:TCTGCAAG+GCTGCACT  
CTACTTCAACATCAACGACATCATTCTTGATGAGTGTCTGTTCTTATCGAAGTCTCAGTTATCGCTGCC  
CGGCCGACGTTTGTGCGGAACTCTCAGAGGTTTACGGCAGAAAAATTTCTCCTGCTTGTAATTCGAGA  
GAG

+

:FFFFFFFFFFFFFFFFFFFFFFFFFFFFFFFFFFFFFFFFFFFFFFFFFFFFFFFFFFFFFFFFFFFFFFFF  
FFFFFFFFF:FFFFFFFFFFFFFFFFFFFFFFFFFFFFFFFFFFFFFFFFFFFFFFFFFFFFFFFF  
FFF

@A00721:190:HGJW7DSXY:4:2604:16685:3051\_1:N:0:TCTGCAAG+GCTGCACT  
ACCCCTTATATCGAGGCTATCGAGGACGATGAGTATCTTGAAGTTGTTGACGACAAGCCTCAAGAGGG  
TAGAGGACCACCTGGATCTTCTACTGTCTCTGCCTTCCAAGATTTCTTAGAAGAGGTTATTCCTGGAA  
CCA

+

FFFFFFFFFFFFFFFFFFFFFFFFFFFFFFFFFFFFFFFFFFFFFFFFFFFFFFFFFFFFFFFFFFFFFFFF  
FFFFFFFFF:FFFFFFFFFFFFFFFFFFFFFFFFFFFFFFFFFFFFFFFFFFFFFFFFFFFFFFFF  
FFF

@A00721:190:HGJW7DSXY:4:2148:31693:30264\_1:N:0:TCTGCAAG+GCTGCACT  
GGTAAGAAGCCCCTTGAGCCGCGTAGTCAGCGCGTTTAGCTGTATCATCAGTCAGAGTATACCCGATA  
GGGTACCGAGTCTCCAAGAGAATATTTATTCTTATGAGGCTCGAACTTCAACGTTTTCAACGGA  
AGA

+

F:FFFFFFFFFFFF:FFFFFFFFFFFFFFFFFFFFFFFFFFFFFFFFFFFFFFFFFFFFFFFFFFFFFFFF  
FFFFFFFFF:FFFFFFFFFFFFFFFFFFFFFFFFFFFFFFFFFFFFFFFFFFFFFFFFFFFFFFFF  
FFF

@A00721:190:HGJW7DSXY:4:1376:9182:29356\_2:N:0:TCTGCAAG+GCTGCACT  
ACTTTATTATGACCTTGGAAGTTTTCGGCTGTGGTTGTGCTGGGGACGATTCCATTCTGTTTTCAA  
AGACTCCAATAACTGATCATTCTGATCATATGATTTTGACAATGGTT

+

FFFFFFFFFFFFFFFFFFFFF:FFFFFFFFFFFFFFFFFFFFFFFFFFFFFFFFFFFFFFFFFFFFFFFF  
FFFFFFFFF:FFFF:FFFF

@A00721:190:HGJW7DSXY:4:1365:12138:21355\_2:N:0:TCTGCAAG+GCTGCACT  
GTGGAGGGAGTTCTTGAAGCATCCCGACCTTTCCTTGTGAAAATTTTGATGCGGTTTCATAAGATTAT  
CAGTAATCCTGATTCTACTACGGATTCATGGACCTTCCATCCTGTACC

+

FFFFFFFFFFFFFFFFFFFFFFFFFFFFFFFFFFFFFFFFFFFFFFFFFFFFFFFFFFFFFFFFFFFFFFFF  
FFFFFFFFF:FFFFFFFFFFFFFFFFFFFFFFFFFFFFFFFFFFFFFFFFFFFFFFFFFFFFFFFF

@A00721:190:HGJW7DSXY:4:2639:27272:33285\_1:N:0:TCTGCAAG+GCTGCACT  
CTTCCGATCTGAACCTTTGGGAATTTGAAGCTCAGGGTGAAGCACAACGTTTGACCGTGACGAACGTG  
GTGTTCTTGATCTACGTTACGGATATACTCTCCTTGAGTTCACTCGTAAGGACACTACCACTTATTAC  
GAT

+

:FF:,FFFFFFFF:F:F:F:,FFFFFFFFFFFFFFFFFFFFFFFFFFFFFFFFFFFFFFFFFFFFFFFF  
FFFFFFFFF:,FFFFFFFFFFFFFFFFFFFFFFFFFFFFFFFFFFFFFFFFFFFFFFFFFFFFFFFF  
FFF

@A00721:190:HGJW7DSXY:4:2553:23149:28494\_2:N:0:TCTGCAAG+GCTGCACT  
GGGTTTTTGAATAGTGATAGCCACCCGCTTACAGAGGGGCAGCAGCATGACCATAATTGGTATTGAC  
TTTGGTACCACCTTTTCTACTGTCTGTCTCGCCTCTTGAATGAAGTT

+

FFFFFFFFFFFFFFFFFFFFFFFFFFFFFFFFFFFFFFFFFFFFFFFFFFFFFFFFFFFFFFFFFFFFFFFF  
FFFFFFFFF:FFFFFFFFF,FFFFFFFFFFFFFF  
FFFFFFFFF:FFFFFFFFFFFFFFFFFFFFFFFFFFFFFFFFFFFFFFFFFFFFFFFFFFFFFFFF



@A00721:190:HGJW7DSXY:4:2459:25473:22529\_1:N:0:TCTGCAAG+GCTGCACT  
TTTTGTTACCAAATTCTTGCTTTCAACGAAGTCTCTGATTTTATTAATCATTACTTTAACGATCTCT  
CGGTCATTTACTCTGTACTTGATCTACGTCGTTTAACTGTCGGAACAACCTTTACTTAGAATGACTCT  
ATC

+

FFFFFFFFFFFFFFFFFFFFFFFFFFFFFFFFFFFFFFFFFFFFFFFFFFFFFFFFFFFFFFFFFFFFFFFF  
FFFFFFFFFFFFFFFFFFFFFFFFFFFFFFFFFFFFFFFFFFFFFFFFFFFFFFFFFFFFFFFFFFFFFFFF  
FFF

@A00721:190:HGJW7DSXY:4:1535:6397:26318\_1:N:0:TCTGCAAG+GCTGCACT  
ACTAAAACCAACTCTTCTTTACTAGACCTGTTGGTATAATATTTTATAGTATCTAAACCCATCTCAACG  
AGTATAATGCTATTTTTCCGTCCTTAACTTAATACACGAAGAGATCATCCGCAAACGACTCGAAACC

+

F:,F:F:,,FF,F,FF,,F:,,,,,:F,F,,,F:,F:F,,,FFF,::,,:,,FF,,FF,,FF,,,  
,F,FFFF,::,:FFF,F,,:F,F,F:,,:F:,F,,,F:,F,F:,,,F:,F:FFFFFFFFFFFFFF

@A00721:190:HGJW7DSXY:4:2438:28999:23907\_1:N:0:TCTGCAAG+GCTGCACT  
AAATGAGGTCAAAGCTCTATTTATTAACGAAGTATTATCCGATTCTTCGAGGGTATCACTACCACTG  
ATCTGCCGACTTTAGTCAAGGAAGTCAATTCCTTCGATGTTTATATTTTCTATAAGGGAAAATAGC  
AAT

+

FFFFFF,F:FF,FFFFFFFFFFFFFFFFFFFFFFFFFFFFFFFFFFFFFFFFFFFFFFFFFFFFFFFF  
FFFFFF:FFFFFF:FFFFFFFFFFFF:FFF:FFFFFFFFFFFF:FFFFFFFFFFFF,:FF:FF:FFFFFF  
FFF

@A00721:190:HGJW7DSXY:4:1144:6442:28244\_1:N:0:TCTGCAAG+GCTGCACT  
ATTTTAGAACTTTATTTTCAAGTCTCTCCGATCACCTTGGTGTGATCTCCCGGAGGATCTTTTCAAT  
AAGATGTATGATGATAATCTACTATTTTAAATAGTGATATTCAGCGTATACTTGAATACTTTATCAA  
AGA

+

FFFFFFFFFFFFFFFFFFFFFFFFFFFFFFFFFFFFFFFFFFFFFFFFFFFFFFFFFFFFFFFFFFFFFFFF  
FFFFFFFFFFFFFFFFFFFFFFFFFFFFFFFFFFFFFFFFFFFFFFFFFFFFFFFFFFFFFFFFFFFFFFFF  
FFF

@A00721:190:HGJW7DSXY:4:2533:8766:32612\_1:N:0:TCTGCAAG+GCTGCACT  
CAAAAAGTTGGAAGAGGTCTATGATATTTATTTTACTTATACTTTAAATAGCACCGATTATAACTTGA  
CTGTTGATAATATTACAATAGCTCTTTCTCAGAAGATTAGAGAAGTAACTCGGTGAACACGTCGGTAG  
CAT

+

FFFFFFFFFFFFFFFFFFFFFFFFFFFFFFFFFFFFFFFFFFFFFFFFFFFFFFFFFFFFFFFFFFFFFFFF  
:FFFFFFFFFFFFFFFFFFFFFFFFFFFFFFFFFFFFFFFFFFFFFFFFFFFFFFFFFFFFFFFFFFFFFF  
FFF

@A00721:190:HGJW7DSXY:4:1418:2239:35837\_2:N:0:TCTGCAAG+GCTGCACT  
TCAAGTACCTGAAGTCTTACATTTTAAATGGTATGGTATAATGTGTCTTACAAATAGAACCTTCACTCT  
CGGTAATGAGAGTGATTCCTTAATATTCTAGTAACCGCTATGTGGGC

+

FFFFFFFFFFFFFFFFFFFFFFFFFFFFFFFFFFFFFFFFFFFFFFFFFFFFFFFFFFFFFFFFFFFFFFFF  
FFFF,FFFFFFFFFFFFFFFFFFFFFFFFFFFFFFFFFFFFFFFFFFFFFFFFFFFFFFFFFFFFFFFF  
FFF

@A00721:190:HGJW7DSXY:4:2102:15899:18630\_1:N:0:TCTGCAAG+GCTGCACT  
ATTCAATAGCTTTAGTATTATTTACTATCGCCTTTATTGAAAATTGTATAAGAGTTAATTGCTTACAC  
AAAAGTGACGCGCAAGGAATCTTAATTGATTGAAGCTAGGCGTTGGGGAGAATGAAGTCCGCTTCC  
CGG

+

FFFFFFFF:FFFFFFFF:FFFFFFFFFFFFFFFFFFFFFFFFFFFFFFFFFFFFFFFFFFFFFFFF:FFFFFF  
FFFFFFFFFFFFFFFFFFFFFFFFFFFFFFFFFFFFFFFFFFFFFFFFFFFFFFFFFFFFFFFFFFFFFF  
FFF

@A00721:190:HGJW7DSXY:4:2132:10104:25034\_2:N:0:TCTGCAAG+GCTGCACT  
GCTGTGCAGAATAACCTTCCCAAATCTAGATCTGCACAGAAGAAGGCTGAAGTTCGTTACCGGACGAC



CACTCAAAGGAAACGGGCTGTTGCCAGAGGAAAGCAGCGACCACCGA

+

FFFFFFFF:FFFFFFFFFFFFFFFF,FFFFFFFFFFFFFFFF,FFFF,FFFFFFFFFFFFFFFFFFFFFFFF:FFFF  
F:FFFF,FFFF:FFFFFFFFFFFFFFFFFFFFFFFF,FFF:FFFFFF:FFF:

@A00721:190:HGJW7DSXY:4:2434:25898:36824\_1:N:0:TCTGCAAG+GCTGCACT  
AAAAGTCACATTCACCACTCCCATGCCAATCAATGATGTGACTATACAGTTCGGCCATTTCAAGAGTG  
GTCAATACGTCGTGGGAGGTACTGAAGCCTTCCCCTCCGCTGGCACGAAGAACTCCCAAGCCAATC  
AAT

+

FFFFFFFFFFFFFFFFFFFFFFFFFFFFFFFFFFFFFFFFFFFFFFFFFFFFFFFFFFFFFFFFFFFFFFFF  
FFFFFFFFFFFFFFFFFFFFFFFFFFFFFFFF:FFFFFFFFFFFFFFFFFFFFFFFFFFFFFFFFFFFFFFFF  
FFF

@A00721:190:HGJW7DSXY:4:2553:20961:36855\_1:N:0:TCTGCAAG+GCTGCACT  
GACGTGTGCTCTTCCGATCTGGAAGAGGGGAAATGTCCCCAAACTGAGAAGAATAAAGGGAAAGGTC  
CATCAGGACCTAAGAAGGGGAAATTACCCCTAATTCTGAAGGAAGATCTCCCACCATCTGGGGTTGGG  
AAT

+

FFFFFFFFFFFFFFFFFFFFFFFFFFFFFFFFFFFFFFFFFFFFFFFFFFFFFFFFFFFFFFFFFFFFFFFF  
FFFFFFFFFFFFFFFFFFFFFFFFFFFFFFFF:FFFFFFFFFFFFFFFFFFFFFFFFFFFFFFFFFFFFFFFF  
FFF

@A00721:190:HGJW7DSXY:4:1431:12617:10848\_1:N:0:TCTGCAAG+GCTGCACT  
CTACGAAGTCGCTGAAGGCGGCTTGGGTCATTAAGGGTAGCTGTAAAGTTGCGCCTGCCGACCCCATC  
TTTGAGACCAAGACTCTCTACAGTAGGTCGTGCCTACTATGAGCAAATCTGTTGAATTCGTCACTGA  
GGA

+

FFFFFFFFFFFFFFFFFFFFFFFFFFFFFFFFFFFFFFFF,FFFFFFFFFFFFFFFFFFFFFFFFFFFFFFFF  
FFFFFFFFFFFFFFFFFFFFFFFF:FFFFFFFFFFFFFFFFFFFFFFFFFFFFFFFFFFFFFFFF:FFFFFFFF  
FFF

@A00721:190:HGJW7DSXY:4:2142:14371:35086\_1:N:0:TCTGCAAG+GCTGCACT  
GACTTTTGGCTACTGGCGACAACTGAGAGCAGTCGCTGGGGAAAGAGAATTGCGTGGGTTGAAGGCC  
GACGCTTCGAGCTTGAGTGTGACGAGGCCGGTGACGTTTTTGTCAACGGCGTTTGGAGGATTTTATCC  
GCG

+

FF:FFFFFFFF:FFF:FFF:F,FFFFFFFFFFFFFFFFFFFFFFFF:FF:F,FFFFFFFFFFFFFFFF,::FFF  
:,FF:FF:FFF,FFFFFF::F:F,,F:FFFFFF:FF:FFFFFFFFFFFFFFFF,FFF:FFFFFFFF,F  
FFF

@A00721:190:HGJW7DSXY:4:1574:21305:13870\_1:N:0:TCTGCAAG+GCTGCACT  
GCGAAGATCCCCTATGGAGTCTTGAAGGACTTAGGTTGGCATATTTATGCCGACGATAATAAGCATGT  
CACCCCTAAGCACCGAGGTAAGCTCGGGACTTACAAGAGAGAGTGTGAGAGAGTCGCTCTCACTATTT  
TTG

+

FFFFFFFFFFFFFFFFFFFFFFFFFFFFFFFFFFFFFFFFFFFFFFFFFFFFFFFFFFFFFFFFFFFFFFFF  
FFFFFFFFFFFFFFFFFFFFFFFFFFFFFFFFFFFFFFFFFFFFFFFFFFFFFFFFFFFFFFFFFFFFFFFF  
FFF

@A00721:190:HGJW7DSXY:4:1669:20817:21324\_1:N:0:TCTGCAAG+GCTGCACT  
TTTCCTCCGTCATTGGGGATTTGATGTGAGAAGGTGGAAGGTGTCAAGGTTCTTTCATGCTGATC  
TTTCAGGACCTAATCACATCATGATTGATAGTTACGGCTCGTATCGAGTTGGAGGGAGGAAGTTCTCC  
GAA

+

::FFFFFFFF:F,FFFFFFFFFFFFFFFFFFFFFFFFFFFFFFFFFFFFFFFFFFFFFFFFFFFFFFFF  
FFFFFFFFFFFFFFFFFFFFFFFFFFFFFFFFFFFFFFFFFFFFFFFFFFFFFFFFFFFFFFFFFFFFFFFF  
FFF

@A00721:190:HGJW7DSXY:4:1452:17381:33536\_1:N:0:TCTGCAAG+GCTGCACT  
GGAAGGCTCTAGAGAAGATCTCACCACTGGAGAAGGCAAGTGGAGAGTCCAGAAGTTGATGAAGAAG

GATTATTTGAAGCAGGGGTTACCACTTCCTAAGGTGGATGAGGGAGGTTGTTTCTTTGGAGTTTTAGATAA

+

FFFFFFFF,FFFFFFFFFFFF::FFF,:FFFFFFFFFFFFFFFF,::,FFFFFFFFFFFFFFFF:::F:F  
FFFF:FFF:FFF::F,FFFF:F:FF::F,FFFFFFFF:FFFFFFFFFFFFFFFFFFFFFFFF:FF  
:FF

@A00721:190:HGJW7DSXY:4:2308:18909:12383\_1:N:0:TCTGCAAG+GCTGCACT  
TGTTCTTCCGGGAAGTTGTGGGATTTAACTTTGACTCAACTACTCCGATCAGATCCGGATGGTTTGA  
TTGGTATGGACTACTCGACTTTTGATCTGGAGTTGTCTAGGGTCATGGCAGATACTACCGATAAGGTG  
AAA

+

FF:FFFFFFFFFFFFFFFFFFFFFFFFFFFFFFFF:FFF,FFFFFFFFFFFFFFFFFFFFFFFFFFFFFFFF  
FFFFFFFFFFFFFFFFFFFFFFFFFFFFFFFFFFFFFFFFFFFFFFFFFFFFFFFFFFFFFFFF:FFFFFFFFFFFFFFFF  
FFF

@A00721:190:HGJW7DSXY:4:2320:12075:3740\_2:N:0:TCTGCAAG+GCTGCACT  
TTTATGATTCAAAACCTATCGTTGTCTGACCTTACAAGGTTGAGGAGACTTTACAGCGCTTATTGTC  
GCGCAGTTTCCAGAATTGCGGTTGAAGTTCACCCATTCTATCTTGAAT

+

FFFFFFFFFFFFFFFFFFFFFFFFFFFFFFFF:FF:FFFFFFFFFFFFFFFF:FFFF,FFFFFFFFFFFFFFFF  
:F,FF::FFFFFFFFFFFFFFFF:FFFF:F:F:FFF,FFFFFFFF,FFF

@A00721:190:HGJW7DSXY:4:1344:25861:29434\_1:N:0:TCTGCAAG+GCTGCACT  
CTTCCGATCTCGTCTAGGAACATTGATTGGGAACGTACCTACTCACGAGACGTATGAAAGCTATCGG  
AGGGAAGCAAAATGTTTCGTTCTGTTACAAGAACGCTTTGGATTGTGACCATAAAGCCTCAGTTGCGA  
TAG

+

FFFFFF:FFFFFFFFFFFFFFFFFFFFFFFFFFFFFFFFFFFFFFFFFFFFFFFFFFFFFFFFFFFFFFFF  
FFFFFFFFFFFF:FFFFFFFFFFFFFFFFFFFFFFFFFFFFFFFFFFFFFFFFFFFFFFFFFFFFFFFFFFFFFFFF  
FFF

@A00721:190:HGJW7DSXY:4:2358:3757:2143\_1:N:0:TCTGCAAG+GCTGCACT  
GTATTGTCATCTCGGGTAAAGTGATTACCAAGATGTTTATATAGATACGAGATACCTAGAGAAGGTC  
GCAGCGATCTTACTCGTTATCGTAGCTAAGAAGAAGACTTTGGTTACACGTTATGCTCGCAAACCTAA  
CGT

+

FFF:FFF,:F,:F,F,,,:::FFFFFF:::,F:FFFF,FFFFFFFF,F,FF,FF:,FFF:F,F,,F,  
FF:, :F,:FFFF,F:,FFFF:F,: ,FFFFFF,F,: , ,FF,,FFF:F,:FF,FF,F:F,,,F,FFF  
FFF

@A00721:190:HGJW7DSXY:4:1252:2121:5854\_1:N:0:TCTGCAAG+GCTGCACT  
CAGGACGCCTACGGTGACTTTATGGACAAGATGCAAGTTCTTGGGAAATACTTGTTCCTTTTTAGG  
TTTAGTAGGTGATCTTGACGTCGATTCTTTGTATAGGGAGTGTGAGAAGACAACGAATCTTGAACTA  
CGG

+

FFFFFFFFFFFFFFFFFFFFFFFF:FFFF:FFFFFFFFFFFFFFFFFFFFFFFFFFFFFFFFFFFFFFFF  
FFFFFFFFFFFFFFFFFFFFFFFFFFFFFFFFFFFFFFFFFFFFFFFFFFFFFFFFFFFFFFFF:FFFFFFFFFFFFFFFF  
FFF

@A00721:190:HGJW7DSXY:4:2509:22525:21277\_1:N:0:TCTGCAAG+GCTGCACT  
TTCTTGAAAACCAAGTTAAGAAGGAGGCTGATCATGGAGTCTTTGTACCTTCTGTCAAACCTTCGAGGT  
TCAGCTACGAGAGGTGATCCCGGATGTGGATTGAAGGCTGGCTCTAAGGGAGACTCCTTCTTTTTGAA  
TGT

+

F:FFFFFFFFFFFFFFFFFFFFFFFFFFFFFFFF:FFFFFFFFFFFFFFFF:FFFFFFFFFFFFFFFF  
FFFFFFFFFFFFFFFFFFFFFFFFFFFFFFFFFFFFFFFFFFFFFFFFFFFFFFFFFFFFFFFF:FFFFFFFFFFFFFFFF  
FFF

@A00721:190:HGJW7DSXY:4:1119:1750:24314\_2:N:0:TCTGCAAG+GCTGCACT  
TGAGAAGTGTGCTTTACAAGGAGTTAGACTCTTCTTCAAGTTTTTAGATCTTCTTGATAATCTTAAAG

+

@A00721:190:HGJW7DSXY:4:2575:22498:30436\_1:N:0:TCTGCAAG+GCTGCACT  
CTTTTACCTTTTGGAGGTCCAGGAACCTTTACTCCTAGTGTCTTTTCTAGAGTCCAAGGACGTTTCCG  
TCGGAGGATGACAGGTGGGAGACCGCTCAATAACACTCTATTGAATCCCTTTTCCACGATGAAAGCTC  
TTT

+

@A00721:190:HGJW7DSXY:4:2628:27489:25457\_2:N:0:TCTGCAAG+GCTGCACT  
CCACTTCTAATTTTAGGAAACGTCGCGAAAAGAAAGTTCATGAGGATGTCTTGGTCGAAAAATATCGC  
CGGGAACCTTCTAATAGAGGATCCTGATGACATTATTTCAACGGATACC

+

@A00721:190:HGJW7DSXY:4:2315:16468:28573\_1:N:0:TCTGCAAG+GCTGCACT  
TGTCTCCACTGATTCGGAATTAGAGAAAGACGACCTTCTTGTGGGGACTGAGACCTCTGAATTTTCAG  
GGTGCCCTGATGAGGACGTTGAAAGGGATAATTTCAACTCTGAGACTTCTAAGAGTGTTTCAAAGAC  
CAG

+

@A00721:190:HGJW7DSXY:4:2361:3143:20525\_2:N:0:TCTGCAAG+GCTGCACT  
AGAACAGCTGATTCTTATTGCATGAACGTCGCTGAGGTCAAACCTGTGGACGTTCTTTTCATCGACGA  
ATTATTCATGATTCACGCTGGTCAGACCCTTTTTCTTACACATCTACT

+

@A00721:190:HGJW7DSXY:4:1501:3115:14622\_1:N:0:TCTGCAAG+GCTGCACT  
CTACTTCAACATCAACGACATCATTCTTGATGAGTGTCTGTTCTTATCGAAGTCTCAGTTATCGCTGCC  
CGGCCGACGTTTGTCTGCGAACTCTCAGAGGTTTACGGCAGAAAAATTTCTCCTGCTTGTAAATTCGAGA  
GAG

+

@A00721:190:HGJW7DSXY:4:2650:18096:4648\_1:N:0:TCTGCAAG+GCTGCACT  
ACCCCTTATATCGAGGCTATCGAGGACGATGAGTATCTTGAAGTTGTTGACGACAAGCCTCAAGAGGG  
TAGAGGACCACCTGGATCTTCTACTGTCTCTGCCTTCCAAGATTTCTTAGAAGAGGTTATTCTGGA  
CCA

+

@A00721:190:HGJW7DSXY:4:2468:21658:25222\_1:N:0:TCTGCAAG+GCTGCACT  
GGTAAGAAGCCCCCTTGAGCCGCGTAGTCAGCGCGTTTAGCTGTATCATCAGTCAGAGTATACCCGATA  
GGGTACCGAGTCTCCAAGAGAATATTTATTCTTATGAGGCTCGAAACTTCAACGTTTTCACACGGAA  
AGA

+

[illegible]

@A00721:190:HGJW7DSXY:4:1416:11252:7232\_2:N:0:TCTGCAAG+GCTGCACT  
ACTTTATTATGACCTTGGAAAGTTTTCGGCTGTGGTTGTCGCTGGGGACGATTCCATTCTGTTTTCAA  
AGACTCCAATAACTGATCATTCTGATCATATGATTTTGGACAATGGTT

@A00721:190:HGJW7DSXY:4:1467:22516:16814\_2:N:0:TCTGCAAG+GCTGCACT  
GTGGAGGGAGTTCTTGAAGCATCCCGACCTTTCCTTGTGAAAATTTTGATGCGGTTTCATAAGATTAT  
CAGTAATCCTGATTCTACTACGGATTCATGGACCTTCCATCCTGTACC

@A00721:190:HGJW7DSXY:4:1112:30897:9533\_2:N:0:TCTGCAAG+GCTGCACT  
GAAAGGCGAACTTTGGGAATTTGAAGCTCAGGGTGAAGCACAACTTTGACCGTGACGAACTGTGGTG  
TTCTTGATCTACGTTACGGATATACTCTCCTTGAGTTCACTCGTAAGG

@A00721:190:HGJW7DSXY:4:1307:21956:29841\_1:N:0:TCTGCAAG+GCTGCACT  
TTTTCGAATAGTGATAGCCACCCGCCTTACAGAGGGGAGCAGCATGACCATAATTGGTATTGACTTT  
CGTACCACCTTTTCTACTGTCTGTCTCGCCTCTTCGAATGAAGTTTAAATGCTTAACAACAATGATAG  
TGA

@A00721:190:HGJW7DSXY:4:1131:20799:23265\_2:N:0:TCTGCAAG+GCTGCACT  
TAATGATGACACTATTGTTTATGGATATGATGCTATTACTCATGATGGTTACGGTCAGGGAGGATTCT  
CAGTTTACAAGGACCTTAAGCGATGGATCGGGGTTAATTCTAAAACAT

@A00721:190:HGJW7DSXY:4:2149:5810:3004\_1:N:0:TCTGCAAG+GCTGCACT  
ACGCAAAGATATTTTCATGAAACTACAGAGGAACGTACCGGATTACCTGTCTTTTCATATTATGAATGA  
ACCTTCGGCCGCTCTCTTTGCTTCGATGTTGGATGTCAAGAAGGGTTCAGAATGGGATTTCCTACGTAG  
TTT

@A00721:190:HGJW7DSXY:4:1410:11686:8516\_1:N:0:TCTGCAAG+GCTGCACT  
CTTGGAACGAAGGCGACCTGTTCCGGAGTTTTTACGGGATCCGGAATGTTCTGTCTATATTAGGTGAA  
GCGAAATACGATTTCGAACGTCAACGTTACCGAGTTTCGTTTCGTACCTTGATGCTGACTTTCGTCA  
ATA

@A00721:190:HGJW7DSXY:4:1501:9905:13009\_1:N:0:TCTGCAAG+GCTGCACT  
GTGCTCTTCCGATCTATAACTTCTAATTTACGTTTGCTACTCAGAGCTGGTCCTCTCAGCAAAGGGAT  
GCATGGTGTTATCTCCTCAGGAGTCCCGGCATTTGATAATAATGACGAGACTTTCGTCATAATCGCTG  
CAT

```
+  
FFFFFFFFFFFFFFFFFFFFFFFFFFFFFFFFFFFFFFFFFFFFFFFFFFFFF: FFFFFFFFFFFFFFFFFFFFFFFFFFFFFFFFFFFFFFFFF  
FFFFFFFFFFFFFFFFFFFFFFFFFFFFFFFFFFFFFFFFFFFFFFFFFFFFFFFFFFFFFFFFFFFFFFFFFFFFFFFFFFFFFFFFFFFFFFF  
FFF  
@A00721:190:HGJW7DSXY:4:2154:22064:14841_2:N:0:TCTGCAAG+GCTGCACT  
GTCAACACTAGTTCGAGTGCTGCTTTGGATTACGATGACGTGAGAATAGGTGAAGGGATAGTTTTTAC  
CTCGACCAACATTAAGGCGGCGGCGACTAATCTTAAAGCTTCACCCAA  
+  
FFFFFFFFFFFFFFFFFFFFFFFFFFFFFFFFFFFFFFFFFFFFFFFFFFFFFFFFFFFFFFFFFFFFFFFFFFFFFFFFFFFFFFFFFFFF  
FFFFFFFFFFFFFFFFFFFFFFFFFFFFFFFFFFFFFFFFFFFFFFFFFFFFFFFFFFFFFFFFFFFFFFFFFFFFFFFFFFFFFFFFFFFF  
@A00721:190:HGJW7DSXY:4:1602:23647:27007_2:N:0:TCTGCAAG+GCTGCACT  
CTAGCCTTCAAGTGGGGTATGCCTGCGGAATACGCTTGCTATTACCAGATTGGTTCGAACCCGTTGA  
TGCTATGTCAGAAGAAGCTATTCAAGCTTGCTGTTTAAAGACTGCAGA  
+  
FFFFFFFFFFFFFFFFFFFFFFFFFFFFFFFFFFFFFFFFFFFFFFFFFFFFF: FFFFFFFFFFFFFFFFFFFFFFFFFFFFF  
FFFFF: FFFFFFFFFFFFFFFFFFFFFFFFFFFFFFFFFFFFFFFFFFFFFFFFFFFFFF  
@A00721:190:HGJW7DSXY:4:2138:12120:35102_2:N:0:TCTGCAAG+GCTGCACT  
CCAGACTCAAGGAGTCCAATCAAAGGTTTTGAATTTAGCTCAACTGGGAGACGTGCTTAAATGGGTG  
ATAAAAATTATTTAGAGATCTTTTCTACTTACAAAGGACAATTCAGTT  
+  
FFFFFFFFFFFFFFFFFFFFFFFFFFFFFFFFFFFFFFFFFFFFFFFFFFFFFFFFFFFFFFFFFFFFFFFFFFFFFFFFFFFFFFFFFFFF  
FFFFFFFFF, FFFFFFFFFFFFFFFFFFFFFFFFFFFFFFFFFFFFFFFFFFFFFFFFFFFFFF  
@A00721:190:HGJW7DSXY:4:2474:8377:22326_1:N:0:TCTGCAAG+GCTGCACT  
TTTTGTTACCAAATTCTTGGCTTTCAACGAAGTCTCTGATTTTATTAATCATTTACTTTAACGATCTCT  
CGGTCAITTTACTCTGTACTTGATCTACGTCGTTTAACTGTCGGAACAACCTTTACTTAGAATGACTCT  
ATC  
+  
FFFFFFFFFFFFFFFFFFFFFFFFFFFFFFFFFFFFFFFFFFFFFFFFFFFFFFFFFFFFFFFFFFFFFFFFFFFFFFFFFFFFFFFFFFFF  
FFFFFFFFFFFFFFFFFFFFFFFFFFFFFFFFFFFFFFFFFFFFFFFFFFFFFFFFFFFFFFFFFFFFFFFFFFFFFFFFFFFFFFFFFFFF  
FFF  
@A00721:190:HGJW7DSXY:4:2271:31060:4460_1:N:0:TCTGCAAG+GCTGCACT  
ACGAAAACCAACTCTTCGTTACGAGACCTGATGGTACAATAGATTTAGTCTATACACCCATCTCAACG  
TGGATAAAGCTTTTTTTTCCGTCCTGAACGTAATACACTACTAGATCACCCGCAAACGACTCGAAACC  
+  
::,FFF,FFF,:F,F:,FFF::,:,FF,,,:F,,,:F,: :FFFF,,,::, :FFFF,F::,:FF:  
,,,::FF,F::,, ,FFFFF,,F:::F,,F,FFFF::,F,,::F::,FF:,F,FFFFFFFFFFFFFFF  
@A00721:190:HGJW7DSXY:4:2560:22697:23077_1:N:0:TCTGCAAG+GCTGCACT  
AAATGAGGTCAAAGCTCTATTTATTAAACGA ACTATTATCCGATTCTTCGAGGGTATCACTACCACTG  
ATCTGCCGACTTTAGTCAAGGA ACTTCAATTCTTCGATGTTTATATTTTTCTATAAGGGAAAATAGC  
AAT  
+  
FFFFFFFFFFFFFFF, FFFFFFFFFFFFFFFFFFFFFFFFFFFFFFFFFFFFFFFFFFFFFFFFFFFFFFFFFFFFFFFFFFFFFF: FFF  
FFFFFFFFFFFFFFFFFFFFFFFFFFFFFFFFFFFFFFFFFFFFFFFFFFFFF: FFFFFFFFFFFFFF: FFFFFFFFFFFFFFFFFFFFF  
FFF  
@A00721:190:HGJW7DSXY:4:1147:21160:3568_1:N:0:TCTGCAAG+GCTGCACT  
ATTTTAGAACTTTATTT CAGAACTCTCTCCGATCACCTTGGTGTGATCTCCGGAGGATCTTTTCAAT  
AAGATGTATGATGATAATCTACTATTTTTAAATAGTGATATTCAGCGTATACTTGAATACTTTATCAA  
AGA  
+  
FFFFFFFFFFFFFFFFFFFFFFFFFFFFFFFFFFFFFFFFFFFFFFFFFFFFF: FFFFFFFFFFFFFFFFFFFFF  
FFFFFFFFFFFFFFFFFFFFFFFFFFFFFFFFFFFFFFFFFFFFFFFFFFFFFFFFFFFFFFFFFFFFFFFFFFFFFFFFFFFFFFFFFFFF  
 ,FF  
@A00721:190:HGJW7DSXY:4:1159:19470:8970_1:N:0:TCTGCAAG+GCTGCACT  
CAAAAAGTTGGAAGAGGTCTATGATATTTATTTTACTTATACTTTAAATAGCACCGATTATAACTTGA
```

CTGTTGATAATATTACAATAGCTCTTTCTCAGAAGATTAGAGAAGTAACCGGTGAACACGTCGGTAGC  
ATT

+

FFF:FFFFFFFFFFFFFFFF:FFF,FFFFFFFFFFFF:F:FFFF:FFFFFFFF:FFFFFFFFFFFF:FFFF  
:FFFFFF:FFFFFFFF:FFFFFFFFFFFFFFFF:FFFFFFFFFFFFFFFFFFFFFFFFFFFFFFFF,FF  
FFF

@A00721:190:HGJW7DSXY:4:1427:9634:31673\_2:N:0:TCTGCAAG+GCTGCACT  
TCAAGTACCTGAACCTTTACATTTTAAATGGTATGGTATAATGTGTCTTACAAATAGAACCTTCACTCT  
CGGTAATGAGAGTGTATTCCTTAATATTCTAGTAACCGCTATGTGGGC

+

FFFFFFFFFFFFFFFFFFFFFFFFFFFFFFFFFFFFFFFFFFFFFFFFFFFFFFFFFFFFFFFFFFFF  
FFFFFFFFFFFFFFFFFFFFFFFFFFFFFFFFFFFFFFFFFFFFFFFFFFFFFFFFFFFF

@A00721:190:HGJW7DSXY:4:2168:30309:26303\_1:N:0:TCTGCAAG+GCTGCACT  
ATTCAATAGCTTTAGTATTATTTACTATCGCCTTTATTGAAAATTGTATAAGAGTTAATTGCTTACAC  
AAAAGTGACGCGCAAGGAATCTTAATTGATTGAAGCTAGGCGTTGGGGAGAATGAAGTCCGCTTCC  
CGG

+

FFFFFFFFF::FFFF:FFFF:FFFFFFFFFFFFFFFFFFFFFFFFFFFFFFFFFFFFFFFF,FFFFFFFFF  
FFFFFFFFFFFFFFFF,FFFFFFFFFFFFFFFFFFFFFFFFFFFFFFFFFFFFFFFFFFFFFFFFFFFFF  
FFF

@A00721:190:HGJW7DSXY:4:2241:23502:35806\_2:N:0:TCTGCAAG+GCTGCACT  
GCTGTGCAGAATAACCTTCCCAAATCTAGATCTGCACAGAAGAAGGCTGAAGTCGTTACCGGACGAC  
CACTCAAAGGAAACGGGCTGTTGCCAGAGGACAGCAGCGACCACCGA

+

FFFFFFFFFFFFFFFFFFFFFFFFFFFFFFFFFFFF:FFFFFFFFFFFFFFFFFFFFFFFFFFFFFFFF  
FFFFFFF:FFFFFFFFFFFFFFFFFFFFFFFFFFFF,FFFFFFF:FFFFFFF

@A00721:190:HGJW7DSXY:4:2453:10728:3192\_1:N:0:TCTGCAAG+GCTGCACT  
AAAAGTCACATTCACCACTCCCATGCCAATCAATGATGTGACTATACAGTTCGGCCATTTCAAGAGTG  
GTCAATACGTCGTGGGAGGTACTGAAGCCTTCCCCTCCGCTGGCACGAAGAACTCCCAAGCCAATC  
AAT

+

FFFFFFFFFFF:FFFFFFFFFFFFFFFFFFFFFFFFFFFFFFFFFFFFFFFFFFFFFFFFFFFFFFFF  
FFFFFFFFFFFFFFFFFFFFFFFFFFFFFFFFFFFFFFFFFFFFFFFFFFFFFFFFFFFFFFFFFFFFF  
FFF

@A00721:190:HGJW7DSXY:4:1259:22761:19774\_1:N:0:TCTGCAAG+GCTGCACT  
GTCTCTAAGTCTACCAGGAAGAGGGGAAATGTCCCCAAACTGAGAAGAATAAAGGGAAAGGTCCATC  
AGGACCTAAGAAGGGGAAATTACCCCTAATTCTGAAGGAAGATCTCCACCATCTGGGGTTGGAATA  
AGA

+

FFFFFFFFFFF:FFFFFFFFFFFFFFFFFFFFFFFFFFFFFFFFFFFFFFFFFFFFFFFFFFFFFFFF,FFFFFFFFFFFF  
FFFFFFFFFFFFFFFFFFFF:FFFFFFFFFFFFFFFFFFFFFFFFFFFFFFFFFFFFFFFFFFFFFFFFFFFF  
FFF

@A00721:190:HGJW7DSXY:4:1460:4716:6402\_1:N:0:TCTGCAAG+GCTGCACT  
CTACGAAGTCGCTGAAGGCGGCTTGGGTCATTAAGGGTAGCTGTAAAGTTGCGCCTGCCGACCCCATC  
TTTGAGACCAAGACTCTCTACAGTAGGTCGTGCCTACTATGAGCAAATCTGTTGAATTCGTCACTGA  
GGA

+

FFFFFFFFFFFFF:FFFFFFFFFFFFFFFFFFFFFFFFFFFF:FFFFFFFFFFFFFFFFFFFFFFFFFFFF  
FFFFFFFFFFFFFFFFFFFF:FFFFFFFFFFFFFFFFFFFFFFFFFFFFFFFFFFFFFFFFFFFFFFFFFFFF  
FFF

@A00721:190:HGJW7DSXY:4:2329:14235:33411\_1:N:0:TCTGCAAG+GCTGCACT  
GACTTTTGGCTACTGGCGACAACTGAGAGCAGTCGCTGGGGAAAGAGAATTGCGTGGGTTGAAGGCC  
GACGCTTCGAGCTTGAGTGTGACGAGGCCGGTGACGTTTTTGTCAACGGCGTTTGGAGGATTTTATCC  
GCG



+  
FFFFFFFFFFFFFFFFFFFFFFFFFFFFFFFFFFFFF:FFFFFFFFFFFFFFFFFFFFFFFF  
FFFFFFFFFFFFFFFFFFFFFFFFFFFFFFFFFFFFFFFFFFFFFFFFFFFFFFFFFFFFFFF  
FFF

@A00721:190:HGJW7DSXY:4:1371:30671:10050\_1:N:0:TCTGCAAG+GCTGCACT  
CAGGACGCCTACGGTGACTTTATGGACAAGATGCAAGTTC TTGGGAATACTTGT TCCCTTTTTTAGG  
TTTAGTAGGTGATCTTGACGTCGATTCTTTGTATAGGGAGTGTGAGAAGACAACGAATCTTGAAACTA  
CGG

+  
FFFFFFFFFFFFFFFF::FFFFFFFFFFFFFFFF:FFFFFFFFFFFFFFFF:FFFFFFF,:FFFFFFF  
FFF:FFFFFFFFFFFFFFFF::FFFFFFFFFFFFFFFFFFFFFFFFFFFFFFFFFFFFFFFFF  
FFF

@A00721:190:HGJW7DSXY:4:2645:3052:13322\_1:N:0:TCTGCAAG+GCTGCACT  
TTCTTGAAAACCAAGTTAAGAAGGAGGCTGATCATGGAGTCTTTGTACCTTCTGTCAA ACTTCGAGGT  
TCAGCTACGAGAGGTGATCCC GGATGTGGATTGAAGGCTGGCTCTAAGGGAGACTCCTTCTTTTGA A  
TGT

+  
FFFFFFFFFFFFFFFFFFFFFFF,:FFFFFFFFFFFF:FFFFFFFFFFFFFFFFFFFFFFFFFFFFFFF:FFF  
FFFFFFF:FFFFFFFFFFFFFFFFFFFFFFFFFFFFFFFFFFFFFFFFFFFFFFFFFFFFFFF  
FFF

@A00721:190:HGJW7DSXY:4:1162:29921:13197\_2:N:0:TCTGCAAG+GCTGCACT  
TGAGAAGTGTGCTTTACAAGGAGTTAGACTCTTCTTCAAGTTTTTAGATCTTCTTGATAATCTTAAG  
AAAAATTTTCGAATAAACTAATGAGAGGTATAGGCTTAGTCAAGTCTG

+  
FFFFFFFFFFFFFFFFFFFFFFFFFFFFFFFFFFFFFFFFFFFFFFFFFFFFFFFFFFFFFFF:FFFF:FFFFFF,  
FFFFFFFFFFFFFFFFFFFFFFFFFFFFFFFFFFFFFFFFFFFFFFFFFFFFFFF::FFFF

@A00721:190:HGJW7DSXY:4:1302:28845:20415\_1:N:0:TCTGCAAG+GCTGCACT  
AGATCTTGCAGAGTGACTGGAGTTCAGACGTGTGCTCTTCCGATCTCTAGAGTCCAAGGACGTTTCCG  
TCG GAGGATGACAGGTGGGAGACC GCTCAATAAAC CTCTATTGAATCCCTTTTCCACGATGAAAGCTC  
TTT

+  
:FFFFFFFFFFFFFFFFFFFFFFFFFFFFFFFFFFFFFFFFFFFFFFFFFFFFF,,FFFFFFFFFFFFFF:FFF  
FFFFFFFFFFFFFFFFFFFFFFFFFFFFFFFFFFFFFFFFFFFFFFFFFFFFFFFFFFFFFFFFF  
FFF

@A00721:190:HGJW7DSXY:4:1614:1307:10895\_1:N:0:TCTGCAAG+GCTGCACT  
ATTTTAGGAAACGTCGCGAAAAGAAAGTTCATGAGGATGTCTTG GTCGAAAA ATATCGCCGG GA ACTT  
CTAATAGAGGATCCTGATGACATTATTTCAACG GATACCGATCTCAGTTCT ACCACAGAAACCGTCTC  
AGG

+  
FFFFFFFFFFFFFFFFFFFFFFFFFFFFFFFFFFFFFFFFFFFFFF:F FFF:FFFFFFFFFFFFFFFFFFFFFFFFF  
FFFFFFFFFFFFFFFFFFFFFFFFFFFFFFFFFFFFFFFFFFFFFFFFFFFFFFFFFFFFFFFFF  
FFF

@A00721:190:HGJW7DSXY:4:2659:24903:31939\_2:N:0:TCTGCAAG+GCTGCACT  
ACTGATCCGGAATTAGAGAAAGACGACCTTCTTGTGGGGACTGAGACCTCTGAATTTTCAGGG TGCC  
TGATGAGGACGTTGAAAGGATAATTTCAACTCTGAGACTTCTAAGAG

+  
FFFFF,FFFFFFFFFFFFFFFFFFFFFFFFFFFFFFFFFFFFFFFFFFFFFFFFFFFFFFFFF  
FFFFFFFFFFFFFFFFFFFFFFFFFFFFFFFFFFFFFFFFFFFFFFFFFFFFFFFFF

@A00721:190:HGJW7DSXY:4:2361:7392:26099\_2:N:0:TCTGCAAG+GCTGCACT  
AGAACAGCTGATTCTTATTGCATGAACGTCGCTGAGGTCAA ACCTGTGGACGTTCTTTTCATCGACGA  
ATTATTCATGATTCACGCTGGTCAGACCCTTTTCTTACACATCTACT

+  
FFFFFFFFFFFFFFFFFFFFFFFFFFFFFFFFFFFFFFFFFFFFFFFFFFFFFFFFFFFFFFFFF  
FFFFFFFFFFFFFFF:FFFFFFFFFFFFFFFFFFFFFFFFFFFFFFFFF



@A00721:190:HGJW7DSXY:4:1548:8938:30467\_1:N:0:TCTGCAAG+GCTGCACT  
CTACTTCAACATCAACGACATCATTCTTGATGAGTGTCTGTTCTTATCGAAGTCTCAGTTATCGCTGCC  
CGGCCGACGTTTGTGCGGAACCTCTCAGAGGTTTACGGCAGAAAAATTTCTCCTGCTTGTAAATTCGAGA  
GAG

+

FFFFF:FFFFFFFFFFFFFFFFFFFFFFFFFFFFFFFFFFFFFFFFFFFFFFFFFFFFFFFFFFFFFFFFFFFFF:FFFFF:FFF  
FFFFFFFFFFFFFFFFFFFFFFFFFFFFFFFFFFFFFFFFFFFFFFFFFFFFFFFFFFFFFFFFFFFFFFFFFFFF  
FFF

@A00721:190:HGJW7DSXY:4:1533:10990:7091\_2:N:0:TCTGCAAG+GCTGCACT  
CCCTTATATCGAGGCTATCGAGGACGATGAGTATCTTGAAGTTGTTGACGACAAGCCTCAAGAGGGTA  
GAGGACCACCTGGATCTTCTACTGTCTCTGCCTTCCAAGATTTCTTAG

+

FFFFFFFFFFFFFFFFFFFFFFFFFFFFFFFFFFFFFFFFFFFFFFFFFFFFFFFFFFFFFFFFFFFFFFFFFFFF  
FFFFFFFFFFFFFFFFFFFFFFFFFFFFFFFFFFFFFFFFFFFFFFFFFFFFFFFFFFFFFFFFFFFFFFFFFFFF

@A00721:190:HGJW7DSXY:4:2549:20302:33458\_1:N:0:TCTGCAAG+GCTGCACT  
GGTAAGAAGCCCCTTGAGCCGCGTAGTCAGCGCGTTTAGCTGTATCATCAGTCAGAGTATACCCGATA  
GGGTACCGAGTCTCCAAGAGAATATTTATTCTTATGAGGCTCGAACTTCAACGTTTTTACAACGGAA  
AGA

+

FFFFFFFFFFFFFFFFFFFFFFFFFFFFFFFFFFFFFFFFFFFFFFFFFFFFFFFFFFFFFFFFFFFFFFFFFFFF  
FFFFFFFFFFFFFFFFFFFFFFFFFFFFFFFFFFFFFFFFFFFFFFFFFFFFFFFFFFFFFFFFFFFFFFFFFFFF  
FFF

@A00721:190:HGJW7DSXY:4:2253:7808:2080\_2:N:0:TCTGCAAG+GCTGCACT  
ACTTTATTATGACCTTGAAAGTTTTTCGGCTGTGTTGTCGCTGGGGACGATTCCATTCTGTTTTCAA  
AGACTCCAATAACTGATCATTCTGATCATATGATTTTGGACAATGGTT

+

FFFFFFFFFFFFFFFFFFFFFFFFFFFFFFFFFFFFFFFFFFFFFFFFFFFFFFFFFFFFFFFFFFFFFFFFFFFF  
FFFFF:FFFFFFFFFFFFFFF:FFFFFFFFFFFFFFFFFFFFF:FFFFFFFFFFFFF

@A00721:190:HGJW7DSXY:4:1522:29966:2534\_2:N:0:TCTGCAAG+GCTGCACT  
GTGGAGGGAGTTCTTGAAGCATCCCGACCTTTCCTTGTGAAAATTTTGATGCGGTTTCATAAGATTAT  
CAGTAATCCTGATTCTACTACGGATTTCATGGACCTTCCATCCTGTACC

+

FFFFFFFFFFFFFFFFFFFFFFFFFFFFFFFFFFFFFFFFFFFFFFFFFFFFFFFFFFFFFFFFFFFFFFFFFFFF  
FFFFFFFFFFFFFFFFFFFFF:FFF:FFFFFFFFFFFFFFFFFFFFFFFFFFFFFFFFFFFFF

@A00721:190:HGJW7DSXY:4:1112:32316:10582\_2:N:0:TCTGCAAG+GCTGCACT  
GAAAGGCGAACTTTGGGAATTTGAAGCTCAGGGTGAAGCACAACGTTTGACCGTGACGAAGTGTGGTG  
TTCTTGATCTACGTTACGGATATACTCTCCTTGAGTTCACTCGTAAGG

+

FFFFFFFFFFFF:FFFFFFFFFFFFFFFFFFFFFFFFFFFFFFFFFFFFF:FFFFFFFFFFFFFFFFFFFFFFFFFFFF  
FFFFFFFFF:FFFFFFFFFFFFFFFFFFFFFFFFFFFFFFFFFFFFFFFFFFFFF:FF

@A00721:190:HGJW7DSXY:4:1318:5159:12336\_1:N:0:TCTGCAAG+GCTGCACT  
TTTTCGAATAGTGATAGCCACCCGCCTTACAGAGGGGCAGCAGCATGACCATAATTGGTATTGACTTT  
GGTACCACCTTTTCTACTGTCTGTCTCGCCTCTTGAATGAAGTTTAAATGCTTAACAACAATGATAG  
TGA

+

FFFFFFFFFFFFFFF:FFFFFFFFFFFFFFFFFFFFFFFFFFFFFFFFFFFFF:FFFFFFFFFFFFFFF  
FFFFFFFFFFFFFFFFFFFFFFFFFFFFFFFFFFFFFFFFFFFFF:FFFFFFFFFFFFFFFFFFFFFFFFFFFF  
FFF

@A00721:190:HGJW7DSXY:4:1353:1045:26663\_2:N:0:TCTGCAAG+GCTGCACT  
TAATGATGACACTATTGTTTATGGATATGATGCTATTACTCATGATGGTTACGGTCAGGGAGGATTCT  
CAGTTTACAAGGACCTTAAGCGATGGATCGGGGTTAATTCTAAAACAT

+

FFFFFFFFFFFFFFFFFFFFFFFFFFFFFFFFFFFFF,FFFFFFFFFFFFFFFFFFFFF:FFFFFFFFFFFFFFFFFFFFF  
FFFFF,FFFFF:FFFF:FFFFFFFFFFFFFFFFFFFFF:FFF:FFFFF

@A00721:190:HGJW7DSXY:4:2201:30436:32503\_1:N:0:TCTGCAAG+GCTGCACT  
ACGCAAAGATATTTTCATGAAAACACAGAGGAACGTACCGGATTACCTGTCTTTTCATATTATGAATGA  
ACCTTCGGCCGCTCTCTTTGCTTCGATGTTGGATGTCAAGAAGGGTTCAGAATGGGATTCTACGTAG  
TTT

+

FFFFFFFFFFFFFFFFFFFFFFFFFFFFFFFFFFFFFFFFFFFFFFFFFFFFFFFFFFFFFFFFFFFFFFFF  
FFFFFFFFFFFFFFFFFFFFFFFFFFFFFFFFFFFFFFFFFFFFFFFFFFFFFFFFFFFFFFFFFFFFFFFF  
FFF

@A00721:190:HGJW7DSXY:4:1412:26847:31078\_1:N:0:TCTGCAAG+GCTGCACT  
CTTGGAACGAAGGCGACCTGTTCCGGAGTTTTTACGGGATCCGGAATGTTCTGTCTATATTAGGTGAA  
GCGAAATACGATTTTCAACGTCAACGTTACCGAGTTTCGTTTCGTACCTTGATGCTGACTTTCGTCA  
ATA

+

F:FF:FFFF:FFF,FFFFFFFF:FFFFFFFF:FFFF:FFFFFFFF:FFFFFFFF:FFFFF,F::F:FF  
FFFFFFFF:FFFFFFFF:FFFFFFFF,FF:FFFFFFFF:FFFFFFFF:FFFFFFFF:FFFFF:F  
FFF

@A00721:190:HGJW7DSXY:4:1635:8269:4163\_1:N:0:TCTGCAAG+GCTGCACT  
GTGCTCTTCCGATCTATAACTTCTAATTTACGTTTGCTACTCAGAGCTGGTCCTCTCAGCAAAGGGAT  
GCATGGTGTATCTCCTCAGGAGTCCCGCATTTGATAATAATGACGAGACTTTCGTCATAATCGCTG  
CAT

+

FFFFFFFFFFFFFFFFFFFF,FFFFFFFFFFFFFFFF,FFFFFFFFFFFFFFFFFFFFFFFF:FFFFFFFF  
FFFFFF:FFFFFFFFFFFFFFFFFFFFFFFFFFFFFFFFFFFFFFFFFFFFFFFFFFFFFFFFFFFFFFFF  
FFF

@A00721:190:HGJW7DSXY:4:2173:22073:12352\_2:N:0:TCTGCAAG+GCTGCACT  
GTCAACACTAGTTTCGAGTGCTGCTTTGGATTACGATGACGTGAGAATAGGTGAAGGGATAGTTTTTAC  
CTCGACCAACATTAAGGCGGCGCGACTAATCTTAAAGCTTCACCCAA

+

FFFFFFFF,FFFFFFFF:FF:FFFFFFFFFFFFFFFFFFFF,F:FFF:FFFFFFFF:F,FFFFFFFF  
FFFFFFFFFFFFFFFF:FFFFFFFFFFFFFFFFFFFFFFFFFFFFFFFF

@A00721:190:HGJW7DSXY:4:1639:16288:18396\_2:N:0:TCTGCAAG+GCTGCACT  
CTAGCCTTCAAGTGGGGTATGCCTGCGGAATACGCTTGCTATTCACCAGATTGGTTCGAACCCGTTGA  
TGCTATGTCAGAAGAAGCTATTCAAGCTTGTCGTTTAAAGACTGCAGA

+

FFFFFFFFFFFFFFFFFFFFFFFFFFFFFFFFFFFFFFFF:FFFFFFFFFFFFFFFFFFFFFFFFFFFF  
FFF:FFFFFFFFFFFFFFFFFFFFFFFFFFFFFFFF:FFFFFFFFFFFF

@A00721:190:HGJW7DSXY:4:2139:18964:4867\_2:N:0:TCTGCAAG+GCTGCACT  
CCGAGACTCAAGGAGTCCAATCAAAGTTTTGAATTTAGCTCAACTGGGAGACGTGCTTAAATGGGTG  
ATAAAATTATTTAGAGATCTTTCTACTTACAAAGACAATTCAGTT

+

FFFFFFFFFFFFFFFFFFFFFFFF:FFFFFFFFFFFFFFFFFFFFFFFFFFFFFFFF:F:FFFF  
FFF,FFFFFFFFFFFFFFFFFFFFFFFFFFFFFFFF:FFFFF

@A00721:190:HGJW7DSXY:4:2511:18647:19194\_1:N:0:TCTGCAAG+GCTGCACT  
TTTTGTTACCAAATTCTTGGCTTTCAACGAAGTCTCTGATTTTATTAATCATTACTTTAACGATCTCT  
CGGTCAATTTACTCTGTACTTGATCTACGTCGTTTAACTGTCGGAACAACCTTTACTTAGAATGACTCT  
ATC

+

FFFFFFFFFFFFFFFF:FFFFFFFF:FFFFFFFFFFFFFFFFFFFFFFFFFFFFFFFFFFFFFFFF  
FFFFFFFF:F:FFFFF:FFFFFFFF,FFFF:FFF,FFF,FFFFFF:F,FFFF::F,FF::FF::,  
FF:

@A00721:190:HGJW7DSXY:4:1323:24252:8453\_1:N:0:TCTGCAAG+GCTGCACT  
AAAACAACTCTTCTTTACGAGACCTTTTGTATAATATATTTAGTCAAAACACCAATCTCAACGCGT  
ATAAAGCTATTTTTCCGTCCTGAACTTAATCCACGAAGATATCACCCGCACACGACTCGA

+

FFFFF,F,,,:FF,,FF:,:,:,:F,:::,:,:FFF,,,FFF,,,:,,,:F,FFF,:::,FF,:,,,:  
FFF,,,:,,,:FFF,:::,,:,,FF,,,F,:::,:F,,,,F,:,,F,,F:FFFFFFFFF  
@A00721:190:HGJW7DSXY:4:1336:25599:22153\_2:N:0:TCTGCAAG+GCTGCACT  
AATGAGGTCAAAGCTCTATTTATTAAACGAAGTATTATCCGATTCTTCGAGGGTATCACTACCACTGA  
TCTGCCGACTTTAGTCAAGGAAGTCAATTCCTTCGATGTTTATATTT

+  
FFFFFFFFFFFFFFFFFFFFFFFFFFFFFFFFFFFFFFFFFFFFFFFFFFFFFFFFFFFFFFFFFFFFFFFF  
FFFFFFFFFFFFFFFFFFFFFFFFFFFFFFFFFFFFFFFFFFFFFFFFFFFFFFFFFFFFFFFFFFFFFFFF  
@A00721:190:HGJW7DSXY:4:1230:29261:16282\_1:N:0:TCTGCAAG+GCTGCACT  
ATTTTAGAAGTCTTATTTTCTCAGAACTCTCTCCGATCACCTTGGTGTGATCTCCCGAGGATCTTTTCAAT  
AAGATGTATGATGATAATCTACTATTTTAAATAGTGATATTCAGCGTATACTTGAATACTTTATCAA  
AGA

+  
FF,:FFFFFFFFFFFFFFFFFFFFFFFFFFFFFFFFFFFFFFFFFFFFFFFFFFFFFFFFFFFFFFFFFFFF  
FFFFFFFFFFFFFFFFFFFFFFFFFFFFFFFFFFFFFFFFFFFFFFFFFFFFFFFFFFFFFFFFFFFFFFFF  
:FF  
@A00721:190:HGJW7DSXY:4:1306:32163:13792\_1:N:0:TCTGCAAG+GCTGCACT  
CAAAAAGTTGGAAGAGGTCTATGATATTTATTTTACTTATACTTTAAATAGCACCGATTATAACTTGA  
CTGTTGATAATATTACAATAGCTCTTTCTCAGAAGATTAGAGAAGTAACCGGTGAACACGTCGGTAGC  
ATT

+  
FFFFFFFFFFFFFFF:FFFFFFFFFFFFFFFFFFFFFFFFFFFFFFFFFFFFFFFFFFFFFFFFFFFFFFFF  
FFFFFFFFFFFFFFFFFFFFFFFFFFFFFFFFFFFFFFFFFFFFFFFFFFFFFFFFFFFFFFFFFFFFFFFF  
:FF  
@A00721:190:HGJW7DSXY:4:1672:17155:23938\_2:N:0:TCTGCAAG+GCTGCACT  
TCAAGTACCTGAAGTCTTACATTTTAAATGGTATGGTATAATGTGTCTTACAAATAGAACCTTCACTCT  
CGGTAATGAGAGTGTATTCCTTAATATTCTAGTAACCGCTATGTGGGC

+  
FFFFFFFFFFFF:FFFFFFFFFFFFFF:FF:FFFFFFFF:FFFF:FFFFFFFFFFFFFFFFFFFFFFFFFFFF  
FFFFFFFFFFFFFF:FFFFFFFFFFFFFF:FFFFFFFF:FF:FFFFFFFF  
@A00721:190:HGJW7DSXY:4:2318:10908:12587\_1:N:0:TCTGCAAG+GCTGCACT  
ATTCAATAGCTTTAGTATTATTTACTATCGCCTTTATTGAAAATTGTATAAGAGTTAATTGCTTACAC  
AAAAGTGACGCGCGAAGGAATCTTAATTGATTGAAGCTAGGCGTTGGGGAGAATGAAGTCCGCTTCC  
CGG

+  
FF:FFFF:FFFF,FFFFFFFFFFFFFFFFFFFFFFFFFFFFFFFFFFFFFFFFFFFFFFFFFFFFFFFFFFFF  
FFFFFFFFFFFFFFFFFFFFFFFFFFFFFFFFFFFFFFFFFFFFFFFFFFFFFFFFFFFFFFFFFFFFFFFFFFFF  
FFF  
@A00721:190:HGJW7DSXY:4:2253:15872:2143\_2:N:0:TCTGCAAG+GCTGCACT  
GCTGTGCAGAATAACCTTCCCAAATCTAGATCTGCACAGAAGAAGGCTGAAGTCGTTACCGGACGAC  
CACTCAAAGGAAACGGGCTGTTGCCAGAGGAAAGCAGCGACCACCGA

+  
FFFFFFFFFFFFFFFFFFFFFFFFFFFF:FFFFFFFFFFFFFFFFFFFF:FF:FFFF:FFFF:FF:FFFFFFFFFFFF  
F:FFFF,FFFFFFFFFFFFFFFFFFFFFFFFFFFFFFFFFFFFFFFFFFFFFFFFFFFFFFFFFFFF  
@A00721:190:HGJW7DSXY:4:1102:8838:2268\_2:N:0:TCTGCAAG+GCTGCACT  
GTCACATTCACTCCCATGCCAATCAATGATGTGACTATACAGTTCGGCCATTTCAAGAGTGGTCA  
ATACGTCGTGGGAGGTACTGAAGCCTTCCCCTCCGCTGGCACGAAGAA

+  
FFFFFFFFFFFFFFFFFFFFFFFFFFFFFFFFFFFFFFFFFFFFFFFFFFFFFFFFFFFFFFFFFFFFFFFF  
FFFFFFFFFFFFFFFFFFFFFFFFFFFFFFFFFFFFFFFFFFFFFFFFFFFFFFFFFFFFFFFFFFFFFFFF  
@A00721:190:HGJW7DSXY:4:2678:32362:32111\_1:N:0:TCTGCAAG+GCTGCACT  
AATAGTTCTTCTGACCAGAATGAAAAGGGGTTTACCAGGGTAGTCTCTAAGTCTACCAGGAAGAGGGG  
AAATGTCCCCAAAAGTGAAGAATAAAGGGAAAGGTCCATCAGGACCTAAGAAGGGGAAATTACCC  
TAA

+  
FFFFFFFFFFFFFFFFFFFFFFFF:FF::FFFFFFFFFFFFFFFFFFFFFFFF:FFF:FFFFFFFFFFFFFFFF  
FFFFFFFFFFFFFFFFFFFFFFFFFFFFFFFFFFFFFFFFFFFFFFFF,FFFFFFFFFFFFFFFFFFFFFFFF:FFFFFFFFFFFF  
FFF

@A00721:190:HGJW7DSXY:4:1460:4797:6104\_1:N:0:TCTGCAAG+GCTGCACT  
CTACGAAGTCGCTGAAGGCGGCTTGGGTCATTAAGGGTAGCTGTAAAGTTGCGCCTGCCGACCCCATC  
TTTGAGACCAAGACTCTCTACAGTAGGTTCTGCTACTATGAGCAAATCTGTTGAATTCGTCACTGA  
GGA

+  
FFF:FF:FFFFFFFF,FFFFFFFFFFFFFFFF:FFFFFFFFFFFFFFFFFFFFFFFFFFFFFFFFFFFFFFFF  
FFFFFFFFFFFFFFFFFFFFFFFFFFFFFFFFFFFFFFFFFFFFFFFFFFFFFFFFFFFFFFFFFFFFFFFF  
FFF

@A00721:190:HGJW7DSXY:4:1526:6397:2018\_1:N:0:TCTGCAAG+GCTGCACT  
ACTTTTGGCTACTGGCGACAACTGAGAGCAGTCGCTGGGGAAGAGAATTGCGTGGGTTGAAGGCCG  
ACGCTTCGAGCTTGAGTGTGACGAGGCCGGTGACGTTTTTGTCAACGGCGTTTGGAGGATTTTATCCG  
CGC

+  
FFFFFFFFFFFFFFFFFFFFFFFF:FFFFFFFFFFFFFFFFFFFFFFFFFFFFFFFFFFFFFFFFFFFFFFFF  
F:FFFFFFFFFFFFFFFFFFFFFFFF:FFFFFFFFFFFFFFFFFFFFFFFFFFFFFFFFFFFFFFFF:FF,FFFFFFFF  
FFF

@A00721:190:HGJW7DSXY:4:2416:7817:1908\_1:N:0:TCTGCAAG+GCTGCACT  
GCGAAGATCCCCTATGGAGTCTTGAAGGACTTAGGTTGGCATATTTATGCCGACGATAATAAGCATGT  
CACCCCTTAAGCACCGAGGTAAGCTCGGGACTTACAAGAGAGAGTGTGAGAGAGTCGCTCTCACTATTT  
TTG

+  
FFFFFFFFFFFFFFFFFFFFFFFF:FFFFFFFFFFFFFFFF:FFFFFFFFFFFFFFFF:FFFFFFFFFFFFFFFF  
FFFFFFFFFFFFFFFFFFFFFFFFFFFFFFFFFFFFFFFFFFFFFFFFFFFFFFFFFFFFFFFFFFFFFFFF  
FFF

@A00721:190:HGJW7DSXY:4:2347:22761:34835\_1:N:0:TCTGCAAG+GCTGCACT  
TTTCCTCCGTCATTGGGGATTTGATGTGAGAAGGTGGAAGGTGTCAAGGGTCTTCTTCATGCTGATC  
TTTCAGGACCTAATCACATCATGATTGATAGTTACGGCTCGTATCGAGTTGGAGGGAGGAAGTTCTCC  
GAA

+  
F,FFFFFF:FFFF, :FFFFFF:FF::FF:F,FF:FF, :FFFF:F:,FF,FF,F:,FF:,F,,FFFF  
FFFF,,F,:FF:F,:F,FFFF,,F:,FFFF,F,, ,FFFF,FFFFFF::F,FFF:FF,FF:FF:F  
,,F

@A00721:190:HGJW7DSXY:4:2142:11153:23124\_1:N:0:TCTGCAAG+GCTGCACT  
GGAAGGCTCTAGAGAAGATCTCACCACTGGAGAAGGCAAGTGGAGAGTCCAGAAGTTGATGAAGAAG  
GATTATTTGAAGCAGGGGTTACCACTTCCTAAGGTGGATGAGGGAGGTTGTTTCTTTGGAGTTTGA  
TAA

+  
FFFFFFFFFFFFFFFFFFFFFFFF:FFFFFFFFFFFFFFFFFFFFFFFFFFFFFFFFFFFFFFFFFFFFFFFF  
FFFFFFFFFFFFFFFFFFFFFFFFFFFFFFFF:FFFFFFFFFFFFFFFFFFFFFFFFFFFFFFFFFFFFFFFF  
FFF

@A00721:190:HGJW7DSXY:4:2461:9670:14450\_1:N:0:TCTGCAAG+GCTGCACT  
TGTTCTTCCGGGAAGTTGTGGGATTTAACTTTGACTCAACTACTCCGATCAGATCCGGATGGTTTGA  
TTGGTATGGACTACTCGACTTTTGATCTGGAGTTGTCTAGGGTCATGGCAGATACTACCGATAAGGTG  
AAA

+  
FFFFFFFFFFF:FFFFFFFFFFFFFFFFFFFFFFFF:FFFFFFF,FFFFFFFFFFFFFFFFFFFFFFFFFFFF  
FFFFFFFFFFFFFFFFFFFFFFFFFFFFFFFFFFFFFFFFFFFFFFFFFFFFFFFFFFFFFFFFFFFFFFFF  
FFF

@A00721:190:HGJW7DSXY:4:2345:4770:3051\_2:N:0:TCTGCAAG+GCTGCACT  
TTTATGATTCAAACCTATCGTTGTCGTACATTACAAGGTTGAGGAGACTTTACAGCGCTTATTGTC

$+$ 

@A00721:190:HGJW7DSXY:4:2456:7175:33865\_1:N:0:TCTGCAAG+GCTGCACT  
CTTCCGATCTCGTCTAGGAACATTGATTGGGAACGTACCTACTCACGAGACGTCATGAAAGCTATCGG  
AGGGAAGCAAAATGTTTCGTTCTGTTACAAGAACGCTTTGGATTGTGACCATAAAGCCTCAGTTGCGA  
TAG

+

@A00721:190:HGJW7DSXY:4:1235:11252:3944\_2:N:0:TCTGCAAG+GCTGCACT  
GATTGTCATCTCGGGGAAAGTGATTACCAAGATGTTCATATAGATACGAGATACCTAGAGAAGGTCG  
CAGCGATCTTACTCGTTATCGGAGATCGGAAGAGCGTCGTGTAGGGAA

+

@A00721:190:HGJW7DSXY:4:1405:2230:36761\_1:N:0:TCTGCAAG+GCTGCACT  
CAGGACGCCTACGGTGACTTTATGGACAAGATGCAAGTTCTTGGGAAATACTTGTTCCTTTTTAGG  
TTTAGTAGGTGATCTTGACGTCGATTCTTTGTATAGGGAGTGTGAGAAGACAACGAATCTTGAAACTA  
CGG

+

@A00721:190:HGJW7DSXY:4:2647:32027:5415\_1:N:0:TCTGCAAG+GCTGCACT  
TTCTTGAAAACCAAGTTAAGAAGGAGGCTGATCATGGAGTCTTTGTACCTTCTGTCAAAC TTCGAGGT  
TCAGCTACGAGAGGTGATCCCGGATGTGGATTGAAGGCTGGCTCTAAGGGAGACTCCTTCTTTTTGAA  
TGT

+

@A00721:190:HGJW7DSXY:4:1311:31647:8328\_2:N:0:TCTGCAAG+GCTGCACT  
TGAGAAGTGTGCTTTACAAGGAGTTAGACTCTTCTTCAAGTTTTTAGATCTTCTTGATAATCTTAAAG  
AAAAATTTTCGAATAAACTAATGAGAGGTATAGGCTTAGTCAAGTCTG

+

@A00721:190:HGJW7DSXY:4:2116:8495:28667\_1:N:0:TCTGCAAG+GCTGCACT  
AGATCTTGACAGGTGACTGGAGTTCAGACGTGTGCTCTTCCGATCTCTAGAGTCCAAGGACGTTTCCG  
TCGGAGGATGACAGGTGGGAGACCGCTCAATAACACTCTATTGAATCCCTTTTCCACGATGAAAGCTC  
TTT

+

@A00721:190:HGJW7DSXY:4:1641:14262:31422\_1:N:0:TCTGCAAG+GCTGCACT  
ATTTTAGGAAACGTCGCGAAAAGAAAGTTCATGAGGATGTCTTGGTCGAAAAATATCGCCGGGAACCTT  
CTAATAGAGGATCCTGATGACATTATTTCAACGGATACCGATCTCAGTTCTACCACAGAAACCGTCTC  
AGG

+

[illegible]

@A00721:190:HGJW7DSXY:4:2672:9588:15280\_1:N:0:TCTGCAAG+GCTGCACT  
GGAATTAGAGAAAGACGACCTTCTTGTGGGACTGAGACCTCTGAATTTTCAGGGTGCCCTGATGAGG  
ACGTTGAAACGGATAATTTCAACTCTGAGACTTCTAAGAGTGTTCAAAAGACCAGAAACGTAACAAG  
AAG

@A00721:190:HGJW7DSXY:4:2625:31259:17863\_2:N:0:TCTGCAAG+GCTGCACT  
AGAACAGCTGATTCTTATTGCATGAACGTCGCTGAGGTCAAACCTGTGGACGTTCTTTTCATCGACGA  
ATTATTCATGATTCACGCTGGTCAGACCCTTTTTCTTACACATCTACT

@A00721:190:HGJW7DSXY:4:2124:27462:28072\_1:N:0:TCTGCAAG+GCTGCACT  
CTACTTCAACATCAACGACATCATTCTTGATGAGTGTCTGTTCTTATCGAAGTCTCAGTTATCGCTGCC  
CGGCCGACGTTTGTGCGGAACCTCTCAGAGGTTTACGGCAGAAAAATTTCTCCTGCTTGTAATTCGAGA  
GAG

@A00721:190:HGJW7DSXY:4:2106:26747:3505\_2:N:0:TCTGCAAG+GCTGCACT  
CCCTTATATCGAGGCTATCGAGGACGATGAGTATCTTGAAGTTGTTGACGACAAGCCTCAAGAGGGTA  
GAGGACCACCTGGATCTTCTACTGTCTCTGCCTTCCAAGATTTCTTAG

@A00721:190:HGJW7DSXY:4:1316:28311:10410\_2:N:0:TCTGCAAG+GCTGCACT  
TTGAGCCGCGTAGTCAGCGCGTTTAGCTGTATCATCAGTCAGAGTATACCCGATAGGGTACCGAGTCT  
CCAAGAGAATATTTATTCTTATGAGGCTCGAAACTTCAACGTTTTTCAC

@A00721:190:HGJW7DSXY:4:2314:25988:8453\_2:N:0:TCTGCAAG+GCTGCACT  
ACTTTATTATGACCTTGGAAAGTTTTCGGCTGTGGTTGTCGCTGGGGACGATTCCATTCTGTTTTCAA  
AGACTCCAATAACTGATCATTCTGATCATATGATTTTGGACAATGGTT

@A00721:190:HGJW7DSXY:4:1532:24270:6167\_2:N:0:TCTGCAAG+GCTGCACT  
GTGGAGGGAGTTCTTGAAGCATCCCGACCTTTCCTTGTGAAAATTTTGATGCGGTTTCATAAGATTAT  
CAGTAATCCTGATTCTACTACGGATTCATGGACCTTCCATCCTGTACC

@A00721:190:HGJW7DSXY:4:2335:7500:7028\_2:N:0:TCTGCAAG+GCTGCACT  
GAAAGGCGAACTTTGGGAATTTGAAGCTCAGGGTGAAGCACAACTTTGACCGTGACGAACTGTGGTG  
TTCTTGATCTACGTTACGGATATACTCTCCTTGAGTTCACTCGTAAGG

[illegible]

@A00721:190:HGJW7DSXY:4:1378:11749:28354\_1:N:0:TCTGCAAG+GCTGCACT  
TTTTCGAATAGTGATAGCCACCCGCCTTACAGAGGGGCAGCAGCATGACCATAATTGGTATTGACTTT  
GGTACCACCTTTTCTACTGTCTGTCTCGCCTCTTCAATGAAGTTTAAATGCTTAACAACAATGATAG  
TGA

+

FFFFFFFFFFFFFFFFFFFFFFFFFFFFFFFFFFFFFFFFFFFFFFFFFFFFFFFFFFFFFFFFFFFFFFFF  
FFFFFFFFFFFFFFFFFFFFFFFFFFFFFFFFFFFFFFFFFFFFFFFFFFFFFFFFFFFFFFFFFFFFFFFF  
FFF

@A00721:190:HGJW7DSXY:4:1515:10917:15076\_2:N:0:TCTGCAAG+GCTGCACT  
TAATGATGACACTATTGTTTATGGATATGATGCTATTACTCATGATGGTTACGGTCAGGGAGGATTCT  
CAGTTTACAAGGACCTTAAGCGATGGATCGGGGTTAATTCTAAAACAT

+

FFFFFFFFFFFFFFFFFFFFFFFFFFFFFFFFFFFFFFFFFFFFFFFFFFFFFFFFFFFFFFFFFFFFFFFF  
F:FFFF:FFFFFFFFFFFF,FFFFFFFFFFFFFFFFFFFFFFFFFFFFFFFFFFFFFFFFFFFFFFFF  
FFF

@A00721:190:HGJW7DSXY:4:2242:4182:20635\_1:N:0:TCTGCAAG+GCTGCACT  
ACGCAAAGATATTTTCATGAAAACCTACAGAGGAACGTACCGGATTACCTGTCTTTCATATTATGAATGA  
ACCTTCGGCCGCTCTCTTTGCTTCGATGTTGGATGTCAAGAAGGGTTCAGAATGGGATTCCTACGTAG  
TTT

+

FFFFFFFFFFFFFFFFFFFFFFFFFFFFFFFFFFFFFFFFFFFFFFFFFFFFFFFFFFFFFFFFFFFFFFFF  
F:FFFF:FFFFFFFFFFFF,FFFFFFFFFFFFFFFFFFFFFFFFFFFFFFFFFFFFFFFFFFFFFFFF  
FFF

@A00721:190:HGJW7DSXY:4:2334:14597:12179\_1:N:0:TCTGCAAG+GCTGCACT  
CTTGGTACGATGGCGACCTGTTCCGGAGTTTTTACGGGATCCGGAATGTTCTGTCTATATTAGGTGAA  
GCGAAATACGATTTTCAACGTCAACGTTACCGAGTTTCGTTTCGTACCTTGATGCTGACTTTCGTCA  
ATA

+

FFFFF,F,FF:FFF,,F,FFF:FF,FF:FFF,,FFFF:F,FF:FFFF:F:FF,FF,FFFFFFFF  
F,F,FFFF,FFFF:FF:FFFFFFFF:FFF::F,F,FFFFFFFFFFFFFFFF:FFFFFFFFFFFFFFFF:FF:F  
FFF

@A00721:190:HGJW7DSXY:4:2136:7672:27430\_1:N:0:TCTGCAAG+GCTGCACT  
GTGCTCTTCCGATCTATAACTTCTAATTTACGTTTGCTACTCAGAGCTGGTCCTCTCAGCAAAGGGAT  
GCATGGTGTATCTCCTCAGGAGTCCCGCATTGATAATAATGACGAGACTTTCGTCATAATCGCTG  
CAT

+

FFFFFFFF:FFFFFFFFFFFFFFFF:FFF:FFFFFFFF:FFFFFFFFFFFFFFFFFFFFFFFF:FF:FFFFFFFF  
FFFF:FFFFFFFFFFFFFFFF:F:FFFFFFFFFFFFFFFFFFFFFFFFFFFFFFFF:FFFFFFFFFFFFFFFF  
FFF

@A00721:190:HGJW7DSXY:4:2319:13241:10739\_2:N:0:TCTGCAAG+GCTGCACT  
GTCAACACTAGTTCGAGTGCTGCTTTGGATTACGATGACGTGAGAATAGGTGAAGGGATAGTTTTTAC  
CTCGACCAACATTAAGGCGGCGGCGACTAATCTTAAAGCTTCACCCAA

+

FFFFFFFFFFFFFFFFFFFFFFFF:FFFFFFFFFFFFFFFF:FFFFFFFFFFFFFFFFFFFFFFFF:FFFFFFFFFFFFFFFF  
FFFFFFFFFFFFFFFFFFFFFFFFFFFFFFFFFFFFFFFFFFFFFFFFFFFFFFFFFFFFFFFF

@A00721:190:HGJW7DSXY:4:2467:27308:2534\_2:N:0:TCTGCAAG+GCTGCACT  
CTAGCCTTCAAGTGGGGTATGCCTGCGGAATACGCTTGCTATTACCAGATTGGTTCGAACCCGTTGA  
TGCTATGTCAGAAGAAGCTATTCAAGCTTGTCGTTTAAAGACTGCAGA

+

FFFFFFFFFFFFFFFFFFFFFFFFFFFFFFFF:FFFFFFFFFFFFFFFF:FFF:FFFFFFFFFFFFFFFF  
:FFF:FFFF:FFFFFFFFFFFFFFFF:FFFFFFFFFFFFFFFF:FFFFF

@A00721:190:HGJW7DSXY:4:2139:19000:4930\_2:N:0:TCTGCAAG+GCTGCACT  
CCAGACTCAAGGAGTCCAATCAAAGTTTTGAATTTAGCTCAACTGGGGAGACGTGCTTAAATGGGTG  
ATAAAAATTATTTAGAGATCTTTTCTACTTACAAAGGACAATTCAGTT

+

FFFFFFFFFFFFFFFFFFFFFFFF:FFFF:FFFFFFFFFFFFFFFFFFFFFFFFFFFFFFFF:FFFFFF  
FFFFFFFF:FFFFFFFFFFFFFFFFFFFFFFFF:FFFF:FFFFFF

@A00721:190:HGJW7DSXY:4:2533:29640:15969\_1:N:0:TCTGCAAG+GCTGCACT  
TTTTGTTACCAAATTCTTGGCTTTCAACGAAGTCTCTGATTTTATTAATCATTACTTTAACGATCTCT  
CGGTCATTTACTCTGTACTTGATCTACGTCGTTTAACTGTCGGAACAACCTTTACTTAGAATGACTCT  
ATC

+  
FFF:FFFFFF,FFFF:FFFFFF,FFFFFFFFFFFFFFFF:FFFFFFFF:FFFFFFFFFFFF:FFFFFF  
FFFFFFFF:FF:FFFFFF:FFFFFFFF:FFFF,F,FF:F:FFFF,FFFFFF:FFFFFF,F:FFF  
F:F

@A00721:190:HGJW7DSXY:4:1552:15148:31109\_1:N:0:TCTGCAAG+GCTGCACT  
AAAACCAACTCTTGGTTACGATACCTGTTGTTATAATATATTTAGTCTCTACACCCATATCAACGTGT  
ATAATGCGTTTTTCCGTCCTGAACCTTAATACTAAGAGATCATCCGCAAACGACTCGA

+  
FFFF,F,,,:FF,,F::,F,,F,F,,FF::,F:F,,, :FF:,,,,,,F,FF,,F:,,:F,F,,,:,  
,:F,,F::,FFF::,,F,F,F,,FF:::,,, :,,,F,,F::,FF,FFFFFFFF

@A00721:190:HGJW7DSXY:4:1602:1090:4131\_2:N:0:TCTGCAAG+GCTGCACT  
AATGAGGTCAAAGCTCTATTTATTAACGAAGTATTATCCGATTCTTCGAGGGTATCACTACCACTGA  
TCTGCCGACTTTAGTCAAGGAACCTCAATTCCTTCGATGTTTATATT

+  
FFFFFFFF:F,FFFFFFFF:FFFFFFFF:FFFFFFFFFFFFFFFFFFFFFFFFFFFFFFFF  
FFF:FFFFFF:FFFFFF:,FFFFFFFF:,FFFFFFFFFFFFFFFF

@A00721:190:HGJW7DSXY:4:1253:1099:36119\_1:N:0:TCTGCAAG+GCTGCACT  
ATTTTAGAACTTTATTTTCAGAACTCTCTCCGATCACCTTGGTGTGATCTCCCGGAGGATCTTTTCAAT  
AAGATGTATGATGATAATCTACTATTTTAAATAGTGATATTCAGCGTATACTTGAATACTTTATCAA  
AGA

+  
FFFFFF:FFFFFFFFFFFFFFFFFFFFFFFFFFFFFFFF:FFFFFFFF:FFFFFFFFFFFFFFFF  
FFFFFFFFFFFFFFFFFFFFFFFFFFFFFFFFFFFFFFFFFFFFFFFF:FFFFFFFF:F:FFF  
FFF

@A00721:190:HGJW7DSXY:4:1363:22019:8500\_1:N:0:TCTGCAAG+GCTGCACT  
CAAAAAGTTGGAAGAGGTCTATGATATTTATTTTACTTATACTTTAAATAGCACCGATTATAACTTGA  
CTGTTGATAATATTACAATAGCTCTTCTCAGAAGATTAGAGAAGTAACCGGTGAACACGTCGGTAGC  
ATT

+  
FFFFFFFFFFFFFFFFFFFFFFFF:FFFFFFFF:FFFFFFFFFFFFFFFFFFFFFFFF  
FFF:FFFFFFFFFFFFFFFFFFFFFFFFFFFFFFFF:FFFFFFFFFFFFFFFF  
F:F

@A00721:190:HGJW7DSXY:4:2415:10547:32534\_2:N:0:TCTGCAAG+GCTGCACT  
TCAAGTACCTGAACCTTTACATTTTAAATGGTATGGTATAATGTGTCTTACAAATAGAACCTTCACTCT  
CGGTAATGAGAGTGATTCTTAATATTCTAGTAACCGCTATGTGGGC

+  
FFFFFFFF:FFFFFFFFFFFFFFFFFFFFFFFF:FFFFFFFFFFFFFFFF  
FFFFFFFFFFFFFFFF:FFFFFFFF:F:FFFF

@A00721:190:HGJW7DSXY:4:2523:24605:25441\_1:N:0:TCTGCAAG+GCTGCACT  
ATTCAATAGCTTTAGTATTATTTACTATCGCCTTTATTGAAAATTGTATAAGAGTTAATTGCTTACAC  
AAAAGTGACGCGCAAGGAATCTTAATTGATTGAAGCTAGGCTTTGGGAGAATGAAGTCCGCTTCC  
CGG

+  
F:F:F,FF:,FF:F:FFFFFFFF:FFFF:FFFF:FFFF,FFFF:F,FFFFFFFF  
,FF,:FF,,F::FF:FFFFFFFF:FFFF, :FFFF:FF,FFFF:FFFF:FFFF  
FFF

@A00721:190:HGJW7DSXY:4:2318:26494:22764\_2:N:0:TCTGCAAG+GCTGCACT  
GCTGTGCAGAATAACCTTCCCAAATCTAGATCTGCACAGAAGAAGGCTGAAGTCGTTACCGGACGAC



CACTCAAAGGAAACGGGCTGTTGCCAGAGGAAAGCAGCGACCACCGA  
+  
FFFFFFFFFFFFFFFFFFFFFFFFFFFFFFFFFFFFFFFFFFFFFFFFFFFFFFFFFFFFFFFF  
FFFFFFF:FF:FFFFFFFFFFFFFFFFFFFFFFFFFFFFFFFFFFFFFFFFFFFFFFFF  
@A00721:190:HGJW7DSXY:4:1203:12518:9079\_2:N:0:TCTGCAAG+GCTGCACT  
GTCACATTCACTACTCCCATGCCAATCAATGATGTGACTATACAGTTCGGCCATTTCAAGAGTGGTCA  
ATACGTCGTGGGAGGTACTGAAGCCTTCCCCTCCGCTGGCACGAAGAA  
+  
FFFFFFFFFFFFFFFFFFFFFFFFFFFFFFFFFFFFFFFFFFFFFFFFFFFFFFFFFFFFFFFF  
FFFFFFFFFFFFFFFFFFFFFFFFFFFFFFFFFFFFFFFFFFFFFFFFFFFFFFFF  
@A00721:190:HGJW7DSXY:4:2122:19144:33489\_1:N:0:TCTGCAAG+GCTGCACT  
GTCTCTAAGTCTACCAGGAAGAGGGGAAATGTCCCCAAACTGAGAAGAATAAAGGGAAAGGTCCATC  
AGGACCTAAGAAGGGGAAATTACCCCTAATTCTGAAGGAAGATCTCCCACCATCTGGGGTTGGGAATA  
AGA  
+  
FFFFFFFFFFFFFFFFFFFFFFFFFFFF:FFFF,FFFFFFFFFFFFFFFFFFFF:FFFF:FF:FFFFFFFFFFFF  
FFFFFFFFFFFFFFFFFFFFFFFFFFFFFFFFFFFFFFFFFFFFFFFFFFFFFFFFFFFFFFFF  
FFF  
@A00721:190:HGJW7DSXY:4:1529:21115:4617\_1:N:0:TCTGCAAG+GCTGCACT  
CTACGAAGTCGCTGAAGGCGGCTTGGGTCATTAAGGGTAGCTGTAAAGTTGCGCCTGCCGACCCCATC  
TTTGAGACCAAGACTCTCTACAGTAGGTCGTGCCTACTATGAGCAAATCTGTTGAATTCGTCACTGA  
GGA  
+  
FFFFFFFFFFFFFFFFFFFFFFFFFFFFFFFFFFFFFFFFFFFFFFFFFFFF:FFFFFFFFFFFFFFFFFFFF  
FFFFFFFFFFFFFFFFFFFFFFFFFFFFFFFFFFFFFFFFFFFFFFFFFFFFFFFFFFFFFFFF  
FFF  
@A00721:190:HGJW7DSXY:4:1557:19045:18975\_1:N:0:TCTGCAAG+GCTGCACT  
ACTTTTGGCTACTGGCGACAACTGAGAGCAGTCGCTGGGGAAAGAGAATTGCGTGGGTGAAGGCCG  
ACGCTTCGAGCTTGAGTGTGACGAGGCCGGTGACGTTTTTGTCAACGGCGTTTGGAGGATTTATCCG  
CGC  
+  
:FFFFFFFFFFFFFFFFFFFF:F:FFFFFFFFFFFFFFFFFFFFFFFFFFFF::,FFF:FFFFFFFFFFFFFFFF  
FF::FFFFFFFFFFFFFFFFFFFFFFFFFFFFFFFFFFFF,FFFFFFFFFFFFFFFFFFFF:FFFF:FFFF:FF  
FFF  
@A00721:190:HGJW7DSXY:4:2470:16712:36010\_1:N:0:TCTGCAAG+GCTGCACT  
GCGAAGATCCCCTATGGAGTCTTGAAGGACTTAGGTTGGCATATTTATGCCGACGATAATAAGCATGT  
CACCCCTAAGCACCGAGGTAAGCTCGGGACTTACAAGAGAGAGTGTGAGAGAGTCGCTCTCACTATTT  
TTG  
+  
FFFFFFFFFFFFFFFFFFFF:FFFFFFFFFFFFFFFFFFFF:FFFFFFFFFFFFFFFFFFFFFFFFFFFFFFFF  
FFFFFFFFF:FFFFFFFFFFFFFFFFFFFFFFFFFFFFFFFFFFFFFFFFFFFFFFFFFFFFFFFF  
FFF  
@A00721:190:HGJW7DSXY:4:2377:11270:8703\_1:N:0:TCTGCAAG+GCTGCACT  
TTTCCTCCGTCATTGGGGATTTGATGTGAGAAGGTGGAAGGTGTCAAGGGTCTTCTTCATGCTGATC  
TTTCAGGACCTAATCACATCATGATTGATAGTTACGGCTCGTATCGAGTTGGAGGGAGGAAGTTCTCC  
GAA  
+  
FFFFFFFFFFFFFFFFFFFFFFFFFFFFFFFFFFFFFFFFFFFFFFFFFFFF:FFFF:FFFFFFF  
FFFFFFFFFFFFFFFFFFFFFFFFFFFFFFFFFFFFFFFFFFFFFFFFFFFFFFFFFFFFFFFF  
FFF  
@A00721:190:HGJW7DSXY:4:2439:10556:11475\_1:N:0:TCTGCAAG+GCTGCACT  
GGAAGGCTCTAGAGAAGATCTCACCACTGGAGAAGGCAAGTGGAGAGTCCAGAAGTTGATGAAGAAG  
GATTATTTGAAGCAGGGGTTACCACTTCCTAAGGTGGATGAGGGAGGTTGTTTCTTTGGAGTTTTAGA  
TAA

FFFFFFFF:FFFFFFFFFFFFFF:FFFFFFFFFFFFFFFFFFFFFFFFFFFFFFFFFFFFFFFF  
FFFFFFFF:FFFFFFFFFFFFFFFFFFFFFFFFFFFFFFFFFFFFFFFFFFFFFFFFFFFFF  
FF:  
@A00721:190:HGJW7DSXY:4:2461:9923:14575\_1:N:0:TCTGCAAG+GCTGCACT  
TGTTCCCTTCGGGAAGTTGTGGGATTTAACTTTGACTCAACTACTCCGATCAGATCCTGATGGTTTGA  
TTGGTATGGACTACTCGACTTTTGATCTGGAGTTGTCTAGTGTGCATGGCAGATACTACCGATAAGGTG  
AAA  
+  
FFFF:FFFF,FF,,FFFF,FFFFFF:,F,:FFFFFFFF,F:FF,FFFFFFFF,,,FFFF,FF,FF  
FFFFFFFF:F,,:FFFFFF,FFFFFFFFFFFFFFFFFFFF,FF,,FFFF,FFFF,FFFF:FF:FF  
:FF  
@A00721:190:HGJW7DSXY:4:2463:4535:35086\_2:N:0:TCTGCAAG+GCTGCACT  
TTTATGATTCAAACCTATCGTTGTCTGACCTTACAAGGTTGAGGAGACTTTACAGCGGCTTATTGTC  
GCGCAGTTTTCCAGAATTGCGGTTGAAGTTCACCCATTCTATCTTGAAT  
+  
FFFFFFFFFFFFFFFFFFFFFFFFFFFFFF:FFFFFFFFFFFFFFFFFFFFFFFFFFFFFFFFFFFFF  
FFFFFFFFFFFFFFFFFFFFFFFFFFFFFFFFFFFFFFFFFFFFFFFFFFFFFFFFFFFFF  
@A00721:190:HGJW7DSXY:4:2632:18756:32878\_1:N:0:TCTGCAAG+GCTGCACT  
CTTCCGATCTCGTCTAGGAACATTGATTGGGAACGTACCTACTCACGAGACGTCATGAAAGCTATCGG  
AGGGAAGCAAAATGTTTCGTTCTGTTACAAGAACGCTTTGGATTGTGACCATAAAGCCTCAGTTGCGA  
TAG  
+  
FFFFFFFFFFFFFFFFFFFFFFFFFFFFFFFFFFFF:FFFF:FFFFFFFFFFFFFFFFFFFFFFFFFFFFF  
FFFFFFFFFFFFFFFFFFFFFFFFFFFFFFFFFFFFFFFFFFFFFFFFFFFFFFFFFFFFF  
FFF  
@A00721:190:HGJW7DSXY:4:1472:20356:17769\_2:N:0:TCTGCAAG+GCTGCACT  
GATTGTCATCTCGGGGAAAGTGATTACCAAGATGTTTCATATAGATACGAGATACCTAGAGAAGGTGCG  
CAGCGATCTTACTCGTTATCGGAGATCGGAAGAGCGTCGTGTAGGGAA  
+  
FFFFFFFFFFFFFFFFFFFFFFFFFFFF:FFFFF:FFFFFFFFFFFFFFFFFFFFFFFFFFFFF:FFFFF  
FFFFFFFFFFFFFFFFFFFFFFFFFFFFFFFFFFFFFFFFFFFF,F,FFFF,  
@A00721:190:HGJW7DSXY:4:1458:18267:34350\_1:N:0:TCTGCAAG+GCTGCACT  
CAGGACGCCCTACGGTGACTTTATGGACAAGATGCAAGTTCTTGGGAAATACTTGTTCCTTTTTAGG  
TTTAGTAGGTGATCTTGACGTCGATTCTTTGTATAGGGAGTGTGAGAAGACAACGAATCTTGAAACTA  
CGG  
+  
FFFFFFFFFFFFFFFFFFFFFFFFFFFF:FFFFFFFFFFFFFFFFFFFFFFFFFFFFFFFFFFFFF  
FFFFFFFFFFFFFFFFFFFFFFFFFFFFFFFFFFFFFFFFFFFFFFFFFFFFF:FFFFFFFFFFFFFFFFF  
FFF  
@A00721:190:HGJW7DSXY:4:2651:15619:13103\_1:N:0:TCTGCAAG+GCTGCACT  
TTCTTGAAAACCAAGTTAAGAAGGAGGCTGATCATGGAGTCTTTGTACCTTCTGTCAAACCTTCGAGGT  
TCAGCTACGAGAGGTGATCCCGGATGTGGATTGAAGGCTGGCTCTAAGGGAGACTCCTTCTTTTTGAA  
TGT  
+  
F:FFFFFFFFFFFFFFFF:FFFFFFFFFFFFFFFFFFFFFFFF:FFFFFFFF:FFFF:FFFFFFFFFFFFF  
FFFFFFFFFFFFFFFFFFFFFFFFFFFFFFFFFFFFFFFFFFFFFFFFFFFFF:FFFFFFFFF  
FFF  
@A00721:190:HGJW7DSXY:4:2277:17644:13730\_2:N:0:TCTGCAAG+GCTGCACT  
TGAGAAGTGTGCTTTACAAGGAGTTAGACTCTTCTTCAAGTTTTTAGATCTTCTTGATAATCTTAAAG  
AAAAATTTTCGAATAAACTAATGAGAGGTATAGGCTTAGTCAAGTCTG  
+  
FFFFFFFFFFFFFFFFFFFFFFFFFFFFFFFFFFFFFFFFFFFFFFFFFFFFFFFFFFFFF  
FFFFFFFFFFFFFFFFFFFFFFFFFFFFFFFFFFFF,FFFFFFFF:FFF

+

@A00721:190:HGJW7DSXY:4:1641:14434:32002\_1:N:0:TCTGCAAG+GCTGCACT  
ATTTTAGGAAACGTCGCGAAAAGAAAGTTCATGAGGATGTCTTGGTCGAAAAATATCGCCGGGAACCTT  
CTAATAGAGGATCCTGATGACATTATTTCAACGGATACCGATCTCAGTTCTACCACAGAAACCGTCTC  
AGG

 $+$ 

@A00721:190:HGJW7DSXY:4:1114:30156:34460\_1:N:0:TCTGCAAG+GCTGCACT  
TAGAGAAAGACGACCTTCTTGTGGGGACTGAGACCTCTGAATTTTCAGGGTGCCCTGATGAGGACGTT  
GAAAGGGATAATTTCAACTCTGAGACTTCTAAGAGTGTTTCAAAGACCAGAAACGTAACAAGAAGAA  
TAA

+

@A00721:190:HGJW7DSXY:4:2647:32090:25911\_2:N:0:TCTGCAAG+GCTGCACT  
AGAACAGCTGATTCTTATTGCATGAACGTCGCTGAGGTCAAACCTGTGGACGTTCTTTTCATCGACGA  
ATTATTCATGATTCACGCTGGTCAGACCCTTTTTCTTACACATCTACT

+

@A00721:190:HGJW7DSXY:4:2164:16251:8813\_1:N:0:TCTGCAAG+GCTGCACT  
CTACTTCAACATCAACGACATCATTCTTGATGAGTGTCTGTTCTTATCGAAGTCTCAGTTATCGCTGCC  
CGGCCGACGTTTGTGCGGAACCTCTCAGAGGTTTACGGCAGAAAAATTTCTCCTGCTTGTAATTCGAGA  
GAG

+

@A00721:190:HGJW7DSXY:4:2457:9679:24862\_2:N:0:TCTGCAAG+GCTGCACT  
CCCTTATATCGAGGCTATCGAGGACGATGAGTATCTTGAAGTTGTTGACGACAAGCCTCAAGAGGGTA  
GAGGACCACCTGGATCTTCTACTGTCTCTGCCTTCCAAGATTTCTTAG

 $+$ 

@A00721:190:HGJW7DSXY:4:1515:15772:28808\_2:N:0:TCTGCAAG+GCTGCACT  
TTGAGCCGCGTAGTCAGCGCGTTTAGCTGTATCATCAGTCAGAGTATACCCGATAGGGTACCGAGTCT  
CCAAGAGAATATTTATTCTTATGAGGCTCGAAACTTCAACGTTTTTCAC

+

@A00721:190:HGJW7DSXY:4:2373:7726:36417\_2:N:0:TCTGCAAG+GCTGCACT  
ACTTTATTATGACCTTGGAAAGTTTTCGGCTGTGGTTGTCGCTGGGGACGATTCCATTCTGTTTTCAA  
AGACTCCAATAACTGATCATTCTGATCATATGATTTTGGACAATGGTT

+

```

FFFFFFFFFFFF:FFFFFFFFFFFFFFFFFFFFFFFFFFFFFFFFFFFFFFFF,FFF:FFFF
F,:FFFF:FFFF:FFFFFFFFFFFFFFFFFFFFFFFFFFFFFFFFFFFFFFFF

```

+

+

+

+

+

+

+



@A00721:190:HGJW7DSXY:4:2440:10529:28338\_2:N:0:TCTGCAAG+GCTGCACT  
TCAAGTACCTGAACCTTTACATTTTAAATGGTATGGTATAATGTGTCTTACAAATAGAACCTTCACTCT  
CGGTAATGAGAGTGATTCTTAATATTCTAGTAACCGCTATGTGGGC

+

FFFFFFFFFFFFFFFFFFFFFFFFFFFFFFFFFFFFFFFFFFFFFFFFFFFFFFFFFFFFFFFFFFFFFFFF  
FFFFFFFFFFFFFFFFFFFFFFFFFFFFFFFFFFFFFFFFFFFFFFFFFFFFFFFFFFFFFFFFFFFFFFFF

@A00721:190:HGJW7DSXY:4:2556:12943:12508\_1:N:0:TCTGCAAG+GCTGCACT  
ATTCAATAGCTTTAGTATTATTTACTATCGCCTTTATTGAAAATTGTATAAGAGTTAATTGCTTACAC  
AAAAGTGACGCGCGAAGGAATCTTAATTGATTGAAGCTAGGCGTTGGGGAGAATGAAGTCCGCTTCC  
CGG

+

FFFFFFFFFFFFFFFFFFFFFFFFFFFFFFFFFFFFFFFFFFFFFFFFFFFFFFFFFFFFFFFFFFFFFFFF  
FFFFFFFFFFFFFFFFFFFFFFFFFFFFFFFFFFFFFFFFFFFFFFFFFFFFFFFFFFFFFFFFFFFFFFFF  
FFF

@A00721:190:HGJW7DSXY:4:2559:31638:24095\_2:N:0:TCTGCAAG+GCTGCACT  
GCTGTGCAGAATAACCTTCCCAAATCTAGATCTGCACAGAAGAAGGCTGAAGTTCGTTACCGGACGAC  
CACTCAATGGAAACGGGCTGTTGCCAGAGGAAAGCAGCGACCACCGA

+

FFFFFFFFFFFFFFFFFFFFFFFFFFFFFFFFFFFFFFFFFFFFFFFFFFFFFFFFFFFFFFFFFFFFFFFF  
FFFFFFFFFFFFFFFFFFFFFFFFFFFFFFFFFFFFFFFFFFFFFFFFFFFFFFFFFFFFFFFFFFFFFFFF

@A00721:190:HGJW7DSXY:4:1336:21522:27555\_2:N:0:TCTGCAAG+GCTGCACT  
GTCACATTCACTCCCATGCCAATCAATGATGTGACTATACAGTTCGGCCATTTCAAGAGTGGTCA  
ATACGTCGTGGGAGGTACTGAAGCCTTCCCCTCCGCTGGCACGAAGAA

+

FFFFFFFFFFFFFFFFFFFFFFFFFFFFFFFFFFFFFFFFFFFFFFFFFFFFFFFFFFFFFFFFFFFFFFFF  
FFFFFFFFFFFFFFFFFFFFFFFFFFFFFFFFFFFFFFFFFFFFFFFFFFFFFFFFFFFFFFFFFFFFFFFF

@A00721:190:HGJW7DSXY:4:2273:17183:27743\_1:N:0:TCTGCAAG+GCTGCACT  
GTCTCTAAGTCTACCAGGAAGAGGGGAAATGTCCCAAAACTGAGAAGAATAAAGGGAAAGGTCCATC  
AGGACCTAAGAAGGGGAAATTACCCCTAATTCTGAAGGAAGATCTCCACCATCTGGGGTTGGGAATA  
AGA

+

FFFFFFFFFFFFFFFFFFFFFFFFFFFFFFFFFFFFFFFFFFFFFFFFFFFFFFFFFFFFFFFFFFFFFFFF  
FFFFFFFFFFFFFFFFFFFFFFFFFFFFFFFFFFFFFFFFFFFFFFFFFFFFFFFFFFFFFFFFFFFFFFFF  
FFF

@A00721:190:HGJW7DSXY:4:1543:23900:21402\_1:N:0:TCTGCAAG+GCTGCACT  
CTACGAAGTCGCTGAAGGCGGCTTGGGTCATTAAGGGTAGCTGTAAAGTTGCGCCTGCCGACCCCATC  
TTTGAGACCAAGACTCTCTACAGTAGGTCGTGCCTACTATGAGCAAATCTGTTGAATTCTGCTACTGA  
GGA

+

FFF:F::F,F,:FF:FFFF:,FFFFF,,FFFFF,FFFFFFFF,F,FF,FFF:FFF:FF::FFF:FF,  
FFFFFFFFFFFF,FFFFFF:,FF,FFFFFFFFFFFF,F:FFFFF:,FFFFFFFF:F:,FFF:FF:F,F::  
,,:  
,,:  
@A00721:190:HGJW7DSXY:4:2177:3070:29481\_1:N:0:TCTGCAAG+GCTGCACT

ACTTTTGGCTACTGGCGACAACTGAGAGCAGTCGCTGGGGAAAGAGAATTGCGTGGGTTGAAGGCCG  
ACGCTTCGAGCTTGAGTGTGACGAGGCCGGTGACGTTTTTGTCAACGGCGTTTGGAGGATTTATCCG  
CGC

+

FFFFFFFF:,F,FFFF:F,:,FFF,FFFFFFFF:FFFFFFFF,F:FFFFFFFF:FFFF:FFFFFFFF  
F:F:FFFFFF:FFFFFFFFFFFFFFFF:FFFFFFFFFFFFFFFFFFFF,,FFFFFFFFFFFF:FFFFF:,F  
FFF

@A00721:190:HGJW7DSXY:4:1115:20925:36667\_1:N:0:TCTGCAAG+GCTGCACT  
CGAAGATCCCCTATGGAGTCTGAAGGACTTAGGTTGGCATATTTATGCCGACGATAATAAGCATGTC  
ACCCTTAAGCACCGAGGTAAGCTCGGGACTTACAAGAGAGAGTGTGAGAGAGTCGCTCTCACTATTTT  
TGC

```
+  
FFFFFFFFFFFFFFFFFFFF:FFFFFFFFFFFFFFFFFFFFFFFFFFFFFFFFFFFFFFF,FFFFFFFF  
FFFFFFFFFFFFFFFFFFFFFFFFFFFFFFFFFFFFFFFFFFFFFFFFFFFFFFFFFFFFFFFFFF  
FFF  
@A00721:190:HGJW7DSXY:4:2401:19244:6856_1:N:0:TCTGCAAG+GCTGCACT  
TTTCCTCCGTCAATTGGGGATTTGCATGTGAGAAGGTGGAAGGTGTCAAGGGTCTTCTTCATGCTGATC  
TTTCAGGACCTAATCACATCATGATTGATAGTTACGGCTCGTATCGAGTTGGAGGGAGGAAGTTCTCC  
GAA  
+  
F,FFFFFFFFFFFFFFFF:FFFFFFFFFFFFFFFFFFFFFFFFFFFFFFFFFFFFFFFFFFFFF  
FFFFFFFFFFFFFFFFFFFFFFFFFFFFFFFFFFFFFFFFFFFFFFFFFFFFFFFFFFFFFFFFFF  
FFF  
@A00721:190:HGJW7DSXY:4:2634:20681:8437_1:N:0:TCTGCAAG+GCTGCACT  
GGAAGGCTCTAGAGAAGATCTCACCACTTGAGAAGGCCAAGTGGAGAGTCCAGAAGTTGATGAAGAAG  
GATTATTTGAAGCAGGGGTTACCACTTCCTAAGGTGGATGAGGGAGGTTGTTTTCTTTGGAGTTTTAGA  
TAA  
+  
FFFFFFF,FFFFFFFFFFFFFFFF:FFFFFF:FFFFFFFFFFFFFFFFFFFFFFFFFFFFFFFFF  
FFFFFFFFFFFFFFFFFFFFFFFFFFFFFFFFFFFFFFFFFFFFFFFFFFFFFFFFFFFFFFFFFF  
FFF  
@A00721:190:HGJW7DSXY:4:2612:18376:12054_1:N:0:TCTGCAAG+GCTGCACT  
TGTTCTTCCGGGAAGTTGTGGGATTTAACTTTGACTCAACTACTCCGATCAGATCCGGATGGTTTGA  
TTGGTATGGACTACTCGACTTTTGATCTGGAGTTGTCTAGGGTCATGGCAGATACTACCGATAAGGTG  
AAA  
+  
FFFFFFFFFFFFFFFFFFFF,FFFFFFFFFFFFFF:FFFFFFFFFFFFFFFFFFFFFFFFFFFFFFFFF  
FFFFFFFFFFFFFFFFFFFFFFFFFFFFFFFFFFFFFFFFFFFFFFFFFFFFFFFFFFFFFFFFFF  
FFF  
@A00721:190:HGJW7DSXY:4:1227:15383:34648_1:N:0:TCTGCAAG+GCTGCACT  
ATGATTCAAACCTATCGTTGTCTGACCTTACAAGGTTGAGGAGACTTTACAGCGGCTTATTGTGCGG  
CAGTTTCCAGAATTGCGGTTGAAGTTCACCATTCTATCTTGAATGCTCACGCCGTCGCAGCCATATC  
GAG  
+  
FFFFFFFFFFFFFFFFFFFFFFFFFFFFFFFFFFFFFFFFFFFFFFFFFFFFFFFFFFFFFFFFF  
FFFFFFFFFFFFFFFFFFFFFFFFFFFFFF:FFFFFFFFFFFFFFFFFFFFFFFFFFFFFFFFF  
FFF  
@A00721:190:HGJW7DSXY:4:1127:26919:1329_1:N:0:TCTGCAAG+GCTGCACT  
TGATTGGAACGTACCTACTCACGAGACGTCATGAAAGCTATCGGAGGGAAGCAAAATGTTTCGTTCT  
GTTACAAGAACGCTTTGGATTGTGACCATAAAGCCTCAGTTGCGATAGCTGTAGAGGTATACGATATC  
TCT  
+  
FFFFFFFFFFFFFFFFFFFFFFFFFFFFFFFFFFFFFFFFFFFFFFFFFFFFFFFFFFFFFF:FFFFFFFFFFFFFFFFF  
FFFFFFFFFFFFFFFFFFFFFFFFFFFFFFFFFFFFFFFFFFFFFFFFFFFFFFFFFFFFFFFFF  
FFF  
@A00721:190:HGJW7DSXY:4:2158:32081:30906_2:N:0:TCTGCAAG+GCTGCACT  
GATTGTCATCTCGGGGAAAGTGATTACCAAGATGTTTCATATAGATACGAGATACCTAGAGAAGGTGCG  
CAGCGATCTTACTCGTTATCGGAGATCGGAAGAGCGTCGTGTAGGGAA  
+  
FFFFFFFFFFFFFFFFFFFFFFFFFFFFFFFFFFFFFFFFFFFFFFFFFFFFFF:FFFFFFFFFFFFFFFFF  
FFFFFFFFFFFFFFFFFFFFFFFFFFFFFFFFFFFFFFFFFFFFFFFFFFFFFFFFFFFFFF:  
@A00721:190:HGJW7DSXY:4:2220:6659:1595_1:N:0:TCTGCAAG+GCTGCACT  
CAGGACGCCTACGGTGACTTTATGGACAAGATGCAAGTTCTTGGGAAATACTTGTTTCCCTTTTTAGG  
TTTAGTAGGTGATCTTGACGTCGATTCTTTGTATAGGGAGTGTGAGAAGACAACGAATCTTGAAACTA  
CGG
```

[illegible]





FFFFFFFFFFFFFFFFFFFFFFFFFFFFFFFFFFFFFFFFFFFFFFFFFFFFFFFFFFFFFFFFFFFFFFFFFFFFFFFF  
FFF

@A00721:190:HGJW7DSXY:4:2437:16694:9862\_1:N:0:TCTGCAAG+GCTGCACT  
CTTGAACGAAGCGACCTGTTCCGGAGTTTTTACGGGATCCGGAATGTTCTGTCTATATTAGGTGAA  
GCGAAATACGATTTCGAACGTCAACGTTACCGAGTTTCGTTTCGTACCTTGATGCTGACTTTCGTCA  
ATA

+  
FFFFFFFFFFFFFFFFFFFFFFFFFFFFFFFFFFFFFFFFFFFFFFFFFFFFFFFFFFFFFFFFFFFFFFFFFFFF:FFFFF  
FFFFFFFFFFFFFFF:FFFFFFFFFFFFFFFFFFFFFFFFFFFFFFFFFFFFFFFFFFFFFFFFFFFFFFFFFFFF  
FFF

@A00721:190:HGJW7DSXY:4:1240:6126:25786\_2:N:0:TCTGCAAG+GCTGCACT  
TACGATACAAATGATAACTTCTAATTTACGTTTGCTACTCAGAGCTGGTCCTCTCAGCAAAGGGATGC  
ATGGTGTATCTCCTCAGGAGTCCCGGCATTTGATAATAATGACGAGA

+  
FFFFFFFFFFFFFFFFFFFFFFFFFFFFFFFFFFFFFFFFFFFFFFFFFFFFFFFFFFFFFFFFFFFFFFFFFFFF  
FFFFFFFFFFFFFFFFFFFFFFFFFFFFFFFFFFFFFFFFFFFFFFFFFFFFFFFFFFFFFFFFFFFFFFFFFFFF

@A00721:190:HGJW7DSXY:4:2325:19180:22091\_2:N:0:TCTGCAAG+GCTGCACT  
TCGCTGCATATTACGGATTACACGGTACCAGCGCATCTCGTGTGAGCCTCGACCCGATTATATGGTA  
TTAACTTATAAAGGTGAGGAGACCATTTTCTTGCTGAAATTTATAGAA

+  
FFFFFFFFFFFFFFFFFFFFFFFFFFFFFFFFFFFFFFFFFFFFFFFFFFFFFFFFFFFFFFFFFFFFFFFFFFFF  
FFFFFFFFFFFFFFF:FFFFFFF:FF:FFFFFFFFFFFFFFFFFFFFFFFFFFFFFFFFFFFF

@A00721:190:HGJW7DSXY:4:2506:11686:10895\_2:N:0:TCTGCAAG+GCTGCACT  
GTCAACACTAGTTCGAGTGCTGCTTTGGATTACGATGACGTGAGAATAGGTGAAGGGATAGTTTTTAC  
CTCGACCAACATTAAGGCGGCGGCGACTAATCTTAAAGCTTCACCCAA

+  
FFFFFFFFFF:FF:FFFFFFF:FFFFFFFFFFFFFFFFFFFFFFFFFFFFFFFFFFFFFFFFFFFF:FFFFFFFFFF  
FFFFFFFFFFFFFFFFFFFFFFFFFFFFFFFFFFFFFFFFFFFF:FFFFFFFFFFFF

@A00721:190:HGJW7DSXY:4:2630:18511:30639\_2:N:0:TCTGCAAG+GCTGCACT  
CTAGCCTTCAAGTGGGGTATGCCTGCGGAATACGCTTGCTATTACCAGATTGGTTCGAACCCGTTGA  
TGCTATGTCAGAAGAAGCTATTCAAGCTTGTCGTTTAAAGTCTGCAGA

+  
FFFFFFFFFFFFFFFFFFFFFFFFFFFFFFFFFFFFFFFFFFFFFFFFFFFFFFFFFFFFFFFFFFFFFFFFFFFF:FFFFFFFFFF  
FFF:FFFFFFFFFFFFFFFFFFFF:FFFFFFFFFFFFFFFFFFFFF:,FFFFFFFF

@A00721:190:HGJW7DSXY:4:2628:24162:30906\_2:N:0:TCTGCAAG+GCTGCACT  
CCAGACTCAAGGAGTCCAATCAAAGGTTTTGAATTTAGCTCAACTGGGGAGACGTGCTTAAATGGGTG  
ATAAAAATTATTTAGAGATCTTTTCTACTTACAAAGGACAATTCAGTT

+  
FFFFFFFFF:FFFFFFFFFFFFFFFFFFFFF:FFFFFFFFFFFFFFFFFFFF:FFFFFFFFFFFFFFFFFFFFF  
FF:F:FF,FFFFFFFFF:FFFFFFFFFFFFFFFFFFFFF:FFF

@A00721:190:HGJW7DSXY:4:2676:16947:1595\_1:N:0:TCTGCAAG+GCTGCACT  
TTTTGTTACCAAATTCTTGCTTTCAACGAAGTCTCTGATTTTATTAATCATTACTTTAACGATCTCT  
CGGTCATTTACTCTGTACTTGATCTACGTCGTTTAACTGTCGGAACAACCTTTACTTAGAATGACTCT  
ATC

+  
FFFFFFFFFFFFFFFFFFFFFFFFFFFFFFFFFFFFFFFFFFFFFFFFFFFFFFFFFFFFFFFFFFFFFFFFFFFF:FFFFFFFFFFFFFFFFFFFFF  
FFFFFFFFFFFFFFFFFFFFFFFFFFFFFFFFFFFFFFFFFFFFFFFFFFFFFFFFFFFFFFFFFFFF:FFFFFFFFFFFF:FFFFF  
FFF

@A00721:190:HGJW7DSXY:4:1218:26612:7091\_1:N:0:TCTGCAAG+GCTGCACT  
AAAACAACTCTTCTTTACTAGACTTTTTTGTTTTATTATATTTAGTCTCCACACCAATCTCACCGAGT  
ATAAAGCTTTTTTCCGTCCTGAACCTTAATACACGAAGATATAAGCCGCACACGACTCGAAA

+  
FFF:F,,,,,FF,,F:,:,F,,F,F,,F:,::,F,F,,,FFF:,,,,,,F,:F:,,,,,,F:,::,,  
::F,,,,:,FFF:F:,,,,:,:::FFF:,F,,F,,,,F,,,F:,,:F,FFFFFFFFF:F

@A00721:190:HGJW7DSXY:4:2324:5674:34679\_2:N:0:TCTGCAAG+GCTGCACT  
AATGAGGTCAAAGCTCTATTTATTAAACGAAGTATTATCCGATTCTTCGAGGGTATCACTACCACTGA  
TCTGCCGACTTTAGTCAAGGAAGTCAATTCCTTCGATGTTTATATTT

+

FFFFFFFFFFFF,FFFFFFFFFFFFFFFFFFFFFFFFFFFFFFFFFFFFFFFFFFFFFFFFFFFFFFFFFFFF  
FFFFFFFFFFFFFFFFFFFFFFFFFFFFFFFFFFFFFFFFFFFFFFFFFFFFFFFFFFFFFFFFFFFFFFFFFFFF

@A00721:190:HGJW7DSXY:4:1316:21070:20572\_1:N:0:TCTGCAAG+GCTGCACT  
ATTTTAGAAGTCTTATTTTCAAGACTCTCTCCGATCACCTTGGTGTGATCTCCCGAGGATCTTTTCAAT  
AAGATGTATGATGATAATCTACTATTTTAAATAGTGATATTCAGCGTATACTTGAATACTTTATCAA  
AGA

+

FFFFFFFFFFFFFFFFFFFFFFFFFFFFFFFFFFFFFFFFFFFFFFFFFFFFFFFFFFFFFFFFFFFFFFFFFFFF  
FFFFFFFFFFFFFFFFFFFFFFFFFFFFFFFFFFFFFFFFFFFFFFFFFFFFFFFFFFFFFFFFFFFFFFFFFFFF,  
FFF

@A00721:190:HGJW7DSXY:4:1545:10682:13823\_1:N:0:TCTGCAAG+GCTGCACT  
CAAAAAGTTGGAAGAGGTCTATGATATTTATTTTACTTATACTTTAAATAGCACCGATTATAACTTGA  
CTGTTGATAATATTACAATAGCTCTTCTCAGAAGATTAGAGAAGTAACCGGTGAACACGTCGGTAGC  
ATT

+

FFFFF:FFFFFFFFFFFFFFFFFFFFFFFFFFFFFFFFFFFFFFFFFFFFFFFFFFFFFFFFFFFFFFFFFFFF  
FFFFFFFFFFFFFFFFFFFF:FFFFFFFFFFFFFFFFFFFFFFFFFFFFFFFFFFFFFFFFFFFF:F:FFFFFFFFFFFFFFFFFFFF  
FFF

@A00721:190:HGJW7DSXY:4:1232:4155:7654\_2:N:0:TCTGCAAG+GCTGCACT  
ACCTGAAGTTTACATTTTAAATGGTATGGTATAATGTGTCTTACAAATAGAACCTTCACTCTCGGTAA  
TGAGAGTGTATTCTTAATATTCTAGTAACCGCTATGTGGGCATTACT

+

FFFFFFFFFFFFFFFFFFFFFFFFFFFF:FF:FFFFF,F:FFFFFF:FFFFFFFFFFFFFFFFFFFFFFFFFFFF  
FFFFFFFFFFFFFFFFFFFFFFFFFFFFFFFFFFFF:FFFFFFFFFFFFFFFFFFFF

@A00721:190:HGJW7DSXY:4:2556:9787:13526\_1:N:0:TCTGCAAG+GCTGCACT  
ATTCAATAGCTTTAGTATTATTTACTATCGCCTTTATTGAAAATTGTATAAGAGTTAATTGCTTACAC  
AAAAGTGACGCGCAAGGAATCTTAATTGATTGAAGCTAGGCGTTGGGGAGAATGAAGTCCGCTTCC  
CGG

+

FFFFFFFFFFFFFFFFFFFFFFFFFFFFFFFFFFFFFFFFFFFFFFFFFFFFFFFFFFFFFFFFFFFFFFFFFFFF  
FFFFFFFFFFFFFFFFFFFFFFFFFFFFFFFFFFFFFFFFFFFFFFFFFFFFFFFFFFFFFFFFFFFFFFFFFFFF  
FFF

@A00721:190:HGJW7DSXY:4:2608:24053:35196\_2:N:0:TCTGCAAG+GCTGCACT  
GCTGTGCAGAATAACCTTCCCAAATCTAGATCTGCACAGAAGAAGGCTGAAGTCGTTACCGGACGAC  
CACTCAAAGGAAACGGGCTGTTGCCAGAGGAAAGCAGCGACCACCGA

+

FFFFFFFFFFFF,FFFFFFFFFFFFFFFFFFFFFFFFFFFFFFFFFFFFFFFFFFFFFFFFFFFFFFFFFFFF  
FFFFFFFFFFFFFFFFFFFFFFFFFFFFFFFFFFFFFFFFFFFFFFFFFFFFFFFFFFFFFFFFFFFFFFFFFFFF

@A00721:190:HGJW7DSXY:4:1572:2058:3552\_2:N:0:TCTGCAAG+GCTGCACT  
GTCACATTCACCACTCCCATGCCAATCAATGATGTGACTATACAGTTCGGCCATTTCAAGAGTGGTCA  
ATACGTCGTGGGAGGTACTGAAGCCTTCCCTCCGCTGGCACGAAGAA

+

FFFFFFFFFFFFFFFFFFFFFFFFFFFFFFFFFFFFFFFFFFFFFFFFFFFFFFFFFFFFFFFFFFFFFFFFFFFF  
FFFFFFFFFFFFFFFFFFFFFFFFFFFFFFFFFFFFFFFFFFFFFFFFFFFFFFFFFFFFFFFFFFFFFFFFFFFF

@A00721:190:HGJW7DSXY:4:2403:15673:32299\_1:N:0:TCTGCAAG+GCTGCACT  
GTCTCTAAGTCTACCAGGAAGAGGGGAAATGTCCCAAAAGTGAAGAATAAAGGGAAAGGTCCATC  
AGGACCTAAGAAGGGGAAATTACCCCTAATTCTGAAGGAAGATCTCCACCATCTGGGGTTGGGAATA  
AGA

+

FFFFFFFFFFFFFFFFFFFFFFFFFFFF:FFF:FFFFFFFFFFFFFFFFFFFF,F:F,FFF,FFFF:FF:FFFFFF

FFFFFFFFFFFF,FFFFFFFF:FFFFFFFFFFFFFFFFFFFFFFFFFFFFFFFFFFFFFFFFFFFF  
FFF

@A00721:190:HGJW7DSXY:4:1607:31376:16595\_1:N:0:TCTGCAAG+GCTGCACT  
CTACGAAGTCGCTGAAGGCGGCTTGGGTCATTAAGGGTAGCTGTAAAGTTGCGCCTGCCGACCCCATC  
TTTGAGACCAAGACTCTCGACAGTAGGTCGTGCCTACTATGAGCAAATCTGTTGAATTCGTCACTGA  
GGA

+

FFFFFFFFFFFFFFFFFFFFFFFFFFFFFFFFFFFFFFFFFFFFFFFFFFFFFFFFFFFFFFFFFFFF  
FFFFFFFFFFFFFFFF:F,FFFFFFFFFFFFFFFFFFFFFFFFFFFFFFFFFFFFFFFFFFFFFFFFFFFF  
FFF

@A00721:190:HGJW7DSXY:4:2364:19560:31422\_1:N:0:TCTGCAAG+GCTGCACT  
ACTTTTGGCTACTGGCGACAACTGAGAGCAGTCGCTGGGGAAGAGAATTGCGTGGGTTGAAGGCCG  
ACGCTTCGAGCTTGAGTGTGACGAGGCCGGTGACGTTTTTGTCAACGGCGTTTGGAGGATTTTATCCG  
CGC

+

FFFFFFFFFFFFFFFFFFFFFFFFFFFFFFFFFFFFFFFFFFFFFFFFFFFFFFFFFFFFFFFFFFFF  
FFFFFFFFFFFFFFFFFFFFFFFFFFFFFFFFFFFFFFFFFFFFFFFFFFFFFFFFFFFFFFFFFFFF:F  
FFF

@A00721:190:HGJW7DSXY:4:1206:18087:14121\_1:N:0:TCTGCAAG+GCTGCACT  
CGAAGATCCCCTATGGAGTCTTGAAGGACTTAGGTTGGCATATTTATGCCGACGATAATAAGCATGTC  
ACCCTTAAGCACCGAGGTAAGCTCGGGACTTACAAGAGAGAGTGTGAGAGAGTCGCTCTCACTATTTT  
TGC

+

FFFFFFFFFFFFFFFFFFFFFFFFFFFFFFFFFFFFFFFFFFFFFFFFFFFFFFFFFFFFFFFFFFFF  
FFFFFFFFFFFFFFFFFFFFFFFFFFFFFFFFFFFFFFFFFFFFFFFFFFFFFFFFFFFFFFFFFFFF:F:F  
FFF

@A00721:190:HGJW7DSXY:4:2547:13422:25363\_1:N:0:TCTGCAAG+GCTGCACT  
TTTCCTCCGTCATTGGGGATTTGATGTGAGAAGGTGGAAGGTGTCAAGGGTCTTCTTCATGCTGATC  
TTTCAGGACCTAATCACATCATGATTGATAGTTACGGCTCGTATCGAGTTGGAGGGAGGAAGTTCTCC  
GAA

+

F:FFFFFFFF:FFFFFFFF,FFFFFFFFFFFFFFFFFFFFFFFFFFFFFFFFFFFFFFFFFFFF:FFFFFFFFFFFF  
FFFFFFFFFFFFFFFFFFFFFFFFFFFFFFFFFFFFFFFFFFFFFFFFFFFFFFFFFFFFFFFFFFFF:F:F  
FFF

@A00721:190:HGJW7DSXY:4:2502:31114:10848\_1:N:0:TCTGCAAG+GCTGCACT  
GTAAGGCTCTAGATAAGATCTCACCACTGGAGAAGGCAAGTGGAGAGTCCAGAAGTTGATGAAGAAG  
GATTATTTGAAGCAGGGGTTACCACTTCCTAAGGTGGATGAGGGAGGTTGTTTCTTTGGAGTTTTAGA  
TAA

+

F,:F,FFFFFFFF,:FFFFFF:F:F,:FF:FF,FF:F:FFFFFFFFFFFFFFFF,FFFFFFFFF:,FFFF  
FFFF,:FFF:FF:F:FFFFFF:FFFFFFFF:F,,FF,,FFF:,FFF:FF,FFF,FFFF:, :FFFFFF,  
FFF

@A00721:190:HGJW7DSXY:4:2675:17219:33880\_1:N:0:TCTGCAAG+GCTGCACT  
TGTTCCCTCCGGAAGTTGTGGGATTTAACTTTGACTCACTACTCCGATCAGATCCGGATGGTTTGA  
TTGGTATGGACTACTCGACTTTTGATCTGGAGTTGTCTAGGGTCATGGCAGATACTACCGATAAGGTG  
AAA

+

FF:FF:FFFFFFFF,FFFFFFFF:FFFFFFFFFFFFFFFF,FF:FFFFFFFFFFFFFFFFFFFFFFFFFFFF  
FFFFFFFFFFFFFFFFFFFFFFFFFFFFFFFFFFFFFFFFFFFFFFFFFFFFFFFFFFFFFFFFFFFF:FFF  
FFF

@A00721:190:HGJW7DSXY:4:1376:17716:36464\_1:N:0:TCTGCAAG+GCTGCACT  
ATGATTCAAAACCTATCGTTGTCTACCTTACAAGGTTGAGGAGACTTTACAGCGGCTTATTGTGCGC  
CAGTTTCCAGAATTGCGGTTGAAGTTCACCCATTCTATCTTGAATGCTCACGCCGTCGAGCCATATC  
GAG

+  
FFFFFFFFFFFFFFFFFFFFFFFFFFFFFFFFFFFFFFFFFFFFFFFFFFFFFFFFFFFFFFFFFFFFFFFF  
FFFFFFFFFFFFFFFFFFFFFFFFFFFFFFFFFFFFFFFFFFFFFFFFFFFFFFFFFFFFFFFFFFFFFFFF  
FFF  
@A00721:190:HGJW7DSXY:4:1420:15121:13182\_1:N:0:TCTGCAAG+GCTGCACT  
TGATTGGAACGTACCTACTCACGAGACGTGATGAAAGCTATCGGAGGGAAGCAAATGTTTCGTTCT  
GTTACAAGAACGCTTTGATTGTGACCATAAAGCCTCAGTTGCGATAGCTGTAGAGGTATACGATATC  
TCT  
+  
FFFFFFFFFFFFFFFFFFFFFFFFFFFFFFFFFFFFFFFFFFFFFFFFFFFFFFFFFFFFFFFFFFFFFFFF  
FFFFFFFFFFFFFFFFFFFFFFFFFFFFFFFFFFFFFFFFFFFFFFFFFFFFFFFFFFFFFFFFFFFFFFFF  
FFF  
@A00721:190:HGJW7DSXY:4:2358:27905:9987\_2:N:0:TCTGCAAG+GCTGCACT  
GATTGTCATCTCGGGGAAAGTGATTCACCAAGATGTTTCATATAGATACGAGATACCTAGAGAAGGTG  
CAGCGATCTTACTCGTTATCGGAGATCGGAAGAGCGTCGTGTAGGGAA  
+  
F:F::FFFFFFFF:FFFFFF:::FFFFFF,:FFFF:FFFFFFFFFFFFFFFF:FFF:FFFF:FF:FF:F  
:F,F:F:FF:FFF::F:FF:,FF:FFFF,FFFF,FFFF:FF,F:FF  
@A00721:190:HGJW7DSXY:4:2448:5936:19820\_1:N:0:TCTGCAAG+GCTGCACT  
CAGGACGCCTACGGTGACTTTATGGACAAGATGCAAGTTCTTGGGAAATACTTGTTCCTTTTGTAGG  
TTTAGTAGGTGATCTTGACGTCGATTCTTTGTATAGGGAGTGTGAGAAGACAACGAATCTTGAACTA  
CGG  
+  
FFFFFFFFFFFFFFFFFFFFFFFFFFFFFFFFFFFFFFFFFFFFFFFFFFFFFFFFFFFFFFFFFFFFFFFF  
FFFFFFFFFFFFFFFFFFFFFFFFFFFFFFFFFFFFFFFFFFFFFFFFFFFFFFFFFFFFFFFFFFFFFFFF  
FFF  
@A00721:190:HGJW7DSXY:4:2228:23176:13667\_1:N:0:TCTGCAAG+GCTGCACT  
TCTTGAAAACCAAGTTAAGAAGGAGGCTGATCATGGAGTCTTTGTACCTTCTGTCAAACCTTCGAGGT  
CAGCTACGAGAGGTGATCCCGATGTGGATTGAAGGCTGGCTCTAAGGGAGACTCCTTCTTTTGAAT  
GTT  
+  
FFFFFFFFFFFFFFFFFFFFFFFFFFFFFFFFFFFFFFFFFFFFFFFFFFFFFFFFFFFFFFFFFFFFFFFF  
FFFFFFFFFFFFFFFFFFFFFFFFFFFFFFFFFFFFFFFFFFFFFFFFFFFFFFFFFFFFFFFFFFFFFFFF  
FFF  
@A00721:190:HGJW7DSXY:4:1262:25473:1423\_1:N:0:TCTGCAAG+GCTGCACT  
TGAGAAGTGTGCTTTACAAGGAGTTAGACTCTTCTTCAAGTTTTTAGATCTTCTTGATAATCTTAAAG  
AAAAATTTTCGAATAAACTAATGAGAGGTATAGGCTTAGTCAAGTCTGTACTTACATTCTTTACGCCA  
GAT  
+  
FFFFFFFFFFFFFFFFFFFFFFFFFFFFFFFFFFFFFFFFFFFFFFFFFFFFFFFFFFFFFFFFFFFFFFFF  
FFFFFFFFFFFFFFFFFFFFFFFFFFFFFFFFFFFFFFFFFFFFFFFFFFFFFFFFFFFFFFFFFFFFFFFF  
FFF  
@A00721:190:HGJW7DSXY:4:1257:32841:1376\_1:N:0:TCTGCAAG+GCTGCACT  
GATCTTGCAGAGTGACTGGAGTTCAGACGTGTGCTCTTCCGATCTCTAGAGTCCAAGGACGTTTCCGT  
CGGAGGATGACAGGTGGGAGACCGCTCAATAACACTCTATTGAATCCCTTTCCACGATGAAAGCTCT  
TT  
+  
FFFF:FFFFFFFFFFFFFFFFFFFFFFFFFFFFFFFFFFFFFFFFFFFFFFFFFFFFFFFFFFFFFFFF  
FFFFFFFFFFFFFFFFFFFFFFFFFFFFFFFFFFFFFFFFFFFFFFFFFFFFFFFFFFFFFFFFFFFFFFFF  
F,  
@A00721:190:HGJW7DSXY:4:2266:16161:16172\_1:N:0:TCTGCAAG+GCTGCACT  
ATTTTAGGAAACGTCGCGAAAAGAAAGTTCATGAGGATGTCTTGGTCGAAAAATATCGCCGGGAACCT  
CTAATAGAGGATCCTGATGACATTATTTCAACGGATACCGATCTCAGTTCTACCACAGAAACCGTCTC  
AGG

+  
FF,FFFF::FFFFFF,FF,FF:FFFFFFFFFFFF:FFF:FFFF:FFFFFFFF:FFFFFF, :FFFFFF  
FFFFFFFFFFFFFFFFFFFF:FFFFFF:FFFF,FFFFFFFFFFFF:FFFFFF, :FFFFFF:FFFFFFFF  
,FF  
@A00721:190:HGJW7DSXY:4:1361:13024:2253\_1:N:0:TCTGCAAG+GCTGCACT  
TAGAGAAAGACGACCTTCTTGTGGGGACTGAGACCTCTGAATTTTCAGGGTGGCCTGATGAGGACGTT  
GAAAGGGATAATTTCAACTCTGAGACTTCTAAGAGTGTTCAAAAGACCAGAAACGTAACAAGAAGAA  
TAA  
+  
FFFFFFFFFFFFFFFFFFFFFFFFFFFFFFFFFFFFFFFFFFFFFFFFFFFFFFFFFFFFFFFFFFFFFFFF  
FFFFFFFFFFFFFFFFFFFFFFFFFFFFFFFFFFFFFFFFFFFFFFFFFFFFFFFFFFFFFFFFFFFFFFFF  
FFF  
@A00721:190:HGJW7DSXY:4:1666:21820:1861\_2:N:0:TCTGCAAG+GCTGCACT  
GAACAGCTGATTCTTATTGCATGAACGTCGCTGAGGTCAAACCTGTGGACGTTCTTTTCATCGACGAA  
TTATTCATGATTCACGCTGGTCAGACCCTTTTTCTTACACATCTACTT  
+  
FFFFFFFFFFFFFFFFFFFFFFFFFFFFFFFFFFFFFFFFFFFFFFFFFFFFFFFFFFFFFFFFFFFFFFFF  
FFFFFFFFFFFFFFFFFFFFFFFFFFFFFFFFFFFFFFFFFFFFFFFFFFFFFFFFFFFFFFFFFFFFFFFF  
@A00721:190:HGJW7DSXY:4:2405:29252:32236\_1:N:0:TCTGCAAG+GCTGCACT  
CTACTTCAACATCAACGACATCATTCTTGATGAGTGTGCTTCTTATCGAAGTCTCAGTTATCGCTGCC  
CGGCCGACGTTTGTGCGGAACCTCTCAGAGGTTTACGGCAGAAAAATTTCTCCTGCTTGTAATTCGAGA  
GAG  
+  
:FF:FFFF:FFFF,FFFFFFFFFFFFFFFF:FFFFFFFFFFFFFFFFFFFFFFFFFFFFFFFFFFFFF  
FFFFFFFFFFFFFFFF:F:FFFFFFFF:FFFFFFFFFFFFFFFFFFFF:FFFF:FFFFFFFFFFFFF  
FFF  
@A00721:190:HGJW7DSXY:4:1105:15998:17331\_1:N:0:TCTGCAAG+GCTGCACT  
CTCTTATATCGAGGCTATCGAGGACGATGAGTATCTTGAAGTTGTTGACGACAAGCCTCAAGAGGGTA  
GAGGACCACCTGGATCTTCTACTGTCTCTGCCTTCCAAGATTTCTTAGAAGAGGTTATTCTGGAACC  
ACC  
+  
:FF,,FFFF:FF:FFFFFFFF:FFFFFFFFFFFFFFFFFFFF:FFFFFFFF:FFFFFF,FFFFFF:F  
FFFFFFFF:FFFFFFFFFFFFFFFF:F:FFFFFF: :F:FFFF:,FFFFFFFF, F:FFFFFFF  
F::  
@A00721:190:HGJW7DSXY:4:2172:22101:25426\_2:N:0:TCTGCAAG+GCTGCACT  
TTGAGCCGCGTAGTCAGCGCTTTAGCTGTATCATCAGTCAGAGTATACCCGATAGGGTACCGAGTCT  
CCAAGAGAATATTTATTCTTATGAGGCTCGAACTTCAACGTTTTTAC  
+  
FFFFFFFFFFFFFFFFFFFFFFFFFFFFFFFFFFFF:FFFFFFFFFFFFFFFFFFFFFFFFFFFFFFFF  
FFFFFFFF,FFFFFFFFFFFFFFFFFFFFFFFFFFFFFFFFFFFFFFFFFFFFFFFF  
@A00721:190:HGJW7DSXY:4:1261:30698:2581\_2:N:0:TCTGCAAG+GCTGCACT  
TATTATGACCTTGAAAGTTTTCGGCTGTGGTTGTGCTGGGACGATTCCATTCTGTTTTCAAAGAC  
TCCAATAACTGATCATTCTGATCATATGATTTTGACAATGGTTTCGA  
+  
FFFFFFFFFFFFFFFFFFFFFFFFFFFFFFFFFFFF:FFFFFFFFFFFFFFFFFFFFFFFFFFFFF  
FFFFFFFFFFFFFFFFFFFFFFFFFFFFFFFFFFFF:FFF:FFFFFFFF  
@A00721:190:HGJW7DSXY:4:1570:31322:3474\_2:N:0:TCTGCAAG+GCTGCACT  
GTGGAGGGAGTTCTTGAAGCATCCCGACCTTTCCTTGTGAAAATTTTGATGCGGTTTCATAAGATTAT  
CAGTAATCCTGATTCTACTACGATTTCATGGACCTTCCATCCTGTACC  
+  
FFFFFFFFFFFFFFFFFFFF:FFFFFFFFFFFFFFFF:FFFFFFFFFFFF:FFFFFFFFFFFFFFFFFFFF  
FFFFFFF:FFFFFFFFFFFF:FFFF,FFFFFFFFFFFFFFFF, :  
@A00721:190:HGJW7DSXY:4:2143:3595:20807\_1:N:0:TCTGCAAG+GCTGCACT  
AAAGGCGAACTTTGGAATTTGAAGCTCAGGTGAAGCACACGTTTGACCGTGACGAAGTGTGGTGT

TCTTGATCTACGTTACGGATATACTCTCCTTGAGTTCACCTCGTAAGGACACTACCACTTATTACGATA  
TTT

+

FFFFF,:F:FFFFFFFFFFFFFFFF:FFFFFFFFFFFFFFFF:FFFFF,:F:FFFF,FFFFF:FFFFFFFFFFFFF  
F,FFFFFFFFFFFFFFFF:FFFFFFFFF:FF,FFFFFFFFF:FFFFFFFFFFFFFFFFFFFFFFFFF,FF,FF  
FFF

@A00721:190:HGJW7DSXY:4:1553:18367:22435\_1:N:0:TCTGCAAG+GCTGCACT  
TTTTCGAATAGTGATAGCCACCCGCCTTACAGAGGGGAGCAGCATGACCATAATTGGTATTGACTTT  
GGTACCACCTTTTCTACTGTCTGTCTCGCCTCTTCGAATGAAGTTTAAATGCTTAACAACAATGATAG  
TGA

+

FFFFFFFFFFFFFFFFFFFFFFFFFFFFFFFFFFFFFFFF:FFFFFFFFFFFFFFFFFFFFFFFFFFFFFFFF  
FFFFFFFFFFFFFFFFFFFFFFFFFFFFFFFFFFFFFFFFFFFFFFFFFFFFFFFFFFFFFFFFFFFFFFFF  
FFF

@A00721:190:HGJW7DSXY:4:2108:23854:25895\_2:N:0:TCTGCAAG+GCTGCACT  
TAATGATGACACTATTGTTTATGGATATGATGCTATTACTCATGATGGTTACGGTCAGGGAGGATTCT  
CAGTTTACAAGGACCTTAAGCGATGGATCGGGGTTAATTCTAAAACAT

+

FFFFFFFFFFFFFFF:FFFFFFFFFFFFFFFFFFFFFFFFFFFFFFFFFFFFFFFFFFFFFFFFFFFFFFFF  
FFFFFFFFF:FFFFFFFFFFFFFFFFFFFFFFFFFFFFFFFFFFFFFFFFFFFFFFFF:FFFFF

@A00721:190:HGJW7DSXY:4:2504:32497:34162\_1:N:0:TCTGCAAG+GCTGCACT  
ACGCAAAGATATTTTCATGAAACTACAGAGGAACGTACCGGATTACCTGTCTTTCATATTATGAATGA  
ACCTTCGGCCGCTCTCTTTGCTTCGATGTTGGATGTCAAGAAGGGTTCAGAATGGGATTCTACGTAG  
TTT

+

FFF:FFFFFFFFF:FFFFFFFFFFFFFFFFFFFFFFFFFFFFFFFFFFFFFFFFFFFFFFFFFFFFFFFF  
FFFFFFFFFFFFFFFFFFFFFFFFFFFFFFFFFFFFFFFFFFFFFFFFFFFFFFFFFFFFFFFFFFFFFFFF  
FFF

@A00721:190:HGJW7DSXY:4:1133:10908:22169\_1:N:0:TCTGCAAG+GCTGCACT  
CTTGGAACGAAGGCGACCTTCCGGAGTTTTTACGGGATCCGGAATGTTCTGTCTATATTAGGTGAAGC  
GAAATACGATTTCAACGTCAACGTTACCGAGTTTCGTTTCGTACCTTGATGCTGACTTTCGTCAAT  
ATG

+

FFFFFFFFFFFFFFFFFFFFFFFFFFFFFFFFFFFFFFFFFFFFFFFFFFFFFFFFFFFFFFFFFFFFFFFF:  
FFFFFFFFF:FFFFFFFFFFFFF:FFFFFFFFFFFFFFFFFFFFFFFFFFFFFFFFFFFFFFFFFFFFFFFF  
FFF

@A00721:190:HGJW7DSXY:4:1128:29324:17957\_1:N:0:TCTGCAAG+GCTGCACT  
TACGATACAAATGATAACTTCTAATTTACGTTTGCTACTCAGAGCTGGTCTCTCAGCAAAGGGATGC  
ATGGTGTATCTCCTCAGGAGTCCCGGCATTGATAATAATGACGAGACTTTCGTCAATCGCTGCA  
TAT

+

FFFFFFFFFFFFFFFFFFFFFFF:FFFFFFFFF:FFFFFFFFFFFFFFFFFFFFFFFFFFFFFFFFFFFF  
FFFFFFFFFFFFFFFFFFFFFFFFFFFFFFFFFFFFFFFFFFFFFFFFFFFFFFFFFFFFFFFFFFFFFFFF  
FFF

@A00721:190:HGJW7DSXY:4:1311:3857:2033\_1:N:0:TCTGCAAG+GCTGCACT  
GTCAACACTAGTTCGAGTGCTGCTTTGGATTACGATGACGTGAGAATAGGTGAAGGGATAGTTTTTAC  
CTCGACCAACATTAAGGCGGCGGCGACTAATCTTAAAGCTTACCCAAAATGAAGGACACTTCGAAAC  
TGA

+

FF:FFFFF:FFFFFFFFFFFFFFFFFFFFFFFFFFFFFFFFFFFFFFFFFFFFFFFFFFFFFFFFFFFF  
FFFFFFFFFFFFFFFFFFFFFFFFFFFFFFFFFFFFFFFFFFFFFFFFFFFFFFFFFFFFFFFFFFFFFFFF  
FFF

@A00721:190:HGJW7DSXY:4:2551:10800:29622\_1:N:0:TCTGCAAG+GCTGCACT  
TTGCAGAGTGACTGGAGTTCAGACGTGTGCTCTTCCGATCTTCAAGCTTGTCTTAAGACTGCAGA





FFFFFFFFFFFFFFFFFFFFFFFFFFFFFFFFFFFFFFFFFFFFFFFFFFFFFFFFFFFFFFFFFFFFFFFF  
FFF

@A00721:190:HGJW7DSXY:4:1449:27751:18865\_1:N:0:TCTGCAAG+GCTGCACT  
GCAGAATAACCTTCCCAAATCTAGATCTGCACAGAAGAAGGCTGAAGGTCGTTACCGGACGACCACTC  
AAAGGAAACGGGCTGTTGCCAGAGGAAAGCAGCGACCACCGAGGTCGCTCGTAACATTGACGGCAGT  
CCC

+  
FFFFFFFFFFFFFFFFFFFFFFFF,FFFF,FFFFFFFFFFFFFFFFFFFFFFFFFFFFFFFFFFFFFFFF:FFFFFF  
FF:FFFF:FFFFFFFFFFFFFFFFFFFFFFFFFFFFFFFFFFFFFFFFFFFFFFFFFFFFFFFFFFFFFFFF  
FFF

@A00721:190:HGJW7DSXY:4:1618:8449:18223\_2:N:0:TCTGCAAG+GCTGCACT  
GTCACATTCACTCCCATGCCAATCAATGATGTGACTATACAGTTCGGCCATTCAAGAGTGGTCA  
ATACGTCGTGGGAGGTACTGAAGCCTTCCCCTCCGCTGGCAGCAAGAA

+  
FFFFFFFFFFFFFFFFFFFFFFFFFFFFFFFFFFFFFFFFFFFFFFFFFFFFFFFFFFFFFFFFFFFFFFFF  
FFFFFFFFFFFFFFFFFFFFFFFFFFFFFFFFFFFFFFFFFFFFFFFFFFFFFFFFFFFFFFFF

@A00721:190:HGJW7DSXY:4:2420:24035:26772\_1:N:0:TCTGCAAG+GCTGCACT  
GTCTCTAAGTCTACCAGGAAGAGGGGAAATGTCCCCAAACTGAGAAGAATAAAGGGAAAGGTCCATC  
AGGACCTAAGAAGGGGAAATTACCCCTAATTCTGAAGGAAGATCTCCACCATCTGGGGTTGGAATA  
AGA

+  
FFFFFFFFFFFFFFFFFFFFFFFF:FFFFFFFFFFFFFFFFFFFFFFFF,FFFF,:FFFFFFFF:FFFF  
FFFFFFFFFFFFFFFFFFFFFFFF:FFFFFFFFFFFFFFFFFFFFFFFFFFFFFFFFFFFFFFFFFFFFFFFF  
FFF

@A00721:190:HGJW7DSXY:4:1608:28546:4742\_1:N:0:TCTGCAAG+GCTGCACT  
CTACGAAGTCGCTGAAGGCGGCTTGGGTCAATTAAGGGTAGCTGTAAAGTTGCGCCTGCCGACCCATC  
TTTGAGACCAAGACTCTCTACAGTAGGTCGTGCCTACTATGAGCAAATCTGTTGAATTGCTCACTGA  
GGA

+  
FFFFFFFFFFFFFFFFFFFFFFFF:FFFFFFFFFFFFFFFF:FFFFFFFFFFFFFFFF:FFFFFF  
FFFFFFFFFFFFFFFFFFFF,F,FFFFFFFFFFFFFFFFFFFFFFFFFFFFFFFFFFFFFFFF:FFFF  
FFF

@A00721:190:HGJW7DSXY:4:2548:20726:5259\_1:N:0:TCTGCAAG+GCTGCACT  
ACTTTTGGCTACTGGCGACAACTGAGAGCAGTCGCTGGGGAAAGAGAATTGCGTGGGTGAAGGCCG  
ACGCTTCGAGCTTGAGTGTGACGAGGCCGGTGACGTTTTTGTCAACGGCGTTTGGAGGATTTATCCG  
CGC

+  
FFFFFFFFFFFFFFFFFFFFFFFFFFFFFFFFFFFFFFFFFFFFFFFFFFFFFFFFFFFFFFFFFFFFFFFF  
FF:FFFFFFFFFFFFFFFFFFFFFFFFFFFFFFFFFFFFFFFFFFFFFFFFFFFFFFFF:F:FFFFFF  
FFF

@A00721:190:HGJW7DSXY:4:1454:32940:21057\_1:N:0:TCTGCAAG+GCTGCACT  
CGAAGATCCCCTATGGAGTCTGAAGGACTTAGGTTGGCATATTTATGCCGACGATAATAAGCATGTC  
ACCCTTAAGCACCGAGGTAAGCTCGGGACTTACAAGAGAGAGTGTGAGAGAGTCGCTCTCACTATTTT  
TGC

+  
FFFFFFFFFFF:FFFFFFFFFFF,FFFFFFFFFFF:FFFFFF:FFFFFFFFFFF,FFFFFFFFFFF:F  
FFFFFF,FFFFFFFFFFFFFFFFFFF,:FFF:FFFFFF:FFFFFF:FFFFFF:FFFF,FFFF:F  
,FF

@A00721:190:HGJW7DSXY:4:2633:14190:22279\_1:N:0:TCTGCAAG+GCTGCACT  
TTTCCTCCGTCATTGGGGATTTGATGTGAGAAGGTGGAAGGTGTCAAGGTCCTTCTTCATGCTGATC  
TTTCAGGACCTAATCACATCATGATTGATAGTTACGGCTCGTATCGAGTTGGAGGGAGGAAGTTCTCC  
GAA

+  
:FFFF:FFF:FFF:F,FFFFFFFFFFFFFFFFFFFFFFFF:FFFFFFFFFFF:FF:FFFFFF:FFFF



@A00721:190:HGJW7DSXY:4:1272:4417:2628\_1:N:0:TCTGCAAG+GCTGCACT  
TGAGAAGTGTGCTTTACAAGGAGTTAGACTCTTCTTCAAGTTTTTAGATCTTCTTGATAATCTTAAAG  
AAAAATTTTCGAATAAACTAATGAGAGGTATAGGCTTAGTCAAGTCTGTACTTACATTCTTTACGCCA  
GAT

+

FF:FF,FFFFFFFFFFFFFFFF:FFFFFFFFFFFFFFFF:FFFFFFFFFFFFFFFF  
FFFFFFFFFFFFFFFF:FFFFFF:FFFFFFFFFFFFFFFF:FFFFFFFFFFFFFFFF:FFFFFFFF  
FFF

@A00721:190:HGJW7DSXY:4:2672:13729:20322\_1:N:0:TCTGCAAG+GCTGCACT  
GATCTTGCAGAGTGAAGTTCAGACGTGTGCTCTTCCGATCTCTAGAGTCCAAGGACGTTTCCGT  
CGGAGGATGACAGGTGGGAGACCGCTCAATAACACTCTATTGAATCCCTTTCCACGATGAAAGCTCT  
TT

+

FFFFFFFFFFFFFFFFFFFFFFFFFFFFFFFFFFFFFFFFFFFFFFFFFFFFFFFFFFFFFFFF  
FFFFFFFFFFFFFFFFFFFFFFFFFFFFFFFFFFFFFFFFFFFFFFFFFFFFFFFFFFFFFFFF  
FF

@A00721:190:HGJW7DSXY:4:2420:22580:28541\_1:N:0:TCTGCAAG+GCTGCACT  
ATTTTAGGAAACGTCGCGAAAAGAAAGTTCATGAGGATGTCTTGGTCGAAAAATATCGCCGGGAACCT  
CTAATAGAGGATCCTGATGACATTATTTCAACGGATACCGATCTCAGTTCTACCACAGAAACCGTCTC  
AGG

+

FFFF:FF,FFFFFFFFFFFFFFFFFFFFFFFFFFFFFFFFFFFFFFFFFFFFFFFFFFFFFFFF  
FFFFFFFFFFFFFFFFFFFFFFFFFFFFFFFFFFFFFFFFFFFFFFFFFFFFFFFF:FFFFFFFF  
FFF

@A00721:190:HGJW7DSXY:4:2665:10348:28682\_1:N:0:TCTGCAAG+GCTGCACT  
TAGAGAAAGACGACCTTCTGTGGGACTGAGACCTCTGAATTTTCAGGGTGCCCTGATGAGGACGTT  
GAAAGGGATAATTTCAACTCTGAGACTTCTAAGAGTGTTCAAAAGACCAGAAACGTAACAAGAAGAA  
TAA

+

FFFFFFFFFFFFFFFFFFFFFFFFFFFFFFFF:FFFFFFFFFFFF:FFFFFFFFFFFFFFFF  
FFFF:FFFFFFFFFFFFFFFFFFFFFFFF,FFFFFFFFFFFF:FFFFFFFFFFFFFFFF  
FFF

@A00721:190:HGJW7DSXY:4:2119:14687:20760\_2:N:0:TCTGCAAG+GCTGCACT  
GAACAGCTGATTCTTATTGCATGAACGTCGCTGAGGTCAAACCTGTGGACGTTCTTTTCATCGACGAA  
TTATTCATGATTCACGCTGGTCAGACCCTTTTCTTACACATCTACTT

+

FFFFFFFFFFFFFFFFFFFFFFFFFFFFFFFF:FFFFFFFFFFFF:FFFFFFFF  
FFFFFFFFFFFFFFFFFFFFFFFFFFFFFFFFFFFFFFFFFFFFFFFFFFFFFFFF

@A00721:190:HGJW7DSXY:4:1331:27823:7122\_2:N:0:TCTGCAAG+GCTGCACT  
TACTTCAACATCAACGACATCATTCTTGATGAGTGTGTTCTTATCGAAGTCTCAGGTATCGCTGCCC  
GGCCGACGTTTGTGCGGAACCTCTCAGAGGTTTACGGCAGAAAAATTTC

+

,F:,FFFFFFFF:F,F:,FF,FF,FFF:F:FFFF,FFF:,F,,FF,F:F:F:,FF:F,F,FFFF  
,FFF,FF:,FFFF,FF:,FF,:,:::FF:FFF:FF:FFFFFF,FF:

@A00721:190:HGJW7DSXY:4:1168:27380:26428\_1:N:0:TCTGCAAG+GCTGCACT  
CTCTTATATCGAGGCTATCGAGGACGATGAGTATCTTGAAGTTGTTGACGACAAGCCTCAAGAGGGTA  
GAGGACCACCTGGATCTTCTACTGTCTCTGCCTTCCAAGATTTCTTAGAAGAGGTTATTCTTGAACC  
ACC

+

FFF:FFFFFFFFFFFFFFFFFFFFFFFFFFFFFFFFFFFFFFFFFFFFFFFFFFFFFFFF  
FFFFFFFFFFFFFFFFFFFFFFFFFFFFFFFF:FFFFFFFFFFFFFFFF  
FFF

@A00721:190:HGJW7DSXY:4:2172:22336:27367\_2:N:0:TCTGCAAG+GCTGCACT  
TTGAGCCGCGTAGTCAGCGCGTTTAGCTGTATCATCAGTCAGAGTATACCCGATAGGGTACCGAGTCT

+

+

+

+

+

+

+

 $+$ [illegible]

+

 $+$  $+$ 

+

+

 $+$ 

+

[illegible]

@A00721:190:HGJW7DSXY:4:2331:9019:21339\_1:N:0:TCTGCAAG+GCTGCACT  
CAAAAAGTTGGAAGAGGTCTATGATATTTATTTTACTTATACTTTAAATAGCACCGATTATAACTTGA  
CTGTTGATAATATTACAATAGCTCTTTCTCAGAAGATTAGAGAAGTAACCGGTGAACACGTCGGTAGC  
ATT

+  
FFFFFFFFFFFF:F:FFFFFFFFFFFFFFFFFFFFFFFFFFFFFFFFFFFFFFFFFFFFFFFFFFFFFFFF  
F,F:FFFFF:FFFFFFFFFFFFFFFFFFFFFFFFFFFFFFFFFFFFFFFFFFFFFFFFFFFFFFFFFFFF  
:FF

@A00721:190:HGJW7DSXY:4:2437:18765:30389\_2:N:0:TCTGCAAG+GCTGCACT  
ACCTGAACCTTTACATTTTAAATGGTATGGTATAATGTGTCTTACAAATAGAACCTTCACTCTCGGTAA  
TGAGAGTGTATTCTTAATATTCTAGTAACCGCTATGTGGGCATTACT

+  
FFFFFFFFFFFFFFFFFFFFFFFFFFFFFFFFFFFFFFFFFFFFFFFFFFFFFFFFFFFFFFFFFFFFFFFF  
FFFFFFFFFFFFFFFFFFFFFFFFFFFFFFFFFFFFFFFFFFFFFFFFFFFFFFFFFFFFFFFFFFFFFFFF

@A00721:190:HGJW7DSXY:4:2676:8486:9925\_1:N:0:TCTGCAAG+GCTGCACT  
ATTCAATAGCTTTAGTATTATTTACTATCGCCTTTATTGAAAATTGTATAAGAGTTAATTGCTTACAC  
AAAAGTGACGCGCGAAGGAATCTTAATTGATTGAAGCTAGGCGTTGGGGAGAATGAAGTCCGCTTCC  
CGG

+  
FFFFFFFFFFFFFFFFFFFFFFFFFFFFFFFFFFFFFFFFFFFFFFFFFFFFFFFFFFFFFFFFFFFFFFFF  
FFFFFFFFFFFFFFFFFFFFFFFFFFFFFFFFFFFFFFFFFFFFFFFFFFFFFFFFFFFFFFFFFFFFFFFF  
FFF

@A00721:190:HGJW7DSXY:4:1453:22724:9189\_1:N:0:TCTGCAAG+GCTGCACT  
GCAGAATAACCTTCCCAAATCTAGATCTGCACAGAAGAAGGCTGAAGGTCGTTACCGGACGACCACTC  
AAAGGAAACGGGCTGTTGCCAGAGGAAAGCAGCGACCACCGAGGTCGCTCGTAACATTGACGGCAGT  
CCC

+  
FFFFFFFFFFFF:FFFFFFFFF,:F:FFFFFFFFFFFFFFFFFFFFFFFFFFFFFFFFFFFFFFFFFFFF  
FF,FFFFFFFFFFFFFFFFFFFFFFFFFFFFFFFFFFFFFFFFFFFFFFFFFFFFFFFFFFFFFFFFFFFF  
FFF

@A00721:190:HGJW7DSXY:4:1662:23421:14058\_2:N:0:TCTGCAAG+GCTGCACT  
GTCACATTCACTCCCATGCCAATCAATGATGTGACTATACAGTTCGGCCATTTCAAGAGTGGTCA  
ATACGTCGTGGGAGGTACTGAAGCCTTCCCCTCCGCTGGCACGAAGAA

+  
FFF:FFFFFFFFFFFFFFFFFFFFFFFFFFFFFFFFFFFFFFFFFFFFFFFFFFFFFFFFFFFFFFFFFFFF  
FFFFFFFFFFFFFFFFFFFFFFFFFFFFFFFFFFFFFFFFFFFFFFFFFFFFFFFFFFFFFFFFFFFFFFFF

@A00721:190:HGJW7DSXY:4:2439:23077:22952\_1:N:0:TCTGCAAG+GCTGCACT  
GTCTCTAAGTCTACCAGGAAGAGGGGAAATGTCCCCAAACTGAGAAGAATAAAGGGAAAGGTCCATC  
AGGACCTAAGAAGGGGAAATTACCCCTAATTCTGAAGGAAGATCTCCACCATCTGGGGTTGGAATA  
AGA

+  
FFFFFFFFFFFFFFFFFFFFFFFFFFFFFFFFFFFFFFFFFFFFFFFFFFFFFFFFFFFFFFFFFFFF:F,FFFFF:FFFFFFFFFFFF  
FFFFFFFFFFFFFFFFFFFF:F:FFFFFFFFFFFFFFFFFFFFFFFFFFFFFFFFFFFFFFFFFFFFFFFFFFFF  
FFF

@A00721:190:HGJW7DSXY:4:1608:31268:35383\_1:N:0:TCTGCAAG+GCTGCACT  
CTACGAAGTCGCTGAAGGCGGCTTGGGTCATTAAGGGTAGCTGTAAAGTTGCGCCTGCCGACCCCATC  
TTTGAGACCAAGACTCTCTACAGTAGGTCGTGCCTACTATGAGCAAATCTGTTGAATTGCTCACTGA  
GGA

+  
FFFFFFFFFFFFFFFFFFFFFFFFFFFFFFFFFFFFFFFFFFFFFFFFFFFFFFFFFFFFFFFFFFFF  
FFFFFFFFFFFFFFFFFFFF:FFFFFFFFFFFF:FFFFFFFFFFFFFFFFFFFFFFFFFFFFFFFFFFFF  
FFF

@A00721:190:HGJW7DSXY:4:2563:27407:16016\_1:N:0:TCTGCAAG+GCTGCACT  
ACTTTTGGCTACTGGCGACAACTGAGAGCAGTCGCTGGGGAAAGAGAATTGCGTGGGTTGAAGGCCG

ACGCTTCGAGCTTGAGTGTGACGAGGCCGGTGACGTTTTTGTCAACGGCGTTTGGAGGATTTTATCCG  
CGC

+

:FFF:FFF:FFFFFF:FFFF:FFFFFFFFFFFFFFFFFFFFFFFFFFFFFFFF:FFFFFFFFFFFFFFFFFFFF  
F:FFFFFFFFFFFFFFFF:FFFFFFFFFFFF,FFFFFFFFFFFFFFFFFFFFFFFFFFFFFFFF,FFFFFFFF  
FFF

@A00721:190:HGJW7DSXY:4:1469:11740:7889\_1:N:0:TCTGCAAG+GCTGCACT  
CGAAGATCCCCTATGGAGTCTTGAAGGACTTAGGTTGGCATATTTATGCCGACGATAATAAGCATGTC  
ACCCTTAAGCACCAGGTAAGCTCGGGACTTACAAGAGAGAGTGTGAGAGAGTCGCTCTCACTATTTT  
TGC

+

FFFFFFFF:FFFF:FFF:FFFFFFFFFFFFFFFFFFFFFFFFFFFFFFFFFFFFFFFF:FFFFFFF  
FFFFFF:FFFFFFFFFFFF:FFFFFFFFFFFFFFFFFFFFFFFFFFFFFFFFFFFFFFFFFFFFFFFFFFFF  
FFF

@A00721:190:HGJW7DSXY:4:2635:25934:31657\_1:N:0:TCTGCAAG+GCTGCACT  
TTTCCTCCGTCATTGGGATTTGCATGTGAGAAGGTGGAAGGTGTCAAGGGTCTTCTTCATGCTGATC  
TTTCAGGACCTAATCACATCATGATTGATAGTTACGGCTCGTATCGAGTTGGAGGGAGGAAGTTCTCC  
GAA

+

::FFFF:FFFFFFFFFFFFFFFFFFFFFFFFFFFFFFFFFFFFFFFFFFFFFFFF:FFFF:,FFFFFFFFFFFF  
FFFFFFFFFFFFFFFFFFFF:FFFFFFFFFFFFFFFFFFFFFFFFFFFFFFFFFFFFFFFFFFFFFFFFFFFF  
FFF

@A00721:190:HGJW7DSXY:4:1266:7997:7607\_2:N:0:TCTGCAAG+GCTGCACT  
GAAGGCTCTAGAGAAGATCTCACCACCTGGAGAAGGCAAGTGGAGAGTCCAGAAGTTGATGAAGAAG  
ATTATTTGAAGCAGGGGTACCCTTCCTAAGGTGGATGAGGGAGGTT

+

FFFFFFFFFFFFFFFFFFFFFFFFFFFFFFFFFFFFFFFFFFFFFFFFFFFFFFFFFFFFFFFF:FFFFFFF:  
FFFFFF:FFFFFFFFFFFFFFFFFFFFFFFFFFFFFFFFFFFFFFFFFFFFFFFFFFFF

@A00721:190:HGJW7DSXY:4:2148:26982:7513\_1:N:0:TCTGCAAG+GCTGCACT  
TAACCTTTGACTCAACTACTCCGATCAGATCCGGATGGTTTGATTGGTATGGACTACTCGACTTTTGAT  
CTGGAGTTGTCTAGGGTCATGGCAGATACTACCGATAAGGTGAAAAATATGCAGGTCAAAGATTCTGT  
AGC

+

FFFF,FFFFFFFFFFFFFFFFFFFFFFFFFFFFFFFFFFFFFFFFFFFFFFFFFFFFFFFF,FFFFFFFF  
FFFFFFFFFFFFFFFFFFFF,FFFFFFFFFFFFFFFFFFFFFFFFFFFFFFFFFFFFFFFFFFFFFFFFFFFF  
FFF

@A00721:190:HGJW7DSXY:4:1146:10728:22733\_1:N:0:TCTGCAAG+GCTGCACT  
TGATTCAAAACCTATCGTTGTCGTACCTTACAAGTTGAGGAGACTTTACAGCGGCTTATTGTCGCGC  
AGTTTCCAGAATTGCGGTTGAAGTTCACCCATTCTATCTTGAATGCTCACGCCGTCGCAGCCATATCG  
AGA

+

FFFFFFFFFFFFFFFFFFFFFFFFFFFFFFFFFFFFFFFFFFFFFFFFFFFFFFFFFFFFFFFFFFFF  
FFFFFFFFFFFFFFFFFFFFFFFFFFFFFFFFFFFFFFFFFFFFFFFFFFFFFFFFFFFFFFFFFFFF  
FFF

@A00721:190:HGJW7DSXY:4:2141:20302:18208\_1:N:0:TCTGCAAG+GCTGCACT  
TGATTGGGAACGTACCTACTCACGAGACGTCATGAAAGCTATCGGAGGGAAGCAAATGTTTCGTTCT  
GTTACAAGAACGCTTTGGATTGTGACCATAAAGCCTCAGTTGCGATAGCTGTAGAGGTATACGATATC  
TCT

+

FFFFFFFFFFFFFFFFFFFFFFFF:FFFFFFFFFFFFFFFFFFFFFFFFFFFFFFFFFFFFFFFFFFFF  
FFFFFFFFFFFFFFFFFFFFFFFFFFFFFFFFFFFFFFFFFFFFFFFFFFFFFFFFFFFFFFFFFFFF  
FFF

@A00721:190:HGJW7DSXY:4:1402:21079:20776\_2:N:0:TCTGCAAG+GCTGCACT  
ATAGATACGAGATACCTAGAGAAGGTCGCAGCGATCTTACTCGTTATCGGAGCTAAGAAGAAGACTTT

GGGTACACGTTATGCTCGCAAACCTTAACGTTAGTACCGGAGGTGATCT  
+  
FFFFFFFFFFFFFFFFFFFFFFFFFFFFFFFFFFFFFFFFFFFFFFFFFFFFFFFFFFFFFFFFFFFFFFFF  
FFFFFFFFFFFF,FFFFFFFFFFFFFFFFFFFFFFFFFFFFFFFFFFFFFFFFFFFFFFFFFFFFFFFF  
@A00721:190:HGJW7DSXY:4:2275:1425:33896\_2:N:0:TCTGCAAG+GCTGCACT  
CGCCTACGGTGACTTTATGGACAAGATGCAAGTTCTTGGGAAATACTTGTTCCCTTTTAGGTTTAG  
TAGGTGATCTTGACGTCGATTCTTTGTATAGGGAGTGTGAGAAGACAA  
+  
FFFFFFFFFFFFFFFFFFFFFFFFFFFFFFFFFFFFFFFFFFFFFFFFFFFFFFFFFFFFFFFFFFFFFFFF  
FFFFFFFFFFFFFFFFFFFFFFFFFFFFFFFFFFFFFFFFFFFFFFFFFFFFFFFFFFFFFFFFFFFFFFFF  
@A00721:190:HGJW7DSXY:4:2667:29658:8328\_1:N:0:TCTGCAAG+GCTGCACT  
TCTTGAAAACCAAGTTAAGAAGGAGGCTGATCATGGAGTCTTGTACCTTCTGTCAAACCTTCGAGGTT  
CAGCTACGAGAGGTGATCCCGGATGTGGATTGAAGGCTGGCTCTAAGGGAGACTCCTTCTTTTGAAT  
GTT  
+  
FFFFFFFFFFFFFFFFFFFFFFFFFFFFFFFFFFFFFFFFFFFFFFFFFFFFFFFFFFFFFFFFFFFFFFFF  
FFFFFFFFFFFFFFFFFFFFFFFFFFFFFFFFFFFFFFFFFFFFFFFFFFFFFFFFFFFFFFFFFFFFFFFF:  
FFF  
@A00721:190:HGJW7DSXY:4:1272:4544:4476\_1:N:0:TCTGCAAG+GCTGCACT  
TGAGAAGTGTGCTTTACAAGGAGTTAGACTCTTCTTCAAGTTTTTAGATCTTCTTGATAATCTTAAAG  
AAAAATTTTCGAATAAACTAATGAGAGGTATAGGCTTAGTCAAGTCTGTACTTACATTCTTTACGCCA  
GAT  
+  
FFFFFFFFFFFFFFFFFFFFFFFFFFFFFFFFFFFFFFFFFFFFFFFFFFFFFFFFFFFFFFFFFFFFFFFF  
FFFFFFFFFFFFFFFFFFFFFFFFFFFFFFFFFFFFFFFFFFFFFFFFFFFFFFFFFFFFFFFFFFFFFFFF  
FFF  
@A00721:190:HGJW7DSXY:4:1170:11695:9533\_1:N:0:TCTGCAAG+GCTGCACT  
TACCTTTTGGAGGTCCAGGAACCTTTACTCCTAGTGTCTTTTCTAGAGTCCAAGGACGTTTCCGTCGG  
AGGATGACAGGTGGGAGACCGCTCAATAAACTCTATTGAATCCCTTTTCCACGATGAAAGCTCTTA  
TGA  
+  
FFFFF:FFFFFFFFFFFFFFFFFFFFFFFFFFFFFFFFFFFFFFFFFFFFFFFFFFFFFFFFFFFFFFFF  
FFFFFFFFFFFFFFFFFFFFFFFFFFFFFFFFFFFFFFFFFFFFFFFFFFFFFFFFFFFFFFFFFFFFFFFF:  
FFF  
@A00721:190:HGJW7DSXY:4:2442:12906:19429\_1:N:0:TCTGCAAG+GCTGCACT  
ATTTTAGGAAACGTCGCGAAAAGAAAGTTCATGAGGATGTCTTGGTCGAAAAATATCGCCGGGAACCT  
CTAATAGAGGATCCTGATGACATTATTTCAACGGATACCGATCTCAGTTCTACCACAGAAACCGTCTC  
AGG  
+  
FFFFFFFFFFFFFFFFFFFFFFFFFFFFFFFFFFFFFFFFFFFFFFFFFFFFFFFFFFFFFFFFFFFFFFFF  
FFFFFFFFFFFFFFFFFFFFFFFFFFFFFFFFFFFFFFFFFFFFFFFFFFFFFFFFFFFFFFFFFFFFFFFF  
FFF  
@A00721:190:HGJW7DSXY:4:2639:4698:3302\_2:N:0:TCTGCAAG+GCTGCACT  
AAAGACGACCTTCTTGTGGGACTGAGACCTCTGAATTTTCAGGGTGCCCTGATGAGGACGTTGAAAG  
GGATAATTTCAACTCTGAGACTTCTAAGAGTGTTCAAAAGACCAGAA  
+  
FFFFFFFFFFFFFFFFFFFFFFFFFFFFFFFFFFFFFFFFFFFFFFFFFFFFFFFFFFFFFFFFFFFFF:  
FFFFF,FFFFFFFFFFFFFFFFFFFFFFFFFFFFFFFFFFFFFFFFFFFFFFFFFFFFFFFF:  
@A00721:190:HGJW7DSXY:4:2261:1741:15749\_2:N:0:TCTGCAAG+GCTGCACT  
GAACAGCTGATTCTTATTGCATGAACGTCGCTGAGGTCAAACCTGTGGACGTTCTTTTCATCGACGAA  
TTATTCATGATTCACGCTGGTCAGACCCTTTTTCTTACACATCTACTT  
+  
:FFFFFFFFFFFFFFFFFFFFFFFFFFFFFFFFFFFFFFFFFFFFFFFFFFFFFFFFFFFFFFFF:  
FFFFFFFF:FFFFFFFF,FFFFFFFFFFFF,F:F:FFFFFFFFFFFFFFFF:F



$+$ 

@A00721:190:HGJW7DSXY:4:1430:16260:1626\_1:N:0:TCTGCAAG+GCTGCACT  
CTCTTATATCGAGGCTATCGAGGACGATGAGTATCTTGAAGTTGTTGACGACAAGCCTCAAGAGGGTA  
GAGGACCACCTGGATCTTCTACTGTCTCTGCCTTCCAAGATTTCTTAGAAGAGGTTATTCCTGGAACC  
ACC

+

@A00721:190:HGJW7DSXY:4:2211:14226:32424\_2:N:0:TCTGCAAG+GCTGCACT  
TTGAGCCGCGTAGTCAGCGCGTTTAGCTGTATCATCAGTCAGAGTATACCCGATAGGGTACCGAGTCT  
CCAAGAGAATATTTATTCTTATGAGGCTCGAAACTTCAACGTTTTTCAC

+

@A00721:190:HGJW7DSXY:4:1463:23375:8750\_2:N:0:TCTGCAAG+GCTGCACT  
TATTATGACCTTGGAAAGTTTTCGGCTGTGGTTGTCGCTGGGGACGATTCCATTCTGTTTTCAAAGAC  
TCCAATAACTGATCATTCTGATCATATGATTTTGGACAATGGTTTCGA

 $+$ 

@A00721:190:HGJW7DSXY:4:2106:29812:7122\_2:N:0:TCTGCAAG+GCTGCACT  
GTGGAGGGAGTTCTTGAAGCATCCCGACCTTTCCTTGTGAAATTTTGATGCGGTTTCATAAGATTAT  
CAGTAATCCTGATTCTACTACGGATTCATGGACCTTCCATCCTGTACC

+

@A00721:190:HGJW7DSXY:4:2367:22272:31610\_1:N:0:TCTGCAAG+GCTGCACT  
AAAGGCGAACTTTGGGAATTTGAAGCTCAGGGTGAAGCACACGTTTGACCGTGACGAACTGTGGTGT  
TCTTGATCTACGTTACGGATATACTCTCCTTGAGTTCACCTCGTAAGGACACTACCACTTATTACGATA  
TTT

+

@A00721:190:HGJW7DSXY:4:2113:3893:7138\_1:N:0:TCTGCAAG+GCTGCACT  
TTTTCGAATAGTGATAGCCACCCGCCTTACAGAGGGGCAGCAGCATGACCATAATTGGTATTGACTTT  
GGTACCACCTTTTCTACTGTCTGTCTCGCCTCTTCGAATGAAGTTTTAATGCTTAACAACAATGATAG  
TGA

 $+$ 

@A00721:190:HGJW7DSXY:4:2545:3088:15546\_2:N:0:TCTGCAAG+GCTGCACT  
TAATGATGACACTATTGTTTATGGATATGATGCTATTACTCATGATGGTTACGGTCAGGGAGGATTCT  
CAGTTTACAAGGACCTTAAGCGATGGATCGGGGTTAATTCTAAACAT

 $+$ [illegible]

@A00721:190:HGJW7DSXY:4:2578:21224:33739\_1:N:0:TCTGCAAG+GCTGCACT  
ACGCAAAGATATTTTCATGAAAACACAGAGGAACGTACCGGATTACCTGTCTTTTCATATTATGAATGA  
ACCTTCGGCCGCTCTCTTTGCTTCGATGTTGGATGTCAAGAAGGGTTCAGAATGGGATTCTACGTAG  
TTT

+

FFFFFFFFFFFFFFFFFFFFFFFFFFFFFFFFFFFFFFFFFFFFFFFFFFFFFFFFFFFFFFFFFFFFFFFF  
FFFFFFFFFFFFFFFFFFFFFFFFFFFFFFFFFFFFFFFFFFFFFFFFFFFFFFFFFFFFFFFFFFFFFFFF  
FFF

@A00721:190:HGJW7DSXY:4:1378:20094:1344\_1:N:0:TCTGCAAG+GCTGCACT  
CTTGGAACGAAGGCGACCTTCCGGAGTTTTTACGGGATCCGGAATGTTCTGTCTATATTAGGTGAAGC  
GAAATACGATTTTCAACGTCAACGTTACCGAGTTTCGTTTCGTACCTTGATGCTGACTTTCGTCAAT  
ATG

+

FF:FFFFFFFFFFFFFFFFFFFFFFFFFFFFFFFFFFFFFFFFFFFFFFFFFFFFFFFFFFFFFFFFFFFF  
FFFFFFFFFFFFFFFFFFFFFFFFFFFFFFFFFFFFFFFFFFFFFFFFFFFFFFFFFFFFFFFFFFFFFFFF  
FFF

@A00721:190:HGJW7DSXY:4:2236:4444:27101\_1:N:0:TCTGCAAG+GCTGCACT  
TACGATACAAATGATAACTTCTAATTTACGTTTGCTACTCAGAGCTGGTCTCTCAGCAAAGGGATGC  
ATGGTGTATCTCCTCAGGAGTCCCGGCATTTGATAATAATGACGAGACTTTCGTCATAATCGCTGCA  
TAT

+

FFFFFFFFFFFFFFFFFFFFFFFFFFFFFFFFFFFFFFFFFFFFFFFFFFFFFFFFFFFFFFFFFFFFFFFF  
FFFFFFFFFFFFFFFFFFFFFFFFFFFFFFFFFFFFFFFFFFFFFFFFFFFFFFFFFFFFFFFFFFFFFFFF  
FFF

@A00721:190:HGJW7DSXY:4:1338:3721:8563\_1:N:0:TCTGCAAG+GCTGCACT  
TGACTGGAGTTCAGACGTGTGCTCTTCCGATCTGATGACGTGAGAATAGGTGAAGGGATAGTTTTTAC  
CTCGACCAACATTAAGGCGGCGGCGACTAATCTTAAAGCTTCACCCAAAATGAAGGACACTTCGAAAC  
TGA

+

F,F::FF::FFF:FF:FFFF,FFFFFF,:FF:FF:FF,F:FF:FF,FFFF,F:F,FF:F,FFFFFF  
FFFFFF:FFFFFFFFF:FFF,,FFFFFFFFF:FFFFFFFFFFFFFFFFFFFFFFFF:F:FFF::F:F  
FFF

@A00721:190:HGJW7DSXY:4:1329:4770:20118\_1:N:0:TCTGCAAG+GCTGCACT  
GATTGGTTCGAACCCGTTGATGCTATGTCAGAAGAAGCTATTCAAGCTTGTGTTTTAAAGACTGCAGA  
GGCTGTCAAACAAGCCCAGACTCAAGGAGTCCAATCAAAGGTTTTGAATTTAGCTCAACTGGGGAGAC  
GTG

+

FFFFFFFFFFFFFFFFFFFFFFFFFFFFFFFFFFFFFFFFFFFFFFFFFFFFFFFFFFFFFFFFFFFFFFFF  
FFFFFFFFFFFFFFFFFFFFFFFFFFFFFFFFFFFFFFFFFFFFFFFFFFFFFFFFFFFFFFFFFFFFFFFF  
FFF

@A00721:190:HGJW7DSXY:4:1667:15049:8547\_1:N:0:TCTGCAAG+GCTGCACT  
TTACCAAATTCTTGGCTTTCAACGAAGTCTCTGATTTTATTAATCATTACTTTAACGATCTCTCGGTC  
ATTTACTCTGTACTTGATCTACGTCGTTTAACTGTCGGAACAACCTTTACTTAGAATGACTCTATCTT  
TTC

+

FFFFFFFFFFFFFFFFFFFFFFFFFFFFFFFFFFFFFFFFFFFFFFFFFFFFFFFFFFFFFFFFFFFFFFFF  
FFFFFFFFFFFFFFFFFFFFFFFFFFFFFFFFFFFFFFFFFFFFFFFFFFFFFFFFFFFFFFFFFFFFFFFF  
FFF

@A00721:190:HGJW7DSXY:4:2240:23728:36980\_1:N:0:TCTGCAAG+GCTGCACT  
CCAACCTCTGTTTAGTCTACCTGTTGTTATAATTTATTTTGTCTCAACACCAATATCAACGTGTATAA  
AGCTATTTTCCGTCCTTAACCTAATACACGATTATAACATCCGAACACGACTCGAAACCGAGACGCC  
GTA

+

F,::,F,F,,:FF::,,,::,F,,:::,FF,,,F,FF:::,::,,,F,,,F,,,F,

,,,,,FFFF:F,::F,F,F,,:,F,,F:,:::,:::,:::,F:,F,FFFFFFFFFFFFFFFFFFFF  
FFF

@A00721:190:HGJW7DSXY:4:1201:10945:5603\_1:N:0:TCTGCAAG+GCTGCACT  
AATGAGGTCAAAGCTCTATTTATTAAACGAAGTATTATCCGATTCTTCGAGGGTATCACTACCACTGA  
TCTGCCGACTTTAGTCAAGGAAGTCAATTCCTTCGATGTTTATATTTTCTATAAGGGAAAATAGCA  
ATA

+

F:FFFFFFFFFFFFFFFFFFFFFFFFFFFFFFFFFFFFFFFFFFFFFFFFFFFFFFFFFFFFFFFF  
FFFFFFFFFFFFFFFFFFFFFFFFFFFFFFFFFFFFFFFFFFFFFFFFFFFFFFFFFFFFFFFF  
FFF

@A00721:190:HGJW7DSXY:4:1432:26585:7639\_1:N:0:TCTGCAAG+GCTGCACT  
ATTTTAGAAGTCTTATTTTCAAGTCTCTCCGATCACCTTGGTGTGATCTCCCGAGGATCTTTTCAAT  
AAGATGTATGATGATAATCTACTATTTTAAATAGTGATATTCAGCGTATACTTGAATACTTTATCAA  
AGA

+

FFFFFFFFFFFFFFFFFFFFFFFFFFFFFFFFFFFFFFFFFFFFFFFFFFFFFFFFFFFFFFFF  
FFFFFFFFFFFFFFFFFFFFFFFFFFFFFFFFFFFFFFFFFFFFFFFFFFFFFFFFFFFFFFFF  
FFF

@A00721:190:HGJW7DSXY:4:2373:26060:26428\_1:N:0:TCTGCAAG+GCTGCACT  
CAAAAAGTTGGAAGAGGTCTATGATATTTATTTTACTTATACTTTAAATAGCACCGATTATACTTGA  
CTGTTGATAATATTACAATAGCTCTTCTCAGAAGATTAGAGAAGTAACCGGTGAACACGTCGGTAGC  
ATT

+

,FFFFF:FFF:FFFFFFFFFFFF:FFFF:FFF,FFFFFFFFF:FFFFFFFFF:FFF:F::FFFFFFFFF  
FFF:FFFFFF:F,,F,FFFFFFFFFFFFFFFFFFFFFFFF:FFFFFFF,FFF:FF::FFF:FF,FFF,FFF  
FFF

@A00721:190:HGJW7DSXY:4:2671:7735:21277\_2:N:0:TCTGCAAG+GCTGCACT  
ACCTGAAGTCTTACATTTTAAATGGTATGGTATAATGTGTCTTACAAATAGAACCTTCACTCTCGGTAA  
TGAGAGTGTATTCTTAATATTCTAGTAACCGCTATGTGGGCATTACT

+

F::F:F:F:FFFF:FF,FFFF:::F:,FFF,F:F,::FF:,FFFFFFFF:FFFFFFFF:,F:FF:F  
F:FFFF::FF:FF,FFFFFFFFF,F:FFFF,,FF,,,,,:FFFF:F

@A00721:190:HGJW7DSXY:4:2403:15971:1658\_2:N:0:TCTGCAAG+GCTGCACT  
TCAATAGCTTTAGTATTATTTACTATCGCCTTTATTGAAAATTGTATAAGAGTTAATTGCTTACACAA  
AAGTGACGCGCGAAGGAATCTTAATTGATTGAAGCTAGGCGTTGGGGA

+

FFFFF::FFFFFFFFFFFFFFFFFFFFFFFFFFFF,FFF,FFFFFFFFFFFF:FFFFFFFFFFFF:FFF:FFFF  
FFFFF::FFFFFFFF:FFFFFFF:,FFFFFFFFFFFFFFFF,FFFFFFFF

@A00721:190:HGJW7DSXY:4:1549:14597:35321\_1:N:0:TCTGCAAG+GCTGCACT  
GCAGAATAACCTTCCCAAATCTAGATCTGCACAGAAGAAGGCTGAAGGTCGTTACCGGACGACCACTC  
AAAGGAAACGGGCTGTTGCCAGAGGAAAGCAGCGACCACCGAGGTCGCTCGTAACATTGACGGCAGT  
CCC

+

FFFFFFFFFFFFFFFFFFFF:FFF,FFFFF:FFFFFFFFFFFF:FFFFFFFFFFFFFFFFFFFFFFFFFFFF  
FFFFFFFF:FFFFFFFFFFFFFFFFFFFFFFFFFFFFFFFFFFFFFFFFFFFFFFFFFFFFFFFFFFFF  
FFF

@A00721:190:HGJW7DSXY:4:2430:17852:1188\_2:N:0:TCTGCAAG+GCTGCACT  
GTCACATTCACTCCCATGCCAATCAATGATGTGACTATACAGTTCGGCCATTTCAAGAGTGGTCA  
ATACGTCGTGGGAGGTACTGAAGCCTTCCCCTCCGCTGGCACGAAGAA

+

FFFFFFFFFFFFFFFFFFFFFFFFFFFFFFFFFFFFFFFFFFFFFFFFFFFFFFFFFFFFFFFF  
FFFFFFFFFFFFFFFFFFFFFFFFFFFFFFFFFFFFFFFFFFFFFFFFFFFFFFFFFFFF

@A00721:190:HGJW7DSXY:4:2452:3857:16407\_1:N:0:TCTGCAAG+GCTGCACT  
GTCTCTAAGTCTACCAGGAAGAGGGGAAATGTCCCAAACTGAGAAGAATAAAGGGAAAGGTCCATC

AGGACCTAAGAAGGGGAAATTACCCCTAATTCTGAAGGAAGATCTCCCACCATCTGGGGTTGGAATA  
AGA

+

FFFFFF::FFFFFFFFFFFFFFFFFFFFFFFFFFFFFFFFFFFFFFFFFFFFFFFFFFFFFFFFFFFFFFFF  
FFFFFFFFFFFFFFFFFFFFFFFFFFFFFFFFFFFFFFFFFFFFFFFFFFFFFFFFFFFFFFFFFFFFFFFF  
FFF

@A00721:190:HGJW7DSXY:4:1618:25870:31579\_1:N:0:TCTGCAAG+GCTGCACT  
CTACGAAGTCGCTGAAGGCGGCTTGGGTCATTAAGGGTAGCTGTAAAGTTGCGCCTGCCGACCCCATC  
TTTGAGACCAAGACTCTCTACAGTAGGTCGTGCCTACTATGAGCAAATCTGTTGAATTCTGCACTGA  
GGA

+

FFFFFFFFFFFFFFFFFFFFFFFFFFFFFFFFFFFFFFFFFFFFFFFFFFFFFFFFFFFFFFFFFFFFFFFF  
FFFFFFFFFFFFFFFFFFFFFFFFFFFFFFFFFFFFFFFFFFFFFFFFFFFFFFFFFFFFFFFFFFFFFFFF  
FFF

@A00721:190:HGJW7DSXY:4:1321:4951:19022\_1:N:0:TCTGCAAG+GCTGCACT  
CTTTTGGCTACTGGCGACAACTGAGAGCAGTCGCTGGGAAAGAGAATTGCGTGGGTTGAAGGCCGA  
CGCTTCGAGCTTGAGTGTGACGAGGCCGGTGACGTTTTTGTCAACGGCGTTTGGAGGATTTTATCCGC  
GC

+

FFFF:FFFFFFFFFFFFFFFFFFFFFFFFFFFFFFFFFFFFFFFFFFFFFFFFFFFFFFFFFFFFFFFF  
FFFFFFFFFFFFFFFFFFFFFFFFFFFFFFFFFFFFFFFFFFFFFFFFFFFFFFFFFFFFFFFFFFFFFFFF  
FF

@A00721:190:HGJW7DSXY:4:1561:19976:26663\_1:N:0:TCTGCAAG+GCTGCACT  
CGAAGATCCCCTATGGAGTCTTGAAGGACTTAGGTTGGCATATTTATGCCGACGATAATAAGCATGTC  
ACCCTTAAGCACCGAGGTAAGCTCGGGACTTACAAGAGAGAGTGTGAGAGAGTCGCTCTCACTATTTT  
TGC

+

FFFFFFFFFFFFFFFFFFFFFFFFFFFFFFFFFFFFFFFFFFFFFFFFFFFFFFFFFFFFFFFFFFFFFFFF  
FFFFFFFFFFFFFFFFFFFFFFFFFFFFFFFFFFFFFFFFFFFFFFFFFFFFFFFFFFFFFFFFFFFFFFFF  
FFF

@A00721:190:HGJW7DSXY:4:1624:19750:27336\_1:N:0:TCTGCAAG+GCTGCACT  
CTCTTCCGATCTTTGGGATTTGATGTGAGAAGGTGGAAGGTGTCAAGGGTCTTCTTCATGCTGATC  
TTTCAGGACCTAATCACATCATGATTGATAGTTACGGCTCGTATCGAGTTGGAGGGAGGAAGTTCTCC  
GAA

+

FFFFFFFFFFFFFFFFFFFFFFFFFFFFFFFFFFFFFFFFFFFFFFFFFFFFFFFFFFFFFFFFFFFFFFFF  
FFFFFFFFFFFFFFFFFFFFFFFFFFFFFFFFFFFFFFFFFFFFFFFFFFFFFFFFFFFFFFFFFFFFFFFF  
FFF

@A00721:190:HGJW7DSXY:4:1273:19777:24846\_2:N:0:TCTGCAAG+GCTGCACT  
GAAGGCTCTAGAGAAGATCTCACCACCTGGAGAAGGCAAGTGGAGAGTCCAGAAGTTGATGAAGAAGG  
ATTATTTGAAGCAGGGGTTACCACTTCCTAAGGTGGATGAGGGAGGTT

+

FFFFFFF,FFFFFFFFFFFFFFFFFFFFFFFFFFFFFFFFFFFFFFFFFFFFFFFFFFFFFFFFFFFFFF  
F:FFFFFFFFFFFFFFFFFFFFFFFFFFFFFFFFFFFFFFFFFFFFFFFFFFFFFFFFFFFFFFFF  
@A00721:190:HGJW7DSXY:4:2171:28375:1376\_1:N:0:TCTGCAAG+GCTGCACT

TAACCTTTGACTCAACTACTCCGATCAGATCCGATGGTTTGATTGGTATGGACTACTCGACTTTTGAT  
CTGGAGTTGTCTAGGGTCATGGCAGATACTACCGATAAGGTGAAAAATATGCAGGTCAAAGATTCTGT  
AGC

+

FFFFFFFFFFFFFFFFFFFFFFFFFFFFFFFFFFFFFFFFFFFFFFFFFFFFFFFFFFFFFFFFFFFFFF  
FFFFFFFFFFFFFFFFFFFFFFFFFFFFFFFFFFFFFFFFFFFFFFFFFFFFFFFFFFFFFFFFFFFFFF  
FFF

@A00721:190:HGJW7DSXY:4:1509:20085:30170\_1:N:0:TCTGCAAG+GCTGCACT  
TGATTCAAAACCTATCGTTGTCGTACCTTACAAGTTGAGGAGACTTTACAGCGGCTTATTGTCGCGC

AGTTTCCAGAATTGCGGTTGAAGTTCACCCATTCTATCTTGAATGCTCACGCCGTCGCAGCCATATCG  
AGA

+

FFFFFFFFFFFFFFFFFFFFFFFFFFFFFFFFFFFFFFFFFFFFFFFFFFFFFFFFFFFFFFFFFFFFFFFF  
FFFFFFFFFFFFFFFFFFFFFFFFFFFFFFFFFFFFFFFFFFFFFFFFFFFFFFFFFFFFFFFFFFFFFFFF  
FFF

@A00721:190:HGJW7DSXY:4:2342:30481:15076\_1:N:0:TCTGCAAG+GCTGCACT  
TGATTGGGAACGTACCTACTCACGAGACGTCATGAAAGCTATCGGAGGGAAGCAAATGTTTCGTTCT  
GTTACAAGAACGCTTTGGATTGTGACCATAAAGCCTCAGTTGCGATAGCTGTAGAGGTATACGATATC  
TCT

+

FFFFFFFFFFFFFFFFFFFFFFFFFFFFFFFFFFFFFFFFFFFFFFFFFFFFFFFFFFFFFFFFFFFFFFFF  
FFFFFFFFFFFFFFFFFFFFFFFFFFFFFFFFFFFFFFFFFFFFFFFFFFFFFFFFFFFFFFFFFFFFFFFF  
FFF

@A00721:190:HGJW7DSXY:4:1458:28944:35180\_2:N:0:TCTGCAAG+GCTGCACT  
ATAGATACGAGATACCTAGAGAAGGTCGCAGCGATCTTACTCGTTATCGGAGCTAAGAAGAAGACTTT  
GGGTACACGTTATGCTCGCAAACCTTAACGTTAGTACCGGAGGTGATCT

+

FFFFFFFFFFFFFFFFFFFFFFFFFFFFFFFFFFFFFFFFFFFFFFFFFFFFFFFFFFFFFFFFFFFFFFFF  
FFFFFFFFFFFFFFFFFFFFFFFFFFFFFFFFFFFFFFFFFFFFFFFFFFFFFFFFFFFFFFFFFFFFFFFF

@A00721:190:HGJW7DSXY:4:2331:31159:29152\_2:N:0:TCTGCAAG+GCTGCACT  
CGCCTACGGTGACTTTATGGACAAGATGCAAGTCTTGGGAAATACTTGTTTCCCTTTTAGGTTTAG  
TAGGTGATCTTGACGTCGATTCTTTGTATAGGGAGTGTGAGAAGACAA

+

FFFFFFFFFFFFFFFFFFFFFFFFFFFFFFFFFFFFFFFFFFFFFFFFFFFFFFFFFFFFFFFFFFFFFFFF  
FFFFFFFFFFFFFFFFFFFFFFFFFFFFFFFFFFFFFFFFFFFFFFFFFFFFFFFFFFFFFFFFFFFFFFFF  
::F:F

@A00721:190:HGJW7DSXY:4:1113:21151:7654\_1:N:0:TCTGCAAG+GCTGCACT  
CTTGAAAACCAAGTTAAGAAGGAGGCTGATCATGGAGTCTTGTACCTTCTGTCAAACCTTCGAGGTTC  
AGCTACGAGAGGTGATCCCGGATGTGGATTGAAGGCTGGCTCTAAGGGAGACTCCTTCTTTTGAATG  
TTG

+

FFFFFFFFFFFFFFFFFFFF,,FFFFFFFFFFFFFFFFFFFFFFFFFFFFFFFFFFFF,FFFF,FFFFFFFFFFFFFFFF  
FFFFFFFFFFFFFFFFFFFFFFFFFFFFFFFFFFFFFFFFFFFFFFFFFFFFFFFFFFFFFFFFFFFFFFFF  
FFF

@A00721:190:HGJW7DSXY:4:1440:21450:29246\_1:N:0:TCTGCAAG+GCTGCACT  
TGAGAAGTGTGCTTTACAAGGAGTTAGACTCTTCTTCAAGTTTTTAGATCTTCTTGATAATCTTAAAG  
AAAAATTTTCGAATAAACTAATGAGAGGTATAGGCTTAGTCAAGTCTGTACTTACATTCTTTACGCCA  
GAT

+

FFFFFFFFFFFFFFFFFFFFFFFFFFFFFFFFFFFFFFFFFFFFFFFFFFFFFFFFFFFFFFFFFFFFFFFF  
FFFFFFFFFFFFFFFFFFFFFFFFFFFFFFFFFFFFFFFFFFFFFFFFFFFFFFFFFFFFFFFFFFFFFFFF  
FFF

@A00721:190:HGJW7DSXY:4:1239:31720:33630\_1:N:0:TCTGCAAG+GCTGCACT  
TACCTTTTGGAGGTCCAGGAACCTTTACTCCTAGTGTCTTTTCTAGAGTCCAAGGACGTTTCCGTCGG  
AGGATGACAGGTGGGAGACCGCTCAATAACACTCTATTGAATCCCTTTTCCACGATGAAAGCTCTTA  
TGA

+

FFFFFFFFFFFFFFFFFFFFFFFFFFFFFFFFFFFFFFFFFFFFFFFFFFFFFFFFFFFFFFFFFFFFFFFF  
FFFFFFFFFFFFFFFFFFFFFFFFFFFFFFFFFFFFFFFFFFFFFFFFFFFFFFFFFFFFFFFFFFFFFFFF  
FFF

@A00721:190:HGJW7DSXY:4:2442:13440:19194\_1:N:0:TCTGCAAG+GCTGCACT  
ATTTTAGGAAACGTCGCGAAAAGAAAGTTCATGAGGATGTCTTGGTCGAAAAATATCGCCGGGAACCT  
CTAATAGAGGATCCTGATGACATTATTTCAACGGATACCGATCTCAGTTCTACCACAGAAACCGTCTC  
AGG

```

+
FFFFFFFFFFFFFFFFFFFF:FFFFFFFFFFFFFFFFFFFFFFFFFFFFFFFFFFFFFFFFFFFFF
FFFFFFFFFFFFFFFFFFFFFFFFFFFFFFFFFFFFFFFFFFFFFFFFFFFFFFFFFFFFFFFFFFFFF
FFF
@A00721:190:HGJW7DSXY:4:2639:5448:3787_2:N:0:TCTGCAAG+GCTGCACT
AAAGACGACCTTCTTGTTGGGACTGAGACCTCTGAATTTTCAGGTGCCCTGATGAGGACGTTGAAAG
GGATAATTTCAACTCTGAGACTTCTAAGAGTGTTTCAAAGACCAGAA
+
:FFFFFFFFFFFFFFFFFFFFFFFFFFFFFFFFFFFFFFFFFFFFFFFFFFFFFFFFFFFFFFFFFFFF:
FFFFFFFFFFFFFFFFFFFFFFFFFFFFFFFFFFFFFFFFFFFFFFFFFF:FFFFFFF
@A00721:190:HGJW7DSXY:4:2502:19623:33724_2:N:0:TCTGCAAG+GCTGCACT
GAACAGCTGATTCTTATTGCATGAACGTCGCTGAGGTCAAACCTGTGGACGTTCTTTTCATCGACGAA
TTATTCATGATTCACGCTGGTCAGACCCTTTTTCTTACACATCTACTT
+
FFFFFFFFFFFFFFFFFFFFFFFFFFFFFFFFFFFFFFFFFFFFFFFFFFFFFFFFFFFFFFFFFFFFF
FFFFFFFFFFFFFFFFFF:FFFFFFFFFFFFFFFFFFFFFFFFFFFFF:FFFFFFF:FF
@A00721:190:HGJW7DSXY:4:1549:6027:27305_2:N:0:TCTGCAAG+GCTGCACT
TACTTCAACATCAACGACATCATTCTTGATGAGTGTCGTTCTTATCGAAGTCTCAGTTATCGCTGCC
GGCCGACGTTTGTGCGGAACCTCTCAGAGGTTTACGGCAGAAAAATTTA
+
,F,:FFFF:F,FFF,FF::FFF,FF,FFFFFF:FF:,FFF:,FF::,FFFF:FF::FF:,FF,:FFF
:FFF,FFF,FFFFFFF,:F,,FFFFFF,FFFFFF,FFFF:FFFF:FF,
@A00721:190:HGJW7DSXY:4:1502:22851:10942_1:N:0:TCTGCAAG+GCTGCACT
CTCTTATATCGAGGCTATCGAGGACGATGAGTATCTTGAAGTTGTTGACGACAAGCCTCAAGAGGGTA
GAGGACCACCTGGATCTTCTACTGTCTCTGCCTTCCAAGATTTCTTAGAAGAGGTTATTCCTGGAACC
ACC
+
FFF:FFFFFFFFFFFFFFFFFFFFFFFFFFFFFFFFFFFFFFFFFFFFFFFFFFFFFFFFFFFFFFFFFFFF
FFFFFFFFFFFFFFFFFFFFFFFFFFFFFFFFFFFFFFFFFFFFFFFFFFFFF:FFFFFFFFFFFFFFFFFFFF
FFF
@A00721:190:HGJW7DSXY:4:2440:21187:11788_2:N:0:TCTGCAAG+GCTGCACT
TTGAGCCGCGTAGTCAGCGCGTTTAGCTGTATCATCAGTCAGAGTATACCCGATAGGGTACCGAGTCT
CCAAGAGAATATTTATTCTTATGAGGCTCGAAACTTCAACGTTTTTCAC
+
FFFFFFFFFFFFFFFFFFFF,FFFFFFFFFFFFFFFFFFFFFFFFFFFFFFFFFFFFF:FFFFFFFFFFFFFFFFFFFF
FFFFFFFFF:FFFFFFFFFFFFFFFFFFFFFFFFFFFFF:FFFFFFFFFFFFFFFFF:FFF
@A00721:190:HGJW7DSXY:4:2174:24352:27289_2:N:0:TCTGCAAG+GCTGCACT
TATTATGACCTTGGAAGTTTTCGGCTGTGGTTGTCGCTGGGGACGATTCCATTCTGTTTTCAAAGAC
TCCAATAACTGATCATTCTGATCATATGATTTTGACAATGGTTTCGA
+
FFFFFFFFFFFFFFFFFFFFFFFFFFFFFFFFFFFFFFFFFFFFFFFFFFFFFFFFFFFFFFFFFFFFF
FFFFFFFFFFFFFFFFFFFFFFFFFFFFFFFFFFFFFFFFFFFFFFFFFFFFFFFFFFFFF
@A00721:190:HGJW7DSXY:4:2222:10429:9032_2:N:0:TCTGCAAG+GCTGCACT
GTGGAGGGAGTTCTTGAAGCATCCCACCTTTCCTTGTTGAAAATTTTGATGCGGTTTCATAAGATTAT
CAGTAATCCTGATTCTACTACGGATTTCATGGACCTTCCATCCTGTACC
+
FFFFFFFFFFFFFFFFFFFFFFFFFFFFFFFFFFFFFFFFFFFFFFFFFFFFFFFFFFFFFFFFFFFFF:FFFFFFFFFFFFF
FFFFFFFFFFFFFFFFFFFFFFFFFFFFFFFFFFFFFFFFFFFFFFFFFFFFFFFFFFFFF
@A00721:190:HGJW7DSXY:4:2557:22281:15248_1:N:0:TCTGCAAG+GCTGCACT
AAAGGCGAACCTTTGGGAATTTGAAGCTCAGGGTGAAGCACAACTTTGACCGTGACGAACGTGGTGT
TCTTGATCTACGTTACGGATATACTCTCCTTGAGTTCACTCGTAAGGACACTACCACTTATTACGATA
TTT
+
FFFFFFF,FFFFFFF:FFFFFFFFFFFFFFFFFFFFFFFFFFFFFFFFFFFFF:F:FFFFFFFFF

```

FFFFFFFF:FFFFFFFFFFFFFFFFFFFFFFFFFFFFFFFFFFFFFFFFFFFFFFFFFFFFFFFFFFFFFFFF  
FFF

@A00721:190:HGJW7DSXY:4:2174:2645:2315\_1:N:0:TCTGCAAG+GCTGCACT  
TTTTCGAATAGTGATAGCCACCCGCCTTACAGAGGGGAGCAGCATGACCATAATTGGTATTGACTTT  
GGTACCACCTTTTCTACTGTCTGTCTCGCCTCTTCAATGAAGTTTAAATGCTTAACAACAATGATAG  
TGA

+  
FFFFFFFFFFFFFFFFFFFFFFFFFFFFFFFFFFFFFFFFFFFFFFFFFFFFFFFFFFFFFFFFFFFFFFFF  
FFFFFFFFFFFFFFFFFFFFFFFFFFFFFFFFFFFFFFFFFFFFFFFFFFFFFFFFFFFFFFFFFFFFFFFF  
FFF

@A00721:190:HGJW7DSXY:4:1273:17842:35211\_2:N:0:TCTGCAAG+GCTGCACT  
AATGATGACACTATTGTTTATGGATATGATGCTATTACTCATGATGGTTACGGTCAGGGAGGATTCTC  
AGTTTACAAGGACCTTAAGCGATGGATCGGGGTTAATTCTAAACATT

+  
FFFFFFFFFFFFFFFFFFFFFFFFFFFFFFFFFFFFFFFFFFFFFFFFFFFFFFFFFFFFFFFFFFFFFFFF  
FFFFFFFFFFFFFFFFFFFFFFFFFFFFFFFFFFFFFFFFFFFFFFFFFFFFFFFFFFFFFFFFFFFFFFFF

@A00721:190:HGJW7DSXY:4:2657:23194:25285\_1:N:0:TCTGCAAG+GCTGCACT  
ACGCAAAGATATTTTCATGAAACTACAGAGGAACGTACCGGATTACCTGTCTTTCATATTATGAATGA  
ACCTTCGGCCGCTCTCTTTGCTTCGATGTTGGATGTCAAGAAGGGTTCAGAATGGGATTCTACGTAG  
TTT

+  
FFFFFFFFFFFF:FFF::FFFFFFFF:FFFFFFFFFFFFFFFFFFFFFFFFFFFFFFFFFFFFFFFFFFFF  
FFFFFFFFFFFFFFFFFFFFFFFFFFFFFFFFFFFFFFFFFFFFFFFFFFFFFFFFFFFFFFFFFFFFFFFF  
FFF

@A00721:190:HGJW7DSXY:4:1444:11487:1814\_1:N:0:TCTGCAAG+GCTGCACT  
CTTGGAACGAAGGCGACCTTCCGGAGTTTTTACGGGATCCGGAATGTTCTGTCTATATTAGGTGAAGC  
GAAATACGATTTCAACGTCAACGTTACCGAGTTTCGTTTCGTACCTTGATGCTGACTTTCGTCAAT  
ATG

+  
FFFFFFFFFFFFFFFFFFFFFFFFFFFFFFFFFFFFFFFFFFFFFFFFFFFFFFFFFFFFFFFFFFFFFFFF  
FFFFFFFFFFFFFFFFFFFFFFFFFFFFFFFFFFFFFFFFFFFFFFFFFFFFFFFFFFFFFFFFFFFFFFFF  
FFF

@A00721:190:HGJW7DSXY:4:2356:24758:16720\_1:N:0:TCTGCAAG+GCTGCACT  
TACGATACAAATGATAACTTCTAATTTACGTTTGCTACTCAGAGCTGGTCTCTCAGCAAAGGGATGC  
ATGGTGTTATCTCCTCAGGAGTCCCGGCATTTGATAATAATGACGAGACTTTCGTCATAATCGCTGCA  
TAT

+  
FFFFF:FFFFFFFFFFFFFFFFFFFFFFFFFFFFFFFFFFFFFFFFFFFFFFFFFFFFFFFFFFFFFFFF  
FFFFFFFFFFFFFFFFFFFFFFFFFFFFFFFFFFFFFFFFFFFFFFFFFFFFFFFFFFFFFFFFFFFFFFFF  
FFF

@A00721:190:HGJW7DSXY:4:1342:23393:10661\_1:N:0:TCTGCAAG+GCTGCACT  
TGAAGGAGTTTCAAGCGTGTGCTCTTCCGATCTGATGACGTGAGAATAGGTGAAGGGATAGTTTTTAC  
CTCGACCAACATTAAGGCGGCGGCGACTAATCTTAAAGCTTACCCAAAATGAAGGACACTTCGAAAC  
TGA

+  
FFF:FFFFFFFFFFFFFFFFFFFFFFFFFFFFFFFFFFFFFFFFFFFFFFFFFFFFFFFFFFFFFFFF,FFFF:F:,F  
FFFFFFFFFFFFFFFFFFFFFFFFFFFFFFFFFFFFFFFFFFFFFFFFFFFFFFFFFFFFFFFFFFFFFFFF,FFFFFF  
FFF

@A00721:190:HGJW7DSXY:4:1419:32850:20870\_1:N:0:TCTGCAAG+GCTGCACT  
GATTGGTTTCAACCCGTTGATGCTATGTCAGAAGAAGCTATTCAAGCTTGTGTTTTAAAGACTGCAGA  
GGCTGTCAAACAAGCCAGACTCAAGGAGTCCAATCAAAGTTTTGAATTTAGCTCAACTGGGAGAC  
GTG

+  
::FFFF:FFFFFF::F,FFFFFFFF:FFFFFFFF:FFFFFFFFFFFFFFFF:FFFFFF:FFFFFFFF





@A00721:190:HGJW7DSXY:4:1605:25455:24126\_1:N:0:TCTGCAAG+GCTGCACT  
GCAGAATAACCTTCCCAAATCTAGATCGGCACAGAAGAAGGCTGAAGGTCGTTACCGGACGACCACTC  
AAAGGAAACGGGCTGTTGCCAGAGGAAAGCAGCGACCACCGAGGTCGCTCGTAACATTGACGGCAGT  
CCC

+

FFFFFFFFFFFF:FFFFFF:FFFFFF:F,FFFFFFFFFFFF,FFFFFFFFFFFF:FFFFFFFFFFFFFFFFFF  
FF:FFFFFFFFFFFFFFFFFFFFFFFFFFFFFFFFFFFFFFFFFFFFFFFFFFFFFFFFFFFFFFFFFFFFFFFF  
FFF

@A00721:190:HGJW7DSXY:4:2453:10728:3192\_2:N:0:TCTGCAAG+GCTGCACT  
GTCACATTCACTCCCATGCCAATCAATGATGTGACTATACAGTTCGGCCATTTCAAGAGTGGTCA  
ATACGTCGTGGGAGGTACTGAAGCCTTCCCTCCGCTGGCACGAAGAA

+

FFFFFFFFFFFFFFFFFFFFFFFFFFFFFFFFFFFFFFFFFFFF:FFFF:FFFFFFFFFFFFFFFFFFFFFFFF  
FFFFFFFFFFFFFFFFFFFFFFFFFFFFFFFFFFFFFFFFFFFFFFFFFFFFFFFFFFFFFFFFFFFFFFFF

@A00721:190:HGJW7DSXY:4:2604:9986:27868\_1:N:0:TCTGCAAG+GCTGCACT  
GTCTCTAAGTCTACCAGGAAGAGGGGAAATGTCCCCAAAAGTGAAGAATAAAGGGAAAGGTCCATC  
AGGACCTAAGAAGGGGAAATTACCCCTAATTCTGAAGGAAGATCTCCACCATCTGGGGTTGGAATA  
AGA

+

FFFFFFFFFFFFFFFFFFFFFFFFFFFF::FFF,FFFFFFFFFFFFFFFFFFFF:FF,F:FF,FFFFFFFFFFFF  
FFFFFFFFFFFFFFFFFFFFFFFFFFFFFFFFFFFFFFFFFFFFFFFFFFFFFFFFFFFFFFFFFFFFFFFFFFFF  
FFF

@A00721:190:HGJW7DSXY:4:1622:20645:36589\_1:N:0:TCTGCAAG+GCTGCACT  
CTACGAAGTCGCTGAAGGCGGCTTGGGTCATTAAGGGTAGCTGTAAAGTTGCGCCTGCCGACCCCATC  
TTTGAGACCAAGACTCTCTACAGTAGGTTCTGCCTACTATGAGCAAATCTGTTGAATTCGTCACTGA  
GGA

+

FFFFFFFFFFFFFFFFFFFFFFFFFFFF:FFFFFFFF:FFFFFFFFFFFFFFFFFFFFFFFF:FFFFFFFFFFFF  
FFFFFFFFFFFFFFFFFFFF:FFFFFFFFFFFFFFFFFFFFFFFFFFFFFFFFFFFFFFFFFFFFFFFFFFFF  
FFF

@A00721:190:HGJW7DSXY:4:1341:12572:10802\_2:N:0:TCTGCAAG+GCTGCACT  
TTTGGCTACTGGCGACAACTGAGAGCAGTCGCTGGGGAAAGAGAATTGCGTGGGTTGAAGGCCGACG  
CTTCGAGCTTGAGTGTGACGAGGCCGGTGACGTTTTTGTCAACGGCGT

+

FFFFFFFFFFFFFFFFFFFFFFFFFFFFFFFFFFFFFFFFFFFF:FFFFFFFFFFFFFFFFFFFFFFFFFFFF  
FFFFFFFFFFFFFFFFFFFFFFFFFFFFFFFFFFFFFFFFFFFFFFFFFFFFFFFFFFFFFFFFFFFFFFFF

@A00721:190:HGJW7DSXY:4:2564:17228:15546\_1:N:0:TCTGCAAG+GCTGCACT  
TAAGTATGGGGCGAAGATCCCCTATGGAGTCTTGAAGGACTTAGGTTGGCATATTTATGCCGACGATA  
ATAAGCATGTCACCCTTAAGCACCGAGGTAAGCTCGGGACTTACAAGAGAGAGTGTGAGAGAGTCGCT  
CTC

+

FFFFFFFFFFFFFFFFFFFFFFFFFFFFFFFFFFFFFFFFFFFF:FFFFFFFFFFFFFFFFFFFFFFFFFFFF  
FF:FFFFFFFFFFFFFFFFFFFFFFFFFFFFFFFFFFFFFFFFFFFFFFFFFFFFFFFFFFFFFFFFFFFFFFFF  
FFF

@A00721:190:HGJW7DSXY:4:1659:28094:28009\_1:N:0:TCTGCAAG+GCTGCACT  
CTCTTCCGATCTTTGGGGATTTGATGTGAGAAGGTGGAAGGTGTCAAGGTCCTTCTTCATGCTGATC  
TTTCAGGACCTAATCACATCATGATTGATAGTTACGGCTCGTATCGAGTTGGAGGGAGGAAGTTCTCC  
GAA

+

FFFFFFFFFFFFFFFFFFFFFFFFFFFFFFFFFFFFFFFFFFFF:FFFFFFFFFFFFFFFFFFFFFFFFFFFF  
FFFFFFFFFFFFFFFFFFFFFFFFFFFFFFFFFFFFFFFFFFFFFFFFFFFFFFFFFFFFFFFFFFFFFFFF  
FFF

@A00721:190:HGJW7DSXY:4:2353:5565:15546\_2:N:0:TCTGCAAG+GCTGCACT  
GAAGGCTCTAGAGAAGATCTCACCACTGGAGAAGGCAAGTGGAGAGTCCAGAAGTTGATGAAGAAGG

ATTATTTGAAGCAGGGGTTACCACTTCCTAAGGTGGATGAGGGAGGTT  
+  
FFFFFFFFFFFFFFFFFFFFFFFFFFFFFFFFFFFFFFFFFFFFFFFFFFFFFFFFFFFFFFFFFFFFFFFF  
FFFFFFFFFFFFFFFFFFFFFFFFFFFFFFFFFFFFFFFFFFFFFFFFFFFFFFFFFFFFFFFFFFFFFFFF  
@A00721:190:HGJW7DSXY:4:2214:8440:21245\_1:N:0:TCTGCAAG+GCTGCACT  
TAACCTTTGACTCAACTACTCCGATCAGATCCGATGGTTTGATTGGTATGGACTACTCGACTTTTGAT  
CTGGAGTTGTCTAGGGTCATGGCAGATACTACCGATAAGGTGAAAAATATGCAGGTCAAAGATTCTGT  
AGC  
+  
FFFFFFFFFFFFFFFFFFFFFFFFFFFFFFFFFFFFFFFFFFFFFFFFFFFFFFFFFFFFFFFFFFFFFFFF  
FFFFFFFFFFFFFFFFFFFFFFFFFFFFFFFFFFFFFFFFFFFFFFFFFFFFFFFFFFFFFFFFFFFFFFFF  
FFF  
@A00721:190:HGJW7DSXY:4:1517:11849:32409\_1:N:0:TCTGCAAG+GCTGCACT  
TGATTCAAAACCTATCGTTGTCGTACCTTACAAGTTGAGGAGACTTTACAGCGGCTTATTGTCGCGC  
AGTTTCCAGAATTGCGGTTGAAGTTCACCCATTCTATCTTGAATGCTCACGCCGTCGCAGCCATATCG  
AGA  
+  
FFFFFFFFFFFFFFFFFFFFFFFFFFFFFFFFFFFFFFFFFFFFFFFFFFFFFFFFFFFFFFFFFFFFFFFF  
FFFFFFFFFFFFFFFFFFFFFFFFFFFFFFFFFFFFFFFFFFFFFFFFFFFFFFFFFFFFFFFFFFFFFFFF  
FFF  
@A00721:190:HGJW7DSXY:4:2619:21124:27931\_1:N:0:TCTGCAAG+GCTGCACT  
TGATTGGAACGTACCTACTCACGAGACGTCATGAAAGCTATCGGAGGGAAGCAAATGTTTCGTTCT  
GTTACAAGAACGCTTTGGATTGTGACCATAAAGCCTCAGTTGCGATAGCTGTAGAGGTATACGATATC  
TCT  
+  
FFFFFFFFFFFFFFFFFFFF:FFFFFFFFFFFFFFFFFFFFFFFFFFFFFFFFFFFFFFFFFFFFFFFFFFFF  
FFFFFFFFFFFFFFFFFFFFFFFFFFFFFFFFFFFFFFFFFFFFFFFFFFFFFFFFFFFFFFFFFFFFFFFF  
FFF  
@A00721:190:HGJW7DSXY:4:2328:10077:9204\_2:N:0:TCTGCAAG+GCTGCACT  
ATAGATACGAGATACCTAGAGAAGGTGCGCAGCGATCTTACTCGTTATCGGAGCTAAGAAGAAGACTTT  
GGGTACACGTTATGCTCGCAAACCTTAACGTTAGTACCGGAGGTGATCT  
+  
FFF::FFFFFFFFFFFFFFFFFFFF:FFFFFFF:FFFFFFFFFFFFFFFFFFFFFFFFFFFF:FFFFFF,FFFFFFFF  
FFFFFFFFFF:FF:FFFFFFFFFFFF:FFFFFFFFFFFFFFFFFFFFFFFFFFFFFFFFFFFF  
@A00721:190:HGJW7DSXY:4:2506:29496:27179\_2:N:0:TCTGCAAG+GCTGCACT  
CGCCTACGGTGACTTTATGGACAAGATGCAAGTCTTGGGAAATACTTGTTTCCCTTTTATAGGTTTAG  
TAGGTGATCTTGACGTCGATTCTTTGTATAGGGAGTGTGAGAAGACAA  
+  
FFFFFFFFFFFFFFFF:F:FFFFFFFFFFFF:F:FFFFFFFFFFFFFFFFFFFFFFFFFFFF:FF,FFFFFF,FFF  
FFFFFFFFFFFFFFFFFFFFFFFFFFFF:FFFFFFF:FFFFFFFFFFFFFFFFFFFF:  
@A00721:190:HGJW7DSXY:4:1338:4218:20008\_1:N:0:TCTGCAAG+GCTGCACT  
CTTGAACCAAGTTAAGAAGGAGGCTGATCATGGAGTCTTTGTACCTTCTGTCAAACCTTCGAGGTT  
AGCTACGAGAGGTGATCCCGATGTGGATTGAAGGCTGGCTCTAAGGGAGACTCCTTCTTTTGAATG  
TTG  
+  
FFFFFFFFFFFFFFFFFFFF,FF:FFFFFF::FFFFFFFFFFFFFFFFFFFFFFFFFFFF:FFFF:FFFFFFFFFFFFFFFF  
FFFFFFFFFFFFFFFFFFFFFFFFFFFF:FFFFFFFFFFFFFFFFFFFFFFFFFFFFFFFFFFFF:FFFFFFFFFFFF  
FFF  
@A00721:190:HGJW7DSXY:4:2234:4092:24893\_1:N:0:TCTGCAAG+GCTGCACT  
TGAGAAGTGTGCTTTACAAGGAGTTAGACTCTTCTTCAAGTTTTTAGATCTTCTTGATAATCCTAAAG  
AAAAATTTTGAATAAACTAATGAGAGGTATAGGCTTAGTCAAGTCTGTACTTACATTCTTTACGCCA  
GAT  
+  
FFF:F::FF,,F,,:FFFFFFFF:FFFFFFFF:F:FFFFFF:FFFFFFFFFFFFFFFF:FFFFFFFF:FFF:

FFFFFFFF:FFFF,FFF:FF:,FFF:FFFFFFFF:FFFFFFFFFFFFFFFFFFFFFFFF,FFFFFFFF:  
FFF

@A00721:190:HGJW7DSXY:4:1320:18593:28244\_1:N:0:TCTGCAAG+GCTGCACT  
TACCTTTTGGAGGTCCAGGAACCTTTACTCCTAGTGTCTTTCTAGAGTCCAAGGACGTTTCCGTCGG  
AGGATGACAGGTGGGAGACCGCTCAATAACACTCTATTGAATCCCTTTTCCACGATGAAAGCTCTTGA  
TGA

+

FFFFFFFF,FFFFFFFF,FFFF:FFFFFFFFFFFFFFFF:FFFFFFFFFFFFFFFF,FFFF  
FFFFFFFFFFFFFFFFFFFFFFFFFFFFFFFF:FFFFFFFFFFFFFFFF:FFFFFFFFFFFFFFFF  
FFF

@A00721:190:HGJW7DSXY:4:2502:31593:35540\_1:N:0:TCTGCAAG+GCTGCACT  
ATTTTAGGAAACGTCGCGAAAAGAAAGTTCATGAGGATGTCTTGGTCGAAAAATATCGCCGGGAACCT  
CTAATAGAGGATCCTGATGACATTATTTCAACGGATACCGATCTCAGTTCTACCACAGAAACCGTCTC  
AGG

+

FFFFFFFFFFFF:FFF,FFFFFFFFFFFFFFFFFFFFFFFFFFFFFFFFFFFFFFFFFFFFFFFF  
FFFFFFFFFFFFFFFFFFFFFFFFFFFFFFFFFFFFFFFFFFFFFFFFFFFFFFFFFFFFFFFF  
FFF

@A00721:190:HGJW7DSXY:4:1248:5258:29763\_2:N:0:TCTGCAAG+GCTGCACT  
AAGACGACCTTCTTGTGGGACTGAGACCTCTGAATTTTCAGGGTGCCCTGATGAGGACGTTGAAAGG  
GATAATTTCAACTCTGAGACTTCTAAGAGTGTTCAAAAGACCAGAAA

+

FFFFFFFFFFFFFFFFFFFFFFFFFFFFFFFF:FFFFFFFFFFFFFFFFFFFFFFFFFFFFFFFF,FFFF  
FF:FFFFFFFF:FFFFFFFFFFFFFFFFFFFFFFFF:FFFFFFFFFFFFFFFF

@A00721:190:HGJW7DSXY:4:2526:9037:17895\_2:N:0:TCTGCAAG+GCTGCACT  
GAACAGCTGATTCTTATTGCATGAACGTCGCTGAGGTCAAACCTGTGGACGTTCTTTTCATCGACGAA  
TTATTCATGATTCACGCTGGTCAGACCCTTTTCTTACACATCTACTT

+

FFFFFFFFFFFFFFFFFFFFFFFFFFFFFFFFFFFFFFFFFFFFFFFFFFFFFFFF:FFFFFFFF  
FFFF:FFFFF::FFFFFFFFFFFFFFFFFFFFFFFFFFFFFFFF

@A00721:190:HGJW7DSXY:4:2258:11080:31203\_2:N:0:TCTGCAAG+GCTGCACT  
TACTTCAACATCAACGACATCATTCTTGATGAGTGTCTTATCGAAGTCTCAGTTATCGCTGCCC  
GGCCGACGTTTGTAGCGAACTCTCAGAGGTTTACGGCAGAAAAATTTA

+

FFF:F:FF:FFFF:FFFF:FFFF,FF,FFFFFFFFFFFFFFFF:FFFFF,,F,:F:FF:F,FF,FFFF  
,FFFFFF:FFF,F,FFFFFF,:F,FFFF:FF,:FFF:FFFFFFFF,

@A00721:190:HGJW7DSXY:4:1508:31295:4272\_1:N:0:TCTGCAAG+GCTGCACT  
CTCTTATATCGAGGCTATCGAGGACGATGAGTATCTTGAAGTTGTTGACGACAAGCCTCAAGAGGGTA  
GAGGACCACCTGGATCTTCTACTGTCTCTGCCTTCCAAGATTTCTTAGAAGAGGTTATTCCTGGAACC  
ACC

+

FFFFFFFFFFFFFFFFFFFFFFFFFFFFFFFFFFFFFFFFFFFFFFFFFFFFFFFFFFFFFFFF  
FFFFFFFFFFFFFFFFFFFFFFFFFFFFFFFFFFFFFFFFFFFFFFFFFFFFFFFFFFFFFFFF  
FFF

@A00721:190:HGJW7DSXY:4:2524:9778:27195\_2:N:0:TCTGCAAG+GCTGCACT  
TTGAGCCGCGTAGTCAGCGCGTTTAGCTGTATCATCAGTCAGAGTATACCCGATAGGGTACCGAGTCT  
CCAAGAGAATATTTATTCTTATGAGGCTCGAACTTCAACGTTTTTCAC

+

FFFFFFFFFFFFFFFFFFFFFFFFFFFFFFFFFFFFFFFFFFFFFFFF:FFFFFFFFFFFFFFFF  
FFFFFFFFFFFFFFFFFFFFFFFFFFFFFFFFFFFFFFFFFFFFFFFF

@A00721:190:HGJW7DSXY:4:2250:19651:5055\_2:N:0:TCTGCAAG+GCTGCACT  
TATTATGACCTTGAAAGTTTTCGGCTGTGGTTGTGCTGGGACGATTCCATTCTGTTTTCAAAGAC  
TCCAATAACTGATCATTCTGATCATATGATTTTGACAATGGTTTCGA

+

FFFFFFFFFFFFFFFFFFFFFFFFFFFFFFFFFFFFFFFFFFFFFFFFFFFFFFFFFFFFFFFF  
F:FFFFFFFFFFFFFFFFFFFFFFFFFFFFFFFFFFFFFFFFFFFFFFFFFFFFFFFF  
@A00721:190:HGJW7DSXY:4:2333:9191:16313\_2:N:0:TCTGCAAG+GCTGCACT  
GTGGAGGGAGTTCTTGAAGCATCCCGACCTTTCCTTGTGAAAATTTTGATGCGGTTTCATAAGATTAT  
CAGTAATCCTGATTCTACTACGGATTCATGGACCTTCCATCCTGTACC

+  
FFFFFFFFFFFFFFFFFFFFFFFFFFFFFFFFFFFFFFFFFFFFFFFFFFFFFFFFFFFFFFFF  
FFFFFFFFFFFFFFFFFFFFFFFFFFFFFFFFFFFFFFFFFFFFFFFFFFFFFFFF::FFFFFFF  
@A00721:190:HGJW7DSXY:4:2561:14163:33536\_1:N:0:TCTGCAAG+GCTGCACT  
AAAGGCGAACTTTGGGAATTTGAAGCTCAGGGTGAAGCACACGTTTGACCGTGACGAAGTGTGGTGT  
TCTTGATCTACGTTACGGATATACTCTCCTTGAGTTCACCTCGTAAGGACACTACCACTTATTACGATA  
TTT

+  
FFFFFFFFFFFFFFF:FFFFFFFFFFFFFFFFFFFFFFFFFFFFFFFFFFFFFFFFFFFFFFFF:FFFFFFFFF  
FFFFFFFFF::FFFFFFFFFFFFFFFFFFFFFFFFFFFFFFFFFFFFFFFFFFFFFFFFFFFFFFFFFFFFF  
FFF  
@A00721:190:HGJW7DSXY:4:2320:11831:11334\_1:N:0:TCTGCAAG+GCTGCACT  
TTTTCGAATAGTGATAGCCACCCGCCTTACAGAGGGGAGCAGCATGACCATAATTGGTATTGACTTT  
GGTACCACCTTTTCTACTGTCTGTCTCGCCTCTTCGAATGAAGTTTAAATGCTTAACAACAATGATAG  
TGA

+  
FFFFF,FFFFFFFFF:FFFFFFFFF:FFFFFFFFF:FFFFFFFFF:FF::F:FFFF:,FFF:FFF,FFFFFFFFF  
F,FFF:F,FFFFF:FFFFFFFFFFFFF:F,:FFFFFFFFFFFFF,FFFFFFFFFFFFF:FFFFFFFFFFFFF  
FFF  
@A00721:190:HGJW7DSXY:4:2203:11912:32706\_2:N:0:TCTGCAAG+GCTGCACT  
AATGATGACACTATTGTTTATGGATATGATGCTATTACTCATGATGGTTACGGTCAGGGAGGATTCTC  
AGTTTACAAGGACCTTAAGCGATGGATCGGGGTTAATTCTAAACATT

+  
FFFFFFFFFFFFFFFFFFFFFFFFFFFFFFFFFFFFFFFFFFFFFFFFFFFFFFFFFFFFFFFF  
FFFFFFFFFFFFFFFFFFFFFFFFFFFFFFFFFFFFFFFFFFFFFFFF:FFFFFFFFFFFFFFF  
@A00721:190:HGJW7DSXY:4:1214:26630:27884\_2:N:0:TCTGCAAG+GCTGCACT  
GCAAAGATATTTTCATGAAACTACATAGGAACGTACCGGATTACCTGTCTTTCATATTATGAATGAAC  
CTTCGGCCGCTCTCTTTGCTTCGATGTTGGATGTCAAGAAGGGTTCAG

+  
FFFFF:FFFFFFFFFFFFF:FFFFFFFFFFFFF:FFFFFFFFFFFFF:FFFFFFFFFFFFF:FFFFFFFFF  
FFFFFFFFFFFFFFFFFFFFF:F,FFF:F,FF:FFFFFFFFFFFFFFFFFFFFF  
@A00721:190:HGJW7DSXY:4:1562:12219:35775\_1:N:0:TCTGCAAG+GCTGCACT  
CTTGAACGAAGCGACCTTCCGGAGTTTTTACGGGATCCGGAATGTTCTGTCTATATTAGGTGAAGC  
GAAATACGATTTCAACGTCAACGTTACCGAGTTTCGTTTCGTACCTTGATGCTGACTTTCGTCAAT  
ATG

+  
FFFFFFFFFFFFFFFFFFFFFFFFFFFFFFFFFFFFFFFFFFFFFFFFFFFFFFFFFFFFFFFF  
FFFFFFFFFFFFFFFFFFFFFFFFFFFFFFFFFFFFFFFFFFFFFFFFFFFFFFFFFFFFFFFFFFFFF  
FFF  
@A00721:190:HGJW7DSXY:4:2624:19479:9079\_1:N:0:TCTGCAAG+GCTGCACT  
TACGATACAAATGATAACTTCTAATTTACGTTTGCTACTCAGAGCTGGTCTCTCAGCAAAGGGATGC  
ATGGTGTATCTCCTCAGGAGTCCCGGCATTTGATAATAATGACGAGACTTTCGTCATAATCGCTGCA  
TAT

+  
FFFFFFFFFFFFFFFFFFFFFFFFFFFFFFFFFFFFFFFFFFFFFFFFFFFFFFFFFFFFFFFF  
FFFFFFFFFFFFFFFFFFFFFFFFFFFFFFFFFFFFFFFFFFFFFFFFFFFFFFFFFFFFFFFFFFFFF  
FFF  
@A00721:190:HGJW7DSXY:4:1352:21151:25097\_1:N:0:TCTGCAAG+GCTGCACT  
TGAAGGAGTTTCAAGCGTGTGCTCTTCGATCTGATGACGTGAGAATAGGTGAAGGGATAGTTTTTAC

CTCGACCAACATTAAGGCGGCGGCGACTAATCTTAAAGCTTCACCCAAAATGAAGGACACTTCGAAAC  
TGA

+

FFFFFFFFFFFFFFFFFFFFFFFFFFFFFFFFFFFFFFFFFFFFFFFFFFFFFFFFFFFFFFFF:FFFFFF  
FFFFFFFFFFFFFFFFFFFFFFFFFFFFFFFFFFFFFFFF:FFF:FFFFFFFF:FFFFFFFFFFFFFFFF  
FFF

@A00721:190:HGJW7DSXY:4:1519:1108:15624\_1:N:0:TCTGCAAG+GCTGCACT  
GATTGGTTCGAACCCGTTGATGCTATGTCAGAAGAAGCTATTCAAGCTTGTCTTTAAAGACTGCAGA  
GGCTGTCAAACAAGCCCAGACTCAAGGAGTCCAATCAAAGGTTTTGAATTTAGCTCAACTGGGGAGAC  
GTG

+

FFFF::FFFFFFFF:F::FF,FFF:FF,FFFFFFFF:FF,FFFFFFFFFFFFFFFF:FFFFFFFF  
FFFFFFFFFFFFFFFF:FFFFFFFF:FFFFFFFFFFFFFFFFFFFFFFFFFFFFFFFF  
FFF

@A00721:190:HGJW7DSXY:4:2341:12924:29356\_1:N:0:TCTGCAAG+GCTGCACT  
TTACCAAATCTTGCTTTCAACGAAGTCTCTGATTTTATTAATCATTACTTTAACGATCTCTCGGTC  
ATTTACTCTGTACTTGATCTACGTCGTTAACTGTCGGAACAACCTTTACTTAGAATGACTCTATCTT  
TTC

+

FFFFFFFFFFFFFFFFFFFFFFFFFFFFFFFFFFFFFFFFFFFFFFFFFFFFFFFFFFFFFFFF  
FFFFFFFFFFFFFFFF:FFFFFFFFFFFFFFFF:FFFFFFFFFFFFFFFF:F,FFFFFFFF  
FF:

@A00721:190:HGJW7DSXY:4:2343:24731:7028\_1:N:0:TCTGCAAG+GCTGCACT  
CAAACCTCTGTTTACGAGACCTTTTGTATAATATTTTCGTATATACACCAATCTCAACGAGTATAA  
CGCGTTTTTCCGTCTTAACCTTAAACCCGAAGATATAAACCGCAAACGACTCGAAACCGAGACGCC  
GTA

+

F,::,:F,,F:::,,,F,:F:,FF,F,F:,,FFF,,:,,,F,FFF,,,:F,:::,,,F:  
,:,,,FFF,F,,F:,F,F,:,:F,,F,,,F,,F,F,,,FF,:F,:FFFFFFFFFFFFFFFF  
FFF

@A00721:190:HGJW7DSXY:4:1427:3748:5791\_1:N:0:TCTGCAAG+GCTGCACT  
AATGAGGTCAAAGCTCTATTTATTAAACGAAGTATTATCCGATTCTTCGAGGGTATCACTACCACTGA  
TCTGCCGACTTTAGTCAAGGAAGTCAATTCCTTCGATGTTTATATTTTCTATAAGGGAAAATAGCA  
ATA

+

FFFFF,,F,F,,:FF,FFF,F:FF:FFFFFF:FFFF:FF:FFFFFFFF:FFFFFFFFFFFFFFFF  
F:FFFFFF:FFFF:F:F:FFF,:FFFFFFFF:FFFF:F,FFFF,FF:FFFF,:FFF,F,FF,F:F  
:FF

@A00721:190:HGJW7DSXY:4:2304:18394:4946\_1:N:0:TCTGCAAG+GCTGCACT  
ATTTTAGAACTTTATTTTCAAGACTCTCTCCGATCACCTTGGTGTGATCTCCCGGAGGATCTTTTCAAT  
AAGATGTATGATGATAATCTACTATTTTAAATAGTGATATTCAGCGTATACTTGAATACTTTATCAA  
AGA

+

FFFFFFFF:FFFFFFFFFFFFFFFFFFFFFFFFFFFFFFFFFFFFFFFFFFFFFFFF  
FFFFFFFFFFFFFFFFFFFFFFFFFFFFFFFF:FFFFFFFFFFFFFFFF:FFFFFFFF  
FFF

@A00721:190:HGJW7DSXY:4:2570:15817:35493\_1:N:0:TCTGCAAG+GCTGCACT  
CAAAAAGTTGGAAGAGGTCTATGATATTTATTTTACTTATACTTTAAATAGCACCGATTATAACTTGA  
CTGTTGATAATATTACAATAGCTCTTCTCAGAAGATTAGAGAAGTAAACGTTGAACACGTCGGTAGC  
ATT

+

FF,FF,,FF:,FF:F,:FFFFFFFF:FFFFFFFFFFFF,:FFFFFF,,F,:F,FFFF,F:FF  
FF:FF:FFFFFFFFFFFF,FFFF,:FF,FF,FFFF:F:FF,FFF,F,,FFF:,F,:F:,FF,F  
FF:

@A00721:190:HGJW7DSXY:4:1511:27995:27336\_1:N:0:TCTGCAAG+GCTGCACT  
TTTTTAATGGTATGGTATAATGTGTCTTACAAATAGAACCTTCACTCTCGGTAATGAGAGTGATTCC  
TTAATATTCTAGTAACCGCTATGTGGGCATTACTAGGATTTATCACACTCTAAATTTGATAGCAATT  
TA

+

FFFFFFFFFFFFFFFF,FFFFFFFFFFFFFFFFFFFFFFFFFFFFFFFFFFFFFFFFFFFFFFFF  
FFFFFFFFFFFFFFFFFFFFFFFFFFFFFFFF,FFFFFFFFFFFFFFFF:F::F::FFFFFFFF:F:  
F:

@A00721:190:HGJW7DSXY:4:1344:25427:2691\_2:N:0:TCTGCAAG+GCTGCACT  
TTTAGTATTATTTACTATCGCCTTTATTGAAAATTGTATAAGAGTTAATTGCTTACACAAAAGTGACG  
CGCGAAGGAATCTTAATTGATTGAAGCTAGGCGTTGGGGAGAATGAAC

+

FFFFFFFFFFFFFFFFFFFFFFFFFFFFFFFFFFFFFFFFFFFFFFFFFFFFFFFFFFFFFFFF:F  
FFFFFFFFFFFFFFFFFFFFFFFFFFFFFFFF:F

@A00721:190:HGJW7DSXY:4:1616:15655:14450\_1:N:0:TCTGCAAG+GCTGCACT  
GCAGAATAACCTTCCCAAATCTAGATCTGCACAGAAGAAGGCTGAAGGTCGTTACCGGACGACCACTC  
AAAGGAAACGGGCTGTTGCCAGAGGAAAGCAGCGACCACCGAGGTCGCTCGTAACATTGACGGCAGT  
CCC

+

FFFFF:FFFFFFFFF,:FF::FFFF:FFFFFFFF:FFFFFFFFFFFFFFFFFFFFFFFF  
FFFFFFFFFFFFFFFFFFFFFFFFFFFFFFFFFFFFFFFFFFFFFFFFFFFFFFFFFFFFFFFF  
FFF

@A00721:190:HGJW7DSXY:4:1142:3125:7999\_2:N:0:TCTGCAAG+GCTGCACT  
TCACATTCACCACTCCCATACCAATCAATGATGTGACTATACAGTTCGGCCATTTCAAGAGTGGTCAA  
TACGTCGTGGGAGGTACTGAAGCCTTCCCCTCCGCTGGCACGAAGAAC

+

FFFFFFFFFFFFFFFFFFFFFFFFFFFFFFFFFFFFFFFFFFFFFFFFFFFFFFFFFFFFFFFF  
FFFFFFFFFFFFFFFFFFFFFFFFFFFFFFFFFFFFFFFF,FFFFFFFFF

@A00721:190:HGJW7DSXY:4:1154:25473:27539\_1:N:0:TCTGCAAG+GCTGCACT  
TCTTCTAAGTCTACCAGGAAGAGGGGAAATGTCCCCAAACTGAGAAGAATAAAGGGAAAGGTCCATC  
AGGACCTAAGAAGGGGAAATTACCCCTAATTCTGAAGGAAGATCTCCCACCATCTGGGGTTGGGAATA  
AGA

+

FFFFFFFFFFFFFFFFFFFFFFFFFFFFFFFFFFFFFFFFFFFFFFFFFFFFFFFFFFFFFFFF  
FFFFFFFFFFFFFFFFFFFFFFFF:F  
FFF

@A00721:190:HGJW7DSXY:4:1625:22318:33473\_1:N:0:TCTGCAAG+GCTGCACT  
CTACGAAGTCGCTGAAGGCGGCTTGGGTCATTAAGGGTAGCTGTAAAGTTGCGCCTGCCGACCCCATC  
TTTGAGACCAAGACTCTCTACAGTAGGTCGTGCCTACTATGAGCAAATCTGTTGAATTGCTCACTGA  
GGA

+

FFFFFFFFFFFFFFFF:F  
FFFFFFFFFFFFFFFF  
FFF

@A00721:190:HGJW7DSXY:4:1408:30987:9533\_2:N:0:TCTGCAAG+GCTGCACT  
TTTGGCTACTGGCGACAACTGAGAGCAGTCGCTGGGGAAAGAGAATTGCGTGGGTTGAAGGCCGACG  
CTTCGAGCTTGAGTGTGACGAGGCCGGTGACGTTTTTGTCAACGGCGT

+

FFFFFFFFFFFF:F  
FFFF:F  
FFFF:F

@A00721:190:HGJW7DSXY:4:2642:1515:17989\_1:N:0:TCTGCAAG+GCTGCACT  
TAATATGGGGCGAAGATCCCCTATGGAGTCTTGAAGGACTTAGGTTGGCATATTTATGCCGACGATA  
ATAAGCATGTCACCCTTAAGCACCGAGGTAAGCTCGGGACTTACAAGAGAGAGTGTGAGAGAGTCGCT  
CTC

[illegible]

@A00721:190:HGJW7DSXY:4:2310:24433:16313\_1:N:0:TCTGCAAG+GCTGCACT  
TGAGAAGTGTGCTTTACAAGGAGTTAGACTCTTCTTCAAGTTTTTAGATCTTCTTGATAATCTTAAAG  
AAAAATTTTCGAATAAACTAATGAGAGGTATAGGCTTAGTCAAGTCTGTACTTACATTCTTTACGCCA  
GAT

+

FFFFFFFFFFFF:FFFFFFFF:FFFFFFFFFFFFFFFFFFFFFFFFFFFFFFFFFFFFFFFFFFFFFFFFFFFF  
FFFFFFFFFFFFFFFF:FFFFFFFFFFFFFFFFFFFFFFFFFFFFFFFFFFFFFFFFFFFFFFFFFFFFFFFFFFFF  
FFF

@A00721:190:HGJW7DSXY:4:1605:4616:4695\_1:N:0:TCTGCAAG+GCTGCACT  
TACCTTTTGGAGGTCCAGGAACCTTTACTCCTAGTGTCTTTCTAGAGTCCAAGGACGTTTCCGTCGG  
AGGATGACAGGTGGGAGACCGCTCAATAACACTCTATTGAATCCCTTTTCCACGATGAAAGCTCTTGA  
TGA

+

FFFFFFFFFFFFFFFFFFFF,FFFFFFFF:FFFFFFFFFFFFFFFFFFFFFFFFFFFFFFFFFFFFFFFFFFFF  
FFFFFFFFFFFFFFFFFFFFFFFFFFFFFFFFFFFFFFFFFFFFFFFFFFFFFFFFFFFFFFFF:FFFFFFFFFFFFFFFFFFFF,  
FFF

@A00721:190:HGJW7DSXY:4:2649:22227:19194\_1:N:0:TCTGCAAG+GCTGCACT  
TTCTAATAGAGGATCCTGATGACATTATTCAACGGATACCGATCTCAGTTCTACCACAGAAACCGTC  
TCAGGAACTGTCTCCACTGATTGGAATTAGAGAAAGACGACCTTCTTGTGGGGACTGAGACCTCTGA  
AT

+

FFFFFFFFFFFFFF:FF:FFFFFF:FFF:FFFFFFFFFFFFFFFFFFFFFFFFFFFFFFFFFFFFFFFFFFFF  
:FFFFFFFFFFFF:FFFFFFFFFFFFFFFFFFFFFFFFFFFFFFFFFFFFFFFFFFFFFFFFFFFFFFFFFFFF  
FF

@A00721:190:HGJW7DSXY:4:1155:30355:3176\_2:N:0:TCTGCAAG+GCTGCACT  
CAGCTGATTCTTATTGCATGAACGTGCTGAGGTCAAACCTGTGGACGTTCTTTTCATCGACGAATTA  
TTCATGATTCACGCTGGTCAGACCCTTTTCTTACACATCTACTTAAG

+

FFFFFFFFFFFFFFFFFFFFFFFFFFFFFFFFFFFFFFFFFFFFFFFFFFFFFFFFFFFFFFFFFFFFFFFFFFFF  
FFFFF:FFFFFFFFFFFFFFFFFFFFFFFFFFFFFFFFFFFFFFFFFFFFFFFFFFFFFFFFFFFF

@A00721:190:HGJW7DSXY:4:2542:16902:8187\_2:N:0:TCTGCAAG+GCTGCACT  
TACATCAACATCAACGACATCATTCTTTATGAGTGTGCTTCTTATCGAAGTCGCAGTTATCGCTGCCC  
GGCCGACGTTTGTGCGGAACACTCAGAGGTTTACGGCAGAAAAATTC

+

:FF,F:FFFF,,F,,:F,F,:FFF,,F,,FF,FF,F:FFF,FFFFFFFF,F:F,,:,,FFF,:FF,,FFF  
,F:F:F:F:FF,F,FF:FF,,:F:F:FF:FFFF:FFFFFFFF,FF,

@A00721:190:HGJW7DSXY:4:2206:14055:10050\_1:N:0:TCTGCAAG+GCTGCACT  
CTCTTATATCGAGGCTATCGAGGACGATGAGTATCTTGAAGTTGTTGACGACAAGCCTCAAGAGGGTA  
GAGGACCACCTGGATCTTCTACTGTCTCTGCCTTCCAAGATTTCTTAGAAGAGGTTATTCTCTGGAACC  
ACC

+

FFFFFFFFFFFFFFFFFFFFFFFFFFFFFFFFFFFFFFFFFFFFFFFFFFFFFFFFFFFFFFFFFFFFFFFFFFFF  
FFFFFFFFFFFFFFFFFFFFFFFFFFFFFFFFFFFFFFFFFFFFFFFFFFFFFFFFFFFFFFFF:FFFFFFFFFFFFFFFFFFFF  
FFF

@A00721:190:HGJW7DSXY:4:2525:24840:21308\_2:N:0:TCTGCAAG+GCTGCACT  
TTGAGCCGCGTAGTCAGCGCGTTTAGCTGTATCATCAGTCAGAGTATACCCGATAGGGTACCGAGTCT  
CCAAGAGAATATTTATTCTTATGAGGCTCGAACTTCAACGTTTTTCAC

+

FFFFFFFFFFF:FFFFFFFF:FFFFFFFF:FFFFFFFFFFFFFFFFFFFFFFFFFFFFFFFF:FFFFFFFFFFFFF  
FFFFFFFF:,FFFFFFFFFFFFFFFFFFFFFFFF:FFFFFFFF:FFFFFF

@A00721:190:HGJW7DSXY:4:2438:16134:4069\_2:N:0:TCTGCAAG+GCTGCACT  
TATTATGACCTTGGAAGTTTTCGGCTGTGGTTGTGCTGGGACGATTCCATTCTGTTTTCAAAGAC  
TCCAATAACTGATCATTCTGATCATATGATTTTGACAATGGTTTCGA

+



```

FFFFFFFFFFFFFFFFFFFFFFFFFFFFFFFF:FFFFFFFFFFFFFFFF:FFF,FFFFFFFFFFFFFFFFFFFFFFFF
F:FFFFFFFF:FFFFFFFFFFFFFFFFFFFFFFFF:FFFFFFFFFFFFFFFF:F

```

+

+

+

+

+

+

+

+

@

+

@

+

@

+

@

+

@

+

@

+

[illegible]

@A00721:190:HGJW7DSXY:4:1651:1362:29309\_1:N:0:TCTGCAAG+GCTGCACT  
TTTTTAATGGTATGGTATAATGTGTCTTACAAATAGAACCTTCACTCTCGGTAATGAGAGTGTATTCC  
TTAATATTCTAGTAACCGCTATGTGGGCATTACTAGGATTTATCACACTCCTAAATTTGATAGCAATT  
TA

+

FFFFFFFFFFFFFFFFFFFFFFFFFFFFFFFFFFFFFFFFFFFFFFFFFFFFFFFFFFFFFFFFFFFFFFFF  
FFFFFFFFFFFFFFFFFFFFFFFFFFFFFFFFFFFFFFFFFFFFFFFFFFFFFFFFFFFFFFFFFFFFFFFF  
FF

@A00721:190:HGJW7DSXY:4:1356:3369:12117\_2:N:0:TCTGCAAG+GCTGCACT  
TTTAGTATTATTTACTATCGCCTTTATTGAAAATTGTATAAGAGTTAATTGCTTACACAAAAGTGACG  
CGCGAAGGAATCTTAATTGATTGAAGCTAGGCGTTGGGGAGAATGAAC

+

F:FFFFFFFFFFFFFFFFFFFFFFFFFFFFFFFFFFFFFFFFFFFFFFFFFFFFFFFFFFFFFFFF  
FFFFFFFFFFFFFFFFFFFFFFFFFFFFFFFFFFFFFFFFFFFFFFFFFFFFFFFFFFFFFFFF  
FFFF

@A00721:190:HGJW7DSXY:4:2122:2049:21950\_1:N:0:TCTGCAAG+GCTGCACT  
GCAGAATAACCTTCCCAAATCTAGATCTGCACAGAAGAAGGCTGAAGGTCGTTACCGGACGACCACTC  
AAAGGAAACGGGCTGTTGCCAGAGGAAAGCAGCGACCACCGAGGTCGCTCGTAACATTGACGGCAGT  
CCC

+

FFFFFF:F,FFFFFFFF,FFF,FFFF:FFFFFFFFFFFFFFFFFFFFFFFFFFFFFFFFFFFFFFFF  
FFFFFFFFFFFFFFFFFFFFFFFFFFFFFFFFFFFFFFFFFFFFFFFFFFFFFFFFFFFFFFFF  
FFF

@A00721:190:HGJW7DSXY:4:1258:11568:9940\_2:N:0:TCTGCAAG+GCTGCACT  
TCACATTCACCACTCCCATGCCAATCAATGATGTGACTATACAGTTCGGCCATTTCAAGAGTGGTCAA  
TACGTCGTGGGAGGTACTGAAGCCTTCCCCTCCGCTGGCACGAAGAAC

+

FFFFFFFFFFFFFFFFFFFFFFFFFFFFFFFFFFFFFFFFFFFFFFFFFFFFFFFFFFFFFFFF  
FFFFFFFFFFFFFFFFFFFFFFFFFFFFFFFFFFFFFFFFFFFFFFFFFFFFFFFFFFFFFFFF

@A00721:190:HGJW7DSXY:4:1219:15989:17096\_1:N:0:TCTGCAAG+GCTGCACT  
TCTTCTAAGTCTACCAGGAAGAGGGGAAATGTCCCCAAACTGAGAAGAATAAAGGGAAAGGTCCATC  
AGGACCTAAGAAGGGGAAATTACCCCTAATTCTGAAGGAAGATCTCCACCATCTGGGGTTGGGAATA  
AGA

+

FFFFFFFFFFFFFFFFFFFFFFFFFFFFFFFFFFFFFFFFFFFFFFFFFFFFFFFFFFFFFFFF  
FFFFFFFFFFFFFFFFFFFFFFFFFFFFFFFFFFFFFFFFFFFFFFFFFFFFFFFFFFFFFFFF  
FFF

@A00721:190:HGJW7DSXY:4:2152:10456:23234\_1:N:0:TCTGCAAG+GCTGCACT  
CTACGAAGTCGCTGAAGGCGGCTTGGGTCATTAAGGGTAGCTGTAAAGTTGCGCCTGCCGACCCCATC  
TTTGAGACCAAGACTCTCTACAGTAGGTCGTGCCTACTATGAGCAAATCTGTTGAATTCGTCACTGA  
GGA

+

FFFFFFFFFFFFFFFF,FFFFFFFFFFFFFFFFFFFFFFFFFFFFFFFFFFFFFFFFFFFFFFFF  
FFFFFFFFFFFFFFFFFFFFFFFFFFFFFFFFFFFFFFFFFFFFFFFFFFFFFFFFFFFFFFFF  
FFF

@A00721:190:HGJW7DSXY:4:1622:10908:1971\_2:N:0:TCTGCAAG+GCTGCACT  
TTTGGCTACTGGCGACAACTGAGAGCAGTCGCTGGGGAAAGAGAATTGCGTGGGTTGAAGGCCGACG  
CTTCGAGCTTGAGTGTGACGAGGCCGGTGACGTTTTTGTCAACGGCGT

+

FFFFFFFFFFFFFFFFFFFFFFFFFFFFFFFFFFFFFFFF,FFFF:FFFFFFFFFFFFFFFFFFFFFFFF  
FF:FFFFFFFFFFFFFFFFFFFFFFFFFFFFFFFFFFFFFFFFFFFFFFFFFFFFFFFF

@A00721:190:HGJW7DSXY:4:2642:6189:1251\_1:N:0:TCTGCAAG+GCTGCACT  
TAACTATGGGGCGAAGATCCCCTATGGAGTCTTGAAGGACTTAGGTTGGCATATTTATGCCGACGATA  
ATAAGCATGTCACCCTTAAGCACCGAGGTAAGCTCGGGACTTACAAGAGAGAGTGTGAGAGAGTCGCT  
CTC

+  
FF,FF,FFF:F,F,FFFFFF,F:FF,:FFFF,:F,FFFFFFFFFFFFFFFFFFFF:FFF:FFF:  
FFF:FFFFFFFF,FFF:FF,FFFFFFFFFFFFFFFF:FFF:,FF:F,FFFFFFFF:FFFFF  
FFF

@A00721:190:HGJW7DSXY:4:2473:31024:21746\_1:N:0:TCTGCAAG+GCTGCACT  
CTCTTCCGATCTTTGGGGATTTCGATGTGAGAAGGTGGAAGGTGTCAAGGGTCTTCTTCATGCTGATC  
TTTCAGGACCTAATCACGTCATGATTGATAGTTACGGCTCGTATCGAGTTGGAGGGAGGAAGTTCTCC  
GAA

+  
FFFFFFFFFFFFFFFFFFFFFFFFFFFFFFFFFFFFFFFFFFFFFFFFFFFFFFFFFFFFFFFF:FFFFFFFFFFFFFFFF  
FFFFFFFFFFFFFFFFFFFFFFFFFFFFFFFFFFFFFFFFFFFFFFFFFFFFFFFFFFFFFFFFFFFFFFFF  
FFF

@A00721:190:HGJW7DSXY:4:2529:14181:33254\_2:N:0:TCTGCAAG+GCTGCACT  
GAAGGCTCTAGAGAAGATCTCACCACCTGGAGAAGGCAAGTGGAGAGTCCAGAAGTTGATGAAGAAGG  
ATTATTTGAAGCAGGGGTTACCACTTCCTAAGGTGGATGAGGGAGGTT

+  
FFFFFFFFFFFFFFFF:FFFFFFFFFFFFFFFFFFFFFFFFFFFFFFFFFFFFFFFFFFFFFFFF  
FFFFFFFFFFFFFFFFFFFFFFFFFFFFFFFFFFFFFFFFFFFFFFFFFFFFFFFFFFFFFFFF

@A00721:190:HGJW7DSXY:4:2557:22788:26960\_1:N:0:TCTGCAAG+GCTGCACT  
TAACCTTGACTCACTACTCCGATCAGATCCGATGGTTTGATTGGTATGGACTACTCGACTTTTGAT  
CTGGAGTTGTCTAGGGTCATGGCAGATACTACCGATAAGGTGAAAAATATGCAGGTCAAAGATTCTGT  
AGC

+  
FFFFFFFFFFFFFFFFFFFFFFFFFFFFFFFFFFFFFFFF,FFFFFFFFFFFFFFFFFFFFFFFFFFFFFFFF  
FFFFFFFFFFFFFFFFFFFFFFFFFFFFFFFFFFFFFFFFFFFFFFFFFFFFFFFFFFFFFFFFFFFFFFFF  
FFF

@A00721:190:HGJW7DSXY:4:1140:2049:9580\_2:N:0:TCTGCAAG+GCTGCACT  
CAAAACCTATCGTTGTCGTACCTTACAAGGTTGAGGAGACTTTACAGCGGCTTATTGTGCGCGAGTTT  
CCAGAATTGCGGTTGAAGTTCACCCATTCTATCTTGAATGCTCACGCC

+  
FFFFFFFFFFFFFFFFFFFFFFFFFFFFFFFF,FF:FFFFFFFF:FFFFFF:FFFFFFFFFFFFFFFF  
FFFFFFFFFFFFFFFF:FFFFFFFFFFFFFFFF,FFFFFFFFFFFFFF

@A00721:190:HGJW7DSXY:4:2469:17119:28886\_2:N:0:TCTGCAAG+GCTGCACT  
ATAGATACGAGATACCTAGAGAAGGTCGCAGCGATCTTACTCGTTATCGGAGCTAAGAAGAAGACTTT  
GGGTACACGTTATGCTCGCAAACCTTAACGTTAGTACCGGAGGTGATCT

+  
FFFFFFFFFFFFFFFFFFFFFFFFFFFFFFFFFFFFFFFFFFFFFFFFFFFFFFFFFFFFFFFF:FFFFFFFFFFFFFFFF  
FFFFFFFFFFFFFFFFFFFFFFFFFFFFFFFFFFFFFFFFFFFFFFFFFFFFFFFFFFFFFFFF

@A00721:190:HGJW7DSXY:4:2531:20292:29622\_2:N:0:TCTGCAAG+GCTGCACT  
CGCCTACGGTGACTTTATGGACAAGATGCAAGTTCTTGGGAAATACTTGTTTCCCTTTTATAGTTTAG  
TAGGTGATCTTGACGTCGATTCTTTGTATAGGGAGTGTGAGAAGACAC

+  
FFFFFFFFFFFFFFFFFFFFFFFFFFFFFFFF:FFFFFFFFFFFFFFFFFFFFFFFFFFFFFFFF:FFFFFFFF:FFFF  
FFFFFFFFFFFFFFFF:FFFF:FFFFFFFFFFFFFFFFFFFFFFF,

@A00721:190:HGJW7DSXY:4:2240:4182:34882\_1:N:0:TCTGCAAG+GCTGCACT  
CTTGAAAACCAAGTTAAGAAGGAGGCTGATCAGGGAGTCTTGTACCTTCTGTCAAACCTTCGAGGTTT  
AGCTACGAGAGGTGATCCCGGATGTGGATTGAAGGCTGGCTCTAAGGGAGACTCCTTCTTTTGAATG  
TTG

+  
FFFFFFFFFFF:FFFFFF,FFFFFF:FFFF:,FFFF:FFF:FFF:FFF:FFFFFF,FFFFFFFFFFFF  
FFFFFFFFFFFFFFFFFFFFFFFFFFFFFFFFFFFFFFFFFFFFFFFFFFFFFFFFFFFFFFFF:FFFFFFFF,FF  
FFF

@A00721:190:HGJW7DSXY:4:1351:2474:25441\_1:N:0:TCTGCAAG+GCTGCACT  
GAGAAGTGTGCTTTACAAGGAGTTAGACTCTTCTTCAAGTTTTTAGATCTTCTTGATAATCTTAAAGA

AAAATTTTCGAATAAACTAATGAGAGGTATAGGCTTAGTCAAGTCTGTACTTACATTCTTTACGCCAG  
ATT

+

FFFFFFFFFFFFFF:FFFFFFFFFFFFFFFFFFFFFFFFFFFFFFFFFFFFFFFFFFFFFFFFFFFFFFFF  
FFFFFFFFFFFFFF:FFFFFFFFFFFFFFFFFFFFFFFFFFFFFFFFFFFFFFFFFFFFFFFFFFFFFFFF:FFFFFFFFFFFFFFFF  
FFF

@A00721:190:HGJW7DSXY:4:2515:19849:18458\_1:N:0:TCTGCAAG+GCTGCACT  
TACCTTTTGGAGGTCCAGGAACCTTTACTCCTAGTGTCTTTCTAGAGTCCAAGGACGTTTCCGTCGG  
AGGATGACAGGTGGGAGACCGCTCAATAACACTCTATTGAATCCCTTTTCCACGATGAAAGCTCTTTA  
TGA

+

FFFFFFFFFFFFFFFFFFFFFFFFFFFFFFFFFFFFFFFFFFFFFFFFFFFFFFFFFFFFFFFF:FFFFFFFFFFFFFFFF  
FFFFFFFFFFFFFFFFFFFFFFFFFFFFFFFFFFFFFFFFFFFFFFFFFFFFFFFFFFFFFFFFFFFFFFFF  
FFF

@A00721:190:HGJW7DSXY:4:2605:11089:35102\_1:N:0:TCTGCAAG+GCTGCACT  
GGATCCTGATGACATTATTTCAACGGATACCGATCTCAGTTCTACCACAGAAACCGTCTCAGGAACGT  
TCTCCACTGATTCGGAATTAGAGAAAGACGACCTTCTTGTTGGGACTGAGACCTCTGAATTTTCAGGG  
TGC

+

:FFFFFFFFFFFFFFFFFFFFFF:FFFFFFFFFFFFFFFFFFFFFFFFFFFFFFFFFFFFFFFFFFFFFFFF  
FFFFFFFFFFFFFFFFFFFFFFFFFFFFFFFFFFFFFFFFFFFFFFFFFFFFFFFFFFFFFFFFFFFFFFFF  
FFF

@A00721:190:HGJW7DSXY:4:2321:9815:7279\_2:N:0:TCTGCAAG+GCTGCACT  
CAGCTGATTCTTATTGCATGAACGTCGCTGAGGTCAAACCTGTGGACGTTCTTTTCATCGACGAATTA  
TTCATGATTCACGCTGGTCAGACCCTTTTCTTACACATCTACTTAAG

+

FFFFFFFFFFFFFFFFFFFFFFFFFFFFFF:FFFFFFFFFFFFFFFFFFFFFFFFFFFFFFFFFFFFFFFF  
FF:FFFFFFFFFFFFFFFFFFFFFFFFFFFFFF:FFFFFFFFFFFFFFFFFFFFFFFFFFFFFF

@A00721:190:HGJW7DSXY:4:2124:28709:27070\_1:N:0:TCTGCAAG+GCTGCACT  
TACTTCAACATCAACGACATCATTCTTGATGAGTGTCTGTTCTTATCGAAGTCTCAGTTATCGCTGCCC  
GGCCGACGTTTGTGCGGAACCTCTCAGAGGTTTACGGCAGAAAAATTTCTCCTGCTTGTAATTCGAGAG  
AG

+

FF:FFFFF:FFFFF:FFFFF,FFFFFFFFF:FFFFF,F:F::FFF:F,FF:FFFFFFFFFFF,FF:F:  
F:FFFFFFFFFFFF,FF:FFF:FFFF:FFFFF:FFFFFFFFFFFFFFFFFFFF::FFFFFFFFFFFFF,F  
FF

@A00721:190:HGJW7DSXY:4:2240:8088:13244\_1:N:0:TCTGCAAG+GCTGCACT  
CTCTTATATCGAGGCTATCGAGGACGATGAGTATCTTGAAGTTGTTGACGACAAGCCTCAAGAGGGTA  
GAGGACCACCTGGATCTTCTACTGTCTCTGCCTTCCAAGATTTCTTAGAAGAGGTTATTCTCTGGAACC  
ACC

+

FF:,F:FFF,FFFFFF,F,FFFFF:FFF:,FFFFFFF,,:FFFFFFFFF:FF:,F:,FFFFFFFFF,  
FFFFFF,FF,:FF:FFFFFF:F:F:FFFFFF:FFFF:FFFFFFFF:FFFFFFFF,FFFFFFFF,F  
FF,

@A00721:190:HGJW7DSXY:4:2569:18792:1313\_2:N:0:TCTGCAAG+GCTGCACT  
TTGAGCCGCGTAGTCAGCGCGTTTAGCTGTATCATCAGTCAGAGTATACCCGATAGGGTACCGAGTCT  
CCAAGAGAATATTTATTCTTATGAGGCTCGAACTTCAACGTTTTTCAC

+

FFFFFFFFFFFFFFFFFFFFFFFFFFFFFFFFFFFFFFFFFFFFFFFFFFFFFFFFFFFFFFFF  
FFFFFFFFFFFFFF,FF:FFFFFFFFFFFFFFFFFFFFFFFFFFFFFFFF

@A00721:190:HGJW7DSXY:4:2503:28610:22357\_2:N:0:TCTGCAAG+GCTGCACT  
ATTATGACCTTGAAAGTTTTCGGCTGTGGTTGTCTGCTGGGACGATTCCATTCTGTTTTCAAAGACT  
CCAATAACTGATCATTCTGATCATATGATTTTGGACAATGGTTTCGAA

+

[illegible]

```
+
FFFFFFFFFFFFFFFFFFFFFFFFFFFFFFFFFFFFFFFFFFFFFFFFFFFFFFFFFFFFFFFFFFFFF,,FFFFFF
FFFFFFFFFFFFFFFFFFFFFFFFFFFFFFFFFFFFFFFFFFFFFFFFFFFFFFFFFFFFFFFFFFFFFFFFFF
FFF
@A00721:190:HGJW7DSXY:4:1621:18846:11772_1:N:0:TCTGCAAG+GCTGCACT
GATTGGTTCGAACCCGTTGATGCTATGT CAGAAGAAGCTATTCAAGCTTGTCGTTTTAAAGACTGCAGA
GGCTGTCAAACAAGCCCAGACTCAAGGAGTCCAATCAAAGGTTTTGAATTTAGCTCAACTGGGAGAC
GTG
+
FFF:FFFFFFFFFFFFFF,FFFFFFFFFFFFFFFFFFFFFFFFFFFFFFFFFFFFFFFFFFFFFFFFFFFFFFFF
FFFFFFFFFFFFFFFFFFFFFFFFFFFFFFFFFFFFFFFFFFFFFFFFFFFFFFFFFFFFFFFFFFFFFFFFFFFF
FFF
@A00721:190:HGJW7DSXY:4:1206:25446:3944_1:N:0:TCTGCAAG+GCTGCACT
TACC AAATTCTTGGCTTTCAACGAAGTCTCTGATTTTATTAATCATTACTTTAACGATCTCTCGGTCA
TTTACTCTGTACTTGATCTACGTCGTTTAACTGT CGGAACAACCTTTACTTAGAATGACTCTATCTTT
TCA
+
FFFFFFFFFFFFFFFFFFFFFFFFFFFFFFFFFFFFFFFFFFFFFFFFFFFFFFFFFFFFFFFFFFFFFFFFFFFF
FFFFFFFFFFFFFFFFFFFFFFFFFFFFFFFFFFFFFFFFFFFFFFFFFFFFFFFFFFFFFFFFFFFFFFFFFFFF
FFF
@A00721:190:HGJW7DSXY:4:1415:13937:11130_2:N:0:TCTGCAAG+GCTGCACT
ACTCTTCGTTACGAGACCTGATGGTAGAATAGATTTAGTCTCTACACCCATCTCAACGAGGATAAAGC
GAGTTTTCCGTCCTGAACGTAATACACGAAGAGATCATCCGCAAACGA
+
FFFFFFFFFFFFFFFFFFFFFFFFFFFFFFFFFFFFFFFFFFFFFFFFFFFFFFFFFFFFFFFFFFFFFFFFFFFF
FFFFFFFFFFFFFFFFFFFFFFFFFFFFFFFFFFFFFFFFFFFFFFFFFFFFFFFFFFFFFFFFFFFFFFFFFFFF
@A00721:190:HGJW7DSXY:4:2334:9127:17331_1:N:0:TCTGCAAG+GCTGCACT
AATGAGGTCAAAGCTCTATTTATTAAACGA ACTATTATCCGATTCTTCGAGGGTATCACTACCACTGA
TCTGCCGACTTTAGTCAAGGA ACTTCAATTCCTTCGATGTTTATATTTTTCTATAAGGGAAAATAGCA
ATA
+
FFFFFFFFFFFFFFFFFFFFFFFFFFFFFFFFFFFFFFFFFFFFFFFFFFFFFFFFFFFFFFFFFFFFFFFFFFFF
FFFFFFFFFFFFFFFFFFFFFFFFFFFFFFFFFFFFFFFFFFFFFFFFFFFFFFFFFFFFFFFFFFFFFFFFFFFF
@A00721:190:HGJW7DSXY:4:2572:32253:27759_1:N:0:TCTGCAAG+GCTGCACT
ATTTTAGAACTTTATTT CAGAACTCTCTCCGATCACCTTGGTGTGATCTCCCGGAGGATCTTTTCAAT
AAGATGTATGATGATAATCTACTATTTTTAAATAGTGATATTCAGCGTATACTTGAATACTTTATCAA
AGA
+
FFFFFFFFFFFFFFFFFFFFFFFFFFFFFFFFFFFFFFFFFFFFFFFFFFFFFFFFFFFFFFFFFFFFFFFFFFFF
FFFFFFFFFFFFFFFFFFFFFFFFFFFFFFFFFFFFFFFFFFFFFFFFFFFFFFFFFFFFFFFFFFFFFFFFFFFF
FFF
@A00721:190:HGJW7DSXY:4:2602:13322:13197_1:N:0:TCTGCAAG+GCTGCACT
CAAAAAGTTGGAAGAGGTCTATGATATTTATTTTACTTATACTTTAAATAGCACC GATTATAACTTGA
CTGTTGATAATATTACAATAGCTCTTTCTCAGAAGATTAGAGAAGTAACCGGTGAACACGTCGGTAGC
ATT
+
FFF:FFFFFFFFFFFFFFFFFFFFFFFFFFFFFFFFFFFFFFFFFFFFFFFFFFFFFFFFFFFFFFFFFFFFFFFF
FFFFFFFFFFFFFFFFFFFFFFFFFFFFFFFFFFFFFFFFFFFFFFFFFFFFFFFFFFFFFFFFFFFFFFFFFFFF
FFF
@A00721:190:HGJW7DSXY:4:2401:7726:21574_1:N:0:TCTGCAAG+GCTGCACT
TTTTTAATGGTATGGTATAATGTGTCTTACAAATAGAACCTTCACTCTCGGTAATGAGAGTGATTCC
TTAATATTCTAGTAACCGCTATGTGGGCATTACTAGGATTTATCACACTCCTAAATTTGATAGCAATT
TAT
```

[illegible]



@A00721:190:HGJW7DSXY:4:2537:28999:8688\_1:N:0:TCTGCAAG+GCTGCACT  
CTCTTCCGATCTTTGGGGATTTTCGATGTGAGAAGGTGGAAGGTGTCAAGGGTCTTCTTCATGCTGATC  
TTTCAGGACCTAATCACATCATGATTGATAGTTACGGCTCGTATCGAGTTGGAGGGAGGAAGTTCTCC  
GAA

+

FFF:FFFFFFFFFFFFFFFFFFFFFFFFFFFFFFFFFFFFFFFFFFFFFFFFFFFFFFFFFFFFFFFFFFFFFFFF  
FFFFFFFFFFFFFFFFFFFFFFFFFFFFFFFFFFFFFFFFFFFFFFFFFFFFFFFFFFFFFFFFFFFFFFFFFFFF  
FFF

@A00721:190:HGJW7DSXY:4:2601:9326:17049\_2:N:0:TCTGCAAG+GCTGCACT  
GAAGGCTCTAGAGAAGATCTCACCACCTGGAGAAGGCAAGTGGAGAGTCCAGAAGTTGATGAAGAAGG  
ATTATTTGAAGCAGGGGTTACCACTTCCTAAGGTGGATGAGGGAGGTT

+

FFFFFFFF,FFFFFFFFFFFFFFFFFFFFFFFFFFFFFFFFFFFFFFFFFFFFFFFFFFFFFFFFFFFFFFFF  
FFFFFFFFFFFFFFFF:FFFFFF,FFFFFFF:,F:FFFFFFFF:FFFFFFFFFFFFFFFFFFFFFFFF

@A00721:190:HGJW7DSXY:4:2636:7726:28494\_1:N:0:TCTGCAAG+GCTGCACT  
TAACCTTTGACTCAACTACTCCGATCAGATCCGATGGTTTGATTGGTATGGACTACTCGACTTTTGAT  
CTGGAGTTGTCTAGGGTCATGGCAGATACTACCGATAAGGTGAAAAATATGCAGGTCAAAGATTCTGT  
AGC

+

FFFFF,FFFFFFF,FFFFFFFFFFFFFFFFFFFFFFFFFFFFFFFFFFFFFFFFFFFFFFFFFFFFFFFFFFFF  
FFFFFFFFFFFFFFFFFFFFFFFFFFFFFFFFFFFFFFFFFFFFFFFFFFFFFFFFFFFFFFFFFFFFFFFFFFFF  
FFF

@A00721:190:HGJW7DSXY:4:1304:9570:19664\_2:N:0:TCTGCAAG+GCTGCACT  
CAAAACCTATCGTTGTCGTACCTTACAAGGTTGAGGAGACTTTACAGCGGCTTATTGTCGCGCAGTTT  
CCAGAATTGCGGTTGAAGTTCACCCATTCTATCTTGAATGCTCACGCC

+

FFFFFFFFFFFFFFFFFFFFFFFFFFFFFFFFFFFFFFFFFFFFFFFFFFFFFFFFFFFFFFFFFFFFFFFFFFFF  
FFFFFFFFFFFF:FFFFFFFFFFFFFFFFFFFF:FFFFFFFFFFFFFFFFFFFF:FFF

@A00721:190:HGJW7DSXY:4:2548:16857:16626\_2:N:0:TCTGCAAG+GCTGCACT  
ATCGGAGCTAAGAAGAAGACTTTGGGTACACGTTATGCTCGAACTTAACGTTAGTACCGGAGGTGA  
TCTCTCTGCTTCTGCGTTACTGAGAGAAAAGATTGAGGACGCCTACGG

+

,FFFFFFFFFFFFFFFFFFFFFFFFFFFFFFFFFFFFFFFFFFFFFFFFFFFFFFFFFFFFFFFFFFFFFFFFFFFF  
FFFFFFFFFFFFFFFFFFFFFFFFFFFFFFFFFFFFFFFFFFFFFFFFFFFFFFFFFFFFFFFFFFFFFFFFFFFF  
FFF

@A00721:190:HGJW7DSXY:4:2550:12924:6402\_1:N:0:TCTGCAAG+GCTGCACT  
CTTGAAAACCAAGTTAAGAAGGAGGCTGATCATGGAGTCTTTGTACCTTCTGTCAAACCTTCGAGGTT  
AGCTACGAGAGGTGATCCCGGATGTGGATTGAAGGCTGGCTCTAAGGGAGACTCCTTCTTTTGAATG  
TTG

+

FFFFFFFFFFFFFFFFFFFF,FFFFFFFFFFFFFFFFFFFFFFFFFFFFFFFFFFFFFFFFFFFFFFFFFFFF  
FFFFFFFFFFFFFFFFFFFFFFFFFFFFFFFFFFFFFFFFFFFFFFFFFFFFFFFFFFFFFFFFFFFFFFFFFFFF  
FFF

@A00721:190:HGJW7DSXY:4:2252:16043:32064\_1:N:0:TCTGCAAG+GCTGCACT  
GAGAAGTGTGCTTTACAAGGAGTTAGACTCTTCTTCAAGTTTTTAGATCTTCTTGATAATCTTAAAGA  
AAAATTTTGAATAAACTAATGAGAGGTATAGGCTTAGTCAAGTCTGTACTTACATTCTTTACGCCAG  
ATT

+

:FFF,FFFF:F,FFFFFFFFF,FFFFFFFFFFFF:FFFFFFFFFFFF:FFFFFFFFFFFF,FFFF  
FFFFFFFFFFFFFFFFFFFF:FFFFFFFFFFFF,FFFFFFFFFFFFFFFFFFFFFFFFFFFFFFFFFFFF:FFFFFFFFFFFF  
FFF

@A00721:190:HGJW7DSXY:4:1530:16758:3333\_1:N:0:TCTGCAAG+GCTGCACT  
ACCTTTTGGAGGTCCAGGAACCTTTACTCCTAGTGTCTTTTCTAGAGTCCAAGGACGTTTCCGTCGGA  
GGATGACAGGTGGGAGACCGCTCAATAACACTCTATTGAATCCCTTTTCCACGATGAAAGCTCTTTAT  
GAG

+  
F:FFFFFFFF,FF,FFFFFF:FFFFFFFFFFFFFFFF:FFFFFFFFFFFFFFFFFFFFFFFFFFFFFFFF  
FFFFFFFFFFFFFFFF:FFFFFFFFFFFFFFFF:FFFFFFFFFFFFFFFFFFFFFFFFFFFFFFFF:  
FFF  
@A00721:190:HGJW7DSXY:4:2641:32805:13495\_1:N:0:TCTGCAAG+GCTGCACT  
GGATCCTGATGACATTATTTCAACGGATACCGATCTCAGTTCTACCACAGAAACCGTCTCAGGAAGT  
TCTCCACTGATTCGGAATTAGAGAAAGACGACCTTCTTGTGGGGACTGAGACCTCTGAATTTTCAGGG  
TGC  
+  
:FFFFFFFFFFFFFFFFFFFFFFFFFFFFFFFFFFFFFFFF:FFFFFFFFFFFFFFFF  
FFFFFFFFFFFFFFFFFFFFFFFFFFFFFFFFFFFFFFFFFFFFFFFFFFFFFFFFFFFFFFFF  
FFF  
@A00721:190:HGJW7DSXY:4:2442:23086:34741\_2:N:0:TCTGCAAG+GCTGCACT  
CAGCTGATTCTTATTGCATGAACGTCGCTGAGGTCAAACCTGTGGACGTTCTTTTCATCGACGAATTA  
TTCATGATTCACGCTGGTCAGACCCTTTTTCTTACACATCTACTTAAG  
+  
FFFFFFFFFFFFFFFFFFFFFFFFFFFFFFFFFFFFFFFFFFFFFFFFFFFFFFFFFFFFFFFF:FF:FFFFF  
FF:FFFFFFFFFFFF:FFFFFFFFFFFFFFFFFFFFFFFFFFFFFFFFFFFF  
@A00721:190:HGJW7DSXY:4:1358:1316:19961\_1:N:0:TCTGCAAG+GCTGCACT  
TTCAACATCAACGACATCATTCTTGATGAGTGTCTTCTTATCGAAGTCTCAGTTATCGCTGCCGGC  
CGACGTTTGTGCGAACTCTCAGAGTTTACGGCAGAAAAATTTCTCCTGCTTGTAAATTCGAGAGAGG  
ACA  
+  
FFFFF:FFF,FFFFFFFFFFFFFFFFFFFFFFFFFFFFFFFF:FF:FFF:FFFFFFFFFFFFFFFFFFFF  
FFFFFFFFFFFFFFFFFFFFFFFFFFFFFFFFFFFFFFFFFFFFFFFFFFFFFFFFFFFFFFFF  
FFF  
@A00721:190:HGJW7DSXY:4:2253:7184:8077\_1:N:0:TCTGCAAG+GCTGCACT  
CTCTTATATCGAGGCTATCGAGGACGATGAGTATCTTGAAGTTGTTGACGACAAGCCTCAAGAGGGTA  
GAGGACCACCTGGATCTTCTACTGTCTCTGCCTTCCAAGATTTCTTAGAAGAGGTTATTCTGGAACC  
ACC  
+  
FFF,FF:FFFFFFFFFFFFFFFFFFFFFFFFFFFFFFFFFFFFFFFFFFFFFFFFFFFFFFFFFFFF  
FFFFFFFFFFFFFFFFFFFFFFFFFFFFFFFFFFFFFFFFFFFFFFFFFFFFFFFFFFFFFFFF  
FFF  
@A00721:190:HGJW7DSXY:4:2656:12689:10848\_2:N:0:TCTGCAAG+GCTGCACT  
ATTATGACCTTGAAAGTTTTCGGCTGTGGTTGTGCTGGGACGATTCCATTCTGTTTTCAAAGACT  
CCAATAACTGATCATTCTGATCATATGATTTTGGACAATGGTTTCGAA  
+  
FFFFFFFFFFFFFFFFFFFFFFFFFFFFFFFFFFFFFFFFFFFFFFFFFFFFFFFFFFFFFFFF  
FFFFFFFFFFFFFFFF:FFFFFFFFFFFF:FFFFFFFFFFFFFFFF:F  
@A00721:190:HGJW7DSXY:4:2517:15456:1705\_2:N:0:TCTGCAAG+GCTGCACT  
GTGGAGGAGTTCTTGAAGCATCCCGACCTTCTTGTGAAAATTTTGATGCGGTTTCATAAGATTAT  
CAGTAATCCTGATTCTACTACGGATTCATGGACCTTCCATCCTGTACC  
+  
FFFFFFFFFFFFFFFFFFFFFFFFFFFFFFFFFFFFFFFF:FFFFFFFFFFFFFFFFFFFFFFFFFFFF  
FFFFFFFFFFFFFFFFFFFFFFFFFFFFFFFFFFFFFFFFFFFFFFFFFFFFFFFF  
@A00721:190:HGJW7DSXY:4:1502:20853:16783\_2:N:0:TCTGCAAG+GCTGCACT  
CTTTGGGAATTTGAAGCTCAGGCTGAAGCACAACGTTTGACCGTGACGAAGTGGTGTCTTGATCT  
ACGTTACGGATATACTCTCCTTGAGTTCACTCGTAAGGACACTACCAC  
+  
FFFFF:FFFFFFFFFFFF:FFFF:FFFFFFFFFFFFFFFFFFFFFFFF:FFF:FFFFFFFFFFFFFFFFFFFF:F  
FFF,FFF:FFFFFFFFFFFF:FFF::FFFF:FFFFFF:FF,FFFF:FFFF  
@A00721:190:HGJW7DSXY:4:1307:21956:29841\_2:N:0:TCTGCAAG+GCTGCACT  
TTCGAATAGTGATAGCCACCCGCCTTACAGAGGGCAGCAGCATGACCATAATTGGTATTGACTTTCG

+

@A00721:190:HGJW7DSXY:4:2515:32904:18991\_2:N:0:TCTGCAAG+GCTGCACT  
AATGATGACACTATTGTTTATGGATATGATGCTATTACTCATGATGGTTACGGTCAGGGAGGATTCTC  
AGTTTACAAGGACCTTAAGCGATGGATCGGGGTTAATTCTAAACATT

+

@A00721:190:HGJW7DSXY:4:2267:2175:20666\_2:N:0:TCTGCAAG+GCTGCACT  
GCAAAGATATTTTCATGAAACTACATAGGAACGTACCGGATTACCTGTCTTTCATATTATGAATGAAC  
CTTCGGCCGCTCTCTTTGCTTCGATGTTGGATGTCAAGAAGGGTT CAG

+

@A00721:190:HGJW7DSXY:4:2112:7383:12117\_1:N:0:TCTGCAAG+GCTGCACT  
CTTGGAACGAAGGCGACCTTCCGGAGTTTTTACGGGATCCGGAATGTTCTGTCTATATTAGGTGAAGC  
GAAATACGATTTCGAACGTCAACGTTCCACCGAGTTTCGTTTCGTACCTTGATGCTGACTTTCGTCAAT  
ATG

+

@A00721:190:HGJW7DSXY:4:1339:24840:28604\_1:N:0:TCTGCAAG+GCTGCACT  
ACGATACAAATGATAACTTCTAATTTACGTTTGCTACTCAGAGCTGGTCCTCTCAGCAAAGGGATGCA  
TGGTGTATCTCCTCAGGAGTCCCGGCATTTGATAATAATGACGAGACTTTCGTATAATCGCTGCAT  
ATT

+

@A00721:190:HGJW7DSXY:4:2369:15347:22654\_1:N:0:TCTGCAAG+GCTGCACT  
TGACTGGAGTTCAGACGTGTGCTCTTCCGATCTGATGACGTGAGAATAGGTGAAGGGATAGTTTTTAC  
CTCGACCAACATTAAGGCGGCGGCGACTAATCTTAAAGCTTCACCCAAAATGAAGGACACTTCGAAAC  
TGA

+

@A00721:190:HGJW7DSXY:4:1665:24596:20917\_1:N:0:TCTGCAAG+GCTGCACT  
GATTGGTTTCGAACCCGTTGATGCTATGTCAGAAGAAGCTATTCAAGCTTGTCTGTTTAAAGACTGCAGA  
GGCTGTCAAACAAGCCAGACTCAAGGAGTCCAATCAAAGGTTTTGAATTTAGCTCAACTGGGGAGAC  
GTG

+

@A00721:190:HGJW7DSXY:4:1517:16107:10379\_1:N:0:TCTGCAAG+GCTGCACT  
TACCAAATTCTTGGCTTTCAACGAAGTCTCTGATTTTATTAATCATTACTTTAACGATCTCTCGGTCA  
TTTACTCTGTACTTGATCTACGTCGTTAACTGTCGGAACAACCTTTACTTAGAATGACTCTATCTTT  
TCA

+

[illegible]





FFFFFFFFFFFFFFFFFFFFFFFFFFFFFFFFFFFFFFFFFFFFFFFFFFFFFFFFFFFFFFFFFFFFFFFF  
FFF

@A00721:190:HGJW7DSXY:4:1512:3441:4413\_2:N:0:TCTGCAAG+GCTGCACT  
CAAAACCTATCGTTGTCGTACCTTACAAGTTGAGGAGACTTTACAGCGGCTTATTGTCGCGCAGTTT  
CCAGAATTGCGGTTGAAGTTCACCCATTCTATCTTGAATGCTCACGCC

+  
FFFFFFFF:FFFFFFFFFFFFFFFFFFFFFFFFFFFFFFFFFFFFFFFFFFFFFFFFFFFFFFFF:FFFFFFFF:FFFFFFFF  
:FFFFFFFFFFFFFFFF:FFFFFFFFFFFFFFFFFFFFFFFFFFFFFFFFFFFFFFFF

@A00721:190:HGJW7DSXY:4:1228:18014:7858\_1:N:0:TCTGCAAG+GCTGCACT  
CGCCTACGGTGACTTTATGGACAAGATGCAAGTTCTTGGGAAATACTTGTTCCTTTTTAGGTTTAG  
TAGGTGATCTTGACGTCGATTCTTTGTATAGGGAGTGTGAGAAGACAACGAATCTTGAAACTACGGTC  
CTT

+  
FF:FFF:FFFF:FFFFFFFF,FFF:FFFF,FFF:FFFFFFFF, F:FFFFFFFF  
FFFFFFFFFFFFFFFFFFFFFFFFFFFFFFFFFFFFFFFF:FFFF,FFFFFFFF:FFFFFFFF  
FFF

@A00721:190:HGJW7DSXY:4:1266:26106:9846\_1:N:0:TCTGCAAG+GCTGCACT  
CTGGAGTTCAGACGTGTGCTCTTCCGATCTCTGGAGTCTTGTACCTTCTGTCAAACCTTCGAGGTTT  
AGCTACGAGAGGTGATCCCGGATGTGGATTGAAGGCTGGCTCTAAGGGAGACTCCTTCTTTTGAATG  
TTG

+  
FFFFFFFFFFFFFFFFFFFFFFFFFFFFFFFFFFFFFFFF:FFFF:FFFFFFFFFFFFFFFFFFFFFFFF  
FFFFFFFFFFFFFFFFFFFFFFFFFFFFFFFFFFFFFFFFFFFFFFFFFFFFFFFFFFFFFFFF  
FFF

@A00721:190:HGJW7DSXY:4:1406:24035:14716\_1:N:0:TCTGCAAG+GCTGCACT  
AAGTGTGCTTTACAAGGAGTTAGACTCTTCTTCAAGTTTTAGATCTTCTTGATAATCTTAAAGAAAA  
ATTTTCGAATAAACTAATGAGAGGTATAGGCTTAGTCAAGTCTGTACTTACATTCTTTACGCCAGATT

+  
F,FFFF,FFFFFF::FFFFFF,FF,FFFFFFFF:FFF:FFFFFF:, :FFFF, F:FFF:F:FF, F  
:FFFFFFFF:F, F::FFF:F:FFFF:FFFFFFFF,FFFFFFFF:FF:FFFFFFFF, F, FF

@A00721:190:HGJW7DSXY:4:1643:21197:8923\_1:N:0:TCTGCAAG+GCTGCACT  
ACCTTTTGGAGGTCCAGGAACCTTTACTCCTAGTGTCTTTTCTAGAGTCCAAGGACGTTTCCGTCGGA  
GGATGACAGGTGGGAGACCGCTCAATAACACTCTATTGAATCCCTTTCCACGATGAAAGCTCTTTAT  
GAG

+  
FFFFFFFFFFFFFFFFFFFFFFFFFFFFFFFFFFFFFFFFFFFFFFFFFFFFFFFFFFFFFFFF  
FFFFFFFFFFFFFFFFFFFFFFFFFFFFFFFF,FFFF:FFFF::FFFFFFFFFFFFFFFF  
FFF

@A00721:190:HGJW7DSXY:4:1102:6479:36166\_1:N:0:TCTGCAAG+GCTGCACT  
GATCCTGATGACATTATTTCAACGGATACCGATCTCAGTTCTACCACAGAAACCGTCTCAGGAAGTGT  
CTCCACTGATTGGAATTAGAGAAAGACGACCTTCTTGTGGGACTGAGACCTCTGAATTTTCAGGTT  
GCC

+  
FFFFFFFFFFFFFFFFFFFFFFFFFFFFFFFFFFFFFFFFFFFFFFFFFFFFFFFFFFFFFFFF  
FFFFFFFFFFFFFFFFFFFFFFFFFFFFFFFFFFFFFFFFFFFFFFFFFFFFFFFFFFFFFFFF  
FFF

@A00721:190:HGJW7DSXY:4:1331:24216:13025\_2:N:0:TCTGCAAG+GCTGCACT  
AAGCTGATTCTTATAGCATGAACGTCGCTGAGGTCAAACATGTGGACGTTCTTTTCATCGACGAATTA  
TTCATGATTCAAGCTGTTCAACACATATTAATACACATATACTTAAG

+  
,F,, ,FFFF,:F,,,,,F:FF,FFF::FFFFFF,FF:F,FF,, ,FFFFFFFF:FF,FFFFFF:FF  
,FFFFFFFF,F,, ,F:,F,F,F,, ,F,,,,,FFF:F,F,,FFF:FFF

@A00721:190:HGJW7DSXY:4:1424:25003:5368\_1:N:0:TCTGCAAG+GCTGCACT  
TTCAACATCAACGACATCATTCTTGATGAGTGTCTTCTTATCGAAGTCTCAGTTATCGCTGCCCGGC

CGACGTTTGTGCGGAACTCTCAGAGGTTTACGGCAGAAAAATTTCTCCTGCTTGTAATTCGAGAGAGG  
ACA

+

FFFFFFFFFFFFFFFFFFFFFFFFFFFFFFFFFFFFFFFFFFFFFFFFFFFFFFFFFFFFFFFFFFFFFFFF  
FFFFFFFFFFFFFFFFFFFFFFFFFFFFFFFFFFFFFFFFFFFFFFFFFFFFFFFFFFFFFFFFFFFFFFFF  
FFF

@A00721:190:HGJW7DSXY:4:2256:11731:23281\_1:N:0:TCTGCAAG+GCTGCACT  
CTCTTATATCGAGGCTATCGAGGACGATGAGTATCTTGAAGTTGTTGACGACAAGCCTCAAGAGGGTA  
GAGGACCACCTGGATCTTCTACTGTCTCTGCCTTCCAAGATTTCTTAGAAGAGGTTATTCCTGGAACC  
ACC

+

FFF::FFFFFFFF:FFFFFFFFFFFFFF:FFFFF,FFFFFFFFFFFF,FFFF:F:FFFFFFFFFFFFFF:FFF  
::FFFF,::,FFFFFFFFFFFFFFFFFFFFFF:FFFFF,FFFFF:FFFFF,:FFFFFFFF:FFFF:F  
F,F

@A00721:190:HGJW7DSXY:4:2430:27697:29418\_1:N:0:TCTGCAAG+GCTGCACT  
CTTGGAAGTTTTTCGGCTGTGGTTGTCGCTGGGGACGATTCCATTCTGTTTTCAAAGACTCCAATAAC  
TGATCATTCTGATCATATGATTTTGACAATGGTTTGAAGCGAAATTTTGAGGGATAAACCAGCGT  
ACT

+

FFFFFFFFFFFF,FFFFFFFFFFFFFFFFFFFFFFFFFFFFFFFFFFFFFFFFFFFFFFFFFFFFFFFFFFFF  
FFFFFFFFFFFFFFFFFFFFFFFFFFFFFFFFFFFFFFFFFFFFFFFFFFFFFFFFFFFFFFFFFFFFFFFF  
FFF

@A00721:190:HGJW7DSXY:4:2543:10827:12007\_2:N:0:TCTGCAAG+GCTGCACT  
GTGGAGGGAGTTCTTGAAGCATCCCGACCTTCTTGTGAAAATTTTGATGCGGTTTCATAAGATTAT  
CAGTAATCCTGATTCTACTACGGATTCATGGACCTTCCATCCTGTACC

+

FFFFFFFFFFFFFFFFFFFFFFFFFFFFFFFFFFFFFF:FFFFFFFFFFFFFFFFFFFFFFFFFFFFFFFFFFFF  
FFFFFFFFFFFFFFFFFFFFFFFFFFFFFFFFFFFFFFFFFFFFFFFFFFFFFFFFFFFFFFFFFFFF

@A00721:190:HGJW7DSXY:4:1324:13250:23750\_2:N:0:TCTGCAAG+GCTGCACT  
TTTGAAGCTCAGGGTGAAGCACAACGTTTGACCGTGACGAAGTGTGGTGTCTTGATCTACGTTACGG  
ATATACTCTCCTTGAGTTCACCTCGTAAGGACACTACCACTTATTACGA

+

,FFFFFFFFFFFFFFFFFFFFFFFFFFFFFF:FFFFFFFFFFFFFFFFFFFFFFFFFFFFFFFFFFFFFFFFFFFF  
FFFFFFFFFFFFFFFFFFFFFFFFFFFFFF:FFFFFFFFFFFFFF:FFFF:FF:FFFF

@A00721:190:HGJW7DSXY:4:1656:7093:24706\_2:N:0:TCTGCAAG+GCTGCACT  
TTCGAATAGTGATAGCCACCCGCCTTACAGAGGGGCAGCAGCATGACCATAATTGGTATTGACTTTCG  
TACCACCTTTCTACTGTCTGTCTCGCCTCTTCAATGAAGTTTAAAT

+

FFFFFFFFFFFFFFFFFFFFFFFFFFFFFFFFFFFFFFFFFFFFFFFFFFFFFFFFFFFFFFFFFFFFFF:FFFFFFFFFFFFFFFFFFFF  
FFFFFFFFFFFFFFFFFFFFFFFFFFFFFFFFFFFFFFFFFFFFFFFFFFFFFFFFFFFFFFFFFFFF

@A00721:190:HGJW7DSXY:4:1308:16622:35853\_1:N:0:TCTGCAAG+GCTGCACT  
TTTATGATATGATGCTATTACTCATGATGTTACGGTCAGGAGGATTCTCAGTTTACAAGGACCTT  
AAGCGATTGATCGGGGTTAATTCTAAAACATTACCCGAAAGACGTGCTAAATTAAAACCATTGTACGA  
TGT

+

FFFFFFFFFFFFFFFFFFFFFFFFFFFFFFFFFFFFFFFFFFFFFFFFFFFFFFFFFFFFFFFFFFFFFF:FFFFFFFFFFFFFFFFFFFF  
FFFFFFFFFFFFFFFFFFFF:FFFFFFF:F:FFFFFFFFFFFFFFFFFFFFFFFFFFFFFFFFFFFF,FFFFFFFFFFFF  
FFF

@A00721:190:HGJW7DSXY:4:2274:18059:35055\_2:N:0:TCTGCAAG+GCTGCACT  
GCAAAGATATTTTCATGAAACTACATAGGAACGTACCGGATTACCTGTCTTTCATATTATGAATGAAC  
CTTCGGCCGCTCTCTTTGCTTCGATGTTGGATGTCAAGAAGGGTTCAG

+

FFFF::FFFFFFFFFFFFFFFFFFFFFF:FFFFFFFFFFFFFFFF:FFFFFFFFFFFF:FFFFF,FFFFFFF  
FFFF:FFFFFFFFFFFF,FFFFF:FFFFFFFFFFFF:FFFFFFFFFFFFFFFF





@A00721:190:HGJW7DSXY:4:2610:13657:14967\_1:N:0:TCTGCAAG+GCTGCACT  
ATTTTAGAACTTTATTTTCAGAACTCTCTCCGATCACCTTGGTGTGATCTCCCGGAGGATCTTTTCAAT  
AAGATGTATGATGATAATCTACTATTTTAAATAGTGATATTCAGCGTATACTTGAATACTTTATCAA  
AGA

+

FFFFFFFFFFFFFFFFFFFFFFFFFFFFFFFFFFFFFFFFFFFFFFFFFFFFFFFFFFFFFFFFFFFFFFFF  
FFFFFFFFFFFFFFFFFFFFFFFFFFFFFFFFFFFFFFFFFFFFFFFFFFFFFFFFFFFFFFFFFFFFFFFF  
FFF

@A00721:190:HGJW7DSXY:4:1171:19343:18082\_1:N:0:TCTGCAAG+GCTGCACT  
AAAAAGTTGGAAGAGGTCTATGATATTTATTTTACTTATACTTTAAATAGCACCGATTATAACTTGAC  
TGTTGATAATATTACAATAGCTCTTCTCAGAAGATTAGAGAAGTAACCGGTGAACACGTCGGTAGCA  
TTG

+

FFFFFFFFFFFFFFFFFFFFFFFFFFFFFFFFFFFFFFFFFFFFFFFFFFFFFFFFFFFFFFFFFFFFFFFF  
FFF:FFFFFFFFFFFFFFFFFFFFFFFFFFFFFFFFFFFFFFFFFFFFFFFFFFFFFFFFFFFFFFFFFFFF  
FFF

@A00721:190:HGJW7DSXY:4:2625:14000:17190\_2:N:0:TCTGCAAG+GCTGCACT  
TCCTTAATATTCTAGTAACCGCTATGTGGGCATTACTAGGATTTATCACACTCCTAAATTTGATAGCA  
ATTTATGTTTTAAATGCTAGGAAAATTTTAGAAAACTCCATTGTATA

+

:FFFFFFFFFFFFFFFFFFFFFFFFFFFFFFFFFFFFFFFFFFFFFFFFFFFFFFFFFFFFFFFFFFFFFFFF  
FFFFFFFFFFFFFFFFFFFFFFFFFFFFFFFFFFFFFFFFFFFFFFFFFFFFFFFFFFFFFFFFFFFFFFFF

@A00721:190:HGJW7DSXY:4:2318:10908:12587\_2:N:0:TCTGCAAG+GCTGCACT  
TTTAGTATTATTTACTATCGCCTTTATTGAAAATTGTATAAGAGTTAATTGCTTACACAAAAGTGACG  
CGCGAAGGAATCTTAATTGATTGAAGCTAGGCGTTGGGGAGAATGAAC

+

FFFFFF:FFFFFFFFFFFFFFFFFFFFFFFFFFFFFFFFFFFFFFFFFFFFFFFFFFFFFFFFFFFFFFFF  
FFFFFFFFFFFF:FFFFFFFFFFFFFFFFFFFFFFFFFFFFFFFFFFFFFFFFFFFFFFFFFFFFFFFFFFFF

@A00721:190:HGJW7DSXY:4:2351:6388:36041\_1:N:0:TCTGCAAG+GCTGCACT  
GCAGAATAACCTTCCCAAATCTAGATCTGCACAGAAGAAGGCTGAAGGTCGTTACCGGACGACCACTC  
AAAGGAAACGGGCTGTTGCCAGAGGAAAGCAGCGACCAACCGAGGTCGCTCGTAACATTGACGGCAGT  
CCC

+

FFFFFFFFFFFFFFFFFFFF,FFFFFFFFFFFFFFFFFFFFFFFFFFFFFFFFFFFFFFFFFFFFFFFFFFFF  
FF:FFFFFFFFFFFFFFFFFFFFFFFFFFFFFFFFFFFFFFFFFFFFFFFFFFFFFFFFFFFFFFFFFFFF  
FFF

@A00721:190:HGJW7DSXY:4:1331:4309:30561\_2:N:0:TCTGCAAG+GCTGCACT  
TCACATTCACCACTCCCATGCCAATCAATGATGTGACTATACAGTTCGGCCATTTCAAGAGTGGTCAA  
TACGTCGTGGGAGGTACTGAAGCCTTCCCCTCCGCTGGCACGAAGAAC

+

FFFFFFF:FFFFFFFFFFFFFFFFFFFFFFFFFFFFFFFFFFFFFFFFFFFFFFFFFFFFFFFFFFFFFFFF  
FFF:FFFFFFFFFFFFFFFFFFFFFFFFFFFFFFFFFFFFFFFFFFFFFFFFFFFFFFFFFFFFFFFFFFFF

@A00721:190:HGJW7DSXY:4:2534:5791:13870\_1:N:0:TCTGCAAG+GCTGCACT  
TCTTCTAAGTCTACCAGGAAGAGGGGAAATGTCCCCAAAAGTGAAGAATAAAGGGAAAGGTCCATC  
AGGACCTAAGAAGGGGAAATTACCCCTAATTCTGAAGGAAGATCTCCACCATCTGGGGTTGGGAATA  
AGA

+

FFFF:FFFFFFFFFFFFF:FFFF:FFFFFFFFFFFFF:FFF:FFFFFFFFFFFFFFFFFFFFFFFFFFFF  
FFFFFFFFFFFFFFFFFFFFFFFFFFFFFFFFFFFFFFFFFFFFFFFFFFFFFFFFFFFFFFFFFFFF,FFFF  
FFF

@A00721:190:HGJW7DSXY:4:2225:5348:22811\_1:N:0:TCTGCAAG+GCTGCACT  
CTACGAAGTCGCTGAAGGCGGCTTGGGTCAATTAAGGGTAGCTGTAAAGTTGCGCCTGCCGACCCCATC  
TTTGAGACCAAGACTCTCTACAGTAGGTCGTGCCTACTATGAGCAAATCTGTTGAATTGCTCACTGA  
GGA

+  
FFFFFFFF:FFFFFFFFFFFFFFFFFFFFFFFFFFFFFFFFFFFFFFFFFFFFFFFF  
:FFFFF:FFFFFFFFFFFFFFFFFFFFFFFFFFFFFFFFFFFFFFFFFFFFFFFF  
FFF  
@A00721:190:HGJW7DSXY:4:2278:9860:8923\_2:N:0:TCTGCAAG+GCTGCACT  
TTTGGCTACTGGCGACAACTGAGAGCAGTCGCTGGGAAAGAGAATTGCGTGGGTTGAAGGCCGACG  
CTTCGAGCTTGAGTGTGACGAGGCCGGTGACGTTTTTGTCAACGGCGT  
+  
FFFFFFFFFFFFFFFFFFFFFFFFFFFFFFFFFFFFFFFFFFFFFFFFFFFFFFFF  
FFFFFFFFFFFFFFFFFFFFFFFFFFFFFFFFFFFFFFFFFFFFFFFF  
@A00721:190:HGJW7DSXY:4:1601:16667:16016\_1:N:0:TCTGCAAG+GCTGCACT  
CGAAGATCCCCTATGGAGTCTTGAAGGACTTAGGTTGGCATATTTATGCCGACGATAATAAGCATGTC  
ACCCTTAAGCACCAGGTAAGCTCGGGACTTACAAGAGAGAGTGTGAGAGAGTCGCTCTCACTATTTT  
TGC  
+  
FF:FFFFFFFFF::FFF:FFFFFFFFFFFFFFFFFFFFFFFF,FFFFFFFFFFFFFFFF,FFFFFFFF  
FFFFFFFFFFFFFFFF:FFFFFFFFFFFF:FFFFFFFFFFFFFFFFFFFFFFFFFFFFFFFF  
FFF  
@A00721:190:HGJW7DSXY:4:2155:17969:24972\_2:N:0:TCTGCAAG+GCTGCACT  
CGTCATTGGGGATTTTCGATGTGAGAAGGTGGAAGGTGTCAAGGGTCTTCTTCATGCTGATCTTTCAGG  
ACCTAATCACATCATGATTGATAGTTACGGCTCGTATCGAGTTGGAGG  
+  
FFFFF,FFFFFFFFFFFFFFFFFFFFFFFFFFFFFFFFFFFFFFFF:FFFFFFFFF:FFFFFFFFFFFFFFFF:FFF  
FFFFFFFFFFFFFFFF:FFF:FFFFFFFFFFFFFFFFFFFFFFFF:FF  
@A00721:190:HGJW7DSXY:4:1217:29243:28682\_1:N:0:TCTGCAAG+GCTGCACT  
GAAGGCTCTAGAGAAGATCTCACCACTGGAGAAGGCAAGTGGAGAGTCCAGAAGTTGATGAAGAAGG  
AGTATTTGAAGCAGGGGTTAACACTTCCTAAGGTGGATGAGGGAGGTTGTTTCTTTGGAGTTTATAGAT  
AA  
+  
FFFF:FFFFFFFF,FFFFFFFFFFFFFFFF:FFFFFF,FFFF,FFFFFFFF,FF,:FFF:FFF:FFFF,  
F,FFFFFFFF,F:FFFFFFFF,:F,FFFFFFFF,FFFFFFFF,FFFFFFFF,FFFFFFFF:FFFFFFF  
FF  
@A00721:190:HGJW7DSXY:4:2664:5728:12070\_1:N:0:TCTGCAAG+GCTGCACT  
TAACCTTTGACTCAACTACTCCGATCAGATCCGATGGTTTGATTGGTATGGACTACTCGACTTTTGAT  
CTGGAGTTGTCTAGGGTCATGGCAGATACTACCGATAAGGTGAAAAATATGCAGGTCAAAGATTCTGT  
AGC  
+  
FF:FFFFFFFFFFFFFFFFFFFFFFFFFFFFFFFFFFFFFFFFFFFFFFFFFFFFFFFF  
FFFFFFFFFFFFFFFFFFFFFFFFFFFFFFFFFFFFFFFFFFFFFFFFFFFFFFFF  
FFF  
@A00721:190:HGJW7DSXY:4:1577:20699:22467\_2:N:0:TCTGCAAG+GCTGCACT  
CAAAACCTATCGTTGTCGTACCTTACAAGGTTGAGGAGACTTTACAGCGGCTTATTGTCGCGCAGTTT  
CCAGAATTGCGGTTGAAGTTCACCCATTCTATCTTGAATGCTCACGCC  
+  
FFFFFFFFFFFFFFFFFFFFFFFFFFFFFFFFFFFFFFFFFFFFFFFFFFFFFFFF  
FFFFFFFFFFFFFFFFFFFFFFFFFFFFFFFFFFFFFFFFFFFFFFFF  
@A00721:190:HGJW7DSXY:4:1335:10700:8218\_1:N:0:TCTGCAAG+GCTGCACT  
CGCCTACGGTGACTTTATGGACAAGATGCAAGTCTTGGGAAATACTTGTTTCCCTTTTAGGTTTAG  
TAGGTGATCTTGACGTCGATTCTTTGTATAGGGAGTGTGAGAAGACAACGAATCTTGAAACTACGGTC  
CTT  
+  
FFFFF:FFFFFFFFFFFFFFFF:::FFFFFFFFFFFF:FFFFFFFFFFFFFFFF:FFFFFFFF:FFF  
FFF:FFFFFFFFFFFFFFFFFFFFFFFFFFFFFFFF:FF:FFFFFFFFFFFFFFFF,FFFFFFFFFFFFFFFF  
FFF

@A00721:190:HGJW7DSXY:4:2303:9281:20447\_1:N:0:TCTGCAAG+GCTGCACT  
CTGGAGTTCAGACGTGTGCTCTTCCGATCTCATGGAGTCTTTGTACCTTCTGTCAAACCTTCGAGGTTT  
AGCTACGAGAGGTGATCCCGGATGTGGATTGAAGGCTGGCTCTAAGGGAGACTCCTTCTTTTTGAATG  
TTG

+

FFFFFFFFFFFFFFFFFFFFFFFFFFFFFFFFFFFFFFFFFFFFFFFFFFFFFFFFFFFFFFFFFFFFFFFF  
FFFFFFFFFFFFFFFFFFFFFFFFFFFFFFFFFFFFFFFFFFFFFFFFFFFFFFFFFFFFFFFFFFFFFFFF  
FFF

@A00721:190:HGJW7DSXY:4:2350:29369:23171\_1:N:0:TCTGCAAG+GCTGCACT  
ACCTTTTGGAGGTCCAGGAACCTTTACTCCTAGTGTCTTTTCTAGAGTCCAAGGACGTTTCCGTCGGA  
GGATGACAGGTGGGAGACCGCTCAATAACACTCTATTGAATCCCTTTCCACGATGAAAGCTCTTTAT  
GAG

+

FFFFFFFFFFFFFFFFFFFFFFFFFFFFFFFFFFFFFFFFFFFFFFFFFFFFFFFFFFFFFFFFFFFFFFFF  
FFFFFFFFFFFFFFFFFFFFFFFFFFFFFFFFFFFFFFFFFFFFFFFFFFFFFFFFFFFFFFFFFFFFFFFF  
FFF

@A00721:190:HGJW7DSXY:4:1239:2474:34240\_1:N:0:TCTGCAAG+GCTGCACT  
GATCCTGATGACATTATTTCAACGGATACCGATCTCAGTTCTACCACAGAAACCGTCTCAGGAACTGT  
CTCCACTGATTCGGAATTAGAGAAAGACGACCTTCTTGTGGGACTGAGACCTCTGAATTTTCAGGT  
GCC

+

FFFFFF:FFFF,FFFFFFFFFFFF,F:FF,FFFFFFFF,FFFF,F,FFFFFF,FFF:FFF:,FFF  
,F,FF:FFFFFF,FFFFF:FFFFFFFF,FFF,FFFFFFFF,F:FFFF,FF:FFFFFFFFFFFF,FF  
F:F

@A00721:190:HGJW7DSXY:4:2178:24994:11083\_2:N:0:TCTGCAAG+GCTGCACT  
AGCTGATTCTTATTGCATGAACGTCGCTGAGGTCAAACCTGTGGACGTTCTTTTCATCGACGAATTAT  
TCATGATTCACGCTGGTCAGACCCTTTTCTTACACATCTACTTAAGG

+

FFFFFFFFFFFFFFFFFFFFFFFFFFFFFFFFFFFFFFFFFFFFFFFFFFFFFFFFFFFFFFFFFFFFFFFF  
FFFFFFFFFFFFFFFFFFFFFFFFFFFFFFFFFFFFFFFFFFFFFFFFFFFFFFFFFFFFFFFFFFFFFFFF

@A00721:190:HGJW7DSXY:4:2312:32344:1924\_1:N:0:TCTGCAAG+GCTGCACT  
TTCAACATCAACGACATCATTCTTGATGAGTGTGCTTCTTATCGAAGTCTCAGTTATCGCTGCCGGC  
CGACGTTTGTGCGGAACTCTCAGAGTTTACGGCAGAAAAATTTCTCCTGCTTGTAAATTCGAGAGAGG  
ACA

+

FFFFFFF:F,FFFFFFFFFFFFFFFFFFFFFFFFFFFFFFFFFFFFFFFFFFFFFFFFFFFFFFFFFFFF  
FF:FF:FF:FFFF,FFF:FFFFFFFFFFFFFFFFFFFFFFFFFFFFFFFFFFFFFFFFFFFFFFFFFFFF  
FFF

@A00721:190:HGJW7DSXY:4:2248:20057:20885\_2:N:0:TCTGCAAG+GCTGCACT  
TATATCGAGGCTATCGAGGACGATGAGTATCTTGAAGTTGTTGACGACAAGCCTCAAGAGGGTAGAGG  
ACCACCTGGATCTTCTACTGTCTCTGCCTTCCAAGATTTCTTAGAAGA

+

FFFFFFFFFFFFFFFFFFFFFFFFFFFFFFFFFFFFFFFFFFFFFFFFFFFFFFFFFFFFFFFFFFFFFFFF  
FFFFFFF::FFFFFFFFFFFFFFFFFFFF:FFFFFFFFF:FFFF:FFFFFF

@A00721:190:HGJW7DSXY:4:2507:6198:6057\_1:N:0:TCTGCAAG+GCTGCACT  
CTTGGAAGTTTTCGGCTGTGGTTGTCGCTGGGACGATTCCATTCTGTTTTCAAAGACTCCAATAAC  
TGATCATTCTGATCATATGATTTTGACAATGGTTTGAAGCGAAATTTTGAGGGATAAACCAGCGT  
ACT

+

FFFFFFFFFFFFFFFFFFFFFFFFFFFFFFFFFFFFFFFFFFFFFFFFFFFFFFFFFFFFFFFFFFFFFFFF  
FF,FFF:FFFFFFFFFFFFFFFFFFFFFFFFFFFFFFFFFFFFFFFFFFFFFFFFFFFFFFFFFFFFFFFF  
FFF

@A00721:190:HGJW7DSXY:4:2615:17372:21371\_2:N:0:TCTGCAAG+GCTGCACT  
GTGGAGGGCGTTCTTGAAGCATCCCGACCTTCTTGTGAAAATTTTGTGCGGTGTCATAAGATTAT

+

@A00721:190:HGJW7DSXY:4:1332:5204:21277\_2:N:0:TCTGCAAG+GCTGCACT  
TTTGAAGCTCAGGGTGAAGCACACGTTTGACCGTGACGAAGTGTGGTGTTCTTGATCTACGTTACGG  
ATATACTCTCCTTGAGTTCACCTCGTAAGGACACTACCACTTATTACGA

+

@A00721:190:HGJW7DSXY:4:2553:23149:28494\_1:N:0:TCTGCAAG+GCTGCACT  
GCCTTACAGAGGGGCAGCAGCATGACCATAATTGGTATTGACTTTTGGTACCACCTTTTCTACTGTCTG  
TCTCGCCTCTTCGAATGAAGTTTTAATGCTTAACAACAATGATAGTGAATTTATACCTACAATCATTG  
GTT

+

@A00721:190:HGJW7DSXY:4:1612:23366:24142\_1:N:0:TCTGCAAG+GCTGCACT  
TTTATGGATATGATGCTATTACTCAGGATGGTTACGGTCAGGGAGGATTCTCAGTGTACAAGGACCTT  
AAGCGATTGATCGGGGTTAATTCTAAACATTACCCGAAAGACGTGCTAAATTAACCATTTGTACGA  
TGT

+

@A00721:190:HGJW7DSXY:4:2349:17616:10958\_2:N:0:TCTGCAAG+GCTGCACT  
GCAAAGATATTTTCATGAAACTACATAGGAACGTACCGGATTACCTGTCTTTCATATTATGAATGAAC  
CTTCGGCCGCTCTCTTTGCTTCGATGTTGGATGTCAAGAAGGGTTCAG

+

@A00721:190:HGJW7DSXY:4:2304:18982:14450\_1:N:0:TCTGCAAG+GCTGCACT  
CTTGGAACGAAGGCGACCTTCCGGAGTTTTTACGGGATCCGGAATGTTCTGTCTATATTAGGTGAAGC  
GAAATACGATTTCGAACGTCAACGTTACCGAGTTTCGTTTCGTACCTTGATGCTGACTTTCGTCAAT  
ATG

+

@A00721:190:HGJW7DSXY:4:2409:1895:13698\_1:N:0:TCTGCAAG+GCTGCACT  
ACGATACAAATGATAACTTCTAATTTACGTTTGCTACTCAGAGCTGGTCCTCTCAGCAAAGGGATGCA  
TGGTGTATCTCCTCAGGAGTCCCGGCATTTGATAATAATGACGAGACTTTCGTCATAATCGCTGCAT  
ATT

+

@A00721:190:HGJW7DSXY:4:2562:6994:14857\_1:N:0:TCTGCAAG+GCTGCACT  
TGA

+

[illegible]



CGCGAAGGAATCTTAATTGATTGAAGCTAGGCGTTGGGGAGAATGAAC

+

FFFFFFFFFFFFFFFFFFFFFFFFFFFFFFFFFFFFFFFFFFFFFFFFFFFFFFFFFFFFFFFFFFFFFFFF  
FFFFFFFFFFFFFFFFFFFFFFFF:FF:FFFFFFFFFFFFFFFFFFFFFFFF

@A00721:190:HGJW7DSXY:4:2353:5177:30812\_1:N:0:TCTGCAAG+GCTGCACT  
GCAGAATAACCTTCCCAAATCTAGATCTGCACAGAAGAAGGCTGAAGGTCGTTACCGGACGACCACTC  
AAAGGAAACGGGCTGTTGCCAGAGGAAAGCAGCGACCACCGAGGTCGCTCGTAACATTGACGGCAGT  
CCC

+

FFFF:FFFFFFFFFFFFFFFFFFFFFFFFFFFFFFFFFFFFFFFFFFFFFFFFFFFFFFFFFFFFFFFF  
FFFFFFFFFFFFFFFFFFFFFFFFFFFFFFFFFFFFFFFFFFFFFFFFFFFFFFFFFFFFFFFFFFFFFFFF  
FFF

@A00721:190:HGJW7DSXY:4:1452:5141:5321\_2:N:0:TCTGCAAG+GCTGCACT  
TCACATTCACCACTCCCATGCCAATCAATGATGTGACTATACAGTTCGGCCATTTCAAGAGTGGTCAA  
TACGTCGTGGGAGGTACTGAAGCCTTCCCCTCCGCTGGCACGAAGAAC

+

FFFFFFFFFFFFFFFFFFFFFFFFFFFFFFFFFFFFFFFFFFFFFFFFFFFFFFFFFFFFFFFFFFFF:FFFFF  
FFFFFFFFFFFFFFFFFFFFFFFFFFFFFFFFFFFFFFFFFFFFFFFF:FFFFFFFFFFFF

@A00721:190:HGJW7DSXY:4:2633:16251:11506\_1:N:0:TCTGCAAG+GCTGCACT  
TCTTCTAAGTCTACCAGGAAGAGGGGAAATGTCCCCAAACTGAGAAGAATAAAGGGAAAGGTCCATC  
AGGACCTAAGAAGGGGAAATTACCCCTAATTCTGAAGGAAGATCTCCCCCATCTGGGGTTGGAATA  
AGA

+

FF,FFF,FFF::F,F,F:,F:F:FF,FFFF,FFF,F,,::FFFF:FFFFF:FFF,FFFFF:F::  
F::FFFF,FF,FF:FF,F:FF,F,FFFFFF,F::FFFF,F:FF::,::FF:FFFF,:FFFF,  
,F,

@A00721:190:HGJW7DSXY:4:2258:32334:22232\_1:N:0:TCTGCAAG+GCTGCACT  
CTACGAAGTCGCTGAAGGCGGCTTGGGTCATTAAGGGTAGCTGTAAAGTTGCGCCTGCCGACCCCATC  
TTTGAGACCAAGACTCTCTACAGTAGGTCGTGCCTACTATGAGCAAATCTGTTGAATTGCTCACTGA  
GGA

+

FFFFFFFFFFFFFFFFFFFFFFFFFFFF:FFFFFFFFFFFFFFFFFFFFFFFFFFFFFFFFFFFF  
,FFFFFFFFFFFFFFFFFFFFFFFFFFFFFFFFFFFFFFFFFFFFFFFFFFFFFFFFFFFFFFFFFFFF  
FFF

@A00721:190:HGJW7DSXY:4:2302:6831:28479\_2:N:0:TCTGCAAG+GCTGCACT  
TTTGGCTACTGGCGACAACTGAGAGCAGTCGCTGGGGAAAGAGAATTGCGTGGGTTGAAGGCCGACG  
CTTCGAGCTTGAGTGTGACGAGGCCGGTGACGTTTTTGTCAACGGCGT

+

,FFF,FF:FFFFFFFFFFFFFFFF:FFFF:FFFFF:FFF,FFFFFFFFFFFF,FF:FFFFFFFFFFFF  
:FFFFFFFF::FFFFF,:F,FFF:FFFFFFFF:FFFFF:FF:FFFF

@A00721:190:HGJW7DSXY:4:2268:3387:20478\_1:N:0:TCTGCAAG+GCTGCACT  
CGAAGATCCCCTATGGAGTCTTGAAGGACTTAGGTTGGCATATTTATGCCGACGATAATAAGCATGTC  
ACCCTTAAGCACCGAGGTAAGCTCGGGACTTACAAGAGAGAGTGTGAGAGAGTCGCTCTCACTATTTT  
TGC

+

FF:FFFFFFFF:FFFFFFFFFFFFFFFFFFFFFFFF:FFFFFFFFFFFFFFFFFFFFFFFF:FFFFFFF  
FFFFFFFFFFFFFFFFFFFFFFFFFFFFFFFFFFFFFFFFFFFFFFFFFFFFFFFFFFFFFFFFFFFF  
FFF

@A00721:190:HGJW7DSXY:4:2371:5394:18349\_2:N:0:TCTGCAAG+GCTGCACT  
CGTCATTGGGGATTTTCGATGTGAGAAGGTGGAAGGTGTCAAGGGTCTTCTTCATGCTGATCTTTCAGG  
ACCTAATCACATCATGATTGATAGTTACGGCTCGTATCGAGTTGGAGG

+

FFFFFFFFFFFFFFFFFFFFFFFFFFFFFFFFFFFFFFFFFFFFFFFFFFFFFFFFFFFFFFFFFFFF  
FFFFFFFFFFFFF,FFFFFFFFFFFFFFFFFFFFFFFFFFFF:FFFFF

@A00721:190:HGJW7DSXY:4:1471:17110:25676\_1:N:0:TCTGCAAG+GCTGCACT  
AAGGCTCTAGAGAAGATCTCACCACCTGGAGAAGGCAAGTGGAGAGTCCAGAAAGTTGATGAAGAAGGA  
TTATTTGAAGCAGGGGTACCACCTCCTAAGGTGGATGAGGGAGGTTGTTTCTTTGGAGTTTGTAGATA  
ATC

+

FFFFFFFFFFFFFFFFFFFF,FF,FFFFFFFFFFFFFFFFFFFFFFFFFFFFFFFFFFFFFFFFFFFFFFFF  
FFFFFFFF:FFF:FFFFFFFFFFFF:FFFFFFFFFFFFFFFFFFFFFFFFFFFFFFFFFFFFFFFFFFFF  
FFF

@A00721:190:HGJW7DSXY:4:1134:30951:26443\_1:N:0:TCTGCAAG+GCTGCACT  
TGACTCAACTACTCCGATCAGATCCGGATGGTTTGATTGGTATGGACTACTCGACTTTTGATCTGGAG  
TTGTCTAGGGTCATGGCAGATACTACCGATAAGGTGAAAAATATGCAGGTCAAAGATTCTGTAGCTCT  
GAG

+

FFFFFFF:FF,FFFFFFFFFFFFFFFFFFFF:FFFFFFFFFFFFFFFFFFFFFFFFFFFFFFFFFFFF  
FFFFFFFFFFFFFFFFFFFFFFFFFFFFFFFFFFFFFFFFFFFF:FFFFFFFFFFFFFFFFFFFFFFFFFFFF  
FFF

@A00721:190:HGJW7DSXY:4:2216:16233:18208\_2:N:0:TCTGCAAG+GCTGCACT  
CAAAACCTATCGTTGTCGTACCTTACAAGGTTGAGGAGACTTTACAGCGGCTTATTGTGCGCAGTTT  
CCAGAATTGCGGTTGAAGTTCACCCATTCTATCTTGAATGCTCACGCC

+

FFFF:FFFFFFFFFFFFFFFFFFFFFFFFFFFFFFFFFFFFFFFFFFFF:FFFFFFFFFFFFFFF:FF  
FFFFFFFFF:FFFFFFFFFFFFFFFFFFFFFFFFFFFFFFFFFFFFFFFFFFFF

@A00721:190:HGJW7DSXY:4:1553:1841:2581\_1:N:0:TCTGCAAG+GCTGCACT  
CGCCTACGGTGACTTTATGGACAAGATGCAAGTCTTGGAATACTTGTTTCCCTTTTGGTTTGTAG  
TAGGTGATCTTGACGTCGATTCTTTGTATAGGGAGTGTGAGAAGACAACGAATCTTGAACTACGGTC  
CTT

+

FFFFFFFFFFFFFFFFFFFF::FF:FFFFFF:FFFFFFFFFFFFFFFFFFFF:FFFFFFFFFFFFFFF:F:FFFF  
FFFF:FFFFFFFFFFFFFFFFFFFF:FFFFFFFFF:FFFFF:FFFFF:FFF,FFFFFFFFFFFFFFFF  
FFF

@A00721:190:HGJW7DSXY:4:2509:24415:2378\_1:N:0:TCTGCAAG+GCTGCACT  
CTGGAGTTTACGACGTGTGCTCTTCCGATCTCATGGAGTCTTGTACCTTCTGTCAAACCTTCGAGGTT  
AGCTACGAGAGGTGATCCCGGATGTGGATTGAAGGCTGGCTCTAAGGGAGACTCCTTCTTTTGAATG  
TTG

+

FFFFFFFFF:FFFFFFFFF:FFFFFFFFF,FFFFFF:FFFFFFFF:FFFFFFFFFFFFFFFFFFFF  
FFFFFFFFFFFFFFFFFFFFFFFFFFFFFFFFFFFFFFFFFFFFFFFFFFFFFFFFFFFFFFFFFFFF  
FFF

@A00721:190:HGJW7DSXY:4:2447:29875:21543\_1:N:0:TCTGCAAG+GCTGCACT  
ACCTTTTGGAGGTCCAGGAACCTTTACTCCTAGTGTCTTTCTAGAGTCCAAGGACGTTTCCGTCGGA  
GGATGACAGGTGGGAGACCGCTCAATAACACTCTATTGAATCCCTTTCCACGATGAAAGCTCTTTAT  
GAG

+

FFFFFFFFFFFFFFFFFFFFFFFFFFFFFFFFFFFFFFFFFFFFFFFFFFFFFFFFFFFFFFFFFFFF  
FFFFFFFFFFFFFFFFFFFFFFFFFFFFFFFFFFFFFFFFFFFFFFFFFFFFFFFFFFFFFFFFFFFF  
FFF

@A00721:190:HGJW7DSXY:4:1264:27760:4225\_1:N:0:TCTGCAAG+GCTGCACT  
GATCCTGATGACATTATTCAACGGATACCGATCTCAGTTCTACCACAGAAACCGTCTCAGGAAGTGT  
CTCCACTGATTGGAATTAGAGAAAGACGACCTTCTTGTGGGACTGAGACCTCTGAATTTTCAGGT  
GCC

+

FFFFFFFFFFFFFFFFFFFFFFFFFFFFFFFFFFFFFFFFFFFF:FFFFFFFFFFFFFFFFFFFF  
FFFFFFFFFFFFFFFFFFFF:FFFFFFFFFFFFFFFFFFFFFFFFFFFFFFFFFFFFFFFFFFFFF:  
FFF

@A00721:190:HGJW7DSXY:4:2245:12319:23829\_2:N:0:TCTGCAAG+GCTGCACT  
AGCTGATTCTTATTGCATGAACGTCGCTGAGGTCAAACCTGTGGACGTTCTTTTCATCGACGAATTAT  
TCATGATTCACGCTGGTCAGACCCTTTTCTTACACATCTACTTAAGG

+

FFFFFFFFFFFFFFFF:FFFFFF:FFFFFFFFFFFFFFFFFFFFFFFFFFFFFFFFFFFFFFFFFFFFFFFF:FFFFFFFF  
FFFFFFFFFFFFFFFFFFFFFFFFFFFFFFFFFFFFFFFFFFFFFFFFFFFFFFFFFFFFFFFF:FFFFF

@A00721:190:HGJW7DSXY:4:2547:18358:22138\_1:N:0:TCTGCAAG+GCTGCACT  
TTCAACATCAACGACATCATTCTTGATGAGTGTCTGTTCTTATCGAAGTCTCAGTTATCGCTGCCCGGC  
CGACGTTTGTGCGAACTCTCAGAGGTTTACGGCAGAAAAATTTCTCCTGCTTGTAAATTCGAGAGAGG  
ACA

+

FFFFFFFFFFFF:FFFFFFFFFFFFFFFFFFFFFFFFFFFFFFFFFFFFFFFFFFFFFFFFFFFFFFFFFFFF  
FFFFFFFFFFFFFFFFFFFFFFFFFFFFFFFFFFFFFFFFFFFFFFFFFFFFFFFFFFFFFFFF:FFFFFFFFFFFFFFFF  
FFF

@A00721:190:HGJW7DSXY:4:2559:24695:5556\_2:N:0:TCTGCAAG+GCTGCACT  
TATATCGAGGCTATCGAGGACGATGAGTATCTTGAAGTTGTTGACGACAAGCCTCAAGAGGGTAGAGG  
ACCACCTGGATCTTCTACTGTCTCTGCCTTCCAAGATTTCTTAGAAGA

+

FFFFFFFFFFFFFFFFFFFFFFFFFFFFFFFFFFFFFFFFFFFFFFFFFFFFFFFFFFFFFFFFFFFFFFFFFFFF  
FFFFFFFFFFFFFFFFFFFFFFFFFFFFFFFFFFFFFFFFFFFFFFFFFFFFFFFFFFFFFFFF:FFF

@A00721:190:HGJW7DSXY:4:2640:30734:13479\_1:N:0:TCTGCAAG+GCTGCACT  
CTTGGAAGTTTTCGGCTGTGGTTGTCTGCTGGGACGATTCCATTCTGTTTTCAAAGACTCCAATAAC  
TGATCATTCTGATCATATGATTTTGGACAATGGTTTGAAGCGAAATTTTGAAGGATAAACCAGCGT  
ACT

+

FFF:FFFFFFFFFFFFFFFFFFFFFFFFFFFFFFFFFFFFFFFFFFFFFFFFFFFFFFFFFFFFFFFFFFFF  
FFFFFFFFFFFFFFFFFFFFFFFFFFFFFFFFFFFFFFFFFFFFFFFFFFFFFFFFFFFFFFFFFFFFFFFFFFFF  
FFF

@A00721:190:HGJW7DSXY:4:1119:32497:29434\_1:N:0:TCTGCAAG+GCTGCACT  
GGAGGGAGTTCTTGAAGCATCCCGACCTTTCCTTGTGAAAATTTTGATGCGGTTTCATAAGATTATCA  
GTAATCCTGATTCTACTACGGATTCATGGACCTTCCATCCTGTACCTCTTCTGGAGAGACGTATCTCA  
AAG

+

FFFFFFFFF:,F:FFFF,FF:FFFFF:FFFF:FF,FFFFFFFFFFFFFFFFFFFF:FF:FFFFF:FFFF:FF  
FFFFFFFFFFFFFFFFFFFFFFFFFFFFFFFFFFFFFFFF:FFF:FFFFFFFFFFFFFFFFFFFFFFFF:FFFFFFF:FF:FFFF  
FFF

@A00721:190:HGJW7DSXY:4:2115:16071:9659\_2:N:0:TCTGCAAG+GCTGCACT  
TTTGAAGCTCAGGGTGAAGCACAACGTTTGACCGTGACGAAGTGTGGTGTCTTGATCTACGTTACGG  
ATATACTCTCCTTGAGTTCACCTCGTAAGGACACTACCACTTATTACGA

+

FFFFFFFFFFFFFFFFFFFFFFFFFFFFFFFFFFFFFFFFFFFFFFFFFFFFFFFFFFFFFFFFFFFFFFFFFFFF  
FF:FFFFFFFFFFFFFFFFFFFFFFFFFFFFFFFFFFFFFFFFFFFFFFFFFFFFFFFFFFFFFFFF

@A00721:190:HGJW7DSXY:4:1359:13169:2221\_1:N:0:TCTGCAAG+GCTGCACT  
CTTACAGAGGGGCAGCAGCATGACCATAATTGGTATTGACTTTGGTACCACCTTTTCTACTGTCTGTC  
TCGCCTCTTGAATGAAGTTTTAATGCTTAACAACAATGATAGTGAATTTATACCTACAATCATTGGT  
TTT

+

FFFFFFFFF:FFFFFFFFFFFFFFFFFFFFFFFFFFFFFFFFFFFFFFFFFFFFFFFFFFFFFFFFFFFFFFFF  
FFFFFFFFFFFFFFFFFFFFFFFFFFFFFFFFFFFFFFFFFFFFFFFFFFFFFFFFFFFFFFFF,FFF:FFFFFFFFFFFFFFFF  
FFF

@A00721:190:HGJW7DSXY:4:2215:10294:25833\_1:N:0:TCTGCAAG+GCTGCACT  
TTTATGGATATGATGCTATTACTCATGATGGTTACGGTCAGGGAGGATTCTCAGTTTACAAGGACCTT  
AAGCGATTGATCGGGGTAAATTCTAAAACATTACCCGAAAGACGTGCTATATTAACCATTTGTACGA  
TGT



+  
FFFFFFFFFFFFFFFFFFFF:FFF::FFFFFF,FFFFFFFFFFFFFFFFFFFFFFFFFFFFFFFF  
FFFFFFFFFFFFFFFFFFFFFFFFFFFFFFFFFFFFFFFFFFFFFFFFFFFFFFFF,FFFFFFFFFFFFFFFF  
FFF  
@A00721:190:HGJW7DSXY:4:2424:21341:17660\_2:N:0:TCTGCAAG+GCTGCACT  
CAAAGATATTTTCATGAAAACACAGAGGAACGTACCGGATTACCTGTCTTTTCATATTATGAATGAACC  
TTCGGCCGCTCTCTTTGCTTCGATGTTGGATGTCAAGAAGGGTTCAGA  
+  
FF:FFFFFFFFFFFFFFFFFFFF:FFFFFFFFFFFFFFFFFFFFFFFFFFFFFFFF:FFFFFFFF  
FFFFFFFFFFFFFFFF:FFFFFFFF:FF:FFFFFFFF:F:FFFFFFFF  
@A00721:190:HGJW7DSXY:4:2327:7943:7952\_1:N:0:TCTGCAAG+GCTGCACT  
CTTGAACGAAGGCGACCTTCCGGAGTTTTTACGGGATCCGGAATGTTCTGTCTATATTAGGTGAAGC  
GAAATACGATTTCAACGTCAACGTTACCGAGTTTCGTTTCGTACCTTGATGCTGACTTTCGTCAAT  
ATG  
+  
F:FFFFFFFFFFFFFFFFFFFFFFFFFFFFFFFFFFFFFFFFFFFFFFFFFFFFFFFFFFFFFFFF  
FFF,FFFFFFFFFFFFFFFFFFFFFFFFFFFFFFFFFFFFFFFFFFFFFFFFFFFFFFFFFFFFFFFF  
FFF  
@A00721:190:HGJW7DSXY:4:2155:21603:25473\_1:N:0:TCTGCAAG+GCTGCACT  
ATACAAATGATAACTTCTAATTTACGTTTGCTACTCAGAGCTGGTCCTCTCAGCAAAGGGATGCATGG  
TGTTATCTCCTCAGGAGTCCCGGCATTTGATAATAATGACGAGACTTTCGTCATAATCGCTGCATATT  
ACG  
+  
FFFFFFFFFFFFFFFFFFFFFFFFFFFFFFFFFFFFFFFFFFFFFFFFFFFFFFFFFFFFFFFF  
FFFFFFFFFFFFFFFFFFFFFFFFFFFFFFFFFFFFFFFFFFFFFFFFFFFFFFFFFFFFFFFF  
FFF  
@A00721:190:HGJW7DSXY:4:2628:17517:12915\_1:N:0:TCTGCAAG+GCTGCACT  
TGACTGGAGTTCAGACGTGTGCTCTTCCGATCTGATGACGTGAGAATAGGTGAAGGGATAGTTTTTAC  
CTCGACCAACATTAAGGCGGCGGCGACTAATCTTAAAGCTTCACCCAAAATGAAGGACACTTCGAAAC  
TGA  
+  
FFFFFFFFFFFFFFFFFFFFFFFFFFFFFFFFFFFFFFFFFFFFFFFFFFFFFFFFFFFFFFFF  
FFFFFFFFFFFFFFFFFFFFFFFFFFFFFFFFFFFFFFFFFFFFFFFFFFFFFFFFFFFFFFFF,FFFFFF  
FFF  
@A00721:190:HGJW7DSXY:4:2610:2392:17127\_1:N:0:TCTGCAAG+GCTGCACT  
GATTGGTTCGAACCCGTTGATGCTATGTCAGAAGAAGCTATTCAAGCTTGTCGTTTAAAGACTGCAGA  
GGCTGTCAAACAAGCCCAGACTCAAGGAGTCCAATCAAAGGTTTTGAATTTAGCTCAACTGGGAGAC  
GTG  
+  
FFFFFFFFFFFFFFFFFFFF:FFFFFFFFFFFFFFFFFFFFFFFFFFFFFFFFFFFFFFFFFFFF  
FFFFFFFFFFFFFFFFFFFFFFFFFFFF:FFFFFFFFFFFFFF:FFFFFFFFFFFFFFFFFFFFFFFF  
FFF  
@A00721:190:HGJW7DSXY:4:1118:22245:31000\_1:N:0:TCTGCAAG+GCTGCACT  
ACCAAATCTTGGCTTTCAACGAAGTCTCTGATTTTATTAATCATTACTTTAACGATCTCTCGGTCAT  
TACTCTGTACTTGATCTACGTCGTTTAACTGTCGGAACAACCTTTACTTAGAATGACTCTATCTTT  
CAG  
+  
FFFFFFFF:FFFFFFFFFFFFFFFFFFFFFFFFFFFFFFFFFFFFFFFFFFFFFFFFFFFFFFFF  
FFFFFFFFFFFFFFFFFFFFFFFFFFFF::FFFFFFFFFFFF:FFF::FFFF:,FF,,:FF,FF,:FF  
:FF  
@A00721:190:HGJW7DSXY:4:1173:28330:12352\_1:N:0:TCTGCAAG+GCTGCACT  
ACTATTCGTTACGAGACCTGATGGTTGAATTTTTTCGTCTCTACACCAATATAACCGTGGATAAAGC  
GTGTTTTCCGTCCTGAACTTAATACACGAAGATATCATCCGAAAACGACTCGAAACCGAGACGCCGTA  
+

```

:,:,FF,,FFF,,,FF,,,,FF,:,,F,F,,,FF:,,:,,,FF:FF:,,:,:,F,,F,F,,,F:,F,
,,:FFFFF,F,F,F,F,,,F,,F,:,,F,,,,:,,F,F,,,F:FFFFFFFFFFFFFFFFFFFFFFFFFFFF
@A00721:190:HGJW7DSXY:4:1275:11198:18505_1:N:0:TCTGCAAG+GCTGCACT
ATGAGGTCAAAGCTCTATTTATTAACGAACATTATCCGATTCTTCGAGGTATCACTACCACTGAT
CTGCCGACTTTAGTCAAGGAACCTCAATTCCTTCGATGTTTATATTTTCTATAAGGGAAAATAGCAA
TAA

```

[illegible]

+

```

FFFFFFFFFFFFFFFFFFFFFFFF:FFFFFFFFFFFFFFFFFFFFFFFFFFFFFFFFFFFFFFFF
FFFFFFFFFFFFFFFFFFFFFFFFFFFFFFFFFFFFFFFF,FFFFFFFFFFFFFF,F

```

+

```
FFF:FFFFFFFFFFFFFFFF:FFFFFF:FFFFFFFFFFFFFFFFFFFFFFFFFFFFFFFFFFFFFFFF
FFFFFFFFFFFFFFFFFFFFFFFF:FFFFFFFFFFFF,FFFFFFFFFFFFFF:
```

+

```

FFFFF:FFFFFFFFFFFF:FF,FFFFFFFFFFFFFFFF:FFF:FFF:FF::F,:F,FFFFFFFFFFFF
FFFFFFFFF:FFF:FFFFFFFFFFFF,FF:FFF::,:FFFFFF:,,:FFF

```

+

```
F:FFFFFFFFFFFFFFFF:FFFFFFFFF:FFFFFFFFFFFFFFFFFFFFFFFFFFFFFFFFFFFFFFFF
FFFFFFFFFFFFFFFFFFFFFFFF:FFFFFFFFFFFFFFFFFFFFFFFF
```

+

[illegible] $+$ [illegible]

T

[illegible]

@A00721:190:HGJW7DSXY:4:2667:28989:11929\_1:N:0:TCTGCAAG+GCTGCACT  
TCTTCTAAGTCTACCAGGAAGAGGGGAAATGTCCCCAAACTGAGAAGAATAAAGGGAAAGGTCCATC  
AGGACCTAAGAAGGGGAAATTACCCCTAATTCTGAAGGAAGATCTCCACCATCTGGGGTTGGAATA  
AGA

+

:FFFFFFFF:FFFFFFFFFFFFFFFFFFFFFFFFFFFFFFFFFFFFFFFFFFFFFFFFFFFFFFFF  
FFFFFFFFFFFFFFFF:FFFFFFFFFFFFFFFFFFFFFFFFFFFFFFFFFFFFFFFFFFFFFFFFFFFF  
FFF

@A00721:190:HGJW7DSXY:4:2277:14561:35728\_1:N:0:TCTGCAAG+GCTGCACT  
CTACGAAGTCGCTGAAGGCGGCTTGGGTCATTAAGGGTAGCTGTAAAGTTGCGCCTGCCGACCCATC  
TTTGAGACCAAGACTCTCGACAGTAGGTCGTGCCTACTATGAGCAAATCTGTTGAATTGCTCACTGA  
GGA

+

FFFFFFFFFFFF:FFFFFFFFFFFFFFFFFFFFFFFFFFFFFFFFFFFFFFFFFFFFFFFFFFFF  
FFFFFFFFFFFFFFFFFFFF,FFFFFFFFFFFFFFFFFFFFFFFFFFFFFFFFFFFFFFFFFFFFFFFF  
FFF

@A00721:190:HGJW7DSXY:4:2312:18367:7153\_2:N:0:TCTGCAAG+GCTGCACT  
TTTGGCTACTGGCGACAACTGAGAGCAGTCGCTGGGGAAAGAGAATTGCGTGGGTTGAAGGCCGACG  
CTTCGAGCTTGAGTGTGACGAGGCCGGTGACGTTTTTGTCAACGGCGT

+

F:FFFFFFFFFFFFFFFFFFFFFFFFFFFFFFFFFFFFFFFFFFFFFFFFFFFFFFFFFFFFFFFF  
FFFFFFFFFFFFFFFFFFFFFFFFFFFFFFFFFFFFFFFFFFFFFFFFFFFFFFFFFFFFFFFF

@A00721:190:HGJW7DSXY:4:2439:11812:4319\_1:N:0:TCTGCAAG+GCTGCACT  
CGAAGATCCCCTATGGAGTCTTGAAGGACTTAGGTTGGCATATTTATGCCGACGATAATAAGCATGTC  
ACCCTTAAGCACCGAGGTAAGCTCGGGACTTACAAGAGAGAGTGTGAGAGAGTCGCTCTCACTATTTT  
TGC

+

FFFFFFFFFFFFF:FFFFFFFFFFFF:FFFFFFFFFFFFFFFFFFFFFFFFFFFFFFFFFFFF  
FFF:FFFFFFFFFFFFFFFFFFFFFFFFFFFFFFFFFFFFFFFFFFFFFFFFFFFFFFFFFFFFF:F:F  
FFF

@A00721:190:HGJW7DSXY:4:2472:12156:2503\_2:N:0:TCTGCAAG+GCTGCACT  
CGTCATTGGGGATTTTCGATGTGAGAAGGTGGAAGGTGTCAAGGGTCTTCTTCATGCTGATCTTTCAGG  
ACCTAATCACATCATGATTGATAGTTACGGCTCGTATCGAGTTGGAGG

+

FFFFF:FFFFFFFFFFFFFFFFFFFFFFFFFFFFFFFFFFFFFFFFFFFFFFFFFFFFFFFFFFFF  
FFFFFFFFFFFFFFFFFFFFFFFFFFFFFFFFFFFFFFFFFFFFFFFFFFFF:FFFFFFFF

@A00721:190:HGJW7DSXY:4:1545:19488:5274\_1:N:0:TCTGCAAG+GCTGCACT  
AAGGCTCTAGAGAAGATCTCCCCACCTGGAGAAGGCAAGTGAGAGTCCAGAAGTTGATGAAGAAGGA  
TTATTTGAAGCAGGGGTACCCTTCCTAAGGTGGATGAGGGAGGTTGTTTCTTTGAGTTTTAGATA  
ATC

+

FFFFFFFFFFFFFFFFFFFF:F,FFFFFFFFFFFFFFFFFFFFFFFFFFFFFFFFFFFFFFFFFFFF  
FFFFFFFFFFFFFFFFFFFFFFFFFFFFFFFFFFFFFFFFFFFFFFFFFFFFFFFFFFFFFFFFFFFF  
FFF

@A00721:190:HGJW7DSXY:4:1436:7817:7232\_1:N:0:TCTGCAAG+GCTGCACT  
TGACTCAACTACTCCGATCAGATCCGGATGTTTGATTGGTATGGACTACTCGACTTTTGATCTGGAG  
TTGTCTAGGGTCATGGCAGATACTACCGATAAGGTGAAAAATATGCAGGTCAAAGATTCTGTAGCTCT  
GAG

+

FFFFF:FFFFFFFFFFFFFFFFFFFFFFFFFFFFFFFFFFFFFFFFFFFFFFFFFFFFFFFFFFFF  
FFFFFFFFFFFFFFFFFFFFFFFFFFFFFFFFFFFFFFFFFFFFFFFFFFFFFFFFFFFFFFFFFFFF  
FFF

@A00721:190:HGJW7DSXY:4:2221:29559:13510\_2:N:0:TCTGCAAG+GCTGCACT  
CAAAACCTATCGTTGTCGTACCTTACAAGGTTGAGGAGACTTTACAGCGGCTTATTGTCGCGCAGTTT

CCAGAATTGCGGTTGAAGTTCACCCATTCTATCTTGAATGCTCACGCC

+

FFFFFFFFFFFFFFFFFFFFFFFFFFFFFFFFFFFFFFFFFFFFFFFFFFFFFFFFFFFFFFFFFFFFFFFF  
FFFFFFFFFFFFFFFFFFFFFFFFFFFFFFFFFFFFFFFFFFFFFFFFFFFFFFFFFFFFFFFFFFFFFFFF

@A00721:190:HGJW7DSXY:4:2114:26323:36151\_1:N:0:TCTGCAAG+GCTGCACT  
CGCCTACGGTGACTTTATGGACAAGATGCTAGTTCTTGGGAAATACTTGTTCCTTTTATAGGTTTAG  
TAGGTGATCTTGACGTCGATTCTTTGTATAGGGAGTGTGAGAAGACAACGAATCTTGAAACTACGGTC  
CTT

+

FFFFFFFFFFFF:FFFFFFFFFFFF:FFFFFFFFFFFFFFFF:FFFFFFFFFFFFFFFF:FFFFFFFFFFFFFFF  
FFFFFFFFFFFFFFFFFFFFFFFFFFFFFFFFFFFFFFFFFFFFFFFFFFFFFFFFFFFFFFFFFFFFFFFF  
FFF

@A00721:190:HGJW7DSXY:4:2455:7690:14497\_1:N:0:TCTGCAAG+GCTGCACT  
TTGAAAACCAAGTTAAGAAGGAGGCTGATCATGGAGTCTTTGTACCTTCTGTCAAACCTTCGAGGTTCA  
GCTACGAGAGGTGATCCCGGATGTGGATTGAAGGCTGGCTCTAAGGGAGACTCCTTCTTTTTGAATGT  
TG

+

FF:FFFFF:FFFFFFFFF:FFFFFFFFFFFF:FFFFFFFFFFFFFFFF:FFFFF:F:FFFFFFFFFFFFFFF  
FFFFFFFFFFFFFFFFFFFFFFFFFFFFFFFFFFFFFFFFFFFFFFFFFFFFFFFFFFFFFFFFFFFFFFFF  
FF

@A00721:190:HGJW7DSXY:4:2469:8739:8046\_1:N:0:TCTGCAAG+GCTGCACT  
ACCTTTTGGAGGTCCAGGAACCTTTGCTCCTAGTGTCTTTTCTAGAGTCCAAGGACGTTTCCGTCGGA  
GGATGACAGGTGGGAGACCGCTCAATAACACTCTATTGAATCCCTTTTCCACGATGAAAGCTCTTTAT  
GAG

+

FFFFFFFFFFFFFFFFFFFFFFFFFFFFFFFFFFFFFFFFFFFFFFFFFFFFFFFFFFFFFFFFFFFFFFFF  
FFFFFFFFFFFFFFFFFFFFFFFFFFFFFFFFFFFFFFFFFFFFFFFFFFFFFFFFFFFFFFFFFFFFFFFF  
FFF

@A00721:190:HGJW7DSXY:4:1309:11442:21057\_1:N:0:TCTGCAAG+GCTGCACT  
GATCCTGATGACATTATTCAACGGATACCGATCTCAGTTCTACCACAGAAACCGTCTCAGGAACTGT  
CTCCACTGATTGGAATTAGAGAAAGACGACCTTCTTGTGGGACTGAGACCTCTGAATTTTCAGGT  
GCC

+

FFFFFFFFFFFFFFFFFFFFFFFFFFFFFFFFFFFFFFFFFFFFFFFFFFFFFFFFFFFFFFFFFFFFFFFF  
FFFFFFFFFFFFFFFFFFFFFFFFFFFFFFFFFFFFFFFFFFFFFFFFFFFFFFFFFFFFFFFFFFFFFFFF  
FFF

@A00721:190:HGJW7DSXY:4:2274:12906:11945\_2:N:0:TCTGCAAG+GCTGCACT  
AGCTGATTCTTATTGCATGAACGTCGCTGAGGTCAAACCTGTGGACGTTCTTTTCATCGACGAATTAT  
TCATGATTCACGCTGGTCAGACCCTTTTCTTACACATCTACTTAAGG

+

FFFFFFFFFFFFFFFFFFFFFFFFFFFFFFFFFFFFFFFFFFFFFFFFFFFFFFFFFFFFFFFFFFFFFFFF  
FFFFFFFFFFFFFFFFFFFFFFFFFFFFFFFFFFFFFFFFFFFFFFFFFFFFFFFFFFFFFFFFFFFFFFFF

@A00721:190:HGJW7DSXY:4:2642:1570:1047\_1:N:0:TCTGCAAG+GCTGCACT  
TTCAACATCAACGACATCATCTTGATGAGTGTGCTTCTTATCGAAGTCTCAGTTATCGCTGCCCGGC  
CGACGTTTGTGCGGAACCTCTCAGAGGTTTACGGCAGAAAAATTTCTCTGCTTGTAAATTCGAGAGAGG  
ACA

+

FFFFFFFFFFFFFFFFFFFFFFFFFFFFFFFFFFFFFFFFFFFFFFFFFFFFFFFFFFFFFFFFFFFFFFFF  
FFFFFFFFFFFFFFFFFFFFFFFFFFFFFFFFFFFFFFFFFFFFFFFFFFFFFFFFFFFFFFFFFFFFFFFF  
FFF

@A00721:190:HGJW7DSXY:4:2604:16685:3051\_2:N:0:TCTGCAAG+GCTGCACT  
TATATCGAGGCTATCGAGGACGATGAGTATCTTGAAGTTGTTGACGACAAGCCTCAAGAGGGTAGAGG  
ACCACCTGGATCTTCTACTGTCTCTGCCTTCCAAGATTTCTTAGAAGA

+

```

FFFFFFFFFFFFFFFFFFFFFFFF:FFFFFFFFFFFFFFFFFFFFFFFF:FFFFFFFFFFFFFFFFFFFFFFFF
FFFFFFFFFFFFFFFFFFFFFFFFFFFFFFFFFFFFFFFFFFFFFFFFFFFFFFFF

```

+

@A00721:190:HGJW7DSXY:4:2249:9498:33035\_2:N:0:TCTGCAAG+GCTGCACT  
TTTGAAGCTCAGGTGAAGCACACGTTTGACCGTGACGAAGTGTGGTGTTCTTGATCTACGTTACGG  
ATATACTCTCCTTGAGTTCACCTCGTAAGGACACTACCACTTATTACGA

```

FFFFFFFFFFFFFFFFFFFFFFFFFFFFFFFFFFFFFFFFFFFFFFFFFFFFFFFFFFFF:FFFFFFFFFFFFFFFFFFFF
FFFFFFFF:FFFFFFFFFFFFFFFFFFFFFFFFFFFFFFFFFFFFFFFFFFFFFFFFFFFF:FFF:F

```

+

@A00721:190:HGJW7DSXY:4:2230:21052:3004\_1:N:0:TCTGCAAG+GCTGCACT  
TTTATGGATATGATGCTATTACTCATGATGGTTACGGTCAGGGAGGATTCTCAGTTTACAAGGACCTT  
AAGCGATTGATCGGGGTTAATTCTAAACATTACCCGAAAGACGTGCTAAATTAAACCATTTGTACGA  
TGT

[illegible]

+

@A00721:190:HGJW7DSXY:4:2460:15763:17581\_1:N:0:TCTGCAAG+GCTGCACT  
CTTGGAACGAAGGCGACCTTCCGAGTTTTTACGGGATCCGGAATGTTCTGTCTATATTAGGTGAAGC  
GAAATACGATTTCGAACGTCAACGTTACCGAGTTTCGTTTCGTACCTTGATGCTGACTTTCGTCAAT  
ATG

[illegible]

+



@A00721:190:HGJW7DSXY:4:1311:26404:10457\_2:N:0:TCTGCAAG+GCTGCACT  
CCTTAATATTCTAGTAACCGCTATGTGGGCATTACTAGGATTTATCACACTCCTAAATTTGATAGCA  
TTTATGTTTTAAATGCTAGGAAAATTTAGAAAACTCCATTGTATAG

@A00721:190:HGJW7DSXY:4:2556:9787:13526\_2:N:0:TCTGCAAG+GCTGCACT  
TTTAGTATTATTTACTATCGCCTTTATTGAAAATTGTATAAGAGTTAATTGCTTACACAAAAGTGACG  
CGCGAAGGAATCTTAATTGATTGAAGCTAGGCGTTGGGGAGAATGAAC

@A00721:190:HGJW7DSXY:4:2507:29161:8093\_1:N:0:TCTGCAAG+GCTGCACT  
GCAGAATAACCTTCCCAAATCTAGATCTGCACAGAAGAAGGCTGAAGGTCGTTACCGGACGACCACTC  
AAAGGAACCGGGCTGTTGCCAGAGGAAAGCAGCGACCACCGAGGTCGCTCGTAACATTGACGGCAGT  
CCC

@A00721:190:HGJW7DSXY:4:1573:22092:28260\_2:N:0:TCTGCAAG+GCTGCACT  
TCACATTCACCACTCCCATGCCAATCAATGATGTGACTATACAGTTTCGCCATTTCAAGAGTGGTCAA  
TACGTCGTGGGAGGTACTGAAGCCTTCCCCTCCGCTGGCACGAAGAAC

@A00721:190:HGJW7DSXY:4:1217:10348:29121\_1:N:0:TCTGCAAG+GCTGCACT  
CTCTAAGTCTACCAGGAAGAGGGGAAATGTCCCCAAACTGAGAAGAATAAAGGGAAAGGTCCATCAG  
GACCTAAGAAGGGGAAATTACCCCTAATTCTGAAGGAAGATCTCCCACCATCTGGGGTTGGGAATAAG  
AAA

@A00721:190:HGJW7DSXY:4:2332:21820:27070\_1:N:0:TCTGCAAG+GCTGCACT  
CTACGAAGTCGCTGAAGGCGGCTTGGGTCATTAAGGGTAGCTGTAAAGTTGCGCCTGCCGACCCCATC  
TTTGAGACCAAGACTCTCTACAGTAGGTCGTGCCTACTATGAGCAAATCTGTTGAATTCGTCACTGA  
GGA

@A00721:190:HGJW7DSXY:4:2354:26467:21934\_2:N:0:TCTGCAAG+GCTGCACT  
TTTGGCTACTGGCGACAACTGAGAGCAGTCGCTGGGGAAAGAGAATTGCGTGGGTTGAAGGCCGACG  
CTTCGAGCTTGAGTGTGACGAGGCCGGTGACGTTTTTGTCAACGGCGT

@A00721:190:HGJW7DSXY:4:2472:16821:34131\_1:N:0:TCTGCAAG+GCTGCACT  
CGAAGATCCCCTATGGAGTCTTGAAGGACTTAGGTTGGCATATTTATGCCGACGATAATAAGCATGTC  
ACCCTTAAGCACCAGGTAAGCTCGGGACTTACAAGAGAGAGTGTGAGAGAGTCGCTCTCACTATTTT  
TGC

@A00721:190:HGJW7DSXY:4:2560:28546:16861\_2:N:0:TCTGCAAG+GCTGCACT  
CGTCATTGGGATTTTCGATGTGAGAAGGTGGAAGGTGTCAAGGGTCTTCTTCATGCTGATCTTTCAGG  
ACCTAATCACATCATGATTGATAGTTACGGCTCGTATCGAGTTGGAGG

@A00721:190:HGJW7DSXY:4:1645:28890:26443\_1:N:0:TCTGCAAG+GCTGCACT  
AAGGCTCTAGAGAAGATCTCACCACCTGGAGAAGGCAAGTGGAGAGTCCAGAAGTTGATGAAGAAGGA  
TTATTTGAAGCAGGGGTTACCACTTCCTAAGGTGGATGAGGGAGGTTGTTTCTTTGGAGTTTTAGATA  
ATC

@A00721:190:HGJW7DSXY:4:1469:16043:25708\_1:N:0:TCTGCAAG+GCTGCACT  
TGACTCAACTACTCCGATCAGATCCGGATGTTTTGATTGGTATGGACTACTCGACTTTTGATCTGGAG  
TTGTCTAGGGTCATGGCAGATACTACCGATAAGGTGAAAAATATGCAGGTCAAAGATTCTGTAGCTCT  
GAG

@A00721:190:HGJW7DSXY:4:2363:14850:5384\_2:N:0:TCTGCAAG+GCTGCACT  
 CAAAACCTATCGTTGTCGTACCTTACAAGGTTGAGGAGACTTTACAGCGGCTTATTGTCGCGCAGTTT  
 CCAGAATTGCGGTTGAAGTTCACCCATTCTATCTTGAATGCTCACGCC

@A00721:190:HGJW7DSXY:4:2620:31629:18881\_1:N:0:TCTGCAAG+GCTGCACT  
CGCCTACGGTGACTTTATGGACAAGATGCAAGTTCCTGGGAAATACTTGTTTCCCTTTTTAGGTTTAG  
TAGGTGATCTTGACGTCGATTCTTTGTATAGGGAGTGTGAGAAGACAACGAATCTTGAAACTACGGTC  
CTT

@A00721:190:HGJW7DSXY:4:2558:14380:16125\_1:N:0:TCTGCAAG+GCTGCACT  
TTGAAACCAAGTTAAGAAGGAGGCTGATCATGGAGTCTTTGTACCTTCTGTCAAACCTTCGAGGTTCA  
GCTACGAGAGGTGATCCCGGATGTGGATTGAAGGCTGGCTCTAAGGGAGACTCCTTCTTTTTGAATGT  
TG

@A00721:190:HGJW7DSXY:4:2625:16984:12555\_1:N:0:TCTGCAAG+GCTGCACT  
ACCTTTTGGAGGTCCAGGAACCTTTACTCCTAGTGTCTTTTCTAGAGTCCAAGGACGTTTCCGTCGGA  
GGATGACAGGTGGGAGACCGCTCAATAACACTCTATTGAATCCCTTTCCACGATGAAAGCTCTTTAT  
GAG

[illegible]



@A00721:190:HGJW7DSXY:4:1374:29993:21245\_1:N:0:TCTGCAAG+GCTGCACT  
GATCCTGATGACATTATTTCAACGGATACCGATCTCAGTTCTACCACAGAAACCGTCTCAGGAACTGT  
CTCCACTGATTTCGAATTAGAGAAAGACGACCTTCTTGTGGGACTGAGACCTCTGAATTTTCAGGGT  
GCC

+

FFFFFFFFFFFFFFFFFFFFFFFFFFFFFFFFFFFFFFFFFFFFFFFFFFFFFFFFFFFFFFFFFFFFFFFF  
FFFFFFFFFFFFFFFFFFFFFFFFFFFFFFFFFFFFFFFFFFFFFFFFFFFFFFFFFFFFFFFFFFFFFFFF  
FFF

@A00721:190:HGJW7DSXY:4:2314:4698:5494\_2:N:0:TCTGCAAG+GCTGCACT  
AGCTGATTCTTATTGCATGAACGTCGCTGAGGTCAAACCTGTGGACGTTCTTTTCATCGACGAATTAT  
TCATGATTCACGCTGGTCAGACCCTTTTCTTACACATCTACTTAAGG

+

FFFFF,FFFFF:FFFFFFFFFFFFFFFFFFFFFFFFFFFFFFFFFFFFFFFFFFFFFFFFFFFFFFFF:  
F:FFFFFFFFF:FFFFFFFFFFFFFFFFF,FFF,:FF,FFFFFFFFFFFFF

@A00721:190:HGJW7DSXY:4:1230:17029:17581\_1:N:0:TCTGCAAG+GCTGCACT  
TTCCGATCTACGACATCATTCTTGATGAGTGTCTGTTCTTATCGAAGTCTCAGTTATCGCTGCCCCGCC  
GACGTTTGTGCGCAACTCTCAGAGGTTTACGGCAGAAAAATTTCTCCTGCTTGTAAATTCGAGAGAGGA  
CAC

+

FFFFFFFFFFFFFFFFFFFFFFFFFFFFFFFFFFFFFFFFFFFFFFFFFFFFFFFFFFFFFFFFFFFFFFFF  
FFFFFFFFFFFFFFFFFFFFFFFFFFFFFFFFFFFFFFFFFFFFFFFFFFFFFFFFFFFFFFFFFFFFFFFF  
FFF

@A00721:190:HGJW7DSXY:4:1210:6813:30420\_2:N:0:TCTGCAAG+GCTGCACT  
ATATCGAGGCTATCGAGGACGATGAGTATCTTGAAGTTGTTGACGACAAGCCTCAAGAGGGTAGAGGA  
CCACCTGGATCTTCTACTGTCTCTGCCTTCCAAGATTTCTTAGAAGAG

+

FFFFFFFFFFFFFFFFFFFFFFFFFFFFFFFFFFFFFFFFFFFFFFFFFFFFFFFFFFFFFFFFFFFFFFFF  
FFFFFFFFFFFFFFFFFFFFFFFFFFFFFFFFFFFFFFFFFFFFFFFFFFFFFFFFFFFFFFFFFFFFFFFF

@A00721:190:HGJW7DSXY:4:1152:20555:6214\_1:N:0:TCTGCAAG+GCTGCACT  
GGAGGGAGTTCTTGAAGCATCCCGACCTTTCCTTGTGAAAATTTTGATGCGGTTTCATAAGATTATCA  
GTAATCCTGATTCTACTACGGATTCATGGACCTTCCATCCTGTACCTCTTCTGGAGAGACGTATCTCA  
AAG

+

FFFFFFFFFFFFFFFFFFFFFFFFFFFFFFFFFFFFFFFFFFFFFFFFFFFFFFFFFFFFFFFFFFFFFFFF  
FFFFFFFFFFFFFFFFFFFFFFFFFFFFFFFFFFFFFFFFFFFFFFFFFFFFFFFFFFFFFFFFFFFFFFFF  
FFF

@A00721:190:HGJW7DSXY:4:2358:2917:19006\_2:N:0:TCTGCAAG+GCTGCACT  
TTTGAAGCTCAGGGTGAAGCACAACGTTTGACCGTGACGAAGTGTGGTGTCTTGATCTACGTTACGG  
ATATACTCTCCTTGAGTTCACCTCGTAAGGACACTACCACTTATTACGA

+

FFFFFFFFFFFFFFFFFFFFFFFFFFFFFFFFFFFFFFFFFFFFFFFFFFFFFFFFFFFFFFFFFFFFFFFF  
FFFFFFFFFFFFFFFFFFFFFFFFFFFFFFFFFFFFFFFFFFFFFFFFFFFFFFFFFFFFFFFFFFFFFFFF

@A00721:190:HGJW7DSXY:4:2269:27480:23688\_1:N:0:TCTGCAAG+GCTGCACT  
CTTACAGAGGGGCAGCAGCATGACCATAATTGGTATTGACTTTGGTACCACCTTTTCTACTGTCTGTC  
TCGCCTCTTCGAATGAAGTTTTAATGCTTAACAACAATGATAGTGAATTTATACCTACAATCATTGGT  
TTT

+

FFF:F:FFF:FFFFFFFFFFFFFFFFFFFFFFFFFFFFFFFFFFFFFFFFFFFFFFFFFFFFFFFF:  
FFFFFFFFFFFF:FFFFFFF,FFFFFFFFFFFFF,FFFFFFF::,FFFF,F:FF:FFFFFF:FFFFFFF  
FFF

@A00721:190:HGJW7DSXY:4:2409:26386:5259\_1:N:0:TCTGCAAG+GCTGCACT  
TTTATGGATATGATGCTATTACTCATGATGGTTACGGTCAGGGAGGATTCTCAGTTTACAAGGACCTT  
AAGCGATTGATCGGGGTAAATTCTAAAACATTACCCGAAAGACGTGCTAAATTAAAACATTGTACGA  
TGT

+  
FFFF:FFFFFFFFFFFFFFFFFFFFFFFFFFFFFFFFFFFFFFFFFFFFFFFFFFFFFFFFFFFFFFFF  
FFFFFFFFFFFFFFFFFFFFFFFFFFFFFFFFFFFFFFFFFFFFFFFFFFFFFFFFFFFFFFFFFFFFFFFF  
FFF  
@A00721:190:HGJW7DSXY:4:1105:10511:30373\_1:N:0:TCTGCAAG+GCTGCACT  
CAAAGATATTTTCATGAAAACACTACAGAGGAACGTACCGGATTACCTGTCTTTTCATATTATGAATGAACC  
TTCGCCGCTCTCTTTGCTTCGATGTTGGATGTCAAGAAGGGTTCAGAATGGGATTCTACGTAGTTT  
ATG  
+  
FFFFFFFFFFFFFFFFFFFFFFFFFFFFFFFFFFFFFFFFFFFFFFFFFFFFFFFFFFFFFFFFFFFFFFFF  
FFFFFFFFFFFFFFFFFFFFFFFFFFFFFFFFFFFFFFFFFFFFFFFFFFFFFFFFFFFFFFFFFFFFFFFF:FFFFFFFFFFFFFFFF  
FFF  
@A00721:190:HGJW7DSXY:4:2643:8739:29121\_1:N:0:TCTGCAAG+GCTGCACT  
CTTGGAACGAAGGCGACCTTCCGGAGTTTTTACGGGATCCGGAATGTTCTGTCTATATTAGGTGAAGC  
GAAATACGATTTCAACGTCAACGTTACCGAGTTTCGTTTCGTACCTTGATGCTGACTTTCGTCAAT  
ATG  
+  
FFFFFFFFFFFFFFFFFFFFFFFFFFFFFFFFFFFFFFFFFFFFFFFFFFFFFFFFFFFFFFFFFFFFFFFF:FFFFFFFFFFFFFFFF  
FFFFF:FFFFFFFFFFFFFFFFFFFFFFFFFFFFFFFFFFFFFFFFFFFFFFFFFFFFFFFFFFFFFFFFFFFFFFFF  
FFF  
@A00721:190:HGJW7DSXY:4:1129:11605:32393\_1:N:0:TCTGCAAG+GCTGCACT  
TACAAATGATAACTTCTAATTTACGTTTGCTACTCAGAGCTGGTCCTCTCAGCAAAGGGATGCATGGT  
GTTATCTCCTCAGGAGTCCCGGCATTTGATAATAATGACGAGACTTTCGTCATAATCGCTGCATATTA  
CGG  
+  
FFFFFFFFFFFFFFFFFFFFFFFFFFFFFFFFFFFFFFFFFFFFFFFFFFFFFFFFFFFFFFFFFFFFFFFF:FFF  
FFFFFFFFFFFFFFFFFFFFFFFFFFFFFFFFFFFFFFFFFFFFFFFFFFFFFFFFFFFFFFFFFFFFFFFF  
FFF  
@A00721:190:HGJW7DSXY:4:1328:6171:12430\_2:N:0:TCTGCAAG+GCTGCACT  
ACTAGTTCGAGTGCTGCTTTGGATTACGATGACGTGAGAATAGGTGAAGGGATAGTTTTTACCTCGAC  
CAACATTAAGGCGGCGGCGACTAATCTTAAAGCTTACCCAAAATGAA  
+  
FFFFFFFFFFFFFFFFFFFFFFFFFFFFFFFFFFFFFFFFFFFFFFFFFFFFFFFFFFFFFFFFFFFFFFFF:FFFFFFFFFFFF:FFFFFFFFFFFF  
FFFFFFFFFFFFFFFFFFFFFFFFFFFFFFFFFFFFFFFFFFFFFFFFFFFFFFFFFFFFFFFFFFFFFFFF:FF:FFFFFFFFFFFFFFFF  
@A00721:190:HGJW7DSXY:4:2665:18539:18098\_1:N:0:TCTGCAAG+GCTGCACT  
GATTGGTTCGAACCCGTTGATGCTATGTCAGAAGAAGCTATTCAAGCTTGTCGTTTTAAAGACTGCAGA  
GGCTGTCAAACAAGCCCAGACTCAAGGAGTCCAATCAAAGGTTTTGAATTTAGCTCAACTGGGGAGAC  
GTG  
+  
FFFFFFFFFFFFFFFFFFFFFFFFFFFFFFFFFFFFFFFFFFFFFFFFFFFFFFFFFFFFFFFFFFFFFFFF  
FFFFFFFFFFFFFFFFFFFFFFFFFFFFFFFFFFFFFFFFFFFFFFFFFFFFFFFFFFFFFFFFFFFFFFFF  
FFF  
@A00721:190:HGJW7DSXY:4:1208:20103:15828\_1:N:0:TCTGCAAG+GCTGCACT  
ACCAAATCTTGCTTTCAACGAAGTCTCTGATTTTATTAATCATTACAATAACGATCTCTCGGTCAT  
TACTCTGTACTTGATCTACGTCGAGTAAATTTCGGAACAACTTTAAAAAGAAAGAAAATATCATTT  
AAG  
+  
FF,FFF,:F:F,,FF,FFFFFFFFF:F:F::FFFF::FF,FF,,F,,,FFF,FFF:FF:, :FF,:  
FFFF,FF:,F::F:F:FFFF,FFF,,,FF,,,::,F,F:FF,F,FF:,,,F:F:, :F,,,F,F,FF,  
,F:  
@A00721:190:HGJW7DSXY:4:2475:19633:29262\_2:N:0:TCTGCAAG+GCTGCACT  
CTTCGTTACGAGACCTGATGGTAGAATAGATTTAGTCTCTACACCCATCTCAACGAGGATAAAGCGAG  
TTTTCCGTCCTGAACGTAATACACGAAGAGATCATCCGCAAACGACTC  
+

```
FFFFFFFFFFFFFFFFFFFFF,FFFFFFFFFFFFFFFFFFFFFFFFFFFFFFFFFFFFFFFF  
FFFFFFFFFFFFFFFFFFFF:FFFFFFFFFFFFFFFFFFFFFFFFFFFFFFFFFFFF
```

+

@A00721:190:HGJW7DSXY:4:2412:2691:25692\_2:N:0:TCTGCAAG+GCTGCACT  
CTTTATTT CAGAACTCTCTCCGATCACCTTGGTGTGATCTCCCGGAGGATCTTTTCAATAAGATGTAT  
GATGATAATCTACTATTTTTTAAATAGTGATATTCAGCGTATACTTGAA

```
FFFF,FFFFFFFFFFFFFFFF:FFFFFFFFFFFFFFFF:FFFFFFFFFFFFFFFFFFFFFFFFFFFFFFFF
FFFFFFFFFFFFFFFF:FFFFFFFFFFFFFFF,FFFFFFFFFFFFFFF
```

+

@A00721:190:HGJW7DSXY:4:2513:10357:28635\_2:N:0:TCTGCAAG+GCTGCACT  
TTTACTTTTACCGTTAGAACTGAAAAAGATTCTTTTCGAAAAGAAACCTATAAGTTACAAACGATTCT  
TCGACTATATTAAAGAAATAAAAATACTTCAAGTACCTGAACTTTACA

```

FFFFFFFFFFFFFFFFFFFFFFFFFFFFFFFFFFFFFFFFFFFFFFFFFFFFFFFFFFFFFFFF,FFFFFFFFFFFFFFFFFFFFFFFF
FFFFFFFFFFFF:FFFFFFFFFFFF:FFFFFFFFFFFFFFFFFFFFFFFF,FFFF

```

+

@A00721:190:HGJW7DSXY:4:2647:15130:14638\_2:N:0:TCTGCAAG+GCTGCACT  
TTTAGTATTATTTACTATCGCCTTTATTGAAAATTGTATAAGAGTTAATTGCTTACACAAAAGTGACG  
CGCGAAGGAATCTTAATTGATTGAAGCTAGGCGTTGGGGAGAATGAAC

[illegible]

+

@A00721:190:HGJW7DSXY:4:1606:8838:3991\_2:N:0:TCTGCAAG+GCTGCACT  
TCACATTCACCACTCCCATACCAATCAATGATGTGACTATACAGTTCGGCCATTTCAAGAGTGGTCAA  
TACGTCGTGGGAGGTACTGAAGCCTTCCCCTCCGCTGGCACGAAGAAC

```
FFFFFFFFFFFFFFFFFFFFFFFFFFFFFFFFFFFFFFFFFFFFFFFFFFFFFFFFFFFFFFFFFFF  
FFFFFFFFFFFFFFFFFFFFFFFF:F::FF::FFF:FFFFFFFF
```

@A00721:190:HGJW7DSXY:4:1252:30092:7764\_1:N:0:TCTGCAAG+GCTGCACT  
CTCTAAGTCTACCAGGAAGAGGGGAAATGTCCCCAAACTGAGAAGAATAAAGGGAAAGGTCCATCAG  
GACCTAAGAAGGGGAAATTACCCCTAATTCTGAAGGAAGATCTCCACCATCTGGGGTTGGAATAAG  
AAA

+

FFFFFFFFFFFFFFFFFFFFFFFFFFFFFFFFFFFFFFFFFFFFFFFFFFFFFFFFFFFFFFFFFFFFFFFF  
FFFFFFFFFFFFFFFFFFFFFFFFFFFFFFFFFFFFFFFFFFFFFFFFFFFFFFFFFFFFFFFFFFFFFFFF  
FF:

@A00721:190:HGJW7DSXY:4:2339:18340:24111\_1:N:0:TCTGCAAG+GCTGCACT  
CTACGAAGTCGCTGAAGGCGGCTTGGGTCATTAAGGGTAGCTGTAAAGTTGCGCCTGCCGACCCATC  
TTTGAGACCAAGACTCTCTACAGTAGGTCGTGCCTACTATGAGCAAATCTGTTGAATTGCTCACTGA  
GGA

+

FFFFFFFFFFFFFF,FFFFFFFF:FFFFFF:FFFFFFFFFFFFFFFFFFFFFFFFFFFFFFFFFFFFFF  
FFFFFFFFFFFFFFFFFFFFFF,FFFFFFFFFFFFFFFFFFFFFFFFFFFFFFFFFFFFFFFFFFFFFFFF  
FFF

@A00721:190:HGJW7DSXY:4:2509:22733:36667\_2:N:0:TCTGCAAG+GCTGCACT  
TTTGGCTACTGGCGACAACTGAGAGCAGTCGCTGGGGAAAGAGAATTGCGTGGGTTGAAGGCCGACG  
CTTCGAGCTTGAGTGTGACGAGGCCGGTGACGTTTTTGTCAACGGCGT

+

FFFFFFFFFFFFFFFFFFFFFFFFFFFFFFFFFFFFFFFFFFFFFFFFFFFFFFFFFFFFFFFFFFFFFF  
FFFFFFFFFFFFFFFFFFFFFFFFFFFFFFFFFFFFFFFFFFFFFFFFFFFFFFFFFFFFFFFFFFFFFF

@A00721:190:HGJW7DSXY:4:2525:2374:11866\_1:N:0:TCTGCAAG+GCTGCACT  
CGAAGATCCCCTATGGAGTCTTGAAGGACTTAGGTTGGCATATTTATGCCGACGATAATAAGCATGTC  
ACCCTTAAGCACCGAGGTAAGCTCGGGACTTACAAGAGAGAGTGTGAGAGAGTCGCTCTCACTATTTT  
TGC

+

FFF:FFFFFFFF,FFFFFFFFFFFFFFFFFFFFFFFFFFFFFFFFFFFFFFFF,FFFFFFFF:FFFFFF  
FFFFFFFFFFFFFFFF:FFFFFFFFFFFFFFFFFFFFFFFFFFFFFFFFFFFFFFFFFFFFFFFFFFFFFF  
:FF

@A00721:190:HGJW7DSXY:4:1244:7988:10848\_2:N:0:TCTGCAAG+GCTGCACT  
ATGTGAGAAGGTGGAAGGTGTCAAGGGTCTTCTTCATGCTGATCTTTCAGGACCTAATCACATCATGA  
TTGATAGTTACGGCTCGTATCGAGTTGGAGGGAGGAAGTTCTCCGAAA

+

F:FFFFFFFFFFFFFFFFFFFFFFFFFFFFFFFFFFFFFFFFFFFFFFFFFFFFFFFFFFFFFFFFFFFF  
FFFFFFFFFFFF:FFFFFFFFFFFFFFFFFFFFFFFFFFFFFFFF:FFFFFFFFFFFF

@A00721:190:HGJW7DSXY:4:2227:17038:17096\_1:N:0:TCTGCAAG+GCTGCACT  
AAGGCTCTAGAGAAGATCTCACCACTGGAGAAGGCAAGTGAGAGTCCAGAAGTTGATGAAGAAGGA  
TGATTTGAAGCAGGGGTACCCTTCCTAAGGTGGATGAGGGAGGTTGTTTCTTTGAGTTTTAGATA  
ATC

+

FFFFFF:FFFF:FFFF:FFFFFFFFFFFFFFFFFFFFFFFFFFFFFFFF:FFFFFFFFFFFF,FF,: ,F  
F,F,: ,F,FFFFFFFFFFFFFFFFFFFFFFFFFFFFFFFFFFFFFFFFFFFFFFFFFFFFFFFFFFFF  
FFF

@A00721:190:HGJW7DSXY:4:1547:2437:3208\_1:N:0:TCTGCAAG+GCTGCACT  
TGACTCAACTACTCCGATCAGATCCGGATGGTTTGATTGGTATGGACTACTCGACTTTTGATCTGGAG  
TTGTCTAGGGTCATGGCAGATACTACCGATAAGGTGAAAAATATGCAGGTCAAAGATTCTGTAGCTCT  
GAG

+

FFFFFFFFFFFFFFFFFFFFFFFFFFFFFFFFFFFFFFFFFFFFFFFFFFFFFFFFFFFFFFFFFFFFFF  
FFFFFFFFFFFFFFFFFFFFFFFFFFFFFFFFFFFFFFFFFFFFFFFFFFFFFFFFFFFFFFFFFFFFFF  
FFF

@A00721:190:HGJW7DSXY:4:2363:17264:5118\_2:N:0:TCTGCAAG+GCTGCACT  
CAAAACCTATCGTTGTCGTACCTTACAAGGTTGAGGAGACTTTACAGCGGCTTATTGTCGCGCAGTTT

+

@A00721:190:HGJW7DSXY:4:2573:18602:8844\_1:N:0:TCTGCAAG+GCTGCACT  
TTGAAAACCAAGTTAAGAAGGAGGCTGATCATGGAGTCTTTGTACCTTCTGTCAAACCTTCGAGGTTCA  
GCTACGAGAGGTGATCCCGGATGTGGATTGAAGGCTGGCTCTAAGGGAGACTCCTTCTTTTTGAATGT  
TG

+

@A00721:190:HGJW7DSXY:4:2175:21793:10927\_2:N:0:TCTGCAAG+GCTGCACT  
GGAGGTCCAGGAACCTTTACTCCTAGTGTCTTTTCTAGAGTCCAAGGACGTTTCCGTCGGAGGATGAC  
AGGTGGGAGACCGCTCAATAACACTCTATTGAATCCCTTTTCCACGAT

+

@A00721:190:HGJW7DSXY:4:1462:5122:35697\_1:N:0:TCTGCAAG+GCTGCACT  
GATCCTGATGACATTATTTCAACGGATACCGATCTCAGTTCTACCACAGAAACCGTCTCAGGAAGTGT  
CTCCACTGATTCGGAATTAGAGAAAGACGACCTTCTTGTGGGGACTGAGACCTCTGAATTTTCAGGGT  
GCC

+

@A00721:190:HGJW7DSXY:4:2314:5502:6449\_2:N:0:TCTGCAAG+GCTGCACT  
AGCTGATTCTTATTGCATGAACGTCGCTGAGGTCAAACCTGTGGACGTTCTTTTCATCGACGAATTAT  
TCATGATTCACGCTGGTCAGACCCCTTTTCTTACACATCTACTTAAGG

+

@A00721:190:HGJW7DSXY:4:1230:18457:16297\_1:N:0:TCTGCAAG+GCTGCACT  
TTCCGATCTACGACATCATTCTTGATGAGTGTCGTTCTTATCGAAGTCTCAGTTATCGCTGCCCCGCC  
GACGTTTGTGCGCAACTCTCAGAGGTTTACGGCAGAAAAATTTCTCCTGCTTGTAATTCGAGAGAGGA  
CAC

+

@A00721:190:HGJW7DSXY:4:1272:3269:25410\_2:N:0:TCTGCAAG+GCTGCACT  
ATATCGAGGCTATCGAGGACGATGAGTATCTTGAAGTTGTTGACGACAAGCCTCAAGAGGGTAGAGGA  
CCACCTGGATCTTCTACTGTCTCTGCCTTCCAAGATTTCTTAGAAGAG

+

@A00721:190:HGJW7DSXY:4:1170:17490:12994\_1:N:0:TCTGCAAG+GCTGCACT  
GGAGGGAGTTCTTGAAGCATCCCGACCTTTCCTTGTGAAAATTTTGATGCGGTTTCATAAGATTATCA  
GTAATCCTGATTCTACTACGGATTCATGGACCTTCCATCCTGTACCTCTTCTGGAGAGACGTATCTCA  
AAG

+

[illegible]

$+$ 

@

+

@

+

©

+

@

+

@

+

6

+

©

@A00721:190:HGJW7DSXY:4:1454:25961:24690\_1:N:0:TCTGCAAG+GCTGCACT  
TGCAGAGTGACTGGAGTTCAGACGTGTGCTCTTCCGATCTTTCAAGCTTGTCGTTAAAGACTGCAGAG



+

@A00721:190:HGJW7DSXY:4:2561:28185:18552\_1:N:0:TCTGCAAG+GCTGCACT  
TTCCCAAATCTAGATCTGCACAGAAGAAGGCTGAAGGTCGTTACCGGACGACCACTCAAAGGAAACGG  
GCTGTTGCCCAGAGGAAAGCAGCGACCACCGAGGTCGCTCGTAACATTGACGGCAGTCCCGTCATCTC  
TGT

+

@A00721:190:HGJW7DSXY:4:2105:11053:11741\_2:N:0:TCTGCAAG+GCTGCACT  
TCACATTCACCACTCCCATGCCAATCAATGATGTGACTATACAGTTCCGCCATTTCAAGAGTGGTCAA  
TACGTCGTGGGAGGTAAGCCTTCCCCTCCGCTGGCACGAAGAAC

+

@A00721:190:HGJW7DSXY:4:1339:29803:8766\_1:N:0:TCTGCAAG+GCTGCACT  
CTCTAAGTCTACCAGGAAGAGGGGAAATGTCCCCAAACTGAGAAGAATAAAGGGAAAGGTCCATCAG  
GACCTAAGAAGGGGAAATTACCCCTAATTCTGAAGGAAGATCTCCACCATCTGGGGTTGGGAATAAG  
AAA

+

@A00721:190:HGJW7DSXY:4:2449:20021:23422\_1:N:0:TCTGCAAG+GCTGCACT  
CTACGAAGTCGCTGAAGGCGGCTTGGGTCATTAAGGGTAGCTGTAAAGTTGCGCCTGCCGACCCCATC  
TTTGAGACCAAGACTCTCTACAGTAGGTCGTGCCTACTATGAGCAAATCTGTTGAATTCGTCACTGA  
GGA

+

@A00721:190:HGJW7DSXY:4:2509:23357:36683\_2:N:0:TCTGCAAG+GCTGCACT  
TTTGGCTACTGGCGACAACTGAGAGCAGTCGCTGGGGAAAGAGAATTGCGTGGGTTGAAGGCCGACG  
CTTCGAGCTTGAGTGTGACGAGGCCGGTGACGTTTTTGTCAACGGCGT

+

@A00721:190:HGJW7DSXY:4:2526:26693:13432\_1:N:0:TCTGCAAG+GCTGCACT  
CGAAGATCCCCCTATGGAGTCTTGAAGGACTTAGGTTGGCATATTTATGCCGACGATAATAAGCATGTC  
ACCCTTAAGCACCGAGGTAAGCTCGGGACTTACAAGAGAGAGTGTGAGAGAGTCGCTCTCACTATTTT  
TGC

+

@A00721:190:HGJW7DSXY:4:1605:3450:28698\_2:N:0:TCTGCAAG+GCTGCACT  
ATGTGAGAAGGTGGAAGGTGTCAAGGGTCTTCTTCATGCTGATCTTTCAGGACCTAATCACATCATGA  
TTGATAGTTACGGCTCGTATCGAGTTGGAGGGAGGAAGTTCTCCGAAA

+



@A00721:190:HGJW7DSXY:4:2264:16893:30436\_1:N:0:TCTGCAAG+GCTGCACT  
AAGGCTCTAGAGAAGATCTCCCCACCTGGAGAAGGCAAGTGGAGAGTCCAGAAAGTTGATGAAGAAGGA  
TTATTTGAAGCAGGGGTTACCACTTCCTAAGGTGGATGAGGGAGGTTGTTTCTTTGGAGTTTGTAGATA  
ATC

+

FFF::FFFFFFFFFFFFFFFF,FFFFFFFFF:FFFFFFFFFFFFFFFFFFFFFFFFFFFFFFFFFFFFFFFF  
FFFFFFFFFFFFFFFF:FFFFFFFFFFFFFFFFFFFFFFFFFFFFFFFFFFFFFFFF:FFFFFFFFFFFFFFFF  
FFF

@A00721:190:HGJW7DSXY:4:2223:11315:33019\_1:N:0:TCTGCAAG+GCTGCACT  
TGACTCAACTACTCCGATCAGATCCGGATGGTTTGATTGGTATGGACTACTCGACTTTTGATCTGGAG  
TTGTCTAGGGTCATGGCAGATACTACCGATAAGGTGAAAAATATGCAGGTCAAAGATTCTGTAGCTCT  
GAG

+

FFFFFFFFFFFFFFFFFFFFFFFFFFFFFFFFFFFFFFFFFFFFFFFFFFFFFFFFFFFFFFFFFFFFFFFF  
:FFFFFFFFF:FFFFFFFFFFFFFFFFFFFFFFFFFFFFFFFFFFFFFFFFFFFFFFFFFFFFFFFFFFFFF  
FFF

@A00721:190:HGJW7DSXY:4:2408:17246:6621\_2:N:0:TCTGCAAG+GCTGCACT  
CAAAACCTATCGTTGTCGTACCTTACAAGGTTGAGGAGACTTTACAGCGGCTTATTGTGCGCAGTTT  
CCAGAATTGCGGTTGAAGTTCACCCATTCTATCTTGAATGCTCACGCC

+

FFFFFFFFFFFFFFFFFFFFFFFFFFFFFFFFFFFFFFFFFFFFFFFFFFFFFFFFFFFFFFFFFFFFFFFF  
FFFFFFFFFFFFFFFFFFFFFFFFFFFFFFFFFFFFFFFF:FFFFFFFFFFFFFFFFFFFFF

@A00721:190:HGJW7DSXY:4:1575:8730:27821\_1:N:0:TCTGCAAG+GCTGCACT  
TGGAGTTCAGACGTGTGCTCTTCCGATCTCCTGGAGTCTTTGTACCTTCTGTCAAACCTTCGAGGGTCA  
GCTACGAGAGGTGATCCCGATGTGGATTGAAGGCTGGCTCTAAGGGAGACTCCTTCTTTTTGAATGT  
TG

+

:FF,:FFF:F,FFFFFFFFF,FFFF::FFF:FFFFFFFFFFFFFFFFFFFFFFFFFFFFFFFF:FFFF,FFF  
FFFFFFFF:FFFFFFFFFFFFFFFFFFFFFFFF:FFF,FFFF:FFFF:FFFFFFFFFFFFF:FFFFFF:FFF:F  
FF

@A00721:190:HGJW7DSXY:4:2677:3947:19225\_2:N:0:TCTGCAAG+GCTGCACT  
GGAGGTCCAGGAACCTTTACTCCTAGTGTCTTTTCTAGAGTCCAAGGACGTTTCCGTCGGAGGATGAC  
AGGTGGGAGACCGCTCAATAACACTCTATTGAATCCCTTTTCCACGAT

+

FFFFFFFFFFFFFFFFFFFFFFFFFFFFFFFFFFFFFFFFFFFFFFFFFFFFFFFFFFFFFFFFFFFFFFFF  
FFFFFFFFFFFFFFFFFFFFFFFFFFFFFFFFFFFFFFFFFFFFFFFFFFFFFFFFFFFFFFFFFFFFF

@A00721:190:HGJW7DSXY:4:1514:31684:3944\_1:N:0:TCTGCAAG+GCTGCACT  
GATCCTGATGACATTATTTCAACGGATACCGATCTCAGTTCTACCACAGAAACCGTCTCAGGAAGTGT  
CTCCACTGATTCGGAATTAGAGAAAGACGACCTTCTTGTGGGGACTGAGACCTCTGAATTTTCAGGGT  
GCC

+

FFFFFFFFFFFFFFFFFFFFFFFFFFFFFFFF,FFFFFFFFFFFFFFFFFFFFFFFF:FFFFFFFFFFFFFFFF  
FFFFFFFFFFFFFFFFFFFFFFFFFFFFFFFFFFFFFFFFFFFFFFFFFFFFFFFFFFFFFFFFFFFFFFFF  
FFF

@A00721:190:HGJW7DSXY:4:2409:24279:10160\_2:N:0:TCTGCAAG+GCTGCACT  
AGCTGATTCTTATTGCATGAACGTCGCTGAGGTCAAACCTGTGGACGTTCTTTTCATCGACGAATTAT  
TCATGATTCACGCTGGTCAGACCCTTTTCTTACACATCTACTTAAGG

+

FFFFFFFFFFFFFFFFFFFFFFFFFFFFFFFFFFFFFFFFFFFFFFFFFFFFFFFFFFFFFFFFFFFFFFFF  
FFFFFFFFFFFFFFFFFFFFFFFFFFFFFFFF:FFFFFFFFFFFFFFFFFFFFFFFFFFFFF

@A00721:190:HGJW7DSXY:4:2308:3775:28980\_1:N:0:TCTGCAAG+GCTGCACT  
TTCCGATCTACGACATCATTCTTGATGAGTGTGTTCTTATCGAAGTCTCAGTTATCGCTGCCCGGCC  
GACGTTTGTGCGGAAGTCTCAGAGGTTTACGGCAGAAAAATTTCTCCTGCTTGAATTCGAGAGAGGA  
CAC



FFFFFFFFFFFFFFFFFFFFFFFFFFFFFFFFFFFFFFFFFFFFFFFFFFFFFFFFFFFFFFFFFFFFFFFFFFFFFFFF  
FFF

@A00721:190:HGJW7DSXY:4:1371:2193:22670\_1:N:0:TCTGCAAG+GCTGCACT  
TACAAATGATAACTTCTAATTTACGTTTGCTACTCAGAGCTGGTCCTCTCAGCAAAGGGATGCATGGT  
GTTATCTCCTCAGGAGTCCCGGCATTTGATAATAATGACGAGACTTTCGTCATAATCGCTGCATATTA  
CGG

+  
FFFFF:FFFFFFFFFFFFFFFFFFFFFFFFFFFFFFFFFFFFFFFFFFFFFFFFFFFFFFFFFFFFFFFFFFFF  
FFFFFFFFFFFFFFFFFFFFFFFFFFFFFFFFFFFFFFFFFFFFFFFFFFFFFFFFFFFFFFFFFFFFFFFFFFFF  
FFF

@A00721:190:HGJW7DSXY:4:1445:15456:16454\_2:N:0:TCTGCAAG+GCTGCACT  
ACTAGTTCGAGTGCTGCTTTGGATTACGATGACGTGAGAATAGGTGAAGGGATAGTTTTTACCTCGAC  
CAACATTGAGGCGGCGGCGACTAATCTTAAAGCTTCACCCAAAATGAA

+  
FFFFFFFFF:FFFFFFF,FFFFFFFFFFF:FFFFFFFFFFFFFFFFFFFF:FFFFFFFFFFFFFFFFFFFFF  
FFFFFFFFFFFFFFFFFFFF:FFFFF,FFFFFFFFF:FFFF,FFFFFFFFFFFF

@A00721:190:HGJW7DSXY:4:2440:4309:10958\_1:N:0:TCTGCAAG+GCTGCACT  
TGCAGAGTGACTGGAGTTCAGACGTGTGCTCTTCCGATCTTCAAGCTTGTCGTTAAAGACTGCAGAG  
GCTGTCAAACAAGCCCAGACTCAAGGAGTCCAATCAAAGGTTTTGAATTTAGCTCAACTGGGGAGACG  
TG

+  
:FFFFFFFFFFFFFFFFFFFFFFFFFFFFFFFFFFFFFFFFFFFFFFFFFFFFFFFFFFFFFFFFFFFFFFFFFFFF  
FFFFFFFFFFFFFFFFFFFFFFFFFFFFFFFFFFFFFFFFFFFF,FFFFFFFFFFFFFFFFFFFFFFFFFFFFFFFFFFFF  
FF

@A00721:190:HGJW7DSXY:4:1263:26919:25817\_1:N:0:TCTGCAAG+GCTGCACT  
ACCAAATCTTGGCTTTCAACGAAGTCTCTGATTTTATTAATCATTACTTTAACGATCTCTCGGTCAT  
TACTCTGTACTTGATCTACGTCGTTTAACTGTGCGGAACAACCTTTACTTAGAATGACTCTATCTTTT  
CAG

+  
FFFFFFFFFFFFFFFFFFFFFFFFFFFFFFFFFFFFFFFFFFFFFFFFFFFFFFFFFFFFFFFFFFFFFFFFFFFF  
FFFFFFFFFFFFFFFFFFFFFFFFFFFFFFFFFFFF:FFFFFFFFFFFFFFFFFFFFFFFFFFFFFFFFFFFFF  
,F:

@A00721:190:HGJW7DSXY:4:2652:6470:24690\_2:N:0:TCTGCAAG+GCTGCACT  
CTTCGTTACGAGACCTGATGGTAGAATAGATTTAGTCTCTACACCCATCTCAACGAGGATAAAGCGAG  
TTTTCCGTCCTGAACGTAATACACGAAGAGATCATCCGCAAACGACTC

+  
FFFFFFFFF:FFFFFFFFFFFF:FFFFFFF::FFFFFFFFFFFFFFFFFFFFFFFFFFFF:FFFFFFFFFFFFFFFFFFFF  
:FFFFFFFFFFFFFFFFFFFFFFFFFFFFFFFFFFFFFFFFFFFFFFFFFFFFFFFFFFFFFFFFFFFF

@A00721:190:HGJW7DSXY:4:1378:1642:12759\_1:N:0:TCTGCAAG+GCTGCACT  
ATGAGGTCAAAGCTCTATTTATTAACGAACACTATTATCCGATTCTTCGAGGGTATCACTACCACTGAT  
CTGCCGACTTTAGTCAAGGAACCTCAATTCCTTCGATGTTTATATTTTCTATAAGGGAAAATAGCAA  
TAA

+  
FFFFFFFFFFFFFFFFFFFFFFFFFFFF:FFFFFFFFFFFFFFFFFFFFFFFFFFFFFFFFFFFFFFFFFFFF:FFFFFFFFFFFF  
FFFFFFFFFFFFFFFFFFFFFFFFFFFFFFFFFFFF:FFFFFFFFFFFFFFFFFFFFFFFFFFFF,FFFFFFFFFFFFFFFFFFFF  
FFF

@A00721:190:HGJW7DSXY:4:2575:32117:19257\_2:N:0:TCTGCAAG+GCTGCACT  
CTTTATTTTCAAGACTCTCTCCGATCACCTTGGTGTGATCTCCCGGAGGATCTTTTCAATAAGATGTAT  
GATGATAATCTACTATTTTAAATAGTGATATTCAGCGTATACTTGAA

+  
FFFFFFFFFFFFF:FFFF:FFFFFFFFFFFFFFFFFFFFFFFFFFFFFFFFFFFFFFFFFFFF:FFF,,FFFF::FFFF  
F:FFFFFFFFFFFF:FFFF:FFFFFFFFFFFFFFFFFFFFFFFFFFFF:FFFFFFFFFFFF:,

@A00721:190:HGJW7DSXY:4:2110:24894:8218\_2:N:0:TCTGCAAG+GCTGCACT  
AAGTTGAAGAGGTCTATGATATTTATTTTACTTATACTTTAAATAGCACCGATTATAACTTGACTGT

+

FFFFFFFFFFFFFFFFFFFFFFFFFFFFFFFF:FFFFFFFFFFFFFFFFFFFFFFFF,FF

+

FFFFFFFFFFFFFFFFFFFFFFFFFFFFFFFFFFFFFFFFFFFFFFFFFFFFFFFFFFFF

+

```
FFFFFFFFFFFFFF:FF,FFFFFF:FFFFFFFFFFFFFF:FFFF:FFFFFFFF
```

 $+$ 

FFF

+

FFF

+

FFFFFFFFFFFFFFFF,FFFFFFFFFFFFFFFFFFFFFFFFFFFFFFFF

+

FF,

+

FFF

@A00721:190:HGJW7DSXY:4:2142:14371:35086\_2:N:0:TCTGCAAG+GCTGCACT  
GGCTACTGGCGACAACTGAGAGCAGTCGCTGGGGAAAGAGAATTGCGTGGGTGAAGGCCGACGCTT  
CGAGCTTGAGTGTGACGAGGCCGGTGACGTTTTTGTCAACGGCGTTTG

+

FF:FFFFFFFFFFFFFF,FFFFFFFFFFFFFF:FFF:FFFFFFFFFFFFFF:FFFFFFFFFFFFFF:FFFFFF::  
FFFFF:,FFFFFFFFFFFFFF:FFFFFFFFFFFFFF:FFF:,,F

@A00721:190:HGJW7DSXY:4:2560:5466:28056\_1:N:0:TCTGCAAG+GCTGCACT  
CGAAGATCCCCTATGGAGTCTTGAAGGACTTAGGTTGGCATATTTATGCCGACGATAATAAGCATGTC  
ACCCTTAAGCACCAGGTAAGCTCGGGACTTACAAGAGAGAGTGTGAGAGAGTCGCTCTCACTATTTT  
TGC

+

FFFFFFFFFFFFFFFF:FFFFFFFFFFFFFFFF:FFFFFFFFFFFFFFFF:FFFFFFFFFFFFFFFF  
FFFFFFFFFFFFFFFF:FFFFFFFFFFFFFFFF:FFFFFFFFFFFFFFFF,FFFFFFFFFFFFFF  
FFF

@A00721:190:HGJW7DSXY:4:1624:19750:27336\_2:N:0:TCTGCAAG+GCTGCACT  
ATGTGAGAAGGTGGAAGGTGTCAAGGGTCTTCTTCATGCTGATCTTTCAGGACCTAATCACATCATGA  
TTGATAGTTACGGCTCGTATCGAGTTGGAGGGAGGAAGTTCTCCGAAA

+

FFFFFFFFFFFFFFFF:FFFFFFFFFFFFFFFF:FFFFFFFFFFFFFFFF:FFFFFFFFFFFFFFFF  
FFFFFFFFFFFFFFFF:FFFFFFFFFFFFFFFF,FFFFFFFFFFFFFF

@A00721:190:HGJW7DSXY:4:2307:17671:15060\_1:N:0:TCTGCAAG+GCTGCACT  
AAGGCTCTAGAGAAGATCTCCCCACCTGGAGAAGGCAAGTGGAGAGTCCAGAAGTTGATGAAGAAGGA  
TTATTTGAAGCAGGGGTACCCTTCCTAAGGTGGATGAGGGAGGTTGTTTCTTTGGAGTTTGTAGATA  
ATC

+

:FFFFFF:FFFFFFFFFFFFFF:FF:FFFFFFFFFFFFFFFF:FFFFFFFFFFFFFFFF:FFFFFFFF  
FFFFFFFFFFFFFFFF:FFFFFFFFFFFFFFFF:FFFFFFFFFFFFFFFF:FFFFFFFFFFFFFFFF  
FFF

@A00721:190:HGJW7DSXY:4:2228:2663:3035\_1:N:0:TCTGCAAG+GCTGCACT  
TGACTCAACTACTCCGATCAGATCCGGATGTTTGATTGGTATGGACTACTCGACTTTTGATCTGGAG  
TTGTCTAGGGTCATGGCAGATACTACCGATAAGGTGAAAAATATGCAGGTCAAAGATTCTGTAGCTCT  
GAG

+

FFFFFFFFF,FFFFFFFFFFFFFFFF:FFFFFFFFFFFFFFFF:FFFFFFFFFFFFFFFF:FFFFFFFF  
FFFFFFFFFFFFFFFF:FFFFFFFFFFFFFFFF:FFFFFFFFFFFFFFFF:FFFFFFFFFFFFFFFF  
FFF

@A00721:190:HGJW7DSXY:4:2534:7301:7122\_2:N:0:TCTGCAAG+GCTGCACT  
CAAAACCTATCGTTGTCGTACCTTACAAGGTTGAGGAGACTTTACAGCGGCTTATTGTCGCGCAGTTT  
CCAGAATTGCGGTTGAAGTTCACCCATTCTATCTTGAATGCTCACGCC

+

FFFFFFFFFFFFFFFF:FFFFFFFFFFFFFFFF:FFFFFFFFFFFFFFFF:FFFFFFFFFFFFFFFF  
FFFFFFFFFFFFFFFF:FFFFFFFFFFFFFFFF:FFFFFFFFFFFFFFFF:FFFFFFFFFFFFFFFF

@A00721:190:HGJW7DSXY:4:1462:6515:34507\_2:N:0:TCTGCAAG+GCTGCACT  
TGAAAACCAAGTTAAGAAGGAGGCTGATCATGGAGTCTTTGTACCTTCTGTCAAACCTTCGAGGTTGAG  
CTACGAGAGGTGATCCCGATGTGGATTGAAGGCTGGCTCTAAGGGAG

+

FFFFFFFFFFFFFFFF:FFFFFFFFFFFFFFFF:FFFFFFFFFFFFFFFF:FFFFFFFFFFFFFFFF  
FFFFFFFFFFFFFFFF,FFFF:FFFFFFFFFFFFFFFF:FFFFFFFF

@A00721:190:HGJW7DSXY:4:1177:26413:29450\_1:N:0:TCTGCAAG+GCTGCACT  
ACCTTTACTCCTAGTGTCTTTCTAGAGTCCAAGGACGTTTCCGTGCGAGGATGACAGGTGGGAGACC  
GCTCAATAACACTCTATTGAATCCCTTTTCCACGATGAAAGCTCTTTATGAGGTGCTCCATGCAAATT  
TAC

+

FFFFFFFFF:FFFFFFFFFFFFFFFF:FFFFFFFFFFFFFFFF:FFFFFFFFFFFFFFFF:FFFFFFFF

FFFFFFFFFFFFFFFFFFFFFFFFFFFFFFFFFFFFFFFFFFFFFFFFFFFFFFFFFFFFFFFFFFFFFFFFFFFFFFFF  
FFF

@A00721:190:HGJW7DSXY:4:1526:5448:36573\_1:N:0:TCTGCAAG+GCTGCACT  
GATCCTGATGACATTATTTCAACGGATACCGATCTCAGTTCTACCACAGAAACCGTCTCAGGAACTGT  
CTCCACTGATTGGAATTAGAGAAAGACGACCTTCTTGTGGGACTGAGACCTCTGAATTTTCAGGGT  
GCC

+

FFFFFFFFFFFFFFFFFFFFFFFFFFFFFFFFFFFFFFFFFFFFFFFFFFFFFFFFFFFFFFFFFFFFFFFFFFFFFFFF  
FFFFFFFFFFFFFFFFFFFFFFFFFFFFFFFFFFFFFFFFFFFFFFFFFFFFFFFFFFFFFFFFFFFFFFFFFFFFFFFF  
FFF

@A00721:190:HGJW7DSXY:4:2422:5068:6668\_2:N:0:TCTGCAAG+GCTGCACT  
AGCTGATTCTTATTGCATGAACGTCGCTGAGGTCAAACCTGTGGACGTTCTTTTCATCGACGAATTAT  
TCATGATTCACGCTGGTCAGACCCTTTTCTTACACATCTACTTAAGG

+

FFFFFFFFFFFFFFFFFFFFFFFFFFFFFFFFFFFFFFFFFFFFFFFFFFFFFFFFFFFFFFFFFFFFFFFFFFFFFFFF  
FFFFFFFFFFFFFFFFFFFFFFFFFFFFFFFFFFFFFFFFFFFFFFFFFFFFFFFFFFFFFFFFFFFFFFFFFFFFFFFF

@A00721:190:HGJW7DSXY:4:2556:10710:9925\_1:N:0:TCTGCAAG+GCTGCACT  
TTCCGATCTACGACATCATTCTTGATGAGTGTGCTTCTTATCGAAGTCTCAGTTATCGCTGCCCCGGCC  
GACGTTTGTGCGAACTCTCAGAGGTTTACGGCAGAAAAATTTCTCCTGCTTGTAAATTCGAGAGAGGA  
CAC

+

FFFFFFFFFFFF:FFFFFFFFFFFFFFFFFFFFFFFFFFFFFFFFFFFFFFFFFFFFFFFFFFFFFFFFFFFFFFFF  
FFFFFFFFFFFFFFFFFFFFFFFFFFFFFFFFFFFFFFFFFFFFFFFFFFFFFFFFFFFFFFFFFFFFFFFFFFFFFFFF  
FFF

@A00721:190:HGJW7DSXY:4:1506:10917:10066\_2:N:0:TCTGCAAG+GCTGCACT  
ATATCGAGGCTATCGAGGACGATGAGTATCTTGAAGTTGTTGACGACAAGCCTCAAGAGGGTAGAGGA  
CCACCTGGATCTTCTACTGTCTCTGCCTTCCAAGATTTCTTAGAAGAG

+

FFF:FFFFFFFFFFFF:FFFFFFFFFFFFFFFFFFFFFFFFFFFFFFFFFFFFFFFFFFFFFFFFFFFFFFFFFFFF  
FFFFFFFFFFFFFFFFFFFF:FFFFFFFFFFFF:FFFFFFFFFFFF:FFFF:F:F:FFF

@A00721:190:HGJW7DSXY:4:1170:17806:12727\_1:N:0:TCTGCAAG+GCTGCACT  
GGAGGGAGTTCTTGAAGCATCCCGACCTTTCCTTGTGAAAATTTTGATGCGGTTTCATAAGATTATCA  
GTAATCCTGATTCTACTACGGATTCATGGACCTTCCATCCTGTACCTCTTCTGGAGAGACGTATCTCA  
AAG

+

FFFFFFFFFFFF:FFFFFFFFFFFFFFFFFFFFFFFFFFFFFFFFFFFFFFFFFFFFFFFFFFFFFFFFFFFFFFFF  
FFFFFFFFFFFFFFFFFFFF,FFFFFFFFFFFFFFFFFFFFFFFFFFFFFFFFFFFFFFFFFFFFFFFFFFFFFFFFFFFF  
FFF

@A00721:190:HGJW7DSXY:4:2639:27272:33285\_2:N:0:TCTGCAAG+GCTGCACT  
TTTGAAGCTCAGGGTGAAGCACAACGTTTGACCGTGACGAAGTGTGGTGTCTTGTATCTACGTTACGG  
ATATACTCTCCTTGAGTTCACTCGTAAGGACACTACCACTTATTACGA

+

FFFFFFFFFFFFFFFFFFFF,FFFFFFFFFFFFFFFFFFFFFFFFFFFFFFFFFFFFFFFFFFFFFFFFFFFFFFFF  
FFFFFFFFFFFFFFFFFFFFFFFFFFFFFFFFFFFFFFFFFFFFFFFFFFFFFFFFFFFFFFFFFFFFFFFFFFFF

@A00721:190:HGJW7DSXY:4:2421:30599:23703\_1:N:0:TCTGCAAG+GCTGCACT  
CTTACAGAGGGGCAGCAGCATGACCATAATTGGTATTGACTTTGGTACCACCTTTTCTACTGTCTGTC  
TCGCTCTTGAATGAAGTTTTAATGCTTAACAACAATGATAGTGAATTTATACCTACAATCATTGGT  
TTT

+

FFFFFFFFFFFF:FFFFFFFFFFFFFFFFFFFF:FFFFFFFFFFFF:FFFF:FFFF:FF:FFFF:FFFFFFFFFFFFFFFF  
F:FFFF,FFF:FFFFFFFFFFFFFFFFFFFFFFFFFFFF:FF:,FFFF:FFFF:,F:FFF:FFFF:FFFFF,  
:FF

@A00721:190:HGJW7DSXY:4:1142:6216:10222\_1:N:0:TCTGCAAG+GCTGCACT  
TTATGGATATGATGCTATTACTCATGATGGTTACGGTCAGGGAGGATTCTCAGTTTACAAGGACCTTA

AGCGATGGATCGGGGTTAATTCTAAAACATTACCCGAAAGACGTGCTAAATTAACCATTGTACGAT  
GTC

+

FFFFFFFFFFFFFFFFFFFFFFFFFFFFFFFFFFFFFFFFFFFFFFFFFFFFFFFFFFFFFFFFFFFFFFFF  
FFFFFFFFFFFFFFFFFFFFFFFFFFFFFFFFFFFFFFFFFFFFFFFFFFFFFFFFFFFFFFFFFFFFFFFF  
FFF

@A00721:190:HGJW7DSXY:4:1155:7166:29309\_1:N:0:TCTGCAAG+GCTGCACT  
CAAAGATATTTTCATGAAAACCTACAGAGGAACGTACCGGATTACCTGTCTTTTCATATTATGAATGAACC  
TTCGGCCGCTCTCTTTGCTTCGATGTTGGATGTCAAGAAGGGTTCAGAATGGGATTCTACGTAGTTT  
ATG

+

FFFFFFFFFFFFFFFFFFFFFFFFFFFFFFFFFFFFFFFFFFFFFFFFFFFFFFFFFFFFFFFFFFFFFFFF  
FFFFFFFFFFFFFFFFFFFFFFFFFFFFFFFFFFFFFFFFFFFFFFFFFFFFFFFFFFFFFFFFFFFFFFFF  
FFF

@A00721:190:HGJW7DSXY:4:2541:26756:13103\_1:N:0:TCTGCAAG+GCTGCACT  
TTGGAACGAAGGCGACCTGTTCCGGAGTTTTTACGGGATCCGGAATGTTCTGTCTATATTAGGTGAAG  
CGAAATACGATTTTGAACGTCAACGTTACCGAGTTTCGTTTCGTACCTTGATGCTGACTTTCGTCAA  
TAT

+

F:FFF,FFFFFFFFFFFF:,FF:F:FFFFF:FF:FFFFFFFF:F,FFFFFFFFFFFF:FF,F:FF:FFF  
:FFFFFFFFFFFFFFFFFFFFFFFFFFFFFFFFFFFFFFFFFFFFFFFFFFFFFFFFFFFFFFFFFFFF  
FFF

@A00721:190:HGJW7DSXY:4:1621:25012:3756\_1:N:0:TCTGCAAG+GCTGCACT  
TACAAATGATAACTTCTAATTTACGTTTGCTACTCAGAGCTGGTCCTCTCAGCAAAGGGATGCATGGT  
GTTATCTCCTCAGGAGTCCCGGCATTTGATAATAATGACGAGACTTTCGTCATAATCGCTGCATATTA  
CGG

+

FFFFFFFFFFFFFFFFFFFFFFFFFFFFF:FFFFFFFFFFFFFFFFFFFFFFFFFFFFFFFFFFFFFFFF  
FFFFFFFFFFFFFFFFFFFFFFFFFFFFFFFFFFFFFFFFFFFFFFFFFFFFFFFFFFFFFFFFFFFFFFFF  
FFF

@A00721:190:HGJW7DSXY:4:1461:16495:28714\_2:N:0:TCTGCAAG+GCTGCACT  
ACTAGTTCGAGTGCTGCTTTGGATTACGATGACGTGAGAATAGGTGAAGGGATAGTTTTTACCTCGAC  
CAACATTAAGGCGGCGGCGACTAATCTTAAAGCTTCACCCAAAATGAA

+

FFFFFFFFFFFFFFFFFFFF:FFFFFFFFFFFFFFFFFFFFFFFFFFFFFFFFFFFFFFFFFFFFFFFF  
FFFFFFFF,FFFFFFFFFFFFFFFFFFFFFFFFFFFFFFFFFFFFFFFFFFFFFFFFFFFFFFFFFFFF

@A00721:190:HGJW7DSXY:4:1524:20989:12195\_2:N:0:TCTGCAAG+GCTGCACT  
CGAACCCGTTGATGCTATGTCAGAAGAAGCTATTCAAGCTTGTCGTTTAAAGACTGCAGAGGCTGTCA  
AACAAGCCCAGACTCAAGGAGTCCAATCAAAGTTTTGAATTTAGCTC

+

FFFFFFFFFFFFFFFFFFFFFFFFFFFFFFFFFFFFFFFFFFFFFFFFFFFFFFFFFFFFFFFFFFFFF:  
F,FFF,FFFFFFFFFFFFFFFFFFFFFFFFFFFFFFFFFFFFFFFFFFFFFFFFFFFFFFFFFFFF,FFF

@A00721:190:HGJW7DSXY:4:1417:3983:19382\_1:N:0:TCTGCAAG+GCTGCACT  
ACCAAATCTTGGCTTTCAACGAAGTCTCTGATTTTATTAATCATTACTTTAACGATCTCTCGGTCAT  
TACTCTGTACTTGATCTACGTCGTTTAACTGTCGGAACAACCTTTACTTAGAATGACTCTATCTTT  
CAG

+

FFFFF:FFFFFFFFFFFFFFFFFFFFFFFFFFFFFFFFFFFFFFFFFFFFFFFFFFFFFFFFFFFFFFFF  
FFFFFFFFFFFFFFFFFFFFFFFFFFFFFFFFFFFFFFFFFFFFFFFFFFFFFFFFFFFFFFFFFFFFF:  
:FF

@A00721:190:HGJW7DSXY:4:2675:2537:22232\_2:N:0:TCTGCAAG+GCTGCACT  
CTTCGTTACGAGACCTGATGGTAGAATAGATTTAGTCTCTACACCCATCTCAACGAGGATAAAGCGAG  
TTTTCCGTCCTGAACGTAATACACGAAGAGATCATCCGCAAACGACTC

+

FFFFFFFFFFFFFFFFFFFFFFFFFFFFFFFFFFFFFFFFFFFFFFFFFFFFFFFFFFFFFFFFFFFFFFFF  
FFFFFFFFFFFFFFFFFFFFFFFFFFFFFFFFFFFFFFFFFFFFFFFFFFFFFFFFFFFFFFFFFFFFFFFF  
@A00721:190:HGJW7DSXY:4:1403:6244:16564\_1:N:0:TCTGCAAG+GCTGCACT  
ATGAGGTCAAAGCTCTATTTATTAACGAACATTATCCGATTCTTCGAGGGTATCACTACCACTGAT  
CTGCCGACTTTAGTCAAGGAACCTCAATTCCTTCGATGTTTATATTTTTCTATAAGGGAAAATAGCAA  
TAA  
+  
FFFFFFFFFFFFFFFFFFFFFFFFFFFFFFFFFFFFFFFFFFFFFFFFFFFFFFFFFFFFFFFFFFFFFFFF  
FFFFFFFFFFFFFFFFFFFFFFFFFFFFFFFFFFFFFFFFFFFFFFFFFFFFFFFFFFFFFFFFFFFFFFFF  
FFF  
@A00721:190:HGJW7DSXY:4:2645:13259:1689\_2:N:0:TCTGCAAG+GCTGCACT  
CTTTATTTTCAGAACTCTCTCCGATCACCTTGGTGTGATCTCCCGGAGGATCTTTTCAATAAGATGTAT  
GATGATAATCTACTATTTTTAAATAGTGATATTCAGCGTATACTTGAA  
+  
FFFFFFFFFFFFFFFFFFFFFFFFFFFFFFFFFFFFFFFFFFFFFFFFFFFFFFFFFFFFFFFFFFFF, FFFFF: FFFFFFFFFF  
FFFFFFFFFFFFFFFFFFFFFFFFFFFFFFFFFFFFFFFFFFFFFFFFFFFFFFFFFFFFFFFFFFFFFFFF  
@A00721:190:HGJW7DSXY:4:2356:24126:8860\_2:N:0:TCTGCAAG+GCTGCACT  
AAGTTGGAAGAGGTCTATGATATTTATTTTACTTATACTTTAAATAGCACCGATTATAACTTGACTGT  
TGATAATATTACAATAGCTCTTTCTCAGAAGATTAGAGAAGTAACAGG  
+  
F: FFFFFFFFF: FFFFFFFFFFFFFFFFFFFFFFFFFFFFFFFFFFFFFFFFFFFFFFFFFFFFFFFFFF, FFFFFFFF: FFFFFFFF: FFFFFFFF  
FFFFFFFFFFFFFFFFFFFF:, : FFFFFFFFFFFFFFFFFFFFF: F: FFF: FFF, FF  
@A00721:190:HGJW7DSXY:4:1343:11740:25614\_2:N:0:TCTGCAAG+GCTGCACT  
TTACTTTTACCGTTAGAACTGAAAAAGATTCTTTTCGAAAAGAAACCTATAAGTTACAAACGATTCTT  
CGACTATATTAAAGAAATAAAAATACTTCAAGTACCTGAACCTTTACAT  
+  
FFFFFFFFFFFFFF: FFFFFFFFFFFFFFFFFFFFFFFFFFFFFFFFFFFFFFFFFFFFFFFFFFFFFFFFFF  
FFFFFFFFFFFFFFFFFFFFFFFFFFFFFFFFFFFFFFFFFFFFFFFFFFFFFFFFFFFFFFFFFFFF:  
@A00721:190:HGJW7DSXY:4:1564:31268:31814\_2:N:0:TCTGCAAG+GCTGCACT  
CCTTAATATTCTAGTAACCGCTATGTGGGCATTACTAGGATTTATCACACTCCTAAATTTGATAGCAA  
TTTATGTTTTAAATGCTAGGAAAATTTTAGAAAACTCCATTGTATAG  
+  
FFFFFFFFFFFFFFFFFFFFFFFFFFFFFFFFFFFFFFFFFFFFFFFFFFFFFFFFFFFFFFFFFFFFFFFF  
: FFFFFFFFFFFFFFFFFF: FFFFFFFFFFFFFFFFFFFFFF: FF: FFFFF:  
@A00721:190:HGJW7DSXY:4:1426:7102:33207\_1:N:0:TCTGCAAG+GCTGCACT  
CTATCGCCTTTATTGAAAATTGTATAAGAGTTAATTGCTTACACAAAAGTGACGCGCGAAGGAATCTT  
AATTGATTGAAGCTAGGCGTTGGGGAGAATGAAGTCCGCTTCCCGGAAGAAACGATCTATTTACAGA  
GTA  
+  
FFFF: FFFFFFFFFFFFFFFFFFFFFFFFFFFFFFFFFFFFFF: F: FF: FFFFFFFFFFFFFFFFFFFFFF, FFFF: FFF  
FFFFFFFF: FFFFFFFFFFFFFFFFFFFFFFFFFFFFFFFFFFFFFF: FFFFFFFFFFFFFFFFFFFFFF: FFF  
FFF  
@A00721:190:HGJW7DSXY:4:2664:16251:28260\_1:N:0:TCTGCAAG+GCTGCACT  
TTCCCAAATCTAGATCTGCACAGAAGAAGGCTGAAGGTCGTTACCGGACGACCACTCAAAGGAAACGG  
GCTGTTGCCAGAGGAAAGCAGCGACCAACCGAGGTCGCTCGTAACATTGACGGCAGTCCCGTCATCTC  
TGT  
+  
: FFFFFF: FFF: FFFF, FF, FFFFFFF: FFFFFFFFFFFFFFFFFFFFFFFFFFFFFFFFFFFFFF  
FFFFFFFFFFFFFFFFFFFFFFFFFFFFFFFFFFFFFFFFFFFFFFFFFFFFFFFFFFFFFFFFFFFFFFFF  
FFF  
@A00721:190:HGJW7DSXY:4:2150:4191:33207\_2:N:0:TCTGCAAG+GCTGCACT  
TCACATTCACCACTCCCATGCCAATCAATGATGTGACTATACAGTTCGGCCATTTCAAGAGTGGTCAA  
TACGTCGTGGGAGGTACTGAAGCCTTCCCCTCCGCTGGCACGAAGAAC  
+



```
FFF,F,:FFFFFFFFFFFFFFFF:FFFFFFFFFFFFFFFF:FF:FFFF:FF:FFFF:FF,FFF
,FF:FF,FFFFFFFFF:F:FFFFFFFFFFFFFFFF,FFFFFF:FF:FFF
```

+

@A00721:190:HGJW7DSXY:4:2526:18945:33144\_1:N:0:TCTGCAAG+GCTGCACT  
CTACGAAGTCGCTGAAGGCGGCTTGGGTCATTAAGGGTAGCTGTAAAGTTGCGCCTGCCGACCCCATC  
TTTGAGACCAAGACTCTCTACAGTAGGTCGTGCCTACTATGAGCAAATCTGTTGAATTCGTCACTGA  
GGA

[illegible]

+

@A00721:190:HGJW7DSXY:4:1178:24026:36683\_1:N:0:TCTGCAAG+GCTGCACT  
GAAGATCCCCTATGGAGTATTGAAGGACTTAGGTTGGAATATTTATGCCGACGATAATAATCATGTCA  
CCCTTAAGCACCGAGGTAAGCTCGGGACTTACAAGAGAGAGTGTGAGAGAGTCGCTCTCACTATTTTT  
GC

```
F,F:FFFF,,FFFF:FF:,FF:F,,FF,FF:FFFF,,,,F:FFFFFF,F,,:::,F,F,F:,F:FFFFFF
:,,FFFF,::F::,FFFF,:FF:FFF,,FFFF,:FF::F,FFFF,FFF,,F,:F:FF:,FFFFFFF:
FF
```

+

@A00721:190:HGJW7DSXY:4:2342:26802:27555\_1:N:0:TCTGCAAG+GCTGCACT  
AAGGCTCTAGAGAAGATCTCCCCACCTGGAGAAGGCAAGTGGAGAGTCCAGAAGTTGATGAAGAAGGA  
TTATTTGAAGCAGGGGTTACCACTTCCTAAGGTGGATGAGGGAGGTTGTTTCTTTGGAGTTTATAGATA  
ATC

```

FFFF:FFFFFFFFFFFFFFF, :FFFF:FFFFFFFFFFFFFFF
FFFFFFFFFFFFFFFFFFFFFFFFFFFFFFFFFFFFFFFF
FFF

```

+

@A00721:190:HGJW7DSXY:4:1249:14832:30718\_1:N:0:TCTGCAAG+GCTGCACT  
TTGTCGTACCTTACAAGGTTGAGGAGACTTTACAGCGGCTTATTGTCGCGCAGTTTCCAGAATTGCGG  
TTGAAGTTCACCCATTCTATCTTGAATGCTCACGCCGTCGCAGCCATATCGAGACTATGTTATAATCA  
CTT

+

:FFFFFFFFFFFFFFFFFFFFFFFFFFFFFFFFFFFFFFFFFFFFFFFFFFFFFFFFFFFFFFFFFFFFFFFF  
FFFFFFFFFFFFFFFFFFFFFFFFFFFFFFFFFFFFFFFFFFFFFFFFFFFFFFFFFFFFFFFFFFFFFFFF  
FFF

@A00721:190:HGJW7DSXY:4:2115:17580:23390\_2:N:0:TCTGCAAG+GCTGCACT  
TGAAAACCAAGTTAAGAAGGAGGCTGATCATGGAGTCTTTGTACCTTCTGTCAAACCTTCGAGGTTGAG  
CTACGAGAGGTGATCCCGGATGTGGATTGAAGGCTGGCTCTAAGGGAG

+

FFFFFFFFFFFFFFFFFFFFFFFFFFFFFFFFFFFFFFFFFFFFFFFFFFFFFFFFFFFFFFFFFFFFFFFF  
FFFFFFFFFFFFFFFFFFFFFFFFFFFFFFFFFFFFFFFFFFFFFFFFFFFFFFFFFFFFFFFFFFFFFFFF  
FFF

@A00721:190:HGJW7DSXY:4:1605:28320:10488\_1:N:0:TCTGCAAG+GCTGCACT  
ACCTTTACTCCTAGTGTCTTTTCTAGAGTCCAAGGACGTTTCCGTCGAGGATGACAGGTGGGAGACC  
GCTCAATAACACTCTATTGAATCCCTTTTCCACGATGAAAGCTCTTTATGAGGTGCTCCATGCAAATT  
TAC

+

FFFFF:FFFFFFFFFFFFFFFFFFFFFFFFFFFFFFFFFFFFFFFFFFFFFFFFFFFFFFFFFFFFFFFF  
FFFFFFFFFFFFFFFFFFFFFFFFFFFFFFFFFFFFFFFFFFFFFFFFFFFFFFFFFFFFFFFFFFFFFFFF  
FFF

@A00721:190:HGJW7DSXY:4:1571:17906:32064\_1:N:0:TCTGCAAG+GCTGCACT  
GATCCTGATGACATTATTTCAACGGATACCGATCTCAGTTCTACCACAGAAACCGTCTCAGGAACTGT  
CTCCACTGATTCGGAATTAGAGAAAGACGACCTTCTTGTTGGGACTGAGACCTCTGAATTTTCAGGGT  
GCC

+

FFFFF,FFFFFFFFFFFFFFFFFFFFFFFFFFFFFFFFFFFFFFFFFFFFFFFFFFFFFFFFFFFFFFFF  
FFFFFFFFFFFFFFFFFFFFFFFFFFFFFFFFFFFFFFFFFFFFFFFFFFFFFFFFFFFFFFFFFFFFFFFF  
FFF

@A00721:190:HGJW7DSXY:4:2427:15185:31861\_2:N:0:TCTGCAAG+GCTGCACT  
AGCTGATTCTTATTGCATGAACGTCGCTGAGGTCAAACCTGTGGACGTTCTTTTCATCGACGAATTAT  
TCATGATTCACGCTGGTCAGACCCTTTTCTTACACATCTACTTAAGG

+

FFFFFFFFFFFFFFFFF:FFFFFFFFFFFFFFFFFFFFFFFFFFFFFFFFFFFFFFFFFFFFFFFFFFFF  
FFFFFFFFF:FFFFFFFFFFFFFFFFF,FFFF:FFFFFFFFFFFFFFFFF

@A00721:190:HGJW7DSXY:4:2273:24542:7388\_1:N:0:TCTGCAAG+GCTGCACT  
TTCCGATATACGAAATCATTATTGATGAGTGTAGTTATTATCGAAGTCTCAGTTATCGCTGCCCGGCC  
GACGTTTGTGCGCAACTCTCAGAGGTTTACGGCAGAAAAATTTCTCCTGCTTGTAATTCGAGAGAGGA  
CAC

+

FF,,, :F,F,,, ,FF,,FF,FF,FF,,, F:F,:FF,FF:F,,F:,F,F,F,FFFFFFFF,F:FF,,  
F,:FFFFFF:F:FFFFFF:,F:F,FFFF:F,:F:FFFFFF:FFFF:FFFFFFFFFFFFFF:FFF  
FFF

@A00721:190:HGJW7DSXY:4:1552:26051:22999\_2:N:0:TCTGCAAG+GCTGCACT  
ATATCGAGGCTATCGAGGACGATGAGTATCTTGAAGTTGTTGACGACAAGCCTCAAGAGGGTAGAGGA  
CCACCTGGATCTTCTACTGTCTCTGCCTTCCAAGATTTCTTAGAAGAG

+

FFFFFFFFFFFFFFFFFFFFFFFFFFFFFFFFFFFFFFFFFFFFFFFFFFFFFFFFFFFFFFFFFFFFFFFF  
FFFFFFFFFFFFFFFFFFFFFFFFFFFFFFFFFFFFFFFFFFFFFFFFFFFFFFFFFFFFFFFFFFFFFFFF

@A00721:190:HGJW7DSXY:4:1174:31467:2347\_1:N:0:TCTGCAAG+GCTGCACT  
GGAGGGAGTTCTTGAAGCATCCCGACCTTTCCTTGTGAAAATTTTGATGCGGTTTCATAAGATTATCA  
GTAATCCTGATTCTACTACGATTGATGACCTTCCATCCTGTACCTCTTCTGGAGAGACGTATCTCA  
AAG

+  
FFFFFFFFFFFFFFFFFFFFFFFFFFFFFFFFFFFFFFFFFFFFFFFFFFFFFFFFFFFFFFFFFFFFFFFF  
FFFFFFFFFFFFFFFFFFFFFFFFFFFFFFFFFFFFFFFFFFFFFFFFFFFFFFFFFFFFFFFFFFFFFFFF  
FFF  
@A00721:190:HGJW7DSXY:4:2464:2275:16141\_1:N:0:TCTGCAAG+GCTGCACT  
AGCTCAGGGTGAAGCACAACTTTGACCGTGACGAACTGTGGTGTCTTGATCTACGTTACGGATATA  
CTCTCCTTGAGTTCACTCGTAAGGACACTACCACTTATTACGATATTTCTTTAGTCGATGGGTTTTCG  
ACT  
+  
FFFFFFFFFFFFFFFFFFFF:FF,FFFFFFFFFFFFFFFFFFFFFFFFFFFFFFFFFFFFFFFFFFFFFFFF  
FFFFFFFFFFFFFFFFFFFFFFFFFFFFFFFFFFFFFFFFFFFFFFFFFFFFFFFFFFFFFFFFFFFFFFFF  
FFF  
@A00721:190:HGJW7DSXY:4:2536:4300:9157\_1:N:0:TCTGCAAG+GCTGCACT  
CTTACAGAGGGGAGCAGCATGACCATAATTGGTATTGACTTTGGTACCACCTTTTCTACTGTCTGTC  
TCGCTCTTGAATGAAGTTTTAATGCTTAACAACAATGATAGTGAATTTATACCTACAATCATTGGT  
TTT  
+  
FF:FF:FFFFFFFFFFFFFFFFFFFFFFFFFFFFFFFFFFFFFFFFFFFFFFFFFFFFFFFFFFFFFFFF  
FFFFFFFF:FFFFFFFFFFFFFFFFFFFFFFFFFFFFFFFFFFFFFFFFFFFFFFFFFFFFFFFFFFFFFF  
FFF  
@A00721:190:HGJW7DSXY:4:1169:29550:31939\_1:N:0:TCTGCAAG+GCTGCACT  
TTATGGATATGATGCTATTACTCATGATGGTTACGGTCAGGGAGGATTCTCAGTTTACAAGGACCTTA  
AGCGATGGATCGGGGTTAATTCTAAACATTACCCGAAAGACGTGCTAAATTAACCATTGTACGAT  
GTC  
+  
FFFFFFFFFFFFFFFFFFFFFFFFFFFFFFFFFFFFFFFFFFFFFFFFFFFFFFFFFFFFFFFFFFFFFFFF  
FFFFFFFFFFFFFFFFFFFFFFFFFFFFFFFFFFFFFFFFFFFFFFFFFFFFFFFFFFFFFFFFFFFFFFFF  
FFF  
@A00721:190:HGJW7DSXY:4:1202:6144:22216\_1:N:0:TCTGCAAG+GCTGCACT  
CAAAGATATTTTCATGAAAACCTACAGAGGAACGTACCGGATTACCTGTCTTTTCATATTATGAATGAACC  
TTCGGCCGCTCTCTTTGCTTCGATGTTGGATGTCAAGAAGGGTTCAGAATGGGATTCTACGTAGTTT  
ATG  
+  
FFFFFFFFFFFFFFFFFFFFFFFFFFFFFFFFFFFFFFFFFFFFFFFFFFFFFFFFFFFFFFFFFFFFFFFF  
FFFFFFFFFFFFFFFFFFFFFFFFFFFFFFFFFFFFFFFFFFFFFFFFFFFFFFFFFFFFFFFFFFFFFFFF  
FFF  
@A00721:190:HGJW7DSXY:4:2260:16920:17989\_1:N:0:TCTGCAAG+GCTGCACT  
TGGAACGAAGGCGACCTGTTCCGGAGTTTTTACGGGATCCGGAATGTTCTGTCTATATTAGGTGAAGC  
GAAATACGATTTCAACGTCAACGTTACCGAGTTTCGTTTCGTACCTTGATGCTGACTTTCGTCAT  
ATG  
+  
FFFFFFFFFFFF:FFFFFFFFFFFFFFFFFFFFFFFFFFFFFFFFFFFFFFFFFFFFFFFFFFFFFFFF  
FFFFFFFFFFFFFFFFFFFFFFFFFFFFFFFFFFFFFFFFFFFFFFFFFFFFFFFFFFFFFFFFFFFFFFFF  
FFF  
@A00721:190:HGJW7DSXY:4:1632:6280:36229\_1:N:0:TCTGCAAG+GCTGCACT  
TACAAATGATAACTTCTAATTTACGTTTGCTACTCAGAGCTGGTCCTCTCAGCAAAGGGATGCATGGT  
GTTATCTCCTCAGGAGTCCCGGCATTTGATAATAATGACGAGACTTTCGTCATAATCGCTGCATATTA  
CGG  
+  
FFFFF:FFFFFFFFFFFFFFFFFFFFFFFFFFFFFFFFFFFFFFFFFFFFFFFFFFFFFFFFFFFFFFFF  
FFFFFFFFFFFF,FFF:FF:FF,FFFFFF:FFFF:FFFFF:FFFFFFFFFFFFFFFFFFFFFFFF  
FFF  
@A00721:190:HGJW7DSXY:4:2152:6460:4695\_2:N:0:TCTGCAAG+GCTGCACT  
ACTAGTTCGAGTGCTGCTTTGGATTACGATGACGTGAGAATAGGTGAAGGGATAGTTTTTACCTCGAC

CAACATTAAGGCGGCGGCGACTAATCTTAAAGCTTCACCCAAAATGAA  
+  
FFFFFFFFFFFF:FF:FFFFFFFFFFFFFFFFFFFFFFFF:F:FFFFFFFF:FFFFFFFFFFFFFFFFFFFF  
F:FF:FFFFF:FFFFFFFFFFFF:FFFFFFFFFFFF:FF:FFFFF,:FFFF  
@A00721:190:HGJW7DSXY:4:1536:11532:12007\_2:N:0:TCTGCAAG+GCTGCACT  
CGAACCCGTTGATGCTATGTCAGAAGAAGCTATTCAAGCTTGTCGTTTAAAGACTGCAGAGGCTGTCA  
AACAAGCCCAGACTCAAGGAGTCCAATCAAAGGTTTTGAATTTAGATC  
+  
FFFFF:,FFFFFFFFFFFFFFFFFFFFFFFF, :FFFFFFFF:FFFF:FFFFFFFF:F,:FF:FF,F,:FFF  
FFFFFFFF,FFFFF,: :F,FF,F:FFFFFFFF, : ,FFF,F: :FFF, ,FF  
@A00721:190:HGJW7DSXY:4:2473:25156:27148\_1:N:0:TCTGCAAG+GCTGCACT  
ACCAAATCTTGCTTTCAACGAAGTCTCTGATTTTATTAATCATTACTTTAACGATCTCTCGGTCAT  
TTACTCTGTACTTGATCTACGTCGTTTAACTGTGCGAACAACCTTTACTTAGAATGACTCTATCTTT  
CAG  
+  
FFFFFFFFFFFFFFFFFFFFFFFFFFFFFFFFFFFFFFFF:FFFFFFFFFFFFFFFFFFFFFFFFFFFFFFFF  
FFFFFFFFFFFFFFFFFFFFFFFFFFFFFFFFFFFFFFFFFFFFFFFFFFFF,FFFFFFFFFFFFFFFFFFFFFFFF  
,FF  
@A00721:190:HGJW7DSXY:4:2675:2582:22373\_2:N:0:TCTGCAAG+GCTGCACT  
CTTCGTTACGAGACCTGATGGTAGAATAGATTTAGTCTCTACACCCATCTCAACGAGGATAAAGCGAG  
TTTTCCGTCCTGAACGTAATACACGAAGAGATCATCCGCAAACGACTC  
+  
FFFFFFFFFFFFFFFFFFFFFFFFFFFFFFFFFFFFFFFFFFFFFFFFFFFFFFFFFFFFFFFFFFFFFFFF  
FFFFFFFFFFFFFFFFFFFFFFFFFFFFFFFFFFFFFFFFFFFFFFFFFFFFFFFFFFFF  
@A00721:190:HGJW7DSXY:4:1446:28782:23782\_1:N:0:TCTGCAAG+GCTGCACT  
ATGAGGTCAAAGCTCTATTTATTAACGAACATTATCCGATTCTTCGAGGGTATCACTACCACTGAT  
CTGCCGACTTTAGTCAAGGAACCTCAATTCCTTCGATGTTTATTTTTCTATAAGGGAAAATAGCAA  
TAA  
+  
FFFFFF:FFFFFFFFFFFFFFFFFFFFFFFFFFFFFFFFFFFFFFFFFFFFFFFFFFFFFFFFFFFFFFFF  
FFFFFFFFFFFFFFFFFFFFFFFFFFFFFFFFFFFFFFFF:FFFFFFFFFFFFFFFF:FFFFFFFFFFFFF  
FFF  
@A00721:190:HGJW7DSXY:4:2162:8929:8124\_2:N:0:TCTGCAAG+GCTGCACT  
ATTTCAAGACTCTCTCCGATCACCTTGGTGTGATCTCCCGAGGATCTTTTCAATAAGATGTATGATG  
ATAATCTACTATTTTTAAATAGTGATATTCAGCGTATACTTGAATACT  
+  
FFFFFFFFFFFFFFFFFFFFFFFFFFFFFFFFFFFFFFFFFFFFFFFFFFFFFFFFFFFFFFFFFFFFFFFF  
FFFFFFFFFFFFFF:FFFFFFFFFFFFFFFFFFFFFFFF:FFFFFFF:FFFFF  
@A00721:190:HGJW7DSXY:4:2415:24316:33927\_2:N:0:TCTGCAAG+GCTGCACT  
AAGTTGGAAGAGGTCTATGATATTTATTTTACTTATACTTTAAATAGCACCGATTATAACTTGACTGT  
TGATAATATTACAATAGCTCTTCTCAGAAGATTAGAGAAGTAACCGG  
+  
FFFFFFFFFFFFFFFFFFFFFFFFFFFFFFFFFFFFFFFFFFFFFFFFFFFFFFFFFFFFFFFFFFFFFFFF  
FFFFFFFFFFFFFFFFFFFFFFFFFFFFFFFFFFFFFFFFFFFFFFFF:FFFFFFFF:F  
@A00721:190:HGJW7DSXY:4:1459:5511:24408\_2:N:0:TCTGCAAG+GCTGCACT  
TTACTTTTACCGTTAGAAGTGAAGAAAGATTCTTTTCGAAAAGAAACCTATAAGTTACAAACGATTCTT  
CGACTATATTAAAGAAATAAAAATACTTCAAGTACCTGAACCTTACAT  
+  
FFFFFFFFF:FFFFFFFFFFFFFFFFFFFFFFFFFFFFFFFF:FFFFFFFFF:FF,F:FFFFFF: :FFFFF:  
FFFFFFFFFFFFFFFFFFFFFFFFFFFFFFFFFFFFFFFFFFFFFFFF:FFFFFFFFFFFF  
@A00721:190:HGJW7DSXY:4:2216:14968:29951\_2:N:0:TCTGCAAG+GCTGCACT  
CCTTAATATTCTAGTAACCGCTATGTGGGCATTACTAGGATTTATCACACTCCTAAATTTGATAGCAA  
TTTATGTTTTAAATGCTAGGAAAATTTAGAAAACTCCATTGTATAG  
+

FFFFFFFFFFFFFFFFFFFFFFFFFFFFFFFFFFFFFFFFFFFFFFFFFFFFFFFFFFFFFFFF:FFFFFFFF,FFFF  
:,FFFFFFFFFFFFFFFF:FFFFFFFFFFFFFFFFFFFFFFFF:FFFFFFFF  
@A00721:190:HGJW7DSXY:4:1614:20943:27398\_1:N:0:TCTGCAAG+GCTGCACT  
CTATCGCCTTTATTGAAAATTGTATAAGAGTTAATTGCTTACACAAAAGTGACGCGCGAAGGAATCTT  
AATTGATTGAAGCTAGGCGTTGGGGAGAATGAACTGCCGCTTCCCGGAAGAAACGATCTATTTACAGA  
GTA  
+  
FFFFFFFFFFFFFFFFFFFFFFFFFFFFFFFFFFFFFFFFFFFFFFFFFFFFFFFFFFFFFFFF,FFFFFFFF  
FFFFFFFFFFFFFFFFFFFFFFFFFFFFFFFFFFFFFFFFFFFFFFFFFFFFFFFFFFFFFFFF:FFFF  
FFF  
@A00721:190:HGJW7DSXY:4:1578:31015:27899\_1:N:0:TCTGCAAG+GCTGCACT  
TCCCAAATCTAGATCTGCACAGAAGAAGGCTGAAGGTCGTTACCGGACGACCACTCAAAGGAAACGGG  
CTGTTGCCAGAGGAAAGCAGCGACCAACGAGGTCGCTCGTAACATTGACGGCAGTCCCGTCATCTCT  
GT  
+  
FFFFF:FFFF,FFFF:FFFFFFFFFFFFFFFFFFFFFFFFFFFFFFFF,FFFFFFFFFFFFFFFFFFFFFFFF  
FFFFFFFFFFFFFFFFFFFFFFFFFFFFFFFFFFFFFFFFFFFFFFFFFFFFFFFFFFFFFFFFFFFFFFFF  
FF  
@A00721:190:HGJW7DSXY:4:2329:2049:36292\_2:N:0:TCTGCAAG+GCTGCACT  
TCACATTCACTACTCCATACCAATCAATGATGTGACTATACAGTTCGGCCATATCAAGAGTGGTCAA  
TACGTCGTGGGAGGTACTGAAGCCTTCCCCACCGCTGGCACGAAGAAC  
+  
FFFFF:FFFFFFFFFFFFFFFFFFFFFFFF,FFFFFFFFFFFF::FFFF,FF:FF::,FFFF:FF,,FFF,F  
FFFF:FFF:FFFFFFFFFFFFFFFFFFFF:F,FFFF:FFFF,FFFF,F  
@A00721:190:HGJW7DSXY:4:1503:16224:32095\_1:N:0:TCTGCAAG+GCTGCACT  
CTCTAAGTCTACCAGGAAGAGGGGAAATGTCCCCAAAAGTGAAGAATAAAGGGAAAGGTCCATCAG  
GACCTAAGAAGGGGAAATTACCCCTAATTCTGAAGGAAGATCTCCACCATCTGGGGTTGGGAATAAG  
AAA  
+  
FF,FFF,FFFFF:FFFFFFF::FFF,:FFFFFFFF:F,FFFF,:FFFFFF:FFFFFFFFFFFFFF  
FFF,FFFFFFFF,FFFF::FFFFFFFFFFFFFFFFFFFFFFFFFFFFFFFF:FFFFFFFF:FFFFFFFF  
FFF  
@A00721:190:HGJW7DSXY:4:2571:5330:16141\_1:N:0:TCTGCAAG+GCTGCACT  
CTACGAAGTCGCTGAAGGCGGCTTGGGTCATTAAGGGTAGCTGTAAAGTTGCGCCTGCCGACCCCATC  
TTTGAGACCAAGACTCTCTACAGTAGGTCGTGCCTACTATGAGCAAATCTGTTGAATTGCTCACTGA  
GGA  
+  
FFFFFFFFFFFFFFFFFFFFFFFFFFFFFFFFFFFFFFFF:FFFFFFFFFFFFFFFFFFFFFFFFFFFFFFFF  
FFFFFFFFFFFFFFFFFFFF,FFFFFFFFFFFFFFFFFFFFFFFFFFFFFFFFFFFFFFFF:FFFFFFFFFFFF  
FFF  
@A00721:190:HGJW7DSXY:4:1212:3468:35556\_2:N:0:TCTGCAAG+GCTGCACT  
CTACTGGCGACAACTGAGAGCAGTCGCTGGGGAAAGAGAATTGCGTGGGTGAAGGCCGACGCTTCG  
AGCTAGAGTGTGACGAGCGCGGTGACGTTTTTGTCAACGGCGTTTGGA  
+  
FFFF:FFFFFFF::FFF:F:FFFFFF:,F:F:FFF::FF:FF:,FF,FF:,F:FFFF:FFF:FF:FF  
FFFF,FFF,FFFF:FF:FFFF:FFFF::,FFFF:,FF:FFFF,FF,:  
@A00721:190:HGJW7DSXY:4:1235:18765:3615\_1:N:0:TCTGCAAG+GCTGCACT  
CCTATGGAGTCTTGAAGGACTTAGGTTGGCATATTTATGCCGACGATAATAAGCATGTCAACCTTAAG  
CACCGAGGTAAGCTCGGACTTACAAGAGAGAGTGTGAGAGAGTCGCTCTCACTATTTTTGCCAGAA  
TGC  
+  
FFFFF::FFFFFFFFFFFF,F::FFFFFF,FFFFFF,FFF,FFFFFF,FF,FFFFFFFF:F:FFFF  
FFFF:FFFF:FFFFFFFFFFFFFFFFFFFFFFFF,FFFFFFFFFFFFFFFFFFFFFFFF:FFFFF:,  
FFF

@A00721:190:HGJW7DSXY:4:2122:27335:18897\_2:N:0:TCTGCAAG+GCTGCACT  
ATGTGAGAAGGTGGAAGGTGTCAAGGGTCTTCTTCATGCTGATCTTTCAGGACCTAATCACATCATGA  
TTGATAGTTACGGCTCGTATCGAGTTGGAGGGAGGAAGTTCTCCGAAA

@A00721:190:HGJW7DSXY:4:2463:19560:35994\_2:N:0:TCTGCAAG+GCTGCACT  
AGCTGATTCTTATTGCATGAACGTCGCTGAGGTCAAACCTGTGGACGTTCTTTTCATCGACGAATTAT  
TCATGATTCACGCTGGTCAGACCCTTTTCTTACACATCTACTTAAGG

+

FFFFFFF:FF:FFFFFFFFFFFFFFFFFFFFFFFFFFFFFFFFFFFFFFFFFFFFFFFFFFFFFFFFFFFFFFFF  
FFFFFFF:FFFFFFFFFFFFFFFFFFFFFFFFFFFFFFFFFFFFFFFFFFFFFFFFFFFFFFFFFFFFFFFF  
FFFFFFF:FFFF:,FFFFFF::FF,FFFFFFFFF,

@A00721:190:HGJW7DSXY:4:2308:3775:29074\_1:N:0:TCTGCAAG+GCTGCACT  
TCCGATCTACGACATCATTCTTGATGAGTGTCTTCTTATCGAAGTCTCAGTTATCGCTGCCCGGCCG  
ACGTTTGTGCGAACTCTCAGAGGTTTACGGCAGAAAAATTTCTCCTGCTTGTAATTCGAGAGAGGAC  
AC

+

FFFFFFFFFFFFFFFFFFFFFFFFFFFFFFFFFFFFFFFFFFFFFFFFFFFFFFFFFFFFFFFFFFFFFFFF  
FFFFFFFFFFFFFFFFFFFFFFFFFFFFFFFFFFFFFFFFFFFFFFFFFFFFFFFFFFFFFFFFFFFFFFFF  
FF

@A00721:190:HGJW7DSXY:4:1569:30273:5071\_2:N:0:TCTGCAAG+GCTGCACT  
ATATCGAGGCTATCGAGGACGATGAGTATCTTGAAGTTGTTGACGACAAGCCTCAAGAGGGTAGAGGA  
CCACCTGGATCTTCTACTGTCTCTGCCTTCCAAGATTTCTTAGAAGAG

+

FFFFFFFFFFFFFFFFFFFFFFFFFFFFFFFFFFFFFFFFFFFFFFFFFFFFFFFFFFFFFFFFFFFFFFFF:FFFF  
FFFFFFFFFFFFFFFFFFFFFFFFFFFFFFFFFFFFFFFFFFFFFFFFFFFFFFFFFFFFFFFFFFFFFFFF:FFF

@A00721:190:HGJW7DSXY:4:1266:17680:30295\_1:N:0:TCTGCAAG+GCTGCACT  
GGAGGGAGTTCTTGAAGCATCCCGACCTTTCCTTGTGAAAATTTTGATGCGGTTTCATAAGATTATCA  
GTAATCCTGATTCTACTACGGATTCATGGACCTTCCATCCTGTACCTCTTCTGGAGAGACGTATCTCA  
AAG

+

FFFFFFFFFFFFFFFFFFFFFFFFFFFFFFFFFFFFFFFFFFFFFFFFFFFFFFFFFFFFFFFFFFFFFFFF:  
FF::FFFFFFFFFFFFFFFFFFFFFFFFFFFFFFFFFFFFFFFFFFFFFFFFFFFFFFFFFFFFFFFF:FFFFFFF  
F:F

@A00721:190:HGJW7DSXY:4:2664:3613:23187\_1:N:0:TCTGCAAG+GCTGCACT  
AGCACAACGTTTGACCGTGACGAAGTGTGGTGTCTTGTATCTACGTTACGGATATACTCTCCTTGAGT  
TCACTCGTAAGGACACTACCACTTATTACGATATTTCTTTAGTCGATGGGTTTTCGACTCCTTTAAGC  
GTC

+

FF:FF:FFF,FFFF:FFFF:F,FFFFFFF:,FFFFFFFFF,FF:FFF:F,FFFF:FFFFFFFFF  
FFFF:F:FFFFFFFFF,FFFFFFFFFFFF:F:FFFFFFFFFFFFFFFFF::,FFFFFFFFFFFFFFFFF  
FF:

@A00721:190:HGJW7DSXY:4:1214:22607:28056\_1:N:0:TCTGCAAG+GCTGCACT  
AGAGGGGCAGCAGCATGACCATAATTGGTATTGACTTTGGTACCACCTTTTCTACTGTCTGTCTCGCC  
TCTTGAATGAAGTTTTAATGCTTAACAACAATGATAGTGAATTTATACCTACAATCATTGGTTTTTC  
TAA

+

FFFFFFFFFFFFFFF:FFFFFFFFFFFFFFF:FFFFFFFFFFFFFFF:FFFF:FFFFFFFFFFFFFFFFF  
FFFFF:FFFFFFFFFFFFFFFFFFFFFFFFFFFFFFFFFFFFFFFFFFFFFFFFFFFFFFFFFFFFFFFF  
FFF

@A00721:190:HGJW7DSXY:4:1273:17842:35211\_1:N:0:TCTGCAAG+GCTGCACT  
TTATGGATATGATGCTATTACTCATGATGGTTACGGTCAGGGAGGATTCTCAGTTTACAAGGACCTTA  
AGCGATGGATCGGGTTAATTCTAAAACATTACCCGAAAGACGTGCTAAATTTAAACATTGTACGAT  
GTC

+

FFFFFFFFFFFFFFFFFFFFFFFFFFFFFFFFFFFFFFFFFFFFFFFFFFFFFFFFFFFFFFFFFFFFFFFF  
FFFFFFFFFFFFFFFFFFFFFFFFFFFFFFFFFFFFFFFFFFFFFFFFFFFFFFFFFFFFFFFFFFFFFFFF  
FFF

@A00721:190:HGJW7DSXY:4:1263:11360:12900\_1:N:0:TCTGCAAG+GCTGCACT  
CAAAGATATTTTCATGAAAACCTACAGAGGAACGTACCGGATTACCTGTCTTTCATATTATGAATGAACC





@A00721:190:HGJW7DSXY:4:2308:11053:36855\_2:N:0:TCTGCAAG+GCTGCACT  
ATTTCAAGACTCTCTCCGATCACCTTGGTGTGATCTCCCGAGGATCTTTTCAATAAGATGTATGATG  
ATAATCTACTATTTTTAAATAGTGATATTCAGCGTATACTTGAATACT

@A00721:190:HGJW7DSXY:4:2465:1497:20525\_2:N:0:TCTGCAAG+GCTGCACT  
AAGTTGGAAGAGGTCTATGATATTTATTTACTTATACTTTAAATAGCACCGATTATAACTTGACTGT  
TGATAATATTACAATAGCTCTTTCTCAGAAGATTAGAGAAGTAACCGG

@A00721:190:HGJW7DSXY:4:1627:27832:14779\_2:N:0:TCTGCAAG+GCTGCACT  
TTACTTTTACCGTTAGAACTGAAAAAGATTCTTTTCGAAAAGAAACCTATAAGTTACAAACGATTCTT  
CGACTATATTAAAGAAATAAAAATACTTCAAGTACCTGAACTTTACAT

@A00721:190:HGJW7DSXY:4:2248:19361:10692\_2:N:0:TCTGCAAG+GCTGCACT  
CCTTAATATTCTAGTAACCGCTATGTGGGCATTACTAGGATTTATCACACTCCTAAATTTGATAGCA  
TTTATGTTTTAAATGCTAGGAAAATTTAGAAAACTCCATTGTATAG

@A00721:190:HGJW7DSXY:4:1614:21766:27633\_1:N:0:TCTGCAAG+GCTGCACT  
CTATCGCCTTTATTGAAAATTGTATAAGAGTTAATTGCTTACACAAAAGTGACGCGCGAAGGAATCTT  
AATTGATTGAAGCTAGGCGTTGGGGAGAATGAAGTCCGCTTCCCGGAAGAAACGATCTATTTACAGA  
GTA

@A00721:190:HGJW7DSXY:4:2175:7211:18114\_1:N:0:TCTGCAAG+GCTGCACT  
CCAAATCTAGATCTGCACAGAAGAAGGCTGAAGGTCGTTACCGGACGACCACTCAAAGGAAACGGGCT  
GTTGCCCAGAGGAAAGCAGCGACCACCGAGGTCGCTCGTAACATTGACGGCAGTCCCGTCATCTCTGT  
GGG

@A00721:190:HGJW7DSXY:4:2374:6894:6449\_2:N:0:TCTGCAAG+GCTGCACT  
TCACATTCACCACTCCCATGCCAATCAATGATGTGACTATACAGTTCGGCCATTTCAAGAGTGGTCAA  
TACGTCGTGGGAGGTACTGAAGCCTTCCCCTCCGCTGGCACCAGAAGAAC

@A00721:190:HGJW7DSXY:4:1503:16468:31422\_1:N:0:TCTGCAAG+GCTGCACT  
CTCTAAGTCTACCAGGAAGAGGGGAAATGTCCCCAAACTGAGAAGAATAAAGGGAAAGGTCCATCAG  
GACCTAAGAAGGGGAAATTACCCCTAATTCTGAAGGAAGATCTCCCACCATCTGGGGTTGGGAATAAG  
AAA





+

@

+

@

+

@

+

@

+

@

+

@

+

@

+

@A00721:190:HGJW7DSXY:4:2226:21052:23015\_1:N:0:TCTGCAAG+GCTGCACT  
TTACTTTAACGATCTCTCGGTCATTTACTCTGTACTTGATCTACGTCGTTTAACTGTCGGAACAACCT  
TTACTTAGAATGACTCTATCTTTTCAGACAATTCTTATATTATTTACAATAGTTAATATCATATTAGT  
AA

FF,,FFFFFFFF,FFF:,,,FF:FFFFFF:FFFFFF,FF:FF,F:FFF:FFFFFF,FF:FF:FFF,FF,FF  
FFF,F:F,F:FF:FFF:FF::FFFF,FFFF,FF,FFFFFFFF,FFF,FFFF,FFFFFFFF:F,FFF,F  
FF

+

@A00721:190:HGJW7DSXY:4:1513:9878:14528\_1:N:0:TCTGCAAG+GCTGCACT  
ATGAGGTCAAAGCTCTATTTATTAACGAACATTATCCGATTCTTCGAGGGTATCACTACCACTGAT  
CTGCCGACTTTAGTCAAGGAACCTCAATTCCTTCGATGTTTATATTTTTCTATAAGGGAAAATAGCAA  
TAA

```

FFFFFFFFFFFFFFFF:FFFFFFFFFFFFFFFFFFFFFFFFFFFFFFFFFFFFFFFF
FFFFFFFFFFFFFFFF:FFFFFFFFFFFFFFFFFFFFFFFFFFFFFFFFFFFFFFFF
FFF

```

+

$$+$$

+

+

+

[illegible]

FFFFFFFFFFFFFFFFFFFFFFFFFFFFFFFFFFFFFFFFFFFFFFFFFFFFFFFFFFFFFFFFFFFFFFFFFFFFFFFF  
FFF

@A00721:190:HGJW7DSXY:4:2565:20835:33254\_1:N:0:TCTGCAAG+GCTGCACT  
CCAAATCTAGATCTGCACAGAAGAAGGCTGAAGGTCGTTACCGCCGACCACTCAAAGGAAACGGGCT  
GTTGCCAGAGGAAAGCAGCGACCACCGAGGTCGCTCGTAACATTGACGGCAGTCCCGTCATCTCTGT  
GGG

+

FFF:FFFFFFFFFFFFFFFFFFFFFFFF:FFFFF,FFFFFFFFFFFF,:FFFFFFFFFFFFFFFF:FFF:FF  
FFFFFFFFFFFFFFFFFFFFFFFFFFFFFFFFFFFFFFFFFFFFFFFFFFFFFFFFFFFFFFFFFFFFFFFFFFFF  
FFF

@A00721:190:HGJW7DSXY:4:2434:25898:36824\_2:N:0:TCTGCAAG+GCTGCACT  
TCACATTCACCACTCCCATGCCAATCAATGATGTGACTATACAGTTCGGCCATTTCAAGAGTGGTCAA  
TACGTCGTGGGAGGTACTGAAGCCTTCCCCTCCGCTGGCACGAAGAAC

+

FFFFFFFFFFFFFFFFFFFFFFFF:FFFFFFFFFFFFFFFFFFFFFFFFFFFFFFFFFFFFFFFF:FFFFFFF  
FFFFFFFFFFFFFFFFFFFFFFFFFFFFFFFFFFFFFFFFFFFFFFFFFFFFFFFFFFFFFFFFFFFFFFFFFFFF

@A00721:190:HGJW7DSXY:4:1504:31910:6684\_1:N:0:TCTGCAAG+GCTGCACT  
CTCTAAGTCTACCAGGAAGAGGGGAAATGTCCCCAAACTGAGAAGAATAAAGGGAAAGGTCCATCAG  
GACCTAAGAAGGGGAAATTACCCCTAATTCTGAAGGAAGATCTCCACCATCTGGGGTTGGAATAAG  
AAA

+

F,F,FFFFFFFFFFFFFFFFFFFFFFFF:FF:FFFFFFFFFFFF:F:FFFF:FFF:FFF:FFFFFF:FFF  
FFFFFFFFFFFFFFFFFFFF:F:FFFFFFFF:FFFFFFFF:FFFFFFFFFFFFFFFFFFFFFFFFFFFFFFFF  
FFF

@A00721:190:HGJW7DSXY:4:1269:18385:21120\_1:N:0:TCTGCAAG+GCTGCACT  
TACGAAGTCGCTGAAGGCGGCTTGGGTCATTAAGGGTAGCTGTAAAGTTGCGCCTGCCGACCCCATCT  
TTGAGACCAAGACTCTCTACAGTAGGTTCTGTCCTACTATGAGCAAATCTGTTGAATTCGTCACTGAG  
GAC

+

FFFFFFFFFFFFFFFFFFFFFFFFFFFFFFFFFFFFFFFFFFFFFFFFFFFFFFFFFFFFFFFFFFFFFFFF:FF  
FFFFFFFFFFFFFFFFFFFFFFFFFFFFFFFFFFFFFFFFFFFFFFFFFFFFFFFFFFFFFFFFFFFFFFFFFFFF  
FFF

@A00721:190:HGJW7DSXY:4:1473:14344:1125\_2:N:0:TCTGCAAG+GCTGCACT  
CTACTGGCGACAACTGAGAGCAGTCGCTGGGGAAGAGAATTGCGTGGGTTGAAGGCCGACGCTTCG  
AGCTTGAGTGTGACGAGGCCGGTGACGTTTTTGTCAACGCGTTTTGGA

+

FFFFFFFFFFFFFFFFFFFFFF,FF:FFFFFFFFFFFFFFFFFFFFFFFFFFFFFFFFFFFFFFFFFFFFFFFF  
FFF:FF,FFFF:F:F:FFFFFFFFFFFFFFFFFFFF:FF:FFFF::

@A00721:190:HGJW7DSXY:4:1369:27606:2926\_1:N:0:TCTGCAAG+GCTGCACT  
CCTATGGAGTCTTGAAGGACTTAGGTTGGCATATTTATGCCGACGATAATAAGCATGTCAACCTTAAG  
CACCGAGGTAAGCTCGGACTTACAAGAGAGAGTGTGAGAGAGTCGCTCTCACTATTTTTGCCAGAA  
TGC

+

FFF:F::FFF:FFF:F:FF:FFFFFFFFFFFFFF,FFFF:FFFFFF,FF:,FFFFFFFF:FF,FF  
FFF:FFF:FFFF:FFFFFFFF:FFFFF:FFFF:FFF::FFFFFFFFFFFF:FF:FFFF,::,  
FF:

@A00721:190:HGJW7DSXY:4:2537:28999:8688\_2:N:0:TCTGCAAG+GCTGCACT  
ATGTGAGAAGGTGGAAGGTGTCAAGGCTTCTTCATGCTGATCTTTCAGGACCTAATCACATCATGA  
TTGATAGTTACGGCTCGTATCGAGTTGGAGGGAGGAAGTTCTCCGAAA

+

FFFFFFFFFFFFFFFFFFFFFFFFFFFFFFFFFFFFFFFFFFFFFFFFFFFFFFFFFFFFFFFFFFFFFFFF  
FFFFFFFFFFFF:FFFFFFFFFFFFFFFFFFFF:FFFFFFFFFFFFFFFFFFFF

@A00721:190:HGJW7DSXY:4:2501:20772:20807\_1:N:0:TCTGCAAG+GCTGCACT  
AAGGCTCTAGAGAAGATCTCCCCACCTGGAGAAGGCAAGTGAGAGTCCAGAAGTTGATGAAGAAGGA

TTATTTGAAGCAGGGGTTACCACTTCCTAAGGTGGATGAGGGAGGTTGTTTCTTTGGAGTTT TAGATA  
ATC

+

FFFFFFFFFFFFFFFFFFFFFFFFFFFFFFFFFFFFFFFFFFFFFFFFFFFFFFFFFFFFFFFFFFFFFFFF  
FFFFFFFFFFFFFFFFFFFFFFFFFFFFFFFFFFFFFFFFFFFFFFFFFFFFFFFFFFFFFFFFFFFFFFFF  
FFF

@A00721:190:HGJW7DSXY:4:1616:14443:5494\_1:N:0:TCTGCAAG+GCTGCACT  
CTGGAGTTCAGACGTGTGCTCTTCCGATCTGTTTGATTGGTATGGACTACTCGACTTTTGATCTGGAG  
TTGTCTAGGGTCATGGCAGATACTACCGATAAGGTGAAAAATATGCAGGTCAAAGATTCTGTAGCTCT  
GAG

+

FFFFFFFFFFFFFFFFFFFFFFFFFFFFFFFFFFFFFFFFFFFFFFFFFFFFFFFFFFFFFFFFFFFFFFFF  
FFFFFFFFFFFFFFFFFFFFFFFFFFFFFFFFFFFFFFFFFFFFFFFFFFFFFFFFFFFFFFFFFFFFFFFF  
FFF

@A00721:190:HGJW7DSXY:4:2474:19361:23844\_1:N:0:TCTGCAAG+GCTGCACT  
TTGTCGTTCTTACAAGGTTGAGGAGACTTTACAGCGGCTTATTGTCGCGCAGTTTCCAGAATTGCGG  
TTGAAGTTCACCCATTCTATCTTGAATGCTCACGCCGTCGCAGCCATATCGAGACTATGTTATAATCA  
CTT

+

FFFFFFF,FF:FFFFFFFFFFFFFFFFFFFFFFFFFFFFFFFFFFFFFFFFFFFFFFFFFFFFFFFFFFFF  
FFFFFFFFFFFFFFFFFFFFFFFFFFFFFFFFFFFFFFFFFFFFFFFFFFFFFFFFFFFFFFFFFFFFFFFF:  
FFF

@A00721:190:HGJW7DSXY:4:1408:24334:9095\_1:N:0:TCTGCAAG+GCTGCACT  
AACCAAGTTAAGAAGGAGGCTGATCATGGAGTCTTTGTACCTTCTGTCAAACCTTCGAGGTTTCAGCTAC  
GAGAGGTGATCCCGGATGTGGATTGAAGGCTGGCTCTAAGGAGACTCCTTCTTTTTGAATGTTGTAA  
AGA

+

FFF::FFF,FFFFFFFFF:F:FFFFFFFFF::FFFFFFFFFFFFF:FFFFFFFFFFFFFFFFFFFFF  
FFFFFFFFFFFFFFFFFFFFFFFFFFFFFFFFFFFFFFFFFFFFFFFFFFFFFFFFFFFFFFFFFFFFF:FFFFFFFFFFFFFFFF  
FFF

@A00721:190:HGJW7DSXY:4:2175:21793:10927\_1:N:0:TCTGCAAG+GCTGCACT  
ACCTTTACTCCTAGTGCTTTTCTAGAGTCCAAGGACGTTCCGTCGGAGGATGACAGGTGGGAGACC  
GCTCAATAACACTCTATTGAATCCCTTTTCCACGATGAAAGCTCTTTATGAGGTGCTCCATGCAAATT  
TAC

+

FFFFFFFFFFFFFFFFFFFFFFFFFFFFFFFFFFFFFFFFFFFF:FFFFFFFFFFFFFFFFFFFFFFFFFFFF  
FFFFFFFFFFFFFFFFFFFFFFFFFFFFFFFFFFFFFFFFFFFF:FF::FFFFFFFFFFFFFFFFFFFFF  
FFF

@A00721:190:HGJW7DSXY:4:2311:15899:4131\_1:N:0:TCTGCAAG+GCTGCACT  
GATCCTGATGACATTATTTCAACGGATACCGATCTCAGTTCTACCACAGAAACCGTCTCAGGAAGTGT  
CTCCACTGATTCGGAATTAGAGAAAGACGACCTTCTTGTTGGGACTGAGACCTCTGAATTTTCAGGGT  
GCC

+

FFFFFFFFFFFFFFFFFFFF:FFFFFFFFFFFFFFFFFFFFFFFFFFFFF:FF:FFFFFFFFFFFFFFFF  
FFFFFFFFFFFF,FFFFFFFFFFFFFFFFFFFFFFFFFFFFFFFFFFFFFFFFFFFFFFFFFFFFFFFFFFFF  
FFF

@A00721:190:HGJW7DSXY:4:2630:12861:23328\_2:N:0:TCTGCAAG+GCTGCACT  
AGCTGATTCTTATTGCATGAACGTCGCTGAGGTCAAACCTGTGGACGTTCTTTTCATCGACGAATTAT  
TCATGATTCACGCTGGTCAGACCCTTTTCTTACACATCTACTTAAGG

+

FFFFFFF:FFFFFF:FFFFFFFFFFFFFFFFFFFFFFFFFFFFFFFFFFFF,FF:FFFFFFFFFFFFF  
:,FF,FFFFFFFFFFFFFFFFFFFF:FFF:FFFF,FFFFFFFFFFFFFFFFFFFF

@A00721:190:HGJW7DSXY:4:1347:28366:27070\_1:N:0:TCTGCAAG+GCTGCACT  
CAACATCAACGACATCATTCTTGATGAGTGTGCTTCTTATCGAAGTCTCAGTTATCGCTGCCCGGCCG

ACGTTTGTGCGAACTCTCAGAGGTTTACGGCAGAAAAATTTCTCCTGCTTGTAATTCGAGAGAGGAC  
ACT

+

FFF:FFFFFFFFFFFF:FF:FFFFFFFFFFFFFFFFFFFFFFFFFFFFFFFFFFFFFFFFFFFFFFFFFFFF  
FFFFFFFFFFFFFFFFFFFFFFFFFFFFFFFFFFFFFFFFFFFFFFFFFFFFFFFFFFFFFFFF:FF:FF::FFFFFFFF  
FFF

@A00721:190:HGJW7DSXY:4:1630:4535:32080\_2:N:0:TCTGCAAG+GCTGCACT  
ATATCGAGGCTATCGAGGACGATGAGTATCTTGAAGTTGTTGACGACAAGCCTCAAGAGGGTAGAGGA  
CCACCTGGATCTTCTACTGTCTCTGCCTTCCAAGATTTCTTAGAAGAG

+

FFFFFFFFFFFFFFFFFFFFFFFFFFFFFFFFFFFFFFFFFFFFFFFFFFFFFFFFFFFFFFFF:FFFFF  
FFFFFFFFFFFFFFFFFFFFFFFFFFFFFFFFFFFFFFFFFFFFFFFFFFFFFFFFFFFFFFFF

@A00721:190:HGJW7DSXY:4:1377:29875:19413\_1:N:0:TCTGCAAG+GCTGCACT  
GGAGGGAGTTCTTGAAGCATCCCGACCTTTCCTTGTGAAAATTTTGATGCGGTTTCATAAGATTATCA  
GTAATCCTGATTCTACTACGGATTATGACCTTCCATCCTGTACCTCTTCTGGAGAGACGTATCTCA  
AAG

+

FFFFFFFFFFFFFFFFFFFF,FFFFFFFFF:FFFFFFFFFFFFFFFFFFFFFFFFFFFFFFFF:FFFFFFFFF  
FFFFFFFFFFFFFFFFFFFFFFFFFFFFFFFFFFFFFFFF:FFFFFFFFFFFFFFFFFFFFFFFFFFFFFFFFFFFF  
FFF

@A00721:190:HGJW7DSXY:4:2255:2627:8108\_2:N:0:TCTGCAAG+GCTGCACT  
GTGACGAACTGTGGTGTCTTGATCTACGTTACGGATATACTCTCCTTGAGTTCCTCGTAAGGACAC  
TACCACTTATTACGATATTTCTTTAGTCGATGGGTTTTCGACGCCTTT

+

,FFFF:F:FFFFFFFFFFFF:FFFFF:FF,FFF:F:FFFFF::FFFF,,:FFF,FFF,F:,FF:FFF:F  
,FFFFF:,,:FFFFF:FFFFF:,F:F,F:F:F:FFFFFFFF:FFF,:F

@A00721:190:HGJW7DSXY:4:1415:23095:21512\_1:N:0:TCTGCAAG+GCTGCACT  
AGAGGGGCAGCAGCATGACCATAATTGGTATTGACTTTGGTACCACCTTTTCTACTGTCTGTCTCGCC  
TCTTGAATGAAGTTTTAATGCTTAACAACAATGATAGTGGATTTATACCTACAATCATTGGTTTTTC  
TAA

+

FFFFFFFFFFFF:FFFFFFFFFFFFFFFFFFFFFFFFFFFFFFFFFFFFFFFFFFFFFFFFFFFFFFFFFFFF  
:FFFFFFFFFFFFFFFFFFFFFFFFFFFFFFFFFFFFFFFFFFFFFFFFFFFFFFFFFFFFFFFFFFFFFFFFFFFF  
FFF

@A00721:190:HGJW7DSXY:4:1417:27742:4977\_1:N:0:TCTGCAAG+GCTGCACT  
TTATGGATATGATGCTATTACTCATGATGGTTACGGTCAGGGAGGATTCTCAGTTTACAAGGACCTTA  
AGCGATGGATCGGGTTAATTCTAAAACATTACCCGAAAGACGTGCTAAATTAACCATTGTACGAT  
GTC

+

FFFFFFFFF:FFFFFFF,F:FFF:FFFFFFFFFFFFFFFFFFFFFFFFFFFFFFFF:FFFFFF:FFFFFF:F  
,FFFFFFFFF:FFFFFFFFF,,::FFFFF:FFFFFF:FFFFFF:FFFFFF:FFFFFF:FFFFFF,F  
FFF

@A00721:190:HGJW7DSXY:4:1272:7572:30733\_1:N:0:TCTGCAAG+GCTGCACT  
CAAAGATATTTTCATGAAAACCTACAGAGGAACGTACCGGATTACCTGTCTTTCATATTATGAATGAACC  
TTCGGCCGCTCTCTTTGCTTCGATGTTGGATGTCAAGAAGGGTTCAGAATGGGATTCCTACGTAGTTT  
ATG

+

FFFFFFFFFFFFFFFFFFFFFFFFFFFFFFFFFFFFFFFFFFFFFFFFFFFFFFFFFFFFFFFF:FFFFFFFFFFFFFFFFFFFFFFFF  
FFFFFFFFFFFFFFFFFFFFFFFFFFFFFFFFFFFFFFFFFFFFFFFFFFFFFFFFFFFFFFFFFFFFFFFFFFFF  
FFF

@A00721:190:HGJW7DSXY:4:2403:26494:12148\_1:N:0:TCTGCAAG+GCTGCACT  
TGGAACGAAGGCACCTGTTCCGGAGTTTTTACGGGATCCGGAATGTTCTGTCTATATTAGGTGAAGC  
GAAATACGATTTTCAACGTCAACGTTACCGAGTTTCGTTTCGTACCTTGATGCTGACTTTCGTCAAT  
ATG



FFFFFFFFFFFFFFFFFFFFFFFFFFFFFFFFFFFFFFFFFFFFFFFFFFFFFFFFFFFFFFFFFFFFF:FFFFFF  
FFFFFFFFFFFFFFFFFFFFFFFFFFFFFFFFFFFFFFFFFFFFFFFFFFFFFFFFFFFFFFFFFFFFF  
FFF

@A00721:190:HGJW7DSXY:4:2654:26738:18552\_1:N:0:TCTGCAAG+GCTGCACT  
TACAAATGATAACTTCTAATTTACGTTTGCTACTCAGAGCTGGTCCTCTCAGCAAAGGGATGCATGGT  
GTTATCTCCTCAGGAGTCCCGGCATTTGATAATAATGACGAGACTTTTCGTATAATCGCTGCATATTGA  
CGG

+

FFFFFFFFFFFFFFFFFFFFFFFFFFFFFFFFFFFFFFFFFFFFFFFFFFFFFFFFFFFFFFFFFFFFF  
FFFFFFFFFFFFFFFFFFFFFFFFFFFFFFFFFFFFFFFFFFFFFFFFFFFFFFFFFFFFFFFFFFFFF  
FFF

@A00721:190:HGJW7DSXY:4:1266:26196:36777\_2:N:0:TCTGCAAG+GCTGCACT  
CTAGTTCGAGTGCTGCTTTGGATTACGATGACGTGAGAATAGGTGAAGGGATAGTTTTTACCTCGACC  
AACATTAAGGCGGCGGCGACTAATCTTAAAGCTTCACCCAAAATGAAG

+

FFFFFFFFFFFFFFFFFFFFFFFFFFFFFFFFFFFFFFFFFFFFFFFFFFFFFFFFFFFFFFFFFFFFF  
FFFFFFFFFFFFFFFFFFFFFFFFFFFFFFFFFFFFFFFFFFFFFFFFFFFFFFFFFFFFFFFFFFFFF

@A00721:190:HGJW7DSXY:4:2513:24035:14215\_2:N:0:TCTGCAAG+GCTGCACT  
CGAACCCGTTGATGCTATGTCAGAAGAAGCTATTCAAGCTTGTCGTTTAAAGACTGCAGAGGCTGTCA  
ACAAGCCCAGACTCAAGGAGTCCAATCAAAGGTTTTGAATTTAGCTC

+

FFFFFFFFFFFFFFFFFFFFFFFFFFFFFFFFFFFFFFFFFFFFFFFFFFFFFFFFFFFFFFFFFFFFF:FFFFFF  
FFFFFFFFFFFFFFFFFFFFFFFFFFFFFFFFFFFFFFFFFFFFFFFFFFFFFFFFFFFFFFFFFFFFF  
FFF

@A00721:190:HGJW7DSXY:4:1359:11749:31203\_1:N:0:TCTGCAAG+GCTGCACT  
TAACGATCTCTCGGTCAATTTACTCTGTACTTGATCTACGTCGTTTAACTGTGCGGAACAACCTTTACTT  
AGAATGACTCTATCTTTTCAGACACTTCTTATATTATTACAATAGTTAATATCATATTAGTAATACT  
CAC

+

FFFFFFFFFFFFFFFFFFFFFFFFFFFFFFFFFFFFFFFFFFFFFFFFFFFFFFFFFFFFFFFFFFFFF:FFFFFF:FFFF:FFF  
:FF,FFFFFFFFFFFFFFFFFFFFFFFFFFFFFFFFFFFFFFFFFFFFFFFFFFFFFFFFFFFFFFFFFFFFF  
FFF

@A00721:190:HGJW7DSXY:4:2557:29658:8891\_1:N:0:TCTGCAAG+GCTGCACT  
TTCTTTAGGAGACCTGTTGTTAGATTTTATTTTCGTCTCTACACCCATCTCAACGTGTATAACGCGTGT  
TTTCCTTCATGACCGTATTACACTAAGAGATAATCCGCAAACGACTCGA

+

F:,F::,,F,FF,F,,,,F,,F::,,,FFF,,::,,,FF,F::,FF,,,,F:,F::,,,,,,F  
FF,F,,,F,,,F,,,FF,:,F,:,F,,,::,,,,F::,F,FFFFFFFFF

@A00721:190:HGJW7DSXY:4:1609:1524:6292\_1:N:0:TCTGCAAG+GCTGCACT  
ATGAGGTCAAAGCTCTATTTATTAACGAACCTATTATCCGATTCTTCGAGGGTATCACTACCACTGAT  
CTGCCGACTTTAGTCAAGGAACCTCAATTCCTTCGATGTTTATATTTTCTATAAGGGAAAATAGCAA  
TAA

+

:FFFFFFFFFFFFFFFFFFFFFFFFFFFFFFFFFFFFFFFFFFFFFFFFFFFFFFFFFFFFFFFFFFFFF,FFFFFFFFFFFFFFFFFFFFFFFFFFFFFFFFFFFFFFFFFFFFF:FF  
FFFFFFFFFFFFFFFFFFFFFFFFFFFFFFFFFFFFFFFFFFFFFFFFFFFFFFFFFFFFFFFFFFFFF  
FFF

@A00721:190:HGJW7DSXY:4:1178:16993:33739\_2:N:0:TCTGCAAG+GCTGCACT  
CAGAACTCTCTCCGATCACCTTGGTGTGATCTCCCGGAGGATCTTTTCAATAAGATGTATGATGATAA  
TCTACTATTTTTAAATAGTGATATTCAGCGTATACTTGAATACTTTAT

+

FFFFFFFFFFFFFFFFFFFFFFFFFFFFFFFFFFFFFFFFFFFFFFFFFFFFFFFFFFFFFFFFFFFFF:FFFFFFFFFFFF:FFF  
FFFFFFFFFFFFFFFFFFFFFFFFFFFFFFFFFFFFFFFFFFFFFFFFFFFFFFFFFFFFFFFFFFFFF  
FFF

@A00721:190:HGJW7DSXY:4:1434:26576:23531\_1:N:0:TCTGCAAG+GCTGCACT  
TTGGAAGAGGTCTATGATATTTATTTTACTTATACTTTAAATAGCACCGATTATAACTTGACTGTTGA





FFFFFFFFFFFFFFFFFFFFFFFFFFFFFFFFFFFFFFFFFFFFFFFFFFFFFFFFFFFFFFFF:FFFFFFFFFFFFFFFF  
FFF

@A00721:190:HGJW7DSXY:4:2407:13756:9001\_1:N:0:TCTGCAAG+GCTGCACT  
CGACGAATTATTCATGATTCACGCTGGTCAGACCCTTTTCTTACACATCTACTTAAGGCGGCTTATA  
CCATAGGTTACGGTGATTCCAATCAAATCGGATTCATCAATCGTATTGATCTCCAAGTCGCAAACTAC  
TTC

+

FFFF:FFFFFFFFFFFF:FFF:FFFFFF:FFFFFFFFFFFFFFFFFFFFFFFFFFFFFFFF,FFFFFFFFFFFF:FF:FF  
FFFFFFFFFFFFFFFFFFFFFFFFFFFFFFFF:FFFFFF:FFFFF:FFFFFF:FFFFFFFFFFFFFFFFFFFFFFFF  
FFF

@A00721:190:HGJW7DSXY:4:1621:14714:32017\_1:N:0:TCTGCAAG+GCTGCACT  
TGTCGTTCTTATCGAAGTCTCAGTTATCGCTGCCCGGCCGACGTTTGTGCGAACTCTCAGAGGTTTA  
CGGCAGAAAAATTTCTCCTGCTTGTAATTCGAGAGAGGACACTATGGAATTAGACCTATCAGATGTC  
TTG

+

FFFFFFFFFFFFFFFFFFFFFFFFFFFFFFFFFFFFFFFFFFFFFFFFFFFFFFFFFFFFFFFFFFFFFFFF  
FF:FFFFFFFFFFFFFFFFFFFFFFFFFFFFFFFFFFFFFFFFFFFFFFFFFFFFFFFFFFFFFFFFFFFFFFFF  
FFF

@A00721:190:HGJW7DSXY:4:2106:1108:27555\_2:N:0:TCTGCAAG+GCTGCACT  
ATATCGAGGCTATCGAGGACGATGAGTATCTTGAAGTTGTTGACGACAAGCCTCAAGAGGGTAGAGGA  
CCACCTGGATCTTCTACTGTCTCTGCCTTCCAAGATTTCTTAGAAGAG

+

FFFFFFFFFFFFFFFFFFFFF:FFFFFFFFFFFFFFFFFFFFFFFFFFFFFFFFFFFFFFFFFFFFFFFF  
FFFFFFFFFFFFFFFFFFFFFFFFFFFFFFFF:FFFFFFFFFFFFFFFFFFFFFFFF

@A00721:190:HGJW7DSXY:4:1522:29966:2534\_1:N:0:TCTGCAAG+GCTGCACT  
GGAGGGAGTTCTTGAAGCATCCCGACCTTCTTGTGAAAATTTTGATGCGGTTTCATAAGATTATCA  
GTAATCCTGATTCTACTACGGATTATGACCTTCCATCCTGTACCTCTTCTGGAGAGACGTATCTCA  
AAG

+

F:F:FFFFFFFFFFFFFFFFFFFFFFFFFFFFFFFFFFFFFFFFFFFFFFFFFFFFFFFFFFFFFFFF  
FFFFFFFFFFFFF:FFFFFFFFFFFFFFFFFFFFFFFFFFFFFFFFFFFFFFFFFFFFFFFFFFFFFFFF  
FFF

@A00721:190:HGJW7DSXY:4:2464:9064:13870\_2:N:0:TCTGCAAG+GCTGCACT  
GTGACGAACTGTGGTGTTCTTGATCTACGTTACGGATATACTCTCCTTGAGTTCACTCGTAAGGACAC  
TACCACTTATTACGATATTTCTTTAGTCGATGGGTTTTCGACGCCTT

+

FFFFFFFFF:FFFFFF,FFFFFFFFFFFFFFFFFFFFFFFFFFFFFFFFFFFFFFFFFFFFFFFF  
FFFFFFFFFFFFFFFFFFFFFFFFFFFFFFFFFFFFFFFFFFFFFFFFFFFFFFFF:FFF

@A00721:190:HGJW7DSXY:4:1445:17454:3537\_1:N:0:TCTGCAAG+GCTGCACT  
AGAGGGGCAGCAGCATGACCATAATTGGTATTGACTTTGTACCACCTTTTCTACTGTCTGTCTCGCC  
TCTTCGAATGAAGTTTTAATGCTTAACAACAATGATAGTGGATTTATACCTACAATCATTGGTTTTTC  
TAA

+

FFFFFFF:FFF:F:FFFFFFFFFFFF:FFFFFFFFFFFFFFFFFFFFFFFFFFFFFFFFFFFFFFFF  
F:FFFFFFFFFFFFFFFFFFFFFFFFFFFFFFFFFFFFFFFFFFFFFFFFFFFFFFFFFFFFFFFF  
FFF

@A00721:190:HGJW7DSXY:4:1417:28293:3208\_1:N:0:TCTGCAAG+GCTGCACT  
TTATGGATATGATGCTATTACTCATGATGGTTACGGTCAGGGAGGATTCTCAGTTTACAAGGACCTTA  
AGCGATGGATCGGGGTTAATTCTAAAACATTACCCGAAAGACGTGCTAAATTAACCATTTGTACGAT  
GTC

+

FFFFFFFFFFFFFFFFFFFFFFFFFFFFFFFFFFFFFFFFFFFFFFFFFFFFFFFFFFFFFFFF:FFFFFFFFF:FFFF  
FFFFFFFFFFFFFFFFFFFFFFFFFFFFFFFF:FFFFFFFFFFFFFFFFFFFFFFFFFFFFFFFFFFFFFFFF  
FFF



[illegible]



@A00721:190:HGJW7DSXY:4:1158:21025:23156\_2:N:0:TCTGCAAG+GCTGCACT  
ATCCTGATGACATTATTTCAACGGATACCGATCTCAGTTCTACCACAGAAACCGTCTCAGGAACTGTC  
TCCACTGATTCTCGAATTAGAGAAAGACGACCTTCTTGTGGGGACTGAG

+

FFFFFFFFFFFFFFFFFFFFFFFFFFFFFFFFFFFFFFFFFFFFFFFFFFFFFFFFFFFFFFFFFFFFFFFFFFFFFFFF  
FFFFFFFFFFFFFFFFFFFFFFFFFFFFFFFFFFFFFFFFFFFFFFFFFFFFFFFFFFFFFFFFFFFFFFFFFFFFFFFF

@A00721:190:HGJW7DSXY:4:1348:5294:30639\_1:N:0:TCTGCAAG+GCTGCACT  
TTCAGGGTGCCCTGATGAGGACGTTGAAAGGGATAATTTCAACTCTGAGACTTCTAAGTGTGTTTCAA  
AAGACCAGAAACGTAACAAGAAGAATAAATGTAGGAAGGGGAGAAAACAGAAACGTAACAAGAAGAAT  
AAA

+

:F::FFFF,, ,FFFFF,:FFFF:FFFFFFFFFFFFFFFFFFFFFFFFFFFFFFFFFFFFFFFFFFFFFFFF  
:F:FFF:FFFFFFFF:FFFFFFFF,,FFFF,FFF:,F::F:F,FFFFFFFFFF,FF:FF:FFFF,:F  
FF:

@A00721:190:HGJW7DSXY:4:2557:21097:5024\_1:N:0:TCTGCAAG+GCTGCACT  
CGACGAATTATTCATGATTCACGCTGGTCAGACCCTTTTTCTTACACATCTACTTAAGGCGGCTTATA  
CCATAGGTTACGGTGATTCCAATCAAATCGGATTCATCAATCGTATTGATCTCCAAGTCGCAAACTAC  
TTC

+

FFFFFFFFFF,FFFFFFFFFFFFFFFFFFFFFFFFFFFFFFFFFFFFFFFFFFFFFFFFFFFFFFFFFFFFFFFF  
FFFFFFFFFFFFFFFFFFFF,FFFFFFFFFFFFFFFFFFFFFFFFFFFFFFFFFFFFFFFFFFFFFFFFFFFFFFFF  
FFF

@A00721:190:HGJW7DSXY:4:2472:16595:27070\_1:N:0:TCTGCAAG+GCTGCACT  
TGTCGTTCTTATCGAAGTCTCAGTTATCGCTGCCCGGCGACGTTTGTGCGGAACTCTCAGAGGTTTA  
CGGCAGAAAAATTTCTCCTGCTTGTAATTCGAGAGAGGACACTATGGAAATTAGACCTATCAGATGTC  
TTG

+

FFFFFFFFFFFFFFFFFFFFFFFFFFFFFFFFFFFFFFFFFFFFFFFFFFFFFFFFFFFFFFFFFFFFFFFFFFFFFFFF  
FFFFFFFFFFFFFFFFFFFFFFFFFFFFFFFFFFFFFFFFFFFFFFFFFFFFFFFFFFFFFFFFFFFFFFFFFFFFFFFF  
FFF

@A00721:190:HGJW7DSXY:4:2145:31006:12164\_2:N:0:TCTGCAAG+GCTGCACT  
ATATCGAGGCTATCGAGGACGATGAGTATCTTGAAGTTGTTGACGACAAGCCTCAAGAGGGTAGAGGA  
CCACCTGGATCTTCTACTGTCTCTGCCTTCCAAGATTTCTTAGAAGAG

+

FF:FFFFFFFF:FFFF:FFF:FFFFFFFFFFFFFFFF,FFFFFFFFFFFF,FFFF:FFFFFFFFFFFFFFFF  
FFFFFFFFFFFFFFFFFFFFFFFFFFFFFFFFFFFFFFFFFFFFFFFFFFFFFFFFFFFFFFFFFFFFFFFFFFFFFFFF  
FFF

@A00721:190:HGJW7DSXY:4:1532:24270:6167\_1:N:0:TCTGCAAG+GCTGCACT  
GGAGGGAGTTCTTGAAGCATCCCGACCTTTCCTTGTGAAAATTTTGATGCGGTTTCATAAGATTATCA  
GTAATCCTGATTCTACTACGGATTCATGGACCTTCCATCCTGTACCTCTTCTGGAGAGACGTATCTCA  
AAG

+

FFFF:FFFFFF:,FF:FFFFFFFF:F:FF:FFFF,FFFFFFFFFFFFFFFFFFFFFFFFFFFFFFFFFFFFFFFF  
FFFF:FFFFFFFFFFFFFFFFFFFFFFFFFFFFFFFFFFFFFFFFFFFFFFFFFFFFFFFFFFFFFFFFFFFFFFFF  
FFF

@A00721:190:HGJW7DSXY:4:1249:16749:31031\_1:N:0:TCTGCAAG+GCTGCACT  
TGTGGTGTTCTTGATCTACGTTACGGATATACTCTCCTTGAGTTCACTCGTAAGGACACTACCACTTA  
TTACGATATTTCTTTAGTCGATGGGTTTTGACGCCTTTAAGCGTCTTCTGTTTCATCGCAACCAGATG  
ATA

+

FFFFFFFFFFFFFFFFFFFFFFFFFFFFFFFFFFFFFFFFFFFFFFFFFFFFFFFFFFFFFFFFFFFFFFFFFFFFFFFF  
FFFFFFFFFFFFFFFFFFFFFFFFFFFFFFFFFFFFFFFFFFFFFFFFFFFFFFFFFFFFFFFFFFFFFFFFFFFFFFFF  
FFF

@A00721:190:HGJW7DSXY:4:2226:28429:10927\_1:N:0:TCTGCAAG+GCTGCACT  
AGAGGGGCAGCAGCATGACCATAATTGGTATTGACTTTGGTACCACCTTTTCTACTGTCTGTCTCGCC



TCTTCGAATGAAGTTTTAATGCTTAACAACAATGATAGTGGATTTATACCTACAATCATTGGTTTTTC  
TAA

+

FFFFFFFFFFFFFFFFFFFFFFFFFFFFFFFFFFFFFFFFFFFFFFFFFFFFFFFFFFFFFFFFFFFFFFFF  
FFFFFFFFFFFFFFFFFFFFFFFFFFFFFFFFFFFFFFFFFFFFFFFFFFFFFFFFFFFFFFFFFFFFFFFF:  
FFF

@A00721:190:HGJW7DSXY:4:2105:15763:35462\_1:N:0:TCTGCAAG+GCTGCACT  
TTATGGATATGATGCTATTACTCATGATGGTTACGGTCAGGAGGATTCTCAGTTTACAAGGACCTTA  
AGCGATGGATCGGGGTTAATTCTAAAACATTACCCGAAAGACGTGCTAAATTAACCATTGTACGAT  
GTC

+

FFFFFFFFFFFFFFFFFFFFFFFFFFFFFFFFFFFFFFFFFFFFFFFFFFFFFFFFFFFFFFFFFFFFFFFF  
FFFFFFFFFFFFFFFFFFFFFFFFFFFFFFFFFFFFFFFFFFFFFFFFFFFFFFFFFFFFFFFFFFFFFFFF:  
FFF

@A00721:190:HGJW7DSXY:4:1433:32515:5478\_1:N:0:TCTGCAAG+GCTGCACT  
CAAAGATATTTTCATGAAAACACTACAGAGGAACGTACCGGATTACCTGTCTTTTCATATTATGAATGAACC  
TTCGCCGCTCTCTTTGCTTCGATGTTGGATGTCAAGAAGGGTTCAGAATGGGATTCTACGTAGTTT  
ATG

+

FFFFFFFFFF,FFFFF,FFFFF,FFFFFFFFFFFFFFFFFFFFFFFFFFFFFFFFFFFFFFFFFFFFFFFF:  
FFFFFFFFF:FFFFFFFFFFFFFFFFFFFFFFFFFFFFFFFFFFFFFFFFFFFFFFFFFFFFFFFFFFFFF:  
FFF

@A00721:190:HGJW7DSXY:4:1156:30318:31172\_2:N:0:TCTGCAAG+GCTGCACT  
GGAGTTTTTACGGGATCCGGAATGTTCTGTCTATATTAGGTGAAGCGAAATACGATTTCGAACGTCAA  
CGTTCACCGAGTTTCGTTTCGTACCTTGATGCTGACTTTTCGTCAATAT

+

FFFFFFFFFFFFFFFFFFFFF,:FFFFFFFFFFFFFFFFFFFFFFFFFFFFFFFFFFFFFFFFFFFFFFFF  
FFFFFFFFFFFFFFFFFFFFFFFFFFFFF:FFFFFFFFFFFFFFFFFFFFFFFFFFFFF

@A00721:190:HGJW7DSXY:4:1259:14552:14512\_1:N:0:TCTGCAAG+GCTGCACT  
ACAAATGATAACTTCTAATTTACGTTTGCTACTCAGAGCTGGTCCTCTCAGCAAAGGGATGCATGGTG  
TTATCTCCTCAGGAGTCCCGGCATTTGATAATAATGACGAGACTTTCGTCATAATCGCTGCATATTAC  
GGA

+

FFFFFFFFFF,FFFFFFFFFFFFFFFFFFFFFFFFFFFFFFFFFFFFFFFFFFFFFFFFFFFFFFFFFFFF  
FFFFFFFFFFFFFFFFFFFFFFFFFFFFFFFFFFFFFFFFFFFFFFFFFFFFFFFFFFFFFFFFFFFFFFFF  
FFF

@A00721:190:HGJW7DSXY:4:1444:10447:30608\_2:N:0:TCTGCAAG+GCTGCACT  
CTAGTTCGAGTGCTGCTTTGGATTACGATGACGTGAGAATAGGTGAAGGGATAGTTTTTACCTCGACC  
AACATTAAGGCGGCGGCGACTAATCTTAAAGCTTCACCCAAAATGAAG

+

FFFFFFFFFFFFFFFFFFFFFFFFFFFFFFFFFFFFFFFFFFFFFFFFFFFFFFFFFFFFFFFFFFFFFFFF  
FFFFFFFFFFFFFFFFFFFFFFFFFFFFFFFFFFFFFFFFFFFFFFFFFFFFFFFFFFFFFFFFFFFFF

@A00721:190:HGJW7DSXY:4:1407:11749:20744\_1:N:0:TCTGCAAG+GCTGCACT  
ATGTCAGAAGAAGCTATTCAAGCTTGTCGTTTAAAGACTGCAGAGGCTGTCAAACAAGCCCAGACTCA  
AGGAGTCCAATCAAAGGTTTTGAATTTAGCTCAACTGGGAGACGTGCTTAAATGGGTGATAAAAATT  
ATT

+

FFFFFFFFFFFFFFFFFFFFFFFFFFFFFFFFFFFFFFFFFFFFFFFFFFFFFFFFFFFFFFFFFFFFF,  
F,FFFFFFFFF,FFF,FFFFF::FFFFF,FF:FF::F:FFFFF,F:,FFFFFFFFF,:FFFFFFFFFFFF  
FFF

@A00721:190:HGJW7DSXY:4:1521:7880:2425\_1:N:0:TCTGCAAG+GCTGCACT  
TAACGATCTCTCGGTCATTTACTCTGTACTTGATCTACGTCGTTTAACTGTGGAACAACCTTTACTT  
AGAATGACTCTATCTTTTCAGACACTTCTTATATTATTTACAATAGTTAATATCATATTAGTAATACT  
CAC

+  
FFFFFFFFFFFF:FF:FFFFFFFFFFFFFFFF:FFFFFFFF:FFFFFFFFFFFFFFFFFFFFFFFF:FFFFFF  
FFFFFFFFFFFFFFFFFFFFFFFFFFFFFFFFFFFFFFFFFFFFFFFFFFFFFFFFFFFFFFFFFFFFFFFF  
FFF

@A00721:190:HGJW7DSXY:4:1144:13268:11224\_1:N:0:TCTGCAAG+GCTGCACT  
TTCGTTACGAGACCTGATGTTATAATAGATTTAGTCTATACACCCATCTCAACGCGTATAACGCTTTT  
TTTCCGTCCTTAACCTAATACTAATATATCACCCGCAAACGACTCGAAACCGAGACGCCGTA

+  
F:,,FF:,,,:FF,F:,F:,F,,,:F:,,,FFF:,,,:,,,:F:,,:,,,,,:,,,,,,FF,,,,,,F  
FF,F,:F,,,F,,,FF:FF:FF,F,,,F:,,,FF,,F,FFFFFFFFFFFFFFFFFFFFFFFF  
@A00721:190:HGJW7DSXY:4:1623:25952:36980\_1:N:0:TCTGCAAG+GCTGCACT

ATGAGGTCAAAGCTCTATTTATTAAACGAACATTATCCGATTCTTCGAGGGTATCACTACCACTGAT  
CTGCCGACTTTAGTCAAGGAACCTCAATTCCTTCGATGTTTATATTTTTCTATAAGGGAAAATAGCAA  
TAA

+  
FFFFFFFFF:FFFFFFFFFFFFFFFFFFFFFFFFFFFFFFFFFFFFFFFFFFFFFFFFFFFFFFFFFFFF  
FFFFFFFFFFFFFFFFFFFFFFFFFFFFFFFFFFFFFFFFFFFFFFFFFFFFFFFFFFFFFFFFFFFFFFFF  
FFF

@A00721:190:HGJW7DSXY:4:2148:12753:3129\_2:N:0:TCTGCAAG+GCTGCACT  
CAGAACTCTCTCCGATCACCTTGGTGTGATCTCCCGGAGGATCTTTTCAATAAGATGTATGATGATAA  
TCTACTATTTTTAAATAGTGATATTCAGCGTATACTTGAATACTTTAT

+  
FFFFFFFFFFFFFFFFFFFFFFFFFFFFFFFFFFFFFFFFFFFFFFFFFFFFFFFFFFFFFFFFFFFF  
FFFFFFFFFFFFFFFFFFFFFFFFFFFFFFFFFFFFFFFFFFFFFFFFFFFFFFFFFFFF

@A00721:190:HGJW7DSXY:4:2272:30120:5400\_1:N:0:TCTGCAAG+GCTGCACT  
TTGGAAGAGGTCTATGATATTTATTTTACTTATACTTTAAATAGCACCGATTATAAATTGACTGTTGA  
TAATATTACAATAGCTCTTCTCAGAAGATTAGAGAAGTAACCGGTGAACACGTCGGTAGCATTGATT  
TAC

+  
FFFFFFFFF:FFFFFFFFFFFFFFFFFFFFFFFFFFFFFFFFFFFFFFFFFFFFFFFFFFFFFFFFFFFF  
FFFFFFFFFFFFFFFFFFFFFFFFFFFFFFFFFFFFFFFFFFFFFFFFFFFFFFFFFFFFFFFFFFFFFFFF  
FFF

@A00721:190:HGJW7DSXY:4:1445:23601:32972\_2:N:0:TCTGCAAG+GCTGCACT  
ATATTCTAGTAACCGCTATGTGGGCATTACTAGGATTTATCACACTCCTAAATTTGATAGCAATTTAT  
GTTTTAAATGCTAGGAAAATTTTAGAAAACTCCATTGTATAGTTCAA

+  
FFFFFFFFFFFFFFFFFFFFFFFFFFFFFFFFFFFFFFFFFFFFFFFFFFFF:FFF:FFFFFFFFFFFFFFF  
FFFFFFFF:FFFFFFFFFFFFFFFF,FFFFFFFFFFFFFFFFFFFFFFFF

@A00721:190:HGJW7DSXY:4:1543:8549:2957\_1:N:0:TCTGCAAG+GCTGCACT  
CGATCTCCTTTATTGAAAATTGTATAAGAGTTAATTGCTTACACAAAAGTGACGCGGAAGGAATCTT  
AATTGATTGAAGCTAGGCGTTGGGAGAATGAACTGCCGCTTCCCGGAAGAAACGATCTATTTACAGA  
GTA

+  
FFFFFFFFF:FFFFFFFFFFFFFFFFFFFFFFFFFFFFFFFFFFFFFFFFFFFFFFFFFFFFFFFFFFFF  
FFFFFFFFFFFFFFFFFFFFFFFFFFFFFFFFFFFFFFFFFFFFFFFFFFFFFFFFFFFF:FFFFFF  
FFF

@A00721:190:HGJW7DSXY:4:2468:21386:8782\_2:N:0:TCTGCAAG+GCTGCACT  
TCACATTCACCACTCCCATACCAATCAATGATGTGACTATACAGTTCGGCCATTTCAAGAGTGGTCAA  
TACGTCGTGGGAGGTACTGAAGCCTTCCCCTCCGCTGGCACGAAGAAC

+  
FFFFFFFFFFFFFFFFFFFFFFFFFFFFFFFFFFFFFFFFFFFFFFFFFFFFFFFFFFFFFFFFFFFF  
FFFFFFFFFFFFFFFFFFFFFFFFFFFFFFFFFFFFFFFFFFFFFFFFFFFF

@A00721:190:HGJW7DSXY:4:2140:15121:12962\_1:N:0:TCTGCAAG+GCTGCACT  
CTCTAAGTCTACCAGGAAGAGGGGAAATGTCCCCAAACTGAGAAGAATAAAGGGAAAGGTCCATCAG

GACCTAAGAAGGGGAAATTACCCCTAATTCTGAAGGAAGATCTCCCACCATCTGGGGTTGGGAATAAG  
AAA

+

FFFFFFFF:FFFFFFFFFFFFFFFFFFFFFFFFFFFFFFFFFFFFFFFFFFFFFFFFFFFFFFFF  
FFFFFFFFFFFFFFFFFFFFFFFFFFFFFFFFFFFFFFFFFFFFFFFFFFFFFFFFFFFFFFFF  
FFF

@A00721:190:HGJW7DSXY:4:1505:11216:15248\_1:N:0:TCTGCAAG+GCTGCACT  
TACGAAGTCGCTGAAGGCGGCTTGGGTCATTAAGGGTAGCTGTAAAGTTGCGCCTGCCGACCCCATCT  
TTGAGACCAAGACTCTCTACAGTAGGTTTCGTGCCTACTATGAGCAAATCTGTTGAATTCGTCACTGAG  
GAC

+

FFFFFFFFFFFFFFFFFFFFFFFFFFFFFFFFFFFFFFFFFFFFFFFFFFFFFFFFFFFFFFFF  
FFFFFFFFFFFFFFFFFFFFFFFF:FFFFFFFFFFFFFFFFFFFFFFFFFFFFFFFFFFFFFFFF  
FFF

@A00721:190:HGJW7DSXY:4:1643:24243:14951\_2:N:0:TCTGCAAG+GCTGCACT  
CTACTGGCGACAACTGAGAGCAGTCGCTGGGGAAAGAGAATTGCGTGGGTTGAAGGCCGACGCTTCG  
AGCTTGAGTGTGACGAGGCCGGTGACGTTTTTGTCAACGGCGTTTGGA

+

FFFFFFFFFFFFFFFFFFFFFFFFFFFFFFFF:FFFF::FFFFFFFFFFFFFFFFFFFFFFFF  
FFFFFFFFFFFFFFFF:FFFFFFFFFFFFFFFF:FFFFFFFFFFFFFF:FFFF

@A00721:190:HGJW7DSXY:4:1607:27588:17174\_1:N:0:TCTGCAAG+GCTGCACT  
CCTATGGAGTCTTGAAGGACTTAGGTTGGCATATTTATGCCGACGATAATAAGCATGTCACCCTTAAG  
CACCGAGGTAAGCTCGGGACTTACAAGAGAGAGTGTGAGAGAGTCGCTCTCACTATTTTTGCCAGAA  
TGC

+

FF:,F::FFFFFFFFFFFFFF,FFF:FFFFFFFF,FFFFFFFFFFFFFFFF:FFFFFFFF  
FFFFFFFF:FFFFFFFF:FFFFFFFFFFFFFFFFFFFFFFFFFFFFFFFFFFFFFFFF  
FFF

@A00721:190:HGJW7DSXY:4:1429:3531:23015\_1:N:0:TCTGCAAG+GCTGCACT  
AGGTGTCAAGGTCTTCTTCATGCTGATCTTTCAGGACCTAATCACATCATGATTGATAGTTACGGCT  
CGTATCGAGTTGGAGGGAGGAAGTTCTCCGAAATTAAAGACGGGGGATTAAGAGTCCAGCTGTAAC  
GTC

+

FFFFFFFFFFFFFFFFFFFFFFFFFFFFFFFFFFFFFFFFFFFFFFFFFFFFFFFFFFFFFFFF  
FFFFFFFFFFFFFFFFFFFFFFFFFFFFFFFFFFFFFFFFFFFFFFFFFFFFFFFFFFFFFFFF:FF  
FFF

@A00721:190:HGJW7DSXY:4:2640:2148:31422\_1:N:0:TCTGCAAG+GCTGCACT  
AAGGCTCTAGAGAAGATCTCACCACTGGAGAAGGCAAGTGGAGAGTCCAGAAGTTGATGAAGAAGGA  
TTATTTGAAGCAGGGGTACCCTTCTAAGGTGGATGAGGGAGGTTGTTTCTTTGGAGTTTATAGATA  
ATC

+

FFFFFFF,FFFF:FF,FFFFFFFFFFFFFFFFFFFFFFFFFFFFFFFF,FFFF,FFFF:FF,:,:,:,  
F::,,FF::FFFFFFFFFFFFFFFFFFFFFFFFFFFFFFFFFFFFFFFFFFFFFFFF  
FFF

@A00721:190:HGJW7DSXY:4:1446:22752:31313\_1:N:0:TCTGCAAG+GCTGCACT  
ACTCAACTACTCCGATCAGATCCGGATGGTTTGATTGGTATGGACTACTCGACTTTTGATCTGGAGTT  
GTCTAGGGTCATGGCAGATACTACCGATAAGGTGAAAAATATGCAGGTCAAAGATTCTGTAGCTCTGA  
GGG

+

FFFFFFFFFFFFFFFFFFFFFFFF:FFFF:FFFFFFFFFFFFFFFFFFFFFFFF:FFFFFFFF  
FFFFFFFFFFFFFFFFFFFFFFFFFFFFFFFFFFFFFFFFFFFFFFFFFFFFFFFF  
FFF

@A00721:190:HGJW7DSXY:4:2356:7979:13025\_1:N:0:TCTGCAAG+GCTGCACT  
AACCAAGTTAAGAAGGAGGCTGATCATGGAGTCTTGTACCTTCTGTCAAACCTTCGAGGTTTCAGCTAC

GAGAGGTGATCCCGGATGTGGATTGAAGGCTGGCTCTAAGGGAGACTCCTTCTTTTTGAATGTTGTAA  
AGA

+

FFFFFFFF:FFFFFFFFFFFFFFFFFFFFFFFFFFFFFFFFFFFFFFFFFFFFFFFFFFFFFFFFFFFFFFFFFFFFFFFF  
FFFFFFFFFFFFFFFFFFFFFFFFFFFFFFFFFFFFFFFFFFFFFFFFFFFFFFFFFFFFFFFFFFFFFFFFFFFFFFFF  
FFF

@A00721:190:HGJW7DSXY:4:1158:21603:22936\_2:N:0:TCTGCAAG+GCTGCACT  
ATCCTGATGACATTATTTCAACGGATACCGATCTCAGTTCTACCACAGAAACCGTCTCAGGAACTGTC  
TCCACTGATTCGGAATTAGAGAAAGACGACCTTCTTGTGGGACTGAG

+

FFFFFFFFFFFFFFFFFFFFFFFFFFFFFFFFFFFFFFFFFFFFFFFFFFFFFFFFFFFFFFFFFFFFFFFFFFFFFFFF  
FFFFFFFFFFFFFFFFFFFFFFFFFFFFFFFFFFFFFFFFFFFFFFFFFFFFFFFFFFFFFFFFFFFFFFFFFFFFFFFF

@A00721:190:HGJW7DSXY:4:1408:22806:25332\_1:N:0:TCTGCAAG+GCTGCACT  
TTCAGGGTGCCCTGATGAGGACGTTGAAAGGATAATTTCAACTCTGAGACTTCTAAGAGTGTTCCTCAA  
AAGACCAGAAACGTAACAAGAAGAATAAAGGTAGGAAGGGAGAAAACAGAAACGTAACAAGAAGAAT  
AAA

+

FF,FFFFFFFF:FFFFFFFFFFFFFFFFFFFFFFFFFFFFFFFFFFFFFFFFFFFFFFFFFFFFFFFFFFFFFFFF  
FFFFFFFFFFFFFFFFFFFFFFFFFFFFFFFFFFFFFFFFFFFFFFFFFFFFFFFFFFFFFFFFFFFFFFFFFFFFFFFF  
FFF

@A00721:190:HGJW7DSXY:4:2664:8901:7200\_1:N:0:TCTGCAAG+GCTGCACT  
CGACGAATTATTCATGATTCACGCTGGTCAGACCCTTTTCTTACACATCTACTTAAGGCGGCTTATA  
CCATAGGTTACGGTGATTCCAATCAAATCGGATTCATCAATCGTATTGATCTCCAAGTCGCAAACTAC  
TTC

+

FFFF:FFFFFFFFFFFFFFFFFFFFFFFFFFFFFFFFFFFFFFFFFFFFFFFFFFFFFFFFFFFFFFFFFFFFFFFF  
FFFFFFFFFFFFFFFFFFFFFFFFFFFFFFFFFFFFFFFFFFFFFFFFFFFFFFFFFFFFFFFFFFFFFFFFFFFFFFFF  
FFF

@A00721:190:HGJW7DSXY:4:2548:28673:28291\_1:N:0:TCTGCAAG+GCTGCACT  
TGTCGTTCTTATCGAAGTCTCAGTTATCGCTGCCCGGCCGACGTTTGTGCGCAACTCTCAGAGGTTTA  
CGGCAGAAAAATTTCTCCTGCTTGTAATTCGAGAGAGGACACTATGGAAATTAGACCTATCAGATGTC  
TTG

+

FFFFFF:FF:FF:FFFFFFFFFFFFFFFFFFFFFFFFFFFFFFFFFFFFFFFFFFFFFFFFFFFFFFFFFFFFFF  
FFFFFFFFFFFFFFFFFFFFFFFFFFFFFFFFFFFFFFFFFFFFFFFFFFFFFFFFFFFFFFFFFFFFFFFFFFFFFF  
FFF

@A00721:190:HGJW7DSXY:4:2148:31693:30264\_2:N:0:TCTGCAAG+GCTGCACT  
ATATCGAGGCTATCGAGGACGATGAGTATCTTGAAGTTGTTGACGACAAGCCTCAAGAGGGTAGAGGA  
CCACCTGGATCTTCTACTGTCTCTGCCTTCCAAGATTTCTTAGAAGAG

+

FFFFFFFFFFFFFFFFFFFFFFFFFFFFFFFFFFFFFFFFFFFFFFFFFFFFFFFFFFFFFFFFFFFFFFFFFFFF  
FFFFFFFFFFFFFFFFFFFFFFFFFFFFFFFFFFFFFFFFFFFFFFFFFFFFFFFFFFFFFFFFFFFFFFFFFFFF

@A00721:190:HGJW7DSXY:4:1553:4390:9095\_1:N:0:TCTGCAAG+GCTGCACT  
GGAGGGAGTTCTTGAAGCATCCCGACCTTTCCTTGTGAAAATTTTGATGCGGTTTCATAAGATTATCA  
GTAATCCTGATTCTACTACGGATTCATGGACCTTCATCCTGTACCTCTTCTGGAGAGACGTATCTCA  
AAG

+

FFFFFFFFFFFF:FFFFFFFFFFFF:FFFFF:FFFFFFFFFFFFFFFFFFFFFFFFFFFFFFFFFFFFFFFFFFFF  
FFFFFFFFFFFFFFFFFFFFFFFFFFFFFFFFFFFFFFFFFFFFFFFFFFFFFFFFFFFFFFFFFFFFFFFFFFFF  
FFF

@A00721:190:HGJW7DSXY:4:2255:2627:8108\_1:N:0:TCTGCAAG+GCTGCACT  
TGTGGTGTTCTTGATCTACGTTACGGATATACTCTCCTTGAGTTCACTCGTAAGGACACTACCACTTA  
TTACGATATTTCTTTAGTCGATGGGTTTTGACGCCTTTAAGCGTCTTCTGTTTCATCGCAACCAGATG  
ATA

[illegible]

F:FFFFFFFF,FFFFFFFF,FF:FFF,:F:FFF::FFFF,F,:FFFFFFFF,,FFF:FFFFFFFF,F  
F:F

@A00721:190:HGJW7DSXY:4:1641:14778:21104\_1:N:0:TCTGCAAG+GCTGCACT  
TAACGATCTCTCGGTAATTTACTCTGTACTTGATCTACGTCGTTTAACTGTCGGAACAACCTTTACTT  
AGAATGACTCTATCTTTTCAGACACTTCTTATATTATTTACAATAGTTAATATCATATTAGTAATACT  
CAC

+

FFF,FFFFFF:,FF,,FFFFFF:FFF,,FFFF:FFF:F:,FFF,F:FFFFFFFFFFFF:FFFFFFF  
FFFFFFFFF:,FFFFFFFFF:FFFFFFFFFFFFFFFFFFFFFFFFFFFFFFFFF:FFF:F:FFFFFFFFFFFFF  
FFF

@A00721:190:HGJW7DSXY:4:2540:21893:20212\_1:N:0:TCTGCAAG+GCTGCACT  
TTCGTTACGAGACCTGATGTTAGAATATATTTTGTCTCAACACCAAATCAACTAGGATAATGCGAGT  
TTTCCGTCCTCAACTTAATACACGAAGAGATCAGCCGAAAACGACTCGAAACCGAGACGCCGTA

+

F:,,FF,,FF:,,,F,,:F,:F,,,F,,,FFF,,:::,F:FF:,::,,FF,,,,:,F:,,,,,F  
FF,F,,,::,,FF,,,F,:F:,F,,,,,,:F:,F,FFFFFFFFFFFFFFFFFFFFFFFFF

@A00721:190:HGJW7DSXY:4:1652:10285:33144\_1:N:0:TCTGCAAG+GCTGCACT  
ATGAGGTCAAAGCTCTATTTATTAACGAACATTATCCGATTCTTCGAGGGTATCACTACCACTGAT  
CTGCCGACTTTAGTCAAGGAACCTCAATTCCTTCGATGTTTATATTTTCTATAAGGGAAATAGCAA  
TAA

+

FFFFFFFFF:FFFFFFFFFFFFFFFFFFFFFFFFFFFFFFFFFFFFFFFFFFFFFFFFFFFFFFFFF  
FFFFFFFFFFFFFFFFF:FFFFFFFFFFFFFFFFFFFFFFFFFFFFFFFFFFFFFFFFFFFFFFFFFFFFF  
FFF

@A00721:190:HGJW7DSXY:4:2415:14931:24909\_2:N:0:TCTGCAAG+GCTGCACT  
CAGAACTCTCTCCGATCACCTTGGTGTGATCTCCCGGAGGATCTTTTCAATAAGATGTATGATGATAA  
TCTACTATTTTTAAATAGTGATATTCAGCGTATACTTGAATACTTTAT

+

FFFFFFFFFFFFFFFFFFFFF:FFFFFFFFF:FFFFFFFFFFFFFFFFFFFFFFFFF:FFFFFFFFFFFFFFFFF  
FFFFFFFFFFFFFFFFF:FFFFFFFFFFFFF:FFFFFFFFF:F:F:FFFFFFF

@A00721:190:HGJW7DSXY:4:2408:17047:26663\_1:N:0:TCTGCAAG+GCTGCACT  
TTGGAAGAGGTCTATGATATTTATTTTACTTATACTTTAAATAGCACCGATTATAACTTGACTGTTGA  
TAATATTACAATAGCTCTTCTCAGAAGATTAGAGAAGTAACCGGTGAACACGTCGGTAGCATTGATT  
TAC

+

FFFFFFFFFFFFFFFFFFFFFFFFF,FFFFF,FFFFFFFFFFFFFFFFFFFFFFFFFFFFFFFFF  
FFFFFFFFFFFFFFFFFFFFFFFFFFFFFFFFF:FFFFFFFFFFFFFFFFFFFFFFFFF:FFFFFFF  
FFF

@A00721:190:HGJW7DSXY:4:1539:25283:31125\_2:N:0:TCTGCAAG+GCTGCACT  
ATATTCTAGTAACCGCTATGTGGCATTACTAGGATTTATCACACTCCTAAATTTGATAGCAATTTAT  
GTTTTAAATGCTAGGAAAATTTAGAAAACTCCATTGTATAGTTCAA

+

FFFFFFFFFFFFFFFFFFFFFFFFFFFFFFFFFFFFFFFFFFFFFFFFFFFFFFFFF:F:FFFFFFFFFFFFF  
FFFFFFF:FF:FFFFFFF:FFFFFFFFF:FFFFF,FFFFFFFFF:

@A00721:190:HGJW7DSXY:4:2239:1533:2707\_1:N:0:TCTGCAAG+GCTGCACT  
CGATCTCCTTTATTGAAAATTGTATAAGAGTTAATTGCTTACACAAAAGTGACGCGGAAGGAATCTT  
AATTGATTGAAGCTAGGCGTTGGGGAGAATGAAGTCCGCTTCCCGGAAGAACGATCTATTTACAGA  
GTA

+

FFFFFFFFFFFFFFFFFFFFFFFFFFFFFFFFFFFFFFFFFFFFFFFFFFFFFFFFF:FF:FFFFFFFFF  
FFFFFFFFFFFFFFFFFFFFFFFFFFFFFFFFFFFFFFFFFFFFFFFFFFFFFFFFF  
FFF

@A00721:190:HGJW7DSXY:4:2548:22616:25567\_2:N:0:TCTGCAAG+GCTGCACT  
TCACATTCACCACTCCCATGCCAATCAATGATGTGACTATACAGTTCGCCATTTCAAGAGTGGTCAA

+

@A00721:190:HGJW7DSXY:4:2210:16143:14168\_1:N:0:TCTGCAAG+GCTGCACT  
CTCTAAGTCTACCAGGAAGAGGGGAAATGTCCCCAAACTGAGAAGAATAAAGGGAAAGTCCATCAG  
GACCTAAGAAGGGGAAATTACCCCTAATTCTGAAGGAAGATCTCCACCATCTGGGGTTGGGAATAAG  
AAA

+

@A00721:190:HGJW7DSXY:4:1603:22869:3959\_1:N:0:TCTGCAAG+GCTGCACT  
TACGAAGTCGCTGAAGGCGGCTTGGGTCATTAAGGGTAGCTGTAAAGTTGCGCCTGCCGACCCCATCT  
TTGAGACCAAGACTCTCTACAGTAGGTTCTGTCCTACTATGAGCAAATCTGTTGAATTCGTCACTGAG  
GAC

+

@A00721:190:HGJW7DSXY:4:2238:25970:4507\_2:N:0:TCTGCAAG+GCTGCACT  
CTACTGGCGACAACTGAGAGCAGTCGCTGGGGAAAGAGAATTGCGTGGGTTGAAGGCCGACGCTTCG  
AGCTTGAGTGTGACGAGGCCGGTGACGTTTTTGTCAACGGCGTTTGA

+

@A00721:190:HGJW7DSXY:4:1646:7148:36417\_1:N:0:TCTGCAAG+GCTGCACT  
CCTATGGAGTCTTGAAGGACTTAGGTTGGCATATTTATGCCGACGATAATAAGCATGTCACCCTTAAG  
CACCGAGGTAAGCTCGGGACTTACAAGAGAGAGTGTGAGAGAGTGCCTCTCACTATTTTTGCCAGAA  
TGC

+

@A00721:190:HGJW7DSXY:4:1526:19316:1470\_1:N:0:TCTGCAAG+GCTGCACT  
AGGTGTCAAGGGTCTTCTTCATGCTGATCTTTCAGGACCTAATCACATCATGATTGATAGTTACGGCT  
CGTATCGAGTTGGAGGGAGGAAGTTCTCCGAAATTAAGACGGGGGGATTAAAGAGTCCAGCTGTAAC  
GTC

+

@A00721:190:HGJW7DSXY:4:1201:2826:35258\_2:N:0:TCTGCAAG+GCTGCACT  
AGGCTCTAGAGAAGATCTCACCACCTGGAGAAGGCAAGTGGAGAGTCCAGAAGTTGATGAAGAAGGAT  
TATTTGAAGCAGGGGTTACCACTTCCTAAGGTGGATGAGGGAGGTTGT

+

@A00721:190:HGJW7DSXY:4:1451:21567:29700\_1:N:0:TCTGCAAG+GCTGCACT  
ACTCAACTACTCCGATCAGATCCGGATGGTTTGATTGGTATGGACTACTCGACTTTTGATCTGGAGTT  
GTCTAGGGTCATGGCAGATACTACCGATAAGGTGAAAAATATGCAGGTCAAAGATTCTGTAGCTCTGA  
GGG

+

[illegible]

FFFFFFFFFFFFFFFFFFFFFFFFFFFFFFFFFFFFFFFFFFFFFFFFFFFFFFFFFFFFFFFFFFFFFFFFFFFFFFFF  
FFF

@A00721:190:HGJW7DSXY:4:2428:18177:25363\_1:N:0:TCTGCAAG+GCTGCACT  
AACCAAGTTAAGAAGGAGGCTGATCATGGAGTCTTTGTACCTTCTGTCAAACCTTCGAGGTTTCAGCTAC  
GAGAGGTGATCCCGGATGTGGATTGAAGGCTGGCTCTAAGGGAGACTCCTTCTTTTTGAATGTTGTAA  
AGA

+  
FFFFFFFFFFFFFFFFFFFFFFFFFFFFFFFF,FFFFFFFFFFFF,FFFFFFFF:FFFFFFFFFFFFFFFFFFFFFFF  
FFFFFFFFFFFFFFFFFFFFFFFFFFFFFFFF,FFFFFFFFFFFFFFFFFFFFFFFFFFFFFFFFFFFFFFFFFFFFFFF  
FFF

@A00721:190:HGJW7DSXY:4:1325:12970:20259\_2:N:0:TCTGCAAG+GCTGCACT  
ATCCTGATGACATTATTTCAACGGATACCGATCTCAGTTCTACCACAGAAACCGTCTCAGGAAGTGTCT  
TCCACTGATTTCGGAATTAGAGAAAGACGACCTTCTTGTGGGGACTGAG

+  
FFFFFFFFFFFFFFFFFFFFFFFFFFFFFFFFFFFFFFFFFFFFFFFFFFFFFFFFFFFFFFFFFFFFFFFFFFFFFFF  
FFFFFFFFFFFF:FFFFFFFFFFFFFFFFFFFFFFFFFFFFFFFFFFFFFFFFFFFF:F

@A00721:190:HGJW7DSXY:4:2256:28971:16094\_1:N:0:TCTGCAAG+GCTGCACT  
TTCAGGGTGCCCTGATGAGGACGTTGAAAGGGATAATTTCAACTCTGAGACTTCTAAGAGTGTTC  
AAGACCAGAAACGTAACAAGAAGAATAAAGGTAGGAAGGGGAGAAAACAGAAACGTAACAAGAAGAAT  
AAA

+  
FFF:FFFF,FFFFFFFF:F:FF:FFFF:FFF:FFFF:FFF:FFFFFFFF:F:FF:FFFFFFFFFFFFF  
FFFF:FFFF:FFFFFFFFFFFFFFFFFFFFFFFFFFFFFFFFFFFFFFFFFFFFFFFFFFFFFFFFFFFFFFFFF  
FFF

@A00721:190:HGJW7DSXY:4:2511:20799:1438\_2:N:0:TCTGCAAG+GCTGCACT  
CTGGTCAGACCCTTTTTCTTACACATCTACTTAAGGCGGCTTATACCATAGGTTACGGTGATTCCAAT  
CAAATCGGATTCAATCGTATTGATCTCCAAGTCGCAAACCTACTTC

+  
FFFFFFFFFFFFFFFFFFFFFFFFFFFFFFFFFFFFFFFFFFFFFFFFFFFFFFFFFFFFFFFFFFFFFFFFFFFFFFF  
FFFFFFFFFFFFFFFFFFFFFFFFFFFFFFFFFFFFFFFFFFFFFFFFFFFFFFFFFFFFFFFF

@A00721:190:HGJW7DSXY:4:2560:18439:13573\_1:N:0:TCTGCAAG+GCTGCACT  
TGTCGTTCTTATCGAAGTCTCAGTTATCGCTGCCCGGCCGACGTTTGTGCGGAACTCTCAGAGGTTTA  
CGGCAGAAAAATTTCTCCTGCTTGTAATTCGAGAGAGGACACTATGGAAATTAGACCTATCAGATGTC  
TTG

+  
FFFFFFFFFFFFFFFFFFFFFFFFFFFFFFFFFFFFFFFFFFFFFFFFFFFFFFFFFFFFFFFFFFFFFFFFFFFFFFF  
F:FFFFFFFFFFFFFFFFFFFFFFFFFFFFFFFFFFFFFFFFFFFFFFFF:FFFFFFFFFFFFFFFFFFFFFFFFF:  
FFF

@A00721:190:HGJW7DSXY:4:2221:32660:4726\_2:N:0:TCTGCAAG+GCTGCACT  
ATATCGAGGCTATCGAGGACGATGAGTATCTTGAAGTTGTTGACGACAAGCCTCAAGAGGGTAGAGGA  
CCACCTGGATCTTCTACTGTCTCTGCCTTCCAAGATTTCTTAGAAGAG

+  
FFFFFFFFFFFFFFFFFFFFFFFFFFFFFFFFFFFFFFFFFFFFFFFFFFFFFFFFFFFFFFFFFFFFFFFFFFFFFFF  
FFFFFFFFFFFFFFFFFFFFFFFFFFFFFFFFFFFFFFFFFFFFFFFFFFFFFFFFFFFFFFFF

@A00721:190:HGJW7DSXY:4:1563:27697:36151\_1:N:0:TCTGCAAG+GCTGCACT  
GGAGGGAGTTCTTGAAGCATCCCGACCTTTCCTTGTGAAAATTTTGATGCGGTTTCATAAGATTATCA  
GTAATCCTGATTCTACTACGGATTGATGACCTTCCATCCTGTACCTCTTCTGGAGAGACGTATCTCA  
AAG

+  
FFFFFFFFFFFF:FFFFFFFFFFFFFFFFFFFFFFFFFFFFFFFFFFFFFFFFFFFFFFFFFFFFFFFFFFFF:FF  
FFFFFFFFFFFFFFFFFFFFFFFFFFFFFFFFFFFFFFFFFFFFFFFFFFFFFFFFFFFFFFFFFFFFFFFFFFFFF  
FFF

@A00721:190:HGJW7DSXY:4:2464:9064:13870\_1:N:0:TCTGCAAG+GCTGCACT  
TGTGGTGTTCTTGATCTACGTTACGGATATACTCTCCTTGAGTTCACTCGTAAGGACACTACCACTTA



TTACGATATTTCTTTAGTCGATGGGTTTTTCGACGCCTTTAAGCGTCTTCTGTTCATCGCAACCAGATG  
ATA

+

FFFFFFFFFFFFFFFFFFFFFFFFFFFFFFFFFFFFFFFFFFFFFFFFFFFFFFFFFFFFFFFFFFFFFFFF  
FFFFFFFFFFFFFFFFFFFFFFFFFFFFFFFFFFFFFFFFFFFFFFFFFFFFFFFFFFFFFFFFFFFFFFFF  
FFF

@A00721:190:HGJW7DSXY:4:2441:14669:26396\_1:N:0:TCTGCAAG+GCTGCACT  
AGAGGGGCAGCAGCATGACCATAATTGGTATTGACTTTGGTACCACCTTTTCTACTGTCTGTCTCGCC  
TCTTCGAATGAAGTTTTAATGCTTAACAACAATGATAGTGAATTTATACCTACAATCATTGGTTTTTC  
TAA

+

FFFFFFFFFFFFFFFFFFFFFFFFFFFFFFFFFFFFFFFFFFFFFFFFFFFFFFFFFFFFFFFFFFFFFFFF  
FFF:FFFFFFFFFFFFFFFFFFFFFFFFFFFFFFFFFFFFFFFFFFFFFFFFFFFFFFFFFFFFFFFFFFFF  
FFF

@A00721:190:HGJW7DSXY:4:2203:11912:32706\_1:N:0:TCTGCAAG+GCTGCACT  
TTATGGATATGATGCTATTACTCATGATGGTTACGGTCAGGGAGGATTCTCAGTTTACAAGGACCTTA  
AGCGATGGATCGGGGTTAATTCTAAAACATTACCCGAAAGACGTGCTAAATTAACCATTGTACGAT  
GTC

+

FFFFFFFFFFFFFFFFFFFFFFFFFFFFFFFFFFFFFFFFFFFFFFFFFFFFFFFFFFFFFFFFFFFFFFFF  
FFFFFFFFFFFFFFFFFFFFFFFFFFFFFFFFFFFFFFFFFFFFFFFFFFFFFFFFFFFFFFFFFFFFFFFF  
FFF

@A00721:190:HGJW7DSXY:4:1456:11939:26052\_1:N:0:TCTGCAAG+GCTGCACT  
CAAAGATATTTTCATGAAAACACTACAGAGGAACGTACCGGATTACCTGTCTTTTCATATTATGAATGAACC  
TTCGGCCGCTCTCTTTGCTTCGATGTTGGATGTCAAGAAGGGTTCAGAATGGGATTCTACGTAGTTT  
ATG

+

FFFFFFFFFFFFFFFFFFFFFFFFFFFFFFFFFFFFFFFFFFFFFFFFFFFFFFFFFFFFFFFFFFFFFFFF  
FFFFFFFFFFFFFFFFFFFFFFFFFFFFFFFFFFFFFFFFFFFFFFFFFFFFFFFFFFFFFFFFFFFFFFFF  
FFF

@A00721:190:HGJW7DSXY:4:1326:31358:35415\_2:N:0:TCTGCAAG+GCTGCACT  
GGAGTTTTTACGGGATCCGGACTGTTCTGTCTATATTAGGTGAAGCGAAATACGATTTCTGAACGTCAA  
CGTTCACCGAGTTTCGTTTCGTACCTTGATGCTGACTTTTCGTCAATAT

+

FFFFFFFFF:FFFFF,FFFF:F,FFFFFF:FFFFFFFFFFFFFFFFFFFFFFFFFFFFFFFF:FFFF:FFFFFFFF  
F:FFFFFFFFFFFFFFFFFFFFFFFF, ,F:FFFFFFFF:FFF,FFFFFFFF

@A00721:190:HGJW7DSXY:4:1609:30355:9940\_1:N:0:TCTGCAAG+GCTGCACT  
ACAAATGATAACTTCTAATTTACGTTTGCTACTCAGAGCTGGTCTCTCAGCAAAGGGATGCATGGTG  
TTATCTCCTCAGGAGTCCCGCATTTGATAATAATGACGAGACTTTCGTCATAATCGCTGCATATTAC  
GGA

+

FFFFFFFFFFF,FFFFFFFFFFFFFFFFFFFFFFFFFFFFFFFFFFFFFFFFFFFFFFFFFFFFFFFFFFFF  
FFFFFFFFFFFFFFFFFFFFFFFF,FF:FFFFFFFFFFFFFFFFFFFFFFFFFFFFFFFFFFFFFFFFFFFF  
FFF

@A00721:190:HGJW7DSXY:4:1451:17345:10394\_2:N:0:TCTGCAAG+GCTGCACT  
CTAGTTCGAGTGCTGCTTTGGATTACGATGACGTGAGAATAGGTGAAGGGATAGTTTTTACCTCGACC  
AACATTAAGGCGGCGGCGACTAATCTTAAAGCTTCACCCAAAATGAAG

+

FFFF:FFFFFFFFFFF,FFFF,FFFFFFFFFFFFFFFFFFFFFFFFFFFFFFFFFFFFFFFFFFFFFFFF,FF  
FFFFFFFFFFFFFFFFFFFFFFFFFFFFFFFFFFFFFFFFFFFFFFFFFFFFFFFFFFFFFFFF:F:F:FFFF

@A00721:190:HGJW7DSXY:4:1654:7301:1454\_1:N:0:TCTGCAAG+GCTGCACT  
ATGTCAGAAGAAGCTATTCAAGCTTGTCGTTTAAAGACTGCAGAGGCTGTCAAACAAGCCAGACTCA  
AGGAGTCCAATCAAAGGTTTTGAATTTAGCTCAACTGGGGAGACGTGCTTAAATGGGTGATAAAAATT  
ATT



AATTGATTGAAGCTAGGCGTTGGGGAGAATGAAGTCCGCTTCCCAGAAACGATCTATTTACAGAGTA

[illegible]

+

```
FFFFFFFFFFFFFFFFFFFFFFFFFFFFFFFFFFFFFFFFFFFFFFFFFFFFFFFFFFFFF
FFFFFFFFFFFFFFFFFFFFFFFFFFFFFFFFFFFFFFFFFFFFFFFFFFFFFFFFFFFF
```

+

```
FFFFFFFFFFFFFFFFFFFFFFFFFFFFFFFFFFFFFFFFFFFFFFFFFFFFFFFFFFFFFFF
FFFFFFFFFFFFFFFFFFFF:FFFFFFFFFFFFFFFFFFFFFFFFFFFFFFFFFFFFFFFFFFF
FFF
```

+

[illegible]

+

```
FFFFFFFFFFFFFFFFFFFFFFFFFFFFFFFFFFFFFFFFFFFFFFFFFFFFFFFFFFFFFFFFFFF
FFFFFFFFFFFFFFFFFFFFFFFFFFFFFFFFFFFFFFFFFFFFFFFFFFFFFFFFFFFF
```

+

[illegible] $+$ [illegible]

+

FFFFFFFFFFFFFFFFFFFFFFFFFFFFFFFFFFFFFFFFFFFFFFFFFFFFFFFFFFFFFFFFFFFFFFFF  
FFFFFFFFFFFFFFFFFFFFFFFF:FFFF:FFFFFFFFFFFFFFFFFFFFFFFF  
@A00721:190:HGJW7DSXY:4:1540:27037:15248\_1:N:0:TCTGCAAG+GCTGCACT  
ACTCAACTACTCCGATCAGATCCGGATGGTTTGATTGGTATGGACTACTCGACTTTTGATCTGGAGTT  
GTCTAGGGTCATGGCAGATACTACCGATAAGGTGAAAAATATGCAGGTCAAAGATTCTGTAGCTCTGA  
GGG  
+  
FFFFFFFFFFFFFFFFFFFFFFFFFFFFFFFF:F:FFFFFFFFFFFFFFFFFFFFFFFFFFFFFFFFFFFF  
FFFFFFFFFFFFFFFFFFFFFFFFFFFFFFFFFFFFFFFFFFFFFFFFFFFFFFFFFFFFFFFFFFFFFFFF  
FFF  
@A00721:190:HGJW7DSXY:4:2678:5113:23657\_1:N:0:TCTGCAAG+GCTGCACT  
AACCAAGTTAAGAAGGAGGCTGATCATGGAGTCTTTGTACCTTCTGTCAAACCTTCGAGGTTTCAGCTAC  
GAGAGGTGATCCCGGATGTGGATTGAAGGCTGGCTCTAAGGGAGACTCCTTCTTTTTGAATGTTGTAA  
AGA  
+  
FFFFF,FFFFFF:FFF:F::,F:::F,:FFFFFF:FFF:FFFF:F:F,FF:FFFFFFFFFFFFFFFFFFFF  
FF:FFFF:FFF:FFFFFFFFFFFFFFFF:FFF:F,FFF:FFF:FFFFFFFF:F:FFFFFF:, :FFFFFFF  
FFF  
@A00721:190:HGJW7DSXY:4:1442:25030:19883\_2:N:0:TCTGCAAG+GCTGCACT  
ATCCTGATGACATTATTTCAACGGATACCGATCTCAGTTCTACCACAGAAACCGTCTCAGGAACGTGTC  
TCCACTGATTCGGAATTAGAGAAAGACGACCTTCTTGTGGGGACTGAG  
+  
FFFFFFFFFFFF:FFFFFFFFFFFFFFFFFFFFFFFFFFFFFFFFFFFFFFFFFFFFFFFFFFFFFFFFFFFFF:FFFFFFFF  
FFFFFFFFFFFFFFFFFFFFFFFFFFFFFFFFFFFFFFFF:FFFFFFFFFFFFFFF  
@A00721:190:HGJW7DSXY:4:2267:31439:6433\_1:N:0:TCTGCAAG+GCTGCACT  
TTCAGGGTGCCCTGATGAGGACGTTGAAAGGGATAATTTCAACTCTGAGACTTCTAAGAGTGTTTCAA  
AAGACCAGAAACGTAACAAGAAGAATAAAGGTAGGAAGGGGAGAAAACAGAAACGTAACAAGAAGAAT  
AAA  
+  
FFFFF:FFFF,FFFFFFFFFFFF,FFFFFFFFF:FFFFFFFF:FFFF:FFF:F:FFFFFFFF:FFFF,FFF  
FFFFFFFFFFFFFFFFFFFFFFFFFFFFFFFFFFFFFFFFFFFFFFFFFFFFFFFFFFFFFFFFFFFFFFFFFFFF  
FFF  
@A00721:190:HGJW7DSXY:4:2554:16468:3521\_2:N:0:TCTGCAAG+GCTGCACT  
CTGGTCAGACCCTTTTTCTTACACATCTACTTAAGGCGGCTTATACCATAGGTTACGGTGATTCCAAT  
CAAATCGGATTCATCAATCGTATTGATCTCCAAGTCGAAACTACTTC  
+  
FFFFFFFFFFFFFFFFFFFFFFFFFFFFFFFFFFFFFFFFFFFFFFFFFFFFFFFFFFFFFFFFFFFFFFFFFFFF  
FFFFFFFFFFFFFFFFFFFFFFFFFFFFFFFFFFFFFFFFFFFFFFFFFFFFFFFFFFFFFFFFFFFF  
@A00721:190:HGJW7DSXY:4:1510:23457:36918\_1:N:0:TCTGCAAG+GCTGCACT  
ATCGAAGTCTCAGTTATCGCTGCCCGGCCGACGTTTGTGCGCAACTCTCAGAGGTTTACGGCAGAAAA  
ATTTCTCCTGCTTGTAATTCGAGAGAGGACACTATGAAATTAGACCTATCAGATGTCTTGACGACTT  
CGA  
+  
FFFFFFFFFFFFFFFFFFFFFFFFFFFFFFFFFFFFFFFFFFFFFFFFFFFFFFFFFFFFFFFFFFFFFFFFFFFF  
FFFFFFFFFFFFFFFFFFFFFFFFFFFFFFFFFFFFFFFFFFFFFFFFFFFFFFFFFFFFFFFFFFFF,FFFFFFFFFFFF  
FFF  
@A00721:190:HGJW7DSXY:4:2231:19777:8343\_2:N:0:TCTGCAAG+GCTGCACT  
ATATCGAGGCTATCGAGGACGATGAGTATCTTGAAGTTGTTGACGACAAGCCTCAAGAGGGTAGAGGA  
CCACCTGGATCTTCTACTGTCTCTGCCTTCCAAGATTTCTTAGAAGAG  
+  
FFFFFFFFFFFFFFFFFFFFFFFFFFFFFFFFFFFFFFFFFFFFFFFFFFFFFFFFFFFFFFFFFFFFFFFFFFFF:FFFFFFFFFFFF  
FFFFFFFFFFFFFFFFFFFFFFFFFFFFFFFFFFFFFFFFFFFFFFFFFFFFFFFFFFFFFFFFFFFF:FFFFFFF  
@A00721:190:HGJW7DSXY:4:1570:31322:3474\_1:N:0:TCTGCAAG+GCTGCACT  
GGAGGGAGTTCTTGAAGCATCCCGACCTTCTTGTGAAAATTTTGATGCGGTTTCATAAGATTATCA

GTAATCCTGATTCTACTACGGATTCATGGACCTTCCATCCTGTACCTCTTCTGGAGAGACGTATCTCA  
AAG

+

FFFFFFFFF,FFFFFFFFF,FFFFFFFFFFFFFFFFFFFFFFFFFFFFFFFFFFFFFFFFFFFFFFFFF  
FFFFFFFFFFFFFFFFFFFFFFFFFFFFFFFFFFFFFFFFFFFFFFFFFFFFFFFFFFFFFFFFFFFFF  
FFF

@A00721:190:HGJW7DSXY:4:2551:15600:10629\_1:N:0:TCTGCAAG+GCTGCACT  
AGAGGGGCAGCAGCATGACCATAATTGGTATTGACTTTGGTACCACCTTTTCTACTGTCTGTCTCGCC  
TCTTCGAATGAAGTTTTAATGCTTAACAACAATGATAGTGAATTTATACCTACAATCATTGGTTTTTC  
TAA

+

FFFFF:FFFFFFFFFFFFFFFFFFFFFFFF:FFFFFFFFFFFFFFFFFFFFFFFFFFFFFFFFFFFFF  
FFFFFFFFFFFFFFFFFFFFFFFFFFFFFFFFFFFFFFFFFFFFFFFFFFFFFFFFFFFFFFFFFFFFF  
FFF

@A00721:190:HGJW7DSXY:4:2323:2202:13291\_1:N:0:TCTGCAAG+GCTGCACT  
TTATGGATATGATGCTATTACTCATGATGGTTACGGTCAGGGAGGATTCTCAGTTTACAAGGACCTTA  
AGCGATGGATCGGGTTAATTCTAAAACATTACCCGAAAGACGTGCTAAATTAACCATTGTACGAT  
GTC

+

FFFFFFFFFFFFFFFFFFFFFFFFFFFFFFFFFFFFFFFFFFFFFFFFFFFFFFFFFFFFFFFFFFFFF  
FFFFFFFFFFFFFFFFFFFFFFFFFFFFFFFFFFFFFFFFFFFFFFFFFFFFFFFFFFFFFFFFFFFFF:FFFFFFFFFFFFF  
FFF

@A00721:190:HGJW7DSXY:4:1533:8449:21699\_1:N:0:TCTGCAAG+GCTGCACT  
CAAAGATATTTTCATGAAAACACTACAGAGGAACGTACCGGATTACCTGTCTTTTCATATTATGAATGAACC  
TTCGGCCGCTCTCTTTGCTTCGATGTTGGATGTCAAGAAGGGTTCAGAATGGGATTCTACGTAGTTT  
ATG

+

F:FF,FFFF,F:,FFF,,,FF:F:FFFF::FFF:F:F,FFFF:F,F:FFF:FF,FFFF:FFFFFF:F  
,FF,:::FFF,FFFF,:::FFFFFFFFFFFFFF,FFFFFF,,FF:F,F,FFFFFFFF:,FF:FFFFFF  
FFF

@A00721:190:HGJW7DSXY:4:1340:31864:20071\_2:N:0:TCTGCAAG+GCTGCACT  
GGAGTTTTTACGGGATCCGGAATGTTCTGTCTATATTAGGTGAAGCGAAATACGATTTCGAACGTCAA  
CGTTCACCGAGTTTCGTTTCGTACCTTGATGCTGACTTTCGTCAATAT

+

FFFFFFFFFFFFFFF:FFFFFF:FFFFFFFFF:FFFFFF:FFFFFFFFFFFFF:FFFFFFFFFFFFFFFFF  
FFFFFFFFFFFFFFFFFFFF:FFFFFFFFFFFFFFFFFFFF:FFFFFFFFFFFFF

@A00721:190:HGJW7DSXY:4:1240:6126:25786\_1:N:0:TCTGCAAG+GCTGCACT  
AAATGATAACTTCTAATTTACGTTTGCTACTCAGAGCTGGTCTCTCAGCAAAGGGATGCATGGTGT  
ATCTCCTCAGGAGTCCCGCATTTGATAATAATGACGAGACTTTCGTATAATCGCTGCATATTACGG  
ATT

+

FFFFFFFFFFFFFFFFFFFFFFFFFFFFFFFFFFFFFFFFFFFFFFFFFFFFFFFFFFFFFFFFFFFFF  
FFFFFFFFFFFFFFFFFFFFFFFFFFFFFFFFFFFFFFFFFFFFFFFFFFFFFFFFFFFFFFFFFFFFF  
FFF

@A00721:190:HGJW7DSXY:4:2149:17951:15734\_2:N:0:TCTGCAAG+GCTGCACT  
CTAGTTCGAGTGCTGCTTTGGATTACGATGACGTGAGAATAGGTGAAGGGATAGTTTTTACCTCGACC  
AACATTAAGGCGGCGGCGACTAATCTTAAAGTTTCACCCAAAATGAAG

+

FFFFFFFFFFFFFFFFFFFFFFFFFFFFFFFFFFFFFFFF:FFFFFFFFFFFFFFFFF:FFFFFFFFFFFFF  
FFFFFFFFFFFFFFFFFFFFFFFFFFFFFFFFFFFFFFFFFFFFFFFFFFFFFFFFFFFFFFFFFFFFF

@A00721:190:HGJW7DSXY:4:2330:19416:6057\_1:N:0:TCTGCAAG+GCTGCACT  
ATGTCAGAAGAAGCTATTCAAGCTTGTCGTTTAAAGACTGCAGAGGCTGTCAAACAAGCCGAGACTCA  
AGGAGTCCAATCAAAGGTTTTGAATTTAGCTCAACTGGGGAGACGTGCTTAAATGGGTGATAAAAATT  
ATT

+  
FFFFFFFFFFFFFFFFFFFFFFFFFFFFFFFFFFFFFFFF,FFF,FF:FFFFFFFFFFFFFFFF,FFFFFFF:FF  
F:FF:FFFF::FFF:F:FFF,FFFFFF,FFFFFFFFF:F:FFF:FFFFF::F:FFFFFFFFFFFF  
FFF  
@A00721:190:HGJW7DSXY:4:2353:19108:19366\_1:N:0:TCTGCAAG+GCTGCACT  
TAACGATCTCTCGGTCACTTACTCTGTACTTGATCTACGTCGTTTAACTGTCGGAACAACCTTTACTT  
AGAATGACTCTATCTTTTCAGACACTTCTTATATTATTTACAATAGTTAATATCATATTAGTAATACT  
CAC  
+  
FFFFFFFFFFFF,FFFFFFFFFFFFFFFF,FFFFFFFFFFFFFFFFFFFFFFFFFFFFFFFF:F:FFFFFF:FFF  
FFFFFFFFFFFFFFFFFFFFFFFFFFFFFFFFFFFFFFFFFFFFFFFFFFFFFFFFFFFFFFFFFFFFFFFF  
FFF  
@A00721:190:HGJW7DSXY:4:1342:19840:5384\_1:N:0:TCTGCAAG+GCTGCACT  
GGTATAATAGATTTTCGTCTCTACACCAATCTCAACGAGGATAACGCGTGTTCCTGACGTAACGTAA  
TACACGAAGATATCATCCGCAAACGACTCGAAACCGAGACGCCGTAGATCAAAGTCCCTTCTAACTTT  
AGA  
+  
F,F,:F,:,,,FFF,,,::,,,FFFFFF,,,::,,,F,:,:,F,FF,:,,,FFF,:,,,F,:,:,F,,,F:  
,:,,,F,,,,,,,F,,,F,FFFFFFFFFFFFFFFFFFFFFFFFFFFFFFFFFFFFFFFFFFFFFFFF:FF  
FFF  
@A00721:190:HGJW7DSXY:4:2118:21866:29058\_1:N:0:TCTGCAAG+GCTGCACT  
ATGAGGTCAAAGCTCTATTTATTAACGAACCTATTATCCGATTCTTCGAGGGTATCACTACCACTGAT  
CTGCCGACTTTAGTCAAGGAACCTCAATTCCTTCGATGTTTATATTTTCTATAAGGGAAAATAGCAA  
TAA  
+  
FFFFFFFFFFFFFFFFFFFFFFFFFFFFFFFFFFFFFFFFFFFFFFFFFFFFFFFFFFFFFFFFFFFFFFFF  
FFFFFFFFFFFFFFFFFFFFFFFFFFFFFFFFFFFFFFFFFFFFFFFFFFFFFFFFFFFFFFFFFFFFFFFF  
FFF  
@A00721:190:HGJW7DSXY:4:2549:1796:4883\_2:N:0:TCTGCAAG+GCTGCACT  
CAGAACTCTCTCCGATCACCTTGGTGTGATCTCCCGAGGATCTTTTCAATAAGATGTATGATGATAA  
TCTACTATTTTAAATAGTGATATTCAGCGTATACTTGAATACTTTAT  
+  
FFFFFFFFFFFFFFFFFFFFFFFFFFFFFFFFFFFFFFFFFFFFFFFFFFFFFFFFFFFFFFFFFFFFFFFF  
FFFFFFFFFFFFFFFFFFFFFFFFFFFFFFFFFFFFFFFFFFFFFFFFFFFFFFFFFFFFFFFFFFFFFFFF  
@A00721:190:HGJW7DSXY:4:1625:11767:25535\_2:N:0:TCTGCAAG+GCTGCACT  
GGTCTATGATATTTATTTTACTTATACTTTAAATAGCACCGATTATAACTTGACTGTTGATAATATTA  
CAATAGCTCTTTCTCAGAAGATTAGAGAAGTAACCGGTGAACACGTCG  
+  
FFFFFFFFFFFFFF:FFFFFFFFFFFF:FFFFFFF,FFFFFFFFFFFFFFFFFFFFFFFFFFFFFFFFFFFF  
FFFFF:FFFFFFFFFFFFFFFFFFFFFFFFFFFF:FFF,FFFFF:F:FFFFFF  
@A00721:190:HGJW7DSXY:4:2372:16260:5760\_1:N:0:TCTGCAAG+GCTGCACT  
TTACTTTTACCGTTAGAACTGAAAAAGATTCTTTTCGAAAAGAAACCTATAAGTTACAAACGATTCTT  
CGACTATATTAAAGAAATAAAAATACTTCAAGTACCTGAACTTTACATTTTAAATGGTATGGTATAAT  
GTG  
+  
FFFFFFFFFFFFFFFFFFFFFFFFFFFFFFFFFFFFFFFFFFFFFFFFFFFFFFFFFFFFFFFFFFFFFFFF  
FFFFFFFFFFFF,FFFFFFFFFFFFFFFFFFFFFFFFFFFFFFFFFFFFFFFFFFFFFFFFFFFFFFFFFFFF  
FFF  
@A00721:190:HGJW7DSXY:4:2160:9643:25207\_2:N:0:TCTGCAAG+GCTGCACT  
ATATTCTAGTAACCGCTATGTGGCATTACTAGGATTTATCACACTCCTAAATTTGATAGCAATTTAT  
GTTTTAAATGCTAGGAAAATTTTAGAAAACTCCATTGTATAGTTCAA  
+  
FFF,FFFFFFFFFFFFFFFFFFFFFFFF::FFFFFFFFFFFF:FFFFFFFFFFFFFFFF,FFF:FFF:FF,FF:F:  
FFFFFFFFFF:FF,F:FFFFFFFFFFFFFFFFFFFFFFFF:FFFFFFFFFFFF:F

@A00721:190:HGJW7DSXY:4:2608:17951:24627\_1:N:0:TCTGCAAG+GCTGCACT  
TATCGCCTTTATTGAAAATTGTATAAGAGTTAATTGCTTACACAAAAGTGACGCGCGAAGGAATCTTA  
ATTGATTGAAGCTAGGCGTTGGGGAGAATGAACTGCCGCTCCCGGAAGAAACGATCTATTTACAGAG  
TA

+

FFF,::,FFF:FF,F::FFFFFFFFFFFF,FFFFFFFF:FFFF::FF:FFFF:FFFFFFFFFFFFFFFFFFFF  
FFFF:FFF:FF:FFFFFFFFFFFFFFFFFFFFFFFFFFFF:FFFF:FFFFFFFFFFFFFFFFFFFFFFFFFFFF  
FF

@A00721:190:HGJW7DSXY:4:2566:19036:15702\_2:N:0:TCTGCAAG+GCTGCACT  
TCACATTCACCACTCCCATACCAATCAATGATGTGACTATACAGTTCGGCCATTTCAAGAGTGGTCAA  
TACGTCGTGGGAGGTACTGAAGCCTTCCCCTCCGCTGGCACGAAGAAC

+

FFFFFFFFFFFFFFFFFFFFFFFFFFFFFFFFFFFFFFFFFFFFFFFFFFFFFFFFFFFFFFFFFFFFFFFFFFFF  
FFFFFFFFFFFFFFFFFFFFFFFFFFFFFFFFFFFFFFFFFFFFFFFFFFFFFFFFFFFFFFFFFFFFFFFFFFFF

@A00721:190:HGJW7DSXY:4:2214:12536:35728\_1:N:0:TCTGCAAG+GCTGCACT  
CTCTAAGTCTACCAGGAAGAGGGGAAATGTCCCCAAAAGTGAAGAATAAAGGGAAAGGTCCATCAG  
GACCTAAGAAGGGGAAATTACCCCTAATTCTGAAGGAAGATCTCCACCATCTGGGGTTGGGAATAAG  
AAA

+

FFFFFFFF::FFFFFFFFFF:FF:FFFFFFFF:FFFFFFFFFFFFFFFFFFFFFFFFFFFFFFFFFFFFFFFFFFFF  
FFFFFFFFFFFFFFFFFFFFFFFFFFFFFFFFFFFFFFFFFFFFFFFFFFFFFFFFFFFFFFFFFFFFFFFFFFFF  
FFF

@A00721:190:HGJW7DSXY:4:2265:8675:4335\_1:N:0:TCTGCAAG+GCTGCACT  
TACGAAGTCGCTGAAGGCGGCTTGGGTCATTAAGGGTAGCTGTAAAGTTGCGCCTGCCGACCCCATCT  
TTGAGACCAAGACTCTCTACAGTAGGTTCTGTCCTACTATGAGCAAATCTGTTGAATTCGTCACTGAG  
GAC

+

FFFFFFFFFFFFFFFFFFFFFFFFFFFFFFFFFFFFFFFFFFFFFFFFFFFFFFFFFFFFFFFFFFFFFFFFFFFF:  
FFFFFFFFF:FFFFFFFFFFFFFFFFFFFFFFFFFFFFFFFFFFFFFFFFFFFFFFFFFFFFFFFFFFFFFFFFFFFF:  
FFF

@A00721:190:HGJW7DSXY:4:2263:29306:3458\_2:N:0:TCTGCAAG+GCTGCACT  
CTACTGGCGACAACTGAGAGCAGTCGCTGGGGAAAGAGAATAGCGTGGGTTGAAGCCGACGCTTCG  
AGCTTGAGTGTGACGAGGCCGGTGACGTTTTTGTCAACGGCGTTTGGA

+

F,FF,F,,,FFFFF:F::F:,FFF,F:::F,F::F,F,,F,F,:FF:,F:F,F,F,FFF:FFFF,FF  
FFF:FFFFFFFF,FFF,:FFFFFFFFF:,FFF,F:F:FF,FF:FF:FF

@A00721:190:HGJW7DSXY:4:2129:19099:31469\_1:N:0:TCTGCAAG+GCTGCACT  
CCTATGGAGTCTTGAAGGACTTAGGTTGGCATATTTATGCCGACGATAATAAGCATGTCAACCTTAAG  
CACCGAGGTAAGCTCGGGACTTACAAGAGAGAGTGTGAGAGAGTCGCTCTCACTATTTTTGCCAGAA  
TGC

+

FFFFFFFFFFFFFFFFFFFFFFFFFFFFFFFFFFFFFFFFFFFFFFFFFFFFFFFFFFFFFFFFFFFFFFFFFFFF  
FFFFFFFFFFFFFFFFFFFFFFFFFFFFFFFFFFFFFFFFFFFFFFFFFFFFFFFFFFFFFFFFFFFFFFFFFFFF:  
FFF

@A00721:190:HGJW7DSXY:4:1608:8296:23375\_1:N:0:TCTGCAAG+GCTGCACT  
AGGTGTCAAGGTCTTCTTCATGCTGATCTTTCAGGACCTAATCACATCATGATTGATAGTTACGGCT  
CGTATCGAGTTGGAGGGAGGAAGTTCTCCGAAATTAAAGACGGGGGATTAAGAGTCCAGCTGTAAC  
GTC

+

FFFFF:FF:FFF:FFFFFFFFFFFFFFFFFFFFFFFFFFFFFFFFFFFFFFFFFFFFFFFFFFFFFFFFFFFF:  
FFFFFFFFFFFFFFFFFFFFFFFFFFFFFFFFFFFFFFFFFFFFFFFFFFFFFFFFFFFFFFFFFFFFFFFFFFFF  
FFF

@A00721:190:HGJW7DSXY:4:1611:28357:8202\_2:N:0:TCTGCAAG+GCTGCACT  
AGGCTCTAGATAAGATCTCACCACTGGATAAGGCAAGTGTAGAGTACAGAAGATGATTACTAATGAT

TATTTTAAGAAGGGGTAACTCTTCCTAAGTTGGATGAGGGAGGTTGT

+

FF:F,,::,F,,F,F:,FF,FFF,,FF,FF,FF,::FF,FFF:,FF,:FF,FF,F,,,,,::,F, FFFF,,F:,FF,:F,,,F,FFF:,F,,,F,:FF:FF,,FF::F,F

@A00721:190:HGJW7DSXY:4:1607:19316:7263\_1:N:0:TCTGCAAG+GCTGCACT  
ACTCAACTACTCCGATCAGATCCGGATGGTTTGATTGGTATGGACTACTCGACTTTTGATCTGGAGTT  
GTCTAGGGTCATGGCAGATACTACCGATAAGGTGAAAAATATGCAGGTCAAAGATTCTGTAGCTCTGA  
GGG

+

FFFFFFFFFFFFFFFFFFFFF:FFFFFF,FFFFFFFF:FFFFFFFFFFFFFFFFFFFFFFFFFFFFFFFF  
FFFFFFFFFFFFFFFFFFFFFFFFFFFFFFFFFFFFFFFFFFFFFFFFFFFFFFFFFFFFFFFFFFFFFFFF  
FFF

@A00721:190:HGJW7DSXY:4:1129:21404:6872\_1:N:0:TCTGCAAG+GCTGCACT  
CCAAGTTAAGAAGGAGGCTGATCATGGAGTCTTTGTACCTTCTGTCAAACCTTCGAGGTTTCTAGCTACGA  
GAGTTGATCCCGTAGTAGGTGATCTTGACGTCGATTCTTTGTATAGGGAGTGTGAGAAGACAACGAAT  
CTT

+

F:F,FFFF,::,::,:::F,FF,FFF,,FF,FFFF,F,FF,FFF:FF,FFFF:F,F:F,FF:F::FF  
,,,F::FF,:FFFFFFFFFFFF:FFFF,FF,FFFFFFFFFFFF::FFFFFFFFF:F:, :FFFF::,FF  
FFF

@A00721:190:HGJW7DSXY:4:1610:28872:16611\_2:N:0:TCTGCAAG+GCTGCACT  
ATCCTGATGACATTATTTCAACGGATACCGATCTCAGTTCTACCACAGAAACCGTCTCAGGAAGTCTC  
TCCACTGATTCGGAATTAGAGAAAGACGACCTTCTTGTGGGACTGAG

+

FFFFFFFFFFFFFFFFF:FFFFFFFFFFFF,FFFFFFFFFFFFFFFFFFFFFFFFFFFFFFFFFFFFF:FFFFF  
FF:FFFFFFFFFFFFFFFFFFFFFFFFFFFFFFFFFFFFFFFFFFFFFFFFFFFFFFFFFFFFF

@A00721:190:HGJW7DSXY:4:2316:5412:19852\_1:N:0:TCTGCAAG+GCTGCACT  
TTCAGGGTGCCCTGATGAGGACGTTGAAAGGGATAATTTCAACTCTGAGACTTCTAAGAGTGTTTCAA  
AAGACCAGAAACGTAACAAGAAGAATAAAGGTAGGAAGGGGAGAAAACAGAAACGTAACAAGAAGAAT  
AAA

+

FFFFFFFFF:F:FFFFFFFFF,FFFFF:FF:F:FFFFFFFFFFFFFFFFFFFFF:FFFFFFFFFFFFFFFFF  
FFFFFFFFFFFFF:FFFFFFFFFFFFF:FFFFFFFFFFFFFFFFFFFFFFFFFFFFFFFFFFFFFFFFFFFFF  
FFF

@A00721:190:HGJW7DSXY:4:1549:6027:27305\_1:N:0:TCTGCAAG+GCTGCACT  
CAACATCAACGACATCATTCTTGATGAGTGTCTTCTTATCGAAGTCTCAGTTATCGCTGCCCGGCCG  
ACGTTTGTGCGAACTCTCAGAGGTTTACGGCAGAAAAATTTCTCCTGCTTGTAAATTCGAGAGAGGAC  
ACT

+

FFFFFFFFFFFFFFFFFFFFFFFFFFFFFFFFFFFFFFFFFFFFFFFFFFFFFFFFFFFFF:FFFFFFFFFFFFFFFFF  
FFFFFFFFFFFFFFFFFFFFFFFFFFFFFFFFFFFFFFFFFFFFFFFFFFFFFFFFFFFFFFFFFFFFFFFFF  
FFF

@A00721:190:HGJW7DSXY:4:2530:4327:36573\_2:N:0:TCTGCAAG+GCTGCACT  
ATATCGAGGCTATCGAGGACGATGAGTATCTTGAAGTTGTTGACGACAAGCCTCAAGAGGGTAGAGGA  
CCACCTGGATCTTCTACTGTCTCTGCCTTCCAAGATTTCTTAGAAGAG

+

FFFFFFFFFFFFFFFFFFFFF::FFFFFFFFFFFFFFFFFFFFFFFFFFFFFFFFFFFFFFFFFFFFF  
FFFFFFFFFFFFFFFFFFFFF:FFFFFFFFFFFFFFFFFFFFFFFFFFFFFFFFFFFFF

@A00721:190:HGJW7DSXY:4:2106:29812:7122\_1:N:0:TCTGCAAG+GCTGCACT  
GGAGGGAGTTCTTGAAGCATCCCGACCTTTCCTTGTGAAAATTTTGATGCGGTTTCATAAGATTATCA  
GTAATCCTGATTCTACTACGATTTCATGGACCTTCATCCTGTACCTCTTCTGGAGAGACGTATCTCA  
AAG

+

:FFF:FFFFFFFFFFFFFFFFFFFFF:F:F:FF,:F:FF:,FFFFFF:FFFFFFFFFFFFFFFFFFFFF



FFFFFFFFFFFFFFFFFFFFFFFFFFFFFFFFFFFFFFFFFFFFFFFFFFFFFFFFFFFFFFFFFFFFFFFF  
F:F

@A00721:190:HGJW7DSXY:4:2633:27028:12477\_1:N:0:TCTGCAAG+GCTGCACT  
AGAGGGGCAGCAGCATGACCATAATTGGTATTGACTTTGGTACCACCTTTTCTACTGTCTGTCTCGCC  
TCTTCGAATGAAGTTTTAATGCTTAACAACAATGATAGTGAATTTATACCTACAATCATTGGTTTTTC  
TAA

+

FFFFFFFFFFFFFFFFFFFFFFFFFFFFFFFFFFFFFFFFFFFFFFFFFFFFFFFFFFFFFFFFFFFFFFFF  
FFFFFFFFFFFFFFFFFFFFFFFFFFFFFFFFFFFFFFFFFFFFFFFFFFFFFFFFFFFFFFFFFFFFFFFF  
FFF

@A00721:190:HGJW7DSXY:4:2404:25979:22153\_1:N:0:TCTGCAAG+GCTGCACT  
TTATGGATATGATGCTATTACTCATGATGGTTACGGTCAGGGAGGATTCTCAGTTTACAAGGACCTTA  
AGCGATGGATCGGGGTTAATTCTAAAACATTACCCGAAAGACGTGCTAAATTTAAACCATTGTACGAT  
GTC

+

FFFFFFFFFFFFFFFFFFFFFFFFFFFFFFFFFFFFFFFFFFFFFFFFFFFFFFFFFFFFFFFFFFFFFFFF  
FFFFFFFFFFFFFFFFFFFFFFFFFFFFFFFFFFFFFFFFFFFFFFFFFFFFFFFFFFFFFFFFFFFFFFFF  
FFF

@A00721:190:HGJW7DSXY:4:1537:15275:21559\_1:N:0:TCTGCAAG+GCTGCACT  
CAAAGATATTTTCATGAAAACACTACAGAGGAACGTACCGGATTACCTGTCTTTTCATATTATGAATGAACC  
TTCGGCCGCTCTCTTTGCTTCGATGTTGGATGTCAAGAAGGGTTCAGAATGGGATTCTACGTAGTTT  
ATG

+

FFFFFFFFFFFFFFFFFFFFFFFFFFFFFFFFFFFFFFFFFFFFFFFFFFFFFFFFFFFFFFFFFFFFFFFF  
FFFFFFFFFFFFFFFFFFFFFFFFFFFFFFFFFFFFFFFFFFFFFFFFFFFFFFFFFFFFFFFFFFFFFFFF  
FFF

@A00721:190:HGJW7DSXY:4:1410:5186:15890\_2:N:0:TCTGCAAG+GCTGCACT  
GGAGTTTTTACGGGATCCGGAATGTTCTGTCTATATTAGGTGAAGCGAAATACGATTTTCAACGTCAA  
CGTTCACCGAGTTTCGTTTCGTACCTTGATGCTGACTTTCGTCAATAT

+

FFFFFFFFFFFFFFFFF:FFFFFFFF:FFFFFFFFFFFFFFFFFFFFFFFFFFFFFFFFFFFFFFFFFFFF  
FF,FFFFFFFFFFFFFFFFFFFFFFFFFFFFFFFFFFFFFFFFFFFFFFFFFFFFFFFF

@A00721:190:HGJW7DSXY:4:1347:20871:16971\_2:N:0:TCTGCAAG+GCTGCACT  
TGATAACTTCTAATTTACGTTTGCTACTCAGAGCTGGTCTCTCAGCAAAGGGATGCATGGTGTATC  
TCCTCAGGAGTCCCGGCATTTGATAATAATGACGAGACTTTCGTCATA

+

FF:FFFFFFFFFFFFFFFFFFFFFFFFFFFFFFFFFFFFFFFFFFFFFFFFFFFFFFFFFFFFFFFF:FF:FFF:FF  
FFFFFFFFFFFFFFFFFFFFFFFFFFFFFFFFFFFFFFFFFFFFFFFFFFFFFFFF

@A00721:190:HGJW7DSXY:4:2149:18521:14497\_2:N:0:TCTGCAAG+GCTGCACT  
CTAGTTCGAGTGCTGCTTTGGATTACGATGACGTGAGAATAGGTGAAGGGATAGTTTTTACCTCGACC  
AACATTAAGGCGGCGGCGACTAATCTTAAAGCTTCACCCAAAATGAAG

+

FFFFFFFFFFFFFF:FFFFFFFFFFFFFFFFFFFFFFFFFFFFFFFFFFFFFFFFFFFFFFFF:FFFFFFFFFFFFFFFF  
FFFFFFFFFFFFFFFFFFFFFFFFFFFFFFFFFFFFFFFF:FFF:FFFFFFFFFFFFFFFF

@A00721:190:HGJW7DSXY:4:2425:7591:9627\_1:N:0:TCTGCAAG+GCTGCACT  
ATGTCAGAAGAAGCTATTCAAGCTTGTCGTTTAAAGACTGCAGAGGCTGTCAAACAAGCCCAGACTCA  
AGGAGTCCAATCAAAGGTTTTGAATTTAGCTCAACTGGGGAGACGTGCTTAAATGGGTGATAAAAATT  
ATT

+

FFFFFFFFFFFFFFFFFFFFFFFFFFFFFFFFFFFFFFFF,F:FFFF,:FF:FFFFFFFF,FFFF,FFFF  
F:FF,FFFF:FFFF:FFFF,:FFFF:FFFF:FFFFFFFF:FFFFFFFF,FF:FFFFFFFF,F  
FFF

@A00721:190:HGJW7DSXY:4:2405:11424:32362\_1:N:0:TCTGCAAG+GCTGCACT  
TAACGATCTCTCGGTCATTTACTCTGTACTTGATCTACGTCGTTTAACTGTCGGAACAACCTTTACTT

AGAATGACTCTATCTTTTCAGACACTTCTTATATTATTTACAATAGTTAATATCATATTAGTAATACT  
CAC

```
FFF,:FFFFFFFFFFFF,FFF,FF:FFFF:FF,:FFFFFFFF:FFFF,FFFFFFFFFFFF,,F:,FF:FFFF
FFFF:FFFF:FFFFFFFFFFFF:FF::FFFFFFFFFFFF::FFFFFFFF:FFFF:FFFF:FFFFFFFFFFFFF,,F
FFF
```

 $+$ 

@A00721:190:HGJW7DSXY:4:2118:21902:29027\_1:N:0:TCTGCAAG+GCTGCACT  
ATGAGGTCAAAGCTCTATTTATTAACGAACATTATCCGATTCTTCGAGGGTATCACTACCACTGAT  
CTGCCGACTTTAGTCAAGGAACTTCAATTCCTTCGATGTTTATATTTTTCTATAAGGGAAAATAGCAA  
TAA

[illegible] $+$ 

@A00721:190:HGJW7DSXY:4:2134:18873:28009\_2:N:0:TCTGCAAG+GCTGCACT  
GGTCTATGATATTTATTTACTTATACTTTAAATAGCACCGATTATAACTTGACTGTTGATAATATTA  
CAATAGCTCTTTCTCAGAAGATTAGAGAAGTAACCGGTGAACACGTCG

```
FF:FFFF:FFFFFFFF:FF:FFFF:FFFF:FF::FF:FFFF:FFFF:FFFFFFFF:FFFF:FF:
FFF:F::FFFFFFFFFFFFFFFFFFFF:F,FFFFFF:,F::FFFFFFFF
```

+

@A00721:190:HGJW7DSXY:4:2366:13810:32675\_2:N:0:TCTGCAAG+GCTGCACT  
ATATTCTAGTAACCGCTATGTGGGCATTACTAGGATTTATCACACTCCTAAATTTGATAGCAATTTAT  
GTTTTAAATGCTAGGAAAAATTTTAGAAAACTCCATTGTATAGTTCAA

[illegible]

+



GTCTAGGGTCATGGCAGATACTACCGATAAGGTGAAAAATATGCAGGTCAAAGATTCTGTAGCTCTGA  
GGG

+

FFFFFFFFFFFFFFFFFFFFFFFFFFFFFFFFFFFFFFFFFFFFFFFFFFFFFFFFFFFFFFFFFFFFFFFF  
FFFFFFFFFFFFFFFFFFFFFFFFFFFFFFFFFFFFFFFFFFFFFFFFFFFFFFFFFFFFFFFFFFFFFFFF  
FFF

@A00721:190:HGJW7DSXY:4:1330:13494:29089\_1:N:0:TCTGCAAG+GCTGCACT  
CCAAGTTAAGAAGGAGGCTGATCATGGAGTCTTTGTACCTTCTGTCAAACCTCGAGGTTTCTGCTACGA  
GAGGTGATCCCGTAGTAGGTGATCTTGACGTCGATTCTTTGTATAGGGAGTGTGAGAAGACAACGAAT  
CTT

+

:FFFFFFFF:F:FFFFFF,FFFFFFFF:FFFFFFFF:FFFF:FFFFFFFF:FFFFFFFF  
FF:FFFFFFFFFFFFFFFFFFFFFFFFFFFFFFFFFFFFFFFFFFFFFFFFFFFFFFFFFFFFFFFF  
FFF

@A00721:190:HGJW7DSXY:4:1616:27805:18991\_2:N:0:TCTGCAAG+GCTGCACT  
ATCCTGATGACATTATTTCAACGGATAACGATCTCAGTTCTACCACAGAAACCGTCTCAGGAACGTCT  
TCCACTGATTCGGAATTAGAGAAAGACGACCTTCTTGTTGGGGACTGAG

+

FFFFFFFFFFFFFFFF:FFFFFFFFFFFFFFFFFFFFFFFFFFFFFFFFFFFFFFFFFFFFFFFF  
FFFFFFFFFFFFFFFFFFFFFFFFFFFFFFFF:FFFFFFFF

@A00721:190:HGJW7DSXY:4:1369:16432:21465\_1:N:0:TCTGCAAG+GCTGCACT  
CAGGGTGCCCTGATGAGGACGTTGAAAGGGATAATTTCAACTCTGAGACTTCTAAGAGTGTTCAAAA  
GACCAGAAACGTAACAAGAAGAATAAAGGTAGGAAGGGGAGAAAACAGAACAGCGAGCGGTTGAAGA  
GAA

+

FFFFFFFFFFFFFFFF,FFFFFFFF:FFFFFFFFFFFFFFFFFFFFFFFFFFFFFFFF  
FFFFFFFFFFFFFFFFFFFFFFFFFFFFFFFFFFFFFFFFFFFFFFFFFFFFFFFFFFFFFFFF  
FFF

@A00721:190:HGJW7DSXY:4:2258:11080:31203\_1:N:0:TCTGCAAG+GCTGCACT  
CAACATCAACGACATCATTCTTGATGAGTGTGCTTCTTATCGAAGTCTCAGTTATCGCTGCCCGCCG  
ACGTTTGTGCGAACTCTCAGAGTTTACGGCAGAAAAATTTCTCCTGCTTGTAAATTCGAGAGAGGAC  
ACT

+

FFFFFFFFFFFFFFFF:FFFFFFFFFFFFFFFFFFFFFFFFFFFFFFFFFFFFFFFF  
FFFF:FFFFFFFFFFFFFFFFFFFFFFFF:FFFFFFFFFFFFFFFF  
FFF

@A00721:190:HGJW7DSXY:4:1311:11577:7357\_1:N:0:TCTGCAAG+GCTGCACT  
ATCGAGGACGATGAGTATCTTGAAGTTGTTGACGACAAGCCTCAAGAGGGTAGAGGACCACCTGGATC  
TTCTACTGTCTCTGCCTTCCAAGATTTCTTAGAAGAGGTTATTCCTGGAACCACCTTAACGTCACTCG  
GTA

+

FFFFFFF:FFFFFFFFFFFFFFFFFFFFFFFFFFFFFFFFFFFFFFFF  
FFFFFFFFFFFFFFFFFFFFFFFFFFFFFFFFFFFFFFFF  
FFF

@A00721:190:HGJW7DSXY:4:2116:25030:29496\_1:N:0:TCTGCAAG+GCTGCACT  
GGAGGGAGTTCTTGAAGCATCCCGACCTTCTTGTGAAAATTTTGATGCGGTTTCATAAGATTATCA  
GTAATCCTGATTCTACTACGGATTCATGGACCTTCATCCTGTACCTCTTCTGGAGAGACGTATCTCA  
AAG

+

FFFF:FFFFFFFFFFFFFFFF:FFFFFFFFFFFFFFFFFFFFFFFF  
FFFFFFFFFFFFFFFFFFFFFFFFFFFFFFFFFFFFFFFF  
FFF

@A00721:190:HGJW7DSXY:4:2652:18421:30138\_2:N:0:TCTGCAAG+GCTGCACT  
GGCAGCAGCATGACCATAATTGGTATTGACTTTGGTACCACCTTTCTACTGTCTGTCTGCCTCTTC

+

@A00721:190:HGJW7DSXY:4:2435:23999:4069\_1:N:0:TCTGCAAG+GCTGCACT  
TTATGGATATGATGCTATTACTCATGATGGTTACGGTCAGGGAGGATTCTCAGTTTACAAGGACCTTA  
AGCGATGGATCGGGGTTAATTCTAAAACATTACCCGAAAGACGTGCTAAATTA AAAACCATTTGTACGAT  
GTC

+

@A00721:190:HGJW7DSXY:4:1554:24939:34757\_1:N:0:TCTGCAAG+GCTGCACT  
CAAAGATATTTTCATGAAACTACAGAGGAACGTACCGGATTACCTGTCTTTCATATTATGAATGAACC  
TTCGGCCGCTCTCTTTGCTTCGATGTTGGATGTCAAGAAGGGTTTCTAGATGGGATTCTACGTAGTTT  
ATG

+

@A00721:190:HGJW7DSXY:4:1608:30608:35744\_2:N:0:TCTGCAAG+GCTGCACT  
GGAGTTTTTACGGGATCCGGAATGTTCTGTCTATATTAGGTGAAGCGAAATACGATTTCAACGTCAA  
CGTTCACCGAGTTTCGTTTCGTACCTTGATGCTGACTTTCGTCAATAT

+

@A00721:190:HGJW7DSXY:4:1532:9118:22451\_2:N:0:TCTGCAAG+GCTGCACT  
TGATAACTTCTAATTTACGTTTGCTACTCAGAGCTGGTCCTCTCAGCAAAGGGATGCATGGTGTTC  
TCCTCAGGAGTCCCGGCATTTGATAATAATGACGAGACTTTTCGTCATA

+

@A00721:190:HGJW7DSXY:4:2149:18539:14465\_2:N:0:TCTGCAAG+GCTGCACT  
CTAGTTCGAGTGCTGCTTTGGATTACGATGACGTGAGAATAGGTGAAGGGATAGTTTTTACCTCGACC  
AACATTAAGGCGGCGGCGACTAATCTTAAAGCTTCACCCAAAATGAAG

+

@A00721:190:HGJW7DSXY:4:2450:12789:20384\_1:N:0:TCTGCAAG+GCTGCACT  
ATGTCAGAAGAAGCTATTCAAGCTTGTCGTTTAAAGACTGCAGAGGCTGTCAAACAAGCCCAGACTCA  
AGGGGTCCAATCAAAGGTTTTGAATTTAGCTCAACTGGGGAGACGTGCTTAAATGGGTGATAAAAATT  
ATT

+

@A00721:190:HGJW7DSXY:4:2453:30716:14544\_1:N:0:TCTGCAAG+GCTGCACT  
TAACGATCTCTCGGTCATTTACTCTGTACTTGATCTACGTCGTTTAACTGTCGGAACAACCTTTACTT  
AGAATGACTCTATCTTTTCAGACACTTCTTATATTATTTACAATAGTTAATATCATATTAGTAATACT  
CAC

+

[illegible]

@A00721:190:HGJW7DSXY:4:1674:28221:8218\_1:N:0:TCTGCAAG+GCTGCACT  
GGTAGAATAGATTTAGTCTCTACACCCATCTCAACGAGGATAAAGCGAGTTTTCCGTCCTGAACGTAA  
TACACGAAGAGATCATCCGCAAACGACTCGAAACGAGACGCCGTAGATCAAAGTCCCTTCTAACTTT  
AGA

+

F,F,,F,F:,,:FFF:,,:,,FFFFFF,:F::FFFF:F,FFFF::,,,FFFFFF,::FF:F,,,FF:  
F:F::,F,,:FFFF:,F:::F,:FFFFFFFFFFFFFFFFFFFFFFFFFFFFFFFFFFFFFFFFFFFFF  
FFF

@A00721:190:HGJW7DSXY:4:2135:24433:21104\_1:N:0:TCTGCAAG+GCTGCACT  
ATGAGGTCAAAGCTCTATTTATTAACGAACATTATCCGATTCTTCGAGGGTATCACTACCACTGAT  
CTGCCGACTTTAGTCAAGGAACCTCAATTCCTTCGATGTTTATATTTTTCTATAAGGGAAATAGCAA  
TAA

+

FFFFFFFFFFFFFFFFFFFFFFFFFFFFFFFFFFFFFFFFFFFFFFFFFFFFFFFFFFFFFFFFFFFFFFFFF  
FFFFFFFFFFFFFFFFFFFFFFFFFFFFFFFFFFFFFFFFFFFFFFFFFFFFFFFFFFFFFFFFFFFFFFFFF  
FFF

@A00721:190:HGJW7DSXY:4:1237:22245:19006\_1:N:0:TCTGCAAG+GCTGCACT  
GAACTCTCTCCGATCACCTTGGTGTGATCTCCCGGAGGATCTTTTCAATAAGATGTATGATGATAATC  
TACTATTTTTAAATAGTGATATTCAGCGTATACTTGAATACTTTATCAAAGATTTGGCTTGGTCTATT  
TAC

+

FFFFFFFFFFFFFFFFFFFFFFFFFFFFFFFFFFFFFFFFFFFFFFFFFFFFFFFFFFFFFFFFFFFFFFFFF  
FFFFFFFFFFFFFFFFFFFFFFFFFFFFFFFFFFFFFFFFFFFFFFFFFFFFFFFFFFFFFFFFFFFFFFFFF  
FFF

@A00721:190:HGJW7DSXY:4:2172:12029:28714\_2:N:0:TCTGCAAG+GCTGCACT  
GGTCTATGATATTTATTTTACTTATACTTTAAATAGCACCGATTATAACTTGACTGTTGATAATATTA  
CAATAGCTCTTTCTCAGAAGATTAGAGAAGTAACCGGTGAACACGTCG

+

FFF,FFF:FFF:F:FFF:,FFFFFFFFFFFFFF:FFF:,FF:,FFFFFFFF,F:FF::FF,FFFFFFFF  
:FF:FF,FF,FF,FF::FF,,:FF,FFFFFFFF:,FFFFFFFF,F,

@A00721:190:HGJW7DSXY:4:2458:5059:35931\_1:N:0:TCTGCAAG+GCTGCACT  
TTACTTTTACCGTTAGAACTGAAAAAGATTCTTTTCGAAAAGAAACCTATAAGTTACAAACGATTCTT  
CGACTATATTAAAGAAATAAAAATACTTCAAGTACCTGAACTTTACATTTTTAATGGTATGGTATAAT  
GTG

+

FFF:FFFFFFFFFFFFFFFFFFFFFFFFFFFFFFFFFFFFFFFFFFFFFFFFFFFFFFFFFFFFFFFFF  
FFFFFFFFFFFFFFFFFFFFFFFFFFFFFFFFFFFFFFFFFFFFFFFFFFFFFFFFFFFFFFFFFFFFFFFFF  
FFF

@A00721:190:HGJW7DSXY:4:2550:1235:25144\_2:N:0:TCTGCAAG+GCTGCACT  
ATATTCTAGTAACCGCTATGTGGGCATTACTAGGATTTATCACACTCCTAAATTTGATAGCAATTTAT  
GTTTTAAATGCTAGGAAAATTTTAGAAAACTCCATTGTATAGTTCAA

+

FFFFFFFFFFFFFFFFFFFFFF:FF:FFFFFFFFFFFFFFFFFFFFFFFFFFFFFFFFFFFFFFFFFFFFF  
FFFFFFFFFFFFFFFFFFFFFF,FFFFFFFFFFFFFFFFFFFFFF:F:FFFFFFF,

@A00721:190:HGJW7DSXY:4:1224:3794:13385\_1:N:0:TCTGCAAG+GCTGCACT  
TATCGCCTTTATTGAAAATTGTATAAGAGTTAATTGCTTACACAAAAGTGACGCGCAAGGAATCTTA  
ATTGATTGAAGCTAGGCGTTGGGGAGAATGAACTGCCGCTCCCGGAAGAAACGATCTATTTACAGAG  
TAT

+

FFFFF,FFFFF:FFFFFFFFFFFFFFFFFFFFFFFFFFFFFFFFFFFFFFFFFFFFFFFFFFFFFFFFF  
FFFFFFFFFFFFFFFFFFFFFFFFFFFFFFFFFFFFFFFFFFFFFFFFFFFFFFFFFFFFFFFFFFFFFFFFF  
FFF

@A00721:190:HGJW7DSXY:4:1303:16975:35243\_2:N:0:TCTGCAAG+GCTGCACT  
CATTCACCACTCCCATACCAATCAATGATGTGACTATACAGTTCGGCCATTCAAGAGTGGTCAATAC

+

@A00721:190:HGJW7DSXY:4:2362:3323:36683\_1:N:0:TCTGCAAG+GCTGCACT  
CTCTAAGTCTACCAGGAAGAGGGGAAATGTCCCCAAACTGAGAAGAATAAAGGGAAAGGTCCATCAG  
GACCTAAGAAGGGGAAATTACCCCTAATTCTGAAGGAAGATCTCCACCATCTGGGGTTGGGAATAAG  
AAA

+

@A00721:190:HGJW7DSXY:4:2126:27227:16611\_1:N:0:TCTGCAAG+GCTGCACT  
CGAAGTCGCTGAAGGCGGCTTGGGTCATTAAGGGTAGCTGTAAAGTTGCGCCTGCCGACCCCATCTTT  
GAGACCAAGACTCTCTACAGTAGGTTCTGTCCTACTATGAGCAAATCTGTTGAATTCGTCACCTGAGGA  
CGA

+

@A00721:190:HGJW7DSXY:4:2551:3694:6950\_2:N:0:TCTGCAAG+GCTGCACT  
CTACTGGCGACAACTGAGAGCAGTCGCTGGGGAAAGAGAATTGCGTGGGTTGAAGCCGACGCTTCG  
AGCTTGAGTGTGACGAGGCCGGTGACGTTTTTGTCAACGGCGTTTGA

+

@A00721:190:HGJW7DSXY:4:2445:32054:2738\_1:N:0:TCTGCAAG+GCTGCACT  
CCTATGGAGTCTTGAAGGACTTAGGTTGGCATATTTATGCCGACGATAATAAGCATGTCAACCCTTAAG  
CACCGAGGTAAGCTCGGGACTTACAAGAGAGAGTGTGAGAGAGTGCCTCTCACTATTTTTGCCAGAA  
TGC

+

@A00721:190:HGJW7DSXY:4:2153:29794:35305\_1:N:0:TCTGCAAG+GCTGCACT  
AGGTGTCAAGGGTCTTCTTCATGCTGATCTTTCAGGACCTAATCACATCATGATTGATAGTTACGGCT  
CGTATCGAGTTGGAGGGAGGAAGTTCTCCGAAATTAAGACGGGGGGATTAAGAGTCCAGCTGTAAC  
GTC

+

@A00721:190:HGJW7DSXY:4:2202:14579:25895\_2:N:0:TCTGCAAG+GCTGCACT  
AGGCTCTAGAGAAGATCTCACCACTGGAGAAGGCAAGTGGAGAGTCCAGAAGTTGATGAAGAAGGAT  
TATTTGAAGCAGGGGTTACCACTTCCTAAGGTGGATGAGGGAGGTTGT

+

@A00721:190:HGJW7DSXY:4:2328:3296:8641\_1:N:0:TCTGCAAG+GCTGCACT  
ACTCAACTACTCCGATCAGATCCGGATGGTTTGATTGGTATGGACTACTCGACTTTTGATCTGGAGTT  
GTCTAGGGTCATGGCAGATACTACCGATAAGGTGAAAAATATGCAGGTCAAAGATTCTGTAGCTCTGA  
GGG

+

[illegible]

FFF:FFFF,FFF:FFFF,F,FFF:FFFFFFFFFFFF:F,FFFFFFFF,FFFFF:FFFFFFFFF::FFF  
FFF

@A00721:190:HGJW7DSXY:4:1369:3504:20149\_1:N:0:TCTGCAAG+GCTGCACT  
CCAAGTTAAGAAGGAGGCTGATCATGGAGTCTTTGTACCTTCTGTCAAACCTTCGAGGTTTCAGCTACGA  
GAGGTGATCCCGTAGTAGGTGATCTTGACGTCGATTCTTTGTATAGGGAGTGTGAGAAGACAACGAAT  
CTT

+

FF:FFF:FFF::FFFFFFFFFFFFFFFFF::FFFFFFFFFFFFFFFFF:FFFFFFFFFFFFFFFFF  
FFFFFFFFFFFFFFFFFFFFFFFFFFFFFFFFFFFFFFFFFFFFFFFFFFFFFFFFFFFFFFFFF:FFFFFFFF  
FFF

@A00721:190:HGJW7DSXY:4:2304:24867:18818\_2:N:0:TCTGCAAG+GCTGCACT  
ATCCTGATGACATTATTTCAACGGATACCGATCTCAGTTCTACCACAGAAACCGTCTCAGGAAGTGT  
TCCACTGATTCGGAATTAGAGAAAGACGACCTTCTTGTGGGGACTGAG

+

FFFFFFFFFFFFFFFFFFFFFFFFFFFFFFFFFFFFFFFFFFFFFFFFFFFFFFFFFFFFFFFFF:FFFFFFFF  
FFFFFFFFFFFFFFFFF:FFFFFFFFFFFFFFFFFFFFFFFFFFFFFFFFF:FFFF

@A00721:190:HGJW7DSXY:4:1445:28031:23516\_1:N:0:TCTGCAAG+GCTGCACT  
CAGGGTGCCTGATGAGGACGTTGAAAGGGATAATTTCAACTCTGAGACTTCTAAGAGTGTTCAAAA  
GACCAGAAACGTAACAAGAAGAATAAAGGTAGGAAGGGGAGAAAACAGAACAGCGAGCGGTTGAAGA  
GAA

+

FFF:FFFFFFFFFFFFFFFFFFFFFFFFFFFFFFFFFFFFFFFFFFFFFFFFFFFFFFFFFFFFF  
FFFFFFFFFFFFFFFFFFFFFFFFFFFFFFFFFFFFFFFFFFFFFFFFFFFFFFFFFFFFFFFFF  
FFF

@A00721:190:HGJW7DSXY:4:2542:16902:8187\_1:N:0:TCTGCAAG+GCTGCACT  
CAACATCAACGACATCATTTCTTGATGAGTGTCTGTTCTTATCGAAGTCTCAGTTATCGCTGCCCGGCCG  
ACGTTTGTGCGAACTCTCAGAGGTTTACGGCAGAAAAATTTCTCCTGCTTGTAAATTCGAGAGAGGAC  
ACT

+

FFFFFFFFFFFFFFFFF:FFFFFFFFFFFFFFFFFFFFFFFFFFFFFFFFFFFFFFFFFFFFFFFFFFFFF  
FFFFFFFFFFFFFFFFFFFFFFFFFFFFFFFFFFFFFFFFFFFFFFFFFFFFFFFFFFFFFFFFF  
FFF

@A00721:190:HGJW7DSXY:4:1460:15121:15937\_1:N:0:TCTGCAAG+GCTGCACT  
ATCGAGGACGATGAGTATCTTGAAGTTGTTGACGACAAGCCTCAAGAGGGTAGAGGACCACCTGGATC  
TTCTACTGTCTCTGCCTTCCAAGATTTCTTAGAATAGGTTATTCCTGGAACCACCTTAACGTCACTCG  
GTA

+

FF,FF:FFF:FFFF:F:F,FFFF:FFFFFF:,::FFF:,FFFF:FFFF,FFFFFFFFF,FFFF  
FF::FFF:F:FFFFFF:FFFFFFF::FF:F,:F,F:F:FFFF,,FF:FFFF:,FF:FFF:F,F  
FFF

@A00721:190:HGJW7DSXY:4:2123:6759:34835\_1:N:0:TCTGCAAG+GCTGCACT  
GGAGGGAGTTCTTGAAGCATCCCGACCTTTCATTGTGAAATTTTGTATGCGGTTTCATAATATTATCA  
GTAATCCTGATTCTACTACGGATTTCATGGACCTTCATCCTGTACCTCTTCTGGAGAGACGTATCTCA  
AAG

+

:,FFFFFFFF,FFFFF:,FFFFFFF:FF:F:,FF:FFFF,,FFFFFFFFF:FFFFFFFFF:,FFFF,F  
,FF:F,,FFFFFFF,,F,,F,FFFF:F:FF:FFFF,:FF:FFFF:FFFFFFFFF,,FFF,FFF,FFF  
F:F

@A00721:190:HGJW7DSXY:4:1108:25292:35055\_1:N:0:TCTGCAAG+GCTGCACT  
CAGCAGCATGACCATAATTGGTATTGACTTTGGTACCACCTTTTCTACTGTCTGTCTCGCCTCTTCGA  
ATGAAGTTTAAATGCTTAACAACAATGATAGTGAATTTATACCTACAATCATTGGTTTTTCTAATAAT  
GAT

+

FFFFFFFFFFFFFFFFF:FFFFFFFFFFFFFFFFFFFFFFFFFFFFFFFFFFFFFFFFFFFFFFFFFFFFF



FFFFFFFFFFFFFFFFFFFFFFFFFFFFFFFFFFFFFFFF:FFF:FFFFFFFFFFFFFFFFFFFFFFFFFFFFFFFF  
FFF

@A00721:190:HGJW7DSXY:4:2505:12264:24518\_1:N:0:TCTGCAAG+GCTGCACT  
TTATGGATATGATGCTATTACTCATGATGGTTACGGTCAGGGAGGATTCTCAGTTTACAAGGACCTTA  
AGCGATGGATCGGGGTTAATTCTAAACATTACCCGAAAGACGTGCTAAATTAACCATTGTACGAT  
GTC

+

FFFF:FFFFFF:FFFFFFFFFFFF, :FFF:FFFFFFFFFFFFFFFF:FF:FFFFFF:FFFFFFFFFFFFFFFF  
FFFFFFFFFFFFFFFF:FFFFFFFFFFFFFFFFFFFFFFFFFFFFFFFFFFFFFFFFFFFFFFFFFFFFFFFF:FFFF  
FFF

@A00721:190:HGJW7DSXY:4:1626:17635:1376\_1:N:0:TCTGCAAG+GCTGCACT  
CAAAGATATTTTCATGAAAACCTACAGAGGAACGTACCGGATTACCTGTCTTTTCATATTATGAATGAACC  
TTCGGCCGCTCTCTTTGCTTCGATGTTGGATGTCAAGAAGGGTTCAGAATGGGATTCTACGTAGTTT  
ATG

+

FFFFFFFFFFFFFF, FFFFFFFF:FFFFFFFF:FFFFFFFFFFFFFFFFFFFFFFFFFFFFFFFFFFFFFFFF  
FFFFFFFFFFFFFFFF:FFFFFFFFFFFFFFFFFFFFFFFF:FFFFFFFFFFFFFFFFFFFFFFFFFFFFFFFF  
FFF

@A00721:190:HGJW7DSXY:4:2120:18078:25504\_2:N:0:TCTGCAAG+GCTGCACT  
GGAGTTTTTACGGGCTCCGGAATGTTCTGTCTATATTAGGTGAAGCGAAATACGATTTTGAACGTCAA  
CGTTCACCGAGTTTCGTTTCGTACCTTGATGCTGACTTTCGTCAATAT

+

FFFFFFFFFFFFFF, FFFFFFFFFFFFFFFFFFFFFFFFFFFFFFFFFFFFFFFFFFFFFFFFFFFFFFFFFF:FFFF:FFFFF  
FFFFFFFFFFFFFFFF:FFFFF:FFFFFFFFFFFFFFFF:FFFFFFFFF

@A00721:190:HGJW7DSXY:4:1573:16288:10504\_2:N:0:TCTGCAAG+GCTGCACT  
TGATAACTTCTAATTTACGTTTGCTACTCAGAGCTGGTCCTCTCAGCAAAGGGATGCATGGTGTATC  
TCCTCAGGAGTCCCGGCATTTGATAATAATGACGAGACTTTCGTCATA

+

FFFFFFF:FFFFF, FFFFFFFFFFFFFFFFFFFFFFFFFFFFFFFFFFFFFFFFFFFFFFFFFFFFFFFFFF:FFFFFFFFF:FFFFFFFFF  
FFFFFFFFFFFFFFFFFFFFFFFFFFFFFFFFFFFFFFFFFFFFFFFFFFFFFFFFFFFFFFFF

@A00721:190:HGJW7DSXY:4:2232:30915:10598\_2:N:0:TCTGCAAG+GCTGCACT  
CTAGTTCGAGTGCTGCTTTGGATTACGATGACGTGAGAATAGGTGAAGGGATAGTTTTTACCTCGACC  
AACATTAAGGCGGCGGCGACTAATCTTAAAGCTTCACCCAAAATGAAG

+

FFFFFFFFFFFFFFFFFFFFFFFFFFFFFFFFFFFFFFFFFFFFFFFFFFFFFFFFFFFFFFFFFFFFFFFF  
FFFFFFFFF:FFFFFFFFF:FFFFFFFFFFFFFFFFFFFFFFFFFFFFFFFF

@A00721:190:HGJW7DSXY:4:2673:3414:22122\_1:N:0:TCTGCAAG+GCTGCACT  
TGCTATTCAAGCTTGTCGTTTAAAGACTGCAGAGGCTGTCAAACAAGCCAGACTCAAGGAGTCCAAT  
CAAAGGTTTTGAATTTAGCTCAACTGGGAGACGTGCTTAAATGGGTGATAAAAATTATTTAGAGATC  
TTT

+

FF:FFFFFFFFFFFFFFFFFFFFFFFF:FFFFFFFFFFFFFFFF:FFFFFFFFFFFFFFFFFFFFFFFF  
FFFFFFFFF:FFFFFFFFFFFFFFFFFFFFFFFFFFFFFFFFFFFFFFFFFFFFFFFFFFFFFFFF  
FFF

@A00721:190:HGJW7DSXY:4:2523:12355:16595\_1:N:0:TCTGCAAG+GCTGCACT  
TAACGATCTCTCGGTCATTTACTCTGTACTTGATCTACGTCGTTTAACTGTCGGAACAACCTTTACTT  
AGAATGACTCTATCTTTTCAGACACTTCTTATATTATTTACAATAGTTAATATCATATTAGTAATACT  
CAC

+

FFFFFFFFFFFFFFFFFFFFFFFFFFFFFFFFFFFFFFFFFFFFFFFFFFFFFFFFFFFFFFFFFFFFFFFF  
FFFFFFFFFFFFFFFFFFFFFFFFFFFFFFFFFFFFFFFFFFFFFFFFFFFFFFFFFFFFFFFFFFFFFFFF  
FFF

@A00721:190:HGJW7DSXY:4:1552:23475:7388\_1:N:0:TCTGCAAG+GCTGCACT  
GTTATAATAGATTTAGTCTCTACACCCATCTCAACGAGGATAAAGCGATTTTCCGACCTGAACGTAA

TCCACGAAGAGATCATCCGCAAACGACTCGAAACGAGACGCCGTAGATCAAAGTCCCTTCTAACTTT  
AGA

+

F,F:,FFF,FFFF,,,,,FF::FFFF,F:FF,F,:F,F,FFFF,,::,,FF:FF,,,F:F,FF,FFF:  
F,F,:F:::,F,F:,FF,FFFFFFFFFFFFFFFFFFFFFFFFFFFFFFFFFFFFFFFFFFFFFFFFFFFF  
FFF

@A00721:190:HGJW7DSXY:4:2206:21341:3286\_1:N:0:TCTGCAAG+GCTGCACT  
ATGAGGTCAAAGCTCTATTTATTAAACGAACTATTATCCGATTCTTCGAGGGTATCACTACCACTGAT  
CTGCCGACTTTAGTCAAGGAACCTCAATTCCTTCGATGTTTATATTTTTCTATAAGGGAAAATAGCAA  
TAA

+

FFFFFFFFFFFFFFFFFFFFFFFFFFFFFFFFFFFFFFFFFFFFFFFFFFFFFFFFFFFFFFFFFFFFFFFF  
FFFFFFFFFFFFFFFFFFFFFFFFFFFFFFFFFFFFFFFFFFFFFFFFFFFFFFFFFFFFFFFFFFFFFFFF:  
FFF

@A00721:190:HGJW7DSXY:4:1564:11369:17926\_1:N:0:TCTGCAAG+GCTGCACT  
GAACTCTCTCCGATCACCTTGGTGTGATCTCCCGGAGGATCTTTTCAATAAGATGTATGATGATAATC  
TACTATTTTTAAATAGTGATATTCAGCGTATACTTGAATACTTTATCAAAGATTTGGCTTGGTCTATT  
TAC

+

FFFFFFFFFFFFFFFFFFFFFFFFFFFFFFFFFFFFFFFFFFFFFFFFFFFFFFFFFFFFFFFFFFFFFFFF  
FFFFFFFFFFFFFFFFFFFFFFFFFFFFFFFFFFFFFFFFFFFFFFFFFFFFFFFFFFFFFFFFFFFFFFFF:  
FFF

@A00721:190:HGJW7DSXY:4:2534:28058:2112\_2:N:0:TCTGCAAG+GCTGCACT  
GGTCTATGATATTTATTTTACTTATACTTTAAATAGCACCGATTATAACTTGACTGTTGATAATATTA  
CAATAGCTCTTCTCAGAAGATTAGAGAAGTAACCGGTGAACACGTCG

+

FFFFFFFFFFFFFFFFFFFFFFFFFFFFFFFFFFFFFFFFFFFFFFFFFFFFFFFFFFFFFFFFFFFFFFFF:  
FFFFFFFFF:FFFFFFFFFFFFFFFFFFFFFFFFFFFFFFFFFFFFFFFFFFFFFFFFFFFFFFFFF:FFFF

@A00721:190:HGJW7DSXY:4:2560:17960:7263\_2:N:0:TCTGCAAG+GCTGCACT  
ATATTCTAGTAACCGCTATGTGGGCATTACTAGGATTTATCACACTCCTAAATTTGATAGCAATTTAT  
GTTTTAAATGCTAGGAAAATTTTAGAAAACTCCATTGTATAGTTCAA

+

FFFFFFFFFFFFFFFFFFFFFFFFFFFFFFFFFFFFFFFFFFFFFFFFFFFFFFFFFFFFFFFFFFFFFFFF:  
FFFFFFFFFFFF:FFFFFFFFFFFFFFFFFFFFFFFFFFFFFFFFFFFFFFFFFFFFFFFFFFFFFFFFF

@A00721:190:HGJW7DSXY:4:1225:6415:33301\_1:N:0:TCTGCAAG+GCTGCACT  
TATCGCCTTTATTGAAAATTGTATAAGAGTTAATTGCTTACACAAAAGTGACGCGCGAAGGAATCTTA  
ATTGATTGAAGCTAGGCGTTGGGGAGAATGAACTGCCGCTTCCCGGAAGAAACGATCTATTTACAGAG  
TAT

+

FFFFF:FFFFFFFFFFFFFFFFFFFFFFFFFFFFFFFFFFFFFFFFFFFFFFFFFFFFFFFFFFFFFFFF:  
FFFFFFFFFFFFFFFFFFFFFFFFFFFFFFFFFFFFFFFFFFFFFFFFFFFFFFFFFFFFFFFFFFFFFFFF  
FFF

@A00721:190:HGJW7DSXY:4:1476:29722:10974\_2:N:0:TCTGCAAG+GCTGCACT  
CATTCACCACTCCCATACCAATCAATGATGTGACTATACAGTTCGGCCATTTCAGAGTGGTCAATAC  
GTCGTGGGAGGTACTGAAGCCTTCCCCTCCGCTGGCAGCAAGAACA

+

FFFFFFFFFFFFFFFFFFFFFFFFFFFFFFFFFFFFFFFFFFFFFFFFFFFFFFFFFFFFFFFFFFFFFFFF:  
FFFFFFFFFF,FF:FFFFFFFFFFFFFFFFFFFFFFFFFFFFFFFFFFFFFFFFFFFFFFFFFFFFF,FFFFF

@A00721:190:HGJW7DSXY:4:2418:4924:32690\_1:N:0:TCTGCAAG+GCTGCACT  
CTCTAAGTCTACCAGGAAGAGGGGAAATGTCCCAAAACTGAGAAGAATAAAGGGAAAGGTCCATCAG  
GACCTAAGAAGGGGAAATTACCCCTAATTCTGAAGGAAGATCTCCACCATCTGGGGTTGGGAATAAG  
AAA

+

F:FFFFFFFFFFFF:FFFFFFFFF:FFFFFFFFFFFFFFFFFFFFFFFFFFFFFFFFFFFFFFFFFFFFF



$+$ 

@A00721:190:HGJW7DSXY:4:1510:32380:15389\_1:N:0:TCTGCAAG+GCTGCACT  
CAGGGTGCCCTGATGAGGACTTTGAAAGGGATAATTTCAACTCTGAGACTTCTAAGAGTGTTTCAAAA  
GACCAGAAACGTAACAAGAAGAATAAAGGTAGGAAGGGGAGAAAACAGAACAAGCGAGCGGTTGAAGA  
GAA

$$+$$

@A00721:190:HGJW7DSXY:4:1105:13720:12884\_1:N:0:TCTGCAAG+GCTGCACT  
AACATCAACGACATCATTCTTGATGAGTGTCGTTCTTATCGAAGTCTCAGTTATCGCTGCCCCGCCGA  
CGTTTGTCGCGAACTCTCAGAGGTTTACGGCAGAAAAATTTCTCTGCTTGTAATTCGAGAGAGGACA  
CTA

+

@A00721:190:HGJW7DSXY:4:1534:17300:2394\_1:N:0:TCTGCAAG+GCTGCACT  
ATCGAGGACGATGAGTATCTTGAAGTTGTTGACGACAAGCCTCAAGAGGGTAGAGGACCACCTGGATC  
TTCTACTGTCTCTGCCTTCCAAGATTTCTTAGAAGAGGTTATTCTGGAACCACTTAACGTCACCTCG  
GTA

+

@A00721:190:HGJW7DSXY:4:2152:32570:9956\_1:N:0:TCTGCAAG+GCTGCACT  
GGAGGGAGTTCTTGAAGCATCCCGACCTTTCCTTGTGAAAATTTTGATGCGGTTTCATAAGATTATCA  
GTAATCCTGATTCTACTACGGATTCATGGACCTTCCATCCTGTACCTCTTCTGGAGAGACGTATCTCA  
AAG

+

@A00721:190:HGJW7DSXY:4:1331:4851:4820\_1:N:0:TCTGCAAG+GCTGCACT  
CAGCAGCATGACCATAATTGGTATTGACTTTGGTACCACCTTTTCTACTGTCTGTCTCGCCTCTTCGA  
ATGAAGTTTTAATGCTTAACAACAATGATAGTGAATTTATACCTACAATCATTGGTTTTTCTAATAAT  
GAT

+

@A00721:190:HGJW7DSXY:4:2515:32904:18991\_1:N:0:TCTGCAAG+GCTGCACT  
TTATGGATATGATGCTATTACTCATGATGGTTACGGTCAGGGAGGATTCTCAGTTTACAAGGACCTTA  
AGCGATGGATCGGGGTTAATTCTAAACATTACCCGAAAGACGTGCTAAATTAAAACCATTGTACGAT  
GTC

+

[illegible]

@A00721:190:HGJW7DSXY:4:1627:18864:28870\_1:N:0:TCTGCAAG+GCTGCACT  
CAAAGATATTTTCATGAAAACACAGAGGAACGTACCGGATTACCTGTCTTTTCATATTATGAATGAACC  
TTCGGCCGCTCTCTTTGCTTCGATGTTGGATGTCAAGAAGGGTTCAGAATGGGATTCTACGTAGTTT  
ATG

+

FFFFFFFFFFFFFFFFFFFFFFFFFFFFFFFFFFFFFFFFFFFFFFFFFFFFFFFFFFFFFFFFFFFFFFFF  
FFFFFFFFFFFFFFFFFFFFFFFFFFFFFFFFFFFFFFFFFFFFFFFFFFFFFFFFFFFFFFFFFFFFFFFF  
FFF

@A00721:190:HGJW7DSXY:4:2120:18304:25614\_2:N:0:TCTGCAAG+GCTGCACT  
GGAGTTTTTACGGGATCCGGAATGTTCTGTCTATATTAGGTGAAGCGAAATACGATTTCGAACGTCAA  
CGTTCACCGAGTTTCGTTTCGTACCTTGATGCTGACTTTCGTCAATAT

+

FFFFFFFFFFFFFFFFFFFFFFFFFFFFFFFFFFFFFFFFFFFFFFFFFFFFFFFFFFFFFFFFFFFFFFFF  
FFFFFFFFFFFFFFFFFFFFFFFFFFFFFFFFFFFFFFFFFFFFFFFFFFFFFFFFFFFFFFFFFFFFFFFF

@A00721:190:HGJW7DSXY:4:2208:1199:13275\_2:N:0:TCTGCAAG+GCTGCACT  
TGATAACTTCTAATTTACGTTTGCTACTCAGAGCTGGTCTCTCAGCAAAGGGATGCATGGTGTATC  
TCCTCAGGAGTCCCGGCATTTGATAATAATGACGAGACTTTCGTCATA

+

FFFFFFF,FFFFFFFFFFFFFFFFFFFFFFFFFFFFFFFFFFFFFFFFFFFFFFFFFFFFFFFFFFFFFFFF  
FFFFFFF:FF:FFFFFFFFF,FF:FFFFFF::FFFFFF:FFFFFF:FF:FF

@A00721:190:HGJW7DSXY:4:2378:8467:32189\_2:N:0:TCTGCAAG+GCTGCACT  
CTAGTTCGAGTGCTGCTTTGGATTACGATGACGTGAGAATAGGTGAAGGGATAGTTTTTACCTCGACC  
AACATTAAGGCGGCGGCGACTAATCTTAAAGCTTCACCCAAAATGAAG

+

FFFF:FFF:FFF,::FFF::FFFFFFFFFFFFFFFFFFFFFFFFFFFFFFFFFFFFFFFF:FFFF:FFFFFFFFFFFFF:,FFFF:F  
FFFFFFFFF,FFFF:FFF:FFF:FF:FFFF:FF:FF::FFFFF:::,:

@A00721:190:HGJW7DSXY:4:1424:13810:15107\_1:N:0:TCTGCAAG+GCTGCACT  
ATTCAAGCTTGTCGTTTAAAGACTGCAGAGGCTGTCAAACAAGCCAGACTCAAGGAGTCCAATCAAA  
GGTTTTGAATTTAGCTCAACTGGGGAGACGTGCTTAAATGGGTGATAAAATTATTTAGAGATCTTTT  
CTA

+

FFFFF:F,FFFFFF,FFFFFFFFF:FFFFFFFFF:FFFFFFFFFFFF:FFF:FFFFFFFFFFFFFFFF  
FFFFFFFFFFFFFFFF:F:FFFFFFFFFFFF:FFFFF:FFFFFFFFFFFFFFFFFFFFFFFFFFFFFFFF  
FFF

@A00721:190:HGJW7DSXY:4:2610:15763:35994\_1:N:0:TCTGCAAG+GCTGCACT  
TAACGATCTCTCGGTCAATTTACTCTGTACTTGATCTACGTCGTTTAACTGTCGGAACAACCTTTACTT  
AGAATGACTCTATCTTTTCAGACACTTCTTATATTATTTACAATAGTTAATATCATATTAGTAATACT  
CAC

+

FFFFFFFFF:F:FFFFFFFFFFFFFFFFFFFFFFFFFFFFFFFFFFFFFFFFFFFFFFFFFFFFFFFFF:FFFFFFFFF:FFFF:F  
FFFFFFFFF:FFF:F,FFFFFFFFFFFFFFFFFFFFFFFFFFFFFFFFFFFFFFFF:FFFFFFFFFFFFFFFFFFFF  
FFF

@A00721:190:HGJW7DSXY:4:2560:6976:10222\_1:N:0:TCTGCAAG+GCTGCACT  
GTTAGAATAGATTTAGACACTACACCCATCTCAACGAGTATAAAGCGAGTTTTCCGTCCTGAACGTAA  
TACACTAATATATAATCCGAAAACGACTCGAAACCGAGACGCCGTAGATCAAAGTCCCTTCTAACTTT  
AGA

+

F,::,F,F,,FFF::,,,:::FFFF:F:F,,F,F::,,,:FF,::,,FFFFF,::,F,F,F,::,FF:  
,FFFF,F,,,,,::,F:FF,,::,FFFFFFFFFFFFFFFFFFFFFFFFFFFFFFFFFFFFFFFFFFFFF  
FFF

@A00721:190:HGJW7DSXY:4:2246:31647:13369\_1:N:0:TCTGCAAG+GCTGCACT  
ATGAGGTCAAAGCTCTATTTATTAACGAACATTATCCGATTCTTCGAGGGTATCACTACCACTGAT  
CTGCCGACTTTAGTCAAGGAACCTCAATTCCTTCGATGTTTATTTTTCTATAAGGGAAATAGCAA  
TAA

[illegible]

@A00721:190:HGJW7DSXY:4:1137:22092:4398\_2:N:0:TCTGCAAG+GCTGCACT  
ACTGGCGACAACTGAGAGCAGTCGCTGGGGAAAGAGAATTGCGTGGGTTGAAGGCCGACGCTTCGAG  
CTTGAGTGTGACGAGGCCGGTGACGTTTTTGTCAACGGCGGTTGGAGG

@A00721:190:HGJW7DSXY:4:2550:13557:10066\_1:N:0:TCTGCAAG+GCTGCACT  
CCTATGGAGTCTTGAAGGACTTAGGTTGGCATATTTATGCCGACGATAATAAGCATGTCAACCCTTAAG  
CACCGAGGTAAGCTCGGGACTTACAAGAGAGAGTGTGAGAGAGTGCCTCTCACTATTTTTGCCAGAA  
TGC

@A00721:190:HGJW7DSXY:4:2438:28447:20259\_1:N:0:TCTGCAAG+GCTGCACT  
AGGTGTCAAGGTCTTCTTCATGCTGATCTTTCAGGACCTAATCACATCATGATTGATAGTTACGGCT  
CGTATCGAGTTGGAGGGAGGAAGTTCTCCGAAATTAAGACGGGGGGATTAAGAGTCCAGCTGTAAC  
GTC

@A00721:190:HGJW7DSXY:4:2437:10149:32503\_2:N:0:TCTGCAAG+GCTGCACT  
AGGCTCTAGAGAAGATCTCACCACCTGGAGAAGGCAAGTGGAGAGTCCAGAAGTTGATGAAGAAGGAT  
TATTTGAAGCAGGGGTTACCACTTCCTAAGGTGGATGAGGGAGGTTGT

@A00721:190:HGJW7DSXY:4:2650:19009:27743\_1:N:0:TCTGCAAG+GCTGCACT  
ACTCAACTACTCCGATCAGATCCGGATGGTTTGATTGGTATGGACTACTCGACTTTTGATCTGGAGTT  
GTCTAGGGTCATGGCAGATACTACCGATAAGGTGAAAAATATGCAGGTCAAAGATTCTGTAGCTCTGA  
GGG

@A00721:190:HGJW7DSXY:4:2562:16369:8422\_1:N:0:TCTGCAAG+GCTGCACT  
AAGTTAAGAAGGAGGCTGATCATGGAGTCTTTGTACCTTCTGTCAAACCTTCGAGGTTTCAGCTACGAGA  
GGTGATCCCGGATGTGGATTGAAGGCTGGCTCTAAGGGAGACTCCTTCTTTTTGAATGTTGTAAAGAA  
TTG

@A00721:190:HGJW7DSXY:4:2433:15347:19586\_2:N:0:TCTGCAAG+GCTGCACT  
ATCCTGATGACATTATTTCAACGGATACCGATCTCAGTTCTACCACAGAAACCGTCTCAGGAAGTGC  
TCCACTGATTTCGGAATTAGAGAAAGACGACCTTCTTGTTGGGGACTGAG

@A00721:190:HGJW7DSXY:4:1665:20708:18443\_1:N:0:TCTGCAAG+GCTGCACT  
CAGGGTGCCCTGATGAGGACGTTGAAAGGGATAATTTCAACTCTGAGACTTCTAAGAGTGTTTCAAAA  
GACCAGAAACGTAACAAGAAGAATAAAGGTAGGAAGGGGAGAAAACAGAACAAGCGAGCGGTTGAAGA  
GAA

[illegible]

+

@A00721:190:HGJW7DSXY:4:1562:13937:30984\_1:N:0:TCTGCAAG+GCTGCACT  
ATCGAGGACGATGAGTATCTTGAAGTTGTTGACGACAAGCCTCAAGAGGGTAGAGGACCACCTGGATC  
TTCTACTGTCTCTGCCTTCCAAGATTTCTTAGAAGAGGTTATTCTGGAACCACCTTAACGTCACTCG  
GTA

[illegible]

+

@A00721:190:HGJW7DSXY:4:1542:22643:1532\_1:N:0:TCTGCAAG+GCTGCACT  
CAGCAGCATGACCATAATTGGTATTGACTTTGGTACCACCTTTTCTACTGTCTGTCTCGCCTCTTCGA  
ATGAAGTTTTTAATGCTTAACAACAATGATAGTGAATTTATACCTACAATCATTGGTTTTTCTAATAAT  
GAT

[illegible]

+

@A00721:190:HGJW7DSXY:4:1663:14416:21668\_1:N:0:TCTGCAAG+GCTGCACT  
CAAAGATATTTTCATGAAAACACAGAGGAACGTACCGATTACCTGTCTTTCATATTATGAATGAACC  
TTCGGCCGCTCTCTTTGCTTCGATGTTGGATGTCAAGAAGGGTTCAAGATGGGATTCTACGTAGTTT  
ATG

```
FFFFFFFFFFFF:FFFFFFFFFFFFFFFFFFFFFFFFFFFFFFFF:FFFFFFFFFFFFFFFFFFFFFFFFFFFFFFF  
FFFFFFFFFFFF:FFFFFFFFFFFFFFFFFFFFFFFF:F:FFFFFFFFFFFFFFFFFFFFFFFFFFFFFFFFFFFFFFF  
FFF
```

@A00721:190:HGJW7DSXY:4:2131:19723:28573\_2:N:0:TCTGCAAG+GCTGCACT  
GGAGTTTTTACGGGATCCGGAATGTTCTGTCTATATTAGGTGAAGCGAAATACGATTTCAACGTCAA



CGTTCACCGAGTTTCGTTTCGTACCTTGATGCTGACTTTCGTCAATAT

```

FFFFFFFFFFFFFFFF,FFFFFFFF:FFFFFFFFFFFFFFFFFFFFFFFFFFFFFFFFFFFFFFFF
FFFFFFFFFFFFFFFFFFFFFFFFFFFFFFFFFFFFFFFFFFFFFFFFFFFFFFFF

```

TGATAACTTCTAATTTACGTTTGCTACTCAGAGCTGGTCCTCTCAGCAAAGGGATGCATGGTGTTATC  
TCCTCAGGAGTCCCGGCATTTGATAATAATGACGAGACTTTCGTCATA

```
FFFFFFFFFFFFFFFFFFFFFFFFFFFFFFFFFFFFFFFFFFFFFFFFFFFFFFFFFFF:FFFFFF:FF  
FFFFFFFFFFFFFFFFFFFFFFFFFFFFFFFFFFFFF::FFFFF:FF:FF,F,F
```

CTAGTTCGAGTGCTGCTTTGGATTACGATGACGTGAGAATAGGTGAAGGGATAGTTTTTACCTCGACC  
AACATTAAGGCGGCGGCGACTAATCTTAAAGCTTCACCCAAAATGAAG

```
FFFFFFFFFFFFFFFF:FFFFFFFFFFFFFFFFFFFFFFFFFFFFFFFFFFFFFFFF
FFFFFFFFFFFFFFFFFFFFFFFFFFFFFFFFFFFFFFFFFFFFFFFF
```

ATTCAAGCTTGTGTTTTAAAGACTGCAGAGGCTGTCAAACAAGCCCAGACTCAAGGAGTCCAATCAAA  
GGTTTTGAATTTAGCTCAACTGGGGAGACGTGCTTAAATGGGTGATAAAAATTATTTAGAGATCTTTT  
CTA

```

FFFFFFFF,FFF:FFFFFFFFFFFFFFFFFFFFFFFF:FFFFFFFFFFFFFFFFFFFFFFFF:FFFFFF:FFFFFFFFFFFF
FFFFFFFFFFFFFFFF:FFFFFFFF:FFFFFFFFFFFFFFFF:FFFFFFFFFFFFFFFFFFFFFFFFFFFFFFFFFFFFFFFF:FF
FFF

```

TAACGATCTCTCGGTCATTTACTCTGTACTTGATCTACGTCGTTTAACTGTCGGAACAACCTTTACTT  
AGAATGACTCTATCTTTTCAGACACTTCTTATATTATTTACAATAGTTAATATCATATTAGTAATACT  
CAC

[illegible]

TAGAATAGATTAGTCTCTACCCATCTCACCAGAGGATAAAGCGAGTTTTCCGTCTGAACGTAATA  
CACGAATAGATCATCCGAAACGACTCGAAACCGAGACGCCGTAGATCAAAGTCCCTTCTAACTTTAG  
ATT

```
FF,FFF,,,FFF:F::,,,FFFF:F,,F,:,,F,F:FF,,::,,FFF:FF:,F:F,F,,,FF:::
F::,F,,:,,,FF,FF:F,FFFFFFFFFFFFFFFFFFFFFFFFFFFFFFFFFFFFFFFFFFFFFFFF
FFF
```

ATGAGGTCAAAGCTCTATTTATTAACGAACTATTATCCGATTCTTCGAGGGTATCACTACCACTGAT  
CTGCCGACTTTAGTCAAGGAATTCAATTCCTTCGATGTTTATATTTTTCTATAAGGGAAAATAGCAA  
TAA

```
FFFFFFFFFFFFFFFF:FFFFFFFFFFFFFFFFFFFFFFFFFFFFFFFFFFFFFFFFFFFF  
FFFFFFFFFFFFFFFFFFFFFFFFFFFFFF:FFFFFFFFFFFFFFFF:FFFFFFFFFFFFFFFFFFFFFFFFFFFFFFFFFFFFF  
FFF
```

GAACTCTCTCCGATCACCTTGGTGTGATCTCCCGGAGGATCTTTTCAATAAGATGTATGATGATAATC  
TACTATTTTTAAATAGTGATATTCAGCGTATACTTGAATACTTTATCAAAGATTTGGCTTGGTCTATT  
TAC

[illegible]

FFFFFFFFFFFFFFFFFFFFFFFFFFFFFFFFFFFFFFFFFFFFFFFFFFFFFFFFFFFFFFFFFFFFFFFF  
FFF

@A00721:190:HGJW7DSXY:4:2315:9742:22153\_2:N:0:TCTGCAAG+GCTGCACT  
TATGATATTTATTTTACTTATACTTTAAATAGCACCGATTATAACTTGACTGTTGATAATATTACAAT  
AGCTCTTTCTCAGAAGATTAGAGAAGTAACCGGTGAACACGTCGGTAG

+

FFFFFFFFFFFFFFFFFFFFFFFFFFFFFFFFFFFFFFFFFFFFFFFFFFFFFFFFFFFFFFFFFFFFFFFF  
FFFFFFFFFFFFFFFFFFFFFFFFFFFFFFFFFFFFFFFFFFFFFFFFFFFFFFFFFFFFFFFFFFFFFFFF

@A00721:190:HGJW7DSXY:4:2138:11044:21934\_1:N:0:TCTGCAAG+GCTGCACT  
TATCGCCTTTATTGAAAATTGTATAAGAGTTAATTGCTTACACAAAAGTGACGCGCGAAGGAATCTTA  
ATTGATTGAAGCTAGGCGTTGGGGAGAATGAACTGCCGCTTCCCGGAAGAAACGATCTATTTACAGAG  
TAT

+

FFFFFFFFFF:FFFFF,FFFFFFFFFFFFFFFF:FFFFFFFFFF:FFFFFFFFFF:F,FF:FF:,FFF  
FFFFFFFFFFFFFFFF:FFFFFFFFF::FFFFFFFFFFFFFFFF:FFFFF:FFFFFFFFFFFFFFFFFFFFF,  
F:F

@A00721:190:HGJW7DSXY:4:2511:28926:2018\_2:N:0:TCTGCAAG+GCTGCACT  
CATTCACTACTCCCATACCAATCAATGATGTGACTATACAGTTCGCCATTTCAGAGTGGTCAATAC  
GTCGTGGGAGGTACTGAAGCCTTCCCTCCGCTGGCACGAAGAACACT

+

FFFFFFFFFFFFFFFFFFFFFFFFFFFFFFFFFFFFFFFFFFFFFFFFFFFFFFFFFFFFFFFFFFFFFFFF  
FFFFFFFFFFFFFFFFFFFFFFFFFFFFFFFFFFFFFFFFFFFFFFFFFFFFFFFFFFFFFFFFFFFFFFFF

@A00721:190:HGJW7DSXY:4:2552:2871:13322\_1:N:0:TCTGCAAG+GCTGCACT  
CTCTAAGTCTACCAGGAAGAGGGGAAATGTCCCCAAACTGAGAAGAATAAAGGGAAAGGTCCATCAG  
GACCTAAGAAGGGGAAATTACCCCTAATTCTGAAGGAAGATCTCCACCATCTGGGGTTGGGAATAAG  
AAA

+

F,FF::,FF:FFFFF:FFFFFF,FF:FFFFFF:,FFFFFFFF:FF:FFFF,FFFF:FFFF,FFFFFF  
FFFFFFFFF:FFF:FFFF:FFFFFFFFFFFFFFFFFFFFFFFFFFFFFFFFF,F:FFFFFFFFFFFFFFFFFFFF  
FFF

@A00721:190:HGJW7DSXY:4:2230:30861:14168\_1:N:0:TCTGCAAG+GCTGCACT  
CGAAGTCGCTGAAGGCGGCTTGGGTCATTAAGGCTAGCTGTAAAGTTGCGCCTGCCGACCCCATCTTT  
GAGACCAAGACTCTCTACAGTAGGTTTCGTGCCTACTATGAGCAAATCTGTTGAATTCGTCACTGAGGA  
CGA

+

FFFFFFFFFFFFFFFFFFFFFFFFFFFFFFFFFFFFFFFFFFFFFFFFFFFFFFFFFFFFFFFFFFFFFFFF  
FFFFFFFFFFFFFFFFFFFFFFFFFFFFFFFFFFFFFFFFFFFFFFFFFFFFFFFFFFFFFFFFFFFFFFFF  
FFF

@A00721:190:HGJW7DSXY:4:1263:2691:25097\_2:N:0:TCTGCAAG+GCTGCACT  
ACTGGCGACAACTGAGAGCAGTCGCTGGGGAAAGAGAATTGCGTGGGTTGAAGCCGACGCTTCGAG  
CTTGAGTGTGACGAGGCCGGTGACGTTTTTGTCAACGGCGTTTGGAGG

+

FFFFFFFFFFFFFFFFFFFFFFFFFFFFFFFFFFFFFFFFFFFFFFFFFFFFFFFFFFFFFFFFFFFFFFFF  
FFFFFFFFFFFFFFFFFFFFFFFFFFFFFFFFFFFFFFFFFFFFFFFFFFFFFFFFFFFFFFFFFFFFFFFF

@A00721:190:HGJW7DSXY:4:2571:12292:23187\_1:N:0:TCTGCAAG+GCTGCACT  
CCTATGGAGTCTTGAAGGACTTAGGTTGGCATATTTATGCCGACGATAATAAGCATGTACCCCTTAAG  
CACCGAGGTAAGCTCGGGACTTACAAGAGAGAGTGTGAGAGAGTCGCTCTCACTATTTTTGCCAGAA  
TGC

+

FFFFFFF:FFFFFFFFFFFFFFFFFFFFFFFFFFFFFFFFFFFFFFFFFFFFFFFFFFFFFFFFFFFFFFFF  
FFFFFFFFF:FFFFFFFFFFFFFFFFFFFFFFFFFFFFFFFFFFFFFFFFFFFFFFFFFFFFFFFFFFFFFFFF  
FFF

@A00721:190:HGJW7DSXY:4:2219:21649:27336\_1:N:0:TCTGCAAG+GCTGCACT  
GGTGTCAAGGGTCTTCTTCATGCTGATCTTTCAGGACCTAATCACATCATGATTGATAGTTACGGCTC

GTATCGAGTTGGAGGGAGGAAGTTCTCCGAAATTAAAGACGGGGGGATTAAGAGTCCAGCTGTAAC TG  
TCA

+

FFFFFF,,FFFF,FFFF::FF,F,FF,FFFF,,:FFFFFF,FF::,FF:FFFFFF,F:FFFF,F:,F,  
:FFF:FF,F:,F:FF::FFF:FFF,FFFFF,:FFFF:FF:,FFFF:FFF:::FFFFFFFFFFFFFFFF  
FFF

@A00721:190:HGJW7DSXY:4:2650:4960:34162\_2:N:0:TCTGCAAG+GCTGCACT  
AGGCTCTAGAGAAGATCTCACCACCTGGAGAAGGCAAGTGGAGAGTCCAGAAGTTGATGAAGAAGGAT  
TATTTGAAGCAGGGGTTACCACTTCCTAAGGTGGAGGAGGGAGGTTGT

+

:FFFFFF,FFFF:F:FFFFFFFFFFFF,FFFFF::FFF:FFFFFFFFFFFFFFFF:FFFFFFFF,FFFFF:FF  
FFFFFFFF:FFFFFFFF:FFFFFFFF::F:F:F:FFFF,FF:FFFF:,FFF

@A00721:190:HGJW7DSXY:4:2372:17101:6558\_1:N:0:TCTGCAAG+GCTGCACT  
ACGTGTGCTCTTCCGATCTCCGATGGTTTGATTGGTATGGACTACTCGACTTTTGATCTGGAGTTGT  
CTAGGGTCATGGCAGATACTACCGATAAGGTGAAAAATATGCAGGTCAAAGATTCTGTAGCTCTGAGG  
GCG

+

:FFFFFFFFFFFFFFFFFFFFFFFFFFFFFFFFFFFFFFFFFFFFFFFFFFFFFFFFFFFFFFFFFFFFFFFF  
FFFFFFFFFFFFFFFFFFFFFFFFFFFFFFFFFFFFFFFFFFFFFFFFFFFFFFFFFFFFFFFFFFFFFFFF  
FFF

@A00721:190:HGJW7DSXY:4:1108:17354:13291\_1:N:0:TCTGCAAG+GCTGCACT  
TGTGCTCTTCCGATCTTGATCATGGAGTCTTTGTACCTTCTGTCAAACCTTCGAGGTTTCAGCTACGAGA  
GGTGATCCCGATGTGGATTGAAGGCTGGCTCTAAGGGAGACTCCTTCTTTTGAATGTTGTAAAGAA  
TTG

+

FFFFFFFFFFFFFFFFFFFFFFFFFFFFFFFFFFFFFFFFFFFFFFFFFFFFFFFFFFFFFFFFFFFFFFFF  
FFFFF:FFFFFFFFFFFFFFFF:FFFFFFFFFFFFFFFFFFFFFFFFFFFFFFFF:FFFFFFFFFFFFFFFF  
FFF

@A00721:190:HGJW7DSXY:4:1139:15103:19977\_2:N:0:TCTGCAAG+GCTGCACT  
CCTGATGACATTATTTCAACGGATACCGATCTCAGTTCTACCACAGAAACCGTCTCAGGAACGTCTC  
CACTGATTCCGAATTAGAGAAAGACGACCTTCTTGTGGGACTGAGAC

+

FFFFFFFFFFFFFFFFFFFFFFFFFFFFFFFFFFFFFFFFFFFFFFFFFFFFFFFFFFFFFFFFFFFFFFFF  
FFFFFFFFFFFFFFFFFFFFFFFFFFFFFFFFFFFFFFFFFFFFFFFFFFFFFFFF:FFF

@A00721:190:HGJW7DSXY:4:1665:20772:18427\_1:N:0:TCTGCAAG+GCTGCACT  
CAGGGTGCCCTGATGAGGACGTTGAAAGGGATAATTTCAACTCTGAGACTTCTAAGAGTGTTCAAAA  
GACCAGAAACGTAACAAGAAGAATAAAGGTAGGAAGGGGAGAAAACAGAACAGCGAGCGGTTGAAGA  
GAA

+

FFFFFFFFFFFFFFFFFFFFFFFFFFFFFFFFFFFFFFFFFFFFFFFFFFFFFFFFFFFFFFFFFFFFFFFF  
FFFFFFFFFFFFFFFFFFFFFFFFFFFFFFFFFFFFFFFFFFFFFFFFFFFFFFFFFFFFFFFFFFFFFFFF  
FFF

@A00721:190:HGJW7DSXY:4:1208:16504:20870\_1:N:0:TCTGCAAG+GCTGCACT  
AACATCAACGACATCATTTGATGAGTGTCGTTCTTATCGAAGTCTCAGTTATCGCTGCCCCGCCGA  
CGTTTGTGCGCAACTCTCAGAGGTTTACGGCAGAAAAATTTCTCCTGCTTGAATTCGAGAGAGGACA  
CTA

+

FFFFFFFFFFFFFFFFFFFFFFFFFFFFFFFFFFFFFFFFFFFFFFFFFFFFFFFFFFFFFFFFFFFFFFFF  
FFFFFFFFFFFFFFFF:FFFFF:FFFFFFFFFFFFFFFFFFFFFFFFFFFFFFFFFFFFFFFFFFFFFFFF  
FFF

@A00721:190:HGJW7DSXY:4:2402:25491:36432\_1:N:0:TCTGCAAG+GCTGCACT  
ATCGAGGACGATGAGTATCTTGAAGTTGTTGACGACAAGCCTCAAGAGGGTAGAGGACCACCTGGATC  
TTCTACTGTCTCTGCCTTCCAAGATTTCTTAGAAGAGGTTATTCCTGGAACCACCTTAACGTCACTCG  
GTA

[illegible]



@A00721:190:HGJW7DSXY:4:2615:7808:15139\_2:N:0:TCTGCAAG+GCTGCACT  
CATTCACTACTCCCATAACCAATCAATGATGTGACTATACAGTTCGGCCATTTCAGAGTGGTCAATAC  
GTCGTGGGAGGTACTGAAGCCTTCCCCTCCGCTGGCACGAAGAACACT

+

FFFFFFFFFFFFFFFFFFFFFFFFFFFFFFFFFFFFFFFFFFFFFFFFFFFFFFFFFFFFFFFFFFFFFFFF  
FFFFFFFFFFFFFFFFFFFFFFFFFFFFFFFFFFFFFFFFFFFFFFFFFFFFFFFFFFFFFFFF

@A00721:190:HGJW7DSXY:4:2606:16929:22921\_1:N:0:TCTGCAAG+GCTGCACT  
CTCTAAGTCTACCAGGAAGAGGGGAAATGTCCCCAAACTGAGAAGAATAAAGGGAAAGGTCCATCAG  
GACCTAAGAAGGGGAAATTACCCCTAATTCTGAAGGAAGATCTCCACCATCTGGGGTTGGGAATAAG  
AAA

+

FF:FFFFFFFFFFFFFFFFFFFFFFFFFFFFFFFFFFFFFFFFFFFFFFFFFFFFFFFFFFFFFFFFFFFF  
FFFFFFFFFFFFFF,FFFF:FFFFFFFFFFFFFFFFFFFFFFFFFFFFFFFFFFFFFFFFFFFFFFFFFFFF  
FFF

@A00721:190:HGJW7DSXY:4:2320:29071:3897\_1:N:0:TCTGCAAG+GCTGCACT  
CGAAGTCGCTGAAGGCGGCTTGGGTCTTAAGGGTAGCTGTAAAGTTGCGCCTGCCGACCCCATCTTT  
GAGACCAAGACTCTCTACAGTAGGTTTCGTGCCTACTATGAGCAAATCTGTTGAATTCGTCACTGAGGA  
CGA

+

FFFFFFFFFFFFFFFFFFFFFFFFFFFFFFFFFFFFFFFFFFFFFFFFFFFFFFFFFFFFFFFFFFFFFFFF  
FFFFFFFFFFFFFFFFFFFFFFFFFFFFFFFFFFFFFFFFFFFFFFFFFFFFFFFFFFFFFFFFFFFFFFFF  
FFF

@A00721:190:HGJW7DSXY:4:1331:28818:28354\_2:N:0:TCTGCAAG+GCTGCACT  
ACTGGCGACAACTGAGAGCAGTCGCTGGGGAAAGAGAATTGCGTGGGTTGAAGGCCGACGCTTCGAG  
CTTGAGTGTGACGAGGCCGGTGACGTTTTTGTCAACGGCGTTTGGAGG

+

FFFFFFFFFFFFFFFFFFFF:FFFFFFFFFFFF:FFFFFFFFFFFF:FF,FFFFFFFFFFFFFFFFFFFF:FF  
FFFFFFFFFFFFFFFFFFFFFFFFFFFFFFFFFFFFFFFFFFFFFFFFFFFFFFFFFFFFFFFF

@A00721:190:HGJW7DSXY:4:2603:21377:12649\_1:N:0:TCTGCAAG+GCTGCACT  
CCTATGGAGTCTTGAAGGACTTAGGTTGGCATATTTATGCCGACGATAATAAGCATGTCAACCTTAAG  
CACCGAGGTAAGCTCGGGACTTACAAGAGAGAGTGTGAGAGAGTCGCTCTCACTATTTTTGCCAGAA  
TGC

+

FFFFFF:FFFFFFFFFFFFFF,FFFFFFFFFFFFFFFFFFFFFFFFFFFFFFFFFFFFFFFFFFFFFFFF  
FFFFFFFFFFFF:FFFFFFFFFFFF:FFFFFFFFFFFFFFFFFFFFFFFFFFFFFFFFFFFFFFFFFFFF  
FFF

@A00721:190:HGJW7DSXY:4:2442:31566:34961\_1:N:0:TCTGCAAG+GCTGCACT  
GGTGTCAAGGGTCTTCTTCATGCTGATCTTTCAGGACCTAATCACATCATGATTGATAGTTACGGCTC  
GTATCGAGTTGGAGGGAGGAAGTTCTCCGAAATTAAGACGGGGGATTAAGAGTCCAGCTGTAACGT  
TCA

+

FFFFFFFFFFFFFFFFFFFFFF:FFFFFFF:FFFFFFFFFFFFFFFFFFFFFFFFFFFFFFFFFFFFFF:FFFFF  
FFFFFFFFFFFFFFFFFFFFFFFFFFFFFFFFFFFFFFFFFFFFFFFFFFFFFFFFFFFFFFFFFFFFFFFF  
FFF

@A00721:190:HGJW7DSXY:4:1219:31051:3223\_1:N:0:TCTGCAAG+GCTGCACT  
AGGCTCTAGAGAAGATCTCACCACCTGGAGAAGGCAAGTGGAGAGTCCAGAAGTTGATGAACAAGGAT  
TATTTGAAGCAGGGGTTACCACTTCCTAAGGTGGATGAGGGAGGTTGTTTCTTTGGAGTTTATAGATAA  
TC

+

FFFFF,FFFFF,F:FFFFF,FF:, :FFFFFFFFF:FFFFFFFFFFFFFF:FF,:F:FFF,,,,:F:  
,F,:FF,,FFFFF:F:FFF:FFFFFFFFFFFFFF:FF:FFF:FFFFFFFFF:FFFFFFFFFFFF,FFFF  
FF

@A00721:190:HGJW7DSXY:4:1610:7310:18411\_2:N:0:TCTGCAAG+GCTGCACT  
TGGACTACTCGACTTTTGATCTGGAGTTGTCTAGGGTCATGGCAGATACTACCGATAAGGTGAAAAAT

ATGCAGGTCAAAGATTCTGTAGCTCTGAGGGCGGTTGAGGGAGCCGTT

+

FFFFFFFF:FF,F::FFFFFFFFFFFFFFFF,FFFF,FFFFFFFFFFFFFFFF,FFFF:FF:::FFFFFF:  
FFFF,FFFFFF:F:FFFFFFFFFFFFFFFF,F:FF,,FFFF:FF:FFFF

@A00721:190:HGJW7DSXY:4:1624:18584:35712\_1:N:0:TCTGCAAG+GCTGCACT  
TGTGCTCTTCCGATCTTGATCATGGAGTCTTTGTACCTTCTGTCAAACCTTCGAGGTTTCAGCTACGAGA  
GGTGATCCCGGATGTGGATTGAAGGCTGGCCCTAAGGGAGACTCCTTCTTTTTGAATGTTGTAAAGAA  
TTG

+

FFFFFFFF:FFFFFFFF:FFFFFFFFFFFFFFFFFFFFFFFFFFFFFFFFFFFFFFFFFFFFFFFF  
FFFFFFFFFFFFFFFFFFFFFFFFFFFFFFFFFFFFFFFFFFFFFFFFFFFFFFFFFFFFFFFF  
FFF

@A00721:190:HGJW7DSXY:4:1221:14543:8829\_2:N:0:TCTGCAAG+GCTGCACT  
CCTGATGACATTATTTCAACGGATACCGATCTCAGTTCTACCACAGAAACCGTCTCAGGAACGTCTC  
CACTGATTCGGAATTAGAGAAAGACGACCTTCTTGTGGGACTGAGAC

+

FFFFFFFFFFFFFFFFFFFFFFFFFFFFFFFFFFFFFFFFFFFFFFFFFFFFFFFFFFFFFFFF  
FFFFF:FFF:FFFFFF,FFFFFFFFFFFFFFFFFFFFFFFFFFFFFFFFFFFFFFFF:FF

@A00721:190:HGJW7DSXY:4:2253:32642:27899\_1:N:0:TCTGCAAG+GCTGCACT  
CAGGGTGCCCTGATGAGGACGTTGAAAGGGATAATTTCAACTCTGAGACTTCTAAGAGTGTTCAAAA  
GACCAGAAACGTAACAAGAAGAATAAAGGTAGGAAGGGGAGAAAACAGAACAGCGAGCGGTTGAAGA  
GAA

+

FFFFFFF:FFFF:FFFFFF,FFFFFFFFF:FFF:FFFFFFFFFFFFFFFF:FFFFFFFFFFFFFFFF  
FFFFFFFFFFFFFFFFFFFFFFFFFFFFFFFFFFFFFFFFFFFFFFFFFFFFFFFF:FFFFFFFFFFFFFFFF  
FFF

@A00721:190:HGJW7DSXY:4:1235:32479:36323\_1:N:0:TCTGCAAG+GCTGCACT  
AACATCAACGACATCATCTTGATGAGTGTCTTCTTATCGAAGTCTCAGTTATCGCTGCCCGGCCGA  
CGTTTGTGCGCAACTCTCAGAGGTTTACGGCAGAAAAATTTCTCCTGCTTGTAAATTCGAGAGAGGACA  
CTA

+

FFFFFFFFFFFFFFFFFFFFFFFFFFFFFFFFFFFFFFFFFFFFFFFFFFFFFFFFFFFFFFFF  
FFFFFFFFFFFFFFFFFFFFFFFFFFFFFFFFFFFFFFFFFFFFFFFFFFFFFFFFFFFFFFFF  
FFF

@A00721:190:HGJW7DSXY:4:2326:20283:13792\_1:N:0:TCTGCAAG+GCTGCACT  
ACGATGAGTATCTTGAAGTTGTTGACGACAAGCCTCAAGAGGGTAGAGGACCACCTGGATCTTCTACT  
GTCTCTGCCTTCCAAGATTTCTTAGAAGAGGTTATTCTGGAACCACCTTAACGTCACTCGGTAATCT  
TTC

+

FFFFFFFFFFFFFFFFFFFFFFFFFFFFFFFFFFFFFFFFFFFFFFFFFFFFFFFFFFFFFFFF  
FFFFFFFFFFFFFFFFFFFFFFFFFFFFFFFFFFFFFFFFFFFFFFFFFFFFFFFFFFFFFFFF  
FFF

@A00721:190:HGJW7DSXY:4:2333:31403:2581\_1:N:0:TCTGCAAG+GCTGCACT  
GGAGGGAGTTCTTGAAGCATCCCGACCTTCTTGTGAAAATTTGATGCGGTTTCATAAGATTATCA  
GTAATCCTGATTCTACTACGGATTATGACCTTCCATCCTGTACCTCTTCTGGAGAGACGTATCTCA  
AAG

+

FFFFFFFFF:FFFFFFFFFFFFFFFFFFFFFFFFFFFFFFFFFFFFFFFFFFFFFFFF:FFFF:FF  
:FFFFFFFFFFFFFFFFFFFFFFFFFFFFFFFFFFFFFFFF:FFFFFFFFFFFFFFFFFFFFFFFF  
FFF

@A00721:190:HGJW7DSXY:4:2234:32398:8876\_1:N:0:TCTGCAAG+GCTGCACT  
CAGCAGCATGACCATAATTGGTATTGACTTTGGTACCACCTTTTCTACTGTCTGTCTCGCCTCTTCGA  
ATGAAGTTTAAATGCTTAACAACAATGATAGTGAATTTATACCTACAATCATTGGTTTTTCTAATAAT  
GAT

+  
FFFFF:FFFF:FFFFFFFF:FFFFFFFFFFFFFFFFFFFFFFFFFFFFFFFFFFFFFFFF:FFFFF  
FFFFFFFFFFFFFFFFFFFFFFFFFFFFFFFFFFFFFFFF:FFFFFFFFF:FFFFFFFFFFFFFFFF  
FFF  
@A00721:190:HGJW7DSXY:4:2351:27850:1752\_1:N:0:TCTGCAAG+GCTGCACT  
GTGACTGGAGTTCAGACGTGTGCTCTTCCGATCTGTCAGGGAGGATTCTCAGTTTACAAGGACCTTAA  
GCGATGGATCGGGGTTAATTCTAAACATTACCCGAAAGACGTGCTAAATTAACATTGTACGATG  
TCG  
+  
FFFFFFFFFFFFFFFFFFFFFFFFFFFFFFFFFFFFFFFFFFFFFFFFFFFFFFFFFFFFFFFF: F  
FFFFFFFFFFFFFFFFFFFFFFFF:FFFFFFFFFFFFFFFFFFFFFFFFFFFFFFFF:FFFF::FFFFFFFF  
FFF  
@A00721:190:HGJW7DSXY:4:2272:30472:19288\_1:N:0:TCTGCAAG+GCTGCACT  
CAAAGATATTTTCATGAAAACCTACAGAGGAACGTACCGGATTACCTGTCTTTTCATATTATGAATGAACC  
TTCGCCGCTCTCTTTGCTTCGATGTTGGATGTCAAGAAGGGTTCAGAATGGGATTCTACGTAGTTT  
ATG  
+  
FFFFFFFFFFFFFFFFFFFFFFFFFFFFFFFFFFFFFFFFFFFFFFFFFFFFFFFFFFFFFFFF  
FFFFFFFFFFFFFFFFFFFFFFFF:FFFFFFFFFFFFFFFFFFFFFFFFFFFFFFFFFFFFFFFF  
FFF  
@A00721:190:HGJW7DSXY:4:2416:12509:36620\_2:N:0:TCTGCAAG+GCTGCACT  
GGAGTTTTTACGGGATCCGGAATGTTCTGTCTATATTAGGTGAAGCGAAATACGATTTCGAACGTCAA  
CGTTCACCGAGTTTCGTTTCGTACCTTGATGCTGACTTTCGTCAATAT  
+  
FF:FFFFFFFF:F,F,FF:F:FF,F,F::,FFFFFFFFF:F:FF,FFFFFFFF:FF:F:FFFF::FFF  
::FF:FF,F:FFFF:,F:F,FFFF,FFFFFFFFF,,FFFFFF  
@A00721:190:HGJW7DSXY:4:1309:19696:19727\_1:N:0:TCTGCAAG+GCTGCACT  
TGATAACTTCTAATTTACGTTTGCTACTCAGAGCTGGTCTCTCAGCAAAGGGATGCATGGTGTATC  
TCCTCAGGAGTCCCGGCATTTGATAATAATGACGAGACTTTCGTCATAATCGCTGCATATTACGGATT  
ACA  
+  
FFFFFFFFFFFF:FF:FFFFFFFFFFFFFFFFFFFFFFFFFFFFFFFFFFFFFFFFFFFFFFFF  
FFFFFFFFFFFFFFFFFFFFFFFF: F:FFFFFFFFFFFFFFFFFFFFFFFFFFFFFFFF:FFFFFFFF  
FFF  
@A00721:190:HGJW7DSXY:4:1406:22146:13667\_1:N:0:TCTGCAAG+GCTGCACT  
CTAGTTCGAGTGCTGCTTTGGATTACGATGACGTGAGAATAGGTGAAGGGATAGTTTTTACCTCGACC  
AACATTAAGGCGGCGGCGACTAATCTTAAAGCTTCACCCAAAATGAAGGACACTTCGAAACTGAATAA  
TG  
+  
FFFFFF:FF:FFFFFFFFFFFF:FFFF:FFFFFFFFFFFF:FFF:FFFFFFFFFFFF:FFFF  
FFFFFFFFFFFFFFFFFFFFFFFF:FFF:FFFFFFFFFFFF:FFFFFF:FF,FF:FFFFFF  
::  
@A00721:190:HGJW7DSXY:4:1554:28158:23923\_1:N:0:TCTGCAAG+GCTGCACT  
ATTCAGCTTGTCGTTTAAAGACTGCAGAGGCTGTCAAACAAGCCAGACTCAAGGAGTCCAATCAAA  
GGTTTTGAATTTAGCTCAACTGGGGAGACGTGCTTAAATGGGTGATAAAAATTATTTAGAGATCTTTT  
CTA  
+  
FFFFFFF:FFFFFFFFFFFFFFFFFFFFFFFFFFFFFFFFFFFFFFFFFFFFFFFFFFFFFFFF  
FFFFFF:FFFF:FFFFFFFFFFFFFFFFFFFFFFFFFFFFFFFFFFFFFFFFFFFFFFFF  
FFF  
@A00721:190:HGJW7DSXY:4:1350:1777:5353\_2:N:0:TCTGCAAG+GCTGCACT  
ATCTCTCGGTCATTTACTCTGTACTTGATCTACGTGCTTAACTGTCGGAACAACCTTTACTTAGAAT  
GACTCTATCTTTTCAGACACTTCTTATATTATTTACAATAGTTAATAT  
+



@A00721:190:HGJW7DSXY:4:2261:3314:34100\_1:N:0:TCTGCAAG+GCTGCACT  
GTGCTCTTCCGATCTCTCTACCCCATCTCACCAGAGATAACGCGAGTTTTCCGTCCTGAACGTAATA  
CACGAAGAGATCATCCGCACACGACTCGAAACCGAGACGCCGTAGATCAAAGTCCCTTCTAACTTTAG  
ATT

```
+
:FF,F:F,F,,F:::,::,,F,FF,,,,,:::,:::,:::,F:,F:,,,FFF,F:,FF,F,F,,,F:,
:::,F:,,,::,F,FF:F,F,FFFFFFFFFFFFFFFFFFFFFFFFFFFFFFFFFFFFFFFFFFFFFFFFFFFF
FFF
```

@A00721:190:HGJW7DSXY:4:2270:28420:1329\_1:N:0:TCTGCAAG+GCTGCACT  
ATGAGGTCAAAGCTCTATTTATTAACGAACATTATCCGATTCTTCGAGGGTATCACTACCACTGAT  
CTGCCGACTTTAGTCAAGGAAC TTCAATTCCTTCGATGTTTATATTTTTCTATAAGGGAAAATAGCAA  
TAA

```
+
FFFFFFFFFFFFFFFFFFFFFFFFFFFFFFFF:FFFFFF:FFFFFFFFFFFFFFFFFFFFFFFFFFFFFFFFFFFFFFFF
FFFFFFFFFFFFFFFFFFFFFFFFFFFFFFFF:FFF:FFFFFFFFFFFFFFFFFFFFFFFF,FFFFFFFFFFFFFFFFFFFF
FFF
```

@A00721:190:HGJW7DSXY:4:2416:17219:36918\_1:N:0:TCTGCAAG+GCTGCACT  
GAACTCTCTCCGATCACCTTGGTGTGATCTCCCTGAGGATCTTTTCAATAAGATGTATGATGATAATC  
TACTATTTTAAATAGTGATATTCAGCGTATACTTGAATACTTTATCAAAGATTTGGCTTGGTCTATT  
TAC

```
+  
FF,,FFFFFFFFFFFFFFFFFFFFF:FFFFFFFFFFF,F:FF:FFFFFF:,::FF:FFF:FFFFFFF:FFF:  
FF:FFFF:FFFFFFFFFFFFFFFFFFFF,FFF,FFFFF,FFFFFF:F:FFFF,F:FFFF,F:FFF:F,FFFF  
FFF
```

@A00721:190:HGJW7DSXY:4:2413:19434:14951\_2:N:0:TCTGCAAG+GCTGCACT  
TATGATATTTATTTTACTTATACTTTAAATAGCACCGATTATACTTGACTGTTGATAATATTACAAT  
AGCTCTTTCTCAGAAGATTAGAGAAGTAACCGGTGAACACGTCGGTAG

```

+
FFFFFFFFFFFFFFFFFFFFFFFFFFFFFFFF:FFFFFFFFFFFFFFFFFFFFFFFFFFFFFFFF
FFFFFFFF:F:F:FFFFFFFFFFFFFFFF:FFFFFFFFFFFFFFFF:FFFFFFF

```

@A00721:190:HGJW7DSXY:4:2256:4788:19648\_1:N:0:TCTGCAAG+GCTGCACT  
TATCGCCTTTATTGAAATTGTATAAGAGTTAATTGCTTACACAAAAGTGACGCGGAAGGAATCTTA  
ATTGATTGAAGCTAGGCGTTGGGGAGAATGAACTGCCGCTTCCCGGAAGAAACGATCTATTTACAGAG  
TAT

```
+
FFFFFFFF:FFFFFFFF:FF:FFFFFFFFFFFFFFFFFFFFFFFF:F:FF,FFFFFFFFFFFFFFFFFFFFFFFF
FFFFFFFFFFFFFFFFFFFFFFFF,FFFFFFFF:F:FF:FFFFFFFFFFFFFFFFFFFFFFFFFFFFFFFF:
FFF
```

@A00721:190:HGJW7DSXY:4:1627:23312:25989\_2:N:0:TCTGCAAG+GCTGCACT  
CACTCCCATGCCAATCAATGATGTGACTATACAGTTCGGCCATTTCAAGAGTGGTCAATACGTCGTGG  
GAGGTACTGAAGCCTTCCCCTCCGCTGGCAGGAAGAACTCCCAAGC

```

+
FFFFFFFFFFFFFFFF:FFFFFFFF:FFFFFFFF:FFFFFFFFFFFFFFFF:FFFFFFFFFFFFFFFFFFFFFFFF:
FFFFFF:FFFFFFFF:FFFFFFFFFFFFFFFFFFFFFFFFFFFFFFFFFFFFFFFF

```

@A00721:190:HGJW7DSXY:4:2621:20202:6104\_1:N:0:TCTGCAAG+GCTGCACT  
CTCTAAGTCTACCAGGAAGAGGGGAAATGTCCCCAAACTGAGAAGAATAAAGGGAAAGGTCCATCAG  
GACCTAAGAAGGGGAAATTACCCCTAATTCTGAAGGAAGATCTCCACCATCTGGGGTTGGGAATAAG  
AAA

```
+  
FFF:FFFFF,FFFFFFFFFFFFFF:FFFFFFFFFFFFFF:FFFFFFFF  
FFFFFFFF:FFFFFFFFFFFFFFFFFFFFFFFFFFFFFFFFFFFFFFFF  
FFF
```

@A00721:190:HGJW7DSXY:4:2321:31015:7952\_1:N:0:TCTGCAAG+GCTGCACT  
CGAAGTCGCTGAAGGCGGCTTGGGTCTTAAGGGTAGCTGTAAAGTTGCGCCTGCCGACCCCATCTTT  
GAGACCAAGACTCTCTACAGTAGGTTCTGTCCTACTATGAGCAAATCTGTTGAATTCGTCACTGAGGA  
CGA

+

FFFFFFFFFFFFFFFFFFFFFFFFFFFFFFFFFFFFFFFFFFFFFFFFFFFFFFFFFFFFFFFFFFFFFFFF:FFF:  
FFFFFFFFFFFFFFFFFFFFFFFFFFFFFFFFFFFFFFFFFFFFFFFFFFFFFFFFFFFFFFFFFFFFFFFF  
FFF

@A00721:190:HGJW7DSXY:4:1348:20654:27774\_2:N:0:TCTGCAAG+GCTGCACT  
ACTGGCGACAACTGAGAGCAGTCGCTGGGGAAGAGAATTGCGTGGGTTGAAGGCCGACGCTTCGAG  
CTTGAGTGTGACGAGGCCGGTGACGTTTTGTCAACGGCGTTTGAGG

+

FFFFFFFFFFFFFFFFFFFFFFFFFFFFFFFFFFFFFFFFFFFFFFFFFFFFFFFFFFFFFFFFFFFFFFFF:FFFFFFFF,FFF:FFFFFFFFFFFFFFFFFFFF  
FFFFFFFFFFFFFFFFFFFFFFFFFFFFFFFFFFFFFFFFFFFFFFFFFFFFFFFFFFFFFFFFFFFFFFFF:FFFFF

@A00721:190:HGJW7DSXY:4:2603:22299:14591\_1:N:0:TCTGCAAG+GCTGCACT  
CCTATGGAGTCTTGAAGGACTTAGGTTGGCATATTTATGCCGACGATAATAAGCATGTCAACCCTTAAG  
CACCGAGGTAAGCTCGGGACTTACAAGAGAGAGTGTGAGAGAGTCGCTCTCACTATTTTTGCCAGAA  
TGC

+

FFFFF:FFFFFFFFFFFFFFFFFFFFFFFFFFFFFFFFFFFFFFFFFFFFFFFFFFFFFFFFFFFFFFFF:FFF:FFFFFFFFFFFFFFFFFFFF  
FFFFFFFFFFFFFFFFFFFFFFFFFFFFFFFFFFFFFFFFFFFFFFFFFFFFFFFFFFFFFFFFFFFFFFFF:FFFFF  
FFF

@A00721:190:HGJW7DSXY:4:2671:21305:15781\_1:N:0:TCTGCAAG+GCTGCACT  
GGTGTCAAGGGTCTTCTTCATGCTGATCTTTCAGGACCTAATCACATCATGATTGATAGTTACGGCTC  
GTATCGAGTTGGAGGGAGGAAGTTCTCCGAAATTAAGACGGGGGATTAAGAGTCCAGCTGTAACGT  
TCA

+

FFFFFFFFFFFFFFFFFFFFFFFFFFFFFFFFFFFFFFFFFFFFFFFFFFFFFFFFFFFFFFFFFFFFFFFF  
FFFFFFFFFFFFFFFFFFFFFFFFFFFFFFFFFFFFFFFFFFFFFFFFFFFFFFFFFFFFFFFFFFFFFFFF:FFF  
FFF

@A00721:190:HGJW7DSXY:4:1646:29089:26976\_1:N:0:TCTGCAAG+GCTGCACT  
AGGCTCTAGAGAAGATCTCCCCACCTGGAGAAGGCAAGTGGAGAGTCCAGAAGTTGATGAAGAAGGAT  
TATTTGAAGCAGGGTTACCACTTCCTAAGGTGGATGAGGGAGGTTGTTTCTTTGGAGTTTTAGATAA  
TC

+

FF:FF:FFFF:FFFFFFFF:FFFFFFFFFFFFFFFFFFFFFFFFFFFFFFFFFFFFFFFF:FFFFFFFFFFFFFFFFFFFF  
FFFFFFFFFFFFFFFFFFFFFFFFFFFFFFFFFFFFFFFFFFFFFFFFFFFFFFFFFFFFFFFFFFFFFFFF:FFFFF  
FF

@A00721:190:HGJW7DSXY:4:1616:14443:5494\_2:N:0:TCTGCAAG+GCTGCACT  
TGGACTACTCGACTTTTGATCTGGAGTTGTCTAGGGTCATGGCAGATACTACCGATAAGGTGAAAAAT  
ATGCAGGTCAAAGATTCTGTAGCTCTGAGGGCGGTTGAGGGAGATCGG

+

FFFFFFFFFFFFFFFFFFFFFFFFFFFFFFFFFFFFFFFF:FF:FFFFFFFFFFFFFFFFFFFFFFFF:FFFFFFFFFFFFFFFF  
FFFFFFFFFFFFFFFFFFFFFFFF:FFFFFFFFFFFFFFFF,FFFFFFFFFFFFFFF

@A00721:190:HGJW7DSXY:4:2406:7238:17002\_1:N:0:TCTGCAAG+GCTGCACT  
TGTGCTCTTCCGATCTTGATCATGGAGTCTTGTACCTTCTGTCAAACCTCGAGGTTACAGCTACGAGA  
GGTGATCCCGATGTGGATTGAAGGCTGGCTCTAAGGGAGACTCCTTCTTTTGAATGTTGTAAAGAA  
TTG

+

FFFFFFFFFFFFFFFFFFFFFFFFFFFFFFFF:FFFFFFFFFFFFFFFFFFFFFFFF:FFFFFFFF:FFFFFFFFFFFF  
FFFFFFFFFFFFFFFFFFFFFFFFFFFFFFFFFFFFFFFFFFFFFFFFFFFFFFFFFFFFFFFFFFFFFFFF  
FFF

@A00721:190:HGJW7DSXY:4:1276:3088:26256\_2:N:0:TCTGCAAG+GCTGCACT  
CCTGATGACATTATTTCAACGGATACCGATCTCAGTTCTACCACAGAAACCGTCTCAGGAAGTGTCTC

CACTGATTCGGAATTAGAGAAAGACGACCTTCTTGTGGGGACTGAGAC

+

FFFFFFFFFFFF,FFFFFFFFFFFF:FFFFFFFFFFFFFFFFFFFFFFFFFFFFFFFFFFFFFFFF:FFFFFFFFF:FFF  
FFFFFFFF::FFFFFFFFFFFFFFFFFFFFFFFF:FFFFFF,FFFFFFFFFFFFFFFF

@A00721:190:HGJW7DSXY:4:2368:13096:21605\_1:N:0:TCTGCAAG+GCTGCACT  
CAGGGTGCCCTGATGAGGACGTTGAAAGGGATAATTTCAACTCTGAGACTTCTAAGAGTGTTCAAAA  
GACCAGAAACGTAACAAGAAGAATAAAGGTAGGAAGGGGAGAAAACAGAACAAGCGAGCGGTTGAAGA  
GAA

+

FFFFFFFFFFFFFFFFFFFFFFFFFFFFFFFFFFFFFFFF:FFFFFFFFFFFFFFFFFFFFFFFFFFFFFFFFFFFFFFFF:FF  
FFFFFFFFFFFFFFFFFFFFFFFFFFFFFFFFFFFFFFFFFFFFFFFFFFFFFFFFFFFFFFFFFFFFFFFFFFFFFFFF  
FFF

@A00721:190:HGJW7DSXY:4:1263:30282:23218\_1:N:0:TCTGCAAG+GCTGCACT  
AACATCAACGACATCATTCTTGATGAGTGTCGTTCTTATCGAAGTCTCAGTTATCGCTGCCCCGGCCGA  
CGTTTGTGCGCAACTCTCAGAGGTTTACGGCAGAAAAATTTCTCCTGCTTGTAATTCGAGAGAGGACA  
CTA

+

FFFFFF:FFFFFFFFFFFFFFFFFFFFFFFFFFFFFFFFFFFFFFFFFFFFFFFFFFFFFFFFFFFFFFFFFFFFFFFF  
FFFFFFFFFFFFFFFFFFFFFFFFFFFFFFFFFFFFFFFFFFFFFFFFFFFFFFFFFFFFFFFFFFFFFFFFFFFFFFFF  
FFF

@A00721:190:HGJW7DSXY:4:2364:30156:33833\_1:N:0:TCTGCAAG+GCTGCACT  
ACGATGAGTATCTTGAAGTTGTTGACGACAAGCCTCAAGAGGGTAGAGGACCACCTGGATCTTCTACT  
GTCTCTGCCTTCCAAGATTTCTTAGAAGAGGTTATTCTCTGGAACCACCTTAACGTCACTCGGTAATCT  
TTC

+

FFFFFFFFFFFFFFFFFFFFFFFFFFFFFFFFFFFFFFFF:FFFFFFFFFFFFFFFFFFFFFFFFFFFFFFFFFFFFFFFF  
FFFFFFFFFFFFFFFFFFFFFFFFFFFFFFFFFFFFFFFFFFFFFFFFFFFFFFFFFFFFFFFFFFFFFFFFFFFFFFFF  
FFF

@A00721:190:HGJW7DSXY:4:2333:9191:16313\_1:N:0:TCTGCAAG+GCTGCACT  
GGAGGGAGTTCTTGAAGCATCCCGACCTTTCCTTGTGAAAATTTTGATGCGGTTTCATAAGATTATCA  
GTAATCCTGATTCTACTACGGATTCATGGACCTTCCATCCTGTACCTCTTCTGGAGAGACGTATCTCA  
AAG

+

FFFFFFFFFFFFFFFFFFFFFFFFFFFFFFFFFFFFFFFF:FFFFFFFFFFFFFFFFFFFFFFFFFFFFFFFFFFFFFFFF  
FFFFFFFFF:FFFFFFFFFFFFFFFFFFFFFFFFFFFFFFFFFFFFFFFFFFFFFFFFFFFFFFFFFFFFFFFFFFFFF  
FFF

@A00721:190:HGJW7DSXY:4:2526:32877:18411\_1:N:0:TCTGCAAG+GCTGCACT  
CAGCAGCATGACCATAATTGGTATTGACTTTGGTACCACCTTTTCTACTGTCTGTCTCGCCTCTTCGA  
ATGAAGTTTAAATGCTTAACAACAATGATAGTGAATTTATACCTACAATCATTGGTTTTTCTAATAAT  
GAT

+

FF:FFFFFFFF:FFFFFFFFFFFFFFFFFFFFFFFFFFFFFFFFFFFFFFFFFFFFFFFFFFFFFFFFFFFFFFFF  
FFFFFFFFFFFF:FFFFFFFFFFFFFFFFFFFFFFFFFFFFFFFFFFFFFFFFFFFFFFFFFFFFFFFFFFFFFFFF  
FFF

@A00721:190:HGJW7DSXY:4:2466:23321:29356\_1:N:0:TCTGCAAG+GCTGCACT  
GTGACTGGAGTTCAGACGTGTGCTCTTCCGATCTGTGAGGAGGATTCTCAGTTTACAAGGACCTTAA  
GCGATGGATCGGGGTTAATTCTAAAACATTACCCGAAAGACGTGCTAAATTAAACCATTGTACGATG  
TCG

+

FFFFFFFFFFFFFFFFFFFFFFFFFFFFFFFFFFFFFFFFFFFFFFFFFFFFFFFFFFFFFFFFFFFFFFFFFFFFF  
FFFFFFFFFFFFFFFFFFFFFFFFFFFFFFFFFFFFFFFFFFFFFFFFFFFFFFFFFFFFFFFFFFFFFFFFFFFFF  
FFF

@A00721:190:HGJW7DSXY:4:2337:8522:4852\_1:N:0:TCTGCAAG+GCTGCACT  
CAAAGATATTTTCATGAAAACCTACAGAGGAACGTACCGGATTACCTGTCTTTCATATTATGAATGAACC

TTCGGCCGCTCTCTTTGCTTCGATGTTGGATGTCAAGAAGGGTTCAGAATGGGATTCTACGTAGTTT  
ATG

+

FFFFFFFFFFFFFF:FFFFFFFFFFFFFFFFFFFFFFFFFFFFFFFFFFFFFFFFFFFFFFFFFFFFFFFF  
FFFFFFFFFFFFFFFFFFFFFFFFFFFFFFFFFFFFFFFFFFFFFFFFFFFFFFFFFFFFFFFFFFFFFFFF,FF  
FFF

@A00721:190:HGJW7DSXY:4:2467:20898:17581\_2:N:0:TCTGCAAG+GCTGCACT  
GGAGTTTTTACGGGATCCGGAATGTTCTGTCTATATTAGGTGAAGCGAAATACGATTTCGAACGTCAA  
CGTTCACCGAGTTTCGTTTCGTACCTTGATGCTGACTTTCGTCAATAT

+

FFFFFFFFFFFFFFFFFFFFFF:FFFFFFF:FFFFFFFFFFFFFFFFFFFFFFFFFFFFFFFFFFFFFFFF  
FF:FFFFFFFFFFFFFFFF:FFFFFFFFFFFFFFFF:FFFFFFFFFFFF

@A00721:190:HGJW7DSXY:4:1336:20799:32221\_1:N:0:TCTGCAAG+GCTGCACT  
TGATAACTTCTAATTTACGTTTGCTACTCAGAGCTGGTCTCTCAGCAAAGGGATGCATGGTGTATC  
TCCTCAGGAGTCCCGGCATTTGATAATAATGACGAGACTTTCGTCATAATCGCTGCATATTACGGATT  
ACA

+

FFFFFFFFFFFFFFFFFFFFFFFFFFFFFFFFFFFFFFFFFFFFFFFFFFFFFFFFFFFFFFFFFFFFFF:FFFFFFFFFFFFFFFF  
FFFFFFFFFFFFFFFFFFFFFFFFFFFFFFFFFFFFFFFFFFFFFFFFFFFFFFFFFFFFFFFFFFFFFFFF  
FFF

@A00721:190:HGJW7DSXY:4:2219:16288:6402\_1:N:0:TCTGCAAG+GCTGCACT  
CTAGTTCGAGTGCTGCTTTGGATTACGATGACGTGAGAATAGGTGAAGGGATAGTTTTTACCTCGACC  
AACATTAAGGCGGCGGCGACTAATCTTAAAGCTTCACCCAAAATGAAGGACACTTCGAAACTGAATAA  
TGA

+

FFFFFFFFFFFFFFFFFFFFFFFFFFFFFFFFFFFFFFFFFFFFFFFFFFFFFFFFFFFFFFFFFFFFFF:FFFFFFFFFFFFFFFF  
FFFFFFFFFFFFFFFFFFFFFFFFFFFFFFFFFFFFFFFFFFFFFFFFFFFFFFFFFFFFFFFFFFFFFFFF:FFFFFFFFFFFF  
FFF

@A00721:190:HGJW7DSXY:4:1557:11586:11851\_1:N:0:TCTGCAAG+GCTGCACT  
ATTCAAGCTTGTCGTTTAAAGACTGCAGAGGCTGTCAAACAAGCCCAGACTCAAGGAGTCCAATCAAA  
GGTTTTGAATTTAGCTCAACTGGGGAGACGTGCTTAAATGGGTGATAAAAATTATTTAGAGATCTTTT  
CTA

+

FFFFFFF:FFFF:FFFFFFFFFFFFFFFFFFFFFFFFFFFFFFFFFFFFFFFFFFFFFFFFFFFFFFFF  
FFFFFFFFFFFFFFFFFFFFFFFFFFFFFFFFFFFFFFFFFFFFFFFFFFFFFFFFFFFFFFFFFFFFFFFF:FFFFFFFFFFFF  
FFF

@A00721:190:HGJW7DSXY:4:1433:23637:15969\_2:N:0:TCTGCAAG+GCTGCACT  
ATCTCTCGGTCATTTACTCTGTACTTGATCTACGTCGTTTAACTGTCGGAACAACCTTTACTTAGAAT  
GACTCTATCTTTTCAGACACTTCTTATATTATTTACAATAGTTAATAT

+

FFFFFFFF:FFFFFFFFFFFFFFFFFFFFFFFFFFFFFFFFFFFFFFFFFFFFFFFFFFFFFFFFFFFF  
FFFFFFFFFFFFFFFFFFFFFFFFFFFFFFFFFFFFFFFFFFFFFFFFFFFFFFFFFFFFFFFFFFFF

@A00721:190:HGJW7DSXY:4:2271:3305:30639\_1:N:0:TCTGCAAG+GCTGCACT  
GTGCTCTTCCGATCTCTCTACCCCATCTCAACGCGGATAAAGCGAGTTTCCGTCCTTAACGTAATA  
CACGACGAGATCACCCGCAAACGACTCGAAACCGAGACGCCGTAGATCAAAGTCCCTTCTAACTTTAG  
ATT

+

FF,:,F,F:,F,F,F,:,:F,FFFF,F,:,:,F,F,FF,:,,,FFF,FF::F,:,F,:,F::,  
F,F,F,,,,,:,:,FF::F,FFFFFFFFFFFFFFFFFFFFFFFFFFFFFFFFFFFFFFFFFFFF  
FFF

@A00721:190:HGJW7DSXY:4:2306:5565:27633\_1:N:0:TCTGCAAG+GCTGCACT  
ATGAGGTCAAAGCTCTATTTATTAACGAACATTATCCGATTCTTCGAGGGTATCACGACCACTGAT  
CTGCCGACTTTAGTCAAGGAACCTCAATTCCTTCGATGTTTATTTTTCTATAAGGGAAATAGCAA  
TAA

+  
FFFFFFFF,FFFFFFFFFFFFFFFFFFFFFFFF:FF,F,F,FFFFFFFFFFFFFFFFFFFFFFFF,FFFFFFFF  
FFFFFFFFFFFFFFFFFFFFFFFFFFFFFFFFFFFFFFFFFFFFFFFFFFFFFFFFFFFFFFFFFFFFFFFF:FFFF  
FFF  
@A00721:190:HGJW7DSXY:4:2527:30969:14857\_1:N:0:TCTGCAAG+GCTGCACT  
GAACTCTCTCCGATCACCTTGGTGTGATCTCCCGGAGGATCTTTTCAATAAGATGTATGATGATAATC  
TACTATTTTAAATAGTGATATTCAGCGTATACTTGAATACTTTATCAAAGATTTGGCTTGGTCTATT  
TAC  
+  
:FFF:FFFFFF:FFFFFFFFFFFFFFFFFFFFFFFFFFFFFFFF:F:FFFFFFFFFFFFFFFFFFFFFFFF  
FFFFFFFFFFFFFFFFFFFFFFFFFFFFFFFFFFFFFFFFFFFFFFFFFFFFFFFF:FFFFFFFFFFFFFFFF  
FFF  
@A00721:190:HGJW7DSXY:4:2457:10990:16861\_2:N:0:TCTGCAAG+GCTGCACT  
TATGATATTTATTTTACTTATACTTTAAATAGCACCGATTATAACTTGACTGTTGATAATATTACAAT  
AGCTCTTCTCAGAAGATTAGAGAAGTAACCGGTGAACACGTCGGTAG  
+  
FFFFFFFFFFFFFFFFFFFFFFFFF:,FFFFFFFFFFFFFFFFFFFFFFFF:FFFFFFFF:FFFFFFFF  
FFFFFFFFFFFFFFFFFFFFFFFFF:FFFFFFFFFFFFFFFFFFFFFFFFF:  
@A00721:190:HGJW7DSXY:4:2451:1859:29011\_1:N:0:TCTGCAAG+GCTGCACT  
TATCGCCTTTATTGAAAATTGTATAAGAGTTAATTGCTTACACAAAAGTGACGCGCGAAGGAATCTTA  
ATTGATTGAAGCTAGGCGTTGGGGAGAATGAAGTGCCTTCCCGGAAGAAACGATCTATTTACAGAG  
TAT  
+  
FFFFFFFFFFFFFFFFFFFFFFFFFFFFFFFFFFFFFFFF:FFF:FFFFFFFFFFFFFFFFFFFFFFFF  
FFFFFFFFFFFFFFFFFFFFFFFFFFFFFFFFFFFFFFFFFFFFFFFFFFFFFFFFFFFFFFFFFFFFFFFF  
FFF  
@A00721:190:HGJW7DSXY:4:1647:7102:36245\_2:N:0:TCTGCAAG+GCTGCACT  
CACTCCCATGCCAATCAATGATGTGACTATACAGTTCGGCCATTTCAAGAGTGGTCAATACGTCGTGG  
GAGGTACTGAAGCCTTCCCTCCGCTGGCACGAAGAACTCCCAAGC  
+  
FFFFFFFFFFFFFFFFFFFFFFFFFFFFFFFFFFFFFFFFFFFFFFFFFFFFFFFFFFFFFFFFFFFFFFFF  
FFFFFFFFFFFFFFFFFFFFFFFFFFFFFFFFFFFFFFFFFFFFFFFFFFFFFFFFFFFFFFFF  
@A00721:190:HGJW7DSXY:4:2631:15573:13369\_1:N:0:TCTGCAAG+GCTGCACT  
CTCTAAGTCTACCAGGAAGAGGGGAAATGTCCCCAAACTGAGAAGAATAAAGGGAAAGGTCCATCAG  
GACCTAAGAAGGGGAAATTACCCCTAATTCTGAAGGAAGATCTCCACCATCTGGGGTTGGAATAAG  
AAA  
+  
:FFFFFFFFFFFFFFFFFFFFFFFFFFFFFFFFFFFFFFFFFFFFFFFFFFFFFFFFFFFFFFFFFFFFFFFF  
FFFFFFFFFFFFFFFFFFFFF:FFFFFFFFFFFFFFFFFFFFFFFFFFFFF,FFFFFFFFFFFFFFFFFFFF  
FFF  
@A00721:190:HGJW7DSXY:4:2355:1985:2644\_1:N:0:TCTGCAAG+GCTGCACT  
CGAAGTCGCTGAAGGCGGCTTGGGTCTTAAGGGTAGCTGTAAAGTTGCGCCTGCCGACCCCATCTTT  
GAGACCAAGACTCTCTACAGTAGGTTTCGTGCCTACTATGAGCAAATCTGTTGAATTCGTCACTGAGGA  
CGA  
+  
FFFFFFFFFFFFFFFFFFFFFFFFFFFFFFFFFFFFFFFFFFFFFFFFFFFFFFFFFFFFFFFFFFFFFFFF  
FFFFFFFFFFFFFFFFFFFFFFFFFFFFFFFFFFFFFFFFFFFFFFFFFFFFFFFFFFFFFFFFFFFFFFFF  
FFF  
@A00721:190:HGJW7DSXY:4:2204:16125:16642\_2:N:0:TCTGCAAG+GCTGCACT  
ACTGGCGACAACTGAGAGCAGTCGCTGGGGAAAGAGAATTGCGTGGGTTGAAGGCCGACGCTTCGAG  
CTTGAGTGTGACGAGGCCGGTGACGTTTTTGTCAACGGCGTGTGGAGG  
+  
:FFFFFFFFFFFFFFFFFFFFFFFFF:,FFFF,F:FFF:FFFFFFFFFFFFFFFFFFFFFFFFFFFFF  
FFFFFFFFFFFFF,FFFFFFFFFFFFF:FFF:FFFFFFF:,FFFFFFF

@A00721:190:HGJW7DSXY:4:2612:1561:9267\_1:N:0:TCTGCAAG+GCTGCACT  
CCTATGGAGTCTTGAAGGACTTAGGTTGGCATATTTATGCCGACGATAATAAGCATGTACCCCTTAAG  
CACCGAGGTAAGCTCGGGACTTACAAGAGAGAGTGTGAGAGAGTCGCTCTCACTATTTTTGCCAGAA  
TGC

+

FFFFFF:FFFFFFFFFFFFFFFFFFFFFFFFFFFFFFFFFFFFFFFFFFFFFFFFFFFFFFFFFFFFFFFF  
FFFFFFFFFFFFFFFFFFFFFFFFFFFFFFFFFFFFFFFFFFFFFFFFFFFFFFFFFFFFFFFFFFFFFFFF  
FFF

@A00721:190:HGJW7DSXY:4:2340:14516:16141\_1:N:0:TCTGCAAG+GCTGCACT  
TGTCAAGGGTCTTCTTCATGCTGATCTTTCAGGACCTAATCACATCATGATTGATAGTTACGGCTCGT  
ATCGAGTTGGAGGGAGGAAGTTCTCCGAAATTAAGACGGGGGATTAAGAGTCCAGCTGTAAGTGC  
ATT

+

FFFFFFFF:FFFFFFFFFFFFFFFFFFFFFFFFFFFFFFFFFFFFFFFFFFFFFFFFFFFFFFFFFFFFFFFF  
FFFFFFFFFFFFFFFFFFFFFFFFFFFFFFFFFFFFFFFFFFFFFFFFFFFFFFFFFFFFFFFFFFFFFFFF  
FFF

@A00721:190:HGJW7DSXY:4:2218:29243:15280\_1:N:0:TCTGCAAG+GCTGCACT  
AGGCTCTAGAGAAGATCTCACCACCTGGAGAAGGCATGTGGAGAGTCCAGAAGTTGATGAAGAATGAT  
TATTTGAAGCAGGGGTTACCACTTCTAAGGTGGATGAGGGAGGTTGTTTCTTTGGAGTTTAGATAA  
TC

+

FFFFF,FFFF,,FFFFFFFF::FFF,F:FFF,:FFF:,F:F,FF:FFF,FFF,FFFFFFFF:FF:,FFF  
FF::,F,FFF:F:F,,FFFF,FFF:FF:F,FFFFFFFF:FF,F:FFFF:FFFF,F,F:FFFFFFFF:  
FF

@A00721:190:HGJW7DSXY:4:1653:28013:30937\_2:N:0:TCTGCAAG+GCTGCACT  
TGGACTACTCGACTTTTGATCTGGAGTTGTCTAGGGTCATGGCAGATACTACCGATAAGGTGAAAAAT  
ATGCAGGTCAAAGATTCTGTAGCTCTGAGGGCGGTTGAGGGAGCCGTT

+

:FFFF,,FFFFFFFF,FFFFFFFFFFFF,F::F:FFF::FFFF,::F,FFFF:F:FFFFFFFF:FF:FF  
FFFFFFFF:FFFFFFFFFFFF:FFFFFFFFFFFFFFFFFFFFFFFFFFFFFFFFFFFFFFFF

@A00721:190:HGJW7DSXY:4:2416:18394:25207\_1:N:0:TCTGCAAG+GCTGCACT  
TGTGCTCTTCCGATCTTGATCATGGAGTCTTTGTACCTTCTGTCAAACCTTCGAGGTTACAGTACGAGA  
GGTGATCCCGATGTGGATTGAAGGCTGGCTCTAAGGGAGACTCCTTCTTTTTGAATGTTGTAAAGAA  
TTG

+

FFFFFFFFFFFFFFFFFFFFFFFFFFFFFFFFFFFFFFFFFFFFFFFFFFFFFFFFFFFFFFFFFFFFFFFF  
FFFFFFFFFFFFFFFFFFFFFFFFFFFFFFFFFFFFFFFFFFFFFFFFFFFFFFFFFFFFFFFFFFFFFFFF  
FFF

@A00721:190:HGJW7DSXY:4:1306:3794:35556\_2:N:0:TCTGCAAG+GCTGCACT  
CCTGATGACATTATTTCAACGATACCGATCTCAGTTCTACCACAGAAACCGTCTCAGGAAGTGTCTC  
CACTGATTCGGAATTAGAGAAAGACGACCTTCTTGTGGGACTGAGAC

+

FFFFFFFFFFFFFFFFFFFFFFFFFFFFFFFFFFFFFFFFFFFFFFFFFFFFFFFFFFFFFFFFFFFFFFFF  
FFFFFFFFFFFFFF:FFFFFFFFFFFFFFFFFFFFFFFFFFFFFFFFFFFFFFFF

@A00721:190:HGJW7DSXY:4:2463:25907:3865\_1:N:0:TCTGCAAG+GCTGCACT  
CAGGGTGCCCTGATGAGGACGTTGAAAGGGATAATTTCAACTCTGAGACTTCTAAGAGTGTTCAAAA  
GACCAGAAACGTAACAAGAAGAATAAAGGTAGGAAGGGGAGAAAACAGAACAGCGAGCGGTTGAAGA  
GAA

+

FFFFFFFFF:FFFFFFFFF,FFFFFFFFFFFFFFFFFFFFFFFFFFFFFFFFFFFFFFFFFFFFFFFFFFFF  
FF:FFFFFFFFFFFFFFFFFFFFFFFFFFFFFFFFFFFFFFFFFFFFFFFFFFFFFFFFFFFFFFFFFFFF  
FFF

@A00721:190:HGJW7DSXY:4:1306:14064:29763\_1:N:0:TCTGCAAG+GCTGCACT  
AACATCAACGACATCATCTTGATGAGTGTCTTCTATCGAAGTCTCAGTTATCGCTGCCCGGCCGA

CGTTTGTGCGAACTCTCAGAGGTTTACGGCAGAAAAATTTCTCCTGCTTGTAATTCGAGAGAGGACA  
CTA

+

:FFFFFFFFFFFFFFFFFFFFFFFFFFFFFFFFFFFFFFFFFFFFFFFFFFFFFFFFFFFFFFFFFFFFFFFF  
FFFFFFFFFFFFFFFFFFFFFFFFFFFFFFFFFFFFFFFFFFFFFFFFFFFFFFFFFFFFFFFFFFFFFFFF  
FFF

@A00721:190:HGJW7DSXY:4:2605:21784:36276\_1:N:0:TCTGCAAG+GCTGCACT  
ACGATGAGTATCTTGAAGTTGTTGACGACAAGCCTCAAGAGGGTAGAGGACCACCTGGATCTTCTACT  
GTCTCTGCCTTCCAAGATTTCTTAGAAGAGGTTATTCTGGAACCACTTAACGTCACTCGGTAATCT  
TTC

+

FFFFFFFFFFFFFFFFFFFFFFFFFFFFFFFFFFFFFFFFFFFFFFFFFFFFFFFFFFFFFFFFFFFFFFFF  
FFFFFFFFFFFFFFFFFFFFFFFFFFFFFFFFFFFFFFFFFFFFFFFFFFFFFFFFFFFFFFFFFFFFFFFF  
FFF

@A00721:190:HGJW7DSXY:4:2357:19596:15076\_1:N:0:TCTGCAAG+GCTGCACT  
GGAGGGAGTTCTTGAAGCATCCCGACCTTTCCTTGTGAAAATTTTGATGCGGTTTCATAAGATTATCA  
GTAATCCTGATTCTACTACGGATTCATGGACCTTCATCCTGTACCTCTTCTGGAGAGACGTATCTCA  
AAG

+

FFFFFFFFF:F:FFFFFFFFFFFFFFFFFFFFFFFFFFFFFFFFFFFFFFFFFFFFFFFFFFFFFFFFFFFF  
FFFFFFFFFFFFFFFFFFFFFFFFFFFFFFFFFFFFFFFFFFFFFFFFFFFFFFFFFFFFFFFFFFFFFFFF  
FFF

@A00721:190:HGJW7DSXY:4:2551:30092:2315\_1:N:0:TCTGCAAG+GCTGCACT  
CAGCAGCATGACCATAATTGGTATTGACTTTGGTACCACCTTTTCTACTGTCTGTCTCGCCTCTTCGA  
ATGAAGTTTTAATGCTTAACAACAATGATAGTGAATTTATACCTACAATCATTGGTTTTTCTAATAAT  
GAT

+

FFFFFFFFFFFF:FFFFFF:FFFFFFFFFFFFFFFFFFFFFFFF:FFF:FFFFF:FFFFFFFFFFFFFFFF  
FFFFFFFFFFFFFFFFFFFFFFFFFFFFFFFFFFFFFFFFFFFFFFFFFFFFFFFFFFFFFFFFFFFFFFFF  
FFF

@A00721:190:HGJW7DSXY:4:2624:26259:16971\_1:N:0:TCTGCAAG+GCTGCACT  
GTGACTGGAGTTCAGACGTGTGCTCTTCCGATCTGTGAGGAGGATTCTCAGTTTACAAGGACCTTAA  
GCGATGGATCGGGGTTAATTCTAAAACATTACCCGAAAGACGTGCTAAATTAACCATTGTACGATG  
TCG

+

FFFFFFFFFFFFFFFFFFFFFFFFFFFFFFFFFFFFFFFFFFFFFFFFFFFFFFFFFFFFFFFFFFFFFFFF  
FFFFFFFFFFFFFFFFFFFFFFFFFFFFFFFFFFFFFFFFFFFFFFFFFFFFFFFFFFFFFFFFFFFFFFFF  
FFF

@A00721:190:HGJW7DSXY:4:2355:19849:23375\_1:N:0:TCTGCAAG+GCTGCACT  
CAAAGATATTTTCATGAAAACACTACAGAGGAACGTACCGGATTACCTGTCTTTCATATTATGAATGAACC  
TTCGCCGCTCTCTTTGCTTCGATGTTGGATGTCAAGAAGGGTTCAGAATGGGATTCTACGTAGTTT  
ATG

+

FFFFFFF:FFF,FFFFFFFFF:FFFFFFFFFFFFFFFFFFFFFFFFFFFFFFFFFFFFFFFFFFFFFFFF  
FFFFFFFFFFFFFFFFFFFFFFFFFFFFFFFFFFFFFFFFFFFFFFFFFFFFFFFFFFFFFFFFFFFFFFFF  
FFF

@A00721:190:HGJW7DSXY:4:2515:24406:7623\_2:N:0:TCTGCAAG+GCTGCACT  
GGAGTTTTTACGGGATCCGGAATGTTCTGTCTATATTAGGTGAAGCGAAATACGATTTCGAACGTCAA  
CGTTCACCGAGTTTCGTTTCGTACCTTGATGCTGACTTTCGTCAATAT

+

FFFFFFFFFFFFFFF:FFFFFF,FF::,FFFFFFFFFFFFFFFFFFFFFFFFFFFFFFFFFFFFFFFF  
FFFFFFFFFFFFFFFFFFFFFFFFFFFFFFFFFFFFFFFFFFFFFFFFFFFFFFFFFFFFFFFF

@A00721:190:HGJW7DSXY:4:1515:29821:24424\_1:N:0:TCTGCAAG+GCTGCACT  
TGATAACTTCTAATTTACGTTTGCTACTCAGAGCTGGTCTCTCAGCAAAGGGATGCATGGTGTATC

TCCTCAGGAGTCCCGGCATTTGATAATAATGACGAGACTTTCGTCATAATCGCTGCATATTACGGATT  
ACA

+

FFFFFFFFFFFFFFFFFFFFFFFFFFFFFFFFFFFFFFFFFFFFFFFFFFFFFFFFFFFFFFFFFFFFFFFF  
FFFFFFFFFFFFFFFFFFFFFFFFFFFFFFFFFFFFFFFFFFFFFFFFFFFFFFFFFFFFFFFFFFFFFFFF  
FFF

@A00721:190:HGJW7DSXY:4:2343:3070:10285\_1:N:0:TCTGCAAG+GCTGCACT  
CTAGTTCGAGTGCTGCTTTGGATTACGATGACGTGAGAATAGGTGAAGGGATAGTTTTTACCTCGACC  
AACATTAAGGCGGCGGCGACTAATCTTAAAGCTTCACCCAAAATGAAGGACACTTCGAAACTGAATAA  
TGA

+

FFFFFFFFFFFFFFFFFFFFFFFFFFFFFFFFFFFFFFFFFFFFFFFFFFFFFFFFFFFFFFFFFFFFFFFF  
FFFFFFFFFFFFFFFFFFFFFFFFFFFFFFFFFFFFFFFFFFFFFFFFFFFFFFFFFFFFFFFFFFFFFFFF  
FFF

@A00721:190:HGJW7DSXY:4:1557:9200:14387\_1:N:0:TCTGCAAG+GCTGCACT  
ATTCAAGCTTGTCGTTTAAAGACTGCAGAGGCTGTCAAACAAGCCAGACTCAAGGAGTCCAATCAAA  
GGTTTTGAATTTAGCTCAACTGGGGAGACGTGCTTAAATGGGTGATAAAAATTATTTAGAGATCTTTT  
CTA

+

:FFFFFF:FFFFFFFFFFFFFFFFFFFFFFFFFFFFFFFFFFFFFFFFFFFFFFFFFFFFFFFFFFFFFF:  
FFF:FFFFFFFFFFFFFFFFFFFFFFFFFFFFFFFFFFFFFFFFFFFFFFFFFFFFFFFFFFFFFFFF:  
FFF

@A00721:190:HGJW7DSXY:4:1466:17372:10723\_2:N:0:TCTGCAAG+GCTGCACT  
ATCTCTCGGTCATTTACTCTGTACTTGATCTACGTCGTTTAACTGTCGGAACAACCTTTACTTAGAAT  
GACTCTATCTTTTCAGACACTTCTTATATTATTTACAATAGTTAATAT

+

FFFFFFFFFFFFFFFFFFFF:FF:FFFFFFFFFFFFFFFFFFFFFFFFFFFFFFFFFFFFFFFFFFFFFF  
FFFFFFFFFFFFFFFFFFFFFFFFFFFFFFFFFFFFFFFFFFFF:FFFFFFFFFFFFFFF

@A00721:190:HGJW7DSXY:4:1223:10465:31829\_1:N:0:TCTGCAAG+GCTGCACT  
ATAATAGATTTAGTCAATACACCAATCTCAACTAGGATAATGCGTGTTTTCCGACCTTAACCTAATAC  
CCTATCAGATCACCCGCACACGACTCGAAACCGAGACGCCGTAGATCAAAGTCCCTTCTAACTTTAGA  
TT

+

: ,F,F,, :FF: , , , , ,FF: , , , , ,F:F: , , , , , , , ,F,,F,, , , ,FF,,FF,, : ,F,F,, , , ,F,, ,  
 , , , : , , ,F,, , ,F: ,FF,FFFFFFFF:FFFFFFFFFFFFFFFFFFFFFFFFFFFFFFFFFFFF  
FF

@A00721:190:HGJW7DSXY:4:2331:26530:4225\_1:N:0:TCTGCAAG+GCTGCACT  
ATGAGGTCAAAGCTCTATTTATTAACGAACCTATTATCCGATTCTTCGAGGGTATCACTACCACTGAT  
CTGCCGACTTTAGTCAAGGAACCTCAATTCCTTCGATGTTTATATTTTCTATAAGGGAAAATAGCAA  
TAA

+

:FFF,F:FFFF,FFFFFFFFFFF:FFF:FFF,FFFFFFFFFFFFFFFFFFFFFFFFFFFFFFFFFFFF:FFFFFF  
FFFF, :FFF:FFFFFFFFFFFFFFFFFFFF,FFFFFF,FFFFFFFFFFFFFF:FFFFFF:FFFFFFFFFF,FFF  
FFF

@A00721:190:HGJW7DSXY:4:2610:12753:26209\_1:N:0:TCTGCAAG+GCTGCACT  
GAACTCTCTCCGATCACCTTGCTGTGATCTCCCGAGGATCTTTTCAATAAGATGTATGATGATAATC  
TACTATTTTAAATAGTGATATTACGCGTATACTTGAATACTTTATCAAAGATTTGGCTTGGTCTATT  
TAC

+

FFFFFFFFFFFFFFFFFFFFFFFFFFFFFFFFFFFFFFFFFFFF:FFFFFFFFFFFFFFFFFFFFFFFFFFFF  
FFFFFFFFFFFFFFFFFFFFFFFFFFFFFFFFFFFFFFFFFFFFFFFFFFFFFFFFFFFFFFFFFFFFFFFF  
FFF

@A00721:190:HGJW7DSXY:4:2205:14669:5729\_1:N:0:TCTGCAAG+GCTGCACT  
TTATTTTACTTATACTTTAAATAGCACCGATTATAACTTGACTGTTGATAATATTACAATAGCTCTTT



CTCAGAAGATTAGAGAAGTAACCGGTGAACACGTCGGTAGCATTGATTTACTTTTACCGTTAGAACTG  
AAA

+

FFFFFFFFFFFFFFFFFFFFFFFFFFFFFFFFFFFFFFFFFFFFFFFFFFFFFFFFFFFFFFFFFFFFFFFF  
FFFFFFFFFFFFFFFFFFFFFFFFFFFFFFFFFFFFFFFFFFFFFFFFFFFFFFFFFFFFFFFFFFFFFFFF  
FFF

@A00721:190:HGJW7DSXY:4:2470:3568:20134\_1:N:0:TCTGCAAG+GCTGCACT  
TATCGCCTTTATTGAAAATTGTATAAGAGTTAATTGCTTACACAAAAGTGACGCGCAAGGAATCTTA  
ATTGATTGAAGCTAGGCGTTGGGGAGAATGAACTGCCGCTCCCGGAAGAAACGATCTATTTACAGAG  
TAT

+

FFFFFFFFFFFFFFFFFFFFFFFFFFFFFFFFFFFFFFFFFFFFFFFFFFFFFFFFFFFFFFFFFFFFFFFF  
FFFFFFFFFFFFFFFFFFFFFFFFFFFFFFFFFFFFFFFFFFFFFFFFFFFFFFFFFFFFFFFFFFFFFFFF  
FFF

@A00721:190:HGJW7DSXY:4:1660:9760:5368\_2:N:0:TCTGCAAG+GCTGCACT  
CACTCCCATGCCAATCAATGATGTGACTATACAGTTCGGCCATTTCAAGAGTGGTCAATACGTCGTGG  
GAGGTACTGAAGCCTTCCCCTCCGCTGGCACGAAGAACACTCCCAAGC

+

FFFFFFFFFFFFFFFFFFFFFFFFFFFFFFFFFFFFFFFFFFFFFFFFFFFFFFFFFFFFFFFFFFFFFFFF  
FFFFFFFFFFFFFFFFFFFFFFFFFFFFFFFFFFFFFFFFFFFFFFFFFFFFFFFFFFFFFFFFFFFFFFFF

@A00721:190:HGJW7DSXY:4:2662:19949:1438\_1:N:0:TCTGCAAG+GCTGCACT  
CTCTAAGTCTACCAGGAAGAGGGGAAATGTCCCCAAAAGTGAAGAATAAAGGGAAAGGTCCATCAG  
GACCTAAGAAGGGGAAATTACCCCTAATTCTGAAGGAAGATCTCCACCATCTGGGGTTGGGAATAAG  
AAA

+

FFFFFFFFFFFFFFFFFFFFFFFFFFFFFFFFFFFFFFFFFFFFFFFFFFFFFFFFFFFFFFFFFFFFFFFF  
FFFFFFFFFFFFFFFFFFFFFFFFFFFFFFFFFFFFFFFFFFFFFFFFFFFFFFFFFFFFFFFFFFFFFFFF  
F,F

@A00721:190:HGJW7DSXY:4:2410:21124:28870\_1:N:0:TCTGCAAG+GCTGCACT  
CGAAGTCGCTGAAGGCGGCTTGGGTCAATTAAGGTAGCTGTAAAGTTGCGCCTGCCGACCCCATCTTT  
GAGACCAAGACTCTCTACAGTAGGTTCTGTCCTACTATGAGCAAATCTGTTGAATTCGTCACTGAGGA  
CGA

+

FFFFFFFFFFFFFFFFFFFFFFFFFFFFFFFFFFFFFFFFFFFFFFFFFFFFFFFFFFFFFFFFFFFFFFFF  
FFFFFFFFFFFFFFFFFFFFFFFFFFFFFFFFFFFFFFFFFFFFFFFFFFFFFFFFFFFFFFFFFFFFFFFF  
FFF

@A00721:190:HGJW7DSXY:4:2405:21459:8970\_2:N:0:TCTGCAAG+GCTGCACT  
ACTGGCGACAACTGAGAGCAGTCGCTGGGGAAAGAGAATTGCGTGGGTTGAAGCCGACGCTTCGAG  
CTTGAGTGTGACGAGGCCGGTGACGTTTTGTCAACGGCGTTTGGAGG

+

FFFFFFFFFFFFFFFFFFFFFFFFFFFFFFFFFFFFFFFFFFFFFFFFFFFFFFFFFFFFFFFFFFFFFFFF  
FFFFFFFFFFFFFFFFFFFFFFFFFFFFFFFFFFFFFFFFFFFFFFFFFFFFFFFFFFFFFFFFFFFFFFFF  
FFF

@A00721:190:HGJW7DSXY:4:2629:3694:3161\_1:N:0:TCTGCAAG+GCTGCACT  
CCTATGGAGTCTTGAAGGACTTAGGTTGGCATATTTATGCCGACGATAATAAGCATGTCACCCTTAAG  
CACCGAGGTAAGCTCGGGACTTACAAGAGAGAGTGTGAGAGAGTCGCTCTCACTATTTTTGCCAGAA  
TGC

+

FFFFF:FFFFFFFFFFFFFFFFFFFFFFFFFFFFFFFFFFFFFFFFFFFFFFFFFFFFFFFFFFFFFFFF  
FFFFFFFFFFFFFFFFFFFFFFFFFFFFFFFFFFFFFFFFFFFFFFFFFFFFFFFFFFFFFFFFFFFFFFFF  
FFF

@A00721:190:HGJW7DSXY:4:1212:6415:11851\_2:N:0:TCTGCAAG+GCTGCACT  
AGGGTCTTCTTCATGATGATCTTTCAGGACCTAATCACATCATGATTGATAGTTACGGCTCGTATCGA  
GTTGGAGGGAGGAAGTTCTCCGAAATTAAAGACGGGGGGATTAAGAGT

+

F,,FFF,,:F:,F:F,::FF,F::FF,FFF:FFF,:F:F,FF:,F,F,FFF:FFF,FF,:F,F,F:FF  
F,FF,,,FFFF,FFFFFF:,F:FFFF,FFFF,,:F:,F,:F:FF:FF  
@A00721:190:HGJW7DSXY:4:2658:30734:18677\_1:N:0:TCTGCAAG+GCTGCACT  
AGGCTCTAGAGAAGATCTCACCACCTGGAGAAGGCAAGTGGAGAGTCCAGAAGTTGATGAAGAAGGAT  
TATTTGAAGCAGGGGTTACCACTTCCTAAGGTGGATGAGGGAGGTTGTTTCTTTGGAGTTTGTAGATAA  
TC

+  
FFF,FFFFFFFF:FFF:,F,FF,F:FFFF:FFFFFFFFFFFF:FFFFFFFFFFFF:FFF:FFF  
FF::FFFF:FFFFFFFFFFFF:FF:FF:FFFFFFFFFFFF:FFFFFFFFFFFF:FFFFFFFF:FFF  
FF

@A00721:190:HGJW7DSXY:4:2673:8666:34413\_2:N:0:TCTGCAAG+GCTGCACT  
TGGACTACTCGACTTTTGATCTGGAGTTGTCTAGGGTCATGGCAGATACTACCGATAAGGTGAAAAAT  
ATGCAGGTCAAAGATTCTGTAGCTCTGAGGGCGGTTGAGGGAGCCGTT

+  
FFFFFFFFFFFFFFFFFFFFFFFFFFFFFFFFFFFFFFFFFFFFFFFFFFFFFFFFFFFFFFFF  
FFFFFFFFFFFFFFFFFFFFFFFFFFFFFFFFFFFFFFFFFFFFFFFFFFFFFFFFFFFFFFFF

@A00721:190:HGJW7DSXY:4:2611:29161:9345\_1:N:0:TCTGCAAG+GCTGCACT  
TGTGCTCTTCCGATCTTGATCATGGAGTCTTGTACCTTCTGTCAAACCTCGAGGTTTCAGCTACGAGA  
GGTGATCCCGGATGTGGATTGAAGGCTGGCTCTAAGGGAGACTCCTTCTTTTGAATGTTGTAAAGAA  
TTG

+  
FFFFFFFFFFFFFFFFFFFFFFFFFFFF:FFFFFFFFFFFFFFFFFFFFFFFFFFFFFFFFFFFF  
FFFFFFFFFFFFFFFFFFFFFFFFFFFFFFFFFFFFFFFFFFFFFFFFFFFFFFFFFFFFFFFFFFFF  
FFF

@A00721:190:HGJW7DSXY:4:1455:24704:7106\_2:N:0:TCTGCAAG+GCTGCACT  
CCTGATGACATTATTTCAACGGATACCGATCTCAGTTCTACCACAGAAACCGTCTCAGGAAGTGTCTC  
CACTGATTCCGAATTAGAGAAAGACGACCTTCTTGTGGGGACTGAGAC

+  
FFFFFFFFFFFFFFFFFFFFFFFFFFFFFFFFFFFFFFFFFFFFFFFFFFFFFFFFFFFFFFFF  
FFFFFFFFFFFFFFFFFFFFFFFFFFFFFFFFFFFFFFFFFFFFFFFFFFFFFFFFFFFFFFFF

@A00721:190:HGJW7DSXY:4:2547:16369:7889\_1:N:0:TCTGCAAG+GCTGCACT  
CAGGGTGCCCTGATGAGGACGTTGAAAGGGATAATTTCAACTCTGAGACTTCTAAGAGTGTTCAAAA  
GACCAGAAACGTAACAAGAAGAATAAAGGTAGGAAGGGGAGAAAACAGAACAAGCGAGCGGTTGAAGA  
GAA

+  
::FFFFFFFF:FFFFFFFFFFFFFFFFFFFFFFFFFFFFFFFFFFFFFFFFFFFFFFFFFFFF  
FFFFFFFFFFFFFFFFFFFFFFFFFFFFFFFFFFFFFFFFFFFFFFFFFFFF:FFFFFFFFFFFF:FFFFF  
FFF

@A00721:190:HGJW7DSXY:4:1319:18050:15812\_1:N:0:TCTGCAAG+GCTGCACT  
AACATCAACGACATCATTTGATGAGTGTCTTCTTATCGAAGTCTCAGTTATCGCTGCCCGGCCGA  
CGTTTGTGCGCAACTCTCAGAGGTTTACGGCAGAAAAATTTCTCCTGCTTGTAAATTCGAGAGAGGACA  
CTA

+  
FFFFFF:FFF:FFFFFF,FFFFFFFFFFFFFFFFFFFF:FFFFF:FFFFFFFFFFFFFF,FFFFFF  
FFFFFFFFFFFFFFFFFFFF:FFFFF:FFFFFFFFFFFFFFFFFFFFFFFFFFFFFFFFFFFF  
FFF

@A00721:190:HGJW7DSXY:4:1340:19425:31469\_1:N:0:TCTGCAAG+GCTGCACT  
TCTTCCGATCTCTTGAAGTTGTTGACGACAAGCCTCAAGAGGGTAGAGGACCACCTGGATCTTCTACT  
GTCTCTGCCTTCCAAGATTTCTTAGAAGAGGTTATTCTGGAACCACTTAACGTCACTCGGTAATCT  
TTC

+  
FFFFFFF:FFFF,FFFFFFFFFFFFFFFFFFFFFFFFFFFFFFFFFFFFFFFFFFFFFFFFFFFF:F  
FFFFFFFFFFFFFFFFFFFF,FFFFFFFFFFFFFFFFFFFFFFFFFFFFFFFFFFFFFFFFFFFF  
FFF

@A00721:190:HGJW7DSXY:4:2363:3152:24831\_1:N:0:TCTGCAAG+GCTGCACT  
GGAGGGAGTTCTTGAAGCATCCCGACCTTTCCTTGTGAAAATTTTGATGCGGTTTCATAAGATTATCA  
GTAATCCTGATTCTACTACGGATTTCATGGACCTTCCATCCTGTACCTCTTCTGGAGAGACGTATCTCA  
AAG

+

:FFFFFFFFFFFFFFFFFFFFFFFFFFFFFFFFFFFFFFFFFFFFFFFFFFFFFFFFFFFFFFFFFFFFFFFF  
FF:FF,FFFFFFFFFFFFFFFFFFFFFFFFFFFFFFFFFFFFFFFFFFFFFFFFFFFFFFFFFFFFFFFF  
FFF

@A00721:190:HGJW7DSXY:4:2632:14859:21997\_1:N:0:TCTGCAAG+GCTGCACT  
CAGCAGCATGACCATAATTGGTATTGACTTTGGTACCACCTTTTCTACTGTCTGTCTCGCCTCTTCGA  
ATGAAGTTTAAATGCTTAACAACAATGATAGTGAATTTATACCTACAATCATTGGTTTTTCTAATAAT  
GAT

+

FFFFFFFFFFFFFFFFFFFFFFFFFFFFFFFFFFFFFFFFFFFFFFFFFFFFFFFFFFFFFFFFFFFFFFFF  
FFFFFFFFFFFFFFFFFFFFFFFFFFFFFFFFFFFFFFFFFFFFFFFFFFFFFFFFFFFFFFFFFFFFFFFF  
FFF

@A00721:190:HGJW7DSXY:4:1576:18756:34757\_1:N:0:TCTGCAAG+GCTGCACT  
TGCTATTACTCATGATGGTTACGGTCAGGGAGGATTCTCAGTTTACAAGGACCTTAAGCGATGGATCG  
GGGTTAATTCTAAAACATTACCCGAAAGACGTGCTAAATTAAAACCATTGTACGATGTCGTCTGTCTC  
GGC

+

FFFFFFFFFFFFFFFFFFFFFFFFFFFFFFFFFFFFFFFFFFFFFFFFFFFFFFFFFFFFFFFFFFFFFFFF  
FFFFFFFFFFFFFFFFFFFFFFFFFFFFFFFFFFFFFFFFFFFFFFFFFFFFFFFFFFFFFFFFFFFFFFFF  
FFF

@A00721:190:HGJW7DSXY:4:2418:13621:29590\_1:N:0:TCTGCAAG+GCTGCACT  
CAAAGATATTTTCATGAAAACCTACAGAGGAACGTACCGGATTACCTGTCTTTTCATATTATGAATGAACC  
TTCGGCCGCTCTCTTTGCTTCGATGTTGGATGTCAAGAAGGGTTCAGAATGGGATTCTACGTAGTTT  
ATG

+

FFFFFFFFFFFFFFFFFFFFFFFFFFFFFFFFFFFFFFFFFFFFFFFFFFFFFFFFFFFFFFFFFFFFFFFF  
FFFFFFFFFFFFFFFFFFFFFFFFFFFFFFFFFFFFFFFFFFFFFFFFFFFFFFFFFFFFFFFFFFFFFFFF  
FFF

@A00721:190:HGJW7DSXY:4:2618:30291:9455\_2:N:0:TCTGCAAG+GCTGCACT  
GGAGTTTTTACGGGATCCGGAATGTTCTGTCTATATTAGGTGAAGCGAAATACGATTTTGAACGTCAA  
CGTTCACCGAGTTTCGTTTCGTACCTTGATGCTGACTTTTCGTCAATAT

+

FFFFFFFFFFFFFFFFFFFFFFFFFFFFFFFFFFFFFFFFFFFFFFFFFFFFFFFFFFFFFFFFFFFFFFFF  
FFFFFFFFFFFFFFFFFFFFFFFFFFFFFFFFFFFFFFFFFFFFFFFFFFFFFFFFFFFFFFFFFFFFFFFF  
FFF

@A00721:190:HGJW7DSXY:4:1604:31801:36965\_1:N:0:TCTGCAAG+GCTGCACT  
TGATAACTTCTAATTTACGTTTGCTACTCAGAGCTGGTCTCTCAGCAAAGGGATGCATGGTGTATC  
TCCTCAGGAGTCCCGGCATTTGATAATAATGACGAGACTTTCGTCATAATCGCTGCATATTACGGATT  
ACA

+

FFFFFFFFFFFFFFFFFFFFFFFFFFFFFFFFFFFFFFFFFFFFFFFFFFFFFFFFFFFFFFFFFFFFFFFF  
FFFFFFFFFFFFFFFFFFFFFFFFFFFFFFFFFFFFFFFFFFFFFFFFFFFFFFFFFFFFFFFFFFFFFFFF  
FFF

@A00721:190:HGJW7DSXY:4:2570:22354:13369\_2:N:0:TCTGCAAG+GCTGCACT  
ATAGGTGAAGGGATAGTTTTTACCTCGACCAACATTAAGGCGGCGGCGACTAATCTTAAAGCTTCACC  
CAAAATGAAGGACACTTCGAAACTGAATAATGATGCACTACAAACAAG

+

FFFFFFFFFFFFFFFFFFFFFFFFFFFFFFFFFFFFFFFFFFFFFFFFFFFFFFFFFFFFFFFFFFFFFFFF  
FFFFFFFFFFFFFFFFFFFFFFFFFFFFFFFFFFFFFFFFFFFFFFFFFFFFFFFFFFFFFFFFFFFFFFFF  
FFF

@A00721:190:HGJW7DSXY:4:1566:17725:21449\_1:N:0:TCTGCAAG+GCTGCACT  
ATTCAAGCTTGTCGTTTAAAGACTGCAGAGGCTGTCAAACAAGCCAGACTCAAGGAGTCCAATCAAA

GGTTTTGAATTTAGCTCAACTGGGGAGACGTGCTTAAATGGGTGATAAAAAATTATTTAGAGATCTTTT  
CTA

+

FFFFFFFFFFFFFFFFFFFFFFFFFFFFFFFFFFFFFFFFFFFFFFFFFFFFFFFFFFFFFFFFFFFFFFFFF:  
F:FFFFFFFFFFFFFFFFFFFFFFFFFFFFFFFFFFFFFFFFFFFFFFFFFFFFFFFFFFFFFFFFFFFFFFFFF  
FFF

@A00721:190:HGJW7DSXY:4:1574:24216:5165\_2:N:0:TCTGCAAG+GCTGCACT  
ATCTCTCGGTCATTTACTCTGTACTTGATCTACGTCGTTTAACTGTCGGAACAACCTTTACTTAGAAT  
GACTCTATCTTTTCAGACACTTCTTATATTATTTACAATAGTTAATAT

+

FFFFFFFFFFFFFFF:FFFFFFFFFFFFFFFFFFFFFFFFFFFFFFFFFFFFFFFFFFFFFFFFFFFFFFFFF,FFFFFF  
FFFFFFFFF,FFFFFFFFFFFFFFFFFFFFFFFFF::FFFFFFFFFFFFFFF

@A00721:190:HGJW7DSXY:4:1302:21992:17754\_1:N:0:TCTGCAAG+GCTGCACT  
ATAATATATTTAGACTCAAAACCCATCTCACCGCGGAAACGCGTTTTTCCGCCCTGAACTAAAAAC  
ACTACGATATCACCCGCACACGACTCGAAACCGAGACGCCGTAGATCAAAGTCCCTTCTAACTTTAGA  
TT

+

: ,F,F,: ,:F: , , , : , , ,F , ,F: , , , , , ,F , , ,F,F: , , , ,FF: ,F,F,F,F,: , , ,FF: ,F  
: , ,F , , ,F , , : ,FF: , : FFFFFFFFFF,FFFFFFFFFFFF:FFFFFF:FFFFFFFFFFFF:F:FFFF  
FF

@A00721:190:HGJW7DSXY:4:2371:27245:17613\_1:N:0:TCTGCAAG+GCTGCACT  
ATGAGGTCAAAGCTCTATTTATTAACGAACATTATCCGATTCTTCGAGGGTATCACTACCACTGAT  
CTGCCGACTTTAGTCAAGGAACCTCAATTCCTTCGATGTTTATATTTTTCTATAAGGGAAATAGCAA  
TAA

+

FFFFFFFFFFFFFFFFF:FFFFFFFFFFFFFFFFFFFFFFFFFFFFFFFFFFFFFFFFFFFFFFFFFFFFFFF:FFFFFF,FFFFFFFFF  
FFFFFFFFFFFFFFFFFFFFFFFFFFFFFFFFF:F:FFFFFFFFFFFFFFFFFFFFFFFFF:FFFFFFFFFFFFFFFFFFFFF  
FFF

@A00721:190:HGJW7DSXY:4:1159:2211:36166\_1:N:0:TCTGCAAG+GCTGCACT  
AACTCTCTCCGATCACCTTGGTGTGATCTCCCGGAGGATCTTTTCAATAAGATGTATGATGATAATCT  
ACTATTTTTAAATAGTGATATTCAGCGTATACTTGAATACTTTATCAAAGATTGGCTTGGTCTATTT  
ACC

+

FFFFFFFFFFFFFFFFFFFFFFFFFFFFFFFFFFFFFFFFF:FFFFFFFFF:FF:FFFFFFFFFFFFFFFFFFFFFFFFF  
FFFFFFFFFFFFFFFFFFFFFFFFFFFFFFFFFFFFFFFFFFFFFFFFFFFFFFFFFFFFFFFFFFFFFFFFF  
FFF

@A00721:190:HGJW7DSXY:4:2210:23285:13949\_1:N:0:TCTGCAAG+GCTGCACT  
TTATTTTACTTATACTTTAAATAGCACCGATTATAACTTGACTGTTGATAATATTACAATAGCTCTTT  
CTCAGAAGATTAGAGAAGTAACCGGTGAACACGTCGGTAGCATTGATTTACTTTTACCGTTAGAACTG  
AAA

+

: ,FF:FFFFFFF:FFF: ,FFFFFFFFFFFFF:F:FFFF: ,F:FFFFFFF:FF:FFFF:FFFFFFFFF  
F:FFFFFF:FFFFFFFFFFFFF:FFF: ,FFFFFFF:FFFFF:FFFFFFFF: ,FFFF:FFFFFFFFF: ,F  
FFF

@A00721:190:HGJW7DSXY:4:2607:29984:23547\_1:N:0:TCTGCAAG+GCTGCACT  
TATCGCCTTTATTGAAAATTGTATAAGAGTTAATTGCTTACACAAAAGTGACGCGCGAAGGAATCTTA  
ATTGATTGAAGCTAGGCGTTGGGGAGAATGAACTGCCGCTTCCCGGAAGAAACGATCTATTTACAGAG  
TAT

+

FFFFF: ,FFFFFFFFFFFFFFFFFFFFFFFFFFFFFFFFF:FFFFFFFFFFFFFFFFFFFFFFFFFFFFFFFFF  
FFFFFFFFFFFFFFFFFFFFFFFFFFFFFFFFFFFFFFFFFFFFFFFFFFFFFFFFFFFFFFFFFFFFFFFFF  
FFF

@A00721:190:HGJW7DSXY:4:1665:3405:8609\_2:N:0:TCTGCAAG+GCTGCACT  
CACTCCCATGCCAATCAATGATGTGACTATACAGTTCGGCCATTTCAAGAGTGGTCAATACGTCGTGG

GAGGTAAGCCTTCCCCTCCGCTGGCACGAAGAACAACACTCCCAAGC

+

FFFFFFFFFFFFFF:FFFFFFFFFFFFFF:FFFFFFFF:FFFF:FFFFFFFFFFFF  
FFFF:FFFFFFFFFFFFFF:FFFFFFFFFFFFFF:FFFFFFFF:F

@A00721:190:HGJW7DSXY:4:1571:32099:1470\_1:N:0:TCTGCAAG+GCTGCACT  
TCTAAGTCTACCAGGAAGAGGGGAAATGTCCCCAAAAGTGAAGAATAAAGGGAAAGGTCCATCAGG  
ACCTAAGAAGGGGAAATTACCCCTAATTCTGAAGGAAGATCTCCCACCATCTGGGGTTGGAATAAGA  
AA

+

FFFF:F,FFFF:FF:FF:FFF:FF:FFFFFF,:FFF:FFFFFFFFF::FFFF::FFFFFF,FFFF  
:FF,F:F,,FFFFFFFF:FFFFFFFF:FFFF:FFFFFFFF,FFFFFFFFFFFF:FFFFFF,FFFFFF  
FF

@A00721:190:HGJW7DSXY:4:2410:21386:28855\_1:N:0:TCTGCAAG+GCTGCACT  
CGAAGTCGCTGAAGGCGGCTTGGGTCATTAAGGGTAGCTGTAAAGTTGCGCCTGCCGACCCCATCTTT  
GAGACCAAGACTCTCTACAGTAGGTTCTGTCCTACTATGAGCAAATCTGTTGAATTCGTCACTGAGGA  
CGA

+

FFFFFFFFFFFFFFFFFFFFFFFFFFFFFFFFFFFFFFFF:FFFFFFFFFFFFFFFFFFFFFFFF  
FFFFFFFFFFFFFFFFFFFFFFFFFFFFFFFFFFFFFFFFFFFFFFFFFFFFFFFFFFFFFFFF  
FFF

@A00721:190:HGJW7DSXY:4:1178:24026:36683\_2:N:0:TCTGCAAG+GCTGCACT  
GGCGACAACTGAGAGCAGTCGCTGGGGAAAGAGAATTGCGTGGGTTGAAGGCCGACGCTTCGAGCTT  
TAGTGTGACGAGGCCGGTGACGTTTTTGTCAACGGCGTTTGTAGGATT

+

F,FFFFFFFF:F,F:FF:FFF,F:FF::FFFF:FFF:,F,::FFFF,F:F,FFF,,F:FFFF,  
,F:,F:F,FFF:F,:F::F,,FFF:,FFFF:F:FFFF:,F,FF:F

@A00721:190:HGJW7DSXY:4:1421:13006:18098\_2:N:0:TCTGCAAG+GCTGCACT  
CTATGGAGTCTTGAAGGACTTAGGTTGGCATATTTATGCCGACGATAATAAGCATGTCAACCTTAAGC  
ACCGAGGTAAGCTCGGGACTTACAAGAGAGAGTGTGAGAGAGTCGCTC

+

FFFFFFFFFFFFFFFFFFFFFFFFFFFFFFFFFFFFFFFF:FFFFFFFFFFFFFFFFFFFFFFFF  
FFFFFFFFFFFFFFFFFFFFFFFFFFFFFFFFFFFFFFFF

@A00721:190:HGJW7DSXY:4:1371:14145:10457\_2:N:0:TCTGCAAG+GCTGCACT  
AGGGTCTTCTTCATGCTGATCTTTCAGGACCTAATCACATCATGATTGATAGTTACGGCTCGTATCGA  
GTTGGAGGGAGGAAGTTCTCCGAAATTAAGACGGGGGGATTAAGAGT

+

FFFFFFFFFFFFFFFFFFFFFFFFFFFFFFFFFFFFFFFF:FFFFFFFFFFFFFFFFFFFFFFFF  
FFFFFFFFFFFFFFFFFFFFFFFFFFFFFFFFFFFF,FFFFFFFFFFFFFF

@A00721:190:HGJW7DSXY:4:2676:6876:2347\_1:N:0:TCTGCAAG+GCTGCACT  
AGGCTCTAGAGAAGATCTCACCACTGGAGAAGGCAAGTGGAGAGTCCAGAAGTTGATGAAGAAGGAT  
TATTTGAAGCAGGGTTACCACTTCTTAAGGTGGATGAGGGAGGTTGTTTCTTTGGAGTTTATAGATAA  
TC

+

FF,FF:FFFFFFFFFFFFFFFF:FFFFFFFFFFFFFFFF:FFFF:FFFFFFFFFFFFFFFF:,F:FFF  
FFFF:F,FFFFFFFFFFFFFFFF:FFFFFFFFFFFFFFFFFFFFFFFFFFFFFFFFFFFF  
FF

@A00721:190:HGJW7DSXY:4:1112:31937:8296\_2:N:0:TCTGCAAG+GCTGCACT  
GGACTACTCGACTTTTGATCTGGAGTTGTCTAGGGTCATGGCAGATACTACCGATAAGGTGAAAAATA  
TGCAGGTCAAAGATTCTGTAGCTCTGAGGGCGGTTGAGGGAGCCGTTT

+

FFFF:FFFFFFFFFFFFFFFFFFFFFFFFFFFFFFFFFFFFFFFFFFFFFFFFFFFFFFFFFFFF  
FFFFFFFFFFFFFF:FFFFFFFFFFFFFFFFFFFFFFFFFFFFFFFFFFFFFFFF

@A00721:190:HGJW7DSXY:4:2624:18936:27524\_1:N:0:TCTGCAAG+GCTGCACT  
TGTGCTCTCCGATCTTGATCATGGAGTCTTGTACCTCTGTCAAACCTTCGAGGTTTCAGCTACGAGA

GGTGATCCCGGATGTGGATTGAAGGCTGGCTCTAAGGGAGACTCCTTCTTTTTGAATGTTGTAAAGAA  
TTG

+

FFFFFFFFFFFF:FFFFFFFFFFFF:FFFFFFFFFFFF:FFFFFFFFFFFF:FFFFFFFFFFFF:FFFFFFFFFFFF  
FFFFFFFFFFFF:FFFFFFFFFFFF:FFFFFFFFFFFF:FFFFFFFFFFFF:FFFFFFFFFFFF:FFFFFFFFFFFF  
FFF

@A00721:190:HGJW7DSXY:4:1457:30816:29966\_2:N:0:TCTGCAAG+GCTGCACT  
CCTGATGACATTATTTCAACGGATACCGATCTCAGTTCTACCACAGAAACCGTCTCAGGAAGTGTCTC  
CACTGATTCCGAATTAGAGAAAGACGACCTTCTTGTGGGGACTGAGAC

+

FFFFFFFFFFFF:FFFFFFFFFFFF:FFFFFFFFFFFF:FFFFFFFFFFFF:FFFFFFFFFFFF:FFFFFFFFFFFF  
FFFFFFFFFFFF:FFFFFFFFFFFF:FFFFFFFFFFFF:FFFFFFFFFFFF:FFFFFFFFFFFF:FFFFFFFFFFFF

@A00721:190:HGJW7DSXY:4:1317:29912:27993\_2:N:0:TCTGCAAG+GCTGCACT  
GGTGCCCTGATGAGGACGTTGAAAGGGATAATTTCAACTCTGAGACTTCTAAGAGTGTTCAAAAGAC  
CAGAAACGTAACAAGAAGAATAAAGGTAGGAAGGGGAGAAAACAGAAC

+

FFFFFFFFFFFF:FFFFFFFFFFFF:FFFFFFFFFFFF:FFFFFFFFFFFF:FFFFFFFFFFFF:FFFFFFFFFFFF  
FFFFFFFFF,FFFFFFFFFFFF:FFFFFFFFFFFF:FFFFF:F

@A00721:190:HGJW7DSXY:4:1476:28971:4758\_1:N:0:TCTGCAAG+GCTGCACT  
AACATCAACGACATCATTCTTGATGAGTGTCGTTCTTATCGAAGTCTCAGTTATCGCTGCCCGGCCGA  
CGTTTGTGCGCAACTCTCAGAGGTTTACGGCAGAAAAATTTCTCCTGCTTGTAAATTCGAGAGAGGACA  
CTA

+

FFF:FFFFFFFFF:FFFFFFFFF:FFFFFFFFF:FFF:F:FFFFFFFF:FFFFFF::FF  
FFFFFFFFF:FFFFF,FFF:FFF:FFFFFFFFFFFFFFFFFFFFFFFFF:FFFFFFFF:FFFFF  
FFF

@A00721:190:HGJW7DSXY:4:1468:5692:32988\_1:N:0:TCTGCAAG+GCTGCACT  
TCTTCCGATCTCTTGAAGTTGTTGACGACAAGCCTCAAGAGGGTAGAGGACCACCTGGATCTTCTACT  
GTCTCTGCCTTCCAAGATTTCTGTAGAAGAGGTTATTCTGGAACACCTTAACGTCACTCGGTAATCT  
TTC

+

FFFFFFFFFFFF:FFFFFFFFF:FFFFFFFFFFFF:FFFFFFFFFFFF:FFFFFFFFFFFF:FFFFFFFFFFFF  
FFFFFFFFFFFFFFFFFFFFF,,FFFFFFFFFFFFFFFFFFFFFFFFFFFFFFFFFFFFFFFFFFFFF  
FFF

@A00721:190:HGJW7DSXY:4:2405:20853:29622\_1:N:0:TCTGCAAG+GCTGCACT  
GGAGGGAGTTCTTGAAGCATCCCGACCTTTCCTTGTGAAAATTTTGATGCGGTTTCATAAGATTATCA  
GTAATCCTGATTCTACTACGGATTCATGGACCTTCCATCCTGTACCTCTTCTGGAGAGACGTATCTCA  
AAG

+

FFFFFF:FFFFFFFFF:F:FFFFFFFFFFFF:FFFFF::FFFFFFFFFFFFFFFFFFFF:F  
FF:FFFFFFFFFFFF:FFFFFFFFF::FFFFFFFFFFFF:FF,FFFF:FFF:FF:FFFFFFF  
FFF

@A00721:190:HGJW7DSXY:4:1666:12445:8672\_1:N:0:TCTGCAAG+GCTGCACT  
AGCAGCATGACCATAATTGGTATTGACTTTGGTACCACCTTTTCTACTGTCTGTCTCGCCTCTTCGAA  
TGAAGTTTAAATGCTTAACAACAATGATAGTGAATTTATACCTACAATCATTGGTTTTTCTAATAATG  
ATG

+

FFFFFFFFF:FFFFFFFFFFFF:FFFFFFFFFFFF:FF:FFFFFF:FFFFFFFF:FFF  
FFFFFFFFFFFFFFFFFFFFFFFFFFFFFFFFFFFFFFFFFFFFFFFFFFFFFFFFFFFFFFFFFFFFF  
FFF

@A00721:190:HGJW7DSXY:4:1673:6415:15890\_1:N:0:TCTGCAAG+GCTGCACT  
TGCTATTACTCATGATGGTTACGGTCAGGGAGGATTCTCAGTTTACAAGGACCTTAAGCGATGGATCG  
GGGTAAATTCTAAAACATTACCCGAAAGACGTGCTAAATTAAAACCATTGTACGATGTCGTCTGTCTC  
GGC

+  
FFFFFFFFFFFFFFFFFFFFFFFFFFFFFFFFFFFFFFFFFFFFFFFFFFFFFFFFFFFFFFFFFFFFFFFF  
FFFFFFFFFFFFFFFFFFFFFFFFFFFFFFFFFFFFFFFFFFFFFFFFFFFFFFFFFFFFFFFFFFFFFFFF  
FFF  
@A00721:190:HGJW7DSXY:4:2526:16767:34162\_1:N:0:TCTGCAAG+GCTGCACT  
CAAAGATATTTTCATGAAAACACTACAGAGGAACGTACCGATTACCTGTCTTTTCATATTATGAATGAACC  
TTCGGCCGCTCTCTTTGCTTCGATGTTGGATGTCAAGAAGGGTTTCAAGATGGGATTCTACGTAGTTT  
ATG  
+  
FFFFFFFFFFFFFFFFFFFFFFFFFFFFFFFFFFFFFFFFFFFFFFFFFFFFFFFFFFFFFFFFFFFFFFFF  
FFFFFFFFFFFFFFFFFFFFFFFFFFFFFFFFFFFFFFFFFFFFFFFFFFFFFFFFFFFFFFFFFFFFFFFF  
FFF  
@A00721:190:HGJW7DSXY:4:2659:11315:25661\_2:N:0:TCTGCAAG+GCTGCACT  
GGAGTTTTTACGGGATCCGGAATGTTCTGTCTATATTAGGTGAAGCGAAATACGATTTTGAACGTCAA  
CGTTCACCGAGTTTCGTTTCGTACCTTGATGCTGACTTTTCGTCAATAT  
+  
FFFFFFFFFFFFFFFFFFFFFFFFFFFFFFFFFFFFFFFFFFFFFFFFFFFFFFFFFFFFFFFFFFFFFFFF  
FFFFFFFFFFFFFFFFFFFFFFFFFFFFFFFFFFFFFFFFFFFFFFFFFFFFFFFFFFFFFFFFFFFFFFFF  
@A00721:190:HGJW7DSXY:4:2156:9173:25958\_1:N:0:TCTGCAAG+GCTGCACT  
TGATAACTTCTAATTTACGTTTGCTACTCAGAGCTGGTCTCTCAGCAAAGGGATGCATGGTGTATC  
TCCTCAGGAGTCCCGGCATTTGATAATAATGACGAGACTTTCGTCATAATCGCTGCATATTACGGATT  
ACA  
+  
FFFFFFFFFFFFFFFFFFFFFFFFFFFFFFFFFFFFFFFFFFFFFFFFFFFFFFFFFFFFFFFFFFFFFFFF  
FFFFF:FFFFFFFFFFFFFFFFFFFFFFFFFFFFFFFFFFFFFFFFFFFFFFFFFFFFFFFFFFFFFFFF  
FFF  
@A00721:190:HGJW7DSXY:4:2628:17517:12915\_2:N:0:TCTGCAAG+GCTGCACT  
ATAGGTGAAGGGATAGTTTTTACCTCGACCAACATTAAGGCGCGCGGCGACTAATCTTAAAGCTTCACC  
CAAATGAAGGACACTTCGAAACTGAATAATGATGCACAGATCGGAAG  
+  
FFFFF:FFFFFFFFFFFFFFFFFFFFFFFFFFFFFFFFFFFFFFFFFFFFFFFFFFFFFFFFFFFFFFFF  
FFFFFFFFFFFFF:FFFFFFFFFFFFFFFFFFFFFFFFFFFFFFFFFFFFFFFFFFFFFFFFFFFFFFFF  
@A00721:190:HGJW7DSXY:4:1606:14959:2284\_1:N:0:TCTGCAAG+GCTGCACT  
ATTCAAGCTTGTCGTTTAAAGACTGCAGAGGCTGTCAAACAAGCCAGACTCAAGGAGTCCAATCAAA  
GGTTTTGAATTTAGCTCAACTGGGGAGACGTGCTTAAATGGGTGATAAAAATTATTTAGAGATCTTTT  
CTA  
+  
FFFFFFFFFFFFFFFFFFFFFFFFFFFFFFFFFFFFFFFFFFFFFFFFFFFFFFFFFFFFFFFFFFFFFFFF  
FFFFFFFFFFFFFFFFFFFFFFFFFFFFFFFFFFFFFFFFFFFFFFFFFFFFFFFFFFFFFFFFFFFFFFFF  
FFF  
@A00721:190:HGJW7DSXY:4:2107:32154:26553\_2:N:0:TCTGCAAG+GCTGCACT  
ATCTCTCGGTCATTTACTCTGTACTTGATCTACGTCGTTTAACTGTCGGAACAACCTTTACTTAGAAT  
GACTCTATCTTTTTCAGACACTTCTTATATTATTTACAATAGTTAATAT  
+  
FFFFFFFFFFFFFFFFFFFFFFFFFFFFFFFFFFFFFFFFFFFFFFFFFFFFFFFFFFFFFFFFFFFFFFFF  
FFFFFFFFFFFFFFFFFFFFFFFFFFFFFFFFFFFFFFFFFFFFFFFFFFFFFFFFFFFFFFFFFFFFFFFF  
@A00721:190:HGJW7DSXY:4:1145:14461:22091\_1:N:0:TCTGCAAG+GCTGCACT  
AATAGATTTTCGTCTATACACCCATCTCAACGCGTATAACGCTTTTTTTCCGTCCTGAACGTAATACAC  
GAATATAACATCCGCAAACGACTCGAAACCGAGACGCCGTAGATCAAAGTCCCTTCTAACTTTAGAT  
+  
F::,,F::,,:,,,F:FFF,,,,,F:F::,,F,FF,,::,,,FFF,F,F,F,:F,,,F::,FF:  
,F,,::,,F,FF,,F,FFFFFFFFFFFFFFFFFFFFFFFFFFFFFFFFFFFFFFFFFFFFFFFFFFFF  
@A00721:190:HGJW7DSXY:4:2425:18783:29262\_1:N:0:TCTGCAAG+GCTGCACT  
ATGAGGTCAAAGCTCTATTTATTAACGAACATTATCCGATTCTTCGAGGGTATCACTACCACTGAT

CTGCCGACTTTAGTCAAGGAACTTCAATTCCTTCGATGTTTATATTTTTCTATAAGGGAAAATAGCAA  
TAA

+

FFFFFFFFFFFFFFFFFFFFFFFFFFFFFFFFFFFFFFFFFFFFFFFFFFFFFFFFFFFFFFFFFFFFFFFF  
FFFFFFFFFFFFFFFFFFFFFFFFFFFFFFFFFFFFFFFFFFFFFFFFFFFFFFFFFFFFFFFFFFFFFFFF  
FFF

@A00721:190:HGJW7DSXY:4:1249:21052:16344\_1:N:0:TCTGCAAG+GCTGCACT  
AACTCTCTCCGATCACCTTGGTGTGATCTCCCGGAGGATCTTTCAATAAGATGTATGATGATAATCT  
ACTATTTTAAATAGTGATATTACAGCGTATACTTGAATACTTTATCAAAGATTGGCTTGGTCTATTT  
ACC

+

FFFFFFFFFFFFFFFFFFFFFFFFFFFFFFFFFFFFFFFFFFFFFFFFFFFFFFFFFFFFFFFFFFFFFFFF  
FFFFFFFFFFFFFFFFFFFFFFFFFFFFFFFFFFFFFFFFFFFFFFFFFFFFFFFFFFFFFFFFFFFFFFFF  
FFF

@A00721:190:HGJW7DSXY:4:2349:23475:10895\_1:N:0:TCTGCAAG+GCTGCACT  
TTATTTTACTTATACTTTAAATAGCACCGATTATAAATTGACTGTTGATAATATTACAATAGCTCTTT  
CTCAGAAGATTAGAGAAGTAACCGGTGAACACGTCGGTAGCATTGATTTACTTTTACCGTTAGAACTG  
AAA

+

FFFFFFFFFFFFFFFFFFFFFFFFFFFFFFFFFFFFFFFFFFFFFFFFFFFFFFFFFFFFFFFFFFFFFFFF  
FFFFFFFFFFFFFFFFFFFFFFFFFFFFFFFFFFFFFFFFFFFFFFFFFFFFFFFFFFFFFFFFFFFFFFFF  
FFF

@A00721:190:HGJW7DSXY:4:2657:17526:33943\_1:N:0:TCTGCAAG+GCTGCACT  
TATCGCCTTTATTGAAAATTGTATAAGAGTTAATTGCTTACACAAAAGTGACGCGCAAGGAATCTTA  
ATTGATTGAAGCTAGGCGTTGGGGAGAATGAACTGCCGCTTCCCGGAAGAAACGATCTATTTACAGAG  
TAT

+

FFFFFFFFFFFFFFFFFFFFFFFFFFFFFFFFFFFFFFFFFFFFFFFFFFFFFFFFFFFFFFFFFFFFFFFF  
FFFFFFFFFFFFFFFFFFFFFFFFFFFFFFFFFFFFFFFFFFFFFFFFFFFFFFFFFFFFFFFFFFFFFFFF  
FFF

@A00721:190:HGJW7DSXY:4:2421:30228:19460\_2:N:0:TCTGCAAG+GCTGCACT  
CACTCCCATGCCAATCAATGATGTGACTATACAGTTCGGCCATTTCAAGAGTGGTCAATACGTCGTGG  
GAGGTACTGAAGCCTTCCCCTCCGCTGGCAGCAAGAACTCCCAAGC

+

FFFFFFFFFFFFFFFFFFFFFFFFFFFFFFFFFFFFFFFFFFFFFFFFFFFFFFFFFFFFFFFFFFFFFFFF  
FFFFFFFFFFFFFFFFFFFFFFFFFFFFFFFFFFFFFFFFFFFFFFFFFFFFFFFFFFFFFFFFFFFFFFFF

@A00721:190:HGJW7DSXY:4:1307:9552:30561\_2:N:0:TCTGCAAG+GCTGCACT  
TAAGTCTACCAGGAAGAGGGGAAATGTCCCCAAACTGAGAAGAATAAAGGGAAAGGTCCATCAGGAC  
CTAAGAAGGGGAAATTACCCCTAATTCTGAAGAGATCGGAAGAGCGTC

+

FFFFFFFFFFFFFFFFFFFFFFFFFFFFFFFFFFFFFFFFFFFFFFFFFFFFFFFFFFFFFFFFFFFFFFFF  
FFFFFFFFFFFFFFFFFFFFFFFFFFFFFFFFFFFFFFFFFFFFFFFFFFFFFFFFFFFFFFFFFFFFFFFF

@A00721:190:HGJW7DSXY:4:2413:22227:34068\_1:N:0:TCTGCAAG+GCTGCACT  
CGAAGTCGCTGAAGGCGGCTTGGGTCAATTAAGGGTAGCTGTAAAGTTGCGCCTGCCGACCCCATCTTT  
GAGACCAAGACTCTCTACAGTAGGTTCTGTCCTACTATGAGCAAATCTGTTGAATTCGTCACTGAGGA  
CGA

+

FFFFFFFFFFFFFFFFFFFFFFFFFFFFFFFFFFFFFFFFFFFFFFFFFFFFFFFFFFFFFFFFFFFFFFFF  
FFFFFFFFFFFFFFFFFFFFFFFFFFFFFFFFFFFFFFFFFFFFFFFFFFFFFFFFFFFFFFFFFFFFFFFF  
FFF

@A00721:190:HGJW7DSXY:4:1469:11740:7889\_2:N:0:TCTGCAAG+GCTGCACT  
GGCGACAACTGAGAGCAGTCGCTGGGGAAAGAGAATTGCGTGGGTTGAAGGCCGACGCTTCGAGCTT  
GAGTGTGACGAGGCCGGTGACGTTTTTGTCAACGGCGTTTGGAGGATT

+



```

FFFFFFFFFFFFFFFFFFFFFFFFFFFFFFFFFFFFFFFFFFFFFFFFFFFFFFFFFFFFFFFF
FFFFFFFFFFFFFFFFFFFFFFFFFFFFFFFFFFFFFFFFFFFFFFFFFFFFFFFFFFFFFFFF
@A00721:190:HGJW7DSXY:4:1470:5791:25113_2:N:0:TCTGCAAG+GCTGCACT
CTATGGAGTCTTGAAGGACTTAGGTTGGCATATTTATGCCGACGATAATAAGCATGTCACCCTTAAGC
ACCGAGGTAAGCTCGGGACTTACAAGAGAGAGTGTGAGAGAGTCGCTC
+
F:FFFFFFFFFFFFFFFFFFFFFFFFFFFFFFFFFFFFFFFFFFFFFFFFFFFFFFFFFFFFFFFF
FFFFFFFFFFFFFFFFFFFFFFFF:FFFFFFFFFFFFFFFF:FFFFFFFFFFFFFFFF:
@A00721:190:HGJW7DSXY:4:2115:26802:22858_2:N:0:TCTGCAAG+GCTGCACT
AGGGTCTTCTTCATGCTGATCTTTCAGGACCTAATCACATCATGATTGATAGTTACGGCTCGTATCGA
GTTGGAGGGAGGAAGTTCTCCGAAATTAAGACGGGGGGATTAAGAGT
+
FF:FFFFF:FFFFFFFFF,FFFFFFFFFFFF,FF:F,FFFFF,FF::FFFFFFFFFFFFFFFF,FFFFF:F
,F::FF:FFFF,F,FFFFFF,FFFFFFFF:F:FFF:FFF:FFF:FFFFF
@A00721:190:HGJW7DSXY:4:1212:6415:11851_1:N:0:TCTGCAAG+GCTGCACT
GGCTCTAGAGAAGATCTCACCACCTGGAGAAGGCAAGTGGAGAGTCCAGAAGTTGATGAAGAAGGATT
ATTTTAAGCAGGGGTTACCACTTCATAAGGTGGATGAGGGAGGTTGTTTCTTTGGAGTTTATAGATAAT
CTT
+
:F,F,F:FF,FFFFFFFFF:FF:FFFF,F,:F:FF,FF:FF,FFF,:FF,F,FF,FF,FFFFF::FFF
FFFF,FF,F,F,FFFFFF:FFFF,FF,:,:FFFFFF:,FFFF,FF,FFFFFFFFFFFFFFFFFFFF,FFFF
,FF
@A00721:190:HGJW7DSXY:4:1209:9091:36401_2:N:0:TCTGCAAG+GCTGCACT
GGACTACTCGACTTTTGATCTGGAGTTGTCTAGGGTCATGGCAGATACTACCGATAAGGTGAAAATA
TGCAGGTCAAAGATTCTGTAGCTCTGAGGGCGGTTGAGGGAGCCGTTT
+
FFFFFFFFFFFFFFFF:FFFFFFFFFFFF:FFFFFFFFFFFF:FFFFFFFF:F,FFFFFFFFFFFFFFFF
FFF:FFF:FFFF:F:FF:FFFFFFFFFFFFFFFF:FFFF:FFFF,
@A00721:190:HGJW7DSXY:4:1173:26539:6026_2:N:0:TCTGCAAG+GCTGCACT
GTTAAGAAGGAGGCTGATCATGGAGTCTTTGTACCTTCTGTCAAACCTTCGAGGTTTCAGCTACGAGAGG
TGATCCCGATGTGGATTGAAGGCTGGCCAGATCGGAAGAGCGTCGTG
+
FFFFFFFFFFFFFFFFFFFFFFFFFFFFFFFFFFFFFFFFFFFFFFFFFFFFFFFFFFFFFFFF
FFFFFFFFFFFFFFFFFFFFFFFFFFFFFFFFFFFFFFFF:FF:FFFFFFF
@A00721:190:HGJW7DSXY:4:1533:9869:11287_2:N:0:TCTGCAAG+GCTGCACT
CCTGATGACATTATTTCAACGATACCGATCTCAGTTCTACCACAGAAACCGTCTCAGGAAGTGTCTC
CACTGATTTCGGAATTAGAGAAAGACGACCTTCTTGTGGGACTGAGAC
+
FFFFFFFFFFFFFFFFFFFFFFFFFFFFFFFFFFFFFFFFFFFFFFFFFFFFFFFFFFFFFFFF:FFFFFFFF
FFFFFFFF:FFFFFFFFFFFFFFFFFFFFFFFFFFFFFFFFFFFFFFFF
@A00721:190:HGJW7DSXY:4:2211:14507:31782_2:N:0:TCTGCAAG+GCTGCACT
GGTGCCCTGATGAGGACGTTGAAAGGGATAATTTCAACTCTGAGACTTCTAAGAGTGTTTCAAAGAC
CAGAAACGTAACAAGAAGATAAAGGTAGGAAGGGGAGAAAACAGAAC
+
FFFFFFFFFFFFFFFFFFFFFFFFFFFFFFFFFFFFFFFFFFFFFFFFFFFFFFFFFFFFFFFF:FFFF
FFFFFFFFFFFFFFFF:FFF:FFFFFFFFFFFFFFFFFFFFFFFF
@A00721:190:HGJW7DSXY:4:1607:12219:16485_1:N:0:TCTGCAAG+GCTGCACT
AACATCAACGACATCATTCTTGATGAGTGTCGTTCTTATCGAAGTCTCAGTTATCGCTGCCCGGCCGA
CGTTTGTGCGCAACTCTCAGAGGTTTACGGCAGAAAAATTTCTCTGCTTGTAAATTCGAGAGAGGACA
CTA
+
FFFFF:FF:FFFFFFFFFFFFFFFFFFFFFFFF:FFFFFFFFFFFFFFFF:FFFFFFFFFFFFFFFF,
FFFFFFFFFFFFFFFFFFFFFFFF:FFFFFFFFFFFFFFFFFFFFFFFFFFFFFFFFFFFFFFFF
FFF

```

```
+
FF,F,,,FF:F,,,FFF,FF,F:,,,F,F,FFF,FF,,FFF,F,F:FF,:,,,F,,F:F:FFFFFFFFF
,FFF,F:F,FFFFFF,,,,FF:,FF,:F:FFFF,FF:FFFF:,,F,,FFF,:F:FFFFFFFFF:,:FF:,
:F:
```

```
+
FFFFFFFFFFFF:FFFFFF:FFFFFFFFFFFF,FFFF:FF:FFFFFF:FFFFFFFFFFFFFFFFFFFFFFFFFFFFFFFF
FFFFFFFFFFFFFFFFFFFFFFFFFFFF:FFFFFFFFFFFFFFFFFFFFFFFFFFFFFFFFFFFFFFFFFFFFFFFFFFFFFFF
FFF
```

```
+
FFFFFFFFFFFFFFFFFFFFFFFFFFFFFFFFFFFFFFFFFFFFFFFFFFFFFFFFFFFFFFFFFFFFFFFF
F:FFFFFFFF:FFFFFFFFFFFFFFFF:FF:FFFF,F:FFFFFFFF::F,:FF
```

```
+
FFFFFFFFFFFFFF:FFFFFFFFFFFFFFFFFFFFFFFFFFFFFFFFFFFFFFFFFFFFFFFFFFFFF
:FFFFFFFFFFFF:FFFFFFFFFFFFFFFFFFFFFFFFFFFFFFFFFFFFFFFFFFFFFFFFFFFFF
FFF
```

```
+
FFFF:FFFF,F::FFF:F:FFFFFFFF:FFFFFFFFFFFFFFFF:FFFFFFFFFFFFFFFF
FFFFFFFF:FFFFFFFFFFFFFFFF:FFFFFFFFFFFFFFFFFFFFFFFF,FFF:FFFFFFF
FFF
```

[illegible][illegible]

@A00721:190:HGJW7DSXY:4:1642:5294:11788\_1:N:0:TCTGCAAG+GCTGCACT  
ATTCAAGCTTGTCTGTTTAAAGACTGCAGAGGCTGTCAAACAAGCCCAGACTCAAGGAGTCCAATCAAA  
GGTTTTGAATTTAGCTCAACTGGGGAGACGTGCTTAAATGGGTGATAAAAAATTATTTAGAGATCTTTT  
CTA

+  
FFFFFFF:FFFF:FFFFFFFFFFFFFFFFFFFFFFFFFFFFFFFFFFFFFFFFFFFFFFFFFFFFFFFFFFFFF,  
FF:FFFFFFFFFFFFFFFFFFFFFFFFFFFFFFFFFFFFFFFFFFFFFFFFFFFFFFFFFFFFFFFFFFFFFFFFF  
FFF

@A00721:190:HGJW7DSXY:4:2138:14841:25661\_2:N:0:TCTGCAAG+GCTGCACT  
ATCTCTCGTCAATTTACTCTGTACTTGATCTACGTCGTTTAACTGTGGAACAACCTTTACTTAGAAT  
GACTCTATCTTTTACAGACACTTCTTATATTATTTACAATAGTTAATAT

+  
FF:FFFFFFF,FFFF:F,FFFFFFFFFFFFFFFFFFFFFFFFFFFFFFFFFFFFFFFFFFFFFFFFFFFFFFFFF,  
F:FFFFFFFFFFFFFFFFFFFFFFFFFFFFFFFFFFFFFFFFFFFFFFFFFFFFFFFFFFFFFFFFFFFFFFFFF

@A00721:190:HGJW7DSXY:4:1571:8956:12680\_1:N:0:TCTGCAAG+GCTGCACT  
AATAGATTTAGTCTCTACACCCATCTCAACGAGGATAAAGCGATTTTTCCGTCCTGAACGTAATACAC  
GAAGAGATCATCCGCAAACGACTCGAAACCGAGACGCCGTAGATCAAAGTCCCTTCTAACTTTAGAT

+  
:FF,: ,FFF:FF,F:F:F:FF,: ::FF:F,: ,F::FFF,FF,,,FFFFFFF,FF:F,FF::FFF:,FFF  
:F,:F,F:FF:FFF:FF:FFFFFFFFFFFFFFFFFFFFFFFFFFFFFFFFFFFFFFFFFFFFFFFFFFFFFFFFF

@A00721:190:HGJW7DSXY:4:2511:31485:29966\_1:N:0:TCTGCAAG+GCTGCACT  
ATGAGGTCAAAGCTCTATTTATTAAACGAACACTATTATCCGATTCTTCGAGGGTATCACTACCACTGAT  
CTGCCGACTTTAGTCAAGGAACCTCAATTCCTTCGATGTTTATATTTTTCTATAAGGGAAAATAGCAA  
TAA

+  
FFFF:F,FFFFFFFFFFFFFFFFFFFFFFFFFFFFFFFFFFFFFFFFFFFFFFFFFFFFFFFFFFFFFFFFFFFF  
FFFFF:FFFFFFFFFFFFFFFFFFFFFFFFFFFFFFFFFFFFFFFFFFFFFFFFFFFFFFFFFFFFFFFFFFFFF  
FFF

@A00721:190:HGJW7DSXY:4:2114:20283:25974\_1:N:0:TCTGCAAG+GCTGCACT  
AACTCTCTCCGATCACCTTGGTGTGATCTCCCGGAGGATCTTTTCAATAAGATGTATGATGATAATCT  
ACTATTTTTAAATAGTGATATTCAGCGTATACTTGAATACTTTATCAAAGATTGGCTTGGTCTATTT  
ACC

+  
FFFFFFFFFFFFFFFFFFFFFFFFFFFFFFFFFFFFFFFFFFFFFFFFFFFFFFFFFFFFFFFFFFFFFFFFF,FF:FFFFFFFFFFFFFFFFF:FFFFFFFFFFFFFFFFF  
FFFFFFFF:FFFFFFFFFFFFFFFFFFFFFFFFFFFFFFFFFFFFFFFFFFFFFFFFFFFFFFFFFFFFFFFFFFFF  
FFF

@A00721:190:HGJW7DSXY:4:2377:20835:13056\_1:N:0:TCTGCAAG+GCTGCACT  
TTATTTTACTTATACTTTAAATAGCACCGATTATAAATTGACTGTTGATAATATTACAATAGCTCTTT  
CTCAGAAGATTAGAGAAGTAACCGGTGAACACGTCGGTAGCATTGATTTACTTTTACCGTTAGAACTG  
AAA

+  
FFFFFFFFFFFFFFFFFFFFFFFFFFFFFFFFFFFFFFFFFFFFFFFFFFFFFFFFFFFFFFFFFFFFFFFFF  
FFFFFFFFFFFFFFFFFFFFFFFFFFFFFFFFFFFFFFFFFFFFFFFFFFFFFFFFFFFFFFFFFFFFFFFFF  
FFF

@A00721:190:HGJW7DSXY:4:1272:16604:6574\_1:N:0:TCTGCAAG+GCTGCACT  
ATTGAAAATTGTATAAGAGTTAATTGCTTACACAAAAGTGACGCGCAAGGAATCTTAATTGATTGAA  
GCTAGGCGTTGGGGAGAATGAAGTCCGCTTCCCGGAAGAAACGATCTATTTACAGAGTATTAGAGT  
AGT

+  
FFFFFFFFFFFFFFFFF,FFFF:FF,FFFFFFFFFFFFFFFFFFFFFFFF, :FFF:FFFF:FF:FFFFFFFF,FFFFFF  
F,FFFFFFFFF:FFFFFFFFF: :FFFFFFFFF:FFFF:FFFF:FFFFFFFF:FFFFFFFFF:FF  
FFF

@A00721:190:HGJW7DSXY:4:2535:7609:30890\_2:N:0:TCTGCAAG+GCTGCACT  
ACTCCCATACCAATCAATGATGTGACTATACAGTTCGGCCATTTCAAGAGTGGTCAATACGTCGTGGG

AGGTACTGAAGCCTTCCCCTCCGCTGGCACGAAGAACACTCCCACGCC  
+  
FFFFFFFFFFFFFF:FFF:FFF,FFFF:FFFFFF:FFFFFFFF:FF,FFFFFFFFFFFFFF:FFFFF  
FFFF:FFFFFF:FFFFFFFFFFFFFFFFFFFFFFFFFFFFFFFF:FFF  
@A00721:190:HGJW7DSXY:4:1339:29803:8766\_2:N:0:TCTGCAAG+GCTGCACT  
TAAGTCTACCAGGAAGAGGGGAAATGTCCCCAAAAGTGAAGAATAAAGGGAAAGGTCCATCAGGAC  
CTAAGAAGGGGAAATTACCCCTAATTCTGAAGGAAGATCTCCCACCAT  
+  
FFFFFFFFFFFFFFFFFFFFFFFFFFFFFFFFFFFFFFFFFFFFFFFF:FFFFFFFFFFFFFFFFFFFFFFF  
FFFFFFFFFFFFFFFFFFFFFFFFFFFFFFFFFFFFFF,FFFFFFFFFFFFFFFFFFFFFF  
@A00721:190:HGJW7DSXY:4:2413:22580:33207\_1:N:0:TCTGCAAG+GCTGCACT  
CGAAGTCGCTGAAGGCGGCTTGGGTCTTAAGGTAGCTGTAAAGTTGCGCCTGCCGACCCCATCTTT  
GAGACCAAGACTCTCTACAGTAGGTTCTGTCCTACTATGAGCAAATCTGTTGAATTCGTCACTGAGGA  
CGA  
+  
FFFFFFFFFFFFFFFFFFFFFFFFFFFFFFFFFFFFFFFF:FFFFFFFFFFFFFF:FF,FFFFFFFFFFFFFFFFFFFFFF:F  
FFFFFFFFFFFFFFFFFFFFFF,FFF:FFFFFFFFFFFFFFFFFFFFFFFFFFFFFFFFFFFFFFFFFFFFFFFF  
FFF  
@A00721:190:HGJW7DSXY:4:1561:19976:26663\_2:N:0:TCTGCAAG+GCTGCACT  
GGCGACAAAGTGAAGCAGTCGCTGGGGAAGAGAATTGCGTGGGTTGAAGGCCGACGCTTCGAGCTT  
GAGTGTGACGAGGCCGGTGACGTTTTTGTCAACGGCGTTTGGAGGATT  
+  
FFFFFFFFFFFFFFFFFFFFFFFFFFFFFFFFFFFFFFFF:FFFFFFFFFFFFFFFFFFFFFFFFFFFFFFFFFFFFFFF  
FFFFFFFFFFFFFFFFFFFFFF:FFFF:FFFFFFFFFFFFFFFFFFFFFFFFFFFFFFF  
@A00721:190:HGJW7DSXY:4:1503:23402:16157\_2:N:0:TCTGCAAG+GCTGCACT  
CTATGGAGTCTTGAAGGACTTAGGTTGGCATATTTATGCCGACGATAATAAGCATGTACCCCTTAAGC  
ACCGAGGTAAGCTCGCGACTTACAAGAGAGAGTGTGAGAGAGTCGCTC  
+  
FFF:,::FFF:,FF:F::FFF,FFFFFFFFFFFFFFFF,F,FFFFFFFFFFFFFFFF,FF:FFFFFF::  
:,FFF,F:F:,FFF,,FFF,FFFFFF::FFF,,,F:F:FF,FFFF  
@A00721:190:HGJW7DSXY:4:2368:18683:35102\_2:N:0:TCTGCAAG+GCTGCACT  
AGGGTCTTCTTCATGCTGATCTTTCAGGACCTAATCACATCATGATTGATAGTTACGGCTCGTATCGA  
GTTGGAGGGAGGAAGTTCTCCGAAATTAAGACGGGGGGATTAAGAGT  
+  
FFFFFFFFFFFFFFFFFFFFFFFFFFFFFFFFFFFFFFFF:FFFFFFFFFFFFFFFFFFFFFFFFFFFFFFF  
FFFFFFFFFFFFFFFFFFFFFFFFFFFFFFFFFFFFFF:FFFFFF:FFFFFFF  
@A00721:190:HGJW7DSXY:4:1371:14145:10457\_1:N:0:TCTGCAAG+GCTGCACT  
GGCTCTAGAGAAGATCTCACCACCTGGAGAAGGCAAGTGGAGAGTCCAGAAGTTGATGAAGAAGGATT  
ATTTGAAGCAGGGGTTACCACTTCCTAAGGTGGATGAGGGAGGTTGTTTCTTTGGAGTTTATAGATAAT  
CTT  
+  
:FFF:FFFFFFFFFFFFFF:FFFFFFFFFFFFFF:FFFFFFFFFFFFFF,FFFFFFFFFFFFFFFFFFFFFFF  
FFFFFFFFFFFFFFFFFFFFFFFFFFFFFF:FFFFFFFFFFFFFFFFFFFFFFFFFFFFFFFFFFFFFF:F  
FFF  
@A00721:190:HGJW7DSXY:4:1328:5448:31751\_2:N:0:TCTGCAAG+GCTGCACT  
GGACTACTCGACTTTTGATCTGGAGTTGTCTAGGGTCATGGCAGATACTACCGATAAGGTGAAAAATA  
TGCAGGTCAAAGATTCTGTAGCTCTGAGGGCGGTTGAGGGAGCCGTTT  
+  
FFFF:FFFFFF:FFFFFFFFFFFFFFFFFFFFFFFFFFFFFFFF:FF:F:FFFFFF:FFF,FFF:FF  
FFFF:FF:FF,FF:FFFFFFFF:FFF:FF:FFF,FFF,::F,FF:F:F  
@A00721:190:HGJW7DSXY:4:1311:17580:2409\_2:N:0:TCTGCAAG+GCTGCACT  
GTTAAGAAGGAGGCTGATCATGGAGTCTTTGTACCTTCTGTCAAAGTTCGAGGTTACAGCTACGAGAGG  
TGATCCCGGATGTGGATTGAAGGCTGGCCAGATCGGAAGAGCGTCGTG  
+

F:F:FFFFFFFFFFFFFFFFFFFFFFFF:FFFF:FFFFFFFFFFFFFF,FFFFFFFFFFFFFF:FF:FFFF  
FFFFFFFFFFFF:FFFFFFFFFFFFFFFFFFFFFFFFFFFFFFFF:FFFFFF,F  
@A00721:190:HGJW7DSXY:4:1643:30707:18630\_2:N:0:TCTGCAAG+GCTGCACT  
CCTGATGACATTATTTCAACGGATACCGATCTCAGTTCTACCACAGAAACCGTCTCAGGAAGTGTCTC  
CACTGATTCGGAATTAGAGAAAGACGACCTTCTTGTGGGGACTGAGAC  
+  
FFFFFFFFFFFFFFFFFFFFFFFFFFFFFFFFFFFFFFFFFFFFFFFFFFFFFFFFFFFFFFFF:FFFFFFFF  
FF:FFFFFFFFFFFFFFFFFFFFFFFFFFFFFFFF:FFFFFFFFFFFFFF  
@A00721:190:HGJW7DSXY:4:2313:22589:4288\_2:N:0:TCTGCAAG+GCTGCACT  
GGTGCCCTGATGAGGACGTTGAAAGGGATAATTTCAACTCTGAGACTTCTAAGAGTGTTTCAAAAGAC  
CAGAAACGTAACAAGAAGAATAAAGGTAGGAAGGGGAGAAAACAGAAC  
+  
FFFFFFFFFFFFFF::F:FFFFFF:FF:FFFFFFFFFFFFFFFFFFFFFFFFFFFFFFFF:FFFFFFFFFFFFFF:  
FFFF::FFFFFFFFFFFF:FFF,FFFF, :FFFFFFFFFFFF:FFFFFFFF  
@A00721:190:HGJW7DSXY:4:1669:32633:4711\_1:N:0:TCTGCAAG+GCTGCACT  
AACATCAACGACATCATTTCTTGATGAGTGTCGTTCTTATCGAAGTCTCAGTTATCGCTGCCCCGCCGA  
CGTTTGTGCGCAACTCTCAGAGGTTTACGGCAGAAAAATTTCTCCTGCTTGTAATTCGAGAGAGGACA  
CTA  
+  
FFFFFFFFFFFFFFFFFFFFFFFFFFFFFFFFFFFFFFFFFFFFFFFFFFFFFFFFFFFFFFFF:FFFFFFFFFFFFFFFFFFFFFFFF  
FFFFFFFFFFFFFFFFFFFFFFFFFFFFFFFFFFFFFFFFFFFFFFFFFFFFFFFFFFFFFFFFFFFFFFFFFFFFFFFF  
FFF  
@A00721:190:HGJW7DSXY:4:2474:5900:14372\_1:N:0:TCTGCAAG+GCTGCACT  
TCTTCCGATCTCTTGAAGTTGTTGACGACAAGCCTCAAGAGGTAGAGGACCACCTGGATCTTCTACT  
GTCTCTGCCTTCCAAGATTTCTTAGAAGAGGTTATTCTGGAACCACCTTAACGTCACTCGGTAATCT  
TTC  
+  
F:FFFFFFFF, :F,FFFFFFFFFFFFFFFFFFFFFFFF:FFFF:FFFFFFFFFFFFFF:FFFF,FFFFFFFF:FF  
FF:FFFFFFFF::,F::FF,F,,FFFFFFFFFFFFFFFFFFFFFFFF, :F,FF:FFF:FFFFFFFF:FFFF  
FFF  
@A00721:190:HGJW7DSXY:4:2474:31485:24486\_1:N:0:TCTGCAAG+GCTGCACT  
GGAGGGAGTTCTTGAAGCATCCCGACCTTTCCTTGTGAAAATTTTGATGCGGTTTCATAAGATTATCA  
GTAATCCTGATTCTACTACGGATTCATGGACCTTCCATCCTGTACCTCTTCTGGAGAGACGTATCTCA  
AAG  
+  
FFFFFFFFFFFFFFFFFFFFFFFFFFFFFFFFFFFFFFFFFFFFFFFFFFFFFFFFFFFFFFFFFFFFFFFFFFFFFFFF  
FFFFFFFFFFFFFFFFFFFFFFFFFFFFFFFFFFFFFFFFFFFFFFFFFFFFFFFFFFFFFFFF:FFFFFFFFFFFFFFFF  
FFF  
@A00721:190:HGJW7DSXY:4:1471:15365:22060\_2:N:0:TCTGCAAG+GCTGCACT  
AGCATGACCATAATTGGTATTGACTTTGGTACCACCTTTTCTACTGTCTGTCTCGCCTCTTCAATGA  
AGTTTTAATGCTTAACAGATCGGAAGAGCGTCGTGTAGGAAAGAGTG  
+  
FFFFFFFFFFFFFFFFFFFFFFFFFFFFFFFFFFFFFFFFFFFFFFFFFFFFFFFFFFFFFFFFFFFFFFFFFFFFFFFF  
FFFFFFFFFFFFFFFFFFFFFFFFFFFFFFFFFFFFFFFFFFFFFFFFFFFFFFFFFFFFFFFF:FF  
@A00721:190:HGJW7DSXY:4:2341:24487:28244\_1:N:0:TCTGCAAG+GCTGCACT  
TGCTATTACTCATGATGGTTACGGTCAGGGAGGATTCTCAGTTTACAAGGACCTTAAGCGATGGATCG  
GGGTTAATTCTAAAACATTACCCGAAAGACGTGCTAAATTAAACCATTGTACGATGTCGTCTGTCTC  
GGC  
+  
F:FFF,FFFFFFFF:FFF:FFFF:FFFFFFFF:FFFFFFFF:FFFFFFFFFFFFFFFFFFFFFFFF  
FFFFFFFFFFFFFFFFFFFFFFFFFFFFFFFFFFFFFFFFFFFFFFFFFFFFFFFFFFFFFFFF:FFFFFFFFFFFFFF  
FFF  
@A00721:190:HGJW7DSXY:4:2620:12744:2206\_1:N:0:TCTGCAAG+GCTGCACT  
CAAAGATATTTTCATGAAAACCTACAGAGGAACGTACCGATTACCTGTCTTTCATATTATGAATGAACC

TTCGGCCGCTCTCTTTGCTTCGATGTTGGATGTCAAGAAGGGTTCAGAATGGGATTCTACGTAGTTT  
ATG

+

FFFFFFFFFFFFFFFFFFFFFFFFFFFFFFFFFFFFFFFFFFFFFFFFFFFFFFFFFFFFFFFFFFFFFFFF  
FFFFFFFFFFFFFFFFFFFFFFFFFFFFFFFFFFFFFFFFFFFFFFFFFFFFFFFFFFFFFFFFFFFFFFFF  
FFF

@A00721:190:HGJW7DSXY:4:2424:21332:8375\_1:N:0:TCTGCAAG+GCTGCACT  
TGATAACTTCTAATTTACGTTTGCTACTCAGAGCTGGTCCTCTCAGCAAAGGGATGCATGGTGTATC  
TCCTCAGGAGTCCCGGCATTTGATAATAATGACGAGACTTTCGTCATAATCGCTGCATATTACGGATT  
ACA

+

F,F,FFFF:FFF::FFFF:,,:F:FFFF:FFF,F:FFFFFF:FF::,FF,FF::,FFFFFFFF  
F:FF:FFFFFFFF:F:,FFFF,FFFFFFFFFFFFFFFFFFFF,FFFFFFFFF,FFFF::F:FFFFFF:  
F,F

@A00721:190:HGJW7DSXY:4:1108:1750:24439\_1:N:0:TCTGCAAG+GCTGCACT  
ATAGTTGAAGGGATAGTTTTACCTCGACCAACATTAAGGCGGCGGCGACTAATCTTAAAGCTTCACC  
CAAAATGAAGGACACTTCGAACTGAATAATGATGCACTACAAACAAGTATCGCTAATCATCTGAAAA  
AGG

+

FFFF,FFFFFF:FFFFFFFFFFFF:FFFFFFFFFFFF:FFFFFFF,FFFFFFFFFFFFFFFF:FF:  
:FFF:F:FFFFFFFF:FF:FF:FFFFFFFFFFFFFFFFFFFFFFFFFFFFFFFFFFFFFFFFFFFF  
FFF

@A00721:190:HGJW7DSXY:4:2113:19877:30843\_1:N:0:TCTGCAAG+GCTGCACT  
ATTCAAGCTTGTCGTTTAAAGACTGCAGAGGCTGTCAAACAAGCCAGACTCAAGGAGTCCAATCAAA  
GGTTTTGAATTTAGCTCAACTGGGGAGACGTGCTTAAATGGGTGATAAAATTATTTAGAGATCTTT  
CTA

+

FFFFFFFFFFFFFFFFFFFFFFFFFFFFFFFFFFFFFFFFFFFFFFFFFFFFFFFFFFFFFFFFFFFFFFFF  
FFFFFFFFFFFFFFFFFFFFFFFFFFFFFFFFFFFFFFFFFFFFFFFFFFFFFFFFFFFFFFFFFFFFFFFF  
FFF

@A00721:190:HGJW7DSXY:4:2307:24379:34287\_2:N:0:TCTGCAAG+GCTGCACT  
ATCTCTCGTCAATTTACTCTGTACTTGATCTACGTCGTTTAACTGTCGGAACAACCTTTACTTAGAAT  
GACTCTATCTTTTCAGACACTTCTTATATTATTTACAATAGTTAATAT

+

FFFFFFFFFFFFFFFFFFFFFFFFFFFFFFFFFFFFFFFFFFFFFFFFFFFFFFFFFFFFFFFFFFFFFF:  
FFFFFFFFF:FFFFFFFFFFFFFFFFFFFFFFFFFFFFFFFFFFFFFFFFFFFFFFFF

@A00721:190:HGJW7DSXY:4:2150:7563:17409\_1:N:0:TCTGCAAG+GCTGCACT  
AATATTTTTAGTCTCACCACCATCTCAACGAGGATAAAGCGTTTTTCCGTCCTGAACGTAATACAC  
TAATAGATCATCCGCACACGACTCGAAACCGAGACGCCGTAGATCAAAGTCCCTTCTAACTTTAGAT

+

F,::,FFF,,::,,,,,FFF,,::,,F,,,,,F:F:,,::,,FFF,F,,,F,F,F,,,,FF:,,,:  
,F,,::,,F,FF,FF,FFFF:FFFFFFFFFFFFFFFFFFFFFFFFFFFFFFFFFFFFFFFFFFFF

@A00721:190:HGJW7DSXY:4:2545:28863:27273\_1:N:0:TCTGCAAG+GCTGCACT  
ATGAGGTCAAAGCTCTATTTATTAACGAACATTATCCGATTCTTCGAGGGTATCACTACCACTGAT  
CTGCCGACTTTAGTCAAGGAACCTCAATTCCTTCGATGTTTATTTTTCTATAAGGGAAAATAGCAA  
TAA

+

:FFFF:FFF:FFFFFFFFFFFFFFFFFFFFFFFFFFFFFFFFFFFFFFFF:F:FFFFFFFFF,FFFF:FFFF  
FFFFFFFF,FFFFFFFFFFFFFFFFFFFFFFFFFFFFFFFFFFFFFFFFFFFFFFFFFFFFFFFFFFFF  
FFF

@A00721:190:HGJW7DSXY:4:2427:11840:12038\_1:N:0:TCTGCAAG+GCTGCACT  
AACTCTCTCCGATCACCTTGGTGTGATCTCCCGGAGGATCTTTTCAATAAGATGTATGATGATAATCT  
ACTATTTTTAAATAGTGATATTCAGCGTATACTTGAATACTTTATCAAAGATTTGGCTTGGTCTATTT  
ACC

+  
FFFFFFFFF,FFFFFFFFFFFFFFFF:FFF::FFFFFFFF:FFFFFFFFFFFFFFFF:FFF  
FFF:FFFFFFFFFFFFFFFFFFFFFFFF:FFFFFFFFFFFFFFFFFFFFFFFFFFFFFFFF,FFFFFFFF  
FFF

@A00721:190:HGJW7DSXY:4:2412:18493:34710\_1:N:0:TCTGCAAG+GCTGCACT  
TTATTTTACTTATACTTTAAATAGCACCGATTATAACTTGACTGTTGATAATATTACAATAGCTCTTT  
CTCAGAAGATTAGAGAAGTAACCGGTGAACACGTCGGTAGCATTGATTTACTTTTACCGTTAGAACTG  
AAA

+  
FFFFFFFFFFFFFFFF:FFFFFFFFFFFFFFFFFFFFFFFFFFFFFFFFFFFFFFFFFFFFFFFF  
FFFFFFFFFFFFFFFFFFFFFFFFFFFFFFFFFFFFFFFFFFFFFFFFFFFFFFFFFFFFFFFF  
FFF

@A00721:190:HGJW7DSXY:4:1515:4634:5760\_1:N:0:TCTGCAAG+GCTGCACT  
ATTGAAAATTGTATAAGAGTTAATTGCTTACACAAAAGTGACGCGCAAGGAATCTTAATTGATTGAA  
GCTAGGCGTTGGGGAGAATGAAGTCCCGCTTCCCGGAAGAAACGATCTATTTACAGAGTATTTAGAGT  
AGT

+  
FFFFFF:F:F:FFF:FFFFFFFFFFFFFFFFFFFFFFFF:FFFFFF: :FFFFFFFFFFFFFFFF  
FFF:FFFFFFFFFFFFFFFFFFFFFFFF,F:FFFFFFFFFFFFFFFFFFFFFFFFFFFFFFFF  
FFF

@A00721:190:HGJW7DSXY:4:2569:14244:3051\_1:N:0:TCTGCAAG+GCTGCACT  
ACTCCCATGCCAATCAATGATGTGACTATACAGTTCGGCCATTTCAAGAGTGGTCAATACGTCGTGGG  
AGGTACTGAAGCCTTCCCCTCCGCTGGCACGAAGAACACTCCCAAGCCAATCAATAGTTCTTCTGACC  
AGA

+  
FFFFFFFFFFFFFFFFFFFFFFFFFFFFFFFFFFFFFFFFFFFFFFFFFFFFFFFFFFFFFFFF  
FFFFFFFFFFFFFF:FFFFFFFFFFFFFFFFFFFFFFFFFFFFFFFFFFFFFFFFFFFFFFFF  
FFF

@A00721:190:HGJW7DSXY:4:1503:16224:32095\_2:N:0:TCTGCAAG+GCTGCACT  
TAAGTCTACCAGGAAGAGGGGAAATGTCCCCAAACTGAGAAGAATAAAGGGAAAGGTCCATCAGGAC  
CTAAGAAGGGGAAATTACCCCTAATTCTGAAGGAAGATCTCCCACCAT

+  
FFFFFFFFFFFFFFFFFFFFFFFF:FFFFFFFFF: :FFFFFFF:FFF,FFFFFFFFFFFFFFFF  
F:FFFFFFFFF:FFFFFFFFFFFFFFFFFFFFFFFFFFFFFFFFFFFFFFFF

@A00721:190:HGJW7DSXY:4:2554:14859:8249\_1:N:0:TCTGCAAG+GCTGCACT  
CGAAGTCGCTGAAGGCGGCTTGGGTCAATAAGGTAGCTGTAAAGTTGCGCCTGCCGACCCCATCTTT  
GAGACCAAGACTCTCTACAGTAGGTTCTGTCCTACTATGAGCAAATCTGTTGAATTCGTCACTGAGGA  
CGA

+  
FFFFFFFFFFFFFFFFFFFFFFFFFFFFFFFF:FFFFFFFFFFFFFFFFFFFFFFFFFFFFFFFF  
FFFFFFFFFFFFFFFFFFFFFFFFFFFFFFFFFFFFFFFFFFFFFFFFFFFFFFFFFFFFFFFF  
FFF

@A00721:190:HGJW7DSXY:4:1561:20229:26850\_2:N:0:TCTGCAAG+GCTGCACT  
GGCGACAACTGAGAGCAGTCGCTGGGGAAAGAGAATTGCGTGGGTTGAAGGCCGACGCTTCGAGCTT  
GAGTGTGACGAGGCCGGTGACGTTTTTGTCAACGGCGTTTGAGGATT

+  
FFFFFFFFFFFFFFFFFFFFFFFFFFFFFFFF:FFFFFFFFFFFFFFFFFFFFFFFFFFFFFFFF  
FFFFFFFFFFFFFFFFFFFFFFFFFFFFFFFFFFFFFFFFFFFFFFFFFFFFFFFF

@A00721:190:HGJW7DSXY:4:1550:22525:14951\_2:N:0:TCTGCAAG+GCTGCACT  
CTATGGAGTCTTGAAGGACTTAGGTTGGCATATTTATGCCGACGATAATAAGCATGTCACCCCTAAGC  
ACCGAGGTAAGCTCGGGACTTACAAGAGAGAGTGTGAGAGAGTCGCTC

+  
FFFFFFFFFFFFFFFFFFFFFFFFFFFFFFFF:FFFFFFFFFFFFFFFFFFFFFFFFFFFFFFFF  
FFFFFFFFFFFFFFFFFFFFFFFFFFFFFFFFFFFFFFFFFFFFFFFF

@A00721:190:HGJW7DSXY:4:2378:13024:30217\_2:N:0:TCTGCAAG+GCTGCACT  
AGGGTCTTCTTCATGCTGATCTTTCAGGACCTAATCACATCATGATTGATAGTTACGGCTCGTATCGA  
GTTGGAGGGAGGAAGTTCTCCGAAATTAAAGACGGGGGGATTAAGAGT

+

FFFFFFFFFFFFFFFFFFFFFFFFFFFFFFFFFFFFFFFFFFFFFFFFFFFFFFFFFFFFFFFFFFFFFFFF  
FFFFFFFFFFFFFFF,FFFFFF:FFFFFFFFFFFFFFFFFFFFFFFFFFFFFFFFFFFFFFFF

@A00721:190:HGJW7DSXY:4:1530:10402:27430\_1:N:0:TCTGCAAG+GCTGCACT  
GGCTCTAGAGAAGATCTCACCACCTGGAGAAGGCAAGTGGAGAGTCCAGAAGTTGATGAAGAAGGATT  
ATTTGAAGCAGGGGTTACCACTTCCTAAGGTGGATGAGGGAGGTTGTTTCTTTGGAGTTTTAGATAAT  
CTT

+

FF,F,FFFFFFFFFFFF,,F:F:,FFFF:F,FF:FF:FFFFFF:FFFFFF:FFFFFFFFFFFFFFFF  
F,FFFFFF:FFFFFFFFFFFF::FF:FF,FFFFFFFFFFFFFFFF,FFF,,FFFFFFFF:FF::,FFF,F  
FFF

@A00721:190:HGJW7DSXY:4:1518:10700:10692\_2:N:0:TCTGCAAG+GCTGCACT  
GGACTACTCGACTTTTGTATCTGGAGTTGTCTAGGGTCATGGCAGATACTACCGATAAGGTGAAAAATA  
TGCAGGTCAAAGATTCTGTAGCTCTGAGGGCGGTTGAGGGAGCCGTTT

+

FFFFFFF:FFFFFFFFFFFFFFFFFFFFFFFFFFFFFFFFFFFFFFFFFFFFFFFFFFFFFFFFFFFFFF  
FFFFFFFFFFFFFFFFFFFFFFFFFFFFFFFFFFFFFFFFFFFFFFFFFFFFFFFFFFFFFF:FF

@A00721:190:HGJW7DSXY:4:1328:11171:23782\_2:N:0:TCTGCAAG+GCTGCACT  
GTTAAGAAGGAGGCTGATCATGGAGTCTTTGTACCTTCTGTCAAACCTTCGAGGTTACAGCTACGAGAGG  
TGATCCCGGATGTGGATTGAAGGCTGGCCAGATCGGAAGAGCGTCGTG

+

FFFFFFFFFFFFFFFFFFFFFFFFFFFFFFFFFFFFFFFFFFFFFFFFFFFFFFFFFFFFFFFFFFFFFF  
FFFFFFFFFFFFFFFFFFFFFFFFFFFFFFFFFFFFFFFFFFFFFFFFFFFFFFFFFFFFFF

@A00721:190:HGJW7DSXY:4:1661:12319:15781\_2:N:0:TCTGCAAG+GCTGCACT  
CCTGATGACATTATTTCAACGGATACCGATCTCAGTTCTACCACAGAAACCGTCTCAGGAAGTGTCTC  
CACTGATTCCGAATTAGAGAAAGACGACCTTCTTGTGGGGACTGAGAC

+

FFFFFFFFFFFFFFFFFFFFFFFFFFFFFFFFFFFFFFFFFFFFFFFFFFFFFFFFFFFFFFFFFFFFFF  
FFFFFFFFFFFFFFFFFFFFFFFFFFFFFFFFFFFFFFFFFFFFFFFFFFFFFF:FFFFFFF

@A00721:190:HGJW7DSXY:4:1243:31403:27884\_1:N:0:TCTGCAAG+GCTGCACT  
TCTCTGATGAGGACGTTGAAAGGGATAATTTCAACTCTGAGACTTCTAAGAGTGTTCAAAAGACCAG  
AAACGTAACAAGAAGAATAAAGGTAGGAAGGGGAGAAAACAGAACAGCGAGCGGTTGAAGAGAAAAC  
TGA

+

FFFFF:FF,F:FF::FFFF,FF,,FFFFFF:FFFFFFFFFFFFFF:FFFFFFFFFFFFFFFFFFFFFF  
FFFFFFFFFFFFFFFF:FFFFFFFFFFFFFFFFFFFFFFFFFFFFFFFFFFFFFFFF:FFFFFFFFFFFFFF  
FFF

@A00721:190:HGJW7DSXY:4:2177:4336:6120\_1:N:0:TCTGCAAG+GCTGCACT  
AACATCAACGACATCATTCTTGATGAGTGTCGTTCTTATCGAAGTCTCAGTTATCGCTGCCCCGGCCGA  
CGTTTGTGCGGAACCTCTCAGAGGTTTACGGCAGAAAAATTTCTCTGCTTGTAATTCGAGAGAGGACA  
CTA

+

F:FFFFF,FFFFFFFFFFFFFFFFFFFFFFFF:FFF:FFFF:F:FFFFFFFFFFFFFFFFFFFFFF,FFF  
FFFFFFFFFFFFFFFF:FFFFFFFFF:F:FFFFFFFFFFFFFF:FFFFFFFF:FFFFFFFFFFFFFF  
FFF

@A00721:190:HGJW7DSXY:4:2604:6234:19774\_1:N:0:TCTGCAAG+GCTGCACT  
TCTTCCGATCTCTTGAAGTTGTTGACGACAAGCCTCAAGAGGGTAGAGGACCACCTGGATCTTCTACT  
GTCTCTGCCTTCCAAGATTTCTTAGAAGAGGTTATTCTGGAACACCTTAACGTCACTCGGTAATCT  
TTC

+

FFFFFFFFFFFF::FFFFFFFFFFFFFFFFFFFFFFFFFFFFFFFF:FFFFFFFFFFFFFFFFFFFFFF



```

FFFFFFFFFFFFFFFFFFFFFFFF,FFFFFFFFFFFFFFFFFFFFFFFFFFFFFFFFFFFFFFFF
FFF

```

+

@A00721:190:HGJW7DSXY:4:2577:21441:24565\_2:N:0:TCTGCAAG+GCTGCACT  
AGCATGACCATAATTGGTATTGACTTTGGTACCACCTTTTCTACTGTCTGTCTCGCCTCTTCGAATGA  
AGTTTTAATGCTTAACAGATCGGAAGAGCGTCGTGTAGGGAAAGAGTG

[illegible]

+

@A00721:190:HGJW7DSXY:4:1203:23077:32784\_1:N:0:TCTGCAAG+GCTGCACT  
CCGATCTATTTTCATGAAACTACAGAGGAACGTACCGGATTACCTGTCTTTCATATTATGAATGAACC  
TTCGGCCGCTCTCTTTGCTTCGATGTTGGATGTCAAGAAGGGTTCAGAATGGGATTCTACGTAGTTT  
ATG

[illegible]

+

@A00721:190:HGJW7DSXY:4:1472:25898:36793\_1:N:0:TCTGCAAG+GCTGCACT  
ATAGGTGAAGGGATAGTTTTTACCTCGACCAACATTAAGGCGGCGGCGACTAATCTTAAAGCTTCACC  
CAAAATGAAGGACACTTCGAAACTGAATAATGATGCACTACAAACAAGTATCGCTAATCATCTGAAAA  
AGG

```

FFFFFFFF,FF,FFFFFFFFFFFFFFFF:F:F:FFFFFFFFFFFFFF:FFFFFFFFFFFFFFFF
FFFF:FFFFFFFFFFFFFFFF:FFF:FFFFFFFFFFFFFFFFFFFFFFFF:FFFFFFFFFFFFFF
FFF

```

+

[illegible]

$+$ 

@A00721:190:HGJW7DSXY:4:2566:5629:36292\_1:N:0:TCTGCAAG+GCTGCACT  
CGAAGTCGCTGAAGGCGGCTTGGGTCATTAAGGGTAGCTGTAAAGTTGCGCCTGCCGACCCCATCTTT  
GAGACCAAGACTCTCTACAGTAGGTTCTGTCCTACTATGAGCAAATCTGTTGAATTCGTCACCTGAGGA  
CGA

+

@A00721:190:HGJW7DSXY:4:1575:12997:5838\_2:N:0:TCTGCAAG+GCTGCACT  
GGCGACAACTGAGAGCAGTCGCTGGGGAAAGAGAATTGCGTGGGTGAAGGCCGACGCTTCGAGCTT  
GAGTGTGACGAGGCCGGTGACGTTTTTGTCAACGGCGTTTGGAGGATT

+

@A00721:190:HGJW7DSXY:4:2111:17219:28557\_2:N:0:TCTGCAAG+GCTGCACT  
CTATGGAGTCTTGAAGGACTTAGGTTGGCATATTTATGCCGACGATAATAAGCATGTCACCCCTTAAGC  
ACCGAGGTAAGCTCGGGACTTACAAGAGAGAGTGTGAGAGAGTCGCTC

+

@A00721:190:HGJW7DSXY:4:1207:32136:31375\_1:N:0:TCTGCAAG+GCTGCACT  
AGTTTCAGACGTGTGCTCTTCCGATCTGTTGGAGGGAGGAAGTTCTCCGAAATTAAGACGGGGGGATT  
AAGAGTCCAGCTGTAAGTGTCAATTCAGAGAGGGGAGCTCTGAAAAGGAACTTCGTCAGAAGATGAG  
GAA

 $+$ 

@A00721:190:HGJW7DSXY:4:2115:26802:22858\_1:N:0:TCTGCAAG+GCTGCACT  
GGCTCTAGAGAAGATCTCACCACCTGGAGAAGGCAAGTGGAGAGTCCAGAAGTTGATGAAGAAGGATT  
ATTTGAAGCAGGGGTTACCACTTCCTAAGGTGGATGAGGGAGGTTGTTTCTTTGGAGTTTTAGATAAT  
CTT

+

@A00721:190:HGJW7DSXY:4:1674:1099:36432\_2:N:0:TCTGCAAG+GCTGCACT  
GGACTACTCGACTTTTGTCTGGAGTTGTCTAGGGTCATGGCAGATACTACCGATAAGGTGAAAAATA  
TGCAGGTCAAAGATTCTGTAGCTCTGAGGGCGGTTGAGGGAGCCGTTT

+

@A00721:190:HGJW7DSXY:4:1677:28655:32049\_2:N:0:TCTGCAAG+GCTGCACT  
GTTAAGAAGGAGGCTGATCATGGAGTCTTTGTACCTTCTGTCAAACCTTCGAGGTTACAGCTACGAGAGG  
TGATCCCGGATGTGGATTGAAGGCTGGCCAGATCGGAAGAGCGTCGGG

+

```

FFFFFFFFFFFFFFFF:FFFFFFFFFFFFFFFF:FFFFFFFFFFFFFFFFFFFFFFFFFFFFFFFFFFFFFFFF
FFFFFFFFFFFF:FFFFF:FFFFFFFFFFFFFFFFFFFFFFFFFFFFFFFFFFFFFFFFFFFF,F

```

@A00721:190:HGJW7DSXY:4:2155:22092:11224\_2:N:0:TCTGCAAG+GCTGCACT  
CCTGATGACATTATTTCAACGGATACCGATCTCAGTTCTACCACAGAAACCGTCTCAGGAAGTGTCTC  
CACTGATTGCGAATTAGAGAAAGACGACCTTCTTGTGGGGACTGAGAC

+

FFFFFFFFFFFFFFFFFFFFFFFFFFFFFFFFFFFFFFFFFFFFFFFFFFFFFFFFFFFFFFFFFFFFFFFF  
FFFFFF:FFFFFFFFFFFFFFFFFFFFFFFFFFFFFFFFFFFFFFFFFFFFFFFFFFFFFFFFFFFFFFFF

@A00721:190:HGJW7DSXY:4:1262:9561:11475\_1:N:0:TCTGCAAG+GCTGCACT  
TCTCTGATGAGGACGTTGAAAGGGATAATTTCAACTCTGAGACTTCTAAGAGTGTTTCAAAAGACCAG  
AAACGTAACAAGAAGAATAAAGGTAGGAAGGGGAGAAAACAGAACAAAGCGAGCGGTTGAAGAGAAAAC  
TGA

+

FFFFFF:FFFFFF:FFFFFFFFFFFFFFFFFFFFFFFFFFFFFFFFFFFFFFFFFFFFFFFFFFFFFFFF  
F,FFFFFFFFFFFFFFFFFFFFFFFFFFFFFFFFFFFFFFFFFFFFFFFFFFFFFFFFFFFFFFFF:FFFF  
FFF

@A00721:190:HGJW7DSXY:4:2206:22761:10723\_1:N:0:TCTGCAAG+GCTGCACT  
AACATCAACGACATCAGTCTTGATGAGTGTCGTTCTTATCGAAGTCTCAGTTATCGCTGCCCCGCCGA  
CGTTTGTGCGCAACTCTCAGAGGTTTACGGCAGAAAAATTTCTCCTGCTTGTAATTCGAGAGAGGACA  
CTA

+

F,:F,:F,FFFFFF,F,FF:FFFF::FFFFFFFF:,FFFFFF:,FFFFFFFFFFFFFF:F:, ,F,FFFF:FF  
FF:FFFFFFFFFFFFFFFFFFFFFFFFFFFFFFFFFFFFFFFFFFFFFFFFFFFFFFFFFFFFFFFF:FF  
:FF

@A00721:190:HGJW7DSXY:4:2604:6488:20462\_1:N:0:TCTGCAAG+GCTGCACT  
TCTTCCGATCTCTTGAAGTTGTTGACGACAAGCCTCAAGAGGGTAGAGGACCACCTGGATCTTCTACT  
GTCTCTGCCTTCCAAGATTTCTTAGAAGAGGTTATTCTGGAACCACCTTAACGTCACTCGGTAATCT  
TTC

+

FFFFFFFFFFFFFF:FFFFFFFFFFFFFFFFFFFFFFFFFFFFFFFFFFFFFFFFFFFFFFFFFFFFFFFF  
FFFFFFFFFFFFFFFF:FFFFFF:,FFFFFFFFFFFFFFFFFFFFFFFFFFFFFFFFFFFFFFFFFFFFFFF  
FFF

@A00721:190:HGJW7DSXY:4:2533:24225:29575\_1:N:0:TCTGCAAG+GCTGCACT  
GGAGGGAGTTCTTGAAGCATCCCGACCTTTCCTTGTGAAAATTTTGATGCGGTTTCATAAGATTATCA  
GTAATCCTGATTCTACTACGGATTCATGGACCTTCCATCCTGTACCTCTTCTGGAGAGACGTATCTCA  
AAG

+

FFFFFFFFFF:FF:FFFFFFFFFFFFFFFFFFFFFFFFFFFFFFFFFFFFFFFFFFFFFFFFFFFFFFFF  
FFFFFFFFFFFFFFFFFFFFFFFFFFFFFFFFFFFFFFFFFFFFFFFFFFFFFFFFFFFFFFFFFFFFFFFF  
FFF

@A00721:190:HGJW7DSXY:4:1666:12445:8672\_2:N:0:TCTGCAAG+GCTGCACT  
CATGACCATAATTGGTATTGACTTTGGTACCACCTTTTCTACTGTCTGTCTCGCCTCTTGAATGAAG  
TTTTAATGCTTAACAACAATGATAGTGAATTTATACCTACAATCATTG

+

FFFFFFFFFFFFFFFFFFFFFFFFFFFFFFFFFFFFFFFFFFFFFFFFFFFFFFFFFFFFFFFFFFFFFF  
FFFFFFFFFFFFFFFFFFFFFFFFFFFFFFFFFFFFFFFFFFFFFFFFFFFFFFFFFFFFFFFF:FFFF

@A00721:190:HGJW7DSXY:4:2604:6262:25801\_1:N:0:TCTGCAAG+GCTGCACT  
TGCTATTACTCATGATGGTTACGGTCAGGGAGGATTCTCAGTTTACAAGGACCTTAAGCGATGGATCG  
GGGTTAATTCTAAAACATTACCCGAAAGACGTGCTAAATTAAACCATTGTACGATGTCGTCTGTCTC  
GGC

+

FFFFFFFFFFFFFFFFFFFFFFFFFFFFFFFFFFFFFFFFFFFFFFFFFFFFFFFFFFFFFFFFFFFFFF  
FFFFFFFFFFFFFFFFFFFFFFFFFFFFFFFFFFFFFFFFFFFFFFFFFFFFFFFFFFFFFFFFFFFFFF  
FFF

@A00721:190:HGJW7DSXY:4:2531:32696:22545\_1:N:0:TCTGCAAG+GCTGCACT  
CCGATCTATTTTCATGAAAACCTACAGAGGAACGTACCGGATTACCTGTCTTTCATATTATGAATGAACC

+

@A00721:190:HGJW7DSXY:4:1417:4661:30013\_1:N:0:TCTGCAAG+GCTGCACT  
GATAACTTCTAATTTACGTTTGCTACTCAGAGCTGGTCCTCTCAGCAAAGGGATGCATGGTGTTATCT  
CCTCAGGAGTCCCGGCATTTGATAATAATGACGAGACTTTCGTCTAATCGCTGCATATTACGGATTA  
CAC

+

@A00721:190:HGJW7DSXY:4:2120:10746:34225\_1:N:0:TCTGCAAG+GCTGCACT  
ATAGGTGAAGGGATAGTTTTTACCTCGACCAACATTAAGGCGGCGGCGACTAATCTTAAAGCTTCACC  
CAAAATGAAGGACACTTCGAAACTGAATAATGATGCACTACAAACAAGTATCGCTAATCATCTGAAAA  
AGG

+

@A00721:190:HGJW7DSXY:4:2148:22453:4742\_1:N:0:TCTGCAAG+GCTGCACT  
ATTCAAGCTTGTCTTTAAAGACTGCAGAGGCTGTCAAACAAGCCCAGACTCAAGGAGTCCAATCAAA  
GGTTTTGAATTTAGCTCAACTGGGGAGACGTGCTTAAATGGGTGATAAAAATTATTTAGAGATCTTTT  
CTA

+

@A00721:190:HGJW7DSXY:4:2351:6361:5274\_2:N:0:TCTGCAAG+GCTGCACT  
ATCTCTCGGTCATTTACTCTGTACTTGATCTACGTCGTTTAACTGTGGAACAACCTTTACTTAGAAT  
GACTCTATCTTTTCAGACACTTCTTATATTATTTACAATAGTTAATAT

+

@A00721:190:HGJW7DSXY:4:2214:8992:19695\_1:N:0:TCTGCAAG+GCTGCACT  
AATATTTTTATTCTCTACACCAATATAAACGAGGATAACGCTTTTTTCCGACCTCAACTTAATACAC  
TAAGATAACATCCCCACACGACTCGAAACCGAGACGCCGTAGATCAAAGTCCCTTCTAACTTTAGAT

+

@A00721:190:HGJW7DSXY:4:2671:11044:26475\_1:N:0:TCTGCAAG+GCTGCACT  
ATGAGGTCAAAGCTCTATTTATTAACGAACATTATCCGATTCTTCGAGGGTATCACTACCACTGAT  
CTGCCGACTTTAGTCAAGGAAC TTCAATTCCTTCGATGTTTATATTTTTCTATAAGGGAAAATAGCAA  
TAA

+

@A00721:190:HGJW7DSXY:4:2224:30689:26052\_1:N:0:TCTGCAAG+GCTGCACT  
TCTCTCCGATCACCTTGGTGTGATCTCCCGGAGGATCTTTCAATAAGATGTATGATGATAATCTACT  
ATTTTTAAATTGTGATATTCAGCGTATACTTGAATACTTTATCAAAGATTGGCTTGGTCTATTTACC  
GCA

+  
FFFFFFFFFFFFFFFF:FFFFFFFFFFFFFFFF,FFFFF,:FFFFFFFF:FFFFFFFFFFFFFFFF:FFFF  
F:F:FFFFFF:FFFFFFFFFFFFFFFFFFFFFFFFFFFFFFFFFFFFFFFFFFFFFFFFFFFFFFFF  
FFF  
@A00721:190:HGJW7DSXY:4:1109:5312:6652\_2:N:0:TCTGCAAG+GCTGCACT  
TATTTTACTTATACTTTAAATAGCACCGATTATACTTGACTGTTGATAATATTACAATAGCTCTTTC  
TCAGAAGATTAGAGAAGTAACCGGTGAACACGTCGGTAGCATTGATTT  
+  
FFFFFFFFFFFFFFFFFFFFFFFFFFFFFFFFFFFFFFFFFFFFFFFFFFFFFFFFFFFFFFFFFFFFFFF  
FFFFFFFF:FFFFFF:FFFF:FFFFFFFFFFFFFFFF:FFFF:FFFF  
@A00721:190:HGJW7DSXY:4:2108:21847:26334\_1:N:0:TCTGCAAG+GCTGCACT  
ATTGAAAATTGTATAAGAGTTAATTGCTTACACAAAAGTGACGCGCAAGGAATCTTAATTGATTGAA  
GCTAGGCGTTGGGGAGAATGAAGTCCGCTTCCCGGAAGAAACGATCTATTTACAGAGTATTTAGAGT  
AGT  
+  
FFFFFFFFFFFFFFFFFFFFFFFF:FFFF:FFFFFFFFFFFFFFFFFFFFFFFFFFFFFFFF:FFFFFFFF:F  
FFFFFFFFF:FFFFFFFFFFFFFFFFFFFFFFFFFFFFFFFFFFFFFFFFFFFFFFFFFFFFFFFFFFFFF  
FFF  
@A00721:190:HGJW7DSXY:4:1241:16893:23516\_1:N:0:TCTGCAAG+GCTGCACT  
TCCGATCTACCAATCAATGATGTGACTATACAGTTCGGCCATTTCAAGAGTGGTCAATACGTCGTGGG  
AGGTACTGAAGCCTTCCCCTCCGCTGGCACGAAGAACAACCTCCAAGCCAATCAATAGTTCTTCTGACC  
AGA  
+  
FFFFFFF:FFFF:FFFFFFFFFFFFFFFFFFFFFFFFFFFFFFFFFFFFFFFFFFFFFFFFFFFFFFFFF  
FFFFFFFFFFFFFFFFFFFFFFFFFFFFFFFFFFFFFFFFFFFFFFFFFFFFFFFFFFFFFFFFFFFFFFFFF  
FFF  
@A00721:190:HGJW7DSXY:4:2127:20717:28134\_2:N:0:TCTGCAAG+GCTGCACT  
TAAGTCTACCAGGAAGAGGGGAAATGTCCCCAAAAGTGAAGAATAAAGGGAAAGGTCCATCAGGAC  
CTAAGAAGGGGAAATTACCCCTAATTCTGAAGAGATCGGAAGAGCGTC  
+  
FFFFFFFFFFFFFFFFFFFFFFFFFFFFFFFFFFFFFFFF:FFFFFFFFFFFFFFFFFFFFFFFFFFFFFFFFF  
FFFFFFFFFFFFF,FFFFFFFFFFFFFFFFFFFFFFFFFFFFFFFFFFFFFFFFFFFFFFFFF  
@A00721:190:HGJW7DSXY:4:2605:29595:8719\_1:N:0:TCTGCAAG+GCTGCACT  
CGAAGTCGCTGAAGGCGGCTTGGGTCAATTAAGGTAGCTGTAAAGTTGCGCCTGCCGACCCCATCTTT  
GAGACCAAGACTCTCTACAGTAGGTTTCGTGCCTACTATGAGCAAATCTGTTGAATTCGTCACTGAGGA  
CGA  
+  
FFFFFFFFFFFFFFFFFFFFFFFF:FFFF:FFFFFFFFFFFFFFFFFFFFFFFFFFFFFFFFFFFFFFFFF  
FFFFFFFFFFFFFFFFFFFF:FFFFFFFFFFFFFFFFFFFFFFFFFFFFFFFFFFFFFFFFFFFFFFFFF  
FFF  
@A00721:190:HGJW7DSXY:4:1601:16667:16016\_2:N:0:TCTGCAAG+GCTGCACT  
GGCGACAAAGTGAAGAGCAGTCGCTGGGGAAAGAGAATTGCGTGGGTTGAAGGCCGACGCTTCGAGCTT  
GAGTGTGACGAGGCCGGTGACGTTTTTGTCAACGGCGTTTGAGGATT  
+  
FFFFFFFFFFFFF,FFFFFFFFFFFFFF:FF,FFFFF:FFFFFF:FFF:FFFFFFFFFFFFF,FFFFFFF  
FFFFFFFFF,F:FFFFFFFFFFFF:FFFFFFFFFFFF:FFFFFFFFFFFF  
@A00721:190:HGJW7DSXY:4:2511:22200:30358\_2:N:0:TCTGCAAG+GCTGCACT  
CTATGGAGTCTTGAAGGACTTAGGTTGGCATATTTATGCCGACGATAATAAGCATGTACCCCTTAAGC  
ACCGAGGTAAGCTCGGGACTTACAAGAGAGAGTGTGAGAGAGTCGCTC  
+  
FFFFFFFFFFFFFFFFFFFFFFFFFFFFFFFFFFFFFFFFFFFFFFFFFFFFFFFFFFFFFFFFFFFFFFF  
FFFFFFFFFFFFFFFFFFFFFFFFFFFFFFFFFFFFFFFFFFFFFFFFFFFFFFFFFFFFFFFFFFFFF  
@A00721:190:HGJW7DSXY:4:1351:24117:12258\_1:N:0:TCTGCAAG+GCTGCACT  
AGTTCAGACGTGTGCTCTCCGATCTGTTGGAGGGAGGAAGTTCTCCGAAATTAAGACGGGGGGATT

AAGAGTCCAGCTGTAAGTGTCTTTTCAGAGAGGGGAGCTCTGAAAAGGAACTTCGTCAGAAGATGAG  
GAA

+

FFFFFFFF:FFFFFFFFFFFFFFFFFFFFFFFFFFFFFFFFFFFFFFFFFFFFFFFFFFFFFFFFFFFFFFFF  
FFFF:FFFFFFFFFFFFFFFFFFFFFFFFFFFFFFFFFFFFFFFFFFFFFFFFFFFFFFFFFFFFFFFFFFFF  
FFF

@A00721:190:HGJW7DSXY:4:2368:18683:35102\_1:N:0:TCTGCAAG+GCTGCACT  
GGCTCTAGAGAAGATCTCCCCACCTGGAGAAGGCAAGTGGAGAGTCCAGAAGTTGATGAAGAAGGATT  
ATTTGAAGCAGGGGTTACCACTTCCTAAGGTGGATGAGGGAGGTTGTTTCTTTGGAGTTTTAGATAAT  
CTT

+

FFFFFFFFFFFFFFFFFFFF,FFFFFFFFFFFFFFFFFFFFFFFFFFFFFFFFFFFFFFFFFFFFFFFFFFFFF:FFFFFFFFFFFF  
FFFFF:FFFFFFFFFFFFFFFFFFFFFFFFFFFFFFFFFFFFFFFFFFFFFFFFFFFFFFFFFFFFFFFFFFFF  
FFF

@A00721:190:HGJW7DSXY:4:2112:29405:14622\_2:N:0:TCTGCAAG+GCTGCACT  
GGACTACTCGACTTTTTGATCTGGAGTTGTCTAGGGTCATGGCAGATACTACCGATAAGGTGAAAAATA  
TGCAGGTCAAAGATTCTGTAGCTCTGAGGGCGGTTGAGGGAGCCGTTT

+

FFFFFFFFFFFFFFFFFFFFFFFFFFFFFFFFFFFFFFFFFFFFFFFFFFFFFFFFFFFFFFFFFFFFF::FFFFFFFFFFFF  
FFFFFFFFF:FFFFFFFFFFFFFFFFFFFFF:FFFFFFFFFFFFFFFFFFFFFFFFFFFF

@A00721:190:HGJW7DSXY:4:2255:18367:12790\_2:N:0:TCTGCAAG+GCTGCACT  
GTAAAGAAGGAGGCTGATCATGGAGTCTTTGTACCTTCTGTCAAACCTTCGAGGTTTCAGCTACGAGAGG  
TGATCCCGGATGTGGATTGAAGGCTGGCCAGATCGGAAGAGCGTCGTG

+

FFFFFFFFFFFFFFFFFFFFFFFFFFFFFFFFFFFFFFFFFFFFFFFFFFFFFFFFFFFFFFFFFFFFF  
FFFFFFFFFFFFFFFFFFFFF:FFFFFFFFFFFFFFFFFFFFFFFFFFFFFFFFFFFFF

@A00721:190:HGJW7DSXY:4:2155:23845:12132\_2:N:0:TCTGCAAG+GCTGCACT  
CCTGATGACATTATTTCAACGGATACCGATCTCAGTTCTACCACAGAAACCGTCTCAGGAAGTGTCTC  
CACTGATTCCGAATTAGAGAAAGACGACCTTCTTGTGGGGACTGAGAC

+

FFFFFFFFFFFFFFFFFFFFFFFFFFFFFFFFFFFFFFFFFFFFFFFFFFFFFFFFFFFFFFFFFFFFF  
FFFFFFFFFFFFFFFFFFFFF:FFFFFFFFFFFFFFFFFFFFFFFFFFFFF

@A00721:190:HGJW7DSXY:4:1262:9959:9283\_1:N:0:TCTGCAAG+GCTGCACT  
TCTCTGATGAGGACGTTGAAAGGGATAATTTCAACTCTGAGACTTCTAAGAGTGTTCAAAAGACCAG  
AAACGTAACAAGAAGATAAAGGTAGGAAGGGGAGAAAACAGAACAGCGAGCGGTTGAAGAGAAAAC  
TGA

+

FFFFFFFFFFFFFFFFFFFFFFFFFFFFFFFFFFFFFFFFFFFFFFFFFFFFFFFFFFFFFFFFFFFFF  
FFFFFFFFFFFFFFFFFFFFF:FFFFFFFFFFFFFFFFFFFFFFFFFFFFF  
FFF

@A00721:190:HGJW7DSXY:4:2206:23493:7482\_1:N:0:TCTGCAAG+GCTGCACT  
AACATCAACGACATCATTCTTGATGAGTGTCTTCTTATCGAAGTCTCAGTTATCGCTGCCCGGCCGA  
CGTTTGTGCGCAACTCTCAGAGGTTTACGGCAGAAAAATTTCTCTGCTTGTAATTCGAGAGAGGACA  
CTA

+

FFFFFFFFFFFFFFFFFFFFFFFFFFFFFFFFFFFFFFFFFFFFFFFFFFFFFFFFFFFFFFFFFFFFF  
FFFFFFFFFFFFF:FFFFFFFFFFFFFFFFFFFFFFFFFFFFFFFFFFFFF:FFFFFFFFFFFFFFFFFFFFF  
FFF

@A00721:190:HGJW7DSXY:4:2644:28131:1579\_1:N:0:TCTGCAAG+GCTGCACT  
TCTTCCGATCTCTTGAAGTTGTTGACGACAAGCCTCATGAGGGTAGAGGACCACCTGGATCTTCTACT  
GTATCTGCCTTCCAAGATTTCTTAGAAGAGGTTTGTCTGGAACCACTTAACGTCACTCGGTAATCT  
TTC

+

FFFF,FF,FFF,F,FFFFFFFFFFFFFFFF, :F,FFFF, :FFFF, ,F,FF, , , , FFFFF,FF:FF::

FF,F,FFFFFF,:F,FFFF,,FFF:FF,FFFF,,FF,FFF,F,F:::FFFFFFFF,FF,F,F:FF:F  
FFF

@A00721:190:HGJW7DSXY:4:2533:25003:28354\_1:N:0:TCTGCAAG+GCTGCACT  
GGAGGGAGTTCTTGAAGCATCCCGACCTTTCCTTGTGAAAATTTTGATGCGGTTTCATAAGATTATCA  
GTAATCCTGATTCTACTACGGATTCATGGACCTTCCATCCTGTACCTCTTCTGGAGAGACGTATCTCA  
AAG

+

FFF:,F:,FFFFFF:FF,FFFFFFFFF,F,F,FFF:F,FF,FFFFFFFFF,F:FF:,FF:FFFFFF,:  
FFFFFFFF:F:FFF,FF,FF:,,:FFFFFFFF:FFFF:FFFFFFFF:F,FF:,F:F::FF::F:FFFFFFFFFFFF  
FFF

@A00721:190:HGJW7DSXY:4:1447:11162:14935\_1:N:0:TCTGCAAG+GCTGCACT  
CATGACCATAATTGGTATTGACTTTGGTACCACCTTTTCTACTGTCTGTCTCGCCTCTTGAATGAAG  
TTTTAATGCTTAACAACAATGATAGTGAATTTATACCTACAATCATTGGTTTTTCTAATAATGATGAC  
ACT

+

::FF:FFFF::FFFFFF:FFFFFFFFFFFFFFFF:FFFFFFFFFFFF:FFFFFFFFFFFF:FFFFFFFFFFFF  
FFFFFFFF:FFFFFFFFFFFFFFFF,FFFFFFFFFFFF:FFFFFFFFFFFFFFFFFFFFFFFFFFFFF,F:FFFF:F:F  
FFF

@A00721:190:HGJW7DSXY:4:2652:18421:30138\_1:N:0:TCTGCAAG+GCTGCACT  
TGCTATTACTCATGATGGTTACGGTCAGGGAGGATTCTCAGTTTACAAGGACCTTAAGCGATGGATCG  
GGGTAAATTCTAAACATTACCCGAAAGACGTGCTAAATTAAACCATTGTACGATGTCGTCTGTCTC  
GGC

+

FFFFFFFFFFFFFFFFFFFFFFFFFFFFFFFFFFFFFFFFFFFFFFFFFFFFFFFFFFFFFFFFFFFFFFFFFFFF  
FFFFFFFFFFFFFFFFFFFFFFFFFFFFFFFFFFFFFFFFFFFFFFFFFFFFFFFFFFFFFFFFFFFFFFFFFFFF  
FFF

@A00721:190:HGJW7DSXY:4:2569:17137:29543\_1:N:0:TCTGCAAG+GCTGCACT  
CCGATCTATTTTCATGAAACTACAGAGGAACGTACCGGATTACCTGTCTTTTCATATTATGAATGAACC  
TTCGGCCGCTCTCTTTGCTTCGATGTTGGATGTCAAGAAGGGTTCAGAATGGGATTCTACGTAGTTT  
ATG

+

FFFFFFFFFFFFFFFFFFFFFFFFFFFFFFFFFFFFFFFFFFFFFFFFFFFFFFFFFFFFFFFFFFFFFFFFFFFF  
FFFFFFFFFFFFFFFFFFFFFFFFFFFFFFFFFFFFFFFFFFFFFFFFFFFFFFFFFFFFFFFFFFFFFFFFFFFF  
FFF

@A00721:190:HGJW7DSXY:4:1530:24867:22576\_1:N:0:TCTGCAAG+GCTGCACT  
GATAACTTCTAATTTACGTTTGCTACTCAGAGCTGGTCCTCTCAGCAAAGGGATGCATGGTGTATCT  
CCTCAGGAGTCCCGCATTTGATAATAATGACGAGACTTTCGTCATAATCGCTGCATATTACGGATTA  
CAC

+

:FFFFFFFFFFFFFFFFFFFFFFFFFFFFFFFFFFFFFFFFFFFFFFFFFFFFFFFFFFFFFFFFFFFFFFFFFFFF  
FFFFFFFFFFFFFFFFFFFFFFFFFFFFFFFFFFFFFFFFFFFFFFFFFFFFFFFFFFFFFFFFFFFFFFFFFFFF  
FFF

@A00721:190:HGJW7DSXY:4:2330:11071:14309\_1:N:0:TCTGCAAG+GCTGCACT  
ATAGGTGAAGGATAGTTTTTACCTCGACCAACATTAAGGCGGCGGCGACTAATCTTAAAGCTTCACC  
CAAAATGAAGGACACTTCGAACTGAATAATGATGCACTACAAACAAGTATCGCTAATCATCTGAAAA  
AGG

+

FFF:FF:FFF:FFFFFFFFFFFFFFFFFFFFFFFFFFFFFFFFFFFFFFFFFFFFFFFFFFFFFFFFFFFFFFFFFFFF  
:FFFFFFFFFF:FF:FFFFFFFFFFFFFFFFFFFFFFFFFFFFFFFFFFFFFFFFFFFFFFFFFFFFFFFFFFFFFFFFFFFF  
FFF

@A00721:190:HGJW7DSXY:4:2151:13792:8719\_1:N:0:TCTGCAAG+GCTGCACT  
ATTCAAGCTTGTCTTTAAAGACTGCAGAGGCTGTCAAACAAGCCAGACTCAAGGAGTCCAATCAAA  
GGTTTTGAATTTAGCTCAACTGGGGAGACGTGCTTAAATGGGTGATAAAATTATTTAGAGATCTTTT  
CTA



```

+
FFFFFFFFFFFFFFFFF:FFFFFFFFFFFFFFFFFFFFFFFFFFFFFFFFFFFFFFFFF:FFFFFFFFFFFFFFFFFFFFFFFFFFFFFFFFFFFFFFFFF:FFFFFFFFFF
FFFFFFFFFFFFFFFFFFFFFFFFF:FFFFFFFFFFFFFFFFFFFFFFFFFFFFFFFFFFFFFFFFFFFFFFFFFFFFFFFFFFFFFFFFFFFFFFFFFFFFFFFFF
FFF
@A00721:190:HGJW7DSXY:4:2367:30147:12023_2:N:0:TCTGCAAG+GCTGCACT
ATCTCTCGTTCATTACTCTGTACTTGATCTACGTCGTTTA ACTGTCCGAACAACCTTTACTTAGAAT
GACTCTATCTTTTCAGACACTTCTTATATTATTTACAATAGTTAATAT
+
FFFFFFF:FFFFFF:FFFFFF:FFFFFFFFFFFFFFFFFFFFFFFFFFFFFFFFFFFFFFFFF:FFFFFFF:F:F:FFFFFFF
FFFFFFFFFFFF:FFFFFFFFFFFFFFFFFFFFFFFFF:, :FFFFFFFFFFFFFFFFFFFF
@A00721:190:HGJW7DSXY:4:2314:29252:8187_1:N:0:TCTGCAAG+GCTGCACT
ATTATTTTTAGTATCAACACCCCATATAAACGTGTATAATGCGTGTTCGGGACCTCAACTTAATACAC
TAAGACATCACCCCCACACGACTCGAAACCGAGACGCCGTAGATCAAAGTCCCTTCTAACTTTAGAT
+
F,F:F,FFF,,,,,,,,:FF:F,,,,,,,,F,,,,,:,:,F,,F,,,,:FFF,:,,,,,:,:,F::,:F:,,F,,,
,F,,,,,,,,,F::,F,FFFFFFFFFFFFFFFFFFFFFFFFFFFFFFFFFFFFFFFFFFFFFFFFFFFFFFFFFFFFFFFFFFFFFFFFFFFFFFFFF
@A00721:190:HGJW7DSXY:4:2343:32334:4570_1:N:0:TCTGCAAG+GCTGCACT
TGAGGTAAAAGATCTATTTATTAACGAAC TATTATCCGATTCTTCGAGGGTATCACTACCCTGATC
TGCCGACTTTAGTCAAGGAAC TTCAATTCCTTCGATGTTTATATTTTTCTATAAGGGAAAATAGCAAT
AA
+
:,F::,FFF,,:::FFFFFFFFFFFFFF:FFFFFFFFFFFFFF:~FFFFFFFFFFFFF,:FFF:FFFFFFFFFFFFFFFFF
FFFFFFFFFFFFF,F:FFFFFFFFFFFFFFFFFFFFFFFFFFFFFFFFF:FFFFF:FFF:FFFFFFFFFFFFFFFFFFFFFFFFF
FF
@A00721:190:HGJW7DSXY:4:1526:31810:32158_1:N:0:TCTGCAAG+GCTGCACT
TCCGATCACCTTGGTGTGATCTCCCGGAGGATCTTTTCAATAAGATGTATGATGATAATCTACTATTT
TTAAATAGTGATATT CAGCGTATACTTGAATACTTTATCAAAGATTTGGCTTGGTCTATTTACCGCAA
AAA
+
FFFFFFFFF:FFFFFFFFFFFFFFFFF:FFFFFFFFFFFFFFFFFFFFFFFFFFFFFFFFFFFFFFFFFFFFFFFFFFFFFFFFFFFFFFFFFFFFFFFFF
FFFFFFFFFFFFFFFFFFFFFFFFFFFFFFFFFFFFFFFFFFFFFFFFFFFFFFFFFFFFFFFFFFFFFFFFFFFFFFFFFFFFFFFFF
FFF
@A00721:190:HGJW7DSXY:4:1161:21567:6433_2:N:0:TCTGCAAG+GCTGCACT
TATTTTACTTATACTTTAAATAGCACCGATTATAACTTGACTGTTGATAATATTACAATAGCTCTTTC
TCAGAAGATTAGAGAAGTAACCGGTGAACACGTCGGTAGCATTGATTT
+
FFFFFFFFFFFFFFFFFFFFFFFFF:FFFFFFFFFFFFFFFFFFFFFFFFFFFFFFFFFFFFFFFFFFFFFFFFFFFFFFFFFFFFFFFFFFFFFFFFF
FFFFFFFFFFFFFFFFFFFFFFFFFFFFFFFFFFFFFFFFF:FFFFFFFFFFFFFFFFFFFF
@A00721:190:HGJW7DSXY:4:2609:28402:35336_1:N:0:TCTGCAAG+GCTGCACT
ATTGAAAATTGTATAAGAGTTAATTGCTTACACAAAAGTGACGCGGAAGGAATCTTAATTGATTGAA
GCTAGGCGTTGGGGAGAATGAAC TGCCGCTTCCCGGAAGAAACGATCTATTTACAGAGTATTTAGAGT
AGT
+
FFFFFFFFFFFFFFFFFFFFFF:FFFFFFFFFFFFFFFFFFFFFFFFFFFFFFFFFFFFFFFFFFFFFFFFFFFFFFFFFFFFFFFFFFFFFFFFF
FFFFFFFFFFFFFFFFFFFFFFFFFFFFFFFFFFFFFFFFF:FFFFFFFFFFFFFFFFFFFF
@A00721:190:HGJW7DSXY:4:1326:22824:8735_1:N:0:TCTGCAAG+GCTGCACT
TCCGATCTACCAATCAATGATGTGACTATACAGTTCGCCATTTCAAGAGTGGTCAATACGTCGTGGG
AGGTACTGAAGCCTTCCCCTCCGCTGGCACGAAGAACTCCCAAGCCAATCAATAGTTCTTCTGACC
AGA
+
FFFFFFFFFFFFF:FFFFFFFFFFFFFFFFFFFFFFFFFFFFFFFFFFFFFFFFFFFFFFFFFFFFFFFFFFFFFFFFFFFFFFFFF
FFFFFFFFFFFFFFFFFFFFFFFFFFFFFFFFFFFFFFFFF:FFFFFFFFFFFFFFFFFFFFFFFFFFFFFFFFFFFFFFFFFFFFFFFFF
FFF

```



+  
FFFFFFFFFFFFFFFFFFFFFFFFFFFFFFFFFFFFFFFFFFFFFFFFFFFFFFFFFFFFFFFFFFFFFFFF  
FFFFFFFFFFFFFFFFFFFFFFFFFFFFFFFFFFFFFFFFFFFFFFFFFFFFFFFFFFFFFFFFFFFFFFFF  
FFF

@A00721:190:HGJW7DSXY:4:2156:13160:10629\_2:N:0:TCTGCAAG+GCTGCACT  
CCTGATGACATTATTTCAACGGATACCGATCTCAGTTCTACCACAGAAACCGTCTCAGGAAGTGTCTC  
CACTGATTCGGAATTAGAGAAAGACGACCTTCTTGTGGGACTGAGAC

+  
FFFFFFFFFFFFFFFFFFFFFFFFFFFFFFFFFFFFFFFFFFFFFFFFFFFFFFFFFFFFFFFFFFFFFFFF  
FFFFFFFFFFFFFFFF:FFFFFFFFFFFFFFFFFFFFFFFFFFFFFFFFFFFFFFFFFFFFFFFF

@A00721:190:HGJW7DSXY:4:1550:19813:31955\_1:N:0:TCTGCAAG+GCTGCACT  
TCTCTGATGAGGACGTTGAAAGGGATAATTTCAACTCTGAGACTTCTAAGAGTGTTCAAAAGACCAG  
AAACGTAACAAGAAGAATAAAGGTAGGAAGGGGAGAAAACAGAACAAAGCGAGCGGTTGAAGAGAAAAC  
TGA

+  
FFF:FFFFFFFFF:FFFFFFFFF:FFF:FFFFFFFFFFFFFFFFFFFFFFFFF,FFFFFFFFF:FFFFFFF  
FFFFFFFFFFFFFFFFFFFFFFFFF:FFFFFFFFFFFFFFFFFFFFFFFFFFFFFFFFFFFFFFFFFFFFF  
FFF

@A00721:190:HGJW7DSXY:4:2229:1551:23218\_1:N:0:TCTGCAAG+GCTGCACT  
AACATCAACGACATCATTCTTGATGAGTGTCTTCTTATCGAAGTCTCAGTTATCGCTGCCCGGCCGA  
CGTTTGTGCGCAACTCTCAGAGGTTTACGGCAGAAAAATTTCTCCTGCTTGAATTCGAGAGAGGACA  
CTA

+  
FFFFFFFFFFFFFFFFFFFFFFFFFFFFFFFFFFFFFFFFFFFFFFFFFFFFFFFFFFFFFFFFFFFFFFFF  
FF:FFFFFFFFFFFFFFFFFFFFFFFFFFFFFFFFFFFFFFFFFFFFFFFFFFFFFFFFFFFFFFFFFFFFF  
FFF

@A00721:190:HGJW7DSXY:4:2604:6234:19774\_2:N:0:TCTGCAAG+GCTGCACT  
GACGACAAGCCTCAAGAGGGTAGAGGACCACCTGGATCTTCTACTGTCTCTGCCTTCCAAGATTTCTT  
AGAAGAGGTTATTCCTGGAACCACCTTAACGTCACCTCGGTAATCTTTC

+  
FFFFFFFFFFFFFFFFFFFFFFFFFFFFFFFFFFFFFFFFFFFFFFFFFFFFFFFFFFFFFFFFFFFFFFFF  
FFFFFFFFFFFFFFFFFFFFFFFFFFFFFFFFFFFFFFFFFFFFFFFFFFFFFFFFFFFFFFFF

@A00721:190:HGJW7DSXY:4:2543:10827:12007\_1:N:0:TCTGCAAG+GCTGCACT  
GGAGGGAGTTCTTGAAGCATCCCGACCTTTCCTTGTGAAAATTTTGATGCGGTTTCATAAGATTATCA  
GTAATCCTGATTCTACTACGGATTCATGGACCTTCCATCCTGTACCTCTTCTGGAGAGACGTATCTCA  
AAG

+  
FFFFFFFFFFFFFFFFFFFFFFFFFFFFFFFFFFFFFFFFFFFFFFFFFFFFFFFFFFFFFFFFFFFFFFF:FFFFF  
FFFFFFFFFFFFFFFFFFFFFFFFFFFFFFFFFFFFFFFFFFFFFFFFFFFFFFFFFFFFFFFFFFFFFFFFF  
FFF

@A00721:190:HGJW7DSXY:4:1603:22046:5321\_1:N:0:TCTGCAAG+GCTGCACT  
CATGACCATAATTGGTATTGACTTTGGTACCACCTTTTCTACTGTCTGTCTCGCCTCTTTCGAATGAAG  
TTTTAATGCTTAACAACAATGATAGTGAATTTATACCTACAATCATTGGTTTTTCTAATAATGATGAC  
ACT

+  
:FFFFFFFFFFFF:FFFFFFFFFFFFFFFFFFFFFFFFFFFFFFFFFFFFFFFFFFFFFFFFFFFFFFFFF  
FFFFFFFFFFFFFFFFFFFFFFFFFFFFFFFFFFFFFFFFFFFFFFFFFFFFFFFFFFFFFFFFFFFFFFFFF  
FFF

@A00721:190:HGJW7DSXY:4:2205:10185:15280\_1:N:0:TCTGCAAG+GCTGCACT  
GAGTTCAGACGTGTGCTATTCCGATCTGGAGGATTCTCAGTTTACAAGGACCTTAAGCGATTGTTAGG  
GGTTATTTCTAAAACATTACCCGAAAGACGTGCTAAATTAACATTGTACGATGTGCTGTCTGCTCG  
GCG

+  
FF:::FFFFFF,FF,F,:FF,FFF,FF:,FFFFFF:FFFFFF,:FFFF,:FF:FF,,FF,,,F,F:

FFFF,,FF,FF:,,,FFFF,:,,FF:F,FFFFFFFF,:FFFF,:,,FFFF,,F,FFF,F:,F:F,F,,  
F,F

@A00721:190:HGJW7DSXY:4:1611:26567:29152\_1:N:0:TCTGCAAG+GCTGCACT  
AAAGATATTTTCATGAAAACCTACAGAGGAACGTACCGGATTACCTGTCTTTTCATATTATGAATGAACCT  
TCGGCCGCTCTCTTTGCTTCGATGTTGGATGTCAAGAAGGGTTCAGAATGGGATTCTACGTAGTTTA  
TG

+

F,FF,FFFF:FFF,F:,,FF,:,,F:FF:,F:F:FF,:F:F,,FFFFFFFFFFFFFFFF,FFFFFFFF:FF,  
FF:FF:FF:FFF:F:F:F:FFFFFF:FF:,:FFF,FF,F,:::FF,FFFF,FF,FF,:F:F:FFFFFF  
FF

@A00721:190:HGJW7DSXY:4:2307:10484:17581\_1:N:0:TCTGCAAG+GCTGCACT  
GATAACTTCTAATTTACGTTTGCTACTCAGAGCTGGTCCTCTCAGCAAAGGGATGCATGGTGTATCT  
CCTCAGGAGTCCCGGCATTTGATAATAATGACGAGACTTTCTGCATAATCGCTGCATATTACGGATTA  
CAC

+

FFFFFFFF:F:FFFFFFFFFFFFFFFFFFFFFFFFFFFFFFFFFFFFFFFFFFFFFFFFFFFFFFFFFFFF  
FFFFFFFFFFFFFFFFFFFFFFFFFFFFFFFFFFFFFFFFFFFFFFFFFFFFFFFFFFFFFFFFFFFFFFFFFFFF  
FFF

@A00721:190:HGJW7DSXY:4:2360:17689:7764\_1:N:0:TCTGCAAG+GCTGCACT  
ATAGGTGAAGGGATAGTTTTACCTCGACCAACATTAAGGCGGCGCGACTAATCTTAAAGCTTCACC  
CAAAATGAAGGACACTTCGAAACTGAATAATGATGCACTACAAACAAGTATCGCTAATCATCTGAAAA  
AGG

+

FFFFFFFFF:FFFFFFFFFFFFFFFFFFFFFFFFF:FFFFFFFFFFFFFFFFFFFFFFFF:FFF:FFFFFFFFFFFFF  
FFFFFFFFFFFFFFFFFFFFFFFFFFFFFFFFFFFFFFFFFFFFFFFFFFFFFFFFFFFFFFFFFFFFFFFFFFFF  
FFF

@A00721:190:HGJW7DSXY:4:2156:29071:25598\_1:N:0:TCTGCAAG+GCTGCACT  
ATTCAAGCTTGTCGTTTAAAGACTGCAGAGGCTGTCAAACAAGCCCAGACTCAAGGAGTCCAATCAAA  
GGTTTTGAATTTAGCTCAACTGGGGAGACGTGCTTAAATGGGTGATAAAAATTATTTAGAGATCTTTT  
CTA

+

FFFFFFF,:FFFFFFFFFFFFFFFFFFFFFFFFFFFFFFFFFFFFFFFFFFFFFFFFFFFFFFFFFFFF:FF  
FFFFFFFFFFFFFFFFFFFFFFFFF:FFFFFFFFFFFFFFFFFFFFFFFFFFFFFFFFFFFFFFFFFFFFFFFFFFFF,FF  
FFF

@A00721:190:HGJW7DSXY:4:2367:30210:12007\_2:N:0:TCTGCAAG+GCTGCACT  
ATCTCTCGTCAATTTACTCTGTACTTGATCTACGTCGTTTAACTGTGGAACAACCATTACTTAGAAT  
GACTCTATCTTTTCAGACACTTCTTATATTATTTACAATAGTTAATAT

+

FFF:FF::FFFFFFFFF:F::FFFFFFFF:FF:FFFF:FFFFFFFFF:FFFFFFFFF,:FFFFFFFFF:  
FFFFFFFFF::F,FF:FFFFFFFFFFFFFFFFF:FFFF:FFFFFFFFF

@A00721:190:HGJW7DSXY:4:2318:25446:22232\_1:N:0:TCTGCAAG+GCTGCACT  
ATTTTTTTTAGTCTATACACCATCTCAACTTGTATAACGGGTGTTTTCGGTCCTTAACCTAATCCCC  
GAAGAGAACACCCCCACACGACTCGAAACCGAGACGCCGTAGATCAAAGTCCCTTCTAACTTTAGAT

+

: ,F,F:FFF,,,,,,,,,: ,:F,F:,,,F,,,,,: ,:F,FFF,,,,: ,F,,: ,:F,,: ,,  
,: ,,,,,,F:,F:,,,F,FFFFFFFFFFFFFFFFFFFFFFFFFFFFFFFFFFFFFFFFFFFFFFFFFFFF

@A00721:190:HGJW7DSXY:4:1201:10945:5603\_2:N:0:TCTGCAAG+GCTGCACT  
GTCAAAGCTCTATTTATTAAACGAACCTATTATCCGATTCTTCGAGGGTATCACTACCACTGATCTGCC  
GACTTTAGTCAAGGAACCTCAATTCCTTCGATGTTTATATTTTCTAT

+

FFFFFFFFFFFFFFFFFFFFFFFFFFFFFFFFFFFFFFFFFFFFFFFFFFFFFFFFFFFFFFFFFFFF  
FFFFFFFFFFFFFFFFFFFFFFFFFFFFFFFFFFFFFFFFFFFFFFFFFFFF:F

@A00721:190:HGJW7DSXY:4:1650:15799:31109\_1:N:0:TCTGCAAG+GCTGCACT  
TCCGATCACCTTGGTGTGATCTCCCGGAGGATCTTTCAATAAGATGTATGATGATAATCTACTATTT



@A00721:190:HGJW7DSXY:4:1642:30373:31485\_1:N:0:TCTGCAAG+GCTGCACT  
AGTTCAGACGTGTGCTCTTCCGATCTGTTGGAGGGAGGAAGTTCTCCGAAATTAAAGACGGGGGGATT  
AAGAGTCCAGCTGTAAGTGTCAATTCAGAGAGGGGAGCTCTGAAAAGGAACTTCGTCAGAAGATGAG  
GAA

+

FFFFFFFFFFFFFFFF:FFFFFFFFFFFFFFFFFFFFFFFFFFFFFFFFFFFFFFFFFFFFFFFFFFFFFFFFFFFFFFFF  
FFFFFFFFFFFFFFFFFFFFFFFFFFFFFFFFFFFFFFFFFFFFFFFFFFFFFFFFFFFFFFFFFFFFFFFFFFFFFFFF  
FFF

@A00721:190:HGJW7DSXY:4:2649:15157:11021\_1:N:0:TCTGCAAG+GCTGCACT  
GGCTCTAGAGAAGATCTCACCACCTGGAGAAGGCAAGTGGAGAGTCCAGAAGTTGATGAAGAAGGATT  
ATTTGAAGCAGGGGTTACCACTTCCTAAGGTGGATGAGGGAGGTTGTTTCTTTGGAGTTTTAGATAAT  
CTT

+

FFFF:FFFFFFFFFFFF,FFFFFFFFFFFFFFFFFFFFFFFFFFFFFFFFFFFFFFFFFFFFFFFFFFFFFFFFFFFFF:FFFFF:FFFFF:  
FFFFFFFFFFFFFFFFFFFFFFFFFFFFFFFFFFFFFFFFFFFFFFFFFFFFFFFFFFFFFFFFFFFFFFFFFFFFFFFF  
FFF

@A00721:190:HGJW7DSXY:4:2511:20817:28808\_2:N:0:TCTGCAAG+GCTGCACT  
GGACTACTCGACTTTTGATCTGGAGTTGTCTAGGGTCATGGCAGATACTACCGATAAGGTGAAAAATA  
TGCAGGTCAAAGATTCTGTAGCTCTGAGGGCGGTTGAGGGAGCCGTTT

+

:FFF:FFFFFFFF,FFFFFFFFFFFFFFFFFFFFFFFFFFFFFFFFFFFFFFFFFFFFFFFFFFFFFFFFFFFFF:FFFFF:FFFFF  
FF:FFFFFFFFFFFF:FFFFFFFFFFFFFFFF,FFFFF:FFFFFFFFFFFF,FF

@A00721:190:HGJW7DSXY:4:2103:23592:34240\_1:N:0:TCTGCAAG+GCTGCACT  
GCAGAGTGACTGGAGTTCAGCGTGTGCTCTTCCGATCTGTCAAACCTTCGAGGTTGAGCTACGAGAGGT  
GATCCCGGATGTGGATTGAAGGCTGGCTCTAAGGGAGACTCCTTCTTTTTGAATGTTGTAAAGAATTG  
GGT

+

FFFFFFFFFFFFFFFFFFFFFFFFFFFFFFFFFFFFFFFFFFFFFFFFFFFFFFFFFFFFFFFFFFFFFFFFFFFFFFFF  
FFFFFFFFFFFFFFFFFFFFFFFFFFFFFFFFFFFFFFFFFFFFFFFFFFFFFFFFFFFFFFFFFFFFFFFFFFFFFFFF  
FFF

@A00721:190:HGJW7DSXY:4:2259:8061:19961\_2:N:0:TCTGCAAG+GCTGCACT  
CCTGATGACATTATTTCAACGATACCGATCTCAGTTCTACCACAGAAACCGTCTCAGGAAGTGTCTC  
CACTGATTCCGAATTAGAGAAAGACGACCTTCTTGTGGGACTGAGAC

+

FFFFFFFFFFFFFFFFFFFFFFFFFFFFFFFFFFFFFFFFFFFFFFFFFFFFFFFFFFFFFFFFFFFFFFFFFFFFFFFF  
FFFFFFFFFFFFFFFFFFFFFFFFFFFFFFFF:FFF:FFFFFFFFFFFFFFFFFFFFFFFF

@A00721:190:HGJW7DSXY:4:1630:20518:30765\_1:N:0:TCTGCAAG+GCTGCACT  
TCTCTGATGAGGACGTTGAAAGGGATAATTTCAACTCTGAGACTTCTAAGAGTGTTCAAAAGACCAG  
AAACGTAACAAGAAGAATAAAGGTAGGAAGGGGAGAAAACAGAACAGCGAGCGGTTGAAGAGAAAAC  
TGA

+

FF:FFFFF:FFFFF:FFFFFFFFFFFFFFFFFFFFFFFFFFFFFFFFFFFF,F:FFFFFFFFFFFFFFFFFFFFFFFF  
FFFFFFFFFFFFFFFFFFFFFFFFFFFFFFFFFFFFFFFFFFFFFFFFFFFFFFFFFFFFFFFFFFFFFFFFFFFF  
FFF

@A00721:190:HGJW7DSXY:4:2307:27010:14105\_1:N:0:TCTGCAAG+GCTGCACT  
AACATCAACGACATCATCTTGATGAGTGTGTTCTTATCGAAGTCTCAGTTATCGCTGCCCGGCCGA  
CGTTTGTGCGCAACTCTCAGAGGTTTACGGCAGAAAAATTTCTCCTGCTTGAATTCGAGAGAGGACA  
CTA

+

FFFFFFFFFFFFFFFF:FFFFFFFFFFFFFFFF:FFFFFFFFFFFFFFFFFFFFFFFFFFFFFFFFFFFFFFFFFFFF  
FFFFFFFFFFFFFFFF:FFFFFFFFFFFFFFFFFFFFFFFFFFFFFFFFFFFFFFFFFFFFFFFFFFFFFFFFFFFF  
FFF

@A00721:190:HGJW7DSXY:4:2604:6488:20462\_2:N:0:TCTGCAAG+GCTGCACT  
GACGACAAGCCTCAAGAGGGTAGAGGACCACCTGGATCTTCTACTGTCTCTGCCTTCAAGATTTCTT

AGAAGAGGTTATTCCTGGAACCACCTTAACGTCACCTCGGTAATCTTTC

+

FFFFFFFFFFFFFFFFFFFFFFFFFFFFFFFFFFFFFFFFFFFFFFFFFFFFFFFFFFFFFFFFFFFFFFFF  
FFFFFFFFFFFFFFFFFFFFFFFFFFFFFFFFFFFFFFFFFFFFFFFFFFFFFFFFFFFFFFFF

@A00721:190:HGJW7DSXY:4:2615:17372:21371\_1:N:0:TCTGCAAG+GCTGCACT  
GGAGGGAGTTCTTGAAGCATCCCGACCTTTCCTTGTGAAAATTTTGATGCGGTTTCATAAGATTATCA  
GTAATCCTGATTCTACTACGGATTTCATGGACCTTCCATCCTGTACCTCTTCTGGAGAGACGTATCTCA  
AAG

+

FFFFFFFFFFFFFFFFFFFFFFFF:FFFFF:FFFFFFFFFFFFFFFFFFFFFFFF:FFFFFFFFFFFFFFFF  
FFFFFFFFFFFFFFFFFFFFFFFF:FFFFFFFFFFFFFFFFFFFFFFFF:FFFFFFFFFFFFFFFF:FFFFFF  
FF,

@A00721:190:HGJW7DSXY:4:1642:27850:36761\_1:N:0:TCTGCAAG+GCTGCACT  
CATGACCATAATTGGTATTGACTTTGGTACCACCTTTTCTACTGTCTGTCTCGCCTCTTGAATGAAG  
TTTTAATGCTTAACAACAATGATAGTGAATTTATACCTACAATCATTGGTTTTTCTAATAATGATGAC  
ACT

+

FFFFFFFFFFFFFFFFFFFFFFFFFFFFFFFFFFFFFFFF:F,FFFFFFFFFFFFFFFFFFFFFFFF  
FFFFFFFFFFFFFFFFFFFFFFFF:FFFF:FF:FFFFFFFFFFFFFFFFFFFFFFFFFFFFFFFF  
FF:

@A00721:190:HGJW7DSXY:4:2214:16812:31360\_1:N:0:TCTGCAAG+GCTGCACT  
GAGTTCAGACGTGTGCTCTTCCGATCTGGAGGATTCTCAGTTTACAAGGACCTTAAGCGATGGATCGG  
GGTTAATTCTAAACATTACCCGAAAGACGTGCTAAATTAACCATTGTACGATGTCGTCTGTCTCG  
GCG

+

FFFFFFFFFFFFFFFFFFFFFFFFFFFFFFFFFFFFFFFFFFFFFFFFFFFFFFFFFFFFFFFFFFFFFFFF  
FFFFFFFFFFFFFFFFFFFFFFFFFFFFFFFFFFFFFFFFFFFFFFFFFFFFFFFFFFFFFFFFFFFFFFFF  
FFF

@A00721:190:HGJW7DSXY:4:1339:5520:36354\_1:N:0:TCTGCAAG+GCTGCACT  
AAGATATTTTCATGAAACTACAGAGGAACGTACCGGATTACCTGTCTTTCATATTATGAATGAACCTT  
CGGCCGCTCTCTTGTCTCGATGTTGGATGTCAAGAAGGGTTCAGAATGGGATTCCCTACGTAGTTTAT  
GAC

+

FFFFFFFFFFFFFFFF:FFFFFFFFFFFFFFFFFFFFFFFFFFFFFFFFFFFFFFFFFFFFFFFF  
FFFFFFFFF:FFFFFFFFFFFFFFFFFFFFFFFFFFFFFFFFFFFFFFFFFFFFFFFFFFFFFFFF  
FFF

@A00721:190:HGJW7DSXY:4:2307:9480:15154\_1:N:0:TCTGCAAG+GCTGCACT  
GATAACTTCTAATTTACGTTTGCTACTCAGAGCTGGTCTCTCAGCAAAGGGATGCATGGTGTATCT  
CCTCAGGAGTCCCGCATTTGATAATAATGACGAGACTTTCGTCATAATCGCTGCATATTACGGATTA  
CAC

+

FFFFFFFFFFFFFFFFFFFFFFFFFFFFFFFFFFFFFFFFFFFFFFFFFFFFFFFFFFFFFFFFFFFFFFFF  
FFFFFFFFFFFFFFFFFFFFFFFFFFFFFFFFFFFFFFFFFFFFFFFFFFFFFFFFFFFFFFFFFFFFFFFF  
FFF

@A00721:190:HGJW7DSXY:4:2628:11162:36730\_1:N:0:TCTGCAAG+GCTGCACT  
ATAGGTGAAGGGATAGTTTTTACCTCGACCAACATTAAGGCGGCGGCGACTAATCTTAAAGCTTCACC  
CAAAATGAAGGACACTTCGAACTGAATAATGATGCACTACAAACAAGTATCGCTAATCATCTGAAAA  
AGG

+

FFFFFFF:F,FFFFFFFFFFFFFFFFFFFFFFFFFFFFFFFF:FFFFFFFFFFFFFF:FFF  
:FFFFFFFFFFFFFFFFFFFFFFFF:FFFFFFFFFFFFFFFFFFFFFFFFFFFFFFFF  
FFF

@A00721:190:HGJW7DSXY:4:2269:31675:3082\_1:N:0:TCTGCAAG+GCTGCACT  
ATTCAAGCTTGTGTTTTAAAGACTGCAGAGGCTGTCAAACAAGCCAGACTCAAGGAGTCCAATCAAA





$+$ 

@A00721:190:HGJW7DSXY:4:1269:18385:21120\_2:N:0:TCTGCAAG+GCTGCACT  
AGTCGCTGAAGGCGGCTTGGGTCATTAAGGGTAGCTGTAAAGTTGCGCTGCCGACCCCATCTTTGAG  
ACCAAGACTCTCTACAGTAGGTTCTGTCCTACTATGAGCAAATCTGTT

+

@A00721:190:HGJW7DSXY:4:2472:16821:34131\_2:N:0:TCTGCAAG+GCTGCACT  
GGCGACAACTGAGAGCAGTCGCTGGGGAAAGAGAATTGCGTGGGTTGAAGGCCGACGCTTCGAGCTT  
GAGTGTGACGAGGCCGGTGACGTTTTTGTCAACGGCGTTTGGAGGATT

+

@A00721:190:HGJW7DSXY:4:1641:8386:6402\_1:N:0:TCTGCAAG+GCTGCACT  
CGATCTCTTGAAGGACTTAGGTTGGCATATTTATGCCGACGATAATAAGCATGTCAACCTTAAGCACC  
GAGGTAAGCTCGGGACTTACAAGAGAGAGTGTGAGAGAGTCGCTCTCACTATTTTTGCCAGAATGCG  
GGC

 $+$ 

@A00721:190:HGJW7DSXY:4:2642:30499:24752\_1:N:0:TCTGCAAG+GCTGCACT  
AGTTTCAGACGTGTGCTCTTCCGATCTGTTGGAGGGAGGAAGTTCTCCGAAATTAAGACGGGGGGATT  
AAGAGTCCAGCTGTAAGTGTCAATTCAGAGAGGGGAGCTCTGAAAAGGAACTTCGTCAGAAGATGAG  
GAA

+

@A00721:190:HGJW7DSXY:4:2649:15447:11083\_1:N:0:TCTGCAAG+GCTGCACT  
GGCTCTAGAGAAGATCTCCCCACCTGGAGAAGGCAAGTGGAGAGTCCAGAAGTTGATGAAGAAGGATT  
ATTTGAAGCAGGGGTTACCACTTCCTAAGGTGGATGAGGGAGGTTGTTTCTTTGGAGTTTTAGATAAT  
CTT

+

@A00721:190:HGJW7DSXY:4:2555:23963:1595\_2:N:0:TCTGCAAG+GCTGCACT  
GGACTACTCGACTTTTGTATCTGGAGTTGTCTAGGGTCATGCCAGATACTACCGATAAGGTGAAAAATA  
TGCAGGTCAAAGATTCTGTAGCTCTGAGGGCGGTTGAGGGAGCCGGTT

 $+$ 

@A00721:190:HGJW7DSXY:4:2264:3305:36245\_1:N:0:TCTGCAAG+GCTGCACT  
CAGAGTGACTGGAGTTCAGAAGTGTGCTCTTCCGATCTGTCAAACCTTCGAGGTTAGCTACGAGAGGT  
GATCCCGGATGTGGATTGAAGGCTGGCTCTAAGGGAGACTCCTTCTTTTTGAATGTTGTAAAGAATTG  
GGT

+

```
FF:F:FF,:F,FFFFFFFF:,FFFFFF,F,FFF,F,FFF,FFF:, ,FF::F,FFF:FFF:FFFFFF,FF
:FFFFFF:F,F:FFFFFFFF,,FFFFFF:FF,F,FFFFFFFFFFFFFFFFFFFFFFFFFFFFFFFFFFFF
FFF
```

@A00721:190:HGJW7DSXY:4:2623:21097:6120\_2:N:0:TCTGCAAG+GCTGCACT  
CCTGATGACATTATTTCAACGGATACCGATCTCAGTTCTACCACAGAAACCGTCTCAGGAAGTGTCTC  
CACTGATTCCGAATTAGAGAAAGACGACCTTCTTGTGGGGACTGAGAC

+

FFFFFFFFFFFFFFFFFFFFFFFFFFFFFFFFFFFFFFFFFFFFFFFFFFFFFFFFFFFFFFFFFFFFFFFF  
FFFFFFFFFFFFFFFFFFFFFFFFFFFFFFFFFFFFFFFFFFFFFFFFFFFFFFFFFFFFFFFFFFFFFFFF

@A00721:190:HGJW7DSXY:4:2372:17924:8641\_1:N:0:TCTGCAAG+GCTGCACT  
TCTCTGATGAGGACGTTGAAAGGGATAATTTCAACTCTGAGACTTCTAAGAGTGTTCAAAAGACCAG  
AAACGTAACAAGAATAAAAGGTAGGAAGGGGAGAAAACAGAACAAAGCGAGCGGTTGAAGAGAAAAC  
TGA

+

FFFF:FFFF:FFFFFFFFFFFFFF:FFFFFFFFFFFFFFFFFFFFFFFFFFFFFFFFFFFFFFFFFFFF  
F:FFFFFFFFFFFFFFFFFFFFFFFFFFFFFFFFFFFFFFFFFFFFFFFFFFFFFFFFFFFFFFFFFFFF  
FFF

@A00721:190:HGJW7DSXY:4:2378:18566:24721\_1:N:0:TCTGCAAG+GCTGCACT  
AACATCAACGACATCATTCTTGATGAGTGTCGTTCTTATCGAAGTCTCAGTTATCGCTGCCCCGCCGA  
CGTTTGTGCGAACTCTCAGAGGTTTACGGCAGAAAAATTTCTCCTGCTTGTAATTCGAGAGAGGACA  
CTA

+

FFFFFFF,FFFFFFFFFFFFFFFFFFFFFFFFFFFFFFFFFFFFFFFFFFFFFFFFFFFFFFFFFFFF  
FFFFFFFFFFFFFFFFFFFFFFFFFFFFFFFFFFFFFFFFFFFFFFFFFFFFFFFFFFFFFFFFFFFF  
FFF

@A00721:190:HGJW7DSXY:4:2619:26467:18427\_2:N:0:TCTGCAAG+GCTGCACT  
GACGACAAGCCTCAAGAGGGTAGAGGACCACCTGGATCTTCTACTGTCTCTGCCTTCCAAGATTTCTT  
AGAAGAGGTTATTCCTGGAACACCTTAACGTCACCTCGGTAATCTTTC

+

FFFFFFFFFFFFFFFFFFFFFFFFFFFFFFFFFFFFFFFFFFFFFFFFFFFFFFFFFFFFFFFFFFFFFFFF  
FFFFFFFFFFFFFFFFFFFFFFFFFFFFFFFFFFFFFFFFFFFFFFFFFFFFFFFFFFFFFFFFFFFFFFFF

@A00721:190:HGJW7DSXY:4:2616:30978:14935\_1:N:0:TCTGCAAG+GCTGCACT  
GGAGGGAGTTCTTGAAGCATCCCGACCTTTCCTTGTGAAAATTTTGATGCGGTTTCATAAGATTATCA  
GTAATCCTGATTCTACTACGGATTATGACCTTCCATCCTGTACCTCTTCTGGAGAGACGTATCTCA  
AAG

+

FFFFFFFFFFFFFFFFFFFFFFFFFFFFFFFFFFFFFFFFFFFFFFFFFFFFFFFFFFFFFFFFFFFFFFFF  
FFFFFFFFFFFFFFFFFFFFFFFFFFFFFFFFFFFFFFFFFFFFFFFFFFFFFFFFFFFFFFFFFFFFFFFF  
FFF

@A00721:190:HGJW7DSXY:4:1643:4164:9267\_1:N:0:TCTGCAAG+GCTGCACT  
CATGACCATAATTGGTATTGACTTTGGTACCACCTTTTCTACTGTCTGTCTCGCCTCTTCGAATGAAG  
TTTTAATGCTTAACAACAATGATAGTGAATTTATACCTACAATCATTGGTTTTTCTAATAATGATGAC  
ACT

+

FFFFFFFFF:FFFFFFFFFFFFFFFFFFFFFFFFFFFFFFFFFFFFFFFFFFFFFFFFFFFFFFFFFFFF  
FFFF:FFFFFFFFFFFFFFFFFFFFFFFFFFFFFFFFFFFFFFFFFFFFFFFFFFFFFFFFFFFF:FFFFF  
FFF

@A00721:190:HGJW7DSXY:4:2478:26350:22482\_2:N:0:TCTGCAAG+GCTGCACT  
TATTACTCATGATGGTTACGGTCAGGGAGGATTCTCAGTTTACAAGGACCTTAAGCGATGGATCGGGG  
TTAATTCTAAAACATTACCCGAAAGACGTGCTAAATTAACCATTTGT

+

FFFFFFFFFFFFFFFFFFFFFFFFFFFFFFFFFFFFFFFFFFFFFFFFFFFFFFFFFFFFFFFFFFFFFFFF  
FFFFFFFFFFFFFFFFFFFFFFFFFFFFFFFFFFFFFFFFFFFFFFFFFFFFFFFFFFFFFFFFFFFF:FFFFF

@A00721:190:HGJW7DSXY:4:1408:17517:31641\_1:N:0:TCTGCAAG+GCTGCACT  
AAGATATTTTCATGAAAACCTACAGAGGAACGTACCGGAGTACCTGTCTTTCATATTATGAATGAACCTT  
CGGCCGCTCTCTTGTCTCGATGTTGGATGTCAAGAAGGGTTCAGAATGGGATTCTACGTAGTTTAT  
GAC

[illegible]

@A00721:190:HGJW7DSXY:4:1447:7102:5682\_2:N:0:TCTGCAAG+GCTGCACT  
TATTTTACTTATACTTTAAATAGCACCGATTATACTTGACTGTTGATAATATTACAATAGCTCTTTC  
TCAGAAGATTAGAGAAGTAACCGGTGAACACGTCGGTAGCATTGATTT

[illegible]

@A00721:190:HGJW7DSXY:4:2565:14669:23578\_2:N:0:TCTGCAAG+GCTGCACT  
TATTACTCATGATGGTTACGGTCAGGAGGATTCTCAGTTTACAAGGACCTTAAGCGATGGATCGGG  
TTAATTCTAAACATTACCCGAAAGACGTGCTAAATTAACCATTGT

+

FFFFFFFFFFFFFFFFFFFFFFFFFFFFFFFFFFFFFFFFFFFFFFFFFFFFFFFFFFFFFFFFFFFFFFFF  
:FFFFFFFFFFFF,FFFFFFFFFFFFFFFFFFFFFFFFFFFFFFFFFFFFFFFFFFFFFFFFFFFFFFFF

@A00721:190:HGJW7DSXY:4:1419:10872:8015\_1:N:0:TCTGCAAG+GCTGCACT  
AAGATATTTTCATGAAAACACAGAGGAACGTACCGGATTACCTGTCTTTTCATATTATGAATGAACCTT  
CGGCCGCTCTCTTTGCTTCGATGTTGGATGTCAAGAAGGGTTCAGAATGGGATTCTACGTAGTTTAT  
GAC

+

FFFFFFFFFFFF:FFFFFFFFFFFFFFFFFFFFFFFFFFFFFFFFFFFFFFFFFFFFFFFFFFFFFFFF  
FFFFFFFF:FFFFFFFFFFFFFFFFFFFFFFFFFFFFFFFFFFFFFFFFFFFFFFFFFFFFFFFFFFFF  
FFF

@A00721:190:HGJW7DSXY:4:1265:15582:1830\_2:N:0:TCTGCAAG+GCTGCACT  
ACTTCTAATTTACGTTTGCTACTCAGAGCTGGTCCTCTCAGCAAAGGGATGCATGGTGTATCTCCTC  
AGGAGTCCCGGCATTTGATAATAATGACGAGACTTTTCGTCATAATCGC

+

FFFFFFFFFFFFFFFFFFFFFFFFFFFFFFFFFFFFFFFFFFFFFFFFFFFFFFFFFFFFFFFFFFFFFFFF  
FFFFFFFFFFFFFFFFFFFF:FFFFFFFFFFFFFFFFFFFFFFFFFFFFFFFFFFFFFFFFFFFFFFFF

@A00721:190:HGJW7DSXY:4:1108:7618:29966\_2:N:0:TCTGCAAG+GCTGCACT  
GAAGGGATAGTTTTTACCTCGACCAACATTAAGGCGGCGGCGACTAATCTTAAAGCTTCACCCAAAAT  
GAAGGACACTTCGAAACTGAATAATGATGCACTACAAACAAGTATCGC

+

FFFFFFFFFFFFFFFFFFFFFFFFFFFFFFFFFFFFFFFFFFFFFFFFFFFFFFFFFFFFFFFFFFFFFFFF  
FFFFFFFFFFFFFFFFFFFF:FFFFFFFFFFFFFFFFFFFFFFFFFFFFFFFFFFFFFFFFFFFFFFFF

@A00721:190:HGJW7DSXY:4:2276:31385:3928\_1:N:0:TCTGCAAG+GCTGCACT  
ATTCAAGCTTGTCGTTTAAAGACTGCAGAGGCTGTCAAACAAGCCCAGACTCAAGGAGTCCAATCAAA  
GGTTTTGAATTTAGCTCAACTGGGGAGACGTGCTTAAATGGGTGATAAAAATTATTTAGAGATCTTTT  
CTA

+

FFFFFFFFFFFF, :FFFFFFFF: :FFFFFFFFFFFFFFFFFFFFFFFFFFFFFFFFFFFFFFFFFFFF  
FFF:FFFFFFFFFFFFFFFFFFFFFFFFFFFFFFFFFFFFFFFFFFFFFFFFFFFFFFFFFFFF:FFFFFFFFFFFFFFFFFFFF, FF  
FFF

@A00721:190:HGJW7DSXY:4:2474:8377:22326\_2:N:0:TCTGCAAG+GCTGCACT  
ATCTCTCGTTCATTTACTCTGTACTTGATCTACGTCGTTTAACTGTCGGAACAACCTTTACTTAGAAT  
GACTCTATCTTTTCAGACACTTCTTATATTATTTACAATAGTTAATAT

+

FFFFFFFFFFFFFFFFFFFFFFFFFFFF:FFFFF,FFFFFFFFFFFFFFFFFFFFFFFFFFFFFFFFFFFF,FFFFFFFFFFFF  
FFFFFFFFFFFFFFFFFFFFFFFFFFFFFFFFFFFFFFFFFFFFFFFFFFFFFFFFFFFFFFFFFFFF

@A00721:190:HGJW7DSXY:4:2278:29496:27461\_1:N:0:TCTGCAAG+GCTGCACT  
AATAGATTTAGTCTCTACACCAATCTCAACGAGGATAACGCGAGTTTTCCGTCCTGAACCTTAATACAC  
GAAGATATCATCCGCACACGACTCGAAACCGAGACGCCGTAGATCAAAGTCCCTTCTAACTTTAGATT

+

F:FF::FFF:,F,,FF:,FF,,,F:,,,::,,::,::FF,::,,,FFFFFFFF:,F:F,FF,,FFFF:,F,  
,F,,,,::,,,F:F,F:FFFFFFFFFFFFFFFFFFFFFFFFFFFFFFFFFFFFFFFFFFFFFFFF

@A00721:190:HGJW7DSXY:4:2238:30933:33082\_2:N:0:TCTGCAAG+GCTGCACT  
GTCAAAGCTCTATTTATTAACGAACCTATTATCCGATTCTTCGAGGGTATCACTACCACTGATCTGCC  
GACTTTAGTCAAGGAACCTCAATTCCTTCGATGTTTATATTTTCTAT

+

FFF:F:FFFFFFFFFFFFFFFFFFFFFFFFFFFFFFFFFFFFFFFFFFFFFFFFFFFFFFFFFFFF:FFFFFFFFFFFFFFFFFFFF  
FFFFFFFF:FFFFFFFFFFFFFFFFFFFFFFFFFFFFFFFFFFFFFFFFFFFFFFFFFFFF,FFF

@A00721:190:HGJW7DSXY:4:2233:8865:3505\_1:N:0:TCTGCAAG+GCTGCACT  
TCCGATCACCTTGGTGTGATCTCCCGAGGATCTTTCAATAAGATGTATGATGATAATCTACTATTT

TTAAATAGTGATATTCAGCGTATACTTGAATACTTTATCAAAGATTTGGCTTGGTCTATTTACCGCAA  
AAA

+

FFFFFFFFFFFFFFFFFFFFFFFFFFFFFFFFFFFFFFFFFFFFFFFFFFFFFFFFFFFFFFFFFFFFFFFF  
FFFFFFFFFFFFFFFFFFFFFFFFFFFFFFFFFFFFFFFFFFFFFFFFFFFFFFFFFFFFFFFFFFFFFFFF  
FFF

@A00721:190:HGJW7DSXY:4:1529:31376:35164\_2:N:0:TCTGCAAG+GCTGCACT  
TATTTTACTTATACTTTAAATAGCACCGATTATAACTTGACTGTTGATAATATTACAATAGCTCTTTC  
TCAGAAGATTAGAGAAGTAACCGGTGAACACGTCGGTAGCATTGATTT

+

FFFFFFFFFFFFFFFFFFFFFFFFFFFFFFFFFFFFFFFFFFFFFFFFFFFFFFFFFFFFFFFFFFFFFFFF  
FFFFFFFFFFFFFFFFFFFFFFFFFFFFFFFFFFFFFFFFFFFFFFFFFFFFFFFFFFFFFFFFFFFFFFFF

@A00721:190:HGJW7DSXY:4:2239:1533:2707\_2:N:0:TCTGCAAG+GCTGCACT  
ATTGTATAAGAGTTAATTGCTTACACAAAAGTGACGCGGAAGGAATCTTAATTGATTGAAGCTAGGC  
GTTGGGAGAATGAAGTCCGCTTCCCGAAGAAACGATCTATTTACA

+

FFFFFFFFFFFF:FFFFFFFFFFFFFFFFFFFFFFFFFFFFFFFFFFFFFFFFFFFFFFFFFFFFFFFFFFFF  
FF:FFFFFFFFFFFFFFFFFFFFFFFFFFFFFFFFFFFFFFFFFFFFFFFFFFFFFFFFFFFFFFFFFFFF

@A00721:190:HGJW7DSXY:4:1554:10646:27132\_2:N:0:TCTGCAAG+GCTGCACT  
CATACCAATCAATGATGTGACTATACAGTTCGCCATTTCAAGAGTGGTCAATACGTCGTGGGAGGTA  
CTGAAGCCTTCCCCTCCGCTGGCACGAAGAACTCCCAAGCCAATCA

+

FFFFFFFFFFFFFFFFFFFFFFFFFFFFFFFFFFFFFFFFFFFFFFFFFFFFFFFFFFFFFFFFFFFFFFFF  
FFFFFFFFFFFFFFFFFFFFFFFFFFFFFFFFFFFFFFFFFFFFFFFFFFFFFFFFFFFFFFFFFFFFFFFF

@A00721:190:HGJW7DSXY:4:2631:15573:13369\_2:N:0:TCTGCAAG+GCTGCACT  
TAAGTCTACCAGGAAGAGGGGAAATGTCCCCAAACTGAGAAGAATAAAGGGAAAGGTCCATCAGGAC  
CTAAGAAGGGGAAATTACCCCTAATTCTGAAGGAAGATCTCCACCCCT

+

FF:FFFFFFFFFFFFFFFFFFFFFFFFFFFFFFFFFFFFFFFFFFFFFFFFFFFFFFFFFFFFFFFFFFFF  
FFFFFFFFFFFFFFFFFFFFFFFFFFFFFFFFFFFFFFFFFFFFFFFFFFFFFFFFFFFFFFFFFFFFFFFF

@A00721:190:HGJW7DSXY:4:1603:22869:3959\_2:N:0:TCTGCAAG+GCTGCACT  
AGTCGCTGAAGGCGGCTTGGGTCATTAAGGGTAGCTGTAAAGTTGCGCCTGCCGACCCCATCTTTGAG  
ACCAAGACTCTCTACAGTAGGTTCTGTCCTACTATGAGCAAATCTGTT

+

FFFFFFFFFFFFFFFFFFFFFFFFFFFFFFFFFFFFFFFFFFFFFFFFFFFFFFFFFFFFFFFFFFFFFFFF  
FFFFFFFFFFFFFFFFFFFFFFFFFFFFFFFFFFFFFFFFFFFFFFFFFFFFFFFFFFFFFFFFFFFFFFFF

@A00721:190:HGJW7DSXY:4:2667:6596:31892\_2:N:0:TCTGCAAG+GCTGCACT  
CGTGGGTTGAAGGCCGACGCTTCGAGCTTGAGTGTGACGAGGCCGGTGACGTTTTTGTCAACGGCGTT  
TGGAGGATTTATCCGCGCTTAAGTATGGGGCAAGATCCCCTATGGA

+

FFFFFFFFFFFFFFFFFFFFFFFFFFFFFFFFFFFFFFFFFFFFFFFFFFFFFFFFFFFFFFFFFFFFFFFF  
FFFFFFFFFFFFFFFFFFFFFFFFFFFFFFFFFFFFFFFFFFFFFFFFFFFFFFFFFFFFFFFFFFFFFFFF

@A00721:190:HGJW7DSXY:4:2203:12970:18474\_2:N:0:TCTGCAAG+GCTGCACT  
TATTTATGCCGACGATAATAAGCATGTCACCCTTAAGCACCGAGTAAGCTCGGGACTTACAAGAGAG  
AGTGTGAGAGAGTCGCTCTCACTATTTTTTCCCAGAATGCGGGCTTTC

+

FFFFFFFFFF,FFF,FFFFFFFFFFFFFF,FFFFF:FFF:FFF:F:FF:FF:F:FF:FFFFFFFF:FF:F  
FFFFFFFFFFFFFFFFFFFFFFFFFFFFFFFFFFFFFFFFFFFFFFFFFFFFFFFFFFFFFFFFFFFFFFFF

@A00721:190:HGJW7DSXY:4:1219:10456:9768\_1:N:0:TCTGCAAG+GCTGCACT  
TCTAGTGAAGATCTCCACACCTGGAGAAGGCAAGTGGAGAGTCCAGAAGTGGATGAAGAAGGTTTATT  
TGAAGCTGGGGTTACCACTTCCTAAGGTGGATGAGGGAGGTTGTTTCTTTGGAGTTTATAGATAATCTT  
TTG

+

F,FF:,FF::FFF::,,,,:F:FFF,F,:,FFFF,::F,,F,,FFF,FF,,,:::FFFFF,,FFFFF

FF,,,,:F,FFF,:,:,FF,,FFF::F,FFFF,F,,,,:FFFFFFFFFFFF,F,FFFF,,FFFFFFFF  
F:F

@A00721:190:HGJW7DSXY:4:2265:5746:2049\_1:N:0:TCTGCAAG+GCTGCACT  
CAGAGTGACTGGAGTTCAGACGTGTCTCTTCCGATCTGTCAAACCTTCGAGGTTTCAGCTACGAGAGGT  
GATCCCGGATGTGGATTGAAGGCTGGCTCTAAGGGAGACTCCTTCTTTTTGAATGTTGTAAAGAATTG  
GGT

+

::FFFFFFFF:FFFFFF,FFFFFFFFFFFFFFFFFFFFFFFFFFFFFFFFFFFFFFFFFFFFFFFFFFFFFFFF  
FFFFFFFF,FFFFFFFFFFFF:F,FFFFFFFFFFFF::FFFFFFFF:FFFFFFFF:FFF,FFFFFFFFF,,FFFF  
FFF

@A00721:190:HGJW7DSXY:4:1133:5330:24565\_1:N:0:TCTGCAAG+GCTGCACT  
ATGACATTATTTCAACGGATACCGATCTCAGTTCTACCACAGAAACCGTCTCAGGAAGTGTCTCCACT  
GATTCGGAATTAGAGAAAGACGACCTTCTTGTGGGGACTGAGACCTCTGAATTTTCAGGGTGCCTGA  
TGA

+

FFFFFFFFFFFFFFFFFFFFFFFFFFFFFFFFFFFFFFFFFFFFFFFFFFFFFFFFFFFFFFFFFFFFFFFFFFFF  
FFFFFFFFFFFFFFFFFFFFFFFFFFFFFFFFFFFFFFFFFFFFFFFFFFFFFFFFFFFFFFFFFFFFFFFFFFFF  
FFF

@A00721:190:HGJW7DSXY:4:2505:15962:2707\_1:N:0:TCTGCAAG+GCTGCACT  
AACATCAACGACATCATTCTTGATGAGTGTCGTTCTTATCGAAGTCTCAGTTATCGCTGCCCGCCGA  
CGTTTGTGCGAACTCTCAGAGGTTTACGGCAGAAAAATTTCTCCTGCTTGAATTCGAGAGAGGACA  
CTA

+

::F,,FFFFFFFFFFFFFFFFFFFFFFFFFFFFFFFFFFFFFFFFFFFFFFFFFFFFFFFFFFFFFFFFFFFF  
FFFFFFFFFFFFFFFFFFFFFFFFFFFFFFFFFFFFFFFFFFFFFFFFFFFFFFFFFFFFFFFFFFFFFFFFFFFF  
FFF

@A00721:190:HGJW7DSXY:4:1112:27263:2581\_1:N:0:TCTGCAAG+GCTGCACT  
GACGACAAGCCTCAAGAGGGTAGAGGACCACCTGGATCTTCTACTGTCTCTGCCTTCCAAGATTTCTT  
AGAAGAGGTTATTCCTGGAACCACCTTAACGTCACCTCGGTAATCTTTCAGCCGAATTAAGTACTAATG  
AGT

+

FFFFFFFFFFFFFFFFFFFFFFFFFFFFFFFFFFFFFFFFFFFFFFFFFFFFFFFFFFFFFFFFFFFFFFFFFFFF  
FFFFFFFFFFFFFFFFFFFFFFFFFFFFFFFFFFFFFFFFFFFFFFFFFFFFFFFFFFFFFFFFFFFFFFFFFFFF  
FFF

@A00721:190:HGJW7DSXY:4:1535:10339:15890\_1:N:0:TCTGCAAG+GCTGCACT  
GAGGGAGTTCTTGAAGCATCCCGACCTTTCCTTGTGAAAATTTTGATGCGGTTTCATAAGATTATCAG  
TAATCCTGATTCTACTACGATTTCATGGACCTTCATCCTGTACCTCTTCTGGAGAGACGTATCTCAA  
AG

+

FF,FFFFFFFFFFFFFFFF:FFFFFF:FFFF,FFFFFFFFFFFFFFFFFFFFFFFF:FFFF,FF,F,FFFFFFF  
F,FFFF:FFFFFF:FFFFFFFFF:FFFFFF,FFFF:FF:FFFF:FFFFFFFFFFFF:FFFFFFFFFF  
:F

@A00721:190:HGJW7DSXY:4:2540:8522:7388\_1:N:0:TCTGCAAG+GCTGCACT  
CATGACCATAATTGGTATTGACTTTGGTACCACCTTTTCTACTGTCTGTCTCGCCTCTTCGAATGAAG  
TTTTAATGCTTAACAACAATGATAGTGAATTTATACCTACAATCATTGGTTTTTCTAATAATGATGAC  
ACT

+

FFFFFFFFFFFFFFFFFFFFFFFFFFFFFFFFFFFFFFFFFFFFFFFFFFFFFFFFFFFFFFFFFFFFFFFFFFFF  
FFFFFFFFFFFFFFFFFFFFFFFFFFFFFFFFFFFFFFFFFFFFFFFFFFFFFFFFFFFFFFFFFFFFFFFFFFFF  
FFF

@A00721:190:HGJW7DSXY:4:1163:26205:14841\_2:N:0:TCTGCAAG+GCTGCACT  
ATTACTCATGATGGTTACGGTCAGGGAGGATTCTCAGTTTACAAGGACCTTAAGCGATGGATCGGGGT  
TAATTCTAAAACATTACCCGAAAGACGTGCTAAATTAACCATTGTA

+



FFFFFFFFFFFFFFFFFFFFFFFFFFFFFFFFFFFFFFFFFFFFFFFFFFFFFFFFFFFFFFFFFFFFFFFF  
FFFFFFFFFFFFFFFFFFFFFFFFFFFFFFFFFFFFFFFFFFFFFFFFFFFFFFFFFFFFFFFFFFFFFFFF  
@A00721:190:HGJW7DSXY:4:1440:21016:36824\_1:N:0:TCTGCAAG+GCTGCACT  
AAGATATTTTCATGAAAACACTACAGAGGAACGTACCGGATTACCTGTCTTTTCATATTATGAATGAACCTT  
CGGCCGCTCTCTTTGCTTCGATGTTGGATGTCAAGAAGGGTTCAGAATGGGATTCCTACGTAGTTTAT  
GAC  
+  
FFFFFFFF:F,FFFFFFFFFFFFFFFFFFFFFFFFFFFFFFFFFFFFFFFFFFFFFFFFFFFFFFFFFFFF  
FFFFFFFFFFFFFFFFFFFFFFFFFFFFFFFFFFFFFFFFFFFFFFFFFFFFFFFFFFFFFFFFFFFFFFFF  
FFF  
@A00721:190:HGJW7DSXY:4:1314:29912:12493\_2:N:0:TCTGCAAG+GCTGCACT  
ACTTCTAATTTACGTTTGCTACTCAGAGCTGGTCCTCTCAGCAAAGGGATGCATGGTGTATCTCCTC  
AGGAGTCCCGGCATTTGATAATAATGACGAGACTTTCGTCATAATCGC  
+  
FFFFFFFFFFFFFFFFFFFFFFFFFFFFFFFFFFFFFFFFFFFFFFFFFFFFFFFFFFFFFFFFFFFFFFFF  
FFFFFFFFFFFFFFFFFFFFFFFFFFFFFFFFFFFFFFFFFFFFFFFFFFFFFFFFFFFFFFFFFFFFFFFF  
@A00721:190:HGJW7DSXY:4:1321:19786:11772\_2:N:0:TCTGCAAG+GCTGCACT  
GAAGGGATAGTTTTTACCTCGACCAACATTAAGGCGGCGGCGACTAATCTTAAAGCTTCACCCAAAAT  
GAAGGACACTTCGAAACTGAATAATGATGCACTACAAACAAGTATCGC  
+  
FFFFFFFFFFFFFFFFFFFFFFFFFFFFFFFFFFFFFFFFFFFFFFFFFFFFFFFFFFFFFFFFFFFFFFFF  
FFFFFFFFFFFFFFFFFFFFFFFFFFFFFFFFFFFFFFFFFFFFFFFFFFFFFFFFFFFFFFFFFFFFFFFF  
@A00721:190:HGJW7DSXY:4:2302:25816:18709\_1:N:0:TCTGCAAG+GCTGCACT  
ATTCAAGCTTGTCGTTTAAAGACTGCAGAGGCTGTCAAACAAGCCAGACTCAAGGAGTCCAATCAA  
GGTTTTGAATTTAGCTCAACTGGGGAGACGTGCTTAAATGGGTGATAAAAATTATTTAGAGATCTTTT  
CTA  
+  
FFFFFFFFFFFFFFFFFFFFFFFFFFFFFFFFFFFFFFFFFFFFFFFFFFFFFFFFFFFFFFFFFFFFFFFF  
FFFFFFFFFFFFFFFFFFFFFFFFFFFFFFFFFFFFFFFFFFFFFFFFFFFFFFFFFFFFFFFFFFFFFFFF  
FFF  
@A00721:190:HGJW7DSXY:4:2511:32497:36229\_2:N:0:TCTGCAAG+GCTGCACT  
ATCTCTCGGTCATTTACTCTGTACTTGATCTACGTCGTTTAACTGTGGAACAACCTTTACTTAGAAT  
GACTCTATCTTTTCAGACACTTCTTATATTATTTACAATAGTTAATAT  
+  
FFFFFFFFFFFFFFFFFFFFFFFFFFFFFFFFFFFFFFFFFFFFFFFFFFFFFFFFFFFFFFFFFFFFFFFF  
FFFFFFFFFFFFFFFFFFFFFFFFFFFFFFFFFFFFFFFFFFFFFFFFFFFFFFFFFFFFFFFFFFFFFFFF  
@A00721:190:HGJW7DSXY:4:2635:3106:24533\_1:N:0:TCTGCAAG+GCTGCACT  
AATATATTTAGTCTCTACACCCATCTCAACGAGTATAACGCGTTTTTTCCGTCCTTAACTTAATACAC  
GAAGATATCACCCGCACACGACTCGAAACCGAGACGCCGTAGATCAAAGTCCCTTCTAACTTTAGATT  
+  
F:F,,:FF:,,:,,,FF:FF:,F,,F:,,,,F,FF:,,:,,FFF,F:,F:,F:::,FF:,,,F  
,:,,,F,,:,F:,,,FFFFFFFFFFFFFFFFFFFFFFFFFFFFFFFFFFFFFFFFFFFFFFFFFFFF  
@A00721:190:HGJW7DSXY:4:2334:9127:17331\_2:N:0:TCTGCAAG+GCTGCACT  
GTCAAAGCTCTATTTATTAAACGAACATTATCCGATTCTTCGAGGGTATCACTACCACTGATCTGCC  
GACTTTAGTCAAGGAACCTCAATTCCTTCGATGTTTATATTTTCTAT  
+  
FFFFFFFFFFFFFFFFFFFFFFFFFFFFFFFFFFFFFFFFFFFFFFFFFFFFFFFFFFFFFFFFFFFFFFFF  
FFFFFFFFFFFFFFFFFFFFFFFFFFFFFFFFFFFFFFFFFFFFFFFFFFFFFFFFFFFFFFFFFFFFFFFF  
@A00721:190:HGJW7DSXY:4:2322:22851:32174\_1:N:0:TCTGCAAG+GCTGCACT  
TCCGATCACCTTGGTGTGATCTCCCGGAGGATCTTTTCAATAAGATGTATGATGATAATCTACTATTT  
TTAAATAGTGATATTCAGCGTATACTTGAATACTTTATCAAAGATTTGGCTTGGTCTATTTACCGCAA  
AAA  
+  
FFFFFFFFF,FFFFF:FFFFFFFFF,FFFFFFFFFFFFFFFFF,FFFFFFFFFFFFFFFFF:F:F:F

FFFFF:FFFFFFFFF:FFFFFFFFFFFFFFFFFFFFFFFFF:FFFFFFFFFFFFFFFFFFFFFFFFF:F  
FFF

@A00721:190:HGJW7DSXY:4:1605:20166:21355\_2:N:0:TCTGCAAG+GCTGCACT  
TATTTTACTTATACTTTAAATAGCACCGATTATACTTGACTGTTGATAATATTACAATAGCTCTTTC  
TCAGAAGATTAGAGAAGTAACCGGTGAACACGTCGGTAGCATTGATTT

+  
FFFFFFFFFFFFFFFFFFFFFFFFF:FFFFFFFFFFFFFFFFFFFFFFFFF:FFFFFFFFFFFFFFFFFFFFFFFFF:  
FFFFF:FFFFFFFFFFFFFFFFFFFFFFFFF:FFF:FFFFFFF

@A00721:190:HGJW7DSXY:4:2364:25563:26443\_2:N:0:TCTGCAAG+GCTGCACT  
ATTGTATAAGAGTTAATTGCTTACACAAAAGTGACGCGCAAGGAATCTTAATTGATTGAAGCTAGGC  
GTTGGGAGAATGAAGTCCGCTTCCCGGAAGAAACGATCTATTTACA

+  
FFFFFFFFFFFFFFFFFFFFFFFFF:FFFFFFFFFFF:FFFFFFFFFFFFFFFFFFFFFFFFFFFFFFFFF:FFFFF  
FFFFFFFFF,FF:FFFFFFFFFFFFFFFFFFFFFFFFFFFFFFFFF

@A00721:190:HGJW7DSXY:4:1554:10791:27007\_2:N:0:TCTGCAAG+GCTGCACT  
CATACCAATCAATGATGTGACTATACAGTTCGGCCATTTCAAGAGTGGTCAATACGTCGTGGGAGGTA  
CTGAAGCCTTCCCCTCCGCTGGCACGAAGAACTCCCAAGCCAATCA

+  
FFFFFFFFFFFFFFFFFFFFFFFFF:FFFFFFFFFFFFFFFFFFFFFFFFFFFFFFFFF:FFFFFFFFF  
FFFFFFFFF,FF:FFFFFFFFFFFFFFFFFFFFFFFFFFFFFFFFF

@A00721:190:HGJW7DSXY:4:2662:19949:1438\_2:N:0:TCTGCAAG+GCTGCACT  
TAAGTCTACCAGGAAGAGGGGAAATGTCCCCAAAAGTGAAGAATAAAGGGAAAGGTCCATCAGGAC  
CTAAGAAGGGGAAATTACCCCTCATTCTGAAGGAAGATCTCCCACCAT

+  
FFFFFFFFFFFFFFFFFFFFFFFFF:FFFFFFFFFFF:FFFFFFFFFFF:FFFFFFFFFFFFFFFFF  
FFFFFFFFF,FFFFFFFFFFFFFFFFF:FFFFFFFFF

@A00721:190:HGJW7DSXY:4:2265:8675:4335\_2:N:0:TCTGCAAG+GCTGCACT  
AGTCGCTGAAGGCGGCTTGCGTCATTAAGGGTAGCTGTAAAGTTGCGCCTGCCGACCCCATCTTTGAG  
ACCAAGACTCTCTACAGTAGGTTCTGTCCTACTATGAGCAAATCTGTT

+  
FFFFFFFFFFFFFFFFF,,FFFFFFFF:FFFFFFFFFFFFFFFFFFFFFFFFFFFFFFFFF  
FFFFFFFFFFFFFFFFFFFFFFFFF

@A00721:190:HGJW7DSXY:4:2128:3423:26146\_1:N:0:TCTGCAAG+GCTGCACT  
CGATCTCTTGAAGGACTTAGGTTGGCATATTTATGCCGACGATAATAAGCATGTCACCCTTAAGCACC  
GAGGTAAGCTCGGGACTTACAAGAGAGAGTGTGAGAGAGTCGCTCTCACTATTTTTGCCAGAATGCG  
GGC

+  
FFFFFFFFFFFFFFFFF:FFFFFFFFFFFFFFFFFFFFFFFFFFFFFFFFF:FFFFFFFFFFFFFFFFF  
FFFFFFFFFFFFFFFFFFFFFFFFF  
FFF

@A00721:190:HGJW7DSXY:4:1532:25292:6308\_1:N:0:TCTGCAAG+GCTGCACT  
TCTAGAGAAGATCTCCCCACCTGGAGAAGGCAAGTGGAGAGTCCAGAAGTTGATGAAGAAGGATTATT  
TGAAGCAGGGGTTACCACTTCCTAAGGTGGATGAGGGAGGTTGTTTCTTTGGAGTTTTAGATAATCTT  
TTG

+  
FFFFFFFFFFFFFFFFF,FFFFFFFFFFFFFFFFFFFFFFFFFFFFFFFFF  
FFFFFFFFFFF,FFFFFFFFFFFFFFFFFFFFFFFFFFFFFFFFF:FFFFFFFFFFFFFFFFF  
FFF

@A00721:190:HGJW7DSXY:4:2447:12246:32158\_1:N:0:TCTGCAAG+GCTGCACT  
CAGAGTGACTGGAGTTACACGCTGTGCTCTTCCGATCTGTCAAACCTTCGAGGTTACGCTACGAGAGGT  
GATCCCGATGTGGATTGAAGGCTGGCTCTAAGGGAGACTCCTTCTTTTGAATGTTGTAAAGAATTG  
GGT

+  
FFFFFFF:FFFFFFF:FFFFFFFFFFFFFFFFFFFFFFFFFFFFFFFFF:FFFFFFF

@A00721:190:HGJW7DSXY:4:1250:17400:1877\_1:N:0:TCTGCAAG+GCTGCACT  
ATGACATTATTTCAACGGATACCGATCTCAGTTCTACCAACAGAAACCGTCTCAGGAAGTGTCTCCACT  
GATTTCGGAATTAGAGAAAGACGACCTTCTTGTGGGGACTGAGACCTCTGAATTTTCAGGGTGCCCTGA  
TGA

@A00721:190:HGJW7DSXY:4:2532:4779:1376\_1:N:0:TCTGCAAG+GCTGCACT  
AACATCAACGACATCATTCTTGATGAGTGTCGTTCTTATCGAAGTCTCAGTTATCGCTGCCCCGCCGA  
CGTTTGTGCGAACTCTCAGAGGTTTACGGCAGAAAAATTTCTCCTGCTTGTAAATTCGAGAGAGGACA  
CTA

@A00721:190:HGJW7DSXY:4:1128:27914:26162\_1:N:0:TCTGCAAG+GCTGCACT  
GACGACAAGCCTCAAGAGGGTAGAGGACCACCTGGATCTTCTACTGTCTCTGCCTTCCAAGATTTCTT  
AGAAGAGGTTATTCTCTGGAACCACCTTAACGTCACTCGGTAATCTTTCAGCCGAATTAAGTACTAATG  
AGT

@A00721:190:HGJW7DSXY:4:1372:19605:6324\_1:N:0:TCTGCAAG+GCTGCACT  
AGGGAGTTCTTGAAGCATCCCACCTTTCTTGTGAAAAATTTTGATGCGGTTTCATAAGATTATCAGT  
AATCCTGATTCTACTACGGATTTCATGGACCTTCCATCCTGTACCTCTTCTGGAGAGACGTATCTCAA  
GAT

@A00721:190:HGJW7DSXY:4:2637:13801:20572\_1:N:0:TCTGCAAG+GCTGCACT  
CATGACCATAATTGGTATTGACTTTTGGTACCACCTTTTCTACTGTCTGTCTCGCCTCTTCGAATGAAG  
TTTTAATGCTTAACAACAATGATAGTGAATTTATACCTACAATCATTGTTTTTCTAATAATGATGAC  
ACT

@A00721:190:HGJW7DSXY:4:1209:12626:33755\_2:N:0:TCTGCAAG+GCTGCACT  
ATTACTCATGATGGTTACGGTCAGGGAGGATTCTCAGTTTACAAGGACCTTAAGCGATGGATCGGGGT  
TAATTCTAAAACATTACCCGAAAGACGTGCTAAATTA AAAACCATTTGA

@A00721:190:HGJW7DSXY:4:1544:1877:29074\_1:N:0:TCTGCAAG+GCTGCACT  
AAGATATTTTCATGAAACTACAGAGGAACGTACCGGATTACCTGTCTTTCATATTATGAATGAACCTT  
CGGCCGCTCTCTTGCTTCGATGTTGGATGTCAAGAAGGGTTCAGAATGGGATTCTACGTAGTTTAT  
GAC

[illegible]

FFFFFFFFFFFFFF:FFFFFFFFFFFFFF, :FFFFFFFFFFFFFF:FFFFFFFF  
FFF

@A00721:190:HGJW7DSXY:4:1314:30210:12947\_2:N:0:TCTGCAAG+GCTGCACT  
ACTTCTAATTTACGTTTGCTACTCAGAGCTGGTCCTCTCAGCAAAGGGATGCATGGTGTTATCTCCTC  
AGGAGTCCCGCATTTGATAATAATGACGAGACTTTCGTCATAATCGC

+

FFFFFFFFFFFFFFFFFFFFFFFFFFFFFFFFFFFFFFFFFFFFFFFFFFFFFFFFFFFFFFFF  
FFFFFFFFFFFFFFFFFFFFFFFFFFFFFFFFFFFFFFFFFFFFFFFFFFFFFFFF

@A00721:190:HGJW7DSXY:4:2245:19452:3082\_2:N:0:TCTGCAAG+GCTGCACT  
GAAGGGATAGTTTTTACCTCGACCAACATTAAGGCGGCGGCGACTAATCTTAAAGCTTCACCCAAAAT  
GAAGGACACTTCGAAACTGAATAATGATGCACTACGAACAAGTATCGC

+

FFFFFFFFFFFFFFFFFFFFFFFFFFFFFFFFFFFFFFFFFFFFFFFFFFFFFFFFFFFFFFFF  
FFFFFFFFFFFFFF:FFFFFFFFFFFFFF:FFFFFF, FFFFFFFFFFFFFF

@A00721:190:HGJW7DSXY:4:2357:11767:35963\_1:N:0:TCTGCAAG+GCTGCACT  
ATTCAAGCTTGTCGTTTAAAGACTGCAGAGGCTGTCAAACAAGCCAGACTCAAGGAGTCCAATCAAA  
GGTTTTGAATTTAGCTCAACTGGGGAGACGTGCTTAAATGGGTGATAAAAATTATTTAGAGATCTTTT  
CTA

+

FFFFFFF:FFFFFF, FFFFFFFFFFFFFFFFFFFFFFFFFFFFFFFFFFFFFFFFFFFFFFFF  
FFFFFFFFFFFFFFFFFFFFFFFFFFFFFFFFFFFFFFFFFFFFFFFFFFFFFFFFFFFFFFFF  
FFF

@A00721:190:HGJW7DSXY:4:2563:32741:4867\_2:N:0:TCTGCAAG+GCTGCACT  
ATCTCTCGGTCATTTACTCTGTACTTGATCTACGTCGTTTAACTGTGGAACAACCTTTACTTAGAAT  
GACTCTATCTTTTCAGACACTTCTTATATTATTTACAATAGTTAATAT

+

FFFFFFFFF:FF:FFFFFFFFFFFFFFFFFFFFFFFFFFFFFF:FFFFFFFFF:FFFFFFFFFFFFFFFF  
FFFFFFFFF:FFFFFFFFFFFFFFFFFFFFFFFF:FFFFFF, FFFFFFFFFF

@A00721:190:HGJW7DSXY:4:2648:32353:6386\_1:N:0:TCTGCAAG+GCTGCACT  
AATATATTTAGTCTCTACACCCATCTCAACGAGTATAAAGCGATTTTTCCGTCCTCAACGTAATACAC  
CAAGAGATCATCCGCACACGACTCGAAACCGAGACGCCGTAGATCAAAGTCCCTTCTAACTTTAGATT

+

F::F,F::,,,,,,,,,FFFFF,F::,,F::,,,F,F,,,::,,FFF,FFF,F,F,F,,,F::,,FF:  
,FF,::,F,FF,FF,FF,FFFFFFFFFFFFFFFFFFFFFFFFFFFFFFFFFFFFFFFF

@A00721:190:HGJW7DSXY:4:2535:15709:31861\_2:N:0:TCTGCAAG+GCTGCACT  
GTCAAAGCTCTATTTATTAACGAACATATTATCCGATTCTTCGAGGGTATCACTACCACTGATCTGCC  
GACTTTAGTCAAGGAACCTCAATTCCTTCGATGTTTATATTTTCTAT

+

FFFFFFFFFFFF:FFF:FFFFFFFFFFFFFFFFFFFFFFFF:FFFFFF:FFFF:FFFFFFFFFFFFFF  
FFFFFFFFF:FFFFFFFFFFFFFF:FFFFFFFFFFFFFFFFFFFFFF:FFF

@A00721:190:HGJW7DSXY:4:2329:9335:35540\_1:N:0:TCTGCAAG+GCTGCACT  
TCCGATCACCTTGGTGTGATCTCCCGGAGGATCTTTTCAATAAGATGTATGATGATAATCTACTATTT  
TAAATAGTGATATTCAGCGTATACTTGAATACTTTATCAAAGATTTGGCTTGGTCTATTTACGCAA  
AAA

+

:FFFFFFFF,FFFFFFFF:FFFFFFF,FFF::FFFFFFFFFFFFFFFFFFFFFFFFFFFFFFFF  
FFFFFFFFFFFFFFFFFFFFFFFFFFFFFFFFFFFFFFFFFFFFFFFFFFFFFFFF  
FFF

@A00721:190:HGJW7DSXY:4:2426:15935:24674\_2:N:0:TCTGCAAG+GCTGCACT  
TATTTTACTTATACTTTAAATAGCACCGATTATAACTTGACTGTTGATAATATTACAATAGCTCTTTC  
TCAGAAGATTAGAGAAGTAACCGGTGAACACGTCGGTAGCATTGATTT

+

FFFFFFFFFFFFFFFFFFFFFFFFFFFFFFFFFFFFFFFFFFFFFFFFFFFFFFFFFFFFFFFF  
FFFFFFFFFFFFFFFFFFFFFFFF:FFFFFFFFFFFFFFFFFFFFFFFF

@A00721:190:HGJW7DSXY:4:2668:28085:9518\_1:N:0:TCTGCAAG+GCTGCACT  
CAAAAGTGACGCGCGAAGGAATCTTAATTGATTGAAGCTAGGCGTTGGGGAGAATGAACTGCCGCTTC  
CCGGAAGAAACGATCTATTTACAGAGTATTTAGAGTAGTCCAAAGTTTGATAAATTTATATGATTTT  
CTA

+  
FFFFFFFFFFFFFFFFFFFFFFFFFFFFFFFFFFFFFFFFFFFFFFFFFFFFFFFFFFFFFFFFFFFFFFFF  
FFFFFFFFFFFFFFFFFFFFFFFFFFFFFFFFFFFFFFFFFFFFFFFFFFFFFFFFFFFFFFFFFFFFFFFF  
FFF

@A00721:190:HGJW7DSXY:4:1556:15167:36871\_2:N:0:TCTGCAAG+GCTGCACT  
CATACCAATCAATGATGTGACTATACAGTTCGGCCATTTCAAGAGTGGTCAATACGTCTGGGAGGTA  
CTGAAGCCTTCCCCTCCGCTGGCACGAAGAACTCCCAAGCCAATCA

+  
FFFFFFFFFFFFFFFFFFFF:FFFFFFFFFFFFFFFFFFFFFFFFFFFF:F:FFFFFFFFFFFFFFFFFFFF  
FFFFFFFFFFFFFFFFFFFFFFFFFFFFFFFFFFFF,FFFFFFFFFFFFFFF:F:FF

@A00721:190:HGJW7DSXY:4:1444:29577:3427\_2:N:0:TCTGCAAG+GCTGCACT  
CAGGAAGAGGGGAAATGTCCCCAAAAGTGAAGAATAAAGGGAAAGGTCCATCAGGACCTAAGAAGG  
GGAAATTACCCCTAATTCTGAAGGAAGATCTCCCACCATCTGGGGTTG

+  
FFFFF,FFFFFFFFFFFFFFFFFFFF:FFFFFFFFF:FFFFF:FFFFFFFFFFFFFFFFFFFF:FF  
FFF,FFFFFFFFFFFFFFFFFFFFFFFFFFFFFFFFFFFF:FFFFF:FFFFFFFF

@A00721:190:HGJW7DSXY:4:1348:27208:18834\_1:N:0:TCTGCAAG+GCTGCACT  
GCTGAAGGCGGCTTGGGTCATTAAGGGTAGCTGTAAAGTTGCGCCTGCCGACCCCATCTTTGAGACCA  
AGACTCTCTACAGTAGGTTCTGCCTACTATGAGCAAATCTGTTGAATTCGTCACTGAGGACGAAGGT  
GAG

+  
FFFFFFFFFFFFFFFFFFFFFFFFFFFFFFFFFFFFFFFFFFFFFFFFFFFFFFFFFFFFFFFFFFFFFFFF  
FFFFFFFFFFFFFFFFFFFFFFFFFFFFFFFFFFFFFFFFFFFFFFFFFFFFFFFFFFFFFFFFFFFFFFFF  
FFF

@A00721:190:HGJW7DSXY:4:2240:18683:18035\_1:N:0:TCTGCAAG+GCTGCACT  
CGATCTCTTGAAGGACTTAGGTTGGCATATTTATGCCGACGATAATAAGCATGTCACCCTTAAGCACC  
GAGGTAAGCTCGGGACTTACAAGAGAGAGTGTGAGAGAGTCGCTCTCACTATTTTTGCCCAGAATGCG  
GGC

+  
FFFFFFF,FFFFFFFFF:FFFFFFFFF:FFFFFFFFFFFFFFFFFFFFFFFFFFFFFFFFFFFFFFFFFFFF  
FFFF:FFFFFFFFFFFFFFFFFFFFFFFFFFFFFFFFFFFFFFFFFFFFFFFFFFFFFFFFFFFFFFFFFFFF  
FFF

@A00721:190:HGJW7DSXY:4:1561:12762:1799\_1:N:0:TCTGCAAG+GCTGCACT  
TCTAGAGAAGATCTCACCACTGGAGAAGGCAAGTGGAGAGTCCAGAAGTTGATGAAGAAGGATTATT  
TGAAGCAGGGTTACCACTTCCTAAGGTGGATGAGGGAGGTTGTTTCTTTGGAGTTTATAGATAATCTT  
TTG

+  
F:FFFFFFF:FFFFF,FFF,FF,FFFFF,,FFFFFFFFF:FF:FFFFFFFF:FFFFFFFFFFFFFFFFFFFF  
FFFFF::F:FFFFFF:FF,FFFFFF,FFFFFFFFF:FF:F:FFFF:FFFFFFFFFFFFFFFFFFFF:FF  
FFF

@A00721:190:HGJW7DSXY:4:2531:12310:30452\_1:N:0:TCTGCAAG+GCTGCACT  
CAGAGTGACTGGAGTTCAGACGTGTGCTCTTCCGATCTGTCAAACCTTCGAGGTTTCAGCTACGAGAGGT  
GATCCCGGATGTGGATTGAAGGCTGGCTCTAAGGGAGACTCCTTCTTTTGAATGTTGTAAAGAATTG  
GGT

+  
FFFFFFFFFFFFF:FFFFFFFFFFFFFFFFFFFF:FFFFFFFFFFFF:FFFFFFFFFFFFFFFFFFFFF:FFFFFFF  
FFFFFFFFFFFFFFFFFFFFFFFFFFFFFFFFFFFF:FFFF:FFFFFFFFFFFFFFFFFFFFFFFFFFFF:FFFFFFFFFFFF  
FFF

@A00721:190:HGJW7DSXY:4:1618:21811:32033\_1:N:0:TCTGCAAG+GCTGCACT  
ATGACATTATTTCAACGATACCGATCTCAGTTCTACCACAGAAACCGTCTCAGGAAGTGTCTCCACT

GATTCGGAATTAGAGAAAGACGACCTTCTTGTGGGGACTGAGACCTCTGAATTTTCAGGGTGCCTGA  
TGA

+

FFFF:FFFF::FFFF:FFFFFFFFFFFF:,,FF,::,FFF,F:FFFF:::,FFFFFFFFFFFF:,  
FFFFFFFF:FFFFFFFF:FFFFFFFFFFFF:FFFFFFFFFFFFFFFFFFF:,F,F:FFFFFFFFFFFF:FFFF  
FFF

@A00721:190:HGJW7DSXY:4:2535:5584:30671\_1:N:0:TCTGCAAG+GCTGCACT  
AACATCAACGACATCATTCTTGATGAGTGTCGTTCTTATCGAAGTCTCAGTTATCGCTGCCCCGCCGA  
CGTTTGTGCGCAACTCTCAGAGGTTTACGGCAGAAAAATTTCTCCTGCTTGTAATTCGAGAGAGGACA  
CTA

+

FFFFFFFFFFFFFFFFFFFFFFFFFFFFFFFFFFFFFFFFFFFFFFFFFFFFFFFFFFFFFFFFFFFFF  
FFFFFFFFFFFFFFFFFFFFFFFFFFFFFFFFFFFFFFFFFFFFFFFFFFFFFFFFFFFFFFFFFFFF:FFFFFFF  
FFF

@A00721:190:HGJW7DSXY:4:1450:28140:1908\_1:N:0:TCTGCAAG+GCTGCACT  
GACGACAAGCCTCAAGAGGGTAGAGGACCACCTGGATCTTCTACTGTCTCTGCCTTCCAAGATTTCTT  
AGAAGAGGTTATTCCTGGAACCACCTTAACGTCACCTCGGTAATCTTTCAGCCGAATTAAGTACTAATG  
AGT

+

FFFFFFFFFFFFFFFFFFFFFFFFFFFFFFFFFFFFFFFFFFFFFFFFFFFFFFFFFFFFFFFFFFFFF  
FFFFFFFFFFFF:FFFFFFFFFFFFFFFF:FFFFFFFFFFFFFFFFFFFFFFFFFFFFFFFFFFFFFFFFFFFF  
FFF

@A00721:190:HGJW7DSXY:4:2123:30517:27759\_1:N:0:TCTGCAAG+GCTGCACT  
AGGGAGTTCTTGAAGCATCCCGACCTTTCCTTGTGAAAATTTGATGCGGTTTCATAAGATTATCAGT  
AATCCTGATTCTACTACGATTTCATGGACCTTCATCCTGTACCTCTTCTGGAGAGACGTATCTCAA  
GAT

+

FFFFFFFFF:FFFFFFFFFFFFFFFFFFFFFFFFFFFFFFFFFFFFFFFFFFFFFFFFFFFFFFFFFFFFF  
FFFFF:FFFFFFFFFFFFFFFFFFFFFFFFFFFFFFFFFFFFFFFFFFFFFFFFFFFFFFFFFFFFFFFFFFFF  
FFF

@A00721:190:HGJW7DSXY:4:2642:5321:36573\_1:N:0:TCTGCAAG+GCTGCACT  
CATGACCATAATTGGTATTGACTTTGGTACCACCTTTTCTACTGTCTGTCTCGCCTCTTCCAATGAAG  
TTTTAATGCTTAACAACAATGATAGTGAATTTATACCTACAATCATTGGTTTTTCTAATAATGATGAC  
ACT

+

:FFFF:FFFFFFFFFFFFFFFFFFFFFFFFFFFFFFFFFFFFFFFFFFFFFFFFFFFFFFFFFFFFFFFFF  
FFFFFFFFFFFFFFFFFFFFFFFFFFFFFFFFFFFFFFFFFFFFFFFFFFFFFFFFFFFFFFFFFFFF:FFFFF  
FFF

@A00721:190:HGJW7DSXY:4:1228:6271:8249\_2:N:0:TCTGCAAG+GCTGCACT  
ATTACTCATGATGGTTACGGTCAGGGAGGATTCTCAGTTTACAAGACCTTAAGCGATGGATCGGGGT  
TAATTCTAAACATTACCCGAAAGACGTGCTAAATTAACCATTTGTA

+

FFFFFFFFFFFFFFFFFFFFFFFFFFFFFFFFFFFFFFFFFFFFFFFFFFFFFFFFFFFFFFFFFFFFF  
FFFFFFFFFFFFFFFFFFFFFFFFFFFFFFFFFFFFFFFFFFFFFFFFFFFFFFFFFFFFFFFFFFFF:,FFFFF

@A00721:190:HGJW7DSXY:4:1608:6162:21809\_1:N:0:TCTGCAAG+GCTGCACT  
AAGATATTTTCATGAAAACCTACAGAGGAACGTACCGGATTACCTGTCTTTCATATTATGAATGAACCTT  
CGGCCGCTCTCTTGTCTCGATGTTGGATGTCAAGAAGGGTTCAGAATGGGATTCTACGTAGTTTAT  
GAC

+

FFFFFFFFFFFFFFFFFFFFFFFFFFFFFFFFFFFFFFFFFFFFFFFFFFFFFFFFFFFFFFFFFFFFF  
FFFFFFFFFFFFFFFFFFFFFFFFFFFFFFFFFFFFFFFFFFFFFFFFFFFFFFFFFFFFFFFFFFFF:FFFFFFFFFFFFF  
FFF

@A00721:190:HGJW7DSXY:4:2366:18150:34741\_2:N:0:TCTGCAAG+GCTGCACT  
ACTTCTAATTTACGTTTGCTACTCAGAGCTGGTCCTCTCAGCAAAGGGATGCATGGTGTTATCTCCTC

AGGAGTCCCGGCATTTGATAATAATGACGAGACTTTTCGTCATAATCGC  
+  
FFFFFFFFFFFFFFFFFFFFFFFFFFFFFFFFFFFFFFFFFFFFFFFFFFFFFFFFFFFFFFFFFFFFFFFF  
FFFFFFFFFFFFFFFFFFFFFFFFFFFFFFFFFFFFFFFFFFFFFFFFFFFFFFFFFFFFFFFF  
@A00721:190:HGJW7DSXY:4:2248:20898:25285\_2:N:0:TCTGCAAG+GCTGCACT  
GAAGGGATAGTTTTTACCTCGACCAACATTAAGGCGGCGGCGACTAATCTTAAAGCTTCACCCAAAAT  
GAAGGACACTTCGAAACTGAATAATGATGCACTACAAACAAGTATCGC  
+  
FF:FFFFFFFFFFFFFFFFFFFFFFFFFFFFFFFFFFFFFFFFFFFFFFFFFFFFFFFFFFFFFFFFFFFF  
FFFFFFFFFFFFFFFF:FFFFFFFFFFFFFFFFFFFFFFFF:FFF,FFFF,F  
@A00721:190:HGJW7DSXY:4:2364:27145:11678\_1:N:0:TCTGCAAG+GCTGCACT  
ATTCAAGCTTGTCGTTTAAAGACTGCAGAGGCTGTCAAACAAGCCCAGACTCAAGGAGTCCAATCAAA  
GGTTTTGAATTTAGCTCAACTGGGGAGACGTGCTTAAATGGGTGATAAAAATTATTTAGAGATCTTTT  
CTA  
+  
:FFFFFFFFFFFFFFFFFFFFFFFFFFFFFFFFFFFFFFFFFFFFFFFFFFFFFFFFFFFFFFFFFFFF  
F:FFFFFFFFFFFFFFFFFFFFFFFFFFFFFFFFFFFFFFFFFFFFFFFFFFFFFFFFFFFFFFFFFFFF  
FFF  
@A00721:190:HGJW7DSXY:4:2638:8793:1094\_2:N:0:TCTGCAAG+GCTGCACT  
ATCTCTCGTCAATTTACTCTGTACTTGATCTACGTCGTTTAACTGTCGGAACAACCTTTACTTAGAAT  
GACTCTATCTTTTCAGACACTTCTTATATTATTTACAATAGTTAATAT  
+  
FFFFFFFFFFFFFFFFFFFFFFFFFFFFFFFFFFFFFFFFFFFFFFFFFFFFFFFFFFFFFFFFFFFF,F:FFFFF  
FFFFF:FFFFFFFFFFFFFFFFFFFFFFFFFFFFFFFFFFFFFFFF:FFF:FFFFFFFFFFFF  
@A00721:190:HGJW7DSXY:4:1369:2835:3176\_2:N:0:TCTGCAAG+GCTGCACT  
ATAGATTTAGTCTCTACACCCATCTCAACGAGGATAAAGCGAGTTTTCCGTCCTGAACGTAATACACG  
AAGAGATCATCCGCAAACGACTCGAAACCGAGACGCCGTAGATCAAAG  
+  
FFFFFFFFFFFFFFFFFFFFFFFFFFFFFFFFFFFFFFFFFFFFFFFFFFFFFFFFFFFFFFFFFFFF  
FFFFFFFFFFFFFFFFFFFFFFFFFFFFFFFFFFFFFFFFFFFFFFFF:FFF  
@A00721:190:HGJW7DSXY:4:1124:24614:1720\_2:N:0:TCTGCAAG+GCTGCACT  
TCAAAGCTCTATTTATTAAACGAAGTATTATCCGATTCTTCGAGGGTATCACTACCACTGATCTGCCG  
ACTTTAGTCAAGGAAGTCAATTCTTCGATGTTTATATTTTCTATA  
+  
FFFFFFFFFFFFFFFFFFFFFFFFFFFFFFFFFFFFFFFFFFFFFFFFFFFFFFFFFFFFFFFFFFFF  
FF,FFFFFFFFFFFF:FFFFFFFFFFFFFFFFFFFFFFFFFFFFFFFFFFFFFFFF:FFF  
@A00721:190:HGJW7DSXY:4:2337:11903:22044\_1:N:0:TCTGCAAG+GCTGCACT  
TCCGATCACCTTGGTGTGATCTCCCGGAGGATCTTTTCAATAAGATGTATGATGATAATCTACTATTT  
TTAAATAGTGATATTCAGCGTATACTTGAATACTTTATCAAAGATTGGCTTGGTCTATTTACCGCAA  
AAA  
+  
FFFFFFFFFFFFFFFFFFFFFFFFFFFFFFFFFFFFFFFFFFFFFFFFFFFFFFFFFFFFFFFFFFFF:FFFFF:F  
FFFFFFFFFFFFFFFFFFFFFFFFFFFFFFFFFFFFFFFFFFFFFFFF:FFFFFFFFFFFFFFFFFFFF  
FFF  
@A00721:190:HGJW7DSXY:4:2607:30264:26130\_2:N:0:TCTGCAAG+GCTGCACT  
TATTTTACTTATACTTTAAATAGCACCGATTATAACTTGACTGTTGATAATATTACAATAGCTCTTTC  
TCAGAAGATTAGAGAAGTAACCGGTGAACACGTCGGTAGCATTGATTT  
+  
FFFFFFFFFFFFFFFF:FFFFFFFFFFFFFFFFFFFFFFFFFFFFFFFFFFFFFFFFFFFFFFFFFFFF  
FFFFFFFFFFFFFFFFFFFFFFFFFFFFFFFFFFFFFFFFFFFFFFFF:FFFFFFFFFFFF  
@A00721:190:HGJW7DSXY:4:1623:24768:6214\_2:N:0:TCTGCAAG+GCTGCACT  
CATACCAATCAATGATGTGACTATACAGTTCGGCCATTTCAAGAGTGGTCAATACGTCGTGGGAGGTA  
CTGAAGCCTTCCCCTCCGCTGGCACGAAGAACTCCCAAGCCAATCA  
+







GGTTTTGAATTTAGCTCAACTGGGGAGACGTGCTTAAATGGGTGATAAAAAATTATTTAGAGATCTTTT  
CTA

+

FFFFFFFFFFFFFFFFFFFFFFFFFFFFFFFFFFFFFFFFFFFFFFFFFFFFFFFFFFFFFFFFFFFFFFFF  
FFFFFFFFFFFFFFFFFFFFFFFFFFFFFFFFFFFFFFFFFFFFFFFFFFFFFFFFFFFFFFFFFFFFFFFF  
FFF

@A00721:190:HGJW7DSXY:4:1218:20256:1344\_2:N:0:TCTGCAAG+GCTGCACT  
TCGGTCATTTACTCTGTACTTGATCTACGTCGTTTAACTGTCGGAACAACCTTTACTTAGAATGACTC  
TATCTTTTCAGACACTTCTTATATTATTTACAATAGTTAATATCATAT

+

FFFFFFFFFFFFFF:FFFFFFFFFFFFFF:FFFFFFFFFFFFFFFFFFFFFFFFFFFFFFFF:FFFFFFFFFFFFFF  
FFFFFFFFFFFF:FFFF:FFFFFFFF:FFFF,FFFFFFFF:FFFFF

@A00721:190:HGJW7DSXY:4:2265:13648:3583\_2:N:0:TCTGCAAG+GCTGCACT  
ATAGATTTAGTCTCTACACCATCTCAACGAGGATAAAGCGAGTTTTCCGTCCTGAACGTAATACAG  
AAGAGATCATCCGCAAACGACTCGAAACCGAGACGCCGTAGATCAAAG

+

FFFFFFFFFFFFFFFFFFFFFFFFFFFFFFFFFFFFFFFFFFFFFFFFFFFFFFFFFFFFFFFF:FFFFFFFF  
FFFFFFFFFFFFFFFFFFFFFFFFFFFFFFFFFFFFFFFFFFFFFFFFFFFFFFFFFFFFFFFF

@A00721:190:HGJW7DSXY:4:1273:30942:24048\_2:N:0:TCTGCAAG+GCTGCACT  
TCAAAGCTCTATTTATTAACGAACATTATCCGATTCTTCGAGGGTATCACTACCACTGATCTGCCG  
ACTTTAGTCAAGGAACCTCAATTCCTTCGATGTTTATATTTTCTATA

+

FFFF:FFFFFFFFFFFF::FFFFFFFFFFFFFFFFFFFFFFFFFFFFFFFFFFFFFFFFFFFFFFFF  
FFFFF:FFFFFFFFFFFFFFFFFFFFFFFF:F,:FFFFFFFFFFFF:FF

@A00721:190:HGJW7DSXY:4:2576:18756:3756\_1:N:0:TCTGCAAG+GCTGCACT  
TCCGATCACCTTGGTGTGATCTCCCGGAGGATCTTTTCAATAAGATGTATGATGATAATCTACTATTT  
TTAAATAGTGATATTACGCGTATACTTGAATACTTTATCAAAGATTTGGCTTGGTCTATTTACCGCAA  
AAA

+

FFFFFFFFFFFFFFFFFFFFFFFFFFFFFFFFFFFFFFFFFFFFFFFFFFFFFFFFFFFFFFFF  
FFFFFFFFFFFFFFFFFFFFFFFFFFFFFFFFFFFFFFFFFFFFFFFFFFFFFFFFFFFFFFFF  
FFF

@A00721:190:HGJW7DSXY:4:2278:16649:16736\_1:N:0:TCTGCAAG+GCTGCACT  
TATTTTACTTATACTTTAAATAGCACCGATTATAACTTGACTGTTGATAATATTACAATAGCTCTTTC  
TCAGAAGATTAGAGAAGTAACCTGTGAACACGTCGGTAGCATTGATTTACTATTACCGTTAGAACTGA  
AA

+

FFFFFFFFFFFF:FF::FF:FFF,FFFF:F,FF,FF:FFFFFFFF,FFFFFFFFFFFFFFFF,FFFFFF  
FF:FFF,FFFF,F,FF,,FFFF,FF:FFFFFFFF:F:F:FFF:,FF::FFF,FFFF:F,FFFF::F  
FF

@A00721:190:HGJW7DSXY:4:2177:25491:5087\_2:N:0:TCTGCAAG+GCTGCACT  
CATACCAATCAATGATGTGACTATACAGTTCGGCCATTTCAAGAGTGGTCAATACGTCGTGGGAGGTA  
CTGAAGCCTTCCCCTCCGCTGGCACGAAGAACACTCCCAAGCCAATCA

+

FFFFFFF:FFFFFFFFFFFFFFFFFFFFFFFFFFFFFFFF:FFF:FFF,FFFFFFFFFFFFFFFF  
FFFFFFFFFFFFFFFFFFFFFFFFFFFFFFFF:FFFFFFFFFFFF,:FFFF:FFF

@A00721:190:HGJW7DSXY:4:1504:31910:6684\_2:N:0:TCTGCAAG+GCTGCACT  
CAGGAAGAGGGGAAATGTCCCCAAAAGTGAAGAATAAAGGGAAAGGTCCATCAGGACCTAAGAAG  
GGAAATTACCCCTAATTCTGAAGGAAGATCTCCCACCATCTGGGGTTG

+

FFFFFFFFFFFFFFFFFFFFFFFFFFFFFFFFFFFFFFFF:FFFFFFFFFFFFFFFFFFFFFFFF  
FFFFFFFFFFFFFFFFFFFFFFFFFFFFFFFFFFFFFFFFFFFFFFFFFFFFFFFF

@A00721:190:HGJW7DSXY:4:2509:13042:16063\_1:N:0:TCTGCAAG+GCTGCACT  
GCTGAAGGCGGCTTGGGTCATTAAGGGTAGCTGTAAAGTTGCGCCTGCCGACCCCATCTTTGAGACCA



@A00721:190:HGJW7DSXY:4:2233:14398:34068\_1:N:0:TCTGCAAG+GCTGCACT  
AGGGAGTTCTTGAAGCATCCCGACCTTTCCTTGTGAAAATTTTGATGCGGTTTCATAAGATTATCAGT  
AATCCTGATTCTACTACGGATTCATGGACCTTCCATCCTGTACCTCTTCTGGAGAGACGTATCTCAA  
GAT

+

FFFFFFFFFFFFFFFFFFFFFFFFFFFFFFFFFFFFFFFFFFFFFFFFFFFFFFFFFFFFFFFFFFFFFFFF  
FFFFFFFFFFFFFFFFFFFFFFFFFFFFFFFFFFFFFFFFFFFFFFFFFFFFFFFFFFFFFFFFFFFFFFFF  
FFF

@A00721:190:HGJW7DSXY:4:1449:15483:13620\_1:N:0:TCTGCAAG+GCTGCACT  
TCGCCTCTTCGAATGAAGTTTTAATGCTTAACAACAATGATAGTGAATTTATACCTACAATCATTGGT  
TTTTCTAATAATGATGACACTATTGTTTATGGATATGATGCTATTACTCATGATGGTTACGGTCAGGG  
AGG

+

FFFFFFFFFFFFFFFFFFFFFFFFFFFFFFFFFFFF,,FFFF:FFFFFFFFFFFFFFFFFFFFFFFF  
FFFFFFFFFFFFFFFFFFFFFFFFFFFFFFFFFFFFFFFFFFFFFFFFFFFFFFFFFFFFFFFFFFFFFFFF  
FFF

@A00721:190:HGJW7DSXY:4:2322:3694:32910\_1:N:0:TCTGCAAG+GCTGCACT  
AAGATATTTTCATGAAACTACAGAGGAACGTACCGGATTACCTGTCTTTCATATTATGAATGAACCTT  
CGGCCGCTCTCTTTCGCTTCGATGTTGGATGTCAAGAAGGGTTCAGAATGGGATTCCTACGTAGTTTAT  
GAC

+

F:FFFFFF:F:FFF:FFFFFF:FFFFFFFFFFFFFFFF:FFFFFFFFFFFFFFFFFFFFFFFFFFFF  
FFFFFFFFFFFFFFFFFFFFFFFFFFFFFFFFFFFFFFFFFFFFFFFFFFFFFFFFFFFFFFFFFFFFFFFF  
FFF

@A00721:190:HGJW7DSXY:4:2455:23240:3881\_2:N:0:TCTGCAAG+GCTGCACT  
ACTTCTAATTTACGTTTGCTACTCAGAGCTGGTCCTCTCAGCAAAGGGATGCATGGTGTTATCTCCTC  
AGGAGTCCCGGCATTTGATAATAATGACGAGACTTTCGTCATAATCGC

+

FFFFFFFFFFFFFFFFFFFFFFFFFFFFFFFFFFFFFFFFFFFFFFFFFFFFFFFFFFFFFFFFFFFFFFFF  
FFFFFFFFFFFFFFFFFFFFFFFFFFFFFFFFFFFFFFFFFFFFFFFFFFFFFFFFFFFFFFFFFFFFFFFF

@A00721:190:HGJW7DSXY:4:2420:20247:11412\_2:N:0:TCTGCAAG+GCTGCACT  
GAAGGGATAGTTTTTACCTCGACCAACATTAAGGCGGCGGCGACTAATCTTAAAGCTTCACCCAAAAT  
GAAGGACACTTCGAAACTGAATAATGATGCACTACAAACAAGTATCGC

+

FFFFFFFFFFFFFFFFFFFFFFFFFFFFFFFFFFFF,FFFFFFFFFF:FFFFFFFFFFFF:FFFFFFFFFFFF  
FFFFFFFFFFFFFFFFFFFF:FFFFFFFFFFFFFFFFFFFFFFFFFFFFFFFFFFFFFFFF

@A00721:190:HGJW7DSXY:4:2412:2220:13166\_1:N:0:TCTGCAAG+GCTGCACT  
ATTCAAGCTTGTCGTTTAAAGACTGCAGAGGCTGTCAAACAAGCCAGACTCAAGGAGTCCAATCAA  
GGTTTTGAATTTAGCTCAACTGGGGAGACGTGCTTAAATGGGTGATAAAAATTATTTAGAGATCTTT  
CTA

+

FFFFFFFFFFFFFFFFFFFFFFFFFFFFFFFFFFFFFFFFFFFF:FFFFFFFFF:FFFFFFFFFFFFFFFF  
FFFFFFF:FFFFFFFFFFFFFFFFFFFFFFFFFFFFFFFFFFFFFFFFFFFFFFFFFFFFFFFFFFFFF:FFFFFFFFFFFF  
FFF

@A00721:190:HGJW7DSXY:4:1223:18385:11412\_2:N:0:TCTGCAAG+GCTGCACT  
TCGGTCATTTACTCTGTACTTGATCTACGTCGTTTAACTGTCGGAACAACCTTTACTTAGAATGACTC  
TATCTTTTCAGACACTTCTTATATTATTTACAATAGTTAATATCATAT

+

FFFFFFFFFFFFFFFFFFFFFFFFFFFFFFFFFFFFFFFFFFFF,FFFFFFFFF:FFFFFFF  
FFFFFFFFFFFFFFFFFF:FF:FFFFFFFFFFFFFFFFFFFFFFFFFFFFFFFF

@A00721:190:HGJW7DSXY:4:2516:14335:25097\_2:N:0:TCTGCAAG+GCTGCACT  
ATAGATTTAGTCTCTACACCATCTCAACGAGGATAAAGCGAGTTTTCCGTCCTGAACGTAATACACG  
AAGAGATCATCCGCAAACGACTCGAAACCGAGACGCCGTAGATCAAAG

+

FFFFFFFFFFFFFFFFFFFFFFFFFFFFFFFFFFFFFFFFFFFFFFFFFFFFFFFFFFFFFFFFFFFFFFFF,FFFF  
F:FFFFFFFFFFFFFFFFFFFFFFFFFFFFFFFFFFFFFFFFFFFFFFFFFFFFFFFFFFFFFFFF:FF:FFF  
@A00721:190:HGJW7DSXY:4:1423:4463:30295\_2:N:0:TCTGCAAG+GCTGCACT  
TCAAAGCTCTATTTATTAACGAAGTATTATCCGATTCTTCGAGGGTATCACTACCACTGATCTGCCG  
ACTTTAGTCAAGGAAGTCAATTCCTTCGATGTTTATATTTTTCTATA  
+  
FFFFFFFFFFFFFFFFFFFFFFFFFFFFFFFFFFFFFFFFFFFFFFFFFFFFFFFFFFFFFFFFFFFFFFFF  
F:FFFFFFFFFFFFFF,FFFFFFFFFFFFFFFFFFFFFFFFFFFFFFFFFFFFFFFFFFFFFFFF:FFF  
@A00721:190:HGJW7DSXY:4:1156:18584:3677\_1:N:0:TCTGCAAG+GCTGCACT  
CCGATCACCTTGGTGTGATCTCCCGGAGGATCTTTTCAATAAGATGTATGATGATAATCTACTATTTT  
TAAATAGTGATATTAGCGTATACTTGAATACTTTATCAAAGATTTGGCTTGGTCTATTTACCGCAA  
AAG  
+  
FFFFFFFFFFFFFFFFFFFFFFFFFFFFFFFFFFFFFFFFFFFFFFFFFFFFFFFFFFFFFFFFFFFFFFFF  
FFFFFFFFFFFFFFFFFFFFFFFFFFFFFFFFFFFFFFFFFFFFFFFFFFFFFFFFFFFFFFFFFFFFFFFF  
FFF  
@A00721:190:HGJW7DSXY:4:1125:15691:6277\_1:N:0:TCTGCAAG+GCTGCACT  
TATTTTACTTATACTTTAAATAGCACCGATTATAACTTGACTGTTGATAATATTACAATAGCTCTTTC  
TCAGAAGATTAGAGAAGTAACCGGTGAACACGTCGGTAGCATTGATTTACTTTTACCGTTAGAACTGA  
AAA  
+  
FFFFFFFFFFFFFFFFFFFFFFFFFFFFFFFFFFFFFFFFFFFFFFFFFFFFFFFFFFFFFFFFFFFFFFFF  
FFFFFFFFFFFFFFFFFFFFFFFFFFFFFFFFFFFFFFFFFFFFFFFFFFFFFFFFFFFFFFFFFFFFFFFF  
FFF  
@A00721:190:HGJW7DSXY:4:2578:19452:13197\_2:N:0:TCTGCAAG+GCTGCACT  
CATACCAATCAATGATGTGACTATACAGTTCGGCCATTTCAAGAGTGGTCAATACGTGTCGGGAGGTA  
CTGAAGCCTTCCCCTCCGCTGGCACGAAGAAGTCCCAAGCCAATCA  
+  
FFFFFFFFFFFFFFFF:FFFFFFFF:FFFFFFFF:F:FF,,FFFFFFFFFFFFFFFFFFFFFFFF  
FFFFFFFFFFFFFFFFFFFFFFFFFFFFFFFFFFFFFFFFFFFFFFFFFFFFFFFFFFFFFFFF,F:  
@A00721:190:HGJW7DSXY:4:1515:27877:19805\_2:N:0:TCTGCAAG+GCTGCACT  
CAGGAAGAGGGGAAATGTCCCCAAAAGTGAAGAATAAAGGGAAAGTCCATCAGGACCTAAGAAGG  
GAAATTACCCCTAATTCTGAAGGAAGATCTCCACCATCTGGGGTTG  
+  
FFFFFFFFFFFFFF:,FFFFFFFFFFFFFFFFFFFFFFFFFFFFFFFFFFFFFFFF:FFFFFFFFFFFFFF:FFFFFF  
FFFFFFFFFFFFFFFFFFFFFFFF:FFFFFF,FFFFFFFFFFFFFFFF:FFFF:F  
@A00721:190:HGJW7DSXY:4:2603:23601:31469\_1:N:0:TCTGCAAG+GCTGCACT  
GCTGAAGCGGCTTGGGTCAATTAAGGGTAGCTGTAAAGTTGCGCCTGCCGACCCCATCTTTGAGACCA  
AGACTCTCTACAGTAGGTTCTGTCCTACTATGAGCAAATCTGTTGAATTCGTCACCTGAGGACGAAGGT  
GAG  
+  
FFFFFFFFF:FFFFFFFFFFFFFFFFFFFFFFFFFFFFFFFFFFFFFFFFFFFFFFFFFFFFFFFFFFFF  
FFFFFFFFFFFFFFFFFFFFFFFFFFFFFFFFFFFFFFFFFFFFFFFFFFFFFFFFFFFFFFFF:FFFFFFFFFFFFFF  
FFF  
@A00721:190:HGJW7DSXY:4:2577:21404:9251\_1:N:0:TCTGCAAG+GCTGCACT  
CGATCTCTGAAGGACTTAGGTTGGCATATTTATGCCGACGATAATAAGCATGTCACCCTTAAGCACC  
GAGGTAAGCTCGGGACTTACAAGAGAGAGTGTGAGAGAGTCGCTCTACTATTTTTGCCAGAAATGCG  
GGC  
+  
FFFFFFFFFFFFFFFFFFFFFFFFFFFFFFFFFFFFFFFFFFFFFFFFFFFFFFFFFFFFFFFFFFFFFFFF  
FFFFFF:FFFFFFFFFFFFFFFFFFFFFFFFFFFFFFFFFFFFFFFFFFFFFFFFFFFFFFFFFFFFFFFF:FFFFFFFFFFFFFF  
FFF  
@A00721:190:HGJW7DSXY:4:1266:7997:7607\_1:N:0:TCTGCAAG+GCTGCACT  
TATTTGAAGCAGGGTTACCACTTCTAAGGTGGATGAGGGAGGTTGTTTCTTTGGAGTTTATAGATAA

TCTTTTGAGAAGGGGTCATAGAGCCAGCAAGAGAAGCTTATATGCTGGTTTAAGTGATGATTATCACT  
CCT

+

:FFFFFFFF:FFFFFFFFFFFFFFFFFFFFFFFFFFFFFFFFFFFFFFFFFFFFFFFFFFFFFFFFFFFFFFFF  
FFFFFFFFFFFFFFFFFFFFFFFFFFFFFFFFFFFFFFFFFFFFFFFFFFFFFFFFFFFFFFFFFFFFFFFFFFFF  
FFF

@A00721:190:HGJW7DSXY:4:2474:14705:4351\_1:N:0:TCTGCAAG+GCTGCACT  
AAGGAGGCTGATCATGGAGTCTTTGTACCTTCTGTCTAACTTCGAGGTTTCAGCTACGAGAGGTGATCC  
CGGATGTGGATTGAAGGCTGGCTCTAAGGGAGACTCCTTCTTTTGAATGTTGTAAAGAATTGGGTTG  
AGA

+

F,FFFF:FFFFF:FFFFFFFFFFFFFFFFFFFFFFFFFFFFFFFFFFFFFFFFFFFFFFFFFFFFFFFFFFFF  
FFFFFFFFFFFFFFFFFFFFFFFFFFFFFFFFFFFFFFFFFFFFFFFFFFFFFFFFFFFFFFFFFFFFFFFFFFFF  
FFF

@A00721:190:HGJW7DSXY:4:2578:6668:4178\_1:N:0:TCTGCAAG+GCTGCACT  
ATGACATTATTTCAACGGATACCGATCTCAGTTCTACCACAGAAACCGTCTCAGGAAGTGTCTCCACT  
GATTCGGAATTAGAGAAAGACGACCTTCTTGTGGGACTGAGACCTCTGAATTTTCAGGGTGCCTGA  
TGA

+

FFFFFFFFFFFFFFFFFFFFFFFFFFFFFFFFFFFFFFFFFFFFFFFFFFFFFFFFFFFFFFFFFFFFFFFFFFFF  
FFFFFFFFFFFFFFFFFFFFFFFFFFFFFFFFFFFFFFFFFFFFFFFFFFFFFFFFFFFFFFFFFFFFFFFFFFFF  
FFF

@A00721:190:HGJW7DSXY:4:2668:3595:23844\_1:N:0:TCTGCAAG+GCTGCACT  
AACATCAACGACATCATTCTTGATGAGTGTCTTCTTATCGAAGTCTCAGTTATCGCTGCCCGGCCGA  
CGTTTGTGCGAACTCTCAGAGGTTTACGGCAGAAAAATTTCTCCTGCTTGTAAATTCGAGAGAGGACA  
CTA

+

FFFFFFFFFFFFFFFFFFFFFFFFFFFFFFFFFFFFFFFFFFFFFFFFFFFFFFFFFFFFFFFFFFFFFFFFFFFF  
FFFFFFFFFFFFFFFFFFFFFFFFFFFFFFFFFFFFFFFFFFFFFFFFFFFFFFFFFFFFFFFFFFFFFFFFFFFF  
FFF

@A00721:190:HGJW7DSXY:4:1675:13729:27649\_1:N:0:TCTGCAAG+GCTGCACT  
GACGACAAGCCTCAAGAGGGTAGAGGACCACCTGGATCTTCTACTGTCTCTGCCTTCCAAGATTTCTT  
AGAAGAGGTTATTCCTGGAACCACCTTAACGTCACTCGGTAATCTTTCAGCCGAATTAAGTACTAATG  
AGT

+

FFFFFFFFFFFFFFFFFFFFFFFFFFFFFFFFFFFFFFFFFFFFFFFFFFFFFFFFFFFFFFFFFFFFFFFFFFFF  
FFFFFFFFFFFFFFFFFFFFFFFFFFFFFFFFFFFFFFFFFFFFFFFFFFFFFFFFFFFFFFFFFFFFFFFFFFFF  
FFF

@A00721:190:HGJW7DSXY:4:1433:18168:6746\_1:N:0:TCTGCAAG+GCTGCACT  
GGGAGTTCTTGAAGCATCCCGACCTTTCCTTGTGAAAATTTTGATGCGGTTTCATAAGATTATCAGTA  
ATCCTGATTCTACTACGGATTCATGGACCTTCCATCCTGTACCTCTTCTGGAGAGACGTATCTCAAAG

+

FFF:FFFFFFFFF,:FF:FFF:,FFFFFFFFFFFFFFFFFFFFFFFFFFFFFFFFFFFFFFFFFFFFFFFFFFFF  
FFFFFFFF:FF:FF,FFFFFFFFF:F:FFFF::FFFFFFFFF::FFF,FFFF:FFFFF:FFFFF:,::F

@A00721:190:HGJW7DSXY:4:1616:2311:36652\_1:N:0:TCTGCAAG+GCTGCACT  
TCGCCTCTTGAATGAAGTTTTAATGCTTAACAACAATGATAGTGAATTTATACCTACAATCATTGGT  
TTTTCTAATAATGATGACACTATTGTTTATGGATATGATGCTATTACTCATGATGGTTACGGTCAGGG  
AGG

+

FFF:FF,FF:FF,FFF,:FFFF:FFF,:FF:F::FF:FF,FF::FFFFFFFFFFFFF:,FFFF,FF,F  
FFFFFFFFFFF,F:FFFFFFFFF,FFFFFFFFFFFFFFFFF::FF:FFFF:FFFF:FF,:FFF:FF:,FFFF  
FFF

@A00721:190:HGJW7DSXY:4:2559:14742:29935\_1:N:0:TCTGCAAG+GCTGCACT  
AAGATATTTTCATGAAAACCTACAGAGGAACGTACCGGATTACCTGTCTTTCATATTATGAATGAACCTT

CGGCCGCTCTCTTTGCTTCGATGTTGGATGTCAAGAAGGGTTCAGAATGGGATTCTACGTAGTTTAT  
GAC

+

FFFFFFFFFFFFFFFF:FFFFFFFFFFFFFFFFFFFFFFFFFFFFFFFFFFFFFFFFFFFFFFFF  
FFFFFFFFFFFFFFFFFFFFFFFFFFFFFFFFFFFFFFFFFFFFFFFFFFFFFFFFFFFFFFFF  
FFF

@A00721:190:HGJW7DSXY:4:2519:14705:16438\_2:N:0:TCTGCAAG+GCTGCACT  
ACTTCTAATTTACGTTTGCTACTCAGAGCTGGTCCTCTCAGCAAAGGGATGCATGGTGTTATCTCCTC  
AGGAGTCCCGGCATTTGATAATAATGACGAGACTTTCGTCATAATCGC

+

FFFFFFFFF::FFFFF::FFFF::FFF::FF,,F,:FFFFFFFFFFFFFF:FFF,,F,FFFF:F:FFFF  
FFFFFFFFFFFFFFFF::FFFFFFFF:FFFF:FFFF,FFF:FFFFFFFF:

@A00721:190:HGJW7DSXY:4:2446:12337:18255\_2:N:0:TCTGCAAG+GCTGCACT  
GAAGGGATAGTTTTTACCTCGACCAACATTAAGGCGGCGGCGACTAATCTTAAAGCTTCACCCAAAAT  
GAAGGACACTTCGAAACTGAATAATGATGCACTACAAACAAGTATCGC

+

FFFFFFFFFFFFFFFFFFFFFFFFFFFFFFFFFFFFFFFFFFFFFFFFFFFFFFFFFFFFFFFF  
FFFFFFFFFFFFFFFFFFFFFFFFFFFFFFFFFFFFFFFFFFFFFFFFFFFFFFFFFFFFFFFF:FF

@A00721:190:HGJW7DSXY:4:2423:1344:36229\_1:N:0:TCTGCAAG+GCTGCACT  
ATTCAAGCTTGTCGTTTAAAGACTGCAGAGGCTGTCAAACAAGCCAGACTCAAGGAGTCCAATCAAA  
GGTTTTGAATTTAGCTCAACTGGGGAGACGTGCTTAAATGGGTGATAAAAATTATTTAGAGATCTTT  
CTA

+

FF:FFFFFFFFFFFF:FFFFFFFFFFFFFFFFFFFFFFFFFFFFFFFF:FFF:FFFFFFFFFFFFFFFFFFFF:FFF  
FFFFFFFFFFFFFFFFFFFFFFFFFFFFFFFFFFFFFFFFFFFFFFFF:FFFFFFFFFFFFFFFF:FFFFFFFFFFFFFFFF  
FFF

@A00721:190:HGJW7DSXY:4:1243:6072:17300\_2:N:0:TCTGCAAG+GCTGCACT  
TCGGTCATTTACTCTGTACTTGATCTACGTCGTTTAACTGTCGGAACAACCTTTACTTAGAATGACTC  
TATCTTTTCAGACACTTCTTATATTATTTACAATAGTTAATATCATAT

+

FFFFFFFFFFFFFFFFFFFFFFFFFFFFFFFFFFFFFFFFFFFFFFFF:FFFFFFFF:FFFFFFFFFFFFFFFF  
FFFFFFFFFFFFFFFF::FFFFF,FFF,FFFFFFFF:FFFFFFFFFFFF

@A00721:190:HGJW7DSXY:4:1455:13232:20087\_1:N:0:TCTGCAAG+GCTGCACT  
TATATTTTTTATCTAAACCAATCTCAACTATGAAAACCTTTTTTCTTCATTAATTTAATAATACA  
TGAGAAAATCCGAAAACGACTCGAAACCGAGACGCCGTAGATCAAAGTCCCTTCTAACTTTAGAT

+

FF:F,FF,:F,,F,F,F:F:FF,,FF,F,:,,F,F,,,::,FFF,F:,,,F,F:,,FF:,:,,,F  
,,F,F,,,F,,,::,,,FFF,FFFFFFFF:,FFF,FF:FFFFFFFF:FFFF,,FF:F::FFF:

@A00721:190:HGJW7DSXY:4:2124:27624:4304\_2:N:0:TCTGCAAG+GCTGCACT  
TCAAAGCTCTATTTATTAAACGAAGTATTATCCGATTCTTCGAGGGTATCACTACCACTGATCTGCCG  
ACTTTAGTCAAGGAAGTCAATTCTTCGATGTTTATATTTTTCTATA

+

FFFF:FFFFFFFFFFFFFFFFFFFFFFFFFFFFFFFFFFFFFFFF,FFFFFFFFFFFFFFFFFFFF  
FFFFFFFFFFFFFFFFFFFFFFFFFFFFFFFF:F:FFFFFFFFFFFFFFFFFFFF,FF

@A00721:190:HGJW7DSXY:4:1162:3405:26459\_1:N:0:TCTGCAAG+GCTGCACT  
CCGATCACCTTGGTGTGATCTCCCGGAGGATCTTTTCAATAAGATGTATGATAATCTACTATTTT  
TAAATAGTGATATTCAGCGTATACTTGAATACTTTATCAAAGATTTGGCTTGGTCTATTTACCGCAA  
AAG

+

:FFFF,,,FF:FFFFFFF,FF,F,FF,FF:,FFFFFF:FFF:FFFF,F,:FFFFFFFF:FFFFFFFF  
FFFFF:,FFFFFFF,,F:FFFFFFF::FFF:FFFFF:,FFFFFF:FFFFFFFFFFFFFFFF:F,FF:F  
FFF

@A00721:190:HGJW7DSXY:4:1251:18936:31751\_1:N:0:TCTGCAAG+GCTGCACT  
TATTTTACTTATACTTTAAATAGCACCGATTATAACTTGACTGTTGATAATATTACAATAGCTCTTTC

TCAGAAGATTAGAGAAGTAACCGGTGAACACGTCGGTAGCATTGATTTACTTTTACCGTTAGAACTGA  
AAA

+

FFFFFFFFFFFFFFFFFFFFFFFFFFFFFFFFFFFFFFFFFFFFFFFFFFFFFFFFFFFFFFFFFFFFFFFF  
FFFFFFFFFFFFFFFFFFFFFFFFFFFFFFFFFFFFFFFFFFFFFFFFFFFFFFFFFFFFFFFFFFFFFFFF  
FFF

@A00721:190:HGJW7DSXY:4:1120:13322:21402\_1:N:0:TCTGCAAG+GCTGCACT  
TACCAATCAATGATGTGACTATACAGTTCGGCCATTTCAAGAGTGGTCAATACGTCGTGGGAGGTACT  
GAAGCCTTCCCCTCCGCTGGCACGAAGAACACTCCCAAGCCAATCAATAGTTCTTCTGACCAGAATGA  
AAA

+

FFFFFFFFFFFFFFFFFFFFFFFFFFFFFFFFFFFFFFFFFFFFFFFFFFFFFFFFFFFFFFFFFFFFFFFF  
FFFFFFFFFFFFFFFFFFFFFFFFFFFFFFFFFFFFFFFFFFFFFFFFFFFFFFFFFFFFFFFFFFFFFFFF  
FFF

@A00721:190:HGJW7DSXY:4:1571:32099:1470\_2:N:0:TCTGCAAG+GCTGCACT  
CAGGAAGAGGGGAAATGTCCCCAAAAGTGAAGAATAAAGGGAAAGGTCCATCAGGACCTAAGAAGG  
GGAAATTACCCCTAATTCTGAAGGAAGATCTCCCACCATCTGGGGTTG

+

FFFFFFFFFFFFFFFFFFFFFFFFFFFFFFFFFFFFFFFFFFFFFFFFFFFFFFFFFFFFFFFFFFFFFFFF  
FFFFFFFFFFFFFFFFFFFFFFFFFFFFFFFFFFFFFFFFFFFFFFFFFFFFFFFFFFFFFFFFFFFFFFFF  
FFF

@A00721:190:HGJW7DSXY:4:2634:29342:12477\_1:N:0:TCTGCAAG+GCTGCACT  
GCTGAAGGCGGCTTGGGTCAATTAAGGGTAGCTGTAAAGTTGCGCCTGCCGACCCCATCTTTGAGACCA  
AGACTCTCTACAGTAGGTTCTGTCCTACTATGAGCAAATCTGTTGAATTCGTCACTGAGGACGAAGGT  
GAG

+

FFFFFFFFFFFFFFFFFFFFFFFFFFFFFFFFFFFFFFFFFFFFFFFFFFFFFFFFFFFFFFFFFFFFFFFF  
FFFFFFFFFFFFFFFFFFFFFFFFFFFFFFFFFFFFFFFFFFFFFFFFFFFFFFFFFFFFFFFFFFFFFFFF  
FFF

@A00721:190:HGJW7DSXY:4:1255:3188:20322\_2:N:0:TCTGCAAG+GCTGCACT  
GAGTCTTGAAGGACTTAGGTTGGCATATTTATGCCGACGATAATAAGCATGTCACCCTTAAGCACCGA  
GGTAAGCTCGGGACTTACAAGAGAGAGTGTGAGAGAGTCGCTCTCACT

+

FFFFFFFFFFFFFFFFFFFFFFFFFFFFFFFFFFFFFFFFFFFFFFFFFFFFFFFFFFFFFFFFFFFFFFFF  
FFFFFFFFFFFFFFFFFFFFFFFFFFFFFFFFFFFFFFFFFFFFFFFFFFFFFFFFFFFFFFFFFFFFFFFF  
FFF

@A00721:190:HGJW7DSXY:4:1273:19777:24846\_1:N:0:TCTGCAAG+GCTGCACT  
TATTTGAAGCAGGGTTACCACTTCTTAAGGTGGATGAGGGAGGTTGTTTCTTTGGAGTTTATAGATAA  
TCTTTTGAGAAGGGGTCATAGAGCCAGCAAGAGAAGCTTATATGCTGGTTTAAGTGATGATTATCACT  
CCT

+

FF:FFFFFFFF:FF,FFFFFFFFFFFFFFFFFFFFFFFFFFFFFFFFFFFFFFFFFFFFFFFFFFFFFFFF  
FFFFFFFFFFFFFFFFFFFFFFFFFFFFFFFFFFFFFFFFFFFFFFFFFFFFFFFFFFFFFFFFFFFFFFFF  
FFF

@A00721:190:HGJW7DSXY:4:2444:23529:27993\_1:N:0:TCTGCAAG+GCTGCACT  
AGGAGGCTGATCATGGAGTCTTTGTACCTTCTGTCAAAGTTCGAGGTTTCTAGCTACGAGAGGTGATCCC  
GGATGTGGATTGAAGGCTGGCTCTAAGGGAGACTCCTTCTTTTGAATGTTGTAAAGAATTGGGTTGA  
GA

+

FFFFFFFF:F,F,FFFFFFFFFFFFFFFFFFFFFFFFFFFFFFFFFFFFFFFFFFFFFFFFFFFFFFFF  
FFFFFFFFFFFFFFFFFFFFFFFFFFFFFFFFFFFFFFFFFFFFFFFFFFFFFFFFFFFFFFFFFFFFFFFF  
FF

@A00721:190:HGJW7DSXY:4:2603:16269:17581\_1:N:0:TCTGCAAG+GCTGCACT  
ATGACATTATTTCAACGGATACCGATCTCAGTTCTACCACAGAAACCGTCTCAGGAAGTGTCTCCACT  
GATTCGGAATTAGAGAAAGACGACCTTCTTGTGGGGACTGAGACCTCTGAATTTTACAGGGTGCCTGA  
TGA



+  
FFFFFFFFFFFFFFFFFFFFFFFFFFFFFFFFFFFFFFFFFFFFFFFFFFFFFFFFFFFFFFFFFFFFFFFF  
FFFFFFFFFFFFFFFFFFFFFFFFFFFFFFFFFFFFFFFFFFFFFFFFFFFFFFFFFFFFFFFFFFFFFFFF  
FFF  
@A00721:190:HGJW7DSXY:4:1248:5249:6198\_1:N:0:TCTGCAAG+GCTGCACT  
ATCAACGACATCATTCTTGATGAGTGTCTGTTCTTATCGAAGTCTCAGTTATCGCTGCCCGGCCGACGT  
TTGTCGCGAACTCTCAGAGTTTACGGCAGAAAAATTTCTCCTGCTTGTAAATTCGAGAGAGGACACTA  
TGG  
+  
FFFFFFFFFFFFFFFFFFFFFFFFFFFFFFFFFFFFFFFFFFFFFFFFFFFFFFFFFFFFFFFFFFFFFFFF  
FFFFFFFFFFFFFFFFFFFFFFFFFFFFFFFFFFFFFFFFFFFFFFFFFFFFFFFFFFFFFFFFFFFFFFFF  
FFF  
@A00721:190:HGJW7DSXY:4:2139:1904:3380\_1:N:0:TCTGCAAG+GCTGCACT  
GACGACAAGCCTCAAGAGGGTAGAGGACCACCTGGATCTTCTACTGTCTCTGCCTTCCAAGATTTCTT  
AGAAGAGGTTATTCCTGGAACCACCTTAACGTCACTCGGTAATCTTTCAGCCGAATTAAGTACTAATG  
AGT  
+  
FFFFFFFFFFFFFFFFFFFFFFFFFFFFFFFFFFFFFFFFFFFFFFFFFFFFFFFFFFFFFFFFFFFFFFFF,F  
FFFFFFFFFFFFFFFFFFFFFFFFFFFFFFFFFFFFFFFFFFFFFFFFFFFFFFFFFFFFFFFFFFFFFFFF  
FFF  
@A00721:190:HGJW7DSXY:4:1226:32714:2284\_1:N:0:TCTGCAAG+GCTGCACT  
GGAGTTCTTGAAGCATCCCTACCTTTCCTTGTGAAAATTTTGATGCGGTTTCATAAGATTATCAGTAA  
TCCTGATTCTACTACGGATTCATGGACCTTCCATCCTGTACCTCTTCTGGAGAGACGTATCTCAAAGA  
TCG  
+  
FFFFFFFFFFFFFFFFFFFFFFF,FFFFFFFFFFFFFFFFFFFFFFFFFFFFFFFFF,FFFFFFFFFFFFFFFFFFFFFFFFF  
FFFFFFFFF:FFFFFFFFFFFFFFFFFFFFFFFFFFFFFFFFFFFFFFFFFFFFFFFFFFFFFFFFF:FF  
FFF  
@A00721:190:HGJW7DSXY:4:2113:21893:3020\_1:N:0:TCTGCAAG+GCTGCACT  
TCGCCTCTTGAATGAAGTTTTAATGCTTAACAACAATGATAGTGAATTTATACCTACAATCATTGGT  
TTTTCTAATAATGATGACACTATTGTTTATGGATATGATGCTATTACTCATGATGGTTACTGTCAGGG  
AGG  
+  
FF:FFF,FF:FFFF,F::FFF,FFFFFFFFFFFFFFFFF,FF:F:F,F:FF::FFFFF,,FFFFFFF:  
,FFFFFF:FFF,FFF,:F::FF,,FFFFFF:FFF,F,:F:, :FFFF,:F:FFFF,FF:F,,FFFF:F  
FFF  
@A00721:190:HGJW7DSXY:4:2615:31548:23343\_1:N:0:TCTGCAAG+GCTGCACT  
AAGATATTTTCATGAAACTACAGAGGAACGTACCGGATTACCTGTCTTTCATATTATGAATGAACCTT  
CGGCCGCTCTCTTTCGCTTCGATGTTGGATGTCAAGAAGGGTTCAGAATGGGATTCCTACGTAGTTTAT  
GAC  
+  
:F:FFFFFFFF:FFFFFFFFFFFF,:F:FFF:, ,FFFFFFFF:FFFFFFFF:FFFFFFFFFFFF:F,:FF  
F:::F:F::,FFFF,FF:F:FFFF,:FFFFFFFF::,FFFF::F::,FFFFFFFFFFFFFFFF:F  
:F:  
@A00721:190:HGJW7DSXY:4:1253:17698:31360\_1:N:0:TCTGCAAG+GCTGCACT  
CTTCTAATTTACGTTTGCTACTCAGAGCTGGTCCTCTCAGCAAAGGGATGCATGGTGTTATCTCCTCA  
GGAGTCCCGGCATTTGATAATAATGACGAGACTTTCGTCATAATCGCTGCATATTACGGATTACACGG  
TAC  
+  
FFFFFFFFFFFFFFFFFFFFFFFFFFFFFFFFFFFFFFFFFFFFFFFFFFFFFFFFFFFFFFFFFFFFFFFF  
FFFFFFFFFFFFFFFFFFFFFFFFFFFFFFFFFFFFFFFFFFFFFFFFFFFFFFFFFFFFFFFFFFFFFFFF  
FFF  
@A00721:190:HGJW7DSXY:4:2546:31331:26976\_2:N:0:TCTGCAAG+GCTGCACT  
GAAGGGATAGTTTTTACCTCGACCAACATTAAGGCGGCGGCGACTAATCTTAAAGCTTCACCCAAAAT

GAAGGACACTTCGAAACTGAATAATGATGCACTACAAACAAGTATCGC

+

FFFFFFFFFFFFFFFFFFFFFFFFFFFFFFFFFFFFFFFFFFFFFFFFFFFFFFFFFFFFFFFFFFFFFFFF  
:FFFFFFFF:FFFFFF:FFFFFFFFFFFFFFFFFFFFFFFFFFFFFFFFFFFFFFFF

@A00721:190:HGJW7DSXY:4:2476:29161:27289\_1:N:0:TCTGCAAG+GCTGCACT  
ATTCAAGCTTGTGCTTTAAAGACTGCAGAGGCTGTCAAACAAGCCCAGACTCAAGGAGTCCAATCAAA  
GGTTTTGAATTTAGCTCAACTGGGGAGACGTGCTTAAATGGGTGATAAAAATTATTTAGAGATCTTTT  
CTA

+

FF:FFFF:FFFFFFFFFFFFFFFFFFFFFFFF:FFF,:FFFFFFFFFFFFFFFFFFFFFFFF:FFFF:F:  
F:FFFF:FFFFFFFFFFFFFFFF:FFFFFFFFFFFFFFFFFFFFFFFF,FFFFFFFFFFFFFFFF  
FFF

@A00721:190:HGJW7DSXY:4:1345:18738:31125\_2:N:0:TCTGCAAG+GCTGCACT  
TCGGTCATTTACTCTGTACTTGATCTACGTCGTTAACTGTCGGAACAACCTTTACTTAGAATGACTC  
TATCTTTTCAGACACTTCTTATATTATTTACAATAGTTAATATCATAT

+

FFFFFFFFFFFFFFFFFFFFFFFFFFFFFFFF:FFFFFFFF:F:F:FFFFFFFFFFFFFFFFFFFFFFFF:FF  
FFF:FFFF:FFFFFF:FFFFFFFFFFFFFFFFFFFFFFFFFFFFFFFF

@A00721:190:HGJW7DSXY:4:1663:31910:37027\_1:N:0:TCTGCAAG+GCTGCACT  
ACGGCATACCCTATCTTGCAGAGTGACTGTAGTTCAGACGTGTGCTCTTCCGATCTCGTAATACACGA  
AGAGATCATCCGCAAACGACTCGAAACCGAGACGCCGTAGATNAAAGTCCCTTCTAACTTTAGATT

+

F,,,F::,,,,,:F:F,,,::,F,FF,,:F::,,,,:F,FF,:FF:F:FF::FF,FFFFFF,::F  
,:::,F,FF:,F:FFFFFFFFFFFFFFFFFFFFFFFFFFFFFFFF#FFFFFFFFFFFFFFFFFFFFF

@A00721:190:HGJW7DSXY:4:2472:31358:27868\_2:N:0:TCTGCAAG+GCTGCACT  
TCAAAGCTCTATTTATTAAACGAACATTATCCGATTCTTCGAGGGTATCACTACCACTGATCTGCCG  
ACTTTAGTCAAGGAACCTCAATTCCTTCGATGTTTATATTTTCTATA

+

FFF,,FFFFFFFFFFFFFFFFFFFFFFFFF::FFFFFFFFFFFFFFFFFFFFFFFFFFFFFFFFFFFFF  
FFFFFFFFFFFFFFFFFFFF:FF:FFFFFFFFFFFFFFFFFFFF:F

@A00721:190:HGJW7DSXY:4:1235:31910:15389\_1:N:0:TCTGCAAG+GCTGCACT  
CCGATCACCTTGGTGTGATCTCCCGGAGGATCTTTTCAATAAGATGTATGATGATAATCTACTATTTT  
TAAATAGTGATATTCAGCGTATACTTGAATACTTTATCAAAGATTTGGCTTGGTCTATTTACCGCAA  
AAG

+

FFFFFFFFF:FFFFFFFFFFFFFFFF:FF:FFFFF,FFFFFF:F:FFFFFFFFFFFF:FFFFFF:FF  
FFFFFFFFFFFFFFFFFFFFFFFF:FFFFFFFFFFFFFFFFFFFFFFFFFFFFFFFFFFFFFFFFFFFFF  
FFF

@A00721:190:HGJW7DSXY:4:1403:2031:29590\_1:N:0:TCTGCAAG+GCTGCACT  
TATTTTACTTATACTTTAAATAGCACCGATTATAACTTGACTGTTGATAATATTACAATAGCTCTTTC  
TCAGAAGATTAGAGAAGTAACCGGTGAACACGTCGGTAGCATTGATTTACTTTTACCGTTAGAACTGA  
AAA

+

FFFFFFFFFFFFFFFF:FFFF:FFFFFFFFFFFFFFFFFFFFFFFFFFFFFFFFFFFFFFFF,FFFFFFF  
FFFFFFFFFFFFFFFF:FFFFFFFF:FFFFFFFFFFFFFFFFFFFFFFFFFFFFFFFF:FFFF,FFFFFF  
FFF

@A00721:190:HGJW7DSXY:4:1165:23764:1752\_1:N:0:TCTGCAAG+GCTGCACT  
TACCAATCAATGATGTGACTATACAGTTCGGCCATTTCAAGAGTGGTCAATACGTCGTGGGAGGTACT  
GAAGCCTTCCCCTCCGCTGGCACGAAGAACTCCCAAGCCAATCAATAGTTCTTCTGACCAGAATGA  
AAA

+

FFFFF:FFFFFFFFFFFF:FFFFFFFFFFFFFFFFFFFFFFFFFFFFFFFF:FFFFFFFFFFFFFFFFFFFF  
FFFFFFFFFFFFFFFFFFFFFFFF:FFFFFFFFFFFFFFFFFFFFFFFF:FFFFFFFFFFFFFFFFFFFF  
FFF



@A00721:190:HGJW7DSXY:4:1521:8115:11350\_1:N:0:TCTGCAAG+GCTGCACT  
GGAGTTCTTGAAGCATCCCTACCTTTCCTTGTGAAAATTTTGATGCGTTTCATAAGATTATCAGTAA  
TCCTGATTCTACTACGGATTTCATGGACCTTCCATCCTGTACCTCTTCTGGAGAGACGTATCTCAAAGA  
TCG

@A00721:190:HGJW7DSXY:4:2214:21377:33191\_1:N:0:TCTGCAAG+GCTGCACT  
TCGCCTCTTCGAATGAAGTTTTAATGCTTGACAACAATGATAGTGAATTTATACCTACAATCATTGGT  
TTTTCTAATAATGATGACACTATTGTTTATGGATATGATGCTATTACTCATGATGGTTACGGTCAGGG  
AGG

@A00721:190:HGJW7DSXY:4:1212:25970:26866\_2:N:0:TCTGCAAG+GCTGCACT  
AAACTACAGAGGAACGTACCGGATTACCTGTCTTTCATATTATGAATGAACCTTCGGCCGCTCTCTT  
TGCTTCGATGTTGGATGTCAAGAAGGGTTCAGAATGGGATTCCCTACGT

@A00721:190:HGJW7DSXY:4:2110:1398:10050\_1:N:0:TCTGCAAG+GCTGCACT  
CTTCTAATTTACGTTTGCTACTCAGAGCTGGTCCTCTCAGCAAAGGGATGCATGGTGTATCTCCTCA  
GGAGTCCCGGCATTTGATAATAATGACGAGACTTTCGTCATAATCGCTGCATATTACGGATTACACGG  
TAC

@A00721:190:HGJW7DSXY:4:2645:8305:29841\_2:N:0:TCTGCAAG+GCTGCACT  
GAAGGGATAGTTTTTACCTCGACCAACATTAAGGCGGCGGCGACTAATCTTAAAGCTTCACCCAAAT  
GAAGGACACTTCGAAACTGAATAATGATGCACTACAAACAAGTATCGC

@A00721:190:HGJW7DSXY:4:2566:19009:27242\_1:N:0:TCTGCAAG+GCTGCACT  
ATTCAAGCTTGTCTTTAAAGACTGCAGAGGCTGTCAAACAAGCCCAGACTCAAGGAGTCCAATCAAA  
GGTTTTGAATTTAGCTCAACTGGGGAGACGTGCTTAAATGGGTGATAAAAATTATTTAGAGATCTTTT  
CTA

@A00721:190:HGJW7DSXY:4:2151:1127:17910\_2:N:0:TCTGCAAG+GCTGCACT  
TCGGTCATTTACTCTGTACTTGATCTACGTCGTTTAACTGTCGGAACAACCTTTACTTAGAATGACTC  
TATCTTTTCAGACACTTCTTATATTATTTACAATAGTTAATATCATAT

@A00721:190:HGJW7DSXY:4:1218:6307:32424\_1:N:0:TCTGCAAG+GCTGCACT  
ATTTTATTCTATACACCCATCACAACGAGTATAAAGCGTTTTTCCGTCCTTAATAAATACACCAAG

AGATCATCCGCACACGACTCGAAACCGAGACGCCGTAGATCAAAGTCCCTTCTAACTTTAGAT  
+  
:FFF,,,:,,,:F,FF,,,:,,,:F,F:,F,,,FFF,F,,,F,F,F,,,F:,,F:,F,,  
,,F,,F,F:,F,FFFFFFFFFFFFFFFFFFFFFFFFFFFFFFFFFFFFFFFFFFFFFFFF:FFFFFF  
@A00721:190:HGJW7DSXY:4:2576:5122:25864\_2:N:0:TCTGCAAG+GCTGCACT  
TCAAAGCTCTATTTATTAAACGAAGTATTATCCGATTCTTCGAGGGTATCACTACCACTGATCTGCCG  
ACTTTAGTCAAGGAAGTCAATTCTTCGATGTTTATATTTTTCTATA  
+  
FFFFFFFFFFFFFFFFFFFFFFFFFFFFFFFFFFFFFFFFFFFFFFFFFFFFFFFFFFFFFFFF  
FFFFFFFFFFFFFFFF:FFFFFFFF:FFF,FFFFFFFFFFFFFFFF:FFF  
@A00721:190:HGJW7DSXY:4:1317:18231:24173\_1:N:0:TCTGCAAG+GCTGCACT  
CCGATCACCTTGGTGTGATCTCCCGAGGATCTTTTCAATAAGATGTATGATGATAATCTACTATTTT  
TAAATAGTGATATTCAGCGTATACTTGAATACTTTATCAAAGATTTGGCTTGGTCTATTTACCGCAA  
AAG  
+  
FFFFFFFFFFFF:FFFFFFFFFFFF:FFFFFFFFFFFF:FFFFFFFFFFFF,FFFFFFFFFFFFFFFF  
FF:FFFFFFFFFFFF:FFFFFFFFFFFFFFFFFFFFFFFF:FFFFFFFFFFFF:FFFFFFFFFFFF  
FFF  
@A00721:190:HGJW7DSXY:4:1607:23095:15186\_1:N:0:TCTGCAAG+GCTGCACT  
TATTTTACTTATACTTTAAATAGCACCGATTATACTTGACTGTTGATAATATTACAATAGCTCTTTC  
TCAGAAGATTAGAGAAGTAACCGGTGAACACGTCGGTAGCATTGATTTACTTTTACCGTTAGAACTGA  
AAA  
+  
FFFFFFFFFFFFFFFFFFFF:FFFFFFFFFFFFFFFFFFFFFFFFFFFFFFFFFFFFFFFFFFFF  
FFFFFFFFFFFFFFFFFFFF:FFFFFFFFFFFFFFFFFFFFFFFFFFFFFFFFFFFF:FFFFFFFFFFFF  
FFF  
@A00721:190:HGJW7DSXY:4:1174:15176:10050\_1:N:0:TCTGCAAG+GCTGCACT  
TACCAATCAATGATGTGACTATACAGTTCGCCATTTCAAGAGTGGTCAATACGTCGTGGGAGGTACT  
GAAGCCTTCCCCTCCGCTGGCACGAAGAAGTCTCCCAAGCCAATCAATAGTTCTTCTGACCAGAATGA  
AAA  
+  
FFFFFFFFFF,FFFFFFFFFFFFFFFFFFFFFFFFFFFFFFFFFFFFFFFFFFFFFFFFFFFF  
FFFFFFFFFFFFFFFFFFFFFFFFFFFFFFFFFFFFFFFFFFFFFFFFFFFFFFFFFFFFFFFFFFFF  
FFF  
@A00721:190:HGJW7DSXY:4:2140:15121:12962\_2:N:0:TCTGCAAG+GCTGCACT  
CAGGAAGAGGGGAAATGTCCCCAAAGTGAAGAATAAAGGGAAAGGTCCATCAGGACCTAAGAAG  
GGAAATTACCCCTAATTCTGAAGGAAGATCTCCCACCATCTGGGGTTG  
+  
FFFFFFFFFFFFFFFFFFFFFFFFFFFFFFFFFFFF:FFFFFFF:FFFFFFFFFFFFFFFFFFFF  
FFFFFFFFFFFFFFFFFFFFFFFFFFFFFFFFFFFFFFFFFFFFFFFFFFFFFFFFFFFF:FF  
@A00721:190:HGJW7DSXY:4:2163:17282:19335\_2:N:0:TCTGCAAG+GCTGCACT  
CTGAAGGCGGCTTGGGTCATTAAGGGTAGCTGTAAAGTTGCGCCTGCCGACCCCATCTTTGAGACCA  
GACTCTCTACAGTAGGTCGTGCCTACTATGAGCAAATCTGTTGAATT  
+  
FFFFFFFFFFFFFFFFFFFF:FFFFFFFFFFFF:FFFFFFFFFFFFFFFFFFFFFFFFFFFF  
FFFFFFFFFFFFFFFFFFFFFFFFFFFFFFFFFFFFFFFFFFFF:FFFFFFFFFFFF  
@A00721:190:HGJW7DSXY:4:1515:16938:15295\_2:N:0:TCTGCAAG+GCTGCACT  
GAGTCTTGAAGGACTTAGGTTGGCATATTTATGCCGACGATAATAAGCATGTCACCCTTAAGCACCGA  
GGTAAGCTCGGGACTTACAAGAGAGAGTGTGAGAGAGTCGCTCTCACT  
+  
FFFFFFFFFFFFFFFFFFFFFFFFFFFFFFFFFFFFFFFFFFFFFFFFFFFFFFFFFFFF  
FFFFFFFFFFFFFFFFFFFFFFFFFFFFFFFFFFFFFFFFFFFFFFFFFFFF:,FF  
@A00721:190:HGJW7DSXY:4:1327:26087:10254\_1:N:0:TCTGCAAG+GCTGCACT  
TATTTGAAGCAGGGTTACCACTTCTAAGGTGGATGAGGGAGGTTGTTTCTTTGGAGTTTATAGATAA

TCTTTTGAGAAGGGGTCATAGAGCCAGCAAGAGAAGCTTATATGCTGGTTTAAGTGATGATTATCACT  
CCT

+

FFFFFFFFFFFFFFFFFFFFFFFFFFFFFFFFFFFFFFFFFFFFFFFFFFFFFFFFFFFFFFFFFFFFFFFF  
FFF:FFFFFFFFFFFFFFFFFFFFFFFFFFFFFFFFFFFFFFFFFFFFFFFFFFFFFFFFFFFFFFFFFFFF  
FFF

@A00721:190:HGJW7DSXY:4:2364:28691:24439\_2:N:0:TCTGCAAG+GCTGCACT  
GGAGGCTGATCATGGAGTCTTTGTACCTTCTGTCAAACCTTCGAGGTTACAGTACGAGAGGTGATCCCG  
GATGTGGATTGAAGGCTGGCTCTAAGGGAGACTCCTTCTTTTGAATG

+

FFFFFFFFFFFFFFFFFFFFFFFFFFFFFFFFFFFFFFFFFFFFFFFFFFFFFFFFFFFFFFFFFFFFFFFF  
FFFF,FFFFFFFFFFFFFFFFFFFFFFFFFFFFFFFFFFFFFFFFFFFFFFFFFFFFFFFFFFFFFFFF

@A00721:190:HGJW7DSXY:4:1238:10637:12273\_1:N:0:TCTGCAAG+GCTGCACT  
GACATTATTTCAACGGATACCGATCTCAGTTCTACCACAGAAACCGTCTCAGGAAGTGTCTCCACTGA  
TTCGGAATTAGAGAAAGACGACCTTCTTGTGGGACTGAGACCTCTGAATTTTCAGGTGCCCTGATG  
AGG

+

FF,FFFFFF,FF,F:FF:F:FFF,F,FFFFFF::FFF:FFF:FFF,F,:F:,FFFFFF,:FF,  
FFFFFFFF:FFFF,F:,F:FFF:FFFFFFFFFFFFFFFF:F:F::FFFFFFFFFFFFFFFF:FF  
FFF

@A00721:190:HGJW7DSXY:4:1419:27489:36730\_1:N:0:TCTGCAAG+GCTGCACT  
ATCAACGACATCATTCTTGATGAGTGTGTTCTTATCGAAGTCTCAGTTATCGCTGCCCGGCCGACGT  
TTGTCGCGAACTCTCAGAGGTTTACGGCAGAAAATTTCTCCTGCTTGTAAATTCGAGAGAGGACACTA  
TGG

+

:FFF,FFFFFFFF:FFFFFFFFFFFFFFFFFFFFFFFFFFFFFFFFFFFFFFFFFFFFFFFFFFFFFFFF  
FFFFFFFFFFFFFFFFFFFFFFFF:FFFFFFFFFFFFFFFFFFFFFFFFFFFFFFFFFFFFFFFF:FFFFFFFF  
:FF

@A00721:190:HGJW7DSXY:4:2619:26467:18427\_1:N:0:TCTGCAAG+GCTGCACT  
GACGACAAGCCTCAAGAGGGTAGAGGACCACCTGGATCTTCTACTGTCTCTGCCTTCCAAGATTTCGT  
AGAAGAGGTTATTCCTGGAACCACCTTAACGTCACTCGGTAATCTTTCAGCCGAATTAAGTACTAATG  
AGT

+

FFF:FF,FF,F,F,:FFFF,FFFFFF,,FFFFFF,FFFFFFFFFFFFFFFF:FF:,F:FFF,FFF,F  
:FFFF:FFF:FFFFFFFFFFFFFFFF::FFFFFFFFFFFFFF,F,FFF:FFFF::FFF:FFFF  
:FF

@A00721:190:HGJW7DSXY:4:2416:13223:10207\_1:N:0:TCTGCAAG+GCTGCACT  
GGAGTTCTTGAAGCATCCCTACCTTTCCTTGTGAAAATTTGATGCGGTTTCATAAGATTATCAGTAA  
TCCTGATTCTACTACGGATTACATGGACCTTCATCCTGTACCTCTTCTGGAGAGACGTATCTCAAAGA  
TCG

+

FFFFFFFFFFFFFFFFFFFFFFFFFFFFFFFFFFFFFFFFFFFFFFFFFFFFFFFFFFFFFFFFFFFFFFFF  
FFFFFFFFFFFFFFFFFFFFFFFFFFFFFFFFFFFFFFFFFFFFFFFFFFFFFFFFFFFFFFFFFFFFFFFF  
FFF

@A00721:190:HGJW7DSXY:4:1450:31078:34303\_2:N:0:TCTGCAAG+GCTGCACT  
ATTACTCATGATGGTTACGGTCAGGGAGGATTCTCAGTTTACAAGGACCTTAAGCGATGGATCGGGGT  
TAATTCTAAACATTACCCGAAAGACGTGCTAAATTAACCATTGTA

+

FFFFFFFFFFFFFFFFFFFFFFFFFFFFFFFFFFFFFFFFFFFFFFFFFFFFFFFFFFFFFFFFFFFFFFFF  
FFFFFFFFF:,FFFFFFFFFFFF:FFFFFFFFFFFFFFFFFFFFFFFF

@A00721:190:HGJW7DSXY:4:1403:5891:11475\_2:N:0:TCTGCAAG+GCTGCACT  
AAACTACAGAGGAACGTACCGGATTACCTGTCTTTCATATTATGAATGAACCTTCGGCCGCTCTCTT  
TGCTTCGAGGTTGGATGTCAAGAAGGGTTCAGAATGGGATTCCTACGT

+

FFFFFFFFFFFFFFFFFFFFFFFFFFFFFFFFFFFFFFFFFFFFFFFFFFFFFFFFFFFFFFFF  
FFF,FFF:,FFFFFFFF:FFFF:FFFFFFFFFFFFFFFFFFFFFFFF  
@A00721:190:HGJW7DSXY:4:1253:17698:31360\_2:N:0:TCTGCAAG+GCTGCACT  
TCTAATTTACGTTTGCTACTCAGAGCTGGTCCTCTCAGCAAAGGGATGCATGGTGTTATCTCCTCAGG  
AGTCCCGGCATTTGATAATAATGACGAGACTTTCGTCATAATCGCTGC

+  
FFFFFFFFFFFFFFFFFFFFFFFFFFFFFFFFFFFFFFFFFFFFFFFFFFFFFFFFFFFFFFFF  
FFFFFFFFFFFFFFFFFFFFFFFFFFFFFFFFFFFFFFFF:FFFFFFFFFFFFFFFF  
@A00721:190:HGJW7DSXY:4:2654:23710:28275\_1:N:0:TCTGCAAG+GCTGCACT  
TTTACCTCGACCAACATTAAGCGCGCGGCGACTAATCTTAAAGCTTCACCCAAAATGAAGGACACTTC  
GAAACTGAATAATGATGCACTACAAACAAGTATCGCTAATCATCTGAAAAAGGCTCTAAAGGACACTA  
TAC

+  
FFFFFFFFFFFFFFFFFFFFFFFFFFFFFFFFFFFFFFFFFFFFFFFFFFFFFFFFFFFFFFFF:FFFFFFFFFFFFFFFF:FFF  
FFFFFFFFFFFFFFFFFFFFFFFFFFFFFFFFFFFFFFFFFFFFFFFFFFFFFFFFFFFFFFFF:FFFFFFFF  
FFF  
@A00721:190:HGJW7DSXY:4:2567:16450:9095\_1:N:0:TCTGCAAG+GCTGCACT  
ATTCAAGCTTGTCGTTTAAAGACTGCAGAGGCTGTCAAACAAGCCAGACTCAAGGAGTCCAATCAAA  
GGTTTTGAATTTAGCTCAACTGGGGAGACGTGCTTAAATGGTGATAAAAATTATTTAGAGATCTTTT  
CTA

+  
FFF::FF,FFFFFFFFFFFFFFFF:FFFFFFFFFFFFFFFF:FFFFFFFFFFFFFFFF:FFFFFFFF:FFF:FF  
FFFFFFFF:FFFFFFFF:FFFFFF:FFFFFFFFFFFFFFFFFFFFFFFFFFFFFFFF:FFF:F  
FFF  
@A00721:190:HGJW7DSXY:4:2367:13593:2675\_2:N:0:TCTGCAAG+GCTGCACT  
CATTTACTCTGTACTTGATCTACGTGTTAACTGTGGAACAACCTTTACTTAGAATGACTCTATCT  
TTTCAGACACTTCTTATATTATTTACAATAGTTAATATCATATTAGTA

+  
FFFFFFFFFFFFFFFFFFFFFFFFFFFFFFFFFFFFFFFFFFFFFFFFFFFFFFFFFFFFFFFF  
FFFFFFFFFFFFFFFFFFFFFFFFFFFFFFFFFFFFFFFFFFFFFFFFFFFFFFFF  
@A00721:190:HGJW7DSXY:4:1177:15673:15890\_1:N:0:TCTGCAAG+GCTGCACT  
TTTAGTCTATACCCCATCTCAACGAGTATAAAGCGAGTTTCCGTCCTGAACGTAATACACTACGAG  
ATCATCCGAAAACGACTCGAAACCGAGACGCCGTAGATCAAAGTCCCTTCTAACTTTAGATT

+  
FFF:F:,F:,F,FFF::F:::,FF,FF:F:FF:FF,F:FFF,F,,:FFF,F,F,FFFF::FF,F,,F,  
F::F:F:F,F:F:FFFFFFFFFFFFFFFFFFFFFFFFFFFFFFFF:FFFF:FFFFFF  
@A00721:190:HGJW7DSXY:4:1270:26729:11271\_1:N:0:TCTGCAAG+GCTGCACT  
TATTTATTAACGAACATTATCCGATTCTTCGAGGGTATCACTACCACTGATCTGCCGACTTTAGTC  
AAGGAAC TTCAATTCCTTCGATGTTTATATTTTCTATAAGGGAAAATAGCAATAATCAAATTCGAC  
AAA

+  
FFFFFF:FFFFFFFFFFFFFFFFFFFFFFFFFFFFFFFFFFFFFFFF:FFFFFFFFFFFF:FFFF:F  
FFFFFFFFFFFFFFFFFFFFFFFFFFFFFFFF:FFFFFFFFFFFFFFFF:FFFFFFFFFFFFFFFF  
FFF  
@A00721:190:HGJW7DSXY:4:1318:1723:30812\_1:N:0:TCTGCAAG+GCTGCACT  
CCGATCACCTTGGTGTGATCTCCCGGAGGATCTTTTCAATAAGATGTATGATAATCTACTATTTT  
TAAATAGTGATATTCAGCGTATACTTGAATACTTTATCAAAGATTTGGCTTGCTATTTACCGCAA  
AAG

+  
:FFFFFFFFFFFFFFFFFFFFFFFFFFFFFFFF:FFFFFFFFFFFFFFFF:FFFFFFFF  
FFFFFFFFFFFFFFFFFFFFFFFFFFFFFFFF:FFFFFFFFFFFFFFFF:FFFFFFFF  
FFF  
@A00721:190:HGJW7DSXY:4:1661:7970:12383\_1:N:0:TCTGCAAG+GCTGCACT  
TATTTTACTTATACTTTAAATAGCACCGATTATAACTTGACTGTTGATAATATTACAATAGCTCTTTC

TCAGAAGATTAGAGAAGTAACCGGTGAACACGTCGGTAGCATTGATTTACTTTTACCGTTAGAACTGA  
AAA

+

FFFFFFFFFFFFFFFFFFFFFFFFFFFFFFFFFFFFFFFFFFFFFFFFFFFFFFFFFFFFFFFFFFFFFFFF  
FFFFFFFFFFFFFFFFFFFFFFFFFFFFFFFFFFFFFFFFFFFFFFFFFFFFFFFFFFFFFFFFFFFFFFFF  
FFF

@A00721:190:HGJW7DSXY:4:1326:14199:28494\_1:N:0:TCTGCAAG+GCTGCACT  
TACCAATCAATGATGTGACTATACAGTTCGGCCATTTCAAGAGTGGTCAATACGTCGTGGGAGGTACT  
GAAGCCTTCCCCTCCGCTGGCACGAAGAACACTCCCAAGCCAATCAATAGTTCTTCTGACCAGAATGA  
AAA

+

FF:FFF::F::FFFFFFFFFFFFFFFFFFFFFFFF:F:FFFFFFFFF:F:FFFFFFFFFFFFFFFFFFFF  
FFFFFFFFFFFFFFFFFFFFFFFFFFFFFFFFFFFFFFFFFFFFFFFFFFFFFFFFFFFFFFFFFFFFFFFF  
FFF

@A00721:190:HGJW7DSXY:4:2214:12292:34209\_2:N:0:TCTGCAAG+GCTGCACT  
CAGGAAGAGGGGAAATGTCCCCAAAAGTGAAGAATAAAGGGAAAGGTCCATCAGGACCTAAGAAGG  
GGAAATTACCCCTAATTCTGAAGGAAGATCTCCCACCATCTGGGGTTG

+

FFFFFFFFFFFFFFFFF:FFFFFFFFFFFFFFFFFFFFFFFFFFFFFFFFFFFFFFFF:FFFFFFFFFFFFFFFFFFFFFFFFFFFF  
FFFFFFFFFFFFFFFFFFFFFFFFFFFFFFFFFFFFFFFFFFFFFFFFFFFFFFFFFFFFFFFFFFFFFFFF

@A00721:190:HGJW7DSXY:4:1151:29912:34350\_1:N:0:TCTGCAAG+GCTGCACT  
AAGGCGGCTTGGGTCATTAAGGGTAGCTTTAAAGTTGCGCCTGCCGACCCCATCTTTGAGACCAAGAC  
TCTCTACAGTAGGTTTCGTGCCTACTATGAGCAAATCTGTTGAATTCGTCACTGAGGACGAATGTGAGA  
GGA

+

FFFFFFFFFFFFFFF,FFF,F:F::,FFF:,F::,FFFF:FF:FF,:FFF:F,FFFF,F:F,F,:F:FFF  
F:FF:FF:FFF,FFF:FFF::FF:FF,:FF:F::,FF:FFFFFFFFFFFF:FFF:FFFFFFFFFF:FF  
,F,

@A00721:190:HGJW7DSXY:4:1628:27977:16282\_2:N:0:TCTGCAAG+GCTGCACT  
GAGTCTTGAAGGACTTAGGTTGGCATATTTATGCCGACGATAATAAGCATGTCACCCTTAAGCACCGA  
GGTAAGCTCGGGACTTACAAGAGAGAGTGTGAGAGAGTCGCTCTCACT

+

FFFFFFFFFFFFFFFFF:FFFFFFFFFFFFFFFFFFFFFFFFFFFFFFFFFFFFFFFF:FF::FFFFFFFFF::FFFFFFF::F:FFFFF  
FFF,:FFFFFFFF:F:F,FF:FFFFFFFF,F:FFFF,FFFFFFFFF,F,

@A00721:190:HGJW7DSXY:4:1327:26151:10426\_1:N:0:TCTGCAAG+GCTGCACT  
TATTTGAATCAGGGGTTACCAATTCCTAAGGTGGATGAGGGAGGTTGTTTCTTTGGAGTTTATAGATAA  
TCTTTTGAGAAGGGGTCATAGAGCCAGCAAGAGAAGCTTATATGCTGGTTTAAGTGATGATTATCACT  
CCT

+

F:FFFFFF,,:F,F,F,FF:F,FFF::F:FFFF::FF,F,F,FFF:,FFF,FFFFFFFF:FF,FFFF,F  
,,F:FFFF:FFFFFFFFFFFF:FF:FFF,FFFF:FF,FF:FFFFFFFF:FFF:FFFFFFFFFFFF:F,F  
FFF

@A00721:190:HGJW7DSXY:4:1218:26982:24455\_1:N:0:TCTGCAAG+GCTGCACT  
GGAGGCTGATCATGGAGTCTTTGTACCTTCTGTCAAACCTTCGAGGTTGAGTACGAGAGGTGATCCCG  
GATGTGGATTGAAGGCTGGCTCTAAGGGAGACTCCTTCTTTTGAATGTTGTAAAGAATTGGGTTGAG  
AAG

+

FFFF:FFFFFFF:FFFFFFFFFFFFFFFFFFFFFFFFFFFFFFFFFFFFFFFFFFFFFFFFFFFFFFFFFFFF  
FFFFFFFFFFFFFFFFFFFFFFFFFFFFFFFFFFFFFFFFFFFFFFFFFFFFFFFFFFFFFFFFFFFFFFFF  
FFF

@A00721:190:HGJW7DSXY:4:1239:13711:31344\_1:N:0:TCTGCAAG+GCTGCACT  
GACATTATTTCAACGGATACCGATCTCAGTTCTACCACAGAAACCGTCTCAGGAAGTGTCTCCACTGA  
TTCGGAATTAGAGAAAGACGACCTTCTTGTGGGGACTGAGACCTCTGAATTTTACAGGTGCCCTGATG  
AGG





@A00721:190:HGJW7DSXY:4:2654:23068:12508\_2:N:0:TCTGCAAG+GCTGCACT  
CATTTACTCTGTACTTGATCTACGTCGTTTAACTGTCGGAACAACCTTTACTTAGAATGACTCTATCT  
TTTCAGACACTTCTTATATTATTTACAATAGTTAATATCATATTAGTA

+

FFFFFFFFFFFFFFFFFFFFFFFFFFFFFFFFFFFFFFFFFFFFFFFFFFFFFFFFFFFFFFFFFFFFFFFF  
FFFFFFFFFFFFFFFFFFFFFFFFFFFFFFFFFFFFFFFFFFFFFFFFFFFFFFFFFFFFFFFF

@A00721:190:HGJW7DSXY:4:2358:25382:29136\_1:N:0:TCTGCAAG+GCTGCACT  
TTTAGTCTCTACACCCATCTCAACTAGTATAAAGCTTGTTTTCCGTCCTGAACGTAATACACGATGAG  
ATCATCCGAAAACGACTCGAAACCGAGACGCCGTAGATCAAAGTCCCTTCTAACTTTAGATT

+

FF,:::,::,FFFFFF:F,,,FF:,,,::,F:F:,,,::,FFF::,FF,F,FF,,,FF::F:,,F,,,,  
,F,FFF,F,,,FFFFFFFFF:FFFFFFFFFFFFFFFFFFFFFFFFFFFFFFFFFFFFFFFFF:FFFFFFF

@A00721:190:HGJW7DSXY:4:1324:30346:28181\_1:N:0:TCTGCAAG+GCTGCACT  
TATTTATTAACGAACATTATCCGATTCTTCGAGGGTATCACTACCACTGATCTGCCGACTTTAGTC  
AAGGAAC TTCAATTCCTTCGATGTTTATATTTTTCTATAAGGAAAATAGCAATAATCAAATTCGAC  
AAA

+

FFFFFFFFFFFFFFFFFFFFFFFFFFFFFFFFFFFFFFFFFFFFFFFFFFFFFFFFFFFFFFFFFFFFFFFF  
FF:FFFFFFFFFFFFFFFFFFFFFFFFFFFFFFFFFFFFFFFFFFFFFFFFFFFFFFFFFFFFFFFFFFFF  
FFF

@A00721:190:HGJW7DSXY:4:1402:4725:34976\_1:N:0:TCTGCAAG+GCTGCACT  
CCGATCACCTTGGTGTGATCTCCCGGAGGATCTTTTCAATAAGATGTATGATGATAATCTACTATTTT  
TAAATAGTGATATTCAGCGTATACTTGAATACTTTATCAAAGATTTGGCTTGGTCTATTTACCGCAA  
AAG

+

FFFFFFFFFFFFFFFFFFFFFFFFFFFFFFFFFFFFFFFFFFFFFFFFFFFFFFFFFFFFFFFFFFFFFFFF  
FFFFFFFFFFFFFFFFFFFFFFFFFFFFFFFFFFFFFFFFFFFFFFFFFFFFFFFFFFFFFFFFFFFF  
FFF

@A00721:190:HGJW7DSXY:4:2277:24424:20650\_1:N:0:TCTGCAAG+GCTGCACT  
TATTTTACTTATACTTTAAATAGCACCGATTATAACTTGACTGTTGATAATATTACAATAGCTCTTTC  
TCAGAAGATTAGAGAAGTAACCGGTGAACACGTCGGTAGCATTGATTTACTTTTACCGTTAGAACTGA  
AAA

+

FFF:FFFFFF:FFFFFFFFF:F:FFFFFFFFFFFFFFFF:FFFFFF:,FFFFFFFFFFFFFFFF:FFFF,FF  
FFFFFFFFFFFFFFFF:FFFFFFFFFFFFFFFFFFFFFFFFFFFFFFFFFFFFFFFFFFFFFFFF:FFFFFFFFF:F  
FFF

@A00721:190:HGJW7DSXY:4:1542:19614:29450\_1:N:0:TCTGCAAG+GCTGCACT  
TACCAATCAATGATGTGACTATACAGTTCGCCATTTCAAGAGTGGTCAATACGTCGTGGGAGGTACT  
GAAGCCTTCCCCTCCGCTGGCACGAAGAACACTCCCAAGCCAATCAATAGTTCTTCTGACCAGAATGA  
AAA

+

FFFFFFFFFFFFFFFFFFFFFFFFFFFFFFFFFFFFFFFFFFFFFFFFFFFFFFFFFFFFFFFFFFFFFFFF  
FFFFFFF:FFFFFFFFFFFFFFFFFFFFFFFFFFFFFFFFFFFFFFFFFFFFFFFFFFFFFFFFFFFFFFFF  
FFF

@A00721:190:HGJW7DSXY:4:2214:12536:35728\_2:N:0:TCTGCAAG+GCTGCACT  
CAGGAAGAGGGGAAATGTCCCCAAAAGTGAAGAATAAAGGGAAAGGTCCATCAGGACCTAAGAAGG  
GGAAATTACCCCTAATTCTGAAGGAAGATCTCCCACCATCTGGGGTTG

+

FFFFFFFFFFFFFFFFFFFFFFFFFFFFFFFFFFFFFFFFFFFFFFFFFFFFFFFFFFFFFFFFFFFFFFFF  
FFFFFFFFFFFFFFFFFFFFFFFFFFFFFFFFFFFFFFFFFFFFFFFFFFFFFFFFFFFFFFFF,FFFFFFFFF

@A00721:190:HGJW7DSXY:4:1668:17680:28667\_1:N:0:TCTGCAAG+GCTGCACT  
AAGGCGGCTTGGGTCAATTAAGGTAGCTGTAAAGTTGCGCCTGCCGACCCCATCTTTGAGACCAAGAC  
TCTCTACAGTAGGTTTCGTGCCTACTATGAGCAAATCTGTTGAATTCGTCACTGAGGACGAATGTGAGA  
GGA

[illegible]

```
FFFFFFFFFFFFFFFFFFFFF:FFFFFFFFFFFFFFFFFFFFFFFFFFFFFFFFFFFFFFFFFFFFFFFFFFF
FFFFFFFFFFFFFFFFFFFFFFFFFFFFFFFFFFFFFFFFFFFFFFFFFFFFFFFFFFFF
```

[illegible][illegible][illegible][illegible][illegible] $+$

FFFFFFFFFFFFFFFFFFFFFFFFFFFFFFFFFFFFFFFFFFFFFFFFFFFFFFFFFFFFFFFF  
FFFFFFFF,F:F:F:FFFFFFFFFFFFFFFFFFFFFFFF:FF:F:FFF  
@A00721:190:HGJW7DSXY:4:1175:28357:36636\_2:N:0:TCTGCAAG+GCTGCACT  
ATTACGTTTGTACTCAGAGCTGGTCCTCTCAGCAAAGGATGCATGGTGTATCTCCTCAGGAGTC  
CCGGCATTGATAATAATGACGAGACTTTCGTCATAATCGCTGCATAT

+  
FFFFFFFFFFFFFFFFFFFFFFFFFFFFFFFFFFFFFFFFFFFFFFFFFFFFFFFFFFFFFFFF  
FFFFFFFFFFFFFFFF:FFFFFFFFFFFFFFFFFFFFFFFFFFFFFFFFFFFFFFFF,  
@A00721:190:HGJW7DSXY:4:1266:25518:2816\_1:N:0:TCTGCAAG+GCTGCACT  
CTCGACCAACATTAAGGCGGCGGCGACTAATCTTAAAGCTTACCCAAAATGAAGGACACTTCGAAAC  
TGAATAATGATGCACTACAAACAAGTATCGCTAATCATCTGAAAAAGGCTCTAAAGGACACTATACAA  
TAT

+  
FFFFFFFFFFFFFFFFFFFFFFFFFFFFFFFFFFFFFFFFFFFFFFFFFFFFFFFFFFFFFFFF,  
FFFFFFFFFFFFFFFFFFFFFFFFFFFFFFFFFFFFFFFFFFFFFFFFFFFFFFFFFFFFFFFF  
FFF  
@A00721:190:HGJW7DSXY:4:2309:11306:3662\_1:N:0:TCTGCAAG+GCTGCACT  
CAGACGTGTGCTCTTCCGATCTCTGCAGAGGCTGTCAAACAAGCCAGACTCAAGGAGTCCAATCAAA  
GGTTTTGAATTTAGCTCAACTGGGGAGACGTGCTTAAATGGGTGATAAAAATTATTTAGAGATCTTTT  
CTA

+  
FFFF:FFFFFFFFFFFFFFFF:FFFFFFFFFFFFFFFF:FFFF:FFFF:FFFFFFFF  
FFFFFFFFFFFFFFFFFFFFFFFFFFFFFFFFFFFFFFFFFFFFFFFFFFFFFFFF:FFFF  
FFF  
@A00721:190:HGJW7DSXY:4:1274:8938:8609\_2:N:0:TCTGCAAG+GCTGCACT  
ATTTACTCTGTACTTGATCTACGTCGTTTAACTGTGGAACAACCTTTACTTAGAATGACTCTATCTT  
TTCAGACACTTCTTATATTATTTACAATAGTTAATATCATATTAGTAA

+  
FFFFFFFFFFFFFFFFFFFFFFFFFFFFFFFFFFFFFFFFFFFFFFFF:FFFFFFFFFFFFFFFF  
FFFFFFFFFFFFFFFFFFFFFFFF:FFFFFFFFFFFFFFFF  
@A00721:190:HGJW7DSXY:4:1443:9824:11365\_1:N:0:TCTGCAAG+GCTGCACT  
CATACGCGATCTTGCAGTGTGACTGGAGTACAGACGTGTGCTCTTCCGATCTCTTAATACACTAAGAG  
ATCATCCGCAAACGACTCGAAACCGAGACGCCGTAGATCAAAGTCCCTTCTAACTTTAGATT

+  
F::,F,,,::,F::,F,FF,,,::,F::,F::F::,FFF:F:,F,,,::,F::FFF:,F::,  
F,,,FF,,F,FFFFFFFFFFFFFFFFFFFFFFFFFFFFFFFFFFFFFFFFFFFFFFFF  
@A00721:190:HGJW7DSXY:4:1421:1208:2675\_1:N:0:TCTGCAAG+GCTGCACT  
TATTTATTAACGAACATTATCCGATTCTTCGAGGGTATCACTACCACTGATCTGCCGACTTTAGTC  
AAGGAAC TTCAATTCCTTCGATGTTTATATTTTCTATAAGGGAAAATAGCAATAATCAAATTCGAC  
AAA

+  
FFFFFFFFFFFFFFFFFFFFFFFF:FFFFFFFFFFFFFFFFFFFFFFFFFFFFFFFFFFFFFFFF  
FFFFFFFFFF:FFFFFFFFFFFFFFFF:FFFFFFFF:FFFFFFFFFFFFFFFF,FF:FFFFFFFF  
FF:  
@A00721:190:HGJW7DSXY:4:1435:12057:18458\_1:N:0:TCTGCAAG+GCTGCACT  
CCGATCACCTTGGTGTGATCTCCCGAGGATCTTTTCAATAAGATGTATGATGATAATCTACTATTTT  
TAAATAGTGATATTCAGCGTATACTTGAATACTTTATCAAAGATTTGGCTTGCTATTTACCGCAA  
AAG

+  
FFFFF:FFFF:FFFFFFFFFFFFFFFF:FFFFFFFFFFFFFFFF:FFFFFFFFFFFFFFFF  
FFFFFFFFFFFFFFFFFFFFFFFF:FFFFFFFFFFFFFFFFFFFFFFFFFFFFFFFFFFFFFFFF  
FFF  
@A00721:190:HGJW7DSXY:4:2368:1976:29904\_1:N:0:TCTGCAAG+GCTGCACT  
TATTTTACTTATACTTTAAATAGCACCGATTATAACTTGACTGTTGATAATATTACAATAGCTCTTTC

TCAGAAGATTAGAGAAGTAACCGGTGAACACGTCGGTAGCATTGATTTACTTTTACCGTTAGAACTGA  
AAA

+

FFFFFFFF,FFFFFFFFFFFFFFFFFFFFFFFFFFFFFFFFFFFFFFFFFFFFFFFFFFFFFFFFFFFFFFFF  
FFFFFFFFFFFFFFFFFFFFFFFFFFFFFFFFFFFFFFFFFFFFFFFFFFFFFFFFFFFFFFFFFFFFFFFF:FFFFFFFF  
FFF

@A00721:190:HGJW7DSXY:4:1634:29993:12947\_1:N:0:TCTGCAAG+GCTGCACT  
TACCAATCAATGATGTGACTATACAGTTCGGCCATTTCAAGAGTGGTCAATACGTCGTGGGAGGTACT  
GAAGCCTTCCCCTCCGCTGGCACGAAGAACACTCCCAAGCCAATCAATAGTTCTTCTGACCAGAATGA  
AAA

+

FFFFFFFFFFFFFFFF:FFFFFFFFFFFF:FFFFFFFFFFFFFFFFFFFFFFFFFFFFFFFFFFFFFFFFFFFF  
FFFFFFFFFFFFFFFFFFFFFFFFFFFFFFFFFFFFFFFFFFFFFFFFFFFFFFFFFFFFFFFFFFFFFFFFFFFF  
FFF

@A00721:190:HGJW7DSXY:4:2544:29722:12947\_2:N:0:TCTGCAAG+GCTGCACT  
CAGGAAGAGGGGAAATGTCCCCAAAAGTGAAGAATAAAGGGAAAGGTCCATCAGGACCTAAGAAGG  
GGAAATTACCCCTAATTCTGAAGGAAGATCTCCCACCATCTGGGGTTG

+

FFFFFFFFFFFFFFFFFFFFFFFFFFFFFFFFFFFFFFFFFFFFFFFFFFFFFFFFFFFFFFFFFFFFFFFFFFFF:FFF:FFFFF  
FFFFFFFFFFFF:FFFFFFFFFFFFFFFFFFFF:FFFFFFFFFFFF:FFFFFFFF:FF

@A00721:190:HGJW7DSXY:4:1433:4227:31516\_1:N:0:TCTGCAAG+GCTGCACT  
AGGCGGCTTGGGTCAATTAAGGGTAGCTGTAAAGTTGCGCCTGCCGACCCCATCTTTGAGACCAAGACT  
CTCTACAGTAGGTTCTGTCCTACTATGAGCAAATCTGTTGAATTCGTCACTGAGGACGAATGTGAGAG  
GA

+

FFFF:FFFF:FFFFFFF,,FFFFFFFFFFFF:FFFFFFFFFFFFFFFFFFFF:FF:FFFFFFFFFFFFFFFF:F:F:FFF  
FFFF:F,FFFFFFFFFFFFFFFFFFFFF,F:::FFFFFFFFFFFF,:FFFF:,FFFF:FF,:FFFF::F:F  
FF

@A00721:190:HGJW7DSXY:4:2528:11406:8782\_1:N:0:TCTGCAAG+GCTGCACT  
AGTCTTGAAGGACTTAGGTTGGCATATTTATGCCGACGATAATAAGCATGTCACCCTTAAGCACCGAG  
GTAAGCTCGGGACTTACAAGAGAGAGTGTGAGAGAGTCGCTCTCACTATTTTTGCCGAGAATGCGGGC  
TTT

+

FFFFFFFFFFFFFFFFFFFFFFFFFFFFFFFFFFFF,FFFFFFFFFFFF:FFFFFFFFFFFFFFFFFFFF:FFFFFFFFFFFF  
FFFFFFFFFFFFFFFFFFFFFFFFFFFFFFFFFFFFFFFFFFFFFFFFFFFFFFFFFFFFFFFFFFFFFFFFFFFF:FFFFFFFFFFFF,FFFFFFF  
FFF

@A00721:190:HGJW7DSXY:4:1405:26196:22060\_1:N:0:TCTGCAAG+GCTGCACT  
TATTTGAAGCAGGGTTACCACTTCCTAAGGTGGATGAGGGAGGTTGTTTCTTTGGAGTTTATAGATAA  
TCTTTTGAGAAGGGGTCATAGAGCCAGCAAGAGAAGCTTATATGCTGGTTTAAGTGATGATTATCACT  
CCT

+

FFFFFFFFFFFF:FFFFFFFFFFFF,F:FFFFFFFFFFFFFFFFFFFF:FFFFFFFFFFFFFFFFFFFFFFFFFFFF  
FFFFFFFFFFFFFFFFFFFFFFFFFFFFFFFFFFFFFFFFFFFFFFFFFFFFFFFFFFFFFFFFFFFFFFFFFFFF:FFFFFFFFFFFF:FFFFFFFFFFFFFFFFFFFF  
FFF

@A00721:190:HGJW7DSXY:4:1606:8133:11130\_1:N:0:TCTGCAAG+GCTGCACT  
GGAGGCTGATCATGGAGTCTTTGTACCTTCTGTCAAACCTTCGAGGTTCACTACGAGAGGTGATCCCG  
GATGTGGATTGAAGGCTGGCTCTAAGGGAGACTCCTTCTTTTTGAATGTTGTAAAGAATTGGGTTGAG  
AAG

+

:,:,F,:F:FF,F,,:FFFF:FFFF:FFFF:FFF:FFFFFFFFFFFFFFFFFFFFFFFF:F:F:FFFFFFF  
FFFFFF:F,FFFFFFFFFFFF,FF,FFFFFFFFFFFF:F:F,FFFFFFFFFFFFFFFFFFFFFFFFFFFFFFFF  
FFF

@A00721:190:HGJW7DSXY:4:1521:6912:4883\_1:N:0:TCTGCAAG+GCTGCACT  
GACATTATTTCAACGGATACCGATCTCAGTTCTACCACAGAAACCGTCTCAGGAAGTGTCTCCACTGA

TTCGGAATTAGAGAAAGACGACCTTCTTGTGGGGACTGAGACCTCTGAATTTTCAGGGTGCCCTGATG  
AGG

+

FFFFFF:FFFFFF:FFFF:FFFFFFF:FFFFFFF::FFFFFFFFFFFFFFF,FFFFFFF:FF:F:F  
FFFF,FF,,FFF:FFFFFF:FF,FFFFFF:FFFFFFFFFFFF:FFFFFFF,FFFFFFFFFFFF  
FFF

@A00721:190:HGJW7DSXY:4:2159:10321:2801\_1:N:0:TCTGCAAG+GCTGCACT  
ATCAACGACATCATTCTTGATGAGTGTCTTCTTATCGAAGTCTCAGTTATCGCTGCCCGGCCGACGT  
TTGTCGCGAACTCTCAGAGGTTTACGGCAGAAAAATTTCTCCTGCTTGTAATTCGAGAGAGGACACTA  
TGG

+

FFFFFFFFFFFFFFFFFFFFFFFFFFFFFFFFFFFFFFFFFFFFFFFFFFFFFFFFFFFFFFFFFFFFFFFFF:FFFFFFFFFFFFFFFFF  
FFFFFFFFFFFFFFFFF:FFFFFFFFFFFFFFFFFFFFFFFFFFFFFFFFFFFFFFFFFFFFFFFFFFFFFFFFFFFFFFFFFFFFFFFFF  
FFF

@A00721:190:HGJW7DSXY:4:2612:32443:18286\_1:N:0:TCTGCAAG+GCTGCACT  
CCCGACCTTCTCTTGTAATAATTTGATGCGGTTTCATAAGATTATCAGTAATCCTGATTCTACTACG  
GATTCATGGACCTTCCATCCTGTACCTCTTCTGGAGAGACGTATCTCAAAGATCGACTTCGAGACAGG  
TGA

+

FFFFFFFFFFFFFFFFF:FFFFFFFFFFFFFFFFFFFFFFFFFFFFFFFFFFFFFFFFFFFFFFFFFFFFFFFFFFFFFFFFFFFFFFFFF  
FFFFFFFFFFFFFFFFFFFFFFFFFFFFFFFFFFFFFFFFFFFFFFFFFFFFFFFFFFFFFFFFFFFFFFFFFFFFFFFFFFFFFFFFFFFFFFFFF  
FFF

@A00721:190:HGJW7DSXY:4:2305:10945:27367\_2:N:0:TCTGCAAG+GCTGCACT  
AAACTACAGAGGAACGTACCGGATTACCTGTCTTTCATATTATGAATGAACCTTCGGCCGCTCTCTT  
TGCTTCGATGTTGGATGTCAAGAAGGGTTCAGAATGGGATTCCTACGT

+

FFFFFFFFFFFFFFFFFFFFFFFFFFFFFFFFFFFFFFFFFFFFFFFFFFFFFFFFFFFFFFFFFFFFFFFFFFFFFFFFFFFFFFFFFFFFFFFFF  
FFFFFFFFF,FFFFFFFFFFFFFFFFFFFFFFFFF::FFFFFFFFFFFFF

@A00721:190:HGJW7DSXY:4:1602:23348:24486\_2:N:0:TCTGCAAG+GCTGCACT  
ATTTACGTTTGCTACTCAGAGCTGGTCTCTCAGCAAAGGGATGCATGGTGTATCTCCTCAGGAGTC  
CCGGCATTGATAATAATGACGAGACTTTCGTCAATAATCGCTGCATAT

+

FF:FFFFFFFFF:FFFFFFFFFFFFFFFFFFFFFFFFFFFFFFFFFFFFFFFFFFFFFFFFFFFFFFFFFFFFFFFFFFFFFFFFF  
FFFFFFF:FFFFFFFFFFFFFFFFFFFFFFFFFFFFFFFFFFFFFFFFFFFFFFFFFFFFFFFFFFFFFFFFF,FFFFFFF

@A00721:190:HGJW7DSXY:4:1301:13467:21433\_1:N:0:TCTGCAAG+GCTGCACT  
CTCGACCAACATTAAGGCGGCGGAATAATCTTAAAGCTTCACCCAAAATGAAGGACACTTCGAAAC  
TGAATAATGATGCACTACAAACAAGTATCGCTAATCATCTGAAAAAGGCTCTAAAGGACACTATACAA  
TAT

+

FF:FFF:F:F:FFF,FF,FFFF,FF,FFFF:,FF::F,FFFFFF,FFF,F:F:FFF,F,FFF,FFF:  
F,FFFF:FFF:FF,FFFFFFFF:FFFFF,FF:F,FFFFFFFFFFFF,FFFFFFFFFFFFFFFFFFFFF:  
FFF

@A00721:190:HGJW7DSXY:4:2413:4752:35963\_1:N:0:TCTGCAAG+GCTGCACT  
CAGACGTGTGCTCTTCCGATCTCTGCAGAGGCTGTCAAACAAGCCAGACTCAAGGAGTCCAATCAAA  
GGTTTTGAATTTAGCTCAACTGGGGAGACGTGCTTAAATGGGTGATAAAAATTATTTAGAGATCTTTT  
CTA

+

FFFFFFFFF:FFFFFFFFFFFFFF,FFFFFFFFFFFFFFFFFFFFFFFFFFFFFFFFFFFFFFFFFFFFFFFFFFFFFFFFF  
:FFFFFFFFFFFF:FFFFFFFFFFFFFFFFFFFFFFFFFFFFFFFFFFFFFFFFFFFFFFFFFFFFFFFFFFFFFFFFF  
FFF

@A00721:190:HGJW7DSXY:4:1301:14678:30232\_2:N:0:TCTGCAAG+GCTGCACT  
ATTTACTCTGTACTTGATCTACGTGCTTAACTGTGGAACAACCTTTACTTAGAATGACTCTATCTT  
TTCAGACACTTCTTATATTATTTACAATAGTTAATATCATATTAGTAA

+

@A00721:190:HGJW7DSXY:4:2652:6470:24690\_1:N:0:TCTGCAAG+GCTGCACT  
TTTAGTCTCTACCAATCTCAACGTGTATAACGCGAGTTTCCGTCCTGAACCTTAATACACTAAGAG  
ATCACCCGCAAACGACTCGAAACCGAGACGCCGTAGATCAAAGTCCCTTCTAACTTTAGATTATGAAT  
CCT

@A00721:190:HGJW7DSXY:4:1435:15239:28604\_1:N:0:TCTGCAAG+GCTGCACT  
TATTTATTAACGAACATTATCCGATTCTTCGAGGGTATCACTACCACTGATCTGCCGACTTTAGTC  
AAGGAACCTCAATTCCTTCGATGTTTATATTTTTCTATAAGGGAAATAGCAATAATCAAATTCGAC  
AAA

@A00721:190:HGJW7DSXY:4:1540:27859:34178\_1:N:0:TCTGCAAG+GCTGCACT  
CCGATCACCTTGGTGTGATCTCCCGGAGGATCTTTTCAATAAGATGTATGATGATAATCTACTATTTT  
TAAATAGTGATATTCAGCGTATACTTGAATACTTTATCAAAGATTTGGCTTGGTCTATTTACCGCAA  
AAG

@A00721:190:HGJW7DSXY:4:1260:3468:24878\_2:N:0:TCTGCAAG+GCTGCACT  
TTTACTTATACTTTAAATAGCACCGATTATAACTTGACTGTTGATAATATTACAATAGCTCTTTCTCA  
GAAGATTAGAGAAGTAACCGGTGAACACGTCGGTAGCATTGATTACT

@A00721:190:HGJW7DSXY:4:2416:29315:30279\_1:N:0:TCTGCAAG+GCTGCACT  
TACCAATCAATGATGTGACTATACAGTTCGCCATTTCAAGAGTGGTCAATACGTCGTGGGAGGTACT  
GAAGCCTTCCCCTCCGCTGGCACGAAGAACACTCCCAAGCCAATCAATAGTTCTTCTGACCAGAATGA  
AAA

@A00721:190:HGJW7DSXY:4:2552:2871:13322\_2:N:0:TCTGCAAG+GCTGCACT  
CAGGAAGAGGGGAAATGTCCCCAAAAGTGAAGAATAAAGGGAAAGGTCCATCAGGACCTAAGAAGG  
GGAAATTACCCCTAATTCTGAAGGAAGATCTCCCACCATCTGGGGTTG

@A00721:190:HGJW7DSXY:4:2143:11415:32283\_1:N:0:TCTGCAAG+GCTGCACT  
AGGCGGCTTGCGTCATTAAGGGTAGCTGTAAAGTTGCGCTGCCGACCCCATCTTTGAGACCAAGACT  
CTCTACAGTAGGTTCTGTCCTACTATGAGCAAATCTGTTGAATTCGTCCTGAGGACGAATGTGAGAG  
GA

```

FFFFFFFF:FFFFFFFFFFFFFFFFFFFFFFFF:FFFFFFFFFFFFFF:FFFFFFFFFFFFFFFFFFFFFFFFFFFFFF
FFFFFFFF:FFFFFFFFFFFFFFFFFFFFFFFFFFFFFFFF:FFFFFFFFFFFFFFFFFFFFFFFFFFFFFFFFFFFFFFFF
FF

```

@A00721:190:HGJW7DSXY:4:1276:31801:32550\_1:N:0:TCTGCAAG+GCTGCACT  
CGATCTGAAGGACTTAGGTTGGCATATTTATGCCGACGATAATAAGCATGTCACCCTTAAGCACCGAG  
GTAAGCTCGGGACTTACAAGAGAGAGTGTGAGAGAGTCGCTCTCACTATTTTTGCCCAGAATGCGGGC  
TTT

+

FFFFFFFFFFFFFFFFFFFFFFFFFFFFFFFFFFFFFFFFFFFFFFFFFFFFFFFFFFFFFFFFFFFFFFFF  
FFFFFFFFFFFFFFFFFFFFFFFFFFFFFFFFFFFFFFFFFFFFFFFFFFFFFFFFFFFFFFFFFFFFFFFF  
FFF

@A00721:190:HGJW7DSXY:4:1449:15365:23093\_1:N:0:TCTGCAAG+GCTGCACT  
TATTTGAAGCAGGGGTTACCACTTCCTAAGGTGGATGAGGGAGGTTGTTTCTTTGGAGTTTATAGATAA  
TCTTTTGAGAAGGGGTCATAGAGCCAGCAAGAGAAGCTTATATGCTGGTTTAAAGTATGATTATCACT  
CCT

+

FFFFFFFFFF:FFFFFFFFF:,FFFFFFFFFFFFFFFFFFFFFFFFFFFFFFFFFFFFFFFFFFFFFFFFF:  
FFFFFFFFFFFFFFFFF:FFFFF:FFFFFFFFFFFFFFFFFFFFFFFFFFFFFFFFFFFFFFFFFFFFFFFFF  
FFF

@A00721:190:HGJW7DSXY:4:1621:18240:17550\_1:N:0:TCTGCAAG+GCTGCACT  
GGAGGCTGATCATGGAGTCTTTGTACCTTCTGTCAAACCTTCGAGGTTGAGTACGAGAGGTGATCCCG  
GATGTGGATTGAAGGCTGGCTCTAAGGGAGACTCCTTCTTTTGAATGTTGTAAAGAATTGGGTTGAG  
AAG

+

FFF:FF:FF:FFFFFFFFFFFFFFFFFFFFFFFFF:FFFFFFFFFFFFFFFFFFFFFFFFFFFFFFFFF  
FFFFFFFFFFFFFFFFFFFFFFFFFFFFFFFFFFFFFFFFFFFFFFFFF:FFFFFFFFFFFFFFFFFFFFFFFFF  
FFF

@A00721:190:HGJW7DSXY:4:1669:23411:7404\_1:N:0:TCTGCAAG+GCTGCACT  
GACATTATTTCAACGGATACCGATCTCAGTTCTACCACAGAAACCGTCTCAGGAACTGTCTCCACTGA  
TTCGGAATTAGAGAAAGACGACCTTCTTGTGGGGACTGAGACCTCTGAATTTTCAGGTGCCCTGATG  
AGG

+

FFFFFFFFFFFFFFF:FFFFFFFFFFFFFFFFFFFFFFFFFFFFFFFFFFFFFFFFFFFFFFFFFFFFFFF  
FFFFFFFFFFFFFFFFFFFFFFFFFFFFFFFFFFFFFFFFFFFFFFFFF:FFFFFFFFFFFFFFFFFFFFFFFFF  
FFF

@A00721:190:HGJW7DSXY:4:2258:15808:9549\_1:N:0:TCTGCAAG+GCTGCACT  
ATCAACGACATCATTCTTGATGAGTGTGTTCTTATCGAAGTCTCAGTTATCGCTGCCCGGCCGACGT  
TTGTGCGAACTCTCAGAGGTTTACGGCAGAAAAATTTCTCCTGCTTGTAATTCGAGAGAGGACACTA  
TGG

+

FFFFFFFFFFF:FFFFFFFFF:FFFFFFF:FFFFFFF,FFFFF,FFFFF:FFFFFFFFFFFFFFFFFFFFF  
FFFFFFFFFFFFFFFFFFFFF:FFFFFFFFFFFFFFFFFFFFFFFFFFFFF:FFFFF:FFF,FFF:FFFFFFFFF  
FFF

@A00721:190:HGJW7DSXY:4:1121:23095:23390\_1:N:0:TCTGCAAG+GCTGCACT  
CCGACCTTTCCTTGTGAAAATTTTGATGCGGTTTCATAAGATTATCAGTAATCCTGATTCTACTACGG  
ATTCATGGACCTTCCATCCTGTACCTCTTCTGGAGAGACGTATCTCAAAGATCGACTTCGAGACAGGT  
GAT

+

FFFFFFFFFFFFFFFFFFFFFFFFFFFFFFFFFFFFFFFFFFFFFFFFF:FFFFFFFFFFFFFFFFFFFFFFFFF  
FFFFFFFFFFFFF:FFFFFFFFFFFFFFFFFFFFF,FFFFFFFFFFFFFFFFFFFFFFFFFFFFFFFFFFFFF  
FFF

@A00721:190:HGJW7DSXY:4:2369:31114:14951\_2:N:0:TCTGCAAG+GCTGCACT  
AAAACTACAGAGGAACGTACCGGATTACCTGTCTTTCATATTATGAATGAACCTTCGGCCGCTCTCTT  
TGCTTCGATGTTGGATGTCAAGAAGGGTTCAGAATGGGATTCCTACGT

+

FFFFFFFFFFFFFFFFFFFFFFFFFFFFFFFFFFFFFFFFFFFFF,FFFFFFFFFFFFF:FFFFFFFFFFFFFFFFF  
FFFFFFFFF,FFFFFFFFFFFFFFFFFFFFFFFFFFFFF:FFFFFFFFFFFFFFFFF:FF



@A00721:190:HGJW7DSXY:4:1602:24560:28557\_2:N:0:TCTGCAAG+GCTGCACT  
ATTTACGTTTGTACTCAGAGCTGGTCCTCTCAGCAAAGGGATGCATGGTGTATCTCCTCAGGAGTC  
CCGGCATTGATAATAATGACGAGACTTTCGTCATAATCGCTGCATAT

+

FFFFFFFFFFFFFFFFFFFFFFFFFFFFFFFFFFFFFFFFFFFFFFFFFFFFFFFFFFFFFFFFFFFFFFFF  
FFFFFFFFFFFFFFFFFFFFFFFFFFFFFFFFFFFFFFFFFFFFFFFFFFFFFFFFFFFFFFFFFFFFFFFF

@A00721:190:HGJW7DSXY:4:2654:9525:30076\_1:N:0:TCTGCAAG+GCTGCACT  
CTCGACCAACATTAAGGCGGCGGCGACTAATCTTAAAGCTTTACCCAAAATGAAGGACACTTCGAAAC  
TGAATAATGATGCACTACAAACAAGTATCGCTAATCATCTGAAAAAGGCTCTAAAGGACACTATACAA  
TAT

+

FFFFFFFFFFFFFF,FFFFFFFFFFFF:FFFFFFFFFFFFFFFFFFFFFFFFFFFFFFFFFFFFFFFF:FFFFFFFFFFFF  
FFFFFFFFFFFF:FFFFFFFFFFFFFFFFFFFFFFFFFFFFFFFFFFFFFFFFFFFFFFFFFFFFFFFFFFFFFFFF  
FFF

@A00721:190:HGJW7DSXY:4:2619:29107:15984\_1:N:0:TCTGCAAG+GCTGCACT  
CAGACGTGTGCTCTTCCGATCTCTGCAGAGGCTGTCAAACAAGCCAGACTCAAGGAGTCCAATCAAA  
GGTTTTGAATTTAGCTCAACTGGGGAGACGTGCTTAAATGGGTGATAAAAAATTATTTAGAGATCTTTT  
CTA

+

FFFFFFFFFFFFFFFFFFFFFFFFFFFF,FFFFFFFFFFFFFFFFFFFFFFFFFFFF:FFFFFFF::FFFFFFFFFFFFFFFF  
FFFFFFFFFFFFFFFFFFFFFFFFFFFFFFFFFFFFFFFFFFFF:FFFFFFFFFFFFFFFFFFFFFFFFFFFFFFFF  
FFF

@A00721:190:HGJW7DSXY:4:1667:15049:8547\_2:N:0:TCTGCAAG+GCTGCACT  
ATTTACTCTGTACTTGATCTACGTCGTTTAACTGTGCGGAACAACCTTTACTTAGAATGACTCTATCTT  
TTCAGACACTTCTTATATTATTTACAATAGTTAATATCATATTAGTAA

+

FFFFFFFFFFFFFFFFFFFFFFFFFFFFFFFFFFFFFFFFFFFFFFFFFFFFFFFFFFFFFFFFFFFFFFFF  
FFFFFFFFFFFF:FFFFFFFFFFFFFFFFFFFFFFFFFFFF:FFFFFFFFFFFFFFFFFFFFFFFF

@A00721:190:HGJW7DSXY:4:2676:17535:15013\_1:N:0:TCTGCAAG+GCTGCACT  
TTTTGTCTCTACACCAATATAAACTTGTTTAAAGCTATTTTCCGACCTCACCTTAATAAACGATGAT  
ATCTTCGGCAAACGACTCGAAACCGAGACGCCGTAGATCAAAGTCCCTTCTAACTTTAGATTATGAAT  
CCT

+

FFF,:,,,:F,FF::,,,,FFF,:,,,:F,:,,,,FF,,,F,,,F,,,F,F,,,FFF,,,,,,F,:,,,  
,:,,,,,,F,:FFFF,FFF:FFFFFFFF:FFFFFF,F:FF::FFFFFF:FFFFFFFFFFFFFFFF  
:FF

@A00721:190:HGJW7DSXY:4:1435:15456:28792\_1:N:0:TCTGCAAG+GCTGCACT  
TATTTATTAAACGAATATTATCCGATTCTTCGAGGGTATCACTACCACTGATCTGCCGACTTTAGTC  
AAGGAAC TTCAATTCCTTCGATGTTTATATTTTCTATAAGGGAAAATAGCAATAATCAAATTTGAC  
AAA

+

FFFFFFFFF:FFFFFFFF:FFFFFFFFFFFFFFFFFFFFFFFFFFFFFFFFFFFFFFFFFFFFFFFFFFFF  
FFFFFFFFFFFFFFFFFFFFFFFFFFFFFFFFFFFFFFFFFFFFFFFFFFFFFFFFFFFFFFFFFFFFFFFF  
FFF

@A00721:190:HGJW7DSXY:4:1564:11261:4085\_1:N:0:TCTGCAAG+GCTGCACT  
CCGATCACCTTGGTGTGATCTCCCGGAGGATCTTTTCAATAAGATGTATGATGATAATCTACTATTTT  
TAAATAGTGATATTCAGCGTATACTTGAATACTTTATCAAAGATTTGGCTTGGTCTATTTACCGCAA  
AAG

+

FFFFFFFFFFFFFFFFFFFFFFFFFFFF,FFFFFFFFFFFFFFFFFFFFFFFFFFFFFFFFFFFFFFFFFFFF  
FFFFFFFFFFFFFFFFFFFFFFFFFFFFFFFFFFFFFFFFFFFF:FFFFFFFFFFFFFFFFFFFFFFFFFFFF  
FFF

@A00721:190:HGJW7DSXY:4:1429:27254:1720\_2:N:0:TCTGCAAG+GCTGCACT  
TTTACTTATACTTTAAATAGCACCGATTATAACTTGACTGTTGATAATATTACAATAGCTCTTTCTCA

$+$ 

@A00721:190:HGJW7DSXY:4:2454:14579:25958\_1:N:0:TCTGCAAG+GCTGCACT  
TACCAATCAATGATGTGACTATACAGTTCGCCATTTCAAGAGTGGTCAATACGTCGTGGGAGGTACT  
GAAGCCTTCCCCTCCGCTGGCACGAAGAACACTCCCAAGCCAATCAATAGTTCTTCTGACCAGAATGA  
AAA

+

@A00721:190:HGJW7DSXY:4:1154:25473:27539\_2:N:0:TCTGCAAG+GCTGCACT  
AGGAAGAGGGGAAATGTCCCCAAACTGAGAAGAATAAAGGGAAAGGTCCATCAGGACCTAAGAAGGG  
GAAATTACCCCTAATTCTGAAGGAAGATCTCCACCATCTGGGGTTGG

+

@A00721:190:HGJW7DSXY:4:1123:12264:4006\_1:N:0:TCTGCAAG+GCTGCACT  
TGCTCTTCCGATCTTTAAGGGTAGCTGTAAAGTTGCGCCTGCCGACCCCATCTTTGAGACCAAGACTC  
TCTACAGTAGGTTTCGTGCCTACTATGAGCAAATCTGTTGAATTCGTCACTGAGGACGAAGGTGAGAGG  
ACT

+

@A00721:190:HGJW7DSXY:4:1446:16161:17801\_1:N:0:TCTGCAAG+GCTGCACT  
CGATCTGAAGGACTTAGGTTGGCATATTTATGCCGACGATAATAAGCATGTCACCCTTAAGCACCGAG  
GTAAGCTCGGGACTTACAAGAGAGAGTGTGAGAGAGTCGCTCTCACTATTTTTGCCAGAATGCGGGC  
TTT

+

@A00721:190:HGJW7DSXY:4:1453:15655:34773\_1:N:0:TCTGCAAG+GCTGCACT  
TATTTGAAGCAGGGGTTACCACTTCCTAAGGTGGATGAGGGAGGTTGTTTCTTTGGAGTTTTAGATAA  
TCTTTTGAGAAGGGGTCATAGAGCCAGCAAGAGAAGCTTATATGCTGGTTTAAGTGATGATTATCACT  
CCT

+

@A00721:190:HGJW7DSXY:4:2176:13838:34444\_1:N:0:TCTGCAAG+GCTGCACT  
GGAGGCTGATCATGGAGTCTTTGTACCTTCTGTCAAACCTTCGAGGTTACGCTACGAGAGGTGATCCCG  
GATGTGGATTGAAGGCTGGCTCTAAGGGAGACTCCTTCTTTTTGAATGTTGTAAGAATTGGGTTGAG  
AAG

+

@A00721:190:HGJW7DSXY:4:2132:20256:24862\_1:N:0:TCTGCAAG+GCTGCACT  
GACATTATTTCAACGGATACCGATCTCAGTTCTACCACAGAAACCGTCTCAGGAAGTGTCTCCACTGA  
TTCGGAATTAGAGAAAGACGACCTTCTTGTGGGGACTGAGACCTCTGAATTTTCAGGGTGCCCTGATG  
AGG

+  
FF:FFFFFFFFFFFFFFFFFFFFFFFFFFFFFFFFFFFFFFFFFFFFFFFFFFFFFFFFFFFFFFFFFFFFFFFF  
FFFFFFFFFFFFFFFFFFFFFFFFFFFFFFFFFFFFFFFFFFFFFFFFFFFFFFFFFFFFFFFFFFFFFFFF  
FFF  
@A00721:190:HGJW7DSXY:4:1665:6759:7999\_1:N:0:TCTGCAAG+GCTGCACT  
TCAACGACATCATTCTTGATGAGTGTCTGTTCTTATCGAAGTCTCAGTTATCGCTGCCCGGCCGACGTT  
TGTCGCGAACTCTCAGAGGTTTACGGCAGAAAAATTTCTCCTGCTTGTAATTCGAGAGAGGACACTAT  
GG  
+  
FFFFFFFFFFFFFFFFFFFFFFFFFFFFFFFFFFFFFFFFFFFFFFFFFFFFFFFFFFFFFFFFFFFFFFFF  
FFFFFFFFFFFFFFFFFFFFFFFFFFFFFFFFFFFFFFFFFFFFFFFFFFFFFFFFFFFFFFFFFFFFFFFF  
FF  
@A00721:190:HGJW7DSXY:4:1544:1425:16799\_1:N:0:TCTGCAAG+GCTGCACT  
CCGACCTTTCCTTGTAATAATTTGATGCGGTTTCATAAGATTATCAGTAATCCTGATTCTACTACGG  
ATTCATGGACCTTCCATCCTGTACCTCTTCTGGAGAGACGTATCTCAAAGATCGACTTCGAGACAGGT  
GAT  
+  
FFFFF::FFFFFFFFFFFFFFFFFFFFFFFFFFFFFFFFFFFFFFFFFFFFFFFFFFFFFFFFFFFFFFFF  
FFFFFFFFFFFFFFFFFFFFFFFFFFFFFFFFFFFFFFFFFFFFFFFFFFFFFFFFFFFFFFFFFFFFFFFF  
FFF  
@A00721:190:HGJW7DSXY:4:2628:27570:15264\_2:N:0:TCTGCAAG+GCTGCACT  
AAACTACAGAGGAACGTACCGGATTACCTGTCTTTCATATTATGAATGAACCTTCGGCCGCTCTCTT  
TGCTTCGATGTTGGATGTCAAGAAGGGTTCAGAATGGGATTCCTACGT  
+  
FFFFFFFFFFFFFFFFFFFFFFFFFFFFFFFFFFFFFFFFFFFFFFFFFFFFFFFFFFFFFFFFFFFFFFFF  
FFF:FFFFFFFFFFFFFFFFFFFFFFFFFFFFFFFFFFFFFFFFFFFFFFFFFFFFFFFFFFFFFFFF  
@A00721:190:HGJW7DSXY:4:2102:9299:12962\_2:N:0:TCTGCAAG+GCTGCACT  
ATTTACGTTTGCTACTCAGAGCTGGTCTCTCAGCAAAGGGATGCATGGTGTATCTCCTCAGGAGTC  
CCGGCATTGATAATAATGACGAGACTTTCGTCTAATCGCTGCATAT  
+  
FFFFFFFFFFFFFFFFFFFFFFFFFFFFFFFFFFFFFFFFFFFFFFFFFFFFFFFFFFFFFFFFFFFFFFFF  
FFFFFFFFFFFFFFFFFFFFFFFFFFFFFFFFFFFFFFFFFFFFFFFFFFFFFFFFFFFFFFFF  
@A00721:190:HGJW7DSXY:4:2658:31711:24627\_1:N:0:TCTGCAAG+GCTGCACT  
CTCGACCAACATTAAGGCGGCGGCGACTAATCTTAAAGCTTTACCCAAAATGAAGGACACTTCGAAAC  
TGAATAATGATGCACTACAAACAAGTATCGCTAATCATCTGAAAAAGGCTCTAAAGGACACTATACAA  
TAT  
+  
FFFFFFFFFFFFFFFFFFFF:FFFFFF:F,FFFFFFFFFFFFFFFF:FFFFFFFFFFFFFFFF:FFFFFFFFFFFF  
FFFFF:FFFFFFFFFFFFFFFFFFFFFFFFFFFFFFFFFFFFFFFFFFFFFFFFFFFFFFFFFFFFFFFF  
FFF  
@A00721:190:HGJW7DSXY:4:1174:28899:15405\_2:N:0:TCTGCAAG+GCTGCACT  
AGCTTGTCGTTTAAAGACTGCAGAGGCTGTCAAACAAGCCAGACTCAAGGAGTCCAATCAAAGGTTT  
TGAATTTAGCTCAACTGGGAGACGTGCTTAAATGGGTGATAAAAATT  
+  
FFFFFFFFFFFFFFFFFFFFFFFFFFFFFFFFFFFFFFFFFFFFFFFFFFFFFFFFFFFFFFFFFFFFFFFF  
FFFFFFFFFFFFFFFFFFFFFFFFFFFFFFFFFFFFFFFFFFFFFFFFFFFFFFFFFFFFFFFF  
@A00721:190:HGJW7DSXY:4:2124:15022:35869\_2:N:0:TCTGCAAG+GCTGCACT  
ATTTACTCTGTACTTGATCTACGTGTTTAACTGTGGAACAACCTTTACTTAGAATGACTCTATCTT  
TTCAGACACTTCTTATATTATTTACAATAGTTAATATCATATTAGTAA  
+  
FFFFFFFFFFFFFFFFFFFFFFFFFFFFFFFFFFFFFFFFFFFFFFFFFFFFFFFFFFFFFFFFFFFFFFFF  
FFFFFFFFFFFFFFFFFFFFFFFFFFFFFFFFFFFFFFFFFFFFFFFFFFFFFFFFFFFFFFFF  
@A00721:190:HGJW7DSXY:4:2469:26811:6558\_1:N:0:TCTGCAAG+GCTGCACT  
TCTATACACCAATCTAAACGAGTATAAAGCGTGTTTTCCGTCGGAACCTAATACACGAAGAGATCAT

CCGCAAACGACTCGAAACCGAGACGCCGTAGATCAAAGTCCCTTCTAACTTTAGATTATGAATCCTGC  
CTT

+

:FF,,FF,FF,F,,,,FF:,,F,F,FF,F,,,,:FFF:F,,,F:,,FF:,,,,:F:,FFF,:F,  
FF,FF:FFFFFFFF:FFFFFFFFFFFFFFFFFFFFFFFFFFFFFFFFFFFFFFFFFFFFFFFFFFFFF  
FFF

@A00721:190:HGJW7DSXY:4:2632:13078:31407\_1:N:0:TCTGCAAG+GCTGCACT  
TATTTATTAAACGAACATTATCCGATTCTTCGAGGGTATCACTACCACTGATCTGCCGACTTTAGTC  
AAGGAAC TTCAATTCCTTCGATGTTTATATTTTTCTATAAGGGAAAATAGCAATAATCAAATTCGAC  
AAA

+

FFFFFFFFFFFF:FF:FFFFFFFFFFFFFFFFFFFFFFFFFFFFFFFFFFFFFFFFFFFFFFFFFFFFF  
FFFFFFFF:FFFF:FFFFFFFFFFFFFFFFFFFFFFFFFFFFFFFFFFFFFFFFFFFFFFFFFFFFF  
FFF

@A00721:190:HGJW7DSXY:4:1577:24234:25927\_1:N:0:TCTGCAAG+GCTGCACT  
CCGATCACCTTGGTGTGATCTCCCGGAGGATCTTTTCAATAAGATGTATGATGATAATCTACTATTTT  
TAAATAGTGATATTCAGCGTATACTTGAATACTTTATCAAAGATTTGGCTTGGTCTATTTACCGCAA  
AAG

+

F:FFFFF:FFFFFFFFFFFFFFFFFFFFFFFFFFFFFFFFFFFFFFFFFFFFFFFFFFFFFFFFFFFFF  
FFFFFFFFFFFFFFFFFFFFFFFFFFFFFFFFFFFFFFFFFFFFFFFFFFFFFFFFFFFFFFFFFFFFF  
FFF

@A00721:190:HGJW7DSXY:4:1471:20446:32737\_2:N:0:TCTGCAAG+GCTGCACT  
TTCAC TTATACTTTAAATAGCACCGATTATAA CTTGACTGTTGATAATATTACAATAGCTCTTTCTCA  
GAAGATTAGAGAAGTAACCGGTGAACACGTCGGTAGCATTGATTACT

+

FFFFFFFFFFFFFFFFFFFFFFFFFFFFFFFFFFFFFFFFFFFFFFFFFFFFFFFFFFFFFFFFFFFFF  
FFFFFFFFFFFFFFFF:FFFFFFFFFFFFFFFFFFFFFFFF:FFFFFFF:FFFFF

@A00721:190:HGJW7DSXY:4:2535:7609:30890\_1:N:0:TCTGCAAG+GCTGCACT  
TACCCATCAATGATGTGACTATACAGTTCGGCCATTTCAAGAGTGGTCAATACGTCGTGGGAGGTACT  
GAAGCCTTCCCTCCGCTGGCACGAAGAACACTCCCAAGCCAATCAATAGTTCTTCTGACCAGAATGA  
AAA

+

FFFF,,FFF,FFF,FFFFFFFFFFFFFFFFFFFFFFFFFFFFFFFFFFFFFFFFFFFFFFFFFFFFF  
FFFF:FFFFF:FFFFFFFFF:F:FFFF:FFFFFFFFFFFFFFFFFFFFF,FFFFFFFFFFFFFFFFF:F:FFF  
FFF

@A00721:190:HGJW7DSXY:4:1219:15989:17096\_2:N:0:TCTGCAAG+GCTGCACT  
AGGAAGAGGGGAAATGTCCCCAAACTGAGAAGAATAAAGGGAAAGGTCCATCAGGACCTAAGAAGGG  
GAAATTACCCCTAATTCTGAAGGAAGATCTCCACCATCTGGGGTTGG

+

FFFFFFFFFFFFFFFFFFFFFFFFFFFFFFFFFFFFFFFFFFFFFFFFFFFFFFFFFFFFFFFFFFFFF  
FFFFFFFFFFFFFFFFFFFFFFFFFFFFFFFFFFFFFFFFFFFFFFFFFFFFFFFFFFFFF

@A00721:190:HGJW7DSXY:4:2174:29414:29951\_1:N:0:TCTGCAAG+GCTGCACT  
TGCTCTTCCGATCTTTAAGGGTAGCTGTAAAGTTGCGCCTGCCGACCCCATCTTTGAGACCAAGACTC  
TCTACAGTAGGTTTCGTGCCTACTATGAGCAAATCTGTTGAATTCGTCACTGAGGACGAAGGTGAGAGG  
ACT

+

FFFF:FFFFFFFF:FFFFFFFF:FFFFF:F,FFF,FFFF:FFFFFFFFFFFFFFFFFFFFFFFF:FFF::FFF  
FFFFFFFFFFFFFFFFFFFFFFFFFFFFFFFF:FFFFFFFFFFFF:FFFFFFFFFFFF,FFFFF:FFFFFFFFFF  
FF:

@A00721:190:HGJW7DSXY:4:2126:14606:4335\_1:N:0:TCTGCAAG+GCTGCACT  
CGATCTGAAGGACTTAGGTTGGCATATTTATGCCGACGATAATAAGCATGTACCCTTAAGCACCGAG  
GTAAGCTCGGGACTTACAAGAGAGAGTGTGAGAGAGTCGCTCTCACTATTTTTGCCAGAATGCGGGC  
TTT

+  
FFFFFFFFFFFFFFFFFFFFFFFFFFFFFFFFFFFFFFFFFFFFFFFFFFFFFFFFFFFFFFFFFFFFFFFF  
FFFFFFFFFFFFFFFFFFFFFFFFFFFFFFFFFFFFFFFFFFFFFFFFFFFFFFFFFFFFFFFFFFFFFFFF  
FFF  
@A00721:190:HGJW7DSXY:4:1537:20401:26929\_1:N:0:TCTGCAAG+GCTGCACT  
TATTTGAAGCAGGGGTTACCACTTCCTAAGGTGGATGAGGGAGGTTGTTTCTTTGGAGTTTATAGATAA  
TCTTTTGAGAAGGGGTCATAGAGCCAGCAAGAGAAGCTTATATGCTGGTTTAAAGTGATGATTATCACT  
CCT  
+  
F,F:FFF:FFFFFFFFFFFF:FFFFFFFFFFFF::FFFFFFFFFFFFFFFF:FFFFFFFFFFFFFFFF  
FFFFFFFFFFFFFFFF,FFFFFFFF:FFFFFFFFFFFFFFFFFFFFFFFF:FFFFFFFFFFFFFFFF  
FFF  
@A00721:190:HGJW7DSXY:4:2323:26323:25222\_1:N:0:TCTGCAAG+GCTGCACT  
GGAGGCTGATCATGGAGTCTTTGTACCTTCTGTCAAACCTTCGAGGTTACGCTACGAGAGGTGATCCCG  
GATGTGGATTGAAGGCTGGCTCTAAGGGAGACTCCTTCTTTTGAATGTTGTAAAGAATTGGGTTGAG  
AAG  
+  
FF:FFFFFFFF:FFFFFFFFFFFFFFFFFFFFFFFFFFFFFFFFFFFFFFFFFFFFFFFFFFFFFFFF  
FFFFFFFFFFFFFFFFFFFFFFFFFFFFFFFFFFFFFFFFFFFFFFFFFFFFFFFFFFFFFFFFFFFFFFFF  
FFF  
@A00721:190:HGJW7DSXY:4:2155:28194:35446\_1:N:0:TCTGCAAG+GCTGCACT  
GACATTATTTCAACGGATACCGATCTCAGTTCTACCACAGAAACCGTCTCAGGAAGTGTCTCCACTGA  
TTCGGAATTAGAGAAAGACGACCTTCTTGTGGGACTGAGACCTCTGAATTTTCAGGGTGCCTGATG  
AGG  
+  
FFFFFF:FFFFFFFFFFFF:FFFFFFFFFFFFFFFFFFFFFFFFFFFFFFFFFFFFFFFFFFFFFFFF  
:FFFFFFFFFFFFFFFFFFFFFFFFFFFFFFFFFFFFFFFFFFFFFFFFFFFFFFFFFFFFFFFFFFFFFFFF  
FFF  
@A00721:190:HGJW7DSXY:4:2363:14823:36338\_1:N:0:TCTGCAAG+GCTGCACT  
TCAACGACATCATTCTTGATGAGTGTGCTTCTTATCGAAGTCTCAGTTATCGCTGCCCGGCCGACGTT  
TGTCGCGAACTCTCAGAGGTTTACGGCAGAAAAATTTCTCCTGCTTGAATTCGAGAGAGGACACTAT  
GG  
+  
FF:FFFF:FFFFFFFFFFFFFFFFFFFFFFFFFFFFFFFFFFFFFFFFFFFFFFFFFFFFFFFFFFFF  
FFFFFFFFFFFFFFFFFFFFFFFFFFFFFFFFFFFFFFFFFFFFFFFFFFFFFFFFFFFFFFFFFFFFFFFF  
FF  
@A00721:190:HGJW7DSXY:4:1562:20582:7200\_1:N:0:TCTGCAAG+GCTGCACT  
CCGACCTTCTTGTGAAAATTTTGATGCGTTTCATAAGATTATCAGTAATCCTGATTCTACTACGG  
ATTCATGGACCTTCCATCCTGTACCTCTTCTGGAGAGACGTATCTCAAAGATCGACTTCGAGACAGGT  
GAT  
+  
FFFFFFFFFFFFFFFFFFFFFFFFFFFFFFFFFFFFFFFF:FFFFFFFFFFFFFFFFFFFFFFFFFFFF  
FFFFFFFFFFFFFFFFFFFFFFFFFFFFFFFFFFFFFFFFFFFFFFFFFFFFFFFFFFFFFFFFFFFFFFFF  
FFF  
@A00721:190:HGJW7DSXY:4:1151:8495:15233\_2:N:0:TCTGCAAG+GCTGCACT  
AAACTACAGAGGAACGTACCGGATTACCTGTCTTTCATATTATGAATGAACCTTCGGCCGCTCTCTT  
GCTTCGATGTTGGATGTCAAGAAGGGTTCAGAATGGGATTCCTACGTA  
+  
F,:FFFFFFFFFFFFFFFFFFFFFFFFFFFFFFFF:FFFFFFFFFFFFFFFF:FFFFFFFFFFFF:FFFF  
:,FF:FFFFFFFF:FFF:FFF:FF:F:F:FFFFFF:FFFF:FFF:FF  
@A00721:190:HGJW7DSXY:4:2129:31123:31720\_2:N:0:TCTGCAAG+GCTGCACT  
ATTTACGTTTGCTACTCAGAGCTGGTCCTCTCAGCAAAGGATGCATGGTGTATCTCCTCAGGAGTC  
CCGGCATTTGATAATAATGACGAGACTTTCGTCATAATCGCTGCATAT  
+

FFFFFF:FFFFFF:FFFFFFFFFFFFFF:FFFFFFFFFFFFFF,FFFFF,:FFFFFFFFFFFFFFFFFFFFFF  
FFFFFF:FFFFFFFFFFFFFF:,FFFFFFFFF:FFFFFFFFFFFFFF  
@A00721:190:HGJW7DSXY:4:2669:9516:2816\_1:N:0:TCTGCAAG+GCTGCACT  
CTCGACCAACATTAAGGCGGCGGCGACTAATCTTAAAGCTTCACCCAAAATGAAGGACACTTCGAAAC  
TGAATAATGATGCACTACAAACAAGTATCGCTAATCATCTGAAAAAGGCTCTAAAGGACACTATACAA  
TAT  
+  
FFFFFF,FF::FFFFFFFFFFFFFFFFFFFFFF:FFFFFFFFF,FFFFFFFFFFFFFFFFFFFFFFFFFFFFFFF  
FFFFFFFFFFFFFFFFFFFFFF:FF:FFFFFFFFFFFFFFFFFFFFFFFFFFFFFF:F:FFFFFFFFFFFFFFFFFFFFFFF  
FFF  
@A00721:190:HGJW7DSXY:4:1471:15393:31062\_2:N:0:TCTGCAAG+GCTGCACT  
AGCTTGTCGTTTTAAAGACTGCAGAGGCTGTCAAACAAGCCAGACTCAAGGAGTCCAATCAAAGGTTT  
TGAATTTAGCTCAACTGGGGAGACGTGCTTAAATGGGTGATAAAAATT  
+  
FFFFFFFFFFFFFFFFFFFFFF:FFFFFFFFFFFFFF,FFFFFFFFFFFFFFFFFFFFFFFFFFFFFF:,FFFFF  
FFFFFFFFF:FFFFFFFFFFFFFF:FFFFFFFFFFFFFFFFFFFFFF,FF  
@A00721:190:HGJW7DSXY:4:2341:12924:29356\_2:N:0:TCTGCAAG+GCTGCACT  
ATTTACTCTGTACTTGATCTACGTCGTTTAACTGTCGGAACAACCTTTACTTAGAATGACTCTATCTT  
TTCAGACACTTCTTATATTATTTACAATAGTTAATATCATATTAGTAA  
+  
FFFFFFFFFFFFFFFFFFFFFFFFFFFFFFFFFFFFFFFFFFFFFFFFFFFFFFFFFFFFFFFFFFFFFFFFF  
FFFFFFFFFFFFFFFFFFFFFFFFFFFFFFFFFFFFFFFFFFFFFFFFFFFFFFFFFFFFFFFFFFFFFFF  
@A00721:190:HGJW7DSXY:4:1211:4381:34162\_2:N:0:TCTGCAAG+GCTGCACT  
CTCTACACCATCTCAACGAGGATAAAGCGAGTTTTCCGTCCTGAACGTAATACACGAAGAGATCATC  
CGCAAACGACTCGAAACCGAGACGCCGTAGATCAAAGTCCCTTCTAAC  
+  
FFFFFFFFFFFFFFFFFFFFFFFFFFFFFFFFFFFFFFFFFFFFFFFFFFFFFFFFFFFFFFFFFFFFFF:FFFFFFF  
FFFFFFFFFFFFFFFFFFFFFFFFFFFFFFFFFFFFFF:FFF:FFFFFFFFFFFFFFF  
@A00721:190:HGJW7DSXY:4:1631:14425:10786\_1:N:0:TCTGCAAG+GCTGCACT  
TAAACGAAC TATTATCCGATTCTTCGAGGGTATCACTACCACTGATCTGCCGACTTTAGTCAAGGAAC  
TTCAATTCCTTCGATGTTTATATTTTCTATAAGGGAAAATAGCAATAATCAAATTTGACAAATTTT  
AGA  
+  
FFFFFFFFFFFFFFF,FFFFFFFFFFFFFFFFFFFFFFFFFFFFFFFFFFFFFFFFFFFFFFFFFFFFFFFFF  
FFFFF:FFFFFFFFFFFFFFFFFFFFFFFFF,FFFFFFFFFFFFFFFFFFFFFF:FFFF:FFFFFFFF:FFFF  
FFF  
@A00721:190:HGJW7DSXY:4:1631:12319:11052\_1:N:0:TCTGCAAG+GCTGCACT  
CCGATCACCTTGGTGTGATCTCCCGTAGGATCTTTTCAATAAGATGTATGATGATAATCTACTATTTT  
TAAATAGTTATATTCAGCGTATACTTGAATACTTTATCATAGATTTGGCTTGGTCTATTTACCGCAA  
AAG  
+  
F:F,F,F,,FF:,FFF,F:FFF,,F,FFF::FFFF:FFFF:,:::,FF,F,,F,FFFFFFFFF:F  
F,,FFFF:, ,FFFF,,F,FF::F,FFF:F:FFFF,,:, ,F,FFFFFFFFF:, :FFFFFF,F,,F,F,  
,FF  
@A00721:190:HGJW7DSXY:4:1511:24894:20400\_2:N:0:TCTGCAAG+GCTGCACT  
TTTACTTATACTTTAAATAGCACCGATTATAACTTGACTGTTGATAATATTACAATAGCTCTTTCTCA  
GAAGATTAGAGAAGTAACCGGTGAACACGTCGGTAGCATTGATTTACT  
+  
FFFFFFFFFFFFFFFFFFFFFFFFFFFFFFFFFFFFFFFFFFFFFFFFFFFFFFFFFFFFFFFFFFFFFFF  
FFFFFFFFFFFFFFFFFFFFFFFFFFFFFFFFFFFFFFFFFFFFFFFFFFFFFFFFFFFFFFFF:F  
@A00721:190:HGJW7DSXY:4:1265:1389:11506\_1:N:0:TCTGCAAG+GCTGCACT  
CCAATCAATGATGTGACTATACAGTTCGCCATTTCAAGAGTGGTCAATACGTCGTGGGAGGTACTGA  
AGCCTTCCCCTCCGCTGGCACGAAGAACACTCCCAAGCCAATCAATAGTTCTTCTGACCAGAATGAAA  
AGG







FFFFFFFFFFFFFFFFFFFFFFFFFFFFFFFFFFFFFFFFFFFFFFFFFFFFFFFFFFFFFFFF:FFFFFFFFFFFFFFFF  
FFF

@A00721:190:HGJW7DSXY:4:1653:28393:30091\_2:N:0:TCTGCAAG+GCTGCACT  
TTTACTTATACTTTAAATAGCACCGATTATAAATTGACTGTTGATAATATTACAATAGCTCTTTCTCA  
GAAGATTAGAGAAGTAACCGGTGAACACGTCGGTAGCATTGATTACT

+  
FFFFFFFFFFFFFFFFFFFF,FFFFFFFFFFFFFFFFFFFFFFFFFFFFFFFFFFFFFFFFFFFFFFFFFFFFF  
FFFFFFFFFFFFFF:FFFFFFFFFFFFFFFFFFFFFFFFFFFFFFFFFFFFFFFF:FFFFFFFFFFFF

@A00721:190:HGJW7DSXY:4:1378:25310:24220\_1:N:0:TCTGCAAG+GCTGCACT  
CCAATCAATGATGTGACTATACAGTTCGGCCATTTCAAGAGTGGTCAATACGTCGTGGGAGGTACTGA  
AGCCTTCCCCTCCGCTGGCACGAAGAACAACCTCCCAAGCCAATCAATAGTTCTTCTGACCAGAATGAAA  
AGG

+  
FFFFFFFFFFFFFFFFFFFFFFFFFFFFFFFFFFFFFFFFFFFFFFFFFFFFFFFFFFFFFFFFFFFFF  
FFFFFFFFFFFFFFFFFFFFFFFFFFFFFFFFFFFFFFFFFFFFFFFFFFFFFFFFFFFFFFFFFFFFF  
FFF

@A00721:190:HGJW7DSXY:4:2534:5177:13338\_2:N:0:TCTGCAAG+GCTGCACT  
AGGAAGAGGGGAAATGTCCCCAAAACCTGAGAAGAATAAAGGGAAAGGTCCATCAGGACCTAAGAAGGG  
GAAATTACCCCTAATTCTGAAGGAAGATCTCCCACCATCTGGGGTTGG

+  
FFFFFFFFFFFFFFFFFFFFFFFFFFFFFFFFFFFFFFFFFFFFFFFFFFFFFFFFFFFFFFFFFFFFF  
FFFFFFFFFFFFFFFFFFFFFFFFFFFFFFFFFFFFFFFFFFFFFFFFFFFFFFFFFFFFFFFFFFFFF

@A00721:190:HGJW7DSXY:4:1234:21034:27837\_2:N:0:TCTGCAAG+GCTGCACT  
CATTAAAGGGTAGCTGTAAAGTTGCGCCTGCCGACCCCATCTTTGAGACCAAGACTCTCTACAGTAGGT  
TCGTGCCTACTATGAGCAAATCTGTTGAATTCGTCACTGAGGACGAAG

+  
FFFFFFFFFFFFFFFFFFFFFFFFFFFFFFFFFFFFFFFFFFFFFFFFFFFFFFFFFFFFFFFFFFFFF  
FFFFFFFFFFFF:FFFFFFF:FFFFF:FFFFFFFFFFFFFFFFFFFFFFFF:FFFF

@A00721:190:HGJW7DSXY:4:2503:25518:3443\_1:N:0:TCTGCAAG+GCTGCACT  
CGATCTGAAGGACTTAGGTTGGCATATTTATGCCGACGATAATAAGCATGTCACCCTTAAGCACCGAG  
GTAAGCTCGGGACTTACAAGAGAGAGTGTGAGAGAGTCGCTCTCACTATTTTTGCCAGAATGCGGGC  
TTT

+  
FFFFF:FFFFFFFFFFFFFFFFFFFFFFFFFFFFFFFFFFFFFFFFFFFFFFFFFFFFFFFFFFFFF,FFFFFFFFFFFFFFFFFFFFFFFFFFFFF  
F:FFFFFFFFFFFFFFFFFFFFFFFFFFFFFFFFFFFFFFFFFFFFFFFFFFFFFFFFFFFFFFFFFFFFF  
FFF

@A00721:190:HGJW7DSXY:4:2147:6497:36385\_1:N:0:TCTGCAAG+GCTGCACT  
TATTTGAAGCAGGGGTTACCACTTCCTAAGGTGGATGAGGGAGGTTGTTTCTTTGGAGTTTATAGATAA  
TCTTTTGAGAAGGGGTCATAGAGCCAGCAAGAGAAGCTTATATGCTGGTTTAAGTGATGATTATCACT  
CCT

+  
FFFFFFFFFFFFFFFFFFFFFFFFFFFFFFFFFFFFFFFFFFFFFFFFFFFFFFFFFFFFFFFFFFFFF  
FFFFFFFFFFFFFFFFFFFFFFFFFFFFFFFFFFFFFFFFFFFFFFFFFFFFFFFFFFFFFFFFFFFFF  
FFF

@A00721:190:HGJW7DSXY:4:1218:26386:24236\_1:N:0:TCTGCAAG+GCTGCACT  
GAGGCTGATCATGGAGTCTTTGTACCTTCTGTCAAACCTTCGAGGTTACAGCTACGAGAGGTGATCCCGG  
ATGTGGATTGAAGGCTGGCTCTAAGGGAGACTCCTTCTTTTTGAATGTTGTAAAGAATTGGGTTGAGA  
AG

+  
FFF:F,F:FFFFFFFFF:FFFFFFFFFFFFFFFFFFFFFFFFFFFFFFFFFFFFFFFFFFFFFFFFFFFFF  
FFFFFFFFFFFFFFFFFFFFFFFFFFFFFFFFFFFFFFFFFFFFFFFFFFFFFFFFFFFFFFFFFFFFF:FFFFFFFFFFFFFFFFFFFFFFFFFFFFF  
FF

@A00721:190:HGJW7DSXY:4:2220:16152:17628\_1:N:0:TCTGCAAG+GCTGCACT  
GACATTATTTCAACGGATACCGATCTCAGTTCTACCACAGAAACCGTCTCAGGAAGTGTCTCCACTGA

TTCGGAATTAGAGAAAGACGACCTTCTTGTGGGGACTGAGACCTCTGAATTTTCAGGGTGCCCTGATG  
AGG

+

FFFFFFFFFFFFFFFFFFFFFFFFFFFFFFFFFFFFFFFFFFFFFFFFFFFFFFFFFFFFFFFFFFFFFFFFFFFFFFFF  
FFFFFFFFFFFFFFFFFFFFFFFFFFFFFFFFFFFFFFFFFFFFFFFFFFFFFFFFFFFFFFFFFFFFFFFFFFFFFFFF  
FFF

@A00721:190:HGJW7DSXY:4:2566:17969:5087\_1:N:0:TCTGCAAG+GCTGCACT  
ATCGAAGTCTCAGTTATCGCTGCCCCGCCGACGTTTGTGCGAACTCTCAGAGGTTTACGGCAGAAAA  
ATTTCTCCTGCTTGTAAATTCGAGAGAGGACACTATGGAAATTAGACCTATCAGATGTCTTGACGACTT  
CGA

+

FFFFFFFFFFFFFFFFFFFFFFFFFFFFFFFFFFFFFFFFFFFFFFFFFFFFFFFFFFFFFFFFFFFFFFFFFFFFFFFF  
FFFFFFFFFFFFFFFFFFFFFFFFFFFFFFFFFFFFFFFFFFFFFFFFFFFFFFFFFFFFFFFFFFFFFFFFFFFFFFFF  
FFF

@A00721:190:HGJW7DSXY:4:2415:26332:13745\_1:N:0:TCTGCAAG+GCTGCACT  
CCGACCTTTCCTTGTGAAAATTTTGATGCGTTTCATAAGATTATCAGTAATCCTGATTCTACTACGG  
ATTCATGGACCTTCCATCCTGTACCTCTTCTGGAGAGACGTATCTCAAAGATCGACTTCGAGACAGGT  
GAT

+

FFFFFFFFFFFF:FFFF::FF,FFFFFFFF::FFFFFFFFFFFFFFFFFFFFFFFFFFFFFFFFFFFFFFFFFFFFF:FFFFFFFF  
FFFFFFFFFFFFFFFFFFFFFFFFFFFFFFFFFFFFFFFFFFFFFFFFFFFFFFFFFFFFFFFFFFFFFFFFFFFF:FFF,FFF:FFFF:FFFFFFFFFFFFFFFFFFFFF  
FFF

@A00721:190:HGJW7DSXY:4:1232:6280:29027\_2:N:0:TCTGCAAG+GCTGCACT  
AAACTACAGAGGAACGTACCGGATTACCTGTCTTTCATATTATGAATGAACCTTCGGCCGCTCTCTTT  
GCTTCGATGTTGGATGTCAAGAAGGGTTCAGAATGGGATTCCTACGTA

+

FFFFFFFFFFFFFF:FFFFFFFFFFFFFFFFFFFFFFFFFFFFFFFFFFFFFFFFFFFFFFFFFFFFFFFFFFFFFFFF  
FFFFFFFFFFFFFFFFFFFFFFFFFFFFFFFFFFFFFFFFFFFFFFFFFFFFFFFFFFFFFFFFFFFFFFFFFFFF

@A00721:190:HGJW7DSXY:4:2305:15438:24439\_2:N:0:TCTGCAAG+GCTGCACT  
ATTTACGTTTGCTACTCAGAGCTGGTCTCTCAGCAAAGGGATGCATGGTGTATCTCCTCAGGAGTC  
CCGGCATTGATAATAATGACGAGACTTTCGTGATAATCGCTGCATAT

+

FFFFFFFFFFFFFFFFFFFFFFFFFFFFFFFFFFFFFFFFFFFFFFFFFFFFFFFFFFFFFFFFFFFFFFFFFFFFF:FFFFFFFF  
:FFFFFFFFFFFFFFFFFFFFFFFFFFFFFFFFFFFFFFFFFFFFFFFFFFFFFFFFFFFFFFFFFFFF:FFFF

@A00721:190:HGJW7DSXY:4:1553:24388:26381\_2:N:0:TCTGCAAG+GCTGCACT  
AGCTTGTCGTTTAAAGACTGCAGAGGCTGTCAAACAAGCCAGACTCAAGGAGTCCAATCAAAGGTTT  
TGAATTTAGCTCAACTGGGAGACGTGCTTAAATGGGTGATAAAAATT

+

FFFFFFFFFFFFFF:FFFFFFFFFFFFFFFFFFFFFFFFFFFFFFFFFFFFFFFFFFFFFFFFFFFFFFFFFFFFF,FFFFF  
FFFFFFFFFFFFFFFFFFFF:FFFFFFFFFFFFFFFFFFFFFFFFFFFF:FFFFFFFFFFFF

@A00721:190:HGJW7DSXY:4:1118:22245:31000\_2:N:0:TCTGCAAG+GCTGCACT  
TACTCTGTACTTGATCTACGTCGTTTAACTGTGGAACAACCTTTACTTAGAATGACTCTATCTTTTC  
AGACACTTCTTATATTATTACAATAGTTAATATCATATTAGTAATAC

+

FFFFFFFFFFFF:FFFFFFFFFFFFFFFFFFFF:FFFFFFFFFFFFFFFFFFFF:F,FF,FFFFFFFFFFFFFFFFFFFF:FF  
FFFFFFFFFFFFFFFFFFFF,FF:F,FFF:FFFFFFFFFFFFFFFFFFFF

@A00721:190:HGJW7DSXY:4:1354:24216:6386\_2:N:0:TCTGCAAG+GCTGCACT  
CTCTACACCATCTCAACGAGGATAAAGCGAGTTTCCGTCCTGAACGTAATACACGAAGAGATCATC  
CGCAAACGACTCGAAACCGAGACGCCGTAGATCAAAGTCCCTTCTAAC

+

FFFFFFFFFFFFFFFFFFFFFFFFFFFFFFFFFFFFFFFFFFFFFFFFFFFFFFFFFFFFFFFFFFFFFFFFFFFFF  
FFFFF:FFFFFFFFFFFFFFFFFFFFFFFFFFFFFFFFFFFFFFFFFFFFFFFFFFFFFFFFFFFF

@A00721:190:HGJW7DSXY:4:2369:9652:12352\_1:N:0:TCTGCAAG+GCTGCACT  
TAAACGAACATTATCCGATTCTTCGAGGGTATCACTACCACTGATCTGCCGACTTTAGTCAAGGAAC

TTCAATTCCTTCGATGTTTATATTTTTCTATAAGGGAAAATAGCAATAATCAAATTTTCGACAAATTTT  
AGA

+

FFFFFFFFFFFFFFFFFFFFFFFFFFFFFFFFFFFFFFFFFFFFFFFFFFFFFFFFFFFFFFFFFFFFFFFF  
FFFFFFFFFFFFFFFFFFFFFFFFFFFFFFFFFFFFFFFFFFFFFFFFFFFFFFFFFFFFFFFFFFFFFFFF  
FFF

@A00721:190:HGJW7DSXY:4:2122:24279:15828\_1:N:0:TCTGCAAG+GCTGCACT  
CCGATCACCTTGGTGTGATCTCCCGGAGGATCTTTTCAATAAGATGTATGATGATAATCTACTATTTT  
TAAATAGTGATATTACGCGTATACTTGAATACTTTATCAAAGATTTGGCTTGGTCTATTTACCGCAA  
AAG

+

FFFFFFFFFFFFFFFFFFFFFFFFFFFFFFFFFFFFFFFFFFFFFFFFFFFFFFFFFFFFFFFFFFFFFFFF  
FFFFFFFFFFFFFFFFFFFFFFFFFFFFFFFFFFFFFFFFFFFFFFFFFFFFFFFFFFFFFFFFFFFFFFFF  
FFF

@A00721:190:HGJW7DSXY:4:2262:28736:4476\_2:N:0:TCTGCAAG+GCTGCACT  
TTTACTTATACTTTAAATAGCACCGATTATAACTTGACTGTTGATAATATTACAATAGCTCTTTCTCA  
GAAGATTAGAGAAGTAACCGGTGAACACGTCGGTAGCATTGATTTACT

+

FFFFFFFF:FFFFFFFFFFFFFFFFFFFFFFFFFFFFFFFFFFFFFFFFFFFFFFFFFFFFFFFFFFFF,FFF  
FFFFFFFFFFFFFFFFFFFF:FFF:FFFFFFFFFF,FFFFFFFFFFFF

@A00721:190:HGJW7DSXY:4:1451:30255:25394\_1:N:0:TCTGCAAG+GCTGCACT  
CCAATCAATGATGTGACTATACAGTTCGGCCATTTCAAGAGTGGTCAATACGTCGTGGGAGGTACTGA  
AGCCTTCCCCTCCGCTGGCACGAAGAACACTCCCAAGCCAATCAATAGTTCTTCTGACCAGAATGAAA  
AGG

+

FFFFFFFFFFFFFFFFFFFFFFFFFFFFFFFFFFFFFFFFFFFFFFFFFFFFFFFFFFFFFFFFFFFFFFFF  
FFFFFFFFFFFFFFFFFFFFFFFFFFFFFFFFFFFFFFFFFFFFFFFFFFFFFFFFFFFFFFFFFFFFFFFF  
FFF

@A00721:190:HGJW7DSXY:4:2534:5791:13870\_2:N:0:TCTGCAAG+GCTGCACT  
AGGAAGAGGGGAAATGTCCCAAAACTGAGAAGAATAAAGGGAAAGGTCCATCAGGACCTAAGAAGGG  
GAAATTACCCCTAATTCTGAAGGAAGATCTCCACCATCTGGGGTTGG

+

FFFFF:FFFFF:FFFFFFFFFF:FFFFFFFFFFFFFFFFFFFFFFFFFFFFFFFFFFFFFFFFFFFFF  
FFFFFFFFFFFFFFFFFFFF:FFFFFFFFFFFFFFFFFFFFFFFFFFFFFFFFFFFF

@A00721:190:HGJW7DSXY:4:1234:21160:29058\_2:N:0:TCTGCAAG+GCTGCACT  
CATTAAGGGTAGCTGTAAAGTTGCGCCTGCCGACCCCATCTTTGAGACCAAGACTCTCTACAGTAGGT  
TCGTGCCTACTATGAGCAAATCTGTTGAATTCGTCACTGAGGACGAAG

+

FFFFFFFFFFFFFFFFFFFFFFFFFFFF:FFFFFFFFFFFFFFFFFFFFFFFFFFFFFFFFFFFFFFFFFFFF  
FFFFFFFFFFFFFFFFFFFF,FFFFFFFFFFFFFF:FFFFFFF:FF,FFF

@A00721:190:HGJW7DSXY:4:2508:11107:34663\_1:N:0:TCTGCAAG+GCTGCACT  
CGATCTGAAGGACTTAGGTTGGCATATTTATGCCGACGATAATAAGCATGTCACCCTTAAGCACCGAG  
GTAAGCTCGGGACTTACAAGAGAGAGTGTGAGAGAGTCGCTCTCACTATTTTGGCCAGAATGCGGGC  
TTT

+

FFFFFFFFFFFFFFFFFFFFFFFFFFFFFFFFFFFFFFFFFFFFFFFFFFFFFFFFFFFFFFFFFFFFFFFF  
FFFFFFFFFFFFFFFFFFFFFFFFFFFFFFFFFFFFFFFFFFFFFFFFFFFFFFFFFFFFFFFF:FFFFFFFFFFFFFFFFFFFF  
FFF

@A00721:190:HGJW7DSXY:4:2316:8395:28244\_1:N:0:TCTGCAAG+GCTGCACT  
TATTTGAAGCAGGGGTTACCACTTCCTAAGGTGGATGAGGGAGGTTGTTTCTTTGGAGTTTATAGATAA  
TCTTTTGAGAAGGGGTCATAGAGCCAGCAAGAGAAGCTTATATGCTGGTTTAAGTGATGATTATCACT  
CCT

+

FF:FFFFFFFFFFFF:FFFFF:FFFFFFFFFFFFFFFFFFFFFFFFFFFFFFFFFFFFFFFFFFFFFFFF

FFFFFFFFFFFFFFFFFFFFFFFFFFFFFFFFFFFFFFFFFFFFFFFFFFFFFFFFFFFFFFFFFFFFFFFF  
FFF

@A00721:190:HGJW7DSXY:4:2427:20021:15217\_1:N:0:TCTGCAAG+GCTGCACT  
GCTGATCATGGAGTCTTTGTACCTTCTGTCAAACCTTCGAGGTTTCAGCTACGAGAGGTGATCCCGGATG  
TGGATTGAAGGCTGGCTCTAAGGGAGACTCCTTCTTTTTGAATGTTGTAAAGAATTGGGTTGAGAAGT  
GTG

+  
FF:FFFFFFFFFFFFFFFF:FFFF:FFFFFFFFFFFFFFFFFFFFFFFFFFFFFFFFFFFFFFFFFFFFF  
FFFFFFFFFFFFFFFFFFFFFFFFFFFFFFFFFFFFFFFFFFFFFFFFFFFFFFFFFFFFFFFFFFFFFFFFF  
FFF

@A00721:190:HGJW7DSXY:4:2273:7771:5024\_1:N:0:TCTGCAAG+GCTGCACT  
GACATTATTTCAACGGATACCGATCTCAGTTCTACCACAGAAACCGTCTCAGGAACTGTCTCCACTGA  
TTCGGAATTAGAGAAAGACGACCTTCTTGTGGGGACTGAGACCTCTGAATTTTCAGGGTGCCTGATG  
AGG

+  
FFFFFFFF:FFFFFFFF: ,F,FFF,:FF: ,FFFFFFFF:FFF:FFF::F::: :FFFFFF:FF:  
FFF:FFFFFFFF:F,FFF,FFFFFFFFFFFFFFFF: :FFFF:FF, :FFFFFFFFFFFF:FFFFFFF  
:F:

@A00721:190:HGJW7DSXY:4:1354:6008:8390\_1:N:0:TCTGCAAG+GCTGCACT  
TCGAAGTCTCAGTTATCGCTGCCCGGCCGGCGTTTGTGCGAACTCTCAGAGGTTTACGGCAGAAAAA  
TTTCTCCTGCTTGTAAATTCGAGAGAGGACACTATGGAAATTAGACCTATCAGATGTCTTGACGACTTC  
GAA

+  
FFFFFFFFFFFFFFFFFFFF:FFFFFFFFFFFF:FFFFFFFFFFFFFFFFFFFFFFFFFFFFFFFFFFFFF  
FFFFFFFFFFFFFFFFFFFFFFFFFFFFFFFFFFFF,FFFFFFFFFFFFFFFFFFFFFFFFFFFFFFFFFFFF  
FFF

@A00721:190:HGJW7DSXY:4:2504:23014:18490\_1:N:0:TCTGCAAG+GCTGCACT  
CCGACCTTTCCTTGTGAAAATTTTGATGCGGTTTCATAAGATTATCAGTAATCCTGATTCTACTACGG  
ATTCATGGACCTTCCATCCTGTACCTCTTCTGGAGAGACGTATCTCAAAGATCGACTTCGAGACAGGT  
GAT

+  
FFFFFFFFFFFFFFFFFFFFFFFFFFFFFFFFFFFFFFFFFFFFFFFFFFFFFFFFFFFFFFFFFFFFF:FFFFFFFFFFFFF  
FFFFFFFFFFFFFFFFFFFFFFFFFFFFFFFFFFFFFFFFFFFFFFFFFFFFFFFFFFFFFFFFFFFFFFFFF  
FFF

@A00721:190:HGJW7DSXY:4:1402:2202:3803\_2:N:0:TCTGCAAG+GCTGCACT  
AAACTACAGAGGAACGTACCGGATTACCTGTCTTTCATATTATGAATGAACCTTCGGCCGCTCTCTTT  
GCTTCGATGTTGGATGTCAAGAAGGGTTTCAGAAATGGGATTCCTACGTA

+  
FFFFFFFFFFFFFFFFFFFFFFFFFFFFFFFFFFFFFFFFFFFF:FFFFFFFFFFFFFFFFFFFFFFFFFFFF:FF  
FFF:FFF:F,FFFFFFFFFFFFFFFFFFFFFFFF:FFFF,FFFFFFFF,

@A00721:190:HGJW7DSXY:4:2347:16269:24283\_2:N:0:TCTGCAAG+GCTGCACT  
ATTTACGTTTGCTACTCAGAGCTGGTCCTCTCAGCAAAGGATGCATGGTGTTATCTCCTCAGGAGTC  
CCGGCATTGATAATAATGACGAGACTTTCGTCATAATCGCTGCATAT

+  
FFFFFFFF:FFFFFFFF:FFFFFFFFFFFFFFFFFFFFFFFF:FFFFFFFFFFFFFFFFFFFFFFFFFFFFF  
FFFFFFFFFFFFFFFFFFFF:FFFFFF,FFFFFFFF:FFFFFF

@A00721:190:HGJW7DSXY:4:2217:25500:1595\_2:N:0:TCTGCAAG+GCTGCACT  
AGCTTGTCGTTTAAAGACTGCAGAGGCTGTCAAACAAGCCAGACTCAAGGAGTCCAATCAAAGGTTT  
TGAATTTAGCTCAACTGGGGAGACGTGCTTAAATGGGTGATAAAATT

+  
FFFFFFFFFFFFFFFFFFFFFFFFFFFFFFFFFFFF:FFFFFF:FFFFFF:FFFFFFFFFF,FF:FFFF  
FFFFFFFFFFFFFFFF:FFFFFFFFFFFFFFFFFFFF:FFFFFF:FFF

@A00721:190:HGJW7DSXY:4:1118:22453:30107\_2:N:0:TCTGCAAG+GCTGCACT  
TACTCTGTACTTGATCTACGTCGTTTAACTGTCGGAACAACCTTTACTTAGAATGACTCTATCTTTTC

AGACACTTCTTATATTATTTACAATAGTTAATATCATATTAGTAATAC

+

FFFFFFFFFFFFFFFFFFFFFFFFFFFFFFFF:FFFF:FFFFFFFF:FFFFFF:FFFFFFFF:FFFFFFFF  
FFFFFFFFFFFFFFFFFFFFFFFFFFFFFFFFFFFFFFFFFFFFFFFFFFFFFFFF

@A00721:190:HGJW7DSXY:4:1417:31937:9142\_2:N:0:TCTGCAAG+GCTGCACT  
CTCTACACCCATCTCAACGAGGATAAAGCGAGTTTTCCGTCCTGAACGTAATACACGAAGAGATCATC  
CGCAAACGACTCGAAACCGAGACGCCGTAGATCAAAGTCCCTTCTAAC

+

FFFFFFFFFFFFFFFFFFFFFFFFFFFFFFFFFFFFFFFFFFFFFFFFFFFFFFFF  
FFFFFFFFFFFFFFFFFFFFFFFFFFFFFFFF:FFFFFFFFFFFF:

@A00721:190:HGJW7DSXY:4:1269:25247:31469\_1:N:0:TCTGCAAG+GCTGCACT  
TATTATCCGATTCTTCGAGGTATCACTACCACTGATCTGCCGACTTTAGTCAAGGAACCTCAATTCC  
TTCGATGTTTATATTTTCTATAAGGGAAAATAGCAATAATCAAATTTGACAAATTTTAGAACTTTA  
TTT

+

F:FFFFFFFFFFFFFFFFFFFFFFFFFFFFFFFFFFFFFFFFFFFFFFFF:FFFFFFFFFFFFFFFFFFFFFF,FFF  
FFFFFFFF,FFFFFF:FFFFFFFFFFFFFFFFFFFFFFFFFFFFFFFFFFFFFFFFFFFFFFFFFFFFFFFF  
FFF

@A00721:190:HGJW7DSXY:4:2134:21079:30608\_1:N:0:TCTGCAAG+GCTGCACT  
CCGATCACCTTGGTGTGATCTCCCGGAGGATCTTTTCAATAAGATGTATGATGATAATCTACTATTTT  
TAAATAGTGATATTCAGCGTATACTTGAATACTTTATCAAAGATTTGGCTTGGTCTATTTACCGCAA  
AAG

+

F:FFFFFFFF,FFFFFFFFFFFFFFFF:FFFFFF:FFFFFFFFFFFFFFFF:FFFFFFFFFFFFFFFF  
FFFFFFFFFFFFFFFFFFFFFFFFFFFFFFFFFFFFFFFFFFFFFFFFFFFFFFFFFFFFFFFFFFFFFFFF  
FFF

@A00721:190:HGJW7DSXY:4:2402:14597:14497\_2:N:0:TCTGCAAG+GCTGCACT  
TTTACTTATACTTTAAATAGCACCGATTATAAATTGACTGTTGATAATATTACAATAGCTCTTTCTCA  
GAAGATTAGAGAAGTAACCGGTGAACACGTCGGTAGCATTGATTACT

+

FFFFFFFFFFFFFFFFFFFFFFFFFFFFFFFFFFFFFFFF:FFFFFFFFFFFFFFFFFFFFFFFF  
FFFFFFFFFFFFFFFFFFFFFFFF:FFFFFFFFFFFFFFFF:FFFFFFFFFFFF:F

@A00721:190:HGJW7DSXY:4:2148:4146:4163\_1:N:0:TCTGCAAG+GCTGCACT  
CCAATCAATGATGTGACTATACAGTTCGCCATTTCAAGAGTGGTCAATACGTCGTGGGAGGTACTGA  
AGCCTTCCCCTCCGCTGGCACGAAGAACAACCTCCCAAGCCAATCAATAGTTCTTCTGACCAGAATGAA  
AGG

+

FFFFFFFFFFFFFFFFFFFFFFFFFFFFFFFFFFFFFFFFFFFFFFFFFFFFFFFF  
FFFFFFFFFFFFFFFFFFFFFFFFFFFFFFFF:FFFFFFFFFFFFFFFFFFFFFFFFFFFFFFFF  
FFF

@A00721:190:HGJW7DSXY:4:2633:16251:11506\_2:N:0:TCTGCAAG+GCTGCACT  
AGGAAGAGGGGAAATGTCCCCAAACTGAGAAGAATAAAGGGAAAGGTCCATCAGGACCTAAGAAGGG  
GAAATTACCCCTAATTCTGAAGGAAGATCTCCCACCATCTGGGGTTGG

+

:FFF::F:F,,::FF::FFFFFFFFFFFFFFFFFFFFFFFF:FFFF:FFF,FF,FFFF:FF:FFF:  
FFF,FFFF:FFFF:FFFF,FF:FFFFFFFF,F,FFF:FF:F

@A00721:190:HGJW7DSXY:4:1456:13114:9079\_2:N:0:TCTGCAAG+GCTGCACT  
CATTAAGGGTAGCTGTAAAGTTGCGCCTGCCGACCCATCTTTGAGACCAAGACTCTCTACAGTAGGT  
TCGTGCCTACTATGAGCAAATCTGTTGAATTCGTCACTGAGGACGAAG

+

FFFFFFFFF:FFFFFFFFFFFFFFFFFFFFFFFFFFFFFFFFFFFFFFFF:F:FFFFFF  
F:FFFFFFFFFFFFFFFF:FFFFFFFFFFFFFFFFFFFFFFFF

@A00721:190:HGJW7DSXY:4:2443:22661:18192\_2:N:0:TCTGCAAG+GCTGCACT  
TATTTATGCCGACGATAATAAGCATGTCACCCTTAAGCACCGAGGTAAGCTCGGGACTTACAAGAGAG

AGTGTGAGAGAGTCGCTCTCACTATTTTTGCCCAGAATGCGGGCCTTC  
+  
FFFFFFFFFFFFFFFFFFFFFFFFFFFFFFFFFFFFFFFFFFFFFFFFFFFFFFFFFFFFFFFFFFFFFFFF  
FFFFFFFFFFFFFFFF:FFFFFFFFFFFFFFFF:FFFFFFF:F:FFFFFFFF  
@A00721:190:HGJW7DSXY:4:2353:5565:15546\_1:N:0:TCTGCAAG+GCTGCACT  
TATTTGAAGCAGGGTTACCACTTCTTAAGGTGGATGAGGGAGGTTGTTTCTTTGGAGTTTATAGATAA  
TCTTTTGAGAAGGGGTCATAGAGCCAGCAAGAGAAGCTTATATGCTGGTTTAAAGTGATGATTATCACT  
CCT  
+  
FFFFFFFFFFFFFFFF:FFFFFFFFFFFFFFFF:FFFFFFFFFFFFFFFFFFFFFFFFFFFFFFFFFFFFF,  
FFFFFFFFFFFFFFFFFFFFFFFFFFFFFFFFFFFFFFFFFFFFFFFFFFFFFFFFFFFFFFFFFFFFFFFF  
FFF  
@A00721:190:HGJW7DSXY:4:2534:19117:6825\_1:N:0:TCTGCAAG+GCTGCACT  
GCTGATCATGGAGTCTTTGTACCTTCTGTCAAACCTTCGAGGTTACGCTACGAGAGGTGATCCCGGATG  
TGGATTGAAGGCTGGCTCTAAGGGAGACTCCTTCTTTTGAATGTTGTAAAGAATTGGGTTGAGAAGT  
GTG  
+  
FF,F,FFFFFFFF:FFFFF,FFFFFFFFFFFFFFFFFFFFFFFFFFFFFFFFFFFFFFFFFFFFFFFFFFFF  
FFFFFFFFFFFFFFFFFFFFFFFFFFFFFFFFFFFFFFFFFFFFFFFFFFFFFFFFFFFFFFFFFFFFFFFF  
FFF  
@A00721:190:HGJW7DSXY:4:2328:20509:20071\_1:N:0:TCTGCAAG+GCTGCACT  
GACATTATTTCAACGGATACCGATCTCAGTTCTACCACAGAAACCGTCTCAGGAAGTGTCTCCACTGA  
TTCGGAATTAGAGAAAGACGACCTTCTTGTGGGACTGAGACCTCTGAATTTTCAGGGTGCCTGATG  
AGG  
+  
FFFF:FFFFFFFF: ,FFFFFFFFFFFFFFFFFFFFFFFFFFFFFFFFFFFFFFFFFFFFFFFFFFFFFFFF  
FFFF,::FFFFFFFF:FF:FFFFFFFFFFFFFFFFFFFFFFFFFFFFFFFFFFFFFFFF:FF:FFFFFFFF  
FFF  
@A00721:190:HGJW7DSXY:4:2567:26847:36808\_1:N:0:TCTGCAAG+GCTGCACT  
TCGAAGTCTCAGTTATCGCTGCCCCGCCGACGTTTGTGCGAACTCTCAGAGGTTTACGGCAGAAAAA  
TTTCTCCTGCTTGTAATTCGAGAGAGGACACTATGGAAATTAGACCTATCAGATGTCTTGACGACTTC  
GAA  
+  
FFFFFFFFFFFFFFFFFFFFFFFFFFFFFFFFFFFFFFFFFFFFFFFFFFFFFFFFFFFFFFFFFFFFFFFF  
FFFFFFFFFFFFFFFFFFFFFFFFFFFFFFFFFFFFFFFFFFFFFFFFFFFFFFFFFFFFFFFFFFFFFFFF  
FFF  
@A00721:190:HGJW7DSXY:4:2517:30807:36213\_1:N:0:TCTGCAAG+GCTGCACT  
CCGACCTTCTTGTGAAAATTTTGATGCGTTTCATAAGATTATCAGTAATCCTGATTCTACTACGG  
ATTCATGGACCTTCCATCCTGTACCTCTTCTGGAGAGACGTATCTCAAAGATCGACTTCGAGACAGGT  
GAT  
+  
FFFF:FFFFFFFF:FFFFFFFFFFFFFFFFFFFFFFFFFFFFFFFFFFFFFFFFFFFFFFFF:FFFFFF:FFFF  
FFFFFFFFFFFFFFFFFFFFFFFFFFFFFFFF:FFFFFFFFFFFFFFFFFFFFFFFFFFFFFFFFFFFFFFFF  
FFF  
@A00721:190:HGJW7DSXY:4:1403:13205:18129\_2:N:0:TCTGCAAG+GCTGCACT  
AAACTACAGAGGAACGTACCGATTACCTGTCTTTCATATTATGAATGAACCTTCGGCCGCTCTCTT  
GCTTCGATGTTGGATGTCAAGAAGGGTTCAGAAATGGGATTCCTACGTA  
+  
FFFFFFFFFFFFFF:FFFFFFFFFFFFFFFFFFFFFFFFFFFFFFFFFFFFFFFFFFFFFFFFFFFFFFFF  
F:FFFFFFFFFFFFFFFF:FFFFFFFFF,FFFFFFFFFFFFFFFF  
@A00721:190:HGJW7DSXY:4:1126:19343:29262\_2:N:0:TCTGCAAG+GCTGCACT  
ATTTACGTTTGTACTCAGAGCTGGTCTCTCAGCAAAGGATGCATGGTGTATCTCCTCAGGAGTC  
CCGGCATTGATAATAATGACGAGACTTTCGTCATAATCGCTGCATAT  
+

FFFFFFFFFFFFFFFFFFFFFFFFFFFFFFFFFFFFFFFFFFFFFFFFFFFFFFFFFFFFFFFFFFFFFFFF  
FFFFFFFFFFFFFFFFFFFFFFFFFFFFFFFFFFFFFFFFFFFFFFFFFFFFFFFFFFFFFFFF, FFFFFF  
@A00721:190:HGJW7DSXY:4:2341:7871:24862\_2:N:0:TCTGCAAG+GCTGCACT  
AGCTTGTCTGTTTAAAGACTGCAGAGGCTGTCAAACAAGCCCAGACTCAAGGAGTCCAATCAAATGTTT  
TGAATTTAGCTCAACTGGGAGACGTGCTTAAATGGGTGATAAAAATT  
+  
FFFFF:FFFF,,FFF:FF:FFFF,FFFFFFFFF,:F:FF:FFFFFFFF::F,F,FFFFF,:FF,:,:F  
F:FFFFFFFF,:FF:::FFFF:F:FFFF:F:,F,,F:FFFFFFFF:FF  
@A00721:190:HGJW7DSXY:4:1206:25446:3944\_2:N:0:TCTGCAAG+GCTGCACT  
TACTCTGTACTTGATCTACGTCTTAACTGTCGGAACAACCTTTACTTAGAATGACTCTATCTTTTC  
AGACACTTCTTATATTATTACAATAGTTAATATCATATTAGTAATAC  
+  
FFFFFFFF:FFFFFFFF:FFFFFFFFFFFFFFFFFFFFFFFFFFFFFFFF:FFFFFFFFFFFFFFFFFFFFFFFF:FFFF  
FFFFFFFFFFFFFFFFFFFFFFFFFFFFFFFFFFFFFFFFFFFFFFFFFFFFFFFFFFFFFFFF  
@A00721:190:HGJW7DSXY:4:1453:5421:4993\_2:N:0:TCTGCAAG+GCTGCACT  
CTCTACACCCATCTCAACGAGGATAAAGCGAGTTTTCCGTCCTGAACGTAATACACGAAGAGATCATC  
CGCAAACGACTCGAAACCGAGACGCCGTAGATCAAAGTCCCTTCTAAC  
+  
FFFFFFFFFFFFFFFFFFFFFFFFFFFFFFFFFFFFFFFFFFFFFFFFFFFFFFFFFFFFFFFF, FFFFFFFFFFFFFFFFFFFFFFFFFF  
FFFFFFFFFFFFFFFFFFFFFFFFFFFFFFFFFFFFFFFFFFFFFFFFFFFFFFFFFFFFFFFF:  
@A00721:190:HGJW7DSXY:4:1639:7771:6965\_1:N:0:TCTGCAAG+GCTGCACT  
TATTATCCGATTCTTCGAGGTATCACTACCACTGATCTGCCGACTTTAGTCAAGGAACCTTCAATTCC  
TTCGATGTTTATATTTTTCTATAAGGGAAAATAGCAATAATCAAATTTGACAAATTTTAGAACTTTA  
TTT  
+  
FFFF:FFFFFF:FFFFFFF:FFFFFFFFFFFF:FFFFFFFFFFFFFFFFFFFFFFFFFFFFFFFFFFFFFFFF  
FFFFFFFFFFFFFFFFFFFFFFFF:FFFFFFFFFFFFFFFFFFFFFFFFFFFFFFFFFFFFFFFFFFFFFFFF  
F:F  
@A00721:190:HGJW7DSXY:4:2252:21694:25097\_1:N:0:TCTGCAAG+GCTGCACT  
CCGATCACCTTGGTGTGATCTCCCGGAGGATCTTTTCAATAAGATGTATGATGATAATCTACTATTTT  
TAAATAGTGATATTCAGCGTATACTTGAATACTTTATCAAAGATTTGGCTTGGTCTATTTACCGCAA  
AAG  
+  
F:FFFFFFFFFFFFFFFFFFFFFFFFFFFFFFFFFFFFFFFFFFFFFFFFFFFFFFFFFFFFFFFF:FFFFFFFFF  
FFFFFFFFFFFFFFFFFFFFFFFFFFFFFFFFFFFFFFFFFFFFFFFF:FFFFFFFFFFFFFFFFFFFFFFFF  
FFF  
@A00721:190:HGJW7DSXY:4:2404:12753:4977\_2:N:0:TCTGCAAG+GCTGCACT  
TTTACTTATACTTTAAATAGCACCGATTATAAATTGACTGTTGATAATATTACAATAGCTCTTTCTCA  
GAAGATTAGAGAAGTAACCGGTGAACACGTCGGTAGCATTGATTACT  
+  
FFFFF:FFFFFFFFFFFF:FFFFFFFF:FFFFFFFFFFFFFFFFFFFFFFFFFFFFFFFF:FFFFFFFFF  
FFFFFFFFFFFFFFFFFFFFFFFF:FFFF:FF:FFF:FFFFFFFFFFFF  
@A00721:190:HGJW7DSXY:4:2357:9191:32628\_1:N:0:TCTGCAAG+GCTGCACT  
GGAGTTCAGACGTGTGCTCTTCCGATCTGCCATTTCAAGAGTGGTCAATACGTCGTGGGAGGTACTGA  
AGCCTTCCCCTCCGCTGGCACGAAGAACAACCTCCAAGCCAATCAATAGTTCTTCTGACCAGAATGAAA  
AGG  
+  
FFFFFFFFFFFFFFFFFFFFFFFFFFFFFFFFFFFFFFFFFFFFFFFFFFFFFFFFFFFFFFFFFFFFFFFF  
FFFFFFFFFFFFFFFFFFFFFFFFFFFFFFFFFFFFFFFFFFFFFFFFFFFFFFFFFFFFFFFFFFFFFFFF  
FFF  
@A00721:190:HGJW7DSXY:4:2667:28989:11929\_2:N:0:TCTGCAAG+GCTGCACT  
AGGAAGAGGGGAAATGTCCCCAAAACCTGAGAAGAATAAAGGGAAAGGTCCATCAGGACCTAAGAAGGG  
GAAATTACCCCTAATTCTGAAGGAAGATCTCCACCATCTGGGGTTGG  
+

[illegible]



@A00721:190:HGJW7DSXY:4:1431:9977:25034\_2:N:0:TCTGCAAG+GCTGCACT  
AAACCACAGAGGAACGTACCGGATTACCTGTCTTTCATATTATGAATGAACCTTCGGCCGCTCTCTTT  
GCTTCGATGTTGGATGTCAAGAAGGGTTCAGAATGGGATTCCTACGTA

+

FFFFFFFFFFFFFFFFFFFFFFFFFFFFFFFFFFFFFFFFFFFFFFFFFFFFFFFFFFFFFFFFFFFFFFFF  
F:FFFFFFFFFFFFFFFFFFFFFFFFFFFFFFFFFFFFFFFFFFFFFFFFFFFFFFFFFFFFFFFF

@A00721:190:HGJW7DSXY:4:1133:18105:17127\_2:N:0:TCTGCAAG+GCTGCACT  
ATTTACGTTTGCTACTCAGAGCTGGTCCTCTCAGCAAAGGATGCATGGTGTTATCTCCTCAGGAGTC  
CCGGCATTGATAATAATGACGAGACTTTCGTCATAATCGCTGCATAT

+

FFF:FFFFFFFFFFFFFFFFFFFFFFFFFFFFFFFFFFFFFFFFFFFFFFFFFFFFFFFFFFFFFFFF  
FFFFFFFFFFFFFFFFFFFFFFFFFFFFFFFFFFFFFFFFFFFFFFFFFFFFFFFFFFFFFFFF

@A00721:190:HGJW7DSXY:4:2415:3812:11005\_2:N:0:TCTGCAAG+GCTGCACT  
AGCTTGTCGTTTAAAGACTGCAGAGGCTGTCAAACAAGCCAGACTCAAGGAGTCCAATCAAAGTTTT  
TGAATTTAGCTCAACTGGGAGACGTGCTTAAATGGGTGATAAAAAGT

+

FFFFFFFFF:FFFFFFFF:FFFFFFFFF:FFFFFFFFF,FFFFFFFFFFF,FFFFFFFFFFF,F,FF:  
FF:FFFF,FFFF:FFFFFFFF:FFFFFFFFFF,FF,FFFF:FFFF:,:

@A00721:190:HGJW7DSXY:4:1208:20103:15828\_2:N:0:TCTGCAAG+GCTGCACT  
TACTCTGTACTTGATCTACGTCGTTTAACTGTCGGAACAACCTTTACTTAGAATGACTCTATCTTTTC  
AGACACTTCTTATATTATTTACAATAGTTAATATCATATTAGTAATAC

+

FF:F,FFFFFFFFF:FF::FFFFFF,,:FFFFFFFFF:FF::FFF:,FFF:FFFF:F:FFF,FFFF  
FFFF:FFFFFFFFFFFFFFFFFFFFFFFFFFFFFFFFFFFFFFFFFFFFFFFFFFFFFFFF

@A00721:190:HGJW7DSXY:4:1535:8395:29277\_2:N:0:TCTGCAAG+GCTGCACT  
CTCTACACCCATCTCAACGAGGATAAAGCGAGTTTTCCGTCCTGAACGTAATACACGAAGAGATCATC  
CGCAAACGACTCGAAACCGAGACGCCGTAGATCAAAGTCCCTTCTAAC

+

FFFFFFFFFFFFFFFFFFFFFFFFFFFFFFFFFFFFFFFFFFFFFFFFFFFFFFFFFFFFFFFFFFFFFFFF  
FFFFFFFFFFFFFFFFFFFFFFFFFFFFFFFFFFFFFFFFFFFFFFFFFFFFFFFFFFFFFFFF

@A00721:190:HGJW7DSXY:4:2204:16034:31391\_1:N:0:TCTGCAAG+GCTGCACT  
TATTATCCGATTCTTCGAGGTATCACTACCACTGATCTGCCGACTTTAGTCAAGGAACCTTCAATTCC  
TTCGATGTTTATATTTTCTATAAGGGAAAATAGCAATAATCAAATTTGACAAATTTAGAACTTTA  
TTT

+

FFFFFFFFFFFFFFFFFFFFFFFFFFFFFFFFFFFFFFFFFFFFFFFFFFFFFFFFFFFFFFFFFFFFFFFF  
FFFFFFFFFFFFFFFFFFFFFFFFFFFFFFFFFFFFFFFFFFFFFFFFFFFFFFFFFFFFFFFFFFFFFFFF  
FFF

@A00721:190:HGJW7DSXY:4:2261:10809:30639\_1:N:0:TCTGCAAG+GCTGCACT  
CCGATCACCTTGGTGTGATCTCCCGGAGGATCTTTTCAATAAGATGTATGATGATAATCTACTATTTT  
TAAATAGTGATATTCAGCGTATACTTGAATACTTTATCAAAGATTTGGCTTGGTCTATTTACCGCAA  
AAG

+

F:FFFFFFFFFFFFFFFFFFFFFFFFFFFFFFFFFFFFFFFFFFFFFFFFFFFFFFFFFFFFFFFFFFFFFFFF  
FFFFFFFFFFFFFFFFFFFFFFFFFFFFFFFFFFFFFFFFFFFFFFFFFFFFFFFFFFFFFFFFFFFFFFFF  
FFF

@A00721:190:HGJW7DSXY:4:2408:23005:18568\_2:N:0:TCTGCAAG+GCTGCACT  
TTTACTTATACTTTAAATAGCACCGATTATAAATTGACTGTTGATAATATTACAATAGCTCTTTCTCA  
GAAGATTAGAGAAGTAACCGGTGAACACGTCGGTAGCATTGATTACT

+

FFFFFFFFFFFFFFFFF,FFFFFFFFFFFFFFFFFFFFFFFFFFFFFFFFFFFFFFFFFFFFFFFFFFFFF  
FFFFF:FFFFFFFFFFFFFFFFFFFFFFFFFFFFFFFFFFFFFFFFFFFFFFFFFFFFFFFF

@A00721:190:HGJW7DSXY:4:2377:7455:23703\_1:N:0:TCTGCAAG+GCTGCACT  
GGAGTTCAGACGTGTGCTCTTCCGATCTGCCATTTCAAGAGTGGTCAATACGTCGTGGGAGGTACTGA

AGCCTTCCCCTCCGCTGGCACGAAGAACAACACTCCCAAGCCAATCAATAGTTCTTCTGACCAGAATGAAA  
AGG

+

FFFFFFFFFFFFFFFFFFFFFFFFFFFFFFFFFFFFFFFFFFFFFFFFFFFFFFFFFFFFFFFFFFFFFFFF:FF  
:FFF:FFFFFFFFFFFFFFFFFFFFFFFFFFFFFFFFFFFFFFFFFFFFFFFFFFFFFFFFFFFFFFFF:FFFFFFFFFFFFFFFF  
FFF

@A00721:190:HGJW7DSXY:4:2344:17553:28761\_1:N:0:TCTGCAAG+GCTGCACT  
AGAGGGGAAATGTCCCCAAAACCTGAGAAGAATAAAGGGAAAGGTCCATCAGGACCTAAGAAGGGGAAA  
TTACCCCTAATTCTGAAGGAAGATCTCCCACCATCTGGGGTTGGGAATAAGAAATCTGCACGGGCCAA  
AGA

+

FFFFFFFFFFFFFFFFFFFFFFFFFFFFFFFF:FFFFF,FFFFFFFFFFFFFFFFFFFFFFFFFFFFFFFF  
:FFFFFFFFFFFFFFFFFFFFFFFFFFFFFFFFFFFFFFFFFFFFFFFFFFFFFFFFFFFFFFFFFFFFFFFF  
FFF

@A00721:190:HGJW7DSXY:4:2646:14127:23578\_2:N:0:TCTGCAAG+GCTGCACT  
CATTAAGGGTAGCTGTAAAGTTGCGCCTGCCGACCCATCTTTGAGACCAAGACTCTCTACAGTAGGT  
TCGTGCCTACTATGAGCAAATCTGTTGAATTCGTCACTGAGGACGAAG

+

FFFFFFFFFFFFFFFFFFFFFFFFFFFFFFFFFFFFFFFFFFFFFFFFFFFFFFFFFFFFFFFFFFFFFFFF  
FFFFFFFFFFFF:FFFFFFFFFFFFFFFFFFFFFFFFFFFFFFFFFFFFFFFFFFFFFFFF

@A00721:190:HGJW7DSXY:4:2675:21414:27023\_2:N:0:TCTGCAAG+GCTGCACT  
TATTTATGCCGACGATAATAAGCATGTCAACCCTTAAGCACCGAGGTAAGCTCGGGACTTACAAGAGAG  
AGTGTGAGAGAGTCGCTCTCACTATTTTTGCCCAGAATGCGGGCTTTC

+

FFFFFFFFFFFFFFFFFFFFFFFFFFFFFFFFFFFFFFFFFFFFFFFFFFFFFFFFFFFFFFFFFFFFFFFF  
FFFFFFFFFF,FF:FFFFFFFFFFFFFFFFFFFFFFFFFFFFFFFFFFFFFFFF:FFFFFFFFF:

@A00721:190:HGJW7DSXY:4:2406:2555:31156\_1:N:0:TCTGCAAG+GCTGCACT  
TATTTGAAGCAGGGGTTACCACTTCCTAAGGTGGATGAGGGAGGTTGTTTCTTTGGAGTTTATAGATAA  
TCTTTTGAGAAGGGGTCATAGAGCCAGCAAGAGAAGCTTATATGCTGGTTTAAGTGATGATTATCACT  
CCT

+

FFFF,F:FFFFFFFFF:FFFFFFFFFFFFFFFFFFFFFFFFFFFFFFFFFFFFFFFFFFFFFFFFF:  
FFFFFFFFFFFFFFFFFFFFFFFFFFFFFFFFFFFFFFFFFFFFFFFFFFFFFFFFFFFFFFFFFFFFFFFF  
FFF

@A00721:190:HGJW7DSXY:4:1442:9200:13448\_1:N:0:TCTGCAAG+GCTGCACT  
GATCTTGACAGAGTGACTGGAGTTCAGACGTGTCTCTTCCGATCTGCTACGAGAGGTGATCCCGGATG  
TGGATTGAAGGCTGGCTCTAAGGGAGACTCCTTCTTTTTGAATGTTGTAAAGAATTGGGTTGAGAAGT  
GTG

+

FFFFFFFFFFF:F:FFFFFFFFFFFFFFFFFFFFFFFFFFFFFFFFFFFFFFFFFFFFFFFFFFFFFFFF  
FFFFFFFFFFFFFFFFFFFFFFFFFFFFFFFFFFFFFFFFFFFFFFFFFFFFFFFFFFFFFFFFFFFFFFFF  
FFF

@A00721:190:HGJW7DSXY:4:2671:28022:24627\_1:N:0:TCTGCAAG+GCTGCACT  
GACATTATTTCAACGGATACCGATCTCAGTTCTACCACAGAAACCGTCTCAGGAAGTGTCTCCACTGA  
TTCGGAATTAGAGAAAGACGACCTTCTTGTGGGGACTGAGACCTCTGAATTTTCAGGGTGCCCTGATG  
AGG

+

F::FFFFF,FFFF:FF:FF,FFF,FF:,FFF:F,,FFF:FFFF,FF:F,FFFFFFFFFFFF,,FFFF  
FFF,FFFFFFFF:F,FF::FFFFFFFFFF,F:FFFFFFFFF:,F:F::FFFFFFFF:F:FF:FFFFFFFF  
:FF

@A00721:190:HGJW7DSXY:4:1170:23538:17613\_1:N:0:TCTGCAAG+GCTGCACT  
AAGTCTCAGTTATCGCTGCCCGGCCGACGTTTGTGCGGAACTCTCAGAGGTTTACGGCAGAAAAATTT  
CTCCTGCTTGTAATTCGAGAGAGGACACTATGGAAATTAGACCTATCAGATGTCTTGACGACTTCGAA  
TTT

FFFFFFFFFFFFFFFFFFFFFFFFFFFFF:FFFFFFFFFFFFFFFFFFFFFFFFFFFFFF  
FFFFFFFFFFFFFFFFFFFFFFFFFFFFFFFFFFFFFFFFFFFFFFFFFFFFFFFFFFFF  
FFF  
@A00721:190:HGJW7DSXY:4:1306:20021:21104\_1:N:0:TCTGCAAG+GCTGCACT  
TGCTCTTCCGATCTAAATTTTGATGCGGTTCATAAGATTATCAGTAATCCTGATTCTACTACGGATT  
CATGGACCTTCCATCCTGTACCTCTTCTGGAGAGACGTATCTCAAAGATCGACTTCGAGACAGGTGAT  
ATT  
+  
FFFFFFFFFF:FFFFFF:FFFFFFFFFFFFFFFFFFFFFFFFFFFFFFFFFFFFFFFFFFFF  
FFFFFFFFFFFFFFFFFFFFFFFFFFFFFFFFFFFFFFFFFFFFFFFFFFFFFFFFFFFF  
FFF  
@A00721:190:HGJW7DSXY:4:1533:26702:26663\_2:N:0:TCTGCAAG+GCTGCACT  
AAACTACAGAGGAACGTACCGGATTACCTGTCTTTCATATTATGAATGAACCTTCGCCCGCTCTCTTT  
GCTTCGATGTTGGATGTCAAGAAGGGTTTCAGAATGGGATTCCTACGTA  
+  
FFFFFFFFFFFFFF:FFFFFFFFFFFFFFFFFFFFFFFFFFFFFFFFFFFFFFFFFFFFF:  
FFFF:FFFF:FFFFFF:FFFFFFFF,FFFFFFFFFFFFFFFFFFFFFF  
@A00721:190:HGJW7DSXY:4:1244:30192:29450\_2:N:0:TCTGCAAG+GCTGCACT  
ATTTACGTTTGCTACTCAGAGCTGGTCCTCTCAGCAAAGGGATGCATGGTGTTATCTCCTCAGGAGTC  
CCGGCATTGTGATAATAATGACGAGACTTTCGTCTATAATCGCTGCATAT  
+  
FFFFFFFFFFFFFFFFFFFFFFFFFFFFFFFFFFFFFFFFFFFFFFFFFFFFFFFFFFFF  
FFFFFFFFFFFFFFFFFFFFFFFFFFFFFFFFFFFFFFFFFFFFFFFFFFFFF  
@A00721:190:HGJW7DSXY:4:2470:5990:10614\_2:N:0:TCTGCAAG+GCTGCACT  
AGCTTGTCGTTTTAAAGACTGCAGAGGCTGTCAAACAAGCCAGACTCAAGGAGTCCAATCAAAGGTTT  
TGAATTTAGCTCAACTGGGGAGACGTGCTTAAATGGGTGATAAAAATT  
+  
FFFFFFFFFFFFFFFFFFFF:FFFFFFFFFFFFFFFFFFFF:FFFFFFFFFFFFFFFF:F  
FFFFFFFFFFFFFFFFFFFF:FFFFFFFFFFFFFFFFFFFF:F,FFFFFFFFFFFFF  
@A00721:190:HGJW7DSXY:4:1225:29866:10723\_2:N:0:TCTGCAAG+GCTGCACT  
TACTCTGTACTTGATCTACGTCGTTTAACTGTCGGAACAACCTTTACTTAGAATGACTCTATCTTTTC  
AGACACTTCTTATATTATTTACAATAGTTAATATCATATTAGTAATAC  
+  
FFFFFFFFFFFFFFFFFFFFFFFFFFFFFFFFFFFFFFFFFFFFFFFFFFFFFFFFFFFF  
FFFFFFFFFFFFFFFFFFFFF:FFFFFFFFFFFFFFFFFFFFFFFFFFFFFFFFF  
@A00721:190:HGJW7DSXY:4:2130:23565:24518\_2:N:0:TCTGCAAG+GCTGCACT  
CTCTACACCCATCTCAACGAGGATAAAGCGAGTTTCCGTCCTGAACGTAATACACGAAGAGATCATC  
CGCAAACGACTCGAAACCGAGACGCCGTAGATCAAAGTCCCTTCTAAC  
+  
FFFFFFFFFFFFFFFFFFFFFFFFFFFFFFFFFFFFFFFFFFFFFFFFFFFFFFFFFFFF  
FFFFFFFFFFFFFFFFFFFFF:FFFFFFFFFFFFFFFFFFFFFFFFFFFFFFFFF  
@A00721:190:HGJW7DSXY:4:2367:2727:18834\_1:N:0:TCTGCAAG+GCTGCACT  
TATTATCCGATTCTTCGAGGGTATCACTACCACTGATCTGCCGACTTTAGTCAAGGAACCTTCAATTCC  
TTCGATGTTTATATTTTCTATAAGGGAAAATAGCAATAATCAAATTTGACAAATTTTAGAACTTTA  
TTT  
+  
FFFFFFFFFFFFFFFFFFFFFFFFFFFFFFFFFFFFFFFFFFFFFFFFFFFFFFFFFFFF  
FFFFFFFFFFFFFFFFFFFFF:FFFFFFFFFFFFFFFFFFFFFFFFFFFFFFFFF  
@A00721:190:HGJW7DSXY:4:2266:2428:23359\_1:N:0:TCTGCAAG+GCTGCACT  
CCGATCACCTTG GTGTGATCTCCCGGAGGATCTTTTCAATAAGATGTATGATGATAATCTACTATTTT  
TAAATAGTGATATTCAGCGTATACTTGAATACTTTATCAAAGATTTGGCTTGGTCTATTTACCGCAA  
AAG

```
+ :FFFFFFFFFFFFFFFFFFFFFFFFFFFFFFFFFFFFFFFFFFFFFFFFFFFFFFFFFFFFFFF  
FFFFFFFFFFFFFFFFFFFFFFFFFFFFFFFFFFFFFFFFFFFFFFFFFFFFFFFFFFFFFFF:  
FFF  
@A00721:190:HGJW7DSXY:4:2623:29649:9064_2:N:0:TCTGCAAG+GCTGCACT  
TTTACTTATACTTTAAATAGCACCGATTATAAATTGACTGTTGATAATATTACAATAGCTCTTTCTCA  
GAAGATTAGAGAAGTAACCGGTGAACACGTCGGTAGCATTGATTACT  
+  
FFFFFFFFFFFF,FFFF:FFFFFFFFFFFFFFFF:FFFFFFFFFFFFFFFFFFFFFFFFFFFFF  
F:FFFFFFFFFFFFFFFF:FFFFFFFFFFFFFFFFFFFFFFFFFFFFFF:F:F  
@A00721:190:HGJW7DSXY:4:1329:23366:30154_1:N:0:TCTGCAAG+GCTGCACT  
AATCAATGATGTGACTATACAGTTCGGCCATTTCAAGAGTGGTCAATACGTCGTGGGAGGTACTGAAG  
CCTTCCCCTCCGCTGGCACGAAGAACACTCCCAAGCCAATCAATAGTTCTTCTGACCAGAATGAAAAG  
GGG  
+  
:, :FFFFFFFF:F:FFFF:FFFFFF:FFF:FFFFFFFFFFFFFF,:FFFF:FFFFFF:FFFFFF  
FFFFFFFFFFFFFFFFFFFFFFFFFFFF,FFFFFFFFFFFFFF:FF:FFFF:FFFFFF:FFF,FFF  
FFF  
@A00721:190:HGJW7DSXY:4:2374:20211:26850_1:N:0:TCTGCAAG+GCTGCACT  
AGAGGGGAAATGTCCCCAAAACAGAGAATAAAGGGAAAGGTCCATCAGGACCTAAGAAGGGGAA  
TTACCCCTAATTCTGAAGGAAGATCTCCCACCATCTGGGGTTGGAATAAGAAATCTGCACGGGCCAA  
AGA  
+  
FFFFFFFFFFF:F:F:FFFFFFFFFFFF:FF:F:FFFF:FFFFFFFFFFFFFFFFFFFFFFFFFFFFF  
F:FFFFFFFFFFFFFFFFFFFFFFFFFFFFFFFFFFFFFFFFFFFFFFFFFFFFFFFFFFFFFFFFF,  
FFF  
@A00721:190:HGJW7DSXY:4:2646:15537:22075_2:N:0:TCTGCAAG+GCTGCACT  
CATTAAGGGTAGCTGTAAAGTTGCGCCTGCCGACCCCATCTTTGAGACCAAGACTCTCTACAGTAGGT  
TCGTGCCTACTATGAGCAAATCTGTTGAATTCGTCACTGAGGACGAAG  
+  
FFFFFFFFFFFFFFFFFFFFFFFFFFFFFFFFFFFFFFFFFFFFFFFFFFFFFFFFFFFF:FFFFFFFF  
FFFFFFFFFFFFFFFFFFFFFFFFFFFFFFFFFFFFFFFFFFFFFFFFFFFFFFFFFFFF  
@A00721:190:HGJW7DSXY:4:2677:25400:4617_2:N:0:TCTGCAAG+GCTGCACT  
TATTTATGCCGACGATAATAAGCATGTCAACCCTTAAGCACCGAGGTAAGCTCGGGACTTACAAGAGAG  
AGTGTGAGAGAGTCGCTCTCACTATTTTTGCCCAGAATGCGGCCTTC  
+  
FFFFFFFFFFFFFFFFFFFFFFFFFFFFFFFFFFFFFFFFFFFFFFFFFFFFFFFFFFFF:FFFFFFFF  
FF:FFFFFFFFFFFFFFFFFFFFFFFFFFFF:FFFFFFFFFFFFFFFFFFFF:  
@A00721:190:HGJW7DSXY:4:2434:22598:10817_1:N:0:TCTGCAAG+GCTGCACT  
TATTTGAAGCAGGGGTTACCACTTCCTAAGGTGGATGAGGGAGGTTGTTTCTTTGGAGTTTATAGATAA  
TCTTTTGAGAAGGGGTCATAGAGCCAGCAAGAGAAGCTTATATGCTGGTTTAAGTGATGATTATCACT  
CCT  
+  
FFFFFFFFFFFFFFFFFFFFFFFFFFFFFFFFFFFFFFFFFFFFFFFFFFFFFFFFFFFF:FFFFFF  
FFFFFFFFFFFFFFFFFFFFFFFFFFFFFFFFFFFFFFFFFFFFFFFFFFFFFFFFFFFF  
FFF  
@A00721:190:HGJW7DSXY:4:1650:28248:30342_1:N:0:TCTGCAAG+GCTGCACT  
GATCTTGCAAGTACTGGAGTTCAGACGTGTGCTCTTCCGATCTGCTACGAGAGGTGATCCCGGATG  
TGGATTGAAGGCTGGCTCTAAGGGAGACTCCTTCTTTTTGAATGTTGTAAAGAATTGGGTTGAGAAGT  
GTG  
+  
FFFFF,FFFFFFFFFFFFFFFF:FFFFFFFFF,FFFFF:FFFFFF:F:FFFFFFFF:FFFF  
FFFFFFFFFFFFFFFF:FFFFFFFFFFFFFFFFFFFFFFFFFFFFFFFFFFFFFFFFFFFF,  
F.F
```





@A00721:190:HGJW7DSXY:4:2460:27877:27477\_1:N:0:TCTGCAAG+GCTGCACT  
TATTTGAAGCAGGGGTTACCACTTCCTAAGGTGGATGAGGGAGGTTGTTTCTTTGGAGTTTATAGATAA  
TCTTTTGAGAAGGGGTCATAGAGCCAGCAAGAGAAGCTTATATGCTGGTTTAAAGTGATGATTATCACT  
CCT

+

FFFFFFFFF,FFF:FFFFFFFFFFFFFFFFFFFFFFFFFFFFFFFFFFFFFFFFFFFFFFFFFFFFFFFFFFFFFFFF  
FFF:FFFFFFFFFFFFFFFFFFFFFFFFFFFFFFFFFFFFFFFFFFFFFFFFFFFFFFFFFFFFFFFFFFFFFFFF  
FFF

@A00721:190:HGJW7DSXY:4:2121:7862:18709\_1:N:0:TCTGCAAG+GCTGCACT  
GATCTTGCAGAGTGACTGGAGTTCAGACGTGTGCTCTTCCGATCTGCTACGAGAGGTGATCCCGGATG  
TGGATTGAAGGCTGGCTCTAAGGGAGACTCCTTCTTTTGAATGTTGTAAAGAATTGGGTTGAGAAGT  
GTG

+

FFFFF:FFFFFFFFFFFFFFFFFFFFFFFFFFFFFFFFFFFFFFFFFFFFFFFFFFFFFFFFFFFFFFFFFFFFFFFF  
FFFFFFFFFFFFFFFFFFFFFFFFFFFFFFFFFFFFFFFFFFFFFFFFFFFFFFFFFFFFFFFFFFFFFFFFFFFFFFFF  
FFF

@A00721:190:HGJW7DSXY:4:1459:24415:11271\_1:N:0:TCTGCAAG+GCTGCACT  
ACATTATTTCAACGGATACCGATCTCAGTTCTACCACAGAAACCGTCTCAGGAAGTGTCTCCACTGAT  
TCGGAATTAGAGAAAGACGACCTTCTTGTGGGGACTGAGACCTCTGAATTTTCAGGGTGCCCTGATGA  
GGA

+

FFFFFFFFFFFFFFFFFFFFFFFFFFFFFFFFFFFFFFFFFFFFFFFFFFFFFFFFFFFFFFFFFFFFFFFFFFFFFFFF  
FFFFFFFFFFFFFFFFFFFFFFFFFFFFFFFFFFFFFFFFFFFFFFFFFFFFFFFFFFFFFFFFFFFFFFFFFFFFFFFF  
FFF

@A00721:190:HGJW7DSXY:4:2410:10655:4257\_1:N:0:TCTGCAAG+GCTGCACT  
AAGTCTCAGTTATCGCTGCCCGCCGACGTTTGTGCGGAACTCTCAGAGGTTTACGGCAGAAAAATTT  
CTCCTGCTTGTAAATTCGAGAGAGGACACTATGGAAATTAGACCTATCAGATGTCTTGACGACTTCGAA  
TTT

+

FFFFFFFFFFFFFFFFFFFFFFFFFFFFFFFFFFFFFFFFFFFFFFFFFFFFFFFFFFFFFFFFFFFFFFFFFFFFFFFF  
FFFFFFFFFFFFFFFFFFFFFFFFFFFFFFFFFFFFFFFFFFFFFFFFFFFFFFFFFFFFFFFFFFFFFFFFFFFFFFFF  
FFF

@A00721:190:HGJW7DSXY:4:2260:25500:16877\_1:N:0:TCTGCAAG+GCTGCACT  
TGCTCTTCCGATCTAAATTTTGATGCGGTTTCATAAGATTATCAGTAATCCTGATTCTACTACGGATT  
CATGGACCTTCCATCCTGTACCTCTTCTGGAGAGACGTATCTCAAAGATCGACTTCGAGACAGGTGAT  
ATT

+

FFFFFFFFFFFFFFFFFFFFFFFFFFFFFFFFFFFFFFFFFFFFFFFFFFFFFFFFFFFFFFFFFFFFFFFFFFFFFFFF  
FFFFFFFFFFFFFFFFFFFFFFFFFFFFFFFFFFFFFFFFFFFFFFFFFFFFFFFFFFFFFFFFFFFFFFFFFFFFFFFF  
FFF

@A00721:190:HGJW7DSXY:4:2330:25500:5979\_2:N:0:TCTGCAAG+GCTGCACT  
AAACTACAGAGGAACGTACCGGATTACCTGTCTTTCATATTATGAATGAACCTTCGGCCGCTCTCTTT  
GCTTCGATGTTGGATGTCAAGAAGGGTTCAGAATGGGATTCCTACGTA

+

FFFFF:FFFFFFFFFFFFFFFFFFFFFFFFFFFFFFFFFFFFFFFFFFFFFFFFFFFFFFFFFFFFFFFFFFFFFFFF  
FF:FFFF,FFFFFFFFFFFFFFFF,F:FFFFF,F:FFFFFFFFFFFFFFFF

@A00721:190:HGJW7DSXY:4:2516:14696:28479\_2:N:0:TCTGCAAG+GCTGCACT  
ATTTACGTTTGCTACTCAGAGCTGGTCTCTCAGCAAAGGGATGCATGGTGTTATCTCCTCAGGAGTC  
CCGGCATTGATAATAATGACGAGACTTTCGTGCTAATCGCTGCATAT

+

FFFFFFFFF:FFF:FFFFFFFFFFFFFFFFFFFFFFFFFFFFFFFFFFFFFFFFFFFFFFFFFFFFFFFFFFFFFFFF  
FFFFFFFFFFFFFFFFFFFFFFFFFFFFFFFFFFFFFFFFFFFFFFFFFFFFFFFFFFFFFFFFFFFFFFFF

@A00721:190:HGJW7DSXY:4:2657:13268:28291\_2:N:0:TCTGCAAG+GCTGCACT  
AGCTTGTCGTTTAAAGACTGCAGAGGCTGTCAAACAAGCCAGACTCAAGGAGTCCAATCAAAGGTTT

+

@A00721:190:HGJW7DSXY:4:1263:26919:25817\_2:N:0:TCTGCAAG+GCTGCACT  
TACTCTGTACTTGATCTACGTCGTTTAACTGTCGGAACAACCTTTACTTAGAATGACTCTATCTTTTC  
AGACACTTCTTATATTATTTACAATAGTTAATATCATATTAGTAATAC

+

@A00721:190:HGJW7DSXY:4:2534:9878:6292\_2:N:0:TCTGCAAG+GCTGCACT  
CTCTACACCCATCTCAACGAGGATAAAGCGAGTTTTCCGTCTGAACGTAATACACGAAGAGATCATC  
CGCAAACGACTCGAAACCGAGACGCCGTAGATCAAAGTCCCTTCTAAC

+

@A00721:190:HGJW7DSXY:4:2552:16568:29058\_1:N:0:TCTGCAAG+GCTGCACT  
TATTATCCGATTCTTCGAGGGTATCACTACCACTGATCTGCCGACTTTAGTCAAGGAACTTCAATTCC  
TTCGATGTTTATATTTTTCTATAAGGGAAAATAGCAATAATCAAATTTGACAAATTTTAGAACTTTA  
TTT

 $+$ 

F,FFFF:FF:FFFFFFFF:FFFFFFFF:FFF:FFFFFFFFFFFFFFFF:FFF:FFF,:FFFFFFFFFFFF:FFF  
:FFFFFFFFFFFF:FFF:FFFFFF:,FFFF,FFFF:FFFFFFFF,FFFF:FFFF:F,FFFFFFFF:F,FFF:  
FFF

@A00721:190:HGJW7DSXY:4:2352:22417:12132\_1:N:0:TCTGCAAG+GCTGCACT  
CCGATCACCTTGGTGTGATCTCCCGGAGGATCTTTTCAATAAGATGTATGATGATAATCTACTATTTT  
TAAATAGTGATATTCAGCGTATTCTTGAATACTTTATCAAAGATTTGGCTTGGTCTATTTACCGCAA  
AAG

+

```
FFFFFFFFFFFFFFFFFFFFFFFFFFFFFFFFFFFFFFFFFFFFFFFFFFFFFFFFFFFFF,FFFFFFFFF  
FFFFFFFFFFFFFFFFFFFFFFF,FFFFFFFFFFFFFFFFFFFFFFFFFFFFFFFFFFFFFFFFFFFFF  
FFF
```

@A00721:190:HGJW7DSXY:4:1639:28546:22247\_2:N:0:TCTGCAAG+GCTGCACT  
TTACTTATACTTTAAATAGCACCGATTATAACTTGACTGTTGATAATATTACAATAGCTCTTTCTCAG  
AAGATTAGAGAAGTAACCGGTGAACACGTCGGTAGCATTGATTTACTT

+

```
FFFFFFFFFFFFFFFFFFFFFFFFFFFFFFFFFFFFFFFFFFFFFFFFFFFFFFFFFFFFFFFFFFFFF:F  
FF:FFFFFFFFFFFFFFFFFFFFFFFFFFFFFFFFFFFFFFFFFFFFFFFFFFFFFF
```

@A00721:190:HGJW7DSXY:4:1440:2175:21543\_1:N:0:TCTGCAAG+GCTGCACT  
AATCAATGATGTGACTATACAGTTTCGCCATTTCAAGAGTGGTCAATACGTCGTGGGAGGTACTGAAG  
CCTTCCCTCCGCTGGCACGAAGAACACTCCCAAGCCAATCAATAGTTCTTCTGACCAGAATGAAAAG  
GGG

+

[illegible]

@A00721:190:HGJW7DSXY:4:2535:32099:24236\_1:N:0:TCTGCAAG+GCTGCACT  
AGAGGGGAAATGTCCCCAAACTGAGAAGAATACAGGGAAAGGTCCATCAGGACCTAAGAAGGGGAAA  
TTACCCCTAATTCTGAAGGAAGATCTCCCACCATCTGGGGTTGGGAATAAGAAATCTGCACGGGCCAA  
AGA

 $+$ [illegible]





@A00721:190:HGJW7DSXY:4:2525:22607:1344\_2:N:0:TCTGCAAG+GCTGCACT  
AAACTACAGAGGAACGTACCGGATTACCTGTCTTTCATATTATGAATGAACCTTCGGCCGCTCTCTTT  
GCTTCGATGTTGGATGTCAAGAAGGGTTTCAGAATGGGATTCCTACGTA

@A00721:190:HGJW7DSXY:4:2670:8006:32643\_2:N:0:TCTGCAAG+GCTGCACT  
ATTTACGTTTGCTACTCAGAGCTGGTCCTCTCAGCAAAGGGATGCATGGTGTTATCTCCTCAGGAGTC  
CCGGCATTGATAATAATGACGAGACTTTCGTGATAATCGCTGCATAT

@A00721:190:HGJW7DSXY:4:2446:12554:17816\_2:N:0:TCTGCAAG+GCTGCACT  
ACAAGCCAGACTCAAGGAGTCCAATCAAAGGTTTTGAATTTAGCTCAACTGGGGAGACGTGCTTAA  
TGGGTGATAAAAATTATTTAGAGATCTTTTCTACTTACAAAGGACAAT

@A00721:190:HGJW7DSXY:4:1417:3983:19382\_2:N:0:TCTGCAAG+GCTGCACT  
TACTCTGTA CTTGATCTACGTCGTTTAACTGTCGGAACAACCTTTACTTAGAATGACTCTATCTTTTC  
AGACACTTCTTATATTATTTACAATAGTTAATATCATATTAGTAATAC

@A00721:190:HGJW7DSXY:4:2652:23692:24799\_2:N:0:TCTGCAAG+GCTGCACT  
CTCTACACCCATCTCAACGAGGATAAAGCGAGTTTTCCGTCTGAACGTAATACACGAAGAGATCATC  
CGCAAACGACTCGAAACCGAGACGCCGTAGATCAAAGTCCCTTCTAAC

@A00721:190:HGJW7DSXY:4:2355:19470:33364\_1:N:0:TCTGCAAG+GCTGCACT  
CCGATCACCTTGGTGTGATCTCCCGGAGGATCTTTTCAATAAGATGTATGATGATAATCTACTATTTT  
TAAATAGTGATATTCAGCGTATACTTGAATACTTTATCAAAGATTTGGCTTGGTCTATTTACCGCAA  
AAG

@A00721:190:HGJW7DSXY:4:1665:14995:17534\_2:N:0:TCTGCAAG+GCTGCACT  
TTACTTATACTTTAAATAGCACCGATTATAACTTGACTGTTGATAATATTACAATAGCTCTTTCTCAG  
AAGATTAGAGAAGTAACCGGTGAACACGTCGGTAGCATTGATTTACTT

@A00721:190:HGJW7DSXY:4:1549:2329:35837\_1:N:0:TCTGCAAG+GCTGCACT  
AATCAATGATGTGACTATACAGTTCGGCCATTTCAAGAGTGGTCAATACGTCGTGGGAGGTACTGAAG  
CCTTCCCCCTCCGCTGGCACGAAGAACACTCCCAAGCCAATCAATAGTTCTTCTGACCAGAATGAAAAG  
GGG

```
F,FFF,FFFFFFFFFFFFFF:FFFFFFFFFFFFFFFFFFFFFFFF:FFFFFFFFFFFFFFFFFFFF  
FFFFFFFFFFFFFFFFFFFFFFFFFFFFFFFFFFFFFFFF:FFFFFFFFFFFF:FFFFFFFFFFFFFFFFFFFFFFFFFFFFF  
FFF
```

@A00721:190:HGJW7DSXY:4:1133:1452:36824\_2:N:0:TCTGCAAG+GCTGCACT  
ATGTCCCCAAACTGAGAAGAATAAAGGGAAAGGTCCATCAGGACCTAAGAAGGGGAAATTACCCCTA  
ATTCTGAAGGAAGATCTCCCACCATCTGGGGTTGGAATAAGAAATCT

+

FFFFFFFFFFFFFFFFFFFFFFFF:FFF:FFFFFFFFFFFFFFFFFFFFFFFF, :FFFFFFFFFFFFFFFF  
FFF:FFFF:FFFFFFFFFFFFFFFFFFFFFFFF:FFFFFFFFFFFFFF

@A00721:190:HGJW7DSXY:4:1456:13114:9079\_1:N:0:TCTGCAAG+GCTGCACT  
TTAAGGGTAGCTGTAAAGTTGCGCCTGCCGACCCATCTTTGAGACCAAGACTCTCTACAGTAGGTTT  
GTGCTACTATGAGCAAATCTGTTGAATTCGTCACTGAGGACGAAGGTGAGAGGACTTTTGGCTACTG  
GCG

+

FFFFFFFFFFFFFFFFFFFFFFFFFFFFFFFFFFFFFFFFFFFFFFFFFFFFFFFFFFFFFFFF:FFFFFFFF  
FFFFFFFFFFFFFFFFFFFFFFFFFFFFFFFFFFFFFFFFFFFFFFFFFFFFFFFFFFFFFFFFFFFFFFFF  
FFF

@A00721:190:HGJW7DSXY:4:2605:8052:34350\_1:N:0:TCTGCAAG+GCTGCACT  
ACCCTTAAGCACCGAGGTAAGCTCGGGACTTACAAGAGAGAGTGTGAGAGAGTCGCTCTCACTATTTT  
TGCCCAAGATGCGGGCTTTCTGACTGATGAGGTTAAACTCTTGCTCCTTCTGTGGGTGAGGGTTTTT  
GTT

+

FFFFFFFFFFFFFFFFFFFFFFFFFFFFFFFFFFFFFFFFFFFFFFFFFFFFFFFFFFFFFFFF:FFFFFFFF  
FFFFFFFF:FFFFFFFFFFFFFFFFFFFFFFFFFFFFFFFFFFFFFFFFFFFFFFFFFFFFFFFFFFFFFFFF  
FFF

@A00721:190:HGJW7DSXY:4:2566:15085:8077\_1:N:0:TCTGCAAG+GCTGCACT  
TATTTGAAGCAGGGTTACCACTTCTTAAGGTGGATGAGGGAGGTTGTTTCTTTGGAGTTTTAGATAA  
TCTTTTGAGAAGGGTTCATAGAGCCAGCAAGAGAAGCTTATATGCTGGTTTAAGTGATGATTATCACT  
CCT

+

FF:FFF::FF,F:FFFF,F:F:F,FF,F:FFF,FFF,F,FFFFFFFF,FFF:FFFFFFFF,FF,:  
FF:FFFFFFFF:FFFFFFFF:F:,F:FFF,FF,F,FF:FFF:FFFFFFFFFFFFFFFFFFFFFFFF  
FFF

@A00721:190:HGJW7DSXY:4:2649:7645:17832\_1:N:0:TCTGCAAG+GCTGCACT  
GATCTTGCAGAGTGACTGGAGTTCAGACGTGTGCTCTTCCGATCTGCTACGAGAGGTGATCCCGGTTG  
TGGATTGAAGGCTGGCTCTAAGTGAGACTCCTTCTTTTTGAATGTTGTAAAGAATTGGGTTGAGAAGT  
GTG

+

FFF,::,FFFFFF,F,FFFF,:F,FF:,FFFF:FFFF,,FFFF:FF,:FFF,:FF,,F:F:,F,F,  
FFF:FFFFFF::FFFF,F:,,,,FF:F:,F:,FFFFFFFF:FFFF,,:F::FF,:FFF:FF::FF  
FF:

@A00721:190:HGJW7DSXY:4:2307:2519:24392\_1:N:0:TCTGCAAG+GCTGCACT  
ACATTATTTCAACGGATACCGATCTCAGTTCTACCACAGAAACCGTCTCAGGAAGTGTCTCCACTGAT  
TCGGAATTAGAGAAAGACGACCTTCTTGTGGGGACTGAGACCTCTGAATTTTCAGGGTGCCCTGATGA  
GGA

+

FFFFFFFFFFFF:FFFFFFFFFFFFFFFFFFFFFFFFFFFFFFFFFFFFFFFFFFFFFFFFFFFF  
FFFFFFFFFFFFFFFFFFFFFFFFFFFFFFFFFFFFFFFFFFFFFFFFFFFFFFFFFFFFFFFFFFFF  
FFF

@A00721:190:HGJW7DSXY:4:2646:32741:31297\_1:N:0:TCTGCAAG+GCTGCACT  
AAGTCTCAGTTATCGCTGCCGCGCCGACGTTTGTGCGGAACTCTCAGAGGTTTACGGCAGAAAAATTT  
CTCCTGCTTGTAAATTCGAGAGAGGACACTATGGAAATTAGACCTATCAGATGTCTTGACGACTTCGAA  
TTT

+

FFFFFFFFFFFFFFFFFFFFFFFFFFFFFFFFFFFFFFFF:FFFFFFFFFFFFFFFFFFFFFFFFFFFF  
FFFFFFFFFFFFFFFFFFFF:FFFFFFFFFFFFFFFFFFFFFFFFFFFFFFFFFFFFFFFFFFFFFFFF  
FFF

@A00721:190:HGJW7DSXY:4:2421:28257:26850\_1:N:0:TCTGCAAG+GCTGCACT  
TGCTCTTCCGATCTAAATTTTGATGCGGTTTCATAAGATTATCAGTAATCCTGATTCTACTACGGATT  
CATGGACCTTCCATCCTGTACCTCTTCTGGAGAGACGTATCTCAAAGATCGACTTCGAGACAGGTGAT  
ATT

+

FFFF,FFF,,FFFFF:FFFFF:FFF:F,FFFFFFFF,FFFF:FF,FFFFFFFFFFFF:FFFFFFFF:F  
FFFFFFFFF:FF::FFFFFFFF:FFFFFFFFFFFFFFFFFFFFFFFF:FFFFF:FFFFFFFFFFFFF:  
FFF

@A00721:190:HGJW7DSXY:4:2548:4580:12054\_2:N:0:TCTGCAAG+GCTGCACT  
AAACTACAGAGGAACGTACCGGATTACCTGTCTTTCATATTATGAATGAACCTTCGGCCGCTCTCTT  
GCTTCGATGTTGGATGTCAAGAAGGGTTCAGAATGGGATTCCTACGTA

+

FFFFFFFFFFFFFFFFFFFFFFFFFFFFFFFFFFFFFFFF:FFFFFFFFFFFFFFFFFFFFFFFFFFFFF  
F:FFFF,F,FFFFFFFF:FFFFFFFFF:FFFFFFFFFFFFFFFFFFFF

@A00721:190:HGJW7DSXY:4:1139:2446:19727\_2:N:0:TCTGCAAG+GCTGCACT  
TTTACGTTTGCTACTCAGAGCTGGTCTCTCAGCAAAGGGATGCATGGTGTATCTCCTCAGGAGTCC  
CGGCATTTGATAATAATGACGAGACTTTCGTCATAATCGCTGCATATT

+

:FFFFFFFFFFFFFFFF:FFFFFFFFFFFFFFFFFFFFFFFFFFFFFFFFFFFFFFFF:FFFF  
FFFFFFFFFFFFFFFFFFFFFFFFFFFFFFFF:FFFFFFFFFFFFFFFFFFFF:FF

@A00721:190:HGJW7DSXY:4:2626:11496:12132\_2:N:0:TCTGCAAG+GCTGCACT  
ACAAGCCCAGACTCAAGGAGTCCAATCAAAGGTTTTGAATTTAGCTCAACTGGGGAGACGTGCTTAA  
TGGGTGATAAAAATTATTTAGAGATCTTTTCTACTTACAAAGGACAAT

+

F:FFFF:FF:FF:FFF::FFFFFFFF:FFF,:FFF,,FFFFFF,FFFF:FF:FFFFFFFF,FFFFF  
FF,:FFFFFF:F:F:FFFFFF,FFF,:FF:FFFF:FFFFF:FFFF:

@A00721:190:HGJW7DSXY:4:1507:19533:24079\_2:N:0:TCTGCAAG+GCTGCACT  
TACTCTGTACTTGATCTACGTCGTTTAACTGTCGGAACAACCTTTACTTAGAATGACTCTATCTTTTC  
AGACACTTCTTATATTATTTACAATAGTTAATATCATATTAGTAATAC

+

FFFFFFFFFFFFFFFFFFFFFFFFFFFFFFFFFFFFFFFFFFFFFFFFFFFFFFFFFFFFFFFF:FFFFFFF  
FFFFFFFFFFFFFFFFFFFFFFFFFFFFFFFFFFFFFFFFFFFFFFFFFFFFFFFFFFFF

@A00721:190:HGJW7DSXY:4:1119:28411:24392\_1:N:0:TCTGCAAG+GCTGCACT  
CTCTACACCAATCTCAACGAGTATAAAGCGTTTTTCCGTCCTGACCTTAATAAACTAATATATAAAC  
CGCAAACGACTCGAAACCGAGACGCCGTAGATCAAAGTCCCTTCTAACTTTAGATTATGAATCCT

+

F:,FF:FF,F:,F,F,,F,FF:,FFF,F:,F,F,F,,,:F,F:,F,F,F,F  
F,,F,FFFF:FFFFFFFFFFFFFFFFFFFFFFFF:FFFFFFFFFFFFFFFFFFFFFFFF

@A00721:190:HGJW7DSXY:4:2377:1570:8625\_1:N:0:TCTGCAAG+GCTGCACT  
CCGATCACCTTGGTGTGATCTCCCGGAGGATCTTTTCAATAAGATGTATGATGATAATCTACTATTTT  
TAAATAGTGATATTCAGCGTATACTTGAATACTTTATCAAAGATTTGGCTTGGTCTATTTACCGCAA  
AAG

+

FFFFFFFFFFFFFFFFFFFFFFFFFFFFFFFFFFFFFFFFFFFFFFFFFFFFFFFFFFFFFFFFFFFFF  
FFFFFFFFFFFFFFFFFFFFFFFFFFFFFFFFFFFFFFFFFFFFFFFFFFFFFFFFFFFFFFFFFFFFF  
FFF

@A00721:190:HGJW7DSXY:4:2571:27471:26396\_2:N:0:TCTGCAAG+GCTGCACT  
TTACTTATACTTTAAATAGCACCGATTATAACTTGACTGTTGATAATATTACAATAGCTCTTTCTCAG  
AAGATTAGAGAAGTAACCGGTGAACACGTCGGTAGCATTGATTACTT

+

FFFFFFFFFFFFFFFFFFFF:FFFFFFFFFFFFFFFFFFFFFFFFFFFFFFFFFFFFFFFFFFFFFFFF  
FFFFFFFFFFFFFFFFFFFFFFFFFFFFFFFFFFFFFFFFFFFFFFFFFFFF:FFFFF

@A00721:190:HGJW7DSXY:4:2324:2428:17378\_1:N:0:TCTGCAAG+GCTGCACT  
AATCAATGATGTGACTATACAGTTCGGCATTTCAGAGTGGTCAATACGTCGTGGGAGGTACTGAAG

CCTTCCCCTCCGCTGGCACGAAGAACACTCCCAAGCCAATCAATAGTTCTTCTGACCAGAATGAAAAG  
GGG

+

FFFFFFFFFFFFFFFFFFFFFFFFFFFFFFFFFFFFFFFFFFFFFFFFFFFFFFFFFFFFFFFFFFFFFFFF  
FF:FFFFFFFFFFFFFFFFFFFFFFFFFFFFFFFFFFFFFFFFFFFFFFFFFFFFFFFFFFFFFFFFFFFF  
FFF

@A00721:190:HGJW7DSXY:4:1323:14986:16047\_2:N:0:TCTGCAAG+GCTGCACT  
ATGTCCCCAAAAGTGAAGAATAAAGGGAAAGGTCCATCAGGACCTAAGAAGGGGAAATTACCCCTA  
ATTCTGAAGGAAGATCTCCCACCATCTGGGGTTGGAATAAGAAATCT

+

FFFFFFFFFFFF,FFFFFFFFFFFF,FFFFFFFFFFFFFFFFFFFFFFFFFFFFFFFFFFFFFFFFFFFFF:FFFFFFFFFFFF  
FFFFFFFFFFFFFFFFFFFFFFFFFFFFFFFFFFFFFFFFFFFFFFFFFFFFFFFFFFFFFFFFFFFF:FFFF

@A00721:190:HGJW7DSXY:4:1519:24632:34914\_1:N:0:TCTGCAAG+GCTGCACT  
TTAAGGGTAGCTGTAAAGTTGCGCCTGCCGACCCCATCTTTGAGACCAAGACTCTCTACAGTAGGTTCT  
GTGCTACTATGAGCAAATCTGTTGAATTCGTCACTGAGGACGAAGGTGAGAGGACTTTTGGCTACTG  
GCG

+

FFFFFFF:FFFFFFFFFFFFFFFFFFFFFFFFFFFFFFFFFFFFFFFFFFFFFFFFFFFFFFFFFFFFFFFF  
FFFFFFFFFFFFFFFFFFFFFFFFFFFFFFFFFFFFFFFFFFFFFFFFFFFFFFFFFFFFFFFFFFFFFFFF  
FFF

@A00721:190:HGJW7DSXY:4:2648:8350:4178\_1:N:0:TCTGCAAG+GCTGCACT  
ACCCTTAAGCACCGAGGTAAGCTCGGGACTTACAAGAGAGAGTGTGAGAGAGTCGCTCTCACTATTTT  
TGCCCAGAATGCGGGCTTTCTGACTGATGAGGTTAAACTCTTGCTCCTTCTGTGGGTGAGGGTTTTT  
GTT

+

FFFFFFFFFFFFFFFFFFFFFFFFFFFFFFFFFFFFFFFFFFFFFFFFFFFFFFFFFFFFFFFFFFFFFFFF  
FFFFFFFFF:FFFFFFFFFFFFFFFFFFFFFFFFFFFFFFFFFFFFFFFFFFFFFFFFFFFFFFFFFFFFFFFF  
FFF

@A00721:190:HGJW7DSXY:4:2601:9326:17049\_1:N:0:TCTGCAAG+GCTGCACT  
TATTTGCAGCAGGGGTTACCACTTCCTAAGGTGGATGAGGGAGGTTGTTTCTTTGGAGTTTATAGATAA  
TCTTTTGAGAAGGGGTCATAGAGCCAGCAAGAGAAGCTTATATGCTGGTTTAAGTGATGATTATCACT  
CCT

+

FF,,FF,FFFFFFFF,FFFF,FFF:FFFFFFFFFFFFFFFFFFFFFFFFFFFFFFFFF:F:FFF:FFFFFFFFFFFF  
FFFFFFFFFFFFFFFFF:F:F,FFFFFFFFFFFFFFFFFFFFFFFFFFFFFFFFFFFFFFFFF:FFFFFFFFF:FFFF  
FFF

@A00721:190:HGJW7DSXY:4:2364:4598:28557\_2:N:0:TCTGCAAG+GCTGCACT  
TCAGCTACGAGAGGTGATCCCGATGTGGATTGAAGGCTGGCTCTAAGGGAGACTCCTTCTTTTTGAA  
TGTTGTAAAGAATTGGGTTGAGAAGTGCTTTACAAGGAGTTAGACT

+

FFFFFFFFFFFFFFFFFFFFFFFFFFFFFFFFFFFFFFFFFFFFFFFFFFFFFFFFFFFFFFFFFFFFFFFF  
FFFFFFFFFFFFFFFFFFFFFFFFFFFFFFFFFFFFFFFFFFFFFFFFFFFFFFFFFFFFFFFFFFFF

@A00721:190:HGJW7DSXY:4:1117:25681:20509\_1:N:0:TCTGCAAG+GCTGCACT  
TCTTCCGATCTCGGATACCGATCTCAGTTCTACCACAGAAACCGTCTCAGGAAGTGTCTCCACTGATT  
CGGAATTAGAGAAAGACGACCTTCTTGTTGGGACTGAGACCTCTGAATTTTCAGGGTGCCCTGATGAG  
GAC

+

FFFFFFF:FF:FFFFFFF::FFFFF:FFFFFFFFF:FFFFFFFFFFFFFFFFF:FFFFFFFFFFFFFFF  
FFFFFFFFFFFF:FFFFFFFFFFFFFFFFFFFFFFFFFFFFFFFFFFFFFFFFFFFFFFFFFFFFFFFFFFFF  
FFF

@A00721:190:HGJW7DSXY:4:2115:13874:1063\_1:N:0:TCTGCAAG+GCTGCACT  
GCCCCGCCGACGTTTGTGCGGAAGTCTCAGAGTTTACGGCAGAAAAATTTCTCCTGCTTGTAATTCTG  
AGAGAGGACACTATGGAAATTAGACCTATCAGATGTCTTGACGACTTCGAATTTGAGGACGGAGTTAA  
ATA

+  
FFFFFFFFFFFFFFFFFFFFFFFFFFFFFFFFFFFFFFFFFFFFFFFFFFFFFFFFFFFFFFFFFFFFFFFF  
FFFFFFFFFFFFFFFFFFFFFFFFFFFFFFFFFFFFFFFFFFFFFFFFFFFFFFFFFFFFFFFFFFFFFFFF  
FFF  
@A00721:190:HGJW7DSXY:4:2508:19153:35289\_1:N:0:TCTGCAAG+GCTGCACT  
TGCTCTTCCGATCTAAATTTTGATGCGGTTTCATAAGATTATCAGTAATCCTGATTCTACTACGGATT  
CATGGACCTTCCATCCTGTACCTCTTCTGGAGAGACGTATCTCAAAGATCGACTTCGAGACAGGTGAT  
ATT  
+  
FFFFFFFFFFFFFF:FFFFFFFFFFFFFFFFFFFFFFFFFFFFFFFFFFFFFFFFFFFFFFFFFFFFFFFF  
FFFFFFFFFFFFFFFFFFFFFFFFFFFFFFFFFFFFFFFFFFFFFFFFFFFFFFFFFFFFFFFFFFFFFFFF  
FFF  
@A00721:190:HGJW7DSXY:4:1203:23077:32784\_2:N:0:TCTGCAAG+GCTGCACT  
CTACAGAGGAACGTACCGGATTACCTGTCTTTCATATTATGAATGAACCTTCGGCCGCTCTCTTTGCT  
TCGATGTTGGATGTCAAGAAGGGTTCAGAATGGGATTCCTACGTAGTT  
+  
FFFFFFFFFFFF:FFFFFFFFFFFFFFFFFFFFFFFFFFFFFFFFFFFFFFFFFFFFFFFFFFFFFFFF  
FF:FFF,F,FFFFFF:FFF,FFFF:FFFFFFFFFFFFFFFFFFFFFFFF  
@A00721:190:HGJW7DSXY:4:1154:31494:10066\_2:N:0:TCTGCAAG+GCTGCACT  
TTTACGTTTGCTACTCAGAGCTGGTCTCTCAGCAAAGGGATGCATGGTGTATCTCCTCAGGAGTCC  
CGGCATTTGATAATAATGACGAGACTTTCGTCATAATCGCTGCATATT  
+  
FFFFFFFFFFFFFFFF:FFFFFFFFFFFFFFFFFFFFFFFFFFFFFFFFFFFFFFFFFFFFFFFFFFFF  
FFFFFFFFFFFFFFFFFFFFFFFFFFFFFFFFFFFFFFFFFFFFFFFF,FFFFFFFFF:  
@A00721:190:HGJW7DSXY:4:1544:19488:21277\_2:N:0:TCTGCAAG+GCTGCACT  
CAGACTCAAGGAGTCCAATCAAAGGTTTTGAATTTAGCTCAACTGGGGAGACGTGCTTAAATGGGTGA  
TAAAAATTATTTAGAGATCTTTTCTACTTACAAAGGACAATTCAGTTT  
+  
FFFFFFFFFFFFFFFFFFFFFFFFFFFF,FF,FFFFFFFFFFFFFFFF:FFFFFFFFF:FFFFFFFFF:FFFFF  
FFFFFFFFFFFFFFFFFFFFFFFFFFFFFFFFFFFFFFFFFFFFFFFFFFFFFFFFFFFFFFFF  
@A00721:190:HGJW7DSXY:4:1517:16107:10379\_2:N:0:TCTGCAAG+GCTGCACT  
TACTCTGTACTTGATCTACGTCGTTAACTGTCGGAACAACCTTTACTTAGAATGACTCTATCTTTTC  
AGACACTTCTTATATTATTTACAATAGTTAATATCATATTAGTAATAC  
+  
FFFFFFFFFFFFFFFFFFFFFFFFFFFFFFFF:FFFFFFFFFFFFFFFFFFFFFFFF:FFFFFFFFFFFFFFFF  
FFFFFFFFFFFFFFFFFFFFFFFFFFFFFFFFFFFFFFFFFFFFFFFFFFFFFFFFFFFFFFFF  
@A00721:190:HGJW7DSXY:4:1241:14995:1971\_1:N:0:TCTGCAAG+GCTGCACT  
ATCTTGCTTTGTGACTGTTTTCTGACGTGTGCTCTTCCGATCTCTTAATACACGAAGATATAATCCG  
CAAACGACTCGAAACCGAGACGCCGTAGATCAAAGTCCCTTCTAACTTTAGATT  
+  
::,F::,,,,:F,,,::,,,F,,,::,,FF,F,,,::,FFF:,FF,F::,,FF,F,,,,,F,,F,F,,F,FF,  
,FFFFFFFFFFFFFFFFFFFFFFFFFFFFFFFFFFFFFFFFFFFFFFFFFFFFFFFFFFFFFFFF  
@A00721:190:HGJW7DSXY:4:2473:2871:16579\_1:N:0:TCTGCAAG+GCTGCACT  
CCGATCACCTTGGTGTGATCTCCCGGAGGATCTTTTCAATAAGATGTATGATGATAATCTACTATTTT  
TAAATAGTGATATTCAGCGTATACTTGAATACTTTATCAAAGATTTGGCTTGGTCTATTTACCGCAA  
AAG  
+  
FFFFFFFFFFFFFFFFFFFFFFFFFFFFFFFFFFFFFFFFFFFFFFFFFFFFFFFFFFFFFFFF:FFFFFFF  
FFFFFFFFFFFFFFFFFFFFFFFFFFFFFFFFFFFFFFFFFFFFFFFFFFFFFFFFFFFFFFFFFFFF  
FFF  
@A00721:190:HGJW7DSXY:4:1214:12897:31939\_1:N:0:TCTGCAAG+GCTGCACT  
ACTTATACTTTAAATAGCACCGATTATAACTTGACTGTTGATAATATTACAATAGCTCTATCTCAGAA  
GATTAGAGAAGTAACCGGTGAACAAGTCGGTAGCATTGATTTACTTTTACCGTTAGAACTGAAAAAGA  
+

F:FFFFFFFFFFFF:FF:FF,FFF,FF:F,F,,,FFF:FFFFFFFFFFFF:FFFFFFFF,F:,FFFFF:FF  
FFFFFFFFFFFFFFFF:F,F,,,F,F,FF,FF:F,FF:FFFFF:FFF,FF:FFFF:FF:FF,,FFF,F  
@A00721:190:HGJW7DSXY:4:2210:16143:14168\_2:N:0:TCTGCAAG+GCTGCACT  
TCAATGATGTGACTATACAGTTCGGCCATTTCAAGAGTGGTCAATACGTCGTGGGAGGTACTGAAGCC  
TCCCCCTCCGCTGGCACGAAGAACACTCCCAAGCCAATCAATAGTTCT

+  
FFF,FFFFFFFF:FFFFFFFFFFFFFFFFFFFFF::F,FFFFFFFF:FFFFFFFFFFFFFFFFFFFF:FFFF,FFF  
FFFFFFFFFFFFFFFFFFFFFFFFFFFFFFFFFFFFF:FFFFFFFFFFFFF  
@A00721:190:HGJW7DSXY:4:1324:7229:4178\_2:N:0:TCTGCAAG+GCTGCACT  
ATGTCCCCAAAACAGAGAATAAAGGGAAAGGTCCATCAGGACCTAAGAAGGGGAAATTACCCCTA  
ATTCTGAAGGAAGATCTCCCACCATCTGGGGTTGGAATAAGAAATCT

+  
FFFFFFFFFFFFFFFFFFFFFFFFFFFFFFFFFFFFFFFFFFFFFFFFFFFFFFFFFFFFFFFFFFFF,FFFFFFFFFFFF  
FFFFFFFFFFFFFFFFFFFFFFFFFFFFFFFFFFFFFFFFFFFFF:FFFFFFFFFFFFF  
@A00721:190:HGJW7DSXY:4:2646:14127:23578\_1:N:0:TCTGCAAG+GCTGCACT  
TTAAGGGTAGCTGTAAAGTTGCGCCTGCCGACCCCATCTTTGAGACCAAGACTCTCTACAGTAGGTTCT  
GTGCTACTATGAGCAAATCTGTTGAATTCGTCACTGAGGACGAAGGTGAGAGGACTTTTGGCTACTG  
GCG

+  
FFFFFFFFFFFF:FFFFFFFFFFFF:FFFFFFFFFFFFFFFFFFFFFFFFFFFFFFFFFFFFFFFFFFFF:FFFFFFFFFFFF  
FFFFFFFFFFFFFFFFFFFFF,FFFFFFFFFFFFFFFFFFFF:FFFFFFFFFFFFFFFFFFFF:FFFFFF:FFFFFFFF:FFF  
FFF  
@A00721:190:HGJW7DSXY:4:2203:12970:18474\_1:N:0:TCTGCAAG+GCTGCACT  
CCCTTAAGCACCGAGGTAAAGCTCGGGACTTACAAGAGAGAGTGTGAGAGAGTCGCTCTCACTATTTTT  
GCCCAGAATGCGGGCTTTCTGACTGATGAGGTTAAACTCTTGCTCCTTCTGTGGGTGAGGGTTTTTG  
TTA

+  
::FFF:FFF:F:FF:F,FFFFFFFF:FF,FFFFFFFF:FFFFFFFFFFFFFFFFFFFFFFFFFFFF:FFFFFF:FFFFFFFF  
,FFFFFFFF:FFFFFFFFFFFF,FFF:FFFFFFFF:F,F:FF:FFFF,FFFFFFFFFFFFFFFFFFFFFFFFFFFF  
FFF  
@A00721:190:HGJW7DSXY:4:2640:26368:5885\_1:N:0:TCTGCAAG+GCTGCACT  
TATTTGAAGCAGGGGTTACCACTTCCTAAGGTGGATGAGGGAGGTTGTTTCTTTGGAGTTTTAGATAA  
TCTTTTGAGAAGGGGTCATAGAGCCAGCAAGAGAAGCTTATATGCTGGTTTAAGTGATGATTATCACT  
CCT

+  
FFF:FF,FFFFFFFF:FFFFF:FFFFFFFFFFFFFFFFFFFFFFFFFFFFFFFFFFFF:FFFFFFFFFFFFFFFFFFFF:FFF,F  
FFF:FFFFFFFFFFFFFFFFFFFFFFFFFFFFFFFFFFFFFFFFFFFFFFFFFFFFFFFFFFFFFFFFFFFF,FFFFFFFF  
FFF  
@A00721:190:HGJW7DSXY:4:2413:14850:16752\_2:N:0:TCTGCAAG+GCTGCACT  
TCAGCTACGAGAGGTGATCCCGGATGTGGATTGAAGGCTGGCTCTAAGGGAGACTCCTTCTTTTTGAA  
TGTTGTAAAGAATTGGGTTGAGAAGTGCTTTACAAGGAGTTAGACT

+  
FFF:FFFFFFFFFFFFFFFFFFFFFFFFFFFFFFFFFFFFFFFFFFFFFFFFFFFFFFFFFFFFFFFFFFFF  
FFFFFFFFF:FFFFFFFFFFFFF:FFFFFFFFFFFFFFFFFFFF::FFFFFFFFFFFF  
@A00721:190:HGJW7DSXY:4:1240:10321:29011\_1:N:0:TCTGCAAG+GCTGCACT  
TCTTCCGATCTCGGATACCGATCTCAGTTCTACCACAGAAACCGTCTCAGGAAGTGTCTCCACTGATT  
CGGAATTAGAGAAAGACGACCTTCTTGTTGGGGACTGAGACCTCTGAATTTTCAGGGTGCCTGATGAG  
GAC

+  
FFFFFFFFFFFFFFFFFFFFF:F:FFFFFFFFFFFFFFFFFFFFFFFFFFFFFFFFFFFFFFFFFFFFFFFFFFFF  
FFFFFFFFFFFFFFFFFFFFFFFFFFFFFFFFFFFFFFFFFFFFFFFFFFFFFFFFFFFFFFFFFFFFF  
FFF  
@A00721:190:HGJW7DSXY:4:2412:9408:25739\_1:N:0:TCTGCAAG+GCTGCACT  
GCCCGGCCGACGTTTGTGCGCAACTCTCAGAGTTTACGCGAGAAAATTTCTCCTGCTTGAATTCTCG

AGAGAGGACACTATGGAAATTAGACCTATCAGATGTCTTGACGACTTCGAATTTGAGGACGGAGTTAA  
ATA

+

FFFFFFFFFFFFFF,FFFFFFFFFFFFFFFFFFFFFFFFFFFFFFFFFFFFFFFFFFFFFFFF  
FFFFFFFFFFFFFF:FFFFFFFFFFFFFFFFFFFFFFFFFFFFFFFFFFFFFFFFFFFFFFFF  
FFF

@A00721:190:HGJW7DSXY:4:2565:3152:32534\_1:N:0:TCTGCAAG+GCTGCACT  
TGCTCTTCCGATCTAAATTTTGATGCGGTTTCATAAGATTATCAGTAATCCTGATTCTACTACGGATT  
CATGGACCTTCCATCCTGTACCTCTTCTGGAGAGACGTATCTCAAAGATCGACTTCGAGACAGGTGAT  
ATT

+

FFFFFFFFFFFFFFFFFFFFFF:FFFFFFFFFFFFFFFFFFFFFFFFFFFFFFFFFFFFFFFF  
FFFFFFFFFFFFFFFFFFFFFFFFFFFFFFFFFFFFFFFFFFFFFFFFFFFFFFFFFFFFFFFF  
FFF

@A00721:190:HGJW7DSXY:4:2126:19497:28902\_2:N:0:TCTGCAAG+GCTGCACT  
CTACAGAGGAACGTACCGGATTACCTGTCTTTCATATTATGAATGAACCTTCGGCCGCTCTCTTTGCT  
TCGATGTTGGATGTCAAGAAGGGTTCAGAATGGGATTCCTACGTAGTT

+

FFFFFFFFFFFF,F,:F::FF,:FFFF,FFF:F::F:FFFF,F,FFF,FF:FFF:FFFFF,F:FF,F  
:FFFF,FFFFFFFFF:F,F,,FFFF:F:FF,,:FF:F,:F,FFFF,F

@A00721:190:HGJW7DSXY:4:1343:20609:31454\_2:N:0:TCTGCAAG+GCTGCACT  
TTTACGTTTGCTACTCAGAGCTGGTCTCTCAGCAAAGGGATGCATGGTGTATCTCCTCAGGAGTCC  
CGGCATTTGATAATAATGACGAGACTTTCGTCATAATCGCTGCATATT

+

FFFFFFFFFFFFFFFFFFFFFFFFFFFFFFFFFFFFFFFFFFFFFFFFFFFFFFFFFFFFFFFF  
FFFFFFFFFFFFFFFFFFFFFF:FFFFFFFFF:FFFFFFFFFFFFFFFFFFFF:FFFF

@A00721:190:HGJW7DSXY:4:1550:28492:5149\_2:N:0:TCTGCAAG+GCTGCACT  
CAGACTCAAGGAGTCCAATCAAAGGTTTTGAATTTAGCTCAACTGGGGAGACGTGCTTAAATGGGTGA  
TAAAAATTATTTAGAGATCTTTTCTACTTACAAAGGACAATTCAGTTT

+

FFFFFFFFFFFFFFFFFFFFFFFFFFFFFFFFFFFFFFFFFFFFFFFFFFFFFFFFFFFFFFF:FFFFFFFF  
FFFFFFFFFFFFFFFFFFFFFFFFFFFFFFFFFFFFFFFFFFFFFFFFFFFFFFFFFFFFFF:FFFF

@A00721:190:HGJW7DSXY:4:2172:13919:25880\_2:N:0:TCTGCAAG+GCTGCACT  
TACTCTGTACTTGATCTACGTCGTTTAACTGTCGGAACAACCTTTACTTAGAATGACTCTATCTTTTC  
AGACACTTCTTATATTATTTACAATAGTTAATATCATATTAGTAATAC

+

FFFFFFFFFFFFFFFFFFFFFFFFFFFFFFFFFFFFFFFFFFFF,FFFF:FFFFFFFFFFFFFFFF:FFF  
FFFFFFFFFFFFFFFFFFFFFFFFFFFFFFFFFFFFFFFFFFFFFFFFFFFFFFFF

@A00721:190:HGJW7DSXY:4:1678:15989:15718\_1:N:0:TCTGCAAG+GCTGCACT  
ACACCCATCTCAACGAGGATAACGCGAGTTTTCCGTCCTGAACGTAATACACGAAGAGATCATCCGCA  
AACGACTCGAAACCGAGACGCCGTAGATCAAAGTCCCTTCTAACTTTAGATTATGAATCCTGCCTTTA  
CTC

+

FFFFF:FF,F,F:F,,::FFF:,F:,,,FFFFFF:F:F:F,F,F,,FF:FF:F,F:F,,F,,:,FFF,F  
,FFFFFFFFFFFFFFFFFFFFFFFFFFFFFFFFFFFFFFFFFFFFFFFFFFFFFFFFFFFFFFFF  
FFF

@A00721:190:HGJW7DSXY:4:2674:4354:23312\_1:N:0:TCTGCAAG+GCTGCACT  
CCGATCACCTTGGTGTGATCTCCCGGAGGATCTTTTCAATAAGATGTATGATGATAATCTACTATTTT  
TAAATAGTGATATTCAGCGTATACTTGAATACTTTATCAAAGATTTGGCTTGGTCTATTTACCGCAA  
AAG

+

FFFFFFFFFFFFFFFFFFFFFFFFFFFFFFFFFFFFFF:FFFFFFFFFFFFFFFFFFFFFFFF  
FFFFFFFFFFFFFFFFFFFFFFFFFFFFFF:FFFFFFFFFFFFFFFFFFFFFFFFFFFFFFFF  
FFF



@A00721:190:HGJW7DSXY:4:2122:28248:3380\_1:N:0:TCTGCAAG+GCTGCACT  
ACTTATACTTTAAATAGCACCGATTATAACTTGACTGTTGATAATATTACAATAGCTCTTTCTCAGAA  
GATTAGAGAAGTAACCGGTGAACACGTCGGTAGCATTGATTTACTTTTTCCGTTAGAACTGTCAAAGA  
T

+  
FFFFFFFFFFFFFFFF,FF,FFFFFFFFFFFFFFFFFFFFFFFFFFFFFFFF:FFFF,FFFFFFFF:FFFFF  
FF:FFFFFFFF,FFFFFF::,FFFF:FFFF:F:,FF:F,FF:F:FF,:::F:F:,F,F,,FF:F:  
:

@A00721:190:HGJW7DSXY:4:2308:18394:30874\_2:N:0:TCTGCAAG+GCTGCACT  
TCAATGATGTGACTATACAGTTCGGCCATTTCAAGAGTGGTCAATACGTCGTGGGAGGTACTGAAGCC  
TTCCCCTCCGCTGGCACGAAGAACAACCTCCAAGCCAATCAATAGTTCT

+  
FFFFF:,FFFFFFFFFFFFFFFFFFFFFFFF,FFFFF:FFFFF:FF:FFFFFFFFFFFFFFFFFFFFFFFF  
FFFFFFFFFFFFFFFFFFFFFFFFFFFFFFFFFFFFFFFFFFFFFFFFFFFFFFFF

@A00721:190:HGJW7DSXY:4:1448:9941:12477\_2:N:0:TCTGCAAG+GCTGCACT  
ATGTCCCCAAAACCTGAGAAGAATAAAGGGAAAGGTCCATCAGGACCTAAGAAGGGGAAATTACCCCTA  
ATTCTGAAGGAAGATCTCCCACCATCTGGGGTTGGAATAAGAAATCT

+  
FFFFFFFFFFFFFFFFFFFFFFFFFFFFFFFFFFFFFFFFFFFFFFFFFFFFFFFFFFFFFFFF:F  
FFFFFFFFFFFFFFFFFFFFFFFFFFFFFFFFFFFFFFFFFFFFFFFF:FFFFFFFF

@A00721:190:HGJW7DSXY:4:2646:15537:22075\_1:N:0:TCTGCAAG+GCTGCACT  
TTAAGGGTAGCTGTAAAGTTGCGCCTGCCGACCCATCTTTGAGACCAAGACTCTCTACAGTAGGTTCT  
GTGCCTACTATGAGCAAATCTGTTGAATTCGTCACTGAGGACGAAGGTGAGAGGACTTTTGGCTACTG  
GCG

+  
FFFFFFFFFFFFFFFF:FFFFFFFFFFFFFFFFFFFFFFFF:FF:FFFFFF:FFFFFFFFFFFFFFFFFFFF  
FFFFFFFFFFFFFFFFFFFFFFFFFFFFFFFFFFFFFFFFFFFFFFFFFFFFFFFFFFFFFFFFFFFF  
FFF

@A00721:190:HGJW7DSXY:4:2675:21414:27023\_1:N:0:TCTGCAAG+GCTGCACT  
CCCTTAAGCACCGAGGTAAGCTCGGGACTTACAAGAGAGAGTGTGAGAGAGTCGCTCTCACTATTTTT  
GCCCAGAATGCGGGCTTTCTGACTGATGAGGTTAAACTCTTGCTCCTTCTGTGGGTGAGGGTTTTG  
TTA

+  
FFFFFFFFFFFFFFFFFFFFFFFFFFFFFFFFFFFFFFFFFFFFFFFFFFFFFFFFFFFFFFFFFFFF  
FFFFFFFFFFFFFFFFFFFFFFFFFFFFFFFFFFFFFFFFFFFFFFFFFFFFFFFFFFFFFFFFFFFF  
FFF

@A00721:190:HGJW7DSXY:4:2657:27877:15671\_1:N:0:TCTGCAAG+GCTGCACT  
TATTGGAAGCAGGGTTACCACTTCCTAAGGTGGATGAGGGAGGTTGTTTCTTTGGAGTTTATAGATAA  
TCTTTTGAGAAGGGGTCATAGAGCCAGCAAGAGAAGCTTATATGCTGGTTTAAGTGATGATTATCACT  
CCT

+  
FFFF,,:FFFF,F:F:FF:FF:FF,FFFFFFFFFFFFFFFF:FF::FFFF:FFF,FFFFFFFFFFFF:  
FFFFFFFFFFFF:FFFFFFFFFFFF:FFFFFFFFFFFFFFFFFFFFFFFF:FFFFFFFFFFFFFFFF  
FFF

@A00721:190:HGJW7DSXY:4:2413:15239:16861\_2:N:0:TCTGCAAG+GCTGCACT  
TCAGCTACGAGAGGTGATCCCGATGTGGATTGAAGGCTGGCTCTAAGGGAGACTCCTTCTTTTTGAA  
TGTTGTAAAGAATTGGGTTGAGAAGTGCTTTACAAGGAGTTAGACT

+  
FFFFFFFFFFFFFFFFFFFFFFFFFFFFFFFFFFFFFFFFFFFFFFFFFFFFFFFFFFFFFFFFFFFF  
FFFFFFFFFFFFFFFFFFFFFFFFFFFFFFFFFFFFFFFFFFFFFFFFFFFFFFFF

@A00721:190:HGJW7DSXY:4:1555:31711:36495\_1:N:0:TCTGCAAG+GCTGCACT  
TCTTCCGATCTCGGATACCGATCTCAGTTCTACCACAGAAACCGTCTCAGGAACTGTCTCCACTGATT  
CGGAATTAGAGAAAGACGACCTTCTTGTTGGGACTGAGACCTCTGAATTTTCAGGGTGCCTGATGAG  
GAC

```

+
:FFFFFFFFFFFFFFFFFFFFFFFFFFFFFFFFFFFFFFFFFFFFFFFFFFFFFFFFFFFFFFFF
FFFFFFFFFFFFFFFFFFFFFFFFFFFFFFFFFFFFFFFFFFFFFFFFFFFFFFFFFFFFFFFF
FFF
@A00721:190:HGJW7DSXY:4:2443:14452:13714_1:N:0:TCTGCAAG+GCTGCACT
GCCCGCCGACGTTTGTCTGCGAACTCTCAGAGTTTACGGCAGAAAAATTTCTCCTGCTTGTAAATTCG
AGAGAGGACACTATGGAAATTAGACCTATCAGATGTCTTGACGACTTCGAATTTGAGGACGGAGTTAA
ATA
+
FFFFFFFFFFFFFFFFFFFFFFFFFFFFFFFFFFFFFFFFFFFFFFFFFFFFFFFFFFFFFFFF
FFFFFFFFFFFFFFFFFFFFFFFFFFFFFFFFFFFFFFFFFFFFFFFFFFFFFFFFFFFFFFFF
FFF
@A00721:190:HGJW7DSXY:4:2531:32696:22545_2:N:0:TCTGCAAG+GCTGCACT
CTACAGAGGAACGTACCGGATTACCTGTCTTTCATATTATGAATGAACCTTCGGCCGCTCTCTTTGCT
TCGATGTTGGATGTCAAGAAGGGTTCAGAATGGGATTCCTACGTAGTT
+
FFFFFFFFFFFFFFFFFFFFFFFFFFFFFFFFFFFFFFFFFFFFFFFFFFFFFFFFFFFFFFFF
FFFFFFFFFFFFFFFFFFFFFFFFFFFFFFFFFFFFFFFFFFFFFFFFFFFFFFFFFFFFFFFF
@A00721:190:HGJW7DSXY:4:1573:25889:27571_2:N:0:TCTGCAAG+GCTGCACT
TTTACGTTTGCTACTCAGAGCTGGTCTCTCAGCAAAGGGATGCATGGTGTATCTCCTCAGGAGTCC
CGGCATTTGATAATAATGACGAGACTTTCGTCATAATCGCTGCATATT
+
FFFFF:FFFFFFFF:FFFFFFFF:FFFFFFFF:FFFFFFFF:FFF::FFFFFFFF:FFF
FFFFFFFFFFFFFFFF,FFFFFFFF,FFFFFFFFFFFFFFFFFFFFFFFF
@A00721:190:HGJW7DSXY:4:2328:13702:21120_2:N:0:TCTGCAAG+GCTGCACT
CAGACTCAAGGAGTCCAATCAAAGGTTTTGAATTTAGCTCAACTGGGGAGACGTGCTTAAATGGGTGA
TAAAAATTATTTAGAGATCTTTCTACTTACAAAGGACAATTCAGTTT
+
FFFFFFF,FFFFFFFFFFFF,FFFFFFFFFFFFFFFF:FFFFFFFFFFFFFFFFFFFFFFFF
FFFFF,FFFFFFFF:FFFFFFFFFFFFFFFFFFFFFFFFFFFFFFFF
@A00721:190:HGJW7DSXY:4:2213:32271:5525_2:N:0:TCTGCAAG+GCTGCACT
TACTCTGTACTTGATCTACGTCTTTAACTGTCGGAACAACCTTTACTTAGAATGACTCTATCTTTTC
AGACACTTCTTATATTATTTACAATAGTTAATATCATATTAGTAATAC
+
FFFFFFFFFFFFFFFFFFFFFFFF,FFFFFFFF:FFFFFFFF,FFFFFFFFFFFFFFFF:FFFFFFF
FFFFFFFFFFFFFFFFFFFFFFFFFFFFFFFFFFFFFFFFFFFFFFFFFFFFFFFF
@A00721:190:HGJW7DSXY:4:2129:18096:1830_1:N:0:TCTGCAAG+GCTGCACT
ACACCCATCTCAACGAGTATAACGCGTTTTTCCGTCCTTAACCTTAATACACGAAGATATCATCCGCA
AACGACTCGAAACCGAGACGCCGTAGATCAAAGTCCCTTCTAACTTTAGATTATGAATCCTGCCTTTA
CTC
+
F,FF:F,,,:F:,,,,,F,FF,:,,,,:FFF:F:,:F,F,F,,,,F:,,,,:,,,,:F,,F,F:::F
,:FFFFFFFFFFFFFFFFFFFFFFFFFFFFFFFFFFFFFFFFFFFFFFFFFFFFFFFF
FFF
@A00721:190:HGJW7DSXY:4:1318:1750:31078_1:N:0:TCTGCAAG+GCTGCACT
CGATCACCTTGGTGTGATCTCCCGGTGGATCTTTTCAATAAGATGTATGATGATAATCTACTATTTTT
AAATAGTGATATTCAGCGTATACTTGAATACTTTATCAAAGATTTGGCTTGGTCTATTTACCGCAAAA
AG
+
F:FFFF,,FF,FFFFFFFFF::FF,FFFFFF:FF:,F,,FFFFFFFFFFFFFFFF::,:FFFF:FF
F:FF:FFF,FFFF:,FFFFFFFF:FF:::,FFFF:FFFFFF:F:F,FFF,F:FFFF,:FFF:FFF
FF
@A00721:190:HGJW7DSXY:4:1274:7229:27038_1:N:0:TCTGCAAG+GCTGCACT
ACTTATACTTTAAATAGCACCGATTATAACTTGACTGTTGATAATATTACAATAGCTCTTTCTCAGAA

```



+

@A00721:190:HGJW7DSXY:4:2569:17137:29543\_2:N:0:TCTGCAAG+GCTGCACT  
CTACAGAGGAACGTACCGGATTACCTGTCTTTCATATTATGAATGAACCTTCGGCCGCTCTCTTTGCT  
TCGATGTTGGATGTCAAGAAGGGTTCAGAATGGGATTCCTACGTAGTT

+

@A00721:190:HGJW7DSXY:4:2103:25861:10394\_2:N:0:TCTGCAAG+GCTGCACT  
TTTACGTTTGCTACTCAGAGCTGGTCTCTCAGCAAAGGGATGCATGGTGTATCTCCTCAGGAGTCC  
CGGCATTTGATAATAATGACGAGACTTTTCGTCATAATCGCTGCATATT

+

@A00721:190:HGJW7DSXY:4:2626:4101:19460\_2:N:0:TCTGCAAG+GCTGCACT  
CAGACTCAAGGAGTCCAATCAAAGGTTTTGAATTTAGCTCAACTGGGGAGACGTGCTTAAATGGGTGA  
TAAAAATTATTTAGAGATCTTTTCTACTTACAAAGGACAATTCAGTTT

+

@A00721:190:HGJW7DSXY:4:2473:25156:27148\_2:N:0:TCTGCAAG+GCTGCACT  
TACTCTGTACTTGATCTACGTCGTTAACTGTCGGAACAACCTTTACTTAGAATGACTCTATCTTTTC  
AGACACTTCTTATATTATTTACAATAGTTAATATCATATTAGTAATAC

+

@A00721:190:HGJW7DSXY:4:2272:3043:14027\_1:N:0:TCTGCAAG+GCTGCACT  
ACACCCATCTCAACGAGGATAAAGCTATTTTTCCGTCTTAACGTAATACACGAAGAGATCATCCGCA  
AACGACTCGAAACCGAGACGCCGTAGATCAAAGTCCCTTCTAACTTTAGATTATGAATCCTGCCTTTA  
CTC

+

@A00721:190:HGJW7DSXY:4:2454:17318:23406\_1:N:0:TCTGCAAG+GCTGCACT  
CGATCACCTTGGTGTGATCTCCCGGAGGATCTTTTCAATAAGATGTATGATGATAATCTACTATTTTT  
AAATAGTGATATTCAGCGTATACTTGAATACTTTATCAAAGATTTGGCTTGGTCTATTTACCGCAAAA  
AG

+

@A00721:190:HGJW7DSXY:4:1355:11568:4022\_1:N:0:TCTGCAAG+GCTGCACT  
ACTTATACTTTAAATAGCACCGATTATAACTTGACTGTTGATAATATTACAATAGCTCTTTCTCAGAA  
GATTAGAGAAGTAACCGGTGAACACGTCGGTAGCATTGATTTACTTTTACCGTTAGAACTGAAAAAGA  
TTC

+

[illegible]

```

FFFFFFFFFFFFFFFFFFFFFFFFFFFFFFFFFFFFFFFFFFFFFFFFFFFFFFFFFFFFFFFFFFFFF:~
FFF
@A00721:190:HGJW7DSXY:4:2621:20202:6104_2:N:0:TCTGCAAG+GCTGCACT
TCAATGATGTGACTATAACAGTTTCGCCATTTCAGAGTGTCATACGTCGTGGGAGGTAAGCC
TTCCCCTCCGCTGGCACGAAGAACAACCTCCAAGCCAATCAATAGTTCT
+
FFFFFFFFFFFFFFFFFFFFFFFFFFFFFFFFFFFFFFFFFFFFFFFFFFFFFFFFFFFFFFFFFFFFF
FFFFFFFFFFFFFFFFFFFFFFFFFFFFFFFFFFFFFFFFFFFFFFFFFFFFFFFFFFFFFFFFFFFFF:~
@A00721:190:HGJW7DSXY:4:2378:25970:31970_2:N:0:TCTGCAAG+GCTGCACT
ATGTCCCCAAAACAGAGAATAAAAGGGAAAGGTCCATCAGGACCTAAGAAGGGGAAATTACCCCTA
ATTCTGAAGGAAGATCTCCCACCATCTGGGGTTGGAATAAGAAATCT
+
FFFFFFFFFFFFFFFFFFFFFFFFFFFFFFFFFFFFFFFFFFFFFFFFFFFFFFFFFFFFFFFFFFFFF
FFFFFFFFFFFFFFFFFFFFFFFFFFFFFFFFFFFFFFFFFFFFFFFFFFFFFFFFFFFFFFFFFFFFF:~
@A00721:190:HGJW7DSXY:4:1570:8359:23766_2:N:0:TCTGCAAG+GCTGCACT
AAGGGTAGCTGTAAAGTTGCGCCTGCCGACCCCATCTTTGAGACCAAGACTCTCTACAGTAGGTTCTG
GCCTACTATGAGCAAATCTGTTGAGATCGGAAGAGCGTCGTGTAGGA
+
FFF::F,FFF,,FF:,,,FFF,FF:FFF:FF,FFFF,FFFFFFFFFFFFFFFF:FFF:FFF,FFF,,,F:
:FF,FF:FF,F:F::FFFFFFFF:F,,FFF:FFF:FFF,,FFFFFF
@A00721:190:HGJW7DSXY:4:1354:4996:14935_2:N:0:TCTGCAAG+GCTGCACT
CTTAAGCACCGAGGTAAGCTCGGGACTTACAAGAGAGAGTGTGAGAGAGTCGCTCTCACTATTTTTGC
CCAGAATGCGGGCTTTCTGACTGATGAGGTTAAACTCTTGCTCCTTC
+
FFFFFFFFFFFFFFFFFFFFFFFFFFFFFFFFFFFFFFFFFFFFFFFFFFFFFFFFFFFFFFFFFFFFF:~
FFFFFFFFFFFFFFFFFFFFFFFFFFFFFFFFFFFFFFFFFFFFFFFFFFFFFFFFFFFFFFFFFFFFF:~
FFFFFFFFFFFFFFFFFFFFFFFFFFFFFFFFFFFFFFFFFFFFFFFFFFFFFFFFFFFFFFFFFFFFF:~
@A00721:190:HGJW7DSXY:4:2677:21513:34397_1:N:0:TCTGCAAG+GCTGCACT
TATTTGAAGCAGGGTTACCACTTCCTAAGGTGGATGAGGGAGGTTGTTTCTTTGGAGTTTATAGATAA
TCTTTTGAGAAGGGGTCATAGAGCCAGCAAGAGAAGCTTATATGCTGGTTTAAGTGATGATTATCACT
CCT
+
FFFFFFFFFFFFFFFFFFFF,FFFFFFFFFFFFFFFFFFFFFFFFFFFFFFFFFFFFFFFFFFFFFFFFFFFFF
FFFFFFFFFFFFFFFFFFFFFFFFFFFFFFFFFFFFFFFFFFFFFFFFFFFFFFFFFFFFFFFFFFFFF,FFFFFFFFFFFFFFFFFFFFFFFFFFFFF
FFF
@A00721:190:HGJW7DSXY:4:2502:30924:7138_2:N:0:TCTGCAAG+GCTGCACT
CCGGATGTGGATTGAAGGCTGGCTCTAAGGGAGACTCCTTCTTTTTGAATGTTGTAAAGAATTGGGTT
GAGAAGTGTGCTTTACAAGGAGTTAGACTCTTCTTCAAGTTTTTAGAT
+
FFFFFFFFFFFFFFFFFFFFFFFFFFFFFFFFFFFFFFFFFFFFFFFFFFFFFFFFFFFFFFFFFFFFF:~
F:FFFFFFFFFFFFFFFFFFFFFFFFFFFFFFFFFFFFFFFFFFFFFFFFFFFFFFFFFFFFFFFFFFFFF:~
@A00721:190:HGJW7DSXY:4:2523:16640:31751_1:N:0:TCTGCAAG+GCTGCACT
TCTTCCGATCTCGGATACCGATCTCAGTTCTACCACAGAAACCGTCTCAGGAAGTGTCTCCACTGATT
CGGAATTAGAGAAAGACGACCTTCTTGTTGGGGACTGAGACCTCTGAATTTTCAGGGTGCCCTGATGAG
GAC
+
FFFFFFFFFFFFFFFFFFFFFFFFFFFFFFFFFFFFFFFFFFFFFFFFFFFFFFFFFFFFFFFFFFFFF
FFFFFFFFFFFFFFFFFFFFFFFFFFFFFFFFFFFFFFFFFFFFFFFFFFFFFFFFFFFFFFFFFFFFF
FFF
@A00721:190:HGJW7DSXY:4:2623:14235:31000_1:N:0:TCTGCAAG+GCTGCACT
GCCCCGCCGACGTTTGTGCGCAACTCTCAGAGTTTACGGCAGAAAAATTTCTCCTGCTTGTAATTG
AGAGAGGACACTATGGAAATTAGACCTATCAGATGTCTTGACGACTTCGAATTTGAGGACGGAGTTAA
ATA
+
FFFFFFFFFFFFFFFFFFFF:FFFFFFFFFFFFFFFFFFFFFFFFFFFFFFFFFFFFFFFFFFFFFFFFFFFFF

```

FFFFFFFFFFFFFFFFFFFFFFFFFFFFFFFFFFFFFFFFFFFFFFFFFFFFFFFFFFFFFFFFFFFFFFFF  
FFF

@A00721:190:HGJW7DSXY:4:2615:13575:8218\_2:N:0:TCTGCAAG+GCTGCACT  
CTACAGAGGAACGTACCGATTACCTGTCTTTTCATATTATGAATGAACCTTCGGCCGCTCTCTTTGCT  
TCGATGTTGGATGTCAAGAAGGGTTCAGAATGGGATTCTACGTAGTT

+

FFFFFFFFFFFFFFFFFFFFFFFFFFFFFFFFFFFFFFFFFFFFFFFFFFFFFFFFFFFFFFFFFFFFFFFF  
FFFFFFFFFFFFFFFFFFFFFFFFFFFFFFFFFFFFFFFFFFFFFFFFFFFFFFFFFFFFFFFFFFFFFFFF

@A00721:190:HGJW7DSXY:4:2146:6036:26130\_2:N:0:TCTGCAAG+GCTGCACT  
TTTACGTTTGCTACTCAGAGCTGGTCTCTCAGCAAAGGGATGCATGGTGTATCTCCTCAGGAGTCC  
CGGCATTTGATAATAATGACGAGACTTTCGTCATAATCGCTGCATATT

+

FFFFFFFFFFFFFFFFFFFFFFFFFFFFFFFFFFFFFFFFFFFFFFFFFFFFFFFFFFFFFFFFFFFFFFFF:  
FFFFFFFFFFFFFFFFFFFFFFFFFFFFFFFFFFFFFFFFFFFFFFFFFFFFFFFFFFFFFFFFFFFFFFFF

@A00721:190:HGJW7DSXY:4:1207:31186:13698\_2:N:0:TCTGCAAG+GCTGCACT  
CAAGGAGTCCAATCAAAGGTTTTGAATTTAGCTCAACTGGGAGACGTGCTTAAATGGGTGATAAAAA  
TTATTTAGAGATCTTTTCTACTTACAAAGGACAATTCAGTTTCATTAA

+

FFFFFFFFFFFFFFFFFFFFFFFFFFFFFFFFFFFFFFFFFFFFFFFFFFFFFFFFFFFFFFFFFFFFFFFF,  
FFF,FFFFFFFF:FFFFFFFFFFFFFFFF,FFFFFFFFFFFFFFFF:FFFFF:

@A00721:190:HGJW7DSXY:4:2655:4336:7028\_2:N:0:TCTGCAAG+GCTGCACT  
TACTCTGTACTTGATCTACGTCGTTTAACTGTCGGAACAACCTTTACTTAGAATGACTCTATCTTTTC  
AGACACTTCTTATATTATTTACAATAGTTAATATCATATTAGTAATAC

+

FFFFFFFFFFFF,FFFFFFFFF:FFFFFF:FF,:FFFFFFFF,FFFFFFFFFFFFFFFFFFFFFFFF  
FFFFFFFFFFFFFFFFFFFFFFFFFFFFFFFFFFFFFFFFFFFFFFFFFFFFFFFFFFFFFFFFFFFFFFFF

@A00721:190:HGJW7DSXY:4:2330:28185:36808\_1:N:0:TCTGCAAG+GCTGCACT  
ACACCCATCTCACCGAGGATAACGCGTGTTTACCGTCCTGAACCTTAATACACGAAGATATCACCCGCA  
AACGACTCGAAACCGAGACGCCGTAGATCAAAGTCCCTTCTAACTTTAGATTATGAATCCTGCCTTTA  
CTC

+

:F:FF,,,F,,F,F:,,,F,F,,,::,,,FF:,F::,F::,F,,,F,,,,,F,F,,,::,FF,FF,,F  
,FFFFFF:FFFFFF:FFFFFFFFFFFFFFFFFFFFFFFFFFFFFFFFFFFFFFFFFFFFFFFFFFFFFF:FFF  
FFF

@A00721:190:HGJW7DSXY:4:1124:24614:1720\_1:N:0:TCTGCAAG+GCTGCACT  
TCACCTTGGTGTGATCTCCCGGAGGATCTTTTCAATAAGATGTATGATGATAATCTACTATTTTTTAAA  
TAGTGATATTACGCGTATACTTGAATACTTTATCAAAGATTTGGCTTGGTCTATTTACCGCAAAAAGT  
TGG

+

FFFFFFFFF:FFFFFFFFFFFFFFFFFFFF:FFF:FFFFFFFFFFFFFFFFFFFFFFFFFFFFFFFF:FFFFFFFFF  
FFFFFFFFFFFFFFFFFFFFFFFFFFFFFFFFFFFFFFFFFFFFFFFFFFFFFFFFFFFFFFFFFFFFFFFFFFFF  
FFF

@A00721:190:HGJW7DSXY:4:1536:13765:15217\_1:N:0:TCTGCAAG+GCTGCACT  
ACTTATACTTTAAATAGCACCGATTATAACTTGACTGTTGATAATATTACAATAGCTCTTTCTCAGAA  
GATTAGAGAAGTAACCGGTGAACACGTCGGTAGCATTGATTTACTTTTACCGTTAGAACTGAAAAAGA  
TTC

+

FFFFFFFFFFFFFFFFFFFFFFFFFFFFFFFF:FFFFFFFFFFFF:FFFFFFFFFFFFFF:FFFFFFFFFFFFFFFF  
FFFFFFFFFFFFFFFF:FFFFFFFFFFFFFFFFFFFF:FFFF:FFFFFFFFFFFFFFFFFFFF:F:FFFF:FF:FFFF  
F,F

@A00721:190:HGJW7DSXY:4:2340:8368:27195\_2:N:0:TCTGCAAG+GCTGCACT  
GACTATACAGTTTCGGCCATTTCAAGAGTGGTCAATACGTCGTGGGAGGTACTGAAGCCTTCCCCTCCG  
CTGGCACGAAGAACTCCCAAGCCAATCAATAGTTCTTCTGACCAGA

+

FFFFFFFFFFFFFFFFFFFFFFFFFFFFFFFFFFFFFFFFFFFFFFFFFFFFFFFFFFFFFFFF  
FFFFF:FFFFFF,FFFFFFFFFFFFFFFFFFFFFFFFFFFFFFFFFFFFFFFF  
@A00721:190:HGJW7DSXY:4:2553:20961:36855\_2:N:0:TCTGCAAG+GCTGCACT  
ATGTCCCCAAACTGAGAAGAATAAAGGGAAAGGTCCATCAGGACCTAAGAAGGGGAAATTACCCCTA  
ATTCTGAAGGAAGATCTCCCACCATCTGGGGTTGGAATAAGAAATCT

+  
FFFFFFFFFFFFFFFFFFFFFFFFFFFFFFFFFFFFFFFFFFFFFFFFFFFFFFFFFFFFFFFF  
FFFFFFFFFFFFFFFFFFFFFFFFFFFFFFFFFFFFFFFFFFFFFFFFFFFFFFFF,FFFFFFFF  
@A00721:190:HGJW7DSXY:4:2433:29595:1705\_1:N:0:TCTGCAAG+GCTGCACT  
CCGACCCCATCTTTGAGACCAAGACTCTCTACAGTAGGTTCTGCTACTATGAGCAAATCTGTTGAA  
TTCGTCACTGAGGACGAAGGTGAGAGGACTTTTGCTACTGGCGACAACTGAGAGCAGTCGCTGGGG  
AAA

+  
FFFFFFFFFFFF:FFFFFFFFFFFFFFFFFFFFFFFFFFFFFFFFFFFFFFFFFFFFFFFF:FFFFFF  
FFFFFFFFFFFFFFFFFFFFFFFFFFFFFFFFFFFFFFFF:FFFFFFFFFFFFFFFFFFFFFFFFFFFFFFFF  
FFF  
@A00721:190:HGJW7DSXY:4:1529:4345:4758\_2:N:0:TCTGCAAG+GCTGCACT  
CTTAAGCACCGAGGTAAGCTCGGGACTTACAAGAGAGAGTGTGAGAGAGTCGCTCTCACTATTTTGC  
CCAGAATGCGGGCTTTCTGACTGATGAGGTTAAACTCTTGCTCCTTC

+  
FFFFFFF:F:FFFFFFFFFFFF:FFFFFFFFFFFFFFFFFFFFFFFFFFFFFFFFFFFFFFFF:::F,FFFFFF:  
FFF::F:FFFF,FFF:FF,:FF,:FFFF:F:F:FFFFFFFFF:,,F:  
@A00721:190:HGJW7DSXY:4:2677:21875:33739\_1:N:0:TCTGCAAG+GCTGCACT  
TATTTGAAGCAGGGTTACCACTTCTTAAGGTGGATGAGGGAGTTGTTTCTTTGGAGTTTATAGATAA  
TCTTTTGAGAAGGGGTCATAGAGCCAGCAAGAGAAGCTTATATGCTGGTTTAAAGTATGATTATCACT  
CCT

+  
FFFFFFFFFFFFFFFFFFFFFFFFFFFFFFFFFFFFFFFFFFFFFFFFFFFFFFFFFFFFFFFF  
FFFFFFFFFFFFFFFFFFFFFFFFFFFFFFFFFFFFFFFFFFFFFFFFFFFFFFFFFFFFFFFF  
FFF  
@A00721:190:HGJW7DSXY:4:2627:1597:8140\_2:N:0:TCTGCAAG+GCTGCACT  
CCGGATGTGGATTGAAGGCTGGCTCTAAGGGAGACTCCTTCTTTTGAATGTTGTAAAGAATTGGGTA  
GAGAAGTGTGCTTTACAAGGAGTTAGACTCTTCTTCAAGTTTATAGAT

+  
FFFFFFFFF,FFFF,FF:FFF,FFFF,FFFFFFFFFFFFFFFF:FFFF:FFF,FF:FFFFFFFFFFFF,,  
FFFFFFFF,F,FFF:FFFFFFFF:FF,FFFFFF:FFFF:FFF,FFFF  
@A00721:190:HGJW7DSXY:4:2524:24695:4178\_1:N:0:TCTGCAAG+GCTGCACT  
TCTTCCGATCTCGGATACCGATCTCAGTTCTACCACAGAAACCGTCTCAGGAAGTGTCTCCACTGATT  
CGGAATTAGAGAAAGACGACCTTCTGTGGGGACTGAGACCTCTGAATTTTCAGGGTGCCTGATGAG  
GAC

+  
FFFFFFFFFFFFFFFFFFFFFFFFFFFFFFFFFFFFFFFFFFFFFFFFFFFFFFFFFFFFFFFF  
FFFFFFFFFFFFFFFFFFFFFFFFFFFFFFFFFFFFFFFFFFFFFFFFFFFFFFFFFFFFFFFF  
FFF  
@A00721:190:HGJW7DSXY:4:2623:15980:31610\_1:N:0:TCTGCAAG+GCTGCACT  
GCCCCGCCGACGTTTGTGCGCAACTCTCAGAGTTTACGGCAGAAAAATTTCTCCTGCTTGTAATTG  
AGAGAGGACACTATGGAAATTAGACCTATCAGATGTCTTGACGACTTCGAATTTGAGGACGGAGTTAA  
ATA

+  
FFFFFFFFFFFFFFFFFFFFFFFFFFFFFFFFFFFFFFFFFFFFFFFFFFFFFFFFFFFFFFFF  
FFFFFFFFFFFFFFFFFFFFFFFFFFFFFFFFFFFFFFFFFFFFFFFFFFFFFFFFFFFFFFFF  
FFF  
@A00721:190:HGJW7DSXY:4:2622:19696:33943\_2:N:0:TCTGCAAG+GCTGCACT  
CTACAGAGGAACGTACCGATTACCTGTCTATCATATTATGAATGAACCTTCGGCCGCTCTCTTTGCT

TCGATGTTGGATGTCAAGAAGGGTTCAGAATGGGATTCCTACGTAGTT  
+  
FFFFFFFFFFFFFFFFFFFFFFFFFFFFFFFFFFFFFFFFFFFFFFFFFFFFFFFFFFFFFFFFFFFFFFFF  
FFFFFFFFFFFFFFFFFFFFFFFFFFFFFFFFFFFFFFFFFFFFFFFFFFFFFFFFFFFFFFFFFFFFFFFF  
@A00721:190:HGJW7DSXY:4:2217:7545:34507\_2:N:0:TCTGCAAG+GCTGCACT  
TTTACGTTTGCTACTCAGAGCTGGTCCTCTCAGCAAAGGGATGCATGGTGTATCTCCTCAGGAGTCC  
CGGCATTTGATAATAATGACGAGACTTTTCGTCATAATCGCTGCATATT  
+  
FFFFFFFFFFFFFFFFFFFFFFFFFFFFFFFFFFFFFFFFFFFFFFFFFFFFFFFFFFFFFFFFFFFFFFFF  
FFFFFFFFFFFFFFFFFFFFFFFFFFFFFFFFFFFFFFFFFFFFFFFFFFFFFFFFFFFFFFFFFFFFFFFF  
@A00721:190:HGJW7DSXY:4:1209:4752:8249\_2:N:0:TCTGCAAG+GCTGCACT  
CAAGGAGTCCAATCAAAGGTTTTGAATTTAGCTCAACTGGGAGACGTGCTTAAATGGGTGATAAAAA  
TTATTTAGAGATCTTTTCTACTTACAAAGGACAATTCAGTTTCATTAA  
+  
FFFFFFFFFFFFFFFFFFFFFFFFFFFFFFFFFFFFFFFFFFFFFFFFFFFFFFFFFFFFFFFFFFFFFFFF  
:FFFFFFFFFFFFFFFFFFFFFFFFFFFFFFFFFFFFFFFFFFFFFFFFFFFFFFFFFFFFFFFFFFFFFFFF  
@A00721:190:HGJW7DSXY:4:1461:20735:31548\_2:N:0:TCTGCAAG+GCTGCACT  
CTCTGTACTTGATCTACGTCGTTTAACTGTCGGAACAACCTTTACTTAGAATGACTCTATCTTTTCAG  
ACACTTCTTATATTATTTACAATAGTTAATATCATATTAGTAATACTC  
+  
FFFFFFFFFFFFFFFFFFFFFFFFFFFFFFFFFFFFFFFFFFFFFFFFFFFFFFFFFFFFFFFFFFFFFFFF  
FFFFFFFFFFFFFFFFFFFFFFFFFFFFFFFFFFFFFFFFFFFFFFFFFFFFFFFFFFFFFFFFFFFFFFFF  
@A00721:190:HGJW7DSXY:4:2361:20030:10347\_1:N:0:TCTGCAAG+GCTGCACT  
ACACCCATCTCAACGTGTATAAAGCTAGTTTTCCGTCCTGAACGTAATACACGAAGAGATCATCCGCA  
AACGACTCGAAACCGAGACGCCGTAGATCAAAGTCCCTTCTAACTTTAGATTATGAATCCTGCCTTTA  
CTC  
+  
FFFFF,:::FFFF,F,,F,FFF:,F:,,,FFF,FF,:F,:F:,,,F:FFFF:,F,,F,::::FFF,F  
,FFFFFFFFFFFFFFFFFFFFFFFFFFFFFFFFFFFFFFFFFFFFFFFFFFFFFFFFFFFFFFFFFFFFFFFF  
FFF  
@A00721:190:HGJW7DSXY:4:1273:30942:24048\_1:N:0:TCTGCAAG+GCTGCACT  
TCACCTTGGTGTGATCTCCCGGAGGATCTTTTCAATAAGATGTATGATGATAATCTACTATTTTTTAA  
TAGTGATATTCAGCGTATACTTGAATACTTTATCAAAGATTTGGCTTGGTCTATTTACCGCAAAAAGT  
TGG  
+  
:FFFFFFFFFFFFFFFFFFFFFFFFFFFFFFFFFFFFFFFFFFFFFFFFFFFFFFFFFFFFFFFFFFFFFFFF  
FFFFFFFFFFFFFFFFFFFFFFFFFFFFFFFFFFFFFFFFFFFFFFFFFFFFFFFFFFFFFFFFFFFFFFFF  
FFF  
@A00721:190:HGJW7DSXY:4:2412:20907:2284\_1:N:0:TCTGCAAG+GCTGCACT  
ACTTATACTTTAAATAGCACCGATTATAACTTGACTGTTGATAATATTACAATAGCTCTTTCTCAGAA  
GATTAGAGAAGTAACCGGTGAACACGTCGGTAGCATTGATTTACTTTTACCGTTAGAACTGAAAAAGA  
TTC  
+  
FFFFFFFFFFFFFFFFFFFFFFFFFFFFFFFFFFFFFFFFFFFFFFFFFFFFFFFFFFFFFFFFFFFFFFFF  
FFFFFFFFFFFFFFFFFFFFFFFFFFFFFFFFFFFFFFFFFFFFFFFFFFFFFFFFFFFFFFFFFFFFFFFF  
FFF  
@A00721:190:HGJW7DSXY:4:2464:9697:35070\_2:N:0:TCTGCAAG+GCTGCACT  
GACTATACAGTTCGGCCATTTCAAGAGTGGTCAATACGTCGTGGGAGGTACTGAAGCCTTCCCCTCCG  
CTGGCACGAAGAACTCCCAAGCCAATCAATAGTTCTTCTGACCAGA  
+  
FFF:FFFFFFFFFFFFFFFFFFFFFFFFFFFFFFFFFFFFFFFFFFFFFFFFFFFFFFFFFFFFFFFFFFFF  
FFFFFFFFFFFFFFFFFFFFFFFFFFFFFFFFFFFFFFFFFFFFFFFFFFFFFFFFFFFFFFFFFFFFFFFF  
@A00721:190:HGJW7DSXY:4:2571:30029:22028\_1:N:0:TCTGCAAG+GCTGCACT  
TGTCCCCAAAAGTGAAGAATAAAGGGAAAGGTCCATCAGGACCTAAGAAGGGGAAATTACCCCTAA



TTCTGAAGGAAGATCTCCCACCATCTGGGGTTGGGAATAAGAAATCTGCACGGGCCAAAGAGGCCGCT  
GCT

+

FFFFFFFFFFFFFFFFFFFFFFFFFFFFFFFFFFFFFFFFFFFFFFFFFFFFFFFFFFFFFFFF:F:FFFF:FFFFFFFF  
FFFFFFFFFFFFFFFFFFFFFFFFFFFFFFFFFFFFFFFFFFFFFFFFFFFFFFFFFFFFFFFF,FFFFFFFF  
FFF

@A00721:190:HGJW7DSXY:4:2521:20292:36793\_1:N:0:TCTGCAAG+GCTGCACT  
CCGACCCCATCTTTGAGACCAAGACTCTCTACAGTAGGTTCTGCCTACTATGAGCAAATCTGTTGAA  
TTCGTCACTGAGGACGAAGGTGAGAGGACTTTTGGCTACTGGCGACAACTGAGAGCAGTCGCTGGGG  
AAA

+

FFFFFFFFFFFFFFFFFFFFFFFFFFFFFFFFFFFFFFFFFFFFFFFFFFFFFFFFFFFFFFFF  
FFFFFFFFFFFFFFFFFFFFFFFFFFFFFFFFFFFFFFFFFFFFFFFFFFFFFFFFFFFFFFFF  
FFF

@A00721:190:HGJW7DSXY:4:2272:26558:8782\_2:N:0:TCTGCAAG+GCTGCACT  
CTTAAGCACCGAGGTAAGCTCGGGACTTACAAGAGAGAGTGTGAGAGAGTCGCTCTCACTATTTTGC  
CCAGAATGCGGGCTTTCTGACTGATGAGGTTAAACTCTTGCTCCTTC

+

FFFFFFFFFFFFFFFFFFFFFFFFFFFFFFFFFFFFFFFFFFFFFFFFFFFFFFFFFFFFFFFF  
FFFFFFFFFFFFFFFFFFFFFFFFFFFFFFFFFFFFFFFFFFFFFFFFFFFFFFFF

@A00721:190:HGJW7DSXY:4:1120:27778:11741\_1:N:0:TCTGCAAG+GCTGCACT  
CTTTTGAAGCAGGGTTACCACTTCCTAAGGTGGATGAGGGAGGTTGTTTCTTTGGAGTTTATAGATAA  
TCTTTTGAGAAGGGTCATAGAGCCAGCAAGAGAAGCTTATATGCTGGTTTAAGTGATGATTATCACT  
CCT

+

FFF:F:FFFF:FFFFFFFFFFFFFFFFFFFFFFFFFFFFFFFFFFFFFFFFFFFFFFFFFFFFFFFF:FF,  
FFFFFFFFFFFFFFFFFFFFFFFFFFFFFFFFFFFFFFFFFFFFFFFFFFFFFFFFFFFFFFFF:FFFFFFFF  
FFF

@A00721:190:HGJW7DSXY:4:2252:16043:32064\_2:N:0:TCTGCAAG+GCTGCACT  
TTGAAGGCTGGCTCTAAGGGAGACTCCTTCTTTTGAATGTTGTACAGAATTGGGTTGAGAAGTGTC  
TTTACAAGGAGTTAGACTCTTCTTCAAGTTTTTAGATCTTCTTGATAA

+

FFFFFFFFFFFFFFFFFFFF:F:FFFF:FFFFF:FF:FFF,FFFFF,FFFFF:F:F,FFFFFFFF  
FF:FFFF:FF,FFFFFFFFFFFF:FFFFFFFFF:FFF,FF::FFFF

@A00721:190:HGJW7DSXY:4:2560:28691:26882\_1:N:0:TCTGCAAG+GCTGCACT  
TCTTCCGATCTCGGATACCGATCTCAGTTCTACCACAGAAACCGTCTCAGGAAGTGTCTCCACTGATT  
CGGAATTAGAGAAAGACGACCTTCTTGTTGGGACTGAGACCTCTGAATTTTCAGGTTGCCCTGATGAG  
GAC

+

FFFFFFFFFFFFFFFFFFFFFFFFFFFFFFFFFFFFFFFFFFFFFFFFFFFFFFFFFFFFFFFF:F:FFFF  
FFFFFFFFFFFFFFFFFFFFFFFFFFFFFFFFFFFFFFFFFFFFFFFFFFFFFFFFFFFFFFFF  
FFF

@A00721:190:HGJW7DSXY:4:2667:22824:17879\_1:N:0:TCTGCAAG+GCTGCACT  
GCCCCGCCGACGTTTGTGCGGAAGTCTCAGAGGTTTACGGCAGAAAAATTTCTCCTGCTTGTAATTG  
AGAGAGGACACTATGGAAATTAGACCTATCAGATGTCTTGACGACTTCGAATTTGAGGACGGAGTTAA  
ATA

+

FFFFFFFFFFFFFFFFFFFFFFFFFFFFFFFFFFFFFFFFFFFFFFFFFFFFFFFFFFFFFFFF:F:FFFF  
FFFFFFFFFFFFFFFFFFFFFFFFFFFFFFFFFFFFFFFFFFFFFFFFFFFFFFFFFFFFFFFF  
FFF

@A00721:190:HGJW7DSXY:4:2634:31620:34648\_2:N:0:TCTGCAAG+GCTGCACT  
CTACAGAGGAACGTACCGATTACCTGTCTTTCATATTATGAATGAACCTTCGGCCGCTCTCTTGTCT  
TCGATGTTGGATGTCAAGAAGGGTTCAGAATGGGATTCTACGTAGTT

+

FFFFFFFFF,FFFFFFFFFFFFFFFFFFFF:FFFFFF:FFFFFFFFFFFFFFFFFFFFFFFF::  
FFFFF,FFFFFFFF:FFF:FFFFFFFFFFFFFFFFFFFFFFFF:FFFF  
@A00721:190:HGJW7DSXY:4:2311:19325:36746\_2:N:0:TCTGCAAG+GCTGCACT  
TTTACGTTTGCTACTCAGAGCTGGTCCTCTCAGCAAAGGGATGCATGGTGTATCTCCTCAGGAGTCC  
CGGCATTTGATAATAATGACGAGACTTTCGTCATAATCGCTGCATATT  
+  
FFFFFFFF:F:FFF:FF:FFFFFFFFFFFFFFFFFFFF,FFFF::FFFFFFFF:F,FFFFFFFFFFFFF  
F:FFFF,,FF,FF:FF:FFFF:FFF,FF,:FFFFFFFF:FFFFF  
@A00721:190:HGJW7DSXY:4:1453:32741:35399\_2:N:0:TCTGCAAG+GCTGCACT  
CAAGGAGTCCAATCAAAGGTTTTGAATTTAGCTCAACTGGGAGACGTGCTTAAATGGGTGATAAAAA  
TTATTTAGAGATCTTTTCTACTTACAAAGGACAATTCAGTTTCATTAA  
+  
FFFFFFFFFFFFFFFFF,FFFFFFFF:FFFF,FFFF:FF:FFFFFFFFFFFFFFFFFFFFFFFF:FF  
FFFF:FFFFFFFF:F::F:FF:FF,FF:FFFF:FFFF::FFFFFFFFF  
@A00721:190:HGJW7DSXY:4:2339:6822:4539\_2:N:0:TCTGCAAG+GCTGCACT  
CTCTGTACTTGATCTACGTCGTTTAACTGTCGGAACAACCTTTACTTAGAATGACTCTATCTTTTCAG  
ACACTTCTTATATTATTTACAATAGTTAATATCATATTAGTAATACTC  
+  
F:FFF,:FFFFFFFFFFFFFFFFFFFFFFFFFFFFFFFFFFFFFFFF:FFFFFFFFFFFFFFFFFFFFF  
FFFFFFFFFFFFFFFFFFFFF:FFFFFFFFFFFFFFFFFFFFF:FFFFF  
@A00721:190:HGJW7DSXY:4:2517:21224:26757\_1:N:0:TCTGCAAG+GCTGCACT  
ACACCCATCTCAACGAGGAAAACGCGATTTTACCGTCCTGAACCTTAATACTAATAAAAACCCGCA  
AACGACTCGAAACCGAGACGCCGTAGATCAAAGTCCCTTCTAACTTTAGATTATGAATCCTGCCTTTA  
CTC  
+  
F::FF,,,:,,F,,:,,F,F,:,,FF,,F,,F,:F,,,FF:::,:::,:::,:::,F::,F  
,FFFFFFFFFFFFFFFFFFFFFFFFFFFFFFFFFFFFFFFFFFFFFFFFFFFFFFFFFFFFFFFFFFFFF  
FFF  
@A00721:190:HGJW7DSXY:4:1423:4463:30295\_1:N:0:TCTGCAAG+GCTGCACT  
TCACCTTGGTGTGATCTCCCGGAGGATCTTTCAATAAGATGTATGATGATAATCTACTATTTTTTAA  
TAGTGATATTCAGCGTATACTTGAATACTTTATCAAAGATTTGGCTTGGTCTATTTACCGCAAAAAGT  
TGG  
+  
FFFFFFFFFFFFFFFFFFFFFFFFFFFF:FFFFFFFFFFFFFFFFFFFFFFFFFFFFFFFFFFFFFFFFFFFF  
FFFFFFFFFFFFFFFFFFFFFFFFFFFFFFFFFFFFFFFFFFFFFFFFFFFFFFFFFFFFFFFFFFFFFFFFFFFF  
FFF  
@A00721:190:HGJW7DSXY:4:2434:18602:20212\_1:N:0:TCTGCAAG+GCTGCACT  
ACTTATACTTTAAATAGCACCGATTATAACTTGACTGTTGATAATATTACAATAGCTCTTTCTCAGAA  
GATTAGAGAAGTAACCGGTGAACACGTCGGTAGCATTGATTTACTTTTACCGTTAGAACTGAAAAAGA  
TTC  
+  
FFFFFFFFFFFF:FFFFFFFFFFFFFFFFFFFFFFFFFFFF:FFFFFFFFFFFFFFFFFFFFFFFFFFFFFFFFFFFF  
FFFFFFFFF:FFFFFFFFFFFFFFFFFFFFFFFFFFFFFFFFFFFF,FFFF:FFFFFFFFFFFFF  
FFF  
@A00721:190:HGJW7DSXY:4:2546:4336:36432\_2:N:0:TCTGCAAG+GCTGCACT  
GACTATACAGTTCGGCCATTTCAAGAGTGGTCAATACGTCGTGGGAGGTACTGAAGCCTTCCCCTCCG  
CTGGCACGAAGAACTCCCAAGCCAATCAATAGTTCTTCTGACCAGA  
+  
FFFFF:FFFFF:FFFFF:FFFFFFFFFFFFFFFFFFFFFFFFFFFFFFFFFFFFFFFF:FFFFF  
FFFFF:FFFFFFFFFFFFFFFFFFFF,:FFFF:FFFFFFFFF,FFF:F  
@A00721:190:HGJW7DSXY:4:2369:28492:15890\_1:N:0:TCTGCAAG+GCTGCACT  
AAAAGTGAAGAATAAAGGGAAAGGTCCATCAGGACCTAAGAAGGGGAAATTACCCCTAATTCTGAA  
GGAAGATCTCCCACCATCTGGGGTTGGGAATAAGAAATCTGCACGGGCCAAAGAGGCCGCTGCTACGA  
AGT

+  
FFFFFFFFFFFFFFFF,FFFFF:F:FFFFFFFFFFFFFFFFFFFFFFFF:FFFFFF::FFFFFFFFFFFFFFFF  
FFFFFFFFFFFFFFFFFFFFFFFFFFFFFFFFFFFFFFFF:FFFFFFFFFFFFFFFFFFFFFFFFFFFFFFFF  
FFF  
@A00721:190:HGJW7DSXY:4:2521:21567:36338\_1:N:0:TCTGCAAG+GCTGCACT  
CCGACCCCATCTTTGAGACCAAGACTCTCTACAGTAGGTTCTGTCCTACTATGAGCAAATCTGTTGAA  
TTCGTCCTGAGGACGAAGGTGAGAGGACTTTTGGCTACTGGCGACAACTGAGAGCAGTCGCTGGGG  
AAA  
+  
FFFFFFFFFFFF,FFFFFFFFF:FFFFFFFFF:FFFFFFFFFFFFFFFFFFFFFFFFFFFFFFFFFFFFFFFF  
FFFFFFFFFFFFFFFFFFFFFFFFFFFFFFFFFFFFFFFFFFFFFFFFFFFFFFFFFFFFFFFFFFFFFFFF  
FFF  
@A00721:190:HGJW7DSXY:4:2240:12726:33207\_1:N:0:TCTGCAAG+GCTGCACT  
AAGCACCGAGGTAAGCTCGGGACTTACAAGAGAGAGTGTGAGAGAGTCGCTCTCACTATTTTTGCCCA  
GAATGCGGGCTTTCTGACTGATGAGGTTAAACTCTTGCTCCTTCTGTGGGTGAGGGTTTTTGTATA  
TTC  
+  
FFFFFFFFFFFFFFFFFFFFFFFFFFFFFFFFFFFFFFFFFFFFFFFFFFFFFFFFFFFFFFFFFFFFFFFF  
FFFFFFFFFFFFFFFFFFFFFFFFFFFFFFFFFFFFFFFFFFFFFFFFFFFFFFFFFFFFFFFFFFFFFFFF  
FFF  
@A00721:190:HGJW7DSXY:4:1532:13584:17221\_1:N:0:TCTGCAAG+GCTGCACT  
CTTTTGAAGCAGGGGTTACCACTTCCTAAGGTGGATGAGGGAGGTTGTTTCTTTGGAGTTTTAGATAA  
TCTTTTGAGAAGGGGTCATAGAGCCAGCAAGAGAAGCTTATATGCTGGTTTAAGTGATGATTATCACT  
CCT  
+  
FFFFFFFFFFFFFFFFFFFFFFFFFFFFFFFFFFFFFFFFFFFFFFFFFFFFFFFFFFFFFFFFFFFFFFFF  
FFFFFFFFFFFFFFFFFFFFFFFFFFFFFFFFFFFFFFFFFFFFFFFFFFFFFFFFFFFFFFFFFFFFFFFF  
FFF  
@A00721:190:HGJW7DSXY:4:2310:24433:16313\_2:N:0:TCTGCAAG+GCTGCACT  
TTGAAGGCTGGCTCTAAGGGAGACTCCTTCTTTTTGAATGTTGTAAAGAATTGGGTTGAGAAGTGTGC  
TTTACAAGGAGTTAGACTCTTCTTCAAGTTTTTAGATCTTCTTGATAA  
+  
FFFFFFFFFFFFFFFFFFFFFFFFFFFFFFFFFFFFFFFFFFFFFFFFFFFFFFFFFFFFFFFFFFFFFFFF  
FFFFFFFFFFFFFFF:F:FF:FFFFFFFFF:FFFFFFFFFFFFFFFFFFFFFFFF  
@A00721:190:HGJW7DSXY:4:2603:15600:6464\_1:N:0:TCTGCAAG+GCTGCACT  
TCTTCCGATCTCGGATACCGATCTCAGTTCTACCACAGAAACCGTCTCAGGAACTGTCTCCACTGATT  
CGGAATTAGAGAAAGACGACCTTCTTGTGGGGACTGAGACCTCTGAATTTTCAGGGTGCCTGATGAG  
GAC  
+  
FFFFFFFFFFFFFFFFFFFFFFFFF:FFFFFFFFFFFFFFFFFFFFFFFFFFFFFFFFFFFFFFFFFFFFFFF  
FFFFFFFFFFFFFFFFFFFFFFFFFFFFFFFFFFFFFFFFFFFFFFFFFFFFFFFFFFFFFFFFFFFFFFFF  
FFF  
@A00721:190:HGJW7DSXY:4:1646:8947:32612\_2:N:0:TCTGCAAG+GCTGCACT  
TACAGAGGAACGTACCGATTACCTGTCTTTCATATTATGAATGAACCTTCGGCCGCTCTCTTGCTT  
CGATGTTGGATGTCAAGAAGGGTTCAGAATGGGATTCTACGTAGTTT  
+  
FFFFFFFFFFFFFFFFFFFFFFFFFFFFFFFFFFFFFFFF:FFFFFFFFFFFFFFFFFFFFFFFFFFFFFFFF  
FFFFFFFFFFFFFFFFFFFFFFFFFFFFFFFFFFFFFFFF:FFFFFFFFFFFFFFFFFFFFFFFF  
@A00721:190:HGJW7DSXY:4:2425:6641:13933\_2:N:0:TCTGCAAG+GCTGCACT  
TTTACGTCTGCTACTCAGAGCTGGTCTCTCAGCAAAGGGATGCATGGTGTATCTCCTCAGGAGTCC  
CGGCATTTGATAATAATGACGAGACTTTCGTCATAATCGCTGCATATT  
+  
FFFFFFF,FFFFFFFFFFFFFFFFFFFFFFFFFFFFFFFFFFFFFFFFFFFFFFFFFFFFFFFFFFFFFFF  
FFFFFFFFFFFFFFFFF,FFFFFFFFFFFFFFFFFFFFFFFFFFFFFFFF:FFFFFFFFF

$+$  $+$ 

+

$$+$$

+

+

+

+

[illegible]

FF:FFF:FF,::FFF,::FFFFFFFFFFFFFFFFFFFFFFFFF:F:FFFFFFFFFFFFFFFFFFFFFFF  
:FF

@A00721:190:HGJW7DSXY:4:2318:18927:23249\_1:N:0:TCTGCAAG+GCTGCACT  
AAGCACCGAGGTAAGCTCGGGACTTACAAGAGAGAGTGTGAGAGAGTCGCTCTCACTATTTTGTCCCA  
GAATGCGGGCTTTCTGACTGATGAGGTTAAACTCTTGCTCCTTCTGTGGGTGAGGGTTTTTGTATA  
TTC

+

FFFFFFFFFFFF,FFFFFFFFFFFFFFFFFFFFFFFFFFFFFFFFFFFFFFFFFFFFFFFFFFFFFFFFF:FFFFFFFFF  
FFFFFFFFFFFFFFFFFFFFFFFFFFFFFFFFFFFFFFFFFFFFFFFFFFFFFFFFFFFFFFFFFFFFFFFFF:FFF  
FFF

@A00721:190:HGJW7DSXY:4:2131:32570:16000\_1:N:0:TCTGCAAG+GCTGCACT  
CTTTTGAAGCAGGGGTTACCACTTCCTAAGGTGGATGAGGGAGGTTGTTTCTTTGGAGTTTATAGATAA  
TCTTTTGAGAAGGGGTCATAGAGCCAGCAAGAGAAGCTTATATGCTGGTTTAAGTGATGATTATCACT  
CCT

+

F:FFFFFFFFFFFFFFFFFFFFFFFFFFFFFFFFFFFFFFFFFFFFFFFFFFFFFFFFFFFFFFFFF:FFFFFFFFF:FFFFFFFFF  
FF:FFFFFFFFFFFFFFFFFFFFFFFFFFFFFFFFFFFFFFFFFFFFFFFFFFFFFFFFFFFFFFFFFFFFFFFFF:FFF  
FFF

@A00721:190:HGJW7DSXY:4:2320:15212:31344\_2:N:0:TCTGCAAG+GCTGCACT  
TTGAAGGCTGGCTCTAAGGGAGACTCCTTCTTTTTGAATGTTGTAAAGAATTGGGTTGAGAAGTGTGC  
TTTACAAGGAGTTAGACTCTTCTTCAAGTTTTTAGATCTTCTTGATAA

+

FFFFFFFFFFFFFFFFFFFFFFFFFFFFFFFFFFFFFFFFFFFFFFFFFFFFFFFFFFFFFFFFF:F,FFFFFF:FFF,FFFF  
FFF:FFFFFFFFFFFFFFFFFFFFFFFFFFFFFFFFFFFFFFFFFFFFFFFFFFFFFFFFFFFFFFFFF:FF:FFFF

@A00721:190:HGJW7DSXY:4:2603:23538:30577\_1:N:0:TCTGCAAG+GCTGCACT  
TCTTCCGATCTCGGATACCGATCTCAGTTCTACCACAGAAACCGTCTCAGGAAGTGTCTCCACTGATT  
CGGAATTAGAGAAAGACGACCTTCTTGTGGGGACTGAGACCTCTGAATTTTCAGGGTGCCTGATGAG  
GAC

+

:FFFFFFFFFFFFFFFFFFFFFFFFFFFFFFFFFFFFFFFFFFFFFFFFFFFFFFFFFFFFFFFFF:FFFFFFF:FFFFFFF  
FFFFFFFFFFFFFFFFFFFFFFFFFFFFFFFFFFFFFFFFFFFFFFFFFFFFFFFFFFFFFFFFFFFFFFFFF,FF  
FFF

@A00721:190:HGJW7DSXY:4:1649:17146:15687\_2:N:0:TCTGCAAG+GCTGCACT  
TACAGAGGAACGTACCGATTACCTGTCTTTCATATTATGAATGAACCTTCGGCCGCTCTCTTTGCTT  
CGATGTTGGATGTCAAGAAGGGTTCAGAATGGGATTCTACGTAGTTT

+

FFFFFFFFF:FFFFFFFFFFFFFFFFFFFFFFFFFFFFFFFFFFFFFFFFFFFFFFFFFFFFFFFFF,FFFFFFFF,FFF,F  
FFFFFFFFFFFFFFFFF:FFFFFFF:F:,FFFFFFFFF:FFF:F:

@A00721:190:HGJW7DSXY:4:2464:24370:35086\_2:N:0:TCTGCAAG+GCTGCACT  
TTTACGTTTGCTACTCAGAGCTGGTCCTCTCAGCAAAGGGATGCATGGTGTATCTCCTCAGGAGTCC  
CGGCATTTGATAATAATGACGAGACTTTCGTCATAATCGCTGCATATT

+

FFFFFFFFFFFFFFFFFFFFFFFFFFFFFFFFFFFFFFFFFFFFFFFFFFFFFFFFFFFFFFFFF  
FFFFFFFFFFFFFFFFFFFFFFFFFFFFFFFFFFFFFFFFFFFFFFFFFFFFFFFFFFFFFFFFF

@A00721:190:HGJW7DSXY:4:2121:8856:14262\_2:N:0:TCTGCAAG+GCTGCACT  
CAAGGAGTCCAATCAAAGTTTTGAATTTAGCTCAACTGGGAGACGTGCTTAAATGGGTGATAAAAA  
TTATTTAGAGATCTTTTCTACTTACAAAGGACAATTCAGTTTCATTAA

+

FFFFFFFFFFFFFFFFFFFFFFFFFFFFFFFFFFFFFFFFFFFFFFFFFFFFFFFFFFFFFFFFF:FFFFFFFFF  
FFFFFFFFFFFFFFFFFFFFFFFFFFFFFFFFFFFFFFFFFFFFFFFFFFFFFFFFFFFFFFFFF

@A00721:190:HGJW7DSXY:4:2221:21603:35618\_1:N:0:TCTGCAAG+GCTGCACT  
CTCTGTACTTGATCTACGTCGTTTAACTGTCGGAACAACCTTTACTTAGAATGACTCTATCTTTTCAG  
ACACTTCTTATATTATTTACAATAGTTAATATCATATTAGTAATACTCACTATCAGATCGGAAGAGCA  
CAC



FFFFFFFFFFFFFFFFFFFFFFFFFFFFFFFF:F:FFF,FFFF:FFFFFFFFFFFFFFFF:FFFFFFFFF  
FFF

@A00721:190:HGJW7DSXY:4:2407:3965:32816\_1:N:0:TCTGCAAG+GCTGCACT  
CTTTTGAAGCAGGGTTACCACTTCCTAAGGTGGATGAGGGAGGTTGTTTCTTTGGAGTTTATAGATAA  
TCTTTTGAGAAGGGGTCATAGAGCCAGCAAGAGAAGCTTATATGCTGGTTTAAGTGATGATTATCACT  
CCT

+

FF:FFFFFFFFFFFFFFFFFFFFFFFFFFFFFFFFFFFFFFFFFFFFFFFFFFFFFFFFFFFFFFFF  
FFFFFFFFFFFFFFFFFFFFFFFFFFFFFFFFFFFFFFFFFFFFFFFFFFFFFFFFFFFFFFFF:FFFFFFFFFFFFFFFF  
FFF

@A00721:190:HGJW7DSXY:4:2665:27001:20509\_2:N:0:TCTGCAAG+GCTGCACT  
TTGAAGGCTGGCTCTAAGGGAGACTCCTTCTTTTTGAATGTTGTAAAGAATTGGGTTGAGAAGTGTC  
TTTACAAGGAGTTAGACTCTACTTCAAGTTTTTAGAACTTCTTGATAA

+

FF:FFFFF:, :FFF:FF,,,FFF:F:::FFF,::,FFFFFF,F:FF:FFFF,FFFFFFFF::, :F,  
:FF:FF,,FFFF,FF:FFFF,F:FF,F,F,:,:F,F,FFFF:FFFF

@A00721:190:HGJW7DSXY:4:2617:2546:13636\_1:N:0:TCTGCAAG+GCTGCACT  
TCTTCCGATCTCGGATACCGATCTCAGTTCTACCACAGAAACCGTCTCAGGAACTGTCTCCACTGATT  
CGGAATTAGAGAAAGACGACCTTCTTGTGGGGACTGAGACCTCTGAATTTTCAGGGTGCCCTGATGAG  
GAC

+

FFFFFFFFFFFFFFFFFFFFFFFFFFFFFFFFFFFFFFFFFFFFFFFFFFFFFFFFFFFFFFFF  
FFFFFFFFFF:FF::F:FFFFFFFF:FFFFFFFFFFFFFFFFFFFFFFFFFFFFFFFFFFFFFFFF  
FFF

@A00721:190:HGJW7DSXY:4:2504:24858:9314\_2:N:0:TCTGCAAG+GCTGCACT  
TACAGAGGAACGTACCGATTACCTGTCTTTCATATTATGAATGAACCTTCGCCGCTCTCTTTGCTT  
CGATGTTGGATGTCAAGAAGGGTTCAGAATGGGATTCTACGTAGTTT

+

FFFFFFFFFFFFFFFFFFFFFFFFFFFFFFFFFFFFFFFFFFFFFFFFFFFFFFFFFFFFFFFF:F  
FFF:FFFFFFFFFFFFFFFFFFFFFFFFFFFFFFFFFFFFFFFFFFFFFFFFFFFFFFFF

@A00721:190:HGJW7DSXY:4:1529:16297:6292\_1:N:0:TCTGCAAG+GCTGCACT  
TTTACGTTTGCTACTCAGAGCTGGTCCTCTCAGCAAAGGGATGCATGGTGTATCTCCTCAGGAGTCC  
CGGCATTTGATAATAATGACGAGACTTTCGTCATAATCGCTGCATATTACGGATTACACGGTACCAGC  
GCA

+

FFFFFFFFFFFFFFFFFFFFFFFFFFFFFFFFFFFFFFFFFFFFFFFFFFFFFFFFFFFFFFFF:FFFFFFFFFFFFFFFF  
FFFFFFFFFFFFFFFFFFFFFFFFFFFFFFFFFFFFFFFFFFFFFFFFFFFFFFFFFFFFFFFFFFFFFFFF  
FFF

@A00721:190:HGJW7DSXY:4:2159:4444:26005\_2:N:0:TCTGCAAG+GCTGCACT  
CAAGGAGTCCAATCAAAGGTTTTGAATTTAGCTCAACTGGGAGACGTGCTTAAATGGGTGATAAAAA  
TTATTTAGAGATCTTTTCTACTTACAAAGGACAATTCAGTTTCATTAA

+

FF:FFFFFFFFFFFFFFFFFFFFFFFFFFFFFFFFFFFFFFFFFFFFFFFFFFFFFFFF:F  
:FFFFFFFFFFFFFFFFFFFFFFFFFFFFFFFFFFFFFFFFFFFFFFFFFFFFFFFF

@A00721:190:HGJW7DSXY:4:2367:13593:2675\_1:N:0:TCTGCAAG+GCTGCACT  
CTCTGTAATTGATCTACGTCGTTTAACTGTCGGAACAACCTTACTTAGAATGACTCTATCTTTTCAG  
ACACTTCTTATATTATTTACAATAGTTAATATCATATTAGTAATACTCACTATCAGATCGGAAGAGCA  
CAC

+

FFFFFFFFFFFFFFFFFFFFFFFFFFFFFFFFFFFFFFFFFFFFFFFFFFFFFFFFFFFFFFFF:FFFFFFFFFFFFF  
FFFF:FFFFFFFFFFFFFFFFFFFFFFFFFFFFFFFFFFFFFFFFFFFFFFFFFFFFFFFF:FFFF:FFF,FFFFFFFF  
FFF

@A00721:190:HGJW7DSXY:4:2561:6054:16955\_1:N:0:TCTGCAAG+GCTGCACT  
CTTCCGATCTCACCGAGTATAAAGCGAGTTTTCTTCTGAACTTAATACACGAAGAGATCAACCGCA

AACGACTCGAAACCGAGACGCCGTAGATCAAAGTCCCTTCTAACTTTAGATTATGAATCCTGCCTTTA  
CTC

+

FFFF,::F,,::,,F,FFF:,F::,,FF::F:F,,F,FFF,:FFFF:,::F,F,,,,,F,F::,F  
FFFFFFFFFFFFFFFFFFFFFFFFFFFFFFFFFFFFFFFFFFFFFFFFFFFFFFFFFFFFFFFFFFFFFFFF  
FFF

@A00721:190:HGJW7DSXY:4:2576:5122:25864\_1:N:0:TCTGCAAG+GCTGCACT  
TCACCTTGGTGTGATCTCCCGGAGGATCTTTTCAATAAGATGTATGATGATAATCTACTATTTTTTAAA  
TAGTGATATTGAGCGTATACTTGAATACTTTATCAAAGATTGGCTTGGTCTATTTACCGCAAAAAGT  
TGG

+

FFFFFFFFFFFFFFFFFFFFFFFFFFFFFFFFFFFFFFFFFFFFFFFFFFFFFFFFFFFFFFFFFFFFFFFF  
FFFFFFFFFFFFFFFFFFFFFFFFFFFFFFFFFFFFFFFFFFFFFFFFFFFFFFFFFFFFFFFFFFFFFFFF  
FFF

@A00721:190:HGJW7DSXY:4:2514:28971:21699\_2:N:0:TCTGCAAG+GCTGCACT  
TTTAAATAGCACCATTATACTTGACTGTTGATAATATTACAATAGCTCTTCTCAGAAGATTAGAG  
AAGTAACCGGTGAACACGTCGGTAGCATTGATTTACTTTTACCGTTAG

+

FFFFF:FFF,FFFFFFFFFFFF,FFFF:FFFFFFFFFFFFFFFF:FFFFF,FFFFFFFFFFFFFFFF  
FFFFFFFFFFFFFFFF:FFF:FFF,F:FFFFFFFFFFFFFFFF:FFFF

@A00721:190:HGJW7DSXY:4:1333:27760:19476\_2:N:0:TCTGCAAG+GCTGCACT  
GTTGCGCCATTTCAAGAGTGGTCAATACGTCGTGGGAGGTACTGAAGCCTTCCCCTCCGCTGGCACGA  
AGAACACTCCCAAGCCAATCAATAGTTCTTCTGACCAGAATGAAAAGG

+

FFFFFFFFFFFFFFFF:FFFFFFFF:FFFFFFFFFFFFFFFF,FFFFFFFFFFFFFFFFFFFFFFFF  
FFFFFFFFFFFFFFFFFFFFFFFFFFFFFFFFFFFFFFFFFFFFFFFFFFFFFFFF:FFF

@A00721:190:HGJW7DSXY:4:1655:9833:14168\_2:N:0:TCTGCAAG+GCTGCACT  
TCTTTGAGACCAAGACTCTCTACAGTAGGTTCTGCTACTATGAGCAAATCTGTTGAATTCGTCCT  
GAGGACGAAGGTGAGAGGACTTTTGGCTACTGGCGACAACTGAGAGC

+

FFFFFFFFFFFFFFFFFFFFFFFFFFFFFFFFFFFFFFFFFFFFFFFFFFFFFFFFFFFFFFFFFFFFFFFF  
FFFFFFFFFFFFFFFFFFFFFFFFFFFFFFFFFFFFFFFFFFFFFFFFFFFFFFFF

@A00721:190:HGJW7DSXY:4:2477:21612:26115\_1:N:0:TCTGCAAG+GCTGCACT  
AAGCACCGAGGTAAGCTCGGGACTTACAAGAGAGAGTGTGAGAGAGTCGCTCTACTATTTTTTGCCCA  
GAATGCGGGCTTTCTGACTGATGAGGTTAAACTCTTGCTCCTTCTGTGGGTGAGGGTTTTTGTATA  
TTC

+

FFFFFFFFFFFF:FFFFFFFFFFFFFFFFFFFFFFFFFFFFFFFFFFFFFFFFFFFFFFFFFFFFFFFF  
FFFFFFFFFFFFFFFFFFFFFFFFFFFFFFFFFFFFFFFFFFFFFFFFFFFFFFFFFFFFFFFFFFFFFFFF  
FFF

@A00721:190:HGJW7DSXY:4:1173:17300:4241\_2:N:0:TCTGCAAG+GCTGCACT  
ATTTGAAGCAGGGGTTACCACTTCCTAAGGTGGATGAGGAGGTTGTTTCTTTGGAGTTTTAGATAAT  
CTTTTGAGAAGGGGTCATAGAGCCAGCAAGAGAAGCTTATATGCTGGT

+

FFFFFFFFFFFFFFFFFFFFFFFFFFFFFFFFFFFFFFFFFFFFFFFFFFFFFFFFFFFFFFFFFFFFF:FFFFFFFFFFFFFFFF  
FFFFFFFFFFFFFFFFFFFFFFFFFFFFFFFFFFFFFFFFFFFFFFFFFFFFFFFF:FF:FF:FFFF:FFF

@A00721:190:HGJW7DSXY:4:1118:14687:10833\_1:N:0:TCTGCAAG+GCTGCACT  
TTGAAGGCTGGCTCTAAGGAGACTCCTTCTTTTTGAATGTTGTAAAGAATTGGGTTGAGAAGTGTGC  
TTTACAAGGAGTTAGACTCTTCTTCAAGTTTTTAGATCTTCTTGATAATCTTAAAGAAAAATTTTCGA  
ATA

+

FFFF:FFFFFFFFFFFFFFFF:FFFFFFFFFFFF:FFFFFFFFFFFFFFFF:FFFFFFFFFFFFFFFF:  
FFFF:FFFFFFFFFFFFFFFF,FFFFFFFFFFFFFFFF,FFFFFFFFFFFFFFFFFFFFFFFFFFFFFFFF  
FFF



@A00721:190:HGJW7DSXY:4:2637:31629:29841\_1:N:0:TCTGCAAG+GCTGCACT  
TCTTCCGATCTCGGATACCGATCTCAGTTCTACCACAGAAACCGTCTCAGGAACTGTCTCCACTGATT  
CGGAATTAGAGAAAGACGACCTTCTTGTGGGGACTGAGACCTCTGAATTTTCAGGGTGCCTGATGAG  
GAC

+

FFFFFFFFFFFFFFFF:FFFFFFFFFFFFFFFFFFFFFFFFFFFFFFFFFFFFFFFFFFFFFFFFFFFFFFFF  
FFFFFFFFFFFFFFFFFFFFFFFFFFFFFFFFFFFFFFFFFFFFFFFFFFFFFFFFFFFFFFFFFFFFFFFF  
FFF

@A00721:190:HGJW7DSXY:4:2504:25699:6637\_2:N:0:TCTGCAAG+GCTGCACT  
TACAGAGGAACGTACCGGATTACCTGTCTTTCATATTATGAATGAACCTTCGGCCGCTCTCTTTGCTT  
CGATGTTGGATGTCAAGAAGGGTTCAGAATGGGATTCTACGTAGTTT

+

FFFFFFFFFFFFFFFFFFFFFFFFFFFFFFFFFFFFFFFFFFFFFFFFFFFFFFFFFFFFFFFFFFFFFFFF, FFFFFFFFFFFFFFFFFFFFFFFFFFFFFFFFFF: F  
FF: FFFFFFFFFFFFFFFFFF: FFFFFFFF: F: FFFFFFFFFF: FFFFFFFFFF

@A00721:190:HGJW7DSXY:4:2157:28926:2206\_1:N:0:TCTGCAAG+GCTGCACT  
TTTACGTTTGCTACTCAGAGCTGGTCTCTCAGCAAAGGGATGCATGGTGTATCTCCTCAGGAGTCC  
CGGCATTTGATAATAATGACGAGACTTTCGTCATAATCGCTGCATATTACGGATTACACGGTACCAGC  
GCA

+

FFFFFFFFFFFFFFFFFFFFFFFFFFFFFFFFFFFFFFFFFFFFFFFFFFFFFFFFFFFFFFFFFFFFFFFF: FFFFFFFF  
FFFFFFFFFFFFFFFFFFFFFFFFFFFFFFFFFFFFFFFFFFFFFFFFFFFFFFFFFFFFFFFFFFFFFFFF: FFFFFFFFFF  
FFF

@A00721:190:HGJW7DSXY:4:2660:19732:36448\_2:N:0:TCTGCAAG+GCTGCACT  
CAAGGAGTCCAATCAAAGGTTTTGAATTTAGCTCAACTGGGAGACGTGCTTAAATGGGTGATAAAAA  
TTATTTAGAGATCTTTTCTACTTACAAAGGACAATTCAGTTTCATTAA

+

FFFFFFFFFFFFFFFFFFFFFFFFFFFFFFFFFFFFFFFFFFFFFFFFFFFFFFFFFFFFFFFFFFFFFFFF, FFFFFFFFFFFFFF  
: FFFFFFFF: FFFFFFFFFFFFFFFFFFFFFFFFFFFFFFFFFFFFFFFFFFFFFFFFFFFFFFFFFF

@A00721:190:HGJW7DSXY:4:2654:23068:12508\_1:N:0:TCTGCAAG+GCTGCACT  
CTCTGTACTTGATCTACGTCGTTTAACTGTCGGAACAACCTTTACTTAGAATGACTCTATCTTTTCAG  
ACACTTCTTATATTATTTACAATAGTTAATATCATATTAGTAATACTCACTATCAGATCGGAAGAGCA  
CAC

+

FFFFFFFFFFFFFFFFFFFFFFFFFFFFFFFFFFFFFFFFFFFFFFFFFFFFFFFFFFFFFFFFFFFFFFFF, FFFFFFFFFFFFFF  
FF, F: FFFFFFFFFFFFFFFFFFFFFFFFFFFFFFFFFFFFFFFFFFFFFFFFFFFFFFFFFF: FFFFFFFFFFFFFF, FFFF  
FFF

@A00721:190:HGJW7DSXY:4:1257:3992:12665\_2:N:0:TCTGCAAG+GCTGCACT  
CACCCATCTCAACGAGGATAAAGCGAGTTTTCCGTTCTGAACGTAATACACGAAGAGATCATCCGCAA  
ACGACTCGAAACCGAGACGCCGTAGATCAAAGTCCCTTCTAACTTTAG

+

FFFFFFFFFFFFFFFFFFFFFFFFFFFFFFFFFFFFFFFFFFFFFFFFFFFFFFFFFFFFFFFFFFFFFFFF  
FFFFFFFFFFFFFFFFFFFFFFFFFFFFFFFFFFFFFFFFFFFFFFFFFFFFFFFFFFFFFFFF

@A00721:190:HGJW7DSXY:4:2669:20048:20369\_1:N:0:TCTGCAAG+GCTGCACT  
TCAATAAGATGTATGATGATAATCTACTATTTTTAAATAGTGATATTCAGCGTATACTTGAATACTTT  
ATCAAAGATTTGGCTTGGTCTATTTACCGCAAAAAGTTGGAAGAGGTCTATGATATTTATTTACTTA  
TAC

+

FFF: FFF: FFFFFFFFFFFFFFFFFF, FFFFF: FFFFFFFFFFFFFFFFFFFFFFFFFFFFFFFFFF: F  
: FFFFFFFFFFFFFFFFFFFFFFFFFFFFFFFFFFFFFFFFFFFFFFFFFFFFFFFFFFFFFFFFFFFFFF  
FFF

@A00721:190:HGJW7DSXY:4:2147:17580:33129\_1:N:0:TCTGCAAG+GCTGCACT  
CTTGACTGTTGATAATATTACAATAGCTCTTTCTCAGAAGATTAGAGAAGTAACCGGTGAACACGTGCG  
GTAGCATTGATTTACTTTTACCGTTAGAACTGAAAAAGATTCTTTTCGAAAAGAAACCTATAAGTTAC  
AAA

```

+
FFFFFFFF,FFFFFFFFFFFFFFFFFFFFFFFFFFFFFFFFFFFFFFFFFFFFFFFFFFFFFFFF
FFFFFFFFFFFFFFFFFFFFFFFFFFFFFFFFFFFFFFFFFFFFFFFFFFFFFFFFFFFFFFFF
FFF
@A00721:190:HGJW7DSXY:4:1460:4716:6402_2:N:0:TCTGCAAG+GCTGCACT
GTTTCGGCCATTTCAAGAGTGGTCAATACGTCGTGGGAGGTACTGAAGCCTTCCCCTCCGCTGGCACGA
AGAACACTCCCAAGCCAATCAATAGTTCTTCTGACCAGAATGAAAAGG
+
FF:FFFFFFFFFFFFFFFFFFFFFFFFFFFFFFFFFFFFFFFFFFFFFFFFFFFFFFFF:FFFFFFFFFFFFFFFF
FFFFFFFFFFFFFFFFFFFFFFFFFFFFFFFFFFFFFFFFFFFFFFFFFFFFFFFF:FF
@A00721:190:HGJW7DSXY:4:2330:11153:6872_2:N:0:TCTGCAAG+GCTGCACT
TCTTTGAGACCAAGACTCTCTACAGTAGGTTCTGTCCTACTATGAGCAAATCTGTTGAATTCGTCACT
GAGGACGAAGGTGAGAGGACTTTTGCTACTGGCGACAACTGAGAGC
+
FFFFFFFFFFFFFFFFFFFFFFFFFFFFFFFFFFFFFFFFFFFFFFFF:FFFFFFFFFFFFFF,FFFFFFFFFFFFFF
FFFFFFFFFFFFFFFF:FFFFFFFFFFFFFF:FFFFFFFFFFFFFF:FF:F
@A00721:190:HGJW7DSXY:4:2555:15962:36746_1:N:0:TCTGCAAG+GCTGCACT
AAGCACCGAGGTAAGCTCGGGACTTACAAGAGAGAGTGTGAGAGAGTCGCTCTCACTATTTTTGCCCA
GAATGCGGGCTTTCTGACTGATGAGGTTAAACTCTTGCTCCTTCTGTGGGTGAGGGTTTTTGTATA
TTC
+
FFFFFFFFF:FFFFFFFFFFFFFFFFFFFFFFFFFFFFFFFFFFFFFFFFFFFFFFFFFFFFFFFF:FF:FFFFFF
FFFFFFFFFFFFFFFFFFFFFFFFFFFFFFFFFFFFFFFFFFFFFFFFFFFFFFFFFFFFFFFFFFFFFFFF
FFF
@A00721:190:HGJW7DSXY:4:1301:5945:33019_2:N:0:TCTGCAAG+GCTGCACT
ATTTGAAGCAGGGGTTACCACTTCCTAAGGTGGATGAGGGAGGTTGTTTCTTTGGAGTTTTAGATAAT
CTTTTGAGAAGGGGTCATAGAGCCAGCAAGAGAAGCTTATATGCTGGT
+
FFFFFFFFFFFFFFFFFFFFFFFFFFFFFF,FFFFFFFFFFFFFFFFFFFFFFFFFFFFFFFFFFFFFFFF
FFFFFFFFFFFFFFFFFFFFFF,FFFFFFFFFFFFFFFF:FF:FFFFFFFF
@A00721:190:HGJW7DSXY:4:1139:15347:34334_1:N:0:TCTGCAAG+GCTGCACT
TTGAAGGCTGGCTCTAAGGGAGACTCCTTCTTTTTGAATGTTGTAAAGAATTGGGTTGAGAAGTGTGC
TTTACAAGGAGTTAGACTCTTCTTCAAGTTTTTAGATCTTCTTGATAATCTTAAAGAAAAATTTTCGA
ATA
+
FF::FFFFFFFFFFFFFFFFFFFFFFFFFFFFFFFFFFFFFFFFFFFFFFFFFFFFFFFF:FFFFFFFFFFFFFF
FFFF:FFFFFFFFFFFFFFFFFFFFFFFFFFFFFFFFFFFFFFFFFFFFFFFFFFFFFFFFFFFFFFFF
FFF
@A00721:190:HGJW7DSXY:4:2639:25870:16172_1:N:0:TCTGCAAG+GCTGCACT
TCTTCCGATCTCGGATACCGATCTCAGTTCTACCACAGAAACCGTCTCAGGAAGTGTCTCCACTGATT
CGGAATTAGAGAAAGACGACCTTCTTGTGGGGACTGAGACCTCTGAATTTTCAGGGTGCCTGATGAG
GAC
+
FFFFFFFFFFFFFFFFFFFFFFFFFFFFFFFFFFFFFFFFFFFFFFFFFFFFFFFFFFFFFFFF
FFFFFFFFFFFFFF:FFFFFFFFFFFFFFFFFFFFFFFFFFFFFFFFFFFFFFFFFFFFFFFF
FFF
@A00721:190:HGJW7DSXY:4:2404:7157:25097_1:N:0:TCTGCAAG+GCTGCACT
TGTCTTTTCATATTATGAATGAACCTTCGGCCGCTCTCTTTGCTTCGATGTTGGATGTCAAGAAGGGTT
CAGAATGGGATTCTACGTAGTTTATGACTTTGGTGGTGGTACTTTCGATACTTCTATCGTCTTACGT
TAC
+
FFFFFFFFFFFFFFFFFFFFFFFFFFFFFFFFFFFFFFFFFFFFFFFFFFFFFFFFFFFFFFFF
FFFFFFFFFFFF:FFFFFFFFFFFFFFFFFFFFFFFFFFFFFFFFFFFFFFFFFFFFFFFF
FFF

```

@A00721:190:HGJW7DSXY:4:2160:6677:3912\_1:N:0:TCTGCAAG+GCTGCACT  
TTTACGTTTGCTACTCAGAGCTGGTCTCTCAGCAAAGGGATGCATGGTGTATCTCCTCAGGAGTCC  
CGGCATTTGATAATAATGACGAGACTTTCGTCATAATCGCTGCATATTACGGATTACACGGTACCAGC  
GCA

+

FFFFFFFFFFFFFFFFFFFFFFFFFFFFFFFFFFFFFFFFFFFFFFFFFFFFFFFFFFFFFFFFFFFFFFFF  
FFFFFFFFFFFFFFFFFFFFFFFFFFFFFFFFFFFFFFFFFFFFFFFFFFFFFFFFFFFFFFFFFFFFFFFF  
FFF

@A00721:190:HGJW7DSXY:4:2315:5249:22952\_1:N:0:TCTGCAAG+GCTGCACT  
GGAGTCCAATCAAAGGTTTTGAATTTAGCTCAACTGGGAGACGTGCTTAAATGGGTGATAAAAATTA  
TTTAGAGATCTTTTCTACTTACAAAGGACAATTCAGTTTCATTAATTCTACGGAAAAGTCCGGAGTAT  
ATT

+

FFFFFFFFFFFF:F:FFFFFFFFFFFFFFFFFFFFFFFFFFFFFFFFFFFFFFFFFFFFFFFFFFFFFFFF  
FF:FFFFFFFF:FFFFFFFFFFFFFFFFFFFFFFFFFFFFFFFFFFFFFFFFFFFFFFFFFFFFFFFF  
FFF

@A00721:190:HGJW7DSXY:4:2125:19678:34256\_2:N:0:TCTGCAAG+GCTGCACT  
CTGTACTTGATCTACGTCGTTTAACTGTCGGAACAACCTTTACTTAGAATGACTCTATCTTTTCAGAC  
ACTTCTTATATTATTTACAATAGTTAATATCATATTAGTAATACTCAC

+

FFFFFFFFFFFFFFFFFFFFFFFFFFFFFFFFFFFFFFFFFFFFFFFFFFFFFFFFFFFFFFFFFFFFFFFF  
FFFFFFFFFFFFFFFFFFFFFFFFFFFFFFFFFFFFFFFFFFFFFFFFFFFFFFFFFFFFFFFFFFFFFFFF

@A00721:190:HGJW7DSXY:4:1257:5285:12680\_2:N:0:TCTGCAAG+GCTGCACT  
CACCCATCTCAACGAGGATAAAGCGAGTTTTCCGTTCTGAACGTAATACACGAAGAGATCATCCGCAA  
ACGACTCGAAACCGAGACGCCGTAGATCAAAGTCCCTTCTAACTTTAG

+

FFFFFFFFFFFFFFFFFFFFFFFFFFFFFFFFFFFFFFFFFFFFFFFFFFFFFFFFFFFFFFFFFFFFFFFF  
:FFFFFFFFFFFF,FFFF:FFFFFFFFFFFFFFFFFFFFFFFFFFFFFFFFFFFFFFFFFFFFFFFF

@A00721:190:HGJW7DSXY:4:2143:31033:17284\_1:N:0:TCTGCAAG+GCTGCACT  
CAATAAGATGTATGATGATAATCTACTATTTTTAAATAGTGATATTCAGCGTATACTTGAATACTTTA  
TCAAAGATTTGGCTTGGTCTATTTACCGCAAAAAGTTGGAAGAGGTCTATGATATTTATTTTACTTAT  
AC

+

:FFF,F,,F,F,FF:F,FFFF,F::F:FFFFFF,FFFFFFFFFFFFFFFF:FF:FF:FF::FFF:FFFF  
F:FF:F:FFFF,FFFFFFFF:FFFFFFFFFFFFFFFF:FFFF:FFFF:FFFFFFFF:FFFFFF:FFFF  
FF

@A00721:190:HGJW7DSXY:4:2158:15167:9596\_1:N:0:TCTGCAAG+GCTGCACT  
CTTGACTGTTGATAATATTACAATAGCTCTTTCTCAGAAGATTAGAGAAGTAACCGGTGAACACGTGCG  
GTAGCATTGATTTACTTTTACCGTTAGAACTGAAAAAGATTCTTTTCGAAAAGAAACCTATAAGTTAC  
AAA

+

FFFFFFF,FFFFFFFFFFFFFFFFFFFFFFFFFFFFFFFF: :FFFF:FFFFFFFFFFFFFFFF:FFFFFFFF  
FFFFFF,F:FFFFFFFFFFFF,FFFFFFFFFFFFFFFFFFFFFFFFFFFFFFFFFFFFFFFFFFFFFFFF  
F::

@A00721:190:HGJW7DSXY:4:1460:4797:6104\_2:N:0:TCTGCAAG+GCTGCACT  
GTTGCGCCATTTCAAGAGTGGTCAATACGTCGTGGGAGGTACTGAAGCCTTCCCCTCCGCTGGCACGA  
AGAACTCCCAAGCCAATCAATAGTTCTTCTGACCAGAATGAAAAGG

+

FFFFFFFFFFFFFFFF:FFFFFFFFFFFFFFFFFFFFFFFF:F,FFFFFF:FFFFFFFFFFFFFFFF  
FF:FFFFFFF,FFFF,FFFFF:FFFFFFFFFFFFFFFFFFFFFFFF

@A00721:190:HGJW7DSXY:4:1111:11180:29810\_2:N:0:TCTGCAAG+GCTGCACT  
TTTGAGACCAAGACTCTCTACAGTAGGTCGTGCCTACTATGAGCAAATCTGTTGAATTCGTCACTGA  
GGACGAAGGTGAGAGGACTTTTGGCTACTGGCGACAACTGAGAGCAG

+

@A00721:190:HGJW7DSXY:4:1316:19280:25144\_2:N:0:TCTGCAAG+GCTGCACT  
ATTTGAAGCAGGGGTACCCTTCTAAGGTGGATGAGGGAGGTTGTTTCTTTGGAGTTTATAGATAAT  
CTTTTGAGAAGGGGTCATAGAGCCAGCAAGAGAAGCTTATATGCTGGT

@A00721:190:HGJW7DSXY:4:1145:12644:19038\_1:N:0:TCTGCAAG+GCTGCACT  
TTGAAGGCTGGCTCTAAGGGAGACTCCTTCTTTTTGAATGTTGTAAAGAATTGGGTTGAGAAGTGTGC  
TTTACAAGGAGTTAGACTCTTCTTCAAGTTTTTAGATCTTCTTGATAATCTTAAAGAAAAATTTTCGA  
ATA

@A00721:190:HGJW7DSXY:4:2640:25030:35884\_1:N:0:TCTGCAAG+GCTGCACT  
TCTTCCGATCTCGGATACCGATCTCAGTTCTACCACAGAAACCGTCTCAGGAAGTGTCTCCACTGATT  
CGGAATTAGAGAAAGACGACCTTCTTGTGGGGACTGAGACCTCTGAATTTTCAGGGTGCCCTGATGAG  
GAC

@A00721:190:HGJW7DSXY:4:1304:19316:31438\_1:N:0:TCTGCAAG+GCTGCACT  
TTTCATATTATGAATGAACCTTCGGCCGCTCTCTTTGCTTCGATGTTGGATGTCAAGAAGGGTTTCAGA  
ATGGGATTCCTACGTAGTTTATGACTTTGGTGGTGGTACTTTCGATACTTCTATCGTCTTACGTTACG  
GTA

@A00721:190:HGJW7DSXY:4:2333:20148:31469\_1:N:0:TCTGCAAG+GCTGCACT  
TTTACGTTTGCTACTCAGAGCTGGTCCTCTCAGCAAAGGGATGCATGGTGTATCTCCTCAGGAGTCC  
CGGCATTTGATAATAATGACGAGACTTTCGTCATAATCGCTGCATATTACGGATTACACGGTACCAGC  
GCA

@A00721:190:HGJW7DSXY:4:2438:17906:17628\_1:N:0:TCTGCAAG+GCTGCACT  
GGAGTCCAATCAAAGGTTTTGAATTTAGCTCAACTGGGGAGACGTGCTTAAATGGGTGATAAAAATTA  
TTTAGAGATCTTTTCTACTTACACAGGACAATTCAGTTTCATTAATTCTACGAAAAGTCCGGAGTAT  
ATT

@A00721:190:HGJW7DSXY:4:2411:19759:26757\_2:N:0:TCTGCAAG+GCTGCACT  
CTGTACTTGATCTACGTCGTTTAACTGTCGGAACAACCTTTACTTAGAATGACTCTATCTTTTCAGAC  
ACTTCTTATATTATTTACAATAGTTAATATCATATTAGTAATACTCAC

[illegible]

+

+

+

+

+

+

+

+

[illegible]

@A00721:190:HGJW7DSXY:4:1333:9191:18850\_1:N:0:TCTGCAAG+GCTGCACT  
TTTCATATTATGAATGAACCTTCGGCCGCTCTCTTTGCTTCGATGTTGGATGTCAAGAAGGGTTCAGA  
ATGGGATTCTACGTAGTTTATGACTTTGGTGGTGGTACTTTCGATACTTCTATCGTCTTACGTTACG  
GTA

+

FFFFFFFFFFFFFFFFFFFFFFFFFFFFFFFFFFFFFFFFFFFFFFFFFFFFFFFFFFFFFFFFFFFFFFFF  
FFFFFFFFFFFFFFFFFFFFFFFFFFFFFFFFFFFFFFFFFFFFFFFFFFFFFFFFFFFFFFFFFFFFFFFF  
FFF

@A00721:190:HGJW7DSXY:4:2343:10086:11569\_1:N:0:TCTGCAAG+GCTGCACT  
TTTACGTTTGCTACTCAGAGCTGGTCTCTCAGCAAAGGGATGCATGGTGTATCTCCTCAGGAGTCC  
CGGCATTTGATAATAATGACGAGACTTTCGTCATAATCGCTGCATATTACGGATTACACGGTACCAGC  
GCA

+

FFF:FFF:FFFFFFFFFFFFFFFFFFFFFFFFFFFFFFFFFFFFFFFFFFFFFFFFFFFFFFFFFFFFFFF  
FFFFFFFFFFFFFFFFFFFFFFFFFFFFFFFFFFFFFFFFFFFFFFFFFFFFFFFFFFFFFFFFFFFFFFFF  
FF,

@A00721:190:HGJW7DSXY:4:2438:18249:17566\_1:N:0:TCTGCAAG+GCTGCACT  
GGAGTCCAATCAAAGGTTTTGAATTTAGCTCAACTGGGAGACGTGCTTAAATGGGTGATAAAAATTA  
TTTAGAGATCTTTTCTACTTACAAAGGACAATTCAGTTTCATTAATTCTACGAAAAGTCCGGAGTAT  
ATT

+

FFFFF,FFFFFF:FFFFFF:FFFFFFFFFFFFFFFFFFFFFFFFFFFFFFFFFFFFFFFFFFFFFFFF  
F,,FFFFFFF:FFFFFFFFFFFFFFFFFFFFFFFFFFFFFFFFFFFFFFFFFFFFFFFFFFFFFFFF  
FFF

@A00721:190:HGJW7DSXY:4:2436:2193:1877\_2:N:0:TCTGCAAG+GCTGCACT  
CTGTACTTGATCTACGTCGTTTAACTGTCGGAACAACCTTTACTTAGAATGACTCTATCTTTTCAGAC  
ACTTCTTATATTATTTACAATAGTTAATATCATATTAGTAATACTCAC

+

FFFFFFFFFFFFFFFFFFFFFFFFFFFFFFFFFFFFFFFFFFFFFFFFFFFFFFFFFFFFFFFFFFFFFFF  
FFFFFFFFFFFF:FFFFFFFFFFFFFFFFFFFFFFFFFFFFFFFFFFFFFFFFFFFFFFFF

@A00721:190:HGJW7DSXY:4:1509:16260:11052\_2:N:0:TCTGCAAG+GCTGCACT  
CACCCATCTCAACGAGGATAAAGCGAGTTTTCCGTTCTGAACGTAATACACGAAGAGATCATCCGCAA  
ACGACTCGAAACCGAGACGCCGTAGATCAAAGTCCCTTCTAACTTTAG

+

FFFFFFFFFFFFFFFFFFFFFFFFFFFFFFFFFFFFFFFFFFFFFFFFFFFFFFFFFFFFFFFFFFFFFFF  
FFFFFFFFFFFFFFFFFFFFFFFFFFFFFFFFFFFFFFFFFFFFFFFFFFFFFFFF

@A00721:190:HGJW7DSXY:4:2408:17047:26663\_2:N:0:TCTGCAAG+GCTGCACT  
AATAAGATGTATGATGATAATCTACTATTTTTAAATAGTGATATTCAGCGTATACTTGAATACTTTAT  
CAAAGATTTGGCTTGGTCTATTTACCGCAAAAAGTTGGAAGAGGTCTA

+

FFFFFFFFFFFFFFFFFFFFFFFFFFFFFFFFFFFFFFFFFFFFFFFFFFFFFFFFFFFFFFFFFFFFFFF  
FFFFFFFFFFFFFFFF:FFFFFFF:FF:FFFFFFFFFFFFFFFFFFFFFF,FFF

@A00721:190:HGJW7DSXY:4:2272:29306:9878\_1:N:0:TCTGCAAG+GCTGCACT  
CTTGACTGTTGATAATATTACAATAGCTCTTCTCAGAAGATTAGAGAAGTAACCGGTGAACACGTCG  
GTAGCATTGATTTACTTTTACCGTTAGAACTGAAAAAGATTCTTTTCGAAAAGAAACCTATAAGTTAC  
AAA

+

FFFFFFFFFFFFFFFFFFFFFFFFFFFFFFFFFFFFFFFFFFFFFFFFFFFFFFFFFFFFFFFFFFFFFFF  
FFFFFFF:FFFFFFFFFFFFFFFFFFFFFFFFFFFFFFFFFFFFFFFFFFFFFFFFFFFFFFFF:FFFFFFF  
FFF

@A00721:190:HGJW7DSXY:4:1629:8241:19335\_2:N:0:TCTGCAAG+GCTGCACT  
GTTTCGGCCATTTCAAGAGTGGTCAATACGTCGTGGGAGGTACTGAAGCCTTCCCCTCCGCTGGCACGA  
AGAACACTCCCAAGCCAATCAATAGTTCTTCTGACCAGAATGAAAAGG

+

```
FFFFFFFFFFF::FFF,FFFFFFFFFFFFFFFFFFFFFFFFF:FFFFFFFFFFFFFFFFFFFFFFFF  
FFFFFFFFFFFFFFFFFFFFFFFFFFFFFFFFF:FFFFFFFFF:FFFF:F  
@A00721:190:HGIW7DSXY:4:1613:28149:11663_2:N:0:TCTGCAAG+GCTGCACT  
TTTGAGACCAAGACTCTCTACAGTAGGTTCGTGCCTACTATGAGCAAATCTGTTGAATTCGTCACTGA  
GGACGAAGGTGAGAGGACTTTTGGCTACTGGCGACAACTGAGAGCAG  
+  
FFFFFFFFFFFFFFFFFFFFFFFFFFFFFFFFFFFFFFFFFFFFFFFFFFFFFFFFFFFFFFFFF  
FFFFFFFFFFFFFFFFFFFFFFFFFFFFFFFFFFFFFFFFFFFFFFFFFFFFFFFFF  
@A00721:190:HGIW7DSXY:4:2335:9281:3161_2:N:0:TCTGCAAG+GCTGCACT  
ATTTGAAGCAGGGGTTACCATTCTTAAGGTGGATGAGGGAGGTTGTTTTCTTTGGAGTTTTAGATAAT  
CTTTTGAGAAGGGGTCATAGAGCCAGCAAGAGAAGCTTATATGCTGGT  
+  
FFFFFFFFFFFFFFFFFFFFFFFFFFFFFFFFFFFFFFFFFFFFFFFFFFFFFFFFFFFFFFFFF  
FFFFFFFFFFFF::FFFFFFFFFFFFFFFFFFFFFFFFFFFFFFFFFFFFFFFFF  
@A00721:190:HGIW7DSXY:4:1174:13494:1939_1:N:0:TCTGCAAG+GCTGCACT  
TTGAAGGCTGGCTCTAAGGGAGACTCCTTCTTTTTGAATGTTGTAAGAATTGGGTTGAGAAGTGTGC  
TTTACAAGGAGTTAGACTCTTCTTCAAGTTTTTAGATCTTCTTGATAATCTTAAAGAAAAATTTTCGA  
ATA  
+  
FFFFFFFFFFFFFFFFFFFFFFFFFFFFFFFFFFFFFFFFFFFFFFFFF:FFFFFFFFFFFFFFFFFFFFF  
FFFFFFFFFFFFFFFFFFFFFFFFFFFFFFFFFFFFFFFFFFFFFFFFF:FFFFFFFFFFFFFFFFFFFFF  
FFF  
@A00721:190:HGIW7DSXY:4:1101:4020:8891_1:N:0:TCTGCAAG+GCTGCACT  
GTGTGCTCTTCCGATCTCCGATCTCAGTTCTACCACAGAAACCGTCTCAGGAAGTGTCTCCACTGATT  
CGGAATTAGAGAAAGACGACCTTCTTGTGGGACTGAGACCTCTGAATTTTCAGGGTGCCCTGATGAG  
GAC  
+  
FFFFFFFFFFFFFFFFFFFFF:FFFFFFFFFFFFFFFFFFFFFFFFFFFFFFFFFFFFFFFFF  
FFFFFFFFFFFFFFFFFFFFFFFFFFFFFFFFFFFFFFFFFFFFFFFFF:FFFFFFFFFFFFFFFFFFFFF  
FFF  
@A00721:190:HGIW7DSXY:4:1436:15365:30577_1:N:0:TCTGCAAG+GCTGCACT  
TTTCATATTATGAATGAACCTTCGGCCGCTCTCTTTGCTTCGATGTTGGATGTCAAGAAGGGTTCAGA  
ATGGGATTCTACGTAGTTTATGACTTTGGTGGTGGTACTTTCGATACTTCTATCGTCTTACGTTACG  
GTA  
+  
:FFFFFFFFFFFFFFFFFFFFFFFFFFFFFFFFFFFFFFFFFFFFFFFFFFFFFFFFFFFFFFFFF  
FFFFFFFFFFFFFFFFFFFFF:FFFFFFFFFFFFFFFFFFFFFFFFFFFFFFFFFFFFFFFFF  
FFF  
@A00721:190:HGIW7DSXY:4:2528:1859:2644_1:N:0:TCTGCAAG+GCTGCACT  
TTTACGTTTGCTACTCAGAGCTGGTCTCTCAGCTAAGGGATGCATGGTTTTATCTCCTCAGGAGTCC  
CGGCATTTGATAATAATGACGAGACTTTCGTCATAATCGCTGCATATTACGGATTACACGGTACCAGC  
GCA  
+  
FFFFF:FF:FFFFFF,FF:,FFFFF:FFFFF:F,,F:FFFFF:,F,FF,FFFFFFFFFFFFFFF,FF,  
,FFF,FFFFFFFFFFFFFFF,FFF,FFFF,FFFFFFFFFF,F,FFFFFFFF:FF,FF::FFF,:F,:FF  
FF:  
@A00721:190:HGIW7DSXY:4:1316:24795:10770_2:N:0:TCTGCAAG+GCTGCACT  
AGTCCAATCAAAGGTTTTGAATTTAGCTCAACTGGGGAGACGTGCTTAAATGGGTGATAAAAATTATT  
TAGAGATCTTTTCTACTTACAAAGGACAATTCAGTTTCATTAATTCTA  
+  
FFFFFFFFF:FFFFFFFFFFFFFFFFFFFFFFFFFFFFFFFFFFFFFFFFF:FFFFFFF:FFFFFFFFF  
FFFFFFFFF:FFFFFFFFFFFF::FFFFFFFFFFFFFFFFFFFFFFFFF:FFFFF  
@A00721:190:HGIW7DSXY:4:2225:26223:23234_2:N:0:TCTGCAAG+GCTGCACT  
CACCCATCTCAACGAGGATAAAGCGAGTTTTCCGTTCTGAACGTAATACACGAAGAGATCATCCGCAA
```

+

@A00721:190:HGJW7DSXY:4:1567:9824:32189\_1:N:0:TCTGCAAG+GCTGCACT  
TAAGATGTATGATGATAATCTACTATTTTTAAATAGTGATATTCAGCGTATACTTGAATACTTTATCA  
AAGATTTGGCTTGGTCTATTTACCGCAAAAAGTTGGAAGAGGTCTATGATATTTATTTACTTATACT  
TTA

+

@A00721:190:HGJW7DSXY:4:1156:29722:6778\_1:N:0:TCTGCAAG+GCTGCACT  
CTTGACTGTTGATAATATTACAATAGCTCTTTCTCAGAAGATTAGAGAAGTAACCGGTGAACACGTCG  
GTAGCATTGATTTACTTTTACCGTTAGAACTGAAAAAGATTCTTTTCGAAAAGAAACCTATAAGTTAC  
AAA

+

@A00721:190:HGJW7DSXY:4:1657:5855:12446\_2:N:0:TCTGCAAG+GCTGCACT  
GTTTCGCCATTTCAAGAGTGGTCAATACGTCGTGGGAGGTACTGAAGCCTTCCCCTCCGCTGGCACGA  
AGAACTCCCAAGCCAATCAATAGTTCTTCTGACCAGAATGAAAAGG

 $+$ 

@A00721:190:HGJW7DSXY:4:1624:26106:10191\_2:N:0:TCTGCAAG+GCTGCACT  
TTTGAGACCAAGACTCTCTACAGTAGGTCGTGCCTACTATGAGCAAATCTGTTGAATTCGTCCTGA  
GGACGAAGGTGAGAGGACTTTTGGCTACTGGCGACAACTGAGAGCAG

+

@A00721:190:HGJW7DSXY:4:1132:18765:18302\_1:N:0:TCTGCAAG+GCTGCACT  
TTTGAAGCAGGGGTTACCACTTCCTAAGGTGGATGAGGGAGGTTGTTTCTTTGGAGTTTTAGATAATC  
TTTTGAGAAGGGGTCATAGAGCCAGCAAGAGAAGCTTATATGCTGGTTTAAAGTGATGATTATCACTCC  
TTG

+

@A00721:190:HGJW7DSXY:4:1178:15275:4554\_1:N:0:TCTGCAAG+GCTGCACT  
TTGAAGGCTGGCTCTAAGGGAGACTCCTTCTTTTTGAATGTTGTAAAGAATTGGGTTGAGAAGTGTGC  
TTTACAAGGAGTTAGACTCTTCTTCAAGTTTTTAGATCTTCTTGATAATCTTAAAGAAAAATTTTCGA  
ATA

+

@A00721:190:HGJW7DSXY:4:1119:23366:25801\_1:N:0:TCTGCAAG+GCTGCACT  
GTGTGCTCTTCCGATCTCCGATCTCAGTTCTACCAAGAAACCGTCTCAGGAAGTGTCTCCACTGATT  
CGGAATTAGAGAAAGACGACCTTCTTGTGGGGACTGAGACCTCTGAATTTTCAGGGTGCCCTGATGAG  
GAC

+



FFFFFFFFFFFFFFFFFFFFFFFFFFFFFFFFFFFFFFFFFFFFFFFFFFFFFFFFFFFFFFFFFFFFFFFFFFFFFFFF  
FFF

@A00721:190:HGJW7DSXY:4:1552:4851:13150\_1:N:0:TCTGCAAG+GCTGCACT  
TTTCATATTATGAATGAACCTTCGGCCGCTCTCTTTGCTTCGATGTTGGATGTCAAGAAGGGTTCAGA  
ATGGGATTCTACGTAGTTTATGACTTTGGTGGTGGTACTTTCGATACTTCTATCGTCTTACGTTACG  
GTA

+

FFFFFFFFFFFFFFFFFFFFFFFFFFFFFFFFFFFFFFFFFFFFFFFFFFFFFFFFFFFFFFFFFFFFFFFFFFFFFFFF  
FFFFFFFFFFFFFFFFFFFFFFFFFFFFFFFFFFFFFFFFFFFFFFFFFFFFFFFFFFFFFFFFFFFFFFFFFFFFFFFF  
FFF

@A00721:190:HGJW7DSXY:4:2666:17535:5274\_1:N:0:TCTGCAAG+GCTGCACT  
TTTACGTTTGCTACTCAGAGCTGGTCCTCTCAGCAAAGGGATGCATGGTGTATCTCCTCAGGAGTCC  
CGGCATTTGATAATAATGACGAGACTTTCGTCATAATCGCTGCATATTACGGATTACACGGTACCAGC  
GCA

+

FFFFFFFFFFFFFFFFFFFFFFFFFFFFFFFFFFFFFFFFFFFFFFFFFFFFFFFFFFFFFFFFFFFFFFFFFFFFFFFF  
FFFFFFFFFFFFFFFFFFFFFFFFFFFFFFFFFFFFFFFFFFFFFFFFFFFFFFFFFFFFFFFFFFFFFFFFFFFFFFFF  
FFF

@A00721:190:HGJW7DSXY:4:1370:20528:22044\_2:N:0:TCTGCAAG+GCTGCACT  
AGTCCAATCAAAGGTTTTGAATTTAGCTCAACTGGGAGACGTGCTTAAATGGGTGATAAAAATTATT  
TAGAGATCTTTTCTACTTACAAAGGACAATTCAGTTTCATTAATTCTA

+

FFFFFFFFFFFFFFFFFFFFFFFFFFFFFFFFFFFFFFFFFFFFFFFFFFFFFFFFFFFFFFFFFFFFFFFFFFFFFFFF  
FFFFFFFFFFFFFFFFFFFFFFFFFFFFFFFFFFFFFFFFFFFFFFFFFFFFFFFFFFFFFFFFFFFFFFFFFFFFFFFF

@A00721:190:HGJW7DSXY:4:1540:4996:25394\_1:N:0:TCTGCAAG+GCTGCACT  
CACCAATCTCAACGAGGAAAAAGCTTTTTTCCGTCCTGAACCTAATACACGAATAGATAAACCGCAA  
ACGACTCGAAACCGAGACGCCGTAGATCAAAGTCCCTTCTAACTTTAGAT

+

: ,FF,F,: , ,F,: , ,F,F,: , , , ,FFF,F,: , ,F,F,F,: , :F,: , ,F,: , ,F,: , ,F,  
FFFFFFFFFFFFFFFFFFFFFFFFFFFFFFFFFFFFFFFFFFFFFFFFFFFFFFFFFFFFFFFFFFFFFFFFFFFFFFFF

@A00721:190:HGJW7DSXY:4:2169:20374:3427\_1:N:0:TCTGCAAG+GCTGCACT  
TAAGATGTATGATGATAATCTACTATTTTTTAAATAGTGATATTCAGCGTATACTTGAATACTTTATCA  
AAGATTTGGCTTGGTCTATTTACCGCAAAAAGTTGGAAGAGGTCTATGATATTTATTTTACTTATACT  
TTA

+

FFFFFFFFFFFFFFFFFFFFFFFFFFFFFFFFFFFFFFFFFFFFFFFFFFFFFFFFFFFFFFFFFFFFFFFFFFFFFFFF  
FFFFFFFFFFFFFFFFFFFFFFFFFFFFFFFFFFFFFFFFFFFFFFFFFFFFFFFFFFFFFFFFFFFFFFFFFFFFFFFF  
FFF

@A00721:190:HGJW7DSXY:4:1159:22959:32988\_1:N:0:TCTGCAAG+GCTGCACT  
CTTGACTGTTGATAATATTACAATAGCTCTTTCTCAGAAGATTAGAGAAGTAACCGGTGAACACGTGCG  
GTAGCATTGATTTACTTTTACCGTTAGAACTGAAAAAGATTCTTTTCGAAAAGAAACCTATAAGTTAC  
AAA

+

FFFFF:FFFFFFFFFFFFFFFFFFFFFFFFFFFFFFFFFFFFFFFFFFFFFFFFFFFFFFFFFFFFFFFFFFFFFFFF  
FFFFF:FFFFFFFFFFFFFFFFFFFFFFFFFFFFFFFFFFFFFFFFFFFFFFFFFFFFFFFFFFFFFFFFFFFFFFFF  
FFF

@A00721:190:HGJW7DSXY:4:2152:10456:23234\_2:N:0:TCTGCAAG+GCTGCACT  
GTTTCGGCCATTTCAAGAGTGGTCAATACGTCGTGGGAGGTACTGAAGCCTTCCCCTCCGCTGGCACGA  
AGAACTCCCAAGCCAATCAATAGTTCTTCTGACCAGAATGAAAAGG

+

,FF:FFFFFFFFFFFFFFFFFFFFFFFFFFFFFFFFFFFFFFFFFFFFFFFFFFFFFFFFFFFFFFFFFFFFFFFF  
FFFFFFFFFFFFFFFFFFFFFFFFFFFFFFFFFFFFFFFFFFFFFFFFFFFFFFFFFFFFFFFFFFFFFFFF, :

@A00721:190:HGJW7DSXY:4:2253:31647:20572\_2:N:0:TCTGCAAG+GCTGCACT  
TTTGAGACCAAGACTCTCTACAGTAGGTCGTGCCTACTATGAGCAAATCTGTTGAATTCGTCACTGA

+

@A00721:190:HGJW7DSXY:4:1165:25183:7874\_1:N:0:TCTGCAAG+GCTGCACT

+

@A00721:190:HGJW7DSXY:4:1208:2220:12759\_1:N:0:TCTGCAAG+GCTGCACT

+

@A00721:190:HGJW7DSXY:4:1162:15854:30013 1:N:0:TCTGCAAG+GCTGCACT

$$+$$

@A00721:190:HGJW7DSXY:4:1560:11433:36980 1:N:0:TCTGCAAG+GCTGCACT

+

@A00721:190:HGJW7DSXY:4:2666:18475:6089 1:N:0:TCTGCAAG+GCTGCACT

+

@A00721:190:HGJW7DSXY:4:1544:7717:33677 2:N:0:TCTGCAAG+GCTGCACT

+

@A00721:190:HGJW7DSXY:4:1607:17282:29512 1:N:0:TCTGCAAG+GCTGCACT

+

@A00721:190:HGJW7DSXY:4:2537:28619:4241\_1:N:0:TCTGCAAG+GCTGCACT  
TAAGATGTATGATGATAATCTACTATTTTTAAATAGTGATATTCAGCGTATACTTGAATACTTTATCA  
AAGATTTGGCTTGGTCTATTTACCGCAAAAAGTTGGAAGAGGTCTATGATATTTATTTACTTATACT  
TTA

+

[illegible]

@A00721:190:HGJW7DSXY:4:1221:19587:2378\_1:N:0:TCTGCAAG+GCTGCACT  
CTTGACTGTTGATAATATTACAATAGCTCTTTCTCAGAAGATTAGAGAAGTAACCGGTGAACACGTCG  
GTAGCATTGATTTACTTTTACCGTTAGAACTGAAAAAGATTCTTTTCGAAAAGAAACCTATAAGTTAC  
AAA

+

```

FFFFFFFFFFFFFFFFFFFFF:, :F,FFFFFFFFFFFFFF,FFFFFFFFFFFFFFFFFFFFF: :F:FF:FFFF
FFFFFFFFFFFFFFFFFFFF,FFFFFFF:FFFFFFFFFFFFFFF:F:FFFFFFFFF:FFFFFFFFF:FF:F,FF,FFFF
FFF

```

@A00721:190:HGJW7DSXY:4:2205:32226:9580\_2:N:0:TCTGCAAG+GCTGCACT  
GTTTCGCCATTTCAAGAGTGGTCAATACGTCGTGGGAGGTACTGAAGCCTTCCCCTCCGCTGGCACGA  
AGAACTCCCAAGCCAATCAATAGTTCTTCTGACCAGAATGAAAAGG

+

[illegible]

@A00721:190:HGJW7DSXY:4:2276:24514:32894\_2:N:0:TCTGCAAG+GCTGCACT  
TTTGAGACCAAGACTCTCTACAGTAGGTTCTGCCTACTATGAGCAAATCTGGTGAATTCGTCCTGA  
GGACGAAGGTGAGAGGACTTTTGGCTACTGGCGACAACTGAGAGCAG

+

F,FFFFFFFFFFFFFFFF,FFFFFF:FF:F:,F:, :FFFFFF:FFFF:FFFF:FF:,FFFFFF,FFFFFF,FF  
FF:FFFF,F:FFFFFF:FFFFFFFFFFFFFFFF:FF:FFFFFF,,FFFFF

@A00721:190:HGJW7DSXY:4:1633:9344:15796\_1:N:0:TCTGCAAG+GCTGCACT  
TTTGAAGCAGGGGTTACCACTTCCTAAGGTGGATGAGGGAGGTTGTTTCTTTGGAGTTTTAGATAATC  
TTTTGAGAAGGGGTCATAGAGCCAGCAAGAGAAGCTTATATGCTGGTTTAAGTGATGATTATCACTCC  
TTG

+

[illegible]

@A00721:190:HGJW7DSXY:4:1272:9652:7968\_1:N:0:TCTGCAAG+GCTGCACT  
TTGAAGGCTGGCTCTAAGGGAGACTCCTTCTTTTTGAATGTTGTAAAGAATTGGGTTGAGAAGTGTGC  
TTTACAAGGAGTTAGACTCTTCTTCAAGTTTTTAGATCTTCTTGATAATCTTAAAGAAAAATTTTCGA  
ATA

+

[illegible]

@A00721:190:HGJW7DSXY:4:1605:20654:22232\_1:N:0:TCTGCAAG+GCTGCACT  
GTGTGCTCTTCCGATCTCCGATCTCAGTTCTACCACAGAAACCGTCTCAGGAAGTGTCTCCACTGATT  
CGGAATTAGAGAAAGACGACCTTCTTGTTGGGGACTGAGACCTCTGAATTTTCAGGGTGCCCTGATGAG  
GAC

+

[illegible]

@A00721:190:HGJW7DSXY:4:1560:12192:35853\_1:N:0:TCTGCAAG+GCTGCACT  
TTTCATATTATGAATGAACCTTCGGCCGCTCTCTTTGCTTCGATGTTGGATGTCAAGAAGGGTTCAGA  
ATGGGATTCTACGTAGTTTATGACTTTGGTGGTGGTACTTTCGATACTTCTATCGTCTTACGTTACG  
GTA

+

FFFFFFFFFFFFFFFFFFFFFFFFFFFFFFFFFFFFFFFFFFFFFFFFFFFFFFFFFFFFFFFFFFFFFFFF  
FFFFFFFFFFFFFFFFFFFFFFFFFFFFFFFFFFFFFFFFFFFFFFFFFFFFFFFFFFFFFFFFFFFFFFFF  
FFF

@A00721:190:HGJW7DSXY:4:1136:10800:22576\_2:N:0:TCTGCAAG+GCTGCACT  
TTACGTTTGCTACTCAGAGCTGGTCCTCTCAGCAAAGGGATGCATGGTGTATCTCCTCAGGAGTCCC  
GGCATTGATAATAATGACGAGACTTTCGTCATAATCGCTGCATATTA

+

FFFFFFFFFFFFFFFFFFFFFFFFFFFFFFFFFFFFFFFFFFFFFFFFFFFFFFFFFFFFFFFFFFFFFFFF  
FFFFFFFFFFFFFFFFFFFFFFFFFFFFFFFFFFFFFFFFFFFFFFFFFFFFFFFFFFFFFFFFFFFFFFFF

@A00721:190:HGJW7DSXY:4:1512:13060:22263\_1:N:0:TCTGCAAG+GCTGCACT  
TCCAATCAAAGGTTTTGAATTTAGCTCAACTGGGAGACGTGCTTAAATGGGTGATAAAAATTATTTA  
GAGATCTTTTCTACTTACAAAGGACAATTCAGTTTCATTAATTCTACGAAAAGTCCGGAGTATATTG  
TAT

+

FFFFFFF,FFFFFFFFF:FFFFFFFFFFFFFFFFFFFFFFFFFFFFFFFFFFFFFFFFFFFFFFFFF,F  
FFF,FFF::FFFFFFFFF:FFFFFFFFFFFFFFFFFFFFFFFFFFFFFFFFFFFFFFFFFFFFFFFFF  
FFF

@A00721:190:HGJW7DSXY:4:2227:18484:11334\_1:N:0:TCTGCAAG+GCTGCACT  
CACCCATCACAACGCGTATAAAGCGTTTTTTTCGACCTCAACTTAATACACGAAGATATCATCCGCAC  
ACGACTCGAAACCGAGACGCCGTAGATCAAAGTCCCTTCTAACTTTAGAT

+

FFFF,,,:,,F,,,:,,F:F,,,:,,:FFF,,,:F:F,F,,,:F:,,,:,,:,,:,,:,,:,,FF,:F,  
FFFFFFFFFFFFFFFFFFFFFFFFFFFFFFFFFFFFFFFFF:FFFFFFFFFFFFF

@A00721:190:HGJW7DSXY:4:2567:32615:6339\_1:N:0:TCTGCAAG+GCTGCACT  
TAAGATGTATGATGATAATCTACTATTTTTAAATAGTGATATTCAGCGTATACTTGAATACTTTATCA  
AAGATTTGGCTTGGTCTATTTACCGCAAAAAGTTGGAAGAGGTCTATGATATTTATTTACTTATACT  
TTA

+

FFFFFFF:FFFF::FFFFF,FFFFFFFFF,FFFFFFFFFFFFFFFFFFFFFFFFFFFFFFFFFFFFF::FFFF  
FFFFFFFFFFFFFFFFFFFFFFFFFFFFFFFFFFFFFFFFFFFFFFFFFFFFFFFFFFFFFFFFFFFFFFFF  
FFF

@A00721:190:HGJW7DSXY:4:1323:27697:3396\_1:N:0:TCTGCAAG+GCTGCACT  
CTTGACTGTTGATAATATTACAATAGCTCTTTCTCAGAAGATTAGAGAAGTAACCGGTGAACACGTGC  
GTAGCATTGATTTACTTTTACCGTTAGAACTGAAAAAGATTCTTTTCGAAAAGAAACCTATAAGTTAC  
AAA

+

FFFF:FFFFFFFF:FFFFFFFFFFFFFFFFFFFFFFFFFFFFFFFFFFFFFFFFFFFFFFFFFFFFFFFF  
FFFFFFFFFFFFFFFFF:FFFFFFFFFFFFFFFFFFFFFFFFFFFFFFFFFFFFFFFFFFFFFFFFF:FFFFF  
FF:

@A00721:190:HGJW7DSXY:4:2209:4679:21089\_2:N:0:TCTGCAAG+GCTGCACT  
GTTGCGCCATTTCAAGAGTGGTCAATACGTCGTGGGAGGTACTGAAGCCTTCCCCTCCGCTGGCACGA  
AGAACTCCCAAGCCAATCAATAGTTCTTCTGACCAGAATGAAAAGG

+

FFFFFFFFFFFFFFFFFFFFFFFFFFFFFFFFFFFFFFFFFFFFFFFFFFFFFFFFFFFFFFFFFFFFFFFF  
FFFFFFFFFFFFFFFFFFFFFFFFFFFFFFFFFFFFFFFFFFFFFFFFF:F:FFFF:

@A00721:190:HGJW7DSXY:4:1427:13774:4867\_1:N:0:TCTGCAAG+GCTGCACT  
TACAGTAGGTTTCGTGCCTACTATGAGCAATCTGTTGAATTCGTCACTGAGGACGAAGGTGAGAGGACT  
TTTGGCTACTGGCGACAACTGAGAGCAGTCGCTGGGGAAGAGAATTGCGTGGGTGAAGGCCGACG  
CTT

+  
FF:FFFFFFFF:FFFFFFFFFFFFFFFF:FFF:FFFFFFFFFFFFFFFFFFFFFFFFFFFFFFFF,FFFFFFFF:FF  
FFFF:FFFF:FFFFFFFFFFFFFFFFFFFFFFFF:FFF:FFFFFFFFFFFFFFFFFFFFFFFFFFFFFFFF  
FFF  
@A00721:190:HGJW7DSXY:4:1638:22146:27007\_1:N:0:TCTGCAAG+GCTGCACT  
TTTGAAGCAGGGGTTACCACTTCCTAAGGTGGATGAGGGAGGTTGTTTCTTTGGAGTTTTAGATAATC  
TTTTGAGAAGGGGTCATAGAGCCAGCAAGAGAAGCTTATATGCTGGTTTAAGTGATGATTATCACTCC  
TTG  
+  
FFFFFFFFFFFFFFFFFFFFFFFFFFFFFFFF:FFFFFFFFFFFFFFFFFFFFFFFFFFFFFFFFFFFFFFFF  
FFFFFFFFFFFFFFFFFFFFFFFFFFFFFFFFFFFFFFFFFFFFFFFFFFFFFFFFFFFFFFFFFFFFFFFF  
FFF  
@A00721:190:HGJW7DSXY:4:1341:8983:9596\_1:N:0:TCTGCAAG+GCTGCACT  
TTGAAGGCTGGCTCTAAGGGAGACTCCTTCTTTTTGAATGTTGTAAAGAATTGGGTTGAGAAGTGTC  
TTTACAAGGAGTTAGACTCTTCTTCAAGTTTTTAGATCTTCTTGATAATCTTAAAGAAAAATTTTCGA  
ATA  
+  
FFFFFFFFFFFFFFFFFFFFFFFFFFFFFFFF:FFFFFFFFFFFFFFFFFFFFFFFFFFFFFFFFFFFFFFFF  
FFFFFFFFFFFFFFFFFFFFFFFFFFFFFFFFFFFFFFFFFFFFFFFFFFFFFFFFFFFFFFFFFFFFFFFF  
FFF  
@A00721:190:HGJW7DSXY:4:2109:12445:2848\_1:N:0:TCTGCAAG+GCTGCACT  
GTGTGCTCTTCCGATCTCCGATCTCAGTTCTACCACAGAAACCGTCTCAGGAACTGTCTCCACTGATT  
CGGAATTAGAGAAAGACGACCTTCTTGTGGGGACTGAGACCTCTGAATTTTCAGGGTGCCCTGATGAG  
GAC  
+  
F:FFFF:F:FFFF:F::F,FFFF:FFF,FFFF,FF:FFFFFFFFFFFF,,FFFF:F:F:FFFFF  
FFFFFFFF:, ,FFFFFFFFFFFFFFFFFFFFFFFF:FFFFFFFFFFFF:FFFFFFFF,FF:FFFFFFF  
FFF  
@A00721:190:HGJW7DSXY:4:1622:10303:30577\_1:N:0:TCTGCAAG+GCTGCACT  
TTTCATATTATGAATGAACCTTCGGCCGCTCTCTTGTCTCGATGTTGGATGTCAAGAAGGGTTCAGA  
ATGGGATTCTACGTAGTTTATGACTTTGGTGGTGGTACTTTCGATACTTCTATCGTCTTACGTTACG  
GTA  
+  
FFFFFFFFFFFFFFFFFFFFFFFFFFFFFFFF:FFFFFFFFFFFFFFFFFFFFFFFFFFFFFFFF:FFFFFFFFFFFF  
FFFFFFFFFFFFFFFFFFFFFFFFFFFFFFFFFFFFFFFFFFFFFFFFFFFFFFFFFFFFFFFFFFFFFFFF  
FFF  
@A00721:190:HGJW7DSXY:4:1254:32217:5118\_2:N:0:TCTGCAAG+GCTGCACT  
TTACGTTTGCTACTCAGAGCTGGTCCTCTCAGCAAAGGGATGCATGGTGTATCTCCTCAGGAGTCCC  
GGCATTGATAATAATGACGAGACTTTCGTCATAATCGCTGCATATTA  
+  
FFFFFFFFFFFFFFFFFFFFFFFFFFFFFFFF:FFFFFFFFFFFFFFFFFFFFFFFFFFFFFFFFFFFFFFFF  
FFFFFFFF:FFFFFFFFFFFFFFFFFFFFFFFFFFFFFFFFFFFFFFFF:FFFFF  
@A00721:190:HGJW7DSXY:4:1512:13060:22326\_1:N:0:TCTGCAAG+GCTGCACT  
TCCAATCAAAGGTTTTGAATTTAGCTCAACTGGGGAGACGTGCTTAAATGGGTGATAAAAATTATTTA  
GAGATCTTTTCTACTTACAAAGGACAATTCAGTTTCATTAATTCTACGGAAGTCCGGAGTATATTG  
TAT  
+  
FFFFFFFFFFFFFFFFFFFFFFFFFFFFFFFF:FFFFFFFFFFFFFFFFFFFFFFFFFFFFFFFFFFFFFFFF, F  
FFFFFFFFFFFFFFFFFFFFFFFF,FFFFFFFFFFFFFFFFFFFFFFFFFFFFFFFFFFFFFFFFFFFFFFFF  
FFF  
@A00721:190:HGJW7DSXY:4:2540:22037:25003\_1:N:0:TCTGCAAG+GCTGCACT  
CACCCATCACAAAGAGTATAAAGCGTGTTTTTCTGTCCTCAACTTAATACACGAAGAGATCATCCGCAA  
ACGACTCGAAACCGAGACGCCGTAGATCAAAGTCCCTTCTAACTTTAGAT  
+

@A00721:190:HGJW7DSXY:4:2654:18774:1376\_1:N:0:TCTGCAAG+GCTGCACT  
TAAGATGTATGATGATAATCTACTATTTTTAAATAGTGATATTCAGCGTATACTTGAATACTTTATCA  
AAGATTTGGCTTGGTCTATTTACCGCAAAAAGTTGGAAGAGGTCTATGATATTTATTTTACTTATACT  
TTA

@A00721:190:HGJW7DSXY:4:1574:18801:34460\_1:N:0:TCTGCAAG+GCTGCACT  
CTTGACTGTTGATAATATTACAATAGCTCTTTCTCAGAAGATTAGAGAGGTAACCGGTGAACACGTCG  
GTAGCATTGATTTACTTTTACCGTTAGAACTGAAAAAGATTCTTTTCGAAAAGAAACCTATAAGTTAC  
AAA

@A00721:190:HGJW7DSXY:4:2225:5348:22811\_2:N:0:TCTGCAAG+GCTGCACT  
GTTTCGCCATTTCAAGAGTGGTCAATACGTCGTGGGAGGTACTGAAGCCTTCCCCTCCGCTGGCACGA  
AGAACTCCCAAGCCAATCAATAGTTCTTCTGACCAGAATGAAAAGG

@A00721:190:HGJW7DSXY:4:1427:13937:5087\_1:N:0:TCTGCAAG+GCTGCACT  
TACAGTAGGTTCTGTCCTACTATGAGCAATCTGTTGAATTCGTCACTGAGGACGAAGGTGAGAGGACT  
TTTGGCTACTGGCGACAACTGAGAGCAGTCGCTGGGGAAAGAGAATTGCGTGGGTTGAAGGCCGACG  
CTT

@A00721:190:HGJW7DSXY:4:2304:5068:7545\_1:N:0:TCTGCAAG+GCTGCACT  
TTTGAAGCAGGGGTTACCACTTCCTAAGGTGGATGAGGGAGGTTGTTTCTTTGGAGTTTTAGATAATC  
TTTTGAGAAGGGGTCATAGAGCCAGCAAGAGAAGCTTATATGCTGGTTTAAGTGATGATTATCACTCC  
TTG

@A00721:190:HGJW7DSXY:4:1413:20989:21057\_1:N:0:TCTGCAAG+GCTGCACT  
TTGAAGGCTGGCTCTAAGGGAGACTCCTTCTTTTTGAATGTTGTAAAGAATTGGGTTGAGAAGTGTGC  
TTTACAAGGAGTTAGACTCTTCTTCAAGTTTTTAGATCTTCTTGATAATCTTAAAGAAAAATTTTCGA  
ATA

@A00721:190:HGJW7DSXY:4:2345:15049:15280\_1:N:0:TCTGCAAG+GCTGCACT  
GTGTGCTCTTCCGATCTCCGATCTCAGTTCTACCAAGAAACCGTCTCAGGAAGTGTCTCCACTGATT  
CGGAATTAGAGAAAGACGACCTTCTTGTGGGGACTGAGACCTCTGAATTTTCAGGGTGCCCTGATGAG  
GAC



+

@A00721:190:HGJW7DSXY:4:1413:21323:20666\_1:N:0:TCTGCAAG+GCTGCACT  
TTGAAGGCTGGCTCTAAGGGAGACTCCTTCTTTTTGAATGTTGTAAAGAATTGGGTTGAGAAGTGTGC  
TTTACAAGGAGTTAGACTCTTCTTCAAGTTTTTAGATCTTCTTGATAATCTTAAAGAAAAATTTTCGA  
ATA

+

@A00721:190:HGJW7DSXY:4:2520:23023:13777\_1:N:0:TCTGCAAG+GCTGCACT  
GTGTGCTCTTCCGATCTCCGATCTCAGTTCTACACAGAAACCGTCTCAGGAAGTGTCTCCACTGATT  
CGGAATTAGAGAAAGACGACCTTCTTGTGGGGACTGAGACCTCTGAATTTTCAGGGTGCCCTGATGAG  
GAC

+

@A00721:190:HGJW7DSXY:4:2126:19497:28902\_1:N:0:TCTGCAAG+GCTGCACT  
TTTCATATTATGAATGAACCTTCGGCCGCTCTCTTTGCTTCGATGTTTGATTTCAAGAAGGTTTCAGA  
ATGGGATTCTACGTAGTTTATGACTTTGGTGGTGGTACTTTCGATACTTCTATCGTCTTACGTTACG  
GTA

+

@A00721:190:HGJW7DSXY:4:1501:9905:13009\_2:N:0:TCTGCAAG+GCTGCACT  
TTACGTTTGCTACTCAGAGCTGGTCCTCTCAGCAAAGGGATGCATGGTGTTATCTCCTCAGGAGTCCC  
GGCATTGGATAATAATGACGAGACTTCGTCATAATCGCTGCATATTA

 $+$ 

@A00721:190:HGJW7DSXY:4:1547:15176:33411\_1:N:0:TCTGCAAG+GCTGCACT  
TCCAATCAAAGGTTTTGAATTTAGCTCAACTGGGGAGACGTGCTTAAATGGGTGATAAAAATTATTTA  
GAGATCTTTTCTACTTACAAAGGACAATTCAGTTTCATTAATTCTACGAAAAGTCCGGAGTATATTG  
TAT

+

@A00721:190:HGJW7DSXY:4:1223:18385:11412\_1:N:0:TCTGCAAG+GCTGCACT  
CACCCAACTCACCAGATATACCGCGTGTTCCTGTCCTGAACGAAATACACGACGAGATCATCCGAA  
ACGACTCGAAACCGAGACGCCGTAGATCAAAGTCCCTTCTAACTTTAGATTATGAATCCTGCCTTTAC  
TC

+

[illegible]



+

@A00721:190:HGJW7DSXY:4:2339:18340:24111\_2:N:0:TCTGCAAG+GCTGCACT  
GTTTCGCCATTTCAAGAGTGGTCAATACGTCGTGGGAGGTACTGAAGCCTTCCCCTCCGCTGGCACGA  
AGAACTCCCAAGCCAATCAATAGTTCTTCTGACCAGACTGAAATGG

+

@A00721:190:HGJW7DSXY:4:1560:24189:28166\_1:N:0:TCTGCAAG+GCTGCACT  
TACAGTAGGTTCTTCCTACTATGAGCAATCTGTTGATTTCTGCTACTGAGGACGAAGGTGAGAGGACT  
TTTGGCTACTGGCGACAAACTGAGAGCAGTCGCTGGGGAAAGAGAATTGCGTGGGTTGAAGGCCGACG  
CTT

+

@A00721:190:HGJW7DSXY:4:2136:19524:20932\_1:N:0:TCTGCAAG+GCTGCACT  
TTGAAGCAGGGGTTACCACTTCCTAAGGTGGATGAGGGAGGTTGTTTCTTTGGAGTTTTAGATAATCT  
TTTGAGAAGGGGTCATAGAGCCAGCAAGAGAAGCTTATATGCTGGTTTAAGTGATGATTATCACTCCT  
TG

+

@A00721:190:HGJW7DSXY:4:1504:12364:9752\_1:N:0:TCTGCAAG+GCTGCACT  
TTGAAGGCTGGCTCTAAGGGAGACTCCTTCTTTTTGAATGTTGTAAAGAATTGGGTTGAGAAGTGTGC  
TTTACAAGGAGTTAGACTCTTCTTCAAGTTTTTAGATCTTCTTGATAATCTTAAAGAAAAATTTTCGA  
ATA

+

@A00721:190:HGJW7DSXY:4:2530:24713:35399\_1:N:0:TCTGCAAG+GCTGCACT  
GTGTGCTCTTCCGATCTCCGATCTCAGTTCTACCACAGAAACCGTCTCAGGAAGTGTCTCCACTGATT  
CGGAATTAGAGAAAGACGACCTTCTTGTGGGGACTGAGACCTCTGAATTTTCAGGGTGCCCTGATGAG  
GAC

+

@A00721:190:HGJW7DSXY:4:2251:31349:6370\_1:N:0:TCTGCAAG+GCTGCACT  
TTTCATATTATGAATGAACCTTCGGCCGCTCTCTTTGCTTCGATGTTGGATGTCAAGAAGGGTTTCAGA  
ATGGGATTCTACGTAGTTTATGACTTTGGTGGTGGTACTTTCGATACTTCTATCGTCTTACGTTACG  
GTA

+

```
FFFFFFFFFFFFFFFFFFFFFFFFFFFFF,FFFFFFFFFFFFFFFFFFFFFFFFFFFFFF  
FFFFFFFFFFFFFFFFFFFFFFFF:FFFFFFFFFFFFFFFFFFFFFFFFFFFFFFFFFFFF  
FFF
```



TTTACAAGGAGTTAGACTCTTCTTCAAGTTTTTAGATCTTCTTGATAATCTTAAAGAAAAATTTTCGA  
ATA

+

FFFFFFFFF:FFFFFFFFFFFFFFFFFFFFFFFFF,:FFFFFFFFF,FFFFFFFFFFFFFFFFF  
FFFFFFFFFFFFFFFFF:FFFFFFFFFFFFFFFFFFFFFFFFFFFFFFFFFFFFFFFFF  
:FF

@A00721:190:HGJW7DSXY:4:1468:29649:35524\_1:N:0:TCTGCAAG+GCTGCACT  
TTATTTCTACGGATACCGATCTCAGTTATACCACAGAAACCGACTCATGAACTGTCTCCACTGATTCTG  
GAATTAGAGAAAGACGACCTTCTTGTGGGACTGAGACCTCTGAAT

+

F,F::,,FF::FF,F,F:::,,,F,,,F:,FF,FFF:FFF,,,F,FFFFFFFFF:FFF:F,,,F  
,,F:F:FFF:FF::,,FFFFFFFF,FFF::FFFF:F,FFFF:FF

@A00721:190:HGJW7DSXY:4:2278:32389:26396\_1:N:0:TCTGCAAG+GCTGCACT  
TTTCATATTATGAATGAACCTTCGGCCGCTCTTTTGCTTCGATGTTGGATGTCAAGAAGGGTTCAGA  
ATGGGATTCTACGTAGTTTATGACTTTGGTGGTGGTACTTTCGATACTTCTATCGTCTTACGTTACG  
GTA

+

FFFFFFFFFFFFFFFFFFFFFFFFFFFFFFFFF:FFFFFFFFFFFFFFFFFFFFFFFFF:FFFFFFF  
FFFFFFFFFFFFFFFFFFFFFFFFFFFFFFFFFFFFFFFFFFFFFFFFFFFFFFFFFFFFFFFFF  
FFF

@A00721:190:HGJW7DSXY:4:2136:7672:27430\_2:N:0:TCTGCAAG+GCTGCACT  
TTACGTTTGCTACTCAGAGCTGGTCCTCTCAGCAAAGGGATGCATGGTGTATCTCCTCAGGAGTCCC  
GGCATTGATAATAATGACGAGACTTTCGTCATAATCGCTGCATATTA

+

FFFFFF:FFFFFFFFFFFFFFFFFFFFFFFFFFFFFFFFF,FFFFFFFFFFFFFFFFF  
FFFFFFFFFFFFFFFFF:FFFFFFFFF:FFF:F:FFFFFFFF:FFFFFFF

@A00721:190:HGJW7DSXY:4:2159:12635:13135\_1:N:0:TCTGCAAG+GCTGCACT  
TCCAATCAAAGGTTTTGAATTTAGCTCAACTGGGAGACGTGCTTAAATGGGTGATAAAATTATTTA  
GAGATCTTTCTACTTACAAAGGACAATTCAGTTTCATTAATTCTACGAAAAGTCCGGAGTATATTG  
TAT

+

FFFFFFF:FFFFFFF,FFFFFFFFFFFFFFFFFFFFFFFFF:FFFFFFFFFFFFFFFFF  
FFFFFFFFFFFFFFFFFFFFFFFFFFFFFFFFFFFFFFFFFFFFFFFFFFFFFFFFFFFFFFFFF  
FFF

@A00721:190:HGJW7DSXY:4:1428:10601:23703\_1:N:0:TCTGCAAG+GCTGCACT  
CACCCATCTCAACGAGGATAACGCTATTTTCCGTCCTTAACGTAATACACGACGAGATCATCCGCAA  
ACGACTCGAAACCGAGACGCCGTAGATCAAAGTCCCTTCTAACTTTAGATTATGAATCCTGCCTTTAC  
TC

+

F:FF,F::,F:::,F:F,,,,,FFF,F::,F:F,F::,FF::,F,F,,,F,F:,F:F::,  
,FFFFFFFF:FFFFFFFFFFFFFFFFFFFFFFFFFFFFFFFFFFFFFFFFFFFFFFFFF  
FF

@A00721:190:HGJW7DSXY:4:2675:17580:35164\_1:N:0:TCTGCAAG+GCTGCACT  
CTTGACTGTTGATAATATTACAATAGCTCTTCTCAGAAGATTAGAGAAGTAACCGGTGAACACGTCG  
GTAGCATTGATTTACTTTTACCGTTAGAACTGAAAAAGATTCTTTTCGAAAAGAAACCTATAAGTTAC  
AAA

+

:FFFFFFFFFFFFFFFFFFFFFFFFFFFFFFFFFFFFFFFFFFFFFFFFFFFFFFFFF  
FFFF:FFFFFFFFF:FFFFFFFFFFFFFFFFFFFFFFFFFFFFFFFFFFFFFFFFF  
FFF

@A00721:190:HGJW7DSXY:4:2449:20021:23422\_2:N:0:TCTGCAAG+GCTGCACT  
GTTCCGCCATTTCAAGAGTGGTCAATACGTCGTGGGAGGTACTGAAGCCTTCCCCTCCGCTGGCACGA  
AGAACTCCCAAGCCAATCAATAGTTCTTCTGACCAGAATGAAAAGG

+



@A00721:190:HGJW7DSXY:4:2433:5746:13197\_1:N:0:TCTGCAAG+GCTGCACT  
TACCTATCTCAACGCGGATAACGCGTTTTTTCCTTCCTGAACGTAATACACTAAGAGAACATCCCCAA  
ACGACTCGAAACCGAGACGCCGTAGATCAAAGTCCCTTCTAACTTTAGATTATGAATCCTGCCTTTAC  
TC

+

F,:F,F:::,F,:F,FF,F,,,:FFF,F:::,F,F,,,FFF,,,:F,,,:F,,F,FF,FF,  
FFFFFFFFFFFFFFFFFFFFFFFFFFFFFFFFFFFFFFFFFFFFFFFFFFFFFFFFFFFFFFFFFFFFFFFF  
FF

@A00721:190:HGJW7DSXY:4:1254:19560:14794\_1:N:0:TCTGCAAG+GCTGCACT  
TTGACTGTTGATAATATTACAATAGCTCTTTCAGAAAGATTAGAGAAGTAACCGGTGAACACGTCGG  
TAGCATTGATTTACTTTTACCGTTAGAACTGAAAAAGATTCTTTTCGAAAAGAAACCTATAAGTTACA

+

FFF:FFFFFFFFFFFFFFFF:FFFFFF:FFFF:FFFF:FF:FFFFFFFF:FFFFFFFFFFFFFFFF  
FFFFFFFFFFFFFFFF:FFF,FFFFFFFF:FFFFFFFF:FFFFFFFFFFFFFFFFFFFFFFFF: :FFFF

@A00721:190:HGJW7DSXY:4:2526:18945:33144\_2:N:0:TCTGCAAG+GCTGCACT  
GTTCGGCCATTTCAAGAGTGGTCAATACGTCGTGGGAGGTACTGAAGCCTTCCCCTCCGCTGGCAGCA  
AGAACTCCCAAGCCAATCAATAGTTCTTCTGACCAGAATGACAAGG

+

FFFFFFFF:FFFFFFFFFFFFFFFFFFFFFFFFFFFFFFFFFFFFFFFFFFFFFFFF:FFFFFFFFFFFFFF  
F,FFFFFFFFFFFFFFFF:FFFFFFFFFFFFFFFFFFFFFFFFFFFFFFFF,FFFF

@A00721:190:HGJW7DSXY:4:2308:10908:31219\_1:N:0:TCTGCAAG+GCTGCACT  
TACAGTAGTTCTGCTACTATGAGCAATCTGTTGAATTCGTCACTGAGGACGAAGGTGAGAGGACT  
TTTGGCTACTGGCGACAACTGAGAGCAGTCGCTGGGGAAGAGAATTGCGTGGGTTGAAGGCCGACG  
CTT

+

FFFFFFFFFFFFFFFF:FFFFFFFFFFFFFFFFFFFFFFFFFFFFFFFFFFFFFFFF:FFFFFFFFFFFFFF  
FFFFFFFFFFFFFFFFFFFFFFFFFFFFFFFFFFFFFFFFFFFFFFFFFFFFFFFF:FFFFFFFFFFFFFF  
FFF

@A00721:190:HGJW7DSXY:4:1535:18349:34741\_1:N:0:TCTGCAAG+GCTGCACT  
TTGAAGCAGGGGTTACCACTTCCTAAGGTGGATGAGGGAGGTTGTTTCTTTGGAGTTTATAGATAATCT  
TTTGAGAAGGGGTCATAGAGCCAGCAAGAGAAGCTTATATGCTGGTTAAGTGATGATTATCACTCCT  
TGA

+

FFFFF:FFFFFFFFFFFFFFFF:FFFFFFFFFFFFFFFF:FFFFFFFFFFFFFF:FFFFFFFFFFFF  
FFFFFFFFFFFFFFFF:FFFFFFFFFFFFFFFF:FFFFFFFFFFFFFFFFFFFFFFFFFFFFFFFFFFFF  
FFF

@A00721:190:HGJW7DSXY:4:1551:29957:7373\_1:N:0:TCTGCAAG+GCTGCACT  
TTGAAGGCTGGCTCTAAGGGAGACTCCTTCTTTTGAATGTTGTAAAGAATTGGGTTGAGAAGTGTGC  
TTTACAAGGAGTTAGACTCTTCTTCAAGTTTTTAGATCTTCTTGATAATCTTAAAGAAAAATTTTCGA  
ATA

+

FFFFFFFFFFFFFFFFFFFFFFFFF:F:FFFFFFFFFFFFFFFFFFFFFFFF:FFFFFFFFFFFFFF  
FFFFFFFFFFFFFFFFFFFFFFFF:FFFFFFFFFFFFFFFF:FFFFFFFFFFFFFFFFFFFFFFFFFFFF  
FF:

@A00721:190:HGJW7DSXY:4:1229:10637:22858\_2:N:0:TCTGCAAG+GCTGCACT  
TTCAACGGATACCGATCTCAGTTCTACCACAGAAACCGTCTCAGGAAGTGTCTCCACTGATTCGGAAT  
TAGAGAAAGACGACCTTCTTGTGGGGACTGAGACCTCTGAATTTTCAG

+

FFF:FF:FFFFFFFFFFFFFFFF, :FFFFFFFF:FFF:FFFFFFFFFFFFFFFF,F:FFFF  
FFFFFFFFFFFFFFFF:F:FFFFFFFFFFFF:FFFF:F:FFF,FF

@A00721:190:HGJW7DSXY:4:2442:10547:25864\_1:N:0:TCTGCAAG+GCTGCACT  
TTTCATATTATGAATGAACCTTCGGCCGCTCTTTTCTTCTGATGTTGGATGTCAAGAAGGGTTCAGA  
ATGGGATTCCTACGTAGTTTATGACTTTGGTGGTGGTACTTTCGATACTTCTATCGTCTTACGTTACG  
GTA

@A00721:190:HGJW7DSXY:4:1515:31069:3443\_1:N:0:TCTGCAAG+GCTGCACT  
TTACGTTTGCTACTCAGAGCTGGTCCTCTCAGCAAAGGGATGCATGGTGTATCTCCTCAGGAGTCCC  
GGCATTGTGATAATAATGACGAGACTTTCGTCATAATCGCTGCATATTACGGATTACACGGTACCAGCG  
CA

@A00721:190:HGJW7DSXY:4:2346:11080:29637\_1:N:0:TCTGCAAG+GCTGCACT  
TCCAATCAAAGGTTTTGAATTTAGCTCAACTGGGGAGACGTGCTTAAATGGGTGATAAAAAATTTTTTA  
TAGATCTTTTCTACTTACAAAGGACAATTCAGTTTCATTAATTCTACGGAAAAGTCCGGAGTATATTG  
TAT

@A00721:190:HGJW7DSXY:4:1616:1561:13777\_1:N:0:TCTGCAAG+GCTGCACT  
TTCCTATCCCCCGAGTATAACGCTTGTTTTCTTCTGAACTTAATACACGAAGAGATCACCCGCC  
ACGACTCGAAACCGAGACGCCGTAGATCAAAGTCCCTTCTAACTTTAGATTATGAATCCTGCCTTTAC  
TC

@A00721:190:HGJW7DSXY:4:1665:14995:17534\_1:N:0:TCTGCAAG+GCTGCACT  
TTGACTGTTGATAATATTACAATAGCTCTTTCTCAGAAGATTAGAGAAGTAACCGGTGAACACTTCGG  
TAGCATTGATTTACTTTTACCGTTAGAAGTAAAAAGATTCTTTTCGAAAAGAAACCTATAAGTTACA

@A00721:190:HGJW7DSXY:4:1421:6460:15562\_1:N:0:TCTGCAAG+GCTGCACT  
TCGCCATTTCAAGAGTGGTCAATACGTCGTGGGAGGTACTGAAGCCTTCCCCTCCGCTGGCACGAAG  
AACACTCCCAAGCCAATCAATAGTTCTTCTGACCAGAATGAAAAGGGGTTTACCAGGGTAGTCTCTAA  
GTC

@A00721:190:HGJW7DSXY:4:2409:20763:25833\_1:N:0:TCTGCAAG+GCTGCACT  
TACAGTAGGTTCTGCTACTATGAGCAATCTGTTGAATTCGTCACTGAGGACGAAGGTGAGAGGACT  
TTTGGCTACTGGCGACAACTGAGAGCAGTCGCTGGGGAAAGAGAATTGCGTGGGTTGAAGGCCGACG  
CTT

@A00721:190:HGJW7DSXY:4:2660:6189:34726\_1:N:0:TCTGCAAG+GCTGCACT  
TTGAAGCAGGGGTTACCACTTCCTAAGGTGGATGAGGGAGGTTGTTTCTTTGGAGTTTTAGATAATCT  
TTTGAGAAGGGGTCATAGAGCCAGCAAGAGAAGCTTATATGCTGGTTAAGTGATGATTATCACTCCT  
TGA

+  
FFFFFFFFFFFFFF:FFFFFF:FFFFFFFFFFFFFFFFFFFFFFFFFFFFFFFFFFFFFFFFFFFFFFFFFFFFFFFFFFFFFFFF:FFFF,FFF  
FFFFFFFFFFFFFFFFFFFFFFFFFFFFFFFFFFFFFFFFFFFFFFFFFFFFFFFFFFFFFFFFFFFFFFFFFFFFFFFFFFFFFFFF  
FFF  
@A00721:190:HGJW7DSXY:4:1644:5204:11099\_1:N:0:TCTGCAAG+GCTGCACT  
TTGAAGGCTGGCTCTAAGGGAGACTCCTTCTTTTTGAATGTTGTAAAGAATTGGGTTGAGAAGTGTGC  
TTTACAAGGAGTTAGACTCTTCTTCAAGTTTTTAGATCTTCTTGATAATCTTAAAGAAAAATTTTCGA  
ATA  
+  
FFFFFFFFFFFF:F,FFF:FFFFFFFFFFFFFFFFFFFFFFFFFFFFFFFFFFFFFFFFFFFFFFFFFFFFFFFFFFFFFFFF  
FFFFFFFFFFFF:FFFFFFFFFFFFFFFFFFFFFFFFFFFFFFFFFFFFFFFFFFFFFFFFFFFFFFFFFFFFFFFF  
FFF  
@A00721:190:HGJW7DSXY:4:1229:9815:21277\_2:N:0:TCTGCAAG+GCTGCACT  
TTCAACGGATACCGATCTCAGTTCTACCACAGAAACCGTCTCAGGAAGTGTCTCCACTGATTCGGAAT  
TAGAGAAAGACGACCTTCTTGTGGGGACTGAGACCTCTGAATTTTCAG  
+  
:FFFFFFFFFFFFFFFFFFFFFFFFFFFFFFFFFFFFFFFFFFFFFFFFFFFFFFFFFFFFFFFFFFFFFFFFFFFFFFFF  
:FF:FFFF:FFFFFFFFFFFFFFFFFFFF:FFFFFFFFFFFFFFFFFFFFFFFFFFFFFFFF  
@A00721:190:HGJW7DSXY:4:2615:13575:8218\_1:N:0:TCTGCAAG+GCTGCACT  
TTTCATATTATGAATGAACCTTCGGCCGCTCTCTTGTCTCGATGTTGGATGTCAAGAAGGGTTCAGA  
ATGGGATTCCTACGTAGTTTATGACTTTGGTGGTGGTACTTTCGATACTTCTATCGTCTTACGTTACG  
GTA  
+  
FFFFFFFFFFFFFFFFFFFFFFFFFFFFFFFFFFFFFFFFFFFFFFFFFFFFFFFFFFFFFFFFFFFFFFFFFFFFFFFF  
FFFFFFFFFFFFFFFFFFFFFFFFFFFFFFFFFFFFFFFFFFFFFFFFFFFFFFFFFFFFFFFFFFFFFFFFFFFFFFFF  
FFF  
@A00721:190:HGJW7DSXY:4:1265:15582:1830\_1:N:0:TCTGCAAG+GCTGCACT  
GTTTGCTACTCAGAGCTGGTCCTCTCAGCAAAGGGATGCATGGTGTATCTCCTCAGGAGTCCCGGCA  
TTTGATAATAATGACGAGACTTTCGTCATAATCGCTGCATATTACGGATTACACGGTACCAGCGCATC  
TCG  
+  
FFFFF::FFFFFFFFFFFFFFFFFFFFFFFFFFFFFFFFFFFFFFFFFFFFFFFFFFFFFFFFFFFFFFFFFFFFFFFF  
FFFFFFFFFFFFFFFFFFFFFFFF:FFFFFF:FFFFFFFFFFFFFFFFFFFFFFFFFFFFFFFFFFFFFFFFFFFFFFFF:  
FFF  
@A00721:190:HGJW7DSXY:4:2351:32832:24408\_1:N:0:TCTGCAAG+GCTGCACT  
TCCAATCAAAGGTTTTGAATTTAGCTCAACTGGGGAGACGTGCTTAAATGGGTGATAAAAATTATTTA  
GAGATCTTTTCTACTTACAAAGGACAATTCAGTTTCATTAATTCTACGAAAAGTCCGGAGTATATTG  
TAT  
+  
FFFFFFF:F:FFFFFFFFFFFFFFFFFFFF:FFFFF:FFFFFFFFFFFFFFFFFFFFFFFFFFFFFFFFFFFFFFFF  
FFFFFFF::FFFFFFFFFFFFFFFFFFFFFFFFFFFFFFFFFFFFFFFFFFFFFFFFFFFFFFFFFFFFFFFFFFFFF  
FFF  
@A00721:190:HGJW7DSXY:4:1445:12038:33144\_1:N:0:TCTGCAAG+GCTGCACT  
TCCCGATCACCACCTTGTATAAAGCGATTTTCTACCTTAACGTAATACACTATTATATAATCCCAAC  
ACGACTCGAAACCGAGACGCCGTAGATCAAAGTCCCTTCTAACTTTAGATTATGAATCCTGCCTTTAC  
TC  
+  
:,F,:,:,F,,F,:,:F,F:,,F,,,FF:,F,:,:,::,,,:FF,,F,,,F,,,,,,FF,,F,  
FF:F,F,FFFFFFFF:FFFFFFFFFFFF:FFFFFFFFFFFF:FFFFFFFFFFFF,F,FFFFFFFF:FFFF:FFFF:  
F:  
@A00721:190:HGJW7DSXY:4:1123:26955:25347\_1:N:0:TCTGCAAG+GCTGCACT  
TTGACTGTTGATAATATTACAATAGCTCTTCTCAGAAGATTAGAGAAGTAACCGGTGAACACGTCGG  
TAGCATTGATTTACTTTTACCGTTAGAACTGAAAAAGATTCTTTTCGAAAAGAAACCTATAAGTTACA  
AA

+  
FFFFFFFF:FFFFFFFF,FFFFFFFFFFFFFFFF:FFFFFFFF,FFFFFFFFFFFFFFFF:FFF:F:  
FFF:FFF:FFFFFFFFFFFFFFFF:FFFFFFFFFFFFFFFFFFFFFFFF:FFFFFF:FFFFFFFFFF  
FF

@A00721:190:HGJW7DSXY:4:1430:4309:18818\_1:N:0:TCTGCAAG+GCTGCACT  
TCGGCCATTTCAAGAGTGGTCAATACGTCGTGGGAGGTACTGAAGCCTTCCCCTCCGCTGGCAGCAAG  
AACACTCCCAAGCCAATCAATAGTTCTTCTGACCAGAATGAAAAGGGTTTACCAGGGTAGTCTCTAA  
GTC

+  
FFFFFFFF:FFFFFFFFFFFFFFFFFFFFFFFFFFFFFFFFFFFFFFFFFFFFFFFFFFFFFFFF  
FFFFFFFF:FFFFFFFFFFFFFFFFFFFFFFFFFFFFFFFFFFFFFFFFFFFFFFFFFFFFFFFF  
FFF

@A00721:190:HGJW7DSXY:4:2542:7581:36323\_1:N:0:TCTGCAAG+GCTGCACT  
TACAGTAGTTTCGTGCCTACTATGAGCAATCTGTTGAATTCGTCACTGAGGACGAAGGTGAGAGGACT  
TTTGGCTACTGGCGACAACTGAGAGCAGTCGTGGGGAAGAGAATTGCGTGGGTTGAAGGCCGACG  
CTT

+  
FFFFFF:FFFFFFFFFFFFFFFFFFFFFFFF:FFFF:FF:FFFFFFFFFFFFFFFFFFFFFFFF:FF  
FFFFFFFFFFFFFFFF:FFF:FFFFFFFFFFFFFFFF:FFFFFF:FFFFFFFFFFFFFFFFFFFF  
FFF

@A00721:190:HGJW7DSXY:4:2601:25834:9251\_1:N:0:TCTGCAAG+GCTGCACT  
AGGTGGATGAGGGAGGTTGTTTCTTTGGAGTTTTAGATAATCTTTGAGAAGGGTCATAGAGCCAGC  
AAGAGAAGCTTATATGCTGGTTTAAGTGATGATTATCACTCCTTGAGAAGACAAGCCACATTAAGATA  
TAA

+  
:FFFFFFFF,FFF,F,FFFFFFFFFFFFFFFF:FFFFFF:FFFFFFFFFFFFFFFFFFFFFFFF:FFFF:FFF  
FFFF:F,F,FFFF,FFFFFFFF,FFFFFFFFFFFFFFFF:FF:FFFFFFFF,FFFFFFFFFFFFFFFF  
FFF

@A00721:190:HGJW7DSXY:4:2109:23330:16595\_1:N:0:TCTGCAAG+GCTGCACT  
TTGAAGGCTGGCTCTAAGGGAGACTCCTTCTTTTTGAATGTTGTAAAGAATTGGGTTGAGAAGTGTGC  
TTTACAAGGAGTTAGACTCTTCTTCAAGTTTTTAGATCTTCTTGATAATCTTAAAGAAAAATTTTCGA  
ATA

+  
FF:FFFFFFFF:FFFFFFFFFFFFFFFFFFFFFFFFFFFFFFFFFFFFFFFFFFFFFFFF:FFFFFFFFFFFFFFFF  
FFFFFFFFFFFFFFFFFFFFFFFFFFFFFFFFFFFFFFFFFFFFFFFFFFFFFFFFFFFFFFFF  
FFF

@A00721:190:HGJW7DSXY:4:1234:24578:34632\_2:N:0:TCTGCAAG+GCTGCACT  
TTCAACGGATACCGATCTCAGTTCTACCACAGAAACCGTCTCAGGAAGTGTCTCCACTGATTCGGAAT  
TAGAGAAAGACGACCTTCTTGTGGGACTGAGACCTCTGAATTTTCAG

+  
FFFFFFFFFFFFFFFFFFFFFFFFFFFFFFFFFFFFFFFFFFFFFFFFFFFFFFFFFFFFFFFF  
FFFFFFFFFFFFFFFFFFFFFFFFFFFFFFFFFFFFFFFFFFFFFFFFFFFFFFFF

@A00721:190:HGJW7DSXY:4:2634:31620:34648\_1:N:0:TCTGCAAG+GCTGCACT  
TTTCATATTATGAATGAACCTTCGGCCGCTCTTTGCTTCGATGTTGGATGTCAAGAAGGGTTCAGA  
ATGGGATTCTACGTAGTTTATGACTTTGGTGGTGGTACTTTCGATACTTCTATCGTCTTACGTTACG  
GTA

+  
FFFFFFFFFFFFFFFFFFFFFFFFFFFFFFFFFFFFFFFFFFFFFFFFFFFFFFFFFFFFFFFF  
FFFFFFFFFFFFFFFFFFFFFFFFFFFFFFFF:FFFFFFFFFFFFFFFFFFFFFFFFFFFFFFFF  
FFF

@A00721:190:HGJW7DSXY:4:1314:29912:12493\_1:N:0:TCTGCAAG+GCTGCACT  
GTTTGCTACTCAGAGCTGGTCCTCTCAGCAAAGGGATGCATGGTGTATCTCCTCAGGAGTCCCGGCA  
TTTGATAATAATGACGAGACTTTCGTCATAATCGCTGCATATTACGGATTACACGGTACCAGCGCATC  
TCG



+  
FFFFFFFFFFFFFFFFFFFFFFFFFFFFFFFFFFFFFFFFFFFFFFFFFFFFFFFFFFFFF:FFFFFFFFF:FFFFFFFFFFFFFF  
FFFFFFFFFFFFFFFFFFFFFFFFFFFFFFFFFFFFFFFFFFFFFFFFFFFFFFFFFFFFFFFFFFFFFFFFFFFFFFFFFFFFFFFF  
FFF  
@A00721:190:HGJW7DSXY:4:2433:19388:4758\_1:N:0:TCTGCAAG+GCTGCACT  
TCCAATCAAAGGTTTTGAATTTAGCTCAACTGGGAGACGTGCTTAAATGGGTGATAAAAATTATTTA  
GAGATCTTTTCTACTTACAAAGGACAATTCAGTTTCATTAATTCTACGAAAAGTCCGGAGTATATTG  
TAT  
+  
FFFFFFFF::FFFFFFFFFFFFFFFFFFFFFFFFFFFFFFFFFFFFFFFFFFFFFFFFFFFFFFFFFFFFFFFF  
FFFFFF:FFFFFFFFFFFFFFFFFFFFFFFFFFFFFFFFFFFFFFFFFFFFFFFFFFFFFFFFFFFFFFFFFFFFFFFF  
FFF  
@A00721:190:HGJW7DSXY:4:1573:17562:14434\_1:N:0:TCTGCAAG+GCTGCACT  
CACCATCTCACC GCGGATAACGCTAGTTTTCCGTCCTGAACGTAATACACGAAGATATCATCCGCAA  
ACGACTCGAAACCGAGACGCCGTAGATCAAAGTCCCTTCTAACTTTAGATTATGAATCCTGCCTTTAC  
TCA  
+  
:FFF::FFFFF,F,,F::F:,F,,, :FF:FFF,FFFF:FFF,FFFF,FFF,F,,F,F,,F:F:FFFF  
FFFFFFFFFFFFFFFFFFFFFFFFFFFFFFFFFFFFFFFFFFFFFFFFFFFFFFFFFFFFFFFFFFFFFFFFFFFFFFFF  
FFF  
@A00721:190:HGJW7DSXY:4:1159:22968:32409\_1:N:0:TCTGCAAG+GCTGCACT  
TTGACTGTTGATAATATTACAATAGATCTTTCTCAGAATATTAGAGAAGTAACCGGTGAACACGTGCG  
TAGCATTGATTTAATTTTACCGTTAGAACTGAAAAAGATTCTTTTCGAAAAGAAACCTATAAGTTACA  
AA  
+  
FF,,,FFFFF:F,,, :FFF,F:F:F,:,FFFFF,F:FF:,FF:,FFF:,F,F,,,,F,,, :FF,F,::  
FF:,,FFFFFFFFF,FFFF:F,,FFFFF:,F,F,F:F:FFF:FFF:,FFFF:FFF:, ,FFFF:FFFFFF  
FF  
@A00721:190:HGJW7DSXY:4:1475:9607:32816\_1:N:0:TCTGCAAG+GCTGCACT  
TCGGCCATTTCAAGAGTG GTCAATACGTCGTGGGAGGTACTGAAGCCTTCCCCTCCGCTGGCAGCAAG  
AACACTCCCAAGCCAATCAATAGTTCTTCTGACCAGAATGAAAAGGGGTTTACCAGGGTAGTCTCTAA  
GTC  
+  
FFFFFFFFFFFFFFFFFFFFFFFFFFFFFFFFFFFFFFFFFFFFFFFFFFFFFFFFFFFFFFFFFFFFFFFFFFFFFFFF  
FFFFFFFFFFFFFFFFFFFFFFFFFFFFFFFFFFFFFFFFFFFFFFFFFFFFFFFFFFFFFFFFFFFFFFFFFFFFFFFF  
FFF  
@A00721:190:HGJW7DSXY:4:1405:21395:29590\_1:N:0:TCTGCAAG+GCTGCACT  
CTCTTCCGATCTCCTACTATGAGCAAATCTGTTGAATTCGTCACTGAGGACGAAGGTGAGAGGACTTT  
TGGCTACTGGCGACAACTGAGAGCAGTCGCTGGGGAAAGAGAATTGCGTGGGTTGAAGGCCGACGCT  
TCG  
+  
FFFFFFFFFFFFFFFFF,FFF:FFFFFFFFFFFFFFFFFFFFFFFFFFFFFFFFFFFFFFFFFFFFFFFFFFFFFFFF  
FFFFFFFF:FFFFFFFFFFFFFFFFFFFFFFFFFFFFFFFFFFFFFFFFFFFFFFFFFFFFFFFFFFFFFFFFFFFFFFFF  
FFF  
@A00721:190:HGJW7DSXY:4:1227:15682:16626\_2:N:0:TCTGCAAG+GCTGCACT  
GTGGATGAGGGAGGTTGTTTCTTTGGAGTTTTAGATAATCTTTTGAGAAGGGGTCATAGAGCCAGCAA  
GAGAAGCTTATATGCTGGTTAAGTGATGATTATCACTCCTTGAGAAG  
+  
FFFFFFFFFFF:FFF:FFFFFFFFFFF:FFFFFFFFFFF:FFFFFFFFFFF:F:FFFF,FFFFFFFFFFFFFFFF  
FFFF:FFFFFFFFFFFFFFFFFFFFFFFFFFFFFFFFFFFFFFFFFFFFFFFFFFFFFFFFFFFFFFFFFFFFFFFF  
FFF  
@A00721:190:HGJW7DSXY:4:2164:10429:27258\_1:N:0:TCTGCAAG+GCTGCACT  
TTGAAGGCTGGCTCTAAGGGAGACTCCTTCTTTTTGAATGTTGTAAAGAATTGGGTTGAGAAGTGTGC  
TTTACAAGGAGTTAGACTCTTCTTCAAGTTTTT TAGATCTTCTTGATAATCTTAAAGAAAAATTTTCGA  
ATA

@A00721:190:HGJW7DSXY:4:1252:27344:9424\_2:N:0:TCTGCAAG+GCTGCACT  
TTCAACGGATACCGATCTCAGTTCTACCACAGAAACCGTCTCAGGAAGTGTCTCCACTGATTCGGAAT  
TAGAGAAAGACGACCTTCTTGTGGGGACTGAGACCTCTGAATTTTCAG

@A00721:190:HGJW7DSXY:4:2622:19696:33943\_1:N:0:TCTGCAAG+GCTGCACT  
TATCATATTATGAATGAACCTTCGGCCGCTCTCTTTGCTTCGATGTTGGATGTCAAGAAGGGTTTCAGA  
ATGGGATTCTACGTAGTTTATGACTTTGGTGGTGGTACTTTCGATACTTCTATCGTCTTACGTTACG  
GTA

@A00721:190:HGJW7DSXY:4:1314:30210:12947\_1:N:0:TCTGCAAG+GCTGCACT  
GTTTGCTACTCAGAGCTGGTCCTCTCAGCAAAGGGATGCATGGTGTATCTCCTCAGGAGTCCCGGCA  
TTTGATAATAATGACGAGACTTTCGTCATAATCGCTGCATATTACGGATTACACGGTACCAGCGCATC  
TCG

@A00721:190:HGJW7DSXY:4:2459:5385:32957\_1:N:0:TCTGCAAG+GCTGCACT  
TCCAATCAAAGGTTTTGAATTTAGCTCAACTGGGGAGACGTGCTTAAATGGGTGATAAAAATTATTTA  
GAGATCTTTTCTACTTACAAAGGACAATTCAGTTTCATTAATTCTACGAAAAGTCCGGAGTATATTG  
TAT

@A00721:190:HGJW7DSXY:4:2629:28140:18787\_1:N:0:TCTGCAAG+GCTGCACT  
CACCAATATCAACGAGTATAAAGCTTGTTTTCCGTCCTTAACCTTAATACACTAACATATCATCCGCAC  
ACGACTCGAAACCGAGACGCCGTAGATCAAAGTCCCTTCTAACTTTAGATTATGAATCCTGCCTTTAC  
TCA

@A00721:190:HGJW7DSXY:4:1307:18701:15562\_1:N:0:TCTGCAAG+GCTGCACT  
TTGACTGTTGATAATATTACAATAGCTCTTTCTCAGAAGATTAGAGAAGTAACCGGTGAACACGTCGG  
TAGCATTGATTACTTTTACCGTTAGAACTGAAAAAGATTCTTTTCGAAAAGAAACCTATAAGTTACA  
AA

@A00721:190:HGJW7DSXY:4:2323:7473:22764\_1:N:0:TCTGCAAG+GCTGCACT  
TCGGCCATTTCAAGAGTGGTCAATACGTCGTGGGAGGTACTGAAGCCTTCCCCTCCGCTGGCACGAAG  
AACACTCCCAAGCCAATCAATAGTTCCTTCTGACCAGAATGAAAAGGGGTTTACCAGGGTAGTCTCTAA  
GTC

+  
FFFFFFFFFFFFFFFFFFFFFFFFFFFFFFFFFFFFFFFFFFFFFFFFFFFFFFFFFFFFFFFFFFFFFFFF  
FFFFFFFFFFFF:FFFFFFFFFFFFFFFFFFFFFFFFFFFFFFFFFFFFFFFFFFFFFFFFFFFFFFFFFFFF  
FFF  
@A00721:190:HGJW7DSXY:4:1456:11107:33098\_1:N:0:TCTGCAAG+GCTGCACT  
CTCTTCCGATCTCCTACTATGAGCAAATCTGTTGAATTCGTCAGGACGAAGGTGAGAGGACTTT  
TGGCTACTGGCGACAACTGAGAGCAGTCGCTGGGGAAAGAGAATTGCGTGGGTTGAAGGCCGACGCT  
TCG  
+  
F:F:FFFFFFFFF::FFFFFFFFFFFFFFFFFFFFFFFFFFFFFFFFFFFFFFFFFFFFFFFFFFFFFFFF  
FFFFFFFFFFFFFFFFFFFFFFFFFFFFFFFFFFFFFFFFFFFFFFFFFFFFFFFFFFFFFFFFFFFFFFFF  
FFF  
@A00721:190:HGJW7DSXY:4:1230:11650:33818\_2:N:0:TCTGCAAG+GCTGCACT  
GTGGATGAGGGAGGTTGTTTCTTTGGAGTTTTAGATAATCTTTTGAGAAGGGGTCATAGAGCCAGCAA  
GAGAAGCTTATATGCTGGTTTAAGTGATGATTATCACTCCTTGAGAAG  
+  
FFFFFFFFFFFFFFFFFFFFFFFFFFFFFFFFFFFFFFFFFFFFFFFFFFFFFFFFFFFFFFFFFFFFFFFF  
FFFFFFFFFFFFFFFFFFFFFFFFFFFFFFFFFFFFFFFFFFFFFFFFFFFFFFFFFFFFFFFFFFFFFFFF  
@A00721:190:HGJW7DSXY:4:2209:4065:26349\_1:N:0:TCTGCAAG+GCTGCACT  
TTGAAGGCTGGCTCTAAGGGAGACTCCTTCTTTTTGAATGTTGTAAAGAATTGGGTTGAGAAGTGTGC  
TTTACAAGGAGTTAGACTCTTCTTCAAGTTTTTAGATCTTCTTGATAATCTTAAAGAAAATTTTCGA  
ATA  
+  
FFFFFFFFFFFFFFFFFFFFFFFFFFFFFFFFFFFFFFFFFFFFFFFFFFFFFFFFFFFFFFFFFFFFFFFF  
FFFFFFFFFFFFFFFFFFFFFFFFFFFFFFFFFFFFFFFFFFFFFFFFFFFFFFFFFFFFFFFFFFFFFFFF  
FFF  
@A00721:190:HGJW7DSXY:4:1424:16514:19977\_2:N:0:TCTGCAAG+GCTGCACT  
TTCAACGGATACCGATCTCAGTTCTACCACAGAAACCGTCTCAGGAAGTGTCTCCACTGATTCGGAAT  
TAGAGAAAGACGACCTTCTTGTGGGGACTGAGACCTCTGAATTTTCAG  
+  
FFFFFFFFFFFFFFFFFFFFFFFFFFFFFFFFFFFFFFFFFFFFFFFFFFFFFFFFFFFFFFFFFFFFFFFF  
FFFFFFFFFFFFFFFFFFFFFFFFFFFFFFFFFFFFFFFFFFFFFFFFFFFFFFFFFFFFFFFFFFFFFFFF  
@A00721:190:HGJW7DSXY:4:1472:18367:29293\_1:N:0:TCTGCAAG+GCTGCACT  
TATGAATGAACCTTCGGCCGCTCTCTTTGCTTCGATGTTGGATGTCAAGAAGGGTTCAGAATGGGATT  
CCTACGTAGTTTATGACTTTGGTGGTGGTACTTTGATACTTCTATCGTCTTACGTTACGGTAATTAC  
TAT  
+  
FFFFFFFFFFFFFFFFFFFFFFFFFFFFFFFFFFFFFFFFFFFFFFFFFFFFFFFFFFFFFFFFFFFFFFFF  
FFFFFFFFFFFFFFFFFFFFFFFFFFFFFFFFFFFFFFFFFFFFFFFFFFFFFFFFFFFFFFFFFFFFFFFF  
FFF  
@A00721:190:HGJW7DSXY:4:2366:18150:34741\_1:N:0:TCTGCAAG+GCTGCACT  
GTTTGCTACTCAGAGCTGGTCCTCTCAGCAAAGGGATGCATGGTGTATCTCCTCAGGAGTCCCGGCA  
TTTGATAATAATGACGAGACTTTCGTCATAATCGCTGCATATTACGGATTACACGGTACCAGCGCATC  
TCG  
+  
FFFFFFFFFFFFF:FFFFFFFFFFFFFFFFFFFFFFFFFFFFFFFFFFFFFFFFFFFFFFFFFFFFFFFF  
FFFFFFFFFFFFFFFFFFFFFFFFFFFFFFFFFFFFFFFFFFFFFFFFFFFFFFFFFFFFFFFFFFFFFFFF  
FFF  
@A00721:190:HGJW7DSXY:4:2472:12373:34820\_1:N:0:TCTGCAAG+GCTGCACT  
TCCAATCAAAGGTTTTGAATTTAGCTCAACTGGGGAGACGTGCTTAAATGGGTGATAAAAATTATTTA  
GAGATCTTTTCTACTTACAAAGGACAATTCAGTTTCATTAATTCTACGAAAAGTCCGGAGTATATTG  
TAT  
+  
FFFFFFFFFFFFF:FFFFFFFFFFFFFFFFFFFFFFFFFFFFFFFFFFFFFFFFFFFFFFFFFFFFFFFF

FFF:FFF:FFFFFFFFF:FFFFFFFFFFFFFFFFFFFFFFFFFFFFFFFFFFFFFFFFF  
FFF

@A00721:190:HGJW7DSXY:4:1218:13123:18270\_2:N:0:TCTGCAAG+GCTGCACT  
ACCCATCTCAACGAGGATAAAGCGAGTTTTCCGTCCTGAACGTAATACACGAAGAGATCATCCGCAA  
CGACTCGAAACCGAGACGCCGTAGATCAAAGTCCCTTCTAACTTTAGA

+

FFFFFFFFFFFFFFFFFFFFFFFFFFFFFFFFFFFFFFFFFFFFFFFFFFFFFFFFFFFFF:  
FFFFFFFFFFFFFFFFFFFFFFFFFFFFFFFFFFFFFFFFFFFFFFFFFFFFF

@A00721:190:HGJW7DSXY:4:1440:31738:19946\_1:N:0:TCTGCAAG+GCTGCACT  
TTGACTGTTGATAATATTACAATAGCTCTTCTCAGAAGATTAGAGAAGTAACCGGTGAACACGTCGG  
TAGCATTGATTTACTTTTACCGTTAGAACTGAAAAAGATTCTTTTCGAAAAGAAACCTATAAGTTACA  
AA

+

FF:F,FFFFFFFFFFFFFFFFFFFFFFFFF:FFFFFF:F:FFFFFFFFFFFFFFFFFFFFFFFFF  
FFFFFFFFFFFFFFFF:F:FFFFFFFFF:FFFFFFF::F,FFFFFFFFFFFFFFFFFFFFFFFFF:FFFFFF  
FF

@A00721:190:HGJW7DSXY:4:1424:16857:25551\_1:N:0:TCTGCAAG+GCTGCACT  
CGGCCATTTCAAGAGTGGTCAATACGTCGTGGGAGGTACTGAAGCCTTCCCCTCCGCTGGCACGAAGA  
ACACTCCCAAGCCAATCAATAGTTCTTCTGACCAGAATGAAAAGGGGTTTACCAGGGTAGTCTCTAAG  
TCT

+

FFFFFFFFFFFFFFFFFFFFFFFFFFFFFFFFFFFFFFFFFFFFFFFFFFFFFFFFFFFFF  
FFFFFFFFF,FFFFFFFFFFFFFFFFFFFFFFFFFFFFFFFFFFFFFFFFF:FFFFFFFFFFFFFFFFF  
FFF

@A00721:190:HGJW7DSXY:4:1520:20699:34021\_1:N:0:TCTGCAAG+GCTGCACT  
CTCTTCCGATCTCCTACTATGAGCAAATCTGTTGAATTCGTCACTGAGGACGAAGGTGAGAGGACTTT  
TGGCTACTGGCGACAACTGAGAGCAGTCGCTGGGGAAAGAGAATTGCGTGGGTTGAAGGCCGACGCT  
TCG

+

FFFFFFFFFFFFFFF:FFF,FFFFFFFFFFFF,FFFFFFFFFFFFFFFFFFFFFFFFF:FFFFFFFFFFFFF  
FFFFFFFFFFFFFFFFFFFFFFFFFFFFFFFFFFFFFFFFFFFFFFFFFFFFFFFFFFFFF  
FFF

@A00721:190:HGJW7DSXY:4:1348:21621:18740\_2:N:0:TCTGCAAG+GCTGCACT  
GTGGATGAGGGAGGTTGTTTCTTTGGAGTTTTAGATAATCTTTTGAGAAGGGGTCATAGAGCCAGCAA  
GAGAAGCTTATATGCTGTTTAAAGTGATGATTATCACTCCTTGAGAAG

+

FFFFFFFFFFFFFFFFFFFFFFFFFFFFFFFFFFFFFFFFFFFFFFFFF:FFFFFFFFFFFFFFFFFFFFF  
FFFF:FFFFFFFFFFFFFFFFFFFFF:FFFFFFFFFFFFFFFFFFFFF

@A00721:190:HGJW7DSXY:4:2214:10737:8719\_1:N:0:TCTGCAAG+GCTGCACT  
TTGAAGGCTGGCTCTAAGGGAGACTCCTTCTTTTTGAATGTTGTAAAGAATTGGGTTGAGAAGTGTGC  
TTTACAAGGAGTTAGACTCTTCTTCAAGTTTTTAGATCTTCTTGATAATCTTAAAGAAAAATTTTCGA  
ATA

+

FFFFFFFFFFFFFFFFFFFFFFFFFFFFFFFFF:FFFFFFFFFFFFFFFFFFFFF:FFFFFFFFFFFFFFFFF  
FFFFFFFFFFFFFFFFFFFFFFFFF:FFFFFFFFFFFFFFFFFFFFF:FFFFFFFFFFFFFFFFFFFFF  
FFF

@A00721:190:HGJW7DSXY:4:1441:10592:15640\_2:N:0:TCTGCAAG+GCTGCACT  
TTCAACGGATACCGATCTCAGTTCTACCACAGAAACCGTCTCAGGAAGTGTCTCCACTGATTCGGAAT  
TAGAGAAAGACGACCTTCTTGTGGGACTGAGACCTCTGAATTTTCAG

+

FFFFFFFFFFFFFFFFFFFFFFFFFFFFFFFFFFFFFFFFFFFFFFFFF:F  
FFFFFFFFFFFFFFFFFFFFFFFFF:FFFFFFFFFFFFFFFFFFFFF

@A00721:190:HGJW7DSXY:4:1516:8693:36902\_1:N:0:TCTGCAAG+GCTGCACT  
TATGAATGAACCTTCGGCCGCTCTTTGCTTCGATGTTGGATGTCAAGAAGGGTTCAGAATGGGATT

CCTACGTAGTTTATGACTTTGGTGGTGGTACTTTTCGATACTTCTATCGTCTTACGTTACGGTAATTAC  
TAT

+

FFFFFFFFFFFFFFFFFFFFFFFFFFFFFFFFFFFFFFFFFFFFFFFFFFFFFFFFFFFFFFFFFFFFFFFF  
FFFFFFFFFFFFFFFFFFFFFFFFFFFFFFFFFFFFFFFFFFFFFFFFFFFFFFFFFFFFFFFFFFFFFFFF:FF  
FFF

@A00721:190:HGJW7DSXY:4:2413:2917:5729\_1:N:0:TCTGCAAG+GCTGCACT  
GTTTGCTACTCAGAGCTGGTCCTCTCAGCAAAGGGATGCATGGTGTTATCTCCTCAGGAGTCCCGGCA  
TTTGATAATAATGACGAGACTTTTCGTCATAATCGCTGCATATTACGGATTACACGGTACCAGCGCATC  
TCG

+

FFFFFFFFFFFF:FFFFFFFFFFFFFFFFFFFFFFFFFFFFFFFFFFFFFFFFFFFFFFFFFFFFFFFF  
FFFFFFFFFFFF:FFFFFFFFFFFFFFFF:FFFFFFFFFFFFFFFFFFFFFFFFFFFFFFFFFFFFFFFF  
FFF

@A00721:190:HGJW7DSXY:4:2459:4743:33004\_1:N:0:TCTGCAAG+GCTGCACT  
TACAATCAAAGGTTTTGAATTTAGATCAACTGGGAGACGTGCTTAAATGGGTGATAAAAATTATTTA  
GAGATCTTTTCTACTTACAAAGGACAATTCAGTTTCATTAATTCTACGAAAAGTCCGGAGTATATTG  
TAT

+

F,:,:FFF,:,:FF,FF,FFFF,:F,:FFF,FFF:F,FFFF,FFF:,F,FFF:FFFFFFFF  
:F:FFFFFFFF,FF,FFF:,:F,:FF:FF,FFFFFFFFFFFF:FF::FFFF:FFFFFFFFFFFF  
F:F

@A00721:190:HGJW7DSXY:4:1218:6307:32424\_2:N:0:TCTGCAAG+GCTGCACT  
ACCCATCTCAACGAGGATAAAGCGAGTTTTCCGTCCTGAACGTAATACACGAAGAGATCATCCGCAA  
CGACTCGAAACCGAGACGCCGTAGATCAAAGTCCCTTCTAACTTTAGA

+

FFFFFFFFFFFFFFFFFFFFFFFFFFFFFFFFFFFFFFFFFFFFFFFFFFFFFFFFFFFFFFFFFFFF  
FFFFFFFFFFFFFFFFFFFFFFFFFFFFFFFFFFFFFFFFFFFFFFFFFFFFFFFFFFFF

@A00721:190:HGJW7DSXY:4:1625:11767:25535\_1:N:0:TCTGCAAG+GCTGCACT  
TTGACTGTTGATAATATTACAATAGCTCTTCTCAGAAGATTAGAGAAGTAACCGGTGAACACGTCGG  
TAGCATTGATTTACTTTTACCGTTAGAACTGAAAAGATTCTTTTCGAAAAGAACTATAAGTTACA  
AA

+

FFFF:FFFF,:FFFF:F:F,:FF:FFF:FFFF::FFF:FFF,FF,FFFFFFFF:F:FFFF,FFFF:F  
F,FF:FFF:FFFFFFFFFFFFFFFF:FFFFFFFFFFFF:F:FFFFFFFFFFFF:FFFFFFFF,FFFFFFFF  
FF

@A00721:190:HGJW7DSXY:4:1661:10691:5760\_1:N:0:TCTGCAAG+GCTGCACT  
CGGCCATTTCAAGAGTGGTCAATACGTCGTGGGAGGTACTGAAGCCTTCCCCTCCGCTGGCACGAAGA  
ACACTCCCAAGCCAATCAATAGTTCTTCTGACCAGAATGAAAAGGGGTTTACCAGGGTAGTCTCTAAG  
TCT

+

FFF:FF:FFF,FFFF:F:FFFFFFFFFFFFFFFF::F::FFFFFF:F,FFF:FFFFFF,FFF:FFFF  
F:FFF:F,FF:FFF:FFFF,FFF:FF:FFFF,FFF:F:FFFFFFFFFFFF:FFFF,FFFFFFFFFFFF  
:FF

@A00721:190:HGJW7DSXY:4:1522:3929:25989\_1:N:0:TCTGCAAG+GCTGCACT  
CTCTTCCGATCTCCTACTATGAGCATATCTGTTGAATTCGTCCTGAGGACGAAGGTGAGAGGACTTT  
TGGCTACTGGCGACAACTGAGAGCAGTCGCTGGTGAAAGAGAATTGCGTGGGTTGAAGGCCGACGCT  
TCG

+

:F:F:FFFF:F,FF:FFF,FFF:,,FFFFFFFF:F,FFFF,F::F,FFF,F,,,FF:FF:F,F,FFF  
F,F::FFF:F,:FFFFFFFF:FFF,,,FFF,F:F,:FF,FF:FFF:FFFFFFFF:FFF:FFFF,:,,FFF  
FF,

@A00721:190:HGJW7DSXY:4:2304:1244:5274\_1:N:0:TCTGCAAG+GCTGCACT  
CCGATCTGGGAGGTTGTTTCTTTGGAGTTTAGATAATCTTTTGAGAAGGGGTCATAGAGCCAGCAAGA

GAAGCTTATATGCTGGTTTAAGTGATGATTATCACTCCTTGAGAAGACAAGCCACATTAAGATATAAT  
TTA

+

FFFFFFFFF:F,FFFFFFFFF:FFFFFFFFFFFFFFFFFFFFFFFFFFFFFFFFFFFFFFFF  
FFFFFFFFF:FFFFFFFFFFFFFFFFFFFFFFFFFFFFFFFFFFFFFFFFFFFFFFFFFFFFF  
FFF

@A00721:190:HGJW7DSXY:4:2262:7093:22733\_1:N:0:TCTGCAAG+GCTGCACT  
TTGAAGGCTGGCTCTAAGGGAGACTCCTTCTTTTGAATGTTGTAAAGAATTGGGTTGAGAAGTGTGC  
TTTACAAGGAGTTAGACTCTTCTTCAAGTTTTTAGATCTTCTTGATAATCTTAAAGAAAAATTTTCGA  
ATA

+

FFFFFFFFF:FFFFFFFFFFFFFFFFFFFFFFFFFFFFFFFFFFFFFFFFFFFFFFFFFFFFF  
FFFFFFFFF:FFFFFFFFFFFFFFFFFFFFFFFFFFFFFFFFFFFFFFFFFFFFFFFFFFFFF  
FFF

@A00721:190:HGJW7DSXY:4:1449:7681:5431\_2:N:0:TCTGCAAG+GCTGCACT  
TTCAACGGATACCGATCTCAGTTCTACCACAGAAACCGTCTCAGGAAGTGTCTCCACTGATTCGGAAT  
TAGAGAAAGACGACCTTCTTGTGGGGACTGAGACCTCTGAATTTTCAG

+

FFFFFFFFF:FFFFFFFFFFFFFFFFFFFFFFFFFFFFFFFFFFFFFFFFFFFFFFFFFFFFF  
FFFFFFFFF:FFFFFFFFFFFFFFFFFFFFFFFFFFFFFFFFFFFFFFFFFFFFFFFFFFFFF

@A00721:190:HGJW7DSXY:4:1516:8775:36636\_1:N:0:TCTGCAAG+GCTGCACT  
TATGAATGAACCTTCGGCCGCTCTCTTTGCTTCGATGTTGGATGTCAAGAAGGGTTCAGAATGGGATT  
CCTACGTAGTTTATGACTTTGGTGGTGGTACTTTGATACTTCTATCGTCTTACGTTACGGTAATTAC  
TAT

+

FFFFFFFFF:FFFFFFFFFFFFFFFFFFFFFFFFFFFFFFFFFFFFFFFFFFFFFFFFFFFFF  
FFFFFFFFF:FFFFFFFFFFFFFFFFFFFFFFFFFFFFFFFFFFFFFFFFFFFFFFFFFFFFF  
FFF

@A00721:190:HGJW7DSXY:4:2455:23240:3881\_1:N:0:TCTGCAAG+GCTGCACT  
GTTTGCTACTCAGAGCTGGTCCTCTCAGCAAAGGGATGCATGGTGTATCTCCTCAGGAGTCCCGGCA  
TTTGATAATAATGACGAGACTTTCGTCATAATCGCTGCATATTACGGATTACACGGTACCAGCGCATC  
TCG

+

FFFFFFFFF:FFFFFFFFFFFFFFFFFFFFFFFFFFFFFFFFFFFFFFFFFFFFFFFFFFFFF,FFFFFFFFF  
FFFFFFFFF:FFFFFFFFFFFFFFFFFFFFFFFFFFFFFFFFFFFFFFFFFFFFFFFFFFFFF  
FFF

@A00721:190:HGJW7DSXY:4:1106:26142:24721\_1:N:0:TCTGCAAG+GCTGCACT  
AATCAAAGTTTTGAATTTAGCTCAACTGGGGAGACGTGCTTAAATGGGTGATAAAAATTATTTAGAG  
ATCTTTTCTACTTACAAAGGACAATTCAGTTTCATTAATTCTACGAAAAGTCCGGAGTATATTGTAT  
GTT

+

FFFFF,FFFFFFFFFFFFFFFFFFFFFFFFFFFFFFFFFFFFFFFFFFFFFFFFFFFFF  
FFFFF:FFFFFFFFFFFFFFFFFFFFFFFFFFFFFFFFFFFFFFFFFFFFFFFFFFFFF  
FFF

@A00721:190:HGJW7DSXY:4:1269:13214:25598\_2:N:0:TCTGCAAG+GCTGCACT  
ACCCATCTCAACGAGGATAAAGCGAGTTTTCCGTCTGAACGTAATACACGAAGAGATCATCCGCAA  
CGACTCGAAACCGAGACGCCGTAGATCAAAGTCCCTTCTAACTTTAGA

+

FFFFFFFFF:FFFFFFFFFFFFFFFFFFFFFFFFFFFFFFFFFFFFFFFFFFFFFFFFFFFFF  
FFFFFFFFF:FFFFFFFFFFFFFFFFFFFFFFFFFFFFFFFFFFFFFFFFFFFFFFFFFFFFF,F:FFFFF:FF:FFFFFFFFF

@A00721:190:HGJW7DSXY:4:2110:24894:8218\_1:N:0:TCTGCAAG+GCTGCACT  
TTGACTGTTGATAATATTACAATAGCTCTTCTCAGAAGATTAGAGAAGTAACCGGTGAACACGTCCG  
TAGCATTGATTTACTTTTACCGTTAGAAGTAAAAAGATTCTTTTCGAAAAGAAACCTATAAGTTACA  
AA

+  
:F,F:F,FFFFFFFFFFFFFFFFF:,F,FFFF:FFFF:, :FFFFFF,FFFFFFFFFFFFFFFFF:F,  
FFF,:FF::FFFF:FFFF,FF,FFFFFF:F:FFFFFF,FF:FFFF:FFFFFFFFFFFFFFFF:FFF:,F  
:F

@A00721:190:HGJW7DSXY:4:1303:16667:36652\_1:N:0:TCTGCAAG+GCTGCACT  
GGCCATTTCAGAGTGGTCAATACGTCGTGGGAGGTACTGAAGCCTTCCCTCCGCTGGCAGCAAGAA  
CACTCCCAAGCCAATCAATAGTTCTTCTGACCAGAATGAAAAGGGGTTTACCAGGGTAGTCTCTAAGT  
CTA

+  
FFFFFFFFFFFFFFFFFFFFFFFF:FFFFFFFFF,FFFFFFFFFFFFFFFFFFFFFFFFFFFFFFFFFFFFF  
FFFFFFFFFFFFFFFF:FFFFF:FFFFFFFFF:FFFFFFFFFFFFFFFFFFFFFFFFFFFFFFFFFFFFF  
FFF

@A00721:190:HGJW7DSXY:4:1549:1949:17143\_1:N:0:TCTGCAAG+GCTGCACT  
CTCTTCCGATCTCCTACTATGAGCAAATCTGTTGAATTCGTCACTGAGGACGAAGGTGAGAGGACTTT  
TGGCTACTGGCGACAACTGAGAGCAGTCGCTGGGGAAGAGAATTGCGTGGGTTGAAGGCCGACGCT  
TCG

+  
FFFFFFFFFFFFFFFFFFFFFFFF:FFFFFFFFFFFFFFFFFFFFFFFFFFFFFFFFFFFFFFFFFFFF,FFFFFFF  
:FFFFFFFFFFFFFFFFFFFFFFFFFFFFFFFFFFFFFFFFFFFFFFFFFFFFFFFFFFFFFFFFFFFFF  
FFF

@A00721:190:HGJW7DSXY:4:1264:30418:17096\_1:N:0:TCTGCAAG+GCTGCACT  
GGATGAGGGAGGTTGTTTCTTTGGAGTTTGTAGATAATCTTTTGAGAAGGGGTCATAGAGCCAGCAAGA  
GAAGCTTATATGCTGGTTAAGTGATGATTATCACTCCTTGAGAAGACAAGCCACATTAAGATATAAT  
TTA

+  
FFFFFFFFFFFFFFFFFFFFFFFFFFFFFFFFFFFFFFFFFFFFFFFFFFFFFFFFFFFFFFFFFFFFFFFFF  
FFFFFFFFFFFFFFFFFFFFFFFFFFFFFFFFFFFFFFFFFFFFFFFFFFFFFFFFFFFFFFFFFFFFFFFFF  
FFF

@A00721:190:HGJW7DSXY:4:2262:7265:20901\_1:N:0:TCTGCAAG+GCTGCACT  
TTGAAGGCTGGCTCTAAGGGAGACTCCTTCTTTTTGAATGTTGTAAAGAATTGGGTTGAGAAGTGTGC  
TTTACAAGGAGTTAGACTCTTCTTCAAGTTTTTAGATCTTCTTGATAATCTTAAAGAAAAATTTTCGA  
ATA

+  
FFFFFFFFFFFFFFF:FFFFF:FFFFFFFFF,FFFFFFFFFFFFFFFFF:FFFFFFFFFFFFFFFFFFFFF:,  
FFFF:FFFFFFFFFFFFFFFFF:FFFFFFFFFFFFFFFFFFFFFFFFFFFFFFFFFFFFFFFFFFFFF  
FFF

@A00721:190:HGJW7DSXY:4:1612:4273:8265\_2:N:0:TCTGCAAG+GCTGCACT  
TTCAACGGATACCGATCTCAGTTCTACCACAGAAACCGTCTCAGGAAGTGTCTCCACTGATTCGGAAT  
TAGAGAAAGACGACCTTCTTGTGGGACTGAGACCTCTGAATTTTCAG

+  
FFFFFFFFFFFFFFFFFFFFFFFFFFFFFFFFFFFFFFFFFFFFFFFFFFFFFFFFFFFFFFFFFFFFFFFFF  
FFFFFFFFFFFFFFFFFFFFFFFFFFFFFFFFFFFFFFFF:FFFFFFFFF,FFFFFFF

@A00721:190:HGJW7DSXY:4:2162:1199:22232\_1:N:0:TCTGCAAG+GCTGCACT  
TATGAATGAACCTTCGGCCGCTCTCTTTGCTTCGATGTTGGATGTCAAGAAGGGTTCAGAATGGGATT  
CCTACGTAGTTTATGACTTTGGTGGTGGTACTTTCGATACTTCTATCGTCTTACGTTACGGTAATTAC  
TAT

+  
FFFFFFFFFFFFFFFFFFFFFFFFFFFFFFFFFFFFFFFFFFFFFFFFFFFFFFFFFFFFFFFFFFFFFFFFF  
F:FFFFF:FFFFFFFFFFFFFFFFFFFFFFFFFFFFFFFFFFFFFFFFFFFFFFFFFFFFFFFFFFFFFFFFF  
FFF

@A00721:190:HGJW7DSXY:4:2519:14705:16438\_1:N:0:TCTGCAAG+GCTGCACT  
GTTTGATACTCAGAGCTGGTCCTCTCAGCAAAGGGATGCTTGGTGTATCTCCTCAGGAGTCGCGTCA  
TTTGATAATAATGACGAGACTTTCGTCATAATCGCTGCATATTACGGATTACACGGTACCAGCGCATC  
TCG

+  
FFF,,,,F:FF,F,F,F:FF:FF:F:FFFF,FF,F:::,F:FF:FFFF:,,:FF,:F,F:,,,,,F  
FFFF,FF,:,,:::,F,:,:FFF:FF::F:F:F:FFFFFF:FFF:FFF::FFF::,FF:F,F,:F,F:  
:FF

@A00721:190:HGJW7DSXY:4:1155:30454:32127\_1:N:0:TCTGCAAG+GCTGCACT  
AATCAAAGGTTTTGAATTTAGCTCAACTGGGGAGACGTGCTTAAATGGGTGATAAAAATTATTTAGAG  
ATCTTTTCTACTTACAAAGGACAATTCAGTTTCATTAATTCTACGAAAAGTCCGGAGTATATTGTAT  
GTT

+  
F:FFFFF::FFFFFFFFFFFFFFFFFFFFFFFFFFFFFFFFFFFFFFFFFFFFFFFFFFFFFFFFFFFFF  
FFFFFFFFF:FFFFF,:FFFFFFFFFFFFFFFFFFFFFFFFFFFFFFFFFFFFFFFFFFFFFFFFFFFFF  
FFF

@A00721:190:HGJW7DSXY:4:1344:25834:14575\_2:N:0:TCTGCAAG+GCTGCACT  
ACCCATCTCAACGAGGATAAAGCGAGTTTTCCGTCCTGAACGTAATACACGAAGAGATCATCCGCAAA  
CGACTCGAAACCGAGACGCCGTAGATCAAAGTCCCTTCTAACTTTAGA

+  
FFFFFFFFFFFFFFFFFFFFFFFFFFFFFFFFFFFFFFFFFFFFFFFFFFFFFFFFFFFFFFFFF:FFFFFFFFFFFFFFFFF  
FFFFFFFFFFFFFFFFFFFFFFFFFFFFFFFFFFFFFFFFFFFFFFFFFFFFFFFFFFFFFFFFF

@A00721:190:HGJW7DSXY:4:2134:18873:28009\_1:N:0:TCTGCAAG+GCTGCACT  
TTGACTGTTGATAATATTACAATAGCTCTTCTCAGAAGATTAGAGAAGTAACCGGTGAACACGTGCG  
TAGCATTGATTTACTTTTACCGTTAGAACTGAAAAGATTCTTTTCGAAAAGAACTATAAGTTACA  
AA

+  
FF::,F,FF:FFF:FFFFF:FF:,FF,FFF::,F,FF,FFF:,F:FF,FFF,,:FF:FF:F,FFF,:  
F,FF,FF,FFFF,FFFFF,FFFF:FFFFFFFFF,FFFFFFFFF:,FFFFFFFF,F,FFFF:FFF:F  
,F

@A00721:190:HGJW7DSXY:4:1303:16975:35243\_1:N:0:TCTGCAAG+GCTGCACT  
GGCCATTTCAAGAGTGGTCAATACGTCGTGGGAGGTACTGAAGCCTTCCCCTCCGCTGGCACGAAGAA  
CACTCCCAAGCCAATCAATAGTTCTTCTGACCAGAATGAAAAGGGTTTACCAGGGTAGTCTCTAAGT  
CTA

+  
FFFFFFFFFFFFFFFFFFFFFFFFFFFFFFFFFFFFFFFFFFFFFFFFFFFFFFFFFFFFFFFFF:FF  
FFFFFFFFF:FFFFFFFFFFFFFFFFF:FFFFFFFFFFFFFFFFFFFFFFFFFFFFFFFFFFFFFFFFF  
FFF

@A00721:190:HGJW7DSXY:4:1565:31241:31704\_1:N:0:TCTGCAAG+GCTGCACT  
CTCTTCCGATCTCCTACTATGAGCAAATCTGTTGAATTCGTCACTGAGGACGAAGGTGAGAGGACTTT  
TGGCTACTGGCGACAACTGAGAGCAGTCGCTGGGGAAGAGAATTGCGTGGGTTGAAGGCCGACGCT  
TCG

+  
FFFFFFFFFFFFFFF,FFFFFFFFFFFFFFFFFFFFFFFFFFFFFFFFFFFFFFFFFFFFFFFFFFFFF:FF  
FFFFFFFFFFFFFFFFFFFFFFFFFFFFFFFFFFFFFFFFFFFFFFFFFFFFFFFFFFFFFFFFF  
FFF

@A00721:190:HGJW7DSXY:4:1456:29243:24737\_1:N:0:TCTGCAAG+GCTGCACT  
GGATGAGGGAGGTTGTTTCTTTGGAGTTTTAGATAATCTTTTGAGAAGGGGTCATAGAGCCAGCAAGA  
GAAGCTTATATGCTGGTTAAGTGATGATTATCACTCCTTGAGAAGACAAGCCACATTAAGATATAAT  
TTA

+  
FFFFFFFFF,FFFFFFFFFFFFFFFFF:FFFFFFFFFFFFFFFFFFFFFFFFFFFFFFFFF:FFFFFFFFFFFFFFFFF  
FFFFFFFFF:FFFFFFFFF:FFFFFFFFFFFFFFFFFFFFFFFFFFFFFFFFFFFFFFFFFFFFFFFFF:F  
FFF

@A00721:190:HGJW7DSXY:4:2358:27651:34632\_1:N:0:TCTGCAAG+GCTGCACT  
TTGAAGGCTGGCTCTAAGGGAGACTCCTTCTTTTTGAATGTTGTAAAGAATTGGGTTGAGAAGTGTGC  
TTTACAAGGAGTTAGACTCTTCTTCAAGTTTTTAGATCTTCTTGATAATCTTAAAGAAAAATTTTCGA  
ATA





@A00721:190:HGJW7DSXY:4:1659:20482:4492\_1:N:0:TCTGCAAG+GCTGCACT  
CTCTTCCGATCTCCTACTATGAGCAATCTGTTGAATTCGTCCTGAGGACGAAGGTGAGAGGACTTT  
TGGCTACTGGCGACAAACTGAGAGCAGTCGCTGGGGAAAGAGAATTGCGTGGGTTGAAGGCCGACGCT  
TCG

@A00721:190:HGJW7DSXY:4:1511:16034:36307\_1:N:0:TCTGCAAG+GCTGCACT  
GGATGAGGGAGGTTGTTTCTTTGGAGTTTTAGATAATCTTTTGAGAAGGGGTCATAGAGCCAGCAAGA  
GAAGCTTATATGCTGGTTTAAGTGATGATTATCACTCCTTGAGAAGACAAGCCACATTAAGATATAAT  
TTA

@A00721:190:HGJW7DSXY:4:2477:12427:33191\_1:N:0:TCTGCAAG+GCTGCACT  
TTGAAGGCTGGCTCTAAGGGAGACTCCTTCTTTTTGAATGTTGTAAAGAATTGGGTTGAGTAGTTTGC  
TTTACAAGGAGTTAGACTCTTCTTCAAGTTTTTAGATCTTCTTGATAATCTTAAAGATAAATTTTCGA  
ATA

@A00721:190:HGJW7DSXY:4:2268:22128:25817\_2:N:0:TCTGCAAG+GCTGCACT  
TTCAACGGATACCGATCTCAGTTCTACCACAGAAACCGTCTCAGGAAGTCTCCACTGATTCGGAAT  
TAGAGAAAGACGACCTTCTTGTTGGGGACTGAGACCTCTGAATTTTCAG

@A00721:190:HGJW7DSXY:4:2343:25455:21026\_1:N:0:TCTGCAAG+GCTGCACT  
TATGAATGAACCTTCGCCGCTCTCTTTGCTTCGATGTTGGATGTCAAGAAGGGTTCAGAATGGGATT  
CCTACGTAGTTTATGACTTTGGTGGTGGTACTTTCGATACTTCTATCGTCTTACGTTACGGTAATTAC  
TAT

@A00721:190:HGJW7DSXY:4:1424:23511:21919\_1:N:0:TCTGCAAG+GCTGCACT  
AATAATGACGAGACTTTCGTCATAATCGCTGCATATTACGGATTACACGGTACCAGCGCATCTCGTGT  
CGAGCCTCGACCCGATTATATGGTATTAAGTTATAAAGGTGAGGAGACCATTTTCTTGCTGAAATTTA  
TAG

@A00721:190:HGJW7DSXY:4:1172:20175:3333\_1:N:0:TCTGCAAG+GCTGCACT  
AATCAAAGGTTTTGAATTTAGCTCAACTGGGGAGACGTGCTTAAATGGGTGATAAAATTATTTAGAG  
ATCTTTTCTACTTACAAAGGACAATTCAGTTTCATTAATTCTACGAAAAGTCCGGAGTATATTGTAT  
GTT

.....

F:FFF:FFFFFFFFFFFFFFFF:FFFFFFFFFFFFFFFFFFFFFFFFFFFFFFFFFFFFFFFF  
FFF

@A00721:190:HGJW7DSXY:4:2272:18322:32659\_2:N:0:TCTGCAAG+GCTGCACT  
ACCCATCTCAACGAGGATAAAGCGAGTTTTCCGTCCTGAACGTAATACACGAAGAGATCATCCGCAA  
CGACTCGAAACCGAGACGCCGTAGATCAAAGTCCCTTCTATCTTTAGA

+

FFFFFFFFFFFFFFFFFFFFFFFFFFFFFFFFFFFFFFFFFFFFFFFFFFFFFFFFFFFFFFFF  
FFFFFFFFFFFFFFFFFFFFFFFFFFFFFFFFFFFFFFFFFFFFFFFFFFFFFFFF,FFFFFFFF

@A00721:190:HGJW7DSXY:4:2356:24126:8860\_1:N:0:TCTGCAAG+GCTGCACT  
TTGAATGTTGATAATATTACAATATCTCTTCTCAGAAGATTAGAGAATTAACCGGTGAACACGTCGG  
TAGCATTGATTTACTTTTACCGTTAGAACTGAAAAAGATTCTTTTCGAAAAGAAACCTATTAGTTACA  
AA

+

FF:F,FFFF,FFFFFF,:,FF:,FFFFFFFF:F,FF,F,FF,F:F:,FFF,,:FF,:F,,:FFFF  
FFFF,FFF,FFF:FFFF:FF,FF::FF:F,F:FF:F,FF,:FFF,:FF:,,, :FFFF,F,F,FFFF  
,:

@A00721:190:HGJW7DSXY:4:2216:7572:22341\_1:N:0:TCTGCAAG+GCTGCACT  
GGCCATTTCAAGAGTGGTCAATACGTCGTGGGAGGTACTGAAGCCTTCCCCTCCGCTGGCACGAAGAA  
CACTCCCAAGCCAATCAATAGTTCTTCTGACCAGAATGAAAAGGGTTTACCAGGGTAGTCTCTAAGT  
CTA

+

FFFFFFFFFFFFFFFFFFFF:FF:FFFFFF,FFFFFFFFFFFF:FFFFFFFFF::FFFF:FFFFFFFFFFFF  
FFFFFFFF:FFFFFFFF:FFFFFFFFFFFFFFFFFFFF:FFFFFFFFF:FFFFFFFFFFFFFFFFFFFFFFFFFFFF  
F:F

@A00721:190:HGJW7DSXY:4:2209:5285:29528\_1:N:0:TCTGCAAG+GCTGCACT  
CTCTTCCGATCTCCTACTATGAGCAAATCTGTTGAATTCGTCACTGAGGACGAAGGTGAGAGGACTTT  
TGGCTACTGGCGACAACTGAGAGCAGTCGCTGGGGAAAGAGAATTGCGTGGGTTGAAGGCCGACGCT  
TCG

+

FFFFFFFFFFFFFFFFFFFF:FFFFFFFFFFFFFFFFFFFF:FFFFFFFFFFFFFFFFFFFFFFFFFFFFFFFFFFFF  
FFFFFFFFFFFFFFFFFFFFFFFFFFFFFFFFFFFFFFFFFFFFFFFFFFFFFFFFFFFFFFFFFFFFFFFFFFFF  
FFF

@A00721:190:HGJW7DSXY:4:2266:9353:15562\_1:N:0:TCTGCAAG+GCTGCACT  
GGATGAGGGAGGTTGTTTCTTTGGAGTTTTAGATAATCTTTTGAGAAGGGGTCATAGAGCCAGCAAGA  
GAAGCTTATATGCTGGTTTAAGTGATGATTATCACTCCTTGAGAAGACAAGCCACATTAAGATATAAT  
TTA

+

FFFFFFFFF:F:FFFFFFFFFFFFFFFF:FFFFFFFFFF,FFFFFFFFFFFFFFFFFFFFFFFFFFFFFFFFFFFF  
FFFFFFFFFFFFFFFFFFFFFFFFFFFFFFFFFFFFFFFFFFFFFFFFFFFFFFFFFFFFFFFFFFFFFFFFFFFF  
FFF

@A00721:190:HGJW7DSXY:4:2502:30924:7138\_1:N:0:TCTGCAAG+GCTGCACT  
TTGAAGGCTGGCTCTAAGGGAGACTCCTTCTTTTTGAATGTTGTAAAGAATTGGGTTGAGAAGTGTGC  
TTTACAAGGAGTTAGACTCTTCTTCAAGTTTTTAGATCTTCTTGATAATCTTAAAGAAAAATTTTCGA  
ATA

+

FFFFFFFFF:FFFFF,F:FFFFFF:FFF,FFFFFFFFFFFFFFFFFFFFFFFFFFFFFFFFFFFF:FFFFFFF  
FFFFFFFFFFFFFFFFFFFFFFFFFFFFFFFF:FFFFFFFFF:FFFFFFFFFFFFFFFFFFFFFFFFFFFFFFFFFFFF  
FFF

@A00721:190:HGJW7DSXY:4:2301:19651:30264\_2:N:0:TCTGCAAG+GCTGCACT  
TTCAACGGATACCGATCTCAGTTCTACCACAGAAACCGTCTCAGGAAGTGTCTCCACTGATTCGGAAT  
TAGAGAAAGACGACCTTCTTGTGGGGACTGAGACCTCTGAATTTTCAG

+

FFFFFFFFFFFFFFFFFFFFFFFFFFFFFFFFFFFFFFFFFFFFFFFFFFFFFFFFFFFFFFFFFFFF  
FFFFFFFFF:FFFFFFFFFFFFFFFFFFFFFFFFFFFFFFFFFFFFFFFFFFFFFFFF

@A00721:190:HGJW7DSXY:4:1231:16125:6151\_1:N:0:TCTGCAAG+GCTGCACT  
TGAACCTTCGGCCGCTCTCTTTGCTTCGATGTTGGATGTCAAGAAGGGTTCAGAATGGGATTCCTACG  
TAGTTTATGACTTTGGTGGTGGTACTTTCGATACTTCTATCGTCTTACGTTACGGTAATTACTATAGT  
GTT

+

FFFFFFFFFFFFFFFF:FFFF:FFFFFFFF:FFFFFF,FFFFFFFFFFFFFFFFFFFFFFFFFFFFFFFF  
:FFFFFFFFFFFFFFFF,FFFFFFFFFFFFFFFFFFFFFFFFFFFFFFFFFFFFFFFFFFFFFFFF  
FFF

@A00721:190:HGJW7DSXY:4:1458:16957:8500\_1:N:0:TCTGCAAG+GCTGCACT  
AATAATGACGAGACTTTCGTCATAATCGCTGCATATTACGGATTACACGGTACCAGCGCATCTCGTGT  
CGAGCCTCGACCCGATTATATGGTATTAACCTATAAAGGTGAGGAGACCATTTCTTGCTGAAATTTA  
TAG

+

FFFFFFFFFFFFFFFFFFFFFFFFFFFFFFFFFFFFFFFF:FFFFFFFFFFFFFFFFFFFFFFFF  
FFFFF:FFFFFFFFFFFFFFFFFFFFFFFFFFFFFFFFFFFFFFFFFFFFFFFFFFFFFFFF  
FFF

@A00721:190:HGJW7DSXY:4:1176:27227:9752\_1:N:0:TCTGCAAG+GCTGCACT  
AATCAAAGTTTTGAATTTAGCTCAACTGGGAGACGTGCTTAAATGGGTGATAAAAATTATTTAGAG  
ATCTTTTCTACTTACAAAGGACAATTCAGTTTCATTAATTCTACGAAAAGTCCGGAGTATATTGTAT  
GTT

+

FFFF::F:F:FFFFFFFFFFFFFFFFFFFFFFFFFFFFFFFFFFFFFFFFFFFFFFFFFFFFFFFF  
FFFFF:FFFFFFFFFFFFFFFFFFFFFFFFFFFFFFFFFFFFFFFFFFFFFFFFFFFFFFFF  
FFF

@A00721:190:HGJW7DSXY:4:2470:31087:4288\_2:N:0:TCTGCAAG+GCTGCACT  
ACCCATCTCAACGAGGATAAAGCGAGTTTTCCGTCCTGAACGTAATACACGAAGAGATCATCCGCAA  
CGACTCGAAACCGAGACGCCGTAGATCAAAGTCCCTTCTAACTTTAGA

+

FFFFFFFFFFFFFFFFFFFFFFFFFFFFFFFFFFFFFFFFFFFFFFFFFFFFFFFFFFFFFFFF  
FFFFFF,FFFFFFFFFFFFFFFF,FFFFFFFF:FFFF:FF:FFFFFF

@A00721:190:HGJW7DSXY:4:2415:24316:33927\_1:N:0:TCTGCAAG+GCTGCACT  
TTGACTGTTGATAATATTACAATAGCTCTTTATCAGAAGATTATAGAAGTAACCGGTGAACACGTCGG  
TAGCATTGATTTACTTTTACCGTTAGAACTGAAAAAGATTCTTTTCGAAAAGAACTATAAGTTACA  
AA

+

:F,F,F,FF,FFFF:FFF:FFFFFFFF,F,FFFF,FFF,: ,FF:F:FFFF:FFFFFFFF,FF  
FFF,FF,FFFFF,FFFF:FFFF,FFFFFFFFF:F:FFFFFFFF:FFFFFFFFFFFFFFFF  
F:

@A00721:190:HGJW7DSXY:4:2511:28926:2018\_1:N:0:TCTGCAAG+GCTGCACT  
GGCCATTTCAAGAGTGGTCAATACGTCGTGGGAGGTACTGAAGCCTTCCCTCCGCTGGCACGAAGAA  
CACTCCCAAGCCAATCAATAGTTCTTCTGACCAGAATGAAAAGGGTTTACCAGGGTAGTCTCTAAGT  
CTA

+

:FFFF:FFFFFFFFFFFFFFFFFFFFFFFFFFFFFFFF,FFFFFFFFFFFFFFFF  
F:FFFFF:FFFF:FFFFFFFFFFFFFFFFFFFFFFFFFFFFFFFFFFFFFFFF  
FFF

@A00721:190:HGJW7DSXY:4:2245:28031:12868\_1:N:0:TCTGCAAG+GCTGCACT  
CTCTTCCGATCTCCTACTATGAGCAAATCTGTTGAATTCGTCACTGAGGACGAAGGTGAGAGGACTTT  
TGGCTACTGGCGACAACTGAGAGCAGTCGCTGGGGAAGAGAATTGCGTGGGTGAAGGCCGACGCT  
TCG

+

FFF,FFFFFFFF:FF:FFFFFFFFFFFFFFFF:FFFFFFFFFFFFFFFF  
FFFFFFFFFFFFFFFFFFFFFFFFFFFFFFFF:FFFFFFFF  
FFF

@A00721:190:HGJW7DSXY:4:2418:32515:17409\_1:N:0:TCTGCAAG+GCTGCACT  
GGATGAGGGAGGTTGTTTCTTTGGAGTTTGTAGATAATCTTTTGAGAAGGGGTCATAGAGCCAGCAAGA  
GAAGCTTATATGCTGGTTTAAGTGATGATTATCACTCCTTGAGAAGACAAGCCACATTAAGATATAAT  
TTA

+

FFFFFFFF:F:FFFFFFFFFFFFFFFF:FFFFF:FFFFF:FFFFFFFFFFFFFFFF,FFFFFFFFFFFFFFFF  
FFFFFFFFFFFFFFFFFFFFFFFFFFFFFFFF:FFFFFFFFFFFFFFFFFFFFFFFFFFFFFFFFFFFFFFFF  
FFF

@A00721:190:HGJW7DSXY:4:2622:10257:10614\_1:N:0:TCTGCAAG+GCTGCACT  
TTGAAGGCTGGCTCTAAGGGAGACTCCTTCTTTTTGAATGTTGTAAAGAATTGGGTTGAGAAGTGTGC  
TTTACAAGGAGTTAGACTCTTCTTCAAGTTTTTAGATCTTCTTGATAATCTTAAAGAAAAATTTTCGA  
ATA

+

FFFFFFFF:FFFFFFFF:FFFFFFFF:FFF:FFFFFFFFFFFFFFFF:FFFFFFFF:FFFFFFFF:FFF  
FFFFFFFFFFFFFFFFFFFFFFFFFFFFFFFFFFFFFFFFFFFFFFFF:FFFFFFFFFFFFFFFFFFFFFFFF  
FFF

@A00721:190:HGJW7DSXY:4:2328:25907:15546\_2:N:0:TCTGCAAG+GCTGCACT  
TTCAACGGATACCGATCTCAGTTCTACCACAGAAACCGTCTCAGGAAGTGTCTCCACTGATTCGGAAT  
TAGAGAAAGACGACCTTCTTGTGGTGACTGAGACCTCTGAATTTTCAG

+

:F,FFFFFFFF::FFFFFFFF:FFF,,:F,FFF,F:FFFFFFFFFFFFFFFF:FFFF,FF::FFF,FF:FF:  
F::FFFFF:FFFFFFFF:FFFFFF:,FFFFF:FFFFFFFFFFFFFFFF

@A00721:190:HGJW7DSXY:4:1402:2202:3803\_1:N:0:TCTGCAAG+GCTGCACT  
TGAACCTTCGCCGCTCTCTTTGCTTCGATGTTGGATGTCAAGAAGGGTTCAGAATGGGATTCCTACG  
TAGTTTATGACTTTGGTGGTGGTACTTTGATACTTCTATCGTCTTACGTTACGGTAATTACTATAGT  
GTT

+

FFFFFFFFFFFFFFFFFFFFFFFFFFFFFFFFFFFFFFFFFFFFFFFFFFFFFFFF:FFFFFFFFFFFFFFFF  
FFFFFFFFFFFFFFFFFFFFFFFFFFFFFFFFFFFFFFFFFFFFFFFFFFFFFFFFFFFFFFFFFFFFFFFF  
FFF

@A00721:190:HGJW7DSXY:4:1526:22218:13949\_1:N:0:TCTGCAAG+GCTGCACT  
AATAATGACGAGACTTTCGTCATAATCGCTGCATATTACGGATTACACGGTACCAGCGCATCTCGTGT  
CGAGCCTCGACCCGATTATATGGTATTAACCTATAAAGGTGAGGAGACCATTTTCTTGCTGAAATTTA  
TAG

+

FFFFFFFFFFFFFFFFFFFFFFFFFFFFFFFFFFFFFFFFFFFFFFFFFFFFFFFFFFFFFFFFFFFFFFFF  
FFFFFFFFFFFFFFFFFFFFFFFFFFFFFFFFFFFFFFFFFFFFFFFFFFFFFFFFFFFFFFFFFFFFFFFF  
FFF

@A00721:190:HGJW7DSXY:4:1207:31186:13698\_1:N:0:TCTGCAAG+GCTGCACT  
AATCAAAGTTTTGAATTTAGCTCAACTGGGGAGACGTGCTTAAATGGGTGATAAAAATTATTTAGAG  
ATCTTTTCTACTTACAAAGGACAATTCAGTTTCATTAATTCTACGAAAAGTCCGGAGTATATTGTAT  
GTT

+

FFFFF:F::FFFFFFFFFFFF:FFFFFFFFFFFFFFFF:FFF,FFF:FFFFFFFFFFFFFFFFFFFFFFFF:  
FFFFFFFFFFFFFFFFFFFFFFFFFFFFFFFFFFFFFFFFFFFFFFFFFFFFFFFFFFFFFFFFFFFFFFFF  
FFF

@A00721:190:HGJW7DSXY:4:2524:2636:16611\_2:N:0:TCTGCAAG+GCTGCACT  
ACCCATCTCAACGAGGATAAAGCGAGTTTTCCGTCTGAACGTAATACACGAAGAGATCATCCGCAA  
CGACTCGAAACCGAGACGCCGTAGATCAAAGTCCCTTCTAACTTTAGA

+

FFFFFFFFFFFFFFFFFFFFFFFFFFFFFFFF:FFFFFFFFFFFFFFFFFFFFFFFFFFFFFFFFFFFFFFFF  
FFFFFFFFFFFFFFFFFFFFFFFFFFFFFFFFFFFFFFFFFFFFFFFF:FFFFFFFF

@A00721:190:HGJW7DSXY:4:2418:12753:3912\_1:N:0:TCTGCAAG+GCTGCACT  
TTGACTGTTGATAATATTACAATAGCTCTTCTCAGAAGATTAGTGATGTAACCGGTGAACACGTCGG

TTGAATTGTTTTACTTTTACCGTTTGAAGTAAATGATTCTTTTCGAATAGAAACCTATAAGTTACA  
AA

+

FFFFFFFFF:FFFF,FF:FF,F:FFF,F:FFF:F,,FF,FFF:,FF,,FF,F,,:FFFF,F:FF:F:  
F,F,:F:F,FFF,FFF,F,F,,FF,:FF,FFF:,FFF,FFFF,FFF,,FF,:,,FFF,FFFF,::  
:F

@A00721:190:HGJW7DSXY:4:2615:7808:15139\_1:N:0:TCTGCAAG+GCTGCACT  
GGCCATTTCAAGAGTGGTCAATACGTCGTGGGAGGTACTGAAGCCTTCCCCTCCGCTGGCAGCAAGAA  
CACTCCCAAGCCAATCAATAGTTCTTCTGACCAGAATGAAAAGGGGTTTACCAGGGTAGTCTCTAAGT  
CTA

+

FFFFFFFFFFFFFFFFFFFFFFFFFFFFFFFFFFFFFFFFFFFFFFFFFFFFFFFFFFFFFFFFFFFFFFFF  
F:FFFFFFFFFFFFFFFFFFFFFFFFFFFFFFFFFFFFFFFFFFFFFFFFFFFFFFFFFFFFFFFFFFFFFFFF  
FFF

@A00721:190:HGJW7DSXY:4:2323:17237:9580\_1:N:0:TCTGCAAG+GCTGCACT  
CTCTTCCGATCTCCTACTATGAGCAAATCTGTTGAATTCGTCACTGAGGACGAAGGTGAGAGGACTTT  
TGGCTACTGGCGACAACTGAGAGCAGTCGCTGGGGAAAGAGAATTGCGTGGGTTGAAGGCCGACGCT  
TCG

+

FFFFFFFFFFFFFFF,,FFFFFFFFFFFFFFFFFFFFFFFFFFFFFFFFFFFFFFFFFFFFFFFFFFFFFFF  
FFFFFFFFFFFFFFFFFFFFFFFFFFFFFFFFFFFFFFFFFFFFFFFFFFFFFFFFFFFFFFFFFFFFFFFFF  
FFF

@A00721:190:HGJW7DSXY:4:2505:2374:15311\_1:N:0:TCTGCAAG+GCTGCACT  
GGATGAGGGAGGTTGTTTCTTTGGAGTTTTAGATAATCTTTTGAGAAGGGGTCATAGAGCCAGCAAGA  
GAAGCTTATATGCTGGTTAAGTGATGATTATCACTCCTTGAGAAGACAAGCCACATTAAGATATAAT  
TTA

+

FF:FFFFFF,F:FFFFFF:FFFFFFFFFFFFFFFFFFFFFFFFFFFFFFFFFFFFFFFFFFFFFFFFFFFF  
FF:FFFFFFFFFFFFFFFFFFFFFFFFFFFFFFFFFFFFFFFFFFFFFFFFFFFFFFFFFFFFFFFFFFFFF  
:FF

@A00721:190:HGJW7DSXY:4:2627:1597:8140\_1:N:0:TCTGCAAG+GCTGCACT  
TTGAAGGCTGGCTCTAAGGGAGACTCCTTCTTTTTGAATGTTGTAAAGAATTGGGTTGAGAAGTGTGC  
TTTACAAGGAGTTAGACTCTTCTTCAAGTTTTTAGATCTTCTTGATAATCTTAAAGAAAAATTTTCGA  
ATA

+

FFFFFFFF,FF:FFFFFFF:F:FF::FF,FFFFFFFFFFFFFFFFFFFFF,FFFF:FFFFFFFFFFFFFFF  
FFFFFFFFFFFFFFFFF,FF:FFFFFF,:FFFFFFFFFFFFFFFFFFFFFFFFFFFFFFFFFFFFFFFFFFFFF:FFFFFFF  
FFF

@A00721:190:HGJW7DSXY:4:2411:18765:33426\_2:N:0:TCTGCAAG+GCTGCACT  
TTCAACGGATACCGATCTCAGTTCTACCACAGAAACCGTCTCAGGAAGTGTCTCCACTGATTCGGAAT  
TAGAGAAAGACGACCTTCTTGTGGGACTGAGACCTCTGAATTTTCAG

+

FFFFFFF:FFFFFFFFFFFFFFFFFFFFFFFFFFFFFFFFFFFFFFFFFFFFFFFFFFFFFFFFFFFFF,FFFFFFFFFFFFFFFFFFFFFFF:F  
FFFFFFFFFFFFFFFFF:FFF::FFFFFFFFFFFFFFFFF:FFFF,FFFF:F

@A00721:190:HGJW7DSXY:4:2208:27561:30561\_1:N:0:TCTGCAAG+GCTGCACT  
TGAACCTTCGGCCGCTCTCTTTGCTTCGATGTTGGATGTCAAGAAGGGTTCAGAAATGGGATTCCTACG  
TAGTTTATGACTTTGGTGGTGGTACTTTCGATACTTCTATCGTCTTACGTTACGGTAATTACTATAGT  
GTT

+

FFFFFFFFFFFFFFFFFFFFFFFFFFFFFFFFFFFFFFFFFFFFFFFFFFFFFFFFFFFFFFFFFFFFF:FFF:FFF  
FFFFFFFFFFFFFFFFFFFFFFFFFFFFFFFFFFFFFFFFFFFFFFFFFFFFFFFFFFFFFFFFFFFFF:FF:F:FFF  
FFF

@A00721:190:HGJW7DSXY:4:1535:15754:19445\_1:N:0:TCTGCAAG+GCTGCACT  
AATAATGACGAGACTTTCGTCATAATCGCTGCATATTACGGATTACACGGTACCAGCGCATCTCGTGT



TTACAAGGAGTTAGACTCTTCTTCAAGTTTTTAGATCTTCTTGATAAT  
+  
FFFFFFFFFFFFFFFFFFFFFFFFFFFFFFFFFFFFFFFFFFFFFFFFFFFFFFFFFFFFFFFF:FFFFFFFFFFFFFFFF  
FFFFFFFFFFFFFFFFFFFFFFFFFFFFFFFFFFFFFFFFFFFFFFFFFFFFFFFFFFFFFFFF  
@A00721:190:HGJW7DSXY:4:2436:2121:26741\_2:N:0:TCTGCAAG+GCTGCACT  
TTCAACGGATACCGATCTCAGTTCTACCACAGAAACCGTCTCAGGAAGTGTCTCCACTGATTCGGAAT  
TAGAGAAAGACGACCTTCTTGTGGGGACTGAGACCTCTGAATTTTCAG  
+  
FFF:F:FFFFFFFFFFFFFFFF:FF:FFF:FFFFFFFFFFFFFFFF:FFFFFFFFFFFFFF:F,FFFFFFFF  
FFFFFFFFFFFFFFFF,FFFFFFFFFFFFFFFF:.:F:FFFFF,  
@A00721:190:HGJW7DSXY:4:2330:25500:5979\_1:N:0:TCTGCAAG+GCTGCACT  
TGAACCTTCGGCCGCTCTCTTGCTTCGATGTTGGATGTCAAGAAGGGTTCAGAAATGGGATTCCTACG  
TAGTTTATGACTTTGGTGGTGGTACTTTCGATACTTCTATCGTCTTACGTTACGGTAATTACTATAGT  
GTT  
+  
FFFFFFFFFFFFFFFFFFFFFFFFFFFFFFFFFFFFFFFFFFFFFFFFFFFFFFFFFFFFFFFF:FFFFFFFFFFFFFFFF  
FFFFFFFFFFFFFFFFFFFFFFFFFFFFFFFFFFFFFFFFFFFFFFFFFFFFFFFFFFFFFFFF  
FFF  
@A00721:190:HGJW7DSXY:4:1622:28664:15718\_1:N:0:TCTGCAAG+GCTGCACT  
AATAATGACGAGACTTTCGTCATAATCGCTGCATATTACGGATTACACGGTACCAGCGCATCTCGTGT  
CGAGCCTCGACCCGATTATATGGTATTAAGTTATAAAGGTGAGGAGACCATTTTCTTGCTGAAATTTA  
TAG  
+  
FFFFFFFFFFFFFFFFFFFFFFFFFFFFFFFFFFFFFFFFFFFFFFFFFFFFFFFFFFFFFFFF:FFFFFFFF  
FFFFFFFFFFFFFFFFFFFFFFFFFFFFFFFFFFFFFFFFFFFFFFFFFFFFFFFFFFFFFFFF  
FFF  
@A00721:190:HGJW7DSXY:4:1231:10881:17331\_1:N:0:TCTGCAAG+GCTGCACT  
AATCAAAGTTTTGAATTTAGCTCAACTGGGGAGACGTGCTTAAATGGGTGATAAAAATTATTTAGAG  
ATCTTTTCTACTTACAAAGGACAATTACGTTTCATTAATTCTACGAAAAGTCCGGAGTATATTGTAT  
GTT  
+  
FFFFFFFFFFFFFFFFFFFFFFFFFFFFFFFFFFFFFFFFFFFFFFFFFFFFFFFFFFFFFFFF:FFFFFFFF  
FFFFFFFFFFFFFFFFFFFFFFFFFFFFFFFFFFFFFFFFFFFFFFFFFFFFFFFFFFFFFFFF  
FFF  
@A00721:190:HGJW7DSXY:4:2623:15691:17769\_2:N:0:TCTGCAAG+GCTGCACT  
ACCCATCTCAACGAGGATAAAGCGAGTTTTCCGTCCTGAACGTAATACACGAAGAGATCATCCGCAA  
CGACTCGAAACCGAGACGCCGTAGATCAAAGTCCCTTCTAACTTTAGA  
+  
FFFFFFFFFFF:FFFFFF:FFFFFFFFFFFFFFFFFFFFFFFFFFFFFFFFFFFFFFFFFFFFFFFF  
FFFFFFFFFFFFFFFFFFFFFFFFFFFFFFFFFFFFFFFFFFFFFFFF:FFFFF  
@A00721:190:HGJW7DSXY:4:2276:9209:23265\_2:N:0:TCTGCAAG+GCTGCACT  
TGACTGTTGATAATATTACAATAGCTCTTCTCAGAAGATTAGAGAAGTAACCGGTGAACACGTCGGT  
AGCATTGATTTACTTTTACCGTTAGAACTGAAAAGATTCTTTTCGAA  
+  
FFF:F:FFFFFFFFFFFFFFFF:FFFFFFFFFFFFFF:FFFF:FFFF,FFF,FFF:FFFF:FF:FF  
F:.:FFF:FFFFFF:FFF:F:FFF:FF:F:FFFF,FFF:F:FF,:FF  
@A00721:190:HGJW7DSXY:4:2117:3314:14904\_1:N:0:TCTGCAAG+GCTGCACT  
ATACGTCGTGGGAGGTACTGAAGCCTTCCCTCCGCTGGCACGAAGAACTCCCAAGCCAATCAATC  
GTTCTTCTGACCAGAATGAAAAGGGTTTACCAGGTAGTCTCTAAGTCTACCAGGAAGAGGGGAAAT  
GTC  
+  
FFF:FFFF:FFFFFFFFFFFFFFFF:FFFF,FFFFFFFF:FFFF:F:FFFFFFFF:F:FFFFFF:  
FFF:FF:FFF:FF:FFFFFFFFFFFFFFFF:FFFFFF:FFFFFF:.:FFFF:FFFFFFFFFFFFFF:FF  
FFF



@A00721:190:HGJW7DSXY:4:2614:11478:35837\_1:N:0:TCTGCAAG+GCTGCACT  
CTCTTCCGATCTCCGACTATGAGCAAATCTGTTGAATTCGTCACCTGAGGACGAAGGTGAGAGGACTTT  
TGGCTACTGGCGACAACTGAGAGCAGTCGCTGGGGAAAGAGAATTGCGTGGGTTGAAGGCCGACGCT  
TCG

+

FFF:FFFFFFFFF,:FFFF:FFFFFFFFFFFFFFFF:FFF:FFFFFFFFFFFFFFFF:F:FFFFFFF  
FFFFFFFFFFFF:FF:FFFF:FFFFFFFFFFFFFFFF:FFFFFFFFFFFFFFFFFFFFFFFF  
FFF

@A00721:190:HGJW7DSXY:4:1206:9869:26757\_1:N:0:TCTGCAAG+GCTGCACT  
ACGCGATCTTGCAGAGTGACTGGAGTTCAGACGTGTGCTCTTCCGATCTGGTCATAGAGCCAGCAAGA  
GAAGCTTATATGCTGGTTAAGTGATGATTATCACTCCTTGAGAAGACAAGCCACATTAAGATATAAT  
TTA

+

:FF,FFFFFFFFFFFFFFFFFFFFFFFFFFFFFFFFFFFFFFFFFFFFFFFFFFFFFFFFFFFFF  
FFFFFFFFFFFFFFFFFFFFFFFFFFFFFFFFFFFFFFFFFFFFFFFFFFFFFFFFFFFFFFFFFFFF  
FFF

@A00721:190:HGJW7DSXY:4:1261:8151:2143\_2:N:0:TCTGCAAG+GCTGCACT  
TGAAGGCTGGCTCTAAGGAGACTCCTTCTTTTTGAATGTTGTAAAGAATTGGGTTGAGAAGTGTGCT  
TTACAAGGAGTTAGACTCTTCTTCAAGTTTTAGATCTTCTTGATAAT

+

FFFFFFFFFFFFFFFF:FFFFFFFFFFFFFFFFFFFFFFFFFFFFFFFFFFFFFFFFFFFFFFFFFFFF,FFFFF:FFFFFFFFFFFFFFFF  
FFFFFFFFFFFF:FFFFFFFFFFFFFFFFFFFFFFFFFFFFFFFFFFFFFFFFFFFF:FF:FF

@A00721:190:HGJW7DSXY:4:2546:4191:32612\_2:N:0:TCTGCAAG+GCTGCACT  
TTCAACGGATACCGATCTCAGTTCTACCACAGAAACCGTCTCAGGAAGTGTCTCCACTGATTCGGAAT  
TAGAGAAAGACGACCTTCTGTGGGGACTGAGACCTCTGAATTTTCAG

+

FFFFFFFFFFFFFFFFFFFFFFFFFFFFFFFFFFFFFFFFFFFFFFFFFFFFFFFFFFFFFFFFFFFF:F  
FFFFFFFFFFFFFFFFFFFFFFFFFFFFFFFFFFFFFFFFFFFFFFFFFFFF,FFFFFF

@A00721:190:HGJW7DSXY:4:2525:22607:1344\_1:N:0:TCTGCAAG+GCTGCACT  
TGAACCTTCGGCCGCTCTCTTTGCTTCGATGTTGGATGTCAAGAAGGGTTCAGAAATGGGATTCCTACG  
TAGTTTATGACTTTGGTGGTGGTACTTTCGATACTTCTATCGTCTTACGTTACGGTAATTACTATAGT  
GTT

+

FFFFFFFFFFFFFFFFFFFFFFFFFFFFFFFFFFFFFFFFFFFFFFFFFFFFFFFFFFFFFFFFFFFF:F  
FFFFF:FFF:FFFFFFFFFFFF:FFFFFFFFFFFFFFFFFFFFFFFFFFFFFFFFFFFFFFFFFFFF:FFFFF  
FFF

@A00721:190:HGJW7DSXY:4:2130:21558:7075\_1:N:0:TCTGCAAG+GCTGCACT  
AATAATGACGAGACTTTCGTCATAATCGCTGCATATTACGGATTACACGGTACCAGCGCATCTCGTGT  
CGAGCCTCGACCCGATTATATGGTATTAAGTTATAAAGGTGAGGAGACCATTTCTTGCTGAAATTTA  
TAG

+

FFFFFFFFFFFFFFFFFFFFFFFFFFFFFFFFFFFFFFFFFFFFFFFFFFFFFFFFFFFFFFFFFFFF  
FFFFFFFFFFFFFFFFFFFFFFFFFFFFFFFFFFFFFFFFFFFFFFFFFFFFFFFFFFFFFFFFFFFF  
FFF

@A00721:190:HGJW7DSXY:4:1235:1072:1188\_1:N:0:TCTGCAAG+GCTGCACT  
AATCAAAGTTTTGAATTTAGCTCAACTGGGGAGACGTGCTTAAATGGGTGATAAAAATTATTTAGAG  
ATCTTTTCTACTTACAAAGGACAATTCAGTTTCATTAATTCTACGAAAAGTCCGGAGTATATTGTAT  
GTT

+

FFF::F,,:FFFF,FFFFFFF:F::F:F:FFF:,FFFF,FF:F,F,FF:FFFFFFFFFFFFFFFF:FF,  
FFFFFFFFFF:FFFFFFF,FF,,FFFF:FF,FFFF:F::FFFF:FFFFFFFFFFFFFFFF:FF:FFFF::  
:FF

@A00721:190:HGJW7DSXY:4:2278:5556:17347\_1:N:0:TCTGCAAG+GCTGCACT  
GTTCTTTCTGATTTACTGTTGTTCTTCATTTTGATTTTCCGATCTTAACTAATTTTACATCCGCAA





AGTTTATGACTTTGGTGGTGGTACTTTTCGATACTTCTATCGTCTTACGTTACGGTAATTACTATAGTG  
TTA

+

FFFFFFFFFFFFFFFF,F:FFFFFFFFFFFFFFFFFFFFFFFFFFFFFFFFFFFFFFFFFFFFFFFF  
FFFFFFFFFFFFFFFFFFFFFFFFFFFFFFFFFFFFFFFFFFFFFFFFFFFFFFFFFFFFFFFF:F:FFFF  
FFF

@A00721:190:HGJW7DSXY:4:2270:6867:25535\_1:N:0:TCTGCAAG+GCTGCACT  
AATAATGACGAGACTTTCGTCATAATCGCTGCATATTACGGATTACACGGTACCAGCGCATCTCGTGT  
CGAGCCTCGACCCGATTATATGGTATTAACCTATAAAGGTGAGGAGACCATTTCTTGCTGAAATTTA  
TAG

+

FFFFFFFFFFFFFFFFFFFFFFFFFFFFFFFFFFFFFFFFFFFFFFFFFFFFFFFFFFFFFFFFFFFF  
FFFFFFFFFFFFFFFFFFFFFFFFFFFFFFFFFFFFFFFFFFFFFFFFFFFFFFFFFFFFFFFFFFFF  
FFF

@A00721:190:HGJW7DSXY:4:1248:30526:27837\_1:N:0:TCTGCAAG+GCTGCACT  
AATCAAAGTTTTGAATTTAGCTCAACTGGGGAGACGTGCTTAAATGGGTGATAAAAATTATTTAGAG  
ATCTTTTCTACTTACAAAGGACAATTCAGTTTCATTAATTCTACGAAAAGTCCGGAGTATATTGTAT  
GTT

+

FFFFF:,FFFF:FFFFFFFF,F:FFFFFFFFFFFFFFFFFFFFFFFFFFFFFFFFFFFFFFFFFFFF  
:FFFFFFFFFFFFFFFFFFFFFFFFFFFFFFFFFFFFFFFFFFFFFFFFFFFFFFFFFFFFFFFFFFFF  
FFF

@A00721:190:HGJW7DSXY:4:1372:3061:14998\_1:N:0:TCTGCAAG+GCTGCACT  
ACCCATCTCACCGCGGATAAAGCGAGTTTTCCGTCTGAACGTAATACACTAAGAGATCATCCGCAA  
CGACTCGAAACCGAGACGCCGTAGATCAAAGTCCCTTCTAACTTTAGATTATGAATCCTGCCTTTACT  
CA

+

FF::F:::FF,::,,:FFFF,::,,:FFF:F:F:F,::F:,,:F,,,:F,,FF,::F,:F,FF:,FFF  
FFFFFFFFFFFFFFFFFFFFFFFFFFFFFFFFFFFFFFFFFFFFFFFFFFFFFFFFFFFFFFFFFFFF  
FF

@A00721:190:HGJW7DSXY:4:2458:5059:35931\_2:N:0:TCTGCAAG+GCTGCACT  
TGACTGTTGATAATATTACAATAGCTCTTTCTCAGAAGATTAGAGAAGTAACCGGTGAACACGTGGT  
AGCATTGATTTACTTTTACCGTTAGAACTGAAAAAGATTCTTTTCGAA

+

FFFFFFFFFFFFFFFFFFFFFFFFFFFFFFFFFFFFFFFFFFFFFFFFFFFFFFFFFFFFFFFFFFFF  
FFFFFFFFFFFFFFFFFFFFFFFFFFFFFFFF:F:FFFFFFFFFFFFFFFFFFFFFFFF

@A00721:190:HGJW7DSXY:4:2209:4535:19523\_1:N:0:TCTGCAAG+GCTGCACT  
ATACGTCGTGGGAGGTACTGAAGCCTTCCCCTCCGCTGGCAGCAAGAACTCCCAAGCCAATCAATA  
GTTCTTCTGACCAGAATGAAAAGGGGTTTACCAGGGTAGTCTCTAAGTCTACCAGGAAGAGGGGAAAT  
GTC

+

FFFFFFFFFFFFFFFFFFFFFFFFFFFFFFFFFFFFFFFFFFFFFFFFFFFFFFFFFFFFFFFFFFFF  
FFFFFFFFFFFFFFFFFFFFFFFFFFFFFFFFFFFFFFFFFFFFFFFFFFFFFFFFFFFFFFFFFFFF  
FFF

@A00721:190:HGJW7DSXY:4:1655:9833:14168\_1:N:0:TCTGCAAG+GCTGCACT  
GTAGGTTCGTGCCTACTATGAGCAAATCTGTTGAATTCGTCACTGAGGACGAAGGTGAGAGGACTTTT  
GGCTACTGGCGACAACTGAGAGCAGTCGCTGGGGAAAGAGAATTGCGTGGGTGAAGGCCGACGCTT  
CGA

+

FFFFFFFFFFFFFFFFFFFFFFFFFFFFFFFFFFFFFFFFFFFFFFFFFFFFFFFFFFFFFFFFFFFF  
FFFFFFFFFFFFFFFFFFFFFFFFFFFFFFFFFFFFFFFFFFFFFFFFFFFFFFFFFFFFFFFFFFFF  
FFF

@A00721:190:HGJW7DSXY:4:2226:11930:17989\_2:N:0:TCTGCAAG+GCTGCACT  
TGAAGGCTGGCTCTAAGGGAGACTCCTTCTTTTGAATGTTGTAAAGAATTTGTTTGATAAGTGTGCT

TTACAAGGAGTTATACTCTTCTTCAAGATTTTAGATCTTCTTGATAAT

+

:FFF:,F:,FF,,FF:,F:FFFF,,::F::FF,::FFF::,FFF:F::F,,,,,F,F,FF,,,,,F:  
F,FFFF,:F,FFF,F,,,F,FF,FFF,,,FF,F:FFF::,FF,FFFF

@A00721:190:HGJW7DSXY:4:2638:31114:33144\_2:N:0:TCTGCAAG+GCTGCACT  
TTCAACGGATACCGATCTCAGTTCTACCACAGAAACCGTCTCAGGAAGTGTCTCCACTGATTCGGAAT  
TAGAGAAAGACGACCTTCTTGTGGGGACTGAGACCTCTGAATTTTCAG

+

FFFFFFFFFFFFFFFFFFFFFFFFFFFFFFFFFFFFFFFFFFFFFFFFFFFFFFFFFFFFFFFFFFFFFFFF  
FFFFFFFFFFFFFFFFFFFFFFFFFFFFFFFFFFFFFFFFFFFFFFFFFFFFFFFFFFFFFFFFFFFFFFFF

@A00721:190:HGJW7DSXY:4:1353:13666:29168\_1:N:0:TCTGCAAG+GCTGCACT  
GAACCTTCGGCCGCTCTCTTTGCTTCGATGTTGGATGTCAAGAAGGGTTCAGAATGGGATTCCTACGT  
AGTTTATGACTTTGGTGGTGGTACTTTGATACTTCTATCGTCTTACGTTACGGTAATTACTATAGTG  
TTA

+

FFFFFFFFFFFFFFFFFFFFFFFFFFFFFFFFFFFFFFFFFFFFFFFFFFFFFFFFFFFFFFFFFFFFFFFF  
FFFFFFFFFFFFFFFFFFFFFFFFFFFFFFFFFFFFFFFFFFFFFFFFFFFFFFFFFFFFFFFFFFFFFFFF  
FFF

@A00721:190:HGJW7DSXY:4:2358:4978:2503\_1:N:0:TCTGCAAG+GCTGCACT  
AATAATGACGAGACTTTCGTCATAATCGCTGCATATTACGGATTACACGGTACCAGCGCATCTCGTGT  
CGAGCCTCGACCCGATTATATGGTATTAAGTTATAAAGGTGAGGAGACCATTTCTTGCTGAAATTTA  
TAG

+

FFFFFFFFFFFFFFFFFFFFFFFFFFFFFFFFFFFFFFFFFFFFFFFFFFFFFFFFFFFFFFFFFFFFFFFF  
FFFFFFFFFFFFFFFFFFFFFFFFFFFFFFFFFFFFFFFFFFFFFFFFFFFFFFFFFFFFFFFFFFFFFFFF  
FFF

@A00721:190:HGJW7DSXY:4:1340:4779:16877\_1:N:0:TCTGCAAG+GCTGCACT  
AATCAAAGTTTTGAATTTAGCTCAACTGGGGAGACGTGCTTAAATGGGTGATAAAAATTATTTAGAG  
ATCTTTTCTACTTACAAAGGACAATTCAGTTTCATTAATTCTACGAAAAGTCCGGAGTATATTGTAT  
GTT

+

FFFFF:FFFFFFFFFFFFFFFFFFFFFFFFFFFFFFFFFFFFFFFFFFFFFFFFFFFFFFFFFFFFFFFF  
F:FFFFFFFFFFFFFFFFFFFFFFFFFFFFFFFFFFFFFFFFFFFFFFFFFFFFFFFFFFFFFFFFFFFF  
FFF

@A00721:190:HGJW7DSXY:4:2172:1615:30718\_1:N:0:TCTGCAAG+GCTGCACT  
ACCCATCTCAACGTGTATAAAGCGTGTTTTTCGGTCTGAACGTAATACACGAAGATATCATCCGCAAA  
CGACTCGAAACCGAGACGCCGTAGATCAAAGTCCCTTCTAACTTTAGATTATGAATCCTGCCTTTACT  
CA

+

FFF::F:F:F,,,,,F,FF,::,,,FFFFF,,,F:,F:,::FFFFF::,F,,,,,::,F,F::,F,F  
FFFFFFFFFFFFFFFFFFFFFFFFFFFFFFFFFFFFFFFFFFFFFFFFFFFFFFFFFFFFFFFFFFFF  
FF

@A00721:190:HGJW7DSXY:4:1109:5312:6652\_1:N:0:TCTGCAAG+GCTGCACT  
TGACTGTTGATAATATTAAGTAGCTCTTCTCAGAAGATTAGAGAAGTAACCGGTGAACACGTCGGT  
AGCTTTGATTTACTTTTACCGTTAGAACTGAAAAGATTCTTTTCGAAAAGAAACCTATAAGTTACAA  
ACG

+

FFF,F,FF,FFF:F:FFF,F:FFF,F,FFF:F::FFFFFFFF:FFFFFFFF:F:FFFFFFFF:FFFFFFF  
F,F,FF:,FFFF:FFFF:F,,FF:F:FFF:FFFFFF,FF:FFF:,FFFF,FFFF,F:FFF:FFFF,  
FFF

@A00721:190:HGJW7DSXY:4:2272:26865:5149\_1:N:0:TCTGCAAG+GCTGCACT  
ATACGTCGTGGGAGGTACTGAAGCCTTCCCCTCCGCTGGCACGAAGAACTCCCAAGCCAATCAATA  
GTTCTTCTGACCAGAATGAAAAGGGGTTTACCAGGGTAGTCTCTAAGTCTACCAGGAAGAGGGGAAAT  
GTC

```

+
FFFFFFFFFFFFFFFFFFFFFFFFFFFFFFFFFFFFFFFFFFFFFFFFFFFFFFFFFFFFF
FFFFFFFFFFFFFFFFFFFFFFFFFFFFFFFFFFFFFFFFFFFFFFFFFFFFFFFFFFFFF
FFF
@A00721:190:HGJW7DSXY:4:2330:11153:6872_1:N:0:TCTGCAAG+GCTGCACT
GTAGGTTTCGTGCCTACTATGAGCAAATCTGTTGAATTTCGTCACTGAGGACGAAGGTGAGAGGACTTTT
GGCTACTGGCGACAACCTGAGAGCAGTCGCTGGGGAAAGAATTGCGTGGGTTGAAGGCCGACGCTT
CGA
+
FFFFFFFFFFFFFF:FFFFFFFFFFFFFFFFFFFFFFFFFFFFFFFFFFFFFFFFFFFFFFFFFFFFF
FFFFFFFFFFFFFFFFFFFFFFFFFFFFFFFFFFFFFFFFFFFFFFFFFFFFFFFFFFFFF
FFF
@A00721:190:HGJW7DSXY:4:2226:12237:15139_2:N:0:TCTGCAAG+GCTGCACT
TGAAGGCTGGCTCTAAGGGAGACTCCTTCTTTTTGAATGTTGTAAAGAATTGGGTTGAGAAGTGTGCT
TTACAAGGAGTTAGACTCTTCTTCAAGTTTTTAGATCTTCTTGATAAT
+
FFFFFFFFFFFFFFFF:FFFFFFFFFFFFFF:FFFFFFFFFFFF:FFFFFFFFFFFFFFFFFFFFFFFFFFFFF
FFFFFFFFFFFFFFFFFFFFFFFFFFFFFFFFFFFF,,FFFFFFFF,FF,FF:FFFFF
@A00721:190:HGJW7DSXY:4:2647:8603:15201_2:N:0:TCTGCAAG+GCTGCACT
TTCAACGGATACCGATCTCAGTTCTACCACAGAAACCGTCTCAGGAAGTGTCTCCACTGATTCCGAAT
TAGAGAAAGACGACCTTCTTGTGGGGACTGAGACCTCTGAATTTTCAG
+
FFFFFFFFFFFFFFFFFFFFFFFFFFFFFFFFFFFFFFFFFFFFFFFFFFFFFFFFFFFFF,F
:FFFFFFFFFFFFFFFF:FFFFFFFFFFFFFFFFFFFFFFFFFFFFFFFFFFFFF
@A00721:190:HGJW7DSXY:4:1437:21983:18897_1:N:0:TCTGCAAG+GCTGCACT
GAACCTTCGGCCGCTCTCTTTGCTTCGATGTTGGATGTCAAGAAGGGTTCAGAATGGGATTCCCTACGT
AGTTTATGACTTTGGTGGTGGTACTTTCGATACTTCTATCGTCTTACGTTACGGTAATTACTATAGTG
TTA
+
FFFFFFFFFFFF:FFFFFF:FFFFFFFFFFFFFFFFFFFFFFFFFFFFFFFFFFFFF:FFFF:FFFFFFFFFFFFF
FFFFFFFFFFFFFFFFFFFFFFFFFFFFFFFFFFFFFFFFFFFFFFFFFFFFFFFFFFFFF
FFF
@A00721:190:HGJW7DSXY:4:2466:26304:36432_1:N:0:TCTGCAAG+GCTGCACT
AATAATGACGAGACTTTCGTCATAATCGCTGCATATTACGGATTACACGGTACCAGCGCATCTCGTGT
CGAGCCTCGACCCGATTATATGGTATTAAGTTATAAAGGTGAGGAGACCATTTTCTTGCTGAAATTTA
TAG
+
FFFFFFFFFFFFFFFFFFFFFFFFFFFFFFFFFFFFFFFFFFFFFFFFFFFFFFFFFFFFF:FFFFFFFFFFFFF
FFFFFFFFFFFFFFFFFFFFFFFFFFFFFFFFFFFFFFFFFFFFFFFFFFFFFFFFFFFFF
FFF
@A00721:190:HGJW7DSXY:4:1367:28727:35618_1:N:0:TCTGCAAG+GCTGCACT
AATCAAAGGTTTTGAATTTAGCTCAACTGGGGAGACGTGCTTAAATGGGTGATAAAAATTATTTAGAG
ATCTTTTCTACTTACAAAGGACAATTCAGTTTCATTAATTCTACGAAAAGTCCGGAGTATATTGTAT
GTT
+
FFFFF:,F:FFFFFFFFFFFFFFFF,FFFFFFFFFFFFFFFFFFFFFFFFFFFFF:FFFFFFFFFFFFF:FFF
FFFF:FFFFFFFFFFFF:FFFFFFFFFFFFFFFFFFFFFFFFFFFFFFFFFFFFF
FFF
@A00721:190:HGJW7DSXY:4:1205:27227:5181_1:N:0:TCTGCAAG+GCTGCACT
CCCATATAAACGATTATAACGCGTTTTTCCGTCCTTACCTTAATACACTACGATATCACCCGAACAC
GACTCGAAACCGAGACGCCGTAGATCAAAGTCCCTTCTAACTTTAGATT
+
FF,F,,,::,,,,,FF,,,,,:FFF:F:,,,::,,,,,FFFF::F,F,,,,,:,,,F:,,,::FF
FFFFFFFF:FFFFFFFFFFFFFFFFFFFFF:FFFFFFFFFFFFFFFFFFFFFFFFFFFFF

```











@A00721:190:HGJW7DSXY:4:2538:20130:36542\_1:N:0:TCTGCAAG+GCTGCACT  
TAGGTTCTGTCCTACTATGAGCAAATCTGTTGAATTCGTCACTGAGGACGAAGGTGAGAGGACTTTTG  
GCTACTGGCGACAACTGAGAGCAGTCGCTGGGGAAGAGAATTGCGTGGGTGAAGGCCGACGCTTC  
GAG

+

:FFFFFFFFFFFFFFFFFFFFFFFFFFFFFFFFFFFFFFFFFFFFFFFFFFFFFFFFFFFFFFFFFFFFFFFF  
FFFFFFFFFFFFFFFFFFFFFFFFFFFFFFFFFFFFFFFFFFFFFFFFFFFFFFFFFFFFFFFFFFFFFFFF  
FFF

@A00721:190:HGJW7DSXY:4:2526:26621:9142\_2:N:0:TCTGCAAG+GCTGCACT  
TGAAGGCTGGCTCTAAGGGAGACTCCTTCTTTTTGAATGTTGTAAAGAATTGGGTTGAGAAGTGTGCT  
TTACAAGGAGTTAGACTCTTCTTCAAGTTTTTAGATCTTCTTGATAAT

+

FFFFFFFFFFFFFFFFFFFFFFFFFFFFFFFFFFFFFFFFFFFFFFFFFFFFFFFFFFFFFFFFFFFFFFFF:FFFFFFFF  
FFFFFFFFFFFFFFFFFFFFFFFFFFFFFFFFFFFFFFFFFFFFFFFFFFFFFFFFFFFFFFFFFFFFFFFF:FFFFFFF:FFFFF

@A00721:190:HGJW7DSXY:4:2275:19985:17503\_1:N:0:TCTGCAAG+GCTGCACT  
AGTGACTGGAGTTCAGACGTGTGCTCTTCCGATCTACTGCCTCCACTGATTCGGAATTAGAGAAAGAC  
GACCTTCTGTGGGGACTGAGACCTCTGAATTTTCAGGGTGCCTGATGAGGACGTTGAAAGGGATAA  
TTT

+

:FFFFFFFFFFFFFFFFFFFFFFFFFFFFFFFFFFFFFFFFFFFFFFFFFFFFFFFFFFFFFFFFFFFFFFFF  
FFFFFFFFFFFFFFFFFFFFFFFFFFFFFFFFFFFFFFFFFFFFFFFFFFFFFFFFFFFFFFFFFFFFFFFF  
FFF

@A00721:190:HGJW7DSXY:4:1576:10122:31328\_1:N:0:TCTGCAAG+GCTGCACT  
GAACCTTCGGCCGCTCTCTTTGCTTCGATGTTGGATGTCAAGAAGGGTTCAGAATGGGATTCCTACGT  
AGTTTATGACTTTGGTGGTGGTACTTTGATACTTCTATCGTCTTACGTTACGGTAATTACTATAGTG  
TTA

+

FFFFFFFFFFFFFFFFFFFFFFFFFFFFFFFFFFFFFFFFFFFFFFFFFFFFFFFFFFFFFFFFFFFFFFFF:FFFFFFFFFFFFFFFF  
FFFFFFFFFFFFFFFFFFFFFFFFFFFFFFFFFFFFFFFFFFFFFFFFFFFFFFFFFFFFFFFFFFFFFFFF  
FFF

@A00721:190:HGJW7DSXY:4:1270:12662:24893\_2:N:0:TCTGCAAG+GCTGCACT  
ATAATGACGAGACTTTTCGTCATAATCGCTGCATATTACGGATTACACGGTACCAGCGCATCTCGTGTC  
GAGCCTCGACCCGATTATATGGTATTAACCTATAAAGGTGAGGAGACC

+

FFFF:FFFFFFF,FFFF:FFFFFFFFFFFFFFFFFFFFFFFFFFFFFFFFFFFFFFFFFFFFFFFF:FFFFFFFFFFFFFFFF  
,FFFFFFF:FFFFFFFFFFFFFFFFFFFFFFFFF,F:FFFFFFFFFFFFFFF:F,

@A00721:190:HGJW7DSXY:4:1458:6063:6950\_1:N:0:TCTGCAAG+GCTGCACT  
AATCAAAGTTTTGAATTTAGCTCAACTGGGGAGACGTGCTTAAATGGGTGATAAAAATTATTTAGAG  
ATCTTTTCTACTTACAAAGACAATTCAGTTTCATTAATTCTACGAAAAGTCCGGAGTATATTGTAT  
GTT

+

FFFFFFFFFFFFFFFFFFFFFFFFFFFFFFFFFFFFFFFFFFFFFFFFFFFFFFFFFFFFFFFFFFFFFFFF  
FFFFFFFFFFFFFFF:FF:F:FFFFFFFFFFFFFFFFFFFFFFFFFFFFFFFFFFFFFFFFFFFFFFFF  
FFF

@A00721:190:HGJW7DSXY:4:2335:28465:36417\_1:N:0:TCTGCAAG+GCTGCACT  
TCAACGAGTATAACGCTATTTTCCGTCTGAACGTAATACACTAATATATCAACCGCAAACGACTCG  
AAACCGAGACGCCGTAGATCAAAGTCCCTTCTAACTTTAGATTATGAATCCTGCCTTTACTCATTTTA  
TA

+

: ,F,F,, :,F,F:,::,,,FFF,F::,F,F,F,,, :F::,,:,F,F,,, :F,:F,FF,,F,FFFFFFFF  
FFFFFFFFFFFFFFFFFFFFFFFFFFFFFFFFFFFFFFFFFFFFFFFFFFFFFFFFFFFFFFFFFFFFFFFF  
FF

@A00721:190:HGJW7DSXY:4:1529:31376:35164\_1:N:0:TCTGCAAG+GCTGCACT  
TGACTGTTGATAATATTACAATAGCTCTTCTCAGAAGATTAGAGAAGTAACCGGTGAACACGTCGGT

AGCATTGATTTACTTTTACCGTTAGAACTGAAAAAGATTCTTTTCGAAAAGAAACCTATAAGTTACAA  
ACG

+

F:F,FFFFFFFFFFFFFFFF:FF:FF,FFFFFFFF:FFFFFFFFFFFFFFFFFFFFFFFF,FFFF,F  
FF:FFF:FFFF:FFFFFFFFFFFFFFFF: F:FFFFFFFFFFFFFFFF:FFFF:FFFFFF  
FFF

@A00721:190:HGJW7DSXY:4:2357:30201:3724\_1:N:0:TCTGCAAG+GCTGCACT  
ATACGTCGTGGGAGGTACTGAAGCCTTCCCCTCCGCTGGCACGAAGAACAACCTCCAAGCCAATCAATA  
GTTCTTCTGACCAGAATGAAAAGGGGTTTACCAGGGTAGTCTCTAAGTCTACCAGGAAGAGGGGAAAT  
GTC

+

FFFFFFFFFFFFFFFFFFFFFFFFFFFFFFFFFFFFFFFFFFFFFFFFFFFFFFFFFFFFFFFF  
FFFFFFFFFFFFFFFFFFFFFFFFFFFFFFFFFFFFFFFFFFFFFFFFFFFFFFFFFFFFFFFF  
FFF

@A00721:190:HGJW7DSXY:4:1529:18973:17253\_1:N:0:TCTGCAAG+GCTGCACT  
TGAAGGCTGGCTCTAAGGAGACTCCTTCTTTTTGAATGTTGTAAAGAATTGGGTTGAGAAGTGTGCT  
TTACAAGGAGTTAGACTCTTCTTCAAGTTTTAGATCTTCTTGATAATCTTAAAGAAAATTTTCGAA  
TAA

+

FFFFFFFFFFFFFFFF:FFFFFFFF:FFFFFFFFFFFFFFFFFFFFFFFFFFFFFFFF: F  
FFFFFFFFFFFFFFFFFFFFFFFFFFFFFFFFFFFFFFFFFFFFFFFFFFFFFFFFFFFFFFFF  
FFF

@A00721:190:HGJW7DSXY:4:2324:4788:36213\_1:N:0:TCTGCAAG+GCTGCACT  
AGTGACTGGAGTTCAGACGTGTGCTCTTCCGATCTACTGTCTCCACTGATTCGGAATTAGAGAAAGAC  
GACCTTCTTGTGGGGACTGAGACCTCTGAATTTTCAGGGTGCCCTGATGAGGACGTTGAAAGGATAA  
TTT

+

FFFFFFFFFFFFFFFFFFFFFFFFFFFFFFFFFFFFFFFF:FFFFFFFFFFFFFFFF  
FFFFFFFFFFFFFFFFFFFFFFFFFFFFFFFFFFFFFFFFFFFFFFFFFFFFFFFFFFFFFFFF  
FFF

@A00721:190:HGJW7DSXY:4:1634:26115:6762\_1:N:0:TCTGCAAG+GCTGCACT  
GAACCTTCGGCCGCTCTTTGCTTCGATGTTGGATGTCAAGAAGGGTTCAGAATGGGATTCCTACGT  
AGTTTATGACTTTGGTGGTGGTACTTTGATACTTCTATCGTCTTACGTTACGGTAATTACTATAGTG  
TTA

+

FFFFFFFFFFFFFFFFFFFFFFFFFFFFFFFFFFFFFFFFFFFFFFFFFFFFFFFFFFFFFFFF  
FFFFFFFFFFFFFFFFFFFFFFFF:FFFFFFFFFFFFFFFFFFFFFFFFFFFFFFFF  
FFF

@A00721:190:HGJW7DSXY:4:1330:24370:20964\_2:N:0:TCTGCAAG+GCTGCACT  
ATAATGACGAGACTTTCGTGATAATCGCTGCATATTACGATTACACGGTACCAGCGCATCTCGTGTC  
GAGCCTCGACCCGATTATATGGTATTAACCTATAAAGGTGAGGAGACC

+

FFFFFFFFFFFF:F:FFFFFFFFFFFFFFFFFFFFFFFFFFFFFFFFFFFFFFFF  
FFFFFFFFFFFFFFFF:FFF:FFFFFFFFFFFF:FFFFFFFFFFFF

@A00721:190:HGJW7DSXY:4:1460:18213:35164\_1:N:0:TCTGCAAG+GCTGCACT  
AATCAAAGTTTTGAATTTAGCTCAACTGGGAGACGTGCTTAAATGGGTGATAAAAATTATTTAGAG  
ATCTTTTCTACTTACAAAGGACAATTCAAGTTTCATTAATTCTACGAAAAGTCCGGAGTATATTGTAT  
GTT

+

FFFFFFF,FFFFFFFFFFFFFFFFFFFFFFFFFFFFFFFFFFFFFFFFFFFFFFFF  
FFFFFFFFFFFFFFFFFFFFFFFFFFFFFFFFFFFFFFFFFFFFFFFFFFFFFFFF  
FFF

@A00721:190:HGJW7DSXY:4:1345:21441:26224\_1:N:0:TCTGCAAG+GCTGCACT  
TGTGTGACTGGAGTTCAGACGGGTGCTCTTCTATCTTACACTAAGAGATAATCCGAAAACGACTCGA

AACCGAGACGCCGTAGATCAAAGTCCCTTCTAACTTTAGATTATGAATCCTGCCTTTACTC  
+  
::,F::,,FF,,,:F::,,,,,,F,,F,F,F::,F:,F,FFF:,F,,F:,,,F,F:,,,F,FFFFFFFFF  
FFFFFFFFFFFFFFFFFFFFFFFFFFFFFFFFFFFFFFFFFFFFFFFFFFFFFFFFFFFFFFFF  
@A00721:190:HGJW7DSXY:4:1605:20166:21355\_1:N:0:TCTGCAAG+GCTGCACT  
TGA CTGTTGATAATATTA AAAATAGCTCTTTCTCAGAAGATTAGAGAAGTAACCGTTAACACGTCGGT  
AGCATTGATTTACTTTTACCGTTAGAACTGAAAAAGATTCTTTTCGAAAAGAAACCTATAAGTTACAA  
ACG  
+  
F:F:FFFF,FFFF,FFF,F:F::FF:FF,:F,F,FF:FFF::F,FFFFFF:F:FF,FF,FF,F:F,F  
,F,,FF:FFFF:,FFFFFFF::F:FFF:F:FFFF,,FF,FFF::FFFF:FFFFFFFFFFFFFFFFF:F  
FFF  
@A00721:190:HGJW7DSXY:4:2367:11017:27179\_1:N:0:TCTGCAAG+GCTGCACT  
ATACGTCGTGGGAGGTACTGAAGCCTTCCCCTCCGCTGGCACGAAGAACTCCCAAGCCAATCAATA  
GTTCTTCTGACCAGAATGAAAAGGGGTTTACCAGGGTAGTCTCTAAGTCTACCAGGAAGAGGGGAAAT  
GTC  
+  
FFFFFFFFFFFFFFFFFFFFFFFFFFFF,FFFFFFFFFFFFFFFFFFFFFFFFFFFFFFFFFFFF:FFFFFFFFFFFF  
FFFFFFFFFFFFFFFFFFFFFFFFFFFFFFFFFFFFFFFFFFFFFFFFFFFFFFFFFFFFFFFFFFFF  
FFF  
@A00721:190:HGJW7DSXY:4:2120:26096:15906\_1:N:0:TCTGCAAG+GCTGCACT  
TGAAGGCTGGCTCTAAGGGAGACTCCTTCTTTTTGAATGTTGTAAAGAATTGGGTTGAGAAGTGTGCT  
TTACAAGGAGTTAGACTCTTCTTCAAGTTTTAGATCTTCTTGATAATCTTAAAGAAAAATTTTCGAA  
TAA  
+  
FFFFFFFFFFFF:F::FFFF,FFFF:FFFFFFFFFFFFFFFFFFFF:FFFFFFFFFFFFFFFFFFFFFFFFFFFF  
FFFFFFFFFFFFFFFFFFFFFFFFFFFF:FFFFFFFFFFFFFFFFFFFF:FFFFFFFFFFFFFFFFFFFFFFFFFFFF  
FFF  
@A00721:190:HGJW7DSXY:4:2447:16432:8500\_1:N:0:TCTGCAAG+GCTGCACT  
AGTGA CTGGAGTTCAGACGTGTGCTCTTCCGATCTACTGTCTCCACTGATTCGGAATTAGAGAAAGAC  
GACCTTCTTGTGGGACTGAGACCTCTGAATTTTCAGGGTGCCTGATGAGGACGTTGAAAGGGATAA  
TTT  
+  
FFFFFFFFFFFFFFFFFFFFFFFFFFFFFFFFFFFFFFFFFFFFFFFFFFFFFFFFFFFFFFFFFFFF:FFF  
FFFFFFFFFFFFFFFFFFFFFFFFFFFF:FF:FFFFFFFFFFFF:FFFFFF:FFFFFFFFFFFFFFFFFFFF:FF  
FFF  
@A00721:190:HGJW7DSXY:4:1637:15230:36417\_1:N:0:TCTGCAAG+GCTGCACT  
GAACCTTCGGCCGCTCTCTTTGCTTCGATGTTGGATGTCAAGAAGGGTTCAGAATGGGATTCCTACGT  
AGTTTATGACTTTGGTGGTGGTACTTTCGATACTTCTATCGTCTTACGTTACGGTAATTACTATAGTG  
TTA  
+  
FFFFFFFFFFFFFFFFFFFFFFFFFFFFFFFFFFFFFFFFFFFF:FFFFFFFFFFFFFFFFFFFFFFFFFFFF  
FFFFFFFFFFFFFFFFFFFFFFFFFFFFFFFFFFFF:FFFFFFFFFFFFFFFFFFFFFFFFFFFFFFFFFFFF:FFF  
FFF  
@A00721:190:HGJW7DSXY:4:1427:20663:29637\_2:N:0:TCTGCAAG+GCTGCACT  
ATAATGACGAGACTTTCGTCATAATCGCTGCATATTACGGATTACACGGTACCAGCGCATCTCGTGTC  
GAGCTCGACCCTATTATATGGTATTAACCTATAAAGGTGAGGAGACC  
+  
FFFFFFFFFFFF:FFFFFFFFFFFFFFFFFFFFFFFFFFFFFFFFFFFF:FFFFFFFFFFFFFFFFFFFFFFFFFFFF  
FFFFFFFFFFFFFFFFFFFFFFFFFFFFFFFFFFFFFFFFFFFFFFFFFFFFFFFFFFFFFFFFFFFF  
@A00721:190:HGJW7DSXY:4:1524:20989:12195\_1:N:0:TCTGCAAG+GCTGCACT  
AATCAAAGTTTTGAATTTAGCTCAACTGGGAGACGTGCTTAAATGGGTGATAAAAATTATTTAGAG  
ATCTTTTCTACTTACAAAGGACAATTCAAGTTTCATTAATTCTACGAAAAGTCCGGAGTATATTGTAT  
GTT

+  
FFFFF::FFF:FFFFFFFF:FFFFFFFFFFFFFFFFFFFFFFFFFFFFFFFFFFFFFFFF  
::F:FFFFFFFF:FFFFFFFFFFFFFFFFFFFFFFFFFFFFFFFFFFFFFFFFFFFF  
FFF  
@A00721:190:HGJW7DSXY:4:1211:4381:34162\_1:N:0:TCTGCAAG+GCTGCACT  
CACCTCGCATAACGCTATTTTTTCGGACCTCAACTTAAAACCCTAATATAACACCCGCACACGACTCGA  
AACCGAGACGCCGTAGATCAAAGTCCCTTCTAACTTTAGATTATGAATCCTGCCTTTACTCATTTT  
+  
FF:F,,,:,,,FF,,,:,,,FFF:F,,,F,F,F,,,F:,,,F,,,,,:,,F,FF,,F,,FFFF:FFF  
FFFFFFFFFFFFFFFFFFFFFFFFFFFFFFFFFFFFFFFFFFFFFFFFFFFFFFFFFFFF  
@A00721:190:HGJW7DSXY:4:2426:15935:24674\_1:N:0:TCTGCAAG+GCTGCACT  
TGACTGTTGATAATATTACAATAGCTCTTCTCAGAAGATTAGAGAAGTAACCGGTGAACACGTCGGT  
AGCATTGATTTACTTTTACCGTTAGAACTGAAAAGATTCTTTTCGAAAAGAAACCTATAAGTTACAA  
ACG  
+  
FF:FFFFF:FFFFF:FFFFFFFFFF:FFFFF,F:F:FF:FFFFFFFFFF:FFFFF:F:FFFFFFFFFF  
FF:FFFFFFFFFFFFFFFF:FFF:FF:F,FFFFFFFF:FFFFFFFFFFFFFFFF:FFFFF:  
FFF  
@A00721:190:HGJW7DSXY:4:2421:30228:19460\_1:N:0:TCTGCAAG+GCTGCACT  
ATACGTCGTGGGAGGTACTGAAGCCTTCCCCTCCGCTGGCAGGAAGAACTCCCAAGCCAATCAATA  
GTTCTTCTGACCAGAATGAAAAGGGTTTACCAGGGTAGTCTCTAAGTCTACCAGGAAGAGGGGAAAT  
GTC  
+  
FFFFFFFFFFFFFFFFFFFFFFFFFFFFFFFF:FFFFFFFFFFFFFFFFFFFFFFFFFFFF  
FFFFFFFFFFFFFFFFFFFFFFFFFFFFFFFF:FFFFFFFFFFFFFFFFFFFFFFFFFFFF  
FFF  
@A00721:190:HGJW7DSXY:4:1175:1759:31375\_2:N:0:TCTGCAAG+GCTGCACT  
GAAGGCTGGCTCTAAGGGAGACTCCTTCTTTTGAATGTTGTAAAGAATTGGGTTGAGAAGTGTGCTT  
TACAAGGAGTTAGACTCTTCTTCAAGTTTTTAGATCTTCTTGATAATC  
+  
FFFFFFFFFFFFFFFFFFFFFFFFFFFFFFFF:FFFFFFFFFFFFFFFFFFFFFFFFFFFF  
FFFFFFFFFFFFFFFFFFFFFFFFFFFFFFFF  
@A00721:190:HGJW7DSXY:4:1117:25681:20509\_2:N:0:TCTGCAAG+GCTGCACT  
TCAGTTCTACCACAGAAACCGTCTCAGGAAGTGTCTCCACTGATTTCGGAATTAGAGAAAGACGACCTT  
CTTGTGGGACTGAGACCTCTGAATTTTCAGGGTGCCCTGATGAGGAC  
+  
FFFFFFFFFFFFFFFFFFFFFFFF:FFFFFFFFFFFFFFFFFFFF:,FFFFFF:FFFFFFFFFFFFFFFF  
FF:FFFFFFFFFFFFFFFFFFFF,FFFF:FFFFFFFFFFFF,FFF:  
@A00721:190:HGJW7DSXY:4:1669:3522:8844\_1:N:0:TCTGCAAG+GCTGCACT  
GAACCTTCGGCCGCTCTCTTTGCTTCGATGTTGGATGTCAAGAAGGGTTCAGAATGGGATTCCTACGT  
AGTTTATGACTTTGGTGGTGGTACTTTGATACTTCTATCGTCTTACGTTACGGTAATTACTATAGTG  
TTA  
+  
FFFFFFFFFFFFFFFF:FFFFFFFFFFFFFFFFFFFFFFFFFFFFFFFFFFFFFFFFFFFF  
FFFFFFFFFFFFFFFFFFFFFFFFFFFFFFFFFFFFFFFFFFFFFFFFFFFFFFFFFFFF  
FFF  
@A00721:190:HGJW7DSXY:4:1569:24587:28855\_2:N:0:TCTGCAAG+GCTGCACT  
ATAATGACGAGACTTTTCGTCATAATCGCTGCATATTACGGATTACACGGTACCAGCGCATCTCGTGTC  
GAGCTCGACCCGATTATATGGTATTAACCTATAAAGGTGAGGAGACC  
+  
FFFF:FFFFFFFF:,FFFFFF:FFFFF:FFFFFF:FF::FFFF,FFFF:FFFFFF:FFFFF  
FFFFFFFF:FFFFFFFFFFFF:FFFFFFFFFFFFFFFF:F,FFF:  
@A00721:190:HGJW7DSXY:4:1528:29722:23907\_1:N:0:TCTGCAAG+GCTGCACT  
AATCAAAGTTTTGAATTTAGCTCAACTGGGAGACGTGCTTAAATGGGTGATAAAAATTATTTAGAG

ATCTTTTCTACTTACAAAGGACAATTCAGTTTCATTAATTCTACGAAAAGTCCGGAGTATATTGTAT  
GTT

+

FFFFFFFFFFFFFFFFFFFFFFFFFFFFFFFFFFFFFFFFFFFFFFFFFFFFFFFFFFFFFFFFFFFFFFFF  
F:FFFFFFFFFFFFFFFFFFFFFFFFFFFFFFFFFFFFFFFFFFFFFFFFFFFFFFFFFFFFFFFFFFFF  
FFF

@A00721:190:HGJW7DSXY:4:2525:15483:16752\_1:N:0:TCTGCAAG+GCTGCACT  
CAACGAGTATAAAGCGTTTTTCCGTCCTCAACTAAATACACGAAGATAACACCCGCAAACGACTCGA  
AACCGAGACGCCGTAGATCAAAGTCCCTTCTAACTTTAGATTATGAATCCTGCCTTTACTCATTTTAT  
A

+

:F:,,,F::F,,F,,,FF,,F:,,F,,,F:,,,FF,:F:,,F,,,F,:F,FF,,F,FFFFFFFF  
FFFFFFFFFFFFFFFFFFFFFFFFFFFFFFFFFFFFFFFFFFFFFFFFFFFFFFFFFFFFFFFFFFFF  
F

@A00721:190:HGJW7DSXY:4:2607:30264:26130\_1:N:0:TCTGCAAG+GCTGCACT  
TGACTGTTTATAATATTACAATAGCTATTTCTCAGAAGATTAGAGAAGTAACCGGTGAACACGTCGGT  
AGCATTGATTTACTTTTACCGTTAGAACTGAAAAAGATTCTTTTCGAAAAGAAACCTATAAGTTACAA  
ACG

+

FFF::FF,FFF:FFF:FFFFFF:,,:FFFF:FF:FF,FFFFFF:FF,FFFFFF:FFFFFF,FFF::F  
FFFFFF,:FFFF:FFF:F:,:F:FFFF:FFFF::FF,FFFF,FFFFFFFF:FFFF::FFFF,  
FFF

@A00721:190:HGJW7DSXY:4:2546:4336:36432\_1:N:0:TCTGCAAG+GCTGCACT  
ATACGTCGTGGGAGGTACTGAAGCCTTCCCCTCCGCTGGCACGAAGAACTCCCAAGCCAATCAATA  
GTTCTTCTGACCAGAATGAAAAGGGGTTTACCAGGGTAGTCTCTAAGTCTACCAGGAAGAGGGGAAAT  
GTC

+

FFF:FFFFFFFF:FFFFFFFF:,F,F:FFFFFFFF:F:F,FF,FFFFFFFF:F,F,:FFF::FFF  
F,FFFF,FFF:FFFFFF:F,F,:FFFF:FFFF:FF,FF,FFFFFFFFFFFFFFFFFFFF:FF:FF:  
FFF

@A00721:190:HGJW7DSXY:4:1265:6813:11099\_2:N:0:TCTGCAAG+GCTGCACT  
GAAGGCTGGCTCTAAGGGAGACTCCTTCTTTTGAATGTTGTAAAGAATTGGGTTGAGAAGTGTGCTT  
TACAAGGAGTTAGACTCTTCTTCAAGTTTTTAGATCTTCTTGATAATC

+

FFFFFFFFFFFFFFFFFFFFFFFFFFFFFFFFFFFFFFFFFFFFFFFFFFFFFFFFFFFFFFFFFFFF  
FFFFFFFFFFFFFFFFFFFFFFFFFFFFFFFFFFFFFFFFFFFFFFFFFFFFFFFFFFFFFFFFFFFF

@A00721:190:HGJW7DSXY:4:1240:10321:29011\_2:N:0:TCTGCAAG+GCTGCACT  
TCAGTTCTACCACAGAAACCGTCTCAGGAAGTGTCTCCACTGATTCGGAATTAGAGAAAGACGACCTT  
CTTGTGGGACTGAGACCTCTGAATTTTCAAGGTGCCCTGATGAGGAC

+

FFFFFFFFFFFFFFFFFFFFFFFFFFFFFFFFFFFFFFFFFFFFFFFFFFFFFFFFFFFFFFFFFFFF  
FFFFFFFFFFFFFFFFFFFFFFFFFFFFFFFFFFFFFFFFFFFFFFFFFFFFFFFFFFFFFFFFFFFF

@A00721:190:HGJW7DSXY:4:2130:4698:17801\_1:N:0:TCTGCAAG+GCTGCACT  
GAACCTTCGGCCGCTCTCTTTGCTTCGATGTTGGATGTCAAGAAGGGTTCAGAATGGGATTCCTACGT  
AGTTTATGACTTTGGTGGTGGTACTTTCGATACTTCTATCGTCTTACGTTACGGTAATTACTATAGTG  
TTA

+

FFFFFFFFFFFFFFFF:F:FFFFFF:FFFFFFFFFFFFFFFFFFFFFFFFFFFFFFFFFFFFFFFFFFFF  
FFFFFFFFFFFFFFFFFFFFFFFFFFFFFFFFFFFFFFFFFFFFFFFFFFFFFFFFFFFFFFFFFFFF  
FFF

@A00721:190:HGJW7DSXY:4:2207:1127:4946\_2:N:0:TCTGCAAG+GCTGCACT  
ATAATGACGAGACTTTTCGTCATAATCGCTGCATATTACGATTACACGGTACCAGCGCATCTCGTGTC  
GAGCTCGACCCTATTATATGGTATTAAGTTATAAAGGTGAGGAGACC

+

@A00721:190:HGJW7DSXY:4:1536:11532:12007\_1:N:0:TCTGCAAG+GCTGCACT  
AATCAAAGGTTTTGAATTTAGCTCAACTGGGGAGACGTGCTTAAATGGGTGATAAAATTATTTAGAG  
ATCTTTTCTACTTACAAAGGACAATTCAAGTTTCATTAATTCTACGAAAAGTCCGGAGTATATTGTAT  
GTT

+

```
F,FFFFFF:FFFFFFFFFFFFFFFFFFFFFFFFFFFFFFFFFFFFFFFFFFFFFFFFFFFFFFFFFFFF
FFFFFFFFFFFFFFFF:FFFFFFFFF::FFFFFFFFFFFFFFFFFFFFFFFFFFFFFFFFFFFFFFFF
FFF
```

@A00721:190:HGJW7DSXY:4:2228:2419:7498\_1:N:0:TCTGCAAG+GCTGCACT  
CACCGCGTATAACGCGATTTTTCCGTCCTGAACGTAATACACGACGATATCACCCGAAAACGACTCGA  
AACCGAGACGCCGTAGATCAAAGTCCCTTCTAACTTTAGATTATGAATCCTGCCTTTACTCATTTTAT  
A

+

[illegible]

@A00721:190:HGJW7DSXY:4:1123:26955:25347\_2:N:0:TCTGCAAG+GCTGCACT  
GACTGTTGATAATATTACAATAGCTCTTTCTCAGAAGATTAGAGAAGTAACCGGTGAACACGTCGGTA  
GCATTGATTTACTTTTACCGTTAGAAGTGAAGGAGATTCTTTTCGAAA

+

[illegible]

@A00721:190:HGJW7DSXY:4:2560:20265:5400\_1:N:0:TCTGCAAG+GCTGCACT  
ATACGTCGTGGGAGGTACTGAAGCCTTCCCCTCCGCTGGCACGAAGAACTCCCAAGCCAATCAATA  
GTTCTTCTGACCAGAATGAAAAGGGGTTTACCAGGGTAGTCTCTAAGTCTACCAGGAAGAGGGGAAAT  
GTC

+

[illegible]

@A00721:190:HGJW7DSXY:4:1347:18059:20306\_2:N:0:TCTGCAAG+GCTGCACT  
GAAGGCTGGCTCTAAGGGAGACTCCTTCTTTTTGAATGTTGTAAAGAATTGGGTTGAGAAAGTGTGCTT  
TACAAGGAGTTAGACTCTTCTTCAAGTTTTTAGATCTTCTTGATAATC

+

[illegible]

@A00721:190:HGJW7DSXY:4:1275:7012:23093\_2:N:0:TCTGCAAG+GCTGCACT  
TCAGTTCTACCACAGAAACCGTCTCAGGAACGTCTCCACTGATTCGGAATTAGAGAAAGACGACCTT  
CTTGTGGGGACTGAGACCTCTGAATTTTCAGGGTGCCCTGATGAGGAC

+

[illegible]

@A00721:190:HGJW7DSXY:4:2207:2374:25645\_1:N:0:TCTGCAAG+GCTGCACT  
GAACCTTCGGCCGCTCTCTTTGCTTCGATGTTGGATGTCAAGAAGGGTTCAGAATGGGATTCCCTACGT  
AGTTTATGACTTTGGTGGTGGTACTTTGATACTTCTATCGTCTTACGTTACGGTAATTACTATAGTG  
TTA

+

[illegible]

@A00721:190:HGJW7DSXY:4:2208:29559:31610\_2:N:0:TCTGCAAG+GCTGCACT  
ATAATGACGAGACTTTCGTCATAATCGCTGCATATTACGGATTACACGGTACCAGCGCATCTCGTGTC



+

@A00721:190:HGJW7DSXY:4:1543:18828:21512\_1:N:0:TCTGCAAG+GCTGCACT  
AATCAAAGGTTTTGAATTTAGCTCAACTGGGGAGACGTGCTTAAATGGGTGATAAAATTATTTAGAG  
ATCTTTTCTACTTACAAAGGACAATTCAAGTTTCATTAATTCTACGAAAAGTCCGGAGTATATTGTAT  
GTT

+

@A00721:190:HGJW7DSXY:4:1363:28203:29794\_1:N:0:TCTGCAAG+GCTGCACT  
CAACGAGGATAAAGCGATTTTTCCGTCCTGAACCTTAATACACGATGAGATCATCCGAAAACGACTCGA  
AACCGAGACGCCGTAGATCAAAGTCCCTTCTAACTTTAGATTATGAATCCTGCCTTTACTCATTAT  
AGC

+

@A00721:190:HGJW7DSXY:4:1141:11153:26600\_2:N:0:TCTGCAAG+GCTGCACT  
GACTGTTGATAATATTACAATAGCTCTTTCTCAGAAGATTAGAGAAGTAACCGGTGAACACGTCGGTA  
GCATTGATTTACTTTTACCGTTAGAAGTAAAAAGATTCTTTTCGAAA

+

@A00721:190:HGJW7DSXY:4:2630:23276:5822\_1:N:0:TCTGCAAG+GCTGCACT  
ATACGTCGTGGGAGGTACTGAAGCCTTCCCCTCCGCTGGCACAAGAACAACCTCCCAAGCCAATCAATA  
GTTCTTCTGACCAGAATGAAAAGGGGTTTACCAGGGTAGTCTCTAAGTCTACCAGGAAGAGGGGAAAT  
GTC

+

@A00721:190:HGJW7DSXY:4:1347:31078:34522\_2:N:0:TCTGCAAG+GCTGCACT  
GAAGGCTGGCTCTAAGGGAGACTCCTTCTTTTTGAATGTTGTAAAGAATTGGGTTGAGAAGTGTGCTT  
TACAAGGAGTTAGACTCTTCTTCAAGTTTTTAGATCTTCTTGATAATC

+

@A00721:190:HGJW7DSXY:4:1555:31711:36495\_2:N:0:TCTGCAAG+GCTGCACT  
TCAGTTCTACCACAGAAACCGTCTCAGGAAGTGTCTCCACTGATTCGGAATTAGAGAAAGACGACCTT  
CTTGTGGGGACTGAGACCTCTGAATTTTCAGGGTGCCCTGATGAGGAC

+

@A00721:190:HGJW7DSXY:4:2248:17282:2206\_1:N:0:TCTGCAAG+GCTGCACT  
GAACCTTCGGCCGCTCTCTTTGCTTCGATGTTGGATGTCAAGAAGGGTTCAGAATGGGATTCCCTACGT  
AGTTTATGACTTTGGTGGTGGTACTTTGATACTTCTATCGTCTTACGTTACGGTAATTACTATAGTG  
TTA

+

[illegible]



@A00721:190:HGJW7DSXY:4:2448:14163:34757\_2:N:0:TCTGCAAG+GCTGCACT  
ATAATGACGAGACTTTTCGTCATAATCGCTGCATATTACGGATTACACGGTACCAGCGCATCTCGTGTC  
GAGCCTCGACCCGATTATATGGTATTAAC TTATAAAGGTGAGGAGATC

+

FFFFFFFFFFFFFF:FFFFFFFFFFFFFF:FFFFFFFFFFFFFF:FFFFFFFFFFFFFF  
FFFFFFFFFFFFFF:FFFFFFFFFFFFFF:FFFFFFFFFFFFFF:FFFFFFFFFFFFFF

@A00721:190:HGJW7DSXY:4:1644:24334:19586\_1:N:0:TCTGCAAG+GCTGCACT  
AATCAAAGTTTTGAATTTAGCTCAACTGGGGAGACGTGCTTAAATGGGTTATAAAAATTATTTAGAG  
ATCTTTTCTACTTACAAAGGACAATTCAAGTTTCATTAATTCTACGAAAAGTCCGGAGTATATTGTAT  
GTT

+

FFFF:FFF,FFFFFF,FFFFFFFFFFFFFF:FFFF,FF,,FF:,FF,FF,,FFFFFF:FFFFFFFF  
,FFFFFF::FFFFFF::FFFF,FFFF:FFFFFFFF:FFF:FFFF,F,:FFF:FFFFFFFF  
FFF

@A00721:190:HGJW7DSXY:4:1521:14335:17895\_1:N:0:TCTGCAAG+GCTGCACT  
AACGAGTATAAAGCTTTTTTCCGTCTTAAC TTAATACACGAATATATCATCCGCACACGACTCGAA  
ACCGAGACGCCGTAGATCAAAGTCCCTTCTAAC TTTAGATTATGAATCCTGCCTTTACTCATTTTATA

+

F,::,:FF::,:FFF:F,,,,F,F,,,,F::F:F,,FF,,,F,,F,FF,,F,FFFFFFFF  
FFFFFFFFFFFFFFFFFFFFFFFFFFFFFFFFFFFFFFFFFFFFFFFFFFFFFFFFFFFFFFFF

@A00721:190:HGJW7DSXY:4:1172:13702:35180\_2:N:0:TCTGCAAG+GCTGCACT  
GACTGTTGATAATATTACAATAGCTCTTTCTCAGAAGATTAGAGAAGTAACCGGTGAACACGTCGGTA  
GCATTGATTACTTTTACCGTTAGAACTGAAAAAGATTCTTTTCGAAA

+

FFF,FFFFFFFF:FFFFFFFFFFFFFFFF,FFFFFFFFFFFFFFFFFFFFFFFF  
FFFFFFFFFFFFFFFFFFFFFFFFFFFFFFFFFFFFFFFF:FFF:F

@A00721:190:HGJW7DSXY:4:1518:10456:34538\_1:N:0:TCTGCAAG+GCTGCACT  
TGTGCTCTTCCGATCTACTGAAGCCTTCCCTCCGCTGGCACGAAGAACTCCCAAGCCAATCAATA  
GTTCTTCTGACCAGAATGAAAAGGGTTTACCAGGCTAGTCTCTAAGTCTACCAGGAAGAGGGGAAAT  
GTC

+

FFFFFFFFFFFFFFFFFFFFFFFFFFFFFFFFFFFFFFFFFFFFFFFFFFFFFFFF  
FFFFFFFFFFFFFFFFFFFFFFFFFFFFFFFFFFFFFFFFFFFFFFFFFFFFFFFF  
FFF

@A00721:190:HGJW7DSXY:4:1506:17689:2096\_2:N:0:TCTGCAAG+GCTGCACT  
GAAGGCTGGCTCTAAGGGAGACTCCTTCTTTTGAATGTTGTAAAGAATTGGGTTGAGAAGTGTGCTT  
TACAAGGAGTTAGACTCTTCTCAAGTTTTTAGATCTTCTTGATAATC

+

FFFFFFFFFFFFFFFF:FFFF::FFFFFFFFFFFFFFFF:FFFFFFFF:FFFFFFF  
FFFFFFFFFFFFFFFFFFFFFFFFFFFFFFFF,FFF::FFFFF:

@A00721:190:HGJW7DSXY:4:2432:25789:17503\_2:N:0:TCTGCAAG+GCTGCACT  
TCAGTTCTACCACAGAAACCGTCTCAGGAAGTGTCTCCACTGATTCGGAATTAGAGAAAGACGACCTT  
CTTGTGGGACTGAGACCTCTGAATTTTCAAGGTGTCCTGATGAGGAC

+

FFFFFFFFFFFFFFFFFFFFFFFFFFFFFFFFFFFFFFFF:FFFFFFFFFFFFFFFF  
FFFFFFFFFFFFFFFFFFFFFFFFFFFFFFFFFFFFFFFF

@A00721:190:HGJW7DSXY:4:2325:31891:6872\_1:N:0:TCTGCAAG+GCTGCACT  
GAACCTTCGGCCGCTCTTTGCTTCGATGTTGGATGTCAAGAAGGGTTCAGAATGGGATTCCTACGT  
AGTTTATGACTTTGGTGGTGGTACTTTCGATACTTCTATCGTCTTACGTTACGGTAATTACTATAGTG  
TTA

+

FFF:FFFF,FF,FF,F:FFFFFFFF:FFFFFFFF,FFFFFFFF,::FFFF::FFF,,F:FF  
FFFFFFFF:FFFFFFFFFFFFFFFFFFFFFFFF:FFFFFFFF,FFFFFFFFFFFF  
FFF

$+$ 

@A00721:190:HGJW7DSXY:4:1646:32886:4773\_1:N:0:TCTGCAAG+GCTGCACT  
AATCAAAGGTTTTGAATTTAGCTCAACTGGGGAGACGTGCTTAAATGGGTGATAAAATTATTTAGAG  
ATCTTTTCTACTTACAAAGGACAATTCAAGTTTCATTAATTCTACGAAAAGTCCGGAGTATATTGTAT  
GTT

 $+$ 

@A00721:190:HGJW7DSXY:4:1627:31159:15969\_1:N:0:TCTGCAAG+GCTGCACT  
ACCGTGGATAAAGCTAGTTTTCCGTCCTGACCTTAATACACGAAGTGATCATCCGCAAACGACTCGAA  
ACCGAGACGCCGTAGATCAAAGTCCCTTCTAACTTTAGATTATGAATCCTGCCTTTACTCATTTTATA

+

@A00721:190:HGJW7DSXY:4:1172:13856:34507\_2:N:0:TCTGCAAG+GCTGCACT  
GACTGTTGATAATATTACAATAGCTCTTTCTCAGAAGATTAGAGAAGTAACCGGTGAACACGTCGGTA  
GCATTGATTTACTTTTACCGTTAGAAGTAAAAAGATTCTTTTCGAAA

+

@A00721:190:HGJW7DSXY:4:1629:16251:32049\_1:N:0:TCTGCAAG+GCTGCACT  
TGTGCTCTTCCGATCTACTGAAGCCTTCCCCTCCGCTGGCACAAGAACAACCTCCCAAGCCAATCAATA  
GTTCTTCTGACCAGAATGAAAAGGGGTTTACCAGGGTAGTCTCTAAGTCTACCAGGAAGAGGGGAAAT  
GTC

+

@A00721:190:HGJW7DSXY:4:1524:18313:22936\_2:N:0:TCTGCAAG+GCTGCACT  
GAAGGCTGGCTCTAAGGGAGACTCCTTCTTTTTGAATGTTGTAAAGAATTGGGTTGAGAAGTGTGCTT  
TACAAGGAGTTAGACTCTTCTTCAAGTTTTTAGATCTTCTTGATAATC

+

@A00721:190:HGJW7DSXY:4:2523:16640:31751\_2:N:0:TCTGCAAG+GCTGCACT  
TCAGTTCTACCACAGAAACCGTCTCAGGAAGTGTCTCCACTGATTCGGAATTAGAGAAAGACGACCTT  
CTTGTGGGGACTGAGACCTCTGAATTTTCAGGGTGCCCTGATGAGGAC

+

@A00721:190:HGJW7DSXY:4:2358:2257:9283\_1:N:0:TCTGCAAG+GCTGCACT  
GAACCTTCGGCCGCTCTCTTTGCTTCGATGTTGGATGTCAAGAAGGGTTCAGAATGGGATTCTACGT  
AGTTTATGACTTTGGTGGTGGTACTTTGATACTTCTATCGTCTTACGTTACGGTAATTACTATAGTG  
TTA

+

[illegible]

@A00721:190:HGJW7DSXY:4:2603:5945:3897\_2:N:0:TCTGCAAG+GCTGCACT  
ATAATGACGAGACTTTTCGTCATAATCGCTGCATATTACGGATTACACGGTACCAGCGCATCTCGTGTC  
GAGCCTCGACCCGATTATATGGTATTAAC TTATAAAGGTGAGGAGATC

+

FFFFFFFFFFFFFFFFFFFFFFFFFFFFFFFFFFFFFFFFFFFFFFFFFFFFFFFFFFFFFFFFFFFFFFFF  
FFFFFFFFFFFFFFFFFFFFFFFFFFFFFFFFFFFFFFFFFFFFFFFFFFFFFFFFFFFFFFFFFFFFFFFF

@A00721:190:HGJW7DSXY:4:2121:14904:9392\_1:N:0:TCTGCAAG+GCTGCACT  
AATCAAAGGTTTTGAATTTAGCTCAACTGGGGAGACGTGCTTAAATGGGTGATAAAAATTATTTAGAG  
ATCTTTTCTACTTACAAAGGACAATTCAGTTTCATTAATTCTACGAAAAGTCCGGAGTATATTGTAT  
GTT

+

FFF:FFF:FFF:FFFFFFFFFFFFFFFFFFFFFFFFFFFFFFFFFFFFFFFFFFFFFFFFFFFFFFFFFFFF  
FFFFFFFF:FFFFFFFFFFFF:FFFFFFFFFFFFFFFFFFFFFFFFFFFFFFFFFFFFFFFFFFFFFFFFFFFF  
FFF

@A00721:190:HGJW7DSXY:4:1215:28203:23062\_1:N:0:TCTGCAAG+GCTGCACT  
AACTCGTATAAAGCGTGTTCGCCCTGAAGTTAATACACTAATAGATCACCCGCACACGACTCGAA  
ACCGAGACGCCGTAGATCAAAGTCCCTTCTAACTTTAGATTATGAATCCTGCCTTTACTCATTTTATA

+

F,F,,,:F,FF,,,:,,FFF:F,,,F:F,F:,,,,:,,F,,,,,:,,,F,,F,F:,,F,FFF:F,FFFF  
FFFFFFFFFFFFFFFFFFFFFFFFFFFFFFFFFFFFFFFFFFFFFFFFFFFFFFFFFFFFFFFFFFFFFFFF

@A00721:190:HGJW7DSXY:4:1375:14832:8108\_2:N:0:TCTGCAAG+GCTGCACT  
GACTGTTGATAATATTACAATAGCTCTTTCTCAGAAGATTAGAGAAGTAACCGGTGAACACGTCGGTA  
GCATTGATTTACTTTTACCGTTAGAACTGAAAAAGATTCTTTTCGAAA

+

F:FFFF:FFFFFFFFFFFF:FFF::F:F:FFFFFFFFFFFFFFFFFFFFFFFFFFFFFFFFFFFFFFFF  
FFFFFFFFFFFFFFFFFFFFFFFFFFFFFFFFFFFFFFFFFFFFFFFFFFFFFFFFFFFFFFFFFFFFFFFF

@A00721:190:HGJW7DSXY:4:1416:14244:33426\_2:N:0:TCTGCAAG+GCTGCACT  
TCGTGGGAGGTACTGAAGCCTTCCCCTCCGCTGGCACGAAGAACTCCCAAGCCAATCAATAGTTCT  
TCTGACCAGAAATGAAAAGGGGTTTACCAGGGTAGTCTCTAAGTCTACC

+

FFFFFFFFFFFFFFFFFFFFFFFFFFFFFFFFFFFFFFFFFFFFFFFFFFFFFFFFFFFFFFFFFFFFFFFF  
FFFFFFFFFFFFFFFFFFFF:FFFFFFFFFFFFFFFFFFFFFFFFFFFFFFFFFFFFFFFFFFFFFFFFFFFF

@A00721:190:HGJW7DSXY:4:1533:16369:32409\_2:N:0:TCTGCAAG+GCTGCACT  
GAAGGCTGGCTCTAAGGGAGACTCCTTCTTTTTGAATGTTGTAAAGAATTGGGTTGAGAAGTGTGCTT  
TACAAGGAGTTAGACTCTTCTTCAAGTTTTTAGATCTTCTTGATAATC

+

FFFFFFFFFFFFFFFFFFFFFFFFFFFFFFFFFFFFFFFFFFFFFFFFFFFFFFFFFFFFFFFFFFFFFFFF  
FFFFFFFFFFFFFFFFFFFFFFFFFFFFFFFFFFFFFFFFFFFFFFFFFFFFFFFFFFFFFFFFFFFFFFFF

@A00721:190:HGJW7DSXY:4:2524:24695:4178\_2:N:0:TCTGCAAG+GCTGCACT  
TCAGTTCTACCACAGAAACCGTCTCAGGAAGTGTCTCCACTGATTCGGAATTAGAGAAAGACGACCTT  
CTTGTGGGACTGAGACCTCTGAATTTTCAGGGTGCCCTGATGAGGAC

+

FFFFFFFFFFFFFFFFFFFFFFFFFFFFFFFFFFFFFFFFFFFFFFFFFFFFFFFFFFFFFFFFFFFFFFFF  
FFFFFFFFFFFFFFFFFFFFFFFFFFFFFFFFFFFFFFFFFFFFFFFFFFFFFFFFFFFFFFFFFFFFFFFF

@A00721:190:HGJW7DSXY:4:2516:18186:13479\_1:N:0:TCTGCAAG+GCTGCACT  
GAACCTTCGGCCGCTCTTTGCTTCGATGTTGGATGTCAAGAAGGGTTCAGAATGGGATTCCTACGT  
AGTTTATGACTTTGGTGGTGGTACTTTCGATACTTCTATCGTCTTACGTTACGGTAATTACTATAGTG  
TTA

+

FFFFFFFFFFFFFF:FFFFFF:FFFFFFFFFFFFFFFFFFFFFFFFFFFFFFFFFFFFFFFFFFFFFFFF  
FFFFFFFFFFFFFFFFFFFFFFFFFFFFFFFFFFFFFFFFFFFFFFFFFFFFFFFFFFFFFFFFFFFFFFFF  
FFF

@A00721:190:HGJW7DSXY:4:2604:5086:33254\_2:N:0:TCTGCAAG+GCTGCACT  
ATAATGACGAGACTTTTCGTCATAATCGCTGCATATTACGGATTACACGGTACCAGCGCATCTCGTGTC

+

@A00721:190:HGJW7DSXY:4:2121:8856:14262\_1:N:0:TCTGCAAG+GCTGCACT  
AATCAAAGGTTTTGAATTTAGCTCAACTGGGGAGACGTGCTTAAATGGGTGATAAAAAATTATTTAGAG  
ATCTTTTCTACTTACAAAGGACAATTCAGTTTCATTAATTCTACGAAAAGTCCGGAGTATATTGTAT  
GTT

+

@A00721:190:HGJW7DSXY:4:1344:25834:14575\_1:N:0:TCTGCAAG+GCTGCACT  
AACGTGTATAAAGCGTTTTTTCCGTCTGAACGTAATACACCAAGAGATCATCCGCAAACGACTCGAA  
ACCGAGACGCCGTAGATCAAAGTCCCTTCTAACTTTAGATTATGAATCCTGCCTTTACTCATTTTATA  
GC

+

@A00721:190:HGJW7DSXY:4:1574:18801:34460\_2:N:0:TCTGCAAG+GCTGCACT  
GACTGTTGATAATATTACAATAGCTCTTTCTCAGAAGATTAGAGAGGTAACCGGTGAACACGTCGGTA  
GCATTGATTTACTTTTACCGTTAGAAGTGAAGGATTTCTTTTCGAAA

+

@A00721:190:HGJW7DSXY:4:1510:24632:21355\_2:N:0:TCTGCAAG+GCTGCACT  
TCGTGGGAGGTACTGAAGCCTTCCCCTCCGCTGGCACGAAGAACACTCCCAAGCCAATCAATAGTTCT  
TCTGACCAGAATGAAAAGGGGTTTACCAGGGTAGTCTCTAAGTCTACC

+

@A00721:190:HGJW7DSXY:4:1564:25807:13526\_2:N:0:TCTGCAAG+GCTGCACT  
GAAGGCTGGCTCTAAGGGAGACTCCTTCTTTTTGAATGTTGTAAAGAATTGGGTTGAGAAGTGTGCTT  
TACAAGGAGTTAGACTCTTCTTCAAGTTTTTAGATCTTCTTGATAATC

+

@A00721:190:HGJW7DSXY:4:2560:28691:26882\_2:N:0:TCTGCAAG+GCTGCACT  
TCAGTTCTACCACAGAAACCGTCTCAGGAAGTGTCTCCACTGATTCGGAATTAGAGAAAGACGACCTT  
CTTGTGGGGACTGAGACCTCTGAATTTTCAGGGTGCCCTGATGAGGAC

$$+$$

@A00721:190:HGJW7DSXY:4:2516:18358:14215\_1:N:0:TCTGCAAG+GCTGCACT  
GAACCTTCGGCCGCTCTCTTTGCTTCGATGTTGGATGTCAAGAAGGGTTCAGAATGGGATTCCCTACGT  
AGTTTATGACTTTGGTGGTGGTACTTTGATACTTCTATCGTCTTACGTTACGGTAATTACTATAGTG  
TTA

+

@A00721:190:HGJW7DSXY:4:2648:8043:2174\_2:N:0:TCTGCAAG+GCTGCACT  
ATAATGACGAGACTTTTCGTCATAATCGCTGCATATTACGGATTACACGGTACCAGCGCATCTCGTGTC

+

@A00721:190:HGJW7DSXY:4:2127:10981:27555\_1:N:0:TCTGCAAG+GCTGCACT  
AATCAAAGGTTTTGAATTTAGCTCAACTGGGGAGACGTGCTTAAATGGGTGATAAAAATTATTTAGAG  
ATCTTTTCTACTTACAAAGGACAATTCAGTTTCATTAATTCTACGAAAAGTCCGGAGTATATTGTAT  
GTT

+

@A00721:190:HGJW7DSXY:4:2272:18322:32659\_1:N:0:TCTGCAAG+GCTGCACT  
AACGAGTATAAAGCGATTTTTCCGTCTGAACGTAAACACTAATATATCATCCGCAAACGACTCGAA  
ACCGAGACGCCGTAGATCAAAGTCCCTTCTAACTTTAGATTATGAATCCTGCCTTTACTCATTTTATA  
GC

+

@A00721:190:HGJW7DSXY:4:1667:32497:5635\_2:N:0:TCTGCAAG+GCTGCACT  
GACTGTTGATAATTACAATAGCTCTTCTCAGAAGATTAGAGAAGTAACCGGTGAACACGTCGGTA  
GCATTGATTTACTTTTACCGTTAGAAGTGAAGAAAGATTCTTTTCGAAA

+

@A00721:190:HGJW7DSXY:4:1523:23068:16485\_2:N:0:TCTGCAAG+GCTGCACT  
TCGTGGGAGGTACTGAAGCCTTCCCCTCCGCTGGCACGAAGAACACTCCCAAGCCAATCAATAGTTCT  
TCTGACCAGAATGAAAAGGGGTTTACCAGGGTAGTCTCTAAGTCTACC

+

@A00721:190:HGJW7DSXY:4:2304:12237:25160\_2:N:0:TCTGCAAG+GCTGCACT  
GAAGGCTGGCTCTAAGGGAGACTCCTTCTTTTGAATGTTGTAAAGAATTGGGTTGAGAAGTGTGCTT  
TACAAGGAGTTAGACTCTTCTTCAAGTTTTTAGATCTTCTTGATAATC

+

@A00721:190:HGJW7DSXY:4:2603:15600:6464\_2:N:0:TCTGCAAG+GCTGCACT  
TCAGTTCTACCACAGAAACCGTCTCAGGAAGTGTCTCCACTGATTGGAATTAGAGAAAGACGACCTT  
CTTGTGGGGACTGAGACCTCTGAATTTTCAGGGTGCCCTGATGAGGAC

+

@A00721:190:HGJW7DSXY:4:2517:32045:21010\_1:N:0:TCTGCAAG+GCTGCACT  
GAACCTTCGCCGCTCTCTTTGCTTCGATGTTGGATGTCAAGAAGGGTTCAGAATGGGATTCTACGT  
AGTTTATGACTTTGGTGGTGGTACTTTCGATACTTCTATCGTCTTACGTTACGGTAATTACTATAGTG  
TTA

+

@A00721:190:HGJW7DSXY:4:2650:17183:18505\_2:N:0:TCTGCAAG+GCTGCACT  
ATAATGACGAGACTTTCGTCATAATCGCTGCATATTACGGATTACACGGTACCAGCGCATCTCGTGTC

$+$ 

@A00721:190:HGJW7DSXY:4:2138:12120:35102\_1:N:0:TCTGCAAG+GCTGCACT  
AATCAAAGGTTTTGAATTTAGCTCAACTGGGGAGACGTGCTTAAATGGGTGATAAAATTATTTAGAG  
ATCTTTTCTACTTACAAAGGACAATTCAGTTTCATTAATTCTACGAAAAGTCCGGAGTATATTGTAT  
GTT

+

@A00721:190:HGJW7DSXY:4:2470:31087:4288\_1:N:0:TCTGCAAG+GCTGCACT  
AACGAGGATAAAGCGTGTTTTCCGTCTGAACTTAATACACGAAGAGAAAAATCCGCAAACGACTCGAA  
ACCGAGACGCCGTAGATCAAAGTCCCTTCTAACTTTAGATTATGAATCCTGCCTTTACTCATTTTATA  
GC

+

@A00721:190:HGJW7DSXY:4:2128:18683:14591\_2:N:0:TCTGCAAG+GCTGCACT  
GACTGTTGATAATATTACAATAGCTCTTCTCAGAAGATTAGAGAAGTAACCGGTGAACACGTCGGTA  
GCATTGATTTACTTTTACCGTTAGAACTGAAAAAGATTCTTTTCGAAA

 $+$ 

@A00721:190:HGJW7DSXY:4:2213:32389:16313\_2:N:0:TCTGCAAG+GCTGCACT  
TCGTGGGAGGTACTGAAGCCTTCCCCTCCGCTGGCACGAAGAACACTCCCAAGCCAATCAATAGTTCT  
TCTGACCAGAATGAAAAGGGGTTTACCAGGGTAGTCTCTAAGTCTACC

+

@A00721:190:HGJW7DSXY:4:2364:2844:19382\_2:N:0:TCTGCAAG+GCTGCACT  
GAAGGCTGGCTCTAAGGGAGACTCCTTCTTTTGAATGTTGTAAAGAATTGGGTTGAGAAGTGTGCTT  
TACAAGGAGTTAGACTCTTCTTCAAGTTTTTAGATCTTCTTGATAATC

+

@A00721:190:HGJW7DSXY:4:2603:23538:30577\_2:N:0:TCTGCAAG+GCTGCACT  
TCAGTTCTACCACAGAAACCGTCTCAGGAAGTGTCTCCACTGATTGGAATTAGAGAAAGACGACCTT  
CTTGTGGGGACTGAGACCTCTGAATTTTCAGGGTGCCCTGATGAGGAC

+

@A00721:190:HGJW7DSXY:4:2548:11541:32847\_1:N:0:TCTGCAAG+GCTGCACT  
GAACCTTCGCCGCTCTCTTTGCTTCGATGTTGGATGTCAAGAAGGGTTCAGAATGGGATTCTACGT  
AGTTTATGACTTTGGTGGTGGTACTTTCGATACTTCTATCGTCTTACGTTACGGTAATTACTATAGTG  
TTA

+

@A00721:190:HGJW7DSXY:4:2672:5412:9267\_2:N:0:TCTGCAAG+GCTGCACT  
ATAATGACGAGACTTTTCGTCATAATCGCTGCATATTACGGATTACACGGTACCAGCGCATCTCGTGTC



GAGCCTCGACCCTATTATATGGTATTAACCTATAAAGGTGAGGAGACC

+

FFFFFFFFFFFFFFFFFFFFFFFFFFFFFFFFFFFFFFFFFFFFFFFFFFFFFFFFFFFFFFFFFFFFFFFF  
FFFFFFFFFFFFFFFFFFFFFFFFFFFFFFFFFFFFFFFFFFFFFFFFFFFFFFFFFFFFFFFFFFFFFFFF

@A00721:190:HGJW7DSXY:4:2139:18964:4867\_1:N:0:TCTGCAAG+GCTGCACT  
AATCAAAGTTTTGAATTTAGCTCAACTGGGGAGACGTGCTTAAATGGGTGATAAAAATTATTTAGAG  
ATCTTTTCTACTTACAAAGGACAATTCAGTTTCATTAATTCTACGAAAAGTCCGGAGTATATTGTAT  
GTT

+

FFFFFFFFFFFFFFFFFFFFFFFFFFFFFFFFFFFFFFFFFFFFFFFFFFFFFFFFFFFFFFFFFFFFFFFF  
FFFFFFFFFFFFFFFFFFFFFFFFFFFFFFFFFFFFFFFFFFFFFFFFFFFFFFFFFFFFFFFFFFFFFFFF  
FFF

@A00721:190:HGJW7DSXY:4:2618:6244:6355\_1:N:0:TCTGCAAG+GCTGCACT  
AACGAGTAAAAAGCTTGTTCCTTCCTGAACGTAATACACTAAGAGAAAAACCGAAAACGACTCGAA  
ACCGAGACGCCGTAGATCAAAGTCCCTTCTAACTTTAGATTATGAATCCTGCCTTTACTCATTTTATA  
GC

+

F,:FF:F,,F:,F,,,FF::F,,,,,F,F:,,,FF,:,:,F,:,,F,FF,,F,FFFFFFFFF  
FFFFFFFFFFFFFFFFFFFFFFFFFFFFFFFFFFFFFFFFFFFFFFFFFFFFFFFFFFFFFFFFFFFFFFFF  
FF

@A00721:190:HGJW7DSXY:4:2218:23258:5478\_2:N:0:TCTGCAAG+GCTGCACT  
GACTGTTGATAATATTACAATAGCTCTTTCTCAGAAGATTAGAGAAGTAACCGGTGAACACGTCGGTA  
GCATTGATTACTTTTACCGTTAGAACTGAAAAAGATTCTTTTCGAAA

+

FFFFFFFFFFFFFFFFFFFFFFFFFFFFFFFFFFFFFFFFFFFFFFFFFFFFFFFFFFFFFFFFFFFFFFFF  
FFFFFFFFFFFFFFFFFFFFFFFFFFFFFFFFFFFFFFFFFFFFFFFFFFFFFFFFFFFFFFFFFFFFFFFF  
FFFFFFFFFFFFFFFFFFFFFFFFFFFFFFFFFFFFFFFFFFFFFFFFFFFFFFFFFFFFFFFFFFFFFFFF

@A00721:190:HGJW7DSXY:4:2262:27227:10347\_2:N:0:TCTGCAAG+GCTGCACT  
TCGTGGGAGGTACTGAAGCCTTCCCCTCCGCTGGCACGAAGAACAACCTCCCAAGCCAATCAATAGTTCT  
TCTGACCAGAATGAAAAGGGGTTTACCAGGGTAGTCTCTAAGTCTACC

+

FFFFFFFFFFFFFFFFFFFFFFFFFFFFFFFFFFFFFFFFFFFFFFFFFFFFFFFFFFFFFFFFFFFFFFFF  
FFFFFFFFFFFFFFFFFFFFFFFFFFFFFFFFFFFFFFFFFFFFFFFFFFFFFFFFFFFFFFFFFFFFFFFF  
FFFFFFFFFFFFFFFFFFFFFFFFFFFFFFFFFFFFFFFFFFFFFFFFFFFFFFFFFFFFFFFFFFFFFFFF

@A00721:190:HGJW7DSXY:4:2404:6072:9095\_2:N:0:TCTGCAAG+GCTGCACT  
GAAGGCTGGCTCTAAGGGAGACTCCTTCTTTTTGAATGTTGTAAAGAATTGGGTTGAGAAGTGTGCTT  
TACAAGGAGTTAGACTCTTCTTCAAGTTTTTAGATCTTCTTGATAATC

+

FFFFFFFFFFFFFFFFFFFFFFFFFFFFFFFFFFFFFFFFFFFFFFFFFFFFFFFFFFFFFFFFFFFFFFFF  
FFFFFFFFFFFFFFFFFFFFFFFFFFFFFFFFFFFFFFFFFFFFFFFFFFFFFFFFFFFFFFFFFFFFFFFF  
FFFFFFFFFFFFFFFFFFFFFFFFFFFFFFFFFFFFFFFFFFFFFFFFFFFFFFFFFFFFFFFFFFFFFFFF

@A00721:190:HGJW7DSXY:4:2617:2546:13636\_2:N:0:TCTGCAAG+GCTGCACT  
TCAGTTCTACCACAGAAACCGTCTCAGGAAGTGTCTCCACTGATTCGGAATTAGAGAAAGACGACCTT  
CTTGTGGGACTGAGACCTCTGAATTTTCAGGGTGCCCTGATGAGGAC

+

FFFFF:FFFFF:FFFFFFFFFFFFFFFFFFFFFFFFFFFFFFFFFFFFFFFFFFFFFFFFFFFFFFFF  
F,:FFFFFF,FFFFFFFFFFFFFFFFFFFFFFFFFFFFFFFFFFFFFFFFFFFFFFFFFFFFFFFF  
FFFFFFFFFFFFFFFFFFFFFFFFFFFFFFFFFFFFFFFFFFFFFFFFFFFFFFFFFFFFFFFFFFFFFFFF

@A00721:190:HGJW7DSXY:4:2563:29767:32283\_1:N:0:TCTGCAAG+GCTGCACT  
GAACCTTCGGCCGCTCTTTGCTTCGATGTTGGATGTCAAGAAGGGTTCAGAATGGGATTCCTACGT  
AGTTTATGACTTTGGTGGTGGTACTTTCGATACTTCTATCGTCTTACGTTACGGTAATTACTATAGTG  
TTA

+

FFFFFFFFFFFFFFF:FFFFFFFFFFFFFFFFFFFFFFFFFFFFFFFFFFFFFFFFFFFFFFFFFFFF  
FFFFFFFFFFFFFFFFFFFFFFFFFFFFFFFFFFFFFFFFFFFFFFFFFFFFFFFFFFFFFFFFFFFFFFFF  
FFF

@A00721:190:HGJW7DSXY:4:2131:23927:3192\_1:N:0:TCTGCAAG+GCTGCACT  
TAATGACGAGACTTTCGTCATAATCGCTGCATATTACGGATTACACGGTACCAGCGCATCTCGTGTGCG

AGCCTCGACCCGATTATATGGTATTAAGGTGAGGAGACCATTTTCTTGCTGAAATTTATA  
GAA

+

FFFFFF:FFFFFFFFFFFFFF:FFFFFFFFFFFFFF:F:FFFFFF:FFFFFFFFFFFFFF  
FFFFFFFFFFFFFFFFFFFFFFFFFFFFFFFFFFFFFFFFFFFFFFFFFFFFFFFF  
FFF

@A00721:190:HGJW7DSXY:4:2139:19000:4930\_1:N:0:TCTGCAAG+GCTGCACT  
AATCAAAGGTTTTGAATTTAGCTCAACTGGGGAGACGTGCTTAAATGGGTGATAAAAATTATTTAGAG  
ATCTTTTCTACTTACAAAGGACAATTCAAGTTTCATTAATTCTACGAAAAGTCCGGAGTATATTGTAT  
GTT

+

FFFFFFFFF,FFFFFFFFFFFFFFFFFFFFFFFFFFFFFFFFFFFFFFFFFFFFFFFF  
FFFFFFFFFFFFFFFFF:FFFFFFFFFFFFFFFFFFFFFFFFFFFFFFFFFFFFFFFF  
FFF

@A00721:190:HGJW7DSXY:4:1610:16649:33771\_1:N:0:TCTGCAAG+GCTGCACT  
GTTGTTCTGAGGTGTGCTCTTCTATCTCTTAATACACGAATAGACAAACCGCACACGACTCGAAACC  
GAGACGCCGTAGATCAAAGTCCCTTCTAACTTTAGATT

+

F,:,:,F,:,:,F,:,:,F,F,:,:,FF,:,:,F,:,:,F,:,:,FF,:,:,  
FFFFFFFFFFFFFFFFFFFFFFFFFFFFFFFFFFFFFFFFFFFFFFFF

@A00721:190:HGJW7DSXY:4:2418:12753:3912\_2:N:0:TCTGCAAG+GCTGCACT  
GACTGTTGATAATATTACAATAGCTCTTTCTCAGAAGATTAGAGAAGTAACCGGTGAACACGTCGGTA  
GCATTGATTACTTTTACCGTTAGAACTGAAAAAGATTCTTTTCGAAA

+

,FFFFFF:F,,FF:,FF:,FF,,FF,:FFFFFFFFF:FFFFFF:FF:F:FFF:F:FFFFFFF  
:FFFF:FFFFFF,F::F,:FFFFFFFFF,FFFFFFFFFFFF:FFF

@A00721:190:HGJW7DSXY:4:2542:25780:12790\_2:N:0:TCTGCAAG+GCTGCACT  
TCGTGGGAGGTACTGAAGCCTTCCCCTCCGCTGGCACGAAGAACAACCTCCAAGCCAATCAATAGTTCT  
TCTGACCAGAATGAAAAGGGGTTTACCAGGGTAGTCTCTAAGTCTACC

+

FFFFFFFFFFFFFFFFFFFFFFFFFFFFFFFFFFFFFFFFFFFFFFFF:FF:FFFFFFFFFFFFF  
FFF:FFFFFF:F,FF:FFFFFFFFFFFFFFFFFFFFFFFFFFFFF,:

@A00721:190:HGJW7DSXY:4:2404:6551:10300\_2:N:0:TCTGCAAG+GCTGCACT  
GAAGGCTGGCTCTAAGGGAGACTCCTTCTTTTGAATGTTGTAAAGAATTGGGTTGAGAAGTGTGCTT  
TACAAGGAGTTAGACTCTTCTTCAAGTTTTTAGATCTTCTTGATAATC

+

FFFFFFFFFFFFF:FFFFFFFFFFFFF:FFFFFF:FFFFFFFFFFFF:FF:F:F:,FFFFFFFFFFFFF  
FFFFFFFFFFFFFFFFFFFFF:FFFFFF:FF:FF:FF,F,FFFFFFFFF

@A00721:190:HGJW7DSXY:4:2630:3161:9878\_2:N:0:TCTGCAAG+GCTGCACT  
TCAGTTCTACCACAGAAACCGTCTCAGGAAGTGTCTCCACTGATTCGGAATTAGAGAAAGACGACCTT  
CTTGTGGGACTGAGACCTCTGAATTTTCAAGGTGCTGATGAGGAC

+

FFFFFFFFFFFFFFFFFFFFFFFFFFFFFFFFFFFFFFFFFFFFFFFF:FFFFFFFFFFFFFFFFFFFFF  
FFFFFFFFFFFFFFFFFFFFFFFFFFFFFFFFFFFFFFFFFFFFFFFF:FFFFF

@A00721:190:HGJW7DSXY:4:2516:18439:13980\_1:N:0:TCTGCAAG+GCTGCACT  
GTAAGTTCGGGCGGTTTATTTGATTGATGTTGGATGTCTAGTAGGGTTCAGAATGGGTTTCTACGT  
AGTTTATGACTTTGGTGGTGTACTTTGATTATTCTATCGTCTTACGTTACGGTAATTACTATAGTG  
TTA

+

F,F,FFF,F:,F:,,,FFFF,F:,F,:FFFFFFFF:FFF,,FF,FFF,FFF,F,,FFF,,FF,FFF,,F  
F,FFF,FF,FFF,FFF,FFF,FFF,FFF:FFF,,FFFFFF,FF,FFF,FF,,:,FFFFFF:F:,F,F  
FF,

@A00721:190:HGJW7DSXY:4:2153:27236:26334\_1:N:0:TCTGCAAG+GCTGCACT  
TAATGACGAGACTTTCGTCATAATCGCTGCATATTACGGATTACACGGTACCAGCGCATCTCGTGTGCG

AGCCTCGACCCGATTATATGGTATTAAGGTGAGGAGACCATTTTCTTGCTGAAATTTATA  
GAA

+

FFFFFFFFFFFFFFFFFFFFFFFFFFFFFFFFFFFFFFFFFFFFFFFFFFFFFFFFFFFFFFFF  
FFFFFFFFFFFFFFFFFFFFFFFFFFFFFFFFFFFFFFFFFFFFFFFFFFFFFFFFFFFFFFFF  
FFF

@A00721:190:HGJW7DSXY:4:2159:4444:26005\_1:N:0:TCTGCAAG+GCTGCACT  
AATCAAAGTTTTGAATTTAGCTCAACTGGGGAGACGTGCTTAAATGGGTGATAAAAATTATTTAGAG  
ATCTTTTCTACTTACAAAGGACAATTCACTTTCATTAATTCTACGAAAAGTCCGGAGTATATTGTAT  
GTT

+

FFFFF:FF::FFFFFFFFFFFFFFFFFFFFFFFFFFFFFFFFFFFFFFFFFFFFFFFFFFFF  
FFFFFFFFFFFFFFFFFFFFFFFFFFFFFFFFFFFFFFFFFFFFFFFFFFFFFFFFFFFFFFFF  
FFF

@A00721:190:HGJW7DSXY:4:1540:4634:25676\_1:N:0:TCTGCAAG+GCTGCACT  
GGATAAAGCTTTTTTCCGTCCTGAAGTAAACACTATTATAACATCCGAAAACGACTCGAAACCGA  
GACGCCGTAGATCAAAGTCCCTTCTAACTTTAGAT

+

: , F , , : F : , : , FFFF , : , : FF , F , : F : : F : F , : FF , , , , , : , , , : , , F , : , : FF : FFFF : FFFFFFF  
FF : F : : FFFFFFFF : FFFFFFFF FFFFFFFF

@A00721:190:HGJW7DSXY:4:2601:25735:21512\_2:N:0:TCTGCAAG+GCTGCACT  
GACTGTTGATAATATTACAATAGCTCTTTCTCAGAAGATTAGAGAAGTAACCGGTGAACACGTCGGTA  
GCATTGATTACTTTTACCGTTAGAACTGAAAAAGATTCTTTTCGAAA

+

FFFFFFFFFFFFFFFFFFFFFFFFFFFFFFFFFFFFFFFF: FFFFFFFF : FFFFFFFF , FFFFFFFF  
FFFFFFFFFFFFFFFFFFFFFFFFFFFFFFFF , FFFFFFFF FFFFFFFF

@A00721:190:HGJW7DSXY:4:2678:32362:32111\_2:N:0:TCTGCAAG+GCTGCACT  
GGAGGTACTGAAGCCTTCCCCTCCGCTGGCACGAAGAACTCCCAAGCCAATCAATAGTTCTTCTGA  
CCAGAATGAAAAGGGGTTACCAGGGTAGTCTCTAAGTCTACCAGGAA

+

FFFFFFFFFFFFFFFFFFFFFFFFFFFFFFFF: : FFFFFFFF FFFFFFFF : FFFFFFFF  
FFFFFFFFFFFFFFFFFFFFFFFFFFFFFFFF FFFFFFFF

@A00721:190:HGJW7DSXY:4:2456:7654:30906\_2:N:0:TCTGCAAG+GCTGCACT  
GAAGGCTGGCTCTAAGGAGACTCCTTCTTTTGAATGTTGTAAAGAATTGGGTTGAGAAGTGTGCTT  
TACAAGGAGTTAGACTCTTCTTCAAGTTTTTAGATCTTCTTGATAATC

+

FFFFFFFFFFFFFFFFFFFFFFFF: : FFFF : FFFFFFFF : : FFFFFFFF , FFFFFFFF  
FFFFF : FFFFFFFF : F : FFFF : F : FFFFFFFF

@A00721:190:HGJW7DSXY:4:2630:3649:10692\_2:N:0:TCTGCAAG+GCTGCACT  
TCAGTTCTACCACAGAAACCGTCTCAGGAAGTGTCTCCACTGATTCGGAATTAGAGAAAGACGACCTT  
CTTGTGGGACTGAGACCTCTGAATTTTCAGGGTGCCCTGATGAGGAC

+

FFFFFFFFFFFFFFFFFFFFFFFF: FF : FFFFFFFF : FFFFF , FFFFFFFF  
FF , FFFFFFFF , F : FFFFFFFF : FFF

@A00721:190:HGJW7DSXY:4:2162:12509:7153\_1:N:0:TCTGCAAG+GCTGCACT  
TAATGACGAGACTTTTCGTCATAATCGCTGCATATTACGGATTACACGGTACCAGCGCATCTCGTGTGCG  
AGCCTCGACCCGATTATATGGTATTAAGGTGAGGAGACCATTTTCTTGCTGAAATTTATA  
GAA

+

FFFFFFFFFFFFFFFFFFFFFFFFFFFFFFFFFFFFFFFFFFFFFFFFFFFFFFFFFFFF  
FFFFFFFFFFFFFFFFFFFFFFFFFFFFFFFFFFFFFFFFFFFFFFFFFFFFFFFFFFFF  
FFF

@A00721:190:HGJW7DSXY:4:2226:23366:10394\_1:N:0:TCTGCAAG+GCTGCACT  
AATCAAAGTTTTGAATTTAGCTCAACTGGGGAGACGTGCTTAAATGGGTGATAAAAATTATTTAGAG



[illegible]

```
+
FFFFFFFFFFFFFFFFFFFFFFFFFFFFFFFFFFFFFFFFFFFFFFFFFFFFFFFFFFFFFFFF:FF,FFFFFFFFFFFFFF
FFFFFFFFFFFFFFFFFFFFFF,F,FFFFFFFFFFFF::FFFFFFFFFFFFFFFF,F
```

```
+
FFFFFFFFFFFFFFFF, , FFFFFFFF:FFFFFFFFFFFFFFFF:FFFFFF, FFFF:FFF:FF:FFFFFFFFFFFF
FFF:FFFFFFFF, FFFFFFFF:FF:FFFFFFFFFFFFFFFFFFFFFFF:F:FFFFFFFFFFFFFFFFFFFFFFFFFFFF
FFF
```

```
+
F:FFFFFFFFFFFFFFFFFFFFFFFF:FFFFFFFFFFFFFFFFFFFFFFFFFFFFFFFFFFFFFFFFFF
FFFFFFFFFFFFFFFFFF:FF:FFFFFFFFFFFFFFFFFFFFFFFFFFFFFFFFFFFF
```

```
+
FFFFFFFFFFFFFFFFFFFFFFFFFFFFFFFFFFFFFFFFFFFFFFFFFFFFF:FFFFFFFFFFFFFFFF
FFFFFFFFFFFFFFFFFFFFFFFFFFFFFFFFFFFFFFFFFFFFFFFFFFFFFF
```

[illegible][illegible][illegible]

@A00721:190:HGJW7DSXY:4:1355:11568:4022\_2:N:0:TCTGCAAG+GCTGCACT  
TTGATAATATTACAATAGCTCTTCTCAGAAGATTAGAGAAGTAACCGGTGAACACGTCGGTAGCATT  
GATTTACTTTTACCGTTAGAACTGAAAAAGATTCTTTTCGAAAAGAAA

@A00721:190:HGJW7DSXY:4:2464:9697:35070\_1:N:0:TCTGCAAG+GCTGCACT  
GGAGGTACTGAAGCCTTCCCCTCCGCTGGCACGAAGAACACTCCCAAGCCAATCAATAGTTCTTCTGA  
CCAGAATGAAAAGGGGTTTACCAGGGTAGTCTCTAAGTCTACCAGGAAGAGGGGAAATGTCCCCAAAA  
CTG

@A00721:190:HGJW7DSXY:4:2603:22164:15671\_2:N:0:TCTGCAAG+GCTGCACT  
GAAGGCTGGCTCTAAGGGAGACTCCTTCTTTTGAATGTTGTAAAGAATTGGGTTGAGAAGTGTGCTT  
TACAAGGAGTTAGACTCTTCTTCAAGTTTTTAGATCTTCTTGATAATC

@A00721:190:HGJW7DSXY:4:2640:25030:35884\_2:N:0:TCTGCAAG+GCTGCACT  
TCAGTTCTACCACAGAAACCGTCTCAGGAAGTGTCTCCACTGATTCGGAATTAGAGAAAGACGACCTT  
CTTGTGGGGACTGAGACCTCTGAATTTTCAGGGTGCCCTGATGAGGAC

@A00721:190:HGJW7DSXY:4:2521:5339:21825\_1:N:0:TCTGCAAG+GCTGCACT  
TAATGACGAGACTTTTCGTCATAATCGCTGCATATTACGGATTACACGGTACCAGCGCATCTCGTGTCG  
AGCCTCGACCCGATTATATGGTATTAACTTATAAAGGTGAGGAGACCATTTTCTTGCTGAAATTTATA  
GAA

@A00721:190:HGJW7DSXY:4:2470:25120:4131\_1:N:0:TCTGCAAG+GCTGCACT  
AATCAAAGGTTTTGAATTTAGCTCAACTGGGGAGACGTGCTTAAATGGGTGATAAAATTATTTAGAG  
ATCTTTTCTACTTACAAAGGACAATTCAGTTTCATTAATTCTACGAAAAGTCCGGAGTATATTGTAT  
GTT

@A00721:190:HGJW7DSXY:4:2534:9878:6292\_1:N:0:TCTGCAAG+GCTGCACT  
GTAAAAAGCTATTTTCCGTCCTTAACCTAAACACTAAGATATCAACCGCACACGACTCGAAACCGA  
GACGCCGTAGATCAAAGTCCCTTCTAACTTTAGATTATGAATCCTGCCTTTACTCATTTT

@A00721:190:HGJW7DSXY:4:1536:13765:15217\_2:N:0:TCTGCAAG+GCTGCACT  
TTGATAATATTACAATAGCTCTTTCTCAGAAGATTAGAGAAGTAACCGGTGAACACGTCGGTAGCATT  
GATTTACTTTTACCGTTAGAACTGAAAAAGATTCTTTTCGAAAAGAAA



@A00721:190:HGJW7DSXY:4:1227:2718:2284\_1:N:0:TCTGCAAG+GCTGCACT  
GAAGGCTGGCTCTAAGGGAGACTCCTTCTTTTTGAATGTTGTAAAGAATTGGGTTGAGAAGTGTGCTT  
TACAAGGAGTTAGACTCTTCTTCAAGTTTTTAGATCTTCTTGATAATCTTAAAGAAAAATTTTCGAAT  
AAA

@A00721:190:HGJW7DSXY:4:2677:29749:29778\_2:N:0:TCTGCAAG+GCTGCACT  
TCAGTTCTACCACAGAAACCGTCTCAGGAAGTGTCTCCACTGATTCGGAATTAGAGAAAGACGACCTT  
CTTGTGGGGACTGAGACCTCTGAATTTTCAGGGTGCCCTGATGAGGAC

@A00721:190:HGJW7DSXY:4:2576:31575:5040\_1:N:0:TCTGCAAG+GCTGCACT  
TAATGACGAGACTTTTCGTCATAATCGCTGCATATTACGGATTACACGGTACCAGCGCATCTCGTGTCG  
AGCCTCGACCCGATTATATGGTATTAACCTATAAAGGTGAGGAGACCATTTTCTTGCTGAAATTTATA  
GAA

@A00721:190:HGJW7DSXY:4:2513:24035:14215\_1:N:0:TCTGCAAG+GCTGCACT  
AATCAAAGGTTTTGAATTTAGCTCAACTGGGGAGACGTGCTTAAATGGGTGATAAAAAATTATTTAGAG  
ATCTTTTCTACTTACAAAGGACAATTCAGTTTCATTAATTCTACGAAAAGTCCGGAGTATATTGTAT  
GTT

@A00721:190:HGJW7DSXY:4:1273:9977:34303\_1:N:0:TCTGCAAG+GCTGCACT  
GGATAAAGCGAGTTTTCCGTCCTGAACGTAATACACGAAGAGATCATCCGCAAACGACTCGAAACCGA  
GACGCCGTAGATCAAAGTCCCTTCTAACTTTAGATTATGAATCCTGCCTTTACTCATTTTATAGCAGT  
TA

@A00721:190:HGJW7DSXY:4:2412:20907:2284\_2:N:0:TCTGCAAG+GCTGCACT  
TTGATAATATTACAATAGCTCTTTCTCAGAAGATTAGAGAAGTAACCGGTGAACACGTCGGTAGCATT  
GATTTACTTTTACCGTTAGAACTGAAAAAGATTCTTTTCGAAAAGAAA

@A00721:190:HGJW7DSXY:4:1236:15085:32471\_1:N:0:TCTGCAAG+GCTGCACT  
TGAGGTAAGCCTTCCCCTCCGCTGGCACGAAGAACAATCCCAAGCCAATCAATAGTTCTTCTGA  
CCAGAATGAAAAGGGGTTTACCAGGGTAGTCTCTAAGTCTACCAGGAAGAGGGGAAATGTCCCCAAAA  
CTG

```
FFFFFFFFFFFFFFFFFFFFFFFFFFFFFFFFFFFFFFFFFFFFFFFFFFFFFFFFFFFFFFF  
FFFFFFFFFFFFFFFFFFFF;FFFFFFFFFFFFFFFFFFFFFFFFFFFFFFFFFFFFFFFFFF  
FFF
```



@A00721:190:HGJW7DSXY:4:1356:4227:14262\_1:N:0:TCTGCAAG+GCTGCACT  
GAAGGCTGGCTCTAAGGGAGACTCCTTCTTTTTGAATGTTGTAAAGAATTGGGTTGAGAAGTGTGCTT  
TACAAGGAGTTAGACTCTTCTTCAAGTTTTTAGATCTTCTTGATAATCTTAAAGAAAAATTTTCGAAT  
AAA

+

FFFFFFFFFFFFFFFFFFFFFFFFFFFFFFFFFFFFFFFFFFFFFFFFFFFFFFFFFFFFFFFFFFFFFFFFFFFFFFFF  
FFFFFFFFFFFFFFFFFFFFFFFFFFFFFFFFFFFFFFFFFFFFFFFFFFFFFFFFFFFFFFFFFFFFFFFFFFFFFFFF,  
FFF

@A00721:190:HGJW7DSXY:4:2659:24903:31939\_1:N:0:TCTGCAAG+GCTGCACT  
TGTCTCCACTGATCCGGAATTAGAGAAAGACGACCTTCTTGTGGGGACTGAGACCTCTGAATTTTCAG  
GGTGCCCTGATGAGGACGTTGAAAGGGATAATTTCAACTCTGAGACTTCTAAGAGTGTTCAAAAGAC  
CAG

+

FFFFFFFFFFFFFF,FFFFFFFFFFFFFFFFFFFFFFFFFFFFFFFFFFFFFFFFFFFFFFFFFFFFFFFFFFFFFFF  
FFFFFFFFFFFFFFFFFFFFFFFFFFFFFFFFFFFFFFFFFFFFFFFFFFFFFFFFFFFFFFFFFFFFFFFFFFFFFFF  
FFF

@A00721:190:HGJW7DSXY:4:1165:3432:34554\_1:N:0:TCTGCAAG+GCTGCACT  
ACGAGACTTTTCGTCATAATCGCTGCATATTACGGATTACACGGTACCAGCGCATCTCGTGTGAGCCCT  
CGACCCGATTATATGGTATTAACCTATAAAGGTGAGGAGACCATTTTCTTGCTGAAATTTATAGAAGA  
TTA

+

FFFFFFFFFFFFFFFFFFFFFFFFFFFFFFFFFFFFFFFFFFFFFFFFFFFFFFFFFFFFFFFFFFFFFFFFFFFFFFF  
FFFFFFFFFFFFFFFFFFFFFFFFFFFFFFFFFFFFFFFFFFFFFFFFFFFFFFFFFFFFFFFFFFFFFFFFFFFFFFF  
FFF

@A00721:190:HGJW7DSXY:4:2628:24162:30906\_1:N:0:TCTGCAAG+GCTGCACT  
AATCAAAGTTTTGAATTTAGCTCAACTGGGGAGACGTGCTTAAATGGGTGATAAAAATTATTTAGAG  
ATCTTTTCTACTTACAAAGGACAATTCAGTTTCATTAATTCTACGGAAAAGTCCGGAGTATATTGTAT  
GTT

+

FFFFFFF,FF:FFFFFFFFFFFFFFFFFFFFFFFFFFFFFFFFFFFFFFFFFFFFFFFFFFFFFFFFFFFFFFFFF  
:FFFFFFFFFFFFFFFFFFFFFFFFFFFFFFFFFFFFFFFFFFFFFFFFFFFFFFFFFFFFFFFFFFFFFFFFFFFF  
FFF

@A00721:190:HGJW7DSXY:4:2652:23692:24799\_1:N:0:TCTGCAAG+GCTGCACT  
TATAATGCTTTTTTTCCGTCTTTAAGGTAATACACTAAGATATCATCCGCAAACGACTCGAAACCGAG  
ACGCCGTAGATCAAAGTCCCTTCTAACTTTAGATTATGAATCCTGCCTTTACTCATTTT

+

FF:FF,F:,,,FFF:F,,:F,F::F,,,:,FF,F:,:,,,:,,,,,,F:,,F,FFFFFFFFF:FFFFF  
FFFFFFFFFFFFFFFFFFFFFFFFFFFFFFFFFFFFFFFFFFFFFFFFFFFFFFFFFFFFFFFFFFFFFFFFFFFF  
FFFFFFFFFFFFFFFFFFFFFFFFFFFFFFFFFFFFFFFFFFFFFFFFFFFFFFFFFFFFFFFFFFFFFFFFFFFF

@A00721:190:HGJW7DSXY:4:2434:18602:20212\_2:N:0:TCTGCAAG+GCTGCACT  
TTGATAATATTACAATAGCTCTTTCTCAGAAGATTAGAGAAGTAACCGGTGAACACGTCGGTAGCATT  
GATTTACTTTTACCGTTAGAACTGAAAAAGATTCTTTTCGAAAAGAAA

+

FFFFFFFFFFFFFFFF,FFFF:FFFF:FFFF,FF:FFFFFFFFFFFFFFFFFFFFFFFFFFFFFFFFFFFFFFF  
FFFFFFFFFFFFFFFFFFFFFFFFFFFFFFFFFFFFFFFFFFFFFFFFFFFFFFFFFFFFFFFFFFFFFFFFFFFF,  
+

@A00721:190:HGJW7DSXY:4:1537:9986:27649\_1:N:0:TCTGCAAG+GCTGCACT  
TGAGGTACTGAAGCCTTCCCCTCCGCTGGCACGAAGAACTCCCAAGCCAATCAATAGTTCTTCTGA  
CCAGAATGAAAAGGGGTTACCAGGGTAGTCTCTAAGTCTACCAGGAAGAGGGGAAATGTCCCCAAAA  
CTG

+

FFFFFFFFFFFFFFFFFFFFFFFFFFFFFFFFFFFFFFFFFFFFFFFFFFFFFFFFFFFFFFFFFFFFFFFFFFFFFFF  
FFFFFFFFFFFFFFFFFFFFFFFFFFFFFFFFFFFFFFFFFFFFFFFFFFFFFFFFFFFFFFFFFFFFFFFFFFFFFFF  
FFF

@A00721:190:HGJW7DSXY:4:1544:23927:18380\_1:N:0:TCTGCAAG+GCTGCACT  
GAAGGCTGGCTCTAAGGGAGACTCCTTCTTTTTGAATGTTGTAAAGAATTGGGTTGAGAAGTGTGCTT

TACAAGGAGTTAGACTCTTCTTCAAGTTTTTAGATCTTCTTGATAATCTTAAAGAAAAATTTTCGAAT  
AAA

+

::FFFFFFFF:FFF:FF,FFFF,FF,FF,FFFFFFFF,FFFF:FF:FF,:FFF,FFFFFF:FFFFFF,FFF  
FFFFFF:F,FF::FFFFFFFF:FFFFFFFFFFFFFFFF:FFFFFFFFFFFFFFFFFFFFFFFF::,FFFFFF:FF  
FF,

@A00721:190:HGJW7DSXY:4:1275:11388:36057\_1:N:0:TCTGCAAG+GCTGCACT  
CGTGTGCTCTTCCGATCTATTAGAGAAAGACGACCTTCTTGTGGGGACTGAGACCTCTGAATTTTCAG  
GGTGCCCTGATGAGGACGTTGAAAGGGATAATTTCAACTCTGAGACTTCTAAGAGTGTTCAAAAGAC  
CAG

+

FFFFFFFFFFFFFFFFFFFFFFFF:FFFFFFFFFFFFFFFFFFFFFFFFFFFFFFFFFFFFFFFFFFFFFFFF  
FFFFFFFFFFFFFFFFFFFFFFFFFFFFFFFFFFFFFFFFFFFFFFFFFFFFFFFFFFFFFFFFFFFFFFFF  
FFF

@A00721:190:HGJW7DSXY:4:1263:25807:17910\_1:N:0:TCTGCAAG+GCTGCACT  
ACGAGACTTTTCGTCATAATCGCTGCATATTACGGATTACACGGTACCAGCGCATCTCGTGTGCTGCCT  
CGACCCGATTATATGGTATTAACCTATAAAGGTGAGGTGACCATTTTCTTGCTGAAATTTATAGAAGA  
TTA

+

:FFF,FFF,F:FFFF,,:FFFFFFFF,FFFF:F,F,F:F,FF:F:FFFF::FF:F:FFFFFFFF:,FFFF  
FF::F::FF,F,FFFF,FF:F,FF:F,FF:FFFF:,F:FFFFFFFF:F:F,:FF,FFFF,FFFF,:F  
FF:

@A00721:190:HGJW7DSXY:4:2660:19732:36448\_1:N:0:TCTGCAAG+GCTGCACT  
AATCAAAGTTTTGAATTTAGCTCAACTGGGGAGACGTGCTTAAATGGGTGATAAAAATTATTTAGAG  
ATCTTTTCTACTTACAAAGGACAATTCAGTTTCATTAATTCTACGAAAAGTCCGGAGTATATTGTAT  
GTT

+

FFFFFFFFFFFFFFFFFFFFFFFFFFFFFFFFFFFFFFFFFFFFFFFFFFFFFFFFFFFFFFFFFFFFFFFF  
FFFFFFFFFFFFFFFFFFFFFFFFFFFFFFFFFFFFFFFFFFFFFFFFFFFFFFFFFFFFFFFFFFFFFFFF  
FFF

@A00721:190:HGJW7DSXY:4:2624:10583:2816\_1:N:0:TCTGCAAG+GCTGCACT  
ATAACGCTTTTTTGCCGTCCTTAAGTAAAAACACTAACATAAAATCCCAACACGACTCGAAACCGAGA  
CGCCGTAGATCAAAGTCCCTTCTAACTTTAGA

+

: ,F:,,,:::FFF,F,,,,:F,F:,,,F,,,,,:,,,,,F,,,FF,,F,FFFFFFFFFFFFFFFF  
FFFFFFFFFFFFFFFFFFFFFFFFFFFFFFFF

@A00721:190:HGJW7DSXY:4:1256:2374:3223\_2:N:0:TCTGCAAG+GCTGCACT  
ATAATATTACAATAGCTCTTTCTCAGAAGATTAGAGAAGTAACCGGTGAACACGTCGGTAGCATTGAT  
TTACTTTTACCGTTAGAACTGAAAAAGATTCTTTTCGAAAAGAAACCT

+

FFFFFFFFFFFFFFFFFFFFF:FFFFFFFFFFFFFFFFFFFFFFFFFFFFFFFFFFFFFFFFFFFFFFFF  
FFFFFFFFFFFFFFFFFFFFFFFFFFFFFFFFFFFFFFFFFFFFFFFFFFFFFFFFFFFFFFFF

@A00721:190:HGJW7DSXY:4:2402:8748:23907\_1:N:0:TCTGCAAG+GCTGCACT  
GAGGTACTGAAGCCTTCCCTCCGCTGGCACGAAGAACTCCCAAGCCAATCAATAGTTCTTCTGAC  
CAGAATGAAAAGGGGTTTACCAGGGTAGTCTCTAAGTCTACCAGGAAGAGGGGAAATGTCCCCAAAAC  
TGA

+

FFFFFFFFFFFFFFFFFFFFFFFFFFFFFFFFFFFFFFFFFFFFFFFFFFFFFFFFFFFFFFFFFFFFFFFF  
FFFFFFFFFFFFFFFFFFFFFFFFFFFFFFFFFFFFFFFFFFFFFFFFFFFFFFFFFFFFFFFFFFFFFFFF  
FFF

@A00721:190:HGJW7DSXY:4:1676:30599:22827\_1:N:0:TCTGCAAG+GCTGCACT  
GAAGGCTGGCTCTAAGGGAGACTCCTTCTTTTTGAATGTTGTAAAGAATTGGGTTGAGAAGTGTGCTT  
TACAAGGAGTTAGACTCTTCTTCAAGTTTTTAGATCTTCTTGATAATCTTAAAGAAAAATTTTCGAAT  
AAA

+  
FFFFFFFF:FFFFFFFFFFFFFFFF:FFFFFFFFFFFFFFFFFFFFFFFFFFFFFFFFFFFFFFFFFFFFFFFF  
FFFFFFFFFFFFFFFFFFFFFFFFFFFFFFFFFFFFFFFFFFFFFFFFFFFFFFFFFFFFFFFFFFFFFFFF:FF  
FFF  
@A00721:190:HGJW7DSXY:4:1533:16721:21183\_1:N:0:TCTGCAAG+GCTGCACT  
CGTGTGCTCTTCCGATCTATTAGAGAAAGACGACCTTCTTGTGGGGACTGAGACCTCTGAATTTTCAG  
GGTGCCCTGATGAGGACGTTGAAAGGGATAATTTCAACTCTGAGACTTCTAAGAGTGTTCAAAAGAC  
CAG  
+  
FFFFFFFF,FF:FFFF:F,FFFF,F,F:F:FFF,FF::FFFF:FFFFFF,F:FF,FFFFFFFF,F  
:FFFF,FFFF:FFF::FFFF:FFFF:FFFF:,F:F:FFF:FFFFFFFF:FFF:FF,FFFF::  
F,F  
@A00721:190:HGJW7DSXY:4:1574:16559:7905\_1:N:0:TCTGCAAG+GCTGCACT  
ACGAGACTTTCGTCATAATCGCTGCATATTACGGATTACACGGTACCAGCGCATCTCGTGTGAGCCT  
CGACCCGATTATATGGTATTAACCTATAAAGGTGAGGAGACCATTTTCTTGCTGAAATTTATAGAAGA  
TTA  
+  
:,F,FFFF:FF:FF:FFFFFF:FFFFFF:FFF:FFFF:FFFFFF,F:FF:FFFFFFFF, :F  
FFFF:FFFFFFFFFFFFFFFFFFFFFFFF:FF:FFFF::FFFFFFFFFFFFFF,F:FFFF:F  
,FF  
@A00721:190:HGJW7DSXY:4:1453:32741:35399\_1:N:0:TCTGCAAG+GCTGCACT  
ATCAAAGGTTTTGAATTTAGCTCAACTGGGAGACGTGCTTAAATGGGTGATAAAAATTATTAGAGA  
TCTTTTCTACTTACAAAGGACAATTCAGTTTCATTAATTCTACGAAAAGTCCGGAGTATATTGTATG  
TT  
+  
F,:,F:,FF,FFFFFFFF,:,FFF,F::,F,FF,FFF::F:FF,,,:FFF::FFFFFF:FFFF,  
,F,:,FF:FFFF::F:,FFFF::FF:F:FFFF,,FFFF:FF,FF:FFFF:FFFFFFFF::F:FF  
F:  
@A00721:190:HGJW7DSXY:4:2233:26178:12258\_1:N:0:TCTGCAAG+GCTGCACT  
ATAACGCGTGTTCGCCCTCACCTTAATACAGATGATAACCCCGCACACGACTCGAAACCGAGA  
CGCCGTAGATCAAAGTCCCTTCTAAGTTTAGATT  
+  
FFF:,,,,,FFF,F:,,F,F,F,,,,F:,F::,F,,,,F::,FF,,,:FFFF:FFFFFFFF  
FFFFFFFFFFFFFFFFFFFFFFFF:FFFFFFF  
@A00721:190:HGJW7DSXY:4:1361:25373:26052\_2:N:0:TCTGCAAG+GCTGCACT  
ATAATATTACAATAGCTCTTCTCAGAAGATTAGAGAAGTAACCGGTGAACACGTCGGTAGCATTGAT  
TTACTTTTACCGTTAGAACTGAAAAAGATTCTTTTCGAAAAGAAACCT  
+  
FFFFFFFFFFFFFFFFFFFFFFFFFFFFFFFFFFFFFFFFFFFFFFFFFFFFFFFFFFFFFFFFFFFFFFFF  
FFFFFFFF:FFFF:FFFFFFFFFFFFFFFFFFFFFFFF:FFFFFFF  
@A00721:190:HGJW7DSXY:4:2146:16396:32675\_1:N:0:TCTGCAAG+GCTGCACT  
GAAGGCTGGCTCTAAGGAGACTCCTTCTTTTGAATGTTGTAAAGAATTGGGTTGAGAAGTGTGCTT  
TACAAGGAGTTAGACTCTTCTTCAAGTTTTTAGATCTTCTTGATAATCTTAAAGAAAAATTTTCAAT  
AAA  
+  
FFFF,FFF:FFFF:F:FFFF:F,FF::FFFFFFFFFFFFFFFF:FFFF:,FFFFFFFFFFFFFFFF  
FFF:FFFFFFFFFFFFFFFF:,FFFFFFFFFFFFFFFF:F:FFFFFFFFFFFFFFFF  
,:F  
@A00721:190:HGJW7DSXY:4:1545:25337:12524\_1:N:0:TCTGCAAG+GCTGCACT  
CGTGTGCTCTTCCGATATATTAGAGAAAGACGACCTTCTTGTGGGGACTGAGACCTCTGAATTTTCAG  
GGTGCCCTGATGAGGACGTTGAAAGGGATAATTTCAACTCTGAGACTTCTAAGAGTGTTCAAAAGAC  
CAG  
+  
FFFFFFFFFFFFFFFF,FF,,FFFFFFFF,FFFFFFFFFFFFFFFF:FFFF:FFFFFFFF

@A00721:190:HGJW7DSXY:4:2208:29559:31610\_1:N:0:TCTGCAAG+GCTGCACT  
ACGAGACTTTTCGTCATAATCGCTGCATATTACGGATTACACGGTACCAGCGCATCTCGTGTCGAGCCT  
CGACCCGATTATATGGTATTAACCTTATAAAGGTGAGGAGACCATTTTCTTGCTGAAATTTATAGAAGA  
TTA

@A00721:190:HGJW7DSXY:4:1162:29469:16266\_1:N:0:TCTGCAAG+GCTGCACT  
ATCAAAGGTTTTGAATTTAGCTCAACTGGGGAGACGTGCTTAAATGGGTGATAAAAATTATTTAGAGA  
TCTTTTCTACTTACAAAGGACAATTCAGTTTCATTAATTCTACGGAAAAGTCCGGAGTATATTGTATG  
TTA

@A00721:190:HGJW7DSXY:4:1616:1452:13808\_1:N:0:TCTGCAAG+GCTGCACT  
ATAAAGCTTTTTTCTTCTCAACTAAATACACGAAGATATCATCCGCACACGACTCGAAACCGAGA  
CGCCGTAGATCAAAGTCCCTTCTAACTTTAGATTATGAATCCTGCCTTTACTC

@A00721:190:HGJW7DSXY:4:1476:16667:10066\_2:N:0:TCTGCAAG+GCTGCACT  
ATAATATTACAATAGCTCTTTCTCAGAAGATTAGAGAAGTAACCGGTGAACACGTCGGTAGCATTGAT  
TTACTTTTACCGTTAGAACTGAAAAAGATTCTTTTCGAAAAGAAACCT

@A00721:190:HGJW7DSXY:4:2440:2139:18474\_1:N:0:TCTGCAAG+GCTGCACT  
GAAGGCTGGCTCTAAGGGAGACTCCTTCTTTTTGAATGTTGTAAAGAATTGGGTTGAGAAGTGTGCTT  
TACAAGGAGTTAGACTCTTCTTCAAGTTTTTAGATCTTCTTGATAATCTTAAAGAAAAATTTTCGAAT  
AAA

@A00721:190:HGJW7DSXY:4:2108:27552:18803\_1:N:0:TCTGCAAG+GCTGCACT  
CGTGTGCTCTTCCGATCTATTAGAGAAAGACGACCTTCTTGTTGGGGACTGAGACCTCTGAATTTTCAG  
GGTGCCCTGATGAGGACGTTGAAAGGGATAATTTCAACTCTGAGACTTCTAAGAGTGTTTCAAAGAC  
CAG

@A00721:190:HGJW7DSXY:4:2525:16785:22482\_1:N:0:TCTGCAAG+GCTGCACT  
ACGAGACTTTTCGTCATAATCGCTGCATATTACGGATTACACGGTACCAGCGCATCTCGTGTCGAGCCT  
CGACCCGATTATATGGTATTAAGTTATAAAGGTGAGGAGACCATTTTCTTGCTGAAATTTATAGAAGA  
TTA

[illegible]

@A00721:190:HGJW7DSXY:4:1275:25581:11381\_1:N:0:TCTGCAAG+GCTGCACT  
ATCAAAGGTTTTGAATTTAGCTCAACTGGGAGACGTGCTTAAATGGGTGATAAAAATTATTTAGAGA  
TCTTTTCTACTTACAAAGGACAATTCAGTTTCATTAATTCTACGAAAAGTCCGGAGTATATTGTATG  
TTA

+

FFFFFFFFFFFFFFFFFFFFFFFFFFFFFFFFFFFFFFFFFFFFFFFFFFFFFFFFFFFFFFFFFFFFFFFF  
FF,F:FFFFFFFF:FFFFFFFFFFFFFFFFFFFFFFFFFFFFFFFFFFFFFFFFFFFFFFFFFFFFFFFF  
FFF

@A00721:190:HGJW7DSXY:4:2561:6117:17159\_1:N:0:TCTGCAAG+GCTGCACT  
ATAAAGCGATTTTTCCTTCCTTAACATAACGAAGATATCATCCGAAACGACTCGAAACCGAGA  
CGCCGTAGATCAAAGTCCCTTCTAACTTTAGATTATGAATCCTGCCTTTACTC

+

: ,FF,::,,,FFF,F,F,F:F,F,::,,FF,:::,,,F,,,,:,F,F:,F,FFFFFFFFFFFFFFFF  
FFFFFFFFFFFFFFFFFFFFFFFFFFFFFFFFFFFFFFFFFFFFFFFFFFFFFFFFFFFFFFFFFFFFFFFF

@A00721:190:HGJW7DSXY:4:2244:5330:8437\_2:N:0:TCTGCAAG+GCTGCACT  
ATAATATTACAATAGCTCTTTCTCAGAAGATTAGAGAAGTAACCGGTGAACACGTCGGTAGCATTGAT  
TTACTTTTACCGTTAGAACTGAAAAAGATTCTTTTCGAAAAGAAACCT

+

FFFFFFFFFFFFFFFFFFFFFFFFFFFFFFFFFFFFFFFFFFFFFFFFFFFFFFFFFFFFFFFFFFFFFFFF  
FFFFF,FFFFFFFFFFFFFFFFFFFFFFFFFFFFFFFFFFFFFFFFFFFFFFFFFFFFFFFFFFFFFFFF

@A00721:190:HGJW7DSXY:4:2576:28736:13557\_1:N:0:TCTGCAAG+GCTGCACT  
GAAGGCTGGCTCTAAGGGAGACTCCTTCTTTTTGAATGTTGTAAAGAATTGGGTTGAGAAGTGTGCTT  
TACAAGGAGTTAGACTCTTCTTCAAGTTTTTAGATCTTCTTGATAATCTTAAAGAAAAATTTTGAAT  
AAA

+

FFFFFFFFFFFF,FFFFFFFFFFFF,FFF,:FFFFFFFF:FFFFFFFFFFFFFFFFFFFFFFFFFFFFFFFF  
FFFFFFFFFFFFFFFFFFFFFFFFFFFFFFFFFFFFFFFFFFFFFFFFFFFFFFFFFFFFFFFFFFFFFFFF  
FFF

@A00721:190:HGJW7DSXY:4:2155:28745:15264\_1:N:0:TCTGCAAG+GCTGCACT  
CGTGTGCTCTTCCGATCTATTAGAGAAAGACGACCTTCTTGTGGGGACTGAGACCTCTGAATTTTCAG  
GGTGCCCTGATGAGGACGTTGAAAGGGATAATTTCAACTCTGAGACTTCTAAGAGTGTTCAAAAGAC  
CAG

+

FFFFF:FF,FFFFFFFF,FFFFF:FFFFFFFFFFFFFFFFFFFFFFFFFFFFFFFFFFFFFFFFFFFFF:F:FFFFFF  
FFFFFFFFFFFFFFFFFFFFFFFFFFFFFFFFFFFFFFFFFFFFFFFFFFFFFFFFFFFFFFFFFFFFFFFF  
FFF

@A00721:190:HGJW7DSXY:4:1465:8088:3787\_1:N:0:TCTGCAAG+GCTGCACT  
CGAGACTTTCGTATAATCGCTGCATATTACGGATTACACGGTACCAGCGCATCTCGTGTGAGCCTC  
GACCCGATTATATGGTATTATCTTATAAATGTGAGGAGACCATTTCTTGCTGAAATTTATAGAAGAT  
TA

+

FFF,F,FF:,FF,FFFFF,:F::FFFFFFFFFFFF:FF:FFFF:FFF,F:FF,F:FFFF:F,F::F,  
F,:F,:FFFFFFFF,FFFFF:, ,FFFFFF, ,FFFFFFFFF:,FFFFFF:FFFFF,:FFF:FFF,F,:FF  
FF

@A00721:190:HGJW7DSXY:4:1413:13458:12399\_1:N:0:TCTGCAAG+GCTGCACT  
ATCAAAGGTTTTGAATTTAGCTCAACTGGGAGACGTGCTTAAATGGGTGATAAAAATTATTTAGAGA  
TCTTTTCTACTTACAAAGGACAATTCAGTTTCATTAATTCTACGAAAAGTCCGGAGTATATTGTATG  
TTA

+

FFFFFFFFFFFFFFFFFFFFFFFFFFFFFFFFFFFFFFFFFFFFFFFFFFFFFFFFFFFFFFFFFFFFFFFF:  
:FFF,FFFFFFFF,FFFFFF:FFFFFFFFFFFFFFFFFFFFFFFFFFFFFFFFFFFFFFFFFFFFFFFF  
FFF

@A00721:190:HGJW7DSXY:4:1132:9073:21214\_1:N:0:TCTGCAAG+GCTGCACT  
ATAACGCTTTTTTCCGTCGTTAACTTAATACCCTAATATATCAACCGAACACGACTCGAAACCGAGA

+

@A00721:190:HGJW7DSXY:4:2361:18240:4523\_2:N:0:TCTGCAAG+GCTGCACT  
ATAATATTACAATAGCTCTTTCTCAGAAGATTAGAGAAGTAACCGGTGAACACGTCGGTAGCATTGAT  
TTACTTTTACCGTTAGAACTGAAAAAGATTCTTTTCGAAAAGAAACCT

+

@A00721:190:HGJW7DSXY:4:2174:22950:30091\_1:N:0:TCTGCAAG+GCTGCACT  
CGTGTGCTCTTCCGATCTATTAGAGAAAGACGACCTTCTTGTGGGGACTGAGACCTCTGAATTTTCAG  
GGTGCCCTGATGAGGACGTTGAAAGGGATAATTTCAACTCTGAGACTTCTAAGAGTGTTTCAAAGAC  
CAG

+

@A00721:190:HGJW7DSXY:4:1569:24587:28855\_1:N:0:TCTGCAAG+GCTGCACT  
CGAGACTTTTCGTCATAATAGCTGCATATTACGGATTACACGGTACCAGAGCATCTCGTGTGAGCCTC  
GACCCTATTATATGGTATTAACCTATAAAGGTGAGGAGACCATTTCTTGCTGAAATTTATAGAAGAT  
TA

+

@A00721:190:HGJW7DSXY:4:1644:15826:16971\_1:N:0:TCTGCAAG+GCTGCACT  
ATCAAAGGTTTTGAATTTAGCTCAACTGGGGAGACGTGCTTAAATGGGTGATAAAAATTATTTAGAGA  
TCTTTTCTACTTACAAAGGACAATTCAGTTTCATTAATTCTACGGAAAAGTCCGGAGTATATTGTATG  
TTA

+

@A00721:190:HGJW7DSXY:4:1208:17481:35837\_1:N:0:TCTGCAAG+GCTGCACT  
ATAACGCGTGTTCCTCCGACCTCACCTTAATACACGAACAGAACCCCGAAACGACTCGAAACCGAGA  
CGCCGTAGATCAAAGTCCCTTCTAAGTTTAGATTATGAATCCTGCCTTTACTCATTTTATA

+

@A00721:190:HGJW7DSXY:4:1226:19488:24345\_2:N:0:TCTGCAAG+GCTGCACT  
ATAATATTACAATAGCTCTTTCTCAGAAGATTAGAGAAGTAACCGGTGAACACGTCGGTAGCATTGAT  
TTACTTTTACCGTTAGAACTGAAAAAGATTCTTTTCGAAAAGAAACCT

+

@A00721:190:HGJW7DSXY:4:2174:23511:31720\_1:N:0:TCTGCAAG+GCTGCACT  
CGTGTGCTCTTCCGATCTATTAGAGAAAGACGACCTTCTTGTGGGGACTGAGACCTCTGAATTTTCAG  
GGTGCCCTGATGAGGACGTTGAAAGGGATAATTTCAACTCTGAGACTTCTAAGAGTGTTTCAAAGAC  
CAG

+

[illegible]

+

@A00721:190:HGJW7DSXY:4:2222:20410:31297\_1:N:0:TCTGCAAG+GCTGCACT  
ATCAAAGGTTTTGAATTTAGCTCAACTGGGAGACGTGCTTAAATGGGTGATAAAAATTATTTAGAGA  
TCTTTTCTACTTACAAAGGACAATTCAGTTTCATTAATTCACGGAAAGTCCGGAGTATATTGTATG  
TTA

+

@A00721:190:HGJW7DSXY:4:1409:5773:35446\_1:N:0:TCTGCAAG+GCTGCACT  
AAAAAGCTAGTTTACCGACCTTAATAAATACTAAGAGATCAGCCGAAAACGACTCGAAACCGAGA  
CGCCGTAGATCAAAGTCCCTTCTAAGTTTATGAATCCTGCCTTTACTCATTTTATA

+

@A00721:190:HGJW7DSXY:4:1353:12454:22874\_2:N:0:TCTGCAAG+GCTGCACT  
ATAATATTACAATAGCTCTTTCTCAGAAGATTAGAGAAGTAACCGGTGAACACGTCGGTAGCATTGAT  
TTACTTTTACCGTTAGAACTGAAAAAGATTCTTTTCGAAAAGAAACCT

+

@A00721:190:HGJW7DSXY:4:2272:12906:19272\_1:N:0:TCTGCAAG+GCTGCACT  
CGTGTGCTCTTCCGATCTATTAGAGAAAGACGACCTTCTTGTGGGGACTGAGACCTCTGAATTTTCAG  
GGTGCCCTGATGAGGACGTTGAAAGGGATAATTTCAACTCTGAGACTTCTAAGAGTGTTTCAAAGAC  
CAG

+

@A00721:190:HGJW7DSXY:4:2647:1271:1564\_2:N:0:TCTGCAAG+GCTGCACT  
TCGCTGCATATTACGGATTACACGGTACCAGCGCATCTCGTGTCGAGCCTCGACCCGATTATATGGTA  
TTAACTTATAAAGGTGAGGAGACCATTTTCTTGCTGAAATTTATAGAA

+

@A00721:190:HGJW7DSXY:4:2378:29713:2597\_1:N:0:TCTGCAAG+GCTGCACT  
ATCAAAGGTTTTGAATTTAGCTCAACTGGGAGACGTGCTTAAATGGGTGATAAAAATTATTTAGAGA  
TCTTTTCTACTTACAAAGGACAATTCAGTTTCATTAATTCTACGGAAAAGTCCGGAGTATATTGTATG  
TTA

+

@A00721:190:HGJW7DSXY:4:1218:13123:18270\_1:N:0:TCTGCAAG+GCTGCACT  
ATAAAGCGATTTTCTTCCTTAATACTAAATACACTAAGATATCATCCGAAACGACTCGAAACCGAGA  
CGCCGTAGATCAAAGTCCCTTCTAACTTTAGATTATGAATCCTGCCTTTACTCATTTTATAGC

 $+$ [illegible]

@A00721:190:HGJW7DSXY:4:1414:13874:6637\_2:N:0:TCTGCAAG+GCTGCACT  
ATAATATTACAATAGCTCTTTCTCAGAAGATTAGAGAAGTAACCGGTGAACACGTCGGTAGCATTGAT  
TTACTTTTACCGTTAGAACTGAAAAAGATTCTTTTCGAAAAGAAACCT

+

FFFFFFFFFFFFFFFFFFFFFFFFFFFFFFFFFFFFFFFFFFFFFFFFFFFFFFFFFFFFFFFFFFFFFFFF  
FFFFFFFF:FFFFFFFFFFFFFFFFFFFFFFFFFFFFFFFFFFFFFFFFFFFFFFFFFFFFFFFF

@A00721:190:HGJW7DSXY:4:2547:13783:5885\_1:N:0:TCTGCAAG+GCTGCACT  
CGTGTGCTCTTCCGATCTATTAGAGAAAGACGACCTTCTTGTGGGGACTGAGACCTCTGAATTTTCAG  
GGTGCCCTGATGAGGACGTTGAAAGGGATAATTTCAACTCTGAGACTTCTAAGAGTGTTTCAAAAGAC  
CAG

+

FFFFFFFFFFFFFF:FFFFFFFFFFFFFFFFFFFFFFFFFFFFFFFFFFFFFFFFFFFFFFFFFFFFFFFF  
FFFFFFFFFFFFFFFFFFFFFFFFFFFFFFFFFFFFFFFFFFFFFFFFFFFFFFFFFFFFFFFFFFFFFFFF  
FFF

@A00721:190:HGJW7DSXY:4:2403:10845:29919\_1:N:0:TCTGCAAG+GCTGCACT  
ATCAAAGGTTTTGAATTTAGCTCAACTGGGGAGACGTGCTTAAATGGGTGATAAAAATTATTTAGAGA  
TCTTTTCTACTTACAAAGGACAATTCAGTTTCATTAATTCTACGAAAAGTCCGGAGTATATTGTATG  
TTA

+

F:FFF:FFFFFFFFFFFFFFFFFFFFFFFFFFFFFFFFFFFFFFFFFFFFFFFFFFFFFFFFFFFFFFFF  
FFFF,FFFFFFFFFFFFFFFFFFFFFFFFFFFFFFFFFFFFFFFFFFFFFFFFFFFFFFFFFFFFFFFF  
FFF

@A00721:190:HGJW7DSXY:4:1412:3830:20306\_1:N:0:TCTGCAAG+GCTGCACT  
ATAAAGCGAGTTTTCCGACCTGAACGTAATACACGAAGAGAACAGCCGCACACGACTCGAAACCGAGA  
CGCCGTAGATCAAAGTCCCTTCTAACTTTAGATTATGAATCCTGCCTTTACTCATTTTATAGCAGTTA

+

F:F:,,,::,FFF,F,F,F:,,,F:,,,FF,:F:F,F,,,F,:F,F:,,,FFFFFFFFFFFFFFFF  
FFFFFFFFFFFFFFFFFFFFFFFFFFFFFFFFFFFFFFFFFFFFFFFFFFFFFFFFFFFFFFFFFFFFFFFF

@A00721:190:HGJW7DSXY:4:2118:13747:18317\_2:N:0:TCTGCAAG+GCTGCACT  
ATAATATTACAATAGCTCTTTCTCAGAAGATTAGAGAAGTAACCGGTGAACACGTCGGTAGCATTGAT  
TTACTTTTACCGTTAGAACTGAAAAAGATTCTTTTCGAAAAGAAACCT

+

FFFFFFFFFFFFFFFF:FFFFFFFFFFFFFFFFFFFFFFFFFFFFFFFFFFFFFFFFFFFFFFFFFFFFFFFF  
FFFFFFFFFFFFFFFFFFFFFFFFFFFFFFFFFFFFFFFFFFFFFFFFFFFFFFFFFFFFFFFF:FF:

@A00721:190:HGJW7DSXY:4:2435:1271:2190\_1:N:0:TCTGCAAG+GCTGCACT  
GTGTGCTCTTCCGATCTATTAGAGAAAGACGACCTTCTTGTGGGGACTGAGACCTCTGAATTTTCAG  
GTGCCCTGATGAGGACGTTGAAAGGGATAATTTCAACTCTGAGACTTCTAAGAGTGTTTCAAAAGACC  
AG

+

FFFFFFFFFFF:FFFF:FFFFFFFFFFFFFFFFFFFFFFFFFFFFFFFFFFFFFFFFFFFFFFFFFFFF  
FFFFFFFFFFFFFFFFFFFFFFFFFFFFFFFFFFFFFFFFFFFFFFFFFFFFFFFFFFFFFFFF:FFFFFFFF  
FF

@A00721:190:HGJW7DSXY:4:2462:10176:1360\_1:N:0:TCTGCAAG+GCTGCACT  
ATCAAAGGTTTTGAATTTAGCTCAACTGGGGAGACGTGCTTAAATGGGTGATAAAAATTATTTAGAGA  
TCTTTTCTACTTACAAAGGACAATTCAGTTTCATTAATTCTACGAAAAGTCCGGAGTATATTGTATG  
TTA

+

FFFFF:FFFFFFFFFFFFFFFFFFFFFFFFFFFFFFFFFFFFFFFFFFFFFFFFFFFFFFFFFFFFFFFF  
,FFFFFFFFFFFFFFFFFFFFFFFFFFFFFFFFFFFFFFFFFFFFFFFFFFFFFFFFFFFFFFFFFFFF  
FFF

@A00721:190:HGJW7DSXY:4:1126:21368:27665\_1:N:0:TCTGCAAG+GCTGCACT  
TAAAGCGAGTTTTCCGTCCTGAACGTAATACACGAAGAGAACATCCGCAAACGACTCGAAACCGAGAC  
GCCGTAGATCAAAGTCCCTTCTAACTTTAGATTATGAATCCTGCCTTTACTCATTTTATAGCAGTTA

+



:FF,::,,:FFF:F,,,FFF,FF:,,F,:::,F,F:,,,F,FF,FF,,F,FFFFFFFF:FFFFFFFF  
FFFFFFFFFFFFFFFFFFFFFFFFFFFFFFFFFFFFFFFFFFFFFFFFFFFFFFFFFFFFFFFF:FFFFFFFF  
@A00721:190:HGJW7DSXY:4:2160:11785:17174\_2:N:0:TCTGCAAG+GCTGCACT  
ATAATATTACAATAGCTCTTTCTCAGAAGATTAGAGAAGTAACCGGTGAACACGTCGGTAGCATTGAT  
TACTTTTACCGTTAGAACTGAAAAAGATTCTTTTCGAAAAGAAACCT

+

FF:FFFFFFFFFFFFFFFFFFFFFFFFFFFFFFFFFFFFFFFFFFFFFFFFFFFFFFFF:FFFFFFFF:FFFFFFFF  
FFFFFFFFFFFFFFFFFFFFFFFFFFFFFFFFFFFFFFFFFFFFFFFFFFFFFFFFFFFFFFFF  
@A00721:190:HGJW7DSXY:4:1340:26738:9878\_2:N:0:TCTGCAAG+GCTGCACT  
AAGACGACCTTCTTGTGGGACTGAGACCTCTGAATTTTCAGGGTGCCCTGATGAGGACGTTGAAAGG  
GATAATTTCAACTCTGAGACTTCTAAGAGTGTTTCAAAGACCAGAAA

+

FFFFFFFFFFFFFFFFFFFFFFFFFFFFFFFFFFFFFFFFFFFFFFFFFFFFFFFF:FFFFF,FFFF:FFFF:FFFFFFFF:,,:F,:FFFFFFFF:F,FF  
FFFFFFFFFFFFFFFFFFFFFFFFFFFFFFFFFFFFFFFFFFFFFFFFFFFFFFFF,FF:FF:FFFF  
@A00721:190:HGJW7DSXY:4:2475:28103:18944\_1:N:0:TCTGCAAG+GCTGCACT  
ATCAAAGGTTTTGAATTTAGCTCAACTGGGAGACGTGCTTAAATGGGTGATAAAAATTATTTAGAGA  
TCTTTTCTACTTACAAAGGACAATTCAGTTTCATTAATTCTACGAAAAGTCCGGAGTATATTGTATG  
TTA

+

FFFFF:FFFFFFFF:FFFFFFFFFFFFFFFFFFFFFFFFFFFFFFFFFFFFFFFFFFFFFFFFFFFFFFFFFFFFFFFF  
FFFF,FFFFFFFFFFFFFFFFFFFFFFFFFFFFFFFFFFFFFFFFFFFFFFFFFFFFFFFFFFFFFFFFFFFFFFFF  
FFF  
@A00721:190:HGJW7DSXY:4:2436:7753:2112\_1:N:0:TCTGCAAG+GCTGCACT  
GTGTGCTCTTCCGATCTCCTCAACTTAATACCCGAAGAGATCATCCGCAAACGACTCGAAACCGAGAC  
GCCGTAGATCAAAGTCCCTTCTAACTTTAGATTATGAATCCTGCCTTTACTCATTTTATAGCAGTTA

+

F::F:,F,F,F,,F,:,:,F,,F:FF,F:,,,F,,F:F,F:,FF,,F,FFFFFFFFFFFFFFFFFFFF  
FFFFFFFFFFFFFFFFFFFFFFFFFFFFFFFFFFFFFFFFFFFFFFFFFFFFFFFFFFFFFFFFFFFFFFFF  
@A00721:190:HGJW7DSXY:4:2320:5692:26068\_2:N:0:TCTGCAAG+GCTGCACT  
ATAATATTACAATAGCTCTTTCTCAGAAGATTAGAGAAGTAACCGGTGAACACGTCGGTAGCATTGAT  
TACTTTTACCGTTAGAACTGAAAAAGATTCTTTTCGAAAAGAAACCT

+

FFFFFFFFFFFFFFFFFFFFFFFFFFFFFFFFFFFFFFFFFFFFFFFFFFFFFFFF:FFFFFFFFFFFFFFFFFFFF  
FFFFFFFF:FFFFFFFFFFFFFFFFFFFFFFFFFFFFFFFFFFFFFFFFFFFFFFFFFFFF  
@A00721:190:HGJW7DSXY:4:1340:28592:7983\_2:N:0:TCTGCAAG+GCTGCACT  
AAGACGACCTTCTTGTGGGACTGAGACCTCTGAATTTTCAGGGTGCCCTGATGAGGACGTTGAAAGG  
GATAATTTCAACTCTGAGACTTCTAAGAGTGTTTCAAAGACCAGAAA

+

FFFFFFFFFFFFFFFFFFFFFFFFFFFFFFFFFFFFFFFFFFFFFFFFFFFFFFFF:FFFFFFFFFFFFFFFFFFFF  
FFFFFFFFFFFFFFFFFFFFFFFFFFFFFFFFFFFFFFFFFFFFFFFFFFFFFFFFFFFF:F  
@A00721:190:HGJW7DSXY:4:2510:10981:21605\_1:N:0:TCTGCAAG+GCTGCACT  
ATCAAAGGTTTTGAATTTAGCTCAACTGGGAGACGTGCTTAAATGGGTGATAAAAATTATTTAGAGA  
TCTTTTCTACTTACAAAGGACAATTCAGTTTCATTAATTCTACGAAAAGTCCGGAGTATATTGTATG  
TTA

+

FFFF,F,:FFFFFFFF:F:F:F:FFF,:FFFF:FF:,F,FFFF,,FFF::FFF:FF,FFFFFFFF  
FF:FFF:F,FFFF,F,F:FF:FFFF:FFFFFFFF:FFFFFFFFFFFF:FFFFFFFFFF:FF,FFFF  
FFF

@A00721:190:HGJW7DSXY:4:1367:18575:24298\_1:N:0:TCTGCAAG+GCTGCACT  
TAAAGCTTGTTTTCCGTCCTGAACCTTAATACACTAAGATATCATCCGCACACGACTCGAAACCGAGAC  
GCCGTAGATCAAAGTCCCTTCTAACTTTAGATTATGAATCCTGCCTTTACTCATTTTATAGCAGTTAT  
TTA

+

:F,,F:,,:FFF,:,,:F,:F::,,FF:,:::,F,:F,,,F:F:,FF,:FFFFFFFF,FFF:FF

FFFFFFFFFFFFFF:FFFFFFFFFFFFFF:FFFFFFFFFFFFFFFFFFFFFFFFFFFFFFFFFFFFFFFF  
FFF

@A00721:190:HGJW7DSXY:4:2418:19434:10441\_2:N:0:TCTGCAAG+GCTGCACT  
ATAATATTACAATAGCTCTTTCTCAGAAGATTAGAGAAGTAACCGGTGAACACGTCGGTAGCATTGAT  
TACTTTTACCGTTAGAACTGAAAAAGATTCTTTTCGAAAAGAAACCT

+

FFFFFFFFFFFFFF:FFFFFFFFFFFFFFFFFFFFFFFFFFFFFFFFFFFFFFFF:F:FFFF:FFFFFFFFFFFFFFFF  
FFFF:FFFFFFFFFFFFFFFFFFFFFFFFFFFFFFFFFFFFFFFFFFFFFFFF

@A00721:190:HGJW7DSXY:4:1346:9887:32456\_2:N:0:TCTGCAAG+GCTGCACT  
AAGACGACCTTCTTGTGGGACTGAGACCTCTGAATTTTCAGGGTGCCCTGATGAGGACGTTGAAAGG  
GATAATTTCAACTCTGAGACTTCTAAGAGTGTTTCAAAGACCAGAAA

+

FFFFFFFFFFFFFF:FFFFFFFFFFFFFFFFFFFFFFFFFFFFFFFFFFFFFFFFFFFFFFFFFFFFFFFF:FF  
FFFFFFFFFFFFFFFFFFFFFFFF,FFF:FFFFFFFFFFFFFFFF

@A00721:190:HGJW7DSXY:4:2641:31629:17566\_1:N:0:TCTGCAAG+GCTGCACT  
ATCAAAGGTTTTGAATTTAGCTCAACTGGGAGACGTGCTTAAATGGGTGATAAAAATTATTTAGAGA  
TCTTTTCTACTTACAAAGGACAATTCAGTTTCATTAATTCTACGAAAAGTCCGGAGTATATTGTATG  
TTA

+

FFF,:FF:FFFFFFFFFFFFFFFFFFFFFFFF:FFFFFFF,FFFFFFFFFFFFFFFFFFFFFFFF  
FFF:FFFFFFFFFFFFFFFF:FFFFFFFFFFFFFFFFFFFFFFFFFFFFFFFFFFFFFFFF  
FFF

@A00721:190:HGJW7DSXY:4:2433:3224:3850\_1:N:0:TCTGCAAG+GCTGCACT  
TAACGCGAGTTTTCGGTCCTGAACGTAATACACGATGAGATAATCCGCAAACGACTCGAAACCGAGAC  
GCCGTAGATCAAAGTCCCTTCTAACTTTAGATTATGAATCCTGCCTTTACTCATTTTATAGCAGTTAT  
TTA

+

:FF,,:::,FFF:F,FFF:F,FF,:F:F,::,,F,,:,FF,F,FFF:F,FFFFFFFFFFFFFFFF  
FFFFFFFFFFFFFFFFFFFFFFFFFFFFFFFFFFFFFFFFFFFFFFFFFFFFFFFF  
FFF

@A00721:190:HGJW7DSXY:4:1114:20265:33082\_2:N:0:TCTGCAAG+GCTGCACT  
TAATATTACAATAGCTCTTTCTCAGAAGATTAGAGAAGTAACCGGTGAACACGTCGGTAGCATTGATT  
TACTTTTACCGTTAGAACTGAAAAAGATTCTTTTCGAAAAGAAACCTA

+

FFFFFFFFFFFFFFFFFFFFFFFFFFFFFFFFFFFFFFFFFFFFFFFFFFFFFFFFFFFFFFFF  
FFFFFFFFFFFFFFFFFFFFFFFFFFFFFFFFFFFFFFFFFFFFFFFF

@A00721:190:HGJW7DSXY:4:1669:13250:19586\_2:N:0:TCTGCAAG+GCTGCACT  
AAGACGACCTTCTTGTGGGACTGAGACCTCTGAATTTTCAGGGTGCCCTGATGAGGACGTTGAAAGG  
GATAATTTCAACTCTGAGACTTCTAAGAGTGTTTCAAAGACCAGAAA

+

FFFFFFFFFFFFFFFFFFFFFFFFFFFFFFFFFFFFFFFFFFFFFFFFFFFFFFFFFFFFFFFF:FF  
FFF:FFFFFFFFFFFFFFFF:FFFFFFFFFFFFFF:FFFF

@A00721:190:HGJW7DSXY:4:1331:24279:15765\_1:N:0:TCTGCAAG+GCTGCACT  
TCAAAGGTTTTGAATTTAGCTCAACTGGGAGACGTGCTTAAATGGGTGATAAAAATTATTTAGAGAT  
CTTTTCTACTTACAAAGGACAATTCAGTTTCATTAATTCTACGAAAAGTCCGGAGTATATTGTATGT  
TA

+

: :FFF,F:FFFFFFFFFFFF: :FFFFFF: :FFFFFF:FFF:FFFF:F,FFFFFFFFFFFFFFFF:FFFF  
F:FF:FFFFFFFFFFFF:FFFFFFFFFFFF:FFFFFFFF:FFFF:FFFFFFFF:FFFFFFFFFFFF  
:F

@A00721:190:HGJW7DSXY:4:2122:12138:2973\_1:N:0:TCTGCAAG+GCTGCACT  
TAACGCTTTTTTCCGTCCTTAACCTTAATACACTAAGATATCACCCGCACACGACTCGAAACCGAGAC  
GCCGTAGATCAAAGTCCCTTCTAACTTTAGATTATGAATCCTGCCTTTACTCATTTTATAGCAGTTAT  
TTA

+  
:F:,,:F:,F:F,F,F,,,:F:,F,,,:F,,,:F,F:,F,FFFFFFFFFFFFFFFFFFFF  
FFFFFFFFFFFFFFFFFFFFFFFFFFFFFFFFFFFFFFFFFFFFFFFFFFFFFFFFFFFFFFFFFFFF  
FFF  
@A00721:190:HGJW7DSXY:4:1241:12753:32534\_2:N:0:TCTGCAAG+GCTGCACT  
TAATATTACAATAGCTCTTTCTCAGAAGATTAGAGAAGTAACCGGTGAACACGTCGGTAGCATTGATT  
TACTTTTACCGTTAGAACTGAAAAAGATTCTTTTCGAAAAGAAACCTA  
+  
FFFFFFFFFFFFFFFFFFFFFFFFFFFFFFFFFFFFFFFFFFFFFFFFFFFFFFFFFFFFFFFFFFFF  
FFFFFFFFFFFFFFFFFFFFFFFFFFFFFFFFFFFFFFFFFFFFFFFFFFFFFFFFFFFFFFFFFFFF  
@A00721:190:HGJW7DSXY:4:2111:3803:35665\_2:N:0:TCTGCAAG+GCTGCACT  
AAGACGACCTTCTTGTGGGACTGAGACCTCTGAATTTTCAGGGTGCCCTGATGAGGACGTTGAAAGG  
GATAATTTCAACTCTGAGACTTCTAAGAGTGTTTCAAAAGACCAGAAA  
+  
FFFFFFFFFFFFFFFFFFFFFFFFFFFFFFFFFFFFFFFFFFFFFFFFFFFFFFFFFFFFFFFFFFFF  
FFFFFFFFFFFFFFFFFFFFFFFFFFFFFFFFFFFFFFFFFFFFFFFFFFFFFFFFFFFFFFFFFFFF  
@A00721:190:HGJW7DSXY:4:1119:20609:25160\_1:N:0:TCTGCAAG+GCTGCACT  
TCAAAGTTTTGAATTTAGCTCAACTGGGAGACGTGCTTAAATGGGTGATAAAAATTATTTAGAGAT  
CTTTTCTACTTACAAAGGACAATTCAGTTTCATTAATTCTACGAAAAGTCCGGAGTATATTGTATGT  
TAA  
+  
FFF:FF:F:FFFFFFFFFFFFFFFFFFFFFFFFFFFFFFFFFFFFFFFFFFFFFFFFFFFFFFFFFFFF  
FFFFFFFFFFFFFFFFFFFFFFFFFFFFFFFFFFFFFFFFFFFFFFFFFFFFFFFFFFFFFFFFFFFF  
FFF  
@A00721:190:HGJW7DSXY:4:1557:1398:19445\_1:N:0:TCTGCAAG+GCTGCACT  
AAAGCGAGTTTTCCGTCCTGAACTAAATACACGAAGAGATCATCCGCAAACGACTCGAAACCGAGACG  
CCGTAGATCAAAGTCCCTTCTAACTTTAGATTATGAATCCTGCCTTTACTCATTTTATAGCAGTTATT  
TA  
+  
FF,F:,,:FFF:F:F,F:F,F:,,:FF,:FF,F,:F,F,FF,FF:FF:FFFFFFFFFFFFFFFFFFFF  
FFFFFFFFFFFFFFFFFFFFFFFFFFFFFFFFFFFFFFFFFFFFFFFFFFFFFFFFFFFFFFFFFFFF  
FF  
@A00721:190:HGJW7DSXY:4:1310:3848:16266\_2:N:0:TCTGCAAG+GCTGCACT  
TAATATTACAATAGCTCTTTCTCAGAAGATTAGAGAAGTAACCGGTGAACACGTCGGTAGCATTGATT  
TACTTTTACCGTTAGAACTGAAAAAGATTCTTTTCGAAAAGAAACCTA  
+  
F,FFFFFFFFFFFFFFFFFFFFFFFFFFFFFFFFFFFFFFFFFFFFFFFFFFFFFFFFFFFFFFFFFFFF  
FFFF:FFFFFFFFFFFFFFFFFFFFFFFFFFFFFFFFFFFFFFFFFFFFFFFFFFFFFFFFFFFF:,F  
@A00721:190:HGJW7DSXY:4:2211:15040:35274\_2:N:0:TCTGCAAG+GCTGCACT  
AAGACGACCTTCTTGTGGGACTGAGACCTCTGAATTTTCAGGGTGCCCTGATGAGGACGTTGAAAGG  
GATAATTTCAACTCTGAGACTTCTAAGAGTGTTTCAAAAGACCAGAAA  
+  
FFFFFFFFFFFFFFFFFFFFFFFFFFFFFFFFFFFFFFFFFFFFFFFFFFFFFFFFFFFFFFFFFFFF  
FFFFFFFFFFFFFFFFFFFFFFFFFFFFFFFFFFFFFFFFFFFFFFFFFFFFFFFFFFFFFFFFFFFF  
@A00721:190:HGJW7DSXY:4:1212:24216:13401\_1:N:0:TCTGCAAG+GCTGCACT  
TCAAAGGTTTTGAATTTAGCTCAACTGGGAGACGTGCTTAAATGGGTGATAAAAATTATTTAGAGAT  
CTTTTCTACTTACAAAGGACAATTCAGTTTCATTAATTCTACGAAAAGTCCGGAGTATATTGTATGT  
TAA  
+  
FFF,:F:FFFFFFFFFFFFFFFFFFFFFFFFFFFFFFFFFFFFFFFFFFFFFFFFFFFFFFFFFFFF  
FFFFFFFFFFFFFFFFFFFFFFFFFFFFFFFFFFFFFFFFFFFFFFFFFFFFFFFFFFFFFFFFFFFF  
FFF  
@A00721:190:HGJW7DSXY:4:1616:1561:13777\_2:N:0:TCTGCAAG+GCTGCACT  
AGCGAGTTTTCTTCCTGAACGTAATACACGAAGAGATCATCCGCAAACGACTCGAAACCGAGACGCC

GTAGATCAAAGTCCCTTCTAACTTTAGATTATGAATCCTGCCTTTACT  
+  
FFFFFFFFFFFFFFFFFFFFFFFFFFFFFFFFFFFFFFFFFFFFFFFFFFFFFFFFFFFFFFFFFFFFFFFF  
FFFFFFFFFFFFFFFFFFFFFFFFFFFFFFFFFFFFFFFFFFFFFFFFFFFFFFFFFFFFFFFFFFFFFFFF  
@A00721:190:HGJW7DSXY:4:1319:30210:2237\_2:N:0:TCTGCAAG+GCTGCACT  
TAATATTACAATAGCTCTTTCTCAGAAGATTAGAGAAGTAACCGGTGAACACGTCGGTAGCATTGATT  
TACTTTTACCGTTAGAACTGAAAAAGATTCTTTTCGAAAAGAAACCTA  
+  
FFFFFFFFFFFF:FFFFFFFFFFFF,FFFFFFFFFFFFFFFFFFFFFFFFFFFFFFFFFFFFFFFF:FFF,FFFFFFFFFFFF  
FF:FF:FF,,FFFFFFFFFFFFFFFF::FFFFFFFF:F:FF:FFFF:FFF  
@A00721:190:HGJW7DSXY:4:2311:32452:27665\_2:N:0:TCTGCAAG+GCTGCACT  
AAGACGACCTTCTTGTGGGACTGAGACCTCTGAATTTTCAGGGTGCCCTGATGAGGACGTTGAAAGG  
GATAATTTCAACTCTGAGACTTCTAAGAGTGTTTCAAAAGACCAGAAA  
+  
FFFFFFFFFFFFFFFFFFFFFFFFFFFFFFFFFFFFFFFFFFFFFFFFFFFFFFFFFFFFFFFFFFFFFFFF  
FFFFFFFFFFFFFFFFFFFFFFFFFFFFFFFFFFFFFFFFFFFFFFFFFFFFFFFFFFFFFFFFFFFFFFFF  
@A00721:190:HGJW7DSXY:4:1341:17345:10802\_1:N:0:TCTGCAAG+GCTGCACT  
TCAAAGTTTTGAATTTAGCTCAACTGGGAGACGTGCTTAAATGGGTGATAAAAATTATTTAGAGAT  
CTTTTCTACTTACAAAGGACAATTCAGTTTCATTAATTCTACGAAAAGTCCGGAGTATATTGTATGT  
TAA  
+  
FFFFFF:FFFFFFFFFFFF:FFFFFF, :FFF:FFF:FFF,FFFF:FF::FF:FFFFFF:FFFFFF:FFFFFF  
:F,FFFFFFFFFFFFFFFFFFFFFFFFFFFFFFFFFFFFFFFFFFFFFFFFFFFFFFFFFFFFFFFFFFFF  
FFF  
@A00721:190:HGJW7DSXY:4:2122:12138:2973\_2:N:0:TCTGCAAG+GCTGCACT  
AGCGAGTTTTCCGTCTGAACGTAATACACGAAGAGATCATCCGCAAACGACTCGAAACCGAGACGCC  
GTAGATCAAAGTCCCTTCTAACTTTAGATTATGAATCCTGCCTTTACT  
+  
FFFFFFFFFFFFFFFFFFFFFFFFFFFFFFFFFFFFFFFFFFFFFFFFFFFFFFFFFFFFFFFFFFFFFFFF  
FFFFFFFFFFFFFFFFFFFFFFFFFFFFFFFFFFFFFFFFFFFFFFFFFFFFFFFFFFFFFFFFFFFFFFFF  
@A00721:190:HGJW7DSXY:4:1607:12264:26490\_2:N:0:TCTGCAAG+GCTGCACT  
TAATATTACAATAGCTCTTTCTCAGAAGATTAGAGAAGTAACCGGTGAACACGTCGGTAGCATTGATT  
TACTTTTACCGTTAGAACTGAAAAAGATTCTTTTCGAAAAGAAACCTA  
+  
FFFFFFFFFFFFFFFFFFFFFFFFFFFFFFFFFFFFFFFFFFFFFFFFFFFFFFFFFFFFFFFFFFFFFFFF  
FFFFFFFFFFFFFFFFFFFFFFFFFFFFFFFFFFFFFFFFFFFFFFFFFFFFFFFFFFFFFFFFFFFFFFFF  
@A00721:190:HGJW7DSXY:4:1607:12264:26490\_2:N:0:TCTGCAAG+GCTGCACT  
TAATATTACAATAGCTCTTTCTCAGAAGATTAGAGAAGTAACCGGTGAACACGTCGGTAGCATTGATT  
TACTTTTACCGTTAGAACTGAAAAAGATTCTTTTCGAAAAGAAACCTA  
+  
FFFFFFFFFFFFFFFFFFFFFFFFFFFFFFFFFFFFFFFFFFFFFFFFFFFFFFFFFFFFFFFFFFFFFFFF  
FFFFFFFFFFFFFFFFFFFFFFFFFFFFFFFFFFFFFFFFFFFFFFFFFFFFFFFFFFFFFFFFFFFFFFFF  
@A00721:190:HGJW7DSXY:4:2371:19985:22545\_2:N:0:TCTGCAAG+GCTGCACT  
AAGACGACCTTCTTGTGGGACTGAGACCTCTGAATTTTCAGGGTGCCCTGATGAGGACGTTGAAAGG  
GATAATTTCAACTCTGAGACTTCTAAGAGTGTTTCAAAAGACCAGAAA  
+  
FFF:FFFFFFFFFFFFFFFFFFFFFFFFFFFFFFFFFFFFFFFFFFFFFFFFFFFFFFFFFFFFFFFFFFFF  
FFFFFFFFFFFFFFFFFFFFFFFFFFFFFFFFFFFFFFFFFFFFFFFFFFFFFFFFFFFFFFFFFFFFFFFF  
@A00721:190:HGJW7DSXY:4:1434:17400:27774\_1:N:0:TCTGCAAG+GCTGCACT  
TCAAAGTTTTGAATTTAGCTCAACTGGGAGACGTGCTTAAATGGGTGATAAAAATTATTTAGAGAT  
CTTTTCTACTTACAAAGGACAATTCAGTTTCATTAATTCTACGAAAAGTCCGGAGTATATTGTATGT  
TAA  
+  
:FFFFFF, :FFFFFFFFFFFF:FFFFFFFFFFFFFFFFFFFFFFFFFFFFFFFFFFFFFFFFFFFFFFFFFFFFF:FF  
FFFFFFFFFFFFFFFFFFFFFFFFFFFFFFFFFFFFFFFFFFFFFFFFFFFFFFFFFFFFFFFFFFFFFFFFFFFF  
FFF  
@A00721:190:HGJW7DSXY:4:2135:20546:10833\_2:N:0:TCTGCAAG+GCTGCACT  
AGCGAGTTTTCCGTCTGAACGTAATACACGAAGAGATCATCCGCAAACGACTCGAAACCGAGACGCC  
GTAGATCAAAGTCCCTTCTAACTTTAGATTATGAATCCTGCCTTTACT  
+

[illegible]



TACTTTTACCGTTAGAACTGAAAAAGATTCTTTTCGAAAAGAAACCTA  
+  
FFFFFFFFFFFFFFFFFFFFFFFFFFFFFFFFFFFFFFFFFFFFFFFFFFFFFFFFFFFFFFFFFFFFFFFF:F  
FFFFFFFFFFFFFFFFFFFFFFFFFFFFFFFFFFFFFFFFFFFFFFFFFFFFFFFFFFFFFFFFFFFFFFFF:  
@A00721:190:HGJW7DSXY:4:2174:22950:30091\_2:N:0:TCTGCAAG+GCTGCACT  
CGACCTTCTTGTGGGGACTGAGACCTCTGAATTTTCAGGGTGCCCTGATGAGGACGTTGAAAGGGATA  
ATTTCAACTCTGAGACTTCTAAGAGTGTTTCAAAGACCAGAAACGTA  
+  
FFFFFFFFFFFFFFFFFFFFFFFFFFFFFFFFFFFFFFFFFFFFFFFFFFFFFFFFFFFFFFFFFFFFFFFF:F  
FFFFFFFFFFFFFFFFFFFFFFFFFFFFFFFFFFFFFFFFFFFFFFFFFFFFFFFFFFFFFFFFFFFFFFFF:  
@A00721:190:HGJW7DSXY:4:2518:17978:9361\_2:N:0:TCTGCAAG+GCTGCACT  
AGCGAGTTTTCTTCTCCTGAACGTAATACACGAAGAGATCATCCGCAAACGACTCGAAACCGAGACGCC  
GTAGATCAAAGTCCCTTCTAACTTTAGATTATGAATCCTGCCTTTACT  
+  
FFFFFFFFFFFFFFFFFFFFFFFFFFFFFFFFFFFFFFFFFFFFFFFFFFFFFFFFFFFFFFFFFFFFFFFF:F  
FFFFFFFFFFFFFFFFFFFFFFFFFFFFFFFFFFFFFFFFFFFFFFFFFFFFFFFFFFFFFFFFFFFFFFFF:  
@A00721:190:HGJW7DSXY:4:2636:19208:3912\_2:N:0:TCTGCAAG+GCTGCACT  
TAATATTACAATAGCTCTTCTCAGAAGATTAGAGAAGTAACCGGTGAACACGTCGGTAGCATTGATT  
TACTTTTACCGTTAGAACTGAAAAAGATTCTTTTCGAAAAGAAACCTA  
+  
FFFFFFFFFFFFFFFFFFFFFFFFFFFFFFFFFFFFFFFFFFFFFFFFFFFFFFFFFFFFFFFFFFFFFFFF:F  
FFFFFFFFFFFFFFFFFFFFFFFFFFFFFFFFFFFFFFFFFFFFFFFFFFFFFFFFFFFFFFFFFFFFFFFF:  
@A00721:190:HGJW7DSXY:4:2174:23511:31720\_2:N:0:TCTGCAAG+GCTGCACT  
CGACCTTCTTGTGGGGACTGAGACCTCTGAATTTTCAGGGTGCCCTGATGAGGACGTTGAAAGGGATA  
ATTTCAACTCTGAGACTTCTAAGAGTGTTTCAAAGACCAGAAACGTA  
+  
FFFFFFFFFFFFFFFFFFFFFFFFFFFFFFFFFFFFFFFFFFFFFFFFFFFFFFFFFFFFFFFFFFFFFFFF:F  
FFFFFFFFFFFFFFFFFFFFFFFFFFFFFFFFFFFFFFFFFFFFFFFFFFFFFFFFFFFFFFFFFFFFFFFF:  
@A00721:190:HGJW7DSXY:4:2547:25039:3583\_2:N:0:TCTGCAAG+GCTGCACT  
AGCGAGTTTTCTTCTCCTGAACGTAATACACGAAGAGATCATCCGCAAACGACTCGAAACCGAGACGCC  
GTAGATCAAAGTCCCTTCTAACTTTAGATTATGAATCCTGCCTTTACT  
+  
FFFFFFFFFFFFFFFFFFFFFFFFFFFFFFFFFFFFFFFFFFFFFFFFFFFFFFFFFFFFFFFFFFFFFFFF:F  
FFFFFFFFFFFFFFFFFFFFFFFFFFFFFFFFFFFFFFFFFFFFFFFFFFFFFFFFFFFFFFFFFFFFFFFF:  
@A00721:190:HGJW7DSXY:4:1309:26431:4210\_2:N:0:TCTGCAAG+GCTGCACT  
TCTTTCTCAGAAGATTAGAGAAGTAACCGGTGAACACGTCGGTAGCATTGATTTACTTTTACCGTTAG  
AACTGAAAAAGATTCTTTTCGAAAAGAAACCTATAAGTTACAAACGAT  
+  
FFFFFFFFFFFFFF:FF:FFFFFF:FFFFFFFFFFFFFFFFFFFFFFFFFFFFFFFFFFFFFFFFFFFFFFFF  
FFFFFFFFFFFFFFFFFFFFFFFFFFFFFFFFFFFFFFFFFFFFFFFFFFFFFFFFFFFFFFFFFFFFFFFF:  
@A00721:190:HGJW7DSXY:4:2272:12906:19272\_2:N:0:TCTGCAAG+GCTGCACT  
CGACCTTCTTGTGGGGACTGAGACCTCTGAATTTTCAGGGTGCCCTGATGAGGACGTTGAAAGGGATA  
ATTTCAACTCTGAGACTTCTAAGAGTGTTTCAAAGACCAGAAACGTA  
+  
FFFFFFFFF:FFFFFFFFFFFFFFFFFFFFFFFFFFFFFFFFFFFFFFFFFFFFFFFFFFFFFFFFFFFFFFFF  
FFFFFFFFFFFFFFFFFFFFFFFFFFFFFFFFFFFFFFFFFFFFFFFFFFFFFFFFFFFFFFFFFFFFFFFF,  
@A00721:190:HGJW7DSXY:4:2561:6054:16955\_2:N:0:TCTGCAAG+GCTGCACT  
AGCGAGTTTTCTTCTCCTGAACGTAATACACGAAGAGATCATCCGCAAACGACTCGAAACCGAGACGCC  
GTAGATCAAAGTCCCTTCTAACTTTAGATTATGAATCCTGCCTTTACT  
+  
FFFFFFFFFFFFFFFFFFFFFFFFFFFFFFFFFFFFFFFFFFFFFFFFFFFFFFFFFFFFFFFFFFFFFFFF:F  
FFFFFFFFFFFFFFFFFFFFFFFFFFFFFFFFFFFFFFFFFFFFFFFFFFFFFFFFFFFFFFFFFFFFFFFF:  
@A00721:190:HGJW7DSXY:4:2168:28601:26537\_2:N:0:TCTGCAAG+GCTGCACT  
TCTTTCTCAGAAGATTAGAGAAGTAACCGGTGAACACGTCGGTAGCATTGATTTACTTTTACCGTTAG

+

@A00721:190:HGJW7DSXY:4:2435:1271:2190\_2:N:0:TCTGCAAG+GCTGCACT  
CGACCTTCTTGTGGGACTGAGACCTCTGAATTTTCAGGGTGCCCTGATGAGGACGTTGAAAGGGATA  
ATTTCAACTCTGAGACTTCTAAGAGTGTTTCAAAGACCAGAAACGTA

+

@A00721:190:HGJW7DSXY:4:2561:6117:17159\_2:N:0:TCTGCAAG+GCTGCACT  
AGCGAGTTTTCTTCCTGAACGTAATACACGAAGAGATCATCCGAAACGACTCGAAACCGAGACGCC  
GTAGATCAAAGTCCCTTCTAAGTTTAGATTATGAATCCTGCCTTTACT

+

@A00721:190:HGJW7DSXY:4:2345:10059:33317\_2:N:0:TCTGCAAG+GCTGCACT  
TCTTCTCAGAAGATTAGAGAAGTAACCGGTGAACACGTCGGTAGCATTGATTTACTTTTACCGTTAG  
AACTGAAAAAGATTCTTTTCGAAAAGAAACCTATAAGTTACAAACGAT

+

@A00721:190:HGJW7DSXY:4:2547:13783:5885\_2:N:0:TCTGCAAG+GCTGCACT  
CGACCTTCTTGTGGGACTGAGACCTCTGAATTTTCAGGGTGCCCTGATGAGGACGTTGAAAGGGATA  
ATTTCAACTCTGAGACTTCTAAGAGTGTTTCAAAGACCAGAAACGTA

+

@A00721:190:HGJW7DSXY:4:1520:7175:7780\_1:N:0:TCTGCAAG+GCTGCACT  
TTCTGAGGTGTGCTCTTCCTTTATTACACCAAGATATCATCCCCACAGACTCGAAACCGAGACGCCG  
TAGATCAAAGTCCCTTCTAACTTTAGATTATGAATCCTGCCTTTACTC

+

@A00721:190:HGJW7DSXY:4:2452:23104:18427\_2:N:0:TCTGCAAG+GCTGCACT  
TCTTCTCAGAAGATTAGAGAAGTAACCGGTGAACACGTCGGTAGCATTGATTTACTTTTACCGTTAG  
AACTGAAAAAGATTCTTTTCGAAAAGAAACCTATAAGTTACAAACGAT

+

@A00721:190:HGJW7DSXY:4:1102:7229:25066\_1:N:0:TCTGCAAG+GCTGCACT  
CTTGTGGGGACTGAGACCTCTGAATTTTCAGGGTGCCCTGATGAGGACGTTGAAAGGGATAATTTCAA  
CTCTGAGACTTCTAAGAGTGTTTCAAAAGACCAGAAACGTAACAAGAAGAATAAAGGTAGGAAGGGGA  
GAA

+

```
FFF
@A00721:190:HGJW7DSXY:4:1208:16080:21480_1:N:0:TCTGCAAG+GCTGCACT
GCTCTTCCTATCTCCTTAACGAAATACACGAAGATATCACCCGAAACGACTCGAAACCGAGACGCCG
```

T

[illegible]





@A00721:190:HGJW7DSXY:4:2407:12102:7106\_2:N:0:TCTGCAAG+GCTGCACT  
GAGTTTTCCGTCCTGAACGTAATACACGAAGAGATCATCCGCAAACGACTCGAAACCGAGACGCCGTA  
GATCAAAGTCCCTTCTAACTTTAGATTATGAATCCTGCCTTTACTCAT

+

FFFFFFFFFFFFFFFFFFFFFFFFFFFFFFFFFFFFFFFFFFFFFFFFFFFFFFFFFFFFFFFFFFFFFFFFFFFFFFFF  
FFFFFFFFFFFFFFFFFFFFFFFFFFFFFFFFFFFFFFFFFFFFFFFFFFFFFFFFFFFFFFFFFFFFFFFFFFFFFFFF

@A00721:190:HGJW7DSXY:4:1460:7826:2988\_2:N:0:TCTGCAAG+GCTGCACT  
CTTTCTCAGAAGATTAGAGAAGTAACCGGTGAACACGTCGGTAGCATTGATTTACTTTTACCGTTAGA  
ACTGAAAAAGATTCTTTTCGAAAAGAAACCTATAAGTTACAAACGATT

+

FFFFFFFFFFFFFFFFFFFFFFFFFFFFFFFFFFFFFFFFFFFFFFFFFFFFFFFFFFFFFFFFFFFFFFFFFFFFFFFF  
FFFFFFFFFFFFFFFFFFFFFFFFFFFFFFFFFFFFFFFFFFFFFFFFFFFFFFFFFFFFFFFFFFFFFFFFFFFFFFFF

@A00721:190:HGJW7DSXY:4:1333:11080:11036\_1:N:0:TCTGCAAG+GCTGCACT  
CTTGTGGGGACTGAGACCTCTGAATTTTCAGGGTGCCCTGATGAGGACGTTGAAAGGGATAATTTCAA  
CTCTGAGACTTCTAAGAGTGTTTCAAAAGACCAGAAACGTAACAAGAAGAATAAAGGTAGGAAGGGGA  
GAA

+

FFFFFFFFFFFFFFFFFFFFFFFFFFFFFFFFFFFFFFFFFFFFFFFFFFFFFFFFFFFFFFFFFFFFFFFFFFFFFFFF  
FFFFFFFFFFFFFFFFFFFFFFFFFFFFFFFFFFFFFFFFFFFFFFFFFFFFFFFFFFFFFFFFFFFFFFFFFFFFFFFF  
FFF

@A00721:190:HGJW7DSXY:4:2407:14724:9580\_2:N:0:TCTGCAAG+GCTGCACT  
GAGTTTTCCGTCCTGAACGTAATACACGAAGAGATCATCCGCAAACGACTCGAAACCGAGACGCCGTA  
GATCAAAGTCCCTTCTAACTTTAGATTATGAATCCTGCCTTTACTCAT

+

FFFFFFFFFFFFFFFFFFFFFFFFFFFFFFFFFFFFFFFFFFFFFFFFFFFFFFFFFFFFFFFFFFFFFFFFFFFFFFFF  
FFFFFFFFFFFFFFFFFFFFFFFFFFFFFFFFFFFFFFFFFFFFFFFFFFFFFFFFFFFFFFFFFFFFFFFFFFFFFFFF

@A00721:190:HGJW7DSXY:4:1517:25943:17738\_2:N:0:TCTGCAAG+GCTGCACT  
CTTTCTCAGAAGATTAGAGAAGTAACCGGTGAACACGTCGGTAGCATTGATTTACTTTTACCGTTAGA  
ACTGAAAAAGATTCTTTTCGAAAAGAAACCTATAAGTTACAAACGATT

+

FFFFFFFFFFFFFFFFFFFFFFFFFFFFFFFFFFFFFFFFFFFFFFFFFFFFFFFFFFFFFFFFFFFFFFFFFFFFFFFF  
FFFFFFFFFFFFFFFFFFFFFFFFFFFFFFFFFFFFFFFFFFFFFFFFFFFFFFFFFFFFFFFFFFFFFFFFFFFFFFFF

@A00721:190:HGJW7DSXY:4:1429:32940:21120\_1:N:0:TCTGCAAG+GCTGCACT  
CTTGTGGGGACTGAGACCTCTGAATTTTCAGGGTGCCCTGATGAGGACGTTGAAAGGGATAATTTCAA  
CTCTGAGACTTCTAAGAGTGTTTCAAAAGACCAGAAACGTAACAAGAAGAATAAAGGTAGGAAGGGGA  
GAA

+

:FFFFFFFF:FFFF:FFF:FFFFFFFFFFFFFFFFFFFFFFFF:F:FF:FFFFFFFF:FFFFF,FFF  
FFFFFFFF:FFFFFFFFFFFFFFFFFFFFFFFFFFFFFFFFFFFFFFFFFFFFFFFFFFFFFFFFFFFFFFFFFFFF  
FFF

@A00721:190:HGJW7DSXY:4:2463:22092:24659\_2:N:0:TCTGCAAG+GCTGCACT  
GAGTTTTCCGTCCTGAACGTAATACACGAAGAGATCATCCGCAAACGACTCGAAACCGAGACGCCGTA  
GATCAAAGTCCCTTCTAACTTTAGATTATGAATCCTGCCTTTACTCAT

+

FFFFFFFFFFFFFFFFFFFFFFFFFFFFFFFFFFFFFFFFFFFFFFFFFFFFFFFFFFFFFFFFFFFFFFFFFFFFFFFF  
FFFFFFFFFFFFFFFFFFFFFFFFFFFFFFFFFFFFFFFFFFFFFFFFFFFFFFFFFFFFFFFFFFFFFFFFFFFFFFFF

@A00721:190:HGJW7DSXY:4:2459:9995:30608\_2:N:0:TCTGCAAG+GCTGCACT  
CTTTCTCAGAAGATTAGAGAAGTAACCGGTGAACACGTCGGTAGCATTGATTTACTTTTACCGTTAGA  
ACTGAAAAAGATTCTTTTCGAAAAGAAACCTATAAGTTACAAACGATT

+

FFFFFFFFFFFFFFFFFFFFFFFFFFFFFFFFFFFFFFFFFFFFFFFFFFFFFFFFFFFFFFFFFFFFFFFFFFFFFFFF  
FFFFFFFFFFFFFFFFFFFFFFFFFFFFFFFF,FFFF:FFFF:FFFFFFFFFFFFFFFF

@A00721:190:HGJW7DSXY:4:1470:22788:3818\_1:N:0:TCTGCAAG+GCTGCACT  
CTTGTGGGGACTGAGACCTCTGAATTTTCAGGGTGCCCTGATGAGGACGTTGAAAGGGATAATTTCAA

CTCTGAGACTTCTAAGAGTGTTTCAAAAGACCAGAAACGTAACAAGAAGAATAAAGGTAGGAAGGGGA  
GAA

+

FFFFFFFFFFFFFFFFFFFFFFFFFFFFFFFFFFFFFFFFFFFFFFFFFFFFFFFFFFFFFFFFFFFFFFFF  
FFFFFFFFFFFFFFFF:FFFFFFFFFFFFFFFFFFFFFFFFFFFFFFFFFFFFFFFFFFFFFFFFFFFFFFFF  
FFF

@A00721:190:HGJW7DSXY:4:2523:25201:17425\_2:N:0:TCTGCAAG+GCTGCACT  
GAGTTTTCCGTCCTGAACGTAATACACGAAGAGATCATCCGCAAACGACTCGAAACCGAGACGCCGTA  
GATCAAAGTCCCTTCTAACTTTAGATTATGAATCCTGCCTTTACTCAT

+

FFFFFFFFFFFFFFFFFFFFFFFFFFFFFFFFFFFFFFFFFFFFFFFFFFFFFFFFFFFFFFFFFFFFFFFF  
FFFFFFFFFFFFFFFF:FFFFFFFFFFFFFFFFFFFFFFFFFFFFFFFF:FFF:

@A00721:190:HGJW7DSXY:4:1146:26323:30859\_1:N:0:TCTGCAAG+GCTGCACT  
CTTTCTCAGAAGATTAGAGAAGTAACCGGTGAACACGTCGGTAGCATTGATTTACTTTTACCGTTAGA  
ACTGAAAAAGATTCTTTTCGAAAAGAAACCTATAAGTTACAAACGATTCTTCGACTATATTAAAGAAA  
TAA

+

FFFFFFFF:FFFFFF:FFFF:FFFFFFFFFF::FF:FF:FFFF,FFFF:F:FFF,FFFFFFFFFFFF  
FFFFFFFFF:FFF:FFFFFFFFFF::FFFFFFFFFFFFFFFFFFFFFFFFFFFFFFFFFFFFFFFF:FFF  
FFF

@A00721:190:HGJW7DSXY:4:1477:11505:18380\_1:N:0:TCTGCAAG+GCTGCACT  
CTTGTGGGGACTGAGACCTCTGAATTTTCAGGGTGCCCTGATGAGGACGTTGAAAGGGATAATTTCAA  
CTCTGAGACTTCTAAGAGTGTTTCAAAAGACCAGAAACGTAACAAGAAGAATAAAGGTAGGAAGGGGA  
GAA

+

:FFFFFFFFFFFFFFFFFFFFFFFFFFFFFFFF:FFFFFFFFFFFFFFFFFFFFFFFFFFFFFFFF:FFFFF  
FFFFFFFFFFFFFFFFFFFFFFFF:FFFFFFFFFFFFFFFFFFFFFFFFFFFFFFFFFFFFFFFFFFFFFFFF  
FFF

@A00721:190:HGJW7DSXY:4:2614:16577:2988\_2:N:0:TCTGCAAG+GCTGCACT  
GAGTTTTCCGTCCTGAACGTAATACACGAAGAGATCATCCGCAAACGACTCGAAACCGAGACGCCGTA  
GATCAAAGTCCCTTCTAACTTTAGATTATGAATCCTGCCTTTACTCAT

+

,FFFF:FFFFFFFFFFFFFFFFFFFFFFFF:FF:FF::FF:FFFFFFFFFFFFFFFF,FFFFFFFFFFFF  
FFFFFFFFFFFFFFFFFFFF:,FFFFFF:FF:FFF:FFFF,FFFFFF

@A00721:190:HGJW7DSXY:4:1248:15483:30906\_1:N:0:TCTGCAAG+GCTGCACT  
CTTTCTCAGAAGATTAGAGAAGTAACCGGTGAACACGTCGGTAGCATTGATTTACTTTTACCGTTAGA  
ACTGAAAAAGATTCTTTTCGAAAAGAAACCTATAAGTTACAAACGATTCTTCGACTATATTAAAGAAA  
TAA

+

FFFFFFFFFFFFFFFFFFFFFFFFFFFFFFFFFFFFFFFFFFFFFFFFFFFFFFFF:FFFFFFFFF,FFFFFFFFFFFF  
F,FFFFFFFFFFFFFFFF:FFFFFFFFFFFFFFFF::F:FFFFFFFFFFFFFFFFFFFFFFFFFFFFFFFF  
FFF

@A00721:190:HGJW7DSXY:4:1609:6361:10661\_1:N:0:TCTGCAAG+GCTGCACT  
CTTGTGGGGACTGAGACCTCTGAATTTTCAGGGTGCCCTGATGAGGACGTTGAAAGGGATAATTTCAA  
CTCTGAGACTTCTAAGAGTGTTTCAAAAGACCAGAAACGTAACAAGAAGAATAAAGGTAGGAAGGGGA  
GAA

+

:FFFFFFFFFFFFFFFFFFFFFFFF:FFFFFFFFFFFFFFFFFFFFFFFFFFFFFFFFFFFFFFFFFFFF  
FFFFFFFFFFFFFFFFFFFFFFFFFFFFFFFFFFFFFFFFFFFFFFFFFFFFFFFFFFFFFFFFFFFFFFFF  
FFF

@A00721:190:HGJW7DSXY:4:2317:3794:20650\_1:N:0:TCTGCAAG+GCTGCACT  
TGTTTTCCGTCCTTAACCTAATACACTACGATATCACCCGCAAACGACTCGAAACCGAGACGCCGTAG  
ATCAAAGTCCCTTCTAACTTTAGATT

+

F,FFF,F,:,:,FF,:F:,FF:F,:,,,F,:,:,FF,,, :FFFFFFFFFFFFFF:FFFFFFFFF  
FFFFFFFF:FFFFFFFFFFFFFFFF

@A00721:190:HGJW7DSXY:4:1377:22426:1438\_1:N:0:TCTGCAAG+GCTGCACT  
CTTTCTCAGAAGATTAGAGAAGTAACCGGTGAACACGTCGGTAGCATTGATTTACTTTTACCGTTAGA  
ACTGAAAAAGATTCTTTTCGAAAAGAAACCTATAAGTTACAAACGATTCTTCGACTATATTAAAGAAA  
TAA

+  
FFFFFFFFFFFFFFFFFFFFFF:FFFFFFFFFFFFFFFFFFFFFFFFFFFFFFFFFFFFFF: :FFFFFFFFFFFF  
FFFFFFFFFFFFFFFFFFFFFFFFFFFFFFFFFFFFFF:FFFFFFF:FFFFFFFFFFFFFFFFFFFFFFFFFFFFFFFF  
FFF

@A00721:190:HGJW7DSXY:4:2572:1542:23015\_1:N:0:TCTGCAAG+GCTGCACT  
CTTGTGGGGACTGAGACCTCTGAATTTTCAGGGTGCCCTGATGAGGACGTTGAAAGGGATAATTTCAA  
CTCTGAGACTTCTAAGAGTGTTTCAAAAGACCAGAAACGTAACAAGAAGAATAAAGGTAGGAAGGGGA  
GAA

+  
FFFFFFFFFFFFFFFFFFFFFF:FFFFFFF,FFFFFFFFFFFFFFFFFFFFFFFFFFFFFFFFFFFFFFF  
FFFFFFFFFFFFFFFFFFFFFFFFFFFFFFFFFFFFFFF:FFFFFFFFFFFFFFFFFFFFFFFFFFFFFFFFFFFFF  
FFF

@A00721:190:HGJW7DSXY:4:2307:25789:28463\_1:N:0:TCTGCAAG+GCTGCACT  
TTTTTACCTTCATTAATACTAAATACACTAAGATACAACCCCCAAACGACTCGAAACCGAGACGCCGTAG  
ATCAAAGTCCCTTCTAACTTTAGATT

+  
FFFFF,:,:,,:F,:,:,FF,F,:,:,,:,,,F,,,F,,, :FFFFFFFFFFFFFFF  
FFFFFFFFFFFFFFFFFFFFFFFF

@A00721:190:HGJW7DSXY:4:1548:26422:5509\_1:N:0:TCTGCAAG+GCTGCACT  
CTTTCTCAGAAGATTAGAGAAGTAACCGGTGAACACGTCGGTAGCATTGATTTACTTTTACCGTTAGA  
ACTGAAAAAGATTCTTTTCGAAAAGAAACCTATAAGTTACAAACGATTCTTCGACTATATTAAAGAAA  
TAA

+  
FFFFFFF:FFFFFFFFFFFFFFFFFFFFFFFFFFFFFFF, :FFF,FFFF:FFFFFFFFFFFFFFFFFFFFF  
FFFFFFFFFFFFFFFFF:FFFFFFFFFFFFFFFFFFFFF,FFFFFFFFFFFFFFFFFFFFFFFFFFFFFFFFFFFFF  
FFF

@A00721:190:HGJW7DSXY:4:2674:28384:28103\_1:N:0:TCTGCAAG+GCTGCACT  
CTTGTGGGGACTGAGACCTCTGAATTTTCAGGGTGCCCTGATGAGGACGTTGAAAGGGATAATTTCAA  
CTCTGAGACTTCTAAGAGTGTTTCAAAAGACCAGAAACGTAACAAGAAGAACAAGGTAGGAAGGGGA  
GAA

+  
FFFFFFFFFFFFFFFFFFFFFFFFFFFFFFFFFFFFFFFFFFFFFFFFFFFFFFFFFFFFFFFFFFFF:FFFF  
FFFFFFFFFFFFFFFFFFFFFFFFFFFFFFFFFFFFFFFFFFFFFFFFFFFFFFFFFFFFFFFFFFFF,FFFFFFFFFFFFF  
FFF

@A00721:190:HGJW7DSXY:4:2510:2474:23156\_1:N:0:TCTGCAAG+GCTGCACT  
TTTTTTCCGTCTTCAAGTTAATCCACTAATAGAACACCCCCACACGACTCGAAACCGAGACGCCGTAG  
ATCAAAGTCCCTTCTAACTTTAGATTATGAATCCTGCCTTTACTCATTTTATAGCAGTTA

+  
:,FFF,F,:F,,,,,:F,:,:,,:F,:,:,FF,: :FFFFFFFFF:FFFFFFFFFFFFFFFFF  
FFFF:FFFFFFFFFFFFFFFFFFFFFFFFFFFFFFFFFFFFFFFFFFFFFFFFFFFFFFFFFFFF

@A00721:190:HGJW7DSXY:4:1565:6054:28322\_1:N:0:TCTGCAAG+GCTGCACT  
CTTTCTCAGAAGATTAGAGAAGTAACCGGTGAACACGTCGGTAGCATTGATTTACTTTTACCGTTAGA  
ACTGAAAAAGATTCTTTTCGAAAAGAAACCTATAAGTTACAAACGATTCTTCGACTATATTAAAGAAA  
TAA

+  
FFF:F:FFFFFFFFFFFFFFFFFFFFFFFFFFFFFFFFFFFF:FFFFFFFFF:FF:FFFFFFFFFFFFFFFFF:FFFF  
FFFFFFFFF:FFFFFFFFFFFFFFFFFFFFF:FFFFFFFFFFFFFFFFFFFFFFFFFFFFFFFFFFFFF  
FFF

@A00721:190:HGJW7DSXY:4:1466:3432:6308\_1:N:0:TCTGCAAG+GCTGCACT  
TTGTGGGGACTGAGACCTCTGAATTTTCAGGGTGCCCTGATGTGGACGTTGAATGTGATAATTTCAAC  
TCTGAGACTTCTAAGAGTGTTCAAAAGACCAGAAACGTAACAAGAAGAATAAAGGTAGGAAGGGGAG  
AA

+  
FF,FF:FFFFFFF,FFFFFFF,FFFFFFFFF:F:F,:F:FFF,,FF:,FF,,F,F,,FFFFFFF:FFF  
F:F:F,,FF,FFFFF,F,FFFF,:FF,FF,FFFFFFFF:FF:FFFF,,FFF:F:,FF:FFFFFF:FFF  
F:

@A00721:190:HGJW7DSXY:4:1328:28845:26866\_1:N:0:TCTGCAAG+GCTGCACT  
TTTTCCGTCCTCACCTTAATACACTACGATACAATCCCCAAACGACTCGAAACCGAGACGCCGTAGAT  
CAAAGTCCCTTCTAACTTTAGA

+  
FF:,,,,,F,,,:,,FFF,:,,:,,,,,,F,,,:F:,,,:FF:F:FFFFFFFFFFFFFFFFFFFFFFF  
FFFFFFFFFFFFFFFFFFFFFFFFF

@A00721:190:HGJW7DSXY:4:1567:12635:21465\_1:N:0:TCTGCAAG+GCTGCACT  
CTTTCTCAGAAGATTAGAGAAGTAACCGGTGAACACGTCGGTAGCATTGATTTACTTTTACCGTTAGA  
ACTGAAAAAGATTCTTTTCGAAAAGAAACCTATAAGTTACAAACGATTCTTCGACTATATTAAAGAAA  
TAA

+  
FFFFFFFF:FFFFFFFFFFFFFFFFFFFFFFFFF:F:FFFFFFFFFFFFFFF,FFFFFFFFFFFFFFFFFFFFFFF  
FFFFFFFF:FF:FFFFFFFFFFFFFFFFFFFFFFFFFFFFFFF:FF,FF,FFFF:FFFFFFFFFFFFFFF:FFFF  
FFF

@A00721:190:HGJW7DSXY:4:1564:3577:9659\_1:N:0:TCTGCAAG+GCTGCACT  
TTGTGGGGACTGAGACCTCTGAATTTTCAGGGTGCCCTGATGAGGACGTTGAAAGGGATAATTTCAAC  
TCTGAGACTTCTAAGAGTGTTCAAAAGACCAGAAACGTAACAAGAAGAATAAAGGTAGGAAGGGGAG  
AA

+  
FFFFFFFFF,FFFFFFFFF,FFFFFFFFFFFFFFFFF,FFFFFFFFFFFFFFFFFFFFFFF:FFFFFFFFFFFF  
FFFFFFFFFFFFFFFFFFFFFFFFFFFFFFFFFFFFFFFFFFFFFFFFFFFFFFFFFFFFFFFFF:FFFFFFFFFFFF  
FF

@A00721:190:HGJW7DSXY:4:2644:22363:9251\_1:N:0:TCTGCAAG+GCTGCACT  
TTTTCCGTCCTTAACCTAATCCACGAAGATATCATCCGCAAACGACTCGAAACCGAGACGCCGTAGAT  
CAAAGTCCCTTCTAACTTTAGA

+  
FFFFF,,,:,:,:F,,:FF,,,:,:F,,,,F,,,,F:,,,,FFFFFFFFFFFFFFFFFFFFFFFFFFFFF  
FFFFFFFFFFFFFFFFFFFFFFFFF

@A00721:190:HGJW7DSXY:4:1631:23402:1219\_1:N:0:TCTGCAAG+GCTGCACT  
CTTTCTCAGAAGATTAGAGAAGTAACCGGTGAACACGTCGGTAGCATTGATTTACTTTTACCGTTAGA  
ACTGAAAAAGATTCTTTTCGAAAAGAAACCTATAAGTTACAAACGATTCTTCGACTATATTAAAGAAA  
TAA

+  
FFF:FFFFFFF:FFFFFFFFFFFFFFFFFFFFFFFFFFFFFFFFF,FFFF,FFFF:FFFFFFFFFFFF,F  
FFFFFFFFF.:FFFFFFFFFFFFFFFFFFFFFFFFF:FFFFFFFFFFFFFFFFFFFFFFFFFFFFFFFFF  
FFF

@A00721:190:HGJW7DSXY:4:1158:21025:23156\_1:N:0:TCTGCAAG+GCTGCACT  
TTGTGGGGACTGAGACCTCTGAATTTTCAGGGTGCCCTGATGAGGACGTTGAAAGGGATAATTTCAAC  
TCTGAGACTTCTAAGAGTGTTCAAAAGACCAGAAACGTAACAAGAAGAATAAAGGTAGGAAGGGGAG  
AAA

+  
FFFFFFFFFFFFFFFFFFFFFFFFFFFFFFFFFFFFFFFFFFFFFFFFFFFFFFFFFFFFFFFFF  
FFFFFFFFFFFFFFFFFFFFFFFFFFFFFFFFFFFFFFFFFFFFFFFFFFFFFFFFFFFFFFFFF  
FFF

@A00721:190:HGJW7DSXY:4:1212:30635:35352\_1:N:0:TCTGCAAG+GCTGCACT  
TTTTTCTCCTTAACCTAATACACGAATATAACATCCGCAAACGACTCGAAACCGAGACGCCGTAGAT

CAAAGTCCCTTCTAACTTTAGAT

+

FFFF,,,,,,,,,F,,,F:,F:,,,,,,,,,F,,,FF,,F,:FF:F:FFFFFFFFFFFFFFFFFFFFFFF  
FFFFFFFFFFFFFFFFFFFFFFF

@A00721:190:HGJW7DSXY:4:2305:30888:28714\_1:N:0:TCTGCAAG+GCTGCACT  
CTTTCTCAGAATATTAGAGAAGTAACCGGTGAACACGTCGGTAGCATTATTACTTTTACCGTTAGA  
ACTGAAAAAGATTCTTTTCGAAAATAAACCTATAAGTTACAAACGATTCTTCGACTATATTAAAGAAA  
TAA

+

:FFFFFF,,F,:FF:FF::FFFFFF:FFF:FF:FFF:FFFFFF,FFF,:FFFF,FFFFFFFFFFFF:F  
FFF:FFFFFF:FF:FFFFFFFFFF,FFFF:FF:FFF,FFFFFFFFFFFFFFFFFFFFFFFFFFFFF:  
FFF

@A00721:190:HGJW7DSXY:4:1303:23665:9627\_1:N:0:TCTGCAAG+GCTGCACT  
TTGTGGGGACTGAGACCTCTGAATTTTCAGGGTGCCCTGATGAGGACGTTGAAAGGGATAATTTCAAC  
TCTGAGACTTCTAAGAGTGTTTCAAAAGACCAGAAACGTAACAAGAAGAATAAAGGTAGGAAGGGGAG  
AAA

+

FFFFFFFF:FFFFFFFFFFFFFFFFFFFF,FFFFFFFFFFFFFFFFFFFFFFFF:F:FFFFFFFFFFFF  
FFFFFFFFFFFFFFFFFFFFFFFFFFFFFFFF:FFFFFFFFFFFFFFFFFFFF:FFFFFFFFFFFFFFFFFFFF  
FFF

@A00721:190:HGJW7DSXY:4:1320:26666:20494\_1:N:0:TCTGCAAG+GCTGCACT  
TTTTCCGTCTTAACCTTAATACACTAAGAGATCACCCGCACACGACTCGAAACCGAGACGCCGTAGAT  
CAAAGTCCCTTCTAACTTTAGAT

+

FFF,F:,,F,F:,,,FF,F:,,,F,:F,F,:F,FF,,F,FFFFFFFFFFFFFFFFFFFFFFFFFFFFF  
FFFFFFFFFFFFFFFFFFFFFFF

@A00721:190:HGJW7DSXY:4:1172:1407:35086\_2:N:0:TCTGCAAG+GCTGCACT  
TTTCTCAGAAGATTAGAGAAGTAACCGGTGAACACGTCGGTAGCATTGATTTACTTTTACCGTTAGAA  
CTGAAAAAGATTCTTTTCGAAAAGAAACCTATAAGTTACAAACGATTC

+

FFFFFFFFFFFF:FFFFFFFFFFFFFFFFFFFFFFFFFFFFFFFFFFFFFFFFFFFFFFFFFFFF:FF  
FFFF:FFFFFFFFFFFFFFFFFFFFFFFFFFFF:FFFFFFFFF:FFFF

@A00721:190:HGJW7DSXY:4:1325:12970:20259\_1:N:0:TCTGCAAG+GCTGCACT  
TTGTGGGGACTGAGACCTCTGAATTTTCAGGGTGCCCTGATGAGGACGTTGAAAGGGATAATTTCAAC  
TCTGAGACTTCTAAGAGTGTTTCAAAAGACCAGAAACGTAACAAGAAGAATAAAGGTAGGAAGGGGAG  
AAA

+

FFFFFFFFFFFFFFFFFFFFFFFFFFFFFFFFFFFFFFFFFFFFFFFFFFFF:FFFFFFFFFFFFFFFF  
FFFFFFFFFFFFFFFFFFFFFFFFFFFF:FFFFFFFFFFFFFFFFFFFFFFFFFFFFFFFFFFFFFFFFFFFF  
FFF

@A00721:190:HGJW7DSXY:4:2330:2998:25880\_1:N:0:TCTGCAAG+GCTGCACT  
TTTTCCGCCCTCAACGTAATACACGATGAGATCAACCGCAAACGACTCGAAACCGAGACGCCGTAGAT  
CAAAGTCCCTTCTAACTTTAGAT

+

FFF,F,,,::,,F,,,F:,F:,F,,,F,,,:::F,FF,::,,FFFFFFFF:FFFFFFFFFFFF,FFFF  
FFFFFFFFFFFFFFFFFFFFFFF

@A00721:190:HGJW7DSXY:4:1218:22417:2769\_2:N:0:TCTGCAAG+GCTGCACT  
TTTCTCAGAAGATTAGAGAAGTAACCGGTGAACACGTCGGTAGCATTGATTTACTTTTACCGTTAGAA  
CTGAAAAAGATTCTTTTCGAAAAGAAACCTATAAGTTACAAACGATTC

+

FFFFFFFFFFFFFFFFFFFFFFFFFFFFFFFFFFFFFFFFFFFF:FFFFFFFFFFFFFFFFFFFFFFFFFFFF  
FFFFFFFFFFFFFFFFFFFFFFFFFFFFFFFFFFFF,FFFFFFFFFFFFF

@A00721:190:HGJW7DSXY:4:1329:4589:36526\_1:N:0:TCTGCAAG+GCTGCACT  
TTGTGGGGACTGAGACCTCTGAATTTTCAGGGTGCCCTGATGAGGACGTTGAAAGGGATAATTTCAAC



@A00721:190:HGJW7DSXY:4:1503:13946:29277\_1:N:0:TCTGCAAG+GCTGCACT  
TTTCTCAGAAGATTAGAGAAGTAACCGGTGAACACGTCGGTAGCATTTATTTACTTTTACCGTTAGAA  
CTGAAAAAGATTCTTTTCGAAAAGAAACCTATAAGTTACAAACGATTCTTCGACTATATTAAAGAAAT  
AA

+

FFFFF::FFF,FF:FF,F,FFFFFF,FF,FF,:::F:,F:,F:FF,FFFF,,F:FFFF:FFFF,FF  
:F,FFFF,,,FF,FFFF,FFFFF,:F::,F,F:::FFF:FFFFFFFFF:FFFFFFFFFFFFFFFF  
FF

@A00721:190:HGJW7DSXY:4:1453:19262:35978\_1:N:0:TCTGCAAG+GCTGCACT  
TTGTGGGGACTGAGACCTCTGAATTTTCAGGGTGCCCTGATGAGGACGTTGAAAGGGATAATTTCAAC  
TCTGAGACTTCTAAGAGTGTTTCAAAGACCAGAAACGTAACAAGAAGAATAAAGGTAGGAAGGGGAG  
AAA

+

FFFFFF:FFFFFFFFF:FFFFFFFFFFFFFFFF::FF:FFFFFFFFFFFFFFFF:FFFF,FFFFFFFF  
FFFFFFFF:FFFFFFFF:FFFFFFFFFFFFFFFFFFFFFFFFFFFFFFFFFFFFFFFFFFFFFFFFFFFF  
FFF

@A00721:190:HGJW7DSXY:4:2205:16604:2942\_1:N:0:TCTGCAAG+GCTGCACT  
TTTACCGTCCTTAACCTAATACACCAAGATATCACCCCAACACGACTCGAAACCGAGACGCCGTAGAT  
CAAAGTCCCTTCTAACTTTAGATTATGAATCCTGCCTTTACTCATTTTATAGCAGTTA

+

FF,,F:,F:,F,,,F:,,,F,F,,:,,,F,,FF,,,FFFFFFFFFFFFFFFFFFFFFFFFFFFF  
FFFFFFFFFFFFFFFFFFFFFFFFFFFFFFFFFFFFFFFFFFFFFFFFFFFFFFFFFFFFFFFFFFFF

@A00721:190:HGJW7DSXY:4:2364:19081:34569\_1:N:0:TCTGCAAG+GCTGCACT  
TTTCTCAGAAGATTAGAGAAGTAACCGGTGAACACGTCGGTAGCATTGATTTACTTTTACCGTTAGAA  
CTGAAAAAGATTCTTTTCGAAAAGAAACCTATAAGTTACAAACGATTCTTCGACTATATTAAAGAAAT  
AA

+

FFFFFFFFF:FFFFFFFFFFFFFFFFFFFFFFFFFFFFFFFFF:FFFFFFFFFFFF:FFFFFFFFFFFF  
FF:FFFFFFFFFFFFFFFF:FFFFFFFFFFFFFFFFFFFFFFFFFFFFFFFFFFFFFFFFFFFFFFFFFFFF  
FF

@A00721:190:HGJW7DSXY:4:1610:28872:16611\_1:N:0:TCTGCAAG+GCTGCACT  
TTGTGGGGACTGAGACCTCTGAATTTTCAGGGTGCCCTGATGAGGACGTTGAAAGGGATAATTTCAAC  
TCTGAGACTTCTAAGAGTGTTTCAAAGACCAGAAACGTAACAAGAAGAATAAAGGTAGGAAGGGGAG  
AAA

+

FFFFFFFFF:FFFFFF:FFFFFFFFFFFFFFFFFFFFFFFFFFFFFFFFFFFFFFFFFFFFFFFFFFFF:FFF  
FFFFFFFFFFFFFFFFFFFFFFFFFFFFFFFFFFFFFFFFFFFFFFFFFFFFFFFFFFFFFFFFFFFF  
FFF

@A00721:190:HGJW7DSXY:4:2135:20546:10833\_1:N:0:TCTGCAAG+GCTGCACT  
TTTTCCGTCACTTAACCTAATACACTAAGATATCATCCGCACACGACTCGAAACCGAGACGCCGTAGAT  
CAAAGTCCCTTCTAACTTTAGATTATGAATCCTGCCTTTACTCATTTTATAGCAGTTATTTA

+

FFF:::,F:,F,,:FF,,,,,:::,F:,F,FF,FFFFFFFFFFFFFFFFFFFFFFFFFFFF  
FFFFFFFFFFFFFFFFFFFFFFFFFFFFFFFFFFFFFFFFFFFFFFFFFFFFFFFFFFFFFFFFFFFF

@A00721:190:HGJW7DSXY:4:1211:8874:19241\_1:N:0:TCTGCAAG+GCTGCACT  
TCTCAGAAGATTAGAGAAGTAACCGGTGAACACGTCGGTAGCATTGATTTACTTTTACCGTTAGAACT  
GAAAAAGATTCTTTTCGAAAAGAAACCTATAAGTTACAAACGATTCTTCGACTATATTAAAGAAATAA  
AAA

+

F:FFF:FFFF:FFFF,FFFF:FF,F,FFF:FFF:F,FFF:FFFFFFFFFFFFFFFF,FFFFFF:F  
,FFFF::FFFFFFFFFFFFFFFFF:F,FFFFFFFFFFFFFFFFFFFFFFFFFFFFFFFFFFFF  
FFF

@A00721:190:HGJW7DSXY:4:1616:27805:18991\_1:N:0:TCTGCAAG+GCTGCACT  
TTGTGGGGACTGAGACCTCTGAATTTTCAGGGTGCCCTGATGAGGACGTTGAAAGGGATAATTTCAAC



TCTGAGACTTCTAAGAGTGTTCAAAAGACCAGAAACGTAACAAGAAGAATAAAGGTAGGAAGGGGAG  
AAA

+

:FFFFFFF:::F,FF:FFFFF,FFFFFFFFFFFFFFFF:FFFFFFF::FFFFFFFFFFFFFFFF:FFFFFFF  
FFFFFFFF:FFFFFFFFFFFFFFFFFFFFFFFFFFFFFFFFFFFFFFFF:FFFFFFF,FFFFFFFFFFFF:FF:  
FFF

@A00721:190:HGJW7DSXY:4:2260:9399:29136\_1:N:0:TCTGCAAG+GCTGCACT  
TTTTCGGTCCTGAACCTAATACACGAAGAGATCATCCGCAAACGACTCGAAACCGAGACGCCGTAGAT  
CAAAGTCCCTTCTAACTTTAGATTATGAATCCTGCCTTTACTCATTTTATAGCAGTTATTTA

+

FFF,::,::,::F:::F:,FFFF,F,::,F:,F:FF,FF,FFFFFFFFFFFFFFFFFFFFFFFFFFFFF  
FFFFFFFFFFFFFFFFFFFFFFFFFFFFFFFFFFFFFFFFFFFFFFFFFFFFFFFFFFFFFFFFFFFF

@A00721:190:HGJW7DSXY:4:1227:24921:26303\_1:N:0:TCTGCAAG+GCTGCACT  
TCTCAGAAGATTAGAGAAGTAACCGGTGAACACGTCGGTAGCATTGATTTACTTTTACCGTTAGAACT  
GAAAAAGATTCTTTTCGAAAAGAAACCTATAAGTTACAAACGATTCTTCGACTATATTAAAGAAATAA  
AAA

+

FFFFF:FF:FFFF:FFFFFFFFFFFF:FFFFFFFFFFFF:FFFF:FFFFFFFFFFFFFFFFFFFFFFFFFFFFF  
,FFFFFFFFFFFFFFFF:FFFFFFFFFFFF:FFFF:FFFFFFFFFFFFFFFFFFFFFFFFFFFFFFFFFFFFF  
FFF

@A00721:190:HGJW7DSXY:4:2158:15103:2691\_1:N:0:TCTGCAAG+GCTGCACT  
TTGTGGGGACTGAGACCTCTGAATTTTCAGGGTGCCCTGATGAGGACGTTGAAAGGGATAATTTCAAC  
TCTGAGACTTCTAAGAGTGTTCAAAAGACCAGAAACGTAACAAGAAGAATAAAGGTAGGAAGGGGAG  
AAA

+

FFFFFFFFFFFFFFFFFFFFFFFFFFFFFFFFFFFFFFFFFFFFFFFFFFFFFFFFFFFFFFFFFFFF:FFFFFFFFFFFFFFFFF  
FFFFFFFFFFFFFFFFFFFFFFFFFFFFFFFFFFFFFFFFFFFFFFFFFFFFFFFFFFFFFFFFFFFFFFFFFFFFF  
FFF

@A00721:190:HGJW7DSXY:4:2570:8305:16407\_2:N:0:TCTGCAAG+GCTGCACT  
TTTCCGTCCTGAACGTAATACACGAAGAGATCATCCGCAAACGACTCGAAACCGAGACGCCGTAGATC  
AAAGTCCCTTCTAACTTTAGATTATGAATCCTGCCTTTACTCATTTTA

+

FFFFFFFFFFFFFFFFFFFFFFFFFFFFFFFFFFFFFFFFFFFFFFFFFFFFFFFFFFFFFFFFFFFFF  
FFFFFFFFFFFFFFFFFFFFFFFFFFFFF:FF:FFFFFFFFFFFFF,FFFFFFF

@A00721:190:HGJW7DSXY:4:2242:30138:16297\_1:N:0:TCTGCAAG+GCTGCACT  
TCTCAGAAGATTAGAGAAGTAACCGGTGAACACGTCGGTAGCATTGATTTACTTTTACCGTTAGAACT  
GAAAAAGATTCTTTTCGAAAAGAAACCTATAAGTTACAAACGATTCTTCGACTATATTAAAGAAATAA  
AAA

+

FFFFF,FF,FFF:,FFFF:FFFFFFFF:FFFFFFFFFFFFF:FFFFF:FFFFFFF:FFFFFFF:FFFF  
FFFFFFFFFFFFF:F:FFFFFFFFFFFFF:FFFFF:FFFFFFFFFFFFFFFFFFFFFFFFFFFFFFFFFFFFF  
FFF

@A00721:190:HGJW7DSXY:4:2202:18078:10347\_1:N:0:TCTGCAAG+GCTGCACT  
TTGTGGGGACTGAGACCTCTGAATTTTCAGGGTGCCCTGATGAGGACGTTGAAAGGGATAATTTCAAC  
TCTGAGACTTCTAAGAGTGTTCAAAAGACCAGAAACGTAACAAGAAGAATAAAGGTAGGAAGGGGAG  
AAA

+

FFFFFF:FFFFFFFFFFFF:FFFFFFFFFFFFFFFF:FFFFFFFFFFFFFFFFFFFFFFFFFFFFF  
FFFFFFFFFFFFF:FFF:FFFFFFFFFFFFF:FFFFF:FFFFFFFFFFFFFFFFFFFFFFFFFFFFFFFFFFFFF  
FFF

@A00721:190:HGJW7DSXY:4:2525:11207:24064\_1:N:0:TCTGCAAG+GCTGCACT  
GTTTGCTCTTCTATCTTACACTAATATATAATCCTCAAACGACTCGAAACCGAGACGCCGTAGATCA  
AAGTCCCTTCTAACTTTAGATTATGAATCCTGCCTTTACTC

+

:F,F,,F,:,F,,,,:F::,,,,F,,,,F,,:,F,,,F,FFFFFFFFFFFFFFFFFFFFFFFFFFFF  
FFFFFFFFFFFFFFFFFFFFFFFFFFFFFFFFFFFFFFFF

@A00721:190:HGJW7DSXY:4:2308:14353:21339\_1:N:0:TCTGCAAG+GCTGCACT  
TCTCAGAAGATTAGAGAAGTAACCGGTGAACACGTCGGTAGCATTGATTTACTTTTACCGTTAGAACT  
GAAAAAGATTCTTTTCGAAAAGAAACCTATAAGTTACAAACGATTCTTCGACTATATTAAAGAAATAA  
AAA

+  
FFF:F,FF:FFFFFFFFFFFFFFFF:F:FFF:FFFFFFFF,FFF::FF,FFFFFFFF,FFFF:FF:FFFF  
:FFFF,FFFFFFFFFFFFFFFFFFFFFFFF:F:F:::FFFFFFFFFFFFFFFFFFFFFFFFFFFF  
FFF

@A00721:190:HGJW7DSXY:4:2232:26738:14544\_1:N:0:TCTGCAAG+GCTGCACT  
TTGTGGGGACTGAGACCTCTGAATTTTCAGGGTGCCCTGATGAGGACGTTGAAAGGGATAATTTCAAC  
TCTGAGACTTCTAAGAGTGTTTCAAAGACCAGAAACGTAACAAGAATAAAGGTAGGAAGGGGAG  
AAA

+  
FFFF:F:F,F:FFFF:F,F,:,FF:FF,FFFFFF:FFFFFF,FFFFFFFF,FFFFFF:FFFFFF  
F:FFFFFF,FFFFFFFF:FFFFF:FFFFFFFFF::FFFFFFFF:FFFF:FFFF:FF:F  
,FF

@A00721:190:HGJW7DSXY:4:1567:27163:19789\_2:N:0:TCTGCAAG+GCTGCACT  
CCGCAAACGACTCGAAACCGAGACGCCGTAGATCAAAGTCCCTTCTAACTTTAGATTATGAATCCTGC  
CTTTACTCATTTTATAGCAGTTATTTATGTTGTACTTTTATAATTTA

+  
FFF:FFFFFFFFFFFFFFFF:F:F,FF:F,FFFFFF:FFFF:,FFF:FFFFFFFF:F::FF  
F,FFF:,FFF:,F:,F,FFFFFF,FFFFF:FFFF:FFFF,FFF:  
@A00721:190:HGJW7DSXY:4:2511:16622:7388\_1:N:0:TCTGCAAG+GCTGCACT

TCTCAGAAGATTAGAGAAGTAACCGGTGAACACGTCGGTAGCATTGATTTACTTTTACCGTTAGAACT  
GAAAAAGATTCTTTTCGAAAAGAAACCTATAAGTTACAAACGATTCTTCGACTATATTAAAGAAATAA  
AAA

+  
FFFF:FF,:FFF:F::FFFFFFFF:FFFF:FF,F,FFFFFF,FFFFFF,F:FFFF,FF:F  
FFFF:F,FFFFFFFFFFF:FFF:FFFFFFFFFFF:FFFFFFFFF:FFFFFFFFFFFFFFF  
FFF

@A00721:190:HGJW7DSXY:4:2249:1895:16391\_1:N:0:TCTGCAAG+GCTGCACT  
TTGTGGGGACTGAGACCTCTGAATTTTCAGGGTGCCCTGATGAGGACGTTGAAAGGGATAATTTCAAC  
TCTGAGACTTCTAAGAGTGTTTCAAAGACCAGAAACGTAACAAGAATAAAGGTAGGAAGGGGAG  
AAA

+  
FFFFFFFFFFFFFFFF:FFFFFFFFFFFFFFFFFFFFFFFFFFFFFFFFFFFFFFFFFFFFFFFF  
FFFFFFFFFFFFFFFFFFFFFFFFFFFFFFFFFFFFFFFFFFFFFFFFFFFFFFFFFFFFFFFF  
FFF

@A00721:190:HGJW7DSXY:4:1673:15022:4460\_2:N:0:TCTGCAAG+GCTGCACT  
CCGCAAACGACTCGAAACCGAGACGCCGTAGATCAAAGTCCCTTCTAACTTTAGATTATGAATCCTGC  
CTTTACTCATTTTATAGCAGTTATTTATGTTGTACTTTTATAATTTA

+  
FFFFFFFFFFFFFFFFFFFFFFFFFFFFFFFF:FFFFFFFFFFFF:FFFFFFFFFFFFFFFF  
FFFFFFFFFFFFFFFF:FFFFFFFFFFFFFFFFFFFFFFFFFFFFFFFF

@A00721:190:HGJW7DSXY:4:1122:26539:8876\_2:N:0:TCTGCAAG+GCTGCACT  
TCATAAGATTAGAGAAGTAACCGGTGAACACGTCGGTAGCATTGATTTACTTTTACCGTTAGAACTGA  
AAAAGATTCTTTTCGAAAAGAAACCTATAAGTTACAAACGATTCTTCG

+  
FFFFFFFFFFFFFFFFFFFFFFFFFFFFFFFFFFFFFFFFFFFFFFFFFFFFFFFFFFFFFFFF  
FFFFFFFFFFFFFFFFFFFFFFFFFFFFFFFFFFFFFFFFFFFF,  
@A00721:190:HGJW7DSXY:4:2304:24867:18818\_1:N:0:TCTGCAAG+GCTGCACT

TTGTGGGGACTGAGACCTCTGAATTTTCAGGGTGCCCTGATGAGGACGTTGAAAGGGATAATTTCAAC

TCTGAGACTTCTAAGAGTGTTTCAAAGACCAGAAACGTAACAAGAAGAATAAAGGTAGGAAGGGGAG  
AAA

+

FFFFFF,FFFFFFFFFFFFFFFFFFFFFFFFFFFFFFFFFFFFFFFFFFFFFFFFFFFFFFFFFFFFFFFFFFFFFFFF  
FFFFFFFFFFFFFFFFFFFFFFFFFFFFFFFFFFFFFFFFFFFFFFFFFFFFFFFFFFFFFFFFFFFFFFFFFFFFFFFF  
FFF

@A00721:190:HGJW7DSXY:4:2244:25726:9502\_2:N:0:TCTGCAAG+GCTGCACT  
CCGCAAACGACTCGAAACCGAGACGCCGTAGATCAAAGTCCCTTCTAACTTTAGATTATGAATCCTGC  
CTTTACTCATTTTATAGCAGTTATTTATGTTGTACTTTTTTATAATTTA

+

FFFFFFFFFFFFFFFFFFFFFFFFFFFFFFFFFFFFFFFFFFFFFFFFFFFFFFFFFFFFFFFFFFFFFFFFFFFFFFFF  
FFFFFFFFFFFFFFFFFFFFFFFFFFFFFFFFFFFFFFFFFFFFFFFFFFFFFFFFFFFFFFFFFFFFFFFFFFFFFFFF

@A00721:190:HGJW7DSXY:4:1130:6253:14700\_2:N:0:TCTGCAAG+GCTGCACT  
TCATAAGATTAGAGAAGTAACCGGTGAACACGTCGGTAGCATTGATTTACTTTTACCGTTAGAACTGA  
AAAAGATTCTTTTCGAAAAGAAACCTATAAGTTACAAACGATTCTTCG

+

FFFFFFFFF:FFFFFFFFFFFFFFFFFFFFFFFFFFFFFFFFFFFFFFFFFFFFFFFFFFFFFFFFFFFFFFFFFFFF  
FFFF:FFFFFFFFF:FFFFFFFFFFFFFFFFFFFFFFFFFFFFFFFFFFFFFFFFFFFFFFFFFFFFFFFFFFFFF

@A00721:190:HGJW7DSXY:4:2357:18846:31814\_1:N:0:TCTGCAAG+GCTGCACT  
TTGTGGGGACTGAGACCTCTGAATTTTCAGGGTGCCTGATGAGGACGTTGAAAGGGATAATTTCAAC  
TCTGAGACTTCTAAGAGTGTTTCAAAGACCAGAAACGTAACAAGAAGAATAAAGGTAGGAAGGGGAG  
AAA

+

FFFFFFFFFFFFFFFFFFFFFFFFFFFFFFFFFFFFFFFFFFFFFFFFFFFFFFFFFFFFFFFFFFFFFFFFFFFFFFFF  
FFFFFFFFFFFFFFFFFFFFFFFFFFFFFFFFFFFFFFFFFFFFFFFFFFFFFFFFFFFFFFFFFFFFFFFFFFFFFFFF  
FFF

@A00721:190:HGJW7DSXY:4:2344:4535:4335\_2:N:0:TCTGCAAG+GCTGCACT  
CCGCAAACGACTCGAAACCGAGACGCCGTAGATCAAAGTCCCTTCTAACTTTAGATTATGAATCCTGC  
CTTTACTCATTTTATAGCAGTTATTTATGTTGTACTTTTTTATAATTTA

+

FFFFFFFFFFFFFFFFFFFFFFFFFFFFFFFFFFFFFFFFFFFFFFFFFFFFFFFFFFFFFFFFFFFFFFFFFFFFFFFF  
FFFFFFFFFFFFFFFFFFFFFFFFFFFFFFFFFFFFFFFFFFFFFFFFFFFFFFFFFFFFFFFFFFFFFFFFFFFFFFFF

@A00721:190:HGJW7DSXY:4:1558:27733:22905\_2:N:0:TCTGCAAG+GCTGCACT  
TCATAAGATTAGAGAAGTAACCGGTGAACACGTCGGTAGCATTGATTTACTTTTACCGTTAGAACTGA  
AAAAGATTCTTTTCGAAAAGAAACCTATAAGTTACAAACGATTCTTCG

+

FFFFFFFFFFFFFFFFF:FFF,FFFFFFFFFFFFFFFFFFFFFFFFFFFFFFFFFFFFFFFFFFFFFFFFFFFFFFFF  
:FFFFFFFFFFFFFFFFFFFFFFFFFFFFFFFFFFFFFFFFFFFFFFFFFFFFFFFFFFFFFFFFFFFFFFFFFFFF

@A00721:190:HGJW7DSXY:4:2433:13349:25363\_1:N:0:TCTGCAAG+GCTGCACT  
TTGTGGGGACTGAGACCTCTGAATTTTCAGGGTGCCTGATGAGGACGTTGAAAGGGATAATTTCAAC  
TCTGAGACTTCTAAGAGTGTTTCAAAGACCAGAAACGTAACAAGAAGAATAAAGGTAGGAAGGGGAG  
AAA

+

FFFFFFFFF:FFFFFF:FFFFFFFFF:FFFFFFFFF,FFFFFFFFFFFFFFFFFFFFFFFFFFFFFFFFFFFFF  
FFFFFFFFFFFFFFFFFFFFFFFFFFFFFFFFFFFFFFFFFFFFFFFFFFFFFFFFFFFFFFFFFFFFFFFFFFFF  
FFF

@A00721:190:HGJW7DSXY:4:2378:4951:36933\_2:N:0:TCTGCAAG+GCTGCACT  
CCGCAAACGACTCGAAACCGAGACGCCGTAGATCAAAGTCCCTTCTAACTTTAGATTATGAATCCTGC  
CTTTACTCATTTTATAGCAGTTATTTATGTTGTACTTTTTTATAATTTA

+

FFFFFFFFFFFFFFFFFFFFFFFFFFFFFFFFFFFFFFFFFFFFFFFFFFFFFFFFFFFFFFFFFFFFFFFFFFFF  
F:FFFFFFFFFFFFFFFFFFFFFFFFFFFFFFFFFFFFFFFFFFFFFFFFFFFFFFFFFFFFFFFFFFFFFFFFFFFF

@A00721:190:HGJW7DSXY:4:2133:13114:1658\_2:N:0:TCTGCAAG+GCTGCACT  
TCATAAGATTAGAGAAGTAACCGGTGAACACGTCGGTAGCATTGATTTACTTTTACCGTTAGAACTGA

AAAAGATTCTTTTCGAAAAGAAACCTATAAGTTACAAACGATTCTTCG

+

FFF:FFFFFFFFFFFFFFFFFFFFFFFFFFFFFFFF:FFFF:FFFFFF:FFFFFFFF:F:FFFFFFFF:  
FFFF::F:FFFFFFFFFFFFFFFF:FFFFFFFFF:FFF:FFFFFF:F

@A00721:190:HGJW7DSXY:4:2433:15347:19586\_1:N:0:TCTGCAAG+GCTGCACT  
TTGTGGGGACTGAGACCTCTGAATTTTCAGGGTGCCCTGATGAGGACGTTGAAAGGGATAATTTCAAC  
TCTGAGACTTCTAAGAGTGTTTCAAAAGACCAGAAACGTAACAAGAAGAATAAAGGTAGGAAGGGGAG  
AAA

+

FFFFFFFFFFFFFFFF:FF:FFFFFFFF:FFFFFFFFFFFFFFFFFFFFFFFF:FFFFFFFFFFFF  
FFFFFFFFFFFFFFFFFFFFFFFF:FFFFFFFFFFFFFFFFFFFFFFFFFFFFFFFFFFFFFFFF  
FFF

@A00721:190:HGJW7DSXY:4:2407:14724:9580\_1:N:0:TCTGCAAG+GCTGCACT  
CCCCACAGACTCGAAACCGAGACGCCGTAGATCAAAGTCCCTTCTAACTTTAGATTATGAATCCTGC  
CTTTACTCATTTTATAGCAGTTATTTATGTTGTACTTTTTATAATTTATAACCTT

+

FF,,F,FFFFFFFFFFFFFFFFFFFFFFFF:FFFFFFFFFFFFFFFFFFFFFFFFFFFFFFFF  
FFFFFFFFF:FFFFFFFFFFFFFFFFFFFFFFFFFFFFFFFFFFFFFFFFFFFFFFFF

@A00721:190:HGJW7DSXY:4:2409:18412:21887\_2:N:0:TCTGCAAG+GCTGCACT  
TCATAAGATTAGAGAAGTAACCGGTGAACACGTCGGTAGCATTGATTTACTTTTACCGTTAGAACTGA  
AAAAGATTCTTTTCGAAAAGAAACCTATAAGTTACAAACGATTCTTCG

+

FFFFFFF,:FFFF:FFFFFFFFFFFFFFFFFFFFFFFF:FFF:FFFFFFFFFFFFFFF:,,,:FFF  
FFFFFFFFFFFFFFFFFFFF:FF::F:FFFFFFFFF,F:FFFFFFF

@A00721:190:HGJW7DSXY:4:2544:6379:23750\_1:N:0:TCTGCAAG+GCTGCACT  
TTGTGGGGACTGAGACCTCTGAATTTTCAGGGTGCCCTGATGAGGACGTTGAAAGGGATAATTTCAAC  
TCTGAGACTTCTAAGAGTGTTTCAAAAGACCAGAAACGTAACAAGAAGAATAAAGGTAGGAAGGGGAG  
AAA

+

FFFFFFFFFFFFFFFFFFFFFFFFFFFFFFFFFFFFFFFFFFFFFFFF:FFFFFFFFFFFF  
FFFFFFFFFFFFFFFFFFFFFFFF:FFFFFFFFFFFFFFFFFFFFFFFFFFFFFFFFFFFFFFFF  
FFF

@A00721:190:HGJW7DSXY:4:1329:14516:8656\_1:N:0:TCTGCAAG+GCTGCACT  
CCGAAAACGACTCGAAACCGAGACGCCGTAGATCAAAGTCCCTTCTAACTTTAGATTATGAATCCTGC  
CTTTACTCATTTTATAGCAGTTATTTATGTTGTACTTTTTATAATTTATAACCTTCTT

+

F:::,FFFFFFFFFFFFFFFFFFFFFFFF:FFFFFFFFFFFFFFFFFFFFFFFF:FFFFFFFFFFFF  
:FFFFFFFFFFFFFFFFFFFFFFFFFFFFFFFFFFFFFFFFFFFFFFFF

@A00721:190:HGJW7DSXY:4:2451:23945:21919\_2:N:0:TCTGCAAG+GCTGCACT  
AAGATTAGAGAAGTAACCGGTGAACACGTCGGTAGCATTGATTTACTTTTACCGTTAGAACTGAAAAA  
GATTCTTTTCGAAAAGAAACCTATAAGTTACAAACGATTCTTCGACTA

+

FFFFFFFFFFFFFFFFFFFFFFFFFFFFFFFFFFFFFFFFFFFFFFFF:FFFFFFFFFFFF  
FFFFFFFFFFFFFFFFFFFFFFFF:FFFF

@A00721:190:HGJW7DSXY:4:1453:19262:35978\_2:N:0:TCTGCAAG+GCTGCACT  
TGTGGGGACTGAGACCTCTGAATTTTCAGGGTGCCCTGATGAGGACGTTGAAAGGGATAATTTCAACT  
CTGAGACTTCTAAGAGTGTTTCAAAAGACCAGAAACGTAACAAGAAGA

+

FFFFFFFFFFFFFFFFFFFFFFFFFFFFFFFFFFFFFFFF:FFFFFFFFFFFFFFFFFFFF  
FFFFFFFFFFFFFFFFFFFF:FFFFFFFF:FFFFFF,FFFFFFFF

@A00721:190:HGJW7DSXY:4:2456:24704:15154\_2:N:0:TCTGCAAG+GCTGCACT  
AAGATTAGAGAAGTAACCGGTGAACACGTCGGTAGCATTGATTTACTTTTACCGTTAGAACTGAAAAA  
GATTCTTTTCGAAAAGAAACCTATAAGTTACAAACGATTCTTCGACTA

+

FFFFFFFFFFFFFFFFFFFFFFFFFFFFFFFFFFFFFFFFFFFFFFFFFFFFFFFFFFFFFFFF  
FFFFFFFFFFFFFFFFFFFFFFFFFFFFFFFFFFFFFFFFFFFFFFFFFFFFFFFFFFFFFFFF  
@A00721:190:HGJW7DSXY:4:2202:18078:10347\_2:N:0:TCTGCAAG+GCTGCACT  
TGTGGGGACTGAGACCTCTGAATTTTCAGGGTGCCCTGATGAGGACGTTGAAAGGGATAATTTCAACT  
CTGAGACTTCTAAGAGTGTTTCAAAGACCAGAAACGTAACAAGAAGA

+  
FFFFFFFFFFFFFFFFFFFFFFFFFFFFFFFFFFFFFFFFFFFFFFFFFFFFFFFFFFFFFFFF  
FFFFFFFFFFFFFFFFFFFFFFFFFFFFFFFFFFFFFFFFFFFFFFFFFFFFFFFFFFFFFFFF  
@A00721:190:HGJW7DSXY:4:2551:5104:36949\_2:N:0:TCTGCAAG+GCTGCACT  
AAGATTAGAGAAGTAACCGGTGAACACGTCGGTAGCATTGATTTACTTTTACCGTTAGAACTGAAAAA  
GATTCTTTTCGAAAAGAAACCTATAAGTTACAAACGATTCTTCGACTA

+  
FFFF:FFFFFFFFFFFFFFFFFFFFFFFFFFFFFFFFFFFFFFFFFFFFFFFFFFFFFFFF  
FFFFFFFFFFFFFFFFFFFFFFFFFFFFFFFFFFFFFFFFFFFFFFFFFFFFFFFFFFFFFFFF  
@A00721:190:HGJW7DSXY:4:2232:26738:14544\_2:N:0:TCTGCAAG+GCTGCACT  
TGTGGGGACTGAGACCTCTGAATTTTCAGGGTGCCCTGATGAGGACGTTGAAAGGGATAATTTCAACT  
CTGAGACTTCTAAGAGTGTTTCAAAGACCAGAAACGTAACAAGAAGA

+  
FFFFFFFFFFFFFFFFFFFFFFFFFFFFFFFFFFFFFFFFFFFFFFFFFFFFFFFFFFFFFFFF  
FFFFFFFFFFFFFFFFFFFFFFFFFFFFFFFFFFFFFFFFFFFFFFFFFFFFFFFFFFFFFFFF  
@A00721:190:HGJW7DSXY:4:1256:2374:3223\_1:N:0:TCTGCAAG+GCTGCACT  
AAGATTAGAGAAGTAACCGGTGAACACGTCGGTAGCATTGATTTACTTTTACCGTTAGAACTGAAAAA  
GATTCTTTTCGAAAAGAAACCTATAAGTTACAAACGATTCTTCGACTATATTAAAGAAATAAAAATAC  
TTC

+  
FFFFFFFFF:FFFFFFFFFFFFFFFFFFFFFFFFFFFFFFFFFFFFFFFFFFFFFFFFFFFFF:FFFFF:FFFFFFFFFFFFFFFF  
FFFFFFFFFFFFFFFFFFFFFFFFFFFFFFFFFFFFFFFFFFFFFFFFFFFFFFFFFFFFFFFF:FFFFF:FFFFFFFFFFFFFFFF  
FFF  
@A00721:190:HGJW7DSXY:4:2249:1895:16391\_2:N:0:TCTGCAAG+GCTGCACT  
TGTGGGGACTGAGACCTCTGAATTTTCAGGGTGCCCTGATGAGGACGTTGAAAGGGATAATTTCAACT  
CTGAGACTTCTAAGAGTGTTTCAAAGACCAGAAACGTAACAAGAAGA

+  
FF:FFFFFFFFFFFFFFFFF:FFFFFFFFFFFFFFFFFFFFFFFFFFFFFFFFFFFFFFFFFFFFF  
FFFFFFFFFFFF:FFFFFFFFFFFFFFFFFFFFFFFFFFFFFFFFFFFFFFFFFFFFFFFFFFFFF  
@A00721:190:HGJW7DSXY:4:1310:3848:16266\_1:N:0:TCTGCAAG+GCTGCACT  
AAGATTAGATAAGTAACCGTTGAACACGTCGGTAGCATTGATTTACTTTTACCGTTAGAACTGAAAAA  
GATTCTTTTCGAAAAGAAACCTATAAGTTACAAACGATTCTTCGACTATATTAAAGAAATAAAAATAC  
TTC

+  
F::FFFF::,FFFFFFFFF,:,FF::F:FF:FFFF:FF,,FFFF:FFFF:F,:FFFFFF:FFFFFFF  
,FFF:FFFFFFFFFFFFFFFFF,F:FFF,FFFFFFFFFFFFFFFFFFFFFFFFFFFFFFFFFFFFFFFFFFFFF  
FFF  
@A00721:190:HGJW7DSXY:4:1158:21603:22936\_1:N:0:TCTGCAAG+GCTGCACT  
TGTGGGGACTGAGACCTCTGAATTTTCAGGGTGCCCTGATGAGGACGTTGAAAGGGATAATTTCAACT  
CTGAGACTTCTAAGAGTGTTTCAAAGACCAGAAACGTAACAAGAAGAATAAAGGTAGGAAGGGGAGA  
AA

+  
FFFFFFFFFFFFFFFFFFFFFFFFFFFFFFFFFFFFFFFFFFFFFFFFFFFFFFFFFFFFFFFF  
FFFFFFFFFFFF:FFFFFFFFFFFFFFFFFFFFFFFFFFFFFFFFFFFFFFFFFFFFFFFFFFFFF:FFFFFFFFFFFFFFFFFFFFFFFFFFFFF  
FF  
@A00721:190:HGJW7DSXY:4:1361:25373:26052\_1:N:0:TCTGCAAG+GCTGCACT  
AAGATTAGAGAAGTAACCGGTGAACACGTCGGTAGCATTGATTTACTTTTACCGTTAGAACTGAAAAA  
GATTCTTTTCGAAAAGAAACCTATAAGTTACAAACGATTCTTCGACTATATTAAAGAAATAAAAATAC  
TTC



@A00721:190:HGJW7DSXY:4:2307:31521:1689\_1:N:0:TCTGCAAG+GCTGCACT  
AAGATTAGAGAAGTAACCGGTGAACACGTCGGTAGCATTGATTTACTTTTACCGTTAGAACTGAAAAA  
GATTCTTTTCGAAAAGAAACCTATAAGTTACAAACGATTCTTCGACTATATTAAAGAAATAAAAATAC  
TTC

+

FF::FFFFF,FF::FFF::FF,F,,FFF:,FFFF,,:FF:FFFF:FFF:FFF,:FF,FFFF,FFFF  
FFFFFFFF:FFFFFF:FFFF:FFFF,FFF,FFFFFFFFFFFFFFFFFFFFFFFFFFFFFFFFFFFFF  
FFF

@A00721:190:HGJW7DSXY:4:2158:15103:2691\_2:N:0:TCTGCAAG+GCTGCACT  
GTGGGGACTGAGACCTCTGAATTTTCAGGGTGCCCTGATGAGGACGTTGAAAGGGATAATTTCAACTC  
TGAGACTTCTAAGAGTGTTTCAAAGACCAGAAACGTAACAAGAAGAA

+

FFFFFFFFFFFFFFFFFFFFFFFFFFFFFFFFFFFFFFFFFFFFFFFFFFFFFFFFFFFFFFFFFFFFF  
FF,FFFFFF:FFFFFFFFFFFFFFFF:FF:FFFFFFFFFFFFFFFF

@A00721:190:HGJW7DSXY:4:2361:18240:4523\_1:N:0:TCTGCAAG+GCTGCACT  
AAGATTAGAGAAGTAACCGGTGAACACGTCGGTAGCATTGATTTACTTTTACCGTTAGAACTGAAAAA  
GATTCTTTTCGAAAAGAAACCTATAAGTTACAAACGATTCTTCGACTATATTAAAGAAATAAAAATAC  
TTC

+

FFFFFFFFFFFFFFFFFFFFFFFFFFFFFFFFFFFFFFFFFFFFFFFFFFFFFFFFFFFFFFFFFFFFF:FFFFFFF  
FFFFFFFFF:FFFFFFFFFFFFFFFF,FFFF:FFFFFFFFFFFFFFFFFFFFFFFFFFFFFFFFFFFFF  
FFF

@A00721:190:HGJW7DSXY:4:2357:18846:31814\_2:N:0:TCTGCAAG+GCTGCACT  
GTGGGGACTGAGACCTCTGAATTTTCAGGGTGCCCTGATGAGGACGTTGAAAGGGATAATTTCAACTC  
TGAGACTTCTAAGAGTGTTTCAAAGACCAGAAACGTAACAAGAAGAA

+

FFFFFFFFFFFFFFFF:F:FFFFFFFFFFFFFFFF:FFFF:FFFFFFFF:FFFFFFFFFFFFFFFFFFFFF  
FFFFFFFFFFFFFFFFFFFFFFFFFFFFFFFFFFFF:F:FFFFFFFFFFFFFFFF

@A00721:190:HGJW7DSXY:4:2516:31213:8077\_1:N:0:TCTGCAAG+GCTGCACT  
AAGATTAGAGAAGTAACCGGTGAACACGTCGGTAGCATTGATTTACTTTTACCGTTAGAACTGAAAAA  
GATTCTTTTCGAAAAGAAACCTATAAGTTACAAACGATTCTTCGACTATATTAAAGAAATAAAAATAC  
TTC

+

FF,FFFFFFFF,FFFFFF:FFFFFFFFFFFF::FFFFFFFF:FFFF:FFFF:FFFFFFFF  
FFFFFFFFFFFFFFFFFFFF:FFFFFFFFFFFFFFFFFFFFFFFFFFFFFFFFFFFFFFFFFFFFF  
FFF

@A00721:190:HGJW7DSXY:4:2433:13349:25363\_2:N:0:TCTGCAAG+GCTGCACT  
GTGGGGACTGAGACCTCTGAATTTTCAGGGTGCCCTGATGAGGACGTTGAAAGGGATAATTTCAACTC  
TGAGACTTCTAAGAGTGTTTCAAAGACCAGAAACGTAACAAGAAGAA

+

FFFFFFFFFFFFFFFF:FFFFFFFFFFFFFFFFFFFFFFFFFFFFFFFFFFFFFFFFFFFF,FFFFFFFFF  
FFFFFFFFF:FFFFFFFFF:FFFFFFFFF:FFFFFFFFF

@A00721:190:HGJW7DSXY:4:2331:9019:21339\_2:N:0:TCTGCAAG+GCTGCACT  
ATTAGAGAAGTAACCGGTGAACACGTCGGTAGCATTGATTTACTTTTACCGTTAGAACTGAAAAAGAT  
TCTTTTCGAAAAGAAACCTATAAGTTACAAACGATTCTTCGACTATAT

+

F:FFFF:FFFFF:,F:FFFF:, :FFFF:FFF,F,F:FFF:FFFFFFFFFFFFFFFF:FFFF:FF  
FFFFFFFFFFFFFFFF:FFF,FF:F:,FFFF:FFFFFFFFFFFFFFFF:

@A00721:190:HGJW7DSXY:4:2544:6379:23750\_2:N:0:TCTGCAAG+GCTGCACT  
GTGGGGACTGAGACCTCTGAATTTTCAGGGTGCCCTGATGAGGACGTTGAAAGGGATAATTTCAACTC  
TGAGACTTCTAAGAGTGTTTCAAAGACCAGAAACGTAACAAGAAGAA

+

FFFFFFFFFFFFFFFFFFFFFFFFFFFFFFFFFFFFFFFFFFFFFFFFFFFFFFFFFFFFFFFFFFFFF  
FFFFFFFFFFFFFFFFFFFFFFFFFFFFFFFFFFFFFFFFFFFFFFFFFFFFFFFF

@A00721:190:HGJW7DSXY:4:2373:26060:26428\_2:N:0:TCTGCAAG+GCTGCACT  
ATTAGAGAAGTAACCGGTGAACACGTCGGTAGCATTGATTTACTTTTACCGTTAGAACTGAAAAAGAT  
TCTTTTCGAAAAGAAACCTATAAGTTACAAACGATTCTTCGACTATAT

+

FFFFFFF,FFFFFFF:FFFFFFF:FFFF,FF,FFFFFFFFFFFFFFF:FFFFF:FFFFFFFFFFFFFFF:FF  
FFFFFFFFFFFFFFF:F:FFFFFFFFF,FFFFFFFFFFFFFFF

@A00721:190:HGJW7DSXY:4:1105:3586:36761\_1:N:0:TCTGCAAG+GCTGCACT  
GTGGGGACTGAGACCTCTGAATTTTCAGGGTGCCCTGATGAGGACGTTGAAAGGGATAATTTCAACTC  
TGAGACTTCTAAGAGTGTTTCAAAGACCAGAAACGTAACAAGAAGAATAAAGGTAGGAAGGGGAGAA  
AAC

+

:FFFFFFFFFFFFFFF:FFFFFFFFFFFFFFF:FFFFFFFFFFFFFFF:FFFFFFFFFFFFFFF:FFFF  
FFFFFFFFFFFFFFF:FFFFFFFFFFFFFFF:FFFFFFFFFFFFFFF:FFFFFFFFFFFFFFF:FFFF  
FFF

@A00721:190:HGJW7DSXY:4:2602:13322:13197\_2:N:0:TCTGCAAG+GCTGCACT  
ATTAGAGAAGTAACCGGTGAACACGTCGGTAGCATTGATTTACTTTTACCGTTAGAACTGAAAAAGAT  
TCTTTTCGAAAAGAAACCTATAAGTTACAAACGATTCTTCGACTATAT

+

FFFFFFFFF:FFFFF,,F,FFFFF,FF::FF,FFFF::FFFFFF:FFFFF,FFFFFFFF,FFFFFFFF  
::FFFFFFFFFFFFFFFFFFFFFFFFFFFFFFFFFFFFFFFFFFFFFFFFFFFFFFFF

@A00721:190:HGJW7DSXY:4:1146:22064:26396\_1:N:0:TCTGCAAG+GCTGCACT  
GTGGGGACTGAGACCTCTGAATTTTCAGGGTGCCCTGATGAGGACGTTGAAAGGGATAATTTCAACTC  
TGAGACTTCTAAGAGTGTTTCAAAGACCAGAAACGTAACAAGAAGAATAAAGGTAGGAAGGGGAGAA  
AAC

+

FFFFFFFFFFFFFFFFF:FFFFFFFFFFFFFFFFFFFFFFFFFFFFFFFFFFFFFFFFFFFFFFFFFFFF  
FFFFFFFFFFFFFFFFFFFFFFFFFFFFFFFFFFFFFFFFFFFFFFFFFFFFFFFFFFFFFFFFFFFF  
FFF

@A00721:190:HGJW7DSXY:4:2343:30228:17206\_2:N:0:TCTGCAAG+GCTGCACT  
AGTAACCGGTGAACACGTCGGTAGCATTGATTTACTTTTACCGTTAGAACTGAAAAAGATTCTTTTCG  
AAAAGAAACCTATAAGTTACAAACGATTCTTCGACTATATTAAAGAAA

+

FFFFFFFFFFFFFFFFFFFFFFFFFFFFFFFFFFFFFFFFFFFFFFFFFFFFFFFFFFFFFFFFFFFF  
FFFFFFFFFFFFFFFFFFFFFFFFFFFFFFFFFFFFFFFFFFFFFFFFFFFF:FFF

@A00721:190:HGJW7DSXY:4:1465:15429:27837\_1:N:0:TCTGCAAG+GCTGCACT  
GTGGGGACTGAGACCTCTGAATTTTCAGGGTGCCCTGATGAGGACGTTGAAAGGGATAATTTCAACTC  
TGAGACTTCTAAGAGTGTTTCAAAGACCAGAAACGTAACAAGAAGAATAAAGGTAGGAAGGGGAGAA  
AAC

+

FFFFFFFFFFFFFFFFFFFFFFFFFFFFFFFFFFFFFFFFFFFFFFFFFFFFFFFFFFFFFFFFFFFF  
FFFFFFFFFFFFFFFFFFFFFFFFFFFFFFFFFFFFFFFFFFFFFFFFFFFFFFFFFFFFFFFFFFFF  
FFF

@A00721:190:HGJW7DSXY:4:1619:2781:13416\_1:N:0:TCTGCAAG+GCTGCACT  
GTAACCGGTGAACACGTCGGTAGCATTGATTTACTTTTACCGTTAGAACTGAAAAAGATTCTTTTCGA  
AAAGAAACCTATAAGTTACAAACGATTCTTCGACTATATTAAAGAAATAAAAATACTTCAAGTACCTG  
AAC

+

FFFFFFFFFFFFFFFFFFFFFFFFFFFFFFFFFFFFFFFFFFFFFFFFFFFFFFFFFFFFFFFFFFFF  
:FFFFFFFFFFFFFFFFFFFFFFFFFFFFFFFFFFFFFFFFFFFFFFFFFFFFFFFFFFFF:FFFFF  
FFF

@A00721:190:HGJW7DSXY:4:2256:24243:22905\_1:N:0:TCTGCAAG+GCTGCACT  
GTGGGGACTGAGACCTCTGAATTTTCAGGGTGCCCTGATGAGGACGTTGAAAGGGATAATTTCAACTC  
TGAGACTTCTAAGAGTGTTTCAAAGACCAGAAACGTAACAAGAAGAATAAAGGTAGGAAGGGGAGAA  
AAC





@A00721:190:HGJW7DSXY:4:2328:25907:15546\_1:N:0:TCTGCAAG+GCTGCACT  
TGTGGACTGAGAAGTCTGAATTTTCAGGTTGCCCTGATGAGGAAGTTGAATGGGTAAATTTCAACTCT  
GAGACTTATAAGAGTGTTTCAAAGACCATAAACGTAAATAGAAGAATAAAGGTAGGAAGGTGAGAAA  
ACA

+

F:,FF,,:FFFF,:F:FF::FF:F:,F,FF:,,:FFFF:FFF:,,:FF:F,,F:,,,F:F:F::F,,F  
FFFFFFFF,F:,,:FFF:FFF:F,:FFF::F,FF,:FFFF,,FFFFFFFF,:FF:FFF:F:,F:::F,F,FF  
F::

@A00721:190:HGJW7DSXY:4:2320:4056:14309\_2:N:0:TCTGCAAG+GCTGCACT  
AACCGGTGAACACGTCGGTAGCATTGATTTACTTTTACCGTTAGAACTGAAAAAGATTCTTTTCGAAA  
AGAAACCTATAAGTTACAAACGATTCTTCGACTATATTAAAGAAATAA

+

F,F,F:FFFFFFFFF,FFFF:FFFFFFFFFFFFFFFFF,F:FFFFFFFFFFFFFFFFFFFFFFFFFFFFF  
FFFFFFFFFFFFFFFFFFFFF,:FFF:FFFFFFFFFFFFFFFFFFFFFFFFFFFFF

@A00721:190:HGJW7DSXY:4:2573:28980:14387\_1:N:0:TCTGCAAG+GCTGCACT  
TGGGGACTGAGACCTCTGAATTTTCAGGGTGCCCTGATGAGGACGTTGAAAGGGATAATTTCAACTCT  
GAGACTTCTAAGAGTGTTTCAAAGACCAGAAACGTAACAAGAAGAATAAAGGTAGGAAGGGGAGAAA  
ACA

+

FFFFFFFFFFFFFFFFFFFFF:FFFFFFFFFFFFFFFFFFFFFFFFFFFFFFFFFFFFFFFFFFFFFFFFFFFFF  
FFFFFFFFFFFFFFFFFFFFFFFFFFFFFFFFFFFFFFFFFFFFFFFFFFFFFFFFFFFFFFFFFFFFFFFFFFFFF  
FFF

@A00721:190:HGJW7DSXY:4:2352:23511:20979\_2:N:0:TCTGCAAG+GCTGCACT  
AACCGGTGAACACGTCGGTAGCATTGATTTACTTTTACCGTTAGAACTGAAAAAGATTCTTTTCGAAA  
AGAAACCTATAAGTTACAAACGATTCTTCGACTATATTAAAGAAATAA

+

FFFFFFFFFFFFFFFFFFFFF:FFFFFFFFFFFFFFFFFFFFFFFFFFFFFFFFFFFFFFFFFFFFFFFFFFFFF  
FFFF:F:FFFFFFFFFFFFFFFFFFFFFFFFFFFFFFFFFFFFFFFFFFFFFFFFFFFFF

@A00721:190:HGJW7DSXY:4:2465:28818:34460\_1:N:0:TCTGCAAG+GCTGCACT  
TCCGATCTGAGACCTCTGAATTTTCAGGGTGCCCTGATGAGGACGTTGAAAGGGATAATTTCAACTCT  
GAGACTTCTAAGAGTGTTTCAAAGACCAGAAACGTAACAAGAAGAATAAAGGTAGGAAGGGGAGAAA  
ACA

+

F:,FFFFFFFF:FFFFFF:FFFF:FFFFFFFF:F:FFFF:FFFF:FFFF:FFFFFFFFFFFFFFFFF  
FFFFFFFFFFFFFFFFFFFFF:F::FFFFFFFFFFFFFFFFFFFFFFFFFFFFFFFFFFFFFFFFFFFFF  
FFF

@A00721:190:HGJW7DSXY:4:2467:4815:8797\_2:N:0:TCTGCAAG+GCTGCACT  
AACCGGTGAACACGTCGGTAGCATTGATTTACTTTTACCGTTAGAACTGAAAAAGATTCTTTTCGAAA  
AGAAACCTATAAGTTACAAACGATTCTTCGACTATATTAAAGAAATAA

+

FFFFFFFFFFFFFFFFFFFFF:FFFFFFFFFFFFFFFFFFFFFFFFFFFFFFFFFFFFFFFFFFFFFFFFFFFFF  
FFFFFFFFFFFFFFFFFFFFFFFFFFFFFFFFFFFFFFFFFFFF:FFFFF,FFFFFFFFF

@A00721:190:HGJW7DSXY:4:2662:3106:1423\_1:N:0:TCTGCAAG+GCTGCACT  
TCCGATCTGAGACCTCTGAATTTTCAGGGTGCCCTGATGAGGACGTTGAAAGGGATAATTTCAACTCT  
GAGACTTCTAAGAGTGTTTCAAAGACCAGAAACGTAACAAGAAGAATAAAGGTAGGAAGGGGAGAAA  
ACA

+

FF:FFFFFFFFFFFFFFFFFFFFFFFFFFFFFFFFFFFFFFFFFFFFFFFFFFFFFFFFFFFFFFFFFFFFF  
FFFFFFFFFFFFFFFFFFFFFFFFFFFFFFFFFFFFFFFFFFFFFFFFFFFFFFFFFFFFFFFFFFFFFFFFFFFFF  
FFF

@A00721:190:HGJW7DSXY:4:1144:14931:20306\_1:N:0:TCTGCAAG+GCTGCACT  
AACCGGTGAACACGTCGTTAGCATTGATTTACTTTTACCGTTAGAAATGAAAAAGATTCTTTTCGAAA  
ATAAACCTATAAGTTACAAACGATTCTTCGACTATATTAAAGAAATAAAATACTTCAAGTACCTGAA  
CTT

+  
F,::F:F,,,F,:F::F,FF,FFFFFFFFF,FFFFFF,FFFFF:FF,F:FFFFF:FFFFFFFFFFFFFFF  
:, :FFFFFF,FFFFFF,F:FFFFFFFFFFFFFFFFFFFFFFFFF:FFFFFFFF:FFF:F::FF:FFFF:  
FFF

@A00721:190:HGJW7DSXY:4:1421:13132:2910\_1:N:0:TCTGCAAG+GCTGCACT  
GGGACTGAGACCTCTGAATTTTCAGGGTGCCCTGATGAGGACGTTGAAAGGGATAATTTCAACTCTGA  
GACTTCTAAGAGTGTTCAAAAGACCAGAAACGTAACAAGAAGAATAAAGGTAGGAAGGGGAGAAAAC  
AGA

+  
F::F,FFFFF,FFFF:F,FFFFF,FFFFF,,,FF:FFFFFFFFF::F:FFF:FFFFFFFF:FFFF:,  
F::FFFFF,: :FFFFFFFFF,FFFFFFFF:F,FFFFFFFF:FF:FFF::FFFFFF::FFFF:FFF::  
FFF

@A00721:190:HGJW7DSXY:4:1638:29143:32863\_1:N:0:TCTGCAAG+GCTGCACT  
AACCGGTGAACACGTCGGTAGCATTGATTTACTTTTACCGTTAGAACTGAAAAAGATTCTTTTCGAAA  
AGAAACCTATAAGTTACAAACGATTCTTCGACTATATTAAGAAATAAAAAACTTCAAGTACCTGAA  
CTT

+  
FFFFFFFFFFFFFFFFFFFFFFFFFFFFFFFFFFFFFFFFFFFFFFFFFFFFFFFFFFFFFFFFFFFFFFFFF  
FFFFFFFFFFFFFFFFFFFFFFFFFFFFFFFFFFFFFFFFFFFFFFFFFFFFFFFFFFFFFFFFFFFFFFFFF  
F:F

@A00721:190:HGJW7DSXY:4:1454:27941:12931\_1:N:0:TCTGCAAG+GCTGCACT  
GGGACTGAGACCTCTGAATTTTCAGGGTGCCCTGATGAGGACGTTGAAAGGGATAATTTCAACTCTGA  
GACTTCTAAGAGTGTTCAAAAGACCAGAAACGTAACAAGAAGAATAAAGGTAGGAAGGGGAGAAAAC  
AGA

+  
:FFFFFFFF:FFFFFF,FFFF:FFFFFFFFFFFFFFFFFFFFFFFFFFFFFFFFFFFFFFFFFFFFFFFFF  
FFFFFFFF:FFFFFFFFFFFFFFFFFFFFFFFFFFFFFFFFFFFFFFFFFFFFFFFF:FFFFFFFFFFFFFFFFF  
FFF

@A00721:190:HGJW7DSXY:4:2134:26693:12649\_1:N:0:TCTGCAAG+GCTGCACT  
AACCGGTGAACACGTCGGTAGCATTGATTTACTTTTACCGTTAGAACTGAAAAAGATTCTTTTCGAAA  
AGAAACCTATAAGTTACAAACGATTCTTCGACTATATTAAGAAATAAAAAACTTCAAGTACCTGAA  
CTT

+  
FFFF:FF:FFF,FFF:,FFFFFFFF,FFFFFFFF:F:FF:FFFF:FF,FFFFFFFF::FFFFFFFF:  
FFFFFFFF:FFFFFF:FFFFFFFFFFFFFFFFFFFFFFFFFFFFFFFFFFFFFFFFFFFFFFFFFFFFFFF  
FFF

@A00721:190:HGJW7DSXY:4:1648:18258:31923\_1:N:0:TCTGCAAG+GCTGCACT  
GGGACTGAGACCTCTGAATTTTCAGGGTGCCCTGATGAGGACGTTGAAAGGGATAATTTCAACTCTGA  
GACTTCTAAGAGTGTTCAAAAGACCAGAAACGTAACAAGAAGAATAAAGGTAGGAAGGGGAGAAAAC  
AGA

+  
FFFFFFFFF:FFFFFFFFFFFFFFFFFFFFFFFFFFFFFFFFFFFFFFFFFFFFFFFFFFFFFFFFFFFFFFF  
FFFFFFFFFFFFFFFFFFFFFFFFFFFFFFFFFFFFFFFFFFFFFFFFFFFFFFFFFFFFFFFFFFFFFFFFF  
FFF

@A00721:190:HGJW7DSXY:4:2162:29460:34006\_1:N:0:TCTGCAAG+GCTGCACT  
AACCGGTGAACACGTCGGTAGCATTGATTTACTTTTACCGTTAGAACTGAAAAAGATTCTTTTCGAAA  
AGAAACCTATAAGTTACAAACGATTCTTCGACTATATTAAGAAATAAAAAACTTCAAGTACCTGAA  
CTT

+  
FFF:FFFFFFFFF,FFFFFFFFFFFFFFFFF:FF:FFFFFFFFFFFFFFFFFFFFFFFF,FFFFFFFF  
FFFFFFFFF:FFFFF,FFFFFFFFFFFFFFFFFFFFFFFFFFFFFFFFFFFFFFFF:FFFFFFFFFFFFFFF  
FFF

@A00721:190:HGJW7DSXY:4:2637:14253:20979\_1:N:0:TCTGCAAG+GCTGCACT  
GGGACTGAGACCTCTGAATTTTCAGGGTGCCCTGATGAGGACGTTGAAAGGGATAATTTCAACTCTGA

GACTTCTAAGAGTGTTTCAAAAGACCAGAAACGTAACAAGAAGAATAAAGGTAGGAAGGGGAGAAAAC  
AGA

+

:FFF,FFFF,FF:F:F,FFFF:FFFFF:FFFFFFFFF,,FFFFFFFF:FFFFFFFFFFFFFFFFF  
FFFFFFFFFFFFFFFFFFFFFFFF:FFFFFFFFFFFFFFFFFFFFFFFF:FFF,FFFFFFFFFFFFFFFFF  
FFF

@A00721:190:HGJW7DSXY:4:2339:10556:8688\_1:N:0:TCTGCAAG+GCTGCACT  
AACCGGTGAACACGTCGGTAGCATTGATTTACTTTTACCGTTAGAACTGAAAAAGATTCTTTTCGAAA  
AGAAACCTATAAGTTACAAACGATTCTTCGACTATATTAAAGAAATAAAAATACTTCAAGTACCTGAA  
CTT

+

FFFFF:F:FFFFFFFF,FFFFFFFFF:FFF,FF:FFFF::FFFFFFFF:FFFFFFFFFFFFFFFFF  
FFFFFFFFFFFFF:FFFF:FFFFFFFFFFFFFFFFFFFFFFFF:FFFFFFFFFFFFFFFFFFFFFFFFF  
FFF

@A00721:190:HGJW7DSXY:4:2614:13223:14152\_1:N:0:TCTGCAAG+GCTGCACT  
TCTCTGAGACCTCTGAATTTTCAGGGTGCCCTGATGAGGACGTTGAAAGGGATAATTTCAACTCTGAG  
ACTTCTAAGAGTGTTTCAAAAGACCAGAAACGTAACAAGAAGAATAAAGGTAGGAAGGGGAGAAAACA  
GAA

+

:FFFFFF:FF,FFFFFFFFFFFFFFFFFFFFFFFF:FFFFFFF:FF,FFFF,FFFFFFFFFFFFFFFFF  
FFFF:F:FFFFFFFFFFFFFFFFFFFFFFFF:FFFFFFFFFFFFFFFFFFFFFFFFFFFFFFFFF  
FFF

@A00721:190:HGJW7DSXY:4:2622:4345:12994\_1:N:0:TCTGCAAG+GCTGCACT  
AACCGGTGAACACGTCGGTAGCATTGATTTACTTTTACCGTTAGAACTGAAAAAGATTCTTTTCGAAA  
AGAAACCTATAAGTTACAAACGATTCTTCGACTATATTAAAGAAATAAAAATACTTCAAGTACCTGAA  
CTT

+

FFFFFFFFFFFFFFFFF:FFF::FFF:FFFF,FFFFF:F::FF:FF:F:FFFF:::FF::FFFF,FFF  
F:FFFFFFFFFFFFFFFFF:FFFFFFFFFFFFFFFFFFFFFFFFFFFFFFFFF:F::FFFFFFFFF  
FFF

@A00721:190:HGJW7DSXY:4:2662:3106:1423\_2:N:0:TCTGCAAG+GCTGCACT  
TTTTCAGGGTGCCCTGATGAGGACGTTGAAAGGGATAATTTCAACTCTGAGACTTCTAAGAGTGTTTC  
AAAAGACCAGAAACGTAACAAGAAGAATAAAGGTAGGAAGGGGAGAAA

+

FFFFFFFFFFFFFFFFF:FFFFFFFFFFFFFFFFFFFFFFFFFFFFFFFFFFFFFFFFFFFFFFFFF  
FFFFFFFFFFFFFFFFFFFFFFFFFFFFFFFFFFFFFFFFFFFFFFFFFFFFFFFFF

@A00721:190:HGJW7DSXY:4:2652:19605:16626\_1:N:0:TCTGCAAG+GCTGCACT  
AACCTGTGAACACGTCGGTAGCATTGATTTACTTTTACCGTTAGAACTGAAAAAGATTCTTTTCGAAA  
AGAAACCTATAAGTTACAAACGATTCTTCGACTATATTAAAGAAATAAAAATACTTCAAGTACCTGAA  
CTT

+

FFFF,FF,FFFF:FF:,FFF,F:FF,,FFF:FFFFFFFFF:FFFF:FFFF,,FFF,FFFFFF::F  
FFFF::,F:F,,:FFFFFFFFF,FF,FF:FF:FFF:,FFF:FFFF:FFFFFFFF,:F,F,FF::  
FFF

@A00721:190:HGJW7DSXY:4:1563:22218:13416\_1:N:0:TCTGCAAG+GCTGCACT  
ACCGGTGAACACGTCGGTAGCATTGATTTACTTTTACCGTTAGAACTGAAAAAGATTCTTTTCGAAA  
GAAACCTATAAGTTACAAACGATTCTTCGACTATATTAAAGAAATAAAAATACTTCAAGTACCTGAAC  
TTT

+

FF:FFFFFFFFFFFFFFFFF:FFFFFFFFF:FFFFFF:FFFFFFFFFFFFFFFFF,FFFFFFF  
FFFFFFFFF:FFFFFFFFFFFFFFFFFFFFFFFFF:FFFFFFFFFFFFFFFFFFFFFFFFF  
FFF

@A00721:190:HGJW7DSXY:4:1642:4869:31125\_1:N:0:TCTGCAAG+GCTGCACT  
ACCGGTGAACACGTCGGTAGCATTGATTTACTTTTACCGTTAGAACTGAAAAAGATTCTTTTCGAAA

+

@

+

@

+

@

+

@

+

@

+

[illegible]
