# Supplementary material for: Characterization of Spanish Olive Virome by High Throughput Sequencing Opens New Insights and Uncertainties
Source: MDPI journal article supplement (doi:10.3390/v13112233), 2021-11-06
Supplement: s1 [file s1]

**Table S1.** RT-PCR detection of OLYaV, OEGV and OLV-3 in the olive samples analysed in this study. Samples testing positive for one or more viruses are listed, indicating the positive (+) or negative (-) result for each virus tested.

| Sample | Variety | Symptomatology                                          | OLYaV | OEGV | OLV-3 |
|--------|---------|---------------------------------------------------------|-------|------|-------|
| 64.1   | Serrana | Yellow leaf discoloration, defoliation and tree decline | +     | +    | -     |
| 64.2   | Serrana | Yellow leaf discoloration                               | +     | +    | -     |
| 64.3   | Serrana | Yellow leaf discoloration                               | +     | +    | -     |
| 64.4   | Serrana | Yellow leaf discoloration                               | +     | +    | -     |
| 64.5   | Serrana | Yellow leaf discoloration                               | +     | +    | -     |
| 64.6   | Serrana | Yellow leaf discoloration                               | +     | +    | -     |
| 64.7   | Serrana | Yellow leaf discoloration                               | +     | -    | -     |
| 64.8   | Serrana | Yellow leaf discoloration                               | +     | -    | -     |
| 64.9   | Serrana | Yellow leaf discoloration                               | -     | +    | -     |
| 64.10  | Serrana | Yellow leaf discoloration                               | +     | -    | -     |
| 66.3   | Picual  | Yellow leaf discoloration and defoliation               | +     | -    | -     |
| 66.4   | Picual  | Yellow leaf discoloration and defoliation               | -     | +    | -     |
| 66.5   | Picual  | Yellow leaf discoloration and defoliation               | +     | -    | -     |
| 66.7   | Picual  | Yellow leaf discoloration and defoliation               | +     | -    | -     |
| 67.1   | Serrana | Symptomless                                             | +     | -    | -     |
| 67.2   | Serrana | Symptomless                                             | +     | +    | -     |
| 67.3   | Serrana | Symptomless                                             | -     | +    | -     |
| 67.4   | Serrana | Symptomless                                             | +     | +    | -     |
| 67.5   | Serrana | Yellow leaf discoloration                               | -     | +    | -     |
| 67.6   | Serrana | Symptomless                                             | -     | +    | -     |
| 67.7   | Serrana | Symptomless                                             | +     | +    | -     |
| 67.9   | Serrana | Symptomless                                             | -     | +    | -     |
| 67.10  | Serrana | Symptomless                                             | -     | +    | -     |
| 67.11  | Serrana | Symptomless                                             | -     | +    | -     |
| 67.12  | Serrana | Symptomless                                             | -     | +    | -     |
| 67.14  | Serrana | Yellow leaf discoloration                               | -     | +    | -     |
| 67.15  | Serrana | Yellow leaf discoloration                               | -     | +    | -     |
| 67.19  | Serrana | Symptomless                                             | -     | +    | -     |
| 67.20  | Serrana | Symptomless                                             | -     | +    | -     |
| 67.21  | Serrana | Symptomless                                             | +     | +    | -     |
| 67.22  | Serrana | Symptomless                                             | -     | +    | -     |
| 67.23  | Serrana | Symptomless                                             | -     | +    | -     |
| 67.25  | Serrana | Symptomless                                             | +     | +    | -     |
| 67.26  | Serrana | Symptomless                                             | -     | +    | -     |
| 67.27  | Serrana | Symptomless                                             | +     | +    | -     |
| 67.28  | Serrana | Symptomless                                             | -     | +    | -     |
| 67.29  | Serrana | Symptomless                                             | +     | +    | -     |
| 67.30  | Serrana | Symptomless                                             | +     | +    | -     |
| 67.31  | Serrana | Symptomless                                             | +     | +    | -     |
| 67.32  | Serrana | Symptomless                                             | +     | +    | -     |
| 67.33  | Serrana | Symptomless                                             | +     | +    | -     |
| 67.34  | Serrana | Tree decline                                            | +     | +    | -     |
| 67.35  | Serrana | Tree decline                                            | +     | +    | -     |
| 67.36  | Serrana | Tree decline                                            | +     | +    | -     |
| 67.37  | Serrana | Symptomless                                             | +     | +    | -     |

|        |         |                           |   |   |   |
|--------|---------|---------------------------|---|---|---|
| 67.38  | Serrana | Symptomless               | + | + | - |
| 67.39  | Serrana | Symptomless               | + | + | - |
| 67.40  | Serrana | Symptomless               | - | + | - |
| 67.41  | Serrana | Symptomless               | + | + | - |
| 67.42  | Serrana | Yellow leaf discoloration | + | + | - |
| 67.43  | Serrana | Symptomless               | + | + | - |
| 67.44  | Serrana | Symptomless               | - | + | - |
| 67.45  | Serrana | Symptomless               | + | + | - |
| 67.46  | Serrana | Symptomless               | - | + | - |
| 67.47  | Serrana | Symptomless               | - | + | - |
| 67.48  | Serrana | Symptomless               | - | + | - |
| 67.49  | Serrana | Symptomless               | + | + | - |
| 67.50  | Serrana | Symptomless               | + | + | - |
| 67.51  | Serrana | Symptomless               | - | + | - |
| 67.52  | Serrana | Symptomless               | - | + | - |
| 67.53  | Serrana | Yellow leaf discoloration | - | + | - |
| 67.54  | Serrana | Symptomless               | - | + | - |
| 67.55  | Serrana | Symptomless               | - | + | - |
| 67.56  | Serrana | Symptomless               | - | + | - |
| 67.57  | Serrana | Symptomless               | - | + | - |
| 67.58  | Serrana | Symptomless               | - | + | - |
| 67.59  | Serrana | Symptomless               | - | + | - |
| 67.60  | Serrana | Symptomless               | - | + | - |
| 101.2  | Picual  | Yellow leaf discoloration | + | - | - |
| 101.3  | Picual  | Yellow leaf discoloration | + | - | - |
| 101.5  | Picual  | Yellow leaf discoloration | + | - | - |
| 101.6  | Picual  | Yellow leaf discoloration | + | - | - |
| 101.11 | Picual  | Defoliation               | + | - | - |
| 101.13 | Picual  | Defoliation               | + | - | - |
