# Supplementary material for: Characterization of Spanish Olive Virome by High Throughput Sequencing Opens New Insights and Uncertainties
Source: MDPI journal article supplement (doi:10.3390/v13112233), 2021-11-06
Supplement: s1 [file s1]

$+$ 

+

+

+

+

+

+

[illegible]







@A00721:190:HGJW7DSXY:4:1262:31575:33661 2:N:0:TCTGCAAG+GCTGCACT  
CTTTTAACAGTCTATTGGTTATCAAAAAGACGATGATATAACATATCATCTGCCGTCGATTTTACTGC  
GTCACTATAGAATTCATTTTTTAGATGGTCATGATCGTGACGCGTGGTCTAATGACAAATCGACACGT  
AAGCGTACGGAGGTG

+

FFFFFFFFFFFFFF:FFFFFFFFFFFFFFFFFFFFFFFFFFFFFFFFFFFFFFFFFFFFFFFFFFFFFFFFFFFFFFFF  
FFFFFFFFFFFFFFFFFFFFFFFFFFFFFFFFFFFFFFFFFFFFFFFFFFFFFFFFFFFFFFFFFFFFFFFFFFFFFFFF  
FFFFF:FFFFFFFFF

@A00721:190:HGJW7DSXY:4:1339:12255:29951 2:N:0:TCTGCAAG+GCTGCACT  
TGCTAAAGCAGTCATCAACACAATAAATATAAATTTGAATTTCAAATTGACCGTCGATTCTACTGC  
GTCACTATAGAATTCATTTTTTAGATGGTTATGATCGTGACGCGTGGTCTAATGACAAATCGACACGT  
AAGCGTACGGAGGTG

+

FFF:FFFFFFFFFFFFFFFFFFFFFFFFFFFFFFFFFFFFFFFFFFFFFFFFFFFFFFFFFFFFFFFFFFFFFFFF  
FFFFFFFFF:FFFFFFFFF::FFFF:FFFF:FFFFFFFFFFFFFF,FFFFFFFF,FFFFFFFFFFFFFFFF  
F:FFFFFFFFFFFF::

@A00721:190:HGJW7DSXY:4:1522:2410:36793 2:N:0:TCTGCAAG+GCTGCACT  
CTTTTAACAGTCTATTGGTTATCAAAAAGACGATGATATAACATATCATCTGCCGTCGATTTTACTGC  
GTCACTATAGAATTCATTTTTTAGATGGTCATGATCGTGACGCGTGGTCTAATGACAAATCGACACGT  
AAGCGTACGGAGGTG

+

FFFFFFFFFFFFFFFFFFFFFFFFFFFFFFFFFFFFFFFFFFFFFFFFFFFFFFFFFFFFFFFFFFFFFFFFFFFF  
FFFFFFFFFFFFFFFFFFFFFFFFFFFFFFFFFFFFFFFFFFFFFFFFFFFFFFFFFFFFFFFFFFFFFFFFFFFF  
F:FFFFFFFFFFFFFFF

@A00721:190:HGJW7DSXY:4:1544:8648:17347 2:N:0:TCTGCAAG+GCTGCACT  
CTTTTAACAGTCTATTGGTTATCAAAAAGACGATGATATAACATATCATCTGCCGTCGATTTTACTGC  
GTCACTATAGAATTCATTTTTTAGATGGTCATGATCGTGACGCGTGGTCTAATGACAAATCGACACGT  
AAGCGTACGGAGGTG

+

FFFFFFFFFFFFFFFFFFFFFFFFFFFFFFFFFFFFFFFFFFFFFFFFFFFFFFFFFFFFFFFFFFFFFFFFFFFF  
FFFFFFFFF:FFFFFFFFF:FFFFFFFFF:FFFFFFFFFFFFFFFFFFFFFFFFFFFFFFFFFFFFFFFFFFFF  
F,,FFFFFFFFFFFF

@A00721:190:HGJW7DSXY:4:1602:7129:24893 2:N:0:TCTGCAAG+GCTGCACT  
CTTTTAACAGTCTATTGGTTATCAAAAAGACGATGATATAACATATCATCTGCCGTCGATTTTACTGC  
GTCACTATAGAATTCATTTTTTAGATGGTCATGATCGTGACGCGTGGTCTAATGACAAATCGACACGT  
AAGCGTACGGAGGTG

+

FFFFFFFFFFFFFFFFFFFFFFFFFFFFFFFFFFFFFFFFFFFFFFFFFFFFFFFFFFFFFFFFFFFFFFFFFFFF  
FFFFFFFFFFFFFFFF,FFFFFFFFFFFFFFFFF:F:FFFFF:FFFFFFFFFFFFFFFFFFFFFFFFFFFFFFFF  
FFFFFFFFFFFFF:FF

@A00721:190:HGJW7DSXY:4:1645:5873:25347 2:N:0:TCTGCAAG+GCTGCACT  
TGCTAAAGCAGTCATCAACACAATAAATATAAATTTGAATTTCAAATTGACCGTCGATTCTACTGC  
GTCACTATAGAATTCATTTTTTAGATGGTTATGATCGTGACGCGTGGTCTAATGACAAATCGACACGT  
AAGCGTACGGAGGTG

+

FFFFFFFFFFFFFFFFFFFFFFFFFFFFFFFFFFFFFFFFFFFFFFFFFFFFFFFFFFFFFFFFFFFFFFFFFFFF  
FFFFFFFFF:FFFFFFF:FFFFFFF:FFFFFFFFFFFFF:F:FFFFFFFFFFFFF:FFFFFFFFFFFFFFFF  
FFFFFFFFFFFF:FFFF

@A00721:190:HGJW7DSXY:4:1667:12301:20948 2:N:0:TCTGCAAG+GCTGCACT  
CTTTTAACAGTCTATTGGTTATCAAAAAGACGATGATATAACATATCATCTGCCGTCGATTTTACTGC  
GTCACTATAGAATTCATTTTTTAGATGGTCATGATCGTGACGCGTGGTCTAATGACAAATCGACACGT  
AAGCGTACGGAGGTG

+

:F:FFFFFFFFFFFF:FFFFFFFFFFFFFFFFFFFF:FFFFFFFFFFFFF::F:FFFF:F,,:FF::FFFFF

,FFFFFFF:F::FFFF,:FFFF,F:::FFF::FFFF,FFFFFF,F:,FFFFFF,FFFFFFFFF,FFFF  
FF:FF:FFFFF:,F:

@A00721:190:HGJW7DSXY:4:2123:21151:29168 2:N:0:TCTGCAAG+GCTGCACT  
CTTTTAACAGTCTATTGGTTATCAAAAAGACGATGATATAACATATCATCTGCCGTCGATTTTACTGC  
GTCACTATAGAATTCATTTTTTTAGATGGTCATGATCGTGACGCGTGGTCTAATGACAAATCGACACGT  
AAGCGTACGGAGGTG

+

:FFFFFFFFFFFFFFFFFFFFFFFFFFFFFFFFFFFFFFFFFFFFFFFFFFFFFFFFFFFFFFFFFFFFFFFFF:FFFFFFFFFFFFFFFFF  
FFFFFFFFFFFFFF:FFFFFFFFFF:FFFFFFF,FFFFFFFFFFFFFFFFFFFFFFFFFFFFFFFFFFFFFFFFF,FF:FF:F  
:F:FFFFFF,FF::F:

@A00721:190:HGJW7DSXY:4:2175:12057:9502 2:N:0:TCTGCAAG+GCTGCACT  
TGCTAAAGCAGTCATCAACACAATAAATATAAATTTGAATTTCAAATTGACCGTCGATTCTACTGC  
GTCACTATAGAATTCATTTTTTTAGATGGTTATGATCGTGACGCGTGGTCTAATGACAAATCGACACGT  
AAGCGTACGGAGGTG

+

FFFFFFFFFFFFFFFFFFFFFFFFFFFFFFFFFFFFFFFFFFFFFFFFFFFFFFFFFFFFFFFFFFFFFFFFF  
FFFFFFFFFFFFFFFFFFFFFFFFFFFFFFFFFFFFFFFFFFFFFFFFFFFFFFFFFFFFFFFFFFFFFFFFF,FFFFFF:FFFFFFFFFFFFFFFFFFFFFFFFFFFFFFFFF:FFFFFFF  
FFFFFFFFF:FFFFFFF

@A00721:190:HGJW7DSXY:4:2340:16504:6840 2:N:0:TCTGCAAG+GCTGCACT  
CTTTTAACAGTCTATTGGTTATCAAAAAGACGATGATATAACATATCATCTGCCGTCGATTTTACTGC  
GTCACTATAGAATTCATTTTTTTAGATGGTCATGATCGTGACGCGTGGTCTAATGACAAATCGACACGT  
AAGCGTACGGAGGTG

+

FFFFFFFFFFFFFFFFFFFFFFFFFFFFFFFFFFFFFFFFFFFFFFFFFFFFFFFFFFFFFFFFFFFFFFFFF  
FFFFFFFFFFFFFFFFFFFFFFFFFFFFFFFFFFFFFFFFFFFFFFFFFFFFFFFFFFFFFFFFFFFFFFFFF:FFFFFFFFFF:FFFFFFFFFFFFF  
FF,F:FFFFFFFFF

@A00721:190:HGJW7DSXY:4:2462:10303:26287 2:N:0:TCTGCAAG+GCTGCACT  
CTTTTAACAGTCTATTGGTTATCAAAAAGACGATGATATAACATATCATCTGCCGTCGATTTTACTGC  
GTCACTATAGAATTCATTTTTTTAGATGGTCATGATCGTGACGCGTGGTCTAATGACAAATCGACACGT  
AAGCGTACGGAGGTG

+

FFFFFFFFFFFFFFFFFFFFFFFFFFFFFFFFFFFFFFFFFFFFFFFFFFFFFFFFFFFFFFFFFFFFFFFFF  
FFFFFFFFFF:FFFFFFFFFFFFFFFFFFFFFFFFFFFFFFFFFFFFFFFFF:FFFFFFFFFFFFFFFFF:FFFFFFF:FFFFFFF  
FFFFFFFFFFFFFFFFF

@A00721:190:HGJW7DSXY:4:2553:13602:11929 2:N:0:TCTGCAAG+GCTGCACT  
CTTTTAACAGTCTATTGGTTATCAAAAAGACGATGATATAACATATCATCTGCCGTCGATTTTACTGC  
GTCACTATAGAATTCATTTTTTTAGATGGTCATGATCGTGACGCGTGGTCTAATGACAAATCGACACGT  
AAGCGTACGGAGGTG

+

FFFFFFFFFFFFFFFFF,FFFFFFFFFFFFFFFFFFFFFFFFFFFFFFFFFFFFFFFFFFFFFFFFFFFFFFFFF:FFFFFFF  
FFFFFFFFFFFFFFFFFFFFFFFFFFFFFFFFFFFFFFFFFFFFFFFFFFFFFFFFFFFFFFFFF:FFFFFFFFFF:FFFFFFFFF:FFFFFFF  
FFFFFFFFFFFFFFFFF:

@A00721:190:HGJW7DSXY:4:2608:5484:6887 2:N:0:TCTGCAAG+GCTGCACT  
CTTTTAACAGTCTATTGGTTATCAAAAAGACGATGATATAACATATCATCTGCCGTCGATTTTACTGC  
GTCACTATAGAATTCATTTTTTTAGATGGTCATGATCGTGACGCGTGGTCTAATGACAAATCGACACGT  
AAGCGTACGGAGGTG

+

FFFFFFFFFFFF:FFF:FFFFFFFFFFFFFFFFF:FFFFFF:FFFFFFFFFFFFFFFFF:FFFFFFFFFFFFFFFFF:  
FF:FFF,FFFFFFFFFFFFFFFFFFFFFFFFF:FFF,FF:FFFF,:FFFFFFFFFFFFFFFFFFFFFFFFF:,FFFFFFF  
FFFF:FFF,FF,FFF

@A00721:190:HGJW7DSXY:4:1427:1642:12853 2:N:0:TCTGCAAG+GCTGCACT  
AATCAACTGCTAAAGCAGTCATCAACACAATAAATATAAATTTGAATTTCAAATTGACCGTCGATT  
CTACTGCGTCACTATAGAATTCATTTTTTTAGATGGTTATGATCGTGACGCGTGGTCTAATGACAAATC  
GACACGTAAGCGTAC

+  
FFFFFFFFFFFFFFFFFFFFFFFFFFFFFFFFFFFFFFFFFFFFFFFFFFFFFFFFFFFFFFFFFFFFFFFF  
FFFFFFFFFFFFFFFFFFFFFFFFFFFFFFFFFFFFFFFFFFFFFFFFFFFFFFFFFFFFFFFFFFFFFFFF  
FFF:FFF,FFFFF  
@A00721:190:HGJW7DSXY:4:1512:16477:34381 2:N:0:TCTGCAAG+GCTGCACT  
AATCAACTGCTAAAGCAGTCATCAACACAATAAATATAAAATTTTGAATTTCAAATTGACCGTCGATT  
CTACTGCGTCACTATAGAATTCATTTTTTTAGATGGTTATGATCGTGACGCGTGGTCTAATGACAAATC  
GACACGTAAGCGTAC

+  
FFFFFFFFFFFFFFFFFFFFFFFFFFFFFFFFFFFFFFFFFFFFFFFFFFFFFFFFFFFFFFFFFFFFFFFF  
FFFFFFFFFFFFFFFFFFFFFFFFFFFFFFFFFFFFFFFFFFFFFFFFFFFFFFFFFFFFFFFFFFFFFFFF  
FFFFFFFFFFFFFFFFFFFFFFFFFFFFFFFFFFFFFFFFFFFFFFFFFFFFFFFFFFFFFFFFFFFFFFFF  
@A00721:190:HGJW7DSXY:4:1512:18584:35117 2:N:0:TCTGCAAG+GCTGCACT  
AATCAACTGCTAAAGCAGTCATCAACACAATAAATATAAAATTTTGAATTTCAAATTGACCGTCGATT  
CTACTGCGTCACTATAGAATTCATTTTTTTAGATGGTTATGATCGTGACGCGTGGTCTAATGACAAATC  
GACACGTAAGCGTAC

+  
FFFFFFFFFFFFFFFFFFFFFFFFFFFFFFFFFFFFFFFFFFFFFFFFFFFFFFFFFFFFFFFFFFFFFFFF  
FFFFFFFFFFFFFFFFFFFFFFFFFFFFFFFFFFFFFFFFFFFFFFFFFFFFFFFFFFFFFFFFFFFFFFFF  
FFFFFFFFFFFFFFFFFFFFFFFFFFFFFFFFFFFFFFFFFFFFFFFFFFFFFFFFFFFFFFFFFFFFFFFF  
@A00721:190:HGJW7DSXY:4:2445:12762:23688 2:N:0:TCTGCAAG+GCTGCACT  
AATCAACTGCTAAAGCAGTCATCAACACAATAAATATAAAATTTTGAATTTCAAATTGACCGTCGATT  
CTACTGCGTCACTATAGAATTCATTTTTTTAGATGGTTATGATCGTGACGCGTGGTCTAATGACAAATC  
GACACGTAAGCGTAC

+  
FFFFFFFFFFFFFFFFFFFFFFFFFFFFFFFFFFFFFFFFFFFFFFFFFFFFFFFFFFFFFFFFFFFFFFFF  
FFFFFFFFFFFFFFFFFFFFFFFFFFFFFFFFFFFFFFFFFFFFFFFFFFFFFFFFFFFFFFFFFFFFFFFF  
FFFFFFFFFFFFFFFFFFFFFFFFFFFFFFFFFFFFFFFFFFFFFFFFFFFFFFFFFFFFFFFFFFFFFFFF  
@A00721:190:HGJW7DSXY:4:2468:5367:7623 2:N:0:TCTGCAAG+GCTGCACT  
AATCAACTGCTAAAGCAGTCATCAACACAATAAATATAAAATTTTGAATTTCAAATTGACCGTCGATT  
CTACTGCGTCACTATAGAATTCATTTTTTTAGATGGTTATGATCGTGACGCGTGGTCTAATGACAAATC  
GACACGTAAGCGTAC

+  
FFFFFFFFFFFFFFFFFFFFFFFFFFFFFFFFFFFFFFFFFFFFFFFFFFFFFFFFFFFFFFFFFFFFFFFF  
FFFFFFFFFFFFFFFFFFFFFFFFFFFFFFFFFFFFFFFFFFFFFFFFFFFFFFFFFFFFFFFFFFFFFFFF  
:FFFFFFFFFFFFFFFF  
@A00721:190:HGJW7DSXY:4:2545:15881:17096 2:N:0:TCTGCAAG+GCTGCACT  
AATCAACTGCTAAAGCAGTCATCAACACAATAAATATAAAATTTTGAATTTCAAATTGACCGTCGATT  
CTACTGCGTCACTATAGAATTCATTTTTTTAGATGGTTATGATCGTGACGCGTGGTCTAATGACAAATC  
GACACGTAAGCGTAC

+  
FFFFFFFFFFFFFFFFFFFFFFFFFFFFFFFFFFFFFFFFFFFFFFFFFFFFFFFFFFFFFFFFFFFFFFFF  
FFFFFFFFFFFFFFFFFFFFFFFFFFFFFFFFFFFFFFFFFFFFFFFFFFFFFFFFFFFFFFFFFFFFFFFF  
FFFFFFFFFFFFFFFFFFFFFFFFFFFFFFFFFFFFFFFFFFFFFFFFFFFFFFFFFFFFFFFFFFFFFFFF  
@A00721:190:HGJW7DSXY:4:1325:14606:11725 2:N:0:TCTGCAAG+GCTGCACT  
GCCATTTATATAGACCTTTTAACAGTCTATTGGTTATCAAAAAGACGATGATATAACATATCATCTGC  
CGTCGATTTTACTGCGTCACTATAGAATTCATTTTTTTAGATGGTTCATGATCGTGACGCGTGGTCTAAT  
GACAAATCGACACGT

+  
FFFFFFFFFFFFFFFFFFFFFFFFFFFFFFFFFFFFFFFFFFFFFFFFFFFFFFFFFFFFFFFFFFFFFFFF  
FFFFFFFFFFFFFFFFFFFFFFFFFFFFFFFFFFFFFFFFFFFFFFFFFFFFFFFFFFFFFFFFFFFFFFFF  
::FFFFF:FFFFF:F  
@A00721:190:HGJW7DSXY:4:1414:13449:4961 2:N:0:TCTGCAAG+GCTGCACT  
GCCATTTATATAGACCTTTTAACAGTCTATTGGTTATCAAAAAGACGATGATATAACATATCATCTGC

CGTCGATTTTACTGCGTCACTATAGAATTCATTTTTTAGATGGTCATGATCGTGACGCGTGGTCTAAT  
GACAAATCGACACGT

+

FFFFFFFFFFFFFFFFFFFFFFFFFFFFFFFFFFFFFFFFFFFFFFFFFFFFFFFFFFFFFFFFFFFFFFFF  
FFFFFFFFFFFFFFFFFFFFFFFFFFFFFFFFFFFFFFFFFFFFFFFFFFFFFFFFFFFFFFFFFFFFFFFF,  
FFFFFFFF:FFFFFFFFFFFF  
FFFFFFFF:FFFFF:F

@A00721:190:HGJW7DSXY:4:1569:31024:3615 2:N:0:TCTGCAAG+GCTGCACT  
GCCATTTATATAGACCTTTTAACAGTCTATTGGTTATCAAAAAGACGATGATATAACATATCATCTGC  
CGTCGATTTTACTGCGTCACTATCGAATTCATTTTTTAGATGGTCATGATCGTGACGCGTGGTCTAAT  
GACAAATCGACACGT

+

F:FFFFFFFFFFFFFFFFFFFFFFFFFFFFFFFFFFFFFFFFFFFFFFFFFFFFFFFFFFFFFFFFFFFF,  
FFFFFFFFFFFFF,FFFFFFFFFFFFF  
FFFFFFFFFFFFFFFFFFFF:FFFFF,:FFFFFFFFFFFFF:FFFFFFFFF:FFFFFFFFFFFFF:FFF  
F,:FFFFF,F:FFFF

@A00721:190:HGJW7DSXY:4:1663:9842:32534 2:N:0:TCTGCAAG+GCTGCACT  
GCCATTTATATAGACCTTTTAACAGTCTATTGGTTATCAAAAAGACGATGATATAACATATCATCTGC  
CGTCGATTTTACTGCGTCACTATAGAATTCATTTTTTAGATGGTCATGATCGTGACGCGTGGTCTAAT  
GACAAATCGACACGT

+

FFFFFFFFFFFFFFFFFFFFFFFFFFFFFFFFFFFFFFFFFFFFFFFFFFFFFFFFFFFFFFFFFFFF,  
:FFFFFFFFFFFFFFFFFFFFFFFFFFFFF,FFFFFFFFFFFFF:FFF,FFFFF:FFFFF:FFFFFFFFFFFFF  
:FFFFFFFFFFFFF

@A00721:190:HGJW7DSXY:4:2341:32398:22310 2:N:0:TCTGCAAG+GCTGCACT  
GCCATTTATATAGACCTTTTAACAGTCTATTGGTTATCAAAAAGACGATGATATAACATATCATCTGC  
CGTCGATTTTACTGCGTCACTATAGAATTCATTTTTTAGATGGTCATGATCGTGACGCGTGGTCTAAT  
GACAAATCGACACGT

+

FFFFFFFFFFFFFFFFFFFFFFFFFFFFFFFFFFFFFFFFFFFFFFFFFFFFFFFFFFFFFFFFFFFF:  
FFFFF::FFFFFFFFFFFFF:FFF:FFFFFFFFFFFFFFFFFFFFF:FFF,FFFFFFFFF:FFF:FF,F  
,:FFFFF,FFFFFFFF

@A00721:190:HGJW7DSXY:4:2365:20329:10488 2:N:0:TCTGCAAG+GCTGCACT  
GCCATTTATATAGACCTTTTAACAGTCTATTGGTTATCAAAAAGACGATGATATAACATATCATCTGC  
CGTCGATTTTACTGCGTCACTATAGAATTCATTTTTTAGATGGTCATGATCGTGACGCGTGGTCTAAT  
GACAAATCGACACGT

+

FFFFFFFFFFFFFFFFFFFFFFFFFFFFFFFFFFFFFFFFFFFFFFFFFFFFFFFFFFFFFFFFFFFF:  
:FFFFFFFFF:FFF:FFFFFFFFFFFFFFFFFFFFFFFFFFFFFFFFFFFFFFFFFFFFFFFFFFFFF:FFFFF  
:FFFFF,:FFFFF

@A00721:190:HGJW7DSXY:4:2533:5801:32017 2:N:0:TCTGCAAG+GCTGCACT  
GCCATTTATATAGACCTTTTAACAGTCTATTGGTTATCAAAAAGACGATGATATAACATATCATCTGC  
CGTCGATTTTACTGCGTCACTATAGAATTCATTTTTTAGATGGTCATGATCGTGACGCGTGGTCTAAT  
GACAAATCGACACGT

+

F:FFFFFFFFFFFFFFFFFFFFFFFFFFFFFFFFFFFFFFFFFFFFFFFFFFFFFFFFFFFFFFFFFFFF,  
FFFFFFFFFFFFFFFFFFFFFFFFFFFFF,:FFF,FFFFFFFFFFFFFFFFFFFFFFFFFFFFFFFFFFFFF:  
FF:FFFFFFFFF:F:

@A00721:190:HGJW7DSXY:4:2544:4227:36495 2:N:0:TCTGCAAG+GCTGCACT  
GCCATTTATATAGACCTTTTAACAGTCTATTGGTTATCAAAAAGACGATGATATAACATATCATCTGC  
CGTCGATTTTACTGCGTCACTATAGAATTCATTTTTTAGATGGTCATGATCTTGACGCGTGGTCTAAT  
GACAAATCTACACGT

+

FFFF:FFFFFFFFFFFFF:FFFFF,FFFFFFFFFFFFFFFFFFFFFFFFFFFFFFFFFFFFF:FFF:FFFFFFFFFFF:  
F:FF:F,FFFFF,:F:FFFF,,:,F,,, :FFFFF:FFFFF,:F:FF:FFF,:FF:FF::FFFFF  
,FFFFFFFF,FFFF,F



@A00721:190:HGJW7DSXY:4:2614:5330:18584 2:N:0:TCTGCAAG+GCTGCACT  
GCCATTTATATAGACCTTTTAACAGTCTATTGGTTATCAAAAAGACGATGATATAACATATCATCTGC  
CGTCGATTTTACTGCGTCACTATAGAATTCATTTTTTAGATGGTCATGATCGTGACGCGTGGTCTAAT  
GACAAATCGACACGT

+

FFFFFFFFFFFFFFFFFFFFFFFFFFFFFFFFFFFFFFFFFFFFFFFFFFFFFFFFFFFFFFFFFFFFFFFF  
FFFFFFFFFFFFFFFFFFFFFFFFFFFFFFFFFFFFFFFFFFFFFFFFFFFFFFFFFFFFFFFFFFFFFFFF  
FFFFFFFFFFFFFFFF

@A00721:190:HGJW7DSXY:4:1423:27778:13401 2:N:0:TCTGCAAG+GCTGCACT  
TAGCCATTTATATAGACCTTTTAACAGTCTATTGGTTATCAAAAAGACGATGATATAACATATCATCT  
GCCGTCGATTTTACTGCGTCACTATAGAATTCATTTTTTAGATGGTCATGATCGTGACGCGTGGTCTA  
ATGACAAATCGACAC

+

FFFFF,FF:FFFFFF:FFF,FFFFFFFFFFFFFFFF,F,FFF:FFFFFFFF:FFF:FFFFFFFFFFFF  
FFFFFFFFFFFFFFFF:FFFFFFFFF,,:FFFFFFFFFFFF:FFFFFFFFFFFF:FFFFFFFFFFFF  
FFFFFF:FF:FFFF

@A00721:190:HGJW7DSXY:4:2130:6894:19758 2:N:0:TCTGCAAG+GCTGCACT  
TAGCCATTTATATAGACCTTTTAACAGTCTATTGGTTATCAAAAAGACGATGATATAACATATCATCT  
GCCGTCGATTTTACTGCGTCACTATAGAATTCATTTTTTAGATGGTCATGATCGTGACGCGTGGTCTA  
ATGACAAATCGACAC

+

FFFFF::FFFFFFFFFFFFFFFFFFFFFFFFFFFF:F:FFFFFFFFFFFFFFFFFFFFFFFFFFFF:FFFFFF  
::,FFFF:,FFFF,F:FFFFFF:F:F:FFFF,F:FFF:FFFF,FF:FF,FF:::FFFFFFFFFF,FF  
FF:F,FFFF::FFFF

@A00721:190:HGJW7DSXY:4:2433:21612:6355 2:N:0:TCTGCAAG+GCTGCACT  
TAGCCATTTATATAGACCTTTTAACAGTCTATTGGTTATCAAAAAGACGATGATATAACATATCATCT  
GCCGTCGATTTTACTGCGTCACTATAGAATTCATTTTTTAGATGGTCATGATCGTGACGCGTGGTCTA  
ATGACAAATCGACAC

+

FFFFFFFFFFFFFFFFFFFFFFFFFFFFFFFFFFFFFFFFFFFF:F:FFFFFFFFFFFFFFFFFFFFFFFF  
FFFFFFFFFFFFFFFFFFFFFFFFFFFF:FF:FFFFFFFFFFFFFFFFFFFFFFFF:F:FFFF:FFFFFFFF  
FFF:FFFF:FFFF

@A00721:190:HGJW7DSXY:4:2522:6849:27978 2:N:0:TCTGCAAG+GCTGCACT  
TAGCCATTTATATAGACCTTTTAACAGTCTATTGGTTATCAAAAAGACGATGATATAACATATCATCT  
GCCGTCGATTTTACTGCGTCACTATAGAATTCATTTTTTAGATGGTCATGATCGTGACGCGTGGTCTA  
ATGACAAATCGACAC

+

FFFFFFF:FFFFFFFFFFFFFFFFFFFFFFFFFFFFFFFFFFFF:FFFFFFFFFFFFFFFFFFFFFFFF  
FFFFFFFFFFFFFFFFFFFFFFFFFFFF:::FFFFFFFFFFFFFF,FFF,FFFF,FF:FFFFFFFF,FF  
FFFF,FFF,,,FFFF

@A00721:190:HGJW7DSXY:4:1224:13937:19774 2:N:0:TCTGCAAG+GCTGCACT  
CAAAAGATAAATGGCATAGCCATTTATATAGACCTTTTAACAGTCTATTGGTTATCAAAAAGACGATG  
ATATAACATATCATCTGCCGTCGATTTTACTGCGTCACTATAGAATTCATTTTTTAGATGGTCATGAT  
CGTGACGCGTGGTCT

+

FFFFFFFFFFFFFFFFFFFF,FFFFFFFFFFFFFFFFFFFFFFFFFFFF:FFFFFFFFFFFFFFFFFFFF  
FFFFFFF:FFFF,FFFFFFFFFFFFFFFFFFFFFFFFFFFF,FFFFFFFFFFFFFF,FFFFFFFFFFFF  
FFFFFFFFF:FFFF

@A00721:190:HGJW7DSXY:4:1447:22878:28588 2:N:0:TCTGCAAG+GCTGCACT  
CAAAAGATAAATGGCATAGCCATTTATATAGACCTTTTAACAGTCTATTGGTTATCAAAAAGACGATG  
ATATAACATATCATCTGCCGTCGATTTTACTGCGTCACTATAGAATTCATTTTTTAGATGGTCATGAT  
CGTGACGCGTGGTCT

+

:FF:FFFFFFFFFFFFFFFF:FFFF:FFFFFFFFFFFFFFFFFFFF,FFFFFFFFFFFFFF,FFFF

FFFFFFFFFFFF:FFFFFF:FF:FFFFFFFF:FFFFFFFFFFFF,F,FFFFFFFFFFFF:FFFFFFFFFFFF:FFFF  
FFFFFFFFFFFF:FFFFF

@A00721:190:HGJW7DSXY:4:2530:30779:5353 2:N:0:TCTGCAAG+GCTGCACT  
CAAAAGATAAATGGCATAGCCATTTATATAGACCTTTTAACAGTCTATTGGTTATCAAAAAGACGATG  
ATATAACATATCATCTGCCGTCGATTTTACTGCGTCACTATAGAATTCATTTTTTTAGATGGTCATGAT  
CGTGACGCGTGGTCT

+

FFF:FFFFFF:FFFFFFFFFFFFFFFFFFFFFFFFFFFFFFFFFFFFFFFFFFFFFFFFFFFFFFFFFFFFFFFF:FFFFFFF  
FFFFFFFFFFFFFFFFFFFFFFFFFFFFFFFFFFFFFFFFFFFFFFFFFFFFFFFFFFFFFFFF:FFF:FFFFFFFF,F:FFF:FF:FFFFFFFFFFFFFFFFFFFFFFFF:F  
,FFFF:F:FFFFFFF

@A00721:190:HGJW7DSXY:4:2631:25626:1846 2:N:0:TCTGCAAG+GCTGCACT  
CAAAAGATAAATGGCATAGCCATTTATATAGACCTTTTAACAGTCTATTGGTTATCAAAAAGACGATG  
ATATAACATATCATCTGCCGTCGATTTTACTGCGTCACTATAGAATTCATTTTTTTAGATGGTCATGAT  
CGTGACGCGTGGTCT

+

FFF:FFFFFFFFFFFFFFFFFFFFFFFFFFFFFFFFFFFFFFFFFFFFFFFFFFFFFFFFFFFFFFFFFFFFFFFF  
FFFFFFFFFFFFFFFFFFFFFFFFFFFFFFFFFFFFFFFFFFFFFFFFFFFFFFFFFFFFFFFF:FFFFF:FFFFFFFFF:,FFFFFFFFFFFF  
FFFF:FFFFFFFFFFFF

@A00721:190:HGJW7DSXY:4:1525:28519:27430 2:N:0:TCTGCAAG+GCTGCACT  
ATTCAAAAGATAAATGGCATAGCCATTTATATAGACCTTTTAACAGTCTATTGGTTATCAAAAAGACG  
ATGATATAACATATCATCTGCCGTCGATTTTACTGCGTCACTATAGAATTCATTTTTTTAGATGGTCAT  
GATCGTGACGCGTGG

+

FFFFFFFFFFFFFFFFFFFFFFFFFFFFFFFFFFFFFFFF,F,FFFFFFFFFFFFF:FFFFFFF:F:FFFF:FFFFFF:F:FFFF  
FF:::FFFFFFFFFFFFFFFFFFFFFFFFFFFFFFFF:FF:FFFFFFF::FFF:,FF:FF:FFFFFF:FFFFFFFFFFFF  
F:FFFF:,FFFFFFF

@A00721:190:HGJW7DSXY:4:2511:30644:30984 2:N:0:TCTGCAAG+GCTGCACT  
ATTCAAAAGATAAATGGCATAGCCATTTATATAGACCTTTTAACAGTCTATTGGTTATCAAAAAGACG  
ATGATATAACATATCATCTGCCGTCGATTTTACTGCGTCACTATAGAATTCATTTTTTTAGATGGTCAT  
GATCGTGACGCGTGG

+

FFFFFFF:FFFFFF:FFFFFFFFFFFFFFFFFFFFFFFFFFFF:::F,FFFFFFFFFFFFFFFFFFFFFFFF:FFFFFFFFF  
FFF:FFFFFFFFFFFF:FFF:F:::FFFFFFFFFFFF:FFFFFFF:FF,,F,FFF,,FFFFFFF:FFF:FF:FF  
:::F:FFF:FFFF:FF

@A00721:190:HGJW7DSXY:4:2569:12997:13448 2:N:0:TCTGCAAG+GCTGCACT  
ATTCAAAAGATAAATGGCATAGCCATTTATATAGACCTTTTAACAGTCTATTGGTTATCAAAAAGACG  
ATGATATAACATATCATCTGCCGTCGATTTTACTGCGTCACTATAGAATTCATTTTTTTAGATGGTCAT  
GATCGTGACGCGTGG

+

FFFFFFFFFFFFFFFFFFFFFFFFFFFFFFFFFFFFFFFF,F,FFFFFFFFF:FFFFFFFFFFFFFFFFFFFFF  
FFFFFFFFFFFFFFFF:FFFFFFFFFFFFFFFFFFFFFFFFFFFFFFFFFFFFFFFF:FFFFFFFFFFFFFFFFFFFFFFFFFFFFF  
FFFFFFFFFFFFFFFFFFFF

@A00721:190:HGJW7DSXY:4:1114:8775:7294 2:N:0:TCTGCAAG+GCTGCACT  
TTACGAAATAACATTCAAAAGATAAATGGCATAGCCATTTATATAGACCTTTTAACAGTCTATTGGTT  
ATCAAAAAGACGATGATATAACATATCATCTGCCGTCGATTTTACTGCGTCACTATAGAATTCATTTT  
TTAGATGGTCATGAT

+

FFFFFFFFFFFF,F,FF:FFFFFFFFFFFFFFFFFFFFFFFFFFFFFFFFFFFFFFFFFFFFFFFFFFFFFFFF:FFFFFFFFFFFFFFFFFFFFF  
FFFFFFFFF::FFFFFFFFFFFFFFFFFFFFFFFFFFFFFFFFFFFFFFFFFFFFFFFF:FFFFFFFFFFFF,F,FF::,FFF:FFFF:FF  
FFFFF,FFF:F:FFF

@A00721:190:HGJW7DSXY:4:1614:4833:35790 2:N:0:TCTGCAAG+GCTGCACT  
TTACGAAATAACATTCAAAAGATAAATGGCATAGCCATTTATATAGACCTTTTAACAGTCTATTGGTT  
ATCAAAAAGACGATGATATAACATATCATCTGCCGTCGATTTTACTGCGTCACTATAGAATTCATTTT  
TTAGATGGTCATGAT

+  
FFFFFFFFFFFFFFFF:FFF:FFFFFFFFFFFFFFFF:FF:FFFFFFFF:FFFFFFFFFFFF,FFFFFFFF  
F:FFFFFFFFFFFFFFFFFFFFFFFFFFFFFFFF:F:FFFF:F:FFFFFFFF:FF,F::FFF:FF:FF  
FFFF,,FFFFFFFF

@A00721:190:HGJW7DSXY:4:2209:17635:1438 2:N:0:TCTGCAAG+GCTGCACT  
TTACGAAATAACATTCAAAAGATAAATGGCATAGCCATTTATATAGACCTTTTAACAGTCTATTGGTT  
ATCAAAAAGACGATGATATAACATATCATCTGCCGTCGATTTTACTGCGTCACTAGAGAATTCATTTT  
TTAGATGGTCATGAT

+  
FFFFFFFFFFFFFFFFFFFFFFFFFFFFFFFFFFFFFFFF:FFFFFFFFFFFF:FFFFFFFFFFFF:FFFF  
:FFFFFF::FFFFFFFF,FFFF:FFFFFFFFFFFF:F:FFFFFFFF,F,F,:F,:F:FFFF  
F:,FFFFFFFF

@A00721:190:HGJW7DSXY:4:2209:16911:1783 2:N:0:TCTGCAAG+GCTGCACT  
TTACGAAATAACATTCAAAAGATAAATGGCATAGCCATTTATATAGACCTTTTAACAGTCTATTGGTT  
ATCAAAAAGACGATGATATAACATATCATCTGCCGTCGATTTTACTGCGTCACTATAGAATTCATTTT  
TTAGATGGTCATGAT

+  
FFFFFFFFFFFFFFFFFFFFFFFFFFFFFFFFFFFFFFFF:FFFFFFFFFFFF,FFFFFFFF:FF:FFF:F  
FFFFFFFFFFFFFFFF:F,,FFFFFFFFFFFFFFFFFFFFFFFF:FFFFFFFFFFFFFFFFFFFFFFFF:FFF:F  
F,F:FF:FFFFFFFF

@A00721:190:HGJW7DSXY:4:2647:25852:7028 2:N:0:TCTGCAAG+GCTGCACT  
TTACGAAATAACATTCAAAAGATAAATGGCATAGCCATTTATATAGACCTTTTAACAGTCTATTGGTT  
ATCAAAAAGACGATGATATAACATATCATCTGCCGTCGATTTTACTGCGTCACTATAGAATTCATTTT  
TTAGATGGTCATGAT

+  
FFFFFFFFFFFFFFFFFFFF:F:FFFFFFFFFFFFFFFF:FFFFFF:FFFFFFFFFFFFFFFFFFFFFFFF  
FFFFFFFFFFFFFFFFFFFFFFFFFFFFFFFF:FFFFFFFFFFFF::FFF,FFFF:FFFFFFFF  
FFFFFFFFFFFF,F

@A00721:190:HGJW7DSXY:4:2340:11767:31172 2:N:0:TCTGCAAG+GCTGCACT  
AATTACGAAATAACATTCAAAAGATAAATGGCATAGCCATTTATATAGACCTTTTAACAGTCTATTGG  
TTATCAAAAAGACGATGATATAACATATCATCTGCCGTCGATTTTACTGCGTCACTATAGAATTCATT  
TTTTAGATGGTCATG

+  
FFFFFFFFF:FFFFFF:FFFF:FFFFFFFFFFFF:FFFFFF,FFFFFF,F:FFFFFF,F:FFFF:F  
FFFFFFFFF:FFFFFF:FFFFFFFFFFFFFFFF::FFFFFFFF,F:FFFFFFFF:FFF:FFFF  
FFFF:FF,FF,FFF

@A00721:190:HGJW7DSXY:4:1370:4544:5729 2:N:0:TCTGCAAG+GCTGCACT  
CATAGATAAATTACGAAATAACATTCAAAAGATAAATGGTATAGCCATTTATATAGACCTTTTAACAG  
TCTATTGGTTATCAAAAAGACGATGATATAACATATCATCTGCCGTCGATTTTACTGCGTCACTCTAG  
AATTCATTTTTTAGA

+  
FFFFFFFFFFFFFFFFFFFF:FFFFFFFFFFFF:FFFFFFFFFFFF::FFFFFFFFFFFFFFFFFFFF  
FFFF,F:FFF:FFFFFFFFFFFFFFFFFFFFFFFFFFFFFFFFFFFFFFFFFFFFFFFF,FFF  
FFFFFFFFFFFF

@A00721:190:HGJW7DSXY:4:1436:24496:15890 2:N:0:TCTGCAAG+GCTGCACT  
CATAGATAAATTACGAAATAACATTCAAAAGATAAATGGTATAGCCATTTATATAGACCTTTTAACAG  
TCTATTGGTTATCAAAAAGACGATGATATAACATATCATCTGCCGTCGATTTTACTGCGTCACTATAG  
AATTCATTTTTTAGA

+  
FFFFFFFFFFFFFFFFFFFFFFFFFFFFFFFFFFFFFFFFFFFFFFFFFFFFFFFFFFFFFFFFFFFF  
FFFFFFFF,FFFFFFFFFFFFFFFFFFFFFFFFFFFFFFFF:F:FFFFFFFF:F:FFFFFFFF:  
FF,FFFF:FFFF:F

@A00721:190:HGJW7DSXY:4:1445:1597:29810 2:N:0:TCTGCAAG+GCTGCACT  
CATAGATAAATTACGAAATAACATTCAAAAGATAAATGGTATAGCCATTTATATAGACCTTTTAACAG

TCTATTGGTTATCAAAAAGACGATGATATAACATATCATCTGCCGTCGATTTTACTGCGTCACTATAG  
AATTAATTTTTTAGA

```

FFFFFFFFFFFFFFFFFFFFFFFF,FFFFFFFFFFFFFFFF:FFFF:FFFFFF::FFFF:FFFFFF
FFFF:FFF:F:FFFFFFFFFFFF:FFFF,FFFFFF:FFFF:FFFFFFFFFFFF:FFFFFFFFFFFF,F,F,FF
FFFF,F:F:FFFF:F

```

 $+$ 

@A00721:190:HGJW7DSXY:4:1627:11379:36229 2:N:0:TCTGCAAG+GCTGCACT  
CATAGATAAATTACGAAATAACATTCAAAAAGATAAATGGTATAGCCATTTATATAGACCTTTTAAACAG  
TCTATTGGTTATCAAAAAGACGATGATATAACATATCATCTGCCGTCGATTTTACTGCGTCACTATAG  
AATTCATTTTTTTAGA

[illegible] $+$ 

@A00721:190:HGJW7DSXY:4:2160:17815:16313 2:N:0:TCTGCAAG+GCTGCACT  
CATAGATAAATTACGAAATAACATTCAAAAAGATAAATGGTATAGCCATTTATATAGACCTTTTAAACAG  
TCTATTGGTTATCAAAAAGACGATGATATAACATATCATCTGCCGTCGATTTTACTGCGTCACTATAG  
AATTCATTTTTTTAGA

[illegible]

+

@A00721:190:HGJW7DSXY:4:1122:6153:21386 2:N:0:TCTGCAAG+GCTGCACT  
TAATTATTAACGCGTAATTCATAGATAAAATTACGAAATAACATTCAAAAGATAAATGGCATAGCCATT  
TATATAGACCTTTTAAACAGTCTATTGGTTATCAAAAAGACGATGATATAACATATCATCTGCCGTCGA  
TTTTACTGCGTCACT

```
FFFFFFFFFFFFFFFFFFFFFFFFFFFFFFFFFFFFFFFF:FFFFFFFFFFFFFFFFFFFFFFF:
FFFFFFFFFFFFFFFFFFFFFFFFFFFF:FFFF:FFFFFFFFFFFFFFFFFFFF,FFFFFFFFFFFFFFFFFFFFFF
:FFF:FFFFFF:FFF
```

$+$ 

+

+

+

+

+

+

FFFFFFFFFFFF: , FFFFFFFFFF: FFFFFF: FFFFFFFFFFFFFFFFFF: FFFFFFFFFFFFFFFFFFFFFF  
: : FFFFFFFFFF: FFF

@A00721:190:HGJW7DSXY:4:1220:26232:35524 2:N:0:TCTGCAAG+GCTGCACT  
CTATAATTATTAACGCGTAATTCATAGATAAATTACGAAATAACATTCAAAAGATAAATGGCATAGCC  
ATTTATATAGACCTTTTAACAGTCTATTGGTTATCAAAAAGACGATGATATAACATATCATCTGCCGT  
CGATTTTACAGATCG

+

FFFFFFFFFFFFFFFFFFFFFFFFFFFFFFFFFFFFFFFFFFFFFFFFFFFFFFFFFFFFFFFFFFFFFFFF  
FFFFFFFFFFFFFFFFFFFFFFFFFFFFFFFFFFFFFFFFFFFFFFFFFFFFFFFFFFFFFFFFFFFFFFFF  
FFFFFFFFFFFFFFFF:F

@A00721:190:HGJW7DSXY:4:1261:1416:18630 2:N:0:TCTGCAAG+GCTGCACT  
CTATAATTATTAACGCGTAATTCATAGATAAATTACGAAATAACATTCAAAAGATAAATGGCATAGCC  
ATTTATATAGACCTTTTAACAGTCTATTGGTTATCAAAAAGACGATGATATAACATATCATCTGCCGT  
CGATTTTACAGATCG

+

F: FFFFFFFFFFFFFFFFFFFFFFFFFFFFFFFFFFFFFFFFFFFFFFFFFFFFFFFFFFFFFFFFF  
F: FFFFFFFFFFFFFFFFFFFFF, FFF: , FF, FFF: : FFFFFFFFFFFFFFFFFFFFFFFFFFFFFF  
FFFFFFFFFFFFFFFF

@A00721:190:HGJW7DSXY:4:1635:26865:31203 2:N:0:TCTGCAAG+GCTGCACT  
CTATAATTATTAACGCGTAATTCATAGATAAATTACGAAATAACATTCAAAAGATAAATGGCATAGCC  
ATTTATATAGACCTTTTAACAGTCTATTGGTTATCAAAAAGACGATGATATAACATATCATCTGCCGT  
CGATTTTACAGATCG

+

FFFFFFFFFFFFFFFFFFFFFFFFFFFFFFFFFFFFFFFFFFFFFFFFFFFFFFFFFFFFFFFFFFFF:F  
FFFFFFFFFFFFFFFF: FFFFF: FFFFFFFFFFFFFFFFFFFFF, FFFFFFFFFFFFFFFFFFFFFFFFFF:F  
FFFFFFFFFFFFFFFF, F

@A00721:190:HGJW7DSXY:4:2171:11803:3051 2:N:0:TCTGCAAG+GCTGCACT  
CTATAATTATTAACGCGTAATTCATAGATAAATTACGAAATAACATTCAAAAGATAAATGGCATAGCC  
ATTTATATAGACCTTTTAACAGTCTATTGGTTATCAAAAAGACGATGATATAACATATCATCTGCCGT  
CGATTTTACAGATCG

+

FFFFFFFFFFFFFFFFFFFFFFFFFFFFFFFFFFFFFFFFFFFFFFFFFFFFFFFFFFFFFFFFFFFF  
F: FFFFFFFFFFFFFFFFFFFFFFFFFFFFF, FFFFFFFFFFFFFFFFFFFFFFFFFF: FFFFFFFFFFFFFFFFF  
FFFFFFFFFFFFFFFF: FF

@A00721:190:HGJW7DSXY:4:2473:10610:6621 2:N:0:TCTGCAAG+GCTGCACT  
CTATAATTATTAACGCGTAATTCATAGATAAATTACGAAATAACATTCAAAAGATAAATGGCATAGCC  
ATTTATATAGACCTTTTAACAGTCTATTGGTTATCAAAAAGACGATGATATAACATATCATCTGCCGT  
CGATTTTACAGATCG

+

FFFFF: FFFFFFFFFFFFFFFFFFFFFFFFFFFFFFFFFFFFFFFFFFFFFFFFFFFFFFFFFFFFF  
FFFFFFFFFFFFFFFFFFFFFFFFFFFFFFFFFFFF: FFFFFFFFFFFFFFFFFFFFFFFFFF: FFFFFFFFF  
FFFFFFFFFFFFFFFF

@A00721:190:HGJW7DSXY:4:2624:17309:32440 2:N:0:TCTGCAAG+GCTGCACT  
CTATAATTATTAACGCGTAATTCATAGATAAATTACGAAATAACATTCAAAAGATAAATGGCATAGCC  
ATTTATATAGACCTTTTAACAGTCTATTGGTTATCAAAAAGACGATGATATAACATATCATCTGCCGT  
CGATTTTACAGATCG

+

FFFFFFFFF: FFFFFFFFFFFFFFFFFFFFFFFFFFFFFFFFFFFFFFFFFFFFFFFFFFFFFFFFF  
FFFFFFFFFFFFFFFFFFFFFFFFFFFFFFFFFFFF: FFFF: FFF: FFFF, FFFFF, FFFFFF: FFFFFFFF  
FFF: FFFFFFFFFF

@A00721:190:HGJW7DSXY:4:2267:32642:31375 2:N:0:TCTGCAAG+GCTGCACT  
TGAAAATGTATCTCGATTTGTTCAAAACAAATCTTACAAATAATCAAGACGAAAACATAATTATTAA  
CGCGTAATTCATAGATAAATTACGAAATAACATTCAAAAGATAAATGGCATAGCCATTTATATAGACC  
TTTTAACAGTCTATT

+  
FFFFFFFFFFFFFFFFFFFFFFFFFFFFFFFFFFFFFFFFFFFFFFFFFFFFFFFFFFFFFFFF:FFFFFF:FFFFFFFFFFFFFF:  
:FFFFFFFFFFFFFFFFFFFFFFFFFFFFFFFFFFFFFFFFFFFFFFFFFFFFFFFFFFFFFFFF:FFFFFF:FFF,FFFF:FFFFFFFFFFFF,F:F  
FFFF: :FFFF:FFFF  
@A00721:190:HGJW7DSXY:4:1606:26087:35524 2:N:0:TCTGCAAG+GCTGCACT  
GGTCTATATAAATGGCTATGCCATTTATCTTTTGAATGTTATTTTCGTAATTTATCTATGAATTACGCG  
TTAATAATTATAGTTTTCTGCTTGATTATTTGTAAGATTTGTTTTGAACAAATCGAGATACATTTTCA  
ATGTCCGTCTGAAGGA  
+  
FFFFFFFFFFFFFFFFFFFFFFFFFFFFFFFFFFFFFFFFFFFFFFFFFFFFFFFFFFFFFFFF:FFFFFF:FFFFFFFFFFFFFF:  
FFFFFFFFFFFFFFFFFFFFFFFFFFFFFFFFFFFFFFFFFFFFFFFFFFFFFFFFFFFFFFFF:FFFFFF:FFFFFFFF  
FFFFF,FFFFF:FFF  
@A00721:190:HGJW7DSXY:4:1610:2917:28588 2:N:0:TCTGCAAG+GCTGCACT  
GGTCTATATAAATGGCTATGCCATTTATCTTTTGAATGTTATTTTCGTAATTTATCTATGAATTACGCG  
TTAATAATTATAGTTTTCTGCTTGATTATTTGTAAGATTTGTTTTGAACAAATCGAGATACATTTTCA  
ATGTCCGTCTGAAGGA  
+  
FFFFFFFFFFFFF,FFFFFFFFFFFF,FFFFFFFFFFFFFFFFFFFF,FFFFFFFFFFFFFFFFFFFFFFFFFFFFFFFF  
FFFFFFFFFFFFFFFFFFFFFFFFFFFF,,: :F,FFFFFFFFFFFFFFFFFFFF:FF:FFFFFFFFFFFFFFFFFFFFFFFF  
FFFFFFFFFFFFFFFFFFFF  
@A00721:190:HGJW7DSXY:4:1657:31593:31000 2:N:0:TCTGCAAG+GCTGCACT  
GGTCTATATAAATGGCTATGCCATTTATCTTTTGAATGTTATTTTCGTAATTTATCTATGAATTACGCG  
TTAATAATTATAGTTTTCTGCTTGATTATTTGTAAGATTTGTTTTGAACAAATCGAGATACATTTTCA  
ATGTCCGTCTGAAGGA  
+  
FFFFFFFFFFFFFFFFFFFFFFFFFFFFFFFF:FFFFFF:FFFFFFFFFFFFFFFFFFFFFFFFFFFFFFFFFFFFFFFFFFFF  
FFF:FFFFFFFF:FFFFFFFFFFFF:FFF: :FFFFFFFFFFFF,FFFFF:,FF:FF:FFFFFFFFFFFFFFFFFFFF:  
FFFFF:FFF,F:FFF  
@A00721:190:HGJW7DSXY:4:1657:31756:31156 2:N:0:TCTGCAAG+GCTGCACT  
GGTCTATATAAATGGCTATGCCATTTATCTTTTGAATGTTATTTTCGTAATTTATCTATGAATTACGCG  
TTAATAATTATAGTTTTCTGCTTGATTATTTGTAAGATTTGTTTTGAACAAATCGAGATACATTTTCA  
ATGTCCGTCTGAAGGA  
+  
:FFFFFFFF:FF:FFFFFFFFFFFFFFFFFFFFFFFFFFFFFFFFFFFFFFFF:F:FFFFFFFFFFFFFFFFFFFFFFFF:FFFFFF  
,FF,FFFFFFFFFFFFF,FFF:FFFFFFFFFFFF:FF,FFFFFFFFFFFFFFFFFFFFFFFFFFFFFFFFFFFFFFFF  
FFFFFFFFFFFF:FFFF  
@A00721:190:HGJW7DSXY:4:2146:21504:32189 2:N:0:TCTGCAAG+GCTGCACT  
GGTCTATATAAATGGCTATGCCATTTATCTTTTGAATGTTATTTTCGTAATTTATCTATGAATTACGCG  
TTAATAATTATAGTTTTCTGCTTGATTATTTGTAAGATTTGTTTTGAACAAATCGAGATACATTTTCA  
ATGTCCGTCTGAAGGA  
+  
FFFFFFFFFFFFFFFFFFFFFFFF:FFFFFF:,FFF:FFFFF,FFFFF,FFFFF:,FFFFFFFFFFFFFFFFFFFF  
:F:FFFFFFFFFFFF:FFFF,FFF,FFF,FFFFFFFF:FFFFFF:F: :FF,FFFF:FFFFFF:FFFF:FFFF  
FFFFFFFFFFFFFFFF  
@A00721:190:HGJW7DSXY:4:1336:23809:10441 2:N:0:TCTGCAAG+GCTGCACT  
ATTTATCTTTTGAATGTTATTTTCGTAATTTATCTATGAATTACGCGTTAATAATTATAGTTTTCTGCT  
TGATTATTTGTAAGATTTGTTTTGAACAAATCGAGATACATTTTCAATGTCCGTCTGAAGGAGATCTGT  
TTGATCGAGATTTTA  
+  
F:FFFFFFFFFFFFFFFFFFFFFFFFFFFFFFFF:FFFFFFFFFFFFFFFFFFFFFFFFFFFFFFFFFFFFFFFFFFFF  
FFFFFFFFF:FFFF: :FFFFFFFFFFFFFFFFFFFFFFFFFFFFFFFFFFFFFFFFFFFF: : ,FFFFFFFFFFFFFFFF  
FFFFF:F:FFFFFFFF  
@A00721:190:HGJW7DSXY:4:1471:4444:22467 2:N:0:TCTGCAAG+GCTGCACT  
ATTTATCTTTTGAATGTTATTTTCGTAATTTATCTATGAATTACGCGTTAATAATTATAGTTTTCTGCT

TGATTATTTGTAAGATTTGTTTTGAACAAATCGAGATACATTTTCAATGTCCGTCGAAGGAGATCTGT  
TTGATCGAGATTTTA

+

FFFFFFFFFFFFFFFFFFFFFFFFFFFFFFFFFFFFFFFFFFFFFFFFFFFFFFFFFFFFFFFFFFFFFFFF:FFF  
FFF:F:FFFFFFFF:FFFFFFFFFFFFFFFFFFFFFFFFFFFFFFFFFFFFFFFF:FF:FFFFFFFF:FFFFF  
FFFFFFFF:FFFFFFF

@A00721:190:HGJW7DSXY:4:1531:6298:6825 2:N:0:TCTGCAAG+GCTGCACT  
ATTTATCTTTTGAATGTTATTTTCGTAATTTATCTATGAATTACGCGTTAATAATTATAGTTTTCTGTCT  
TGATTATTTGTAAGATTTGTTTTGAACAAATCGAGATACATTTTCAATGTCCGTCGAAGGAGATCTGT  
TTGATCGAGATTTTA

+

:F,:FFF:FFFFFF::FFFFFFFFFFFFFFFF:FFFF:FFFFFFFFFFFFFFFFFFFFFFFFFFFF,FFF  
:FFFFFFFFFFFFFF:FFF,FFFFFFFFFFFFFFFF,FFFFFFFFFFFFFF:F,:FF:F,FFFFFFFFF  
FFFFFFFF:FFFFFFF

@A00721:190:HGJW7DSXY:4:2158:18584:30733 2:N:0:TCTGCAAG+GCTGCACT  
ATTTATCTTTTGAATGTTATTTTCGTAATTTATCTATGAATTACGCGTTAATAATTATAGTTTTCTGTCT  
TGATTATTTGTAAGATTTGTTTTGAACAAATCGAGATACATTTTCAATGTCCGTCGAAGGAGATCTGT  
TTGATCGAGATTTTA

+

FFFF:FFFFFFFFFFFFFFFFFFFFFFFFFFFFFFFFFFFFFFFFFFFFFFFFFFFFFFFFFFFFFFFFFFFF  
FFFFFFFFFFFFFFFFFFFFFFFFFFFFFFFFFFFFFFFFFFFFFFFFFFFFFFFFFFFFFFFFFFFFFFFFFFFF  
FFFFFFFFF,FFFFF

@A00721:190:HGJW7DSXY:4:2162:14624:35086 2:N:0:TCTGCAAG+GCTGCACT  
ATTTATCTTTTGAATGTTATTTTCGTAATTTATCTATGAATTACGCGTTAATAATTATAGTTTTCTGTCT  
TGATTATTTGTAAGATTTGTTTTGAACAAATCGAGATACATTTTCAATGTCCGTCGAAGGAGATCTGT  
TTGATCGAGATTTTA

+

FFFFFFFFFFFFFFFFFFFFFFFFFFFFFFFFFFFFFFFFFFFFFFFFFFFFFFFFFFFFFFFFFFFFFFFFFFFF  
FFFFFFFFFFFFFFFFFFFFFF:FFFFFFFF:FFFFFFFFFFFFFFFFFFFFFFFFFFFFFFFFFFFFFFFFFFFF  
FFFFFFFFFFFFFFFFF

@A00721:190:HGJW7DSXY:4:2335:25726:17895 2:N:0:TCTGCAAG+GCTGCACT  
ATTTATCTTTTGAATGTTATTTTCGTAATTTATCTATGAATTACGCGTTAATAATTATAGTTTTCTGTCT  
TGATTATTTGTAAGATTTGTTTTGAACAAATCGAGATACATTTTCAATGTCCGTCGAAGGAGATCTGT  
TTGATCGAGATTTTA

+

FFFFFFFFFFFFFFFFFFFFFFFFFFFFFFFFFFFFFFFFFFFFFFFFFFFFFFFFFFFFFFFFFFFFFFFFFFFF  
FFF:FFFFFFFF:FFFFFFFFFFFFFFFFFFFFFFFFFFFFFFFFFFFFFFFF:FFF:FFFF:FFFFFFF  
FFFFFFFFFFFFFFFFF

@A00721:190:HGJW7DSXY:4:2670:8793:29027 2:N:0:TCTGCAAG+GCTGCACT  
ATTTATCTTTTGAATGTTATTTTCGTAATTTATCTATGAATTACGCGTTAATAATTATAGTTTTCTGTCT  
TGATTATTTGTAAGATTTGTTTTGAACAAATCGAGATACATTTTCAATGTCCGTCGAAGGAGATCTGT  
TTGATCGAGATTTTA

+

FFFFFFFFFFFFFFFFFFFFFFFFFFFFFFFFFFFFFFFFFFFFFFFFFFFFFFFFFFFFFFFFFFFFFFFFFFFF  
FFFFFFFFFFFFFFFFFFFFFFFFFFFFFFFFFFFFFFFF:FFFFFFFFFFFFFFFFFFFFFFFFFFFFFFFFFFFF  
FFFFFFFFFFFFFFFFF

@A00721:190:HGJW7DSXY:4:1146:27317:25567 2:N:0:TCTGCAAG+GCTGCACT  
CGTTTTCTGCTTAAATCTCGATCAATCAGATCTCCTTCGACGACATTGAAAATGTATCTCGATTG  
TTCAAAACAAATCTTACAAATAATCAAGACGAAACTATAATTATTAACGCGTAATTCATAGATAAAT  
TACGAAATAACATTC

+

FFFFFFFFFFFFFFFFFFFFFFFFFFFF,FFFFFFFFFFFFFFFFFFFFFFFFFFFFFFFFFFFFFFFFFFFF  
FFFFF,:FFFFFFFFFFFFFFFFFFFFFFFFFFFFFFFF:FFFFFFFFFFFFFFFFFFFFFFFFFFFF:FF  
FFFFFFFFFFFFFFFFF



@A00721:190:HGJW7DSXY:4:1245:21106:12493 2:N:0:TCTGCAAG+GCTGCACT  
CGTTTTTCGTCTTAAATCTCGATCAAACAGATCTCCTTCGACGGACATTGAAAATGTATCTCGATTTG  
TTCAAAACAAATCTTACAAATAATCAAGACGAAAACATAATTATTAACGCGTAATTCATAGATAAAT  
TACGAAATAACATTC

[illegible]

+

```
FFFFFFFFFFFFFFFF:FFFFFFFFFFFF:FFFFFFFFFFFFFF:FFFFFFFFFFFFFFFFFFFFFFFFFFFFFFFF
FFFFFFFFFFFFFFFFFFFFFFFFFFFFF:FFFFFFFFFFFFFFFFFFFFFFF:FFFFFFFFFFFFFFFFFFFFFFFFFFFF
FFFFFFFFFFFFFFFF
```

+

[illegible]

+

[illegible]

+

```
FFFFFFFFFFFFFFFFFFFFFFFFFFFFFFFFFFFFFFFFFFFFFFFFFFFFFFFFFFFFFFFFFFFFF
FFFFFFFFFFFFFFFFFFFFFF;FFFFFFFFFFFFFFFF;FFFFFFFFFFFFFFFFFFFFFFFFFFFFF
FFFFFFFFFFFFFFFF
```

+

[illegible]

+

[illegible]

@A00721:190:HGJW7DSXY:4:2376:20473:17378 2:N:0:TCTGCAAG+GCTGCACT  
CGTTTTTCGTCTTAAATCTCGATCAAACAGATCTCCTTCGACGGACATTGAAAATGTATCTCGATTTG  
TTCAAACAAATCTTACAAATAATCAAGACGAAACTATAATTATTAACGCGTAATTCATAGATAAAT  
TACGAAATAACATTC

@A00721:190:HGJW7DSXY:4:2442:11388:10535 2:N:0:TCTGCAAG+GCTGCACT  
CGTTTTTCGTCTTAAATCTCGATCAAACAGATCTCCTTCGACGGACATTGAAAATGTATCTCGATTTG  
TTCAAAACAAATCTTACAAATAATCAAGACGAAAACATAATTATTAACGCGTAATTCATAGATAAAT  
TACGAAATAACATTC

@A00721:190:HGJW7DSXY:4:1223:9317:25081 2:N:0:TCTGCAAG+GCTGCACT  
TTTCCATTAGCAGCAGCCTGGATCGTTTTCTTCTTAAAATCTCGATCAAACAGATCTCCTTCGACGGA  
CATTGAAAATGTATCTCGATTTGTTCAAAACAAATCTTACAAATAATCAAGACGAAAACATAATTAT  
TAACGCGTAATTCAT

@A00721:190:HGJW7DSXY:4:1277:14886:7138 2:N:0:TCTGCAAG+GCTGCACT  
TTTCCATTAGCAGCAGCCTGGATCGTTTTCTTCTTAAAATCTCGATCAAACAGATCTCCTTCGACGGA  
CATTGAAAAATGTATCTCGATTTGTTCAAACAAATCTTACAAATAATCAAGACGAAAACTATAATTAT  
TAACGCGTAATTCAT

@A00721:190:HGJW7DSXY:4:1334:2908:18396 2:N:0:TCTGCAAG+GCTGCACT  
TTTCCATTAGCAGCAGCCTGGATCGTTTTCTGTCTTAAAATCTCGATCAAACAGATCTCCTTCGACGGA  
CATTGAAAATGTATCTCGATTTGTTCAAAACAAATCTTACAAATAATCAAGACGAAAACATAATTAT  
TAACGCGTAATTCAT

@A00721:190:HGJW7DSXY:4:1370:7916:2080 2:N:0:TCTGCAAG+GCTGCACT  
TTTCCATTAGCAGCAGCCTGGATCGTTTTCTGTCTTAAAATCTCGATCAAACAGATCTCCTTCGACGGA  
CATTGAAAATGTATCTCGATTTGTTCAAAACAAATCTTACAAATAATCAAGACGAAACTATAATTAT  
TAACGCGTAATTCAT

@A00721:190:HGJW7DSXY:4:1510:12599:13009 2:N:0:TCTGCAAG+GCTGCACT  
TTTCCATTAGCAGCAGCCTGGATCGTTTTCTTCTTAAAATCTCGATCAAACAGATCTCCTTCGACGGA  
CATTGAAAATGTATCTCGATTTGTTCAAAACAAATCTTACAAATAATCAAGACGAAAACATAATTAT  
TAACGCGTAATTCAT

```

FFFFFFFFFFFFFFFFFFFFFFFFFFFFFFFF:FFFFFFFFFFFFFFFFFFFFFFFFFFFFFFFF
FFFFFFFFFFFFFFFFFFFFFFFFFFFFFFFF,FFFFFFFFFFFFFFFFFFFFFFFFFFFFFFFF
FF:FF:FFFFFFFF

```

```

FFFFFFFFFFFFFFFF:FFFFFFFFFFFFFFFF:FFFFFFFFFFFFFFFF,FFFFFFFFFFFFFFFF
FFFFFFFFFFFFFFFF:FFFFFFFFF::FFFFFFFFFFFFFFFF,FFFFFF:FFFFFFFFFFFF
FF,F:FFFFFFFFF

```

[illegible][illegible]

```

FFFFFFFFFFFFFFFFFFFFFFFF:FFFFFFFFFFFFFFFFFFFFFFFFFFFFFFFFFFFFFFFF
FFFFFFFFFFFFFFFFFFFFFFFF:FFFFFFFFFFFFFFFFFFFFFFFFFFFFFFFFFFFF,FFFF
FFFFF:FFFFFFF

```

```

FFFFFFFFFFFFFFFFFFFFFFFF:FFFFFFFFFFFFFFFFFFFFFFFFFFFFFFFF:FFFFFFFFF,FF
FFFFFFFFF,FFFFFFFFFFFFFFFF:FFFFFFF:FFFFFFF:FFFFFFFFFFFFFF:FFFFFFFFF:FFF
FFFFFFF,FFFF:FFF

```

[illegible]

@A00721:190:HGJW7DSXY:4:1256:2220:12727 2:N:0:TCTGCAAG+GCTGCACT  
GTTTCGTCCTTGATTATTTGTAAGATTTGTTTTGAACAAATCGAGATACATTTTCAATGTCCGTCGAA

GGAGATCTGTTTGATCGAGATTTTAAGACGAAACGATCCAGGCTGCTGCTAATGGAAATTGGGGCAA  
TGTAAGCTCCAAAT

```
FFFF:FFFFFFFFFFFFFFFFFFFF:FFFFFFFFFFFFFFFF:FFFFFF:FFFFFF:F:FFFF
FFFFFFFF,FFFFFF:FFFFFFFFFFFF:FFF:FF:FFFFFFFFFFFFFFFFFFFFFFFFFFFF:F:F:,FFF
FF:FFF,FFF,FFFF
```

 $+$ 

@A00721:190:HGJW7DSXY:4:1475:29930:28494 2:N:0:TCTGCAAG+GCTGCACT  
GTTTTCTGCTTGATTATTTGTAAGATTTGTTTTGAACAAATCGAGATACATTTTCAATGTCCGTCGAA  
GGAGATCTGTTTGATCGAGATTTTAAGACGAAAACGATCCAGGCTGCTGCTAATGGAAATTGGGGCAA  
TGTAAGCTCCAAAT

```

FFFFFFFF:FFFFFFFFFFFFFFFF,FFFFFFFFFFFFFFFFFFFFFFFFFFFFFFFF:FFFFFFFFFFFF
FFFFFFFFFFFFFFFFFFFFFFFFFFFF:FF:F:FFFFFFFF:FFFFFFFFFFFF,FFFFFFF:FFFFFFF
FFFFFFFFFFFFFFFFFFFF

```

+

@A00721:190:HGJW7DSXY:4:1560:27624:30232 2:N:0:TCTGCAAG+GCTGCACT  
GTTTTCTGCTTGATTATTTGTAAGATTTGTTTTGAACAAATCGAGATACATTTTCAATGTCCGTCGAA  
GGAGATCTGTTTGATCGAGATTTTAAGACGAAAACGATCCAGGCTGCTGCTAATGGAAATTGGGGCAA  
TGTAAGCTCCAAAT

```

FFFFFFFFFFFFFFFFFFFF:FFFFF:FFFFFFFFFFFFFFFF:FFFFFFFF:FFFFFFFFFFFFFFFFFFFFFFFF
FFFFFFFFFFFFFFFFFFFF:FFFFFFFFFFFFFFFF:FFFFFFFFFFFFFFFF:FFFFF:FFFFFFF:FF
FFFF,FF:FFFFFFF

```

+

@A00721:190:HGJW7DSXY:4:1640:9905:31297 2:N:0:TCTGCAAG+GCTGCACT  
GTTTCGTCCTTGATTATTTGTAAGATTTGTTTTGAACAAATCGAGATACATTTTCAATGTCCGTCGAA  
GGAGATCTGTTTGATCGAGATTTTAAGACGAAAACGATCCAGGCTGCTGCTAATGGAAATTGGGGCAA  
TGTAAGCTCCAAAT

```

FFFFFFFF:FFFFFFFFFFFFFFFF:FFFFFFFFFFFFFFFF:FFFFFFFFFFFFFF:FFFFFF:FFFF:F
F,FFFFFFFFFFFFFFFFFFFFFFFF:F::FFFF:FFFFFFFFFFFFFFFFFFFFFFFFFFFFFFFF
FFFFFFFF:FFFF:

```



FFFFFFFFFFFFFFFFFFFFFFFFFFFFFFFFFFFFFFFFFFFFFFFFFFFFFFFFFFFFFFFFFFFFFFFFFFFFFFFF  
FFFFFFFFFFFFFFFF

@A00721:190:HGJW7DSXY:4:1513:9453:28980 2:N:0:TCTGCAAG+GCTGCACT  
CTGGGCATTTGGAGCTTTACATTGCCCCAATTTCCATTAGCAGCAGCCTGGATCGTTTTTCGTCTTAAA  
ATCTCGATCAAACAGATCTCCTTCGACGGATATTGAAAATGTATCTCGATTTGTTCAAACAAATCTT  
ACAAATAATCAAGAC

+

FFFFFF:FFFFFFFFFFFFFFFFFFFFFFFFFFFFFFFFFFFFFFFFFFFFFFFFFFFFFFFFFFFFFFFFFFFF  
FFFFFFFFFFFFFFFFFFFFFFFFFFFFFFFFFFFFFFFFFFFFFFFFFFFFFFFFFFFFFFFFFFFFFFFFFFFF:FFFFFFFF  
FFF:FFF:FFFFFF:

@A00721:190:HGJW7DSXY:4:1567:19379:25254 2:N:0:TCTGCAAG+GCTGCACT  
CTGGGCATTTGGAGCTTTACATTGCCCCAATTTCCATTAGCAGCAGCCTGGATCGTTTTTCGTCTTAAA  
ATCTCGATCAAACAGATCTCCTTCGACGGATATTGAAAATGTATCTCGATTTGTTCAAACAAATCTT  
ACAAATAATCAAGAC

+

FFFFFFFFFFFFFFFF:FFFFFFFFFFFF:FFFFFFFFFFFFFFFFFFFFFFFFFFFFFFFFFFFFFFFFFFFF  
FFFFFFFFFFFFFFFFFFFFFFFFFFFFFFFFFFFFFFFFFFFFFFFFFFFFFFFFFFFFFFFFFFFFFFFFFFFF:FFFFFFFF  
FFFFFFFFFFFF,FF

@A00721:190:HGJW7DSXY:4:1614:1958:17660 2:N:0:TCTGCAAG+GCTGCACT  
CTGGGCATTTGGAGCTTTACATTGCCCCAATTTCCATTAGCAGCAGCCTGGATCGTTTTTCGTCTTAAA  
ATCTCGATCAAACAGATCTCCTTCGACGGATATTGAAAATGTATCTCGATTTGTTCAAACAAATCTT  
ACAAATAATCAAGAC

+

FFFFFFFFFFFFFFFFFFFFFFFFFFFFFFFFFFFFFFFFFFFFFFFFFFFFFFFFFFFFFFFFFFFFFFFFFFFF  
FFFFFFFFFFFFFFFFFFFFFFFFFFFFFFFFFFFFFFFFFFFFFFFFFFFFFFFFFFFFFFFFFFFFFFFFFFFF:FFFFFFFF  
FFFFFFFFFFFFFFFF

@A00721:190:HGJW7DSXY:4:2361:24044:25160 2:N:0:TCTGCAAG+GCTGCACT  
CTGGGCATTTGGAGCTTTACATTGCCCCAATTTCCATTAGCAGCAGCCTGGATCGTTTTTCGTCTTAAA  
ATCTCGATCAAACAGATCTCCTTCGACGGATATTGAAAATGTATCTCGATTTGTTCAAACAAATCTT  
ACAAATAATCAAGAC

+

FFFFFFFFFFFFFFFFFFFFFFFFFFFFFFFFFFFFFFFFFFFFFFFFFFFFFFFFFFFFFFFFFFFFFFFFFFFF  
FFFFFFFFFFFFFFFFFFFFFFFFFFFFFFFFFFFFFFFFFFFFFFFFFFFFFFFFFFFFFFFFFFFFFFFFFFFF:FFFFFFF  
FFFFFFFFFFFFFF:F

@A00721:190:HGJW7DSXY:4:2650:2935:3161 2:N:0:TCTGCAAG+GCTGCACT  
CTGGGCATTTGGAGCTTTACATTGCCCCAATTTCCATTAGCAGCAGCCTGGATCGTTTTTCGTCTTAAA  
ATCTCGATCAAACAGATCTCCTTCGACGGATATTGAAAATGTATCTCGATTTGTTCAAACAAATCTT  
ACAAATAATCAAGAC

+

FFFFFFFFFFFFFFFFFFFFFFFFFFFFFFFFFFFFFFFFFFFFFFFFFFFFFFFFFFFFFFFFFFFFFFFFFFFF  
FFFFFFFFFFFFFFFFFFFFFFFFFFFFFFFFFFFFFFFFFFFFFFFFFFFFFFFFFFFFFFFFFFFFFFFFFFFF:FFFFFFF  
FFFFFFFFFFFFFF:FF

@A00721:190:HGJW7DSXY:4:2119:24740:21574 2:N:0:TCTGCAAG+GCTGCACT  
CTGGGCATTTGGAGCTTTACATTGCCCCAATTTCCATTAGCAGCAGCCTGGATCGTTTTTCGTCTTAAA  
ATCTCGATCAAACAGATCTCCTTCGACGGATATTGAAAATGTATCTCGATTTGTTCAAACAAATCTT  
ACAAATAATCAAGA

+

:FFFFFFFF:FFFFFFFFFFFFFFFFFFFFFFFFFFFFFFFFFFFFFFFFFFFFFFFFFFFFFFFFFFFFFFFF  
FFFFF:FFFFFFFFFFFFFFFFFFFF:FFFFFFFFFFFF:FFFFF:FFFFFFFFFFFFFFFFFFFF  
F,FFFFFFFFFFFFF

@A00721:190:HGJW7DSXY:4:1244:7509:6918 2:N:0:TCTGCAAG+GCTGCACT  
TACTGGGCATTTGGAGCTTTACATTGCCCCAATTTCCATTAGCAGCAGCCTGGATCGTTTTTCGTCTTA  
AAATCTCGATCAAACAGATCTCCTTCGACGGACATTGAAAATGTATCTCGATTTGTTCAAACAAATC  
TTACAAATAATCAAG

+  
FFFFFFFFFFFFFFFFFFFFFFFFFFFFFFFFFFFFFFFFFFFFFFFFFFFFFFFFFFFFFFFF  
FFFFFFFFFFFFFFFFFFFFFFFFFFFFFFFFFFFFFFFFFFFFFFFFFFFFFFFFFFFFFFFF  
FFFFFFFFFFFFFFFF  
@A00721:190:HGJW7DSXY:4:1616:4372:16203 2:N:0:TCTGCAAG+GCTGCACT  
TACTGGGCATTTGGAGCTTTACATTGCCCAATTTCCATTAGCAGCAGCCTGGATCGTTTTTCGTCTTA  
AAATCTCGATCAAACAGATCTCCTTCGACGGACATTGAAAATGTATCTCGATTGTTCAAAACAAATC  
TTACAAATAATCAAG

+  
FFFFFFFFFFFFFFFFFFFFFFFFFFFFFFFFFFFFFFFFFFFFFFFFFFFFFFFFFFFFFFFF  
FF:FFFFFFFFFFFFFFFFFFFFFFFFFFFFFFFFFFFFFFFFFFFFFFFFFFFFFFFFFFFF,FFFFFFFFFFFFFFFFFFFFFFFFFFFFFFFFFFFFFFFFFFFFFFFFFFFF,FFFFFFFF  
FFFFFFFFFFFFFFFF  
@A00721:190:HGJW7DSXY:4:2102:28664:28902 2:N:0:TCTGCAAG+GCTGCACT  
TACTGGGCATTTGGAGCTTTACATTGCCCAATTTCCATTAGCAGCAGCCTGGATCGTTTTTCGTCTTA  
AAATCTCGATCAAACAGATCTCCTTCGACGGACATTGAAAATGTATCTCGATTGTTCAAAACAAATC  
TTACAAATAATCAAG

+  
FFFFFFFFFFFFFFFFFFFFFFFFFFFFFFFFFFFFFFFFFFFFFFFFFFFFFFFFFFFFFFFF  
FFFFFFFFFFFFFFFFFFFFFFFFFFFFFFFFFFFFFFFFFFFFFFFFFFFFFFFFFFFFFFFF  
FFFFFFFFFFFFFFFF  
@A00721:190:HGJW7DSXY:4:2673:10520:34021 2:N:0:TCTGCAAG+GCTGCACT  
TACTGGGCATTTGGAGCTTTACATTGCCCAATTTCCATTAGCAGCAGCCTGGATCGTTTTTCGTCTTA  
AAATCTCGATCAAACAGATCTCCTTCGACGGACATTGAAAATGTATCTCGATTGTTCAAAACAAATC  
TTACAAATAATCAAG

+  
FFFFFFFFFFFFFFFFFFFFFFFFFFFFFFFFFFFFFFFFFFFFFFFFFFFFFFFFFFFFFFFF  
FFFFFFFFFFFFFFFFFFFFFFFFFFFFFFFFFFFFFFFFFFFFFFFFFFFFFFFFFFFFFFFF  
FFFFFFFFFFFFFFFF  
@A00721:190:HGJW7DSXY:4:1339:4119:9283 2:N:0:TCTGCAAG+GCTGCACT  
TACTGGGCATTTGGAGCTTTACATTGCCCAATTTCCATTAGCAGCAGCCTGGATCGTTTTTCGTCTTA  
AAATCTCGATCAAACAGATCTCCTTCGACGGACATTGAAAATGTATCTCGATTGTTCAAAACAAATC  
TTACAAATAATCAA

+  
FFFFFFFFF:FFFFFFFFFFFFFFFFFFFFFFFFFFFFFFFFFFFFFFFFFFFFFFFFFFFFFFFF,FFFFFFFFFFFFFFFFFFFFFFFFFFFFFFFFFFFFFFFF  
FF:FFFFFFFFFFFFFFFFFFFFFFFFFFFFFFFFFFFFFFFFFFFFFFFFFFFFFFFFFFFF,FFFFFFFFFFFFFFFFFFFFFFFFFFFFFFFFFFFFFFFFFFFFFFFFFFFF,FFFFFFFF  
FFFFFFFFFFFFFFFF  
@A00721:190:HGJW7DSXY:4:2257:24026:10974 2:N:0:TCTGCAAG+GCTGCACT  
TACTGGGCATTTGGAGCTCTACATTGCCCAATTTCCATTAGCAGCAGCCTGGATCGTTTTTCGTCTTA  
AAATCTCGATCAAACAGATCTCCTTCGACGGACATTGAAAATGTATCTCGATTGTTCAAAACAAATC  
TTACAAATAATCAA

+  
FFFF:FFFFFFFFFFFFFFFFFFFFFFFFFFFFFFFFFFFFFFFFFFFFFFFFFFFFFFFF:F:FFFFFFFFF:FFFF,FFFFFFFF:FF,FF  
:FFFFFFFFFFFFFFFFFFFFFFFFFFFFFFFFFFFFFFFFFFFFFFFFFFFFFFFFFFFF,F,FFFFFFFFFFFFFFFFFFFFFFFFFFFFFFFFFFFFFFFFFFFFFFFFFFFF,FFFFF:FFF,FFFFFFFF  
FF::FFFFFFFF,FF  
@A00721:190:HGJW7DSXY:4:1504:15772:15937 2:N:0:TCTGCAAG+GCTGCACT  
CCATACTGGGCATTTGGAGCTTTACATTGCCCAATTTCCATTAGCAGCAGCCTGGATCGTTTTTCGTCTTA  
TAAAATCTCGATCAAACAGATCTCCTTCGACGGACATTGAAAATGTATCTCGATTGTTCAAAACAA  
ATCTTACAAATAATC

+  
FFFFFFFFFFFFFFFFFFFFFFFFFFFFFFFFFFFFFFFFFFFFFFFFFFFFFFFFFFFFFFFF  
FFFFFFFFFFFFFFFFFFFFFFFFFFFFFFFFFFFFFFFFFFFFFFFFFFFFFFFFFFFFFFFF  
FFFFFFFFFFFF:FFFFF  
@A00721:190:HGJW7DSXY:4:2201:12527:23218 2:N:0:TCTGCAAG+GCTGCACT  
CCATACTGGGCATTTGGAGCTTTACATTGCCCAATTTCCATTAGCAGCCGCCTGGATCGTTTTTCGTCTTA





@A00721:190:HGJW7DSXY:4:1609:8269:6230 2:N:0:TCTGCAAG+GCTGCACT  
CTTCAACTTATTGTACATCACATCGGCCATACTGGGCATTTGGAGCTTTACATTGCCCAATTTCCAT  
TAGCAGCAGCCTGGATCGTTTTCTTCTTAAAATCTCGATCAAACAGATCTCCTTCGACGGACATTGAA  
AATGTATCTCGATTT

```

FFFFFFFFFFFFFFFFFFFFFFFFFFFFFFFF:FFFFFFFFFFFFFFFFFFFFFFFFFFFFFFFF
FFFFFFFFFFFFFFFFFFFFFFFFFFFFFFFF:FFFFFFFFFFFFFF:FFFFFFFFFFFF
FFFFFFFFFFFF:FFFF

```

+

[illegible]

+

```
FFFFFFFFFFFFFFFFFFFFFFFFFFFFFFFFFFFFFFFFFFFFFFFFFFFFFFFFFFFFFFFFFFFFF  
FFFFFFFFFFFFFFFFFFFFFFFFFFFFFFFFFFFFFF:FFFFFFFFFFFFFFFFFFFFFFFFFFFFFFFF  
FFFFFFFFFFFFFFFF
```

+

[illegible]

+

[illegible]

+

```

FFFFFFFF:FFFFFFFFFFFFFFFFFFFFFFFFFFFFFFFF:FFFFFFFFFFFFFFFFFFFFFFFFFFFFFFFF
FFFFFFFFFFFFFFFFFFFFFFFFFFFFFFFFFFFFFFFF:FFFFFFFFFFFFFFFFFFFFFFFFFFFFFFFF
FFFFFFFFFFFFFFFFFFFFFFFF

```

+

[illegible]

FFFFFFFFFFFFFFFF:FFFFF:FFFFFFFFFFFF:FFFFFFFFFFFFFFFFFFFFFFFFFFFFFFFF:FFFFFFFF  
FFFFFFFFFFFFFFFF::

@A00721:190:HGJW7DSXY:4:2258:32244:9361 2:N:0:TCTGCAAG+GCTGCACT  
AATCGAGATACATTTTCAATGTCCGTCGAAGGAGATCTGTTTGATCGAGATTTTAAGACGAAAACGAT  
CCAGGCTGCTGCTAATGGAAATTGGGGCAATGTAAAGCTCCAAATGCCAGTATGGCCGATGTGATGT  
ACAATAAGTTGAAGA

+

FFFFFFFFFFFFFFFFFFFFFFFFFFFFFFFF:FFFFFFFFFFFFFFFFFFFFFFFFFFFFFFFF:FFFFFFFF  
FFFFFFFFFFFFFFFFFFFFFFFFFFFFFFFF:FFFFFFFFFFFFFFFFFFFFFFFFFFFFFFFF:FF:FFFFFFFF  
F:FFFFFFFF

@A00721:190:HGJW7DSXY:4:2258:30463:19241 2:N:0:TCTGCAAG+GCTGCACT  
AATCGAGATACATTTTCAATGTCCGTCGAAGGAGATCTGTTTGATCGAGATTTTAAGACGAAAACGAT  
CCAGGCTGCTGCTAATGGAAATTGGGGCAATGTAAAGCTCCAAATGCCAGTATGGCCGATGTGATGT  
ACAATAAGTTGAAGA

+

FFFFFFFFFFFFFFFFFFFFFFFFFFFFFFFFFFFFFFFFFFFFFFFFFFFFFFFFFFFFFFFF:FFFFF:FFFF  
FFFFFFFFFFFFFFFFFFFFFFFFFFFFFFFFFFFFFFFFFFFFFFFFFFFFFFFFFFFFFFFF:FFFFFFF,FFFFFFFF  
FFF:FF:FFFFFFFF

@A00721:190:HGJW7DSXY:4:2408:4508:29716 2:N:0:TCTGCAAG+GCTGCACT  
AATCGAGATACATTTTCAATGTCCGTCGAAGGAGATCTGTTTGATCGAGATATTAAGACGAAAACGAT  
CCAGGCTGCTGCTAATGGAAATTGGTGCAATGTAAAGCTCCAAATGCCAGTATGGCCGATGTGATGT  
ACAATAAGTTGAAGA

+

F:,FFF:FFF:F,F,FFFFF,F,F:FF,F,FFFFFF,:FFFFFFFF:F:F,,,FFF:FFFFFF:F,FF  
FFFF:,,,FF:,FFFF,FFFFFF,,FFFFFF,FFF,FF,FF:F:FF:F:FF,F:,FF,FF:,FFF,F  
FFFFFFF,:,:FF:F

@A00721:190:HGJW7DSXY:4:2409:8856:35117 2:N:0:TCTGCAAG+GCTGCACT  
AATCGAGATACATTTTCAATGTCCGTCGAAGGAGATCTGTTTGATCGAGATTTTAAGACGAAAACGAT  
CCAGGCTGCTGCTAATGGAAATTGGGGCAATGTAAAGCTCCAAATGCCAGTATGGCCGATGTGATGT  
ACAATAAGTTGAAGA

+

FFFFFFFFFFFFFFFFFFFFFFFFFFFFFFFFFFFFFFFFFFFFFFFFFFFFFFFFFFFFFFFF:FFFFF:FFFF  
FFFFFFFFFFFFFFFFFFFFFFFFFFFFFFFFFFFFFFFFFFFFFFFFFFFFFFFFFFFFFFFF:FFFFFFFF  
FFFFFFFFFFF:FFF:

@A00721:190:HGJW7DSXY:4:2533:27037:6511 2:N:0:TCTGCAAG+GCTGCACT  
AATCGAGATACATTTTCAATGTCCGTCGAAGGAGATCTGTTTGATCGAGATTTTAAGACGAAAACGAT  
CCAGGCTGCTGCTAATGGAAATTGGGGCAATGTAAAGCTCCAAATGCCAGTATGGCCGATGTGATGT  
ACAATAAGTTGAAGA

+

FFFFFFFFFFFFFFFFFFFFFFFFFFFFFFFFFFFFFFFFFFFFFFFFFFFFFFFFFFFFFFFF:,FFFFFFFF  
FFFFFFFFFFFFFFFFFFFFFFFFFFFFFFFF:FFFF:FFFFFFFF:FFFFFFFFFFFF,FFFFFFF  
FFFFFFFFF:FF:FFF

@A00721:190:HGJW7DSXY:4:1311:5864:24956 2:N:0:TCTGCAAG+GCTGCACT  
CAATCATGATCGCGTGTTCCTTCAACTTATTGTACATCACATCGGCCATACTGGGCATTTGGAGCTTT  
ACATTGCCCCAATTTCCATTAGCAGCAGCCTGGATCGTTTTTCGTCTTAAATCTCGATCAAACAGATC  
TCCTTCGACAGATCG

+

FFFFFFFFFFFFFFFFFFFFFFFFFFFFFFFFFFFFFFFFFFFFFFFFFFFFFFFFFFFFFFFF:FFFFFFFF  
FFFFFFFFFFFFFFFFFFFFFFFFFFFFFFFF:FFFFFFFFFFFFFFFF:FFFFF:FF:FFFFFFFF,FFFF,  
F:F:FFFFFFFF

@A00721:190:HGJW7DSXY:4:1662:17671:7263 2:N:0:TCTGCAAG+GCTGCACT  
CAATCATGATCGCGTGTTCCTTCAACTTATTGTACATCACATCGGCCATACTGGGCATTTGGAGCTTT  
ACATTGCCCCAATTTCCATTAGCAGCAGCCTGGATCGTTTTTCGTCTTAAATCTCGATCAAACAGATC  
TCCTTCGACAGATCG

+  
FFFFFFFFFFFFFFFFFFFFFFFFFFFFFFFFFFFFFFFFFFFFFFFFFFFFFFFFFFFFFFFFFFFFFFFF  
FFFFFFFFFFFFFFFFFFFFFFFFFFFFFFFFFFFFFFFFFFFFFFFFFFFFFFFFFFFFFFFFFFFFFFFF,FFFFFFFFFFFFFFFF:FFFFFF  
FFFFFFFFFFFFFFFF

@A00721:190:HGJW7DSXY:4:2246:23891:30123 2:N:0:TCTGCAAG+GCTGCACT  
CAATCATGATCGCGTGTTCCTTCAACTTATTGTACATCACATCGGCCATACTGGGCATTTGGAGCTTT  
ACATTGCCCAATTTCCATTAGCAGCAGCCTGGATCGTTTTTCGTCTTAAATCTCGATCAAACAGATC  
TCCTTCGACAGATCG

+  
FFFFFFFFFFFFFFFFFFFFFFFFFFFFFFFFFFFFFFFFFFFFFFFFFFFFFFFFFFFFFFFFFFFFFFFF  
FFFFFFFFFFFFFFFFFFFFFFFFFFFFFFFFFFFFFFFFFFFFFFFFFFFFFFFFFFFFFFFFFFFFFFFF  
FFFFFFF:FFFFFFF

@A00721:190:HGJW7DSXY:4:2276:3513:1814 2:N:0:TCTGCAAG+GCTGCACT  
CAATCATGATCGCGTGTTCCTTCAACTTATTGTACATCACATCGGCCATACTGGGCATTTGGAGCTTT  
ACATTGCCCAATTTCCATTAGCAGCAGCCTGGATCGTTTTTCGTCTTAAATCTCGATCAAACAGATC  
TCCTTCGACAGATCG

+  
FFFFFFFFFFFFFFFFFFFFFFFFFFFFFFFFFFFFFFFFFFFFFFFFFFFFFFFFFFFFFFFFFFFFFFFF  
FFFFFFFFFFFFFFFFFFFFFFFFFFFFFFFFFFFFFFFFFFFFFFFFFFFFFFFFFFFFFFFFFFFFFFFF  
FFFFFFFFFFFFFFFF

@A00721:190:HGJW7DSXY:4:2375:15365:9690 2:N:0:TCTGCAAG+GCTGCACT  
CAATCATGATCGCGTGTTCCTTCAACTTATTGTACATCACATCGGCCATACTGGGCATTTGGAGCTTT  
ACATTGCCCAATTTCCATTAGCAGCAGCCTGGATCGTTTTTCGTCTTAAATCTCGATCAAACAGATC  
TCCTTCGACAGATCG

+  
FFFFFFFFFFFFFFFFFFFFFFFFFFFFFFFFFFFFFFFFFFFFFFFFFFFFFFFFFFFFFFFFFFFFFFFF  
FFFFFFFFFFFFFFFFFFFFFFFFFFFFFFFFFFFFFFFFFFFFFFFFFFFFFFFFFFFFFFFFFFFFFFFF  
FFFFFFFFFFFFFFFF

@A00721:190:HGJW7DSXY:4:2525:31919:31688 2:N:0:TCTGCAAG+GCTGCACT  
CAATCATGATCGCGTGTTCCTTCAACTTATTGTACATCACATCGGCCATACTGGGCATTTGGAGCTTT  
ACATTGCCCAATTTCCATTAGCAGCAGCCTGGATCGTTTTTCGTCTTAAATCTCGATCAAACAGATC  
TCCTTCGACAGATCG

+  
FFFFFFFFFFFFFFFFFFFFFFFFFFFFFFFFFFFFFFFFFFFFFFFFFFFFFFFFFFFFFFFFFFFFFFFF  
FFFFFFFFFFFFFFFFFFFFFFFFFFFFFFFFFFFFFFFFFFFFFFFFFFFFFFFFFFFFFFFFFFFFFFFF:FF:FF:FFF:FFFF  
FFFFFFFFFFFFFFFF

@A00721:190:HGJW7DSXY:4:1114:21269:5447 2:N:0:TCTGCAAG+GCTGCACT  
CACAGCGATCAATCATGATCGCGTGTTCCTTCAACTTATTGTACATCACATCGGCCATACTGGGCATT  
TGGAGCTTTACATTGCCCAATTTCCATTAGCAGCAGCCTGGATCGTTTTTCGTCTTAAATCTCGATC  
AAACAGATCTCCTTC

+  
F:FFFFFFFFFFFF:FFFFFFF:FFFFFFFFFFFF,FFFFFFFFFFFFFFFFFFFFFFFFFFFFFFFFFFFF  
FFFFFFFFFFFFFFFFFFFF::FFFFFFFFFFFFFFFFFFFFFFFFFFFF:FFFFFFFFFFFFFFFF:FFFFFFF  
:FFFFFFFFFFFFFFFF

@A00721:190:HGJW7DSXY:4:1402:9634:12633 2:N:0:TCTGCAAG+GCTGCACT  
CACAGCGATCAATCATGATCGCGTGTTCCTTCAACTTATTGTACATCACATCGGCCATACTGGGCATT  
TGGAGCTTTACATTGCCCAATTTCCATTAGCAGCAGCCTGGATCGTTTTTCGTCTTAAATCTCGATC  
AAACAGATCTCCTTC

+  
FFFFFFFFFFFFFFFFFFFFFFFFFFFFFFFFFFFFFFFFFFFFFFFFFFFFFFFFFFFFFFFFFFFFFFFF:FFFFFFFFFFFFFFFFFFFF  
FFFFFFFFFFFFFFFF,FFFFFFFFFFFFFFFFFFFFFFFFFFFFFFFF:FFFFFFF:FFFFFFFFFFFF:FFFFF:FF  
FFFFFFFFFFFFFFFF

@A00721:190:HGJW7DSXY:4:2101:20419:16438 2:N:0:TCTGCAAG+GCTGCACT  
CACAGCGATCAATCATGATCGCGTGTTCCTTCAACTTATTGTACATCACATCGGCCATACTGGGCATT

TGGAGCTTTACATTGCCCAATTTCCATTAGCAGCAGCCTGGATCGTTTTTCGTCTTAAATCTCGATC  
AAACAGATCTCCTTC

+

FFFFFFFFFFFFFFFFFFFFFFFFFFFFFFFFFFFFFFFFFFFFFFFFFFFFFFFFFFFFFFFFFFFFFFFF  
FFFFFFFFFFFFFFFFFFFFFFFFFFFFFFFFFFFFFFFFFFFFFFFFFFFFFFFFFFFFFFFFFFFFFFFF  
FF:FFFFFFFFFFFF

@A00721:190:HGJW7DSXY:4:1251:21260:35775 2:N:0:TCTGCAAG+GCTGCACT  
AGGAGATCTGTTTGATCGAGATTTTAAGACGAAAACGATCCAGGCTGCTGCTAATGGAAATTGGGGCA  
ATGTAAAGCTCCAAATGCCCAGTATGGCCGATGTGATGTACAATAAGTTGAAGAAACACGCGATCATG  
ATTGATCGCTGTGTT

+

FFFFFFFFFFFFFFFFFFFFFFFFFFFFFFFFFFFFFFFFFFFFFFFFFFFFFFFFFFFFFFFFFFFFFFFF  
FFFFFFFFFFFFFFFFFFFFFFFFFFFFFFFFFFFFFFFFFFFFFFFFFFFFFFFFFFFFFFFFFFFFFFFF  
FFFFFFFFFFFFFFFFFFFF

@A00721:190:HGJW7DSXY:4:1524:1380:7388 2:N:0:TCTGCAAG+GCTGCACT  
AGGAGATCTGTTTGATCGAGATTTTAAGACGAAAACGATCCAGGCTGCTGCTAATGGAAATTGGGGCA  
ATGTAAAGCTCCAAATGCCCAGTATGGCCGATGTGATGTACAATAAGTTGAAGAAACACGCGATCATG  
ATTGATCGCTGTGTT

+

FFFFFFFFFFFFFFFFFFFFFFFFFFFFFFFFFFFFFFFFFFFFFFFFFFFFFFFFFFFFFFFFFFFFFFFF  
:FFFFFFFFFFFFFFFFFFFFFFFFFFFFFFFFFFFFFFFFFFFFFFFFFFFFFFFFFFFFFFFFFFFFFFFF  
FFFFFFFFFFFFFFFFFFFF

@A00721:190:HGJW7DSXY:4:2170:29677:3944 2:N:0:TCTGCAAG+GCTGCACT  
AGGAGATCTGTTTGATCGAGATTTTAAGACGAAAACGATCCAGGCTGCTGCTAATGGAAATTGGGGCA  
ATGTAAAGCTCCAAATGCCCAGTATGGCCGATGTGATGTACAATAAGTTGAAGAAACACGCGATCATG  
ATTGATCGCTGTGTT

+

FFFFFFFFFFFFFFFFFFFFFFFFFFFFFFFFFFFFFFFFFFFFFFFFFFFFFFFFFFFFFFFFFFFFFFFF  
FFFFFFFFFFFFFFFFFFFFFFFFFFFFFFFFFFFFFFFFFFFFFFFFFFFFFFFFFFFFFFFFFFFFFFFF  
FFFFFFFFFFFFFFFFFFFF

@A00721:190:HGJW7DSXY:4:2265:20781:12493 2:N:0:TCTGCAAG+GCTGCACT  
AGGAGATCTGTTTGATCGAGATTTTAAGACGAAAACGATCCAGGCTGCTGCTAATGGAAATTGGGGCA  
ATGTAAAGCTCCAAATGCCCAGTATGGCCGATGTGATGTACAATAAGTTGAAGAAACACGCGATCATG  
ATTGATCGCTGTGTT

+

FFFFFFFFFFFFFFFFFFFFFFFFFFFFFFFFFFFFFFFFFFFFFFFFFFFFFFFFFFFFFFFFFFFFFFFF  
FFFFFFFFFFFFFFFFFFFFFFFFFFFFFFFFFFFFFFFFFFFFFFFFFFFFFFFFFFFFFFFFFFFFFFFF  
FFFFFFFFFFFFFFFFFFFF

@A00721:190:HGJW7DSXY:4:2343:2311:15671 2:N:0:TCTGCAAG+GCTGCACT  
AGGAGATCTGTTTGATCGAGATTTTAAGACGAAAACGATCCAGGCTGCTGCTAATGGAAATTGGGGCA  
ATGTAAAGCTCCAAATGCCCAGTATGGCCGATGTGATGTACAATAAGTTGAAGAAACACGCGATCATG  
ATTGATCGCTGTGTT

+

FFFFFFFFFFFFFFFFFFFFFFFFFFFFFFFFFFFFFFFFFFFFFFFFFFFFFFFFFFFFFFFFFFFFFFFF  
FFFFF,FFFFFFFFFFFFFFFFFFFFFFFFFFFFFFFFFFFFFFFFFFFFFFFFFFFFFFFFFFFFFFFF  
FFFFFFFFFFFFFFFFFFFF

@A00721:190:HGJW7DSXY:4:2418:9588:18286 2:N:0:TCTGCAAG+GCTGCACT  
CAATCATGATCGCGTGTTCCTTCAACTTATTGTACATCACATCGGCCATACTGGGCATTTGGAGCTTT  
ACATTGCCCAATTTCCATTAGCAGCAGCCTGGATCGTTTTTCGTCTTAAATATCGATAAAACAGAT

+

FFFFFFF:FF:FFFFFFFFFFFFFFFFFFFFFFFFFFFFFFFFFFFFFFFFFFFFFFFFFFFFFFFF:  
FFFFFF,::F:FFFFFF,:FF:F,:F:,F:FF::,FF:,,:FFF:,,:FFFFFF,,,,F:,FFF,F,F:

@A00721:190:HGJW7DSXY:4:1117:21802:4899 2:N:0:TCTGCAAG+GCTGCACT  
CTCGATAACACAGCGATCAATCATGATCGCGTGTTCCTTCAACTTATTGTACATCACATCGGCCATAC



@A00721:190:HGJW7DSXY:4:2529:32009:6825 2:N:0:TCTGCAAG+GCTGCACT  
CTCGATAACACAGCGATCAATCATGATCGCGTGTTTCTTCAACTTATTGTACATCACATCGGCCATAC  
TGGGCATTTGGAGCTTTACATTGCCCAATTTCCATTAGCAGCAGCCTGGATCGTTTTCGTCTTAAAA  
TCTCGATCAAACAGA

[illegible]

+

[illegible]

+

[illegible]

+

[illegible]

+

```
FFFFFFFF:FFFFFFFFFFFFFFFFFFFFFFFFFFFFFFFFFFFFFFFFFFFFFFFFFFFFFFF  
FFFFFFFFFFFFFFFFFFFFF:FFFFFFFFFFFFFFFFFFFFFFFFFFFFFFFF:F:  
:FFFFFFFFFFFFFFFF
```

+

[illegible] $+$ [illegible]

FFFFFFFFFFFFFFFFFFFFFFFFFFFFFFFFFFFFFFFFFFFFFFFFFFFFFFFFFFFFFFFFFFFFFFFFFFFFFFFF  
FFFFFFFFFFFFFFFF

@A00721:190:HGJW7DSXY:4:2332:15854:17989 2:N:0:TCTGCAAG+GCTGCACT  
CTGGTGTGCGATACTCGATAACACAGCGATCAATCATGATCGCGTGTTCCTTCAACTTATTGTACATCA  
CATCGGCCATACTGGGCATTTGGAGCTTTACATTGCCCCAATTTCCATTAGCAGCAGCCTGGATCGTT  
TTCGTCTTAAAATCT

+

FFFFFFFFFFFFFFFFFFFFFFFFFFFFFFFFFFFFFFFFFFFFFFFFFFFFFFFFFFFFFFFFFFFFFFFFFFFFFFFF  
FFFFFFFFFFFFFFFFFFFFFFFFFFFFFFFFFFFFFFFFFFFFFFFFFFFFFFFFFFFFFFFFFFFFFFFFFFFFFFFF  
FFFFFFFFFFFFFFFF

@A00721:190:HGJW7DSXY:4:2539:1371:16110 2:N:0:TCTGCAAG+GCTGCACT  
CTGGTGTGCGATACTCGATAACACAGCGATCAATCATGATCGCGTGTTCCTTCAACTTATTGTACATCA  
CATCGGCCATACTGGGCATTTGGAGCTTTACATTGCCCCAATTTCCATTAGCAGCAGCCTGGATCGTT  
TTCGTCTTAAAATCT

+

FFF:FFFFFFFFFFFFFFFFFFFFFFFFFFFFFFFFFFFFFFFFFFFFFFFFFFFFFFFFFFFFFFFFFFFFFFFF  
FFFFFFFFFFFFFFFFFFFFFFFFFFFFFFFFFFFFFFFFFFFFFFFFFFFFFFFFFFFFFFFFFFFFFFFFFFFFFFFF  
FFFFFFFFFFFFFFFF

@A00721:190:HGJW7DSXY:4:1146:10719:34240 2:N:0:TCTGCAAG+GCTGCACT  
TATTAATCGGACACTGGTGTGCGATACTCGATAACACAGCGATCAATCATGATCGCGTGTTCCTTCAAC  
TTATTGTACATCACATCGGCCATACTGGGCATTTGGAGCTTTACATTGCCCCAATTTCCATTAGCAGC  
AGCCTGGATCGTTTT

+

FFFFFFFFFFFFFFFFFFFFFFFFFFFFFFFFFFFFFFFFFFFFFFFFFFFFFFFFFFFFFFFFFFFFFFFFFFFFFFFF  
FFFFFFFFFFFFFFFFFFFFFFFFFFFFFFFFFFFFFFFFFFFFFFFFFFFFFFFFFFFFFFFFFFFFFFFFFFFFFFFF  
FFFFFFFFFFFFF:FFF

@A00721:190:HGJW7DSXY:4:1217:26078:9768 2:N:0:TCTGCAAG+GCTGCACT  
TATTAATCGGACACTGGTGTGCGATACTCGATAACACAGCGATCAATCATGATCGCGTGTTCCTTCAAC  
TTATTGTACATCACATCGGCCATACTGGGCATTTGGAGCTTTACATTGCCCCAATTTCCATTAGCAGC  
AGCCTGGATCGTTTT

+

FFFFFFFFFFFFFFFFFFFFFFFFFFFFFFFFFFFFFFFFFFFFFFFFFFFFFFFFFFFFFFFFFFFFFFFFFFFFFFFF  
FFFFFFFFFFFFFFFFFFFFFFFFFFFFFFFFFFFFFFFFFFFFFFFFFFFFFFFFFFFFFFFFFFFFFFFFFFFFFFFF  
FFFFFFFFFFFFF:FFF

@A00721:190:HGJW7DSXY:4:1217:28311:13823 2:N:0:TCTGCAAG+GCTGCACT  
TATTAATCGGACACTGGTGTGCGATACTCGATAACACAGCGATCAATCATGATCGCGTGTTCCTTCAAC  
TTATTGTACATCACATCGGCCATACTGGGCATTTGGAGCTTTACATTGCCCCAATTTCCATTAGCAGC  
AGCCTGGATCGTTTT

+

FFFFFFFFFFFFFFFFFFFFFFFFFFFFFFFFFFFFFFFFFFFFFFFFFFFFFFFFFFFFFFFFFFFFFFFFFFFFFFFF  
FFFFFFFFFFFFFFFFFFFFFFFFFFFFFFFFFFFFFFFFFFFFFFFFFFFFFFFFFFFFFFFFFFFFFFFFFFFFFFFF  
FFFFFFFFFFFFF:,,FF

@A00721:190:HGJW7DSXY:4:2269:25355:24862 2:N:0:TCTGCAAG+GCTGCACT  
TATTAATCGGACACTGGTGTGCGATACTCGATAACACAGCGATCAATCATGATCGCGTGTTCCTTCAAC  
TTATTGTACATCACATCGGCCATACTGGGCATTTGGAGCTTTACATTGCCCCAATTTCCATTAGCAGC  
AGCCTGGATCGTTTT

+

FFFFFFFFFFFFFFFFFFFFFFFFFFFFFFFFFFFFFFFFFFFFFFFFFFFFFFFFFFFFFFFFFFFFFFFFFFFFFFFF  
FFFFFFFFFFFFFFFFFFFFFFFFFFFFFFFFFFFFFFFFFFFFFFFFFFFFFFFFFFFFFFFFFFFFFFFFFFFFFFFF  
FFFFFFFFFFFFF:FFF:FFFFFFFFFFFFFFFFFFFFFFFFFFFFFFFFFFFFFFFF

@A00721:190:HGJW7DSXY:4:2573:1696:11663 2:N:0:TCTGCAAG+GCTGCACT  
TATTAATCGGACACTGGTGTGCGATACTCGATAACACAGCGATCAATCATGATCGCGTGTTCCTTCAAC  
TTATTGTACATCACATCGGCCATACTGGGCATTTGGAGCTTTACATTGCCCCAATTTCCATTAGCAGC  
AGCCTGGATCGTTTT





GATCAATCATGATCGCGTGTTTCTTCAACTTATTGTACATCACATCGGCCATACTGGGCATTGAGC  
TTTACATTGCCCAA

+

FFFFFFFFFFFFFFFFFFFFFFFFFFFFFFFFFFFFFFFFFFFFFFFFFFFFFFFFFFFFFFFFFFFF  
FFFFFFFFFFFFFFFFFFFFFFFFFFFFFFFFFFFFFFFFFFFFFFFFFFFFFFFFFFFFFFFFFFFF  
FFFFFFFFFFFFFFFF

@A00721:190:HGJW7DSXY:4:1375:30843:28009 2:N:0:TCTGCAAG+GCTGCACT  
GTGCACCTGGATCCTAACGGATCCCTCACTATTAATCGGACACTGGTGTGATACTCGATAACACAGC  
GATCAATCATGATCGCGTGTTTCTTCAACTTATTGTACATCACATCGGCCATACTGGGCATTGAGC  
TTTACATTGCCCAA

+

FFFFFFFFFFFFFFFF:FFFFFFFFFFFFFFFFFFFFFFFFFFFFFFFFFFFFFFFFFFFFFFFFFFFF  
FFFFFFFFFFFFFFFFFFFFFFFFFFFFFFFFFFFF,FFFFFFFFFFFFFFFFFFFFFFFFFFFFFFFFFFFF  
FFFFFFFFFFFFFFFF

@A00721:190:HGJW7DSXY:4:1654:14516:2300 2:N:0:TCTGCAAG+GCTGCACT  
GTGCACCTGGATCCTAACGGATCCCTCACTATTAATCGGACACTGGTGTGATACTCGATAACACAGC  
GATCAATCATGATCGCGTGTTTCTTCAACTTATTGTACATCACATCGGCCATACTGGGCATTGAGC  
TTTACATTGCCCAA

+

FFFFFFFFFFFFFFFFFFFFFFFFFFFF,FFF::FFFFFFFFFFFFFFFFFFFFFFFFFFFFFFFFFFFF  
FFFFFFFFFFFFFFFFFFFFFFFFFFFFFFFFFFFFFFFFFFFFFFFFFFFF:FFFF:FFFFFFFFFFFFFFFFFFFF,  
F::FFFFFFFFFFFF

@A00721:190:HGJW7DSXY:4:2325:31114:32957 2:N:0:TCTGCAAG+GCTGCACT  
GTGCACCTGGATCCTAACGGATCCCTCACTATTAATCGGACACTGGTGTGATACTCGATAACACAGC  
GATCAATCATGATCGCGTGTTTCTTCAACTTATTGTACATCACATCGGCCATACTGGGCATTGAGC  
TTTACATTGCCCAA

+

FFFFFFFFFFFFFFFFFFFFFFFFFFFFFFFFFFFFFFFFFFFFFFFFFFFFFFFFFFFFFFFFFFFF  
FFFFFFFFFFFFFFFFFFFFFFFFFFFFFFFFFFFFFFFFFFFFFFFFFFFFFFFFFFFFFFFFFFFF  
FFFFFFFFFFFFFFFF

@A00721:190:HGJW7DSXY:4:1402:20482:12696 2:N:0:TCTGCAAG+GCTGCACT  
GCTCCAAATGCCAGTATGGCCGATGTGATGTACAATAAGTTGAAGAAACACGCGATCATGATTGATC  
GCTGTGTTATCGAGTATCGACACCAGTGTCCGATTAATAGTGAGGGATCCGTTAGGATCCAGGTGCAC  
GATAGTCGAATGATG

+

FFFFFFFFFFFFFFFFFFFFFFFFFFFFFFFFFFFFFFFFFFFFFFFFFFFFFFFFFFFFFFFFFFFF  
FFFFFFFFFFFFFFFFFFFFFFFFFFFFFFFFFFFFFFFFFFFFFFFFFFFFFFFFFFFFFFFFFFFF::FFFFFFFFFFFF  
FFFFFFFFFFFFFFFF

@A00721:190:HGJW7DSXY:4:1648:31403:1485 2:N:0:TCTGCAAG+GCTGCACT  
GCTCCAAATGCCAGTATGGCCGATGTGATGTACAATAAGTTGAAGAAACACGCGATCATGATTGATC  
GCTGTGTTATCGAGTATCGACACCAGTGTCCGATTAATAGTGAGGGATCCGTTAGGATCCAGGTGCAC  
GATAGTCGAATGATG

+

FFFFFFFFFFFFFFFFFFFFFFFFFFFFFFFFFFFFFFFFFFFFFFFFFFFFFFFFFFFFFFFFFFFF  
FFFFFFFFFFFFFFFFFFFFFFFFFFFFFFFFFFFFFFFFFFFFFFFFFFFF,FFFFFFFFFFFF:FFFF:FFFFFFFF  
FFFFFFFFFFFFFFFF

@A00721:190:HGJW7DSXY:4:2133:8006:28291 2:N:0:TCTGCAAG+GCTGCACT  
GCTCCAAATGCCAGTATGGCCGATGTGATGTACAATAAGTTGAAGAAACACGCGATCATGATTGATC  
GCTGTGTTATCGAGTATCGACACCAGTGTCCGATTAATAGTGAGGGATCCGTTAGGATCCAGGTGCAC  
GATAGTCGAATGATG

+

FFFFFFFFFFFFFF:FF,FFFFFFFFFFFFFFFFFFFFFFFFFFFFFFFFFFFFFFFFFFFFFFFFFFFF  
FFFFFF:FFFFFFFFFFFFFFFFFFFFFFFFFFFFFFFFFFFF:FFFFFFFFFFFFFFFF:FFFFFFFFFFFF  
F:FFFFFFFFFFFF

@A00721:190:HGJW7DSXY:4:2362:11894:14450 2:N:0:TCTGCAAG+GCTGCACT  
GCTCCAAATGCCAGTATGGCCGATGTGATGTACAATAAGTTGAAGAAACACGCGATCATGATTGATC  
GCTGTGTTATCGAGTATCGACACCAGTGTCCGATTAATAGTGAGGGATCCGTTAGGATCCAGGTGCAC  
GATAGTCGAATGATG

+

FFFFFFFFFFFFFFFFFFFFFFFFFFFFFFFFFFFFFFFFFFFFFFFFFFFFFFFFFFFFFFFFFFFFFFFF  
FFFFFFFFFFFFFFFF,FFFFFFFFFFFFFFFFFFFFFFFFFFFFFFFFFFFFFFFFFFFFFFFFFFFFFFFF  
FFFFFFFFFFFFFFFF

@A00721:190:HGJW7DSXY:4:1523:24316:13291 2:N:0:TCTGCAAG+GCTGCACT  
GCCAGTATGGCCGATGTGATGTACAATAAGTTGAAGAAACACGCGATCATGATTGATCGCTGTGTTA  
TCGAGTATCGACACCAGTGTCCGATTAATAGTGAGGGATCCGTTAGGATCCAGGTGCACGATAGTCGA  
ATGATGGGAACAGCG

+

FFFFFFF,FFFFFFFFFFFFFFFFFFFFFFFFFFFFFFFFFFFFFFFFFFFFFFFFFFFFFFFFFFFFFFFF  
FFFFFFFFFFFFFFFFFFFFFFFFFFFFFFFFFFFFFFFFFFFFFFFFFFFFFFFFFFFFFFFFFFFFFFFF:F  
FFFFFFFFFFFFFFFF

@A00721:190:HGJW7DSXY:4:2304:2600:23469 2:N:0:TCTGCAAG+GCTGCACT  
GCCAGTATGGCCGATGTGATGTACAATAAGTTGAAGAAACACGCGATCATGATTGATCGCTGTGTTA  
TCGAGTATCGACACCAGTGTCCGATTAATAGTGAGGGATCCGTTAGGATCCAGGTGCACGATAGTCGA  
ATGATGGGAACAGCG

+

FFFFFFF:FFFFFFFFFFFFFFFFFFFFFFFFFFFFFFFFFFFFFFFFFFFFFFFFFFFFFFFFFFFFFFFF  
FFFFFFFFFFFFFFFFFFFFFFFFFFFFFFFFFFFFFFFFFFFFFFFFFFFFFFFFFFFFFFFFFFFFFFFF:F  
FFFFFFFFFF,FFFF:

@A00721:190:HGJW7DSXY:4:2523:20961:17848 2:N:0:TCTGCAAG+GCTGCACT  
GCCAGTATGGCCGATGTGATGTACAATAAGTTGAAGAAACACGCGATCATGATTGATCGCTGTGTTA  
TCGAGTATCGACACCAGTGTCCGATTAATAGTGAGGGATCCGTTAGGATCCAGGTGCACGATAGTCGA  
ATGATGGGAACAGCG

+

FFFFFFF,FFFFFFFFFFFFFFFFFFFFFFFFFFFFFFFFFFFFFFFFFFFFFFFFFFFFFFFFFFFFFFFF  
F:FFFFFFFFFFFF:FFFFFFFFFFFFFFFFFFFFFFFFFFFFFFFFFFFFFFFFFFFFFFFFFFFFFFFF  
:FFFFFFFFFFFF

@A00721:190:HGJW7DSXY:4:1317:32027:23797 2:N:0:TCTGCAAG+GCTGCACT  
TCGACTATCGTGACCTGGATCCTAACGGATCCCTCACTATTAATCGGACACTGGTGTGATACTCGA  
TAACACAGCGATCAATCATGATCGCGTGTCTTCAACTTATTGTACATCACATCGGCCATACTAGAT

+

FFFFFFFFFFFFFFFFFFFFFFFFFFFFFFFFFFFFFFFFFFFFFFFFFFFFFFFFFFFFFFFFFFFFFFFF  
FFFFFFFFFFFFFFFFFFFFFFFFFFFFFFFFFFFFFFFFFFFFFFFFFFFFFFFFFFFFFFFFFFFFFFFF:F  
FFFFFFFFFFFFFFFF

@A00721:190:HGJW7DSXY:4:1425:6153:31532 2:N:0:TCTGCAAG+GCTGCACT  
TCGACTATCGTGACCTGGATCCTAACGGATCCCTCACTATTAATCGGACACTGGTGTGATACTCGA  
TAACACAGCGATCAATCATGATCGCGTGTCTTCAACTTATTGTACATCACATCGGCCATACTAGAT

+

FFFFFFFFFFFFFFFFFFFFFFFFFFFFFFFFFFFFFFFFFFFFFFFFFFFFFFFFFFFFFFFFFFFFFFFF  
FFFFFFFFFFFFFFFFFFFFFFFFFFFFFFFFFFFFFFFFFFFFFFFFFFFFFFFFFFFFFFFFFFFFFFFF:F  
FFFFFFFF:

@A00721:190:HGJW7DSXY:4:1536:28619:15608 2:N:0:TCTGCAAG+GCTGCACT  
TCGACTATCGTGACCTGGATCCTAACGGATCCCTCACTATTAATCGGACACTGGTGTGATACTCGA  
TAACACAGCGATCAATCATGATCGCGTGTCTTCAACTTATTGTACATCACATCGGCCATACTAGAT

+

FFFFFFFFFFFFFFFFFFFFFFFFFFFFFFFFFFFFFFFFFFFFFFFFFFFFFFFFFFFFFFFFFFFFFFFF  
FFFFFFFFFFFFFFFFFFFFFFFFFFFFFFFFFFFFFFFFFFFFFFFFFFFFFFFFFFFFFFFFFFFFFFFF:F  
FFFFFFFF:

@A00721:190:HGJW7DSXY:4:1669:19352:20102 2:N:0:TCTGCAAG+GCTGCACT  
TCGACTATCGTGACCTGGATCCTAACGGATCCCTCACTATTAATCGGACACTGGTGTGATACTCGA  
TAACACAGCGATCAATCATGATCGCGTGTCTTCAACTTATTGTACATCACATCGGCCATACTAGAT

+

[illegible]

@A00721:190:HGJW7DSXY:4:2362:5150:26725 2:N:0:TCTGCAAG+GCTGCACT  
GCCGATGTGATGTACAATAAGTTGAAGAAACACGCGATCATGATTGATCGCTGTGTTATCGAGTATCG  
ACACCAGTGTCCGATTAATAGTGAGGGATCCGTTAGGATCCAGGTGCACGATAGTCGAATGATGGGAA  
CAGCGTCTAAACAAG

@A00721:190:HGJW7DSXY:4:2563:21531:21715 2:N:0:TCTGCAAG+GCTGCACT  
GCCGATGTGATGTACAATAAGTTGAAGAAACACGCGATCATGATTGATCGCTGTGTTATCGAGTATCG  
ACACCAGTGTCCGATTAATAGTGAGGGATCCGTTAGGATCCAGGTGCACGATAGACGAATGATGGGAA  
CAGCGTCTAAACAAG

@A00721:190:HGJW7DSXY:4:2641:31331:10504 2:N:0:TCTGCAAG+GCTGCACT  
GCCGATGTGATGTACAATAAGTTGAAGAAACACGCGATCATGATTGATCGCTGTGTTATCGAGTATCG  
ACACCAGTGTCCGATTAATAGTGAGGGATCCGTTAGGATCCAGGTGCACGATAGTCGAATGATGGGAA  
CAGCGTCTAAACAAG

@A00721:190:HGJW7DSXY:4:1326:9507:10379 2:N:0:TCTGCAAG+GCTGCACT  
TTTAGACGCTGTTCCCATCATTCGACTATCGTGCACCTGGATCCTAACGGATCCCTCACTATTAATCG  
GACACTGGTGTGATACTCGATAACACAGCGATCAATCATGATCGCGTGTTCCTCAACTTATTGTAC  
ATCACATCGG

@A00721:190:HGJW7DSXY:4:1442:31024:36808 2:N:0:TCTGCAAG+GCTGCACT  
TTTAGACGCTGTTCCCATCATTGCACTATCGTGCACCTGGATCCTAACGGATCCCTCACTATTAATCG  
GACACTGGTGTGCGATACTCGATAACACAGCGATCAATCATGATCGCGTGTTCCTCAACTTATTGTAC  
ATCACATCGG

@A00721:190:HGJW7DSXY:4:2119:30834:30968 2:N:0:TCTGCAAG+GCTGCACT  
TTTAGACGCTGTTCCCATCATTGCACTATCGTGCACCTGGATCCTAACGGATCCCTCACTATTAATCG  
GACACTGGTGTGATACTCGATAACACAGCGATCAATCATGATCGCGTGTTCCTCAACTTATTGTAC  
ATCACATCGG

@A00721:190:HGJW7DSXY:4:2549:18530:31798 2:N:0:TCTGCAAG+GCTGCACT  
TTTAGACGCTGTTCCCATCTTCGACTATCGTGCACCTGGATCCTAACGGATCCCTCACTATTAATCG  
GACACTGGTGTGATACTCGATAACACAGCGATCAATCATGATCGCGTGTTCCTCAACTTATTGTAC  
ATCACATCGG

+  
F:,FFFF::FFFFFFFFFFFFFFFF,FFFF:,F:FFF,F,FFFFFFFFFFFF:FFFF::FFFFFFFFFFFF  
:FFFFFFFF:FF,F:FFFFFFFFFFFFFFFFFFFFFFFFFFFF:FFFFFF,FFF:F::FFFF,FF,FFFF  
FFFFFFFFF:

@A00721:190:HGJW7DSXY:4:2644:25129:17550 2:N:0:TCTGCAAG+GCTGCACT  
TTTAGACGCTGTTCCCATCATTCGACTATCGTGCACCTGGATCCTAACGGATCCCTCACTATTAATCG  
GACACTGGTGTGCGATACTCGATAACACAGCGATCAATCATGATCGCGTGTTTCTTCAACTTATTGTAC  
ATCACATCGG

+  
FFFFFFFFFFFFFFFFFFFFFFFFFFFFFFFFFFFFFFFFFFFFFFFFFFFFFFFFFFFFFFFFFFFF:FFFF  
FFFFFFFFFFFFFFFFFFFFFFFFFFFFFFFFFFFFFFFFFFFFFFFFFFFFFFFFFFFFFFFFFFFF  
FFFFFFFFF:

@A00721:190:HGJW7DSXY:4:1439:14434:8954 2:N:0:TCTGCAAG+GCTGCACT  
TTTAGACGCTGTTCCCATCATTCGACTATCGTGCACCTGGATCCTAACGGATCCCTCACTATTAATCG  
GACACTGGTGTGCGATACTCGATAACACAGCGATCAATCATGATCGCGTGTTTCTTCAACTTATTGTAC  
ATCAC

+  
FFFFFFFFFFFFFFFFFFFFFFFFFFFF:FFFFFFFFFFFFFFFFFFFFFFFFFFFFFFFFFFFFFFFFFFFF  
FFFFFFFFFFFFFFFFFFFFFFFFFFFFFFFFFFFFFFFFFFFFFFFFFFFFFFFFFFFFFFFFFFFF:FFFFF:  
FF:FF

@A00721:190:HGJW7DSXY:4:1508:14823:3740 2:N:0:TCTGCAAG+GCTGCACT  
TTTAGACGCTGTTCCCATCATTCGACTATCGTGCACCTGGATCCTAACGGATCCCTCACTATTAATCG  
GACACTGGTGTGCGATACTCGATAACACAGCGATCAATCATGATCGCGTGTTTCTTCAACTTATTGTAC  
ATCAC

+  
FFFFFFFFFFFFFFFFFFFFFFFFFFFFFFFFFFFFFFFFFFFFFFFFFFFFFFFFFFFFFFFFFFFF  
FFFFFFFFFFFFFFFFFFFFFFFFFFFF:FFFFFFFFF:FFFFFFFFFFFFFFFFFFFFFFFFFFFFFFFFFFFF  
FF:FF

@A00721:190:HGJW7DSXY:4:2248:20356:31297 2:N:0:TCTGCAAG+GCTGCACT  
TTTAGACGCTGTTCCCATCATTCGACTATCGTGCACCTGGATCCTAACGGATCCCTCACTATTAATCG  
GACACTGGTGTGCGATACTCGATAACACAGCGATCAATCATGATCGCGTGTTTCTTCAACTTATTGTAC  
ATCAC

+  
FFFFFFFFFFFFFFFFFFFFFFFFFFFF:FFFFFFFFFFFFFFFFFFFFFFFFFFFFFFFFFFFFFFFFFFFF  
FFFFFFFFFFFFFFFFFFFFFFFFFFFF:FFFFF:FFFFFFFFFFFFF:FFFFF,FFFFFFFFFFFF:FFFFFFFFF  
FF,FF

@A00721:190:HGJW7DSXY:4:2428:16649:2487 2:N:0:TCTGCAAG+GCTGCACT  
TTTAGACGCTGTTCCCATCATTCGACTATCGTGCACCTGGATCCTAACGGATCCCTCACTATTAATCG  
GACACTGGTGTGCGATACTCGATAACACAGCGATCAATCATGATCGCGTGTTTCTTCAACTTATTGTAC  
ATCAC

+  
FFFFFFFFFFFFFFFFFFFFFFFFFFFFFFFFFFFFFFFFFFFFFFFFFFFFFFFFFFFFFFFFFFFF  
FFFFFFFFFFFFFFFFFFFFFFFFFFFFFFFFFFFFFFFFFFFFFFFFFFFFFFFFFFFFFFFFFFFF  
FF:FF

@A00721:190:HGJW7DSXY:4:2168:29957:3051 2:N:0:TCTGCAAG+GCTGCACT  
TTTAGACGCTGTTCCCATCATTCGACTATCGTGCACCTGGATCCTAACGGATCCCTCACTATTAATCG  
GACACTGGTGTGCGATACTCGATAACACAGCGATCAATCATGATCGCGTGTTTCTTCAACTTATTGTAC  
ATCA

+  
FFFFFFFFFFFFFFFFFFFFFFFFFFFF,FFFFFFFFFFFFFFFFFFFFFFFFFFFFFFFFFFFFFFFFFFFF  
FFFFFFFFFFFFFFFFFFFFFFFFFFFFFFFFFFFFFFFFFFFFFFFFFFFFFFFFFFFFFFFFFFFF:FFFFF  
FFFF

@A00721:190:HGJW7DSXY:4:1351:3965:28087 2:N:0:TCTGCAAG+GCTGCACT  
AACTGGCATTACGAATTCAGCTTGTTTAGACGCTGTTCCCATCATTCGACTATCGTGCACCTGGATCC

TAACGGATCCCTCACTATTAATCGGACACTGGTGTGCGATACTCGATAACACAGCGATCAATCATGATC  
GCGTGTTCCTTCAAC

```
FFFFFFFF:FFFFFF:FFFFF,:FFFFFFFFFFFFFFFFFFFFFFFFFFFFFFFFFFFFFFFF
FFFFFFFFFFFFFFFFFFFFFFFFFFFFFFFF:F:FFFFFFFFFFFFFFFFFFFFFFFFFFFFF
FFFFFFFFFF:FFFFF
```

 $+$ 

@A00721:190:HGJW7DSXY:4:2122:30273:8265 2:N:0:TCTGCAAG+GCTGCACT  
CGTAACTGGCATTACGAATTCAGCTTGTTTAGACGCTGTTCCCATCATTCGACTATCGTGCACCTGGA  
TCCTAACGGATCCCTCACTATTAATCGGACACTGGTGTGATACTCGATAACACAGCGATCAATCATG  
ATCGCGTGTTCCTTC

[illegible]

+

@A00721:190:HGJW7DSXY:4:1559:8115:13291 2:N:0:TCTGCAAG+GCTGCACT  
GTTACACGTAACGGCATTACGAATTCAGCTTGTGTTAGACGCTGTTCCCATCATTCGACTATCGTGCA  
CCTGGATCCTAACGGATCCCTCACTATTAATCGGACACTGGTGTGATACTCGATAACACAGCGATCA  
ATCATGATCGCGTGT

[illegible]

+

@A00721:190:HGJW7DSXY:4:2168:15799:20776 2:N:0:TCTGCAAG+GCTGCACT  
GTTACACGTAACGGCATTACGAATTCAGCTTGTTTAGACGCTGTTCCCATCATTGCACTATCGTGCA  
CCTGGATCCTAACGGATCCCTCACTATTAATCGGACACTGGTGTCGATACTCGATAACACAGCGATCA  
ATCATGATCGCGTGT

```

FFFFFFFFFFFFFFFFFFFFFFFFFFFFFFFFFFFFFFFFFFFFFFFFFFFFFFFFFFFFFFFFFFFFFFFF
FFFFFFFFFFFFFFFFFFFFFFFFFFFFFFFFFFFFFFFFFFFFFFFFFFFFFFFFFFFFFFFFFFFFFFFF:
FFFFFFFFFFFFFFFFFFFFFFFFFFFFFFFF
FFFFFFFF:FFFFFFFF

```

@A00721:190:HGJW7DSXY:4:2202:25229:15718 2:N:0:TCTGCAAG+GCTGCACT  
GTTACACGTAACGGATCCCTCACTATTAATCGGACACTGGTGTGATACTCGATAACACAGCGATCA  
ATCATGATCGCGTGT

[illegible]

+

```

FFFFFFFFFFFFFFFFFFFFF:FFF:FFFFF,FFFFF:FFFFFFFFFFFFFFFFF:FFF:FF:FFFFF
FFF:FFFFFFF:FFFFFFF,FFF,FFFFFFFFF:FFF,FFF:FFF:FFFFFFFFF:FFFFFFFFFFFFF
FFFFFFFFFFFFFFFFFFFFF

```

+

```

FFFFFFFF:FFFFFFFF:FFFFFFFFFFFFFFFFFFFFFFFFFFFFFFFFFFFFFFFFFFFFFFFF:FFFFFFFF
FFFF,FFFFFFFF,FF:FFFFFFFFF:,FFFF,FFFFFFFFFFFFFFFF:FFF:FFF:FFFFF,FFFF:F
FF,FFFFFFFF:FFFF

```

+

[illegible]

+

[illegible]

+

[illegible]

+

[illegible]

FFFFFFFFFFFFFFFFFFFFFFFFFFFFFFFFFFFFFFFFFFFFFFFFFFFFFFFFFFFFFFFFFFFFFFFFFFFFFFFF  
FFFFFFFFFFFFFFFF

@A00721:190:HGJW7DSXY:4:2602:24451:1031 2:N:0:TCTGCAAG+GCTGCACT  
GTTACACGTAACGGATTACGAATTCAGCTTGTTTAGACGCTGTTCCCATCATTCGACTATCGTGCA  
CCTGGATCCTAACGGATCCCTCACTATTAATCGGACACTGGTGTGCGATACTCGATAACACAGCGATCA  
ATCATGATCGCGTGT

+

FFFFFFFFFFFFFFFF::F:F,FFFFFFFFFFFFFFFF:FFF:FF:FFF:F:FFFFF,:FFFFFFFFFFFFFF  
FFFFFFFFFFFFFFFF:FFFFFFFFF::FFFFFFFFFFFF,FF:FFFFFFFFFFFFFFFF:FFFFF  
FFFFF:F:FFF:,FF

@A00721:190:HGJW7DSXY:4:2602:23421:2409 2:N:0:TCTGCAAG+GCTGCACT  
GTTACACGTAACGGATTACGAATTCAGCTTGTTTAGACGCTGTTCCCATCATTCGACTATCGTGCA  
CCTGGATCCTAACGGATCCCTCACTATTAATCGGACACTGGTGTGCGATACTCGATAACACAGCGATCA  
ATCATGATCGCGTGT

+

FFFFFFFFFFFFFFFFFFFFFFFFFFFFFFFFFFFFFFFFFFFFFFFFFFFFFFFFFFFFFFFFFFFFFFFFFFFF  
FFFFFFFFFFFFFFFFFFFFFFFFFFFFFFFFFFFFFFFFFFFFFFFFFFFFFFFFFFFFFFFFFFFFFFFFFFFF  
FFFFFFFFFFFFFFFF

@A00721:190:HGJW7DSXY:4:1262:19651:31234 2:N:0:TCTGCAAG+GCTGCACT  
ATCGCAGTTACACGTAACGGATTACGAATTCAGCTTGTTTAGACGCTGTTCCCATCATTCGACTAT  
CGTGACCTGGATCCTAACGGATCCCTCACTATTAATCGGACACTGGTGTGCGATACTCGATAACACAG  
CGATCAATCATGATC

+

FFFFFFFFFFFFFFFFFFFFFFFFFFFFFFFFFFFFFFFFFFFFFFFFFFFFFFFFFFFFFFFFFFFFFFFFFFFF  
FFFFFFFFFFFFFFFFFFFFFFFFFFFFFFFFFFFFFFFFFFFFFFFFFFFFFFFFFFFFFFFFFFFFFFFFFFFF  
FFFFFFFFFFFFFFFF

@A00721:190:HGJW7DSXY:4:2108:25509:8594 2:N:0:TCTGCAAG+GCTGCACT  
ATCGCAGTTACACGTAACGGATTACGAATTCAGCTTGTTTAGACGCTGTTCCCATCATTCGACTAT  
CGTGACCTGGATCCTAACGGATCCCTCACTATTAATCGGACACTGGTGTGCGATACTCGATAACACAG  
CGATCAATCATGATC

+

FFF:FFFFFFFFFFFFFFFFFFFFFFFFFFFFFFFFFFFFFFFFFFFFFFFFFFFFFFFFFFFFFFFFFFFF  
FFFFFFFFFFFFFFFFFFFFFFFFFFFFFFFFFFFFFFFFFFFFFFFFFFFFFFFFFFFFFFFFFFFFFFFFFFFF  
,FFFFFFFFFFFFFF

@A00721:190:HGJW7DSXY:4:2108:25120:9048 2:N:0:TCTGCAAG+GCTGCACT  
ATCGCAGTTACACGTAACGGATTACGAATTCAGCTTGTTTAGACGCTGTTCCCATCATTCGACTAT  
CGTGACCTGGATCCTAACGGATCCCTCACTATTAATCGGACACTGGTGTGCGATACTCGATAACACAG  
CGATCAATCATGATC

+

FFFFFFFFFFFFFFFFFFFFFFFFFFFFFFFFFFFFFFFFFFFF:,FFF,FFFFFFFFFFFFFFFFFFFFFFFFFFFF  
FFFFFFFFFFFFFFFF,FFFFFFFFFFFFFF:FFFFFFFFFFFFFFFFFFFFFFFFFFFFFFFF:F,FF,  
FFFFFFFFF::FFFFF

@A00721:190:HGJW7DSXY:4:2156:21712:5212 2:N:0:TCTGCAAG+GCTGCACT  
ATCGCAGTTACACGTAACGGATTACGAATTCAGCTTGTTTAGACGCTGTTCCCATCATTCGACTAT  
CGTGACCTGGATCCTAACGGATCCCTCACTATTAATCGGACACTGGTGTGCGATACTCGATAACACAG  
CGATCAATCATGATC

+

FFFFFFFFFFFFFFFFFFFFFFFFFFFFFFFFFFFFFFFFFFFF::FFFFFFFFFFFFFFFFFFFFFFFFFFFFFFFF  
FFFFFFFFFFFFFFFFFFFFFFFFFFFFFFFFFFFFFFFFFFFFFFFFFFFFFFFFFFFFFFFFFFFFFFFFFFFF  
FFFFFFFFFFFFFFFF

@A00721:190:HGJW7DSXY:4:2371:15420:11788 2:N:0:TCTGCAAG+GCTGCACT  
ATCGCAGTTACACGTAACGGATTACGAATTCAGCTTGTTTAGACGCTGTTCCCATCATTCGACTAT  
CGTGACCTGGATCCTAACGGATCCCTCACTATTAATCGGACACTGGTGTGCGATACTCGATAACACAG  
CGATCAATCATGATC



+  
FFFFFFFFFFFFFFFFFFFFFFFF:FF:FFFFFFFFFFFFFFFF:FFFFFFFFFFFFFFFFFFFFFFFF  
FFFFFFFFFFFFFFFFFFFFFFFFFFFFFFFFFFFFFFFFFFFFFFFFFFFFFFFFFFFFFFFF  
FFFFFFFFFFFFFFFF

@A00721:190:HGJW7DSXY:4:1239:21856:16955 2:N:0:TCTGCAAG+GCTGCACT  
CAGATCGCAGTTACACGTAACGGATTACGAATTCAGCTTGTTTAGACGCTGTTCCCATCATTCGAC  
TATCGTGACCTGGATCCTAACGGATCCCTCACTATTAATCGGACACTGGTGTGATACTCGATAACA  
CAGCGATCAATCATG

+  
FF:FFFFFFFFFFFFFFFFFFFFFFFF:FFFFFFFFFFFFFFFF:FFFFFFFFFFFFFFFFFFFFFFFF  
FFFFFFFFFFFFFFFFFFFFFFFFFFFFFFFFFFFFFFFFFFFFFFFFFFFFFFFFFFFFFFFF  
FFFFFFFFFFFFFFFF

@A00721:190:HGJW7DSXY:4:1473:30309:14340 2:N:0:TCTGCAAG+GCTGCACT  
CAGATCGCAGTTACACGTAACGGATTACGAATTCAGCTTGTTTAGACGCTGTTCCCATCATTCGAC  
TATCGTGACCTGGATCCTAACGGATCCCTCACTATTAATCGGACACTGGTGTGATACTCGATAACA  
CAGCGATCAATCATG

+  
FFFFFFFFFFFFFFFFFFFFFFFFFFFFFFFFFFFFFFFF:FFFFFFFFFFFFFFFFFFFFFFFFFFFFFFFF  
FFFFFFFFFFFFFFFFFFFFFFFFFFFFFFFFFFFFFFFFFFFFFFFFFFFFFFFFFFFFFFFF  
FFFFFFFFFFFFFFFF

@A00721:190:HGJW7DSXY:4:2436:7003:29622 2:N:0:TCTGCAAG+GCTGCACT  
CAGATCGCAGTTACACGTAACGGATTACGAATTCAGCTTGTTTAGACGCTGTTCCCATCATTCGAC  
TATCGTGACCTGGATCCTAACGGATCCCTCACTATTAATCGGACACTGGTGTGATACTCGATAACA  
CAGCGATCAATCATG

+  
FFFFFFFFFFFFFFFFFFFFFFFFFFFFFFFFFFFFFFFF,FFFFFFFFFFFF,:FF:FFFFFFFFFFFFFFFFFFFFFFFF  
FFFFFFFFFFFFFFFFFFFFFFFF:FFFFFFFFFFFFFFFFFFFFFFFFFFFFFFFF:F:FFFFFFFF,FFFFFFFF  
FFFFFFFF:FFFFF

@A00721:190:HGJW7DSXY:4:1524:21513:20682 2:N:0:TCTGCAAG+GCTGCACT  
CGTCAGATCGCAGTTACACGTAACGGATTACGAATTCAGCTTGTTTAGACGCTGTTCCCATCATTC  
GACTATCGTGACCTGGATCCTAACGGATCCCTCACTATTAATCGGACACTGGTGTGATACTCGATA  
ACACAGCGATCAATC

+  
:FFFFFFFFFFFFFFFFFFFFFFFFFFFFFFFFFFFFFFFF:FFFFFFFF:FFF:FFFFFFFFFFFFFFFF  
FFFFFFFF:FFFFFFFF:FFFFFFFF:FFFF:,FFFFFFFFFFFF,FFFF,FFFFFFFFFFFFFFFF  
FFFFF,FF:FFFFF

@A00721:190:HGJW7DSXY:4:2153:18692:13980 2:N:0:TCTGCAAG+GCTGCACT  
CGTCAGATCGCAGTTACACGTAACGGATTACGAATTCAGCTTGTTTAGACGCTGTTCCCATCATTC  
GACTATCGTGACCTGGATCCTAACGGATCCCTCACTATTAATCGGACACTGGTGTGATACTCGATA  
ACACAGCGATCAATC

+  
FFFFFFFFFFFFFFFFFFFFFFFFFFFFFFFF:FFFFFFFFFFFFFFFF,FFFFFFFFFFFFFFFFFFFFFFFF  
FFFFFFFFFFFFFFFFFFFFFFFFFFFFFFFF:FFFFFFFFFFFFFFFF:FFF:FFFFFFFFFFFFFFFF  
FFFFFFFF:FFFFF

@A00721:190:HGJW7DSXY:4:2252:21106:2409 2:N:0:TCTGCAAG+GCTGCACT  
CGTCAGATCGCAGTTACACGTAACGGATTACGAATTCAGCTTGTTTAGACGCTGTTCCCATCATTC  
GACTATCGTGACCTGGATCCTAACGGATCCCTCACTATTAATCGGACACTGGTGTGATACTCGATA  
ACACAGCGATCAATC

+  
FFFFFFFFFFFFFFFF:FFFFFFFFFFFFFFFF:FFFF:FFFFFFFFFFFFFFFFFFFFFFFF:FFF:FFFF  
FFFFFFFF:FFF:F:FFFFFF:FF::FFFFFFFFFFFFFFFF,F:FFFFFF:FFFFFFFF::FFFF::  
FFFFFFFF:FFFFF:

@A00721:190:HGJW7DSXY:4:2306:2510:23124 2:N:0:TCTGCAAG+GCTGCACT  
CGTCAGATCGCAGTTACACGTAACGGATTACGAATTCAGCTTGTTTAGACGCTGTTCCCATCATTC

GACTATCGTGACCTGGATCCTAACGGATCCCTCACTATTAATCGGACACTGGTGTGATACTCGATA  
ACACAGCGATCAATC

```
FF:FFFFFFFFFFFFFFFFFFFFFFFFFFFFFFFFFFFFFFFF:FFFFFFFFFFFFFF:FFFF:FFFF
FFFF:FFFFFFFFFF:FFFFFFFF:FFFFFFFFFFFFFFFF:FFFFFFFFFFFFFFFFFFFFFFFFFFFFFF
FFFFFFFFFFFFFFFF
```

 $+$ 

@A00721:190:HGJW7DSXY:4:2322:15872:31767 2:N:0:TCTGCAAG+GCTGCACT  
CGTCAGATCGCAGTTACACGTAACGGATTACGAATTCAGCTTGTGTTAGACGCTGTTCCCATCATTC  
GACTATCGTGCACCTGGATCCTAACGGATCCCTCACTATTAATCGGACACTGGTGTGATACTCGATA  
ACACAGCGATCAATC

```

FFFFFFFF:FFFFFFFFFFFFFFFFFFFFFFFF::FFFFF:F:F:FFFFFFFFFFFFFF:FFFFFFFF
FFFFFFFFFFFFFFFFFFFFFFFF,FFFFFFFF:FFFFFFFFFFFFFFFFFFFF:,FFFFFFFFFFFFFFFF
FFFFFFFFFFFFFFFF

```

+

@A00721:190:HGJW7DSXY:4:1149:29044:19727 2:N:0:TCTGCAAG+GCTGCACT  
CGTAAACGTCAGATCGCAGTTACACGTAAC TGGCATTACGAATTCAGCTTGT TTAGACGCTGTTCCC  
ATCATTGCACTATCGTGCACCTGGATCCTAACGGATCCCTACTATTAATCGGACACTGGTGTGCGATA  
CTCGATAACACAGCG

[illegible]

+

@A00721:190:HGJW7DSXY:4:1530:3812:31548 2:N:0:TCTGCAAG+GCTGCACT  
CGTAAACGTCAGATCGCAGTTACACGTAAC TGGCATTACGAATTCAGCTTGT TTAGACGCTGTTCCC  
ATCATTCGACTATCGTGCACCTGGATCCTAACGGATCCCTCACTATTAATCGGACACTGGTGTGCGATA  
CTCGATAACACAGCG

[illegible]



FFFFFFFFFFFFFFFF:FFFFFFFFFFFFFFFF:FFFFFFFFFFFFFFFFFFFFFFFFFFFFFFFFFFFFFFFF  
FFFFFFFFFFFFFFFF

@A00721:190:HGJW7DSXY:4:1278:32669:27289 2:N:0:TCTGCAAG+GCTGCACT  
CTCCAACAACCTCCGTAAAACGTCAGATCGCAGTTACACGTAACCTGGCATTACGAATTCAGCTTGTTT  
AGACGCTGTTCCCATCATTCGACTATCGTGCACCTGGATCCTAACGGATCCCTCACTATTAATCGGAC  
ACTGGTGTGATACT

+

FFFFFFFFFFFFFFFFFFFFFFFF:FFFFFFFFFFFFFFFFFFFFFFFFFFFFFFFFFFFFFFFF:FFFFFF:FFFFF  
FF:FFFFFFFFFFFFFFFFFFFFFFFFFFFFFFFFFFFFFFFFFFFFFFFFFFFFFFFF:FFFFFFFFFFFFFFFFFFFFF  
FFFFFFFFFFFFFFFF

@A00721:190:HGJW7DSXY:4:1341:28185:25473 2:N:0:TCTGCAAG+GCTGCACT  
CTCCAACAACCTCCGTAAAACGTCAGATCGCAGTTACACGTAACCTGGCATTACGAATTCAGCTTGTTT  
AGACGCTGTTCCCATCATTCGACTATCGTGCACCTGGATCCTAACGGATCCCTCACTATTAATCGGAC  
ACTGGTGTGATACT

+

FFFFFFFFFFFFFFFFFFFFFFFFFFFFFFFFFFFFFFFFFFFFFFFFFFFFFFFFFFFFFFFF:FFFFFFFFFFFFFFFFFFFFF  
FFFFFFFFFFFFFFFFFFFFFFFFFFFFFFFFFFFFFFFFFFFFFFFFFFFFFFFFFFFFFFFF:FFFFFFFFFFFFFFFFFFFFF  
FF:FFFFFFFFFFFFF

@A00721:190:HGJW7DSXY:4:1412:8151:36307 2:N:0:TCTGCAAG+GCTGCACT  
CTCCAACAACCTCCGTAAAACGTCAGATCGCAGTTACACGTAACCTGGCATTACGAATTCAGCTTGTTT  
AGACGCTGTTCCCATCATTCGACTATCGTGCACCTGGATCCTAACGGATCCCTCACTATTAATCGGAC  
ACTGGTGTGATACT

+

FFFFFFFFFFFFFFFFFFFFFFFFFFFFFFFFFFFFFFFFFFFFFFFFFFFFFFFFFFFFFFFFFFFFFFFFFFFFFFFF  
F:FFFFFFFFFFFFFFFFFFFFFFFFFFFFFFFFFFFFFFFFFFFFFFFFFFFFFFFFFFFFFFFF:FFFFFFFFFFFFFFFFFFFFF  
FFFFFF:FFFFFFF

@A00721:190:HGJW7DSXY:4:1434:28094:29481 2:N:0:TCTGCAAG+GCTGCACT  
CTCCAACAACCTCCGTAAAACGTCAGATCGCAGTTACACGTAACCTGGCATTACGAATTCAGCTTGTTT  
AGACGCTGTTCCCATCATTCGACTATCGTGCACCTGGATCCTAACGGATCCCTCACTATTAATCGGAC  
ACTGGTGTGATACT

+

FFFFFFFFFFFFFFFFFFFF:FFFFFFFFFFFFFFFFFFFFFFFFFFFFFFFFFFFFFFFFFFFFFFFFFFFFFFFFFFFFF:FF:F  
FFFFFFFFFFFFFFFFFFFFFFFFFFFFFFFFFFFFFFFFFFFFFFFFFFFFFFFFFFFFFFFFFFFFFFFFFFFFFFFF  
FFFFFFFFFFFF:FFFF

@A00721:190:HGJW7DSXY:4:1464:15058:28917 2:N:0:TCTGCAAG+GCTGCACT  
CTCCAACAACCTCCGTAAAACGTCAGATCGCAGTTACACGTAACCTGGCATTACGAATTCAGCTTGTTT  
AGACGCTGTTCCCATCATTCGACTATCGTGCACCTGGATCCTAACGGATCCCTCACTATTAATCGGAC  
ACTGGTGTGATACT

+

FFFFF:FFFFFFFFFFFFF,FFFFFFFFFFFFFFFFFFFFFFFFFFFFFFFFFFFFFFFFFFFFFFFFFFFFFFFFFFFFF:FFFFFFFFFFF:  
FFFFFFFFFFFFFFFFFFFFFFFFFFFFFFFFFFFFFFFFFFFFFFFFFFFFFFFFFFFFFFFFFFFFFFFFFFFFFFFF:FFFFFFFFFFFFF  
FFFFFFFFFFFFFFFF

@A00721:190:HGJW7DSXY:4:1527:11469:27774 2:N:0:TCTGCAAG+GCTGCACT  
CTCCAACAACCTCCGTAAAACGTCAGATCGCAGTTACACGTAACCTGGCATTACGAATTCAGCTTGTTT  
AGACGCTGTTCCCATCATTCGACTATCGTGCACCTGGATCCTAACGGATCCCTCACTATTAATCGGAC  
ACTGGTGTGATACT

+

FFFFFFFFFFFFFFFFFFFFFFFFFFFFFFFFFFFFFFFFFFFFFFFFFFFFFFFFFFFFFFFFFFFFFFFFFFFFFFFF  
FFFFFFFFFFFFFFFFFFFFFFFFFFFFFFFFFFFFFFFFFFFFFFFFFFFFFFFFFFFFFFFF:FFFFF,FFFFFFFF:FFFFFFFFFFFFFFFFFFFFF  
:FFFFFFFFFFFFFFFF

@A00721:190:HGJW7DSXY:4:1606:26087:15107 2:N:0:TCTGCAAG+GCTGCACT  
CTCCAACAACCTCCGTAAAACGTCAGATCGCAGTTACACGTAACCTGGCATTACGAATTCAGCTTGTTT  
AGACGCTGTTCCCATCATTCGACTATCGTGCACCTGGATCCTAACGGATCCCTCACTATTAATCGGAC  
ACTGGTGTGATACT

[illegible]

```

FFFFF:FFFFFFFFFFFFFF:FFFFFFFFFFFFFFF,FFFFF:,FFFF:FFFF
FFF:F,FFFFFF:FFFFFF:FF:FFFF::FFF,:FFFFFFFF:FFFFFF:FFFF::FF
FFFF::FFF:FFFFF

```

[illegible][illegible]

```
FF:,FFFFFFFF:FFFFFFFFFFFFFFFFFFFFFFFF:FFFFFFFFFFFFFF:FFFFFFFFFFFFFF:FFFF::FFFF,
F:FF:FFFFFF:FFFFFF,FFFF:FFFF,FF,FF:FFFFFFFF,F:FF,FFFFFFFFF:FFFFFFFFF
FF.:::FFFF:FFFF
```

[illegible][illegible]

@A00721:190:HGJW7DSXY:4:2555:3378:19022 2:N:0:TCTGCAAG+GCTGCACT  
CTCCAACAACCTTCCGTA AAAACGTGAGATCGCAGTTACACGTA AACTGGCATTACGAATTCAGCTTGTTT



$+$ 

+

+

+

+

+

+

FFFFFFFF,FFFFFF:FFFFFFFF:FFFFFFFFFFFFFFFFFFFFFFFFFFFFFFFFFFFFFFFF:FFFFF  
FFFFFFFFFFFFFFFF

@A00721:190:HGJW7DSXY:4:1306:24731:5368 2:N:0:TCTGCAAG+GCTGCACT  
CATCTTCCAAGGCATCTCATCAGACGATGCAGAACTCCAACAACCTCCGTAAAACGTCAGATCGCAGT  
TACACGTAAGTGGCATTACGAATTCAGCTTGTTTAGACGCTGTTCCCATCATTCGACTATCGTGCACC  
TGGATCCTAACGGAT

+

FFFFFFFFFFFFFFFFFFFFFFFFFFFFFFFFFFFFFFFFFFFFFFFFFFFFFFFFFFFFFFFFFFFFFFFF  
FFFFFFFFFFFFFFFFFFFFFFFFFFFFFFFFFFFFFFFF,FFFFFFFFFFFFFFFFFFFFFFFFFFFFFFFF:FF  
FFFFFFFFFFFFFFFF:

@A00721:190:HGJW7DSXY:4:1344:24939:10739 2:N:0:TCTGCAAG+GCTGCACT  
ATCTTCCAAGGCATCTCATCAGACGATGCAGAACTCCAACAACCTCCGTAAAACGTCAGATCGCAGTT  
ACACGTAAGTGGCATTACGAATTCAGCTTGTTTAGACGCTGTTCCCATCATTCGACTATCGTGCACCT  
GGATCCTAACCTGAT

+

FFFFF,FFF,FFFFFFFFF,FF:FFFF:FF,FF:FFFF,,FF:,FFFF:FFFF,FF,FFFF  
F:,FFFFFFFF:FF,F::FFFF::FFFF:FF,FFFF:FFFFFFFF:FF,FFFF:FFFFFFFFFFFF,F  
FFFFFFFFFFFF,FFF

@A00721:190:HGJW7DSXY:4:1417:5737:32283 2:N:0:TCTGCAAG+GCTGCACT  
CATCTTCCAAGGCATCTCATCAGACGATGCAGAACTCCAACAACCTCCGTAAAACGTCAGATCGCAGT  
TACACGTAAGTGGCATTACGAATTCAGCTTGTTTAGACGCTGTTCCCATCATTCGACTATCGTGCACC  
TGGATCCTAACGGAT

+

FFFFFFFFFFFFFFFFFFFFFFFFFFFFFFFFFFFFFFFFFFFFFFFFFFFFFFFFFFFFFFFFFFFFF:FFFFFFFFFFFFF  
FFFFFFFF:FFFFFF:FFFFFFFFFFFFFFFFFFFFFFFFFFFFFFFFFFFFFFFFFFFFFFFFFFFFFFFF  
FFFFFFFFFFFFFFFF

@A00721:190:HGJW7DSXY:4:1624:9968:25332 2:N:0:TCTGCAAG+GCTGCACT  
CATCTTCCAAGGCATCTCATCAGACGATGCAGAACTCCAACAACCTCCGTAAAACGTCAGATCGCAGT  
TACACGTAAGTGGCATTACGAATTCAGCTTGTTTAGACGCTGTTCCCATCATTCGACTATCGTGCACC  
TGGATCCTAACGGAT

+

FFFFFFFFFFFFFFFFFFFFFFFFFFFFFFFFFFFFFFFFFFFFFFFFFFFFFFFFFFFFFFFFFFFFF  
FFFFFF:F:FF:FFFFFFFFF:FFFFF,FFFFFFFFFFFFFFFFFFFFFFFFFFFFFFFF:FFFFFFFFFFFFF  
FFFFFFFFFFFF:FFF

@A00721:190:HGJW7DSXY:4:2608:22941:11882 2:N:0:TCTGCAAG+GCTGCACT  
CATCTTCCAAGGCATCTCATCAGACGATGCAGAACTCCAACAACCTCCGTAAAACGTCAGATCGCAGT  
TACACGTAAGTGGCATTACGAATTCAGCTTGTTTAGACGCTGTTCCCATCATTCGACTATCGTGCACC  
TGGATCCTAACGGAT

+

F:FFFFFFFF:FFFFFFFFFFFFFFFFFFFFFFFFFFFFFFFFFFFFFFFFFFFFFFFFFFFFFFFF:FFFFFFFFF  
FFFFFFFFFFFFFFFFFFFFFFFFFFFFFFFFFFFFFFFF:FFFFFFFFFFFFFFFFFFFFFFFFFFFF,FFFFF:FFFFFFFFF  
F:FFFFFFFFFFFF

@A00721:190:HGJW7DSXY:4:1353:4634:22858 2:N:0:TCTGCAAG+GCTGCACT  
TTAGGATCCAGGTGCACGATAGTCGAATGATGGGAACAGCGTCTAAACAAGCTGAATTCGTAATGCCA  
GTTACGTGTAAGTGCATCTGACGTTTTACGGAAGTTGTTGGAGTTCTGCATCGTCTGATGAGATGCC  
TTGGAAGATGTTGTA

+

:FFF:FFFFFFFFFFFFFFFFFFFFFFFFFFFFFFFFFFFFFFFFFFFFFFFFFFFFFFFFFFFFFFFF:  
FFFFFFFFFFFFFFFF:FFFFFFFFFF,FFFF:FFFF,FF,FFFFFFFFF::FFFFFFFF:FFFFFFFF  
FFF::FF,,FF:FFF

@A00721:190:HGJW7DSXY:4:1632:24089:29747 2:N:0:TCTGCAAG+GCTGCACT  
TTAGGATCCAGGTGCACGATAGTCGAATGATGGGAACAGCGTCTAAACAAGCTGAATTCGTAATGCCA  
GTTACGTGTAAGTGCATCTGACGTTTTACGGAAGTTGTTGGAGTTCTGCATCGTCTGATGAGATGCC  
TTGGAAGATGTTGTA





GTGTAAGTGCATCTGACGTTTTACGGAAGTTGTTGGAGTTCTGCATCGTCTGATGAGATGCCTTGGA  
AGATGTTGTATAGGT

+

FFFFFFFFFFFFFFFFFFFFFFFFFFFFFFFFFFFFFFFFFFFFFFFFFFFFFFFFFFFFFFFFFFFFFFFF:FFFFFFFFFFFFFFFF  
FFFF:FFFFFFFFFFFFFFFFFFFFFFFFFFFFFFFFFFFFFFFFFFFFFFFFFFFFFFFFFFFFFFFFFFFFFFFF:FFFFFFFFFFFFFFFF  
F:FFFFFFFFFFFFFFFF

@A00721:190:HGJW7DSXY:4:2537:6361:8093 2:N:0:TCTGCAAG+GCTGCACT  
ATCCAGGTGCACGATAGTCGAATGATGGGAACAGCGTCTAAACAAGCTGAATTCGTAATGCCAGTTAC  
GTGTAAGTGCATCTGACGTTTTACGGAAGTTGTTGGAGTTCTGCATCGTCTGATGAGATGCCTTGGA  
AGATGTTGTATAGGT

+

FFFF:FFFFFFFFFFFFFFFFFFFFFFFFFFFFFFFFFFFFFFFFFFFFFFFFFFFFFFFFFFFFFFFFFFFFFFFF:FFFFFFFFFFFFF:FFFFFFFFFFFFFFFF  
F,FFFFFFFFFFFFFFFFFFFFFFFFFFFFFFFFFFFFFFFFFFFFFFFFFFFFFFFFFFFFFFFFFFFFFFFF:FFF:FFFFFFFFFFFFFFFFFFFFFFFFFFFFFFFF  
FFFFFFFFFFFFFFFF

@A00721:190:HGJW7DSXY:4:1105:6578:8625 2:N:0:TCTGCAAG+GCTGCACT  
CAGCGTCTAAACAAGCTGAATTCGTAATGCCAGTTACGTGTAAGTGCATCTGACGTTTTACGGAAGT  
TGTTGGAGTTCTGCATCGTCTGATGAGATGCCTTGGAAGATGTTGTATAGGTTGGAAAATTCCAACCT  
CAAAACAGGTACTCT

+

FFFFFFFFFFFFFFFFFFFFFFFFFFFFFFFFFFFFFFFFFFFFFFFFFFFFFFFFFFFFFFFFFFFFFFFFFFFFFFFFFFFFFFFF  
FF:FFFFFFFFFFFFFFFFFFFFFFFFFFFFFFFFFFFFFFFFFFFFFFFFFFFFFFFFFFFFFFFFFFFFFFFFFFFFFFFFFFFFFFFF  
FFFFFFFFFFFFFFFF

@A00721:190:HGJW7DSXY:4:1251:7093:19727 2:N:0:TCTGCAAG+GCTGCACT  
CAGCGTCTAAACAAGCTGAATTCGTAATGCCAGTTACGTGTAAGTGCATCTGACGTTTTACGGAAGT  
TGTTGGAGTTCTGCATCGTCTGATGAGATGCCTTGGAAGATGTTGTATAGGTTGGAAAATTCCAACCT  
CAAAACAGGTACTCT

+

F:FFFFFFFFFFFFFFFFFFFFFFFFFFFFFFFFFFFFFFFFFFFFFFFFFFFFFFFFFFFFFFFFFFFFFFFFFFFFFFFF  
FFF:FFFFFFFFFFFFFFFFFFFFFFFFFFFFFFFFFFFFFFFFFFFFFFFFFFFFFFFFFFFFFFFFFFFFFFFFFFFFFFFF  
F:FFFFFFFFFFFFFFFF

@A00721:190:HGJW7DSXY:4:1269:23782:27117 2:N:0:TCTGCAAG+GCTGCACT  
CAGCGTCTAAACAAGCTGAATTCGTAATGCCAGTTACGTGTAAGTGCATCTGACGTTTTACGGAAGT  
TGTTGGAGTTCTGCATCGTCTGATGAGATGCCTTGGAAGATGTTGTATAGGTTGGAAAATTCCAACCT  
CAAAACAGGTACTCT

+

FFFFFFFFFFFFFFFFFFFF:FFFFFFF:FFFFFFFFFFFFFFFFFFFFFFFFFFFFFFFFFFFFFFFFFFFFFFFF:FFFFFFFFFFFFFFFF,F:  
FFF:FFFFFFFFFFFFFFFFFFFFFFFFFFFFFFFFFFFFFFFFFFFFFFFFFFFFFFFFFFFFFFFFFFFFFFFF,FFFFFFFFFFFFFFFFFFFFFFFF  
FFFFFFFFF:F:FFFF

@A00721:190:HGJW7DSXY:4:1342:23818:34256 2:N:0:TCTGCAAG+GCTGCACT  
CAGCGTCTAAACAAGCTGAATTCGTAATGCCAGTTACGTGTAAGTGCATCTGACGTTTTACGGAAGT  
TGTTGGAGTTCTGCATCGTCTGATGAGATGCCTTGGAAGATGTTGTATAGGTTGGAAAATTCCAACCT  
CAAAACAGGTACTCT

+

FFFFFFFFFFFFFFFFFFFFFFFFFFFFFFFFFFFFFFFFFFFFFFFFFFFFFFFFFFFFFFFFFFFFFFFF:FFFF:FFFFFFFFFFFF::FFFFFFFF:FFFF  
FFFFFFFFFFFFFFFFFFFFFFFFFFFFFFFFFFFFFFFFFFFFFFFFFFFFFFFFFFFFFFFFFFFFFFFF:FFFFFFFFFFFFFFFFFFFFFFFF  
FFFFFFFF:FFFFFFFF

@A00721:190:HGJW7DSXY:4:2410:24876:21057 2:N:0:TCTGCAAG+GCTGCACT  
CAGCGTCTAAACAAGCTGAATTCGTAATGCCAGTTACGTGTAAGTGCATCTGACGTTTTACGGAAGT  
TGTTGGAGTTCTGCATCGTCTGATGAGATGCCTTGGAAGATGTTGTATAGGTTGGAAAATTCCAACCT  
CAAAACAGGTACTCT

+

FFFFFFFFF:FFF,FFFFFFFFFFFFFFFFFFFFFFFFFFFFFFFFFFFFFFFFFFFFFFFFFFFFFFFFFFFFFFFF:FF:FF  
FFFFFFFFFFFFFFFFFFFFFFFFFFFFFFFFFFFFFFFFFFFFFFFFFFFFFFFFFFFFFFFF:FFFF:FFFFFFFFFFFFFFFFFFFFFFFF  
FFFFFFFF:FFFFFF:

$+$ 

@

+

©

+

@

+

@

+

@

+

@

+

@A00721:190:HGJW7DSXY:4:2564:30463:35524 2:N:0:TCTGCAAG+GCTGCACT  
CACATAGCTTCAGACGTCCTTTGATTCTACAAAACAGAGTACCTGTTTTGAGGTTGGAATTTTCCAAC  
CTATACAACATCTTCCAAGGCATCTCATCAGACGATGCAGAACTCCAACAACCTTCGGTAAAACGTCAG  
ATCGCAGTTACACGT

@A00721:190:HGJW7DSXY:4:1402:16152:14215 2:N:0:TCTGCAAG+GCTGCACT  
AAGCACATAGCTTCAGACGTCCTTTGATTCTACAAAACAGAGTACCTGTTTTGAGGTTGGAATTTTCC  
AACCTATACAACATCTTCCAAGGCATCTCATCAGACGATGCAGAACTCCAACAACCTCCGTAAACGT  
CAGATCGCAGTTACA

@A00721:190:HGJW7DSXY:4:1406:7057:10989 2:N:0:TCTGCAAG+GCTGCACT  
AAGCACATAGCTTCAGACGTCCTTTGATTCTACAAAACAGAGTACCTGTTTTGAGGTTGGAATTTTCC  
AACCTATACAACATCTTCCAAGGCATCTCATCAGACGATGCAGAACTCCAACAACCTCCGTA AACGT  
CAGATCGCAGTTACA

@A00721:190:HGJW7DSXY:4:1451:30816:7576 2:N:0:TCTGCAAG+GCTGCACT  
AAGCACATAGCTTCAGACGTCCTTTGATTCTACAAAACAGAGTACCTGTTTTGAGGTTGGAATTTTCC  
AACCTATACAACATCTTCCAAGGCATCTCATCAGACGATGCAGAACTCCAACAACCTCCGTA AACGT  
CAGATCGCAGTTACA

@A00721:190:HGJW7DSXY:4:1534:24560:35383 2:N:0:TCTGCAAG+GCTGCACT  
AAGCACATAGCTTCAGACGTCCTTTGATTCTACAAAACAGAGTACCTGTTTTGAGGTTGGAATTTTCC  
AACCTATACAACATCTTCCAAGGCATCTCATCAGACGATGCAGAACTCCAACAACCTCCGTA AAAACGT  
CAGATCGCAGTTACA

@A00721:190:HGJW7DSXY:4:2372:15591:8296 2:N:0:TCTGCAAG+GCTGCACT  
AAGCACATAGCTTCAGACGTCCTTTGATTCTACAAAACAGAGTACCTGTTTTGAGGTTGGAATTTTCC  
AACCTATACAACATCTTCCAAGGCATCTCATCAGACGATGCAGAACTCCAACAACCTCCGTAAACGT  
CAGATCGCAGTTACA

@A00721:190:HGJW7DSXY:4:1125:15944:21402 2:N:0:TCTGCAAG+GCTGCACT  
CCTCAACGCGCTTCGAAGCACATAGCTTCAGACGTCCTTTGATTCTACAAAACAGAGTACCTGTTTTG  
AGGTTGGAATTTTCCAACCTATACAACATCTTCCAAGGCATCTCATCAGACGATGCAGAACTCCAACA  
AC



CTACAAAACAGAGTACCTGTTTTGAGGTTGGAATTTTCCAACCTATACAACATCTTCCAAGGCATCTC  
ATCAGACGATGCAGA

[illegible] $+$ [illegible]
$$+$$

```

FFFFFFFFFFFFFFFFFFFFFFFFFFFFFFFF:FFFFFFFFFFFFFFFFFFFFFFFF,F
FFFF:F::FFFFFFFFFFFFFFFFFFFF,FFFFFFFFFFFFFFFFFFFFFFFFFFFF
FFFFFFFFFFFFFFFF

```

+

F:FF:FFF:F,,F,FFFFFF:FFFFFFFFFFFF:F,:FFF,FFFFFFFFFFFFFF,FFF:FFF:,,:FFF  
 FFFFFFF:FFFFFF:FFFFFF:,FFFF:,FF:,,:FFFF:,F,,FF::F:F:,FF,FF,,FFF,,F,:,:  
 :FFF,FF,FFF,,FF

+

[illegible]

+

```

FFFFFFFF:FFFFFFFFFFFFFFFFFFFFFFFFFFFFFFFFFFFFFFFFFFFFFFFFFFFFFFFF
FFFFF:FFFF:FFFFFF:FFFF:FFFFFFFFFFFF,FFFFFFFFFFFFFFFFFFFFFFFFFFFF
FFFFFFFFFFFFFFFF

```

 $+$ [illegible]

@A00721:190:HGJW7DSXY:4:1315:8730:7498 2:N:0:TCTGCAAG+GCTGCACT  
CTCTTCGACAGGATGTTGATCCTGGGACTCCTGAACTCAATCTCCTCAACGCGCTTCGAAGCACATAG  
CTTCAGACGTCCTTTGATTCTACAAAACAGAGTACCTGTTTTGAGGTTGGACTTTTCCAACCTATACA  
ACATCTTCCAAGGCA

+

FFFFFFFFFFFFFFFFFFFFFFFFFFFFFFFFFFFFFFFFFFFFFFFFFFFFFFFFFFFFFFFFFFFFFFFF,FFFFF  
FFFFFFFFFFFFFFFFFFFFFFFFFFFFFFFFFFFFFFFFFFFFFFFFFFFFFFFFFFFFFFFFFFFFFFFF,FFFFFFFFFFFFFFFF  
FFF:FFF:F:F::F

@A00721:190:HGJW7DSXY:4:2310:3513:4695 2:N:0:TCTGCAAG+GCTGCACT  
CTCTTCGACAGGATGTTGATCCTGGGACTCCTGAACTCAATCTCCTCAACGCGCTTCGAAGCACATAG  
CTTCAGACGTCCTTTGATTCTACAAAACAGAGTACCTGTTTTGAGGTTGGAATTTTCCAACCTATACA  
ACATCTTCCAAGGCA

+

FFF,FFFFFFFF:FFFFFFFFFFFFFFFFFFFFFFFFFFFFFFFFFFFFFFFFFFFFFFFFFFFFFFFF:FFFFFFF  
FFFFFFFFFFFFFFFF:FFFFFFFFF:FFFFFFFFFFFFFFFFFFFFFFFF,FFFFFF:FFFFFFFFFFFFFFFFFFFFFFFF  
FFFFFFFFFFFF,FFF

@A00721:190:HGJW7DSXY:4:2355:30219:20134 2:N:0:TCTGCAAG+GCTGCACT  
CTCTTCGACAGGATGTTGATCCTGGGACTCCTGAACTCAATCTCCTCAACGCGCTTCGAAGCACATAG  
CTTCAGACGTCCTTTGATTCTACAAAACAGAGTACCTGTTTTGAGGTTGGAATTTTCCAACCTATACA  
ACATCTTCCAAGGCA

+

FFFFFFFFFFFFFFFFF:FFFFFFFFFFFFFFFFFFFFFFFFFFFFFFFFFFFFFFFFFFFFFFFFFFFFFFFF:FF  
FFFFFFFF:FFFF,FFFFFFFFFFFFFFFFFFFFFFFFFFFFFFFFFFFFFFFFFFFFFFFFFFFFFFFF::FFFFF,FFFFFFF  
FFFF:FFFFFFFFF

@A00721:190:HGJW7DSXY:4:2456:32759:26913 2:N:0:TCTGCAAG+GCTGCACT  
CTCTTCGACAGGATGTTGATCCTGGGACTCCTGAACTCAATCTCCTCAACGCGCTTCGAAGCACATAG  
CTTCAGACGTCCTTTGATTCTACAAAACAGAGTACCTGTTTTGAGGTTGGAATTTTCCAACCTATACA  
ACATCTTCCAAGGCA

+

FFFFFFFFFFFFFFFFFFFFFFFFFFFFFFFFFFFFFFFFFFFFFFFFFFFFFFFFFFFFFFFFFFFFFFFF:FFFFF  
FFFFFFFFFFFFFFFFFFFFFFFFFFFFFFFFFFFFFFFFFFFFFFFFFFFFFFFFFFFFFFFFFFFFFFFF,FFFFFFFFF:FFF:FFFF:F:FFFFFFFFF  
FFFF:FF:,FF,FFF

@A00721:190:HGJW7DSXY:4:1153:28447:29371 2:N:0:TCTGCAAG+GCTGCACT  
GCCTCTTCGACAGGATGTTGATCCTGGGACTCCTGAACTCAATCTCCTCAACGCGCTTCGAAGCACAT  
AGCTTCAGACGTCCTTTGATTCTACAAAACAGAGTACCTGTTTTGAGGTTGGAATTTTCCAACCTATA  
CAACATCTTCCAAGG

+

FFFFFFFFFFFFFFFFFFFFFFFFFFFFFFFFFFFFFFFFFFFFFFFFFFFFFFFFFFFFFFFFFFFFFFFF:FFFFF  
FFFFFFFF:FFFFFFFFFFFFFFFFFFFFFFFFFFFFFFFFFFFFFFFFFFFFFFFFFFFFFFFFFFFFFFFFFFFFFFFF  
FFFFFFFFFFFFFFFFF

@A00721:190:HGJW7DSXY:4:1166:1633:15248 2:N:0:TCTGCAAG+GCTGCACT  
GCCTCTTCGACAGGATGTTGATCCTGGGACTCCTGAACTCAATCTCCTCAACGCGCTTCGAAGCACAT  
AGCTTCAGACGTCCTTTGATTCTACAAAACAGAGTACCTGTTTTGAGGTTGGAATTTTCCAACCTATA  
CAACATCTTCCAAGG

+

FFFFFFFFFFFFFFFFFFFFFFFFFFFFFFFFFFFFFFFFFFFFFFFFFFFFFFFFFFFFFFFFFFFFFFFF:FFF  
FFFFFFFFFFFFFFFF:FFFFFFFFFFFFFFFFFFFFFFFFFFFFFFFFFFFFFFFFFFFFFFFFFFFFFFFFFFFFFFFF  
FFFFFFFFFFFFFFFFF

@A00721:190:HGJW7DSXY:4:1263:6759:15421 2:N:0:TCTGCAAG+GCTGCACT  
GCCTCTTCGACAGGATGTTGATCCTGGGACTCCTGAACTCAATCTCCTCAACGCGCTTCGAAGCACAT  
AGCTTCAGACGTCCTTTGATTCTACAAAACAGAGTACCTGTTTTGAGGTTGGAATTTTCCAACCTATA  
CAACATCTTCCAAGG

+

FFFFFFFFFFFFFFFFF,FFFFFFFFFFFFFFFFFFFFFFFFFFFFFFFFFFFFFFFFFFFFFFFFFFFFFFFF

FFFFFFFFFFFFFFFF:FFFFFFFF:FFFFFFFFFFFFFF,FFFFFFFFFFFF,FFFFFFFFFFFF:FF  
FFFFFFFFFFFFFFFF

@A00721:190:HGJW7DSXY:4:2467:7509:6355 2:N:0:TCTGCAAG+GCTGCACT  
GCCTCTTCGACAGGATGTTGATCCTGGGACTCCTGAACTCAATCTCCTCAACGCGCTTCGAAGCACAT  
AGCTTCAGACGTCCTTTGATTCTACAAAACAGAGTACCTGTTTTGAGGTTGGACTTTTCCAACCTATA  
CAACATCTTCCAAGG

+

FFFFFFFFFFFFFFFFFFFFFFFFFFFFFFFFFFFFFFFFFFFFFFFFFFFFFFFFFFFFFFFFFFFFFFFF  
FFFFFFFFFFFFFFFF: :FFFFFFFFFFFFFFFFFFFFFFFFFFFFFFFFFFFFFFFFFFFFFFFFFFFF,FFFFFFFFFFFF:FF  
FFFFFFFFFFFFFFFF

@A00721:190:HGJW7DSXY:4:2633:2736:17409 2:N:0:TCTGCAAG+GCTGCACT  
GCCTCTTCGACAGGATGTTGATCCTGGGACTCCTGAACTCAATCTCCTCAACGCGCTTCGAAGCACAT  
AGCTTCAGACGTCCTTTGATTCTACAAAACAGAGTACCTGTTTTGAGGTTGGAATTTTCCAACCTATA  
CAACATCTTCCAAGG

+

FFFFF:FFFFFFFF:FFFFFFFFFFFFFFFFFFFFFFFFFFFFFFFFFFFFFFFFFFFFFFFFFFFFFFFF  
FFFFFFFFFFFFFFFF:F,FFFFFFFF:FFFFFFFFFFFFFFFF:FFFFFFFFFFFF,F:FFFFFFFF:  
FFFFF:FFFFF:,FF

@A00721:190:HGJW7DSXY:4:2678:12382:33332 2:N:0:TCTGCAAG+GCTGCACT  
GCCTCTTCGACAGGATGTTGATCCTGGGACTCCTGAACTCAATCTCCTCAACGCGCTTCGAAGCACAT  
AGCTTCAGACGTCCTTTGATTCTACAAAACAGAGTACCTGTTTTGAGGTTGGAATTTTCCAACCTATA  
CAACATCTTCCAAGG

+

FFFFFFFFFFFFFFFFFFFFFFFFFFFFFFFFFFFFFFFFFFFFFFFFFFFFFFFFFFFFFFFFFFFFFFFF  
FFFFFFFFFFFFFFFFFFFFFFFFFFFFFFFFFFFFFFFFFFFFFFFFFFFFFFFFFFFFFFFFFFFFFFFF  
FFFFFFFFFFFFFFFF

@A00721:190:HGJW7DSXY:4:2368:25771:33661 2:N:0:TCTGCAAG+GCTGCACT  
GCCTCTTCGACAGGATGTTGATCCTGGGACTCCTGAACTCAATCTCCTCAACGCGCTTCGAAGCACAT  
AGCTTCAGACGTCCTTTGATTCTACAAAACAGAGTACCTGTTTTGAGGTTGGAATTTTCCAACCTATA  
CAACATCTTCCAAG

+

FFFFFFFFFFFFFFFFFFFFFFFFFFFFFFFFFFFFFFFFFFFFFFFFFFFFFFFFFFFFFFFFFFFFFFFF  
FFFFFFFFFFFFFFFFFFFFFFFFFFFFFFFFFFFFFFFFFFFFFFFFFFFFFFFFFFFFFFFFFFFFFFFF  
FFFFFFFFFFFF:FFF

@A00721:190:HGJW7DSXY:4:1223:30626:30264 2:N:0:TCTGCAAG+GCTGCACT  
TGTATAGGTTGGAAAATTCCAACCTCAAAACAGGTACTCTGTTTTGTAGAATCAAAGGACGTCTGAAG  
CTATGTGCTTCGAAGCGCGTTGAGGAGATTGAGTTCAGGAGTCCCAGGATCAACATCCTGACGAAGAG  
GCATGAAGCCAAGGA

+

F,FF,F:FFFFFFFFFFFFFFFFFFFFFFFF:FFF,FF::F:,FF,FF:FFF:F,FF:F:FF,F,F:FFF  
F,FF,,FFFF,FFFF:FFF::F:F:FFFF,FFF,F:FF,F:FF:FFFFFFFFFFFFFFFF,FFF:FF,  
FFFF:F,F,FFFFF

@A00721:190:HGJW7DSXY:4:1268:28131:6370 2:N:0:TCTGCAAG+GCTGCACT  
TGTATAGGTTGGAAAATTCCAACCTCAAAACAGGTACTCTGTTTTGTAGAATCAAAGGACGTCTGAAG  
CTATGTGCTTCGAAGCGCGTTGAGGAGATTGAGTTCAGGAGTCCCAGGATCAACATCCTGTGCAAGAG  
GCATGAAGCCAAGGA

+

FFFFFFFFFFFFFFFFFFFFFFFFFFFFFFFFFFFFFFFFFFFFFFFFFFFFFFFFFFFFFFFFFFFFFFFF  
F:FFFFFFFFFFFFFFFFFFFFFFFFFFFFFFFFFFFFFFFFFFFFFFFFFFFFFFFFFFFFFFFFFFFFFFFF  
FFFFFFFFFFFFFFFF

@A00721:190:HGJW7DSXY:4:1350:9091:1705 2:N:0:TCTGCAAG+GCTGCACT  
TGTATAGGTTGGAAAATTCCAACCTCAAAACAGGTACTCTGTTTTGTAGAATCAAAGGACGTCTGAAG  
CTATGTGCTTCGAAGCGCGTTGAGGAGATTGAGTTCAGGAGTCCCAGGATCAACATCCTGTGCAAGAG  
GCATGAAGCCAAGGA



+  
FFFFFFFFFFFFFFFFFFFFFFFFFFFFFFFFFFFFF:FFFFFFFFFFFFFFFFFFFFFF  
FFFFFFFFFFFFFFFFFFFFFFFFFFFFFFFFFFFFF:FFFFF  
FFFFFFFFFFFFFF

@A00721:190:HGJW7DSXY:4:1628:16676:3443 2:N:0:TCTGCAAG+GCTGCACT  
TGTATAGGTTGGAAAATTCCAACCTCAAACAGGTA CTCTGTTTTGTAGAATCAAAGGACGTCTGAAG  
CTATGTGCTTCGAAGCGCGTTGAGGAGATTGAGTTCAGGAGTCCCAGGATCAACATCCTGTCTGAAGAG  
GCATGAAGCCAAGGA

+  
FFFFFFFFFFFFFFFFFFFFFFFFFFFFFFFFFFFFF:FFFFFFFFFFFFFFFFFFFFFF:F  
FFFFFFFFFFFFFF,F,FFFFFFFFFFFFFFFFFFFFFFFFFFFFF:FFFFFFFFFFFFFFFFFFF:  
FFFFFFFFFFFFFF

@A00721:190:HGJW7DSXY:4:2277:27046:21934 2:N:0:TCTGCAAG+GCTGCACT  
TGTATAGGTTGGAAAATTCCAACCTCAAACAGGTA CTCTGTTTTGTAGAATCAAAGGACGTCTGAAG  
CTATGTGCTTCGAAGCGCGTTGAGGAGATTGAGTTCAGGAGTCCCAGGATCAACATCCTGTCTGAAGAG  
GCATGAAGCCAAGGA

+  
FFFFFFFFFFFFFFF:FFFFFFFFFFFFFFFFFFFFFFFFFF,F,FFFFFFFFFFFFFFFFFFFFFFFFFFFF  
FF:FFFFFFFF::FFFF,F,FFFFFFFF:,FFF,FFFFFFFFFFFFFFFFFFFFFFFFFFFFF:FFFFF:FFF  
FFFFFFFFFFFF:FFF

@A00721:190:HGJW7DSXY:4:2451:30391:6778 2:N:0:TCTGCAAG+GCTGCACT  
TGTATAGGTTGGAAAATTCCAACCTCAAACAGGTA CTCTGTTTTGTAGAATCAAAGGACGTCTGAAG  
CTATGTGCTTCGAAGCGCGTTGAGGAGATTGAGTTCAGGAGTCCCAGGATCAACATCCTGTCTGAAGAG  
GCATGAAGCCAAGGA

+  
FFFFFFFFFFFFFFF:FFFFFFFFFFFFFFFFFFFFFFFFFF:FFFFFFFFFFFFFFFFFFFF:FFFFFFFF,  
FFFFFFFFFFFF,:FFFFFFFFFFFFFFFFFFFF,F,FFFFFFFFFFFFFFFFFFFFFFFFFFFFF:FFFFFFFFFFFF  
FF:FFFFFFFF:FFFF

@A00721:190:HGJW7DSXY:4:2520:10484:1235 2:N:0:TCTGCAAG+GCTGCACT  
TGTATAGGTTGGAAAATTCCAACCTCAAACAGGTA CTCTGTTTTGTAGAATCAAAGGACGTCTGAAG  
CTATGTGCTTCGAGGCGCGTTGAGGAGATTGAGTTCAGGAGTCCCAGGATCAACATCCTGTCTGAAGAG  
GCATGAAGCCAAGGA

+  
FFFFFFFFFFFFFFFFFFFFFFFFFFFFFFFFFFFFF:FFFFFFFFF:FFFF:FFFFFFFFFFFF,FFFFFFFFFFFF  
FFFFFFFFFFFF,F,FFFFFFFFFFFF:FFFF,F:FFFFFFFFF:FFFFFFFFFFFFFFFFFFFFFFFFFFFF  
FFF:FFFFFFFFFFFF

@A00721:190:HGJW7DSXY:4:2520:10529:1344 2:N:0:TCTGCAAG+GCTGCACT  
TGTATAGGTTGGAAAATTCCAACCTCAAACAGGTA CTCTGTTTTGTAGAATCAAAGGACGTCTGAAG  
CTATGTGCTTCGAAGCGCGTTGAGGAGATTGAGTTCAGGAGTCCCAGGATCAACATCCTGTCTGAAGAG  
GCATGAAGCCAAGGA

+  
FFFFFFFFFFFFFFFFFFFFFFFFFFFFFFFFFFFFF:FFFFFFFFF:FFFFFFFF:FFFFFFFFFFFFFFFFFFFF:F  
F:,FFFFFFFFFFFFFFFFFFFF,F,FFFFFFFF:FFFFFFFFFFFFFFFFFFFFFFFFFFFFFFFFFFFF  
FFFF:FFFFFFFFFFFF

@A00721:190:HGJW7DSXY:4:1261:30400:33974 2:N:0:TCTGCAAG+GCTGCACT  
TATCTATATCCTTGCTTCATGCCTCTTCGACAGGATGTTGATCCTGGGACTCCTGAACTCAATCTCC  
TCAACGCGCTTCGAAGCACATAGCTTCAGACGTCCTTTGATTCTACAAAACAGAGTACCTGTTTTGAG  
GTTGGAATTTTCCAA

+  
FFFFFFFFFFFFFFFFFFFFFFFFFFFFFFFFFFFFF:FFFFFFFFF:FFFFFFFF:FFFFFFFFFFFFFFFFFFFF:F  
F:,FFFFFFFFFFFFFFFFFFFF,F,FFFFFFFF:FFFFFFFFFFFFFFFFFFFFFFFFFFFFFFFFFFFF  
FFFFF,FFFFFFFFFFFF

@A00721:190:HGJW7DSXY:4:1452:12653:23876 2:N:0:TCTGCAAG+GCTGCACT  
TATCTATATCCTTGCTTCATGCCTCTTCGACAGGATGTTGATCCTGGGACTCCTGAACTCAATCTCC





FFFFFFFFFFFFFFFF:FFFFFF:FFFF:FFFFFFFFFFFFFFFFFFFFFFFFFFFFFFFFFFFF  
FFFFFFFF:FFFFF

@A00721:190:HGJW7DSXY:4:2427:27516:28948 2:N:0:TCTGCAAG+GCTGCACT  
GTTCAACGTGGGTTGACTAGTGGCATATTCAACATGCCACATATCTATATCCTTGGCTTCATGCCTCT  
TCGACAGGATGTTGATCCTGGGACTCCTGAACTCAATCTCCTCAACGCGCTTCGAAGCACATAGCTTC  
AGACGTCCTTTGATT

+

FFFFFFFF:FFFFFFFFFFFFFFFF:FFFFFFFFFFFFFFFFFFFFFFFFFFFFFFFFFFFF  
FFFFFFFFFFFFFFFFFFFFFFFFFFFFFFFFFFFFFFFF:FFFFFFFFFFFFFFFF:FFFF:FFFFF:FFF  
FFFFFFFF,FFFFF

@A00721:190:HGJW7DSXY:4:2126:11207:34773 2:N:0:TCTGCAAG+GCTGCACT  
GTTCAACGTGGGTTGACTAGTGGCATATTCAACATGCCACATATCTATATCCTTGGCTTCATGCCTCT  
TCGACAGGATGTTGATCCTGGGACTCCTGAACTCAATCTCCTCAACGCGCTTCGAAGCACATAGCTTC  
AGACGTCCTTTGAT

+

FFFFF:FFFFFFFFFFFFFFFFFFFFFFFF:FFFFFFFFFFFFF,FFFFFFFFFFFFFFFFFFFFFFFF  
FFFFFFFF:FFFFFFFFFFFFFFFFFFFFFFFFFFFFFFFF:FFFFFFFFFFFFFFFFFFFFFFFF:FFF  
FFFFFFFF:FFFF

@A00721:190:HGJW7DSXY:4:1629:12310:16673 2:N:0:TCTGCAAG+GCTGCACT  
CACGGTTCAACGTGGGTTGACTAGTGGCATATTCAACATGCCACATATCTATATCCTTGGCTTCATGC  
CTCTTCGACAGGATGTTGATCCTGGGACTCCTGAACTCAATCTCCTCAACGCGCTTCGAAGCACATAG  
CTTCAGACGTCCTTT

+

FFFFFFFFFFFFFFFFFFFFFFFFFFFFFFFFFFFFFFFF:FFFFFFFFFFFFFFFFFFFFFFFFFFFF  
FFFFFFFFFFFFFFFFFFFFFFFFFFFFFFFFFFFFFFFFFFFFFFFFFFFFFFFFFFFFFFFFFFFF  
FFFFFFFFFFFFFFFF

@A00721:190:HGJW7DSXY:4:2221:12771:9142 2:N:0:TCTGCAAG+GCTGCACT  
CACGGTTCAACGTGGGTTGACTAGTGGCATATTCAACATGCCACATATCTATATCCTTGGCTTCATGC  
CTCTTCGACAGGATGTTGATCCTGGGACTCCTGAACTCAATCTCCTCAACGCGCTTCGAAGCACATAG  
CTTCAGACGTCCTTT

+

FFFFFFFFFFFF,FFFFFFFFFFFFFFFFFFFFFFFFFFFFFFFFFFFFFFFFFFFFFFFFFFFF:FF  
FFFFFFFFFFFFFFFFFFFFFFFFFFFFFFFFFFFFFFFFFFFFFFFFFFFFFFFFFFFFFFFFFFFF:FFFFF  
FFFFFFFFFFFFFFFF

@A00721:190:HGJW7DSXY:4:1408:15826:23610 2:N:0:TCTGCAAG+GCTGCACT  
CACGAAAGCACACGGTTCAACGTGGGTTGACTAGTGGCATATTCAACATGCCACATATCTATATCCTT  
GGCTTCATGCCTCTTCGACAGGATGTTGATCCTGGGACTCCTGAACTCAATCTCCTCAACGCGCTTCG  
AAGCACATAGCTTCA

+

FFFFFFFFFFFFFFFFFFFFFFFFFFFFFFFFFFFFFFFFFFFFFFFFFFFFFFFFFFFFFFFFFFFF  
FFFFFFFFFFFFFFFFFFFFFFFFFFFFFFFFFFFFFFFFFFFFFFFFFFFFFFFFFFFFFFFFFFFF:FFFFFFFFFFFFF  
FFFFFFFFFFFF:FF

@A00721:190:HGJW7DSXY:4:1451:31159:16564 2:N:0:TCTGCAAG+GCTGCACT  
CACGAAAGCACACGGTTCAACGTGGGTTGACTAGTGGCATATTCAACATGCCACATATCTATATCCTT  
GGCTTCATGCCTCTTCGACAGGATGTTGATCCTGGGACTCCTGAACTCAATCTCCTCAACGCGCTTCG  
AAGCACATAGCTTCA

+

FFFFFFFFFFFFFFFFFFFFFFFFFFFFFFFFFFFFFFFFFFFFFFFFFFFFFFFFFFFFFFFFFFFF  
FFFFFFFFFFFFFFFFFFFFFFFFFFFFFFFFFFFFFFFFFFFFFFFFFFFFFFFFFFFFFFFFFFFF:FFFFFFFFFFFFF  
FFFF:FFFFFFFF

@A00721:190:HGJW7DSXY:4:1645:32398:15765 2:N:0:TCTGCAAG+GCTGCACT  
CACGAAAGCACACGGTTCAACGTGGGTTGACTAGTGGCATATTCAACATGCCACATATCTATATCCTT  
GGCTTCATGCCTCTTCGACAGGATGTTGATCCTGGGACTCCTGAACTCAATCTCCTCAACGCGCTTCG  
AAGCACATAGCTTCA

```

FFFFFFFFFFFFFFFFFFFFFFFFFFFFFFFF:FFFFFFFFFFFFFFFFFFFFFFFFFFFFFFFF:FFFFFFFFFFFF
FFFFFFFFFFFFFFFFFFFFFFFF:F:F,FFFFFFFF:FFFFFFFFFFFFFFFF:FFFFFFFFFFFF:FFFFFFFFFFFF
FFFFFFFFFFFFFFFFFFFF

```

[illegible][illegible][illegible]

```
FFFFFFFFFFFFFFFFFFFFFFFFFFFFFFFFFFFFFFFFFFFFFFFFFFFFFFFFFFFF:FFFFFFFFFFFFF
FFFFFFFF,FFFFFFF:FFFFFF,F:FFF:FFFFFFFFFFFFFFFFFFFFF,FFFFFFF:FFFF:FFFFF
FFFFFFFFFFFFFFFF
```

[illegible][illegible]

@A00721:190:HGJW7DSXY:4:1578:25654:33708 2:N:0:TCTGCAAG+GCTGCACT  
ACGCACGAAAGCACACGGTTCAACGTGGGTTGACTAGTGGCATATTCAACATGCCACATATCTATATC



$+$ 

+

+

+

+

+

+

[illegible]

FFFFFFFFFFFFFFFF:FFFFFFFFFFFFFFFF,FFFFFFFFFFFFFFFFFFFFFFFFFFFFFFFF  
FFFFFFFFFFFFFFFF

@A00721:190:HGJW7DSXY:4:1431:6017:3082 2:N:0:TCTGCAAG+GCTGCACT  
CCGGGCAAGACCGTAATGGAATCAGAACTAAGTCTTCTCCGATCTACGCACGAAAGCACACGGTTCAA  
CGTGGGTTGACTAGTGGCATATTCAACATGCCACATATCTATATCCTTGGCTTCATGCCTCTTCGACA  
GGATGTTGATCCTGG

+

FFFFFFFFFFFFFFFFFFFFFFFFFFFFFFFFFFFFFFFFFFFFFFFFFFFFFFFFFFFFFFFF  
FFFFFFFFFFFFFFFFFFFFFFFFFFFFFFFFFFFFFFFFFFFFFFFFFFFFFFFFFFFFFFFF  
FFFFFFFFFFFFFFFF

@A00721:190:HGJW7DSXY:4:2136:1226:11663 2:N:0:TCTGCAAG+GCTGCACT  
CCGGGCAAGACCGTAATGGAATCAGAACTAAGTCTTCTCCGATCTACGCACGAAAGCACACGGTTCAA  
CGTGGGTTGACTAGTGGCATATTCAACATGCCACATATCTATATCCTTGGCTTCATGCCTCTTCGACA  
GGATGTTGATCCTGG

+

FFFFFFFFFFFFFFFF:FFF:FFFFFFFFFFFFFFFFFFFFFFFFFFFFFFFFFFFFFFFF  
FFFFFFFFFFFFFFFFFFFFFFFFFFFFFFFFFFFFFFFFFFFFFFFFFFFFFFFFFFFFFFFF  
FFFFFFFFFFFFFFFF

@A00721:190:HGJW7DSXY:4:2318:30825:15796 2:N:0:TCTGCAAG+GCTGCACT  
CCGGGCAAGACCGTAATGGAATCAGAACTAAGTCTTCTCCGATCTACGCACGAAAGCACACGGTTCAA  
CGTGGGTTGACTAGTGGCATATTCAACATGCCACATATCTATATCCTTGGCTTCATGCCTCTTCGACA  
GGATGTTGATCCTGG

+

FFFFFFFF:FFFFFF,FFFFFFFFFFFFFFFFFFFFFFFFFFFFFFFFFFFFFFFF:FFFFFFFFFFFFFF:  
FFFFFFFFFFFFFFFFFFFFFFFFFFFFFFFFFFFFFFFFFFFFFFFFFFFFFFFF:FFFF:FFFFFFFF:FFF  
FFFFFFFF:FF:FFF

@A00721:190:HGJW7DSXY:4:2410:8775:17942 2:N:0:TCTGCAAG+GCTGCACT  
CCGGGCAAGACCGTAATGGAATCAGAACTAAGTCTTCTCCGATCTACGCACGAAAGCACACGGTTCAA  
CGTGGGTTGACTAGTGGCATATTCAACATGCCACATATCTATATCCTTGGCTTCATGCCTCTTCGACA  
GGATGTTGATCCTGG

+

FFFFFFFFFFFFFFFF:FFFFFFFFFFFFFF:FFFFFFFFFFFFFFFFFFFFFFFF:FF  
FFFFFFFF:FFFFFFFFFFFFFFFFFFFFFFFFFFFFFFFF:FF:FFFF, :FFFFFFFFFFFFFFFF  
FFFFFFFF

@A00721:190:HGJW7DSXY:4:2414:3739:33082 2:N:0:TCTGCAAG+GCTGCACT  
CCGGGCAAGACCGTAATGGAATCAGAACTAAGTCTTCTCCGATCTACGCACGAAAGCACACGGTTCAA  
CGTGGGTTGACTAGTGGCATATTCAACATGCCACATATCTATATCCTTGGCTTCATGCCTCTTCGACA  
GGATGTTGATCCTGG

+

FFFFFFFFFFFFFFFFFFFFFFFFFFFFFFFFFFFFFFFFFFFFFFFFFFFFFFFF  
FFFFFFFFFFFFFFFFFFFFFFFFFFFFFFFFFFFFFFFFFFFFFFFFFFFFFFFF  
FFFFFFFF

@A00721:190:HGJW7DSXY:4:2427:18078:1141 2:N:0:TCTGCAAG+GCTGCACT  
CCGGGCAAGACCGTAATGGAATCAGAACTAAGTCTTCTCCGATCTACGCACGAAAGCACACGGTTCAA  
CGTGGGTTGACTAGTGGCATATTCAACATGCCACATATCTATATCCTTGGCTTCATGCCTCTTCGACA  
GGATGTTGATCCTGG

+

FFFFFFFFFFFFFFFF:FFFFFFFFFFFFFFFFFFFFFFFFFFFFFFFFFFFFFFFF  
FFFFFFFFFFFFFFFFFFFFFFFFFFFFFFFFFFFFFFFFFFFFFFFFFFFFFFFF  
FFFFFFFF

@A00721:190:HGJW7DSXY:4:2616:32353:34413 2:N:0:TCTGCAAG+GCTGCACT  
CCGGGCAAGACCGTAATGGAATCAGAACTAAGTCTTCTCCGATCTACGCACGAAAGCACACGGTTCAA  
CGTGGGTTGACTAGTGGCATATTCAACATGCCACATATCTATATCCTTGGCTTCATGCCTCTTCGACA  
GGATGTTGATCCTGG



+  
FFFFFFFFFFFFFFFFFFFFFFFFFFFFFFFFFFFFFFFFFFFFFFFFFFFFFFFFFFFFFFFFFFFFFFFF  
FFFFFFFFFFFFFFFFFFFFFFFFFFFFFFFFFFFFFFFFFFFFFFFFFFFFFFFFFFFFFFFFFFFFFFFF  
FFFFFFFFFFFFFFFF

@A00721:190:HGJW7DSXY:4:1213:6867:36902 2:N:0:TCTGCAAG+GCTGCACT  
CATTCCGGGCAAGACCGTAATGGAATCAGAACTAAGTCTTCTCCGATCTACGCACGAAAGCACACGGT  
TCAACGTGGGTTGACTAGTGGCATATTCAACATGCCACATATCTATATCCTTGGCTTCATGCCTCTTC  
GACAGGATGTTGATC

+  
FFFFFFFFFFFFFFFFFFFFFFFFFFFFFFFFFFFFFFFFFFFFFFFFFFFFFFFFFFFFFFFFFFFFFFFF  
FFFFFFF,FFFFFFFFF:FFFFF:FFFFFFFFFFFFFFFFFFFFFFFFFFFFFFFFFFFFFFFFFFFFFFF  
FFFFFFFFF:FFFFFFFFF

@A00721:190:HGJW7DSXY:4:1308:22932:24893 2:N:0:TCTGCAAG+GCTGCACT  
ATTCCGGGCAAGACCGTAATGGAATCAGAACTAAGTCTTCTCCGATCTACGCACGAAAGCACACGGT  
CAACGTGGGTTGACTAGTGGCATATTCAACAGGCCACATATCTATATCCTTGGCTACATGCCTCTTCG  
ACAGGATGTTGATC

+  
F:FFFFFFFFFFFFF:FF:F,F:FF,:FFFF:::FF:FF:FFFFFFFFFFFF:FFFF,FFF,FFFFFFFFF  
FFFFFFFFF,:FFFF,:FF,:F,FFFF:FFF,F,:FFFF,FFFFFFFFF:FFF:FFF,,F::FF:F,F,:  
FF:, :FFF,F,FF:

@A00721:190:HGJW7DSXY:4:1669:11487:24079 2:N:0:TCTGCAAG+GCTGCACT  
CATTCCGGGCAAGACCGTAATGGAATCAGAACTAAGTCTTCTCCGATCTACGCACGAAAGCACACGGT  
TCAACGTGGGTTGACTAGTGGCATATTCAACATGCCACATATCTATATCCTTGGCTTCATGCCTCTTC  
GACAGGATGTTGATC

+  
FFFFFFFFFFFFFFFFFFFFFFFFFFFFFFFFFFFFFFFFFFFFFFFFFFFFFFFFFFFFFFFFFFFFFFFF  
FFFFFFFFFFFFFFFFFFFFFFFFFFFFFFFFFFFFFFFFFFFFFFFFFFFFFFFFFFFFFFFFFFFFFFFF  
FFFFFFFFFFFFFFFF

@A00721:190:HGJW7DSXY:4:2228:25780:34240 2:N:0:TCTGCAAG+GCTGCACT  
CATTCCGGGCAAGACCGTAATGGAATCAGAACTAAGTCTTCTCCGATCTACGCACGAAAGCACACGGT  
TCAACGTGGGTTGACTAGTGGCATATTCAACATGCCACATATCTATATCCTTGGCTTCATGCCTCTTC  
GACAGGATGTTGATC

+  
FFFFFFFFFFFFFFFFFFFFFFFFFFFFFFFFFFFFFFFFFFFFFFFFFFFFFFFFFFFFFFFFFFFFFFFF  
FFFFFFFFFFFFFFFFFFFFFFFFFFFFFFFFFFFFFFFFFFFFFFFFFFFFFFFFFFFFFFFFFFFFFFFF  
FFFFFFFFFFFFFFFF

@A00721:190:HGJW7DSXY:4:2237:22110:19867 2:N:0:TCTGCAAG+GCTGCACT  
CATTCCGGGCAAGACCGTAATGGAATCAGAACTAAGTCTTCTCCGATCTACGCACGAAAGCACACGGT  
TCAACGTGGGTTGACTAGTGGCATATTCAACATGCCACATATCTATATCCTTGGCTTCATGCCTCTTC  
GACAGGATGTTGATC

+  
FFF:FFFF:FFF:FF:FFFF:F:FFF:FFFFFFFFF,FFF:FFFFFFFFFFFFFFFFFFFFFFFFFFFFF  
FFFFF:FFFFFFFFFFFFFFFFFFFFF:F:FFFFFFFFF:FFF:F:FF:F:FF:FFFFFFFFFFFF:FFFFF  
,F:FFFFF::FFFFF

@A00721:190:HGJW7DSXY:4:2261:4634:36354 2:N:0:TCTGCAAG+GCTGCACT  
CATTCCGGGCAAGACCGTAATGGAATCAGAACTAAGTCTTCTCCGATCTACGCACGAAAGCACACGGT  
TCAACGTGGGTTGACTAGTGGCATATTCAACATGCCACATATCTATATCCTTGGCTTCATGCCTCTTC  
GACAGGATGTTGATC

+  
FFFFFFFFFFFFFFFFFFFFFFFFFFFFFFFFFFFFFFFFFFFFFFFFFFFFFFFFFFFFFFFFFFFFFFFF  
FFFFFFFFFFFFFFFFFFFFFFFFFFFFFFFFFFFFFFFFFFFFFFFFFFFFFFFFFFFFFFFFFFFFFFFF  
FFF,FFFFFFFFF

@A00721:190:HGJW7DSXY:4:2337:27037:25739 2:N:0:TCTGCAAG+GCTGCACT  
CATTCCGGGCAAGACCGTAATGGAATCAGAACTAAGTCTTCTCCGATCTACGCACGAAAGCACACGGT





FFFFFFFFFFFFFFFFFFFFFFFFFFFFFFFFFFFFFFFFFFFFFFFFFFFFFFFFFFFFFFFF:FFFFFFFFFFFFFFFFFFFFFFFF  
FFFFFFFFFFFFFFFF

@A00721:190:HGJW7DSXY:4:1478:9950:11741 2:N:0:TCTGCAAG+GCTGCACT  
CTGGATATCTCACTGTAACACATTCCGGGCAAGACCGTAATGGAATCAGAACTAAGTCTTCTCCGATC  
TACGCACGAAAGCACACGGTTCAACGTGGGTTGACTAGTGGCATATTCAACATGCCACATATCTATAT  
CCTTGGCTTCATGC

+

FFFFFFFFFFFFFFFFFFFFFFFFFFFFFFFFFFFFFFFFFFFFFFFFFFFFFFFFFFFFFFFF:FFFFFFFFFFFFFFFFFFFFFFFF  
FFFFFFFFFFFFFFFFFFFFFFFFFFFFFFFFFFFFFFFFFFFFFFFFFFFFFFFFFFFFFFFFFFFFFFFFFFFFFFFFFFFFFFFF  
FFFFFFFFFFFFFFFF

@A00721:190:HGJW7DSXY:4:1157:12400:30765 2:N:0:TCTGCAAG+GCTGCACT  
ATCACATTCAGCTATCGATCTTCTGGATATCTCACTGTAACACATTCCGGGCAAGACCGTAATGGAAT  
CAGAACTAAGTCTTCTCCGATCTACGCACGAAAGCACACGGTTCAACGTGGGTTGACTAGTGGCATAT  
TCAACATGCTACATA

+

FFFFFFFFFFFFFFFFFFFFFFFFFFFFFFFFFFFFFFFFFFFFFFFFFFFFFFFFFFFFFFFF:FFF:F  
FFFFFFFFFFFFFFFFFFFFFFFFFFFFFFFFFFFFFFFFFFFFFFFFFFFFFFFFFFFFFFFF:FFFFFFFFFFFFFFFFFFFFFFFF  
FFFFFFFFFFFFFFFF

@A00721:190:HGJW7DSXY:4:1329:2971:23359 2:N:0:TCTGCAAG+GCTGCACT  
ATCACATTCAGCTATCGATCTTCTGGATATCTCACTGTAACACATTCCGGGCAAGACCGTAATGGAAT  
CAGAACTAAGTCTTCTCCGATCTACGCACGAAAGCACACGGTTCAACGTGGGTTGACTAGTGGCATAT  
TCAACATGCTACATA

+

FFFFFFFFFFFFFFFFFFFFFFFFFFFFFFFFFFFFFFFFFFFFFFFFFFFFFFFFFFFFFFFF:F:FF:F:  
FFFFFFFFFFFFFFFFFFFFFFFFFFFFFFFFFFFFFFFFFFFFFFFFFFFFFFFFFFFFFFFF,FFFFFFFFFFFF,FFFFFFF::FFFFFFF  
:FFFFFFFFFFFF

@A00721:190:HGJW7DSXY:4:1359:23258:21574 2:N:0:TCTGCAAG+GCTGCACT  
ATCACATTCAGCTATCGATCTTCTGGATATCTCACTGTAACACATTCCGGGCAAGACCGTAATGGAAT  
CAGAACTAAGTCTTCTCCGATCTACGCACGAAAGCACACGGTTCAACGTGGGTTGACTAGTGGCATAT  
TCAACATGCTACATA

+

FFFFFFFFFFFFFFFFFFFFFFFFFFFFFFFFFFFFFFFFFFFFFFFFFFFFFFFFFFFFFFFF:F:FFFF  
FFFFFFFFFFFFFFFFFFFFFFFFFFFFFFFFFFFFFFFFFFFFFFFFFFFFFFFFFFFFFFFF:FFFFFFFFFFFFFFFFFFFFFFFF  
FFFFFFFFFFFFFFFF

@A00721:190:HGJW7DSXY:4:1469:24325:26115 2:N:0:TCTGCAAG+GCTGCACT  
ATCACATTCAGCTATCGATCTTCTGGATATCTCACTGTAACACATTCCGGGCAAGACCGTAATGGAAT  
CAGAACTAAGTCTTCTCCGATCTACGCACGAAAGCACACGGTTCAACGTGGGTTGACTAGTGGCATAT  
TCAACATGCTACATA

+

FFFFFFFFFFFFFFFFFFFFFFFFFFFFFFFFFFFFFFFFFFFFFFFFFFFFFFFFFFFFFFFF:FFFFFFFFFFFFFFFF  
FFFFFFFFFFFFFFFFFFFFFFFFFFFFFFFFFFFFFFFFFFFFFFFFFFFFFFFFFFFFFFFFFFFFFFFFFFFFFFFF  
FFFFFFFFFFFFFFFF

@A00721:190:HGJW7DSXY:4:2131:27380:9862 2:N:0:TCTGCAAG+GCTGCACT  
ATCACATTCAGCTATCGATCTTCTGGATATCTCACTGTAACACATTCCGGGCAAGACCGTAATGGAAT  
CAGAACTAAGTCTTCTCCGATCTACGCACGAAAGCACACGGTTCAACGTGGGTTGACTAGTGGCATAT  
TCAACATGCTACATA

+

:FFFFFFFFFFFFFFFFFFFFFFFFFFFFFFFFFFFFFFFFFFFFFFFFFFFFFFFFFFFFFFFF:FFF:F  
FFFFFFFFFFFFFFFFFFFFFFFFFFFFFFFFFFFFFFFFFFFFFFFFFFFFFFFFFFFFFFFF:FFFFFF:FFFFFFFFFFFFFFFF  
FFFFFFFFFFFF:FF:F

@A00721:190:HGJW7DSXY:4:2176:4924:32628 2:N:0:TCTGCAAG+GCTGCACT  
ATCACATTCAGCTATCGATCTTCTGGATATCTCACTGTAACACATTCCGGGCAAGACCGTAATGGAAT  
CAGAACTAAGTCTTCTCCGATCTACGCACGAAAGCACACGGTTCAACGTGGGTTGACTAGTGGCATAT  
TCAACATGCTACATA

+  
FFFFFFFFFFFFFFFFFFFFFFFFFFFFFFFFFFFFFFFFFFFFFFFFFFFFFFFFFFFFFFFFFFFFFFFF:FF:FF  
FFFFFFFFFFFFFFFFFFFFFFFFFFFFFFFFFFFFFFFFFFFFFFFFFFFFFFFFFFFFFFFFFFFFFFFF  
FFFFFFFFFFFFFFFF

@A00721:190:HGJW7DSXY:4:2423:13621:9173 2:N:0:TCTGCAAG+GCTGCACT  
ATCACATTACGCTATCGATCTTCTGGATATCTCACTGTAACACATTCCGGGCAAGACCGTAATGGAAT  
CAGAACTAAGTCGTCTCCGATCTACGCACGAAAGCACACGGTTCAACGGGGTTGACTAGTGGCATAT  
TCAACATGCTACATA

+  
FFFFFFFFFFFFFFFF,FFF,FFF:FFFF,FFF:FFFFFFFFF:F:FFF:FFF,F,FFFF:F:F,:FF:  
FF,,FFFFFFFF,,FFF,FFFFFF,FFFF:,,,FFFFFFFFFFFFFFFF,,FF:FFFF::FFFF:FFF  
F,FFFFFF,::FFFF

@A00721:190:HGJW7DSXY:4:2550:23375:12571 2:N:0:TCTGCAAG+GCTGCACT  
ATCACATTACGCTATCGATCTTCTGGATATCTCACTGTAACACATTCCGGGCAAGACCGTAATGGAAT  
CAGAACTAAGTCGTCTCCGATCTACGCACGAAAGCACACGGTTCAACGTGGTTGACTAGTGGCATAT  
TCAACATGCTACATA

+  
FFFFFFFFFFFFFFFFFFFFFFFFFFFFFFFFFFFFFFFFFFFFFFFFFFFFFFFFFFFFFFFFFFFFFFFF:FFF:F  
FFFFFFFFFFFFFFFFFFFFFFFFFFFFFFFFFFFFFFFFFFFFFFFFFFFFFFFFFFFFFFFFFFFFFFFF:FFFFFFFF  
FFFFFFFFFFFFFFFF:F

@A00721:190:HGJW7DSXY:4:2669:2537:34788 2:N:0:TCTGCAAG+GCTGCACT  
ATCACATTACGCTATCGATCTTCTGGATATCTCACTGTAACACATTCCGGGCAAGACCGTAATGGAAT  
CAGAACTAAGTCGTCTCCGATCTACGCACGAAAGCACACGGTTCAACGTGGTTGACTAGTGGCATAT  
TCAACATGCTACATA

+  
:FFFFFFFFFFFFFFFFFFFFFFFFFFFFFFFFFFFFFFFFFFFFFFFFFFFFFFFFFFFFFFFFFFFFFFFF  
FFFFFFFFFFFFFFFFFFFFFFFFFFFFFFFFFFFFFFFFFFFFFFFFFFFFFFFFFFFFFFFF:FFFFFF:FFFFFF,F:FFFFFF  
FFFFFF:FFFFFF

@A00721:190:HGJW7DSXY:4:1120:25310:26600 2:N:0:TCTGCAAG+GCTGCACT  
CTCAAACTATGTCTTCTATCACATTACGCTATCGATCTTCTGGATATCTCACTGTAACACATTCCGG  
GCAAGACCGTAATGGAATCAGAACTAAGTCGTCTCCGATCTACGCACGAAAGCACACGGTTCAACGTG  
GGTTGACTAGTGGCA

+  
FFF:FFFFFFFFFFFFFFFFFFFFFFFFFFFFFFFFFFFFFFFFFFFFFFFFFFFFFFFFFFFFFFFF  
FFFFFFFFFFFFFFFFFFFFFFFFFFFFFFFFFFFFFFFFFFFFFFFFFFFFFFFFFFFFFFFF:FF  
FFFFFFFFFFFFFFFF

@A00721:190:HGJW7DSXY:4:1203:7572:31046 2:N:0:TCTGCAAG+GCTGCACT  
CTCAAACTATGTCTTCTATCACATTACGCTATCGATCTTCTGGATATCTCACTGTAACACATTCCGG  
GCAAGACCGTAATGGAATCAGAACTAAGTCGTCTCCGATCTACGCACGAAAGCACACGGTTCAACGTG  
GGTTGACTAGTGGCA

+  
FFFFFF:FFF:FFFFFFFFFFFFFFFFFFFFFFFFFFFFFFFFFFFFFFFF:FFFFFF,FFFF:F:FFF:FFFFFFFF,,F  
FFFFFFFFFFFFFF,FFFFFFFFFF:FFF:FFF:FFFFFFFF,FFFFFFFFFFFF,FFFFFFFFF:  
FFF:FFFFFF:FF

@A00721:190:HGJW7DSXY:4:1478:31873:29700 2:N:0:TCTGCAAG+GCTGCACT  
CTCAAACTATGTCTTCTATCACATTACGCTATCGATCTTCTGGATATCTCACTGTAACACATTCCGG  
GCAAGACCGTAATGGAATCAGAACTAAGTCGTCTCCGATCTACGCACGAAAGCACACGGTTCAACGTG  
GGTTGACTAGTGGCA

+  
FFFFFFFFFFFFFFFFFFFFFFFFFFFFFFFFFFFFFFFFFFFFFFFFFFFFFFFFFFFFFFFF  
FFFFFFFFFFFFFF:FF:FFFFFFFF:FFFFFFFFFFFFFFFFFFFFFFFFFFFFFFFF  
FFFFFFFFFFFFFF

@A00721:190:HGJW7DSXY:4:2270:1470:6668 2:N:0:TCTGCAAG+GCTGCACT  
CTCAAACTATGTCTTCTATCACATTACGCTATCGATCTTCTGGATATCTCACTGTAACACATTCCGG

GCAAGACCGTAATGGAATCAGAACTAAGTCTTCTCCGATCTACGCACGAAAGCACACGGTTCAACGTG  
GGTTGACTAGTGGCA

+

FFFFFFFFFFFFFFFFFFFFFFFFFFFFFFFFFFFFFFFFFFFFFFFFFFFFFFFFFFFFFFFFFFFFFFFF  
FFFFFFFFFFFFFF:FFFFFFFFFFFFFFFFFFFFFFFFFFFFFFFFFFFFFFFFFFFFFFFFFFFFFFFF  
FFFFFFFFFFFFFFFF

@A00721:190:HGJW7DSXY:4:2346:19859:31062 2:N:0:TCTGCAAG+GCTGCACT  
CTCAAACTATGTCTTCTATCACATTACAGCTATCGATCTTCTGGATATCTCACTGTAACACATTCCGG  
GCAAGACCGTAATGGAATCAGAACTAAGTCTTCTCCGATCTACGCACGAAAGCACACGGTTCAACGTG  
GGTTGACTAGTGGCA

+

FFFFFFFF:FFFFFFFFFFFFFFFFFFFFFFFFFFFFFFFFFFFFFFFFFFFFFFFFFFFFFFFFFFFFFF  
FFFFFFFFFFFFFF:FFFFFFFFFFFFFFFFFFFFFFFFFFFFFFFFFFFFFFFFFFFFFFFFFFFFFFFF  
FFFFFFFFFFFFFF:F:

@A00721:190:HGJW7DSXY:4:2414:29460:28338 2:N:0:TCTGCAAG+GCTGCACT  
CTCAAACTATGTCTTCTATCACATTACAGCTATCGATCTTCTGGATATCTCACTGTAACACATTCCGG  
GCAAGACCGTAATGGAATCAGAACTAAGTCTTCTCCGATCTACGCACGAAAGCACACGGTTCAACGTG  
GGTTGACTAGTGGCA

+

FFFFFFFFFFFFFFFFFFFFFFFFFFFFFFFFFFFFFFFFFFFFFFFFFFFFFFFFFFFFFFFFFFFFFF  
FFFFFFFFFFFFFF,FFF:FFFF:FFFFFFFF:FFFFFFFFFFFFFFFFFFFFFFFFFFFFFFFFFFFF:F  
FFFFFFFFFFFFFF

@A00721:190:HGJW7DSXY:4:1274:19180:2832 2:N:0:TCTGCAAG+GCTGCACT  
GCAATGACGTTGCTCGATATCTCAAACTATGTCTTCTATCACATTACAGCTATCGATCTTCTGGATAT  
CTCACTGTAACACATTCCGGGCAAGACCGTAATGGAATCAGAACTAAGTCTTCTCCGATCTACGCACG  
AAAGCACACGGTTCA

+

FFFFF:FFFFFFFF:FFFFFFFFFFFFFFFFFFFFFFFFFFFFFFFFFFFFFFFFFFFFFFFFFFFFFF:F  
FFFFFFFFFFFFFFFFFFFFFFFFFFFFFFFFFFFFFFFFFFFFFFFFFFFFFFFFFFFFFFFFFFFFFF  
FFFFFFFFFFFFFF

@A00721:190:HGJW7DSXY:4:1601:27543:28839 2:N:0:TCTGCAAG+GCTGCACT  
GCAATGACGTTGCTCGATATCTCAAACTATGTCTTCTATCACATTACAGCTATCGATCTTCTGGATAT  
CTCACTGTAACACATTCCGGGCAAGACCGTAATGGAATCAGAACTAAGTCTTCTCCGATCTACGCACG  
AAAGCACACGGTTCA

+

FFFF:FFFFFFFFFFFFFFFFFFFFFFFFFFFFFFFFFFFFFFFFFFFFFFFFFFFFFFFFFFFFFF:F,F  
FFFFFFFF:FFFFFFFFFFFFFFFFFFFFFFFFFFFFFFFFFFFFFFFFFFFFFFFFFFFFFFFFFFFFFF  
FFFFFFFFFFFFFF

@A00721:190:HGJW7DSXY:4:1538:30110:20322 2:N:0:TCTGCAAG+GCTGCACT  
TCAGCAATGACGTTGCTCGATATCTCAAACTATGTCTTCTATCACATTACAGCTATCGATCTTCTGGA  
TATCTCACTGTAACACATTCCGGGCAAGACCGTAATGGAATCAGAACTAAGTCTTCTCCGATCTACGC  
ACGAAAGCACACGGT

+

FFFFFFFFFFFFFFFFFFFFFFFFFFFFFFFFFFFFFFFFFFFFFFFFFFFFFFFFFFFFFFFFFFFFFF  
FFFFFFFFFFFFFFFFFFFFFF:FFFFFFFFFFFFFFFFFFFFFFFFFFFFFFFFFFFFFFFFFFFFFFFF  
FFFFFFFFFFFFFF

@A00721:190:HGJW7DSXY:4:1653:12662:3004 2:N:0:TCTGCAAG+GCTGCACT  
TCAGCAATGACGTTGCTCGATATCTCAAACTATGTCTTCTATCACATTACAGCTATCGATCTTCTGGA  
TATCTCACTGTAACACATTCCGGGCAAGACCGTAATGGAATCAGAACTAAGTCTTCTCCGATCTACGC  
ACGAAAGCACACGGT

+

F:F:FFFF::FF,FFFF:FFFF::FFFF,FFFFFFFF:FFFFFFFFFFFFFF,FFFF:FFFFFFFF  
FFFFFFFF:F,,FFFFF:FFFFFFFFF:FFFF:F,FFF:FFFFFFFFFFFFFF,F:FFFFF  
FF:FFFFFFFF,F,F

@A00721:190:HGJW7DSXY:4:2350:11532:8030 2:N:0:TCTGCAAG+GCTGCACT  
TCAGCAATGACGTTGCTCGATATCTCAAACTATGTCTTCTATCACATTCAGCTATCGATCTTCTGGA  
TATCTCACTGTAACACATTCCGGGCAAGACCGTAATGGAATCAGAACTAAGTCTTCTCCGATCTACGC  
ACGAAAGCACACGGT

```
FFFFFFFFFFFFFFFFFFFFF:FFFFFFFFFFFFFFFFFFFFFFFFFFFFFFFFFFFFFFFF
FFFFFFFFFFFFFFFFFFFFF:FFFFFFFFFFFFFFFFFFFFF,FFFFFFFFFFFFFFFF
FFFFFFFFFFFFFFFFFFFF
```

+

```

FFFFFFFFFFFFFFFFFFFFFFFFFFFFFFFFFFFFFFFF:FFFFFFFFFFFFFFFFFFFFFFFFFFFF
FFFF:FFFFFFFFFFFFFFFFFFFFFFFFFFFFFFFF:FFF:FFFFFFFFFFFFF,FFFFFFFF,FFFFF
FFF:EEEE:FF:,FF

```

+

```

FFFFFFFFFFFFFFFFFFFFFFFFFFFFFFFF:FFFFFFFFFFFFFFFFFFFFFFFFFFFFFFFF
FFFFFFFFFFFFFFFFFFFFFFFFFFFFFFFF:FFFFFFFFFFFFFFFFFFFFFFFFFFFFFFFF
FFFFFFFFFFFFFFFF

```

+

```

FFFFFFFFFFFFFFFFFFFFFFFFFFFFFFFFFFFFFFFFFFFFFFFFFFFFFFFFFFFFFFFFFFFFFFFF
FFFFFFFF:FFFFFFFFFFFFFFFFFFFFFFFFFFFFFFFFFFFFFFFF:FFFF:FFFFFFFF,FF,FFFFFF,FFFFFF
FFFFFFFFFFFF:FFF

```

+

```

FFFFFFFFFFFFFFFFFFFFFFFFFFFFFFFFFFFFFFFFFFFFFFFFFFFFFFFFFFFFFFFFFFFFFFFF
FFFFFFFFFFFFFFFFFFFFFFFFFFFFFFFFFFFFFFFFFFFFFFFFFFFFFFFFFFFFFFFFFFFFFFFF
FFFFFFFF:FFFFFFFFFFFFFFFF:FFFFFF:FFFFFFFFFFFFFFFF
FFFFFFFF:FFFFFFFF

```

+

[illegible]

+

[illegible]

@A00721:190:HGJW7DSXY:4:2367:32533:31876 2:N:0:TCTGCAAG+GCTGCACT  
CTTCAACTTTGGCATCAGCAATGACGTTGCTCGATATCTCAAACCTATGTCTTCTATCACATTCAGCT  
ATCGATCTTCTGGATATCTCACTGTAACACATTCCGGGCAAGACCGTAATGGAATCAGAACTAAGACT  
TCTCCGATCTACGCA

@A00721:190:HGJW7DSXY:4:2558:18331:34084 2:N:0:TCTGCAAG+GCTGCACT  
CTTCAACTTTGGCATCAGCAATGACGTTGCTCGATATCTCAAACCTATGTCTTCTATCACATTCAGCT  
ATCGATCTTCTGGATATCTCACTGTAACACATTCCGGGCAAGACCGTAATGGAATCAGAACTAAGTCT  
TCTCCGATCTACGCA

@A00721:190:HGJW7DSXY:4:2560:4707:13620 2:N:0:TCTGCAAG+GCTGCACT  
CTTCAACTTTGGCATCAGCAATGACGTTGCTCGATATCTCAAACTATGTCTTCTATCACATTCAGCT  
ATCGATCTTCTGGATATCTCACTGTAACACATTCCGGGCAAGACCGTAATGGAATCAGAACTAAGTCT  
TCTCCGATCTACGCA

@A00721:190:HGJW7DSXY:4:2576:10719:25880 2:N:0:TCTGCAAG+GCTGCACT  
CTTCAACTTTGGCATCAGCAATGACGTTGCTCGATATCTCAAACATATGTCTTCTATCACATTCAGCT  
ATCGATCTTCTGGATATCTCACTGTAACACATTCCGGGCAAGACCGTAATGGAATCAGAACTAAGTCT  
TCTCCGATCTACGCA

@A00721:190:HGJW7DSXY:4:2670:18014:14591 2:N:0:TCTGCAAG+GCTGCACT  
CTTCAACTTTGGCATCAGCAATGACGTTGCTCGATATCTCAAACTATGTCTTCTATCACATTCAGCT  
ATCGATCTTCTGGATATCTCACTGTAACACATTCCGGGCAAGACCGTAATGGAATCAGAACTAAGTCT  
TCTCCGATCTACGCA

@A00721:190:HGJW7DSXY:4:1228:7392:24189 2:N:0:TCTGCAAG+GCTGCACT  
CGGGCCTAATATCTTCAACATTTGGCATCAGCAATGACGTTGCTCGATATCTCAAACTATGTCTTCTA  
TCACATTCAGCTATCGATCTTCTGGATATCTCACTGTAACACATTCCGGGCAAGACCGTAATGGAATC  
AGAACTAAGTCTTCT

@A00721:190:HGJW7DSXY:4:1350:2745:7153 2:N:0:TCTGCAAG+GCTGCACT  
CGGGCCTAATATCTTCAACTTTGGCATCAGCAATGACGTTGCTCGATATCTCAAACTATGTCTTCTA  
TCACATTCAGCTATCGATCTTCTGGATATCTCACTGTAACACATTCCGGGCAAGACCGTAATGGAATC  
AGAACTAAGTCTTCT



+  
FFFFFFFFFFFFFFFFFFFFFFFFFFFFFFFFFFFFFFFFFFFFFFFFFFFFFFFFFFFFFFFFFFFFFFFF  
FFFFFFFFFFFFFFFFFFFFFFFFFFFFFFFFFFFFFFFFFFFFFFFFFFFFFFFFFFFFFFFFFFFFFFFF  
FF:FFFFFFFFFFFFF:  
@A00721:190:HGJW7DSXY:4:1350:2284:7169 2:N:0:TCTGCAAG+GCTGCACT  
CGGGCCTAATATCTTCAACTTTGGCATCAGCAATGACGTTGCTCGATATCTCAAACTATGTCTTCTA  
TCACATTCAGCTATCGATCTTCTGGATATCTCACTGTAACACATTCCGGGCAAGACCGTAATGGAATC  
AGAACTAAGTCTTCT

+  
:FFFFFFFFFFFFFF:FFFFFFFFFFFFFFFFFFFFFFFFFFFFFFFFFFFFFFFFFFFFFFFFFFFFFFF  
FFFFFFFFFFFFFFFFFFFFFFFFFFFFFFFFFFFFFFFFFFFFFFFFFFFFFFFFFFFFFFFFFFFFFFFF  
FFFFFFFFFFFFFFFFF  
@A00721:190:HGJW7DSXY:4:1362:2727:36057 2:N:0:TCTGCAAG+GCTGCACT  
CGGGCCTAATATCTTCAACTTTGGCATCAGCAATGACGTTGCTCGATATCTCAAACTATGTCTTCTA  
TCACATTCAGCTATCGATCTTCTGGATATCTCACTGTAACACATTCCGGGCAAGACCGTAATGGAATC  
AGAACTAAGTCTTCT

+  
FFFFFFFFFFFFFFFFFFFFFFFFFFFFFFFFFFFFFFFFFFFFFFFFFFFFFFFFFFFFFFFFFFFFFFFF  
FFFFFFFFFFFF:FFFFFFFFFFFFFFFFFFFFFFFFFFFFFFFFFFFFFFFFFFFFFFFFFFFF,FFFFFFFFFFFFFFFFFFFFFFFF:FFF  
FFFFFFFFFFFFFFFFF  
@A00721:190:HGJW7DSXY:4:1366:11867:3255 2:N:0:TCTGCAAG+GCTGCACT  
CGGGCCTAATATCTTCAACTTTGGCATCAGCAATGACGTTGCTCGATATCTCAAACTATGTCTTCTA  
TCACATTCAGCTATCGATCTTCTGGATATCTCACTGTAACACATTCCGGGCAAGACCGTAATGGAATC  
AGAACTAAGTCTTCT

+  
FFFFFFFFFFFFFFFFFFFFFFFFFFFFFFFFFFFFFFFFFFFFFFFFFFFFFFFFFFFFFFFFFFFFFFFF  
FFFFFFFFFFFFFFFFFFFFFFFFFFFFFFFFFFFFFFFFFFFFFFFFFFFFFFFFFFFFFFFFFFFFFFFF  
FFFFFFFFFFFFFFFFF  
@A00721:190:HGJW7DSXY:4:1368:29649:12164 2:N:0:TCTGCAAG+GCTGCACT  
CGGGCCTAATATCTTCAACTTTGGCATCAGCAATGACGTTGCTCGATATCTCAAACTATGTCTTCTA  
TCACATTCAGCTATCGATCTTCTGGATATCTCACTGTAACACATTCCGGGCAAGACCGTAATGGAATC  
AGAACTAAGTCTTCT

+  
FFFFFFFFFFFFFFFFFFFFFFFFFFFFFFFFFFFFFFFFFFFFFFFFFFFFFFFFFFFFFFFFFFFFFFFF  
FFFFFFFFFFFFFFFFFFFFFFFFFFFFFFFFFFFFFFFFFFFFFFFFFFFFFFFFFFFFFFFFFFFFFFFF  
FFFFFFFFFFFFFFFFF  
@A00721:190:HGJW7DSXY:4:2220:16812:31641 2:N:0:TCTGCAAG+GCTGCACT  
CGGGCCTAATATCTTCAACTTTGGCATCAGCAATGACGTTGCTCGATATCTCAAACTATGTCTTCTA  
TCACATTCAGCTATCGATCTTCTGGATATCTCACTGTAACACATTCCGGGCAAGACCGTAATGGAATC  
AGAACTAAGTCTTCT

+  
FFFFFF:FFFFFFFFFFFFFF:FFFFFFFF:FFFFFFFFFFFFFFFFFFFFFFFFFFFFFFFFFFFFFFF  
FFFFFFFFFFFFFFFFFFFFFFFFFFFFFFFFFFFFFFFFFFFFFFFFFFFFFFFFFFFFFFFFFFFFFFFF  
FFFFFFFFFFFFFFFFF  
@A00721:190:HGJW7DSXY:4:2220:16333:32002 2:N:0:TCTGCAAG+GCTGCACT  
CGGGCCTAATATCTTCAACTTTGGCATCAGCAATGACGTTGCTCGATATCTCAAACTATGTCTTCTA  
TCACATTCAGCTATCGATCTTCTGGATATCTCACTGTAACACATTCCGGGCAAGACCGTAATGGAATC  
AGAACTAAGTCTTCT

+  
FFFFFFFFFFFFFFFFFFFFFFFFFFFFFFFFFFFFFFFFFFFFFFFFFFFFFFFFFFFFFFFFFFFFFFFF  
FFFFFFFFFFFFFFFFFFFFFFFFFFFFFFFFFFFFFFFFFFFFFFFFFFFFFFFFFFFFFFFFFFFFFFFF  
FFFFFFFFFFFFFFFFF  
@A00721:190:HGJW7DSXY:4:2302:1145:2440 2:N:0:TCTGCAAG+GCTGCACT  
CGGGCCTAATATCTTCAACTTTGGCATCAGCAATGACGTTGCTCGATATCTCAAACTATGTCTTCTA





@A00721:190:HGJW7DSXY:4:1160:12391:30843 2:N:0:TCTGCAAG+GCTGCACT  
GTTACAGTGAGATATCCAGAAGATCGATAGCTGAATGTGATAGAAGACATAGTTTTGAGATATCGAGC  
AACGTCATTGCTGATGCCAAAGTTGAAGATATTAGGCCCGAAGATAGTGTTAGTCAGACGTCGAGTGT  
TAGACGAGACCAAGTG

+

[illegible]

@A00721:190:HGJW7DSXY:4:2437:15691:26412 2:N:0:TCTGCAAG+GCTGCACT  
GTTACAGTGAGATATCCAGAAGATCGATAGCTGAATGTGATAGAAGACATAGTTTTGAGATATCGAGC  
AACGTCATTGCTGATGCCAAAGTTGAAGATATTAGGCCCGAAGATAGTGTTAGTCAGACGTCGAGTGT  
TAGACGAGACCAAGTG

+

```

FFFFFFFFFFFFFFFFFFFFFFFFFFFFFFFF:FFFFFFFFFFFFFFFFFFFFFFFFFFFFFFFF
F:FFFFFFFFFFFFFFFFFFFFFFFFFFFFFFFF:FFFFFFFFFFFFFFFFFFFFFFFFFFFFFFFF
FFFFFFFFFFFFFFFF

```

@A00721:190:HGJW7DSXY:4:2437:16170:26678 2:N:0:TCTGCAAG+GCTGCACT  
GTTACAGTGAGATATCCAGAAGATCGATAGCTGAATGTGATAGAAGACATAGTTTTGAGATATCGAGC  
AACGTCATTGCTGATGCCAAAGTTGAAGATATTAGGCCCGAAGATAGTGTTAGTCAGACGTCGAGTGT  
TAGACGAGACCAAGT

+

```

FFFFFFFFFFFFFFFFFFFF,FFFFFFFFFFFFFFFF:FFFFFFFFFFFFFFFF:FFFFF:FFFFFFFF
FFFFFFFFFFFFFFFFFFFFFFFFFFFFFFFF,FFFFFFF:FFFFFFFFFFFFFFFF:FFFFFFFFFF:FFFFF
FFFFFFFFFFFFFFFF

```

@A00721:190:HGJW7DSXY:4:2173:1931:6965 2:N:0:TCTGCAAG+GCTGCACT  
ACAGTGAGATATCCAGAAGATCGATAGCTGAATGTGATAGAAGACATAGTTTTGAGATATCGAGCAAC  
GTCATTGCTGATGCCAAAGTTGAAGATATTAGGCCCGAAGATAGTGTTAGTCAGACGTCGAGTGTTAG  
ACGAGACCAAGTG

+

```

::FFFFFFFF:FFFFF,F:F:FFFFFFFFFFFFFFFF,FFFFFF:FFF:F,,FFFFFFFFFFFF:FF:F
F,FF:F:FFFFFF,FFF:F,,FFF:FF,,,F,:FF,F,FFFFF,F:, ,FFFFFFFF::,F:FFFFFFF
FFFFFFFFF:::

```

@A00721:190:HGJW7DSXY:4:1117:10041:28933 2:N:0:TCTGCAAG+GCTGCACT  
ATTCATAATGCTGGTGCATCCAGCCAGACACTGGTCTCGTCTAACACTCGACGTCTGACTAACACTAT  
CTTCGGGCCCTAATATCTTCAACTTTGGCATCAGCAATGACGTTGCTCGATATCTCAAACTATGTCTT  
CTATCACATTGAGCT

+

[illegible]

@A00721:190:HGJW7DSXY:4:1275:3351:22169 2:N:0:TCTGCAAG+GCTGCACT  
ATTTCATAATGCTGGTTCGATCCAGCCAGACACTGGTCTCGTCTAACACTCGACGTCTGACTAACACTAT  
CTTCGGGCCTAATATCTTCAACTTTGGCATCAGCAATGACGTTGCTCGATATCTCAAACTATGTCTT  
CTATCACATTCAGCT

+

[illegible]

@A00721:190:HGJW7DSXY:4:1407:23836:24267 2:N:0:TCTGCAAG+GCTGCACT  
ATTCATAATGCTGGTGCATCCAGCCAGACACTGGTCTCGTCTAACACTCGACGTCTGACTAACACTAT  
CTTCGGGCCCTAATATCTTCAACTTTGGCATCAGCAATGACGTTGCTCGATATCTCAAACTATGTCTT  
CTATCACATTGAGCT

+  
FFFFFFFFFFFFFFFFFFFFFFFFFFFFFFFFFFFFFFFFFFFFFFFFFFFFFFFFFFFFFFFFFFFFFFFF  
FFFFFFFFFFFFFFFFFFFFFFFFFFFFFFFFFFFFFFFFFFFFFFFFFFFFFFFFFFFFFFFFFFFFFFFF  
FFFFFFFFFFFFFFFF

@A00721:190:HGJW7DSXY:4:1545:20871:35916 2:N:0:TCTGCAAG+GCTGCACT  
ATTCATAATGCTGGTCGATCCAGCCAGACACTGGTCTCGTCTAACACTCGACGTCTGACTAACACTAT  
CTTCGGGCCTAATATCTTCAACTTTGGCATCAGCAATGACGTTGCTCGATATCTCAAACTATGTCTT  
CTATCACATTCAGCT

+  
FFFFFFFFFFFFFFFFFFFFFFFFFFFFFFFFFFFFFFFFFFFFFFFFFFFFFFFFFFFFFFFFFFFFFFFF  
FFFFFFFFFFFFFFFFFFFFFFFFFFFFFFFFFFFFFFFFFFFFFFFFFFFFFFFFFFFFFFFFFFFFFFFF  
FFFFFFFFFFFFFFFF

@A00721:190:HGJW7DSXY:4:2141:27190:2644 2:N:0:TCTGCAAG+GCTGCACT  
ATTCATAATGCTGGTCGATCCAGCCAGACACTGGTCTCGTCTAACACTCGACGTCTGACTAACACTAT  
CTTCGGGCCTAATATCTTCAACTTTGGCATCAGCAATGACGTTGCTCGATATCTCAAACTATGTCTT  
CTATCACATTCAGCT

+  
FFFFFFFFFFFFFFFFFFFFFFFFFFFFFFFFFFFFFFFFFFFFFFFFFFFFFFFFFFFFFFFFFFFFFFFF  
FFFFFFFFFFFF,FFFFFFFFFFFFFFFFFFFFFFFFFFFFFFFFFFFFFFFFFFFFFFFFFFFFFFFFFFFF  
FF:FFFFFFFFFFFF

@A00721:190:HGJW7DSXY:4:2334:28782:13228 2:N:0:TCTGCAAG+GCTGCACT  
ATTCATAATGCTGGTCGATCCAGCCAGACACTGGTCTCGTCTAACACTCGACGTCTGACTAACACTAT  
CTTCGGGCCTAATATCTTCAACTTTGGCATCAGCAATGACGTTGCTCGATATCTCAAACTATGTCTT  
CTATCACATTCAGCT

+  
FFFFFFFFFFFFFFFFFFFFFFFFFFFFFFFFFFFFFFFFFFFFFFFFFFFFFFFFFFFFFFFFFFFFFFFF  
FFFFFFFFFFFFFFFFFFFFFFFFFFFFFFFFFFFFFFFFFFFFFFFFFFFFFFFFFFFFFFFFFFFFFFFF  
FFFF:FFFFFFFFFFFF

@A00721:190:HGJW7DSXY:4:2407:25880:24987 2:N:0:TCTGCAAG+GCTGCACT  
ATTCATAATGCTGGTCGATCCAGCCAGACACTGGTCTCGTCTAACACTCGACGTCTGACTAACACTAT  
CTTCGGGCCTAATATCTTCAACTTTGGCATCAGCAATGACGTTGCTCGATATCTCAAACTATGTCTT  
CTATCACATTCAGCT

+  
FFFFFFFFFFFFFFFFFFFFFFFFFFFFFFFFFFFFFFFFFFFFFFFFFFFFFFFFFFFFFFFFFFFFFFFF  
FFFFFFFFFFFFFFFFFFFFFFFFFFFFFFFFFFFFFFFFFFFFFFFFFFFFFFFFFFFFFFFFFFFFFFFF  
FFFFFFFFFFFFF:FFF

@A00721:190:HGJW7DSXY:4:1156:12527:9815 2:N:0:TCTGCAAG+GCTGCACT  
CATTACATAATGCTGGTCGATCCAGCCAGACACTGGTCTCGTCTAACACTCGACGTCTGACTAACACTA  
TCTTCGGGCCTAATATCTTCAACTTTGGCATCAGCAATGACGTTGCTCGATATCTCAAACTATGTCT  
TCTATCACATTCAGC

+  
FFFFFFFFFFFFFFFFFFFFFFFFFFFFFFFFFFFFFFFFFFFFFFFFFFFFFFFFFFFFFFFFFFFFFFFF  
FFFFFFFFFFFFFFFFFFFFFFFFFFFFFFFFFFFFFFFFFFFFFFFFFFFFFFFFFFFFFFFFFFFFFFFF  
FFFFFFFFFFFFFFFF

@A00721:190:HGJW7DSXY:4:1336:31882:6918 2:N:0:TCTGCAAG+GCTGCACT  
CATTACATAATGCTGGTCGATCCAGCCAGACACTGGTCTCGTCTAACACTCGACGTCTGACTAACACTA  
TCTTCGGGCCTAATATCTTCAACTTTGGCATCAGCAATGACGTTGCTCGATATCTCAAACTATGTCT  
TCTATCACATTCAGC

+  
FFFFFFFFFFFFFFFFFFFFFFFFFFFFFFFFFFFFFFFFFFFFFFFFFFFFFFFFFFFFFFFFFFFFF:FFFFFFFF  
FFFFFFFFFFFFFFFFFFFFFFFFFFFFFFFFFFFFFFFFFFFFFFFFFFFFFFFFFFFFFFFFFFFFFFFF  
FFFFFFFFFFFFFFFFF:F

@A00721:190:HGJW7DSXY:4:1344:31295:19460 2:N:0:TCTGCAAG+GCTGCACT  
CATTACATAATGCTGGTCGATCCAGCCAGACACTGGTCTCGTCTAACACTCGACGTCTGACTAACACTA



@A00721:190:HGJW7DSXY:4:2241:31204:28948 2:N:0:TCTGCAAG+GCTGCACT  
CATTTCATAATGCTGGTCGATCCAGCCAGACACTGGTCTCGTCTAACACTCGACGTCTGACTAACACTA  
TCTTCGGGCCTAATATCTTCAACTTTGGCATCAGCAATGACGTTGCTCGATATCTCAAACTATGTCT  
TCTATCACATTCAGC

+

FFFFFFFFFFFFFFFFFFFFFFFFFFFFFFFFFFFFFFFFFFFFFFFFFFFFFFFFFFFFFFFFFFFFFFFFFFFFFFFF  
FFFFFFFFFFFFFFFFFFFFFFFFFFFFFFFFFFFFFFFFFFFFFFFFFFFFFFFFFFFFFFFFFFFFFFFFFFFFFFFF  
FFFFFFFFFFFFFFFFFFFFFFFFFFFFFFFFFFFFFFFFFFFFFFFFFFFFFFFFFFFFFFFFFFFFFFFFFFFFFFFF  
FFFFFFFF,FFF  
FFFFFFFF:FF:FFFFFFFFFFFFFFFF,::FF:FFFFFFFF:FFFF:FFFFFFFF:FFFFFF:F:FFFF  
FFFFF,,FFFF,FF:

@A00721:190:HGJW7DSXY:4:2643:12536:36354 2:N:0:TCTGCAAG+GCTGCACT  
CATTTCATAATGCTGGTCGATCCAGCCAGACACTGGTCTCGTCTAACACTCGACGTCTGACTAACACTA  
TCTTCGGGCCTAATATCTTCAACTTTGGCATCAGCAATGACGTTGCTCGATATCTCAAACTATGTCT  
TCTATCACATTCAGC

+

FFFFFFFFFFFFFFFFFFFFFFFFFFFFFFFFFFFFFFFFFFFFFFFFFFFFFFFFFFFFFFFFFFFFFFFFFFFFFFFF  
FFFFFFFFFFFFFFFFFFFFFFFFFFFFFFFFFFFFFFFFFFFFFFFFFFFFFFFFFFFFFFFFFFFFFFFFFFFFFFFF  
FFFFFFFFFFFFFFFFFFFFFFFFFFFFFFFFFFFFFFFFFFFFFFFFFFFFFFFFFFFFFFFFFFFFFFFFFFFFFFFF  
FFFFFFFF:

@A00721:190:HGJW7DSXY:4:1117:31946:14575 2:N:0:TCTGCAAG+GCTGCACT  
GCATTTCATAATGCTGGTCGATCCAGCCAGACACTGGTCTCGTCTAACACTCGACGTCTGACTAACACT  
ATCTTCGGGCCTAATATCTTCAACTTTGGCATCAGCAATGACGTTGCTCGATATCTCAAACTATGTC  
TTCTATCACATTCAG

+

FFFFFFFFFFFFFF:FFFFFFFFFFFFFFFFFFFFFFFFFFFFFFFFFFFFFFFFFFFFFFFFFFFFFFFFFFFFFFF,FFFFFFFF  
FFFFFFFFFFFFFFFFFFFFFFFFFFFFFFFFFFFFFFFFFFFFFFFFFFFFFFFFFFFFFFFFFFFFFFFFFFFFFFFF  
FFFFFFFFFFFFFFFFFFFFFFFFFFFFFFFFFFFFFFFFFFFFFFFFFFFFFFFFFFFFFFFFFFFFFFFFFFFFFFFF  
FFFFFFFF

@A00721:190:HGJW7DSXY:4:1237:29243:20322 2:N:0:TCTGCAAG+GCTGCACT  
GCATTTCATAATGCTGGTCGATCCAGCCAGACACTGGTCTCGTCTAACACTCGACGTCTGACTAACACT  
ATCTTCGGGCCTAATATCTTCAACTTTGGCATCAGCAATGACGTTGCTCGATATCTCAAACTATGTC  
TTCTATCACATTCAG

+

::FFFFFFFFFFFFFFFFFFFFFFFFFFFFFFFFFFFFFFFFFFFFFFFFFFFFFFFFFFFFFFFFFFFFFFFFFFFF  
FFFFFFFFFFFFFFFFFFFFFFFFFFFFFFFFFFFFFFFFFFFFFFFFFFFFFFFFFFFFFFFFFFFFFFFFFFFFFFFF  
FFFFFFFFFFFFFFFFFFFFFFFFFFFFFFFFFFFFFFFFFFFFFFFFFFFFFFFFFFFFFFFFFFFFFFFFFFFFFFFF  
FFFFFFFF

@A00721:190:HGJW7DSXY:4:1240:25780:14231 2:N:0:TCTGCAAG+GCTGCACT  
GCATTTCATAATGCTGGTCGATCCAGCCAGACACTGGTCTCGTCTAACACTCGACGTCTGACTAACACT  
ATCTTCGGGCCTAATATCTTCAACTTTGGCATCAGCAATGACGTTGCTCGATATCTCAAACTATGTC  
TTCTATCACATTCAG

+

FFFFFFFFFFFFFFFFFFFFFFFFFFFFFFFFFFFFFFFFFFFFFFFFFFFFFFFFFFFFFFFFFFFFFFFFFFFFFFFF  
:FFFFFFFFFFFFFFFF:F:FFFFFFFFFFFFFFFFFFFFFFFFFFFFFFFFFFFFFFFFFFFFFFFFFFFFFFFF  
FFFFFFFFFFFFFFFF

@A00721:190:HGJW7DSXY:4:1313:7129:32597 2:N:0:TCTGCAAG+GCTGCACT  
GCATTTCATAATGCTGGTCGATCCAGCCAGACACTGGTCTCGTCTAACACTCGACGTCTGACTAACACT  
ATCTTCGGGCCTAATATCTTCAACTTTGGCATCAGCAATGACGTTGCTCGATATCTCAAACTATGTC  
TTCTATCACATTCAG

+

FFFFFFFFFFFFFFFFFFFFFFFFFFFFFFFFFFFFFFFFFFFFFFFFFFFFFFFFFFFFFFFFFFFFFFFFFFFFFFFF  
FFFFFFFF:FFFFFFFFFFFFFFFFFFFFFFFFFFFFFFFFFFFFFFFFFFFFFFFFFFFFFFFFFFFFFFFFFFFF  
FFFFFFFFFFFFFFFF

@A00721:190:HGJW7DSXY:4:1424:19018:33395 2:N:0:TCTGCAAG+GCTGCACT  
GCATTTCATAATGCTGGTCGATCCAGCCAGACACTGGTCTCGTCTAACACTCGACGTCTTACTAACACT  
ATCTTCGGGCCTAATATCTTCAACTTTGGCATCAGCAATGACGTTGCTCGATATCTCAAACTATGTC  
TTCTATCACATTCAG

+

FFFF,FF,FF:FFF,:FFFF,FFF::FFF,FFF:FFFF,:FFFFFFFF::FFFF,,FFFF:F:F

FF,FFF,F,:FFF:FFFFFFFF:FFF,,,:FFFF,:FFF:,FFFFFFFF:FFF:FFFFFFFFFFFFFFFFF:  
:FFFFFF:,FFFF,F

@A00721:190:HGJW7DSXY:4:1475:5267:30185 2:N:0:TCTGCAAG+GCTGCACT  
GCATTCATAATGCTGGTCGATCCAGCCAGACACTGGTCTCGTCTAACACTCGACGTCTGACTAACACT  
ATCTTCGGGCCTAATATCTTCAACTTTGGCATCAGCAATGACGTTGCTCGATATCTCAAACTATGTC  
TTCTATCACATTCAG

+

FFF,FFFFFFFFFFFFFFFFFFFFFFFFFFFFFFFFFFFFFFFFFFFFFFFFFFFFFFFFFFFFFFFFFFFFF  
FFFFFFFFFFFFFFFFFFFFFFFFFFFFFFFFFFFFFFFFFFFFFFFFFFFFFFFFFFFFFFFFFFFFFFFFF  
FFFFFFFFFFFFFFFFF

@A00721:190:HGJW7DSXY:4:1531:2148:31892 2:N:0:TCTGCAAG+GCTGCACT  
ATTCATAATGCTGGTCGATCCAGCCAGACACTGGTCTCGTCTAACACTCGACGTCTGACTAACACTAT  
CTTCGGGCCTAATATCTTCAACTTTGGCATCAGCAATGACGTTGCTCGATATCTCAAACTATGTCTT  
CTATCACATTCAG

+

FF,:FFFFFF,FFFF:FFFFFF:FFFFFF:FFFFFF:FF:F:F:FF:FFFFFFFFFFFFFFFFF  
FFFF:F:FFFFFF:FF,FFFFFFFFFFFFFFFF:FFF:FFFF:FFFFFFFFFFFFFFFF:FFFFFFF  
:FFF:FFF:FFF

@A00721:190:HGJW7DSXY:4:1657:4092:18161 2:N:0:TCTGCAAG+GCTGCACT  
GCATTCATAATGCTGGTCGATCCAGCCAGACACTGGTCTCGTCTAACACTCGACGTCTGACTAACACT  
ATCTTCGGGCCTAATATCTTCAACTTTGGCATCAGCAATGACGTTGCTCGATATCTCAAACTATGTC  
TTCTATCACATTCAG

+

FF:FFFFFFFFFFFFFFFFFFFFFFFFFFFFFFFFFFFFFFFFFFFFFFFFFFFFFFFFFFFFFFFFFFFFF  
FFFFFFFFFFFFFFFFFFFFFFFFFFFFFFFFFFFFFFFFFFFFFFFFFFFFFFFFFFFFFFFFFFFFFFFFF  
FFFFFFFFFFFFFFFFF

@A00721:190:HGJW7DSXY:4:1657:4806:19586 2:N:0:TCTGCAAG+GCTGCACT  
GCATTCATAATGCTGGTCGATCCAGCCAGACACTGGTCTCGTCTAACACTCGACGTCTGACTAACACT  
ATCTTCGGGCCTAATATCTTCAACTTTGGCATCAGCAATGACGTTGCTCGATATCTCAAACTATGTC  
TTCTATCACATTCAG

+

FFFFFFFFFFFFFFFFFFFFFFFFFFFFFFFFFFFFFFFFFFFFFFFFFFFFFFFFFFFFFFFFFFFFFFFFF  
FFFFFFFFFFFFFFFFFFFFFFFFFFFFFFFFFFFFFFFFFFFFFFFFFFFFFFFFFFFFFFFFFFFFFFFFF  
FFFFFFFFFFFFFFFFF

@A00721:190:HGJW7DSXY:4:2276:32904:15765 2:N:0:TCTGCAAG+GCTGCACT  
GCATTCATAATGCTGGTCGATCCAGCCAGACACTGGTCTCGTCTAACACTCGACGTCTGACTAACACT  
ATCTTCGGGCCTAATATCTTCAACTTTGGCATCAGCAATGACGTTGCTCGATATCTCAAACTATGTC  
TTCTATCACATTCAG

+

FFFFFFFFFFFFFFFFFFFFFFFFFFFFFFFFFFFFFFFFFFFFFFFFFFFFFFFFFFFFFFFFFFFFFFFFF  
FFFFFFFFFFFFFFFFFFFFFFFFFFFFFFFFFFFFFFFFFFFFFFFFFFFFFFFFFFFFFFFFFFFFFFFFF  
FFFFFFFFFFFFFFFF:F  
FFFFFFFFFFFFFFFF:F

@A00721:190:HGJW7DSXY:4:2363:2528:2895 2:N:0:TCTGCAAG+GCTGCACT  
GCATTCATAATGCTGGTCGATCCAGCCAGACACTGGTCTCGTCTAACACTCGACGTCTGACTAACACT  
ATCTTCGGGCCTAATATCTTCAACTTTGGCATCAGCAATGACGTTGCTCGATATCTCAAACTATGTC  
TTCTATCACATTCAG

+

FFFFFFFFFFFFFFFFFFFFFFFFFFFFFFFFFFFFFFFFFFFFFFFFFFFFFFFFFFFFFFFFFFFFFFFFF  
:FFFFFFFFFFFFFFFFFFFFFFFFFFFFFFFFFFFFFFFFFFFFFFFFFFFFFFFFFFFFFFFFFFFFFFFFF  
FFFFFFFFFFFFFFFFF

@A00721:190:HGJW7DSXY:4:2642:5068:7795 2:N:0:TCTGCAAG+GCTGCACT  
GCATTCATAATGCTGGTCGATCCAGCCAGACACTGGTCTCGTCTAACACTCGACGTCTGACTAACACT  
ATCTTCGGGCCTAATATCTTCAACTTTGGCATCAGCAATGACGTTGCTCGATATCTCAAACTATGTC  
TTCTATCACATTCAG



+  
FFFFFFFFFFFFFFFFFFFFFFFFFFFFFFFFFFFFFFFFFFFFFFFFFFFFFFFFFFFFFFFFFFFFFFFF:FFFF  
FFFFFFFFFFFFFFFFFFFFFFFFFFFFFFFFFFFFFFFFFFFFFFFFFFFFFFFFFFFFFFFFFFFFFFFF  
,FFFFFFFF:FFFFF  
@A00721:190:HGJW7DSXY:4:1251:8612:3850 2:N:0:TCTGCAAG+GCTGCACT  
GATCAGCATTCATAATGCTGGTCGATCCAGCCAGACACTGGTCTCGTCTAACACTCGACGTCTGACTA  
ACACTATCTTCGGGCCTAATATCTTCAACTTTGGCATCAGCAATGACGTTGCTCGATATCTCAAACT  
ATGTCTTCTATCACA  
+  
FFFFFFFFFFFFFFFFFFFFFFFFFFFFFFFFFFFFFFFFFFFFFFFFFFFFFFFFFFFFFFFFFFFFFFFF  
FFFFFFFFFFFFFFFFFFFFFFFFFFFFFFFFFFFFFFFFFFFFFFFFFFFFFFFFFFFFFFFFFFFFFFFF  
FFFFFFFFFFFFF:FFF  
@A00721:190:HGJW7DSXY:4:1537:10755:35806 2:N:0:TCTGCAAG+GCTGCACT  
GATCAGCATTCATAATGCTGGTCGATCCAGCCAGACACTGGTCTCGTCTAACACTCGACGTCTGACTA  
ACACTATCTTCGGGCCTAATATCTTCAACTTTGGCATCAGCAATGACGTTGCTCGATATCTCAAACT  
ATGTCTTCTATCACA  
+  
FFFFFFFFFFFFFFFFFFFFFFFFFFFFFFFFFFFFFFFFFFFFFFFFFFFFFFFFFFFFFFFFFFFFFFFF  
FFFFFFFFFFFFFFFFFFFFFFFFFFFFFFFFFFFFFFFFFFFFFFFFFFFFFFFFFFFFFFFFFFFFFFFF  
FFFFFFFFFFFFF:FFF  
@A00721:190:HGJW7DSXY:4:1545:20347:27712 2:N:0:TCTGCAAG+GCTGCACT  
GATCAGCATTCATAATGCTGGTCGATCCAGCCAGACACTGGTCTCGTCTAACACTCGACGTCTGACTA  
ACACTATCTTCGGGCCTAATATCTTCAACTTTGGCATCAGCAATGACGTTGCTCGATATCTCAAACT  
ATGTCTTCTATCACA  
+  
FFFFFFFFFFFFFFFFFFFFFFFFFFFFFFFFFFFFFFFFFFFFFFFFFFFFFFFFFFFFFFFFFFFFFFFF  
FFFFFFFFFFFFFFFFFFFFFFFFFFFFFFFFFFFFFFFFFFFFFFFFFFFFFFFFFFFFFFFFFFFFFFFF  
FFFFF:FFFFFFFFF  
@A00721:190:HGJW7DSXY:4:2321:31295:26882 2:N:0:TCTGCAAG+GCTGCACT  
ATCAGCATTCATAATGCTGGTCGATCCAGCCAGACACTGGTCTCGTCTAACACTCGACGTCTGACTAA  
CACTATCTTCGGGCCTAATATCTTCAACTTTGGCATCAGCAATGACGTTGCTCGATATCTCAAACTA  
TGTCTTCTATCACA  
+  
F,FF,FFFFFF:FFFFF,F:FF:FFFFFF::FFF,F,FF,F:F,:FFFF,FFFFFFFFF,:FF:FF  
FFF:F::FFFF,:,:FFFFFF,FF:FFFF:,,,FFFF,FFF,F:::F,FF,FF,FFFF:F::FFFFF  
F:FFFF,FFF,F,F  
@A00721:190:HGJW7DSXY:4:2430:4137:2049 2:N:0:TCTGCAAG+GCTGCACT  
GATCAGCATTCATAATGCTGGTCGATCCAGCCAGACACTGGTCTCGTCTAACACTCGACGTCTGACTA  
ACACTATCTTCGGGCCTAATATCTTCAACTTTGGCATCAGCAATGACGTTGCTCGATATCTCAAACT  
ATGTCTTCTATCACA  
+  
FFFFFFFFFFFFFFFFFFFFFFFFFFFFFFFFFFFFFFFFFFFFFFFFFFFFFFFFFFFFFFFFFFFFFFFF  
FFFFFFFFFFFFFFFFFFFFFFFFFFFFFFFFFFFFFFFFFFFFFFFFFFFFFFFFFFFFFFFFFFFFFFFF  
FF:FFFFFF:FFFF  
@A00721:190:HGJW7DSXY:4:2535:27272:34507 2:N:0:TCTGCAAG+GCTGCACT  
GATCAGCATTCATAATGCTGGTCGATCCAGCCAGACACTGGTCTCGTCTAACACTCGACGTCTGACTA  
ACACTATCTTCGGGCCTAATATCTTCAACTTTGGCATCAGCAATGACGTTGCTCGATATCTCAAACT  
ATGTCTTCTATCACA  
+  
FFFFFFFFFFFFFFF,FFFFFFFFFFFFFFFFFFFFFFFFFFFFFFFFFFFFFFFFFFFFFFFFFFFFFFFF  
FFFFF:FF:FFFFFFF:FFFFFFFFFFFFFFFFFFFFFFFFFFFFFFFFFFFFFFFFFFFFFFFFFFFF  
:FFFFFFFFFFFFFFFFF  
@A00721:190:HGJW7DSXY:4:2546:6262:12493 2:N:0:TCTGCAAG+GCTGCACT  
GATCAGCATTCATAATGCTGGTCGATCCAGCCAGACACTGGTCTCGTCTAACACTCGACGTCTGACTA





FFFFFFFFFFFFFFFFFFFFFFFFFFFFFFFFFFFFFFFFFFFFFFFFFFFFFFFFFFFFFFFF:FFFF::  
FFFFFFFFFFFF

@A00721:190:HGJW7DSXY:4:2464:1994:15092 2:N:0:TCTGCAAG+GCTGCACT  
AATATTGATTTTTTTTCCCCTATCCATAGCAATCTGCAATATATCGACCAGATCAGCATTATAATGCT  
GGTCGATCCAGCCAGACACTGGTCTCGTCTAACACTCGACGTCTGACTAACACTATCTTCGGGCCTAA  
TATCTTCAACT

+

FF:FFFF:FFFFFFFFFFFFFFFFFFFFFFFFFFFFFFFFFFFFFFFFFFFFFFFFFFFFFFFF  
FFFFFFFFFFFFFFFFFFFFFFFFFFFFFFFFFFFFFFFFFFFFFFFFFFFFFFFFFFFFFFFF  
FFFFFFFFFFFF

@A00721:190:HGJW7DSXY:4:2513:11803:9001 2:N:0:TCTGCAAG+GCTGCACT  
AATATTGATTTTTTTTCCCCTATCCATAGCAATCTGCAATATATCGACCAGATCAGCATTATAATGCT  
GGTCGATCCAGCCAGACACTGGTCTCGTCTAACACTCGACGTCTGACTAACACTATCTTCGGGCCTAA  
TATCTTCAACT

+

FFFFFFFFFFFFFFFFFFFFFFFFFFFFFFFFFFFFFFFFFFFFFFFFFFFFFFFFFFFFFFFF  
FFFFFFFFFFFFFFFFFFFFFFFFFFFFFFFFFFFFFFFFFFFFFFFFFFFFFFFFFFFFFFFF  
FFFFFFFFFFFF

@A00721:190:HGJW7DSXY:4:1663:5701:34413 2:N:0:TCTGCAAG+GCTGCACT  
AATAATGATTTTTTATCCCCTATCCATAGCAATCTGCAATATATCGACCAGATAAGCATTATAATGCT  
GGTAGAACAAAGCCAGACACTGGTCTCGTCTAACAAATCGACGTCAGACTAACACTAACTTCGGGCCTAA  
TATCTTCA

+

FF,F,:,FFF,F,,,F,,F,FFFF,F,FFFF,,,FF,F,F:FFFF,F,F,,F,F:F,,F:F:,,,F  
,,F,FF,F,F,,:F,FF,F,,F:F:,F,F:FFFF,F:FFF,,,,,FF,FF,FF,F,F:,:,,,F,,FF  
:F:F,:FF

@A00721:190:HGJW7DSXY:4:1262:9426:31563 2:N:0:TCTGCAAG+GCTGCACT  
ATGACTGTCAAATATTGATTTTTTTCCCCTATCCATAGCAATCTGCAATATATCGACCAGATCAGCAT  
TCATAATGCTGGTCGATCCAGCCAGACACTGGTCTCGTCTAACACTCGACGTCTGACTAACACTATCT  
TCGGGCCTAATATCT

+

FFFFFFFFFFFFFFFFFFFFFFFFFFFFFFFFFFFFFFFFFFFFFFFFFFFFFFFFFFFFFFFF  
FFFFFFFFF:FFFFFFFFFFFFFFFFFFFFFFFFFFFFFFFFFFFFFFFFFFFFFFFFFFFFFFFF  
,FFFFFFFF,F,FFFF

@A00721:190:HGJW7DSXY:4:1262:10800:32377 2:N:0:TCTGCAAG+GCTGCACT  
TGACTGTCAAATATTGATTTTTTTCCCCTATCCATAGCAATCTGCAATATATCGACCAGATCAGCATT  
CATAATGCTGGTCGATCCAGCCAGACACTGGTCTCGTCTAACACTCGACGTCTGACTAACACTATCT  
CGGGCCTAATATCT

+

FFFFFFFFFFFFFFFFFFFFFFFFFFFFFFFFFFFFFFFFFFFFFFFFFFFFFFFFFFFFFFFF  
FFFFFFFFFFFFFFFFF:FFFFFFFFFFFFFFFFFFFFFFFFFFFFFFFFFFFFFFFFFFFFFFFF  
FFFFFFFFFFFFFFFFF

@A00721:190:HGJW7DSXY:4:1315:12192:12148 2:N:0:TCTGCAAG+GCTGCACT  
ATGACTGTCAAATATTGATTTTTTTCCCCTATCCATAGCAATCTGCAATATATCGACCAGATCAGCAT  
TCATAATGCTGGTCGATCCAGCCAGACACTGGTCTCGTCTAACACTCGACGTCTGACTAACACTATCT  
TCGGGCCTAATATCT

+

FFFFFFFFFFFFFFF:FFFFFFFFFFFFFFFFFFFF,FFFFFFFFFFFFFFFFFFFFFFFFFFFFFFFF  
FFFFFFFFFFFFFFFFFFFFFFFFFFFFFFFFFFFFFFFFFFFFFFFFFFFFFFFFFFFFFFFF  
FFFFFFFFFFFFFFFFF

@A00721:190:HGJW7DSXY:4:1406:17671:17503 2:N:0:TCTGCAAG+GCTGCACT  
ATGACTGTCAAATATTGATTTTTTTCCCCTATCCATAGCAATCTGCAATATATCGACCAGATCAGCAT  
TCATAATGCTGGTCGATCCAGCCAGACACTGGTCTCGTCTAACACTCGACGTCTGACTAACACTATCT  
TCGGGCCTAATATCT

+  
FFFFFFFFFFFFFFFFFFFFFFFFFFFFFFFFFFFFFFFFFFFFFFFFFFFFFFFFFFFFFFFFFFFFFFFF  
FFFFFFFFFFFFFFFFFFFFFFFFFFFFFFFFFFFFFFFFFFFFFFFFFFFFFFFFFFFFFFFFFFFFFFFF  
FFFFFFFFFFFFFFFF  
@A00721:190:HGJW7DSXY:4:1471:3269:1767 2:N:0:TCTGCAAG+GCTGCACT  
ATGACTGTCAAATATTGATTTTTTTTCCCCTATCCATAGCAATCTGCAATATATCGACCAGATCAGCAT  
TCATAATGCTGGTCGATCCAGCCAGACACTGGTCTCGTCTAACACTCGACGTCTGACTAACACTATCT  
TCGGGCCTAATATCT  
+  
FFFFF:FFF,F:FFFFFFFFFFFFFFFFFFFFFFFFFFFFFFFFFFFFFFFFFFFFFFFFFFFFFFFFF:F:,FFF  
,FFFFFF,FFFFFF:FFFFFFFFFFFFFF,FFFFFFFFFFFFFFFFFFFFFFFFFFFFFFFF,FFFFFFFFFFFFFF  
:FFFFFF:FFFFFF  
@A00721:190:HGJW7DSXY:4:1668:4291:2472 2:N:0:TCTGCAAG+GCTGCACT  
ATGACTGTCAAATATTGATTTTTTTTCCCCTATCCATAGCAATCTGCAATATATCGACCAGATCAGCAT  
TCATAATGCTGGTCGATCCAGCCAGACACTGGTCTCGTCTAACACTCGACGTCTGACTAACACTATCT  
TCGGGCCTAATATCT  
+  
FFFFFFFFFFFFF,F:FFFFFFFFFFFFFFFFFFFFFFFFFFFFFFFFFFFFFFFFFFFFFFFFFFFFFFFFF:  
FFFFFFFFFFFFFFFFFFFFFFFFFFFFFFFFFFFFFFFFFFFFFFFFFFFFFFFFFFFFFFFFFFFFFFFF  
FFFFFFFFF:FFFFFF  
@A00721:190:HGJW7DSXY:4:2243:16721:36996 2:N:0:TCTGCAAG+GCTGCACT  
ATGACTGTCAAATATTGATTTTTTTTCCCCTATCCATAGCAATCTGCAATATATCGACCAGATCAGCAT  
TCATAATGCTGGTCGATCCAGCCAGACACTGGTCTCGTCTAACACTCGACGTCTGACTAACACTATCT  
TCGGGCCTAATATCT  
+  
FFFFFFFFFFFFFFF:FFFFFFFFFFFFFFFFFFFFFFFFFFFFFFFFFFFFFFFFFFFFFFFFFFFFFFFFF:  
FFFF:FFFFFFFFFFFFFFFFFFFFFFFFFFFFFFFFFFFFFFFFFFFFFFFFFFFFFFFFFFFFFFFF  
FFFFFFFFFFFFF,F  
@A00721:190:HGJW7DSXY:4:2446:16495:18067 2:N:0:TCTGCAAG+GCTGCACT  
ATGACTGTCAAATATTGATTTTTTTTCCCCTATCCATAGCAATCTGCAATATATCGACCAGATCAGCAT  
TCATAATGCTGGTCGATCCAGCCAGACACTGGTCTCGTCTAACACTCGACGTCTGACTAACACTATCT  
TCGGGCCTAATATCT  
+  
FFFFFFFFFFFFFFFFFFFFFFFFFFFFFFFFFFFFFFFFFFFFFFFFFFFFFFFFFFFFFFFFFFFFFFFFF:FFFFFFFFFFFFFFF  
FFFFFFFFFFFFFFFFFFFFFFFFFFFFFFFFFFFFFFFFFFFFFFFFFFFFFFFFFFFFFFFFFFFFFFFF  
FFFFFFFFFFFFFFFFF  
@A00721:190:HGJW7DSXY:4:2461:23484:23062 2:N:0:TCTGCAAG+GCTGCACT  
ATGACTGTCAAATATTGATTTTTTTTCCCCTATCCATAGCAATCTGCAATATATCGACCAGATCAGCAT  
TCATAATGCTGGTCGATCCAGCCAGACACTGGTCTCGTCTAACACTCGACGTCTGACTAACACTATCT  
TCGGGCCTAATATCT  
+  
FFFFFFFFFFFFFFFFFFFFFFFFFFFFFFFFFFFFFFFFFFFFFFFFFFFFFFFFFFFFFFFFFFFFFFFFF  
FFFFFFFFFFFFFFFFFFFFFFFFFFFFFFFFFFFFFFFFFFFFFFFFFFFFFFFFFFFFFFFFFFFFFFFF  
FFFFFFFFFFFFFFFFF  
@A00721:190:HGJW7DSXY:4:2528:6876:7513 2:N:0:TCTGCAAG+GCTGCACT  
ATGACTGTCAAATATTGATTTTTTTTCCCCTATCCATAGCAATCTGCAATATATCGACCAGATCAGCAT  
TCATAATGCTGGTCGATCCAGCCAGACACTGGTCTCGTCTAACACTCGACGTCTGACTAACACTATCT  
TCGGGCCTAATATCT  
+  
FFFFFFFFFFFFFFFFFFFFFFFFFFFFFFFFFFFFFFFFFFFFFFFFFFFFFFFFFFFFFFFFFFFFFFFFF  
FFFFFFFFFFFFFFFFFFFFFFFFFFFFFFFFFFFFFFFFFFFFFFFFFFFFFFFFFFFFFFFFFFFFFFFF  
FFFFFFFFFFFFFFFFF  
@A00721:190:HGJW7DSXY:4:2528:6596:7780 2:N:0:TCTGCAAG+GCTGCACT  
ATGACTGTCAAATATTGATTTTTTTTCCCCTATCCATAGCAATCTGCAATATATCGACCAGATCAGCAT

TCATAATGCTGGTCGATCCAGCCAGACACTGGTCTCGTCTAACACTCGACGTCTGACTAACACTATCT  
TCGGGCCTAATATCT

+

FFFFFFFFFFFFFFFFFFFFFFFFFFFFFFFFFFFFFFFFFFFFFFFFFFFFFFFFFFFFFFFFFFFFFFFF  
FFFFFFFFFFFFFFFFFFFFFFFFFFFFFFFFFFFFFFFFFFFFFFFFFFFFFFFFFFFFFFFFFFFFFFFF  
FFFFFFFFFFFFFFFF

@A00721:190:HGJW7DSXY:4:1147:28049:2503 2:N:0:TCTGCAAG+GCTGCACT  
CCGAAGATAGTGTAGTCAGACGTCGAGTGTTAGACGAGACCAGTGTCTGGCTGGATCGACCAGCATT  
ATGAATGCTGATCTGGTCGATATATTGCAGATTGCTATGGATAGGGGAAAAAAATCAATATTTGACAG  
TCATATTACTAAAGA

+

FFFFFFFF:FFFFFFFFFFFFFFFFFFFFFFFFFFFFFFFFFFFFFFFFFFFFFFFFFFFFFFFFFFFFFF:F  
FFFFFFFFFFFFFFFFFFFFFFFFFFFFFFFFFFFFFFFFFFFFFFFFFFFFFFFFFFFFFFFF:FF:FFFF,FFFFFFFFFFFFFFFF  
FFFF:FFFFFFFF

@A00721:190:HGJW7DSXY:4:1344:14850:8265 2:N:0:TCTGCAAG+GCTGCACT  
CCGAAGATAGTGTAGTCAGACGTCGAGTGTTAGACGAGACCAGTGTCTGGCTGGATCGACCAGCATT  
ATGAATGCTGATCTGGTCGATATATTGCAGATTGCTATGGATAGGGGAAAAAAATCAATATTTGACAG  
TCATATTACTAAAGA

+

FFFFFFFFFFFFFFFFFFFFFFFFFFFFFFFFFFFFFFFFFFFFFFFFFFFFFFFFFFFFFFFFFFFFFFFF  
FFFFFFFFFF::FFFFFFFFFFFFFFFFFFFFFFFFFFFFFFFFFFFFFFFFFFFFFFFFFFFFFFFFFFFF  
FFFFFFFFFFFFFFFF

@A00721:190:HGJW7DSXY:4:1410:19777:30859 2:N:0:TCTGCAAG+GCTGCACT  
CCGAAGATAGTGTAGTCAGACGTCGAGTGTTAGACGAGACCAGTGTCTGGCTGGATCGACCAGCATT  
ATGAATGCTGATCTGGTCGATATATTGCAGATTGCTATGGATAGGGGAAAAAAATCAATATTTGACAG  
TCATATTACTAAAGA

+

FFFFFFFFFFFFFFFFFFFFFFFFFFFFFFFFFFFFFFFFFFFFFFFFFFFFFFFFFFFFFFFFFFFFFFFF  
FFFFFFFFFFFFFFFFFFFFFFFFFFFFFFFFFFFFFFFFFFFFFFFFFFFFFFFFFFFFFFFF:FFFFFF::FF:FFFFFFFFFFFFFFFF  
FF:FFFFFFFF

@A00721:190:HGJW7DSXY:4:1502:6289:22811 2:N:0:TCTGCAAG+GCTGCACT  
CCGAAGATAGTGTAGTCAGACGTCGAGTGTTAGACGAGACCAGTGTCTGGCTGGATCGACCAGCATT  
ATGAATGCTGATCTGGTCGATATATTGCAGATTGCTATGGATAGGGGAAAAAAATCAATATTTGACAG  
TCATATTACTAAAGA

+

FFFFF:FFFF,FFFFFFFFF::F:FF:FF:FFFFFF:FFFF:FFFFFFFFFFFFFFFF:FFF:F:FFFF  
::FFF:FFFFFF:FFFFFFFFFFFFFFFFFFFFFFFF:F::FF,FF:FFF::FFFFFFFFF:,FF:FFFF  
FFFFFFFFF,,FFFF

@A00721:190:HGJW7DSXY:4:2102:25518:15374 2:N:0:TCTGCAAG+GCTGCACT  
CCGAAGATAGTGTAGTCAGACGTCGAGTGTTAGACGAGACCAGTGTCTGGCTGGATCGACCAGCATT  
ATGAATGCTGATCTGGTCGATATATTGCAGATTGCTATGGATAGGGGAAAAAAATCAATATTTGACAG  
TCATATTACTAAAGA

+

FFFFFFFFFFFFFFFFFFFFFFFFFFFFFFFFFFFFFFFFFFFFFFFFFFFFFFFFFFFFFFFFFFFFFFFF  
FFFFFFFFFFFFFFFFFFFFFFFFFFFFFFFFFFFFFFFFFFFFFFFFFFFFFFFFFFFFFFFFFFFFFFFF  
FFFFFFFFFFFFFFFF:F

@A00721:190:HGJW7DSXY:4:2251:32072:28886 2:N:0:TCTGCAAG+GCTGCACT  
CCGAAGATAGTGTAGTCAGACGTCGAGTGTTAGACGAGACCAGTGTCTGGCTGGATCGACCAGCATT  
ATGAATGCTGATCTGGTCGATATATTGCAGATTGCTATGGATAGGGGAAAAAAATCAATATTTGACAG  
TCATATTACTAAAGA

+

FFFFFFFFFFFFFFFFFFFFFFFFFFFFFFFFFFFFFFFFFFFFFFFFFFFFFFFFFFFFFFFFFFFFFFFF  
FFFFFFFFFFFFFFFFFFFFFFFFFFFFFFFFFFFFFFFFFFFFFFFFFFFFFFFFFFFFFFFF:F:,F,FFFFFFFFFFFF:FFF  
FFFFFFFFFFFF::FF

$+$ 

+

+

+

+

+

+

[illegible]

@A00721:190:HGJW7DSXY:4:1450:30074:4288 2:N:0:TCTGCAAG+GCTGCACT  
GTTAGTCAGACGTCGAGTGTTAGACGAGACCAGTGTCTGGCTGGATCGACCAGCATTATGAATGCTGA  
TCTGGTCGATATATTGCAGATTGCTATGGATAGGGGAAAAAATCAATATTTGACAGTCATATTACTA  
AAGAAAGAAATAAGA

+

FFFFFFFFFFFFFFFFFFFFFFFFFFFFFFFFFFFFFFFFFFFFFFFFFFFFFFFFFFFFFFFFFFFFFFFF  
FFFFFFFFFFFFFFFFFFFFFFFFFFFFFFFFFFFFFFFFFFFFFFFFFFFFFFFFFFFFFFFFFFFFFFFF  
FF:FF:FFFFFFFF

@A00721:190:HGJW7DSXY:4:2238:20889:19445 2:N:0:TCTGCAAG+GCTGCACT  
GTTAGTCAGACGTCGAGTGTTAGACGAGACCAGTGTCTGGCTGGATCGACCAGCATTATGAATGCTGA  
TCTGGTCGATATATTGCAGATTGCTATGGATAGGGGAAAAAATCAATATTTGACAGTCATATTACTA  
AAGAAAGAAATAAGA

+

FFFFFFFFFFFFFFFFFFFFFFFFFFFFFFFFFFFFFFFFFFFFFFFFFFFFFFFFFFFFFFFFFFFFFFFF  
FFFFFFFFFFFFFFFFFFFFFFFFFFFFFFFFFFFFFFFFFFFFFFFFFFFFFFFFFFFFFFFFFFFFFFFF  
FFFFFFFFFFFFFFFF

@A00721:190:HGJW7DSXY:4:2245:12689:12696 2:N:0:TCTGCAAG+GCTGCACT  
GTTAGTCAGACGTCGAGTGTTAGACGAGACCAGTGTCTGGCTGGATCGACCAGCATTATGAATGCTGA  
TCTGGTCGATATATTGCAGATTGCTATGGATAGGGGAAAAAATCAATATTTGACAGTCATATTACTA  
AAGAAAGAAATAAGA

+

FFFFFFFFFFFFFFFFFFFFFFFFFFFFFFFFFFFFFFFFFFFFFFFFFFFFFFFFFFFFFFFFFFFFFFFF  
FFFFFFFFFFFFFFFFFFFFFFFFFFFFFFFFFFFFFFFFFFFFFFFFFFFFFFFFFFFFFFFFFFFFFFFF  
,FFFFFFFF:FFFFF

@A00721:190:HGJW7DSXY:4:2308:15700:31657 2:N:0:TCTGCAAG+GCTGCACT  
GTTAGTCAGACGTCGAGTGTTAGACGAGACCAGTGTCTGGCTGGATCGACCAGCATTATGAATGCTGA  
TCTGGTCGATATATTGCAGATTGCTATGGATAGGGGAAAAAATCAATATTTGACAGTCATATTACTA  
AAGAAAGAAATAAGA

+

FFFFFFFFFFFFFFFFFFFFFFFFFFFFFFFFFFFFFFFFFFFFFFFFFFFFFFFFFFFFFFFFFFFFFFFF  
FFFFFFFFFFFFFFFFFFFFFFFFFFFFFFFFFFFFFFFFFFFFFFFFFFFFFFFFFFFFFFFFFFFFFFFF  
FFFFFFFFFFFFFFFF

@A00721:190:HGJW7DSXY:4:2378:27877:13322 2:N:0:TCTGCAAG+GCTGCACT  
GTTAGTCAGACGTCGAGTGTTAGACGAGACCAGTGTCTGGCTGGATCGACCAGCATTATGAATGCTGA  
TCTGGTCGATATATTGCAGATTGCTATGGATAGGGGAAAAAATCAATATTTGACAGTCATATTACTA  
AAGAAAGAAATAAGA

+

FFFFFFFFFFFFFFFFFFFFFFFFFFFFFFFFFFFFFFFFFFFFFFFFFFFFFFFFFFFFFFFFFFFFFFFF  
FFFFFFFFFFFFFFFFFFFFFFFFFFFFFFFFFFFFFFFFFFFFFFFFFFFFFFFFFFFFFFFFFFFFFFFF  
FFFFFFFFFFFFFFFF

@A00721:190:HGJW7DSXY:4:1555:32696:35916 2:N:0:TCTGCAAG+GCTGCACT  
TTTTAGTCAGACTTCTAGTGTTAGACTAGACCAGTGTCTGGCTGGATCGACCAGCATTATGAATTCTG  
ATCTGGTCGATATATTGCAGATTGCTATGGATAGGTGAAAAAATAAATATTTGACAGTCATATTACT  
AAAGAAAGAAATAA

+

F,:FFFF,F,,F:,F,:F,F,F,,F:F,FF:F:F:F,,FF,,FF,,F:FFFFFFFF,FF,,,F,  
FFFF,,F,,FFFFFF,:FFFFFF,FFFF,FFFF,,FFFFFFFF,FF,F:FF:FFFFFFFFFFFF,F  
FFF,FFF,FFFFF

@A00721:190:HGJW7DSXY:4:1251:8531:16517 2:N:0:TCTGCAAG+GCTGCACT  
ATTTTATTTTATTTTACAGTCTTATTTCTTTCTTTAGTAATATGACTGTCAAATATTGATTTTTTTCCC  
CTATCCATAGCAATCTGCAATATATCGACCAGATCAGCATTCATAATGCTGGTCGATCCAGCCAGACA  
CTGGTCTCGTCTAAC

+

FFFFFFFFFFFFFF:FFFFFFF:FFFF:FFFF,FFFFFFFFFFFFFFFFFFFFFFFF,FFFFFFFFFFFFFFFF



FFFFFFFFFFFFFFFFFFFFFFFFFFFFFFFFFFFFFFFFFFFFFFFFFFFFFFFFFFFFFFFFFFFFFFFFFFFFFFFF  
FFFFFFFFFFFFFFFF

@A00721:190:HGJW7DSXY:4:1270:25409:24643 2:N:0:TCTGCAAG+GCTGCACT  
ATTTTATTTTCAATTCACGTCTTATTTCTTTCTTTAGTAATATGACTGTCAAATATTGATTTTTTTTCCC  
CTATCCATAGCAATCTGCAATATATCGACCAGATCAGCATTCTAATGCTGGTTCGATCCAGCCAGACA  
CTGGTCTCGTCTAAC

+

FFFFFFFFFFFFFFFFFFFFFFFFFFFFFFFFFFFFFFFFFFFFFFFFFFFFFFFFFFFFFFFFFFFFFFFFFFFFFFFF  
FFFFFFFFFFFFFFFFFFFFFFFFFFFFFFFFFFFFFFFFFFFFFFFFFFFFFFFFFFFFFFFFFFFFFFFFFFFFFFFF  
FFFFFFFFFFFFFFFF

@A00721:190:HGJW7DSXY:4:2316:3667:28197 2:N:0:TCTGCAAG+GCTGCACT  
ATTTTATTTTCAATTCACGTCTTATTTCTTTCTTTAGTAATATGACTGTCAAATATTGATTTTTTTTCCC  
CTATCCATAGCAATCTGCAATATATCGACCAGATCAGCATTCTAATGCTGGTTCGATCCAGCCAGACA  
CTGGTCTCGTCTAAC

+

FFFFFFFFFFFFFFFFFFFFFFFFFFFFFFFFFFFFFFFFFFFFFFFFFFFFFFFFFFFFFFFFFFFFFFFFFFFFFFFF  
FFFFFFFFFFFFFFFFFFFFFFFFFFFFFFFFFFFFFFFFFFFFFFFFFFFFFFFFFFFFFFFFFFFFFFFFFFFFFFFF  
FFFFFFFFFFFFFFFF

@A00721:190:HGJW7DSXY:4:2423:1913:35055 2:N:0:TCTGCAAG+GCTGCACT  
ATTTTATTTTCAATTCACGTCTTATTTCTTTCTTTAGTAATATGACTGTCAAATATTGATTTTTTTTCCC  
CTATCCATAGCAATCTGCAATATATCGACCAGATCAGCATTCTAATGCTGGTTCGATCCAGCCAGACA  
CTGGTCTCGTCTAAC

+

FFFFFFFFFFFFFFFFFFFFFFFFFFFFFFFFFFFFFFFFFFFFFFFFFFFFFFFFFFFFFFFFFFFFFFFFFFFFFFFF  
FFFFFFFFFFFFFFFFFFFFFFFFFFFFFFFFFFFFFFFFFFFFFFFFFFFFFFFFFFFFFFFFFFFFFFFFFFFFFFFF  
FFFFFFFFFFFFFFFF

@A00721:190:HGJW7DSXY:4:2613:8124:12774 2:N:0:TCTGCAAG+GCTGCACT  
ATTTTATTTTCAATTCACGTCTTATTTCTTTCTTTAGTAATATGACTGTCAAATATTGATTTTTTTTCCC  
CTATCCATAGCAATCTGCAATATATCGACCAGATCAGCATTCTAATGCTGGTTCGATCCAGCCAGACA  
CTGGTCTCGTCTAAC

+

FFFF:FFFFFFFFFFFFFFFFFFFFFFFFFFFFFFFFFFFFFFFFFFFFFFFFFFFFFFFFFFFFFFFFFFFFFFFF  
FFFFFFFFFFFFFFFFFFFFFFFFFFFFFFFFFFFFFFFFFFFFFFFFFFFFFFFFFFFFFFFFFFFFFFFFFFFFFFFF  
F:F:FFFFFFFF

@A00721:190:HGJW7DSXY:4:1135:20817:17879 2:N:0:TCTGCAAG+GCTGCACT  
ATTAGATGATTAATAAAATTACAAATTTTATTTTCAATTCACGTCTTATTTCTTTCTTTAGTAATATGA  
CTGTCAAATATTGATTTTTTTTCCCCTATCCATAGCAATCTGCAATATATCGACCAGATCAGCATTCTA  
AATGCTGGTTCGATCC

+

FFFFFFFFFFFFFFFFFFFFFFFFFFFFFFFFFFFFFFFFFFFFFFFFFFFFFFFFFFFFFFFFFFFFFFFFFFFFFFFF  
FFFFFFFFFFFFFFFFFFFFFFFFFFFFFFFFFFFFFFFFFFFFFFFFFFFFFFFFFFFFFFFFFFFFFFFFFFFFFFFF  
FFFFFFFFFFFFFFFF

@A00721:190:HGJW7DSXY:4:1301:15628:24831 2:N:0:TCTGCAAG+GCTGCACT  
ATTAGATGATTAATAAAATTACAAATTTTATTTTCAATTCACGTCTTATTTCTTTCTTTAGTAATATGA  
CTGTCAAATATTGATTTTTTTTCCCCTATCCATAGCAATCTGCAATATATCGACCAGATCAGCATTCTA  
AATGCTGGTTCGATCC

+

FFFFFFFFFFFFFFFFFFFFFFFFFFFFFFFFFFFFFFFFFFFFFFFFFFFFFFFFFFFFFFFFFFFFFFFFFFFFFFFF  
FFFF:FFFFFFFFFFFFFFFFFFFFFFFFFFFFFFFFFFFFFFFFFFFFFFFFFFFFFFFFFFFFFFFFFFFFFFFF  
FFFF,::FFFFFFFFFFFFFFFFFFFFFFFFFFFFFFFFFFFFFFFFFFFFFFFFFFFFFFFFFFFFFFFF  
FFFF,FFFFFFFF::

@A00721:190:HGJW7DSXY:4:1301:15682:24893 2:N:0:TCTGCAAG+GCTGCACT  
ATTAGATGATTAATAAAATTACAAATTTTATTTTCAATTCACGTCTTATTTCTTTCTTTAGTAATATGA  
CTGTCAAATATTGATTTTTTTTCCCCTATCCATAGCAATCTGCAATATATCGACCAGATCAGCATTCTA  
AATGCTGGTTCGATCC

```
F:FFFFFFFFFFFFFFFF:FFFFFFFFFFFFFFFFFFFFFFFFFFFFFFFF:FFFFFFFFFFFF
FFFFFFFFFFFFFFFFFFFFFFFFFFFFFFFFFFFFFFFF:FFFFFFFFF:FFFFFFFFFFFFFFFFFFFFFFFF
:FFFFFFFFFFFFFFFF
```

[illegible][illegible]

```

:FFFFFFFFFFFFFFFFFFFFFFFFFFFFFFFFFFFFFFFF:,:FFFFFFF:FFFFFFF:FFF
FFFFFFFFFFFFFFFFFFFFFFFFFFFFFFFF:FFFFFFFFFFFF:FFFF,FFFFFFFFFFFFFFFFFFFF
FF:FFFFFFFFFFFFFF

```

[illegible][illegible]

```
FFFFFFFFFFFFFFFFFFFFFFFFFFFFFFFFFFFFFFFFFFFFFFFFFFFFFFFFFFFFFFF
FFFFFFFFFFFFFFFFFFFFFFFFFFFF:FFFFFFFFFFFFFFFFFFFFFF:FFFFFFFFFFFFF
FFFFFFFFFF:FF:F
```

@A00721:190:HGJW7DSXY:4:2666:19298:20885 2:N:0:TCTGCAAG+GCTGCACT  
ATTAGATGATTAATAAAATTACAAATTTTATTTCAATTTACAGTCTTATTTCTTTCTTTAGTAATATGA

CTGTCAAATATTGATTTTTTTTCCCCTATCCATAGCAATCTGCAATATATCGACCAGATCAGCATTTCAT  
AATGCTGGTCGATCC

+

FFFFFF,FFFFFFFF:FFFFF:FFFFFFFFFFFFFFFFFFFF::,F:FFFFFF:FFFFFFFFFFFF  
FFFFFFFF:FFFFF:FFFFFFFFFFFFFFFFFFFF:FFFFFFFFFFFFFFFFFFFFFFFF:FFFFFFF  
:FFFFFF:FFFFFF

@A00721:190:HGJW7DSXY:4:1154:14778:25676 2:N:0:TCTGCAAG+GCTGCACT  
ATTAGATGATTAATAAAATTACAAATTTTATTTCAATTCACGTCTTATTTCTTTCTTTAGTAATATGA  
CTGTCAAATATTGATTTTTTTTCCCCTATCCATAGCAATCTGCAATATATCGACCAGATCAGCATTTCAT  
AATGCTGGTCGATC

+

FFFFFFFFFFFFFFFFFFFFFFFFFFFFFFFFFFFFFFFFFFFFFFFFFFFFFFFFFFFFFFFFFFFF:,FFFFFFFF,FFF  
FFFF:FF:FFFFFFFFFFFFFFFFFFFF,FFFFFFFFFFFFFFFFFFFFFFFFFFFFFFFFFFFFFFFFFFFFF  
FFFFFFFFFFFFFFFF

@A00721:190:HGJW7DSXY:4:2168:10312:4852 2:N:0:TCTGCAAG+GCTGCACT  
ATTAGATGATTAATAAAATTACAAATTTTATTTCAATTCACGTCTTATTTCTTTCTTTAGTAATATGA  
CTGTCAAATATTGATTTTTTTTCCCCTATCCATAGCAATCTGCAATATATCGACCAGATCAGCATTTCAT  
AATGCTGGTCGATC

+

FFFFFFFFFFFFFFFFFFFFFFFFFFFFFFFFFFFFFFFFFFFFFFFFFFFFFFFFFFFFFFFFFFFF:FFFFF:FFFFF:FFFF:FF,FF:FFFFFFFF::F:FF:FFFFFFF  
FFFF,F,:FFFF,:FFFFFFFFFFFFFFFF:FFF:F,FFFFFFFFFFFF:FFFF:FFFF,FFFF:FF:F  
FFFFFFFFFFFF:FFF

@A00721:190:HGJW7DSXY:4:1119:19208:12336 2:N:0:TCTGCAAG+GCTGCACT  
TGTATTAGATGATTAATAAAATTACAAATTTTATTTCAATTCACGTCTTATTTCTTTCTTTAGTAATA  
TGACTGTCAAATATTGATTTTTTTTCCCCTATCCATAGCAATCTGCAATATATCGACCAGATCAGCATT  
CATAATGCTGGTCGA

+

FFFFFFFFFFFFFFFFFFFFFFFFFFFFFFFFFFFFFFFFFFFFFFFFFFFFFFFFFFFFFFFFFFFF  
FF:FFFFFFFFFFFFFFFFFFFFFFFFFFFFFFFFFFFFFFFFFFFFFFFFFFFFFFFFFFFFFFFFFFFF  
FFFFFFFFFFFFFFFF

@A00721:190:HGJW7DSXY:4:2175:19407:14716 2:N:0:TCTGCAAG+GCTGCACT  
TGTATTAGATGATTAATAAAATTACAAATTTTATTTCAATTCACGTCTTATTTCTTTCTTTAGTAATA  
TGACTGTCAAATATTGATTTTTTTTCCCCTATCCATAGCAATCTGCAATATATCGACCAGATCAGCATT  
CATAATGCTGGTCGA

+

FFFFFFFFFFFFFFFFFFFFFFFFFFFFFFFFFFFFFFFFFFFFFFFFFFFFFFFFFFFFFFFFFFFF  
FFFFFFFFFFFFFFFFFFFFFFFFFFFFFFFFFFFFFFFFFFFFFFFFFFFFFFFFFFFFFFFFFFFF  
FF:FFFFFFFFFFFF

@A00721:190:HGJW7DSXY:4:2250:30364:6104 2:N:0:TCTGCAAG+GCTGCACT  
TGTATTAGATGATTAATAAAATTACAAATTTTATTTCAATTCACGTCTTATTTCTTTCTTTAGTAATA  
TGACTGTCAAATATTGATTTTTTTTCCCCTATCCATAGCAATCTGCAATATATCGACCAGATCAGCATT  
CATAATGCTGGTCGA

+

FFFFFFFFFFFFFFFFFFFFFFFFFFFFFFFFFFFFFFFFFFFFFFFFFFFFFFFFFFFFFFFFFFFF:  
FF:FF:FFF::F,FFFFFFFFFFFF:FFFF:FFFF:F:FFFFFFFFFFFFFFFFFFFF:F:FFFF:F  
FFFFFFFF,FFFFFF

@A00721:190:HGJW7DSXY:4:2253:24840:24815 2:N:0:TCTGCAAG+GCTGCACT  
TGTATTAGATGATTAATAAAATTACAAATTTTATTTCAATTCACGTCTTATTTCTTTCTTTAGTAATA  
TGACTGTCAAATATTGATTTTTTTTCCCCTATCCATAGCAATCTGCAATATATCGACCAGATCAGCATT  
AATAATGCTGGTCGA

+

FFFFFFF:FFFFFFFFFFFFFFFFFFFF:F:FFFFF,FFFFFFFFFFFFFFFFFFFF:F:FFFFFFFFFFFF  
FFF:FFFFFFF:FFF,FFFF:FFF::F:,FFF:F,F:FFFF,F,FFFFFFFF,FF,FFFF:F:F::  
,FFFF::FFFF:F:



@A00721:190:HGJW7DSXY:4:1233:30409:21496 2:N:0:TCTGCAAG+GCTGCACT  
CGTTTCGATGTATTAGATGATTAATAAAATTACAAATTTTATTTTCAATTCACGTCTTATTTCTTTCTTT  
AGTAATATGACTGTCAAATATTGATTTTTTTTCCCCTATCCATAGCAATCTGCAATATATCGACCAGAT  
CAGCATTCATAATGC

@A00721:190:HGJW7DSXY:4:2118:12852:15295 2:N:0:TCTGCAAG+GCTGCACT  
CGTTTCGATGTATTAGATGATTAATAAAATTACAAATTTTATTTTCAATTCACGTCTTATTTCTTTCTTT  
AGTAATATGACTGTCAAATATTGATTTTTTTTCCCCTATCCATAGCAATCTGCAATATATCGACCAGAT  
CAGCATTCATAATGC

@A00721:190:HGJW7DSXY:4:1448:3513:36793 2:N:0:TCTGCAAG+GCTGCACT  
CGTTTCGATGTATTAGATGATTAATAAAATTACAAATTTTATTTTCAATTCACGTCTTATTTCTTTCTTT  
AGTAATATGACTGTCAAATATTGATTTTTTTTCCCCTATCCATAGCAATCTGCAATATATCGACCAGAT  
CAGCATTCATAATG

@A00721:190:HGJW7DSXY:4:2209:18701:31720 2:N:0:TCTGCAAG+GCTGCACT  
GTTTCGATGTATTAGATGATTAATAAAATTACAAATTTTATTTTCATTTTACGTCTTATTTCTTTCTTTA  
GTAATATGACTGTCAAATATTGATTTTTTTTACCTATCCATAGCAATATGCAATATATCGACCAGATC  
AGCATTTCATAAGTCT

@A00721:190:HGJW7DSXY:4:2261:23140:11819 2:N:0:TCTGCAAG+GCTGCACT  
TCGATGTATTAGATGATTAATAAAATTACAAATTTTATTTTCAATTCACGTCTTATTTCTTTCTTTAGT  
AATATGACTGTCAAATATTGATTTTTTTCCCCTATCCATAGCAATCTGCAATATATCGACCAGATCAG  
CATTCATAA

@A00721:190:HGJW7DSXY:4:2646:22209:9737 2:N:0:TCTGCAAG+GCTGCACT  
ATTCCAATACACCAGCCAATAGCGTTTCGATGTATTAGATGATTAATAAAATTACAAATTTTATTTTCAT  
TTCACGTCTTATTTCTTTCTTTAGTAATATGACTGTCAAATATTGATTTTTTTCCCCTATCCATAGCA  
ATCTGCAATATATCG

@A00721:190:HGJW7DSXY:4:1365:3396:3396 2:N:0:TCTGCAAG+GCTGCACT  
CATTAAATCCAATACACCAGCCAATAGCGTTCGATGTATTAGATGATTAATAAAATTACAAATTTTAT  
TTCATTTACAGTCTTATTTCTTTCTTTAGTAATATGACTGTCAAATATTGATTTTTTTTCCCCTATCCA  
TAGCAATCTGCAATA

+  
F:FFFFFFFFFFFFFFFFFFFF:FFF:FFFFFFFFFFFF:FFFFFFFFFFFF:FFFFFFFFFFFF:FFFFFF  
FFFFFFFFFFFF:FFFF:,FFFFFFFFFFFFFFFFFFFFFFFFFFFF:FFFFFFFFFFFF:FFFFFF  
FFFFFFFFFFFF:FF  
@A00721:190:HGJW7DSXY:4:1436:10493:5822 2:N:0:TCTGCAAG+GCTGCACT  
CATTAATTCCAATACACCAGCCAATAGCGTTCGATGTATTAGATGATTAATAAAATTACAAATTTTAT  
TTCATTTACGTCTTATTTCTTTCTTTAGTAATATGACTGTCAAATATTGATTTTTTTTCCCCTATCCA  
TAGCAATCTGCAATA

+  
FFFFFFFFFFFFFFFFFFFFFFFF,FFFFFFFFFFFF:FFF,:FFF:FFFFFFFFFFFFFFFFFFFFFFFF  
FFFFFFFFFFFFFFFFFFFFFFFFFFFFFFFFFFFFFFFFFFFFFFFFFFFFFFFFFFFFFFFF,FFFFFFFFFFFFFFFFFFFFFFFF  
FFFFFFFFFFFF:FF  
@A00721:190:HGJW7DSXY:4:2531:19217:19930 2:N:0:TCTGCAAG+GCTGCACT  
CATTAATTCCAATACACCAGCCAATAGCGTTCGATGTATTAGATGATTAATAAAATTACAAATTTTAT  
TTCATTTACGTCTTATTTCTTTCTTTAGTAATATGACTGTCAAATATTGATTTTTTTTCCCCTATCCA  
TAGCAATCTGCAATA

+  
FFFFFFFFFFFFFFFFFFFFFFFFFFFFFFFFFFFFFFFFFFFFFFFFFFFFFFFFFFFFFFFFFFFFFFFF  
FFFFFFFFFFFFFFFFFFFF:FFFFFFFFFFFFFFFFFFFFFFFFFFFFFFFFFFFFFFFFFFFFFFFF:FFFFFFFFFFFFFFFF  
FFFFFFFFFFFF:FFF  
@A00721:190:HGJW7DSXY:4:2541:15203:6590 2:N:0:TCTGCAAG+GCTGCACT  
CATTAATTCCAATACACCAGCCAATAGCGTTCGATGTATTAGATGATTAATAAAATTACAAATTTTAT  
TTCATTTACGTCTTATTTCTTTCTTTAGTAATATGACTGTCAAATATTGATTTTTTTTCCCCTATCCA  
TAGCAATCTGCAATA

+  
FF:FFFFFFFFFFFFFFFFFFFFFFFFFFFFFFFFFFFFFFFFFFFFFFFFFFFFFFFFFFFFFFFFFFFF  
FFFFFFFFFFFF:FFFFFFFFFFFF:FFFF:FFFFFFFFFFFFFFFFFFFFFFFFFFFFFFFFFFFF:FFF:FFFFFF  
FFF:FFFFFFFFFFFF  
@A00721:190:HGJW7DSXY:4:1572:26277:30655 2:N:0:TCTGCAAG+GCTGCACT  
GATACATTAATTCCAATACACCAGCCAATAGCGTTCGATGTATTAGATGATTAATAAAATTACAAATT  
TTATTTTCAATTCACGTCTTATTTCTTTCTTTAGTAATATGACTGTCAAATATTGATTTTTTTTCCCCTA  
TCCATAGCAATCTGC

+  
FFFFFFFFFFFFFFFFFFFFFFFFFFFFFFFFFFFFFFFFFFFFFFFFFFFFFFFFFFFFFFFFFFFFFFFF  
FFFFFFFFFFFFFFFFFFFFFFFFFFFF:FFFFFFFFFFFFFFFFFFFFFFFFFFFFFFFFFFFFFFFFFFFF:FF  
FF:FFFF:FFFFFF  
@A00721:190:HGJW7DSXY:4:2361:31530:26694 2:N:0:TCTGCAAG+GCTGCACT  
GATACATTAATTCCAATACACCAGCCAATAGCGTTCGATGTATTAGATGATTAATAAAATTACAAATT  
TTATTTTCAATTCACGTCTTATTTCTTTCTTTAGTAATATGACTGTCAAATATTGATTTTTTTTCCCCTA  
TCCATAGCAATCTGC

+  
FFFFFFFFFFFFFFFFFFFFFFFFFFFFFFFFFFFF:FFFFFFFFFFFFFFFFFFFFFFFF:FFFFFFFFFFFFFF  
FFFFFFFFFFFFFFFFFFFF,FFFFFFFFFFFFFFFFFFFFFFFF:FFFFFFFFFFFFFF:FFFF:FFF::FF  
FFFFFF:FFFFFF:F  
@A00721:190:HGJW7DSXY:4:2572:29568:34820 2:N:0:TCTGCAAG+GCTGCACT  
GATACATTAATTCCAATACACCAGCCAATAGCGTTCGATGTATTAGATGATTAATAAAATTACAAATT  
TTATTTTCAATTCACGTCTTATTTCTTTCTTTAGTAATATGACTGTCAAATATTGATTTTTTTTCCCCTA  
TCCATAGCAATCTGC

+  
FFFFFFFFFFFFFFFFFFFFFFFFFFFFFFFFFFFF:FFF:FFFFFFFFFFFF:FFFFFFFFFFFFFF  
FFFFFFFFFFFFFFFFFFFF,FFFF:FFF,FFFFFFFFFFFFFFFFFFFF:FF,FFFFFFFFFFFFFFFFFFFF:F  
FFFFFFFFFFFFFFFFFFFF  
@A00721:190:HGJW7DSXY:4:1269:8486:25833 2:N:0:TCTGCAAG+GCTGCACT  
ATATTTGACAGTCATATTACTAAAGAAAGAAATAAGACGTGAAATGAAATAAAATTTGTAATTTTATT







@A00721:190:HGJW7DSXY:4:2239:31656:34272 2:N:0:TCTGCAAG+GCTGCACT  
CTATTACGAAGAACTGGAATGCAGATGCATGGATTTCTGTTGGAATAGACGAAATCGTTCTAATGTACG  
ACTACTTTAGATATCCTCCACCAAATCCTGATCTGAATCACTTTCCGTATTTAATAGGTCACATGAC  
CAGATGTCAGATACA

@A00721:190:HGJW7DSXY:4:2274:24044:5650 2:N:0:TCTGCAAG+GCTGCACT  
CTATTACGAAGAACTGGAATGCAGATGCATGGATTTCTGTTGGAATAGACGAAATCGTTCTAATGTACG  
ACTACTTTAGATATCCTCCACCAAATCCTGATCTGAATCACTTTCCGTATTTAATAGGTCACTATGAC  
CAGATGTCAGATACA

@A00721:190:HGJW7DSXY:4:2420:1642:12477 2:N:0:TCTGCAAG+GCTGCACT  
CTATTACGAAGAACTGGAATGCAGATGCATGGATTTCTGTTGGAATAGACGAAATCGTTCTAATGTACG  
ACTACTTTAGATATCCTCCACCAAATCCTGATCTGAATCACTTTCCGTATTTAATAGGTCACTATGAC  
CAGATGTCAGATACA

@A00721:190:HGJW7DSXY:4:2661:21612:16908 2:N:0:TCTGCAAG+GCTGCACT  
CTATTACGAAGAACTGGAATGCAGATGCATGGATTTCTGTTGGAATAGACGAAATCGTTCTAATGTACG  
ACTACTTTAGATATCCTCCACCAAATCCTGATCTGAATCACTTTCCGTATTTAATAGGTCCTATGAC  
CAGATGTCAGATACA

@A00721:190:HGJW7DSXY:4:1315:23231:2143 2:N:0:TCTGCAAG+GCTGCACT  
AATTAATGATATCGAAACGAGTATAACTATTACGAAGAACTGGAATGCAGATGCATGGATTTCTGTG  
GAATAGACGAAATCGTTCTAATGTACGACTACTTTAGATATCCTCCACCAAATCCTGATCTGAATCAC  
TTTCCGATTTAATA

@A00721:190:HGJW7DSXY:4:1441:29315:25050 2:N:0:TCTGCAAG+GCTGCACT  
AATTAATGATATCGAAAACGAGTATAACTATTACGAAGAACTGGAATGCAGATGCATGGATTTCTGTG  
GAATAGACGAAATCGTTCTAATGTACGACTACTTTAGATATCCTCCACCAAATCCTGATCTGAATCAC  
TTTCCGTATTTAATA

@A00721:190:HGJW7DSXY:4:2139:30192:31015 2:N:0:TCTGCAAG+GCTGCACT  
AATTAATGATATCGAAAACGAGTATAACTATTACGAAGAACTGGAATGCAGATGCATGGATTTCTGTG  
GAATAGACGAAATCGTTCTAATGTACGACTACTTTAGATATCCTCCACCAAATCCTGATCTGAATCAC  
TTTCCGTATTTAATA

+  
FFFFFFFFFFFFFFFFFFFFFFFFFFFFFFFFFFFFFFFFFFFFFFFFFFFFFFFFFFFFFFFFFFFFFFFF  
FFFFFFFFFFFFFFFFFFFFFFFFFFFFFFFFFFFFFFFFFFFFFFFFFFFFFFFFFFFFFFFFFFFFFFFF  
F:FFFFFFFFFFFFFFF

@A00721:190:HGJW7DSXY:4:2212:17806:1141 2:N:0:TCTGCAAG+GCTGCACT  
AATTAATGATATCGAAAACGAGTATAACTATTACGAAGAACTGGAATGCAGATGCATGGATTTCGTTG  
GAATAGACGAAATCGTTCTAATGTACGACTACTTTAGATATCCTCCACCAAATCCTGATCTGAATCAC  
TTTCCGTATTTAATA

+  
FFFFFFFFFFFFFFFFFFFFFFFFFFFFFFFFFFFFFFFFFFFFFFFFFFFFFFFFFFFFFFFFFFFFFFFF  
FFFFFFFFFFFFFFFFFFFFFFFFFFFFFFFFFFFFFFFFFFFFFFFFFFFFFFFFFFFFFFFFFFFFFFFF  
F:FFFFFFFFFFFFFFF

@A00721:190:HGJW7DSXY:4:2318:17779:15405 2:N:0:TCTGCAAG+GCTGCACT  
AATTAATGATATCGAAAACGAGTATAACTATTACGAAGAACTGGAATGCAGATGCATGGATTTCGTTG  
GAATAGACGAAATCGTTCTAATGTACGACTACTTTAGATATCCTCCACCAAATCCGGATCTGAATCAC  
TGTCCGTATTTAATA

+  
FFFFF::FFFFFFFFF:FFFFFFFF:FFFFFFFFFFFFFFFFFFFFFFFFFFFFFFFF, F:FFFF:FFFFFFFFFFFFFFFF  
FFFFFFFF:FFFF:F:FFFFFFFFFFFFFFFFFFFFFFFFFFFFFFFF:FFFFFFFFFFFFFFFFFFFFFFFF:FFF, FF, FFFFFFFFF  
F, FFFFF:F:F:FFF

@A00721:190:HGJW7DSXY:4:2578:7618:1157 2:N:0:TCTGCAAG+GCTGCACT  
AATTAATGATATCGAAAACGAGTATAACTATTACGAAGAACTGGAATGCAGATGCATGGATTTCGTTG  
GAATAGACGAAATCGTTCTAATGTACGACTACTTTAGATATCCTCCACCAAATCCTGATCTGAATCAC  
TTTCCGTATTTAATA

+  
FFFFFFFFFFFFFFFFFFFF:FFFFFFFFFFFFFFFF:FFFFFFFFF:FFFFFFFFFFFFFFFFFFFFFFFFFFFFFFFF  
:FFFFFFFF:FFFFFFFFFFFFFFFFFFFFFFFFFFFFFFFFFFFFFFFFFFFFFFFFFFFFFFFFFFFFFFFF  
FFF:FFFFFFFFFFFFF

@A00721:190:HGJW7DSXY:4:2613:6551:1282 2:N:0:TCTGCAAG+GCTGCACT  
AATTAATGATATCGAAAACGAGTATAACTATTACGAAGAACTGGAATGCAGATGCATGGATTTCGTTG  
GAATAGACGAAATCGTTCTAATGTACGACTACTTTAGATATCCTCCACCAAATCCTGATCTGAATCAC  
TTTCCGTATTTAATA

+  
F:FFFFFFFFFFFFFFFFFFFFFFFF, FFFFFFFFFFFFFFFFFFFFFFFFFFFFFFFFFFFFFFFFFFFFFFFFFF:FF  
FFFFFFFFFFFFFFFFFFFFFFFFFFFFFFFFFFFFFFFFFFFFFFFFFFFFFFFFFFFFFFFFFFFFFFFF  
FFFFFFFFFFFFFFFFFFFFF

@A00721:190:HGJW7DSXY:4:1407:8793:35884 2:N:0:TCTGCAAG+GCTGCACT  
ATCGTTTCGATGAAATATATAATTAATGATATCGAAAACGAGTATAACTATTACGAAGAACTGGAATG  
CAGATGCATGGATTTCGTTGGAATAGACGAAATCGTTCTAATGTACGACTACTTTAGATATCCTCCAC  
CAAATCCTGATCTGA

+  
FFFFFFFFFFFFFFFFFFFFFFFFFFFFFFFFFFFFFFFFFFFFFFFFFFFFFFFFFFFFFFFFFFFFFFFF:FFFFFFFFF  
FFFFFFFFFFFFFFFFFFFFFFFFFFFFFFFFFFFFFFFFFFFFFFFFFFFFFFFFFFFFFFFFFFFFFFFF  
FFFFFFFFFFFFFFFFFFFFF

@A00721:190:HGJW7DSXY:4:1424:26576:24126 2:N:0:TCTGCAAG+GCTGCACT  
ATCGTTTCGATGAAATATATAATTAATGATATCGAAAACGAGTATAACTATTACGAAGAACTGGAATG  
CAGATGCATGGATTTCGTTGGAATAGACGAAATCGTTCTAATGTACGACTACTTTAGATATCCTCCAC  
CAAATCCTGATCTGA

+  
FFFFFFFFFFFFFFFFFFFFFFFFFFFFFFFFFFFFFFFFFFFFFFFFFFFFFFFFFFFFFFFFFFFFFFFF  
FFFFFFFFFFFFFFFFFFFFFFFFFFFFFFFFFFFFFFFFFFFFFFFFFFFFFFFFFFFFFFFFFFFFFFFF  
FFFFFFFFFFFFFFFFFFFFF

@A00721:190:HGJW7DSXY:4:1558:29134:8046 2:N:0:TCTGCAAG+GCTGCACT  
ATCGTTTCGATGAAATATATAATTAATGATATCGAAAACGAGTATAACTATTACGAAGAACTGGAATG

CAGATGCATGGATTTTCGTTGGAATAGACGAAATCGTTCTAATGTACGACTACTTTAGATATCCTCCAC  
CAAATCCTGATCTGA

[illegible] $+$ 

```

FFFFFFFFFFFFFF:FFFFFFFFFFFFFFFFFFFFFFFFFFFFFFFFFFFFFFFFFFFFFFFF
FFFFFFFFFFFFFFFFFFFFFFFF:FFFFFFFFFFFFFFFF:FFFFFFFFFFFFFFFFFFFFFFFF
FFFFFFFFFFFFFFFF

```

+

[illegible]

+

[illegible]

+

[illegible]

+

```

FFFFFFFFFFFFFFFFFFFFFFFFFFFFFFFF:FFFFFFFFFFFFFFFFFFFFFFFFFFFFFFFF
FFFFFFFFFFFFFFFFFFFFFFFFFFFFFFFF:FFFFFFFFFFFFFFFFFFFFFFFFFFFFFFFF
FFFFFFFFFFFFFFFFFFFFFFFF

```

+

[illegible]

@A00721:190:HGJW7DSXY:4:1339:14859:15828 2:N:0:TCTGCAAG+GCTGCACT  
AATTAACCAGATCAGCATTCCCAACAGTGTGATCGTTTCGATGAAATATATAATTAATGATATCGAAA  
ACGAGTATAACTATTACGAAGAACTGGAATGCAGATGCATGGATTTCTGTTGGAATAGACGAAATCGTT  
CTAATGTACGACTAC

```

FFFFFFFFFFFFFFFFFFFFFFFFFFFFFFFF:FFFFFF:F:FFFFFFFFFFFFFFFFFFFFFFFF
,FF:FFFFFFFFFFFF:FFFF,FFFFFFFFF,F:FFFF,FFF,FFFFFFFFFFFFFFFFFFFF:FF:FFF
FFF,FFFFFFFFFFFF

```

@A00721:190:HGJW7DSXY:4:1460:2953:1125 2:N:0:TCTGCAAG+GCTGCACT  
AATTAACCAGATCAGCATTCCCAACAGTGTGATCGTTTCGATGAAATATATAATTAATGATATCGAAA  
ACGAGTATAACTATTACGAAGAACTGGAATGCAGATGCATGGATTTCGTTGGAATAGACGAAATCGTT  
CTAATGTACGACTAC

[illegible]

@A00721:190:HGJW7DSXY:4:2176:5358:2691 2:N:0:TCTGCAAG+GCTGCACT  
AATTAACCAGATCAGCATTCCCAACAGTGTGATCGTTTCGATGAAATATATAATTAATGATATCGAAA  
ACGAGTATAACTATTACGAAGAACTGGAATGCAGATGCATGGATTTCGTTGGAATAGACGAAATCGTT  
CTAATGTACGACTAC

```
FFF:FFFFFF:FFFF:FFFFFFFFF::FFFFFFFFFFFFFFF::FFFFFFFFFFFFFFFFFFFFFFF
,FFFFFFFFFFFF,FFFF:FFF:FFFFFFFFF,,FF:FFFF,FFFFFFF,FFFFFFFFFFFF:F,FFFFF
FFFF:FFF,FF,FFF
```

@A00721:190:HGJW7DSXY:4:2249:23149:32690 2:N:0:TCTGCAAG+GCTGCACT  
AATTAACCAGATCAGCATTCCCAACAGTGTGATCGTTTCGATGAAATATATAATTAATGATATCGAAA  
ACGAGTATAACTATTACGAAGAACTGGAATGCAGATGCATGGATTTCGTTGGAATAGACGAAATCGTT  
CTAATGTACGACTAC

```

FFFFFFFFFFFFFFFFFFFFFFFFFFFFFFFFFFFFFFFF:FFFFFFFFFFFFFFFF:FFFF
FFFFFFFFFFFF,FFFFFFFFFFFFFFFFFFFFFFFFFFFFFFFFFFFFFFFFFFFF
FFFF:FFFFFFFF:

```

@A00721:190:HGJW7DSXY:4:2442:15338:16250 2:N:0:TCTGCAAG+GCTGCACT  
AATTAACCAGATCAGCATTCCCAACAGTGTGATCGTTTCGATGAAATATATAATTAATGATATCGAAA  
ACGAGTATAACTATTACGAAGAACTGGAATGCAGATGCATGGATTTCGTTGGAATAGACGAAATCGTT  
CTAATGTACGACTAC

```
FFFFFFFFFFFFFFFFFFFFF,F:F,FFFFFFFFFFF,FFFFFFFFFFFFFFFFFFFFFFF  
FF:FFFFFF::FFFFFFFFFFFFFFFFFFFFFFFFFFFFFFFFFFFFF:F:FFF:FFFFFF:FF,FF:FFFF  
FF::FFFFFFFFFFF:
```

@A00721:190:HGJW7DSXY:4:2570:1931:18771 2:N:0:TCTGCAAG+GCTGCACT  
AATTAACCAGATCAGCATTCCCAACAGTGTGATCGTTTCGATGAAATATATAATTAATGATATCGAAA  
ACGAGTATAACTATTACGAAGAACTGGAATGCAGATGCATGGATTTCGTTGGAATAGACGAAATCGTT  
CTAATGTACGACTAC

[illegible]

@A00721:190:HGJW7DSXY:4:1146:7744:17284 2:N:0:TCTGCAAG+GCTGCACT  
GACGAAGTCGTCTATACAATTAACCAGATCAGCATCCCAACAGTGTGATCGTTTCGATGAAATATAT  
AATTAATGATATCGAAAAAGAGTATAACTATTACGAAGAACTGGAATGCAGATGCATGGATTTCGTTG  
GAATAGACGAAATCG

[illegible]



+  
FFFFFFFFFFFFFFFFFFFFFFFFFFFFFFFFFFFFFFFFFFFFFFFFFFFFFFFFFFFFFFFFFFFFFFFFFFFFFFFF  
FFFFFFFFFFFFFFFFFFFFFFFFFFFFFFFFFFFFFFFFFFFFFFFFFFFFFFFFFFFFFFFFFFFFFFFFFFFFFFFF  
FFFFF, FFFFFFFF

@A00721:190:HGJW7DSXY:4:2132:26765:27305 2:N:0:TCTGCAAG+GCTGCACT  
ATACTTTCAGACATGCACATCCGTGTAAAGGAAGTAATAGACGAAGTCGTCTATACAATTAACCAGAT  
CAGCATTCCCAACAGTGTGATCGTTTCGATGAAATATATAATTAATGATATCGAAAACGAGTATAACT  
ATTACGAAGAACTGG

+  
FFFFFFFFFFFFFFFFFFFFFFFFFFFFFFFFFFFFFFFFFFFFFFFFFFFFFFFFFFFFFFFFFFFFFFFFFFFFFFFF  
FFFFFFFFFFFFFFFFFFFFFFFFFFFFFFFFFFFFFFFFFFFFFFFFFFFFFFFFFFFFFFFFFFFFFFFFFFFFFFFF  
FFFFFFFF: FFFFFFFF

@A00721:190:HGJW7DSXY:4:2135:9833:15577 2:N:0:TCTGCAAG+GCTGCACT  
ATACTTTCAGACATGCACATCCGTGTAAAGGAAGTAATAGACGAAGTCGTCTATACAATTAACCAGAT  
CAGCATTCCCAACAGTGTGATCGTTTCGATGAAATATATAATTAATGATATCGAAAACGAGTATAACT  
ATTACGAAGAACTGG

+  
FFFFFFFFFFFFFFFFFFFFFFFFFFFFFFFFFFFFFFFFFFFFFFFFFFFFFFFFFFFFFFFFFFFFFFFFFFFFFFFF  
FFFFFFFFFFFFFFFFFFFFFFFF: FFFFFF: FFF: : FF: F: FFFFFFFF: FFFFF: FFFFFFFFFFFFFFFFFF  
FFFFFFFFFFFFFFFF

@A00721:190:HGJW7DSXY:4:2135:12093:17425 2:N:0:TCTGCAAG+GCTGCACT  
ATACTTTCAGACATGCACATCCGTGTAAAGGAAGTAATAGACGAAGTCGTCTATACAATTAACCAGAT  
CAGCATTCCCAACAGTGTGATCGTTTCGATGAAATATATAATTAATGATATCGAAAACGAGTATAACT  
ATTACGAAGAACTGG

+  
FFFFFFFFFFFFFFFFFFFFFFFFFFFFFFFFFFFFFFFFFFFFFFFFFFFFFFFFFFFFFFFFFFFFFFFFFFFFFFFF  
FFFFFFFFFFFFFFFFFFFFFFFFFFFFFFFFFFFFFFFFFFFFFFFFFFFFFFFFFFFFFFFFFFFFFFFFFFFFFFFF  
FFFFFFFFFFFFFFFF

@A00721:190:HGJW7DSXY:4:2249:11098:35744 2:N:0:TCTGCAAG+GCTGCACT  
ATACTTTCAGACATGCACATCCGTGTAAAGGAAGTAATAGACGAAGTCGTCTATACAATTAACCAGAT  
CAGCATTCCCAACAGTGTGATCGTTTCGATGAAATATATAATTAATGATATCGAAAACGAGTATAACT  
ATTACGAAGAACTGG

+  
FFFFFFFFFFFFFFFFFFFFFFFFFFFFFFFFFFFFFFFFFFFFFFFFFFFFFFFFFFFFFFFFFFFFFFFFFFFFFFFF  
FFFFFFFFFFFFFFFFFFFFFFFFFFFFFFFF: FFFFFFFF: FFFFFFFFFFFFFFFFFFFFFFFFFFFFFFFFFF, FFFF  
FFFFFFFFFFFFFFFF

@A00721:190:HGJW7DSXY:4:2628:14344:9048 2:N:0:TCTGCAAG+GCTGCACT  
ATACTTTCAGACATGCACATCCGTGTAAAGGAAGTAATAGACGAAGTCGTCTATACAATTAACCAGAT  
CAGCATTCCCAACAGTGTGATCGTTTCGATGAAATATATAATTAATGATATCGAAAACGAGTATAACT  
ATTACGAAGAACTGG

+  
FFFFFFFFFFFFFFFFFFFFFFFFFFFFFFFFFFFFFFFFFFFFFFFFFFFFFFFFFFFFFFFFFFFFFFFFFFFFFFFF  
FFFFFFFFFFFFFFFFFFFFFFFFFFFFFFFFFFFFFFFFFFFFFFFFFFFFFFFFFFFFFFFFFFFFFFFFFFFFFFFF  
FFFFFFFFFFFFFFFF

@A00721:190:HGJW7DSXY:4:1569:26982:34131 2:N:0:TCTGCAAG+GCTGCACT  
CTTCGTAATAGTTATACTCGGTTTCGATATCATTAAATTATATATTTTCATCGAAACGATCACACTGTTG  
GGAATGCTGATCTGGTTAATTGTATAGACGACTTCGTCTATTACTTCCTTTACACGGATGTGCATGTC  
TGAAAGTATGTCGTC

+  
FFFFFFFFFFFFFFFFFFFFFFFFFFFFFFFFFFFFFFFFFFFFFFFFFFFFFFFFFFFFFFFFFFFFFFFFFFFFFFFF  
FFFFFFFFFFFFFFFFFFFFFFFFFFFFFFFFFFFFFFFFFFFFFFFFFFFFFFFFFFFFFFFFFFFFFFFFFFFFFFFF  
FFF: FFFFFFFFFF

@A00721:190:HGJW7DSXY:4:2252:18502:16908 2:N:0:TCTGCAAG+GCTGCACT  
CTTCGTAATAGTTATACTCGGTTTCGATATCATTAAATTATATATTTTCATCGAAACGATCACACTGTTG



@A00721:190:HGJW7DSXY:4:1454:24180:27743 2:N:0:TCTGCAAG+GCTGCACT  
CATTAATTATATATTTTCATCGAAACGATCACACTGTTGGGAATGCTGATCTGGTTAATTGTATAGACG  
ACTTCGTCTATTACTTCCTTTACACGGATGTGCATGTCTGAAAGTATGTCGTCTCTGAAGAATGCGAA  
GCAATTGTAATCCGG

+

FFFFFFFFFFFFFFFFFFFFFFFFFFFFFFFFFFFFFFFFFFFFFFFFFFFFFFFFFFFFFFFFFFFFFFFF,FF  
FFFFFFFFFFFFFFFFFFFFFFFFFFFFFFFFFFFFFFFFFFFFFFFFFFFFFFFFFFFFFFFFFFFFFFFF  
FFF,FFFF,FFFF

@A00721:190:HGJW7DSXY:4:2269:5412:16219 2:N:0:TCTGCAAG+GCTGCACT  
CATTAATTATATATTTTCATCGAAACGATCACACTGTTGGGAATGCTGATCTGGTTAATTGTATAGACG  
ACTTCGTCTATTACTTCCTTTACACGGATGTGCATGTCTGAAAGTATGTCGTCTCTGAAGAATGCGAA  
GCAATTGTAATCCGG

+

FFFFFFFFFFFFFFFFFFFFFFFFFFFFFFFFFFFFFFFFFFFFFFFFFFFFFFFFFFFFFFFFFFFFFFFF:FFFFFFFFFFFFFFFF  
FFFFFFFFFFFFFFFFFFFFFFFFFFFFFFFFFFFFFFFFFFFFFFFFFFFFFFFFFFFFFFFFFFFFFFFF:FFFFFFFF  
FFF:FFFFFFFF:FF

@A00721:190:HGJW7DSXY:4:2536:1434:33473 2:N:0:TCTGCAAG+GCTGCACT  
CATTAATTATATATTTTCATCGAAACGATCACACTGTTGGGAATGCTGATCTGGTTAATTGTATAGACG  
ACTTCGTCTATTACTTCCTTTACACGGATGTGCATGTCTGAAAGTATGTCGTCTCTGAAGAATGCGAA  
GCAATTGTAATCCGG

+

FFFFFFFFFFFFFFFFFFFFFFFFFFFFFFFFFFFFFFFFFFFFFFFFFFFFFFFFFFFFFFFFFFFFFFFF,FFFFFFFFFFFFFFFF  
FFFFFFFFFFFFFFFFFFFFFFFFFFFFFFFFFFFFFFFFFFFFFFFFFFFFFFFFFFFFFFFFFFFFFFFF:FFFFFF:FFF  
FFF:FFFFFFFF

@A00721:190:HGJW7DSXY:4:1410:30210:30859 2:N:0:TCTGCAAG+GCTGCACT  
AGCAGATATACTGGTCCAGATACGTAGAAAACGAAGCACGATTCAGAGCTGCTCTGAAAATGACGAAG  
ATCATATATCCATTCTGGTGTCCGGATTACAATTGCTTCGCATTCTTCAGAGACGACATACTTTCAGA  
CATGCACATCCGTGT

+

FFFFFFFFFFFFFFFFFFFFFFFFFFFFFFFFFFFFFFFFFFFFFFFFFFFFFFFFFFFFFFFFFFFFFFFF:FFFF  
FFFFFFFFFFFFFFFFFFFFFFFFFFFFFFFFFFFFFFFFFFFFFFFFFFFFFFFFFFFFFFFFFFFFFFFF:FFFF:FF,FF  
FFFFFFFFFFFFFFFF

@A00721:190:HGJW7DSXY:4:1462:15835:2174 2:N:0:TCTGCAAG+GCTGCACT  
AGCAGATATACTGGTCCAGATACGTAGAAAACGAAGCACGATTCAGAGCTGCTCTGAAAATGACGAAG  
ATCATATATCCATTCTGGTGTCCGGATTACAATTGCTTCGCATTCTTCAGAGACGACATACTTTCAGA  
CATGCACATCCGTGT

+

FFFFFFFF,FFFF:FFFF:FFFFFFFF:FFFFFFFFFFFFFFFFFFFFFFFFFFFFFFFFFFFFFFFF  
FFF:F:FFFFFFFFFFFFFFFFFFFFFFFFFFFFFFFF:FFFFFFFF:FFFFFFFFFFFFFFFF:FF  
FFFFFF:FFF,FFF:

@A00721:190:HGJW7DSXY:4:2446:22254:25786 2:N:0:TCTGCAAG+GCTGCACT  
AGCAGATATACTGGTCCAGATACGTAGAAAACGAAGCACGATTCAGAGCTGCTCTGAAAATGACGAAG  
ATCATATATCCATTCTGGTGTCCGGATTACAATTGCTTCGCATTCTTCAGAGACGACATACTTTCAGA  
CATGCACATCCGTGT

+

FFFFFFFFFFFFFFFFFFFFFFFFFFFFFFFFFFFFFFFFFFFFFFFFFFFFFFFFFFFFFFFFFFFFFFFF:FFFFFFFF  
FFFFFFFFFFFFFFFFFFFFFFFFFFFFFFFFFFFFFFFFFFFFFFFFFFFFFFFFFFFFFFFF:FFF:FFFFFFFF  
F,FFFFFFFF

@A00721:190:HGJW7DSXY:4:2503:31349:21339 2:N:0:TCTGCAAG+GCTGCACT  
AGCAGATATACTGGTCCAGATACGTAGAAAACGAAGCACGATTCAGAGCTGCTCTGAAAATGACGAAG  
ATCATATATCCATTCTGGTGTCCGGATTACAATTGCTTCGCATTCTTCAGAGACGACATACTTTCAGA  
CATGCACATCCGTGT

+

FFFFFFFF:FFFFFFFF:FFFFFFFFFFFFFFFFFFFFFFFFFFFFFFFF:FFFFFFFF:FFFFFFFF



FFFFFFFFFFFFFFFFFFFFFFFFFFFFFFFFFFFFFFFFFFFFFFFFFFFFFFFFFFFFFFFF:F:FFFFFFFFFFFFFFFFFFFF  
FFFFFFFFFFFFFFFFFFFF

@A00721:190:HGJW7DSXY:4:2671:28610:9455 2:N:0:TCTGCAAG+GCTGCACT  
AGCAGATATACTGGTCCAGATACGTAGAAAACGAAGCACGATTGAGAGCTGCTCTGAAAATGACGAAG  
ATCATATATCCATTCTGGTGTCCGGATTACAATTGCTTCGCATTCTTCAGAGACGACATACTTTTCAGA  
CATGCACATCCGTGT

+  
FFFF:FFFFFFFFFFFFFFFFFFFFFFFFFFFFFFFFFFFFFFFFFFFFFFFFFFFFFFFFFFFFFFFF:FFFFFFFF:FFFFF  
FFFFFFFFFFFFFFFFFFFFFFFFFFFFFFFFFFFFFFFFFFFFFFFFFFFFFFFFFFFFFFFF:FFFFFFFF:FFFFF:FFFFFFFFFFFFFFFF:FFFFFFFFFFFFFFFF:  
FFFFFFFFFFFFFFFFFFFF

@A00721:190:HGJW7DSXY:4:1405:13015:24878 2:N:0:TCTGCAAG+GCTGCACT  
AGCAGATATACTGGTCCAGATACGTAGAAAACGAAGCACGATTGAGAGCTGCTCTGAAAATGACGAAG  
ATCATATATCCATTCTGGTGTCCGGATTACAATTGCTTCGCATTCTTCAGAGACGACATACTTTTCAGA  
CATGCACATCC

+  
FFFFFFF,FFFFFFFFFFFFFFFFFFFFFFFFFFFFFFFFFFFFFFFFFFFFFFFFFFFFFFFFFFFFFFFFFFFFFFFFFFFFFFFF  
FFFFFFFFFFFFFFFFFFFFFFFFFFFFFFFFFFFFFFFFFFFFFFFFFFFFFFFFFFFFFFFF:FFFF,FFFFFFFFFFFFFFFF:FFFF:FFFFFFFF  
FF:FFFFFFFF

@A00721:190:HGJW7DSXY:4:1409:11822:12821 2:N:0:TCTGCAAG+GCTGCACT  
AGCAGATATACTGGTCCAGATACGTAGAAAACGAAGCACGATTGAGAGCTGCTCTGAAAATGACGAAG  
ATCATATATCCATTCTGGTGTCCGGATTACAATTGCTTCGCATTCTTCAGAGACGACATACTTTTCAGA  
CATGCACATCC

+  
FFFFFFFF:FFFFFFFFFFFFFFFFFFFFFFFFFFFFFFFFFFFFFFFFFFFFFFFFFFFFFFFFFFFFFFFFFFFFFFFFFFFFFFFF  
FFFFFFFFFFFFFFFFFFFFFFFFFFFFFFFFFFFFFFFFFFFFFFFFFFFFFFFFFFFFFFFFFFFFFFFFFFFFFFFFFFFFFFFF  
FFFFFFFFFFFF

@A00721:190:HGJW7DSXY:4:1561:29369:22858 2:N:0:TCTGCAAG+GCTGCACT  
AGCAGATATACTGGTCCAGATACGTAGAAAACGAAGCACGATTGAGAGCTGCTCTGAAAATGACGAAG  
ATCATATATCCATTCTGGTGTCCGGATTACAATTGCTTCGCATTCTTCAGAGACGACATACTTTTCAGA  
CATGCACATCC

+  
FFFFFFFFFFFFFFFFFFFFFFFFFFFFFFFFFFFFFFFFFFFFFFFFFFFFFFFFFFFFFFFFFFFFFFFFFFFFFFFF:FFFFFFF  
FFFFFFFFFFFFFFFFFFFFFFFFFFFFFFFFFFFFFFFFFFFFFFFFFFFFFFFFFFFFFFFF:FFFF: :FFFFFFFFFFFFFFFF:FFFFFFFFFFFF  
FFFFFFFFFFFF

@A00721:190:HGJW7DSXY:4:2202:10013:18959 2:N:0:TCTGCAAG+GCTGCACT  
AGCAGATATACTGGTCCAGATACGTAGAAAACGAAGCACGATTGAGAGCTGCTCTGAAAATGACGAAG  
ATCATATATCCATTCTGGTGTCCGGATTACAATTGCTTCGCATTCTTCAGAGACGACATACTTTTCAGA  
CATGCACATCC

+  
FFFFFFFFFFFFFFFFFFFFFFFFFFFFFFFFFFFFFFFFFFFFFFFFFFFFFFFFFFFFFFFFFFFFFFFFFFFFFFFFFFFFF  
FFFFFFFFFFFFFFFFFFFF,FFFFFFFFFFFFFFF:FFFF:F:F:FFFFFFFFFFFFFFFFFFFF,FFFFFFFFFFFF  
FFFFF:FFFFF

@A00721:190:HGJW7DSXY:4:2407:26711:3004 2:N:0:TCTGCAAG+GCTGCACT  
AGCAGATATACTGGTCCAGATACGTAGAAAACGAAGCACGATTGAGAGCTGCTCTGAAAATGACGAAG  
ATCATATATCCATTCTGGTGTCCGGATTACAATTGCTTCGCATTCTTCAGAGACGACATACTTTTCAGA  
CATGCACATCC

+  
FFFFFFF:FFFFFFFFFFFFFFFFFFFFFFFFFFFFFFFFFFFFFFFFFFFFFFFFFFFFFFFFFFFFFFFF:FFF:F  
FFFFFF:FFFFFFFFFFFFFFFFFFFFFFFFFFFFFFFFFFFFFFFFFFFFFFFFFFFFFFFFFFFFFFFF:FFFFFFFFFFFFFFFFFFFFFFFF,FF  
F,FFFFFFFF

@A00721:190:HGJW7DSXY:4:2427:28782:4272 2:N:0:TCTGCAAG+GCTGCACT  
AGCAGATATACTGGTCCAGATACGTAGAAAACGAAGCACGATTGAGAGCTGCTCTGAAAATGACGAAG  
ATCATATATCCATTCTGGTGTCCGGATTACAATTGCTTCGCATTCTTCAGAGACGACATACTTTTCAGA  
CATGCACATCC

+  
 FFFFFFFFFFFFFFFFFFFFFFFFFFFFFF,FFFFFFFFFFFFFFFFFFFFFFFFFFFFFFFF:FFFFFFFFFFFFFF  
 FFFFFFFFFF:FFFF::FFFF:FFFFFFFFFF:FFFF::FFFFFFFFFFFFFF:FFFFFF:FFFF:  
 FFFFFFFFFF,F  
 @A00721:190:HGIW7DSXY:4:2432:18502:7733 2:N:0:TCTGCAAG+GCTGCACT  
 AGCAGATATACTGGTCCAGATACGTAGAAAACGAAGCACGATTAGAGACTGCTCTGAAATGACGAAG  
 ATCATATATCCATTCTGGTGTCCGGATTACAATTGCTTCGCATTCTTCAGAGACGACATACTTTAGA  
 CATGCACATCC  
 +  
 FFFFFFFFFFFFFFFFFFFFFFFFFFFFFFFFFFFFFFFFFFFFFFFFFFFFFFFFFFFFFFFFFFFFFFFF  
 FFFF:FFFFFFFFFFFFFFFFFFFFFFFFFFFFFFFF:FFFFFFFFFFFF:FFFFFFFFFFFFFFFFFFFF  
 FFFFFFFFFF  
 @A00721:190:HGIW7DSXY:4:2518:21133:16642 2:N:0:TCTGCAAG+GCTGCACT  
 AGCAGATATACTGGTCCAGATACGTAGAAAACGAAGCACGATTAGAGACTGCTCTGAAATGACGAAG  
 ATCATATATCCATTCTGGTGTCCGGATTACAATTGCTTCGCATTCTTCAGAGACGACATACTTTAGA  
 CATGCACATCC  
 +  
 FFFFFFFFFFFFFFFFFFFFFFFFFFFFFFFFFFFFFFFFFFFFFFFFFFFFFFFFFFFFFFFFFFFFFFFF,FFFFFFFFFFFF  
 FFFFFFFFFFFFFFFFFFFFFFFFFFFFFFFFFFFFFFFFFFFFFFFFFFFFFFFFFFFFFFFFFFFFFFFF,FF  
 FFFFFFFFFF  
 @A00721:190:HGIW7DSXY:4:2609:9923:19711 2:N:0:TCTGCAAG+GCTGCACT  
 AGCAGATATACTGGTCCAGATACGTAGAAAACGAAGCACGATTAGAGACTGCTCTGAAATGACGAAG  
 ATCATATATCCATTCTGGTGTCCGGATTACAATTGCTTCGCATTCTTCAGAGACGACATACTTTAGA  
 CATGCACATCC  
 +  
 FFFFFFFF,F:FFFFFFFFFFFFFFFFFFFFFFFFFFFFFFFFFFFFFFFFFFFFFFFFFFFFFFFFFFFFF:FFFFFFFFFFFFFFFF  
 FFFFFFFFFFFFFFFFFFFFFFFFFFFFFFFFFFFFFFFFFFFFFFFFFFFFFFFFFFFFFFFFFFFFFFFF,  
 FFFFFFFFFF  
 @A00721:190:HGIW7DSXY:4:2364:13069:33614 2:N:0:TCTGCAAG+GCTGCACT  
 AGCAGATATACTGGTCCAGATACGTAGAAAACGAAGCACGATTAGAGACTGCTCTGAAATGACGAAG  
 ATCATATATCCATTCTGGTGTCCGGATTACAATTGCTTCGCATTCTTCAGAGACGACATACTTTAGA  
 CATGCACATC  
 +  
 F,FFFFFF::F::FFF,FFFF::FF,F:FF::FFFF::FFFFFFFFFFFFFFFF:FFFFFFFF:FFF,,  
 FFFF,,FFF,,F,,FF,:,F:F,FFF,:FFFF,F:F:FFFF:FFFFFFFFF:FFFFFFFFF,:FFF  
 :F,FF:FF:F  
 @A00721:190:HGIW7DSXY:4:1327:8305:36323 2:N:0:TCTGCAAG+GCTGCACT  
 TTGAAGCATCAAGTCAAGCAGATATACTGGTCCAGATACGTAGAAAACGAAGCACGATTAGAGACTGC  
 TCTGAAATGACGAAGATCATATATCCATTCTGGTGTCCGGATTACAATTGCTTCGCATTCTTCAGAG  
 ACGACATACTTTAG  
 +  
 FFFFFFFFFFFFFFFFFFFFFFFFFFFFFFFFFFFFFFFFFFFFFFFFFFFFFFFFFFFFFFFFFFFFFFFF  
 FFFFFFFFFFFFFFFFFFFFFFFFFFFFFFFFFFFFFFFFFFFFFFFFFFFFFFFFFFFFFFFFFFFFFFFF:FFFFFFFFFFFF:  
 FFFFFFFFFF  
 @A00721:190:HGIW7DSXY:4:2244:17743:25113 2:N:0:TCTGCAAG+GCTGCACT  
 TTGAAGCATCAAGTCAAGCAGATATACTGGTCCAGATACGTAGAAAACGAAGCACGATTAGAGACTGC  
 TCTGAAATGACGAAGATCATATATCCATTCTGGTGTCCGGATTACAATTGCTTCGCATTCTTCAGAG  
 ACGACATACTTTAG  
 +  
 FFFFFFFFFFFFFFFFFFFFFFFFFFFFFFFFFFFFFFFFFFFFFFFFFFFFFFFFFFFFFFFFFFFFFFFF  
 FFFFFFFFFFFFFFFFFFFFFFFFFFFFFFFFFFFFFFFFFFFFFFFFFFFFFFFFFFFFFFFFFFFFFFFF  
 FFFFFFFFFF  
 @A00721:190:HGIW7DSXY:4:2334:25590:33661 2:N:0:TCTGCAAG+GCTGCACT  
 TTGAAGCATCAAGTCAAGCAGATATACTGGTCCAGATACGTAGAAAACGAAGCACGATTAGAGACTGC

TCTGAAAATGACGAAGATCATATATCCATTCTGGTGTCCGGATTACAATTGCTTCGCATTCTTCAGAG  
ACGACATACTTTTCAG

+

FFFFFFFFFFFFFFFFFFFFFFFFFFFFFFFFFFFFFFFFFFFFFFFFFFFFFFFFFFFFFFFFFFFFFFFF  
FFFFFFFFFFFFFFFFFFFFFFFFFFFFFFFFFFFFFFFFFFFFFFFFFFFFFFFFFFFFFFFFFFFFFFFF,FFFFFFFFFFFF  
FFFFFFFFFFFF:FFFF

@A00721:190:HGJW7DSXY:4:2443:8585:23469 2:N:0:TCTGCAAG+GCTGCACT  
TTGAAGCATCAAGTCAAGCAGATATACTGGTCCAGATACGTAGAAAACGAAGCACGATTTCAGAGCTGC  
TCTGAAAATGACGAAGATCATATATCCATTCTGGTGTCCGGATTACAATTGCTTCGCATTCTTCAGAG  
ACGACATACTTTTCAG

+

FFFFFFFFFFFFFFFFFFFFFFFFFFFFFFFFFFFFFFFFFFFFFFFFFFFFFFFFFFFFFFFFFFFFFFFF  
FFFFFFFFFFFFFFFFFFFFFFFFFFFFFFFFFFFFFFFFFFFFFFFFFFFFFFFFFFFFFFFFFFFFFFFF  
FF:FFFFFFFFFFFF

@A00721:190:HGJW7DSXY:4:2443:8612:24205 2:N:0:TCTGCAAG+GCTGCACT  
TTGAAGCATCAAGTCAAGCAGATATACTGGTCCAGATACGAAGAAAACGAAGCACGATTTCAGAGCTGC  
TCTGAAAATGACGAAGATCATATATCCATTCTGGTGTCCGGATTACAATTGCTTCGCATTCTTCAGAG  
ACGACATACTTTTCAG

+

FFFFFFFFFFFFFFFFFFFFFFFFFFFFFFFFFFFFFFFFFFFFFFFFFFFFFFFFFFFFFFFFFFFFFFFF  
FFFFFFFFFFFFFFFFFFFFFFFFFFFFFFFFFFFFFFFFFFFFFFFFFFFFFFFFFFFFFFFFFFFFFFFF  
FFFF:FFFFFFFFFFFF

@A00721:190:HGJW7DSXY:4:2551:23213:15264 2:N:0:TCTGCAAG+GCTGCACT  
TTGAAGCATCAAGTCAAGCAGATATACTGGTCCAGATACGTAGAAAACGAAGCACGATTTCAGAGCTGC  
TCTGAAAATGACGAAGATCATATATCCATTCTGGTGTCCGGATTACAATTGCTTCGCATTCTTCAGAG  
ACGACATACTTTTCAG

+

FFFFFFFFFFFFFFFFFFFFFFFFFFFFFFFFFFFFFFFFFFFFFFFFFFFFFFFFFFFFFFFFFFFFFFFF  
FFFFFFFFFFFFFFFFFFFFFFFFFFFFFFFFFFFFFFFFFFFFFFFFFFFFFFFFFFFFFFFFFFFFFFFF  
FFFF:FFFFFFFFFFFF

@A00721:190:HGJW7DSXY:4:1438:3730:31093 2:N:0:TCTGCAAG+GCTGCACT  
AAGCATCAAGTCAAGCAGATATACTGGTCCAGATACGTAGAAAACGAAGCACGATTTCAGAGCTGCTCT  
GAAAATGACGAAGATCATATATCCATTCTGGTGTCCGGATTACAATTGCTTCGCATTCTTCAGAGACG  
ACATACTTTCA

+

FFFFFFFFF:FFF:FFFFFFFFF:,FFFFFFFFFFFFFFFFFFFFFFFFFFFFFFFFFFFFFFFFFFFF  
FFFFFFFFFFFFFFFFFFFFFFFFFFFFFFFFFFFFFFFFFFFFFFFFFFFFFFFFFFFFFFFFFFFFFFFF:FFFFFFFFFFFFFFFF  
FFFFFFFFFFFF

@A00721:190:HGJW7DSXY:4:1517:19253:19210 2:N:0:TCTGCAAG+GCTGCACT  
AAGCATCAAGTCAAGCAGATATACTGGTCCAGATACGTAGAAAACGAAGCACGATTTCAGAGCTGCTCT  
GAAAATGACGAAGATCATATATCCATTCTGGTGTCCGGATTACAATTGCTTCGCATTCTTCAGAGACG  
ACATACTTTCA

+

FFFFFFFFF:FFFFFFFFFFFFFFFFFFFFFFFFFFFFFFFFFFFFFFFFFFFFFFFFFFFFFFFFFFFF  
FFFFFFFFFFFFFFFFFFFFFFFFFFFFFFFFFFFFFFFFFFFFFFFFFFFFFFFFFFFFFFFFFFFFFFFF:FFFFFF:FFFFFFFFF:FFFF  
FFFFFFFFFFFF

@A00721:190:HGJW7DSXY:4:1524:3396:24439 2:N:0:TCTGCAAG+GCTGCACT  
ACGCATCAAGTCAAGCAGATATACTGGTCCAGATACGTAGAAAACGAAGCACGATTTCAGAGCTGCTCT  
GAAAATGACGAAGATCATATATCCATTCTGGTGTCCGGATTACAATTGCTTCGCATTCTTCAGAGACG  
ACATACTTTCA

+

F,FFFFFFFFFFFFFFFFFFFF,FFFFF:FFFFFFFFF:FFF,FFFFFFFF,FFFFFFFFFFFFFFFFFFFF  
FFFFFFFFF:FFFFFFFFFFFFFFFFFFFFFFFFF:FFF,:FF,FFFFFFFFFFFF,F,FFFFFFFFFFFF,FFFF:FFF  
FF:FFFFFFFF

@A00721:190:HGJW7DSXY:4:1536:24451:21512 2:N:0:TCTGCAAG+GCTGCACT  
AAGCATCAAGTCAAGCAGATATACTGGTCCAGATACGTAGAAAACGAAGCACGATTCAGAGCTGCTCT  
GAAAATGACGAAGATCATATATCCATTCTGGTGTCCGGATTACAATTGCTTCGCATTCTTCAGAGACG  
ACATACTTTCA

[illegible]

+

```

FFFFFFFFFFFFFFFFFFFFFFFFFFFFFFFFFFFFFFFFFFFFFFFFFFFFFFFFFFFFFFFF
FFFFFFFFFFFFFFFFFFFFFFFFFFFFFFFFFFFFFFFFFFFFFFFFFFFFFFFFFFFFFFFF:
FFFFFFFFFFFFFFFFFFFFFFFFFFFFFFFF
FFFFFFFFFFFFFF

```

+

```

FFFFFFFFFFFFFFFFFFFFFFFFFFFFFFFFFFFFFFFFFFFFFFFFFFFFFFFFFFFFFFFFFFFFFFFF
FFF:FFFFFFFF:FFFFFFFF:FFFFFFFFFFFFFFFFFFFFFFFFFFFFFFFFFFFFFFFFFFFFFFFF
FFFF:FFFF

```

+

```
FFFFFFFFFFFFFFFFFFFFFFFFFFFFFFFFFFFFFFFFFFFFFFFFFFFFFFFFFFFF:FFFFFFFFF
FFFFFFFFFFF:FFFFFFFFFFFFFFFFFFFFFFFFFFFFFFFFFFFF:FfF:FFFFFFFFFFFFFFFFFFFFFFF
FFFFFFFFFFFFFFFF
```

+

```

FFFFFFFF:FFFFFFFFFFFFFFFFFFFFFFFF,FFFFFFFFFFFFFFFFFFFFFFFFFFFFFFFF
FFFFFFFFFFFFFFFFFFFFFFFFFFFFFFFF,FFFFFF:FFFF:FF,FFFFFFFFFFFFFFFF
FFFFFFFFFFFFFFFF

```

+

```

FFFFFFFFFFFFFFFFFFFFFFFFFFFFFFFF:FFFFFFFFFFFFFFFFFFFFFFFFFFFFFFFF
FFFFFFFFFFFFFFFFFFFFFFFFFFFFFFFF:FFFFFFFFFFFF:FFFFFFFFFFFFFFFFFFFF
FFFFFFFFFFFFFFFF

```

+

[illegible]

,FFFFFFFFFFFFFFFFFFFFFFFFFFFFFFFFFFFFFFFFFFFFFFFFFFFFFFFFFFFFFFFFFFFFFFFFFFFFFFFF  
FFFFFFFFFFFFFFFF

@A00721:190:HGJW7DSXY:4:1662:8314:13792 2:N:0:TCTGCAAG+GCTGCACT  
CTACAACATTCTCCAGATGACTTGAAGCATCAAGTCAAGCAGATATACTGGTCCAGATACGTAGAAA  
ACGAAGCACGATTCAGAGCTGCTCTGAAAATGACGAAGATCATATATCCATTCTGGTGTCCGGATTAC  
AATTGCTTCGCATTC

+  
FFFFFFFFFFFFFFFFFFFFFFFFFFFFFFFFFFFFFFFFFFFFFFFFFFFFFFFFFFFFFFFFFFFFFFFFFFFFFFFF  
FFFFFFFF:FFF,FFFFFFFFFFFFFFFFFFFFFFFFFFFFFFFFFFFFFFFFFFFFFFFFFFFFFFFFFFFFFFFF  
FFF:FFFF:FFFF

@A00721:190:HGJW7DSXY:4:1664:4517:27727 2:N:0:TCTGCAAG+GCTGCACT  
CTACAACATTCTCCAGATGACTTGAAGCATCAAGTCAAGCAGATATACTGGTCCAGATACGTAGAAA  
ACGAAGCACGATTCAGAGCTGCTCTGAAAATGACGAAGATCATATATCCAGTCTGGTGTCCGGATTAC  
AATTGCTTCGCATTC

+  
FFFF,F:FFFFFFFF:FFFF:F:FF:,FFFF,:F,FFFF,FFFFFFFF:FF,:FFFFFFFF:FFF:,F,FFF  
FFFF,FFFFFF,FFF,FFFFFFFFFFFFFFFF:F,F,FFFF,:,,FFFFFFFF,:FFF:,F,F:FFFFFF  
FF:,F:FFFFFF,:F

@A00721:190:HGJW7DSXY:4:2576:4951:26256 2:N:0:TCTGCAAG+GCTGCACT  
CTACAACATTCTCCAGATGACTTGAAGCATCAAGTCAAGCAGATATACTGGTCCAGATACGTAGAAA  
ACGAAGCACGATTCAGAGCTGCTCTGAAAATGACGAAGATCATATATCCATTCTGGTGTCCGGATTAC  
AATTGCTTCGCATTC

+  
FFFFFFFFFFFFFFFFFFFFFFFFFFFFFFFFFFFFFFFFFFFFFFFFFFFFFFFFFFFFFFFFFFFFFFFFFFFFFFFF  
:FFFFFFFFFFFFFFFFFFFFFFFFFFFFFFFFFFFFFFFFFFFFFFFFFFFFFFFFFFFFFFFFFFFFFFFFFFFFFFFF  
FFFFFFFFFFFFFFFF

@A00721:190:HGJW7DSXY:4:2617:24306:17910 2:N:0:TCTGCAAG+GCTGCACT  
CTACAACATTCTCCAGATGACTTGAAGCATCAAGTCAAGCAGATATACTGGTCCAGATACGTAGAAA  
ACGAAGCACGATTCAGAGCTGCTCTGAAAATGACGAAGATCATATATCCATTCTGGTGTCCGGATTAC  
AATTGCTTCGCATTC

+  
FFFFFFFFFFFFFFFFFFFFFFFFFFFFFFFFFFFFFFFFFFFFFFFFFFFFFFFFFFFFFFFFFFFFFFFFFFFFFFFF  
FFFFFFFFFFFFFFFFFFFFFFFFFFFFFFFFFFFFFFFFFFFFFFFFFFFFFFFFFFFFFFFFFFFFFFFFFFFFFFFF  
FFFFFFFFFF:FFFF

@A00721:190:HGJW7DSXY:4:1147:32434:3771 2:N:0:TCTGCAAG+GCTGCACT  
GATATCTACAACATTCTCCAGATGACTTGAAGCATCAAGTCAAGCAGATATACTGGTCCAGATACGT  
AGAAAACGAAGCACGATTCAGAGCTGCTCTGAAAATGACGAAGATCATATATCCATTCTGGTGTCCGG  
ATTACAATTGATTCTG

+  
FFFFFFFFFFFFFFFFFFFFFFFFFFFFFFFFFFFFFFFFFFFFFFFFFFFFFFFFFFFFFFFFFFFFFFFFFFFFFFFF  
FFFFFFFFFFFFFFFF:FFFFF,FFFFFFFFFF:FFFFFFFFF:FFFFFFFFF:FFF:FFFFF:FFF  
FFF:FFFFF,FF,F

@A00721:190:HGJW7DSXY:4:1168:1199:25488 2:N:0:TCTGCAAG+GCTGCACT  
GATATCTACAACATTCTCCAGATGACTTGAAGCATCAAGTCAAGCAGATATACTGGTCCAGATACGT  
AGAAAACGAAGCACGATTCAGAGCTGCTCTGAAAATGACGAAGATCATATATCCATTCTGGTGTCCGG  
ATTACAATTGCTTCG

+  
FFFFFFFFFFFFFFFFFFFFFFFFFFFFFFFFFFFFFFFFFFFFFFFFFFFFFFFFFFFFFFFFFFFFFFFFFFFFFFFF  
FFFFFFFFFFFFFFFFFFFFFFFFFFFFFFFFFFFFFFFFFFFFFFFFFFFFFFFFFFFFFFFFFFFFFFFFFFFFFFFF  
FFFFFFFFFFFFFFFF

@A00721:190:HGJW7DSXY:4:1209:16929:16532 2:N:0:TCTGCAAG+GCTGCACT  
GATATCTACAACATTCTCCAGATGACTTGAAGCATCAAGTCAAGCAGATATACTGGTCCAGATACGT  
AGAAAACGAAGCACGATTCAGAGCTGCTCTGAAAATGACGAAGATCATATATCCATTCTGGTGTCCGG  
ATTACAATTGCTTCG

[illegible]

```
FFFFFFFFFFFFFFFFFFFFFFFFFFFFFFFFFFFFF:FFFFFFFFFFFFFFFFFFFFFFFFFFFFFFF
FFFFFFFFFFFFFFFFFFFFFFFFFFFFFFFFFFFFF:FFFFFFFFFFFFFFFFFFFF:FFFFFFFFFFFFFFFF
FFFFFFFFFFFFFFFFFFFF
```

[illegible][illegible][illegible][illegible]

```

FFFF:FFFFFFFFFFFFFFFFFFFFFFFF:FFFFFFFFFFFFFFFF:FFF:FFF,FFFFFFFFFFFFFF
FFFFFFFFFFFFFFFFFFFFFFFF:FFFFFFFFFFFFFFFF:FFFFF:F:F:FF:FFFFFFFFFFFFFFFF
FFFFFFFFFFFFFFFF

```

@A00721:190:HGJW7DSXY:4:1515:31774:20447 2:N:0:TCTGCAAG+GCTGCACT  
GATATCTACAACATTCTCCCAGATGACTTGAAGCATCAAGTCAAGCAGATATACTGGTCCAGATACGT

AGAAAACGAAGCACGATTCAGAGCTGCTCTGAAAATGACGAAGATCATATATCCATTCTGGTGTCCGG  
ATTACAATTGCTTCG

[illegible] $+$ 

@A00721:190:HGJW7DSXY:4:1614:5249:23610 2:N:0:TCTGCAAG+GCTGCACT  
GATATCTACAACATTCTCCCAGATGACTTGAAGCATCAAGTCAAGCAGATATACTGGTCCAGATACGT  
AGAAAACGAAGCACGATTCAGAGCTGCTCTGAAAATGACGAAGATCATATATCCATTCTGGTGTCCGG  
ATTACAATTGCTTCG

```
FFFFFFFFFFFFFFFFFFFFFFFFFFFFFFFFFFFFFFFFFFFFF:FFF:FFFFFFFFFFFFFFFFFFFF  
FFFFFFFFFFFFFFFFFFFFFFFFFFFFFFFFFFFFFFFFFFFFF:FFFFFFFFFFFFFFFFFFFFFFFF  
F,FFFFFF:FFF::FF
```

+

@A00721:190:HGJW7DSXY:4:1624:8079:15452 2:N:0:TCTGCAAG+GCTGCACT  
GATATCTACAACATTCTCCCAGATGACTTGAAGCATCAAGTCAAGCAGATATACTGGTCCAGATACGT  
AGAAAACGAAGCACGATTCAGAGCTGCTCTGAAAATGACGAAGATCATATATCCATTCTGGTGTCCGG  
ATTACAATTGCTTCG

[illegible] $+$ 

@A00721:190:HGJW7DSXY:4:2153:23411:8750 2:N:0:TCTGCAAG+GCTGCACT  
GATATCTACAACATTCTCCCAGATGACTTGAAGCATCAAGTCAAGCAGATATACTGGTCCAGATACGT  
AGAAAACGAAGCACGATTTCAGAGCTGCTCTGAAAATGACGAAGATCATATATCCATTCTGGTGTCCGG  
ATTACAATTGCTTCG

[illegible]

$+$ 

+

 $+$ 

+

+

+

+



@A00721:190:HGJW7DSXY:4:2603:1145:22639 2:N:0:TCTGCAAG+GCTGCACT  
GATATCTACAACATTCTCCCAGATGACTTGAAGCATCAAGTCAAGCAGATATACTGGTCCAGATACGT  
AGAAAACGAAGCACGATTCAGAGCTGCTCTGAAAATGACGAAGATCATATATCCATTCTGGTGTCCGG  
ATTACAATTGCTTCG

@A00721:190:HGJW7DSXY:4:1259:24903:19695 2:N:0:TCTGCAAG+GCTGCACT  
TGTCAAATGGCGTCGAACTATGGTACTATCAAATTTGACGATATCTACAACATTCTCCCAGATGACTT  
GAAGCATCAAGTCAAGCAGATATACTGGTCCAGATACGTAGAAAACGAAGCACGATTAGAGCTGCTC  
TGAAAATGACGAAGA

@A00721:190:HGJW7DSXY:4:2209:17544:36573 2:N:0:TCTGCAAG+GCTGCACT  
TGTCAAATGGCGTCGAACTATGGTACTATCAAATTTGACGATATCTACAACATTCTCCCAGATGACTT  
GAAGCATCAAGTCAAGCAGATATACTGGTCCAGATACGTAGAAAACGAAGCACGATTGAGAGCTGCTC  
TGAAAATGACGAAGA

@A00721:190:HGJW7DSXY:4:1101:21965:30671 2:N:0:TCTGCAAG+GCTGCACT  
CTTCGTCATTTTCAGAGCAGCTCTGAATCGTGCTTCGTTTTCTACGTATCTGGACCAGTATATCTGCT  
TGACTTGATGCTTCAAGTCATCTGGGAGAATGTTGTAGATATCGTCAAATTTGATAGTACCATAGTTC  
GACGCCATTTGACAC

@A00721:190:HGJW7DSXY:4:1170:2519:33661 2:N:0:TCTGCAAG+GCTGCACT  
CTTCGTCATTTTCAGAGCAGCTCTGAATCGTGCTTCTACGTATCTGGACCAGTATATCTGCT  
TGACTTGATGCTTCAAGTCATCTGGGAGAATGTTGTAGATATCGTCAAATTTGATAGTACCATAGTTC  
GACGCCATTTGACAC

@A00721:190:HGJW7DSXY:4:1351:27787:7279 2:N:0:TCTGCAAG+GCTGCACT  
CTTCGTCATTTTCAGAGCAGCTCTGAATCGTGCTTCGTTTTCTACGTATCTGGACCAGTATATCTGCT  
TGACTTGATGCTTCAAGTCATCTGGGAGAATGTTGTAGATATCGTCAAATTTGATAGTACCATAGTTC  
GACGCCATTTGACAC

@A00721:190:HGJW7DSXY:4:2109:8766:11162 2:N:0:TCTGCAAG+GCTGCACT  
CTTCGTCATTTTCAGAGCAGCTCTGAATCGTGCTTCGTTTTCTACGTATCTGGACCAGTATATCTGCT  
TGACTTGATGCTTCAAGTCATCTGGGAGAATGTTGTAGATATCGTCAAATTTGATAGTACCATAGTTC  
GACGCCATTTGACAC

+  
FFFFFFFFFFFFFFFFFFFFFFFFFFFFFFFFFFFFFFFFFFFFFFFFFFFFFFFFFFFFFFFF  
F:FFFFFFFFFFFFFFFFFFFFFFFFFFFFFFFFFFFFFFFF,FFFFFFFF:FFFF:FFFFFFFFFFFF  
:FF:FFF,FFF:FF:  
@A00721:190:HGJW7DSXY:4:2138:18810:22858 2:N:0:TCTGCAAG+GCTGCACT  
CTTCGTCATTTTCAGAGCAGCTCTGAATCGTGCTTCGTTTTCTACGTATCTGGACCAGTATATCTGCT  
TGACTTGATGCTTCAAGTCATCTGGGAGAATGTTGTAGATATCGTCAAATTTGATAGTACCATAGTTC  
GACGCCATTTGACAC

+  
:FFFFFFFFFFFFFF:FFFFFFFF:FFFFF,FFFFFFFFFFFFFFFFFFFFFFFF:F:FFFFFFFFFFFF,F:  
,FFFFFFFF,FF:FFFFFFFF:FFFFFFFFFFFFFFFFFFFFFFFF:FFFFFFFF:FFFFFFFF:FF:FFFF  
,FFFFFFFFFFFFFF  
@A00721:190:HGJW7DSXY:4:2526:10520:22717 2:N:0:TCTGCAAG+GCTGCACT  
CTTCGTCATTTTCAGAGCAGCTCTGAATCGTGCTTCGTTTTCTACGTATCTGGACCAGTATATCTGCT  
TGACTTGATGCTTCAAGTCATCTGGGAGAATGTTGTAGATATCGTCAAATTTGATAGTACCATAGTTC  
GACGCCATTTGACAC

+  
FFFFFFFFFFFFFFFFFFFFFFFFFFFFFFFFFFFFFFFFFFFFFFFFFFFFFFFFFFFFFFFF,FFFFFFFF  
FFFFFFFFFFFFFFFFFFFFFFFFFFFFFFFFFFFFFFFF,FFFFFFFFFFFF,FFFFFFFF:FFF:FFFF:FF  
FFFFFFFFFFFFFF  
@A00721:190:HGJW7DSXY:4:1310:15989:11397 2:N:0:TCTGCAAG+GCTGCACT  
CAAATGGCGTCGAACTATGGTACTATCAAATTTGACGATATCTACAACATTCTCCCAGATGACTTGAA  
GCATCAAGTCAAGCAGATATACTGGTCCAGATACGTAGAAAACGAAGCACGATTCAGAGCTGCTCTGA  
AAATGACG

+  
FFFFFFFFFFFFFFFFFFFFFFFF:FF:FFFFFFFFFFFFFFFFFFFFFFFFFFFFFFFFFFFFFFFFFFFF  
FFFFFFFFFFFFFFFFFFFFFFFFFFFFFFFFFFFFFFFFFFFFFFFFFFFFFFFFFFFFFFFFFFFFFFFFFFFF  
FFFFFFFF:  
@A00721:190:HGJW7DSXY:4:1313:19407:2002 2:N:0:TCTGCAAG+GCTGCACT  
CAAATGGCGTCGAACTATGGTACTATCAAATTTGACGATATCTACAACATTCTCCCAGATGACTTGAA  
GCATCAAGTCAAGCAGATATACTGGTCCAGATACGTAGAAAACGAAGCACGATTCAGAGCTGCTCTGA  
AAATGACG

+  
FFFFFFFFFFFFFFFFFFFFFFFF:FFFFFFFFFFFFFFFFFFFFFFFFFFFFFFFFFFFFFFFFFFFF  
FFFFFFFFFFFFFFFFFFFFFFFFFFFFFFFFFFFFFFFFFFFFFFFFFFFFFFFFFFFFFFFF:FFFFFFFFFFFFFFFF  
FFFFFFFF  
@A00721:190:HGJW7DSXY:4:1436:10456:5916 2:N:0:TCTGCAAG+GCTGCACT  
CAAATGGCGTCGAACTATGGTACTATCAAATTTGACGATATCTACAACATTCTCCCAGATGACTTGAA  
GCATCAAGTCAAGCAGATATACTGGTCCAGATACGTAGAAAACGAAGCACGATTCAGAGCTGCTCTGA  
AAATGACG

+  
FFFFFFFFFFFFFFFFFFFFFFFF:FFFFFFFFFFFFFFFFFFFFFFFFFFFFFFFFFFFFFFFFFFFF  
FFFFFFFFFFFFFFFFFFFFFFFFFFFFFFFFFFFFFFFFFFFFFFFFFFFFFFFFFFFFFFFFFFFFFFFFFFFF  
FFFFFFFF  
@A00721:190:HGJW7DSXY:4:1503:3387:14841 2:N:0:TCTGCAAG+GCTGCACT  
CAAATGGCGTCGAACTATGGTACTATCAAATTTGACGATATCTACAACATTCTCCCAGATGACTTGAA  
GCATCAAGTCAAGCAGATATACTGGTCCAGATACGTAGAAAACGAAGCACGATTCAGAGCTGCTCTGA  
AAATGACG

+  
FFFFFFFFFFFFFFFFFFFFFFFF,FFFFFFFFFFFFFFFF:FFFFFFFFFFFFFFFFFFFFFFFFFFFF  
FFFFFFFFFFFFFFFFFFFFFFFFFFFFFFFFFFFFFFFFFFFFFFFF:FFFFFFFF:FFFFFFFF:FFFF  
FF:FFFF  
@A00721:190:HGJW7DSXY:4:2377:32072:12915 2:N:0:TCTGCAAG+GCTGCACT  
CAAATGGCGTCGAACTATGGTACTATCAAATTTGACGATATCTACAACATTCTCCCAGATGACTTGAA

GCATCAAGTCAAGCAGATATACTGGTCCAGATACGTAGAAAACGAAGCACGATTCAGAGCTGCTCTGA  
AAATGACG

```

FFFFFFFFFFFFFFFFFFFFFFFFFFFFFFFF:FFFF:FFFFFFFFFFFFFFFFFFFFFFFFFFFFFFFF
FFFFFF,FFFFFFFFFFFFFFFFFFFFFFFF,FFFFFFFFFFFFFFFFFFFFFFFFFFFFFFFFFFFF
FFFFF,:F

```

 $+$ [illegible] $+$ [illegible]

+

```

FFFFFFFFFFFFFF:FFFFFF:F,,FFFFFFFFFFFFFFFFFFFFFFFFFFFFFFFFFFFFFFFF
FFFFFFFFFFFFFFFFFFFFFFFFFFFFFFFFFFFFFFFF,FFFFFFFFFFFFF:FFFFFFFFFFFFFF
FFFFFFF:FFFFFFF:

```

+

[illegible]

+

[illegible]

+

[illegible]

@A00721:190:HGJW7DSXY:4:2225:19732:19100 2:N:0:TCTGCAAG+GCTGCACT  
AAATGGCGTCGAACTATGGTACTATAAAATTTGACGATATCTACAACATTCTCACAGATGACTTGAAG  
CATCAAGTCAAGCAGATATACTGGTCCAGATACGTAGAAAACGAAGCACGATTGAGAGCTGCTCTGAA  
AATGACAGATCGGA

+

FFFFF:FFFF,FFF:FF,,FF,FF::FFFFF,,F:FFFF:,FFFFF,,::,FF,FFFF:FFFFF,  
:FFF,:F:FFF,F:FFFFF:,F,:F,F:F:,FF::FFF:,FFF:F,:FFFFFFFFF,FFF:FF:  
FFFFFFFFF:F:FF

@A00721:190:HGJW7DSXY:4:2311:11288:17785 2:N:0:TCTGCAAG+GCTGCACT  
CAAATGGCGTCGAACTATGGTACTATCAAATTTGACGATATCTACAACATTCTCCCAGATGACTTGAA  
GCATCAAGTCAAGCAGATATACTGGTCCAGATACGTAGAAAACGAAGCACGATTGAGAGCTGCTCTGA  
AAATGAC

+

FFFFF:FFFFFFFFFFFFFFFFFFFFFFFFF:FF:FFFFFFFFFFFFFFFFF:FFFFFFFFFFFFFFFFF  
FFFF:FFF,FFFFFFFF:FFFFFFFFFFFFFFFFFFFFFFFFFFFFFFFFFFFFFFFFFFFFFFFFF  
FFF::FF

@A00721:190:HGJW7DSXY:4:1310:27570:28009 2:N:0:TCTGCAAG+GCTGCACT  
TTTCAGAGCAGCTCTGAATCGTGCTTCGTTTTCTACGTATCTGGACCAGTATATCTGCTTGACTTGAT  
GCTTCAAGTCATCTGGGAGAATGTTGTAGATATCGTCAAATTTGATAGTACCATAGTTCGACGCCATT  
TGACACACTGTTGA

+

FFFFFFFFFFFFFFFFF:FFFFF:FFFFFFFFFFFFF,FFFFFFFFFFFFFFFFFFFFFFFFFFFFF  
FFFFFFFFFFFFFFFFF:FF,FF,FF,FFFF,FFFFFFFFFFFF:FFFFF:FFFFFFFFFFFFF:F  
FFFFFFFFF:F:FFF

@A00721:190:HGJW7DSXY:4:1611:8621:13385 2:N:0:TCTGCAAG+GCTGCACT  
TTTCAGAGCAGCTCTGAATCGTGCTTCGTTTTCTACGTATCTGGACCAGTATATCTGCTTGACTTGAT  
GCTTCAAGTCATCTGGGAGAATGTTGTAGATATCGTCAAATTTGATAGTACCATAGTTCGACGCCATT  
TGACACACTGTTGAT

+

FFFFFFFFFFFFFFFFF:FFF:FFFFFFFFFFFFFFFFFFFFFFFFFFFFFFFFFFFFFFFFF  
:FFFFFFFFFFFFFFFFF,,FFFFFF:FFFFFFFFF,FFFF:FFFFFFFFFFFFFFFFFFFFF  
FFFFFFFFF:FFF

@A00721:190:HGJW7DSXY:4:2109:25672:7341 2:N:0:TCTGCAAG+GCTGCACT  
TTTCAGAGCAGCTCTGAATCGTGCTTCGTTTTCTACGTATCTGGACCAGTATATCTGCTTGACTTGAT  
GCTTCAAGTCATCTGGGAGAATGTTGTAGATATCGTCAAATTTGATAGTACCATAGTTCGACGCCATT  
TGACACACTGTTGAT

+

FFFFFFFFFFFFFFFFFFFFFFFFFFFFFFFFFFFFFFFFFFFFFFFFFFFFFFFFFFFFFFFFF  
FFFFFFFFFFFF:FFFFFFFFF:FFFFFFFFFFFFFFFFFFFFFFFFFFFFF:FFF:,FFFFFFFFF  
FFFFFFFFF

@A00721:190:HGJW7DSXY:4:2423:5556:18223 2:N:0:TCTGCAAG+GCTGCACT  
TTTCAGAGCAGCTCTGAATCGTGCTTCGTTTTCTACGTATCTGGACCAGTATATCTGCTTGACTTGAT  
GCTTCAAGTCATCTGGGAGAATGTTGTAGATATCGTCAAATTTGATAGTACCATAGTTCGACGCCATT  
TGACACACTGTTGAT

+

FFFFFFFFFFFFFFFFFFFFFFFFFFFFFFFFFFFFFFFFFFFFFFFFFFFFFFFFFFFFFFFFF  
FFFFFFFFFFFF,FFFFFFFFFFFFFFFFF:FFF:FFFFF:F:FFFFFFFFFFFFFFFFFFFFF,  
FFFFFFFFF:FFF

@A00721:190:HGJW7DSXY:4:1110:24261:6120 2:N:0:TCTGCAAG+GCTGCACT  
TTTACATTATATTACAAATTCATCATATCAACAGTGTGTCAAATGGCGTCGAACTATGGTACTATCAA  
ATTTGACGATATCTACAACATTCTCCCAGATGACTTGAAGCATCAAGTCAAGCAGATATACTGGTCCA  
GATACGTAGAAAACG

+

FFFFFFFF:FFFFFFFFF:FFFFFFFFFFFFFFFFFFFFFFFFFFFFFFFFFFFFFFFFF,FFFFF

@A00721:190:HGJW7DSXY:4:1202:4978:22514 2:N:0:TCTGCAAG+GCTGCACT  
TTTACATTATATTACAAATTCATCATATCAACAGTGTGTCAAATGGCGTCGAAGTATGGTACTATCAA  
ATTTGACGATATCTACAACATTCTCCCAGATGACTTGAAGCATCAAGTCAAGCAGATATACTGGTCCA  
GATACGTAGAAAACG

@A00721:190:HGJW7DSXY:4:1274:16242:4131 2:N:0:TCTGCAAG+GCTGCACT  
TTTACATTATATTACAAATTCATCATATCAACAGTGTGTCAAATGGCGTCGAAGTATGGTACTATCAA  
ATTTGACGATATCTACAACATTCTCCCAGATGACTTGAAGCATCAAGTCAAGCAGATATACTGGTCCA  
GATACGTAGAAAACG

@A00721:190:HGJW7DSXY:4:1417:17146:30373 2:N:0:TCTGCAAG+GCTGCACT  
TTTACATTATATTACAAATTCATCATATCAACAGTGTGTCAAATGGCGTCGAAGTATGGTACTATCAA  
ATTTGACGATATCTACAACATTCTCCCAGATGACTTGAAGCATCAAGTCAAGCAGATATACTGGTCCA  
GATACGTAGAAAACG

@A00721:190:HGJW7DSXY:4:1649:23529:5353 2:N:0:TCTGCAAG+GCTGCACT  
TTTACATTATATTACAAATTCATCATATCAACAGTGTGTCAAATGGCGTCGAAGTATGGTACTATCAA  
ATTTGACGATATCTACAACATTCTCCCAGATGACTTGAAGCATCAAGTCAAGCAGATATACTGGTCCA  
GATACGTAGAAAACG

@A00721:190:HGJW7DSXY:4:2304:3061:34820 2:N:0:TCTGCAAG+GCTGCACT  
TTTACATTATATTACAAATTCATCATATCAACAGTGTGTCAAATGGCGTCGAAGTATGGTACTATCAA  
ATTTGACGATATCTACAACATTCTCCCAGATGACTTGAAGCATCAAGTCAAGCAGATATACTGGTCCA  
GATACGTAGAAAACG

@A00721:190:HGJW7DSXY:4:2332:17418:13777 2:N:0:TCTGCAAG+GCTGCACT  
TTTACATTATATTACAAATTCATCATATCAACAGTGTGTCAAATGGCGTCGAAGTATGGTACTATCAA  
ATTTGACGATATCTACAACATTCTCCCAGATGACTTGAAGCATCAAGTCAAGCAGATATACTGGTCCA  
GATACGTAGAAAACG

@A00721:190:HGJW7DSXY:4:2648:4472:33254 2:N:0:TCTGCAAG+GCTGCACT  
TTTACATTATATTACAAATTCATCATATCAACAGTGTGTCAAATGGCGTCGAAGTATGGTACTATCAA  
ATTTGACGATATCTACAACATTCTCCCAGATGACTTGAAGCATCAAGTCAAGCAGATATACTGGTCCA  
GATACGTAGAAAACG

+  
FFFFFFFFFFFFFFFF,FFFFFFFFFFFFFFFFFFFFFFFFFFFFFFFF:FFFFFFFF:F,FFFF:FFFF:FFFF  
FFF:FFFFFFFFFFFFFFFFFFFFFFFFFFFFFFFF:FFFFFFF::FFFFFFFFFFFFFFFFFFFFFFFF:FFFF  
FFFF:FFFFFFFFF::

@A00721:190:HGJW7DSXY:4:1471:31458:32424 2:N:0:TCTGCAAG+GCTGCACT  
TTTACATTATATTACAAATTCAGCATATCAACAGTGTGTCAAATGGCGTCGAACTATGGTACTATCAA  
ATTTGACGATATCTACAACATTCTCCCAGATGACTTGAAGCATCAAGTCAAGCAGATATACTGGTCCA  
GATACGTAGAAAAAC

+  
FFFFFFFFFFFFFFFFFFFFFFFF,FFFFFFFFFFFFFFFFFFFFFFFFFFFFFFFFFFFFFFFF:FFFFFFFFFF  
FFFFFFFFFFFFFFFFFFFFFFFFFFFFFFFFFFFFFFFFFFFFFFFFFFFFFFFFFFFFFFFFFFFFFFFF,F:FF:FF  
FFFFFFFFFFFF,F

@A00721:190:HGJW7DSXY:4:1172:12111:35368 2:N:0:TCTGCAAG+GCTGCACT  
ATTTTACATTATATTACAAATTCATCATATCAACAGTGTGTCAAATGGCGTCGAACTATGGTACTATC  
AAATTTGACGATATCTACAACATTCTCCCAGATGACTTGAAGCATCAAGTCAAGCAGATATACTGGTC  
CAGATACGTAGAAAA

+  
FFFFFFFFFFFFFFFFFFFFFF:FFFFFFFFFFFFFFFFFFFFFFFFFFFFFFFFFFFFFFFF:FFFFFFFFFFFFFF  
FFFFFFF:F:FFFFFFFF:FFFFFF:FFFFFF:FFFFFFFFFFFF:FFF:FFFFFFFFFFFFFF:FFFF  
FFFFFFFFFFFFFFFF

@A00721:190:HGJW7DSXY:4:1514:17255:12900 2:N:0:TCTGCAAG+GCTGCACT  
TTTTCTACGTATCTGGACCAGTATATCTGCTTGACTTGATGCTTCAAGTCATCTGGGAGAATGGTGTA  
GATATCGTCAAATTTGATAGTACCATAGTTCGACGCCATTTGACACACTGTTGATATGATGAATTTGT  
AATATAATGTAAAAT

+  
FFFFFFFFFFFF,FFFFFFFFFFFF:FFFFFF::FF:FFFFFFFFF:F,F:F:FFFF,FFFF:F,FFFF  
FFFF:FFFFFFFFFFFF,FF:F:FF:F:F,FFFFFFFFF:FFFF:FF,::FFFFFF:FFFF:F:::F:F  
FFF:FFF:FFF:F:F

@A00721:190:HGJW7DSXY:4:1648:12608:28025 2:N:0:TCTGCAAG+GCTGCACT  
ATTTTACATTATATTACAAATTCATCATATCAACAGTGTGTCAAATGGCGTCGAACTATGGTACTATC  
AAATTTGACGATATCTACAACATTCTCCCAGATGACTTGAAGCATCAAGTCAAGCAGATATACTGGTC  
CAGATACGTAGAAAA

+  
FFFF,FFFFFFFF,FFF,F,FFFFFFFFFFFFFFFF:FFFFFFFFFF,FFFF:FFFFFFFFFFFF:FFFFFF  
::FFFFFFFFF:FFFFFFFFFFFFFFFFFFFFFFFFFFFFFFFFFFFFFFFFFFFFFFFFFFFFFFFFFFFFF,:F  
FFF:,FFFFFF:FFF

@A00721:190:HGJW7DSXY:4:2122:2727:36777 2:N:0:TCTGCAAG+GCTGCACT  
TTTTCTACGTATCTGGACCAGTATATCTGCTTGACTTGATGCTTCAAGTCATCTGGGAGAATGTTGTA  
GATATCGTCAAATTTGATAGTACCATAGTTCGACGCCATTTGACACACTGTTGATATGATGAATTTGT  
AATATAATGTAAAAT

+  
FFFFFFFFFFFFFFFFFFFFFFFFFFFFFFFFFFFFFFFF:FFFFFFFFFFFFFFFFFFFFFFFFFFFF:FFFF:FFFFF  
FFF:F:FFFFFFFFFFFFFFFFFFFFFFFFFFFFFFFF:FFFFFFF,FFFF:FFFF:FFFFFFFFF::F:FFFF  
FFFFFFFFFFFFFFFF

@A00721:190:HGJW7DSXY:4:2146:25672:16611 2:N:0:TCTGCAAG+GCTGCACT  
ATTTTACATTATATTACAAATTCATCATATCAACAGTGTGTCAAATGGCGTCGAACTATGGTACTATC  
AAATTTGACGATATCTACAACATTCTCCCAGATGACTTGAAGCATCAAGTCAAGCAGATATACTGGTC  
CAGATACGTAGAAAA

+  
FFFFFFFFFFFF:FFFFFFFFFFFFFFFFFFFFFFFFFFFFFFFF:FFFFFFF:FFFFFFFFFFFFFFFFFFFFFF  
F,FFFFFFFFFFFFFFFFFFFFFFFFFFFFFFFFFFFFFFFFFFFFFFFFFFFFFFFFFFFFFFFFFFFF::FFF  
F:FFFFFFFFF:FFFF

@A00721:190:HGJW7DSXY:4:2178:11975:11240 2:N:0:TCTGCAAG+GCTGCACT  
ATTTTACATTATATTACAAATTCATCATATCAACAGTGTGTCAAATGGCGTCGAACTATGGTACTATC

AAATTTGACGATATCTACAACATTCTCCCAGATGACTTGAAGCATCAAGTCAAGCAGATATACTGGTC  
CAGATACGTAGAAAA

+

FFFFFFFFFFFFFFFFFFFFFFFFFFFFFFFFFFFFFFFFFFFFFFFFFFFFFFFFFFFFFFFFFFFFFFFF:FFFF  
FFFFFFFFF:FFFFFFFFFFFFFFFFF:FFFFFFFFFFFFFFFFFFFFFFFFFFFFFFFFFFFFFFFFFFFFF  
FFFFFFFFFFFFFFFFF

@A00721:190:HGJW7DSXY:4:2178:12038:11256 2:N:0:TCTGCAAG+GCTGCACT  
ATTTTACATTATATTACAAATTCATCATATCAACAGTGTGTCAAATGGCGTCGAACTATGGTACTATC  
AAATTTGACGATATCTACAACATTCTCCCAGATGACTTGAAGCATCAAGTCAAGCAGATATACTGGTC  
CAGATACGTAGAAAA

+

FFFFFFFFFFFFFFFFFFFFFFFFFFFFFFFFFFFFFFFFFFFFFFFFFFFFFFFFFFFFFFFFFFFFFFFF  
FFFFFFFFFFFFFFFFFFFFFFFFFFFFFFFFFFFFFFFFFFFFFFFFFFFFFFFFFFFFFFFFFFFFFFFF:FFF  
FFFFFFFF:FF:FFFF

@A00721:190:HGJW7DSXY:4:2211:13078:5040 2:N:0:TCTGCAAG+GCTGCACT  
ATTTTACATTATATTACAAATTCATCATATCAACAGTGTGTCAAATGGCGTCGAACTATGGTACTATC  
AAATTTGACGATATCTACAACATTCTCCCAGATGACTTGAAGCATCAAGTCAAGCAGATATACTGGTC  
CAGATACGTAGAAAA

+

FFF:FFFFFFFFFFFFFFFFFFFFFFFFFFFFFFFFFFFFFFFFFFFFFFFFFFFFFFFFFFFFFFFFFFFF:FF  
FFFFFFFFFFFFFFFFFFFFFFFFFFFFFFFFFFFFFFFFFFFFFFFFFFFFFFFFFFFFFFFFFFFFFFFF  
FFFFFFFFFFFFF:FFF

@A00721:190:HGJW7DSXY:4:2421:3025:3975 2:N:0:TCTGCAAG+GCTGCACT  
TTTACATTATATTAAAAATTCATCATATCAACAGTGTGTCAAATGGCGTCGAACTATGGTACTATCAA  
ATTTGACGATATCTACAACAATCTCCCAGATGACTAGAAGCATCAAGTCAAGCAGATATACTGGTCCA  
GATACGTAGAAAA

+

F,FFFFF::FFFFF,:FF:FFFFF:FFFFFFFFF,FFFFFFFFFFFFFFFFF:FFFFF,FFFF,FFFF  
:F:F:F,FFFF,F:,FFFF,,:FFFFFFFF,,FFF,:FFF:FFFFF::FFF,FF:FFFFF:,::FFF:  
FFFF::FFFFFFFF

@A00721:190:HGJW7DSXY:4:2426:3685:13761 2:N:0:TCTGCAAG+GCTGCACT  
ATTTTACATTATATTACAAATTCATCATATCAACAGTGTGTCAAATGGCGTCGAACTATGGTACTATC  
AAATTTGACGATATCTACAACATTCTCCCAGATGACTTGAAGCATCAAGTCAAGCAGATATACTGGTC  
CAGATACGAAGAAAA

+

FFFFFFFFFFFFFFFFFFFFF:F,FFFFFFFFFFFFFFFFF:FFFFFFFFFFFFFFFFFFFFFFFFFFFFF:F  
FFFFFFFFF:FFFFFFFFF:FFFFFFFFFFFFF:FFF:FFFFFFFFF:FFF:FFFFFFFFFFFFFFFFFFFF,,F  
,FF,FF,:,:,F,:::

@A00721:190:HGJW7DSXY:4:2528:12364:23657 2:N:0:TCTGCAAG+GCTGCACT  
ATTTTACATTATATTACAAATTCATCATATCAACAGTGTGTCAAATGGCGTCGAACTATGGTACTATC  
AAATTTGACGATATCTACAACATTCTCCCAGATGACTTGAAGCATCAAGTCAAGCAGATATACTGGTC  
CAGATACGTAGAAAA

+

FF,F:F:FFFFFFFFFFFFFFFFF,FFF,F::FFFF:FFFFFFFFF:,FFFFFFFFF:FF:FF:FFFF  
FFF,FF,FFF:FF,FFFFFFFFFFFFFFFFF:F:F:,FF:F,:FF:FFFF:FFFF,:FF:F:FF:F,F,F  
,FFF,FF:FF,FFFF

@A00721:190:HGJW7DSXY:4:2538:23258:21543 2:N:0:TCTGCAAG+GCTGCACT  
ACATTATATTACAAATTCATCATATCAACAGTGTGTCAAATGTCGTCGAACTATGGTACTATCAAATT  
TGAAGATATCTACAACATTCTCCCAGATGACTTGAAGCATCAAGACAAGAAGATATACTGGTCCAGAT  
ACGAAGAAAA

+

F:FFFFF:,FFFFFFFF,FFFFFF:,FF,FF,,F,F,FFFF:,F,F:FFF,FFF,,:,FFFFFFFF:  
,FF,FFFFFF,F,FF,F:,F,,FFF,FF,,FFF:,FFFF,,FFF,F,FFFF,F:,FF,FFFF  
F,,F,FFFF





FFFFFFFF:FFFF,FFFFFFFFFFFF:FFFFFFFFFFFFFFFFFFFFFFFFFFFFFFFF,FFFFFFFFFFFFFFF  
F:FFFFFF,FFFF:

@A00721:190:HGJW7DSXY:4:1625:29668:11412 2:N:0:TCTGCAAG+GCTGCACT  
AACAAACTCACAACACATTTTACATTATATTACAAATTCATCATATCAACAGTGTGTCAAATGGCGT  
CGAACTATGGTACTATCAAATTTGACGATATCTACAACATTCTCCAGATGACTTGAAGCATCAAGTC  
AAGCAGATATACTGG

+

FFFFFFFFFFFFFFFFFFFFFFFFFFFFFFFF:FFF,FFFF:FFFFFFFF,FFFFFFFFFFFFFFFFFFFF:FFFFFF  
FFFFFFFFFFFFFFFFFFFFFFFFFFFFFFFFFFFFFFFFFFFFFFFFFFFFFFFFFFFFFFFFFFFFFFFF  
FFFFFFFFFFFFFFFF

@A00721:190:HGJW7DSXY:4:2129:14895:5368 2:N:0:TCTGCAAG+GCTGCACT  
AACAAACTCACAACACATTTTACATTATATTACAAATTCATCATATCAACAGTGTGTCAAATGGCGT  
CGAACTATGGTACTATCAAATTTGACGATATCTACAACATTCTCCAGATGACTTGAAGCATCAAGTC  
AAGCAGATATACTGG

+

FFFFFFFFFFFFFFFFFFFFFFFF:FFFFFFFFFFFFFFFF,FFFFFFFFFFFFFFFFFFFFFFFFFFFFFFFF  
FFFFFF,FFFFFFFFFFFFFFFFFFFFFFFFFFFFFFFFFFFFFFFFFFFFFFFFFFFFFFFFFFFFFFFF  
FFFFFFFFFFFFFFFF

@A00721:190:HGJW7DSXY:4:2343:6045:13338 2:N:0:TCTGCAAG+GCTGCACT  
AACAAACTCACAACACATTTTACATTATATTACAAATTCATCATATCAACAGTGTGTCAAATGGCGT  
CGAACTATGGTACTATCAAATTTGACGATATCTACAACATTCTCCAGATGACTTGAAGCATCAAGTC  
AAGCAGATATACTGG

+

FFFFFFFFFFFFFFFFFFFFFFFFFFFFFFFF:FFFFFF:, :FFFFFFFFFFFFFFFFFFFFFFFFFFFFFFFF  
FFFFFFFFFFFFFFFFFFFFFFFF:FFFFFFFFFFFFFFFFFFFFFFFFFFFFFFFFFFFFFFFF:FFFFFFFF  
FFFFFFFF

@A00721:190:HGJW7DSXY:4:2406:1678:22153 2:N:0:TCTGCAAG+GCTGCACT  
AACAAACTCACAACACATTTTACATTATATTACAAATTCATCATATCAACAGTGTGTCAAATGGCGT  
CGAACTATGGTACTATCAAATTTGACGATATCTACAACATTCTCCAGATGACTTGAAGCATCAAGTC  
AAGCAGATATACTGG

+

FFFFFF:FFFFFFFFFFFFFFFFFFFF:F:FFFFFFF,FFF:FFFFFF:FFFFFF:FFFFFF:FFF  
FFFFFFFFFFFF:FFFFFFF:FFFF:FFFFF,FFFFFF:FFFF:FFFFFFFFFFFFFFFFFFFF:FF  
FFFF,FFFFF::F

@A00721:190:HGJW7DSXY:4:2435:16007:35070 2:N:0:TCTGCAAG+GCTGCACT  
AACAAACTCACAACACATTTTACATTATATTACAAATTCATCATATCAACAGTGTGTCAAATGGCGT  
CGAACTATGGTACTATCAAATTTGACGATATCTACAACATTCTCCAGATGACTTGAAGCATCAAGTC  
AAGCAGATATACTGG

+

FFFFFFFFFFFFFFFFFFFFFFFFFFFFFFFFFFFFFFFFFFFFFFFFFFFFFFFFFFFFFFFFFFFFFFFF:FFF  
FFFFFFFFFFFFFFFF:FFFFFFFFFFFFFFFFFFFFFFFFFFFFFFFFFFFFFFFFFFFFFFFFFFFFFFFF  
FFFF:FFFFFFFF

@A00721:190:HGJW7DSXY:4:2461:4264:31485 2:N:0:TCTGCAAG+GCTGCACT  
AACAAACTCACAACACATTTTACATTATATTACAAATTCATCATATCAACAGTGTGTCAAATGGCGT  
CGAACTATGGTACTATCAAATTTGACGATATCTACAACATTCTCCAGATGACTTGAAGCATCAAGTC  
AAGCAGATATACTGG

+

FFFFFFFFFFFFFFFFFFFFFFFFFFFFFFFFFFFFFFFFFFFFFFFFFFFFFFFFFFFFFFFFFFFFFFFF  
FFFFFFFFFFFF,F::FF:,FFFFFFFFFFFFFFFFFFFFFFFFFFFFFFFFFFFFFFFFFFFFFFFF  
FFFFFF:F:FFFF

@A00721:190:HGJW7DSXY:4:2435:16794:36808 2:N:0:TCTGCAAG+GCTGCACT  
AACAAACTCACAACACATTTTACATTATATTACAAATTCATCATATCAACAGTGTGTCAAATGGCGT  
CGAACTATGGTACTATCAAATTTGACGATATCTACAACATTCTCCAGATGACTTGAAGCATCAAGTC  
AAGCAGATATACTG

+  
FFFFFFFFFFFFFFFFFFFFFFFFFFFFFFFFFFFFFFFFFFFFFFFFFFFFFFFFFFFFFFFFFFFFFFFF  
FFFFFFFFFFFFFF:FFFFFFFFFFFFFFFFFFFFFFFFFFFFFFFFFFFFFFFFFFFFFFFFFFFFFFFF  
FFFFFFFFFFFFFF  
@A00721:190:HGJW7DSXY:4:1339:18032:27743 2:N:0:TCTGCAAG+GCTGCACT  
GAACATAACAAAACCTCACAAACACATTTTACATTATATTACAAATTCATCATATCAACAGTGTGTCAAA  
TGGCGTCGAACTATGGTACTATCAAATTTGACGATATCTACAACATTCTCCCAGATGACTTGAAGCAT  
CAAGTCAAGCAGATA

+  
FFFFFFFFFFFFFFFFFFFFFFFFFFFFFFFFFFFFFFFFFFFFFFFFFFFFFFFFFFFFFFFFFFFFFFFF  
FFFF:FFFFFFFFFFFFFFFFFFFFFFFFFFFFFFFFFFFFFFFFFFFFFFFFFFFFFFFFFFFFFFFF  
FFFFFFFFFFFFFF  
@A00721:190:HGJW7DSXY:4:1342:7835:35196 2:N:0:TCTGCAAG+GCTGCACT  
GAACATAACAAAACCTCACAAACACATTTTACATTATATTACAAATTCATCATATCAACAGTGTGTCAAA  
TGGCGTCGAACTATGGTACTATCAAATTTGACGATATCTACAACATTCTCCCAGATGACTTGAAGCAT  
CAAGTCAAGCAGATA

+  
FFFFFFFFFFFFFFFFFFFFFFFFFFFFFFFFFFFFFFFFFFFFFFFFFFFFFFFFFFFFFFFFFFFFFFFF  
FFFFFFFFFFFFFFFFFFFFFFFFFFFFFFFFFFFFFFFFFFFFFFFFFFFFFFFFFFFFFFFFFFFFFFFF  
FFFFFFFFFF:FFFFFFF  
@A00721:190:HGJW7DSXY:4:1449:12518:21198 2:N:0:TCTGCAAG+GCTGCACT  
GAACATAACAAAACCTCACAAACACATTTTACATTATATTACAAATTCATCATATCAACAGTGTGTCAAA  
TGGCGTCGAACTATGGTACTATCAAATTTGACGATATCTACAACATTCTCCCAGATGACTTGAAGCAT  
CAAGTCAAGCAGATA

+  
FF:FFFFFFFFF:FFFFFFFFFFFF,FFFFFFFFFFFFFFFFFFFFFFFFFFFFFFFFFFFFFFFF:FFFFFFFFF:FFFFFFFFF  
FF:FFFFFFFFFFFF:FF:FFFFFFFFFFFFFFFFFFFFFFFFFFFFFFFFFFFFFFFFFFFFFFFFFFFFFFFF  
FFFFFFFFF:FFFFFFF  
@A00721:190:HGJW7DSXY:4:1526:16667:29763 2:N:0:TCTGCAAG+GCTGCACT  
GAACATAACAAAACCTCACAAACACATTTTACATTATATTACAAATTCATCATATCAACAGTGTGTCAAA  
TGGCGTCGAACTATGGTACTATCAAATTTGACGATATCTACAACATTCTCCCAGATGACTTGAAGCAT  
CAAGTCAAGCAGATA

+  
FFFFFFFFFFFFFFFFFFFFFFFFFFFFFFFFFFFFFFFFFFFFFFFFFFFFFFFFFFFFFFFFFFFFFFFF  
FFFFFFFFFFFFFFFFFFFFFFFFFFFFFFFFFFFFFFFFFFFFFFFFFFFFFFFFFFFFFFFFFFFFFFFF  
FFFFFFFFFFFFFFFFF:F  
@A00721:190:HGJW7DSXY:4:2242:26549:15687 2:N:0:TCTGCAAG+GCTGCACT  
GAACATAACAAAACCTCACAAACACATTTTACATTATATTACAAATTCATCATATCAACAGTGTGTCAAA  
TGGCGTCGAACTATGGTACTATCAAATTTGACGATATCTACAACATTCTCCCAGATGACTTGAAGCAT  
CAAGTCAAGCAGATA

+  
FFFFFFFFFFFFFFFFFFFFFFFFFFFFFFFFFFFFFFFFFFFFFFFFFFFFFFFFFFFFFFFFFFFFFFFF  
FF:FFFFFFFFFFFFFFFFFFFFFFFFFFFFFFFFFFFFFFFFFFFFFFFFFFFFFFFFFFFFFFFFFFFF:F  
FFFFFFFFFFFF:FFF  
@A00721:190:HGJW7DSXY:4:2318:15456:12665 2:N:0:TCTGCAAG+GCTGCACT  
GAACATAACAAAACCTCACAAACACATTTTACATTATATTACAAATTCATCATATCAACAGTGTGTCAAA  
TGGCGTCGAACTATGGTACTATCAAATTTGACGATATCTACAACATTCTCCCAGATGACTTGAAGCAT  
CAAGTCAAGCAGATA

+  
FFFFFFFFFFFFFFFFFFFFFFFFFFFFFFFFFFFFFFFFFFFFFFFFFFFFFFFFFFFFFFFFFFFFFFFF  
FFFFFFFFFFFFFFFFFFFFFFFFFFFFFFFFFFFFFFFFFFFFFFFFFFFFFFFFFFFFFFFFFFFFFFFF  
FFFFFFFFFFFFFFFFF  
@A00721:190:HGJW7DSXY:4:2318:15474:13416 2:N:0:TCTGCAAG+GCTGCACT  
GAACATAACAAAACCTCACAAACACATTTTACATTATATTACAAATTCATCATATCAACAGTGTGTCAAA

TGGCGTCGAACTATGGTACTATCAAATTTGACGATATCTACAACATTCTCCCAGATGACTTGAAGCAT  
CAAGTCAAGCAGATA

+

FFFFFFFFFFFFFFFFFFFFFFFFFFFFFFFFFFFFFFFFFFFFFFFFFFFFFFFFFFFFFFFFFFFFFFFF  
FFFFFFFFFFFFFFFFFFFFFFFFFFFFFFFFFFFFFFFFFFFFFFFFFFFFFFFFFFFFFFFFFFFFFFFF  
FFFFFFFF,FFFF::

@A00721:190:HGJW7DSXY:4:2360:24569:26412 2:N:0:TCTGCAAG+GCTGCACT  
GAACATAACAAAACCTCACAACACATTTTACATTATATTACAAATTCATCATATCAACAGTGTGTCAA  
TGGCGTCGAACTATGGTCCTATCAAATTTGACGATATCTACAACATTCTCCCAGATGACTTGAAGCAT  
CAAGTCAAGCAGATA

+

FFFFF:FFFFFFFFFFFFFFFF,FFFFFFFFFFFFFFFFFFFFFFFFFFFFFFFFFFFFFFFFFFFFFFFF  
FFFFFFFFFFFF:FFFF,FFFFFFFFFFFFFFFFFFFFFFFFFFFFFFFFFFFFFFFFFFFFFFFFFF  
FFFFFFFF,FFFFF

@A00721:190:HGJW7DSXY:4:2432:23149:36573 2:N:0:TCTGCAAG+GCTGCACT  
GAACATAACAAAACCTCACAACACATTTTACATTATATTACAAATTCATCATATCAACAGTGTGTCAA  
TGGCGTCGAACTATGGTACTATCAAATTTGACGATATCTACAACATTCTCCCAGATGACTTGAAGCAT  
CAAGTCAAGCAGATA

+

FFFFFFFFFFFFFFFFFFFFFFFFFFFFFFFFFFFFFFFFFFFFFFFFFFFFFFFFFFFFFFFFFFFFFFF  
FFFFFFFFFFFFFFFFFFFFFFFFFFFFFFFFFFFFFFFFFFFFFFFFFFFFFFFFFFFFFFFFFFFFFFF  
FFFFFFFFFFFFFFFF

@A00721:190:HGJW7DSXY:4:2464:5981:35493 2:N:0:TCTGCAAG+GCTGCACT  
GAACATAACAAAACCTCACAACACATTTTACATTATATTACAAATTCATCATATCAACAGTGTGTCAA  
TGGCGTCGAACTATGGTACTATCAAATTTGACGATATCTACAACATTCTCCCAGATGACTTGAAGCAT  
CAAGTCAAGCAGATA

+

FFFFFFFFFFFFFFFFFFFFFFFFFFFFFFFFFFFFFFFFFFFFFFFFFFFFFFFFFFFFFFFFFFFFFFF  
FFFFFFFFFFFFFFFFFFFFFFFFFFFFFFFFFFFFFFFFFFFFFFFFFFFFFFFFFFFFFFFFFFFFFFF  
FFFFFFFFFFFFFFFF

@A00721:190:HGJW7DSXY:4:2533:13973:25755 2:N:0:TCTGCAAG+GCTGCACT  
GAACATAACAAAACCTCACAACACATTTTACATTATATTACAAATTCATCATATCAACAGTGTGTCAA  
TGGCGTCGAACTATGGTACTATCAAATTTGACGATATCTACAACATTCTCCCAGATGACTTGAAGCAT  
CAAGTCAAGCAGATA

+

FFFFFFFFFFFF:FFFFFFFFFFFFFFFFFFFFFFFFFFFFFFFFFFFFFFFFFFFFFFFFFFFFFFFFF  
FFFFFFFFFFFFFFFFFFFFFFFF:FFFF:FFFFFFFFFFFFFFFFFFFFFFFFFFFFFFFFFFFFFFFFF  
FFFFFFFFFFFFFFFF

@A00721:190:HGJW7DSXY:4:2629:23303:1485 2:N:0:TCTGCAAG+GCTGCACT  
GAACATAACAAAACCTCACAACACATTTTACATTATATTACAAATTCATCATATCAACAGTGTGTCAA  
TGGCGTCGAACTATGGTACTATCAAATTTGACGATATCTACAACATTCTCCCAGATGACTTGAAGCAT  
CAAGTCAAGCAGATA

+

FFFFFFFFFFFFFFFFFFFFFFFFFFFFFFFFFFFFFFFFFFFFFFFFFFFFFFFFFFFFFFFFFFFFFFF  
FFFFFFFFFFFFFFFFFFFFFFFF:FFFFFFFFFFFFFFFFFFFFFFFFFFFFFFFFFFFFFFFFFFFFFFF  
FFFFFFFFFFFFFFFF

@A00721:190:HGJW7DSXY:4:1417:5367:27915 2:N:0:TCTGCAAG+GCTGCACT  
CATTGTATAAATGTAGTGTTCGAACATAACAAAACCTCACAACACATTTTACATTATATTACAAAT  
TCATCATATCAACAGTGTGTCAAATGGCGTCGAACTATGGTACTATCAAATTTGACGATATCTACAAC  
ATTCTCCCAGATGAC

+

FFFFFFFFFFFF,FFFFFFFFFF:FFFFFFFFFFFFFFFF:FFFFFFFFFFFFFFFFFFFF:,FFFFFFFFFFFFFFF  
FFFFFFFFFFFFFFFFFFFF:FFFFFFFFFFFFFFFFFFFFFFFFFFFFFFFF,FF,FFFFFFFFFFFFFFFFFFFF  
FFFFFFFFFFFFFFFF



FFF,FFFF,FFFF:FFFFFFFF:FFFFFFFFFFFFFFFFFFFFFFFF:FFFFFFFF:FFFF,F,FFFFFFFFF  
F::FFFF:FFFF,:F

@A00721:190:HGJW7DSXY:4:1336:22498:26960 2:N:0:TCTGCAAG+GCTGCACT  
AAGCAACAAGATTCTCTTATATACATATCGAATCTTAAACATTGTATAAATGTAGTGTTGTTTGAACA  
TAACAAAACCTCACAACACATTTTACATTATATTACAAATTCATCATATCAACAGTGTGTCAAATGGCG  
TCGAACATATGGTACT

+

FFFFFFFFFFFFFFFFFFFFFFFF:FFFFFFFFFFFFFFFF:FFFFFFFFFFFFFFFFFFFFFFFF:FFFFFFF  
F:F:FFFFFFFFFFFFFFFF:FFFFFFFFFFFFFFFF,FFFFFFFFFFFFFFFFFFFFFFFFFFFFFFFFFFFFF  
FFFFFFFFFFFFFFFF

@A00721:190:HGJW7DSXY:4:2369:26033:15013 2:N:0:TCTGCAAG+GCTGCACT  
AAGCAACAAGATTCTCTTATATACATATCGAATCTTAAACATTGTATAAATGTAGTGTTGTTTGAACA  
TAACAAAACCTCACAACACATTTTACATTATATTACAAATTCATCATATCAACAGTGTGTCAAATGGCG  
TCGAACATATGGTACT

+

FFFFFFFFFFFFFFFFFFFFFFFFFFFFFFFFFFFFFFFFFFFFFFFFFFFFFFFFFFFFFFFF:FFFFFFFFFFFFFFFF  
FFFFFFFFFFFFFFFFFFFFFFFFFFFFFFFFFFFFFFFFFFFFFFFF:FFFFFFFFFFFFFFFF:FFFFFFFF:FFFFF  
FFFFFFFFF:FFFFF

@A00721:190:HGJW7DSXY:4:2438:28619:26725 2:N:0:TCTGCAAG+GCTGCACT  
AAGCAACAAGATTCTCTTATATACATATCGAATCTTAAACATTGTATAAATGTAGTGTTGTTTGAACA  
TAACAAAACCTCACAACACATTTTACATTATATTACAAATTCATCATATCAACAGTGTGTCAAATGGCG  
TCGAACATATGGTACT

+

FFFFFFFFFFFFFFFFFFFFFFFFFFFFFFFFFFFFFFFFFFFFFFFFFFFFFFFFFFFFFFFFFFFFFFFF  
FFFFFFFFFFFFFFFFFFFFFFFFFFFFFFFFFFFFFFFFFFFFFFFFFFFFFFFFFFFFFFFFFFFFFFFF  
FFFFFFF:FFFF:FF

@A00721:190:HGJW7DSXY:4:2603:20708:19820 2:N:0:TCTGCAAG+GCTGCACT  
AAGCAACAAGATTCTCTTATATACATATCGAATCTTAAACATTGTATAAATGTAGTGTTGTTTGAACA  
TAACAAAACCTCACAACACAGTTTACATTATATTACAAATTCATCATATCAACAGTGTGTCAAATGTG  
TCGATCTATGGTACT

+

FF:FFFFFF:F:F,F,:FFFF:FFFFFFFFF,:FFFFFFFF:FFFFFF,FFFF:FFF:FFFFFF:FF  
FFFFFFFFFFFF,FF,F::F,FFFFFFFF:FF,FFFFFF,:FFFF:FFFFFFFFFFFFFFFF:FFF:FFF,FF  
FFFF,F:FFF:FF:F

@A00721:190:HGJW7DSXY:4:1152:19208:22952 2:N:0:TCTGCAAG+GCTGCACT  
AAAAGGTTAAAAGCAACAAGATTCTCTTATATACATATCGAATCTTAAACATTGTATAAATGTAGTGT  
TGTTTGAACATAACAAAACCTCACAACACATTTTACATTATATTACAAATTCATCATATCAACAGTGTG  
TCAAATGGCGTCGAA

+

FFFFFFFFFFFFFFFFFFFFFFFFFFFFFFFFFFFFFFFFFFFFFFFFFFFFFFFFFFFFFFFFFFFFFFFF  
FFFFFFFFFFFFFFFFFFFFFFFFFFFFFFFFFFFFFFFF:FFFFFFFFFFFFFFFFFFFFFFFFFFFFFFFFFFFF  
FFFFFFFFFFFFFFFF

@A00721:190:HGJW7DSXY:4:1323:30472:21104 2:N:0:TCTGCAAG+GCTGCACT  
AAAAGGTTAAAAGCAACAAGATTCTCTTATATACATATCGAATCTTAAACATTGTATAAATGTAGTGT  
TGTTTGAACATAACAAAACCTCACAACACATTTTACATTATATTACAAATTCATCATATCAACAGTGTG  
TCAAATGGCGTCGAA

+

FFFFFFFFFFFFFFFFFFFFFFFFFFFFFFFFFFFFFFFFFFFFFFFFFFFFFFFFFFFFFFFF,FFFFFFFFFFFFFFFF  
FFFFF:FFFFFFFFFFFFFFFFFFFFFFFFFFFF:FF:FFFFFFFFFFFFFFFFFFFFFFFFFFFF,FFFFF  
FFFF:FFFFFFFFF:

@A00721:190:HGJW7DSXY:4:1511:1832:25676 2:N:0:TCTGCAAG+GCTGCACT  
AAAAGGTTAAAAGCAACAAGATTCTCTTATATACATATCGAATCTTAAACATTGTATAAATGTAGTGT  
TGTTTGAACATAACAAAACCTCACAACACATTTTACATTATATTACAAATTCATCATATCAACAGTGTG  
TCAAATGGCGTCGAA

```
F:FFF:FFFFFFFFFFFFFFFFFFFFFFFFFFFFFFFFFFFFFFFFFFFFFFFFFFFFF:FFFFFFF
FFFFFFFFFFFFFFFFFFFFFFFFF:FFFFFFFFFFFFFFFFFFFFFFFFFFFFFFFFFFFFF
FFFFFFFFFFFFFFFFF
```

[illegible]

```
FFFFFFFFFFFFFFFFFFFFFFFFFFFFFFFFFFFFFFFFFFFFFFFFFFFFFFFFFFFFFFF
FFFFFFFFF:FFFFFFFFFFFFFFFFFFFFF:FFFFFFFFFFFFFFFFFFFFFFFFFFFFFFF
FFFFFFFFFFFFFFFF
```

```
F:FFFFFFFF:FFFFFFFF:FFFFFFFFFFFF:FFFFFF:FF:FFFFFF:FFFFFFFFFFFFFF:FFFF:FFF
,FFF,FFFFFFFFFFFF::FFFFF,FFF:,FFFFFFFFFFFFFF:FFF,FFFFFF:.,FFFFF,FFFFFF
:FFFFF:FFFFF:F
```

```
FFFFFFFFFFFFFFFFFFFFFFFFFFFFFFFFFFFFFFFFFFFFFFFFFFFFFFFFFFFFFFFFFFF
FFFFFFFFFFFFFFFFFFFFFFFF:F0000000:F000:F000000000000000000000000000
000000:F000000
```

```
FFFFFFFFFFFFFFFFFFFFFFFFFFFFFFFF:F:FFFFFFFFFFFFFFFFFFFFFFFFFFFFF
FFFFFFFFFFFFFFFFFFFFFFFFFFFFFFFFFFFFFFFFFFFFFFFFFFFFFFFFFFFFF:FFFFFFF:FFFFFFFFFFFFFFFFFFFFF
FFFFFFFFFFFFFFFFFFFF
```

```
FFFFFFFFFFFFFFFFFFFFFFFFFFFFF:FFFFFF:FFFFFFFFFFFFFFFFFFFFFFFFFFFFF
FF:FFFFFFFFFFFFFFFFFFFFFFFFFFFFFFFFFFFFFFFFFFFFFFFFFFFFF:FFFFFFFFFFFFFFFFFFFF,FFFFFFF
F:FFFFFF:FF:FF,F
```

@A00721:190:HGJW7DSXY:4:2242:18313:7404 2:N:0:TCTGCAAG+GCTGCACT  
CTTTGACAGTCGATTTTCATCTTTATGTCAAAATTCAAAAAAAGGTTAAAAGCAAAAAGATTCTATTAT

ATACATATCGAATCTTAAACATTGTATAAATGTAGTGTTTTTCGAACATAACAAAAATCACAACACAA  
TTTACATTATATTAC

+

FF,FFF:FFF:FFFFFFF,,FFFF:F,,:FFFFFFFFFFFFFFF:,F:FFF:FFF,FFFFFFF,,FFF  
:FF,FFFF,,:FFFFFFFFFFF:F,FFFFFFF::F,F,FF,,FFFF,FFFFFFF:F,FFFFFFFFF,  
::FF,FFFF,:FFF:

@A00721:190:HGJW7DSXY:4:2671:20862:3333 2:N:0:TCTGCAAG+GCTGCACT  
CTTTGACAGTCGATTTTCATCTTTATGTCAAAATTCAAAAAAAGGTTAAAAGCAACAAGATTCTCTTAT  
ATACATATCGAATCTTAAACATTGTATAAATGTAGTGTTGTTTCGAACATAACAAAACACTCACAACACAT  
TTTACATTATATTAC

+

FFFFFFFFFFFFFFFFFFFFFFFFFFFFFFFFFFFFFFFFFFFFFFFFFFFFFFFFFFFFFFFFFFFFFFFF  
FFFFFFFFFFF,FFFFFFFF:FFFFFFFFFFFFFFFFFFFFFFFFFFFFFFFFFFFFFFFFFFFFFFFFF,F  
:FF:FFFFFFFFFFF

@A00721:190:HGJW7DSXY:4:1336:31385:2832 2:N:0:TCTGCAAG+GCTGCACT  
CTTTGACAGTCGATTTTCATCTTTATGTCAAAATTCAAAAAAAGGTTAAAAGCAACAAGATTCTCTTAT  
ATACATATCGAATCTTAAACATTGTATAAATGTAGTGTTGTTTCGAACATAACAAAACACTCACAACACAT  
TTTACATTATATTA

+

FFFFFFFFFFFFFFFF:FF:FF:FFFF:F,,FFFF:FFFFFFF,F:FF:FFFFFFFF:FFFF,FFFF  
FFFF:F:,FFF,FFFF::FFF:FFFF:F:FF:FFFFFF:FFF:FFFF,,FFFF,FF:FFFFFF,  
FFF::FFFFFFFFF

@A00721:190:HGJW7DSXY:4:2509:17210:14826 2:N:0:TCTGCAAG+GCTGCACT  
CTTTGACAGTCGATTTTCATCTTTATGTCAAAATTCAAAAAAAGGTTAAAAGCAACAAGATTCTCTTAT  
ATACATATCGAATCTTAAACATTGTATAAATGTAGTGTTGTTTCGAACATAACAAAACACTCACAACACAT  
TTTACATTATATTA

+

FFFFFFFFFFFFFFFFFFFFFFFFFFFFFFFFFFFFFFFFFFFFFFFFFFFFFFFFFFFFFFFF:FFFFFFF:F:,FFF  
FFFF,FF,FFFF,FFFF:FFF,FFFFFFF:FF:F,FF:FF,FFFF,FF,FFFF::FFFF,FFF,  
FFFFFF:FFF,FF

@A00721:190:HGJW7DSXY:4:1318:16016:34679 2:N:0:TCTGCAAG+GCTGCACT  
GCCGTACAACTTTGACAGTCGATTTTCATCTTTATGTCAAAATTCAAAAAAAGGTTAAAAGCAACAAG  
ATTCTCTTATATACATATCGAATCTTAAACATTGTATAAATGTAGTGTTGTTTCGAACATAACAAAACACT  
CACAACACAGTTTAC

+

FFFFFFFFFFFFFFFFFFFFFFFFFFFFFFFFFFFFFFFFFFFFFFFFFFFFFFFF:F:FFFFFFFFFFFFFFFFFFFFFFFF  
FFFFF::F:FFF:FFFF,F:FF,F:,F,FFFF,FFFFFF,,FFFF:F:FFFFFFFFFFFFFFFFFFFFF:  
FFF,FFFF,FFF::

@A00721:190:HGJW7DSXY:4:1352:1841:14450 2:N:0:TCTGCAAG+GCTGCACT  
GCCGTACAACTTTGACAGTCGATTTTCATCTTTATGTCAAAATTCAAAAAAAGGTTAAAAGCAACAAG  
ATTCTCTTATATACATATCGAATCTTAAACATTGTATAAATGTAGTGTTGTTTCGAACATAACAAAACACT  
CACAACACATTTTAC

+

FFFFFFFFFFFFFFFFFFFFFFFFFFFFFFFFFFFFFFFFFFFFFFFF:F:FFFFFFFFFFFFFFFFFFFFFFFFFFFFFFFF  
FFFFFFFFFFFFFFFFFFFFFFFFFFFFFFFFFFFFFFFF:FFFFFFFFFFFFFFFFFFFFFFFFFFFFFFFF,FFFF  
FF:FFFF:F,FFFF

@A00721:190:HGJW7DSXY:4:2117:2555:10551 2:N:0:TCTGCAAG+GCTGCACT  
GCCGTACAACTTTGACAGTCGATTTTCATCTTTATGTCAAAATTCAAAAAAAGGTTAAAAGCAACAAG  
ATTCTCTTATATACATATCGAATCTTAAACATTGTATAAATGTAGTGGTGTTCGAACATACCAAACACT  
CACAACACAGTTTAC

+

FFFFFFFFFFFFFFFFFFFFFFFFFFFFFFFFFFFFFFFF:F:FFF,FF:FF::FF:,FFFF,FFF:F:FFFFFFF  
:F,:::,F::FFFFFFFFF:::FF:FFF,FFF,FFF::FFFFF:,FF,F:F:FF:,,,,,,FFF  
F:FFFFFFF,:F::F

@A00721:190:HGJW7DSXY:4:2267:29369:15154 2:N:0:TCTGCAAG+GCTGCACT  
GCCGTACAAACTTTGACAGTCGATTTTCATCTTTATGTCAAAATTCAAAAAAGGTTAAAAGCAACAAG  
ATTCTCTTATATACATATCGAATCTTAAACATTGTATAAATGTAGTGTTGTTCGAACATAACAAAAC  
CACAACACATTTTAC

```

FFFFFFFFFFFFFFFFFFFFFFFFFFFFFFFF:FFFFFF,FFFFFFFFFFFFFFFFFFFFFFFF:FFFFFFFF:
FFFFFFFFFFFFFFFFFFFFFFFF:FF:F:FFFFFFFFFFFFFFFF:F,FF:FFFF,FFF::F,FFFFFFFF:F
FFFFF:F:FF,FF:F

```

@A00721:190:HGJW7DSXY:4:2662:6885:1705 2:N:0:TCTGCAAG+GCTGCACT  
GCCGTACAAACTTTGACAGTCGATTTTCATCTTTATGTCAAATTCAAAAAAGGTTAAAAGCAACAAG  
ATTCTCTTATATACATATCGAATCTTAAACATTGTATAAATGTAGTGTTGTTCTGAACATAACAAAAC  
CACAACACATTTTAC

[illegible]

@A00721:190:HGJW7DSXY:4:1508:20338:16705 2:N:0:TCTGCAAG+GCTGCACT  
GCCGTACAAACTTTGACAGTCGATTTTCATCTTTATGTCAAATTCAAAAAAGGTTAAAAGCAACAAG  
ATTCTCTTATATACATATCGAATCTTAAAAATTGTATAAATGTAGTGTTGTTCTGAACATAACAAAAAA  
CACAACACATTTTA

```

FFFFFFFFFFFFFFFFFFFFFFFF:FFFFFFFF::FFFFFFFFFFFFFFFF:FFF:FFFFFFFFFFFF,
FFF:F:,FF,F:F:,FFFFFFFF:FF:FF,F,F:FFFFFFFFFFFFFFFF:FF:FF::F::FF,:FFF,,
,:FFFFFFF,F,FF

```

@A00721:190:HGJW7DSXY:4:2352:3052:19085 2:N:0:TCTGCAAG+GCTGCACT  
GCCGTACAAACTTTGACAGTCGATTTTCATCTTTATGTCAAATTCAAAAAAGGTTAAAAGCAACAAG  
ATTCTCTTATATAAATATCGAATCTTAAACATTGTATAAATGTAGTGTTGTTCGAACATAACAAAAC  
CACAACACAGTTTA

[illegible]

@A00721:190:HGJW7DSXY:4:2417:4318:23124 2:N:0:TCTGCAAG+GCTGCACT  
GCCGTACAAACTTTGACAGTCGATTTTCATCTTTATGTCAAATTCAAAAAAGGTTAAAAGCAACAAG  
ATTCTCTTATATACATATCGAATCTTAAACATTGTATAAATGTAGTGTTGTTCTGAACATAACAAAAC  
CACAACACATTTTA

```

FFFFFFFFFFFFFFFFFFFFFFFF,FFF:FF,:FF,F:FFFFFFFFFFF:F:F,F,FFFFFFFFF:
F:FFF::FFFFFFFFF:F:,FFFFFFFFF:FF:F:FFFFFFFFFFFF:FFF:FFF,,F:F,FFFFF,F
FFFFF:FFF,F,FF

```

@A00721:190:HGJW7DSXY:4:1325:15338:8265 2:N:0:TCTGCAAG+GCTGCACT  
GTTTTGTTATGTTTGAACAACACTACATTTATACAATGTTTAAGATTCGATATGTATATAAGAGAATC  
TTGTTGCTTTTAACTTTTTTTGAATTTTGACATAAAGATGAAATCGACTGTCAAAGTTTGTACGGCT  
CATATTTTCAAATTT

```
FFFFFFFFFFFFFFFFFFFFFFFFFFFFFFFFFFFFFFFFFFFFFFFFFFFFFFFFFFFFFFFFFFFFF
FFFFFFFFFFFFFFF:FFFFFFFFFFFFFFFFFFFFFFFFFFFFF:FFFFFFFFFFFFFFFFFFFFFFF::FF
FFFFFFFFFFFFFFFF
```

@A00721:190:HGJW7DSXY:4:2422:11776:30749 2:N:0:TCTGCAAG+GCTGCACT  
GTTTTGTTATGTTTGAACAACACTACATTTATACAATGTTTAAAGATTCGATATGTATATAAGAGAATC  
TTGTTGCTTTTAACTTTTTTTGAATTTTGACATAAAGATGAAATCGACTGTCAAAGTTTGTACGGCT  
CATATTTTCAAATTT

```
FF,FF,FFF:FFFFFF:FFFFFF:FFFFFFFFF::FF::FFF,:FFFF,FFF,F:F::FFFF:FFFF,
```



:F:FF:FFFFFF:::F:FFF::FFFFFFFFFFFF:FFFF,FFFFFFFF::FFFF,FFFFFF,F,FFF::F:  
FF,F,FFFF:FFFF

@A00721:190:HGJW7DSXY:4:1660:13593:14920 2:N:0:TCTGCAAG+GCTGCACT  
CATTTATACAATGTTTAAGATTTCGATATGTATATAAGAGAATCTTGTTGCTTTTAACCTTTTTTTTGAA  
TTTTGACATAAAGATGAAATCGACTGTCAAAGTTTGTACGGCTCATATTTTCAAATTTGAAATTTGAA  
TTTCAAATCTATTTT

+

FFFFFFFFFFFFFF:FFFFFFFF:FFFFFFFFFFFFFFFFFFFFFFFF,FFFFFFFFFFFFFFFFFFFFFFFFFFFF  
FFFFFFFFFFFFFFFFFFFFFFFFFFFFFFFFFFFFFFFF:FFFFFFFF:FFFFFFFFFFFFFFFF:FFFFFFFFFFFFF  
FFFFFFFFFFFFFFFF

@A00721:190:HGJW7DSXY:4:1660:13015:15421 2:N:0:TCTGCAAG+GCTGCACT  
CATTTATACAATGTTTAAGATTTCGATATGTATATAAGAGAATCTTGTTGCTTTTAACCTTTTTTTTGAA  
TTTTGACATAAAGATGAAATCGACTGTCAAAGTTTGTACGGCTCATATTTTCAAATTTGAAATTTGAA  
TTTCAAATCTATTTT

+

FFFFFFFFFFFFFF:FFFFFFFFFFFFFFFFFFFFFFFFFFFFFFFF:FFFFFFFFFFFFFFFFFFFFFFFFFFFF  
FFFFFFFFFFFFFFFFFFFFFFFFFFFFFFFFFFFFFFFF:FFFFFFFFFFFFFFFFFFFFFFFFFFFFFFFF:FFFFFFF  
FFFFFFFFFFFFFFFF

@A00721:190:HGJW7DSXY:4:2240:12816:8437 2:N:0:TCTGCAAG+GCTGCACT  
CATTTATACAATGTTTAAGATTTCGATATGTATATAAGAGAATCTTGTTGCTTTTAACCTTTTTTTTGAA  
TTTTGACATAAAGATGAAATCGACTGTCAAAGTTTGTACGGCTCATATTTTCAAATTTGAAATTTGAA  
TTTCAAATCTATTT

+

FFFFFFFFFFFFFFFFFFFFFFFFFFFFFFFFFFFFFFFFFFFFFFFFFFFFFFFFFFFFFFFFFFFFFFFFFFFF  
FFFFF:FFFFFFFF,FFFFFFFFFFFFFFFFFFFFFFFFFFFFFFFFFFFFFFFFFFFFFFFFFFFFFFFFFFFF,FF  
FFFF:FFF:FFFF

@A00721:190:HGJW7DSXY:4:2438:11234:36229 2:N:0:TCTGCAAG+GCTGCACT  
CATTTATACAATGTTTAAGATTTCGATATGTCTATAAGAGAATCTTGTTGCTTTTAACCTTTTTTTTGAA  
TTTTGACATAAAGATGAAATCGACTGTCAAAGTTTGTACGGCTCATATTTTCAAATTTGAAATTTGAA  
TTTCAAATCTATTTT

+

FFFFFFFFFFF:FFF:FFFF,FFFF::F:,,FFF:FFFF,FFF:FFFF:F:,:FFFFFFFF,,FFF  
FFFFFFFFFF:FFFF:FFFFFFFFFFFFFFFF:F,FFFFFFFFFFFFFFFF:FFF:F::FFFFFFFFFFFF  
FFFFF,FFFFFFFF

@A00721:190:HGJW7DSXY:4:1563:9860:14215 2:N:0:TCTGCAAG+GCTGCACT  
ATTCGATATGTATATAAGAGAATCTTGTTGCTTTTAACCTTTTTTTGAATTTTGACATAAAGATGAAA  
TCGACTGTCAAAGTTTGTACGGCTCATATTTTCAAATTTGAAATTTGAATTTCAAATCTATTTCAACT  
GTACAAACATTTACT

+

FFFFFFFFFFFFFFFFFFFFFFFFFFFFFFFFFFFFFFFFFFFFFFFFFFFFFFFFFFFFFFFFFFFF,FFFFF  
FFFFFFFFFFFFFFFFFFFFFFFFFFFFFFFFFFFFFFFFFFFFFFFFFFFFFFFF:FFFFFFFFFFFFFFFF,FFFFFFFFFFFF  
FFFFFFFFFF:FFFF

@A00721:190:HGJW7DSXY:4:2401:15221:27070 2:N:0:TCTGCAAG+GCTGCACT  
ATTCGATATGTATATAAGAGAATCTTGTTGCTTTTAACCTTTTTTTGAATTTTGACATAAAGATGAAA  
TCGACTGTCAAAGTTTGTACGGCTCATATTTTCAAATTTGAAATTTGAATTTCAAATCTATTTCAACT  
GTACAAACATTTACT

+

FFFFFFFFFFFFFFFFFFFFFFFFFFFFFFFFFFFFFFFFFFFFFFFFFFFFFFFFFFFFFFFFFFFF:F  
FFFFFFFFFFFFFFFFFFFFFFFFFFFFFFFFFFFFFFFFFFFFFFFFFFFFFFFFFFFFFFFFFFFF:FFFF  
FFFFF:FFF:FF,F

@A00721:190:HGJW7DSXY:4:1149:12029:30718 2:N:0:TCTGCAAG+GCTGCACT  
CGACTGTCAAAGTTTGTACGGCTCATATTTTCAAATTTGAAATTTGAATTTCAAATCTATTTCAACTG  
TACAAACATTTACTGTATACATTACTTATGATCTAAGTCAGCCACTTACATATACTTGTATATATTT  
CGAATCTACTGATTC

[illegible]

ACTTAGATCATAAGTAATGTATACAGTAAATGTTTGTACAGTTGAAATAGATTTGAAATTCAAATTTCAAATTTGAAAATATG

[illegible] $+$ [illegible]
$$+$$
[illegible]

+

[illegible]

+

[illegible]

+

```

FFFFFFFFFFFFFFFFFFFFFFFFFFFFFFFF:FFFFFFFFFFFFFFFFFFFFFFFFFFFFFFFF
FFFFFFFFFF:FFFFFF:FFF:FFFFFFFFFFFFFFFFF:FFFFFFFFFFFFFFFFF:FFFFFFF:F:F:FFF
FFFFFFFFF:FFFFF:

```

 $+$ [illegible]

@A00721:190:HGJW7DSXY:4:2463:20998:31093 2:N:0:TCTGCAAG+GCTGCACT  
TTCAAAATTAAATGACAGTCCTCGAATCAGTAGATTCGAAATATATGACAAGTATATGTAAGTGGCTG  
ACTTAGATCATAAGTAATGTATACAGTAAATGTTTGTACAGTTGAAATAGATTTGAAATTCAAATTC  
AAATTTGAAAATATG

[illegible]

+

[illegible]

+

[illegible]

+

```
FFF:FFFFFFFF,FFFFF:FFFFFFFFFFFFFFFFFFFFFFFFFFFFFFFFFFFFFFFF:
FFFFFFFFFFFFFFFFFFFF:FFFFF,FFFFF:FFFFF:FFFFFFFFFFFFFFFFFFFF:FFFFF
F:FFFFFFFFFFFFFFFF
```

+

```
FFFFFFFFFFFFFFFFFFFFFFFFFFFFFFFFFFFFFFFFFFFFFFFFFFFFFFFFFFFFF:FFFFFFFFFFFFFFF
FFFFFFFFFFFFFFFFFFFFFFFFFFFFFFFFFFFFFFFFFFFF:FF,FFFFFFFFFFFFFFFFFFFFFFFFFFF,FFFFFFF
F:EEEE.EEEE.EE
```

+

```

FFFFFFFFFFFFFF:FFFFFFFFFFFFFFFFFFFFFFFFFFFFFFFFFFFFFFFFFFFFFFFF
FFFFFFFFFFFFFFFFFFFFFFFFFFFFFFFF:FFFFF:FFFFFFFFFFFFFFFFFFFFFFFF
FFFFFFFFFFFFFFFFFFFFFFFFFFFFFFFF:FFFFF
FFFFFFFFFFFFFFFF

```

+

[illegible]

FFFFFFFFFFFFFF:FFFFFFFFFFFFFF:FFFFF:FFFFFFFFFFFFFFFFFFFFFFFFFFFFFFFFFFFFFFFF:FFFFFFF  
FFFFFFFFFFFFFFFF

@A00721:190:HGJW7DSXY:4:1668:20772:21026 2:N:0:TCTGCAAG+GCTGCACT  
TGATATCAGATCTTTCATTATTCAAAATTAAATGACAGTCCTCGAATCAGTAGATTTCGAAATATATGA  
CAAGTATATGTAAGTGGCTGACTTAGATCATAAGTAATGTATACAGTAAATGTTTGTACAGTTGAAAT  
AGATTTGAAATTCAA

+

FFFFFFFFFFFFFFFFFFFFFFFFFFFFFFFFFFFFFFFFFFFFFFFFFFFFFFFFFFFFFFFFFFFFFFFF:FFFFFFFFFFFFFFF  
FFFFFFFFFFFFFFFFFFFFFFFFFFFFFFFFFFFFFFFFFFFFFFFFFFFFFFFFFFFFFFFFFFFFFFFF,FFFFFFFFFFFFFFFFFFFFFFFFFFFFFFFF  
FFFFFFFFFFFFFFFF

@A00721:190:HGJW7DSXY:4:2174:2365:7592 2:N:0:TCTGCAAG+GCTGCACT  
TGATATCAGATCTTTCATTATTCAAAATTAAATGACAGTCCTCGAATCAGTAGATTTCGAAATATATGA  
CAAGTATATGTAAGTGGCTGACTTAGATCATAAGTAATGTATACAGTAAATGTTTGTACAGTTGAAAT  
AGATTTGAAATTCAA

+

FFFFFFFFFFFFFFFFFFFFFFFFFFFFFFFFFFFFFFFFFFFFFFFFFFFFFFFFFFFFFFFFFFFFFFFF,FFFFFFFFFFFFFFFF:FF  
FFFFFFFFFFFFFFFFFFFFFFFFFFFFFFFFFFFFFFFFFFFFFFFFFFFFFFFFFFFFFFFFFFFFFFFF:FFFF,FFFFFFFFFFFFFFFFFFFFFFFFFFFFFFFF  
FFF:FFFFFFFF

@A00721:190:HGJW7DSXY:4:2525:18882:26177 2:N:0:TCTGCAAG+GCTGCACT  
TGATATCAGATCTTTCATTATTCAAAATTAAATGACAGTCCTCGAATCAGTAGATTTCGAAATATATGA  
CAAGTATATGTAAGTGGCTGACTTAGATCATAAGTAAGTATACAGTAAATGTTTGTACAGTTGAAAT  
AGATTTGAAATTCAA

+

FFFFFFFFFFFFFFFFFFFFFFFFFFFFFFFFFFFFFFFFFFFFFFFFFFFFFFFFFFFFFFFFFFFFFFFFF,FFFFFFFFFFFFFFFF:FF  
F,FFFFF,FFFFFFFFFFFFFFFFFFFF::FFFFFFFF:FFF,:FFFFFFFFFFFFFFFFFFFFFFFF, :FFFF,FF  
F:FFFFFFFF:FFFF:F

@A00721:190:HGJW7DSXY:4:2547:13087:32330 2:N:0:TCTGCAAG+GCTGCACT  
TGATATCAGATCTTTCATTATTCAAAATTAAATGACAGTCCTCGAATCAGTAGATTTCGAAATATATGA  
CAAGTATATGTAAGTGGCTGACTTAGATCATAAGTAATGTATACAGTAAATGTTTGTACAGTTGAAAT  
AGATTTGAAATTCAA

+

FFFFFFFFFFFFFFFFFFFFFFFFFFFFFFFFFFFFFFFFFFFFFFFFFFFFFFFFFFFFFFFFFFFFFFFF,FFFFFFFFFFFFFFFF:FFFFFFF,FFFFFFFFFFFFFFFF  
:FFFFFFFFFFFFFFFFFFFFFFFFFFFFFFFFFFFFFFFFFFFFFFFFFFFFFFFFFFFFFFFFFFFFFFFF:FFFFFFF:FF:FFFF:FFFFFFFF:FFFFF:FFFFF:FFFFFFF  
FFFFFFFFFFFFFFFF

@A00721:190:HGJW7DSXY:4:2654:18493:3646 2:N:0:TCTGCAAG+GCTGCACT  
TGATATCAGATCTTTCATTATTCAAAATTAAATGACAGTCCTCGAATCAGTAGATTTCGAAATATATGA  
CAAGTATATGTAAGTGGCTGACTTAGATCATAAGTAATGTATACAGTAAATGTTTGTACAGTTGAAAT  
AGATTTGAAATTCAA

+

FFFFFFFFFFFFFFFFFFFFFFFFFFFFFFFFFFFFFFFFFFFFFFFFFFFFFFFFFFFFFFFFFFFFFFFFF  
FFFFF:FFFFFFFFFFFFFFFFFFFFFFFFFFFFFFFFFFFFFFFFFFFFFFFFFFFFFFFFFFFFFFFFFFFFFFFF  
FFFFFFFFFFFFFFFF:F

@A00721:190:HGJW7DSXY:4:1117:1533:23249 2:N:0:TCTGCAAG+GCTGCACT  
GTTCTAACACGTCGTTTGAAAGATGATATCAGATCTTTCATTATTCAAAATTAAATGACAGTCCTCGA  
ATCAGTAGATTTCGAAATATATGACAAGTATATGTAAGTGGCTGACTTAGATCATAAGTAATGTATACA  
GTAAATGTTTGTACA

+

FFFFFFFFFFFF:FFFFFFFFFFFF:FFFFFFFFFFFFFFFFFFFFFFFF,F:FFFFFF,FFFF,,FFFFFFFFFFFF  
FF:FF,FFFFFF:FFFFFFFF:FFFFFFFFFFFF,FFFFFF:FFFF,FFFFFFFF,FF:FF:FF:FF  
FFFF:FFFF,F

@A00721:190:HGJW7DSXY:4:1241:11568:20650 2:N:0:TCTGCAAG+GCTGCACT  
GTTCTAACACGTCGTTTGAAAGATGTTATCAGATCTTTCATTATTCAAAATTAAATGACAGTCCTCGA  
ATCAGTAGATTTCGAAATATATGACAAGTATATGTAAGTGGCTGACTTAGATCATAAGTAATGTATACA  
GTAAATGTTTGTACA

+  
FFFFFFFFFFFFFFFFFFFFFFFFFFFFFFFFFFFFFFFFFFFFFFFFFFFFFFFFFFFFFFFFFFFFFFFF  
FF:FFFFFFFFFFFFFFFFFFFFFFFFFFFFFFFFFFFFFFFFFFFFFFFFFFFFFFFFFFFFFFFFFFFFFFFF  
FFFFFFFFFFFF:FFFF  
@A00721:190:HGJW7DSXY:4:1241:11794:20729 2:N:0:TCTGCAAG+GCTGCACT  
GTTCTAACACGTCGTTTGAAAGATGTTATCAGATCTTTCATTATTCAAATTAATGACAGTCCTCGA  
ATCAGTAGATTGCAAAATATATGACAAGTATATGTAAGTGGCTGACTTAGATCATAAGTAATGTATACA  
GTAAATGTTTGTACA

+  
FFFFFFFFFFFF:FFFFFFFFFFFFFFFFFFFFFFFFFFFFFFFFFFFFFFFFFFFFFFFFFFFFFFFFFFFF  
FFFFF::FFFFFFFFFFFFFFFFFFFFFFFFFFFFFFFFFFFFFFFFFFFFFFFFFFFFFFFFFFFFFFFF  
FFFFFFFFFFFF:FFF  
@A00721:190:HGJW7DSXY:4:1427:24985:35618 2:N:0:TCTGCAAG+GCTGCACT  
GTTCTAACACGTCGTTTGAAAGATGTTATCAGATCTTTCATTATTCAAATTAATGACAGTCCTCGA  
ATCAGTAGATTGCAAAATATATGACAAGTATATGTAAGTGGCTGACTTAGATCATAAGTAATGTATACA  
GTAAATGTTTGTACA

+  
FFFFFFFFFFFF:FFFFFFFFFFFFFFFFFFFFFFFFFFFFFFFFFFFFFFFFFFFFFFFFFFFFFFFFFFFF  
FFFFFFFFFFFF:FFFFFFFFFFFFFFFFFFFFFFFFFFFFFFFFFFFFFFFFFFFFFFFFFFFFFFFFFFFF  
FFFFFFFFFFFF:FFF  
@A00721:190:HGJW7DSXY:4:1549:1678:5337 2:N:0:TCTGCAAG+GCTGCACT  
GTTCTAACACGTCGTTTGAAAGATGATATCAGATCTTTCATTATTCAAATTAATGACAGTCCTCGA  
ATCAGTAGATTGCAAAATATATGACAAGTATATGTAAGTGGCTGACTTAGATCATAAGTAATGTATACA  
GTAAATGTTTGTACA

+  
FFFFFFFFFFFFFFFFFFFFFFFFFFFFFFFFFFFFFFFFFFFFFFFFFFFFFFFFFFFFFFFFFFFFFFFF  
FFFFFFFFFFFFFFFFFFFFFFFFFFFFFFFFFFFFFFFFFFFFFFFFFFFFFFFFFFFFFFFFFFFFFFFF  
FFFFFFFFFFFFFFFFFFFF  
@A00721:190:HGJW7DSXY:4:1624:23556:19022 2:N:0:TCTGCAAG+GCTGCACT  
GTTCTAACACGTCGTTTGAAAGATGTTATCAGATCTTTCATTATTCAAATTAATGACAGTCCTCGA  
ATCAGTAGATTGCAAAATATATGACAAGTATATGTAAGTGGCTGACTTAGATCATAAGTAATGTATACA  
GTAAATGTTTGTACA

+  
FFFFFFFFFFFFFFFFFFFFFFFFFFFFFFFFFFFFFFFFFFFFFFFFFFFFFFFFFFFFFFFFFFFFFFFF  
FF:FF:FFFF:FFFFFFFFFFFFFFFFFFFFFFFFFFFFFFFFFFFFFFFFFFFFFFFFFFFFFFFFFFFF  
FFFFF,FFFFF:F  
@A00721:190:HGJW7DSXY:4:1626:30346:7451 2:N:0:TCTGCAAG+GCTGCACT  
GTTCTAACACGTCGTTTGAAAGATGTTATCAGATCTTTCATTATTCAAATTAATGACAGTCCTCGA  
ATCAGTAGATTGCAAAATATATGACAAGTATATGTAAGTGGCTGACTTAGATCATAAGTAATGTATACA  
GTAAATGTTTGTACA

+  
FFFFFFFFFFFFFFFFFFFFFFFFFFFFFFFFFFFFFFFFFFFFFFFFFFFFFFFFFFFFFFFFFFFFFFFF  
FFFFFFFFFFFFFFFFFFFFFFFFFFFFFFFFFFFFFFFFFFFFFFFFFFFFFFFFFFFFFFFFFFFFFFFF  
FFFFFFFFFFFFFFFFFFFF:  
@A00721:190:HGJW7DSXY:4:2224:20039:5228 2:N:0:TCTGCAAG+GCTGCACT  
GTTCTAACACGTCGTTTGAAAGATGATATCAGATCTTTCATTATTCAAATTAATGACAGTCCTCGA  
ATCAGTAGATTGCAAAATATATGACAAGTATATGTAAGTGGCTGACTTAGATCATAAGTAATGTATACA  
GTAAATGTTTGTACA

+  
FFFFFFFFFFFFFFFFFFFFFFFFFFFFFFFFFFFFFFFFFFFFFFFFFFFFFFFFFFFFFFFFFFFFFFFF  
FFFFFFFFFFFF:FFFFFFFFFFFFFFFFFFFFFFFFFFFFFFFFFFFFFFFFFFFFFFFFFFFFFFFFFFFF  
FFFFFFFFFFFF:F  
@A00721:190:HGJW7DSXY:4:2536:1859:14512 2:N:0:TCTGCAAG+GCTGCACT  
GTTCTAACACGTCGTTTGAAAGATGTTATCAGATCTTTCATTATTCAAATTAATGACAGTCCTCGA



@A00721:190:HGJW7DSXY:4:1157:19488:8061 2:N:0:TCTGCAAG+GCTGCACT  
CTTACATATACTTGTTCATATATTTTGAATCTACTGATTCGAGGACTGTCATTTAATTTTGAATAATGA  
AAGATCTGATATCATCTTTCAAACGACGTGTTAGAACTGGTTATCTGTGACGTATATCCATTTGCGTG  
TAGAAACCAGAATCC

[illegible]

@A00721:190:HGJW7DSXY:4:1263:31295:6433 2:N:0:TCTGCAAG+GCTGCACT  
CTTACATATACTTGTTCATATATTTTGAATCTACTGATTCGAGGACTGTCATTTAATTTTGAATAATGA  
AAGATCTGATATCATCTTTCAAACGACGTGTTAGAACTGGTTATCTGTGACGTATATCCATTTGCGTG  
TAGAAACCAGAATCC

```
FFFFFFFFFFFFFFFFFFFFFFFFFFFFFFFFFFFFFFFFFFFFFFFFFFFFFFFFFFFFFFF
FFF:FFFFFFFFFFFFFFFF:FFFFFFFFFFFFFFFFFFFFFFFFFFFFFFFFFFFFFFFFF
FFFFFFFFFFFFF:
```

@A00721:190:HGJW7DSXY:4:1632:12301:13808 2:N:0:TCTGCAAG+GCTGCACT  
CTTACATATACTTGTTCATATATTTTGAATCTACTGATTCGAGGACTGTCATTTAATTTTGAATAATGA  
AAGATCTGATATCATCTTTCAAACGACGTGTTAGAACTGGTTATCTGTGACGTATATCCATTTGCGTG  
TAGAAACCAGAATCC

```
FFFFFFFFFFFFFFFFFFFFFFFFFFFFFFFFFFFFFFFFFFFFFFFFFFFFFFFFFFFFFFF
FFFFFFFFFFFFFFFFFFFFFFFFFFFF,FFFFFFFFFFFFFFFFFF:FFFFFFFFFFFFFFF
FFFFFFFFFFFF:F
```

@A00721:190:HGJW7DSXY:4:2173:10402:28244 2:N:0:TCTGCAAG+GCTGCACT  
CTTACATATACTTGTTCATATATTTTGAATCTACTGATTCGAGGACTGTCATTTAATTTTGAATAATGA  
AAGATCTGATATCATCTTTCAAACGACGTGTTAGAACTGGTTATCTGTGACGTATATCCATTTGCGTG  
TAGAAACCAGAATCC

```

FFFFFFFFFFFFFFFF,FFFFFFFFFFFFFFFFFFFFFFFFFFFFFFFFFFFFFFFF
FFFFFFFFFFFFFFFFFFFFFFFF,FFFFFFFFFFFFFFFFFFFFFFFFFFFFFFFF
FE:FFFFFFFFFFFF

```

@A00721:190:HGJW7DSXY:4:1447:6244:14372 2:N:0:TCTGCAAG+GCTGCACT  
CGAATCTACTGATTCGAGGACTGTCATTTAATTTTGAATAATGAAAGATCTGATATCATCTTTCAAAC  
GACGTGTTAGAACTGGTTATCTGTGACGTATATCCATTTCGGTGTAGAAACCAGAATCCTTCAGATCG  
GCAATGAATTCGGAT

```

FFFFFFFFFFFFFFFFFFFFFFFFFFFFFFFFFFFFFFFFFFFFFFFFFFFFFFFFFFFFFFFFFFFFFFFF
FFFFFFFFFFFFFFFFFFFFFFFFFFFFFFFFFFFFFFFFFFFFFFFFFFFFFFFFFFFFFFFFFFFFFFFF:
FFF:FF:FFFFFFFFFFFFFFFFFFFFFFFF:FFF
FFF:FF:FFFFFFFF

```

@A00721:190:HGJW7DSXY:4:2522:7645:5588 2:N:0:TCTGCAAG+GCTGCACT  
CGAATCTACTGATTCGAGGACTGTCATTTAATTTTGAATAATGAAAGATCTGATATCATCTTTCAAAC  
GACGTGTTAGAACTGGTTATCTGTGACGTATATCCATTTCGGTGTAGAAACCAGAATCCTTCAGATCG  
GCAATGAATTCGGAT

```
FFFF,FFFFFFFFFFFFFFFF:FFF:FFFFFF,,FFFFFFFFFFFFFFFFFFFFFFFFFFFFFFFFFFFF
FFFFFFFFFFFFFFFFFFFFFFFF:FFFFFFFFFFFFFFFF:FF,FFF:FFFFFFFFFFFFFFFFFFFF
FFF.FFF:FFF:FFF
```

@A00721:190:HGJW7DSXY:4:1452:3052:24095 2:N:0:TCTGCAAG+GCTGCACT  
ATCGATAGATCCTCATCGGAATTCATTGCCGATCTGAAGGATTCTGGTTTCTACACCGAAATGGATAT  
ACGTCACAGATAACCAGTTCTAACACGTCGTTTGAAAGATGATATCAGATCTTTCATTATTCAAATT  
AAATGACAGTCCTCG

[illegible]



@A00721:190:HGJW7DSXY:4:1555:14986:27070 2:N:0:TCTGCAAG+GCTGCACT  
ATCGATAGATCCTCATCGGAATTCATTGCCGATCTGAAGGATTCTGGTTTCTACACCGAAATGGATAT  
ACGTCACAGATAACCGATTCTAACACGTCGTTTGAAAGATGATATCAGATCTTTCATTATTCAAAT  
AAATGACAGTCCTCG

@A00721:190:HGJW7DSXY:4:2153:22354:22670 2:N:0:TCTGCAAG+GCTGCACT  
ATCGATAGATCCTCATCGGAATTCATTGCCGATCTGAAGATTCTGGTTTCTACACCGAAATGGATAT  
ACGTCACAGATAACCAGTTCTAACACGTCGTTTGAAAGATGATATCAGATCTTTCATTATTCAAAT  
AAATGACAGTCCTCG

@A00721:190:HGJW7DSXY:4:2513:5258:18114 2:N:0:TCTGCAAG+GCTGCACT  
ATCGATAGATCCTCATCGGAATTCATTGCCGATCTGAAGATTCTGGTTTCTACACCGAAATGGATAT  
ACGTCACAGATAACCAGTTCTAACACGTCGTTTGAAAGATGATATCAGATCTTTCATTATTCAAAT  
AAATGACAGTCCTCG

@A00721:190:HGJW7DSXY:4:2629:13865:4648 2:N:0:TCTGCAAG+GCTGCACT  
ATCGATAGATCCTCATCGGAATTCATTGCCGATCTGAAGATTCTGGTTTCTACACCGAAATGGATAT  
ACGTCACAGATAACCAGTTCTAACACGTCGTTTGAAAGATGATATCAGATCTTTCATTATTCAAAT  
AAATGACAGTCCTCG

@A00721:190:HGJW7DSXY:4:1339:22625:19570 2:N:0:TCTGCAAG+GCTGCACT  
CAGAAGTGAAGATCGATAGATCCTCATCGGAATTCATTGCCGATCTGAAGGATTCTGGTTTCTACACC  
GAAATGGATATACGTCACAGATAACCAGTTCTAACACGTCGTTTGAAAGATGATATCAGATCTTTCAT  
TATTCAAAATTAAAT

@A00721:190:HGJW7DSXY:4:1462:12961:10347 2:N:0:TCTGCAAG+GCTGCACT  
CAGAAGTGAAGATCGATAGATCCTCATCGGAATTCATTGCCGATCTGAAGGATTCTGGTTTCTACACC  
GAAATGGATATACGTCACAGATAACCAGTTCTAACACGTCGTTTGAAAGATGATATCAGATCTTTCAT  
TATTCAAAATTAAAT

@A00721:190:HGJW7DSXY:4:1669:21594:4413 2:N:0:TCTGCAAG+GCTGCACT  
CAGAAGTGAAGATCGATGATCCTCATCGAATTCATTGCCGATCTGAAGGATTCTGTTTCTACACC  
GAAATGGATATACGTCACAGATAACCAGTTCTAACACGTCGTTTGAAAGATGATATCAGATCTTTCAT  
TATTCAAAATTAAAT

+  
FFFFFFFFF,FFFFFFFFFFFFFFFFFFFFFFFFFFFFFFFFFFFFFFFFFFFFFFFFFFFFFFFF  
FFFFFFFFFFFFFFFFFFFFFFFFFFFFFFFFFFFFFFFFFFFFFFFFFFFFFFFFFFFFFFFFFFFF,FFFFFF  
FFFFFFFFFFFFFFFF

@A00721:190:HGJW7DSXY:4:2123:2275:27164 2:N:0:TCTGCAAG+GCTGCACT  
CAGAAGTGAAGATCGATAGATCCTCATCGGAATTCATTGCCGATCTGAAGGATTCTGGTTTCTACACC  
GAAATGGATATACGTCACAGATAACCAGTTCTAACACGTCGTTTGAAAGATGATATCAGATCTTTCAT  
TATTCAAAATTAAAT

+  
FFFFFFFFFFFFFFFFFFFFFFFFFFFFFFFFFFFFFFFFFFFFFFFFFFFFFFFFFFFFFFFFFFFF  
FFFFFFFFFFFFFFFFFFFFFFFFFFFFFFFFFFFFFFFFFFFFFFFFFFFFFFFFFFFFFFFFFFFF,FFFFFF  
FFFFFFFFFFFFFFFF

@A00721:190:HGJW7DSXY:4:2250:4499:29293 2:N:0:TCTGCAAG+GCTGCACT  
CAGAAGTGAAGATCGATAGATCCTCATCGGAATTCATTGCCGATCTGAAGGATTCTGGTTTCTACACC  
GAAATGGATATACGTCACAGATAACCAGTTCTAACACGTCGTTTGAAAGATGATATCAGATCTTTCAT  
TATTCAAAATTAAAT

+  
FFFFFFFFFFFFFFFFFFFFFFFFFFFFFFFFFFFFFFFFFFFFFFFFFFFFFFFFFFFFFFFFFFFF:FFFFFF  
FFFFFFFFFFFFFFFFFFFFFFFFFFFFFFFFFFFFFFFFFFFFFFFFFFFFFFFFFFFFFFFFFFFF:FFFFFF  
FFFFFFFFFFFFFFFF

@A00721:190:HGJW7DSXY:4:2353:32018:29011 2:N:0:TCTGCAAG+GCTGCACT  
CAGAAGTGAAGATCGATAGATCCTCATCGGAATTCATTGCCGATCTGAAGGATTCTGGTTTCTACACC  
GAAATGGATATACGTCACAGATAACCAGTTCTAACACGTCGTTTGAAAGATGATATCAGATCTTTCAT  
TATTCAAAATTAAAT

+  
FFFFFFFFFFFFFFFFFFFFFFFFFFFFFFFFFFFFFFFFFFFFFFFFFFFFFFFFFFFFFFFFFFFF:FF  
FFFFFFFFFFFFFFFFFFFFFFFFFFFFFFFFFFFFFFFFFFFFFFFFFFFFFFFFFFFFFFFFFFFF:F  
FFFF:FFFF:FFF

@A00721:190:HGJW7DSXY:4:2657:15628:1157 2:N:0:TCTGCAAG+GCTGCACT  
CAGAAGTGAAGATCGATAGATCCTCATCGGAATTCATTGCCGATCTGAAGGATTCTGGTTTCTACACC  
GAAATGGATATACGTCACAGATAACCAGTTCTAACACGTCGTTTGAAAGATGATATCAGATCTTTCAT  
TATTCAAAATTAAAT

+  
FFFFFFFFFFFFFFFFFFFFFFFFFFFFFFFFFFFFFFFFFFFFFFFFFFFFFFFFFFFFFFFFFFFF:FF  
FFFFFFFFFFFFFFFFFFFFFFFFFFFFFFFFFFFFFFFFFFFFFFFFFFFFFFFFFFFFFFFFFFFF:  
FFF,FFFFFFFF:F

@A00721:190:HGJW7DSXY:4:1214:21856:8907 2:N:0:TCTGCAAG+GCTGCACT  
CGTCGACAATAGACAGAAGTGAAGATCGATAGATCCTCATCGGAATTCATTGCCGATCTGAAGGATTC  
TGGTTTCTACACCGAAATGGATATACGTCACAGATAACCAGTTCTAACACGTCGTTTGAAAGATGATA  
TCAGATCTTTCATTA

+  
FFFFFFFFFFFFFFFFFFFFFFFFFFFFFFFFFFFFFFFFFFFFFFFFFFFFFFFFFFFFFFFFFFFF  
FFF:FFFFFFFFFFFFFFFFFFFFFFFFFFFFFFFFFFFFFFFFFFFFFFFFFFFFFFFFFFFFFFFFFFFF,  
FFFFFFFFFFFF:FF

@A00721:190:HGJW7DSXY:4:1331:25500:17597 2:N:0:TCTGCAAG+GCTGCACT  
CGTCGACAATAGACAGAAGTGAAGATCGATAGATCCTCATCGGAATTCATTGCCGATCTGAAGGATTC  
TGGTTTCTACACCGAAATGGATATACGTCACAGATAACCAGTTCTAACACGTCGTTTGAAAGATGATA  
TCAGATCTTTCATTA

+  
FFFFFFFFFFFFFFFFFFFF:FFFFFFFFFFFFFFFFFFFFFFFFFFFFFFFFFFFFFFFFFFFF:FFFFFF  
FFFFFFFFFFFFFFFFFFFFFFFFFFFFFFFFFFFFFFFFFFFFFFFFFFFFFFFFFFFFFFFFFFFF:FFFFFF  
FFFFFFFFFFFF:::F

@A00721:190:HGJW7DSXY:4:1506:18602:21183 2:N:0:TCTGCAAG+GCTGCACT  
CGTCGACAATAGACAGAAGTGAAGATCGATAGATCCTCATCGGAATTCATTGCCGATCTGAAGGATTC

TGGTTTCTACACCGAAATGGATATACGTCACAGATAACCAAGTTCTAACACGTCGTTTGAAAGATGATA  
TCAGATCTTTCATTA

+

FFFFFFFFFFFFFFFFFFFFFFFFFFFFFFFFFFFFFFFFFFFFFFFFFFFFFFFFFFFFFFFFFFFFFFFF:FFFFFF  
FFFFFFFFFFFFFFFFFFFFFFFFFFFFFFFFFFFFFFFFFFFFFFFFFFFFFFFFFFFFFFFFFFFFFFFF:FFFFFFFFFFFFFFFFFFFFFFFFFFFFFFFF  
FFFFFFFFFFFFFFFF

@A00721:190:HGJW7DSXY:4:1558:21829:14779 2:N:0:TCTGCAAG+GCTGCACT  
CGTCGACAATAGACAGAAGTGAAGATCGATAGATCCTCATCGGAATTCATTGCCGATCTGAAGGATTC  
TGGTTTCTACACCGAAATGGATATACGTCACAGATAACCAAGTTCTAACACGTCGTTTGAAAGATGATA  
TCAGATCTTTCATTA

+

FFFFFFFFFFFFFFFFFFFFFFFFFFFFFFFFFFFFFFFFFFFFFFFFFFFFFFFFFFFFFFFFFFFFFFFF  
FFFFFFFFFFFFFFFFFFFFFFFFFFFFFFFFFFFFFFFFFFFFFFFFFFFFFFFFFFFFFFFFFFFFFFFF:FFFFFFFFFFFFFFFFFFFFFFFFFFFFFFFF:FFFFFFFF  
FFFFFFFFFFFFFFFF

@A00721:190:HGJW7DSXY:4:1617:5376:32503 2:N:0:TCTGCAAG+GCTGCACT  
CGTCGACAATAGACAGAAGTGAAGATCGATAGATCCTCATCGGAATTCATTGCCGATCTGAAGGATTC  
TGGTTTCTACACCGAAATGGATATACGTCACAGATAACCAAGTTCTAACACGTCGTTTGAAAGATGATA  
TCAGATCTTTCATTA

+

FFFFFFFFFFFFFFFFFFFFFFFFFFFFFFFFFFFFFFFFFFFFFFFFFFFFFFFFFFFFFFFFFFFFFF,FFFFFFFF,FFFFFFFF:FF  
FFFFFFFFFFFFFFFFFFFFFFFFFFFFFFFFFFFFFFFFFFFFFFFFFFFFFFFFFFFFFFFFFFFFFFFFFFFFFFFFFFFFFFFFFFFFFFFFFFFFFFFF  
FFFFFFFFFFFFFFFF

@A00721:190:HGJW7DSXY:4:2258:9561:9846 2:N:0:TCTGCAAG+GCTGCACT  
CGTCGACAATAGACCGAAGTGAAGATCGATAGATCCTCATCGGAATTCATTGCCGATCTGAAGGATTC  
TGGTTTCTACACCGAAATGGATATACGTCACAGATAACCAAGTTCTAACACGTCGTTTGAAAGATGATA  
TCAGATCTTTCATTA

+

FFFFF:FFFFFF:F,:FFFFFFFFFFFFFFFFFFFFFFFFFFFFFFFFFFFFFFFFFFFFFFFFFFFFFFFF:FFFF:FF  
FFFFFFFFFFFFFFFFFFFFFFFF:FFFFFFFFFFFFFFFFFFFFFFFFFFFFFFFFFFFFFFFFFFFFFFFFFFFFFFFF:FFFFF:FFFFF  
FFFFFFFFFFFFFFFF

@A00721:190:HGJW7DSXY:4:2261:24153:11913 2:N:0:TCTGCAAG+GCTGCACT  
CGTCGACAATAGACAGAAGTGAAGATCGATAGATCCTCATCGGAATTCATTGCCGATCTGAAGGATTC  
TGGTTTCTACACCGAAATGGATATACGTCACAGATAACCAAGTTCTAACACGTCGTTTGAAAGATGATA  
TCAGATCTTTCATTA

+

FFFFFFFFFFFFFFFFFFFFFFFFFFFFFFFFFFFFFFFFFFFFFFFFFFFFFFFFFFFFFFFFFFFFFFFF  
FFFFFFFFFFFFFFFFFFFFFFFFFFFFFFFFFFFFFFFFFFFFFFFFFFFFFFFFFFFFFFFFFFFFFFFF:FFFFFFFF:FFFFF  
FFFFFFFFFFFFFFFF

@A00721:190:HGJW7DSXY:4:2333:4020:20509 2:N:0:TCTGCAAG+GCTGCACT  
CGTCGACAATAGACAGAAGTGAAGATCGATAGATCCTCATCGGAATTCATTGCCGATCTGAAGGATTC  
TGGTTTCTACACCGAAATGGATATACGTCACAGATAACCAAGTTCTAACACGTCGTTTGAAAGATGATA  
TCAGATCTTTCATTA

+

FFFFFFFFFFFFFFFFFFFFFFFFFFFFFFFFFFFFFFFFFFFFFFFFFFFFFFFFFFFFFFFFFFFFFFFF  
FFFFFFFFFFFFFFFFFFFFFFFFFFFFFFFFFFFFFFFFFFFFFFFFFFFFFFFFFFFFFFFFFFFFFFFF:FFFFFFFF:FFFFF  
FFFFFFFFFFFFFFFF

@A00721:190:HGJW7DSXY:4:2514:6388:13150 2:N:0:TCTGCAAG+GCTGCACT  
CGTCGACAATAGACAGAAGTGAAGATCGATAGATCCTCATCGGAATTCATTGCCGATCTGAAGGATTC  
TGGTTTCTACACCGAAATGGATATACGTCACAGATAACCAAGTTCTAACACGTCGTTTGAAAGATGATA  
TCAGATCTTTCATTA

+

FFFFFFFF:FFFFFFFFFFFFFFFFFFFFFFFFFFFFFFFFFFFFFFFFFFFFFFFFFFFFFFFFFFFFFFFF  
FFFFFFFFFFFFFFFFFFFFFFFFFFFFFFFFFFFFFFFFFFFFFFFFFFFFFFFFFFFFFFFFFFFFFFFF:FFFFFFFFFFFFFFFFFFFFFFFF  
FFFFFFFFFFFFFFFF

@A00721:190:HGJW7DSXY:4:2533:15790:32033 2:N:0:TCTGCAAG+GCTGCACT  
CGTCGACAATAGACAGAAGTGAAGATCGATAGATCCTCATCGGAATTCATTGCCGATCTGAAGGATTC  
TGGTTTCTACACCGAAATGGATATACGTCACAGATAACCAGTTCTAACACGTCGTTTGAAAGATGATA  
TCAGATCTTTCATTA

[illegible]

@A00721:190:HGJW7DSXY:4:2629:14959:1251 2:N:0:TCTGCAAG+GCTGCACT  
CGTCGACAATAGACAGAAGTGAAGATCGATAGATCCTCATCGGAATTCATTGCCGATCTGAAGGATTC  
TGGTTTCTACACCGAAATGGATATACGTCACAGATAACCAGTTCTAACACGTCGTTTGAAAGATGATA  
TCAGATCTTTCATTA

[illegible]

@A00721:190:HGJW7DSXY:4:2546:19804:25614 2:N:0:TCTGCAAG+GCTGCACT  
CGTCGACAATAGACAGAAGTGAAGATCGATAGATCCTCATCGGAATTCATTGACTATCTGAAGGATTC  
TGGTTTCTACACAGAAATGGATATACGTCACAGATAACCAGTTCTAAACGTCGTTTGAAAGATGATA  
TCAGATCTATCA

```
F:FF::FFFFFFF,FFFFFF,F:::FF:FFFFF:FFFF:FFFFFFFF:FF,,F,FF,F,FF:F:FFF
FF:F:F:FFFF,,FFF:,FF,FFFFFFFFFFFF:FF,FFFF:F:FF:F,FFF,F,,FF:FFF:FF,F,F
FFFFFF:,FF:
```

@A00721:190:HGJW7DSXY:4:1248:18783:10598 2:N:0:TCTGCAAG+GCTGCACT  
TAACATTCCCAGCAGCGCATATCGTCGACAATAGACAGAAGTGAAGATCGATAGATCCTCATCGGAAT  
TCATTGCCGATCTGAAGGATTCTGGTTTCTACACCGAAATGGATATACGTCACAGATAACCAGTTCTA  
ACACGTCGTTTGAAA

[illegible]

@A00721:190:HGJW7DSXY:4:2636:6433:27195 2:N:0:TCTGCAAG+GCTGCACT  
TAACATTCCCAGCAGCGCATATCGTCGACAATAGACAGAAGTGAAGATCGATAGATCCTCATCGGAAT  
TCATTGCCGATCTGAAGGATTCTGGTTTCTACACCGAAATGGATATACGTCACAGATAACCAGTTCTA  
ACACGTCGTTTGAAA

```

FFFFFFFFFFFFFF:FFFFFFFFFFFFFFFFFFFFFFFFFFFFFFFFFFFFFFFFFFFFFFFF
FFFFFFFFFFFFFF:F:FFFFFFFFF,FFFFFFFFFFFF:FFFF,:FFF:FFF:FFF:FFFFFFF
FFFFFFFFFFFFFF

```

@A00721:190:HGJW7DSXY:4:1432:28791:2910 2:N:0:TCTGCAAG+GCTGCACT  
CGAACATGAATCGTGAATACATAACATTCCCGGCAGCGCATATCGTCGACAATAGACAGAAGTGAAG  
ATCGATAGATCCTCATCGGAATTCATTGCCGATCTGAAGATTCTGGTTTCTACACCGAAATGGATAT  
ACGTCACAGATAACC

[illegible]

@A00721:190:HGJW7DSXY:4:1625:23466:24940 2:N:0:TCTGCAAG+GCTGCACT  
CGAACATGAATCGTCGAATACATAACATTCCCAGCAGCGCATATCGTCGACAATAGACAGAAGTGAAG  
ATCGATAGATCCTCATCGGAATTCATTGCCGATCTGAAGGATTCTGGTTTCTACACCGAAATGGATAT  
ACGTCACAGATAACC

[illegible]

FFFFFFFFFFFFFFFFFFFFFFFFFFFFFFFFFFFFFFFFFFFFFFFFFFFFFFFFFFFFFFFFFFFFFFFFFFFFFFFF  
FFFFFFFFFFFFFFFF

@A00721:190:HGJW7DSXY:4:1646:27001:15875 2:N:0:TCTGCAAG+GCTGCACT  
CGAACATGAATCGTCGAATACATAACATTCCCAGCAGCGCATATCGTCGACAATAGACAGAAGTGAAG  
ATCGATAGATCCTCATCGGAATTCATTGCCGATCTGAAGGATTCTGGTTTCTACACCGAAATGGATAT  
ACGTCACAGATAACC

+  
FFFFFFFFFFFFFFFFFFFFFFFFFFFFFFFFFFFFFFFFFFFFFFFFFFFFFFFFFFFFFFFFFFFFFFFFFFFFFFFF  
FFFFFFFFFFFFFFFFFFFFFFFFFFFFFFFFFFFFFFFFFFFFFFFFFFFFFFFFFFFFFFFFFFFFFFFFFFFFFFFF  
FFFFFFFFFFFFFFFF

@A00721:190:HGJW7DSXY:4:1114:32579:9220 2:N:0:TCTGCAAG+GCTGCACT  
AAGCGAACATGAATCGTCGAATACATAACATTCCCAGCAGCGCATATCGTCGACAATAGACAGAAGTG  
AAGATCGATAGATCCTCATCGGAATTCATTGCCGATCTGAAGGATTCTGGTTTCTACACCGAAATGGA  
TATACGTCACAGATA

+  
FFFFFFFFFFFFFFFFFFFFFFFFFFFFFFFFFFFFFFFFFFFFFFFFFFFFFFFFFFFFFFFFFFFFFFFFFFFFFFFF  
FFFFFFFFFFFFFFFFFFFFFFFFFFFFFFFFFFFFFFFFFFFFFFFFFFFFFFFFFFFFFFFFFFFFFFFFFFFFFFFF  
F:F:FFFFFFFF

@A00721:190:HGJW7DSXY:4:1129:5755:3850 2:N:0:TCTGCAAG+GCTGCACT  
AAGCGAACATGAATCGTCGAATACATAACATTCCCAGCAGCGCATATCGTCGACAATAGACAGAAGTG  
AAGATCGATAGATCCTCATCGGAATTCATTGCCGATCTGAAGGATTCTGGTTTCTACACCGAAATGGA  
TATACGTCACAGATA

+  
FFFFFFFFFFFFFFFFFFFFFFFFFFFFFFFFFFFFFFFFFFFFFFFFFFFFFFFFFFFFFFFFFFFFFFFFFFFFFFFF  
FFFFFFFFFFFF:FFFFFFFFFFFF:FFFFFFFFFFFF:FFFF,FFFFFFFF,FFFFFFFFF:  
F:F:FFFFFFFF

@A00721:190:HGJW7DSXY:4:1349:24433:7545 2:N:0:TCTGCAAG+GCTGCACT  
AAGCGAACATGAATCGTCGAATACATAACATTCCCAGCAGCGCATATCGTCGACAATAGACAGAAGTG  
AAGATCGATAGATCCTCATCGGAATTCATTGCCGATCTGAAGGATTCTGGTTTCTACACCGAAATGGA  
TATACGTCACAGATA

+  
FFFFFFFFFFFFFFFFFFFFFFFFFFFFFFFFFFFFFFFFFFFFFFFFFFFFFFFFFFFFFFFFFFFFFFFFFFFFFFFF  
FFFFFFFFFFFFFFFFFFFFFFFFFFFFFFFFFFFFFFFFFFFFFFFFFFFFFFFFFFFFFFFFFFFFFFFFFFFFFFFF  
FFFFFFFFFFFFFFFF

@A00721:190:HGJW7DSXY:4:1607:21206:24220 2:N:0:TCTGCAAG+GCTGCACT  
AAGCGAACATGAATCGTCGAATACATAACATTCCCAGCAGCGCATATCGTCGACAATAGACAGAAGTG  
AAGATCGATAGATCCTCATCGGAATTCATTGCCGATCTGAAGGATTCTGGTTTCTACACCGAAATGGA  
TATACGTCACAGATA

+  
FFFFFFFFFFFFFFFFFFFFFFFFFFFFFFFFFFFFFFFFFFFFFFFFFFFFFFFFFFFFFFFFFFFFFFFFFFFFFFFF  
FFFFFFFFFFFFFFFFFFFFFFFFFFFFFFFFFFFFFFFFFFFFFFFFFFFFFFFFFFFFFFFFFFFFFFFFFFFFFFFF  
FFFFFFFFFFFFFFFF

@A00721:190:HGJW7DSXY:4:1670:1253:15248 2:N:0:TCTGCAAG+GCTGCACT  
AAGCGAACATGAATCGTCGAATACATAACATTCCCAGCAGCGCATATCGTCGACAATAGACAGAAGTG  
AAGATCGATAGATCCTCATCGGAATTCATTGCCGATCTGAAGGATTCTGGTTTCTACACCGAAATGGA  
TATACGTCACAGATA

+  
FFFFFFFFFFFFFFFFFFFFFFFFFFFFFFFFFFFFFFFFFFFFFFFFFFFFFFFFFFFFFFFFFFFFFFFFFFFFFFFF  
FFFFFFFFFFFFFFFFFFFFFFFFFFFFFFFFFFFFFFFFFFFFFFFFFFFFFFFFFFFFFFFFFFFFFFFFFFFFFFFF  
FFFFFFFFFFFFFFFF

@A00721:190:HGJW7DSXY:4:2529:7536:20400 2:N:0:TCTGCAAG+GCTGCACT  
AAGCGAACATGAATCGTCGAATACATAACATTCCCAGCAGCGCATATCGTCGACAATAGACAGAAGTG  
AAGATCGATAGATCCTCATCGGAATTCATTGCCGATCTGAAGGATTCTGGTTTCTACACCGAAATGGA  
TATACGTCACAGATA

+  
FFFFFFFFFFFFFFFFFFFFFFFFFFFFFFFFFFFFFFFFFFFFFFFFFFFFFFFFFFFFFFFFFFFFFFFF  
FFFFFFFFF:FFFFFFFFFFFFFFFFFFFFFFFFFFFFFFFFFFFFFFFFFFFFFFFFFFFFFFFFFFFF  
FFFFFFFFFFFFFFFFF

@A00721:190:HGJW7DSXY:4:1119:11550:8938 2:N:0:TCTGCAAG+GCTGCACT  
ACGAAAGCGAACATGAATCGTCGAATACATAACATTCCCAGCAGCGCATATCGTCGACAATAGACAGA  
AGTGAAGATCGATAGATCCTCATCGGAATTCATTGCCGATCTGAAGGATTCTGGTTTCTACACCGAAA  
TGGATATACGTCACA

+  
FFFFFFFFFFFFFFFFFFFFFFFFFFFFFFFFFFFFFFFFFFFFFFFFFFFFFFFFFFFFFFFFFFFFFFFF:FFFFFFFF  
FFFFFFFFFFFFFFFFFFFFFFFFFFFFFFFFFFFFFFFFFFFFFFFFFFFFFFFFFFFFFFFFFFFFFFFF  
FFFFFFFFFFFFFFFFF

@A00721:190:HGJW7DSXY:4:1237:4499:34992 2:N:0:TCTGCAAG+GCTGCACT  
ACGAAAGCGAACATGAATCGTCGAATACATAACATTCCCAGCAGCGCATATCGTCGACAATAGACAGA  
AGTGAAGATCGATAGATCCTCATCGGAATTCATTGCCGATCTGAAGGATTCTGGTTTCTACACCGAAA  
TGGATATACGTCACA

+  
FFFFFFFFFFFFFFFFFFFFFFFFFFFFFFFFFFFFFFFFFFFFFFFFFFFFFFFFFFFFFFFFFFFFFFFF:FFFFFFFF  
FFFFFFFFFFFFFFFF:FFFFFFFFFFFFFFFFFFFFFFFFFFFFFFFFFFFFFFFFFFFFFFFFFFFFFFFF  
FF:FFFFFFFFFFFFF

@A00721:190:HGJW7DSXY:4:1306:10402:36949 2:N:0:TCTGCAAG+GCTGCACT  
ACGAAAGCGAACATGAATCGTCGAATACATAACATTCCCAGCAGCGCATATCGTCGACAATAGACAGA  
AGTGAAGATCGATAGATCCTCATCGGAATTCATTGCCGATCTGAAGGATTCTGGTTTCTACACCGAAA  
TGGATATACGTCACA

+  
FFFFFFFFFFFFFFFFFFFFFFFFFFFFFFFFFFFFFFFFFFFFFFFFFFFFFFFFFFFFFFFFFFFFFFFF  
FFFFFFFFFFFFFFFFFFFFFFFFFFFFFFFFFFFFFFFFFFFFFFFFFFFFFFFFFFFFFFFFFFFFFFFF:FFFFFFFF  
FFFFFFFFFFFFFFFFF:

@A00721:190:HGJW7DSXY:4:1311:4860:31360 2:N:0:TCTGCAAG+GCTGCACT  
ACGAAAGCGAACATGAATCGTCGAATACATAACATTCCCAGCAGCGCATATCGTCGACAATAGACAGA  
AGTGAAGATCGATAGATCCTCATCGGAATTCATTGCCGATCTGAAGGATTCTGGTTTCTACACCGAAA  
TGGATATACGTCACA

+  
FFFFFFFFFFFFFFFFFFFFFFFFFFFFFFFFFFFFFFFFFFFFFFFFFFFFFFFFFFFFFFFFFFFFFFFF,FFFFFFFF  
FFFFFFFFFFFFFFFFFFFFFFFFFFFFFFFFFFFFFFFFFFFFFFFFFFFFFFFFFFFFFFFFFFFFFFFF:F  
FFFFFFFFFFFFFFFFF

@A00721:190:HGJW7DSXY:4:1442:24903:20102 2:N:0:TCTGCAAG+GCTGCACT  
ACGAAAGCGAACATGAATCGTCGAATACATAACATTCCCAGCAGCGCATATCGTCGACAATAGACAGA  
AGTGAAGATCGATAGATCCTCATCGGAATTCATTGCCGATCTGAAGGATTCTGGTTTCTACACCGAAA  
TGGATATACGTCACA

+  
FFFFFFFFFFFFFFFFFFFFFFFFFFFFFFFFFFFFFFFFFFFFFFFFFFFFFFFFFFFFFFFFFFFFFFFF:FFFFFFFF  
FFFFF:FFFFFFFFFFFFFFFFFFFFFFFFFFFFFFFFFFFFFFFFFFFFFFFFFFFFFFFFFFFFFFFF  
F:FFFFFFFFFFFFF

@A00721:190:HGJW7DSXY:4:1654:20374:36933 2:N:0:TCTGCAAG+GCTGCACT  
ACGAAAGCGAACATGAATCGTCGAATACATAACATTCCCAGCAGCGCATATCGTCGACAATAGACAGA  
AGTGAAGATCGATAGATCCTCATCGGAATTCATTGCCGATCTGAAGGATTCTGGTTTCTACACCGAAA  
TGGATATACGTCACA

+  
FFFFFFFFFFFFFFFFFFFFFFFFFFFFFFFFFFFFFFFFFFFFFFFFFFFFFFFFFFFFFFFFFFFFFFFF:FF  
:FFFFFFFFFFFFF,FFFFFFFFFFFFFFFFFFFFFFFFFFFFFFFFFFFFFFFFFFFFFFFFFFFFFFFF  
FFFFFFFFFFFFFFFFF

@A00721:190:HGJW7DSXY:4:2229:5746:34053 2:N:0:TCTGCAAG+GCTGCACT  
ACGAAAGCGAACATGAATCGTCGAATACATAACATTCCCAGCAGCGCATATCGTCGACAATAGACAGA



@A00721:190:HGJW7DSXY:4:1678:10954:35305 2:N:0:TCTGCAAG+GCTGCACT  
CGAATTCAGAACTTTATTGTTCTACAATAACGAAAGCGAACATGAATCGTCGAATACATAACATTCCC  
AGCAGCGCATATCGTCGACAATAGACAGAAGTGAAGATCGATAGATCCTCATCGGAATTCATTGCCGA  
TCTGAAGGATTCTGG

+

FFFFFFFFFFFFFFFFFFFFFFFFFFFFFFFFFFFFFFFFFFFFFFFFFFFFFFFFFFFFFFFFFFFFFFFF  
FFF,FFFFFFFFFFFFFFFFFFFFFFFFFFFFFFFFFFFFFFFFFFFFFFFFFFFFFFFFFFFFFFFFFFFF  
FFFFFFFFFFFFFFFF

@A00721:190:HGJW7DSXY:4:2116:25075:19554 2:N:0:TCTGCAAG+GCTGCACT  
CGAATTCAGAACTTTATTGTTCTACAATAACGAAAGCGAACATGAATCGTCGAATACATAACATTCCC  
AGCAGCGCATATCGTCGACAATAGACAGAAGTGAAGATCGATAGATCCTCATCGGAATTCATTGCCGA  
TCTGAAGGATTCTGG

+

FFFFFFFFFFFFFFFFFFFFFFFFFFFFFFFFFFFFFFFFFFFFFFFFFFFFFFFFFFFFFFFFFFFF:F:FFFFFFFF  
:FF:FFFFFFFFFFFFFFFF,FFF:FFFFFFFFFFFFFFFF:FFFFFFFFFFFFFFFFFFFFFFFFFFFF  
FFFFFFFFFFFFFFFF

@A00721:190:HGJW7DSXY:4:2203:28031:25394 2:N:0:TCTGCAAG+GCTGCACT  
CGAATTCAGAACTTTATTGTTCTACAATAACGAAAGCGAACATGAATCGTCGAATACATAACATTCCC  
AGCAGCGCATATCGTCGACAATAGACAGAAGTGAAGATCGATAGATCCTCATCGGAATTCATTGCCGA  
TCTGAAGGATTCTGG

+

FFFFFFFFFFFFFFFFFFFFFFFFFFFFFFFFFFFFFFFFFFFFFFFFFFFFFFFFFFFFFFFFFFFF:FFFFFFFF  
FFFFFFFFFFFFFFFFFFFFFFFFFFFFFFFFFFFFFFFFFFFFFFFFFFFFFFFFFFFFFFFFFFFF,FFFFFFFF  
FFFFFFFFFFFFFFFF

@A00721:190:HGJW7DSXY:4:2269:6885:31454 2:N:0:TCTGCAAG+GCTGCACT  
CGAATTCAGAACTTTATTGTTCTACAATAACGAAAGCGAACATGAATCGTCGAATACATAACATTCCC  
AGCAGCGCATATCGTCGACAATAGACAGAAGTGAAGATCGATAGATCCTCATCGGAATTCATTGCCGA  
TCTGAAGGATTCTGG

+

FFFFFFFFFFFFFFFFFFFFFFFFFFFFFFFFFFFFFFFFFFFFFFFFFFFFFFFFFFFFFFFFFFFF  
FFFFFFFFFFFFFFFFFFFFFFFFFFFFFFFFFFFFFFFFFFFFFFFFFFFFFFFFFFFFFFFFFFFF  
FFFFFFFFFFFFFFFF:

@A00721:190:HGJW7DSXY:4:1216:18973:11115 2:N:0:TCTGCAAG+GCTGCACT  
TAACATTCTGGTGTGACGAATTCAGAACTTTATTGTTCTACAATAACGAAAGCGAACATGAATCGTCG  
AATACATAACATTCCCAGCAGCGCATATCGTCGACAATAGACAGAAGTGAAGATCGATAGATCCTCAT  
CGGAATTCATTGCCG

+

FFFFFFFFFFFFFFFFFFFFFFFFFFFFFFFFFFFFFFFFFFFFFFFFFFFFFFFFFFFFFFFFFFFF  
FFFFFFFFFFFFFFFFFFFFFFFFFFFFFFFFFFFFFFFFFFFFFFFFFFFFFFFFFFFFFFFFFFFF  
FFFFFFFFFFFFFFFF

@A00721:190:HGJW7DSXY:4:1219:25473:32863 2:N:0:TCTGCAAG+GCTGCACT  
TAACATTCTGGTGTGACGAATTCAGAACTTTATTGTTCTACAATAACGAAAGCGAACATGAATCGTCG  
AATACATAACATTCCCAGCAGCGCATATCGTCGACAATAGACAGAAGTGAAGATCGATAGATCCTCAT  
CGGAATTCATTGCCG

+

FFFFFFFFFFFFFFFFFFFFFFFFFFFFFFFFFFFFFFFF,FFFFFFFFFFFFFFFFFFFFFFFFFFFF  
FFFFFFFFFFFFFFFFFFFFFFFFFFFFFFFFFFFFFFFFFFFFFFFFFFFFFFFFFFFFFFFFFFFF  
FFFFFFFFFFFFFFFF

@A00721:190:HGJW7DSXY:4:1445:19416:1861 2:N:0:TCTGCAAG+GCTGCACT  
TAACATTCTGGTGTGACGAATTCAGAACTTTATTGTTCTACAATAACGAAAGCGAACATGAATCGTCG  
AATACATAACATTCCCAGCAGCGCATATCGTCGACAATAGACAGAAGTGAAGATCGATAGATCCTCAT  
CGGAATTCATTGCCG

+

FFFFFFFFFFFF,FFFFFFFF,FFFFFFFFFFFFFFFFFFFFFFFF:FFFF,FFFFFFFFFFFF:FFFFF:F





+  
FFFFFFFFFFFFFFFFFFFFFFFFFFFFFFFFFFFFFFFFFFFFFFFFFFFFFFFFFFFFFFFFFFFFFFFF  
FFFFFFFF:FFFFFFFFFFFFFFFFFFFFFFFFFFFFFFFFFFFFFFFFFFFFFFFFFFFFFFFFFFFFFFFF  
FFFFFFFF:FFFFFFFFFFFFFFFFFFFFFFFFFFFFFFFFFFFFFFFFFFFFFFFFFFFFFFFFFFFFFFFF  
FFFFFFFF:FFFFFFFFFFFFFFFFFFFFFFFFFFFFFFFFFFFFFFFFFFFFFFFFFFFFFFFFFFFFFFFF

@A00721:190:HGJW7DSXY:4:1165:26711:8891 2:N:0:TCTGCAAG+GCTGCACT  
CAGACTGACGTCAGAGGTTCTAATAACATTCTGGTGTGACGAATTCAGAACTTTATTGTTCTACAATA  
ACGAAAGCGAACATGAATCGTCGAATACATAACATTCCCAGCAGCGCATATCGTCGACAATAGACAGA  
AGTGAAGATCGATAG

+  
FFFF,FFFFFFFFFFFFFFFFFFFFFFFFFFFFFFFFFFFFFFFFFFFFFFFFFFFFFFFFFFFFFFFF  
FFFFFFFFFFFFFFFFFFFFFFFFFFFFFFFFFFFFFFFFFFFFFFFFFFFFFFFFFFFFFFFFFFFFFFFF  
FFFFFFFFFFFFFFFFFFFFFFFFFFFFFFFFFFFFFFFFFFFFFFFFFFFFFFFFFFFFFFFFFFFFFFFF  
FFFFFFFFFFFFFFFFFFFFFFFFFFFFFFFFFFFFFFFFFFFFFFFFFFFFFFFFFFFFFFFFFFFFFFFF

@A00721:190:HGJW7DSXY:4:1205:13141:30608 2:N:0:TCTGCAAG+GCTGCACT  
CAGAATGACGTCAGAGGTTCTAATAACATTCTGGTGTGACGAATTCAGAACTTTATTGTTCTACAATA  
ACGAAAGCGAACATGAATCGTCGAATACATAACATTCCCAGCAGCGCATATCGTCGACAATAGACAGA  
AGTGAAGATCGATAG

+  
FFFFFFFFFFFFFFFFFFFFFFFFFFFFFFFFFFFFFFFFFFFFFFFFFFFFFFFFFFFFFFFFFFFFFFFF  
FFFFFFFFFFFFFFFFFFFFFFFFFFFFFFFFFFFFFFFFFFFFFFFFFFFFFFFFFFFFFFFFFFFFFFFF  
FFFFFFFFFFFFFFFFFFFFFFFFFFFFFFFFFFFFFFFFFFFFFFFFFFFFFFFFFFFFFFFFFFFFFFFF  
FFFFFFFFFFFFFFFFFFFFFFFFFFFFFFFFFFFFFFFFFFFFFFFFFFFFFFFFFFFFFFFFFFFFFFFF

@A00721:190:HGJW7DSXY:4:1325:31458:9752 2:N:0:TCTGCAAG+GCTGCACT  
CAGAATGACGTCAGAGGTTCTAATAACATTCTGGTGTGACGAATTCAGAACTTTATTGTTCTACAATA  
ACGAAAGCGAACATGAATCGTCGAATACATAACATTCCCAGCAGCGCATATCGTCGACAATAGACAGA  
AGTGAAGATCGATAG

+  
FF:FFFFFFFFFFFFFFFFFFFFFFFFFFFFFFFFFFFFFFFFFFFFFFFFFFFFFFFFFFFFFFFF  
FFFFFFFFFFFFFFFFFFFFFFFFFFFFFFFFFFFFFFFFFFFFFFFFFFFFFFFFFFFFFFFFFFFFFFFF  
FFFFFFFFFFFFFFFFFFFFFFFFFFFFFFFFFFFFFFFFFFFFFFFFFFFFFFFFFFFFFFFFFFFFFFFF  
FFFFFFFFFFFFFFFFFFFFFFFFFFFFFFFFFFFFFFFFFFFFFFFFFFFFFFFFFFFFFFFFFFFFFFFF

@A00721:190:HGJW7DSXY:4:1360:29152:3255 2:N:0:TCTGCAAG+GCTGCACT  
CAGAATGACGTCAGAGGTTCTAATAACATTCTGGTGTGACGAATTCAGAACTTTATTGTTCTACAATA  
ACGAAAGCGAACATGAATCGTCGAATACATAACATTCCCAGCAGCGCATATCGTCGACAATAGACAGA  
AGTGAAGATCGATAG

+  
FFFFFFFFFFFFFFFFFFFFFFFFFFFFFFFFFFFFFFFFFFFFFFFFFFFFFFFFFFFFFFFFFFFFFFFF  
FFFFFFFFFFFFFFFFFFFFFFFFFFFFFFFFFFFFFFFFFFFFFFFFFFFFFFFFFFFFFFFFFFFFFFFF  
FFFFFFFFFFFFFFFFFFFFFFFFFFFFFFFFFFFFFFFFFFFFFFFFFFFFFFFFFFFFFFFFFFFFFFFF  
FFFFFFFFFFFFFFFFFFFFFFFFFFFFFFFFFFFFFFFFFFFFFFFFFFFFFFFFFFFFFFFFFFFFFFFF

@A00721:190:HGJW7DSXY:4:1557:13304:5556 2:N:0:TCTGCAAG+GCTGCACT  
CAGAATGACGTCAGAGGTTCTAATAACATTCTGGTGTGACGAATTCAGAACTTTATTGTTCTACAATA  
ACGAAAGCGAACATGAATCGTCGAATACATAACATTCCCAGCAGCGCATATCGTCGACAATAGACAGA  
AGTGAAGATCGATAG

+  
FFFF:FFFFFFFFFFFFFFFFFFFFFFFFFFFFFFFFFFFFFFFFFFFFFFFFFFFFFFFFFFFFFFFF  
FFFFFFFF:FFFFFFFFFFFFFFFFFFFFFFFFFFFFFFFFFFFFFFFFFFFFFFFFFFFFFFFFFFFFFFFF  
F:FFFFFFFFFFFFFFFFFFFFFFFFFFFFFFFFFFFFFFFFFFFFFFFFFFFFFFFFFFFFFFFFFFFF

@A00721:190:HGJW7DSXY:4:2232:17861:15139 2:N:0:TCTGCAAG+GCTGCACT  
CAGAATGACGTCAGAGGTTCTAATAACATTCTGGTGTGACGAATTCAGAACTTTATTGTTCTACAATA  
ACGAAAGCGAACATGAATCGTCGAATACATAACATTCCCAGCAGCGCATATCGTCGACAATAGACAGA  
AGTGAAGATCGATAG

+  
FFFFFFFFFFFFFFFFFFFFFFFFFFFFFFFFFFFFFFFFFFFFFFFFFFFFFFFFFFFFFFFFFFFFFFFF  
FFFFFFFFFFFFFFFFFFFFFFFFFFFFFFFFFFFFFFFFFFFFFFFFFFFFFFFFFFFFFFFFFFFFFFFF  
F:FFF,FFFFFFFFFFFFFFFFFFFFFFFFFFFFFFFFFFFFFFFFFFFFFFFFFFFFFFFFFFFFFFFF

@A00721:190:HGJW7DSXY:4:2306:13431:19179 2:N:0:TCTGCAAG+GCTGCACT  
CAGAATGACGTCAGAGGTTCTAATAACATTCTGGTGTGACGAATTCAGAACTTTATTGTTCTACAATA

ACGAAAGCTAAAATGAATCGTCGAATACATAACATTCCCAGCAGCGCATATCGTCGACAATAGACAGA  
AGTGAAGATCTATAG

+

FFFFFFFF,FFFF,:FF:FFFFFFFFFFFFFFFF,FFF:FFFFFFF:F:FF:FFFFFFFF,FFFFFFF  
FF,FFFF,FF,FFFFFF,FFF:FFFFFFFF,FFFF,:FF:FF,FFFFFF,,FF,F,FFFFFFFFF:  
FFF:FFFF,,FFF:

@A00721:190:HGJW7DSXY:4:2369:11369:4805 2:N:0:TCTGCAAG+GCTGCACT  
CAGAATGACGTCAGAGGTTCTAATAACATTCTGGTGTGACGAATTCAGAACTTTATTGTTCTACAATA  
ACGAAAGCGAACATGAATCGTCGAATACATAACATTCCCAGCAGCGCATATCGTCGACAATAGACAGA  
AGTGAAGATCGATAG

+

FFFF:FFFFFFFFFFFFFFFFFFFFFFFFFFFFFFFFFFFFFFFFFFFFFFFFFFFFFFFFFFFFFFFFFFFF  
FFFFFFFFFFFFFFFFFFFFFFFFFFFFFFFFFFFFFFFFFFFFFFFFFFFFFFFFFFFFFFFFFFFFFFFFFFFF  
FFFFFFFFFFFFFFFF:

@A00721:190:HGJW7DSXY:4:2469:12328:6339 2:N:0:TCTGCAAG+GCTGCACT  
CAGAATGACGTCAGAGGTTCTAATAACATTCTGGTGTGACGAATTCAGAACTTTATTGTTCTACAATA  
ACGAAAGCGAACATGAATCGTCGAATACATAACATTCCCAGCAGCGCATATCGTCGACAATAGACAGA  
AGTGAAGATCGATAG

+

FFFF:FFFFFFFFFFFFFFFFFFFFFFFFFFFFFFFFFFFFFFFFFFFFFFFFFFFFFFFFFFFFFFFFFFFF  
FFFFFFFFFFFFFFFFFFFFFFFFFFFFFFFFFFFFFFFFFFFFFFFFFFFFFFFFFFFFFFFFFFFFFFFFFFFF  
FFFFF:FFFFFFFF

@A00721:190:HGJW7DSXY:4:2666:20157:22874 2:N:0:TCTGCAAG+GCTGCACT  
CAGAATGACGTCAGAGGTTCTAATAACATTCTGGTGTGACGAATTCAGAACTTTATTGTTCTACAATA  
ACGAAAGCGAACATGAATCGTCGAATACATAACATTCCCAGCAGCGCATATCGTCGACAATAGACAGA  
AGTGAAGATCGATAG

+

FFFFFFFFFFFFFFFFFFFFFFFFFFFFFFFFFFFFFFFFFFFFFFFFFFFFFFFFFFFFFFFFFFFFFFFFFFFF  
FFFFFFFFFFFFFFFFFFFFFFFFFFFFFFFFFFFFFFFFFFFFFFFFFFFFFFFFFFFFFFFFFFFFFFFFFFFF  
FFFFFFFFFFFFFFFF

@A00721:190:HGJW7DSXY:4:1123:27100:26005 2:N:0:TCTGCAAG+GCTGCACT  
CAGAATGACGTCAGAGGTTCTAATAACATTCTGGTGTGACGAATTCAGAACTTTATTGTTCTACAATA  
ACGAAAGCGAACATGAATCGTAGAATACATAACATTCCCAGCAGCGCATATCGTCGACAATAGACAGA  
AGTGAAGATCTATA

+

:F:F:F,FF,:F:FFFFFF:FFFFFF:FF,:FFF,F:FFFFFF,FFF,FF::FFFFFF:FFFFFFF  
F,:F:FFFFFF,FF:FFFF,,FFFFFFFFFFFFFFFF,:FFFFFFFFFFFFFF,FFF,FFFFFF,FFF,F  
FFFFFF::,F:FFF

@A00721:190:HGJW7DSXY:4:2344:16215:28009 2:N:0:TCTGCAAG+GCTGCACT  
CAGAATGACGTCAGAGGTTCTAATAACATTCTGGTGTGACGAATTCAGAACTTTATTGTTCTACAATA  
ACGAAAGCGAACATGAATCGTCGAATACATAACATTCCCAGCAGCGCATATCGTCGACAATAGACAGA  
AGTGAAGATCGATA

+

FFFF,FFFFFFFFFFFFFF:FFFFFFFFFFFFFFFFFFFFFFFFFFFFFFFFFFFFFFFFFFFFFFFFFFFFF:FFFFF  
FFFFFFFFFFFFFFFFFFFFFFFFFFFFFFFFFFFFFFFFFFFFFFFFFFFFFFFFFFFFFFFFFFFFFFFFFFFF  
FFFFFFFFFFFFFFFF

@A00721:190:HGJW7DSXY:4:1119:20817:2660 2:N:0:TCTGCAAG+GCTGCACT  
ATGATATGAGACAATTGATGCGGACCAGCAATGACGTCAGAGGTTCTAATAACATTCTGGTGTGAC  
GAATTCAGAACTTTATTGTTCTACAATAACGAAAGCGAACATGAATCGTCGAATACATAACATTCCCA  
GCAGCAAGATCGGAA

+

FFFFFFFFFFFFFFFFFFFFFFFFFFFFFFFFFFFFFFFFFFFFFFFFFFFFFFFFFFFFFFFFFFFFFFFFFFFF  
FFFFFFFFFFFFFFFFFFFFFFFFFFFFFFFFFFFFFFFFFFFFFFFFFFFFFFFFFFFFFFFFFFFFFFFFFFFF  
FFFFFFFFFFFFFFFF:F  
FFFFFFFFFFFFFF:F

$+$ 

+

 $+$ 

+

+

+

+

.....

FFFFFFFFFFFFFFFFFFFFFFFFFFFFFFFFFFFFFFFFFFFFFFFFFFFFFFFFFFFFFFFFFFFFFFFFFFFFFFFF  
FFFFFFFFFFFFFFFF

@A00721:190:HGJW7DSXY:4:2269:3341:34491 2:N:0:TCTGCAAG+GCTGCACT  
ATGATATGAGACAATTGATGCGGACCACCAGAATGACGTCAGAGGTTCTAATAACATTCTGGTGTGAC  
GAATTCAGAACTTTATTGTTCTACAATAACGAAAGCGAACATGAATCGTCGAATACATAACATTCCCA  
GCAGCAAGATCGGAA

+

FFFFFFFFFFFFFFFFFFFFFFFFFFFFFFFFFFFFFFFFFFFFFFFFFFFFFFFFFFFFFFFFFFFFFFFFFFFFFFFF  
FFF:FFFFFFFFFFFFFFFFFFFFFFFFFFFFFFFFFFFFFFFFFFFFFFFFFFFFFFFFFFFFFFFFFFFFFFFF  
FFFFF:FFFFFFFFF:

@A00721:190:HGJW7DSXY:4:2378:10059:3975 2:N:0:TCTGCAAG+GCTGCACT  
ATGATATGAGACAATTGATGCGGACCACCAGAATGACGTCAGAGGTTCTAATAACATTCTGGTGTGAC  
GAATTCAGAACTTTATTGTTCTACAATAACGAAAGCGAACATGAATCGTCGAATACATAACATTCCCA  
GCAGCAAGATCGGAA

+

FFFFFFFFFFFFFFFFFFFFFFFFFFFFFFFFFFFFFFFFFFFFFFFFFFFFFFFFFFFFFFFFFFFFFFFFFFFFFFFF  
FFFFFFFFFFFFFFFFFFFFFFFFFFFFFFFFFFFFFFFFFFFFFFFFFFFFFFFFFFFFFFFFFFFFFFFFFFFFFFFF  
FFFFFFFFFFFFFFFF

@A00721:190:HGJW7DSXY:4:2378:9968:7482 2:N:0:TCTGCAAG+GCTGCACT  
ATGATATGAGACAATTGATGCGGACCACCAGAATGACGTCAGAGGTTCTAATAACATTCTGGTGTGAC  
GAATTCAGAACTTTATTGTTCTACAATAACGAAAGCGAACATGAATCGTCGAATACATAACATTCCCA  
GCAGCAAGATCGGAA

+

FFFFFFFFFFFFFFF::FFFFFFFFFFFFFFFFFFFFFFFFFFFFFFFFFFFFFFFFFFFFFFFFFFFFFFFFFFFFF,FFFFFFFFFFFFF  
:FFFFFFFFFFFFFFFFFFFFFFFFFFFFFFFFFFFFFFFFFFFFFFFFFFFFFFFFFFFFFFFFFFFFFFFFFFFFF  
FFFFFFFFFFFFFFFF

@A00721:190:HGJW7DSXY:4:2563:19416:34585 2:N:0:TCTGCAAG+GCTGCACT  
ATGATATGAGACAATTGATGCGGACCACCAGAATGACGTCAGAGGTTCTAATAACATTCTGGTGTGAC  
GAATTCAGAACTTTATTGTTCTACAATAACGAAAGCGAACATGAATCGTCGAATACATAACATTCCCA  
GCAGCAAGATCGGAA

+

FFFFFFFFFFFFFFF:FFFFFFFFFFFFFFFFFFFFFFFFFFFFFFFFFFFFFFFFFFFFFFFFFFFFFFFFFFFFF  
FFFFFFFFFFFFFFFFFFFFFFFFFFFFFFFFFFFFFFFFFFFFFFFFFFFFFFFFFFFFFFFFFFFFFFFFFFFFF:FFFFFFFFFFFFFFFFFFFFF  
FFFFFFFFFFFFFFF:F

@A00721:190:HGJW7DSXY:4:2618:10140:14011 2:N:0:TCTGCAAG+GCTGCACT  
ATGATATGAGACAATTGATGCGGACCACCAGAATGACGTCAGAGGTTCTAATAACATTCTGGTGTGAC  
GAATTCAGAACTTTATTGTTCTACAATAACGAAAGCGAACATGAATCGTCGAATACATAACATTCCCA  
GCAGCAAGATCGGAA

+

FFFFFFFFFFFFFFF:FFFFFFFFFFFFFFFFFFFFFFFFFFFFFFFFFFFFFFFFFFFFFFFFFFFFFFFFFFFFF  
FFFFFFFFFFFFFFFFFFFFFFFFFFFFFFFFFFFFFFFFFFFFFFFFFFFFFFFFFFFFFFFFFFFFFFFFFFFFF:FF  
FFFFFFF:FFFFFFFFF

@A00721:190:HGJW7DSXY:4:2133:32832:11443 2:N:0:TCTGCAAG+GCTGCACT  
ATGATATGAGACAATTGATGCGGACCACCAGAATGACGTCAGAGGTTCTAATAACATTCTGGTGTGAC  
GAATTCAGAACTTTATTGTTCTACAATAACGAAAGCGAACATGAATCGTCGAATACATAACATTCCCA  
GCAGCAAGATCGGA

+

FFFFFFFFFFFFFFFFFFFFFFFFFFFFFFFFFFFFFFFFFFFFFFFFFFFFFFFFFFFFFFFFFFFFFFFFFFFFF  
FFFFFFFFFFFFFFFFFFFFFFFFFFFFFFFFFFFFFFFFFFFFFFFFFFFFFFFFFFFFFFFFFFFFFFFFFFFFF:FFFFFFFFFFF:FFF,FFFFFFFFFFFFFFF:F  
FFFFFFFFF:FFF:F

@A00721:190:HGJW7DSXY:4:1345:10438:16470 2:N:0:TCTGCAAG+GCTGCACT  
TCATTAATAAATGATATGAGACAATTGATGCGGACCACCAGAATGACGTCAGAGGTTCTAATAACAT  
TCTGGTGTGACGAATTCAGAACTTTATTGTTCTACAATAACGAAAGCGAACATGAATCGTCGAATACA  
TAACATTCCCAGCAG

+  
FFFFFFFFFFFFFFFFFFFFFFFFFFFFFFFFFFFFFFFFFFFFFFFFFFFFFFFFFFFFFFFFFFFFFFFF  
FFFFFFFFFFFFFFFFFFFFFFFFFFFFFFFFFFFFFFFFFFFFFFFFFFFFFFFFFFFFFFFFFFFFFFFF  
FFFFFFFFFFFF,FF:F

@A00721:190:HGJW7DSXY:4:1569:10854:33442 2:N:0:TCTGCAAG+GCTGCACT  
TCATTAATAAATGATATGAGACAATTGATGCGGACCACCAGAATGACGTCAGAGGTTCTAATAACAT  
TCTGGTGTGACGAATTCAGAACTTTATTGTTCTACAATAACGAAAGCGAACATGAATCGTCGAATACA  
TAACATTCCCAGCAG

+  
FFFFFFFFFFFFFFFFFFFFFFFFFFFFFFFFFFFFFFFFFFFFFFFFFFFFFFFFFFFFFFFFFFFFFFFF  
FFFFFFFFFFFFFFFFFFFFFFFFFFFFFFFFFFFFFFFFFFFFFFFFFFFFFFFFFFFFFFFFFFFFFFFF  
:FFFFFFFFFFFFFFFF

@A00721:190:HGJW7DSXY:4:2158:13991:36808 2:N:0:TCTGCAAG+GCTGCACT  
TCATTAATAAATGATATGAGACAATTGATGCGGACCACCAGAATGACGTCAGAGGTTCTAATAACAT  
TCTGGTGTGACGAATTCAGAACTTTATTGTTCTACAATAACGAAAGCGAACATGAATCGTCGAATACA  
TAACATTCCCAGCAG

+  
FFFFFFFFFFFFFFFFFFFFFFFFFFFFFFFFFFFFFFFFFFFFFFFFFFFFFFFFFFFFFFFFFFFFFFFF  
FFFFFFFFFFFFFFFFFFFFFFFFFFFFFFFFFFFFFFFFFFFFFFFFFFFFFFFFFFFFFFFFFFFFFFFF  
FFFFFFFFFFFFFFFF

@A00721:190:HGJW7DSXY:4:2369:26304:18114 2:N:0:TCTGCAAG+GCTGCACT  
TCATTAATAAATGATATGAGACAATTGATGCGGACCACCAGAATGACGTCAGAGGTTCTAATAACAT  
TCTGGTGTGACGAATTCAGAACTTTATTGTTCTACAATAACGAAAGCGAACATGAATCGTCGAATACA  
TAACATTCCCAGCAG

+  
FFFFFFFFFFFFFFFFFFFFFFFFFFFFFFFFFFFFFFFFFFFFFFFFFFFFFFFFFFFFFFFFFFFFFFFF  
FFFFFFFFFFFFFFFFFFFFFFFFFFFFFFFFFFFFFFFFFFFFFFFFFFFFFFFFFFFFFFFFFFFFFFFF  
F:FFFFFFFFFFFFFFFF

@A00721:190:HGJW7DSXY:4:2578:15673:28635 2:N:0:TCTGCAAG+GCTGCACT  
TCATTAATAAATGATATGAGACAATTGATGCGGACCACCAGAATGACGTCAGAGGTTCTAATAACAT  
TCTGGTGTGACGAATTCAGAACTTTATTGTTCTACAATAACGAAAGCGAACATGAATCGTCGAATACA  
TAACATTCCCAGCAG

+  
FFF,FFFF:FFFFFFFFFFFFFFFFFFFFFFFFFFFFFFFFFFFFFFFFFFFFFFFFFFFFFFFFFFFF  
FFFFFFFFFFFFFFFFFFFFFFFFFFFFFFFFFFFFFFFFFFFFFFFFFFFFFFFFFFFFFFFFFFFFFFFF  
FFFFFFFFFFFFFFFF

@A00721:190:HGJW7DSXY:4:2661:24758:27993 2:N:0:TCTGCAAG+GCTGCACT  
TCATTAATAAATGATATGAGACAATTGATGCGGACCACCAGAATGACGTCAGAGGTTCTAATAACAT  
TCTGGTGTGACGAATTCAGAACTTTATTGTTCTACAATAACGAAAGCGAACATGAATCGTCGAATACA  
TAACATTCCCAGCAG

+  
FFFFFFFFFFFF::FFFFFF,FFFFFFFFFFFFFFFFFFFFFFFFFFFFFFFFFFFFFFFFFFFFFFFF  
FFFFFFFFFFFFFFFFFFFFFFFFFFFFFFFFFFFFFFFFFFFFFFFFFFFFFFFFFFFFFFFF:F,FFFF:FFFFFFFFFFFFFFFF,F::F:,  
FFFFFFFF,FF:FFF

@A00721:190:HGJW7DSXY:4:1220:3504:22780 2:N:0:TCTGCAAG+GCTGCACT  
TCCTCATTAATAAATGATATGAGACAATTGATGCGGACCACCAGAATGACGTCAGAGGTTCTAATAA  
CATTCTGGTGTGACGAATTCAGAACTTTATTGTTCTACAATAACGAAAGCGAACATGAATCGTCGAAT  
ACATAACATTCCCAG

+  
FFFFFFFFFFFFFFFFFFFFFFFFFFFFFFFFFFFFFFFFFFFFFFFFFFFFFFFFFFFFFFFFFFFFFFFF  
FFFFFFFFFFFFFFFFFFFFFFFFFFFFFFFFFFFFFFFFFFFFFFFFFFFFFFFFFFFFFFFF::FFFFFFFFFFFFFFFFFFFFFFFF:FFFFFFFFFFFFFFFF:  
FFFFFFFFFFFFFFFF

@A00721:190:HGJW7DSXY:4:1238:4056:32878 2:N:0:TCTGCAAG+GCTGCACT  
TCCTCATTAATAAATGATATGAGACAATTGATGCGGACCACCAGAATGACGTCAGAGGTTCTAATAA

CATTCTGGTGTGACGAATTCAGAACTTTATTGTTCTACAATAACGAAAGCGAACATGAATCGTCGAAT  
ACATAACATTCCCAG

[illegible]

TCCTCATTA ACTAAATGATATGAGACAATTGATGCGGACCACCAGAATGACGTCAGAGGTTCTAATAA  
CATTCTGGTGTGACGAATTCAGAACTTTATTGTTCTACAATAACGAAAGCGAACATGAATCGTCGAAT  
ACATAACATTCCCAG

[illegible]

TCCTCATTAACATAAATGATATGAGACAATTGATGCGGACCACCAGAATGACGTCAGAGGTTCTAATAA  
CATTCTGGTGTGACGAATTCAGAACTTTATTGTTCTACAATAACGAAAGCGAACATGAATCGTCGAAT  
ACATAACATTCCCAG

```
FFFFFFFFFFFFFFFFFFFFFFFFFFFFFFFFFFFFFFFFFFFFFFFFFFFFFFFFFFFFFFF
FFFFFFFFFFFFFFFFFFFFFFFFFFFFFFFFFFFF,FFFFFFFFFFFFFFFFFFFFFFFFFFFF
FFFFFFFFFFFFFFF,F
```

TCCTCATTAACATAAATGATATGAGACAATTGATGCGGACCACCAGAATGACGTCAGAGGTTCTAATAA  
CATTCTGGTGTGACGAATTCAGAACTTTATTGTTCTACAATAACGAAAGCGAACATGAATCGTCGAAT  
ACATAACATTCCCAG

```

FFFFFFFFFFFFFFFFFFFFFFFFFFFFFFFFFFFFFFFFFFFFFFFFFFFFFFFFFFFFFFFFFFFFFFFF
FFFFFFFFFFFFFFFF:FFFFFF:FFFFFFFF:FFFFFFFFFFFFFFFFFFFFFFFFFFFFFFFFFFFFFF:F
FFFFFFFFFFFFFFFF

```

TCCTCATTAACATAAATGATATGAGACAATTGATGCGGACCACCAGAATGACGTCAGAGGTTCTAATAA  
CATTCTGGTGTGACGAATTCAGAACTTTATTGTTCTACAATAACGAAAGCGAACATGAATCGTCGAAT  
ACATAACATTCCCAG

```
FFF:FFFFFFFFFFFFFFFFFFFFFFFFFFFFFFFFFFFFFFFFFFFFFFFFFFFFFFFFFFFF:FFFFFFFF
FFFFFFFF:F:FFFF:FF,FFFFFFFFFFFF:FFFFFFFFFFFFFFFF:FFFFFFFFFFFFFFFFFFFFF:
FFFFFFFFEE::FFFFF
```

ATTATCCTCATTAATAATGATATGAGACAATTGATGCGGACCACCAGAATGACGTCAGAGGTTCTA  
ATAACATTCTGGTGTGACGAATTCAGAACTTTATTGTTCTACAATAACGAAAGCGAACATGAATCGTC  
GAATACATAACATTC

[illegible]

ATTATCCTCATTAATAATGATATGAGACAATTGATGCGGACCACCAGAATGACGTCAGAGGTTCTA  
ATAACATTCTGGTGTGACGAATTCAGAACTTTATTGTTCTACAATAACGAAAGAGAACATGAATCGTC  
GAATACATAACATTC

```
FFF,FFFFFFFF,FFFFFFFF,FF:FFFF:F:FFFF,FFFFFFFFFFFF:FFFFFFFFFFFFFFFF:F
FFFFFFFF:FFFFFFFF:FF:FFFF:FFFFFFFFFFFF:FFF:FFFF,FF:FFFFFFFF,FFFFFF:FFFFFF
:E:FFFFFF:FFF:F
```

@A00721:190:HGJW7DSXY:4:1502:4472:33442 2:N:0:TCTGCAAG+GCTGCACT  
ATTATCCTCATTAATAAATGATATGAGACAATTGATGCGGACCACCAGAATGACGTCAGAGGTTCTA  
ATAACATTCTGGTGTGACGAATTCAGAACTTTATTGTTCTACAATAACGAAAGCGAACATGAATCGTC  
GAATACATAACATTC

```
FFFFFFFF:FF:FFFFFFFFFFFFFFFFFFFFFFFFFFFFFFFFFFFFFFFF,FFFFFFFFFFFFFFFFFFFF
FFFFFFFFFFFFFFFFFFFFFFFFFFFFFFFFFFFFFFFF,FFFFFFFFFFFFFFFFFFFFFFFFFFFFFFFF
FFFFFFFFFFFFFFFF
```

+

```

FFFFFFFFFFFFFFFFFFFFFFFFFFFFFFFF:FFFFFFFFFFFFFFFFFFFFFFFFFFFFFFFF,FF:F
FFFFFFFFFFFFFFFFFFFFFFFFFFFFFFFF:FFFFFFFFFFFFFFFF:FFFF:FFFFFFFFFFFFFF:FFF:FFFFFFFFFFFF
FFFFFFFFFFFFFFFFFFFF

```

+

[illegible]

+

```
FFF:FFFFFFFFFFFFFFFF,FFFFFFFF:FFFFFFFFFFFFFFFF,FFFFFFFFFFFFFFFF
FFFFFFFF:FFFFFFFFFFFFFFFF:FF:F:FFFFFFFFFFFFFFFFFFFFFFFFFFFFFFFF
:FFFFFFF,FFFFFFF
```

+

[illegible] $+$ 

```
FFFFFFFFFFFFFFFFFFFFF,:FFFFFFFFFFFFFFFFFFFFFF:FFFFFFFFFF:FF  
FFFFFFFFFFF,FFFFFFFF:FFFFFFFFFFFFFFFFFFFF,,f:FFFFFF,Ffff:Ff:FFFFFF  
FFFFFFFFFFFFFFFF
```

+

[illegible]



FFFFFFFFFFFFFFFFFFFFFFFF:FFF:FFFFFFFFFFFFFFFF:FFFF:FF,FFFF:FFFFFF:FFFFFF,  
FFFFFFFFFFFF:FFFF

@A00721:190:HGJW7DSXY:4:1529:30147:9706 2:N:0:TCTGCAAG+GCTGCACT  
ATATTATCCTCATTAATACTAAATGATATGAGACAATTGATGCGGACCACCAGAATGACGTCAGAGGTTT  
TAATAACATTCTGGTGTGACGAATTCAGAACTTTATTGTTCTACAATAACGAAAGCGAACATGAATCG  
TCGAATACATAACAT

+

FFFFFFFFFFFFFFFFFFFFFFFF,FFFFFFFFFFFFFFFFFFFFFFFFFFFFFFFFFFFFFFFFFFFFFFFF  
FFFFFFFFFFFFFFFFFFFFFFFFFFFFFFFFFFFFFFFFFFFFFFFFFFFFFFFFFFFFFFFFFFFFFFFF:  
FFFFFFFFFFFFFFFFFFFFFFFF

@A00721:190:HGJW7DSXY:4:1535:31548:6057 2:N:0:TCTGCAAG+GCTGCACT  
ATATTATCCTCATTAATACTAAATGATATGAGACAATTGATGCGGACCACCAGAATGACGTCAGAGGTTT  
TAATAACATTCTGGTGTGACGAATTCAGAACTTTATTGTTCTACAATAACGAAAGCGAACATGAATCG  
TCGAATACATAACAT

+

FFFFFFFFFFFFFFFFFFFFFFFFFFFFFFFFFFFFFFFFFFFFFFFFFFFFFFFFFFFFFFFFFFFFFFFF  
FFFFFFFFFFFFFFFFFFFFFFFFFFFFFFFFFFFFFFFFFFFFFFFFFFFFFFFFFFFFFFFFFFFFFFFF:  
FFFFFFFFFFFFFFFFFFFFFFFF

@A00721:190:HGJW7DSXY:4:2208:24795:7357 2:N:0:TCTGCAAG+GCTGCACT  
ATATTATCCTCATTAATACTAAATGATATGAGACAATTGATGCGGACCACCAGAATGACGTCAGAGGTTT  
TAATAACATTCTGGTGTGACGAATTCAGAACTTTATTGTTCTACAATAACGAAAGCGAACATGAATCG  
TCGAATACATAACAT

+

FFFFFFFFFFFFFFFFFFFFFFFFFFFFFFFFFFFFFFFFFFFFFFFFFFFFFFFFFFFFFFFFFFFFFFFF  
FFFFFFFFFFFFFFFFFFFFFFFFFFFFFFFFFFFFFFFFFFFFFFFFFFFFFFFFFFFFFFFFFFFFFFFF:  
FFFFFFFFFFFFFFFFFFFFFFFF

@A00721:190:HGJW7DSXY:4:2278:4842:29512 2:N:0:TCTGCAAG+GCTGCACT  
ATATTATCCTCATTAATACTAAATGATATGAGACAATTGATGCGGACCACCAGAATGACGTCAGAGGTTT  
TAATAACATTCTGGTGTGACGAATTCAGAACTTTATTGTTCTACAATAACGAAAGCGAACATGAATCG  
TCGAATACATAACAT

+

FFFFFFFFFFFFFFFFFFFFFFFFFFFFFFFFFFFFFFFFFFFFFFFFFFFFFFFFFFFFFFFFFFFFFFFF  
F:FFFFFFFFFFFFFFFFFFFFFFFFFFFFFFFFFFFFFFFFFFFFFFFFFFFFFFFFFFFFFFFF:  
FFFF,FFFF:FFFF

@A00721:190:HGJW7DSXY:4:1129:20817:7827 2:N:0:TCTGCAAG+GCTGCACT  
CAAACATATCATCAAGGATAAATATTATCCTCATTAATACTAAATGATATGAGACAATTGATGCGGACCA  
CCAGAATGACGTCAGAGGTTCTAATAACATTCTGGTGTGACGAATTCAGAACTTTATTGTTCTACAAT  
AACGAAAGCGAACAT

+

FFFFFFFFFFFFFFFFFFFFFFFFFFFFFFFFFFFFFFFFFFFFFFFFFFFFFFFFFFFFFFFFFFFFFFFF  
FFFFFFFFFFFFFFFFFFFFFFFFFFFFFFFFFFFFFFFFFFFFFFFFFFFFFFFFFFFFFFFFFFFFFFFF:  
FFFFFFFFFFFFFFFFFFFFFFFF

@A00721:190:HGJW7DSXY:4:2174:21703:11459 2:N:0:TCTGCAAG+GCTGCACT  
CAAACATATCATCAAGGATAAATATTATCCTCATTAATACTAAATGATATGAGACAATTGATGCGGACCA  
CCAGAATGACGTCAGAGGTTCTAATAACATTCTGGTGTGACGAATTCAGAACTTTATTGTTCTACAAT  
ACCGAAAGCGAACAT

+

FFFFFFFFFFFF,F,FFFFFFFFFFFF,FFFFFFFFFFFFFFFFFFFFFFFF:F:FFFF:FFF,FFFFFFFF:FF:F  
:FFFF:,FFF:FFFFFFFF::FF:FFFF:FFFFFF:FFFF,F:FFFFFFFF:FFF,,F:FFFFFFFF  
F,F,:FFF:F:FFFF

@A00721:190:HGJW7DSXY:4:2404:30897:10598 2:N:0:TCTGCAAG+GCTGCACT  
CAAACATATCATCAAGGATAAATATTATCCTCATTAATACTAAATGATATGAGACAATTGATGCGGACCA  
CCAGAATGACGTCAGAGGTTCTAATAACATTCTGGTGTGACGAATTCAGAACTTTATTGTTCTACAAT  
AACGAAAGCGAACAT

+  
FFF:FFFFFFFFFFFFFFFFFFFFFFFFFFFFFFFFFFFFFFFFFFFFFFFFFFFFFFFFFFFFFFFFFFFFFFFF  
FFFFFFFFFFFFFFFFFFFFFFFFFFFFFFFFFFFFFFFFFFFFFFFFFFFFFFFFFFFFFFFFFFFFFFFF  
F:FFF:FFF:FFFF  
@A00721:190:HGJW7DSXY:4:2413:3568:17347 2:N:0:TCTGCAAG+GCTGCACT  
CAAACATATCATCAAGGATAAATATTATCCTCATTAATAAATGATATGAGACAATTGATGCGGACCA  
CCAGAATGACGTGAGAGGTTCTAATAACATTCTGGTGTGACGAATTCAGAACTTTATTGTTCTACAAT  
AACGAAAGCGAACAT  
+  
FFFFFFFFFFFFFFFFFFFFFFFFFFFFFFFFFFFFFFFFFFFFFFFFFFFFFFFFFFFFFFFFFFFFFFFF  
FFFFF:FFFFFFFFFFFFFFFFFFFFFFFFFFFFFFFFFFFFFFFFFFFFFFFFFFFFFFFFFFFFFFFF  
FFFFFFFFFFFFFFFF  
@A00721:190:HGJW7DSXY:4:2469:31385:5588 2:N:0:TCTGCAAG+GCTGCACT  
CAAACATATCATCAAGGATAAATATTATCCTCATTAATAAATGATATGAGACAATTGATGCGGACCA  
CCAGAATGACGTGAGAGGTTCTAATAACATTCTGGTGTGACGAATTCAGAACTTTATTGTTCTACAAT  
AACGAAAGCGAACAT  
+  
FFFFFFFFFFFFFFFF:FFFFFFFFFFFFFFFFFFFFFFFFFFFFFFFFFFFFFFFFFFFFFFFFFFFFFFFF  
:FFFFFFFF:FFFFFFFFFFFFFFFFFFFFFFFFFFFFFFFFFFFFFFFFFFFFFFFFFFFFFFFF:FFFFFFFF  
FFFFF:F:FFFFFFFF  
@A00721:190:HGJW7DSXY:4:2477:3007:11898 2:N:0:TCTGCAAG+GCTGCACT  
CAAACATATCATCAAGGATAAATATTATCCTCATTAATAAATGATATGAGACAATTGATGCGGACCA  
CCAGAATGACGTGAGAGGTTCTAATAACATTCTGGTGTGACGAATTCAGAACTTTATTGTTCTACAAT  
AACGAAAGCGAACAT  
+  
F::FFFFFFFFFFFFFFFFFFFFFFFFFFFFFFFFFFFFFFFFFFFFFFFFFFFFFFFFFFFFFFFF  
FFFFFFFFFFFFFFFFFFFFFFFF:FFFFFFFFFFFFFFFF:FFFFFFFFFFFFFFFF,FFFFFFFF  
FFF:FF:FFFFFFFF  
@A00721:190:HGJW7DSXY:4:2535:19452:26162 2:N:0:TCTGCAAG+GCTGCACT  
CAAACATATCATCAAGGATAAATATTATCCTCATTAATAAATGATATGAGACAATTGATGCGGACCA  
CCAGAATGACGTGAGAGGTTCTAATAACATTCTGGTGTGACGAATTCAGAACTTTATTGTTCTACAAT  
AACGAAAGCGAACAT  
+  
:FFFFFFFFFFFFFFFFFFFFFFFFFFFFFFFFFFFFFFFFFFFFFFFFFFFFFFFFFFFFFFFF:FFFFFFFF  
FFFFFFFF:FFFFFFFFFFFFFFFFFFFFFFFFFFFFFFFFFFFFFFFFFFFFFFFFFFFFFFFF  
FFF:FFF:FFFFF:  
@A00721:190:HGJW7DSXY:4:2560:17797:32628 2:N:0:TCTGCAAG+GCTGCACT  
CAAACATATCATCAAGGATAAATATTATCCTCATTAATAAATGATATGAGACAATTGATGCGGACCA  
CCAGAATGACGTGAGAGGTTCTAATAACATTCTGGTGTGACGAATTCAGAACTTTATTGTTCTACAAT  
AACGAAAGCGAACAT  
+  
FFFFFFFFFFFFFFFFFFFFFFFFFFFFFFFFFFFFFFFFFFFFFFFFFFFFFFFFFFFFFFFF:FFFFFFFF  
FFFFFFFFFFFFFFFFFFFFFFFFFFFFFFFFFFFFFFFFFFFFFFFF:FFFFFFFFFFFFFFFF:FFFFFFFF  
:FFFF:FFFFFFFF  
@A00721:190:HGJW7DSXY:4:2641:7889:29747 2:N:0:TCTGCAAG+GCTGCACT  
CAAACATATCATCAAGGATAAATATTATCCTCATTAATAAATGATATGAGACAATTGATGCGGACCA  
CCAGAATGACGTGAGAGGTTCTAATAACATTCTGGTGTGACGAATTCAGAACTTTATTGTTCTACAAT  
AACGAAAGCGAACAT  
+  
FFFFFFFFFFFFFFFFFFFFFFFFFFFFFFFFFFFFFFFFFFFFFFFFFFFFFFFFFFFFFFFF:FFFFFFFF  
FFFFF:FFFFFFFFFFFF:FF:FFFFFFFFFFFFFFFFFFFFFFFF:FFFFFFFFFFFFFFFF  
FFFFF:FFFFFFFF  
@A00721:190:HGJW7DSXY:4:1159:28926:7905 2:N:0:TCTGCAAG+GCTGCACT  
AAACATATCATCAAGGATAAATATTATCCTCATTAATAAATGATATGAGACAATTGATGCGGACCAC



@A00721:190:HGJW7DSXY:4:1152:26449:18552 2:N:0:TCTGCAAG+GCTGCACT  
ATCAAACATATCATCAAGGATAAATATTATCCTCATTAATAATGATATGAGACAATTGATGCGGAC  
CACCAGAATGACGTGAGAGGTTCTAATAACATTCTGGTGTGACGAATTCAGAACTTTATTGTTCTACA  
ATAACGAAAGCGAAC

[illegible]

+

[illegible] $+$ [illegible]

+

```

FFFFFFFFFFFFFFFFFFFFFFFFFFFFFFFF,FFFFFFFFFFFFFFFFFFFFFFFFFFFFFFFF
FFFFFFFFFFFFFFFFFFFFFFFFFFFFFFFF:FFFFFFFFFFFFFF,FFFFFFFFFFFFFFFF
FFFFFFFFFFFFFFFF

```

 $+$ [illegible]

+

```
FFFFF:FFFFFFFFFFFFFFFFFFFFFFFFFFFFFFFFFFFFFFFF:FFFFFFFFFFFFFFFFFFFFFFFFFFFFFFF
FFFFFFFFFFFFFFFFFFFFFFFFFFFF::FFFFFFFF:FFFFFFFFFFFFFFFFFFFFFFFF:FFFFFFFFFFF:FFFFF
FFF:FFFFFFFFFFFF
```

+

FFFFFFFFFFFFFFFFFFFFFFFF:FFFFFFFFFFFFFFFFFFFFFFFFFFFFFFFFFFFFFFFFFFFFFFFFFFFFFFFF

@A00721:190:HGJW7DSXY:4:1471:26793:35336 2:N:0:TCTGCAAG+GCTGCACT  
ATCAAACATATCATCAAGGATAAATATTATCCTCATTAATAATGATATGAGACAATTGATGCGGAC  
CACCAGAATGACGTGAGAGGTTCTAATAACATTCTGGTGTGACGAATTCAGAACTTTATTGTTCTACA  
ATAACGAAAGCGAAC

@A00721:190:HGJW7DSXY:4:1611:18611:9987 2:N:0:TCTGCAAG+GCTGCACT  
ATCAAACATATCATCAAGGATAAATATTATCCTCATTAATAATGATATGAGACAATTGATGCGGAC  
CACCAGAATGACGTGAGAGTTCTAATAACATTCTGGTGTGACGAATTCAGAACTTTATTGTTCTACA  
ATAACGAAAGCGAAC

@A00721:190:HGJW7DSXY:4:1611:20012:10504 2:N:0:TCTGCAAG+GCTGCACT  
ATCAAACATATCATCAAGGATAAATATTATCCTCATTAATAAATGATATGAGACAATTGATGCGGAC  
CACCAGAATGACGTGAGAGTTCTAATAACATTCTGGTGTGACGAATTCAGAACTTTATTGTTCTACA  
ATAACGAAAGCGAAC

@A00721:190:HGJW7DSXY:4:1660:3305:18959 2:N:0:TCTGCAAG+GCTGCACT  
ATCAAACATATCATCAAGGATAAATATTATCCTCATTAATAATGATATGAGACAATTGATGCGGAC  
CACCAGAATGACGTGAGAGTTCTAATAACATTCTGGTGTGACGAATTCAGAACTTTATTGTTCTACA  
ATAACGAAAGCGAAC

@A00721:190:HGJW7DSXY:4:2143:6732:33223 2:N:0:TCTGCAAG+GCTGCACT  
ATCAAACATATCATCAAGGATAAATATTATCCTCATTAATAAATGATATGAGACAATTGATGCGGAC  
CACCAGAATGACGTCAGAGGTTCTAATAACATTCTGGTGTGACGAATTCAGAACTTTATTGTTCTACA  
ATAACGAAAGCGAAC

@A00721:190:HGJW7DSXY:4:2153:8196:27868 2:N:0:TCTGCAAG+GCTGCACT  
ATCAAACATATCATCAAGGATAAATATTATCCTCATTAATAATGATATGAGACAATTGATGCGGAC  
CACCAGAATGACGTGAGAGTTCTAATAACATTCTGGTGTGACGAATTCAGAACTTTATTGTTCTACA  
ATAACGAAAGCGAAC

@A00721:190:HGJW7DSXY:4:2233:11234:29590 2:N:0:TCTGCAAG+GCTGCACT  
ATCAAACATATCATCAAGGATAAATATTATCCTCATTAATAAATGATATGAGACAATTGATGCGGAC  
CACCAGAATGACGTGAGAGTTCTAATAACATTCTGGTGTGACGAATTCAGAACTTTATTGTTCTACA  
ATAACGAAAGCGAAC

+  
FFFFFFFFFFFFFFFFFFFFFFFFFFFFFFFFFFFFFFFFFFFFFFFFFFFFFFFFFFFFFFFFFFFFFFFF  
FFFFFFFFFFFFFFFFFFFFFFFFFFFFFFFFFFFFFFFFFFFFFFFFFFFFFFFFFFFFFFFFFFFFFFFF  
FFFFFFFFFFFF:FFFF

@A00721:190:HGJW7DSXY:4:2257:7563:21386 2:N:0:TCTGCAAG+GCTGCACT  
ATCAAACATATCATCAAGGATAAATATTATCCTCATTAATAAATGATATGAGACAATTGATGCGGAC  
CACCAGAATGACGTCAGAGGTTCTAATAACATTCTGGTGTGACGAATTCAGAACTTTATTGTTCTACA  
ATAACGAAAGCGAAC

+  
:FFFFFFFFFFFFFFFFFFFFFFFFFFFFFFFFFFFFFFFFFFFFFFFFFFFFFFFFFFFFFFFFFFFF:FFF  
FFFFFFFFFFFFFFFFFFFF:FFFFFFFFFFFFFFFFFFFF:FFFF:FF:FFFF:F:FF:F,FFFFFFFFFFFF  
FFFF,:FFFF:FFFF

@A00721:190:HGJW7DSXY:4:2404:8404:16078 2:N:0:TCTGCAAG+GCTGCACT  
ATCAAACATATCATCAAGGATAAATATTATCCTCATTAATAAATGATATGAGACAATTGATGCGGAC  
CACCAGAATGACGTCAGAGGTTCTAATAACATTCTGGTGTGACGAATTCAGAACTTTATTGTTCTACA  
ATAACGAAAGCGAAC

+  
FFFFFFFFFFFFFFFFFFFFFFFFFFFFFFFFFFFFFFFFFFFFFFFFFFFFFFFFFFFFFFFFFFFFFFFF  
FFFFFFFFFFFFFFFFFFFFFFFFFFFFFFFFFFFFFFFFFFFFFFFFFFFFFFFFFFFFFFFFFFFFFFFF  
FFFFFFFFFFFF:FFFFF

@A00721:190:HGJW7DSXY:4:2523:27661:35775 2:N:0:TCTGCAAG+GCTGCACT  
ATCAAACATATCATCAAGGATAAATATTATCCTCATTAATAAATGATATGAGACAATTGATGCGGAC  
CACCAGAATGACGTCAGAGGTTCTAATAACATTCTGGTGTGACGAATTCAGAACTTTATTGTTCTACA  
ATAACGAAAGCGAAC

+  
FFFFFFFFFFFFFFFFFFFFFFFFFFFFFFFFFFFFFFFFFFFFFFFFFFFFFFFFFFFFFFFFFFFF:FFFFFFFFFFFFFFFFFFFF  
FFFFFFF,FFFFFFFFFFFFFFFFFFFFFFFFFFFFFFFFFFFFFFFFFFFFFFFFFFFF,:FFFFFFFFFFFF:FFFF:FF,  
FFFFFFFFFFFFFFFFFFFF

@A00721:190:HGJW7DSXY:4:2528:14154:21026 2:N:0:TCTGCAAG+GCTGCACT  
ATCAAACATATCATCAAGGATAAATATTATCCTCATTAATAAATGATATGAGACAATTGATGCGGAC  
CACCAGAATGACGTCAGAGGTTCTAATAACATTCTGGTGTGACGAATTCAGAACTTTATTGTTCTACA  
ATAACGAAAGCGAAC

+  
FFFFFFFFFFFFFFFFFFFFFFFFFFFFFFFFFFFFFFFFFFFFFFFFFFFFFFFFFFFFFFFFFFFFFFFF  
FFFFFFFFFFFFFFFFFFFFFFFFFFFFFFFFFFFFFFFFFFFFFFFFFFFFFFFFFFFFFFFFFFFFFFFF  
FFFFFFFFFFFFFFFFFFFF

@A00721:190:HGJW7DSXY:4:2548:17481:1329 2:N:0:TCTGCAAG+GCTGCACT  
ATCAAACATATCATCAAGGATAAATATTATCCTCATTAATAAATGATATGAGACAATTGATGCGGAC  
CACCAGAATGACGTCAGAGGTTCTAATAACATTCTGGTGTGACGAATTCAGAACTTTATTGTTCTACA  
ATAACGAAAGCGAAC

+  
FFFFFFFFFFFFFFFFFFFFFFFFFFFFFFFFFFFFFFFFFFFFFFFFFFFFFFFFFFFFFFFFFFFFFFFF  
FFFFFFFFF:FFFFFFFFFFFFFFFFFFFFFFFFFFFFFFFFFFFFFFFFFFFFFFFFFFFFFFFFFFFFFFFF  
FFFFFFFFFFFFFFFFFFFF

@A00721:190:HGJW7DSXY:4:2652:16839:32910 2:N:0:TCTGCAAG+GCTGCACT  
ATCAAACATATCATCAAGGATAAATATTATCCTCATTAATAAATGATATGAGACAATTGATGCGGAC  
CACCAGAATGACGTCAGAGGTTCTAATAACATTCTGGTGTGACGAATTCAGAACTTTATTGTTCTACA  
ATAACGAAAGCGAAC

+  
:FFFFFFFFFFFFFFFFFFFFFFFFFFFFFFFFFFFFFFFFFFFF:FFFFFFFFFFFFFFFFFFFFFFFFFFFFFFFF  
FFFFFFFFFFFFFFFFFFFFFFFFFFFFFFFFFFFFFFFFFFFFFFFFFFFFFFFFFFFFFFFFFFFFFFFF  
FFFFFFFFFFFFFFFFFFFF

@A00721:190:HGJW7DSXY:4:2661:1163:12774 2:N:0:TCTGCAAG+GCTGCACT  
ATCAAACATATCATCAAGGATAAATATTATCCTCATTAATAAATGATATGAGACAATTGATGCGGAC

CACCAGAATGACGTCAGAGGTTCTAATAACATTCTGGTGTGACGAATTCAGAACTTTATTGTTCTACA  
ATAACGAAAGCGAAC

+

FFFFFFFFFFFFFFFFFFFFFFFFFFFFFFFFFFFFFFFFFFFFFFFFFFFFFFFFFFFFFFFFFFFFFFFF  
FFFFFFFFFFFFFFFFFFFFFFFFFFFFFFFFFFFFFFFFFFFFFFFFFFFFFFFFFFFFFFFFFFFFFFFF  
FFFFFFFFFFFF:FFFF

@A00721:190:HGJW7DSXY:4:2676:31385:26318 2:N:0:TCTGCAAG+GCTGCACT  
ATCAAACATATCATCAAGGATAAATATTATCCTCATTAATACTAAATGATATGAGACAATTGATGCGGAC  
CACCAGAATGACGTCAGAGGTTCTAATAACATTCTGGTGTGACGAATTCAGAACTTTATTGTTCTACA  
ATAACGAAAGCGAAC

+

FFFFFFFFFFFFFFFFFFFFFFFFFFFFFFFFFFFFFFFFFFFFFFFFFFFFFFFFFFFFFFFFFFFFFFFF:F  
FFFFFFFFFFFFFFFFFFFFFFFFFFFFFFFFFFFFFFFFFFFFFFFFFFFFFFFFFFFFFFFFFFFFFFFF:FFF:FF  
:FF:FFFF,FFFFF

@A00721:190:HGJW7DSXY:4:1564:9534:15123 2:N:0:TCTGCAAG+GCTGCACT  
CGATGAAATCAAACATATCATCAAGGATAAATATTATCCTCATTAATACTAAATGATATGAGACAATTGA  
TGCGGACCACCAGAATGACGTCAGAGGTTCTAATAACATTCTGGTGTGACGAATTCAGAACTTTATTG  
TTCTACAATAACGAA

+

FFFFFFFFFFFFFFFFFFFFFFFFFFFFFFFFFFFFFFFFFFFFFFFFFFFFFFFFFFFFFFFFFFFFFFFF  
FFFFFFFFFFFFFFFF:FFFFFFFFFFFFFFFFFFFFFFFFFFFFFFFFFFFFFFFFFFFFFFFFFFFFFFFFF  
FFFFFFFFFFFFFFFF

@A00721:190:HGJW7DSXY:4:2227:15564:20181 2:N:0:TCTGCAAG+GCTGCACT  
ATCAAACATATCATCAAGGATAAATATTATCCTCATTAATACTAAATGATATGAGACAATTGATGCGGAC  
CACCAGAATGACGTCAGAGGTTCTAATAACATTCTGGTGTGACGAATTCAGAACTTTATTGTTCTACA  
ATAACGAGATCGGAA

+

FFFFFFFFFFFFFFFFFFFFFFFFFFFFFFFFFFFFFFFFFFFFFFFFFFFFFFFFFFFFFFFFFFFFFFFF  
FFFFFFFFFFFFFFFFFFFFFFFFFFFFFFFFFFFFFFFFFFFFFFFFFFFFFFFFFFFFFFFFFFFFFFFF  
FFFFFFFFFFFFFFFF

@A00721:190:HGJW7DSXY:4:2530:12789:7169 2:N:0:TCTGCAAG+GCTGCACT  
ATCAAACATATCATCAAGGATAAATATTATCCTCATTAATACTAAATGATATGAGACAATTGATGCGGAC  
CACCAGAATGACGTCAGAGGTTCTAATAACATTCTGGTGTGACGAATTCAGAACTTTATTGTTCTACA  
ATAACGAGATCGGAA

+

FFFFF:FFFFFFFFFFFFFFFFFFFFFFFFFFFFFFFFFFFFFFFFFFFFFFFFFFFFFFFFFFFFFFFF  
FFFFFFFFFFFFFFFFFFFFFFFFFFFFFFFFFFFFFFFFFFFFFFFFFFFFFFFFFFFFFFFFFFFFFFFF  
FFFFFFFFFFFF:FFF

@A00721:190:HGJW7DSXY:4:1127:4978:36511 2:N:0:TCTGCAAG+GCTGCACT  
CTCTTCCCGATGAAATCAAACATATCATCAAGGATAAATATTATCCTCATTAATACTAAATGATATGAGA  
CAATTGATGCGGACCACCAGAATGACGTCAGAGGTTCTAATAACATTCTGGTGTGACGAATTCAGAAC  
TTTATTGTTCTACAA

+

FFFFFFFFFFFFFFFFFFFFFFFF:F  
FF:FFFFFFFFFFFFFFFFFFFFFFFF: :FFFFFFFFFFFF:FFFFFFFFFFFF:FFFFFFFF  
FFFF:FFFFFFFF

@A00721:190:HGJW7DSXY:4:1206:15890:12226 2:N:0:TCTGCAAG+GCTGCACT  
CTCTTCCCGATGAAATCAAACATATCATCAAGGATAAATATTATCCTCATTAATACTAAATGATATGAGA  
CAATTGATGCGGACCACCAGAATGACGTCAGAGGTTCTAATAACATTCTGGTGTGACGAATTCAGAAC  
TTTATTGTTCTACAA

+

FFFFFFFFFFFFFFFFFFFFFFFFFFFFFFFFFFFFFFFFFFFFFFFFFFFFFFFFFFFFFFFFFFFFFFFF  
FFFFFFFFFFFFFFFFFFFFFFFF:F  
FFFFFFFFFFFFFFFF

$+$ 

+

 $+$ 

+

 $+$ 

+

 $+$ [illegible]



@A00721:190:HGJW7DSXY:4:1111:26521:30138 2:N:0:TCTGCAAG+GCTGCACT  
CTTTCATCTCTTCCCGATGAAATCAAACATATCATCAAGGATAAATATTATCCTCATTAATACTAAATGA  
TATGAGACAATTGATGCGGACCACCAGAATGACGTCAGAGGTTCTAATAACATTCTGGTGTGACGAAT  
TCAGAACTTTATTGT

@A00721:190:HGJW7DSXY:4:1346:31720:24017 2:N:0:TCTGCAAG+GCTGCACT  
CTTTCATCTCTTCCCGATGAAATCAAACATATCATCAAGGATAAATATTATCCTCATTAATACTAAATGA  
TATGAGACAATTGATGCGGACCACCAGAATGACGTCAGAGGTTCTAATAACATTCTGGTGTGACGAAT  
TCAGAACTTTATTGT

@A00721:190:HGJW7DSXY:4:1452:32163:29982 2:N:0:TCTGCAAG+GCTGCACT  
CTTTCATCTCTTCCCGATGAAATCAAACATATCATCAAGGATAAATATTATCCTCATTAATACTAAATGA  
TATGAGACAATTGATGCGGACCACCAGAATGACGTCAGAGGTTCTAATAACATTCTGGTGTGACGAAT  
TCAGAACTTTATTGT

@A00721:190:HGJW7DSXY:4:1666:18304:4539 2:N:0:TCTGCAAG+GCTGCACT  
CTTTCATCTCTTCCCGATGAAATCAAACATATCATCAAGGATAAATATTATCCTCATTAATACTAAATGA  
TATGAGACAATTGATGCGGACCACCAGAATGACGTCAGAGGTTCTAATAACATTCTGGTGTGACGAAT  
TCAGAACTTTATTGT

@A00721:190:HGJW7DSXY:4:2663:16776:12101 2:N:0:TCTGCAAG+GCTGCACT  
CTTTCATCTCTTCCCGATGAAATCAAACATATCATCAAGGATAAATATTATCCTCATTAATACTAAATGA  
TATGAGACAATTGATGCGGACCACCAGAATGACGTCAGAGGTTCTAATAACATTCTGGTGTGACGAAT  
TCAGAACTTTATTGT

@A00721:190:HGJW7DSXY:4:1412:8413:1720 2:N:0:TCTGCAAG+GCTGCACT  
ATTTACTTTTCATCTCTTCCCGATGAAATCAAACATATCATCAAGGATAAATATTATCCTCATTAACTA  
AATGATATGAGACAATTGATGCGGACCACCAGAATGACGTCAGAGGTTCTAATAACATTCTGGTGTGA  
CGAATTCAGAACTTT

@A00721:190:HGJW7DSXY:4:2452:17598:7576 2:N:0:TCTGCAAG+GCTGCACT  
ATTTACTTTTCATCTCTTCCCGATGAAATCAAACATATCATCAAGGATAAATATTATCCTCATTAACTA  
AATGATATGAGACAATTGATGCGGACCACCAGAATGACGTCAGAGGTTCTAATAACATTCTGGTGTGA  
CGAATTCAGAACTTT

+  
FFFFFFFFFFFFFFFFFFFFFFFFFFFFFFFFFFFFF, FFFFFFFFFFFFFFFFFFFFFFFFFFFFFFFFFFFFF  
FFFFFFFFFFFFFFFFFFFFFFFFFFFFFF: FFFFFFFFFFFFFFFFFFFFFFFFFFFFFFFF: FFFFFFFFF  
F:F, FFFFFFFFFF  
@A00721:190:HGWJ7DSXY:4:1247:15899:34131 2:N:0:TCTGCAAG+GCTGCACT  
AATTTACTTTCATCTCTTCCCGATGAAATCAAACATATCATCAAGGATAAATTATCCTCATTA  
AAATGATATGAGACAATTGATGCGGACCACCAGAATGACGTGAGAGGTTCTAATAACATTCTGGTG  
ACGAATTCAGAACTT  
+  
FFFFFFFFFFFFFFFFFFFFFFFFFFFFFFFFFFFFFFFFFFFFFFFFFFFFFFFFFFFFFFFFFFFFFFFF  
FFFFFFFFFFFFFFFFFFFFFFFFFFFFFFFFFFFFFFFFFFFFFFFFFFFFFFFFFFFFFFFFFFFFFFFF  
FFFFFFFFFFFFFFFFFF  
@A00721:190:HGWJ7DSXY:4:1423:7048:22811 2:N:0:TCTGCAAG+GCTGCACT  
AATTTACTTTCATCTCTTCCCGATGAAATCAAACATATCATCAAGGATAAATTATCCTCATTA  
AAATGATATGAGACAATTGATGCGGACCACCAGAATGACGTGAGAGGTTCTAATAACATTCTGGTG  
ACGAATTCAGAACTT  
+  
FFFFFFFFFFFFFFFFFFFFFFFFFFFFFFFFFFFFFFFFFFFFFFFFFFFFFFFFFFFFFFFFFFFFFFFF  
FFFFFF: FFFFFFFFFFFFFFFFFFFF: FFFFFFFFFFFFFFFFFFFFFF  
FFFFFF: FFFFFFFFFFFFFFFFFFFFFF, FFFFFFFFFFFFFFFFFFFF: FFFFFFFFFFFFFF  
FFFFFFFFFF: FFFF  
@A00721:190:HGWJ7DSXY:4:1510:28339:33755 2:N:0:TCTGCAAG+GCTGCACT  
AATTTACTTTCATCTCTTCCCGATGAAATCAAACATATCATCAAGGATAAATTATCCTCATTA  
AAATGATATGAGACAATTGATGCGGACCACCAGAATGACGTGAGAGGTTCTAATAACATTCTGGTG  
ACGAATTCAGAACTT  
+  
F, FFFFFFFFFFFFFFFFFFFFFFFFFFFFFFFFFFFFFFFFFFFFFFFFFFFFFFFFFFFFFFFFFFFFF  
FFFFFFFFFFFFFFFFFFFFFFFFFFFFFFFFFFFFFFFFFFFFFFFFFFFFFFFFFFFFFFFFFFFFFFFF  
F:F:FFF:F:FFFFF  
@A00721:190:HGWJ7DSXY:4:1662:19569:29215 2:N:0:TCTGCAAG+GCTGCACT  
AATTTACTTTCATCTCTTCCCGATGAAATCAAACATATCATCAAGGATAAATTATCCTCATTA  
AAATGATATGAGACAATTGATGCGGACCACCAGAATGACGTGAGAGGTTCTAATAACATTCTGGTG  
ACGAATTCAGAACTT  
+  
FFFFFFFFFFFFFFFFFFFF, FFFFFFFFFFFFFFFFFFFFFFFFFFFFFFFFFFFFFFFFFFFFFF: FFFFFFFFFFFFFFFFFFFFF: FFFF  
FFFFFFFFFFFFFFFFFFFF: FFFFFFFFFFFFFFFFFFFFFF: FFFFFFFFFFFFFFFFFFFFFF: FFFFFFFFF  
FFFFF, FFFFFFFFFF  
@A00721:190:HGWJ7DSXY:4:2344:6506:8343 2:N:0:TCTGCAAG+GCTGCACT  
AATTTACTTTCATCTCTTCCCGATGAAATCAAACATATCATCAAGGATAAATTATCCTCATTA  
AAATGATATGAGACAATTGATGCGGACCACCAGAATGACGTGAGAGGTTCTAATAACATTCTGGTG  
ACGAATTCAGAACTT  
+  
FFFFFFFFFFFFFFFFFFFFFFFFFFFFFFFFFFFFFFFFFFFFFFFFFFFFFFFFFFFFFFFFFFFFFFFF  
F: FFFFFFFFFFFFFFFFFFFFFF: FF, FFFFFFF, :, FFFFFF  
FFFFFFFFFFFFFFFFFF  
@A00721:190:HGWJ7DSXY:4:2476:16179:18740 2:N:0:TCTGCAAG+GCTGCACT  
AATTTACTTTCATCTCTTCCCGATGAAATCAAACATATCATCAAGGATAAATTATCCTCATTA  
AAATGATATGAGACAATTGATGCGGACCACCAGAATGACGTGAGAGGTTCTAATAACATTCTGGTG  
ACGAATTCAGAACTT  
+  
FFFF: FFFFFFFF, FFFFFFFFFFFF: FF:: FFFFFFFFFFFFFFFFFF, FFFFF: FFFFF: FFFFF: FF  
FFFFFF: FFFF: FFFFFFFFFF: FFFFFFFFFF: FFFFFFFFFF: FFFFFFFFFFFFFFFFFF, : FFFFFFF  
FFFF: FFFF: FFF

@A00721:190:HGWJ7DSXY:4:1116:22869:30859 2:N:0:TCTGCAAG+GCTGCACT  
CAGAAATTTACTTTCATCTCTTCCCGATGAAATCAAACATATCATCAAGGATAAATTATCCTCATTA

AACTAAATGATATGAGACAATTGATGCGGACCACCAGAATGACGTCAGAGGTTCTAATAACATTCTGG  
TGTGACGAATTCAGA

+

FFFFFFFFFFFF:::FFFFFF::FFFFF:FFFFFFFFFFFFFFF:FFFFFFFFF:FF:,FFFF:F:FFFF,  
FFFFFFFFF:FFFFFFFFF:F:FFFFFFFFFFFFFFF:F,FFFFFFFFFFFFFFFFFFFFFFFFFFFFF  
,FFF:FFFFFFFF,F

@A00721:190:HGJW7DSXY:4:1317:19226:31908 2:N:0:TCTGCAAG+GCTGCACT  
CAGAAATTTACTTTTCATCTCTTCCCGATGAAATCAAACATATCATCAAGGATAAATATTATCCTCATT  
AACTAAATGATATGAGACAATTGATGCGGACCACCAGAATGACGTCAGAGGTTCTAATAACATTCTGG  
TGTGACGAATTCAGA

+

FFFFFFFFFFFFFFFFFFFFFFFFFFFFFFFFFFFFFFFFFFFFFFFFFFFFFFFFFFFFFFFFFFFFFFFFFFFF  
FFFFFFFFFFFFFFFFFFFFFFFFFFFFFFFFFFFFFFFFFFFFFFFFFFFFFFFFFFFFFFFFFFFFFFFFFFFF,  
FFFFFFFFFFFFFFFFFFFFFFFFFFFFFFFFFFFFFFFFFFFFFFFFFFFFFFFFFFFFFFFFFFFFFFFFFFFF  
FFFFFFFFFFFFFFFFFFFF

@A00721:190:HGJW7DSXY:4:1412:23023:33943 2:N:0:TCTGCAAG+GCTGCACT  
CAGAAATTTACTTTTCATCTCTTCCCGATGAAATCAAACATATCATCAAGGATAAATATTATCCTCATT  
AACTAAATGATATGAGACAATTGATGCGGACCACCAGAATGACGTCAGAGGTTCTAATAACATTCTGG  
TGTGACGAATTCAGA

+

F:FFFFFFFFFFFFFFFFFFFFFFFFFFFFFFFFFFFFFFFFFFFFFFFFFFFFFFFFFFFFFFFFFFFFFFFFFFFF  
FFFFFFFFFFFF:FFFFF:FFFFFFFFFFFFFFFFFFFFFFF:FFFFFFFFFFFFFFFFFFFFFFFFFFFFFFF:F  
FFF:FF,FFFFFFFF

@A00721:190:HGJW7DSXY:4:1505:14235:10300 2:N:0:TCTGCAAG+GCTGCACT  
CAGAAATTTACTTTTCATCTCTTCCCGATGAAATCAAACATATCATCAAGGATAAATATTATCCTCATT  
AACTAAATGATATGAGACAATTGATGCGGACCACCAGAATGACGTCAGAGGTTCTAATAACATTCTGG  
TGTGACGAATTCAGA

+

FFFFFFFFFFFFFFFFFFFFFFFFFFFFFFFFFFFFFFFFFFFFFFFFFFFFFFFFFFFFFFFFFFFFFFFFFFFF  
FFFFFFFFFFFFFFFFFFFF:FFFFFFFFFFFFFFFFFFFFFFFFFFFFFFF,FFFFFFFFFFFFFFFFFFFFFFFFFFFF  
FFFFFFFFFFFFFFFFFFFF

@A00721:190:HGJW7DSXY:4:1521:6677:10833 2:N:0:TCTGCAAG+GCTGCACT  
CAGAAATTTACTTTTCATCTCTTCCCGATGAAATCAAACATATCATCAAGGATAAATATTATCCTCATT  
AACTAAATGATATGAGACAATTGATGCGGACCACCAGAATGACGTCAGAGGTTCTAATAACATTCTGG  
TGTGACGAATTCAGA

+

FFFFFFFFFFFFFFFFFFFFFFFFFFFFFFFFFFFFFFFFFFFFFFFFFFFFFFFFFFFFFFFFFFFFFFFFFFFF  
FFFFFFFFFFFFFFFFFFFFFFFFFFFF,FF:FFFFFFFFFFFFFFFFFFFFFFFFFFFFFFFFFFFFFFFFFFFFF  
FFFF:FFFFFFFFFFFF

@A00721:190:HGJW7DSXY:4:1554:25491:5274 2:N:0:TCTGCAAG+GCTGCACT  
CAGAAATTTACTTTTCATCTCTTCCCGATGAAATCAAACATATCATCAAGGATAAATATTATCCTCATT  
AACTAAATGATATGAGACAATTGATGCGGACCACCAGAATGACGTCAGAGGTTCTAATAACATTCTGG  
TGTGACGAATTCAGA

+

FFFFFFFFFFFFFFFFFFFFFFFFFFFFFFFFFFFFFFFFFFFFFFFFFFFFFFFFFFFFFFFFFFFFFFFFFFFF  
FFFFFFFFFFFFFFFFFFFFFFFFFFFFFFFFFFFFFFFFFFFFFFFFFFFFFFFFFFFFFFFFFFFFFFFFFFFF:FFFF:FFF:FFFFFFF  
FFFFFFFFFFFFFFFFFFFF

@A00721:190:HGJW7DSXY:4:1603:32705:11788 2:N:0:TCTGCAAG+GCTGCACT  
CAGAAATTTACTTTTCATCTCTTCCCGATGAAATCAAACATATCATCAAGGATAAATATTATCCTCATT  
AACTAAATGATATGAGACAATTGATGCGGACCACCAGAATGACGTCAGAGGTTCTAATAACATTCTGG  
TGTGACGAATTCAGA

+

FFFFFFFFFFFFFFF::FFFFFFFFFFFFFFFFFFFFFFFFFFFFFFFFFFFFFFFFFFFFFFFFFFFF:FF,FFFF:F:FFFFFFF  
FFFF:FFFFF:FFFFFFFFFFFF,FFFFFFFFFFFFFFF:FFFFFFFFF::F:FFFFFFFFFFFF::FFF  
FFFFFFFFFFFFFFF:FF

@A00721:190:HGJW7DSXY:4:2263:5791:18944 2:N:0:TCTGCAAG+GCTGCACT  
CAGAAATTTACTTTTCATCTCTTCCCGATGAAATCAAACATATCATCAAGGATAAATATTATCCTCATT  
AACTAAATGATATGAGACAATTGATGCGGACCACCAGAATGACGTCAGAGGTTCTAATAACATTCTGG  
TGTGACGAATTCAGA

+

FFFFFFFFFFFFFFFFFFFFFFFFFFFFFFFFFFFFFFFFFFFFFFFFFFFFFFFFFFFFFFFFFFFFFFFF  
FFFFFFFFFFFFFFFFFFFFFFFFFFFFFFFFFFFFFFFFFFFFFFFFFFFFFFFFFFFFFFFFFFFFFFFF  
FFFFFFFFFFFFFFFFFFFFFFFF

@A00721:190:HGJW7DSXY:4:2268:30472:1282 2:N:0:TCTGCAAG+GCTGCACT  
CAGAAATTTACTTTTCATCTCTTCCCGATGAAATCAAACATATCATCAAGGATAAATATTATCCTCATT  
AACTAAATGATATGAGACAATTGATGCGGACCACCAGAATGACGTCAGAGGTTCTAATAACATTCTGG  
TGTGACGAATTCAGA

+

FFF:FFFFFFFFFFFFFFFFFFFFFFFFFFFFFFFFFFFFFFFFFFFFFFFFFFFFFFFFFFFFFFFF  
F:FFFFFFFFFFFFFFFFFFFFFFFFFFFFFFFFFFFFFFFFFFFFFFFFFFFFFFFFFFFFFFFF  
FFFF, F:FFFFFFFF:FFFFFF:FF:FFFF, F:FFFFFF:FFFFFF:FF, FFF  
FFFF, FFFFFFFFFF

@A00721:190:HGJW7DSXY:4:2313:3866:30765 2:N:0:TCTGCAAG+GCTGCACT  
CAGAAATTTACTTTTCATCTCTTCCCGATGAAATCAAACATATCATCAAGGATAAATATTATCCTCATT  
AACTAAATGATATGAGACAATTGATGCGGACCACCAGAATGACGTCAGAGGTTCTAATAACATTCTGG  
TGTGACGAATTCAGA

+

FFFFFFFFFFFFFFFFFFFFFFFFFFFFFFFFFFFFFFFFFFFFFFFFFFFFFFFFFFFFFFFFFFFFFFFF  
F:FFFFFFFF:FFFFFFF:FFFFFFFFF:FFFFFFFFFFFFFFFFFFFFFFFFFFFFFFFFFFFFFFFF  
FFFFFFFFF:FFFFFFF

@A00721:190:HGJW7DSXY:4:2373:19551:20885 2:N:0:TCTGCAAG+GCTGCACT  
CAGAAATTTACTTTTCATCTCTTCCCGATGAAATCAAACATATCATCAAGGATAAATATTATCCTCATT  
AACTAAATGATATGAGACAATTGATGCGGACCACCAGAATGACGTCAGAGGTTCTAATAACATTCTGG  
TGTGACGAATTCAGA

+

FFFF:FFFFFFF:FFFFFFFFFFFFFFFFFFFFFFFFFFFFFFFFFFFFFFFFFFFFFFFFFFFFFFFF  
FFFFFFFFFFFFFFFFFFFFFFFFFFFFFFFFFFFFFFFFFFFFFFFFFFFFFFFFFFFFFFFFFFFFFFFF  
FFFFFFFF:FFFFFFF

@A00721:190:HGJW7DSXY:4:2377:17336:18082 2:N:0:TCTGCAAG+GCTGCACT  
CAGAAATTTACTTTTCATCTCTTCCCGATGAAATCAAACATATCATCAAGGATAAATATTATCCTCATT  
AACTAAATGATATGAGACAATTGATGCGGACCACCAGAATGACGTCAGAGGTTCTAATAACATTCTGG  
TGTGACGAATTCAGA

+

FFFFFFFFFFFFFFF:FFFFFFFFFFFFFFFFFFFFFFFFFFFFFFFFFFFFFFFFFFFFFFFFFFFFFFFF  
, FFFFFFFFFF:FFFFFFFFFFFFFFFFFFFFFFFFFFFFFFFFFFFFFFFFFFFFFFFFFFFFFFFF  
FFFFFFFF:FFFFFFF

@A00721:190:HGJW7DSXY:4:2505:8558:8985 2:N:0:TCTGCAAG+GCTGCACT  
CAGAAATTTACTTTTCATCTCTTCCCGATGAAATCAAACATATCATCAAGGATAAATATTATCCTCATT  
AACTAAATGATATGAGACACTTGATGCGGACCACCAGAATGACGTCAGAGGTTCTAATAACATTCTGG  
TGTGACGAATTCAGA

+

FF, FFFFFFF, F:FFFF:FFFFFF:FFF, :FFFFFFFF:FFFFFFFFFFFFFFFF, F, FFFF:FFFFFF::FFF  
FFF, FF, FFFFFFF:FFFF, :FFF:FFFFFF:FFFFFFFF:FFFFFFFFFFFFFFFF:FFFFFFF, F::F  
:FF::FFFFFFFF::F

@A00721:190:HGJW7DSXY:4:2541:32190:22357 2:N:0:TCTGCAAG+GCTGCACT  
CAGAAATTTACTTTTCATCTCTTCCCGATGAAATCAAACATATCATCAAGGATAAATATTATCCTCATT  
AACTAAATGATATGAGACAATTGATGCGGACCACCAGAATGACGTCAGAGGTTCTAATAACATTCTGG  
TGTGACGAATTCAGA

+

FFF:FFFF:FFFFFFFFFFFFFFFFFFFFFFFFFFFFFFFFFFFFFFFFFFFFFFFFFFFFFFFF



+  
FFFFFF,FFFFFFFF:FF:FFFFFF:FFF:FFFFFFFFFFFFFFFFFFFFFFFFFFFFFFFF  
FFFFFFFFFFFFFFFFFFFFFFFF:FFFFFFFF:FFFFFFF,FF:FFFFFFFFFFFFFFFFFFFFFFFF  
:F,F:FFFFFF:FF

@A00721:190:HGJW7DSXY:4:1125:27651:35164 2:N:0:TCTGCAAG+GCTGCACT  
CGCTAACATCATATTCAGAAATTTACTTTTCATCTCTTCCCGATGAAATCAAACATATCATCAAGGATA  
AATATTATCCTCATTAATACTAAATGATATGAGACAATTGATGCGGACCACCAGAATGACGTCAGAGGTT  
CTAATAACATTCTGG

+  
FFFFFFFFFFFFFFFF:FFF,:FFFFFFFFFFFFFFFFFFFFFFFFFFFFFFFF: F:FFFFFFFF  
FF:FFFFFFFF:FFFFFFFFFFFFFFFF,FF,FFFFFF:FFFFFFFF,F,FFFFFFFF  
FF:FFFFFFFF: :

@A00721:190:HGJW7DSXY:4:2474:13919:24283 2:N:0:TCTGCAAG+GCTGCACT  
CGCTAACATCATATTCAGAAATTTACTTTTCATCTCTTCCCGATGAAATCAAACATATCATCAAGGATA  
AATATTATCCTCATTAATACTAAATGATATGAGACAATTGATGCGGACCACCAGAATGACGTCAGAGGTT  
CTAATAACATTCTGG

+  
FFFFFFFFFFFFFFFFFFFFFFFFFFFFFFFFFFFFFFFFFFFFFFFFFFFFFFFF:FFFFFFFF  
FFFFFFFFFFFFFFFFFFFFFFFFFFFFFFFF,FFFFFFFFFFFFFFFF:FFFFFFFF  
FFFFFF:FFF:FFFF

@A00721:190:HGJW7DSXY:4:2545:25880:10269 2:N:0:TCTGCAAG+GCTGCACT  
CGCTAACATCATATTCAGAAATTTACTTTTCATCTCTTCCCGATGAAATCAAACATATCATCAAGGATA  
AATATTATCCTCATTAATACTAAATGATATGAGACAATTGATGCGGACCACCAGAATGACGTCAGAGGTT  
CTAATAACATTCTGG

+  
FFFFFFF:FFFFFFFFFFFFFFFFFFFFFFFFFFFFFFFFFFFFFFFF:FFFFFFFF  
FFFFFFFFFFFFFFFFFFFFFFFF:FFFFFFFF:FFFFFFFFFFFFFFFFFFFFFFFF  
FFF:FFFFFFFF:

@A00721:190:HGJW7DSXY:4:1135:28989:13808 2:N:0:TCTGCAAG+GCTGCACT  
GTCCGCATCAATTGTCTCATATCATTTAGTTAATGAGGATAATATTTATCCTTGATGAAATCAAACAT  
ATCATCAAGGATAAATATTATCCTCATTAATACTAAATGATATGAGACAATTGATGCGGACCACCAGAAT  
GACGTCAGAGGTTCT

+  
FFFFFFFFFFFFFFFFFFFFFFFFFFFFFFFFFFFFFFFF:FFFFF:FFFFFFFF:F,,F:F  
FFFFFFFF:FFFFFFF,FFF,FFFFFFFFFFFFFFFF:FF,FFFFFFFF:FFF,F  
FFFFFFFF,FFFFF

@A00721:190:HGJW7DSXY:4:1271:2682:27054 2:N:0:TCTGCAAG+GCTGCACT  
GTCCGCATCAATTGTCTCATATCATTTAGTTAATGAGGATAATATTTATCCTTGATGAAATCAAACAT  
ATCATCAAGGATAAATATTATCCTCATTAATACTAAATGATATGAGACAATTGATGCGGACCACCAGAAT  
GACGTCAGAGGTTCT

+  
FFFFFFFFF:FFFFFFFFFFFFFFFFFFFFFFFFFFFFFFFFFFFFFFFF, ,FFF  
FFFFFFFFFFFFFFFF,FFFF:FFFFFFFFFFFFFFFFFFFFFFFFFFFFFFFF  
FF:FFFFFFFF

@A00721:190:HGJW7DSXY:4:1639:31087:14027 2:N:0:TCTGCAAG+GCTGCACT  
GTCCGCATCAATTGTCTCATATCATTTAGTTAATGAGGATAATATTTATCCTTGATGAAATCAAACAT  
ATCATCAAGGATAAATATTATCCTCATTAATACTAAATGATATGAGACAATTGATGCGGACCACCAGAAT  
GACGTCAGAGGTTCT

+  
FFFFFFFFFFFFFFFF:FFFFFFFFFFFFFFFFFFFFFFFFFFFFFFFF,FFF  
FFFFFFFFFFFFFFFF,FFFFF:F:FFFFFFFFFFFFFFFFFFFFFFFF:FF  
FFFFFFFF

@A00721:190:HGJW7DSXY:4:2150:25943:25034 2:N:0:TCTGCAAG+GCTGCACT  
GTCCGCATCAATTGTCTCATATCATTTAGTTAATGAGGATAATATTTATCCTTGATGAAATCAAACAT



@A00721:190:HGJW7DSXY:4:1661:16532:15342 2:N:0:TCTGCAAG+GCTGCACT  
CTCCTTCATCTTCTTCATCGCGTTTCTCCATTAACGCTAACATCATATTCAGAAATTTACTTTTCATCT  
CTTCCCGATGAAATCAAACATATCATCAAGGATAAATATTATCCTCATTAATAATGATATGAGACA  
ATTGATGCGGACCAC

+

FFFFFFFFFFFFFFFFFFFFFFFFFFFFFFFFFFFFFFFFFFFFFFFFFFFFFFFFFFFFFFFFFFFFFFFFF:FFFFFFFFF  
FFF:FFFFFFFFFFFFFFFFFFFFFFFFFFFFFFFFFFFFFFFFFFFFFFFFFFFFFFFFFFFFFFFFFFFFF  
FFFFFF,F,FFFFFF

@A00721:190:HGJW7DSXY:4:2106:1768:19523 2:N:0:TCTGCAAG+GCTGCACT  
CTCCTTCATCTTCTTCATCGCGTTTCTCCATTAACGCTAACATCATATTCAGAAATTTACTTTTCATCT  
CTTCCCGATGAAATCAAACATATCATCAAGGATAAATATTATCCTCATTAATAATGATATGAGACA  
ATTGATGCGGACCAC

+

FFFFFFFFFFFFFFFFFFFFFFFFFFFFFFFFFFFFFFFFFFFFFFFFFFFFFFFFFFFFFFFFFFFFFFFFF  
FFFFF:FFFFFFFFFFFFFFFFFFFFFFFFFFFFFFFFFFFFFFFFFFFFFFFFFFFFFFFFFFFFFFFFFFFFF  
F::FFFF::FFFFFF

@A00721:190:HGJW7DSXY:4:2242:28167:14450 2:N:0:TCTGCAAG+GCTGCACT  
CTCCTTCATCTTCTTCATCGCGTTTCTCCATTAACGCTAACATCATATTCAGAAATTTACTTTTCATCT  
CTTCCCGATGAAATCAAACATATCATCAAGGATAAATATTATCCTCATTAATAATGAAATGAGACA  
ATTGATGCGGACCAC

+

FFFFFFFFFFFFF,FFFF,FFFFFFFFFFFFF,FFFFFF:FFFFFF::FFFFFFFFFFFFF:FFF:FFFFFF  
F:FFFFFFF,FFFFFFFFF,FF,FFFFFFFFF:FFFFFFFFF:FF,F::FFF,F,F:F:FFF:,FFFFFFFFF  
F:,FFF:FFF::FFF

@A00721:190:HGJW7DSXY:4:2342:28330:16266 2:N:0:TCTGCAAG+GCTGCACT  
CTCCTTCATCTTCTTCATCGCGTTTCTCCATTAACGCTAACATCATATTCAGAAATTTACTTTTCATCT  
CTTCCCGATGAAATCAAACATATCATCAAGGATAAATATTATCCTCATTAATAATGATATGAGACA  
ATTGATGCGGACCAC

+

FFFFFFFFFFFFFFFFFFFFFFFFFFFFFFFFFFFFFFFFFFFFFFFFFFFFFFFFFFFFFFFFFFFFFFFFF  
FFFFFFFFFFFFFFFFFFFFFFFFFFFFFFFFFFFFFFFFFFFFFFFFFFFFFFFFFFFFFFFFFFFFF:FF:FFFFFFFFFFFFFFFFFFFFFFFFF  
FFFF,FF:,FFFFFFF

@A00721:190:HGJW7DSXY:4:2420:31629:15718 2:N:0:TCTGCAAG+GCTGCACT  
CTCCTTCATCTTCTTCATCGCGTTTCTCCATTAACGCTAACATCATATTCAGAAATTTACTTTTCATCT  
CTTCCCGATGAAATCAAACATATCATCAAGGATAAATATTATCCTCATTAATAATGATATGAGACA  
ATTGATGCGGACCAC

+

FFFFFFFFFFFFFFFFFFFFFFFFFFFFFFFFFFFFFFFFFFFFFFFFFFFFFFFFFFFFFFFFFFFFFFFFF  
FFFFFFFFFFFFFFFFFFFFFFFFFFFFFFFFFFFFFFFFFFFFFFFFFFFFFFFFFFFFFFFFFFFFF,:FFFFFFFFFFFFF,FFFFFFFFF  
FFF,FF:,FFF:FF

@A00721:190:HGJW7DSXY:4:2420:30626:17206 2:N:0:TCTGCAAG+GCTGCACT  
CTCCTTCATCTTCTTCATCGCGTTTCTCCATTAACGCTAACATCATATTCAGAAATTTACTTTTCATCT  
CTTCCCGATGAAATCAAACATATCATCAAGGATAAATATTATCCTCATTAATAATGATATGAGACA  
CTTGATGCGGACCAC

+

FFFFFFFFFFFFFFFFFFFFFFFFFFFFFFFFFFFFFFFFFFFFFFFFFFFFFFFFFFFFFFFFFFFFFFFFF  
FFFFFFFFFFFFFFFFFFFFFFFFFFFFFFFFFFFFFFFFFFFFFFFFFFFFFFFFFFFFFFFFFFFFF:FFFFFFF:FFFFF:FFFFFFFFFFFFF:FFF:FFFFFFFFFFFFF  
,FFF:FFFFFFF,FF

@A00721:190:HGJW7DSXY:4:2551:4553:8406 2:N:0:TCTGCAAG+GCTGCACT  
CTCCTTCATCTTCTTCATCGCGTTTCTCCATTAACGCTAACATCATATTCAGAAATTTACTTTTCATCT  
CTTCCCGATGAAATCAAACATATCATCAAGGATAAATATTATCCTCATTAATAATGATATGAGACA  
ATTGATGCGGACCAC

+

FFFFFFFFFFFFFFFFFFFFFFFFFFFFF,FFFFFFFFFFFFFFFFFFFFFFFFFFFFFFFFFFFFFFFFFFFFF



```
FFFFFFFFFFFFFFFFFFFFF:FFFFFFFFFFFFFFFFFFFFFFFFFFFFFFF:FFFFFFFFFFFFFFFFF:FFFFFFFFFFF
FFFFFFFFF:FFFFFFF
```

+

@A00721:190:HGJW7DSXY:4:2642:4571:28761 2:N:0:TCTGCAAG+GCTGCACT  
CTCCTTCATCTTCTTCATCGCGTTTCTCCATTAACGCTAACATCATATTCAGAAATTTACTTTTCATCT  
CTTCCCGATGAAATCAAACATATCATCAAGGATAAATATTATCCTCATTAATAATGATATGAGACA  
ATTGATGCGGACCAC

[illegible] $+$ 

@A00721:190:HGJW7DSXY:4:1342:26241:2848 2:N:0:TCTGCAAG+GCTGCACT  
CCTGATTTAACAGTAATGGGGACTCCTTCATCTTCTTCATCGCGTTTCTCCATTAACGCTAACATCAT  
ATTCAGAAATTTACTTTCATCTCTTCCCGATGAAATCAACATATCATCAAGGATAAATATTATCCTC  
ATTAATAAATGATA

[illegible]

+

@A00721:190:HGJW7DSXY:4:1561:1732:17206 2:N:0:TCTGCAAG+GCTGCACT  
CCTGATTTAACAGTAATGGGGACTCCTTCATCTTCTTCATCGCGTTTCTCCATTAACGCTAACATCAT  
ATTCAGAAATTTACTTTTCATCTCTTCCCGATGAAATCAACATATCATCAAGGATAAATATTATCCTC  
ATTAATAAATGATA

```

FFFFFFFFFFFFFFFFFFFFFFFFFFFFFFFFFFFFFFFFFFFFFFFFFFFFFFFFFFFFFFFF:FF:FFF
FFFFFFFFFFFFFFFFFFFFFFFFFFFFFFFFFFFFFFFFFFFFFFFFFFFFFFFFFFFFFFFF:FFFFFFFFFFFFFF:FFFFFFFFFFFFFF
FFFFFFFFFFFFFFFF

```

+  
FFFFFFFFFFFFFFFF:FFFFFFFFFFFFFFFFFFFFFFFFFFFFFFFFFFFFFFFF  
FFFFFFFFFFFFFFFFFFFFFFFFFFFFFFFF:FFFFFFFF:FFFFFFFF:FFF:FFFFFFF  
FFFFFFFFFFFF:F  
@A00721:190:HGJW7DSXY:4:1645:12870:29324 2:N:0:TCTGCAAG+GCTGCACT  
CCTGATTAAACAGTAATGGGGACTCCTTCATCTTCTTCATCGCGTTTCTCCATTAACGCTAACATCAT  
ATTCAGAAATTTACTTTTCATCTCTTCCCGATGAAATCAAACATATCATCAAGGATAAATATTATCCTC  
ATTAATAAATGATA

+  
FFFFFFFFFFFFFFFFFFFFFFFFFFFFFFFFFFFFFFFFFFFFFFFFFFFFFFFFFFFFFFFF  
FFFFFFF,FFFFFFFFFFFFFFFFFFFFFFFFFFFFFFFFFFFFFFFFFFFFFFFFFFFFFFFF  
FFFF:FFFFFFFF  
@A00721:190:HGJW7DSXY:4:1648:15094:20932 2:N:0:TCTGCAAG+GCTGCACT  
CCTGATTAAACAGTAATGGGGACTCCTTCATCTTCTTCATCGCGTTTCTCCATTAACGCTAACATCAT  
ATTCAGAAATTTACTTTTCATCTCTTCCCGATGAAATCAAACATATCATCAAGGATAAATATTATCCTC  
ATTAATAAATGATA

+  
FFFFFFFFFFFFFFFFFFFFFFFFFFFFFFFFFFFFFFFFFFFFFFFFFFFFFFFFFFFFFFF,FFFF  
FFFFFFFFFFFFFFFFFFFFFFFFFFFFFFFFFFFFFFFFFFFFFFFFFFFFFFFFFFFFFFFF  
FFFFFFFFFFFFFFFF  
@A00721:190:HGJW7DSXY:4:1670:14335:34648 2:N:0:TCTGCAAG+GCTGCACT  
CCTGATTAAACAGTAATGGGGACTCCTTCATCTTCTTCATCGCGTTTCTCCATTAACGCTAACATCAT  
ATTCAGAAATTTACTTTTCATCTCTTCCCGATGAAATCAAACATATCATCAAGGATAAATATTATCCTC  
ATTAATAAATGATA

+  
FFFFFFFFFFFFFFFFFFFFFFFFFFFFFFFFFFFFFFFFFFFFFFFFFFFFFFFFFFFFFFF,FFFFFFFFF:  
FFFFFFFFF:FFFFFFFFFFFFFFFF:FFFFFFFFFFFFFFFF:FFFFF,FFFFFFFFF:FF  
FFFFFFFF:FFFFFF  
@A00721:190:HGJW7DSXY:4:2167:32226:35289 2:N:0:TCTGCAAG+GCTGCACT  
CCTGATTAAACAGTAATGGGGACTCCTTCATCTTCTTCATCGCGTTTCTCCATTAACGCTAACATCAT  
ATTCAGAAATTTACTTTTCATCTCTTCCCGATGAAATCAAACATATCATCAAGGATAAATATTATCCTC  
ATTAATAAATGATA

+  
FFFFFFFFFFFFFFFFFFFFFFFFFFFFFFFFFFFFFFFFFFFFFFFFFFFFFFFFFFFFFFF:FFFFFFFFFFFF  
FFFFFFFFFFFFFFFFFFFFFFFFFFFFFFFFFFFFFFFFFFFFFFFF:FFFFFFFFF:FFFFF:FFFFFF:FF  
FFFFFFFFF::,FFF  
@A00721:190:HGJW7DSXY:4:2173:32786:22858 2:N:0:TCTGCAAG+GCTGCACT  
CCTGATTAAACAGTAATGGGGACTCCTTCATCTTCTTCATCGCGTTTCTCCATTAACGCTAACATCAT  
ATTCAGAAATTTACTTTTCATCTCTTCCCGATGAAATCAAACATATCATCAAGGATAAATATTATCCTC  
ATTAATAAATGATA

+  
FFFF:FFFFFFFFFFFFFFFFFFFFFFFFFFFFFFFFFFFFFFFF:FFFFFFFFFFFFFFFF,FFFF::FFFF  
FFFFFFFFFFFFFFFFFFFFFFFFFFFFFFFFFFFFFFFFFFFFFFFFFFFFFFFFFFFFFFFF, :FFFFFFFF:  
FFFF,FFFFFF,FF  
@A00721:190:HGJW7DSXY:4:2249:24026:5400 2:N:0:TCTGCAAG+GCTGCACT  
CCTGATTAAACAGTAATGGGGACTCCTTCATCTTCTTCATCGCGTTTCTCCATTAACGCTAACATCAT  
ATTCAGAAATTTACTTTTCATCTCTTCCCGATGAAATCAAACATATCATCAAGGATAAATATTATCCTC  
ATTAATAAATGATA

+  
FFFFFFFFFFFFFFFFFFFFFFFFFFFFFFFFFFFFFFFF:FF:FFFFFF:FFFFFFFFFFFFFFFF  
FFFFFFFFFFFFFFFFFFFFFFFFFFFFFFFFFFFFFFFFFFFFFFFF:FFFFFFFFFFFFFFFF:,FF  
FFFFFFFF:FFFFF  
@A00721:190:HGJW7DSXY:4:2460:1633:3067 2:N:0:TCTGCAAG+GCTGCACT  
CCTGATTAAACAGTAATGGGGACTCCTTCATCTTCTTCATCGCGTTTCTCCATTAACGCTAACATCAT





FFFF:FFFFFFFF:FF:FFFFFFFFFFFF,F:FFFFFFFF:FFFFFFFFFFFFFFFFFFFFFFFFFFFFFFFFFFFF  
FFFFFFFFFFFFFFFF

@A00721:190:HGJW7DSXY:4:1418:25970:21167 2:N:0:TCTGCAAG+GCTGCACT  
CCAATATAATGCTTAATATGCGGATGTCCCTGATTAAACAGTAATGGGGACTCCTTCATCTTCTTCAT  
CGCGTTTCTCCATTAACGCTAACATCATATTCAGAAATTTACTTTTCATCTCTTCCCGATGAAATCAAA  
CATATCATCAAGGAT

+

FFFFFFFFFFFFFFFFFFFFFFFFFFFFFFFFFFFF,FFFFFFFFFF:FFFFFFFFFFFFFFFFFFFFFFFFFFFF:FFF  
FFFFFFFFFFFFFFFFFFFF:FFFF,FFFFFFFFFF,FFFFF:FFFFFFFFFFFFFFFFFFFFFFFFFFFFFFFFFFFF  
FFF,FFFFFFFFFFFF

@A00721:190:HGJW7DSXY:4:1445:17246:34585 2:N:0:TCTGCAAG+GCTGCACT  
CCAATATAATGCTTAATATGCGGATGTCCCTGATTAAACAGTAATGGGGACTCCTTCATCTTCTTCAT  
CGCGTTTCTCCATTAACGCTAACATCATATTCAGAAATTTACTTTTCATCTCTTCCCGATGAAATCAAA  
CATATCATCAAGGAT

+

FFFFFFF:FFFFFFFFFFFFFFFFFFFFFFFFFFFFFFFFFFFF:F,FFFFFFFFF:FFFFFFFFFFFFFFFFFFFF  
FFFFFFFFFFFFFFFFFFFFFFFFFFFFFFFFFFFF:FFFFFFFFFFFFFFFFFFFFFFFFFFFFFFFFFFFF:FFFFFFF  
FFFFFFFFFFFF,FFFF:

@A00721:190:HGJW7DSXY:4:2310:9525:27946 2:N:0:TCTGCAAG+GCTGCACT  
CCAATATAATGCTTAATATGCGGATGTCCCTGATTAAACAGTAATGGGGACTCCTTCATCTTCTTCAT  
CGCGTTTCTCCATTAACGCTAACATCATATTCAGAAATTTACTTTTCATCTCTTCCCGATGAAATCAAA  
CATATCATCAAGGAT

+

FFFFFFFFFFFFFFFFFFFFFFFFFFFFFFFFFFFF:FFFFFFFFFFFFFFFFFFFFFFFFFFFFFFFFFFFF  
FFFFFFFFFFFFFFFFFFFFFFFFFFFFFFFFFFFF:FFFF:FF:FFFFFFFFFFFFFFFF:FFFFFFFFFFFFFFFFFFFF  
FFFF:FFFFFFFFFFFF

@A00721:190:HGJW7DSXY:4:2365:5475:33458 2:N:0:TCTGCAAG+GCTGCACT  
CCAATATAATGCTTAATATGCGGATGTCCCTGATTAAACAGTAATGGGGACTCCTTCATCTTCTTCAT  
CGCGTTTCTCCATTAACGCTAACATCATATTCAGAAATTTACTTTTCATCTCTTCCCGATGAAATCAAA  
CATATCATCAAGGAT

+

FFFFFFFFFFFFFFFFFFFFFFFFFFFFFFFFFFFFFFFFFFF:FFFFFFFFFFFFFFFFFFFFFFFFFFFFFFFFFFFF  
FFFFFFFFFFFFFFFFFFFFFFFFFFFFFFFFFFFFFFFFFFF:FFFF:FF:FFFFFFFFFFFFFFFF:FFFFFFFFFFFFFFFFFFFF  
FFFF:FFFFFFFFFFFF

@A00721:190:HGJW7DSXY:4:2372:19868:26506 2:N:0:TCTGCAAG+GCTGCACT  
CCAATATAATGCTTAATATGCGGATGTCCCTGATTAAACAGTAATGGGGACTCCTTCATCTTCTTCAT  
CGCGTTTCTCCATTAACGCTAACATCATATTCAGAAATTTACTTTTCATCTCTTCCCGATGAAATCAAA  
CATATCATCAAGGAT

+

FFFFFFFFFFFFFFFFFFFFFFFFFFFFFFFFFFFFFFFFFFF:FFFFFFFFFFFFFFFFFFFF  
FFFFFFFFFFFFFFFFFFFF:FFFFFFFFFFFFFFFFFFFFFFFFFFFFFFFFFFFFFFFFFFFFFFFFFFFF  
FFFFFFF:FFFF:FFF

@A00721:190:HGJW7DSXY:4:2411:29903:8876 2:N:0:TCTGCAAG+GCTGCACT  
CCAATATAATGCTTAATATGCGGATGTCCCTGATTAAACAGTAATGGGGACTCCTTCATCTTCTTCAT  
CGCGTTTCTCCATTAACGCTAACATCATATTCAGAAATTTACTTTTCATCTCTTCCCGATGAAATCAAA  
CATATCATCAAGGAT

+

FFFFFFFFF:FFFFFFFFFFFFFFFFFFFFFFFFFFFFFFFFFFFFFFFFFFF:FFFFFFFFFFFFFFFFFFFF  
FFFFFFFFFFFFFFFFFFFF:FFFFFFFFFFFFFFFF:FFFFFFFFFFFFFFFFFFFF:FFFF,FFFFFF:FF:FFFFFF  
FFFF:FFFFFFFFFFFF

@A00721:190:HGJW7DSXY:4:2674:29966:13213 2:N:0:TCTGCAAG+GCTGCACT  
CCAATATAATGCTTAATATGCGGATGTCCCTGATTAAACAGTAATGGGGACTCCTTCATCTTCTTCAT  
CGCGTTTCTCCATTAACGCTAACATCATATTCATAAATTTACTTTTCATCTCTTCCCGATGAAATCAAA  
CATATCATCAAGGAT

+  
FFFFFFFFF,F:FFFF,F:F,FFFFFFFFF:F:FFFFFFFFF:FFFF::FFF,F:F,F:FFFFF,F::FF  
FFFF:FF,FFFF,FF:,,,FFFF:FF,F:FFF,F,FFF,FFF,:,F,FF,FFFF::F:FF:FFFF:FFF  
FFFFF:F:FFF,FFF

@A00721:190:HGJW7DSXY:4:1163:32407:35697 2:N:0:TCTGCAAG+GCTGCACT  
TGAAAGTAAATTTCTGAATATGATGTTAGCGTTAATGGAGAAACGCGATGAAGAAGATGAAGGAGTCC  
CCATTACTGTTAAATCAGGGACATCCGCATATTAAGCATTATATTGGGGACTGGGGACCTATATATAT  
GTATAGAGTAATCCG

+  
FFF:FFFFFFFFFFFFFFFFFFFFFFFFFFFFFFFFFFFFFFFFFFFFFFFFFFFFFFFFFFFFFFFFFFFFFFFFF,FFFFFFFFFFFFFFFFF,FFFFFFFFFFFFFFFFF  
FFFFFFFFF:FFFFFFFFFFFFFFFFFFFFFFFFFFFFFFFFFFFFFFFFFFFFFFFFFFFFFFFFFFFFFFFFFFFFFFFFF:FFFFFFFFFFFFFFFFF:FFF:FFFFFFFFF  
FFF:FFFFFFFFF

@A00721:190:HGJW7DSXY:4:1325:12861:10958 2:N:0:TCTGCAAG+GCTGCACT  
TGAAAGTAAATTTCTGAATATGATGTTAGCGTTAATGGAGAAACGCGATGAAGAAGATGAAGGAGTCC  
CCATTACTGTTAAATCAGGGACATCCGCATATTAAGCATTATATTGGGGACTGGGGACCTATATATAT  
GTATAGAGTAATCCG

+  
FFFFFFFFFFFFF,FFFFFFFFF:FFFFFFFFFFFFF:FFFFFFFFFFFFFFFFFFFFFFFFFFFFFFFFF:FFFFFFFFFFFFFFFFFFFFF  
FFFFFFFFFFFFFFFFFFFFFFFFFFFFFFFFFFFFFFFFFFFFFFFFFFFFFFFFFFFFFFFFFFFFFFFFFFFFFFFFF:F,F  
FF,FFFFFFFFFFFFF

@A00721:190:HGJW7DSXY:4:1326:30165:25958 2:N:0:TCTGCAAG+GCTGCACT  
TGAAAGTAAATTTCTGAATATGATGTTAGCGTTAATGGAGAAACGCGATGAAGAAGATGAAGGAGTCC  
CCATTACTGTTAAATCAGGGACATCCGCATATTAAGCATTATATTGGGGACTGGGGACCTATATATAT  
GTATAGAGTAATCCG

+  
FFFFFFFFFFFFF:FFFFFFFFFFFFFFFFFFFFFFFFFFFFFFFFFFFFFFFFFFFFFFFFFFFFFFFFFFFFFFFFF,FFFFFFFFFFFFF:FFF:FFFFFFFFFFFFFFFFF  
FFFFFFFFFFFFFFFFFFFFFFFFFFFFFFFFFFFFFFFFFFFFFFFFFFFFFFFFFFFFFFFFFFFFFFFFFFFFFFFFF:FFFFFFFFFFFFFFFFFFFFFFFFF  
FFFFF:FFFFFFFFF

@A00721:190:HGJW7DSXY:4:1331:2239:14982 2:N:0:TCTGCAAG+GCTGCACT  
TGAAAGTAAATTTCTGAATATGACGTTAGCGTTAATGGAGAAACGCGATGAAGAAGATGAAGGAGTCC  
CCATTACTGTTAAATCAGGGACATCCGCATATTAAGCATTATATTGGGGACTGGGGACCTATATATAT  
GTATAGAGTAATCCG

+  
FFFFFFFFFFFFFFFFFFFFFFFFFFFFFFFFFFFFFFFFFFFFFFFFFFFFFFFFFFFFFFFFFFFFFFFFF,:FFFFFFFFFFFFFFFFFFFFF  
FFFFFFFFFFFFFFFFFFFFFFFFFFFFFFFFFFFFFFFFFFFFFFFFFFFFFFFFFFFFFFFFFFFFFFFFF:F:FFFFFFFFFFFFFFFFFFFFF,  
,F:FF,FFFFFFFFF

@A00721:190:HGJW7DSXY:4:1433:22914:19132 2:N:0:TCTGCAAG+GCTGCACT  
TGAAAGTAAATTTCTGAATATGATGTTAGCGTTAATGGAGAAACGCGATGAAGAAGATGAAGGAGTCC  
CCATTACTGTTAAATCAGGGACATCCGCATATTAAGCATTATATTGGGGACTGGGGACCTATATATAT  
GTATAGAGTAATCCG

+  
FFFFFFFFFFFFFFFFFFFFFFFFFFFFFFFFFFFFFFFFFFFFFFFFFFFFFFFFFFFFFFFFFFFFFFFFF:FFFF  
FFFFFFFFFFFFFFFFFFFFFFFFFFFFFFFFFFFFFFFFFFFFFFFFFFFFFFFFFFFFFFFFFFFFFFFFF  
FFFFFFFFFFFFFFFFF

@A00721:190:HGJW7DSXY:4:1464:22010:3630 2:N:0:TCTGCAAG+GCTGCACT  
TGAAAGTAAATTTCTGAATATGATGTTAGCGTTAATGGAGAAACGCGATGAAGAAGATGAAGGAGTCC  
CCATTACTGTTAAATCAGGGACATCCGCATATTAAGCATTATATTGGGGACTGGGGACCTATATATAT  
GTATAGAGTAATCCG

+  
FFFFFFFFFFFFFFFFFFFFFFFFFFFFFFFFFFFFFFFFFFFFFFFFFFFFFFFFFFFFFFFFFFFFFFFFF:FFFFFFFFF  
FFFFFFFFFFFFF:FFFFFFF:FFFFF:FFFFFFF:FFF:FFFFFFFFFFFFFFFFFFFFFFFFFFFFFFFFF  
FFFFFFFFFFFFFFFFF

@A00721:190:HGJW7DSXY:4:1521:31250:26209 2:N:0:TCTGCAAG+GCTGCACT  
TGAAAGTAAATTTCTGAATATGATGTTAGCGTTAATGGAGAAACGCGATGAAGAAGATGAAGGAGTCC

CCATTACTGTTAAATCAGGGACATCCGCATATTAAGCATTATATTGGGGACTGGGGACCTATATATAT  
GTATAGAGTAATCCG

[illegible] $+$ 

@A00721:190:HGJW7DSXY:4:2253:1072:20791 2:N:0:TCTGCAAG+GCTGCACT  
TGAAAGTAAATTTCTGAATATGATGTTAGCGTTAATGGAGAAACGCGATGAAGAAGATGAAGGAGTCC  
CCATTACTGTTAAATCAGGGACATCCGCATATTAAGCATTATATTGGGGACTGGGGACCTATATATAT  
GTATAGAGTAATCCG

```

FFFFF,FFFFFFFF:FFF:FFFFFFFFFFFFFFFF,FFFFFFFF,FFFFFFFFFFFFFFFF,FFFFFF:FF
,FFFFFFFFFFFFFFFFFFFFF,F,FFF:F:FFFFFFFF:FF:FF:FFFF,FFFFFFFFFFFFFFFFFFFF
FFFFF:FFFFFF:FF

```

+

@A00721:190:HGJW7DSXY:4:2528:16098:19351 2:N:0:TCTGCAAG+GCTGCACT  
TGAAAGTAAATTTCTGAATATGATGTTAGCGTTAATGGAGAAACGCGATGAAGAAGATGAAGGAGTCC  
CCATTACTGTAAATCAGGGACATCCGCATATTAAGCATTATATTGGGGACTGGGGACCTATATATAT  
GTATAGAGTAATCCG

[illegible]

+

@A00721:190:HGJW7DSXY:4:2575:21495:25160 2:N:0:TCTGCAAG+GCTGCACT  
TGAAAGTAAATTTCTGAATATGATGTTAGCGTTAATGGAGAAACGCGATGAAGAAGATGAAGGAGTCC  
CCATTACTGTTAAATCAGGGACATCCGCATATTAAGCATTATATTGGGGACTGGGGACCTATATATAT  
GTATAGAGTAATCCG

[illegible]

@A00721:190:HGJW7DSXY:4:2674:21169:16799 2:N:0:TCTGCAAG+GCTGCACT  
TGAAAGTAAATTTCTGAATATGATGTTAGCGTTAATGGAGAAACGCGATGAAGAAGATGAAGGAGTCC  
CCATTACTGTAAATCAGGGACATCCGCATATTAAGCATTATATTGGGGACTGGGGACCTATATATAT  
GTATAGAGTAATCCG

```

FFFFFFFFFFFFFFFFFFFFFFFFFFFFFFFFFFFFFFFFFFFFFFFFFFFFFFFFFFFFFFFFFFFFFFFF
FFFFFFFFFFFFFFFF:FFFFFFFFFFFFFFFFFFFFFFFFFFFFFFFF:FFFF:FFFFFFFFFFFFFFFF:FFFFFF
FFFFFFFFFFFFFFFF

```

+

[illegible]

+

```

FFFFF:FFFFFFFFFFFFFFFFFFFFFFFFFFFFFFFFF::FFFFFFFFFFFFF:FFFFFFF:FF:FFF
:FFFFFFFFFFFFF,FFFFFF:FFFF:FFFFFF:FF,FF:F:FF:FFFFFFFFFFFFFFFFF,FFFF:FFFFF
FFFFFFFFFFFFFFFFF

```

+

[illegible]

+

```
F:FFFFFFFF:FFFFFFFFFFFFFFFFFFFFFFFFFFFFFFFFFFFFFFFFFFFFFFFFFFFFFFFF
FFFFFFFFFFFFFFFFFFFFFFFFFFFFFFFFFFFFFFFF,FFFFFFFFFFFFFF:FFFFFF,FFFFFFFF:F
FFFFF:FFFFFFFF
```

+

```

FFFFFFFFFFFFFFFFFFFFFFFFFFFFFFFF:FFFFFFFF:FFFFFFFFFFFFFFFFFFFFFFFF
FFFFFFFFFFFFFFFFFFFFFFFFFFFFFFFF:FFFFFFFFFFFFFFFFFFFFFFFFFFFFFFFF
FFFFFFFFFFFFFFFF

```

+

[illegible]



@A00721:190:HGJW7DSXY:4:2370:17770:30358 2:N:0:TCTGCAAG+GCTGCACT  
TGGGGATAGATTCTCCGGATTACTCTATACATATATATAGGTCCCCAGTCCCCAATATAATGCTTAA  
TATGCGGATGTCCCTGATTAAACAGTAATGGGGACTCCTTCATCTTCTTCATCGCGTTTCTCCATTAA  
CGCTAACATCAGAGA

@A00721:190:HGJW7DSXY:4:2475:24804:8844 2:N:0:TCTGCAAG+GCTGCACT  
TGGGGATAGATTCTCCGGATTACTCTATACATATATATAGGTCCCCAGTCCCCAATATAATGCTTAA  
TATGCGGATGTCCCTGATTAAACAGTAATGGGGACTCCTTCATCTTCTTCATCGCGTTTCTCCATTAA  
CGCTAACATCAGAGA

@A00721:190:HGJW7DSXY:4:2535:9715:22608 2:N:0:TCTGCAAG+GCTGCACT  
TGGGGATAGATTCTCCGGATTACTCTATACATATATATAGGTCCCCAGTCCCCAATATAATGCTTAA  
TATGCGGATGTCCCTGATTAAACAGTAATGGGGACTCCTTCATCTTCTTCATCGCGTTTCTCCATTAA  
CGCTAACATCAGAGA

@A00721:190:HGJW7DSXY:4:2613:1461:23469 2:N:0:TCTGCAAG+GCTGCACT  
TGGGGATAGATTCTCCGGATTACTCTATACATATATATAGGTCCCCAGTCCCCAATATAATGCTTAA  
TATGCGGATGTCCCTGATTTAACAGTAATGGGGACTCCTTCATCTTCTTCATCGCGTTTCTCCATTAA  
CGCTAACATCAGAGA

@A00721:190:HGJW7DSXY:4:2654:5891:16172 2:N:0:TCTGCAAG+GCTGCACT  
TGGGGATAGATTCTCCGGATTACTCTATACATATATATAGGTCCCCAGTCCCCAATATAATGCTTAA  
TATGCGGATGTCCCTGATTTAACAGTAATGGGGACTCCTTCATCTTCTTCATCGCGTTTCTCCATTAA  
CGCTAACATCAGAGA

@A00721:190:HGJW7DSXY:4:1239:14859:17613 2:N:0:TCTGCAAG+GCTGCACT  
CCCCAATATAATGCTTAATATGCGAATGTCCCTGATTTAACAGTAATGGGGACTCCTTCATCTTCTTC  
ATCGCGTTTTCTGCATTAACGCGAAGAATTATTTCTTAACTTATTCAAGATGTCCAATTTCCAAAGAAA  
TTGTTCTCGACCAA

@A00721:190:HGJW7DSXY:4:1460:12192:27712 2:N:0:TCTGCAAG+GCTGCACT  
CCCCAATATAATGCTTAATATGCGAATGTCCCTGATTTAACAGTAATGGGGACTCCTTCATCTTCTTC  
ATCGCGTTTTCTGCATTAACGCGAAGAATTATTTCTTAACTTATTCAAGATGTCCAATTTCCAAAGAAA  
TTGTTCTCGACCAA

+  
FFFFFFFFFFFFFFFFFFFFFFFFFFFFFFFFFFFFFFFFFFFFFFFFFFFFFFFFFFFFFFFFFFFFFFFF  
FFF:FFFFFFFFFFFFFFFFFFFFFFFFFFFFFFFFFFFFFFFFFFFFFFFFFFFFFFFFFFFFFFFFFFFF  
FFFFFFFFFFFFFFFF  
@A00721:190:HGJW7DSXY:4:1475:32217:5588 2:N:0:TCTGCAAG+GCTGCACT  
CCCCAATATAATGCTTAATATGCGAATGTCCCTGATTTAACAGTAATGGGGACTCCTTCATCTTCTTC  
ATCGCGTTTCTGCATTAACGCGAAGAATTATTTCTTAAGTATTCAAGATGTCCAATTTCCAAAGAAA  
TTGTTCTCGACCAA

+  
FFFFFFFFFFFFFFFFFFFFFFFFFFFFFFFFFFFFFFFFFFFFFFFFFFFFFFFFFFFFFFFFFFFFFFFF  
FFFFF:FFFFFFFFFFFFFFFFFFFFFFFFFFFFFFFFFFFFFFFFFFFFFFFFFFFFFFFFFFFFFFFF  
FFFFFFFFFFFFFFFF:FFFFFFFFFFFFFFFF:FFFFFFFF:F,FFFF:  
FFFFFFFF:FF,FFF  
@A00721:190:HGJW7DSXY:4:1507:23981:15718 2:N:0:TCTGCAAG+GCTGCACT  
CCCCAATATAATGCTTAATATGCGAATGTCCCTGATTTAACAGTAATGGGGACTCCTTCATCTTCTTC  
ATCGCGTTTCTGCATTAACGCGAAGAATTATTTCTTAAGTATTCAAGATGTCCAATTTCCAAAGAAA  
TTGTTCTCGACCAA

+  
FFFFFFFFFFFFFFFFFFFFFFFFFFFFFFFFFFFFFFFFFFFFFFFFFFFFFFFFFFFFFFFFFFFFFFFF  
FFF:FFFFFFFFFFFFFFFFFFFFFFFFFFFFFFFFFFFFFFFFFFFFFFFFFFFFFFFFFFFFFFFFFFFF  
FFFFFFFFFFFFFFFF  
@A00721:190:HGJW7DSXY:4:1535:19470:26694 2:N:0:TCTGCAAG+GCTGCACT  
CCCCAATATAATGCTTAATATGCGAATGTCCCTGATTTAACAGTAATGGGGACTCCTTCATCTTCTTC  
ATCGCGTTTCTGCATCAACGCGAAGAATTATTTCTTAAGTATTCAAGATGTCCAATTTCCAAAGAAA  
TTGTTCTCGACCAA

+  
FFFFFFFFFFFFFFFFFFFFFFFFFFFFFFFFFFFFFFFFFFFFFFFFFFFFFFFFFFFFFFFFFFFFFFFF  
FFFFFFFFFFFFFFFF,FFFFFFFF:FFFFFFFFFFFFFFFFFFFFFFFF,FFFFFF:FFFF:FFFF,F:  
FFFF:FFFFFFFF  
@A00721:190:HGJW7DSXY:4:2650:28031:10050 2:N:0:TCTGCAAG+GCTGCACT  
CCCCAATATAATGCTTAATATGCGAATGTCCCTGATTTAACAGTAATGGGGACTCCTTCATCTTCTTC  
ATCGCGTTTCTGCATTAACGCGAAGAATTATTTCTTAAGTATTCAAGATGTCCAATTTCCAAAGAAA  
TTGTTCTCGACCAA

+  
FFFFFFFFFFFFFFFFFFFFFFFFFFFFFFFFFFFFFFFFFFFFFFFFFFFFFFFFFFFFFFFFFFFFFFFF  
FFFFFFFFFFFFFFFFFFFFFFFFFFFFFFFFFFFFFFFFFFFFFFFFFFFFFFFFFFFFFFFF:FFFFFFFFFFFFFFFF  
FFFFFFFF,FFFFF  
@A00721:190:HGJW7DSXY:4:1136:24505:32659 2:N:0:TCTGCAAG+GCTGCACT  
TTTCTTTGGAAATTGGACATCTTGAATAAGTTAAGAAATAATTCTTCGCGTTAATGCAGAAACGCGAT  
GAAGAAGATGAAGGAGTCCCCATTACTGTAAATCAGGGACATTTCGCATATTAAGCATTATATTGGGG  
ACTGGGGACCTATAT

+  
FFFFFFFFFFFFFFFFFFFFFFFFFFFFFFFFFFFFFFFFFFFFFFFFFFFFFFFFFFFFFFFF:FFFFFFFFFFFFFFFF:FF,FFF:FFFFF:FF  
FFFFFFFFFFFFFFFF:FFFFFF,::FFFFFF:FF:FFFFFFFF:FFF:FFF,FFFF:FFF::,F  
:,FFF:FFFFFFFF  
@A00721:190:HGJW7DSXY:4:1213:15076:32612 2:N:0:TCTGCAAG+GCTGCACT  
TTTCTTTGGAAATTGGACATCTTGAATAAGTTAAGAAATAATTCTTCGCGTTAATGCAGAAACGCGAT  
GAAGAAGATGAAGGAGTCCCCATTACTGTAAATCAGGGACATTTCGCATATTAAGCATTATATTGGGG  
ACTGGGGACCTATAT

+  
FF:FF:FFFF:FFFFFFFFFFFFFFFFFFFFFFFFFFFFFFFF:FFFFFFFFFFFF:FFFFFF:FFFF:  
FFFF:FFFFFFFFFFFFFFFF:FFFFFFFFFFFFFFFF:FFFFFFFF:F:FFFFFF,FFFF,FFFFFFFF  
F:FFFFFFFF,FFF  
@A00721:190:HGJW7DSXY:4:1264:29234:26475 2:N:0:TCTGCAAG+GCTGCACT  
TTTCTTTGGAAATTGGACATCTTGAATAAGTTAAGAAATAATTCTTCGCGTTAATGCAGAAACGCGAT

GAAGAAGATGAAGGAGTCCCCATTACTGTTAAATCAGGGACATTTCGCATATTAAGCATTATATTGGGG  
ACTGGGGACCTATAT

```
FFFFFFFFFFFFFFFFFFFFFFFFFFFFFFFFFFFFFFFFFFFFFFFFFFFFFFFFFFFFFFFFFFFFFFFFFFFF
FFFFFFFFFFFF:FFFFFFFFFFFFFFFFFFFFFFFFFFFFFFFFFFFF,FFFFFFFFFFFFFF:FFFFFFFFFFFFF
FFFFFFFFFFFFFFFFFFFF
```

 $+$ [illegible]

+

[illegible] $+$ 

```

FFFFFFFF:FFFFFFFFFFFFFFFFFFFFFFFFFFFFFFFF:FFFFF:FFFFFF:FFFFFFF::FFFF
FFFFFFFFFFFFFFF,FFFF:FFFFFFFFFFFFFFFFFFFFFFFF:FFFFFFFFF,FFFFFFFFFFFFFFFFFFFF:FFFF
FFFFFFFFFFFFFFFFFFFF

```

+

[illegible]

+

```
:FFFF:FFFF:FFFFFF,FFF:FFFFFFFFFFFFFFFFFFFFFFFFFFFFFFFFFFFFFFFF:F
FFFFFFFFF:FFFFFFFFFFFFFFFFFFFFFFFF:FFFFFF:, ,FFF:FFFF,FFFF,FFFFF:FFFFF
FFFFFFFFFFFFFFFF
```

+

[illegible]

@A00721:190:HGJW7DSXY:4:1512:10556:28573 2:N:0:TCTGCAAG+GCTGCACT  
ATTCCTCCGGATTACTCTATACATATATATAGGTCCCCAGTCCCCAATATAATGCTTAATATGCGAAT  
GTCCCTGATTAAACAGTAATGGGGACTCCTTCATCTTCTTCATCGCGTTTCTGCATTAACGCGAAGAA  
TTATTTCTTAACTTA

+

FFFFFFFFFFFFFFFFFFFFFFFFFFFFFFFFFFFFFFFFFFFFFFFFFFFFFFFFFFFFFFFFFFFFFFFF  
FFF:FFFFFFFF:FFFFFFFF:FFFFFFFFFFFFFFFFFFFFFFFFFFFFFFFFFFFFFFFFFFFFFFFF  
FFFFFFFFFFFFFFFF

@A00721:190:HGJW7DSXY:4:1607:25265:16438 2:N:0:TCTGCAAG+GCTGCACT  
ATTCCTCCGGATTACTCTATACATATATATAGGTCCCCAGTCCCCAATATAATGCTTAATATGCGAAT  
GTCCCTGATTAAACAGTAATGGGGACTCCTTCATCTTCTTCATCGCGTTTCTGCATTAACGCGAAGAA  
TTATTTCTTAACTTA

+

FFF::FFFFFFFF:FFFFFFFF:FFFF:FFFFFFFF:FFFFFFFF,F:FFFFFF:F:FFF  
FFF::FFFFFFFFFFFFFFFF:FFF::F,F:FFF:FFFFFFFF:F,:F::FFF:FFFF:FFF,FF  
FFF:FF,FFFF:FF

@A00721:190:HGJW7DSXY:4:2302:14416:26021 2:N:0:TCTGCAAG+GCTGCACT  
ATTCCTCCGGATTACTCTATACATATATATAGGTCCCCAGTCCCCAATATAATGCTTAATATGCGAAT  
GTCCCTGATTAAACAGTAATGGGGACTCCTTCATCTTCTTCATCGCGTTTCTGCATTAACGCGAAGAA  
TTATTTCTTAACTTA

+

F:FFFFFFFFFFFFFFFFFFFFFFFFFFFFFFFFFFFFFFFFFFFFFFFFFFFFFFFFFFFFFFFFFFFF  
FFFFFFFF:FFFFFFFFFFFFFFFFFFFFFFFFFFFFFFFFFFFFFFFF:FFFFFFFF,FF:FFFFFFFF  
FFFFFFFF:FFFF

@A00721:190:HGJW7DSXY:4:2549:18295:28635 2:N:0:TCTGCAAG+GCTGCACT  
ATTCCTCCGGATTACTCTATACATATATATAGGTCCCCAGTCCCCAATATAATGCTTAATATGCGAAT  
GTCCCTGATTAAACAGTAATGGGGACTCCTTCATCTTCTTCATCGCGTTTCTGCATTAACGCGAAGAA  
TTATTTCTTAACTTA

+

FFFFFFFFFFFF:FFFFFFFFFFFFFFFFFFFFFFFFFFFFFFFFFFFFFFFFFFFFFFFFFFFFFFFFFFFF  
FFFFFFFFFFFFFFFFFFFFFFFFFFFFFFFFFFFFFFFF:F:FFFFFFFFFFFFFFFF:FFFFFFFFFFFFFFFF  
FFFFFFFFFFFF:FFFF

@A00721:190:HGJW7DSXY:4:1129:23610:36714 2:N:0:TCTGCAAG+GCTGCACT  
GATTCCTCCGGATTACTCTATACATATATATAGGTCCCCAGTCCCCAATATAATGCTTAATATGCGAA  
TGTCCCTGATTAAACAGTAATGGGGACTCCTTCATCTTCTTCATCGCGTTTCTGCATTAACGCGAAGA  
ATTATTTCTTAACTT

+

FFFFFFFFFFFFFFFFFFFFFFFFFFFFFFFFFFFFFFFFFFFFFFFFFFFFFFFFFFFFFFFFFFFF  
FFFFFFFFFFFFFFFFFFFFFFFFFFFFFFFFFFFFFFFFFFFFFFFFFFFFFFFFFFFFFFFF:FFFFF  
FFFFFFFFFFFFFFFF

@A00721:190:HGJW7DSXY:4:1202:25880:25739 2:N:0:TCTGCAAG+GCTGCACT  
GATTCCTCCGGATTACTCTATACATATATATAGGTCCCCAGTCCCCAATATAATGCTTAATATGCGAA  
TGTCCCTGATTAAACAGTAATGGGGACTCCTTCATCTTCTTCATCGCATTTCTGCATTAACGCGAAGA  
ATTATTTCTTAACTT

+

FFFFFFFFFFFFFFFFFFFFFFFFFFFFFFFFFFFFFFFFFFFFFFFFFFFFFFFFFFFFFFFFFFFF  
FFFFFFFFF:FFFFFFFF,::FFFFFFFFFFFFFFFFFFFFFFFFFFFFFFFFFFFFFFFF:FFFFFFF  
F:FFFFFFFFFFFF

@A00721:190:HGJW7DSXY:4:2527:21703:13777 2:N:0:TCTGCAAG+GCTGCACT  
ATTCCTCCGGATTACTCTATACATATATATAGGTCCCCAGTCCCCAATATAATGCTTAATATGCGAAT  
GTCCCTGATTGAACAGTAATGGGGACTCCTTCATCTTCTTCATCGCGTTTCTGCATTAACGCGAAGAA  
TTATTTCTTAACTT

+

F:FF,,,:FFF:FF,F,F,FFF::F:,FFF:F,:::FFFFFF,FFFF,FF:F:F:FF:FF:FF::F

:FF,:FFF,,,F,:F,,,F,:,:::FFF:,FFFFFF::F,:FFF,FFF,,:F,:FFFFFF,,FFF,F:F  
F,F:::F:,FF:::

@A00721:190:HGJW7DSXY:4:2606:11333:23437 2:N:0:TCTGCAAG+GCTGCACT  
GATTCCTCCGATTACTCTATACATATATATAGGTCCCCAGTCCCCAATATAATGCTTAATATGCGAA  
TGTCCCTGATTAAACAGTAATGGGGACTCCTTCATCTTCTTCATCGCATTTCTGCATTAACGCGAAGA  
ATTATTTCTTAACCTT

+

FFFFFFFFFFFFFF,FFFFFFFFFF:FF:FFFFFF:FF:FFFFFFFFFFFFFFFFFFFFFFFFFFFFFFFF:FFF,F:FF  
FFFF:FFFFFF:FFFFFFFFFFFFFFFFFFFFFFFFFFFFFFFF,FF,,FFFFFF:FFFF:,FFFF::F:FF:FF  
FFFFFFFFFFFFFFFF:

@A00721:190:HGJW7DSXY:4:1212:28212:23140 2:N:0:TCTGCAAG+GCTGCACT  
AAATAATTCTTCGCGTTAATGCAGAAACGCGATGAAGAAGATGAAGGAGTCCCCATTACTGTAAATC  
AGGGACATTTCGCATATTAAGCATTATATTGGGGACTGGGGACCTATATATATGTATAGAGTAATCCGG  
AGGAATCTATCCCCA

+

FFFFFFFFFFFFFFFF:FFFFFFFFFFFFFFFFFFFF:,FF::FFFF,FFFFFFFFFF:FFF:FFF,FFFFFFFF  
FFFFFFFFFFFFFFFFFFFFFFFFFFFFFFFF:FFFFFF:FFFFFFFFFF:,F,FFFFFFFF:FFFFFFFFFFFF  
FFFF,FFFFFFFFFF

@A00721:190:HGJW7DSXY:4:1240:8983:33301 2:N:0:TCTGCAAG+GCTGCACT  
AAATAATTCTTCGCGTTAATGCAGAAACGCGATGAAGAAGATGAAGGAGTCCCCATTACTGTAAATC  
AGGGACATTTCGCATATTAAGCATTATATTGGGGACTGGGGACCTATATATATGTATAGAGTAATCCGG  
AGGAATCTATCCCCA

+

FFFFFFFFFFFFFFFFFFFFFFFFFFFFFFFFFFFFFFFFFFFFFFFFFFFFFFFFFFFFFFFFFFFFFFFFFFFF  
FFFFFFFFFFFFFFFFFFFF:FFFFFFFFFFFFFFFFFFFFFFFFFFFFFFFF:FFFFFFFFFFFFFFFFFFFF  
FFFFFFFFFFFFFFFFFF

@A00721:190:HGJW7DSXY:4:1304:14443:22467 2:N:0:TCTGCAAG+GCTGCACT  
AAATAATTCTTCGCGTTAATGCAGAAACGCGATGAAGAAGATGAAGGAGTCCCCATTACTGTAAATC  
AGGGACATTTCGCATATTAAGCATTATATTGGGGACTGGGGACCTATATATATGTATAGAGTAATCCGG  
AGGAATCTATCCCCA

+

FFFFFFFFFFFFFFFFFFFFFFFFFFFF:F:FFFFFFFFFFFF:::FFFFFFFFFFFFFFFF:FFFFFFFFFF:FF  
:FFFFFFFFFFFFFFFFFFFF:,FFFFFFFFFFFFFFFFFFFF:FFFFFFFFFFFFFFFFFFFFFFFFFFFF  
FFFFFFFFFFFF:FFF

@A00721:190:HGJW7DSXY:4:1415:14543:33160 2:N:0:TCTGCAAG+GCTGCACT  
AAATAATTCTTCGCGTTAATGCAGAAACGCGATGAAGAAGATGAAGGAGTCCCCATTACTGTAAATC  
AGGGACATTTCGCATATTAAGCATTATATTGGGGACTGGGGACCTATATATATGTATAGAGTAATCCGG  
AGGAATCTATCCCCA

+

FFFFFFFFFFFFFFFFFFFFFFFFFFFFFFFFFFFFFFFFFFFF:FFFF:FFFFFFFFFFFFFFFFFFFFFFFF  
FFFFFFFFFFFFFFFF,FFFFFFFFFFFFFFFFFFFFFFFFFFFFFFFFFFFF,FFF:FFFFFFFFFFFFFFFF  
FFFF,FFF:FFF:FF

@A00721:190:HGJW7DSXY:4:1673:19199:11099 2:N:0:TCTGCAAG+GCTGCACT  
AAATAATTCTTCGCGTTAATGCAGAAACGCGATGAAGAAGATGAAGGAGTCCCCATTACTGTAAATC  
AGGGACATTTCGCATATTAAGCATTATATTGGGGACTGGGGACCTATATATATGTATAGAGTAATCCGG  
AGGAATCTATCCCCA

+

FFFFFFFFFFFFFFFFFFFFFFFFFFFFFFFFFFFFFFFFFFFF:FFFFFFFFFFFFFFFFFFFFFFFFFFFFFFFF  
FFFFFFFFFFFFFFFF:FFFF:FFFFFFFFFFFFFFFFFFFFFFFFFFFF,FFFF:FFFFFFFFFFFF:FFFF  
FFFFFFFFFFFF:FFF

@A00721:190:HGJW7DSXY:4:2443:14009:31735 2:N:0:TCTGCAAG+GCTGCACT  
AAATAATTCTTCGCGTTAATGCAGAAACGCGATGAAGAAGATGAAGGAGTCCCCATTACTGTAAATC  
AGGGACATTTCGCATATTAAGCATTATATTGGGGACTGGGGACCTATATATATGTATAGAGTAATCCGG  
AGGAATCTATCCCCA

[illegible][illegible][illegible]

```

FFFFFFFFFFFFFFFFFFFFFFFFFFFFFFFFFFFFFFFFFFFFFFFF:F:FFFFFFFFFFFFFFFFFFFFFFF
FFFF,FFFF,FFFFFFFFFFFFFFFFFFFFFFFFFFFFFFFFFFFFFFFF:F:FFFFFFFFFFFFFFFFFFFFFFF
FFFFFFFFFFFFFFFF:F

```

```

FFFFFFFFFFFFFFFFFFFFFFFFFFFFFFFF:FFFFFFFFFFFFFFFFFFFFFFFFFFFFFFFF:FFF
FFFFFFFFFFFFFFFFFFFFFFFFFFFFFFFF:FFFFFFFFFFFFFFFF,F,:FFFFFFFFFFFFFFFF:FFF
FFFFFFFFFFFFFFFF

```

[illegible]

```
FFFFFFFFFFFFFFFFFFFFF:,FF,FFFF:FFFFFFFFFFFFFFFFFFFFFFFFFFFFFFFFFFFF
FFFFFF,F:FFFFFFFF:FFFFFFFFFFFFFFFFFFFFFFFFFFFFFFFF:F:FFFFFFFFFFFFFFFF
FFFFFFFF
```

@A00721:190:HGJW7DSXY:4:1214:22996:14606 2:N:0:TCTGCAAG+GCTGCACT  
CGCGATGAAGAAGATGAAGGAGTCCCCATTACTGTTAAATCAGGGACATCCGCATATTAAGCATTATA

TTGGGGACTGGGGACCTATATATATGTATAGAGTAATCCGGAGGAATCTATCCCCAATTGGAATAGTA  
ATGATTTCAAATTC

```
FFFFFFFFFFFFFF,:FFFFFFFFFFFFFFFFFFFFFFFFFFFFFFFFFFFFFFFFFFFFF
FFFFFFFFFFFFFFFFFFFFFFFFFFFFF,FFFFFFFFFFFFFFFFFFFFFFFFFFFFFFFFFF:FF
FFFFFFFFFFFFFFFFFFFF
```

+

[illegible]

+

```

FFFFFFFFFFFFFFFFFFFFFFFFFFFFFFFFFFFFFFFFFFFFFFFFFFFFFFFFFFFFFFFF:FFFFFFFFFFFFFFFFFFFFFFFFFFFFFFFF
:FFFFFFFFFFFFFFFFFFFFFFFFFFFFFFFFFFFFFFFFFFFFFFFFFFFFFFFFFFFFFFFF,FFFFFFFFFFFFFFFFFFFFFFFFFFFFFFFF
FFFFFFFFFFFFFFFFFFFFFFFF

```

 $+$ 

```

FFFFFFFFFFFFFFFFFFFFFFFFFFFFFFFFFFFFFFFFFFFFFFFFFFFFFFFFFFFFFFFFFFFFFFFF:
FFFFFFFFFFFFFFFFFFFFFFFFFFFFFFFFFFFFFFFFFFFFFFFFFFFFFFFFFFFFFFFFFFFFFFFF:FFFFFFFFFFFFFFFFFFFFFFFF
FFFFFFFFFFFFFF:FFFF

```

 $+$ 

```

FFFFFFFFFFFFFFFFFFFFFFFFFFFFFFFFFFFFFFFFFFFFFFFFFFFFFFFFFFFFFFFF,FFFFFFFFFFFF
FFFFFFFF:FFFFFFFFFFFFFFFFFFFFFFFFFFFFFFFFFFFFFFFF:FFFFFFFFFFFFFFFFFFFFFFFF:FF
:FFFF:E:FFFFFFF

```

+

[illegible]

+

[illegible]

@A00721:190:HGJW7DSXY:4:2601:1353:36401 2:N:0:TCTGCAAG+GCTGCACT  
CGGGATATTTCAAATTTGAAATTTGAAATCATTACTATTCCAATTGGGGATAGATTCTCCGGATTA  
CTCTATACATATATATAGGTCCCCAGTCCCCAATATAATGCTTAATATGCGGATGTCCCTGATTTAAC  
AGTAATGGGGACTCC

+

FFFFFFFFFFFFFFFFFFFFFFFF:FFFFFFFFFFFFFFFF,F:FF:F:F,FFFF:FF:FFFF:F:FFF  
FFFFFFFF:FFFFFFFFFFFFFFFF,FFFF:FFFF,FFFFFFFFFFFF:FFFF,FFFF  
FF:FFFF:FF,FFF

@A00721:190:HGJW7DSXY:4:1216:30273:30091 2:N:0:TCTGCAAG+GCTGCACT  
TTTGAATTGGTATACTGTAGGGCGGGATATTTCAAATTTGAAATTTGAAATCATTACTATTCCAATT  
GGGGATAGATTCTCCGGATTACTCTATACATATATATAGGTCCCCAGTCCCCAATATAATGCTTAAT  
ATGCGGATGTCCCTG

+

FFFFFFFFFFFFFFFF,FFF:FFFFFFFFFFFFFFFF,FFFF:FFFFFFFFFFFFFFFFFFFFFFFF  
F:FF,FFFFFFFFFFFFFFFFFFFFFFFF:FFFFFFFF,FFFFFFFFFFFF:FFFF:FFFFFFFFFFFF  
FFFFFFFFFFFFFFFF

@A00721:190:HGJW7DSXY:4:1221:11767:18364 2:N:0:TCTGCAAG+GCTGCACT  
TTTGAATTGGTATACTGTAGGGCGGGATATTTCAAATTTGAAATTTGAAATCATTACTATTCCAATT  
GGGGATAGATTCTCCGGATTTCTCTATACATATATATAGGTCCCCAGTCCCCAATATAATGCTTAAT  
ATGCGAATGTCCCTG

+

F:FFFFFFFFFFFFFFFFFFFFFFFFFFFFFFFFFFFFFFFFFFFFFFFFFFFFFFFFFFFFFFFF  
FFFFFFFFFFFFFFFFFFFFFFFFFFFFFFFFFFFFFFFFFFFFFFFF:FFFFFFFFFFFFFFFFFFFF  
FFFFFFFFF:F,FFF

@A00721:190:HGJW7DSXY:4:1329:12509:31172 2:N:0:TCTGCAAG+GCTGCACT  
TTTGAATTGGTATACTGTAGGGCGGGATATTTCAAATTTGAAATTTGAAATCATTACTATTCCAATT  
GGGGATAGATTCTCCGGATTACTCTATACATATATATAGGTCCCCAGTCCCCAATATAATGCTTAAT  
ATGCGGATGTCCCTG

+

FFFFFF:FFF:FFFFFFFF:FFFF,FFFFFFFFFFFFFFFFFFFFFFFFFFFFFFFF:F:FFFFFF:FF:  
FFFFFFFFFFFFFFFFFFFFFFFFFFFFFFFFFFFFFFFFFFFFFFFF:FFFF:FFFFFFFF:FFF,FF,FF  
FF,FFFF:FFF:FF

@A00721:190:HGJW7DSXY:4:1455:17372:5306 2:N:0:TCTGCAAG+GCTGCACT  
TTTGAATTGGTATACTGTAGGGCGGGATATTTCAAATTTGAAATTTGAAATCATTACTATTCCAATT  
GGGGATAGATTCTCCGGATTACTCTATACATATATATAGGTCCCCAGTCCCCAATATAATGCTTAAT  
ATGCGGATGTCCCTG

+

FFFFFF:FFFFFF:FFFFFFFFFFFFFFFFFFFFFFFFFFFFFFFFFFFFFFFFFFFFFFFF,FFFFF  
FFFFF,FFFFFFFFFFFFFFFFFFFFFFFF:FFFFF:FFFFFFFFFFFFFFFFFFFFFFFFFFFF  
FFFFFFFFFFFF,F

@A00721:190:HGJW7DSXY:4:1455:16342:8719 2:N:0:TCTGCAAG+GCTGCACT  
TTTGAATTGGTATACTGTAGGGCGGGATATTTCAAATTTGAAATTTGAAATCATTACTATTCCAATT  
GGGGATAGATTCTCCGGATTACTCTATACATATATATAGGTCCCCAGTCCCCAATATAATGCTTAAT  
ATGCGGATGTCCCTG

+

FFFFFFFFFFFFFFFFFFFFFFFFFFFFFFFFFFFFFFFFFFFFFFFFFFFFFFFFFFFFFFFF  
:FFFFFFFFFFFFFFFF:FFFFFFFFFFFFFFFFFFFFFFFFFFFFFFFF:FFFFF  
FFFFFFFFFFFFFFFF

@A00721:190:HGJW7DSXY:4:1542:17336:4460 2:N:0:TCTGCAAG+GCTGCACT  
TTTGAATTGGTATACTGTAGGGCGGGATATTTCAAATTTGAAATTTGAAATCATTACTATTCCAATT  
GGGGATAGATTCTCCGGATTACTCTATACATATATATAGGTCCCCAGTCCCCAATATAATGCTTAAT  
ATGCGGATGTCCCTG

+

FFFFFFFFFFFFFFFFFFFFFFFF:FFFFFFFFFFFFFFFFFFFFFFFFFFFFFFFFFFFFFFFF



@A00721:190:HGJW7DSXY:4:2149:19199:32800 2:N:0:TCTGCAAG+GCTGCACT  
TTTGAATTGGTATACTGTAGGGCGGGATATTTTCAAATTTGAAATTTGAAATCATTACTATTCCAATT  
GGGGATAGATTCCCTCCGATTCTCTATACATATATATAGGTCCCCAGTCCCCAATATAATGCTTAAT  
ATGCGAATGTCCTG

@A00721:190:HGJW7DSXY:4:2356:3929:9549 2:N:0:TCTGCAAG+GCTGCACT  
TTTGAATTGGTATACTGTAGGGCGGGATATTTTCAAATTTGAAATTTGAAATCATTACTATTCCAATT  
GGGGATAGATTCCCTCCGATTTCTCTATACATATATATAGGTCCCCAGTCCCCAATATAATGCTTAAT  
ATGCGAATGTCCTG

@A00721:190:HGJW7DSXY:4:2361:11397:18411 2:N:0:TCTGCAAG+GCTGCACT  
TTTGAATTGGTATACTGTAGGGCGGGATATTTTCAAATTTGAAATTTGAAATCATTACTATTCCAATT  
GGGGATAGATTCCCTCCGATTACTCTATACATATATATAGGTCCCCAGTCCCCAATATAATGCTTAAT  
ATGCGGATGTCCCTG

@A00721:190:HGJW7DSXY:4:2404:12165:34460 2:N:0:TCTGCAAG+GCTGCACT  
TTTGAATTGGTATACTGTAGGGCGGGATATTTTCAAATTTGAAATTTGAAATCATTACTATTCCAATT  
GGGGATAGATTCCCTCCGATTACTCTATACATATATATAGGTCCCCAGTCCCCAATATAATGCTTAAT  
ATGCGGATGTCCTG

@A00721:190:HGJW7DSXY:4:2618:5773:23390 2:N:0:TCTGCAAG+GCTGCACT  
TTTGAATTGGTATACTGTAGGGCGGGATATTTTCAAATTTGAAATTTGAAATCATTACTATTCCAATT  
GGGGATAGATTCCCTCCGATTTCTCTATACATATATATAGGTCCCCAGTCCCCAATATAATGCTTAAT  
ATGCGAATGTCCCTG

@A00721:190:HGJW7DSXY:4:1347:18954:30123 2:N:0:TCTGCAAG+GCTGCACT  
CGGAGGAATCTATCCCCAATTGGAATAGTAATGATTTTCAAATTTGAAATTTGAAATCATTACTATTC  
CAATTGGGGATAGATTCTCCGGATTACTCTATACATATATATAGGTCCCCAGTCCCCAATATAATGC  
TTAATATGCGATAGA

@A00721:190:HGJW7DSXY:4:1431:18358:3693 2:N:0:TCTGCAAG+GCTGCACT  
CGGAGGAATCTATCCCCAATTGGAATAGTAATGATTTTCAAATTTGAAATTTGAAATCATTACTATTC  
CAATTGGGGATAGATTCTCCGGATTACTCTATACATATATATAGGTCCCCAGTCCCCAATATAATGC  
TTAATATGCGATAGA

```
FFFFFFFFFFFFFFFF:F  
F:F  
FFFFFFFFFFFFFFFF:  
F
```

```

FFFFF:F,FFF:FFFF:F:,F,FFFFF,F,FFFFF,FFF:F::FFFFFFFF:F:FFFFFFFF,F::F:F
,,,FFFFFFFF:F,FFFFF,FFFFF::F:F:FF,F::F,FFF,FFFFFFFF,FFFFFFFFFFFFFFFF
F:F,F::FFFFF

```

```

FFFFFFFFFFFFFFFFFFFFFFFFFFFFFFFFFFFFFFFFFFFFFFFFFFFFFFFFFFFFFFFF:FFFFFFFF:FFF
FFFFFFFF:FFFFFFFFFFFFFFFFFFFFFFFFFFFFFFFFFFFFFFFF:FFFFFFFFFFFFFFFFFFFFF,:FF:FFFFF
,FFFFFFFFFFFFFFFF

```

```
FFF:FFFFFFFFFFFFFFFFFFFFFFFFFFFFFFFFFFFFFFFFFFFFFFFF:FFF::FFFFFFFFF,FFFF
FFFFFFFFFFFFFFFFFFFFFFFFFFFFFFFFFFFFFFFF:FFFFFFFFFFFFFFFFFFFF:F,FFFFF:FFFFFFFFF
F:FFFFFFFFFFFFF,F
```

[illegible][illegible]

```

FFFFFFFFFFFFFFFFFFFFFFFFFFFFFFFFFFFFFFFFFFFFFFFFFFFFFFFFFFFFFFFF:FFFFFFFFFFFFFFFFFFFFFFFF
FFFFFFFFFFFFFFFFFFFFFFFFFFFFFFFFFFFFFFFFFFFFFFFFFFFFFFFFFFFFFFFF:FFFF:FFFFFFFFFFFFFFFFFFFFFFFF
FFFFFFFFFFFFFFFFFFFFFFFF

```

@A00721:190:HGJW7DSXY:4:2130:29035:30953 2:N:0:TCTGCAAG+GCTGCACT  
TGGGGACTGGGGACCTATATATATGTATAGAGTAATCCGGAGGAATCTATCCCCAATTGGAATAGTAA

TGATTTCAAATTTCAAATTTGAAAATATCCCGCCCTACAGTATACCAATTCAAATTCAAATTCAAATA  
GAATTCCATAGGCC

+

FFFFFFFFFFFFFFFFFFFFFFFFFFFFFFFFFFFFFFFFFFFFFFFFFFFFFFFFFFFFFFFFFFFFFFFF, F  
FFFFFFFFFFFFFFFFFFFFFFFFFFFFFFFFFFFFFFFFFFFFFFFFFFFFFFFFFFFFFFFFFFFFFFFF: FFF:F, FFFFFFFFFFFFFFFFFFFFFFFFFFFFFFFFFFFFFFFFFFFFFFFFFF  
FFFFFFFFFFFFFFFF: FFF

@A00721:190:HGJW7DSXY:4:2221:32117:31876 2:N:0:TCTGCAAG+GCTGCACT  
TGGGGACTGGGGACCTATATATATGTATAGAGTAATCCGGAGGAATCTATCCCCAATTGGAATAGTAA  
TGATTTCAAATTTCAAATTTGAAAATATCCCGCCCTACAGTATACCAATTCAAATTCAAATTCAAATA  
GAATTCCATAGGCC

+

FFFFFFFFFFFFFFFFFFFFFFFFFFFFFFFFFFFFFFFFFFFFFFFFFFFFFFFFFFFFFFFFFFFFFFFF: F, FFFFFFFFFF: FFFF: : FFFFFFFFFFFFFFFFFF, FFFFFFFFFF  
FFFFFFFFFFFFFFFFFFFFFFFFFFFFFFFFFFFFFFFFFFFFFFFFFFFFFFFFFFFFFFFFFFFFFFFF: FFFFFFFFFF: FFFFFFFFFFFFFFFFFF: FFFFFFFFFF: F: FF: FF: FFFFFFFFFF  
, FFFF, FFFF: , FF

@A00721:190:HGJW7DSXY:4:2656:3821:23265 2:N:0:TCTGCAAG+GCTGCACT  
TGGGGACTGGGGACCTATATATATGTATAGAGTAATCCGGAGGAATCTATCCCCAATTGGAATAGTAA  
TGATTTCAAATTTCAAATTTGAAAATATCCCGCCCTACAGTATACCAATTCAAATTCAAATTCAAATA  
GAATTCCATAGGCC

+

FFFFFFFFFFFFFFFFFFFFFFFFFFFFFFFFFFFFFFFFFFFFFFFFFFFFFFFFFFFFFFFFFFFFFFFF: FFFFFFFFFFFFFFFFFF: FFFFFFFF  
FFFFFFFFFFFFFFFFFFFFFFFFFFFFFFFFFFFFFFFFFFFFFFFFFFFFFFFFFFFFFFFFFFFFFFFF: : FF,  
FF: FFFFFFF: FFFF

@A00721:190:HGJW7DSXY:4:1259:26449:18646 2:N:0:TCTGCAAG+GCTGCACT  
CTGGGGACCTATATATATGTATAGAGTAATCCGGAGGAATCTATCCCCAATTGGAATAGTAATGATTT  
CAAATTTCAAATTTGAAAATATCCCGCCCTACAGTATACCAATTCAAATTCAAATTCAAATAGAATTC  
CATAGGCCCGCAGG

+

FFFFFFFF: FFFFFF: FFFFFFFFFFFFFFFFFFFFFFFFFFFFFFFFFFFFFFFFFFFFFFFFFF: FFFFFFFFFFFFFF  
FFFFFFFFFFFFFFFFFFFFFFFFFFFFFFFFFFFFFFFFFFFFFFFFFFFFFFFFFFFFFFFFFFFFFFFF: FF: FFFFFFFF  
FFFFFFFFFFFFFFFF

@A00721:190:HGJW7DSXY:4:1413:26621:28463 2:N:0:TCTGCAAG+GCTGCACT  
CTGGGGACCTATATATATGTATAGAGTAATCCGGAGGAATCTATCCCCAATTGGAATAGTAATGATTT  
CAAATTTCAAATTTGAAAATATCCCGCCCTACAGTATACCAATTCAAATTCAAATTCAAATAGAATTC  
CATAGGCCCGCAGG

+

FFFFFFFFFFFFFFFFFFFFFFFFFFFFFFFFFFFFFFFFFFFFFFFFFFFFFFFFFFFFFFFFFFFFFFFFF  
FFFFFFFFFFFFFFFFFFFFFFFFFFFFFFFFFFFFFFFFFFFFFFFFFFFFFFFFFFFFFFFFFFFFFFFF: F  
FFFFFFFFFFFFFFFF

@A00721:190:HGJW7DSXY:4:2366:25256:34961 2:N:0:TCTGCAAG+GCTGCACT  
CTGGGGACCTATATATATGTATAGAGTAATCCGGAGGAATCTATCCCCAATTGGAATAGTAATGATTT  
CAAATTTCAAATTTGAAAATATCCCGCCCTACAGTATACCAATTCAAATTCAAATTCAAATAGAATTC  
CATAGGCCCGCAGG

+

FFFFFFFFFFFFFFFFFFFFFFFFFFFFFFFFFFFFFFFFFFFFFFFFFFFFFFFFFFFFFFFFFFFFFFFFF  
FFFFFFFFFFFFFFFFFFFFFFFFFFFFFFFFFFFFFFFFFFFFFFFFFFFFFFFFFFFFFFFFFFFFFFFF: FFFF: FFFFFFFFFFFFFFFFFF:  
FF: FFFFFF: FFFF

@A00721:190:HGJW7DSXY:4:2366:24587:35994 2:N:0:TCTGCAAG+GCTGCACT  
CTGGGGACCTATATATATGTATAGAGTAATCCGGAGGAATCTATCCCCAATTGGAATAGTAATGATTT  
CAAATTTCAAATTTGAAAATATCCCGCCCTACAGTATACCAATTCAAATTCAAATTCAAATAGAATTC  
CATAGGCCCGCAGG

+

FFFFFFFFFFFFFFFFFFFFFFFFFFFFFFFFFFFFFFFFFFFFFFFFFFFFFFFFFFFFFFFFFFFFFFFFF  
FFFFFFFFFFFFFFFFFFFFFFFFFFFFFFFFFFFFFFFFFFFFFFFFFFFFFFFFFFFFFFFFFFFFFFFF, FFFF, FFFFFFFFFFFFFFFFFF: FFFFFFFFFF  
: FFFFFFFFFFFFFFFFFF

@A00721:190:HGJW7DSXY:4:1123:2618:33896 2:N:0:TCTGCAAG+GCTGCACT  
GGGACCTATATATATGTATAGAGTAATCCGGAGGAATCTATCCCCAATTGGAATAGTAATGATTTCAA  
ATTTCAAATTTGAAAATATCCCGCCCTACAGTATACCAATTCAAATTCAAATTCAAATAGAATTCCAT  
AGGCCCCGCAGGGGC

[illegible]

@A00721:190:HGJW7DSXY:4:1142:27263:14387 2:N:0:TCTGCAAG+GCTGCACT  
GGGACCTATATATATGTATAGAGTAATCCGGAGGAATCTATCCCCAATTGGAATAGTAATGATTTCAA  
ATTTCAAATTTGAAAATATCCCGCCCTACAGTATACCAATTCAAATTCAAATTCAAATAGAATTCCAT  
AGGCCCCGCAGGGGC

```
:F:FFFFFFFFFFFFFFFFFFFF:FFFFFFFFFFFF:FFFFFFFF:FFFFFFFFFF:FFFFFF:FFFF
FFFFFFFF:FFFFFFFFFFFFFFFFFFFFFFFFFFFF:FFFFFFF,FFFF:FFFFFFFFFFFFFFFFFFFF:F:F
FF:FFFFFFFFFFFF
```

@A00721:190:HGJW7DSXY:4:2362:28357:34757 2:N:0:TCTGCAAG+GCTGCACT  
GGGACCTATATATATGTATAGAGTAATCCGGAGGAATCTATCCCCAATTGGAATAGTAATGATTTCAA  
ATTTCAAATTTGAAAATATCCCGCCCTACAGTATACCAATTCAAATTCAAATTCAAATAGAATTCCAT  
AGGCCCCGCAGGGGC

[illegible]

@A00721:190:HGJW7DSXY:4:2412:30689:25332 2:N:0:TCTGCAAG+GCTGCACT  
GGGACCTATATATATGTATAGAGTAATCCGGAGGAATCTATCCCCAATTGGAATAGTAATGATTTCAA  
ATTTCAAATTTGAAATATCCCGCCCTACAGTATACCAATTCAAATTCAAATTCAAATAGAATTCCAT  
AGGCCCCGCAGGGGC

```

FFFFFFFFFFFFFFFFFFFFFFFFFFFFFFFF:FFFFFFFFFFFFFFFFFFFFFFFFFFFFFFFF
FFFFFFFFFFFFFFFFFFFFFFFFFFFFFFFF:.:FFFFFFFFFFFF:FFFFFFFFFFFF
FF:FFFFFF:FFFFF

```

@A00721:190:HGJW7DSXY:4:2441:26666:24251 2:N:0:TCTGCAAG+GCTGCACT  
GGGACCTATATATATGTATAGAGTAATCCGGAGGAATCTATCCCCAATTGGAATAGTAATGATTTCAA  
ATTTCAAATTTGAAATATCCCGCCCTACAGTATACCAATTCAAATTCAAATTCAAATAGAATTCCAT  
AGGCCCCGCAGGGGC

```

FFFFFFFFFFFFFFFFFFFFFFFFFFFFFFFFFFFFFFFF:FF:FFFFFFFFFFFFFFFF
F:FFFFFFFFF:FFFFFFFFFFFFFFFFFFFFFFFFF,FFFFFFFFFFFF:,FFF:F:FFFF,FFF
FF:FFFFFFFF:FFF

```

@A00721:190:HGJW7DSXY:4:1222:2492:22811 2:N:0:TCTGCAAG+GCTGCACT  
GATGCCCTGCGGGCCTATGGAATTCTATTTGAATTTGAATTTGAATTGGTATACTGTAGGGCGGGA  
TATTTTCAAATTTGAAATTTGAAATCATTACTATTCCAATTGGGGATAGATTCTCCGGATTACTCTA  
TACATATATATAGGT

```

FFFFFFFFFFFFFFFF:FFFFF:F:FFFF:FFFFFFFFFFFFFFFFFFFFFFFF:FFFFFFFFFF
F:FFFFFFFFFFFF:FFFFFFFFFFFFFFFF,FFFFFF,FFFFFFFFFFFFFFFFFFFFFF
FFFFFFFFF:FFFFF

```

@A00721:190:HGJW7DSXY:4:2216:32280:35477 2:N:0:TCTGCAAG+GCTGCACT  
GATGCCCTGCGGGCCTATGGAATTCTATTTGAATTTGAATTTGAATTGGTATACTGTAGGGCGGGA  
TATTTTCAAATTTGAAATTTGAAATCATTACTATTCCAATTGGGGATAGATTCTCCGGATTACTCTA  
TACATATATATAGGT

[illegible]



```

FFFFFFFFFFFFFFFFFFFFFFFFFFFFFFFFFFFFFFFFFFFFFFFFFFFFFFFFFFFFFFFF:FFFFFFFFFFFFFFFF:FFFFFFF
F:FFFFFFFFFFFFFFFFFFFFFFFFFFFFFFFFFFFFFFFFFFFFFFFFFFFFFFFFFFFFFFFF:,FFFFFFFFFFFFFFFF:FFFF:FFFFFFFF:
FFFFFFFFFFFFFFFF

```

[illegible]

```
F:FFFFFFFF:FFFFFFFFFFFFFFFFFFFFFFFFFFFFFFFFFFFFFFFFFFFFFFFFFFFFFFFF:F
FFFFFFFFFFFFFFFFFFFFFFFF:FFFFFFF,FFFFFFFFFFFFFFFFFFFFFFFFFFFFFFFF
FFFFFFFFF:FFFFFFF
```

[illegible][illegible]

```

FFFFFFFFFFFFFFFFFFFFFFFF:FFFFFFFFFFFFFFFFFFFFFFFFFFFFFFFFFFFFFFFF
FFFFFFFFFFFFFFFFFFFFFFFFFFFFFFFF:FFFFFF:FFFFFFFFFFFFFFFFFFFFFFFF:FFF
FFFFFFFFFFFFFFFF

```

```

FFFFFFFFFFFFFFFF:FFFFFFFFFFFFFF:FFFFFFFFFFFFFFFF::FFF::FFFFFFFFFFFFFFFF:
FFFFFFFF:FFFFFFFF,FFFFFFFF,FFFFFFFFFFFFFFFFFFFFFFFFF:F:FFFFFF:FFFFFFF
F:FFFFFFFFF:FFF

```

@A00721:190:HGJW7DSXY:4:1565:11686:23109 2:N:0:TCTGCAAG+GCTGCACT  
CCACGGTCTGCGGTAAGATGCCCTGCGGGCCTATGGAATTCTATTTGAATTTGAATTTGAATTGGT



@A00721:190:HGJW7DSXY:4:2571:32931:26772 2:N:0:TCTGCAAG+GCTGCACT  
GTAATCCGGAGGAATCTATCCCCAATTGGAATAGTAATGATTTCAAATTTCAAATTTGAAAATATCCC  
GCCCTACAGTATACCAATTCAAATTCAAATTCAAATAGAATTCCATAGGCCCGCAGGGGCATCTTAC  
CGCAGACCGTGGGGC

```

FFFFFFFFFFFFFFFFFFFFFFFFFFFFFFFF:FFFFFFFFFFFFFFFF:FFFFFFFFFFFF:FFFFFFFF
FFFFFFFF:FFFFFFFFFFFFFFFF,FFFFFFFFFFFF:FFFFFFFFFFFFFFFF:FFFFFFFFFFFFFFFF:
FFFFFFFFFFFF:FFFFF

```

@A00721:190:HGJW7DSXY:4:1503:30056:17253 2:N:0:TCTGCAAG+GCTGCACT  
GAGGAATCTATCCCCAATTGGAATAGTAATGATTTCAAATTTCAAATTTGAAAATATCCCGCCCTACA  
GTATACCAATTCAAATTCAAATTCAAATAGAATTCCATAGGCCCCGCAGGGGCATCTTACCGCAGACC  
GTGGGGCAAGCCAAT

[illegible]

@A00721:190:HGJW7DSXY:4:2225:18376:12273 2:N:0:TCTGCAAG+GCTGCACT  
GAGGAATCTATCCCCAATTGGAATAGTAATGATTTCAAATTTCAAATTTGAAAATATCCCGCCCTACA  
GTATACCAATTCAAATTCAAATTCAAATAGAATTCCATAGGCCCCGCAGGGGCATCTTACCGCAGACC  
GTGGGGCAAGCCAAT

[illegible]

@A00721:190:HGJW7DSXY:4:2264:32832:25974 2:N:0:TCTGCAAG+GCTGCACT  
GAGGAATCTATCCCCAATTGGAATAGTAATGATTTCAAATTTCAAATTTGAAAATATCCCGCCCTACA  
GTATACCAATTCAAATTCAAATTCAAATAGAATTCCATAGGCCCGCAGGGGCATCTTACCGCAGACC  
GTGGGGCAAGCCAAT

```

FFFFFFFFFFFFFFFFFFFFFFFFFFFFFFFF:FFFFFF,FFFFFF:FFFFFFFFFFFFFFFF
FFFFFFFFFFFFFFFF:FFFFFF,FFFFF,FFFFFFFFFFFFFFFF:FFFFFF:FFFFFFFFFFFFFFFF
F:FFFF:F:FFFFFF

```

@A00721:190:HGJW7DSXY:4:2664:30346:14372 2:N:0:TCTGCAAG+GCTGCACT  
GAGGAATCTATCCCCAATTGGAATAGTAATGATTTCAAATTTCAAATTTGAAAATATCCCGCCCTACA  
GTATACCAATTCAAATTCAAATTCAAATAGAATTCCATAGGCCCGCAGGGGCATCTTACCGCAGACC  
GTGGGGCAAGCCAAT

```

FFFFFFFFFFFFFFFFFFFFFFFFFFFFFFFFFFFFFFFFFFFFFFFFFFFFFFFFFFFF:F:F::FF:F
:FFFFFFFFFFFFFFFFFFFFFFFFFFFFFFFFFFFFFFFFFFFFFFFFFFFF:FFFFF,FFFFFFFF:FFFFFFFFF::FFFFFFFF
FFFFFFFF,FFFFF;

```

@A00721:190:HGJW7DSXY:4:2647:29288:9251 2:N:0:TCTGCAAG+GCTGCACT  
ATATTGGCTTGCCCCACGGTCTGCGGTAAGATGCCCTGCGGGCCTATGGAATTCTATTTGAATTTG  
AATTTGAATTGGTATACTGTAGGGCGGGATATTTCAAATTTGAAATTTGAAATCATTACTATTCCAA  
TTGGGGATAGATTCC

[illegible]

@A00721:190:HGJW7DSXY:4:1226:10963:36104 2:N:0:TCTGCAAG+GCTGCACT  
ATATTGGCTTGCCCCACGGTCTGCGGTAAGATGCCCTGCGGGCCTATGGAATTCTATTTGAATTTG  
AATTTGAATTGGTATACTGTAGGGCGGGATATTTCAAATTTGAAATTTGAAATCATTACTATTCAA  
TTGGGGATAGATTC

FFFFFFFF;FFFFFFFF;FFFFFFFFFFFFFFFFFFFFFFFFFFFFFFFF,F;FFFFFF,FFFFFF;F;FFF



FFFFFFFFFFFFFF:F:FFFFFFFFFFFFFF:FFFFFFFFFFFFFF  
FFFFFF:F:F:

@A00721:190:HGJW7DSXY:4:1234:20184:12712 2:N:0:TCTGCAAG+GCTGCACT  
ATATTGGCTTGCCCCACGGTCTGCGGTAAGATGCCCTGCGGGCCTATGGAATTCTATTTGAATTTG  
AATTTGAATTGGTATACTGTAGGGCGGGATATTTCAAATTTGAAATTTGAAATCATTACTATTCCAA  
TTGGGGATAGATTC

+

:FFFFFFFFFFFFFFFFFFFFFFFFFFFFFFFFFFFFFFFFFFFFFFFFFFFFFFFFFFFFFFFF  
FFFFFFFFFFFFFFFFFFFFFFFFFFFFFFFFFFFFFFFFFFFFFFFFFFFFFFFFFFFFFFFF  
FFFFFF:FFFFFF

@A00721:190:HGJW7DSXY:4:2334:23665:19774 2:N:0:TCTGCAAG+GCTGCACT  
ATATTGGCTTGCCCCACGGTCTGCGGTAAGATGCCCTGCGGGCCTATGGAATTCTATTTGAATTTG  
AATTTGAATTGGTATACTGTAGGGCGGGATATTTCAAATTTGAAATTTGAAATCATTACTATTCCAA  
TTGGGGATAGATTC

+

FFFFFFFFFFFFFFFFFFFFFFFFFFFFFFFFFFFFFFFFFFFFFFFFFFFFFFFFFFFFFFFF,FFFFFFFFFFFFFFFFFFFFFFFF  
FFFFFFFFFFFFFFFFFFFFFFFFFFFFFFFFFFFFFFFFFFFFFFFFFFFFFFFFFFFFFFFF:FFFF:FF:FFF  
FFFFFF,FFFFFF

@A00721:190:HGJW7DSXY:4:1265:32108:30013 2:N:0:TCTGCAAG+GCTGCACT  
ATTATATTGGCTTGCCCCACGGTCTGCGGTAAGATGCCCTGCGGGCCAATGGAATTCTATTTGAAT  
TTGAATTTGAATTGGTATACTGTAGGGCGGGATATTTCAAATTTGAAATTTTAAATCATTACTATT  
CAATTGGGGATAGAT

+

FFFFF,,FFFFFF:F:F,F,,F,FFF,FF:FF::,FFFF,,:,FFFFFFFF:F:FF:F,FF  
FF:FFFFFF:F,F,FFF,,:F:F:F,F,FFFFFFFF,F,FFF:FFFFFF,,:FF,FFF:,F:F,  
:FFFF,F:F:FFFF

@A00721:190:HGJW7DSXY:4:1519:3143:27383 2:N:0:TCTGCAAG+GCTGCACT  
ATTATATTGGCTTGCCCCACGGTCTGCGGTAAGATGCCCTGCGGGCCTATGGAATTCTATTTGAAT  
TTGAATTTGAATTGGTATACTGTAGGGCGGGATATTTCAAATTTGAAATTTGAAATCATTACTATT  
CAATTGGGGATAGAT

+

FFFFFFFFFFFFFFFFFFFFFFFFFFFFFFFFFFFFFFFFFFFFFFFFFFFFFFFFFFFFFFFF:  
FFFFFFFFFFFF:FFFFFFFFFFFFFFFFFFFFFFFF,F::FFFFFF:FFFFFFFF:FFFFFFFF  
FFFFFFFFFFFFFFFF

@A00721:190:HGJW7DSXY:4:2110:4779:14058 2:N:0:TCTGCAAG+GCTGCACT  
ATTATATTGGCTTGCCCCACGGTCTGCGGTAAGATGCCCTGCGGGCCTATGGAATTCTATTTGAAT  
TTGAATTTGAATTGGTATACTGTAGGGCGGGATATTTCAAATTTGAAATTTGAAATCATTACTATT  
CAATTGGGGATAGAT

+

FFFFFFFFFFFFFFFFFFFFFFFFFFFFFFFFFFFFFFFFFFFFFFFFFFFFFFFF:FFFF,FFFF:  
FFFFFFFFFFFFFFFFFFFFFFFFFFFFFFFFFFFFFFFF:FFFFFFFFFFFFFFFFFFFFFFFF  
FFF:FFFFFFFF

@A00721:190:HGJW7DSXY:4:2110:2700:16157 2:N:0:TCTGCAAG+GCTGCACT  
ATTATATTGGCTTGCCCCACGGTCTGCGGTAAGATGCCCTGCGGGCCTATGGAATTCTATTTGAAT  
TTGAATTTGAATTGGTATACTGTAGGGCGGGATATTTCAAATTTGAAATTTGAAATCATTACTATT  
CAATTGGGGATAGAT

+

FFFFFFFFFFFF:F:F:FFFFFFFFFFFFFFFFFFFFFFFFFFFFFFFFFFFFFFFF:F:F,F,:FFFF  
FFFFFFFFFFFF:FFFFFFFFFFFFFFFFFFFFFFFFFFFFFFFFFFFFFFFF:F:F:F:F:F  
FFFFFFFFFFFFFFFF

@A00721:190:HGJW7DSXY:4:2241:10773:23531 2:N:0:TCTGCAAG+GCTGCACT  
ATTATATTGGCTTGCCCCACGGTCTGCGGTAAGATGCCCTGCGGGCCTATGGAATTCTATTTGAAT  
TTGAATTTGAATTGGTATACTGTAGGGCGGGATATTTCAAATTTGAAATTTGAAATCATTACTATT  
CAATTGGGGATAGAT

[illegible]

```
F:FFFFFFFF:FF,FF:FFFFFFFF:FFFFFFFFFFFFFFFFFFFFFFFF:FFFFFFFFFFFFFFFF:FF::FFFFF
FFFFFFFFFFFF:FFFF:FFF:FFF:F:FFFFFFFF:F:FFFFFF:FF,FFFF:F:,,F,:F:FFFF,F
,,:,FFF,FF,:FFFF
```

[illegible]

```
FFFFFFFFFFFFFFFFFFFFFFFFFFFFFFFFFFFFFFFFFFFFF::FFFFFFFFFFFFFFFFFFFFFF:  
FFFFFFFFFFFFFFFFFFFFFFFFFFFFFFFFFFFFFFFFFFFFF,FFFFFFFFFFFFFFFFFFFFFF:  
FFFFFFFFFFFFFFFF
```

[illegible]

```

FFFFFFFFFFFFFFFFFFFFFFFFFFFFFFFFFFFFFFFFFFFFFFFFFFFFFFFFFFFFFFFFFFFFFFFF::
FFFF:FFFFFFFF:FFF:FFFFFFFFF:FFFFFFFFFFFFFFFFFFFFFFFFFFFFFFFFFFFFFFFF
FFFFFFFFFFFFFFFF

```

[illegible]

@A00721:190:HGJW7DSXY:4:1178:23294:28494 2:N:0:TCTGCAAG+GCTGCACT  
AGTAATATTATATTGGCTTGCCCCACGGTCTGCGGTAAGATGCCCTGCGGGCCTATGGAATTCTAT



@A00721:190:HGJW7DSXY:4:1574:10619:4633 2:N:0:TCTGCAAG+GCTGCACT  
AGTAATATTATATTGGCTTGCCCCACGGTCTGCGGTAAGATGCCCTGCGGGCCTATGGAATTCTAT  
TTGAATTTGAATTTGAATTGGTATACTGTAGGGCGGGATATTTTCAAATTTGAAATTTGAAATCATT  
CTATTCCAATTGGGG

[illegible]

+

```

FFFFFFFFFFFFFFFFFFFFFFFFFFFFFFFFFFFFFFFFFFFFFFFFFFFFFFFFFFFFFFFFFFFFFFFF
FFFFFFFFFFFFFFFFFFFFFFFFFFFFFFFF:F:FFFFFFFFFFFFFFFFFFFFFFFFFFFFFFFF:F:FFFFF
FFFFFFFFEE:FFFFF

```

+

[illegible]

+

```
FFFF:FFFF:FFFFFFFF:FFFFFFFFFFFFFFFFFFFFFFFF:FFFFFFF,FFFFFF:FFFFFFFF,F:F
FFFFFFFF:FFFF:FFF::FFFFFFFFFFFFFFFF:FFFFFFFF:FFFFFFFFFFFF:FFFF:FFFF
:FFFFFFFFFFFF,FF
```

+

[illegible]

+

```
FFFFFFFFFFFFFFFFFFFFFFFFFFFFFFFFFFFFFFFFFFFFFFFFFFFFFFFFFFFFFFFFFFFF
FFFFFFFFFFFFFFFFFFFFFFFFFFFFFFFFFFFFFFFFFFFFFFFFFFFFFFFFFFFFFFFFFFFF
FFFFFFF:FFFFFFFFFFFFFFFFFFFFFFFFFFFFFFFFFFFFFFFFFFFFFFFFFFFFFFFFFFFF
```

+

[illegible]

```
FFFF:FFFFFFFFFFFF:FFFFFFFFFFFFFFFFFFFFFFFFFFFFFFFFFFFFFFFF
FFFFFFFFF:FFFFF
```

+

@A00721:190:HGJW7DSXY:4:1424:21793:12085 2:N:0:TCTGCAAG+GCTGCACT  
CCCAATTGGAATAGTAATGATTTCAAATTTCAAATTTGAAAATATCCCGCCCTACAGTATACCAATTC  
AAATTCAAATAGAATTCCATAGGCCCCGCAGGGGCATCTTACCGCAGACCGTGGGGCAAGCCAATATA  
ATATTACTGGCTTGC

[illegible]

+

@A00721:190:HGJW7DSXY:4:1537:22625:19914 2:N:0:TCTGCAAG+GCTGCACT  
CCCAATTGGAATAGTAATGATTTCAAATTTCAAATTTGAAAATATCCCGCCCTACAGTATACCAATTC  
AAATTCAAATAGAATTCCATAGGCCCCGCAGGGGCATCTTACCGCAGACCGTGGGGCAAGCCAATATA  
ATATTACTGGCTTG

[illegible]

+

@A00721:190:HGJW7DSXY:4:2278:23873:2848 2:N:0:TCTGCAAG+GCTGCACT  
CCCAATTGGAATAGTAATGATTTCAAATTTCAAATTTGAAAATATCCCGCCCTACAGTATACCAATTC  
AAATTCAAATAGAATTCCATAGGCCCCGCAGGGGCATCTTACCGCAGACCGTGGGGCAAGCCAATATA  
ATATTACTGGCTTGC

[illegible]

```

FFFFFFFFFFFFFFFFFFFFFFFF:FFFFFF:FFFFFFFFFFFFFFFFFFFFFFFFFFFFFFFF
,FFFFFFFFF::FFFFF:FFFFF::FFFFFFFFFFFFFFFFFFFFFFFFFFFFFFFFFFFF:FFFFFF
FFFFF,FFF,FFFFF

```

[illegible][illegible]

```

FFFFFFFFFFFFFFFFFFFFFFFFFFFFFFFF:FFFFFFFFFFFFFFFFFFFFFFFFFFFFFFFF
FFFFFFFFFFFFFFFFFFFFFFFFFFFFFFFF:FFFF:FFFFFFFFFFFFFFFFFFFFFFFFFFFFFFFF
FFFFFFFFFFFFFFFFFFFFFFFF

```

```

FFFFFFFFFFFFFFFFFFFFFFFFFFFFFFFFFFFFFFFFFFFFFFFFFFFFFFFFFFFFFFFFFFFFFFFF,FF
FFF:F,FFF,FFFF,F:FFFFFFFFFFFFFFFFFFFF:FFF,FFFFFFFF:FFFFFFFFFFFFFFFFFFFF
FFFFFFFFFFFFFF:FF

```

```

FFFFFFFF:FFFFFFFF:FFFFFFFFFFFFFF:FFFFFFFF:FFFFFFFFFFFFFFFFFFFFFFFFFFFFFFFF
FFFFFFFFFFFFFFFFFFFFFFFFFFFFFFFF:FFFFFFFFFFFFFFFFFFFFFFFFFFFFFFFFFFFFFFFF
FFFFFFFFF:FFFFF

```

```

FFFFFFFFFFFFFFFFFFFFFFFFFFFFFFFFFFFFFFFF,FFFF:FFF:FFFFFFFF:FFFFFF:FF
FFFFFFFFFFFFFFFFFFFFFFFF:FFFFFFFF, :FF:FF:FFFF:FFFF,FFFFFFFFFFFFFFFF
FFFFFFFFFFFFFFFF

```

@A00721:190:HGJW7DSXY:4:1239:2926:9815 2:N:0:TCTGCAAG+GCTGCACT  
AGCGTACGGAGGTGTCCCCGGCGCGGGCAAGCCAGTAATATTATATTGGCTTGCCCCACGGTCTGCGG

TAAGATGCCCTGCGGGCCTATGGAATTCTATTTGAATTTGAATTTGAATTGGTATACTGTAGGGCG  
GGATATTTTCAAATT

+

FFFFFFFFFFFFFFFFFFFFFFFFFFFFFFFFFFFFFFFFFFFFFFFFFFFFFFFFFFFFFFFFFFFFFFFF,F,FFFF  
FFFF:FFFFFFFFFFFFFFFF:FFFFFFFFFFFF:FFFFFFFFFFFF:FFFFFFFFFFFF:FFFFFFFFFFFF  
FFF::FFFF:FF,F

@A00721:190:HGJW7DSXY:4:1301:1389:25441 2:N:0:TCTGCAAG+GCTGCACT  
AGCGTACGAGGTGTCCCCGGCGCGGGCAAGCCAGTAATATTATATTGGCTTGCCCCACGGTCTGCGG  
TAAGATGCCCTGCGGGCCTATGGAATTCTATTTGTATTTGAATTTGAATTGGTATACTGTAGGGCG  
GGATATTTTCAAATT

+

FFFFFFFFFFFFFFFFFFFFFFFFFFFFFFFFFFFFFFFF:F:FFFF::FFF,FFF:FFFFFFFF,FFF:,FFFF  
FFFF:FFFFF:FFFFF,FF,FFFFFFFF,F,F:FF,F,FFF,:FFF:FFFFFFFF,F,FFFF:FF:F  
F:FF:FFFF:F:F,F

@A00721:190:HGJW7DSXY:4:1301:16278:35790 2:N:0:TCTGCAAG+GCTGCACT  
AGCGTACGAGGTGTCCCCGGCGCGGGCAAGCCAGTAATATTATATTGGCTTGCCCCACGGTCTGCGG  
TAAGATGCCCTGCGGGCCTATGGAATTCTATTTGAATTTGAATTTGAATTGGTATACTGTAGGGCG  
GGATATTTTCAAATT

+

FFFFFFFFFFFFFFFFFFFFFFFFFFFFFFFFFFFFFFFF::FFFFFFFFFFFFFFFF:F:FF,F,FFFFFFFF:FFFF  
F,FFFFFFFFFFFFFFFF::FFFFFFFF:FFF,FFFF,:FFF:FFFF:FFFFFFFF,FFFFFFFF  
FFFFFFFF:FFFF

@A00721:190:HGJW7DSXY:4:1310:21206:18270 2:N:0:TCTGCAAG+GCTGCACT  
AGCGTACGAGGTGTCCCCGGCGCGGGCAAGCCAGTAATATTATATTGGCTTGCCCCACGGTCTGCGG  
TAAGATGCCCTGCGGGCCTATGGAATTCTATTTGAATTTGAATTTGAATTGGTATACTGTAGGGCG  
GGATATTTTCAAATT

+

FFFFFFFFFFFFFFFFFFFFFFFFFFFFFFFFFFFFFFFF,FFFFFFFFFFFFFFFFFFFFFFFFFFFFFFFF  
:FFFF:FFFFFFFFFFFFFFFFFFFFFFFFFFFFFFFFFFFFFFFFFFFFFFFFFFFFFFFF:FFFFFFFFFFFF  
FFFFFFFFFFFFFFFF

@A00721:190:HGJW7DSXY:4:1612:22869:5963 2:N:0:TCTGCAAG+GCTGCACT  
AGCGTACGAGGTGTCCCCGGCGCGGGCAAGCCAGTAATATTATATTGGCTTGCCCCACGGTCTGCGG  
TAAGATGCCCTGCGGGCCTATGGAATTCTATTTGAATTTGAATTTGAATTGGTATACTGTAGGGCG  
GGATATTTTCAAATT

+

FFFFFFFFFFFFFFFFFFFFFFFFFFFFFFFFFFFFFFFF:FFFFFF,FFFFFFFFFFFFFFFFFFFFFFFF:FFFF  
FFFFFF:FFFFFFFFFFFF,FFFFFFFF:FFFF,F:FFFFFFFFFFFFFFFFFFFFFFFFFFFFFFFFFFFF  
FFFF:FFFFFFFF

@A00721:190:HGJW7DSXY:4:2145:16947:17065 2:N:0:TCTGCAAG+GCTGCACT  
AGCGTACGAGGTGTCCCCGGCGCGGGCAAGCCAGTAATATTATATTGGCTTGCCCCACGGTCTGCGG  
TAAGATGCCCTGCGGGCCTATGGAATTCTATTTGAATTTGAATTTGAATTGGTATACTGTAGGGCG  
GGATATTTTCAAATT

+

FFFFFFFFFFFFFFFFFFFFFFFFFFFFFFFFFFFFFFFF:FFFFFFFF:FFFFFFFFFFFFFFFFFFFFFFFF  
:FFFFFFFFFFFFFFFFFFFF,FFFF,FFFFFFFFFFFFFFFF:FFFFFFFFFFFFFFFFFFFFFFFF  
FFFFFFFFFFFF:F

@A00721:190:HGJW7DSXY:4:2169:19307:31955 2:N:0:TCTGCAAG+GCTGCACT  
AGCGTACGAGGTGTCCCCGGCGCGGGCAAGCCAGTAATATTATATTGGCTTGCCCCACGGTCTGCGG  
TAAGATGCCCTGCGGGCCTATGGAATTCTATTTGAATTTGAATTTGAATTGGTATACTGTAGGGCG  
GGATATTTTCAAATT

+

FFFFFFFFFFFFFFFFFFFFFFFFFFFFFFFFFFFFFFFF,F:FF:FFFFFFFF:FFFFFFFFFFFFFFFF  
:FFFFFF:FFFFFFFFFFFFFFFFFFFFFFFFFFFFFFFF:FFFFFFFFFFFFFFFFFFFFFFFF  
FFF:FFFFFF:FF:F

$+$ 

+

+

+

+

+

+

.....



FFFFFFFFFFFF:FFFFFFFFFFFF,FFF:FFFF:FFFFFFFFFFFFFFFFFFFFFFFFFFFF:FFFFFFFFFFFF

@A00721:190:HGJW7DSXY:4:1641:27218:24205 2:N:0:TCTGCAAG+GCTGCACT  
CGTAAGCGTACGGAGGTGTCCCCGGCGCGGGCAAGCCAGTAATATTATATTGGCTTGCCCCACGGTCT  
GCGGTAAGATGCCCTGCGGGCCTATGGAATTCTATTTGAATTTGAATTTGAATTGGTATACTGTAG  
GGCGGGATATTTTCA

+

FFFFFFFFFFFFFFFFFFFFFFFFFFFFFFFFFFFFFFFFFFFFFFFFFFFFFFFFFFFFFFFF:FFFFFFFFFFFFFFFFFFFFFFFF  
FFFFFFFF:FFFFFFFFFFFFFFFFFFFFFFFF,FF:FF,FFFF:F:FFF:F:F:FFFFFFFF,FFFFFFFF  
FFFFFFFFFFFFFFFF

@A00721:190:HGJW7DSXY:4:2259:26449:7279 2:N:0:TCTGCAAG+GCTGCACT  
CGTAAGCGTACGGAGGTGTCCCCGGCGCGGGCAAGCCAGTAATATTATATTGGCTTGCCCCACGGTCT  
GCGGTAAGATGCCCTGCGGGCCTATGGAATTCTATTTGAATTTGAATTTGAATTGGTCTACTGTAG  
GGCGGGATATTTTCA

+

FFFFFFFFFFFFFF::FFFFF:F:FFF,F:FFFFFFFFFFFFFFFF:FFFFFFFF:FFF:FFFF:FFFFF,  
:F,FFFFFFFF,FFFFF:F:FFFF:FFFFFFFF:, :F:F,, :F,F,, FFFFFFFFF::F,F:,FFFFF  
,FFFFFFFFFFFFFF:

@A00721:190:HGJW7DSXY:4:1541:22037:30514 2:N:0:TCTGCAAG+GCTGCACT  
CGTAAGCGTACGGAGGTGTCCCCGGCGCGGGCAAGCCAGTAATATTATATTGGCTTGCCCCACGGTCT  
GCGGTAAGATGCCCTGCGGGCCTATGGAATTCTATTTGAATTTGAATTTGAATTGGTATACTGTAG  
GGCGGGATATTTTC

+

FFFFFFFFFFFFFFFFFFFFFFFFFFFFFFFFFFFFFFFFFFFFFFFFFFFFFFFFFFFF,F,FFFF,FFFFFF:FFFFF  
F:FFFFFFFFFFFFFFFFFFFFFFFFFFFFFFFF:FF:FFFFFF,FFFFFFFFFFFFFF,FFFFFF:FFF:F  
FFFFFFFFFFFFFF

@A00721:190:HGJW7DSXY:4:1201:6406:36824 2:N:0:TCTGCAAG+GCTGCACT  
TGACAAATCGACACGTAAGCGTACGGAGGTGTCCCCGGCGCGGGCAAGCCAGTAATATTATATTGGCT  
TGCCCCACGGTCTGCGGTAAGAAGCCCCAGCGGGCCTATGGAATTCTATTTGAATTTGAATTTGAAT  
TGGTATACTGTAGGG

+

FFFFFFFFFFFFFFFFFFFFFFFFFFFFFFFFFFFFFFFFFFFFFFFFFFFFFFFFFFFF:F,  
F,FFFF,FFFFFFFF:FFF,FFFF,FFFFFFFFFFFF:F:FFF:F:,FFFF,FF:F::FFFF,  
FFFF:FF:,FFFF,F

@A00721:190:HGJW7DSXY:4:1228:23647:17989 2:N:0:TCTGCAAG+GCTGCACT  
TGACAAATCGACACGTAAGCGTACGGAGGTGTCCCCGGCGCGGGCAAGCCAGTAATAATATATTTGCT  
TGCCCCACGGTCTGCGGAAGATGCACCTGCGGGCCTATGGAATTCTATTTGAATTTGAATTTAAT  
TGGTATACTGTAGGG

+

FFFFFFFF:FF,FFFFFF::FF,F:FFFF:F:F,F:FFFF,FFF,F:F,FFF:F,FF,FFF,FFF  
F:, :FF:FF, :F,,F:,FF:FFF:,FF:FFFF::FF, :,:FFF:FFFF:FF,FFFFFFFF,FF,FF,  
F,:FF,:F:FFF,:F

@A00721:190:HGJW7DSXY:4:1305:31286:30655 2:N:0:TCTGCAAG+GCTGCACT  
TGACAAATCGACACGTAAGCGTACGGAGGTGTCCCCGGCGCGGGCAAGCCAGTAATATTATATTGGCT  
TGCCCCACGGTCTGCGGTAAGATGCCCTGCGGGCCTATGGAATTCTATTTGAATTTGAATTTGAAT  
TGGTATACTTTAGGG

+

FF:FFFFFF:F,:FFFFFFFF,FFFFFFFFF:,FFFF:FFF:F:FFFF,FFFFFFFF,FF,:FF  
F:,FFFFFF:FFF:::F,,FF:F::FFF,FFF:FF::,F,FFFF:F,FFFFFF:F,: :F:FFF:FF,  
F:FF,FF,,,FFF,F

@A00721:190:HGJW7DSXY:4:1430:28971:2816 2:N:0:TCTGCAAG+GCTGCACT  
TGACAAATCGACACGTAAGCGTACGGAGGTGTCCCCGGCGCGGGCAAGCCAGTAATATTATATTGGCT  
TGCCCCACGGTCTGCGGTAAGATGCCCTGCGGGCCTATGGAATTCTATTTGAATTTGAATTTGAAT  
TGGTATACTGTAGGG

+  
FFFFFFFFF:FFFFFFFFF,FFFFFFFFF:FFFFFFFFFFFFFFFFFFFFFFFFF  
F:FFFFFFFFF:,FFFFFFFFFFFFFFFFFFFFFFFFFFFFFFFFF:FFFFFFFFF:FFFFFFF  
FFF:FFF:FFFFFFF

@A00721:190:HGJW7DSXY:4:1472:9751:28401 2:N:0:TCTGCAAG+GCTGCACT  
TGACAAATCGACACGTAAGCGTACGGAGGTGTCCCCGGCGCGGGCAAGCCAGTAATATTATATTGGCT  
TGCCCCACGGTCTGCGGTAAGATGCCCCTGCGGGCCTATGGAATTCTATTTGAATTTGAATTTGAAT  
TGGTATACTGTAGGG

+  
FFFFFFFFFFFFFFFFFFFFFFFFFFFFFFFFFFFFFFFFFFFFFFFFFFFFFFFFF,FFFFF  
FFFFFFFFFFFFFFFFF:FFF:FFFFFF, :FFFFFF:,FFFFFFFFFFFFFF:FFFFFFFFFFFFFFF  
FFFFFF:FFFFFFF

@A00721:190:HGJW7DSXY:4:1475:29469:6684 2:N:0:TCTGCAAG+GCTGCACT  
TGACAAATCGACACGTAAGCGTACGGAGGTGTCCCCGGCGCGGGCAAGCCAGTAATATTATATTGGCT  
TGCCCCACGGTCTGCGGTAAGATGCCCCTGCGGGCCTATGGAATTCTATTTGAATTTGAATTTGAAT  
TGGTATACTGTAGGG

+  
FFFFFFFFFFFFF:FFFFFFFFFFFFFFFFFFFFFFFFFFFFFFFFFFFFF:F,FFFFFF:FFFFFFFFF  
FFFFFFFFFFFFFFFFF:FFFFFFFFFFFFFFFFF,FFFFFFFFFFFFFF:FFFFFFFFF  
F:FFFFFF:FFFFF

@A00721:190:HGJW7DSXY:4:1577:21169:5431 2:N:0:TCTGCAAG+GCTGCACT  
TGACAAATCGACACGTAAGCGTACGGAGGTGTCCCCGGCGCGGGCAAGCCAGTAATATTATATTGGCT  
TGCCCCACGGTCTGCGGTAAGATGCCCCTGCGGGCCTATGGAATTCTATTTGAATTTGAATTTGAAT  
TGGTATACTGTAGGG

+  
:FFFFFFFFFFFFFFFFF:FFFFFF:FFFFFF:FFFFFFFFFFFFF:FFFFFFFFFFFFFFFFF  
F:FFFFFFFFFFFFFFFFF:FFFFFF:FFFFFFFFF:FFFFF:FFFFF,F:FFFFFFFFFFFFFFFFF  
FFFFFFFF:FFFFF,:

@A00721:190:HGJW7DSXY:4:1635:8205:22874 2:N:0:TCTGCAAG+GCTGCACT  
TGACAAATCGACACGTAAGCGTACGGAGGTGTCCCCGGCGCGGGCAAGCCCGTAATATTATATTGGCT  
TGCCCCACGGTCTGCGGTAAGATGCCCCTGCGGGCCTATGGAATTCTATTTGAATTTGAATTTGAAT  
TGGTATACTGTAGGG

+  
FFFFFFFFFFFFFFFFFFFFFFFFFFFFFFFFF:FFFFFFFFFFFFFFFFF,FFFF,FFF,FFFFFFFF  
FFFFFFFFF,,F,FFF,FFFFFFFFFFFFFFFFF: :FFFFFFFFFFFFFFFFF:F,FF,FFFFFFF  
FFFF:FFFFFFF:F

@A00721:190:HGJW7DSXY:4:2108:14425:34554 2:N:0:TCTGCAAG+GCTGCACT  
TGACAAATCGACACGTAAGCGTACGGAGGTGTCCCCGGCGCGGGCAAGCCAGTAATATTATATTGGCT  
TGCCCCACGGTCTGCGGTAAGATGCCCCTGCGGGCCTATGGAATTCTATTTGAATTTGAATTTGAAT  
TGGTATACTGTAGGG

+  
FFFFFFFFFFFFFFFFFFFFFFFFFFFFFFFFFFFFFFFFFFFFFFFFFFFFFFFFF  
FFFFFFFFFFFFFFFFF:FFFFFFFFFFFFFFFFF,FFFFFFFFF,FFFFFFFFFFFFFFFFF:  
FFFFFFFFFFFFF:FF

@A00721:190:HGJW7DSXY:4:2211:19777:13135 2:N:0:TCTGCAAG+GCTGCACT  
TGACAAATCGACACGTAAGCGTACGGAGGTGTCCCCGGCGCGGGCAAGCCAGTAATATTATATTGGCT  
TGCCCCACGGTCTGCGGTAAGATGCCCCTGCGGGCCTATGGAATTCTATTTGAATTTGAATTTGAAT  
TGGTATACTGTAGGG

+  
FFFFFFFFFFFFFFFFFFFFF:FFFFFFFFFFFFFFFFFFFFFFFFFFFFF:FFFFFFF:FFFF:,FFFF:F  
FFFFFFFFF:FFFFFFFFFFFFFFFFFFFFFFFFFFFFFFFFF:FFFFFFFFF: :FFFFFFFFFFFFF:  
FFFFFFF:F,FFFFFFF

@A00721:190:HGJW7DSXY:4:2222:9281:5760 2:N:0:TCTGCAAG+GCTGCACT  
TGACAAATCGACACGTAAGCGTACGGAGGTGTCCCCGGCGCGGGCAAGCCAGTAATATTATATTGGCT

TGCCCCACGGTCTGCGGTAAGATGCCCCTGCGGGGCCTATGGAATTCTATTTGAATTTGAATTTGAAT  
TGGTATACTGTAGGG

[illegible] $+$ 

```

FFFFFFFF,FFFFFFFF:FFFF:FFFFFF:FFFFFF:FFFFFF:FFF::FFFF:,FFFF:FF:F
F:,FFFF,,FF,:FFFFFFFFFFFF:FFF:FF:FF:,FFFF:FF,,, :FF:FFFF:, :FF:,FFFF:
:,,:,FF,FF:FF,F

```

+

```

FFFFFFFFFFFFFF:FFFFFF,FFFF:FFFFFF:FFFFFF:FFFF:FFFFFFFFFFFF,F,FFFFFF::F
FF:FFFF:FF:FFF,:FF:FFFFFF:FFF:FFFFFFFFFFFF:FFFFFF,FFF:FFF:FFF,F:FFFF,F,
F::FFF,:FFFF,F

```

+

[illegible]

+

```

FFFFFFFFFFFFFFFFFFFFFFFFFFFFFFFFFFFFFFFFFFFFFFFFFFFFFFFFFFFFFFFFFFFFFFFF
FFFFFFFFFFFFFFFF:FFFFFFFF:FFFFFFFFFFFFFFFFFFFFFFFF:FFFFFFFF:FFFFFFFFFF:FFFFFFFFFFFFFF
FFFFFF,FFFFFF

```

+

```
FFFFFFFFFFFFFFFFFFFFFFFFFFFFFFFFFFFFFFFFFFFFFFFFFFFFFFFFFFFF:FFFFFFFFFFFFF
FFFFFFFFFFFFFFFFFFFFFFFFFFFFFFFFFFFFFFFFFFFFFFFFFFFFFFFFFFFF:FFFFFFFFFFFFFFFFFFFFFFFFFFFFF
FFFFFFFFFFFFFFFFFFFFFF
```

+

[illegible]

@A00721:190:HGJW7DSXY:4:1530:3938:2487 2:N:0:TCTGCAAG+GCTGCACT  
GACAAATCGACACGTAAGCGTACGGAGGTGTCCCCGGCGCGGGCAAGCCAGTAATATTATATTGGCTT  
GCCCCACGGTCTGCGGTAAGATGCCCTGCGGGGCCTATGGAATTCTATTTGAATTTGAATTTGAATT  
GGTATACTGTAGGAG

[illegible]

+

```

FFFFFFFFFFFFFFFFFFFFFFFFFFFFFFFFFFFFFFFFFFFFFFFFFFFFFFFFFFFFFFFFFFFFFFFF
FFFFFFFFFFFFFFF,FFFFFF:FFFFFFFFFFFFFFFFFFFF,FFFFF::FFFFF::FFFFFFFFFFFFFFFF
FFFFFFFFFFFFFFFF

```

+

```

FFFFFFFFFFFFFFFFFFFFFFFF:FFFFFFFF:FF:FFFFFFFF:FFF:F::F:F:, :F:, :F:FFFF
, ,FFF:FFF:F,FFFF:F::F:F,FFFFFFFFFFFFFFFF,FFF, ,FFF:F,FF::,FFFFF:,FFF::F
FFF,F:FFFFFFFFFFFF

```

+

```

FFFFFFFFFFFFFFFFFFFFF:FFF:FFFFFFFFFFFFFFFFFFFFFFFF:FF,FF:FFFFF,FFFFFFF,
,FF:FFFFF,FFFFFFF:FF::FFFFFFFFFFFFFFFF:F:FFFFFF::FF,FFF:F,F:FFF,FFFFFF:F
FFF:::,E,:FFF

```

+

```

FFFFFFFFFFFFFFFFFFFFFFFFFFFFFFFFFFFFFFFFFFFFFFFFFFFFFFFFFFFFFFFFFFFFFFFFFFFF
FFFFFFFFFFFFFFFF:FFFFFFFFFFFFFFFFFFFFFFFFFFFFFFFF, :FFFFFFFFFFFFFFFFFFFFFFF
E.FFFFFFFFFFFFFFFF

```

+

```

FFFFFFFFFFFFFFFFFFFFFFFFFFFFFFFFFFFFFFFFFFFFFFFFFFFFFFFFFFFF:FFFFFFFFFF
FFFFFFFFFFFFFFFFFFFFFFFFFFFFFFFFFFFFFFFFFFFFFFFFFFFFFFFFFFFF,F,FFFFFFFF:FFFFFFFFFFFFFFFF:FFFF
FFFF:FFFFFFFFFFFF

```

+

```
FFFFFFFFFFFFFFFF:FFFFFFFFFFFFFFFFFFFFFFFFFFFFFFFF::FF,,FFFFF:::::FF
```

,FFFF:FFFFFFFFFFFF,FF,FFFFFFFFFFFF,FFFFFFFFFFFF:FFFFFFFFFFFF,F,:FFFFFFFF:FFFF  
FFFFF:FFFFFF:FF

@A00721:190:HGJW7DSXY:4:2120:31611:18693 2:N:0:TCTGCAAG+GCTGCACT  
CTAATGACAAATCGACACGTAAGCGTACGGAGGTGTCCCCGGCGCGGGCAAGCCAGTAATATTATAGT  
GGCTTGCCCCACGGTCTGCGGTAAGATGCCCCTGCGGGGCCTATGGAATTCTATTTGAATTCGAATTT  
GAATTGGTATACTGT

+

FFFFFFFFFFFF:FFFFFFFFFFFFFFFFFFFFFFFFFFFFFFFFFFFFFFFFFFFFFFFF:F::F:FF,F  
FFFFFFFFFFFFFFFF:F:FFFFFF:F,F::FFFFFFFF:FFF:FFFFFF:F:,FF:FFFF:FFF:,FFF  
FFFFFFFFFFFFFFFF

@A00721:190:HGJW7DSXY:4:2242:18105:7482 2:N:0:TCTGCAAG+GCTGCACT  
CTAATGACCAATCGACACGTAAGCGTACGGAGGTGTCCCCGGCGCGGGCAAGCCAGTAATATTATATT  
GGCTTGCCCCACGGTCTGCGGTAAGATGCCCCTGCGGGGCCTATGGAATTCTATTTGACTTCGAATTT  
GAATTGGTATACTGT

+

FFFFFFFFF,:FFFFFFFFFFFFFFFFFFFFFFFFFFFFFFFFFFFFFFFFFFFFFFFF,FFFFFFF,FFF,F:F:F,:F,FF:F  
F:FFFFFFFFFFFFFFFF:F,F,FFF:FFFFFFFFF:FFFFFFFFF:FFFFF,:FF,FF,F:F,:FFF,FFF  
FFF,,FF:FFFFFF

@A00721:190:HGJW7DSXY:4:2316:30120:26694 2:N:0:TCTGCAAG+GCTGCACT  
CTAATGACAAATCGACACGTAAGCGTACGGAGGTGTCCCCGGCGCGGGCAAGCCAGTAATATTATATT  
GGCTTGCCCCACGGTCTGCGGTAAGATGCCCCTGCGGGGCCTATGGAATTCTATTTGAATTCGAATTT  
GAATTGGTATACTGT

+

FFFFFFFFFFFFFFFFFFFFFFFFFFFFFFFFFFFFFFFFFFFFFFFFFFFFFFFFFFFFFFFFFFFF,FFFFF,FFF:FFF  
FFFFFFFFFFFFFFFFFFFFFFFFFFFFFFFFFFFFFFFFFFFFFFFFFFFFFFFFFFFFFFFFFFFF:FFFFFFFFFFFFFFFF  
FFFFFFFFFFFFFFFF

@A00721:190:HGJW7DSXY:4:2641:6515:33818 2:N:0:TCTGCAAG+GCTGCACT  
CTAATGACAAATCGACACGTAAGCGTACGGAGGTGTCCCCGGCGCGGGCAAGCCAGTAATATTATATT  
GGCTTGCCCCACGGTCTGCGGTAAGATGCCCCTGCGGGGCCTATGGAATTCTATTTGAATTCGAATTT  
GAATTGGTATACTGT

+

FFFFFFFFFFFFFFFFFFFFFFFFFFFFFFFFFFFFFFFFFFFFFFFFFFFFFFFFFFFFFFFFFFFF,FFFF,FFFFFFFFF:FF  
FFFFFFFFFFFFFFFFFFFFFFFFFFFFFFFFFFFFFFFFFFFFFFFFFFFFFFFFFFFFFFFFFFFF:FFFFFFF:F::FFFFFFFFFFFFFFFF  
FFFF:FF:FFFFFF

@A00721:190:HGJW7DSXY:4:2677:17833:23797 2:N:0:TCTGCAAG+GCTGCACT  
CTAATGACAAATCGACACGTAAGCGTACGGAGGTGTCCCCGGCGCGGGCAAGCCAGTAATATTATATT  
GGCTTGCCCCACGGTCTGCGGTAAGATGCCCCTGCGTGGCCTATGGAATTCTATTTGAATTAGAATTT  
GAATTGTTATACTGT

+

FFFFF,F,FFFFF:FFFF,:F,F:,FF,FFFF,F,,FFF:F,F::,FF:FF:F:FF,FF,FFFFF  
,FF,:FFFFFFFFF,,,FFFF,FF,:F::,F:,F:FF:FF,FFFFFFFFF:FFF,,,F,,,FF  
,FFFFF,FFF:,FFF

@A00721:190:HGJW7DSXY:4:2677:17815:23954 2:N:0:TCTGCAAG+GCTGCACT  
CTAATGACAAATCGACACGTAAGCGTACGGAGGTGTCCCCGGCGCGGGCAAGCCAGTAATATTATATT  
GGCTTGCCCCACGGTCTGCGGTAAGATGCCCCTGCGGGGCCTATGGAATTCTATTTGAATTCGAATTT  
GAATTGGTATACTGT

+

FFFFFFFFFFFFFFFFFFFFFFFFFFFFFFFFFFFFFFFFFFFFFFFFFFFFFFFFFFFFFFFFFFFF  
FFFFFFFFFFFFFFFFFFFFFFFFFFFFFFFFFFFFFFFFFFFFFFFFFFFFFFFFFFFFFFFFFFFF:FFFFFFFFFFFFFFFFFFFFFFFF  
F:FFFFFFFFFFFFFFFF

@A00721:190:HGJW7DSXY:4:1341:7229:5274 2:N:0:TCTGCAAG+GCTGCACT  
TCTAATGACAAATCGACACGTAAGCGTACGGAGGTGTCCCCGGCGCGGGCAAGCCAGTAATATTATAT  
TGGCTTGCCCCACGGTCTGCGGTAAGATGCCCCTGCGGGGCCTATGGAATTCTATTTGAATTTGAATT  
TGAATTGGTATACTG

+  
FFFFFFFFFFFFFFFFFFFFFFFFFFFFFFFFFFFFFFFFFFFFFFFFFFFFFFFFFFFFFFFFF,F:F:FFFF,F:  
FFFFFFFFFFFF,FFFFFFFFFFFFFFFFFFFFFFFFFFFFFFFFFFFFFFFF:F:FFFF:FFF:F:FFF::FFF:FFF  
FFF:FFFFFFFFFFFF  
@A00721:190:HGJW7DSXY:4:1403:10529:8547 2:N:0:TCTGCAAG+GCTGCACT  
TCTAATGACAAATCGACACGTAAGCGTACGGAGGTGTCCCCGGCGCGGGCAAGCCAGGAATATTATAT  
TGGCTTGCCCCACGGTCTGCGGTAAGATGCCCTGCGGGGCCTATGGAATTCTATTTGAATTTGAATT  
TGAATTGGTATACTG  
+  
F:FFFFFFFFFFFFFFFFFFFFFFFFFFFFFFFFFFFFFFFFFFFFFFFFFFFFFFFFFFFFFFF:FFFFF,F:FF:F,FF:F,FF:F:  
F,FFFFFFFFF:FFFF,,FFFF,:FFFF:FFFFFFFFFFFF:F:FF:FFF,F,FF,FFFFFFFF::FFFF  
FF,:FFFFFFFFFFFF  
@A00721:190:HGJW7DSXY:4:1545:20302:6402 2:N:0:TCTGCAAG+GCTGCACT  
TCTAATGACAAATCGACACGTAAGCGTACGGAGGTGTCCCCGGCGCGGGCAAGCCAGTAATATTATAT  
TGGCTTGCCCCACGGTCTGCGGTAAGATGCCCTGCGGGGCCTATGGAATTCTATTTGAATTTGAATT  
TGAATTGGTATACTG  
+  
FFFFFFFFFFFFFFFFFFFFFFFFFFFFFFFFFFFFFFFFFFFFFFFFFFFFFFFFFFFFFFFFF,FFFFF:FFF  
FFFF:FFFFFFFFFFFFFFFFFFFFFFFFFFFFFFFFFFFFFFFFFFFFFFFFFFFFFFFFFFFFF:FFFFF:F,FFF,FFF:FF:FF,FF  
FF:F:FFFFFFFFFFFF  
@A00721:190:HGJW7DSXY:4:2148:22905:16611 2:N:0:TCTGCAAG+GCTGCACT  
TCTAATGACAAATCGACACGTAAGCGTACGGAGGTGTCCCCGGCGCGGGCAAGCCAGTAATATTATAT  
TGGCTTGCCCCACGGTCTGCGGTAAGATGCCCTGCGGGGCCTATGGAATTCTATTTGAATTTGAATT  
TGAATTGGTATACTG  
+  
FFFFFFFFFFFFFFFFFFFFFFFFFFFFFFFFFFFFFFFFFFFFFFFFFFFFFFFFFFFFFFFFF,FFFFF:FFF  
FFFF:FFFFFFFFFFFFFFFFFFFFFFFFFFFFFFFFFFFFFFFFFFFFFFFFFFFFFFFFFFFFF,FFFFFFFFFFFFFFFFFFFF:F  
FFFF:FFFFFFFFFFFF  
@A00721:190:HGJW7DSXY:4:2506:8377:16219 2:N:0:TCTGCAAG+GCTGCACT  
TCTAATGACAAATCGACACGTAAGCGTACGGAGGTGTCCCCGGCGCGGGCAAGCCAGTAATATTATAT  
TGGCTTGCCCCACGGTCTGCGGTAAGATGCCCTGCGGGGCCTATGGAATTCTATTTGAATTTGAATT  
TGAATTGGTATACTG  
+  
FFFFFFFFFFFFFFFFFFFFFFFFFFFFFFFFFFFFFFFFFFFFFFFFFFFFFFFFFFFFFFFFF,FFFFF:FFF  
FFFF:F:FFFFFFFFF:FFFFFFFFFFFF::FFFF:FFFFFFFF,F:FFFFFFFFF:FFFFFFFFFFFFF  
F,:FFF,FFFFFFFF  
@A00721:190:HGJW7DSXY:4:1344:4562:35133 2:N:0:TCTGCAAG+GCTGCACT  
GTCTAATGACAAATCGACACGTAAGCGTACGGAGGTGTCCCCGGCGCGGGCAAGCCAGTAATATTATA  
TTGGCTTGCCCCACGGTCTGCGGTAAGATGCCCTGCGGGGCCTATGGAATTCTATTTGAATTTGAAT  
TTGAATTGGTAAGAT  
+  
FFFFFFFFFFFFFFFFFFFFFFFFFFFFFFFFFFFFFFFFFFFFFFFFFFFFFFFFFFFFFFFFF,FFFFFFFFFFFF::FFF  
FFFFFFFFFFFFFFFFFFFFFFFFFFFFFFFFFFFFFFFFFFFFFFFFFFFFFFFFFFFFF:,FFFFFF:F,F,FFFF,F:FF:F  
FFFF,FFFFFF:FF  
@A00721:190:HGJW7DSXY:4:1648:5692:33144 2:N:0:TCTGCAAG+GCTGCACT  
GTCTAATGACAAATCGACACGTAAGCGTACGGAGGTGTCCCCGGCGCGGGCAAGCCAGTAATATTATA  
TTGGCTTGCCCCACGGTCTGCGGTAAGATGCCCTGCGGGGCCTATGGAATTCTATTTGAATTTGAAT  
TTGAATTGGTAAGAT  
+  
FFFFFFFFFFFFFFFFFFFFFFFFFFFFFFFFFFFFFFFFFFFFFFFFFFFFFFFFFFFFFFFFF,FFFFFFFFFFFF:FF,FFFFFFFFFFFFF:FFFF,FFFF:FFF:FF,FFF,F  
FFFF::FFFFFFFFFFFF  
@A00721:190:HGJW7DSXY:4:2648:7780:27336 2:N:0:TCTGCAAG+GCTGCACT  
GTCTAATGACAAATCGACACGTAAGCGTACGGAGGTGTCCCCGGCGCGGGCAAGCCAGTAATATTATA



@A00721:190:HGJW7DSXY:4:2133:1542:32409 2:N:0:TCTGCAAG+GCTGCACT  
GTGACGCGTGGTCTAATGACAAATCGACACGTAAGCGTACGGAGGTGTCCCCGGCGCGGGCAAGCCAG  
TAATATTATATTGGCTTGCCCCACGGTCTGCGGTAAGATGCCCTGCGGGGCCTATGGAATTCTATTT  
GAATTTGAATTTGAA

+

FFFFFFFFFFFFFFFFFFFFFFFFFFFFFFFFFFFFFFFFFFFFFFFFFFFFFFFFFFFFFFFFFFFFFFFF  
FFFFFFFFFFFFFFFFFFFFFFFFFFFFFFFFFFFFFFFFFFFFFFFFFFFFFFFFFFFFFFFFFFFFFFFF  
FFFFFFFFFFFFFFFF

@A00721:190:HGJW7DSXY:4:2455:26775:12477 2:N:0:TCTGCAAG+GCTGCACT  
GTGACGCGTGGTCTAATGACAAATCGACACGTAAGCGTACGGAGGTGTCCCCGGCGCGGGCAAGCCAG  
TAATATTATATTGGCTTGCCCCACGGTCTGCGGTAAGATGCCCTGCGGGGCCTATGGAATTCTATTT  
GAATTTGAATTTGAA

+

FFFFFFFFFFFFFFFFFFFFFFFFFFFFFFFFFFFFFFFFFFFFFFFFFFFFFFFFFFFFFFFFFFFFFFFF  
,FFFF:FFFFFFFF,FFFFFFFFFFFFFFFFFFFFFFFFFFFFFFFFFFFFFFFFFFFFFFFFFFFFFFFF  
F::FFF:FFF,FFF

@A00721:190:HGJW7DSXY:4:2242:28782:13698 2:N:0:TCTGCAAG+GCTGCACT  
TACCAAAATCAAATTCAAAAAGAAATCCATAGGCACCGCAGGGGCATATTACCGCAGACCGTGGGGCAA  
GCCAATATAAAATAACAGGCTAGCCCGCGCCGGGGACACCTCCGTACGCTTACGTGTGATTTGTCAT  
TAGACCACGCGTCA

+

FFF:FF,,FFFFFFFFF:,F:FF,,FFFFFFFFF:FFF:F,,FFFFFFFFF,F,:,FFFF:,F  
FFFF,,:FFF,FF:FF,:FFF,F,F:F,FF:F:FFFFFFFFFFFF,FFFF:F:FFFFFFFFF:FFF,FF  
,FFFFFFFFFFFF:

@A00721:190:HGJW7DSXY:4:2123:10601:31000 2:N:0:TCTGCAAG+GCTGCACT  
TACCAATTCAAATTCAAATAGAATTCCATAGGCCCGCAGGGGCATCTTACCGCAGACCGTGGGGCAA  
GCCAATATAATATTACTGGCTTGCCCGCGCCGGGGACACCTCCGTACGCTTACGTGTGATTTGTCAT  
TAGACCACGCGTCAC

+

FFFFFFFFFFFFFFFFFFFFFFFFFFFFFFFFFFFFFFFFFFFFFFFFFFFFFFFFFFFFFFFFFFFFFFFF  
FFF:FFFF:FFFFFFFF,FFF:FFFFFFFFFFFFFFFFFFFFFFFFFFFFFFFFFFFFFFFFFFFFFFFF  
FFFFFFFFFFFF:FF:

@A00721:190:HGJW7DSXY:4:2123:11333:32518 2:N:0:TCTGCAAG+GCTGCACT  
TACCAATTCAAATTCAAATAGAATTCCATAGGCCCGCAGGGGCATCTTACCGCAGACCGTGGGGCAA  
GCCAATATAATATTACTGGCTTGCCCGCGCCGGGGACACCTCCGTACGCTTACGTGTGATTTGTCAT  
TAGACCACGCGTCAC

+

FFFFFFFFFFFFFFFFFFFFFFFFFFFFFFFFFFFFFFFFFFFFFFFFFFFFFFFFFFFFFFFFFFFFFFFF  
FFFFFFFFFFFF:FFFFFFFFF:FFFFFFFFFFFFFFFFFFFFFFFFFFFFFFFFFFFFFFFFFFFFFFFF  
FFFFFFFFFFFF:FFFFF

@A00721:190:HGJW7DSXY:4:2124:31882:13964 2:N:0:TCTGCAAG+GCTGCACT  
TACCAATTCAAATTCAAATAGAATTCCATAGGCCCGCAGGGGCATCTTACCGCAGACCGTGGGGCAA  
GCCAATATAATATTACTGGCTTGCCCGCGCCGGGGACACCTCCGTACGCTTACGTGTGATTTGTCAT  
TAGACCACGCGTCAC

+

FFFFFFFFFFFFFFFFFFFFFFFFFFFFFFFFFFFFFFFFFFFFFFFFFFFFFFFFFFFFFFFFFFFFFFFF  
FFFFFFFFFFFFFFFFFFFFFFFFFFFFFFFFFFFFFFFFFFFFFFFFFFFFFFFFFFFFFFFFFFFFFFFF  
FFF:FFFFFFFF

@A00721:190:HGJW7DSXY:4:2145:7690:19914 2:N:0:TCTGCAAG+GCTGCACT  
TACCAATTCAAATTCAAATAGAATTCCATAGGCCCGCAGGGGCATCTTACCGCAGACCGTGGGGCAA  
GCCAATATAATATTACTGGCTTGCCCGCGCCGGGGACACCTCCGTACGCTTACGTGTGATTTGTCAT  
TAGACCACGCGTCAC

+

FFFFFFFFF:FF,FFFFFFFFF:FFFFFFFFFFFFFFFFFFFFFFFFFFFFFFFFFFFFFFFFFFFFFFFF



FFFFFFFFFFFFFFFFFFFFFFFFFFFFFFFFFFFFFFFFFFFFFFFFFFFFFFFFFFFFFFFF:FFFFFF,  
FFFFFFFFFFFFFFFF  
@A00721:190:HGJW7DSXY:4:2344:2356:11240 2:N:0:TCTGCAAG+GCTGCACT  
TACCAATTCAAATTCAAATAGAAATTCATAGGCCCGCAGGGGCATCTTACCGCAGACCGTGGGGCAA  
GCCAATATAATATTACTGGCTTGCCCGCGCCGGGGACACCTCCGTACGCTTACGTGTGATTTGTCAT  
TAGACCACGCGTCAC  
+  
FFFFFFFFFFFFFFFFFFFFFFFFFFFFFFFFFFFFFFFFFFFFFFFFFFFFFFFFFFFFFFFF:FFFFFF  
FFFFF:FFFFFFFFFFFFFFFFFFFFFFFFFFFFFFFFFFFFFFFFFFFFFFFFFFFFFFFF:FFFFFFF  
FF:FFFFFF:FFFFF  
@A00721:190:HGJW7DSXY:4:2355:29559:26788 2:N:0:TCTGCAAG+GCTGCACT  
TACCAATTCAAATTCAAATAGAAATTCATAGGCCCGCAGGGGCATCTTACCGCAGACCGTGGGGCAA  
GCCAATATAATATTACTGGCTTGCCCGCGCCGGGGACACCTCCGTACGCTTACGTGTGATTTGTCAT  
TAGACCACGCGTCAC  
+  
FFFFFFFFFFFFFFFFFFFFFFFFFFFFFFFFFFFFFFFFFFFFFFFFFFFFFFFFFFFFFFFF,  
FFFFFFFFFFFFFFFFFFFFFFFFFFFFFFFFFFFFFFFFFFFFFFFFFFFFFFFFFFFFFFFF:  
FFFFFFFFFFFFFFFFFFFFFFFFFFFFFFFFFFFFFFFFFFFFFFFFFFFFFFFF:  
FFFFFFFFFFFFFFFF  
@A00721:190:HGJW7DSXY:4:1344:30373:13917 2:N:0:TCTGCAAG+GCTGCACT  
GATCGTGACGCGTGGTCTAATGACAAATCGACACGTAAGCGTACGGAGGTGTCCCCGGCGCGGGCAAG  
CCAGTAATATTATATTGGCTTGCCCCACGGTCTGCGGTAAGATGCCCTGCGGGGCCTATGGAATTCT  
ATTTGAATTTGAATT  
+  
FFFFFFFFFFFFFFFFFFFFFFFFFFFFFFFFFFFFFFFFFFFFFFFFFFFFFFFFFFFFFFFFFFFF  
FFFFFFFFFFFFFFFFFFFFFFFFFFFFFFFFFFFFFFFFFFFFFFFFFFFFFFFFFFFFFFFF,FF:F  
:F:FFF:FFFFFFFF  
@A00721:190:HGJW7DSXY:4:1362:16559:8155 2:N:0:TCTGCAAG+GCTGCACT  
GATCGTGACGCGTGGTCTAATGACAAATCGACACGTAAGCGTACGGAGGTGTCCCCGGCGCGGGCAAG  
CCAGTAATATTATATTGGCTTGCCCCACGGTCTGCGGTAAGATGCCCTGCGGGGCCTATGGAATTCT  
ATTTGAATTTGAATT  
+  
FFFF:FFFF:F,FFFF:FF:FFFFFFFFFFFFFFFFFFFFFFFFFFFFFFFFFFFFFFFFFFFFFFFF,  
FFFF,:F,FF,FFFFFFFFFFFFFFFFFFFFFFFFFFFFFFFFFFFFFFFFFFFFFFFF,FFFFFFFFFFFF  
FFFF:FFFFFFFF:F  
@A00721:190:HGJW7DSXY:4:1432:15374:8359 2:N:0:TCTGCAAG+GCTGCACT  
GATCGTGACGCGTGGTCTAATGACAAATCGACACGTAAGCGTACGGAGGTGTCCCCGGCGCGGGCAAG  
CCAGTAATATTATATTTGCTTGCCCCACGGTCTGCGGTAAGATGCCCTGCGGGGCCTATGGAATTCT  
ATTTGAATTTGAATT  
+  
FFF:FFFF,F,,F:FFFFFFFF:FFFF:FFFF:FFFF:FFFF:FFFF,FF:FFFFFFFF,:F:FF:F:FFF  
FF::FF:FF,:FFFF,F,:FFFF,FF:F,:FF,F,FFF:,F:FFFFFFFF:FFFF::,F:FFFF  
FF:FFFF,F,,FFFF  
@A00721:190:HGJW7DSXY:4:1668:7374:34240 2:N:0:TCTGCAAG+GCTGCACT  
GATCGTGACGCGTGGTCTAATGACAAATCGACACGTAAGCGTACGGAGGTGTCCCCGGCGCGGGCAAG  
CCAGTAATATTATATTGGCTTGCCCCACGGTCTGCGGTAAGATGCCCTGCGGGGCCTATGGAATTCT  
ATGTGAATTTGAATT  
+  
FFFFFFFFF:FFF:FFFFFFFFFFFFFFFFFFFFFFFFFFFFFFFFFFFFFFFFFFFFFFFFFFFFFFFF  
FFFFFFFFF:FFFF:FFFFFFFFFFFFFFFFFFFFFFFFFFFFFFFFFFFFFFFFFFFFFFFFFFFFFFFF:FFFFFFF  
FF,FFFF,:FFF:FF  
@A00721:190:HGJW7DSXY:4:1677:32208:4758 2:N:0:TCTGCAAG+GCTGCACT  
GATCGTGACGCGTGGTCTAATGACAAATCGACACGTAAGCGTACGGAGGTGTCCCCGGCGCGGGCAAG  
CCAGTAATATTATATTGGCTTGCCCCACGGTCTGCGGTAAGATGCCCTGCGGGGCCTATGGAATTCT  
ATTTGAATTTGAATT

+  
FFFFFFFFFFFFFFFFFFFFFFFFFFFFFFFFFFFFFFFFFFFFFFFFFFFFFFFFFFFFFFFFFFFFFFFF  
FFFFFFFFFFFFFFFFFFFFFFFFFFFFFFFFFFFFFFFFFFFFFFFFFFFFFFFFFFFFFFFFFFFFFFFF,  
:FFFFFFFFFFFF:F  
@A00721:190:HGJW7DSXY:4:2174:5267:34601 2:N:0:TCTGCAAG+GCTGCACT  
GATCGTGACGCGTGGTCTAATGACAAATCGACACGTAAGCGTACGGAGGTGTCCCCGGCGCGGGCAAG  
CCAGTAATATTATATTGGCTTGCCCCACGGTCTGCGGTAAGATGCCCTGCGGGGCCTATGGAATTCT  
ATTTGAATTTGAATT

+  
FFFFFFF,FFFFFFFFFFFFFFFF:FFFFFFFFFFFFFFFF,FFF:FFFFFFFFFFFFFFFFFFFFFFFFF,  
FFFFFFFFFFFFFFFFFFFFFFFFFFFFFFFFFFFFFFFF:FFFFFF:FFFFFFFFFFFFFFFFFFFFFFFF,  
F::FFF:FFFFFFF  
@A00721:190:HGJW7DSXY:4:2267:5575:17534 2:N:0:TCTGCAAG+GCTGCACT  
GATCGTGACGCGTGGTCTAATGACAAATCGACACGTAAGCGTACGGAGGTGTCCCCGGCGCGGGCAAG  
CCAGTAATATTATATTGGCTTGCCCCACGGTCTGCGGTAAGATGCCCTGCGGGGCCTATGGAATTCT  
ATTTGAATTTGAATT

+  
FFFFFFFFFFFFFFFFFFFFFFFFFFFFFFFFFFFFFFFFFFFFFFFFFFFFFFFFFFFFFFFFFFFFFFFF  
FFFFFFFFFFFFFFFFFFFFFFFFFFFFFFFFFFFFFFFFFFFFFFFFFFFFFFFFFFFFFFFFFFFFFFFF:FFFFF,  
FFFFFFFFFF,FF,:F  
@A00721:190:HGJW7DSXY:4:2327:10077:6324 2:N:0:TCTGCAAG+GCTGCACT  
GATCGTGACGCGTGGTCTAATGACAAATCGACACGTAAGCGTACGGAGGTGTCCCCGGCGCGGGCAAG  
CCAGTAATATTATATTGGCTTGCCCCACGGTCTGCGGTAAGATGCCCTGCGGGGCCTATGGAATTCT  
ATTTGAATTTGAATT

+  
FFFFFFF:FFFFFFFFFFFFFFFFFFFFFFFFFFFFFFFFFFFFFFFFFFFFFFFFFFFFFFFFFFFFFFFF:  
FFFF,FF:FFFF,:FFFF:FFFFFF:FFFF,FFFF:,FFF:FFFF,FFFFFFFF:FFFFFF:F  
FFFFFF,FFFFFFF  
@A00721:190:HGJW7DSXY:4:2533:6506:11600 2:N:0:TCTGCAAG+GCTGCACT  
GATCGTGACGCGTGGTCTAATGACAAATCGACACGTAAGCGTACGGAGGTGTCCCCGGCGCGGGCAAG  
CCAGTAATATTATATTGGCTTGCCCCACGGTCTGCGGTAAGATGCCCTGCGGGGCCTATGGAATTCT  
ATTTGAATTTGAATT

+  
FFFFFFFFFFFFFFFFFFFFFFFFFFFFFFFFFFFFFFFFFFFFFFFFFFFFFFFFFFFFFFFFFFFFFFFF:  
FFFFFFFFF:FFFFFFFFF:FFFFFFFFFFFFFFFFFFFFFFFF:FF:FFFFFFFFFFFF,FFFF:FFFF  
F,FFFFFFFFF::FF  
@A00721:190:HGJW7DSXY:4:2670:10131:26647 2:N:0:TCTGCAAG+GCTGCACT  
GATCGTGACGCGTGGTCTAATGACAAATCGACACGTAAGCGTACGGAGGTGTCCCCGGCGCGGGCAAG  
CCAGTAATATTATATTGGCTTGCCCCACGGTCTGCGGTAAGATGCCCTGCGGGGCCTATGGAATTCT  
ATTTGAATTTGAATT

+  
FFFFFFFFFFFFFFFFFFFFFFFFFFFFFFFFFFFFFFFFFFFFFFFFFFFFFFFFFFFFFFFFFFFFFFFF:  
FFFFFFF:FFFFFFF:FFFFFFFFFFFFFFFFFFFFFFFFFFFFFFFFFFFFFFFFFFFFFFFFFFFF,  
F,F:FFF,FFFFFFF  
@A00721:190:HGJW7DSXY:4:1611:23149:18004 2:N:0:TCTGCAAG+GCTGCACT  
ATGATCGTGACGCGTGGTCTAATGACAAATCGACACGTAAGCGTACGGAGGTGTCCCCGGCGCGGGCA  
AGCCAGTAATATTATATTGGCTTGCCCCACGGTCTGCGGTAAGATGCCCTGCGGGGCCTATGGAATT  
CTATTTGAATTTGAA

+  
FFFFFFFFFFFFFFFFFFFFFFFFFFFFFFFFFFFFFFFFFFFFFFFFFFFFFFFFFFFFFFFFFFFFFFFF  
FFFFFFFFFFFFFFFFFFFFFFFFFFFFFFFFFFFFFFFF:FFFF,FFFFFFFFFFFFFFFFFFFFFFFF,  
,F,FFFF:FFFFFFF  
@A00721:190:HGJW7DSXY:4:2216:14642:25629 2:N:0:TCTGCAAG+GCTGCACT  
ATGATCGTGACGCGTGGTCTAATGACAAATCGACACGTAAGCGTACGGAGGTGTCCCCGGCGCGGGCA

AGCCAGTAATATTATATTGGCTTGCCCCACGGTCTGCGGTAAGATGCCCTGCGGGCCTATGGAATT  
CTATTTGAATTTGAA

+

FFFFFFFFFFFFFFFFFFFFFFFFFFFFFFFFFFFFFFFFFFFFFFFFFFFFFFFFFFFFFFFFFFFFFFFF  
FFFFFFFFFFFFFFFFFFFFFFFFFFFFFFFFFFFFFFFFFFFFFFFFFFFFFFFFFFFFFFFFFFFFFFFF  
FFFFFFFFFFFF:FFFF

@A00721:190:HGJW7DSXY:4:1128:5855:25598 2:N:0:TCTGCAAG+GCTGCACT  
ATTTTTTAGATGGTCATGATCGTGACGCGTGGTCTAATGACAAATCGACACGTAAGCGTACGGAGGTG  
TCCCCGCGCGGGCAAGCCAGTAATATTATATTGGCTTGCCCCACGGTCTGCGGTAAGATGCCCTGC  
GGGGCCTATGGAATT

+

FFFFFFFFFFFF:FFFFFFFFFFFFFFFFFFFFFFFFFFFFFFFFFFFFFFFFFFFFFFFFFFFFFFFF  
FF:FFFFFFFFFFFFF, :FFF:FFFFFFFFFFFFFFFFFFFFFFFFFFFFFFFFFFFFFFFFFFFFF: :FF  
FFFFFFFFFFFFFFFFFFFF

@A00721:190:HGJW7DSXY:4:1128:3540:35931 2:N:0:TCTGCAAG+GCTGCACT  
ATTTTTTAGATGGTCATGATCGTGACGCGTGGTCTAATGACAAATCGACACGTAAGCGTACGGAGGTG  
TCCCCGCGCGGGCAAGCCAGTAATATTATATTGGCTTGCCCCACGGTCTGCGGTAAGATGCCCTGC  
GGGGCCTATGGAATT

+

FFF:FFFF:FFFFFFFFFFFFFFFFFFFFFFFFFFFFFFFFFFFFFFFFFFFFFFFFFFFFFFFFFFFF  
FF, FFFFFFFFFFFFFFFFFFFFFFFFFFFFFFFFFFFFFFFFFFFFFFFFFFFFFFFFFFFFFFFFFFFFF  
FFFFFFFFFFFFFFFFFFFF

@A00721:190:HGJW7DSXY:4:1172:20961:16344 2:N:0:TCTGCAAG+GCTGCACT  
ATTTTTTAGATGGTCATGATCGTGACGCGTGGTCTAATGACAAATCGACACGTAAGCGTACGGAGGTG  
TCCCCGCGCGGGCAAGCCAGTAATATTATATTGGCTTGCCCCACGGTCTGCGGTAAGATGCCCTGC  
GGGGCCTATGGAATT

+

FFFFFFFFFFFFFFFFFFFFFFFFFFFFFFFFFFFFFFFFFFFFFFFFFFFFFFFFFFFFFFFFFFFFF  
FFFFFFFFFFFFFFFFFFFFFFFFFFFF, FFF:FF, FFFFFFFFFFFFFFFFFFFFFFFFFFFFFFFFF  
FFFFFFFFFFFFFFFFFFFF:

@A00721:190:HGJW7DSXY:4:1253:25129:27007 2:N:0:TCTGCAAG+GCTGCACT  
ATTTTTTAGATGGTCATGATCGTGACGCGTGGTCTAATGACAAATCGACACGTAAGCGTACGGAGGTG  
TCCCCGCGCGGGCAAGCCAGTAATATTATATTGGCTTGCCCCACGGTCTGCGGTAAGATGCCCTGC  
GGGGCCTATGGAATT

+

FFFFFFFFFFFFFFFFFFFFFFFFFFFFFFFFFFFFFFFFFFFFFFFFFFFFFFFFFFFFFFFFFFFFF  
FFFFFFFFFFFFFFFFFFFFFFFFFFFF:FFFFFFFFFFFFFFFFFFFFFFFFFFFFFFFFFFFFFFFFFFFF  
FFFFFFFFFFFFFFFF, FF

@A00721:190:HGJW7DSXY:4:1255:23628:12633 2:N:0:TCTGCAAG+GCTGCACT  
ATTTTTTAGATGGTCATGATCGTGACGCGTGGTCTAATGACAAATCGACACGTAAGCGTACGGAGGTG  
TCCCCGCGCGGGCAAGCCAGTAATATTATATTGGCTTGCCCCACGGTCTGCGGTAAGATGCCCTGC  
GGGGCCTATGGAATT

+

FFFFFFF:FFF:FFFFFFFFFFFFFFFFFFFFFFFFFFFFFFFFFFFFFFFFFFFFFFFFFFFFFFFF  
FFFFFFFFFFFFFFFFFFFF:FFFFFFFFFFFFFFFFFFFFFFFFFFFFFFFFFFFFFFFFFFFFFFFFFFFF  
FFFFFFFFFFFFFFFF:FF

@A00721:190:HGJW7DSXY:4:1263:30581:8766 2:N:0:TCTGCAAG+GCTGCACT  
ATTTTTTAGATGGTCATGATCGTGACGCGTGGTCTAATGACAAATCGACACGTAAGCGTACGGAGGTG  
TCCCCGCGCGGGCAAGCCAGTAATATTATATTGGCTTGCCCCACGGTCTGCGGTAAGATGCCCTGC  
GGGGCCTATGGAATT

+

FFF:FFFFFFFFFFFFFFFFFFFFFFFFFFFFFFFFFFFFFFFFFFFFFFFFFFFFFFFFFFFFFFFF  
FFFFFFFFFFFFFFFFFFFFFFFFFFFF:FFFFFFFFFFFFFFFFFFFF:FFFFFFFFFFFFFFFFFFFF  
FFFFFFFFFFFFFFFFFFFF

@A00721:190:HGJW7DSXY:4:1317:17535:17738 2:N:0:TCTGCAAG+GCTGCACT  
ATTTTTTAGATGGTCATGATCGTGACGCGTGGTCTAATGACAAATCGACACGTAAGCGTACGGAGGTG  
TCCCCGGCGCGGGCAAGCCAGTAATATTATATTGGCTTGCCCCACGGTCTGCGGTAAGATGCCCCTGC  
GGGGCCTATGGAATT

+

FFFFF,FFFFFFFFFFFFFFFFFFFFFFFFFFFFFFFFFFFFFFFFFFFFFFFFFFFFFFFFFFFFFFFF  
FFFFFFFFFFFFFFFFFFFFFFFFFFFFFFFFFFFFFFFFFFFFFFFFFFFFFFFFFFFFFFFF:FFFFFFFF  
FFFFFFFFFFFFFFFFFFFFFFFF

@A00721:190:HGJW7DSXY:4:1460:12391:12680 2:N:0:TCTGCAAG+GCTGCACT  
ATTTTTTAGATGGTCATGATCGTGACGCGTGGTCTAATGACAAATCGACACGTAAGCGTACGGAGGTG  
TCCCCGGCGCGGGCAAGCCAGTAATATTATATTGGCTTGCCCCACGGTCTGCGGTAAGATGCCCCTGC  
GGGGCCTATGGAATT

+

FFFF:F:FFFFFFFFFFFFFFFFFFFFFFFFFFFFFFFFFFFFFFFFFFFFFFFFFFFFFFFFFFFFFFFF  
FFFFFFFFFFFFFFFFFFFFFFFFF:,FFFFFFFFFFFFFFFFFFFFFFFFFFFFFFFFFFFFFFFFFFFFF  
FFFFFFFFFFFFFFFFFFFF

@A00721:190:HGJW7DSXY:4:2655:7229:20838 2:N:0:TCTGCAAG+GCTGCACT  
ATTTTTTAGATGGTCATGATCGTGACGCGTGGTCTAATGACAAATCGACACGTAAGCGTACGGAGGTG  
TCCCCGGCGCGGGCAAGCCAGTAATATTATATTGGCTTGCCCCACGGTCTGCGGTAAGATGCCCCTGC  
GGGGCCTATGGAATT

+

FFFFFFFFFFFFFFFFFFFFFFFFFFFFFFFFFFFFFFFFFFFFFFFFFFFFFFFFFFFFFFFFFFFFF,F,F  
FFFFFFFFFFFF:FFFFFFF:FFF:FFFFFFFF,FFFFFFFFFFFF:F:F:FF:FFFFFF:FFFFFFF  
FF:FFFFFFFFFFFF

@A00721:190:HGJW7DSXY:4:2673:31810:15374 2:N:0:TCTGCAAG+GCTGCACT  
ATTTTTTAGATGGTCATGATCGTGACGCGTGGTCTAATGACAAATCGACACGTAAGCGTACGGAGGTG  
TCCCCGGCGCGGGCAAGCCAGTAATATTATATTGGCTTGCCCCACGGTCTGCGGTAAGATGCCCCTGC  
GGGGCCTATGGAATT

+

FFFFFFFFFFFFFFFFFFFFFFFFFFFFFFFFFFFFFFFFFFFFFFFFFFFFFFFFFFFFFFFFFFFFF  
FFFFFFFFFFFFFFFFFFFFFFFFF:FFFFF,FFFFFFFFFFFFFFFFFFFFFFFFFFFFFFFFFFFFFFFF  
FFFFFFFFF:FFFFF

@A00721:190:HGJW7DSXY:4:1268:16324:5431 2:N:0:TCTGCAAG+GCTGCACT  
TTCATTTTTTAGATGGTTATGATCGTGACGCGTGGTCTAATGACAAATCGACACGTAAGCGTACGGAG  
GTGTCCCCGGCGCGGGCAAGCCAGTAATATTATATTGGCTTGCCCCACGGTCTGCGGTAAGATGCCCC  
TGCGGGGCCTATGGA

+

FFFFFFFFFFFFFFFFFFFFFFFFFFFFFFFFFFFFFFFFFFFFFFFFFFFFFFFFFFFFFFFFFFFFF  
FFFFFFFFFFFFFFFFFFFFFFFFF:FFFFFFF,FFFFFFFFFFFFFFFFFFFFFFFFFFFFFFFFFFFFF  
FFFFFFFFF:FFFFF

@A00721:190:HGJW7DSXY:4:1433:1036:3380 2:N:0:TCTGCAAG+GCTGCACT  
TTCATTTTTTAGATGGTTATGATCGTGACGCGTGGTCTAATGACAAATCGACACGTAAGCGTACGGAG  
GTGTCCCCGGCGCGGGCAAGCCAGTAATATTATATTGGCTTGCCCCACGGTCTGCGGTAAGATGCCCC  
TGCGGGGCCTATGGA

+

FFFFFFFFFFFFFFFFFFFFFFFFFFFFFFFFFFFFFFFFFFFFFFFFFFFFFFFFFFFFFFFFFFFFF  
FFFFFFFFFFFFFFFFFFFFFFFFF:FFFFFFFFFFFFFFFFFFFFFFFFFFFFFFFFFFFFFFFFFFFFF,FFFFF  
FFFFFFF::FF:FFF

@A00721:190:HGJW7DSXY:4:1457:6470:2832 2:N:0:TCTGCAAG+GCTGCACT  
TTCATTTTTTAGATGGTTATGATCGTGACGCGTGGTCTAATGACAAATCGACACGTAAGCGTACGGAG  
GTGTCCCCGGCGCGGGCAAGCCAGTAATATTATATTGGCTTGCCCCACGGTCTGCGGTAAGATGCCCC  
TGCGGGGCCTATGGA

+

FFFFFFFFFFFFFFF,FFFFFFFFFFFFFFFFFFFFFFFFFFFFFFFFFFFFFFFFFFFFFFFFFFFFFFFF

@A00721:190:HGJW7DSXY:4:1464:1280:7498 2:N:0:TCTGCAAG+GCTGCACT  
TTCATTTTTTAGATGGTTATGATCGTGACGCGTGGTCTAATGACAAATCGACACGTAAGCGTACGGAG  
GTGTCCCCGGCGCGGGCAAGCCAGTAATATTATATTGGCTTGCCCCACGGTCTGCGGTAAGATGCCCC  
TGCGGGGCCTATGGA

@A00721:190:HGJW7DSXY:4:1535:17942:12868 2:N:0:TCTGCAAG+GCTGCACT  
TTCATTTTTTAGATGGTTATGATCGTGACGCGTGGTCTAATGACAAATCGACACGTAAGCGTACGGAG  
GTGTCCCCGGCGCGGGCAAGCCAGTAATATTATATTGGCTTGCCCCACGGTCTGCGGTAAGATGCCCC  
TGCGGGGCCTATGGA

@A00721:190:HGJW7DSXY:4:2202:15863:18975 2:N:0:TCTGCAAG+GCTGCACT  
TTCATTTTTTAGATGGTTATGATCGTGACGCGTGGTCTAATGACAAATCGACACGTAAGCGTACGGAG  
GTGTCCCCGGCGCGGGCAAGCCAGTAATATTATATTGGCTTGCCCCACGGTCTGCGGTAAGATGCCCC  
TGCGGGGGCCTATGGA

@A00721:190:HGJW7DSXY:4:2230:26250:3176 2:N:0:TCTGCAAG+GCTGCACT  
TTCATTTTTTAGATGGTTATGATCGTGACGCGTGGTCTAATGACAAATCGACACGTAAGCGTACGGAG  
GTGTCCCCGGCGCGGGCAAGCCAGTAATATTATATTGGCTTGCCCCACGGTCTGCGGTAAGATGCCCC  
TGCGGGGCCTATGGA

@A00721:190:HGJW7DSXY:4:2658:18132:9502 2:N:0:TCTGCAAG+GCTGCACT  
TTCATTTTTTAGATGGTTATGATCGTGACGCGTGGTCTAATGACAAATCGACACGTAAGCGTACGGAG  
GTGTCCCCGGCGCGGGCAAGCCAGTAATATTATATTGGCTTGCCCCACGGTCTGCGGTAAGATGCCCC  
TGCGGGGCCCTATGGA

@A00721:190:HGJW7DSXY:4:1176:29514:28432 2:N:0:TCTGCAAG+GCTGCACT  
ATTCATTTTTTAGATGGTTATGATCGTGACGCGTGGTCTAATGACAAATCGACACGTAAGCGTACGGA  
GGTGTCCCCGCGCGGGCAAGCCAGTAATATTATATTGGCTTGCCCCACGGTCTGCGGTAAGATGCCC  
CTGCAGGGCCAGATC

@A00721:190:HGJW7DSXY:4:1509:27407:7247 2:N:0:TCTGCAAG+GCTGCACT  
ATTCATTTTTTAGATGGTTATGATCGTGACGCGTGGTCTAATGACAAATCGACACGTAAGCGTACGGA  
GGTGTCCCCGCGCGGGCAAGCCAGTAATATTATATTGGCTTGCCCCACGGTCTGCGGTAAGATGCC  
CTGCAGGGCCAGATC

+  
FFFFFFFFFFFFFFFFFFFFFFFFFFFFFFFFFFFFFFFFFFFFFFFFFFFFFFFFFFFFFFFFFFFFFFFF  
FFFFFFFFFFFFFFFFFFFFFFFF:FFFFFFFF:FFFFFFFFFFFFFFFFFFFFFFFFFFFFFFFF,FFFF:FFFFFFFF  
FFFFFFFFFFFFFFFF

@A00721:190:HGJW7DSXY:4:1551:13467:17143 2:N:0:TCTGCAAG+GCTGCACT  
ATTCATTTTTTAGATGGTTATGATCGTGACGCGTGGTCTAATGACAAATCGACACGTAAGCGTACGGA  
GGTGTCCCCGGCGCGGGCAAGCCAGTAATATTATATTGGCTTGCCCCACGGTCTGCGGTAAGATGCCC  
CTGCAGGGCCAGATC

+  
FFFFFFFFFFFFFFFFFFFFFFFFFFFFFFFFFFFFFFFFFFFFFFFFFFFFFFFFFFFFFFFFFFFFFFFF  
FFFFFFFFFFFFFFFFFFFFFFFFFFFFFFFFFFFFFFFFFFFFFFFFFFFFFFFFFFFFFFFFFFFFFFFF:FFFFFFFFFFFFFFFF  
FFFFFFFFFFFFFFFF

@A00721:190:HGJW7DSXY:4:1636:10791:3677 2:N:0:TCTGCAAG+GCTGCACT  
ATTCATTTTTTAGATGGTTATGATCGTGACGCGTGGTCTAATGACAAATCGACACGTAAGCGTACGGA  
GGTGTCCCCGGCGCGGGCAAGCCAGTAATATTATATTGGCTTGCCCCACGGTCTGCGGTAAGATGCCC  
CTGCAGGGCCAGATC

+  
FFFFFFFFFFFFFFFF:FFFFFFFFFFFFFFFFFFFFFFFFFFFFFFFFFFFFFFFFFFFFFFFFFFFFFFFF  
FFFFFFFFFFFFFFFFFFFFFFFFFFFFFFFFFFFFFFFFFFFFFFFFFFFFFFFFFFFFFFFFFFFFFFFF:FFFFFFF  
F:FFFFFFFFFFFFFF

@A00721:190:HGJW7DSXY:4:2123:15637:25535 2:N:0:TCTGCAAG+GCTGCACT  
ATTCATTTTTTAGATGGTTATGATCGTGACGCGTGGTCTAATGACAAATCGACACGTAAGCGTACGGA  
GGTGTCCCCGGCGCGGGCAAGCCAGTAATATTATATTGGCTTGCCCCACGGTCTGCGGTAAGATGCCC  
CTGCAGGGCCAGATC

+  
FFFFFFFFFFFFFFFFFFFFFFFFFFFFFFFFFFFFFFFFFFFFFFFFFFFFFFFFFFFFFFFFFFFFFFFF  
FFFFFFFFFFFFFFFFFFFFFFFF:FFFFFFFFFFFFFFFFFFFFFFFFFFFFFFFFFFFFFFFFFFFFFFFF  
FFFFFFFFFFFFFFFF

@A00721:190:HGJW7DSXY:4:2123:14362:26209 2:N:0:TCTGCAAG+GCTGCACT  
ATTCATTTTTTAGATGGTTATGATCGTGACGCGTGGTCTAATGACAAATCGACACGTAAGCGTACGGA  
GGTGTCCCCGGCGCGGGCAAGCCAGTAATATTATATTGGCTTGCCCCACGGTCTGCGGTAAGATGCCC  
CTGCAGGGCCAGATC

+  
:FFFFFF:FFFFFFFFFFFF:FFFFFFFFFFFFFFFFFFFFFFFFFFFFFFFFFFFFFFFFFFFFFFFF  
FFFFFFFFFFFFFFFFFFFFFFFFFFFFFFFFFFFFFFFFFFFFFFFFFFFFFFFFFFFFFFFFFFFFFFFF  
FFFF:FFFFFFFF

@A00721:190:HGJW7DSXY:4:2150:27154:17519 2:N:0:TCTGCAAG+GCTGCACT  
ATTCATTTTTTAGATGGTTATGATCGTGACGCGTGGTCTAATGACAAATCGACACGTAAGCGTACGGA  
GGTGTCCCCGGCGCGGGCAAGCCAGTAATATTATATTGGCTTGCCCCACGGTCTGCGGTAAGATGCCC  
CTGCAGGGCCAGATC

+  
FFFFFFFFFFFFFFFFFFFFFFFFFFFFFFFFFFFFFFFFFFFFFFFFFFFFFFFFFFFFFFFFFFFFFFFF  
FFFFFFFFFFFFFFFFFFFFFFFF:FFFFFFFFFFFFF:FFFFFFFFFFFFFFFFFFFFFFFFFFFFFFFF:FF  
FFFFFFFFFFFFFFFF

@A00721:190:HGJW7DSXY:4:2355:14805:9283 2:N:0:TCTGCAAG+GCTGCACT  
ATTCATTTTTTAGATGGTTATGATCGTGACGCGTGGTCTAATGACAAATCGACACGTAAGCGTACGGA  
GGTGTCCCCGGCGCGGGCAAGCCAGTAATATTATATTGGCTTGCCCCACGGTCTGCGGTAAGATGCCC  
CTGCAGGGCCAGATC

+  
FFFFFFFFF:FFFF:FFFFFFFFFFFFFFFFFFFFFFFFFFFFFFFFFFFFFFFFFFFFFFFFFFFFFFFF  
FFFFFFFFFFFFFFFFFFFFFFFFFFFFFFFFFFFFFFFFFFFFFFFFFFFFFFFFFFFFFFFFFFFFFFFF:FFF:FFF  
FFFFF:FFFFFF:F

@A00721:190:HGJW7DSXY:4:2374:19334:20979 2:N:0:TCTGCAAG+GCTGCACT  
ATTCATTTTTTAGATGGTTATGATCGTGACGCGTGGTCTAATGACAAATCGACACGTAAGCGTACGGA



@A00721:190:HGJW7DSXY:4:2326:7093:34976 2:N:0:TCTGCAAG+GCTGCACT  
ATAGAATTCATTTTTTAGATGGTCATGATCGTGACGCGTGGTCTAATGACAAATCGACACGTAAGCGT  
ACGGAGGTGTCCCCGGCGCGGGCAAGCCAGTAATATTATATTGGCTTGCCCCACGGTCTGCGGTAAGA  
TGCCCCCTGCGGGGCC

@A00721:190:HGJW7DSXY:4:2349:24713:12446 2:N:0:TCTGCAAG+GCTGCACT  
ATAGAATTCATTTTTTATGATGGTTATGATCGTGACGCGTGGTCTAATGACAAATCGACACGTAAGCGT  
ACGGAGGTGTCCCCGGCGCGGGCAAGCCAGTAATATTATATTGGCTTGCCCCACGGTCTGCGGTAAGA  
TGCCCCCTGCGGGGCC

@A00721:190:HGJW7DSXY:4:2358:25238:16141 2:N:0:TCTGCAAG+GCTGCACT  
ATAGAATTCATTTTTTAGATGGTCATGATCGTGACGCGTGGTCTAATGACAAATCGACACGTAAGCGT  
ACGGAGGTGTCCCCGGCGCGGGCAAGCCAGTAATATTATATTGGCTTGCCCCACGGTCTGCGGTAAGA  
TGCCCCCTGCGGGGCC

@A00721:190:HGJW7DSXY:4:2555:13810:25285 2:N:0:TCTGCAAG+GCTGCACT  
ATAGAATTCATTTTTTAGATGGTCATGATCGTGACGCGTGGTCTAATGACAAATCGACACGTAAGCGT  
ACGGAGGTGTCCCCGGCGCGGGCAAGCCAGTAATATTATATTGGCTTGCCCCACGGTCTGCGGTAAGA  
TGCCCCTGCGGGGCC

@A00721:190:HGJW7DSXY:4:2636:18765:28072 2:N:0:TCTGCAAG+GCTGCACT  
ATAGAATTCATTTTTTAGATGGTTATGATCGTGACGCGTGGTCTAATGACAAATCGACACGTAAGCGT  
ACGGAGGTGTACCGGCGCGGGCAAGCCAGTAATATTATATTGGCTTGCCCCACGGTCTGCGGTAAGA  
TGCCCCTGCGGGGCC

@A00721:190:HGJW7DSXY:4:2651:2257:27508 2:N:0:TCTGCAAG+GCTGCACT  
ATAGAATTCATTTTTTAGATGGTCATGATCGTGACGCGTGGTCTAATGACAAATCGACACGTAAGCGT  
ACGGAGGTGTCCCCGGCGCGGGCAAGCCAGTAATATTATATTGGCTTGCCCCACGGTCTGCGGTAAGA  
TGCCCCCTGCGGGGCC

@A00721:190:HGJW7DSXY:4:1343:26675:1971 2:N:0:TCTGCAAG+GCTGCACT  
ATAGAATTCATTTTTTAGATGGTTATGATCGTGACGCGTGGTCTAATGACAAATCGACACGTAAGCGT  
ACGGAGGTGTCCCCGGCGCGGGCAAGCCAGTAATATTATATTGGCTTGCCCCACGGTCTGCGGTAAGA  
TGCCCCCTGCGGGGC



FFFFFFFFFFFFFFFFFFFFFFFFFFFFFFFFFFFFFFFFFFFFFFFFFFFFFFFFFFFFFFFF:FF:FFFFFFF  
FFFFFFFFFFFFFFF

@A00721:190:HGJW7DSXY:4:2461:3812:17362 2:N:0:TCTGCAAG+GCTGCACT  
ATAGAATTCATTTTTTAGATGGTCATGATCGTGACGCGTGGTCTAATGACAAATCGACACGTAAGCGT  
ACGGAGGTGTCCCCGGCGCGGGCAAGCCAGTAATATTATATTGGCTTGCCCCACGGTCTGCGGTAA  
TGACCCTGCGGGGC

+  
FFFFFFFFFFFFFFFFFFFFFFFFFFFFFFFFFFFFFFFFFFFFFFFFFFFFFFFFFFFFFFFF:FF,FFFFFFFF::FFFF:,FFFF::  
F:FFFF:FFFF,FF:,::FFFF::F,FFFFFFFF:FF,,F:FFF,FFFFFF,FF,,F,:FFFF  
FF,F,FFFFFFFFF

@A00721:190:HGJW7DSXY:4:1418:16685:14168 2:N:0:TCTGCAAG+GCTGCACT  
CTATAGAATTCATTTTTTAGATGGTCATGATCGTGACGCGTGGTCTAATGACAAATCGACACGTAAGC  
GTACGGAGGTGTCCCCGGCGCGGGCAAGCCAGTAATATTATATTGGCTTGCCCCACGGTCTGCGGTAA  
GATGCCCCTGC

+  
FFFFFFFFFFFFFFFFFFFFFFFFFFFFFFFFFFFFFFFFFFFFFFFFFFFFFFFFFFFFFFFF  
FFFFFFFFFFFFFFFFFFFFFFFFFFFFFFFFFFFFFFFFFFFFFFFFFFFFFFFFFFFFFFFF, :FFFFFFFFFFFFFFFFFFFFFFFF:FFFFFFF  
FFFFFFFFFFFFF

@A00721:190:HGJW7DSXY:4:1613:24795:2879 2:N:0:TCTGCAAG+GCTGCACT  
CTATAGAATTCATTTTTTAGATGGTCATGATCGTGACGCGTGGTCTAATGACAAATCGACACGTAAGC  
GTACGGAGGTGTCCCCGGCGCGGGCAAGCCAGAAATATTATATTGGCATGCCCCACGGTCTGCGGTAA  
GATGCCCCTGC

+  
FFFF,FFF:FFFF,FFFFFFFFFFFFFFFFFFFFFFFF:FFFF:FFF::F:FFFFFFFFF:FFFFFFFF,FF  
FFFFFFFFFFFFFFFFFFFF:FF:FF:F::F:FF,F,FF:FF::FF,FFFF,:F:FFFF,:FF,FF:FFFF  
:FF,FFFF::

@A00721:190:HGJW7DSXY:4:2240:17481:27759 2:N:0:TCTGCAAG+GCTGCACT  
CTATAGAATTCATTTTTTAGATGGTCATGATCGTGACGCGTGGTCTAATGACAAATCGACACGTAAGC  
GTACGGAGGTGTCCCCGGCGCGGGCAAGCCAGTAATATTATATTGGCTTGCCCCACGGTCTGCGGTAA  
GATGCCCCTGC

+  
FFFFFFFFFFFFFFFFFFFFFFFFFFFFFFFFFFFFFFFFFFFFFFFFFFFFFFFFFFFFFFFF  
FFFFFFFFFFFFFFFFFFFFFFFFFFFFFFFFFFFFFFFFFFFFFFFFFFFFFFFFFFFFFFFF  
FFFFFFFFFFFFF

@A00721:190:HGJW7DSXY:4:2240:14769:29074 2:N:0:TCTGCAAG+GCTGCACT  
CTATAGAATTCATTTTTTAGATGGTCATGATCGTGACGCGTGGTCTAATGACAAATCGACACGTAAGC  
GTACGGAGGTGTCCCCGGCGCGGGCAAGCCAGTAATATTATATTGGCTTGCCCCACGGTCTGCGGTAA  
GATGCCCCTGC

+  
FFFFFFFFFFFFFFFFFFFF:FFFFFFFFFFFFFFFFFFFFFFFFFFFFFFFFFFFFFFFF  
FFFFFFFFFFFFFFFFFFFFFFFFFFFFFFFFFFFFFFFFFFFFFFFFFFFFFFFFFFFFFFFF  
FFFFFFFFFFFFF

@A00721:190:HGJW7DSXY:4:2307:20925:27492 2:N:0:TCTGCAAG+GCTGCACT  
CTATAGAATTCATTTTTTAGATGGTCATGATCGTGACGCGTGGTCTAATGACAAATCGACACGTAAGC  
GTACGGAGGTGTCCCCGGCGCGGGCAAGCCAGTAATATTATATTGGCTTGCCCCACGGTCTGCGGTAA  
GATGCCCCTGC

+  
FFFFFFFFFFFFFFFFFFFFFFFFFFFFFFFFFFFFFFFFFFFFFFFFFFFFFFFFFFFFFFFF  
FFFFFFFFFFFFFFFFFFFFFFFFFFFFFFFFFFFFFFFFFFFFFFFFFFFFFFFFFFFFFFFF:FFF:FFFFF  
FFF:FFFF:FF

@A00721:190:HGJW7DSXY:4:2446:10321:9220 2:N:0:TCTGCAAG+GCTGCACT  
CTATAGAATTCATTTTTTAGATGGTCATGATCGTGACGCGTGGTCTAATGACAAATCGACACGTAAGC  
GTACGGAGGTGTCCCCGGCGCGGGCAAGCCAGTAATAGTATATTGGCTTGCCCCACGGTCTGCGGTAA  
GATGCCCCTGC

+  
FFFFFFFF:FFFFFFFFFFFFFFFFFFFFFFFFFFFFFFFFFFFFFFFFFFFFFFFFFFFFFFFFFFFFFFFF  
FFFFFFFFFFFFFFFFFFFFFFFFFFFFFFFFFFFFFFFFFFFFFFFFFFFFFFFFFFFFFFFFFFFFFFFF, F:  
FFFFFFFFFFFF  
@A00721:190:HGJW7DSXY:4:2519:28230:22044 2:N:0:TCTGCAAG+GCTGCACT  
CTATAGAATTCATTTTTTTAGATGGTCATGATCGTGACGCGTGGTCTAATGACAAATCGACACGTAAGC  
GTACGGAGGTGTCCCCGGCGCGGGCAAGCCAGTAATATTATATTGGCTTGCCCCACGGTCTGCGGTAA  
GATGCCCTGC  
+  
FFFF:F:FFFFFFFFFFFFFFFFFFFFFFFFFFFFFFFFFFFFFFFFFFFFFFFFFFFFFFFFFFFFFFFF  
FFFFFFFFFFFFFFFFFFFFFFFFFFFFFFFFFFFFFFFFFFFFFFFFFFFFFFFFFFFFFFFFFFFFFFFF, F  
FFFF,FFFF  
@A00721:190:HGJW7DSXY:4:2653:17544:34194 2:N:0:TCTGCAAG+GCTGCACT  
CTATAGAATTCATTTTTTTAGATGGTCATGATCGTGACGCGTGGTCTAATGACAAATCGACACGTAAGC  
GTACGGAGGTGTCCCCGGCGCGGGCAAGCCAGTAATATTATATTGGCTTGCCCCACGGTCTGCGGTAA  
GATGCCCTGC  
+  
FFFFFFF,FFFFFFFFFFFFFFFFFFFFFFFFFFFFFFFFFFFFFFFFFFFFFFFFFFFFFFFFFFFFFFFF:FF  
FFFFFFFFFFFFFFFFFFFFFFFFFFFFFFFFFFFFFFFFFFFFFFFFFFFFFFFFFFFFFFFFFFFFFFFF, F:FFFFFFFFFFFFFFFFFFFFFFFFFFFFFFFFFFFFFFFF:FF  
FFFFFFFF:F  
@A00721:190:HGJW7DSXY:4:2653:17852:34225 2:N:0:TCTGCAAG+GCTGCACT  
CTATAGAATTCATTTTTTTAGATGGTCATGATCGTGACGCGTGGTCTAATGACAAATCGACACGTAAGC  
GTACGGAGGTGTCCCCGGCGCGGGCAAGCCAGTAATATTATATTGGCTTGCCCCACGGTCTGCGGTAA  
GATGCCCTGC  
+  
FFFFFFFFFFFFFFFFFFFFFFFFFFFFFFFFFFFFFFFFFFFFFFFFFFFFFFFFFFFFFFFFFFFFFFFF  
FFFFFFFFFFFFFFFFFFFFFFFFFFFFFFFFFFFFFFFFFFFFFFFFFFFFFFFFFFFFFFFF:FFFFFFFFFFFFFFFFFFFFFFFF  
FFFFFFFFFFFF  
@A00721:190:HGJW7DSXY:4:1119:8558:22200 2:N:0:TCTGCAAG+GCTGCACT  
TGCGTCACTATAGAATTCATTTTTTTAGATGGTTATGATCGTGACGCGTGGTCTAATGACAAATCGACA  
CGTAAGCGTACGGAGGTGTCCCCGGCGCGGGCAAGCCAGTAATATTATATTGGCTTGCCCCACGGTCT  
GCGGTAAGATGCCCC  
+  
FFFFFFFFFFFFFFFFFFFFFFFFFFFFFFFF, FFF:FFFFFFFFFFFFFFFFFFFFFFFFFFFFFFFF:FFFFFF  
FFFFFFFFFFFFFFFFFFFFFFFFFFFFFFFFFFFFFFFFFFFFFFFFFFFFFFFF, :FFFFFF: :FFFFFFFFFFFFFFFF  
F:FFFFFFFFFFFF  
@A00721:190:HGJW7DSXY:4:1647:11939:23703 2:N:0:TCTGCAAG+GCTGCACT  
TGCGTCACTATAGAATTCATTTTTTTAGATGGTTATGATCGTGACGCGTGGTCTAATGACAAATCGACA  
CGTAAGCGTACGGAGGTGTCCCCGGCGCGGGCAAGCCAGTAATATTATATTGTCTTGCCCCACGGTCT  
GCGGTAAGATGCCCC  
+  
FFFF,FFFF,FFFFFFFFFFFF::FFFF,FF:FFFF:FFF:FFFF:F:FFF,FFFFFFFFFFFF  
FFFFFFFFFFFF:F,FF:,FFFFFFFFFFFF:FF:,FFFF,FFFFFFFFFFFF:,FFF,F:FFFF::FFF  
FFF:,F::FF:FFF:  
@A00721:190:HGJW7DSXY:4:2664:18177:3317 2:N:0:TCTGCAAG+GCTGCACT  
TGCGTCACTATAGAATTCATTTTTTTAGATGGTTATGATCGTGACGCGTGGTCTAATGACAAATCGACA  
CGTAAGCGTACGGAGGTGTCCCCGGCGCGGGCAAGCCAGTAATATTATATTGGCTTGCCCCACGGTCT  
GCGGTAAGATGCCCC  
+  
FFFFFFFFFFFFFFFFFFFFFFFFFFFFFFFF,FFFFFFFFFFFFFFFFFFFFFFFFFFFFFFFF,FFFFFFFFFFFFFFFF:FFFF  
FFFFFFFFFFFFFFFFFFFFFFFFFFFFFFFFFFFFFFFFFFFFFFFFFFFFFFFFFFFFFFFF:FFFFFFFFFFFF:FFFFFFFF  
FFFFFFFFFFFF  
@A00721:190:HGJW7DSXY:4:1214:3179:35180 2:N:0:TCTGCAAG+GCTGCACT  
ATTCTACTGCGTCACTATAGAATTCATTTTTTTAGATGGTTATGATCGTGACGCGTGGTCTAATGACAA

ATCGACACGTAAGCGTACGGAGGTGTCCCCGGCGCGGGCAAGCCAGTAATATTATATTGGCTTGCCCC  
ACGGTCTGCGGTAAG

+

F:FFFFFFFFFFFFFFFFFFFFFFFFFFFFFFFFFFFFFFFFFFFFFFFFFFFFFFFFFFFFFFFFFFFFFFFF  
FFFFFFFFFFFFFFFFFFFFFFFFFFFFFFFFFFFFFFFFFFFFFFFFFFFFFFFFFFFFFFFFFFFFFFFF  
FFFFFFFF:FFFFFFFF:FFFFFFFFFFFFFFFF,FFFFFFFFFFFFFFFF  
FFFFFF:FFFFFFF

@A00721:190:HGJW7DSXY:4:1417:10936:12884 2:N:0:TCTGCAAG+GCTGCACT  
ATTCTACTGCGTCACTATAGAATTCATTTTTTAGATGGTTATGATCGTGACGCGTGGTCTAATGACAA  
ATCGACACGTAAGCGTACGGAGGTGTCCCCGGCGCGGGCAAGCCAGTAATATTATATTGGCTTGCCCC  
ACGGTCTGCGGTAAG

+

FFFFFFFFFFFFFFFFFFFFFFFFFFFFFFFFFFFFFFFFFFFFFFFFFFFFFFFFFFFFFFFFFFFFFFFF:  
FFFFFFFF:FFFFFFFFFFFFFFFFFFFFFFFFFFFFFFFFFFFFFFFFFFFFFFFFFFFFFFFFFFFFFFFF  
FFFFFF,FFFF:F:F

@A00721:190:HGJW7DSXY:4:1621:25852:28729 2:N:0:TCTGCAAG+GCTGCACT  
ATTCTACTGCGTCACTATAGAATTCATTTTTTAGATGGTTATGATCGTGACGCGTGGTCTAATGACAA  
ATCGACACGTAAGCGTACGGAGGTGTCCCCGGCGCGGGCAAGCCAGTAATATTATATTGGCTTGCCCC  
ACGGTCTGCGGTAAG

+

FFFFFFFFFFFFFFFFFFFFFFFFFFFFFFFFFFFFFFFFFFFFFFFFFFFFFFFFFFFFFFFFFFFFFFFF  
FFFFFFFFFFFFFFFFFFFFFFFFFFFFFFFFFFFFFFFFFFFFFFFFFFFFFFFFFFFFFFFFFFFFFFFF  
FFFFFFFFFFFFFF:

@A00721:190:HGJW7DSXY:4:1656:13892:10770 2:N:0:TCTGCAAG+GCTGCACT  
ATTCTACTGCGTCACTATAGAATTCATTTTTTAGATGGTTATGATCGTGACGCGTGGTCTAATGACAA  
ATCGACACGTAAGCGTACGGAGGTGTCCCCGGCGCGGGCAAGCCAGTAATATTATATTGGCTTGCCCC  
ACGGTCTGCGGTAAG

+

FFFFFFFFFFFFFFFFFFFFFFFFFFFFFFFFFFFFFFFFFFFFFFFFFFFFFFFFFFFFFFFFFFFFFFFF:  
FFFFFFFFFFFFFFFF:FFFFFFFFFFFFFFFFFFFFFFFFFFFFFFFFFFFFFFFFFFFFFFFFFFFFFFFF  
FFFFFFFFFFFFFFF

@A00721:190:HGJW7DSXY:4:2253:9100:6104 2:N:0:TCTGCAAG+GCTGCACT  
ATTCTACTGCGTCACTATAGAATTCATTTTTTAGATGGTTATGATCGTGACGCGTGGTCTAATGACAA  
ATCGACACGTAAGCGTACGGAGGTGTCCCCGGCGCGGGCAAGCCAGTAATATTATATTGGCTTGCCCC  
ACGGTCTGCGGTAAG

+

FFFFFFFFFFFFFFFFFFFFFFFFFFFFFFFFFFFFFFFFFFFFFFFFFFFFFFFFFFFFFFFFFFFFFFFF:  
FFFFFFFFFFFFFFFF:FFFFFFFFFFFFFFFFFFFFFFFFFFFFFFFFFFFFFFFFFFFFFFFFFFFFFFFF  
FFFFFFFFFFFFFFF  
FFF,FFFFFFFF:FFFFFFFF:FFFFFFFF:FF:FF:FFFF:FFF  
:F:F,FFFFFFFFF

@A00721:190:HGJW7DSXY:4:1128:23402:8923 2:N:0:TCTGCAAG+GCTGCACT  
CGATTTTACTGCGTCACTATAGAATTCATTTTTTAGATGGTCATGATCGTGACGCGTGGTCTAATGAC  
AAATCGACACGTAAGCGTACGGAGGTGTCCCCGGCGCGGGCAAGCCAGTAATATTATATTGGCTTGCC  
CCACGGTCTGCGGTA

+

FFFF,FFFF:FFFFFFFFFFFFFFFFFFFFFFFFFFFFFFFFFFFFFFFFFFFFFFFFFFFFFFFFFFFF  
FFFFFFFF,FFF:F,FFFF:FFF:,FFFFFFFF::F::FFFF:FFFFFFFF:FFFFFFFF,FFFFFF  
F::,F,FFFF::F

@A00721:190:HGJW7DSXY:4:1231:6415:31391 2:N:0:TCTGCAAG+GCTGCACT  
CGATTTTACTGCGTCACTATAGAATTCATTTTTTAGATGGTCATGATCGTGACGCGTGGTCTAATGAC  
AAATCGACACGTAAGCGTACGGAGGTGTCCCCGGCGCGGGCAAGCCAGTAATATTATATTGGCTTGCC  
CCACGGTCTGCGGTA

+

FFFFFFFFFFFFFFFFFFFF,FF,FFFFFFFFFFFFFFFFFFFFFFFFFFFFFFFFFFFFFFFFFFFFFFFF  
FFFFFFFFFFFFFFFF:FFFFFFFFFFFFFFFFFFFFFFFFFFFFFFFF:FFFF,FFFFFFFFFFFFFFFF  
FF:FFFFFFFFFFFFF

@A00721:190:HGJW7DSXY:4:1644:11451:13088 2:N:0:TCTGCAAG+GCTGCACT  
CGATTTTACTGCGTCACTATAGAATTCATTTTTTTAGATGGTCATGATCGTGACGCGTGGTCTAATGAC  
AAATCGACACGTAAGCGTACGGAGGTGTCCCCGGCGCGGGCAAGCCAGTAATATTATATTGGCTTGCC  
CCACGGTCTGCGGTA

+

FFF,:FFFFFFFFFFFFFFFF,FF,FFFFFFFFFFFFFFFF:FFFFFFFFFFFFFFFFFFFFFFFFFFFF  
F,FFFFFFFFFFFFFFFFFFFFFFFFFFFFFFFF:FFFFFFFFFFFFFFFFFFFFFFFFFFFFFFFFFFFF  
FF:FFFFFFFFFFFF

@A00721:190:HGJW7DSXY:4:1338:16685:19899 2:N:0:TCTGCAAG+GCTGCACT  
ATTTTACTGCGTCACTATAGAATTCATTTTTTTAGATGGTCATGATCGTGACGCGTGGTCTAATGACAA  
ATCGACACGTAAGCGTACGGAGGTGTCCCCGGCGCGGGCAAGCCAGTAATATTATATTGGCTTGCCCC  
ACGGTCTGCGGAGAT

+

FFFFFFFFFFFF:FFFF:FFFFFFFF:FFFFFFFFFFFFFFFFFFFFFFFFFFFFFFFFFFFFFFFFFFFF  
FFFFFFFFFFFFFFFFFFFFFFFFFFFFFFFF:FFFFFFFFFFFFFFFFFFFFFFFFFFFFFFFF:FFFFFFFFFFFFFFFFFFFF:FFFF  
FFFFFF: :FFFFFF

@A00721:190:HGJW7DSXY:4:2424:28022:34679 2:N:0:TCTGCAAG+GCTGCACT  
ATTTTACTGCGTCACTATAGAATTCATTTTTTTAGATGGTCATGATCGTGACGCGTGGTCTAATGACAA  
ATCGACACGTAAGCGTACGGAGGTGTCCCCGGCGCGGGCAAGCCAGTAATATTATATTGGCTTGCCCC  
ACGGTCTGCGGAGAT

+

F:FFFFFFFFFFFFFFFFFFFFFFFF:FFFFFFFFFFFFFFFFFFFFFFFFFFFFFFFFFFFFFFFFFFFF  
FFFFFFFFFFFFFFFFFFFFFFFFFFFFFFFFFFFFFFFFFFFFFFFFFFFFFFFFFFFFFFFF:F,FF:FFFFFFFFFFFF  
FFFFFFFFFFFFFFFF

@A00721:190:HGJW7DSXY:4:2504:9290:10128 2:N:0:TCTGCAAG+GCTGCACT  
ATTTTACTGCGTCACTATAGAATTCATTTTTTTAGATGGTCATGATCGTGACGCGTGGTCTAATGACAA  
ATCGACACGTAAGCGTACGGAGGTGTCCCCGGCGCGGGCAAGCCAGTAATATTATATTGGCTTGCCCC  
ACGGTCTGCGGAGAT

+

FFFFFFFFFFFF:F:FF,FFFFFFFFFFFFFFFFFFFFFFFFFFFFFFFF:FFFFFFFFFFFFFFFF,FFFFFFFF:F  
FFFFFFFFFFFFFFFFFFFFFFFFFFFFFFFFFFFFFFFFFFFFFFFFFFFFFFFF:F:FFFF,F,F,FFFF,FFFFFFFF  
:FFFF:FFFFFFFF

@A00721:190:HGJW7DSXY:4:2522:31864:13088 2:N:0:TCTGCAAG+GCTGCACT  
ATTTTACTGCGTCACTATAGAATTCATTTTTTTAGATGGTCATGATCGTGACGCGTGGTCTAATGACAA  
ATCGACACGTAAGCGTACGGAGGTGTCCCCGGCGCGGGCAAGCCAGTAATATTATATTGGCTTGCCCC  
ACGGTCTGCGGAGAT

+

FFFFF:FFFFFFFFFFFF,FFFFFFFFFFFFFFFFFFFFFFFFFFFFFFFF:FFFFFFFFFFFFFFFF:FFF  
FFFF:FFFFFFFFFFFFFFFFFFFFFFFFFFFFFFFFFFFFFFFF:FFFFF,FFFFFFFFFFFF,FFFFFFFF  
FFFFFFFFFFFF:FF

@A00721:190:HGJW7DSXY:4:1110:23321:23406 2:N:0:TCTGCAAG+GCTGCACT  
GTCGATTCTACTGCGTCACTATAGAATTCATTTTTTTAGATGGTTATGATCGTGACGCGTGGTCTAATG  
ACAAATCGACACGTAAGCGTACGGAGGTGTCCCCGGCGCGGGCAAGCCAGTAATATTATATTGGCTTG  
CCCCACGGTCTGCGG

+

FFFFFFFFFFFFFFFFFFFF,FFFFFF:FFFFFFFFFFFFFFFF,FFFFFFFFFFFFFFFFFFFFFFFFFFFF  
FFFFFFFFFFFFFFFFFFFFFFFFFFFFFFFFFFFFFFFF:FFFFFFFFFFFF:,FFFFFF:FF:FFFFFF:FF:FF  
FFFF,FFFFFFFF

@A00721:190:HGJW7DSXY:4:2320:20745:14027 2:N:0:TCTGCAAG+GCTGCACT  
GTCGATTCTACTGCGTCACTATAGAATTCATTTTTTTAGATGGTTATGATCGTGACGCGTGGTCTAATG  
ACAAATCGACACGTAAGCGTACGGAGGTGTCCCCGGCGCGGGCAAGCCAGTAATATTATATTGGCTTG  
CCCCACGGTCTGCGG

+

FFFFFFFFFFFFFFFFFFFF,F,FFFFFFFFFFFF:FFFFFFFFFFFFFFFFFFFFFFFFFFFF:FFFFFFFF

FFFFFFFF:FFFFFFFFFFFFFFFFFFFFFFFFFFFFFFFFFFFFFFFFFFFFFFFFFFFFFFFFFFFFFFFF  
FFFFFFFFFFFFFFFF

@A00721:190:HGJW7DSXY:4:2331:11668:20447 2:N:0:TCTGCAAG+GCTGCACT  
GTCGATTCTACTGCGTCACTATAGAATTCATTTTTTTAGATGGTTATGATCGTGACGCGTGGTCTAATG  
ACAAATCGACACGTAAGCGTACGGAGGTGTCCCCGGCGCGGGCAAGCCAGTAATATTATATTGGCTTG  
CCCCACGGTCTGCGG

+

FFFFFFFFFFFFFFFFFFFFFFFFFFFFFFFFFFFFFFFFFFFFFFFFFFFFFFFFFFFFFFFFFFFFFFFF  
FFFFFFFFFFFFFFFFFFFFFFFFFFFFFFFFFFFFFFFFFFFFFFFFFFFFFFFFFFFFFFFFFFFFFFFF  
:FFFFFFFFFFFFFFFF

@A00721:190:HGJW7DSXY:4:2472:18331:9377 2:N:0:TCTGCAAG+GCTGCACT  
GTCGATTCTACTGCGTCACTATAGAATTCATTTTTTTAGATGGTTATGATCGTGACGCGTGGTCTAATG  
ACAAATCGACACGTAAGCGTACGGAGGTGTCCCCGGCGCGGGCAAGCCAGTAATATTATATTGGCTTG  
CCCCACGGTCTGCGG

+

FF:FFFFFFFFFFFFFFFFFFFFFFFFFFFFFFFFFFFFFFFFFFFFFFFFFFFFFFFFFFFFFFFF  
FFFFFFFFFFFFFFFFFFFFFFFFFFFFFFFFFFFFFFFFFFFFFFFFFFFFFFFFFFFFFFFFFFFFFFFF  
:FF:F:FFFFFFFF:FFFFFFFFFFFFFFFF,FFFFFFFFFFFFFFFF:FFFF:F

@A00721:190:HGJW7DSXY:4:2472:18285:9424 2:N:0:TCTGCAAG+GCTGCACT  
GTCGATTCTACTGCGTCACTATAGAATTCATTTTTTTAGATGGTTATGATCGTGACGCGTGGTCTAATG  
ACAAATCGACACGTAAGCGTACGGAGGTGTCCCCGGCGCGGGCAAGCCAGTAATATTATATTGGCTTG  
CCCCACGGTCTGCGG

+

FFFFFFFFFFFFFFFFFFFFFFFFFFFFFFFFFFFFFFFFFFFFFFFFFFFFFFFFFFFFFFFFFFFFFFFF  
FFFFFFFFFFFFFFFFFFFFFFFFFFFFFFFFFFFFFFFFFFFFFFFFFFFFFFFFFFFFFFFFFFFFFFFF  
FFFFFFFFFFFFFFFF

@A00721:190:HGJW7DSXY:4:1528:12816:22467 2:N:0:TCTGCAAG+GCTGCACT  
CGTCGATTCTACTGCGTCACTATAGAATTCATTTTTTTAGATGGTTATGATCGTGACGCGTGGTCTAAT  
GACAAATCGACACGTAAGCGTACGGAGGTGTCCCCGGCGCGGGCAAGCCAGTAATATTATATTGGCTT  
GCCCCACGGTCTGCG

+

FFFFFFFFFFFFFFFFFFFFFFFFFFFFFFFFFFFFFFFFFFFFFFFFFFFFFFFFFFFFFFFFFFFFFFFF  
FFFFFFFFFFFFFFFFFFFFFFFFFFFFFFFFFFFFFFFFFFFFFFFFFFFFFFFFFFFFFFFFFFFFFFFF  
:FFFFFFFFFFFFFFFF

@A00721:190:HGJW7DSXY:4:2123:22923:15327 2:N:0:TCTGCAAG+GCTGCACT  
CGTCGATTCTACTGCGTCACTATAGAATTCATTTTTTTAGATGGTTATGATCGTGACGCGTGGTCTAAT  
GACAAATCGACACGTAAGCGTACGGAGGTGTCCCCGGCGCGGGCAAGCCAGTAATATTATATTGGCTT  
GCCCCACGGTCTGCG

+

FF:FFFFFFFFFFFFFFFF:FFFF:FFFF,FFFFFFFFFFFFFFFF:FFFFFFFFFFFFFFFFFFFFFFFF  
FFFFFFFFFFFFFFFFFFFFFFFFFFFFFFFFFFFFFFFFFFFFFFFFFFFFFFFFFFFFFFFFFFFFFFFF  
FFF:FFFFFFFF

@A00721:190:HGJW7DSXY:4:2167:3106:31579 2:N:0:TCTGCAAG+GCTGCACT  
CGTCGATTCTACTGCGTCACTATAGAATTCATTTTTTTAGATGGTTATGATCGTGACGCGTGGTCTAAT  
GACAAATCGACACGTAAGCGTACGGAGGTGTCCCCGGCGCGGGCAAGCCAGTAATATTATATTGGCTT  
GCCCCACGGTCTGCG

+

FFFFFFFFFFFFFFFFFFFFFFFFFFFFFFFFFFFFFFFFFFFFFFFFFFFFFFFFFFFFFFFFFFFFFFFF  
FFFFFFFFFFFFFFFFFFFFFFFFFFFFFFFFFFFFFFFFFFFFFFFFFFFFFFFFFFFFFFFFFFFFFFFF  
FFFFFFFFFFFF:FFF

@A00721:190:HGJW7DSXY:4:2167:4200:32847 2:N:0:TCTGCAAG+GCTGCACT  
CGTCGATTCTACTGCGTCACTATATAATTCAAATATTATATGGTTATGATCGTGACGCGTGGTCTAAT  
GACAAATCGACACGAAAGCGAACGGAGGTCTACCGGCGCGGGCAAGCCAGAAAAATTATAAAGGCTT  
GCCCCACGGACTGC

+  
FFFF,FFFFFF:FFF,F::F,FF:,F:,FFF,,,,,,:F,,,FF:,FFFF,::FFFFFF,F:FF:F:  
FFF:FFFF:FF::,,,,,F,,FF,,F:F:,F,FF,:F,FF,,F:,FFF,,::,FF,:F,,,FF,  
,::,,:F,::,FFF:

@A00721:190:HGJW7DSXY:4:1311:4851:26396 2:N:0:TCTGCAAG+GCTGCACT  
ATTGACCGTCGATTCTACTGCGTCACTATAGAATTCATTTTTTAGATGGTTATGATCGTGACGCGTGG  
TCTAATGACAAATCGACACGTAAGCGTACGGAGGTGTCCCCGGCGCGGGCAAGCCAGTAATATTATAT  
TGGCTTGCCCCACGG

+  
FFFFFFFFFFFFFF,FFFF:F:FFF:FFFF,:FFFFFFFFFFFFFFFF:FFFFFFFF:FFFFFFFF,FF  
FFFFFFFFFFFFFFFF:FFFFFFFF:FFFFFFFF:FFFFFFFF:FFFFFFFF:FFFF:  
FFFFFFFFFFFFFFFF

@A00721:190:HGJW7DSXY:4:1616:6894:26710 2:N:0:TCTGCAAG+GCTGCACT  
ATTGACCGTCGATTCTACTGCGTCACTATAGAATTCATTTTTTAGATGGTTATGATCGTGACGCGTGG  
TCTAATGACAAATCGACACGTAAGCGTACGGAGGTGTCCCCGGCGCGGGCACGCCAGTAATATTATAT  
TGGCTTGCCCCACGG

+  
FFFFFFFFFFFFFFFFFFFFFFFF,FFF:FFFFFFFF:FF,FFFFFFFFFFFFFFFF:FFFFFFF  
,FFFFFFFFFFFFFFFF::FF:FFFFFFFFFFFFFFFFFFFFFFFFFFFFFFFF,FF:FFF,FFFF,FFFF  
F,FFFF,FFFFFFFF

@A00721:190:HGJW7DSXY:4:2206:16794:32675 2:N:0:TCTGCAAG+GCTGCACT  
ATTGACCGTCGATTCTACTGCGTCACTATAGAATTCATTTTTTAGATGGTTATGATCGTGACGCGTGG  
TCTAATGACAAATCGACACGTAAGCGTACGGAGGTGTCCCCGGCGCGGGCAAGCCAGTAATATTATAT  
TGGCGTGCCCCACGG

+  
FFFFFFFFFFFFFFFF:FFFFFFFF,FF,FFFFFF,FFFFFF:FF::FFFFF:FFFFFF:FFFFFFF  
FFFFF:FFFFFFFFF:F:FFFF:,FFFFFFFFFFFFFFFF:FFFFF,:FFFF,,:F::FFFF  
FFFF:FFFFFFFF

@A00721:190:HGJW7DSXY:4:2304:12084:33254 2:N:0:TCTGCAAG+GCTGCACT  
ATTGACCGTCGATTCTACTGCGTCACTATAGAATTCATTTTTTAGATGGTTATGATCGTGACGCGTGG  
TCTAATGACAAATCGACACGTAAGCGTACGGAGGTGTCCCCGGCGCGGGCAAGCCAGTAATATTATAT  
TGGCTTGCCCCACGG

+  
FFFFFFFFFFFFFFFFFFFFFFFFFFFFFFFF:FFFF:FFFFFFFF:FFFFFFFF:FFFFFF:FFFFFFF  
FFFFFFFFFFFFFFFFFFFFFFFFFFFFFFFFFFFFFFFFFFFFFFFFFFFFFFFFFFFFFFFF:FFFF:FF:FFFFF:  
FFFFFFFFFFFFFF:F

@A00721:190:HGJW7DSXY:4:2509:10384:30686 2:N:0:TCTGCAAG+GCTGCACT  
ATTGACCGTCGATTCTACTGCGTCACTATAGAATTCATTTTTTAGATGGTTATGATCGTGACGCGTGG  
TCTAATGACAAATCGACACGTAAGCGTACGGAGGTGTCCCCGGCGCGGGCAAGCCAGTAATATTATAT  
TGGCTTGCCCCACGG

+  
FFFFFFFFFFFFFF:FFFFFF:FFFFFF:,F:FFFFFFFF,FFF:FFFFFF:FFFFFFFFFFFFFFF  
:FFFFFFFF:FFFFFFFFFFFFFFFFFFFFFFFFFFFFFFFFFFFFFFFFFFFFFFFFFFFFFFFF  
FF,FFFFFFFF

@A00721:190:HGJW7DSXY:4:1103:9064:11866 2:N:0:TCTGCAAG+GCTGCACT  
TGAATTTCAAATTGACCGTCGATTCTACTGCGTCACTATAGAATTCATTTTTTAGATGGTTATGATC  
GTGACGCGTGGTCTAATGACAAATCGACACGTAAGCGTACGGAGGTGTCCCCGGCGCGGGCAAGCCAG  
TAATATTATATTGGC

+  
FFFFFFFFFFFFFFFF:FFFFFFFFFFFFFFFF:FFFFFFFFFFFFFFFFFFFFFFFF,FF  
FFF:FFFFFFFF:FFFFFFFF:FFFFFFFF,FFFFFFFFFFFFFFFF,FFFFF  
,FFF:FFF:FFF,F

@A00721:190:HGJW7DSXY:4:1166:12554:2284 2:N:0:TCTGCAAG+GCTGCACT  
TGAATTTCAAATTGACCGTCGATTCTACTGCGTCACTATAGAATTCATTTTTTAGATGGTTATGATC

GTGACGCGTGGTCTAATGACAAATCGACACGTAAGCGTACGGAGGTGTCCCCGGCGCGGGCAAGCCAG  
TAATATTATATTGGC

+

FFFFFFFFFFFFFF:FFFFFFFFFFFFFFF:FFFFFFFFFFFFFFF  
FFFFFFFF:FFFFFFFFFFFFFFF:FFFFF:FFFFFFFFF:F  
F:FFFFFFFFF,:F

@A00721:190:HGJW7DSXY:4:1331:22110:18020 2:N:0:TCTGCAAG+GCTGCACT  
TGAATTTCAAATTGACCGTCGATTCTACTGCGTCACTATAGAATTCATTTTTTAGATGGTTATGATC  
GTGACGCGTGGTCTAATGACAAATCGACACGTAAGCGTACGGAGGTGTCCCCGGCGCGGGCAAGCCAG  
TAATATTATATTGGC

+

FF:FFFFFFFFF:FFFFFFFFFFFFFFF:FFFFFFFFFFFFFFF  
FFFFFFFFFFFFFFF:FFFFFFFFFFFFFFF:FFFFFFFFFFFFFFF  
F:FFFFFFFFF:

@A00721:190:HGJW7DSXY:4:1622:28718:24893 2:N:0:TCTGCAAG+GCTGCACT  
TGAATTTCAAATTGACCGTCGATTCTACTGCGTCACTATAGAATTCATTTTTTAGATGGTTATGATC  
GTGACGCGTGGTCTAATGACAAATCGACACGTAAGCGTACGGAGGTGTCCCCGGCGCGGGCAAGCCAG  
TAATATTATATTGGC

+

FFFFFFFFFFFFFFF:FFF:,FFFFFFFFFFFFFFF  
FFFFFFFFF:FFFFFF:FFFFFF:FFFFFFF,F:F:FFFFFFFFF:FFFF  
FFFFFFFFF,:F

@A00721:190:HGJW7DSXY:4:2456:4625:10191 2:N:0:TCTGCAAG+GCTGCACT  
TGAATTTCAAATTGACCGTCGATTCTACTGCGTCACTATAGAATTCATTTTTTAGATGGTTATGATC  
GTGACGCGTGGTCTAATGACAAATCGACACGTAAGCGTACGGAGGTGTCCCCGGCGCGGGCAAGCCAG  
TAATATTATATTGGC

+

FFFFFFFFFFFFFFF:FFFFFFFFF:FFFFFFFFF  
FFFFFFFF,FFFFFFFF:FFFFFFFFF,FF,F,F  
,FFFFF::FFF,F

@A00721:190:HGJW7DSXY:4:2510:11116:9001 2:N:0:TCTGCAAG+GCTGCACT  
TGAATTTCAAATTGACCGTCGATTCTACTGCGTCACTATAGAATTCATTTTTTAGATGGTTATGATC  
GTGACGCGTGGTCTAATGACAAATCGACACGTAAGCGTACGGAGGTGTCCCCGGCGCGGGCAAGCCAG  
TAATATTATATTGC

+

FF:FFF::FFFFFFFFF:FFFF:F::FFFFF:FFF:F::F,FF::F,FF,:FFFFFFFF:FFFF  
FF,,F:FF,FFFFF,FFFFFFFF,F:FFFFFFFF:FFFF:FFFFFFFF:FF:FFF,  
,,F:F,F::,FF,FF

@A00721:190:HGJW7DSXY:4:2673:9715:5447 2:N:0:TCTGCAAG+GCTGCACT  
TGAATTTCAAATTGACCGTCGATTCTACTGCGTCACTATAGAATTCATTTTTTAGATGGTTATGATC  
GTGACGCGTGGTCTAATGACAAATCGACACGTAAGCGTACGGAGGTGTCCCCGGCGCGGGCAAGCCAG  
TAATATTATATTGGC

+

FFF:FFFFFFFFF:FFFFFFFFF:FFFFFFFFF  
FFFFFFFFF:FFFFFFFFF:FFFFFFFFF:FFFF  
FFFFFFFFF

@A00721:190:HGJW7DSXY:4:1516:32452:16423 2:N:0:TCTGCAAG+GCTGCACT  
TTTGAATTTCAAATTGACCGTCGATTCTACTGCGTCACTATAGAATTCATTTTTTAGATGGTTATGA  
TCGTGACGCGTGGTCTAATGACAAATCGACACGTAAGCGTACGGAGGTGTCCCCGGCGCGGGCAAGCC  
AGTAATATTATATTG

+

FFFFFFFFF:FFFFFF:FFFF,F:FFFFFFFFF,FFFFFFFFF  
FFFFFFFFF,F:FFFFFFFFF:FFFFFFFFF:FFFFFFFFF,F  
,FF,FFFFF:FFFF

@A00721:190:HGJW7DSXY:4:2205:16224:6574 2:N:0:TCTGCAAG+GCTGCACT  
TTTGAATTTCAAATTGACCGTCGATTCTACTGCGTCACTATAGAATTCATTTTTTAGATGGTTATGA  
TCGTGACGCGTGGTCTAATGACAAATCGACACGTAAGCGTACGGAGGTGTCCCCGGCGCGGGCAAGCC  
AGTAATATTATATTG

+

FFFFFFFFFFFFFF:FFFFFFFFFFFFFF:FFFFFFFFFFFFFF,FFFFFFFF  
FFFFFFFFFFFFFF, :FFFFFF, FFFFFFFF:FFFFFFFFFFFFFF, FFFF  
FFFFFF, FFFF, FF

@A00721:190:HGJW7DSXY:4:2324:28085:34757 2:N:0:TCTGCAAG+GCTGCACT  
TTTGAATTTCAAATTGACCGTCGATTCTACTGCGTCACTATAGAATTCATTTTTTAGATGGTTATGA  
TCGTGACGCGTGGTCTAATGACAAATCGACACGTAAGCGTACGGAGGTGTCCCCGGCGCGGGCAAGCC  
AGTAATATTATATTG

+

FFFFFFFFFFFFFFFFFFFFFFFF, :F:FFFFFFFFFFFFFF:FFF:FFFFFFFF, FFFFF  
FFFFFF:FFFFFFFFFFFFFFFF:FFFF:F:FFF:, FFFFFFF, FFFFFFFFFFFFFFFF  
:FFFF, F:FFFFFF

@A00721:190:HGJW7DSXY:4:2435:25780:27539 2:N:0:TCTGCAAG+GCTGCACT  
TTTGAATTTCAAATTGACCGTCGATTCTACTGCGTCACTATAGAATTCATTTTTTAGATGGTTATGA  
TCGTGACGCGTGGTCTAATGACAAATCGACACGTAAGCGTACGGAGGTGTCCCCGGCGCGGGCAAGCC  
AGTAATATTATATTG

+

FFFFFF:FFFF: :FFFFFFFFFFFFFFFF:FFFFFFFFFFFFFFFFFFFFFFFF:  
FFFF:FFFF:FFFFFFFF:FFF, FFFF, F, FFFFFFF:F:FF:FFF:FFFFFFFF:F:F:  
:FFFF:FFFFFF

@A00721:190:HGJW7DSXY:4:2471:28176:12868 2:N:0:TCTGCAAG+GCTGCACT  
TTTGAATTTCAAATTGACCGTCGATTCTACTGCGTCACTATAGAATTCATTTTTTAGATGGTTATGA  
TCGTGACGCGTGGTCTAATGACAAATCGACACGTAAGCGTACGGAGGTGTCCCCGGCGCGGGCAAGCC  
AGTAATATTATATTG

+

FFFFFFFFFFFFFFFFFFFFFFFFFFFFFFFF, F:FFFFFF:F:FFFFFFFF  
FFFFFFFFFFFFFFFFFFFFFFFFFFFFFFFFFFFFFFFFFFFFFFFFFFFFFFFF  
FFFFFFFF

@A00721:190:HGJW7DSXY:4:2521:8865:25488 2:N:0:TCTGCAAG+GCTGCACT  
TTTGAATTTCAAATTGACCGTCGATTCTACTGCGTCACTATAGAATTCATTTTTTAGATGGTTATGA  
TCGTGACGCGTGGTCTAATGACAAATCGACACGTAAGCGTACGGAGGTGTCCCCGGCGCGGGCAAGCC  
AGTAATATTATATTG

+

FFFFFFF:FFFFFF:FFFFFFFFFFFFFFFFFFFFFFFF, FF:FFFFFF, FFFFFFFFF  
FFFFFFFFFFFFFFFF:FFFFFF:FFFFFFFF:FFFFFFFFFFFFFFFFFFFFFF:FFF  
FFFF:FFF, FF: :FF

@A00721:190:HGJW7DSXY:4:2647:30680:3239 2:N:0:TCTGCAAG+GCTGCACT  
TTTGAATTTCAAATTGACCGTCGATTCTACTGCGTCACTATAGAATTCATTTTTTAGATGGTTATGA  
TCGTGACGCGTGGTCTAATGACAAATCGACACGTAAGCGTACGGAGGTGTCCCCGGCGCGGGCAAGCC  
AGTAATATTATATTG

+

FFFFFFF:FFFF:FFFFFFFFFFFFFFFFFFFFFFFF, FF:FFFFFF, FFFFFFFFF  
FFFFFFFFFFFFFFFFFFFFFFFFFFFFFFFFFFFFFFFF:FFFFFFFF:FFFF  
FFFFFF, FFFF:FF

@A00721:190:HGJW7DSXY:4:1176:19732:36855 2:N:0:TCTGCAAG+GCTGCACT  
ATAAATTTTGAATTTCAAATTGACCGTCGATTCTACTGCGTCACTATAGAATTCATTTTTTAGATGG  
TTATGATCGTGACGCGTGGTCTAATGACAAATCGACACGTAAGCGTACGGAGGTGTCCCCGGCGCGGG  
CAAGCCAGTAATATT

+

FFFFFFF:FFFFFFFFFFFFFFFFFFFFFFFF:FFFFFFFFFFFFFFFFFFFFFFFF



@A00721:190:HGJW7DSXY:4:1427:21414:12994 2:N:0:TCTGCAAG+GCTGCACT  
ATAAATTTTGAATTTCAAAATTGACCGTCGATTCTACTGCGTCACTATAGAATTCATTTTTTAGATGG  
TTATGATCGTGACGCGTGGTCTAATGACAAATCGACACGTAAGCGTACGGAGGTGTCCCCGGCGCGGG  
CAAGCCAGTAATATT

@A00721:190:HGJW7DSXY:4:1464:12906:5682 2:N:0:TCTGCAAG+GCTGCACT  
ATAAATTTTGAATTTCAAAATTGACCGTCGATTCTACTGCGTCACTATAGAATTCATTTTTTAGATGG  
TTATGATCGTGACGCGTGGTCTAATGACAAATCGACACGTAAGCGTACGGAGGTGTCCCCGGCGCGGG  
CAAGCCAGTAATATT

@A00721:190:HGJW7DSXY:4:2254:4363:28745 2:N:0:TCTGCAAG+GCTGCACT  
ATAAATTTTGAATTTCAAAATTGACCGTCGATTCTACTGCGTCACTATAGAATTCATTTTTTAGATGG  
TTATGATCGTGACGCGTGGTCTAATGACAAATCGACACGTAAGCGTACGGAGGTGTCCCCGGCGCGGG  
CAAGCCAGTAATATT

@A00721:190:HGJW7DSXY:4:2605:23701:12226 2:N:0:TCTGCAAG+GCTGCACT  
ATAAATTTTGAATTTCAAAATTGACCGTCGATTCTACTGCGTCACTATAGAATTCATTTTTTAGATGG  
TTATGATCGTGACGCGTGGTCTAATGACAAATCGACACGTAAGCGTACGGAGGTGTCCCCGGCGCGGG  
CAAGCCAGTAATATT

@A00721:190:HGJW7DSXY:4:2678:15383:9157 2:N:0:TCTGCAAG+GCTGCACT  
ATAAATTTTGAATTTCAAAATTGACCGTCGATTCTACTGCGTCACTATAGAATTCATTTTTTAGATGG  
TTATGATCGTGACGCGTGGTCTAATGACAAATCGACACGTAAGCGTACGGAGGTGTCCCCGGCGCGGG  
CAAGCCAGTAATATT

@A00721:190:HGJW7DSXY:4:1147:31837:24972 2:N:0:TCTGCAAG+GCTGCACT  
TATAAATTTTGAATTTCAAAATTGACCGTCGATTCTACTGCGTCACTATAGAATTCATTTTTTAGATG  
GTTATGATCGTGACGCGTGGTCTAATGACAAATCGACACGTAAGCGTACGGAGGTGTCCCCGGCGCGG  
GCAAGCCAGTAATAT

@A00721:190:HGJW7DSXY:4:1147:31783:25160 2:N:0:TCTGCAAG+GCTGCACT  
TATAAATTTTGAATTTCAAAATTGACCGTCGATTCTACTGCGTCACTATAGAATTCATTTTTTAGATG  
GTTATGATCGTGACGCGTGCTAATGACAAATCGACACGTAAGCGTACGGAGGTGTCCCCGGCGCGG  
GCAAGCCAGTAATAT

[illegible][illegible]

```
FFFFFFFFFFFFFFFFFFFFFFFFFFFFFFFFFFFFFFFFFFFFF::FFFFFF:FFFFFFFFFFFFFFFFFFFF  
FFFFFFFFFFFFFFFFFFFFFFFFFFFFFFFFFFFFFFFFFFFFF:FF:FFFFFFFFFFFFFFFFFFFF  
FFFFFFFFFFFFFFFF:F
```

```

FFFFFFFFFFFFFFFFFFFFFFFFFFFFFFFFFFFFFFFF:FFFFFFFFFFFFFFFFFFFFFFFF
FFFFF:FFFFFFFFFFFFF::FFFF,F::FF:FFFFFFFFFFFFFFFFFFFFFFFFFFFFFFFF
:FFFFFFFFFFFFFFFF

```

[illegible][illegible]

```

FFFFFFFFFFFFFFFFFFFFFFFFFFFFFFFF:FFFFFFFF:FFFFFFFFFFFFFFFFFFFFFFFF
FFF:FFFFFFFFFFFFFFFF:FFFFFFF,FFF:FFFFFFFFFFFFFFFFFFFFFFFFFFFFFFFF:F:
F:FFFFFFFFFFFFFFFF

```

@A00721:190:HGJW7DSXY:4:2158:26187:28369 1:N:0:TCTGCAAG+GCTGCACT  
ACTGGCTTGCCCCGCGCCGGGGACACCTCCGTACGCTTACGTGTCGATTTGTATTAGACCACGCGTCA

CGATCATAACCATCTAAAAAATGAATTCTATAGTGACGCAGTAGAATCGACGGTCAATTTTGAAATTC  
AAAATTTATATTTAT

@A00721:190:HGJW7DSXY:4:2229:11749:12070 1:N:0:TCTGCAAG+GCTGCACT  
ACTGGCTTGCCCGCGCCGGGACACCTCCGTACGCTTACGTGTCGATTTGTCATTAGACCACGCGTCA  
CGATCATAACCATCTAAAAAATGAATTCTATAGTGACGCAGTAGAATCGACGGTCAATTTTGAATTC  
AAAATTTATATTTAT

@A00721:190:HGJW7DSXY:4:2340:16504:6840 1:N:0:TCTGCAAG+GCTGCACT  
ACTGGCTTGCCCGCGCCGGGACACCTCCGTACGCTTACGTGTCGATTTGTCATTAGACCACGCGTCA  
CGATCATGACCATCTAAAAAATGAATTCTATAGTGACGCAGTAAAATCGACGGCAGATGATATGTTAT  
ATCATCGTCTTTTTTG

@A00721:190:HGJW7DSXY:4:2462:10303:26287 1:N:0:TCTGCAAG+GCTGCACT  
ACTGGCTTGCCCGCGCCGGGACACCTCCGTACGCTTACGTGTCGATTTGTCATTAGACCACGCGTCA  
CGATCATGACCATCTAAAAAATGAATTCTATAGTGACGCAGTAAAATCGACGGCAGATGATATGTTAT  
ATCATCGTCTTTTTTG

@A00721:190:HGJW7DSXY:4:2475:21206:6057 1:N:0:TCTGCAAG+GCTGCACT  
ACTGGCTTGCCCGCGCCGGGACACCTCCGTACGCTTACGTGTCGATTTGTCATTAGACCACGCGTCA  
CGATCATAACCATCTAAAAAATGAATTCTATAGTGACGCAGTAGAATCGACGGTCAATTTTGAATTC  
AAAATTTATATTTAT

@A00721:190:HGJW7DSXY:4:2553:13602:11929 1:N:0:TCTGCAAG+GCTGCACT  
ACTGGCTTGCCCGCGCCGGGACACCTCCGTACGCTTACGTGTCGATTTGTCATTAGACCACGCGTCA  
CGATCATGACCATCTAAAAAATGAATTCTATAGTGACGCAGTAAAATCGACGGCAGATGATATGTTAT  
ATCATCGTCTTTTTTG

@A00721:190:HGJW7DSXY:4:1138:13376:9345 1:N:0:TCTGCAAG+GCTGCACT  
GCTGGCTTGCCCGCGCCGGGACACCTCCGTACGCTTACGTGTCGATTTGTCATTAGACCACGCGTCA  
CGATCATAACCATCTAAAAAATGAATTCTATAGTGACGCAGTAGAATCGACGGTCAATTTTGAATTC  
AAAATTTATAGTTAT

@A00721:190:HGJW7DSXY:4:1160:23439:19883 1:N:0:TCTGCAAG+GCTGCACT  
GCTGGCTTGCCCGCGCCGGGACACCTCCGTACGCTTACGTGTCGATTTGTCATTAGACCACGCGTCA  
CGATCATAACCATCTAAAAAATGAATTCTATAGTGACGCGAGTAGAATCGACGGTCAATTTTGAAATTC  
AAAATTTATATTTAT

```
FFFFFFFFFFFFFFFFFFFFFFFFFFFFFFFFFFFFFFFFFFFFFFFFFFFFFFFFFFFFF
FFFFFFFF:FFFFFFFF:FFFFFFFFFFFFFFFFFFFFFFFFFFFFFFFFFFFFFFFF
FFFFFFFFFFF:FFF
```

+

[illegible]

+

```
FFFFFFFFFFFFFFFFFFFFFFFFFFFFFFFFFFFFFFFFFFFFFFFFFFFFFFFFFFFFFFFFFFFFF  
FFFFFFFFFFFFFFFFFFFFFFFFFFFFFFFFFFFFFF:FFFFFFFFFFFFFFFFFFFFFFFFFFFFFFFF  
FFFFFFFFFFF,FFF
```

+

```

FFFFFFFFFFFFFFFFFFFFFFFFFFFFFFFF:FFFFFFFFFFFFFFFFFFFFFFFF:FF:FFFFFFF
FFFFFFFFFFFFFFFF,FFF,FFFFFF,:F,FFFFFFFFFFFFFFFFFFFFFFFFFFFFF:FFFF
:F:F,FF,:F::FF

```

+

```
F:FFFFFFFFFFFFFFFFFFFFFFFFFFFFFFFF:FFFFFFFFFF:FFFFF::FFFFFFFFFFFFFFFF
FFFFFFFFFFFFFFFF, :FFF, FFFFFFFF: :FFFFF, FFF, FFFFFFFFFF: FFFFFFF: :FFFFFFF:
:E..FF:FF.FFFF
```

+

```
FFFFFFFFFFFFFFFFFFFFFFFFFFFFFFFFFFFFFFFFFFFFFFFFFFFFFFFFFFFFFFFFFFFFF
FFFFFFFFFFFFFFFFFFFFFFFFFFFFFFFFFFFFFF:FFFFFFF:FFFFFFFFFFFFFFFFFFFFFFFF
FFFFFFF:FFFFFF:
```

+

[illegible]

FFF:FFFFFFFFFFFFFF,FFF,FFFFF:FFFFFFFFFFFFFFFFFFFFFFFFFFFFFFFFFFFFFFFF:FFFF  
FFFFFFFFFFFFFFFF

@A00721:190:HGJW7DSXY:4:2130:6894:19758 1:N:0:TCTGCAAG+GCTGCACT  
GGCTTGCCCGCGCCGGGACACCTCCGTACGCTTACGTGTCGATTTGTCATTAGACCACGCGTCACGA  
TCATGACCATCTAAAAAATGAATTCTATAGTGACGCAGTAAAATCGACGGCAGATGATATGTTATATC  
ATCGTCTTTTTGATA

+

FFFFFFFFFFFFFFFF:FFFFFFFF:FFFFFFFFFFFFFFFFFFFFFFFF:FFFFFFFF:FFFFFFFFFFFFFFFF  
,FFF,FFFFFFFFFFFF:F,FFFFFFFFF:FFF:FFFFFFFFFFFFFFFF:FFFF:FFFF:FFFF,F  
FFFFFFFF:FFFFFF

@A00721:190:HGJW7DSXY:4:2433:21612:6355 1:N:0:TCTGCAAG+GCTGCACT  
GGCTTGCCCGCGCCGGGACACCTCCGTACGCTTACGTGTCGATTTGTCATTAGACCACGCGTCACGA  
TCATGACCATCTAAAAAATGAATTCTATAGTGACGCAGTAAAATCGACGGCAGATGATATGTTATATC  
ATCGTCTTTTTGATA

+

FFFFFFFFFFFFFFFFFFFFFFFFFFFFFFFFFFFFFFFFFFFFFFFFFFFFFFFFFFFFFFFFFFFFFFFF  
FFFFFFFFFFFFFFFF:FFF,FFFF:FFFFFFFFFFFFFFFFFFFFFFFFFFFFFFFFFFFFFFFFFFFFF  
FFFFFFFFFFFFFFFF

@A00721:190:HGJW7DSXY:4:2522:6849:27978 1:N:0:TCTGCAAG+GCTGCACT  
GGCTTGCCCGCGCCGGGACACCTCCGTACGCTTACGTGTCGATTTGTCATTAGACCACGCGTCACGA  
TCATGACCATCTAAAAAATGAATTCTATAGTGACGCAGTAAAATCGACGGCAGATGATATGTTATATC  
ATCGTCTTTTTGATA

+

FFFFFFFFFFFFFFFFFFFFFFFFFFFFFFFFFFFFFFFFFFFFFFFFFFFFFFFFFFFFFFFFFFFFFFFF:  
:FFFFFFFFFFFFFFFFFFFFF,F:FF:FFFFFFFFFFFFFFFFFFFFFFFFFFFFFFFFFFFFFFFF:FFFF  
FFFFFFFF:F,F,:FF

@A00721:190:HGJW7DSXY:4:1168:3197:6903 1:N:0:TCTGCAAG+GCTGCACT  
CGCCCGCGCCGGGACACCTCCGTACGCTTACGTGTCGATTTGTCATTAGACCACGCGTCACGATCAT  
AACCATCTAAAAAATGAATTCTATAGTGACGCAGTAGAATCGACGGTCAATTTTGAATTCAAATTT  
ATAAATATTGTGGGT

+

FFFFFFFFFFFFFFFFFFFFFFFFFFFFFFFFFFFFFFFFFFFFFFFFFFFFFFFFFFFFFFFFFFFFFFFF:  
FFFFFFFF:FFFFFFFF:,FFFF,FFFFFFFFFFFFFFFF:FFFFFFFFFF,FF,FFFFFF,FFFF  
F:,FFF:F:FFFFFF

@A00721:190:HGJW7DSXY:4:1203:23836:35352 1:N:0:TCTGCAAG+GCTGCACT  
CGCCCGCGCCGGGACACCTCCGTACGCTTACGTGTCGATTTGTCATTAGACCACGCGTCACGATCAT  
AACCATCTAAAAAATGAATTCTATAGTGACGCAGTAGAATCGACGGTCAATTTTGAATTCAAATTT  
ATAAATATTGTGGGT

+

FFFFFFFFFFFFFFFFFFFFFFFFFFFFFFFFFFFFFFFFFFFFFFFFFFFFFFFFFFFFFFFFFFFFFFFF:  
FFFFFFF,FFFFFFFF:,F,FFFFFFFFFFFFFFFFFFFFFFFFFFFFFFFF:FFFF,FF::FFFFFFFFFFFF  
FF:FF:FFF:F:,FF

@A00721:190:HGJW7DSXY:4:1351:24297:1329 1:N:0:TCTGCAAG+GCTGCACT  
CGCCCGCGCCGGGACACCTCCGTACGCTTACGTGTCGATTTGTCATTAGACCACGCGTCACGATCAT  
AACCATCTAAAAAATGAATTCTATAGTGACGCAGTAGAATCGACGGTCAATTTTGAATTCAAATTT  
ATAAATATTGTGGGT

+

FFFFFFFFFFFFFFFFFFFFFFFFFFFFFFFFFFFFFFFFFFFFFFFFFFFFFFFFFFFFFFFFFFFFFFFF  
FFFFFFFFFFFFFFFFFFFF,F:F:FFFFFFFFFFFF,FFFFFFFFFFFFFFFF:FFFFFFFFFF:FF,F  
FFF:FFFFFF:FFFF

@A00721:190:HGJW7DSXY:4:1571:31024:20243 1:N:0:TCTGCAAG+GCTGCACT  
CGCCCGCGCCGGGACACCTCCGTACGCTTACGTGTCGATTTGTCATTAGACCACGCGTCACGATCAT  
AACCATCTAAAAAATGAATTCTATAGTGACGCAGTAGAATCGACGGTCAATTTTGAATTCAAATTT  
ATAAATATTGTGGGT

+  
F:FFFFFFFF:FFFFFFFF:F:FFFFFFFFFFFFFFFF:FFFFFFFFFFFFFFFFFFFFFFFF  
FFFFFFFFFFFFFFFF:FFFFFF:FFFF:FFFFFFFFFFFFFFFF:FFFFFF,FF:FFF:FFFFFFFF  
FFFFFFFF:FFFFF  
@A00721:190:HGJW7DSXY:4:1643:9805:8797 1:N:0:TCTGCAAG+GCTGCACT  
CGCCCGCGCCGGGACACCTCCGTACGCTTACGTGTCGATTTGTCATTAGACCACGCGTCACGATCAT  
AACCATCTAAAAAATGAATTCTATAGTGACGCAGTAGAATCGACGGTCAATTTTGAATTCAAAATTT  
ATAAATATTGTGGGT

+  
FFFFFFFFFFFFFFFFFFFFFFFFFFFFFFFFFFFFFFFFFFFFFFFFFFFFFFFFFFFFFFFF  
FFFFFFFFFFFFFFFFFFFFFFFFFFFF,FFFFFFFFFFFFFFFFFFFFFFFFFFFFFFFFFFFFFFFF  
FFFFFFFFFFFFFFFF  
@A00721:190:HGJW7DSXY:4:1657:2338:7858 1:N:0:TCTGCAAG+GCTGCACT  
CGCCCGCGCCGGGACACCTCCGTACGCTTACGTGTCGATTTGTCATTAGACCACGCGTCACGATCAT  
AACCATCTAAAAAATGAATTCTATAGTGACGCAGTAGAATCGACGGTCAATTTTGAATTCAAAATTT  
ATAAATATTGTGGGT

+  
FFFFFFFFFFFFFFFFFFFFFFFFFFFFFFFFFFFFFFFFFFFFFFFFFFFFFFFFFFFFFFFF  
FFFFFFFFFFFFFFFFFFFFFFFF:FF,F,FFFFFFFFFFFFFFFFFFFFFFFFFFFFFFFFFFFFFFFF  
FFFFF::FFFFFFFF  
@A00721:190:HGJW7DSXY:4:2238:21070:33098 1:N:0:TCTGCAAG+GCTGCACT  
CGCCCGCGCCGGGACACCTCCGTACGCTTACGTGTCGATTTGTCATTAGACCACGCGTCACGATCAT  
AACCATCTAAAAAATGAATTCTATAGTGACGCAGTAGAATCGACGGTCAATTTTGAATTCAAAATTT  
ATAAATATTGTGGGT

+  
FFFFFFFFFFFFFFFFFFFFFFFFFFFFFFFFFFFFFFFFFFFFFFFFFFFFFFFFFFFFFFFF  
FFFFFFFFFFFFFFFFFFFFFFFF:FFF,FFFFFF:FFFFFFFF:FFFFFFFFFFFFFFFF:FFFFFF:FFFF  
F:FFFFFFFF  
@A00721:190:HGJW7DSXY:4:2238:21730:33270 1:N:0:TCTGCAAG+GCTGCACT  
CGCCCGCGCCGGGACACCTCCGTACGCTTACGTGTCGATTTGTCATTAGACCACGCGTCACGATCAT  
AACCATCTAAAAAATGAATTCTATAGTGACGCAGTAGAATCGACGGTCAATTTTGAATTCAAAATTT  
ATAAATATTGTGGGT

+  
FFFFFFFFFFFFFFFFFFFFFFFFFFFFFFFF:FF:,FFFFFFFFFFFFFFFF:FFFFFFFFFFFFFFFF:FFF:  
F:FFFF,FFFF,FFF:::F,F,FFFFFFFFFFFFFFFFFFFFFFFFFFFFFFFF,FFFF:FFFF  
FFF:FFF::F,FFFF  
@A00721:190:HGJW7DSXY:4:2258:20745:15593 1:N:0:TCTGCAAG+GCTGCACT  
CGCCCGCGCCGGGACACCTCCGTACGCTTACGTGTCGATTTGTCATTAGACCACGCGTCACGATCAT  
AACCATCTAAAAAATGAATTCTATAGTGACGCAGTAGAATCGACGGTCAATTTTGAATTCAAAATTT  
ATAAATATTGTGGGT

+  
FFFFFFFFFFFFFFFFFFFFFFFFFFFFFFFFFFFFFFFFFFFFFFFFFFFFFFFFFFFFFFFF  
FFFFFFFFFFFFFFFF:FFFFFFFFFFFFFFFF:FFFFFFFFFFFFFFFFFFFFFFFFFFFFFFFF  
FFF:FFFFFFFF:  
@A00721:190:HGJW7DSXY:4:2312:19325:5525 1:N:0:TCTGCAAG+GCTGCACT  
CGCCCGCGCCGGGACACCTCCGTACGCTTACGTGTCGATTTGTCATTAGACCACGCGTCACGATCAT  
AACCATCTAAAAAATGAATTCTATAGTGACGCAGTAGAATCGACGGTCAATTTTGAATTCAAAATTT  
ATAAATATTGTGGGT

+  
FFFFFFFFFFFFFFFFFFFFFFFFFFFFFFFFFFFFFFFFFFFFFFFFFFFFFFFFFFFFFFFF  
FFFFFFFFFFFFFFFFFFFFFFFFFFFFFFFF:FFFFFFFFFFFFFFFFFFFFFFFFFFFFFFFF  
FFFFFFFFFFFFFFFF  
@A00721:190:HGJW7DSXY:4:2413:27905:9893 1:N:0:TCTGCAAG+GCTGCACT  
CGCCCGCGCCGGGACACCTCCGTACGCTTACGTGTCGATTTGTCATTAGACCACGCGTCACGATCAT







FFFFFFFFFFFFFFFF:F:FFFFFFFFFFFFFFFFFFFFFFFFFFFFFFFFFFFFFFFFFFFFFFFF  
FFFFFFF

@A00721:190:HGJW7DSXY:4:1325:14606:11725 1:N:0:TCTGCAAG+GCTGCACT  
CCCGCGCCGGGGACACCTCCGTACGCTTACGTGTCGATTTGTCATTAGACCACGCGTCACGATCATGA  
CCATCTAAAAAATGAATTCTATAGTGACGCAGTAAATCGACGGCAGATGATATGTTATATCATCGTC  
TTTTTGA

+

FFFFFFFFFFFFFFFFFFFFFFFFFFFFFFFFFFFFFFFFFFFFFFFFFFFFFFFFFFFFFFFFFFFF  
FFFFFFFFFFFFFFFFFFFFFFFFFFFFFFFFFFFFFFFFFFFFFFFFFFFFFFFFFFFFFFFFFFFF  
FFFFFFF:

@A00721:190:HGJW7DSXY:4:1331:21504:6731 1:N:0:TCTGCAAG+GCTGCACT  
CCCGCGCCGGGGACACCTCCGTACGCTTACGTGTCGATTTGTCATTAGACCACGCGTCACGATCATAA  
CCATCTAAAAAATGAATTCTATAGTGACGCAGTAGAATCGACGGTCAATTTTGAAATTCAAAATTTAT  
ATTTATTGTG

+

FF:::F:FF:F::FFFFFFFFFFFFFFFF:FFFFFFFFFF,FFFF:F:F:FFFF:FF:FFFFFFFFFFFF  
FFFFFFFFFFFF::FFF:FF::F,FFFFFF::FFFF,FFFFFFFFF,FFFF,FF:FFFF:FFFFFF,FFF  
FF,FFFF::

@A00721:190:HGJW7DSXY:4:1339:12255:29951 1:N:0:TCTGCAAG+GCTGCACT  
CCCGCGCCGGGGACACCTCCGTACGCTTACGTGTCGATTTGTCATTAGACCACGCGTCACGATCATAA  
CCATCTAAAAAATGAATTCTATAGTGACGCAGTAGAATCGACGGTCAATTTTGAAATTCAAAATTTAT  
ATTTATT

+

FFFFFFFFFFFFFFFFFFFFFFFFFFFFFFFFFFFFFFFFFFFFFFFFFFFFFFFFFFFFFFFFFFFF  
FFFFFFFFFFFFFFFFFFFF:FF:FFFFFFFFFFFFFFFF:FFFFFFFFFFFFFFFFFFFFFFFFFFFF  
FFFFFFF

@A00721:190:HGJW7DSXY:4:1363:18954:8641 1:N:0:TCTGCAAG+GCTGCACT  
CCCGCGCCGGGGACACCTCCGTACGCTTACGTGTCGATTTGTCATTAGACCACGCGTCACGATCATGA  
CCATCTAAAAAAGGAATTCTATAGTGACGCAGTAAATCGACGGCAGATGATATGTTATATCATCGTC  
TTTTTGA

+

:FFFF,FFF:FFFFFFFFFFFF,FFFFFF:FFF,F:FFFFFFFF:FFFFFF:FFFFFFFFFFFFFFFF  
FFFFFFFF:FFF,,FF:,F:,FF,FFFFFF:FFFFFFFF:FFFFFFFFFFFF,FFF,FF:FFFFFFFF  
F,F,FFF

@A00721:190:HGJW7DSXY:4:1414:13449:4961 1:N:0:TCTGCAAG+GCTGCACT  
CCCGCGCCGGGGACACCTCCGTACGCTTACGTGTCGATTTGTCATTAGACCACGCGTCACGATCATGA  
CCATCTAAAAAATGAATTCTATAGTGACGCAGTAAATCGACGGCAGATGATATGTTATATCATCGTC  
TTTTTGA

+

FFFFFFFFFFFFFFFFFFFFFFFFFFFFFFFFFFFFFFFFFFFFFFFFFFFFFFFFFFFFFFFFFFFF  
FFFFFFFFFFFFFFFFFFFFFFFFFFFFFFFFFFFFFFFFFFFFFFFFFFFFFFFFFFFFFFFFFFFF  
FFFFFFF

@A00721:190:HGJW7DSXY:4:1427:1642:12853 1:N:0:TCTGCAAG+GCTGCACT  
CCCGCGCCGGGGACACCTCCGTACGCTTACGTGTCGATTTGTCATTAGACCACGCGTCACGATCATAA  
CCATCTAAAAAATGAATTCTATAGTGACGCAGTAGAATCGACGGTCAATTTTGAAATTCAAAATTTAT  
ATTTATTGTG

+

FFFFFFFFFFFFFFFFFFFFFFFFFFFFFFFFFFFFFFFFFFFFFFFFFFFFFFFFFFFFFFFFFFFF  
FFFFFFFFFFFFFFFFFFFF:FFFFFFFFFFFFFFFFFFFFFFFFFFFFFFFFFFFFFFFF:FFFFFF:  
F:F::FFFF

@A00721:190:HGJW7DSXY:4:1442:18403:17268 1:N:0:TCTGCAAG+GCTGCACT  
CCCGCGCCGGGGACACCTCCGTACGCTTACGTGTCGATTTGTCATTAGACCACGCGTCACGATCATAA  
CCATCTAAAAAATGAATTCTATAGTGACGCAGTAGAATCGACGGTCAATTTTGAAATTCAAAATTTAT  
ATTTATTGTG

+  
FFFFFFFF:F:FFFF:FF:F:FFFF,FFFF:FFFF:FFF,FFF,,FFF:FF,FFFFFF,FFFFFF,  
FFFFFFFFFFFFF,:FF:FF:F:F:,F,FFFFFFFFFFFFFFFFFFFFFFFFFFFFFFFFFFFF,FF::  
:FFFF:F::FF  
@A00721:190:HGJW7DSXY:4:1447:22878:28588 1:N:0:TCTGCAAG+GCTGCACT  
CCCGCGCCGGGGACACCTCCGTACGCTTACGTGTCGATTTGTCATTAGACCACGCGTCACGATCATGA  
CCATCTAAAAAATGAATTCTATAGTGACGCAGTAAATCGACGGCAGATGATATGTTATATCATCGTC  
TTTTTGA

+  
FFFFFFFFFFFFFFFFFFFFFFFFFFFF,FFFFFFFFFFFFFFFF:FFFFFFFFFFFFFFFF:FFFFF:FFFF  
FFFFFFFFFFFFFFFFF:,FF:F,FFFFFFFFFFFFFFFFFFFFFFFFFFFFFFFFFFFF:FFFF,FFFFFFFFFF  
FFFFFFFF  
@A00721:190:HGJW7DSXY:4:1448:14796:13996 1:N:0:TCTGCAAG+GCTGCACT  
CCCGCGCCGGGGACACCTCCGTACGCTTACGTGTCGATTTGTCATTAGACCACGCGTCACGATCATAA  
CCATCTAAAAAATGAATTCTATAGTGACGCAGTAGAATCGACGGTCAATTTTGAAATTCAAAATTTAT  
ATTTATTGTGT

+  
FFFFFFFFFFFFFFFFFFFFFFFFFFFFFFFFFFFFFFFFFFFFFFFFFFFFFFFFFFFFFFFF:FFFFFFFFFFFFFFFFFFFFFFFFFFFFFFFF:FFFFF  
FFFFFFFFFFFFFFFFFFFFFFFF:FFFF:FFFFFFFFFFFFFFFFFFFFFFFFFFFFFFFFFFFFFFFFFFFFFFFFFFFFFFFF:FFFFF  
FFFFFFFFFFFF  
@A00721:190:HGJW7DSXY:4:1512:4869:5541 1:N:0:TCTGCAAG+GCTGCACT  
CCCGCGCCGGGGACACCTCCGTACGCTTACGTGTCGATTTGTCATTAGACCACGCGTCACGATCATAA  
CCATCTAAAAAATGAATTCTATAGTGACGCAGTAGAATCGACGGTCAATTTTGAAATTCAAAATTTAT  
ATTTATTGT

+  
FFF:FFFFFFFFFFFFFFFFFFFFFFFFFFFFFFFFFFFFFFFFFFFFFFFFFFFFFFFF,F,FFFFFF:FFFFFFFFFFFFFFFFFFFFFFFF:FF  
FFFFFFFFFFFF,FF:FFFFFFFFFFFFFFFF,FFFF,FF:FFFFFFFFFFFFFFFF:FFFFFFFFFFFFFFFF  
FFFFFFFF  
@A00721:190:HGJW7DSXY:4:1512:16477:34381 1:N:0:TCTGCAAG+GCTGCACT  
CCCGCGCCGGGGACACCTCCGTACGCTTACGTGTCGATTTGTCATTAGACCACGCGTCACGATCATAA  
CCATCTAAAAAATGAATTCTATAGTGACGCAGTAGAATCGACGGTCAATTTTGAAATTCAAAATTTAT  
ATTTATTGTG

+  
FFFFFFFFFFFFFFFFFFFFFFFFFFFFFFFFFFFFFFFFFFFFFFFFFFFFFFFFFFFFFFFFFFFFFFFFFFFFFFFF  
FFFFFFFFFFFFFFFFFFFFFFFF:FF:,FFFFFFFFFFFFFFFFFFFFFFFFFFFFFFFFFFFFFFFFFFFFFFFF  
F:FFFFFF:F  
@A00721:190:HGJW7DSXY:4:1512:18584:35117 1:N:0:TCTGCAAG+GCTGCACT  
CCCGCGCCGGGGACACCTCCGTACGCTTACGTGTCGATTTGTCATTAGACCACGCGTCACGATCATAA  
CCATCTAAAAAATGAATTCTATAGTGACGCAGTAGAATCGACGGTCAATTTTGAAATTCAAAATTTAT  
ATTTATTGTG

+  
FFFFFFFFFFFFFFFFFFFFFFFFFFFFFFFFFFFFFFFFFFFFFFFFFFFFFFFFFFFFFFFFFFFFFFFFFFFFFFFF  
FFFFFFFFFFFFFFFFFFFFFFFFFFFFFFFFFFFFFFFFFFFFFFFFFFFFFFFFFFFFFFFFFFFFFFFFFFFFFFFF  
FFF,FFFFF  
@A00721:190:HGJW7DSXY:4:1523:32036:18584 1:N:0:TCTGCAAG+GCTGCACT  
CCCGCGCCGGGGACACCTCCGTACGCTTACGTGTCGATTTGTCATTAGACCACGCGTCACGATCATGA  
CCATCTAAAAAATGAATTCTATAGTGACGCAGTAAATCGACGGCAGATGATATGTTATATCATCGTC  
TTTTTGA

+  
FFFFFFF::F:FFFFFFFFFFFFFFFFFFFFFFFFFFFFFFFFFFFFFFFFFFFFFFFF:FFFF::FFFFFFFF,FFFF:FFFF,F:,F  
FFFFFFFFFFFFFFFFFFFFFFFF:FFFFFFFFFFFFFFFFFFFFFFFF,FFFF,FFFFFFFF:,FFFFFFFF,FF  
FF:FFFF  
@A00721:190:HGJW7DSXY:4:1530:2510:35650 1:N:0:TCTGCAAG+GCTGCACT  
CCCGCGCCGGGGACACCTCCGTACGCTTACGTGTCGATTTGTCATTAGACCACGCGTCACGATCATGA



@A00721:190:HGJW7DSXY:4:2175:12057:9502 1:N:0:TCTGCAAG+GCTGCACT  
CCCGCGCCGGGGACACCTCCGTACGCTTACGTGTCGATTTGTCATTAGACCACGCGTCACGATCATAA  
CCATCTAAAAAATGAATTCTATAGTGACGCAGTAGAATCGACGGTCAATTTTGAAATTCAAAATTTAT  
ATTTATT

[illegible]

+

```

FFFFFFFFFFFFFFFFFFFFFFFFFFFFFFFFFFFFFFFFFFFFFFFFFFFFFFFFFFFFFFFFFFFFFFFF
FFFFFFFFFFFFFFFFFFFFFFFF:FF,FFFFFFFFFFFFFFFFFFFFFFFF:FFFFFFFF:FFFFFFFFFFFF
FFFFF:FFFF

```

+

[illegible]

+

```
FFFFFFFFFFFFFFFFFFFFFFFFFFFFFFFFFFFFFFFFFFFFFFFFFFFFFFFFFFFFFFF  
FFFFFFFFFFFFFFFFFFFF,FFFFFFFFFFFFFFFFFFFFFFFFFFFFFFFFFFF:F  
FFFFFF
```

+

[illegible]

+

[illegible] $+$ [illegible]

FFFFFFFF:FFFFFFFFFFFFFFFFFFFFFFFFFFFFFFFFFFFFFFFFFFFFFFFFFFFFFFFFFFFFFFFF  
FFFFFFFF

@A00721:190:HGJW7DSXY:4:2445:12762:23688 1:N:0:TCTGCAAG+GCTGCACT  
CCCGCGCCGGGACACCTCCGTACGCTTACGTGTCGATTTGTCATTAGACCACGCGTCACGATCATAA  
CCATCTAAAAAATGAATTCTATAGTGACGCAGTAGAATCGACGGTCAATTTTGAAATTCAAAATTTAT  
ATTTATTGTG

+

FFFFFFFFFFFFFFFFFFFFFFFFFFFFFFFFFFFFFFFFFFFFFFFFFFFFFFFFFFFFFFFFFFFFFFFF  
FFFFFFFFFFFFFFFFFFFFFFFFFFFFFFFFFFFFFFFFFFFFFFFFFFFFFFFFFFFFFFFFFFFFFFFF:  
F:::FFFFFF

@A00721:190:HGJW7DSXY:4:2447:6641:25989 1:N:0:TCTGCAAG+GCTGCACT  
CCCGCGCCGGGACACCTCCGTACGCTTACGTGTCGATTTGTCATTAGACCACGCGTCACGATCATAA  
CCATCTAAAAAATGAATTCTATAGTGACGCAGTAGAATCGACGGTCAATTTTGAAATTCAAAATTTAT  
ATTTATTGTG

+

FFFFFFFFFFFFFFFFFFFFFFFFFFFFFFFFFFFFFFFFFFFFFFFFFFFFFFFFFFFFFFFFFFFFFFFF  
FFFFFFFFFFFFFFFFFFFFFFFFFFFFFFFFFFFFFFFFFFFFFFFFFFFFFFFFFFFFFFFFFFFFFFFF  
FFFFFFFFF:F

@A00721:190:HGJW7DSXY:4:2450:20003:1376 1:N:0:TCTGCAAG+GCTGCACT  
CCCGCGCCGGGACACCTCCGTACGCTTACGTGTCGATTTGTCATTAGACCACGCGTCACGATCATAA  
CCATCTAAAAAATGAATTCTATAGTGACGCAGTAGAATCGACGGTCAATTTTGAAATTCAAAATTTAT  
ATTTATTGTG

+

FFFFFFFFFFFFFFFFFFFFFFFFFFFFFFFFFFFFFFFFFFFFFFFFFFFFFFFFFFFFFFFFFFFFFFFF  
FFFFFFFFFFFFFFFFFFFFFFFFFFFFFFFFFFFFFFFFFFFFFFFFFFFFFFFFFFFFFFFFFFFFFFFF:  
FFFFFFFFF

@A00721:190:HGJW7DSXY:4:2468:5367:7623 1:N:0:TCTGCAAG+GCTGCACT  
CCCGCGCCGGGACACCTCCGTACGCTTACGTGTCGATTTGTCATTAGACCACGCGTCACGATCATAA  
CCATCTAAAAAATGAATTCTATAGTGACGCAGTAGAATCGACGGTCAATTTTGAAATTCAAAATTTAT  
ATTTATTGTG

+

FFFFFFFFFFFFFFFFFFFFFFFFFFFFFFFFFFFFFFFFFFFFFFFFFFFFFFFFFFFFFFFFFFFFFFFF  
FFFFFFFFFFFFFFFFFFFFFFFFFFFFFFFFFFFFFFFFFFFFFFFFFFFFFFFFFFFFFFFFFFFFFFFF:  
FFFFFFFFF:F

@A00721:190:HGJW7DSXY:4:2502:26829:2738 1:N:0:TCTGCAAG+GCTGCACT  
CCCGCGCCGGGACACCTCCGTACGCTTACGTGTCGATTTGTCATTAGACCACGCGTCACGATCATAA  
CCATCTAAAAAATGAATTCTATAGTGACGCAGTAGAATCGACGGTCAATTTTGAAATTCAAAATTTAT  
ATTTATTGT

+

FFFFFFFFFFFFFFFFFFFFFFFFFFFFFFFFFFFFFFFFFFFFFFFFFFFFFFFFFFFFFFFFFFFFFFFF  
FFFFFFFFFFFFFFF:FFF:FF,FFFFFFFFFFFFFFFFFFFFFFFFFFFFFFFFFFFFFFFFFFFFFFFF:  
FFFFFFF,F

@A00721:190:HGJW7DSXY:4:2517:6894:16908 1:N:0:TCTGCAAG+GCTGCACT  
CCCGCGCCGGGACACCTCCGTACGCTTACGTGTCGATTTGTCATTAGACCACGCGTCACGATCATGA  
CCATCTAAAAAATGAATTCTATAGTGACGCAGTAAAATCGACGGCAGATGATATGTTATATCATCGTC  
TTTTTGA

+

FFFFFFFFFFFFFFFFFFFFFFFFFFFFFFFFFFFFFFFFFFFFFFFFFFFFFFFFFFFFFFFFFFFFFFFF  
FFFFFFFFFFFFFFF:FFFFFFFFFFFF:FFFFFFFFFFFFFFFFFFFFFFFFFFFFFFFFFFFFFFFF  
FFFFFFF

@A00721:190:HGJW7DSXY:4:2530:30779:5353 1:N:0:TCTGCAAG+GCTGCACT  
CCCGCGCCGGGACACCTCCGTACGCTTACGTGTCGATTTGTCATTAGACCACGCGTCACGATCATGA  
CCATCTAAAAAATGAATTCTATAGTGACGCAGTAAAATCGACGGCAGATGATATGTTATATCATCGTC  
TTTTTGA

+  
FFFFFFFFFFFFFFFFFFFFFFFFFFFFFFFFFFFFFFFFFFFFFFFFFFFFFFFFFFFFFFFFFFFFFFFF  
FFFFFFFFFFFF:FFFFFFFFFFFFFFFF:FFFFFFFFFFFFFFFFFFFFFFFFFFFFFFFFFFFFFFFF  
FFFFFFF

@A00721:190:HGJW7DSXY:4:2533:5801:32017 1:N:0:TCTGCAAG+GCTGCACT  
CCCGCGCCGGGACACCTCCGTACGCTTACGTGTCGATTTGTCATTAGACCACGCGTCACGATCATGA  
CCATCTAAAAAATGAATTCTATAGTGACGCAGTAAATCGACGGCAGATGATATGTTATATCATCGTC  
TTTTTGA

+  
FFFFFFFFFFFFFFFFFFFFFFFFFFFFFFFFFFFFFFFFFFFFFFFFFFFFFFFFFFFFFFFFFFFFFFFF  
FFFFFFFFFFFFFFFFFFFFFFFFFFFFFFFFFFFFFFFFFFFFFFFFFFFFFFFFFFFFFFFFFFFFFFFF  
FFFFFFF

@A00721:190:HGJW7DSXY:4:2543:12491:31735 1:N:0:TCTGCAAG+GCTGCACT  
CCCGCGCCGGGACACCTCCGTACGCTTACGTGTCGATTTGTCATTAGACCACGCGTCACGATCATGA  
CCATCTAAAAAATGAATTCTATAGTGACGCAGTAAATCGACGGCAGATGATATGTTATATCATCGTC  
TTTTTGA

+  
FFFFFFFFFFFFFFFFFFFFFFFFFFFFFFFFFFFFFFFFFFFFFFFFFFFFFFFFFFFFFFFFFFFFFFFF  
FFFFFFFFFFFFFFFFFFFFFFFFFFFFFFFFFFFFFFFFFFFFFFFFFFFFFFFFFFFFFFFFFFFFFFFF  
FFFFFFF:

@A00721:190:HGJW7DSXY:4:2544:4227:36495 1:N:0:TCTGCAAG+GCTGCACT  
CCCGCGCCGGGACACCTCCGTACGCTTACGTGTCGATTTGTCATTAGACCACGCGTCACGATCATGA  
CCATCTAAAAAATGAATTCTATAGTGACGCAGTAAATCGACGGCAGATGATATGTTATATCATCGTC  
TTTTTGA

+  
FF:F:FFFFF,FFFFFF:F:F:F:FF,FFF:F:FFFF:FFF,FF::F,FF,FFFFFF::FF:FFFF:F  
FFFFFFFFFF:F:, :FFF::FF:FFFF:FFF,F::FFFFFF:FF:,FFFFF,FFF,FFFF,FFFFFF  
F,FFFF:

@A00721:190:HGJW7DSXY:4:2545:15881:17096 1:N:0:TCTGCAAG+GCTGCACT  
CCCGCGCCGGGACACCTCCGTACGCTTACGTGTCGATTTGTCATTAGACCACGCGTCACGATCATAA  
CCATCTAAAAAATGAATTCTATAGTGACGCAGTAGAATCGACGGTCAATTTTGAAATTCAAAATTTAT  
ATTTATTGTG

+  
FFFFFFFFFFFFFFFFFFFFFFFFFFFFFFFFFFFFFFFFFFFFFFFFFFFFFFFFFFFFFFFFFFFFFFFF  
FFFFFFFFFFFFFFFFFFFFFFFFFFFFFFFFFFFFFFFFFFFFFFFFFFFFFFFFFFFFFFFFFFFFFFFF  
F, :,FFFF:F

@A00721:190:HGJW7DSXY:4:2614:5330:18584 1:N:0:TCTGCAAG+GCTGCACT  
CCCGCGCCGGGACACCTCCGTACGCTTACGTGTCGATTTGTCATTAGACCACGCGTCACGATCATGA  
CCATCTAAAAAATGAATTCTATAGTGACGCAGTAAATCGACGGCAGATGATATGTTATATCATCGTC  
TTTTTGA

+  
FFFFFFFFFFFFFFFFFFFFFFFFFFFFFFFFFFFFFFFFFFFFFFFFFFFFFFFFFFFFFFFFFFFFFFFF  
FFFFFFFFFFFFFFFFFFFFFFFFFFFFFFFFFFFFFFFFFFFFFFFFFFFFFFFFFFFFFFFFFFFFFFFF  
FFFFFFF

@A00721:190:HGJW7DSXY:4:2618:30897:21590 1:N:0:TCTGCAAG+GCTGCACT  
CCCGCGCCGGGACACCTCCGTACGCTTACGTGTCGATTTGTCATTAGACCACGCGTCACGATCATAA  
CCATCTAAAAAATGAATTCTATAGTGACGCAGTAGAATCGACGGTCAATTTTGAAATTCAAAATTTAT  
ATTTATTGTG

+  
FFFFFFFFFFFFFFFFFFFFFFFFFFFFFFFFFFFFFFFFFFFFFFFFFFFFFFFFFFFFFFFFFFFFFFFF  
FFFFFFFFFFFFFFFFFFFFFFFFFFFFFFFFFFFFFFFFFFFFFFFFFFFFFFFFFFFFFFFFFFFFFFFF  
FFFFFFFFFFFF

@A00721:190:HGJW7DSXY:4:2631:25626:1846 1:N:0:TCTGCAAG+GCTGCACT  
CCCGCGCCGGGACACCTCCGTACGCTTACGTGTCGATTTGTCATTAGACCACGCGTCACGATCATGA

CCATCTAAAAAATGAATTCTATAGTGACGCAGTAAAATCGACGGCAGATGATATGTTATATCATCGTC  
TTTTTGA

+

FFFFFFFFFFFFFFFFFFFFFFFFFFFFFFFFFFFFFFFFFFFFFFFFFFFFFFFFFFFFFFFFFFFFFFFF  
FFFFFFFFFFFFFFFF:FFFFFFFFFFFFFFFFFFFFFFFFFFFFFFFFFFFFFFFFFFFFFFFF,FFFFFFFF  
FFFFF:

@A00721:190:HGJW7DSXY:4:2677:8793:23265 1:N:0:TCTGCAAG+GCTGCACT  
CCCGCGCCGGGGACACCTCCGTACGCTTACGTGTCGATTTGTCATTAGACCACGCGTCACGATCATAA  
CCATCTAAAAAATGAATTCTATAGTGACGCAGTAGAATCGACGGTCAATTTTGAAATTCAAAATTTAT  
ATTTATTGTGT

+

FFFFFFFFFFFFFFFFFFFFFFFFFFFFFFFFFFFFFFFFFFFFFFFF:FFFFFFFFFFFFFFFFFFFFFFF  
FFFFFFFFFFFFFFFFFFFFFFFFFFFFFFFF:FFFFFFFFFFFFFFFFFFFFFFFF:FFFFFFFFFFFFFFFF  
FFFF:FFFF:

@A00721:190:HGJW7DSXY:4:2677:8730:24158 1:N:0:TCTGCAAG+GCTGCACT  
CCCGCGCCGGGGACACCTCCGTACGCTTACGTGTCGATTTGTCATTAGACCACGCGTCACGATCATAA  
CCATCTAAAAAATGAATTCTATAGTGACGCAGTAGAATCGACGGTCAATTTTGAAATTCAAAATTTAT  
ATTTATTGTGT

+

FFFFFFFFF:FFFFFFFFFFFFFFFFFFFFFFFF:FFFFFFFFFFFFFFFFFFFFFFFFFFFFFFFFFFFF  
FFFF:FFFFFFFFFFFFFFFF:FFFF:,FFFFFFFFFFFFFFFFFFFFFFFFFFFFFFFF,FFFFFFFFFFFF  
F:FFFFFFFF

@A00721:190:HGJW7DSXY:4:1168:13883:7153 1:N:0:TCTGCAAG+GCTGCACT  
ACCTCCGTACGCTTACGTGTCGATTTGTCATTAGACCACGCGTCACGATCATAACCATCTAAAAAATG  
AAATCTATAGTGACGCAGTAGAATCGACGGTCAATTTTGAAATTCAAAATTTATATTTATTGTGTTGA  
TGACTGCTTTAGCAG

+

F,FFFF,FFFFFF,FFFF,FF:FFF:F,,F:FF,F::F,,:FFFF:FFFF,FFFF,F:FFFFFFF:  
FF,,,FFFF:,FF::FF:FFFF:FFF,:,,FFF,FF,,FFFF::FFFFFF,F:F,:FF,F,,,FFFF  
,,FFFF,,FFF,,FF

@A00721:190:HGJW7DSXY:4:1304:11912:1297 1:N:0:TCTGCAAG+GCTGCACT  
ACCTCCGTACGCTTACGTGTCGATTTGTCATTAGACCACGCGTCACGATCATAACCATCTAAAAAATG  
AATTCTATAGTGACGCAGTAGAATCGACGGTCAATTTTGAAATTCAAAATTTATATTTATTGTGTTGA  
TGACTGCTTTAGCAG

+

FFFFFFFFFFFF:FFFFFFFFFFFF:FFFFFFFFFFFFFFFFFFFFFFFFFFFFFFFF:FFFFFFFFFFFF::FF  
FF:FFFFFFFF:FFFFFFFFFFFFFFFFFFFFFFFFFFFFFFFFFFFFFFFF:FFFF,,FFFF  
FFFFFFFFFFFFFF

@A00721:190:HGJW7DSXY:4:1622:31665:13056 1:N:0:TCTGCAAG+GCTGCACT  
ACCTCCGTACGCTTACGTGTCGATTTGTCATTAGACCACGCGTCACGATCATAACCATCTAAAAAATG  
AATTCTATAGTGACGCAGTAGAATCGACGGTCAATTTTGAAATTCAAAATTTATATTTATTGTGTTGA  
TGACTGCTTTAGCAG

+

FFFFFFFFFFFFFFFFFFFFFFFFFFFFFFFFFFFFFFFFFFFFFFFFFFFFFFFFFFFFFFFFFFFF:FFF  
:FFFFFFFF:FFFFFFFFFFFFFFFFFFFFFFFFFFFFFFFFFFFFFFFF:FF:FFFFFFFFFFFFFFFF  
FFFFFFFFF:F:FF

@A00721:190:HGJW7DSXY:4:2168:15510:14512 1:N:0:TCTGCAAG+GCTGCACT  
ACCTCCGTACGCTTACGTGTCGATTTGTCATTAGACCACGCGTCACGATCATAACCATCTAAAAAATG  
AATTCTATAGTGACGCAGTAGAATCGACGGTCAATTTTGAAATTCAAAATTTATATTTATTGTGTTGA  
TGACTGCTTTAGCAG

+

FFFFFFFFFFFFFFFFFFFF:FFFFF::FFFFFFFFF:FFFFFFFFFFFFFFFFFFFFFFFFFFFF,FFFF  
FFFFFFFF:FFF:FFFFFFFFFFFF:FFFFFFFFFFFF:FFFFFFFFFFFFFFFFFFFF:FFFF:FFFF:FFF  
FFF:FFFFFFFF:F,F

$+$ 

+

+

+

+

+

+



@A00721:190:HGJW7DSXY:4:2125:6325:8907 1:N:0:TCTGCAAG+GCTGCACT  
CTCCGTACGCTTACGTGTCGATTTGTCATTAGACCACGCGTCACGATCATGACCATCTAAAAAATGAA  
TTCTATAGTGACGCAGTAAAATCGACGGCAGATGATATGTTATATCATCGTCTTTTTGATAACCAATA  
GACTGTTAAAAGGTC

@A00721:190:HGJW7DSXY:4:2160:17815:16313 1:N:0:TCTGCAAG+GCTGCACT  
CTCCGTACGCTTACGTGTCGATTTGTCATTAGACCACGCGTCACGATCATGACCATCTAAAAAATGAA  
TTCTATAGTGACGCAGTAAAATCGACGGCAGATGATATGTTATATCATCGTCTTTTTGATAACCAATA  
GACTGTTAAAAGGTC

@A00721:190:HGJW7DSXY:4:2547:23692:10645 1:N:0:TCTGCAAG+GCTGCACT  
CTCCGTACGCTTACGTGTCGATTTGTCATTAGACCACGCGTCACGATCATGACCATCTAAAAAATGAA  
TTCTATAGTGACGCAGTAAAATCGACGGCAGATGATATGTTATATCATCGTCTTTTTGATAACCAATA  
GACTGTTAAAAGGTC

@A00721:190:HGJW7DSXY:4:1153:20030:5838 1:N:0:TCTGCAAG+GCTGCACT  
ACGCTTACGTGTCGATTTGTCATTAGACCACGCGTCACGATCATAACCATCTAAAAATGAATTCTAT  
AGTGACGCAGTAGAATCGACGGTCAATTTTGAAATTCAAAATTTATTGTGTTGATGACTGCTTTAGCA  
GTTGATTGATGGATT

@A00721:190:HGJW7DSXY:4:1309:18295:35462 1:N:0:TCTGCAAG+GCTGCACT  
ACGCTTACGTGTCGATTTGTCATTAGACCACGCGTCACGATCATAACCATCTAAAAATGAATTCTAT  
AGTGACGCAGTAGAATCGACGGTCAATTTTGAAATTCAAAATTTATTGTGTTGATGACTGCTTTAGCA  
GTTGATTGATGGATT

@A00721:190:HGJW7DSXY:4:1331:21667:36417 1:N:0:TCTGCAAG+GCTGCACT  
ACGCTTACGTGTCGATTTGTCATTAGACCACGCGTCACGATCATAACCATCTAAAAAATGAATTCTAT  
AGTGACGCAGTAGAATCGACGGTCAATTTTGAAATTCAAAATTTATTGTGTTGATGACTGCTTTAGCA  
GTTGATTGATGGATT

@A00721:190:HGJW7DSXY:4:1332:32678:4789 1:N:0:TCTGCAAG+GCTGCACT  
ACGCTTACGTGTCGATTTGTCATTAGACCACGCGTCACGATCATAACCATCTAAAAATGAATTCTAT  
AGTGACGCAGTAGAATCGACGGTCAATTTTGAAATTCAAAATTTATTGTGTTGATGACTGCTTTAGCA  
GTTGATTGATGGATT

```

FFFFFFFF:FFFFFFFFFFFFFFFFFFFFFFFF,FFF:FFF:F:,FFFFF,FFF:FFF:
FFFFFFFFFFFFFFFFFFFFFFFF,FFFFFFFFFF:FF,FF::FFF:,F:FFFF:FFFF,FFFFFF:FF
FFF:FFFFFFFF

```

```

FFFFFFFFFFFFFFFFFFFFFFFFFFFFFFFFFFFFFFFFFFFFFFFFFFFFFFFFFFFFFFFFFFFFFFFF:
FFFFFFFFFFFFFFFFFFFFFFFFFFFFFFFFFFFFFFFFFFFFFFFFFFFFFFFFFFFFFFFFFFFFFFFF:FFFFFFFFFFFFFFFFFFFFFFFFFFFFFFFFFFFFFFFF
F:FFFFFFF:FFFFFFF

```

[illegible][illegible][illegible][illegible]

```

FFFFFFFFFFFFFFFFFFFFFFFFFFFFFFFFFFFFFFFFFFFFFFFFFFFFFFFFFFFFFFFF:FFFFFFFF
FFFFFFFFFFFFFFFFFFFFFFFFFFFFFFFFFFFFFFFF:FFFFFF:FFF:FFFFFFFFFF:F:FF:FFFFFFFFFFFF
FFFFFF:FF:FFFFF

```

@A00721:190:HGJW7DSXY:4:1457:4101:3427 1:N:0:TCTGCAAG+GCTGCACT  
GCTTACGTGTCGATTTGTCATTAGACCACGCGTCACGATCATAACCATCTAAAAAATGAATTCTATAG

TGACGCAGTAGAATCGACGGTCAATTTTGAAATTCAAAATTTATATTTATTGTGTTGATGACTGCTTT  
AGCAGTTGATTGATG

```

FFFFFFFFFFFFFFFFFFFFFFFFFFFFFFFFFFFFFFFFFFFFFFFFFFFFFFFFFFFFFFFFFFFF:FFFFFFFF
FFFFFFFFFFFFFFFFFFFFFFFFFFFFFFFFFFFFFFFFFFFFFFFFFFFFFFFFFFFFFFFFFFFF,F,F:F:FFFFFFFFFFFFFFFFFFFF
FFFFFFFFFFFFFFFFFFFF

```

 $+$ [illegible]

+

```

FFFFFFFFFFFFFFFFFFFFFFFFFFFFFFFF:FFFFFFFFFFFFFFFFFFFFFFFF:FFFFFFFFFFFFFFFFFFFFFFFF
FFFFFFFFFFFFFFFFFFFFFFFFFFFFFFFF,FFFF,FFFFFFFFFF,FF,FFFFFFFFF:FFFFFFF
FFF:FF,F:FFF:FF

```

+

[illegible]

+

```
FFF,FFFF::FFF:FF:FFFF:FFFF:FFFFFFFFFFFFFF:FFFFFFFFFFFFFF:F:FF,FFF:F:F
FFFFFFFFFFFFFFFFFFFF,FFFFFFFFFFFFFFFFFFFF:FFFFF,FFFFFFFFF:FFFFF,F,FFFF
FF:FFF,::,FFFFF
```

+

[illegible]

+

[illegible]

@A00721:190:HGJW7DSXY:4:1370:28058:17801 1:N:0:TCTGCAAG+GCTGCACT  
CTTACGTGTCGATTTGTCATTAGACCACGCGTCACGATCATAACCATCTAAAAAATGAATTCTATAGT  
GACGCAGTAGAATCGACGGTCAATTTTGAAATTCAAAATTTATATTTATTGTGTTGATGACTGCTTTA  
GCAGTTGATTGATGG

```

FFFFFFFFFFFFFFFFFFFFFFFFFFFFFFFFFFFFFFFF:FFFF:FFFFFFFF:FFFFFFFF:FF
FFFFFFFF:FFFFFFFFFFFFFFFFFFFFFFFF:FFFFFFFF:FF:FF:,FFFFFFFFFFFFFFFF
FFFFFFFF:FFF

```

@A00721:190:HGJW7DSXY:4:1531:6090:35931 1:N:0:TCTGCAAG+GCTGCACT  
CTTACGTGTCGATTTGTCATTAGACCACGCGTCACGATCATAACCATCTAAAAAATGAATTCTATAGT  
GACGCAGTAGAATCGACGGTCAATTTTGAAATTCAAAATTTATATTTATTGTGTTGATGACTGCTTTA  
GCAGTTGATTGATGG

```

FFFFFFFFFFFFFFFFFFFFFFFFFFFFFFFFFFFFFFFFFFFFFFFFFFFFFFFFFFFFFFFFFFFFFFFF:FFFF
FFF:FFFFFFFFFFFFFFFFFFFFFFFFFFFFFFFFFFFFFFFFFFFFFFFFFFFFFFFFFFFFFFFF:FFFFFFF:F:FFFFFFFFFFFFFFFF
FFFFFFFFFFFFFFFF

```

@A00721:190:HGJW7DSXY:4:2322:10881:19366 1:N:0:TCTGCAAG+GCTGCACT  
CTTACGTGTCGATTTGTCATTAGACCACGCGTCACGATCATAACCATCTAAAAAATGAATTCTATAGT  
GACGCAGTAGAATCGACGGTCAATTTTGAAATTCAAATTTATATTTATTGTGTTGATGACTGCTTTA  
GCAGTTGATTGATGG

[illegible]

@A00721:190:HGJW7DSXY:4:2475:30544:13651 1:N:0:TCTGCAAG+GCTGCACT  
CTTACGTGTCGATTTGTCATTAGACCACGCGTCACGATCATAACCATCTAAAAAATGAATTCTATAGT  
GACGCAGTAGAATCGACGGTCAATTTTGAAATTCAAAATTTATATTTATTGTGTTGATGACTGCTTTA  
GCAGTTGATTGATGG

```

FFFFFFFFFFFFFFFFFFFFFFFFFFFFFFFFFFFFFFFFFFFFFFFFFFFFFFFFFFFFFFFFFFFFFFFF
FFFFFFFFFFFFFFFFFFFFFFFF:FFFFFFFFFFFF:FFFFFFFFFFFFFFFF,FFFFFFFFFFFFFFFF:
FFFFFFFFFFFFFFFF

```

@A00721:190:HGJW7DSXY:4:2615:25337:20729 1:N:0:TCTGCAAG+GCTGCACT  
CTTACGTGTCGATTTGTCATTAGACCACGCGTCACGATCATAACCATCTAAAAAATGAATTCTATAGT  
GACGCAGTAGAATCGACGGTCAATTTTGAAATTCAAATTTATATTTATTGTGTTGATGACTGCTTTA  
GCAGTTGATTGATGG

```

FFFFFFFFFFFFFFFFFFFFFFFFFFFFFFFF:FFFFFFFFFFFFFFFFFFFFFFFF:FFF
FFFFFFFF:FFFFFFFFFFFFFFFFFFFF,FFFFFFFFFFFF,FFF:FFFFFFFFFFFFFFFF,FFF
::FF:FF.FFFFFFFF

```

@A00721:190:HGJW7DSXY:4:1146:27317:25567 1:N:0:TCTGCAAG+GCTGCACT  
TCTATAGTGACGCAGTAAAAATCGACGGCAGATGATATGTTATATCATCGTCTTTTTGATAACCAATAG  
ACTGTTAAAAGGTCTATATAAATGGCTATGCCATTTATCTTTTGAATGTTATTTTCGTAATTTATCTAT  
GAATTACGCGTTAAT

```
FFFFFFFF:FFFFFFFFFFFFFFFFFFFF:FFF:FFFFFFFFFFFFFFFFFFFFFFFFFFFFFFFF
FFFFFFFFFFFFFFFFFFFFFFFFFFFF:FFF:FFFFFFFFFFFFFFFFFFFF:FFFFFFF,FFF,FFFFFFF
FFFFFF,EE:FFFFF
```

@A00721:190:HGJW7DSXY:4:1245:21106:12493 1:N:0:TCTGCAAG+GCTGCACT  
TCTATAGTGACGCAGTAAATCGACGGCAGATGATATGTTATATCATCGTCTTTTTGATAACCAATAG  
ACTGTTAAAAGGTCTATATAAATGGCTATGCCATTTATCTTTTGAATGTTATTTGTAATTTATCTAT  
GAATTACGCGTTAAT

[illegible]



+  
FFFFFFFF:FFFFFFFFFFFFFFFFFFFFFFFFFFFFFFFF,FFFFFFFF:FFFFFFFFFFFFFFFFFFFFFFFF  
F,FFFF:FFFFFFFFFFFFFFFF:FFFFFFFFF,F:FFFFFFFFFFFFFFFFFFFFFFFFFFFFFFFF  
FFFFFFFFFFFFFFFF

@A00721:190:HGJW7DSXY:4:2442:11388:10535 1:N:0:TCTGCAAG+GCTGCACT  
TCTATAGTGACGCAGTAAAATCGACGGCAGATGATATGTTATATCATCGTCTTTTTGATAACCAATAG  
ACTGTTAAAAGGTCTATATAAATGGCTATGCCATTTATCTTTGAATGTTATTTCTGAATTTATCTAT  
GAATTACGCGTTAAT

+  
FFFFFFFFFFFFFFFFFFFFFFFFFFFFFFFFFFFFFFFFFFFFFFFFFFFFFFFFFFFFFFFFFFFFFFFF  
FFFFFFFFF,FFFFFFFFFFFFFFFFFFFFFFFF:FFFFFF:FFF:FFFFFFFFFFFFFFFFFFFFFFFF  
FFF:FF,FFFFFFFF

@A00721:190:HGJW7DSXY:4:2267:32642:31375 1:N:0:TCTGCAAG+GCTGCACT  
TGACGCAGTAAAATCGACGGCAGATGATATGTTATATCATCGTCTTTTTGATAACCAATAGACTGTTA  
AAAGGTCTATATAAATGGCTATGCCATTTATCTTTGAATGTTATTTCTGAATTTATCTATGAATTAC  
GCGTTAATAATTATA

+  
FF:FFFFFFFFFFFFFFFFFFFFFFFFFFFFFFFFFFFFFFFF:~F:F:FFFFFFFFFFFFFFFFFFFFFFFF  
F:FFFFFFFFFFFFFFFFFFFFFFFF:F::~FFFFFFFFFFFFFFFFFFFFFFFF:FFF:FFFFFF:FFFFFFFF  
FFF,FF:FF::~FFF:

@A00721:190:HGJW7DSXY:4:1220:26232:35524 1:N:0:TCTGCAAG+GCTGCACT  
GTAAAATCGACGGCAGATGATATGTTATATCATCGTCTTTTTGATAACCAATAGACTGTTAAAAGGTC  
TATATAAATGGCTATGCCATTTATCTTTGAATGTTATTTCTGAATTTATCTATGAATTACGCGTTAA  
TAATTATAGAGATCG

+  
FFFFFFFFFFFFFFFF:FFFFFFFFFFFFFFFFFFFFFFFFFFFFFFFFFFFFFFFFFFFFFFFF:FFFF  
FFFFFFFFFFFFFFFFFFFFFFFF,FFFF:FFFFFFFFFFFFFFFFFFFFFFFFFFFFFFFFFFFFFFFF:FFF  
FFFFFFFFFFFFFFFF

@A00721:190:HGJW7DSXY:4:1261:1416:18630 1:N:0:TCTGCAAG+GCTGCACT  
GTAAAATCGACGGCAGATGATATGTTATATCATCGTCTTTTTGATAACCAATAGACTGTTAAAAGGTC  
TATATAAATGGCTATGCCATTTATCTTTGAATGTTATTTCTGAATTTATCTATGAATTACGCGTTAA  
TAATTATAGAGATCG

+  
FFFFFFFFFFFFFFFFFFFFFFFFFFFFFFFFFFFFFFFFFFFFFFFFFFFFFFFFFFFFFFFF:FFFF  
FFFFFFFFFFFF:FFFFFFFFFFFF:FFFFF:FFFFFFFFFFFFFFFFFFFFFFFFFFFFFFFF,~F:  
FFFFFFFF:FFFFF:

@A00721:190:HGJW7DSXY:4:1635:26865:31203 1:N:0:TCTGCAAG+GCTGCACT  
GTAAAATCGACGGCAGATGATATGTTATATCATCGTCTTTTTGATAACCAATAGACTGTTAAAAGGTC  
TATATAAATGGCTATGCCATTTATCTTTGAATGTTATTTCTGAATTTATCTATGAATTACGCGTTAA  
TAATTATAGAGATCG

+  
FFFFFFFFFFFFFFFF:FFFFFFFFFFFFFFFFFFFFFFFFFFFFFFFFFFFFFFFFFFFFFFFF,FFFF  
FFFFFFF,FFFFFFFFFFFFFFFF,FFFFFFFFFFFFFFFF:FFFFFFFFFFFF:FFFFFFFF  
FFFFFFFFFFFFFFFF

@A00721:190:HGJW7DSXY:4:2171:11803:3051 1:N:0:TCTGCAAG+GCTGCACT  
GTAAAATCGACGGCAGATGATATGTTATATCATCGTCTTTTTGATAACCAATAGACTGTTAAAAGGTC  
TATATAAATGGCTATGCCATTTATCTTTGAATGTTATTTCTGAATTTATCTATGAATTACGCGTTAA  
TAATTATAGAGATCG

+  
FFFFFFFFFFFFFFFFFFFFFFFFFFFFFFFF:FFFFFFFFFFFFFFFFFFFFFFFFFFFFFFFFFFFF  
FFFFFFFFFFFFFFFFFFFFFFFF:FFFFFFFF:FFFFFFFFFFFFFFFFFFFFFFFF:FFFFF:FFF  
F:FFFFFFFFFFFFFF

@A00721:190:HGJW7DSXY:4:2473:10610:6621 1:N:0:TCTGCAAG+GCTGCACT  
GTAAAATCGACGGCAGATGATATGTTATATCATCGTCTTTTTGATAACCAATAGACTGTTAAAAGGTC

TATATAAATGGCTATGCCATTTATCTTTTGAATGTTATTTCTGTAATTTATCTATGAATTACGCGTTAA  
TAATTATAGAGATCG

+

FFFFFFFFFFFFFFFFFFFFFFFFFFFFFFFFFFFFFFFFFFFFFFFFFFFFFFFFFFFFFFFFFFFFFFFFFFFFFFFF  
FFFFFFFFFFFFFFFFFFFFFFFFFFFFFFFFFFFFFFFFFFFFFFFFFFFFFFFFFFFFFFFFFFFFFFFFFFFFFFFF  
FFFFFFFF:FFFFFFFF

@A00721:190:HGJW7DSXY:4:2624:17309:32440 1:N:0:TCTGCAAG+GCTGCACT  
GTAAAATCGACGGCAGATGATATGTTATATCATCGTCTTTTGTATAACCAATAGACTGTTAAAAGGTC  
TATATAAATGGCTATGCCATTTATCTTTTGAATGTTATTTCTGTAATTTATCTATGAATTACGCGTTAA  
TAATTATAGAGATCG

+

FFFFFFFFFFFFFFFFFFFFFFFFFFFFFFFFFFFFFFFFFFFFFFFFFFFFFFFFFFFFFFFFFFFFFFFFFFFFFFFF  
FFFFFFFFFFFFFFFFFFFFFFFFFFFFFFFFFFFFFFFFFFFFFFFFFFFFFFFFFFFFFFFFFFFFFFFFFFFFFFFF  
F:FFFFFFFFFFFFFFFFFFFFFFFFFFFFFFFFFFFFFFFFFFFFFFFFFFFFFFFFFFFFFFFFFFFFFFFFFFFF  
,FF:FF:FFFFFFFF

@A00721:190:HGJW7DSXY:4:1223:9317:25081 1:N:0:TCTGCAAG+GCTGCACT  
ATCGTCTTTTGTATAACCAATAGACTGTTAAAAGGTCTATATAAATGGCTATGCCATTTATCTTTTGA  
ATGTTATTTCTGTAATTTATCTATGAATTACGCGTTAATAATTATAGTTTTCTGCTTGATTATTTGTAA  
GATTTGTTTTGAACA

+

FFFFFFFFF:FFFFFFFFFFFFFFFFFFFFFFFFFFFFFFFFFFFFFFFFFFFFFFFFFFFFFFFFFFFFFFFFFFFF  
F:FFFFFFFFFFFFFFFFFFFFFFFFFFFFFFFFFFFFFFFFFFFFFFFFFFFFFFFFFFFFFFFFFFFFFFFFFFFF  
FFFFFFFF:F,F,,FFF

@A00721:190:HGJW7DSXY:4:1277:14886:7138 1:N:0:TCTGCAAG+GCTGCACT  
ATCGTCTTTTGTATAACCAATAGACTGTTAAAAGGTCTATATAAATGGCTATGCCATTTATCTTTTGA  
ATGTTATTTCTGTAATTTATCTATGAATTACGCGTTAATAATTATAGTTTTCTGCTTGATTATTTGTAA  
GATTTGTTTTGAACA

+

FFFFFFFFFFFFFFFFFFFFFFFFFFFFFFFFFFFFFFFFFFFFFFFFFFFFFFFFFFFFFFFFFFFFFFFFFFFF  
FFFFFF:F:FFFFFF:F:FFFFFFF::FFFFFFFF:FFFFFFFFFFFFFFFF:FFF:::FF:FFFFFFFF:  
FFFFFF:FFFFFF

@A00721:190:HGJW7DSXY:4:1334:2908:18396 1:N:0:TCTGCAAG+GCTGCACT  
ATCGTCTTTTGTATAACCAATAGACTGTTAAAAGGTCTATATAAATGGCTATGCCATTTATCTTTTGA  
ATGTTATTTCTGTAATTTATCTATGAATTACGCGTTAATAATTATAGTTTTCTGCTTGATTATTTGTAA  
GATTTGTTTTGAACA

+

FFFFFFFFFFFFFFFFFFFFFFFFFFFFFFFFFFFFFFFFFFFFFFFFFFFFFFFFFFFFFFFFFFFFFFFFFFFF  
FFFFFFFFFFFFFFFFFFFFFFFFFFFFFFFFFFFFFFFFFFFFFFFFFFFFFFFFFFFFFFFFFFFFFFFFFFFF  
FFFFF:FFFF, :FFF

@A00721:190:HGJW7DSXY:4:1370:7916:2080 1:N:0:TCTGCAAG+GCTGCACT  
ATCGTCTTTTGTATAACCAATAGACTGTTAAAAGGTCTATATAAATGGCTATGCCATTTATCTTTTGA  
ATGTTATTTCTGTAATTTATCTATGAATTACGCGTTAATAATTATAGTTTTCTGCTTGATTATTTGTAA  
GATTTGTTTTGAACA

+

FFFFFFFFFFFFFFFFFFFFFFFFFFFFFFFFFFFFFFFFFFFFFFFFFFFFFFFFFFFFFFFFFFFFFFFFFFFF  
FFFFFFFFFFFFFFFFFFFFFFFFFFFFFFFFFFFFFFFFFFFFFFFFFFFFFFFFFFFFFFFFFFFFFFFFFFFF  
FFFFFFFFFFFF,FFF

@A00721:190:HGJW7DSXY:4:1510:12599:13009 1:N:0:TCTGCAAG+GCTGCACT  
ATCGTCTTTTGTATAACCAATAGACTGTTAAAAGGTCTATATAAATGGCTATGCCATTTATCTTTTGA  
ATGTTATTTCTGTAATTTATCTATGAATTACGCGTTAATAATTATAGTTTTCTGCTTGATTATTTGTAA  
GATTTGTTTTGAACA

+

FFFFFFFFFFFFFFFFFFFFFFFFFFFFFFFFFFFFFFFFFFFFFFFFFFFFFFFFFFFFFFFFFFFFFFFFFFFF  
FFF:FFFFFFFFFFFFFFFF:FFFF:FFFFFFFFFFFF:FFFFFFFFFFFFFFFF::F,,FFFFFFFFFFFF  
FFFFFFFFFFFF:FFF

@A00721:190:HGJW7DSXY:4:1638:1163:10363 1:N:0:TCTGCAAG+GCTGCACT  
ATCGTCTTTTTGATAACCAATAGACTGTTAAAAGGTCTATATAAATGGCTATGCCATTTATCTTTTGA  
ATGTTATTTCTGAATTTATCTATGAATTACGCGTTAATAATTATAGTTTTCGTCTTGATTATTTGTAA  
GATTTGTTTTGAACA

[illegible]

+

```

FFFFFFFFFFFFFF:FFFFFFFFFFFFFFFFFFFFFFFFFFFFFFFFFFFFFFFFFFFFFFFF
FFFFFFFFFFFFFF:FFFFFFFFFFFFFFFF:FFF:FFFFFFFFFFFFFF,FFFFFF:FFFFFF
F:FFF:FFFFFF,FF

```

+

```

FFFFFFFFFFFFFFFFFFFFFFFFFFFFFFFF,FFFFFFFFFFFFFF:FFFFFFFFFFFFFFFF,FFFFFF
FFFFFFFFFFFFFFFFFFFFFFFF:FFFFFFFFF::FFFFFFFFFFFFFFFF,FFFF,FF,:FFFFFFFFF,FFF
:FFFFFFFFF,:FF:

```

+

```

FFFFFFFFFFFFFFFFFFFFFFFFFFFFFFFF:FFFFFFFFFFFFFFFFFFFFFFFFFFFFFFFF:FF:FF
FF:FFFFFFFFFFFFFFFFFFFFFFFFFFFFFFFF:FF,FFFFFFFFFFFFFFFF,FFFFFFFF:FFFFFFFF
F:FFFF:E:FF:E:F

```

+

[illegible]

+

```

FFFFFFFFFFFFFFFFFFFFFFFFFFFFFFFF:FFFFFFFFFFFFFFFFFFFFFFFFFFFFFFFF
FFFFFFFFFFFFFFFFFFFFFFFFFFFFFFFF:FFFFFFFFFFFFFFFFFFFFFFFF:FF:F
FFFFFFFFEE.EEEE

```

+

```
FFFFFFFFFFFFFFFF;FFFFFFFFFFFFFFFF,FFFFFFF,F::FFFFFFFFFFFF;FFFF;FFFF
```



FFFFFF,FFFFFF,FFFF:FFFFFFFFFFFF,FFFFFFFFFFFF::FFFFFFFFF:FFFF,F,F:F  
:,FFFF,F:,FF,::

@A00721:190:HGJW7DSXY:4:2344:2356:11240 1:N:0:TCTGCAAG+GCTGCACT  
CGACGGACATTGAAAATGTATCTCGATTTGTTCAAAACAAATCTTACAAATAATCAAGACGAAAACCTA  
TAATTATTAACGCGTAATTCATAGATAAATTACGAAATAACATTCAAAAGATAAATGGCATAGCCATT  
TATATAGACCTTTTA

+

FFFFFFFFFFFFFFFF:FFFFFFFFFFFFFFFFFFFFFFFFFFFFFFFFFFFFFFFFFFFFFFFFF  
FF:FFFFFFFFFFFFFFFFFFFFFFFFFFFFFFFFFFFFFFFFFFFFFFFFFFFFFFFFF:FFFFFF:F  
FFFFFF:FFF::FFF

@A00721:190:HGJW7DSXY:4:2355:29559:26788 1:N:0:TCTGCAAG+GCTGCACT  
CGACGGACATTGAAAATGTATCTCGATTTGTTCAAAACAAATCTTACAAATAATCAAGACGAAAACCTA  
TAATTATTAACGCGTAATTCATAGATAAATTACGAAATAACATTCAAAAGATAAATGGCATAGCCATT  
TATATAGACCTTTTA

+

FFFFFFFFFFFFFFFFFFFFFFFFFFFFFFFFFFFFFFFFFFFFFFFFFFFFFFFFFFFFFFFFF:  
F:FFFFFFFFFFFFFFFFFFFFFFFFFFFFFFFFFFFFFFFFFFFFFFFFF:FFFF:FFFFFFFFFFFFFFFFF,F  
FFFFFFFFF:,FFFF

@A00721:190:HGJW7DSXY:4:2124:31882:13964 1:N:0:TCTGCAAG+GCTGCACT  
CGACGGACATTGAAAATGTATCTCGATTTGTTCAAAACAAATCTTACAAATAATCAAGACGAAAACCTA  
TAATTATTAACGCGTAATTCATAGATAAATTACGAAATAACATTCAAAAGATAAATGGCATAGCCAGT  
TATATAGACCTTTT

+

FFFFF:FFFFFFFFFFFFFFFFFFFFFFFFFFFFFFFFFFFFFFFFFFFFFFFFF:FF:  
FFFFFFFFF,FFFFFFFFFFFFF:FFF:F,FFFFFFFF:FF::FFFFF,FFF:F:FFFFF::FFFFF:,F  
,,FFFFFF:,FF,:

@A00721:190:HGJW7DSXY:4:1201:21594:22576 1:N:0:TCTGCAAG+GCTGCACT  
GTTATTTTCGTAATTTATCTATGAATTACGCGTTAATAATTATAGTTTTCGTCTTGATTATTTGTAAGA  
TTTGTTTTGAACAAATCGAGATACATTTTCAATATCCGTCGAAGGAGATCTGTTTGATCGAGATTTTA  
AGACGAAAACGATCC

+

FFFFFFFFFFFFFFFFFFFFFFFFFFFFFFFFFFFFFFFFFFFFFFFFF:FF:FFFFFFFFF:  
FFFFFFFFFFFFFFFFFFFFFFFFFFFFFFFFFFFFFFFFFFFFFFFFF:FFFFFFFFF:FFFF  
F:FF:FFF:FFFF:

@A00721:190:HGJW7DSXY:4:1204:15989:32377 1:N:0:TCTGCAAG+GCTGCACT  
GTTATTTTCGTAATTTATCTATGAATTACGCGTTAATAATTATAGTTTTCGTCTTGATTATTTGTAAGA  
TTTGTTTTGAACAAATCGAGATACATTTTCAATATCCGTCGAAGGAGATCTGTTTGATCGAGATTTTA  
AGACGAAAACGATCC

+

FFFFFFFFFFFFFFFFFFFFFFFFFFFFFFFFFFFFFFFFFFFFFFFFF:FFFFFFFFFFFFFFFFF:  
FFFFFFFFFFFFFFFFFFFFFFFFFFFFFFFFFFFFFFFFFFFFFFFFF,FFFFFFFFFFFFFFF  
F,:F:FFFFFFFFF

@A00721:190:HGJW7DSXY:4:1319:30779:11303 1:N:0:TCTGCAAG+GCTGCACT  
GTTATTTTCGTAATTTATCTATGAATTACGCGTTAATAATTATAGTTTTCGTCTTGATTATTTGTAAGA  
TTTGTTTTGAACAAATCGAGATACATTTTCAATGTCCGTCGAAGGAGATCTGTTTGATCGAGATTTTA  
AGACGAAAACGATCC

+

FFFFFFFFFFFFFFFFFFFFFFFFFFFFFFFFFFFFFFFFFFFFFFFFF  
FFFFFFFFF,FFFFFFFFFFFFFFFFFFFFFFFFFFFFFFFFFFFFFFFFF:FFFFFFFFFFFFFFF  
FF:FFFFF,FFF:F

@A00721:190:HGJW7DSXY:4:1446:18900:31814 1:N:0:TCTGCAAG+GCTGCACT  
GTTATTTTCGTAATTTATCTATGAATTACGCGTTAATAATTATAGTTTTCGTCTTGATTATTTGTAAGA  
TTTGTTTTGAACAAATCGAGATACATTTTCAATGTCCGTCGAAGGAGATCTGTTTGATCGAGATTTTA  
AGACGAAAACGATCC

+  
FFFFFFFFFFFFFFFFFFFFFFFFFFFFFFFFFFFFFFFFFFFFFFFFFFFFFFFFFFFFFFFFFFFFFFFFF:  
FFFFFFFFFFFFFFFFFFFFFFFFFFFFFFFFFFFFFFFFFFFFFFFFFFFFFFFFFFFFFFFFFFFFFFFFF:  
::FFFFFFFF,FFFF:F  
@A00721:190:HGJW7DSXY:4:1513:9453:28980 1:N:0:TCTGCAAG+GCTGCACT  
GTTATTTTCGTAATTTATCTATGAATTACGCGTTAATAATTATAGTTTTCGTCTTGATTATTTGTAAGA  
TTTGTGTTTGAACAAATCGAGATACATTTTCAATATCCGTCGAAGGAGATCTGTTTGATCGAGATTTTA  
AGACGAAAACGATCC  
+  
FFFFFFFFFFFFFFFFFFFFFFFFFFFFFFFFFFFFFFFFFFFFFFFFFFFFFFFFFFFFFFFFFFFFFFFFF:  
FFFFFFFFFFFFFFFFFFFFFFFFFFFFFFFFFFFFFFFFFFFFFFFFFFFFFFFFFFFFFFFFFFFFFFFFF:  
FF:FFFFFFFFFFFF:F  
@A00721:190:HGJW7DSXY:4:1567:19379:25254 1:N:0:TCTGCAAG+GCTGCACT  
GTTATTTTCGTAATTTATCTATGAATTACGCGTTAATAATTATAGTTTTCGTCTTGATTATTTGTAAGA  
TTTGTGTTTGAACAAATCGAGATACATTTTCAATATCCGTCGAAGGAGATCTGTTTGATCGAGATTTTA  
AGACGAAAACGATCC  
+  
FFFFFFFFFFFFFFFFFFFFFFFFFFFFFFFFFFFFFFFFFFFFFFFFFFFFFFFFFFFFFFFFFFFFFFFFF:  
FFFFFFFFFFFFFFFFFFFFFFFFFFFFFFFFFFFFFFFFFFFFFFFFFFFFFFFFFFFFFFFFFFFFFFFFF:  
F:FFFFFFFF,FFFF  
@A00721:190:HGJW7DSXY:4:1614:1958:17660 1:N:0:TCTGCAAG+GCTGCACT  
GTTATTTTCGTAATTTATCTATGAATTACGCGTTAATAATTATAGTTTTCGTCTTGATTATTTGTAAGA  
TTTGTGTTTGAACAAATCGAGATACATTTTCAATATCCGTCGAAGGAGATCTGTTTGATCGAGATTTTA  
AGACGAAAACGATCC  
+  
FFFFF:FFFFFFFFFFFF:FF:FFFFFFFFFFFF:FFFFFFFFFFFFFFFFFFFFFFFFFFFFF:,FF:FFFFFFFFFFFF  
FFF:FFFFFFFFFFFFFFFFFFFFFFFFFFFFFFFFFFFFFFFFFFFFFFFFFFFFFFFFFFFFFFFFFFFFF:  
FFFFFFFFFFFF,FFFF  
@A00721:190:HGJW7DSXY:4:2119:24740:21574 1:N:0:TCTGCAAG+GCTGCACT  
GTTATTTTCGTAATTTATCTATGAATTACGCGTTAATAATTATAGTTTTCGTCTTGATTATTTGTAAGA  
TTTGTGTTTGAACAAATCGAGATACATTTTCAATATCCGTCGAAGGAGATCTGTTTGATCGAGATTTTA  
AGACTAAAACGATC  
+  
:FFF:FFFFF:,FFFFFFFFFFFFFFFFFFFF,::FF,FFFFFFFFFFFF:FFFFFFFFFFFF,FF,FFFF:  
:F,,F,FF:FF:FFF:F,F:FFFFF,:FF:FFFFF:::F:FFF,,FFFFF:,FF::FF,FFFFF:FFF  
F:::,FFFFF,FFF  
@A00721:190:HGJW7DSXY:4:2361:24044:25160 1:N:0:TCTGCAAG+GCTGCACT  
GTTATTTTCGTAATTTATCTATGAATTACGCGTTAATAATTATAGTTTTCGTCTTGATTATTTGTAAGA  
TTTGTGTTTGAACAAATCGAGATACATTTTCAATATCCGTCGAAGGAGATCTGTTTGATCGAGATTTTA  
AGACGAAAACGATCC  
+  
FFFFFFFFFFFFF:FFFFFFFFFFFFFFFFFFFFFFFFFFFFFFFFFFFFFFFFFFFFFFFFFFFFFFFFFFFFF  
FFFFFFFFFFFFFFFFFFFFFFFFFFFFFFFFFFFFFFFFFFFFFFFFFFFFFFFFFFFFFFFFFFFFFFFFF  
FFFFFFFFFFFFF  
@A00721:190:HGJW7DSXY:4:2412:14570:9565 1:N:0:TCTGCAAG+GCTGCACT  
GTTATTTTCGTAATTTATCTATGAATTACGCGTTAATAATTATAGTTTTCGTCTTGATTATTTGTAAGA  
TTTTTTTTGAACAAATAGAGATACAATTTCAATTTACGTCGAAGGAGATCAGTTTGATCGAGATTTTA  
AGACGAAAACGATCC  
+  
FFFF:FFFFFFFF:FFFFFFFFFFFF,FFFFFFFFFFFFFFFFFFFFFFFFFFFFFFFFFFFFFFFFFFFFF  
FFF,:FFF,,F,FFF,,,F,,,F:F,FFF,FF,,F,F,F,F:F,FF::,,FFF,,F,,FFFFFFFF  
F:,F::FFF,:F,:F  
@A00721:190:HGJW7DSXY:4:2422:20184:5822 1:N:0:TCTGCAAG+GCTGCACT  
GTTATTTTCGTAATTTATCTATGACTTACGCGTTAATAATTATAGTTTTCGTCTTGATTATTTGTAAGA

TTTGTTTTGAACAAATCGAGATACATTTTCAATGTCCGTCGAAGGAGATCTGTTTGATCGAGATTTTA  
AGACGAAACGATCC

```

FFFFFFFFFFFFFFFFFFFFFFFF,FFFFFFFFFFFFFFFFFFFFFFFFFFFFFFFFFFFFFFFF
FFFFFFFFFFFFFFFFFFFFFFFF:FFFFFFFFFFFFFFFF:FFFFFFFFFFFFFFFF:~
FF:FFF:FFFFFF:

```

GTTATTTTCGTAATTTATCTATGAATTACGCGTTAATAATTATAGTTTTTCGTCTTGATTATTTGTAAGA  
TTTGTTTTGAACAAATCGAGATACATTTTCAATATCCGTCGAAGGAGATCTGTTTGATCGAGATTTTA  
AGACGAAAACGATCC

[illegible]

GTTATTTTCGTAATTTATCTATGAATTACGCGTTAATAATTATAGTTTTCGTCTTGATTATTTGTAAGA  
TTTGTTTTGAACAAATCGAGATACATTTTCAATGTCCGTCGAAGGAGATCTGTTTGATCGAGATTTTA  
AGACGAAAACGATCC

[illegible]

5  
 CTGGATCGTTTTCGTCTTAAATCTCGATCAAACAGATCTCCTTCGACGGACATTGAAAATGTATCT  
 CGATTTGTTCAAACAAATCTTACAAATAATCAAGACGAAACTATAATTATTAACGCGTAATTCATA  
 GATAAATTACGAAAT

[illegible]

CCTGGATCGTTTTCGTCTTAAATCTCGATCAAACAGATCTCCTTCGACGGACATTGAAAATGTATCT  
CGATTTGTTCAAAACAAATCTTACAAATAATCAAGACGAAACTATAATTATTAACGCGTAATTCATA  
GATAAATTACGAAAT

```
FFFFFFFFFFFFFFFFFFFFFFFFFFFFFFFFFFFFFFFFFFFFFFFFFFFFFFFFFFFFFFFFFFFFF  
FFFFFFFFFFFFFFFFFFFFFFFFFFFFFFFFFFFFFFFF:FFFFFFFFFFFFFFFFFFFFFFFFFFFFFF  
FFFFFFFFFFFFFF:FEE
```

CTGGATCGTTTTCGTCTTAAATCTCGATCAAACAGATCTCCTTCGACGGACATTGAAAATGTATCT  
 CGATTTGTTCAAACAAATCTTACAAATAATCAAGACGAAACTATAATTATTACGCGTAATTCATA  
 GATAAATTACGAAAT

```

FFFFFFFFFFFFFFFFFFFFFFFFFFFFFFFFFFFFFFFFFFFFFFFFFFFFFFFFFFFFFFFFFFFFFFFF
FFFFFFFFFFFFFFFF:FFFFFFFFFFFFFFFFFFFFFFFF:FFFFFFFFFFFFFFFF:FFFFFFFFFFFFF
FFFFFFFFFFFFFFFF

```

CTGGATCGTTTTCGTCTTAAATCTCGATCAAACAGATCTCCTTCGACGGACATTGAAAATGTATCT  
CGATTTGTTCAAACAAATCTTACAAATAATCAAGACGAAACTATAATTATTAACGCGTAATTCATA  
GATAAATTACGAAAT

[illegible]

@A00721:190:HGJW7DSXY:4:2146:21504:32189 1:N:0:TCTGCAAG+GCTGCACT  
CCTGGATCGTTTTCTTAAATCTCGATCAAACAGATCTCCTTCGACGGACATTGAAAATGTATCT  
CGATTTGTTCAAAACAAATCTTACAAATAATCAAGACGAAACTATAATTATTAACGCGTAATTCATA  
GATAAATTACGAAAT

```

FFFFFFFFFFFFFFFFFFFFFFFFFFFFFFFFFFFFFFFFFFFFFFFFFFFFFFFFFFFFFFFFFFFFFFFF
FFFFFFFFFFFFFFFFFFFFFFFF:FF:FFFFFFFFFFFFFFFF:FFFFFFFFFFFFFFFFFFFFFFFF,FFFFFFFF
FFFFFFFF:FFF,FFFF

```

+

```
FFFFFFFFFFFFFFFFFFFFFFFF:FFFFFFFFFFFFFFFFFFFFFFFFFFFFFFFFFFFFFFFFFFFFF
FFFFFFFFFFFFFFFF:FFFFFFFFFFFFFFFFFFFFFF,FFFFFFFFFFFFFFFFFFFFFFFFFFFFFFFF
FFFFFFFFFFFFFFFF
```

+

[illegible]

+

```

FFFFFFFF:FFFF::FFFFFF:FF:FF,FFFFFFFF,,FFFFFFFFF::F:FFFFFFFFFFFFFFF:FFF,FF
F:FFFFFFFF:FFFFFF:FFFFFFFF:FFFFF,F:FFFFFFFF,,F,,:FFFFFF,,FF::FF::F,FFFF,
FF:FFF,FFF:FFFF

```

+

```
FFFFFFFFFFFFFFFFFFFFFFFFFFFFFFFFFFFFFFFFFFFFFFFFFFFFFFFFFFFFFFF
FFFFFFFFFFFFFFFFFFFFFFFFFFFF:FFFFFFFFFFFFFFFFFFFFFFFFFFFFFFFF:FFFF
FFFFFFFFFFFFFF:E
```

+

[illegible]

+

[illegible]

```
FFFFFFFFFFFFFFFFFFFFFFFFFFFFFFFFFFFFFFFF:FFFFFFFFFFFFFFFFFFFFFFFFFFFFFF:FFFFFFFF
FFFFFFFF,F:FFFF
```

+

@A00721:190:HGJW7DSXY:4:1114:21269:5447 1:N:0:TCTGCAAG+GCTGCACT  
ACGCGTTAATAATTATAGTTTTCTGTTGATTATTTGTAAGATTTGTTTTGAACAAATCGAGATACAT  
TTTCAATGTCCGTCGAAGGAGATCTGTTTGATCGAGATTTTAAGACGAAAACGATCCAGGCTGCTGCT  
AATGGAAATTGGGGC

```

FFFFFFFF,FFFFFFFFFFFFFFFFFFFFFFFFFFFFFFFFFFFFFFFFFFFFFFFFFFFFFFFFFFFFFFFF
FFFFFFFFFFFFFFFFFFFFFFFFFFFFFFFFFFFFFFFF:FFFFFFFFFFFFFF:FFF,FFFFFFFFFFFFFF
F,F,FF:FFFFFFFFF

```

+

@A00721:190:HGJW7DSXY:4:2101:20419:16438 1:N:0:TCTGCAAG+GCTGCACT  
ACGCGTTAATAATTATAGTTTTCTGTTGATTATTTGTAAGATTTGTTTTGAACAAATCGAGATACAT  
TTTCAATGTCCGTCGAAGGAGATCTGTTTGATCGAGATTTTAAGACGAAAACGATCCAGGCTGCTGCT  
AATGGAAATTGGGGC

```

FFFFFFFFFFFFFFFFFFFFFFFF:FFFFFFFFFFFFFFFFFFFFFFFFFFFFFFFFFFFFFFFF
FFFFFFFFFFFFFFFFFFFFFFFF:FFFFFFFFFFFFFFFFFFFFFFFFFFFFFFFFFFFFFFFF
FFFFF,FFFFFFF

```

+

@A00721:190:HGJW7DSXY:4:2201:12527:23218 1:N:0:TCTGCAAG+GCTGCACT  
CGCGTTAATAATTATAGTTTTTCGTCTTGATTATTTGTAAGATTTGTTTTGAACAAATCGAGATACATT  
TTCAATGTCCGTCGAAGGAGATCTGTTTGATCGAGATTTTAAGACGAAAACGATCCAGGCTGCTGCTA  
ATGGAAATTGGGGCA

```

FFFFFFFFFFFFFFFFFFFF:FFFFFF,FF:FFFFFFFFFFFFFFFFFFFFFFFFFFFF:F:FF:F,FF:F
FFFFFFFFFFFF:FF:FFFFFF:FFF:FF:FFFFFFFFFFFFFFFFFFFFFFFF:FFFFFFFFFFFF:FFFFFFFFFFFF
E.:FFFFFFFFFFFFFF

```

+  
FFFFFFFFFFFFFFFFFFFFFFFFFFFFFFFFFFFFFFFFFFFFFFFFFFFFFFFFFFFFFFFFFFFFFFFF  
FFFFFFFFFFFF:FFFFFFFFFFFFFFFFFFFFFFFFFFFFFFFFFFFFFFFFFFFFFFFFFFFFFFFF  
FFFFFFFFFFFFFFFFFFFF

@A00721:190:HGJW7DSXY:4:2255:8811:17190 1:N:0:TCTGCAAG+GCTGCACT  
CGCGTTAATAATTATAGTTTTCTGCTTGATTATTTGTAAGATTTGTTTTGAACAAATCGAGATACATT  
TTCAATGTCCGTCGAAGGAGATCTGTTTGATCGAGATTTTAAGACGAAAACGATCCAGGCTGCTGCTA  
ATGGAAATTGGGGCA

+  
FFFFFFFFFFFFFFFFFFFFFFFFFFFFFFFFFFFFFFFFFFFFFFFFFFFFFFFFFFFFFFFFFFFFFFFF  
FFFFFFFFFFFFFFFFFFFFFFFFFFFFFFFFFFFFFFFFFFFFFFFFFFFFFFFFFFFFFFFFFFFFFFFF  
FFFFFFFFFFFF:F:FFFFFFFFFFFFFFFFFFFFFFFFFFFFFFFFFFFFFFFFFFFFFFFFFFFFFFFF  
FFFFFFFFFFFF:FFFFFFF

@A00721:190:HGJW7DSXY:4:2318:20772:18490 1:N:0:TCTGCAAG+GCTGCACT  
CGCGTTAATAATTATAGTTTTCTGCTTGATTATTTGTAAGATTTGTTTTGAACAAATCGAGATACATT  
TTCAATGTCCGTCGAAGGAGATCTGTTTGATCGAGATTTTAAGACGAAAACGATCCAGGCTGCTGCTA  
ATGGAAATTGGGGCA

+  
FFFFFFFFFFFFFFFFFFFFFFFFFFFFFFFFFFFFFFFFFFFFFFFFFFFFFFFFFFFFFFFFFFFFFFFF  
FFFFFFFFFFFFFFFFFFFFFFFFFFFFFFFFFFFFFFFFFFFFFFFFFFFFFFFFFFFFFFFFFFFFFFFF  
FFFFFFFFFFFFFFFFFFFF

@A00721:190:HGJW7DSXY:4:2504:17472:20040 1:N:0:TCTGCAAG+GCTGCACT  
CGCGTTAATAATTATAGTTTTCTGCTTGATTATTTGTAAGATTTGTTTTGAACAAATCGAGATACATT  
TTCAATGTCCGTCGAAGGAGATCTGTTTGATCGAGATTTTAAGACGAAAACGATCCAGGCTGCTGCTA  
ATGGAAATTGGGGCA

+  
FFFFFFFFFFFFFFFFFFFFFFFFFFFFFFFFFFFFFFFFFFFFFFFFFFFFFFFFFFFFFFFFFFFFFFFF  
FFFFFFFFFFFFFFFFFFFFFFFFFFFFFFFFFFFFFFFFFFFFFFFFFFFFFFFFFFFFFFFFFFFFFFFF  
FFFFFFFFFFFFFFFFFFFF:FFF:FFFFFFFFFFFF:FFFFFFFFFFFF:FFFFFFFFFFFF:F  
FFFFF,FFFFFFFF:FF

@A00721:190:HGJW7DSXY:4:2609:7862:26224 1:N:0:TCTGCAAG+GCTGCACT  
CGCGTTAATAATTATAGTTTTCTGCTTGATTATTTGTAAGATTTGTTTTGAACAAATCGAGATACATT  
TTCAATGTCCGTCGAAGGAGATCTGTTTGATCGAGATTTTAAGACGAAAACGATCCAGGCTGCTGCTA  
ATGGAAATTGGGGCA

+  
FFFFFFFFFFFFFFFFFFFFFFFFFFFFFFFFFFFFFFFFFFFFFFFFFFFFFFFFFFFFFFFFFFFFFFFF  
FFFFFFFFFFFFFFFFFFFFFFFFFFFFFFFFFFFFFFFFFFFFFFFFFFFFFFFFFFFFFFFFFFFFFFFF  
FFFFFFFFFFFFFFFFFFFF:

@A00721:190:HGJW7DSXY:4:1244:7509:6918 1:N:0:TCTGCAAG+GCTGCACT  
GCGTTAATAATTATAGTTTTCTGCTTGATTATTTGTAAGATTTGTTTTGAACAAATCGAGATACATTT  
TCAATGTCCGTCGAAGGAGATCTGTTTGATCGAGATTTTAAGACGAAAACGATCCAGGCTGCTGCTAA  
TGGAATTGGGGCAA

+  
FFFFFFFFFFFF:FFFFFFFFFFFFFFFFFFFFFFFFFFFFFFFFFFFFFFFFFFFFFFFFFFFFFFFF  
FFFFFFFFFFFFFFFFFFFFFFFFFFFFFFFFFFFFFFFFFFFFFFFFFFFFFFFFFFFFFFFFFFFFFFFF  
FFFFFFFFFFFFFFFFFFFF

@A00721:190:HGJW7DSXY:4:1339:4119:9283 1:N:0:TCTGCAAG+GCTGCACT  
GCGTTAATAATTATAGTTTTCTGCTTGATTATTTGTAAGATTTGTTTTGAACAAATCGAGATACATTT  
TCAATGTCCGTCGAAGGAGATCTGTTTGATCGAGATTTTAAGACGAAAACGATCCAGGCTGCTGCTAA  
TGGAATTGGGGCAA

+  
FFFFFFFFFFFF:FFFFFFFFFFFFFFFFFFFFFFFFFFFFFFFFFFFFFFFFFFFFFFFFFFFFFFFF  
FFFFFFFFFFFFFFFFFFFFFFFFFFFFFFFFFFFFFFFFFFFFFFFFFFFFFFFFFFFFFFFFFFFFFFFF  
FFF:FFFFFFFFFFFF

@A00721:190:HGJW7DSXY:4:1616:4372:16203 1:N:0:TCTGCAAG+GCTGCACT  
CGCGTTAATAATTATAGTTTTCTGCTTGATTATTTGTAAGATTTGTTTTGAACAAATCGAGATACATTT

TCAATGTCCGTCGAAGGAGATCTGTTTGATCGAGATTTTAAGACGAAAACGATCCAGGCTGCTGCTAA  
TGGAATTGGGGCAA

+

FFFFFFFFFFFFFFFFFFFFFFFFFFFFFFFFFFFFFFFFFFFFFFFFFFFFFFFFFFFFFFFFFFFFFFFF  
FFFFFFFFFFFFFFFF:FFFFFFFFFFFFFFFFFFFFFFFFFFFFFFFFFFFFFFFFFFFFFFFFFFFFFFFF  
FFFFFFFF:FFFFFFF

@A00721:190:HGJW7DSXY:4:2102:28664:28902 1:N:0:TCTGCAAG+GCTGCACT  
GCGTTAATAATTATAGTTTTCTGCTTGATTATTTGTAAGATTTGTTTTGAACAAATCGAGATACATTT  
TCAATGTCCGTCGAAGGAGATCTGTTTGATCGAGATTTTAAGACGAAAACGATCCAGGCTGCTGCTAA  
TGGAATTGGGGCAA

+

FFFFFFFFFFFFFFFFFFFFFFFFFFFFFFFFFFFFFFFFFFFFFFFFFFFFFFFFFFFFFFFFFFFFFFFF  
FFFFFFFF:FFFFFFFFFFFFFFFFFFFFFFFFFFFFFFFFFFFFFFFFFFFFFFFFFFFFFFFFFFFFFFFF  
F:FFFFFFF,FFF:

@A00721:190:HGJW7DSXY:4:2257:24026:10974 1:N:0:TCTGCAAG+GCTGCACT  
GCGTTAATAATTATAGTTTTCTGCTTGATTATTTGTAAGATTTGTTTTGAACAAATCGAGATACATTT  
TCAATGTCCGTCGAAGGAGATCTGTTTGATCGAGATTTTAAGACGAAAACGATCCAGGCTGCTGCTAA  
TGGAATTGGGGCAA

+

FFF,:FFFFFFFF:FF,,FFFF,,FFFFFFFFFFFFFFFFFFFFFFFF:FF:FFFFFFFF:F,F:FFFFFF:F  
FFFFFFFF,F,F,FFF:FFFFFFFF:FF:FFF:FF,FFFFFFFF:FFF:FF::F,F:,,:FFFF:F,  
,FFF,F,:FFF,F

@A00721:190:HGJW7DSXY:4:2673:10520:34021 1:N:0:TCTGCAAG+GCTGCACT  
GCGTTAATAATTATAGTTTTCTGCTTGATTATTTGTAAGATTTGTTTTGAACAAATCGAGATACATTT  
TCAATGTCCGTCGAAGGAGATCTGTTTGATCGAGATTTTAAGACGAAAACGATCCAGGCTGCTGCTAA  
TGGAATTGGGGCAA

+

FFFFFFFFFFFFFFFFFFFFFFFFFFFFFFFFFFFFFFFFFFFFFFFFFFFFFFFFFFFFFFFFFFFFFFFF  
FFFFFFFFFFFFFFFFFFFFFFFFFFFFFFFFFFFFFFFFFFFFFFFFFFFFFFFFFFFFFFFFFFFFFFFF  
FFFFF,FFFFFFFFF

@A00721:190:HGJW7DSXY:4:1524:21513:20682 1:N:0:TCTGCAAG+GCTGCACT  
ATCGTCTTGATTATTTGTAAGATTTGTTTTGAACAAATCGAGATACATTTTCAATGTCCGTCGAAGGA  
GATCTGTTTGATCGAGATTTTAAGACGAAAACGATCCAGGCTGCTGCTAATGGAAATTGGGGCAATGT  
AAAGCTCCAAATGCC

+

FFFFFFFFFFFFFFFF,FFFFFF:FFFFFFFFFF,FF:FFFF,FF:FFFFFFFF::FFF,FF,:FF:FFFF  
FFF:FFFFFFFFFFFFFFFF,FFFF:FFFFFFFFFFFF:FFFFFF,FFFF:FFFFFFFF::FFFFFFFF:F  
FFF,FFFFFFFF:F

@A00721:190:HGJW7DSXY:4:2153:18692:13980 1:N:0:TCTGCAAG+GCTGCACT  
ATCGTCTTGATTATTTGTAAGATTTGTTTTGAACAAATCGAGATACATTTTCAATGTCCGTCGAAGGA  
GATCTGTTTGATCGAGATTTTAAGACGAAAACGATCCAGGCTGCTGCTAATGGAAATTGGGGCAATGT  
AAAGCTCCAAATGCC

+

FFFFFFFFFFFFFFFF:FFFFFFFFFFFFFFFFFFFFFFFFFFFFFFFFFFFFFFFFFFFFFFFFFFFFFFFF  
FFFFFFFFFFFFFFFF:FFFFFFFFFFFFFFFFFFFFFFFFFFFFFFFFFFFFFFFFFFFFFFFFFFFFFFFF  
FFFFFFFFFFFFFFFFF

@A00721:190:HGJW7DSXY:4:2252:21106:2409 1:N:0:TCTGCAAG+GCTGCACT  
ATCGTCTTGATTATTTGTAAGATTTGTTTTGAACAAATCGAGATACATTTTCAATGTCCGTCGAAGGA  
GATCTGTTTGATCGAGATTTTAATACGAAAACGATCCAGGCTGCTGCTAATGGAAATTGGGGCAATGT  
AAAGCTCCAAATGC

+

FFFFF:,F:F:FFFFF:FFFFFFFFFFFFFFFF:FFFFF,::,FFFF,FFF:F::FFFFFFFF:F,FFFF:F  
FF,FF,F,FFFFF,F:FFF,FFF:FF:FFFFF:FFF:F,FF,:FFF:FF:FF,FFFFFF:FFFFFFFF  
FFFFFFFFFFFFFFFFF

$+$ 

+

 $+$ 

+

+

+

+



FFFFFFFFFFFFFFFFFFFFFFFFFFFFFFFFFFFFFFFFFFFFFFFFFFFFFFFFFFFFFFFFFFFFFFFFFFFFFFFF  
FFFFFFFFFFFFFFFF

@A00721:190:HGJW7DSXY:4:1157:12762:10066 1:N:0:TCTGCAAG+GCTGCACT  
GTCTTGATTATTTGTAAGATTTGTTTTGAACAAATCGAGATACATTTTCAATGTCCGTGCAAGGAGAT  
CTGTTTGATCGAGATTTTAAGACGAAAACGATCCAGGCTGCTGCTAATGGAAATTGGGGCAATGTAAA  
GCTCCAAATGCCAG

+

FFFFFFFFFFFFFFFFFFFFFFFFFFFFFFFFFFFFFFFFFFFFFFFFFFFFFFFFFFFFFFFFFFFFFFFFFFFFFFFF  
FFFFFFFFFFFFFFFFFFFFFFFFFFFFFFFFFFFFFFFFFFFFFFFFFFFFFFFFFFFFFFFFFFFFFFFFFFFFFFFF,  
FFFFFFFFFFFFFFFF

@A00721:190:HGJW7DSXY:4:1302:21233:28494 1:N:0:TCTGCAAG+GCTGCACT  
GTCTTGATTATTTGTAAGATTTGTTTTGAACAAATCGAGATACATTTTCAATGTCCGTGCAAGGAGAT  
CTGTTTGATCGAGATTTTAAGACGAAAACGATCCAGGCTGCTGCTAATGGAAATTGGGGCAATGTAAA  
GCTCCAAATGCCAG

+

FFFFFFFFFFF,F::FFF:F:FFFFFFFFFFFFFFFF:FFFFFFFFFFF:FFFFFFFFFFFFFFFF:FFFFFFF  
FFFFFFFFFFFFFFFFFFFFFFFFFFFFFFFFFFFFFFFFFFFFFFFFFFFFFFFFFFFFFFFFFFFFFFFFFFFFFFFF  
FFFF:FFF::FF:FF

@A00721:190:HGJW7DSXY:4:1412:24252:33191 1:N:0:TCTGCAAG+GCTGCACT  
GTCTTGATTATTTGTAAGATTTGTTTTGAACAAATCGAGATACATTTTCAATGTCCGTGCAAGGAGAT  
CTGTTTGATCGAGATTTTAAGACGAAAACGATCCAGGCTGCTGCTAATGGAAATTGGGGCAATGTAAA  
GCTCCAAATGCCAG

+

FFFFFFFFFFFFFFFFFFFFFFFFFFFFFFFFFFFFFFFFFFFFFFFFFFFFFFFFFFFFFFFFFFFFFFFFFFFFFFFF,  
FFFFFFFFFFFFFFFFFFFFFFFFFFFFFFFFFFFFFFFFFFFFFFFFFFFFFFFFFFFFFFFFFFFFFFFFFFFFFFFF  
FFFFFFFFFFFFFFFF

@A00721:190:HGJW7DSXY:4:1412:24885:34256 1:N:0:TCTGCAAG+GCTGCACT  
GTCTTGATTATTTGTAAGATTTGTTTTGAACAAATCGAGATACATTTTCAATGTCCGTGCAAGGAGAT  
CTGTTTGATCGAGATTTTAAGACGAAAACGATCCAGGCTGCTGCTAATGGAAATTGGGGCAATGTAAA  
GCTCCAAATGCCAG

+

FFFF:FFFFFFFFFFFF:FFFFFFFFFFFFFFFFFFFFFFFFFFFFFFFFFFFFFFFFFFFFFFFFFFFFFFFFFFFF  
FFFFFFFFFFFFFFFFFFFFFFFFFFFFFFFFFFFFFFFFFFFFFFFFFFFFFFFFFFFFFFFFFFFFFFFFFFFFFFFF  
FFFFFFFFFFFFFFFF

@A00721:190:HGJW7DSXY:4:2332:15854:17989 1:N:0:TCTGCAAG+GCTGCACT  
GTCTTGATTATTTGTAAGATTTGTTTTGAACAAATCGAGATACATTTTCAATGTCCGTGCAAGGAGAT  
CTGTTTGATCGAGATTTTAAGACGAAAACGATCCAGGCTGCTGCTAATGGAAATTGGGGCAATGTAAA  
GCTCCAAATGCCAG

+

F:FFFFFFFFFFFFFFFFFFFFFFFFFFFFFFFFFFFFFFFFFFFFFFFFFFFFFFFFFFFFFFFFFFFFFFFFFFFF  
FFFFFFFFFFFFF:FFFFFFFFFFFFFFFFFFFFF,FFFFFFFFFFFFFFFFFFFFFFFFFFFFFFFFFFFFFFFF  
FFFFFFFFFFFFFFFF

@A00721:190:HGJW7DSXY:4:2539:1371:16110 1:N:0:TCTGCAAG+GCTGCACT  
GTCTTGATTATTTGTAAGATTTGTTTTGAACAAATCGAGATACATTTTCAATGTCCGTGCAAGGAGAT  
CTGTTTGATCGAGATTTTAAGACGAAAACGATCCAGGCTGCTGCTAATGGAAATTGGGGCAATGTAAA  
GCTCCAAATGCCAG

+

FFF:FFFFFFFFFFFF:FFFFFFFFFFFFFFFFFFFFFFFFFFFFFFFFFFFFFFFFFFFFFFFFFFFFFFFFFFFF  
FFFFFFFFFFFFFFFFFFFFFFFFFFFFFFFFFFFFFFFFFFFFFFFFFFFFFFFFFFFFFFFFFFFFFFFFFFFFFFFF  
FFFFFFFFFFFFFFFF

@A00721:190:HGJW7DSXY:4:2168:15799:20776 1:N:0:TCTGCAAG+GCTGCACT  
CGAGATACATTTTCAATGTCCGTGCAAGGAGATCTGTTTGATCGAGATTTTAAGACGAAAACGATCCA  
GGCTGCTGCTAATGGAAATTGGGGCAATGTAAAGCTCCAAATGCCAGTATGGCCGATGTGATGTACA  
ATAAGTTGAAGAAAC

+  
FFFFFFFFFFFFFFFFFFFFFFFFFFFFFFFFFFFFFFFFFFFFFFFFFFFFFFFFFFFFFFFFFFFFFFFF  
FFFFFFFFFFFFFFFFFFFFFFFFFFFFFFFFFFFFFFFFFFFFFFFFFFFFFFFFFFFFFFFFFFFFFFFF  
FFFFFFFFFFFF:FFF  
@A00721:190:HGJW7DSXY:4:2336:7916:2206 1:N:0:TCTGCAAG+GCTGCACT  
CGAGATACATTTTCAATGTCCGTCTGAAGGAGATCTGTTTGATCGAGATTTTAAGACGAAAACGATCCA  
GGCTGCTGCTAATGGAAATTGGGGCAATGTAAAGCTCCAAATGCCAGTATGGCCGATGTGATGTACA  
ATAAGTTGAAGAAAC

+  
FFFFFFFFFFFFFFFFFFFFFFFFFFFFFFFFFFFFFFFFFFFFFFFFFFFFFFFFFFFFFFFFFFFFFFFF  
FFFFFFFFFFFFFFFFFFFFFFFFFFFFFFFFFFFFFFFFFFFFFFFFFFFFFFFFFFFFFFFFFFFFFFFF  
FFFFF:FFF:FFFFF  
@A00721:190:HGJW7DSXY:4:2543:29640:24361 1:N:0:TCTGCAAG+GCTGCACT  
CGAGATACATTTTCAATGTCCGTCTGAAGGAGATCTGTTTGATCGAGATTTTAAGACGAAAACGATCCA  
GGCTGCTGCTAATGGAAATTGGGGCAATGTAAAGCTCCAAATGCCAGTATGGCCGATGTGATGTACA  
ATAAGTTGAAGAAAC

+  
FFFFFFFFFFFFFFFFFFFFFFFFFFFFFFFFFFFFFFFFFFFFFFFFFFFFFFFFFFFFFFFFFFFFFFFF  
FFFFFFFFFFFFFFFFFFFFFFFFFFFFFFFFFFFFFFFFFFFFFFFFFFFFFFFFFFFFFFFFFFFFFFFF  
FFFFF:FFFF,F:F  
@A00721:190:HGJW7DSXY:4:2566:17852:23923 1:N:0:TCTGCAAG+GCTGCACT  
CGAGATACATTTTCAATGTCCGTCTGAAGGAGATCTGTTTGATCGAGATTTTAAGACGAAAACGATCCA  
GGCTGCTGCTAATGGAAATTGGGGCAATGTAAAGCTCCAAATGCCAGTATGGCCGATGTGATGTACA  
ATAAGTTGAAGAAAC

+  
FFFFFFFFFFFFFFFFFFFFFFFFFFFFFFFFFFFFFFFFFFFFFFFFFFFFFFFFFFFFFFFFFFFFFFFF  
FFFFFFFFFFFFFFFFFFFFFFFFFFFFFFFFFFFFFFFFFFFFFFFFFFFFFFFFFFFFFFFFFFFFFFFF  
FFF,F,FFFFFFFFF  
@A00721:190:HGJW7DSXY:4:2602:24451:1031 1:N:0:TCTGCAAG+GCTGCACT  
CGAGATACATTTTCAATGTCCGTCTGAAGGAGATCTGTTTGATCGAGATTTTAAGACGAAAACGATCCA  
GGCTGCTGCTAATGGAAATTGGGGCAATGTAAAGCTCCAAATGCCAGTATGGCCGATGTGATGTACA  
ATAAGTTGAAGAAAC

+  
FFFFFFFFFFFFFFFFFFFFFFFFFFFFFFFFFFFFFFFFFFFFFFFFFFFFFFFFFFFFFFFFFFFFFFFF  
FFFFFFFFFFFFFFFFFFFFFFFFFFFFFFFFFFFFFFFFFFFFFFFFFFFFFFFFFFFFFFFFFFFFFFFF  
:FFFFFFFF,FFFFF  
@A00721:190:HGJW7DSXY:4:2602:23421:2409 1:N:0:TCTGCAAG+GCTGCACT  
CGAGATACATTTTCAATGTCCGTCTGAAGGAGATCTGTTTGATCGAGATTTTAAGACGAAAACGATCCA  
GGCTGCTGCTAATGGAAATTGGGGCAATGTAAAGCTCCAAATGCCAGTATGGCCGATGTGATGTACA  
ATAAGTTGAAGAAAC

+  
FFFFFFFFFFFFFFFFFFFFFFFFFFFFFFFFFFFFFFFFFFFFFFFFFFFFFFFFFFFFFFFFFFFFFFFF  
FFFFFFFFFFFFFFFFFFFFFFFFFFFFFFFFFFFFFFFFFFFFFFFFFFFFFFFFFFFFFFFFFFFFFFFF  
F:FFFFFFFF:FFF  
@A00721:190:HGJW7DSXY:4:1175:5475:3302 1:N:0:TCTGCAAG+GCTGCACT  
GCGTGTTTCTTCAACTTATTGTACATCACATCGGCCATACTGGGCATTTGGAGCTTTACATTGCCCA  
ATTTCCATTAGCAGCAGCCTGGATCGTTTTTCGTCTTAAATCTCGATCAAACAGATCTCCTTCGACGG  
ACATTGAAAATGTAT

+  
FFFFFFFFFFFFFFFFFFFFFFFFFFFFFFFFFFFFFFFFFFFFFFFFFFFFFFFFFFFFFFFFFFFFFFFF  
FFFFFFFFFFFFFFFFFFFFFFFFFFFFFFFFFFFFFFFFFFFFFFFFFFFFFFFFFFFFFFFFFFFFFFFF  
FFFFFFFFFFFFFFFFF  
@A00721:190:HGJW7DSXY:4:1178:24089:9173 1:N:0:TCTGCAAG+GCTGCACT  
GCGTGTTTCTTCAACTTATTGTACATCACATCGGCCATACTGGGCATTTGGAGCTTTACAAAGCCCCA

ATTTCATTAGCAGCAGCCTGGATCGTTTTTCGTCTTAAATCTCGATCAAACAGATCTCCTTCGACGG  
ACATTGAAAATGTAT

[illegible] $+$ [illegible] $+$ [illegible]

+

[illegible]

+

[illegible]

+

[illegible]

+

[illegible]

$+$ 

+

 $+$ 

+

+

 $+$ 

+

FFFFFFFF:FFFFFFFFFFFFFFFF:FFFFFFFFFFFFFFFF:FFFFFFFF:FFFF:F:,F,:FFFF  
:,F:F:FFFF:FFFF

@A00721:190:HGJW7DSXY:4:1117:21802:4899 1:N:0:TCTGCAAG+GCTGCACT  
GTCCGTCGAAGGAGATCTGTTTGATCGAGATTTTAAGACGAAAACGATCCAGGCTGCTGCTAATGGAA  
ATTGGGGCAATGTAAAGCTCCAAATGCCAGTATGGCCGATGTGATGTACAATAAGTTGAAGAAACAC  
GCGATCATGATTGAT

+

FFFFFFFFFFFFFFFFFFFFFFFFFFFFFFFFFFFFFFFFFFFFFFFFFFFFFFFFFFFFFFFF:FFFFFFFFFFFFFFFFFFFFF  
FFFFFFFFFFFFFFFFFFFFFFFFFFFFFFFFFFFFFFFFFFFFFFFFFFFFFFFFFFFFFFFF:F:FF:FF:FFFFFFFFFFFFFFFF  
FFFFFFFFFFFFFFFF

@A00721:190:HGJW7DSXY:4:1367:28366:26537 1:N:0:TCTGCAAG+GCTGCACT  
GTCCGTCGAAGGAGATCTGTTTGATCGAGATTTTAAGACGAAAACGATCCAGGCTGCTGCTAATGGAA  
ATTGGGGCAATGTAAAGCTCCAAATGCCAGTATGGCCGATGTGATGTACAATAAGTTGAAGAAACAC  
GCGATCATGATTGAT

+

FFFFFFFFFFFFFFFFFFFFFFFFFFFFFFFFFFFFFFFFFFFFFFFFFFFFFFFFFFFFFFFFFFFFF  
FFFFFFFFFFFFFFFFFFFFFFFFFFFFFFFFFFFFFFFFFFFFFFFFFFFFFFFFFFFFFFFFFFFFF:FFF:F  
:FFFFFFFFFFFFFFFF

@A00721:190:HGJW7DSXY:4:1549:19831:31798 1:N:0:TCTGCAAG+GCTGCACT  
GTCCGTCGAAGGAGATCTGTTTGATCGAGATTTTAAGACGAAAACGATCCAGGCTGCTGCTAATGGAA  
ATTGGGGCAATGTAAAGCTCCAAATGCCAGTATGGCCGATGTGATGTACAATAAGTTGAAGAAACAC  
GCGATCATGATTGAT

+

FFFFFFFFFFFFFFFFFFFFFFFFFFFFFFFFFFFFFFFFFFFFFFFFFFFFFFFFFFFFFFFFFFFFF  
FFFFFFFFF:FFFFFFFFFFFFFFFFFFFFFFFFFFFFFFFFFFFFFFFFFFFFFFFFFFFFFFFFFFFF:FFFFFFFFF  
FFFFFFFFFFFFFFFF

@A00721:190:HGJW7DSXY:4:1644:6515:24768 1:N:0:TCTGCAAG+GCTGCACT  
GTCCGTCGAAGGAGATCTGTTTGATCGAGATTTTAAGACGAAAACGATCCAGGCTGCTGCTAATGGAA  
ATTGGGGCAATGTAAAGCTCCAAATGCCAGTATGGCCGATGTGATGTACAATAAGTTGAAGAAACAC  
GCGATCATGATTGAT

+

FFFFFFFFFFFFFFFFFFFFFFFFFFFFFFFFFFFFFFFFFFFFFFFFFFFFFFFFFFFFFFFFFFFFF:  
FFFFFFFFFFFFFFFFFFFFFFFFFFFFFFFFFFFFFFFFFFFFFFFFFFFFFFFFFFFFFFFFFFFFF,FFFFFFFFFFFFFFFFFFFFFFFF  
FFFFFFFFFFFFFFFF

@A00721:190:HGJW7DSXY:4:2201:1714:33364 1:N:0:TCTGCAAG+GCTGCACT  
GTCCGTCGAAGGAGATCTGTTTGATCGAGATTTTAAGACGAAAACGATCCAGGCTGCTGCTAATGGAA  
ATTGGGGCAATGTAAAGCTCCAAATGCCAGTATGGCCGATGTGATGTACAATAAGTTGAAGAAACAC  
GCGATCATGATTGAT

+

:FFFFF::FFFFFFFFFFFFFFFF:FFF:FFFFFFFFFFFFFFFFFFFFFFFF:FFFFF:FFF:FFFFFFFFFFFF  
FFFF, :FFFFFFFFFFFFFFFF:FFFF::F:FFFFFFFFFFFF, :FFF:,FFFFF:FFF::FFF:F:FFFF  
F:FFFFFFFF:FFFFF

@A00721:190:HGJW7DSXY:4:2208:32443:27492 1:N:0:TCTGCAAG+GCTGCACT  
GTCCGTCGAAGGAGATCTGTTTGATCGAGATTTTAAGACGAAAACGATCCAGGCTGCTGCTAATGGAA  
ATTGGGGCAATGTAAAGCTCCAAATGCCAGTATGGCCGATGTGATGTACAATAAGTTGAAGAAACAC  
GCGATCATGATTGAT

+

FFFFFFFFFFFFFFFFFFFFFFFFFFFFFFFFFFFFFFFFFFFFFFFFFFFFFFFFFFFFFFFF:FFFFFFFFF:FFFFFFFFFFFFFFFFFFFFFFFF  
FFFFFFFFFFFFF:FFF:FFFFFFFFFFFFFFFFFFFFFFFF:FFFFFFFFFFFFFFFFFFFFFFFF:FFFF  
,FFF:FFFFFFFF:F

@A00721:190:HGJW7DSXY:4:2344:12084:3443 1:N:0:TCTGCAAG+GCTGCACT  
GTCCGTCGAAGGAGATCTGTTTGATCGAGATTTTAAGACGAAAACGATCCAGGCTGCTGCTAATGGAA  
ATTGGGGCAATGTAAAGCTCCAAATGCCAGTATGGCCGATGTGATGTACAATAAGTTGAAGAAACAC  
GCGATCATGATTGAT

+  
FFFFFFFFFFFFFFFFFFFFFFFFFFFFFFFFFFFFFFFFFFFFFFFFFFFFFFFFFFFFFFFFFFFFFFFF  
FFFFFFFFFFFFFFFFFFFFFFFFFFFFFFFFFFFFFFFFFFFFFFFFFFFFFFFFFFFFFFFFFFFFFFFF  
FFFFFFFFFFFFFFFF

@A00721:190:HGJW7DSXY:4:2529:32009:6825 1:N:0:TCTGCAAG+GCTGCACT  
GTCCGTCGAAGGAGATCTGTTTGATCGAGATTTTAAGACGAAAACGATCCAGGCTGCTGCTAATGGAA  
ATTGGGGCAATGTAAAGCTCCAAATGCCAGTATGGCCGATGTGATGTACAATAAGTTGAAGAAACAC  
GCGATCATGATTGAT

+  
FFFFFFFFFFFFFFFFFFFFFFFFFFFFFFFFFFFFFFFFFFFFFFFFFFFFFFFFFFFFFFFFFFFFFFFF  
FFFFFFFFFFFFFFFFFFFFFFFFFFFFFFFFFFFFFFFFFFFFFFFFFFFFFFFFFFFFFFFFFFFFFFFF  
FFFFFFFFFFFFFFFF:F  
FFFFFFFFFFFFFFFF:F

@A00721:190:HGJW7DSXY:4:2649:8757:4319 1:N:0:TCTGCAAG+GCTGCACT  
GTCCGTCGAAGGAGATCTGTTTGATCGAGATTTTAAGACGAAAACGATCCAGGCTGCTGCTAATGGAA  
ATTGGGGCAATGTAAAGCTCCAAATGCCAGTATGGCCGATGTGATGTACAATAAGTTGAAGAAACAC  
GCGATCATGATTGAT

+  
FFFFFFFFFFFFFFFFFFFFFFFFFFFFFFFFFFFFFFFFFFFFFFFFFFFFFFFFFFFFFFFFFFFFFFFF  
FFFFFFFFFFFFFFFFFFFFFFFFFFFFFFFFFFFFFFFFFFFFFFFFFFFFFFFFFFFFFFFFFFFFFFFF  
FFFFFFFFFFFFFFFF

@A00721:190:HGJW7DSXY:4:1149:29044:19727 1:N:0:TCTGCAAG+GCTGCACT  
CGGCCGTCGAAGGAGATCTGTTTGATCGAGATTTTAAGACGAAAACGATCCAGGCTGCTGCTAATGGA  
AATTGGGGCAATGTAAAGCTCCAAATGCCAGTATGGCCGATGTGATGTACAATAAGTTGAAGAAACA  
CGCGATCATGATTGA

+  
FFFFFFFFFFFFFFFFFFFFFFFFFFFFFFFFFFFFFFFFFFFFFFFFFFFFFFFFFFFFFFFFFFFFFFFF  
FFFFFFFFFFFFFFFFFFFFFFFFFFFFFFFFFFFFFFFFFFFFFFFFFFFFFFFFFFFFFFFFFFFFFFFF  
FFFF,FFFFFFFFFF

@A00721:190:HGJW7DSXY:4:1249:1841:9878 1:N:0:TCTGCAAG+GCTGCACT  
CGGCCGTCGAAGGAGATCTGTTTGATCGAGATTTTAAGACGAAAACGATCCAGGCTGCTGCTAATGGA  
AATTGGGGCAATGTAAAGCTCCAAATGCCAGTATGGCCGATGTGATGTACAATAAGTTGAAGAAACA  
CGCGATCATGATTGA

+  
FFFFFFFFFFFFFFFFFFFFFFFFFFFFFFFFFFFFFFFFFFFFFFFFFFFFFFFFFFFFFFFFFFFFFFFF  
FFFFFFFFFFFFFFFFFFFFFFFFFFFFFFFFFFFFFFFFFFFFFFFFFFFFFFFFFFFFFFFFFFFFFFFF  
F:FFFFFFFF:FF,FF

@A00721:190:HGJW7DSXY:4:1530:3812:31548 1:N:0:TCTGCAAG+GCTGCACT  
CGGCCGTCGAAGGAGATCTGTTTGATCGAGATTTTAAGACGAAAACGATCCAGGCTGCTGCTAATGGA  
AATTGGGGCAATGTAAAGCTCCAAATGCCAGTATGGCCGATGTGATGTACAATAAGTTGAAGAAACA  
CGCGATCATGATTGA

+  
FFFFFFFFFFFFFFFFFFFFFFFFFFFFFFFFFFFFFFFFFFFFFFFFFFFFFFFFFFFFFFFFFFFFFFFF  
:FFFFFFFFFFFFFFFFFFFFFFFFFFFFFFFFFFFFFFFFFFFFFFFFFFFFFFFFFFFFFFFFFFFFFFFF  
FFFFFFFFFFFFFFFF:

@A00721:190:HGJW7DSXY:4:1530:3775:31610 1:N:0:TCTGCAAG+GCTGCACT  
CGGCCGTCGAAGGAGATCTGTTTGATCGAGATTTTAAGACGAAAACGATCCAGGCTGCTGCTAATGGA  
AATTGGGGCAATGTAAAGCTCCAAATGCCAGTATGGCCGATGTGATGTACAATAAGTTGAAGAAACA  
CGCGATCATGATTGA

+  
FFFFFFFFFFFFFFFFFFFFFFFFFFFFFFFFFFFFFFFFFFFFFFFFFFFFFFFFFFFFFFFFFFFFFFFF  
FFFFFFFFFFFFFFFFFFFFFFFFFFFFFFFFFFFFFFFFFFFFFFFFFFFFFFFFFFFFFFFFFFFFFFFF  
FFFFFFFFFFFFFFFF

@A00721:190:HGJW7DSXY:4:1574:8404:17926 1:N:0:TCTGCAAG+GCTGCACT  
CGGCCGTCGAAGGAGATCTGTTTGATCGAGATTTTAAGACGAAAACGATCCAGGCTGCTGCTAATGGA

AATTGGGGCAATGTAAAGCTCCAAATGCCCAGTATGGCCGATGTGATGTACAATAAGTTGAAGAAACA  
CGCGATCATGATTGA

```

FFFFFFFFFFFFFFFFFFFFFFFFFFFFFFFFFFFFFFFF:FFFFFFFFFFFFFFFFFFFFFFFF:FFFFF:FFFF
FFF:FFFFFFFFFFFFFFFFFFFFFFFF:FFF:F:FF:FFFFFFFFFFFFFFFFFFFFFFFF:FFFFFFFFFFFFFFFFFFFFFFFF:FFFF
FFFFFFFFFFFFFFFFFFFF

```

 $+$ 

@A00721:190:HGJW7DSXY:4:2144:10185:18161 1:N:0:TCTGCAAG+GCTGCACT  
CGGCCGTCGAAGGAGATCTGTTTGATCGAGATTTTAAGACGAAAACGATCCAGGCTGCTGCTAATGGA  
AATTGGGGCAATGTAAAGCTCCAAATGCCAGTATGGCCGATGTGATGTACAATAAGTTGAAGAAACA  
CGCGATCATGATTGA

[illegible] $+$ 

@A00721:190:HGJW7DSXY:4:1146:10719:34240 1:N:0:TCTGCAAG+GCTGCACT  
CGTCGAAGGAGATCTGTTTGATCGAGATTTTAAGACGAAAACGATCCAGGCTGCTGCTAATGGAAATT  
GGGGCAATGTAAAGCTCCAAATGCCAGTATGGCCGATGTGATGTACAATAAGTTGAAGAAACACGCG  
ATCATGATTGATCGC

```

FFFFFFFFFFFFFFFFFFFFFFFFFFFFFFFF:FFFFFFFFFFFFFFFFFFFFFFFFFFFFFFFF
FFFFFFF,FFFF:FFFFFFFF:FFFFFFFFFFFFFFFFFFFFFFFF:FFFFFFFFFFFFFFFF
FFFFFFFFEE:EEEE:E

```

+

@A00721:190:HGJW7DSXY:4:1217:28311:13823 1:N:0:TCTGCAAG+GCTGCACT  
CGTCGAAGGAGATCTGTTTGATCGAGATTTTAAGACGAAAACGATCCAGGCTGCTGCTAATGGAAATT  
GGGGCAATGTAAAGCTCCAAATGCCAGTATGGCCGATGTGATGTACAATAAGTTGAAGAAACACGCG  
ATCATGATTGATCGC

[illegible]

$+$ 

+

+

+

+

+

+

[illegible]



FFFFFFFFFFFFFFFFFFFFFFFFFFFFFFFFFFFFFFFFFFFFFFFFFFFFFFFFFFFFFFFFFFFFFFFFFFFFFFFF:FFFFFFFFF  
FFFFFFFFF:FFFFF

@A00721:190:HGJW7DSXY:4:2375:15365:9690 1:N:0:TCTGCAAG+GCTGCACT  
GTCAAGGAGATCTGTTTGATCGAGATTTTAAGACGAAAACGATCCAGGCTGCTGCTAATGGAAATTG  
GGGCAATGTAAAGCTCCAAATGCCAGTATGGCCGATGTGATGTACAATAAGTTGAAGAAACACGCGA  
TCATGATTGAGATCG

+

FFFFFFFFFFFFFFFFFFFFFFFFFFFFFFFFFFFFFFFFFFFFFFFFFFFFFFFFFFFFFFFFFFFFFFFFFFFFFFFF  
FFFFFFFFFFFFFFFFFFFFFFFFFFFFFFFFFFFFFFFFFFFFFFFFFFFFFFFFFFFFFFFFFFFFFFFFFFFFFFFF  
FFFFFFF,:FFFFFFF

@A00721:190:HGJW7DSXY:4:2418:9588:18286 1:N:0:TCTGCAAG+GCTGCACT  
GTCAAGGAGATCTGTTTGATCGAGATTTTAAGACGAAAACGATCCAGGCTGCTGCTAATGGAAATTG  
GGGCAATGTAAAGCTCCAAATGCCAGTATGGCCGATGTGATGTACAATAAGTTGAAGAAACACGCGA  
TCATGATTGAGATCG

+

FFFFFFFFFFFFFFFFFFFFFFFFFFFFFFFFFFFFFFFFFFFFFFFFFFFFFFFFFFFFFFFFFFFFFFFFFFFFFFFF:FFFF  
FFFFFFFFFFFFFFFFFFFFFFFFFFFFFFFFFFFFFFFFFFFFFFFFFFFFFFFFFFFFFFFFFFFFFFFFFFFFFFFF:FFFFFFFFFFFFF  
FFFFFFF,FFFFFFF

@A00721:190:HGJW7DSXY:4:2525:31919:31688 1:N:0:TCTGCAAG+GCTGCACT  
GTCAAGGAGATCTGTTTGATCGAGATTTTAAGACGAAAACGATCCAGGCTGCTGCTAATGGAAATTG  
GGGCAATGTAAAGCTCCAAATGCCAGTATGGCCGATGTGATGTACAATAAGTTGAAGAAACACGCGA  
TCATGATTGAGATCG

+

FFFFFFFFFFFFFFFFFFFFFFFFFFFFFFFFFFFFFFFFFFFFFFFFFFFFFFFFFFFFFFFFFFFFFFFFFFFFFFFF  
FFFFFFFFFFFFFFFFFFFFFFFFFFFFFFFFFFFFFFFFFFFFFFFFFFFFFFFFFFFFFFFFFFFFFFFFFFFFFFFF  
FFFFFFFFFFFFFFFFF

@A00721:190:HGJW7DSXY:4:1111:11885:31594 1:N:0:TCTGCAAG+GCTGCACT  
CGAGATTTTAAGACGAAAACGATCCAGGCTGCTGCTAATGGAAATTGGGGCAATGTAAAGCTCCAAAT  
GCCAGTATGGCCGATGTGATGTACAATAAGTTGAAGAAACACGCGATCATGATTGATCGCTGTGTTA  
TCGAGTATCGACACC

+

FFFFFFFFFFFFFFFFFFFFFFFFFFFFFFFFFFFFFFFFFFFFFFFFFFFFFFFFFFFFFFFFFFFFFFFFFFFFFFFF  
FFFFFFFFFFFFFFFFFFFFFFFFFFFFFFFFFFFFFFFFFFFFFFFFFFFFFFFFFFFFFFFFFFFFFFFFFFFFFFFF  
FF:FFFFFFFFFFFFF

@A00721:190:HGJW7DSXY:4:1375:30843:28009 1:N:0:TCTGCAAG+GCTGCACT  
CGAGATTTTAAGACGAAAACGATCCAGGCTGCTGCTAATGGAAATTGGGGCAATGTAAAGCTCCAAAT  
GCCAGTATGGCCGATGTGATGTACAATAAGTTGAAGAAACACGCGATCATGATTGATCGCTGTGTTA  
TCGAGTATCGACACC

+

FFFFFFFFFFFFF:FFFFFFFFFFFFFFFFFFFFFFFFFFFFFFFFFFFFFFFFFFFFFFFFFFFFFFFFFFFFFFFF  
FFFFFFFFFFFFFFFFFFFFFFFFFFFFFFFFFFFFFFFFFFFFFFFFFFFFFFFFFFFFFFFFFFFFFFFFFFFFFFFF  
FFFFFFFFFFFFFFFFF

@A00721:190:HGJW7DSXY:4:1654:14516:2300 1:N:0:TCTGCAAG+GCTGCACT  
CGAGATTTTAAGACGAAAACGATCCAGGCTGCTGCTAATGGAAATTGGGGCAATGTAAAGCTCCAAAT  
GCCAGTATGGCCGATGTGATGTACAATAAGTTGAAGAAACACGCGATCATGATTGATCGCTGTGTTA  
TCGAGTATCGACACC

+

FFF:FFF,FFFFFFFFFFFFFFFFFFFFF,F:FF,FF:FFFFFFFFFFFFFFFFFFFFFFFFFFFFFFFFFFFFF:  
FFF,F::FFFF:F,FF:F:FFFFFFFFF:FFFFFFF:FFFFFFFFFFFFF::,,FFFFFF:FFF:FFFFF  
F,FF,FFFFFF,F:F

@A00721:190:HGJW7DSXY:4:2325:31114:32957 1:N:0:TCTGCAAG+GCTGCACT  
CGAGATTTTAAGACGAAAACGATCCAGGCTGCTGCTAATGGAAATTGGGGCAATGTAAAGCTCCAAAT  
GCCAGTATGGCCGATGTGATGTACAATAAGTTGAAGAAACACGCGATCATGATTGATCGCTGTGTTA  
TCGAGTATCGACACC

+  
FFFFFFFFFFFFFFFFFFFFFFFFFFFFFFFFFFFFFFFFFFFFFFFFFFFFFFFFFFFFFFFFFFFFFFFF  
FFFFFFFFFFFFFFFFFFFFFFFFFFFFFFFFFFFFFFFFFFFFFFFFFFFFFFFFFFFFFFFFFFFFFFFF  
FFFFFFFFFFFFFFFF

@A00721:190:HGJW7DSXY:4:1122:20582:2910 1:N:0:TCTGCAAG+GCTGCACT  
CTGGTGTGCGATACTCGATAACACAGCGATCAATCATGATCGCGTGTCTTCAACTTATTGTACATCA  
CATCGGCCATACTGGGCATTTGGAGCTTTACATTGCCCAATTTCCATTAGCAGCAGCCTGGATCGTT  
TTCGTCTTAAATCT

+  
FFFFFFFFFFFFFFFFFFFFFFFFFFFFFFFFFFFFFFFFFFFFFFFFFFFFFFFFFFFFFFFFFFFFFFFF,FF  
FF,FFF:FF:FFFFFFFFFFFFFFFFFFFFFFFFFFFFFFFFFFFFFFFFFFFFFFFFFFFFFFFFFFFFF:  
FFFFFFFF:FFFFFF

@A00721:190:HGJW7DSXY:4:1160:16387:13964 1:N:0:TCTGCAAG+GCTGCACT  
CTGGTGTGCGATACTCGATAACACAGCGATCAATCATGATCGCGTGTCTTCAACTTATTGTACATCA  
CATCGGCCATACTGGGCATTTGGAGCTTTACATTGCCCAATTTCCATTAGCAGCAGCCTGGATCGTT  
TTCGTCTTAAATCT

+  
FFFFFFFFFFFFFFFFFFFFFFFFFFFFFFFFFFFFFFFFFFFFFFFFFFFFFFFFFFFFFFFFFFFFFFFF:FFFFFFFFFFFFFFFFFFFFFFFFFFFFFFFFFFFFFFFFFFFFFFFF:FFFFF  
FFFFFFFFFFFFFFFFFFFFFFFFFFFFFFFFFFFFFFFFFFFFFFFFFFFFFFFFFFFFFFFFFFFFFFFF:FFFFFFFFFFFFFFFFFFFFFFFFFFFFFFFFFFFFFFFFFFFFFFFF  
FFFFFFFFFFFFFFFF

@A00721:190:HGJW7DSXY:4:1336:17264:23938 1:N:0:TCTGCAAG+GCTGCACT  
CTGGTGTGCGATACTCGATAACACAGCGATCAATCATGATCGCGTGTCTTCAACTTATTGTACATCA  
CATCGGCCATACTGGGCATTTGGAGCTTTACAGTGCCCAATTTCCATTAGCAGCAGCCTGGATCGTT  
TTCGTCTTAAATCT

+  
:F,FFFFFFFFFFFFFFFFFFFFFFFFFFFFFFFFFFFFFFFFFFFFFFFFFFFFFFFFFFFFFFFF:F,FFFFFFFF:F,FFFFFF:FFFFF  
FFFFFFFFFFFF:FFFFFF,FFFFFFFF:FFFF,:FFFFFFFF:FFFFFFFFFFFFFFFF:FF,FFF:FF,F  
FFFFFF,:FFF:FFF

@A00721:190:HGJW7DSXY:4:1552:8703:16783 1:N:0:TCTGCAAG+GCTGCACT  
CTGGTGTGCGATACTCGATAACACAGCGATCAATCATGATCGCGTGTCTTCAACTTATTGTACATCA  
CATCGGCCATACTGGGCATTTGGAGCTTTACATTGCCCAATTTCCATTAGCAGCAGCCTGGATCGTT  
TTCGTCTTAAATCT

+  
FFFFFFFFFFFFFFFFFFFFFFFFFFFFFFFFFFFFFFFFFFFFFFFFFFFFFFFFFFFFFFFFFFFFFFFF  
FFFFFFFFFFFFFFFFFFFFFFFFFFFFFFFFFFFFFFFFFFFFFFFFFFFFFFFFFFFFFFFFFFFFFFFF  
FFFFFFFFFFFFFFFF

@A00721:190:HGJW7DSXY:4:1608:19741:8093 1:N:0:TCTGCAAG+GCTGCACT  
CTGGTGTGCGATACTCGATAACACAGCGATCAATCATGATCGCGTGTCTTCAACTTATTGTACATCA  
CATCGGCCATACTGGGCATTTGGAGCTTTACATTGCCCAATTTCCATTAGCAGCAGCCTGGATCGTT  
TTCGTCTTAAATCT

+  
FFFFFFFFFFFFFFFFFFFFFFFFFFFFFFFFFFFFFFFFFFFFFFFFFFFFFFFFFFFFFFFFFFFFFFFF  
FFFFFFFFFFFFFFFFFFFFFFFFFFFFFFFFFFFFFFFFFFFFFFFFFFFFFFFFFFFFFFFFFFFFFFFF  
FFFFFFFFFFFFFFFF

@A00721:190:HGJW7DSXY:4:1677:27498:11819 1:N:0:TCTGCAAG+GCTGCACT  
CTGGTGTGCGATACTCGATAACACAGCGATCAATCATGATCGCGTGTCTTCAACTTATTGTACATCA  
CATCGGCCATACTGGGCATTTGGAGCTTTACATTGCCCAATTTCCATTAGCAGCAGCCTGGATCGTT  
TTCGTCTTAAATCT

+  
FFFFFFFFFFFFFFFFFFFFFFFFFFFFFFFFFFFFFFFFFFFFFFFFFFFFFFFFFFFFFFFF:FFFFFF:FFFFFF:FFFFFF:FFFFFF  
FFFFFFFFFFFFFFFFFFFFFFFFFFFFFFFF:FFFFFF,FF:FFFFFFFFFFFFFFFF:FFFFFFFFFFFFFFFF  
FFFFFFFFFFFFFFFF

@A00721:190:HGJW7DSXY:4:2258:32244:9361 1:N:0:TCTGCAAG+GCTGCACT  
CTGGTGTGCGATACTCGATAACACAGCGATCAATCATGATCGCGTGTCTTCAACTTATTGTACATCA



@A00721:190:HGJW7DSXY:4:2202:25229:15718 1:N:0:TCTGCAAG+GCTGCACT  
CAGGCTGCTGCTAATGGAAATTGGGGCAATGTAAAGCTCCAAATGCCAGTATGGCCGATGTGATGTA  
CAATAAGTTGAAGAAACACGCGATCATGATTGATCGCTGTGTTATCGAGTATCGACACCAGTGTCCGA  
TTAATAGTGAGGGAT

+

FFFFFFFFFFFFFFFFFFFFFFFFFFFFFFFFFFFFFFFFFFFFFFFFFFFFFFFFFFFFFFFFFFFFFFFF,FFFFFFF  
FFFFFFFFFFFFFFFFFFFFFFFFFFFFFFFFFFFFFFFFFFFFFFFFFFFFFFFFFFFFFFFFFFFFFFFFFFFF  
FFFFFFFFFFFFFFFF

@A00721:190:HGJW7DSXY:4:2428:20039:20979 1:N:0:TCTGCAAG+GCTGCACT  
CAGGCTGCTGCTAATGGAAATTGGGGCAATGTAAAGCTCCAAATGCCAGTATGGCCGATGTGATGTA  
CAATAAGTTGAAGAAACACGCGATCATGATTGATCGCTGTGTTATCGAGTATCGACACCAGTGTCCGA  
TTAATAGTGAGGGAT

+

FFFFFFFFFFFFFFFFFFFFFFFFFFFFFFFFFFFFFFFFFFFFFFFFFFFFFFFFFFFFFFFFFFFFFFFF,FFFFFFFF:FFFFFF  
FFFFFFFFFFFFFFFFFFFFFFFFFFFFFFFFFFFFFFFFFFFFFFFFFFFFFFFFFFFFFFFFFFFFFFFFFFFF  
FFFFFFFFFFFFFFFF

@A00721:190:HGJW7DSXY:4:2428:19524:22529 1:N:0:TCTGCAAG+GCTGCACT  
CAGGCTGCTGCTAATGGAAATTGGGGCAATGTAAAGCTCCAAATGCCAGTATGGCCGATGTGATGTA  
CAATAAGTTGAAGAAACACGCGATCATGATTGATCGCTGTGTTATCGAGTATCGACACCAGTGTCCGA  
TTAATAGTGAGGGAT

+

FFFFFFFFFFFFFFFFFFFFFFFFFFFFFFFFFFFFFFFFFFFFFFFFFFFFFFFFFFFFFFFFFFFFFFFF:FFF  
FFFFFFFFFFFFFFFFFFFFFFFFFFFFFFFFFFFFFFFFFFFFFFFFFFFFFFFFFFFFFFFFFFFFFFFFFFFF  
FFFFFFFFFFFFFFFF

@A00721:190:HGJW7DSXY:4:2563:14687:3505 1:N:0:TCTGCAAG+GCTGCACT  
CAGGCTGCTGCTAATGGAAATTGGGGCAATGTAAAGCTCCAAATGCCAGTATGGCCGATGTGATGTA  
CAATAAGTTGAAGAAACACGCGATCATGATTGATCGCTGTGTTATCGAGTATCGACACCAGTGTCCGA  
TTAATAGTGAGGGAT

+

FFFFFFFFFFFFFFFFFFFFFFFFFFFFFFFFFFFFFFFFFFFFFFFFFFFFFFFFFFFFFFFFFFFFFFFFFFFF  
FFFFFFFFFFFFFFFFFFFFFFFFFFFFFFFFFFFFFFFFFFFFFFFFFFFFFFFFFFFFFFFFFFFFFFFFFFFF  
FFFFFFFFFFFFFFFF

@A00721:190:HGJW7DSXY:4:1306:24731:5368 1:N:0:TCTGCAAG+GCTGCACT  
CTCCAAATGCCAGTATGGCCGATGTGATGTACAATAAGTTGAAGAAACACGCGATCATGATTGATCG  
CTGTGTTATCGAGTATCGACACCAGTGTCCGATTAATAGTGAGGGATCCGTTAGGATCCAGGTGCACG  
ATAGTCGAATGATGG

+

FFFFFFFFFFFFFFFF:FFFFFFFF,FFFFFFFF,FFFFFFFFFFFFFFFFFFFFFFFFFFFFFFFF:FFFFFFFF  
FFFFFFFFFFFFFFFFFFFFFFFFFFFFFFFFFFFFFFFF, :FFFFF:FFFFFFFF:FFFFFFFF:FFFFF:F:FFFFF  
FFFFFFFFFFFF:FF

@A00721:190:HGJW7DSXY:4:1326:9507:10379 1:N:0:TCTGCAAG+GCTGCACT  
CTCCAAATGCCAGTATGGCCGATGTGATGTACAATAAGTTGAAGAAACACGCGATCATGATTGATCG  
CTGTGTTATCGAGTATCGACACCAGTGTCCGATTAATAGTGAGGGATCCGTTAGGATCCAGGTGCACG  
ATAGTCGAATGATGG

+

FFFFFFFFFFFFFFFFFFFFFFFFFFFFFFFFFFFFFFFFFFFFFFFFFFFFFFFFFFFFFFFFFFFFFFFFFFFF  
FFFFFFFFFFFFFFFFFFFFFFFFFFFFFFFFFFFFFFFFFFFFFFFFFFFFFFFFFFFFFFFFFFFFFFFFFFFF, :FF:FFFFFF:FFFFF  
FFFFFFFFFFFFFFFF

@A00721:190:HGJW7DSXY:4:1344:24939:10739 1:N:0:TCTGCAAG+GCTGCACT  
CTCCAAATGCCAGTATGGCCGATGTGATGTACAATAAGTTGAAGAAACACGCGATCATGATTGATCG  
CTGTGTTATCGAGTATCGACACCAGTGTCCGATTAATAGTGAGGGATCCGTTAGGATCCAGGTGCACG  
ATAGTCGAATGATGG

+

:FFFF:FFFF,, ,FFFFFFFF, :FFFF,FFFFFFFF:FFFFFFFF:FFF:FFFFFFFF

,FFFF:FFF:FFFFFFFFFFFF,FFFF,:FF:F,FFFFFFFFF:,FFFF,,:FFFFFFFFF,:F,FFFF  
FFF:FFFFFFFFFFFF

@A00721:190:HGJW7DSXY:4:1417:5737:32283 1:N:0:TCTGCAAG+GCTGCACT  
CTCCAAATGCCAGTATGGCCGATGTGATGTACAATAAGTTGAAGAAACACGCGATCATGATTGATCG  
CTGTGTTATCGAGTATCGACACCAGTGTCCGATTAATAGTGAGGGATCCGTTAGGATCCAGGTGCACG  
ATAGTCGAATGATGG

+  
FFFFFFFFFFFFFFFFFFFFFFFFFFFFFFFFFFFFFFFFFFFFFFFFFFFFFFFFFFFFFFFFFFFFFFFFFFFF  
FFFFFFFFFFFFFFFFFFFFFFFFFFFFFFFFFFFFFFFFFFFFFFFFFFFFFFFFFFFFFFFFFFFFFFFFFFFF:FFFFFFFF  
FFFFFFFFF,FFFFFF

@A00721:190:HGJW7DSXY:4:1442:31024:36808 1:N:0:TCTGCAAG+GCTGCACT  
CTCCAAATGCCAGTATGGCCGATGTGATGTACAATAAGTTGAAGAAACACGCGATCATGATTGATCG  
CTGTGTTATCGAGTATCGACACCAGTGTCCGATTAATAGTGAGGGATCCGTTAGGATCCAGGTGCACG  
ATAGTCGAATGATGG

+  
FFFFFFFFFFFFFFFFFFFFFFFFFFFFFFFFFFFFFFFFFFFFFFFFFFFFFFFFFFFFFFFFFFFFFFFFFFFF  
FFFFFFFFFFFFFFFFFFFFFFFFFFFFFFFFFFFFFFFFFFFFFFFFFFFFFFFFFFFFFFFFFFFFFFFFFFFF::FF:FFFFFFFFFFFF  
FFFFFFFFFFFFFFFFFFFF

@A00721:190:HGJW7DSXY:4:1624:9968:25332 1:N:0:TCTGCAAG+GCTGCACT  
CTCCAAATGCCAGTATGGCCGATGTGATGTACAATAAGTTGAAGAAACACGCGATCATGATTGATCG  
CTGTGTTATCGAGTATCGACACCAGTGTCCGATTAATAGTGAGGGATCCGTTAGGATCCAGGTGCACG  
ATAGTCGAATGATGG

+  
FFFFFFFFFFFFFFFFFFFFFFFFFFFFFFFFFFFFFFFFFFFFFFFFFFFFFFFFFFFFFFFFFFFFFFFFFFFF  
FFFFFFFFFFFFFFFFFFFFFFFFFFFFFFFFFFFFFFFFFFFFFFFFFFFFFFFFFFFFFFFFFFFFFFFFFFFF,F:FFFFFFFFFFFFFFFF  
F::FFFFFFFFFFFFF

@A00721:190:HGJW7DSXY:4:2119:30834:30968 1:N:0:TCTGCAAG+GCTGCACT  
CTCCAAATGCCAGTATGGCCGATGTGATGTACAATAAGTTGAAGAAACACGCGATCATGATTGATCG  
CTGTGTTATCGAGTATCGACACCAGTGTCCGATTAATAGTGAGGGATCCGTTAGGATCCAGGTGCACG  
ATAGTCGAATGATGG

+  
FFFFFFFFFFFFFFFFFFFFFFFFFFFFFFFFFFFFFFFFFFFFFFFFFFFFFFFFFFFFFFFFFFFFFFFFFFFF  
FFFFFFFFFFFFFFFFFFFFFFFFFFFFFFFFFFFFFFFFFFFFFFFFFFFFFFFFFFFFFFFFFFFFFFFFFFFF:F,FFFFFF:FFFFFFFF  
FFFFFFFFFFFFFFFFFFFF

@A00721:190:HGJW7DSXY:4:2549:18530:31798 1:N:0:TCTGCAAG+GCTGCACT  
CTCCAAATGCCAGTATGGCCGATGTGATGTACAAAAGTTGAAGAAACACGCGATCATGATTGATCG  
CTGTGTTATCGAGTATCGACACCAGTGTCCGATTAATAGTGAGGGATCCGTTAGGATCCAGGTGCACG  
ATAGTCGAATGATGG

+  
FF:FFFFFF,FF,FFFFF:,F:F:FF:,FFFFF,FFFFFFFFF:FFFFFF,,FFF:FFFFFFFF  
FF,FFF:,F,FF,,F:FFFFFFFFF:FFFF,FFFFFFFFF:,FFFFF:F,,,:FFF:F:,F:F,FF  
FF:,FFFF,F,,F,F

@A00721:190:HGJW7DSXY:4:2608:22941:11882 1:N:0:TCTGCAAG+GCTGCACT  
CTCCAAATGCCAGTATGGCCGATGTGATGTACAATAAGTTGAAGAAACACGCGATCATGATTGATCG  
CTGTGTTATCGAGTATCGACACCAGTGTCCGATTAATAGTGAGGGATCCGTTAGGATCCAGGTGCACG  
ATAGTCGAATGATGG

+  
FFFFFFFFFFFFFFFFFFFFFFFFFFFFFFFFFFFFFFFFFFFFFFFFFFFFFFFFFFFFFFFFFFFFFFFFFFFF  
FFFFFFFFFFFFFFFFFFFFFFFFFFFFFFFFFFFFFFFFFFFFFFFFFFFFFFFFFFFFFFFFFFFFFFFFFFFF:FFFFFFF  
F:FFFFFFFFFFFFF

@A00721:190:HGJW7DSXY:4:2644:25129:17550 1:N:0:TCTGCAAG+GCTGCACT  
CTCCAAATGCCAGTATGGCCGATGTGATGTACAATAAGTTGAAGAAACACGCGATCATGATTGATCG  
CTGTGTTATCGAGTATCGACACCAGTGTCCGATTAATAGTGAGGGATCCGTTAGGATCCAGGTGCACG  
ATAGTCGAATGATGG

+  
FFFFFFFFFFFFFFFFFFFFFFFFFFFFFFFFFFFFFFFFFFFFFFFFFFFFFFFFFFFFFFFFFFFFFFFFFFFF,FFFFFFFFFFFFFFF  
FFFFFFFFFFFFFFFFFFFFFFFFFFFFFFFFFFFFFFFFFFFFFFFFFFFFFFFFFFFFFFFFFFFFFFFFFFFF,FFFFFFFFFFFFFFF:FF  
FFFFFFFFFFFFFFFFFFFF  
@A00721:190:HGJW7DSXY:4:2122:27272:7952 1:N:0:TCTGCAAG+GCTGCACT  
CCCAGTATGGCCGATGTGATGTACAATAAGTTGAAGAAACACGCGATCATGATTGATCGCTGTGTTAT  
CGAGTATCGACACCAGTGTCCGATTAATAGTGAGGGATCCGTTAGGATCCAGGTGCACGATAGTCGAA  
TGATGGGAACAGCGT  
+  
:FFFFF,FFFFFFFFFFFFFFFFFFFFFFFFFFFFFFFFFFFFFFFFFFFFFFFFFFFFFFFFFFFFFFFF:F  
FFFFFFFFF:FFFFFFFFFFFFFFFFFFFFFFFFFFFFFFFFFFFFFFFFFFFFFFFFFFFFFFFFFFFFFFFF,F  
FFFFFFFFFFFFFFFFFFFFFFFFFFFFFFFFFFFFFFFFFFFFFFFFFFFFFFFFFFFFFFFF  
FFFFFFFFF:,FFFFFFF  
@A00721:190:HGJW7DSXY:4:2122:30273:8265 1:N:0:TCTGCAAG+GCTGCACT  
CCCAGTATGGCCGATGTGATGTACAATAAGTTGAAGAAACACGCGATCATGATTGATCGCTGTGTTAT  
CGAGTATCGACACCAGTGTCCGATTAATAGTGAGGGATCCGTTAGGATCCAGGTGCACGATAGTCGAA  
TGATGGGAACAGCGT  
+  
FFFFFFFFFFFFFFFFFFFFFFFFFFFFFFFFFFFFFFFFFFFFFFFFFFFFFFFFFFFFFFFFFFFFFFFFFFFF  
FFFFFFFFFFFFFFFFFFFFFFFFFFFFFFFFFFFFFFFFFFFFFFFFFFFFFFFFFFFFFFFF:F  
FFFFFFFFFFFFFFFFFFFFFFFFFFFFFFFFFFFFFFFFFFFFFFFFFFFFFFFFFFFFFFFF  
FFFFFFFFF:  
@A00721:190:HGJW7DSXY:4:2161:1877:36683 1:N:0:TCTGCAAG+GCTGCACT  
CCCAGTATGGCCGATGTGATGTACAATAAGTTGAAGAAACACGCGATCATGATTGATCGCTGTGTTAT  
CGAGTATCGACACCAGTGTCCGATTAATAGTGAGGGATCCGTTAGGATCCAGGTGCACGATAGTCGAA  
TGATGGGAACAGCGT  
+  
FFFFFFF:FFFFFFFFFFFFFFFFFFFFFFFFFFFFFFFFFFFFFFFFFFFFFFFFFFFFFFFFFFFFFFFF:F  
FFFFFFFFFFFFFFFFFFFFFFFFFFFFFFFFFFFFFFFFFFFFFFFFFFFFFFFFFFFFFFFF:F,F,FFF:FFFFFFFFFFFFFFFFFFFFFFFF  
FFFFFFFFF,FFFFFFF  
@A00721:190:HGJW7DSXY:4:1317:32027:23797 1:N:0:TCTGCAAG+GCTGCACT  
AGTATGGCCGATGTGATGTACAATAAGTTGAAGAAACACGCGATCATGATTGATCGCTGTGTTATCGA  
GTATCGACACCAGTGTCCGATTAATAGTGAGGGATCCGTTAGGATCCAGGTGCACGATAGTCGAATGA  
TGGAACAGCGAGAT  
+  
FFFFFFFFFFFFFFFFFFFFFFFFFFFFFFFFFFFFFFFFFFFFFFFFFFFFFFFFFFFFFFFFFFFFFFFFFFFF  
FFFFFFFFFFFFFFFFFFFFFFFFFFFFFFFFFFFFFFFFFFFFFFFFFFFFFFFFFFFFFFFF:F  
FFFFFFF:FFFFFFFFF  
@A00721:190:HGJW7DSXY:4:1425:6153:31532 1:N:0:TCTGCAAG+GCTGCACT  
AGTATGGCCGATGTGATGTACAATAAGTTGAAGAAACACGCGATCATGATTGATCGCTGTGTTATCGA  
GTATCGACACCAGTGTCCGATTAATAGTGAGGGATCCGTTAGGATCCAGGTGCACGATAGTCGAATGA  
TGGAACAGCGAGAT  
+  
FFFFFFFFFFFFFFFFFFFFFFFFFFFFFFFFFFFFFFFFFFFFFFFFFFFFFFFFFFFFFFFFFFFFFFFFFFFF  
FFFFFFFFFFFFFFFFFFFFFFFFFFFFFFFFFFFFFFFFFFFFFFFFFFFFFFFFFFFFFFFF:F  
FFFFFFFFFFFFFFFFFFFF  
@A00721:190:HGJW7DSXY:4:1536:28619:15608 1:N:0:TCTGCAAG+GCTGCACT  
AGTATGGCCGATGTGATGTACAATAAGTTGAAGAAACACGCGATCATGATTGATCGCTGTGTTATCGA  
GTATCGACACCAGTGTCCGATTAATAGTGAGGGATCCGTTAGGATCCAGGTGCACGATAGTCGAATGA  
TGGAACAGCGAGAT  
+  
FFFFFFFFFFFFFFFFFFFFFFFFFFFFFFFFFFFFFFFFFFFFFFFFFFFFFFFFFFFFFFFFFFFFFFFFFFFF  
FFFFFFFFFFFFFFFFFFFFFFFFFFFFFFFFFFFFFFFFFFFFFFFFFFFFFFFFFFFFFFFF:F  
FFFFFFFFFFFFFFFFFFFF  
@A00721:190:HGJW7DSXY:4:1669:19352:20102 1:N:0:TCTGCAAG+GCTGCACT  
AGTATGGCCGATGTGATGTACAATAAGTTGAAGAAACACGCGATCATGATTGATCGCTGTGTTATCGA

GTATCGACACCAGTGTCCGATTAATAGTGAGGGATCCGTTAGGATCCAGGTGCACGATAGTCGAATGA  
TGGGAACAGCGAGAT

```
FFFFFFFFFFFFFFFFFFFFFFFFFFFFFFFFFFFFFFFFFFFFFFFFFFFFFFFFFFFFFFFFFFFFF
FFFFFFFFFFFFFFFFFFFFFFFFFFFFFFFFFFFFFFFF:FFFF:FFFFFFFFFFFFFFFFFFFFFFFFF
FFF:FF:FFFFFFFF
```

 $+$ [illegible]

+

[illegible]

+

```
FFFFFFFFFFFFFFFFFFFFFFFFFFFFFFFFFFFFFFFFFFFFFFFFFFFFFFFFFFFF:FFFFFFFFFFFFFFFFFFFFFFFF
FFFFFFFFFFFFFFFFFFFFFFFFFFFFFFFFFFFFFFFFFFFFFFFFFFFFFFFFFFFF,FFFFFFFFFFFFFFFFFFFFFFFFFFFFF,FFFFF
,FFFFFFFFFFFF,FFF
```

+

```
FFFFFFFFFFFFFFFFFFFFFFFFFFFFFFFFFFFFFFFFFFFFFFFFFFFFFFFFFFFFFFFF
FFFFFFFFFFFFFFFFFFFFFFFFFFFFF:FFFFFFFFFFFFFFFFFFFFFFFFFFFFFFFF
:FFFFFFFFFFFFFFFF
```

+

[illegible]

+

```

FFFFFFFFFFFFFFFFFFFFFFFFFFFFFFFFFFFFFFFFFFFFFFFFFFFFFFFFFFFFFFFFFFFFFFFF
FFFFFFFFFFFFFFFFFFFFFFFFFFFFFFFF:FFFFFF,FFFFFFFFFFFFFFFFFFFFFFFFFFFFFFFF
:FFFFFFFFFFFFFFFF

```

@A00721:190:HGJW7DSXY:4:1351:3965:28087 1:N:0:TCTGCAAG+GCTGCACT  
GGCCGATGTGATGTACAATAAGTTGAAGAAACACGCGATCATGATTGATCGCTGTGTTATCGAGTATC  
GACACCAGTGTCCGATTAATAGTGAGGGATCCGTTAGGATCCAGGTGCACGATAGTCGAATGATGGGA  
ACAGCGTCTAAACAA

+

FFFFFFFFFFFFFFFFFFFFFFFFFFFFFFFFFFFFFFFFFFFFFFFFFFFFFFFFFFFFFFFFFFFFFFFF  
FFFFFFFFFFFFFFFFFFFFFFFFFFFFFFFFFFFFFFFFFFFFFFFFFFFFFFFFFFFFFFFFFFFFFFFF  
:FFFFFFFFFFFFFFFF

@A00721:190:HGJW7DSXY:4:1412:8151:36307 1:N:0:TCTGCAAG+GCTGCACT  
GGCCGATGTGATGTACAATAAGTTGAAGAAACACGCGATCATGATTGATCGCTGTGTTATCGAGTATC  
GACACCAGTGTCCGATTAATAGTGAGGGATCCGTTAGGATCCAGGTGCACGATAGTCGAATGATGGGA  
ACAGCGTCTAAACAA

+

FFFFFFFFFFFFFFFFFFFFFFFFFFFFFFFFFFFFFFFFFFFFFFFFFFFFFFFFFFFFFFFFFFFFFFFF  
FFFFFFFFFFFFFFFFFFFFFFFFFFFFFFFFFFFFFFFFFFFFFFFFFFFFFFFFFFFFFFFFFFFFFFFF  
FFFFFFFFFFFFFFFF

@A00721:190:HGJW7DSXY:4:1464:15058:28917 1:N:0:TCTGCAAG+GCTGCACT  
GGCCGATGTGATGTACAATAAGTTGAAGAAACACGCGATCATGATTGATCGCTGTGTTATCGAGTATC  
GACACCAGTGTCCGATTAATAGTGAGGGATCCGTTAGGATCCAGGTGCACGATAGTCGAATGATGGGA  
ACAGCGTCTAAACAA

+

FFFFFFFFFFFFFFFFFFFFFFFFFFFFFFFFFFFFFFFFFFFFFFFFFFFFFFFFFFFFFFFFFFFFFFFF  
FFFFFFFFFFFFFFFFFFFFFFFFFFFFFFFFFFFFFFFFFFFFFFFFFFFFFFFFFFFFFFFFFFFFFFFF  
FFFFFFFFFFFFFFFF

@A00721:190:HGJW7DSXY:4:1473:30309:14340 1:N:0:TCTGCAAG+GCTGCACT  
GGCCGATGTGATGTACAATAAGTTGAAGAAACACGCGATCATGATTGATCGCTGTGTTATCGAGTATC  
GACACCAGTGTCCGATTAATAGTGAGGGATCCGTTAGGATCCAGGTGCACGATAGTCGAATGATGGGA  
ACAGCGTCTAAACAA

+

FFFFFFFFFFFFFFFFFFFFFFFFFFFFFFFFFFFFFFFFFFFFFFFFFFFFFFFFFFFFFFFFFFFFFFFF  
FFFFFFFFFFFFFFFFFFFFFFFFFFFFFFFFFFFFFFFFFFFFFFFFFFFFFFFFFFFFFFFFFFFFFFFF  
FFFFFFFFFFFFFFFF

@A00721:190:HGJW7DSXY:4:1527:11469:27774 1:N:0:TCTGCAAG+GCTGCACT  
GGCCGATGTGATGTACAATAAGTTGAAGAAACACGCGATCATGATTGATCGCTGTGTTATCGAGTATC  
GACACCAGTGTCCGATTAATAGTGAGGGATCCGTTAGGATCCAGGTGCACGATAGTCGAATGATGGGA  
ACAGCGTCTAAACAA

+

FFFFFFFF:FFFFFFFF:FFFFFFFFFFFFFFFFFFFFFFFFFFFFFFFFFFFFFFFFFFFFFFFFFFFF  
FFFFFFFFFFFFFFFFFFFFFFFFFFFFFFFFFFFFFFFFFFFFFFFFFFFFFFFFFFFFFFFFFFFFFFFF  
,FFFFFFFFFFFFFFFF

@A00721:190:HGJW7DSXY:4:1606:26087:15107 1:N:0:TCTGCAAG+GCTGCACT  
GGCCGATGTGATGTACAATAAGTTGAAGAAACACGCGATCATGATTGATCGCTGTGTTATCGAGTATC  
GACACCAGTGTCCGATTAATAGTGAGGGATCCGTTAGGATCCAGGTGCACGATAGTCGAATGATGGGA  
ACAGCGTCTAAACAA

+

FFFFFFFFFFFFFFFFFFFFFFFFFFFFFFFFFFFFFFFFFFFFFFFFFFFFFFFFFFFFFFFFFFFFFFFF  
FFFFFFFFFFFFFFFFFFFFFFFFFFFFFFFFFFFFFFFFFFFFFFFFFFFFFFFFFFFFFFFFFFFFFFFF  
:FFFFFFFFFFFFFFFF

@A00721:190:HGJW7DSXY:4:2108:25509:8594 1:N:0:TCTGCAAG+GCTGCACT  
GGCCGATGTGATGTACAATAAGTTGAAGAAACACGCGATCATGATTGATCGCTGTGTTATCGAGTATC  
GACACCAGTGTCCGATTAATAGTGAGGGATCCGTTAGGATCCAGGTGCACGATAGTCGAATGATGGGA  
ACAGCGTCTAAACAA

+

FF:FFFFFFFF:FFFFFFFF:FFFFFFFFFFFFFFFFFFFFFFFFFFFFFFFFFFFFFFFFFFFFFFFF



FFFFFFFFFFFFFFFF:FFF,:FFFFFFFFFFFFFFFFFFFFFFFFFFFFFFFF:FFFFFFFFFFFFFF:FFFFFFFF  
FFFFFFFFFFFFFFFF

@A00721:190:HGJW7DSXY:4:2108:25120:9048 1:N:0:TCTGCAAG+GCTGCACT  
GGCCGATGTGATGTACAATAAGTTGAAGAAACACGCGATCATGATTGATCGCTGTGTTATCGAGTATC  
GACACCAGTGTCCGATTAATAGTGAGGGATCCGTTAGGATCCAGGTGCACGATAGTCGAATGATGGGA  
ACAGCGTCTAAACAA

+

FFFFFFFFFFFFFFFFFFFFFFFFFFFFFFFFFFFFFFFFFFFFFFFFFFFFFFFFFFFFFFFFFFFFFFFFFFFFFFFF  
FFFFFFFFFFFFFFFFFFFFFFFFFFFFFFFFFFFFFFFFFFFFFFFFFFFFFFFFFFFFFFFFFFFFFFFFFFFFFFFF  
FFFFFFFFFFFFFFFF

@A00721:190:HGJW7DSXY:4:2156:21712:5212 1:N:0:TCTGCAAG+GCTGCACT  
GGCCGATGTGATGTACAATAAGTTGAAGAAACACGCGATCATGATTGATCGCTGTGTTATCGAGTATC  
GACACCAGTGTCCGATTAATAGTGAGGGATCCGTTAGGATCCAGGTGCACGATAGTCGAATGATGGGA  
ACAGCGTCTAAACAA

+

FFFFFFFF:FFFFFFFFFFFFFFFFFFFFFFFFFFFFFFFFFFFFFFFFFFFFFFFFFFFFFFFFFFFFFFFFFFFFFFFF  
FFFFFFFFFFFFFFFFFFFFFFFFFFFFFFFFFFFFFFFFFFFFFFFFFFFFFFFFFFFFFFFFFFFFFFFFFFFFFFFF  
,FFFFFFFF

@A00721:190:HGJW7DSXY:4:2177:31864:12837 1:N:0:TCTGCAAG+GCTGCACT  
GGCCGATGTGATGTACAATAAGTTGAAGAAACACGCGATCATGATTGATCGCTGTGTTATCGAGTATC  
GACACCAGTGTCCGATTAATAGTGAGGGATCCGTTAGGATCCAGGTGCACGATAGTCGAATGATGGGA  
ACAGCGTCTAAACAA

+

FFFFFFFFFFFFFFFFFFFFFFFFFFFFFFFFFFFFFFFFFFFFFFFFFFFFFFFFFFFFFFFFFFFFFFFFFFFFFFFF  
FFFFFFFFFFFFFFFFFFFFFFFFFFFFFFFFFFFFFFFFFFFFFFFFFFFFFFFFFFFFFFFFFFFFFFFFFFFFFFFF  
FFFFFFFFFFFFFFFF

@A00721:190:HGJW7DSXY:4:2322:3540:23594 1:N:0:TCTGCAAG+GCTGCACT  
GGCCGATGTGATGTACAATAAGTTGAAGAAACACGCGATCATGATTGATCGCTGTGTTATCGAGTATC  
GACACCAGTGTCCGATTAATAGTGAGGGATCCGTTAGGATCCAGGTGCACGATAGTCGAATGATGGGA  
ACAGCGTCTAAACAA

+

FF,, :F,FFFF:,FFFF,FFFF,FF,FFFFFFFF,FFFFFFFF,FF::FF,F,,FFFFF,:F:F  
FFFFFFFF:FF,FFFFF,FFFFF:FFFF:F,,::FFFFFF,FF,FFF,FF:FFFF::FFF:,FFF,FF  
,FF:F,F:FFFF,FF

@A00721:190:HGJW7DSXY:4:2371:15420:11788 1:N:0:TCTGCAAG+GCTGCACT  
GGCCGATGTGATGTACAATAAGTTGAAGAAACACGCGATCATGATTGATCGCTGTGTTATCGAGTATC  
GACACCAGTGTCCGATTAATAGTGAGGGATCCGTTAGGATCCAGGTGCACGATAGTCGAATGATGGGA  
ACAGCGTCTAAACAA

+

FFFFFFFF:FFFFFF:FFFFFFFFFFFFFFFFFFFFFFFFFFFFFFFFFFFFFFFFFFFFFFFFFFFFFFFF  
FFFFFFFFFFFFFFFFFFFFFFFFFFFFFFFFFFFFFFFFFFFFFFFFFFFFFFFFFFFFFFFFFFFFFFFF  
FFFFFFFFFFFFFFFF

@A00721:190:HGJW7DSXY:4:2375:26368:14716 1:N:0:TCTGCAAG+GCTGCACT  
GGCCGATGTGATGTACAATAAGTTGAAGAAACACGCGATCATGATTGATCGCTGTGTTATCGAGTATC  
GACACCAGTGTCCGATTAATAGTGAGGGATCCGTTAGGATCCAGGTGCACGATAGTCGAATGATGGGA  
ACAGCGTCTAAACAA

+

FFFFFFFFFFFFFFFFFFFFFFFFFFFFFFFFFFFFFFFFFFFFFFFFFFFFFFFFFFFFFFFFFFFFFFFF  
FFFFF,FFFFFFFFFFFFFFFFFFFFFFFFFFFFFFFFFFFFFFFFFFFFFFFFFFFFFFFFFFFFFFFF  
FFFFFFFFFFFFFFFF

@A00721:190:HGJW7DSXY:4:2411:23439:2347 1:N:0:TCTGCAAG+GCTGCACT  
GGCCGATGTGATGTACAATAAGTTGAAGAAACACGCGATCATGATTGATCGCTGTGTTATCGAGTATC  
GACACCAGTGTCCGATTAATAGTGAGGGATCCGTTAGGATCCAGGTGCACGATAGTCGAATGATGGGA  
ACAGCGTCTAAACAA

+  
FFFFFFFFFFFFFFFFFFFFFFFFFFFFFFFFFFFFFFFFFFFFFFFFFFFFFFFFFFFFFFFF  
FFFFFFFFFFFFFFFFFFFFFFFFFFFFFFFFFFFFFFFFFFFFFFFFFFFFFFFFFFFFFFFF  
FFFFFFFFFFFFFFFFFFFFFFFFFFFFFFFFFFFFFFFFFFFFFFFFFFFFFFFFFFFFFFFF  
FFFFFFFFFFFFFFFFFFFFFFFFFFFFFFFFFFFFFFFFFFFFFFFFFFFFFFFFFFFFFFFF

@A00721:190:HGJW7DSXY:4:2436:7003:29622 1:N:0:TCTGCAAG+GCTGCACT  
GCCGATGTGATGTACAATAAGTTGAAGAAACACGCGATCATGATTGATCGCTGTGTTATCGAGTATC  
GACACCAGTGTCCGATTAATAGTGAGGGATCCGTTAGGATCCAGGTGCACGATAGTCGAATGATGGGA  
ACAGCGTCTAAACAA

+  
FFFFFFFFFFFFFFFFFFFFFFFFFFFFFFFFFFFFFFFFFFFFFFFFFFFFFFFFFFFFFFFF  
FFFFFFFFFFFFFFFFFFFFFFFFFFFFFFFFFFFFFFFFFFFFFFFFFFFFFFFFFFFFFFFF  
FFFFFFFFFFFFFFFFFFFFFFFFFFFFFFFFFFFFFFFFFFFFFFFFFFFFFFFFFFFFFFFF

@A00721:190:HGJW7DSXY:4:1122:2998:11130 1:N:0:TCTGCAAG+GCTGCACT  
GCCGATGTGATGTACAATAAGTTGAAGAAACACGCGATCATGATTGATCGCTGTGTTATCGAGTATCG  
ACACCAGTGTCCGATTAATAGTGAGGGATCCGTTAGGATCCAGGTGCACGATAGTCGAATGATGGGAA  
CAGCGTCTAAACAAG

+  
:FFFFFFFF:FFFFFFFF,FFFFFFFF:FFFFFFFFFFFFFFFF,FFFFFF:F:FFFFFFFF:F:FFF  
FFFFFFFFFFFFFFFF:FFFFFFFFFFFFFFFF:FFFF:F,:FFFFFFFFFFFFFFFFFFFFFFFFFFFFFFFF:F,  
FFF:FF:FFF:FF:F

@A00721:190:HGJW7DSXY:4:1152:21640:20776 1:N:0:TCTGCAAG+GCTGCACT  
GCCGATGTGATGTACAATAAGTTGAAGAAACACGCGATCATGATTGATCGCTGTGTTATCGAGTATCG  
ACACCAGTGTCCGATTAATAGTGAGGGATCCGTTAGGATCCAGGTGCACGATAGTCGAATGATGGGAA  
CAGCGTCTAAACAAG

+  
FFFFFFFFFFFFFFFFFFFFFFFFFFFFFFFFFFFFFFFFFFFFFFFFFFFFFFFFFFFFFFFF  
FFFFFFFFFFFFFFFFFFFFFFFFFFFFFFFFFFFFFFFFFFFFFFFFFFFFFFFFFFFFFFFF  
FFFFFFFFFFFFFFFFFFFFFFFFFFFFFFFFFFFFFFFFFFFFFFFFFFFFFFFFFFFFFFFF

@A00721:190:HGJW7DSXY:4:1351:29704:11005 1:N:0:TCTGCAAG+GCTGCACT  
GCCGATGTGATGTACAATAAGTTGAAGAAACACGCGATCATGATTGATCGCTGTGTTATCGAGTATCG  
ACACCAGTGTCCGATTAATAGTGAGGGATCCGTTAGGATCCAGGTGCACGATAGTCGAATGATGGGAA  
CAGCGTCTAAACAAG

+  
FFFFFFFFFFFFFFFFFFFFFFFFFFFFFFFFFFFFFFFFFFFFFFFFFFFFFFFFFFFFFFFF  
FFFFFFFFFFFFFFFFFFFFFFFFFFFFFFFFFFFFFFFFFFFFFFFFFFFFFFFFFFFFFFFF  
FFFFFFFFFFFFFFFFFFFFFFFFFFFFFFFFFFFFFFFFFFFFFFFFFFFFFFFFFFFFFFFF

@A00721:190:HGJW7DSXY:4:1439:14434:8954 1:N:0:TCTGCAAG+GCTGCACT  
GCCGATGTGATGTACAATAAGTTGAAGAAACACGCGATCATGATTGATCGCTGTGTTATCGAGTATCG  
ACACCAGTGTCCGATTAATAGTGAGGGATCCGTTAGGATCCAGGTGCACGATAGTCGAATGATGGGAA  
CAGCGTCTAAACAAG

+  
FFFFFFFFFFFFFFFFFFFFFFFFFFFFFFFFFFFFFFFFFFFFFFFFFFFFFFFFFFFFFFFF  
F:FFFFFFFFFFFFFFFFFFFFFFFFFFFFFFFFFFFFFFFFFFFFFFFFFFFFFFFFFFFFFFFF  
FFFFFFFFFFFFFFFFFFFFFFFFFFFFFFFFFFFFFFFFFFFFFFFFFFFFFFFFFFFFFFFF

@A00721:190:HGJW7DSXY:4:1474:31819:13730 1:N:0:TCTGCAAG+GCTGCACT  
GCCGATGTGATGTACAATAAGTTGAAGAAACACGCGATCATGATTGATCGCTGTGTTATCGAGTATCG  
ACACCAGTGTCCGATTAATAGTGAGGGATCCGTTAGGATCCAGGTGCACGATAGTCGAATGATGGGAA  
CAGCGTCTAAACAAG

+  
FFFFFFFFFFFFFFFFFFFFFFFFFFFFFFFFFFFFFFFFFFFFFFFFFFFFFFFFFFFFFFFF  
FFFFFFFFFFFFFFFFFFFFFFFFFFFFFFFFFFFFFFFFFFFFFFFFFFFFFFFFFFFFFFFF  
FFFFFFFFFFFFFFFFFFFFFFFFFFFFFFFFFFFFFFFFFFFFFFFFFFFFFFFFFFFFFFFF

@A00721:190:HGJW7DSXY:4:1508:14823:3740 1:N:0:TCTGCAAG+GCTGCACT  
GCCGATGTGATGTACAATAAGTTGAAGAAACACGCGATCATGATTGATCGCTGTGTTATCGAGTATCG

ACACCAGTGTCCGATTAATAGTGAGGGATCCGTTAGGATCCAGGTGCACGATAGTCGAATGATGGGAA  
CAGCGTCTAAACAAG

```

FFFFFFFFFFFFFFFFFFFFFFFFFFFFFFFF:FFFFFFFFFFFFFFFFFFFFFFFFFFFFFFFF
FFFFFFFFFFFFFFFFFFFFFFFFFFFFFFFF:FFF:FFFFFFFFFFFFFFFFFFFFFFFFFFFF:F:
FFFFFFFFFFFFFFFF

```

 $+$ 

@A00721:190:HGJW7DSXY:4:1559:11369:5588 1:N:0:TCTGCAAG+GCTGCACT  
GCCGATGTGATGTACAATAAGTTGAAGAAACACGCGATCATGATTGATCGCTGTGTTATCGAGTATCG  
ACACCAGTGTCCGATTAATAGTGAGGGATCCGTTAGGATCCAGGTGCACGATAGTCGAATGATGGGAA  
CAGCGTCTAAACAAG

```
FFFFFFFFFFFFFFFFFFFFFFFFFFFFFFFFFFFFFFFFFF,FFFFFFFFFFFFFFFFFFFFFFFFFF  
FFFFF:FFFFFFFFFFFFFFFFFFFFFFFFFF::FFFFFFFFFFFFFFFFFFFFFFFFFFFFFFFF  
FFFFFFFFFFFFFFFF
```

+

@A00721:190:HGJW7DSXY:4:2168:29957:3051 1:N:0:TCTGCAAG+GCTGCACT  
GCCGATGTGATGTACAATAAGTTGAAGAAACACGCGATCATGATTGATCGCTGTGTTATCGAGTATCG  
ACACCAGTGTCCGATTAATAGTGAGGGATCCGTTAGGATCCAGGTGCACGATAGTCGAATGATGGGAA  
CAGCGTCTAAACAAG

[illegible]

+

@A00721:190:HGJW7DSXY:4:2178:12183:18239 1:N:0:TCTGCAAG+GCTGCACT  
GCCGATGTGATGTACAATAAGTTGAAGAAACACGCGATCATGATTGATCGCTGTGTTATCGAGTATCG  
ACACCAGTGTCCGATTAATAGTGAGGGATCCGTTAGGATCCAGGTGCACGATAGTCGAATGATGGGAA  
CAGCGTCTAAACAAG

```
FFFFFFFFFFFFFFFFFFFFF:FFFFFFFFFFFFFFFFFFFFFFFFFFFFFF
FFFFFFFFFFFFFFFFFFFFF,FFFFFFFFFFFFFFFFFFFFFFFFFFFFFF
FFFFFFFFFFFFFFFF
```

@A00721:190:HGJW7DSXY:4:2178:10791:22874 1:N:0:TCTGCAAG+GCTGCACT  
GCCGATGTGATGTACAATAAGTTGAAGAAACACGCGATCATGATTGATCGCTGTGTTATCGAGTATCG  
ACACCAGTGTCCGATTAATAGTGAGGGATCCGTTAGGATCCAGGTGCACGATAGTCGAATGATGGGAA  
CAGCGTCTAAACAAG

[illegible]

+

[illegible]

+

```

FFFFFFFFF,F:FFFF,FFFFFFFFFFFFFFFF,:FFFFFFFFFFFFFFFF,FFFFFFFFFFFFFF:FFF
FFFFFFFF:FFFFFFFFFFFFFFFFFFFFFFFFFFFFFFFF:FFFFFFFFFFFFFFFFFFFFFFFF:FFFFFF:FFF
FFFFFFFFFFFFFFFF

```

+

```
FFFFFFFFFFFFFFFFFFFFFFFFFFFFFFFFFFFFFFFFFFFFFFFFFFFFFFFFFFFFFFF  
FFFFFFFFFFFFFFFFFFFFFFFFFFFFFFFFFFFF,FFFFFFFFFFFFFFFFFFFFFFFFFFF:  
FFFFFFFFFFFFFFFF
```

+

```

FFFFFFFFFFFFFFFFFFFFFFFFFFFFFFFFFFFFFFFFFFFFFFFFFFFFFFFFFFFFFFFFFFFFFFFF
FFFFFFFFFFFFFF:FFFFFFFFFFFFFFFFFFFFFFFF:F:FFFFFFFFFFFFFFFFFFFFFFFFFFFFFF:
FFFFFFFFFFFF:FFF:

```

+

```
FFFFFFFFFFFFFFFFFFFFFFFFFFFFFFFFFFFFFFFFFFFFFFFFFFFFFFFFFFFFFFFF
FFFFFFFFFFFFFFFFFFFFFFFFFFFFFFFFFFFF,FFFFFFFFFFFFFFFFFFFFFFFFFFFF
EEEEEEEEEEEEEEEEE
```

+

[illegible]

```

FFFFFFFFFFFFFFFFFFFFFFFFFFFFFFFF:FFFFFFFFFFFFFFFFFFFFFFFFFFFFFFFFFFFFFFFF
FFFFFFFF:F

```

+

@A00721:190:HGJW7DSXY:4:2170:29677:3944 1:N:0:TCTGCAAG+GCTGCACT  
TTTAGACGCTGTTCCCATCATTCGACTATCGTGCACCTGGATCCTAACGGATCCCTCACTATTAATCG  
GACACTGGTGTGATACTCGATAACACAGCGATCAATCATGATCGCGTGTTCCTCAACTTATTGTAC  
ATCACATCGG

[illegible]
$$+$$

@A00721:190:HGJW7DSXY:4:2343:2311:15671 1:N:0:TCTGCAAG+GCTGCACT  
TTTAGACGCTGTTCCCATCATTCGACTATCGTGCACCTGGATCCTAACGGATCCCTCACTATTAATCG  
GACACTGGTGTGATACTCGATAACACAGCGATCAATCATGATCGCGTGTTCCTCAACTTATTGTAC  
ATCACATCGG

```

FFFFFFFFFFFFFFFFFFFFFFFFFFFFFFFFFFFFFFFF:FFFFFFFF,FFFFFFFFFF:FFFFFF:F
FFF:FFFFFFFFFFFFFFFFFFFFFFFF,FFFFFF:FFFFFFFFFFFFFFFFFFFFFFFF,FF:FF:F::,F,FFF,F
:FFFFFFFF

```

+

@A00721:190:HGJW7DSXY:4:1648:31403:1485 1:N:0:TCTGCAAG+GCTGCACT  
ATTACGAATTCAGCTTGTTTAGACGCTGTTCCCATCATTCGACTATCGTGACCTGGATCCTAACGGA  
TCCCTCACTATTAATCGGACACTGGTGTGATACTCGATAACACAGCGATCAATCATGATCGCGTGT  
TCTTCAACTTATTGT

[illegible]

+  
FFFFFFFFFFFFFFFFFFFFF:FFFFFFFFFFFFFFFFFFFFFFFFFFFFFFFFFFFFF:FFFF,  
FFFFFFFFFFFFFFFFFFFFF:FFFFFFFFFFFFFFFFFFFFFFFFFFFFFFFFFFFFF:FFFFFFFFFFFFFFFF  
FFFFFFFFFFFFFFFFFF  
@A00721:190:HGJW7DSXY:4:2362:11894:14450 1:N:0:TCTGCAAG+GCTGCACT  
ATTACGAATTCAGCTTGTTTAGACGCTGTGCCCATCATTCGACTATCGTGCACCTGGATCCTAACGGA  
TCCCTCACTATTAATCGGACACTGGTGTGATACTCGATAACACAGCGATCAATCATGATCGCGTGTT  
TCTTCAACTTATTGT  
+  
FFFFFFFFFFFFFFFFFFFFFFFFFFFFFFFFFFFFFFFFFFFFFFFFFFFFFFFFFFFFFFF:FFFFF  
FFFFFFFFFFFFFFFFFFFFFFFFFFFFFFFFFFFFFFFFFFFFFFFFFFFFFFFFFFFFFFF:FFFFFFFFFFFFFFFF  
FFFFFFFFFFFFFFFFFF  
@A00721:190:HGJW7DSXY:4:1523:24316:13291 1:N:0:TCTGCAAG+GCTGCACT  
CTGGCATTACGAATTCAGCTTGTTTAGACGCTGTGCCCATCATTCGACTATCGTGCACCTGGATCCTA  
ACGGATCCCTCACTATTAATCGGACACTGGTGTGATACTCGATAACACAGCGATCAATCATGATCGC  
GTGTTTCTTCAACTT  
+  
FFFFFFFFFFFFFFFFFFFFFFFFFFFFFFFFFFFFFFFFFFFFFFFFFFFFFFFFFFFFFFF:FFFFF  
FFFF::FFFFFFFFFFFFFFFFFFFFFFFFFFFFFFFFFFFFFFFFFFFFFFFFFFFFFFFFFFFFF:FFFF  
FFFFFFFFFFFFFFFFFF  
@A00721:190:HGJW7DSXY:4:2304:2600:23469 1:N:0:TCTGCAAG+GCTGCACT  
CTGGCATTACGAATTCAGCTTGTTTAGACGCTGTGCCCATCATTCGACTATCGTGCACCTGGATCCTA  
ACGGATCCCTCACTATTAATCGGACACTGGTGTGATACTCGATAACACAGCGATCAATCATGATCGC  
GTGTTTCTTCAACTT  
+  
FFFFFFFFFFFFFFFFFFFFFFFFFFFFFFFFFFFFFFFFFFFFFFFFFFFFFFFFFFFFFFF,F  
FFFFFFFFFFFFFFFFFFFFFFFFFFFFFFFFFFFFFFFFFFFFFFFFFFFFFFFFFFFFF:FFFF,FFFF:FFFFF  
FFFFFFFFFFFFFFFFFF  
@A00721:190:HGJW7DSXY:4:2523:20961:17848 1:N:0:TCTGCAAG+GCTGCACT  
CTGGCATTACGAATTCAGCTTGTTTAGACGCTGTGCCCATCATTCGACTATCGTGCACCTGGATCCTA  
ACGGATCCCTCACTATTAATCGGACACTGGTGTGATACTCGATAACACAGCGATCAATCATGATCGC  
GTGTTTCTTCAACTT  
+  
FFFFFFFFFFFFFFFFFFFFFFFFFFFFFFFFFFFFFFFFFFFFF:FFFFFFFFFFFFFFFFFFFFFFFFFFFFFFF  
FFFFFFFFFFFFFFFFFFFFFFFFFFF:FFFFFFFFFFFFFFFFFFFFFFFFFFFFFFFFFFFFF:FFFFFFFFFFFF  
FFFFFFFFFFFFFFFFFF:  
@A00721:190:HGJW7DSXY:4:1129:1796:30906 1:N:0:TCTGCAAG+GCTGCACT  
GCTGTGTTATCGAGTATCGACACCAGTGTCCGATTAATAGTGAGGGATCCGTTAGGATCCAGGTGCAC  
GATAGTCGAATGATGGGAACAGCGTCTAAACAAGCTGAATTCGTAATGCCAGTTACGTGTAAGTGC GA  
TCTGACGTTTTACGG  
+  
FFFFFFFFFFFFFFFFFFFFFFFFFFFFFFFFFFFFFFFFFFFF,FFFFFFFFFFFFFFFFFFFF,:FFFFFFFFFFFFFFF  
FFFFFFFFFFFFFFFFFFFFFFFFFFFFFFFFFFFFFFFFFFFFFFFFFFFFFFFFFFFFFFFFFFFFFFFFFFFFF  
:FFFFFFFFFFFFFFFFFF  
@A00721:190:HGJW7DSXY:4:1434:28094:29481 1:N:0:TCTGCAAG+GCTGCACT  
GCTGTGTTATCGAGTATCGACACCAGTGTCCGATTAATAGTGAGGGATCCGTTAGGATCCAGGTGCAC  
GATAGTCGAATGATGGGAACAGCGTCTAAACAAGCTGAATTCGTAATGCCAGTTACGTGTAAGTGC GA  
TCTGACGTTTTACGG  
+  
FFFF:FFFFFFFFFFFF:FFFF:FF:FFFFFFFFFFFFFFFF:FFFFFFFFFFFF,,FFF,FFFFFFFFFFFF  
FFFFFFFFFFFFFFFFFFFFF:FFFFFFFFFFFFFFFFFFFFFFFFFFFFFFFFFFFFF:FFFFFFFFFFFFFFFFFFFF  
FFFFFFFFFFFFFFFFFF  
@A00721:190:HGJW7DSXY:4:2277:24695:27414 1:N:0:TCTGCAAG+GCTGCACT  
GCTGTGTTATCGAGTATCGACACCAGTGTCCGATTAATAGTGAGGGATCCGTTAGGATCCAGGTGCAC

GATAGTCGAATGATGGGAACAGCGTCTAAACAAGCTGAATTCGTAATGCCAGTTACGTGTAAGTACGCGA  
TCTGGCGTTTTACGG

[illegible]

+

[illegible]

+

[illegible]

+

[illegible]

+

```
FFFFFFFFFFFFFFFFFFFFFFFFFFFFFFFFFFFFFFFFFFFFFFFFFFFFFFFFFFFFFFFFFFFFF
FFFFFFFFFFFFFFFFFFFFFFFFFFFFFFFFFFFFFFFF:F:FFF:F:FFFFFFFFFFFFFFF:FFFFFFF:FFF
:FFFFFFFFFFFFFFFF
```

+

```
FFFFFFFFFFFFFF:FFFFFFFFFFFFFFFFFFFFFFFFFFFFFFFFFFFFFFFFFFFFF  
FFFFFFFFFFFFFFFFFFFFFFFFFFFFFFFFFFFFF:FFF::FFFFFFFFFFFFFFFFFFFFFFFFFFFFF  
FFFFFFFFFFFFFFFF
```

 $+$ 

```

FFFFFFFFFFFFFFFFFFFFFFFFFFFFFFFFFFFFFFFFFFFFFFFFFFFFFFFFFFFFFFFF:FFFFFFFFFFFFFFFF
FFFFFF:FFFFFFFFFFFFFFFFFFFFFFFFFFFFFFFFFFFFFFFF:FF:FFFFFF:FFFFFFFFFFFFFFFF:FFFFFF
FFFFFFFFFFFFFFFF

```

@A00721:190:HGJW7DSXY:4:2325:24505:35540 1:N:0:TCTGCAAG+GCTGCACT  
CTTCCGTA AAAACGT CAGATCGCAGTTACACGTA ACTGGCATTACGAATTCAGCTTGT TTAGACGCTGT  
TCCCATCATTCGACTATCGTGCACCTGGATCCTAACGGATCCCTCACTATTAATCGGACACTGGTGTC  
GATACTCGATAACAC

```

FFFFFFFFFFFFFFFFFFFFFFFFFFFFFFFFFFFFFFFFFFFFFFFFFFFFFFFFFFFFFFFFFFFFFFFFFFFFFFFF,
FFFFFFFF:FFFFFFFF:FFFFFFFFFFFFFFFFFFFFFFFFFFFFFFFF,,FFFFFFFF:FF:FFFFFFFFFFFF,FFFFFF
FF:FFFFFFFFFFFFFF

```

@A00721:190:HGJW7DSXY:4:2362:5150:26725 1:N:0:TCTGCAAG+GCTGCACT  
CTTCCGTAACACGTGATCGCAGTTACACGTAACCTGGCATTACGAATTCAGCTTGTTTAGACGCTGT  
TCCCATCATTGACTATCGTGCACCTGGATCCTAACGGATCCCTACTATTAATCGGACACTGGTGTC  
GATACTCGATAACAC

```
FFFFFFFFFFFFFFFFFFFFFFFFFFFFFFFFFFFFFFFFFFFFFFFFFFFFFFFFFFFFFFFFFFFFF:
FFFFFFFFFFFFFFFFFFFFFFFFFFFFFFFFFFFFFFFFFFFFFFFFFFFFFFFFFFFFFFFFFFFF,FFFFFFFFFFFFFFFFFFFFFFFFFFFFFFFFFFFFFFFF
FFFFFFFFFFFFFFFF
```

@A00721:190:HGJW7DSXY:4:2563:21531:21715 1:N:0:TCTGCAAG+GCTGCACT  
CTTCCGTA AAAACGT CAGATCGCAGTTACACGTA ACTGGCATTACGAATTCAGCTTGT TTAGACGCTGT  
TCCCATCATTCGCCTATCGTGCACCTGGATCCTAACGGATCCCTCACTATTAATCGGACACTGGTGTC  
GATACTCGATAACAC

```
FF:FFFFFFFF:FFFFFFFFFFFFFFFFFFFFFFFF,FFFF:FFFFFF:F:FFFF:F,FFFFFFF
,FFFFFFFFFFFF,FFFFFFFFF:FFFFFF:FF,:FFFFF,FFF,FFF,FFFFFFFFF:FFF:FFF,FFF
FF:FF:FFFFFF:FF
```

@A00721:190:HGJW7DSXY:4:2641:31331:10504 1:N:0:TCTGCAAG+GCTGCACT  
CTTCCGTA AAAACGT CAGATCGCAGTTACACGTA ACTGGCATTACGAATTCAGCTTGT TTAGACGCTGT  
TCCCATCATTCGACTATCGTGCACCTGGATCCTAACGGATCCCTCACTATTAATCGGACACTGGTGTC  
GATACTCGATAACAC

[illegible]

@A00721:190:HGJW7DSXY:4:1109:6533:12211 1:N:0:TCTGCAAG+GCTGCACT  
CGACGCCAGTGTCCGATTAATAGTGAGGGATCCGTTAGGATCCAGGTGCACGATAGTCGAATGATGGG  
AACAGCGTCTAAACAAGCTGAATTGTAATGCCAGTTACGTGTAACCTGCGATCTGACGTTTTACGGAA  
GTTGTTGGAGTTCTG

```

FFFFFFFFFFFFFFFFFFFFFFFFFFFFFFFF:FFFFFFFFFFFFFFFFFFFFFFFFFFFFFFFF
FFFFFFFFFFFFFFFFFFFFFFFF:FFFFFFFFFFFFFFFFFFFFFFFFFFFFFFFFFFFFFFFFF:
FFFFFFFFFFFFFFFF

```

@A00721:190:HGJW7DSXY:4:1126:31991:13683 1:N:0:TCTGCAAG+GCTGCACT  
CGACGCCAGTGTCCGATTAATAGTGAGGGATCCGTTAGGATCCAGGTGCACGATAGTCGAATGATGGG  
AACAGCGTCTAAACAAGCTGAATTCGTAATGCCAGTTACGTGTAAC TGCATCTGACGTTTTACGGA  
GTTGTTGGAGTTCTG

[illegible]

@A00721:190:HGJW7DSXY:4:1228:21540:13275 1:N:0:TCTGCAAG+GCTGCACT  
CGACGCCAGTGTCCGATTAATAGTGAGGGATCCGTTAGGATCCAGGTGCACGATAGTCGAATGATGGG  
AACAGCGTCTAAACAAGCTGAATTCGTAATGCCAGTTACGTGTAACCTGCGATCTGACGTTTTACGGAA  
GTTGTTGGAGTTCTG

[illegible]



FFF,FFFFFFFFFFFFFFFF:FFFFFFFFF:FFFFFFFFFFFFFFFFFFFFFFFFFFFFFFFF  
FFFFFFFFFFFFFFFF

@A00721:190:HGJW7DSXY:4:1315:8730:7498 1:N:0:TCTGCAAG+GCTGCACT  
CGACGCCAGTGTCCGATTAATAGTGAGGGATCCGTTAGGATCCAGGTGCACGATAGTCGAATGATGGG  
AACAGCGTCTAAACAAGCTGAATTCGTAATGCCAGTTACGTGTAAGTGCATCTGACGTTTTACGGAA  
GTTGTTGGAGTTCTG

+

FFFFFFFFF:FFFFFFFFFFFFFFFFFFFFFFFFFFFF::,FFFFFFFFFFFFFFFFFFFFFFFFFFFFFFFF  
FFFFFFFFFFFFFFFF:FFFFFFFFFFFFFFFFFFFFFFFFFFFFFFFFFFFFFFFFFFFFFFFF:FFFF  
FFFFFFFFFFFFFFFF:

@A00721:190:HGJW7DSXY:4:2310:3513:4695 1:N:0:TCTGCAAG+GCTGCACT  
CGACGCCAGTGTCCGATTAATAGTGAGGGATCCGTTAGGATCCAGGTGCACGATAGTCGAATGATGGG  
AACAGCGTCTAAACAAGCTGAATTCGTAATGCCAGTTACGTGTAAGTGCATCTGACGTTTTACGGAA  
GTTGTTGGAGTTCTG

+

FFFFFFFFFFFFFFFFFFFFFFFFFFFFFFFFFFFFFFFFFFFFFFFFFFFFFFFFFFFFFFFFFFFF  
F:FFFFFFFFFFFFFFFF:FFFFFFFFFFFFFFFFFFFFFFFFFFFFFFFFFFFFFFFFFFFFFFFF  
FFFFFFFFFFFFFFFF

@A00721:190:HGJW7DSXY:4:2355:30219:20134 1:N:0:TCTGCAAG+GCTGCACT  
CGACGCCAGTGTCCGATTAATAGTGAGGGATCCGTTAGGATCCAGGTGCACGATAGTCGAATGATGGG  
AACAGCGTCTAAACAAGCTGAATTCGTAATGCCAGTTACGTGTAAGTGCATCTGACGTTTTACGGAA  
GTTGTTGGAGTTCTG

+

FFFFFFFFFFFFFFFFFFFFFFFFFFFFFFFFFFFFFFFF,FFFFFFFFFFFFFFFFFFFFFFFF:FFFF  
FFFFFFFFFFFFFFFFFFFFFFFFFFFFFFFFFFFFFFFF:FFFFFFFFFFFFFFFFFFFFFFFF:F:  
FF,FFFFFFFF

@A00721:190:HGJW7DSXY:4:2456:32759:26913 1:N:0:TCTGCAAG+GCTGCACT  
CGACGCCAGTGTCCGATTAATAGTGAGGGATCCGTTAGGATCCAGGTGCACGATAGTCGAATGATGGG  
AACAGCGTCTAAACAAGCTGAATTCGTAATGCCAGTTACGTGTAAGTGCATCTGACGTTTTACGGAA  
GTTGTTGGAGTTCTG

+

FFFFFFFFFFFFFFFFFFFFFFFFFFFFFFFFFFFFFFFFFFFFFFFFFFFFFFFFFFFFFFFFFFFF  
F:FFFFFFFFFFFFFFFFFFFFFFFFFFFFFFFFFFFFFFFFFFFFFFFFFFFFFFFF:FFFF:FFFF,FFFF  
FFFFFFFFFFFF,FF

@A00721:190:HGJW7DSXY:4:1125:15944:21402 1:N:0:TCTGCAAG+GCTGCACT  
GTCCGATTAATAGTGAGGGATCCGTTAGGATCCAGGTGCACGATAGTCGAATGATGGGAACAGCGTCT  
AAACAAGCTGAATTCGTAATGCCAGTTACGTGTAAGTGCATCTGACGTTTTACGGAAGTTGTTGGAG  
TTCTGCATCGTCTGA

+

FFFFFFFFFFFFFFFFFFFFFFFFFFFFFFFFFFFFFFFFFFFFFFFFFFFFFFFFFFFFFFFF,FFFFFFF  
FFFFFFFFFFFFFFFF:FFFF:FFFFFFFFFFFF:FFFFFFFFFFFFFFFF:FFFF:FFFF  
FFFFFFFFFFFF

@A00721:190:HGJW7DSXY:4:1402:16152:14215 1:N:0:TCTGCAAG+GCTGCACT  
GTCCGATTAATAGTGAGGGATCCGTTAGGATCCAGGTGCACGATAGTCGAATGATGGGAACAGCGTCT  
AAACAAGCTGAATTCGTAATGCCAGTTACGTGTAAGTGCATCTGACGTTTTACGGAAGTTGTTGGAG  
TTCTGCATCGTCTGA

+

FFFFFFFFFFFFFFFFFFFFFFFFFFFFFFFFFFFFFFFFFFFFFFFFFFFFFFFFFFFFFFFF:FFFFFFFFFFFFFFFF  
FFFFFFFFFFFFFFFFFFFFFFFFFFFFFFFFFFFFFFFFFFFFFFFFFFFFFFFFFFFFFFFF:FFFFFFFFFFFF  
FFFFFFFFFFFF

@A00721:190:HGJW7DSXY:4:1451:30816:7576 1:N:0:TCTGCAAG+GCTGCACT  
GTCCGATTAATAGTGAGGGATCCGTTAGGATCCAGGTGCACGATAGTCGAATGATGGGAACAGCGTCT  
AAACAAGCTGAATTCGTAATGCCAGTTACGTGTAAGTGCATCTGACGTTTTACGGAAGTTGTTGGAG  
TTCTGCATCGTCTGA

+  
FFFFFFFFFFFFFFFFFFFFFFFFFFFFFFFFFFFFFFFFFFFFFFFFFFFFFFFFFFFFFFFFFFFFFFFF  
FFFFFFFFFFFFFFFFFFFFFFFFFFFFFFFFFFFFFFFFFFFFFFFFFFFFFFFFFFFFFFFFFFFFFFFF  
FFFFFFFFFFFFFFFF

@A00721:190:HGJW7DSXY:4:1453:31060:17487 1:N:0:TCTGCAAG+GCTGCACT  
GTCCGATTAATAGTGAGGGATCCGTTAGGATCCAGGTGCACGATAGTCGAATGATGGGAACAGCGTCT  
AAACAAGCTGAATTCGTAATGCCAGTTACGTGTAAGTACGATCTGACGTTTTACGGAAGTTGTTGGAG  
TTCTGCATCGTCTGA

+  
FFFFFFFFFFFFFFFFFFFFFFFFFFFF::,FFFFFFFFFFFFFFFFFFFFFFFFFFFFFFFFFFFFFFFF:FFFFFFFF  
FFFFFFFFFFFFFFFFFFFFFFFFFFFFFFFFFFFFFFFFFFFFFFFFFFFFFFFFFFFFFFFFFFFFFFFF,FFFFFFFF  
FFFFFFFFFFFFFFFF

@A00721:190:HGJW7DSXY:4:1534:24560:35383 1:N:0:TCTGCAAG+GCTGCACT  
GTCCGATTAATAGTGAGGGATCCGTTAGGATCCAGGTGCACGATAGTCGAATGATGGGAACAGCGTCT  
AAACAAGCTGAATTCGTAATGCCAGTTACGTGTAAGTACGATCTGACGTTTTACGGAAGTTGTTGGAG  
TTCTGCATCGTCTGA

+  
FFFFFFFFFFFFFFFFFFFFFFFFFFFFFFFF:FFFFFFFFFFFFFFFFFFFFFFFFFFFFFFFFFFFFFFFF:FFFFFFFF  
FFFFFFFFFFFFFFFFFFFFFFFF:FFFFFFFFFFFFFFFFFFFFFFFFFFFFFFFFFFFFFFFFFFFFFFFF:FFFFFFFF  
FFF:FFFFFFFF

@A00721:190:HGJW7DSXY:4:1611:2844:17754 1:N:0:TCTGCAAG+GCTGCACT  
GTCCGATTAATAGTGAGGGATCCGTTAGGATCCAGGTGCACGATAGTCGAATGATGGGAACAGCGTCT  
AAACAAGCTGAATTCGTAATGCCAGTTACGTGTAAGTACGATCTGACGTTTTACGGAAGTTGTTGGAG  
TTCTGCATCGTCTGA

+  
FFFFFFFFFFFFFFFFFFFFFFFFFFFFFFFF:FFFFFFFFFFFFFFFFFFFFFFFFFFFFFFFFFFFFFFFFFFFFFFFF  
FFFFFFFFFFFFFFFFFFFFFFFFFFFFFFFFFFFFFFFF, :FFF:F:FFFFFFFFFFFFFFFFFFFFFFFF:FFFFFF  
FFFF:FFFF::F

@A00721:190:HGJW7DSXY:4:2115:14968:5462 1:N:0:TCTGCAAG+GCTGCACT  
GTCCGATTAATAGTGAGGGATCCGTTAGGATCCAGGTGCACGATAGTCGAATGATGGGAACAGCGTCT  
AAACAAGCTGAATTCGTAATGCCAGTTACGTGTAAGTACGATCTGACGTTTTACGGAAGTTGTTGGAG  
TTCTGCATCGTCTGA

+  
FFFFFFFFFFFFFFFFFFFFFFFFFFFF,F:FFFFFFFFFFFFFFFFFFFFFFFFFFFFFFFFFFFFFFFFFFFFFFFF  
FFFFFFFFFFFFFFFFFFFFFFFFFFFFFFFFFFFFFFFFFFFFFFFFFFFFFFFFFFFFFFFFFFFFFFFFFFFFFFFF  
FFFFFFFFFFFFFFFF

@A00721:190:HGJW7DSXY:4:2135:5547:3302 1:N:0:TCTGCAAG+GCTGCACT  
GTCCGATTAATAGTGAGGGATCCGTTAGGATCCAGGTGCACGATAGTCGAATGATGGGAACAGCGTCT  
AAACAAGCTGAATTCGTAATGCCAGTTACGTGTAAGTACGATCTGACGTTTTACGGAAGTTGTTGGAG  
TTCTGCATCGTCTGA

+  
FFFFFFFFFFFFFFFFFFFFFFFFFFFFFFFF:FFFFFFFFFFFFFFFFFFFFFFFFFFFFFFFFFFFFFFFF:FFFFF:FFFFFF  
FFFFFFFFFFFFFFFFFFFFFFFFFFFFFFFFFFFFFFFFFFFFFFFFFFFFFFFFFFFFFFFFFFFFFFFFFFFFFFFF  
FFFFFFFFFFFFFFFF

@A00721:190:HGJW7DSXY:4:2372:15591:8296 1:N:0:TCTGCAAG+GCTGCACT  
GTCCGATTAATAGTGAGGGATCCGTTAGGATCCAGGTGCACGATAGTCGAATGATGGGAACAGCGTCT  
AAACAAGCTGAATTCGTAATGCCAGTTACGTGTAAGTACGATCTGACGTTTTACGGAAGTTGTTGGAG  
TTCTGCATCGTCTGA

+  
FFFFFFFFFFFFFFFFFFFFFFFFFFFF:F,FFFFFFFFFFFFFFFFFFFFFFFFFFFFFFFFFFFFFFFF:FFFFFFF  
FFFFFFFFFFFF:FFFFFFFFFFFFFFFFFFFFFFFFFFFFFFFFFFFFFFFFFFFFFFFFFFFFFFFFFFFFFFFF  
FFFFFFFFFFFFFFFF

@A00721:190:HGJW7DSXY:4:2518:9317:11115 1:N:0:TCTGCAAG+GCTGCACT  
GTCCGATTAATAGTGAGGGATCCGTTAGGATCCAGGTGCACGATAGTCGAATGATGGGAACAGCGTCT

AAACAAGCTGAATTCGTAATGCCAGTTACGTGTAACGCGATCTGACGTTTTACGGAAGTTGTTGGAG  
TTCTGCATCGTCTGA

[illegible] $+$ 

@A00721:190:HGJW7DSXY:4:1406:7057:10989 1:N:0:TCTGCAAG+GCTGCACT  
GCACGATAGTCGAATGATGGGAACAGCGTCTAAACAAGCTGAATTCGTAATGCCAGTTACGTGTAAC  
GCGATCTGACGTTTTACGGAAGTTGTTGGAGTTCTGCATCGTCTGATGAGATGCCTTGGAAGATGTTG  
TATAGGTTGGAAAAT

```

FFFFFFFFFFFFFFFF:FFFFFFFFFFFFFFFFFFFFFFFFFFFFFFFFFFFFFFFF
FF:FFFFFFFFFFFFFFFF:FFFFFFFFFFFFFFFFFFFFFFFFFFFFFFFFFFFF
FFFFFFFFFFFFFFFF

```

+

@A00721:190:HGJW7DSXY:4:1163:8097:4742 1:N:0:TCTGCAAG+GCTGCACT  
CCTGTTTTGAGGTTGGAATTTTCCAACCTATACAACATCTTCCAAGGCATCTCATCAGACGATGCAGA  
ACTCCAACAAC TTCCGTAAAACGTCAGATCGCAGTTACACGTA ACTGGCATTACGAATTCAGCTTGTT  
TAGACGCTGTTCCCA

[illegible]

+

@A00721:190:HGJW7DSXY:4:2129:14335:33489 1:N:0:TCTGCAAG+GCTGCACT  
CCTGTTTTGAGGTTGGAATTTCCAACCTATACAACATCTTCCAAGGCATCTCATCAGACGATGCAGA  
ACTCCAACAAC TTCCGTAAAACGTCAGATCGCAGTTACACGTA ACTGGCATTACGAATTCAGCTTGTT  
TAGACGCTGTTCCCA

[illegible]

@A00721:190:HGJW7DSXY:4:2323:10131:33379 1:N:0:TCTGCAAG+GCTGCACT  
CCTGTTTTGAGGTTGGAATTTTCCAACCTATACAACATCTTCCAAGGCATCTCATCAGACGATGCAGA  
ACTCCAACAACTTCCGTAAAACGTCAGATCGCAGTTACACGTAAGTGGCATTACGAATTCAGCTTGTT  
TAGACGCTGTTCCCA

[illegible]

+

[illegible]

+

```
:FFFFFFFFFFFFFFFFFFFFFFFFFFFFFFFFFFFFFFFFFFFFFFFFFFFFFFFFFFFFFFFF:FFFFFFF
FFFFFFFFFFFF:FFFFFFFFFFFF:FF:F,FF:FFFFFFFFFFFF:FFFFFFFFFFFFFFFFFFFF
FFFFFFFFF::FFFFF
```

+

[illegible]

+

[illegible]

+

[illegible]

+

[illegible]

@A00721:190:HGJW7DSXY:4:1452:12653:23876 1:N:0:TCTGCAAG+GCTGCACT  
CTGCGATCTGACGTTTTACGGAAGTTGTTGGAGTTCTGCATCGTCTGATGAGATGCCTTGGAAGATGT  
TGTATAGGTTGGAAAATTCCAACCTCAAAACAGGTACTCTGTTTTGTAGAATCAAAGGACGTCTGAAG  
CTATGTGCTTCGAAG

@A00721:190:HGJW7DSXY:4:2273:1796:4914 1:N:0:TCTGCAAG+GCTGCACT  
CTGCGATCTGACGTTTTACGGAAGTTGTTGGAGTTCTGCATCGTCTGATGAGATGCCTTGGAAGATGT  
TGTATAGGTTGGAAAATTCCAACCTCAAAACAGGTACTCTGTTTTGTAGAATCAAAGGACGTCTGAAG  
CTATGTGCTTCGAAG

@A00721:190:HGJW7DSXY:4:2273:1524:5008 1:N:0:TCTGCAAG+GCTGCACT  
CTGCGATCTGACGTTTTACGGAAGTTGTTGGAGTTCTGCATCGTCTGATGAGATGCCTTGGAAGATGT  
TGTATAGGTTGGAAAATTCCAACCTCAAAACAGGTA CTCTGTTTTGTAGAATCAAAGGACGTCTGAAG  
CTATGTGCTTCGAAG

@A00721:190:HGJW7DSXY:4:2273:1362:5071 1:N:0:TCTGCAAG+GCTGCACT  
CTGCGATCTGACGTTTTACGGAAGTTGTTGGAGTTCTGCATCGTCTGATGAGATGCCTTGGAAGATGT  
TGTATAGGTTGGAAAATTCCAACCTCAAAACAGGTA CTCTGTTTTGTAGAATCAAAGGACGTCTGAAG  
CTATGTGCTTCGAAG

@A00721:190:HGJW7DSXY:4:2665:29161:32174 1:N:0:TCTGCAAG+GCTGCACT  
CTGCGATCTGACGTTTTACGGAAGTTGTTGGAGTTCTGCATCGTCTGATGAGATGCCTTGGAAGATGT  
TGTATAGGTTGGAAAATTCCAACCTCAAAACAGGTA CTCTGTTTTGTAGAATCAAAGGACGTCTGAAG  
CTATGTGCTTCGAAG

@A00721:190:HGJW7DSXY:4:1138:18014:32221 1:N:0:TCTGCAAG+GCTGCACT  
CTGGCGTTTTACGGAAGTTGTTGGAGTTCTGCATCGTCTGATGAGATGCCTTGAAGATGTTGTATAG  
GTTGGA AAAATTCCAACCTCAAACAGGTA CTCTGTTTTGTAGAATCAAAGGACGTCTGAAGCTATGTG  
CTTCGAAGCGCGTT

@A00721:190:HGJW7DSXY:4:1153:28447:29371 1:N:0:TCTGCAAG+GCTGCACT  
CTGACGTTTTACGGAAGTTGTTGGAGTTCTGCATCGTCTGATGAGATGCCTTGAAGATGTTGTATAG  
GTTGGAAAATTCCAACCTCAAACAGGTA CTCTGTTTTGTAGAATCAAAGGACGTCTGAAGCTATGTG  
CTTCGAAGCGCGTTG

+  
FFFFFFFFFFFFFFFFFFFFFFFFFFFFFFFFFFFFFFFFFFFFFFFFFFFFFFFFFFFFFFFFFFFFFFFF  
FFFFFFFFFFFFFFFFFFFFFFFFFFFFFFFFFFFFFFFFFFFFFFFFFFFFFFFFFFFFFFFFFFFFFFFF:FFFFFFFFFFFFFFFF:FF  
FFFFFFFF:FFFFF

@A00721:190:HGJW7DSXY:4:1166:1633:15248 1:N:0:TCTGCAAG+GCTGCACT  
CTGACGTTTTACGGAAGTTGTTGGAGTTCTGCATCGTCTGATGAGATGCCTTGGAAGATGTTGTATAG  
GTTGGAAAATTCCAACCTCAAACAGGTACTCTGTTTTGTAGAATCAAAGGACGTCTGAAGCTATGTG  
CTTCGAAGCGCGTTG

+  
FFFFF:FFFFFFFFFFFFFFFFFFFFFFFFFFFFFFFFFFFFFFFFFFFFFFFFFFFFFFFFFFFFFFFF:FFFF:FFFF  
FFFFFFFFFFFFFFFFFFFFFFFF:FFFF:FFFFFFFFFFFFFFFFFFFFFFFFFFFFFFFFFFFFFFFF:FFFFFF:  
FFFFFFFFFFFF:FF

@A00721:190:HGJW7DSXY:4:1263:6759:15421 1:N:0:TCTGCAAG+GCTGCACT  
CTGACGTTTTACGGAAGTTGTTGGAGTTCTGCATCGTCTGATGAGATGCCTTGGAAGATGTTGTATAG  
GTTGGAAAATTCCAACCTCAAACAGGTACTCTGTTTTGTAGAATCAAAGGACGTCTGAAGCTATGTG  
CTTCGAAGCGCGTTG

+  
FFFFFFFFFFFFFFFFFFFF:FFFFFFFFFFFFFFFFFFFFFFFFFFFFFFFFFFFFFFFFFFFFFFFF:FFFFFFFFFFFFFFFF:FFFFFFFFFFFF  
FFFFFF:FFFFFFFFFFFFFFFFFFFFFFFFFFFFFFFFFFFFFFFFFFFFFFFFFFFFFFFFFFFFFFFF:FFFFFFFFFFFFFFFFFFFFFFFFFFFFFFFF  
FFFFFFFFFFFFFFFFFFFF

@A00721:190:HGJW7DSXY:4:2203:3079:9580 1:N:0:TCTGCAAG+GCTGCACT  
CTGGCGTTTTACGGAAGTTGTTGGAGTTCTGCATCGTCTGATGAGATGCCTTGGAAGATGTTGTATAG  
GTTGGAAAATTCCAACCTCAAACAGGTACTCTGTTTTGTAGAATCAAAGGACGTCTGAAGCTATGTG  
CTTCGAAGCGCGTTG

+  
FFFFFFFFFFFFFFFFFFFFFFFFFFFFFFFFFFFF:FF:FFFF::FFFFFFFFFFFFFFFFFFFFFFFFFFFFFFFF:FFFFFFFF:  
FFFF:FFFFFFFFFFFF:FFFFFFFF:F::FFFFFFFFF,FFFFF,FFF,FFFFFFFF:FFF,FF,:FFFFFF  
FFF,FFF:FFFFF,F

@A00721:190:HGJW7DSXY:4:2368:25771:33661 1:N:0:TCTGCAAG+GCTGCACT  
CTGACGTTTTACGGAAGTTGTTGGAGTTCTGCATCGTCTGATGAGATGCCTTGGAAGATGTTGTATAG  
GTTGGAAAATTCCAACCTCAAACAGGTACTCTGTTTTGTAGAATCAAAGGACGTCTGAAGCTATGTG  
CTTCGAAGCGCGTTG

+  
FFFFFFFFFFFFFFFFFFFFFFFFFFFFFFFFFFFFFFFFFFFFFFFFFFFFFFFFFFFFFFFFFFFFFFFF  
FFFFFFFFFFFFFFFFFFFFFFFFFFFFFFFFFFFFFFFFFFFFFFFFFFFFFFFFFFFFFFFFFFFFFFFF:FFF:FFFFFFFFFFFFFFFF  
FFFFFFFFFFFFFFFFFFFF

@A00721:190:HGJW7DSXY:4:2378:12364:12477 1:N:0:TCTGCAAG+GCTGCACT  
CTGGCGTTTTACGGAAGTTGTTGGAGTTCTGCATCGTCTGATGAGATGCCTTGGAAGATGTTGTATAG  
GTTGGAAAATTCCAACCTCAAACAGGTACTCTGTTTTGTAGAATCAAAGGACGTCTGAAGCTATGTG  
CTTCGAAGCGCGTTG

+  
FFFFFFFFFFFFFFFFFFFF,FFFFFFFFFFFFFFFFFFFFFFFFFFFFFFFFFFFFFFFFFFFFFFFF:FFFFFFFFFFFFFFFFFFFF  
FFFFFFFFFFFFFFFFFFFFFFFFFFFFFFFFFFFFFFFFFFFFFFFFFFFFFFFFFFFFFFFFFFFFFFFF:FFFFFFFFFFFF  
FFFFFFFFFFFFFFFFFFFF

@A00721:190:HGJW7DSXY:4:2467:7509:6355 1:N:0:TCTGCAAG+GCTGCACT  
CTGACGTTTTACGGAAGTTGTTGGAGTTCTGCATCGTCTGATGAGATGCCTTGGAAGATGTTGTATAG  
GTTGGAAAATTCCAACCTCAAACAGGTACTCTGTTTTGTAGAATCAAAGGACGTCTGAAGCTATGTG  
CTTCGAAGCGCGTTG

+  
FFFFFFF:FFFFFFFFFFFFFFFF:FFFFFFF:FFFFFFFFFFFFFFFFFFFFFFFFFFFFFFFFFFFFFFFF:FFFFFFFFFFFF  
FFFFFFFFFFFFFFFFFFFFFFFFFFFFFFFFFFFFFFFFFFFFFFFFFFFFFFFFFFFFFFFFFFFFFFFF:FFFFFFFFFFFF:FF:FFFFFFFFFFFF  
FFFFFFFFFFFFFFFFFFFF

@A00721:190:HGJW7DSXY:4:2633:2736:17409 1:N:0:TCTGCAAG+GCTGCACT  
CTGACGTTTTACGGAAGTTGTTGGAGTTCTGCATCGTCTGATGAGATGCCTTGGAAGATGTTGTATAG

GTTGGAAAATTCCAACCTCAAAACAGGTACTCTGTTTTGTAGAATCAAAGGACGTCTGAAGCGATGTG  
CTTCGAAGCGCGTTG

+

FFFFFFFFFFFFFFFFFFFFFFFFFFFFFFFFFFFFFFFFFFFFFFFFFFFFFFFFFFFFFFFFFFFFFFFF  
FFFFFFFFFFFFFFFFFFFFFFFFFFFFFFFFFFFFFFFFFFFFFFFFFFFFFFFFFFFFFFFFFFFFFFFF  
FFFFFFFF, : FFF  
FFFF, : FFFFFFFFF

@A00721:190:HGJW7DSXY:4:2678:12382:33332 1:N:0:TCTGCAAG+GCTGCACT  
CTGACGTTTTACGGAAGTTGTTGGAGTTCTGCATCGTCTGATGAGATGCCTTGGAAGATGTTGTATAG  
GTTGGAAAATTCCAACCTCAAAACAGGTACTCTGTTTTGTAGAATCAAAGGACGTCTGAAGCTATGTG  
CTTCGAAGCGCGTTG

+

FFFFFFFFFFFFFFFFFFFFFFFFFFFFFFFFFFFFFFFFFFFFFFFFFFFFFFFFFFFFFFFFFFFFFFFF  
FFFFFFFFFFFFFFFFFFFFFFFFFFFFFFFFFFFFFFFFFFFFFFFFFFFFFFFFFFFFFFFFFFFFFFFF  
FFF: FFFFFFFFF

@A00721:190:HGJW7DSXY:4:1317:20202:26240 1:N:0:TCTGCAAG+GCTGCACT  
GACGTTTTACGGAAGTTGTTGGAGTTCTGCATCGTCTGATGAGATGCCTTGGAAGATGTTGTATAGGT  
TGGAAAATTCCAACCTCAAAACAGGTACTCTGTTTTGTAGAATCAAAGGACGTCTGAAGCTATGTGCT  
TCGAAGCGCG

+

FFFFFFFFFFFFFFFFFFFFFFFFFFFFFFFFFFFFFFFFFFFFFFFFFFFFFFFFFFFFFFFFFFFFFFFF  
FFFFFFFFFFFFFFFFFFFFFFFFFFFFFFFFFFFFFFFFFFFFFFFFFFFFFFFFFFFFFFFFFFFFFFFF  
FFFF: FFFF

@A00721:190:HGJW7DSXY:4:1375:32488:6621 1:N:0:TCTGCAAG+GCTGCACT  
GACGTTTTACGGAAGTTGTTGGAGTTCTGCATCGTCTGATGAGATGCCTTGGAAGATGTTGTATAGGT  
TGGAAAATTCCAACCTCAAAACAGGTACTCTGTTTTGTAGAATCAAAGGACGTCTGAAGCTATGTGCT  
TCGAAGCGCG

+

FFFFFFFFFFFFFFFFFFFFFFFFFFFFFFFFFFFFFFFFFFFFFFFFFFFFFFFFFFFFFFFFFFFFFFFF  
FFFFFFFFFFFFFFFFFFFFFFFFFFFFFFFFFFFFFFFFFFFFFFFFFFFFFFFFFFFFFFFFFFFFFFFF  
: FFFFFFFFF

@A00721:190:HGJW7DSXY:4:1376:17671:7232 1:N:0:TCTGCAAG+GCTGCACT  
GACGTTTTACGGAAGTTGTTGGAGTTCTGCATCGTCTGATGAGATGCCTTGGAAGATGTTGTATAGGT  
TGGAAAATTCCAACCTCAAAACAGGTACTCTGTTTTGTAGAATCAAAGGACGTCTGAAGCTATGTGCT  
TCGAAGCGCG

+

FFFFFFFFFFFFFFFFFFFFFFFFFFFFFFFFFFFFFFFFFFFFFFFFFFFFFFFFFFFFFFFFFFFFFFFF  
FFFFFFFFFFFFFFFFFFFFFFFFFFFFFFFFFFFFFFFFFFFFFFFFFFFFFFFFFFFFFFFFFFFFFFFF  
FFFFFFFF

@A00721:190:HGJW7DSXY:4:1619:27145:24236 1:N:0:TCTGCAAG+GCTGCACT  
GACGTTTTACGGAAGTTGTTGGAGTTCTGCATCGTCTGATGAGATGCCTTGGAAGATGTTGTATAGGT  
TGGAAAATTCCAACCTCAAAACAGGTACTCTGTTTTGTAGAATCAAAGGACGTCTGAAGCTATGTGCT  
TCGAAGCGCG

+

FFFFFFFFFFFFFFFF, FF: FF, : FFFFFFFFFFFFFFFFFF: F: FF: FFF: FFFFFFFFFFFFFFFFFF  
FFFFFFFFFFFFFFFFFFFFFFFFFFFFFFFFFFFFFFFFFFFFFFFFFFFFFFFFFFFFFFFFFFFFFFFF  
F: F: F: FFFF

@A00721:190:HGJW7DSXY:4:1105:6578:8625 1:N:0:TCTGCAAG+GCTGCACT  
CCTGGGACTCCTGAACCTCAATCTCCTCAACGCGCTTCGAAGCACATAGCTTCAGACGTCTTTGATTC  
TACAAAACAGAGTACCTGTTTTGAGGTTGGAATTTTCCAACCTATACAACATCTTCCAAGGCATCTCA  
TCAGACGATGCAGAA

+

FFFFFFFFFFFFFFFFFFFFFFFFFFFFFFFFFFFFFFFFFFFFFFFFFFFFFFFFFFFFFFFFFFFFFFFF  
FFFF: FFFFFFFFFFFFFFFFFFFFFFFFFFFFFFFFFFFFFFFFFF: FFFFFFFFFFFFFFFFFFFFFFFFFF  
FFFF: FFF: FFFFF

$+$ 

+

 $+$ 

+

+

+

+



FFFFFFFFFFFFFFFFFFFFFFFFFFFFFFFFFFFFFFFFFFFFFFFFFFFFFFFFFFFFFFFFFFFFFFFF  
FFFFFFFFFFFFFFFF

@A00721:190:HGJW7DSXY:4:1408:15826:23610 1:N:0:TCTGCAAG+GCTGCACT  
TGATGAGATGCCTTGGAAGATGTTGTATAGGTTGGAAAATTCCAACCTCAAAACAGGTACTCTGTTTT  
GTAGAATCAAAGGACGTCTGAAGCTATGTGCTTCGAAGCGCGTTGAGGAGATTGAGTTCAGGAGTCCC  
AGGATCAACATCCTG

+

FFFFFFFFFFFFFFFFFFFFFFFFFFFFFFFFFFFFFFFFFFFFFFFFFFFFFFFFFFFFFFFFFFFFFFFF  
FFFFFFFFFFFFFFFFFFFFFFFFFFFFFFFFFFFFFFFFFFFFFFFFFFFFFFFFFFFFFFFFFFFFFFFF  
FFFFFFFFFFFFFFFF

@A00721:190:HGJW7DSXY:4:1451:31159:16564 1:N:0:TCTGCAAG+GCTGCACT  
TGATGAGATGCCTTGGAAGATGTTGTATAGGTTGGAAAATTCCAACCTCAAAACAGGTACTCTGTTTT  
GTAGAATCAAAGGACGTCTGAAGCTATGTGCTTCGAAGCGCGTTGAGGAGATTGAGTTCAGGAGTCCC  
AGGATCAACATCCTG

+

FFFFFFFFFFFFFFFFFFFFFFFFFFFFFFFFFFFFFFFFFFFFFFFFFFFFFFFFFFFFFFFFFFFFFFFF  
FFFFFFFFFFFFFFFFFFFFFFFFFFFFFFFFFFFFFFFFFFFFFFFFFFFFFFFFFFFFFFFFFFFFFFFF  
FFFFFFFFFFFFFFFF

@A00721:190:HGJW7DSXY:4:1645:32398:15765 1:N:0:TCTGCAAG+GCTGCACT  
TGATGAGATGCCTTGGAAGATGTTGTATAGGTTGGAAAATTCCAACCTCAAAACAGGTACTCTGTTTT  
GTAGAATCAAAGGACGTCTGAAGCTATGTGCTTCGAAGCGCGTTGAGGAGATTGAGTTCAGGAGTCCC  
AGGATCAACATCCTG

+

FFFFFFFFFFFFFFFFFFFFFFFFFFFFFFFFFFFFFFFFFFFFFFFFFFFFFFFFFFFFFFFFFFFFFFFF  
FFF,FFFFFFFF:FFFF:FFFFFFFFFFFFFFFFFFFFFFFFFFFFFFFFFFFFFFFFFFFFFFFFFFFF  
FF:FFFF:FFFF

@A00721:190:HGJW7DSXY:4:2271:21233:21512 1:N:0:TCTGCAAG+GCTGCACT  
TGATGAGATGCCTTGGAAGATGTTGTATAGGTTGGAAAATTCCAACCTCAAAACAGGTACTCTGTTTT  
GTAGAATCAAAGGACGTCTGAAGCTATGTGCTTCGAAGCGCGTTGAGGAGATTGAGTTCAGGAGTCCC  
AGGATCAACATCCTG

+

FFFFFFFFFFFFFFFFFFFFFFFFFFFFFFFFFFFFFFFFFFFFFFFFFFFFFFFFFFFFFFFFFFFFFFFF  
FFFFFFFFFFFFFFFFFFFFFFFFFFFFFFFFFFFFFFFFFFFFFFFFFFFFFFFFFFFFFFFFFFFFFFFF  
FFFFFFFFFFFFFFFF

@A00721:190:HGJW7DSXY:4:2271:23023:22138 1:N:0:TCTGCAAG+GCTGCACT  
TGATGAGATGCCTTGGAAGATGTTGTATAGGTTGGAAAATTCCAACCTCAAAACAGGTACTCTGTTTT  
GTAGAATCAAAGGACGTCTGAAGCTATGTGCTTCGAAGCGCGTTGAGGAGATTGAGTTCAGGAGTCCC  
AGGATCAACATCCTG

+

FFFFFFFFFFFFFFFFFFFFFFFFFFFFFFFFFFFFFFFFFFFFFFFFFFFFFFFFFFFFFFFFFFFFFFFF  
FFFFFFFFFFFFFFFFFFFFFFFFFFFFFFFFFFFFFFFFFFFFFFFFFFFFFFFFFFFFFFFFFFFFFFFF  
FFFFFFFFFFFFFFFF

@A00721:190:HGJW7DSXY:4:2608:6072:2268 1:N:0:TCTGCAAG+GCTGCACT  
TGATGAGATGCCTTGGAAGATGTTGTATAGGTTGGAAAATTCCAACCTCAAAACAGGTACTCTGTTTT  
GTAGAATCAAAGGACGTCTGAAGCTATGTGCTTCGAAGCGCGTTGAGGAGATTGAGTTCAGGAGTCCC  
AGGATCAACATCCTG

+

FFFFFFFFFFFFFF:FFFFFFFF,FFFFFFFFFFFFFFFFFFFFFFFFFFFFFFFFFFFFFFFFFFFFFFFF  
FFFFFFFFFFFF,FFFFFFFFFFFFFFFF:FFFFFFFFFFFFFFFFFFFFFFFFFFFFFFFFFFFFFFFF  
FFFFFFFFFFFFFFFF

@A00721:190:HGJW7DSXY:4:2625:19117:10833 1:N:0:TCTGCAAG+GCTGCACT  
TGATGAGATGCCTTGGAAGATGTTGTATAGGTTGGAAAATTCCAACCTCAAAACAGGTACTCTGTTTT  
GTAGAATCAAAGGACGTCTGAAGCTATGTGCTTCGAAGCGCGTTGAGGAGATTGAGTTCAGGAGTCCC  
AGGATCAACATCCTG

[illegible][illegible][illegible]

```
:FFFFFFFFFFFFFFFFFFFFFFF,FFFFFFFFFFFFFFFFFFFFFFFFFFFF,FFFFFFFFFFFFFFFFFFFFFFFFFFFF  
FFFFFFFFFFFFFF:FFFFFFFFFFFFFFFFFFFFFFFFFFFFFFFFFFFFFFFF:FFFFFFFFFFFFFFFFFFFFFFFF:F  
FFFFFFFFFFFFFFFFFFFFFF
```

```

FFFFFFFFFFFFFFFFFFFFFFFFFFFFFFFFFFFFFFFFFFFFFFFFFFFFFFFFFFFFFFFFFFFFFFFF
FFFFFFFFFFFF:FFFFFFFFFFFFFFFFFFFF:FFFFFFFFFFFFFFFFFFFFFFFFFFFFFFFFFFFF
FFFFFFFFFFFFFFFFFFFF

```

[illegible][illegible]

@A00721:190:HGJW7DSXY:4:2610:12337:1282 1:N:0:TCTGCAAG+GCTGCACT  
GGAAGATGTTGTATAGGTTGGAAAATTCCAACCTCAAAACAGGTACTCTGTTTTGTAGAATCAAAGGA



@A00721:190:HGJW7DSXY:4:2221:12771:9142 1:N:0:TCTGCAAG+GCTGCACT  
CTCTGTTTTGTAGAATCAAAGGACGTCTGAAGCTATGTGCTTCGAAGCGGTTGAGGAGATTGAGTTC  
AGGAGTCCCAGGATCAACATCCTGTGCGAAGAGGCATGAAGCCAAGGATATAGATATGTGGCATGTTGA  
ATATGCCACTAGTCA

[illegible]

+

[illegible]

+

```
FFFFFFFFFFFFFFFFFFFFFFFFFFFFFFFFFFFFFFFF:FFFFFFFFFFFFFFFFFFFFFFFF
FFFFFFFFFFFFFFFFFFFFFFFFFFFFFFFFFFFFFFFF:FFFFFFFFFFFFFFFFFF:FFFFFFF:FFFFFFF
FFFFFFFFFFFFFFFFFFFF
```

+

```
FFFFFFFFFFFFFFFFFFFFFFFFFFFFFFFFFFFFFFFFFFFFFFFFFFFFFFFFFFFFFFFFFFFFF  
FFFFFFFFFFFFFFFFFFFFFF,FFFFFFFFFFFFFFFFFFF:FFFFFFFFFFFFFFFFFFFFFFFFFFFF  
EEEEEEEEEEEEEE
```

+

[illegible]

+

[illegible]

+

[illegible]

@A00721:190:HGJW7DSXY:4:2260:12066:8797 1:N:0:TCTGCAAG+GCTGCACT  
TGTAGAATCAAAGGACGTCTGAAGCTATGTGCTTCGAAGCGCGTTGAGGAGATTGAGTTCAGGAGTCC  
CAGGATCAACATCCTGTCTGAAGAGGCATGAAGCCAAGGATATAGATATGTGGCATGTTGAATATGCCA  
CTAGTCAACCCACGT

@A00721:190:HGJW7DSXY:4:2427:18078:1141 1:N:0:TCTGCAAG+GCTGCACT  
TGTAGAATCAAAGGACGTCTGAAGCTATGTGCTTCGAAGCGCGTTGAGGAGATTGAGTTCAGGAGTCC  
CAGGATCAACATCCTGTCTGAAGAGGCATGAAGCCAAGGATATAGATATGTGGCATGTTGAATATGCCA  
CTAGTCAACCCACGT

@A00721:190:HGJW7DSXY:4:2431:31638:11350 1:N:0:TCTGCAAG+GCTGCACT  
TGTAGAATCAAAGGACGTCTGAAGCTATGTGCTTCGAAGCGCGTTGAGGAGATTGAGTTCAGGAGTCC  
CAGGATCAACATCCTGTCTGAAGAGGCATGAAGCCAAGGATATAGATATGTGGCATGTTGAATATGCCA  
CTAGTCAACCCACGT

@A00721:190:HGJW7DSXY:4:1213:6867:36902 1:N:0:TCTGCAAG+GCTGCACT  
CGGACGTCTGAAGCTATGTGCTTCGAAGCGCGTTGAGGAGATTGAGTTCAGGAGTCCCAGGATCAACA  
TCCTGTGGAAGAGGCATGAAGCCAAGGATATAGATATGTGGCATGTTGAATATGCCACTAGTCAACCC  
ACGTTGAACCGTGTG

@A00721:190:HGJW7DSXY:4:1308:22932:24893 1:N:0:TCTGCAAG+GCTGCACT  
CGGACGTCTGAAGCTATGTGCTTCGAAGCGCTTGAGGAGATTGAGTTCAGGAGTCCCAGGATCAACA  
TCCTGTCTGAAGAGGCATGAAGCCAAGGATATAGATATGTGGCATGTTGAATATGCCACTAGTCAACCC  
ACGTTGAACCGTGTG

@A00721:190:HGJW7DSXY:4:1669:11487:24079 1:N:0:TCTGCAAG+GCTGCACT  
CGGACGTCTGAAGCTATGTGCTTCGAAGCGCTTGAGGAGATTGAGTTCAGGAGTCCCAGGATCAACA  
TCCTGTGGAAGAGGCATGAAGCCAAGGATATAGATATGTGGCATGTTGAATATGCCACTAGTCAACCC  
ACGTTGAACCGTGTG

@A00721:190:HGJW7DSXY:4:2228:25780:34240 1:N:0:TCTGCAAG+GCTGCACT  
CGGACGTCTGAAGCTATGTGCTTCGAAGCGCGTTGAGGAGATTGAGTTCAGGAGTCCCAGGATCAACA  
TCCTGTGCAAGAGGCATGAAGCCAAGGATATAGATATGTGGCATGTTGAATATGCCACTAGTCAACCC  
ACGTTGAACCGTGTG

+  
FFFFFFFFFFFFFFFFFFFFFFFFFFFFFFFFFFFFFFFFFFFFFFFFFFFFFFFFFFFFFFFFFFFFFFFF  
FFFFFFFFFFFFFFFFFFFFFFFFFFFFFFFFFFFFFFFFFFFFFFFFFFFFFFFFFFFFFFFFFFFFFFFF  
FFFFFFF:FFFFFFF  
@A00721:190:HGJW7DSXY:4:2237:22110:19867 1:N:0:TCTGCAAG+GCTGCACT  
CGGACGTCTGAAGCTATGTGCTTCGAAGCGCGTTGAGGAGATTGAGTTCAGGAGTCCCAGGATCAACA  
TCCTGTCTGAAGAGGCATGAAGCCAAGGATATAGATATGTGGCATGTTGAATATGCCACTAGTCAACCC  
ACGTTGAACCGT

+  
FF,FFFFFFFFFFFFFF:FFFFFF:FFF,FFFFFFFFFFFFFFFFFFFFFFFF:FFFFFFF,,FFFFFFF  
,:F:FFF:FFFFF,FFF:FF,:FFF,:FFFF:FFF,:F,FFF:,FFFFFFFFF,FF:FF:FFFFFFF  
F:F:F:FFF,F:  
@A00721:190:HGJW7DSXY:4:2261:4634:36354 1:N:0:TCTGCAAG+GCTGCACT  
CGGACGTCTGAAGCTATGTGCTTCGAAGCGCGTTGAGGAGATTGAGTTCAGGAGTCCCAGGATCAACA  
TCCTGTCTGAAGAGGCATGAAGCCAAGGATATAGATATGTGGCATGTTGAATATGCCACTAGTCAACCC  
ACGTTGAACCGTGTG

+  
FFFFFFFFFFFFFFFFF,FFFFFFFFFFFFFFFFFFFFFFFFFFFFFFFFFFFFFFFFFFFFFFFFFFFFFFFF  
FFFFFFFFFFFFFFFFFFFFFFFFFFFFFFFFFFFFFFFFFFFFFFFFFFFFFFFFFFFFFFFFFFFFFFFF  
FFFF:FFFFFFFFFFFF  
@A00721:190:HGJW7DSXY:4:2337:27037:25739 1:N:0:TCTGCAAG+GCTGCACT  
CGGACGTCTGAAGCTATGTGCTTCGAAGCGCGTTGAGGAGATTGAGTTCAGGAGTCCCAGGATCAACA  
TCCTGTCTGAAGAGGCATGAAGCCAAGGATATAGATATGTGGCATGTTGAATATGCCACTAGTCAACCC  
ACGTTGAACCGTGTG

+  
FF:FFFFFFFFFFFFFFFFFFFFFFFF:FF:F:FFFFFF:FFFF:FFFFFFFFF:FFFFFFFFFFFFFFFF  
FF:FFFFFFFFF,FFFFFFFFF,FF:FFFFFFFFF,FFFFFFFFF::F:FFF:FFFFFFFFFFFFFFFF  
FFFFFFFFFF:::FF  
@A00721:190:HGJW7DSXY:4:2525:28492:12759 1:N:0:TCTGCAAG+GCTGCACT  
CGGACGTCTGAAGCTATGTGCTTCGAAGCGCGTTGAGGAGATTGAGTTCAGGAGTCCCAGGATCAACA  
TCCTGTCTGAAGAGGCATGAAGCCAAGGATATAGATATGTGGCATGTTGAATATGCCACTAGTCAACCC  
ACGTTGAACCGTGTG

+  
FFFFFFFFFFFFFFFFF:FFFFFFFFFFFFFFFFFFFFFFFFFFFFFFFFFFFFFFFFFFFFFFFFFFFFFFFF  
FFFFFFFFFFFFFFFFFFFFFFFFFFFFFFFFFFFFFFFFFFFFFFFFFFFFFFFFFFFFFFFFFFFFFFFF  
FFF:FFFFFFFFFFFF  
@A00721:190:HGJW7DSXY:4:1311:7292:27743 1:N:0:TCTGCAAG+GCTGCACT  
CTGAAGCTATGTGCTTCGAAGCGCGTTGAGGAGATTGAGTTCAGGAGTCCCAGGATCAACATCCTGTC  
GAAGAGGCATGAAGCCAAGGATATAGATATGTGGCATGTTGAATATGCCACTAGTCAACCCACGTTGA  
ACCGTGTGCTTTCGT

+  
FFFFFFFFFFFFFFFFFFFFFFFFFFFFFFFFFFFFFFFFFFFFFFFFFFFFFFFFFFFFFFFFFFFFFFFF  
FFFFFFFFFFFFFFFFFFFFFFFFFFFFFFFFFFFFFFFFFFFFFFFFFFFFFFFFFFFFFFFFFFFFFFFF  
FFFFFFFFFFFFFFFFFFFF  
@A00721:190:HGJW7DSXY:4:1431:6017:3082 1:N:0:TCTGCAAG+GCTGCACT  
CTGAAGCTATGTGCTTCGAAGCGCGTTGAGGAGATTGAGTTCAGGAGTCCCAGGATCAACATCCTGTC  
GAAGAGGCATGAAGCCAAGGATATAGATATGTGGCATGTTGAATATGCCACTAGTCAACCCACGTTGA  
ACCGTGTGCTTTCGT

+  
FFFF:FF:FFFFFFFFFFFFFFFFFFFFFFFFFFFFFFFFFFFFFFFFFFFFFFFFFFFFFFFFFFFFFFFF  
FFFFFFFFFFFFFFFFFFFFFFFFFFFFFFFF:FFFFFFFFFFFFFFFFFFFFFFFFFFFFFFFFFFFFFFFF  
FFFFFFFFFFFFFFFFFFFF  
@A00721:190:HGJW7DSXY:4:2136:1226:11663 1:N:0:TCTGCAAG+GCTGCACT  
CTGAAGCTATGTGCTTCGAAGCGCGTTGAGGAGATTGAGTTCAGGAGTCCCAGGATCAACATCCTGTC

GAAGAGGCATGAAGCCAAGGATATAGATATGTGGCATGTTGAATATGCCACTAGTCAACCCACGTTGA  
ACCGTGTGCTTTCGT

+

FFFFFFFFFFFFFFFFFFFFFFFFFFFFFFFFFFFFFFFFFFFFFFFFFFFFFFFFFFFFFFFFFFFFFFFF  
FFFFFFFFFFFFFFFFFFFFFFFFFFFFFFFFFFFFFFFFFFFFFFFFFFFFFFFFFFFFFFFFFFFFFFFF  
FFFFFFFFFFFFFFFF

@A00721:190:HGJW7DSXY:4:2318:30825:15796 1:N:0:TCTGCAAG+GCTGCACT  
CTGAAGCTATGTGCTTCGAAGCGCGTTGAGGAGATTGAGTTCAGGAGTCCCAGGATCAACATCCTGTC  
GAAGAGGCATGAAGCCAAGGATATAGATATGTGGCATGTTGAATATGCCACTAGTCAACCCACGTTGA  
ACCGTGTGCTTTCGT

+

FFFFFFFFFFFFFFFFFFFFFFFFFFFFFFFFFFFFFFFFFFFFFFFFFFFFFFFFFFFFFFFFFFFFFFFF  
FFFFFFFFFFFFFFFFFFFFFFFFFFFFFFFFFFFFFFFFFFFFFFFFFFFFFFFFFFFFFFFFFFFFFFFF  
FFFFFFFFFFFFFFFF

@A00721:190:HGJW7DSXY:4:2410:8775:17942 1:N:0:TCTGCAAG+GCTGCACT  
CTGAAGCTATGTGCTTCGAAGCGCGTTGAGGAGATTGAGTTCAGGAGTCCCAGGATCAACATCCTGTC  
GAAGAGGCATGAAGCCAAGGATATAGATATGTGGCATGTTGAATATGCCACTAGTCAACCCACGTTGA  
ACCGTGTGCTTTCGT

+

FFFFFFFFFFFFFFFFFFFFFFFFFFFFFFFFFFFFFFFFFFFFFFFFFFFFFFFFFFFFFFFFFFFFFFFF  
FFFFFFFFFFFFFFFFFFFFFFFFFFFFFFFFFFFFFFFFFFFFFFFFFFFFFFFFFFFFFFFFFFFFFFFF  
FFFFFFFFFFFFFFFF

@A00721:190:HGJW7DSXY:4:2414:3739:33082 1:N:0:TCTGCAAG+GCTGCACT  
CTGAAGCTATGTGCTTCGAAGCGCGTTGAGGAGATTGAGTTCAGGAGTCCCAGGATCAACATCCTGTC  
GAAGAGGCATGAAGCCAAGGATATAGATATGTGGCATGTTGAATATGCCACTAGTCAACCCACGTTGA  
ACCGTGTGCTTTCGT

+

FFFF:FFFFFFFFFFFFFFFFFFFFFFFFFFFFFFFFFFFFFFFFFFFFFFFFFFFFFFFFFFFFFFFF  
FFFFFFFFFFFFFFFFFFFFFFFFFFFFFFFFFFFFFFFFFFFFFFFFFFFFFFFFFFFFFFFFFFFFFFFF  
FFFFFFFFFFFFFFFF

@A00721:190:HGJW7DSXY:4:2616:32353:34413 1:N:0:TCTGCAAG+GCTGCACT  
CTGAAGCTATGTGCTTCGAAGCGCGTTGAGGAGATTGAGTTCAGGAGTCCCAGGATCAACATCCTGTC  
GAAGAGGCATGAAGCCAAGGATATAGATATGTGGCATGTTGAATATGCCACTAGTCAACCCACGTTGA  
ACCGTGTGCTTTCGT

+

FFFFFF:FFFFFFFFFFFFFFFFFFFFFFFFFFFFFFFFFFFFFFFFFFFFFFFFFFFFFFFFFFFFFFFF  
FFFFFFFFFFFFFFFFFFFFFFFFFFFFFFFFFFFFFFFFFFFFFFFFFFFFFFFFFFFFFFFFFFFFFFFF  
FFFFFFFFFFFFFFFF

@A00721:190:HGJW7DSXY:4:1268:28131:6370 1:N:0:TCTGCAAG+GCTGCACT  
ACGCACGAAAGCACACGGTTCAACGTGGGTTGACTAGTGGCATATTCAACATGCCACATATCTATATC  
CTTGGCTTCATGCCTCTTCGACAGGATGTTGATCCTGGGACTCCTGAACTCAATCTCCTCAACGCGCT  
TCGAAG

+

FFFFFFFFFFFFFFFFFFFFFFFFFFFFFFFFFFFFFFFFFFFFFFFFFFFFFFFFFFFFFFFFFFFFFFFF  
FFFFFFFFFFFFFFFFFFFFFFFFFFFFFFFFFFFFFFFFFFFFFFFFFFFFFFFFFFFFFFFFFFFFFFFF  
FFFFFFF

@A00721:190:HGJW7DSXY:4:1350:9091:1705 1:N:0:TCTGCAAG+GCTGCACT  
ACGCACGAAAGCACACGGTTCAACGTGGGTTGACTAGTGGCATATTCAACATGCCACATATCTATATC  
CTTGGCTTCATGCCTCTTCGACAGGATGTTGATCCTGGGACTCCTGAACTCAATCTCCTCAACGCGCT  
TCGAAG

+

FFFFFFFFFFFFFFFFFFFFFFFFFFFFFFFFFFFFFFFFFFFFFFFFFFFFFFFFFFFFFFFFFFFFFFFF  
FFFFFFFFFFFFFFFFFFFFFFFFFFFFFFFFFFFFFFFFFFFFFFFFFFFFFFFFFFFFFFFFFFFFFFFF  
FFFFFFF,FFFFFFFFFFFFFFFFFFFFFFFFFFFFFFFF,FF,:FFFFFFFFFFFFFFFFFFFFFFFF,  
FF:FFF

@A00721:190:HGJW7DSXY:4:1628:16676:3443 1:N:0:TCTGCAAG+GCTGCACT  
ACGCACGAAAGCACACGGTTCAACGTGGGTTGACTAGTGGCATATTCAACATGCCACATATCTATATC  
CTTGGCTTCATGCCTCTTCGACAGGATGTTGATCCTGGGACTCCTGAACTCAATCTCCTCAACGCGCT  
TCGAAG

[illegible]

+

```

FFFFFFFF:F:FFFFFFFFFFFFFFFF::FFFFFFFF:FF,FFFFFF:,F:FFFFFF,FFF:,FF,FFFFF
:FFFFFFFFF::FFFFFFFFFFFFFFFFFFFF,,F:FFFF::F:FFFFFFFFFFFFFFFFFFFF,FFFFFF:FF:F,
FFFFFF

```

+

```
FFFFFFFFFFFFFFFFFFFFFFFFFFFFFFFFFFFFFFFFFFFFFFFFFFFFFFFFFFFFFFFFFFFFF
FFFFFFFFFFFFFFFFFFFFFF;FFFFFFFFFFFFFFFFFFFFFFFFFFFFFFFFFFFFFFFFFFFFFFF
FFFFF
```

+

[illegible]

+

[illegible]

+

```
FF,FFF:F,:FFF,:F:F,F,,FFFFFFF,,,F,:,:FFF:FFFFFF,FFF,FFFF,FF,,,F,:,:,
FF:F:FFFFFFFFF,,,F,FFFFFF,FF,,,F,FF,F,FFF:,,,F,F,F:FFF,,,,FFF,FFFF,,,
F.FF:
```

+

[illegible]



FFFFFFFFFFFFFFFFFFFFFFFFFFFFFFFFFFFFFFFFFFFFFFFFFFFFFFFFFFFFFFFFFFFFFFFFFFFFFFFF  
FFFFFFFFFFFFFFFF

@A00721:190:HGJW7DSXY:4:2201:28546:21308 1:N:0:TCTGCAAG+GCTGCACT  
CGTTGAGGAGATTGAGTTCAGGAGTCCCAGGATCAACATCCTGTCTGAAGAGGCATGAAGCCAAGGATA  
TAGATATGTGGCATGTTGAATATGCCACTAGTCAACCCACGTTGAACCGTGTGCTTTCGTGCGTAGAT  
CGGAGAAGACTTAGT

+

:FFF,FFFFFFFFFFFF:F:FF:FFFFFFFFFFFFFFFFFFFF:FFFFFFFF:FFFFFF:FFFFFF:FFFFFFFF  
FF:FFFFF,FFFFFFFFFFFFFFFF:FFFFFFFF:FFF:FFFF:FFFFFFFF:FFFFFF:F,FFFFFF:FF  
FFFFFFFFFFFF:FF:F

@A00721:190:HGJW7DSXY:4:2264:25292:19304 1:N:0:TCTGCAAG+GCTGCACT  
CGTTGAGGAGATTGAGTTCAGGAGTCCCAGGATCAACATCCTGTCTGAAGAGGCATGAAGCCAAGGATA  
TAGATATGTGGCATGTTGAATATGCCACTAGTCAACCCACGTTGAACCGTGTGCTTTCGTGCGTAGAT  
CGGAGAAGACTTAGT

+

FFFFFFFFFFFFFFFFFFFFFFFFFFFFFFFFFFFFFFFFFFFFFFFFFFFFFFFFFFFFFFFFFFFFFFFFFFFFFFFF  
FFFFFFFFFFFFFFFFFFFFFFFFFFFFFFFFFFFFFFFFFFFFFFFFFFFFFFFFFFFFFFFFFFFFFFFFFFFFFFFF  
FFFFFFFFFFFFFFFF

@A00721:190:HGJW7DSXY:4:2505:29324:26193 1:N:0:TCTGCAAG+GCTGCACT  
CGTTGAGGAGATTGAGTTCAGGAGTCCCAGGATCAACATCCTGTCTGAAGAGGCATGAAGCCAAGGATA  
TAGATATGTGGCATGTTGAATATGCCACTAGTCAACCCACGTTGAACCGTGTGCTTTCGTGCGTAGAT  
CGGAGAAGACTTAGT

+

FFFFFFFFFFFFFFFFFFFFFFFFFFFF:FFFFFFFFFFFFFFFFFFFFFFFFFFFFFFFFFFFFFFFFFFFF:FFFFF  
FFFFFFFFFFFFFFFFFFFFFFFFFFFFFFFFFFFFFFFFFFFFFFFFFFFFFFFFFFFFFFFFFFFFFFFFFFFFFFFF  
FFFFFFF:FFFFFFF

@A00721:190:HGJW7DSXY:4:2561:27263:28479 1:N:0:TCTGCAAG+GCTGCACT  
CGTTGAGGAGATTGAGTTCAGGAGTCCCAGGATCAACATCCTGTCTGAAGAGGCATGAAGCCAAGGATA  
TAGATATGTGGCATGTTGAATATGCCACTAGTCAACCCACGTTGAACCGTGTGCTTTCGTGCGTAGAT  
CGGAGAAGACTTAGT

+

FFFFFFFFFFFFFFFFFFFFFFFFFFFFFFFFFFFFFFFFFFFFFFFFFFFFFFFFFFFFFFFFFFFFFFFFFFFFFFFF  
FFFFFFFFFFFFFFFFFFFFFFFFFFFFFFFFFFFFFFFFFFFFFFFFFFFFFFFFFFFFFFFFFFFFFFFFFFFFFFFF  
FFFFFFFFFFFFFFFF

@A00721:190:HGJW7DSXY:4:2623:32235:21684 1:N:0:TCTGCAAG+GCTGCACT  
CGTTGAGGAGATTGAGTTCAGGAGTCCCAGGATCAACATCCTGTCTGAAGAGGCATGAAGCCAAGGATA  
TAGATATGTGGCATGTTGAATATGCCACTAGTCAACCCACGTTGAACCGTGTGCTTTCGTGCGTAGAT  
CGGAGAAGACTTAGT

+

FFFFFFFFFFFFFFFFFFFFFFFFFFFFFFFFFFFFFFFFFFFFFFFFFFFFFFFFFFFFFFFFFFFFFFFFFFFFFFFF  
FFFFFFFFFFFFFFFFFFFFFFFFFFFFFFFFFFFFFFFFFFFFFFFFFFFFFFFFFFFFFFFFFFFFFFFFFFFF:FFF  
FFFFFFFFFFFFFFFF

@A00721:190:HGJW7DSXY:4:2666:8983:35806 1:N:0:TCTGCAAG+GCTGCACT  
CGTTGAGGAGATTGAGTTCAGGAGTCCCAGGATCAACATCCTGTCTGAAGAGGCATGAAGCCAAGGATA  
TAGATATGTGGCATGTTGAATATGCCACTAGTCAACCCACGTTGAACCGTGTGCTTTCGTGCGTAGAT  
CGGAGAAGACTTAGT

+

FFFFFFFFFFFF:FFFFFFFFFFFFFFFFFFFFFFFFFFFFFFFFFFFFFFFFFFFFFFFFFFFFFFFFFFFFFFFF  
FFFFFFFFFFFFFFFFFFFFFFFFFFFFFFFFFFFFFFFFFFFFFFFFFFFFFFFFFFFFFFFFFFFFFFFFFFFFFFFF  
FFFFFFFFFFFFFFFF

@A00721:190:HGJW7DSXY:4:1251:8612:3850 1:N:0:TCTGCAAG+GCTGCACT  
GAGGAGATTGAGTTCAGGAGTCCCAGGATCAACATCCTGTCTGAAGAGGCATGAAGCCAAGGATATAGA  
TATGTGGCATGTTGAATATGCCACTAGTCAACCCACGTTGAACCGTGTGCTTTCGTGCGTAGATCGGA  
GAAGACTTAGTTCTG

+  
FFFFFFFFFFFFFFFFFFFFFFFFFFFFFFFFFFFFFFFFFFFFFFFFFFFFFFFFFFFFFFFFFFFFFFFF  
FFFFFFFFF:FFFFFFFFFFFFFFFFFFFFFFFFFFFFFFFFFFFFFFFFFFFFFFFFFFFFFFFFFFFFF  
FFFFFFF:FFFFFFF  
@A00721:190:HGJW7DSXY:4:1537:10755:35806 1:N:0:TCTGCAAG+GCTGCACT  
GAGGAGATTGAGTTCAGGAGTCCCAGGATCAACATCCTGTCTGAAGAGGCATGAAGCCAAGGATATAGA  
TATGTGGCATGTTGAATATGCCACTAGTCAACCCACGTTGAACCGTGTGCTTTCGTGCGTAGATCGGA  
GAAGACTTAGTTCTG  
+  
FFFFFFFFFFFFFFFFFFFFFFFFFFFFFFFFFFFFFFFFFFFFFFFFFFFFFFFFFFFFFFFFFFFFFFFF  
FFFFFFFFF:FFFFFFFFFFFFFFFFFFFFFFFFFFFFFFFFFFFFFFFFFFFFFFFFFFFFFFFFFFFFF  
FFFFFFFFF  
@A00721:190:HGJW7DSXY:4:1545:20347:27712 1:N:0:TCTGCAAG+GCTGCACT  
GAGGAGATTGAGTTCAGGAGTCCCAGGATCAACATCCTGTCTGAAGAGGCATGAAGCCAAGGATATAGA  
TATGTGGCATGTTGAATATGCCACTAGTCAACCCACGTTGAACCGTGTGCTTTCGTGCGTAGATCGGA  
GAAGACTTAGTTCTG  
+  
FFFFFFFFFFFFFFFFFFFFFFFFFFFFFFFFFFFFFFFFFFFFFFFFFFFFFFFFFFFFFFFFFFFFFFFF  
FFFFFFFFF:FFFFFFFFFFFFFFFFFFFFFFFFFFFFFFFFFFFFFFFFFFFFFFFFFFFFFFFFFFFFF  
FFFFFFFFF  
@A00721:190:HGJW7DSXY:4:2321:31295:26882 1:N:0:TCTGCAAG+GCTGCACT  
GAGGAGATTGAGTTCAGGAGTCCCAGGATCAACATCCTGTCTGAAGAGGCATGAAGCCAAGGATATAGA  
TATGTGGCATGTTGAATATGCCACTAGTCAACCCACGTTGAACCGTGTGCTTTCGTGCGTAGATCGGA  
GAAGACTTAGTTCTG  
+  
FFF:FFF,F:FFFFFFF,FF:F:FFFFFFFFFFFFFFFFFFFFF:FFFFFFF::FFFFFFFFFF:FFFFFFF  
FFFFFFFFF::FFFF,::FFF,FF:FFFFFFFFF,:F:FFFFFFF,F,FFFFFFFF:FFFFFFF,FF  
FFF,,F::FFFFFFF  
@A00721:190:HGJW7DSXY:4:2430:4137:2049 1:N:0:TCTGCAAG+GCTGCACT  
GAGGAGATTGAGTTCAGGAGTCCCAGGATCAACATCCTGTCTGAAGAGGCATGAAGCCAAGGATATAGA  
TATGTGGCATGTTGAATATGCCACTAGTCAACCCACGTTGAACCGTGTGCTTTCGTGCGTAGATCGGA  
GAAGACTTAGTTCTG  
+  
FFFFFFFFFFFFFFFFFFFFFFFFFFFFFFFFFFFFFFFFFFFFFFFFFFFFFFFFFFFFFFFFFFFFFFFF  
FFFFFFFFF:FFFFFFFFFFFFFFFFF:F:FFFFFFFFFFFFFFFFFFFFFFFFFFFFFFFFFFFFF  
FFFFF:FFFFFFF  
@A00721:190:HGJW7DSXY:4:2535:27272:34507 1:N:0:TCTGCAAG+GCTGCACT  
GAGGAGATTGAGTTCAGGAGTCCCAGGATCAACATCCTGTCTGAAGAGGCATGAAGCCAAGGATATAGA  
TATGTGGCATGTTGAATATGCCACTAGTCAACCCACGTTGAACCGTGTGCTTTCGTGCGTAGATCGGA  
GAAGACTTAGTTCTG  
+  
FFFFFFFFFFFFFFFFFFFFFFFFFFFFFFFFFFFFFFFFFFFFFFFFFFFFFFFFFFFFFFFFFFFFF:FFFFFFFFF  
FFFFFFFFF:FFFFFFFFFFFFFFFFFFFFFFFFFFFFFFFFFFFFF:FFFFFFFFFFFFFFFFF:FFFFFFF  
FFFFFFFFF  
@A00721:190:HGJW7DSXY:4:2546:6262:12493 1:N:0:TCTGCAAG+GCTGCACT  
GAGGAGATTGAGTTCAGGAGTCCCAGGATCAACATCCTGTCTGAAGAGGCATGAAGCCAAGGATATAGA  
TATGTGGCATGTTGAATATGCCACTAGTCAACCCACGTTGAACCGTGTGCTTTCGTGCGTAGATCGGA  
GAAGACTTAGTTCTG  
+  
FFFFF:F:F:FF:FFFF:FFFF:FF:FFFF::FFFF,,FF:FFFF,FFF:F:FF,FFFF:FFFF  
FFFFFFFFF,FFFFFFFFFFFFFFFFFFFFFFFFF:FFFFFFFFF:F:FFFF:FFFF:FF:FFFFF:F:F  
:FFF:, :FFFFFFF:  
@A00721:190:HGJW7DSXY:4:2546:7591:12947 1:N:0:TCTGCAAG+GCTGCACT  
GAGGAGATTGAGTTCAGGAGTCCCAGGATCAACATCCTGTCTGAAGAGGCATGAAGCCAAGGATATAGA

TATGTGGCATGTTGAATATGCCACTAGTCAACCCACGTTGAACCGTGTGCTTTCGTGCGTAGATCGGA  
GAAGACTTAGTTCTG

+

FFFFFFFF:FFFFFFFFFFFFFFFFFFFFFFFFFFFFFFFFFFFFFFFFFFFFFFFFFFFFFFFFFFFFFFFF,FFFF  
FFFFFFFFFFFFFFFFFFFFFFFFFFFFFFFFFFFFFFFFFFFFFFFFFFFFFFFFFFFFFFFF:FFFFFFFFFFFFFFFFFFFFFFFF:FFFFF  
FFFFFFFF:FFFFFFFF

@A00721:190:HGJW7DSXY:4:1228:2428:1470 1:N:0:TCTGCAAG+GCTGCACT  
GGAGATTGAGTTCAGGAGTCCCAGGATCAACATCCTGTGCGAAGAGGCATGAAGCCAAGGATATAGATA  
TGTGGCATGTTGAATATGCCACTAGTCAACCCACGTTGAACCGTGTGCTTTCGTGCGTAGATCGGAGA  
AGACTTAGTTCTGAT

+

FFFFFFFFFFFFFFFFFFFFFFFFFFFFFFFFFFFFFFFFFFFFFFFFFFFFFFFFFFFFFFFFFFFFFFFFFFFF  
FFFFFFFFFFFFFFFF:FFFFFFFFFFFFFFFFFFFFFFFFFFFFFFFFFFFFFFFFFFFFFFFFFFFFFFFFFFFF  
FFFFFFFFFFFFFFFF

@A00721:190:HGJW7DSXY:4:1267:23755:11381 1:N:0:TCTGCAAG+GCTGCACT  
GGAGATTGAGTTCAGGAGTCCCAGGATCAACATCCTGTGCGAAGAGGCATGAAGCCAAGGATATAGATA  
TGTGGCATGTTGAATATGCCACTAGTCAACCCACGTTGAACCGTGTGCTTTCGTGCGTAGATCGGAGA  
AGACTTAGTTCTGAT

+

FFFFFFFFFFFFFFFFFFFFFFFFFFFFFFFFFFFFFFFFFFFFFFFFFFFFFFFFFFFFFFFFFFFFFFFFFFFF  
FFFFFFFFFFFFFFFFFFFFFFFFFFFFFFFFFFFFFFFFFFFFFFFFFFFFFFFFFFFFFFFFFFFFFFFFFFFF  
FFFFFFFFFFFFFFFF

@A00721:190:HGJW7DSXY:4:1460:26946:6010 1:N:0:TCTGCAAG+GCTGCACT  
GGAGATTGAGTTCAGGAGTCCCAGGATCAACATCCTGTGCGAAGAGGCATGAAGCCAAGGATATAGATA  
TGTGGCATGTTGAATATGCCACTAGTCAACCCACGTTGAACCGTGTGCTTTCGTGCGTAGATCGGAGA  
AGACTTAGTTCTGAT

+

FFFFFFFFFFFFFFFFFFFFFFFFFFFFFFFFFFFFFFFFFFFFFFFFFFFFFFFFFFFFFFFFFFFFFFFFFFFF,FFFFF  
FFFFFFFFFFFFFFFFFFFFFFFFFFFFFFFFFFFFFFFFFFFFFFFFFFFFFFFFFFFFFFFFFFFFFFFFFFFF  
,F::FFFFFFFF:F

@A00721:190:HGJW7DSXY:4:2210:29957:24126 1:N:0:TCTGCAAG+GCTGCACT  
GGAGATTGAGTTCAGGAGTCCCAGGATCAACATCCTGTGCGAAGAGGCATGAAGCCAAGGATATAGATA  
TGTGGCATGTTGAATATGCCACTAGTCAACCCACGTTGAACCGTGTGCTTTCGTGCGTAGATCGGAGA  
AGACTTAGTTCTGAT

+

FFFFFFFFFFFFFFFFFFFFFFFFFFFFFFFFFFFFFFFFFFFFFFFFFFFFFFFFFFFFFFFFFFFFFFFFFFFF:F  
FFFFFFFFFFFFFFFFFFFFFFFFFFFFFFFFFFFFFFFFFFFFFFFFFFFFFFFFFFFFFFFFFFFFFFFFFFFF  
FFFFFFFFFFFFFFFF

@A00721:190:HGJW7DSXY:4:2457:21007:36057 1:N:0:TCTGCAAG+GCTGCACT  
GGAGATTGAGTTCAGGAGTCCCAGGATCAACATCCTGTGCGAAGAGGCATGAAGCCAAGGATATAGATA  
TGTGGCATGTTGAATATGCCACTAGTCAACCCACGTTGAACCGTGTGCTTTCGTGCGTAGATCGGAGA  
AGACTTAGTTCTGAT

+

FFFFFFFFFFFFFFFFFFFFFFFFFFFFFFFFFFFFFFFFFFFFFFFFFFFFFFFFFFFFFFFFFFFFFFFFFFFF  
FFFFFFFFFFFFFFFFFFFFFFFFFFFFFFFFFFFFFFFFFFFFFFFFFFFFFFFFFFFFFFFFFFFFFFFFFFFF  
FFFFFFFFFFFFFFFF

@A00721:190:HGJW7DSXY:4:2558:21404:21057 1:N:0:TCTGCAAG+GCTGCACT  
GGAGATTGAGTTCAGGAGTCCCAGGATCAACATCCTGTGCGAAGAGGCATGAAGCCAAGGATATAGATA  
TGTGGCATGTTGAATATGCCACTAGTCAACCCACGTTGAACCGTGTGCTTTCGTGCGTAGATCGGAGA  
AGACTTAGTTCTGAT

+

FFFFFFFFFFFFFFFFFFFFFFFFFFFFFFFFFFFFFFFFFFFFFFFFFFFFFFFFFFFFFFFFFFFFFFFFFFFF  
FFFFFFFFFFFFFFFFFFFFFFFFFFFFFFFFFFFFFFFFFFFFFFFFFFFFFFFFFFFFFFFFFFFFFFFFFFFF:FFFFFFFFFFFFFFFFFFFFFFFF  
FFFFFFFFFFFFFFFF

$+$ 

+

+

+

+

+

+

.....

FFFFFFFFFFFFFFFFFFFFFFFFFFFFFFFFFFFFFFFFFFFFFFFFFFFFFFFFFFFFFFFFFFFFFFFFFFFFFFFF  
FFFFFFFFFFFFFFFF

@A00721:190:HGJW7DSXY:4:1274:19180:2832 1:N:0:TCTGCAAG+GCTGCACT  
CCCAGGATCAACATCCTGTCTGAAGAGGCATGAAGCCAAGGATATAGATATGTGGCATGTTGAATATGC  
CACTAGTCAACCCACGTTGAACCGTGTGCTTTCGTGCGTAGATCGGAGAAGACTTAGTTCTGATTCCA  
TTACGGTCTTGCCCG

+

FFFFFFFFFFFFFFFFFFFFFFFFFFFFFFFFFFFFFFFFFFFFFFFFFFFFFFFFFFFFFFFFFFFFFFFFFFFFFFFF  
FFFFFFFFFFFFFFFFFFFFFFFFFFFFFFFFFFFFFFFFFFFFFFFFFFFFFFFFFFFFFFFFFFFFFFFFFFFFFFFF  
FFFFFFFFFFFFFFFF

@A00721:190:HGJW7DSXY:4:1601:27543:28839 1:N:0:TCTGCAAG+GCTGCACT  
CCCAGGATCAACATCCTGTCTGAAGAGGCATGAAGCCAAGGATATAGATATGTGGCATGTTGAATATGC  
CACTAGTCAACCCACGTTGAACCGTGTGCTTTCGTGCGTAGATCGGAGAAGACTTAGTTCTGATTCCA  
TTACGGTCTTGCCCG

+

FFFFFFFFFFFFFFFFFFFFFFFFFFFFFFFFFFFFFFFFFFFFFFFFFFFFFFFFFFFFFFFFFFFFFFFFFFFFFFFF  
FFFFFFFFFFFFFFFFFFFFFFFFFFFFFFFFFFFFFFFFFFFFFFFFFFFFFFFFFFFFFFFFFFFFFFFFFFFFFFFF  
FFFFFFFFFFFFFFFF

@A00721:190:HGJW7DSXY:4:1157:12400:30765 1:N:0:TCTGCAAG+GCTGCACT  
CAAGGATATAGATATGTAGCATGTTGAATATGCCACTAGTCAACCCACGTTGAACCGTGTGCTTTCGT  
GCGTAGATCGGAGAAGACTTAGTTCTGATTCCATTACGGTCTTGCCCGGAATGTGTTACAGTGAGATA  
TCCAGAAGATCGATA

+

FFFFFFFFFFFFFFFFFFFFFFFFFFFFFFFFFFFFFFFFFFFFFFFFFFFFFFFFFFFFFFFFFFFFFFFFFFFFFFFF  
FFFFFFFFFFFFFFFFFFFFFFFFFFFFFFFFFFFFFFFFFFFFFFFFFFFFFFFFFFFFFFFFFFFFFFFFFFFFFFFF  
FFFFFFF:FFFFFFF

@A00721:190:HGJW7DSXY:4:1329:2971:23359 1:N:0:TCTGCAAG+GCTGCACT  
CAAGGATATAGATATGTAGCATGTTGAATATGCCACTAGTCAACCCACGTTGAACCGTGTGCTTTCGT  
GCGTAGATCGGAGAAGACTTAGTTCTGATTCCATTACGGTCTTGCCCGGAATGTGTTACAGTGAGATA  
TCCAGAAGATCGATA

+

FFFFFFFFFFFFFFFFFFFFFFFFFFFFFFFFFFFFFFFFFFFFFFFFFFFFFFFFFFFFFFFFFFFFFFFFFFFFFFFF  
FFFFFFFFFFFFFFFFFFFFFFFFFFFFFFFFFFFFFFFFFFFFFFFFFFFFFFFFFFFFFFFFFFFFFFFFFFFFFFFF  
FFFFFFFFFFFFFFFF

@A00721:190:HGJW7DSXY:4:1359:23258:21574 1:N:0:TCTGCAAG+GCTGCACT  
CAAGGATATAGATATGTAGCATGTTGAATATGCCACTAGTCAACCCACGTTGAACCGTGTGCTTTCGT  
GCGTAGATCGGAGAAGACTTAGTTCTGATTCCATTACGGTCTTGCCCGGAATGTGTTACAGTGAGATA  
TCCAGAAGATCGATA

+

FFFFFFFFFFFFFFFFFFFFFFFFFFFFFFFFFFFFFFFFFFFFFFFFFFFFFFFFFFFFFFFFFFFFFFFFFFFFFFFF  
FFFFFFFFFFFFFFFFFFFFFFFFFFFFFFFFFFFFFFFFFFFFFFFFFFFFFFFFFFFFFFFFFFFFFFFFFFFFFFFF  
FFFFFFFFFFFFFFFF

@A00721:190:HGJW7DSXY:4:1469:24325:26115 1:N:0:TCTGCAAG+GCTGCACT  
CAAGGATATAGATATGTAGCATGTTGAATATGCCACTAGTCAACCCACGTTGAACCGTGTGCTTTCGT  
GCGTAGATCGGAGAAGACTTAGTTCTGATTCCATTACGGTCTTGCCCGGAATGTGTTACAGTGAGATA  
TCCAGAAGATCGATA

+

FFFFFFFFFFFFFFFFFFFFFFFFFFFFFFFFFFFFFFFFFFFFFFFFFFFFFFFFFFFFFFFFFFFFFFFFFFFFFFFF  
FFF:FFFFFFFFFFFFFFFFFFFFFFFFFFFFFFFFFFFFFFFFFFFFFFFFFFFFFFFFFFFFFFFFFFFFFFFF  
FFFFFFFFFFFFFFFF

@A00721:190:HGJW7DSXY:4:2131:27380:9862 1:N:0:TCTGCAAG+GCTGCACT  
CAAGGATATAGATATGTAGCATGTTGAATATGCCACTAGTCAACCCACGTTGAACCGTGTGCTTTCGT  
GCGTAGATCGGAGAAGACTTAGTTCTGATTCCATTACGGTCTTGCCCGGAATGTGTTACAGTGAGATA  
TCCAGAAGATCGATA

+  
FFFFFFFFFFFFFFFFFFFFFFFFFFFFFFFFFFFFFFFFFFFFFFFFFFFFFFFFFFFFFFFFFFFFFFFF  
FFFFFFFFFFFFFFFFFFFFFFFFFFFFFFFFFFFFFFFFFFFFFFFFFFFFFFFFFFFFFFFFFFFFFFFF  
FFFFFF:FFFFFF:  
@A00721:190:HGJW7DSXY:4:2176:4924:32628 1:N:0:TCTGCAAG+GCTGCACT  
CAAGGATATAGATATGTAGCATGTTGAATATGCCACTAGTCAACCCACGTTGAACCGTGTGCTTTTCGT  
GCGTAGATCGGAGAAGACTTAGTTCTGATTCCATTACGGTCTTGCCCGGAATGTGTTACAGTGAGATA  
TCCAGAAGATCGATA

+  
FFFFFFFFFFFFFFFFFFFFFFFFFFFFFFFFFFFFFFFFFFFFFFFFFFFFFFFFFFFFFFFFFFFFFF,FFFFFFFFFFFFFFFF  
FFFFFFFFFFFFFFFFFFFFFFFFFFFFFFFFFFFFFFFFFFFFFFFFFFFFFFFFFFFFFFFFFFFFFF:FFFFFFFFFFFFFFFF  
FFFFFF,FFFFFF  
@A00721:190:HGJW7DSXY:4:2423:13621:9173 1:N:0:TCTGCAAG+GCTGCACT  
CAAGGATATAGATATGTAGCATGTTGAATATGCCACTAGTCAACCCACGTTGAACCGTGTGCTTTTCGT  
GCGTAGATCGGAGAAGACTTAGTTCTGATTCCATTACGGTCTTGCCCGGAATGTGTTACAGTGAGATA  
TCCAGAAGATCGATA

+  
FFFFF:,FFFF:FFFFFFFF::F:FF:FF:,FFFF:FFFF,FFF:,FFFF,F,F,FF:FFFFFF  
FFF,:FFFFFF,FF,:F:F,:FFF:F:,FFFFFF,,:FF:FFFF,F::F,,,::F:FFFFFF  
F:FFFF,F,FFFF  
@A00721:190:HGJW7DSXY:4:2550:23375:12571 1:N:0:TCTGCAAG+GCTGCACT  
CAAGGATATAGATATGTAGCATGTTGAATATGCCACTAGTCAACCCACGTTGAACCGTGTGCTTTTCGT  
GCGTAGATCGGAGAAGACTTAGTTCTGATTCCATTACGGTCTTGCCCGGAATGTGTTACAGTGAGATA  
TCCAGAAGATCGATA

+  
FFFFFFFFFFFFFFFFFFFFFFFFFFFFFFFFFFFFFFFFFFFFFFFFFFFFFFFFFFFFFFFFFFFFFFFF  
FFFFFFFFFFFFFFFFFFFFFFFFFFFFFFFFFFFFFFFFFFFFFFFFFFFFFFFFFFFFFFFFFFFFFFFF  
FFFFFFFFFFFFFFFFFFFF  
@A00721:190:HGJW7DSXY:4:2669:2537:34788 1:N:0:TCTGCAAG+GCTGCACT  
CAAGGATATAGATATGTAGCATGTTGAATATGCCACTAGTCAACCCACGTTGAACCGTGTGCTTTTCGT  
GCGTAGATCGGAGAAGACTTAGTTCTGATTCCATTACGGTCTTGCCCGGAATGTGTTACAGTGAGATA  
TCCAGAAGATCGATA

+  
FFFFFFFFFFFFFFFFFFFFFFFFFFFFFFFFFFFFFFFFFFFFFFFFFFFFFFFFFFFFFFFFFFFFFFF:  
FFF,FFFF:FFFFFFFFFFFFFF:FFFFFFFF:FFFFFFFFFFFFFFFFFFFFFFFFFFFFFF:F:FFFFFFFF  
FFFFFFFFFFFF:FFFF  
@A00721:190:HGJW7DSXY:4:1120:25310:26600 1:N:0:TCTGCAAG+GCTGCACT  
GGATATAGATATGTGGCATGTTGAATATGCCACTAGTCAACCCACGTTGAACCGTGTGCTTTTCGTGCG  
TAGATCGGAGAAGACTTAGTTCTGATTCCATTACGGTCTTGCCCGGAATGTGTTACAGTGAGATATCC  
AGAAGATCGATAGCT

+  
:FFFFFFFFFFFFFFFFFFFFFFFFFFFFFFFFFFFFFFFFFFFFFFFFFFFFFFFFFFFFFFFFFFFFFFF  
FFFFFFFFFFFFFFFFFFFF:FFFFFFFFFFFFFFFFFFFFFFFFFFFFFFFFFFFFFFFFFFFFFFFFFFFF  
FFFFFFFFFFFFFFFFFFFF  
@A00721:190:HGJW7DSXY:4:1203:7572:31046 1:N:0:TCTGCAAG+GCTGCACT  
GGATATAGATATGTGGCATGTTGAATATGCCACTAGTCAACCCACGTTGAACCGTGTGCTTTTCGTGCG  
TAGATCGGAGAAGACTTAGTTCTGATTCCATTACGGTCTTGCCCGGAATGTGTTACAGTGAGATATCC  
AGAAGATCGATAGCT

+  
FFFFFFFFFFFFFFFFFFFFFFFFFFFF:FFFFFFF:FFF:FFFFFFFFFFFF,FFFFFF,FFFF:FFFFFF  
FFFFFFFFF:FFF:F,FFF:FFFFFFFF,F:FF,FF:FF,,F,F:FFFFFFFFFFFFFFFFFFFF:FFF:F  
FFFFFFFF,FFFFF  
@A00721:190:HGJW7DSXY:4:1478:31873:29700 1:N:0:TCTGCAAG+GCTGCACT  
GGATATAGATATGTGGCATGTTGAATATGCCACTAGTCAACCCACGTTGAACCGTGTGCTTTTCGTGCG

TAGATCGGAGAAGACTTAGTTCTGATTCCATTACGGTCTTGCCCGGAATGTGTTACAGTGAGATATCC  
AGAAGATCGATAGCT

[illegible]

GGATATAGATATGTGGCATGTTGAATATGCCACTAGTCAACCCACGTTGAACCGTGTGCTTTCGTGCG  
TAGATCGGAGAAGACTTAGTTCTGATTCCATTACGGTCTTGCCCGAATGTGTTACAGTGAGATATCC  
AGAAGATCGATAGCT

[illegible]

GGATATAGATATGTGGCATGTTGAATATGCCACTAGTCAACCCACGTTGAACCGTGTGCTTTCGTGCG  
TAGATCGGAGAAGACTTAGTTCTGATTCCATTACGGTCTTGCCCGAATGTGTTACAGTGAGATATCC  
AGAAGATCGATAGCT

[illegible]

GGATATAGATATGTGGCATGTTGAATATGCCACTAGTCAACCCACGTTGAACCGTGTGCTTTCGTGCG  
TAGATCGGAGAAGACTTAGTTCTGATTCCATTACGGTCTTGCCCGAATGTGTTACAGTGAGATATCC  
AGAAGATCGATAGCT

[illegible]

CACTAGTCAACCCACGTTGAACCGTGTGCTTTCGTGCGTAGATCGGAGAAGACTTAGTTCTGATTCCA  
 TTACGGTCTTGCCCGGAATGTGTTACAGTGAGATATCCAGAAGATCGATAGCTGAATGTGATAGAAGA  
 CATAGTTTTGAGATA

[illegible]

CACTAGTCAACCCACGTTGAACCGTGTGCTTTCTGTCGTAGATCGGAGAAGACTTAGTTCTGATTCCA  
TTACGGTCTTGCCCGGAATGTGTTACAGTGAGATATCCAGAAGATCGATAGCTGAATGTGATAGAAGA  
CATAGTTTTGAGATA

[illegible]

CACTAGTCAACCCACGTTGAACCGTGTGCTTTCGTGCGTAGATCGGAGAAGACTTAGTTCTGATTCCA  
TTACGGTCTTGCCCCGAATGTGTTACAGTGAGATATCCAGAAGATCGATAGCTGAATGTGATAGAAGA  
CATAGTTTTGAGATA

```

FFFFFFFFFFFFFFFF:FFFFFFFFFFFFFFFF:FFFFFFFFFFFFFFFF:FFFFFF
FFFFFFFFFFFFFFFF:FF:FFFFFFFFFFFFFFFFFFFFFFFFFFFFFFFFFFFF
FFFFFFFFFFFFFFFF

```

@A00721:190:HGJW7DSXY:4:2156:10050:13542 1:N:0:TCTGCAAG+GCTGCACT  
CACTAGTCAACCCACGTTGAACCGTGTGCTTTCTGTCGTAGATCGGAGAAGACTTAGTTCTGATTCCA  
TTACGGTCTTGCCCGGAATGTGTTACAGTGAGATATCCAGAAGATCGATAGCTGAATGTGATAGAAGA  
CATAGTTTTGAGATA

[illegible]

@A00721:190:HGJW7DSXY:4:2350:20591:4648 1:N:0:TCTGCAAG+GCTGCACT  
CACTAGTCAACCCACGTTGAACCGTGTGCTTTCTGTCGTAGATCGGAGAAGACTTAGTTCTGATTCCA  
TTACGGTCTTGCCCGGAATGTGTTACAGTGAGATATCCAGAAGATCGATAGCTGAATGTGATAGAAGA  
CATAGTTTTGAGATA

```

FFFFFFFF:FFFFFF::FFFFFFFF:FFFFFFFFFFFFFFFFFFFFFFFF:FFFFFFF::FFFFF:FF,FFF
FFFFFFFFFFFFFFFFFFFFFFFF:F:F,F,F,FFFFFFFFFFFFFFFF:FFFFFFFFF:FFFFFFFFFFFFFF:FFF
FFFFF,FFFFFFFFF

```

@A00721:190:HGJW7DSXY:4:2355:2935:33442 1:N:0:TCTGCAAG+GCTGCACT  
CACTAGTCAACCCACGTTGAACCGTGTGCTTTCTGTCGTAGATCGGAGAAGACTTAGTTCTGATTCCA  
TTACGGTCTTGCCCGGAATGTGTTACAGTGAGATATCCAGAAGATCGATAGCTGAATGTGATAGAAGA  
CATAGTTTTGAGATA

[illegible]

@A00721:190:HGJW7DSXY:4:2419:30346:16689 1:N:0:TCTGCAAG+GCTGCACT  
CACTAGTCAACCCACGTTGAACCGTGTGCTTTCTGTCGTAGATCGGAGAAGACTTAGTTCTGATTCCA  
TTACGGTCTTGCCCGGAATGTGTTACAGTGAGATATCCAGAAGATCGATAGCTGAATGTGATAGAAGA  
CATAGTTTTGAGATA

[illegible]

@A00721:190:HGJW7DSXY:4:2464:1994:15092 1:N:0:TCTGCAAG+GCTGCACT  
CACTAGTCAACCCACGTTGAACCGTGTGCTTTCTGTCGTAGATCGGAGAAGACTTAGTTCTGATTCCA  
TTACGGTCTTGCCCGGAATGTGTTACAGTGAGATATCCAGAAGATCGATAGCTGAATGTGATAGAAGA  
CATAGTTTTTGAGATA

[illegible]

@A00721:190:HGJW7DSXY:4:2513:11803:9001 1:N:0:TCTGCAAG+GCTGCACT  
CACTAGTCAACCCACGTTGAACCGTGTGCTTTCTGTCGTAGATCGGAGAAGACTTAGTTCTGATTCCA  
TTACGGTCTTGCCCGGAATGTGTTACAGTGAGATATCCAGAAGATCGATAGCTGAATGTGATAGAAGA  
CATAGTTTTGAGATA

[illegible]

@A00721:190:HGJW7DSXY:4:1538:30110:20322 1:N:0:TCTGCAAG+GCTGCACT  
ACGTTGAACCGTGTGCTTTCGTGCGTAGATCGGAGAAGACTTAGTTCTGATTCCATTACGGTCTTGCC  
CGGAATGTGTTACAGTGAGATATCCAGAAGATCGATAGCTGAATGTGATAGAAGACATAGTTTTGAGA  
TATCGAGCAACGTCA

FFFFFFFFFFFFFFFFFFFFFFFFFFFFFFFF:FFFFFFFFFFFFFFFFFFFFFFFFFFFFFFFFFFFFFFFFFFFFFFFFFFFFFFFF



FFFFFFFFF:FFF:FFFFFFFFFFFFFFFFFFFFFFFFFFFFFFFFFFFFFFFFF: ,FFFFFFFFF  
FFFFFF:FF,FFFF

@A00721:190:HGJW7DSXY:4:1653:12662:3004 1:N:0:TCTGCAAG+GCTGCACT  
ACGTTGAACCGTGTGCTTTCGTGCGTAGATCGGAGAAGACTTAGTTCTGATTCCATTACGGTCTTGCC  
CGGAATGTGTTACAGTTAGATATCCAGAAGATCGAAAGCTGACAGTGATAGAAGACATAGTTTTGAGA  
TATCGAGCAACGACA

+

F:FFFFFFFF:F::,,FFFF:,F:F,F:F,:FFFFFF,FFFFFF,,FF:FFF,FF,F:,,F,F,:F  
F::FF,F,: ,FFFF,,F,FFF,FFF,FFFFFF,F,F:FFFF,,F:FFF,FF:FFF,F,,,FF,F:F  
F,FF:FFFFFF:,FF

@A00721:190:HGJW7DSXY:4:2350:11532:8030 1:N:0:TCTGCAAG+GCTGCACT  
ACGTTGAACCGTGTGCTTTCGTGCGTAGATCGGAGAAGACTTAGTTCTGATTCCATTACGGTCTTGCC  
CGGAATGTGTTACAGTGAGATATCCAGAAGATCGATAGCTGAATGTGATAGAAGACATAGTTTTGAGA  
TATCGAGCAACGTCA

+

FFFFFFFFFFFFFFFFFFFFFFFFFFFFFFFFFFFFFFFFFFFFFFFFFFFFFFFFFFFFFFFFF  
FFFFFFFFFFFFFFFFFFFFFFFFFFFFFFFFFFFFFFFFFFFFFFFFFFFFFFFFFFFFFFFFF:FFFFFFFFF  
FFFFFFFFF:FFFFF

@A00721:190:HGJW7DSXY:4:2607:28845:18756 1:N:0:TCTGCAAG+GCTGCACT  
ACGTTGAACCGTGTGCTTTCGTGCGTAGATCGGAGAAGACTTAGTTCCGATTCCATTACGGTCTTGCC  
CGGACTGTGTTACAGTGAGATATCCAGAAGATCGATAGCTGAATGTGATAGAAGACATAGTTTTGAGA  
TATCTAGCAACGTCA

+

:FFFF:FF,FF,: ,F:,FFF:FF:F:F:F,FFFF:, ,FF,,FFFF,FFFF:FFFFFF,FF,F,FF  
F,FF,FFFF,F,FFF:FFF::FFFFFF,FF,:F:FFF,FF:FFF,,FF,,FFF:FFFFFF,F,FFF  
FFFF,F,FFFF,:FF

@A00721:190:HGJW7DSXY:4:1116:18475:31328 1:N:0:TCTGCAAG+GCTGCACT  
GCTTTCGTGCGTAGATCGGAGAAGACTTAGTTCTGATTCCATTACGGTCTTGCCCGGAATGTGTTACA  
GTGAGATATCCAGAAGATCGATAGCTGAATGTGATAGAAGACATAGTTTTGAGATATCGAGCAACGTC  
ATTGCTGATGC

+

FFFFFFFFFFFFFFFFFFFFFFFFFFFFFFFFFFFFFFFFF:F,,FFFFFFFFF:F:FFF:FFFFFF,F,FFF  
FFFFFFFFFFFFFFFFF:FFFF:F::FF:FF:FFFFFF:F:::FFF:F:F,FFF,FFF:FFFFFF,F  
FFF:FFFFFF

@A00721:190:HGJW7DSXY:4:1136:13602:5071 1:N:0:TCTGCAAG+GCTGCACT  
GCTTTCGTGCGTAGATCGGAGAAGACTTAGTTCTGATTCCATTACGGTCTTGCCCGGAATGTGTTACA  
GTGAGATATCCAGAAGATCGATAGCTGAATGTGATAGAAGACATAGTTTTGAGATATCGAGCAACGTC  
ATTGCTGATGC

+

FFFFFFFFFFFFFFFFFFFFFFFFFFFFFFFFFFFFFFFFF:FFFFFFFF:FFFFFFFF:FFFFF  
FFFFFFFFFFFFFFFFFFFFFFFFF:,FFFFFFFFFFFFFFFF:FFFFFFFF:FFFFFFFFFFFFF  
FFFFFFFFF

@A00721:190:HGJW7DSXY:4:1167:31168:30044 1:N:0:TCTGCAAG+GCTGCACT  
GCTTTCGTGCGTAGATCGGAGAAGACTTAGTTCTGATTCCATTACGGTCTTGCCCGGAATGTGTTACA  
GTGAGATATCCAGAAGATCGATAGCTGAATGTGATAGAAGACATAGTTTTGAGATATCGAGCAACGTC  
ATTGCTGATGC

+

FFFFFFFFFFFFFFFFFFFFFFFFFFFFFFFFFFFFFFFFF:FFFFFFFFFFFFFFFFFFFFFFFFFFFFF  
FFFFFFFFFFFFFFFFFFFFFFFFF:FFFFFFFFFFFFFFFFFFFFFFFFFFFFFFFFF:FFFFFFFFFFFFF  
FFFFFFFFF

@A00721:190:HGJW7DSXY:4:2161:18041:7592 1:N:0:TCTGCAAG+GCTGCACT  
GCTTTCGTGCGTAGATCGGAGAAGACTTAGTTCTGATTCCATTACGGTCTTGCCCGGAATGTGTTACA  
GTGAGATATCCAGAAGATCGATAGCTGAATGTGATAGAAGACATAGTTTTGAGATATCGAGCAACGTC  
ATTGCTGATGC

+  
FFFFFFFFFFFFFFFFFFFFFFFFFFFFFFFFFFFFFFFFFFFFFFFFFFFFFFFFFFFFFFFFFFFFFFFF  
FFFFFFFFFFFFFFFFFFFFFFFFFFFFFFFFFFFFFFFFFFFFFFFFFFFFFFFFFFFFFFFFFFFFFFFF  
FFFFFFFFFFFF

@A00721:190:HGJW7DSXY:4:2241:23511:9612 1:N:0:TCTGCAAG+GCTGCACT  
GCTTTCGTGCGTAGATCGGAGAAGACTTAGTTCTGATTCCATTACGGTCTTGCCCGGAATGTGTTACA  
GTGAGATATCCAGAAGATCGATAGCTGAATGTGATAGAAGACATAGTTTTGAGATATCGAGCAACGTC  
ATTGCTGATGC

+  
FFFFFFFFFFFFFFFFFFFFFFFFFFFFFFFFFFFFFFFFFFFFFFFFFFFFFFFFFFFFFFFFFFFFFFFF  
FFFFFFFFFFFFFFFFFFFF,FFFFFFFFFFFFFFFFFFFFFFFFFFFFFFFFFFFFFFFFFFFFFFFFFFFF  
FFFFFFFFFFFF

@A00721:190:HGJW7DSXY:4:2242:14389:18991 1:N:0:TCTGCAAG+GCTGCACT  
GCTTTCGTGCGTAGATCGGAGAAGACTTAGTTCTGATTCCATTACGGTCTTGCCCGGAATGTGTTACA  
GTGAGATATCCAGAAGATCGATAGCTGAATGTGATAGAAGACATAGTTTTGAGATATCGAGCAACGTC  
ATTGCTGATGC

+  
FFFFFFFFFFFFFFFFFFFFFFFFFFFFFFFFFFFFFFFFFFFFFFFFFFFFFFFFFFFFFFFFFFFFFFFF  
FFFFFFFFFFFFFFFFFFFF:FFFFFFFFFFFFFFFFFFFFFFFFFFFFFFFFFFFFFFFFFFFFFFFFFFFF  
FFFFFFFF:FFF

@A00721:190:HGJW7DSXY:4:2367:32533:31876 1:N:0:TCTGCAAG+GCTGCACT  
GCTTTCGTGCGTAGATCGGAGAAGACTTAGTTCTGATTCCATTACGGTCTTGACCGGAATGTGTTACA  
GTGAGATATCAAGAAGATCGATAGCTGAATGTGATAGAAGACATAGTTTTGAGATATCGAGCAACGTC  
ATTGCTGATGC

+  
FFFF:F:FFFFFFFFFFFFFF:::,FF:F::FFF,F:::,FFFFFF,,FF,,:,FFFFFF:F,,FFFF  
:FFFF,F,F,F,FFFF,,FFFF,FF::FFFFFFFFFF,F:FFF,,FFFF,FFF,, ,FFF,FFFFFF  
F:::,FF:FFF

@A00721:190:HGJW7DSXY:4:2558:18331:34084 1:N:0:TCTGCAAG+GCTGCACT  
GCTTTCGTGCGTAGATCGGAGAAGACTTAGTTCTGATTCCATTACGGTCTTGCCCGGAATGTGTTACA  
GTGAGATATCCAGAAGATCGATAGCTGAATGTGATAGAAGACATAGTTTTGAGATATCGAGCAACGTC  
ATTGCTGATGC

+  
FFFFFFFFFFFFFFFFFFFFFFFFFFFFFFFFFFFFFFFFFFFFFFFFFFFFFFFFFFFFFFFFFFFFFFFF  
FFFFFFFFFFFFFFFFFFFFFFFFFFFFFFFFFFFFFFFFFFFFFFFFFFFFFFFFFFFFFFFFFFFFFFFF  
FFFFFFFFFFFF

@A00721:190:HGJW7DSXY:4:2560:4707:13620 1:N:0:TCTGCAAG+GCTGCACT  
GCTTTCGTGCGTAGATCGGAGAAGACTTAGTTCTGATTCCATTACGGTCTTGCCCGGAATGTGTTACA  
GTGAGATATCCAGAAGATCGATAGCTGAATGTGATAGAAGACATAGTTTTGAGATATCGAGCAACGTC  
ATTGCTGATGC

+  
FFFFFFFFFFFFFFFFFFFFFFFFFFFFFFFFFFFFFFFFFFFFFFFFFFFFFFFFFFFFFFFFFFFFFFFF  
FFFFFFFFFFFFFFFFFFFFFFFFFFFFFFFFFFFFFFFFFFFFFFFFFFFFFFFFFFFFFFFFFFFFFFFF  
FFFFFFFFFFFF

@A00721:190:HGJW7DSXY:4:2576:10719:25880 1:N:0:TCTGCAAG+GCTGCACT  
GCTTTCGTGCGTAGATCGGAGAAGACTTAGTTCTGATTCCATTACGGTCTTGCCCGGAATGTGTTACA  
GTGAGATATCCAGAAGATCGATAGCTGAATGTGATAGAAGACATAGTTTTGAGATATCGAGCAACGTC  
ATTGCTGATGC

+  
FFFFFFFFFFFFFFFFFFFFFFFFFFFF:FFFF:FFFFFFFFFFFFFFFFFFFFFFFFFFFFFFFFFFFF  
FFFFFFFFFFFFFFFFFFFF:F:FFFFFFFFFFFF:FFFFFFFFFFFFFF,FFFFFFFFFFFFFFFFFFFF  
FFFFFFFFFFFF

@A00721:190:HGJW7DSXY:4:2670:18014:14591 1:N:0:TCTGCAAG+GCTGCACT  
GCTTTCGTGCGTAGATCGGAGAAGACTTAGTTCTGATTCCATTACGGTCTTGCCCGGAATGTGTTACA



@A00721:190:HGJW7DSXY:4:1350:2745:7153 1:N:0:TCTGCAAG+GCTGCACT  
TGCGTAGATCGGAGAAGACTTAGTTCTGATTCCATTACGGTCTTGCCCGGAATGTGTTACAGTGAGAT  
ATCCAGAAGATCGATAGCTGAATGTGATAGAAGACATAGTTTTGAGATATCGAGCAACGTCATTGCTG  
ATGCCAAAGTTGAAG

[illegible]

TCGGTAGATCGGAGAAGACTTAGTTCTGATTCCATTACGGTCTTGCCCGAATGTGTTACAGTGAGAT  
 ATCCAGAAGATCGATAGCTGAATGTGATAGAAGACATAGTTTTGAGATATCGAGCAACGTCATTGCTG  
 ATGCCAAAGTTGAAG

[illegible]

TGCGTAGATCGGAGAAGACTTAGTTCTGATTCCATTACGGTCTTGCCCGGAATGTGTTACAGTGAGAT  
ATCCAGAAGATCGATAGCTGAATGTGATAGAAGACATAGTTTTGAGATATCGAGCAACGTCATTGCTG  
ATGCCAAAGTTGAAG

[illegible]

TGCGTAGATCGGAGAAGACTTAGTTCTGATTCCATTACGGTCTTGCCCGGAATGTGTTACAGTGAGAT  
ATCCAGAAGATCGATAGCTGAATGTGATAGAAGACATAGTTTTGAGATATCGAGCAACGTCATTGCTG  
ATGCCAAAGTTGAAG

[illegible]

TGCGTAGATCGGAGAAGACTTAGTTCTGATTCCATTACGGTCTTGCCCGGAATGTGTTACAGTGAGAT  
ATCCAGAAGATCGATAGCTGAATGTGATAGAAGACATAGTTTTGAGATATCGAGCAACGTCATTGCTG  
ATGCCAAAGTTGAAG

[illegible]

TGCGTAGATCGGAGAAGACTTAGTTCTGATTCCATTACGGTCTTGCCCGAATGTGTTACAGTGAGAT  
ATCCAGAAGATCGATAGCTGAATGTGATAGAAGACATAGTTTTGAGATATCGAGCAACGTCATTGCTG  
ATGCCAAAGTTGAAG

[illegible]

TCGGTAGATCGGAGAAGACTTAGTTCTGATTCCATTACGGTCTTGCCCGGAATGTGTTACAGTGAGAT  
 ATCCAGAAGATCGATAGCTGAATGTGATAGAAGACATAGTTTTGAGATATCGAGCAACGTCATTGCTG  
 ATGCCAAAGTTGAAG

[illegible]

@A00721:190:HGJW7DSXY:4:2302:1145:2440 1:N:0:TCTGCAAG+GCTGCACT  
TGCGTAGATCGGAGAAGACTTAGTTCTGATTCCATTACGGTCTTGCCCGGAATGTGTTACAGTGAGAT  
ATCCAGAAGATCGATAGCTGAATGTGATAGAAGACATAGTTTTGAGATATCGAGCAACGTCATTGCTG  
ATGCCAAAGTTGAAG

@A00721:190:HGJW7DSXY:4:2345:32678:36699 1:N:0:TCTGCAAG+GCTGCACT  
TGCGTAGATCGGAGAAGACTTAGTTCTGATTCCATTACGGTCTTGCCCGGAATGTGTTACAGTGAGAT  
ATCCAGAAGATCGATAGCTGAATGTGATAGAAGACATAGTTTTGAGATATCGAGCAACGTCATTGCTG  
ATGCCAAAGTTGAA

@A00721:190:HGJW7DSXY:4:2348:26982:24424 1:N:0:TCTGCAAG+GCTGCACT  
TGCGTAGATCGGAGAAGACTTAGTTCTGATTCCATTACGGTCTTGCCCGGAATGTGTTACAGTGAGAT  
ATCCAGAAGATCGATAGCTGAATGTGATAGAAGACATAGTTTTGAGATATCGAGCAACGTCATTGCTG  
ATGCCAAAGTTGAAG

@A00721:190:HGJW7DSXY:4:2350:28980:21151 1:N:0:TCTGCAAG+GCTGCACT  
TGCGTAGATCGGAGAAGACTTAGTTCTGATTCCATTACGGTCTTGCCCGGAATGTGTTACAGTGAGAT  
ATCCAGAAGATCGATAGCTGAATGTGATAGAAGACATAGTTTTGAGATATCGAGCAACGTCATTGCTG  
ATGCCAAAGTTGAAG

@A00721:190:HGJW7DSXY:4:2445:2266:29904 1:N:0:TCTGCAAG+GCTGCACT  
TGCGTAGATCGGAGAAGACATAGTTCTGATTCCATTACGGTCTTGCCCGGAATGTGTTACAGTGAGAT  
ATCCAGAAGATCGATAGCTGAATGTGATAGAAGACATAGTTTTGAGATATCGAGCAACGTCATTGCTG  
ATGCCAAAGTTGAAG

@A00721:190:HGJW7DSXY:4:2476:23990:29606 1:N:0:TCTGCAAG+GCTGCACT  
TGCGTAGATCGGAGAAGACTTAGTTCTGATTCCATTACGGTCTTGCCCGGAATGTGTTACAGTGAGAT  
ATCCAGAAGATCGATAGCTGAATGTGATAGAAGACATAGTTTTGAGATATCGAGCAACGTCATTGCTG  
ATGCCAAAGTTGAAG

@A00721:190:HGJW7DSXY:4:2510:15980:26725 1:N:0:TCTGCAAG+GCTGCACT  
TGCGTAGATCGGAGAAGACTTAGTTCTGATTCCATTACGGTCTTGCCCGGAATGTGTTACAGTGAGAT  
ATCCAGAAGATCGATAGCTGAATGTGATAGAAGACATAGTTTTGAGATATCGAGCAACGTCATTGCTG  
ATGCCAAAGTTGAAG

[illegible]

```
FFFFFFFFFFFFFFFFFFFFFFFFFFFFFFFFFFFFFFFFFFFFFFFFFFFFFFFFFFFFFFF
FFFFFFFFFFFFFFFFFFFFFFFFFFFFFFFFFFFF:FFFFFFFFFFFFFFFFFFFFFFFFFFFF
FFFFFFFFFFFFFFFF
```

[illegible][illegible][illegible][illegible]

```
FFFFFFFFFFFFFFFFFFFFFFFFFFFFFFFFFFFFFFFFFFFFFFFFFFFFFFFFFFFFF:FFFFFFFFF
FFFFFFFFF:FFFFFFFFFFFFFFFFFFFFFFFFFFFFFFFFFFFFF:FFFFFFFFFFFFFFFFFF:FFFFFFFFFFFFFFF
FFFFFFFFFFFFFFFFFFFF
```

@A00721:190:HGJW7DSXY:4:2241:31204:28948 1:N:0:TCTGCAAG+GCTGCACT  
CGTAGATCGGAGAAGACTTAGTTCTGATTCCATTACGGTCTTGCCCGGAATGTGTTACAGTGAGATAT

CCAGAAGATCGATAGCTGAATGTGATAGAAGACATAGTTTTGAGATATCGAGCAACGTCATTGCTGAT  
GCCAAAGTTGAAGAT

+

FFFFFFFFFFFFF:,FFFFFFFF:FFFFFF:FFFFFF,FFFFFF,FF::FFFFFFFFFFFFFFFFF  
FFFFF:FFFFFFFF:FFFFFFFFFFFFF:FFFFFFFF:FF,FFFFFF:FF,FFF::FFF:FFFF:F  
,,FFFFFFFF:F,FF

@A00721:190:HGJW7DSXY:4:1237:29243:20322 1:N:0:TCTGCAAG+GCTGCACT  
TCGGAGAAGACTTAGTTCTGATTCCATTACGGTCTTGCCCGAATGTGTTACAGTGAGATATCCAGAA  
GATCGATAGCTGAATGTGATAGAAGACATAGTTTTGAGATATCGAGCAACGTCATTGCTGATGCCAAA  
GTTGAAGATATTAGG

+

FFFFFFFFFFFFFFFFFFFFFFFFFFFFFFFFFFFFFFFFFFFFFFFFFFFFFFFFFFFFFFFFFFFFF  
FFFFFFFFFFFFFFFFFFFFFFFFFFFFFFFFFFFFFFFFFFFFFFFFFFFFFFFFFFFFFFFFFFFFF:FFFFFFFFFFFFFFFFFFFFF  
FFFF:FFFFFFFFFFFF

@A00721:190:HGJW7DSXY:4:1240:25780:14231 1:N:0:TCTGCAAG+GCTGCACT  
TCGGAGAAGACTTAGTTCTGATTCCATTACGGTCTTGCCCGAATGTGTTACAGTGAGATATCCAGAA  
GATCGATAGCTGAATGTGATAGAAGACATAGTTTTGAGATATCGAGCAACGTCATTGCTGATGCCAAA  
GTTGAAGATATTAGG

+

FFFFFFFFFFFFFFFFFFFFFFFFFFFFFFFFFFFFFFFFFFFFFFFFFFFFFFFFFFFFFFFFFFFFF  
FFFFFFFFFFFFFFFFFFFFFFFFFFFFFFFFFFFFFFFFFFFFFFFFFFFFFFFFFFFFFFFFFFFFF:FFFFFFFFFFFFFFFFFFFFF  
FFFFFFFFFFFFFFFFFFFF

@A00721:190:HGJW7DSXY:4:1313:7129:32597 1:N:0:TCTGCAAG+GCTGCACT  
TCGGAGAAGACTTAGTTCTGATTCCATTACGGTCTTGCCCGAATGTGTTACAGTGAGATATCCAGAA  
GATCGATAGCTGAATGTGATAGAAGACATAGTTTTGAGATATCGAGCAACGTCATTGCTGATGCCAAA  
GTTGAAGATATTAGG

+

FFFFFFFFFFFFFFFFF:FFFFFFFF,FFFFFFFF:FFFFFFFFFFFFFFFFFFFFFFFFFFFFFFFFF:FFFFF  
FFFFFFFFFFFFFFFFFFFFFFFFFFFFF:FFFFF,FFFFFFFFFFFFFFFFFFFFFFFFFFFFFFFFF:FFFF,FFFF  
FFFFFFFFF:FFFFF

@A00721:190:HGJW7DSXY:4:1475:5267:30185 1:N:0:TCTGCAAG+GCTGCACT  
TCGGAGAAGACTTAGTTCTGATTCCATTACGGTCTTGCCCGAATGTGTTACAGTGAGATATCCAGAA  
GATCGATAGCTGAATGTGATAGAAGACATAGTTTTGAGATATCGAGCAACGTCATTGCTGATGCCAAA  
GTTGAAGATATTAGG

+

FFFFFFFFFFFFFFFFFFFFFFFFFFFFFFFFFFFFFFFFFFFFFFFFFFFFFFFFFFFFFFFFFFFFF  
FFFFFFFFFFFFFFFFFFFFFFFFFFFFFFFFFFFFFFFFFFFFFFFFFFFFFFFFFFFFFFFFFFFFF:FFFFFFFFFFFFFFFFFFFFF  
FFFFFFFFFFFFFFFFFFFF

@A00721:190:HGJW7DSXY:4:1657:4092:18161 1:N:0:TCTGCAAG+GCTGCACT  
TCGGAGAAGACTTAGTTCTGATTCCATTACGGTCTTGCCCGAATGTGTTACAGTGAGATATCCAGAA  
GATCGATAGCTGAATGTGATAGAAGACATAGTTTTGAGATATCGAGCAACGTCATTGCTGATGCCAAA  
GTTGAAGATATTAGG

+

FFFFFFFFFFFFFFF:FFFFFFFFFFFFFFFFFFFFFFFFFFFFFFFFFFFFFFFFFFFFFFFFFFFFF  
FFFFFFFFFFFFFFFFFFFFFFFFFFFFFFFFFFFFF:FFFFFFFFFFFFFFFFFFFFFFFFFFFFF:FFFFFFFFFFFFF  
FFFFFFFFFFFFFFFFFFFF

@A00721:190:HGJW7DSXY:4:1657:4806:19586 1:N:0:TCTGCAAG+GCTGCACT  
TCGGAGAAGACTTAGTTCTGATTCCATTACGGTCTTGCCCGAATGTGTTACAGTGAGATATCCAGAA  
GATCGATAGCTGAATGTGATAGAAGACATAGTTTTGAGATATCGAGCAACGTCATTGCTGATGCCAAA  
GTTGAAGATATTAGG

+

FFFFFFFFFFFFF:FFFFFFFFFFFFFFFFFFFFFFFFFFFFF:FFFFFFFFF:FFFF:FFFFFFFFFFFFFFFFF  
FFFFFFFFFFFFFFFFFFFFFFFFFFFFFFFFFFFFF:FFFFFFFFFFFFFFFFFFFFFFFFFFFFF  
FFFFFFFFFFFFFFFFFFFF

@A00721:190:HGJW7DSXY:4:2363:2528:2895 1:N:0:TCTGCAAG+GCTGCACT  
TCGGAAGAAGACTTAGTTCTGATTCCATTACGGTCTTGCCCGGAATGTGTTACAGTGAGATATCCAGAA  
GATCGATAGCTGAATGTGATAGAAGACATAGTTTTGAGATATCGAGCAACGTCATTGCTGATGCCAAA  
GTTGAAGATATTAGG

```

FFFFFFFFFFFFFFFFFFFFFFFFFFFFFFFFFFFFFFFF:FFFFFFFFFFFFFFFFFFFFFFFFFFFFF:
FFFFFFFFFFFFFFF:FFFFFFFFFFFFFFFFF,FFFFFFFFFFFFFFFFFFFFFFFF:FFFFFFFFFFFFFFFF
FFFFFFFFF:FFFFF

```

+

[illegible]

+

[illegible]

+

[illegible]

+

[illegible]

+

[illegible]

+

[illegible]



@A00721:190:HGJW7DSXY:4:2407:25880:24987 1:N:0:TCTGCAAG+GCTGCACT  
CCCGGAATGTGTTACAGTGAGATATCCAGAAGATCGATAGCTGAATGTGATAGAAGACATAGTTTTGA  
GATATCGAGCAACGTCATTGCTGATGCCAAAGTTGAAGATATTAGCCCCGAAGATAGTGTTAGTCAGA  
CGTCGAGTGTTAGAC

@A00721:190:HGJW7DSXY:4:1152:10375:34397 1:N:0:TCTGCAAG+GCTGCACT  
GTGAGATATCCAGAAGATCGATAGCTGAATGTGATAGAAGACATAGTTTTGAGATATCGAGCAACGTC  
ATTGCTGATGCCAAAGTTGAAGATATTAGGCCCGAAGATAGTGTTAGTCAGACGTCGAGTGTTAGACG  
AGACCAAGTGTCTGGC

@A00721:190:HGJW7DSXY:4:1259:1542:30029 1:N:0:TCTGCAAG+GCTGCACT  
GTGAGATATCCAGAAGATCGATAGCTGAATGTGATAGAAGACATAGTTTTGAGATATCGAGCAACGTC  
ATTGCTGATGCCAAAGTTGAAGATATTAGGCCCGAAGATAGTGTTAGTCAGACGTCGAGTGTTAGACG  
AGACCAGTGTCTGGC

@A00721:190:HGJW7DSXY:4:2117:23529:36010 1:N:0:TCTGCAAG+GCTGCACT  
GTGAGATATCCAGAAGATCGATAGCTGAATGTGATAGAAGACATAGTTTTGAGATATCGAGCAACGTC  
ATTGCTGATGCCAAAGTTGAAGATATTAGGCCCGAAGATAGTGTTAGTCAGACGTCGAGTGTTAGACG  
AGACCAGTGTCTGGC

@A00721:190:HGJW7DSXY:4:2145:20735:2112 1:N:0:TCTGCAAG+GCTGCACT  
GTGAGATATCCAGAAGATCGATAGCTGAATGTGATAGAAGACATAGTTTTGAGATATCGAGCAACGTC  
ATTGCTGATGCCAAAGTTGAAGATATTAGGCCCGAAGATAGTGTTAGTCAGACGTCGAGTGTTAGACG  
AGACCAGTGTCTGGC

@A00721:190:HGJW7DSXY:4:1156:12527:9815 1:N:0:TCTGCAAG+GCTGCACT  
ATCCAGAAGATCGATAGCTGAATGTGATAGAAGACATAGTTTTGAGATATCGAGCAACGTCATTGCTG  
ATGCCAAAGTTGAAGATATTAGGCCCCGAAGATAGTGTTAGTCAGACGTCGAGTGTTAGACGAGACCG  
TGCTCTGGCTGGATCG

@A00721:190:HGJW7DSXY:4:1336:31882:6918 1:N:0:TCTGCAAG+GCTGCACT  
ATCCAGAAGATCGATAGCTGAATGTGATAGAAGACATAGTTTTGAGATATCGAGCAACGTCATTGCTG  
ATGCCAAAGTTGAAGATATTAGGCCCGAAGATAGTGTAGTCAGACGTCGAGTGTAGACGAGACCAG  
TGCTCTGGCTGGATCG

+  
FFFFFFFFFFFFFFFFFFFFFFFFFFFFFFFFFFFFFFFFFFFFFFFFFFFFFFFFFFFFFFFFFFFFFFFF  
FFFFFFFFFFFFFFFFFFFFFFFFFFFFFFFFFFFFFFFFFFFFFFFFFFFFFFFFFFFFFFFFFFFFFFFF  
FFFFFFFFFFFFFFFF:

@A00721:190:HGJW7DSXY:4:1344:31295:19460 1:N:0:TCTGCAAG+GCTGCACT  
ATCCAGAAGATCGATAGCTGAATGTGATAGAAGACATAGTTTTGAGATATCGAGCAACGTCATTGCTG  
ATGCCAAAGTTGAAGATATTAGGCCCGAAGATAGTGTTAGTCAGACGTCGAGTGTTAGACGAGACCAG  
TGTCTGGCTGGATCG

+  
FFFFFFF,FFFFFFFFFFFFFFFFFFFFFFFFFFFFFFFFFFFFFFFFFFFFFFFFFFFFFFFFFFFFFFFF  
FFFFFFFFFFFFFFFFFFFFFFFFFFFFFFFFFFFFFFFFFFFFFFFFFFFFFFFFFFFFFFFFFFFFFFFF  
FFFFFFFFFFFFFFFF

@A00721:190:HGJW7DSXY:4:2241:26684:12226 1:N:0:TCTGCAAG+GCTGCACT  
ATCCAGAAGATCGATAGCTGAATGTGATAGAAGACATAGTTTTGAGATATCGAGCAACGTCATTGCTG  
ATGCCAAAGTTGAAGATATTAGGCCCGAAGATAGTGTTAGTCAGACGTCGAGTGTTAGACGAGACCAG  
TGTCTGGCTGGATCG

+  
FFFFFFFFFFFFFFFFFFFFFFFFFFFFFFFFFFFFFFFFFFFFFFFFFFFFFFFFFFFFFFFFFFFFFFFF  
FFFFF:FFFFFFFFFFFFFFFFFFFFFFFFFFFFFFFFFFFFFFFFFFFFFFFFFFFFFFFFFFFFFFFF  
FFFFFFFFFFFFFFFF

@A00721:190:HGJW7DSXY:4:2643:12536:36354 1:N:0:TCTGCAAG+GCTGCACT  
ATCCAGAAGATCGATAGCTGAATGTGATAGAAGACATAGTTTTGAGATATCGAGCAACGTCATTGCTG  
ATGCCAAAGTTGAAGATATTAGGCCCGAAGATAGTGTTAGTCAGACGTCGAGTGTTAGACGAGACCAG  
TGTCTGGCTGGATCG

+  
FFFFFFFFFFFFFFFFFFFFFFFFFFFFFFFFFFFFFFFFFFFFFFFFFFFFFFFFFFFFFFFFFFFFFFFF  
FFFFFFFFFFFFFFFFFFFFFFFFFFFFFFFFFFFFFFFFFFFFFFFFFFFFFFFFFFFFFFFFFFFFFFFF  
FFFFFFFFFFFFFFFF

@A00721:190:HGJW7DSXY:4:1160:12391:30843 1:N:0:TCTGCAAG+GCTGCACT  
TGCTGGTCGATCCAGCCAGACACTGGTCTCGTCTAACACTCGACGTCTGACTAACACTATCTTCGGGC  
CTAATATCTTCACTTTGGCATCAGCAATGACGTTGCTCGATATCTCAAACTATGTCTTCTATCACA  
TTCAGCTATCGATCT

+  
FFFFFFFFFFFFFFFFFFFFFFFFFFFFFFFFFFFFFFFFFFFFFFFFFFFFFFFFFFFFFFFFFFFFFFFF  
FFFFFFFFFFFFFFFFFFFFFFFFFFFFFFFFFFFFFFFFFFFFFFFFFFFFFFFFFFFFFFFFFFFFFFFF  
FFFFFFFFFFFFFFFF

@A00721:190:HGJW7DSXY:4:2437:15691:26412 1:N:0:TCTGCAAG+GCTGCACT  
TGCTGGTCGATCCAGCCAGACACTGGTCTCGTCTAACACTCGACGTCTGACTAACACTATCTTCGGGC  
CTAATATCTTCACTTTGGCATCAGCAATGACGTTGCTCGATATCTCAAACTATGTCTTCTATCACA  
TTCAGCTATCGATCT

+  
FFFFFFFFFFFFFFFFFFFFFFFFFFFFFFFFFFFFFFFFFFFFFFFFFFFFFFFFFFFFFFFFFFFFFFFF  
FFFFFFFFF:FFFFFFFFFFFFFFFFFFFFFFFFFFFFFFFFFFFFFFFFFFFFFFFFFFFFFFFFFFFF  
FFFFFFFFFFFFFFFF

@A00721:190:HGJW7DSXY:4:2437:16170:26678 1:N:0:TCTGCAAG+GCTGCACT  
TGCTGGTCGATCCAGCCAGACACTGGTCTCGTCTAACACTCGACGTCTGACTAACACTATCTTCGGGC  
CTAATATCTTCACTTTGGCATCAGCAATGACGTTGCTCGATATCTCAAACTATGTCTTCTATCACA  
TTCAGCTATCGATCT

+  
FFFFFFFFFFFFFFFFFFFFFFFFFFFFFFFFFFFFFFFFFFFFFFFFFFFFFFFFFFFFFFFFFFFFFFFF  
FFFFFFFFFFFFFFFFFFFFFFFFFFFFFFFFFFFFFFFFFFFFFFFFFFFFFFFFFFFFFFFFFFFFFFFF  
FFFFFFFFFFFFFFFF

@A00721:190:HGJW7DSXY:4:1251:8531:16517 1:N:0:TCTGCAAG+GCTGCACT  
CGATAGCTGAATGTGATAGAAGACATAGTTTTGAGATATCGAGCAACGTCATTGCTGATGCCAAAGTT



@A00721:190:HGJW7DSXY:4:2163:24162:5635 1:N:0:TCTGCAAG+GCTGCACT  
CCTATCCATAGCAATCTGCAATATATCGACCAGATCAGCATTTCATAATGCTGGTCGATCCAGCCAGAC  
ACTGGTCTCGTCTAACACTCGACGTCTGACTAACACTATCTTCGGGCCTAATATCTTCAACTTTGGCA  
TCAGCAATGACGTTG

[illegible]

+

[illegible]

+

```

FFFFFFFFFFFFFFFFFFFFFFFFFFFFFFFFFFFFFFFFFFFFFFFFFFFFFFFFFFFFFFFFFFFFFFFF
FFFFFFFFFFFFFFFFFFFFFFFFFFFFFFFFFFFFFFFF,F:FFFFFF:FFFFFFFFFFFFFF:FFFFFFFF
FFFFFFFFFFFFFFFF

```

+

```

FFFFFFFFFFFFFFFFFFFFFFFFFFFFFFFFFFFFFFFFFFFFFFFFFFFFFFFFFFFFFFFFFFFFFFFF
FFFFFFFFFFFFFFFF:FFFFFFFFFFFFFFFFFFFFFFFF:F:FFFFFFFFFFFFFFFFFFFFFFFFFFFF:FFFF
FFFFFFFFFFFFFFFF

```

+

[illegible]

+

[illegible] $+$ 

FFFFFFFFFFFFFFFF:FF,FFFFFFFFFFFFFFFFFFFFFFFFFFFFFFFFFFFFFFFFFFFFFFFFFFFFFFFF

```

FFFFFFFFFFFFFFFFFFFFFFFFFFFFFFFFFFFFFFFFFFFFFFFFFFFFFFFFFFFFFFFF:FFFFFFFFFFFFFFFFFFFFFFFFFFFFFFFF
FF:FFFFFFFFFFFFFF

```

+

@A00721:190:HGJW7DSXY:4:1471:3269:1767 1:N:0:TCTGCAAG+GCTGCACT  
GCCAAAGTTGAAGATATTAGCCCCGAAGATAGTGTTAGTCAGACGTCGAGTGTTAGACGAGACCAAGTG  
TCTGGCTGGATCGACCAGCATTATGAATGCTGATCTGGTCGATATATTGCAGATTGCTATGGATAGGG  
GAAAAAATCAATAT

```
FFFF,FF::FFFFFFFF,F:FFF:FFFFFFFF::FFF:F:FFFFFFFF:FFFF:F:FFFFFFFF
FFF::FFFFFFF,FFFFFFFF:FF:FFFFFFFF:FF:FFFF:FFFFFFFFFFFFFFF,FFFF:FFFF
FF,FFFF:FFFFFF
```

 $+$ 

@A00721:190:HGJW7DSXY:4:2243:16721:36996 1:N:0:TCTGCAAG+GCTGCACT  
GCCAAAGTTGAAGATATTAGGCCCGAAGATAGTGTTAGTCAGACGTCGAGTGTTAGACGAGACCAAGTG  
TCTGGCTGGATCGACCAGCATTATGAATGCTGATCTGGTCGATATATTGCAGATTGCTATGGATAGGG  
GAAAAAATCAATAT

```
FFFFFFFFFFFFFFFFFFFFFFFFFFFFFFFFFFFFFFFFFFFFFFFFFFFFFFFFFFFFF
FFFFFFFFFFFFFFFFFF::FFFFFFFFFFFFFFFFFFFFFFFFFFFFFF:F
FF:FFFFFFFFFFFFFF
```

+

@A00721:190:HGJW7DSXY:4:2461:23484:23062 1:N:0:TCTGCAAG+GCTGCACT  
GCCAAAGTTGAAGATATTAGGCCCGAAGATAGTGTTAGTCAGACGTCGAGTGTTAGACGAGACCAGTG  
TCTGGCTGGATCGACCAGCATTATGAATGCTGATCTGGTCGATATATTGCAGATTGCTATGGATAGGG  
GAAAAAATCAATAT

[illegible]

+  
FFFFFFFFFFFFFFFFFFFFFFFFFFFFFFFFFFFFFFFFFFFFFFFFFFFFF:FFFFFFFFFFFFFFFFFFFFFFFFFFFFFFFF  
FFFFFFFFFFFFFFFFFFFFFFFFFFFFFFFFFFFFFFFFFFFFFFFFFFFFFFFFFFFFFFFFFFFFFFFFFFFFFFFFFFFF  
FF,FFFFFFFFFFFFFF  
@A00721:190:HGJW7DSXY:4:2528:6596:7780 1:N:0:TCTGCAAG+GCTGCACT  
GCCAAAGTTGAAGATATTAGGCCCGAAGATAGTGTTAGTCAGACGTCGAGTGTAGACGAGACCAGTG  
TCTGGCTGGATCGACCAGCATTATGAATGCTGATCTGGTCGATATATTGCAGATTGCTATGGATAGGG  
AAAAAAAATCAATAT  
+  
FFFFFFFFFFFFFFFFFFFFFFFFFFFFFFFFFFFFFFFFFFFFFFFFFFFFFFFFFFFFFFFFFFFFFFFFFFFFFFFFFFFF  
FFFFFFFFFFFFFFFFFFFFFFFFFFFFFFFFFFFFFFFFFFFFFFFFFFFFFFFFFFFFFFFFFFFFFFFFFFFFFFFFFFFF  
FFFFFFFFFFFFFFFFFFFFFFFFFFFFFFFFFFFFFFFFFFFFFFFFFFFFFFFFFFFFFFFFFFFFFFFFFFFFFFFFFFFF  
@A00721:190:HGJW7DSXY:4:2545:25997:27038 1:N:0:TCTGCAAG+GCTGCACT  
GCCAAAGTTGAAGATATTAGGCCCGAAGATAGTGTTAGTCAGACGTCGAGTGTAGACGAGACCAGTG  
TCTGGCTGGATCGACCAGCATTATGAATGCTGATCTGGTCGATATATTGCAGATTGCTATGGATAGGG  
AAAAAAAATCAATAT  
+  
FFFFFFFFFFFFFFFFFFFFFFFFFFFFFFFFFFFFFFFFFFFFFFFFFFFFFFFFFFFFFFFFFFFFFFFFFFFFFFFFFFFF  
FFFFFFFFFFFFFFFFFFFFFFFFFFFFFFFFFFFFFFFFFFFFFFFFFFFFFFFFFFFFFFFFFFFFFFFFFFFFFFFFFFFF  
FFFFFFFFFFFFFFFFFFFFFFFFFFFFFFFFFFFFFFFFFFFFFFFFFFFFFFFFFFFFFFFFFFFFFFFFFFFFFFFFFFFF  
@A00721:190:HGJW7DSXY:4:2646:22209:9737 1:N:0:TCTGCAAG+GCTGCACT  
GCCAAAGTTGAAGATATTAGGCCCGAAGATAGTGTTAGTCAGACGTCGAGTGTAGACGAGACCAGTG  
TCTGGCTGGATCGACCAGCATTATGAATGCTGATCTGGTCGATATATTGCAGATTGCTATGGATAGGG  
AAAAAAAATCAATAT  
+  
FFFFFFFFFFFFFFFFFFFFFFFFFFFFFFFFFFFFFFFFFFFFFFFFFFFFFFFFFFFFFFFFFFFFFFFFFFFFFFFFFFFF  
FFFFFFFFFFFFFFFFFFFFFFFFFFFFFFFFFFFFFFFFFFFFFFFFFFFFFFFFFFFFFFFFFFFFFFFFFFFFFFFFFFFF  
FFFFFFFFFFFFFFFFFFFFFFFFFFFFFFFFFFFFFFFFFFFFFFFFFFFFFFFFFFFFFFFFFFFFFFFFFFFFFFFFFFFF  
@A00721:190:HGJW7DSXY:4:2676:26115:7513 1:N:0:TCTGCAAG+GCTGCACT  
GCCAAAGTTGAAGATATTAGGCCCGAAGATAGTGTTAGTCAGACGTCGAGTGTAGACGAGACCAGTG  
TCTGGCTGGATCGACCAGCATTATGAATGCTGATCTGGTCGATATATTGCAGATTGCTATGGATAGGG  
AAAAAAAATCAATAT  
+  
FFFFFFFFFFFFFFFFFFFFFFFFFFFFFFFFFFFFFFFFFFFFFFFFFFFFFFFFFFFFFFFFFFFFFFFFFFFFFFFFFFFF  
FFFFFFFFFFFFFFFFFFFFFFFFFFFFFFFFFFFFFFFFFFFFFFFFFFFFFFFFFFFFFFFFFFFFFFFFFFFFFFFFFFFF  
FFFFFFFFFFFFFFFFFFFFFFFFFFFFFFFFFFFFFFFFFFFFFFFFFFFFFFFFFFFFFFFFFFFFFFFFFFFFFFFFFFFF  
@A00721:190:HGJW7DSXY:4:1262:9426:31563 1:N:0:TCTGCAAG+GCTGCACT  
CCAAAGTTGAAGATATTAGGCCCGAAGATAGTGTTAGTCAGACGTCGAGTGTAGACGAGACCAGTGT  
CTGGCTGGATCGACCAGCATTATGAATGCTGATCTGGTCGATATATTGCAGATTGCTATGGATAGGGG  
AAAAAAAATCAATAT  
+  
F,FFFFFFFF:F:F:FF:FFF:FFFFFFFFFFFFFFFF,FFF:F:F,FFFFFFFFFFFFFFFF:FFFFFF  
,F::F:FFFFFFFF:FFFF:FF,FFF,FF:FFFFFFFFFFFFFFFF:FFF,FFFF:, :FFFFFF,:F  
FFFF:FF,FFF,FF  
@A00721:190:HGJW7DSXY:4:1233:30409:21496 1:N:0:TCTGCAAG+GCTGCACT  
GTATTAGGCCCGAAGATAGTGTTAGTCAGACGTCGAGTGTAGACGAGACCAGTGTCTGGCTGGATCG  
ACCAGCATTATGAATGCTGATCTGGTCGATATATTGCAGATTGCTATGGATAGGGGAAAAAAAATCAAT  
ATTGACAGTCATAT  
+  
FFFFFFFFFFFFFFFFFFFFFFFFFFFFFFFFFFFFFFFFFFFFFFFFFFFFFFFFFFFFFFFFFFFFFFFFFFFFFFFFFFFF  
FFFFFFFFFFFFFFFFFFFFFFFFFFFFFFFFFFFFFFFFFFFFFFFFFFFFFFFFFFFFFFFFFFFFFFFFFFFFFFFFFFFF  
FFF:FFFFFFFF:F  
@A00721:190:HGJW7DSXY:4:1448:3513:36793 1:N:0:TCTGCAAG+GCTGCACT  
GTATTAGGCCCGAAGATAGTGTTAGTCAGACGTCGAGTGTAGACGAGACCAGTGTCTGGCTGGATCG



@A00721:190:HGJW7DSXY:4:1613:29143:13354 1:N:0:TCTGCAAG+GCTGCACT  
CCTGAAGATAGTGTTAGTCAGACGTCGAGTGTTAGACGAGACCAGTGTCTGGCTGGATCGACCAGCAT  
TATGAATGCTGATCTGGTCGATATATTGCAGATTGCTATGGATAGGGGAAAAAAATCAATATTTGACA  
GTCATATTACTAA

+

FFFFFFFF:FFFFFFFFFFFFFFFFFFFFFFFFFFFFFFFFFFFFFFFFFFFFFFFFFFFFFFFFFFFFFFFF:FFFFFFFF  
FFFFFFFFFFFFFFFFFFFFFFFFFFFFFFFFFFFFFFFFFFFFFFFFFFFFFFFFFFFFFFFFFFFFFFFF:FFFFFFFF  
FFFFFFFFFFFFFFFF

@A00721:190:HGJW7DSXY:4:2175:19407:14716 1:N:0:TCTGCAAG+GCTGCACT  
CCCGAAGATAGTGTTAGTCAGACGTCGAGTGTTAGACGAGACCAGTGTCTGGCTGGATCGACCAGCAT  
TATGAATGCTGATCTGGTCGATATATTGCAGATTGCTATGGATAGGGGAAAAAAATCAATATTTGACA  
GTCATATTACTAAAG

+

FFFFFFFFFFFFFFFFFFFFFFFFFFFFFFFFFFFFFFFFFFFFFFFFFFFFFFFFFFFFFFFFFFFFFFFF:FFFFFFF  
FFFF:FFFFFFFFFFFFFFFFFFFFFFFFFFFFFFFFFFFFFFFFFFFFFFFFFFFFFFFFFFFFFFFFFFFFF  
FFFFFFFFFFFFFFFF

@A00721:190:HGJW7DSXY:4:2209:18701:31720 1:N:0:TCTGCAAG+GCTGCACT  
CCTGAAGATAGTGTTAGTCAGACGTCGAGTGTTAGACGAGACCAGTGTCTGGCTGGATCGACCAGCAT  
TATGAATGCTGATCTGGTCGATATATTGCAGATTGCTATGGATAGGGGAAAAAAATCAATATTTGACA  
GTCATATTACTAAAG

+

FF:FFFFFFFFFFFFFFFFFFFFFF,F:FF:,F,F:FFFFFFFF:FFF:FFFFFFFF:F::FFFF:  
FFFFFFFF,F:FFFFFFFF:FFFFFFF:F:,F:F,F,FFFFFFFF:FFFFFF,FFFFFFFF:F::  
:FFFFFFFFFFFF:

@A00721:190:HGJW7DSXY:4:2226:15745:33144 1:N:0:TCTGCAAG+GCTGCACT  
CCCGAAGATAGTGTTAGTCAGACGTCGAGTGTTAGACGAGACCAGTGTCTGGCTGGATCGACCAGCAT  
TATGAATGCTGATCTGGTCGATATATTGCAGATTGCTATGGATAGGGGAAAAAAATCAATATTTGACA  
GTCATATTACTAAAG

+

FFFFFFFFFFFFFFFFFFFFFFFFFFFFFFFFFFFFFFFFFFFFFFFFFFFFFFFFFFFFFFFFFFFFFFFF  
FFFFFFFFF:FFFFFFFFFFFFFFFFFFFFFFFFFFFFFFFFFFFFFFFFFFFFFFFFFFFFFFFFFFFFFFFF:FFFFFFF  
FFFFFFFFFFFFFF:

@A00721:190:HGJW7DSXY:4:2233:20907:32033 1:N:0:TCTGCAAG+GCTGCACT  
CCTGAAGATAGTGTTAGTCAGACGTCGAGTGTTAGACGAGACCAGTGTCTGGCTGGATCGACCAGCAT  
TATGAATGCTGATCTGGTCGATATATTGCAGATTGCTATGGATAGGGGAAAAAAATCAATATTTGACA  
GTCATATTACTAAAG

+

FFFFFFFFFFFFFFFFFFFFFFFFFFFFFFFFFFFFFFFFFFFFFFFFFFFFFFFFFFFFFFFFFFFFFFFF:  
FFFFFFFFFFFFFFFFFFFFFFFFFFFFFFFFFFFFFFFFFFFFFFFFFFFFFFFFFFFFFFFFFFFFFFFF  
FFFFFFFFFFFFFF

@A00721:190:HGJW7DSXY:4:2250:30364:6104 1:N:0:TCTGCAAG+GCTGCACT  
CCCGAAGATAGTGTTAGTCAGACGTCGAGTGTTAGACGAGACCAGTGTCTGGCTGGATCGACCAGCAT  
TATGAATGCTGATCTGGTCGATATATTGCAGATTGCTATGGATAGGGGAAAAAAATCAATATTTGACA  
GTCATATTACTAAAG

+

FFFFFFFFFFFFFFFFFFFFFFFFFFFFFFFFFFFFFFFFFFFFFFFFFFFFFFFFFFFFFFFFFFFFFFFF:  
FFFFFFFFFFFFFFFFFFFFFFFFFFFFFFFFFFFFFFFFFFFFFFFFFFFFFFFFFFFFFFFFFFFFFFFF  
FFFFFFFFFFFFFF

@A00721:190:HGJW7DSXY:4:2253:24840:24815 1:N:0:TCTGCAAG+GCTGCACT  
CCCGAAGATAGTGTTAGTCAGACGTCGAGTGTTAGACGAGACCAGTGTCTGGCTGGATCGACCAGCAT  
TATGAATGCTGATCTGGTCGATATATTGCAGATTTCTATGGATAGGGGAAAAAAATCAATATTTGACA  
GTCATATTACTAAAG

+

FF:FFFFF:,FF,:FFFFFFFFF,FFF,FFFFF,FFFFF,FFFFFFFF:FFFFFF:FFFF





+  
FFFFFFFFFFFFFFFFFFFFFFFFFFFFFFFFFFFFFFFFFFFFFFFFFFFFFFFFFFFFFFFFFFFFFFFF  
FFFFFFFFFFFFFFFFFFFFFFFFFFFFFFFFFFFFFFFFFFFFFFFFFFFFFFFFFFFFFFFFFFFFFFFF  
FFFFFFFFFFFFFF:F

@A00721:190:HGJW7DSXY:4:1301:15628:24831 1:N:0:TCTGCAAG+GCTGCACT  
CGAAGATAGTGTTAGTCAGACGTCGAGTGTTAGACGAGACCAGTGTCTGGCTGGATCGACCAGCATT  
TGAATGCTGATCTGGTCGATATATTGCAGATTGCTATGGATAGGGGAAAAAAATCAATATTTGACAGT  
CATATTACTAAAGAA

+  
FFFFFFFFFFFFFFFFFFFFFFFFFFFFFFFFFFFFFFFFFFFFFFFFFFFFFFFFFFFFFFFFFFFFFFFF  
FFFFFFFFFFFFFFFFFFFFFFFFFFFFFFFFFFFFFFFFFFFFFFFFFFFFFFFFFFFFFFFFFFFFFFFF  
FFFFFFFFFFFFFF:F  
FFFFFFFFFFFFFFFFFFFFFFFFFFFFFFFFFFFFFFFFFFFFFFFFFFFFFFFFFFFFFFFFFFFFFFFF  
FFFFFFFFFFFFFF

@A00721:190:HGJW7DSXY:4:1301:15682:24893 1:N:0:TCTGCAAG+GCTGCACT  
CGAAGATAGTGTTAGTCAGACGTCGAGTGTTAGACGAGACCAGTGTCTGGCTGGATCGACCAGCATT  
TGAATGCTGATCTGGTCGATATATTGCAGATTGCTATGGATAGGGGAAAAAAATCAATATTTGACAGT  
CATATTACTAAAGAA

+  
FFFFFFFFFFFFFFFFFFFFFFFFFFFFFFFFFFFFFFFFFFFFFFFFFFFFFFFFFFFFFFFFFFFFFFFF  
FFFFFFFFFFFFFFFFFFFFFFFFFFFFFFFFFFFFFFFFFFFFFFFFFFFFFFFFFFFFFFFFFFFFFFFF  
FFFFFFFF:F  
FFFFFFFFFFFFFFFFFFFFFFFFFFFFFFFFFFFFFFFFFFFFFFFFFFFFFFFFFFFFFFFFFFFFFFFF  
FFFFFFFF:F,FFFFFF

@A00721:190:HGJW7DSXY:4:1428:9833:15139 1:N:0:TCTGCAAG+GCTGCACT  
CGAAGATAGTGTTAGTCAGACGTCGAGTGTTAGACGAGACCAGTGTCTGGCTGGATCGACCAGCATT  
TGAATGCTGATCTGGTCGATATATTGCAGATTGCTATGGATAGGGGAAAAAAATCAATATTTGACAGT  
CATATTACTAAAGAA

+  
FFFFFFFFFFFFFFFFFFFFFFFFFFFFFFFFFFFFFFFFFFFFFFFFFFFFFFFFFFFFFFFFFFFFFFFF  
FFFFFFFFFFFFFFFFFFFFFFFFFFFFFFFFFFFFFFFFFFFFFFFFFFFFFFFFFFFFFFFFFFFFFFFF  
FFFFFFFFFFFFFF

@A00721:190:HGJW7DSXY:4:1572:26277:30655 1:N:0:TCTGCAAG+GCTGCACT  
CGAAGATAGTGTTAGTCAGACGTCGAGTGTTAGACGAGACCAGTGTCTGGCTGGATCGACCAGCATT  
TGAATGCTGATCTGGTCGATATATTGCAGATTGCTATGGATAGGGGAAAAAAATCAATATTTGACAGT  
CATATTACTAAAGAA

+  
FFFFFFFFF:FFFFFFFFFFFFFFFFFFFFFFFFFFFFFFFFFFFFFFFFFFFFFFFFFFFFFFFFFFFFFF  
FFFFFFFFFFFFFFFFFFFFFFFFFFFFFFFFFFFFFFFFFFFFFFFFFFFFFFFFFFFFFFFFFFFFFFFF  
FFFFFFFF,F  
FFFFFFFFFFFFFF

@A00721:190:HGJW7DSXY:4:1576:22173:4382 1:N:0:TCTGCAAG+GCTGCACT  
CGAAGATAGTGTTAGTCAGACGTCGAGTGTTAGACGAGACCAGTGTCTGGCTGGATCGACCAGCATT  
TGAATGCTGATCTGGTCGATATATTGCAGATTGCTATGGATAGGGGAAAAAAATCAATATTTGACAGT  
CATATTACTAAAGAA

+  
FFFFFFFFFFFFFFFFF:FFFFFFFFFFFFFFFFFFFFFFFFFFFFFFFFFFFFFFFFFFFFFFFFFFFFFF  
FFFFFFFFFFFFFFFFFFFFFFFFFFFFFFFFFFFFFFFFFFFFFFFFFFFFFFFFFFFFFFFFFFFFFFFF  
FFFFFFFFF:FFFF

@A00721:190:HGJW7DSXY:4:2319:13277:26334 1:N:0:TCTGCAAG+GCTGCACT  
CGAAGATAGTGTTAGTCAGACGTCGAGTGTTAGACGAGACCAGTGTCTGGCTGGATCGACCAGCATT  
TGAATGCTGATCTGGTCGATATATTGCAGATTGCTATGGATAGGGGAAAAAAATCAATATTTGACAGT  
CATATTACTAAAGAA

+  
FFFFFFFFFFFFFFFFFFFFFFFFFFFFFFFFFFFFFFFFFFFFFFFFFFFFFFFFFFFFFFFFFFFFFFFF  
FFFFFFFFFFFFFFFFFFFFFFFFFFFFFFFFFFFFFFFFFFFFFFFFFFFFFFFFFFFFFFFFFFFFFFFF  
FFFFFFFFFFFFFF

@A00721:190:HGJW7DSXY:4:2361:31530:26694 1:N:0:TCTGCAAG+GCTGCACT  
CGAAGATAGTGTTAGTCAGACGTCGAGTGTTAGACGAGACCAGTGTCTGGCTGGATCGACCAGCATT

TGAATGCTGATCTGGTCGATATATTGCAGATTGCTATGGATAGGGGAAAAAAATCAATATTTGACAGT  
CATATTACTAAAGAA

+

FFFFFFFFFFFFFFFFFFFFFFFFFFFFFFFFFFFFFFFFFFFFFFFFFFFFFFFFFFFFFFFFFFFFFFFF  
FFFFFFFFF:FFFFFFFFFFFFFFFFFFFFFFFFFFFFFFFFFFFFFFFFFFFFFFFFFFFFFFFFFFFFF:FFFFFFFFFFFFFFFFF:FFFF  
FFFFFFFF:F:FFFFF

@A00721:190:HGJW7DSXY:4:2458:26386:5134 1:N:0:TCTGCAAG+GCTGCACT  
CGAAGATAGTGTTAGTCAGACGTCGAGTGTTAGACGAGACCACTGTCTGGCTGGATCGACCAGCATT  
TGAATGCTGATCTGGTCGATATATTGCAGATTGCTATGGATAGGGGAAAAAAATCAATATTTGACAGT  
CATATTACTAAAGAA

+

FFFFFFFFFFFFFFFFFFFFFFFFFFFFFFFFFFFFFFFFFFFFFFFFFFFFFFFFFFFFFFFFFFFFFFFF  
FFFFFFFFFFFFFFFFFFFFFFFFFFFFFFFFFFFFFFFFFFFFFFFFFFFFFFFFFFFFF:FFFFF,FFFFFFFFFFFFFFFFFFFFFFFFFFFFF  
FFFFFFFFF:FFFFF

@A00721:190:HGJW7DSXY:4:2471:14290:9580 1:N:0:TCTGCAAG+GCTGCACT  
CGAAGATAGTGTTAGTCAGACGTCGAGTGTTAGACGAGACCACTGTCTGGCTGGATCGACCAGCATT  
TGAATGCTGATCTGGTCGATATATTGCAGATTGCTATGGATAGGGGAAAAAAATCAATATTTGACAGT  
CATATTACTAAAGAA

+

FFFFFFFFFFFFFFFFFFFFFFFFFFFFFFFFFFFFFFFFFFFFFFFFFFFFFFFFFFFFFFFFFFFFFFFF  
FF:FFFFFFFFFFFFFFFFFFFFFFFFFFFFFFFFFFFFFFFFFFFFFFFFFFFFFFFFFFFFF:FFFFF  
FFFFFFFFF:FFF

@A00721:190:HGJW7DSXY:4:2542:12988:22764 1:N:0:TCTGCAAG+GCTGCACT  
CGAAGATAGTGTTAGTCAGACGTCGAGTGTTAGACGAGACCACTGTCTGGCTGGATCGACCAGCATT  
TGAATGCTGATCTGGTCGATATATTGCAGATTGCTATGGATAGGGGAAAAAAATCAATATTTGACAGT  
CATATTACTAAAGAA

+

FFFFFFFFFFFFF::FFFFFFFFFFFFFFFFFFFFFFFFFFFFFFFFFFFFFFFFFFFFFFFFFFFFFFFF  
FFFFFFFFFFFFFFFFFFFFFFFFFFFFFFFFFFFFFFFFFFFFFFFFFFFFFFFFFFFFF:FFFFFFFFFFFFFFFFFFFFFFFFFFFFF  
FFFFFFFFFFFFFFFFF

@A00721:190:HGJW7DSXY:4:2572:29568:34820 1:N:0:TCTGCAAG+GCTGCACT  
CGAAGATAGTGTTAGTCAGACGTCGAGTGTTAGACGAGACCACTGTCTGGCTGGATCGACCAGCATT  
TGAATGCTGATCTGGTCGATATATTGCAGATTGCTATGGATAGGGGAAAAAAATCAATATTTGACAGT  
CATATTACTAAAGAA

+

FFFFF:F:FFFFFFFFFFFFFFFFFFFFFFFFFFFFFFFFFFFFFFFFFFFFFFFFFFFFFFFFFFFFF:FFF  
FFFFFFFFFFFFFFFFFFFFFFFFFFFFFFFFFFFFFFFFFFFFFFFFFFFFFFFFFFFFF:FF:FFFFFFFFFFFFFFFFFFFFFFFFF:FFF:F  
FFFFFFFFF:FFFFF

@A00721:190:HGJW7DSXY:4:2666:19298:20885 1:N:0:TCTGCAAG+GCTGCACT  
CGAAGATAGTGTTAGTCAGACGTCGAGTGTTAGACGAGACCACTGTCTGGCTGGATCGACCAGCATT  
TGAATGCTGATCTGGTCGATATATTGCAGATTGCTATGGATAGGGGAAAAAAATCAATATTTGACAGT  
CATATTACTAAAGAA

+

FFF,FFFFFFFFFFFFFFFFFFFFFFFFFFFFFFFFFFFFFFFFFFFFFFFFFFFFFFFFFFFFF  
FFFFFFFFFFFFFFFFFFFFFFFFFFFFFFFFFFFFFFFFFFFFFFFFFFFFFFFFFFFFF:FFFFFFFFFFFFFFFFF:  
FFFFFFFFFFFFFFFFF:

@A00721:190:HGJW7DSXY:4:2168:10312:4852 1:N:0:TCTGCAAG+GCTGCACT  
GAAGATAGTGTTAGTCAGACGTCGAGTGTTAGACGAGACCACTGTCTGGCTGGATCGACCAGCATT  
GAATGCTGATCTGGTCGATATATTGCAGATTGCTATGGATAGGGGAAAAAAATCAATATTTGACAGT  
ATATTACTAAAGAA

+

FFFFFFFFF:F:FFF:FF:FFFF:FFFFF:FFFFFFFFFFFFF,FFF:F,FFFFFFFFFFFFF:FFFFF  
:FF:FFFFFFFFF,F:FFF:FFFFFF,F,FFFFFFFFF:FF:F,:FFFFF,FFFF,FFFFF,FFFFF:F  
FFFFFFFFFFFFF,FF



:FFFFFFFFFFFFFFFFFFFFFFFF:F:FFF:FFFFFFFFFFFFFFFFFFFFFFFF:FFFFFFFFFFFFFFFF  
FFFFFFFFFFFFFFFF

@A00721:190:HGJW7DSXY:4:1344:14850:8265 1:N:0:TCTGCAAG+GCTGCACT  
TAATAAAATTACAAATTTTATTTCAATTCACGTCTTATTTCTTTCTTTAGTAATATGACTGTCAAATA  
TTGATTTTTTTTCCCCTATCCATAGCAATCTGCAATATATCGACCAGATCAGCATTCATAATGCTGGTC  
GATCCAGCCAGACAC

+

FFFFFFFFFFFFFFFFFFFFFFFFFFFFFFFFFFFFFFFF:FFFFFFF::FFFFFFFFFFFFFFFFFFFFFFFF:FFFF  
FFFFFFFFFFFFFFFFFFFFFFFFFFFFFFFFFFFFFFFF:FFFFFFFFFFFFFFFFFFFFFFFFFFFFFFFF  
FFFFFFFFFFFFFFFF

@A00721:190:HGJW7DSXY:4:1410:19777:30859 1:N:0:TCTGCAAG+GCTGCACT  
TAATAAAATTACAAATTTTATTTCAATTCACGTCTTATTTCTTTCTTTAGTAATATGACTGTCAAATA  
TTGATTTTTTTTCCCCTATCCATAGCAATCTGCAATATATCGACCAGATCAGCATTCATAATGCTGGTC  
GATCCAGCCAGACAC

+

FFFFFFFFFFFFFFFFFFFFFFFFFFFFFFFFFFFFFFFF:FFF:FFFFFFFFFFFFFFFFFFFFFFFFFFFFFFFF  
FFFFFFFFFFFFFFFFFFFFFFFFFFFFFFFFFFFFFFFFFFFFFFFFFFFFFFFFFFFFFFFFFFFFFFFF  
FFFFFFFFFFFFFFFF

@A00721:190:HGJW7DSXY:4:1502:6289:22811 1:N:0:TCTGCAAG+GCTGCACT  
TAATAAAATTACAAATTTTATTTCAATTCACGTCTTATTTCTTTCTTTAGTAATATGACTGTCAAATA  
TAGATTTTTTTTCCCCTATCCATAGCAATCTGCAATATATCTACCAGATCAGCATTCATAATGCTGGTC  
GATCCAGCCAGACAC

+

FFFFFF:F,F:FFF:FFFF:FFF:FFF,FFFF:FFFF:,F:FFF:,,,FFF::FF:,,F,FFF:,,  
F,FFFF:F,:,:,FFF,:FFF:FFFFFF:, :FFFF,F,FF,:FFFFFFFF:, :FFFF::F,:FF  
FF:F:F:F:F,F,FFFF

@A00721:190:HGJW7DSXY:4:2102:25518:15374 1:N:0:TCTGCAAG+GCTGCACT  
TAATAAAATTACAAATTTTATTTCAATTCACGTCTTATTTCTTTCTTTAGTAATATGACTGTCAAATA  
TTGATTTTTTTTCCCCTATCCATAGCAATCTGCAATATATCGACCAGATCAGCATTCATAATGCTGGTC  
GATCCAGCCAGACAC

+

FFFFFFFFFFFFFFFF:F:FFFFFFFFFFFFFFFF:FFFFFFFFFFFFFFFFFFFFFFFFFFFFFFFF  
FFFFFFFFFFFFFFFF:FFFFFFFFFFFFFFFFFFFFFFFFFFFFFFFFFFFFFFFFFFFFFFFF::FFFFFFFF  
FFFF:FFFFFFFF

@A00721:190:HGJW7DSXY:4:2251:32072:28886 1:N:0:TCTGCAAG+GCTGCACT  
TAATAAAATTACAAATTTTATTTCAATTCACGTCTTATTTCTTTCTTTAGTAATATGACTGTCAAATA  
TTGATTTTTTTTCCCCTATCCATAGCAATCTGCAATATATCGACCAGATCAGCATTCATAATGCTGGTC  
GATCCAGCCAGACAC

+

FFFFFFFFFFFFFF:F:FFFFFFFFFFFFFFFF::F:FFFFFFFFFFFFFFFF:FFFFFF::F:  
FFFFFFFF:FFFFFFFFFFFFFFFF:FFFFFFFFFFFFFF,FFFFFFFFFFFFFFFF:,FFFF  
,:FFFFFFFF

@A00721:190:HGJW7DSXY:4:2251:32443:28933 1:N:0:TCTGCAAG+GCTGCACT  
TAATAAAATTACAAATTTTATTTCAATTCACGTCTTATTTCTTTCTTTAGTAATATGACTGTCAAATA  
TTGATTTTTTTTCCCCTATCCATAGCAATCTGCAATATATCGACCAGATCAGCATTCATAATGCTGGTC  
GATCCAGCCAGACAC

+

FFFFFFFFFFFFFFFFFFFFFFFFFFFFFFFFFFFFFFFF:FFFFFF,FFFFFFFFFFFFFFFF:FFFFFFFF  
FFF:FFFFFF:FFFFFFFFFFFF:FFFF:FFFFFFFF:FFFFFFFFFFFF:FFFFFFFFFFFF:F  
FFF:FFFFFFFF

@A00721:190:HGJW7DSXY:4:2262:27977:20603 1:N:0:TCTGCAAG+GCTGCACT  
TAATAAAATTACAAATTTTATTTCAATTCACGTCTTATTTCTTTCTTTAGTAATATGACTGTCAAATA  
TTGATTTTTTTTCCCCTATCCATAGCAATCTGCAATATATCGACCAGATCAGCATTCATAATGCTGGTC  
GATCCAGCCAGACAC

+  
FFFFFFFFFFFFFFFFFFFFFFFFFFFFFFFFFFFFFFFFFFFFFFFFFFFFFFFFFFFFFFFFFFFFFFFF  
FFFFFFFFFFFFFFFF:FFFFFFFFFFFFFFFFFFFFFFFFFFFFFFFF:FFFFFFFFFFFFFFFFFFFFFFFF  
FFFFFFFFFFFFFFFF  
@A00721:190:HGJW7DSXY:4:2372:24641:10567 1:N:0:TCTGCAAG+GCTGCACT  
TAATAAAATTACAAATTTTATTTTCATTTTCACGTCTTATTTCTTTCTTTAGTAATATGACTGTCAAATA  
TTGATTTTTTTTCCCCTATCCATAGCAATCTGCAATATATCGACCAGATCAGCATTCATAATGCTGGTC  
GATCCAGCCAGACAC

+  
FFFFFFF:FFFFFFF:FFFFFFFFFFFFFFFFFFFFFFFFFFFFFFFF:FFFFFFFFFFFFFFFFFFFF:FF:FFFFFFF  
FF:FFFFFFFFFFFFFFFF:FFFFFFFFF:FFFFFFFFFFFFFFFFFFFFFFFFFFFFFFFFFFFFFFFF:FFFFFFF  
FFFFFFFFFFFFFFFF:  
@A00721:190:HGJW7DSXY:4:1156:4716:25222 1:N:0:TCTGCAAG+GCTGCACT  
CGATGTATTAGATGATTAATAAAATTACAAATTTTATTTTCATTTTCACGTCTTATTTCTTTCTTTAGTA  
ATATGACTGTCAAATATTGATTTTTTTTCCCCTATCCATAGCAATCTGCAATATATCGACCAGATCAGC  
ATTCATAATGCTGGT

+  
FFFFFFF:FFFFFFFFFFFFFFFFFFFFFFFFFFFFFFFF,FFFFFFFFFFFFFFFFFFFF:FF:F,FFFFFFFFFFFF  
:F:FFFFFFFF:FF,FFFFFFFFFFFFFFFFFFFFFFFFFFFFFFFFFFFFFFFFFFFFFFFFFFFFFFFFFFFF  
FFFFFFFFFFFFFFFF  
@A00721:190:HGJW7DSXY:4:1555:32696:35916 1:N:0:TCTGCAAG+GCTGCACT  
CGATGTATTAGATGATTAATAAAATTACAAATTTTATTTTCATTTTCACGTCTTATTTCTTTCTTTAGTA  
ATATGACTGTCAAATATTGATTTTTTTTCCCCTATCCATAGCAATCTGCAATATATCGACCAGATCAGC  
ATTCATAATGCTGGT

+  
FFFFFFFFFFFFFFFF:FFFFFFFFFFFFFFFFFFFFFFFFFFFFFFFFFFFFFFFF:FF::FFFF,:F::FFFF,FFFF  
FFF,,FFFFFFFFFFFFFFFFFFFFFFFF:FFFFFFFFF,:FFFFFFFFFFFFFFFFFFFFFFFFFFFF,FF,  
FF:FF:FFF:::,F  
@A00721:190:HGJW7DSXY:4:2546:29496:10895 1:N:0:TCTGCAAG+GCTGCACT  
CGATGTATTAGATGATTAATAAAATTACAAATTTTATTTTCATTTTCACGTCTTATTTCTTTCTTTAGTA  
ATATGACTGTCAAATATTGATTTTTTTTCCCCTATCCATAGCAATCTGCAATATATCGACCAGATCAGC  
ATTCATAATGCTGGT

+  
FFFFFFFFFFFFFFFFFFFFFFFFFFFFFFFFFFFFFFFFFFFFFFFFFFFFFFFFFFFFFFFFFFFF,FFFFFFFFFFFFFFFF  
FFFFFFFFFFFFFFFFFFFFFFFFFFFFFFFFFFFF,FFFFFFFFFFFFFFFFFFFFFFFFFFFFFFFFFFFFFFFFFFFF  
FFFF:FFFFFFFF::  
@A00721:190:HGJW7DSXY:4:1357:31611:30248 1:N:0:TCTGCAAG+GCTGCACT  
CGATGTATTAGATGATTAATAAAATTACAAATTTTATTTTCATTTCAAGTCTTATTTCTTTCTTTAGTA  
ATATGACTGTCAAATATTGATTTTTTTTCCCCTATCCATAGCAATATTCAATATATCGAACAGATCAGC  
AATCATAATTCTGT

+  
FFFF,FF:,FFFF::,,F:FFFF:,FFFF,FFFF,FFFFFFFF,F,:,,F:,FFF,FF,,:F,FF  
:FF,,F,:F:,F:FFFF,FFF,:F,FFFF,F::,,FFFF,FFF,,,,FFFFFFFF,F,FFFF,F,:  
:,:,F,FFF:F,::  
@A00721:190:HGJW7DSXY:4:1269:22706:22247 1:N:0:TCTGCAAG+GCTGCACT  
GGTCGATATATTGCAGATTGCTATGGATAGGGGAAAAAAATCAATATTTGACAGTCATATTACTAAAG  
AAAGAAATAAGACGTGAAATGAAATAAAATTTGTAATTTTATTAATCATCTAATACATCGAACGCTAT  
TGGCTGGTGTATTGG

+  
FFFFFFFFFFFFFFFFFFFFFFFFFFFFFFFFFFFFFFFFFFFFFFFFFFFFFFFFFFFFFFFFFFFF:FFFFFFFFFFFFFFFF  
FFFFFFFFFFFFFFFFFFFFFFFFFFFFFFFFFFFFFFFFFFFFFFFFFFFFFFFFFFFFFFFFFFFFFFFFFFFF  
F:FFFFFFFFFFFF  
@A00721:190:HGJW7DSXY:4:1530:18123:29246 1:N:0:TCTGCAAG+GCTGCACT  
GGTCGATATATTGCAGATTGCTATGGATAGGGGAAAAAAATCAATATTTGACAGTCATATTACTAAAG

AAAGAAATAAGACGTGAAATGAAATAAAATTTGTAATTTTATTAATCATCTAATACATCGAACGCTAT  
TGGCTGGTGTATTGG

```

FFFFFFFFFFFFFFFFFFFFFFFF,FFFFFFFFFFFFFFFFFFFFFFFFFFFFFFFF
FFFF,FFFFFFFFFFFFFFFF:FFFFFFFFFFFF,FFFFFFFFFFFFFFFFFFFF:F:
FFFFFFFFFFFFFFFF

```

 $+$ 

@A00721:190:HGJW7DSXY:4:2621:10791:21997 1:N:0:TCTGCAAG+GCTGCACT  
GGTCGATATATTGCAGATTGCTATGGATAGGGGAAAAAAATCAATATTTGACAGTCATATTACTAAAG  
AAAGAAATAAGACGTGAAATGAAATAAAATTTGTAATTTTATTAATCATCTAATACATCGAACGCTCT  
TGGCTGGTGTATTGG

```

FFFFFFFFFFFFFFFF:FFFFFF:F,FFFFFFFFFFFFFFFF,,FF:F,F,FFFF:FFF:FFFFFF:FFF:
FFFFFF:F:FF,FFF,FFFF,FFF:FFFFFF:FFFF:,,FFFFFFFF:FFFFFFFFFFFFFF:F,FF:,F,F
,FF:FFFFFF:FFFF

```

+

@A00721:190:HGJW7DSXY:4:1611:6298:24987 1:N:0:TCTGCAAG+GCTGCACT  
GCCTCCACCAAATCCTGATCTGAATCACTTTCCGTATTTAATAGGTCAGTATGACCAGATGTCAGATA  
CATTAATTCCAATACACCAGCCAATAGCGTTCGATGTATTAGATGATTAATAAAATTACAAATTTTAT  
TTCATTTACGTCTT

```
FFF:FFFFFFFF:FFFFFFFFFFFFFFFFFFFFF::FFF:FFFFFF:FFFFFFFFFFFFFFFF:FFFFF
FFFFFFFFF:FFFFFFFFFFFFFFFFFFFFFFFFFFFFF:FF:FFFFFFFFFFFFF:FFFFFFFFFFFFFFFF:FFFF
FFFFFFFFE,E,FFFFF
```

+

@A00721:190:HGJW7DSXY:4:1135:24768:11725 1:N:0:TCTGCAAG+GCTGCACT  
GGCTGGTGTATTGGAATTAATGTATCTGACATCTGGTCATAGTGACCTATTAAATACGGAAAGTGATT  
CAGATCAGGATTTGGTGGAGGATATCTAAAGTAGTCGTACATTAGAACGATTTCTGCTATTCCAACGA  
AATCCATGCATCTGC

[illegible]

$+$ 

+

+

+

+

+

+

[illegible]



FFFFFFFF:FFFFFFFFFFFFFFFFFFFFFFFFFFFFFFFFFFFFFFFFFFFFFFFFFFFFFFFFFFFFFFFF:FFFFF  
FFFF:FFF:FFFFF

@A00721:190:HGJW7DSXY:4:2661:21612:16908 1:N:0:TCTGCAAG+GCTGCACT  
GGCTGGTGTATTGGAATTAATGTATCTGACATCTGGTCATAGTGACCTATTAAATACGGAAAGTGATT  
CAGATCAGGATTTGGTGGAGGATATCTAAAGTAGTCGTACATTAGAACGATTTTCGTCTATTCCAACGA  
AATCCATGCATCTGC

+

FFFFFFFFFFFFFFFFFFFFFFFFFFFFFFFFFFFFFFFFFFFFFFFFFFFFFFFFFFFFFFFFFFFFFFFFFFFF  
FFFFFFFFFFFFFFFFFFFFFFFFFFFFFFFFFFFFFFFFFFFFFFFFFFFFFFFFFFFFFFFFFFFFFFFFFFFF  
FFFFFFFFFFFFFFFFFFFF

@A00721:190:HGJW7DSXY:4:1315:23231:2143 1:N:0:TCTGCAAG+GCTGCACT  
CTGACATCTGGTCATAGTGACCTATTAAATACGGAAAGTGATTCAGATCAGGATTTGGTGGAGGATAT  
CTAAAGTAGTCGTACATTAGAACGATTTTCGTCTATTCCAACGAAATCCATGCATCTGCATTCCAGTTC  
TTCGTAATAGTTATA

+

FFFFFFFFFFFFFFFFFFFFFFFFFFFFFFFFFFFFFFFFFFFFFFFFFFFFFFFFFFFFFFFFFFFFFFFFFFFF:FFFFFFFFFFFFFFF  
FFFFFFFFFFFFFFFFFFFFFFFFFFFFFFFFFFFFFFFFFFFFFFFFFFFFFFFFFFFFFFFFFFFFFFFFFFFF  
FFFFFFFFFFFFFFFFFFFF

@A00721:190:HGJW7DSXY:4:1407:8793:35884 1:N:0:TCTGCAAG+GCTGCACT  
CTGACATCTGGTCATAGTGACCTATTAAATACGGAAAGTGATTCAGATCAGGATTTGGTGGAGGATAT  
CTAAAGTAGTCGTACATTAGAACGATTTTCGTCTATTCCAACGAAATCCATGCATCTGCATTCCAGTTC  
TTCGTAATAGTTATA

+

FFFFFFFFFFFFFFF:FFFFFFFFFFFFFFFFFFFFFFFFFFFFFFFFFFFFFFFFFFFFFFFFFFFFFFFFFFFFFFFFFFFF  
FFFFFFFFFFFFFFFFFFFFFFFFFFFFFFFFFFFFFFFFFFFFFFFFFFFFFFFFFFFFFFFFFFFFFFFFFFFF:FFFFFFFFFFFF  
FFFFFFFFFFFFFFFFFFFF

@A00721:190:HGJW7DSXY:4:1424:26576:24126 1:N:0:TCTGCAAG+GCTGCACT  
CTGACATCTGGTCATAGTGACCTATTAAATACGGAAAGTGATTCAGATCAGGATTTGGTGGAGGATAT  
CTAAAGTAGTCGTACATTAGAACGATTTTCGTCTATTCCAACGAAATCCATGCATCTGCATTCCAGTTC  
TTCGTAATAGTTATA

+

FFFFFFFFFFFFFFFFFFFFFFFFFFFFFFFFFFFFFFFFFFFFFFFFFFFFFFFFFFFFFFFFFFFFFFFFFFFF  
FFFF:FFFFFFFFFFFFFFFFFFFFFFFFFFFFFFFFFFFFFFFFFFFFFFFFFFFFFFFFFFFFFFFFFFFFF  
:FFFFFFFFFFFFFFFFFFFF

@A00721:190:HGJW7DSXY:4:1441:29315:25050 1:N:0:TCTGCAAG+GCTGCACT  
CTGACATCTGGTCATAGTGACCTATTAAATACGGAAAGTGATTCAGATCAGGATTTGGTGGAGGATAT  
CTAAAGTAGTCGTACATTAGAACGATTTTCGTCTATTCCAACGAAATCCATGCATCTGCATTCCAGTTC  
TTCGTAATAGTTATA

+

FFFFFFFFFFFFFFFFFFFFFFFFFFFFFFFFFFFFFFFFFFFFFFFFFFFFFFFFFFFFFFFFFFFFFFFFFFFF  
FFFFFFFFFFFFFFFFFFFF:FFFFFFF,FFFFFFFFF:FFFFFFFFFFFFFFFFFFFFFFFFFFFFFFFFFFFF  
FFFFFFFFFFFFFFFFFFFF:FF

@A00721:190:HGJW7DSXY:4:1558:29134:8046 1:N:0:TCTGCAAG+GCTGCACT  
CTGACATCTGGTCATAGTGACCTATTAAATACGGAAAGTGATTCAGATCAGGATTTGGTGGAGGATAT  
CTAAAGTAGTCGTACATTAGAACGATTTTCGTCTATTCCAACGAAATCCATGCATCTGCATTCCAGTTC  
TTCGTAATAGTTATA

+

FFF:FFFFFFFFFFFFFFFFFFFFFFFFFFFFFFFFFFFFFFFFFFFFFFFFFFFFFFFFFFFFFFFFFFFF,FFFFFFFFFFFF  
FFFFFFFFFFFFFFFFFFFFFFFFFFFFFFFFFFFFFFFFFFFFFFFFFFFFFFFFFFFFFFFFFFFFFFFFFFFF  
FFFFFFF:FFFFFFFFFFFF

@A00721:190:HGJW7DSXY:4:2139:30192:31015 1:N:0:TCTGCAAG+GCTGCACT  
CTGACATCTGGTCATAGTGACCTATTAAATACGGAAAGTGATTCAGATCAGGATTTGGTGGAGGATAT  
CTAAAGTAGTCGTACATTAGAACGATTTTCGTCTATTCCAACGAAATCCATGCATCTGCATTCCAGTTC  
TTCGTAATAGTTATA

+  
FFFFFFFFFFFFFFFFFFFFFFFFFFFFFFFFFFFFFFFFFFFFFFFFFFFFFFFFFFFFFFFFFFFFFFFF  
FFFFFFFFFFFFFFFFFFFFFFFFFFFFFFFFFFFFFFFFFFFFFFFFFFFFFFFFFFFFFFFFFFFFFFFF  
FFFFFFFFFFFFFFFF  
@A00721:190:HGJW7DSXY:4:2169:12038:7091 1:N:0:TCTGCAAG+GCTGCACT  
CTGACATCTGGTCATAGTGACCTATTAAATACGGAAAGTGATTAGATCAGGATTTGGTGGAGGATAT  
CTAAAGTAGTCGTACATTAGAACGATTTTCGTCTATTCCAACGAAATCCATGCATCTGCATTCCAGTTC  
TTCGTAATAGTTATA

+  
FFFFFFFFFFFFFFFFFFFFFFFFFFFFFFFFFFFFFFFFFFFFFFFFFFFFFFFFFFFFFFFFFFFFFFFF  
FFFFFFFFFFFFFFFFFFFFFFFFFFFFFFFFFFFFFFFFFFFFFFFFFFFFFFFFFFFFFFFFFFFFFFFF  
FFFFFFFFFFFFFFFF  
@A00721:190:HGJW7DSXY:4:2212:17806:1141 1:N:0:TCTGCAAG+GCTGCACT  
CTGACATCTGGTCATAGTGACCTATTAAATACGGAAAGTGATTAGATCAGGATTTGGTGGAGGATAT  
CTAAAGTAGTCGTACATTAGAACGATTTTCGTCTATTCCAACGAAATCCATGCATCTGCATTCCAGTTC  
TTCGTAATAGTTATA

+  
FFFFFFFFFFFFFFFFFFFFFFFFFFFFFFFFFFFFFFFFFFFFFFFFFFFFFFFFFFFFFFFFFFFFFF:FFFFFFFFFFFFFFFF  
FFFFFFFFFFFFFFFFFFFFFFFFFFFFFFFFFFFFFFFFFFFFFFFFFFFFFFFFFFFFFFFFFFFFFFFF:FFFFFFFFFFFFFFFF  
FFFFFFFFFFFFFFFF  
@A00721:190:HGJW7DSXY:4:2318:17779:15405 1:N:0:TCTGCAAG+GCTGCACT  
CTGACATCTGGTCATAGTGACCTATTAAATACGGAAAGTGATTAGATCAGGATTTGGTGGAGGATAT  
CTAAAGTAGTCGTACATTAGAACGATTTTCGTCTATTCCAACGAAATCCATGCATCTGCATTCCAGTTC  
TTCGTAATAGTTATA

+  
FFF:FFFFFFFFFFFFFFFFFFFFFFFFFFFFFFFFFFFFFFFFFFFFFFFFFFFFFFFFFFFFFFFFFFFF  
FFFFFFFFFFFFFFFFFFFFFFFFFFFFFFFFFFFFFFFFFFFFFFFFFFFFFFFFFFFFFFFFFFFFFF::FFFFFFFFFFFFFFFF  
FFFFFFFFFFFFFFFF  
@A00721:190:HGJW7DSXY:4:2424:26693:17284 1:N:0:TCTGCAAG+GCTGCACT  
CTGACATCTGGTCATAGTGACCTATTAAATACGGAAAGTGATTAGATCAGGATTTGGTGGAGGATAT  
CTAAAGTAGTCGTACATTAGAACGATTTTCGTCTATTCCAACGAAATCCATGCATCTGCATTCCAGTTC  
TTCGTAATAGTTATA

+  
F:FFFFFFFFFFFFFFFFFFFFFFFFFFFFFFFFFFFFFFFFFFFFFFFFFFFFFFFFFFFFFFFFFFFF  
FFFFFFFFFFFFFFFFFFFFFFFFFFFFFFFFFFFFFFFFFFFFFFFFFFFFFFFFFFFFFFFFFFFFFF  
FFFFFFFFF:FFFFF  
@A00721:190:HGJW7DSXY:4:2571:3649:5494 1:N:0:TCTGCAAG+GCTGCACT  
CTGACATCTGGTCATAGTGACCTATTAAATACGGAAAGTGATTAGATCAGGATTTGGTGGAGGATAT  
CTAAAGTAGTCGTACATTAGAACGATTTTCGTCTATTCCAACGAAATCCATGCATCTGCATTCCAGTTC  
TTCGTAATAGTTATA

+  
FFFFFFFFFFFFFFFFFFFFFFFFFFFFFFFFFFFFFFFFFFFFFFFFFFFFFFFFFFFFFFFFFFFF:FFFFFFFFFFFFFFFF  
FFFFFFFFFFFFFFFFFFFFFFFFFFFFFFFFFFFFFFFFFFFFFFFFFFFFFFFFFFFFFFFFFFFFFF:FFFFFFFFFFFFFFFF  
FFFFFFFFFFFFFFFF  
@A00721:190:HGJW7DSXY:4:2578:7618:1157 1:N:0:TCTGCAAG+GCTGCACT  
CTGACATCTGGTCATAGTGACCTATTAAATACGGAAAGTGATTAGATCAGGATTTGGTGGAGGATAT  
CTAAAGTAGTCGTACATTAGAACGATTTTCGTCTATTCCAACGAAATCCATGCATCTGCATTCCAGTTC  
TTCGTAATAGTTATA

+  
F:FFFF:FFFFFFFFFFFFFFFFFFFFFFFFFFFFFFFFFFFFFFFFFFFFFFFFFFFFFFFFFFFFFF  
FFFFFFFFFFFFFFFFFFFFFFFFFFFFFFFFFFFFFFFFFFFFFFFFFFFFFFFFFFFFFFFFFFFF:FFF,FFFFFFFFFFFF  
FFFFFFFFFFFFFFFF  
@A00721:190:HGJW7DSXY:4:2603:2889:23469 1:N:0:TCTGCAAG+GCTGCACT  
CTGACATCTGGTCATAGTGACCTATTAAATACGGAAAGTGATTAGATCAGGATTTGGTGGAGGATAT



+

@A00721:190:HGJW7DSXY:4:2176:5358:2691 1:N:0:TCTGCAAG+GCTGCACT  
GTGGAGGATATCTAAAGTAGTCGTACATTAGAACGATTTCTGTCTATTCCAACGAAATCCATGCATCTG  
CATTCCAGTTCTTCGTAATAGTTATACTCGTTTTCGATATCATTAATTATATATTTTCATCGAAACGAT  
CACACTGTTGGGAAT

 $+$ 

@A00721:190:HGJW7DSXY:4:2249:23149:32690 1:N:0:TCTGCAAG+GCTGCACT  
GTGGAGGATATCTAAAGTAGTCGTACATTAGAACGATTTCTGTCTATTCCAACGAAATCCATGCATCTG  
CATTCCAGTTCTTCGTAATAGTTATACTCGTTTTCGATATCATTAATTATATATTTTCATCGAAACGAT  
CACACTGTTGGGAAT

+

@A00721:190:HGJW7DSXY:4:2442:15338:16250 1:N:0:TCTGCAAG+GCTGCACT  
GTGGAGGATATCTAAAGTAGTCGTACATTAGAACGATTTTCGTCTATTCCAACGAAATCCATGCATCTG  
CATTCCAGTTCTTCGTAATAGTTATACTCGTTTTCGATATCATTAATTATATATTTTCATCGAAACGAT  
CACACTGTTGGGAAT

+

@A00721:190:HGJW7DSXY:4:2570:1931:18771 1:N:0:TCTGCAAG+GCTGCACT  
GTGGAGGATATCTAAAGTAGTCGTACATTAGAACGATTTCTGTCTATTCCAACGAAATCCATGCATCTG  
CATTCCAGTTCTTCGTAATAGTTATACTCGTTTTCGATATCATTAATTATATATTTTCATCGAAACGAT  
CACACTGTTGGGAAT

+

@A00721:190:HGJW7DSXY:4:1146:7744:17284 1:N:0:TCTGCAAG+GCTGCACT  
GGAGGATATCTAAAGTAGTCGTACATTAGAACGATTTCTGTCTATTCCAACGAAATCCATGCATCTGCA  
TTCCAGTTCTTCGTAATAGTTATACTCGTTTTCGATATCATTAATTATATATTTTCATCGAAACGATCA  
CACTGTTGGGAATGC

+

@A00721:190:HGJW7DSXY:4:1150:28320:16219 1:N:0:TCTGCAAG+GCTGCACT  
GGAGGATATCTAAAGTAGTCGTACATTAGAACGATTTCTGTCTATTCCAACGAAATCCATGCATCTGCA  
TTCCAGTTCTTCGTAATAGTTATACTCGTTTTCGATATCATTAATTATATATTTTCATCGAAACGATCA  
CACTGTTGGAATGC

+

@A00721:190:HGJW7DSXY:4:1165:26494:27461 1:N:0:TCTGCAAG+GCTGCACT  
GGAGGATATCTAAAGTAGTCGTACATTAGAACGATTTCTGTCTATTCCAACGAAATCCATGCATCTGCA  
TTCCAGTTCTTCGTAATAGTTATACTCGTTTTCGATATCATTAATTATATATTTTCATCGAAACGATCA  
CACTGTTGGGAATGC

@A00721:190:HGJW7DSXY:4:1304:15709:15045 1:N:0:TCTGCAAG+GCTGCACT  
GGAGGATATCTAAAGTAGTCGTACATTAGAACGATTTCTGTCTATTCCAACGAAATCCATGCATCTGCA  
TTCCAGTTCTTCGTAATAGTTATACTCGTTTTCGATATCATTAATTATATATTTTCATCGAAACGATCA  
CACTGTTGGGAATGC

@A00721:190:HGJW7DSXY:4:1643:32443:10363 1:N:0:TCTGCAAG+GCTGCACT  
GGAGGATATCTAAAGTAGTCGTACATTAGAACGATTTCTGTCTATTCCAACGAAATCCATGCATCTGCA  
TTCCAGTTCTTCGTAATAGTTATACTCGTTTTCGATATCATTAATTATATATTTTCATCGAAACGATCA  
CACTGTTGGAATGC

@A00721:190:HGJW7DSXY:4:1472:28565:33238 1:N:0:TCTGCAAG+GCTGCACT  
AAAGTAGTCGTACATTAGAACGATTTCTGCTATTCCAACGAAATCCATGCATCTGCATTCCAGTTCTT  
CGTAATAGTTATACTCGTTTTCGATATCATTAAATTATATATTTTCATCGAAACGATCACACTGTTGGGA  
ATGCTGATCTG

@A00721:190:HGJW7DSXY:4:1474:15826:31657 1:N:0:TCTGCAAG+GCTGCACT  
AAAGTAGTCGTACATTAGAACGATTTCTGCTATTCCAACGAAATCCATGCATCTGCATTCCAGTTCTT  
CGTAATAGTTATACTCGTTTTCGATATCATTAATTATATATTTTCATCGAAACGATCACACTGTTGGGA  
ATGCTGATCTG

@A00721:190:HGJW7DSXY:4:1521:30716:24064 1:N:0:TCTGCAAG+GCTGCACT  
AAAGTAGTCGTACATTAGAACGATTTCTGCTATTCCAACGAAATCCATGCATCTGCATTCCAGTTCTT  
CGTAATAGTTATACTCGTTTTCGATATCATTAAATTATATATTTTCATCGAAACGATCACACTGTTGGGA  
ATGCTGATCTG

@A00721:190:HGJW7DSXY:4:2132:26765:27305 1:N:0:TCTGCAAG+GCTGCACT  
AAAGTAGTCGTACATTAGAACGATTTCTGTCTATTCCAACGAAATCCATGCATCTGCATTCCAGTTCTT  
CGTAATAGTTATACTCGTTTTCGATATCATTAATTATATATTTTCATCGAAACGATCACACTGTTGGGA  
ATGCTGATCTG

+  
FFFFFFFFFFFFFFFFFFFFFFFFFFFFFFFFFFFFFFFFFFFFFFFFFFFFFFFFFFFFFFFFFFFFFFFF,F  
FFFFFFFFFFFFFFFFFFFFFFFFFFFFFFFFFFFFFFFFFFFFFFFFFFFFFFFFFFFFFFFFFFFFFFFF  
FFFFFFFFFFFF  
@A00721:190:HGJW7DSXY:4:2135:9833:15577 1:N:0:TCTGCAAG+GCTGCACT  
AAAGTAGTCGTACATTAGAACGATTTTCGTCTATTCCAACGAAATCCATGCATCTGCATTCCAGTTCTT  
CGTAATAGTTATACTCGTTTTTCGATATCATTAATTATATATTTTCATCGAAACGATCACACTGTTGGGA  
ATGCTGATCTG  
+  
FFFFFFFFFFFFFFFFFFFFFFFFFFFFFFFFFFFFFFFFFFFFFFFFFFFFFFFFFFFFFFFFFFFFFFFF  
FFFFFFFFFFFFFFFFFFFFFFFFFFFFFFFFFFFFFFFFFFFFFFFFFFFFFFFFFFFFFFFFFFFFFFFF  
FFFFFFFFFFFF  
@A00721:190:HGJW7DSXY:4:2135:12093:17425 1:N:0:TCTGCAAG+GCTGCACT  
AAAGTAGTCGTACATTAGAACGATTTTCGTCTATTCCAACGAAATCCATGCATCTGCATTCCAGTTCTT  
CGTAATAGTTATACTCGTTTTTCGATATCATTAATTATATATTTTCATCGAAACGATCACACTGTTGGGA  
ATGCTGATCTG  
+  
FFFFFFFFFFFFFFFFFFFFFFFFFFFFFFFFFFFFFFFFFFFFFFFFFFFFFFFFFFFFFFFFFFFFFFFF:FFFFFFFFFFFF  
FFFFFFFFFFFFFFFFFFFFFFFFFFFFFFFFFFFFFFFFFFFFFFFFFFFFFFFFFFFFFFFFFFFFFFFF:FFFFF  
:FFFFFFFFFFFF  
@A00721:190:HGJW7DSXY:4:2249:11098:35744 1:N:0:TCTGCAAG+GCTGCACT  
AAAGTAGTCGTACATTAGAACGATTTTCGTCTATTCCAACGAAATCCATGCATCTGCATTCCAGTTCTT  
CGTAATAGTTATACTCGTTTTTCGATATCATTAATTATATATTTTCATCGAAACGATCACACTGTTGGGA  
ATGCTGATCTG  
+  
FFFFFFFFFFFFFFFFFFFFFFFFFFFFFFFFFFFFFFFFFFFFFFFFFFFFFFFFFFFFFFFFFFFFFFFF  
FFFFFFFFFFFFFFFFFFFFFFFFFFFFFFFFFFFFFFFFFFFFFFFFFFFFFFFFFFFFFFFFFFFFFFFF  
FFFFFFFFFFFF  
@A00721:190:HGJW7DSXY:4:2628:14344:9048 1:N:0:TCTGCAAG+GCTGCACT  
AAAGTAGTCGTACATTAGAACGATTTTCGTCTATTCCAACGAAATCCATGCATCTGCATTCCAGTTCTT  
CGTAATAGTTATACTCGTTTTTCGATATCATTAATTATATATTTTCATCGAAACGATCACACTGTTGGGA  
ATGCTGATCTG  
+  
FFFFFFFFFFFFFFFFFFFFFFFFFFFFFFFFFFFFFFFFFFFFFFFFFFFFFFFFFFFFFFFFFFFFFFFF  
FFFFFFFFFFFFFFFFFFFFFFFFFFFFFFFFFFFFFFFFFFFFFFFFFFFFFFFFFFFFFFFFFFFFFFFF  
FF:FFFFFFFF  
@A00721:190:HGJW7DSXY:4:1405:13015:24878 1:N:0:TCTGCAAG+GCTGCACT  
CTTCGTAATAGTTATACTCGTTTTTCGATATCATTAATTATATATTTTCATCGAAACGATCACACTGTTG  
GGAATGCTGATCTGGTTAATTGTATAGACGACTTCGTCTATTACTTCCTTTACACGGATGTGCATGTC  
TGAAAGTATGTCGTC  
+  
:FFFFFFFFFFFFFFFFFFFFFFFFFFFFFFFFFFFFFFFFFFFFFFFFFFFFFFFFFFFFFFFFFFFFFFFF  
FFFFFFFFFFFF:FFFFFFFFFFFFFFFFFFFFFFFFFFFFFFFFFFFFFFFFFFFFFFFFFFFFFFFFFFFF  
FFFFFFFFFFFF:FF  
@A00721:190:HGJW7DSXY:4:1409:11822:12821 1:N:0:TCTGCAAG+GCTGCACT  
CTTCGTAATAGTTATACTCGTTTTTCGATATCATTAATTATATATTTTCATCGAAACGATCACACTGTG  
GGAATGCTGATCTGGTTAATTGTATAGACGACTTCGTCTATTACTTCCTTTACACGGATGTGCATGTC  
TGAAAGTATGTCGTC  
+  
FFFFFFFFFF:FFFFFFFFFFFFFFFFFFFFFFFFFFFFFFFFFFFFFFFFFFFFFFFFFFFFFFFFFFFF,FF,F  
FFFFFFFFFFFF:FFF:FFFFFFFFFFFFFFFFFFFFFFFFFFFFFFFFFFFFFFFFFFFFFFFFFFFFFFFF  
FFFFFFFFFFFF:FFFFF  
@A00721:190:HGJW7DSXY:4:1561:29369:22858 1:N:0:TCTGCAAG+GCTGCACT  
CTTCGTAATAGTTATACTCGTTTTTCGATATCATTAATTATATATTTTCATCGAAACGATCACACTGTTG



@A00721:190:HGJW7DSXY:4:2364:13069:33614 1:N:0:TCTGCAAG+GCTGCACT  
TTCGTAATAGTTATACTCGTTTTTCGATATCATTAATTATATATTTTCATCGAAACGATCACACTGTTGG  
GAATGCTGATCTGGTTAATTGTATAGACGACTTCGTCTATTACTTCCTTTACACGGATGTGCATGTCT  
GAAAGTATGTCGTC

+

FFFFFFFFFFFFFFFF:FFF,FFFF:F,FFF:F::FFFF:FFFFFFFFFFFFFFFFFFFFFFFF:FFF,:F  
FFFF:FFFF:F:FFF:FFF:FFFF,FFFFFFFFFFFFFFFFFFFFFFFF:FFFFF:FF:F:FF:F,,FFF  
FFFFFFFF:FFFF:F

@A00721:190:HGJW7DSXY:4:1410:30210:30859 1:N:0:TCTGCAAG+GCTGCACT  
CTCGTTTTTCGATATCATTAATTATATATTTTCATCGAAACGATCACACTGTTGGGAATGCTGATCTGGT  
TAATTGTATAGACGACTTCGTCTATTACTTCCTTTACACGGATGTGCATGTCTGAAAGTATGTCGTC  
CTGAAGAATGCGAAG

+

FFFFFFFFFFFFFFFFFFFFFFFFFFFFFFFFFFFFFFFFFFFFFFFFFFFFFFFFFFFFFFFFFFFFFFFF  
FFFFFFFFFFFF:FFF:FFFFFFFFFFFFFFFFFFFFFFFFFFFFFFFFFFFFFFFFFFFFFFFFFFFFFFFF  
FFFFFFFFFFFFFFFF

@A00721:190:HGJW7DSXY:4:1462:15835:2174 1:N:0:TCTGCAAG+GCTGCACT  
CTCGTTTTTCGATATCATTAATTATATATTTTCATCGAAACGATCACACTGTTGGGAATGCTGATCTGGT  
TAATTGTATAGACGACTTCGTCTATTACTTCCTTTACACGGATGTGCATGTCTGAAAGTATGTCGTC  
CTGAAGAATGCGAAG

+

FFFFFFFFFFFFFF::,FFFFFFFFFFFFFFFFFFFFFFFFFFFFFFFFFFFFFFFFFFFFFFFF:FFFFFFFFFFFF  
FFFFFFFFFFFF:FFFFFFFFFFFFFFFFFFFFFFFFFFFFFFFFFFFFFFFFFFFFFFFFFFFFFFFFFFFFF:FFF  
FFFFFFFFFFFFFFFF

@A00721:190:HGJW7DSXY:4:2446:22254:25786 1:N:0:TCTGCAAG+GCTGCACT  
CTCGTTTTTCGATATCATTAATTATATATTTTCATCGAAACGATCACACTGTTGGGAATGCTGATCTGGT  
TAATTGTATAGACGACTTCGTCTATTACTTCCTTTACACGGATGTGCATGTCTGAAAGTATGTCGTC  
CTGAAGAATGCGAAG

+

FFFFFFFFFFFF::FFFFFFFFFFFFFFFFFFFFFFFFFFFFFFFFFFFFFFFFFFFFFFFF:FFFFFFFFFFFF  
FFFFFFFFFFFF:FFFFFFFFFFFFFFFFFFFFFFFFFFFFFFFFFFFFFFFFFFFFFFFFFFFFFFFFFFFFF:FFF  
FFFF::FFFF:FFF

@A00721:190:HGJW7DSXY:4:2503:31349:21339 1:N:0:TCTGCAAG+GCTGCACT  
CTCGTTTTTCGATATCATTAATTATATATTTTCATCGAAACGATCACACTGTTGGGAATGCTGATCTGGT  
TAATTGTATAGACGACTTCGTCTATTACTTCCTTTACACGGATGTGCATGTCTGAAAGTATGTCGTC  
CTGAAGAATGCGAAG

+

FFFFFFFFFFFFFFFFFFFFFFFFFFFFFFFFFFFFFFFFFFFFFFFFFFFFFFFFFFFFFFFFFFFFFFFF:FFFFFFFFFFFF  
FFFFFFFFFFFF:FFFFFFFFFFFFFFFFFFFFFFFFFFFFFFFFFFFFFFFFFFFFFFFFFFFFFFFFFFFFF:FFF  
FFFFFFFFFFFFFFFF

@A00721:190:HGJW7DSXY:4:2671:28610:9455 1:N:0:TCTGCAAG+GCTGCACT  
CTCGTTTTTCGATATCATTAATTATATATTTTCATCGAAACGATCACACTGTTGGGAATGCTGATCTGGT  
TAATTGTATAGACGACTTCGTCTATTACTTCCTTTACACGGATGTGCATGTCTGAAAGTATGTCGTC  
CTGAAGAATGCGAAG

+

FFFFFFFFFFFFFFFFFFFFFFFFFFFFFFFFFFFFFFFFFFFFFFFFFFFFFFFFFFFFFFFFFFFFFFFF:FFFFFFFFFFFF  
FFFFFFFFFFFFFFFFFFFFFFFFFFFFFFFFFFFFFFFFFFFFFFFFFFFFFFFFFFFFFFFFFFFFFFFF:FFF  
FFFFFFFF:FFFFF

@A00721:190:HGJW7DSXY:4:2252:18502:16908 1:N:0:TCTGCAAG+GCTGCACT  
GTCCGATTACAATTGCTTCGATTCTTCAGAGACGACATACTTTCAGACATGCACATCCGTGTAAAG  
GAAGTAATAGACGAAGTCGTCTATACAATTAACCAGATCAGCATTCCAACAGTGTGATCGTTTCGAT  
GAAATATATAATTAA

+

F,FFFFFFFFFFFFFFFF,F:FFFFFFFFFFFFFFFFFFFFFFFFFFFFFFFFFFFFFFFFFFFFFFFF:FFFFF



FFFFFFFFFFFFFF:FFFFFFFFFFFFFFFFFFFFFFFFFFFFFFFFFFFFFFFFFFFFFFFF  
FFF,FFFFFFFF

@A00721:190:HGJW7DSXY:4:2568:3613:31203 1:N:0:TCTGCAAG+GCTGCACT  
GTCCGGATTACAATTGCTTCGCATTCTTCAGAGACGACATACTTTCAGACATGCACATCCGTGTAAAG  
GAAGTAATAGACGAAGTCGTCTATAACAATTAACCAGATCAGCATTCCCAACAGTGTGATCGTTTCGAT  
GAAATATATAATTAA

+

F:FFF:FF:FFFF:FF,FFFFFFFFFFFFFF:FFFFFFFFFFFFFF:FF:FFF:FFFFFFFFFFFF:F:F:  
FFFFFFFFFFFFFFFFFFFFFFFFFFFFFFFFFFFFFFFFFFFFFFFFFFFFFFFFFFFFFFFF,FFFFFFFF:FFFFF  
FF:FFFF:FFF,FF

@A00721:190:HGJW7DSXY:4:2568:3794:31516 1:N:0:TCTGCAAG+GCTGCACT  
GTCCGGATTACAATTGCTTCGCATTCTTCAGAGACGACATACTTTCAGACATGCACATCCGTGTAAAG  
GAAGTAATAGACGAAGTCGTCTATAACAATTAACCAGATCAGCATTCCCAACAGTGTGATCGTTTCGAT  
GAAATATATAATTAA

+

FFFFFFFFFFFFFFFFFFFFFFFFFFFFFFFFFFFFFFFFFFFFFFFFFFFFFFFFFFFFFFFF:F  
FF:FFFFFFFFFFFFFFFFFFFFFFFFFFFFFFFFFFFFFFFFFFFFFFFFFFFFFFFFFFFFFFFF  
FFFFFFFFFFFFFFFF

@A00721:190:HGJW7DSXY:4:1569:26982:34131 1:N:0:TCTGCAAG+GCTGCACT  
GTCCGGATTACAATTGCTTCGCATTCTTCAGAGACGACATACTTTCAGACATGCACATCCGTGTAAAG  
GAAGTAATAGACGAAGTCGTCTATAACAATTAACCAGATCAGCATTCCCAACAGTGTGATCGTTTCGAT  
GAAATATATAATTA

+

FFFFFFFFFFFFFFFFFFFFFFFFFFFFFFFFFFFFFFFFFFFFFFFFFFFFFFFFFFFFFF:FFFF,F,FF  
FFFFFFFFFFFFFF:F:FFFFFFFFFFFFFFFFFFFFFFFFFFFFFFFF,FFFFFFFFFFFF:FFFFFF:FFFF,FF  
FFFFFFFFFFFFFF

@A00721:190:HGJW7DSXY:4:1438:3730:31093 1:N:0:TCTGCAAG+GCTGCACT  
ATCGGAACGATCACACTGTTGGGAATGCTGATCTGGTTAATTGTATAGACGACTTCGTCTATTACTTC  
CTTTACACGGATGTGCATGTCTGAAAGTATGTCGTCTCTGAAGAATGCGAAGCAATTGTAATCCGGAC  
ACCAGAATGGATATA

+

FFFFFFFFFFFFFFFF:FFFFFFFFFFFFFFFFFFFFFFFFFFFFFFFF:FFFFFFFFFFFFFFFF  
FFFFFFFFFFFFFFFFFFFFFFFFFFFFFFFFFFFFFFFFFFFFFFFFFFFFFFFFFFFFFFFF  
FFFFFFF:FFFFFF

@A00721:190:HGJW7DSXY:4:1517:19253:19210 1:N:0:TCTGCAAG+GCTGCACT  
ATCGGAACGATCACACTGTTGGGAATGCTGATCTGGTTAATTGTATAGACGACTTCGTCTATTACTTC  
CTTTACACGGATGTGCATGTCTGAAAGTATGTCGTCTCTGAAGAATGCGAAGCAATTGTAATCCGGAC  
ACCAGAATGGATATA

+

FFFFFFFFFFFFFFFFFFFFFFFFFFFFFF:FFFFFFFFFFFFFFFFFFFFFFFF:FFFFFFFFFFFFFFFF  
FFFFFFFFFFFFFFFFFFFFFFFFFFFFFFFFFFFFFFFFFFFFFFFFFFFFFFFFFFFFFFFF  
FFFFFFFFFFFF:F

@A00721:190:HGJW7DSXY:4:1524:3396:24439 1:N:0:TCTGCAAG+GCTGCACT  
ATCGGAACGATCACACTGTTGGGAATGCTGATCTGGTTAATTGTATAGACGACTTCGTCTATTACTTC  
CTTTACACGGATGTGCATGTCTGAAAGTATGTCGTCTCTGAAGAATGCGAAGCAATTGTAATCCGGAC  
ACCAGAATGGATATA

+

FFFFFFFFFFFFFFFFFFFFFFFF,F:F:FFFF:FFFFFFFFFFFFFF:FF,FFFF,FFFFF,FF,  
:FFFFFFF:,FFFF:FFFFFFFFFFFF:FFFF:FFFF:FF:FF,:FFFFFFFF:FFFFFFFFFFFF  
::FFFFFFFF

@A00721:190:HGJW7DSXY:4:1536:24451:21512 1:N:0:TCTGCAAG+GCTGCACT  
ATCGGAACGATCACACTGTTGGGAATGCTGATCTGGTTAATTGTATAGACGACTTCGTCTATTACTTC  
CTTTACACGGATGTGCATGTCTGAAAGTATGTCGTCTCTGAAGAATGCGAAGCAATTGTAATCCGGAC  
ACCAGAATGGATATA

[illegible][illegible]

```

FFFFFFFFFFFFFFFF,FFFFFF:FFFFFFFFFFFFFFFFFFFFFFFFFFFFFFFF:FFFFFF
FFFFFFFFFFFFFFFF,FFFFFF:FFFFFFFFFFFFFFFFFFFFFFFFFFFFFFFF:FFFFFF
FFFFFFFFFFFFFFFF

```

[illegible]

```

FFFFFFFF:FFFFFFFF:FFFFFFFFFFFFFFFFFFFFFFFFFFFFFFFFFFFFFFFFFFFFFFFFFFFFFFFF
FFFFFFFFFFFF:FFFFF,FFFF,FFFF:FFFFFFFFFFFFFF:FFFFFFFFFFFFFFFFFFFFFFFFFFFFF
FFFFFFFFFFFF:FFFF

```

[illegible]

```
FFFFFFFFFFFFFFFF:FFFFFFFFFFFFFFFFFFFFFFFFFFFFFFFFFFFFFFFFFFFFF
FFFFFFFFFFFFFFFFFFFFFFFF,FFFFFFFFFFFFFFFFFFFFFFFFFFFFFFFFFFFFFF
FFFFFFFFFFFFFFFF
```

@A00721:190:HGJW7DSXY:4:2202:30092:3787 1:N:0:TCTGCAAG+GCTGCACT  
GGTTAATTGTATAGACGACTTCGTCTATTACTTCCTTTACACGGATGTGCATGTCTGAAAGTATGTCG

TCTCTGAAGAATGCGAAGCAATTGTAATCCGGACACCAGAATGGATATATGATCTTCGTCATTTTCAG  
AGCAGCTCTGAATCG

+

FFFFFFFFFFFFFFFF:FFFFFFFFFFFFFFFFFFFFFFFFFFFFFFFFFFFFFFFFFFFFFFFF  
FFFFFFFFFFFFFFFFFFFFFFFFFFFFFFFFFFFFFFFFFFFFFFFFFFFFFFFFFFFFFFFF  
FFFFFFFFFFFFF:FFF

@A00721:190:HGJW7DSXY:4:2212:3134:26303 1:N:0:TCTGCAAG+GCTGCACT  
GGTTAATTGTATAGACGACTTCGTCTATTACTTCCTTTACACGGATGTGCATGTCTGAAAGTATGTCTG  
TCTCTGAAGAATGCGAAGCAATTGTAATCCGGACACCAGAATGGATATATGATCTTCGTCATTTTCAG  
AGCAGCTCTGAATCG

+

FFFFFFFFFFFFFFFF:FFFFFFFFFFFFFFFFFFFFFFFFFFFFFFFFFFFFFFFFFFFFFFFF  
FFFFFFFFFFFFFFFFFFFFFFFF:FFFFFFFFFFFFFFFFFFFFFFFFFFFFFFFFFFFFFFFF  
F:FFFFFFFFFFFFF:

@A00721:190:HGJW7DSXY:4:2367:10746:5603 1:N:0:TCTGCAAG+GCTGCACT  
GGTTAATTGTATAGACGACTTCGTCTATTACTTCCTTTACACGGATGTGCATGTCTGAAAGTATGTCTG  
TCTCTGAAGAATGCGAAGCAATTGTAATCCGGACACCAGAATGGATATATGATCTTCGTCATTTTCAG  
AGCAGCTCTGAATCG

+

FFFFFFFFFFFFFFFFFFFFFFFFFFFFFFFFFFFFFFFFFFFFFFFFFFFFFFFFFFFFFFFF  
FFFFFFFFFFFFFFFFFFFFFFFF:FFFFFFFFFFFFFFFFFFFFFFFFFFFFFFFFFFFFFFFF  
FFFFFFFFFFFFFFFFF

@A00721:190:HGJW7DSXY:4:2367:11912:5744 1:N:0:TCTGCAAG+GCTGCACT  
GGTTAATTGTATAGACGACTTCGTCTATTACTTCCTTTACACGGATGTGCATGTCTGAAAGTATGTCTG  
TCTCTGAAGAATGCGAAGCAATTGTAATCCGGACACCAGAATGGATATATGATCTTCGTCATTTTCAG  
AGCAGCTCTGAATCG

+

FF:FFFFFFFFFFFFFFFFFFFFFFFFFFFFFFFFFFFFFFFFFFFFFFFFFFFFFFFFFFFF  
FFFFFFFFFFFFFFFFFFFFFFFFFFFFFFFF:FFFFFFFFFFFF,FFFFFFFFFFFF:FFFFFFFFFFFF  
FFFFFFFFFFFFFFFFF

@A00721:190:HGJW7DSXY:4:1147:32434:3771 1:N:0:TCTGCAAG+GCTGCACT  
GTCTGAAAGTATGTCGTCTCTGAAGAATGCGAAGCAATTGTAATCCGGACACCAGAATGGATATATGA  
TCTTCGTCATTTTCAGAGCAGCTCTGAATCGTGCTTCGTTTCTACGTATCTGGACCAGTATATCTGC  
TTGACTTGATGCTTC

+

FFFFFFFFFFFFFFFFFFFFFFFFFFFFFFFFFFFFFFFFFFFFFFFFFFFFFFFFFFFFFFFF  
FFFFFFFFFFFFFFFFFFFFFFFFFFFFFFFF:FFFFFFFFFFFFFFFFFFFFFFFF:FFF:FFF  
FFF,FFFFFFFFFFFF:

@A00721:190:HGJW7DSXY:4:1168:1199:25488 1:N:0:TCTGCAAG+GCTGCACT  
GTCTGAAAGTATGTCGTCTCTGAAGAATGCGAAGCAATTGTAATCCGGACACCAGAATGGATATATGA  
TCTTCGTCATTTTCAGAGCAGCTCTGAATCGTGCTTCGTTTCTACGTATCTGGACCAGTATATCTGC  
TTGACTTGATGCTTC

+

FFFFFFFFFFFFFFFFFFFFFFFFFFFFFFFFFFFFFFFFFFFFFFFFFFFFFFFFFFFFFFFF  
FFFFFFFFFFFFFFFFFFFFFFFFFFFFFFFF:FFFFFFFFFFFFFFFFFFFFFFFF:FFF:FFF  
FFFFFFFFFFFFFFFFF

@A00721:190:HGJW7DSXY:4:1209:16929:16532 1:N:0:TCTGCAAG+GCTGCACT  
GTCTGAAAGTATGTCGTCTCTGAAGAATGCGAAGCAATTGTAATCCGGACACCAGAATGGATATATGA  
TCTTCGTCATTTTCAGAGCAGCTCTGAATCGTGCTTCGTTTCTACGTATCTGGACCAGTATATCTGC  
TTGACTTGATGCTTC

+

FFFFFFFFFFFFFFFFFFFFFFFFFFFFFFFFFFFFFFFFFFFFFFFFFFFFFFFFFFFFFFFF  
FFFFFFFFFFFFFFFFFFFFFFFFFFFFFFFF:FFFFFFFFFFFFFFFFFFFFFFFF:FFF:FFF  
FFFFFFFFFFFFFFFFF

@A00721:190:HGJW7DSXY:4:1269:2419:26068 1:N:0:TCTGCAAG+GCTGCACT  
GTCTGAAAGTATGTCGTCTCTGAAGAATGCGAAGCAATTGTAATCCGGACACCAGAATGGATATATGA  
TCTTCGTCATTTTCAGAGCAGCTCTGAATCGTGCTTCGTTTTCTACGTATCTGGACCAGTATATCTGC  
TTGACTTGATGCTTC

@A00721:190:HGJW7DSXY:4:1269:2510:26287 1:N:0:TCTGCAAG+GCTGCACT  
GTCTGAAAGTATGTCGTCTCTGAAGAATGCGAAGCAATTGTAATCCGGACACCAGAATGGATATATGA  
TCTTCGTCATTTTCAGAGCAGCTCTGAATCGTGCTTCGTTTTCTACGTATCTGGACCAGTATATCTGC  
TTGACTTGATGCTTC

@A00721:190:HGJW7DSXY:4:1310:15989:11397 1:N:0:TCTGCAAG+GCTGCACT  
GTCTGAAAGTATGTCGTCTCTGAAGAATGCGAAGCAATTGTAATCCGGACACCAGAATGGATATATGA  
TCTTCGTCATTTTCAGAGCAGCTCTGAATCGTGCTTCGTTTTCTACGTATCTGGACCAGTATATCTGC  
TTGACTTGATGCTTC

@A00721:190:HGJW7DSXY:4:1313:19407:2002 1:N:0:TCTGCAAG+GCTGCACT  
GTCTGAAAGTATGTCGTCTCTGAAGAATGCGAAGCAATTGTAATCCGGACACCAGAATGGATATATGA  
TCTTCGTCATTTTCAGAGCAGCTCTGAATCGTGCTTCGTTTTCTACGTATCTGGACCAGTATATCTGC  
TTGACTTGATGCTTC

@A00721:190:HGJW7DSXY:4:1327:8305:36323 1:N:0:TCTGCAAG+GCTGCACT  
GTCTGAAAGTATGTCGTCTCTGAAGAATGCGAAGCAATTGTAATCCGGACACCAGAATGGATATATGA  
TCTTCGTCATTTTCAGAGCAGCTCTGAATCGTGCTTCGTTTTCTACGTATCTGGACCAGTATATCTGC  
TTGACTTGATGCTTC

@A00721:190:HGJW7DSXY:4:1339:32642:29027 1:N:0:TCTGCAAG+GCTGCACT  
GTCTGAAAGTATGTCGTCTCTGAAGAATGCGAAGCAATTGTAATCCGGACACCAGAATGGATATATGA  
TCTTCGTCATTTTCAGAGCAGCTCTGAATCGTGCTTCGTTTTCTACGTATCTGGACCAGTATATCTGC  
TTGACTTGATGCTTC

@A00721:190:HGJW7DSXY:4:1362:9471:7122 1:N:0:TCTGCAAG+GCTGCACT  
GTCTGAAAGTATGTCGTCTCTGAAGAATGCGAAGCAATTGTAATCCGGACACCAGAATGGATATATGA  
TCTTCGTCATTTTCAGAGCAGCTCTGAATCGTGCTTCGTTTTCTACGTATCTGGACCAAGTATATCTGC  
TTGACTTGATGCTTC

FFF:FFFFFFFFFFFFFFFFFFFFFFFFFFFFFFFFFFFFFFFFFFFFFFFFFFFFFFFFFFFFFFFF:
FF:FFFFFFFFFFFF

@A00721:190:HGJW7DSXY:4:1436:10456:5916 1:N:0:TCTGCAAG+GCTGCACT
GTCTGAAAGTATGTCGTCTCTGAAGAATGCGAAGCAATTGTAATCCGGACACCAGAATGGATATATGA
TCTTCGTCATTTTCAGAGCAGCTCTGAATCGTGCTTCGTTTTCTACGTATCTGGACCAGTATATCTGC
TTGACTTGATGCTTC

+
FFFFFFFFFFFFFFFFFFFFFFFFFFFFFFFFFFFFFFFFFFFFFFFFFFFFFFFFFFFFFFFFFFFFF
FFFFFFFFFFFFFFFFFFFFFFFFFFFFFFFFFFFFFFFFFFFFFFFFFFFFFFFFFFFFFFFFFFFFF:FFF:FF::FFFFFFFFFFFFFFFF:FFFFF
FFFFFFFFFFFFFFFF

@A00721:190:HGJW7DSXY:4:1502:19271:32737 1:N:0:TCTGCAAG+GCTGCACT
GTCTGAAAGTATGTCGTCTCTGAAGAATGCGAAGCAATTGTAATCCGGACACCAGAATGGATATATGA
TCTTCGTCATTTTCAGAGCAGCTCTGAATCGTGCTTCGTTTTCTACGTATCTGGACCAGTATATCTGC
TTGACTTGATGCTTC

+
FFFFFFFFFFFFFFFFFFFFFFFFFFFFFFFFFFFFFFFFFFFFFFFFFFFFFFFFFFFFFFFFFFFFF
FFFFFFFFFFFFFFFFFFFFFFFFFFFFFFFFFFFFFFFFFFFFFFFFFFFFFFFFFFFFFFFFFFFFF:
FFFFFFFFFFFFF:FFF

@A00721:190:HGJW7DSXY:4:1502:18475:32831 1:N:0:TCTGCAAG+GCTGCACT
GTCTGAAAGTATGTCGTCTCTGAAGAATGCGAAGCAATTGTAATCCGGACACCAGAATGGATATATGA
TCTTCGTCATTTTCAGAGCAGCTCTGAATCGTGCTTCGTTTTCTACGTATCTGGACCAGTATATCTGC
TTGACTTGATGCTTC

+
FFFFFFFFFFFFFFFFFFFFFFFFFFFFFFFFFFFFFFFFFFFFFFFFFFFFFFFFFFFFFFFFFFFFF
FFFFFFFFFFFFFFFFFFFFFFFFFFFFFFFFFFFFFFFFFFFFFFFFFFFFFFFFFFFFFFFFFFFFF
FFFFFFFFFFFFFFFF

@A00721:190:HGJW7DSXY:4:1503:3387:14841 1:N:0:TCTGCAAG+GCTGCACT
GTCTGAAAGTATGTCGTCTCTGAAGAATGCGAAGCAATTGTAATCCGGACACCAGAATGGATATATGA
TCTTCGTCATTTTCAGAGCAGCTCTGAATCGTGCTTCGTTTTCTACGTATCTGGACCAGTATATCTGC
TTGACTTGATGCTTC

+
FFFFFFFFFFFFFFFFFFFFFFFFFFFFFFFFFFFFFFFFFFFFFFFFFFFFFFFFFFFFFFFFFFFFF:FFFFFFFFFF
FFFFFFFFFFFFFFFFFFFFFFFFFFFFFFFFFFFFFFFFFFFFFFFFFFFFFFFFFFFFFFFFFFFFF
FFFFFFFFFFFFFFFF

@A00721:190:HGJW7DSXY:4:1515:31774:20447 1:N:0:TCTGCAAG+GCTGCACT
GTCTGAAAGTATGTCGTCTCTGAAGAATGCGAAGCAATTGTAATCCGGACACCAGAATGGATATATGA
TCTTCGTCATTTTCAGAGCAGCTCTGAATCGTGCTTCGTTTTCTACGTATCTGGACCAGTATATCTGC
TTGACTTGATGCTTC

+
FFFFFFFFFFFFFFFFFFFFFFFFFFFFFFFFFFFFFFFFFFFFFFFFFFFFFFFFFFFFFFFFFFFFF,FFFFFFFFFF
FFFFFFFFFFFFFFFFFFFFFFFFFFFFFFFFFFFFFFFFFFFFFFFFFFFFFFFFFFFFFFFFFFFFF
FFFFFFFFFFFFFFFF

@A00721:190:HGJW7DSXY:4:1558:22507:21527 1:N:0:TCTGCAAG+GCTGCACT
GTCTGAAAGTATGTCGTCTCTGAAGAATGCGAAGCAATTGTAATCCGGACACCAGAATGGATATATGA
TCTTCGTCATTTTCAGAGCAGCTCTGAATCGTGCTTCGTTTTCTACGTATCTGGACCAGTATATCTGC
TTGACTTGATGCTTC

+
FFFFFFFFFFFFFFFFFFFFFFFFFFFFFFFFFFFFFFFFFFFFFFFFFFFFFFFFFFFFFFFFFFFFF:FFFF:FFFFF
FFFFFFFFFFFFFFFFFFFFFFFFFFFFFFFFFFFFFFFFFFFFFFFFFFFFFFFFFFFFFFFFFFFFF
FFFFFFFFFFFFFFFF

@A00721:190:HGJW7DSXY:4:1614:5249:23610 1:N:0:TCTGCAAG+GCTGCACT
GTCTGAAAGTATGTCGTCTCTGAAGAATGCGAAGCAATTGTAATCCGGACACCAGAATGGATATATGA
TCTTCGTCATTTTCAGAGCAGCTCTGAATCGTGCTTCGTTTTCTACGTATCTGGACCAGTATATCTGC
TTGACTTGATGCTTC

```

FFFFFFFFFFFFFFFFFFFFFFFFFFFFFFFFFFFFFFFF:FFFFFFFFFFFFFFFFFFFFFFFFFFFFFFFF
FFFFFFFFFFFFFFFFFFFFFFFFFFFFFFFFFFFFFFFF:FFFFFFFFFFFFFFFFFFFFFFFFFFFFFFFF
FFFFFFFFFFFFFFFF

```

[illegible][illegible][illegible][illegible][illegible][illegible]

@A00721:190:HGJW7DSXY:4:2253:6108:17362 1:N:0:TCTGCAAG+GCTGCACT  
GTCTGAAAGTATGTCGTCTCTGAAGAATGCCAAGCAATTGTAATCCGGACACCAGAATGGATATATGA







@A00721:190:HGJW7DSXY:4:1472:12057:14826 1:N:0:TCTGCAAG+GCTGCACT  
GTCGTCTCTGAAGAATGCGAAGCAATTGTAATCCGGACACCAGAATGGATATATGATCTTCGTCAATTT  
TCAGAGCAGCTCTGAATCGTGCTTCGTTTTCTACGTATCTGGACCAGTATATCTGCTTGACTTGATGC  
TTCAAGTCATCTGGG

@A00721:190:HGJW7DSXY:4:1510:31268:4476 1:N:0:TCTGCAAG+GCTGCACT  
GTCGTCTCTGAAGAATGCGAAGCAATTGTAATCCGGACACCAGAATGGATATATGATCTTCGTCAATT  
TCAGAGCAGCTCTGAATCGTGCTTCGTTTTCTACGTATCTGGACCAGTATATCTGCTTGACTTGATGC  
TTCAAGTCATCTGGG

@A00721:190:HGJW7DSXY:4:1603:26458:17002 1:N:0:TCTGCAAG+GCTGCACT  
GTCGTCTCTGAAGAATGCGAAGCAATTGTAATCCGGACACCAGAATGGATATATGATCTTCGTCATTT  
TCAGAGCAGCTCTGAATCGTGCTTCGTTTTCTACGTATCTGGACCAGTATATCTGCTTGACTTGATGC  
TTCAAGTCATCTGGG

@A00721:190:HGJW7DSXY:4:1662:8314:13792 1:N:0:TCTGCAAG+GCTGCACT  
GTCGTCTCTGAAGAATGCGAAGCAATTGTAATCCGGACACCAGAATGGATATATGATCTTCGTCAATTT  
TCAGAGCAGCTCTGAATCGTGCTTCGTTTTCTACGTATCTGGACCAGTATATCTGCTTGACTTGATGC  
TTCAAGTCATCTGGG

@A00721:190:HGJW7DSXY:4:1664:4517:27727 1:N:0:TCTGCAAG+GCTGCACT  
GTCGTCTCTGAAGAATGCGAAGCAATTGTAATCCGGACACCAGAATGGATATATGATCTTCGTCATTT  
TCAGAGCAGCTCTGAATCGTGCTTCGTTTTCTACGTATCTGGACCAGTATATCTGCTTGACTTGATGC  
TTAAAGTCATCTGG

@A00721:190:HGJW7DSXY:4:2576:4951:26256 1:N:0:TCTGCAAG+GCTGCACT  
GTCGTCTCTGAAGAATGCGAAGCAATTGTAATCCGGACACCAGAATGGATATATGATCTTCGTCATTT  
TCAGAGCAGCTCTGAATCGTGCTTCGTTTTCTACGTATCTGGACCAGTATATCTGCTTGACTTGATGC  
TTCAAGTCATCTGGG

@A00721:190:HGJW7DSXY:4:2617:24306:17910 1:N:0:TCTGCAAG+GCTGCACT  
GTCGTCTCTGAAGAATGCGAAGCAATTGTAATCCGGACACCAGAATGGATATATGATCTTCGTCATTT  
TCAGAGCAGCTCTGAATCGTGCTTCGTTTTCTACGTATCTGGACCAGTATATCTGCTTGACTTGATGC  
TTCAAGTCATCTGGG

```
FFFFFFFFFFFFFFFFFFFFFFFFFFFFFFFFFFFFFFFFFFFFFFFFFFFFFFFFFFFF:FFFFFFFFFFFFFFFFFFFFF
FFFFFFFFFFFFFFFFFFFFFFFFFFFFFFFFFFFFFFFFFFFFFFFFFFFFFFFFFFFF:FFFFFFFFFFFFFFFFFFFFFFFF
FFFFFFFFFFFFFFFFFFFF
```

```

FFFFFFFFFFFFFFFFFFFFF:,FFFFFF:FFFFFFFFFFFFFFFF,FFF:FFFFFFFFFFFFFFFF:FFFFFF
FFFFFFFFFFFFFFFFFFFFFFFFFFFFFFFFFFFFF:F:FFFFFFFFFFFFFFFFFFFF:FFFF:FFFFFFF
:FFFFFFFF:FFFFFF

```

[illegible][illegible][illegible][illegible]

```
FFFFFFFFFFFFFFFFFFFFFFFFFFFFFFFFFFFFFFFFFFFF;FFFFFFFFFFFFFFF;FFFFFFFFFFFFFFF
FFFFFFFFFFFFFFFFFFFFFFFFFFFFFFFFFFFFFFFFFFFF;FFFFFFFFFFFFFFFFFFFFFFFFFFFFFFFFFF
FFFFFFFFFFFFFFFFFFFF
```

@A00721:190:HGJW7DSXY:4:2676:7274:28338 1:N:0:TCTGCAAG+GCTGCACT  
GTCTCTGAAGAATGCGAAGCAATTGTAATCCGGACACCAGAATGGATATATGATCTTCGTCATTTTCA





FFFFFFFFFFFFFFFFFFFFFFFFFFFFFFFFFFFFFFFFFFFFFFFFFFFFFFFFFFFFFFFF:FFFFF  
FFFFFFFFFFFFFFFF

@A00721:190:HGJW7DSXY:4:1417:17146:30373 1:N:0:TCTGCAAG+GCTGCACT  
CCGGACACCAGAATGGATATATGATCTTCGTCATTTTCAGAGCAGCTCTGAATCGTGCTTCGTTTTCT  
ACGTATCTGGACCAGTATATCTGCTTGACTTGATGCTTCAAGTCATCTGGGAGAATGTTGTAGATATC  
GTCAAATTTGATAGT

+

FFFFFFFFFFFFFFFFFFFFFFFFFFFFFFFFFFFFFFFFFFFFFFFFFFFFFFFFFFFFFFFF  
FFFFFFFFFFFFFFFFFFFFFFFFFFFFFFFFFFFFFFFFFFFFFFFFFFFFFFFFFFFFFFFF  
:FF:FFFFFFFFFFFF

@A00721:190:HGJW7DSXY:4:1471:31458:32424 1:N:0:TCTGCAAG+GCTGCACT  
CCGGACACCAGAATGGATATATGATCTTCGTCATTTTCAGAGCAGCTCTGAATCGTGCTTCGTTTTCT  
ACGTATCTGGACCAGTATATCTGCTTGACTTGATGCTTCAAGTCATCTGGGAGAATGTTGTAGATATC  
GTCAAATTTGATAGT

+

FFFFFFFFFFFFFFFFFFFFFFFFFFFFFFFFFFFFFFFFFFFFFFFFFFFFFFFFFFFFFFFF  
FFFFFFFFFFFFFFFFFFFFFFFFFFFFFFFFFFFFFFFFFFFFFFFFFFFFFFFFFFFFFFFF:FFFFFFFFFFFFFFFF  
FFFFFFFFFFFFFFFF

@A00721:190:HGJW7DSXY:4:1649:23529:5353 1:N:0:TCTGCAAG+GCTGCACT  
CCGGACACCAGAATGGATATATGATCTTCGTCATTTTCAGAGCAGCTCTGAATCGTGCTTCGTTTTCT  
ACGTATCTGGACCAGTATATCTGCTTGACTTGATGCTTCAAGTCATCTGGGAGAATGTTGTAGATATC  
GTCAAATTTGATAGT

+

FFFFFF:FFFFFFFFFFFFFFFFFFFFFFFFFFFFFFFFFFFFFFFFFFFFFFFFFFFFFFFF  
FFFFFFFFFFFFFFFFFFFFFFFFFFFFFFFFFFFFFFFFFFFFFFFFFFFFFFFFFFFFFFFF  
FFFFF:FFFFFFFF

@A00721:190:HGJW7DSXY:4:2304:3061:34820 1:N:0:TCTGCAAG+GCTGCACT  
CCGGACACCAGAATGGATATATGATCTTCGTCATTTTCAGAGCAGCTCTGAATCGTGCTTCGTTTTCT  
ACGTATCTGGACCAGTATATCTGCTTGACTTGATGCTTCAAGTCATCTGGGAGAATGTTGTAGATATC  
GTCAAATTTGATAGT

+

FFFFFFFFFFFFFFFFFFFFFFFFFFFFFFFFFFFFFFFFFFFFFFFFFFFFFFFFFFFFFFFF  
FFFFFFFFFFFFFFFFFFFFFFFFFFFFFFFFFFFFFFFFFFFFFFFFFFFFFFFFFFFFFFFF:  
FFFFFFFFFFFFFFFF

@A00721:190:HGJW7DSXY:4:2332:17418:13777 1:N:0:TCTGCAAG+GCTGCACT  
CCGGACACCAGAATGGATATATGATCTTCGTCATTTTCAGAGCAGCTCTGAATCGTGCTTCGTTTTCT  
ACGTATCTGGACCAGTATATCTGCTTGACTTGATGCTTCAAGTCATCTGGGAGAATGTTGTAGATATC  
GTCAAATTTGATAGT

+

FFFFFFFFFFFFFFFFFFFFFFFFFFFFFFFFFFFFFFFFFFFFFFFFFFFFFFFFFFFFFFFF  
FFFFF:FFFFFFFFFFFFFFFFFFFFFFFFFFFFFFFFFFFFFFFFFFFFFFFFFFFFFFFF  
FFFFFFF,FFFFFF

@A00721:190:HGJW7DSXY:4:2648:4472:33254 1:N:0:TCTGCAAG+GCTGCACT  
CCGGACACCAGAATGGATATATGATCTTCGTCATTTTCAGAGCAGCTCTGAATCGTGCTTCGTTTTCT  
ACGTATCTGGACCAGTATATCTGCTTGACTTGATGCTTCAAGTCATCTGGGAGAATGTTGTAGATATC  
GTCAAATTTGATAGT

+

FFFFFFFFFFFFFFFFFFFFFFFFFFFFFFFFFFFFFFFFFFFFFFFFFFFFFFFFFFFFFFFF:FFFFFFFFFFFF  
:FFFFFFFFFFFFFFFFFFFFFFFFFFFFFFFFFFFFFFFFFFFFFFFFFFFFFFFF:FFFFFFF:FFF:FFFF:FFF  
FF:FFFFFFFFFFFF

@A00721:190:HGJW7DSXY:4:1275:18213:25426 1:N:0:TCTGCAAG+GCTGCACT  
CAGAATGGATATATGATCTTCGTCATTTTCAGAGCAGCTCTGAATCGTGCTTCGTTTTCTACGTATCT  
GGACCAGTATATCTGCTTGACTTGATGCTTCAAGTCATCTGGGAGAATGTTGTAGATATCGTCAAATT  
TGATAGTACCATAGT

+  
FFFF:FFFFFFFFFFFFFFFFFFFFFFFFFFFFFFFFFFFFFFFFFFFFFFFFFFFFFFFFFFFFFFFFFFFFFFFF  
FFFFFFFFFFFFFFFFFFFFFFFFFFFFFFFFFFFFFFFFFFFFFFFFFFFFFFFFFFFFFFFFFFFFFFFF,FFFFFFFFFFFFFFFF:FFFFFFF  
FFFFFFFFFFFFFFFFFFFF  
@A00721:190:HGJW7DSXY:4:1275:18141:25457 1:N:0:TCTGCAAG+GCTGCACT  
CAGAATGGATATATGATCTTCGTCATTTTCAGAGCAGCTCTGAATCGTGCTTCGTTTTCTACGTATCT  
GGACCAGTATATCTGCTTGACTTGATGCTTCAAGTCATCTGGGAGAATGTTGTAGATATCGTCAAATT  
TGATAGTACCATAGT  
+  
FFFFFFFFFFFFFFFFFFFFFFFFFFFFFFFFFFFFFFFFFFFFFFFFFFFFFFFFFFFFFFFFFFFFFFFF:FFFFFFFFFFFFFFFF,FFFFFFF  
FFFFFFFFFFFFFFFFFFFF:F:FFF:FFFFFFFFFFFF:FFFF,FF,FF:FFFFFFFFFFFF,FFFFFF:FFFF  
FFFFFFFFF::FFFFF  
@A00721:190:HGJW7DSXY:4:1329:1660:12477 1:N:0:TCTGCAAG+GCTGCACT  
CAGAATGGATATATGATCTTCGTCATTTTCAGAGCAGCTCTGAATCGTGCTTCGTTTTCTACGTATCT  
GGACCAGTATATCTGCTTGACTTGATGCTTCAAGTCATCTGGGAGAATGTTGTAGATATCGTCAAATT  
TGATAGTACCATAGT  
+  
FFFF:FFFFFFFFFFFFFFFFFFFFFFFFFFFFFFFFFFFFFFFFFFFFFFFFFFFFFFFFFFFFFFFFFFFFFFFF:FFFFFFF:FFFFFFFFFFFFFFFF  
FFFFFFFFFFFFFFFFFFFFFFFFFFFFFFFFFFFFFFFFFFFFFFFFFFFFFFFFFFFFFFFFFFFFFFFF:FFFFFFFFFFFFFFFFFFFFFFFFFFFF:F  
FFFFFFFFFFFFFFFFFFFF  
@A00721:190:HGJW7DSXY:4:1625:29668:11412 1:N:0:TCTGCAAG+GCTGCACT  
CAGAATGGATATATGATCTTCGTCATTTTCAGAGCAGCTCTGAATCGTGCTTCGTTTTCTACGTATCT  
GGACCAGTATATCTGCTTGACTTGATGCTTCAAGTCATCTGGGAGAATGTTGTAGATATCGTCAAATT  
TGATAGTACCATAGT  
+  
FFFFFFFFFFFFFFFFFFFFFFFFFFFFFFFFFFFFFFFFFFFFFFFFFFFFFFFFFFFFFFFFFFFFFFFFFFFFFFFFFFFFFFFFFFFFFFFFFFFFFFFF  
FFFFFFFFFFFFFFFFFFFFFFFFFFFFFFFFFFFFFFFFFFFFFFFFFFFFFFFFFFFFFFFFFFFFFFFFFFFFFFFFFFFFFFFFFFFFFFFFFFFFFFFF  
FFFFFFFFFFFFFFFFFFFF  
@A00721:190:HGJW7DSXY:4:2129:14895:5368 1:N:0:TCTGCAAG+GCTGCACT  
CAGAATGGATATATGATCTTCGTCATTTTCAGAGCAGCTCTGAATCGTGCTTCGTTTTCTACGTATCT  
GGACCAGTATATCTGCTTGACTTGATGCTTCAAGTCATCTGGGAGAATGTTGTAGATATCGTCAAATT  
TGATAGTACCATAGT  
+  
FFFFFFFFFFFFFFFFFFFFFFFFFFFFFFFFFFFFFFFFFFFFFFFFFFFFFFFFFFFFFFFFFFFFFFFFFFFFFFFFFFFFFFFFFFFFFFFFFFFFFFFF  
FFFFFFFFFFFFFFFFFFFF:FFFFFFFFFFFFFFFFFFFFFFFFFFFFFFFFFFFFFFFFFFFFFFFFFFFFFFFFFFFFFFFFFFFFFFFFFFFFFFFF  
FFFFFFFFF:FFFFFFF  
@A00721:190:HGJW7DSXY:4:2343:6045:13338 1:N:0:TCTGCAAG+GCTGCACT  
CAGAATGGATATATGATCTTCGTCATTTTCAGAGCAGCTCTGAATCGTGCTTCGTTTTCTACGTATCT  
GGACCAGTATATCTGCTTGACTTGATGCTTCAAGTCATCTGGGAGAATGTTGTAGATATCGTCAAATT  
TGATAGTACCATAGT  
+  
FFFFFFFFFFFFFFFFFFFFFFFFFFFFFFFFFFFFFFFFFFFFFFFFFFFFFFFFFFFFFFFFFFFFFFFFFFFFFFFFFFFFFFFFFFFFFFFFFFFFFFFF  
FFFFFFFFFFFFFFFFFFFFFFFFFFFFFFFFFFFFFFFFFFFFFFFFFFFFFFFFFFFFFFFFFFFFFFFFFFFFFFFFFFFFFFFFFFFFFFFFFFFFFFFF  
FFFFFFFFF:FFFFFFF  
@A00721:190:HGJW7DSXY:4:2406:1678:22153 1:N:0:TCTGCAAG+GCTGCACT  
CAGAATGGATATATGATCTTCGTCATTTTCAGAGCAGCTCTGAATCGTGCTTCGTTTTCTACGTATCT  
GGACCAGTATATCTGCTTGACTTGATGCTTCAAGTCATCTGGGAGAATGTTGTAGATATCGTCAAATT  
TGATAGTACCATAGT  
+  
FFFFFFFFFFFFFFFFFFFFFFFFFFFF:FFFFFFFFFFFFFFFFFFFFFFFFFFFFFFFFFFFFFFFFFFFFFFFFFFFFFFFFFFFFFFFFFFFFFFFF:FF  
FFFFFFFFFFFFFFFFFFFFFFFFFFFFFFFFFFFFFFFFFFFFFFFFFFFFFFFFFFFFFFFFFFFFFFFF:FFFFF:FFFFFFFFFFFFFFFFFFFF:FFF  
FFFFFFFFFFFFFFFFFFFF  
@A00721:190:HGJW7DSXY:4:2435:16007:35070 1:N:0:TCTGCAAG+GCTGCACT  
CAGAATGGATATATGATCTTCGTCATTTTCAGAGCAGCTCTGAATCGTGCTTCGTTTTCTACGTATCT



@A00721:190:HGJW7DSXY:4:1449:12518:21198 1:N:0:TCTGCAAG+GCTGCACT  
CGTCATTTTCAGAGCAGCTCTGAATCGTGCTTCGTTTTCTACGTATCTGGACCAGTATATCTGCTTGA  
CTTGATGCTTCAAGTCATCTGGGAGAATGTTGTAGATATCGTCAAATTTGATAGTACCATAGTTGAC  
GCCATTTGACACACT

```

FFFFFFFFFFFFFFFFFFFFFFFFFFFFFFFFFFFFFFFFFFFFFFFFFFFFFFFFFFFFFFFFFFFFFFFF
:FFFFFFFFFFFFFFFFFFFFFFFF:FFFFFFFFFFFF:FFFFFFFFFFFFFFFFFFFFFFFFFFFFFFFF
FFFFFFFFFFFFFFFFFFFF

```

@A00721:190:HGJW7DSXY:4:1526:16667:29763 1:N:0:TCTGCAAG+GCTGCACT  
CGTCATTTTCAGAGCAGCTCTGAATCGTGCTTCGTTTTCTACGTATCTGGACCAGTATATCTGCTTGA  
CTTGATGCTTCAAGTCATCTGGGAGAATGTTGTAGATATCGTCAAATTTGATAGTACCATAGTTGCAC  
GCCATTTGACACAC

```

FFFFFFFFFFFFFFFFFFFFFFFFFFFFFFFFFFFFFFFFFFFFFFFFFFFFFFFFFFFFFFFFFFFFFFFF
FFFFFFFFFFFFFFFFFFFFFFFFFFFFFFFF:FFFF,FF:FFFFFFFFFFFFFFFF:FFFFFFFFFFFFFFFF
:FFFFFFFFFFFFFFFF

```

@A00721:190:HGJW7DSXY:4:2242:26549:15687 1:N:0:TCTGCAAG+GCTGCACT  
CGTCATTTTCAGAGCAGCTCTGAATCGTGCTTCGTTTTCTACGTATCTGGACCAGTATATCTGCTTGA  
CTTGATGCTTCAAGTCATCTGGGAGAATGTTGTAGATATCGTCAAATTTGATAGTACCATAGTTCGAC  
GCCATTTGACACACT

```

FFFFFFFFFFFFFFFFFFFFFFFFFFFFFFFFFFFFFFFFFFFFFFFFFFFFFFFFFFFFFFFFFFFFFFFF
FFFFFFFFFFFFFFFFFFFFFFFFFFFFFFFFFFFFFFFFFFFFFFFFFFFFFFFFFFFFFFFFFFFFFFFF:FFFF,FFFFFFFFFFFF:FFF
FFFFFFFFFFFFFFFFFFFF:

```

@A00721:190:HGJW7DSXY:4:2318:15456:12665 1:N:0:TCTGCAAG+GCTGCACT  
CGTCATTTTCAGAGCAGCTCTGAATCGTGCTTCGTTTTCTACGTATCTGGACCAGTATATCTGCTTGA  
CTTGATGCTTCAAGTCATCTGGGAGAATGTTGTAGATATCGTCAAATTTGATAGTACCATAGTTCGAC  
GCCATTTGACACACT

```

FFFFFFFFFFFFFFFFFFFFFFFFFFFFFFFFFFFFFFFFFFFFFFFFFFFFFFFFFFFFFFFFFFFFFFFF
FFFFFFFFFFFFFFFFFFFFFFFFFFFFFFFFFFFFFFFF,F:FFFFFF,FFFFFFFFFF:FFFFFFFFFFFFFFFF
FFF.:FFFFFFFFF:F

```

@A00721:190:HGJW7DSXY:4:2318:15474:13416 1:N:0:TCTGCAAG+GCTGCACT  
CGTCATTTTCAGAGCAGCTCTGAATCGTGCTTCGTTTTCTACGTATCTGGACCAGTATATCTGCTTGA  
CTTGATGCTTCAAGTCATCTGGGAGAATGTTGTAGATATCGTCAAATTTGATAGTACCATAGTTCGAC  
GCCATTTGACACACT

```

FFFFFFFFFFFFFFFFFFFFFFFF:FFFFFFFFFFFFFFFF:FFFFFFFFFFFFFFFF
FFFFFFFFFFFFFFFF:FFFFFFF,FFFFFFFFFFFFFFFF:FFFFFFFFFFFFFFFF
:FFFFFFFFFFFFFFFF

```

@A00721:190:HGJW7DSXY:4:2360:24569:26412 1:N:0:TCTGCAAG+GCTGCACT  
CGTCATTTTCAGAGCAGCTCTGAATCGTGCTTCGTTTTCTACGTATCTGGACCAGTATATCTGCTTGA  
CTTGATGCTTCAAGTCATCTGGGAGAATGTTGTAGATATCGTCAAATTTGATAGTACCATAGTTCGAC  
GCCATTTGACACACT

```

FFFFFFFFFFFFFFFFFFFFFFFFFFFFFFFFFFFFFFFFFFFFFFFFFFFFFFFFFFFFFFFFFFFFFFFF
F:FFFFFFFFFFFFFFFFFFFFFFFF:FFFFFFFFFFFFFFFFFFFFFFFF:FFFFFFFFFFFFFFFF
FFFF,FFFFFFFF

```

@A00721:190:HGJW7DSXY:4:2432:23149:36573 1:N:0:TCTGCAAG+GCTGCACT  
CGTCATTTTCAGAGCAGCTCTGAATCGTGCTTCGTTTTCTACGTATCTGGACCAGTATATCTGCTTGA  
CTTGATGCTTCAAGTCATCTGGGAGAATGTTGTAGATATCGTCAAATTTGATAGTACCATAGTTCGAC  
GCCATTTGACACACT

[illegible]



FFFFFFFFFFFFFFFFFFFFFFFFFFFFFFFFFFFFFFFFFFFFFFFFFFFFFFFFFFFFFFFFFFFFFFFFFFFFFFFF  
FFFFFFFFFFFFFFFF

@A00721:190:HGJW7DSXY:4:2464:5981:35493 1:N:0:TCTGCAAG+GCTGCACT  
CGTCATTTTCAGAGCAGCTCTGAATCGTGCTTCGTTTTCTACGTATCTGGACCAGTATATCTGCTTGA  
CTTGATGCTTCAAGTCATCTGGGAGAATGTTGTAGATATCGTCAAATTTGATAGTACCATAGTTCGAC  
GCCATTTGACACACT

+

FFFFFFFFFFFFFFFFFFFFFFFFFFFFFFFFFFFFFFFFFFFFFFFFFFFFFFFFFFFFFFFFFFFFFFFFFFFFFFFF  
FFFFFFFFFFFFFFFFFFFFFFFFFFFFFFFFFFFFFFFFFFFFFFFFFFFFFFFFFFFFFFFFFFFFFFFFFFFFFFFF  
FFFFFFFFFFFFFFFF

@A00721:190:HGJW7DSXY:4:2533:13973:25755 1:N:0:TCTGCAAG+GCTGCACT  
CGTCATTTTCAGAGCAGCTCTGAATCGTGCTTCGTTTTCTACGTATCTGGACCAGTATATCTGCTTGA  
CTTGATGCTTCAAGTCATCTGGGAGAATGTTGTAGATATCGTCAAATTTGATAGTACCATAGTTCGAC  
GCCATTTGACACACT

+

FFFFFFFFFFFFFFFFFFFFFFFFFFFFFFFFFFFFFFFFFFFFFFFFFFFFFFFFFFFFFFFFFFFFFFFFFFFFFFFF  
FFFFFFFFFFFFFFFFFFFFFFFFFFFFFFFFFFFFFFFFFFFFFFFFFFFFFFFFFFFFFFFFFFFFFFFFFFFFFFFF  
FFFFFFFFFFFFFFFF

@A00721:190:HGJW7DSXY:4:2629:23303:1485 1:N:0:TCTGCAAG+GCTGCACT  
CGTCATTTTCAGAGCAGCTCTGAATCGTGCTTCGTTTTCTACGTATCTGGACCAGTATATCTGCTTGA  
CTTGATGCTTCAAGTCATCTGGGAGAATGTTGTAGATATCGTCAAATTTGATAGTACCATAGTTCGAC  
GCCATTTGACACACT

+

FFFFFFFFFFFFFFFFFFFFFFFFFFFFFFFFFFFFFFFFFFFFFFFFFFFFFFFFFFFFFFFFFFFFFFFFFFFFFFFF  
FFFFFFFFFFFFFFFFFFFFFFFFFFFFFFFFFFFFFFFFFFFFFFFFFFFFFFFFFFFFFFFFFFFFFFFFFFFFFFFF  
:FFFFFFFFFFFFFFFF

@A00721:190:HGJW7DSXY:4:1127:16016:24659 1:N:0:TCTGCAAG+GCTGCACT  
CGACAGTGTGTCAAATGGCGTCGAACTATGGTACTATCAAATTTGACGATATCTACAACATTCTCCCA  
GATGACTTGAAGCATCAAGTCAAGCAGATATACTGGTCCAGATACGTAGAAAACGAAGCACGATTTCAG  
AGCTGCTCTGAAAAT

+

FFFFFFFFFFFFFFFFFFFFFFFFFFFFFFFFFFFFFFFFFFFFFFFFFFFFFFFFFFFFFFFFFFFFFFFFFFFFFFFF  
FFFFFFFFFFFFFFFFFFFFFFFFFFFFFFFFFFFFFFFFFFFFFFFFFFFFFFFFFFFFFFFFFFFFFFFFFFFFFFFF  
FFFFFFFFFFFFFFFF

@A00721:190:HGJW7DSXY:4:1171:12337:5822 1:N:0:TCTGCAAG+GCTGCACT  
CGACAGTGTGTCAAATGGCGTCGAACTATGGTACTATCAAATTTGACGATATCTACAACATTCTCCCA  
GATGACTTGAAGCATCAAGTCAAGCAGATATACTGGTCCAGATACGTAGAAAACGAAGCACGATTTCAG  
AGCTGCTCTGAAAAT

+

FFFFFFFFFFFFFFFFFFFFFFFFFFFFFFFFFFFFFFFFFFFFFFFFFFFFFFFFFFFFFFFFFFFFFFFFFFFFFFFF  
FFFFFFFFFFFFFFFFFFFFFFFFFFFFFFFFFFFFFFFFFFFFFFFFFFFFFFFFFFFFFFFFFFFFFFFFFFFFFFFF  
FFFFFFFFFFFFFFFF

@A00721:190:HGJW7DSXY:4:1330:26630:6621 1:N:0:TCTGCAAG+GCTGCACT  
CGACAGTGTGTCAAATGGCGTCGAACTATGGTACTATCAAATTTGACGATATCTACAACATTCTCCCA  
GATGACTTGAAGCATCAAGTCAAGCAGATATACTGGTCCAGATACGTAGAAAACGAAGCACGATTTCAG  
AGCTGCTCTGAAAAT

+

FFFFFFFFFFFFFFFFFFFFFFFFFFFFFFFFFFFFFFFFFFFFFFFFFFFFFFFFFFFFFFFFFFFFFFFFFFFFFFFF  
FFFFFFFFFFFFFFFFFFFFFFFFFFFFFFFFFFFFFFFFFFFFFFFFFFFFFFFFFFFFFFFFFFFFFFFFFFFFFFFF  
FFFFFFFFFFFFFFFF

@A00721:190:HGJW7DSXY:4:1454:24740:27398 1:N:0:TCTGCAAG+GCTGCACT  
CGACAGTGTGTCAAATGGCGTCGAACTATGGTACTATCAAATTTGACGATATCTACAACATTCTCCCA  
GATGACTTGAAGCATCAAGTCAAGCAGATATACTGGTCCAGATACGTAGAAAACGAAGCACGATTTCAG  
AGCTGCTCTGAAAAT

+  
FFFFFFFFFFFFFFFFFFFFFFFFFFFFFFFFFFFFFFFFFFFFFFFFFFFFFFFFFFFFFFFFFFFFFFFF  
FFFFFFFFFFFFFFFFFFFFFFFFFFFFFFFFFFFFFFFFFFFFFFFFFFFFFFFFFFFFFFFFFFFFFFFF  
FFFFFFF:FFFFFFFFF  
@A00721:190:HGJW7DSXY:4:1454:24180:27743 1:N:0:TCTGCAAG+GCTGCACT  
CGACAGTGTGTCAAATGGCGTCGAACTATGGTACTATCAAATTTGACGATATCTACAACATTCTCCCA  
GATGACTTGAAGCATCAAGTCAAGCAGATATACTGGTCCAGATACGTAGAAAACGAAGCACGATTGAG  
AGCTGCTCTGAAAAT  
+  
FFFFFFFFFFFFFFFFF:FFFFFFFFFFFFFFFFFFFFFFFFFFFFFFFFFFFFFFFFFFFFFFFFFFFFFFF  
FFFFFFFFFFFFFFFFFFFFFFFFFFFFFFFFFFFFFFFFFFFFFFFFFFFFFFFFFFFFFFFFFFFFFFFF  
FFFFFFFFFFFFFFFFF  
@A00721:190:HGJW7DSXY:4:2269:5412:16219 1:N:0:TCTGCAAG+GCTGCACT  
CGACAGTGTGTCAAATGGCGTCGAACTATGGTACTATCAAATTTGACGATATCTACAACATTCTCCCA  
GATGACTTGAAGCATCAAGTCAAGCAGATATACTGGTCCAGATACGTAGAAAACGAAGCACGATTGAG  
AGCTGCTCTGAAAAT  
+  
FFFFFFFFFFFFFFFFFFFFFFFFFFFFFFFFFFFFFFFFFFFF,FFFFFFFFFFFFFFFFFFFFFFFFFFFFF  
FFFFFFFFFFFFFFFFFFFFFFFFFFFFFFFFFFFFFFFFF:FFFFFFFFFFFFFFFFFFFFFFFFF:FFFFFFFFFFFFFFFFF  
FFFFFFFFFFFFFFFFF  
@A00721:190:HGJW7DSXY:4:2536:1434:33473 1:N:0:TCTGCAAG+GCTGCACT  
CGACAGTGTGTCAAATGGCGTCGAACTATGGTACTATCAAATTTGACGATATCTACAACATTCTCCCA  
GATGACTTGAAGCATCAAGTCAAGCAGATATACTGGTCCAGATACGTAGAAAACGAAGCACGATTGAG  
AGCTGCTCTGAAAAT  
+  
FFFFFFFFFFFFFFFFF:FFFFFFFFFFFFFFFFFFFFFFFFFFFFFFFFFFFFFFFFFFFFFFFFFFFFFFF  
FFFFFFFFFFFFFFFFFFFFFFFFFFFFFFFFFFFFFFFFF:FFFFFFFFFFFFFFFFFFFF,FFFFFFFFFFFFFFFFF  
:FFFFFFFFFFFFFFFFF  
@A00721:190:HGJW7DSXY:4:1103:3757:7905 1:N:0:TCTGCAAG+GCTGCACT  
TTTTCAGAGCAGCTCTGAATCGTGCTTCGTTTTCTACGTATCTGGACCAGTATATCTGCTTGACTTGA  
TGCTTCAAGTCATCTGGGAGAATGTTGTAGATATCGTCAAATTTGATAGTACCATAGTTTCGACGCCAT  
TTAGATCGGAA  
+  
FFFFFFFFFFFFFFFFFFFFFFFFFFFFFFFFFFFFFFFFF:FFFFFFFFFFFFFFFFFFFFFFFFFFFFFFFFF  
FFFFFFF:FFFFFFFFFFFF:FF,FFFFFFFFFFFFFFFFFFFF:FFFFFFF:FFFFFFFFF:FFFFFFF  
FFFFFFFFFFFF  
@A00721:190:HGJW7DSXY:4:1366:15356:27211 1:N:0:TCTGCAAG+GCTGCACT  
TTTTCAGAGCAGCTCTGAATCGTGCTTCGTTTTCTACGTATCTGGACCAGTATATCTGCTTGACTTGA  
TGCTTCAAGTCATCTGGGAGAATGTTGTAGATATCGTCAAATTTGATAGTACCATAGTTTCGACGCCAT  
TTAGATCGGAA  
+  
FFFFFFFFFFFFFFFFFFFFFFFFFFFFFFFFFFFFFFFFF:FFFFFFFFFFFFFFFFFFFFFFFFFFFFFFFFF  
FFFFFFFFFFFFFFFFFFFFFFFFFFFF,FFFFFFFFFFFF,FFFFFFFFFFFFFFFFFFFFFFFFFFFFFFFFF  
FFFFFFFFFFFF  
@A00721:190:HGJW7DSXY:4:1654:27661:33489 1:N:0:TCTGCAAG+GCTGCACT  
TTTTCAGAGCAGCTCTGAATCGTGCTTCGTTTTCTACGTATCTGGACCAGTATATCTGCTTGACTTGA  
TGCTTCAAGTCATCTGGGAGAATGTTGTAGATATCGTCAAATTTGATAGTACCATAGTTTCGACGCCAT  
TTAGATCGGAA  
+  
FFFFFFFFFFFFFFFFFFFFFFFFFFFFFFFFFFFFFFFFF:FFFFFFFFFFFFFFFFFFFFFFFFFFFFFFFFF  
FFFFFFFFFFFFFFFFFFFFFFFFFFFF:FFFFF:FFFFFFFFFFFF:FFFFFFFFFFFFFFFFFFFFFFFFF:  
FFFFFFFFFFFF  
@A00721:190:HGJW7DSXY:4:2225:19732:19100 1:N:0:TCTGCAAG+GCTGCACT  
TTTTCAGAGCAGCTCTGAATCGTGATTGTTTTCTACGTATCTGGACCAGTATATCTGCTTTACTTGA



@A00721:190:HGJW7DSXY:4:1672:27335:11725 1:N:0:TCTGCAAG+GCTGCACT  
GGAGAATGTTGTAGATATCGTCAAATTTGATAGTACCATAGTTCGACGCCATTTGACACACTGTTGAT  
ATGATGAATTTGTAATATAATGTAAATGTGTTGTGAGTTTGTATGTTTGAACAACACTACATTTA  
TACAATGTTTAAGAT

+

FFFFFFFFFFFFFFFFFFFFFFFFFFFFFFFFFFFFFFFFFFFFFFFFFFFFFFFFFFFFFFFFFFFFFFFF  
FFFFFFFF:FFFFFFFFFFFFFFFFFFFFFFFFFFFFFFFFFFFFFFFFFFFFFFFFFFFFFFFFFFFFFFFF  
FFFFFFFFFFFFFFFF

@A00721:190:HGJW7DSXY:4:2430:15239:22529 1:N:0:TCTGCAAG+GCTGCACT  
GGAGAATGTTGTAGATATCGTCAAATTTGATAGTACCATAGTTCGACGCCATTTGACACACTGTTGAT  
ATGATGAATTTGTAATATAATGTAAATGTGTTGTGAGTTTGTATGTTTGAACAACACTACATTTA  
TACAATGTTTAAGAT

+

FFFFFFFFFFFFFFFFFFFFFFFFFFFFFFFFFFFFFFFFFFFFFFFFFFFFFFFFFFFFFFFFFFFFFFFF,  
FFFFFFFFFFFFFFFFFFFFFFFFFFFFFFFFFFFFFFFFFFFFFFFFFFFFFFFFFFFFFFFFFFFFFFFF  
FFFFFFFFFFFFFFFF

@A00721:190:HGJW7DSXY:4:1318:16016:34679 1:N:0:TCTGCAAG+GCTGCACT  
CATAGTTCGACGCCATTTGACACACTGTTGATATGATGAATTTGTAATATAATGTAAATGTGTTGTG  
AGTTTTGTTATGTTTGAACAACACTACATTTATACAATGTTTAAGATTTCGATATGTATATAAGAGAAT  
CTTGTTGCTTTTAAC

+

FFFFFFFFFFFFFFFFFFFFFFFFFFFFFFFFFFFFFFFFFFFFFFFFFFFFFFFFFFFFFFFFFFFFFFFF  
FFFFFFFFFFFFFFFFFFFFFFFFFFFFFFFFFFFFFFFFFFFFFFFFFFFFFFFFFFFFFFFFFFFFFFFF  
FFF:FFFF:FFFF

@A00721:190:HGJW7DSXY:4:1336:31385:2832 1:N:0:TCTGCAAG+GCTGCACT  
CATAGTTCGACGCCATTTGACACACTGTTGATATGATGAATTTGTAATATAATGTAAATGTGTTGTG  
AGTTTTGTTATGTTTGAACAACACTACATTTATACAATGTTTAAGATTTCGATATGTATATAAGAGAAT  
CTTGTTGCTTTTAAC

+

FFFFFFFFFFFFFFFFFFFFFFFFFFFFFFFFFFFFFFFFFFFFFFFFFFFFFFFFFFFFFFFFFFFFFFFF  
FFFFFFFFFFFFFFFFFFFFFFFFFFFFFFFFFFFFFFFFFFFFFFFFFFFFFFFFFFFFFFFFFFFFFFFF  
FFFFFFFFFFFFFF,F

@A00721:190:HGJW7DSXY:4:1352:1841:14450 1:N:0:TCTGCAAG+GCTGCACT  
CATAGTTCGACGCCATTTGACACACTGTTGATATGATGAATTTGTAATATAATGTAAATGTGTTGTG  
AGTTTTGTTATGTTTGAACAACACTACATTTATACAATGTTTAAGATTTCGATATGTATATAAGAGAAT  
CTTGTTGCTTTTAAC

+

FFFFFFFFFFFFFFFFFFFFFFFFFFFFFFFFFFFFFFFFFFFFFFFFFFFFFFFFFFFFFFFFFFFFFFFF  
FFFFFFFFFFFFFFFFFFFFFFFFFFFFFFFFFFFFFFFFFFFFFFFFFFFFFFFFFFFFFFFFFFFFFFFF  
FFFFFFFFFFFFFF,F  
FFFFFFFFFFFFFFFFFFFFFFFFFFFFFFFFFFFFFFFFFFFFFFFFFFFFFFFFFFFFFFFFFFFFFFFF:  
FFFFFFFFFFFFFFFF

@A00721:190:HGJW7DSXY:4:1508:20338:16705 1:N:0:TCTGCAAG+GCTGCACT  
CATAGTTCGACGCCATTTGACACACTGTTGATATGATGAATTTGTAATATAATGTAAATGTGTTGTG  
AGTTTTGTTATGTTTGAACAACACTACATTTATACAATGTTTAAGATTTCGATATGTATATAAGAGAAT  
CTTGTTGCTTTTAAC

+

FFFFFFFFFFFFFFFFFFFFFFFFFFFFFFFFFFFFFFFFFFFFFFFFFFFFFFFFFFFFFFFFFFFFFFFF  
FFFFFFFFFFFFFFFFFFFFFFFFFFFFFFFFFFFFFFFFFFFFFFFFFFFFFFFFFFFFFFFFFFFFFFFF  
,FFFFFFFFFFFFFF

@A00721:190:HGJW7DSXY:4:2117:2555:10551 1:N:0:TCTGCAAG+GCTGCACT  
CATAGTTCGACGCCATTTGACACACTGTTGATATGATGAATTTGTAATATAATGTAAATGTGTTGTG  
AGTTTTGTTATGTTTGAACAACACTACATTTATACAATGTTTAAGATTTCGATATGTATATAAGAGAAT  
CTTGTTGCTTTTAAC

+

FFFFFFFFFFFFFFFFFFFFFFFFFFFFFFFF:F:FFFFFFFF:FFFFFFFFFFFFFFFFFFFFFFFFFFFFFFFF,F

FFFFFFFFFFFFFFFF:FFFFFFFFFFFFFFFFFFFFFFFFFFFFFFFFFFFFFFFF,FF,FFFFFFFFFFFFF  
:FFF:FFF,FFFF:F

@A00721:190:HGJW7DSXY:4:2242:18313:7404 1:N:0:TCTGCAAG+GCTGCACT  
CATAGTTCGACGCCATTTGACACACTGTTGATATGATGAATTTGTAATATAATGTAAAATGTGTTGTG  
AGTTTTGTTATGTTGGAACAACACTACATTTATACAATGTTTAAGATTGATATGTATATAAGAGAAT  
CTTGTTGCTTTTAAC

+

FFFFFFFFFFFFFFFFFFFFFFFFFFFFFFFFFFFFFFFFFFFFFFFFFFFFFFFFFFFFFFFF:FFFFFFFFFFFF,F  
FFFFFFFFFFFFFFFFFFFFFFFFFFFFFFFFFFFFFFFFFFFFFFFF:F,:FF:FFFF:FFFF:FFFFFFFFFFFFFFFFF,  
FFFFFFFFFFFF:FFF

@A00721:190:HGJW7DSXY:4:2267:29369:15154 1:N:0:TCTGCAAG+GCTGCACT  
CATAGTTCGACGCCATTTGACACACTGTTGATATGATGAATTTGTAATATAATGTAAAATGTGTTGTG  
AGTTTTGTTATGTTGGAACAACACTACATTTATACAATGTTTAAGATTGATATGTATATAAGAGAAT  
CTTGTTGCTTTTAAC

+

FFFFFFFFFFFFFFFFFFFFFFFFFFFFFFFFFFFFFFFFFFFFFFFFFFFFFFFFFFFFFFFFFFFFFFFFFFFFFFFF  
FFFFFFFFFFFFFFFFFFFFFFFFFFFFFFFFFFFFFFFFFFFFFFFFFFFFFFFFFFFFFFFFFFFFFFFF,FFFFFFFFF:FFFFF  
FFFFFFFFFFFFFFFF

@A00721:190:HGJW7DSXY:4:2352:3052:19085 1:N:0:TCTGCAAG+GCTGCACT  
CATAGTTCGACGCCATTTGACACACTGTTGATATGATGAATTTGTAATATAATGTAAAATGTGTTGTG  
AGTTTTGTTATGTTGGAACAACACTACATTTATACAATGTTTAAGATTGATATGTATATAAGAGAAT  
CTTGTTGCTTTTAAC

+

FFFFFFFFFFFFFFFFFFFFFFFFFFFFFFFFFFFFFFFFFFFFFFFFFFFFFFFFFFFFFFFFFFFFFFFF:FFFFFFF  
FFFFFFFFFFFFFFFFFFFFFFFFFFFFFFFFFFFFFFFFFFFFFFFFFFFFFFFFFFFFFFFFFFFFFFFF:FFFFFFFFF  
FFFFFFFF:FFFFFF:

@A00721:190:HGJW7DSXY:4:2417:4318:23124 1:N:0:TCTGCAAG+GCTGCACT  
CATAGTTCGACGCCATTTGACACACTGTTGATATGATGAATTTGTAATATAATGTAAAATGTGTTGTG  
AGTTTTGTTATGTTGGAACAACACTACATTTATACAATGTTTAAGATTGATATGTATATAAGAGAAT  
CTTGTTGCTTTTAAC

+

FFFFFFFFFFFFFFFFFFFFFFFFFFFFFFFF:F:FFF:FFFFFFFFFFFFFFFFFFFFFFFFFFFFFFFFFFFFFFFF  
FFFFFFFFFFFFFFFFFFFFFFFFFFFFFFFFFFFFFFFFFFFFFFFFFFFFFFFFFFFFFFFF:FFFFFFF:F:FFFFFFFFFFFF:  
FFFFFFFFFF:FFFFF

@A00721:190:HGJW7DSXY:4:2509:17210:14826 1:N:0:TCTGCAAG+GCTGCACT  
CATAGTTCGACGCCATTTGACACACTGTTGATATGATGAATTTGTAATATAATGTAAAATGTGTTGTG  
AGTTTTGTTATGTTGGAACAACACTACATTTATACAATGTTTAAGATTGATATGTATATAAGAGAAT  
CTTGTTGCTTTTAAC

+

FFFFFFFFFFFFFFFF:F:FFFFFFFFFFFFFFFFFFFFFFFFFFFFFFFFFFFFFFFFFFFFFFFF:FFFFFFFFF  
FFFFFFFFFFFFFFFFFFFFFFFFFFFFFFFFFFFFFFFFFFFFFFFFFFFFFFFFFFFFFFFF:FFFFFFFFFFFFFFFF:  
FFFFFFFFFFFFFFFF

@A00721:190:HGJW7DSXY:4:2662:6885:1705 1:N:0:TCTGCAAG+GCTGCACT  
CATAGTTCGACGCCATTTGACACACTGTTGATATGATGAATTTGTAATATAATGTAAAATGTGTTGTG  
AGTTTTGTTATGTTGGAACAACACTACATTTATACAATGTTTAAGATTGATATGTATATAAGAGAAT  
CTTGTTGCTTTTAAC

+

FFFFFFFFFFFFFFFFFFFFFFFFFFFFFFFFFFFFFFFFFFFFFFFFFFFFFFFFFFFFFFFFFFFFFFFF  
FFFFFFFFFFFFFFFFFFFFFFFFFFFFFFFFFFFFFFFFFFFFFFFFFFFFFFFFFFFFFFFFFFFFFFFF,F  
FFFFFFFFFFFFFFFF

@A00721:190:HGJW7DSXY:4:2671:20862:3333 1:N:0:TCTGCAAG+GCTGCACT  
CATAGTTCGACGCCATTTGACACACTGTTGATATGATGAATTTGTAATATAATGTAAAATGTGTTGTG  
AGTTTTGTTATGTTGGAACAACACTACATTTATACAATGTTTAAGATTGATATGTATATAAGAGAAT  
CTTGTTGCTTTTAAC

+  
FFFFFFFFFFFFFFFFFFFFFFFFFFFFFFFFFFFFFFFFFFFFFFFFFFFFFFFFFFFFFFFFFFFFFFFF  
FFFFFFFFFFFFFFFFFFFFFFFFFFFFFFFFFFFFFFFFFFFFFFFFFFFFFFFFFFFFFFFFFFFFFFFF  
FF:FFFFFFFFFFFF

@A00721:190:HGJW7DSXY:4:1310:27570:28009 1:N:0:TCTGCAAG+GCTGCACT  
AAATTCAAAAAAAGGTTAAAAGCAACAAGATTCTCTTATATACATATCGAATCTTAAACATTGTATAA  
ATGTAGTGTGTTGTTGCGAACATAACAAAACACTCACACACATTTTACATTATATTACAAATTCATCATATC  
AACAGTGTGTC

+  
FFFFFFFFFFFFFFFFFFFFFFFFFFFFFFFFFFFFFFFFFFFFFFFFFFFFFFFFFFFFFFFFFFFFFFFF  
FFFFFFFFFFFFFFFFFFFFFFFFFFFFFFFFFFFFFFFFFFFFFFFFFFFFFFFFFFFFFFFFFFFFFFFF  
FFF:F:FFFFF

@A00721:190:HGJW7DSXY:4:1611:8621:13385 1:N:0:TCTGCAAG+GCTGCACT  
AAATTCAAAAAAAGGTTAAAAGCAACAAGATTCTCTTATATACATATCGAATCTTAAACATTGTATAA  
ATGTAGTGTGTTGTTGCGAACATAACAAAACACTCACACACATTTTACATTATATTACAAATTCATCATATC  
AACAGTGTGTC

+  
FFFFFFFFFFFFFFFFFFFFFFFFFFFFFFFFFFFFFFFFFFFFFFFFFFFFFFFFFFFFFFFFFFFFFFFF  
FFFFFFFFFFFFFFFFFFFFFFFFFFFFFFFFFFFFFFFFFFFFFFFFFFFFFFFFFFFFFFFFFFFFFFFF  
FFFFFFFFFFFFF

@A00721:190:HGJW7DSXY:4:2109:25672:7341 1:N:0:TCTGCAAG+GCTGCACT  
AAATTCAAAAAAAGGTTAAAAGCAACAAGATTCTCTTATATACATATCGAATCTTAAACATTGTATAA  
ATGTAGTGTGTTGTTGCGAACATAACAAAACACTCACACACATTTTACATTATATTACAAATTCATCATATC  
AACAGTGTGTC

+  
F:FFFFFFFFFFFF:FFFFFFFFFFFFFFFFFFFFFFFFFFFFFFFFFFFFFFFFFFFFFFFFFFFFFFFF  
FFFFFFFFFFFFFFFFFFFFFFFFFFFFFFFFFFFFFFFFFFFFFFFFFFFFFFFFFFFFFFFFFFFFFFFF  
FFFFFFFFFFFFF

@A00721:190:HGJW7DSXY:4:2423:5556:18223 1:N:0:TCTGCAAG+GCTGCACT  
AAATTCAAAAAAAGGTTAAAAGCAACAAGATTCTCTTATATACATATCGAATCTTAAACATTGTATAA  
ATGTAGTGTGTTGTTGCGAACATAACAAAACACTCACACACATTTTACATTATATTACAAATTCATCATATC  
AACAGTGTGTC

+  
FFFFFFFFFFFFFFFFFFFFFFFFFFFFFFFFFFFFFFFFFFFFFFFFFFFFFFFFFFFFFFFFFFFFFFFF  
FFFFFFFFFFFFFFFFFFFFFFFFFFFFFFFFFFFFFFFFFFFFFFFFFFFFFFFFFFFFFFFFFFFFFFFF  
FFFFFFFFFFFFF

@A00721:190:HGJW7DSXY:4:1101:21965:30671 1:N:0:TCTGCAAG+GCTGCACT  
TGTCAAAATTCAAAAAAAGGTTAAAAGCAACAAGATTCTCTTATATACATATCGAATCTTAAACATTG  
TATAAATGTAGTGTGTTGTTGCGAACATAACAAAACACTCACACACATTTTACATTATATTACAAATTCATC  
ATATCAACAGTGTGT

+  
FFFFFFFFFFFFFFFFFFFFFFFFFFFFFFFFFFFFFFFFFFFFFFFFFFFFFFFFFFFFFFFFFFFFFFFF  
FFFFFFFFFFFFFFFFFFFFFFFFFFFFFFFFFFFFFFFFFFFFFFFFFFFFFFFFFFFFFFFFFFFFFFFF  
FFFFFFFFFFFFF

@A00721:190:HGJW7DSXY:4:1170:2519:33661 1:N:0:TCTGCAAG+GCTGCACT  
TGTCAAAATTCAAAAAAAGGTTAAAAGCAACAAGATTCTCTTATATACATATCGAATCTTAAACATTG  
TATAAATGTAGTGTGTTGTTGCGAACATAACAAAACACTCACACACATTTTACATTATATTACAAATTCATC  
ATATCAACAGTGTGT

+  
FFFFFFFFFFFFFFFFFFFFFFFFFFFFFFFFFFFFFFFFFFFFFFFFFFFFFFFFFFFFFFFFFFFFFFFF  
:FFFFFFFFFFFF:FFFFFFFFFFFFFFFFFFFFFFFFFFFFFFFFFFFFFFFFFFFFFFFFFFFFFFFF  
FFFFFFFFFFFFF

@A00721:190:HGJW7DSXY:4:1351:27787:7279 1:N:0:TCTGCAAG+GCTGCACT  
TGTCAAAATTCAAAAAAAGGTTAAAAGCAACAAGATTCTCTTATATACATATCGAATCTTAAACATTG

TATAAATGTAGTGTTGTTCTGAACATAACAAAACCTCACAACACATTTTACATTATATTACAAATTCATC  
ATATCAACAGTGTGT

@A00721:190:HGJW7DSXY:4:2109:8766:11162 1:N:0:TCTGCAAG+GCTGCACT  
TGTCAAAATTCAAAAAAGGTTAAAAGCAACAAGATTCTCTTATATACATATCGAATCTTAAACATTG  
TATAAATGTAGTGTTGTTGCGAACATAACAAAACCTCACAACACATTTTACATTATATTACAAATTCATC  
ATATCAACAGTGTGT

@A00721:190:HGJW7DSXY:4:2138:18810:22858 1:N:0:TCTGCAAG+GCTGCACT  
TGTCAAAATTCAAAAAAGGTTAAAAGCAACAAGATTCTCTTATATACATATCGAATCTTAAACATTG  
TATAAATGTAGTGTTGTTCGAACATAACAAAACCTCACAACACATTTTACATTATATTACAAATTCATC  
ATATCAACAGTGTGT

@A00721:190:HGJW7DSXY:4:2526:10520:22717 1:N:0:TCTGCAAG+GCTGCACT  
TGTCAAAATTCAAAAAAGGTTAAAAGCAACAAGATTCTTTATATACATATCGAATCTTAAACATTG  
TATAAATGTAGTGTTGTTGGAACATAACAAAACCTCACAACACATTTTACATTATATTACAAATTCATC  
ATATCAACAGTGTGT

@A00721:190:HGJW7DSXY:4:1514:17255:12900 1:N:0:TCTGCAAG+GCTGCACT  
CATCTTTATGTCAAAATTCAAAAAAGGTTAAAGCAACAAGATTCTCTTATATACATATCGAATCTT  
AAACATTGTATAAATGTAGTGTGTTGCGAACATAACAAACTCACAACACATTTTACATTATATTACA  
AATTCATCATATCAA

@A00721:190:HGJW7DSXY:4:2122:2727:36777 1:N:0:TCTGCAAG+GCTGCACT  
CATCTTTATGTCAAATTCAAAAAAAGGTTAAAAGCAACAAGATTCTCTTATATACATATCGAATCTT  
AAACATTGTATAAATGTAGTGTGTTCTGAACATAACAAACTCACAACACATTTTACATTATATTACA  
AATTCATCATATCAA

@A00721:190:HGJW7DSXY:4:2625:8024:27007 1:N:0:TCTGCAAG+GCTGCACT  
ATCTTTATGTCAAAATTCAAAAAAGGTTAAAAGCAACAAGATTCTCTTATATACATATCGAATCTTA  
AACATTGTATAAATGTAGTGTTGTTCGAACATAACAAAACTCACAACACATTTTACATTATATTACAA  
ATTCATCATATCAA

$+$ 

+

+

+

+

+

+

[illegible]



FFFFFFFFFFFFFFFFFFFFFFFFFFFFFFFFFFFFFFFF:FF:FF:FFFFFFFFFFFFFFFFFFFFFFFF  
FF:FFFFFFFF:F

@A00721:190:HGJW7DSXY:4:1668:20772:21026 1:N:0:TCTGCAAG+GCTGCACT  
CGCTTTTAACCTTTTTTTGAATTTTGACATAAAGATGAAATCGACTGTCAAAGTTTGTACGGCTCATA  
TTTTCAAATTTGAAATTTGAATTTCAAATCTATTTCAACTGTACAAACATTTACTGTATACATTACTT  
ATGATCTAAGTCAGC

+

FFFFFFFFFFFFFFFF:FFFFFFFFFFFFFFFFFFFFFFFFFFFFFFFFFFFFFFFFFFFFFFFF  
FFFFFFFFFFFFFFFFFFFFFFFFFFFFFFFFFFFFFFFFFFFFFFFFFFFFFFFF: :F,FFFFFFFFFFFFFFFF  
FFFFFF:F:FFFFFF

@A00721:190:HGJW7DSXY:4:2174:2365:7592 1:N:0:TCTGCAAG+GCTGCACT  
CGCTTTTAACCTTTCTTTGAATTTTGACATAAAGATGAAATCGACTGTCAAAGTTTGTACGGCTCATA  
TTTTCAAATTTGAAATTTGAATTTCAAATCTATTTCAACTGTACAAACATTTACTGTATACATTACTT  
ATGATCTAAGTCAGC

+

FFFF:FFFFFFFFFFFFFFFFFFFFFFFFFFFFFFFFFFFFFFFFFFFFFFFFFFFFFFFF  
FFFFFFFFFFFFFFFFFFFFFFFFFFFFFFFFFFFFFFFFFFFFFFFFFFFFFFFF: FFFFFFFFFFFFFFFFFF  
FFFFFFFFFFF,FFFF

@A00721:190:HGJW7DSXY:4:2525:18882:26177 1:N:0:TCTGCAAG+GCTGCACT  
CGCTTTTAACCTTTTTTTGAATTTTGACATAAAGATGAAATCGACTGTCAAAGTTTGTACGGCTCATA  
TTTTCAAATTTGAAATTTGAATTTCAAATCTATTTCAACTGTACAAACATTTACTGTATACATTACTT  
ATGATCTAAGTCAGC

+

FF:F:FFFFFFFF:FFFFFFF,F:FFFFFFFFFFFFFFFFFFFFFFFF:F:FFFF:FFFFFFFF  
FFFFFFFFFFFFFFFFFFFFFFFF:FFFFFFFFF,FFFFFFFFFFFFFFFF:F,FFFFF,F:FFFF,  
FFFFFFFFFFF,F:F

@A00721:190:HGJW7DSXY:4:2547:13087:32330 1:N:0:TCTGCAAG+GCTGCACT  
CGCTTTTAACCTTTTTTTGAATTTTGACATAAAGATGAAATCGACTGTCAAAGTTTGTACGGCTCATA  
TTTTCAAATTTGAAATTTGAATTTCAAATCTATTTCAACTGTACAAACATTTACTGTATACATTACTT  
ATGATCTAAGTCAGC

+

FFFFFFFFFFFFFFFF,FFFFFFFFFFFFFFFFFFFFFFFFFFFFFFFF:FFFFFFFFFFFFFF,FFFF,FFFF  
FFFFFF:::F:FFFFFFFF:F:FFFFFFFFFFFFFFFF:FFFFFFFFF:FFFFFFFFFFFF:FFFF  
FF,FFFFFF:F,FFF

@A00721:190:HGJW7DSXY:4:2654:18493:3646 1:N:0:TCTGCAAG+GCTGCACT  
CGCTTTTAACCTTTTTTTGAATTTTGACATAAAGATGAAATCGACTGTCAAAGTTTGTACGGCTCATA  
TTTTCAAATTTGAAATTTGAATTTCAAATCTATTTCAACTGTACAAACATTTACTGTATACATTACTT  
ATGATCTAAGTCAGC

+

FFFFFFFFFFFFFF:FFFFFFFFFFFFFF:FFFFFFFFFFFFFF:FFFF:FFFF:FFFFFFFFFFFF  
F:FF,FFFF:FFFFFF,FFFFFFFFF:FFFFFFFFFFFFFFFFFFFFFFFFFFFF,FFFFFF  
FF,FF,FFF:FFFF:

@A00721:190:HGJW7DSXY:4:1112:16459:3317 1:N:0:TCTGCAAG+GCTGCACT  
CTTTTTTTGAATTTTGACATAAAGATGAAATCGACTGTCAAAGTTTGTACGGCTCATATTTTCAAATT  
TGAAATTTGAATTTCAAATCTATTTCAACTGTACAAACATTTACTGTATACATTACTTATGATCTAAG  
TCAGCCACTTACATA

+

FFFFFFFFFFFFFFFFFFFFFFFFFFFFFFFFFFFFFFFFFFFFFFFFFFFFFFFF  
FFFFFFFFFFFFFFFFFFFFFFFFFFFFFFFFFFFFFFFFFFFFFFFFFFFFFFFF  
FFFFFFFFFFFFFFFF

@A00721:190:HGJW7DSXY:4:1112:16405:3787 1:N:0:TCTGCAAG+GCTGCACT  
CTTTTTTTGAATTTTGACATAAAGATGAAATCGACTGTCAAAGTTTGTACGGCTCATATTTTCAAATT  
TGAAATTTGAATTTCAAATCTATTTCAACTGTACAAACATTTACTGTATACATTACTTATGATCTAAG  
TCAGCCACTTACATA

+  
FFFFFFFFFFFFFFFFFFFFFFFFFFFFFFFFFFFFFFFFFFFFFFFFFFFFFFFFFFFFFFFFFFFFFFFF  
FFFFFFFFFFFFFFFFFFFFFFFFFFFFFFFFFFFFFFFFFFFFFFFFFFFFFFFFFFFFFFFFFFFFFFFF  
FFF:FFFF:FFFF  
@A00721:190:HGJW7DSXY:4:1117:1533:23249 1:N:0:TCTGCAAG+GCTGCACT  
CTTTTTTTGAATTTTGACATAAAGATGAAATCGACTGTCAAAGTTTGTACGGCTCATATTTTCAAATT  
TGAAATTTGAATTTCAAATCTATTTCAACTGTACAAACATTTACTGTATACATTACTTATGATCTAAG  
TCAGCCACTTACATA  
+  
FFFF,FFFFFFFFFFFFFFFFFFFFFFFFFFFFFFFFFFFFFFFFFFFFFFFFFFFFFFFFFFFFFFFF  
FFFFFFFFFFFF:FFFFF::FFFFFFFFF,FFFFFFFF,F:FFFFFFFFFFFFFFFFFFFFFFFF,FFFFFFFF  
FFFFFFFF:FFFFF  
@A00721:190:HGJW7DSXY:4:1228:6659:31720 1:N:0:TCTGCAAG+GCTGCACT  
CTTTTTTTGAATTTTGACATAAAGATGAAATCGACTGTCAAAGTTTGTACGGCTCATATTTTCAAATT  
TGAAATTTGAATTTCAAATCTATTTCAACTGTACAAACATTTACTGTATACATTACTTATGATCTAAG  
TCAGCCACTTACATA  
+  
FFFFFFFFFFFFFFFFFFFF:FFFFFFFFFFFFFFFFFFFFFFFFFFFFFFFFFFFFFFFFFFFFFFFF:FFFFF  
:FFFFFFFFFFFFFFFFFFFFFFFFFFFFFFFFFFFFFFFFFFFFFFFFFFFFFFFFFFFFFFFFFFFF:FFFFF  
FFFF:FFFFFFFFFFFF  
@A00721:190:HGJW7DSXY:4:1316:15917:25457 1:N:0:TCTGCAAG+GCTGCACT  
CTTTTTTTGAATTTTGACATAAAGATGAAATCGACTGTCAAAGTTTGTACGGCTCATATTTTCAAATT  
TGAAATTTGAATTTCAAATCTATTTCAACTGTACAAACATTTACTGTATACATTACTTATGATCTAAG  
TCAGCCACTTACATA  
+  
FFFFFFFFFFFFFFFFFFFFFFFFFFFFFFFFFFFFFFFFFFFFFFFFFFFFFFFFFFFFFFFFFFFFFFFF  
FFFFFFFFFFFFFFFFFFFFFFFFFFFFFFFFFFFFFFFFFFFFFFFFFFFFFFFFFFFFFFFFFFFFFFFF:  
FFFFFFFFFFFFFFFFFFFF  
@A00721:190:HGJW7DSXY:4:1341:7075:34945 1:N:0:TCTGCAAG+GCTGCACT  
CTTTTTTTGAATTTTGACATAAAGATGAAATCGACTGTCAAAGTTTGTACGGCTCATATTTTCAAATT  
TGAAATTTGAATTTCAAATCTATTTCAACTGTACAAACATTTACTGTATACATTACTTATGATCTAAG  
TCAGCCACTTACATA  
+  
FFFFFFFFFFFFFFFFFFFFFFFFFFFFFFFFFFFFFFFFFFFFFFFFFFFFFFFFFFFFFFFFFFFFFFFF  
FFFFFFFFFFFFFFFFFFFFFFFFFFFFFFFFFFFFFFFFFFFFFFFFFFFFFFFFFFFFFFFFFFFFFFFF:  
FFF:FFFFFFFFFFFF  
@A00721:190:HGJW7DSXY:4:1539:32145:31391 1:N:0:TCTGCAAG+GCTGCACT  
CTTTTTTTGAATTTTGACATAAAGATGAAATCGACTGTCAAAGTTTGTACGGCTCATATTTTCAAATT  
TGAAATTTGAATTTCAAATCTATTTCAACTGTACAAACATTTACTGTATACATTACTTATGATCTAAG  
TCAGCCACTTACATA  
+  
FFFFFFFFFFFFFFFFFFFFFFFFFFFF,FFFFFFFFFFFFFFFFFFFFFFFFFFFFFFFFFFFFFFFFFFFF  
FFFFFFFFFFFFFFFFFFFFFFFFFFFFFFFFFFFFFFFFFFFFFFFFFFFFFFFFFFFFFFFFFFFFFFFF:  
FFFFFFFFFFFFFFFFFFFF  
@A00721:190:HGJW7DSXY:4:1549:1678:5337 1:N:0:TCTGCAAG+GCTGCACT  
CTTTTTTTGAATTTTGACATAAAGATGAAATCGACTGTCAAAGTTTGTACGGCTCATATTTTCAAATT  
TGAAATTTGAATTTCAAATCTATTTCAACTGTACAAACATTTACTGTATACATTACTTATGATCTAAG  
TCAGCCACTTACATA  
+  
FFFFFFFFFFFFFFFFFFFFFFFFFFFFFFFFFFFFFFFFFFFFFFFFFFFFFFFFFFFFFFFFFFFFFFFF  
FFFFFFFFFFFFFFFFFFFFFFFFFFFFFFFFFFFFFFFFFFFFFFFFFFFFFFFFFFFFFFFFFFFFFFFF  
FFFFFFFFFFFFFFFFFFFF  
@A00721:190:HGJW7DSXY:4:1620:13783:15906 1:N:0:TCTGCAAG+GCTGCACT  
CTTTTTTTGAATTTTGACATAAAGATGAAATCGACTGTCAAAGTTTGTACGGCTCATATTTTCAAATT



@A00721:190:HGJW7DSXY:4:1259:17318:29293 1:N:0:TCTGCAAG+GCTGCACT  
CAGTCCTCGAATCAGTAGATTGAAATATATGACAAGTATATGTAAGTGGCTGACTTAGATCATAAGT  
AATGTATACAGTAAATGTTGTACAGTTGAAATAGATTTGAAATTCAAATTTCAAATTTTAAAATATG  
AGCCGTACAACTTT

+

:FFFFFFF:FF::FF:F:F:FF:FFFFFFF,FFFFFFF,FF:FFF,,,FF:F:FF:F::FFFFFFF  
:::FF,FFFFFFF:FFFF::FFFFFFFFFFFFFFFFFFFF:FF:FFFFFFFFFFFFFFFF:FFFFFFF  
FFFFFFF,FFFFFFF

@A00721:190:HGJW7DSXY:4:1459:20726:2597 1:N:0:TCTGCAAG+GCTGCACT  
CAGTCCTCGAATCAGTAGATTGAAATATATGACAAGTATATGTAAGTGGCTGACTTAGATCATAAGT  
AATGTATACAGTAAATGTTGTACAGTTGAAATAGATTTGAAATTCAAATTTCAAATTTTAAAATATG  
AGCCGTACAACTTT

+

FFFFFFFFFFFFFFFFFFFFFFFFFFFFFFFFFFFFFFFFFFFFFFFFFFFFFFFFFFFFFFFFFFFFFFFF  
FFFFFFFFFFFFFFFFFFFFFFFFFFFFFFFFFFFFFFFFFFFFFFFFFFFFFFFFFFFFFFFFFFFFFFFF  
FFFFFFFFFFFFFFFF

@A00721:190:HGJW7DSXY:4:2169:21965:36025 1:N:0:TCTGCAAG+GCTGCACT  
CAGTCCTCGAATCAGTAGATTGAAATATATGACAAGTATATGTAAGTGGCTGACTTAGATCATAAGT  
AATGTATACAGTAAATGTTGTACAGTTGAAATAGATTTGAAATTCAAATTTCAAATTTTAAAATATG  
AGCCGTACAACTTT

+

FFFFFFFFFFFFFFFFFFFFFFFFFFFFFFFFFFFFFFFFFFFFFFFFFFFFFFFFFFFFFFFFFFFFFFFF  
FFFFFFFFFFFFFFFFFFFFFFFFFFFFFFFFFFFFFFFFFFFFFFFFFFFFFFFFFFFFFFFFFFFFFFFF  
FFFFFFFFFFFFFFFF

@A00721:190:HGJW7DSXY:4:2277:20636:16188 1:N:0:TCTGCAAG+GCTGCACT  
CAGTCCTCGAATCAGTAGATTGAAATATATGACAAGTATATGTAAGTGGCTGACTTAGATCATAAGT  
AATGTATACAGTAAATGTTGTACAGTTGAAATAGATTTGAAATTCAAATTTCAAATTTTAAAATATG  
AGCCGTACAACTTT

+

FFFFFFFFFFFFFFFF:FFFFFFFFFFFFFFFFFFFFFFFFFFFFFFFFFFFFFFFFFFFFFFFFFFFFFFF  
:FFFFFFFFFFFFFFFFFFFFFFFFFFFFFFFFFFFFFFFFFFFFFFFFFFFFFFFFFFFFFFFFFFFFFFF  
F:FFFFFFFFFFFF

@A00721:190:HGJW7DSXY:4:1241:11568:20650 1:N:0:TCTGCAAG+GCTGCACT  
CTCATATTTTCAAATTTGAAATTTGAATTTCAAATCTATTTCAACTGTACAAACATTTACTGTATACA  
TTACTTATGATCTAAGTCAGCCACTTACATATACTTGTATATATTTTGAATCTACTGATTGAGGAC  
TGTCATTTAATTTTG

+

FFFFFFFFFFFFFFFFFFFFFFFFFFFFFFFFFFFFFFFFFFFFFFFFFFFFFFFFFFFFFFFFFFFFFFFF  
FFFFFFFFFFFFFFFFFFFFFFFFFFFFFFFFFFFFFFFFFFFFFFFFFFFFFFFFFFFFFFFFFFFFFFFF  
FFFFFFFFFFFF:FFF

@A00721:190:HGJW7DSXY:4:1241:11794:20729 1:N:0:TCTGCAAG+GCTGCACT  
CTCATATTTTCAAATTTGAAATTTGAATTTCAAATCTATTTCAACTGTACAAACATTTACTGTATACA  
TTACTTATGATCTAAGTCAGCCACTTACATATACTTGTATATATTTTGAATCTACTGATTGAGGAC  
TGTCATTTAATTTTG

+

FFFFFFFFFFFFFFFFFFFFFFFFFFFFFFFFFFFFFFFFFFFFFFFFFFFFFFFFFFFFFFFFFFFFFFF  
FFFFFFFFFFFFFFFFFFFFFFFFFFFFFFFFFFFFFFFFFFFFFFFFFFFFFFFFFFFFFFFFFFFFFFF,FFFFFFFFFFFFFFFFFFFFFFFFFFFFFFFF  
FFFFF:FFFFFFFF

@A00721:190:HGJW7DSXY:4:1427:24985:35618 1:N:0:TCTGCAAG+GCTGCACT  
CTCATATTTTCAAATTTGAAATTTGAATTTCAAATCTATTTCAACTGTACAAACATTTACTGTATACA  
TTACTTATGATCTAAGTCAGCCACTTACATATACTTGTATATATTTTGAATCTACTGATTGAGGAC  
TGTCATTTAATTTTG

+

FFFFFFFFFFFFFFFFFFFFFFFFFFFFFFFFFFFFFFFFFFFFFFFFFFFFFFFFFFFFFFFFFFFFFFF,FFFFFFFFFFFFFFFFFFFFFFFF:FFFFFFFFFFFFFFFF



+  
FFFFFFFFFFFFFFFFFFFFFFFFFFFFFFFFFFFFFFFFFFFFFFFFFFFFFFFFFFFFFFFFFFFFFFFF  
:FFFFFFFFFFFFFFFFFFFFFFFFFFFFFFFFFFFFFFFFFFFFFFFFFFFFFFFFFFFFFFFFFFFFFFFF  
FFFFFFFFFFFFFFFF  
@A00721:190:HGJW7DSXY:4:1214:21856:8907 1:N:0:TCTGCAAG+GCTGCACT  
CAACTGTACAAACATTTACTGTATACATTACTTATGATCTAAGTCAGCCACTTACATATACTTGTCAT  
ATATTTTGAATCTACTGATTGAGGACTGTCATTTAATTTTGAATAATGAAAGATCTGATATCATCTT  
TCAAACGACGTGTTA

+  
FFFFFFFFFFFFFFFFFFFFFFFFFFFFFFFFFFFFFFFFFFFFFFFFFFFFFFFFFFFFFFFFFFFFFFFF  
FFFFFFFFFFFFFFFFFFFFFFFFFFFFFFFFFFFFFFFFFFFFFFFFFFFFFFFFFFFFFFFFFFFFFFFF  
FFFFFFF:FFFFFFFFF  
@A00721:190:HGJW7DSXY:4:1331:25500:17597 1:N:0:TCTGCAAG+GCTGCACT  
CAACTGTACAAACATTTACTGTATACATTACTTATGATCTAAGTCAGCCACTTACATATACTTGTCAT  
ATATTTTGAATCTACTGATTGAGGACTGTCATTTAATTTTGAATAATGAAAGATCTGATATCATCTT  
TCAAACGACGTGTTA

+  
FFF,F:FFFFFFFFFFFFFFFFFFFFFFFFFFFFFFFFFFFFFFFFFFFFFFFFFFFFFFFFFFFFFFFF  
F,FF:FFFFFFFFFFFFFFFFFFFFFFFFFFFFFFFFFFFFFFFFFFFFFFFFFFFFFFFFFFFFFFFF  
,F:FFFFF:F:F:FF  
@A00721:190:HGJW7DSXY:4:1506:18602:21183 1:N:0:TCTGCAAG+GCTGCACT  
CAACTGTACAAACATTTACTGTATACATTACTTATGATCTAAGTCAGCCACTTACATATACTTGTCAT  
ATATTTTGAATCTACTGATTGAGGACTGTCATTTAATTTTGAATAATGAAAGATCTGATATCATCTT  
TCAAACGACGTGTTA

+  
FFFFFFFFFFFFFFFFFFFFFFFFFFFFFFFFFFFFFFFFFFFFFFFFFFFFFFFFFFFFFFFFFFFFFFFF  
FFFFFFFFFFFFFFFFFFFFFFFFFFFFFFFFFFFFFFFFFFFFFFFFFFFFFFFFFFFFFFFFFFFFFFFF  
FFFFFFFFFFFFFFFF  
@A00721:190:HGJW7DSXY:4:1558:21829:14779 1:N:0:TCTGCAAG+GCTGCACT  
CAACTGTACAAACATTTACTGTATACATTACTTATGATCTAAGTCAGCCACTTACATATACTTGTCAT  
ATATTTTGAATCTACTGATTGAGGACTGTCATTTAATTTTGAATAATGAAAGATCTGATATCATCTT  
TCAAACGACGTGTTA

+  
FFFFFFFFFFFFFF:FFFFFFFFFFFFFFFFFFFFFFFFFFFFFFFFFFFFFFFFFFFFFFFFFFFFFFFF  
F:FFFFFFFFFFFFFFFFFFFFFFFFFFFFFFFFFFFFFFFFFFFFFFFFFFFFFFFFFFFFFFFFFFFF  
FFFF:FF:FF:FFFF  
@A00721:190:HGJW7DSXY:4:1617:5376:32503 1:N:0:TCTGCAAG+GCTGCACT  
CAACTGTACAAACATTTACTGTATACATTACTTATGATCTAAGTCAGCCACTTACATATACTTGTCAT  
ATATTTTGAATCTACTGATTGAGGACTGTCATTTAATTTTGAATAATGAAAGATCTGATATCATCTT  
TCAAACGACGTGTTA

+  
FFFFFFFFFFFFFFFFFFFFFFFFFFFFFFFFFFFFFFFFFFFFFFFFFFFFFFFFFFFFFFFFFFFFFFFF  
FFFFFFFFFFFFFFFFFFFFFFFFFFFFFFFFFFFFFFFFFFFFFFFFFFFFFFFFFFFFFFFFFFFFFFFF  
FFFF:FFFFFFFFF  
@A00721:190:HGJW7DSXY:4:2258:9561:9846 1:N:0:TCTGCAAG+GCTGCACT  
CAACTGTACAAACATTTACTGTATACATTACTTATGATCTAAGTCAGCCACTTACATATACTTGTCAT  
ATATTTTGAATCTACTGATTGAGGACTGTCATTTAATTTTGAATAATGAAAGATCTGATATCATCTT  
TCAAACGACGTGTTA

+  
FFFFFFFFFFFF:FFFFFFFFFFFFFFFFFFFFFFFFFFFFFFFFFFFFFFFFFFFFFFFFFFFFFFFF  
FFFFFFFFFFFFFFFFFFFFFFFFFFFFFFFFFFFFFFFFFFFFFFFFFFFFFFFFFFFFFFFFFFFFFFFF  
FFFFFFFFF:FFFFF  
@A00721:190:HGJW7DSXY:4:2261:24153:11913 1:N:0:TCTGCAAG+GCTGCACT  
CAACTGTACAAACATTTACTGTATACATTACTTATGATCTAAGTCAGCCACTTACATATACTTGTCAT







@A00721:190:HGJW7DSXY:4:2264:2157:33567 1:N:0:TCTGCAAG+GCTGCACT  
CGCCACTTACATATACTTGTTCATATATTTTGAATCTACTGATTCGAGGACTGTCATTTAATTTTGAAT  
AATGAAAGATCTGATATCATCTTTCAAACGACGTGTTAGAACTGGTTATCTGTGACGTATATCCATT  
CGGTGTAGAAACCG

@A00721:190:HGJW7DSXY:4:1339:22625:19570 1:N:0:TCTGCAAG+GCTGCACT  
GCCACTTACATATACTTGTGCATATATTTCTGAATCTACTGATTCGAGGACTGTCATTTAATTTTGAATA  
ATGAAAGATCTGATATCATCTTTCAAACGACGTGTTAGAACTGGTTATCTGTGACGTATATCCATTTT  
GGTGTAGAAACCAGA

@A00721:190:HGJW7DSXY:4:1452:3052:24095 1:N:0:TCTGCAAG+GCTGCACT  
GCCACTTACATATACTTGTGCATATATTTTCGAATCTACTGATTCGAGGACTGTCATTTAATTTTGAATA  
ATGAAAGATCTGATATCATCTTTCAAACGACGTGTTAGAACTGGTTATCTGTGACGTATATCCATTTT  
GGTGTAGAAACCAGA

@A00721:190:HGJW7DSXY:4:1462:12961:10347 1:N:0:TCTGCAAG+GCTGCACT  
GCCACTTACATATACTTGGCATATATTTTGAATCTACTGATTCGAGGACTGTCATTTAATTTTGAATA  
ATGAAAGATCTGATATCATCTTTCAAACGACGTGTTAGAACTGGGTATCTGTGACGTATATCCATTTT  
GGTGTAGAAACCAGA

@A00721:190:HGJW7DSXY:4:1555:14986:27070 1:N:0:TCTGCAAG+GCTGCACT  
GCCACTTACATATACTTGTCATATATTTTGAATCTACTGATTCGAGGACTGTCATTTAATTTTGAATA  
ATGAAAGATCTGATATCATCTTTCAAACGACGTGTTAGAACTGGTTATCTGTGACGTATATCCATTTT  
GGTGTAGAAACAAGA

@A00721:190:HGJW7DSXY:4:1669:21594:4413 1:N:0:TCTGCAAG+GCTGCACT  
GCCACTTACATATACTTGTGCATATATTTTGAATCTACTGATTCGAGGACTGTCATTTAATTTTGAATA  
ATGAAAGATCTGATATCATCTTTCAAACGACGTGTTAGAACTGGTTATCTGTGACGTATATCCATTTT  
GGTGTAGAAACCAGA

@A00721:190:HGJW7DSXY:4:2123:2275:27164 1:N:0:TCTGCAAG+GCTGCACT  
GCCACTTACATATACTTGTTCATATATTTTCGAATCTACTGATTGAGGACTGTCATTTAATTTTGAATA  
ATGAAAGATCTGATATCATCTTTCAAACGACGTGTTAGAACTGGTTATCTGTGACGTATATCCATTTT  
GGTGTAGAAACCAGA

+  
FFFFFFFFFFFFFFFFFFFFFFFF,FFFFFFFFFFFFFFFFFFFFFFFFFFFFFFFFFFFFFFFF  
FFFFFFFFFFFFFFFFFFFFFFFFFFFFFFFFFFFFFFFFFFFFFFFFFFFFFFFFFFFFFFFF:FFFFFFFFFFFF:FFFFFFFFFF  
FFFFFFFFFFFFFFFF

@A00721:190:HGJW7DSXY:4:2153:22354:22670 1:N:0:TCTGCAAG+GCTGCACT  
GCCACTTACATATACTTGT CATATATTTT CGAATCTACTGATT CGAGGACTGTCATTTAATTTTGAATA  
ATGAAAGATCTGATATCATCTTTCAAACGACGTGTTAGAACTGGTTATCTGTGACGTATATCCATTTC  
GGTGTAGAAACCAGA

+  
FFFFFFFFFFFFFFFFFFFFFFFFFFFFFFFFFFFFFFFFFFFFFFFFFFFFFFFFFFFFFFFF:F:FFFFFFFFFFFF  
FFFFFFFFFFFFFFFFFFFFFFFFFFFFFFFFFFFFFFFFFFFFFFFFFFFFFFFFFFFFFFFF, :FFFF  
FF:FFF, :FFFFFFF

@A00721:190:HGJW7DSXY:4:2250:4499:29293 1:N:0:TCTGCAAG+GCTGCACT  
GCCACTTACATATACTTGT CATATATTTT CGAATCTACTGATT CGAGGACTGTCATTTAATTTTGAATA  
ATGAAAGATCTGATATCATCTTTCAAACGACGTGTTAGAACTGGTTATCTGTGACGTATATCCATTTC  
GGTGTAGAAACCAGA

+  
FFFFFFFFFFFFFFFFFFFFFFFFFFFFFFFFFFFFFFFFFFFFFFFFFFFFFFFFFFFFFFFF  
FFFFFFFFFFFFFFFFFFFFFFFFFFFFFFFFFFFFFFFFFFFFFFFFFFFFFFFFFFFFFFFF  
FFFFFFFFFFFFFFFF

@A00721:190:HGJW7DSXY:4:2353:32018:29011 1:N:0:TCTGCAAG+GCTGCACT  
GCCACTTACATATACTTGT CATATATTTT CGAATCTACTGATT CGAGGACTGTCATTTAATTTTGAATA  
ATGAAAGATCTGATATCATCTTTCAAACGACGTGTTAGAACTGGTTATCTGTGACGTATATCCATTTC  
GGTGTAGAAACCAGA

+  
FFFFFFFFFFFFFFFFFFFFFFFFFFFFFFFFFFFFFFFFFFFFFFFFFFFFFFFFFFFFFFFF:FFFFFFFFFFFF  
FFFFFFFFFFFFFFFFFFFFFFFFFFFFFFFF:F,FFFFFFFFFFFFFFFFFFFFFFFFFFFFFFFF:FFFFF  
FFFFFFFFFFFFFFFF

@A00721:190:HGJW7DSXY:4:2513:5258:18114 1:N:0:TCTGCAAG+GCTGCACT  
GCCACTTACATATACTTGT CATATATTTT CGAATCTACTGATT CGAGGACTGTCATTTAATTTTGAATA  
ATGAAAGATCTGATATCATCTTTCAAACGACGTGTTAGAACTGGTTATCTGTGACGTATATCCATTTC  
GGTGTAGAAACCAGA

+  
FFFFFFFFFFFFFFFFFFFFFFFFFFFFFFFFFFFFFFFFFFFFFFFFFFFFFFFFFFFFFFFF  
FFFFFFFFFFFFFFFFFFFFFFFFFFFFFFFFFFFFFFFFFFFFFFFFFFFFFFFFFFFFFFFF  
FFFFFFFFFFFFFFFF

@A00721:190:HGJW7DSXY:4:2629:13865:4648 1:N:0:TCTGCAAG+GCTGCACT  
GCCACTTACATATACTTGT CATATATTTT CGAATCTACTGATT CGAGGACTGTCATTTAATTTTGAATA  
ATGAAAGATCTGATATCATCTTTCAAACGACGTGTTAGAACTGGTTATCTGTGACGTATATCCATTTC  
GGTGTAGAAACCAGA

+  
FFFFFFFFFFFFFFFFFFFFFFFFFFFFFFFFFFFFFFFFFFFFFFFFFFFFFFFFFFFFFFFF:FFFFFFFFFFFF  
FFFFFFFFFFFFFFFFFFFFFFFFFFFFFFFFFFFFFFFFFFFFFFFFFFFFFFFFFFFFFFFF:FFFFFFFFFFFF  
FFFFFF:FFFFFFF

@A00721:190:HGJW7DSXY:4:2657:15628:1157 1:N:0:TCTGCAAG+GCTGCACT  
GCCACTTACATATACTTGT CATATATTTT CGAATCTACTGATT CGAGGACTGTCATTTAATTTTGAATA  
ATGAAAGATCTGATATCATCTTTCAAACGACGTGTTAGAACTGGTTATCTGTGACGTATATCCATTTC  
GGTGTAGAAACCAGA

+  
FFFFFFFFFFFFFFFFFFFFFFFFFFFFFFFFFFFFFFFFFFFFFFFFFFFFFFFFFFFFFFFF  
FFFFFFFFFFFFFFFFFFFFFFFFFFFFFFFFFFFFFFFFFFFFFFFFFFFFFFFFFFFFFFFF:FFFFF  
FFFFFFFFFFFFFFFF

@A00721:190:HGJW7DSXY:4:1134:23936:3270 1:N:0:TCTGCAAG+GCTGCACT  
CACTTACATATACTTGT CATATATTTT CGAATCTACTGATT CGAGGACTGTCATTTAATTTTGAATAAT

GAAAGATCTGATATCATCTTTCAAACGACGTGTTAGAACTGGTTATCTGTGACGTATATCCATTTTCGG  
TGTAGAAACCAGAGA

[illegible] $+$ 

@A00721:190:HGJW7DSXY:4:1436:9634:3771 1:N:0:TCTGCAAG+GCTGCACT  
CACTTACATATACTTGTGCATATATTTGGAATCTACTGATTCGAGGACTGTCATTTAATTTTGAATAAT  
GAAAGATCTGATATCATCTTTCAAACGACGTGTTAGAACTGGTTATCTGTGACGTATATCCATTTGCG  
TGTAGAAACCAGAGA

[illegible] $+$ 

@A00721:190:HGJW7DSXY:4:1540:6849:4366 1:N:0:TCTGCAAG+GCTGCACT  
CACTTACATATACTTGTGCATATATTTTGAATCTACTGATTCGAGGACTGTCATTTAATTTTGAATAAT  
GAAAGATCTGATATCATCTTTCAAACGACGTGTTAGAACTGGTTATCTGTGACGTATATCCATTTGCG  
TGTAGAAACCAGAGA

```
FFFFFFFFFFFFFFFFFFFFFFFFFFFFFFFFFFFFFFFFFFFFFFFFFFFFFFFFFFFFF
FFFFFFFFFFFFFFFFFFFFFFFF:FFFFFFFFFFFFFFFFFFFFFFFFFFFFFFFFFFFF
EEEEEEEEE
```

+

@A00721:190:HGJW7DSXY:4:1114:32579:9220 1:N:0:TCTGCAAG+GCTGCACT  
TCATATATTTCTGAATCTACTGATTGAGGACTGTCATTTAATTTTGAATAATGAAAGATCTGATATCA  
TCTTTCAAACGACGTGTTAGAACTGGTTATCTGTGACGTATATCCATTTCTGGTGTAGAAACCAGAATC  
CTTCAGATCGG

```

FFFFFFFFFFFFFFFFFFFFFFFFFFFFFFFF:FFFFFFFFFFFFFFFFFFFFFFFFFFFFFFFF
FFFFFFFFFFFFFFFFFFFFFFFFFFFFFFFF:FFFFFFFFFFFFFFFFFFFFFFFFFFFFFFFF
FFFFFFFFFFFF

```



@A00721:190:HGJW7DSXY:4:2325:10999:13025 1:N:0:TCTGCAAG+GCTGCACT  
CTCGAGGACTGTCATTTAATTTTGAATAATGAAAGATCTGATATCATCTTTCAAACGACGTGTTAGAA  
CTGGTTATCTGTGACGTATATCCATTTGCGGTGTAGAAACCAGAATCCTTCAGATCGGCAATGAATTCC  
GATGAGGATCTATCG

@A00721:190:HGJW7DSXY:4:2615:4264:10974 1:N:0:TCTGCAAG+GCTGCACT  
CTCGAGGACTGTCATTTAATTTTGAATAATGAAAGATCTGATATCATCTTTCAAACGACGTGTTAGAA  
CTGGTTATCTGTGACGTATATCCATTTGCGGTGTAGAAACCAGAATCCTTCAGATCGGCAATGAATTCC  
GATGAGGATCTATCG

@A00721:190:HGJW7DSXY:4:1248:18783:10598 1:N:0:TCTGCAAG+GCTGCACT  
AGGACTGTCATTTAATTTTGAATAATGAAAGATCTGATATCATCTTTCAAACGACGTGTTAGAACTGG  
TTATCTGTGACGTATATCCATTTCTGGTGTAGAAACCAGAATCCTTCAGATCGGCAATGAATTCCGATG  
AGGATCTATCGATCT

@A00721:190:HGJW7DSXY:4:2636:6433:27195 1:N:0:TCTGCAAG+GCTGCACT  
AGGACTGTCATTTAATTTTGAATAATGAAAGATCTGATATCATCTTTCAAACGACGTGTTAGAACTGG  
TTATCTGTGACGTATATCCATTTCTGGTGTAGAAACCAGAATCCTTCAGATCGGCAATGAATTCCGATG  
AGGATCTATCGATCT

@A00721:190:HGJW7DSXY:4:1432:28791:2910 1:N:0:TCTGCAAG+GCTGCACT  
CTGTCATTTAATTTTGAATAATGAAAGATCTGATATCATCTTTCAAACGACGTGTTAGAACTGGTTAT  
CTGTGACGTATATCCATTTTCGGTGTAGAAACCAGAATCCTTCAGATCGGCAATGAATTCCGATGAGGA  
TCTATCGATCTTCAC

@A00721:190:HGJW7DSXY:4:1625:23466:24940 1:N:0:TCTGCAAG+GCTGCACT  
CTGTCATTTAATTTGAATAATGAAAGATCTGATATCATCTTTCAAACGACGTGTTAGAACTGGTTAT  
CTGTGACGTATATCCATTTTCGGTGTAGAAACCAGAATCCTTCAGATCGGCAATGAATTCCGATGAGGA  
TCTATCGATCTTCAC

@A00721:190:HGJW7DSXY:4:1646:27001:15875 1:N:0:TCTGCAAG+GCTGCACT  
CTGTCATTTAATTTGAATAATGAAAGATCTGATATCATCTTTCAAACGACGTGTTAGAACTGGTTAT  
CTGTGACGTATATCCATTTTCGGTGTAGAAACCAGAATCCTTCAGATCGGCAATGAATTCCGATGAGGA  
TCTATCGATCTTCAC

+  
FFFFFFFFFFFFFFFFFFFFFFFFFFFFFFFFFFFFFFFFFFFFFFFFFFFFFFFFFFFFFFFFFFFFFFFF  
FFFFFFFFFFFFFFFFFFFFFFFFFFFFFFFFFFFFFFFFFFFFFFFFFFFFFFFFFFFFFFFFFFFFFFFF  
FFFFFFFFF:FFF:F  
@A00721:190:HGJW7DSXY:4:1157:19488:8061 1:N:0:TCTGCAAG+GCTGCACT  
AGCGCATATCGTCGACAATAGACAGAAGTGAAGATCGATAGATCCTCATCGGAATTCATTGCCGATCT  
GAAGGATTCTGGTTTCTACACCGAAATGGATATACGTCACAGATAACCAGTTCTAACACGTCGTTTGA  
AAGATGATATCAGAT

+  
FFFFFFFFFFFFFFFFFFFFFFFFFFFFFFFFFFFFFFFFFFFFFFFFFFFFFFFFFFFFFFFFFFFFFFFF  
FFFFFFFFFFFFFFFFF:FFFFFFFFFFFFFFFFFFFFFFFFFFFFFFFFFFFFFFFFFFFFFFFFFFFFF  
FFFFFFFFFFFFFFFFF  
@A00721:190:HGJW7DSXY:4:1263:31295:6433 1:N:0:TCTGCAAG+GCTGCACT  
AGCGCATATCGTCGACAATAGACAGAAGTGAAGATCGATAGATCCTCATCGGAATTCATTGCCGATCT  
GAAGGATTCTGGTTTCTACACCGAAATGGATATACGTCACAGATAACCAGTTCTAACACGTCGTTTGA  
AAGATGATATCAGAT

+  
FFFFFFFFFFFFFFFFFFFFFFFFFFFFFFFFFFFFFFFFFFFFFFFFFFFFFFFFFFFFFFFFFFFFFFFF  
FFFFFFFFFFFFFFFFFFFFFFFFFFFFFFFFFFFFFFFFFFFFFFFFFFFFFFFFFFFFFFFFFFFFFFFF  
FFFFFFFFFFFFFFFFF  
@A00721:190:HGJW7DSXY:4:1632:12301:13808 1:N:0:TCTGCAAG+GCTGCACT  
AGCGCATATCGTCGACAATAGACAGAAGTGAAGATCGATAGATCCTCATCGGAATTCATTGCCGATCT  
GAAGGATTCTGGTTTCTACACCGAAATGGATATACGTCACAGATAACCAGTTCTAACACGTCGTTTGA  
AAGATGATATCAGAT

+  
FFFFFFFFFFFFFFFFFFFFFFFFFFFFFFFFFFFFFFFFFFFFFFFFFFFFFFFFFFFFFFFFFFFFFFFF  
FFFFFFFFFFFFFFFFFFFFFFFFFFFFFFFFFFFFFFFFFFFFFFFFFFFFFFFFFFFFFFFFFFFFFFFF  
FFFFFFFFFFFFFFFFF  
@A00721:190:HGJW7DSXY:4:2173:10402:28244 1:N:0:TCTGCAAG+GCTGCACT  
AGCGCATATCGTCGACAATAGACAGAAGTGAAGATCGATAGATCCTCATCGGAATTCATTGCCGATCT  
GAAGGATTCTGGTTTCTACACCGAAATGGATATACGTCACAGATAACCAGTTCTAACACGTCGTTTGA  
AAGATGATATCAGAT

+  
FFFFFFFFFFFFFFFFFFFFFFFFFFFFFFFFFFFFFFFFFFFFFFFFFFFFFFFFFFFFFFFFFFFFFFFF  
FFFFFFFFFFFFFFFFFFFFFFFFFFFFFFFFFFFFFFFFFFFFFFFFFFFFFFFFFFFFFFFFFFFFFFFF  
FFFFFFFFFFFFFFFFF  
@A00721:190:HGJW7DSXY:4:1219:16468:28980 1:N:0:TCTGCAAG+GCTGCACT  
GCGACGTGTTAGAACTGGTTATCTGTGACGTATATCCATTTCGGTGTAGAAACCAGAATCCTTCAGAT  
CGGCAATGAATCCGATGAGGATCTATCGATCTTCACTTCTGTCTATTGTCGACGATATGCGCTGCTG  
GGAATGTTATGTATT

+  
FFFFFFFFFFFFFFFFFFFFFFFFFFFFFFFFFFFFFFFFFFFFFFFFFFFFFFFFFFFFFFFFFFFFFFFF  
FFFFFFFFFFFFFFFFFFFFFFFFFFFFFFFFFFFFFFFFFFFFFFFFFFFFFFFFFFFFFFFFFFFFFFFF  
FFF,FFFFFFFFF  
@A00721:190:HGJW7DSXY:4:1303:28076:29951 1:N:0:TCTGCAAG+GCTGCACT  
GCGACGTGTTAGAACTGGTTATCTGTGACGTATATCCATTTCGGTGTAGAAACCAGAATCCTTCAGAT  
CGGCAATGAATCCGATGAGGATCTATCGATCTTCACTTCTGTCTATTGTCGACGATATGCGCTGCTG  
GGAATGTTATGTATT

+  
FFFFFFFFFFFFFFFFFFFFFFFFFFFFFFFFFFFFFFFFFFFFFFFFFFFFFFFFFFFFFFFFFFFFFFFF  
FFFFFFFFFFFFFFFFF:FFFFFFFFFFFFFFFFFFFFFFFFFFFFFFFFFFFFFFFFFFFFFFFFFFFFF  
FFF,FFFFFFFFF  
@A00721:190:HGJW7DSXY:4:1678:10954:35305 1:N:0:TCTGCAAG+GCTGCACT  
GCGACGTGTTAGAACTGGTTATCTGTGACGTATATCCATTTCGGTGTAGAAACCAGAATCCTTCAGAT

CGGCAATGAATTCCGATGAGGATCTATCGATCTTCACTTCTGTCTATTGTCGACGATATGCGCTGCTG  
GGAATGTTATGTATT

+

FFFFFFFFFFFFFF:FFFFFFFFFFFFFFFFFFFFFFFFFFFFFFFFFFFFFFFFFFFFFFFFFFFFFFFF  
FFFFFFFFFFFFFFFFFFFFFFFFFFFFFFFFFFFFFFFFFFFFFFFFFFFFFFFFFFFFFFFFFFFFFFFF  
FFFFFFFFFFFFFFFF

@A00721:190:HGJW7DSXY:4:2116:25075:19554 1:N:0:TCTGCAAG+GCTGCACT  
GCGACGTGTTAGAACTGGTTATCTGTGACGTATATCCATTTCGGTGTAGAAACCAGAATCCTTCAGAT  
CGGCAATGAATTCCGATGAGGATCTATCGATCTTCACTTCTGTCTATTGTCGACGATATGCGCTGCTG  
GGAATGTTATGTATT

+

FFFFFFFFFFFFFFFFFFFFFFFFFFFFFFFFFFFFFFFFFFFFFFFFFFFFFFFFFFFFFFFFFFFFFFFF  
FFFFFFFFFFFFFFFFFFFFFFFF:FFFFFFFFFFFFFFFFFFFFFFFFFFFFFFFFFFFFFFFFFFFFFFFF  
FFFF:F:FFFFFFFF

@A00721:190:HGJW7DSXY:4:2203:28031:25394 1:N:0:TCTGCAAG+GCTGCACT  
GCGACGTGTTAGAACTGGTTATCTGTGACGTATATCCATTTCGGTGTAGAAACCAGAATCCTTCAGAT  
CGGCAATGAATTCCGATGAGGATCTATCGATCTTCACTTCTGTCTATTGTCGACGATATGCGCTGCTG  
GGAATGTTATGTATT

+

FFFFFFFFFFFFFFFFFFFFFFFFFFFFFFFFFFFFFFFFFFFFFFFFFFFFFFFFFFFFFFFFFFFFFFFF  
FFFFFFFFFFFFFFFFFFFFFFFFFFFFFFFFFFFFFFFFFFFFFFFFFFFFFFFFFFFFFFFFFFFFFFFF  
FFF:FFFFFFFF

@A00721:190:HGJW7DSXY:4:2269:6885:31454 1:N:0:TCTGCAAG+GCTGCACT  
GCGACGTGTTAGAACTGGTTATCTGTGACGTATATCCATTTCGGTGTAGAAACCAGAATCCTTCAGAT  
CGGCAATGAATTCCGATGAGGATCTATCGATCTTCACTTCTGTCTATTGTCGACGATATGCGCTGCTG  
GGAATGTTATGTATT

+

FFFFFFFFFFFFFFFFFFFFFFFFFFFFFFFFFFFFFFFFFFFFFFFFFFFFFFFFFFFFFFFFFFFFFFFF  
FFFFFFFFFFFFFFFFFFFFFFFFFFFFFFFFFFFFFFFFFFFFFFFFFFFFFFFFFFFFFFFFFFFFFFFF  
FFF,FFFFFFFF

@A00721:190:HGJW7DSXY:4:1345:10438:16470 1:N:0:TCTGCAAG+GCTGCACT  
GACGTGTTAGAACTGGTTATCTGTGACGTATATCCATTTCGGTGTAGAAACCAGAATCCTTCAGATCG  
GCAATGAATTCCGATGAGGATCTATCGATCTTCACTTCTGTCTATTGTCGACGATATGCGCTGCTGGG  
AATGTTATGTATTTCG

+

FFFFFFFFFFFFFFFFFFFFFFFFFFFFFFFFFFFFFFFFFFFFFFFFFFFFFFFFFFFFFFFFFFFFFFFF  
FFFFFFFFFFFFFFFFFFFFFFFFFFFFFFFFFFFFFFFFFFFFFFFFFFFFFFFFFFFFFFFFFFFFFFFF  
FFFFFFFFFFFFFFFF

@A00721:190:HGJW7DSXY:4:1569:10854:33442 1:N:0:TCTGCAAG+GCTGCACT  
GACGTGTTAGAACTGGTTATCTGTGACGTATATCCATTTCGGTGTAGAAACCAGAATCCTTCAGATCG  
GCAATGAATTCCGATGAGGATCTATCGATCTTCACTTCTGTCTATTGTCGACGATATGCGCTGCTGGG  
AATGTTATGTATTTCG

+

FFFFFFFFFFFFFFFFFFFFFFFFFFFFFFFFFFFFFFFFFFFFFFFFFFFFFFFFFFFFFFFFFFFFFFFF  
FFFFFFFFFFFFFFFFFFFFFFFF:FFFFFFFFFFFFFFFFFFFFFFFFFFFFFFFFFFFFFFFFFFFFFFFF  
FFFFFF:FFFFFF

@A00721:190:HGJW7DSXY:4:2158:13991:36808 1:N:0:TCTGCAAG+GCTGCACT  
GACGTGTTAGAACTGGTTATCTGTGACGTATATCCATTTCGGTGTAGAAACCAGAATCCTTCAGATCG  
GCAATGAATTCCGATGAGGATCTATCGATCTTCACTTCTGTCTATTGTCGACGATATGCGCTGCTGGG  
AATGTTATGTATTTCG

+

FFFFFFFFFFFFFFFFFFFFFFFFFFFFFFFFFFFFFFFFFFFFFFFFFFFFFFFFFFFFFFFFFFFFFFFF  
FFFFFFFFFFFFFFFFFFFFFFFF:FFFFFFFFFFFFFFFFFFFFFFFFFFFFFFFFFFFFFFFFFFFFFFFF  
FFFFFFFF:FFFFFF,FFFFFFFFFFFFFFFF:FFFFFF  
FFFFFFFFFFFFFFFF





```

FFFFFFFFFFFFFFFFFFFFFFFFFFFFFFFFFFFFFFFFFFFFFFFFFFFFFFFFFFFFFFFF,FFFFFFFFFFFFFFFFFFFFFFFFFFFFFFFFFFFFFFFF
:FFFFFFFFFFFFFFFF

```

+

@A00721:190:HGJW7DSXY:4:1205:13141:30608 1:N:0:TCTGCAAG+GCTGCACT  
CGTGTTAGAACTGGTTATCTGTGACGTATATCCATTTGCGGTGTAGAAACCAGAATCCTTCAGATCGGC  
AATGAATTCCGATGAGGATCTATCGATCTTCACCTTCTGTCTATTGTGCGACGATATGCGCTGCTGGGAA  
TGTTATGTATTTCGAC

```

FFFFFFFFFFFFFFFFFFFFFFFFFFFFFFFF:FFFFFFFFFFFFFFFFFFFFFFFFFFFFFFFFFFFFFFFF
FFFFFFFFFFFFFFFFFFFFFFFFFFFFFFFFFFFFFFFFFFFFFFFFFFFFFFFFFFFFFFFF:FFFFFFFFF,
FFFFFFFFFFFFFFFFFFFFFFFF,
FFFFFFFFFFFFFFFF

```

+

@A00721:190:HGJW7DSXY:4:1360:29152:3255 1:N:0:TCTGCAAG+GCTGCACT  
CGTGTTAGAACTGGTTATCTGTGACGTATATCCATTTGCGGTGTAGAAACCAGAATCCTTCAGATCGGC  
AATGAATTCCGATGAGGATCTATCGATCTTCACCTCTGTCTATTGTCGACGATATGCGCTGCTGGGAA  
TGTTATGTATTTCGAC

[illegible]

+

@A00721:190:HGJW7DSXY:4:2232:17861:15139 1:N:0:TCTGCAAG+GCTGCACT  
CGTGTTAGAACTGGTTATCTGTGACGTATATCCATTTGCGGTGTAGAAACCAGAATCCTTCAGATCGGC  
AATGAATTCCGATGAGGATCTATCGATCTTCACCTCTGTCTATTGTGCGACGATATGCGCTGCTGGGAA  
TGTTATGTATTTCGAC

```

FFFFFFFFFFFFFFFFFFFFFFFFFFFFFFFFFFFFFFFFFFFFFFFFFFFFFFFFFFFFFFFFFFFFFFFF
FFFFFFFFFFFFFFFFFFFFFFFFFFFFFFFF:FFFFFFFFFFFFFFFF:FFFFFFFFF:FFFFFFFFFFFF,
FFFFFFFFFFFFFFFF

```

```
FFF:FFFFFFFFFFFFFFFFFFFFFFFFFFFFFFFF,FFFFF:FF:FFFFFFFF:FFFFFFFFFFFFFFFF:F::
FFFFFFFFF,:FFFFFFFFFFFFFFFFFFFFFFFFFFFFFFFFFFFFF:F:FFFFF,FFFF:F:FFFFFFFFFFF,
FFFFFFFF:FFFFF,FF
```

```

FFFFFFFF:FFFFFFFFFFFFFFFFFFFFFFFFFFFFFFFFFFFFFFFFFFFFFFFFFFFFFFFF:FFFFFFFFFFFFFFFFFFFF,FF
FFFFFFFF::FFFFFF:FFFF:FFF,F:FFFFFF:FFFFFFFF:FFFFFFFF:FFFFFFFFFFFFFFFFFFFFFFFFFFFF,
F:FFFFFFFFFFFFFFFF

```

FFFFFFFFFFFFFFFFFFFFFFFFFFFFFFFFFFFFFFFFFFFFFFFFFFFFFFFFFFFFFFFFFFFF  
 FFFFFFFFFFFFFFFFFFFFFFFFFFFFFFFFFFFFFFFF,FFFFFFFFFFFFFFFFFFFFFFFFFFFF  
 FFFFFFFFFFFFFFFF

```

FFFFFFFFFFFFFFFF:FFFFFFFFFFFFFFFFFFFFFFFFFFFFFFFFFFFFFFFF
FFFFFFFFFFFFFFFFFFFFFFFFFFFFFFFFFFFFFFFFFFFFFFFF,
FFFFFFFFFFFFFFFFFFFFFFFFFFFFFFFFFFFFFFFF,
FFFFFFFFFFFFFFFF

```

```

FFFFFFFFFFFFFFFFFFFFFFFFFFFFFFFFFFFFFFFFFFFFFFFFFFFFFFFFFFFFFFFF
FFFFFFFFFFFFFFFFFFFFFFFFFFFFFFFFFFFFFFFFFFFFFFFFFFFFFFFFFFFFFFFF:
FFFFFFFFFFFFFFFFFFFFFFFFFFFFFFFFFFFFFFFF
FFFFFFFFFFFFFFFF

```

[illegible][illegible]

@A00721:190:HGJW7DSXY:4:1445:19416:1861 1:N:0:TCTGCAAG+GCTGCACT  
TGTTAGAACTGGTTATCTGTGACGTATATCCATTTCCGGTGTAGAAACCAGAATCCTTCAGATCGGCAA



@A00721:190:HGJW7DSXY:4:2549:5348:22968 1:N:0:TCTGCAAG+GCTGCACT  
CAGAATCCTTCAGATCAGCAATGAATTCCGATGAGGATCTATCGATCTTCACTTCTGTCTATTGTCGA  
CGATATGCGCTGCTGGGAATGTTATGTATTGACGATTGATGTTGCTTTGTTATTGTAGAACAATA  
AAGTTCTGAATTC

+

FF:FF:FFFFFFFFFFFF,FFFFFFFFFFFF:FFFFFFFFFFFF::FF,FF:FFFFFFFFFFFF:FFF:F  
F:FFF:FF:FF::F:,FFFFFF:FFF:FFFFFF,,FFFFFF:,FF,F:FFFFFFFFFFFF:FFFF  
F:FFFF:FFF::F

@A00721:190:HGJW7DSXY:4:1447:6244:14372 1:N:0:TCTGCAAG+GCTGCACT  
GACGAATTCAGAACTTTATTGTTCTACAATAACGAAAGCGAACATGAATCGTCGAATACATAACATTC  
CCAGCAGCGCATATCGTCGACAATAGACAGAAGTGAAGATCGATAGATCCTCATCGGAATTCATTGCC  
GATCTGAAGGATTCT

+

FFFFFFFFFFFFFFFFFFFFFFFFFFFFFFFFFFFFFFFFFFFFFFFFFFFFFFFFFFFFFFFFFFFFFFFFFFFF:FFFFFFFFFFFF  
FFFFFFFFFFFFFFFFFFFFFFFFFFFFFFFFFFFFFFFFFFFFFFFFFFFFFFFFFFFFFFFFFFFFFFFFFFFFFFFF  
FFFFFFFFFFFFFFFFFFFF

@A00721:190:HGJW7DSXY:4:2522:7645:5588 1:N:0:TCTGCAAG+GCTGCACT  
GACGAATTCAGAACTTTATTGTTCTACAATAACGAAAGCGAACATGAATCGTCGAATACATAACATTC  
CCAGCAGCGCATATCGTCGACAATAGACAGAAGTGAAGATCGATAGATCCTCATCGGAATTCATTGCC  
GATCTGAAGGATTCT

+

FFFFFFFFFFFFFFFFFFFFFFFFFFFFFFFFFFFFFFFFFFFFFFFFFFFFFFFFFFFFFFFFFFFFFFFFFFFF:FFFFFFFFFFFF  
FFFFFFFFFFFFFFFFFFFFFFFFFFFFFFFFFFFFFFFFFFFFFFFFFFFFFFFFFFFFFFFFFFFFFFFFFFFFFFFF  
F:FFFFF:FFFF:FF

@A00721:190:HGJW7DSXY:4:1614:31729:16799 1:N:0:TCTGCAAG+GCTGCACT  
GAATCCTTCAGATCGGCAATGAATTCCGATGAGGATCTATCGATCTTCACTTCTGTCTATTGTCGACG  
ATATGCGCTGCTGGGAATGTTATGTATTGACGATTGATGTTGCTTTGTTATTGTAGAACAATAAA  
GTTCTGAATTCGTCA

+

FFFFFFFFFFFFFFFFFFFFFFFFFFFFFFFFFFFFFFFFFFFFFFFFFFFFFFFFFFFFFFFFFFFFFFFFFFFF:FFFFFFFFFFFF  
FFFFFFFFFFFFFFFFFFFFFFFFFFFFFFFFFFFFFFFFFFFFFFFFFFFFFFFFFFFFFFFFFFFFFFFFFFFFFFFF  
FFFFFFFFFFFFFF:FFF

@A00721:190:HGJW7DSXY:4:2506:18710:10723 1:N:0:TCTGCAAG+GCTGCACT  
GAATCCTTCAGATCGGCAATGAATTCCGATGAGGATCTATCGATCTTCACTTCTGTCTATTGTCGACG  
ATATGCGCTGCTGGGAATGTTATGTATTGACGATTGATGTTGCTTTGTTATTGTAGAACAATAAA  
GTTCTGAATTCGTCA

+

FFFFFFFFFFFFFFFFFFFFFFFFFFFFFFFFFFFFFFFFFFFFFFFFFFFFFFFFFFFFFFFFFFFFFFFFFFFF:FFFFFFFFFFFF  
FFFFFFFFFFFFFFFFFFFFFFFFFFFFFFFFFFFFFFFFFFFFFFFFFFFFFFFFFFFFFFFFFFFFFFFFFFFFFFFF  
FFFFFFFFFFFFFF:FFF

@A00721:190:HGJW7DSXY:4:2513:26359:28354 1:N:0:TCTGCAAG+GCTGCACT  
GAATCCTTCAGATCGGCAATGAATTCCGATGAGGATCTATCGATCTTCACTTCTGTCTATTGTCGACG  
ATATGCGCTGCTGGGAATGTTATGTATTGACGATTGATGTTGCTTTGTTATTGTAGAACAATAAA  
GTTCTGAATTCGTCA

+

FFFFFFFFFFFFFFFFFFFFFFFFFFFFFFFFFFFFFFFFFFFFFFFFFFFFFFFFFFFFFFFFFFFFFFFFFFFF:FFFFFFFFFFFF  
FFFFFFFFFFFFFFFFFFFFFFFFFFFFFFFFFFFFFFFFFFFFFFFFFFFFFFFFFFFFFFFFFFFFFFFFFFFFFFFF  
FFFFFFFFFFFFFF:FFF

@A00721:190:HGJW7DSXY:4:1116:22869:30859 1:N:0:TCTGCAAG+GCTGCACT  
GCAATGAATTCGATGAGGATCTATCGATCTTCACTGCTGTCTATTGTCGACGATATGCGCTGCTGGG  
AATGTTATGTATTGACGATTGATGTTGCTTTGTTATTGTAGAACAAAAAGTTCTGAATTCGTCA  
CACCA

+

FFFFFFFF,FFFFFFFF:FFFFFFFF, :F:FFF, ::FFFF, FF:FFFF:FFFF:F:F::FF,

FFFFFF:F,F,FFFFFF:FFFF:FFF,FFF:,FFFF,:FFFFFFFF,::,FFF:F,FFFFFF:,FFFF  
,FF,F

@A00721:190:HGJW7DSXY:4:1317:19226:31908 1:N:0:TCTGCAAG+GCTGCACT  
GCAATGAATTCCGATGAGGATCTATCGATCTTCACCTTCTGTCTATTGTGCGACGATATGCGCTGCTGGG  
AATGTTATGTATTGACGATTCATGTTGCTTTGTTATTGTAGAACAAATAAGTTCTGAATTCGTCA  
CACCA

+

FFFFFFFFFFFFFFFFFFFFFFFFFFFFFFFFFFFFFFFF:FFFFFFFFF:FFFF:FFFFFFFFFFFFFFFFFFFFFFF  
FFFFFFFFFFFFFFFFFFFFFFFFFFFFFFFFFFFFFFFF:FFFFFFFFFFFFFFFFFFFFFFFFFFFFFFFFFFFFFFF  
FF,FF

@A00721:190:HGJW7DSXY:4:1412:23023:33943 1:N:0:TCTGCAAG+GCTGCACT  
GCAATGAATTCCGATGAGGATCTATCGATCTTCACCTTCTGTCTATTGTGCGACGATATGCGCTGCTGGG  
AATGTTATGTATTGACGATTCATGTTGCTTTGTTATTGTAGAACAAATAAGTTCTGAATTCGTCA  
CACCA

+

FFFFFFFFFFFFFFFFFFFFFFFFFFFFFFFFFFFFFFFF:FFF:F:FFFFFFFF:FFFFFFFFFFFFFFFFFFFFFFF:FFF  
FFFFFFFFFFFFFFFFFFFFFFFFFFFFFFFFFFFFFFFFFFFFFFFFFFFF,FFFFFFFFFFFFFFFFFFFFFFFFFFFFF  
FFFFF

@A00721:190:HGJW7DSXY:4:1521:6677:10833 1:N:0:TCTGCAAG+GCTGCACT  
GCAATGAATTCCGATGAGGATCTATCGATCTTCACCTTCTGTCTATTGTGCGACGATATGCGCTGCTGGG  
AATGTTATGTATTGACGATTCATGTTGCTTTGTTATTGTAGAACAAATAAGTTCTGAATTCGTCA  
CACCA

+

FFFFFFFFFFFFFFFFFFFFFFFFFFFFFFFFFFFFFFFF, :FFFFFFFFFFFFFFFFFFFFFFFFFFFFFFFFFFFFFFF  
FFFFFFFFFFFFFFFFFFFFFFFFFFFFFFFFFFFFFFFFFFFFFFFFFFFFFFFF:FFFFFFFFFFFFFFFF:FFFFFFF  
FFFFF

@A00721:190:HGJW7DSXY:4:1554:25491:5274 1:N:0:TCTGCAAG+GCTGCACT  
GCAATGAATTCCGATGAGGATCTATCGATCTTCACCTTCTGTCTATTGTGCGACGATATGCGCTGCTGGG  
AATGTTATGTATTGACGATTCATGTTGCTTTGTTATTGTAGAACAAATAAGTTCTGAATTCGTCA  
CACCA

+

FFFFFFFFFFFFFFFFFFFFFFFFFFFFFFFFFFFFFFFF:FFFFFFFFFFFFFF,FFFFFFFFFFFFFFFF:FFFFFFF  
FFFFFFFFFFFFFFFFFFFFFFFFFFFFFFFFFFFFFFFFFFFFFFFFFFFFFFFFFFFFFFFFFFFFFFFFFFFFFFF  
FFFFF

@A00721:190:HGJW7DSXY:4:1603:32705:11788 1:N:0:TCTGCAAG+GCTGCACT  
GCAATGAATTCCGATGAGGATCTATCGATATTCACTTCTGTCTATTGTGCGACGATATGCGCTGCTGGG  
AATGTTATGTATTGACGATTCATGTTGCTTTGTTATTGTAGAACAAATAAGTTCTGAATTCGTCA  
CACCA

+

FFFF:FFFFFFFF:FFFFFFFFFFFFFFF,,,FFFFFF,FF:FFFFFFFFFFFFFFFF,FFFF: :FFFFF  
FFFFFFFFF:FFFFFFF,F:FFF,FF,FFF:FFFFFF:FFFF:FFFFFFFF:FFFFFFFFFFFF:FFF  
FFF,F

@A00721:190:HGJW7DSXY:4:2268:30472:1282 1:N:0:TCTGCAAG+GCTGCACT  
GCAATGAATTCCGATGAGGATCTATCGATCTTCACCTTCTGTCTATTGTGCGACGATATGCGCTGCTGGG  
AATGTTATGTATTGACGATTCATGTTGCTTTGTTATTGTAGAACAAATAAGTTCTGAATTCGTCA  
CACCA

+

FFFFFFFFFFFFFFFFFFFFFFFFFFFFFFFFFFFFFFFF,FFFFFFFFFFFFFF:FFFFFFFFFFFFFFFFFFFFFFF  
FFFFFFFFFFFFFFFFFFFFFFF,FFFFFFFFFFFFFFFFFFFFFFFFFFFFFFFFFFFFFFF,FFFFFFFFFFFFFFF  
FFFFF

@A00721:190:HGJW7DSXY:4:2373:19551:20885 1:N:0:TCTGCAAG+GCTGCACT  
GCAATGAATTCCGATGAGGATCTATCGATCTTCACCTTCTGTCTATTGTGCGACGATATGCGCTGCTGGG  
AATGTTATGTATTGACGATTCATGTTGCTTTGTTATTGTAGAACAAATAAGTTCTGAATTCGTCA  
CACCA

+  
FFFFFFFFFFFF::FF:FFFFFFFF:FFFF:FF:FFFF:FFF::FFFFFFFFFFFF:FFFFFFFFFFFF:  
:,FFFFFFFFFFFFFFFFFFFF::FFFFFF,FFF:FFFFFFFF:FFFFFFFFFFFFFFFFFFFF,FFFFFFFF  
FFFFF

@A00721:190:HGJW7DSXY:4:2377:17336:18082 1:N:0:TCTGCAAG+GCTGCACT  
GCAATGAATTCCGATGAGGATCTATCGATCTTCACTTCTGTCTATTGTGCGACGATATGCGCTGCTGGG  
AATGTTATGTATTGACGATTCATGTTGCTTTGTTATTGTAGAACAAATAAAGTTCTGAATTCGTCA  
CACCA

+  
FFFFFFFFFFFFFFFFFFFF:FFFFFFFFFFFF:FFFFF:FFFFFFFFFFFFFFFFFFFFFFFFFFFFFFFFFFFF  
F,FFFFF:FFFFFFFFFFFF:FFFFFFFFFFFFFFFFFFFFFFFFFFFFFFFFFFFF:FFFFFFFFFFFF:FFFFF  
FFFFF

@A00721:190:HGJW7DSXY:4:2541:32190:22357 1:N:0:TCTGCAAG+GCTGCACT  
GCAATGAATTCCGATGAGGATCTATCGATCTTCACTTCTGTCTATTGTGCGACGATATGCGCTGCTGGG  
AATGTTATGTATTGACGAGTCATGTTGCTTTGTTATTGTAGAAAAATAAAGTTCTGAAATCGTCA  
CACCA

+  
FFFF,::FFFF:FF:,FFFFFF:FFFFFF,F,FF:FFFF:,F:FFF,:FFF:,FFFF,F:,FF:FFF,  
FFFF:FFFFF:,FFFF:F,,FFFFFF:,FF:FFFFFF:FFFF,FF,:F,FFF:F::F,F,,F:,:,F  
FFF,F

@A00721:190:HGJW7DSXY:4:1342:26241:2848 1:N:0:TCTGCAAG+GCTGCACT  
TCACTTCTGTCTATTGTGCGACGATATGCGCTGCTGGGAATGTTATGTATTGACGATTCATGTTGCT  
TTCGTTATTGTAGAACAAATAAAGTTCTGAATTCGTACACCAGAATGTTATTAGAACCTCTGACGTCA  
TTCTG

+  
FFFFFFFFFFFFFFFFFFFFFFFFFFFFFFFFFFFFFFFFFFFFFFFFFFFFFFFFFFFFFFFFFFFFFFFFFFFF  
FFFFFFFFFFFFFFFFFFFFFFFFFFFFFFFFFFFFFFFFFFFFFFFFFFFFFFFFFFFFFFFFFFFFFFFFFFFF  
FFFFF

@A00721:190:HGJW7DSXY:4:1645:12870:29324 1:N:0:TCTGCAAG+GCTGCACT  
TCACTTCTGTCTATTGTGCGACGATATGCGCTGCTGGGAATGTTATGTATTGACGATTCATGTTGCT  
TTCGTTATTGTAGAACAAATAAAGTTCTGAATTCGTACACCAGAATGTTATTAGAACCTCTGACGTCA  
TTCTG

+  
FFFFFFFFFFFFFFFFFFFFFFFFFFFFFFFFFFFFFFFFFFFFFFFFFFFFFFFFFFFFFFFFFFFFFFFFFFFF  
FFFFFFFFFFFFFFFFFFFFFFFFFFFFFFFFFFFFFFFFFFFFFFFFFFFFFFFFFFFFFFFFFFFFFFFFFFFF  
FFFFF

@A00721:190:HGJW7DSXY:4:2249:24026:5400 1:N:0:TCTGCAAG+GCTGCACT  
TCACTTCTGTCTATTGTGCGACGATATGCGCTGCTGGGAATGTTATGTATTGACGATTCATGTTGCT  
TTCGTTATTGTAGAACAAATAAAGTTCTGAATTCGTACACCAGAATGTTATTAGAACCTCTGACGTCA  
TTCTG

+  
FFFF:, ,FFFFFFFF:FFFF,FFFFFFFF:FFF::FFFFFFFFFFFFFFFFFFFFFFFFFFFFFFFFFFFF:FFFFF,F  
FFFFFFFF:F:FF:FFFFFFFFFFFFFFFFFFFFFFFFFFFFFFFFFFFFFFFFFFFFFFFFFFFF,FF:FFFFFFF  
F,FFF

@A00721:190:HGJW7DSXY:4:2508:18059:7373 1:N:0:TCTGCAAG+GCTGCACT  
TCACTTCTGTCTATTGTGCGACGATATGCGCTGCTGGGAATGTTATGTATTGACGATTCATGTTGCT  
TTCGTTATTGTAGAACAAATAAAGTTCTGAATTCGTACACCAGAATGTTATTAGAACCTCTGACGTCA  
TTCTG

+  
FFFFFFFFFFFFFFFFFFFFFFFFFFFFFFFFFFFFFFFFFFFFFFFFFFFFFFFFFFFFFFFFFFFFFFFFFFFF  
FFFFFFFFFFFFFFFFFFFFFFFFFFFFFFFFFFFFFFFFFFFFFFFFFFFFFFFFFFFFFFFFFFFF:FFFFFFFFF:FFFF  
FFFFF

@A00721:190:HGJW7DSXY:4:2539:24632:15029 1:N:0:TCTGCAAG+GCTGCACT  
TCACTTCTGTCTATTGTGCGACGATATGCGCTGCTGGGAATGTTATGTATTGACGATTCATGTTGCT



$+$  $+$ 

+

+

+

+

+

[illegible]



FFFFFFFFFFFFFFFF:FFFF:FFFFFFFFFFFFFFFFFFFFFFFFFFFFFFFF,FFF,FFF,FFF:FFFFFFFFF  
FFFFFFFFFFFFFFFF

@A00721:190:HGJW7DSXY:4:1666:18304:4539 1:N:0:TCTGCAAG+GCTGCACT  
AGTCTATTGTCGACGATATGCGCTGCTGGGAATGTTATGTATTGACGATTCATGTTGCTTTTCGTTA  
TTGTAGAACAATAAAGTTCTGAATTCGTACACCAGAATGTTATTAGAACCTCTGACGTCATTCTGGT  
GTCCGCATCAATTG

+

FF,F:FFFFFFFFFFFFFFFFFFFFFFFFFFFFFFFFFFFFFFFFFFFFFFFFFFFFFFFFFFFFFFFF  
FFFFFFFFFFFFFFFFFFFFFFFFFFFFFFFFFFFFFFFFFFFFFFFF,FFFF,FFFFFFFFFFFFFFFFFFFFF  
FFFFFFFFFFFFFFFF

@A00721:190:HGJW7DSXY:4:2663:16776:12101 1:N:0:TCTGCAAG+GCTGCACT  
AGTCTATTGTCGACGATATGCGCTGCTGGGAATGTTATGTATTGACGATTCATGTTGCTTTTCGTTA  
TTGTAGAACAATAAAGTTCTGAATTCGTACACCAGAATGTTATTAGAACCTCTGACGTCATTCTGGT  
GTCCGCATCAATTG

+

FFFFFFFFFFFFFFFFFFFFFFFFFFFFFFFF,FFFFFFFFFFFFFFFFFFFFFFFFFFFFFFFFFFFFF  
:FFFF:FFFFFFFF:FFFFFFFFFFFFFFFFFFFFFFFFFFFFFFFFFFFFFFFFFFFFFFFFFFFFF  
FFFFFFFFFFFF:FFFF

@A00721:190:HGJW7DSXY:4:1127:4978:36511 1:N:0:TCTGCAAG+GCTGCACT  
GTCTATTGTCGACGATATGCGCTGCTGGGAATGTTATGTATTGACGATTCATGTTGCTTTTCGTTAT  
TGTAGAACAATAAAGTTCTGAATTCGTACACCAGAATGTTATTAGAACCTCTGACGTCATTCTGGTG  
GTCCGCATCAATTG

+

FFFF:FFFFFFFFFFFFFFFFFFFFFFFFFFFFFFFFFFFFFFFFFFFFFFFFFFFFFFFFFFFFFFFF  
FFFFFFFFFFFFFFFFFFFFFFFFFFFFFFFFFFFFFFFFFFFFFFFF:FFFFFFFFFFFFFFFFFFFFFFFF  
FFFFFFFFFFFFFFFF

@A00721:190:HGJW7DSXY:4:1206:15890:12226 1:N:0:TCTGCAAG+GCTGCACT  
GTCTATTGTCGACGATATGCGCTGCTGGGAATGTTATGTATTGACGATTCATGTTGCTTTTCGTTAT  
TGTAGAACAATAAAGTTCTGAATTCGTACACCAGAATGTTATTAGAACCTCTGACGTCATTCTGGTG  
GTCCGCATCAATTG

+

FFFF:FFFFFFFFFFFFFFFFFFFFFFFFFFFFFFFFFFFFFFFFFFFFFFFFFFFFFFFFFFFFFFFF  
FFFFFFFFFFFFFFFFFFFFFFFFFFFFFFFFFFFFFFFFFFFFFFFFFFFFFFFFFFFFFFFFFFFFFFFF  
FFFFFFFFFFFFFFFF

@A00721:190:HGJW7DSXY:4:1206:15420:15702 1:N:0:TCTGCAAG+GCTGCACT  
GTCTATTGTCGACGATATGCGCTGCTGGGAATGTTATGTATTGACGATTCATGTTGCTTTTCGTTAT  
TGTAGAACAATAAAGTTCTGAATTCGTACACCAGAATGTTATTAGAACCTCTGACGTCATTCTGGTG  
GTCCGCATCAATTG

+

:F:FFFFFFFFFFFFFFFFFFFFFFFFFFFFFFFF:FFFFFF:FFFFFFFF:FFFFFF:FFFFFFFFF  
F,FFFFFFFF:FFFFFFFFFFFFFFFFFFFFFFFF:FF:FFFFFF:FFF:FFFF,FFF,FFF:FF  
FFFFFFFF:FFFF:FFF

@A00721:190:HGJW7DSXY:4:1313:5095:12195 1:N:0:TCTGCAAG+GCTGCACT  
GTCTATTGTCGACGATATGCGCTGCTGGGAATGTTATGTATTGACGATTCATGTTGCTTTTCGTTAT  
TGTAGAACAATAAAGTTCTGAATTCGTACACCAGAATGTTATTAGAACCTCTGACGTCATTCTGGTG  
GTCCGCATCAATTG

+

FFFFFFFFFFFFFFFFFFFFFFFFFFFFFFFFFFFFFFFFFFFFFFFFFFFFFFFFFFFFFFFFFFFFF  
FFFFFFFFFFFFFFFFFFFFFFFFFFFFFFFFFFFFFFFFFFFFFFFF:FFFFFFFFFFFFFFFFFFFFF  
FFF:FFFFFFFF

@A00721:190:HGJW7DSXY:4:1538:29324:8500 1:N:0:TCTGCAAG+GCTGCACT  
GTCTATTGTCGACGATATGCGCTGCTGGGAATGTTATGTATTGACGATTCATGTTGCTTTTCGTTAT  
TGTAGAACAATAAAGTTCTGAATTCGTACACCAGAATGTTATTAGAACCTCTGACGTCATTCTGGTG  
GTCCGCATCAATTG

[illegible]

F,FFFF:,FFFFFFFFFFFFFFFFFFFF,:F:F:FF:,FFFFFFFFFFFFFF:FFFFF,FFF:FFFFF:FFFFF  
F:FFFFFFFFFFFFFFFFFFFFFFFFFFFF:FFFFFFFFFFFFFFF,FF:FF,FFFFF:FFFFFFFFFF:FFFF:FF  
FFFFFFFFFFFFFFF,F

[illegible][illegible][illegible][illegible]

```
FFFF:FF::FFFFFFFF,,F,FFFF:,,,FFF:F,FFFFFFFF,FFFFFFFF,FF:FFFF,FFF,FFFFF
F,FF::F:FFFFFFFF::FFFFFFFF:,FFFFFF:FFFFFF:FFF:FFFF,FFFFFFFF:FFFFFF,FFFFFF:FFF
,FF::,,,FFFFFFF
```

@A00721:190:HGJW7DSXY:4:1502:4472:33442 1:N:0:TCTGCAAG+GCTGCACT  
CTCTATTGTCGACGATATGCGCTGCTGGGAATGTTATGTATTCGACGATTCATGTTTCGCTTCGTTAT



$+$ 

+

+

+

+

+

 $+$



+  
FFFFFFFFFFFFFF,FFFFFFFFFFFFFFFFFFFFFFFFFFFFFFFFFFFFFFFFFFFFFFFF  
FFF:FFFFFFFFFFFFFFFFFFFFFFFFFFFFFFFFFFFFFFFFFFFFFFFFFFFFFFFF  
FFFF:FFFFFFFF

@A00721:190:HGJW7DSXY:4:1317:5755:26960 1:N:0:TCTGCAAG+GCTGCACT  
CGCGCTGCTGGGAATGTTATGTATTCGACGATTCATGTTTCGCTTTCGTTATTGTAGAACAATAAAGTT  
CTGAATTCGTACACCAGAATGTTATTAGAACCTCTGACGTCATTCTGGTGGTCCGCATCAATTGTCT  
CATATCATTTAGTTA

+  
FFFFFFFFFFFFFFFFFFFFFFFFFFFFFFFFFFFFFFFFFFFFFFFFFFFFFFFFFFFFFFFF  
FFFFFFFFFFFFFFFFFFFFFFFFFFFFFFFFFFFFFFFFFFFFFFFFFFFFFFFFFFFFFFFF  
FFFFFFFFFFFFFFFF

@A00721:190:HGJW7DSXY:4:2257:7563:21386 1:N:0:TCTGCAAG+GCTGCACT  
CGCGCTGCTGGGAATGTTATGTATTCGACGATTCATGTTTCGCTTTCGTTATTGTAGAACAATAAAGTT  
CTGAATTCGTACACCAGAATGTTATTAGAACCTCTGACGTCATTCTGGTGGTCAGCATCAATTGTCT  
CATATCATTTAGTTA

+  
FF:FFFFFF,FFFF:F,FF,FFF,,FFFFFF,FFFFFF::FF:FFFFFF::F,FFFFFF:FFFF:  
FFFFFFFF,F:FFFFFFFF,F::FFFF,:F,:F,F::,FF,:FFF:FF,:F::FFF,F:F,FFFF:FFFF  
FF,FFFF::FFFFFF

@A00721:190:HGJW7DSXY:4:2404:8404:16078 1:N:0:TCTGCAAG+GCTGCACT  
CGCGCTGCTGGGAATGTTATGTATTCGACGATTCATGTTTCGCTTTCGTTATTGTAGAACAATAAAGTT  
CTGAATTCGTACACCAGAATGTTATTAGAACCTCTGACGTCATTCTGGTGGTCCGCATCAATTGTCT  
CATATCATTTAGTTA

+  
FFFFFFFFFFFFFFFFFFFFFFFFFFFFFFFFFFFFFFFFFFFFFFFFFFFFFFFFFFFFFFFF:FFFFFFFF  
FFFFFFFF:FFFFFFFFFFFFFFFFFFFFFFFF,FFFFFFFFFFFFFFFFFFFFFFFFFFFFFFFFFFFFFFFF  
FFFFFFFF,FFFFFF

@A00721:190:HGJW7DSXY:4:2661:1163:12774 1:N:0:TCTGCAAG+GCTGCACT  
CGCGCTGCTGGGAATGTTATGTATTCGACGATTCATGTTTCGCTTTCGTTATTGTAGAACAATAAAGTT  
CTGAATTCGTACACCAGAATGTTATTAGAACCTCTGACGTCATTCTGGTGGTCCGCATCAATTGTCT  
CATATCATTTAGTTA

+  
FFFFFFFFFFFFFFFF:FFFFFFFFFFFFFFFFFFFFFFFFFFFFFFFFFFFFFFFFFFFFFFFF  
FFFFFFFFFFFFFFFFFFFFFFFFFFFFFFFFFFFFFFFFFFFFFFFFFFFFFFFFFFFFFFFF:FFFFFFFF:FF  
FFFFFFFFFFFFFFFF

@A00721:190:HGJW7DSXY:4:1119:20817:2660 1:N:0:TCTGCAAG+GCTGCACT  
TGCTGCTGGGAATGTTATGTATTCGACGATTCATGTTTCGCTTTCGTTATTGTAGAACAATAAAGTTCT  
GAATTCGTACACCAGAATGTTATTAGAACCTCTGACGTCATTCTGGTGGTCCGCATCAATTGTCTCA  
TATCATAGATCGGAA

+  
FF:FFFFFFFFFFFFFFFFFFFFFFFFFFFFFFFFFFFFFFFFFFFFFFFFFFFFFFFFFFFFFFFF  
FFFFFFFFFFFFFFFFFFFFFFFFFFFFFFFFFFFFFFFFFFFFFFFFFFFFFFFFFFFFFFFF:FFFFFFFF:FF  
FFFF,FFFFFFFF

@A00721:190:HGJW7DSXY:4:1173:22318:20259 1:N:0:TCTGCAAG+GCTGCACT  
TGCTGCTGGGAATGTTATGTATTCGACGATTCATGTTTCGCTTTCGTTATTGTAGAACAATAAAGTTCT  
GAATTCGTACACCAGAATGTTATTAGAACCTCTGACGTCATTCTGGTGGTCCGCATCAATTGTCTCA  
TATCATAGATCGGAA

+  
FFFFFFFFFFFFFFFFFFFFFFFFFFFFFFFFFFFFFFFFFFFFFFFFFFFFFFFFFFFFFFFF  
FFFFFFFFFFFFFFFFFFFFFFFFFFFFFFFFFFFFFFFFFFFFFFFFFFFFFFFFFFFFFFFF:FFFFFFFF  
FFFFFFFFFFFFFFFF

@A00721:190:HGJW7DSXY:4:1415:4689:35477 1:N:0:TCTGCAAG+GCTGCACT  
TGCTGCTGGGAATGTTATGTATTCGACGATTCATGTTTCGCTTTCGTTATTGTAGAACAATAAAGTTCT

GAATTCGTCACACCAGAATGTTATTAGAACCTCTGACGTCATTCTGGTGGTCCGCATCAATTGTCTCA  
TATCATAGATCGGAA

```
:FFFFFFFFF:FFF:FFFFFFFF:FFFFFFFFFFFFFFFFFFFFFFFF:FFFFFFFFFFFF:FF:F  
FFF:FFFFFFFFFFFFFFFFFFFFFFFFFFFFFFFFFFFFFFFF,FFFFFFFFFFFFFFFFFFFFFFFF  
FFFFFFFFFFFF:FFF
```

 $+$ 

```

FFFFFFFF:FFFFFFFFFFFFFFFFFFFFFFFFFFFFFFFFFFFFFFFFFFFFFFFFFFFFFFFFFFFFFFFF
FFFFFFFFFFFFFFFFFFFFFFFFFFFFFFFF:FFFFFFFFFFFFFFFFFFFFFFFFFFFFFFFF:FF:FFFFFFF
FFFFFFF:FFFFFFF

```

$$+$$
[illegible]

+

[illegible]

+

```

FFFFFFFFFFFFFFFFFFFFFFFFFFFFFFFF:FFFFFFFFFFFFFFFFFFFFFFFF:FFFFFFF
:FFFFFFFFFFFFFFFF,FFFFFFFFFFFF,FFFF:FFFF:FFFFFFFFFFFFFFFF,FFFFFFFFF,F::
FFF:EEEEEEEEE,E:

```

+

[illegible]

+

[illegible]

$+$ 

+

+

+

+

+

+



@A00721:190:HGJW7DSXY:4:1471:26793:35336 1:N:0:TCTGCAAG+GCTGCACT  
GCTGCTGGGAATGTTATGTATTTCGACGATTCATGTTTCGCTTTCGTTATTGTAGAACAATAAAGTTCTG  
AATTTCGTACACCAGAATGTTATTAGAACCTCTGACGTCATTCTGGTGGTCCGCATCAATTGTCTCAT  
ATCATTTAGTTAATG

@A00721:190:HGJW7DSXY:4:1570:12536:33724 1:N:0:TCTGCAAG+GCTGCACT  
CATTAATAAATGATATGAGACAATTGATGCGGACCACCAGAATGACGTCAGAGGTTCTAATAACATT  
CTGGTGTGACGAATTCAGAACTTTATTGTTCTACAATAACGAAAGCGAACATGAATCGTCGAATACAT  
AACATTCCCAGCAGC

@A00721:190:HGJW7DSXY:4:1611:18611:9987 1:N:0:TCTGCAAG+GCTGCACT  
GCTGCTGGGAATGTTATGTATTTCGACGATTCATGTTTCGCTTTCGTTATTGTAGAACAATAAAGTTCTG  
AATTCGTCACACCAGAATGTTATTAGAACCTCTGACGTCATTCTGGTGGTCCGCATCAATTGTCTCAT  
ATCATTTAGTTAATG

@A00721:190:HGJW7DSXY:4:1611:20012:10504 1:N:0:TCTGCAAG+GCTGCACT  
GCTGCTGGGAATGTTATGTATTTCGACGATTCATGTTTCGCTTTCGTTATTGTAGAACAATAAAGTTCTG  
AATTCGTCACACCAGAATGTTATTAGAACCTCTGACGTCATTCTGGTGGTCCGCATCAATTGTCTCAT  
ATCATTTAGTTAATG

@A00721:190:HGJW7DSXY:4:1647:15338:33943 1:N:0:TCTGCAAG+GCTGCACT  
CATTAACTAAATGATATGAGACAATTGATGCGGACCACCAGAATGACGTCAGAGTTCTAATAACATT  
CTGGTGTGACGAATTCAGAACTTTATTGTTCTACAATAACGAAAGCGAACATGAATCGTCGAATACAT  
AACATTCCCAGCAGC

@A00721:190:HGJW7DSXY:4:2143:6732:33223 1:N:0:TCTGCAAG+GCTGCACT  
GCTGCTGGGAATGTTATGTATTCGACGATTCATGTTTCGCTTTCGTTATTGTAGAACAATAAAGTTCTG  
AATTCGTCACACCAGAATGTTATTAGAACCTCTGACGTCATTCTGGTGGTCCGCATCAATTGTCTCAT  
ATCATTTAGTTAATG

@A00721:190:HGJW7DSXY:4:2153:8196:27868 1:N:0:TCTGCAAG+GCTGCACT  
GCTGCTGGGAATGTTATGTATTCGACGATTCATGTTTCGTTTCGTTATTGTAGAACAATAAAGTTCTG  
AATTCGTACACCAAGATGTTATTAGAACCTCTGACGTCAATTCTGGTGGTCCGCATCAATTGTCTCAT  
ATCATTGATTAAT

```

FFFFFFFF:FFF:FFFFFFFFFFFFFFFFFFFFFFFFFFFFFFFFFFFFFFFF:FFFFFFFFFFFFFFFF:
FFFFFFFFFFFFFFFF:FFFFFFFFFFFF:FFFFFFFFFFFFFFFFFFFFFFFF:FFFFFFFF:FFFFFFFFFFFF,FFFF
FFFF:FFFFFFFFFFFF

```

```

FFFFFFFFFFFFFFFFFFFFFFFFFFFFFFFFFFFFFFFFFFFFFFFFFFFFFFFFFFFFFFFF
FFFFFFFF,FFFFFF,FFFFFFFFFFFF:FFFFFFFFFFFFFFFF,FFFFFFFFFFFFFFFF
FFFFFFFFFFFFFFFF

```

[illegible][illegible][illegible][illegible]

```

FFFFFFFFFFFFFFFFFFFFFFFFFFFFFFFFFFFFFFFFFFFFFFFFFFFFFFFFFFFFFFFFFFFFF
FFFFFFFFFFFFFFFFFFFFFFFFFFFFFF,FFFFFFFFFFFFFFFFFFFFFFFFFFFFFFFFFFFFFF
EEEEEEEEEEEEEE E

```

@A00721:190:HGJW7DSXY:4:2208:24795:7357 1:N:0:TCTGCAAG+GCTGCACT  
CGCTGGGAATGTTATGTATTCGACGATTCATGTTGCTTTCTTTATTGTAGAACAAATAAAGTTCGAA







[illegible][illegible][illegible]

```

FFFFFFFFFFFFFFFFFFFFFFFFFFFFFFFFFFFFFFFFFFFFFFFFFFFFFFFFFFFF:FFFFF:FFFFF
FFFFFFFFF:FFFFFFFFFFFFFFF,FFFFFFFFFFFFFFFFFFFFFFFFF:FFFFFFFFFFFFFFFFFFFFFF
FFFFFFFFFFFFFFFFFFFF

```

```

FFFFFFFFFFFFFFFFFFFFFFFFFFFFFFFFFFFFFFFFFFFFFFFFFFFFFFFFFFFFFFFFFFFFFFFF
FFFFFFFFFFFFFFFFFFFFFFFFFFFFFFFF:FFFFFFFF:FFFF:FFF:FFFFFFFF,FFFFFFFFFFFFFFFF
FFF,FFFFFFFFFFFF

```

[illegible][illegible]

@A00721:190:HGJW7DSXY:4:2242:28167:14450 1:N:0:TCTGCAAG+GCTGCACT  
TGGGAATGTTATGTATTCGACGATTCATGTTTCGCTTTCGTTATTGTAGAACAATAAAGTTCGAATTC



@A00721:190:HGJW7DSXY:4:2675:26232:30452 1:N:0:TCTGCAAG+GCTGCACT  
TGGGAATGTTATGTATTCGACGATTCATGTTTCGCTTTCGTTATTGTAGAACAATAAAGTTCTGAATTC  
GTCACACCAGAATGTTATTAGAACCTCTGACGTCATTCTGGTGGTCCGCATCAATTGTCTCATATCAT  
TTAGTTAATGAGGAT

[illegible]

+

[illegible]

+

```
FFFFFFFFFFFFFFFFFFFFFFFFFFFFFFFFFFFFFFFFFFFFFFFFFFFFF:FFFFFFFFFFFFFFFFFF
FFFFFFFFFFFFFFFFFFFFF:FFFFFFFFFFFFFFFFFFFFF:FFFFFFFFFFFFFFFFFFFFF:FFFFFFFFFFFFF
FE:FFFFFFFEE:FFF
```

+

[illegible]

+

```

FFFFF:,F:F,FFFF:FF:FF,,,:F,,,F,FFFFFFFFFFFFFF:,FF,,,F:,F:F,FFFF,,FFF
FFF,FF,FF:F,FF,FFFF,FFF,F,,,F,FFF,:FF:F,,,FF:F:,F,:,F,,,F,,F,FF,:F
F:F,,FFFF,F,F:F

```

+

```

FFFFFFFFFFFFFFFF:FFFF:FFFFFFFFFFFFFFFFFFFFFFFFFFFFFFFF:FFFFFF,FFFF::FFF
,FFFFFFFFFFFFFFFF:FFF:FFFFF:F:FF:FFFFFFFFF:F:FF,FF:FF,FFFF,FFFFFFF
FFF,:F:E,FFFFFF

```

 $+$ [illegible]



@A00721:190:HGJW7DSXY:4:1254:12002:24377 1:N:0:TCTGCAAG+GCTGCACT  
GATTCATGTTTCGCTTTTCGTTATTGTAGAACAAATAAAGTTCTGAATTCGTCACACCAGAATGTTATTAG  
AACCTCTGACGTCATTCTGGTGGTCCGCATCAATTGTCTCATATCATTTAGTTAATGAGGATAATATT  
TATCCTTGATGATAT

@A00721:190:HGJW7DSXY:4:1261:19307:15170 1:N:0:TCTGCAAG+GCTGCACT  
GATTCATGTTGCTTTGTTATTGTAGAACAAATAAGTTCTGAATTCGTCACACCAGAATGTTATTAG  
AACCTCTGACGTCATTCTGGTGGTCCGCATCAATTGTCTCATATCATTTAGTTAATGAGGATAATATT  
TATCCTTGATGATAT

@A00721:190:HGJW7DSXY:4:1434:8612:5572 1:N:0:TCTGCAAG+GCTGCACT  
GATTCATGTTGCTTTCTGTTATTGTAGAACAAATAAGTTCTGAATTCGTCACACCAGAATGTTATTAG  
AACCTCTGACGTCATTCTGGTGGTCCGCATCAATTGTCTCATATCATTTAGTTAATGAGGATAATATT  
TATCCTTGATGATAT

@A00721:190:HGJW7DSXY:4:2319:3468:18552 1:N:0:TCTGCAAG+GCTGCACT  
GATTCATGTTGCTTTCTGTTATTGTAGAACAAATAAGTTCTGAATTCGTCACACCAGAATGTTATTAG  
AACCTCTGACGTCATTCTGGTGGTCCGCATCAATTGTCTCATATCATTTAGTTAATGAGGATAATATT  
TATCCTTGATGATAT

@A00721:190:HGJW7DSXY:4:2418:14326:12179 1:N:0:TCTGCAAG+GCTGCACT  
GATTCATGTTGCTTTGCTTATTGTAGAACAAATAAGTTCTGAATTCGTCACACCAGAATGTTATTAG  
AACCTCTGACGTCATTCTGGTGGTCCGCATCAATTGTCTCATATCATTTAGTTAATGAGGATAATATT  
TATCCTTGATGATAT

@A00721:190:HGJW7DSXY:4:2450:17626:33520 1:N:0:TCTGCAAG+GCTGCACT  
GATTCATGTTGCTTTGCTTATTGTAGAACAAATAAGTTCTGAATTCGTCACACCAGAATGTTATTAT  
AACCTCTGACGTCATTCTTGTGGTCCGCATCAATTGCTCATATCATTTAGTTAATGAGGATAATATT  
TATCCTTGATGATAT

@A00721:190:HGJW7DSXY:4:1146:19651:22153 1:N:0:TCTGCAAG+GCTGCACT  
GTTTCGCTTTCTGTTATTGTAGAACAATAAAGTTCTGAATTCGTACACCAGAATGTTATTAGAACCTCT  
GACGTCATTCTGGTGGTCCGCATCAATTGTCTCATATCATTTAGTTAATGAGGATAATATTTATCCTT  
GATGATATGTTTGAT

+  
FFFFFFFFFFFFFFFFFFFFFFFFFFFFFFFFFFFFFFFFFFFFFFFFFFFFFFFFFFFFFFFFFFFFFFFF  
FFFFFFF:FFFFFFFFFFFFFFFFFFFFFFFFFFFFFFFFFFFFFFFFFFFFFFFFFFFFFFFFFFFFFFFF  
FFFFFFFFF:FFFFFFF  
@A00721:190:HGJW7DSXY:4:1152:26449:18552 1:N:0:TCTGCAAG+GCTGCACT  
GTTTCGCTTTTCGTTATTGTAGAACATAAAAGTTCTGAATTCGTCACACCAGAATGTTATTAGAACCTCT  
GACGTCAGTCTGGTGGTCCGCATCAATTGTCTCATATCATTTAGTTAATGAGGATAATATTTATCCTT  
GATGATATGTTTGAT

+  
FFFFFFFFFFFFFFFFFFFFFFFFFFFFFFFFFFFFFFFFFFFFFFFFFFFFFFFFFFFFFFFFFFFFFFFF  
FFFFFFF,FFFFFFFFFFFFFFFFFFFFFFFFFFFFFFFFFFFFFFFFFFFFFFFFFFFFFFFFFFFFFFFF  
FFFFFFF:FFFFFFF  
@A00721:190:HGJW7DSXY:4:1159:28926:7905 1:N:0:TCTGCAAG+GCTGCACT  
GTTTCGCTTTTCGTTATTGTAGAACATAAAAGTTCTGAATTCGTCACACCAGAATGTTATTAGAACCTCT  
GACGTCATTCTGGTGGTCCGCATCAATTGTCTCATATCATTTAGTTAATGAGGATAATATTTATCCTT  
GATGATATGTTTAGA

+  
FFFFFFFFFFFFFFFFFFFFFFFFFFFFFFFFFFFFFFFFFFFFFFFFFFFFFFFFFFFFFFFFFFFFFFFF  
FFFFFFFFFFFFFFFFFFFFFFFFFFFFFFFFFFFFFFFFFFFFFFFFFFFFFFFFFFFFFFFFFFFFFFFF  
FFFFFFFFFFFFFFFFF:  
@A00721:190:HGJW7DSXY:4:1268:15176:1344 1:N:0:TCTGCAAG+GCTGCACT  
GTTTCGCTTTTCGTTATTGTAGAACATAAAAGTTCTGAATTCGTCACACCAGAATGTTATTAGAACCTCT  
GACGTCATTCTGGTGGTCCGCATCAATTGTCTCATATCATTTAGTTAATGAGGATAATATTTATCCTT  
GATGATATGTTTGAT

+  
FFFFFFFFFFFFFFFFFFFFFFFFFFFFFFFFFFFFFFFFFFFFFFFFFFFFFFFFFFFFFFFFFFFFFFFF  
FFFFFFFFFFFFFFFFFFFFFFFFFFFFFFFFFFFFFFFFFFFFFFFFFFFFFFFFFFFFFFFFFFFFFFFF  
FFFFFFFFFFFFFFFFF:  
@A00721:190:HGJW7DSXY:4:1328:15709:6903 1:N:0:TCTGCAAG+GCTGCACT  
GTTTCGCTTTTCGTTATTGTAGAACATAAAAGTTCTGAATTCGTCACACCAGAATGTTATTAGAACCTCT  
GACGTCATTCTGGTGGTCCGCATCAATTGTCTCATATCATTTAGTTAATGAGGATAATATTTATCCTT  
GATGATATGTTTGAT

+  
FFFFFFFFFFFFFFFFFFFFFFFFFFFFFFFFFFFFFFFFFFFFFFFFFFFFFFFFFFFFFFFFFFFFFFFF  
FFFFFFFFFFFFFFFFFFFFFFFFFFFFFFFFFFFFFFFFFFFFFFFFFFFFFFFFFFFFFFFFFFFFFFFF  
FF,FFFFFFFFFFFFFFFFF  
@A00721:190:HGJW7DSXY:4:1401:25355:8891 1:N:0:TCTGCAAG+GCTGCACT  
GTTTCGCTTTTCGTTATTGTAGAACATAAAAGTTCTGAATTCGTCACACCAGAATGTTATTAGAACCTCT  
GACGTCATTCTGGTGGTCCGCATCAATTGTCTCATATCATTTAGTTAATGAGGATAATATTTATCCTT  
GATGATATGTTTAG

+  
FFFFFFFFFFFFFFFFFFFFFFFFFFFFFFFFFFFFFFFFFFFFFFFFFFFFFFFFFFFFFFFFFFFFFFFF  
FF:FFFFFFFFFFFFFFFFF:FFFFFFFFF:FFFFFFFFFFFFFFFFFFFFFFFFF,FFFFFFFFFFFFFFFFF:FFF,FF  
FFFFFFFFF:FFF  
@A00721:190:HGJW7DSXY:4:1435:26458:32002 1:N:0:TCTGCAAG+GCTGCACT  
GTTTCGCTTTTCGTTATTGTAGAACATAAAAGTTCTGAATTCGTCACACCAGAATGTTATTAGAACCTCT  
GACGTCATTCTGGTGGTCCGCATCAATTGTCTCATATCATTTAGTTAATGAGGATAATATTTATCCTT  
GATGATATGTTTAGA

+  
FFFFFFFFFFFFFFFFFFFFFFFFFFFFFFFFFFFFFFFFFFFFFFFFFFFFFFFFFFFFFFFFFFFFFFFF  
FFFFFFFFFFFFFFFFFFFFFFFFFFFFFFFFFFFFFFFFFFFFFFFFFFFFFFFFFFFFFFFFFFFFFFFF  
:FF:FFFF,FFFFFFF  
@A00721:190:HGJW7DSXY:4:1660:3305:18959 1:N:0:TCTGCAAG+GCTGCACT  
GTTTCGCTTTTCGTTATTGTAGAACATAAAAGTTCTGAATTCGTCACACCAGAATGTTATTAGAACCTCT



$+$ 

+

+

+

+

+

+

FFFFFFFFFFFFFFFFFFFFFFFFFFFFFFFFFFFFFFFFFFFFFFFFFFFFFFFFFFFFFFFF:FFFFFFFFFFFFFFFF  
FFFFFFFFFFFFFFFF

@A00721:190:HGJW7DSXY:4:1561:1732:17206 1:N:0:TCTGCAAG+GCTGCACT  
ATATCATTTAGTTAATGAGGATAATATTTATCCTTGATGATATGTTTGATTTCATCGGGAAGAGATGA  
AAGTAAATTTCTGAATATGATGTTAGCGTTAATGGAGAAACGCGATGAAGAAGATGAAGGAGTCCCCA  
T TACTGT TAAATCAG

+  
FFFFFFFFFFFFFFFFFFFFFFFFFFFFFFFFFFFFFFFFFFFFFFFFFFFFFFFFFFFFFFFF,FFF:FFFFFFF  
FFF,FFFF:FFFFFFFFFFFFFFFFFFFFFFFFFFFFFFFFFFFFFFFFFFFFFFFFFFFFFFFF,FFFFFFF  
FFFFFFFFFFFFFFFF

@A00721:190:HGJW7DSXY:4:1565:16080:31814 1:N:0:TCTGCAAG+GCTGCACT  
ATATCATTTAGTTAATGAGGATAATATTTATCCTTGATGATATGTTTGATTTCATCGGGAAGAGATGA  
AAGTAAATTTCTGAATATGATGTTAGCGTTAATGGAGAAACGCGATGAAGAAGATGAAGGAGTCCCCA  
T TACTGT TAAATCAG

+  
FFFFFFF:FFFFFFFFFFFFFFFFFFFFFFFFFFFFFFFFFFFFFFFFFFFFFFFFFFFFFFFFFFFFFFFF  
FFFFFFFFFFFFFFFFFFFFFFFFFFFFFFFF:FFF:FFFFFFFFFFFFFFFFFFFFFFFF:FFFFFFFFFFFFFFFF  
FFFFFFFFFFFFFFFF

@A00721:190:HGJW7DSXY:4:1648:15094:20932 1:N:0:TCTGCAAG+GCTGCACT  
ATATCATTTAGTTAATGAGGATAATATTTATCCTTGATGATATGTTTGATTTCATCGGGAAGAGATGA  
AAGTAAATTTCTGAATATGATGTTAGCGTTAATGGAGAAACGCGATGAAGAAGATGAAGGAGTCCCCA  
T TACTGT TAAATCAG

+  
FFFFFFFFFFFFFFFFFFFFFFFFFFFFFFFFFFFFFFFFFFFFFFFFFFFFFFFFFFFFFFFF:FFFFFFFFFFFFFFFFFFFFFFFF  
FFFFFFFFFFFFFFFFFFFFFFFFFFFFFFFF:FFFFFFFFFFFF:FFFFFFFFF:F:FFFFFFFFFFFF:FFFFF:FFFFFF  
,FFFFFFFFFFFFFFFF

@A00721:190:HGJW7DSXY:4:1670:14335:34648 1:N:0:TCTGCAAG+GCTGCACT  
ATATCATTTAGTTAATGAGGATAATATTTATCCTTGATGATATGTTTGATTTCATCGGGAAGAGATGA  
AAGTAAATTTCTGAATATGATGTTAGCGTTAATGGAGAAACGCGATGAAGAAGATGAAGGAGTCCCCA  
T TACTGT TAAATCAG

+  
FFFFFFFFFFFFFFFFFFFFFFFFFFFFFFFFFFFFFFFFFFFFFFFFFFFFFFFFFFFFFFFF:FFFF:FFFFFFFFFFFFFFFF  
FFFFFFFFFFFFFFFFFFFFFFFFFFFFFFFFFFFFFFFFFFFFFFFF:FFFFFFFFFFFFFFFFFFFFFFFFFFFFFFFF  
FFFFFFFFFFFFFFFF

@A00721:190:HGJW7DSXY:4:2167:32226:35289 1:N:0:TCTGCAAG+GCTGCACT  
ATATCATTTAGTTAATGAGGATAATATTTATCCTTGATGATATGTTTGATTTCATCGGGAAGAGATGA  
AAGTAAATTTCTGAATATGATGTTAGCGTTAATGGAGAAACGCGATGAAGAAGATGAAGGAGTCCCCA  
T TACTGT TAAATCAG

+  
FFFFFFFFFFFFFFFFFFFFFFFFFFFFFFFFFFFFFFFFFFFFFFFFFFFFFFFFFFFFFFFFFFFFFFFFFFFFFFFF  
FFFFFFFFFFFFFFFFFFFFFFFFFFFFFFFFFFFFFFFFFFFFFFFFFFFFFFFF:FFFFFF:FFFFFFFFFF:FFFF:FFF  
FFFFFFFFFFFFFFFF

@A00721:190:HGJW7DSXY:4:2173:32786:22858 1:N:0:TCTGCAAG+GCTGCACT  
ATATCATTTAGTTAATGAGGATAATATTTATCCTTGATGATATGTTTGATTTCATCGGGAAGAGATGA  
AAGTAAATTTCTGAATATGATGTTAGCGTTAATGGAGAAACGCGATGAAGAAGATGAAGGAGTCCCCA  
T TACTGT TAAATCAG

+  
FFFFFFFFF:FFFFFFFFFFFFFFFFFFFFFFFFFFFFFFFFFFFFFFFFFFFFFFFFFFFFFFFFFFFFFFFF  
FFFFFFFFFFFFFFFFFFFFFFFFFFFFFFFF:FFFF:FFFFF:FFFFFFFFFFFFFFFFFFFFFFFF:FFFF:FFF  
FFFFFFFFFFFF:FF

@A00721:190:HGJW7DSXY:4:2460:1633:3067 1:N:0:TCTGCAAG+GCTGCACT  
ATATCATTTAGTTAATGAGGATAATATTTATCCTTGATGATATGTTTGATTTCATCGGGAAGAGATGA  
AAGTAAATTTCTGAATATGATGTTAGCGTTAATGGAGAAACGCGATGAAGAAGATGAAGGAGTCCCCA  
T TACTGT TAAATCAG

+  
FFFFFFFF:FFFFFFFFFFFFFFFFFFFFFFFFFFFFFFFFFFFFFFFFFFFFFFFFFFFFFFFFFFFFFFFF  
FFFFFFFFFFFFFFFFFFFFFFFFFFFFFFFFFFFFFFFFFFFFFFFFFFFFFFFFFFFFFFFF:FFFFFFFFFFFFFFFF  
FFFFFFFFFFFFFFFF

@A00721:190:HGJW7DSXY:4:1216:30273:30091 1:N:0:TCTGCAAG+GCTGCACT  
CTGATATGTTTGATTTTCATCGGGAAGAGATGAAAGTAAATTTCTGAATATGATGTTAGCGTTAATGGA  
GAAACGCGATGAAGAAGATGAAGGAGTCCCCATTACTGTAAATCAGGGACATCCGCATATTAAGCAT  
TATATTGGGGACTGG

+  
FFFFFFFFFFFFFFFFFFFFFFFFFFFFFFFFFFFFFFFFFFFFFFFFFFFFFFFFFFFFFFFFFFFFFFFF  
FFFFFFFFFFFFFFFFFFFFFFFFFFFFFFFFFFFFFFFFFFFFFFFFFFFFFFFFFFFFFFFFFFFFFFFF  
FFF:FFFFFFFF

@A00721:190:HGJW7DSXY:4:1329:12509:31172 1:N:0:TCTGCAAG+GCTGCACT  
CTGATATGTTTGATTTTCATCGGGAAGAGATGAAAGTAAATTTCTGAATATGATGTTAGCGTTAATGGA  
GAAACGCGATGAAGAAGATGAAGGAGTCCCCATTACTGTAAATCAGGGACATCCGCATATTAAGCAT  
TATATTGGGGACTGG

+  
FFFFFFFFFFFFFFFFFFFFFFFFFFFFFFFFFFFFFFFFFFFFFFFFFFFFFFFFFFFFFFFFFFFFFFFF  
FFFFFFFFFFFFFFFFFFFFFFFFFFFFFFFFFFFFFFFFFFFFFFFFFFFFFFFFFFFFFFFFFFFFFFFF  
FFFF:FFFFFFFF

@A00721:190:HGJW7DSXY:4:1455:17372:5306 1:N:0:TCTGCAAG+GCTGCACT  
CTGATATGTTTGATTTTCATCGGGAAGAGATGAAAGTAAATTTCTGAATATGATGTTAGCGTTAATGGA  
GAAACGCGATGAAGAAGATGAAGGAGTCCCCATTACTGTAAATCAGGGACATCCGCATATTAAGCAT  
TATATTGGGGACTGG

+  
FFFF:FFFFFFFFFFFFFFFF:FFFFFFFFFFFFFFFFFFFFFFFFFFFFFFFFFFFFFFFFFFFFFFFF  
FFFFFFFFFFFFFFFFFFFFFFFFFFFFFFFFFFFFFFFFFFFFFFFFFFFFFFFFFFFFFFFFFFFFFFFF  
FFF:FFFF:FFFF

@A00721:190:HGJW7DSXY:4:1455:16342:8719 1:N:0:TCTGCAAG+GCTGCACT  
CTGATATGTTTGATTTTCATCGGGAAGAGATGAAAGTAAATTTCTGAATATGATGTTAGCGTTAATGGA  
GAAACGCGATGAAGAAGATGAAGGAGTCCCCATTACTGTAAATCAGGGACATCCGCATATTAAGCAT  
TATATTGGGGACTGG

+  
FFFFFFFFFFFFFFFFFFFFFFFFFFFFFFFFFFFFFFFFFFFFFFFFFFFFFFFFFFFFFFFFFFFFFFFF  
FFFFFFFFFFFFFFFFFFFFFFFFFFFFFFFFFFFFFFFFFFFFFFFFFFFFFFFFFFFFFFFFFFFFFFFF  
FFFFFFFFFFFFFFFF

@A00721:190:HGJW7DSXY:4:1542:17336:4460 1:N:0:TCTGCAAG+GCTGCACT  
CTGATATGTTTGATTTTCATCGGGAAGAGATGAAAGTAAATTTCTGAATATGATGTTAGCGTTAATGGA  
GAAACGCGATGAAGAAGATGAAGGAGTCCCCATTACTGTAAATCAGGGACATCCGCATATTAAGCAT  
TATATTGGGGACTGG

+  
FFFFF:FFFFFFFFFFFFFFFFFFFFFFFFFFFFFFFFFFFFFFFFFFFFFFFFFFFFFFFFFFFFFFFF  
FFFFFFFFFFFFFFFFFFFFFFFFFFFFFFFFFFFFFFFFFFFFFFFFFFFFFFFFFFFFFFFFFFFFFFFF  
FFFFFFFFFFFFFFFF

@A00721:190:HGJW7DSXY:4:2361:11397:18411 1:N:0:TCTGCAAG+GCTGCACT  
CTGATATGTTTGATTTTCATCGGGAAGAGATGAAAGTAAATTTCTGAATATGATGTTAGCGTTAATGGA  
GAAACGCGATGAAGAAGATGAAGGAGTCCCCATTACTGTAAATCAGGGACATCCGCATATTAAGCAT  
TATATTGGGGACTGG

+  
FFFFFFFFFFFFFFFFFFFFFFFFFFFFFFFFFFFFFFFFFFFFFFFFFFFFFFFFFFFFFFFFFFFFFFFF  
FFFFFFFFFFFFFFFFFFFFFFFFFFFFFFFFFFFFFFFFFFFFFFFFFFFFFFFFFFFFFFFFFFFFFFFF  
FFFFFFF:FFFFFF

@A00721:190:HGJW7DSXY:4:2404:12165:34460 1:N:0:TCTGCAAG+GCTGCACT  
CTGATATGTTTGATTTTCATCGGGAAGAGATGAAAGTAAATTTCTGAATATGATGTTAGCGTTAATGGA

GAAACGCGATGAAGAAGATGAAGGAGTCCCCATTACTGTAAATCAGGGACATCCGCATATTAAGCAT  
TATATTGGGGACTGG

+

:FFFFFFFFFFFFFFFFFFFFFFFFFFFFFFFFFFFFFFFFFFFFFFFFFFFFFFFFFFFFFFFFFFFFFFFF  
FFFFFFFFFFFFFFFFFFFFFFFFFFFFFFFFFFFFFFFFFFFFFFFFFFFFFFFFFFFFFFFFFFFFFFFF:FFFFFFFFFFFFFFFF:FF  
FFFFFFFFFFFFFFFF

@A00721:190:HGJW7DSXY:4:1656:14814:8672 1:N:0:TCTGCAAG+GCTGCACT  
GAAGAGATGAAAGTAAATTTCTGAATATGATGTTAGCGTTAATGGAGAAACGCGATGAAGAAGATGAA  
GGAGTCCCCATTACTGTAAATCAGGGACATCCGCATATTAAGCATTATATTGGGGACTGGGGACCTA  
TATATATGTATAGAG

+

FFFFFFFFFFFFFFFFFFFFFFFFFFFFFFFFFFFFFFFFFFFFFFFFFFFFFFFFFFFFFFFFFFFFFFFF  
FFFFFFFFFFFFFFFFFFFFFFFFFFFFFFFFFFFFFFFFFFFFFFFFFFFFFFFFFFFFFFFFFFFFFFFF  
FFFFFFFFFFFFFFFF

@A00721:190:HGJW7DSXY:4:1656:15311:9627 1:N:0:TCTGCAAG+GCTGCACT  
GAAGAGATGAAAGTAAATTTCTGAATATGATGTTAGCGTTAATGGAGAAACGCGATGAAGAAGATGAA  
GGAGTCCCCATTACTGTAAATCAGGGACATCCGCATATTAAGCATTATATTGGGGACTGGGGACCTA  
TATATATGTATAGAG

+

FFFFFFFFFFFFFFFFFFFFFFFFFFFFFFFFFFFFFFFF:FFFFFF:FFFFFFFFFFFFFFFFFFFFFFFF  
F,FF:FFFFFFFF:FFFFFF,FFFFFFFF,FFFF:FFFFFFFFFFFFFFFFFFFFFFFF  
FF:FFF:F,FFFF:F

@A00721:190:HGJW7DSXY:4:2265:17445:18208 1:N:0:TCTGCAAG+GCTGCACT  
GAAGAGATGAAAGTAAATTTCTGAATATGATGTTAGCGTTAATGGAGAAACGCGATGAAGAAGATGAA  
GGAGTCCCCATTACTGTAAATCAGGGACATCCGCATATTAAGCATTATATTGGGGACTGGGGACCTA  
TATATATGTATAGAG

+

FFFFFFFFFFFFFFFFFFFFFFFFFFFFFFFFFFFFFFFF:FFFFFFFFFFFFFFFFFFFFFFFF  
FFFFFFFFFFFFFFFFFFFFFFFFFFFFFFFFFFFFFFFFFFFFFFFFFFFFFFFFFFFFFFFF  
FFFFFFFFFFFFFFFF

@A00721:190:HGJW7DSXY:4:2601:1353:36401 1:N:0:TCTGCAAG+GCTGCACT  
GAAGAGATGAAAGTAAATTTCTGAATATGATGTTAGCGTTAATGGAGAAACGCGATGAAGAAGATGAA  
GGAGTCCCCATTACTGTAAATCAGGGACATCCGCATATTAAGCATTATATTGGGGACTGGGGACCTA  
TATATATGTATAGAG

+

FFFFFFFFFFFFFF::FFF,FF::FF:::FFFF:FFFFFFFFFFFFFFFFFFFFFFFF  
FFFFFFFFFFFF:FFFFFFFFFFFFFFFFFFFF,FFFF:FFFFFFFF:FFFFFFFF  
FFFFFFFF

@A00721:190:HGJW7DSXY:4:1163:32407:35697 1:N:0:TCTGCAAG+GCTGCACT  
CCGGATTACTCTATACATATATAGGTCCCCAGTCCCCAATATAATGCTTAATATGCGGATGTCCCT  
GATTTAACAGTAATGGGGACTCCTTCATCTTCTTCATCGCGTTTCTCCATTAACGCTAACATCATATT  
CAGAAATTTACTTTC

+

FFFFFFFFFFFFFFFFFFFFFFFFFFFFFFFFFFFFFFFFFFFFFFFFFFFFFFFFFFFFFFFF  
FFFFFFFFFFFFFFFFFFFFFFFFFFFFFFFFFFFFFFFFFFFFFFFFFFFFFFFF,FFFF,FF:FFF,,FFFF:FFF  
FFFF,FFFFFFFF

@A00721:190:HGJW7DSXY:4:1325:12861:10958 1:N:0:TCTGCAAG+GCTGCACT  
CCGGATTACTCTATACATATATAGGTCCCCAGTCCCCAATATAATGCTTAATATGCGGATGTCCCT  
GATTTAACAGTAATGGGGACTCCTTCATCTTCTTCATCGCGTTTCTCCATTAACGCTAACATCATATT  
CAGAAATTTACTTTC

+

FFFFFFFFFFFFFFFF:FFFFFFFFFFFFFFFFFFFFFFFFFFFFFFFFFFFFFFFF  
FFFFFFFFFFFFFFFFFFFFFFFFFFFFFFFF:FFFFFFF:FFFFFFFF:FFFFF:FFFFFF  
FFFFFFFF







+  
FFFFFFFFFFFFFFFFFFFFFFFFFFFFFFFFFFFFFFFFFFFFFFFFFFFFFFFFFFFFFFFFFFFFFFFF  
FFFFFFFFFFFFFFFFFFFFFFFFFFFFFFFFFFFFFFFFFFFFFFFFFFFFFFFFFFFFFFFFFFFFFFFF:  
FFFFFFFFFFFFFFFFFFFFFFFFFFFFFFFFFFFFFFFFFFFFFFFFFFFFFFFFFFFFFFFFFFFFFFFF  
@A00721:190:HGJW7DSXY:4:2445:11505:5415 1:N:0:TCTGCAAG+GCTGCACT  
CCGGATTACTCTATACATATATATAGGTCCCCAGTCCCCAATATAATGCTTAATATGCGGATGTCCCT  
GATTTAACAGTAATGGGGACTCCTTCATCTTCTTCATCGCGTTTCTCCATTAACGCTAACATCATATT  
CAGAAATTTAGATCG

+  
FFFFFFFFFFFFFFFFFFFFFFFFFFFFFFFFFFFFFFFFFFFFFFFFFFFFFFFFFFFFFFFFFFFFFFFF  
FFFFFFFFFFFFFFFFFFFFFFFFFFFFFFFFFFFFFFFFFFFFFFFFFFFFFFFFFFFFFFFFFFFFFFFF:  
FFFFFFFFFFFFFFFFFFFFFFFFFFFFFFFFFFFFFFFFFFFFFFFFFFFFFFFFFFFFFFFFFFFFFFFF  
@A00721:190:HGJW7DSXY:4:2466:11098:25003 1:N:0:TCTGCAAG+GCTGCACT  
CCGGATTACTCTATACATATATATAGGTCCCCAGTCCCCAATATAATGCTTAATATGCGGATGTCCCT  
GATTTAACAGTAATGGGGACTCCTTCATCTTCTTCATCGCGTTTCTCCATTAACGCTAACATCATATT  
CAGAAATTTAGATCG

+  
FFFFFFFFFFFFFFFFFFFFFFFFFFFFFFFFFFFFFFFFFFFFFFFFFFFFFFFFFFFFFFFFFFFFFFFF  
FFFFFFFFFFFFFFFFFFFFFFFFFFFFFFFFFFFFFFFFFFFFFFFFFFFFFFFFFFFFFFFFFFFFFFFF  
FFFFFFFFFFFFFFFFFFFFFFFFFFFFFFFFFFFFFFFFFFFFFFFFFFFFFFFFFFFFFFFFFFFFFFFF  
@A00721:190:HGJW7DSXY:4:2417:14163:36542 1:N:0:TCTGCAAG+GCTGCACT  
CCGGATTACTCTGTACATATATATAGGTCCCCAGTCCCCAATATAATGCTTAATATGCGGATGTCCCT  
GATTTAACAGTAATGGGGACTCCTTCATCTTCTTCATCGCGTTTCTCCATTAACGCTAACATCATATT  
CAGAAATTTAGATC

+  
FFFFFF:FF:F,,:FFFFFF:FFFFFF:FFFFFFFFFFFFFFFFFFFF:FF:F:F,FFFFFFFF:FFFFF  
FFFFFFFFFFFFFFFFFFFFFFFFFFFFFFFFFFFFFFFFFFFFFFFF:FFF:FFFFFFFFFFFF:FFFFFFFF  
FFF,:FFF:,FFF  
@A00721:190:HGJW7DSXY:4:2368:5358:34006 1:N:0:TCTGCAAG+GCTGCACT  
CTGATGTTAGCGTTAATGGAGAAACGCGATGAAGAAGATGAAGGAGTCCCCATTACTGTTAAATCAGG  
GACATCCGCATATTAAGCATTATATTGGGGACTGGGGACCTATATATATGTATAGAGTAATCCGGAGG  
AATCTATCCCCAAGA

+  
FFFFFFFFFFFFFFFFFFFFFFFFFFFFFFFFFFFFFFFFFFFFFFFFFFFFFFFFFFFFFFFFFFFFFFFF  
FFFFFFFFFFFFFFFFFFFFFFFFFFFFFFFFFFFFFFFFFFFFFFFFFFFFFFFFFFFFFFFFFFFFFFFF  
FFFFFFFFFFFFFFFFFFFFFFFFFFFFFFFFFFFFFFFFFFFFFFFFFFFFFFFFFFFFFFFFFFFFFFFF  
@A00721:190:HGJW7DSXY:4:2370:17770:30358 1:N:0:TCTGCAAG+GCTGCACT  
CTGATGTTAGCGTTAATGGAGAAACGCGATGAAGAAGATGAAGGAGTCCCCATTACTGTTAAATCAGG  
GACATCCGCATATTAAGCATTATATTGGGGACTGGGGACCTATATATATGTATAGAGTAATCCGGAGG  
AATCTATCCCCAAGA

+  
FFFFFFFFFFFFFFFFFFFFFFFFFFFFFFFFFFFFFFFFFFFFFFFFFFFFFFFFFFFFFFFFFFFFFFFF  
FFFFFFFFFFFFFFFFFFFFFFFFFFFFFFFFFFFFFFFFFFFFFFFFFFFFFFFFFFFFFFFFFFFFFFFF  
FFFFFFFFFFFFFFFFFFFFFFFFFFFFFFFFFFFFFFFFFFFFFFFFFFFFFFFFFFFFFFFFFFFFFFFF  
@A00721:190:HGJW7DSXY:4:2475:24804:8844 1:N:0:TCTGCAAG+GCTGCACT  
CTGATGTTAGCGTTAATGGAGAAACGCGATGAAGAAGATGAAGGAGTCCCCATTACTGTTAAATCAGG  
GACATCCGCATATTAAGCATTATATTGGGGACTGGGGACCTATATATATGTATAGAGTAATCCGGAGG  
AATCTATCCCCAAGA

+  
FFFFFFFFFFFFFFFFFFFFFFFFFFFFFFFFFFFFFFFFFFFFFFFFFFFFFFFFFFFFFFFFFFFFFFFF  
FFFFFFFFFFFFFFFFFFFFFFFFFFFFFFFFFFFFFFFFFFFFFFFFFFFFFFFFFFFFFFFFFFFFFFFF  
FFFFFFFFFFFFFFFFFFFFFFFFFFFFFFFFFFFFFFFFFFFFFFFFFFFFFFFFFFFFFFFFFFFFFFFF  
@A00721:190:HGJW7DSXY:4:2535:9715:22608 1:N:0:TCTGCAAG+GCTGCACT  
CTGATGTTAGCGTTAATGGAGAAACGCGATGAAGAAGATGAAGGAGTCCCCATTACTGTTAAATCAGG



@A00721:190:HGJW7DSXY:4:1648:28763:29356 1:N:0:TCTGCAAG+GCTGCACT  
CCTCAATATAATGCTTAATATGCGAATGTCCCTGATTTAACAGTAATGGGGACTCCTTCATCTTCTTC  
ATCGCGTTTCTGCATTAACGCGAAGAATTATTTCTTAACTTATTCAAGATGTCCAATTTCCAAAGAAA  
TTGTTCTCGACCAA

[illegible]

@A00721:190:HGJW7DSXY:4:2226:18231:35039 1:N:0:TCTGCAAG+GCTGCACT  
CCTCAATATAATGCTTAATATGCGAATGTCCCTGATTTAACAGTAATGGGGACTCCTTCATCTTCTTC  
ATCGCGTTTCTGCATTAACGCGAAGAATTATTTCTTAACTTATTCAAGATGTCCAATTTCCAAAGAAA  
TTGTTCTCGACCAA

```

FFFFFFFFFFFFFFFFFFFFFFFFFFFFFFFFFFFFFFFFFFFFFFFFFFFFFFFFFFFFFFFFFFFFFFFF
FFFFFFFFFFFFFFFFFFFFFFFF:FFFFFFFFFFFFFFFF:FFFFFFFFFFFFFFFFFFFFFFFFFFFFFFFF
FFFFFFFFFFFFFFFF

```

@A00721:190:HGJW7DSXY:4:2451:14733:32737 1:N:0:TCTGCAAG+GCTGCACT  
CCTCAATATAATGCTTAATATGCGAATGTCCCTGATTTAACAGTAATGGGGACTCCTTCATCTTCTTC  
ATCGCGTTTTCTGCATTAACGCGAAGAATTATTTCTTAACTTATTCAAGATGTCCAATTTCCAAAGAAA  
TTGTTCTCGACCAA

```

FFFFFFFFFFFFFFFFFFFFFFFFFFFFFFFFFFFFFFFFFFFFFFFFFFFFFFFFFFFFFFFF
FFFFFFFFFFFFFFFFFFFFFFFF:FFFFFFFFFFFFFFFFFFFFFFFFFFFFFFFFFFFFFFFF
FFFFFFFF:FFFFFF

```

@A00721:190:HGJW7DSXY:4:2452:6696:8484 1:N:0:TCTGCAAG+GCTGCACT  
CCTCAATATAATGCTTAATATGCGAATGTCCCTGATTTAACAGTAATGGGACTCCTTCATCTTCTTC  
ATCGCGTTTCTGCATTAACGCGAAGAATTATTTCTTAACTTATTCAAGATGTCCAATTTCCAAAGAAA  
TTGTTCTCGACCAA

[illegible]

@A00721:190:HGJW7DSXY:4:2540:25229:6104 1:N:0:TCTGCAAG+GCTGCACT  
CCTCAATATAATGCTTAATATGCGAATGTCCCTGATTTAACAGTAATGGGACTCCTTCATCTTCTTC  
ATCGCGTTTCTGCATTAACGCGAAGAATTATTTCTTAACTTATTCAAGATGTCCAATTTCAAAGAAA  
TTGTTCTCGACCAA

[illegible]

@A00721:190:HGJW7DSXY:4:2572:25129:18928 1:N:0:TCTGCAAG+GCTGCACT  
CCTCAATATAATGCTTAATATGCGAATGTCCCTGATTTAACAGTAATGGGGACTCCTTCATCTTCTTC  
ATCGCGTTTTCTGCATTAACGCGAAGAATTATTTCTTAACTTATTCAAGATGTCCAATTTCCAAAGAAA  
TTGTTCTCGACCAAA

```
FFFFFFFFFFFFFFFFFFFFFFFFFFFFFFFFFFFFFFFFFFFFFFFFFFFFFFFFFFFFFFF
FFFFFFFFFFFFFFFFFFFFFFFFFFFF:FFFFFFFFFFFFFFFFFFFFFFFFFFFFFFFFFF
FE:FFFFFFFFFFFFFF
```

@A00721:190:HGJW7DSXY:4:1221:11767:18364 1:N:0:TCTGCAAG+GCTGCACT  
GTCTGAGAACAATTTCTTTGGAAATTGGACATCTTGAATAAGTTAAGAAATAATTCTTCGCGTTAATGC  
AGAAACGCGATGAAGAAGATGAAGGAGTCCCCATTACTGTAAATCAGGGACATTTCGCATATTAAGCA  
TTATATTGGGGACTG

[illegible]

@A00721:190:HGJW7DSXY:4:2149:19199:32800 1:N:0:TCTGCAAG+GCTGCACT  
GTCGAGAACAATTTCTTTGGAAATTGGACATCTTGAATAAGTTAAGAAATAATTCTTCGCGTTAATGC  
AGAAACGCGATGAAGAAGATGAAGGAGTCCCCATTACTGTAAATCAGGGACATTTCGCATATTAAGCA  
TTATATTGGGGACTG

@A00721:190:HGJW7DSXY:4:2356:3929:9549 1:N:0:TCTGCAAG+GCTGCACT  
GTCGAGAACAATTTCTTTGGAAATTGGACATCTTGAATAAGTTAAGAAATAATTCTTCGCGTTAATGC  
AGAAACGCGATGAAGAAGATGAAGGAGTCCCCATTACTGTAAATCAGGGACATTTCGCATATTAAGCA  
TTATATTGGGGACTG

@A00721:190:HGJW7DSXY:4:2618:5773:23390 1:N:0:TCTGCAAG+GCTGCACT  
GTCTGAGAACAATTTCTTTGGAAATTGGACATCTTGAATAAGTTAAGAAATAATTCTTCGCGTTAATGC  
AGAAACGCGATGAAGAAGATGAAGGAGTCCCCATTACTGTAAATCAGGGACATTTCGCATATTAAGCA  
TTATATTGGGGACTG

@A00721:190:HGJW7DSXY:4:1129:23610:36714 1:N:0:TCTGCAAG+GCTGCACT  
TCGAGAACAATTTCTTTGGAAATTGGACATCTTGAATAAGTTAAGAAATAATTCTTCGCGTTAATGCA  
GAAACGCGATGAAGAAGATGAAGGAGTCCCCATTACTGTAAATCAGGGACATTGCGATATTAAGCAT  
TATATTGGGGACTGG

@A00721:190:HGJW7DSXY:4:1202:25880:25739 1:N:0:TCTGCAAG+GCTGCACT  
TCGAGAACAATTTCTTTGGAAATTGGACATCTTGAATAAGTTAAGAAATAATTCTTCGCGTTAATGCA  
GAAATGCGATGAAGAAGATGAAGGAGTCCCCATTACTGTAAATCAGGGACATTTCGCATATTAAGCAT  
TATATTGGGGACTGG

@A00721:190:HGJW7DSXY:4:2527:21703:13777 1:N:0:TCTGCAAG+GCTGCACT  
TCGAGAACAATTTCTTTGGAAATTGGACATATTGAATAAGTTAAGAAATAATTCTTCGCGTTAATGCA  
GAAACGCGATGAAGAAGATGAAGGAGTCCCCATAACTGTAAATCAGGGACATTTCGCATATTAAGCAT  
TATATTGGGGACTG

@A00721:190:HGJW7DSXY:4:2606:11333:23437 1:N:0:TCTGCAAG+GCTGCACT  
TCGAGAACAATTTCTTTGGAAATTGGACATCTTGAATAAGTTAAGAAATAATTCTTCGCGTTAATGCA  
GAAATGCGATGAAGAAGATGAAGGAGTCCCCATTACTGTAAATCAGGGACATTGCGATATTAATCAT  
TATATTGGGGACTG

+  
FF:F,FFFFFFFF,FF:F:FFFFFFFF:FFFFFFFFFFFFFFFFFFFFFFFF,F,FFFF,FFFF:F  
FFFFFFFFFFFFFFFFFFFFFFFF:FFFFF::FF:F,FFFF,:FFFFFFFF:FFFF:FFFFFFFF,FFF  
,FFF:F,F:FFFF

@A00721:190:HGJW7DSXY:4:1512:10556:28573 1:N:0:TCTGCAAG+GCTGCACT  
GGACATCTTGAATAAGTTAAGAAATAATTCTTCGCGTTAATGCAGAAACGCGATGAAGAAGATGAAGG  
AGTCCCCATTACTGTTAAATCAGGGACATTTCGCATATTAAGCATTATATTGGGGACTGGGGACCTATA  
TATATGTATAGAGTA

+  
FFFFFFFFFFFF:FFFFFFFFFFFFFFFFFFFFFFFFFFFFFFFFFFFFFFFFFFFFFFFFFFFFFFFF:FFFF  
FFFFFFFFFFFFFFFFFFFFFFFFFFFFFFFFFFFFFFFFFFFFFFFFFFFFFFFFFFFFFFFFFFFFFFFF  
FFFFFFFFFFFFFFFF

@A00721:190:HGJW7DSXY:4:1607:25265:16438 1:N:0:TCTGCAAG+GCTGCACT  
GGACATCTTGAATAAGTTAAGAAATAATTCTTCGCGTTAATGCAGAAACGCGATGAAGAAGATGAAGG  
AGTCCCCATTACTGTTAAATCAGGGACATTTCGCATATTAAGCATTATATTGGGGACTGGGGACCTATA  
TATATGTATAGAGTA

+  
::FFFFFFFF::F:FFFFFFFFFFFFFFFFFFFFFFFFFFFFFFFFFFFFFFFF:FFFFFF:FFFFFF,FFFF::FFFF  
FFFFFFFF,FFFFFF:FFF:FFFFFFFFFFFFFFFF:FFFFFFFFFFFF,F:F:FFFFFF:FFFFFFFF  
FFFF:FFFFFF,F

@A00721:190:HGJW7DSXY:4:2302:14416:26021 1:N:0:TCTGCAAG+GCTGCACT  
GGACATCTTGAATAAGTTAAGAAATAATTCTTCGCGTTAATGCAGAAACGCGATGAAGAAGATGAAGG  
AGTCCCCATTACTGTTAAATCAGGGACATTTCGCATATTAAGCATTATATTGGGGACTGGGGACCTATA  
TATATGTATAGAGTA

+  
FFFFFFFFFFFFFFFFFFFFFFFFFFFFFFFFFFFFFFFFFFFFFFFFFFFFFFFFFFFFFFFFFFFFFFFF  
FFFFFFFFFFFFFFFFFFFFFFFFFFFFFFFFFFFFFFFFFFFFFFFFFFFFFFFFFFFFFFFFFFFFFFFF  
FFFFFFFFFFFFFFFF

@A00721:190:HGJW7DSXY:4:2549:18295:28635 1:N:0:TCTGCAAG+GCTGCACT  
GGACATCTTGAATAAGTTAAGAAATAATTCTTCGCGTTAATGCAGAAACGCGATGAAGAAGATGAAGG  
AGTCCCCATTACTGTTAAATCAGGGACATTTCGCATATTAAGCATTATATTGGGGACTGGGGACCTATA  
TATATGTATAGAGTA

+  
FFFFFFFFFFFFFFFFFFFFFFFFFFFFFFFFFFFFFFFFFFFFFFFFFFFFFFFFFFFFFFFFFFFFFFFF  
FFFFFFFFFFFFFFFFFFFFFFFFFFFFFFFFFFFFFFFFFFFFFFFFFFFFFFFFFFFFFFFFFFFFFFFF  
FFFFFFFFFFFFFF:F

@A00721:190:HGJW7DSXY:4:1133:12066:21574 1:N:0:TCTGCAAG+GCTGCACT  
CTCCGGATTACTCTATACATATATATAGGTCCCCAGTCCCCAATATAATGCTTAATATGCGAATGTCC  
CTGATTTAACAGTAATGGGGACTCCTTCATCTTCTTCATCGCGTTTCTGCATTAACGCGAAGAATTAT  
TTCTTAATTATTCA

+  
FFFFFFFFFFFFFFFFFFFFFFFFFFFFFFFFFFFFFFFFFFFFFFFFFFFFFFFFFFFFFFFFFFFFFFFF  
FFFFFFFFFFFFFF:FFFF:F::FFF:FFFFFFFFFFFFFFFFFFFFFFFF,FFFFFFFFFFFFFF  
FFFFFFFFFFFFFF

@A00721:190:HGJW7DSXY:4:1136:24505:32659 1:N:0:TCTGCAAG+GCTGCACT  
CTCCGGATTACTCTATACATATATATAGGTCCCCAGTCCCCAATATAATGCTTAATATGCGAATGTCC  
CTGATTTAACAGTAATGGGGACTCCTTCATCTTCTTCATCGCGTTTCTGCATTAACGCGAAGAATTAT  
TTCTTAATTATTCA

+  
FFFFFFFFFFFF:FFFF:FFFFFFFFFFFF:FF:FF:F:F:FFFFFFFFFFFF:FFFFFFFFFFFF:FFF:F:,  
FFFFFFFFFFFF:FFFFFF,FFFF:FF,FFFFFFFFFFFF:FFF,FFFFFFFF:F:FFFF,F:FF:FFFF:  
FFFFFFFFFFFFFF,F

@A00721:190:HGJW7DSXY:4:1213:15076:32612 1:N:0:TCTGCAAG+GCTGCACT  
CTCCGGATTACTCTATACATATATATAGGTCCCCAGTCCCCAATATAATGCTTAATATGCGAATGTCC



$+$ 

+

 $+$ 

+

+

+

+

[illegible]



FFFFFFFFFFFFFFFFFFFFFFFFFFFFFFFFFFFFFFFFFFFFFFFFFFFFFFFFFFFFFFFFFFFFFFFF  
FFFF:FFFFFFFF

@A00721:190:HGJW7DSXY:4:1212:23936:33364 1:N:0:TCTGCAAG+GCTGCACT  
GACTATTCCAATTGGGGATAGATTCTCCGGATTACTCTATACATATATATAGGTCCCCAGTCCCCAA  
TATAATGCTTAATATGCGAATGTCCCTGATTAAACAGTAATGGGGACTCCTTCATCTTCTTCATCGCG  
TTTCTGCATTAACGC

+

FFFFFF:FFFFFFFFFFFFFFFFFFFFFFFFFFFFFFFFFFFFFFFFFFFFFFFFFFFFFFFFFFFFFFFF  
FFFFFFFF:FFFFFFFFFFFFFFFFFFFFFFFFFFFFFFFF:FFFF:FFFFFFFF:FFFFFFFFFFFFFFFF:  
FFFFFFFFFFFFFFFF

@A00721:190:HGJW7DSXY:4:1351:12825:11490 1:N:0:TCTGCAAG+GCTGCACT  
GACTATTCCAATTGGGGATAGATTCTCCGGATTACTCTATACATATATATAGGTCCCCAGTCCCCAA  
TATAATGCTTAATATGCGAATGTCCCTGATTAAACAGTAATGGGGACTCCTTCATCTTCTTCATCGCG  
TTTCTGCATTAACGC

+

FFFF,FFFFFFFFFFFFFFFFFFFFFFFFFFFFFFFFFFFFFFFFFFFFFFFFFFFFFFFFFFFFFFFF  
FFFFFFFFFFFFFFFFFFFFFFFFFFFFFFFFFFFFFFFF:FFF:FFFF:F:FFFFFFFF:FFFFFFFFFFFFFF  
FF:FFFFFFFF:FFFF

@A00721:190:HGJW7DSXY:4:2136:30382:23641 1:N:0:TCTGCAAG+GCTGCACT  
GACTATTCCAATTGGGGATAGATTCTCCGGATTACTCTATACATATATATAGGTCCCCAGTCCCCAA  
TATAATGCTTAATATGCGAATGTCCCTGATTAAACAGTAATGGGGACTCCTTCATCTTCTTCATCGCG  
TTTCTGCATTAACGC

+

FFFFFFFFFFFFFFFFFFFFFFFFFFFFFFFFFFFFFFFFFFFFFFFFFFFFFFFFFFFFFFFFFFFFFF  
FFFFFFFFFFFFFFFFFFFFFFFFFFFFFFFFFFFFFFFF:FFFFFF:F:FFFFFFFFFFFFFFFFFFFFFF  
FFFFFFFFFFFFFFFF

@A00721:190:HGJW7DSXY:4:2262:31964:24815 1:N:0:TCTGCAAG+GCTGCACT  
GACTATTCCAATTGGGGATAGATTCTCCGGATTACTCTATACATATATATAGGTCCCCAGTCCCCAA  
TATAATGCTTAATATGCGAATGTCCCTGATTAAACAGTAATGGGGACTCCTTCATCTTCTTCATCGCG  
TTTCTGCATTAACGC

+

FFFFFFFFFFFFFFFFFFFFFFFFFFFFFFFFFFFFFFFFFFFFFFFFFFFFFFFFFFFFFFFFFFFFFF  
FFFFFFFFFFFFFFFFFFFFFFFFFFFFFFFFFFFFFFFF:FFFFFFFFFFFFFFFFFFFFFFFFFFFFFF  
FFF:FF::FFFF::

@A00721:190:HGJW7DSXY:4:2536:8784:4022 1:N:0:TCTGCAAG+GCTGCACT  
GACTATTCCAATTGGGGATAGATTCTCCGGATTACTCTATACATATATATAGGTCCCCAGTCCCCAA  
TATAATGCTTAATATGCGAATGTCCCTGATTAAACAGTAATGGGGACTCCTTCATCTTCTTCATCGCG  
TTTCTGCATTAACGC

+

FFFFFFFFFFFFFFFFFFFFFFFFFFFFFFFFFFFFFFFFFFFFFFFFFFFFFFFFFFFFFFFFFFFFFF  
FFFFFFFFFFFFFFFFFFFFFFFFFFFFFFFFFFFFFFFF,FFFFFF:FFFFFFFFFFFFFFFFFFFFFF  
FFFFFFFFFFFFFF:F

@A00721:190:HGJW7DSXY:4:1111:14986:12853 1:N:0:TCTGCAAG+GCTGCACT  
GCGGGATATTTTCAAATTTGAAATTTGAAATCATTACTATTCCAATTGGGGATAGATTCTCCGGATT  
ACTCTATACATATATATAGGTCCCCAGTCCCCAATATAATGCTTAATATGCGAATGTCCCTGATTAA  
CAGTAATGGGGACTC

+

FFFFFFFFFFFFFFFFFFFFFFFFFFFFFFFFFFFFFFFFFFFFFFFFFFFFFFFFFFFFFFFFFFFFFF  
FFFFFFFFFFFFFFFFFFFFFFFFFFFFFFFFFFFFFFFF:FFFFFFFFFFFFFFFFFFFFFFFFFFFFFF  
FFFF:FFFFFFFF

@A00721:190:HGJW7DSXY:4:2242:18837:25285 1:N:0:TCTGCAAG+GCTGCACT  
GCGGGATATTTTCAAATTTGAAATTTGAAATCATTACTATTCCAATTGGGGATAGATTCTCCGGATT  
ACTCTATACATATATATAGGTCCCCAGTCCCCAATATAATGCTTAATATGCGAATGTCCCTGATTAA  
CAGTAATGGGGACTC

+  
FFFFFFFFFFFFFFFFFFFFFFFFFFFFFFFFFFFFFFFFFFFFFFFFFFFFFFFFFFFFFFFFFFFFFFFF  
FFFFFFFFFFFFFFFFFFFFFFFFFFFFFFFFFFFFFFFFFFFFFFFFFFFFFFFFFFFFFFFFFFFFFFFF  
FFFFFFFFFFFFFFFFFFFFFFFFFFFFFFFFFFFFFFFFFFFFFFFFFFFFFFFFFFFFFFFFFFFFFFFF  
@A00721:190:HGJW7DSXY:4:2457:1253:6355 1:N:0:TCTGCAAG+GCTGCACT  
GCGGGATATTTTCAAATTTGAAATTTGAAATCATTACTATTCCAATTGGGGATAGATTCTCCGGATT  
ACTCTATACATATATATAGGTCCCCAGTCCCCAATATAATGCTTAATATGCGAATGTCCCTGATTAA  
CAGTAATGGGGACTC

+  
FFFFFFFFFFFFFFFFFFFFFFFFFFFFFFFFFFFFFFFFFFFFFFFFFFFFFFFFFFFFFFFFFFFFFFFF  
FFFFFFFFFFFFFFFFFFFFFFFFFFFFFFFFFFFFFFFFFFFFFFFFFFFFFFFFFFFFFFFFFFFFFFFF  
FFFFFFFFFFFFFFFFFFFFFFFFFFFFFFFFFFFFFFFFFFFFFFFFFFFFFFFFFFFFFFFFFFFFFFFF  
@A00721:190:HGJW7DSXY:4:2548:14787:14262 1:N:0:TCTGCAAG+GCTGCACT  
GCGGGATATTTTCAAATTTGAAATTTGAAATCATTACTATTCCAATTGGGGATAGATTCTCCGGATT  
ACTCTATACATATATATAGGTCCCCAGTCCCCAATATAATGCTTAATATGCGAATGTCCCTGATTAA  
CAGTAATGGGGACTC

+  
FFFFFFFFFFFFFFFFFFFFFFFFFFFFFFFFFFFFFFFFFFFFFFFFFFFFFFFFFFFFFFFFFFFFFFFF  
FFFFFFFFFFFFFFFFFFFFFFFFFFFFFFFFFFFFFFFFFFFFFFFFFFFFFFFFFFFFFFFFFFFFFFFF  
FFFFFFFFFFFFFFFFFFFFFFFFFFFFFFFFFFFFFFFFFFFFFFFFFFFFFFFFFFFFFFFFFFFFFFFF  
@A00721:190:HGJW7DSXY:4:1212:28212:23140 1:N:0:TCTGCAAG+GCTGCACT  
GGGCGGGATATTTTCAAATTTGAAATTTGAAATCATTACTATTCCAATTGGGGATAGATTCTCCGGA  
TACTCTATACATATATATAGGTCCCCAGTCCCCAATATAATGCTTAATATGCGAATGTCCCTGATT  
AACAGTAATGGGGAC

+  
FFFFFFFFFFFFFFFFFFFFFFFFFFFFFFFFFFFFFFFFFFFFFFFFFFFFFFFFFFFFFFFFFFFFFFFF  
FFFFFFFFFFFFFFFFFFFFFFFFFFFFFFFFFFFFFFFFFFFFFFFFFFFFFFFFFFFFFFFFFFFFFFFF  
FFFFFFFFFFFFFFFFFFFFFFFFFFFFFFFFFFFFFFFFFFFFFFFFFFFFFFFFFFFFFFFFFFFFFFFF  
@A00721:190:HGJW7DSXY:4:1240:8983:33301 1:N:0:TCTGCAAG+GCTGCACT  
GGGCGGGATATTTTCAAATTTGAAATTTGAAATCATTACTATTCCAATTGGGGATAGATTCTCCGGA  
TACTCTATACATATATATAGGTCCCCAGTCCCCAATATAATGCTTAATATGCGAATGTCCCTGATT  
AACAGTAATGGGGAC

+  
FFFFFFFFFFFFFFFFFFFFFFFFFFFFFFFFFFFFFFFFFFFFFFFFFFFFFFFFFFFFFFFFFFFFFFFF  
FFFFFFFFFFFFFFFFFFFFFFFFFFFFFFFFFFFFFFFFFFFFFFFFFFFFFFFFFFFFFFFFFFFFFFFF  
FFFFFFFFFFFFFFFFFFFFFFFFFFFFFFFFFFFFFFFFFFFFFFFFFFFFFFFFFFFFFFFFFFFFFFFF  
@A00721:190:HGJW7DSXY:4:1304:14443:22467 1:N:0:TCTGCAAG+GCTGCACT  
GGGCGGGATATTTTCAAATTTGAAATTTGAAATCATTACTATTCCAATTGGGGATAGATTCTCCGGA  
TACTCTATACATATATATAGGTCCCCAGTCCCCAATATAATGCTTAATATGCGAATGTCCCTGATT  
AACAGTAATGGGGAC

+  
FFFFFFFFFFFFFFFFFFFFFFFFFFFFFFFFFFFFFFFFFFFFFFFFFFFFFFFFFFFFFFFFFFFFFFFF  
FFFFFFFFFFFFFFFFFFFFFFFFFFFFFFFFFFFFFFFFFFFFFFFFFFFFFFFFFFFFFFFFFFFFFFFF  
FFFFFFFFFFFFFFFFFFFFFFFFFFFFFFFFFFFFFFFFFFFFFFFFFFFFFFFFFFFFFFFFFFFFFFFF  
@A00721:190:HGJW7DSXY:4:1415:14543:33160 1:N:0:TCTGCAAG+GCTGCACT  
GGGCGGGATATTTTCAAATTTGAAATTTGAAATCATTACTATTCCAATTGGGGATAGATTCTCCGGA  
TACTCTATACATATATATAGGTCCCCAGTCCCCAATATAATGCTTAATATGCGAATGTCCCTGATT  
AACAGTAATGGGGAC

+  
FFFFFFFFFFFFFFFFFFFFFFFFFFFFFFFFFFFFFFFFFFFFFFFFFFFFFFFFFFFFFFFFFFFFFFFF  
FFFFFFFFFFFFFFFFFFFFFFFFFFFFFFFFFFFFFFFFFFFFFFFFFFFFFFFFFFFFFFFFFFFFFFFF  
FFFFFFFFFFFFFFFFFFFFFFFFFFFFFFFFFFFFFFFFFFFFFFFFFFFFFFFFFFFFFFFFFFFFFFFF  
@A00721:190:HGJW7DSXY:4:1673:19199:11099 1:N:0:TCTGCAAG+GCTGCACT  
GGGCGGGATATTTTCAAATTTGAAATTTGAAATCATTACTATTCCAATTGGGGATAGATTCTCCGGA



$+$ 

+

+

+

+

+

+

---



+  
FFFFFFFFFFFFFFFFFFFFFFFFFFFFFFFFFFFFFFFFFFFFFFFFFFFFFFFFFFFFFFFFFFFFFFFF  
FFFFFFFFFFFFFFFFFFFFFFFFFFFFFFFFFFFFFFFFFFFFFFFFFFFFFFFFFFFFFFFFFFFFFFFF  
FFFFF:FFF:FFFF  
@A00721:190:HGJW7DSXY:4:1301:16278:35790 1:N:0:TCTGCAAG+GCTGCACT  
CCGCATATTAAGCATTATATTGGGGACTGGGGACCTATATATATGTATAGAGTAATCCGGAGGAATCT  
ATCCCCAATTGGAATAGTAATGATTTCAAATTTCAAATTTGAAAATATCCCGCCCTACAGTATACCAA  
TTCAAATTCAAATTC

+  
FFFFFFFFFFFFFFFFFFFFFFFFFFFFFFFFFFFFFFFFFFFFFFFFFFFFFFFFFFFFFFFFFFFFFFFF  
FFFFFFFFFFFFFFFFFFFFFFFFFFFFFFFFFFFFFFFFFFFFFFFFFFFFFFFFFFFFFFFFFFFFFFFF  
:FFFFFFFFFFFFFFFF  
@A00721:190:HGJW7DSXY:4:1310:21206:18270 1:N:0:TCTGCAAG+GCTGCACT  
CCGCATATTAAGCATTATATTGGGGACTGGGGACCTATATATATGTATAGAGTAATCCGGAGGAATCT  
ATCCCCAATTGGAATAGTAATGATTTCAAATTTCAAATTTGAAAATATCCCGCCCTACAGTATACCAA  
TTCAAATTCAAATTC

+  
FFFFFFFFFFFFFFFFFFFFFFFFFFFFFFFFFFFFFFFFFFFFFFFFFFFFFFFFFFFFFFFFFFFFFFFF  
FFFFFFFFFFFFFFFFFFFFFFFFFFFFFFFFFFFFFFFFFFFFFFFFFFFFFFFFFFFFFFFFFFFFFFFF  
FFFFFFFFFFFFFFFFFFFF  
@A00721:190:HGJW7DSXY:4:1612:22869:5963 1:N:0:TCTGCAAG+GCTGCACT  
CCGCATATTAAGCATTATATTGGGGACTGGGGACCTATATATATGTATAGAGTAATCCGGAGGAATCT  
ATCCCCAATTGGAATAGTAATGATTTCAAATTTCAAATTTGAAAATATCCCGCCCTACAGTATACCAA  
TTCAAATTCAAATTC

+  
FFFFFFFFFFFFFFFFFFFFFFFFFFFFFFFFFFFFFFFFFFFFFFFFFFFFFFFFFFFFFFFFFFFFFFFF  
FFFFFFFFFFFFFFFFFFFFFFFFFFFFFFFFFFFFFFFFFFFFFFFFFFFFFFFFFFFFFFFFFFFFFFFF  
:FFFFFFFFFFFFFFFF  
@A00721:190:HGJW7DSXY:4:2145:16947:17065 1:N:0:TCTGCAAG+GCTGCACT  
CCGCATATTAAGCATTATATTGGGGACTGGGGACCTATATATATGTATAGAGTAATCCGGAGGAATCT  
ATCCCCAATTGGAATAGTAATGATTTCAAATTTCAAATTTGAAAATATCCCGCCCTACAGTATACCAA  
TTCAAATTCAAATTC

+  
FFFFFFFFFFFFFFFFFFFFFFFFFFFFFFFFFFFFFFFFFFFFFFFFFFFFFFFFFFFFFFFFFFFFFFFF  
FFFFFFFFFFFFFFFFFFFFFFFFFFFFFFFFFFFFFFFFFFFFFFFFFFFFFFFFFFFFFFFFFFFFFFFF  
FFFFFFFFFFFFFFFF:FFF  
@A00721:190:HGJW7DSXY:4:2169:19307:31955 1:N:0:TCTGCAAG+GCTGCACT  
CCGCATATTAAGCATTATATTGGGGACTGGGGACCTATATATATGTATAGAGTAATCCGGAGGAATCT  
ATCCCCAATTGGAATAGTAATGATTTCAAATTTCAAATTTGAAAATATCCCGCCCTACAGTATACCAA  
TTCAAATTCAAATTC

+  
FFFFFFFFFFFFFFFFFFFFFFFFFFFFFFFFFFFFFFFFFFFFFFFFFFFFFFFFFFFFFFFFFFFFFFFF  
FFFFFFFFFFFFFFFFFFFFFFFFFFFFFFFFFFFFFFFFFFFFFFFFFFFFFFFFFFFFFFFFFFFFFFFF  
FFFFFFFFFFFFFFFFFFFF  
@A00721:190:HGJW7DSXY:4:2336:22968:27023 1:N:0:TCTGCAAG+GCTGCACT  
CCGCATATTAAGCATTATATTGGGGACTGGGGACCTATATATATGTATAGAGTAATCCGGAGGAATCT  
ATCCCCAATTGGAATAGTAATGATTTCAAATTTCAAATTTGAAAATATCCCGCCCTACAGTATACCAA  
TTCAAATTCAAATTC

+  
F:FFFFFFFFFFFFFFFFFFFFFFFFFFFFFFFFFFFFFFFFFFFFFFFFFFFFFFFFFFFFFFFFFFFF  
FFF:FFFF:FFFFFFFFFFFFFFFFFFFFFFFFFFFFFFFFFFFFFFFFFFFFFFFFFFFFFFFFFFFF  
FFFFFFFFFF:FF:FF:  
@A00721:190:HGJW7DSXY:4:2544:24153:5494 1:N:0:TCTGCAAG+GCTGCACT  
CCGCATATTAAGCATTATATTGGGGACTGGGGACCTATATATATGTATAGAGTAATCCGGAGGAATCT

ATCCCCAATTGGAATAGTAATGATTTCAAATTTCAAATTTGAAAATATCCCGCCCTACAGTATACCAA  
TTCAAATTCAAATTC

+

FFFFFFFFFFFFFFFFFFFFFFFFFFFFFFFFFFFFFFFFFFFFFFFFFFFFFFFFFFFFFFFFFFFFFFFF:FFFFFFFF,FFF  
FFFFFFFFFFFFFFFFFFFFFFFFFFFFFFFFFFFFFFFFFFFFFFFFFFFFFFFFFFFFFFFFFFFFFFFFFFFFFFFF  
FFFFFFFFFFFFFFFF

@A00721:190:HGJW7DSXY:4:2544:27697:5682 1:N:0:TCTGCAAG+GCTGCACT  
CCGCATATTAAGCATTATATTGGGGACTGGGGACCTATATATATGTATAGAGTAATCCGGAGGAATCT  
ATCCCCAATTGGAATAGTAATGATTTCAAATTTCAAATTTGAAAATATCCCGCCCTACAGTATACCAA  
TTCAAATTCAAATTC

+

FFFFFFFFFFFFFFFFFFFFFFFFFFFFFFFFFFFFFFFFFFFFFFFFFFFFFFFFFFFFFFFFFFFFFFFF:FFF  
FFFFFFFFFFFFFFFFFFFFFFFFFFFFFFFFFFFFFFFFFFFFFFFFFFFFFFFFFFFFFFFFFFFFFFFFFFFFFFFF  
FFFFFFFFFFFFFFFF

@A00721:190:HGJW7DSXY:4:1347:18954:30123 1:N:0:TCTGCAAG+GCTGCACT  
ATCGCATATTAAGCATTATATTGGGGACTGGGGACCTATATATATGTATAGAGTAATCCGGAGGAATC  
TATCCCCAATTGGAATAGTAATGATTTCAAATTTCAAATTTGAAAATCATTACTATTCCAATTGGGGA  
TAGATTCCTCCGAGA

+

FFFFFFFFFFFFFFFFFFFFFFFFFFFFFFFFFFFFFFFFFFFFFFFFFFFFFFFFFFFFFFFFFFFFFFFF  
FFFFFFFFFFFFFFFFFFFFFFFFFFFFFFFFFFFFFFFFFFFFFFFFFFFFFFFFFFFFFFFFFFFFFFFF,FFFFF:FFF:FFFF:FF:FFF:  
FFFFFFFFFFFFFFFF

@A00721:190:HGJW7DSXY:4:1431:18358:3693 1:N:0:TCTGCAAG+GCTGCACT  
ATCGCATATTAAGCATTATATTGGGGACTGGGGACCTATATATATGTATAGAGTAATCCGGAGGAATC  
TATCCCCAATTGGAATAGTAATGATTTCAAATTTCAAATTTGAAAATCATTACTATTCCAATTGGGGA  
TAGATTCCTCCGAGA

+

FFFFFFFFFFFFFFFFFFFFFFFFFFFFFFFFFFFFFFFFFFFFFFFFFFFFFFFFFFFFFFFFFFFFFFFF  
FFFFFFFFFFFFFFFFFFFFFFFFFFFFFFFFFFFFFFFFFFFFFFFFFFFFFFFFFFFFFFFFFFFFFFFF,F,FF:FFF:  
FFFFFFFFFFFFFFFF

@A00721:190:HGJW7DSXY:4:2446:1787:6746 1:N:0:TCTGCAAG+GCTGCACT  
ATCGCATATTAAGCATTATATTGGGGACTGGGGACCTATATATATGTATAGAGTAATCCGGAGGAATC  
AATCCCCAATTGGAATAGTAATGATTTCAAATTTCAAATTTGAAAATCATTACTATTCCAATTGGGGA  
TAGATTCACCGAGA

+

FFFFFFFFF:FFFFFFFFFFFFF:FFFFFF,F,FFFFFFFF:FFF,F,FFF::,FFFFFFFFF:F,FF  
,FFFF:FFFF:F,FFFFFFFFFFFF:FFFFF,:F:FFF,:FFF:FFF:FFFFFFFF:FF:F,F,F:  
FFFFFFFF,FF,FF:

@A00721:190:HGJW7DSXY:4:1357:30698:19617 1:N:0:TCTGCAAG+GCTGCACT  
CGCATATTAAGCATTATATTGGGGACTGGGGACCTATATATATGTATAGAGTAATCCGGAGGAATCTA  
TCCCCAATTGGAATAGTAATGATTTCAAATTTCAAATTTGAAAATATCCCGCCCTACAGTATACCAAT  
TCAAATTCAAATTCA

+

FFFFFFFFFFFFFFFFFFFFFFFFFFFFFFFFFFFFFFFFFFFFFFFFFFFFFFFFFFFFFFFFFFFFFFFF  
FFFFFFFFFFFFFFFFFFFFFFFFFFFFFFFFFFFFFFFFFFFFFFFFFFFFFFFFFFFFFFFFFFFFFFFF  
FFFFFFFFFFFFFFFF

@A00721:190:HGJW7DSXY:4:1471:23294:3411 1:N:0:TCTGCAAG+GCTGCACT  
CGCATATTAAGCATTATATTGGGGACTGGGGACCTATATATATGTATAGAGTAATCCGGAGGAATCTA  
TCCCCAATTGGAATAGTAATGATTTCAAATTTCAAATTTGAAAATATCCCGCCCTACAGTATACCAAT  
TCAAATTCAAATTCA

+

FF:F:FFFFFFFFFFFFFFFFFFFFFFFFFFFFFFFFFFFFFFFFFFFFFFFFFFFFFFFFFFFFFFFF:, :FFFFFFFFF  
:FFF,FFFF,FFFF:FFFF:FFFF:FF::F:FF,F,FFFFFFFF,FF:FF,FF,FFFF:FF:FF:  
F,FFFF::F,FFFF

@A00721:190:HGJW7DSXY:4:2177:32045:21136 1:N:0:TCTGCAAG+GCTGCACT  
CGCATATTAAGCATTATATTGGGGACTGGGGACCTATATATATGTATAGAGTAATCCGGAGGAATCTA  
TCCCCAATTGGAATAGTAATGATTTCAAATTTCAAATTTGAAAATATCCCGCCCTACAGTATACCAAT  
TCAAATTCAAATTCA

[illegible]

@A00721:190:HGJW7DSXY:4:2201:10809:17143 1:N:0:TCTGCAAG+GCTGCACT  
CGCATATTAAGCATTATATTGGGGACTGGGGACCTATATATATGTATAGAGTAATCCGGAGGAATCTA  
TCCCCAATTGGAATAGTAATGATTTCAAATTTCAAATTTGAAAATATCCCGCCCTACAGTATACCAAT  
TCAAATTCAAATTCA

```

FFFFFFFFFFFFFFFFFFFFFFFFFFFFFFFFFFFFFFFFFFFFFFFFFFFFFFFFFFFFFFFFFFFFFFFF
FFFFFFFF:FFFFFFFFFFFFFFFFFFFFFFFFFFFFFFFF:FFFFFFFFFFFFFFFFFFFFFFFFFFFFFF
FFFF:FFFFFFFF

```

@A00721:190:HGJW7DSXY:4:1222:2492:22811 1:N:0:TCTGCAAG+GCTGCACT  
GCATATTAAGCATTATATTGGGGACTGGGGACCTATATATATGTATAGAGTAATCCGGAGGAATCTAT  
CCCCAATTGGAATAGTAATGATTTCAAATTTCAAATTTGAAAATATCCCGCCCTACAGTATACCAATT  
CAAATTCAAATTCAA

[illegible]

@A00721:190:HGJW7DSXY:4:2216:32280:35477 1:N:0:TCTGCAAG+GCTGCACT  
GCATATTAAGCATTATATTGGGGACTGGGGACCTATATATATGTATAGAGTAATCCGGAGGAATCTAT  
CCCCAATTGGAATAGTAATGATTTCAAATTTCAAATTTGAAAATATCCCGCCCTACAGTATACCAATT  
CAAATTCAAATTCAA

```
FFFFFFFFFFFFFFFFFFFFFFFFFFFFFFFFFFFFFFFFFFFFFFFFFFFFFFFFFFFFF:FFFFFFFFFFFFFFFFFF
FFFFFFFFFFFFFFFFFFFFFFFFFFFFFFFFFFFFFFFFFFFFFFFFFFFFFFFFFFFFF:FFFFFFFFFFF,FFFFFFFFFFFFFFFF
FFFFFFFFFFFFFFFF
```

@A00721:190:HGJW7DSXY:4:1528:31403:36432 1:N:0:TCTGCAAG+GCTGCACT  
GGGGACTGGGGACCTATATATATGTATAGAGTAATCCGGAGGAATCTATCCCCAATTGGAATAGTAAT  
GATTTCAAATTTCAAATTTGAAAATATCCCGCCCTACAGTATACCAATTCAAATTCAAATTCAAATAG  
AATTCCATAGGCCCC

[illegible]

@A00721:190:HGJW7DSXY:4:1650:16269:12414 1:N:0:TCTGCAAG+GCTGCACT  
GGGGACTGGGGACCTATATATGTATAGAGTAATCCGGAGGAATCTATCCCCAATTGGAATAGTAAT  
GATTTCAAATTTCAAATTTGAAAATATCCCGCCCTACAGTATACCAATTCAAATTCAAATTCAAATAG  
AATTCCATAGGCCCC

[illegible]

@A00721:190:HGJW7DSXY:4:2465:22146:8938 1:N:0:TCTGCAAG+GCTGCACT  
GGGGACTGGGGACCTATATATATGTATAGAGTAATCCGGAGGAATCTATCCCCAATTGGAATAGTAAT  
GATTTCAAATTTCAAATTTGAAAATATCCCGCCCTACAGTATACCAATTCAAATTCAAATTCAAATAG  
AATTCCATAGGCCCC

[illegible]



FFFFFFFFFFFFFFFFFFFFFFFFFFFFFFFFFFFFFFFFFFFFFFFFFFFFFFFFFFFFFFFFFFFFFFFF  
FFFF:FFFF:FFFF

@A00721:190:HGJW7DSXY:4:1201:6406:36824 1:N:0:TCTGCAAG+GCTGCACT  
GGCTGGGGACCTATATATATGTATAGAGTAATCCGGAGGAATCTATCCCCAATTGGAATAGTAATGAT  
TTCAAATTTCAAATTTGAAAATATCCCGCCCTACAGTATACCAATTCAAATTCAAATTCAAATAGAAT  
TCCATAGGCCCCGCA

+  
:FFFFFFFFFFFFFFFFFFFFFFFFFFFFFFFFFFFFFFFFFFFFFFFFFFFFFFFFFFFFFFFFFFFF,FFFFFFFFFFFF:FFFFFFFFFFFFFFFF:F  
FFFFFFFFFFFFFFFFFFFFFFFFFFFFFFFFFFFFFFFFFFFFFFFFFFFFFFFFFFFFFFFFFFFF:FFFFFFFFFFFFFFFFFFFFFFFFFFFFFFFFFFFFF  
:F:FFFF:FFFF

@A00721:190:HGJW7DSXY:4:1228:23647:17989 1:N:0:TCTGCAAG+GCTGCACT  
GGCTGGGGACCTATATATATGTATAGAGTAATCCGGAGGAATCTATCCCCAATTGGAATAGTAATGAT  
TTCAAATTTCAAATTTGAAAATATCCCGCCCTACAGTATACCAATTCAAATTCAAATTCAAATAGAAT  
TCCATAGGCCCCGCA

+  
::F,FFFF:FFFFFFFFFFFFFFFFFFFFFFFFFFFFFFFFFFFFFFFFFFFFFFFFFFFFFFFFFFFF,FFFF,F::F,:FFFFFFFF:FFF:FF:FF,FF:F:FFF,:F:  
F,:F::FFFF:FFF,FF:FFFF:, ,FFFFFFFFF::FFF,FFF:FFFF:FF:FFF::FFFFFFFF,FFF  
:, :FFF:F,F,FF:F

@A00721:190:HGJW7DSXY:4:1305:31286:30655 1:N:0:TCTGCAAG+GCTGCACT  
GGCTGGGGACCTATATATATGTATAGAGTAATCCGGAGGAATCTATCCCCAATTGGAATAGTAATGAT  
TTCAAATTTCAAATTTGAAAATATCCCGCCCTACAGTATACCAATTCAAATTCAAATTCAAATAGAAT  
TCCATAGGCCCCGCA

+  
::F:FFFFFFFFFFFFFFFFFFFFFFFFFFFFFFFFFFFFFFFFFFFFFFFFFFFFFFFFFFFF:FFFFFFFFFFFFFFFFFFFFFFFFFFFFFFFFFFFF:FFFFF  
FFFFF:F:FFFFFFFF:FFFFF::FFFFFFFFFFFF,FF:F:F:F:FFFFF,:F:FF,FFFFF:FF:FF,FFF  
FF,FFF,,F:F,FFF

@A00721:190:HGJW7DSXY:4:1430:28971:2816 1:N:0:TCTGCAAG+GCTGCACT  
GGCTGGGGACCTATATATATGTATAGAGTAATCCGGAGGAATCTATCCCCAATTGGAATAGTAATGAT  
TTCAAATTTCAAATTTGAAAATATCCCGCCCTACAGTATACCAATTCAAATTCAAATTCAAATAGAAT  
TCCATAGGCCCCGCA

+  
FFFFFFFFFFFFFFFFFFFFFFFFFFFFFFFFFFFFFFFFFFFFFFFFFFFFFFFFFFFF:FFFFFFFFFFFFFFFFFFFFFFFFFFFFFFFFFFFF  
FFFFFFFFFFFFFFFFFFFFFFFFFFFFFFFFFFFFFFFFFFFFFFFFFFFFFFFFFFFF:FFFFFFFFFFFFFFFFFFFFFFFFFFFFFFFFFFFF:FFF  
FF:FFFFFFFFFFFFFFFF

@A00721:190:HGJW7DSXY:4:1472:9751:28401 1:N:0:TCTGCAAG+GCTGCACT  
GGCTGGGGACCTATATATATGTATAGAGTAATCCGGAGGAATCTATCCCCAATTGGAATAGTAATGAT  
TTCAAATTTCAAATTTGAAAATATCCCGCCCTACAGTATACCAATTCAAATTCAAATTCAAATAGAAT  
TCCATAGGCCCCGCA

+  
FFFFFFFFFFFFFFFFFFFFFFFFFFFFFFFFFFFFFFFFFFFFFFFFFFFFFFFFFFFF:FFFFFFFFFFFFFFFFFFFFFFFFFFFFFFFFFFFF  
FFFFFFFFFFFFFFFFFFFFFFFFFFFFFFFFFFFFFFFFFFFFFFFFFFFFFFFFFFFF:FFFFFFFFFFFFFFFFFFFFFFFFFFFFFFFFFFFF  
FFFFFFFFFFFFFFFFFFFF

@A00721:190:HGJW7DSXY:4:1475:29469:6684 1:N:0:TCTGCAAG+GCTGCACT  
GGCTGGGGACCTATATATATGTATAGAGTAATCCGGAGGAATCTATCCCCAATTGGAATAGTAATGAT  
TTCAAATTTCAAATTTGAAAATATCCCGCCCTACAGTATACCAATTCAAATTCAAATTCAAATAGAAT  
TCCATAGGCCCCGCA

+  
FFFFFFFFFFFFFFFFFFFFFFFFFFFFFFFFFFFFFFFFFFFFFFFFFFFFFFFFFFFF:FFFFFFFFFFFFFFFFFFFFFFFFFFFFFFFFFFFF  
FFFFFFFFFFFF,FFFFFFFFFFFF:FFFFFFFFFFFFFFFFFFFFFFFFFFFFFFFFFFFFFFFFFFFFFFFFFFFFFFFFFFFF,FFF  
FFFFFFFFFFFFFFFFFFFF

@A00721:190:HGJW7DSXY:4:1577:21169:5431 1:N:0:TCTGCAAG+GCTGCACT  
GGCTGGGGACCTATATATATGTATAGAGTAATCCGGAGGAATCTATCCCCAATTGGAATAGTAATGAT  
TTCAAATTTCAAATTTGAAAATATCCCGCCCTACAGTATACCAATTCAAATTCAAATTCAAATAGAAT  
TCCATAGGCCCCGCA

+  
FFFFFFFFFFFFFFF,FFFFFFFFFFFFFFFFFFFFFFFFFFFFFFFFFFFFFFFFFFFFFFFFFFFF  
FFFFFFFFFFFFFFFFFFFFFFFFFFFFFFFFFFFFFFFFFFFFFFFFFFFFFFFFFFFFFFFFFFFF:FFF  
FFFFFFFFFFFF:FFFF  
@A00721:190:HGW7DSXY:4:1635:8205:22874 1:N:0:TCTGCAAG+GCTGCACT  
GGCTGGGGACCTATATATATGTATAGAGTAATCCGGAGGAATCTATCCCCAATTGGAATAGTAATGAT  
TTCAAATTTCAAATTTGAAAATATCCCGCCCTACAGTATACCAATTCAAATTCAAATTCAAATAGAAT  
TCCATAGGCCCCGCA  
+  
FFFFFFFFFFFFFFFFFFFFFFFFFFFFFFFFFFFFFFFFFFFFFFFFFFFFFFFFFFFFFFFFFFFF  
FFFFFFFFFFFFFFFFFFFFFFFFFFFFFFFFFFFFFFFFFFFFFFFFFFFFFFFFFFFFFFFFFFFF,FFF  
FF:F:FFFFFFFFFFFF  
@A00721:190:HGW7DSXY:4:2108:14425:34554 1:N:0:TCTGCAAG+GCTGCACT  
GGCTGGGGACCTATATATATGTATAGAGTAATCCGGAGGAATCTATCCCCAATTGGAATAGTAATGAT  
TTCAAATTTCAAATTTGAAAATATCCCGCCCTACAGTATACCAATTCAAATTCAAATTCAAATAGAAT  
TCCATAGGCCCCGCA  
+  
FFFFFFFFFFFFFFFFFFFFFFFFFFFFFFFFFFFFFFFFFFFFFFFFFFFFFFFFFFFFFFFFFFFF  
FFFFFFFFFFFFFFFFFFFFFFFFFFFFFFFFFFFFFFFFFFFFFFFFFFFFFFFFFFFFFFFFFFFF,FFF  
FFFFF:FFFFF  
@A00721:190:HGW7DSXY:4:2211:19777:13135 1:N:0:TCTGCAAG+GCTGCACT  
GGCTGGGGACCTATATATATGTATAGAGTAATCCGGAGGAATCTATCCCCAATTGGAATAGTAATGAT  
TTCAAATTTCAAATTTGAAAATATCCCGCCCTACAGTATACCAATTCAAATTCAAATTCAAATAGAAT  
TCCATAGGCCCCGCA  
+  
FFFFFFF:FFFFFFFFFFFFFFFFFFFFFFFFFFFFFFFFFFFFFFFFFFFFFFFFFFFFFFFFFFFF  
FFF:FFF:FFFFF:FFFFFFFFFFFFFFFFFFFFFFFFFFFFFFFFFFFFFFFFFFFFFFFFFFFF,FFFFFFFFF:FFFFFFFFFFFF::F:FFF  
FFFFFFFFFFFF:FFFF  
@A00721:190:HGW7DSXY:4:2222:9281:5760 1:N:0:TCTGCAAG+GCTGCACT  
GGCTGGGGACCTATATATATGTATAGAGTAATCCGGAGGAATCTATCCCCAATTGGAATAGTAATGAT  
TTCAAATTTCAAATTTGAAAATATCCCGCCCTACAGTATACCAATTCAAATTCAAATTCAAATAGAAT  
TCCATAGGCCCCGCA  
+  
FFFFFFFFFFFFFFF:FFFFFFFFFFFFFFFFFFFFFFFFFFFFFFFFFFFFFFFFFFFFFFFFFFFF  
FFFFFFFFFFFFFFFFFFFFFFFFFFFFFFFFFFFFFFFFFFFFFFFFFFFFFFFFFFFFFFFFFFFF:FFFFFFFFFFFFFFFFFFFFFFFFFFFFF  
F,FFFFFFFFFFFFFFF  
@A00721:190:HGW7DSXY:4:2236:6207:29277 1:N:0:TCTGCAAG+GCTGCACT  
GGCTGGGGACCTATATATATGTATAGAGTAATCCGGAGGAATCTATCCCCAATTGGAATAGTAATGAT  
TTCAAATTTCAAATTTGAAAATATCCCGCCCTACAGTATACAAATTCAAATTCAAATTCAAATAGAAT  
TACATATGCCCCGCA  
+  
FFFFFFFFFFFF::FFFFF:FFFFFFFFFFFFFFFFFFFFFFFFFFFFFFFFFFFFFFFFFFFFFFFFFFFF  
FFFFFFFFFFFF,FFFFF:FFFFF:,F:FFFFFFFF:FFFFF,FFF,FFFF::FFFFFFFFFFFFFFFFFFFF  
,,,FFF,:F:F:F  
@A00721:190:HGW7DSXY:4:2655:29053:6339 1:N:0:TCTGCAAG+GCTGCACT  
GGCTGGGGACCTATATATATGTATAGAGTAATCCGGAGGAATCTATCCCCAATTGGAATAGTAATGAT  
TTCAAATTTCAAATTTGAAAATATCCCGCCCTACAGTATACCAATTCAAATTCAAATTCAAATAGAAT  
TCCATAGGCCCCGCA  
+  
FFFFFFFFFFFFFFFFFFFFFFFFFFFFFFFFFFFFFFFFFFFFFFFFFFFFFFFFFFFFFFFFFFFF:FFFFFFFFFFFFFFFFFFFF  
FFFFFFFFFFFFFFFFFFFFFFFFFFFFFFFFFFFFFFFFFFFFFFFFFFFFFFFFFFFFFFFFFFFF:F:FFFFFFFFF,FFFFF  
F:FFFFFFFFFFFFFFF  
@A00721:190:HGW7DSXY:4:2226:21025:23030 1:N:0:TCTGCAAG+GCTGCACT  
GCTGGGGACCTATATATATGTATAGAGTAATCCTGAGGAATCTATCCCCAATTGGAATAGTAATGATT

TCAAATTTCAAATTTGAAAATATCACGCACTACAGTATACCAATTCAAATTCAAATTCAAATAGAATT  
CCATAGGCCCCGCA

```
FFF,F:FFFF:FFFFFFFF:FFFFFFFF,,F,,:F,:FFF:FFFF,FFFFFF:FFFF:,FFF:FFF
F,FF:,FFFFFF,FFFFF,F::,,:,,FF:FF,F,FF:FFF:,FFFFFF,FFF,,,FFFFFF:FFFF
F:F,F:FFFFFFFF
```

 $+$ 

@A00721:190:HGJW7DSXY:4:1244:17463:10347 1:N:0:TCTGCAAG+GCTGCACT  
GGGCGTATGGAATTCTATTTGAATTTGAATTTGAATTTGAATTGGTATACTGTAGGGCGGGATATTTT  
CAAATTTGAAATTTGAAATCATTACTATTCCAATTGGGGATAGATTCTCCGGATTACTCTATACATA  
TATATAGGTCCCCAG

[illegible] $+$ 

@A00721:190:HGJW7DSXY:4:1606:21043:24408 1:N:0:TCTGCAAG+GCTGCACT  
CTGGGGACCTATATATATGTATAGAGTAATCCGGAGGAATCTATCCCCAATTGGAATAGTAATGATTT  
CAAATTTCAAATTTGAAAATATCCCGCCCTACAGTATACCAATTCAAATTCAAATTCAAATAGAAATTC  
CATAGGCCCCCGCAGG

[illegible]

+

@A00721:190:HGJW7DSXY:4:1674:29116:17472 1:N:0:TCTGCAAG+GCTGCACT  
GGGCGTATGGAATTCTATTTGAATTTGAATTTGAATTTGAATTGGTATACTGTAGGGCGGGATATTTT  
CAAATTTGAAATTTGAAATCATTACTATTCCAATTGGGGATAGATTCTCCTCCGGATTACTCTATACATA  
TATATAGGTCCCCAG

[illegible]

@A00721:190:HGJW7DSXY:4:2525:7708:18192 1:N:0:TCTGCAAG+GCTGCACT  
CTGGGGACCTATATATATGTATAGAGTAATCCGGAGGAATCTATCCCAATTGGAATAGTAATGATTT  
CAAATTTCAAATTTGAAAATATCCCGCCCTACAGTATACCAATTCAAATTCAAATAGAAATTC  
CATAGCCCCGCAGG

+

FFFFFFFFFFFFFFFFFFFFFFFFFFFFFFFFFFFFFFFFFFFFFFFFFFFFFFFFFFFFFFFFFFFFFFFF  
FFFFFFFFFFFFFFFFFFFFFFFFFFFFFFFFFFFFFFFFFFFFFFFFFFFFFFFFFFFFFFFFFFFFFFFF,  
FFFFFFFFFFFFFFFF

@A00721:190:HGJW7DSXY:4:2536:3794:34898 1:N:0:TCTGCAAG+GCTGCACT  
GGGCGTATGGAATTCTATTTGAATTTGAATTTGAATTTGAATTGGTATACTGTAGGGCGGGATATTTT  
CAAATTTGAAATTTGAAATCATTACTATTCCAATTGGGGATAGATTCTCCGATTACTCTATACATA  
TATATAGGTCCCCAG

+

FFFFFFFFFFFFFFFFFFFFFFFFFFFFFFFFFFFFFFFFFFFFFFFFFFFFFFFFFFFFFFFFFFFFFFFF  
FFFFFFFFFFFFFFFFFFFFFFFFFFFFFFFFFFFFFFFFFFFFFFFFFFFFFFFFFFFFFFFFFFFFFFFF,  
FFFFFFFF,FFFFFF

@A00721:190:HGJW7DSXY:4:1460:9109:2300 1:N:0:TCTGCAAG+GCTGCACT  
GGGACCTATATATATGTATAGAGTAATCCGGAGGAATCTATCCCAATTGGAATAGTAATGATTTCAA  
ATTTCAAATTTGAAAATATCCCGCCCTACAGTATACCAATTCAAATTCAAATTCAAATAGAAATTCAT  
AGGCCCCGCAGGGGC

+

FFFFFFFFFFFFFFFFFFFFFFFFFFFFFFFFFFFFFFFFFFFFFFFFFFFFFFFFFFFFFFFFFFFFFFFF  
FFFFFFFFFFFFFFFFFFFFFFFFFFFFFFFFFFFFFFFFFFFFFFFFFFFFFFFFFFFFFFFFFFFFFFFF:  
FFFFFFFF,FFFFFF

@A00721:190:HGJW7DSXY:4:2158:27769:23124 1:N:0:TCTGCAAG+GCTGCACT  
GGGACCTATATATATGTATAGAGTAATCCGGAGGAATCTATCCCAATTGGAATAGTAATGATTTCAA  
ATTTCAAATTTGAAAATATCCCGCCCTACAGTATACCAATTCAAATTCAAATTCAAATAGAAATTCAT  
AGGCCCCGCAGGGGC

+

FFFFFFFFFFFFFFFFFFFFFFFFFFFFFFFFFFFFFFFFFFFFFFFFFFFFFFFFFFFFFFFFFFFFFFFF  
FFFFFFFFFFFFFFFFFFFFFFFFFFFFFFFFFFFFFFFFFFFFFFFFFFFFFFFFFFFFFFFFFFFFFFFF  
FFFFF:FFFFFFFF

@A00721:190:HGJW7DSXY:4:2326:7093:34976 1:N:0:TCTGCAAG+GCTGCACT  
GGGACCTATATATATGTATAGAGTAATCCGGAGGAATCTATCCCAATTGGAATAGTAATGATTTCAA  
ATTTCAAATTTGAAAATATCCCGCCCTACAGTATACCAATTCAAATTCAAATTCAAATAGAAATTCAT  
AGGCCCCGCAGGGGC

+

FFFFFFFFFFFFFFFFFFFFFFFFFFFFFFFFFFFFFFFFFFFFFFFFFFFFFFFFFFFFFFFFFFFFFFFF  
FFFFFFFFFFFFFFFFFFFFFFFFFFFFFFFFFFFFFFFFFFFFFFFFFFFFFFFFFFFFFFFFFFFFFFFF  
FFFFFF:FFFFFFFF

@A00721:190:HGJW7DSXY:4:2358:25238:16141 1:N:0:TCTGCAAG+GCTGCACT  
GGGACCTATATATATGTATAGAGTAATCCGGAGGAATCTATCCCAATTGGAATAGTAATGATTTCAA  
ATTTCAAATTTGAAAATATCCCGCCCTACAGTATACCAATTCAAATTCAAATTCAAATAGAAATTCAT  
AGGCCCCGCAGGGGC

+

FFFFFFFFFFFFFFFFFFFFFFFFFFFFFFFFFFFFFFFFFFFFFFFFFFFFFFFFFFFFFFFFFFFFFFFF  
FFFFFFFFFFFFFFFFFFFFFFFFFFFFFFFFFFFFFFFFFFFFFFFFFFFFFFFFFFFFFFFFFFFFFFFF  
FFFFF:FFFFFFFF  
F,F,FFFFFFFF

@A00721:190:HGJW7DSXY:4:2461:3812:17362 1:N:0:TCTGCAAG+GCTGCACT  
GGGACCTATATATATGTATAGAGTAATCCGGAGGAATCTATCCCAATTGGAATAGTAATGATTTCAA  
ATTTCAAATTTGAAAATATCCCGCCCTACAGTATACCAATTCAAATTCAAATTCAAATAGAAATTCAT  
AGGCCCCGCAGGGGC

+

FFFFFFFFF:FFFF::FFFFF:F:F::F::FFFFFFFFFFFFFFFFFFFFFFFFFFFFFFFF

FFFFFFFFFFFFFFFFFFFF, :FFFFFF:FFFFFFFFF::FFFFF, :FFFFFFF, F, FF::FF:F  
FF:FFF:FFFF:FFF

@A00721:190:HGJW7DSXY:4:2555:13810:25285 1:N:0:TCTGCAAG+GCTGCACT  
GGGACCTATATATATGTATAGAGTAATCCGGAGGAATCTATCCCCAATTGGAATAGTAATGATTTCAA  
ATTTCAAATTTGAAAATATCCCGCCCTACAGTATACCAATTCAAATTCAAATTAAGAATTCCAT  
AGGCCCCGCAGGGGC

+

FFFFFFFFFFFFFFFFFFFFFFFFFFFFFFFFFFFFFFFFFFFFFFFFFFFFFFFFFFFFFFFFFFFFFFFF  
FFFFFFFFFFFFFFFFFFFFFFFFFFFFFFFFFFFFFFFFFFFFFFFFFFFFFFFFFFFFFFFFFFFFFFFF:FFFFF:FFFFFF::FF  
FFFFFFFFFFFFFFFF

@A00721:190:HGJW7DSXY:4:2651:2257:27508 1:N:0:TCTGCAAG+GCTGCACT  
GGGACCTATATATATGTATAGAGTAATCCGGAGGAATCTATCCCCAATTGGAATAGTAATGATTTCAA  
ATTTCAAATTTGAAAATATCCCGCCCTACAGTATACCAATTCAAATTCAAATTCAAATTAAGAATTCCAT  
AGGCCCCGCAGGGGC

+

FFFFFFFFFFFFFFFFFFFFFFFFFFFFFFFFFFFFFFFFFFFFFFFFFFFFFFFFFFFFFFFFFFFFFFFF  
FFFFFFFFFFFFFFFFFFFFFFFFFFFFFFFFFFFFFFFFFFFFFFFFFFFFFFFFFFFFFFFFFFFFFFFF:FFFFFFFF  
FFFFFFFFFFFFFFFF

@A00721:190:HGJW7DSXY:4:1226:10963:36104 1:N:0:TCTGCAAG+GCTGCACT  
GTATAGAGTAATCCGGAGGAATCTATCCCCAATTGGAATAGTAATGATTTCAAATTTCAAATTTGAAA  
ATATCCCGCCCTACAGTATACCAATTCAAATTCAAATTCAAATTAAGAATTCCATAGGCCCCGCAGGGGC  
ATCTTACCGCAGACC

+

FFFFFFFFFFFFFFFFFFFFFFFFFFFFFFFFFFFFFFFFFFFFFFFFFFFFFFFFFFFFFFFFFFFFFFFF  
FFFFFFFFFFFFFFFFFFFFFFFFFFFFFFFFFFFFFFFFFFFFFFFFFFFFFFFFFFFFFFFFFFFFFFFF:FFFFF  
FFFFFFFFFFFFFFFF

@A00721:190:HGJW7DSXY:4:1234:20184:12712 1:N:0:TCTGCAAG+GCTGCACT  
GTATAGAGTAATCCGGAGGAATCTATCCCCAATTGGAATAGTAATGATTTCAAATTTCAAATTTGAAA  
ATATCCCGCCCTACAGTATACCAATTCAAATTCAAATTCAAATTAAGAATTCCATAGGCCCCGCAGGGGC  
ATCTTACCGCAGACC

+

FFFFFFFFFFFFFFFFFFFFFFFFFFFFFFFFFFFFFFFFFFFFFFFFFFFFFFFFFFFFFFFFFFFFFFFF  
FFFFFFFFFFFFFFFFFFFFFFFFFFFFFFFFFFFFFFFFFFFFFFFFFFFFFFFFFFFFFFFFFFFFFFFF:FFFFFFFF:FFFFFFFFFFFF  
, FFFFFFFFFFFFFF

@A00721:190:HGJW7DSXY:4:1265:32108:30013 1:N:0:TCTGCAAG+GCTGCACT  
GTATAGAGTAATCCGGAGGAATCTATCCCCAATTGGAATAGTAATGATTTCAAATTTCAAATTTGATA  
ATATCCCGCCCTACAGTATACCAATTCAAATTCAAATTCAAATTAAGAATTCCATAGGCCCCGCAGGGGC  
ATCTTACCGCAGA

+

FFFFF:FFFFFF, FFFF:, F:FFFFFF, FFFFFFFFFFFFFFFF:FF:FFFFFF::FF:, , :FFFF, F  
:FF:F:FFFF, :FFFF:FF::FFFF, FFFFF, FFF:::FFFF, :, :F:, , FF, F, , :, FFFF, F:,  
FF, FFF, , :F:FF

@A00721:190:HGJW7DSXY:4:1519:3143:27383 1:N:0:TCTGCAAG+GCTGCACT  
GTATAGAGTAATCCGGAGGAATCTATCCCCAATTGGAATAGTAATGATTTCAAATTTCAAATTTGAAA  
ATATCCCGCCCTACAGTATACCAATTCAAATTCAAATTCAAATTAAGAATTCCATAGGCCCCGCAGGGGC  
ATCTTACCGCAGACC

+

FFFFFFFFFFFFFFFFFFFFFFFFFFFFFFFFFFFFFFFFFFFFFFFFFFFFFFFFFFFFFFFFFFFFFFFF:FFFFFFFFFFFFFFF  
FFFFFFFFFFFFFFFFFFFFFFFFFFFFFFFFFFFFFFFFFFFFFFFFFFFFFFFFFFFFFFFFFFFFFFFFFFF:FFFFFFFFFFFFFFF  
FFF:FFFFFFFF

@A00721:190:HGJW7DSXY:4:2110:4779:14058 1:N:0:TCTGCAAG+GCTGCACT  
GTATAGAGTAATCCGGAGGAATCTATCCCCAATTGGAATAGTAATGATTTCAAATTTCAAATTTGAAA  
ATATCCCGCCCTACAGTATACCAATTCAAATTCAAATTCAAATTAAGAATTCCATAGGCCCCGCAGGGGC  
ATCTTACCGCAGACC

[illegible]

```

FFFFFFFFFFFFFFFFFFFFF:FFFFFFFFFFFFFFFFFFFFFFFFFFFFFFFFFFFFFFFF
FFFFFFFFFFFFFFFFFFFF:FFFFFFFFFFFFFFFFFFFFFFFFFFFFFFFFFFFF::FFFF:FFFFFFFFFFFFFFFFFFFFFFFF
:FFFFFFF:FFFFFFF

```

[illegible][illegible]

```

FFFFFFFFFFFFFFFFFFFFFFFFFFFFFFFFFFFFFFFFFFFFFFFFFFFFFFFFFFFFFFFFFFFFFFFF
FFFFFFFFFFFFFFFF:FFFFFFFFFFFFFFFFFFFFFFFF:FFFFFFFF:FFFF,FFFFFFFFFFFFFFFF
,FF,FF,FFF,FFFF

```

[illegible]

```
FF:FFFFFFFFFFFFFFFFFFFFFFFFFFFFFFFFFFFFFFFFFFFFFFFFFFFFFFFFFFFFFFFF
FFFFFFFFFFFFFFFFFFFFFFFFFFFFFFFFFFFFFFFFFFFFFFFFFFFFFFFFFFFFFFFF:
FFFFFFFFFFFFFFFFFFFFFFFFFFFFFFFFFFFFFFFF
FFFFFFFFFFFFFFFF
```

@A00721:190:HGJW7DSXY:4:2441:19379:23657 1:N:0:TCTGCAAG+GCTGCACT  
GTATAGAGTAATCCGGAGGAATCTATCCCCAATTGGAATAGTAATGATTTCAAATTTCAAATTTGAAA

ATATCCCGCCCTACAGTATACCAATTCAAATTCAAATTCAAATAGAATTCCATAGGCCCCCGCAGGGGC  
ATCTTACCGCAGACC

+

FFFFFFFF:FFFFFFFFFFFFFFFFFFFFFFFFFFFFFFFFFFFFFFFFFFFFFFFFFFFFFFFF  
FFFFFFFFFFFFFFFFFFFFFFFFFFFFFFFFFFFFFFFFFFFFFFFFFFFFFFFFFFFFFFFF  
FFFFFFFFFFFFFFFF

@A00721:190:HGJW7DSXY:4:2647:29288:9251 1:N:0:TCTGCAAG+GCTGCACT  
GTATAGAGTAATCCGGAGGAATCTATCCCAATTGGAATAGTAATGATTTCAAATTTCAAATTTGAAA  
ATATCCCGCCCTACAGTATACCAATTCAAATTCAAATTCAAATAGAATTCCATAGGCCCCCGCAGGGGC  
ATCTTACCGCAGACC

+

FFFFF:FFFF:FFFFFFFF:FFFFFFFFFFFFFFFFFFFFFFFFFFFFFFFFFFFFFFFFFFFF  
FFFFFFFFFFFFFFFFFFFFFFFFFFFFFFFF:FFFF:F:FFFFFFFFFFFF,FFFF,FFFFFF:FF:FFFFF  
FFFFFFFFFFFF:FFF

@A00721:190:HGJW7DSXY:4:1148:19994:35994 1:N:0:TCTGCAAG+GCTGCACT  
ATAGAGTAATCCGGAGGAATCTATCCCAATTGGAATAGTAATGATTTCAAATTTCAAATTTGAAAAT  
ATCCCGCCCTACAGTATACCAATTCAAATTCAAATTCAAATAGAATTCCATAGGCCCCCGCAGGGGCAT  
CTTACCGCAGACCGT

+

FFFFFFFFFFFFFFFFFFFFFFFF:FFFFFFFFFFFFFFFFFFFFFFFFFFFFFFFFFFFFFFFFFFFF  
FFFFFFFFFFFFFFFFFFFFFFFFFFFFFFFFFFFFFFFFFFFFFFFFFFFFFFFFFFFFFFFFFFFF  
FFFFFFFFFFFFFFFF

@A00721:190:HGJW7DSXY:4:1168:24306:15060 1:N:0:TCTGCAAG+GCTGCACT  
ATAGAGTAATCCGGAGGAATCTATCCCAATTGGAATAGTAATGATTTCAAATTTCAAATTTGAAAAT  
ATCCCGCCCTACAGTATACCAATTCAAATTCAAATTCAAATAGAATTCCATAGGCCCCCGCAGGGGCAT  
CTTACCGCAGACCGT

+

FFFFFFFFFFFFFFFFFFFFFFFFFFFFFFFFFFFFFFFFFFFFFFFFFFFFFFFFFFFFFFFFFFFF  
FFFFFFFFFFFFFFFFFFFFFFFFFFFFFFFFFFFFFFFFFFFFFFFFFFFFFFFFFFFFFFFFFFFF:FFFFFFFFFFFF,F  
FFFFFFFFFFFFFFFF

@A00721:190:HGJW7DSXY:4:1178:23294:28494 1:N:0:TCTGCAAG+GCTGCACT  
ATAGAGTAATCCGGAGGAATCTATCCCAATTGGAATAGTAATGATTTCAAATTTCAAATTTGAAAAT  
ATCCCGCCCTACAGTATACCAATTCAAATTCAAATTCAAATAGAATTCCATAGGCCCCCGCAGGGGCAT  
CTTACCGCAGACCGT

+

FFFFFFF:FFFFFFFFFFFFFFFFFFFFFFFFFFFFFFFFFFFFFFFFFFFFFFFFFFFFFFFFFFFF  
FFFFFFFFFFFF,FFFFFF,FFFFFFFFFFFFFFFFFFFFFFFFFFFFFFFF:FF:FFFFFF:FFFFFFFFFFFF:F  
FFF:FFFFFFFFFFFF

@A00721:190:HGJW7DSXY:4:1228:6632:16861 1:N:0:TCTGCAAG+GCTGCACT  
ATAGAGTAATCCGGAGGAATCTATCCCAATTGGAATAGTAATGATTTCAAATTTCAAATTTGAAAAT  
ATCCCGCCCTACAGTATACCAATTCAAATTCAAATTCAAATAGAATTCCATAGGCCCCCGCAGGGGCAT  
CTTACCGCAGACCGT

+

FFFFFFF:FFFFFFF:::FFF:F,FF:FFF,FFFFFFFFFFFF:F:FFFFFF:FFFFFFFFFFFF  
FF:FFF:F::FFF:FFFFFFFFFFFFFFFFFFFFFFFFFFFFFFFF:FF:F:F:FFFF,FFFFFFFF:FFFF  
FFFFFFFF:FFFFF

@A00721:190:HGJW7DSXY:4:1233:26304:13416 1:N:0:TCTGCAAG+GCTGCACT  
ATAGAGTAATCCGGAGGAATCTATCCCAATTGGAATAGTAATGATTTCAAATTTCAAATTTGAAAAT  
ATCCCGCCCTACAGTATACCAATTCAAATTCAAATTAATAAGAATTCCATAGGCCCCCGCAGGGGCAT  
CTTACAGCAGACCGT

+

FF,,FFFFFFFF:FF,:FFFFFFFFFFFF,FFF:FFFFFF:FFFFFFF:,FFFF,:FFFFFF,F:FFFF:  
F:F:,F,F,FFF,FF,FF,FFFFFFFF,FFFF,FF,FFF,:FF,F::FFF,,F,FF,,FF,F,:F  
FF,FF,FFFF:F,F





@A00721:190:HGJW7DSXY:4:2223:9001:1705 1:N:0:TCTGCAAG+GCTGCACT  
ATAGAGTAATCCGGAGGAATCTATCCCCAATTGGAATAGTAATGATTTCAAATTTCAAATTTGAAAT  
ATCCCGCCCTACAGTATGCCAATTCAAATTCAAATTCAAATAGAAATTCATAGGCCCCGCAGGGGCAT  
CTTACCGCAGACCGT

@A00721:190:HGJW7DSXY:4:2223:10167:2597 1:N:0:TCTGCAAG+GCTGCACT  
ATAGAGTAATCCGGAGGAATCTATCCCCAATTGGAATAGTAATGATTTCAAATTTCAAATTTGAAAT  
ATCCCGCCCTACAGTATACCAATTCAAATTCAAATTCAAATAGAAATTCATAGGCCCCGCAGGGGCAT  
CTTACCGCAGACCGT

@A00721:190:HGJW7DSXY:4:2226:6298:14559 1:N:0:TCTGCAAG+GCTGCACT  
ATAGAGTAATCCGGAGGAATCTATCCCCAATTGGAATAGTAATGATTTCAAATTTCAAATTTGAAAT  
ATCCCGCCCTACAGTATACCAATTCAAATTCAAATTCAAATAGAAATTCCATAGGCCCCGCAGGGGCAT  
CTTACCGCAGACCGT

@A00721:190:HGJW7DSXY:4:2314:20509:12900 1:N:0:TCTGCAAG+GCTGCACT  
ATAGAGTAATCCGGAGGAATCTATCCCCAATTGGAATAGTAATGATTTCAAATTTCAAATTTGAAAT  
ATCCCGCCCTACAGTATACCAATTCAAATTCAAATTCAAATAGAAATTCCATAGGCCCCGCAGGGGCAT  
CTTACCGCAGACCGT

@A00721:190:HGJW7DSXY:4:1128:5855:25598 1:N:0:TCTGCAAG+GCTGCACT  
CCGGAGGAATCTATCCCCAATTGGAATAGTAATGATTTCAAATTTCAAATTTGAAAATATCCCGCCCT  
ACAGTATACCAATTCAAATTCAAATTCAAATAGAATTCCATAGGCCCCGCAGGGGCATCTTACCGCAG  
ACCGTGGGGCAAGCC

@A00721:190:HGJW7DSXY:4:1128:3540:35931 1:N:0:TCTGCAAG+GCTGCACT  
CCGGAGGAATCTATCCCCAATTGGAATAGTAATGATTTCAAATTTCAAATTTGAAAATATCCCGCCCT  
ACAGTATACCAATTCAAATTCAAATTCAAATAGAATTCCATAGGCCCCGAGGGGCATCTTACCGCAG  
ACCGTGGGGCAAGCC

@A00721:190:HGJW7DSXY:4:1172:20961:16344 1:N:0:TCTGCAAG+GCTGCACT  
CCGGAGGAATCTATCCCCAATTGGAATAGTAATGATTTCAAATTTCAAATTTGAAAATATCCCGCCCT  
ACAGTATACCAATTCAAATTCAAATTCAAATAGAATTCCATAGCCCCGCAGGGGCATCTTACCGCAG  
ACCGTGGGGCAAGCC

+  
FFFFFFFFFFFFFFFFFFFFFFFFFFFFFFFFFFFFFFFFFFFFFFFFFFFFFFFFFFFFFFFFFFFFFFFF  
FFFFFFF:FFFFFFFFFFFFFFFFFFFFFFFFFFFFFFFFFFFFFFFFFFFFFFFFFFFFFFFFFFFFFFFF  
FFFFFFFFFFFF:F:FF

@A00721:190:HGJW7DSXY:4:1263:30581:8766 1:N:0:TCTGCAAG+GCTGCACT  
CCGGAGGAATCTATCCCCAATTGGAATAGTAATGATTTCAAATTTCAAATTTGAAAATATCCCGCCCT  
ACAGTATACCAATTCAAATTCAAATTCAAATAGAATTCCATAGGCCCCGCAGGGGCATCTTACCGCAG  
ACCGTGGGGCAAGCC

+  
FFFFFFFFFFFFFFFFFFFFFFFFFFFFFFFFFFFFFFFFFFFFFFFFFFFFFFFFFFFFFFFFFFFFFFFF  
FFFFF:FFFFFFFFFFFFFFFFFFFFFFFFFFFFFFFFFFFFFFFFFFFFFFFFFFFFFFFFFFFFFFFF  
FFFFFFFFFFFFFFFF

@A00721:190:HGJW7DSXY:4:1317:17535:17738 1:N:0:TCTGCAAG+GCTGCACT  
CCGGAGGAATCTATCCCCAATTGGAATAGTAATGATTTCAAATTTCAAATTTGAAAATATCCCGCCCT  
ACAGTATACCAATTCAAATTCAAATTCAAATAGAATTCCATAGGCCCCGCAGGGGCATCTTACCGCAG  
ACCGTGGGGCAAGCC

+  
FFFFFFFFFFFFFFFFFFFFFFFFFFFFFFFFFFFFFFFFFFFFFFFFFFFFFFFFFFFFFFFFFFFFFFFF  
FFFFFFF:FFFF:FFFFFFFFFFFFFFFFFFFFFFFF:FF:FFFFFFFFFFFFFFFFFFFFFFFF,FFFFFFFFFFFFFFFF  
FFFFFFFFFFFFFFFF

@A00721:190:HGJW7DSXY:4:2655:7229:20838 1:N:0:TCTGCAAG+GCTGCACT  
CCGGAGGAATCTATCCCCAATTGGAATAGTAATGATTTCAAATTTCAAATTTGAAAATATCCCGCCCT  
ACAGTATACCAATTCAAATTCAAATTCAAATAGAATTCCATAGGCCCCGCAGGGGCATCTTACCGCAG  
ACCGTGGGGCAAGCC

+  
FFFFFFFFFFFFFFFFFFFFFFFFFFFFFFFFFFFFFFFFFFFFFFFFFFFFFFFFFFFFFFFFFFFFFFFF  
FFFFFFF:,FFFFFFFFFFFFFFFFFFFFFFFF:FFFFFFFFF:FFFF,FFFFFFFFFFFFFFFFFFFFFFFF  
FFFFFFFFFFFFFFFF

@A00721:190:HGJW7DSXY:4:1504:2862:4946 1:N:0:TCTGCAAG+GCTGCACT  
CGGAGGAATCTATCCCCAATTGGAATAGTAATGATTTCAAATTTCAAATTTGAAAATATCCCGCCCTA  
CAGTATACCAATTCAAATTCGAATTCAAATAGAATTCCATAGGCCCCGCAGGGGCATCTTACCGCAGA  
CCGTGGGGCAAGCCA

+  
FFFFFFFFFFFFFFFFFFFFFFFFFFFFFFFFFFFFFFFFFFFFFFFFFFFFFFFFFFFFFFFFFFFFFFFF  
FFFFFFFFFFFFFFFFFFFFFFFFFFFFFFFF:FFFF,FFFFFFFFFFFFFFFFFFFFFFFFFFFFFFFFFFFFFFFF  
FFFFFFFFFFFFFFFF

@A00721:190:HGJW7DSXY:4:2120:31611:18693 1:N:0:TCTGCAAG+GCTGCACT  
CGGAGGAATCTATCCCCAATTGGAATAGTAATGATTTCAAATTTCAAATTTGAAAATATCCCGCCCTA  
CAGTATACCAATTCAAATTCGAATTCAAATAGAATTCCATAGGCCCCGCAGGGGCATCTTACCGCAGA  
CCGTGGGGCAAGCC

+  
FFFFFFFFFFFFFFFFFFFFFFFFFFFFFFFFFFFFFFFFFFFFFFFFFFFFFFFFFFFFFFFFFFFFFFFF  
FFF:FFFFFFFFFFFFFFFFFFFFFFFFFFFFFFFFFFFFFFFFFFFFFFFFFFFFFFFFFFFFFFFF:FFFFFFFFFFFF  
FFFFFFFFFFFFFFFF

@A00721:190:HGJW7DSXY:4:2242:18105:7482 1:N:0:TCTGCAAG+GCTGCACT  
CGGAGGAATCTATCCCCAATTGGAATAGTAATGATTTCAAATTTCAAATTTGAAAATATCCCGCCCTA  
CAGTATACCAATTCAAATTCGAATTCAAATAGAATTCCATAGGCCCCGCAGGGGCATCTTACCGCAGA  
CCGTGGGGCAAGCC

+  
FFFFFFFFFFFFFFFFFFFFFFFF:FFFFFFFFFF:FFFFFFFFFFFFFFFFFFFFFFFFFFFFFFFF:FFFFFFFFFF,  
FFF:,FFF:FFFFFFFFFFFFFFFFFFFFFFFF,FFFFFFFFFF:FFF:F:FFFFFFFFFFFFFFFFFFFFFFFF  
F:FFFFFFFF:FFFFF

@A00721:190:HGJW7DSXY:4:2316:30120:26694 1:N:0:TCTGCAAG+GCTGCACT  
CGGAGGAATCTATCCCCAATTGGAATAGTAATGATTTCAAATTTCAAATTTGAAAATATCCCGCCCTA

CAGTATACCAATTCAAATTCGAATTCAAATAGAAATTCATAGGCCCCGCAGGGGCATCTTACCGCAGA  
CCGTGGGGCAAGCCA

[illegible]

+

@A00721:190:HGJW7DSXY:4:2677:17815:23954 1:N:0:TCTGCAAG+GCTGCACT  
CGGAGGAATCTATCCCCAATTGGAATAGTAATGATTTCAAATTTCAAATTTGAAAATATCCCGCCCTA  
CAGTATACCAATTCAAATTCGAATTCAAATAGAAATTCATAGGCCCCGCAGGGGCATCTTACCGCAGA  
CCGTGGGGCAAGCCA

```

FFFFFFFFFFFFFFFFFFFFFFFFFFFFFFFFFFFFFFFFFFFFFFFFFFFFFFFFFFFFFFFFFFFFFFFF
FFFFFFFFFFFFFFFF:FFFFFFFFF:FF:FFFF:FFFFFFFFFFFFFFFFFFFFFFFFFFFFF:F:FFF:FFFFF
FFFFFFFFFFFFFFFF

```

+

@A00721:190:HGJW7DSXY:4:1120:28022:24815 1:N:0:TCTGCAAG+GCTGCACT  
GGAGGAATCTATCCCCAATTGGAATAGTAATGATTTCAAATTTCAAATTTGAAAATATCCCGCCCTAC  
AGTATACCAATTCAAATTCAAATTCAAATAGAATTCCATAGGCCCCGCAGGGGCATCTTACCGCAGAC  
CGTGGGGCAAGCCAA

[illegible]

+

@A00721:190:HGJW7DSXY:4:1531:17472:19570 1:N:0:TCTGCAAG+GCTGCACT  
GGAGGAATCTATCCCCAATTGGAATAGTAATGATTTCAAATTTCAAATTTGAAAATATCCCGCCCTAC  
AGTATACCAATTCAAATTCAAATTCAAATAGAATTCCATAGGCCCCGCAGGGGCATCTTACCGCAGAC  
CGTGGGGCAAGCCAA

[illegible]

@A00721:190:HGJW7DSXY:4:1541:22037:30514 1:N:0:TCTGCAAG+GCTGCACT  
GGAGGAATCTATCCCCAATTGGAATAGTAATGATTTCAAATTTCAAATTTGAAAATATCCCGCCCTAC  
AGTATACCAATTCAAATTCAAATTCAAATAGATTCCATAGGCCCGCAGGGGCATCTTACCGCAGAC  
CGTGGGGCAAGCCAA

+

FFFFFFFFFFFFFFFFFFFFFFFFFFFFFFFFFFFFFFFFFFFFFFFFFFFFFFFFFFFFFFFFFFFFFFFF  
FFFFFFFFFFFFFFFFFFFFFFFFFFFFFFFFFFFFFFFFFFFFFFFFFFFFFFFFFFFFFFFFFFFFFFFF  
FFFFFFFFFFFFFFFF:

@A00721:190:HGJW7DSXY:4:1641:27218:24205 1:N:0:TCTGCAAG+GCTGCACT  
GGAGGAATCTATCCCCAATTGGAATAGTAATGATTTCAAATTTCAAATTTGAAAATATCCCGCCCTAC  
AGTATACCAATTCAAATTCAAATTCAAATAGATTCCATAGGCCCGCAGGGGCATCTTACCGCAGAC  
CGTGGGGCAAGCCAA

+

FFFFFFFFFFFFFFFFFFFFFFFFFFFFFFFFFFFFFFFFFFFFFFFFFFFFFFFFFFFFFFFFFFFFFFFF  
FFFFFFFFFFFFFFFFFFFFFFFFFFFFFFFFFFFFFFFFFFFFFFFFFFFFFFFFFFFFFFFFFFFFFFFF  
FFFFFFFFFFFFFFFF:F

@A00721:190:HGJW7DSXY:4:2259:26449:7279 1:N:0:TCTGCAAG+GCTGCACT  
GGAGGAATCTATCCCCAATTGGAATATTAATGATTTCAAATTTCAAATTTGAAAATATCCCGCCCTAC  
AGTATACCAATTCAAATTCAAATTCAAATAGATTCCATAGTCCCGCAGGGGCCTCTTACCGCAGAA  
CGTGGGGCAAGCCAA

+

FFFF,FFFFFF,, :FFFF:FFFF:FFFF::FFFFF:FFFFF:FFF:FFF:FFFFFF,F,FF,  
F,F,F::FFFFFFF,,FFFFFF,:F,:F:FFFF:FF:F,,FF,FFF:,: ,F,,FF,FF::,,F,F,  
F,,,F:::F::,FF

@A00721:190:HGJW7DSXY:4:2677:17833:23797 1:N:0:TCTGCAAG+GCTGCACT  
GGAGGAATCTATCCCCAATTGGAATAGTAATGATTTCAAATTTCAAATTTGAAAATATCCCGCCCTAC  
AGTATACCAATTCAAATTCAAATTCAAATAGATTCCAAAGGCCCGCAGGTGCATCTTACCGCATAC  
CGTGGGGCAAGCC

+

FFF:FFFFF:F:FFFFF:FFF,F,FFF,FF,,FFFFF:F:FFFF:FFFFFFFFFF,F:FFF:  
F,, :F,FFFFFF,FFF:F:::F,,FFF:,:FFFF,FF,FF:FF:F,,F,F:::F:FFF:,:,,,  
,FFF:,FFF:,F

@A00721:190:HGJW7DSXY:4:1344:30373:13917 1:N:0:TCTGCAAG+GCTGCACT  
ATTGGAATAGTAATGATTTCAAATTTCAAATTTGAAAATATCCCGCCCTACAGTATACCAATTCAAAT  
TCAAATTCAAATAGATTCCATAGGCCCGCAGGGGCATCTTACCGCAGACCGTGGGGCAAGCCAATA  
TAATATTACTGGCTT

+

FFFFFFFFFFFFFFFFFFFFFFFFFFFFFFFFFFFFFFFFFFFFFFFFFFFFFFFFFFFFFFFFFFFFFFFF  
FFFFFFFFFFFF:F:FFFFF:FFFFF:FFFFF:FFFFF:FFFFF:FFFFF:FFFFF:FFFFF:FFFFF  
FFFFFFFFFFFF

@A00721:190:HGJW7DSXY:4:1362:16559:8155 1:N:0:TCTGCAAG+GCTGCACT  
ATTGGAATAGTAATGATTTCAAATTTCAAATTTGAAAATATCCCGCCCTACAGTATACCAATTCAAAT  
TCAAATTCAAATAGATTCCATAGGCCCGCAGGGGCATCTTACCGCAGACCGTGGGGCAAGCCAATC  
TAATATTACTGGCTT

+

F:F:FFFF:FFFFFFFFFFFFFFFFFFFFFFFFFFFFFFFF:FFFF:FFFFF:FFFFF:FFFFF:FFFFF:FFFFF  
FFFFFFFFFFFF:FFFF:FFF:FFFF:FFFFFFFFFFFFFFFFFFFFFFFFFFFFFFFF,F:FFFFF:F,  
FF:FFFFFFFF

@A00721:190:HGJW7DSXY:4:1432:15374:8359 1:N:0:TCTGCAAG+GCTGCACT  
ATTGGAATAGTAATGATTTCAAATTTCAAATTTGAAAATATCACGCCCTACAGTATACCAATTCAAAT  
TCAAATTCAAATAGATTCCATAGGCCCGCAGGGGCATCTTACCGCAGACCGTGGGGCAAGCCAATA  
TAATATTACTGGCTT

+

FFF:FFFFFFFF:FF:FFFFF,FFFFFFFFFFFFFFFF:,,F,F,FFFFFFFFFFFF,: ,FFFFF

,FFFFF,:FF,FFFFF:F:FFFF,,FFFF,FF,FFFFFF:F,FFFF:FFFFF:F:FF,FFF,F,FF,F  
,FFFFF:FFF,:F,F

@A00721:190:HGJW7DSXY:4:1668:7374:34240 1:N:0:TCTGCAAG+GCTGCACT  
ATTGGAATAGTAATGATTTCAAATTTCAAATTTGAAAATATCCCGCCCTACAGTATACCAATTCAAAT  
TCAAATTCAAATAGAATTCCATAGGCCCGCAGGGGCATCTTACCGCAGACCGTGGGGCAAGCCAATA  
TAATATTACTGGCTT

+

FFFFFFFFFFFFFFFFFFFFFFFFFFFFFFFFFFFFFFFFFFFFFFFFFFFFFFFFFFFFFFFFFFFFFFFF  
FFFFFFFFFFFFFFFFFFFFFFFFFFFFFFFFFFFFFFFFFFFFFFFFFFFFFFFFFFFFFFFFFFFFFFFF:FFF  
FFFFFFFFFFFFFFFF

@A00721:190:HGJW7DSXY:4:1677:32208:4758 1:N:0:TCTGCAAG+GCTGCACT  
ATTGGAATAGTAATGATTTCAAATTTCAAATTTGAAAATATCCCGCCCTACAGTATACCAATTCAAAT  
TCAAATTCAAATAGAATTCCATAGGCCCGCAGGGGCATCTTACCGCAGACCGTGGGGCAAGCCAATA  
TAATATTACTGGCTT

+

FFFFFFFFFFFFFFFFFFFFFFFFFFFFFFFFFFFFFFFFFFFFFFFFFFFFFFFFFFFFFFFFFFFF,FF,F:FFFFF:FFFFFFFF  
FFFFFFFFFFFFFFFF:FFFFFFFFFFFFFFFFFFFFFFFFFFFFFFFFFFFFFFFF:FFFFFFFFFFFFFFFF:FFFFF  
F:FFFFFFFF

@A00721:190:HGJW7DSXY:4:2174:5267:34601 1:N:0:TCTGCAAG+GCTGCACT  
ATTGGAATAGTAATGATTTCAAATTTCAAATTTGAAAATATCCCGCCCTACAGTATACCAATTCAAAT  
TCAAATTCAAATAGAATTCCATAGGCCCGCAGGGGCATCTTACCGCAGACCGTGGGGCAAGCCAATA  
TAATATTACTGGCTT

+

FFFFFFFFFFFFFFFFFFFFFFFFFFFFFFFFFFFFFFFFFFFFFFFFFFFFFFFFFFFFFFFFFFFFFFFF  
FFFFFFFFFFFFFFFFFFFFFFFFFFFFFFFFFFFFFFFFFFFFFFFFFFFFFFFFFFFFFFFFFFFF,FFF,FFF  
F,FFFFFFFF

@A00721:190:HGJW7DSXY:4:2267:5575:17534 1:N:0:TCTGCAAG+GCTGCACT  
ATTGGAATAGTAATGATTTCAAATTTCAAATTTGAAAATATCCCGCCCTACAGTATACCAATTCAAAT  
TCAAATTCAAATAGAATTCCATAGGCCCGCAGGGGCATCTTACCGCAGACCGTGGGGCAAGCCAATA  
TAATATTACTGGCTT

+

FFFFFFFFFFFFFFFFFFFFFFFFFFFFFFFFFFFFFFFFFFFFFFFFFFFFFFFFFFFFFFFFFFFFFFFF  
FFFFFFFFFFFFFFFFFFFFFFFFFFFFFFFFFFFFFFFFFFFFFFFFFFFFFFFFFFFFFFFFFFFFFFFF  
FFFFFFFF

@A00721:190:HGJW7DSXY:4:2327:10077:6324 1:N:0:TCTGCAAG+GCTGCACT  
ATTGGAATAGTAATGATTTCAAATTTCAAATTTGAAAATATCCCGCCCTACAGTATACCAATTCAAAT  
TCAAATTCAAATAGAATTCCATAGGCCCGCAGGGGCATCTTACCGCAGACCGTGGGGCAAGCCAATA  
TAATATTACTGGCTT

+

FFFFFFFFFFFFFFFFFFFFFFFFFFFFFFFFFFFFFFFFFFFFFFFFFFFFFFFFFFFFFFFFFFFFFFFF  
FFFFFFFFFFFFFFFFFFFFFFFFFFFFFFFFFFFFFFFFFFFFFFFFFFFFFFFFFFFFFFFFFFFF,FFFFFFFF  
F:FFFFFFFF

@A00721:190:HGJW7DSXY:4:2533:6506:11600 1:N:0:TCTGCAAG+GCTGCACT  
ATTGGAATAGTAATGATTTCAAATTTCAAATTTGAAAATATCCCGCCCTACAGTATACCAATTCAAAT  
TCAAATTCAAATAGAATTCCATAGGCCCGCAGGGGCATCTTACCGCAGACCGTGGGGCAAGCCAATA  
TAATATTACTGGCTT

+

FFFFFFFFFFFFFFFFFFFFFFFFFFFFFFFFFFFFFFFFFFFFFFFFFFFFFFFFFFFFFFFFFFFFFFFF  
FFFFFFFFFFF:FFFF,FFFFFFFFFFFFFFFFFFFFFFFFFFFFFFFFFFFFFFFFFFFFFFFFFFFF  
FFF,FFFFFFFF

@A00721:190:HGJW7DSXY:4:2670:10131:26647 1:N:0:TCTGCAAG+GCTGCACT  
ATTGGAATAGTAATGATTTCAAATTTCAAATTTGAAAATATCCCGCCCTACAGTATACCAATTCAAAT  
TCAAATTCAAATAGAATTCCATAGGCCCGCAGGGGCATCTTACCGCAGACCGTGGGGCAAGCCAATA  
TAATATTACTGGCTT

```

FFFFFFFFFFFFFFFFFFFFFFFFFFFFFFFF:FFFFFFFFFFFFFFFF:FFFF:FFFFFFFF
FFFFFFFFFFFFFFFFFFFFFFFF:FFF: :FFFFFFFFFFFFFFFFFFFFFFFFFFFFFFFF:FF
FFFFFFFFFFFFFFFF

```

```

FFFFFFFFFFFFFF:F:FFFF:FFFFFFFFFFFFFFFFFFFFFFFFFFFFFF,FF:FFFFF:::F:FFF,FFFF
FFFF:F:FF:FFF:FFFFFF:FFFFFFFFFF:FFFFFFFFFF:FFFFFFFFFFFFFFFF, :FFFFF:FFFFF
F:,,FFFF:FF,FFF

```

```

FFFFFFFFFFFFFFFF,FFF:FFFFFFFFFFFFFFFF,FFFF,FFFFFF:FF::FFF:FF,FFFFFFFF:FFF
FF:F,F:,FFFFFF,:FF:F,,FFFF,FFFF:FFFFFF,,FFF,FFFFFFFF:FFF,FFFFFFFF:FFF,F
F:FFFF:F:FFF,F:

```

```

FFFFFFFFFFFFFFFF:FFFFFFFFFFFFFFFFFFFFFFFFFFFFFFFF:FFFFFFFF
FFFFFFFFFFFFFFFF:FFFFFFFFFFFFFFFF:FFFFFFFFFFFFFFFFFFFFFFFFFFFFFFFF
FFFFFFFFFFFFFFFF

```

```

FFFFFFFFFFFFFF,:FFF:F:,,,F,FFFF:FFFF:FFFFFFFF:F:F:F,FFFF,FFFFFFFFFFFF:FFFF
FFFF,:,:FFFF:FFFF:FF,F:FFFFFF:FFFF,F:F,F,:FFFFFFFFFFFFFFFF:F:FFFFFFFF:FFF
F:,:FF::FFFFFF,FF

```

```

FFFFFFFFFFFFFFFFFFFFF:FFF,:FFFFFF:FFFFFFFFFFFFFFFFFFFFFFFFFFFFFFFFFFFF
FFFFFFFFFFFFFFFFFFFFF:FFFFFFFFFFFFFFFFF:FFFFFFF:FFFFFFFFFFFFFFFFFFFFF
FFFFFFFFF:FFFFFFF

```

```

FFFFFFFFFFFF:F::FF,FFF,FFFFFF,F:F:FFFFFFFF:FF:::FFFFF,:::FFF,,FFF
FFFF,FF::FF,F,FFFFFF,:F:FF,:F:FF,FF:F:FFFFFF,:::FFFFFFFFFFFF,FFF,FFFFFF
,,FF:F::FFFF,FF

```

@A00721:190:HGJW7DSXY:4:1257:2745:13761 1:N:0:TCTGCAAG+GCTGCACT  
CCCCGCGCGGGCAAGCCAGTAATATTATATTGGCTTGCCCCACGGTCTGCGGTAAGATGCCCCCTGCGG

GGCCTATGGAATTCTATTTGAATTTGAATTTGAATTGGTATACTGTAGGGCGGGATATTTTCAAATTT  
GAAATTTGAAATCAT

+

FFFFFFFFFFFFFFFF:FFFFFFFF:FFFFFFFFFFFFFFFFFFFFFFFFFFFFFFFF:FFFFFFFFFFFF  
FFFF,FFFFFFFF::F:F:F:FFFFFFFF:FFFFFFFFFFFFFFFFFFFFFFFFFFFFFFFF:FFFFFFF  
FFFFFFFF,:FF,FFF

@A00721:190:HGJW7DSXY:4:1346:30129:22326 1:N:0:TCTGCAAG+GCTGCACT  
CCTGGCGCGGGCAAGCCAGTAATATTATATTGGCTTGCCCCACGGTCTGCGGTAAGATGCCCCTGCGG  
GGCCTATGGAATTCTATTTGAATTTGAATTTGAATTGGTATACTGTAGGGCGGGATATTTTCAAATTT  
GAAATTTGAAATCAT

+

FFFFFFFFFFFFFFFF:FFF:FFFF:FFFF:FFFFFFFFFFFFFFFFFFFF:F,FFFF,F,FFFF,FFFF  
FFFF,FFFF:FF:FF:FF:FFFF:FF:FF::FFFFFFFF:FFFFFFFFFFFF:FFFFFF,FFF:FF  
,FFFFFF,FFFFFF:

@A00721:190:HGJW7DSXY:4:1348:27850:2597 1:N:0:TCTGCAAG+GCTGCACT  
CCC GGCGCGGGCAAGCCAGTAATATTATATTGGCTTGCCCCACGGTCTGCGGTAAGATGCCCCTGCGG  
GGCCTATGGAATTCTATTTGAATTTGAATTTGAATTGGTATACTGTAGGGCGGGATATTTTCAAATTT  
GAAATTTGAAATCAT

+

FFFFFFFFFFFFFF::FFF,FF,:FFF:FFFFFFFFFFFFFFFFFFFF:FFFF:F::FFFFFFFF:FFFF  
FFFF,FFFF,,FF::FFFF::FFF:F,FF:FFFFFFFFFF:FF:FFFFFFFF:FFFFFF,:FF:FF  
FFFFFFFF:FFFFFF

@A00721:190:HGJW7DSXY:4:1351:19560:3677 1:N:0:TCTGCAAG+GCTGCACT  
CCTGGCGCGGGCAAGCCAGTAATATTATATTGGCTTGCCCCACGGTCTGCGGTAAGATGCCCCTGCGG  
GGCCTATGGAATTCTATTTGAATTTGAATTTGAATTGGTATACTGTAGGGCGGGATATTTTCAAATTT  
GAAATTTGAAATCAT

+

FFFFFFFFFFFFFFFF:FFF:FFF:FFFFFFFFFFFF,FFFFFF:FFFFFFFF:FFFFFFFFFFFF,FFFF  
FFFFFFFF:FFFF,FFFFFFFFFFFFFFFFFFFFFFFFFFFF:FFFFFFFFFFFFFFFFFFFFFFFFFFFF:FF  
FFFFFFFF:FFFF,F:

@A00721:190:HGJW7DSXY:4:1451:3414:23312 1:N:0:TCTGCAAG+GCTGCACT  
CCC GGCGCGGGCAAGCCAGTAATATTATATTGGCTTGCCCCACGGTCTGCGGTAAGATGCCCCTGCGG  
GGCCTATGGAATTCTATTTGAATTTGAATTTGAATTGGTATACTGTAGGGCGGGATATTTTCAAATTT  
GAAATTTGAAATCAT

+

FFFFFFFFFFFFFFFFFFFFFFFFFFFFFFFFFFFF,FFFF:FFFFFFFF:FFFFFFFF,F:FFFF::FFF  
FFFFFFFFFFFF,FFFF::FF:FFFFFF:FFFF:FFFFFFFFFFFF:FFFFFFFFFFFFFFFFFFFF:FF  
,FFFFFFFFFFFFFFF

@A00721:190:HGJW7DSXY:4:1564:11478:14700 1:N:0:TCTGCAAG+GCTGCACT  
CCTGGCGCGGGCAAGCCAGTAATATTATATTGGCTTGCCCCACGGTCTGCGGTAAGATGCCCCTGCGG  
GGCCTATGGAATTCTATTTGAATTTGAATTTGAATTGGTATACTGTAGGGCGGGATATTTTCAAATTT  
GAAATTTGAAATCAT

+

FFFFFFFFFFFFFF:FFFF:FFFF:F:FFFF:FFFFFFFFFFFFFFFFFFFFFFFFFFFFFFFF:FFFF  
FFFF:FFFF:FFFFFFFFFFFFFFFFFFFFFFFFFFFFFFFF:FFFFFFFFFFFFFFFFFFFFFFFFFFFF  
:FFFFFFFFFFFFFFF

@A00721:190:HGJW7DSXY:4:2130:29035:30953 1:N:0:TCTGCAAG+GCTGCACT  
CCTGGCGCGGGCAAGCCAGTAATATTATATTGGCTTGCCCCACGGTCTGCGGTAAGATGCCCCTGCGG  
GGCCTATGGAATTCTATTTGAATTTGAATTTGAATTGGTATACTGTAGGGCGGGATATTTTCAAATTT  
GAAATTTGAAATCAT

+

FFFFFFFFFFFFFF,FF,FFFFFFFFFFFF:FFFFFFFFFFFF::FFFFFFFFFFFF::FFFF:FFFF  
FFFFFFFFFFFF::F,FFFF,FFFF:FFFF,FF:F,FFFF,FFFFFFFFFFFFFFFFFFFF::FF:  
,:FF:FF,,FFFFFF

$+$ 

+

+

+

+

+

+

FFFFFFFFFFFFFFFFFFFFFFFF:FFFFFF:FFFFFFFFFFFFFFFFFFFFFFFF:FFFFFFFFFFFFFFFFFFFFFFFF



FFFFFFFF:FFFFFFFF,FFF::FFFF,FFFFFFFF:FFFFFFFFFFFFFFFFFFFFFFFF  
FFFF,FFFFFF:FFF

@A00721:190:HGJW7DSXY:4:2221:32117:31876 1:N:0:TCTGCAAG+GCTGCACT  
CCTGGCGCGGGCAAGCCCGTAATATTAAATTGGCTTGCCCCAAGGTCTGCGGTAATATTCCCCTGCGG  
GGCCTATGGAATTCTATTTGAATTTGAATTTTAATTGGTATACATTATGGCGGGATATTTTCAAATTT  
TAAATTTTAAATAAT

+  
FFFFFFFFFFFFFFFF,,FF,FFFF:FFF:,F,F,:,:,F:FFF,,:,,,:F:FF,,F,F:,F,,F:F  
FFFF,FFF:FFFF,F::FFF:FFFF,FFFF,,:FF,,FFFFFF,,FF,:::FFF:F,FFFF,FFFFFF  
,,FFFF,,FF:FF

@A00721:190:HGJW7DSXY:4:2225:18376:12273 1:N:0:TCTGCAAG+GCTGCACT  
ACGGAGGTGTCCCCGGCGCGGGCAAGCCAGTAATATTATATTGGCTTGCCCCACGGTCGGCGGTAAGA  
TGCCCCAGCGGGCCTATGGAATTCTATTTGAATTTGTATTTGAATTTGTATACTGTAGGGCGGGATA  
TTTTCAAATTTGAAA

+  
FFFFFFFFFFFFFFFFFFFFFFFF:,F,,F,,,F,F,FF:F:F,F,,F:FFFF:F:FF:,F,FF:::F  
:F,FFF,FFFFFF,F,,:FF:FFF,,F,FF,,F:FF,,:F:F,,FFF,FF:FF,,:,,,FF,FFF,:F  
,:FF,:F::FF,,FF

@A00721:190:HGJW7DSXY:4:2264:32832:25974 1:N:0:TCTGCAAG+GCTGCACT  
ACGGAGGTGTCCCCGGCGCGGGCAAGCCAGTAATATTATATTGGCTTGCCCCACGGTCGCGGTAAGA  
TGCCCCGCGGGCCTATGGAATTCTATTTGAATTTGAATTTGAATTTGTATACTGTAGGGCGGGATA  
TTTTCAAATTTGAAA

+  
FFFFFFFF:FFFF:FFFFFFFFFFFF:F:,FFFF:,F:FFFFFFFF:FFFFFFFF:FFF,,,,FFFFF,:  
FF:FFFFFFFFFFFF,F:FFFF:F,F,F:FFFFFFFF,,FFF:FFFF:FFFF:FFFF,,FFFFFFFF  
F:FFFF,:FFFF,FF

@A00721:190:HGJW7DSXY:4:2664:30346:14372 1:N:0:TCTGCAAG+GCTGCACT  
ACGGAGGTGTCCCCGGCGCGGGCAAGCCAGTAATATTATATTGGCTTGCCCCACGGTCGCGGTAAGA  
TGCCCCGCGGGCCTATGGAATTCTATTTGAATTTGAATTTGAATTTGTATACTGTAGGGCGGGATA  
TTTTCAAATTTGAAA

+  
FFFFFFFFFFFFFFFFFFFFFFFFFFFF,FF:F,FF:F::F,FF,F:FFFFFFFF:FF:FF:FF:FFFF  
FFFFFF,FFFFFFFF,,FFF,F,,:FFF:FFFF:,F:FF,FFFF,FFFFFFFF,F:FF:FFFFFFFF  
FFFF,F,FFFF:F:F

@A00721:190:HGJW7DSXY:4:1503:30056:17253 1:N:0:TCTGCAAG+GCTGCACT  
ACGGAGGTGTCCCCGGCGCGGGCAAGCCAGTAATATTATATTTGGTTGCCCCACGGTCGCGGTAAGA  
TGGCCCGCGGGCCTATGGAATTATATTTGTATTTTATTTTAATTTGTATAATGTAGGGGGGGGTA  
TTTTAAAATTT

+  
FFFFFFFFFFFFFFFFFFFFFFFF,,F:,F,,,::,,F,:,:F,,,:::FF::,F,,,F,FF,,F:,  
,,,FF,,:FFF,F,,,,,F:F,:FFFF,,FFF,,,FF,,:F,,,F,,,::,F,FFF,::  
:FFF,:F:,FF

@A00721:190:HGJW7DSXY:4:1128:6958:6026 1:N:0:TCTGCAAG+GCTGCACT  
ATCCCGCCCTACAGTATACCAATTCAAATTCAAATTCAAATAGAATTCCATAGGCCCGCAGGGGCAT  
CTTACCGCAGACCGTGGGGCAAGCCAATATAATATTACTGGCTTGCCCGCGCCGGGGACACCTCCGTA  
CGCTTACGTGTCGAT

+  
FFFFFFFFFFFFFFFFFFFFFFFFFFFFFFFFFFFFFFFFFFFFFFFFFFFFFFFFFFFFFFFF  
FFFFFFFFFFFFFFFFFFFFFFFFFFFFFFFFFFFFFFFFFFFFFFFFFFFFFFFFFFFFFFFF  
FFFFFFFFFFFFFFFF

@A00721:190:HGJW7DSXY:4:1435:2220:11475 1:N:0:TCTGCAAG+GCTGCACT  
ATCCCGCCCTACAGTATACCAATTCAAATTCAAATTCAAATAGAATTCCATAGGCCCGCAGGGGCAT  
CTTACCGCAGACCGTGGGGCAAGCCAATATAATATTACTGGCTTGCCCGCGCCGGGGACACCTCCGTA  
CGCTTACGTGTCGAT

+  
FFFFFFFFFFFFFFFFFFFFFFFFFFFFFFFFFFFFFFFFFFFFFFFFFFFFFFFFFFFFFFFFFFFFFFFF  
FFFFFFFFFFFFFFFF:FFFFFFFFFFFFFF,FFFFFFFFFFFFFFFFFFFFFFFFFFFFFFFFFFFFFFFF  
FFFFFFFFFFFFFFFF:

@A00721:190:HGJW7DSXY:4:1471:23493:29684 1:N:0:TCTGCAAG+GCTGCACT  
ATCCCGCCCTACAGTATACCAATTCAAATTCAAATTCAAATAGAATTCCATAGGCCCGCAGGGGCAT  
CTTACCGCAGACCGTGGGGCAAGCCAATATAATATTACTGGCTTGCCCGCGCCGGGGACACCTCCGTA  
CGCTTACGTGTTCGAT

+  
FFFFFFFFFFFFFFFFFFFFFFFFFFFFFFFFFFFFFFFFFFFFFFFFFFFFFFFFFFFFFFFFFFFFFFFF  
FFFFFFFFFFFFFFFFFFFFFFFF:FFFFFFFFFFFFFFFFFFFFFFFFFFFFFFFFFFFFFFFFFFFFFFFF  
FFFFFFFFFFFFFFFFFFFFFFFF:FFFFFFFFFFFFFFFFFFFFFFFFFFFFFFFFFFFFFFFFFFFFFFFF:FF  
FFF,FF:FFFFFFFF

@A00721:190:HGJW7DSXY:4:1641:5231:35790 1:N:0:TCTGCAAG+GCTGCACT  
ATCCCGCCCTACAGTATACCAATTCAAATTCAAATTCAAATAGAATTCCATAGGCCCGCAGGGGCAT  
CTTACCGCAGACCGTGGGGCAAGCCAATATAATATTACTGGCTTGCCCGCGCCGGGGACACCTCCGTA  
CGCTTACGTGTTCGAT

+  
FFFFFFFFFFFFFFFFFFFFFFFFFFFFFFFFFFFFFFFFFFFFFFFFFFFFFFFFFFFFFFFFFFFFFFFF  
FFFFFFFFFFFFFFFFFFFFFFFFFFFFFFFFFFFFFFFFFFFFFFFFFFFFFFFFFFFFFFFFFFFFFFFF  
FFFFFFFFFFFFFFFF

@A00721:190:HGJW7DSXY:4:2133:1542:32409 1:N:0:TCTGCAAG+GCTGCACT  
ATCCCGCCCTACAGTATACCAATTCAAATTCAAATTCAAATAGAATTCCATAGGCCCGCAGGGGCAT  
CTTACCGCAGACCGTGGGGCAAGCCAATATAATATTACTGGCTTGCCCGCGCCGGGGACACCTCCGTA  
CGCTTACGTGTTCGAT

+  
FFFFFFFFFFFFFFFFFFFFFFFFFFFFFFFFFFFFFFFFFFFFFFFFFFFFFFFFFFFFFFFFFFFFFFFF  
FFFFFFFFFFFFFFFFFFFFFFFFFFFFFFFFFFFFFFFFFFFFFFFFFFFFFFFFFFFFFFFFFFFFFFFF  
FFFFFFFFFFFFFFFF

@A00721:190:HGJW7DSXY:4:2455:26775:12477 1:N:0:TCTGCAAG+GCTGCACT  
ATCCCGCCCTACAGTATACCAATTCAAATTCAAATTCAAATAGAATTCCATAGGCCCGCAGGGGCAT  
CTTACCGCAGACCGTGGGGCAAGCCAATATAATATTACTGGCTTGCCCGCGCCGGGGACACCTCCGTA  
CGCTTACGTGTTCGAT

+  
FFFFFFFFFFFFFF:FFFFFF:FFFFFFFFFFFFFFFFFFFFFFFFFFFFFFFFFFFFFFFFFFFFFFFF  
FFFFFFFFFFFFFFFFFFFFFFFFFFFFFFFF:FFFFFFFFFFFFFFFFFFFFFFFFFFFFFFFFFFFFFFFF  
FFFF:FFFFFFFF

@A00721:190:HGJW7DSXY:4:1611:23149:18004 1:N:0:TCTGCAAG+GCTGCACT  
CCCGCCCTACAGTATACCAATTCAAATTCAAATTCAAATAGAATTCCATAGGCCCGCAGGGGCATCT  
TACCGCAGACCGTGGGGCAAGCCAATATAATATTACTGGCTTGCCCGCGCCGGGGACACCTCCGTACG  
CTTACGTGTTCGATTT

+  
FFFFFFFFFFF:FFFFFFFFFFFFFFFFFFFFFFFFFFFFFFFFFFFFFFFFFFFFFFFFFFFFFFFF  
FFFFFFFFFFFFFFFFFFFFFFFFFFFFFFFF,FFFFFFFFFFFFFFFFFFFFFFFFFFFFFFFF,FFFFFFFF  
FFFFFF:FFFFFFFF

@A00721:190:HGJW7DSXY:4:2216:14642:25629 1:N:0:TCTGCAAG+GCTGCACT  
CCCGCCCTACAGTATACCAATTCAAATTCAAATTCAAATAGAATTCCATAGGCCCGCAGGGGCATCT  
TACCGCAGACCGTGGGGCAAGCCAATATAATATTACTGGCTTGCCCGCGCCGGGGACACCTCCGTACG  
CTTACGTGTTCGATTT

+  
FFFFFFFFFFFFFFFFFFFFFFFFFFFFFFFFFFFFFFFFFFFFFFFFFFFFFFFFFFFFFFFFFFFFFFFF  
FFFFFFFFFFFFFFFFFFFFFFFFFFFFFFFFFFFFFFFFFFFFFFFFFFFFFFFFFFFFFFFFFFFFFFFF  
FFFFFFFFFFFFFFFF:

@A00721:190:HGJW7DSXY:4:1240:24876:2769 1:N:0:TCTGCAAG+GCTGCACT  
CCGCCCTACAGTATACCAATTCAAATTCAAGATTCAAATAGAATTCCATAGGCCCGCAGGGGCATCTT



@A00721:190:HGJW7DSXY:4:1532:10737:6715 1:N:0:TCTGCAAG+GCTGCACT  
CCGCCCTACAGTATACCAATTCAAATTCAAATTCAAATAGAAATTCATAGGCCCGCAGGGGCATCTT  
ACCGCAGACCGTGGGGCAAGCCAATATAATATTACTGGCTTGCCCGCGCCGGGGACACCTCCGTACGC  
TTACGTGTCGATTTG

[illegible]

+

[illegible]

+

```

FFFFFFFF,FFFFFFFFFFFFFFFF:FFFFFFFF:FFFFFFFF:FFFFFFFFFFFFFFFF:F:FF:FFFFFFFFFFFF,FFFFFF:F
FFFFFFFF:FFFFFFFF:FF:FFFFFFFFFFFF:FF:FFFFFFFFFFFF:FFFFFFFFFFFF,FFFFFFFFFFFFFFFFFFFFFFFF,FF,F
FFFF:,F,FFFFFFFF

```

+

[illegible]

+

```

FFFFFFFFFFFFFFFFFFFFFFFFFFFFFFFFFFFFF:FFF:FFFFFFFFFFFFFFFFFFFFFFFFFFFFF
FFFFFFFFFFFFFFFFFFFFFFFFFFFFFFFFFFFFF
FFFFFFFFFFFFFFFFFFFF

```

+

```

FFFFFFFF:FFFFFFFFFFFFFFFFFFFFFFFFFFFFFFFFFFFFFFFFFFFFFFFFFFFFFFFF
FFFFFFFFFFFFFFFFFFFFFFFFFFFF:FFFFFFFFFFFFFFFFFFFFFFFFFFFFFFFFFFFF
FFFFF.FFFFFFFFFF

```

+

[illegible]

FFFFFFFFFFFFFFFFFFFFFFFFFFFFFFFFFFFFFFFFFFFFFFFFFFFFFFFFFFFFFFFFFFFFFFFFFFFFFFFF  
FFFFFFFFFFFFFFFF

@A00721:190:HGJW7DSXY:4:2205:16224:6574 1:N:0:TCTGCAAG+GCTGCACT  
CCGCCCTACAGTATACCAATTCAAATTCAAATTCAAATAGAATTCCATAGGCCCGCAGGGGCATCTT  
ACCGCAGACCGTGGGGCAAGCCAATATAATATTACTGGCTTGCCCGCGCCGGGGACACCTCCGTACGC  
TTACGTGTCGATTTG

+

FFFFFFFFFFFFFFFFFFFFFFFFFFFFFFFFFFFFFFFFFFFFFFFFFFFFFFFFFFFFFFFFFFFFFFFFFFFFFFFF  
FFFFFFFFFFFFFFFFFFFFFFFFFFFFFFFFFFFFFFFFFFFFFFFFFFFFFFFFFFFFFFFFFFFFFFFFFFFFFFFF  
FFFFFFFFFFFFFFFF

@A00721:190:HGJW7DSXY:4:2210:15917:11240 1:N:0:TCTGCAAG+GCTGCACT  
CCGCCCTACAGTATACCAATTCAAATTCAAATTCAAATAGAATTCCATAGGCCCGCAGGGGCATCTT  
ACCGCAGACCGTGGGGCAAGCCAATATAATATTACTGGCTTGCCCGCGCCGGGGACACCTCCGTACGC  
TTACGTGTCGATTTG

+

FFFFFFFFFFFFFFFFFFFFFFFFFFFFFFFFFFFFFFFFFFFFFFFFFFFFFFFFFFFFFFFFFFFFFFFFFFFFFFFF  
FFFFFFFFFFFFFFFFFFFFFFFFFFFFFFFFFFFFFFFFFFFFFFFFFFFFFFFFFFFFFFFFFFFFFFFFFFFFFFFF  
F:FFFFFFFFFFFFFF:

@A00721:190:HGJW7DSXY:4:2240:17481:27759 1:N:0:TCTGCAAG+GCTGCACT  
CCGCCCTACAGTATACCAATTCAAATTCAAATTCAAATAGAATTCCATAGGCCCGCAGGGGCATCTT  
ACCGCAGACCGTGGGGCAAGCCAATATAATATTACTGGCTTGCCCGCGCCGGGGACACCTCCGTACGC  
TTACGTGTCGATTTG

+

FFFFFFFFFFFFFFFFFFFFFFFFFFFFFFFFFFFFFFFFFFFFFFFFFFFFFFFFFFFFFFFFFFFFFFFFFFFFFFFF  
FFFFFFFFFFFFFFFFFFFFFFFFFFFFFFFFFFFFFFFFFFFFFFFFFFFFFFFFFFFFFFFFFFFFFFFFFFFFFFFF  
FFFFFFFFFFFFFFFF

@A00721:190:HGJW7DSXY:4:2240:14769:29074 1:N:0:TCTGCAAG+GCTGCACT  
CCGCCCTACAGTATACCAATTCAAATTCAAATTCAAATAGAATTCCATAGGCCCGCAGGGGCATCTT  
ACCGCAGACCGTGGGGCAAGCCAATATAATATTACTGGCTTGCCCGCGCCGGGGACACCTCCGTACGC  
TTACGTGTCGATTTG

+

FFFFFFFFFFFFFFFFFFFFFFFFFFFFFFFFFFFFFFFFFFFFFFFFFFFFFFFFFFFFFFFFFFFFFFFFFFFFFFFF  
FFFFFFFFFFFFFFFFFFFFFFFFFFFFFFFFFFFFFFFFFFFFFFFFFFFFFFFFFFFFFFFFFFFFFFFFFFFFFFFF  
FFFFFFFFFFFFFFFF

@A00721:190:HGJW7DSXY:4:2307:20925:27492 1:N:0:TCTGCAAG+GCTGCACT  
CCGCCCTACAGTATACCAATTCAAATTCAAATTCAAATAGAATTCCATAGGCCCGCAGGGGCATCTT  
ACCGCAGACCGTGGGGCAAGCCAATATAATATTACTGGCTTGCCCGCGCCGGGGACACCTCCGTACGC  
TTACGTGTCGATTTG

+

FFFFFFFFFFFFFFFFFFFFFFFFFFFFFFFFFFFFFFFFFFFFFFFFFFFFFFFFFFFFFFFFFFFFFFFFFFFFFFFF  
FFFFFFFFFFFFFFFFFFFFFFFFFFFFFFFFFFFFFFFFFFFFFFFFFFFFFFFFFFFFFFFFFFFFFFFFFFFFFFFF  
FFFFFFFFFFFFFFFF

@A00721:190:HGJW7DSXY:4:2324:28085:34757 1:N:0:TCTGCAAG+GCTGCACT  
CCGCCCTACAGTATACCAATTCAAATTCAAATTCAAATAGAATTCCATAGGCCCGCAGGGGCATCTT  
ACCGCAGACCGTGGGGCAAGCCAATATAATATTACTGGCTTGCCCGCGCCGGGGACACCTCCGTACGC  
TTACGTGTCGATTTG

+

FFFFFFF,FFFFFFFFFFFFFFFFFFFFFFFFFFFFFFFFFFFFFFFFFFFFFFFFFFFFFFFFFFFFFFFFFFFF  
FFFFFFFFFFFF,FFFFFFF:FFFFFFFFFFFFFFFFFFFFFFFFFFFFFFFFFFFFFFFFFFFFFFFFFFFFFFFF  
FFFFFFFFFFFFFFFF

@A00721:190:HGJW7DSXY:4:2362:15917:7670 1:N:0:TCTGCAAG+GCTGCACT  
CCGCCCTACAGTATACCAATTCAAATTCAAATTCAAATAGAATTCCATAGGCCCGCAGGGGCATCTT  
ACCGCAGACCGTGGGGCAAGCCAATATAATATTACTGGCTTGCCCGCGCCGGGGACACCTCCGTACGC  
TTACGTGTCGATTTG

+  
FFFFFFFFFFFFFFFFFFFFFFFFFFFFFFFFFFFFFFFFFFFFFFFFFFFFFFFFFFFFFFFFFFFFFFFF  
FFFFFFFFFFFFFFFFFFFFFFFFFFFFFFFFFFFFFFFFFFFFFFFFFFFFFFFFFFFFFFFFFFFFFFFF  
FFFFFFFFFFFFFFFF

@A00721:190:HGJW7DSXY:4:2369:7148:3223 1:N:0:TCTGCAAG+GCTGCACT  
CCGCCCTACAGTATACCAATTCAAATTCAAATTCAAATAGAATTCCATAGGCCCGCAGGGGCATCTT  
ACCGCAGACCGTGGGGCAAGCCAATATAATATTACTGGCTTGCCCGCGCCGGGGACACCTCCGTACGC  
TTACGTGTCGATTTG

+  
FFFFFFFFFFFFFFFFFFFFFFFFFFFFFFFFFFFFFFFFFFFFFFFFFFFFFFFFFFFFFFFFFFFFFFFF  
FFFFFFFFFFFFFFFFFFFFFFFFFFFFFFFFFFFFFFFFFFFFFFFFFFFFFFFFFFFFFFFFFFFFFFFF  
FFFFFFFFFFFFFFFF

@A00721:190:HGJW7DSXY:4:2435:25780:27539 1:N:0:TCTGCAAG+GCTGCACT  
CCGCCCTACAGTATACCAATTCAAATTCAAATTCAAATAGAATTCCATAGGCCCGCAGGGGCATCTT  
ACCGCAGACCGTGGGGCAAGCCAATATAATATTACTGGCTTGCCCGCGCCGGGGACACCTCCGTACGC  
TTACGTGTCGATTTG

+  
FFFFFFFFFFFFFFFFFFFFFFFFFFFFFFFFFFFFFFFF:FFFFFFFF:FFFFFFFFFFFFFFFF:FFFFFFF  
FFFFFFFFFFFFFFFFFFFFFFFFFFFFFFFFFFFFFFFF:FFFFF:FFFFFFFFFFFFFFFFFFFFFFFF  
FFFFFFFFFFFFFFFF

@A00721:190:HGJW7DSXY:4:2445:4291:14591 1:N:0:TCTGCAAG+GCTGCACT  
CCGCCCTACAGTATACCAATTCAAATTCAAATTCAAATAGAATTCCATAGGCCCGCAGGGGCATCTT  
ACCGCAGACCGTGGGGCAAGCCAATATAATATTACTGGCTTGCCCGCGCCGGGGACACCTCCGTACGC  
TTACGTGTCGATTTG

+  
FFFFFFFFF:FFFFFFFFFFFFFFFFFFFFFFFFFFFFFFFF:FFFFFFFFFFFFFFFFFFFFFFFFFFFF  
FFFFFFFFFFFFFFFFFFFFFFFFFFFFFFFFFFFFFFFFFFFFFFFFFFFFFFFFFFFFFFFFFFFFFFFF:FFF  
FFFF:FFFFFFFF

@A00721:190:HGJW7DSXY:4:2445:4734:17362 1:N:0:TCTGCAAG+GCTGCACT  
CCGCCCTACAGTATACCAATTCAAATTCAAATTCAAATAGAATTCCATAGGCCCGCAGGGGCATCTT  
ACCGCAGACCGTGGGGCAAGCCAATATAATATTACTGGCTTGCCCGCGCCGGGGACACCTCCGTACGC  
TTACGTGTCGATTTG

+  
FFFFFFFFFFFFFFFFFFFFFFFFFFFFFFFFFFFFFFFFFFFFFFFFFFFFFFFFFFFFFFFFFFFFFFFF  
FFFFFFFFFFFFFFFFFFFFFFFFFFFFFFFFFFFFFFFFFFFFFFFFFFFFFFFFFFFFFFFFFFFFFFFF  
:FFFFFFFF

@A00721:190:HGJW7DSXY:4:2446:10321:9220 1:N:0:TCTGCAAG+GCTGCACT  
CCGCCCTACAGTATACCAATTCAAATTCAAATTCAAATAGAATTCCATAGGCCCGCAGGGGCATCTT  
ACCGCAGACCGTGGGGCAAGCCAATATAATATTACTGGCTTGCCCGCGCCGGGGACACCTCCGTACGC  
TTACGTGTCGATTTG

+  
FFFFFFFFFFFFFFFFFFFFFFFFFFFFFFFFFFFFFFFF:FFFFFFFFFFFFFFFFFFFFFFFFFFFF  
FFFFFFFFFFFFFFFFFFFF,FFFFFF,FF,FFFFFFFFFFFFFFFFFFFFFFFFFFFFFFFFFFFFFFFF  
FF:FFFFFFFF:FF

@A00721:190:HGJW7DSXY:4:2471:28176:12868 1:N:0:TCTGCAAG+GCTGCACT  
CCGCCCTACAGTATACCAATTCAAATTCAAATTCAAATAGAATTCCATAGGCCCGCAGGGGCATCTT  
ACCGCAGACCGTGGGGCAAGCCAATATAATATTACTGGCTTGCCCGCGCCGGGGACACCTCCGTACGC  
TTACGTGTCGATTTG

+  
FFFFFFFFFFFFFFFFFFFFFFFF:FFFFFFFFFFFFFFFFFFFFFFFFFFFFFFFFFFFFFFFFFFFF  
FFFFFFFFFFFFFFFFFFFFFFFF:FFFFFFFFFFFFFFFFFFFFFFFFFFFFFFFFFFFFFFFFFFFF  
FFFFFFFFFFFF:FFF

@A00721:190:HGJW7DSXY:4:2506:8377:16219 1:N:0:TCTGCAAG+GCTGCACT  
CCGCCCTACAGTATACCAATTCAAATTCAAATTCAAATAGAATTCCATAGGCCCGCAGGGGCATCTT

ACCGCAGACCGTGGGGCAAGCCAATATAATATTACTGGCTTGCCCGCGCCGGGGACACCTCCGTACGC  
TTACGTGTCGATTTG

[illegible] $+$ 

@A00721:190:HGJW7DSXY:4:2521:8865:25488 1:N:0:TCTGCAAG+GCTGCACT  
CCGCCCTACAGTATACCAATTCAAATTCAAATTCAAATAGAATTCCATAGCCCCGCAGGGGCATCTT  
ACCGCAGACCGTGGGGCAAGCCAATATAATATTACTGGCTTGCCCGCGCCGGGGACACCTCCGTACGC  
TTACGTGTCGATTTG

[illegible]

+

@A00721:190:HGJW7DSXY:4:2577:16333:29058 1:N:0:TCTGCAAG+GCTGCACT  
CCGCCCTACAGTATACCAATTCAAATTCAAATTCAAATAGAATTCCATAGCCCCGCAGGGGCATCTT  
ACCGCAGACCGTGGGGCAAGCCAATATAATATTACTGGCTTGCCCGCGCCGGGGACACCTCCGTACGC  
TTACGTGTCGATTTG

[illegible]

+

@A00721:190:HGJW7DSXY:4:2653:17544:34194 1:N:0:TCTGCAAG+GCTGCACT  
CCGCCCTACAGTATACCAATTCAAATTCAAATTCAAATAGAATTCCATAGCCCCGCAGGGGCATCTT  
ACCGCAGACCGTGGGGCAAGCCAATATAATATTACTGGCTTGCCCGCGCCGGGGACACCTCCGTACGC  
TTACGTGTCGATTG

[illegible]

@A00721:190:HGJW7DSXY:4:2653:17852:34225 1:N:0:TCTGCAAG+GCTGCACT  
CGCCCTACAGTATACCAATTCAAATTCAAATTCAAATAGAATTCCATAGGCCCGCAGGGGCATCTT  
ACGCAGACCGTGGGGCAAGCCAATATAATATTACTGGCTTGCCCGCGCCGGGGACACCTCCGTACGC  
TTACGTGTCGATTTG

+

FFFFFFFFFFFFFFFFFFFFFFFFFFFFFFFFFFFFFFFFFFFFFFFFFFFFFFFFFFFFFFFFFFFFFFFF  
FFFFFFFFFFFFFFFFFFFFFFFFFFFFFFFFFFFFFFFFFFFFFFFFFFFFFFFFFFFFFFFFFFFFFFFF  
FFFFF:FFFFFFFFF

@A00721:190:HGJW7DSXY:4:1103:9064:11866 1:N:0:TCTGCAAG+GCTGCACT  
CGCCCTACAGTATACCAATTCAAATTCAAATTCAAATAGAATTCCATAGGCCCGCAGGGGCATCTTA  
CCGCAGACCGTGGGGCAAGCCAATATAATATTACTGGCTTGCCCGCGCCGGGGACACCTCCGTACGCT  
TACGTGTCGATTTGT

+

FFFFF:FFFFFFFFF:FFFFFFFFFFFFFFFFFFFFFFFFFFFFFFFFFFFFFFFFFFFFFFFFFFFFFFF  
FFFFFFFFFFFFFFFFFFFFFFFFFFFFFFFFFFFFFFFFFFFFFFFFFFFFFFFFFFFFFFFFFFFFFFFF  
FFFFFFFFFFFFFFFFF

@A00721:190:HGJW7DSXY:4:1166:12554:2284 1:N:0:TCTGCAAG+GCTGCACT  
CGCCCTACAGTATACCAATTCAAATTCAAATTCAAATAGAATTCCATAGGCCCGCAGGGGCATCTTA  
CCGCAGACCGTGGGGCAAGCCAATATAATATTACTGGCTTGCCCGCGCCGGGGACACCTCCGTACGCT  
TACGTGTCGATTTGT

+

FFFFFFFFFFFFFFFFFFFFFFFFFFFFFFFFFFFFFFFFFFFFFFFFFFFFFFFFFFFFFFFFFFFFFFFF  
FFFFFFFFFFFFFFFFFFFFFFFFFFFFFFFFFFFFFFFFFFFFFFFFFFFFFFFFFFFFFFFFFFFFFFFF  
FFFFFFFFFFFFFFFFF

@A00721:190:HGJW7DSXY:4:1331:22110:18020 1:N:0:TCTGCAAG+GCTGCACT  
CGCCCTACAGTATACCAATTCAAATTCAAATTCAAATAGAATTCCATAGGCCCGCAGGGGCATCTTA  
CCGCAGACCGTGGGGCAAGCCAATATAATATTACTGGCTTGCCCGCGCCGGGGACACCTCCGTACGCT  
TACGTGTCGATTTGT

+

FFFFFFFFFFFFFFFFFFFFFFFFFFFFFFFFFFFFFFFFFFFFFFFFFFFFFFFFFFFFFFFFFFFFFFFF  
FFFFFFFFFFFFFFFFFFFFFFFFFFFFFFFFFFFFFFFFFFFFFFFFFFFFFFFFFFFFFFFFFFFFFFFF  
F:FFFFFFFFFFFFF

@A00721:190:HGJW7DSXY:4:1622:28718:24893 1:N:0:TCTGCAAG+GCTGCACT  
CGCCCTACAGTATACCAATTCAAATTCAAATTCAAATAGAATTCCATAGGCCCGCAGGGGCATCTTA  
CCGCAGACCGTGGGGCAAGCCAATATAATATTACTGGCTTGCCCGCGCCGGGGACACCTCCGTACGCT  
TACGTGTCGATTTGT

+

FFFFFFFFFFFFFFFFFFFFFFFFFFFFFFFFFFFFFFFFFFFFFFFFFFFFFFFFFFFFFFFFFFFFFFFF  
FFFFFFFFFFFFFFFFFFFFFFFFFFFFFFFFFFFFFFFFFFFFFFFFFFFFFFFFFFFFFFFFFFFFFFFF  
FFFFFFFFFFFFFFFFF

@A00721:190:HGJW7DSXY:4:2456:4625:10191 1:N:0:TCTGCAAG+GCTGCACT  
CGCCCTACAGTATACCAATTCAAATTCAAATTCAAATAGAGTTCCATAGGCCCGCAGGGGCATCTTA  
CCGCAGACCGTGGGGCAAGCCAATATAATATTACTGGCTTGCCCGCGCCGGGGACACCTCCGTACGCT  
TACGTGTCGATTTGT

+

FFFFFFFFFFFFFFFFFFFFFFFFFFFFFFFFFFFFFFFFFFFFFFFFFFFFFFFFFFFFFFFFFFFFFFFF  
FFFFFFFFFFFFFFFFFFFFFFFFFFFFFFFFFFFFFFFFFFFFFFFFFFFFFFFFFFFFFFFFFFFFFFFF  
FFFFFFFFFFFFFFFFF

@A00721:190:HGJW7DSXY:4:2510:11116:9001 1:N:0:TCTGCAAG+GCTGCACT  
CGCCCTACCGTATACCAATTCAAATTCAAATTCAAATAGAATTCCATAGGCCCGCAGGGGCATCTTA  
CCGCAGACCGTGGGGCAAGCCAATATAATATTACTGGCTTGCCCGCGCCGGGGACACCTCCGTACGCT  
TACGTGTCGATTTGT

+

FFFFFFFFF,:FFFFFFFFFFFFF:,FFFFFFFFFFFFFFFFF:FFF,FFF,FFFFFFFFFFFF:FF,,:FF



:FFFFFFFFFFFF,FFFFF:FFFF:FFFF,,F,FFFFFF:FFF:FFFF:F,F:F,F:FF,FFF,F:FFF  
,FFFF:FFFF:FFF

@A00721:190:HGJW7DSXY:4:2673:9715:5447 1:N:0:TCTGCAAG+GCTGCACT  
CGCCTACAGTATACCAATTCAAATTCAAATTCAAATAGAATTCCATAGGCCCGCAGGGGCATCTTA  
CCGAGACCGTGGGGCAAGCCAATATAATATTACTGGCTTGCCCGCGCCGGGGACACCTCCGTACGCT  
TACGTGTCGATTTGT

+

FFFFFFFFFFFFFFFFFFFFFFFFFFFFFFFFFFFFFFFFFFFFFFFFFFFFFFFFFFFFFFFFFFFFFFFF  
FFFFFFFFFFFFFFFFFFFFFFFFFFFFFFFFFFFFFFFFFFFFFFFFFFFFFFFFFFFFFFFFFFFFFFFF  
FFFF:FFFFFFFF:FFF

@A00721:190:HGJW7DSXY:4:1253:25129:27007 1:N:0:TCTGCAAG+GCTGCACT  
GCCCTACAGTATACCAATTCAAATTCAAATTCAAATAGAATTCCATAGGCCCGCAGGGGCATCTTAC  
CGCAGACCGTGGGGCAAGCCAATATAATATTACTGGCTTGCCCGCGCCGGGGACACCTCCGTACGCTT  
ACGTGTCGATTTGTC

+

FFFFFFFFFFFFFFFFFFFFFFFFFFFFFFFFFFFFFFFFFFFFFFFFFFFFFFFFFFFFFFFFFFFFFFFF  
FFFFFFFFFFFFFFFFFFFFFFFFFFFFFFFFFFFFFFFFFFFFFFFFFFFFFFFFFFFFFFFFFFFFFFFF  
FFFFFFFFFFFFFFFFFFFF

@A00721:190:HGJW7DSXY:4:1255:23628:12633 1:N:0:TCTGCAAG+GCTGCACT  
GCCCTACAGTATACCAATTCAAATTCAAATTCAAATAGAATTCCATAGGCCCGCAGGGGCATCTTAC  
CGCAGACCGTGGGGCAAGCCAATATAATATTACTGGCTTGCCCGCGCCGGGGACACCTCCGTACGCTT  
ACGTGTCGATTTGTC

+

FFFFFFFFFFFFFFFFFFFFFFFFFFFFFFFFFFFFFFFFFFFFFFFFFFFFFFFFFFFFFFFFFFFFFFFF  
FFFFFFFFFFFFFFFFFFFFFFFFFFFFFFFFFFFFFFFFFFFFFFFFFFFFFFFFFFFFFFFFFFFFFFFF  
FFFFFFFFFFFFFFFFFFFF

@A00721:190:HGJW7DSXY:4:1460:12391:12680 1:N:0:TCTGCAAG+GCTGCACT  
GCCCTACAGTATACCAATTCAAATTCAAATTCAAATAGAATTCCATAGGCCCGCAGGGGCATCTTAC  
CGCAGACCGTGGGGCAAGCCAATATAATATTACTGGCTTGCCCGCGCCGGGGACACCTCCGTACGCTT  
ACGTGTCGATTTGTC

+

FFFFFFFFFFFFFFFFFFFFFFFFFFFFFFFFFFFFFFFFFFFFFFFFFFFFFFFFFFFFFFFFFFFFFFFF  
FFFFFFFFFFFFFFFFFFFFFFFFFFFFFFFFFFFFFFFFFFFFFFFFFFFFFFFFFFFFFFFFFFFFFFFF  
FFFFFFFFFFFFFFFFFFFF

@A00721:190:HGJW7DSXY:4:2673:31810:15374 1:N:0:TCTGCAAG+GCTGCACT  
GCCCTACAGTATACCAATTCAAATTCAAATTCAAATAGAATTCCATAGGCCCGCAGGGGCATCTTAC  
CGCAGACCGTGGGGCAAGCCAATATAATATTACTGGCTTGCCCGCGCCGGGGACACCTCCGTACGCTT  
ACGTGTCGATTTGTC

+

FFFFFFFFFFFFFFFFFFFFFFFFFFFFFFFFFFFFFFFFFFFFFFFFFFFFFFFFFFFFFFFFFFFFFFFF  
FFFFFFFFFFFFFFFFFFFFFFFFFFFFFFFFFFFFFFFFFFFFFFFFFFFFFFFFFFFFFFFFFFFFFFFF  
FFFFFFFFFFFFFFFFFFFF

@A00721:190:HGJW7DSXY:4:1237:4661:7310 1:N:0:TCTGCAAG+GCTGCACT  
CCTACAGTATACCAATTCAAATTCAAATTCAAATAGAATTCCATAGGCCCGCAGGGGCATCTTACCG  
CAGACCGTGGGGCAAGCCAATATAATATTACTGGCTTGCCCGCGCCGGGGACACCTCCGTACGCTTAC  
GTGTCGATTTGTCAG

+

FFFFFFF,FFFFFF::FFFFFF:FFF,FFFFF,FFFFFF:FF,F,FFFFFF:FFFF,FFFF:FFF:FF  
:FFF::FF:FFFFFFF,FFFFFFFFFFFF:FFF:FF:FF:FFF:F,FFFFFFFF:FF:FFFF:FF:FF  
FFFFF:FFFF,FFFF

@A00721:190:HGJW7DSXY:4:1336:25464:1720 1:N:0:TCTGCAAG+GCTGCACT  
CCTACAGTATACCAATTCAAATTCAAATTCAAATAGAATTCCATAGGCCCGCAGGGGCATCTTACCG  
CAGACCGTGGGGCAAGCCAATATAATATTACTGGCTTGCCCGCGCCGGGGACACCTCCGTACGCTTAC  
GTGTCGATTTGTCAG

+  
FFFFFFFFFFFFFFFF:FFFFFFFFFFFFFFFFFFFFFFFFFFFFFFFFFFFFFFFFFFFFFFFFFFFFFFFFFFFFFFFFFFFFFFFFFFFFFFFF  
FFFFFFFFFFFFFFFFFFFFFFFFFFFFFFFFFFFFFFFFFFFFFFFFFFFFFFFFFFFFFFFFFFFFFFFFFFFFFFFFFFFFFFFFFFFFFFFF  
FFFFFFFF:FFFFFFFF

@A00721:190:HGJW7DSXY:4:1371:16676:26678 1:N:0:TCTGCAAG+GCTGCACT  
CCTACAGTATACCAATTCAAATTCAAATTCAAATAGAATTCCATAGGCCCGCAGGGGCATCTTACCG  
CAGACCGTGGGGCAAGCCAATATAATATTACTGGCTTGCCCGCGCCGGGGACACCTCCGTACGCTTAC  
GTGTCGATTTGTCAG

+  
FFFFFFFFFFFFFFFFFFFFFFFFFFFFFFFFFFFFFFFFFFFFFFFFFFFFFFFFFFFFFFFFFFFFFFFFFFFFFFFFFFFFFFFFFFFFFFFF  
FFFFFFFFFFFFFFFFFFFFFFFFFFFFFFFFFFFFFFFFFFFFFFFFFFFFFFFFFFFFFFFFFFFFFFFFFFFFFFFFFFFFFFFFFFFFFFFF  
FFFFFFFFFFFFFFFF

@A00721:190:HGJW7DSXY:4:1430:18927:10567 1:N:0:TCTGCAAG+GCTGCACT  
CCTACAGTATACCAATTCAAATTCAAATTCAAATAGAATTCCATAGGCCCGCAGGGGCATCTTACCG  
CAGACCGTGGGGCAAGCCAATATAATATTACTGGCTTGCCCGCGCCGGGGACACCTCCGTACGCTTAC  
GTGTCGATTTGTCAG

+  
FFFFFFFFFFFFFFFFFFFFFFFFFFFFFFFFFFFFFFFFFFFFFFFFFFFFFFFFFFFFFFFFFFFFFFFFFFFFFFFFFFFFFFFFFFFFFFFF  
FFFFFFFFFFFFFFFFFFFFFFFFFFFFFFFFFFFFFFFFFFFFFFFFFFFFFFFFFFFFFFFFFFFFFFFFFFFFFFFFFFFFFFFFFFFFFFFF  
FFFFFFFFFFFFFFFF

@A00721:190:HGJW7DSXY:4:1530:3938:2487 1:N:0:TCTGCAAG+GCTGCACT  
CCTACAGTATACCAATTCAAATTCAAATTCAAATAGAATTCCATAGGCCCGCAGGGGCATCTTACCG  
CAGACCGTGGGGCAAGCCAATATAATATTACTGGCTTGCCCGCGCCGGGGACACCTCCGTACGCTTAC  
GTGTCGATTTGTCAG

+  
FFFFF:FFFFFFFFFFFFFFFFFFFFFFFFFFFFFFFFFFFFFFFFFFFFFFFFFFFFFFFFFFFFFFFFFFFFFFFFFFFFFFFFFFFFFFFF  
FFFFFFFFFFFFFFFFFFFFFFFFFFFFFFFFFFFFFFFFFFFFFFFFFFFFFFFFFFFFFFFFFFFFFFFFFFFFFFFFFFFFFFFFFFFFFFFF  
FFFFFFFFFFFFFFFF

@A00721:190:HGJW7DSXY:4:1677:20799:11522 1:N:0:TCTGCAAG+GCTGCACT  
CCTACAGTATACCAATTCAAATTCAAATTCAAATAGAATTCCATAGGCCCGCAGGGGCATCTTACCG  
CAGACCGTGGGGCAAGCCAATATAATATTACTGGCTTGCCCGCGCCGGGGACACCTCCGTACGCTTAC  
GTGTCGATTTGTCAG

+  
FFFFFFFFFFFFFFFFFFFFFFFFFFFFFFFFFFFFFFFFFFFFFFFFFFFFFFFFFFFFFFFFFFFFFFFFFFFFFFFFFFFFFFFFFFFFFFFF  
FFFFFFFFFFFFFFFFFFFFFFFFFFFFFFFFFFFFFFFFFFFFFFFFFFFFFFFFFFFFFFFFFFFFFFFFFFFFFFFFFFFFFFFFFFFFFFFF  
FFFFFFFFFFFFFFFF

@A00721:190:HGJW7DSXY:4:1128:23402:8923 1:N:0:TCTGCAAG+GCTGCACT  
CTACAGTATACCAATTCAAATTCAAATTCAAATAGAATTCCATAGGCCCGCAGGGGCATCTTACCGC  
AGACCGTGGGGCAAGCCAATATAATATTACTGGCTTGCCCGCGCCGGGGACACCTCCGTACGCTTACG  
TGTCGATTTGTCATT

+  
F:FFFFFFFFFFFFFFFFFFFFFFFFFFFFFFFFFFFFFFFFFFFFFFFFFFFFFFFFFFFFFFFFFFFFFFFFFFFFFFFFFFFFFFFF  
FFFFFFFFFFFFFFFFFFFFFFFFFFFFFFFFFFFFFFFFFFFFFFFFFFFFFFFFFFFFFFFFFFFFFFFFFFFFFFFFFFFFFFFFFFFFFFFF  
FFFFFFFFFFFFFFFF:

@A00721:190:HGJW7DSXY:4:1231:6415:31391 1:N:0:TCTGCAAG+GCTGCACT  
CTACAGTATACCAATTCAAATTCAAATTCAAATAGAATTCCATAGGCCCGCAGGGGCATCTTACCGC  
AGACCGTGGGGCAAGCCAATATAATATTACTGGCTTGCCCGCGCCGGGGACACCTCCGTACGCTTACG  
TGTCGATTTGTCATT

+  
FFFFFFFFFFFFFFFFFFFFFFFFFFFFFFFFFFFFFFFFFFFFFFFFFFFFFFFFFFFFFFFFFFFFFFFFFFFFFFFFFFFFFFFFFFFFFFFF  
FFFFFFFFFFFFFFFFFFFFFFFFFFFFFFFFFFFFFFFFFFFFFFFFFFFFFFFFFFFFFFFFFFFFFFFFFFFFFFFFFFFFFFFFFFFFFFFF  
FFFFFFFFFFFFFFFF

@A00721:190:HGJW7DSXY:4:1268:16324:5431 1:N:0:TCTGCAAG+GCTGCACT  
CTACAGTATACCAATTCAAATTCAAATTCAAATAGAATTCCATAGGCCCGCAGGGGCATCTTACCGC

AGACCGTGGGGCAAGCCAATATAATATTACTGGCTTGCCCGCGCCGGGGACACCTCCGTACGCTTACG  
TGTCGATTTGTCATT

[illegible]

CTACAGTATACCAATTCAAATTCAAATTCAAATAGAATTCCATAGGCCCCGCAGGGGCATCTTACCGC  
AGACCGTGGGGCAAGCCAATATAATATTACTGGCTTGCCCGCGCCGGGACACCTCCGTACGCTTACG  
TGTCGATTTGTCATT

```

FFFFFFFFFFFFFFFFFFFFFFFFFFFFFFFF:FFF:FFF:FFFFFFFFFFFFFFFFFFFFFFFF
FFFFFFFFFFFFFFFFFFFFFFFFFFFFFFFF:FFFFFFFFFF:FFFFFFFFFFFFFF:FFF
FFFFFFFFFFFFFFFF

```

CTACAGTATACCAATTCAAATTCAAATTCAAATAGAATTCCATAGGCCCCGCAGGGGCATCTTACCGC  
AGACCGTGGGGCAAGCCAATATAATATTACTGGCTTGCCCGCGCCGGGACACCTCCGTACGCTTACG  
TGTCGATTTGTCATT

[illegible]

CTACAGTATACCAATTCAAATTCAAATTCAAATAGAATTCATAGGCCCGCAGGGGCATCTTACCGC  
AGACCGTGGGGCAAGCCAATATAATATTACTGGCTTGCCCGCGCCGGGACACCTCCGTACGCTTACG  
TGTCGATTTGTCATT

```
FFFFFFFFFFFFFFFFFFFFFFFFFFFFFFFFFFFFF:FFFFFFFFFFFFFFFFFFFFFFFFFFFFFF  
FFFFFFFFFFFFFFFFFFFFFFFFFFFFFFFFFFFFF  
FFFFFFFFFFFFFFFF
```

CTACAGTATACCAATTCAAATTCAAATTCAAATAGAATTCCATAGGCCCCGCAGGGGCATCTTACCGC  
AGACCGTGGGGCAAGCCAATATAATATTACTGGCTTGCCCGCGCCGGGACACCTCCGTACGCTTACG  
TGTCGATTTGTCATT

```

FFFFFFFFFFFFFFFF:F:FFFFFFFFFFFF::FFFFFFFFFFFF:F:FF:FFFFFFFFFFFFFFFFFFFFFFFF
FFFFFFFFFFFFFFFFFFFFFFFFFFFFFFFF:FFFFFFFFFFFFFFFF,FFFFFFFFFFFFFFFFFFFFFFFF:FFFFFFFFFF:FF,
FFFFFFFFFFFF:FFFFF

```

CTACAGTATACCAATTCAAATTCAAATTCAAATAGAATTCCATAGGCCCCGCAGGGGCATCTTACCGC  
AGACCGTGGGGCAAGCCAATATAATATTACTGGCTTGCCCGCGCCGGGACACCTCCGTACGCTTACG  
TGTCGATTTGTCATT

```
F:FFFFFFFFFFFFFFFFFFFFFFFFFFFFFFFF:FFFFFFFFFFFFFFFFFFFFFFFFFFFFFFFF
FFFFFFFFFFFFFFFFFFFFFFFFFFFFFFFF:FFFFFFFFFFFFFFFFFFFFFFFFFFFFFFFF
:FFFFFFFFFFFFFFFF
```

CTACAGTATACCAATTCAAATTCAAATTCAAATAGAATTCCATAGGCCCCGCAGGGGCATCTTACCGC  
AGACCGTGGGGCAAGCCAATATAATATTACTGGCTTGCCCGCGCCGGGACACCTCCGTACGCTTACG  
TGTCGATTTGTCATT

```

FFFFFFFFFFFFFFFFFFFFFFFFFFFFFFFFFFFFFFFF:FFFFFFFFFFFFFFFFFFFFFFFFFFFFFFFF
FFFFFFFFFFFFFFFFFFFFFFFFFFFFFFFFFFFFFFFF,FFFFFFFFFFFFFFFFFFFFFFFFFFFFFFFF
FFFFFFF:FFFFFFF

```



@A00721:190:HGJW7DSXY:4:2648:7780:27336 1:N:0:TCTGCAAG+GCTGCACT  
TACCAATTCAAATTCAAATTCAAATAGAAATTCATAGGCCCGCAGGGGCATCTTACCGCAGACCGTG  
GGGCAAGCCAATATAATATTACTGGCTTGCCCGCGCCGGGGACACCTCCGTACGCTTACGTGTCGATT  
TGTCATTAGACAGAT

@A00721:190:HGJW7DSXY:4:2664:18177:3317 1:N:0:TCTGCAAG+GCTGCACT  
TACCAATTCAAATTCAAATTCAAATAGAAATTCATAGGCCCGCAGGGGCATCTTACCGCAGACCGTG  
GGGCAAGCCAATATAATATTACTGGCTTGCCCGCGCCGGGGACACCTCCGTACGCTTACGTGTCGATT  
TGTCATTAGACCACG

@A00721:190:HGJW7DSXY:4:1123:2618:33896 1:N:0:TCTGCAAG+GCTGCACT  
GGTCATGATCGTGACGCGTGGTCTAATGACAAATCGACACGTAAGCGTACGGAGGTGTCCCCGGCGCG  
GGCAAGCCAGTAATATTATATTGGCTTGCCCCACGGTCTGCGGTAAGATTCCCCTGCGGGGCCTATGG  
AATTCTATTTGAATT

@A00721:190:HGJW7DSXY:4:1142:27263:14387 1:N:0:TCTGCAAG+GCTGCACT  
GGTCATGATCGTGACGCGTGGTCTAATGACAAATCGACACGTAAGCGTACGGAGGTGTCCCCGGCGCG  
GGCAAGCCAGTAATATTATATTGGCTTGCCCCACGGTCTGCGGTAAGATGCCCTGCGGGGCCTATGG  
AATTCTATTTGAATT

@A00721:190:HGJW7DSXY:4:2362:28357:34757 1:N:0:TCTGCAAG+GCTGCACT  
GGTCATGATCGTGACGCGTGGTCTAATGACAAATCGACACGTAAGCGTACGGAGGTGTCCCCGGCGCG  
GGCAAGCCAGTAATATTATATTGGCTTGCCCCACGGTCTGCGGTAAGATGCCCTGCGGGGCCTATGG  
AATTCTATTTGAATT

@A00721:190:HGJW7DSXY:4:2412:30689:25332 1:N:0:TCTGCAAG+GCTGCACT  
GGTCATGATCGTGACGCGTGGTCTAATGACAAATCGACACGTAAGCGTACGGAGGTGTCCCCGGCGCG  
GGCAAGCCAGTAATATTATATTTGCTTGCCCCACGGTCTGCGGTAAGATGCCCTGCGGGGCCTATGG  
AATTCTATTTGAATT

@A00721:190:HGJW7DSXY:4:2441:26666:24251 1:N:0:TCTGCAAG+GCTGCACT  
GGTCATGATCGTGACGCGTGGTCTAATGACAAATCGACACGTAAGCGTACGGAGGTGTCCCCGGCGCG  
GGCAAGCCAGTAATATTATATTGGCTTGCCCCACGGTCTGCGGTAAGATGCCCTGCGGGGCCTATGG  
AATTCTATTTGAATT

+  
FFFFFFFFFFFFFFFFFFFFFFFFFFFFFFFFFFFFFFFFFFFFFFFFFFFFFFFFFFFFFFFFFFFFFFFF  
FFFFF,FF:FFFF:FFF:FFF:,::FFFFFFFF:FF:F:,FFFF:FF,,FFF,:FFFFFFFF,FFFF  
FF,FFF::FFFF:F

@A00721:190:HGJW7DSXY:4:1214:3179:35180 1:N:0:TCTGCAAG+GCTGCACT  
TACGATCATAACCATCTAAAAAATGAATTCTATAGTCCCCGCAGGGGCATCTTACCGCAGACCGTGGG  
GCAAGCCAATATAATATTACTGGCTTGCCCGCGCCGGGGACACCTCCGTACGCTTACGTGTGCGATTG  
TCATTAGACCACGCG

+  
FFFFFFFFFFFFFFFFFFFFFFFFFFFFFFFFFFFFFFFFFFFFFFFFFFFFFFFFFFFFFFFFFFFFFFFF  
FFF:FFFFFFFFFFFFFFFFFFFFFFFFFFFFFFFFFFFFFFFFFFFFFFFFFFFFFFFFFFFFFFFF:FFF  
FFFFFFFFFFFFFFFF

@A00721:190:HGJW7DSXY:4:1417:10936:12884 1:N:0:TCTGCAAG+GCTGCACT  
TACGATCATAACCATCTAAAAAATGAATTCTATAGTCCCCGCAGGGGCATCTTACCGCAGACCGTGGG  
GCAAGCCAATATAATATTACTGGCTTGCCCGCGCCGGGGACACCTCCGTACGCTTACGTGTGCGATTG  
TCATTAGACCACGCG

+  
FFFFFFFFFFFFFFFFFFFFFFFFFFFFFFFFFFFFFFFFFFFFFFFFFFFFFFFFFFFFFFFFFFFFFFFF  
FFFFFFFFFFFFFFFFFFFFFFFFFFFFFFFFFFFFFFFFFFFFFFFFFFFFFFFFFFFFFFFFFFFFFFFF:FFF  
FFFFFFFFFFFFFFFF

@A00721:190:HGJW7DSXY:4:1621:25852:28729 1:N:0:TCTGCAAG+GCTGCACT  
TCCATAGGCCCGCAGGGGCATCTTACCGCAGACCGTGGGGCAAGCCAATATAATATTACTGGCTTGC  
CCGCGCCGGGGACACCTCCGTACGCTTACGTGTGCGATTGTTCATTAGACCACGCGTCACGATCATAAC  
CATCTAAAAAATGAA

+  
FFFFFFFFFFFFFFFFFFFFFFFFFFFFFFFFFFFFFFFFFFFFFFFFFFFFFFFFFFFFFFFFFFFFFFFF  
FFFFFFFFFFFFFFFFFFFFFFFFFFFFFFFFFFFFFFFFFFFFFFFFFFFFFFFFFFFFFFFFFFFFFFFF:FFF  
FFFFFFFF:FFFFF

@A00721:190:HGJW7DSXY:4:1656:13892:10770 1:N:0:TCTGCAAG+GCTGCACT  
TCCATAGGCCCGCAGGGGCATCTTACCGCAGACCGTGGGGCAAGCCAATATAATATTACTGGCTTGC  
CCGCGCCGGGGACACCTCCGTACGCTTACGTGTGCGATTGTTCATTAGACCACGCGTCACGATCATAAC  
CATCTAAAAAATGAA

+  
FFFFFFFFFFFFFFFFFFFFFFFFFFFFFFFFFFFFFFFFFFFFFFFFFFFFFFFFFFFFFFFFFFFFFFFF  
FFFFFFFFFFFFFFFFFFFFFFFFFFFFFFFFFFFFFFFFFFFFFFFFFFFFFFFFFFFFFFFFFFFFFFFF:FFFFF  
FFFFF:FFFFFFFF

@A00721:190:HGJW7DSXY:4:2253:9100:6104 1:N:0:TCTGCAAG+GCTGCACT  
TCCATAGGCCCGCAGGGGCATCTTACCGCAGACCGTGGGGCAAGCCAATATAATATTACTGGCTTGC  
CCGCGCCGGGGACACCTCCGTACGCTTACGTGTGCGATTGTCTTAGACCACGCGTCACGATCATAAC  
CATCTAAACAATGAA

+  
F:FFFFFFFFFFFFFFFFFFFFFFFFFFFFFFFFFFFFFFFFFFFFFFFFFFFFFFFFFFFFFFFF:FFFF:FFFF,FFFF:,F::,F:FFFF:FFFF:FFF  
FFFFF,,F:F:FF:F:FFF::,F:FF,FF,F::,FF:FFFF,,F:F:FFFFFFFFFFFFFFFF,FF:F  
FFF::FFF,FFFFF

@A00721:190:HGJW7DSXY:4:1103:9561:34867 1:N:0:TCTGCAAG+GCTGCACT  
CCATAGGCCCGCAGGGGCATCTTACCGCAGACCGTGGGGCAAGCCAATATAATATTACTGGCTTGCC  
CGCGCCGGGGACACCTCCGTACGCTTACGTGTGCGATTGTTCATTAGACCACGCGTCACGATCATAACC  
ATCTAAAAAATGAAT

+  
FFFFFFFFFFFFFFFFFFFFFFFFFFFFFFFFFFFFFFFFFFFFFFFFFFFFFFFFFFFFFFFFFFFFFFFF:FFF:FFFFFFFF  
FFFFFFFFFFFFFFFFFFFFFFFFFFFFFFFFFFFFFFFFFFFFFFFFFFFFFFFFFFFFFFFF:FF:FFFFFFFFFFFFFFFF  
FFFFFFFFFFFFFFFF

@A00721:190:HGJW7DSXY:4:1121:22996:18646 1:N:0:TCTGCAAG+GCTGCACT  
CCATAGGCCCGCAGGGGCATCTTACCGCAGACCGTGGGGCAAGCCAATATAATATTACTGGCTTGCC







FFFFFFFFFFFFFFFFFFFFFFFFFFFFFFFFFFFFFFFFFFFFFFFFFFFFFFFFFFFFFFFFFFFFFFFF  
FFFFFFFF:FFFF

@A00721:190:HGJW7DSXY:4:2348:22073:16235 1:N:0:TCTGCAAG+GCTGCACT  
CCATAGGCCCGCAGGGGCATCTTACCGCAGACCGTGGGGCAAGCCAATATAATATTACTGGCTTGCC  
CGCGCCGGGACACCTCCGTACGCTTACGTGTCGATTTGTCATTAGACCACGCGTCACGATCATAACC  
ATCTAAAAAATGAAT

+

FFFFFFFFFFFFFFFFFFFFFFFFFFFFFFFFFFFFFFFFFFFFFFFFFFFFFFFFFFFFFFFFFFFFFFFF  
FFFFFFFFFFFFFFFFFFFFFFFFFFFFFFFFFFFFFFFFFFFFFFFFFFFFFFFFFFFFFFFFFFFFFFFF,F:FFFF  
FFFFFFFFFFFFFFFF

@A00721:190:HGJW7DSXY:4:2630:6560:23657 1:N:0:TCTGCAAG+GCTGCACT  
CCATAGGCCCGCAGGGGCATCTTACCGCAGACCGTGGGGCAAGCCAATATAATATTACTGGCTTGCC  
CGCGCCGGGACACCTCCGTACGCTTACGTGTCGATTTGTCATTAGACCACGCGTCACGATCATAACC  
ATCTAAAAAATGAAT

+

FFFFFFFFFFFFFFFFFFFFFFFFFFFFFFFFFFFFFFFFFFFFFFFFFFFFFFFFFFFFFFFFFFFFFFFF  
FFFFFFFFFFFFFFFFFFFFFFFFFFFFFFFFFFFFFFFFFFFFFFFFFFFFFFFFFFFFFFFFFFFFFFFF  
FFFFFFFFFFFFFFFF

@A00721:190:HGJW7DSXY:4:1308:4553:21715 1:N:0:TCTGCAAG+GCTGCACT  
CCTAGGCCCGCAGGGGCATCTTACCGCAGACCGTGGGGCAAGCCAATATAATATTACTGGCTTGCCC  
GCGCCGGGACACCTCCGTACGCTTACGTGTCGATTTGTCATTAGACCACGCGTCACGATCATAACCA  
TCTAAAAAATGAATT

+

FFFFFFFFFFFFFFFFFFFFFFFFFFFFFFFFFFFFFFFFFFFFFFFFFFFFFFFFFFFFFFFFFFFFFFFF  
FFFFFFFFFFFFFFFFFFFFFFFFFFFFFFFFFFFFFFFFFFFFFFFFFFFFFFFFFFFFFFFFFFFFFFFF,FFFF  
FFFFFFFF:FFFF:

@A00721:190:HGJW7DSXY:4:2612:5168:33207 1:N:0:TCTGCAAG+GCTGCACT  
CCTAGGCCCGCAGGGGCATCTTACCGCAGACCGTGGGGCAAGCCAATATAATATTACTGGCTTGCCC  
GCGCCGGGACACCTCCGTACGCTTACGTGTCGATTTGTCATTAGACCACGCGTCACGATCATAACCA  
TCTAAAAAATGAATT

+

FFFFFFFFFFFFFFFFFFFFFFFFFFFFFFFFFFFFFFFFFFFFFFFFFFFFFFFFFFFFFFFFFFFFFFFF  
FFFFFFFFFFFFFFFFFFFFFFFFFFFFFFFFFFFFFFFFFFFFFFFFFFFFFFFFFFFFFFFFFFFFFFFF  
FFFFFFFFFFFF,FF

@A00721:190:HGJW7DSXY:4:1176:29514:28432 1:N:0:TCTGCAAG+GCTGCACT  
GGCCCTGCAGGGGCATCTTACCGCAGACCGTGGGGCAAGCCAATATAATATTACTGGCTTGCCCGCGC  
CGGGGACACCTCCGTACGCTTACGTGTCGATTTGTCATTAGACCACGCGTCACGATCATAACCATCTA  
AAAAATGAATAGATC

+

FFFFFFFFFFFFFF:FFFFFFFFFFFFFFFFFFFFFFFFFFFFFFFFFFFFFFFFFFFFFFFF:FFFF:FFFFFFFF  
FFFFFFFFFFFFFFFFFFFFFFFFFFFFFFFFFFFFFFFFFFFFFFFFFFFFFFFFFFFFFFFFFFFFFFFF  
FFFFFFFFFFFF:FFF

@A00721:190:HGJW7DSXY:4:1509:27407:7247 1:N:0:TCTGCAAG+GCTGCACT  
GGCCCTGCAGGGGCATCTTACCGCAGACCGTGGGGCAAGCCAATATAATATTACTGGCTTGCCCGCGC  
CGGGGACACCTCCGTACGCTTACGTGTCGATTTGTCATTAGACCACGCGTCACGATCATAACCATCTA  
AAAAATGAATAGATC

+

FFFFFFFFFFFFFFFFFFFFFFFFFFFFFFFFFFFFFFFFFFFFFFFFFFFFFFFFFFFFFFFFFFFFFFFF  
FFFFF:FFFFFFFF:FFFF:FFFFFFFFFFFFFFFFFFFFFFFFFFFFFFFFFFFFFFFFFFFFFFFF  
FFFFFFFF:FFFFF

@A00721:190:HGJW7DSXY:4:1525:28519:27430 1:N:0:TCTGCAAG+GCTGCACT  
GGCCCCGCAGGGGCATCTTACCGCAGACCGTGGGGCAAGCCAATATAATATTACTGGCTTGCCCGCGC  
CGGGGACACCTCCGTACGCTTACGTGTCGATTTGTCATTAGACCACGCGTCACGATCATGACCATCTA  
AAAAATGAATTCTAT

```

FFFFFFFFFFFFFFFFFFFFFFFFFFFFFFFF:FFFFFFFFFFFFFFFFFFFFFFFFFFFFFF
FFFFFFFFFFFFFFFFFFFFFFFFFFFFFFFF:FFFFFFFFFFFFFFFFFFFFFFFFFFFFFF
FFFFFFFFFFFFFFFF

```

[illegible][illegible][illegible][illegible][illegible][illegible]

@A00721:190:HGJW7DSXY:4:2374:19334:20979 1:N:0:TCTGCAAG+GCTGCACT  
GGCCCTGCAGGGGCATCTTACCGCAGACCGTGGGGCAAGCCAATATAATATTACTGGCTTGCCCGCGC

CGGGGACACCTCCGTACGCTTACGTGTCGATTTGTCATTAGACCACGCGTCACGATCATAACCATCTA  
AAAAATGAATAGATC

+

FFFFFFFFFFFFFFFFFFFFFFFFFFFFFFFFFFFFFFFFFFFFFFFFFFFFFFFFFFFFFFFFFFFFFFFF  
FFFFFFFFFFFFFFFFFFFFFFFFFFFFFFFFFFFFFFFFFFFFFFFFFFFFFFFFFFFFFFFFFFFFFFFF  
F:FFFFFFFFFFFFFF

@A00721:190:HGJW7DSXY:4:2511:30644:30984 1:N:0:TCTGCAAG+GCTGCACT  
GGCCCCGCAGGGGCATCTTACCGCAGACCGTGGGGCAAGCCAATATAATATTACTGGCTTGCCCGCGC  
CGGGGACACCTCCGTACGCTTACGTGTCGATTTGTCATTAGACCACGCGTCACGATCATGACCATCTA  
AAAAATGAATTCTAT

+

FFFFFFFFFFFFFFFFFFFFFFFFFFFFFFFFFFFFFFFFFFFFFFFFFFFFFFFFFFFFFFFFFFFFFFFF  
FFFFFFFFFFFFFFFFFFFFFFFFFFFFFFFFFFFFFFFFFFFFFFFFFFFFFFFFFFFFFFFFFFFFFFFF  
FFFFFFFF:FFFFFFFFFFFFFFFFFFFFFFFF:FFFFFFFFFFFFFFFFFFFFFFFFFFFFFFFF

@A00721:190:HGJW7DSXY:4:2569:12997:13448 1:N:0:TCTGCAAG+GCTGCACT  
GGCCCCGCAGGGGCATCTTACCGCAGACCGTGGGGCAAGCCAATATAATATTACTGGCTTGCCCGCGC  
CGGGGACACCTCCGTACGCTTACGTGTCGATTTGTCATTAGACCACGCGTCACGATCATGACCATCTA  
AAAAATGAATTCTAT

+

FFFFFFFFFFFFFFFFFFFFFFFFFFFFFFFFFFFFFFFFFFFFFFFFFFFFFFFFFFFFFFFFFFFFFFFF  
FFFFFFFFFFFF:FFFFFFFFFFFFFFFFFFFFFFFFFFFFFFFFFFFFFFFFFFFFFFFFFFFFFFFF  
FFFFFFFFFFFFFFFF

@A00721:190:HGJW7DSXY:4:2673:13584:25989 1:N:0:TCTGCAAG+GCTGCACT  
GGCCCTGCAGGGGCATCTTACCGCAGACCGTGGGGCAAGCCAATATAATATTACTGGCTTGCCCGCGC  
CGGGGACACCTCCGTACGCTTACGTGTCGATTTGTCATTAGACCACGCGTCACGATCATAACCATCTA  
AAAAATGAATAGATC

+

FFFFFFFFFFFFFFFFFFFFFFFFFFFFFFFFFFFFFFFFFFFFFFFFFFFFFFFFFFFFFFFFFFFFFFFF  
FFFFFFFFFFFFFFFFFFFFFFFFFFFFFFFFFFFFFFFFFFFFFFFFFFFFFFFFFFFFFFFFFFFFFFFF  
FFFFFFFFFFFFFFFF

@A00721:190:HGJW7DSXY:4:1176:19732:36855 1:N:0:TCTGCAAG+GCTGCACT  
GCTCCGCAGGGGCATCTTACCGCAGACCGTGGGGCAAGCCAATATAATATTACTGGCTTGCCCGCGCC  
GGGGACACCTCCGTACGCTTACGTGTCGATTTGTCATTAGACCACGCGTCACGATCATAACCATCTAA  
AAAATGAATTCTATA

+

FFFFFFFFFFFFFFFFFFFFFFFFFFFFFFFFFFFFFFFFFFFFFFFFFFFFFFFFFFFFFFFFFFFFFFFF  
FFFFFFFFFFFFFFFFFFFFFFFFFFFFFFFFFFFFFFFFFFFFFFFFFFFFFFFFFFFFFFFFFFFFFFFF  
FFFFFFFFFF:FFFF:F

@A00721:190:HGJW7DSXY:4:1427:21414:12994 1:N:0:TCTGCAAG+GCTGCACT  
GCTCCGCAGGGGCATCTTACCGCAGACCGTGGGGCAAGCCAATATAATATTACTGGCTTGCCCGCGCC  
GGGGACACCTCCGTACGCTTACGTGTCGATTTGTCATTAGACCACGCGTCACGATCATAACCATCTAA  
AAAATGAATTCTATA

+

FFFFFFFFFFFF:FFFFFFFFFFFFFFFFFFFFFFFFFFFFFFFFFFFFFFFFFFFFFFFFFFFFFFFF  
FFFFFFFFFFFFFFFFFFFFFFFFFFFFFFFFFFFFFFFFFFFFFFFFFFFFFFFFFFFFFFFFFFFFFFFF  
FFFF,FF,F:FFFF

@A00721:190:HGJW7DSXY:4:1464:12906:5682 1:N:0:TCTGCAAG+GCTGCACT  
GCTCCGCAGGGGCATCTTACCGCAGACCGTGGGGCAAGCCAATATAATATTACTGGCTTGCCCGCGCC  
GGGGACACCTCCGTACGCTTACGTGTCGATTTGTCATTAGACCACGCGTCACGATCATAACCATCTAA  
AAAATGAATTCTATA

+

FFFFFFFFFFFFFFFFFFFFFFFFFFFFFFFFFFFFFFFFFFFFFFFFFFFFFFFFFFFFFFFFFFFFFFFF  
FFFFFFFFFFFFFFFFFFFFFFFFFFFFFFFFFFFFFFFFFFFFFFFFFFFFFFFFFFFFFFFFFFFFFFFF  
FFFF,FFFFFFFF:FFFF,FFFFFFFF:FFFFFFFFFFFFFFFF,FFFF  
FFFF,FFFFFFFF::

$+$ 

+

 $+$ 

+

+

 $+$  $+$ [illegible]

[illegible]

+

@A00721:190:HGJW7DSXY:4:1522:2410:36793 1:N:0:TCTGCAAG+GCTGCACT  
CCCCGAGGGGCATCTTACCGCAGACCGTGGGGCAAGCCAATATAATATTACTGGCTTGCCCGCGCCG  
GGGACACCTCCGTACGCTTACGTGTCGATTTGTCATTAGACCACGCGTCACGATCATGACCATCTAAA  
AAATGAATTCTATAG

[illegible]
$$+$$

@A00721:190:HGJW7DSXY:4:1616:6894:26710 1:N:0:TCTGCAAG+GCTGCACT  
CCCCGAGGGGCATCTTACCGCAGACCGTGGGGCAAGCCAATATAATATTACTGGCTTGCCCGCGCCG  
GGGACACCTCCGTACGCTTACGTGTCGATTTGTCAATTAGACCACGCGTCACGATCATAACCATCTAAA  
AAATGAATTCTATAG

[illegible]

+

@A00721:190:HGJW7DSXY:4:2206:16794:32675 1:N:0:TCTGCAAG+GCTGCACT  
CCCCGAGGGGCATCTTACCGCAGACCGTGGGGCAAGCCAATATAATATTACTGGCTTGCCCGCGCCG  
GGGACACCTCCGTACGCTTACGTGTCGATTTGTCATTAGACCACGCGTCACGATCATAACCATCTAAA  
AAATGAATTCTATAG

[illegible]

+  
FFFFFFFFFFFFFFFFFFFFFFFFFFFFFFFFFFFFFFFFFFFFFFFFFFFFFFFFFFFFFFFFFFFFFFFF  
FFFFFFFFFFFFFFFFFFFFFFFFFFFFFFFFFFFFFFFFFFFFFFFFFFFFFFFFFFFFFFFFFFFFFFFF:F:FFFFFFFFFFFF  
FF:FFFFFFFFFF:

@A00721:190:HGJW7DSXY:4:2209:16911:1783 1:N:0:TCTGCAAG+GCTGCACT  
CCCCGCAGGGGCATCTTACCGCAGACCGTGGGGCAAGCCAATATAATATTACTGGCTTGCCCGCGCCG  
GGGACACCTCCGTACGCTTACGTGTCGATTTGTCATTAGACCACGCGTCACGATCATGACCATCTAAA  
AAATGAATTCTATAG

+  
FFFFFFFFFFFFFFFFFFFFFFFFFFFFFFFFFFFFFFFFFFFFFFFFFFFFFFFFFFFFFFFFFFFFFFFF  
FFFFFFFFFFFFFFFFFFFFFFFFFFFFFFFFFFFFFFFFFFFFFFFFFFFFFFFFFFFFFFFFFFFFFFFF  
FFFFFFFFFFFFFFFFFFFFFFFF

@A00721:190:HGJW7DSXY:4:2304:12084:33254 1:N:0:TCTGCAAG+GCTGCACT  
CCCCGCAGGGGCATCTTACCGCAGACCGTGGGGCAAGCCAATATAATATTACTGGCTTGCCCGCGCCG  
GGGACACCTCCGTACGCTTACGTGTCGATTTGTCATTAGACCACGCGTCACGATCATAACCATCTAAA  
AAATGAATTCTATAG

+  
FFFFFFFFFFFFFFFFFFFFFFFFFFFFFFFFFFFFFFFFFFFFFFFFFFFFFFFFFFFFFFFFFFFFFFFF  
FFFFFFFFFFFFFFFFFFFFFFFFFFFFFFFFFFFFFFFFFFFFFFFFFFFFFFFFFFFFFFFFFFFFFFFF:F:FFFFFFFFFFFF  
FFFFFFFFFFFFFFFFFFFFFFFFFFFFFFFFFFFFFFFFFFFFFFFFFFFFFFFFFFFFFFFFFFFFFFFF:FFFFFFFFFFFF  
FFFFFFFFFFFFFFFFFF:

@A00721:190:HGJW7DSXY:4:2509:10384:30686 1:N:0:TCTGCAAG+GCTGCACT  
CCCCGCAGGGGCATCTTACCGCAGACCGTGGGGCAAGCCAATATAATATTACTGGCTTGCCCGCGCCG  
GGGACACCTCCGTACGCTTACGTGTCGATTTGTCATTAGACCACGCGTCACGATCATAACCATCTAAA  
AAATGAATTCTATAG

+  
FFFFFFFFFFFFFFFFFFFFFFFFFFFFFFFFFFFFFFFFFFFFFFFFFFFFFFFFFFFFFFFFFFFFFFFF  
FFFFFFFFFFFFFFFFFFFFFFFFFFFFFFFFFFFFFFFFFFFFFFFFFFFFFFFFFFFFFFFFFFFFFFFF:FFFFFFFFFFFF  
FFFFFFFFFFFFFFFFFFFFFFFFFFFFFFFFFFFFFFFFFFFFFFFFFFFFFFFFFFFFFFFFFFFFFFFF:F:FFFFFFFF  
FFFFFFFFFF:

@A00721:190:HGJW7DSXY:4:2608:5484:6887 1:N:0:TCTGCAAG+GCTGCACT  
CCCCGCAGGGGCATCTTACCGCAGACCGTGGGGCAAGCCAATATAATATTACTGGCTTGCCCGCGCCG  
GGGACACCTCCGTACGCTTACGTGTCGATTTGTCATTAGACCACGCGTCACGATCATGACCATCTAAA  
AAATGAATTCTATA

+  
FFFFFFFFFFFFFFFFFFFFFFFFFFFFFFFFFFFFFFFFFFFFFFFFFFFFFFFFFFFFFFFFFFFFFFFF  
FFFFFFFFFFFFFFFFFFFFFFFFFFFFFFFFFFFFFFFFFFFFFFFFFFFFFFFFFFFFFFFFFFFFFFFF  
FFFFFFFFFFFFFFFFFF:F

@A00721:190:HGJW7DSXY:4:2647:25852:7028 1:N:0:TCTGCAAG+GCTGCACT  
CCCCGCAGGGGCATCTTACCGCAGACCGTGGGGCAAGCCAATATAATATTACTGGCTTGCCCGCGCCG  
GGGACACCTCCGTACGCTTACGTGTCGATTTGTCATTAGACCACGCGTCACGATCATGACCATCTAAA  
AAATGAATTCTAGAG

+  
FFFFFFFFFFFFFFFFFFFFFFFFFFFFFFFFFFFFFFFFFFFFFFFFFFFFFFFFFFFFFFFFFFFFFFFF  
FFFFFFFFFFFFFFFFFFFFFFFFFFFFFFFFFFFFFFFFFFFFFFFFFFFFFFFFFFFFFFFFFFFFFFFF  
FF:FFF,:FFFF,FF

@A00721:190:HGJW7DSXY:4:1123:28791:14653 1:N:0:TCTGCAAG+GCTGCACT  
CCCGCAGGGGCATCTTACCGCAGACCGTGGGGCAAGCCAATATAATATTACTGGCTTGCCCGCGCCG  
GGACACCTCCGTACGCTTACGTGTCGATTTGTCATTAGACCACGCGTCACGATCATAACCATCTAAAA  
AATGAATTCTATAGT

+  
FFFFFFFFFFFFFFFFFFFFFFFFFFFFFFFFFFFFFFFFFFFFFFFFFFFFFFFFFFFFFFFFFFFFFFFF  
FFFFFFFFFFFFFFFFFFFFFFFFFFFFFFFFFFFFFFFFFFFFFFFFFFFFFFFFFFFFFFFFFFFFFFFF  
FFFFFFFFFFFFFFFFFF::F

@A00721:190:HGJW7DSXY:4:1367:31656:30514 1:N:0:TCTGCAAG+GCTGCACT  
CCCGCAGGGGCATCTTACCGCAGACCGTGGGGCAAGCCAATATAATATTACTGGCTTGCCCGCGCCG

GGACACCTCCGTACGCTTACGTGTCGATTTGTCATTAGACCACGCGTCACGATCATAACCATCTAAAA  
AATGAATTCTATAGT

[illegible]

+

[illegible]

+

[illegible]

+

[illegible]

+

[illegible]

+

```

FFFFFFFFFFFFFFFFFFFF,FFFFFF,,FFFFFFFF:FF:,FFFFFFFF,FFFFFF:,FFFF:FFFFFF
:FFFF:FFFFFF,F:FF,F:FF:F:FFF:,FFFFFF:FF,FFFFFFFFFFFFFFFFFFFFFF,FF:FFFFFF
FE:FFFF:FE:,E:

```

+

[illegible]





@A00721:190:HGJW7DSXY:4:2355:20971:13479 1:N:0:TCTGCAAG+GCTGCACT  
CGTCACTATAGAATTCATTTTTTAGATGGTCATGATCGTGACGCGTGGTCTAATGACAAATCGACACG  
TAAGCGTACGGAGGTGTCCCCGGCGCGGGCAAGCCAGTAATATTATATTGGCTTGCCCCACGGTCTGC  
GGTAAGATGCCCTG

+

```

FFFFFFFFFFFFFFFFFFFFFFFFFFFFFFFFFFFFFFFFFFFFFFFFFFFFFFFFFFFFFFFFFFFFFFFF
FFFFFFFFFFFFFFFFFFFFFFFFFFFFFFFFFFFFFFFFFFFFFFFFFFFFFFFFFFFFFFFFFFFFFFFF
FFFFF:FFFFFFFFF:FFFFFFFFFFFFFFFFFFFFFFFF
FFFFF:FFFFFFFFF

```

@A00721:190:HGJW7DSXY:4:2167:4200:32847 1:N:0:TCTGCAAG+GCTGCACT  
AGGGGCATCTTACCGCAGACCGTGGGGCAAGCCAATATAATATTACTGGCTTGCCCGCGCCGGGGACA  
CCTCCGTACGCTTACGTGTCGATTTGTCATTAGACCACGCGTCACGATCATAACCATCTAAAAAATGA  
ATTCTATAGTG

+

FF:F,:F,FFFF:FFFF,FFF:,FFFF::,,F:FFFFFFFF,FF,FF:FFFFFFFF:FF:FF,F:,FFF:F  
 FFFF:FFFFFFFF,FFFFFFFFF,F,FFFFFFFF:FFFF:FF::FFFFFFFFFFFFFFFFF,:FFFFFFFFF:  
 F,FF,FFF:FF

@A00721:190:HGJW7DSXY:4:1147:31837:24972 1:N:0:TCTGCAAG+GCTGCACT  
ACCGCAGACCGTGGGGCAAGCCAATATAATATTACTGGCTTGCCCGCGCCGGGGACACCTCCGTACGC  
TTACGTGTCGATTTGTCATTAGACCACGCGTCACGATCATAACCATCTAAAAAATGAATTCTATAGTG  
ACGCAGTAGAATCGA

+

```

FFFFFFFF:FFFFFF::FFFFFF:FFFF:FFFF:FFFFFFFF:FFF,FFFFFFFFF::FFFFFFFFFFFFFFFFF
:FFFFFFFFFFFFFFFFFFFF:FF:FFFFFFFFFFFFFFFFFFFF:FFFFFFFFFFFFFFFFFFFFFFFF,FF,, :FFFF
:::FF:FFF:FFFFF

```

@A00721:190:HGJW7DSXY:4:1147:31783:25160 1:N:0:TCTGCAAG+GCTGCACT  
ACCGCAGACCGTGGGGCAAGCCAATATAATATTACTGGCTTGCCCGCGCCGGGGACACCTCCGTACGC  
TTACGTGTGATTTGTCATTAGACCACGCGTCACGATCATAACCATCTAAAAAATGAATTCTATAGTG  
ACGCAGTAGAATCGA

+

[illegible]

@A00721:190:HGJW7DSXY:4:1526:22272:35462 1:N:0:TCTGCAAG+GCTGCACT  
ACCGCAGACCGTGGGGCAAGCCAATATAATATTACTGGCTTGCCCGCGCCGGGGACACCTCCGTACGC  
TTACGTGTCGATTTGTCATTAGACCACGCGTCACGATCATAACCATCTAAAAAATGAATTCTATAGTG  
ACGCAGTAGAATCGA

+

[illegible]

@A00721:190:HGJW7DSXY:4:1620:30427:20337 1:N:0:TCTGCAAG+GCTGCACT  
ACCGCAGACCGTGGGGCAAGCCAATATAATATTACTGGCTTGCCCGCGCCGGGGACACCTCCGTACGC  
TTACGTGTCGATTTGTCATTAGACCACGCGTCACGATCATAACCATCTAAAAAATGAATTCTATAGTG  
ACGCAGTAGAATCGA

+

```
FFFFFFFFFFFFFFFFFFFFFFFFFFFFFFFFFFFFFFFFFFFFFFFFFFFFFFFFFFFFFFFF
FFFFFFFFFFFFFFFFFFFFFFFF:FFFFFFFFFFFFFFFFFFFFFFFFFFFFFFFFFFFFFFF
FFFFFFFFFFFFFFFFFFFF
```

@A00721:190:HGJW7DSXY:4:1110:23321:23406 1:N:0:TCTGCAAG+GCTGCACT  
GCCGCAGACCGTGGGGCAAGCCAATATAATATTACTGGCTTGCCCGCGCCGGGGACACCTCCGTACGC  
TTACGTGTCGATTTGTCATTAGACCACGCGTCACGATCATAACCATCTAAAAAATGAATTCTATAGTG  
ACGCAGTAGAATCGA

+  
FFFFFFFFFFFFFFFFFFFFFFFFFFFFFFFFFFFFFFFFFFFFFFFFFFFFFFFFFFFFFFFFFFFFFFFF  
FFFFFFFFFFFF:FFFFF:FFFFFFFFFFFFFFFFFFFFFFFFFFFFFFFFFFFFFFFFFFFFFFFFFFFFF  
FFFF,FFFFFFFFF  
@A00721:190:HGJW7DSXY:4:2320:20745:14027 1:N:0:TCTGCAAG+GCTGCACT  
GCCGCAGACCGTGGGGCAAGCCAATATAATATTACTGGCTTGCCCGCGCCGGGGACACCTCCGTACGC  
TTACGTGTCGATTTGTCATTAGACCACGCGTCACGATCATAACCATCTAAAAAATGAATTCTATAGTG  
ACGCAGTAGAATCGA

+  
FFFFFFFFFFFFFFFFFFFFFFFFFFFFFFFFFFFFFFFFFFFFFFFFFFFFFFFFFFFFFFFFFFFFFFFF  
FFFFFFFFFFFFFFFFFFFFFFFFFFFFFFFFFFFFFFFFFFFFFFFFFFFFFFFFFFFFFFFFFFFFFFFF  
FFFFFFFFFFFFFFFFF  
@A00721:190:HGJW7DSXY:4:2331:11668:20447 1:N:0:TCTGCAAG+GCTGCACT  
GCCGCAGACCGTGGGGCAAGCCAATATAATATTACTGGCTTGCCCGCGCCGGGGACACCTCCGTACGC  
TTACGTGTCGATTTGTCATTAGACCACGCGTCACGATCATAACCATCTAAAAAATGAATTCTATAGTG  
ACGCAGTAGAATCGA

+  
FFFFFFFFFFFFFFFFFFFFFFFFFFFFFFFFFFFFFFFFFFFFFFFFFFFFFFFFFFFFFFFFFFFFFFFF  
FFFFFFFFFFFFFFFFFFFFFFFFFFFFFFFFFFFFFFFFFFFFFFFFFFFFFFFFFFFFFFFFFFFFFFFF  
FFFFFFFFFFFFFFFFF  
@A00721:190:HGJW7DSXY:4:2472:18331:9377 1:N:0:TCTGCAAG+GCTGCACT  
GCCGCAGACCGTGGGGCAAGCCAATATAATATTACTGGCTTGCCCGCGCCGGGGACACCTCCGTACGC  
TTACGTGTCGATTTGTCATTAGACCACGCGTCACGATCATAACCATCTAAAAAATGAATTCTATAGTG  
ACGCAGTAGAATCGA

+  
:FFFFFFFFFFFFFFFFFFFFFFFFFFFFFFFFFFFFFFFFFFFFFFFFFFFFFFFFFFFFFFFFFFFFFFFF  
FFFFFFFFFFFFFFFFFFFFFFFFFFFFFFFFFFFFFFFFFFFFFFFFFFFFFFFFFFFFFFFFFFFFFFFF  
FF:FFFFFFFFFFFFF  
@A00721:190:HGJW7DSXY:4:2472:18285:9424 1:N:0:TCTGCAAG+GCTGCACT  
GCCGCAGACCGTGGGGCAAGCCAATATAATATTACTGGCTTGCCCGCGCCGGGGACACCTCCGTACGC  
TTACGTGTCGATTTGTCATTAGACCACGCGTCACGATCATAACCATCTAAAAAATGAATTCTATAGTG  
ACGCAGTAGAATCGA

+  
FFFFFFFFFFFFFFFFFFFFFFFFFFFFFFFFFFFFFFFFFFFFFFFFFFFFFFFFFFFFFFFFFFFFFFFF  
FFFFFFFFFFFFFFFFFFFFFFFFFFFFFFFFFFFFFFFFFFFFFFFFFFFFFFFFFFFFFFFFFFFFFFFF  
FFFFFFFFFFFFFFFFF  
@A00721:190:HGJW7DSXY:4:1338:16685:19899 1:N:0:TCTGCAAG+GCTGCACT  
CCGCAGACCGTGGGGCAAGCCAATATAATATTACTGGCTTGCCCGCGCCGGGGACACCTCCGTACGCT  
TACGTGTCGATTTGTCATTAGACCACGCGTCACGATCATGACCATCTAAAAAATGAATTCTATAGTGA  
CGCAGTAAAATAGAT

+  
FFFFFFFFFFFFFFFFFFFFFFFFFFFFFFFFFFFFFFFFFFFFFFFFFFFFFFFFFFFFFFFFFFFFFFFF  
FFFFFFFFFFFFFFFFFFFFFFFFFFFFFFFFFFFFFFFFFFFFFFFFFFFFFFFFFFFFFFFFFFFFFFFF  
FFFFFFFFFFFFFFFFF  
@A00721:190:HGJW7DSXY:4:2424:28022:34679 1:N:0:TCTGCAAG+GCTGCACT  
CCGCAGACCGTGGGGCAAGCCAATATAATATTACTGGCTTGCCCGCGCCGGGGACACCTCCGTACGCT  
TACGTGTCGATTTGTCATTAGACCACGCGTCACGATCATGACCATCTAAAAAATGAATTCTATAGTGA  
CGCAGTAAAATAGAT

+  
FFFFFFFFFFFFFFFFFFFFFFFFFFFFFFFFFFFFFFFFFFFFFFFFFFFFFFFFFFFFFFFFFFFFFFFF  
FFFFFFFFFFFFFFFFFFFFFFFFFFFFFFFFFFFFFFFFFFFFFFFFFFFFFFFFFFFFFFFFFFFFFFFF  
FFFFFFFFFFFFFFFFF  
@A00721:190:HGJW7DSXY:4:2504:9290:10128 1:N:0:TCTGCAAG+GCTGCACT  
CCGCAGACCGTGGGGCAAGCCAATATAATATTACTGGCTTGCCCGCGCCGGGGACACCTCCGTACGCT

TACGTGTCGATTTGTCATTAGACCACGCGTCACGATCATGACCATCTAAAAAATGAATTCTATAGTGA  
CGCAGTAAAATAGAT

+

FFFFFFFFFFFFFFFFFFFFFFFFFFFFFFFFFFFFFFFFFFFFFFFFFFFFFFFFFFFFFFFFFFFFFFFF  
FFFFFFFFFFFFFFFFFFFFFFFFFFFFFFFFFFFFFFFFFFFFFFFFFFFFFFFFFFFFFFFFFFFFFFFF  
FFFFFFFFFFFFFFFF

@A00721:190:HGJW7DSXY:4:2522:31864:13088 1:N:0:TCTGCAAG+GCTGCACT  
CCGCAGACCGTGGGGCAAGCCAATATAATATTACTGGCTTGCCCGCGCCGGGACACCTCCGTACGCT  
TACGTGTCGATTTGTCATTAGACCACGCGTCACGATCATGACCATCTAAAAAATGAATTCTATAGTGA  
CGCAGTAAAATAGAT

+

FFFFFFFFFFFFFFFFFFFFFFFFFFFFFFFFFFFFFFFFFFFFFFFFFFFFFFFFFFFFFFFFFFFFFFFF  
FFFFFFFFFFFFFFFFFFFFFFFFFFFFFFFFFFFFFFFFFFFFFFFFFFFFFFFFFFFFFFFFFFFFFFFF  
FFFFFFFFFFFFFFFF

@A00721:190:HGJW7DSXY:4:2573:15275:27414 1:N:0:TCTGCAAG+GCTGCACT  
TATAAATTTTGAATTTCAAAATTGACCGTCGATTCTACTGCGTCACTATAGAATTCATTTTTTAGATG  
GTTATGATCGTGACGCGTGGTCTAATGACAAATCGACACGTAAGCGTACGGAGGTGTCCCCGGCGCGG  
GCAAGCCAGTAATAT

+

FFFFFFFFFFFFFFFF:FFFFFFFFFFFFFFFF,FF:FF:FFFFFFFF:FF:FFFF:FFFF:F:FF  
FFFFF:F:FFFFFFFFFFFFFFFF,FFFF:FFFFFFFF:F:FFFF:FFFFFFFF:FFFFFFFFFFFF  
FFFFFFFF,FFFFF

@A00721:190:HGJW7DSXY:4:2660:18973:4633 1:N:0:TCTGCAAG+GCTGCACT  
TATAAATTTTGAATTTCAAAATTGACCGTCGATTCTACTGCGTCACTATAGAATTCATTTTTTAGATG  
GTTATGATCGTGACGCGTGGTCTAATGACAAATCGACACGTAAGCGTACGGAGGTGTCCCCGGCGCGG  
GCAAGCCAGTAATAT

+

FFFFFFFFFFFFFFFFFFFFFFFFFFFFFFFFFFFFFFFFFFFFFFFFFFFFFFFFFFFFFFFF:F:FFFFFFFFFFFF,FF  
FFFFF:FFFFFFFFFFFFFFFF:FFFFFFFFFFFFFFFF:FFFF:FFFFFFFFFFFF  
F,,FFFF:FFFFF
